# Supplementary material for: Model for Vaccine Design by Prediction of B-Epitopes of IEDB Given Perturbations in Peptide Sequence, In Vivo Process, Experimental Techniques, and Source or Host Organisms
Source: Hindawi journal article supplement (doi:10.1155/2014/768515), 2014-01-01
Supplement: f1 [file 768515.f1.pdf]

| Pred                            |      | Obs                             | INPUT                           | VARS               |                         |                         |                         |                         |    | NEW      | STATE                      |                     |
|---------------------------------|------|---------------------------------|---------------------------------|--------------------|-------------------------|-------------------------|-------------------------|-------------------------|----|----------|----------------------------|---------------------|
| $\lambda(\epsilon_{ij})$<br>new | p1   | $\lambda(\epsilon_{ij})$<br>new | $\lambda(\epsilon_{ij})$<br>ref | $\Delta\chi_{seq}$ | $\Delta\Delta\chi_{ho}$ | $\Delta\Delta\chi_{so}$ | $\Delta\Delta\chi_{pt}$ | $\Delta\Delta\chi_{tq}$ | CV | IDEi_new | Sequence                   | ho                  |
| 1                               | 1.00 | 1                               | 1                               | 0.01               | 0.012                   | 0.004                   | 0.017                   | 0.012                   | t  | 115153   | MKGVVCT<br>RIYEKV          | Homo<br>sapiens     |
| 1                               | 1.00 | 1                               | 1                               | 0                  | 0                       | -0.018                  | 0                       | 0.002                   | t  | 52124    | QQQPP                      | Homo<br>sapiens     |
| 1                               | 1.00 | 1                               | 1                               | 0.04               | 0.04                    | 0.039                   | 0.043                   | 0.04                    | t  | 3639     | APLGVT                     | Homo<br>sapiens     |
| 1                               | 1.00 | 1                               | 1                               | -0.04              | -0.038                  | -0.047                  | -0.033                  | -0.04                   | t  | 135959   | LTRAYAKD<br>VKFG           | Homo<br>sapiens     |
| 1                               | 1.00 | 1                               | 1                               | -0.01              | -0.006                  | -0.01                   | -0.003                  | -0.011                  | t  | 108075   | PREPQVY                    | Homo<br>sapiens     |
| 1                               | 1.00 | 1                               | 1                               | 0.02               | 0.022                   | 0.013                   | 0.023                   | 0.02                    | t  | 25113    | HVVDLP                     | Homo<br>sapiens     |
| 1                               | 1.00 | 1                               | 1                               | 0.02               | 0.022                   | 0.008                   | 0.021                   | 0.021                   | t  | 48780    | PPFSPQ                     | Homo<br>sapiens     |
| 1                               | 1.00 | 1                               | 1                               | 0.02               | 0.018                   | 0.006                   | 0.019                   | 0.02                    | t  | 40988    | LYVVAYQA                   | Mus<br>musculu<br>s |
| 1                               | 1.00 | 1                               | 1                               | 0.04               | 0.038                   | 0.028                   | 0.039                   | 0.04                    | t  | 50439    | QDAYNAA<br>G               | Mus<br>musculu<br>s |
| 1                               | 1.00 | 1                               | 1                               | -0.05              | -0.05                   | -0.053                  | -0.04                   | -0.051                  | t  | 98849    | KIPAVFKID<br>A             | Homo<br>sapiens     |
| 1                               | 1.00 | 1                               | 1                               | 0.01               | 0.014                   | 0.008                   | 0.017                   | 0.009                   | t  | 116171   | TQDQDPB<br>BHFFKNIV<br>TPR | Homo<br>sapiens     |
| 1                               | 1.00 | 1                               | 1                               | -0.02              | -0.02                   | -0.025                  | -0.017                  | -0.022                  | t  | 123442   | LLKDLRKN                   | Homo<br>sapiens     |
| 1                               | 1.00 | 1                               | 1                               | 0.01               | 0.007                   | 0.005                   | 0.013                   | 0.009                   | t  | 47858    | PHVVDL                     | Homo<br>sapiens     |
| 1                               | 1.00 | 1                               | 1                               | 0.03               | 0.025                   | 0.019                   | 0.029                   | 0.03                    | t  | 61783    | STNKAVVS<br>LS             | Bos<br>taurus       |

|   |      |   |   |       |        |        |       |        |   |        |                  |                                  |
|---|------|---|---|-------|--------|--------|-------|--------|---|--------|------------------|----------------------------------|
| 1 | 1.00 | 1 | 1 | 0.05  | 0.054  | 0.05   | 0.057 | 0.048  | t | 118210 | VMLYQISE<br>E    | Homo<br>sapiens                  |
| 1 | 1.00 | 1 | 1 | 0.01  | 0.006  | -0.002 | 0.011 | 0.012  | t | 130944 | LFKHS            | Oryctola<br>gus<br>cuniculu<br>s |
| 1 | 1.00 | 1 | 1 | 0     | 0      | 0      | 0.007 | -0.002 | t | 23028  | GVKYA            | Homo<br>sapiens                  |
| 1 | 1.00 | 1 | 1 | 0.03  | 0.026  | 0.018  | 0.029 | 0.03   | t | 51199  | QKKAIE           | Oryctola<br>gus<br>cuniculu<br>s |
| 1 | 1.00 | 1 | 1 | 0.03  | 0.032  | 0.023  | 0.033 | 0.029  | t | 144783 | SHVVTML<br>DNF   | Homo<br>sapiens                  |
| 1 | 1.00 | 1 | 1 | 0     | 0      | -0.009 | 0     | 0      | t | 134343 | DLYIK            | Mus<br>musculu<br>s              |
| 1 | 1.00 | 1 | 1 | -0.01 | -0.008 | -0.022 | -0.01 | -0.011 | t | 38321  | LNQLAGR<br>M     | Anas<br>platyrhy<br>nchos        |
| 1 | 1.00 | 1 | 1 | 0.02  | 0.024  | 0.013  | 0.027 | 0.022  | t | 144657 | GQITVDM<br>MYG   | Homo<br>sapiens                  |
| 1 | 1.00 | 1 | 1 | 0.03  | 0.03   | 0.013  | 0.03  | 0.032  | t | 21084  | GLQN             | Mus<br>musculu<br>s              |
| 1 | 1.00 | 1 | 1 | 0.04  | 0.037  | 0.027  | 0.04  | 0.041  | t | 98453  | SGFSGSVQ<br>FV   | Oryctola<br>gus<br>cuniculu<br>s |
| 1 | 1.00 | 1 | 1 | 0.04  | 0.04   | 0.027  | 0.04  | 0.041  | t | 98453  | SGFSGSVQ<br>FV   | Mus<br>musculu<br>s              |
| 1 | 1.00 | 1 | 1 | 0.05  | 0.048  | 0.043  | 0.053 | 0.05   | t | 107107 | EAIQP            | Rattus<br>norvegic<br>us         |
| 1 | 1.00 | 1 | 1 | 0     | 0.002  | -0.017 | 0.003 | 0.003  | t | 110857 | FTGEAYSY<br>WSAK | Homo<br>sapiens                  |
| 1 | 1.00 | 1 | 1 | 0.01  | 0.01   | 0      | 0.011 | 0.009  | t | 36315  | LGSAYP           | Mus<br>musculu<br>s              |

|   |      |   |   |       |        |        |        |        |   |        |              |                       |
|---|------|---|---|-------|--------|--------|--------|--------|---|--------|--------------|-----------------------|
| 1 | 1.00 | 1 | 1 | 0.01  | 0.01   | 0.001  | 0.01   | 0.009  | t | 122034 | WNPAD        | Rattus norvegicus     |
| 1 | 1.00 | 1 | 1 | 0     | -0.002 | -0.014 | -0.001 | 0      | t | 25013  | HVADIDKLID   | Mus musculus          |
| 1 | 1.00 | 1 | 1 | 0     | -0.003 | -0.007 | 0      | -0.001 | t | 36162  | LGIHE        | Oryctolagus cuniculus |
| 1 | 1.00 | 1 | 1 | -0.02 | -0.022 | -0.027 | -0.021 | -0.021 | t | 67253  | TWEVLH       | Mus musculus          |
| 1 | 1.00 | 1 | 1 | -0.02 | -0.022 | -0.027 | -0.021 | -0.021 | t | 67253  | TWEVLH       | Mus musculus          |
| 1 | 1.00 | 1 | 1 | 0.01  | 0.01   | -0.002 | 0.007  | 0.008  | t | 50990  | QGYRVSSYLP   | Homo sapiens          |
| 1 | 1.00 | 1 | 1 | 0.03  | 0.028  | 0.018  | 0.03   | 0.03   | t | 100458 | RDVLQLYAPE   | Mus musculus          |
| 1 | 1.00 | 1 | 1 | 0.03  | 0.035  | 0.02   | 0.033  | 0.03   | t | 111036 | TESTFTGEAYSV | Homo sapiens          |
| 1 | 1.00 | 1 | 1 | 0.03  | 0.032  | 0.03   | 0.037  | 0.03   | t | 117919 | IFIEME       | Homo sapiens          |
| 1 | 1.00 | 1 | 1 | 0.01  | 0.006  | -0.003 | 0.009  | 0.01   | t | 7127   | CTDSDKLF     | Oryctolagus cuniculus |
| 1 | 1.00 | 1 | 1 | 0.01  | 0.012  | 0.01   | 0.017  | 0.01   | t | 112253 | PGQSPKL      | Homo sapiens          |
| 1 | 1.00 | 1 | 1 | 0     | 0      | -0.009 | 0      | -0.001 | t | 122034 | WNPAD        | Rattus norvegicus     |
| 1 | 1.00 | 1 | 1 | 0.03  | 0.032  | 0.028  | 0.037  | 0.033  | t | 131878 | FLMLVGGSTL   | Homo sapiens          |
| 1 | 1.00 | 1 | 1 | 0.05  | 0.05   | 0.041  | 0.05   | 0.05   | t | 70664  | VQVVYDYQ     | Homo sapiens          |
| 1 | 1.00 | 1 | 1 | 0.04  | 0.04   | 0.032  | 0.043  | 0.042  | t | 71545  | VTV          | Homo sapiens          |

|   |      |   |   |       |        |        |        |        |   |        |             |                   |
|---|------|---|---|-------|--------|--------|--------|--------|---|--------|-------------|-------------------|
| 1 | 1.00 | 1 | 1 | 0.01  | 0.01   | 0.01   | 0.01   | 0.006  | t | 127856 | TDVRYKD     | Mus musculus      |
| 1 | 1.00 | 1 | 1 | 0     | 0      | 0      | 0.007  | 0      | t | 112149 | GVGWIRQ     | Homo sapiens      |
| 1 | 1.00 | 1 | 1 | -0.01 | -0.008 | -0.01  | -0.003 | -0.011 | t | 119581 | FSCSVMHE    | Homo sapiens      |
| 1 | 1.00 | 1 | 1 | -0.01 | -0.006 | -0.017 | -0.003 | -0.008 | t | 144657 | GQITVDM MYG | Homo sapiens      |
| 1 | 1.00 | 1 | 1 | 0     | -0.002 | -0.014 | -0.001 | 0      | t | 25013  | HVADIDKLID  | Mus musculus      |
| 1 | 1.00 | 1 | 1 | -0.02 | -0.018 | -0.027 | -0.013 | -0.02  | t | 144652 | GMRGMK GLVY | Homo sapiens      |
| 1 | 1.00 | 1 | 1 | -0.04 | -0.04  | -0.053 | -0.04  | -0.041 | t | 104515 | HDCRPKKI    | Mus musculus      |
| 1 | 1.00 | 1 | 1 | -0.02 | -0.018 | -0.043 | -0.023 | -0.018 | t | 7367   | CYGDWA      | Homo sapiens      |
| 1 | 1.00 | 1 | 1 | -0.02 | -0.018 | -0.043 | -0.023 | -0.018 | t | 7367   | CYGDWA      | Homo sapiens      |
| 1 | 1.00 | 1 | 1 | -0.01 | -0.007 | -0.018 | -0.01  | -0.012 | t | 144610 | DFFTYK      | Mus musculus      |
| 1 | 1.00 | 1 | 1 | 0.05  | 0.05   | 0.05   | 0.057  | 0.05   | t | 112047 | ASTRESG     | Homo sapiens      |
| 1 | 1.00 | 1 | 1 | 0.01  | 0.01   | 0.007  | 0.013  | 0.009  | t | 36136  | LGGVFT      | Homo sapiens      |
| 1 | 1.00 | 1 | 1 | -0.01 | -0.01  | -0.01  | 0      | -0.009 | t | 115256 | FRELKDLKGY  | Homo sapiens      |
| 1 | 1.00 | 1 | 1 | 0.03  | 0.034  | 0.03   | 0.037  | 0.03   | t | 129024 | KADQLYK     | Homo sapiens      |
| 1 | 1.00 | 1 | 1 | 0     | 0.002  | -0.007 | 0      | -0.002 | t | 148481 | YTRDLVYK    | Rattus norvegicus |

|   |      |   |   |       |        |        |        |        |   |        |                   |                                  |
|---|------|---|---|-------|--------|--------|--------|--------|---|--------|-------------------|----------------------------------|
| 1 | 1.00 | 1 | 1 | 0.04  | 0.038  | 0.04   | 0.043  | 0.039  | t | 150850 | GY                | Mus<br>musculu<br>s              |
| 1 | 1.00 | 1 | 1 | -0.03 | -0.028 | -0.03  | -0.023 | -0.031 | t | 107366 | FPPKPKD           | Homo<br>sapiens                  |
| 1 | 1.00 | 1 | 1 | 0.04  | 0.042  | 0.035  | 0.037  | 0.038  | t | 114859 | ICGTDGVT<br>YT    | Homo<br>sapiens                  |
| 1 | 1.00 | 1 | 1 | -0.02 | -0.021 | -0.012 | -0.013 | -0.021 | t | 62149  | SVHLF             | Homo<br>sapiens                  |
| 1 | 1.00 | 1 | 1 | 0.04  | 0.04   | 0.027  | 0.04   | 0.041  | t | 98455  | SGSVQFVP<br>IQ    | Mus<br>musculu<br>s              |
| 1 | 1.00 | 1 | 1 | 0.04  | 0.035  | 0.029  | 0.037  | 0.039  | t | 61783  | STNKAVVS<br>LS    | Bos<br>taurus                    |
| 1 | 1.00 | 1 | 1 | 0     | -0.002 | -0.012 | 0      | 0      | t | 100318 | NAPKTFQF<br>IN    | Mus<br>musculu<br>s              |
| 1 | 1.00 | 1 | 1 | -0.04 | -0.04  | -0.041 | -0.036 | -0.041 | t | 118947 | PFSAPPPA          | Homo<br>sapiens                  |
| 1 | 1.00 | 1 | 1 | 0.01  | 0.008  | 0.007  | 0.013  | 0.01   | t | 78323  | YSFRD             | Mus<br>musculu<br>s              |
| 1 | 1.00 | 1 | 1 | -0.04 | -0.04  | -0.045 | -0.04  | -0.043 | t | 145831 | IPLGTRP           | Mus<br>musculu<br>s              |
| 1 | 1.00 | 1 | 1 | 0.01  | 0.012  | 0.01   | 0.017  | 0.009  | t | 119592 | HTFPAVLQ          | Homo<br>sapiens                  |
| 1 | 1.00 | 1 | 1 | -0.01 | -0.004 | -0.014 | -0.009 | -0.013 | t | 58780  | SKAANLSII<br>K    | MD                               |
| 1 | 1.00 | 1 | 1 | 0.01  | 0.012  | 0.004  | 0.013  | 0.01   | t | 115153 | MKGVVCT<br>RIYEKV | Homo<br>sapiens                  |
| 1 | 1.00 | 1 | 1 | -0.01 | -0.013 | -0.021 | -0.01  | -0.01  | t | 133629 | LPLRF             | Oryctola<br>gus<br>cuniculu<br>s |
| 1 | 1.00 | 1 | 1 | 0.08  | 0.082  | 0.078  | 0.087  | 0.08   | t | 96215  | EEEEAEDK<br>ED    | Homo<br>sapiens                  |

|   |      |   |   |       |        |        |        |        |   |        |              |                |
|---|------|---|---|-------|--------|--------|--------|--------|---|--------|--------------|----------------|
| 1 | 1.00 | 1 | 1 | 0.01  | 0.014  | -0.001 | 0.007  | 0.009  | t | 39782  | LTAASV       | Homo sapiens   |
| 1 | 1.00 | 1 | 1 | 0     | 0.002  | 0      | 0.007  | -0.001 | t | 107479 | KFNWYVD      | Homo sapiens   |
| 1 | 1.00 | 1 | 1 | 0.05  | 0.036  | 0.041  | 0.049  | 0.05   | t | 63569  | TETVNSDI     | Macaca mulatta |
| 1 | 1.00 | 1 | 1 | 0.05  | 0.053  | 0.05   | 0.05   | 0.048  | t | 134028 | DDTIS        | Mus musculus   |
| 1 | 1.00 | 1 | 1 | 0     | 0      | 0      | 0.004  | -0.003 | t | 23028  | GVKYA        | Homo sapiens   |
| 1 | 1.00 | 1 | 1 | -0.03 | -0.03  | -0.03  | -0.02  | -0.029 | t | 115293 | IMCVKKILDK   | Homo sapiens   |
| 1 | 1.00 | 1 | 1 | 0.01  | 0.013  | -0.003 | 0.01   | 0.01   | t | 65105  | TLTPENTL     | Mus musculus   |
| 1 | 1.00 | 1 | 1 | 0.02  | 0.018  | 0.019  | 0.02   | 0.016  | t | 134471 | PKPEQ        | Mus musculus   |
| 1 | 1.00 | 1 | 1 | 0.07  | 0.068  | 0.071  | 0.073  | 0.07   | t | 142228 | LYCYEQLNDSSE | Homo sapiens   |
| 1 | 1.00 | 1 | 1 | 0.03  | 0.032  | 0.021  | 0.031  | 0.03   | t | 21549  | GNYDFWYQS    | Homo sapiens   |
| 1 | 1.00 | 1 | 1 | 0.03  | 0.034  | 0.021  | 0.031  | 0.03   | t | 21549  | GNYDFWYQS    | Homo sapiens   |
| 1 | 1.00 | 1 | 1 | 0.06  | 0.06   | 0.059  | 0.063  | 0.06   | t | 34908  | LAPLGE       | Homo sapiens   |
| 1 | 1.00 | 1 | 1 | 0.01  | 0.008  | 0.01   | 0.011  | 0.007  | t | 130454 | CLFPNNSYC    | Mus musculus   |
| 1 | 1.00 | 1 | 1 | -0.01 | -0.006 | -0.013 | -0.009 | -0.01  | t | 19644  | GFVPSM       | Homo sapiens   |

|   |      |   |   |       |        |        |        |        |   |        |               |                                  |
|---|------|---|---|-------|--------|--------|--------|--------|---|--------|---------------|----------------------------------|
| 1 | 1.00 | 1 | 1 | 0.01  | 0.01   | 0.001  | 0.01   | 0.01   | t | 20678  | GKRPE         | Mus<br>musculu<br>s              |
| 1 | 1.00 | 1 | 1 | -0.02 | -0.016 | -0.016 | -0.02  | -0.025 | t | 123278 | GYLKDLPT<br>T | Ovis<br>aries                    |
| 1 | 1.00 | 1 | 1 | 0.06  | 0.06   | 0.06   | 0.06   | 0.056  | t | 141067 | PLSLEPDP      | Mus<br>musculu<br>s              |
| 1 | 1.00 | 1 | 1 | 0.03  | 0.033  | 0.026  | 0.03   | 0.03   | t | 139248 | SFAGTVIE      | Mus<br>musculu<br>s              |
| 1 | 1.00 | 1 | 1 | -0.06 | -0.06  | -0.073 | -0.06  | -0.061 | t | 104515 | HDCRPKKI      | Mus<br>musculu<br>s              |
| 1 | 1.00 | 1 | 1 | 0.02  | 0.02   | 0.011  | 0.02   | 0.019  | t | 113517 | HLYADGLT<br>D | Mus<br>musculu<br>s              |
| 1 | 1.00 | 1 | 1 | 0.01  | 0.012  | 0.003  | 0.017  | 0.01   | t | 156970 | VERHQ         | Homo<br>sapiens                  |
| 1 | 1.00 | 1 | 1 | 0.02  | 0.02   | 0.017  | 0.02   | 0.018  | t | 78252  | PVQNL         | Mus<br>musculu<br>s              |
| 1 | 1.00 | 1 | 1 | 0.01  | 0.006  | 0.004  | 0.01   | 0.008  | t | 6068   | CCPDKNKS      | Mus<br>musculu<br>s              |
| 1 | 1.00 | 1 | 1 | -0.02 | -0.016 | -0.037 | -0.023 | -0.02  | t | 53109  | RAGVCY        | Homo<br>sapiens                  |
| 1 | 1.00 | 1 | 1 | 0.06  | 0.06   | 0.047  | 0.057  | 0.06   | t | 147041 | IPEQ          | Homo<br>sapiens                  |
| 1 | 1.00 | 1 | 1 | 0.05  | 0.046  | 0.041  | 0.049  | 0.05   | t | 70664  | VQVVYDY<br>Q  | Oryctola<br>gus<br>cuniculu<br>s |
| 1 | 1.00 | 1 | 1 | 0     | 0      | -0.009 | 0      | 0      | t | 134343 | DLYIK         | Mus<br>musculu<br>s              |
| 1 | 1.00 | 1 | 1 | 0.03  | 0.03   | 0.03   | 0.03   | 0.03   | t | 131365 | ATLVCLI       | Homo<br>sapiens                  |
| 1 | 1.00 | 1 | 1 | 0     | 0.002  | -0.002 | 0.007  | 0.001  | t | 112119 | FYNTVLK       | Homo<br>sapiens                  |

|   |      |   |   |       |        |        |        |        |   |        |              |                       |
|---|------|---|---|-------|--------|--------|--------|--------|---|--------|--------------|-----------------------|
| 1 | 1.00 | 1 | 1 | 0.02  | 0.02   | 0.025  | 0.02   | 0.015  | t | 107378 | GELP         | Rattus norvegicus     |
| 1 | 1.00 | 1 | 1 | -0.01 | -0.01  | -0.01  | -0.01  | -0.013 | t | 119461 | GVQGGMV      | Homo sapiens          |
| 1 | 1.00 | 1 | 1 | 0.03  | 0.03   | 0.03   | 0.04   | 0.03   | t | 114757 | CLLCAYSIEF   | Homo sapiens          |
| 1 | 1.00 | 1 | 1 | -0.05 | -0.048 | -0.051 | -0.043 | -0.051 | t | 117526 | HGIIKECT     | Homo sapiens          |
| 1 | 1.00 | 1 | 1 | 0     | 0.002  | -0.007 | 0.007  | 0      | t | 121117 | ADGKKIDG     | Homo sapiens          |
| 1 | 1.00 | 1 | 1 | 0.05  | 0.048  | 0.038  | 0.05   | 0.05   | t | 100451 | QYTHQDEIYE   | Mus musculus          |
| 1 | 1.00 | 1 | 1 | 0     | 0.002  | -0.017 | 0.003  | 0.002  | t | 96967  | TKEKPTPVK    | Homo sapiens(human)   |
| 1 | 1.00 | 1 | 1 | 0.05  | 0.05   | 0.048  | 0.051  | 0.047  | t | 116085 | EPANPSEK     | Mus musculus          |
| 1 | 1.00 | 1 | 1 | 0.01  | 0.01   | 0.005  | 0.012  | 0.008  | t | 117973 | LCG          | Homo sapiens          |
| 1 | 1.00 | 1 | 1 | -0.01 | -0.014 | -0.015 | -0.007 | -0.01  | t | 97169  | ADPVATKPL    | Oryctolagus cuniculus |
| 1 | 1.00 | 1 | 1 | -0.04 | -0.038 | -0.047 | -0.037 | -0.041 | t | 115658 | VGWYRPPFSRVV | Homo sapiens          |
| 1 | 1.00 | 1 | 1 | 0     | 0      | -0.007 | 0      | -0.002 | t | 127196 | TEVPFRLM     | Rattus norvegicus     |
| 1 | 1.00 | 1 | 1 | -0.01 | -0.01  | -0.01  | -0.004 | -0.011 | t | 157292 | GAIIGLM      | Homo sapiens          |
| 1 | 1.00 | 1 | 1 | 0     | 0.004  | -0.014 | 0.003  | 0.002  | t | 64769  | TLEEFSAKL    | Homo sapiens          |
| 1 | 1.00 | 1 | 1 | 0.03  | 0.027  | 0.023  | 0.03   | 0.029  | t | 138040 | SLGQNVLS     | Oryctolagus cuniculus |



|   |      |   |   |       |        |        |        |        |   |        |            |                       |
|---|------|---|---|-------|--------|--------|--------|--------|---|--------|------------|-----------------------|
| 1 | 1.00 | 1 | 1 | 0.03  | 0.016  | 0.023  | 0.03   | 0.029  | t | 138040 | SLGQNVLS   | Oryctolagus cuniculus |
| 1 | 1.00 | 1 | 1 | -0.02 | -0.022 | -0.028 | -0.021 | -0.02  | t | 27416  | ILYAVFK    | Mus musculus          |
| 1 | 1.00 | 1 | 1 | 0.06  | 0.06   | 0.047  | 0.057  | 0.06   | t | 147041 | IPEQ       | Homo sapiens          |
| 1 | 1.00 | 1 | 1 | 0.04  | 0.042  | 0.028  | 0.037  | 0.04   | t | 115060 | GYLEQL     | Homo sapiens          |
| 1 | 1.00 | 1 | 1 | 0.02  | 0.02   | 0.017  | 0.03   | 0.02   | t | 98740  | EALEKFDKAL | Homo sapiens          |
| 1 | 1.00 | 1 | 1 | 0     | 0.002  | -0.007 | 0.003  | 0      | t | 144783 | SHVVTMLDNF | Homo sapiens          |
| 1 | 1.00 | 1 | 1 | -0.04 | -0.038 | -0.04  | -0.039 | -0.043 | t | 111055 | VYDFAFQDL  | Homo sapiens          |
| 1 | 1.00 | 1 | 1 | -0.04 | -0.038 | -0.04  | -0.039 | -0.043 | t | 111055 | VYDFAFQDL  | Homo sapiens          |
| 1 | 1.00 | 1 | 1 | -0.02 | -0.022 | -0.029 | -0.019 | -0.021 | t | 73889  | YFRTLEDAAH | Mus musculus          |
| 1 | 1.00 | 1 | 1 | -0.02 | -0.022 | -0.029 | -0.019 | -0.021 | t | 73889  | YFRTLEDAAH | Mus musculus          |
| 1 | 1.00 | 1 | 1 | 0.11  | 0.113  | 0.103  | 0.11   | 0.11   | t | 140014 | DSDVGE     | Mus musculus          |
| 1 | 1.00 | 1 | 1 | 0.02  | 0.024  | 0.028  | 0.027  | 0.017  | t | 124205 | GPLQLGM    | Homo sapiens          |
| 1 | 1.00 | 1 | 1 | 0.08  | 0.078  | 0.066  | 0.079  | 0.081  | t | 46777  | PAEGEK     | Mus musculus          |
| 1 | 1.00 | 1 | 1 | 0.03  | 0.032  | 0.023  | 0.037  | 0.03   | t | 141673 | IDEYCVQQLK | Homo sapiens          |
| 1 | 1.00 | 1 | 1 | 0.02  | 0.022  | 0.013  | 0.021  | 0.02   | t | 22669  | GTGP       | Homo sapiens          |

|   |      |   |   |       |        |        |        |        |   |        |                     |                   |
|---|------|---|---|-------|--------|--------|--------|--------|---|--------|---------------------|-------------------|
| 1 | 1.00 | 1 | 1 | 0.01  | 0.014  | 0.01   | 0.017  | 0.008  | t | 126903 | QVINVREG            | Homo sapiens      |
| 1 | 1.00 | 1 | 1 | 0.02  | 0.02   | 0.008  | 0.02   | 0.02   | t | 30799  | KFNPDLAG<br>G       | Homo sapiens      |
| 1 | 1.00 | 1 | 1 | -0.03 | -0.027 | -0.04  | -0.03  | -0.031 | t | 156553 | YSTCYFIM            | Mus musculus      |
| 1 | 1.00 | 1 | 1 | -0.02 | -0.02  | -0.023 | -0.01  | -0.018 | t | 116732 | GLGFYG              | Homo sapiens      |
| 1 | 1.00 | 1 | 1 | -0.04 | -0.04  | -0.04  | -0.03  | -0.039 | t | 115197 | CVKKILDK<br>VG      | Homo sapiens      |
| 1 | 1.00 | 1 | 1 | 0     | 0.002  | 0      | 0.007  | -0.003 | t | 134783 | RKLQKSTH<br>LLIRKLP | Homo sapiens      |
| 1 | 1.00 | 1 | 1 | 0.06  | 0.06   | 0.06   | 0.06   | 0.057  | t | 120082 | LPTDSGEK            | Rattus norvegicus |
| 1 | 1.00 | 1 | 1 | -0.01 | -0.006 | -0.01  | -0.003 | -0.011 | t | 131166 | YSCRHGYE<br>LQ      | Homo sapiens      |
| 1 | 1.00 | 1 | 1 | 0     | 0      | 0      | 0.007  | 0.001  | t | 112283 | RDGAWFA             | Homo sapiens      |
| 1 | 1.00 | 1 | 1 | 0.03  | 0.032  | 0.035  | 0.037  | 0.029  | t | 112414 | YLSSFTF             | Homo sapiens      |
| 1 | 1.00 | 1 | 1 | 0.01  | 0.014  | 0.007  | 0.011  | 0.007  | t | 103297 | IWKLIKDM<br>LILPYLD | Homo sapiens      |
| 1 | 1.00 | 1 | 1 | 0.06  | 0.062  | 0.05   | 0.061  | 0.062  | t | 30265  | KDTTSDYE            | Homo sapiens      |
| 1 | 1.00 | 1 | 1 | -0.01 | -0.012 | -0.014 | -0.01  | -0.012 | t | 20453  | GITDVF              | Mus musculus      |
| 1 | 1.00 | 1 | 1 | 0.04  | 0.04   | 0.04   | 0.04   | 0.038  | t | 139524 | ISSQT               | Mus musculus      |

|   |      |   |   |       |        |        |        |       |   |        |                  |                         |
|---|------|---|---|-------|--------|--------|--------|-------|---|--------|------------------|-------------------------|
| 1 | 1.00 | 1 | 1 | -0.03 | -0.03  | -0.041 | -0.03  | -0.03 | t | 60039  | SPFART           | Homo sapiens            |
| 1 | 1.00 | 1 | 1 | 0.02  | 0.032  | 0.019  | 0.019  | 0.018 | t | 41126  | MASLIYRQ<br>LL   | Gallus gallus           |
| 1 | 1.00 | 1 | 1 | 0.04  | 0.038  | 0.022  | 0.041  | 0.042 | t | 60798  | SRSESSIEN<br>F   | Homo sapiens            |
| 1 | 1.00 | 1 | 1 | 0.01  | 0.015  | -0.005 | 0.013  | 0.012 | t | 97065  | VPKVTKEK<br>PT   | Homo sapiens(<br>human) |
| 1 | 1.00 | 1 | 1 | 0.07  | 0.07   | 0.058  | 0.07   | 0.071 | t | 122569 | SFQDENFV<br>FEEF | Rattus norvegicus       |
| 1 | 1.00 | 1 | 1 | 0.03  | 0.034  | 0.028  | 0.03   | 0.027 | t | 1448   | AGAPDRA<br>RGQYP | Mus musculus            |
| 1 | 1.00 | 1 | 1 | 0     | 0.002  | -0.015 | -0.003 | 0.002 | t | 39217  | LRSVYQ           | Homo sapiens            |
| 1 | 1.00 | 1 | 1 | 0.02  | 0.022  | 0.02   | 0.027  | 0.019 | t | 119632 | QYNSTYRV         | Homo sapiens            |
| 1 | 1.00 | 1 | 1 | 0.01  | 0.012  | 0.01   | 0.013  | 0.007 | t | 94685  | SICSNNPT<br>CWA  | Homo sapiens            |
| 1 | 1.00 | 1 | 1 | -0.02 | -0.018 | -0.025 | -0.019 | -0.02 | t | 19644  | GFVPSM           | Homo sapiens            |
| 1 | 1.00 | 1 | 1 | 0     | 0      | -0.018 | 0      | 0.003 | t | 52124  | QQQPP            | Homo sapiens            |
| 1 | 1.00 | 1 | 1 | 0.03  | 0.03   | 0.024  | 0.03   | 0.028 | t | 48876  | PPPQAPY<br>QGY   | Mus musculus            |
| 1 | 1.00 | 1 | 1 | 0.04  | 0.042  | 0.03   | 0.041  | 0.041 | t | 58963  | SKVPEDTL         | Homo sapiens            |

|   |      |   |   |       |        |        |        |        |   |        |                |                       |
|---|------|---|---|-------|--------|--------|--------|--------|---|--------|----------------|-----------------------|
| 1 | 1.00 | 1 | 1 | -0.02 | -0.023 | -0.033 | -0.02  | -0.02  | t | 41982  | MLKSLDNL       | Oryctolagus cuniculus |
| 1 | 1.00 | 1 | 1 | -0.02 | -0.02  | -0.019 | -0.013 | -0.022 | t | 40340  | LVFKT          | Homo sapiens          |
| 1 | 1.00 | 1 | 1 | -0.01 | -0.008 | -0.017 | -0.007 | -0.011 | t | 115661 | VVHLYRN GKDQD  | Homo sapiens          |
| 1 | 1.00 | 1 | 1 | -0.01 | -0.008 | -0.027 | -0.007 | -0.007 | t | 110932 | LNLKIDGL KISV  | Homo sapiens          |
| 1 | 1.00 | 1 | 1 | 0.03  | 0.03   | 0.023  | 0.03   | 0.029  | t | 107702 | YVDGVQV        | Homo sapiens          |
| 1 | 1.00 | 1 | 1 | 0.01  | 0.01   | 0.003  | 0.01   | 0.01   | t | 14702  | EVGKVA         | Homo sapiens          |
| 1 | 1.00 | 1 | 1 | 0     | -0.001 | -0.006 | 0.001  | 0      | t | 71545  | VTV            | Bos taurus            |
| 1 | 1.00 | 1 | 1 | -0.01 | -0.006 | -0.01  | -0.003 | -0.008 | t | 107421 | GPSVFLF        | Homo sapiens          |
| 1 | 1.00 | 1 | 1 | -0.06 | -0.057 | -0.071 | -0.06  | -0.062 | t | 102784 | RWWS           | Mus musculus          |
| 1 | 1.00 | 1 | 1 | 0.02  | 0.022  | 0.02   | 0.027  | 0.019  | t | 119593 | HYTQKSLS       | Homo sapiens          |
| 1 | 1.00 | 1 | 1 | 0     | 0.002  | -0.013 | 0.001  | 0      | t | 34082  | KVKVEYQK TMGSM | Homo sapiens          |
| 1 | 1.00 | 1 | 1 | 0.01  | 0.012  | -0.007 | 0.007  | 0.01   | t | 33936  | KTYSQYKV       | Homo sapiens          |
| 1 | 1.00 | 1 | 1 | 0.03  | 0.03   | 0.022  | 0.033  | 0.03   | t | 110964 | PNLKLNN GTDYK  | Homo sapiens          |
| 1 | 1.00 | 1 | 1 | -0.01 | -0.005 | -0.02  | -0.007 | -0.01  | t | 110839 | ETTSQMIV KDIK  | Homo sapiens          |

|   |      |   |   |       |        |        |        |        |   |        |              |                       |
|---|------|---|---|-------|--------|--------|--------|--------|---|--------|--------------|-----------------------|
| 1 | 1.00 | 1 | 1 | 0.01  | 0.01   | -0.002 | 0.01   | 0.01   | t | 48620  | PNDPPP       | Mus musculus          |
| 1 | 1.00 | 1 | 1 | 0.01  | 0.01   | -0.002 | 0.01   | 0.01   | t | 48620  | PNDPPP       | Mus musculus          |
| 1 | 1.00 | 1 | 1 | 0     | 0      | 0      | 0      | -0.003 | t | 101053 | MASPGS       | Homo sapiens          |
| 1 | 1.00 | 1 | 1 | 0.04  | 0.038  | 0.036  | 0.039  | 0.038  | t | 3698   | APPQA        | Mus musculus          |
| 1 | 1.00 | 1 | 1 | -0.03 | -0.028 | -0.039 | -0.027 | -0.03  | t | 77929  | KFHRVIKDF    | Homo sapiens          |
| 1 | 1.00 | 1 | 1 | -0.02 | -0.023 | -0.027 | -0.02  | -0.022 | t | 137425 | KFP          | Oryctolagus cuniculus |
| 1 | 1.00 | 1 | 1 | 0.03  | 0.03   | 0.03   | 0.03   | 0.031  | t | 107784 | DGSFFLY      | Homo sapiens          |
| 1 | 1.00 | 1 | 1 | 0.03  | 0.032  | 0.03   | 0.037  | 0.029  | t | 119576 | EYKCKVSN     | Homo sapiens          |
| 1 | 1.00 | 1 | 1 | 0.03  | 0.032  | 0.013  | 0.031  | 0.032  | t | 96940  | TAPTKPTYET   | Homo sapiens(human)   |
| 1 | 1.00 | 1 | 1 | -0.03 | -0.03  | -0.045 | -0.027 | -0.028 | t | 53548  | REKMITEF     | Homo sapiens          |
| 1 | 1.00 | 1 | 1 | 0.01  | 0.012  | 0.01   | 0.017  | 0.009  | t | 119619 | NNYKTPP      | Homo sapiens          |
| 1 | 1.00 | 1 | 1 | 0.08  | 0.084  | 0.08   | 0.087  | 0.078  | t | 129058 | KEESEEDMGFGL | Homo sapiens          |
| 1 | 1.00 | 1 | 1 | -0.01 | -0.01  | -0.026 | -0.012 | -0.01  | t | 45679  | NRGFDART     | Homo sapiens          |
| 1 | 1.00 | 1 | 1 | -0.01 | -0.007 | -0.017 | -0.01  | -0.013 | t | 75222  | YNSSRSYWT    | Mus musculus          |

|   |      |   |   |       |        |        |        |        |   |        |                     |                       |
|---|------|---|---|-------|--------|--------|--------|--------|---|--------|---------------------|-----------------------|
| 1 | 1.00 | 1 | 1 | 0.04  | 0.04   | 0.04   | 0.04   | 0.036  | t | 141067 | PLSLEPDP            | Mus musculus          |
| 1 | 1.00 | 1 | 1 | -0.01 | -0.008 | -0.012 | -0.007 | -0.011 | t | 131580 | PDRFSGS             | Homo sapiens          |
| 1 | 1.00 | 1 | 1 | 0.01  | 0.011  | 0.003  | 0.009  | 0.01   | t | 73973  | YFYVGLDY            | Equus caballus        |
| 1 | 1.00 | 1 | 1 | 0.01  | 0.008  | 0.003  | 0.009  | 0.01   | t | 73973  | YFYVGLDY            | Mus musculus          |
| 1 | 1.00 | 1 | 1 | 0.14  | 0.14   | 0.125  | 0.14   | 0.143  | t | 144880 | EE                  | Mus musculus          |
| 1 | 1.00 | 1 | 1 | 0.07  | 0.067  | 0.064  | 0.07   | 0.068  | t | 50396  | QAYQQGV<br>TVD      | Oryctolagus cuniculus |
| 1 | 1.00 | 1 | 1 | 0.04  | 0.042  | 0.035  | 0.037  | 0.038  | t | 115901 | PQSVLSLS<br>QS      | Homo sapiens          |
| 1 | 1.00 | 1 | 1 | 0     | 0.002  | -0.011 | 0.003  | 0      | t | 159063 | RKAADTFN<br>FKTFFHT | Homo sapiens          |
| 1 | 1.00 | 1 | 1 | -0.07 | -0.072 | -0.09  | -0.069 | -0.068 | t | 96386  | IFDVTT              | Mus musculus          |
| 1 | 1.00 | 1 | 1 | 0.02  | 0.023  | 0.014  | 0.02   | 0.018  | t | 9591   | DPAKAAF<br>D        | Mus musculus          |
| 1 | 1.00 | 1 | 1 | 0.02  | 0.02   | 0.012  | 0.02   | 0.02   | t | 63832  | TGGAGYFY            | Mus musculus          |
| 1 | 1.00 | 1 | 1 | 0.08  | 0.08   | 0.075  | 0.083  | 0.08   | t | 65604  | TPIDTT              | Homo sapiens          |
| 1 | 1.00 | 1 | 1 | -0.02 | -0.02  | -0.02  | -0.013 | -0.023 | t | 158587 | EFGTFLW             | Homo sapiens          |
| 1 | 1.00 | 1 | 1 | 0.05  | 0.046  | 0.033  | 0.043  | 0.051  | t | 110768 | ANPENYFT            | Oryctolagus cuniculus |

|   |      |   |   |       |        |        |        |        |   |        |                |                       |
|---|------|---|---|-------|--------|--------|--------|--------|---|--------|----------------|-----------------------|
| 1 | 1.00 | 1 | 1 | 0.05  | 0.046  | 0.033  | 0.043  | 0.051  | t | 110768 | ANPENYFT       | Oryctolagus cuniculus |
| 1 | 1.00 | 1 | 1 | 0.01  | 0.008  | 0.008  | 0.013  | 0.01   | t | 97167  | AANYTTAV       | Mus musculus          |
| 1 | 1.00 | 1 | 1 | 0     | 0      | 0      | 0.006  | -0.001 | t | 157178 | EASNCF         | Homo sapiens          |
| 1 | 1.00 | 1 | 1 | 0.03  | 0.03   | 0.018  | 0.03   | 0.03   | t | 133552 | ECAYCLTI       | Mus musculus          |
| 1 | 1.00 | 1 | 1 | 0.02  | 0.018  | 0.02   | 0.021  | 0.017  | t | 130457 | CRQPGNNYC      | Mus musculus          |
| 1 | 1.00 | 1 | 1 | 0.01  | 0.008  | 0.003  | 0.009  | 0.008  | t | 43330  | NAVFHFDQNG     | Mus musculus          |
| 1 | 1.00 | 1 | 1 | -0.05 | -0.052 | -0.06  | -0.051 | -0.052 | t | 12992  | ELDLQARR       | Mus musculus          |
| 1 | 1.00 | 1 | 1 | -0.01 | -0.008 | -0.015 | -0.01  | -0.012 | t | 127196 | TEVPFRLM       | Rattus norvegicus     |
| 1 | 1.00 | 1 | 1 | 0.03  | 0.032  | 0.035  | 0.037  | 0.029  | t | 112058 | AYWGQGT        | Homo sapiens          |
| 1 | 1.00 | 1 | 1 | 0.01  | 0.012  | -0.011 | 0.007  | 0.012  | t | 10164  | DSLKEKLQ       | Homo sapiens          |
| 1 | 1.00 | 1 | 1 | 0.04  | 0.046  | 0.029  | 0.04   | 0.04   | t | 92873  | GVDTIYGN DG    | Ovis aries            |
| 1 | 1.00 | 1 | 1 | -0.02 | -0.018 | -0.018 | -0.013 | -0.023 | t | 120612 | IFNLFSTKDSSAAW | Homo sapiens          |
| 1 | 1.00 | 1 | 1 | 0     | 0.004  | -0.011 | 0.001  | 0      | t | 9982   | DRHFLN         | Homo sapiens          |
| 1 | 1.00 | 1 | 1 | 0.03  | 0.03   | 0.028  | 0.033  | 0.03   | t | 3685   | APPLPP         | Homo sapiens          |

|   |      |   |   |       |        |        |        |        |   |        |                  |                                  |
|---|------|---|---|-------|--------|--------|--------|--------|---|--------|------------------|----------------------------------|
| 1 | 1.00 | 1 | 1 | 0.02  | 0.018  | 0.011  | 0.023  | 0.02   | t | 8143   | DEREECKC         | Mus<br>musculu<br>s              |
| 1 | 1.00 | 1 | 1 | -0.01 | -0.007 | -0.018 | -0.01  | -0.011 | t | 144610 | DFFTYK           | Mus<br>musculu<br>s              |
| 1 | 1.00 | 1 | 1 | 0     | -0.009 | -0.013 | 0      | 0.002  | t | 64561  | TKFLGKNK         | Macaca<br>mulatta                |
| 1 | 1.00 | 1 | 1 | -0.04 | -0.04  | -0.043 | -0.03  | -0.041 | t | 98885  | LPMHIRLS<br>FN   | Homo<br>sapiens                  |
| 1 | 1.00 | 1 | 1 | 0.01  | 0.012  | 0.001  | 0.007  | 0.008  | t | 10794  | DVYSFSLA         | Homo<br>sapiens                  |
| 1 | 1.00 | 1 | 1 | 0.02  | 0.023  | 0.002  | 0.02   | 0.022  | t | 66303  | TSLLSNS          | Mus<br>musculu<br>s              |
| 1 | 1.00 | 1 | 1 | 0.03  | 0.032  | 0.03   | 0.037  | 0.03   | t | 122564 | RTAGFDIK<br>LIDT | Homo<br>sapiens                  |
| 1 | 1.00 | 1 | 1 | 0     | 0.004  | -0.006 | 0.001  | -0.002 | t | 17998  | FTKWTWE<br>TKGDL | Homo<br>sapiens                  |
| 1 | 1.00 | 1 | 1 | -0.04 | -0.04  | -0.049 | -0.04  | -0.041 | t | 118764 | CYGSFARP<br>TN   | Mus<br>musculu<br>s              |
| 1 | 1.00 | 1 | 1 | 0.04  | 0.038  | 0.029  | 0.039  | 0.04   | t | 96854  | SAPSISTE         | Mus<br>musculu<br>s              |
| 1 | 1.00 | 1 | 1 | -0.02 | -0.017 | -0.025 | -0.02  | -0.022 | t | 126828 | PKYA             | Mus<br>musculu<br>s              |
| 1 | 1.00 | 1 | 1 | 0.01  | 0.007  | -0.003 | 0.01   | 0.01   | t | 1445   | AGAKSAIL         | Oryctola<br>gus<br>cuniculu<br>s |
| 1 | 1.00 | 1 | 1 | 0     | 0      | 0      | 0.007  | 0.001  | t | 112314 | SGVPDRF          | Homo<br>sapiens                  |
| 1 | 1.00 | 1 | 1 | 0     | 0.002  | -0.007 | -0.003 | -0.003 | t | 116039 | YPSYGLNY<br>YQ   | Homo<br>sapiens                  |



|   |      |   |   |       |        |        |        |        |   |        |                             |                                  |
|---|------|---|---|-------|--------|--------|--------|--------|---|--------|-----------------------------|----------------------------------|
| 1 | 1.00 | 1 | 1 | 0     | 0.002  | -0.007 | -0.003 | -0.003 | t | 116039 | YPSYGLNY<br>YQ              | Homo<br>sapiens                  |
| 1 | 1.00 | 1 | 1 | 0.02  | 0.022  | 0.013  | 0.021  | 0.019  | t | 138057 | TPGTEYTV                    | Homo<br>sapiens                  |
| 1 | 1.00 | 1 | 1 | 0.02  | 0.01   | 0.013  | 0.021  | 0.019  | t | 138057 | TPGTEYTV                    | Homo<br>sapiens                  |
| 1 | 1.00 | 1 | 1 | 0.02  | 0.018  | 0.02   | 0.023  | 0.02   | t | 49295  | PSAPPL                      | Homo<br>sapiens                  |
| 1 | 1.00 | 1 | 1 | 0.02  | 0.018  | 0.02   | 0.023  | 0.02   | t | 49295  | PSAPPL                      | Homo<br>sapiens                  |
| 1 | 1.00 | 1 | 1 | 0     | 0.002  | 0.005  | 0.007  | 0      | t | 112814 | PEQPPIH                     | Homo<br>sapiens                  |
| 1 | 1.00 | 1 | 1 | 0.05  | 0.047  | 0.045  | 0.05   | 0.048  | t | 49408  | PSISEGPSY<br>EFS            | Oryctola<br>gus<br>cuniculu<br>s |
| 1 | 1.00 | 1 | 1 | 0.04  | 0.04   | 0.033  | 0.04   | 0.04   | t | 95692  | PTTSDV                      | Mus<br>musculu<br>s              |
| 1 | 1.00 | 1 | 1 | -0.01 | -0.01  | -0.017 | -0.004 | -0.01  | t | 96762  | PVKPTAPT<br>KP              | Homo<br>sapiens(<br>human)       |
| 1 | 1.00 | 1 | 1 | 0.01  | 0.012  | 0.005  | 0.007  | 0.008  | t | 115900 | PQRDMPI<br>QAF              | Homo<br>sapiens                  |
| 1 | 1.00 | 1 | 1 | 0.03  | 0.033  | 0.034  | 0.03   | 0.025  | t | 122917 | TKVYSTDIF<br>FILEITDNP<br>Y | Mus<br>musculu<br>s              |
| 1 | 1.00 | 1 | 1 | -0.03 | -0.026 | -0.03  | -0.023 | -0.033 | t | 134707 | KLPFSRLA<br>REICVKF         | Homo<br>sapiens                  |
| 1 | 1.00 | 1 | 1 | 0.01  | 0.01   | 0.01   | 0.02   | 0.01   | t | 114757 | CLLCAYSIE<br>F              | Homo<br>sapiens                  |
| 1 | 1.00 | 1 | 1 | 0     | 0.002  | -0.011 | 0.003  | 0      | t | 159063 | RKAADTFN<br>FKTFFHT         | Homo<br>sapiens                  |
| 1 | 1.00 | 1 | 1 | 0.01  | 0.008  | -0.007 | 0.007  | 0.01   | t | 45052  | NNAYNMS<br>I                | Mus<br>musculu<br>s              |

|   |      |   |   |       |        |        |        |        |   |        |                     |                                  |
|---|------|---|---|-------|--------|--------|--------|--------|---|--------|---------------------|----------------------------------|
| 1 | 1.00 | 1 | 1 | 0.02  | 0.024  | 0.02   | 0.021  | 0.017  | t | 48778  | PPFSLSPV<br>PTL     | Homo<br>sapiens                  |
| 1 | 1.00 | 1 | 1 | -0.02 | -0.024 | -0.021 | -0.019 | -0.023 | t | 75686  | YRYDSRPP            | Oryctola<br>gus<br>cuniculu<br>s |
| 1 | 1.00 | 1 | 1 | -0.02 | -0.022 | -0.021 | -0.019 | -0.023 | t | 75686  | YRYDSRPP            | Mus<br>musculu<br>s              |
| 1 | 1.00 | 1 | 1 | 0.02  | 0.02   | 0.01   | 0.02   | 0.02   | t | 137759 | NQEDAEAI<br>THLF    | Mus<br>musculu<br>s              |
| 1 | 1.00 | 1 | 1 | 0.02  | 0.02   | 0.01   | 0.02   | 0.02   | t | 137759 | NQEDAEAI<br>THLF    | Mus<br>musculu<br>s              |
| 1 | 1.00 | 1 | 1 | 0.02  | 0.02   | 0.012  | 0.02   | 0.02   | t | 45629  | NQSTVK              | Mus<br>musculu<br>s              |
| 1 | 1.00 | 1 | 1 | -0.01 | -0.01  | -0.01  | -0.003 | -0.01  | t | 112151 | GWIRQRS             | Homo<br>sapiens                  |
| 1 | 1.00 | 1 | 1 | -0.01 | -0.01  | -0.019 | -0.01  | -0.012 | t | 67524  | VAALNRRI<br>QLLEEDL | Homo<br>sapiens                  |
| 1 | 1.00 | 1 | 1 | -0.02 | -0.024 | -0.033 | -0.021 | -0.02  | t | 41982  | MLKSLDNL            | Oryctola<br>gus<br>cuniculu<br>s |
| 1 | 1.00 | 1 | 1 | -0.01 | -0.014 | -0.014 | -0.009 | -0.012 | t | 30294  | KEAIVTK             | Bos<br>taurus                    |
| 1 | 1.00 | 1 | 1 | 0.03  | 0.034  | 0.016  | 0.027  | 0.03   | t | 147041 | IPEQ                | Homo<br>sapiens                  |
| 1 | 1.00 | 1 | 1 | -0.02 | -0.022 | -0.029 | -0.02  | -0.021 | t | 73889  | YFRTLEDA<br>AH      | Mus<br>musculu<br>s              |
| 1 | 1.00 | 1 | 1 | -0.02 | -0.02  | -0.029 | -0.02  | -0.021 | t | 73889  | YFRTLEDA<br>AH      | Mus<br>musculu<br>s              |

|   |      |   |   |       |        |        |        |        |   |        |                     |                                  |
|---|------|---|---|-------|--------|--------|--------|--------|---|--------|---------------------|----------------------------------|
| 1 | 1.00 | 1 | 1 | 0.01  | 0.012  | 0.003  | 0.017  | 0.01   | t | 144589 | ALKHLPND<br>PM      | Homo<br>sapiens                  |
| 1 | 1.00 | 1 | 1 | 0.08  | 0.084  | 0.073  | 0.087  | 0.083  | t | 140020 | ENTNIT              | Homo<br>sapiens                  |
| 1 | 1.00 | 1 | 1 | 0.04  | 0.044  | 0.035  | 0.047  | 0.041  | t | 122282 | AYLVGLFE<br>DTNLCAI | Homo<br>sapiens                  |
| 1 | 1.00 | 1 | 1 | 0.02  | 0.022  | 0.013  | 0.02   | 0.019  | t | 126982 | RREFEFYG            | Homo<br>sapiens                  |
| 1 | 1.00 | 1 | 1 | -0.05 | -0.046 | -0.057 | -0.043 | -0.051 | t | 115633 | PPFSRVVH<br>LYRN    | Homo<br>sapiens                  |
| 1 | 1.00 | 1 | 1 | 0.04  | 0.042  | 0.029  | 0.047  | 0.042  | t | 133921 | QLELTEG<br>MRFDKGYI | Homo<br>sapiens                  |
| 1 | 1.00 | 1 | 1 | 0.06  | 0.059  | 0.05   | 0.06   | 0.06   | t | 21504  | GNQSLLET            | Anas<br>platyrhy<br>nchos        |
| 1 | 1.00 | 1 | 1 | 0.01  | 0.01   | 0.003  | 0.01   | 0.009  | t | 130919 | KFPEDFES            | Homo<br>sapiens                  |
| 1 | 1.00 | 1 | 1 | 0.02  | 0.032  | 0.019  | 0.019  | 0.018  | t | 41126  | MASLIYRQ<br>LL      | Gallus<br>gallus                 |
| 1 | 1.00 | 1 | 1 | 0.05  | 0.047  | 0.044  | 0.05   | 0.049  | t | 105979 | NIEADVNT            | Oryctola<br>gus<br>cuniculu<br>s |
| 1 | 1.00 | 1 | 1 | 0.01  | 0.007  | 0.01   | 0.01   | 0.007  | t | 135566 | KCSRLYTA<br>CVY     | Oryctola<br>gus<br>cuniculu<br>s |
| 1 | 1.00 | 1 | 1 | 0.03  | 0.03   | 0.023  | 0.03   | 0.028  | t | 132766 | YRAYATEP            | Mus<br>musculu<br>s              |
| 1 | 1.00 | 1 | 1 | 0.01  | 0.01   | -0.001 | 0.01   | 0.009  | t | 113800 | QYTPTTQP<br>YPRVT   | Mus<br>musculu<br>s              |
| 1 | 1.00 | 1 | 1 | 0.05  | 0.052  | 0.055  | 0.057  | 0.048  | t | 122607 | TEAFLAEM<br>EK      | Homo<br>sapiens                  |

|   |      |   |   |       |        |        |        |        |   |        |                  |                                  |
|---|------|---|---|-------|--------|--------|--------|--------|---|--------|------------------|----------------------------------|
| 1 | 1.00 | 1 | 1 | 0.01  | 0.013  | 0.004  | 0.01   | 0.007  | t | 43548  | NDYEDRYY<br>RE   | Mus<br>musculu<br>s              |
| 1 | 1.00 | 1 | 1 | 0.03  | 0.03   | 0.022  | 0.03   | 0.03   | t | 6205   | CETEFSKLY        | Mus<br>musculu<br>s              |
| 1 | 1.00 | 1 | 1 | 0.03  | 0.03   | 0.022  | 0.03   | 0.03   | t | 6205   | CETEFSKLY        | Mus<br>musculu<br>s              |
| 1 | 1.00 | 1 | 1 | 0.03  | 0.026  | 0.021  | 0.029  | 0.03   | t | 70665  | VQVVYDY<br>QHK   | Oryctola<br>gus<br>cuniculu<br>s |
| 1 | 1.00 | 1 | 1 | 0     | 0.002  | 0      | 0.007  | -0.001 | t | 119639 | SCSVMHE<br>A     | Homo<br>sapiens                  |
| 1 | 1.00 | 1 | 1 | -0.02 | -0.02  | -0.032 | -0.02  | -0.02  | t | 49975  | PVSSLTML         | Oryctola<br>gus<br>cuniculu<br>s |
| 1 | 1.00 | 1 | 1 | 0.04  | 0.038  | 0.04   | 0.039  | 0.036  | t | 62289  | SVPSSSS          | Mus<br>musculu<br>s              |
| 1 | 1.00 | 1 | 1 | 0.01  | 0.01   | -0.003 | 0.007  | 0.01   | t | 147225 | QLQPFP           | Homo<br>sapiens                  |
| 1 | 1.00 | 1 | 1 | -0.01 | -0.008 | -0.017 | -0.007 | -0.011 | t | 115661 | VVHLYRN<br>GKDQD | Homo<br>sapiens                  |
| 1 | 1.00 | 1 | 1 | 0.03  | 0.03   | 0.018  | 0.03   | 0.03   | t | 58275  | SGV              | Homo<br>sapiens                  |
| 1 | 1.00 | 1 | 1 | 0.03  | 0.03   | 0.017  | 0.024  | 0.028  | t | 70439  | VPPVIKQV<br>SA   | Homo<br>sapiens                  |
| 1 | 1.00 | 1 | 1 | 0.01  | 0.008  | 0.004  | 0.007  | 0.008  | t | 50666  | QEPIVA           | Mus<br>musculu<br>s              |
| 1 | 1.00 | 1 | 1 | 0.03  | 0.03   | 0.022  | 0.032  | 0.03   | t | 110964 | PNLKLNN<br>GTDYK | Homo<br>sapiens                  |
| 1 | 1.00 | 1 | 1 | 0.02  | 0.018  | 0.019  | 0.02   | 0.017  | t | 134471 | PKPEQ            | Mus<br>musculu<br>s              |

|   |      |   |   |       |        |        |        |        |   |        |               |                      |
|---|------|---|---|-------|--------|--------|--------|--------|---|--------|---------------|----------------------|
| 1 | 1.00 | 1 | 1 | 0.02  | 0.023  | 0.015  | 0.019  | 0.017  | t | 157702 | NKFAVETL      | Chlorocebus aethiops |
| 1 | 1.00 | 1 | 1 | -0.01 | -0.01  | -0.025 | -0.013 | -0.01  | t | 54340  | RKEVMK        | Homo sapiens         |
| 1 | 1.00 | 1 | 1 | 0.02  | 0.02   | 0.005  | 0.018  | 0.021  | t | 98780  | FPQPQLPY SQPQ | Homo sapiens         |
| 1 | 1.00 | 1 | 1 | -0.02 | -0.014 | -0.02  | -0.021 | -0.025 | t | 131294 | DWGLPIPS PSP  | Homo sapiens         |
| 1 | 1.00 | 1 | 1 | 0.02  | 0.022  | 0.011  | 0.017  | 0.018  | t | 114823 | FNPVCGT DGV   | Homo sapiens         |
| 1 | 1.00 | 1 | 1 | -0.02 | -0.02  | -0.025 | -0.014 | -0.021 | t | 107218 | PAGGPGFP      | Rattus norvegicus    |
| 1 | 1.00 | 1 | 1 | 0.01  | 0.014  | 0.01   | 0.017  | 0.012  | t | 107296 | APIEKT        | Homo sapiens         |
| 1 | 1.00 | 1 | 1 | 0.02  | 0.02   | 0.011  | 0.023  | 0.022  | t | 70038  | VMYASSG       | Homo sapiens         |
| 1 | 1.00 | 1 | 1 | 0.01  | 0.01   | -0.002 | 0.01   | 0.01   | t | 120839 | NLTEFQHA FS   | Mus musculus         |
| 1 | 1.00 | 1 | 1 | 0.03  | 0.03   | 0.014  | 0.03   | 0.031  | t | 120867 | PFDQDLSK KH   | Mus musculus         |
| 1 | 1.00 | 1 | 1 | 0.02  | 0.02   | 0.011  | 0.024  | 0.02   | t | 135900 | ATCRFYTL DSIK | Homo sapiens         |
| 1 | 1.00 | 1 | 1 | 0.04  | 0.038  | 0.035  | 0.037  | 0.037  | t | 115827 | KKNQDKT EIP   | Homo sapiens         |
| 1 | 1.00 | 1 | 1 | 0.04  | 0.044  | 0.035  | 0.037  | 0.037  | t | 115827 | KKNQDKT EIP   | Homo sapiens         |
| 1 | 1.00 | 1 | 1 | 0.02  | 0.024  | 0.008  | 0.02   | 0.02   | t | 61945  | STTNKDK       | Cavia porcellus      |

|   |      |   |   |       |        |        |        |        |   |        |                              |                 |
|---|------|---|---|-------|--------|--------|--------|--------|---|--------|------------------------------|-----------------|
| 1 | 1.00 | 1 | 1 | 0.02  | 0.02   | 0.008  | 0.02   | 0.02   | t | 61945  | STTNKDK                      | Mus<br>musculus |
| 1 | 1.00 | 1 | 1 | -0.02 | -0.02  | -0.02  | -0.01  | -0.019 | t | 115197 | CVKKILDK<br>VG               | Homo<br>sapiens |
| 1 | 1.00 | 1 | 1 | 0.07  | 0.068  | 0.07   | 0.069  | 0.07   | t | 61741  | STLPETTV<br>V                | Mus<br>musculus |
| 1 | 1.00 | 1 | 1 | 0.01  | 0.014  | 0      | 0.011  | 0.01   | t | 155473 | PSTP                         | Homo<br>sapiens |
| 1 | 1.00 | 1 | 1 | -0.01 | -0.012 | -0.019 | -0.013 | -0.011 | t | 109349 | IPVDLL                       | Mus<br>musculus |
| 1 | 1.00 | 1 | 1 | 0     | 0      | 0      | 0.011  | -0.002 | t | 18588  | GAGGGAG<br>GAGAGGG<br>AGGAGA | Homo<br>sapiens |
| 1 | 1.00 | 1 | 1 | 0.04  | 0.028  | 0.034  | 0.04   | 0.038  | t | 63252  | TDVFSS                       | Mus<br>musculus |
| 1 | 1.00 | 1 | 1 | -0.03 | -0.026 | -0.032 | -0.029 | -0.032 | t | 29755  | KAANLSIIK                    | MD              |
| 1 | 1.00 | 1 | 1 | -0.03 | -0.026 | -0.032 | -0.029 | -0.032 | t | 29755  | KAANLSIIK                    | MD              |
| 1 | 1.00 | 1 | 1 | 0.07  | 0.07   | 0.07   | 0.07   | 0.066  | t | 141004 | EPDP                         | Mus<br>musculus |
| 1 | 1.00 | 1 | 1 | 0.04  | 0.043  | 0.039  | 0.04   | 0.038  | t | 122113 | IIASTEKLP                    | Mus<br>musculus |
| 1 | 1.00 | 1 | 1 | -0.04 | -0.042 | -0.048 | -0.041 | -0.04  | t | 27416  | ILYAVFK                      | Mus<br>musculus |
| 1 | 1.00 | 1 | 1 | -0.04 | -0.042 | -0.048 | -0.041 | -0.04  | t | 27416  | ILYAVFK                      | Mus<br>musculus |
| 1 | 1.00 | 1 | 1 | 0.02  | 0.018  | 0.013  | 0.023  | 0.019  | t | 107166 | GPPGPQG                      | Mus<br>musculus |
| 1 | 1.00 | 1 | 1 | 0.04  | 0.042  | 0.035  | 0.041  | 0.039  | t | 14173  | ESIQQC                       | Homo<br>sapiens |
| 1 | 1.00 | 1 | 1 | 0.01  | 0.013  | 0.01   | 0.01   | 0.007  | t | 134702 | KEKKYS                       | Mus<br>musculus |

|   |      |   |   |       |        |        |        |        |   |        |                           |                       |
|---|------|---|---|-------|--------|--------|--------|--------|---|--------|---------------------------|-----------------------|
| 1 | 1.00 | 1 | 1 | 0.14  | 0.138  | 0.125  | 0.139  | 0.143  | t | 144880 | EE                        | Mus musculus          |
| 1 | 1.00 | 1 | 1 | -0.02 | -0.02  | -0.026 | -0.02  | -0.022 | t | 56075  | RTHRQLY                   | Mus musculus          |
| 1 | 1.00 | 1 | 1 | 0     | -0.004 | -0.014 | -0.001 | 0      | t | 10580  | DVENSMLQAN                | Oryctolagus cuniculus |
| 1 | 1.00 | 1 | 1 | 0.04  | 0.04   | 0.039  | 0.04   | 0.037  | t | 122913 | TGEPVELK                  | Oryctolagus cuniculus |
| 1 | 1.00 | 1 | 1 | 0.04  | 0.026  | 0.031  | 0.039  | 0.04   | t | 65098  | TLTKTSLE                  | Macaca mulatta        |
| 1 | 1.00 | 1 | 1 | 0     | 0.002  | 0      | 0.007  | 0      | t | 107479 | KFNWYVD                   | Homo sapiens          |
| 1 | 1.00 | 1 | 1 | 0.02  | 0.022  | 0.003  | 0.02   | 0.023  | t | 110951 | NDGYFWE DGTNG             | Homo sapiens          |
| 1 | 1.00 | 1 | 1 | -0.02 | -0.027 | -0.02  | -0.017 | -0.023 | t | 48839  | PPNKPNN DFHFE             | Homo sapiens          |
| 1 | 1.00 | 1 | 1 | 0     | 0      | 0      | 0      | -0.003 | t | 107368 | FSSAP                     | Rattus norvegicus     |
| 1 | 1.00 | 1 | 1 | -0.01 | -0.01  | -0.011 | 0      | -0.01  | t | 106429 | FVLPWRI                   | Homo sapiens          |
| 1 | 1.00 | 1 | 1 | 0.03  | 0.037  | 0.026  | 0.033  | 0.028  | t | 48308  | PLENRVLT                  | MD                    |
| 1 | 1.00 | 1 | 1 | 0.03  | 0.037  | 0.026  | 0.033  | 0.028  | t | 48308  | PLENRVLT                  | MD                    |
| 1 | 1.00 | 1 | 1 | 0.03  | 0.03   | 0.034  | 0.03   | 0.025  | t | 122932 | VCTPKSDE FNPCE<br>DIM GYK | Mus musculus          |

|   |      |   |   |       |        |        |        |        |   |        |                |                       |
|---|------|---|---|-------|--------|--------|--------|--------|---|--------|----------------|-----------------------|
| 1 | 1.00 | 1 | 1 | 0.01  | 0.013  | -0.003 | 0.01   | 0.011  | t | 65105  | TLTPENTL       | Mus musculus          |
| 1 | 1.00 | 1 | 1 | 0.03  | 0.026  | 0.023  | 0.029  | 0.029  | t | 138040 | SLGQNVLS       | Oryctolagus cuniculus |
| 1 | 1.00 | 1 | 1 | 0.03  | 0.03   | 0.019  | 0.027  | 0.03   | t | 53270  | RCFDST         | Homo sapiens          |
| 1 | 1.00 | 1 | 1 | 0     | 0.004  | 0.002  | 0.007  | -0.001 | t | 119648 | SWNSGALT       | Homo sapiens          |
| 1 | 1.00 | 1 | 1 | -0.05 | -0.048 | -0.051 | -0.043 | -0.05  | t | 117526 | HGIIKECT       | Homo sapiens          |
| 1 | 1.00 | 1 | 1 | 0.06  | 0.065  | 0.051  | 0.061  | 0.06   | t | 3572   | APGITTAIEQ     | Homo sapiens          |
| 1 | 1.00 | 1 | 1 | -0.02 | -0.018 | -0.018 | -0.013 | -0.022 | t | 120464 | EDSILAVRKYFQRI | Homo sapiens          |
| 1 | 1.00 | 1 | 1 | 0     | -0.004 | -0.01  | -0.001 | 0      | t | 8599   | DIDFDSVPQI     | Oryctolagus cuniculus |
| 1 | 1.00 | 1 | 1 | 0.03  | 0.026  | 0.023  | 0.03   | 0.03   | t | 12459  | EIIEQLDVT      | Oryctolagus cuniculus |
| 1 | 1.00 | 1 | 1 | 0.03  | 0.03   | 0.022  | 0.027  | 0.03   | t | 53984  | RGSQGF         | Homo sapiens          |
| 1 | 1.00 | 1 | 1 | 0     | 0.004  | 0      | 0      | -0.001 | t | 139840 | PAAFAFL        | Ovis aries            |
| 1 | 1.00 | 1 | 1 | 0.03  | 0.036  | 0.018  | 0.031  | 0.03   | t | 30140  | KDEPNGRASDT    | Equus caballus        |
| 1 | 1.00 | 1 | 1 | 0.03  | 0.026  | 0.019  | 0.03   | 0.03   | t | 25013  | HVADIDKLID     | Mus musculus          |



|   |      |   |   |       |        |        |        |        |   |        |                     |                                  |
|---|------|---|---|-------|--------|--------|--------|--------|---|--------|---------------------|----------------------------------|
| 1 | 1.00 | 1 | 1 | 0.02  | 0.02   | 0.014  | 0.02   | 0.018  | t | 79524  | CHTTATIPS<br>SAVTC  | Mus<br>musculu<br>s              |
| 1 | 1.00 | 1 | 1 | 0.02  | 0.02   | 0.014  | 0.02   | 0.018  | t | 79524  | CHTTATIPS<br>SAVTC  | Mus<br>musculu<br>s              |
| 1 | 1.00 | 1 | 1 | 0     | 0.002  | 0.002  | 0.007  | 0      | t | 119671 | WLNGKEY<br>K        | Homo<br>sapiens                  |
| 1 | 1.00 | 1 | 1 | -0.02 | -0.017 | -0.02  | -0.02  | -0.022 | t | 79215  | FNPVYP              | Mus<br>musculu<br>s              |
| 1 | 1.00 | 1 | 1 | 0.02  | 0.022  | 0.02   | 0.02   | 0.019  | t | 104014 | KPQ                 | Homo<br>sapiens                  |
| 1 | 1.00 | 1 | 1 | -0.01 | -0.008 | -0.011 | -0.007 | -0.01  | t | 24722  | HSAPLG              | Homo<br>sapiens                  |
| 1 | 1.00 | 1 | 1 | -0.01 | -0.012 | -0.011 | -0.007 | -0.01  | t | 24722  | HSAPLG              | Homo<br>sapiens                  |
| 1 | 1.00 | 1 | 1 | 0.02  | 0.026  | 0.009  | 0.02   | 0.02   | t | 92864  | GSKFNDAF<br>NG      | Ovis<br>aries                    |
| 1 | 1.00 | 1 | 1 | 0     | -0.002 | -0.014 | -0.001 | 0      | t | 133543 | DKAFAV              | Mus<br>musculu<br>s              |
| 1 | 1.00 | 1 | 1 | 0.02  | 0.018  | 0      | 0.017  | 0.022  | t | 17261  | FPAYGGM<br>QQILA    | Sus<br>scrofa                    |
| 1 | 1.00 | 1 | 1 | 0.04  | 0.037  | 0.025  | 0.04   | 0.042  | t | 38606  | LPNVGITQ            | Oryctola<br>gus<br>cuniculu<br>s |
| 1 | 1.00 | 1 | 1 | 0.04  | 0.034  | 0.025  | 0.04   | 0.042  | t | 38606  | LPNVGITQ            | Oryctola<br>gus<br>cuniculu<br>s |
| 1 | 1.00 | 1 | 1 | 0     | -0.003 | -0.003 | 0      | -0.002 | t | 94484  | DDYRQK              | Oryctola<br>gus<br>cuniculu<br>s |
| 1 | 1.00 | 1 | 1 | 0.01  | 0.014  | 0.001  | 0.007  | 0.008  | t | 6314   | CGLRAPQ<br>RCDLDVES | Homo<br>sapiens                  |

|   |      |   |   |       |        |        |        |        |   |        |                 |                |
|---|------|---|---|-------|--------|--------|--------|--------|---|--------|-----------------|----------------|
| 1 | 1.00 | 1 | 1 | -0.01 | -0.01  | -0.01  | -0.003 | -0.01  | t | 112038 | ARMRDGA         | Homo sapiens   |
| 1 | 1.00 | 1 | 1 | 0.03  | 0.032  | 0.028  | 0.033  | 0.032  | t | 131878 | FLMLVGG<br>STL  | Homo sapiens   |
| 1 | 1.00 | 1 | 1 | 0.02  | 0.02   | 0.012  | 0.02   | 0.02   | t | 45630  | NQSTVKT         | Mus musculus   |
| 1 | 1.00 | 1 | 1 | -0.01 | -0.012 | -0.01  | -0.009 | -0.013 | t | 130454 | CLFPNN<br>SYC   | Mus musculus   |
| 1 | 1.00 | 1 | 1 | -0.01 | -0.012 | -0.027 | -0.017 | -0.01  | t | 67605  | VAGLEK          | Mus musculus   |
| 1 | 1.00 | 1 | 1 | 0.02  | 0.02   | 0.013  | 0.02   | 0.02   | t | 35341  | LDYSPAFS        | Mus musculus   |
| 1 | 1.00 | 1 | 1 | 0.02  | 0.023  | 0.013  | 0.02   | 0.02   | t | 35341  | LDYSPAFS        | Equus caballus |
| 1 | 1.00 | 1 | 1 | 0     | 0      | -0.012 | 0      | 0      | t | 120942 | SGVATKGL<br>NE  | Mus musculus   |
| 1 | 1.00 | 1 | 1 | 0     | -0.002 | -0.009 | -0.001 | -0.002 | t | 7768   | DDEIYGND<br>GHP | Mus musculus   |
| 1 | 1.00 | 1 | 1 | -0.01 | -0.008 | -0.01  | -0.014 | -0.016 | t | 23174  | GVTRPS          | Homo sapiens   |
| 1 | 1.00 | 1 | 1 | 0.01  | 0.01   | 0.015  | 0.017  | 0.009  | t | 125027 | EHIEL           | Homo sapiens   |
| 1 | 1.00 | 1 | 1 | 0.02  | 0.02   | 0.02   | 0.03   | 0.02   | t | 114885 | LCAYSIEFG<br>T  | Homo sapiens   |
| 1 | 1.00 | 1 | 1 | 0     | 0.002  | -0.005 | 0.001  | -0.001 | t | 38662  | LPQVVM          | Homo sapiens   |
| 1 | 1.00 | 1 | 1 | 0.02  | 0.023  | 0.022  | 0.02   | 0.016  | t | 146067 | VPSTSLSG<br>Y   | Mus musculus   |

|   |      |   |   |       |        |        |        |        |   |        |                    |                                  |
|---|------|---|---|-------|--------|--------|--------|--------|---|--------|--------------------|----------------------------------|
| 1 | 1.00 | 1 | 1 | 0.01  | 0.008  | 0.01   | 0.017  | 0.01   | t | 123259 | GQPPYMP<br>P       | Homo<br>sapiens                  |
| 1 | 1.00 | 1 | 1 | 0.01  | 0.01   | 0.01   | 0.02   | 0.01   | t | 114752 | AYSIEFGT<br>NI     | Homo<br>sapiens                  |
| 1 | 1.00 | 1 | 1 | 0     | -0.003 | -0.007 | 0      | 0      | t | 36162  | LGIHE              | Oryctola<br>gus<br>cuniculu<br>s |
| 1 | 1.00 | 1 | 1 | 0.04  | 0.038  | 0.026  | 0.043  | 0.042  | t | 25277  | IAGAGD             | Mus<br>musculu<br>s              |
| 1 | 1.00 | 1 | 1 | 0.03  | 0.03   | 0.03   | 0.03   | 0.027  | t | 9588   | DPAFSL             | Mus<br>musculu<br>s              |
| 1 | 1.00 | 1 | 1 | -0.03 | -0.027 | -0.04  | -0.03  | -0.03  | t | 156553 | YSTCYFIM           | Mus<br>musculu<br>s              |
| 1 | 1.00 | 1 | 1 | 0.04  | 0.042  | 0.03   | 0.041  | 0.04   | t | 19202  | GEAGPGV<br>A       | Homo<br>sapiens                  |
| 1 | 1.00 | 1 | 1 | 0.03  | 0.03   | 0.03   | 0.03   | 0.031  | t | 131365 | ATLVCLI            | Homo<br>sapiens                  |
| 1 | 1.00 | 1 | 1 | 0.04  | 0.042  | 0.04   | 0.043  | 0.039  | t | 114207 | FLGELTSSE<br>VATEV | Homo<br>sapiens                  |
| 1 | 1.00 | 1 | 1 | 0.01  | 0.01   | 0.01   | 0.02   | 0.01   | t | 108595 | PVSSTRGN<br>M      | Homo<br>sapiens                  |
| 1 | 1.00 | 1 | 1 | -0.03 | -0.03  | -0.035 | -0.024 | -0.03  | t | 109310 | IAGAPGFP           | Rattus<br>norvegic<br>us         |
| 1 | 1.00 | 1 | 1 | -0.03 | -0.034 | -0.034 | -0.03  | -0.033 | t | 47859  | PHWA               | Mus<br>musculu<br>s              |
| 1 | 1.00 | 1 | 1 | 0.02  | 0.006  | 0.013  | 0.02   | 0.019  | t | 138057 | TPGTEYTV           | Oryctola<br>gus<br>cuniculu<br>s |
| 1 | 1.00 | 1 | 1 | 0.02  | 0.017  | 0.013  | 0.02   | 0.019  | t | 138057 | TPGTEYTV           | Oryctola<br>gus<br>cuniculu<br>s |

|   |      |   |   |       |        |        |        |        |   |        |                   |                       |
|---|------|---|---|-------|--------|--------|--------|--------|---|--------|-------------------|-----------------------|
| 1 | 1.00 | 1 | 1 | 0.01  | 0.012  | 0      | 0.013  | 0.01   | t | 4849   | ASYKVMTRSSHQSLV   | Homo sapiens          |
| 1 | 1.00 | 1 | 1 | 0     | 0      | -0.007 | 0.006  | 0      | t | 112841 | SSKRGRQTPVLYAMLDH | Rattus norvegicus     |
| 1 | 1.00 | 1 | 1 | -0.01 | -0.008 | -0.027 | -0.01  | -0.007 | t | 110954 | NNKYTVTLKATP      | Homo sapiens          |
| 1 | 1.00 | 1 | 1 | 0.07  | 0.07   | 0.07   | 0.07   | 0.068  | t | 159283 | EGP               | Oryctolagus cuniculus |
| 1 | 1.00 | 1 | 1 | 0     | 0      | -0.013 | -0.003 | 0      | t | 146918 | FFQP              | Homo sapiens          |
| 1 | 1.00 | 1 | 1 | 0.1   | 0.1    | 0.098  | 0.1    | 0.1    | t | 117195 | DT                | Mus musculus          |
| 1 | 1.00 | 1 | 1 | -0.01 | -0.01  | -0.021 | -0.007 | -0.01  | t | 6906   | CRAAKL            | Homo sapiens          |
| 1 | 1.00 | 1 | 1 | -0.05 | -0.05  | -0.05  | -0.04  | -0.049 | t | 115209 | DKVGINYWLA        | Homo sapiens          |
| 1 | 1.00 | 1 | 1 | 0.06  | 0.058  | 0.057  | 0.065  | 0.06   | t | 10692  | DVPDYASL          | Mus musculus          |
| 1 | 1.00 | 1 | 1 | 0     | 0.002  | -0.007 | 0.007  | 0.002  | t | 108944 | FFLYSKL           | Homo sapiens          |
| 1 | 1.00 | 1 | 1 | 0.05  | 0.05   | 0.049  | 0.06   | 0.052  | t | 106428 | FVEIYSP           | Homo sapiens          |
| 1 | 1.00 | 1 | 1 | 0     | 0.002  | 0.007  | 0.007  | 0      | t | 112769 | EPLYGPY           | Homo sapiens          |
| 1 | 1.00 | 1 | 1 | 0.02  | 0.024  | 0.022  | 0.027  | 0.019  | t | 119561 | DWLNGKEY          | Homo sapiens          |
| 1 | 1.00 | 1 | 1 | 0.02  | 0.022  | 0.022  | 0.027  | 0.019  | t | 119561 | DWLNGKEY          | Homo sapiens          |
| 1 | 1.00 | 1 | 1 | -0.02 | -0.032 | -0.035 | -0.02  | -0.018 | t | 34895  | LAPDNISL          | Macaca mulatta        |

|   |      |   |   |       |        |        |        |        |   |        |                         |                       |
|---|------|---|---|-------|--------|--------|--------|--------|---|--------|-------------------------|-----------------------|
| 1 | 1.00 | 1 | 1 | -0.02 | -0.029 | -0.035 | -0.02  | -0.018 | t | 34895  | LAPDNISL                | Macaca mulatta        |
| 1 | 1.00 | 1 | 1 | -0.02 | -0.029 | -0.035 | -0.02  | -0.018 | t | 34895  | LAPDNISL                | Macaca mulatta        |
| 1 | 1.00 | 1 | 1 | 0.04  | 0.044  | 0.04   | 0.047  | 0.039  | t | 119660 | VEWESNGQ                | Homo sapiens          |
| 1 | 1.00 | 1 | 1 | 0.02  | 0.02   | 0.01   | 0.02   | 0.02   | t | 26046  | IFDT                    | Mus musculus          |
| 1 | 1.00 | 1 | 1 | 0.03  | 0.032  | 0.03   | 0.037  | 0.03   | t | 122579 | SLIFVTISSEWG            | Homo sapiens          |
| 1 | 1.00 | 1 | 1 | 0.08  | 0.08   | 0.08   | 0.087  | 0.08   | t | 133692 | SG                      | Homo sapiens          |
| 1 | 1.00 | 1 | 1 | 0.02  | 0.02   | 0.012  | 0.02   | 0.019  | t | 76633  | YYV NKQEGKSLYVKG        | Mus musculus          |
| 1 | 1.00 | 1 | 1 | -0.01 | -0.008 | -0.028 | -0.011 | -0.009 | t | 98697  | AMCNVYI PPYCT           | Homo sapiens          |
| 1 | 1.00 | 1 | 1 | 0.02  | 0.02   | 0.02   | 0.02   | 0.017  | t | 48778  | PPFSLSPV PTL            | Oryctolagus cuniculus |
| 1 | 1.00 | 1 | 1 | -0.01 | -0.013 | -0.021 | -0.01  | -0.009 | t | 133629 | LPLRF                   | Oryctolagus cuniculus |
| 1 | 1.00 | 1 | 1 | 0.05  | 0.052  | 0.04   | 0.051  | 0.05   | t | 19202  | GEAGPGV A               | Homo sapiens          |
| 1 | 1.00 | 1 | 1 | 0.03  | 0.034  | 0.019  | 0.03   | 0.029  | t | 113504 | GYIPANTTI PF GGAYNI PLV | Cavia porcellus       |
| 1 | 1.00 | 1 | 1 | 0.03  | 0.03   | 0.028  | 0.03   | 0.028  | t | 107378 | GELP                    | Rattus norvegicus     |
| 1 | 1.00 | 1 | 1 | -0.02 | -0.018 | -0.018 | -0.013 | -0.022 | t | 127927 | AKPAPPKP EPKPKKA        | Homo sapiens          |

|   |      |   |   |       |        |        |        |        |   |        |                  |                       |
|---|------|---|---|-------|--------|--------|--------|--------|---|--------|------------------|-----------------------|
| 1 | 1.00 | 1 | 1 | 0.04  | 0.04   | 0.03   | 0.04   | 0.04   | t | 71091  | VSQKNGGY         | Oryctolagus cuniculus |
| 1 | 1.00 | 1 | 1 | 0.03  | 0.03   | 0.016  | 0.03   | 0.032  | t | 45625  | NQSFEEDTEK       | Oryctolagus cuniculus |
| 1 | 1.00 | 1 | 1 | 0.04  | 0.037  | 0.036  | 0.04   | 0.038  | t | 94484  | DDYRQK           | Oryctolagus cuniculus |
| 1 | 1.00 | 1 | 1 | -0.01 | -0.01  | -0.017 | -0.01  | -0.011 | t | 107700 | YRVVSVL          | Homo sapiens          |
| 1 | 1.00 | 1 | 1 | -0.01 | -0.012 | -0.017 | -0.007 | -0.011 | t | 10529  | DTYRYI           | Mus musculus          |
| 1 | 1.00 | 1 | 1 | 0     | 0      | 0      | 0.01   | 0.001  | t | 115256 | FRELKDLKGY       | Homo sapiens          |
| 1 | 1.00 | 1 | 1 | 0     | 0.002  | -0.005 | 0.003  | 0      | t | 3382   | ANPPDH           | Homo sapiens          |
| 1 | 1.00 | 1 | 1 | 0.03  | 0.034  | 0.015  | 0.027  | 0.03   | t | 13084  | ELGVRE           | Homo sapiens          |
| 1 | 1.00 | 1 | 1 | -0.03 | -0.028 | -0.037 | -0.029 | -0.031 | t | 119275 | MPMMGPPPPGMMPVGP | Homo sapiens          |
| 1 | 1.00 | 1 | 1 | 0.01  | 0.008  | 0.01   | 0.017  | 0.01   | t | 123259 | GQPPYMP          | Homo sapiens          |
| 1 | 1.00 | 1 | 1 | 0.02  | 0.02   | 0.005  | 0.018  | 0.021  | t | 98783  | FQQPLQQYPLGQ     | Homo sapiens          |
| 1 | 1.00 | 1 | 1 | -0.02 | -0.022 | -0.028 | -0.019 | -0.02  | t | 1373   | AFPL             | Mus musculus          |
| 1 | 1.00 | 1 | 1 | -0.03 | -0.028 | -0.035 | -0.027 | -0.031 | t | 48828  | PPLPPV           | Homo sapiens          |
| 1 | 1.00 | 1 | 1 | 0.02  | 0.022  | 0.01   | 0.021  | 0.02   | t | 136749 | WMLRAAEYSMNLGF   | Homo sapiens          |

|   |      |   |   |       |        |        |        |        |   |        |                  |                    |
|---|------|---|---|-------|--------|--------|--------|--------|---|--------|------------------|--------------------|
| 1 | 1.00 | 1 | 1 | 0     | 0.002  | -0.012 | 0.003  | 0.001  | t | 1477   | AGDR             | Homo sapiens       |
| 1 | 1.00 | 1 | 1 | -0.01 | -0.011 | -0.008 | -0.003 | -0.012 | t | 3985   | AQKKIAEKT        | Homo sapiens       |
| 1 | 1.00 | 1 | 1 | 0     | 0.002  | -0.016 | 0.003  | 0.002  | t | 27379  | ILTGGKSKQTEGLLLL | Homo sapiens       |
| 1 | 1.00 | 1 | 1 | 0.01  | 0.014  | 0.007  | 0.011  | 0.009  | t | 36136  | LGGVFT           | Homo sapiens       |
| 1 | 1.00 | 1 | 1 | -0.06 | -0.062 | -0.079 | -0.057 | -0.058 | t | 96062  | ADTIQKGFYY       | Mus musculus       |
| 1 | 1.00 | 1 | 1 | 0     | 0.002  | -0.013 | 0.001  | 0      | t | 48676  | PNM              | Homo sapiens       |
| 1 | 1.00 | 1 | 1 | 0     | 0      | 0      | 0.004  | -0.003 | t | 119272 | MGPPIGLPAR       | Homo sapiens       |
| 1 | 1.00 | 1 | 1 | 0.02  | 0.022  | 0.015  | 0.02   | 0.02   | t | 14398  | ETHPLYQS         | Anas platyrhynchos |
| 1 | 1.00 | 1 | 1 | 0.04  | 0.04   | 0.04   | 0.04   | 0.039  | t | 153865 | PETTDLYCY        | Cavia porcellus    |
| 1 | 1.00 | 1 | 1 | 0.03  | 0.033  | 0.02   | 0.03   | 0.03   | t | 132754 | YER              | Mus musculus       |
| 1 | 1.00 | 1 | 1 | 0     | 0.002  | 0      | 0.007  | -0.002 | t | 134783 | RKLQKSTHLLIRKLP  | Homo sapiens       |
| 1 | 1.00 | 1 | 1 | 0.03  | 0.03   | 0.018  | 0.03   | 0.03   | t | 97539  | NYTTAVDR         | Mus musculus       |
| 1 | 1.00 | 1 | 1 | 0.04  | 0.04   | 0.04   | 0.04   | 0.039  | t | 139524 | ISSQT            | Mus musculus       |
| 1 | 1.00 | 1 | 1 | 0.04  | 0.038  | 0.028  | 0.039  | 0.04   | t | 66143  | TSAEDK           | Mus musculus       |

|   |      |   |   |       |        |        |        |        |   |        |                 |                       |
|---|------|---|---|-------|--------|--------|--------|--------|---|--------|-----------------|-----------------------|
| 1 | 1.00 | 1 | 1 | 0.04  | 0.042  | 0.033  | 0.047  | 0.042  | t | 109983 | TLPPSRE         | Homo sapiens          |
| 1 | 1.00 | 1 | 1 | -0.02 | -0.02  | -0.02  | -0.02  | -0.024 | t | 48819  | PPLGNWFG        | Rattus norvegicus     |
| 1 | 1.00 | 1 | 1 | 0.04  | 0.037  | 0.028  | 0.04   | 0.04   | t | 25831  | IEHYADTYEEVL    | Oryctolagus cuniculus |
| 1 | 1.00 | 1 | 1 | 0.02  | 0.016  | 0.011  | 0.023  | 0.022  | t | 70038  | VMYASSG         | Oryctolagus cuniculus |
| 1 | 1.00 | 1 | 1 | 0     | 0      | 0.011  | 0.01   | -0.003 | t | 69265  | VKLSG           | Homo sapiens          |
| 1 | 1.00 | 1 | 1 | -0.03 | -0.026 | -0.03  | -0.023 | -0.032 | t | 126922 | REWIKFAAACRE    | Homo sapiens          |
| 1 | 1.00 | 1 | 1 | 0.06  | 0.06   | 0.051  | 0.06   | 0.06   | t | 81983  | FDTTTL          | Mus musculus          |
| 1 | 1.00 | 1 | 1 | 0.06  | 0.058  | 0.051  | 0.06   | 0.06   | t | 81983  | FDTTTL          | Mus musculus          |
| 1 | 1.00 | 1 | 1 | -0.01 | -0.017 | -0.011 | -0.007 | -0.013 | t | 48844  | PPNRQDPRFTDTLVD | Homo sapiens          |
| 1 | 1.00 | 1 | 1 | -0.02 | -0.022 | -0.032 | -0.017 | -0.02  | t | 107219 | PAGGPFGPG       | Rattus norvegicus     |
| 1 | 1.00 | 1 | 1 | 0.02  | 0.024  | 0.018  | 0.027  | 0.018  | t | 131955 | LPHGNALVRYSSKEE | Homo sapiens          |
| 1 | 1.00 | 1 | 1 | -0.02 | -0.023 | -0.035 | -0.02  | -0.02  | t | 98575  | VGKPGSDVYY      | Oryctolagus cuniculus |
| 1 | 1.00 | 1 | 1 | 0     | -0.002 | -0.012 | 0      | 0      | t | 100385 | PKTFQFINDQ      | Mus musculus          |
| 1 | 1.00 | 1 | 1 | 0     | 0      | -0.008 | 0      | 0      | t | 22460  | GSQGFP          | Homo sapiens          |
| 1 | 1.00 | 1 | 1 | 0.01  | 0.008  | -0.005 | 0.009  | 0.012  | t | 49119  | PQRPQQPFPQ      | Mus musculus          |



|   |      |   |   |       |        |        |        |        |   |        |                          |                                  |
|---|------|---|---|-------|--------|--------|--------|--------|---|--------|--------------------------|----------------------------------|
| 1 | 1.00 | 1 | 1 | 0.02  | 0.02   | 0.003  | 0.02   | 0.022  | t | 15984  | FGGHNSV<br>DFE           | Oryctola<br>gus<br>cuniculu<br>s |
| 1 | 1.00 | 1 | 1 | 0.01  | 0.007  | 0.001  | 0.01   | 0.01   | t | 113346 | DTSTTPVP<br>SV           | Oryctola<br>gus<br>cuniculu<br>s |
| 1 | 1.00 | 1 | 1 | 0.01  | 0.008  | 0.001  | 0.009  | 0.009  | t | 10588  | DVFGANY<br>YYQ           | Mus<br>musculu<br>s              |
| 1 | 1.00 | 1 | 1 | -0.02 | -0.018 | -0.022 | -0.016 | -0.021 | t | 118548 | PAPGMRP<br>P             | Homo<br>sapiens                  |
| 1 | 1.00 | 1 | 1 | 0.04  | 0.04   | 0.043  | 0.046  | 0.04   | t | 142150 | EYMLDLQ<br>PETTD         | Homo<br>sapiens                  |
| 1 | 1.00 | 1 | 1 | 0.03  | 0.028  | 0.029  | 0.031  | 0.029  | t | 78972  | FGGDTA                   | Mus<br>musculu<br>s              |
| 1 | 1.00 | 1 | 1 | 0.03  | 0.032  | 0.023  | 0.027  | 0.027  | t | 61155  | SSLFQLWK<br>SE           | Homo<br>sapiens                  |
| 1 | 1.00 | 1 | 1 | 0     | 0.002  | 0      | 0.007  | -0.002 | t | 119633 | QYTGHIT<br>WTPPAIFK<br>S | Homo<br>sapiens                  |
| 1 | 1.00 | 1 | 1 | 0     | 0      | -0.012 | 0      | 0.001  | t | 35852  | LFIG                     | Mus<br>musculu<br>s              |
| 1 | 1.00 | 1 | 1 | -0.03 | -0.025 | -0.03  | -0.023 | -0.031 | t | 144311 | GNLTAG                   | Homo<br>sapiens                  |
| 1 | 1.00 | 1 | 1 | -0.02 | -0.018 | -0.023 | -0.019 | -0.02  | t | 33888  | KTTLLK                   | Homo<br>sapiens                  |
| 1 | 1.00 | 1 | 1 | 0.01  | 0.012  | 0.012  | 0.017  | 0.009  | t | 119676 | WQQGNV<br>FS             | Homo<br>sapiens                  |
| 1 | 1.00 | 1 | 1 | -0.01 | -0.01  | -0.01  | -0.004 | -0.011 | t | 157292 | GAIIGLM                  | Homo<br>sapiens                  |
| 1 | 1.00 | 1 | 1 | 0     | -0.003 | 0.008  | 0      | -0.005 | t | 125211 | QHWSYGL<br>RPG           | Canis<br>lupus                   |

|   |      |   |   |       |        |        |        |        |   |        |                  |                           |
|---|------|---|---|-------|--------|--------|--------|--------|---|--------|------------------|---------------------------|
| 1 | 1.00 | 1 | 1 | 0.02  | 0.023  | 0.012  | 0.02   | 0.018  | t | 52249  | QRQYGDV<br>FKGD  | Mus<br>musculu<br>s       |
| 1 | 1.00 | 1 | 1 | 0.03  | 0.028  | 0.027  | 0.031  | 0.029  | t | 11862  | EERPPETT         | Anas<br>platyrhy<br>nchos |
| 1 | 1.00 | 1 | 1 | -0.02 | -0.02  | -0.025 | -0.017 | -0.02  | t | 123442 | LLKDLRKN         | Homo<br>sapiens           |
| 1 | 1.00 | 1 | 1 | 0.02  | 0.022  | 0.023  | 0.021  | 0.019  | t | 45033  | NMTVM            | Homo<br>sapiens           |
| 1 | 1.00 | 1 | 1 | 0.03  | 0.03   | 0.017  | 0.027  | 0.03   | t | 147218 | QGSFQP           | Homo<br>sapiens           |
| 1 | 1.00 | 1 | 1 | 0     | 0.002  | -0.012 | 0.001  | 0      | t | 142381 | AAEFATEV<br>KKAT | Homo<br>sapiens           |
| 1 | 1.00 | 1 | 1 | 0     | 0      | 0      | 0.01   | 0.001  | t | 115317 | KKILDKVG<br>IN   | Homo<br>sapiens           |
| 1 | 1.00 | 1 | 1 | 0.03  | 0.032  | 0.028  | 0.037  | 0.03   | t | 104756 | DTTFEYQD<br>LC   | Homo<br>sapiens           |
| 1 | 1.00 | 1 | 1 | 0     | 0.002  | -0.02  | 0.001  | 0.002  | t | 43582  | NEDQRVGI         | Homo<br>sapiens           |
| 1 | 1.00 | 1 | 1 | -0.05 | -0.049 | -0.051 | -0.047 | -0.051 | t | 99204  | EISKFL           | Equus<br>caballus         |
| 1 | 1.00 | 1 | 1 | 0.01  | 0.008  | -0.003 | 0.009  | 0.011  | t | 65105  | TLTPENTL         | Mus<br>musculu<br>s       |
| 1 | 1.00 | 1 | 1 | 0.03  | 0.033  | 0.018  | 0.03   | 0.03   | t | 12550  | EIPQPQW<br>T     | Anas<br>platyrhy<br>nchos |
| 1 | 1.00 | 1 | 1 | -0.01 | -0.008 | -0.016 | -0.003 | -0.01  | t | 144823 | YWEGSGI<br>GAI   | Homo<br>sapiens           |
| 1 | 1.00 | 1 | 1 | 0.03  | 0.028  | 0.018  | 0.03   | 0.03   | t | 100477 | RNKTQEE<br>HLK   | Mus<br>musculu<br>s       |

|   |      |   |   |       |        |        |       |        |   |        |                  |                                  |
|---|------|---|---|-------|--------|--------|-------|--------|---|--------|------------------|----------------------------------|
| 1 | 1.00 | 1 | 1 | 0.01  | 0.013  | -0.004 | 0.011 | 0.011  | t | 58683  | SIQTKFAP         | Sus<br>scrofa                    |
| 1 | 1.00 | 1 | 1 | -0.02 | -0.02  | -0.021 | -0.02 | -0.023 | t | 75686  | YRYDSRPP         | Mus<br>musculu<br>s              |
| 1 | 1.00 | 1 | 1 | -0.02 | -0.023 | -0.021 | -0.02 | -0.023 | t | 75686  | YRYDSRPP         | Mus<br>musculu<br>s              |
| 1 | 1.00 | 1 | 1 | -0.02 | -0.023 | -0.021 | -0.02 | -0.023 | t | 75686  | YRYDSRPP         | Oryctola<br>gus<br>cuniculu<br>s |
| 1 | 1.00 | 1 | 1 | -0.02 | -0.022 | -0.021 | -0.02 | -0.023 | t | 75686  | YRYDSRPP         | Mus<br>musculu<br>s              |
| 1 | 1.00 | 1 | 1 | 0.02  | 0.02   | 0.013  | 0.02  | 0.02   | t | 68763  | VGPQSVG<br>PL    | Mus<br>musculu<br>s              |
| 1 | 1.00 | 1 | 1 | -0.01 | -0.009 | -0.02  | -0.01 | -0.009 | t | 111038 | TGALSKIY         | Oryctola<br>gus<br>cuniculu<br>s |
| 1 | 1.00 | 1 | 1 | 0.01  | 0.01   | -0.006 | 0.01  | 0.012  | t | 46087  | NTFINNAY         | Mus<br>musculu<br>s              |
| 1 | 1.00 | 1 | 1 | 0     | -0.007 | -0.017 | 0     | 0.003  | t | 110857 | FTGEAYSY<br>WSAK | Macaca                           |
| 1 | 1.00 | 1 | 1 | 0.01  | 0.013  | 0.004  | 0.01  | 0.007  | t | 43549  | NDYEDRY<br>REN   | Mus<br>musculu<br>s              |
| 1 | 1.00 | 1 | 1 | 0.03  | 0.034  | 0.03   | 0.03  | 0.03   | t | 137402 | FIDSYICQV        | Homo<br>sapiens                  |
| 1 | 1.00 | 1 | 1 | 0     | 0      | -0.009 | 0     | 0      | t | 120694 | KLLLDYTG<br>KI   | Rattus<br>norvegic<br>us         |
| 1 | 1.00 | 1 | 1 | 0.04  | 0.043  | 0.039  | 0.04  | 0.038  | t | 122113 | IIASTEKLP        | Mus<br>musculu<br>s              |

|   |      |   |   |       |        |        |        |        |   |        |                     |                     |
|---|------|---|---|-------|--------|--------|--------|--------|---|--------|---------------------|---------------------|
| 1 | 1.00 | 1 | 1 | 0.02  | 0.022  | 0.02   | 0.027  | 0.02   | t | 133371 | SPSPTPTP<br>GP      | Homo<br>sapiens     |
| 1 | 1.00 | 1 | 1 | -0.02 | -0.018 | -0.02  | -0.013 | -0.022 | t | 128494 | EDKINALIK<br>AAGVNV | Homo<br>sapiens     |
| 1 | 1.00 | 1 | 1 | 0     | 0.003  | 0.002  | 0      | -0.004 | t | 146066 | VPKVSGLQ<br>Y       | Mus<br>musculu<br>s |
| 1 | 1.00 | 1 | 1 | 0     | 0.004  | -0.003 | 0.001  | -0.004 | t | 85032  | LCVYGKLQ<br>KN      | Homo<br>sapiens     |
| 1 | 1.00 | 1 | 1 | 0.03  | 0.028  | 0.016  | 0.033  | 0.032  | t | 60527  | SQPQQPF<br>PQQ      | Mus<br>musculu<br>s |
| 1 | 1.00 | 1 | 1 | 0.04  | 0.04   | 0.04   | 0.043  | 0.04   | t | 67990  | VDIVLE              | Homo<br>sapiens     |
| 1 | 1.00 | 1 | 1 | 0.01  | 0.01   | 0.005  | 0.013  | 0.01   | t | 59112  | SLFTPGP             | Homo<br>sapiens     |
| 1 | 1.00 | 1 | 1 | 0.01  | 0.013  | 0.008  | 0.01   | 0.008  | t | 74008  | YGGL                | Mus<br>musculu<br>s |
| 1 | 1.00 | 1 | 1 | 0.01  | 0.006  | 0.008  | 0.01   | 0.008  | t | 74008  | YGGL                | Mus<br>musculu<br>s |
| 1 | 1.00 | 1 | 1 | 0.01  | 0.005  | 0.008  | 0.01   | 0.008  | t | 74008  | YGGL                | Mus<br>musculu<br>s |
| 1 | 1.00 | 1 | 1 | -0.03 | -0.025 | -0.037 | -0.027 | -0.03  | t | 60780  | SRRFAPAL            | Homo<br>sapiens     |
| 1 | 1.00 | 1 | 1 | -0.01 | -0.01  | -0.01  | -0.01  | -0.013 | t | 134769 | QIFNL               | Mus<br>musculu<br>s |
| 1 | 1.00 | 1 | 1 | 0.02  | 0.022  | 0.014  | 0.023  | 0.019  | t | 53240  | RAVVAPD<br>KEVLYE   | Homo<br>sapiens     |
| 1 | 1.00 | 1 | 1 | -0.03 | -0.03  | -0.03  | -0.02  | -0.029 | t | 115239 | EVFRELKD<br>LK      | Homo<br>sapiens     |

|   |      |   |   |       |        |        |        |        |   |        |                  |                                  |
|---|------|---|---|-------|--------|--------|--------|--------|---|--------|------------------|----------------------------------|
| 1 | 1.00 | 1 | 1 | 0.01  | 0.01   | 0.01   | 0.01   | 0.007  | t | 50104  | PYIEQGM<br>QL    | Homo<br>sapiens                  |
| 1 | 1.00 | 1 | 1 | 0.02  | 0.022  | 0      | 0.017  | 0.022  | t | 75541  | YQQYPQQ          | Homo<br>sapiens                  |
| 1 | 1.00 | 1 | 1 | -0.02 | -0.018 | -0.027 | -0.023 | -0.023 | t | 116037 | YIPIQYVLS<br>R   | Homo<br>sapiens                  |
| 1 | 1.00 | 1 | 1 | -0.02 | -0.021 | -0.032 | -0.023 | -0.02  | t | 130621 | TFYTK            | Oryctola<br>gus<br>cuniculu<br>s |
| 1 | 1.00 | 1 | 1 | -0.02 | -0.019 | -0.032 | -0.023 | -0.02  | t | 130621 | TFYTK            | Rattus<br>norvegic<br>us         |
| 1 | 1.00 | 1 | 1 | 0.04  | 0.04   | 0.038  | 0.04   | 0.038  | t | 130741 | ATGFVKKD<br>Q    | Mus<br>musculu<br>s              |
| 1 | 1.00 | 1 | 1 | 0.03  | 0.032  | 0.021  | 0.031  | 0.029  | t | 20722  | GKVTNGS          | Homo<br>sapiens                  |
| 1 | 1.00 | 1 | 1 | 0.03  | 0.034  | 0.021  | 0.031  | 0.029  | t | 20722  | GKVTNGS          | Homo<br>sapiens                  |
| 1 | 1.00 | 1 | 1 | 0     | 0.002  | -0.015 | -0.003 | 0      | t | 27693  | INNEWC           | Homo<br>sapiens                  |
| 1 | 1.00 | 1 | 1 | 0.02  | 0.011  | 0.007  | 0.02   | 0.021  | t | 34576  | KYQAWNA<br>G     | Macaca<br>mulatta                |
| 1 | 1.00 | 1 | 1 | -0.01 | -0.01  | -0.02  | -0.01  | -0.01  | t | 2179   | AKEVLKGY         | Oryctola<br>gus<br>cuniculu<br>s |
| 1 | 1.00 | 1 | 1 | -0.05 | -0.046 | -0.069 | -0.053 | -0.05  | t | 47240  | PEAVLR           | Homo<br>sapiens                  |
| 1 | 1.00 | 1 | 1 | -0.03 | -0.027 | -0.04  | -0.03  | -0.03  | t | 156553 | YSTCYFIM         | Mus<br>musculu<br>s              |
| 1 | 1.00 | 1 | 1 | -0.01 | -0.008 | -0.018 | -0.007 | -0.01  | t | 110971 | PVSDLNLKI<br>DGL | Homo<br>sapiens                  |

|   |      |   |   |       |        |        |        |        |   |        |                  |                                  |
|---|------|---|---|-------|--------|--------|--------|--------|---|--------|------------------|----------------------------------|
| 1 | 1.00 | 1 | 1 | -0.03 | -0.031 | -0.042 | -0.033 | -0.03  | t | 130620 | TFYLK            | Oryctola<br>gus<br>cuniculu<br>s |
| 1 | 1.00 | 1 | 1 | 0.01  | 0.012  | 0.003  | 0.017  | 0.012  | t | 108966 | FLYSKLT          | Homo<br>sapiens                  |
| 1 | 1.00 | 1 | 1 | 0     | 0      | 0.007  | 0      | -0.003 | t | 3242   | ANDPPP           | Mus<br>musculu<br>s              |
| 1 | 1.00 | 1 | 1 | 0.01  | 0.006  | -0.004 | 0.009  | 0.01   | t | 37001  | LKQPGDG<br>N     | Oryctola<br>gus<br>cuniculu<br>s |
| 1 | 1.00 | 1 | 1 | 0.04  | 0.042  | 0.038  | 0.041  | 0.039  | t | 36955  | LKLYFEP          | Homo<br>sapiens                  |
| 1 | 1.00 | 1 | 1 | 0.01  | 0.007  | 0.001  | 0.01   | 0.01   | t | 113734 | PVAPSDPS<br>IV   | Oryctola<br>gus<br>cuniculu<br>s |
| 1 | 1.00 | 1 | 1 | 0.02  | 0.02   | 0.013  | 0.02   | 0.019  | t | 65653  | TPLQCTM          | Mus<br>musculu<br>s              |
| 1 | 1.00 | 1 | 1 | -0.01 | -0.006 | -0.01  | -0.003 | -0.01  | t | 122943 | WDPAQPP<br>RD    | Homo<br>sapiens                  |
| 1 | 1.00 | 1 | 1 | 0.03  | 0.028  | 0.019  | 0.029  | 0.03   | t | 120406 | APDMFEY<br>MNK   | Mus<br>musculu<br>s              |
| 1 | 1.00 | 1 | 1 | 0     | 0.002  | 0      | 0.001  | -0.002 | t | 38522  | LPHSNL           | Homo<br>sapiens                  |
| 1 | 1.00 | 1 | 1 | 0     | 0.002  | 0      | 0.007  | 0      | t | 117208 | GLSLSRFS<br>WGA  | Homo<br>sapiens                  |
| 1 | 1.00 | 1 | 1 | -0.04 | -0.04  | -0.043 | -0.03  | -0.04  | t | 98885  | LPMHIRLS<br>FN   | Homo<br>sapiens                  |
| 1 | 1.00 | 1 | 1 | -0.03 | -0.028 | -0.03  | -0.023 | -0.031 | t | 119661 | VFSCSV<br>MH     | Homo<br>sapiens                  |
| 1 | 1.00 | 1 | 1 | 0.05  | 0.046  | 0.033  | 0.043  | 0.051  | t | 110767 | AKEEISFVA<br>TFS | Oryctola<br>gus<br>cuniculu<br>s |

|   |      |   |   |       |        |        |        |        |   |        |                    |                |
|---|------|---|---|-------|--------|--------|--------|--------|---|--------|--------------------|----------------|
| 1 | 1.00 | 1 | 1 | 0.02  | 0.006  | 0.011  | 0.019  | 0.02   | t | 54982  | RNEYPINK           | Macaca mulatta |
| 1 | 1.00 | 1 | 1 | 0.01  | 0.013  | 0      | 0.01   | 0.01   | t | 121081 | YIPFDQDL SK        | Mus musculus   |
| 1 | 1.00 | 1 | 1 | -0.01 | -0.01  | -0.015 | -0.01  | -0.011 | t | 133549 | DVNGKLFL           | Mus musculus   |
| 1 | 1.00 | 1 | 1 | -0.01 | -0.008 | -0.017 | -0.003 | -0.009 | t | 117333 | MVTSTITE KLLKNLVKI | Homo sapiens   |
| 1 | 1.00 | 1 | 1 | 0     | 0.004  | -0.014 | 0.001  | 0.002  | t | 64769  | TLEEFSAKL          | Homo sapiens   |
| 1 | 1.00 | 1 | 1 | 0.01  | -0.002 | 0.005  | 0.01   | 0.008  | t | 65027  | TLQNQGA WP         | Mus musculus   |
| 1 | 1.00 | 1 | 1 | 0.03  | 0.032  | 0.023  | 0.033  | 0.031  | t | 144783 | SHVVTML DNF        | Homo sapiens   |
| 1 | 1.00 | 1 | 1 | 0.02  | 0.022  | 0.018  | 0.021  | 0.02   | t | 58883  | SKLLTL             | Homo sapiens   |
| 1 | 1.00 | 1 | 1 | 0.04  | 0.04   | 0.04   | 0.04   | 0.037  | t | 140593 | PYQFFTAS E         | Mus musculus   |
| 1 | 1.00 | 1 | 1 | 0     | 0      | 0      | 0.007  | 0      | t | 135893 | AFLQDVM NILLQ      | Homo sapiens   |
| 1 | 1.00 | 1 | 1 | 0.01  | 0.012  | 0.012  | 0.017  | 0.009  | t | 119675 | WNSGALT S          | Homo sapiens   |
| 1 | 1.00 | 1 | 1 | -0.01 | -0.01  | -0.02  | -0.01  | -0.011 | t | 112898 | AAVKQSY AAT        | Mus musculus   |
| 1 | 1.00 | 1 | 1 | 0.03  | 0.033  | 0.02   | 0.03   | 0.03   | t | 120919 | RLNEAVKY TG        | Mus musculus   |
| 1 | 1.00 | 1 | 1 | 0.01  | 0.012  | 0.015  | 0.017  | 0.01   | t | 134058 | GDKVSFF            | Homo sapiens   |
| 1 | 1.00 | 1 | 1 | 0.01  | 0.012  | 0.015  | 0.017  | 0.01   | t | 134058 | GDKVSFF            | Homo sapiens   |

|   |      |   |   |       |        |        |        |        |   |        |                           |                                  |
|---|------|---|---|-------|--------|--------|--------|--------|---|--------|---------------------------|----------------------------------|
| 1 | 1.00 | 1 | 1 | 0.01  | 0.01   | 0.025  | 0.01   | 0.001  | t | 55115  | RPAPPKPT<br>PQP           | Mus<br>musculu<br>s              |
| 1 | 1.00 | 1 | 1 | -0.01 | -0.01  | -0.025 | -0.01  | -0.01  | t | 41461  | MEVTPSG<br>TWLTYHG<br>AIK | Homo<br>sapiens                  |
| 1 | 1.00 | 1 | 1 | 0.01  | 0.005  | 0      | 0.01   | 0.009  | t | 127847 | SYNSTADE<br>WLPV          | Trichosu<br>rus<br>vulpecul<br>a |
| 1 | 1.00 | 1 | 1 | 0     | 0.002  | -0.013 | 0.001  | 0.001  | t | 45589  | NQMHML<br>SNKS            | Homo<br>sapiens                  |
| 1 | 1.00 | 1 | 1 | 0.01  | 0.01   | 0.001  | 0.01   | 0.01   | t | 25217  | IAADQLPN                  | Oryctola<br>gus<br>cuniculu<br>s |
| 1 | 1.00 | 1 | 1 | -0.02 | -0.018 | -0.027 | -0.013 | -0.02  | t | 144600 | CQREFALK<br>HL            | Homo<br>sapiens                  |
| 1 | 1.00 | 1 | 1 | 0.01  | 0.014  | -0.003 | 0.007  | 0.009  | t | 65983  | TQYTDAPS<br>FS            | Homo<br>sapiens                  |
| 1 | 1.00 | 1 | 1 | 0.02  | 0.022  | 0.003  | 0.023  | 0.023  | t | 110926 | KSEKDSTN<br>NNK           | Homo<br>sapiens                  |
| 1 | 1.00 | 1 | 1 | -0.01 | -0.01  | -0.018 | -0.008 | -0.01  | t | 110932 | LNLKIDGL<br>KISV          | Homo<br>sapiens                  |
| 1 | 1.00 | 1 | 1 | 0     | 0      | 0      | 0.004  | -0.001 | t | 119621 | NVFSCSV<br>M              | Homo<br>sapiens                  |
| 1 | 1.00 | 1 | 1 | 0.02  | 0.024  | 0.035  | 0.027  | 0.019  | t | 103843 | DF                        | Homo<br>sapiens                  |
| 1 | 1.00 | 1 | 1 | 0     | 0      | 0      | 0      | -0.003 | t | 50104  | PYIEQGM<br>QL             | Homo<br>sapiens                  |
| 1 | 1.00 | 1 | 1 | 0.02  | 0.02   | 0.015  | 0.02   | 0.018  | t | 35611  | LEN                       | Mus<br>musculu<br>s              |
| 1 | 1.00 | 1 | 1 | 0.03  | 0.028  | 0.023  | 0.029  | 0.028  | t | 21475  | GNMVETE<br>DTKEPGVL       | Mus<br>musculu<br>s              |



|   |      |   |   |       |        |        |        |        |   |        |                       |                                  |
|---|------|---|---|-------|--------|--------|--------|--------|---|--------|-----------------------|----------------------------------|
| 1 | 1.00 | 1 | 1 | 0.01  | 0.008  | -0.004 | 0.007  | 0.009  | t | 49450  | PSNQDSF<br>QWQ        | Mus<br>musculu<br>s              |
| 1 | 1.00 | 1 | 1 | 0.02  | 0.02   | 0.02   | 0.02   | 0.019  | t | 117344 | PPGMRPP               | Homo<br>sapiens                  |
| 1 | 1.00 | 1 | 1 | 0     | 0      | -0.01  | 0      | 0      | t | 69942  | VMENFVA<br>F          | Homo<br>sapiens                  |
| 1 | 1.00 | 1 | 1 | 0.03  | 0.032  | 0.025  | 0.037  | 0.03   | t | 141604 | APPDDGP<br>P          | Homo<br>sapiens                  |
| 1 | 1.00 | 1 | 1 | 0.05  | 0.05   | 0.052  | 0.06   | 0.05   | t | 105993 | PAEGT                 | Homo<br>sapiens                  |
| 1 | 1.00 | 1 | 1 | 0.08  | 0.084  | 0.073  | 0.083  | 0.08   | t | 61994  | STVSEEAS<br>AEDVVC    | Homo<br>sapiens                  |
| 1 | 1.00 | 1 | 1 | 0.04  | 0.036  | 0.033  | 0.039  | 0.038  | t | 104235 | SDIDFLIEEI<br>ERLGQDL | Oryctola<br>gus<br>cuniculu<br>s |
| 1 | 1.00 | 1 | 1 | -0.05 | -0.046 | -0.046 | -0.05  | -0.055 | t | 123280 | GYWKIRGL<br>Q         | Ovis<br>aries                    |
| 1 | 1.00 | 1 | 1 | 0.02  | 0.02   | 0.016  | 0.02   | 0.018  | t | 106690 | NSDHFLQP<br>DPPL      | Mus<br>musculu<br>s              |
| 1 | 1.00 | 1 | 1 | 0.02  | 0.022  | 0.018  | 0.027  | 0.021  | t | 112130 | GKGLEWL               | Homo<br>sapiens                  |
| 1 | 1.00 | 1 | 1 | 0     | 0.002  | 0.002  | 0.007  | -0.003 | t | 122525 | PRFLRLLDL<br>AQEGLK   | Homo<br>sapiens                  |
| 1 | 1.00 | 1 | 1 | -0.01 | -0.008 | -0.016 | -0.003 | -0.01  | t | 144823 | YWEGSGI<br>GAI        | Homo<br>sapiens                  |
| 1 | 1.00 | 1 | 1 | -0.01 | -0.011 | -0.02  | -0.006 | -0.01  | t | 30041  | KCAFATTP<br>VCQF      | Myodes<br>glareolu<br>s          |

|   |      |   |   |       |        |        |       |        |   |        |                         |                                  |
|---|------|---|---|-------|--------|--------|-------|--------|---|--------|-------------------------|----------------------------------|
| 1 | 1.00 | 1 | 1 | 0     | 0.004  | -0.011 | 0.001 | 0      | t | 9983   | DRHFLNN<br>VC           | Homo<br>sapiens                  |
| 1 | 1.00 | 1 | 1 | 0.02  | 0.02   | 0.01   | 0.02  | 0.02   | t | 136749 | WMLRAAE<br>EYSMNLG<br>F | Mus<br>musculu<br>s              |
| 1 | 1.00 | 1 | 1 | 0.02  | 0.02   | 0.01   | 0.02  | 0.02   | t | 136749 | WMLRAAE<br>EYSMNLG<br>F | Mus<br>musculu<br>s              |
| 1 | 1.00 | 1 | 1 | 0.03  | 0.03   | 0.024  | 0.03  | 0.028  | t | 19375  | GENK                    | Mus<br>musculu<br>s              |
| 1 | 1.00 | 1 | 1 | 0.04  | 0.042  | 0.031  | 0.037 | 0.038  | t | 114814 | ESNGTLTL<br>SH          | Homo<br>sapiens                  |
| 1 | 1.00 | 1 | 1 | 0.03  | 0.023  | 0.025  | 0.03  | 0.03   | t | 65     | AAAVLNLT                | Oryctola<br>gus<br>cuniculu<br>s |
| 1 | 1.00 | 1 | 1 | 0.11  | 0.11   | 0.11   | 0.11  | 0.107  | t | 143682 | EEIEKE                  | Mus<br>musculu<br>s              |
| 1 | 1.00 | 1 | 1 | 0.04  | 0.044  | 0.042  | 0.047 | 0.039  | t | 119646 | SNGQPEN<br>N            | Homo<br>sapiens                  |
| 1 | 1.00 | 1 | 1 | 0.01  | 0.008  | -0.005 | 0.009 | 0.012  | t | 49118  | PQRPFAQ<br>QPE          | Mus<br>musculu<br>s              |
| 1 | 1.00 | 1 | 1 | -0.03 | -0.03  | -0.037 | -0.02 | -0.03  | t | 107087 | ARGLTGRP<br>GDA         | Homo<br>sapiens                  |
| 1 | 1.00 | 1 | 1 | 0     | 0.004  | 0      | 0.007 | 0.002  | t | 107396 | GKEYKCK                 | Homo<br>sapiens                  |
| 1 | 1.00 | 1 | 1 | -0.01 | -0.01  | -0.031 | -0.01 | -0.008 | t | 65909  | TQP                     | Mus<br>musculu<br>s              |
| 1 | 1.00 | 1 | 1 | -0.06 | -0.054 | -0.056 | -0.06 | -0.065 | t | 123281 | GYWKLRG<br>LA           | Ovis<br>aries                    |
| 1 | 1.00 | 1 | 1 | 0.01  | 0.008  | -0.001 | 0.007 | 0.008  | t | 47969  | PIQPQQPF<br>PQ          | Mus<br>musculu<br>s              |

|   |      |   |   |       |        |        |        |        |   |        |                |                       |
|---|------|---|---|-------|--------|--------|--------|--------|---|--------|----------------|-----------------------|
| 1 | 1.00 | 1 | 1 | 0.05  | 0.054  | 0.034  | 0.051  | 0.052  | t | 67562  | VAEEHVE        | Homo sapiens          |
| 1 | 1.00 | 1 | 1 | 0.03  | 0.033  | 0.025  | 0.037  | 0.03   | t | 117543 | KFKGKATLTSDK   | Mus musculus          |
| 1 | 1.00 | 1 | 1 | 0.03  | 0.03   | 0.025  | 0.037  | 0.03   | t | 117543 | KFKGKATLTSDK   | Mus musculus          |
| 1 | 1.00 | 1 | 1 | 0.01  | 0.01   | 0.01   | 0.021  | 0.01   | t | 104115 | MILSLQM        | Homo sapiens          |
| 1 | 1.00 | 1 | 1 | 0.01  | 0.01   | 0.001  | 0.014  | 0.01   | t | 135900 | ATCRFYTLDSIK   | Homo sapiens          |
| 1 | 1.00 | 1 | 1 | -0.05 | -0.048 | -0.063 | -0.049 | -0.051 | t | 55639  | RRLGAALL       | Homo sapiens          |
| 1 | 1.00 | 1 | 1 | 0.02  | 0.017  | 0.013  | 0.02   | 0.018  | t | 1022   | AEKQKAAEATKVAE | Oryctolagus cuniculus |
| 1 | 1.00 | 1 | 1 | 0     | 0.002  | 0      | 0.007  | -0.001 | t | 119671 | WLNGKEYK       | Homo sapiens          |
| 1 | 1.00 | 1 | 1 | 0     | -0.002 | 0.002  | 0.003  | -0.003 | t | 69946  | VMFDFASG       | Mus musculus          |
| 1 | 1.00 | 1 | 1 | -0.02 | -0.022 | -0.02  | -0.021 | -0.024 | t | 48819  | PPLGNWFG       | Rattus norvegicus     |
| 1 | 1.00 | 1 | 1 | 0.05  | 0.052  | 0.043  | 0.057  | 0.052  | t | 110029 | VEWGSND        | Homo sapiens          |
| 1 | 1.00 | 1 | 1 | 0.02  | 0.017  | 0.008  | 0.02   | 0.021  | t | 61945  | STTNKDK        | Oryctolagus cuniculus |
| 1 | 1.00 | 1 | 1 | 0.02  | 0.024  | 0.008  | 0.02   | 0.021  | t | 61945  | STTNKDK        | Cavia porcellus       |
| 1 | 1.00 | 1 | 1 | 0.02  | 0.02   | 0.008  | 0.02   | 0.021  | t | 61945  | STTNKDK        | Mus musculus          |
| 1 | 1.00 | 1 | 1 | 0.07  | 0.066  | 0.068  | 0.073  | 0.071  | t | 99274  | GGFSEV         | Oryctolagus cuniculus |

|   |      |   |   |       |        |        |        |        |   |        |                 |                       |
|---|------|---|---|-------|--------|--------|--------|--------|---|--------|-----------------|-----------------------|
| 1 | 1.00 | 1 | 1 | 0.05  | 0.05   | 0.05   | 0.05   | 0.047  | t | 67323  | TYDNE           | Homo sapiens          |
| 1 | 1.00 | 1 | 1 | 0.03  | 0.03   | 0.019  | 0.031  | 0.03   | t | 25538  | IDANDCLVTPSVK   | Homo sapiens          |
| 1 | 1.00 | 1 | 1 | 0.06  | 0.058  | 0.05   | 0.059  | 0.06   | t | 44163  | NHPQNTSD        | Mus musculus          |
| 1 | 1.00 | 1 | 1 | 0.03  | 0.027  | 0.016  | 0.027  | 0.03   | t | 47316  | PEKAFRELAND     | Oryctolagus cuniculus |
| 1 | 1.00 | 1 | 1 | 0.02  | 0.02   | 0.02   | 0.029  | 0.02   | t | 107814 | EGLHNNHY        | Homo sapiens          |
| 1 | 1.00 | 1 | 1 | 0.01  | 0.008  | 0.009  | 0.011  | 0.01   | t | 36315  | LGSAYP          | Mus musculus          |
| 1 | 1.00 | 1 | 1 | -0.04 | -0.036 | -0.04  | -0.033 | -0.043 | t | 137456 | TAIASRSV        | Homo sapiens          |
| 1 | 1.00 | 1 | 1 | 0.01  | 0.013  | 0      | 0.01   | 0.01   | t | 121079 | YFTDIDLVEH      | Mus musculus          |
| 1 | 1.00 | 1 | 1 | 0     | -0.002 | -0.005 | -0.001 | -0.001 | t | 109841 | RPGEAGLP        | Rattus norvegicus     |
| 1 | 1.00 | 1 | 1 | 0.01  | 0.01   | 0.006  | 0.01   | 0.009  | t | 48279  | PLATQPPV LAL    | Mus musculus          |
| 1 | 1.00 | 1 | 1 | 0.01  | 0.007  | 0      | 0.01   | 0.012  | t | 95111  | KTVDH           | Oryctolagus cuniculus |
| 1 | 1.00 | 1 | 1 | 0.04  | 0.042  | 0.04   | 0.047  | 0.04   | t | 119573 | EWEDTYGIVL      | Homo sapiens          |
| 1 | 1.00 | 1 | 1 | -0.01 | -0.01  | -0.01  | -0.008 | -0.012 | t | 69828  | VLVLFGFF TLSPWY | Homo sapiens          |
| 1 | 1.00 | 1 | 1 | -0.02 | -0.018 | -0.028 | -0.02  | -0.021 | t | 48926  | PPSSPPQW        | Anas platyrhynchos    |

|   |      |   |   |       |        |        |        |        |   |        |                             |                                  |
|---|------|---|---|-------|--------|--------|--------|--------|---|--------|-----------------------------|----------------------------------|
| 1 | 1.00 | 1 | 1 | 0.02  | 0.02   | 0.012  | 0.02   | 0.02   | t | 76268  | YVFDKSEL<br>TN              | Mus<br>musculu<br>s              |
| 1 | 1.00 | 1 | 1 | 0.02  | 0.023  | 0.012  | 0.02   | 0.02   | t | 76268  | YVFDKSEL<br>TN              | Mus<br>musculu<br>s              |
| 1 | 1.00 | 1 | 1 | -0.01 | -0.013 | -0.024 | -0.01  | -0.01  | t | 47751  | PGSQHI                      | Oryctola<br>gus<br>cuniculu<br>s |
| 1 | 1.00 | 1 | 1 | 0.07  | 0.074  | 0.07   | 0.077  | 0.07   | t | 125610 | YYVFEEQ<br>EDEIIGFG<br>QELK | Homo<br>sapiens                  |
| 1 | 1.00 | 1 | 1 | -0.04 | -0.04  | -0.049 | -0.04  | -0.04  | t | 118764 | CYGSFARP<br>TN              | Mus<br>musculu<br>s              |
| 1 | 1.00 | 1 | 1 | -0.04 | -0.04  | -0.049 | -0.04  | -0.04  | t | 118764 | CYGSFARP<br>TN              | Mus<br>musculu<br>s              |
| 1 | 1.00 | 1 | 1 | 0     | 0      | 0      | 0.007  | -0.002 | t | 113321 | DENPVVH<br>FFKNIVTP<br>RT   | Homo<br>sapiens                  |
| 1 | 1.00 | 1 | 1 | 0.03  | 0.026  | 0.021  | 0.029  | 0.03   | t | 70665  | VQVVYDY<br>QHK              | Oryctola<br>gus<br>cuniculu<br>s |
| 1 | 1.00 | 1 | 1 | -0.04 | -0.038 | -0.045 | -0.037 | -0.042 | t | 134183 | PLIFRNV                     | Homo<br>sapiens                  |
| 1 | 1.00 | 1 | 1 | 0.01  | 0.008  | 0.002  | 0.009  | 0.01   | t | 34132  | KVNDA                       | Mus<br>musculu<br>s              |
| 1 | 1.00 | 1 | 1 | 0.03  | 0.028  | 0.022  | 0.029  | 0.028  | t | 10336  | DTFNPVYP<br>YDTE            | Mus<br>musculu<br>s              |
| 1 | 1.00 | 1 | 1 | 0.02  | 0      | 0.017  | 0.021  | 0.018  | t | 111523 | LTADVK                      | Cricetina<br>e                   |
| 1 | 1.00 | 1 | 1 | 0.03  | 0.034  | 0.03   | 0.031  | 0.027  | t | 134696 | ITLYLTEK                    | MD                               |
| 1 | 1.00 | 1 | 1 | -0.01 | -0.008 | -0.015 | -0.003 | -0.009 | t | 115256 | FRELKDLK<br>GY              | Homo<br>sapiens                  |

|   |      |   |   |       |        |        |       |        |   |        |                   |                                  |
|---|------|---|---|-------|--------|--------|-------|--------|---|--------|-------------------|----------------------------------|
| 1 | 1.00 | 1 | 1 | 0.02  | 0.017  | 0.011  | 0.02  | 0.02   | t | 41449  | METMKL<br>MMEKVD  | Oryctola<br>gus<br>cuniculu<br>s |
| 1 | 1.00 | 1 | 1 | 0.02  | 0.02   | 0.011  | 0.02  | 0.02   | t | 41449  | METMKL<br>MMEKVD  | Rattus<br>norvegic<br>us         |
| 1 | 1.00 | 1 | 1 | 0.03  | 0.027  | 0.016  | 0.03  | 0.032  | t | 47316  | PEKAFREL<br>AD    | Oryctola<br>gus<br>cuniculu<br>s |
| 1 | 1.00 | 1 | 1 | 0.01  | -0.004 | 0      | 0.007 | 0.01   | t | 33770  | KTLTKTSL          | Macaca<br>mulatta                |
| 1 | 1.00 | 1 | 1 | 0.04  | 0.042  | 0.042  | 0.047 | 0.04   | t | 119670 | WESNGQP<br>E      | Homo<br>sapiens                  |
| 1 | 1.00 | 1 | 1 | 0     | 0.003  | -0.019 | 0     | 0.002  | t | 4032   | AQPKSA            | Mus<br>musculu<br>s              |
| 1 | 1.00 | 1 | 1 | 0.06  | 0.06   | 0.058  | 0.06  | 0.059  | t | 137209 | ITANVTDE<br>SYLY  | Sus<br>scrofa                    |
| 1 | 1.00 | 1 | 1 | 0.03  | 0.03   | 0.015  | 0.03  | 0.032  | t | 43506  | NDPN              | Mus<br>musculu<br>s              |
| 1 | 1.00 | 1 | 1 | 0     | -0.004 | -0.005 | 0     | 0      | t | 16569  | FLEGAAR           | Mus<br>musculu<br>s              |
| 1 | 1.00 | 1 | 1 | 0.01  | 0.012  | 0.004  | 0.013 | 0.012  | t | 115153 | MKGVVCT<br>RIYEKV | Homo<br>sapiens                  |
| 1 | 1.00 | 1 | 1 | 0     | -0.001 | 0.001  | 0.004 | -0.003 | t | 30041  | KCAFATTP<br>VCQF  | Myodes<br>glareolu<br>s          |
| 1 | 1.00 | 1 | 1 | 0.04  | 0.042  | 0.037  | 0.047 | 0.04   | t | 107800 | DSRGNPT<br>VE     | Homo<br>sapiens                  |
| 1 | 1.00 | 1 | 1 | 0.01  | 0.01   | -0.005 | 0.007 | 0.01   | t | 52023  | QQFHQQ<br>Q       | Homo<br>sapiens                  |
| 1 | 1.00 | 1 | 1 | 0.03  | 0.03   | 0.014  | 0.03  | 0.032  | t | 120867 | PFDQDLSK<br>KH    | Mus<br>musculu<br>s              |
| 1 | 1.00 | 1 | 1 | -0.01 | -0.01  | -0.017 | -0.01 | -0.01  | t | 131249 | LVVGLC            | Homo<br>sapiens                  |

|   |      |   |   |       |        |        |        |        |   |        |                      |                                  |
|---|------|---|---|-------|--------|--------|--------|--------|---|--------|----------------------|----------------------------------|
| 1 | 1.00 | 1 | 1 | 0.02  | 0.018  | 0.019  | 0.019  | 0.019  | t | 56788  | SAFVFPTK<br>D        | Mus<br>musculu<br>s              |
| 1 | 1.00 | 1 | 1 | -0.01 | -0.01  | -0.025 | -0.01  | -0.01  | t | 98321  | PAYYTKNT<br>NN       | Mus<br>musculu<br>s              |
| 1 | 1.00 | 1 | 1 | 0.01  | 0.007  | 0.009  | 0.01   | 0.009  | t | 105828 | GKDLESIK             | Oryctola<br>gus<br>cuniculu<br>s |
| 1 | 1.00 | 1 | 1 | 0.05  | 0.052  | 0.05   | 0.057  | 0.049  | t | 119574 | EWESNGQ<br>P         | Homo<br>sapiens                  |
| 1 | 1.00 | 1 | 1 | 0     | 0      | -0.007 | 0      | -0.002 | t | 117689 | VSMNTHL<br>KAVKMT    | Homo<br>sapiens                  |
| 1 | 1.00 | 1 | 1 | -0.04 | -0.038 | -0.047 | -0.037 | -0.04  | t | 135959 | LTRAYAKD<br>VKFG     | Homo<br>sapiens                  |
| 1 | 1.00 | 1 | 1 | -0.03 | -0.028 | -0.03  | -0.023 | -0.032 | t | 129249 | LKARVDEL<br>ERIRRSIL | Homo<br>sapiens                  |
| 1 | 1.00 | 1 | 1 | 0.01  | 0.012  | 0.012  | 0.017  | 0.009  | t | 119676 | WQQGNV<br>FS         | Homo<br>sapiens                  |
| 1 | 1.00 | 1 | 1 | -0.01 | -0.01  | -0.024 | -0.01  | -0.01  | t | 120532 | FKDSINNL<br>VK       | Mus<br>musculu<br>s              |
| 1 | 1.00 | 1 | 1 | 0.05  | 0.052  | 0.04   | 0.047  | 0.05   | t | 13894  | EQNVDP               | Cavia<br>porcellu<br>s           |
| 1 | 1.00 | 1 | 1 | -0.01 | -0.008 | -0.01  | -0.003 | -0.011 | t | 119602 | KGQPREP<br>Q         | Homo<br>sapiens                  |
| 1 | 1.00 | 1 | 1 | 0.02  | 0.022  | 0.018  | 0.021  | 0.02   | t | 62329  | SVSLVL               | Homo<br>sapiens                  |
| 1 | 1.00 | 1 | 1 | 0.04  | 0.04   | 0.04   | 0.04   | 0.037  | t | 143362 | ETPLMKE              | Mus<br>musculu<br>s              |
| 1 | 1.00 | 1 | 1 | 0.01  | 0.01   | -0.005 | 0.007  | 0.01   | t | 7698   | DCCQQL               | Homo<br>sapiens                  |
| 1 | 1.00 | 1 | 1 | 0     | 0      | 0      | 0      | -0.003 | t | 50104  | PYIEQGM<br>QL        | Homo<br>sapiens                  |
| 1 | 1.00 | 1 | 1 | -0.02 | -0.02  | -0.023 | -0.01  | -0.02  | t | 98858  | LACQCLVR<br>TP       | Homo<br>sapiens                  |

|   |      |   |   |       |        |        |        |        |   |        |                          |                                  |
|---|------|---|---|-------|--------|--------|--------|--------|---|--------|--------------------------|----------------------------------|
| 1 | 1.00 | 1 | 1 | 0.03  | 0.03   | 0.025  | 0.031  | 0.03   | t | 22044  | GRGGIYRF<br>VTPGER       | Homo<br>sapiens                  |
| 1 | 1.00 | 1 | 1 | -0.01 | -0.014 | -0.011 | -0.011 | -0.012 | t | 78711  | KQYDPDR<br>P             | Oryctola<br>gus<br>cuniculu<br>s |
| 1 | 1.00 | 1 | 1 | 0     | 0      | 0      | 0      | -0.003 | t | 115376 | LTKCEVFR<br>EL           | Homo<br>sapiens                  |
| 1 | 1.00 | 1 | 1 | 0     | 0.002  | -0.012 | 0.001  | 0      | t | 39626  | LSREM                    | Homo<br>sapiens                  |
| 1 | 1.00 | 1 | 1 | 0     | -0.002 | -0.02  | 0.003  | 0.003  | t | 141689 | KMDKKYS<br>AHKMKCT<br>EV | Rattus<br>norvegic<br>us         |
| 1 | 1.00 | 1 | 1 | 0     | -0.004 | -0.02  | 0.003  | 0.003  | t | 141689 | KMDKKYS<br>AHKMKCT<br>EV | Oryctola<br>gus<br>cuniculu<br>s |
| 1 | 1.00 | 1 | 1 | 0.04  | 0.042  | 0.042  | 0.047  | 0.039  | t | 96828  | RLKEEEED<br>KK           | Homo<br>sapiens                  |
| 1 | 1.00 | 1 | 1 | -0.01 | -0.008 | -0.017 | -0.007 | -0.01  | t | 48827  | PPLPHV                   | Homo<br>sapiens                  |
| 1 | 1.00 | 1 | 1 | 0.02  | 0.022  | 0.015  | 0.023  | 0.02   | t | 15246  | FAPALPV<br>W             | Homo<br>sapiens                  |
| 1 | 1.00 | 1 | 1 | 0.01  | 0.01   | 0.003  | 0.014  | 0.009  | t | 130448 | AYAKDVKF<br>GADA         | Homo<br>sapiens                  |
| 1 | 1.00 | 1 | 1 | 0.01  | 0.008  | 0.01   | 0.01   | 0.01   | t | 112672 | TAEFQMT<br>FHLFI         | Oryctola<br>gus<br>cuniculu<br>s |
| 1 | 1.00 | 1 | 1 | 0.01  | 0.012  | 0.003  | 0.013  | 0.009  | t | 135899 | ASLYHVYE<br>VNLV         | Homo<br>sapiens                  |
| 1 | 1.00 | 1 | 1 | 0.02  | 0.028  | 0.009  | 0.02   | 0.02   | t | 99226  | ERQLKSA                  | Gallus<br>gallus                 |
| 1 | 1.00 | 1 | 1 | -0.01 | -0.01  | -0.013 | 0      | -0.01  | t | 98973  | QSLACQCL<br>VR           | Homo<br>sapiens                  |
| 1 | 1.00 | 1 | 1 | 0     | 0.002  | 0      | 0.007  | -0.002 | t | 117512 | GRGRGRG<br>RGGPRR        | Homo<br>sapiens                  |



|   |      |   |   |       |        |        |        |        |   |        |                    |                                  |
|---|------|---|---|-------|--------|--------|--------|--------|---|--------|--------------------|----------------------------------|
| 1 | 1.00 | 1 | 1 | 0     | 0      | 0      | 0.01   | 0      | t | 114885 | LCAYSIEFG<br>T     | Homo<br>sapiens                  |
| 1 | 1.00 | 1 | 1 | 0.02  | 0.021  | 0.014  | 0.02   | 0.02   | t | 41644  | MGVIGFSF<br>FVKDWS | Myodes<br>glareolu<br>s          |
| 1 | 1.00 | 1 | 1 | -0.03 | -0.03  | -0.042 | -0.03  | -0.03  | t | 23641  | HDRHFLN<br>NV      | Homo<br>sapiens                  |
| 1 | 1.00 | 1 | 1 | 0.02  | 0.018  | 0.013  | 0.02   | 0.02   | t | 45303  | NPASTTNK<br>DK     | Mus<br>musculu<br>s              |
| 1 | 1.00 | 1 | 1 | 0.04  | 0.04   | 0.04   | 0.05   | 0.04   | t | 114965 | TSEDGKV<br>MVL     | Homo<br>sapiens                  |
| 1 | 1.00 | 1 | 1 | 0.05  | 0.052  | 0.037  | 0.05   | 0.05   | t | 142218 | LDLPETT<br>DLYC    | Homo<br>sapiens                  |
| 1 | 1.00 | 1 | 1 | 0.01  | 0.01   | 0.003  | 0.01   | 0.008  | t | 126069 | FVFEEFAR<br>QNLK   | Mus<br>musculu<br>s              |
| 1 | 1.00 | 1 | 1 | 0.02  | 0.018  | 0.019  | 0.02   | 0.019  | t | 95146  | SESPNK             | Oryctola<br>gus<br>cuniculu<br>s |
| 1 | 1.00 | 1 | 1 | 0.02  | 0.018  | 0.016  | 0.023  | 0.018  | t | 19906  | GGLEPINF<br>QT     | Mus<br>musculu<br>s              |
| 1 | 1.00 | 1 | 1 | 0.01  | 0.008  | 0.001  | 0.007  | 0.01   | t | 108900 | EIPVDLL            | Mus<br>musculu<br>s              |
| 1 | 1.00 | 1 | 1 | 0     | 0      | -0.009 | 0      | -0.001 | t | 94553  | IFD                | Mus<br>musculu<br>s              |
| 1 | 1.00 | 1 | 1 | -0.01 | -0.013 | -0.012 | -0.01  | -0.011 | t | 55263  | RPPAPCL            | Oryctola<br>gus<br>cuniculu<br>s |
| 1 | 1.00 | 1 | 1 | -0.03 | -0.024 | -0.03  | -0.023 | -0.031 | t | 131293 | AGRAREYV           | Homo<br>sapiens                  |
| 1 | 1.00 | 1 | 1 | 0.01  | 0.012  | -0.001 | 0.007  | 0.008  | t | 114790 | EGKDVLVC<br>NK     | Homo<br>sapiens                  |
| 1 | 1.00 | 1 | 1 | 0     | 0.004  | -0.003 | 0.001  | -0.001 | t | 20724  | GKVVLP             | Homo<br>sapiens                  |

|   |      |   |   |       |        |        |        |        |   |        |                      |                       |
|---|------|---|---|-------|--------|--------|--------|--------|---|--------|----------------------|-----------------------|
| 1 | 1.00 | 1 | 1 | 0     | 0.002  | -0.003 | 0.001  | -0.001 | t | 20724  | GKVVLP               | Homo sapiens          |
| 1 | 1.00 | 1 | 1 | 0     | 0.002  | -0.003 | 0.001  | -0.001 | t | 20724  | GKVVLP               | Homo sapiens          |
| 1 | 1.00 | 1 | 1 | -0.02 | -0.022 | -0.015 | -0.017 | -0.024 | t | 141726 | PTAPPLLP HS          | Rattus norvegicus     |
| 1 | 1.00 | 1 | 1 | 0.02  | 0.018  | 0.018  | 0.027  | 0.021  | t | 3516   | APDTRP               | Mus musculus          |
| 1 | 1.00 | 1 | 1 | 0.02  | 0.023  | 0.011  | 0.02   | 0.02   | t | 41449  | METMKL MMEKVD        | Equus caballus        |
| 1 | 1.00 | 1 | 1 | 0.03  | 0.03   | 0.027  | 0.037  | 0.03   | t | 120167 | RFQSSAV MALQEAC EAYL | Mus musculus          |
| 1 | 1.00 | 1 | 1 | 0.01  | 0.003  | 0.003  | 0.017  | 0.012  | t | 156970 | VERHQ                | Homo sapiens          |
| 1 | 1.00 | 1 | 1 | 0.02  | 0.02   | 0.017  | 0.02   | 0.02   | t | 78252  | PVQNLT               | Mus musculus          |
| 1 | 1.00 | 1 | 1 | 0.05  | 0.05   | 0.048  | 0.05   | 0.048  | t | 98725  | DDEALEKFDK           | Homo sapiens          |
| 1 | 1.00 | 1 | 1 | 0.05  | 0.048  | 0.047  | 0.049  | 0.05   | t | 50512  | QDPV                 | Mus musculus          |
| 1 | 1.00 | 1 | 1 | 0.02  | 0.018  | 0.013  | 0.023  | 0.02   | t | 107166 | GPPGPQG              | Mus musculus          |
| 1 | 1.00 | 1 | 1 | -0.01 | -0.012 | -0.01  | -0.003 | -0.01  | t | 123787 | TPATKKAV             | Homo sapiens          |
| 1 | 1.00 | 1 | 1 | -0.04 | -0.038 | -0.039 | -0.033 | -0.042 | t | 40340  | LVFKT                | Homo sapiens          |
| 1 | 1.00 | 1 | 1 | 0.02  | 0.016  | 0.011  | 0.019  | 0.02   | t | 39465  | LSKSFLEAGGVSK        | Oryctolagus cuniculus |

|   |      |   |   |       |        |        |        |        |   |        |                   |                    |
|---|------|---|---|-------|--------|--------|--------|--------|---|--------|-------------------|--------------------|
| 1 | 1.00 | 1 | 1 | 0     | 0.002  | 0.002  | 0.007  | 0      | t | 119669 | VSWNSGAL          | Homo sapiens       |
| 1 | 1.00 | 1 | 1 | 0.01  | 0.006  | 0.004  | 0.01   | 0.01   | t | 6068   | CCPDKNKS          | Mus musculus       |
| 1 | 1.00 | 1 | 1 | 0.01  | 0.012  | 0.01   | 0.017  | 0.01   | t | 119673 | WNPDDYGVK         | Homo sapiens       |
| 1 | 1.00 | 1 | 1 | 0     | 0.002  | 0.005  | 0.007  | 0      | t | 112813 | PEFAPWA           | Homo sapiens       |
| 1 | 1.00 | 1 | 1 | -0.02 | -0.022 | -0.025 | -0.023 | -0.023 | t | 116025 | VYPFPGPIPN        | Homo sapiens       |
| 1 | 1.00 | 1 | 1 | 0     | -0.002 | 0      | 0.001  | -0.003 | t | 130449 | CFFPNLSYC         | Mus musculus       |
| 1 | 1.00 | 1 | 1 | 0.02  | 0.02   | 0.012  | 0.023  | 0.02   | t | 55469  | RQQEPE            | Homo sapiens       |
| 1 | 1.00 | 1 | 1 | 0.04  | 0.038  | 0.028  | 0.037  | 0.039  | t | 144641 | FFENKD            | Mus musculus       |
| 1 | 1.00 | 1 | 1 | 0.01  | 0.013  | 0.01   | 0.01   | 0.008  | t | 137401 | FEDVW             | Mus musculus       |
| 1 | 1.00 | 1 | 1 | -0.01 | -0.01  | -0.01  | -0.01  | -0.013 | t | 134769 | QIFNL             | Mus musculus       |
| 1 | 1.00 | 1 | 1 | 0     | 0      | 0      | 0.007  | -0.002 | t | 113321 | DENPVVHFFKNIVTPRT | Homo sapiens       |
| 1 | 1.00 | 1 | 1 | 0.04  | 0.044  | 0.04   | 0.047  | 0.04   | t | 138230 | QQFNSTF           | Homo sapiens       |
| 1 | 1.00 | 1 | 1 | 0.05  | 0.052  | 0.045  | 0.051  | 0.05   | t | 66295  | TSLFTPG           | Homo sapiens       |
| 1 | 1.00 | 1 | 1 | 0.05  | 0.052  | 0.045  | 0.051  | 0.05   | t | 66295  | TSLFTPG           | Homo sapiens       |
| 1 | 1.00 | 1 | 1 | 0.04  | 0.036  | 0.032  | 0.04   | 0.04   | t | 48073  | PKGTLTWS          | Anas platyrhynchos |

|   |      |   |   |       |        |        |        |        |   |        |              |                       |
|---|------|---|---|-------|--------|--------|--------|--------|---|--------|--------------|-----------------------|
| 1 | 1.00 | 1 | 1 | 0.04  | 0.044  | 0.037  | 0.041  | 0.041  | t | 19965  | GGPLTN       | Homo sapiens          |
| 1 | 1.00 | 1 | 1 | 0.04  | 0.038  | 0.034  | 0.04   | 0.042  | t | 25080  | HVQTMEEI     | Anas platyrhynchos    |
| 1 | 1.00 | 1 | 1 | 0.02  | 0.018  | 0.011  | 0.023  | 0.022  | t | 57654  | SETQKSQNY    | Mus musculus          |
| 1 | 1.00 | 1 | 1 | 0.03  | 0.034  | 0.03   | 0.037  | 0.028  | t | 126903 | QVINVREG     | Homo sapiens          |
| 1 | 1.00 | 1 | 1 | 0.04  | 0.04   | 0.04   | 0.04   | 0.04   | t | 127899 | YFKEQFLDGD   | Homo sapiens          |
| 1 | 1.00 | 1 | 1 | 0.04  | 0.042  | 0.038  | 0.04   | 0.039  | t | 36955  | LKLYFEP      | Homo sapiens          |
| 1 | 1.00 | 1 | 1 | 0.02  | 0.016  | 0.013  | 0.019  | 0.019  | t | 138057 | TPGTEYTV     | Oryctolagus cuniculus |
| 1 | 1.00 | 1 | 1 | -0.05 | -0.048 | -0.055 | -0.047 | -0.051 | t | 72326  | WDQMWKCLI    | Homo sapiens          |
| 1 | 1.00 | 1 | 1 | 0.02  | 0.017  | 0.007  | 0.02   | 0.02   | t | 15462  | FDSSKQSF     | Oryctolagus cuniculus |
| 1 | 1.00 | 1 | 1 | 0.02  | 0.017  | 0.007  | 0.02   | 0.02   | t | 15462  | FDSSKQSF     | Oryctolagus cuniculus |
| 1 | 1.00 | 1 | 1 | 0.04  | 0.044  | 0.034  | 0.04   | 0.038  | t | 57766  | SFFSYGEI     | MD                    |
| 1 | 1.00 | 1 | 1 | 0.05  | 0.042  | 0.033  | 0.043  | 0.05   | t | 110769 | ANPENYFTNGEA | Macaca                |
| 1 | 1.00 | 1 | 1 | 0.05  | 0.042  | 0.033  | 0.043  | 0.05   | t | 110769 | ANPENYFTNGEA | Macaca                |

|   |      |   |   |       |       |        |       |        |   |        |                              |                                  |
|---|------|---|---|-------|-------|--------|-------|--------|---|--------|------------------------------|----------------------------------|
| 1 | 1.00 | 1 | 1 | 0.05  | 0.042 | 0.033  | 0.043 | 0.05   | t | 110769 | ANPENYFT<br>NGEA             | Macaca                           |
| 1 | 1.00 | 1 | 1 | 0.03  | 0.034 | 0.022  | 0.031 | 0.03   | t | 33478  | KSQDADY<br>H                 | Homo<br>sapiens                  |
| 1 | 1.00 | 1 | 1 | 0.03  | 0.032 | 0.025  | 0.027 | 0.028  | t | 114854 | HKVEQGA<br>SVD               | Homo<br>sapiens                  |
| 1 | 1.00 | 1 | 1 | 0.04  | 0.04  | 0.025  | 0.04  | 0.042  | t | 28268  | IRDFMEKE<br>SP               | Mus<br>musculu<br>s              |
| 1 | 1.00 | 1 | 1 | 0.05  | 0.05  | 0.05   | 0.05  | 0.048  | t | 159282 | EENW                         | Oryctola<br>gus<br>cuniculu<br>s |
| 1 | 1.00 | 1 | 1 | 0.01  | 0.012 | 0.013  | 0.013 | 0.01   | t | 48452  | PLPPVA                       | Homo<br>sapiens                  |
| 1 | 1.00 | 1 | 1 | 0.04  | 0.041 | 0.033  | 0.04  | 0.039  | t | 139689 | APDPSVITL<br>ENS             | Oryctola<br>gus<br>cuniculu<br>s |
| 1 | 1.00 | 1 | 1 | 0.04  | 0.042 | 0.038  | 0.04  | 0.039  | t | 36955  | LKLYFEP                      | Homo<br>sapiens                  |
| 1 | 1.00 | 1 | 1 | 0.04  | 0.042 | 0.038  | 0.04  | 0.039  | t | 36955  | LKLYFEP                      | Homo<br>sapiens                  |
| 1 | 1.00 | 1 | 1 | 0     | 0.002 | -0.006 | 0.007 | 0      | t | 118824 | GRRPFFHP<br>VGEADYFE<br>YHQE | Homo<br>sapiens                  |
| 1 | 1.00 | 1 | 1 | 0.03  | 0.029 | 0.027  | 0.03  | 0.029  | t | 11862  | EERPPETT                     | Anas<br>platyrhy<br>nchos        |
| 1 | 1.00 | 1 | 1 | 0.02  | 0.022 | 0.016  | 0.021 | 0.02   | t | 112837 | SGYIPANT<br>TIPF             | Homo<br>sapiens                  |
| 1 | 1.00 | 1 | 1 | 0.04  | 0.04  | 0.039  | 0.04  | 0.038  | t | 122913 | TGEPVELK                     | Oryctola<br>gus<br>cuniculu<br>s |
| 1 | 1.00 | 1 | 1 | -0.01 | -0.01 | -0.026 | -0.01 | -0.009 | t | 109325 | IDGVNH                       | Mus<br>musculu<br>s              |

|   |      |   |   |       |        |        |        |        |   |        |                    |                              |
|---|------|---|---|-------|--------|--------|--------|--------|---|--------|--------------------|------------------------------|
| 1 | 1.00 | 1 | 1 | 0     | 0      | -0.024 | 0.006  | 0.006  | t | 113013 | GSLPQKSQ<br>RSQDEN | Rattus<br>norvegicus         |
| 1 | 1.00 | 1 | 1 | 0.04  | 0.042  | 0.033  | 0.047  | 0.042  | t | 109227 | GQPREPQ            | Homo<br>sapiens              |
| 1 | 1.00 | 1 | 1 | 0     | 0.002  | 0      | 0.003  | -0.001 | t | 8473   | DGQPAGD<br>R       | Homo<br>sapiens              |
| 1 | 1.00 | 1 | 1 | -0.01 | -0.008 | -0.017 | -0.013 | -0.013 | t | 116040 | YQQKPVA<br>LIN     | Homo<br>sapiens              |
| 1 | 1.00 | 1 | 1 | -0.07 | -0.068 | -0.07  | -0.063 | -0.073 | t | 134650 | CRYTPRRN<br>IP     | Homo<br>sapiens              |
| 1 | 1.00 | 1 | 1 | 0     | 0.002  | -0.002 | 0.007  | 0.001  | t | 112129 | GIGVGWI            | Homo<br>sapiens              |
| 1 | 1.00 | 1 | 1 | 0.04  | 0.04   | 0.034  | 0.04   | 0.038  | t | 155744 | SAHSTPS            | Homo<br>sapiens              |
| 1 | 1.00 | 1 | 1 | 0.03  | 0.031  | 0.024  | 0.031  | 0.028  | t | 6721   | CNPPDCP<br>GVGTG   | Myodes<br>glareolus          |
| 1 | 1.00 | 1 | 1 | 0     | 0      | -0.013 | 0      | 0.001  | t | 45589  | NQMHML<br>SNKS     | Mus<br>musculus              |
| 1 | 1.00 | 1 | 1 | 0.01  | 0.012  | 0.008  | 0.013  | 0.01   | t | 29342  | IVLGGGCA<br>LL     | Homo<br>sapiens              |
| 1 | 1.00 | 1 | 1 | 0.01  | 0.006  | 0.001  | 0.009  | 0.01   | t | 25217  | IAADQLPN           | Oryctola<br>gus<br>cuniculus |
| 1 | 1.00 | 1 | 1 | -0.01 | -0.004 | -0.021 | -0.01  | -0.011 | t | 94196  | VVDNYELL<br>KH     | Ovis<br>aries                |
| 1 | 1.00 | 1 | 1 | -0.03 | -0.026 | -0.053 | -0.033 | -0.029 | t | 67859  | VCKVPI             | Homo<br>sapiens              |
| 1 | 1.00 | 1 | 1 | -0.01 | -0.014 | -0.012 | -0.007 | -0.013 | t | 14899  | EVVLQNR<br>RGLDLL  | Oryctola<br>gus<br>cuniculus |
| 1 | 1.00 | 1 | 1 | -0.01 | -0.014 | -0.012 | -0.007 | -0.013 | t | 14899  | EVVLQNR<br>RGLDLL  | Oryctola<br>gus<br>cuniculus |

|   |      |   |   |       |        |        |        |        |   |        |                            |                                  |
|---|------|---|---|-------|--------|--------|--------|--------|---|--------|----------------------------|----------------------------------|
| 1 | 1.00 | 1 | 1 | 0.01  | 0.013  | -0.006 | 0.01   | 0.012  | t | 98061  | GFSGSVQF<br>VP             | Mus<br>musculu<br>s              |
| 1 | 1.00 | 1 | 1 | -0.01 | -0.01  | -0.027 | -0.014 | -0.01  | t | 10106  | DSEPFPRQ<br>KHKKVD         | Homo<br>sapiens                  |
| 1 | 1.00 | 1 | 1 | 0.01  | 0.008  | 0.005  | 0.007  | 0.007  | t | 115828 | KPAAVRSP<br>AQ             | Homo<br>sapiens                  |
| 1 | 1.00 | 1 | 1 | 0.01  | 0.014  | 0.005  | 0.007  | 0.007  | t | 115828 | KPAAVRSP<br>AQ             | Homo<br>sapiens                  |
| 1 | 1.00 | 1 | 1 | 0.02  | 0.022  | 0.008  | 0.021  | 0.02   | t | 142408 | DQVTKKEK<br>KTIKKA         | Homo<br>sapiens                  |
| 1 | 1.00 | 1 | 1 | -0.02 | -0.021 | -0.032 | -0.023 | -0.02  | t | 130621 | TFYTK                      | Oryctola<br>gus<br>cuniculu<br>s |
| 1 | 1.00 | 1 | 1 | -0.02 | -0.019 | -0.032 | -0.023 | -0.02  | t | 130621 | TFYTK                      | Rattus<br>norvegic<br>us         |
| 1 | 1.00 | 1 | 1 | 0.04  | 0.04   | 0.03   | 0.04   | 0.04   | t | 9980   | DRGYISQY                   | Homo<br>sapiens                  |
| 1 | 1.00 | 1 | 1 | 0.02  | 0.022  | 0.02   | 0.027  | 0.02   | t | 101258 | SQNALPK                    | Homo<br>sapiens                  |
| 1 | 1.00 | 1 | 1 | 0.01  | 0.014  | 0.008  | 0.017  | 0.011  | t | 116171 | TQDQDPB<br>BHFFKNIV<br>TPR | Homo<br>sapiens                  |
| 1 | 1.00 | 1 | 1 | 0.02  | 0.018  | 0.009  | 0.019  | 0.02   | t | 8510   | DGVFNNPI                   | Mus<br>musculu<br>s              |
| 1 | 1.00 | 1 | 1 | 0     | 0.003  | -0.01  | 0      | -0.002 | t | 48715  | PNVDPN                     | Mus<br>musculu<br>s              |
| 1 | 1.00 | 1 | 1 | 0.01  | 0.01   | 0.01   | 0.02   | 0.01   | t | 115293 | IMCVKKIL<br>DK             | Homo<br>sapiens                  |
| 1 | 1.00 | 1 | 1 | 0.01  | 0.01   | -0.001 | 0.01   | 0.009  | t | 117238 | TKDTNNN<br>L               | Mus<br>musculu<br>s              |

|   |      |   |   |       |        |        |        |        |   |        |                      |                                  |
|---|------|---|---|-------|--------|--------|--------|--------|---|--------|----------------------|----------------------------------|
| 1 | 1.00 | 1 | 1 | 0.02  | 0.023  | 0.018  | 0.02   | 0.018  | t | 45303  | NPASTTNK<br>DK       | Mus<br>musculu<br>s              |
| 1 | 1.00 | 1 | 1 | -0.02 | -0.016 | -0.036 | -0.017 | -0.019 | t | 119301 | PEVVVLGS<br>QEGAMHT  | Homo<br>sapiens                  |
| 1 | 1.00 | 1 | 1 | 0.02  | 0.02   | 0.02   | 0.02   | 0.017  | t | 4330   | ASARGDLA<br>HLTTT    | Mus<br>musculu<br>s              |
| 1 | 1.00 | 1 | 1 | 0.02  | 0.02   | 0.013  | 0.02   | 0.019  | t | 138257 | VLTVLHQ              | Homo<br>sapiens                  |
| 1 | 1.00 | 1 | 1 | 0.04  | 0.042  | 0.028  | 0.041  | 0.04   | t | 142383 | AEQIQAEL<br>QKVKTA   | Homo<br>sapiens                  |
| 1 | 1.00 | 1 | 1 | -0.01 | -0.013 | -0.025 | -0.01  | -0.01  | t | 141763 | TGKGIDDA<br>NKKACCAI | Oryctola<br>gus<br>cuniculu<br>s |
| 1 | 1.00 | 1 | 1 | 0.02  | 0.022  | 0.003  | 0.017  | 0.021  | t | 2777   | ALNELNSF<br>GDLINP   | Homo<br>sapiens                  |
| 1 | 1.00 | 1 | 1 | 0.06  | 0.06   | 0.06   | 0.063  | 0.06   | t | 149108 | SLPNLTQ              | Sus<br>scrofa                    |
| 1 | 1.00 | 1 | 1 | -0.01 | -0.01  | -0.009 | -0.003 | -0.01  | t | 42633  | MSPVNKS<br>FEIEVTCS  | Homo<br>sapiens                  |
| 1 | 1.00 | 1 | 1 | 0.01  | 0.012  | 0.012  | 0.017  | 0.009  | t | 119675 | WNSGALT<br>S         | Homo<br>sapiens                  |
| 1 | 1.00 | 1 | 1 | 0     | 0.004  | 0      | 0      | 0      | t | 139840 | PAAFAFL              | Ovis<br>aries                    |
| 1 | 1.00 | 1 | 1 | 0     | -0.003 | 0      | 0      | -0.003 | t | 7849   | DDPPATVY<br>RYD      | Oryctola<br>gus<br>cuniculu<br>s |
| 1 | 1.00 | 1 | 1 | 0     | -0.003 | 0      | 0      | -0.003 | t | 7849   | DDPPATVY<br>RYD      | Oryctola<br>gus<br>cuniculu<br>s |



|   |      |   |   |       |        |        |        |        |   |        |                      |                       |
|---|------|---|---|-------|--------|--------|--------|--------|---|--------|----------------------|-----------------------|
| 1 | 1.00 | 1 | 1 | 0.01  | 0.01   | 0.01   | 0.01   | 0.008  | t | 117456 | DGQFCH               | Homo sapiens          |
| 1 | 1.00 | 1 | 1 | 0     | 0      | -0.014 | 0      | 0      | t | 120951 | SLDPEFLNLI           | Mus musculus          |
| 1 | 1.00 | 1 | 1 | 0.01  | 0.006  | -0.006 | 0.009  | 0.012  | t | 35241  | LDNLGGNG             | Oryctolagus cuniculus |
| 1 | 1.00 | 1 | 1 | -0.01 | -0.008 | -0.027 | -0.01  | -0.007 | t | 110795 | CDLIPNLKLNNG         | Homo sapiens          |
| 1 | 1.00 | 1 | 1 | 0.03  | 0.032  | 0.023  | 0.031  | 0.029  | t | 76192  | YTTSEYPSQPPS         | Homo sapiens          |
| 1 | 1.00 | 1 | 1 | 0.03  | 0.032  | 0.023  | 0.031  | 0.029  | t | 76192  | YTTSEYPSQPPS         | Homo sapiens          |
| 1 | 1.00 | 1 | 1 | 0.01  | 0.012  | 0.013  | 0.017  | 0.008  | t | 127923 | AIQVGTSWKQVDQFLGVPYA | Homo sapiens          |
| 1 | 1.00 | 1 | 1 | -0.01 | -0.013 | -0.022 | -0.01  | -0.01  | t | 42251  | MNYLLFCLFFAF         | Oryctolagus cuniculus |
| 1 | 1.00 | 1 | 1 | 0.03  | 0.03   | 0.036  | 0.032  | 0.029  | t | 8259   | DFELIK               | Homo sapiens          |
| 1 | 1.00 | 1 | 1 | 0.03  | 0.03   | 0.023  | 0.037  | 0.03   | t | 140681 | GPEYWEQQTRIAKEWEQ    | Rattus norvegicus     |
| 1 | 1.00 | 1 | 1 | 0     | 0.002  | -0.01  | 0.007  | 0.003  | t | 131874 | EVFISAPR             | Homo sapiens          |
| 1 | 1.00 | 1 | 1 | 0.03  | 0.03   | 0.024  | 0.03   | 0.029  | t | 48876  | PPPQAPYQGY           | Mus musculus          |
| 1 | 1.00 | 1 | 1 | 0     | 0.015  | 0      | 0.007  | -0.002 | t | 125478 | LHQEYEENLGDSIVGYKEKS | Homo sapiens          |
| 1 | 1.00 | 1 | 1 | -0.01 | -0.008 | -0.02  | -0.009 | -0.01  | t | 49993  | PVVAESPKKP           | Homo sapiens          |

|   |      |   |   |       |        |        |        |        |   |        |                     |                                  |
|---|------|---|---|-------|--------|--------|--------|--------|---|--------|---------------------|----------------------------------|
| 1 | 1.00 | 1 | 1 | 0.03  | 0.03   | 0.018  | 0.03   | 0.031  | t | 97539  | NYTTAVDR            | Mus<br>musculu<br>s              |
| 1 | 1.00 | 1 | 1 | -0.03 | -0.028 | -0.035 | -0.03  | -0.031 | t | 114223 | PFSRVVHL            | Rattus<br>norvegic<br>us         |
| 1 | 1.00 | 1 | 1 | -0.03 | -0.03  | -0.031 | -0.026 | -0.031 | t | 118822 | GPPRPGM<br>MPA      | Homo<br>sapiens                  |
| 1 | 1.00 | 1 | 1 | 0     | 0      | -0.01  | 0      | 0      | t | 53186  | RAQEGAFL<br>TG      | Homo<br>sapiens                  |
| 1 | 1.00 | 1 | 1 | 0     | 0.002  | -0.007 | 0.001  | 0      | t | 34297  | KWGVTTLS            | Homo<br>sapiens                  |
| 1 | 1.00 | 1 | 1 | -0.05 | -0.053 | -0.063 | -0.05  | -0.051 | t | 55639  | RRLGAALL            | Oryctola<br>gus<br>cuniculu<br>s |
| 1 | 1.00 | 1 | 1 | 0.03  | 0.024  | 0.028  | 0.03   | 0.028  | t | 10277  | DSYGRDPY<br>SPSQDPY | Oryctola<br>gus<br>cuniculu<br>s |
| 1 | 1.00 | 1 | 1 | -0.03 | -0.028 | -0.049 | -0.029 | -0.028 | t | 49459  | PSPFGQAA<br>AGDK    | Homo<br>sapiens                  |
| 1 | 1.00 | 1 | 1 | 0.03  | 0.032  | 0.03   | 0.033  | 0.03   | t | 117919 | IFIEME              | Homo<br>sapiens                  |
| 1 | 1.00 | 1 | 1 | 0     | 0.004  | -0.005 | 0.001  | 0      | t | 70839  | VRVCEK              | Homo<br>sapiens                  |
| 1 | 1.00 | 1 | 1 | 0     | 0.004  | -0.005 | 0.001  | 0      | t | 70839  | VRVCEK              | Homo<br>sapiens                  |
| 1 | 1.00 | 1 | 1 | 0     | -0.003 | -0.007 | 0      | 0.001  | t | 36162  | LGIHE               | Oryctola<br>gus<br>cuniculu<br>s |
| 1 | 1.00 | 1 | 1 | -0.03 | -0.026 | -0.032 | -0.023 | -0.031 | t | 119554 | CNVNHKPS            | Homo<br>sapiens                  |
| 1 | 1.00 | 1 | 1 | 0.03  | 0.027  | 0.019  | 0.033  | 0.031  | t | 142150 | EYMLDLQ<br>PETTD    | Homo<br>sapiens                  |

|   |      |   |   |       |        |        |        |        |   |        |                     |                       |
|---|------|---|---|-------|--------|--------|--------|--------|---|--------|---------------------|-----------------------|
| 1 | 1.00 | 1 | 1 | 0.05  | 0.05   | 0.054  | 0.05   | 0.05   | t | 23207  | GVVTLY              | Homo sapiens          |
| 1 | 1.00 | 1 | 1 | 0     | -0.001 | 0      | 0.004  | -0.003 | t | 15293  | FATTPVCQ<br>FDGN    | Myodes glareolus      |
| 1 | 1.00 | 1 | 1 | 0.01  | 0.01   | 0.003  | 0.01   | 0.01   | t | 130919 | KFPEDFES            | Homo sapiens          |
| 1 | 1.00 | 1 | 1 | 0.06  | 0.062  | 0.059  | 0.067  | 0.06   | t | 144320 | GSEN                | Homo sapiens          |
| 1 | 1.00 | 1 | 1 | 0.05  | 0.052  | 0.043  | 0.051  | 0.05   | t | 150971 | CDNTCME<br>SVKNGTYD | Homo sapiens          |
| 1 | 1.00 | 1 | 1 | 0     | 0.004  | -0.009 | 0      | 0      | t | 93522  | NVTNSLDK<br>LI      | Ovis aries            |
| 1 | 1.00 | 1 | 1 | -0.01 | -0.012 | -0.017 | -0.011 | -0.01  | t | 27014  | ILDTSNPV<br>K       | Mus musculus          |
| 1 | 1.00 | 1 | 1 | 0     | 0.004  | -0.011 | 0      | -0.001 | t | 93328  | LSKVVDNY<br>EL      | Ovis aries            |
| 1 | 1.00 | 1 | 1 | 0.03  | 0.026  | 0.02   | 0.033  | 0.03   | t | 51077  | QIHTL               | Oryctolagus cuniculus |
| 1 | 1.00 | 1 | 1 | 0     | 0.004  | -0.02  | 0.001  | 0.002  | t | 66666  | TTIVHDKN            | Homo sapiens          |
| 1 | 1.00 | 1 | 1 | 0.01  | 0.007  | 0      | 0.01   | 0.009  | t | 59972  | SPAFTKGE<br>KVDLN   | Oryctolagus cuniculus |
| 1 | 1.00 | 1 | 1 | 0     | 0.004  | -0.007 | 0.003  | 0      | t | 13728  | EPPVVHGC            | Homo sapiens          |
| 1 | 1.00 | 1 | 1 | 0     | 0.002  | 0      | 0.007  | -0.001 | t | 108074 | PQVYTLTP            | Homo sapiens          |
| 1 | 1.00 | 1 | 1 | 0.03  | 0.03   | 0.019  | 0.03   | 0.03   | t | 25538  | IDANDCLV<br>TPSVK   | Homo sapiens          |

|   |      |   |   |       |        |        |        |        |   |        |                |                       |
|---|------|---|---|-------|--------|--------|--------|--------|---|--------|----------------|-----------------------|
| 1 | 1.00 | 1 | 1 | 0     | -0.004 | 0      | 0.003  | -0.001 | t | 115397 | NLLSICKTAEF    | Oryctolagus cuniculus |
| 1 | 1.00 | 1 | 1 | 0.04  | 0.04   | 0.024  | 0.042  | 0.043  | t | 99057  | WQIPEQSQCQAI   | Homo sapiens          |
| 1 | 1.00 | 1 | 1 | -0.02 | -0.012 | -0.018 | -0.02  | -0.025 | t | 156974 | WGTHTSYPWRLS   | Gallus gallus         |
| 1 | 1.00 | 1 | 1 | 0.01  | 0.01   | 0.001  | 0.01   | 0.01   | t | 800    | ADYHRVMY       | Homo sapiens          |
| 1 | 1.00 | 1 | 1 | 0.01  | 0.008  | 0.006  | 0.009  | 0.009  | t | 48279  | PLATQPPVLAL    | Mus musculus          |
| 1 | 1.00 | 1 | 1 | 0.07  | 0.07   | 0.07   | 0.07   | 0.069  | t | 159283 | EGP            | Oryctolagus cuniculus |
| 1 | 1.00 | 1 | 1 | 0.03  | 0.031  | 0.024  | 0.031  | 0.028  | t | 6721   | CNPPDCPGVGTG   | Myodes glareolus      |
| 1 | 1.00 | 1 | 1 | 0.04  | 0.04   | 0.033  | 0.04   | 0.04   | t | 48115  | PKPKVASEAFMST  | Homo sapiens          |
| 1 | 1.00 | 1 | 1 | -0.03 | -0.028 | -0.031 | -0.023 | -0.032 | t | 134803 | THLLIRKLPSRLAR | Homo sapiens          |
| 1 | 1.00 | 1 | 1 | 0.03  | 0.032  | 0.02   | 0.031  | 0.029  | t | 44613  | NKVDAAVA       | Homo sapiens          |
| 1 | 1.00 | 1 | 1 | 0     | 0      | -0.008 | 0      | -0.001 | t | 79111  | VNKGYTG Y      | Mus musculus          |
| 1 | 1.00 | 1 | 1 | 0.01  | 0.01   | 0.015  | 0.017  | 0.01   | t | 125027 | EHIEL          | Homo sapiens          |
| 1 | 1.00 | 1 | 1 | 0.03  | 0.03   | 0.03   | 0.03   | 0.028  | t | 140462 | FNTKHDMQGDTS   | Mus musculus          |
| 1 | 1.00 | 1 | 1 | -0.01 | -0.007 | -0.014 | -0.01  | -0.013 | t | 50177  | PYTSTLLP       | Mus musculus          |

|   |      |   |   |       |        |        |        |        |   |        |                            |                                  |
|---|------|---|---|-------|--------|--------|--------|--------|---|--------|----------------------------|----------------------------------|
| 1 | 1.00 | 1 | 1 | 0     | -0.004 | -0.004 | -0.001 | -0.001 | t | 43106  | MYYLKNT<br>NF              | Oryctola<br>gus<br>cuniculu<br>s |
| 1 | 1.00 | 1 | 1 | -0.03 | -0.03  | -0.03  | -0.03  | -0.033 | t | 115530 | VAGTWYS<br>LAM             | Homo<br>sapiens                  |
| 1 | 1.00 | 1 | 1 | -0.05 | -0.052 | -0.065 | -0.051 | -0.05  | t | 50350  | QAQYNQ<br>MHML             | Mus<br>musculu<br>s              |
| 1 | 1.00 | 1 | 1 | 0.03  | 0.03   | 0.027  | 0.037  | 0.03   | t | 120167 | RFQSSAV<br>MALQEAC<br>EAYL | Mus<br>musculu<br>s              |
| 1 | 1.00 | 1 | 1 | -0.01 | -0.01  | -0.019 | -0.01  | -0.012 | t | 60267  | SPSQDPYS<br>PSQDPDR        | Homo<br>sapiens                  |
| 1 | 1.00 | 1 | 1 | 0     | 0.004  | -0.007 | 0.007  | 0      | t | 128038 | KSPKKAKA<br>AKPKKAP        | Homo<br>sapiens                  |
| 1 | 1.00 | 1 | 1 | 0.04  | 0.04   | 0.033  | 0.04   | 0.038  | t | 102816 | SPVPQD                     | Mus<br>musculu<br>s              |
| 1 | 1.00 | 1 | 1 | 0     | 0.001  | -0.001 | 0.003  | -0.001 | t | 99260  | FVDRL                      | Equus<br>caballus                |
| 1 | 1.00 | 1 | 1 | 0.05  | 0.048  | 0.043  | 0.05   | 0.05   | t | 50871  | QGGNIVDI<br>DF             | Oryctola<br>gus<br>cuniculu<br>s |
| 1 | 1.00 | 1 | 1 | 0.01  | 0.007  | 0.001  | 0.01   | 0.01   | t | 62907  | TALDTSNK                   | Oryctola<br>gus<br>cuniculu<br>s |
| 1 | 1.00 | 1 | 1 | 0.03  | 0.032  | 0.023  | 0.037  | 0.03   | t | 108080 | QGKVGPS<br>GAPG            | Homo<br>sapiens                  |
| 1 | 1.00 | 1 | 1 | -0.01 | -0.008 | -0.017 | -0.007 | -0.008 | t | 78024  | SYTRLFLIL                  | Homo<br>sapiens                  |
| 1 | 1.00 | 1 | 1 | 0.01  | 0.01   | -0.002 | 0.01   | 0.01   | t | 78365  | DSWDHEQ<br>A               | Mus<br>musculu<br>s              |
| 1 | 1.00 | 1 | 1 | 0.02  | 0.02   | 0.012  | 0.02   | 0.019  | t | 30180  | KDKDKDN<br>TDE             | Mus<br>musculu<br>s              |

|   |      |   |   |       |        |        |        |        |   |        |                          |                       |
|---|------|---|---|-------|--------|--------|--------|--------|---|--------|--------------------------|-----------------------|
| 1 | 1.00 | 1 | 1 | 0.04  | 0.037  | 0.033  | 0.04   | 0.04   | t | 37325  | LLGEATAL                 | Oryctolagus cuniculus |
| 1 | 1.00 | 1 | 1 | 0.01  | 0.014  | -0.001 | 0.01   | 0.009  | t | 93326  | LSFSDSNLKD               | Ovis aries            |
| 1 | 1.00 | 1 | 1 | 0.01  | 0.014  | 0.007  | 0.011  | 0.006  | t | 89854  | VAKLTVMVYN               | Homo sapiens          |
| 1 | 1.00 | 1 | 1 | 0.04  | 0.037  | 0.033  | 0.047  | 0.042  | t | 136704 | VEALAFPD<br>TDFPGLITLTIS | Homo sapiens          |
| 1 | 1.00 | 1 | 1 | 0.03  | 0.03   | 0.024  | 0.03   | 0.028  | t | 19375  | GENK                     | Mus musculus          |
| 1 | 1.00 | 1 | 1 | -0.02 | -0.018 | -0.027 | -0.017 | -0.02  | t | 144652 | GMRGMKGLVY               | Homo sapiens          |
| 1 | 1.00 | 1 | 1 | 0.04  | 0.04   | 0.04   | 0.04   | 0.036  | t | 6457   | CITQYQRE<br>SQAYYQRG     | Mus musculus          |
| 1 | 1.00 | 1 | 1 | 0.03  | 0.03   | 0.03   | 0.034  | 0.029  | t | 119576 | EYKCKVSN                 | Homo sapiens          |
| 1 | 1.00 | 1 | 1 | 0.01  | 0.01   | 0      | 0.01   | 0.009  | t | 78461  | LYVCLNET                 | Mus musculus          |
| 1 | 1.00 | 1 | 1 | 0.05  | 0.052  | 0.04   | 0.057  | 0.052  | t | 125229 | RDSEGDLV<br>AEKLGPI      | Homo sapiens          |
| 1 | 1.00 | 1 | 1 | 0.02  | 0.022  | 0.013  | 0.027  | 0.022  | t | 109530 | LTKNQVS                  | Homo sapiens          |
| 1 | 1.00 | 1 | 1 | 0.02  | 0.02   | 0.015  | 0.02   | 0.02   | t | 7058   | CSQAAPYIE                | Homo sapiens          |
| 1 | 1.00 | 1 | 1 | -0.02 | -0.018 | -0.028 | -0.02  | -0.021 | t | 48926  | PPSSPPQW                 | Anas platyrhynchos    |
| 1 | 1.00 | 1 | 1 | 0     | 0.027  | -0.013 | 0      | -0.002 | t | 61827  | STPPLPWP<br>WSPAAL       | Mustela               |

|   |      |   |   |       |        |        |        |        |   |        |                    |                                  |
|---|------|---|---|-------|--------|--------|--------|--------|---|--------|--------------------|----------------------------------|
| 1 | 1.00 | 1 | 1 | 0     | 0.027  | -0.013 | 0      | -0.002 | t | 61827  | STPPLPWP<br>WSPAAL | Mustela                          |
| 1 | 1.00 | 1 | 1 | 0.06  | 0.062  | 0.056  | 0.061  | 0.06   | t | 144925 | NETIYNTTL<br>K     | Homo<br>sapiens                  |
| 1 | 1.00 | 1 | 1 | 0.01  | 0.01   | 0.018  | 0.01   | 0.005  | t | 59975  | SPAIFQSS<br>M      | Mus<br>musculu<br>s              |
| 1 | 1.00 | 1 | 1 | 0.02  | 0.02   | 0.019  | 0.03   | 0.022  | t | 106235 | AGFNVPW            | Homo<br>sapiens                  |
| 1 | 1.00 | 1 | 1 | 0     | 0.002  | -0.007 | 0.001  | 0      | t | 98438  | SAVGKTVK<br>VY     | Homo<br>sapiens                  |
| 1 | 1.00 | 1 | 1 | 0.01  | 0.012  | 0.01   | 0.011  | 0.01   | t | 64004  | TGYGTV             | Homo<br>sapiens                  |
| 1 | 1.00 | 1 | 1 | -0.05 | -0.048 | -0.05  | -0.043 | -0.049 | t | 118864 | KIPPTPFS           | Homo<br>sapiens                  |
| 1 | 1.00 | 1 | 1 | 0.01  | 0.01   | 0.01   | 0.01   | 0.007  | t | 134200 | PVVNSLDP<br>PLLTRY | Homo<br>sapiens                  |
| 1 | 1.00 | 1 | 1 | 0.02  | 0.022  | 0.01   | 0.023  | 0.02   | t | 1595   | AGLFLTTE<br>AV     | Homo<br>sapiens                  |
| 1 | 1.00 | 1 | 1 | 0.02  | 0.02   | 0.018  | 0.027  | 0.02   | t | 135953 | LLQYVVKS<br>FDRS   | Homo<br>sapiens                  |
| 1 | 1.00 | 1 | 1 | 0.03  | 0.034  | 0.03   | 0.031  | 0.027  | t | 134696 | ITLYLTEK           | MD                               |
| 1 | 1.00 | 1 | 1 | 0     | -0.002 | 0      | 0.007  | 0      | t | 123314 | IGTFKAFD           | Homo<br>sapiens                  |
| 1 | 1.00 | 1 | 1 | 0.02  | 0.016  | 0.014  | 0.02   | 0.018  | t | 29567  | IYDKLTVQ<br>TTG    | Oryctola<br>gus<br>cuniculu<br>s |
| 1 | 1.00 | 1 | 1 | 0.04  | 0.036  | 0.028  | 0.04   | 0.04   | t | 144538 | VVDAEVV<br>DDDRESK | Bos<br>taurus                    |
| 1 | 1.00 | 1 | 1 | 0.04  | 0.039  | 0.03   | 0.04   | 0.04   | t | 9669   | DPLLGNQS           | Anas<br>platyrhy<br>nchos        |

|   |      |   |   |       |        |        |        |        |   |        |                     |                       |
|---|------|---|---|-------|--------|--------|--------|--------|---|--------|---------------------|-----------------------|
| 1 | 1.00 | 1 | 1 | 0.01  | 0.014  | 0.005  | 0.013  | 0.009  | t | 119466 | IRGERA              | Homo sapiens          |
| 1 | 1.00 | 1 | 1 | 0.05  | 0.05   | 0.047  | 0.05   | 0.05   | t | 61997  | STVTEN              | Homo sapiens          |
| 1 | 1.00 | 1 | 1 | 0.03  | 0.028  | 0.024  | 0.03   | 0.028  | t | 30561  | KEPGVLM<br>GGQSESVE | Mus musculus          |
| 1 | 1.00 | 1 | 1 | 0.02  | 0.018  | 0.018  | 0.027  | 0.021  | t | 3517   | APDTRPAP            | Mus musculus          |
| 1 | 1.00 | 1 | 1 | -0.03 | -0.032 | -0.042 | -0.033 | -0.032 | t | 25664  | IDRSLPIV<br>K       | Homo sapiens          |
| 1 | 1.00 | 1 | 1 | 0.01  | 0.014  | -0.002 | 0.009  | 0.01   | t | 141559 | SDEALPLG<br>SPR     | Mus musculus          |
| 1 | 1.00 | 1 | 1 | -0.01 | -0.006 | -0.017 | -0.003 | -0.008 | t | 144700 | KEWAKRA<br>ALP      | Homo sapiens          |
| 1 | 1.00 | 1 | 1 | 0.04  | 0.04   | 0.04   | 0.044  | 0.04   | t | 157130 | CIIEEN              | Homo sapiens          |
| 1 | 1.00 | 1 | 1 | 0     | 0      | -0.017 | 0      | 0.004  | t | 32802  | KPNDKSLY            | Mus musculus          |
| 1 | 1.00 | 1 | 1 | -0.03 | -0.03  | -0.03  | -0.023 | -0.03  | t | 112295 | RMRDGA<br>W         | Homo sapiens          |
| 1 | 1.00 | 1 | 1 | -0.01 | -0.017 | -0.027 | -0.01  | -0.007 | t | 110932 | LNLKIDGL<br>KISV    | Macaca                |
| 1 | 1.00 | 1 | 1 | 0.05  | 0.046  | 0.048  | 0.049  | 0.05   | t | 65193  | TMEEINTL            | Anas platyrhynchos    |
| 1 | 1.00 | 1 | 1 | -0.02 | -0.02  | -0.025 | -0.02  | -0.02  | t | 48409  | PLLRTQF             | Mus musculus          |
| 1 | 1.00 | 1 | 1 | -0.02 | -0.023 | -0.025 | -0.02  | -0.02  | t | 48409  | PLLRTQF             | Oryctolagus cuniculus |



|   |      |   |   |      |       |        |       |       |   |        |                    |                       |
|---|------|---|---|------|-------|--------|-------|-------|---|--------|--------------------|-----------------------|
| 1 | 1.00 | 1 | 1 | 0.01 | 0.006 | 0.004  | 0.01  | 0.01  | t | 6068   | CCPDKNKS           | Mus musculus          |
| 1 | 1.00 | 1 | 1 | 0.01 | 0.008 | -0.004 | 0.009 | 0.01  | t | 39251  | LRYGNVLDVN         | Mus musculus          |
| 1 | 1.00 | 1 | 1 | 0.07 | 0.07  | 0.07   | 0.073 | 0.07  | t | 149106 | SITNPTQ            | Sus scrofa            |
| 1 | 1.00 | 1 | 1 | 0.07 | 0.066 | 0.066  | 0.073 | 0.072 | t | 105721 | DQISTVQA           | Oryctolagus cuniculus |
| 1 | 1.00 | 1 | 1 | 0.03 | 0.034 | 0.023  | 0.037 | 0.03  | t | 20097  | GGYGDGGAHGGGYGG    | Homo sapiens          |
| 1 | 1.00 | 1 | 1 | 0.06 | 0.064 | 0.06   | 0.067 | 0.06  | t | 118373 | GIEADDDR LNKVISE   | Homo sapiens          |
| 1 | 1.00 | 1 | 1 | 0.04 | 0.043 | 0.038  | 0.04  | 0.039 | t | 89661  | TQLTSSYEDYML       | Mus musculus          |
| 1 | 1.00 | 1 | 1 | 0.01 | 0.01  | 0.01   | 0.013 | 0.01  | t | 3639   | APLGVT             | Homo sapiens          |
| 1 | 1.00 | 1 | 1 | 0.01 | 0.01  | 0      | 0.01  | 0.01  | t | 21566  | GPAFHER            | Mus musculus          |
| 1 | 1.00 | 1 | 1 | 0.07 | 0.073 | 0.058  | 0.07  | 0.07  | t | 97667  | STTDSFSD           | Mus musculus          |
| 1 | 1.00 | 1 | 1 | 0.03 | 0.032 | 0.028  | 0.031 | 0.03  | t | 63805  | TGDLRAY            | Homo sapiens          |
| 1 | 1.00 | 1 | 1 | 0.03 | 0.032 | 0.028  | 0.031 | 0.03  | t | 63805  | TGDLRAY            | Homo sapiens          |
| 1 | 1.00 | 1 | 1 | 0.03 | 0.03  | 0.021  | 0.03  | 0.029 | t | 110941 | MHGDTPTLHEYMLDLQPE | Mus musculus          |
| 1 | 1.00 | 1 | 1 | 0.01 | 0.013 | 0.008  | 0.01  | 0.007 | t | 32089  | KLPTPIELPK         | Oryctolagus cuniculus |

|   |      |   |   |       |        |        |        |        |   |        |                    |              |
|---|------|---|---|-------|--------|--------|--------|--------|---|--------|--------------------|--------------|
| 1 | 1.00 | 1 | 1 | -0.01 | -0.008 | -0.015 | -0.009 | -0.01  | t | 20082  | GGVYLLPR           | Homo sapiens |
| 1 | 1.00 | 1 | 1 | 0     | -0.002 | 0      | -0.001 | -0.004 | t | 59374  | SLNTGWL<br>AGLFY   | Mus musculus |
| 1 | 1.00 | 1 | 1 | 0     | -0.002 | -0.009 | 0.003  | -0.001 | t | 47014  | PAYYTKDT<br>NNNLTL | Mus musculus |
| 1 | 1.00 | 1 | 1 | 0.02  | 0.022  | 0.015  | 0.021  | 0.02   | t | 38404  | LPALSTGL           | Homo sapiens |
| 1 | 1.00 | 1 | 1 | 0.01  | 0.01   | 0.005  | 0.01   | 0.01   | t | 78433  | KLYVCLNE           | Mus musculus |
| 1 | 1.00 | 1 | 1 | 0.01  | 0.01   | 0.005  | 0.01   | 0.01   | t | 78433  | KLYVCLNE           | Mus musculus |
| 1 | 1.00 | 1 | 1 | -0.02 | -0.022 | -0.02  | -0.021 | -0.022 | t | 40922  | LYREFD             | Mus musculus |
| 1 | 1.00 | 1 | 1 | 0.02  | 0.022  | 0.025  | 0.027  | 0.02   | t | 112801 | LATPNPS            | Homo sapiens |
| 1 | 1.00 | 1 | 1 | 0.03  | 0.022  | 0.022  | 0.029  | 0.03   | t | 110964 | PNLKLNN<br>GTDYK   | Macaca       |
| 1 | 1.00 | 1 | 1 | -0.01 | -0.01  | -0.023 | -0.01  | -0.01  | t | 96849  | SAETIF             | Mus musculus |
| 1 | 1.00 | 1 | 1 | -0.01 | -0.01  | -0.023 | -0.01  | -0.01  | t | 96849  | SAETIF             | Mus musculus |
| 1 | 1.00 | 1 | 1 | 0.03  | 0.03   | 0.03   | 0.037  | 0.03   | t | 135974 | PSNSASVP<br>ALTA   | Homo sapiens |
| 1 | 1.00 | 1 | 1 | -0.01 | -0.01  | -0.01  | -0.01  | -0.012 | t | 117600 | PKKAK              | Homo sapiens |
| 1 | 1.00 | 1 | 1 | -0.02 | -0.018 | -0.028 | -0.017 | -0.02  | t | 110913 | KDIKANPE<br>NYFT   | Homo sapiens |
| 1 | 1.00 | 1 | 1 | 0.01  | 0.012  | 0.01   | 0.01   | 0.01   | t | 128955 | ILFSVFD            | MD           |

|   |      |   |   |       |        |        |        |        |   |        |                             |                                  |
|---|------|---|---|-------|--------|--------|--------|--------|---|--------|-----------------------------|----------------------------------|
| 1 | 1.00 | 1 | 1 | 0.02  | 0.017  | 0.003  | 0.02   | 0.022  | t | 141763 | TGKGIDDA<br>NKKACCAI        | Oryctola<br>gus<br>cuniculu<br>s |
| 1 | 1.00 | 1 | 1 | 0.02  | 0.02   | 0.003  | 0.02   | 0.022  | t | 141763 | TGKGIDDA<br>NKKACCAI        | Rattus<br>norvegic<br>us         |
| 1 | 1.00 | 1 | 1 | 0.03  | 0.034  | 0.03   | 0.031  | 0.027  | t | 134696 | ITLYLTEK                    | MD                               |
| 1 | 1.00 | 1 | 1 | -0.02 | -0.022 | -0.028 | -0.019 | -0.019 | t | 1373   | AFPL                        | Mus<br>musculu<br>s              |
| 1 | 1.00 | 1 | 1 | -0.01 | -0.006 | -0.01  | -0.003 | -0.008 | t | 108075 | PREPQVY                     | Homo<br>sapiens                  |
| 1 | 1.00 | 1 | 1 | -0.04 | -0.04  | -0.047 | -0.034 | -0.041 | t | 10987  | EAAGIGILT<br>V              | Homo<br>sapiens                  |
| 1 | 1.00 | 1 | 1 | 0     | 0      | 0      | 0.007  | -0.002 | t | 125552 | RRFEYDDP<br>RFLRLDLA<br>QEG | Homo<br>sapiens                  |
| 1 | 1.00 | 1 | 1 | 0.01  | 0.01   | 0.007  | 0.012  | 0.01   | t | 383    | AAPYIEQA<br>QVIAHQ          | Homo<br>sapiens                  |
| 1 | 1.00 | 1 | 1 | 0.01  | 0.012  | 0.003  | 0.007  | 0.008  | t | 73334  | YAATVAA<br>APEVKY           | Homo<br>sapiens                  |
| 1 | 1.00 | 1 | 1 | 0.02  | 0.02   | 0.02   | 0.027  | 0.019  | t | 125284 | TYICEVED<br>QKEE            | Mus<br>musculu<br>s              |
| 1 | 1.00 | 1 | 1 | -0.01 | -0.013 | -0.02  | -0.01  | -0.01  | t | 110839 | ETTSQMIV<br>KDIK            | Macaca                           |
| 1 | 1.00 | 1 | 1 | 0.03  | 0.028  | 0.02   | 0.033  | 0.033  | t | 78256  | QYPALTA                     | Mus<br>musculu<br>s              |
| 1 | 1.00 | 1 | 1 | 0.01  | 0.01   | 0.008  | 0.01   | 0.008  | t | 75370  | YPNQV                       | Mus<br>musculu<br>s              |
| 1 | 1.00 | 1 | 1 | 0.01  | 0.01   | 0.008  | 0.01   | 0.008  | t | 75370  | YPNQV                       | Mus<br>musculu<br>s              |

|   |      |   |   |       |        |        |        |        |   |        |                     |                                  |
|---|------|---|---|-------|--------|--------|--------|--------|---|--------|---------------------|----------------------------------|
| 1 | 1.00 | 1 | 1 | 0.05  | 0.048  | 0.033  | 0.049  | 0.051  | t | 78148  | ENQANPT<br>TAET     | Mus<br>musculu<br>s              |
| 1 | 1.00 | 1 | 1 | 0     | 0      | -0.005 | 0      | -0.001 | t | 26339  | IGVKGSSI            | Oryctola<br>gus<br>cuniculu<br>s |
| 1 | 1.00 | 1 | 1 | 0.02  | 0.022  | 0.018  | 0.027  | 0.02   | t | 126227 | HNNAHY<br>VFEEQED   | Homo<br>sapiens                  |
| 1 | 1.00 | 1 | 1 | 0     | -0.003 | -0.017 | -0.003 | 0.003  | t | 111038 | TGALSKIY            | Oryctola<br>gus<br>cuniculu<br>s |
| 1 | 1.00 | 1 | 1 | 0.01  | 0.013  | 0.01   | 0.01   | 0.006  | t | 21407  | GNDYEDR<br>YYREN    | Mus<br>musculu<br>s              |
| 1 | 1.00 | 1 | 1 | 0.06  | 0.056  | 0.059  | 0.057  | 0.058  | t | 118991 | RAEDNAD<br>TLALVFEA | Oryctola<br>gus<br>cuniculu<br>s |
| 1 | 1.00 | 1 | 1 | 0     | 0      | -0.012 | 0      | 0      | t | 8972   | DKPSYQFG<br>GH      | Oryctola<br>gus<br>cuniculu<br>s |
| 1 | 1.00 | 1 | 1 | 0.03  | 0.032  | 0.023  | 0.031  | 0.032  | t | 40649  | LVYQTEKF            | Homo<br>sapiens                  |
| 1 | 1.00 | 1 | 1 | -0.03 | -0.025 | -0.037 | -0.027 | -0.03  | t | 72236  | WAKH<br>MW<br>NFI   | Homo<br>sapiens                  |
| 1 | 1.00 | 1 | 1 | -0.02 | -0.018 | -0.028 | -0.023 | -0.023 | t | 30115  | KDASIQV<br>V<br>SA  | Homo<br>sapiens                  |
| 1 | 1.00 | 1 | 1 | 0.02  | 0.02   | 0.008  | 0.016  | 0.02   | t | 30799  | KFNPD<br>LAP<br>G   | Homo<br>sapiens                  |
| 1 | 1.00 | 1 | 1 | 0.01  | 0.012  | 0.009  | 0.011  | 0.01   | t | 47426  | PESPFA              | Homo<br>sapiens                  |
| 1 | 1.00 | 1 | 1 | -0.01 | -0.012 | -0.019 | -0.007 | -0.009 | t | 115483 | SFFDIGGS<br>VSAGFSN | Mus<br>musculu<br>s              |

|   |      |   |   |       |        |        |        |        |   |        |                  |                       |
|---|------|---|---|-------|--------|--------|--------|--------|---|--------|------------------|-----------------------|
| 1 | 1.00 | 1 | 1 | 0.03  | 0.033  | 0.02   | 0.03   | 0.031  | t | 132754 | YER              | Mus musculus          |
| 1 | 1.00 | 1 | 1 | 0.01  | 0.005  | 0      | 0.01   | 0.01   | t | 127782 | QAAELTLG<br>PSAC | Trichosurus vulpecula |
| 1 | 1.00 | 1 | 1 | -0.03 | -0.037 | -0.037 | -0.023 | -0.028 | t | 156885 | GYRAR            | Homo sapiens          |
| 1 | 1.00 | 1 | 1 | 0.01  | 0.014  | 0.01   | 0.01   | 0.008  | t | 22357  | GSGVRGD<br>FG    | Cavia porcellus       |
| 1 | 1.00 | 1 | 1 | 0.04  | 0.038  | 0.028  | 0.043  | 0.042  | t | 95723  | QNDPTT           | Mus musculus          |
| 1 | 1.00 | 1 | 1 | 0     | 0.002  | -0.017 | 0      | 0.001  | t | 68833  | VHASFFDIG        | Homo sapiens          |
| 1 | 1.00 | 1 | 1 | 0     | 0      | -0.017 | 0      | 0.001  | t | 68833  | VHASFFDIG        | Mus musculus          |
| 1 | 1.00 | 1 | 1 | 0     | -0.004 | -0.005 | 0      | -0.002 | t | 99914  | CGQGIDC<br>GPIQP | Oryctolagus cuniculus |
| 1 | 1.00 | 1 | 1 | 0.03  | 0.032  | 0.025  | 0.033  | 0.032  | t | 71203  | VSVPAEIL         | Homo sapiens          |
| 1 | 1.00 | 1 | 1 | -0.01 | -0.01  | -0.01  | 0      | -0.01  | t | 33732  | KTKIPAVFK<br>I   | Homo sapiens          |
| 1 | 1.00 | 1 | 1 | 0     | 0.002  | 0      | 0.007  | -0.001 | t | 119622 | NVNHKPS<br>N     | Homo sapiens          |
| 1 | 1.00 | 1 | 1 | 0     | 0      | 0      | 0      | -0.004 | t | 10124  | DSGCVVSWK        | Homo sapiens          |
| 1 | 1.00 | 1 | 1 | 0.01  | 0.01   | 0      | 0.016  | 0.012  | t | 8473   | DGQPAGD<br>R     | Homo sapiens          |
| 1 | 1.00 | 1 | 1 | 0.02  | 0.02   | 0.018  | 0.023  | 0.02   | t | 47674  | PGHLAP           | Homo sapiens          |

|   |      |   |   |       |        |        |        |        |   |        |                            |                     |
|---|------|---|---|-------|--------|--------|--------|--------|---|--------|----------------------------|---------------------|
| 1 | 1.00 | 1 | 1 | -0.03 | -0.032 | -0.027 | -0.031 | -0.032 | t | 122138 | LKKDV                      | Mus<br>musculu<br>s |
| 1 | 1.00 | 1 | 1 | 0.01  | 0.008  | 0.012  | 0.009  | 0.009  | t | 15807  | FFFDIDLLL                  | Mus<br>musculu<br>s |
| 1 | 1.00 | 1 | 1 | 0.06  | 0.06   | 0.06   | 0.06   | 0.058  | t | 156756 | SGPSYTT                    | Mus<br>musculu<br>s |
| 1 | 1.00 | 1 | 1 | -0.02 | -0.022 | -0.025 | -0.021 | -0.022 | t | 74476  | YKLPDHVR<br>T              | Mus<br>musculu<br>s |
| 1 | 1.00 | 1 | 1 | -0.03 | -0.025 | -0.027 | -0.028 | -0.033 | t | 157292 | GAIGLM                     | Homo<br>sapiens     |
| 1 | 1.00 | 1 | 1 | -0.02 | -0.02  | -0.028 | -0.017 | -0.021 | t | 47983  | PISLERLDV<br>GTNLGN        | Homo<br>sapiens     |
| 1 | 1.00 | 1 | 1 | -0.04 | -0.04  | -0.047 | -0.043 | -0.04  | t | 46987  | PAVFK                      | Homo<br>sapiens     |
| 1 | 1.00 | 1 | 1 | 0     | 0      | -0.006 | 0      | -0.001 | t | 30661  | KEVPALTA<br>VETGAT         | Homo<br>sapiens     |
| 1 | 1.00 | 1 | 1 | -0.04 | -0.034 | -0.043 | -0.04  | -0.04  | t | 139898 | SLPWFPF                    | Ovis<br>aries       |
| 1 | 1.00 | 1 | 1 | 0.02  | 0.018  | 0.019  | 0.02   | 0.019  | t | 134471 | PKPEQ                      | Mus<br>musculu<br>s |
| 1 | 1.00 | 1 | 1 | 0     | 0      | -0.01  | 0      | 0      | t | 21422  | GNFERISG<br>DLKTQID        | Homo<br>sapiens     |
| 1 | 1.00 | 1 | 1 | -0.01 | -0.006 | -0.017 | -0.003 | -0.008 | t | 144816 | WSHNFTN<br>MLG             | Homo<br>sapiens     |
| 1 | 1.00 | 1 | 1 | -0.02 | -0.018 | -0.027 | -0.013 | -0.02  | t | 117281 | DVVYALKR<br>QGRTLYGF<br>GG | Homo<br>sapiens     |

|   |      |   |   |       |        |        |        |        |   |        |                            |                                  |
|---|------|---|---|-------|--------|--------|--------|--------|---|--------|----------------------------|----------------------------------|
| 1 | 1.00 | 1 | 1 | -0.02 | -0.018 | -0.027 | -0.013 | -0.02  | t | 117281 | DVVYALKR<br>QGRTLYGF<br>GG | Homo<br>sapiens                  |
| 1 | 1.00 | 1 | 1 | -0.02 | -0.018 | -0.022 | -0.016 | -0.02  | t | 118548 | PAPGMRP<br>P               | Homo<br>sapiens                  |
| 1 | 1.00 | 1 | 1 | -0.02 | -0.027 | -0.02  | -0.019 | -0.024 | t | 50965  | QGTDYKH<br>W               | Homo<br>sapiens                  |
| 1 | 1.00 | 1 | 1 | 0     | -0.002 | -0.007 | -0.001 | -0.002 | t | 33244  | KRVVIN                     | Mus<br>musculu<br>s              |
| 1 | 1.00 | 1 | 1 | -0.02 | -0.018 | -0.026 | -0.02  | -0.021 | t | 27085  | ILGWPLAE<br>RT             | Homo<br>sapiens                  |
| 1 | 1.00 | 1 | 1 | 0.02  | 0.018  | 0.013  | 0.02   | 0.02   | t | 65852  | TQGIVEFY                   | Oryctola<br>gus<br>cuniculu<br>s |
| 1 | 1.00 | 1 | 1 | 0.01  | 0.01   | 0.006  | 0.008  | 0.008  | t | 96598  | LPPKKIKDP<br>D             | Homo<br>sapiens                  |
| 1 | 1.00 | 1 | 1 | 0.03  | 0.032  | 0.035  | 0.037  | 0.028  | t | 121347 | GPLTVAQK<br>KAQNIME        | Homo<br>sapiens                  |
| 1 | 1.00 | 1 | 1 | 0.03  | 0.032  | 0.035  | 0.037  | 0.028  | t | 121347 | GPLTVAQK<br>KAQNIME        | Homo<br>sapiens                  |
| 1 | 1.00 | 1 | 1 | -0.02 | 0.004  | -0.029 | -0.02  | -0.02  | t | 113597 | LCLPLAPQ<br>GLL            | Rattus                           |
| 1 | 1.00 | 1 | 1 | 0.05  | 0.046  | 0.047  | 0.049  | 0.05   | t | 4771   | ASSGIGPE<br>KA             | Oryctola<br>gus<br>cuniculu<br>s |
| 1 | 1.00 | 1 | 1 | 0     | 0.002  | -0.007 | -0.003 | -0.002 | t | 115690 | AQTQSLVY<br>PF             | Homo<br>sapiens                  |
| 1 | 1.00 | 1 | 1 | 0.09  | 0.09   | 0.09   | 0.097  | 0.091  | t | 133692 | SG                         | Homo<br>sapiens                  |
| 1 | 1.00 | 1 | 1 | -0.04 | -0.038 | -0.047 | -0.043 | -0.041 | t | 51431  | QLRLKKY<br>KV              | Homo<br>sapiens                  |
| 1 | 1.00 | 1 | 1 | -0.01 | -0.008 | -0.016 | -0.003 | -0.009 | t | 144823 | YWEGSGI<br>GAI             | Homo<br>sapiens                  |

|   |      |   |   |       |        |        |        |        |   |        |                             |                                  |
|---|------|---|---|-------|--------|--------|--------|--------|---|--------|-----------------------------|----------------------------------|
| 1 | 1.00 | 1 | 1 | 0.03  | 0.032  | 0.022  | 0.031  | 0.03   | t | 61824  | STPLLYPSL<br>A              | Homo<br>sapiens                  |
| 1 | 1.00 | 1 | 1 | 0.03  | 0.032  | 0.022  | 0.031  | 0.03   | t | 61824  | STPLLYPSL<br>A              | Homo<br>sapiens                  |
| 1 | 1.00 | 1 | 1 | -0.02 | -0.019 | -0.021 | -0.017 | -0.021 | t | 99260  | FVDRLL                      | Equus<br>caballus                |
| 1 | 1.00 | 1 | 1 | 0.03  | 0.03   | 0.023  | 0.04   | 0.031  | t | 117383 | TLHKAFKG<br>SIFVVFDSE<br>SA | Homo<br>sapiens                  |
| 1 | 1.00 | 1 | 1 | 0.03  | 0.03   | 0.02   | 0.033  | 0.03   | t | 30877  | KFVKEQRE                    | Homo<br>sapiens                  |
| 1 | 1.00 | 1 | 1 | 0     | -0.003 | -0.004 | 0      | -0.002 | t | 19532  | GFGHIGVT<br>VDDVHKA         | Oryctola<br>gus<br>cuniculu<br>s |
| 1 | 1.00 | 1 | 1 | 0     | -0.003 | -0.004 | 0      | -0.002 | t | 19532  | GFGHIGVT<br>VDDVHKA         | Oryctola<br>gus<br>cuniculu<br>s |
| 1 | 1.00 | 1 | 1 | 0     | -0.003 | -0.004 | 0      | -0.002 | t | 19532  | GFGHIGVT<br>VDDVHKA         | Oryctola<br>gus<br>cuniculu<br>s |
| 1 | 1.00 | 1 | 1 | 0.03  | 0.03   | 0.02   | 0.03   | 0.03   | t | 155334 | PADSS                       | Oryctola<br>gus<br>cuniculu<br>s |
| 1 | 1.00 | 1 | 1 | 0.02  | 0.024  | 0.018  | 0.027  | 0.019  | t | 119855 | FAESRIRRE<br>TIAAED         | Homo<br>sapiens                  |
| 1 | 1.00 | 1 | 1 | 0.02  | 0.024  | 0.018  | 0.027  | 0.019  | t | 119855 | FAESRIRRE<br>TIAAED         | Homo<br>sapiens                  |
| 1 | 1.00 | 1 | 1 | 0.01  | 0.007  | 0.004  | 0.011  | 0.009  | t | 72616  | WIGNGYR<br>Y                | Homo<br>sapiens                  |
| 1 | 1.00 | 1 | 1 | 0.02  | 0.02   | 0.02   | 0.02   | 0.018  | t | 140461 | EVSLHDM<br>NLATH            | Mus<br>musculu<br>s              |



|   |      |   |   |       |        |        |        |        |   |        |                             |                                  |
|---|------|---|---|-------|--------|--------|--------|--------|---|--------|-----------------------------|----------------------------------|
| 1 | 1.00 | 1 | 1 | 0.02  | 0.016  | 0.013  | 0.023  | 0.02   | t | 107247 | TFGSGTRL<br>TV              | Oryctola<br>gus<br>cuniculu<br>s |
| 1 | 1.00 | 1 | 1 | 0.01  | 0.009  | 0.003  | 0.01   | 0.008  | t | 56768  | SAEYEKSK<br>VNKYLKTI<br>MPF | Equus<br>caballus                |
| 1 | 1.00 | 1 | 1 | 0     | 0.004  | 0      | 0.007  | 0      | t | 136063 | FIRFDKRIE<br>AEE            | Homo<br>sapiens                  |
| 1 | 1.00 | 1 | 1 | 0.07  | 0.072  | 0.069  | 0.071  | 0.069  | t | 69624  | VLLQME                      | Homo<br>sapiens                  |
| 1 | 1.00 | 1 | 1 | 0.01  | 0.008  | 0.01   | 0.011  | 0.009  | t | 130454 | CLFPNNSY<br>C               | Mus<br>musculu<br>s              |
| 1 | 1.00 | 1 | 1 | -0.01 | -0.012 | -0.019 | -0.011 | -0.01  | t | 39085  | LRFSGK                      | Mus<br>musculu<br>s              |
| 1 | 1.00 | 1 | 1 | 0.03  | 0.03   | 0.024  | 0.03   | 0.03   | t | 42984  | MVQVVYD                     | Homo<br>sapiens                  |
| 1 | 1.00 | 1 | 1 | -0.01 | -0.01  | -0.016 | -0.01  | -0.01  | t | 31787  | KLDLYGKV<br>H               | Sus<br>scrofa                    |
| 1 | 1.00 | 1 | 1 | 0.07  | 0.07   | 0.07   | 0.073  | 0.07   | t | 149106 | SITNPTQ                     | Sus<br>scrofa                    |
| 1 | 1.00 | 1 | 1 | 0     | -0.004 | -0.006 | -0.001 | -0.002 | t | 40159  | LTSAILGL<br>DGTWV           | Oryctola<br>gus<br>cuniculu<br>s |
| 1 | 1.00 | 1 | 1 | -0.04 | -0.038 | -0.047 | -0.033 | -0.041 | t | 136007 | VKEKGMA<br>ALPRL            | Homo<br>sapiens                  |
| 1 | 1.00 | 1 | 1 | -0.03 | -0.022 | -0.038 | -0.033 | -0.032 | t | 14380  | ETFTNKLK<br>EKHTD           | Homo<br>sapiens                  |
| 1 | 1.00 | 1 | 1 | 0.01  | 0.014  | 0.01   | 0.017  | 0.01   | t | 123612 | PPGMIPPP                    | Homo<br>sapiens                  |
| 1 | 1.00 | 1 | 1 | 0.07  | 0.072  | 0.061  | 0.073  | 0.072  | t | 34908  | LAPLGE                      | Homo<br>sapiens                  |

|   |      |   |   |       |        |        |        |        |   |        |                          |                                  |
|---|------|---|---|-------|--------|--------|--------|--------|---|--------|--------------------------|----------------------------------|
| 1 | 1.00 | 1 | 1 | 0.06  | 0.057  | 0.05   | 0.061  | 0.061  | t | 89745  | TTELTAE<br>NQE           | Homo<br>sapiens                  |
| 1 | 1.00 | 1 | 1 | 0.02  | 0.017  | 0.003  | 0.017  | 0.023  | t | 110952 | NDLQTVL<br>G             | Oryctola<br>gus<br>cuniculu<br>s |
| 1 | 1.00 | 1 | 1 | 0     | -0.004 | -0.02  | 0.003  | 0.003  | t | 141618 | DLMNEVL<br>NKMDKKY<br>SA | Oryctola<br>gus<br>cuniculu<br>s |
| 1 | 1.00 | 1 | 1 | 0     | -0.002 | -0.02  | 0.003  | 0.003  | t | 141618 | DLMNEVL<br>NKMDKKY<br>SA | Rattus<br>norvegic<br>us         |
| 1 | 1.00 | 1 | 1 | -0.01 | -0.008 | -0.011 | -0.009 | -0.01  | t | 72413  | WFLDLP                   | Homo<br>sapiens                  |
| 1 | 1.00 | 1 | 1 | 0.03  | 0.03   | 0.021  | 0.034  | 0.03   | t | 135908 | DINTVTTV<br>AQSR         | Homo<br>sapiens                  |
| 1 | 1.00 | 1 | 1 | 0.04  | 0.036  | 0.034  | 0.039  | 0.038  | t | 155744 | SAHSTPS                  | Oryctola<br>gus<br>cuniculu<br>s |
| 1 | 1.00 | 1 | 1 | 0.01  | 0.01   | 0.01   | 0.02   | 0.01   | t | 3985   | AQKKIIAEK<br>T           | Homo<br>sapiens                  |
| 1 | 1.00 | 1 | 1 | 0.07  | 0.067  | 0.064  | 0.07   | 0.07   | t | 50396  | QAYQQGV<br>TVD           | Oryctola<br>gus<br>cuniculu<br>s |
| 1 | 1.00 | 1 | 1 | 0.01  | 0.006  | -0.006 | 0.013  | 0.012  | t | 105412 | NQTKV                    | Oryctola<br>gus<br>cuniculu<br>s |
| 1 | 1.00 | 1 | 1 | 0.04  | 0.04   | 0.027  | 0.04   | 0.042  | t | 75479  | YQELGV                   | Homo<br>sapiens                  |
| 1 | 1.00 | 1 | 1 | 0     | 0.001  | -0.001 | 0.003  | -0.001 | t | 99779  | YACRDI                   | Equus<br>caballus                |
| 1 | 1.00 | 1 | 1 | 0.03  | 0.03   | 0.023  | 0.03   | 0.031  | t | 107702 | YVDGVQV                  | Homo<br>sapiens                  |
| 1 | 1.00 | 1 | 1 | 0.05  | 0.047  | 0.04   | 0.051  | 0.051  | t | 89745  | TTELTAE<br>NQE           | Homo<br>sapiens                  |
| 1 | 1.00 | 1 | 1 | 0.01  | 0.014  | -0.002 | 0.009  | 0.01   | t | 141560 | SDEALPPG<br>SPR          | Mus<br>musculu<br>s              |

|   |      |   |   |       |        |        |       |        |   |        |                  |                       |
|---|------|---|---|-------|--------|--------|-------|--------|---|--------|------------------|-----------------------|
| 1 | 1.00 | 1 | 1 | 0.01  | 0.01   | 0.01   | 0.01  | 0.01   | t | 135506 | VTFPGA           | Oryctolagus cuniculus |
| 1 | 1.00 | 1 | 1 | -0.03 | -0.027 | -0.04  | -0.03 | -0.029 | t | 156553 | YSTCYFIM         | Mus musculus          |
| 1 | 1.00 | 1 | 1 | 0.04  | 0.042  | 0.04   | 0.047 | 0.039  | t | 119670 | WESNGQP E        | Homo sapiens          |
| 1 | 1.00 | 1 | 1 | -0.02 | -0.02  | -0.02  | -0.01 | -0.02  | t | 114948 | SIEFGTNIS K      | Homo sapiens          |
| 1 | 1.00 | 1 | 1 | 0     | -0.003 | -0.002 | 0.001 | -0.003 | t | 103143 | EMIEAVGY RSWPRYF | Homo sapiens          |
| 1 | 1.00 | 1 | 1 | 0.06  | 0.058  | 0.053  | 0.059 | 0.06   | t | 96067  | AETIFD           | Mus musculus          |
| 1 | 1.00 | 1 | 1 | 0.06  | 0.055  | 0.053  | 0.059 | 0.06   | t | 96067  | AETIFD           | Oryctolagus cuniculus |
| 1 | 1.00 | 1 | 1 | 0.06  | 0.058  | 0.053  | 0.059 | 0.06   | t | 96067  | AETIFD           | Mus musculus          |
| 1 | 1.00 | 1 | 1 | 0.01  | 0.007  | 0      | 0.01  | 0.01   | t | 26047  | IFDVTTL          | Oryctolagus cuniculus |
| 1 | 1.00 | 1 | 1 | 0.01  | 0.01   | -0.001 | 0.01  | 0.01   | t | 38700  | LPSAVK           | Mus musculus          |
| 1 | 1.00 | 1 | 1 | 0.05  | 0.048  | 0.041  | 0.043 | 0.05   | t | 110845 | EYMLD            | Mus musculus          |
| 1 | 1.00 | 1 | 1 | 0.05  | 0.048  | 0.041  | 0.043 | 0.05   | t | 110845 | EYMLD            | Mus musculus          |
| 1 | 1.00 | 1 | 1 | 0.05  | 0.048  | 0.041  | 0.043 | 0.05   | t | 110845 | EYMLD            | Mus musculus          |
| 1 | 1.00 | 1 | 1 | 0.05  | 0.048  | 0.041  | 0.043 | 0.05   | t | 110845 | EYMLD            | Mus musculus          |
| 1 | 1.00 | 1 | 1 | 0.05  | 0.048  | 0.041  | 0.043 | 0.05   | t | 110845 | EYMLD            | Mus musculus          |

|   |      |   |   |       |        |        |        |        |   |        |                    |                       |
|---|------|---|---|-------|--------|--------|--------|--------|---|--------|--------------------|-----------------------|
| 1 | 1.00 | 1 | 1 | 0.01  | 0.012  | -0.002 | 0.011  | 0.01   | t | 142383 | AEQIQAE<br>LQKVKA  | Homo sapiens          |
| 1 | 1.00 | 1 | 1 | 0.04  | 0.04   | 0.041  | 0.037  | 0.039  | t | 19607  | GFQYSP             | Homo sapiens          |
| 1 | 1.00 | 1 | 1 | -0.03 | -0.03  | -0.04  | -0.027 | -0.031 | t | 20663  | GKPVVQTI<br>LA     | Homo sapiens          |
| 1 | 1.00 | 1 | 1 | 0.02  | 0.018  | 0.014  | 0.02   | 0.02   | t | 9591   | DPAKA<br>AFD       | Mus musculus          |
| 1 | 1.00 | 1 | 1 | 0.05  | 0.05   | 0.05   | 0.051  | 0.051  | t | 130643 | YSLLEPYT<br>FDP    | Homo sapiens          |
| 1 | 1.00 | 1 | 1 | 0.01  | 0.01   | 0.01   | 0.01   | 0.007  | t | 45004  | NMMKYIS<br>PPIFL   | Oryctolagus cuniculus |
| 1 | 1.00 | 1 | 1 | -0.01 | -0.012 | -0.03  | -0.007 | -0.007 | t | 141771 | VAEREAY<br>LWKQYNP | Rattus norvegicus     |
| 1 | 1.00 | 1 | 1 | -0.01 | -0.012 | -0.01  | -0.009 | -0.013 | t | 130457 | CRQPGNN<br>YC      | Mus musculus          |
| 1 | 1.00 | 1 | 1 | 0.02  | 0.016  | 0.022  | 0.02   | 0.018  | t | 99985  | EFRHDSGY<br>EV     | Oryctolagus cuniculus |
| 1 | 1.00 | 1 | 1 | 0     | 0.002  | 0      | 0.001  | 0      | t | 29126  | ITTYV              | Homo sapiens          |
| 1 | 1.00 | 1 | 1 | -0.01 | -0.01  | -0.01  | -0.008 | -0.011 | t | 157292 | GAIIGLM            | Homo sapiens          |
| 1 | 1.00 | 1 | 1 | 0.01  | 0.012  | 0.012  | 0.011  | 0.009  | t | 52273  | QRVEFL             | Homo sapiens          |
| 1 | 1.00 | 1 | 1 | 0     | 0      | -0.024 | 0.006  | 0.006  | t | 113013 | GSLPQKSQ<br>RSQDEN | Rattus norvegicus     |
| 1 | 1.00 | 1 | 1 | 0     | 0.002  | 0.017  | 0.007  | -0.001 | t | 109251 | GSFFLYS            | Homo sapiens          |

|   |      |   |   |       |        |        |        |        |   |        |                              |                                  |
|---|------|---|---|-------|--------|--------|--------|--------|---|--------|------------------------------|----------------------------------|
| 1 | 1.00 | 1 | 1 | -0.05 | -0.048 | -0.064 | -0.047 | -0.05  | t | 19108  | GDRRKAM<br>FEDIA             | Homo<br>sapiens                  |
| 1 | 1.00 | 1 | 1 | -0.01 | -0.01  | -0.01  | -0.01  | -0.011 | t | 76586  | YYR                          | Mus<br>musculu<br>s              |
| 1 | 1.00 | 1 | 1 | -0.07 | -0.068 | -0.07  | -0.063 | -0.073 | t | 134650 | CRYTPRRN<br>IP               | Homo<br>sapiens                  |
| 1 | 1.00 | 1 | 1 | 0.03  | 0.032  | 0.029  | 0.03   | 0.029  | t | 21631  | GPGEVWV<br>T                 | Homo<br>sapiens                  |
| 1 | 1.00 | 1 | 1 | 0.01  | 0.01   | 0.01   | 0.01   | 0.007  | t | 50929  | QGPGAP                       | Mus<br>musculu<br>s              |
| 1 | 1.00 | 1 | 1 | 0.01  | 0.01   | 0.01   | 0.01   | 0.007  | t | 50929  | QGPGAP                       | Mus<br>musculu<br>s              |
| 1 | 1.00 | 1 | 1 | 0.01  | 0.008  | 0.01   | 0.013  | 0.01   | t | 3382   | ANPPDH                       | Homo<br>sapiens                  |
| 1 | 1.00 | 1 | 1 | 0.04  | 0.037  | 0.034  | 0.04   | 0.038  | t | 133540 | DALVAKA<br>QEVs              | Oryctola<br>gus<br>cuniculu<br>s |
| 1 | 1.00 | 1 | 1 | 0.07  | 0.072  | 0.07   | 0.077  | 0.07   | t | 117547 | KLEVQATD<br>REENKQIA<br>LGTS | Homo<br>sapiens                  |
| 1 | 1.00 | 1 | 1 | 0     | -0.004 | -0.005 | 0.001  | -0.002 | t | 79026  | MSDGAVQ<br>PDGGQPA<br>V      | Oryctola<br>gus<br>cuniculu<br>s |
| 1 | 1.00 | 1 | 1 | -0.01 | -0.008 | -0.017 | -0.003 | -0.01  | t | 144594 | ARGISRTK<br>YW               | Homo<br>sapiens                  |
| 1 | 1.00 | 1 | 1 | 0.03  | 0.03   | 0.03   | 0.033  | 0.03   | t | 38631  | LPPVAD                       | Homo<br>sapiens                  |
| 1 | 1.00 | 1 | 1 | 0.04  | 0.036  | 0.034  | 0.041  | 0.039  | t | 59869  | SNNPE                        | Bos<br>taurus                    |
| 1 | 1.00 | 1 | 1 | -0.01 | -0.014 | -0.01  | -0.007 | -0.01  | t | 105717 | DPSIMAKF                     | Oryctola<br>gus<br>cuniculu<br>s |
| 1 | 1.00 | 1 | 1 | 0.03  | 0.034  | 0.011  | 0.027  | 0.031  | t | 39789  | LTAENTAI                     | Homo<br>sapiens                  |

|   |      |   |   |       |        |        |        |        |   |        |                     |                                  |
|---|------|---|---|-------|--------|--------|--------|--------|---|--------|---------------------|----------------------------------|
| 1 | 1.00 | 1 | 1 | -0.01 | -0.008 | -0.019 | -0.013 | -0.012 | t | 67524  | VAALNRRI<br>QLLEEDL | Homo<br>sapiens                  |
| 1 | 1.00 | 1 | 1 | -0.03 | -0.03  | -0.03  | -0.02  | -0.03  | t | 98845  | KFDKALKA<br>LP      | Homo<br>sapiens                  |
| 1 | 1.00 | 1 | 1 | -0.05 | -0.049 | -0.067 | -0.05  | -0.05  | t | 66075  | TRPHGR              | Mus<br>musculu<br>s              |
| 1 | 1.00 | 1 | 1 | 0.01  | 0.008  | -0.001 | 0.009  | 0.01   | t | 120419 | AVKYTGYT<br>GG      | Mus<br>musculu<br>s              |
| 1 | 1.00 | 1 | 1 | 0     | 0.002  | -0.007 | -0.003 | -0.003 | t | 27650  | INHVVLLV<br>GY      | Homo<br>sapiens                  |
| 1 | 1.00 | 1 | 1 | -0.01 | -0.01  | -0.02  | -0.01  | -0.01  | t | 49993  | PVVAESPK<br>KP      | Mus<br>musculu<br>s              |
| 1 | 1.00 | 1 | 1 | 0.03  | 0.035  | 0.021  | 0.031  | 0.03   | t | 47483  | PFCGESTL<br>YT      | Homo<br>sapiens                  |
| 1 | 1.00 | 1 | 1 | 0.02  | 0.02   | 0.02   | 0.02   | 0.018  | t | 73384  | YALADASL<br>KMAD    | Oryctola<br>gus<br>cuniculu<br>s |
| 1 | 1.00 | 1 | 1 | 0.01  | 0.01   | -0.002 | 0.01   | 0.01   | t | 25622  | IDLTKNA<br>A        | Homo<br>sapiens                  |
| 1 | 1.00 | 1 | 1 | -0.03 | -0.03  | -0.042 | -0.03  | -0.03  | t | 78452  | LNVAHQL<br>A        | Mus<br>musculu<br>s              |
| 1 | 1.00 | 1 | 1 | 0.01  | 0.01   | -0.002 | 0.01   | 0.01   | t | 25623  | IDLTKNA<br>AK       | Homo<br>sapiens                  |
| 1 | 1.00 | 1 | 1 | 0.04  | 0.04   | 0.033  | 0.04   | 0.04   | t | 119478 | KNDK                | Homo<br>sapiens                  |
| 1 | 1.00 | 1 | 1 | -0.03 | -0.032 | -0.042 | -0.03  | -0.03  | t | 100250 | LDVRKQYK<br>RD      | Mus<br>musculu<br>s              |
| 1 | 1.00 | 1 | 1 | 0.04  | 0.04   | 0.04   | 0.04   | 0.039  | t | 118038 | NLNEIKKK<br>D       | Homo<br>sapiens                  |
| 1 | 1.00 | 1 | 1 | 0.05  | 0.048  | 0.05   | 0.043  | 0.045  | t | 134669 | FGFPQE              | Mus<br>musculu<br>s              |

|   |      |   |   |       |        |        |        |       |   |        |                |                    |
|---|------|---|---|-------|--------|--------|--------|-------|---|--------|----------------|--------------------|
| 1 | 1.00 | 1 | 1 | 0.03  | 0.032  | 0.027  | 0.03   | 0.03  | t | 48990  | PQEIPQPQ       | Anas platyrhynchos |
| 1 | 1.00 | 1 | 1 | 0.03  | 0.032  | 0.013  | 0.031  | 0.032 | t | 68745  | VGNYDFWYQ      | Homo sapiens       |
| 1 | 1.00 | 1 | 1 | -0.01 | -0.008 | -0.018 | -0.009 | -0.01 | t | 49993  | PVVAESPKKP     | Homo sapiens       |
| 1 | 1.00 | 1 | 1 | 0.03  | 0.028  | 0.025  | 0.031  | 0.03  | t | 38956  | LQQATRQAQ      | Homo sapiens       |
| 1 | 1.00 | 1 | 1 | 0.03  | 0.028  | 0.025  | 0.031  | 0.03  | t | 38970  | LQRATQQQA      | Homo sapiens       |
| 1 | 1.00 | 1 | 1 | 0.01  | 0.01   | -0.005 | 0.013  | 0.012 | t | 39626  | LSREM          | Homo sapiens       |
| 1 | 1.00 | 1 | 1 | 0     | 0.004  | 0      | 0.007  | 0     | t | 131818 | AKEERRY        | Homo sapiens       |
| 1 | 1.00 | 1 | 1 | 0.01  | 0.012  | 0.01   | 0.017  | 0.01  | t | 134781 | RGDGPFRLLGG    | Homo sapiens       |
| 1 | 1.00 | 1 | 1 | 0.04  | 0.038  | 0.04   | 0.039  | 0.04  | t | 110962 | PIDVVDP        | Mus musculus       |
| 1 | 1.00 | 1 | 1 | 0.03  | 0.032  | 0.016  | 0.03   | 0.03  | t | 140080 | YEKEPTPTRTPDQ  | Rattus norvegicus  |
| 1 | 1.00 | 1 | 1 | 0.03  | 0.032  | 0.016  | 0.03   | 0.03  | t | 140080 | YEKEPTPTRTPDQ  | Rattus norvegicus  |
| 1 | 1.00 | 1 | 1 | 0.07  | 0.078  | 0.07   | 0.07   | 0.067 | t | 136365 | IDSNHVYKDFLT   | Gallus gallus      |
| 1 | 1.00 | 1 | 1 | -0.01 | -0.01  | -0.017 | -0.004 | -0.01 | t | 109241 | GRTGPAGAA      | Rattus norvegicus  |
| 1 | 1.00 | 1 | 1 | 0.05  | 0.053  | 0.045  | 0.057  | 0.051 | t | 119749 | ALQEACEAYLVGLF | Mus musculus       |

|   |      |   |   |       |        |        |        |        |   |        |                      |                                  |
|---|------|---|---|-------|--------|--------|--------|--------|---|--------|----------------------|----------------------------------|
| 1 | 1.00 | 1 | 1 | 0     | 0.004  | -0.005 | 0.003  | 0      | t | 4024   | AQPGYPW<br>PLYGNEG   | Homo<br>sapiens                  |
| 1 | 1.00 | 1 | 1 | 0.06  | 0.058  | 0.057  | 0.059  | 0.06   | t | 61727  | STLLPELS<br>ETPNAT   | Mus<br>musculu<br>s              |
| 1 | 1.00 | 1 | 1 | 0.06  | 0.06   | 0.053  | 0.06   | 0.058  | t | 121775 | RAPVSQA<br>AKFDPSTK  | Homo<br>sapiens                  |
| 1 | 1.00 | 1 | 1 | 0.02  | 0.02   | 0.01   | 0.023  | 0.02   | t | 52010  | QQEGAQQ<br>PAPATA    | Homo<br>sapiens                  |
| 1 | 1.00 | 1 | 1 | 0.02  | 0.023  | 0.016  | 0.02   | 0.02   | t | 102818 | SPYTDRYK<br>F        | Mus<br>musculu<br>s              |
| 1 | 1.00 | 1 | 1 | -0.03 | -0.026 | -0.045 | -0.027 | -0.028 | t | 136080 | RAGTDEGF<br>G        | Homo<br>sapiens                  |
| 1 | 1.00 | 1 | 1 | 0.04  | 0.042  | 0.038  | 0.047  | 0.04   | t | 125201 | PPQTEHIE<br>L        | Homo<br>sapiens                  |
| 1 | 1.00 | 1 | 1 | 0.03  | 0.03   | 0.03   | 0.026  | 0.03   | t | 131365 | ATLVCLI              | Homo<br>sapiens                  |
| 1 | 1.00 | 1 | 1 | 0.02  | 0.02   | 0.01   | 0.02   | 0.019  | t | 10496  | DTTIP                | Mus<br>musculu<br>s              |
| 1 | 1.00 | 1 | 1 | 0     | 0.002  | -0.016 | 0.001  | 0.002  | t | 27379  | ILTGGKSK<br>QTEGLLLL | Homo<br>sapiens                  |
| 1 | 1.00 | 1 | 1 | -0.01 | -0.006 | -0.01  | -0.003 | -0.01  | t | 107659 | VKFNWYV              | Homo<br>sapiens                  |
| 1 | 1.00 | 1 | 1 | 0.01  | 0.006  | 0.001  | 0.009  | 0.01   | t | 800    | ADYHRVM<br>Y         | Oryctola<br>gus<br>cuniculu<br>s |
| 1 | 1.00 | 1 | 1 | 0.03  | 0.028  | 0.023  | 0.033  | 0.03   | t | 125565 | STDDYASF<br>SRAL     | Mus<br>musculu<br>s              |
| 1 | 1.00 | 1 | 1 | 0.04  | 0.037  | 0.035  | 0.04   | 0.04   | t | 47096  | PDFYGDPL<br>E        | Mus<br>musculu<br>s              |
| 1 | 1.00 | 1 | 1 | 0.03  | 0.042  | 0.032  | 0.03   | 0.027  | t | 4702   | ASQKIQLV             | Pan<br>troglody<br>tes           |



|   |      |   |   |       |        |        |        |        |   |        |                    |                                  |
|---|------|---|---|-------|--------|--------|--------|--------|---|--------|--------------------|----------------------------------|
| 1 | 1.00 | 1 | 1 | 0.05  | 0.05   | 0.048  | 0.05   | 0.05   | t | 10320  | DTDSGYD<br>VPDY    | Mus<br>musculu<br>s              |
| 1 | 1.00 | 1 | 1 | -0.01 | -0.012 | -0.026 | -0.007 | -0.008 | t | 38946  | LQPGKTS            | Mus<br>musculu<br>s              |
| 1 | 1.00 | 1 | 1 | 0.01  | 0.014  | 0.01   | 0.017  | 0.007  | t | 122892 | RSILPYGDS<br>MDRIE | Homo<br>sapiens                  |
| 1 | 1.00 | 1 | 1 | 0.03  | 0.028  | 0.022  | 0.033  | 0.032  | t | 111661 | QAEP               | Mus<br>musculu<br>s              |
| 1 | 1.00 | 1 | 1 | 0.06  | 0.06   | 0.063  | 0.066  | 0.06   | t | 142225 | LNDSSEEE<br>DEID   | Homo<br>sapiens                  |
| 1 | 1.00 | 1 | 1 | 0     | -0.002 | 0.001  | -0.001 | -0.001 | t | 56788  | SAFVFPTK<br>D      | Mus<br>musculu<br>s              |
| 1 | 1.00 | 1 | 1 | 0     | 0      | -0.002 | 0      | -0.003 | t | 57648  | SETLKS             | Mus<br>musculu<br>s              |
| 1 | 1.00 | 1 | 1 | 0.02  | 0.02   | 0.009  | 0.02   | 0.02   | t | 49703  | PTLLGEAT           | Oryctola<br>gus<br>cuniculu<br>s |
| 1 | 1.00 | 1 | 1 | 0.02  | 0.018  | 0.013  | 0.02   | 0.019  | t | 95047  | VEVPGSQ<br>HIDSQ   | Oryctola<br>gus<br>cuniculu<br>s |
| 1 | 1.00 | 1 | 1 | 0.02  | 0.018  | 0.013  | 0.02   | 0.019  | t | 95047  | VEVPGSQ<br>HIDSQ   | Oryctola<br>gus<br>cuniculu<br>s |
| 1 | 1.00 | 1 | 1 | 0     | 0      | -0.005 | -0.002 | -0.002 | t | 100085 | GSWCVPK<br>PGVSD   | Homo<br>sapiens                  |
| 1 | 1.00 | 1 | 1 | 0     | -0.002 | 0.003  | -0.001 | -0.002 | t | 122138 | LKKDV              | Mus<br>musculu<br>s              |
| 1 | 1.00 | 1 | 1 | 0.01  | 0.01   | 0.01   | 0.01   | 0.01   | t | 127906 | YVKLF PNS<br>LD    | Homo<br>sapiens                  |
| 1 | 1.00 | 1 | 1 | 0.01  | 0.014  | 0.002  | 0.01   | 0.009  | t | 140594 | RELVLAGTI          | Cavia<br>porcellu<br>s           |

|   |      |   |   |       |        |        |        |        |   |        |                |                                  |
|---|------|---|---|-------|--------|--------|--------|--------|---|--------|----------------|----------------------------------|
| 1 | 1.00 | 1 | 1 | 0     | -0.002 | -0.017 | -0.007 | 0      | t | 67606  | VAGLQND<br>PT  | Mus<br>musculu<br>s              |
| 1 | 1.00 | 1 | 1 | 0.01  | 0.006  | 0.001  | 0.009  | 0.01   | t | 62907  | TALDTSNK       | Oryctola<br>gus<br>cuniculu<br>s |
| 1 | 1.00 | 1 | 1 | 0.04  | 0.042  | 0.033  | 0.043  | 0.04   | t | 62458  | SWGSPKV<br>TKD | Homo<br>sapiens                  |
| 1 | 1.00 | 1 | 1 | 0.02  | 0.018  | 0.02   | 0.023  | 0.022  | t | 49295  | PSAPPL         | Homo<br>sapiens                  |
| 1 | 1.00 | 1 | 1 | 0.04  | 0.04   | 0.033  | 0.04   | 0.041  | t | 78276  | TEVPVEKT       | Homo<br>sapiens                  |
| 1 | 1.00 | 1 | 1 | -0.02 | -0.016 | -0.02  | -0.013 | -0.02  | t | 121875 | SRERSKDK       | Homo<br>sapiens                  |
| 1 | 1.00 | 1 | 1 | 0.04  | 0.04   | 0.045  | 0.04   | 0.037  | t | 28250  | IQWDGYA<br>RQ  | Mus<br>musculu<br>s              |
| 1 | 1.00 | 1 | 1 | 0.01  | 0.006  | 0.001  | 0.013  | 0.012  | t | 70039  | VMYASSGI<br>GP | Oryctola<br>gus<br>cuniculu<br>s |
| 1 | 1.00 | 1 | 1 | 0.01  | 0.008  | -0.002 | 0.013  | 0.011  | t | 107126 | GAPGTPG<br>PQG | Mus<br>musculu<br>s              |
| 1 | 1.00 | 1 | 1 | 0     | 0.002  | 0      | 0.007  | -0.001 | t | 119669 | VSWNSGA<br>L   | Homo<br>sapiens                  |
| 1 | 1.00 | 1 | 1 | 0.02  | 0.02   | 0.02   | 0.019  | 0.02   | t | 35994  | LFTGHL         | Homo<br>sapiens                  |
| 1 | 1.00 | 1 | 1 | -0.03 | -0.038 | -0.03  | -0.03  | -0.029 | t | 110126 | YIK            | Mus<br>musculu<br>s              |
| 1 | 1.00 | 1 | 1 | -0.03 | -0.027 | -0.043 | -0.03  | -0.031 | t | 65779  | TPTAWKP<br>N   | Mus<br>musculu<br>s              |
| 1 | 1.00 | 1 | 1 | 0.07  | 0.069  | 0.069  | 0.071  | 0.07   | t | 66316  | TSLSVS         | Homo<br>sapiens                  |
| 1 | 1.00 | 1 | 1 | -0.02 | -0.018 | -0.027 | -0.013 | -0.019 | t | 144600 | CQREFALK<br>HL | Homo<br>sapiens                  |

|   |      |   |   |       |        |        |        |        |   |        |                      |              |
|---|------|---|---|-------|--------|--------|--------|--------|---|--------|----------------------|--------------|
| 1 | 1.00 | 1 | 1 | 0.03  | 0.032  | 0.029  | 0.027  | 0.028  | t | 75761  | YSIEF                | Homo sapiens |
| 1 | 1.00 | 1 | 1 | 0.07  | 0.072  | 0.065  | 0.071  | 0.07   | t | 19057  | GDN                  | Homo sapiens |
| 1 | 1.00 | 1 | 1 | -0.01 | -0.006 | -0.017 | -0.007 | -0.011 | t | 115631 | NVRFSDG<br>GFTC      | Homo sapiens |
| 1 | 1.00 | 1 | 1 | 0.02  | 0.022  | 0.011  | 0.02   | 0.019  | t | 110733 | VGENVPD<br>DLYIKGSG  | Homo sapiens |
| 1 | 1.00 | 1 | 1 | 0.02  | 0.02   | 0.017  | 0.02   | 0.02   | t | 11882  | EESPLGFS<br>PE       | Mus musculus |
| 1 | 1.00 | 1 | 1 | 0.01  | 0.012  | -0.002 | 0.013  | 0.01   | t | 80018  | RQTDR                | Homo sapiens |
| 1 | 1.00 | 1 | 1 | 0.01  | 0.012  | -0.002 | 0.013  | 0.01   | t | 80018  | RQTDR                | Homo sapiens |
| 1 | 1.00 | 1 | 1 | -0.01 | -0.007 | -0.014 | -0.01  | -0.013 | t | 50177  | PYTSTLLP             | Mus musculus |
| 1 | 1.00 | 1 | 1 | -0.01 | -0.01  | -0.01  | -0.007 | -0.01  | t | 25094  | HVSPTHYV<br>P        | Homo sapiens |
| 1 | 1.00 | 1 | 1 | 0.01  | 0.012  | 0.01   | 0.013  | 0.007  | t | 47045  | PCSICSNN<br>PTCWAICK | Homo sapiens |
| 1 | 1.00 | 1 | 1 | 0.01  | 0.014  | 0.025  | 0.017  | 0.01   | t | 103843 | DF                   | Homo sapiens |
| 1 | 1.00 | 1 | 1 | 0.03  | 0.028  | 0.014  | 0.027  | 0.031  | t | 915    | AEGDDPA<br>KA        | Mus musculus |
| 1 | 1.00 | 1 | 1 | 0     | 0.004  | 0      | 0.007  | -0.002 | t | 130289 | VSAAPGSA<br>APAAGSA  | Homo sapiens |

|   |      |   |   |       |        |        |        |        |   |        |                      |                                |
|---|------|---|---|-------|--------|--------|--------|--------|---|--------|----------------------|--------------------------------|
| 1 | 1.00 | 1 | 1 | -0.01 | -0.014 | -0.025 | -0.011 | -0.01  | t | 48912  | PPSDIKGK<br>YVKEVEVK | Oryctola<br>gus<br>cunicu<br>s |
| 1 | 1.00 | 1 | 1 | 0.03  | 0.033  | 0.033  | 0.03   | 0.029  | t | 49878  | PVGTPE               | Mus<br>musculu<br>s            |
| 1 | 1.00 | 1 | 1 | 0.03  | 0.026  | 0.028  | 0.029  | 0.028  | t | 9819   | DPYSPSQD<br>PDRRDY   | Oryctola<br>gus<br>cunicu<br>s |
| 1 | 1.00 | 1 | 1 | 0.06  | 0.06   | 0.056  | 0.06   | 0.06   | t | 144925 | NETIYNTTL<br>K       | Homo<br>sapiens                |
| 1 | 1.00 | 1 | 1 | -0.01 | -0.013 | -0.013 | -0.01  | -0.012 | t | 66668  | TTKAPTQA<br>AK       | Oryctola<br>gus<br>cunicu<br>s |
| 1 | 1.00 | 1 | 1 | 0.01  | 0.014  | -0.006 | 0.009  | 0.011  | t | 99057  | WQIPEQS<br>QCQAI     | Homo<br>sapiens                |
| 1 | 1.00 | 1 | 1 | -0.01 | -0.014 | -0.015 | -0.01  | -0.012 | t | 100032 | FEPNTVKA<br>HAAY     | Oryctola<br>gus<br>cunicu<br>s |
| 1 | 1.00 | 1 | 1 | 0.03  | 0.029  | 0.017  | 0.027  | 0.03   | t | 25525  | ICSISPSQG<br>CQF     | Homo<br>sapiens                |
| 1 | 1.00 | 1 | 1 | 0.03  | 0.034  | 0.017  | 0.027  | 0.03   | t | 25525  | ICSISPSQG<br>CQF     | Homo<br>sapiens                |
| 1 | 1.00 | 1 | 1 | 0.03  | 0.032  | 0.017  | 0.027  | 0.03   | t | 25525  | ICSISPSQG<br>CQF     | Homo<br>sapiens                |
| 1 | 1.00 | 1 | 1 | 0.04  | 0.036  | 0.04   | 0.033  | 0.037  | t | 122872 | PLTLEL               | Oryctola<br>gus<br>cunicu<br>s |
| 1 | 1.00 | 1 | 1 | 0.02  | 0.018  | 0.02   | 0.023  | 0.022  | t | 49295  | PSAPPL               | Homo<br>sapiens                |
| 1 | 1.00 | 1 | 1 | 0.02  | 0.018  | 0.02   | 0.023  | 0.022  | t | 49295  | PSAPPL               | Homo<br>sapiens                |

|   |      |   |   |       |        |        |        |        |   |        |                    |                                  |
|---|------|---|---|-------|--------|--------|--------|--------|---|--------|--------------------|----------------------------------|
| 1 | 1.00 | 1 | 1 | 0     | 0      | -0.001 | 0.011  | 0      | t | 30661  | KEVPALTA<br>VETGAT | Homo<br>sapiens                  |
| 1 | 1.00 | 1 | 1 | 0.05  | 0.048  | 0.043  | 0.049  | 0.05   | t | 96286  | FDVTTL             | Mus<br>musculu<br>s              |
| 1 | 1.00 | 1 | 1 | 0.05  | 0.048  | 0.043  | 0.049  | 0.05   | t | 96286  | FDVTTL             | Mus<br>musculu<br>s              |
| 1 | 1.00 | 1 | 1 | 0.04  | 0.038  | 0.028  | 0.043  | 0.042  | t | 95416  | GLQNDP             | Mus<br>musculu<br>s              |
| 1 | 1.00 | 1 | 1 | 0.02  | 0.022  | 0.013  | 0.023  | 0.019  | t | 144682 | HLVGSALS<br>DP     | Homo<br>sapiens                  |
| 1 | 1.00 | 1 | 1 | 0.01  | 0.01   | 0.01   | 0.01   | 0.008  | t | 70387  | VPNLRGDL<br>QV     | Cavia<br>porcellu<br>s           |
| 1 | 1.00 | 1 | 1 | 0.03  | 0.03   | 0.018  | 0.03   | 0.03   | t | 72544  | WHLKSIG<br>QLVIE   | Mus<br>musculu<br>s              |
| 1 | 1.00 | 1 | 1 | 0.03  | 0.027  | 0.018  | 0.03   | 0.03   | t | 72544  | WHLKSIG<br>QLVIE   | Oryctola<br>gus<br>cuniculu<br>s |
| 1 | 1.00 | 1 | 1 | 0.03  | 0.032  | 0.023  | 0.033  | 0.03   | t | 62458  | SWGSPKV<br>TKD     | Homo<br>sapiens                  |
| 1 | 1.00 | 1 | 1 | -0.02 | -0.02  | -0.023 | -0.017 | -0.02  | t | 50016  | PVWARPD<br>Y       | Homo<br>sapiens                  |
| 1 | 1.00 | 1 | 1 | 0.01  | 0.01   | -0.004 | 0.01   | 0.01   | t | 102943 | YGCYCGLG<br>G      | Mus<br>musculu<br>s              |
| 1 | 1.00 | 1 | 1 | -0.03 | -0.032 | -0.046 | -0.029 | -0.029 | t | 23455  | GYSDRVRS<br>ITLGNS | Homo<br>sapiens                  |
| 1 | 1.00 | 1 | 1 | 0.08  | 0.08   | 0.08   | 0.08   | 0.078  | t | 135570 | LFDASDSS<br>S      | Oryctola<br>gus<br>cuniculu<br>s |
| 1 | 1.00 | 1 | 1 | 0     | 0      | -0.012 | 0      | 0      | t | 1477   | AGDR               | Mus<br>musculu<br>s              |

|   |      |   |   |       |        |        |        |        |   |        |                      |                     |
|---|------|---|---|-------|--------|--------|--------|--------|---|--------|----------------------|---------------------|
| 1 | 1.00 | 1 | 1 | 0.04  | 0.038  | 0.03   | 0.039  | 0.04   | t | 9669   | DPLLGNQS             | Anas platyrhynchos  |
| 1 | 1.00 | 1 | 1 | 0     | 0.004  | 0      | 0.001  | -0.003 | t | 134694 | ISPFSCCLK            | MD                  |
| 1 | 1.00 | 1 | 1 | 0.03  | 0.034  | 0.025  | 0.037  | 0.03   | t | 122956 | YYVFFEEQ<br>EDEIIGFG | Homo sapiens        |
| 1 | 1.00 | 1 | 1 | 0.04  | 0.043  | 0.039  | 0.04   | 0.039  | t | 122113 | IIASTEKL             | Mus musculus        |
| 1 | 1.00 | 1 | 1 | -0.01 | -0.01  | -0.02  | -0.01  | -0.011 | t | 112897 | AATGAAT<br>AAA       | Mus musculus        |
| 1 | 1.00 | 1 | 1 | -0.01 | -0.007 | -0.019 | -0.007 | -0.01  | t | 66101  | TRSQSGLT<br>FA       | Capra hircus        |
| 1 | 1.00 | 1 | 1 | 0.02  | 0.025  | 0.005  | 0.021  | 0.022  | t | 97069  | VQPQVNK<br>EIR       | Homo sapiens(human) |
| 1 | 1.00 | 1 | 1 | 0.02  | 0.018  | 0.012  | 0.023  | 0.022  | t | 111176 | CTSICKYPD<br>YIKMVS  | Mus musculus        |
| 1 | 1.00 | 1 | 1 | -0.01 | -0.007 | -0.017 | -0.01  | -0.01  | t | 63832  | TGGAGYFY             | Equus caballus      |
| 1 | 1.00 | 1 | 1 | 0.04  | 0.043  | 0.031  | 0.04   | 0.04   | t | 99934  | DFLSTEEKE<br>F       | Mus musculus        |
| 1 | 1.00 | 1 | 1 | 0.01  | 0.012  | 0.005  | 0.011  | 0.008  | t | 30697  | KFAENVG              | Homo sapiens        |
| 1 | 1.00 | 1 | 1 | 0.01  | 0.012  | 0.004  | 0.011  | 0.01   | t | 57215  | SDIEKKVN             | Homo sapiens        |
| 1 | 1.00 | 1 | 1 | -0.01 | -0.008 | -0.016 | -0.003 | -0.009 | t | 144823 | YWEGSGI<br>GAI       | Homo sapiens        |

|   |      |   |   |      |       |        |       |        |   |        |                             |                                  |
|---|------|---|---|------|-------|--------|-------|--------|---|--------|-----------------------------|----------------------------------|
| 1 | 1.00 | 1 | 1 | 0.01 | 0.009 | 0      | 0.01  | 0.009  | t | 3863   | APTIEAIR<br>PIQVA           | Anas<br>platyrh<br>nchos         |
| 1 | 1.00 | 1 | 1 | 0.02 | 0.024 | 0.02   | 0.027 | 0.02   | t | 123618 | PPPGLAPG                    | Homo<br>sapiens                  |
| 1 | 1.00 | 1 | 1 | 0.01 | 0.013 | 0.01   | 0.01  | 0.009  | t | 137401 | FEDVW                       | Mus<br>musculu<br>s              |
| 1 | 1.00 | 1 | 1 | 0.06 | 0.062 | 0.053  | 0.06  | 0.058  | t | 142486 | YNQYTEEE<br>K               | Homo<br>sapiens                  |
| 1 | 1.00 | 1 | 1 | 0.02 | 0.022 | 0.02   | 0.021 | 0.019  | t | 58129  | SGLTSLF                     | Homo<br>sapiens                  |
| 1 | 1.00 | 1 | 1 | 0    | 0.002 | -0.005 | 0.003 | 0      | t | 159063 | RKAADTFN<br>FKTFFHT         | Homo<br>sapiens                  |
| 1 | 1.00 | 1 | 1 | 0.03 | 0.025 | 0.02   | 0.03  | 0.03   | t | 127786 | QEPGNPSE<br>FEAD            | Trichosu<br>rus<br>vulpecul<br>a |
| 1 | 1.00 | 1 | 1 | 0.02 | 0.018 | 0.015  | 0.023 | 0.02   | t | 6067   | CCNLEPEA<br>RKVISS          | Homo<br>sapiens                  |
| 1 | 1.00 | 1 | 1 | 0.03 | 0.034 | 0.034  | 0.037 | 0.03   | t | 122932 | VCTPKSDE<br>FNPCEDIM<br>GYK | Homo<br>sapiens                  |
| 1 | 1.00 | 1 | 1 | 0    | 0.002 | 0      | 0     | -0.005 | t | 105206 | GAIIGLMV<br>GGVV            | Homo<br>sapiens                  |
| 1 | 1.00 | 1 | 1 | 0.03 | 0.022 | 0.019  | 0.03  | 0.03   | t | 53011  | QYNQLST<br>GLQEA            | Mus<br>musculu<br>s              |
| 1 | 1.00 | 1 | 1 | 0.01 | 0.012 | 0.003  | 0.017 | 0.01   | t | 156799 | VYATRSSA<br>VRLRSSV         | Homo<br>sapiens                  |
| 1 | 1.00 | 1 | 1 | 0.02 | 0.022 | 0.008  | 0.021 | 0.02   | t | 142382 | AEDAAEEA<br>KEAAKK          | Homo<br>sapiens                  |
| 1 | 1.00 | 1 | 1 | 0    | 0.002 | 0      | 0.007 | 0      | t | 118535 | NGNLQLR<br>NKEVT            | Homo<br>sapiens                  |

|   |      |   |   |       |        |        |        |        |   |        |                             |                       |
|---|------|---|---|-------|--------|--------|--------|--------|---|--------|-----------------------------|-----------------------|
| 1 | 1.00 | 1 | 1 | 0     | -0.002 | -0.008 | -0.001 | -0.001 | t | 21883  | GQHPAKSM                    | Anas platyrhynchos    |
| 1 | 1.00 | 1 | 1 | 0     | 0.004  | -0.005 | 0.007  | 0      | t | 122956 | YYVFFEEQ<br>EDEIIGFG        | Homo sapiens          |
| 1 | 1.00 | 1 | 1 | 0     | 0.002  | -0.005 | 0.007  | 0      | t | 106634 | LVGPRGER<br>GFP             | Homo sapiens          |
| 1 | 1.00 | 1 | 1 | 0.02  | 0.022  | 0.013  | 0.027  | 0.021  | t | 122328 | EEYHLYKD<br>GHLPISEFALLV    | Homo sapiens          |
| 1 | 1.00 | 1 | 1 | 0     | 0.002  | 0      | 0.007  | 0      | t | 118536 | NITDHGSLI<br>YSFSECAF       | Homo sapiens          |
| 1 | 1.00 | 1 | 1 | 0.04  | 0.042  | 0.034  | 0.041  | 0.039  | t | 133540 | DALVAKA<br>QEVs             | Homo sapiens          |
| 1 | 1.00 | 1 | 1 | 0.05  | 0.046  | 0.048  | 0.053  | 0.051  | t | 99737  | TVKVGd                      | Oryctolagus cuniculus |
| 1 | 1.00 | 1 | 1 | 0     | -0.003 | -0.01  | 0.001  | 0.002  | t | 81048  | DIKLTITGP<br>G              | Homo sapiens          |
| 1 | 1.00 | 1 | 1 | -0.01 | -0.01  | -0.02  | 0      | -0.008 | t | 52184  | QRAKEALD<br>KYELENH         | Homo sapiens          |
| 1 | 1.00 | 1 | 1 | 0.02  | 0.022  | 0.009  | 0.021  | 0.02   | t | 68272  | VELKIKIAS<br>GFGPLI         | Homo sapiens          |
| 1 | 1.00 | 1 | 1 | 0.01  | 0.009  | 0.003  | 0.01   | 0.008  | t | 56768  | SAEYEKSK<br>VNKYLKTI<br>MPF | Equus caballus        |
| 1 | 1.00 | 1 | 1 | 0.01  | 0.008  | -0.004 | 0.007  | 0.01   | t | 49450  | PSNQDSF<br>QWQ              | Mus musculus          |
| 1 | 1.00 | 1 | 1 | -0.05 | -0.05  | -0.057 | -0.053 | -0.05  | t | 46987  | PAVFK                       | Homo sapiens          |



|   |      |   |   |       |        |        |       |        |   |        |                 |                       |
|---|------|---|---|-------|--------|--------|-------|--------|---|--------|-----------------|-----------------------|
| 1 | 1.00 | 1 | 1 | 0.02  | 0.019  | 0.023  | 0.021 | 0.02   | t | 25694  | IDTTIM          | Homo sapiens          |
| 1 | 1.00 | 1 | 1 | 0.01  | 0.013  | -0.002 | 0.016 | 0.012  | t | 125209 | QFQIHGPR        | Mus musculus          |
| 1 | 1.00 | 1 | 1 | 0.02  | 0.018  | 0.02   | 0.02  | 0.02   | t | 117344 | PPGMRPP         | Mus musculus          |
| 1 | 1.00 | 1 | 1 | 0.02  | 0.02   | 0.02   | 0.02  | 0.02   | t | 117344 | PPGMRPP         | Homo sapiens          |
| 1 | 1.00 | 1 | 1 | 0.01  | 0.012  | -0.002 | 0.011 | 0.01   | t | 142391 | DAANIAH QKWLKAT | Homo sapiens          |
| 1 | 1.00 | 1 | 1 | 0     | 0      | 0      | 0     | -0.002 | t | 74415  | YIWPRND YDG     | Mus musculus          |
| 1 | 1.00 | 1 | 1 | -0.01 | -0.01  | -0.01  | -0.01 | -0.011 | t | 131314 | TFLTVPN         | Homo sapiens          |
| 1 | 1.00 | 1 | 1 | 0.05  | 0.054  | 0.045  | 0.053 | 0.048  | t | 118133 | SESQTLDK VYQM   | Homo sapiens          |
| 1 | 1.00 | 1 | 1 | 0.02  | 0.016  | 0.011  | 0.017 | 0.018  | t | 79622  | NYARTGG QVTAG   | Oryctolagus cuniculus |
| 1 | 1.00 | 1 | 1 | 0.01  | 0.008  | -0.004 | 0.009 | 0.01   | t | 133546 | DSARAAY         | Mus musculus          |
| 1 | 1.00 | 1 | 1 | 0.02  | 0.024  | 0.027  | 0.021 | 0.014  | t | 5249   | AVAEAEG G       | Homo sapiens          |
| 1 | 1.00 | 1 | 1 | -0.02 | -0.02  | -0.027 | -0.02 | -0.02  | t | 121823 | RTVLVSM NY      | Mus musculus          |
| 1 | 1.00 | 1 | 1 | 0.03  | 0.029  | 0.036  | 0.031 | 0.029  | t | 8259   | DFELIK          | Homo sapiens          |
| 1 | 1.00 | 1 | 1 | 0.03  | 0.03   | 0.036  | 0.031 | 0.029  | t | 8259   | DFELIK          | Homo sapiens          |
| 1 | 1.00 | 1 | 1 | 0     | -0.003 | -0.002 | 0     | 0      | t | 36834  | LKEYKDK         | Oryctolagus cuniculus |

|   |      |   |   |       |        |        |        |        |   |        |                     |                          |
|---|------|---|---|-------|--------|--------|--------|--------|---|--------|---------------------|--------------------------|
| 1 | 1.00 | 1 | 1 | 0.07  | 0.07   | 0.07   | 0.07   | 0.069  | t | 107107 | EAIQP               | Rattus<br>norvegicus     |
| 1 | 1.00 | 1 | 1 | 0     | 0.002  | -0.002 | 0.003  | 0      | t | 131580 | PDRFSGS             | Homo<br>sapiens          |
| 1 | 1.00 | 1 | 1 | 0.03  | 0.022  | 0.022  | 0.029  | 0.03   | t | 110964 | PNLKLNN<br>GTDYK    | Macaca                   |
| 1 | 1.00 | 1 | 1 | 0.03  | 0.03   | 0.025  | 0.036  | 0.029  | t | 13986  | EREVSVPA            | Homo<br>sapiens          |
| 1 | 1.00 | 1 | 1 | -0.04 | -0.04  | -0.04  | -0.036 | -0.041 | t | 119607 | KTHTCPPC            | Homo<br>sapiens          |
| 1 | 1.00 | 1 | 1 | -0.01 | -0.012 | -0.021 | -0.011 | -0.01  | t | 58402  | SHRELWAK            | Mus<br>musculus          |
| 1 | 1.00 | 1 | 1 | -0.01 | -0.024 | -0.021 | -0.011 | -0.01  | t | 58402  | SHRELWAK            | Macaca<br>mulatta        |
| 1 | 1.00 | 1 | 1 | 0     | 0      | -0.012 | 0.01   | 0.003  | t | 106738 | QKRAAYD<br>QYGHAAFE | Homo<br>sapiens          |
| 1 | 1.00 | 1 | 1 | 0     | 0.008  | 0      | 0      | -0.002 | t | 156946 | QLLYGS              | Gallus<br>gallus         |
| 1 | 1.00 | 1 | 1 | -0.01 | -0.016 | -0.008 | -0.01  | -0.013 | t | 5109   | ATPYHPPA<br>TP      | Oryctolagus<br>cuniculus |
| 1 | 1.00 | 1 | 1 | 0.04  | 0.04   | 0.04   | 0.044  | 0.04   | t | 135959 | LTRAYAKD<br>VKFG    | Homo<br>sapiens          |
| 1 | 1.00 | 1 | 1 | -0.03 | -0.028 | -0.032 | -0.029 | -0.032 | t | 46713  | NYTIFKIRM           | Homo<br>sapiens          |
| 1 | 1.00 | 1 | 1 | 0     | 0      | -0.007 | 0      | -0.002 | t | 133664 | PPPPPPPP<br>PP      | Mus<br>musculus          |
| 1 | 1.00 | 1 | 1 | 0.02  | 0.024  | 0.007  | 0.017  | 0.021  | t | 75541  | YQQYPQQ             | Homo<br>sapiens          |
| 1 | 1.00 | 1 | 1 | -0.02 | -0.021 | -0.024 | -0.019 | -0.022 | t | 30294  | KEAIVTK             | Bos<br>taurus            |

|   |      |   |   |       |        |        |        |        |   |        |                          |                                  |
|---|------|---|---|-------|--------|--------|--------|--------|---|--------|--------------------------|----------------------------------|
| 1 | 1.00 | 1 | 1 | 0     | 0.004  | -0.005 | 0.003  | 0      | t | 36463  | LIANCASIL<br>CKCYTT      | Homo<br>sapiens                  |
| 1 | 1.00 | 1 | 1 | 0.01  | 0.006  | 0.01   | 0.013  | 0.01   | t | 105937 | LPNIEADV                 | Oryctola<br>gus<br>cuniculu<br>s |
| 1 | 1.00 | 1 | 1 | 0.01  | 0.01   | 0.003  | 0.01   | 0.01   | t | 153425 | MQIFVKTL<br>TGKTITL      | Mus<br>musculu<br>s              |
| 1 | 1.00 | 1 | 1 | 0.03  | 0.028  | 0.017  | 0.029  | 0.03   | t | 63089  | TCPDKKST<br>A            | Mus<br>musculu<br>s              |
| 1 | 1.00 | 1 | 1 | 0.02  | 0.02   | 0.01   | 0.02   | 0.02   | t | 63238  | TDSQDS                   | Oryctola<br>gus<br>cuniculu<br>s |
| 1 | 1.00 | 1 | 1 | 0.01  | 0.008  | 0.008  | 0.009  | 0.01   | t | 97167  | AANYTTAV                 | Mus<br>musculu<br>s              |
| 1 | 1.00 | 1 | 1 | 0.01  | 0.008  | 0.008  | 0.009  | 0.01   | t | 97167  | AANYTTAV                 | Mus<br>musculu<br>s              |
| 1 | 1.00 | 1 | 1 | -0.06 | -0.058 | -0.067 | -0.053 | -0.061 | t | 107828 | ERGLKGHR<br>GFT          | Homo<br>sapiens                  |
| 1 | 1.00 | 1 | 1 | 0     | 0      | 0      | 0.006  | -0.002 | t | 868    | AEEAFDL<br>WNECAKA<br>CV | Homo<br>sapiens                  |
| 1 | 1.00 | 1 | 1 | 0.03  | 0.03   | 0.021  | 0.03   | 0.03   | t | 8646   | DIGDIVRG<br>KDLY         | Homo<br>sapiens                  |
| 1 | 1.00 | 1 | 1 | -0.01 | -0.008 | -0.022 | -0.009 | -0.01  | t | 12422  | EIDLTNKN<br>AAKLRGD      | Homo<br>sapiens                  |
| 1 | 1.00 | 1 | 1 | 0.01  | 0.013  | 0.006  | 0.01   | 0.01   | t | 29103  | ITTATGY                  | Felis<br>catus                   |
| 1 | 1.00 | 1 | 1 | -0.01 | -0.014 | -0.02  | -0.007 | -0.01  | t | 11313  | EDERTLTK                 | Oryctola<br>gus<br>cuniculu<br>s |
| 1 | 1.00 | 1 | 1 | 0     | -0.002 | 0      | 0.007  | 0      | t | 123570 | PATKKAV<br>Q             | Homo<br>sapiens                  |

|   |      |   |   |       |        |        |        |        |   |        |                     |                       |
|---|------|---|---|-------|--------|--------|--------|--------|---|--------|---------------------|-----------------------|
| 1 | 1.00 | 1 | 1 | 0.03  | 0.032  | 0.03   | 0.037  | 0.03   | t | 107315 | DGKEYKC             | Homo sapiens          |
| 1 | 1.00 | 1 | 1 | -0.02 | -0.02  | -0.019 | -0.016 | -0.021 | t | 55577  | RRGPRLGV            | Homo sapiens          |
| 1 | 1.00 | 1 | 1 | 0.03  | 0.033  | 0.025  | 0.037  | 0.031  | t | 117543 | KFKGKATL<br>TSDK    | Mus musculus          |
| 1 | 1.00 | 1 | 1 | 0.02  | 0.017  | 0.01   | 0.021  | 0.021  | t | 88952  | SNYTPKNK<br>IE      | Homo sapiens          |
| 1 | 1.00 | 1 | 1 | -0.01 | -0.012 | -0.015 | -0.007 | -0.01  | t | 38836  | LQFGYTSM            | Mus musculus          |
| 1 | 1.00 | 1 | 1 | 0.03  | 0.038  | 0.03   | 0.03   | 0.027  | t | 136648 | SPLNNFYK<br>TQLR    | Gallus gallus         |
| 1 | 1.00 | 1 | 1 | 0.01  | 0.01   | 0.002  | 0.01   | 0.01   | t | 43212  | NALSFTNK            | Mus musculus          |
| 1 | 1.00 | 1 | 1 | 0.02  | 0.022  | 0.02   | 0.027  | 0.019  | t | 119660 | VEWESNG<br>Q        | Homo sapiens          |
| 1 | 1.00 | 1 | 1 | 0.01  | 0.014  | 0.015  | 0.017  | 0.009  | t | 115608 | GRTELLKD<br>AIGE    | Homo sapiens          |
| 1 | 1.00 | 1 | 1 | 0.01  | 0.014  | 0.015  | 0.017  | 0.009  | t | 115608 | GRTELLKD<br>AIGE    | Homo sapiens          |
| 1 | 1.00 | 1 | 1 | 0.02  | 0.016  | 0.02   | 0.023  | 0.02   | t | 105850 | GTAPFEIH            | Oryctolagus cuniculus |
| 1 | 1.00 | 1 | 1 | 0     | 0.004  | -0.016 | 0.003  | 0.001  | t | 119379 | VGNETQG<br>VTAEITPQ | Homo sapiens          |
| 1 | 1.00 | 1 | 1 | 0.02  | 0.02   | 0.017  | 0.02   | 0.019  | t | 46786  | PAEVTQLK<br>GLS     | Mus musculus          |
| 1 | 1.00 | 1 | 1 | 0.01  | 0.012  | 0.006  | 0.017  | 0.01   | t | 141916 | HSLRYNLT<br>VLSW    | Homo sapiens          |

|   |      |   |   |       |        |        |        |        |   |        |                            |                       |
|---|------|---|---|-------|--------|--------|--------|--------|---|--------|----------------------------|-----------------------|
| 1 | 1.00 | 1 | 1 | 0.01  | 0.01   | 0.01   | 0.019  | 0.01   | t | 122116 | IPDSRLK                    | Homo sapiens          |
| 1 | 1.00 | 1 | 1 | 0.01  | 0.01   | 0.01   | 0.01   | 0.007  | t | 134200 | PVVNSLDP<br>PLLTRY         | Homo sapiens          |
| 1 | 1.00 | 1 | 1 | 0.02  | 0.02   | 0.008  | 0.02   | 0.02   | t | 81782  | EQVEYPLK<br>PI             | Oryctolagus cuniculus |
| 1 | 1.00 | 1 | 1 | 0     | 0.006  | -0.014 | 0.001  | 0      | t | 120928 | RRSNVIWP<br>VSKDQLLR       | Equus caballus        |
| 1 | 1.00 | 1 | 1 | 0.03  | 0.034  | 0.03   | 0.031  | 0.027  | t | 134696 | ITLYLTEK                   | MD                    |
| 1 | 1.00 | 1 | 1 | 0.01  | 0.007  | 0.005  | 0.01   | 0.01   | t | 52476  | QTASGLVS<br>MF             | Oryctolagus cuniculus |
| 1 | 1.00 | 1 | 1 | 0.01  | 0.013  | 0.011  | 0.01   | 0.008  | t | 30863  | KFTEPVKDI<br>M             | Mus musculus          |
| 1 | 1.00 | 1 | 1 | -0.01 | -0.01  | -0.027 | -0.014 | -0.01  | t | 111025 | SKIYDTKT<br>GTDR           | Homo sapiens          |
| 1 | 1.00 | 1 | 1 | -0.01 | -0.01  | -0.027 | -0.014 | -0.01  | t | 111025 | SKIYDTKT<br>GTDR           | Homo sapiens          |
| 1 | 1.00 | 1 | 1 | 0     | -0.002 | 0      | -0.001 | -0.004 | t | 10124  | DSGCVVS<br>WK              | Mus musculus          |
| 1 | 1.00 | 1 | 1 | 0.05  | 0.053  | 0.039  | 0.05   | 0.05   | t | 111309 | GDTPTLHE<br>YMLDLQ         | Mus musculus          |
| 1 | 1.00 | 1 | 1 | 0.03  | 0.03   | 0.021  | 0.03   | 0.03   | t | 8475   | DGQPAGD<br>RADGQPA<br>GDRA | Mus musculus          |
| 1 | 1.00 | 1 | 1 | 0.02  | 0.02   | 0.02   | 0.02   | 0.02   | t | 78400  | GLLNDY                     | Mus musculus          |
| 1 | 1.00 | 1 | 1 | -0.01 | -0.006 | -0.008 | -0.003 | -0.011 | t | 119647 | SRWQQG<br>NV               | Homo sapiens          |

|   |      |   |   |       |        |        |        |        |   |        |                     |                       |
|---|------|---|---|-------|--------|--------|--------|--------|---|--------|---------------------|-----------------------|
| 1 | 1.00 | 1 | 1 | 0.02  | 0.02   | 0.02   | 0.029  | 0.02   | t | 133795 | DFTYDQV<br>AFNGLPQF | Homo sapiens          |
| 1 | 1.00 | 1 | 1 | 0.01  | 0.01   | 0.009  | 0.01   | 0.01   | t | 49825  | PVADLP              | Homo sapiens          |
| 1 | 1.00 | 1 | 1 | -0.01 | -0.008 | -0.021 | -0.009 | -0.009 | t | 66410  | TSRVEHAV<br>VYYVYSP | Homo sapiens          |
| 1 | 1.00 | 1 | 1 | 0     | 0.002  | 0.011  | 0.007  | -0.003 | t | 69265  | VKLSG               | Homo sapiens          |
| 1 | 1.00 | 1 | 1 | -0.03 | -0.028 | -0.04  | -0.029 | -0.03  | t | 36890  | LKIKIASGF<br>GPLITH | Homo sapiens          |
| 1 | 1.00 | 1 | 1 | 0.02  | 0.02   | 0.02   | 0.029  | 0.021  | t | 107814 | EGLHNHY             | Homo sapiens          |
| 1 | 1.00 | 1 | 1 | 0     | 0.002  | 0      | 0.007  | -0.001 | t | 108874 | DPISGHVS<br>LF      | Homo sapiens          |
| 1 | 1.00 | 1 | 1 | 0.03  | 0.029  | 0.03   | 0.033  | 0.028  | t | 156965 | SVQERYYA<br>FWST    | Bos taurus            |
| 1 | 1.00 | 1 | 1 | 0.03  | 0.026  | 0.03   | 0.033  | 0.028  | t | 156965 | SVQERYYA<br>FWST    | Bos taurus            |
| 1 | 1.00 | 1 | 1 | -0.01 | -0.01  | -0.024 | -0.01  | -0.01  | t | 63730  | TFPQPQQ<br>TYP      | Mus musculus          |
| 1 | 1.00 | 1 | 1 | 0.01  | 0.008  | 0.001  | 0.009  | 0.01   | t | 80508  | ATAIFD              | Mus musculus          |
| 1 | 1.00 | 1 | 1 | 0.01  | 0.008  | 0.001  | 0.009  | 0.01   | t | 80508  | ATAIFD              | Mus musculus          |
| 1 | 1.00 | 1 | 1 | 0.05  | 0.052  | 0.05   | 0.057  | 0.049  | t | 117613 | QEKLQVAL<br>GE      | Homo sapiens          |
| 1 | 1.00 | 1 | 1 | 0.02  | 0.01   | 0.013  | 0.021  | 0.019  | t | 137891 | HETHYGYA<br>TLSY    | Homo sapiens          |
| 1 | 1.00 | 1 | 1 | 0.02  | 0.022  | 0.013  | 0.021  | 0.019  | t | 137891 | HETHYGYA<br>TLSY    | Homo sapiens          |
| 1 | 1.00 | 1 | 1 | 0.03  | 0.026  | 0.023  | 0.029  | 0.028  | t | 88388  | SAWNSDS<br>EKPFDHL  | Oryctolagus cuniculus |

|   |      |   |   |       |        |        |        |        |   |        |                             |                                  |
|---|------|---|---|-------|--------|--------|--------|--------|---|--------|-----------------------------|----------------------------------|
| 1 | 1.00 | 1 | 1 | 0.03  | 0.032  | 0.023  | 0.029  | 0.028  | t | 88388  | SAWNSDS<br>EKPFDHDL         | MD                               |
| 1 | 1.00 | 1 | 1 | -0.03 | -0.028 | -0.032 | -0.023 | -0.03  | t | 127643 | ERPLELRV<br>RVLDI           | Homo<br>sapiens                  |
| 1 | 1.00 | 1 | 1 | 0.02  | 0.013  | 0.013  | 0.027  | 0.022  | t | 156970 | VERHQ                       | Homo<br>sapiens                  |
| 1 | 1.00 | 1 | 1 | 0.08  | 0.08   | 0.067  | 0.08   | 0.082  | t | 141957 | MEKIAEED<br>I               | Mus<br>musculu<br>s              |
| 1 | 1.00 | 1 | 1 | -0.04 | -0.04  | -0.052 | -0.036 | -0.038 | t | 96487  | KPTAPTKP<br>TY              | Homo<br>sapiens(<br>human)       |
| 1 | 1.00 | 1 | 1 | 0.03  | 0.029  | 0.02   | 0.03   | 0.03   | t | 51943  | QPQWTPE<br>E                | Anas<br>platyrhy<br>nchos        |
| 1 | 1.00 | 1 | 1 | 0.02  | 0.024  | 0.014  | 0.021  | 0.019  | t | 53240  | RAVVAPD<br>KEVLYE           | Homo<br>sapiens                  |
| 1 | 1.00 | 1 | 1 | 0.06  | 0.059  | 0.053  | 0.06   | 0.062  | t | 14576  | ETTTIPPS                    | Anas<br>platyrhy<br>nchos        |
| 1 | 1.00 | 1 | 1 | 0.03  | 0.026  | 0.03   | 0.033  | 0.03   | t | 105715 | DLESIKGT                    | Oryctola<br>gus<br>cuniculu<br>s |
| 1 | 1.00 | 1 | 1 | 0.02  | 0.024  | 0.02   | 0.027  | 0.019  | t | 131700 | TGVTTQG<br>VKSLTSM<br>YVKEF | Homo<br>sapiens                  |
| 1 | 1.00 | 1 | 1 | -0.02 | -0.016 | -0.039 | -0.023 | -0.018 | t | 47350  | PELPYPQP                    | Homo<br>sapiens                  |
| 1 | 1.00 | 1 | 1 | -0.02 | -0.016 | -0.028 | -0.019 | -0.02  | t | 53112  | RAHYNIVT<br>F               | Homo<br>sapiens                  |
| 1 | 1.00 | 1 | 1 | 0.04  | 0.038  | 0.03   | 0.037  | 0.04   | t | 64062  | THPLYQSE                    | Anas<br>platyrhy<br>nchos        |
| 1 | 1.00 | 1 | 1 | 0.01  | 0.012  | -0.007 | 0.01   | 0.013  | t | 110819 | DTKTGTDR<br>ETTS            | Homo<br>sapiens                  |
| 1 | 1.00 | 1 | 1 | -0.01 | -0.014 | -0.019 | -0.011 | -0.011 | t | 29803  | KAFRELAD<br>AL              | Oryctola<br>gus<br>cuniculu<br>s |

|   |      |   |   |       |        |        |        |        |   |        |                              |                                  |
|---|------|---|---|-------|--------|--------|--------|--------|---|--------|------------------------------|----------------------------------|
| 1 | 1.00 | 1 | 1 | -0.04 | -0.04  | -0.049 | -0.04  | -0.039 | t | 118764 | CYGSFARP<br>TN               | Mus<br>musculu<br>s              |
| 1 | 1.00 | 1 | 1 | -0.04 | -0.036 | -0.056 | -0.043 | -0.04  | t | 43791  | NEWCRC                       | Homo<br>sapiens                  |
| 1 | 1.00 | 1 | 1 | -0.02 | -0.016 | -0.016 | -0.013 | -0.021 | t | 144700 | KEWAKRA<br>ALP               | Homo<br>sapiens                  |
| 1 | 1.00 | 1 | 1 | 0.08  | 0.082  | 0.078  | 0.079  | 0.078  | t | 96215  | EEEEAEDK<br>ED               | Homo<br>sapiens                  |
| 1 | 1.00 | 1 | 1 | 0     | -0.006 | -0.016 | 0      | 0.001  | t | 41169  | MAVPAFS<br>DIAKSAND<br>LLNKD | Oryctola<br>gus<br>cuniculu<br>s |
| 1 | 1.00 | 1 | 1 | -0.01 | -0.012 | -0.01  | -0.009 | -0.013 | t | 130461 | CWNYCLP                      | Mus<br>musculu<br>s              |
| 1 | 1.00 | 1 | 1 | 0     | 0      | -0.013 | 0      | 0      | t | 94517  | FNENMAY                      | Oryctola<br>gus<br>cuniculu<br>s |
| 1 | 1.00 | 1 | 1 | 0     | 0      | 0      | 0.011  | 0      | t | 18588  | GAGGGAG<br>GAGAGGG<br>AGGAGA | Homo<br>sapiens                  |
| 1 | 1.00 | 1 | 1 | 0.02  | 0.02   | 0.011  | 0.023  | 0.02   | t | 2610   | ALHQSM<br>LNSQAIDNL          | Homo<br>sapiens                  |
| 1 | 1.00 | 1 | 1 | -0.03 | -0.03  | -0.042 | -0.03  | -0.031 | t | 30062  | KCKNDGW<br>AGYWR             | Oryctola<br>gus<br>cuniculu<br>s |
| 1 | 1.00 | 1 | 1 | -0.03 | -0.027 | -0.042 | -0.03  | -0.031 | t | 30062  | KCKNDGW<br>AGYWR             | Mus<br>musculu<br>s              |
| 1 | 1.00 | 1 | 1 | 0.02  | 0.024  | 0.02   | 0.027  | 0.019  | t | 116681 | CFEGQEKA<br>HNQDLGL          | Homo<br>sapiens                  |
| 1 | 1.00 | 1 | 1 | 0     | 0.004  | -0.014 | 0.001  | 0      | t | 21353  | GMTFRAQ<br>EGAFLTG           | Homo<br>sapiens                  |



|   |      |   |   |       |        |        |        |        |   |        |                  |                       |
|---|------|---|---|-------|--------|--------|--------|--------|---|--------|------------------|-----------------------|
| 1 | 1.00 | 1 | 1 | -0.01 | -0.01  | -0.011 | 0      | -0.008 | t | 106235 | AGFNVPW          | Homo sapiens          |
| 1 | 1.00 | 1 | 1 | 0.03  | 0.03   | 0.03   | 0.03   | 0.03   | t | 78400  | GLNDY            | Mus musculus          |
| 1 | 1.00 | 1 | 1 | -0.01 | -0.01  | -0.008 | 0.001  | -0.01  | t | 118432 | ISIGYHYPP ICLGRA | Homo sapiens          |
| 1 | 1.00 | 1 | 1 | -0.01 | -0.006 | -0.008 | -0.009 | -0.011 | t | 74217  | YIGGPL           | Homo sapiens          |
| 1 | 1.00 | 1 | 1 | 0.04  | 0.03   | 0.033  | 0.041  | 0.039  | t | 137867 | GEIKFEAV EGAV    | Homo sapiens          |
| 1 | 1.00 | 1 | 1 | 0.04  | 0.042  | 0.033  | 0.041  | 0.039  | t | 137867 | GEIKFEAV EGAV    | Homo sapiens          |
| 1 | 1.00 | 1 | 1 | 0.03  | 0.032  | 0.03   | 0.037  | 0.03   | t | 107451 | ISKAKGQ          | Homo sapiens          |
| 1 | 1.00 | 1 | 1 | 0     | 0.002  | 0.002  | 0.003  | -0.001 | t | 46951  | PASSHTILV        | Homo sapiens          |
| 1 | 1.00 | 1 | 1 | 0     | 0.002  | 0.002  | 0.003  | -0.001 | t | 46951  | PASSHTILV        | Homo sapiens          |
| 1 | 1.00 | 1 | 1 | 0.05  | 0.048  | 0.039  | 0.053  | 0.051  | t | 70502  | VPVPDFSQ         | Mus musculus          |
| 1 | 1.00 | 1 | 1 | 0.01  | 0.012  | 0.015  | 0.017  | 0.01   | t | 112814 | PEQPPIH          | Homo sapiens          |
| 1 | 1.00 | 1 | 1 | -0.03 | -0.031 | -0.039 | -0.029 | -0.03  | t | 58346  | SHDRHFLN N       | Homo sapiens          |
| 1 | 1.00 | 1 | 1 | 0.05  | 0.05   | 0.037  | 0.05   | 0.052  | t | 87834  | REGVEEEK TSEE    | Oryctolagus cuniculus |
| 1 | 1.00 | 1 | 1 | 0     | 0.002  | -0.018 | -0.001 | 0.001  | t | 98697  | AMCNVYI PPYCT    | Homo sapiens          |
| 1 | 1.00 | 1 | 1 | 0.03  | 0.032  | 0.023  | 0.033  | 0.031  | t | 142474 | SSTTGVA M        | Homo sapiens          |

|   |      |   |   |       |        |        |        |        |   |        |                      |                                  |
|---|------|---|---|-------|--------|--------|--------|--------|---|--------|----------------------|----------------------------------|
| 1 | 1.00 | 1 | 1 | -0.01 | -0.018 | -0.014 | -0.01  | -0.011 | t | 29160  | ITYGACPR<br>YVK      | Mus<br>musculu<br>s              |
| 1 | 1.00 | 1 | 1 | -0.01 | -0.018 | -0.014 | -0.01  | -0.011 | t | 29160  | ITYGACPR<br>YVK      | Mus<br>musculu<br>s              |
| 1 | 1.00 | 1 | 1 | -0.01 | -0.018 | -0.014 | -0.01  | -0.011 | t | 29160  | ITYGACPR<br>YVK      | Mus<br>musculu<br>s              |
| 1 | 1.00 | 1 | 1 | -0.07 | -0.068 | -0.074 | -0.063 | -0.072 | t | 127779 | PSRRRRRR<br>KATLAPA  | Homo<br>sapiens                  |
| 1 | 1.00 | 1 | 1 | -0.01 | -0.012 | -0.022 | -0.013 | -0.01  | t | 75445  | YPYLKDGK             | Mus<br>musculu<br>s              |
| 1 | 1.00 | 1 | 1 | 0.01  | 0.008  | 0.008  | 0.009  | 0.006  | t | 74794  | YLLPAIVHI            | Mus<br>musculu<br>s              |
| 1 | 1.00 | 1 | 1 | 0.01  | 0.014  | 0.007  | 0.011  | 0.007  | t | 103550 | RIFYKDAF<br>AKHQELF  | Homo<br>sapiens                  |
| 1 | 1.00 | 1 | 1 | 0     | 0.004  | 0.002  | 0.007  | 0      | t | 119641 | SEHETRLV<br>AKLFKDYS | Homo<br>sapiens                  |
| 1 | 1.00 | 1 | 1 | 0.02  | 0.02   | 0.006  | 0.02   | 0.022  | t | 109349 | IPVDLL               | Mus<br>musculu<br>s              |
| 1 | 1.00 | 1 | 1 | 0.01  | 0.012  | 0.003  | 0.013  | 0.01   | t | 986    | AEIERMVR<br>EAAKYEA  | Homo<br>sapiens                  |
| 1 | 1.00 | 1 | 1 | 0.04  | 0.04   | 0.04   | 0.043  | 0.04   | t | 149116 | SYAAVAS              | Sus<br>scrofa                    |
| 1 | 1.00 | 1 | 1 | 0.04  | 0.036  | 0.028  | 0.039  | 0.04   | t | 65     | AAAVLNLT             | Oryctola<br>gus<br>cuniculu<br>s |
| 1 | 1.00 | 1 | 1 | 0.03  | 0.032  | 0.017  | 0.027  | 0.03   | t | 115060 | GYLEQL               | Homo<br>sapiens                  |
| 1 | 1.00 | 1 | 1 | 0.02  | 0.02   | 0.019  | 0.02   | 0.02   | t | 32494  | KNFNFEVE             | Homo<br>sapiens                  |
| 1 | 1.00 | 1 | 1 | -0.02 | -0.018 | -0.02  | -0.013 | -0.02  | t | 131358 | APSVTLF              | Homo<br>sapiens                  |

|   |      |   |   |       |        |        |        |        |   |        |                     |                                  |
|---|------|---|---|-------|--------|--------|--------|--------|---|--------|---------------------|----------------------------------|
| 1 | 1.00 | 1 | 1 | 0     | -0.002 | -0.006 | -0.001 | -0.002 | t | 70134  | VNNKV               | Mus<br>musculu<br>s              |
| 1 | 1.00 | 1 | 1 | 0.02  | 0.022  | 0.018  | 0.02   | 0.02   | t | 71449  | VTPLGPPA<br>AEY     | Homo<br>sapiens                  |
| 1 | 1.00 | 1 | 1 | 0.04  | 0.042  | 0.029  | 0.041  | 0.04   | t | 133687 | SAEALLRL<br>QA      | Homo<br>sapiens                  |
| 1 | 1.00 | 1 | 1 | 0     | -0.001 | -0.012 | 0      | 0      | t | 64644  | TKPTDPTG<br>IE      | Mus<br>musculu<br>s              |
| 1 | 1.00 | 1 | 1 | 0.01  | 0.006  | -0.003 | 0.009  | 0.01   | t | 43039  | MYASSGIG            | Oryctola<br>gus<br>cuniculu<br>s |
| 1 | 1.00 | 1 | 1 | 0     | 0.004  | -0.005 | 0.001  | 0      | t | 65428  | TNSKGQ              | Homo<br>sapiens                  |
| 1 | 1.00 | 1 | 1 | -0.01 | -0.011 | -0.02  | -0.01  | -0.011 | t | 73074  | WSGKFPTL            | Anas<br>platyrhy<br>nchos        |
| 1 | 1.00 | 1 | 1 | 0     | 0      | 0      | 0      | -0.002 | t | 61394  | SSTKNLIY            | Mus<br>musculu<br>s              |
| 1 | 1.00 | 1 | 1 | 0     | 0.002  | 0      | 0.006  | -0.002 | t | 3274   | ANETIYNT<br>TLKYGDV | MD                               |
| 1 | 1.00 | 1 | 1 | 0.02  | 0.02   | 0.003  | 0.02   | 0.022  | t | 120414 | ATNLIKSG<br>VA      | Mus<br>musculu<br>s              |
| 1 | 1.00 | 1 | 1 | 0.01  | 0.01   | 0.003  | 0.01   | 0.009  | t | 138258 | VMHEALH             | Homo<br>sapiens                  |
| 1 | 1.00 | 1 | 1 | -0.05 | -0.05  | -0.05  | -0.04  | -0.05  | t | 98681  | AEKTKIPA<br>VF      | Homo<br>sapiens                  |
| 1 | 1.00 | 1 | 1 | 0.02  | 0.022  | 0.004  | 0.017  | 0.02   | t | 74475  | YKLNIFYD<br>LLRAKL  | Homo<br>sapiens                  |
| 1 | 1.00 | 1 | 1 | 0     | 0.002  | 0      | 0.007  | 0.002  | t | 107479 | KFNWYVD             | Homo<br>sapiens                  |
| 1 | 1.00 | 1 | 1 | 0.04  | 0.042  | 0.04   | 0.043  | 0.04   | t | 68017  | VDLPQL              | Homo<br>sapiens                  |

|   |      |   |   |       |        |        |        |        |   |        |                            |                       |
|---|------|---|---|-------|--------|--------|--------|--------|---|--------|----------------------------|-----------------------|
| 1 | 1.00 | 1 | 1 | 0.01  | 0.012  | 0.005  | 0.01   | 0.01   | t | 49745  | PTPQEIPQ                   | Anas platyrhynchos    |
| 1 | 1.00 | 1 | 1 | -0.02 | -0.018 | -0.028 | -0.019 | -0.02  | t | 60626  | SRCEQIRE                   | Homo sapiens          |
| 1 | 1.00 | 1 | 1 | 0.01  | 0.012  | 0.015  | 0.017  | 0.007  | t | 57618  | SERVQLLH<br>SQNTSLIN<br>QK | Homo sapiens          |
| 1 | 1.00 | 1 | 1 | -0.02 | -0.018 | -0.027 | -0.013 | -0.019 | t | 144600 | CQREFALK<br>HL             | Homo sapiens          |
| 1 | 1.00 | 1 | 1 | 0.03  | 0.03   | 0.03   | 0.03   | 0.028  | t | 79528  | CPSKKPYE<br>EVTC           | Mus musculus          |
| 1 | 1.00 | 1 | 1 | 0.03  | 0.03   | 0.03   | 0.03   | 0.028  | t | 79528  | CPSKKPYE<br>EVTC           | Mus musculus          |
| 1 | 1.00 | 1 | 1 | 0.03  | 0.03   | 0.03   | 0.03   | 0.028  | t | 79528  | CPSKKPYE<br>EVTC           | Mus musculus          |
| 1 | 1.00 | 1 | 1 | -0.01 | -0.01  | -0.025 | -0.01  | -0.009 | t | 133533 | CKCGKCNT                   | Mus musculus          |
| 1 | 1.00 | 1 | 1 | -0.05 | -0.05  | -0.057 | -0.053 | -0.05  | t | 46987  | PAVFK                      | Homo sapiens          |
| 1 | 1.00 | 1 | 1 | 0.03  | 0.027  | 0.03   | 0.03   | 0.028  | t | 95717  | QLDTDGK<br>GYE             | Oryctolagus cuniculus |
| 1 | 1.00 | 1 | 1 | 0.04  | 0.04   | 0.04   | 0.049  | 0.04   | t | 119506 | PIVET                      | Homo sapiens          |
| 1 | 1.00 | 1 | 1 | 0     | 0.002  | 0      | 0      | 0      | t | 29126  | ITTYV                      | Homo sapiens          |
| 1 | 1.00 | 1 | 1 | 0.01  | 0.012  | 0.003  | 0.017  | 0.01   | t | 133787 | CQALVRM<br>LAKKPGW<br>K    | Homo sapiens          |
| 1 | 1.00 | 1 | 1 | -0.01 | -0.01  | -0.01  | -0.001 | -0.011 | t | 131293 | AGRAREYV                   | Homo sapiens          |

|   |      |   |   |       |        |        |        |        |   |        |                           |                       |
|---|------|---|---|-------|--------|--------|--------|--------|---|--------|---------------------------|-----------------------|
| 1 | 1.00 | 1 | 1 | -0.03 | -0.032 | -0.044 | -0.031 | -0.03  | t | 42576  | MSIRRSMA                  | Mus musculus          |
| 1 | 1.00 | 1 | 1 | 0.05  | 0.049  | 0.039  | 0.049  | 0.05   | t | 69289  | VKPGTPAQEI                | Myodes glareolus      |
| 1 | 1.00 | 1 | 1 | 0.02  | 0.022  | 0.02   | 0.027  | 0.02   | t | 114196 | CKPISGHN<br>SLFQWYR<br>QT | Homo sapiens          |
| 1 | 1.00 | 1 | 1 | -0.02 | -0.022 | -0.019 | -0.017 | -0.02  | t | 73741  | YEPPVVHG                  | Homo sapiens          |
| 1 | 1.00 | 1 | 1 | -0.02 | -0.018 | -0.019 | -0.017 | -0.02  | t | 73741  | YEPPVVHG                  | Homo sapiens          |
| 1 | 1.00 | 1 | 1 | 0.02  | 0.022  | 0.02   | 0.027  | 0.02   | t | 107758 | AWNCCVK<br>QTP            | Homo sapiens          |
| 1 | 1.00 | 1 | 1 | 0.02  | 0.022  | 0.02   | 0.027  | 0.02   | t | 107758 | AWNCCVK<br>QTP            | Homo sapiens          |
| 1 | 1.00 | 1 | 1 | 0.01  | 0.012  | 0.01   | 0.017  | 0.009  | t | 107878 | GWVAMH<br>PQGDL           | Homo sapiens          |
| 1 | 1.00 | 1 | 1 | 0.03  | 0.03   | 0.03   | 0.03   | 0.027  | t | 22620  | GTDGV                     | Homo sapiens          |
| 1 | 1.00 | 1 | 1 | 0.02  | 0.02   | 0.02   | 0.027  | 0.02   | t | 136003 | TRKDINTV<br>TTVA          | Homo sapiens          |
| 1 | 1.00 | 1 | 1 | -0.02 | -0.023 | -0.027 | -0.02  | -0.02  | t | 137425 | KFP                       | Oryctolagus cuniculus |
| 1 | 1.00 | 1 | 1 | 0.02  | 0.024  | 0.011  | 0.021  | 0.02   | t | 46867  | PAN                       | MD                    |
| 1 | 1.00 | 1 | 1 | 0     | 0      | 0.006  | 0      | -0.006 | t | 15968  | FGDSYI                    | Homo sapiens          |
| 1 | 1.00 | 1 | 1 | 0.02  | 0.022  | 0.018  | 0.021  | 0.02   | t | 55967  | RSSSGCVT                  | Homo sapiens          |
| 1 | 1.00 | 1 | 1 | 0.04  | 0.043  | 0.029  | 0.04   | 0.04   | t | 43157  | NAGTSL                    | Equus caballus        |

|   |      |   |   |       |        |        |        |        |   |        |                      |                                  |
|---|------|---|---|-------|--------|--------|--------|--------|---|--------|----------------------|----------------------------------|
| 1 | 1.00 | 1 | 1 | 0.06  | 0.06   | 0.045  | 0.053  | 0.061  | t | 102880 | VDELD                | Mus<br>musculu<br>s              |
| 1 | 1.00 | 1 | 1 | 0.02  | 0.022  | 0.016  | 0.023  | 0.02   | t | 76350  | YVLLSEKKI<br>S       | Homo<br>sapiens                  |
| 1 | 1.00 | 1 | 1 | -0.01 | -0.014 | -0.005 | -0.007 | -0.012 | t | 95979  | VPQPPVS<br>QFHIQ     | Oryctola<br>gus<br>cuniculu<br>s |
| 1 | 1.00 | 1 | 1 | 0.02  | 0.018  | 0.02   | 0.019  | 0.019  | t | 69883  | VLYQEFDE             | Mus<br>musculu<br>s              |
| 1 | 1.00 | 1 | 1 | 0.01  | 0.008  | 0.01   | 0.01   | 0.011  | t | 112672 | TAEFQMT<br>FHLFI     | Oryctola<br>gus<br>cuniculu<br>s |
| 1 | 1.00 | 1 | 1 | -0.02 | -0.02  | -0.02  | -0.01  | -0.02  | t | 114752 | AYSIEFGT<br>NI       | Homo<br>sapiens                  |
| 1 | 1.00 | 1 | 1 | 0.04  | 0.042  | 0.026  | 0.037  | 0.04   | t | 62354  | SVTEEVVE<br>EEGPVDEE | Homo<br>sapiens                  |
| 1 | 1.00 | 1 | 1 | 0     | 0.002  | 0.005  | 0.003  | -0.003 | t | 47033  | PCNTRKTA             | Homo<br>sapiens                  |
| 1 | 1.00 | 1 | 1 | -0.01 | -0.01  | -0.02  | -0.01  | -0.01  | t | 112898 | AAVKQSY<br>AAT       | Mus<br>musculu<br>s              |
| 1 | 1.00 | 1 | 1 | 0.04  | 0.042  | 0.034  | 0.041  | 0.039  | t | 133540 | DALVAKA<br>QEVs      | Homo<br>sapiens                  |
| 1 | 1.00 | 1 | 1 | 0.02  | 0.017  | 0.014  | 0.02   | 0.02   | t | 105954 | MAKFTQF<br>A         | Oryctola<br>gus<br>cuniculu<br>s |
| 1 | 1.00 | 1 | 1 | 0.06  | 0.06   | 0.05   | 0.06   | 0.06   | t | 34138  | KVNIKPLE<br>DK       | Mus<br>musculu<br>s              |
| 1 | 1.00 | 1 | 1 | -0.01 | -0.012 | -0.017 | -0.007 | -0.01  | t | 10529  | DTYRYI               | Mus<br>musculu<br>s              |
| 1 | 1.00 | 1 | 1 | 0.01  | 0.006  | 0.008  | 0.01   | 0.009  | t | 74008  | YGGL                 | Mus<br>musculu<br>s              |

|   |      |   |   |       |        |        |        |        |   |        |                    |                                  |
|---|------|---|---|-------|--------|--------|--------|--------|---|--------|--------------------|----------------------------------|
| 1 | 1.00 | 1 | 1 | 0.01  | 0.013  | 0.008  | 0.01   | 0.009  | t | 74008  | YGGL               | Mus<br>musculu<br>s              |
| 1 | 1.00 | 1 | 1 | 0.01  | 0.005  | 0.008  | 0.01   | 0.009  | t | 74008  | YGGL               | Mus<br>musculu<br>s              |
| 1 | 1.00 | 1 | 1 | 0.01  | 0.006  | -0.002 | 0.009  | 0.011  | t | 133683 | RQRY               | Oryctola<br>gus<br>cuniculu<br>s |
| 1 | 1.00 | 1 | 1 | 0.02  | 0.026  | 0.017  | 0.021  | 0.019  | t | 20725  | GKVVLPEN           | MD                               |
| 1 | 1.00 | 1 | 1 | 0.02  | 0.024  | 0.017  | 0.021  | 0.019  | t | 20725  | GKVVLPEN           | MD                               |
| 1 | 1.00 | 1 | 1 | 0.02  | 0.024  | 0.017  | 0.021  | 0.019  | t | 20725  | GKVVLPEN           | MD                               |
| 1 | 1.00 | 1 | 1 | -0.01 | -0.006 | -0.017 | -0.009 | -0.011 | t | 138027 | SADFTPGT           | Homo<br>sapiens                  |
| 1 | 1.00 | 1 | 1 | 0.01  | 0.012  | -0.002 | 0.011  | 0.01   | t | 142385 | AKTAATN<br>AEKKKTK | Homo<br>sapiens                  |
| 1 | 1.00 | 1 | 1 | 0.01  | 0.012  | 0.003  | 0.007  | 0.008  | t | 115700 | CEKDERFF<br>SD     | Homo<br>sapiens                  |
| 1 | 1.00 | 1 | 1 | 0.01  | 0.014  | 0.003  | 0.013  | 0.012  | t | 111049 | TVTLKATP<br>NDGY   | Homo<br>sapiens                  |
| 1 | 1.00 | 1 | 1 | 0     | 0      | 0      | 0.002  | -0.001 | t | 157178 | EASNCF             | Homo<br>sapiens                  |
| 1 | 1.00 | 1 | 1 | 0.01  | 0.008  | -0.006 | 0.003  | 0.01   | t | 98081  | GSVQFVPI<br>QN     | Mus<br>musculu<br>s              |
| 1 | 1.00 | 1 | 1 | 0     | 0.003  | -0.017 | 0      | 0.001  | t | 45325  | NPDNPNN            | Mus<br>musculu<br>s              |

|   |      |   |   |       |        |        |        |        |   |        |                            |                                  |
|---|------|---|---|-------|--------|--------|--------|--------|---|--------|----------------------------|----------------------------------|
| 1 | 1.00 | 1 | 1 | 0     | -0.004 | -0.005 | 0      | -0.002 | t | 100538 | SWNCDFS<br>QTATL           | Oryctola<br>gus<br>cuniculu<br>s |
| 1 | 1.00 | 1 | 1 | 0.03  | 0.03   | 0.025  | 0.027  | 0.028  | t | 50901  | QGLRGEE<br>MEEMV           | Homo<br>sapiens                  |
| 1 | 1.00 | 1 | 1 | 0.02  | 0.02   | 0.02   | 0.016  | 0.018  | t | 117695 | YITTIAGV<br>M              | Homo<br>sapiens                  |
| 1 | 1.00 | 1 | 1 | 0     | 0      | -0.018 | 0      | 0.001  | t | 56599  | RYNLVFSG<br>DSDRICSN<br>RA | Mus<br>musculu<br>s              |
| 1 | 1.00 | 1 | 1 | 0     | 0      | 0      | 0      | -0.002 | t | 65555  | TPEMDIPG<br>QV             | Mus<br>musculu<br>s              |
| 1 | 1.00 | 1 | 1 | 0.02  | 0.018  | 0.025  | 0.019  | 0.02   | t | 104312 | TNMWDF                     | Mus<br>musculu<br>s              |
| 1 | 1.00 | 1 | 1 | 0.02  | 0.02   | 0.002  | 0.02   | 0.022  | t | 1187   | AETHLFTG                   | Mus<br>musculu<br>s              |
| 1 | 1.00 | 1 | 1 | 0.05  | 0.052  | 0.043  | 0.057  | 0.052  | t | 142448 | NKYRGTA<br>GNALMDG<br>ASQL | Homo<br>sapiens                  |
| 1 | 1.00 | 1 | 1 | 0     | 0.002  | -0.017 | -0.002 | 0      | t | 45009  | NMNLVD<br>WLR              | Homo<br>sapiens                  |
| 1 | 1.00 | 1 | 1 | 0.02  | 0.02   | 0.006  | 0.02   | 0.022  | t | 109348 | IPVDL                      | Mus<br>musculu<br>s              |
| 1 | 1.00 | 1 | 1 | 0.01  | 0.01   | 0      | 0.008  | 0.01   | t | 63420  | TEKFBKEQ                   | Homo<br>sapiens                  |
| 1 | 1.00 | 1 | 1 | -0.02 | -0.014 | -0.03  | -0.02  | -0.021 | t | 66743  | TTNRFAKY                   | Equus<br>caballus                |
| 1 | 1.00 | 1 | 1 | 0.05  | 0.05   | 0.038  | 0.048  | 0.05   | t | 28907  | ITGEYVQIL<br>DAHAAY        | Homo<br>sapiens                  |



|   |      |   |   |       |        |        |        |        |   |        |                             |                                  |
|---|------|---|---|-------|--------|--------|--------|--------|---|--------|-----------------------------|----------------------------------|
| 1 | 1.00 | 1 | 1 | 0.02  | 0.02   | 0.001  | 0.02   | 0.022  | t | 30289  | KEAESVCA<br>PIMSKIYQ        | Homo<br>sapiens                  |
| 1 | 1.00 | 1 | 1 | -0.01 | -0.008 | -0.01  | -0.003 | -0.01  | t | 118189 | TYYIKEQKL<br>GL             | Homo<br>sapiens                  |
| 1 | 1.00 | 1 | 1 | 0.01  | 0.01   | 0.003  | 0.02   | 0.011  | t | 117383 | TLHKAFKG<br>SIFVVFSI<br>ESA | Homo<br>sapiens                  |
| 1 | 1.00 | 1 | 1 | 0.03  | 0.027  | 0.027  | 0.03   | 0.029  | t | 74760  | YLL                         | Oryctola<br>gus<br>cuniculu<br>s |
| 1 | 1.00 | 1 | 1 | 0.05  | 0.05   | 0.041  | 0.054  | 0.05   | t | 10991  | EAAKYEAE<br>DKDQVRQ         | Homo<br>sapiens                  |
| 1 | 1.00 | 1 | 1 | 0.01  | 0.01   | 0.005  | 0.01   | 0.012  | t | 133570 | FLPKYALS                    | Mus<br>musculu<br>s              |
| 1 | 1.00 | 1 | 1 | 0.05  | 0.051  | 0.049  | 0.053  | 0.049  | t | 99176  | EDTLEEKM<br>YACRDIG         | Equus<br>caballus                |
| 1 | 1.00 | 1 | 1 | 0.02  | 0.023  | 0.008  | 0.02   | 0.02   | t | 134794 | SEATVAES<br>DSF             | Mus<br>musculu<br>s              |
| 1 | 1.00 | 1 | 1 | -0.02 | -0.02  | -0.024 | -0.02  | -0.02  | t | 60792  | SRRYPFVK<br>F               | Homo<br>sapiens                  |
| 1 | 1.00 | 1 | 1 | 0     | 0      | -0.005 | 0.003  | -0.001 | t | 64093  | THVTGGA                     | Homo<br>sapiens                  |
| 1 | 1.00 | 1 | 1 | 0     | 0.004  | 0      | 0.003  | 0      | t | 5380   | AVILLMCA<br>VHPTLV          | Homo<br>sapiens                  |
| 1 | 1.00 | 1 | 1 | 0.01  | 0.01   | -0.002 | 0.01   | 0.01   | t | 133537 | CLTINTTVC<br>A              | Mus<br>musculu<br>s              |
| 1 | 1.00 | 1 | 1 | -0.05 | -0.05  | -0.057 | -0.053 | -0.05  | t | 46987  | PAVFK                       | Homo<br>sapiens                  |
| 1 | 1.00 | 1 | 1 | 0.01  | 0.002  | 0.006  | 0.01   | 0.008  | t | 29159  | ITYGACPK<br>YVKQNTLK        | Mus<br>musculu<br>s              |
| 1 | 1.00 | 1 | 1 | -0.02 | -0.02  | -0.016 | -0.014 | -0.022 | t | 33915  | KTWGQY<br>WQV               | Homo<br>sapiens                  |

|   |      |   |   |       |        |        |        |       |   |        |                  |                       |
|---|------|---|---|-------|--------|--------|--------|-------|---|--------|------------------|-----------------------|
| 1 | 1.00 | 1 | 1 | -0.02 | -0.023 | -0.028 | -0.02  | -0.02 | t | 68182  | VEFPLDITAG       | Oryctolagus cuniculus |
| 1 | 1.00 | 1 | 1 | -0.02 | -0.02  | -0.028 | -0.02  | -0.02 | t | 68182  | VEFPLDITAG       | Mus musculus          |
| 1 | 1.00 | 1 | 1 | 0.01  | 0.006  | 0.002  | 0.009  | 0.008 | t | 51463  | QLPFPQQPQQ       | Mus musculus          |
| 1 | 1.00 | 1 | 1 | 0.04  | 0.04   | 0.029  | 0.04   | 0.04  | t | 66707  | TTLPKGIFYAEGSRGG | Macaca cyclopis       |
| 1 | 1.00 | 1 | 1 | 0.04  | 0.04   | 0.029  | 0.04   | 0.04  | t | 66707  | TTLPKGIFYAEGSRGG | Mus musculus          |
| 1 | 1.00 | 1 | 1 | 0.01  | 0      | 0.003  | 0.011  | 0.009 | t | 137867 | GEIKFEAVEGAV     | Homo sapiens          |
| 1 | 1.00 | 1 | 1 | 0.03  | 0.033  | 0.023  | 0.03   | 0.031 | t | 138862 | KFPED            | Mus musculus          |
| 1 | 1.00 | 1 | 1 | 0.02  | 0.024  | 0.02   | 0.027  | 0.02  | t | 113091 | MESALDQLKQFTTVV  | Homo sapiens          |
| 1 | 1.00 | 1 | 1 | 0.03  | 0.03   | 0.02   | 0.03   | 0.032 | t | 22639  | GTEKF            | Mus musculus          |
| 1 | 1.00 | 1 | 1 | 0     | 0      | -0.009 | 0      | 0     | t | 94553  | IFD              | Mus musculus          |
| 1 | 1.00 | 1 | 1 | 0     | 0.003  | -0.01  | 0      | 0     | t | 48714  | PNVDP            | Mus musculus          |
| 1 | 1.00 | 1 | 1 | 0.05  | 0.05   | 0.05   | 0.05   | 0.05  | t | 15355  | FCVQPE           | Homo sapiens          |
| 1 | 1.00 | 1 | 1 | 0     | 0.002  | -0.021 | -0.001 | 0.002 | t | 153174 | YTVDVKNKRTFLSP   | Homo sapiens          |
| 1 | 1.00 | 1 | 1 | 0.03  | 0.028  | 0.018  | 0.033  | 0.031 | t | 107242 | SQTTANPSCPEGT    | Rattus norvegicus     |
| 1 | 1.00 | 1 | 1 | 0.04  | 0.04   | 0.029  | 0.04   | 0.04  | t | 94473  | CNPACGPKYS       | Oryctolagus cuniculus |

|   |      |   |   |       |        |        |        |        |   |        |                           |                       |
|---|------|---|---|-------|--------|--------|--------|--------|---|--------|---------------------------|-----------------------|
| 1 | 1.00 | 1 | 1 | 0     | 0      | -0.002 | 0.003  | 0.002  | t | 38654  | LPQLGP                    | Homo sapiens          |
| 1 | 1.00 | 1 | 1 | -0.01 | -0.01  | -0.012 | -0.01  | -0.014 | t | 159204 | VYNDVEK<br>WKSDYKY<br>FP  | Mus musculus          |
| 1 | 1.00 | 1 | 1 | 0.02  | 0.018  | 0.013  | 0.023  | 0.021  | t | 107166 | GPPGPQG                   | Mus musculus          |
| 1 | 1.00 | 1 | 1 | 0.02  | 0.018  | 0.015  | 0.023  | 0.018  | t | 55048  | RNQE                      | Mus musculus          |
| 1 | 1.00 | 1 | 1 | 0.03  | 0.027  | 0.023  | 0.03   | 0.028  | t | 122906 | SRPSESNG                  | Oryctolagus cuniculus |
| 1 | 1.00 | 1 | 1 | 0.04  | 0.044  | 0.033  | 0.047  | 0.041  | t | 104569 | MASPGSG<br>FWSFGSE<br>DGS | Homo sapiens          |
| 1 | 1.00 | 1 | 1 | -0.02 | -0.018 | -0.027 | -0.017 | -0.021 | t | 138807 | RLQGISPKI                 | Homo sapiens          |
| 1 | 1.00 | 1 | 1 | 0.03  | 0.03   | 0.03   | 0.033  | 0.03   | t | 32683  | KPDYEPPV                  | Homo sapiens          |
| 1 | 1.00 | 1 | 1 | 0     | 0.004  | -0.005 | 0.001  | 0      | t | 58742  | SIVTAPFQ<br>VK            | Homo sapiens          |
| 1 | 1.00 | 1 | 1 | 0     | 0.008  | -0.007 | 0      | -0.002 | t | 125246 | RRQPHVM<br>S              | Macaca fascicularis   |
| 1 | 1.00 | 1 | 1 | 0.03  | 0.032  | 0.028  | 0.037  | 0.03   | t | 126227 | HNNAHY<br>VFEEQED         | Homo sapiens          |
| 1 | 1.00 | 1 | 1 | 0.04  | 0.04   | 0.04   | 0.05   | 0.04   | t | 114987 | YANTTSED<br>GK            | Homo sapiens          |
| 1 | 1.00 | 1 | 1 | -0.01 | -0.01  | -0.026 | -0.008 | -0.007 | t | 98930  | PFRPQQPY<br>PQPQ          | Homo sapiens          |
| 1 | 1.00 | 1 | 1 | 0.05  | 0.052  | 0.043  | 0.051  | 0.05   | t | 150964 | AIDEITNKV<br>NSVIEK       | Homo sapiens          |
| 1 | 1.00 | 1 | 1 | 0.05  | 0.05   | 0.05   | 0.05   | 0.049  | t | 159282 | EENW                      | Oryctolagus cuniculus |
| 1 | 1.00 | 1 | 1 | 0.04  | 0.042  | 0.04   | 0.039  | 0.04   | t | 123441 | LLEYLGEEY                 | Ovis aries            |

|   |      |   |   |       |        |        |        |        |   |        |                      |                       |
|---|------|---|---|-------|--------|--------|--------|--------|---|--------|----------------------|-----------------------|
| 1 | 1.00 | 1 | 1 | 0.04  | 0.039  | 0.033  | 0.04   | 0.039  | t | 55248  | RPPETTTI             | Anas platyrhynchos    |
| 1 | 1.00 | 1 | 1 | -0.02 | -0.02  | -0.02  | -0.02  | -0.022 | t | 48819  | PPLGNWFG             | Rattus norvegicus     |
| 1 | 1.00 | 1 | 1 | -0.02 | -0.02  | -0.02  | -0.02  | -0.022 | t | 48819  | PPLGNWFG             | Mus musculus          |
| 1 | 1.00 | 1 | 1 | 0.03  | 0.028  | 0.02   | 0.029  | 0.029  | t | 78687  | IRVRKRKGSNKKAEDTLED  | Mus musculus          |
| 1 | 1.00 | 1 | 1 | 0     | -0.004 | -0.002 | 0.003  | 0.001  | t | 99137  | DDTFTV               | Oryctolagus cuniculus |
| 1 | 1.00 | 1 | 1 | 0.04  | 0.04   | 0.04   | 0.04   | 0.04   | t | 153865 | PETTDLYCY            | Cavia porcellus       |
| 1 | 1.00 | 1 | 1 | 0.01  | 0.01   | 0.008  | 0.014  | 0.009  | t | 47593  | PFVQWFVGL            | Homo sapiens          |
| 1 | 1.00 | 1 | 1 | 0.02  | 0.02   | 0.02   | 0.023  | 0.02   | t | 72087  | VYLLPR               | Homo sapiens          |
| 1 | 1.00 | 1 | 1 | -0.01 | -0.01  | -0.017 | 0      | -0.009 | t | 117383 | TLHKAFKGSIFVVFDSIESA | Homo sapiens          |
| 1 | 1.00 | 1 | 1 | 0.01  | 0.006  | 0.01   | 0.01   | 0.008  | t | 70388  | VPNLRGDLQVLA         | Mus musculus          |
| 1 | 1.00 | 1 | 1 | 0.04  | 0.042  | 0.028  | 0.041  | 0.04   | t | 142415 | EVAKAEVLNAEVK        | Homo sapiens          |
| 1 | 1.00 | 1 | 1 | -0.01 | -0.01  | -0.017 | -0.01  | -0.01  | t | 121966 | VFRFSFVPV            | Mus musculus          |
| 1 | 1.00 | 1 | 1 | -0.01 | -0.008 | -0.017 | -0.007 | -0.01  | t | 117333 | MVTSTITEKLLKNLVKI    | Homo sapiens          |
| 1 | 1.00 | 1 | 1 | 0.03  | 0.03   | 0.021  | 0.032  | 0.03   | t | 17531  | FQSFPSPGEPNSKLSGFFQS | Homo sapiens          |
| 1 | 1.00 | 1 | 1 | -0.01 | -0.008 | -0.01  | -0.003 | -0.011 | t | 107758 | AWNCCVKQTP           | Homo sapiens          |

|   |      |   |   |       |        |        |        |        |   |        |                     |                                  |
|---|------|---|---|-------|--------|--------|--------|--------|---|--------|---------------------|----------------------------------|
| 1 | 1.00 | 1 | 1 | -0.01 | -0.012 | -0.014 | -0.011 | -0.01  | t | 8880   | DKHIEQYL<br>KK      | Mus<br>musculu<br>s              |
| 1 | 1.00 | 1 | 1 | 0.04  | 0.039  | 0.03   | 0.04   | 0.04   | t | 55248  | RPPETTTI            | Anas<br>platyrhy<br>nchos        |
| 1 | 1.00 | 1 | 1 | 0.01  | 0.006  | -0.002 | 0.01   | 0.01   | t | 95663  | PKYVKQNT            | Mus<br>musculu<br>s              |
| 1 | 1.00 | 1 | 1 | 0.01  | 0.008  | 0.006  | 0.013  | 0.009  | t | 158947 | LDIDIDPKV<br>KVATLS | Mus<br>musculu<br>s              |
| 1 | 1.00 | 1 | 1 | 0.02  | 0.018  | 0.011  | 0.023  | 0.023  | t | 57654  | SETQKSQN<br>Y       | Mus<br>musculu<br>s              |
| 1 | 1.00 | 1 | 1 | 0.01  | 0.012  | 0.012  | 0.017  | 0.009  | t | 96808  | QVKSGTIF<br>DN      | Homo<br>sapiens                  |
| 1 | 1.00 | 1 | 1 | 0.02  | 0.02   | 0.013  | 0.02   | 0.02   | t | 138257 | VLTVLHQ             | Homo<br>sapiens                  |
| 1 | 1.00 | 1 | 1 | 0.04  | 0.038  | 0.03   | 0.039  | 0.04   | t | 14358  | ETEFSKLY            | Mus<br>musculu<br>s              |
| 1 | 1.00 | 1 | 1 | 0     | -0.002 | -0.007 | 0.003  | 0.001  | t | 107062 | AEFRHD              | Mus<br>musculu<br>s              |
| 1 | 1.00 | 1 | 1 | 0.02  | 0.022  | 0.013  | 0.023  | 0.022  | t | 77841  | AYDFLYNY<br>L       | Homo<br>sapiens                  |
| 1 | 1.00 | 1 | 1 | 0.02  | 0.02   | 0.02   | 0.02   | 0.019  | t | 68399  | VEVPGS              | Oryctola<br>gus<br>cuniculu<br>s |
| 1 | 1.00 | 1 | 1 | 0.01  | 0.008  | 0.002  | 0.009  | 0.011  | t | 56699  | SAAFYYRV            | Mus<br>musculu<br>s              |
| 1 | 1.00 | 1 | 1 | 0.02  | 0.024  | 0.007  | 0.021  | 0.02   | t | 67167  | TVSSNGDR            | Homo<br>sapiens                  |
| 1 | 1.00 | 1 | 1 | 0.01  | 0.006  | 0.01   | 0.013  | 0.007  | t | 111966 | YKSNNIAR<br>MRLYDPN | Oryctola<br>gus<br>cuniculu<br>s |
| 1 | 1.00 | 1 | 1 | 0     | 0      | 0      | 0.007  | -0.001 | t | 58388  | SHLVEALY<br>LVCGERG | Mus<br>musculu<br>s              |

|   |      |   |   |       |        |        |        |        |   |        |                      |                                  |
|---|------|---|---|-------|--------|--------|--------|--------|---|--------|----------------------|----------------------------------|
| 1 | 1.00 | 1 | 1 | -0.01 | -0.008 | -0.017 | -0.003 | -0.01  | t | 156799 | VYATRSSA<br>VRLRSSV  | Homo<br>sapiens                  |
| 1 | 1.00 | 1 | 1 | 0.02  | 0.02   | 0.011  | 0.02   | 0.02   | t | 132715 | VEEFSPSIA<br>REIYEMY | Mus<br>musculu<br>s              |
| 1 | 1.00 | 1 | 1 | -0.02 | -0.024 | -0.037 | -0.023 | -0.02  | t | 55935  | RSQRQLLQ<br>W        | Oryctola<br>gus<br>cuniculu<br>s |
| 1 | 1.00 | 1 | 1 | 0.02  | 0.016  | 0.01   | 0.019  | 0.02   | t | 7817   | DDLDDKC<br>KNDGW     | Oryctola<br>gus<br>cuniculu<br>s |
| 1 | 1.00 | 1 | 1 | 0.01  | 0.008  | 0.009  | 0.008  | 0.01   | t | 36315  | LGSAYP               | Mus<br>musculu<br>s              |
| 1 | 1.00 | 1 | 1 | 0.02  | 0.024  | 0.018  | 0.027  | 0.02   | t | 131955 | LPHGNALV<br>RYSSKEE  | Homo<br>sapiens                  |
| 1 | 1.00 | 1 | 1 | -0.03 | -0.03  | -0.02  | -0.019 | -0.032 | t | 14013  | ERKRR                | Homo<br>sapiens                  |
| 1 | 1.00 | 1 | 1 | 0.03  | 0.03   | 0.03   | 0.033  | 0.03   | t | 149116 | SYAAVAS              | Sus<br>scrofa                    |
| 1 | 1.00 | 1 | 1 | 0.02  | 0.024  | 0.02   | 0.021  | 0.02   | t | 18039  | FTPGPSQ              | Homo<br>sapiens                  |
| 1 | 1.00 | 1 | 1 | 0     | 0      | -0.012 | 0      | 0      | t | 25624  | IDLTKNA<br>AKL       | Homo<br>sapiens                  |
| 1 | 1.00 | 1 | 1 | 0.02  | 0.018  | 0.013  | 0.02   | 0.019  | t | 95047  | VEVPGSQ<br>HIDSQ     | Oryctola<br>gus<br>cuniculu<br>s |
| 1 | 1.00 | 1 | 1 | 0.02  | 0.018  | 0.013  | 0.02   | 0.019  | t | 95047  | VEVPGSQ<br>HIDSQ     | Oryctola<br>gus<br>cuniculu<br>s |
| 1 | 1.00 | 1 | 1 | 0.03  | 0.035  | 0.035  | 0.03   | 0.03   | t | 41573  | MGFSYD               | Homo<br>sapiens                  |

|   |      |   |   |       |        |        |        |        |   |        |                      |              |
|---|------|---|---|-------|--------|--------|--------|--------|---|--------|----------------------|--------------|
| 1 | 1.00 | 1 | 1 | 0.03  | 0.03   | 0.035  | 0.03   | 0.03   | t | 41573  | MGFSYD               | Homo sapiens |
| 1 | 1.00 | 1 | 1 | 0     | 0.002  | -0.013 | 0.001  | 0      | t | 21606  | GPEKAFRE             | Homo sapiens |
| 1 | 1.00 | 1 | 1 | -0.02 | -0.016 | -0.032 | -0.023 | -0.022 | t | 105044 | YQFVDCG<br>DSF       | Homo sapiens |
| 1 | 1.00 | 1 | 1 | 0.05  | 0.048  | 0.038  | 0.049  | 0.05   | t | 9108   | DLGTTL               | Mus musculus |
| 1 | 1.00 | 1 | 1 | 0.01  | 0.012  | -0.002 | 0.011  | 0.01   | t | 142407 | DKTIAAAK<br>KAKKARE  | Homo sapiens |
| 1 | 1.00 | 1 | 1 | 0.02  | 0.018  | 0.02   | 0.021  | 0.019  | t | 130457 | CRQPGNN<br>YC        | Mus musculus |
| 1 | 1.00 | 1 | 1 | 0.04  | 0.04   | 0.03   | 0.04   | 0.04   | t | 119575 | EWESTYSIL<br>G       | Homo sapiens |
| 1 | 1.00 | 1 | 1 | 0.03  | 0.028  | 0.026  | 0.037  | 0.03   | t | 123851 | WTEVSEV<br>ATEV      | Homo sapiens |
| 1 | 1.00 | 1 | 1 | 0.02  | 0.02   | 0.012  | 0.02   | 0.02   | t | 31521  | KKEFLNSY<br>EDEFSSSE | Mus musculus |
| 1 | 1.00 | 1 | 1 | -0.02 | -0.018 | -0.027 | -0.017 | -0.021 | t | 144600 | CQREFALK<br>HL       | Homo sapiens |
| 1 | 1.00 | 1 | 1 | -0.01 | -0.01  | -0.01  | -0.01  | -0.012 | t | 69828  | VLVLFGFF<br>TLSPWY   | Homo sapiens |
| 1 | 1.00 | 1 | 1 | -0.01 | -0.018 | -0.018 | -0.011 | -0.01  | t | 110932 | LNLKIDGL<br>KISV     | Macaca       |
| 1 | 1.00 | 1 | 1 | 0     | 0      | -0.009 | 0.002  | 0      | t | 135941 | ITTQECAN<br>VVVG     | Homo sapiens |
| 1 | 1.00 | 1 | 1 | -0.05 | -0.05  | -0.065 | -0.052 | -0.05  | t | 50350  | QAQYNQ<br>MHML       | Homo sapiens |
| 1 | 1.00 | 1 | 1 | 0.03  | 0.028  | 0.018  | 0.029  | 0.03   | t | 72544  | WHLKSIG<br>QLVIE     | Mus musculus |

|   |      |   |   |       |        |        |        |        |   |        |                           |                                  |
|---|------|---|---|-------|--------|--------|--------|--------|---|--------|---------------------------|----------------------------------|
| 1 | 1.00 | 1 | 1 | 0.02  | 0.022  | 0.008  | 0.021  | 0.02   | t | 142385 | AKTAATN<br>AEKKKTK        | Homo<br>sapiens                  |
| 1 | 1.00 | 1 | 1 | -0.01 | -0.008 | -0.01  | -0.003 | -0.01  | t | 104254 | SPFLKAF                   | Homo<br>sapiens                  |
| 1 | 1.00 | 1 | 1 | 0.02  | 0.02   | 0.008  | 0.02   | 0.02   | t | 150200 | FGEHKQEK<br>DLEYGAC       | Mus<br>musculu<br>s              |
| 1 | 1.00 | 1 | 1 | 0.01  | 0.012  | 0.001  | 0.011  | 0.01   | t | 67444  | TYRATYQD                  | Homo<br>sapiens                  |
| 1 | 1.00 | 1 | 1 | 0.03  | 0.027  | 0.018  | 0.03   | 0.03   | t | 144611 | DFNGSFD<br>MNGTITA        | Oryctola<br>gus<br>cuniculu<br>s |
| 1 | 1.00 | 1 | 1 | -0.01 | -0.01  | -0.021 | -0.013 | -0.01  | t | 53152  | RALLGLAV<br>CLFLMALC<br>T | Homo<br>sapiens                  |
| 1 | 1.00 | 1 | 1 | 0.05  | 0.048  | 0.039  | 0.053  | 0.053  | t | 45571  | NQITSALS<br>TQ            | Mus<br>musculu<br>s              |
| 1 | 1.00 | 1 | 1 | 0.02  | 0.02   | 0.02   | 0.02   | 0.02   | t | 75202  | YNPLLKET                  | Homo<br>sapiens                  |
| 1 | 1.00 | 1 | 1 | 0.07  | 0.07   | 0.07   | 0.07   | 0.07   | t | 159283 | EGP                       | Oryctola<br>gus<br>cuniculu<br>s |
| 1 | 1.00 | 1 | 1 | 0.03  | 0.027  | 0.02   | 0.03   | 0.03   | t | 13354  | EMDKID                    | Oryctola<br>gus<br>cuniculu<br>s |
| 1 | 1.00 | 1 | 1 | 0.02  | 0.02   | 0.032  | 0.02   | 0.015  | t | 19264  | GEFMFDF<br>DGDEIF         | Mus<br>musculu<br>s              |
| 1 | 1.00 | 1 | 1 | 0.01  | 0.008  | 0.002  | 0.007  | 0.01   | t | 34132  | KVNDA                     | Mus<br>musculu<br>s              |
| 1 | 1.00 | 1 | 1 | 0.01  | 0.013  | 0      | 0.01   | 0.01   | t | 120402 | ALKASGLV<br>PE            | Mus<br>musculu<br>s              |
| 1 | 1.00 | 1 | 1 | 0.01  | 0.01   | 0      | 0.01   | 0.01   | t | 120402 | ALKASGLV<br>PE            | Mus<br>musculu<br>s              |
| 1 | 1.00 | 1 | 1 | -0.01 | -0.01  | -0.01  | -0.006 | -0.012 | t | 135970 | PPGMRPP<br>MGPMGIP<br>P   | Homo<br>sapiens                  |



|   |      |   |   |       |        |        |        |        |   |        |                     |                       |
|---|------|---|---|-------|--------|--------|--------|--------|---|--------|---------------------|-----------------------|
| 1 | 1.00 | 1 | 1 | 0.04  | 0.04   | 0.03   | 0.04   | 0.04   | t | 9980   | DRGYISQY            | Homo sapiens          |
| 1 | 1.00 | 1 | 1 | 0.01  | 0.01   | 0.01   | 0.01   | 0.007  | t | 62830  | TAEGRAIN            | Mus musculus          |
| 1 | 1.00 | 1 | 1 | 0     | 0      | -0.016 | 0.002  | 0.003  | t | 98930  | PFRPQQPY<br>PQPQ    | Homo sapiens          |
| 1 | 1.00 | 1 | 1 | 0.07  | 0.072  | 0.075  | 0.077  | 0.068  | t | 118289 | DEKKEESE<br>ESDDDMG | Homo sapiens          |
| 1 | 1.00 | 1 | 1 | 0.03  | 0.03   | 0.016  | 0.024  | 0.029  | t | 38294  | LNPDLQ              | Mus musculus          |
| 1 | 1.00 | 1 | 1 | -0.01 | -0.006 | -0.019 | -0.01  | -0.01  | t | 113993 | VHTGFGA<br>MDFTTLQ  | Cavia porcellus       |
| 1 | 1.00 | 1 | 1 | -0.01 | -0.006 | -0.019 | -0.01  | -0.01  | t | 113993 | VHTGFGA<br>MDFTTLQ  | Cavia porcellus       |
| 1 | 1.00 | 1 | 1 | -0.01 | -0.013 | -0.019 | -0.01  | -0.01  | t | 113993 | VHTGFGA<br>MDFTTLQ  | Oryctolagus cuniculus |
| 1 | 1.00 | 1 | 1 | -0.02 | -0.02  | -0.022 | -0.02  | -0.022 | t | 79748  | AIFTKPKA            | Mus musculus          |
| 1 | 1.00 | 1 | 1 | -0.02 | -0.02  | -0.022 | -0.02  | -0.022 | t | 79748  | AIFTKPKA            | Mus musculus          |
| 1 | 1.00 | 1 | 1 | -0.01 | -0.008 | -0.019 | -0.013 | -0.012 | t | 50833  | QGASVDK<br>R        | Homo sapiens          |
| 1 | 1.00 | 1 | 1 | -0.02 | -0.016 | -0.016 | -0.013 | -0.021 | t | 144700 | KEWAKRA<br>ALP      | Homo sapiens          |
| 1 | 1.00 | 1 | 1 | 0.02  | 0.023  | 0.012  | 0.02   | 0.022  | t | 48774  | PPFFLVQE<br>KGI     | Mus musculus          |
| 1 | 1.00 | 1 | 1 | -0.01 | -0.01  | -0.019 | -0.01  | -0.01  | t | 29802  | KAFRELAD            | Homo sapiens          |

|   |      |   |   |       |       |        |       |        |   |        |                        |                       |
|---|------|---|---|-------|-------|--------|-------|--------|---|--------|------------------------|-----------------------|
| 1 | 1.00 | 1 | 1 | 0.04  | 0.04  | 0.04   | 0.04  | 0.04   | t | 11481  | EDYPSP                 | Homo sapiens          |
| 1 | 1.00 | 1 | 1 | 0.03  | 0.031 | 0.029  | 0.033 | 0.029  | t | 99264  | GAKEPY                 | Equus caballus        |
| 1 | 1.00 | 1 | 1 | -0.01 | -0.01 | -0.018 | -0.01 | -0.01  | t | 30704  | KDFDKSK VKENSY         | Mus musculus          |
| 1 | 1.00 | 1 | 1 | 0.01  | 0.008 | 0.003  | 0.013 | 0.011  | t | 107109 | EFRHDS                 | Mus musculus          |
| 1 | 1.00 | 1 | 1 | 0.02  | 0.02  | 0.02   | 0.02  | 0.02   | t | 27421  | ILYEA FDEM             | Homo sapiens          |
| 1 | 1.00 | 1 | 1 | 0.03  | 0.026 | 0.02   | 0.033 | 0.03   | t | 51078  | QIHTLN                 | Oryctolagus cuniculus |
| 1 | 1.00 | 1 | 1 | 0.02  | 0.018 | 0.02   | 0.019 | 0.019  | t | 69883  | VLYQEFDE               | Mus musculus          |
| 1 | 1.00 | 1 | 1 | 0.02  | 0.022 | 0.003  | 0.023 | 0.022  | t | 96537  | LDQAAKD AKSAGVN VVQDA  | Homo sapiens( human)  |
| 1 | 1.00 | 1 | 1 | 0.02  | 0.022 | 0.011  | 0.021 | 0.021  | t | 110808 | DLYCYEQL NDSSEE        | Homo sapiens          |
| 1 | 1.00 | 1 | 1 | 0.01  | 0.01  | 0.01   | 0.01  | 0.01   | t | 23221  | GVYLLPRR               | Homo sapiens          |
| 1 | 1.00 | 1 | 1 | -0.02 | -0.02 | -0.015 | -0.02 | -0.024 | t | 108382 | GGVVIA                 | Mus musculus          |
| 1 | 1.00 | 1 | 1 | 0.04  | 0.043 | 0.031  | 0.04  | 0.04   | t | 100555 | THQDEIYE QV            | Mus musculus          |
| 1 | 1.00 | 1 | 1 | 0.03  | 0.03  | 0.025  | 0.033 | 0.03   | t | 39472  | LSKYTINP               | Homo sapiens          |
| 1 | 1.00 | 1 | 1 | 0.01  | 0.014 | 0.008  | 0.01  | 0.009  | t | 105805 | GAGIGWG ID             | Mus musculus          |
| 1 | 1.00 | 1 | 1 | -0.02 | -0.02 | -0.035 | -0.02 | -0.02  | t | 102912 | VPKVTKEK PTPPVKPT APTK | Mus musculus          |

|   |      |   |   |       |        |        |        |        |   |        |                            |                                  |
|---|------|---|---|-------|--------|--------|--------|--------|---|--------|----------------------------|----------------------------------|
| 1 | 1.00 | 1 | 1 | -0.01 | -0.013 | -0.018 | -0.01  | -0.012 | t | 153392 | GNTLQCI<br>MLVYCFLG<br>YCC | Oryctola<br>gus<br>cuniculu<br>s |
| 1 | 1.00 | 1 | 1 | 0.04  | 0.04   | 0.045  | 0.041  | 0.038  | t | 106633 | LVFFAED                    | Mus<br>musculu<br>s              |
| 1 | 1.00 | 1 | 1 | 0.04  | 0.04   | 0.045  | 0.041  | 0.038  | t | 106633 | LVFFAED                    | Mus<br>musculu<br>s              |
| 1 | 1.00 | 1 | 1 | 0.02  | 0.02   | 0.013  | 0.02   | 0.02   | t | 138257 | VLTVLHQ                    | Homo<br>sapiens                  |
| 1 | 1.00 | 1 | 1 | 0.03  | 0.03   | 0.028  | 0.03   | 0.03   | t | 107378 | GELP                       | Rattus<br>norvegic<br>us         |
| 1 | 1.00 | 1 | 1 | -0.02 | -0.02  | -0.035 | -0.02  | -0.02  | t | 53864  | RGFLGRM<br>LF              | Homo<br>sapiens                  |
| 1 | 1.00 | 1 | 1 | 0.03  | 0.028  | 0.03   | 0.029  | 0.028  | t | 22494  | GSRYPGQ<br>GSPG            | Mus<br>musculu<br>s              |
| 1 | 1.00 | 1 | 1 | 0.01  | 0.012  | 0.008  | 0.013  | 0.01   | t | 117653 | TLESLPAPE<br>TSVYFCA       | Homo<br>sapiens                  |
| 1 | 1.00 | 1 | 1 | 0.02  | 0.02   | 0.02   | 0.023  | 0.021  | t | 69883  | VLYQEFDE                   | Homo<br>sapiens                  |
| 1 | 1.00 | 1 | 1 | 0     | 0.002  | 0      | 0.007  | -0.001 | t | 110996 | RARPAKA<br>AATQKKVE<br>RKA | Homo<br>sapiens                  |
| 1 | 1.00 | 1 | 1 | 0.05  | 0.05   | 0.034  | 0.052  | 0.053  | t | 99042  | VLQQSTY<br>QLLQE           | Homo<br>sapiens                  |
| 1 | 1.00 | 1 | 1 | -0.02 | -0.018 | -0.018 | -0.017 | -0.023 | t | 120612 | IFNLFSTKD<br>SSAAW         | Homo<br>sapiens                  |
| 1 | 1.00 | 1 | 1 | -0.03 | -0.03  | -0.037 | -0.02  | -0.028 | t | 96211  | EDKKRKEE<br>EE             | Homo<br>sapiens                  |
| 1 | 1.00 | 1 | 1 | 0.03  | 0.03   | 0.03   | 0.03   | 0.03   | t | 105855 | GVV                        | Mus<br>musculu<br>s              |
| 1 | 1.00 | 1 | 1 | 0.05  | 0.05   | 0.045  | 0.052  | 0.048  | t | 118133 | SESQTLDK<br>VYQM           | Homo<br>sapiens                  |

|   |      |   |   |       |        |        |        |        |   |        |                  |                              |
|---|------|---|---|-------|--------|--------|--------|--------|---|--------|------------------|------------------------------|
| 1 | 1.00 | 1 | 1 | 0.03  | 0.028  | 0.01   | 0.023  | 0.03   | t | 65421  | TNSGINNS         | Mus musculus                 |
| 1 | 1.00 | 1 | 1 | 0     | 0      | 0      | 0.006  | -0.002 | t | 11819  | EENVEHDA         | Homo sapiens                 |
| 1 | 1.00 | 1 | 1 | 0.02  | 0.02   | 0.008  | 0.02   | 0.02   | t | 105078 | AFNHFGIQLVQR     | Homo sapiens                 |
| 1 | 1.00 | 1 | 1 | -0.01 | -0.01  | -0.024 | -0.01  | -0.01  | t | 111722 | RGLPRYFNVTLRKRWV | Oryctolagus cuniculus        |
| 1 | 1.00 | 1 | 1 | 0.03  | 0.03   | 0.016  | 0.027  | 0.03   | t | 30212  | KDLVFTKE NTIT    | Homo sapiens                 |
| 1 | 1.00 | 1 | 1 | 0.05  | 0.054  | 0.038  | 0.051  | 0.05   | t | 142440 | LDISPESAD NITSK  | Homo sapiens                 |
| 1 | 1.00 | 1 | 1 | -0.03 | -0.028 | -0.033 | -0.033 | -0.032 | t | 111212 | DQIKVSTAI DLT    | Homo sapiens                 |
| 1 | 1.00 | 1 | 1 | -0.03 | -0.028 | -0.033 | -0.033 | -0.032 | t | 111212 | DQIKVSTAI DLT    | Homo sapiens                 |
| 1 | 1.00 | 1 | 1 | 0     | 0      | 0      | 0.003  | -0.003 | t | 45013  | NMPASMK RVRIE    | Rattus norvegicus            |
| 1 | 1.00 | 1 | 1 | 0     | 0      | 0      | 0.003  | -0.003 | t | 33215  | KRRLRPSR VRIE    | Rattus norvegicus            |
| 1 | 1.00 | 1 | 1 | 0.02  | 0.022  | 0.013  | 0.018  | 0.018  | t | 106595 | LDGETKTG PQRV    | Homo sapiens                 |
| 1 | 1.00 | 1 | 1 | 0     | 0.001  | -0.009 | 0.001  | 0      | t | 7355   | CYDLSCNQ TVCQ    | Myodes glareolus             |
| 1 | 1.00 | 1 | 1 | 0     | 0.001  | -0.009 | 0.001  | 0      | t | 7355   | CYDLSCNQ TVCQ    | Myodes glareolus             |
| 1 | 1.00 | 1 | 1 | -0.03 | -0.004 | -0.026 | -0.021 | -0.031 | t | 106906 | THWQGVY WVGATPKA | Maccullochella macquariensis |
| 1 | 1.00 | 1 | 1 | 0.06  | 0.06   | 0.027  | 0.06   | 0.067  | t | 102093 | STGSSDV          | Mus musculus                 |

|   |      |   |   |       |        |        |        |        |   |        |                              |                                  |
|---|------|---|---|-------|--------|--------|--------|--------|---|--------|------------------------------|----------------------------------|
| 1 | 1.00 | 1 | 1 | 0     | 0      | -0.005 | 0      | 0      | t | 58742  | SIVTAPFQ<br>VK               | Homo<br>sapiens                  |
| 1 | 1.00 | 1 | 1 | -0.05 | -0.048 | -0.05  | -0.043 | -0.048 | t | 118864 | KIPPTPFS                     | Homo<br>sapiens                  |
| 1 | 1.00 | 1 | 1 | 0     | 0      | -0.014 | 0      | 0      | t | 51942  | QPQRPFQ<br>QQP               | Mus<br>musculu<br>s              |
| 1 | 1.00 | 1 | 1 | 0.04  | 0.042  | 0.04   | 0.047  | 0.041  | t | 131762 | YAASSYL                      | Homo<br>sapiens                  |
| 1 | 1.00 | 1 | 1 | 0.02  | 0.016  | 0.022  | 0.02   | 0.018  | t | 100034 | FFAEDVGS<br>NK               | Oryctola<br>gus<br>cuniculu<br>s |
| 1 | 1.00 | 1 | 1 | 0.02  | 0.02   | 0.02   | 0.02   | 0.02   | t | 146019 | TCPPDIIP                     | Mus<br>musculu<br>s              |
| 1 | 1.00 | 1 | 1 | -0.01 | -0.006 | -0.023 | -0.013 | -0.01  | t | 31638  | KKMSQFID<br>KKFIPLVFI<br>TLK | Homo<br>sapiens                  |
| 1 | 1.00 | 1 | 1 | 0.05  | 0.05   | 0.034  | 0.052  | 0.053  | t | 98941  | PQYSQPQ<br>QPISQ             | Homo<br>sapiens                  |
| 1 | 1.00 | 1 | 1 | 0     | 0      | -0.007 | -0.003 | -0.002 | t | 14109  | ESAFNKAL<br>NECT             | Homo<br>sapiens                  |
| 1 | 1.00 | 1 | 1 | 0.02  | 0.018  | 0.017  | 0.019  | 0.02   | t | 125400 | ELLKLLIEA                    | Mus<br>musculu<br>s              |
| 1 | 1.00 | 1 | 1 | 0     | -0.002 | -0.01  | 0.003  | 0      | t | 6073   | CCRGRCN<br>KKGEQVG<br>M      | Homo<br>sapiens                  |
| 1 | 1.00 | 1 | 1 | 0.01  | 0.012  | 0.008  | 0.017  | 0.01   | t | 115619 | IRALVGDE<br>VELP             | Homo<br>sapiens                  |
| 1 | 1.00 | 1 | 1 | -0.01 | -0.006 | -0.02  | -0.009 | -0.01  | t | 30041  | KCAFATTP<br>VCQF             | Myodes<br>glareolu<br>s          |
| 1 | 1.00 | 1 | 1 | -0.01 | -0.01  | -0.02  | -0.01  | -0.01  | t | 63236  | TDSPGG                       | Oryctola<br>gus<br>cuniculu<br>s |
| 1 | 1.00 | 1 | 1 | 0.05  | 0.05   | 0.041  | 0.05   | 0.05   | t | 135990 | SASVPALT<br>AVET             | Homo<br>sapiens                  |

|   |      |   |   |       |        |        |        |        |   |        |                              |                                  |
|---|------|---|---|-------|--------|--------|--------|--------|---|--------|------------------------------|----------------------------------|
| 1 | 1.00 | 1 | 1 | 0.02  | 0.018  | 0      | 0.013  | 0.02   | t | 128146 | WSVCVGL<br>TTYVNDYV<br>LPYLA | Mus<br>musculu<br>s              |
| 1 | 1.00 | 1 | 1 | 0.05  | 0.05   | 0.048  | 0.049  | 0.048  | t | 42277  | MPHKLEK<br>ADLLKAIQ<br>EQLIA | Homo<br>sapiens                  |
| 1 | 1.00 | 1 | 1 | 0.03  | 0.03   | 0.024  | 0.03   | 0.03   | t | 48876  | PPPQAPY<br>QGY               | Mus<br>musculu<br>s              |
| 1 | 1.00 | 1 | 1 | -0.01 | -0.006 | -0.01  | -0.003 | -0.01  | t | 123612 | PPGMIPPP                     | Homo<br>sapiens                  |
| 1 | 1.00 | 1 | 1 | -0.01 | -0.008 | -0.022 | -0.01  | -0.01  | t | 37626  | LLNQLAGR                     | Anas<br>platyrhy<br>nchos        |
| 1 | 1.00 | 1 | 1 | 0.04  | 0.036  | 0.028  | 0.037  | 0.04   | t | 82932  | GTNVELG<br>GRLSI             | Oryctola<br>gus<br>cuniculu<br>s |
| 1 | 1.00 | 1 | 1 | 0.01  | 0.014  | 0.005  | 0.013  | 0.012  | t | 134185 | PLQKTY                       | Homo<br>sapiens                  |
| 1 | 1.00 | 1 | 1 | 0.03  | 0.028  | 0.025  | 0.033  | 0.03   | t | 72466  | WGENDTD<br>VFVLNNTR          | Mus<br>musculu<br>s              |
| 1 | 1.00 | 1 | 1 | -0.01 | -0.01  | -0.01  | -0.01  | -0.012 | t | 159294 | QPLWLL                       | Oryctola<br>gus<br>cuniculu<br>s |
| 1 | 1.00 | 1 | 1 | 0     | 0.002  | -0.004 | -0.003 | -0.002 | t | 106691 | NTFWASD<br>LMH               | Homo<br>sapiens                  |
| 1 | 1.00 | 1 | 1 | 0.03  | 0.027  | 0.039  | 0.03   | 0.024  | t | 46084  | NTEPSQLP<br>PTA              | Oryctola<br>gus<br>cuniculu<br>s |
| 1 | 1.00 | 1 | 1 | 0.04  | 0.04   | 0.046  | 0.041  | 0.039  | t | 8329   | DFVEGV                       | Homo<br>sapiens                  |

|   |      |   |   |       |        |        |        |        |   |        |                            |                                  |
|---|------|---|---|-------|--------|--------|--------|--------|---|--------|----------------------------|----------------------------------|
| 1 | 1.00 | 1 | 1 | -0.05 | -0.053 | -0.063 | -0.05  | -0.05  | t | 55639  | RRLGAALL                   | Oryctola<br>gus<br>cuniculu<br>s |
| 1 | 1.00 | 1 | 1 | -0.03 | -0.026 | -0.037 | -0.023 | -0.028 | t | 144594 | ARGISRTK<br>YW             | Homo<br>sapiens                  |
| 1 | 1.00 | 1 | 1 | 0.02  | 0.005  | 0.008  | 0.017  | 0.02   | t | 42655  | MSRSER                     | Marmot<br>a monax                |
| 1 | 1.00 | 1 | 1 | 0.04  | 0.043  | 0.039  | 0.04   | 0.04   | t | 122113 | IIASTEKL                   | Mus<br>musculu<br>s              |
| 1 | 1.00 | 1 | 1 | 0.05  | 0.05   | 0.05   | 0.061  | 0.05   | t | 118289 | DEKKEESE<br>ESDDDMG        | Homo<br>sapiens                  |
| 1 | 1.00 | 1 | 1 | -0.03 | -0.032 | -0.042 | -0.03  | -0.03  | t | 100667 | YMKPKHV<br>RVWCPRP         | Homo<br>sapiens                  |
| 1 | 1.00 | 1 | 1 | 0.02  | 0.02   | 0.012  | 0.02   | 0.02   | t | 30180  | KDKDKDN<br>TDE             | Mus<br>musculu<br>s              |
| 1 | 1.00 | 1 | 1 | 0.01  | 0.007  | -0.007 | 0.01   | 0.013  | t | 97020  | TVTRGTIS<br>DP             | Oryctola<br>gus<br>cuniculu<br>s |
| 1 | 1.00 | 1 | 1 | 0     | 0      | -0.011 | 0      | 0      | t | 26328  | IGTLKKILD<br>ETVKDKLA<br>K | Mus<br>musculu<br>s              |
| 1 | 1.00 | 1 | 1 | 0.01  | 0.008  | 0.011  | 0.013  | 0.01   | t | 30863  | KFTEPVKDI<br>M             | Mus<br>musculu<br>s              |
| 1 | 1.00 | 1 | 1 | 0     | 0.004  | 0      | 0.007  | 0      | t | 108074 | PQVYTLP                    | Homo<br>sapiens                  |
| 1 | 1.00 | 1 | 1 | 0     | 0.002  | 0      | 0.007  | 0      | t | 108074 | PQVYTLP                    | Homo<br>sapiens                  |
| 1 | 1.00 | 1 | 1 | 0     | 0.002  | 0      | 0.007  | 0      | t | 108074 | PQVYTLP                    | Homo<br>sapiens                  |
| 1 | 1.00 | 1 | 1 | 0.06  | 0.06   | 0.053  | 0.06   | 0.06   | t | 119524 | SKEQV                      | Homo<br>sapiens                  |

|   |      |   |   |       |        |        |        |        |   |        |                              |                                  |
|---|------|---|---|-------|--------|--------|--------|--------|---|--------|------------------------------|----------------------------------|
| 1 | 1.00 | 1 | 1 | 0.01  | 0.014  | -0.002 | 0.007  | 0.009  | t | 67707  | VAPFPEVF<br>GK               | Homo<br>sapiens                  |
| 1 | 1.00 | 1 | 1 | -0.03 | -0.028 | -0.041 | -0.027 | -0.03  | t | 110468 | YYVLHLCL<br>AATKYPLL<br>KLLG | Homo<br>sapiens                  |
| 1 | 1.00 | 1 | 1 | 0.03  | 0.03   | 0.03   | 0.03   | 0.03   | t | 153865 | PETTDLYC<br>Y                | Cavia<br>porcellu<br>s           |
| 1 | 1.00 | 1 | 1 | 0.01  | 0.012  | 0.003  | 0.013  | 0.012  | t | 48940  | PPVADL                       | Homo<br>sapiens                  |
| 1 | 1.00 | 1 | 1 | 0.02  | 0.022  | 0.013  | 0.021  | 0.02   | t | 1022   | AEKQKAAE<br>ATKVAE           | Homo<br>sapiens                  |
| 1 | 1.00 | 1 | 1 | -0.02 | -0.016 | -0.018 | -0.013 | -0.023 | t | 134679 | GGSGPQR<br>RGG               | Homo<br>sapiens                  |
| 1 | 1.00 | 1 | 1 | -0.03 | -0.028 | -0.035 | -0.027 | -0.032 | t | 134076 | GWLGFNK<br>ERGHQLQ           | Homo<br>sapiens                  |
| 1 | 1.00 | 1 | 1 | -0.05 | -0.05  | -0.062 | -0.046 | -0.048 | t | 96239  | EKPTPPVK<br>PT               | Homo<br>sapiens(<br>human)       |
| 1 | 1.00 | 1 | 1 | 0.04  | 0.037  | 0.028  | 0.04   | 0.041  | t | 132838 | HSDLKIQE                     | Oryctola<br>gus<br>cuniculu<br>s |
| 1 | 1.00 | 1 | 1 | -0.01 | -0.012 | -0.02  | -0.007 | -0.01  | t | 6073   | CCRGRCN<br>KKGEQVG<br>M      | Homo<br>sapiens                  |
| 1 | 1.00 | 1 | 1 | 0.02  | 0.022  | 0.015  | 0.021  | 0.019  | t | 17557  | FQYSPG                       | Homo<br>sapiens                  |
| 1 | 1.00 | 1 | 1 | 0.05  | 0.054  | 0.05   | 0.047  | 0.047  | t | 67323  | TYDNE                        | Homo<br>sapiens                  |
| 1 | 1.00 | 1 | 1 | 0.03  | 0.026  | 0.03   | 0.033  | 0.03   | t | 105853 | GVTHDQL<br>N                 | Oryctola<br>gus<br>cuniculu<br>s |
| 1 | 1.00 | 1 | 1 | -0.01 | -0.013 | -0.02  | -0.01  | -0.01  | t | 98434  | RYMDQPS<br>RD                | Oryctola<br>gus<br>cuniculu<br>s |



|   |      |   |   |       |        |        |       |        |   |        |                     |                                  |
|---|------|---|---|-------|--------|--------|-------|--------|---|--------|---------------------|----------------------------------|
| 1 | 1.00 | 1 | 1 | -0.01 | -0.01  | -0.02  | -0.01 | -0.01  | t | 98434  | RYMDQPS<br>RD       | Mus<br>musculu<br>s              |
| 1 | 1.00 | 1 | 1 | -0.02 | -0.02  | -0.02  | -0.02 | -0.024 | t | 141760 | TAPPLLPH            | Rattus<br>norvegic<br>us         |
| 1 | 1.00 | 1 | 1 | 0.03  | 0.033  | 0.021  | 0.03  | 0.03   | t | 55802  | RSASAAAI<br>LEEDDSK | Mus<br>musculu<br>s              |
| 1 | 1.00 | 1 | 1 | 0.06  | 0.06   | 0.06   | 0.06  | 0.06   | t | 120082 | LPTDSGEK            | Rattus<br>norvegic<br>us         |
| 1 | 1.00 | 1 | 1 | 0.06  | 0.062  | 0.06   | 0.06  | 0.06   | t | 120082 | LPTDSGEK            | Rattus<br>norvegic<br>us         |
| 1 | 1.00 | 1 | 1 | 0     | 0.003  | -0.009 | 0     | 0      | t | 100407 | QDLLFTNQ<br>LK      | Mus<br>musculu<br>s              |
| 1 | 1.00 | 1 | 1 | 0.02  | 0.015  | 0.016  | 0.02  | 0.02   | t | 71568  | VTVVTTSG<br>S       | Bos<br>taurus                    |
| 1 | 1.00 | 1 | 1 | 0.03  | 0.032  | 0.02   | 0.031 | 0.03   | t | 44613  | NKVDAAV<br>A        | Homo<br>sapiens                  |
| 1 | 1.00 | 1 | 1 | 0.03  | 0.032  | 0.02   | 0.031 | 0.03   | t | 44613  | NKVDAAV<br>A        | Homo<br>sapiens                  |
| 1 | 1.00 | 1 | 1 | 0.01  | 0.014  | 0.01   | 0.017 | 0.009  | t | 107478 | KEYKCKV             | Homo<br>sapiens                  |
| 1 | 1.00 | 1 | 1 | 0.01  | 0.012  | 0.01   | 0.017 | 0.009  | t | 107478 | KEYKCKV             | Homo<br>sapiens                  |
| 1 | 1.00 | 1 | 1 | -0.07 | -0.033 | -0.08  | -0.07 | -0.074 | t | 12792  | EKLCVWN<br>NKTPHAIA | Oryctola<br>gus<br>cuniculu<br>s |
| 1 | 1.00 | 1 | 1 | 0     | 0.002  | -0.007 | 0.001 | 0      | t | 150965 | AKSFYKNLI<br>WLVKKG | Homo<br>sapiens                  |

|   |      |   |   |       |        |        |        |        |   |        |                     |                           |
|---|------|---|---|-------|--------|--------|--------|--------|---|--------|---------------------|---------------------------|
| 1 | 1.00 | 1 | 1 | 0.01  | -0.003 | 0.005  | 0.01   | 0.009  | t | 19096  | GDRADGQ<br>PA       | Aotus<br>griseime<br>mbra |
| 1 | 1.00 | 1 | 1 | -0.05 | -0.045 | -0.067 | -0.05  | -0.05  | t | 21334  | GMRFDGRG<br>Y       | Homo<br>sapiens           |
| 1 | 1.00 | 1 | 1 | 0.03  | 0.03   | 0.013  | 0.03   | 0.031  | t | 114142 | PQKSQRS<br>QDEN     | Rattus<br>norvegic<br>us  |
| 1 | 1.00 | 1 | 1 | 0.04  | 0.04   | 0.028  | 0.04   | 0.04   | t | 140674 | ESQDPKP<br>DELHKS   | Mus<br>musculu<br>s       |
| 1 | 1.00 | 1 | 1 | -0.01 | -0.012 | -0.022 | -0.007 | -0.01  | t | 107092 | AVDAVIAE<br>LKKQSKP | Rattus<br>norvegic<br>us  |
| 1 | 1.00 | 1 | 1 | 0.05  | 0.05   | 0.05   | 0.053  | 0.05   | t | 149054 | GSPNFTQ             | Sus<br>scrofa             |
| 1 | 1.00 | 1 | 1 | 0.06  | 0.06   | 0.053  | 0.057  | 0.06   | t | 42678  | MSTLQEL<br>QENITA   | Homo<br>sapiens           |
| 1 | 1.00 | 1 | 1 | 0.05  | 0.05   | 0.037  | 0.047  | 0.05   | t | 5206   | ATVSSQSF            | Homo<br>sapiens           |
| 1 | 1.00 | 1 | 1 | -0.01 | -0.008 | -0.01  | -0.003 | -0.01  | t | 104343 | VSGGPFI             | Homo<br>sapiens           |
| 1 | 1.00 | 1 | 1 | 0.01  | 0.01   | -0.006 | 0.01   | 0.012  | t | 10801  | DWEDRYR<br>E        | Mus<br>musculu<br>s       |
| 1 | 1.00 | 1 | 1 | -0.01 | -0.01  | -0.01  | -0.01  | -0.015 | t | 133536 | CKPVENRA<br>C       | Mus<br>musculu<br>s       |
| 1 | 1.00 | 1 | 1 | 0.02  | 0.02   | 0.015  | 0.02   | 0.02   | t | 114224 | PQDENPV<br>VHF      | Mus<br>musculu<br>s       |
| 1 | 1.00 | 1 | 1 | 0.02  | 0.023  | 0.015  | 0.02   | 0.02   | t | 114224 | PQDENPV<br>VHF      | Mus<br>musculu<br>s       |
| 1 | 1.00 | 1 | 1 | -0.03 | -0.032 | -0.039 | -0.027 | -0.029 | t | 115483 | SFFDIGGS<br>VSAGFSN | Mus<br>musculu<br>s       |
| 1 | 1.00 | 1 | 1 | 0     | 0      | -0.015 | -0.003 | 0      | t | 61760  | STLTITVNS<br>KKT    | Homo<br>sapiens           |
| 1 | 1.00 | 1 | 1 | 0.03  | 0.03   | 0.023  | 0.03   | 0.03   | t | 119508 | QFIGYPI             | Homo<br>sapiens           |

|   |      |   |   |       |        |        |        |        |   |        |                             |                      |
|---|------|---|---|-------|--------|--------|--------|--------|---|--------|-----------------------------|----------------------|
| 1 | 1.00 | 1 | 1 | -0.04 | -0.038 | -0.04  | -0.033 | -0.041 | t | 134764 | PTPGPSRR<br>GP              | Homo<br>sapiens      |
| 1 | 1.00 | 1 | 1 | 0.02  | 0.022  | 0.013  | 0.023  | 0.02   | t | 53281  | RCIPALDSL<br>T              | Homo<br>sapiens      |
| 1 | 1.00 | 1 | 1 | -0.01 | -0.01  | -0.017 | -0.01  | -0.01  | t | 122944 | WEGVGVV<br>PDV              | Rattus<br>norvegicus |
| 1 | 1.00 | 1 | 1 | 0.02  | 0.026  | 0.009  | 0.02   | 0.02   | t | 94178  | VSAFTSSN<br>DS              | Ovis<br>aries        |
| 1 | 1.00 | 1 | 1 | 0.01  | 0.01   | -0.005 | 0.013  | 0.013  | t | 56142  | RTNPSDNS<br>SDSNIKT         | Homo<br>sapiens      |
| 1 | 1.00 | 1 | 1 | 0.06  | 0.06   | 0.053  | 0.06   | 0.058  | t | 102309 | ANQTEV                      | Mus<br>musculus      |
| 1 | 1.00 | 1 | 1 | 0     | 0.002  | 0.011  | 0.007  | -0.003 | t | 69265  | VKLSG                       | Homo<br>sapiens      |
| 1 | 1.00 | 1 | 1 | 0.02  | 0.02   | 0.015  | 0.023  | 0.02   | t | 4091   | AQVIAEH<br>QF               | Homo<br>sapiens      |
| 1 | 1.00 | 1 | 1 | 0     | 0.002  | -0.011 | 0.003  | 0      | t | 158834 | IGFASKSA<br>DDVKKAF         | Homo<br>sapiens      |
| 1 | 1.00 | 1 | 1 | 0     | 0.004  | -0.013 | 0.001  | 0      | t | 19014  | GDKPSLFG<br>QAAAGDK<br>PSLF | Homo<br>sapiens      |
| 1 | 1.00 | 1 | 1 | 0.01  | 0.014  | 0.007  | 0.011  | 0.009  | t | 103297 | IWKLIKDM<br>LILPYLD         | Homo<br>sapiens      |
| 1 | 1.00 | 1 | 1 | 0.02  | 0.02   | 0.02   | 0.03   | 0.02   | t | 114910 | NTTSEDGK<br>VM              | Homo<br>sapiens      |
| 1 | 1.00 | 1 | 1 | 0.03  | 0.028  | 0.03   | 0.033  | 0.028  | t | 51262  | QKTTS                       | Mus<br>musculus      |
| 1 | 1.00 | 1 | 1 | -0.04 | -0.038 | -0.04  | -0.033 | -0.04  | t | 117229 | RHGFLPRH<br>RD              | Homo<br>sapiens      |
| 1 | 1.00 | 1 | 1 | 0.03  | 0.032  | 0.013  | 0.027  | 0.032  | t | 71199  | VSVNDPFI<br>DLEYM           | Homo<br>sapiens      |
| 1 | 1.00 | 1 | 1 | -0.01 | -0.01  | -0.021 | -0.01  | -0.011 | t | 14210  | ESMAGKR<br>EMV              | Mus<br>musculus      |

|   |      |   |   |       |        |        |        |        |   |        |                     |                       |
|---|------|---|---|-------|--------|--------|--------|--------|---|--------|---------------------|-----------------------|
| 1 | 1.00 | 1 | 1 | -0.03 | -0.03  | -0.05  | -0.036 | -0.03  | t | 49372  | PSGDRA              | Homo sapiens          |
| 1 | 1.00 | 1 | 1 | 0.04  | 0.026  | 0.033  | 0.04   | 0.039  | t | 137867 | GEIKFEAV<br>EGAV    | Oryctolagus cuniculus |
| 1 | 1.00 | 1 | 1 | 0.03  | 0.033  | 0.024  | 0.03   | 0.028  | t | 9592   | DPAKAAF<br>DSLQASAT | Mus musculus          |
| 1 | 1.00 | 1 | 1 | 0.01  | 0.008  | 0.01   | 0.013  | 0.01   | t | 3394   | ANQPGH              | Homo sapiens          |
| 1 | 1.00 | 1 | 1 | 0.02  | 0.018  | 0.004  | 0.013  | 0.02   | t | 98122  | IQNSKSAY<br>TP      | Mus musculus          |
| 1 | 1.00 | 1 | 1 | 0.02  | 0.016  | 0.004  | 0.013  | 0.02   | t | 98122  | IQNSKSAY<br>TP      | Oryctolagus cuniculus |
| 1 | 1.00 | 1 | 1 | 0.03  | 0.033  | 0.021  | 0.03   | 0.03   | t | 100406 | QDEIYEQV<br>HS      | Mus musculus          |
| 1 | 1.00 | 1 | 1 | -0.03 | -0.03  | -0.034 | -0.03  | -0.03  | t | 60792  | SRRYPFVK<br>F       | Homo sapiens          |
| 1 | 1.00 | 1 | 1 | -0.01 | -0.01  | -0.016 | -0.011 | -0.01  | t | 31787  | KLDLYGKV<br>H       | Sus scrofa            |
| 1 | 1.00 | 1 | 1 | 0     | 0      | -0.012 | 0.004  | 0.002  | t | 96450  | KEKPTPPV<br>KP      | Homo sapiens(human)   |
| 1 | 1.00 | 1 | 1 | -0.02 | -0.017 | -0.029 | -0.02  | -0.018 | t | 120790 | LVPEHADA<br>FK      | Mus musculus          |
| 1 | 1.00 | 1 | 1 | -0.02 | -0.034 | -0.029 | -0.017 | -0.02  | t | 34476  | KYKDKPLY            | Macaca mulatta        |
| 1 | 1.00 | 1 | 1 | -0.02 | -0.022 | -0.029 | -0.017 | -0.02  | t | 66792  | TTQTKPKS<br>AF      | Mus musculus          |
| 1 | 1.00 | 1 | 1 | -0.06 | -0.058 | -0.067 | -0.053 | -0.06  | t | 121983 | VKGWRPR<br>R        | Homo sapiens          |

|   |      |   |   |       |        |        |        |        |   |        |                          |                                  |
|---|------|---|---|-------|--------|--------|--------|--------|---|--------|--------------------------|----------------------------------|
| 1 | 1.00 | 1 | 1 | 0.04  | 0.042  | 0.033  | 0.041  | 0.04   | t | 62975  | TAQSTMK<br>AEEITP        | Homo<br>sapiens                  |
| 1 | 1.00 | 1 | 1 | -0.01 | -0.013 | -0.022 | -0.009 | -0.009 | t | 88446  | SDTVQTR<br>HVVQHRS<br>R  | Homo<br>sapiens                  |
| 1 | 1.00 | 1 | 1 | 0.03  | 0.028  | 0.021  | 0.029  | 0.03   | t | 49450  | PSNQDSF<br>QWQ           | Mus<br>musculu<br>s              |
| 1 | 1.00 | 1 | 1 | 0.05  | 0.052  | 0.04   | 0.057  | 0.053  | t | 125229 | RDSEGLV<br>AEKLGPI       | Homo<br>sapiens                  |
| 1 | 1.00 | 1 | 1 | 0     | 0      | 0      | 0.006  | -0.002 | t | 868    | AEFAFDL<br>WNECAKA<br>CV | Homo<br>sapiens                  |
| 1 | 1.00 | 1 | 1 | 0     | -0.003 | -0.009 | 0      | 0      | t | 112442 | ACQKH                    | Oryctola<br>gus<br>cuniculu<br>s |
| 1 | 1.00 | 1 | 1 | 0.04  | 0.042  | 0.025  | 0.043  | 0.042  | t | 119313 | QGVTAET<br>PQASTTE       | Homo<br>sapiens                  |
| 1 | 1.00 | 1 | 1 | 0     | 0      | -0.011 | 0.006  | 0.002  | t | 16031  | FGPLWILQ<br>ASLLKV       | Homo<br>sapiens                  |
| 1 | 1.00 | 1 | 1 | 0.04  | 0.042  | 0.038  | 0.04   | 0.04   | t | 36955  | LKLYFEP                  | Homo<br>sapiens                  |
| 1 | 1.00 | 1 | 1 | 0.01  | 0.007  | 0.01   | 0.01   | 0.009  | t | 135566 | KCSRLYTA<br>CVY          | Oryctola<br>gus<br>cuniculu<br>s |
| 1 | 1.00 | 1 | 1 | 0.04  | 0.043  | 0.03   | 0.04   | 0.04   | t | 57506  | SEKSKCEE<br>NTMFQPY      | Equus<br>caballus                |
| 1 | 1.00 | 1 | 1 | 0     | 0      | -0.008 | 0.003  | 0      | t | 110964 | PNLKLNN<br>GTDYK         | Homo<br>sapiens                  |
| 1 | 1.00 | 1 | 1 | 0.05  | 0.05   | 0.05   | 0.05   | 0.052  | t | 127818 | SDFGKFV                  | Homo<br>sapiens                  |
| 1 | 1.00 | 1 | 1 | -0.02 | -0.02  | -0.025 | -0.024 | -0.022 | t | 123442 | LLKDLRKN                 | Homo<br>sapiens                  |
| 1 | 1.00 | 1 | 1 | -0.02 | -0.018 | -0.02  | -0.019 | -0.021 | t | 51428  | QLLRIPQAI<br>MDM         | Homo<br>sapiens                  |

|   |      |   |   |       |        |        |        |        |   |        |                              |                                  |
|---|------|---|---|-------|--------|--------|--------|--------|---|--------|------------------------------|----------------------------------|
| 1 | 1.00 | 1 | 1 | -0.01 | -0.012 | -0.017 | -0.01  | -0.011 | t | 120146 | QGARVYA<br>YVF               | Oryctola<br>gus<br>cuniculu<br>s |
| 1 | 1.00 | 1 | 1 | -0.01 | -0.01  | -0.017 | -0.01  | -0.011 | t | 120146 | QGARVYA<br>YVF               | Mus<br>musculu<br>s              |
| 1 | 1.00 | 1 | 1 | 0     | 0      | 0      | 0.004  | -0.003 | t | 133372 | SPSPTPTP<br>GPSRRG           | Homo<br>sapiens                  |
| 1 | 1.00 | 1 | 1 | -0.03 | -0.028 | -0.037 | -0.023 | -0.03  | t | 121667 | NTHLKAVK<br>MTLKNR           | Homo<br>sapiens                  |
| 1 | 1.00 | 1 | 1 | 0.04  | 0.042  | 0.033  | 0.047  | 0.041  | t | 136547 | PGGKHNM<br>DFYVEALA<br>FPDTD | Homo<br>sapiens                  |
| 1 | 1.00 | 1 | 1 | -0.02 | -0.02  | -0.028 | -0.02  | -0.021 | t | 119654 | TSGVHTFP                     | Homo<br>sapiens                  |
| 1 | 1.00 | 1 | 1 | 0.06  | 0.062  | 0.055  | 0.061  | 0.06   | t | 19621  | GFSYDT                       | Homo<br>sapiens                  |
| 1 | 1.00 | 1 | 1 | -0.01 | -0.008 | -0.01  | -0.003 | -0.01  | t | 112753 | ARWELNL                      | Homo<br>sapiens                  |
| 1 | 1.00 | 1 | 1 | 0.01  | 0.01   | -0.01  | 0.01   | 0.012  | t | 74475  | YKLNIFYD<br>LLRAKL           | Mus<br>musculu<br>s              |
| 1 | 1.00 | 1 | 1 | 0     | 0.004  | 0      | 0.007  | -0.002 | t | 126922 | REWIKFAA<br>ACRE             | Homo<br>sapiens                  |
| 1 | 1.00 | 1 | 1 | 0.02  | 0.018  | 0.008  | 0.021  | 0.022  | t | 70384  | VPNLQGV<br>PESPFSRT          | Homo<br>sapiens                  |
| 1 | 1.00 | 1 | 1 | 0.02  | 0.018  | 0.017  | 0.019  | 0.018  | t | 67645  | VAKETSDK<br>Q                | Mus<br>musculu<br>s              |
| 1 | 1.00 | 1 | 1 | 0.01  | 0.014  | 0.014  | 0.017  | 0.009  | t | 144746 | PTEEQVS<br>WLS               | Homo<br>sapiens                  |
| 1 | 1.00 | 1 | 1 | 0.02  | 0.016  | 0.006  | 0.019  | 0.023  | t | 50815  | QFQTQQ                       | Oryctola<br>gus<br>cuniculu<br>s |

|   |      |   |   |       |        |        |        |        |   |        |                    |                                  |
|---|------|---|---|-------|--------|--------|--------|--------|---|--------|--------------------|----------------------------------|
| 1 | 1.00 | 1 | 1 | 0     | 0.002  | 0.004  | 0.007  | 0      | t | 145657 | YRSYNDSDV<br>DP    | Homo<br>sapiens                  |
| 1 | 1.00 | 1 | 1 | 0     | 0.003  | 0.002  | 0.007  | 0.001  | t | 104895 | LVEALYLV<br>CGERG  | Mus<br>musculu<br>s              |
| 1 | 1.00 | 1 | 1 | 0.05  | 0.048  | 0.05   | 0.051  | 0.052  | t | 130643 | YSLLEPYT<br>FDP    | Mus<br>musculu<br>s              |
| 1 | 1.00 | 1 | 1 | 0.05  | 0.05   | 0.05   | 0.051  | 0.052  | t | 130643 | YSLLEPYT<br>FDP    | Homo<br>sapiens                  |
| 1 | 1.00 | 1 | 1 | 0.02  | 0.022  | 0.025  | 0.027  | 0.021  | t | 112801 | LATPNPS            | Homo<br>sapiens                  |
| 1 | 1.00 | 1 | 1 | -0.03 | -0.034 | -0.044 | -0.027 | -0.028 | t | 105    | AAEFTINK<br>PK     | Oryctola<br>gus<br>cuniculu<br>s |
| 1 | 1.00 | 1 | 1 | -0.05 | -0.048 | -0.055 | -0.049 | -0.051 | t | 72326  | WDQMW<br>KCLI      | Homo<br>sapiens                  |
| 1 | 1.00 | 1 | 1 | -0.03 | -0.031 | -0.045 | -0.033 | -0.03  | t | 41862  | MKLTA              | Homo<br>sapiens                  |
| 1 | 1.00 | 1 | 1 | 0.01  | 0.012  | 0.01   | 0.011  | 0.007  | t | 37310  | LLGACFS            | Homo<br>sapiens                  |
| 1 | 1.00 | 1 | 1 | 0     | 0      | -0.007 | 0      | -0.002 | t | 76606  | YYSPAF             | Mus<br>musculu<br>s              |
| 1 | 1.00 | 1 | 1 | 0.02  | 0.02   | 0.02   | 0.023  | 0.021  | t | 69883  | VLYQEFDE           | Homo<br>sapiens                  |
| 1 | 1.00 | 1 | 1 | 0.04  | 0.04   | 0.04   | 0.04   | 0.038  | t | 140507 | TKTWQSM            | Mus<br>musculu<br>s              |
| 1 | 1.00 | 1 | 1 | 0.03  | 0.023  | 0.03   | 0.03   | 0.03   | t | 114008 | VSLVEETSF<br>I     | Oryctola<br>gus<br>cuniculu<br>s |
| 1 | 1.00 | 1 | 1 | -0.01 | -0.014 | -0.018 | -0.007 | -0.01  | t | 6106   | CDICTNTM<br>DVIKML | Oryctola<br>gus<br>cuniculu<br>s |
| 1 | 1.00 | 1 | 1 | 0.04  | 0.04   | 0.04   | 0.044  | 0.04   | t | 135975 | PTLAFLQD<br>VMNI   | Homo<br>sapiens                  |

|   |      |   |   |       |        |        |        |        |   |        |                  |                       |
|---|------|---|---|-------|--------|--------|--------|--------|---|--------|------------------|-----------------------|
| 1 | 1.00 | 1 | 1 | 0.01  | 0.012  | 0.004  | 0.011  | 0.01   | t | 39254  | LRYLEA           | Homo sapiens          |
| 1 | 1.00 | 1 | 1 | 0.01  | 0.012  | 0.004  | 0.011  | 0.01   | t | 39254  | LRYLEA           | Homo sapiens          |
| 1 | 1.00 | 1 | 1 | 0.05  | 0.052  | 0.035  | 0.047  | 0.05   | t | 51279  | QLADIN           | Homo sapiens          |
| 1 | 1.00 | 1 | 1 | 0.05  | 0.05   | 0.05   | 0.059  | 0.052  | t | 130919 | KFPEDFES         | Homo sapiens          |
| 1 | 1.00 | 1 | 1 | 0.04  | 0.04   | 0.04   | 0.04   | 0.04   | t | 65846  | TQGCNCSI<br>YP   | Homo sapiens          |
| 1 | 1.00 | 1 | 1 | -0.04 | -0.037 | -0.04  | -0.04  | -0.042 | t | 134017 | CFHQGKEY<br>APG  | Mus musculus          |
| 1 | 1.00 | 1 | 1 | 0     | 0      | -0.017 | 0      | 0.002  | t | 7939   | DEDKRDG<br>N     | Oryctolagus cuniculus |
| 1 | 1.00 | 1 | 1 | 0.02  | 0.022  | -0.003 | 0.017  | 0.022  | t | 62277  | SVPEVC           | Homo sapiens          |
| 1 | 1.00 | 1 | 1 | 0.01  | 0.014  | -0.002 | 0.009  | 0.011  | t | 141559 | SDEALPLG<br>SPR  | Mus musculus          |
| 1 | 1.00 | 1 | 1 | -0.02 | -0.023 | -0.022 | -0.02  | -0.021 | t | 95034  | PKPAKSP          | Oryctolagus cuniculus |
| 1 | 1.00 | 1 | 1 | -0.02 | -0.02  | -0.022 | -0.02  | -0.021 | t | 95034  | PKPAKSP          | Mus musculus          |
| 1 | 1.00 | 1 | 1 | -0.05 | -0.046 | -0.057 | -0.047 | -0.051 | t | 115633 | PPFSRVVH<br>LYRN | Homo sapiens          |
| 1 | 1.00 | 1 | 1 | -0.05 | -0.036 | -0.057 | -0.047 | -0.051 | t | 115633 | PPFSRVVH<br>LYRN | Homo sapiens          |
| 1 | 1.00 | 1 | 1 | 0     | 0      | 0      | 0.006  | 0      | t | 107064 | AGAPGFP<br>G     | Rattus norvegicus     |
| 1 | 1.00 | 1 | 1 | -0.01 | -0.01  | -0.026 | -0.011 | -0.007 | t | 98976  | QYPLGQG<br>SFRPS | Homo sapiens          |



|   |      |   |   |       |        |        |        |        |   |        |                      |                                  |
|---|------|---|---|-------|--------|--------|--------|--------|---|--------|----------------------|----------------------------------|
| 1 | 1.00 | 1 | 1 | -0.03 | -0.028 | -0.025 | -0.023 | -0.033 | t | 126757 | NKPLITVT<br>NSKY     | Homo<br>sapiens                  |
| 1 | 1.00 | 1 | 1 | 0.01  | 0.01   | 0.003  | 0.01   | 0.011  | t | 107698 | YNSTYRV              | Homo<br>sapiens                  |
| 1 | 1.00 | 1 | 1 | 0     | 0.004  | 0.002  | 0.007  | 0      | t | 119641 | SEHETRLV<br>AKLFKDYS | Homo<br>sapiens                  |
| 1 | 1.00 | 1 | 1 | 0.01  | 0.01   | 0.008  | 0.01   | 0.009  | t | 75370  | YPNQV                | Mus<br>musculu<br>s              |
| 1 | 1.00 | 1 | 1 | 0.01  | 0.006  | 0.009  | 0.009  | 0.01   | t | 78711  | KQYDPDR<br>P         | Oryctola<br>gus<br>cuniculu<br>s |
| 1 | 1.00 | 1 | 1 | -0.01 | -0.012 | -0.016 | -0.011 | -0.012 | t | 70134  | VNNKV                | Mus<br>musculu<br>s              |
| 1 | 1.00 | 1 | 1 | -0.01 | -0.006 | -0.01  | -0.003 | -0.011 | t | 116682 | CHGRGTC<br>NYYANAYS  | Homo<br>sapiens                  |
| 1 | 1.00 | 1 | 1 | 0.04  | 0.043  | 0.04   | 0.04   | 0.04   | t | 57504  | SEKSEEIN             | Mus<br>musculu<br>s              |
| 1 | 1.00 | 1 | 1 | 0.04  | 0.043  | 0.04   | 0.04   | 0.04   | t | 57504  | SEKSEEIN             | Mus<br>musculu<br>s              |
| 1 | 1.00 | 1 | 1 | -0.01 | -0.006 | -0.01  | -0.003 | -0.011 | t | 107660 | VLHQNWL              | Homo<br>sapiens                  |
| 1 | 1.00 | 1 | 1 | -0.02 | -0.016 | -0.031 | -0.02  | -0.021 | t | 93332  | LSSLQFAR<br>AA       | Ovis<br>aries                    |
| 1 | 1.00 | 1 | 1 | 0.06  | 0.06   | 0.06   | 0.063  | 0.06   | t | 149106 | SITNPTQ              | Sus<br>scrofa                    |
| 1 | 1.00 | 1 | 1 | 0.05  | 0.053  | 0.038  | 0.05   | 0.051  | t | 101363 | VEPSYEAE<br>PT       | Mus<br>musculu<br>s              |

|   |      |   |   |       |        |        |        |        |   |        |                         |                       |
|---|------|---|---|-------|--------|--------|--------|--------|---|--------|-------------------------|-----------------------|
| 1 | 1.00 | 1 | 1 | 0.05  | 0.056  | 0.057  | 0.057  | 0.048  | t | 127754 | NTPEEKD                 | Homo sapiens          |
| 1 | 1.00 | 1 | 1 | 0.06  | 0.056  | 0.059  | 0.057  | 0.059  | t | 118991 | RAEDNAD<br>TLALVFEA     | Oryctolagus cuniculus |
| 1 | 1.00 | 1 | 1 | -0.01 | -0.016 | -0.008 | -0.01  | -0.012 | t | 5109   | ATPYHPPA<br>TP          | Oryctolagus cuniculus |
| 1 | 1.00 | 1 | 1 | 0.03  | 0.036  | 0.03   | 0.03   | 0.03   | t | 58743  | SIVYEAA                 | MD                    |
| 1 | 1.00 | 1 | 1 | -0.02 | -0.02  | -0.019 | -0.017 | -0.02  | t | 73741  | YEPPVVHG                | Homo sapiens          |
| 1 | 1.00 | 1 | 1 | 0.01  | 0.005  | 0      | 0.01   | 0.01   | t | 132827 | FSQILPSFD<br>DETMGR     | Trichosurus vulpecula |
| 1 | 1.00 | 1 | 1 | -0.01 | -0.01  | -0.01  | -0.01  | -0.014 | t | 16755  | FLLTRILTI               | Mus musculus          |
| 1 | 1.00 | 1 | 1 | 0.03  | 0.034  | 0.023  | 0.037  | 0.031  | t | 20097  | GGYGDGG<br>AHGGGYG<br>G | Homo sapiens          |
| 1 | 1.00 | 1 | 1 | -0.01 | -0.014 | -0.015 | -0.007 | -0.01  | t | 50887  | QGIVEFYT                | Oryctolagus cuniculus |
| 1 | 1.00 | 1 | 1 | 0.04  | 0.04   | 0.033  | 0.04   | 0.041  | t | 58728  | SITTPSQ                 | Oryctolagus cuniculus |
| 1 | 1.00 | 1 | 1 | 0     | 0      | -0.014 | 0      | 0      | t | 51942  | QPQRPFQ<br>QQP          | Mus musculus          |
| 1 | 1.00 | 1 | 1 | -0.03 | -0.026 | -0.03  | -0.023 | -0.03  | t | 123626 | PPYMPPG<br>G            | Homo sapiens          |
| 1 | 1.00 | 1 | 1 | 0.01  | 0.01   | -0.001 | 0.01   | 0.01   | t | 79898  | LDPLVTAL<br>LGAFD       | Mus musculus          |

|   |      |   |   |      |        |        |        |        |   |        |                             |              |
|---|------|---|---|------|--------|--------|--------|--------|---|--------|-----------------------------|--------------|
| 1 | 1.00 | 1 | 1 | 0.01 | 0.01   | 0.006  | 0.014  | 0.009  | t | 120060 | LGSSERR<br>ALQDSQR          | Homo sapiens |
| 1 | 1.00 | 1 | 1 | 0.04 | 0.04   | 0.03   | 0.04   | 0.041  | t | 57542  | SELSQLS                     | Mus musculus |
| 1 | 1.00 | 1 | 1 | 0    | 0      | 0      | 0.008  | -0.001 | t | 136080 | RAGTDEGFG                   | Homo sapiens |
| 1 | 1.00 | 1 | 1 | 0    | 0      | 0      | 0.008  | -0.001 | t | 124604 | QIERDTER<br>DRFLSAPE<br>AV  | Homo sapiens |
| 1 | 1.00 | 1 | 1 | 0.02 | 0.02   | 0.022  | 0.02   | 0.018  | t | 72911  | WNSTTFH<br>QTLQDP           | Mus musculus |
| 1 | 1.00 | 1 | 1 | 0.02 | 0.02   | 0.022  | 0.02   | 0.018  | t | 72911  | WNSTTFH<br>QTLQDP           | Mus musculus |
| 1 | 1.00 | 1 | 1 | 0.01 | 0.01   | 0.01   | 0.01   | 0.008  | t | 50823  | QFYQKFP<br>QYL              | Homo sapiens |
| 1 | 1.00 | 1 | 1 | 0.06 | 0.058  | 0.049  | 0.059  | 0.06   | t | 66084  | TRQELANK<br>QQESKENE<br>KAL | Mus musculus |
| 1 | 1.00 | 1 | 1 | 0.04 | 0.04   | 0.04   | 0.04   | 0.04   | t | 117509 | GQIPPGAM                    | Homo sapiens |
| 1 | 1.00 | 1 | 1 | 0.01 | 0.01   | 0      | 0.013  | 0.013  | t | 58582  | SIKEDVQF                    | Homo sapiens |
| 1 | 1.00 | 1 | 1 | 0.04 | 0.043  | 0.028  | 0.039  | 0.04   | t | 30939  | KGGKGTEEK                   | Mus musculus |
| 1 | 1.00 | 1 | 1 | 0.01 | 0.012  | 0.01   | 0.017  | 0.01   | t | 134773 | QKSTHLLIR<br>KLPSFR         | Homo sapiens |
| 1 | 1.00 | 1 | 1 | 0.01 | 0.012  | 0.018  | 0.009  | 0.008  | t | 2133   | AIYGAA                      | Homo sapiens |
| 1 | 1.00 | 1 | 1 | 0.01 | 0.01   | 0.01   | 0.02   | 0.013  | t | 141638 | EIHSKTKS                    | Homo sapiens |
| 1 | 1.00 | 1 | 1 | 0    | -0.002 | -0.004 | -0.003 | -0.002 | t | 18955  | GDDPLLGNQSL                 | Mus musculus |

|   |      |   |   |       |        |        |        |        |   |        |                      |                                  |
|---|------|---|---|-------|--------|--------|--------|--------|---|--------|----------------------|----------------------------------|
| 1 | 1.00 | 1 | 1 | 0     | -0.003 | -0.01  | 0      | 0      | t | 131874 | EVFISAPR             | Oryctola<br>gus<br>cuniculu<br>s |
| 1 | 1.00 | 1 | 1 | 0.06  | 0.06   | 0.053  | 0.06   | 0.058  | t | 102310 | ANQTEVE<br>M         | Mus<br>musculu<br>s              |
| 1 | 1.00 | 1 | 1 | 0.02  | 0.022  | 0.013  | 0.021  | 0.02   | t | 34278  | KVYVGNY<br>DF        | Homo<br>sapiens                  |
| 1 | 1.00 | 1 | 1 | 0.05  | 0.05   | 0.053  | 0.05   | 0.047  | t | 78938  | CAPGQNL<br>CY        | Mus<br>musculu<br>s              |
| 1 | 1.00 | 1 | 1 | 0.01  | 0.01   | 0.01   | 0.013  | 0.01   | t | 149049 | FTPQMVR              | Sus<br>scrofa                    |
| 1 | 1.00 | 1 | 1 | -0.08 | -0.076 | -0.084 | -0.077 | -0.08  | t | 134143 | LMPPKY               | Homo<br>sapiens                  |
| 1 | 1.00 | 1 | 1 | 0.02  | 0.022  | 0.008  | 0.021  | 0.02   | t | 142413 | EIAAEVAK<br>AKVAK    | Homo<br>sapiens                  |
| 1 | 1.00 | 1 | 1 | 0.05  | 0.05   | 0.047  | 0.05   | 0.051  | t | 102880 | VDELD                | Mus<br>musculu<br>s              |
| 1 | 1.00 | 1 | 1 | 0.02  | 0.02   | 0.02   | 0.02   | 0.018  | t | 137407 | GPEYWDG<br>ETRKVKA   | Oryctola<br>gus<br>cuniculu<br>s |
| 1 | 1.00 | 1 | 1 | 0     | 0.001  | -0.007 | -0.003 | -0.001 | t | 130464 | DFRVT                | Mus<br>musculu<br>s              |
| 1 | 1.00 | 1 | 1 | 0.02  | 0.02   | 0.009  | 0.02   | 0.02   | t | 125176 | NNSTGDFE<br>L        | Mus<br>musculu<br>s              |
| 1 | 1.00 | 1 | 1 | 0.03  | 0.032  | 0.028  | 0.03   | 0.029  | t | 122876 | PSPDSKPT             | Rattus<br>norvegic<br>us         |
| 1 | 1.00 | 1 | 1 | -0.01 | -0.008 | -0.017 | -0.013 | -0.012 | t | 116040 | YQQKPVA<br>LIN       | Homo<br>sapiens                  |
| 1 | 1.00 | 1 | 1 | -0.03 | -0.028 | -0.037 | -0.023 | -0.031 | t | 121267 | ERMERKR<br>REK       | Homo<br>sapiens                  |
| 1 | 1.00 | 1 | 1 | 0.05  | 0.054  | 0.043  | 0.053  | 0.05   | t | 131657 | SGLQAEDE<br>ADYYCSSY | Homo<br>sapiens                  |

|   |      |   |   |       |        |        |        |        |   |        |                    |                       |
|---|------|---|---|-------|--------|--------|--------|--------|---|--------|--------------------|-----------------------|
| 1 | 1.00 | 1 | 1 | 0.03  | 0.028  | 0.024  | 0.029  | 0.03   | t | 55048  | RNQE               | Mus musculus          |
| 1 | 1.00 | 1 | 1 | -0.03 | -0.028 | -0.027 | -0.023 | -0.03  | t | 119654 | TSGVHTFP           | Homo sapiens          |
| 1 | 1.00 | 1 | 1 | -0.01 | -0.01  | -0.017 | -0.01  | -0.011 | t | 138027 | SADFTPGT           | Oryctolagus cuniculus |
| 1 | 1.00 | 1 | 1 | 0.03  | 0.028  | 0.031  | 0.033  | 0.03   | t | 11377  | EDLDGA             | Mus musculus          |
| 1 | 1.00 | 1 | 1 | 0     | -0.002 | -0.013 | 0.003  | 0.002  | t | 75392  | YPQPQPFRPQ         | Mus musculus          |
| 1 | 1.00 | 1 | 1 | 0     | 0      | 0      | 0      | -0.004 | t | 143676 | DRVGLRNLRGYY       | Mus musculus          |
| 1 | 1.00 | 1 | 1 | 0.06  | 0.06   | 0.06   | 0.06   | 0.059  | t | 143362 | ETPLMKE            | Mus musculus          |
| 1 | 1.00 | 1 | 1 | 0.06  | 0.06   | 0.06   | 0.06   | 0.059  | t | 143362 | ETPLMKE            | Mus musculus          |
| 1 | 1.00 | 1 | 1 | -0.01 | -0.006 | -0.01  | -0.003 | -0.007 | t | 108075 | PREPQVY            | Homo sapiens          |
| 1 | 1.00 | 1 | 1 | -0.04 | -0.04  | -0.047 | -0.034 | -0.04  | t | 10987  | EAAGIGILT V        | Homo sapiens          |
| 1 | 1.00 | 1 | 1 | 0.05  | 0.054  | 0.043  | 0.051  | 0.05   | t | 137858 | FTPGTEYT           | Homo sapiens          |
| 1 | 1.00 | 1 | 1 | -0.01 | -0.01  | -0.009 | -0.01  | -0.012 | t | 76606  | YYSPAF             | Mus musculus          |
| 1 | 1.00 | 1 | 1 | -0.01 | -0.007 | -0.009 | -0.01  | -0.012 | t | 76606  | YYSPAF             | Mus musculus          |
| 1 | 1.00 | 1 | 1 | 0     | -0.003 | -0.012 | 0      | 0      | t | 141792 | YYLWKQY NPTGKGID D | Oryctolagus cuniculus |

|   |      |   |   |       |        |        |        |        |   |        |                              |                          |
|---|------|---|---|-------|--------|--------|--------|--------|---|--------|------------------------------|--------------------------|
| 1 | 1.00 | 1 | 1 | 0     | -0.005 | -0.007 | -0.006 | -0.002 | t | 148481 | YTRDLVYK                     | Rattus<br>norvegicus     |
| 1 | 1.00 | 1 | 1 | -0.01 | -0.013 | -0.027 | -0.01  | -0.009 | t | 69233  | VKGSSIAA                     | Oryctolagus<br>cuniculus |
| 1 | 1.00 | 1 | 1 | 0.03  | 0.03   | 0.03   | 0.03   | 0.027  | t | 138088 | WLDLSKT                      | Mus<br>musculus          |
| 1 | 1.00 | 1 | 1 | 0.04  | 0.038  | 0.045  | 0.043  | 0.039  | t | 138765 | EEIKMDISK<br>LNA             | Mus<br>musculus          |
| 1 | 1.00 | 1 | 1 | 0.09  | 0.086  | 0.087  | 0.09   | 0.09   | t | 141004 | EPDP                         | Mus<br>musculus          |
| 1 | 1.00 | 1 | 1 | 0.02  | 0.022  | 0.01   | 0.017  | 0.018  | t | 11190  | EASQAAD<br>ESERMKV           | Homo<br>sapiens          |
| 1 | 1.00 | 1 | 1 | 0.01  | 0.01   | 0.003  | 0.02   | 0.011  | t | 117383 | TLHKAFKG<br>SIFVVFDSI<br>ESA | Homo<br>sapiens          |
| 1 | 1.00 | 1 | 1 | 0.01  | 0      | 0.008  | 0.01   | 0.01   | t | 42655  | MSRSER                       | Marmota<br>monax         |
| 1 | 1.00 | 1 | 1 | 0     | -0.003 | -0.005 | 0      | 0      | t | 26339  | IGVKGSSI                     | Oryctolagus<br>cuniculus |
| 1 | 1.00 | 1 | 1 | 0.03  | 0.034  | 0.023  | 0.027  | 0.028  | t | 50677  | QEQIKGEE<br>VREL             | Homo<br>sapiens          |
| 1 | 1.00 | 1 | 1 | 0     | 0      | 0      | 0.009  | 0.001  | t | 132098 | TLLLEGVMA<br>A               | Homo<br>sapiens          |
| 1 | 1.00 | 1 | 1 | 0.02  | 0.022  | 0.013  | 0.023  | 0.02   | t | 141638 | EIHSKTKS                     | Homo<br>sapiens          |
| 1 | 1.00 | 1 | 1 | 0     | -0.003 | -0.006 | 0      | -0.001 | t | 105891 | KADPSIMA                     | Oryctolagus<br>cuniculus |
| 1 | 1.00 | 1 | 1 | 0.01  | 0.01   | -0.004 | 0.01   | 0.01   | t | 59376  | SLNVLFDR                     | Mus<br>musculus          |
| 1 | 1.00 | 1 | 1 | 0.01  | 0.013  | 0.01   | 0.01   | 0.009  | t | 134702 | KEKKYS                       | Mus<br>musculus          |

|   |      |   |   |       |        |        |        |        |   |        |                      |                                  |
|---|------|---|---|-------|--------|--------|--------|--------|---|--------|----------------------|----------------------------------|
| 1 | 1.00 | 1 | 1 | 0.02  | 0.024  | 0.018  | 0.027  | 0.018  | t | 132044 | RLRKWTT<br>VDSISVNT  | Homo<br>sapiens                  |
| 1 | 1.00 | 1 | 1 | -0.02 | -0.018 | -0.027 | -0.023 | -0.022 | t | 115694 | AVPYPQR<br>DMP       | Homo<br>sapiens                  |
| 1 | 1.00 | 1 | 1 | 0.01  | 0.012  | 0.004  | 0.011  | 0.008  | t | 59222  | SLKLESSCN<br>FDL     | Homo<br>sapiens                  |
| 1 | 1.00 | 1 | 1 | 0     | 0.004  | 0      | 0.007  | 0      | t | 119678 | YKCKVSNK             | Homo<br>sapiens                  |
| 1 | 1.00 | 1 | 1 | 0.03  | 0.032  | 0.025  | 0.031  | 0.029  | t | 97598  | RDLLKKG<br>VDA       | Homo<br>sapiens                  |
| 1 | 1.00 | 1 | 1 | 0.03  | 0.032  | 0.025  | 0.031  | 0.029  | t | 97598  | RDLLKKG<br>VDA       | Homo<br>sapiens                  |
| 1 | 1.00 | 1 | 1 | -0.02 | -0.023 | -0.03  | -0.02  | -0.021 | t | 6762   | CPFIKPEVK<br>PGTPA   | Oryctola<br>gus<br>cuniculu<br>s |
| 1 | 1.00 | 1 | 1 | 0.03  | 0.03   | 0.021  | 0.03   | 0.029  | t | 69312  | VKSASPHG<br>ESNSSEE  | Mus<br>musculu<br>s              |
| 1 | 1.00 | 1 | 1 | -0.01 | -0.017 | -0.018 | -0.01  | -0.01  | t | 110971 | PVSDLNLKI<br>DGL     | Macaca                           |
| 1 | 1.00 | 1 | 1 | 0.02  | 0.005  | 0.008  | 0.017  | 0.02   | t | 42655  | MSRSER               | Marmot<br>a monax                |
| 1 | 1.00 | 1 | 1 | 0.01  | 0.008  | -0.002 | 0.01   | 0.01   | t | 100244 | LANAYSHF<br>YDGFAK   | Homo<br>sapiens                  |
| 1 | 1.00 | 1 | 1 | 0     | 0.002  | 0      | 0.007  | -0.001 | t | 9278   | DLSLLGKA<br>RKVVVTKD | Homo<br>sapiens                  |
| 1 | 1.00 | 1 | 1 | 0.02  | 0.02   | 0.02   | 0.02   | 0.018  | t | 95934  | TTVRIVDQ<br>CS       | Homo<br>sapiens                  |
| 1 | 1.00 | 1 | 1 | 0     | 0      | 0      | 0      | -0.004 | t | 135912 | EALVLDTN<br>GLMS     | Mus<br>musculu<br>s              |

|   |      |   |   |       |        |        |        |        |   |        |                           |                                  |
|---|------|---|---|-------|--------|--------|--------|--------|---|--------|---------------------------|----------------------------------|
| 1 | 1.00 | 1 | 1 | -0.03 | -0.03  | -0.042 | -0.026 | -0.028 | t | 96239  | EKPTPPVK<br>PT            | Homo<br>sapiens(<br>human)       |
| 1 | 1.00 | 1 | 1 | 0.01  | 0.008  | 0.011  | 0.011  | 0.01   | t | 61473  | SSWPKLEQ<br>F             | Homo<br>sapiens                  |
| 1 | 1.00 | 1 | 1 | 0     | 0      | 0      | 0      | 0      | t | 71343  | VTGSVVC                   | Mus<br>musculu<br>s              |
| 1 | 1.00 | 1 | 1 | -0.03 | -0.032 | -0.05  | -0.027 | -0.027 | t | 141713 | NGTDRKTI<br>RQLVWDA<br>M  | Rattus<br>norvegic<br>us         |
| 1 | 1.00 | 1 | 1 | -0.02 | -0.023 | -0.028 | -0.02  | -0.022 | t | 2215   | AKKPAGK<br>GSPSTLQT<br>PG | Oryctola<br>gus<br>cuniculu<br>s |
| 1 | 1.00 | 1 | 1 | 0.01  | 0.012  | 0.006  | 0.011  | 0.009  | t | 110872 | GSGSTANL<br>ASSNYFP       | Homo<br>sapiens                  |
| 1 | 1.00 | 1 | 1 | 0.02  | 0.02   | 0.017  | 0.027  | 0.02   | t | 127935 | ARLSAKPA<br>PPKPEPK       | Homo<br>sapiens                  |
| 1 | 1.00 | 1 | 1 | -0.02 | -0.022 | -0.02  | -0.021 | -0.022 | t | 48819  | PPLGNWF<br>G              | Mus<br>musculu<br>s              |
| 1 | 1.00 | 1 | 1 | 0.05  | 0.053  | 0.05   | 0.05   | 0.051  | t | 134028 | DDTIS                     | Mus<br>musculu<br>s              |
| 1 | 1.00 | 1 | 1 | 0.03  | 0.032  | 0.028  | 0.037  | 0.029  | t | 51852  | QPHDLGK<br>VGEVIVTK<br>D  | Homo<br>sapiens                  |
| 1 | 1.00 | 1 | 1 | 0     | 0.002  | -0.002 | 0.007  | 0.001  | t | 114013 | VVHFFKNI<br>VT            | Homo<br>sapiens                  |
| 1 | 1.00 | 1 | 1 | 0.02  | 0.018  | 0      | 0.013  | 0.02   | t | 128152 | YIFSEEAQ<br>VKDVPVVT      | Mus<br>musculu<br>s              |
| 1 | 1.00 | 1 | 1 | 0     | -0.002 | 0.005  | -0.001 | -0.006 | t | 54707  | RLPRYMQ<br>EV             | Mus<br>musculu<br>s              |
| 1 | 1.00 | 1 | 1 | 0.02  | 0.02   | 0.014  | 0.02   | 0.02   | t | 79524  | CHTTATIPS<br>SAVTC        | Mus<br>musculu<br>s              |
| 1 | 1.00 | 1 | 1 | 0.02  | 0.02   | 0.014  | 0.02   | 0.02   | t | 79524  | CHTTATIPS<br>SAVTC        | Mus<br>musculu<br>s              |



|   |      |   |   |       |        |        |        |        |   |        |                          |                                  |
|---|------|---|---|-------|--------|--------|--------|--------|---|--------|--------------------------|----------------------------------|
| 1 | 1.00 | 1 | 1 | 0.02  | 0.02   | 0.014  | 0.02   | 0.02   | t | 79524  | CHTTATIPS<br>SAVTC       | Mus<br>musculu<br>s              |
| 1 | 1.00 | 1 | 1 | 0.02  | 0.02   | 0.014  | 0.02   | 0.02   | t | 79524  | CHTTATIPS<br>SAVTC       | Mus<br>musculu<br>s              |
| 1 | 1.00 | 1 | 1 | 0     | -0.002 | -0.006 | -0.001 | 0      | t | 133725 | TVCTYRDF<br>MY           | Mus<br>musculu<br>s              |
| 1 | 1.00 | 1 | 1 | 0.02  | 0.02   | 0.017  | 0.02   | 0.019  | t | 46786  | PAEVTQLK<br>GLS          | Mus<br>musculu<br>s              |
| 1 | 1.00 | 1 | 1 | -0.01 | -0.013 | -0.017 | -0.01  | -0.011 | t | 135506 | VTFPGA                   | Oryctola<br>gus<br>cuniculu<br>s |
| 1 | 1.00 | 1 | 1 | 0.05  | 0.046  | 0.046  | 0.053  | 0.052  | t | 105753 | ELPNIEAD                 | Oryctola<br>gus<br>cuniculu<br>s |
| 1 | 1.00 | 1 | 1 | 0.04  | 0.04   | 0.04   | 0.044  | 0.04   | t | 115671 | AAMEL                    | Homo<br>sapiens                  |
| 1 | 1.00 | 1 | 1 | 0.03  | 0.03   | 0.03   | 0.03   | 0.03   | t | 141895 | FKYPEIEKY<br>EVDG        | Mus<br>musculu<br>s              |
| 1 | 1.00 | 1 | 1 | 0.03  | 0.03   | 0.03   | 0.03   | 0.03   | t | 141895 | FKYPEIEKY<br>EVDG        | Mus<br>musculu<br>s              |
| 1 | 1.00 | 1 | 1 | 0.04  | 0.04   | 0.04   | 0.04   | 0.04   | t | 134257 | VKSTP                    | Homo<br>sapiens                  |
| 1 | 1.00 | 1 | 1 | 0.03  | 0.03   | 0.03   | 0.03   | 0.029  | t | 64640  | TKPTDGN                  | Oryctola<br>gus<br>cuniculu<br>s |
| 1 | 1.00 | 1 | 1 | 0.03  | 0.03   | 0.03   | 0.03   | 0.029  | t | 64640  | TKPTDGN                  | Oryctola<br>gus<br>cuniculu<br>s |
| 1 | 1.00 | 1 | 1 | 0     | 0.003  | -0.005 | 0      | 0      | t | 6317   | CGMFTGL<br>FNQGAQQ<br>KL | Mus<br>musculu<br>s              |
| 1 | 1.00 | 1 | 1 | 0.01  | 0.014  | 0.01   | 0.01   | 0.009  | t | 137402 | FIDSYICQV                | Homo<br>sapiens                  |

|   |      |   |   |       |        |        |        |        |   |        |                              |                              |
|---|------|---|---|-------|--------|--------|--------|--------|---|--------|------------------------------|------------------------------|
| 1 | 1.00 | 1 | 1 | 0     | 0      | 0.003  | 0      | -0.004 | t | 133697 | SITTANPSS<br>FNKY            | Rattus<br>norvegicus         |
| 1 | 1.00 | 1 | 1 | -0.02 | -0.02  | -0.028 | -0.017 | -0.02  | t | 47983  | PISLERLDV<br>GTNLGN          | Homo<br>sapiens              |
| 1 | 1.00 | 1 | 1 | -0.01 | -0.008 | -0.017 | -0.007 | -0.011 | t | 135905 | CLFDRRLC<br>SHLE             | Homo<br>sapiens              |
| 1 | 1.00 | 1 | 1 | 0.02  | 0.024  | 0.015  | 0.027  | 0.02   | t | 136087 | VETDKATV<br>GF               | Homo<br>sapiens              |
| 1 | 1.00 | 1 | 1 | 0.04  | 0.046  | 0.047  | 0.047  | 0.04   | t | 127646 | EYNIMFGP<br>DI               | Homo<br>sapiens              |
| 1 | 1.00 | 1 | 1 | -0.02 | -0.02  | -0.024 | -0.023 | -0.022 | t | 114997 | YTNDCLLC<br>AY               | Homo<br>sapiens              |
| 1 | 1.00 | 1 | 1 | 0.06  | 0.062  | 0.059  | 0.063  | 0.058  | t | 47267  | PEEFEGAG<br>DGEPPED<br>DDSAT | Homo<br>sapiens              |
| 1 | 1.00 | 1 | 1 | -0.01 | -0.008 | -0.014 | -0.009 | -0.011 | t | 12625  | EKAFREL                      | Homo<br>sapiens              |
| 1 | 1.00 | 1 | 1 | 0.02  | 0.02   | 0.02   | 0.02   | 0.019  | t | 138623 | SKFGGFDP<br>QG               | Oryctola<br>gus<br>cuniculus |
| 1 | 1.00 | 1 | 1 | 0     | 0      | 0      | 0      | -0.003 | t | 21990  | GRAIN                        | Mus<br>musculus              |
| 1 | 1.00 | 1 | 1 | -0.02 | -0.02  | -0.023 | -0.02  | -0.02  | t | 67272  | TWKSKK                       | Homo<br>sapiens              |
| 1 | 1.00 | 1 | 1 | 0.01  | 0.016  | 0.011  | 0.011  | 0.009  | t | 99208  | EKMYAC                       | Equus<br>caballus            |
| 1 | 1.00 | 1 | 1 | -0.02 | -0.012 | -0.013 | -0.02  | -0.025 | t | 123014 | AIMRYIAD<br>K                | Ovis<br>aries                |

|   |      |   |   |       |        |        |        |        |   |        |                          |                           |
|---|------|---|---|-------|--------|--------|--------|--------|---|--------|--------------------------|---------------------------|
| 1 | 1.00 | 1 | 1 | 0.01  | 0.012  | 0.008  | 0.011  | 0.01   | t | 49405  | PSIPSRAAT<br>L           | Homo<br>sapiens           |
| 1 | 1.00 | 1 | 1 | 0.01  | 0.014  | 0.003  | 0.01   | 0.01   | t | 21720  | GPPAAEY                  | Homo<br>sapiens           |
| 1 | 1.00 | 1 | 1 | 0.03  | 0.034  | 0.018  | 0.031  | 0.03   | t | 142472 | SATAAETA<br>KNNAVS       | Homo<br>sapiens           |
| 1 | 1.00 | 1 | 1 | 0     | 0.002  | -0.01  | -0.003 | -0.002 | t | 50696  | QESLLKAN<br>IQLVEKD      | Homo<br>sapiens           |
| 1 | 1.00 | 1 | 1 | 0.02  | 0.022  | 0.02   | 0.027  | 0.02   | t | 107520 | LTVLHQN                  | Homo<br>sapiens           |
| 1 | 1.00 | 1 | 1 | 0.01  | 0.009  | 0      | 0.01   | 0.01   | t | 37354  | LLGNQSSL                 | Anas<br>platyrhy<br>nchos |
| 1 | 1.00 | 1 | 1 | -0.01 | -0.008 | -0.015 | -0.003 | -0.01  | t | 121034 | VHPDTGIS<br>SKAMGIM<br>N | Homo<br>sapiens           |
| 1 | 1.00 | 1 | 1 | 0.03  | 0.03   | 0.029  | 0.04   | 0.032  | t | 106647 | MHLTTNI                  | Homo<br>sapiens           |
| 1 | 1.00 | 1 | 1 | 0.03  | 0.032  | 0.018  | 0.031  | 0.03   | t | 70384  | VPNLQGV<br>PESPFRT       | Homo<br>sapiens           |
| 1 | 1.00 | 1 | 1 | 0.04  | 0.039  | 0.033  | 0.04   | 0.039  | t | 55248  | RPPETTTI                 | Anas<br>platyrhy<br>nchos |
| 1 | 1.00 | 1 | 1 | 0.01  | 0.008  | 0.004  | 0.013  | 0.01   | t | 63694  | TFKSGATF<br>QV           | Mus<br>musculu<br>s       |
| 1 | 1.00 | 1 | 1 | 0.01  | 0.01   | 0.001  | 0.008  | 0.01   | t | 800    | ADYHRVM<br>Y             | Homo<br>sapiens           |
| 1 | 1.00 | 1 | 1 | 0.04  | 0.04   | 0.043  | 0.042  | 0.04   | t | 142150 | EYMLDLQ<br>PETTD         | Homo<br>sapiens           |
| 1 | 1.00 | 1 | 1 | -0.03 | -0.028 | -0.03  | -0.023 | -0.032 | t | 134782 | RGRGRGG<br>PRR           | Homo<br>sapiens           |
| 1 | 1.00 | 1 | 1 | 0.01  | 0.01   | -0.004 | 0.01   | 0.01   | t | 75532  | YQPQQPF<br>PQP           | Mus<br>musculu<br>s       |

|   |      |   |   |       |        |        |        |        |   |        |                    |                                  |
|---|------|---|---|-------|--------|--------|--------|--------|---|--------|--------------------|----------------------------------|
| 1 | 1.00 | 1 | 1 | 0.02  | 0.018  | 0.015  | 0.021  | 0.021  | t | 29939  | KASAAC             | Homo sapiens                     |
| 1 | 1.00 | 1 | 1 | -0.02 | -0.018 | -0.018 | -0.013 | -0.021 | t | 122392 | HARLRDSG<br>RAY    | Homo sapiens                     |
| 1 | 1.00 | 1 | 1 | 0.01  | 0.012  | 0.006  | 0.007  | 0.008  | t | 106898 | TFWASDL<br>MHR     | Homo sapiens                     |
| 1 | 1.00 | 1 | 1 | 0.03  | 0.026  | 0.029  | 0.03   | 0.03   | t | 8800   | DITKD              | Oryctola<br>gus<br>cuniculu<br>s |
| 1 | 1.00 | 1 | 1 | 0.04  | 0.04   | 0.04   | 0.041  | 0.038  | t | 106941 | TVKQLYTL<br>YPAA   | Mus<br>musculu<br>s              |
| 1 | 1.00 | 1 | 1 | -0.01 | -0.01  | -0.009 | -0.006 | -0.011 | t | 30945  | KGGRKP             | Homo sapiens                     |
| 1 | 1.00 | 1 | 1 | 0.01  | 0.006  | 0.005  | 0.01   | 0.011  | t | 41713  | MIHFGND            | Mus<br>musculu<br>s              |
| 1 | 1.00 | 1 | 1 | -0.01 | -0.013 | -0.008 | -0.01  | -0.012 | t | 122320 | DVTVGPLI<br>FL     | Oryctola<br>gus<br>cuniculu<br>s |
| 1 | 1.00 | 1 | 1 | 0.04  | 0.04   | 0.04   | 0.04   | 0.04   | t | 58769  | SIYQCC             | Homo sapiens                     |
| 1 | 1.00 | 1 | 1 | 0     | -0.003 | -0.013 | 0      | 0      | t | 21606  | GPEKAFRE           | Oryctola<br>gus<br>cuniculu<br>s |
| 1 | 1.00 | 1 | 1 | 0     | -0.003 | -0.013 | 0      | 0      | t | 21606  | GPEKAFRE           | Oryctola<br>gus<br>cuniculu<br>s |
| 1 | 1.00 | 1 | 1 | 0.01  | 0.008  | -0.004 | 0.009  | 0.01   | t | 48107  | PKNTLTPL<br>EELYPT | Mus<br>musculu<br>s              |
| 1 | 1.00 | 1 | 1 | 0.01  | 0.012  | -0.004 | 0.009  | 0.01   | t | 48107  | PKNTLTPL<br>EELYPT | Aotus<br>nancyma<br>ae           |
| 1 | 1.00 | 1 | 1 | 0.01  | 0.007  | -0.003 | 0.009  | 0.012  | t | 1445   | AGAKSAIL           | Oryctola<br>gus<br>cuniculu<br>s |

|   |      |   |   |       |        |        |        |        |   |        |                            |                       |
|---|------|---|---|-------|--------|--------|--------|--------|---|--------|----------------------------|-----------------------|
| 1 | 1.00 | 1 | 1 | 0.01  | 0.014  | 0.005  | 0.011  | 0.009  | t | 3127   | AMKPDLQ<br>NTLMAVPR        | Homo sapiens          |
| 1 | 1.00 | 1 | 1 | 0.01  | -0.001 | -0.005 | 0.01   | 0.012  | t | 95142  | RIKNTDGSI<br>S             | Oryctolagus cuniculus |
| 1 | 1.00 | 1 | 1 | 0.01  | 0.007  | -0.005 | 0.01   | 0.012  | t | 43509  | NDPNRNV<br>D               | Oryctolagus cuniculus |
| 1 | 1.00 | 1 | 1 | -0.05 | -0.052 | -0.065 | -0.053 | -0.05  | t | 50350  | QAQYNQ<br>MHML             | Mus musculus          |
| 1 | 1.00 | 1 | 1 | 0.04  | 0.043  | 0.029  | 0.04   | 0.04   | t | 78937  | AYSDDFFV<br>GRV            | Mus musculus          |
| 1 | 1.00 | 1 | 1 | 0.02  | 0.02   | 0.02   | 0.02   | 0.02   | t | 105850 | GTAPFEIH                   | Oryctolagus cuniculus |
| 1 | 1.00 | 1 | 1 | 0.06  | 0.06   | 0.06   | 0.063  | 0.06   | t | 149113 | STPNVTQ                    | Sus scrofa            |
| 1 | 1.00 | 1 | 1 | -0.02 | -0.022 | -0.037 | -0.02  | -0.018 | t | 58906  | SKNLAPI                    | Mus musculus          |
| 1 | 1.00 | 1 | 1 | 0.02  | 0.02   | 0.015  | 0.02   | 0.019  | t | 3881   | APTYSWGE                   | Mus musculus          |
| 1 | 1.00 | 1 | 1 | 0.01  | 0.007  | -0.005 | 0.003  | 0.008  | t | 104051 | LPSDPIGG<br>KSNMHFM<br>NTL | Oryctolagus cuniculus |
| 1 | 1.00 | 1 | 1 | 0.01  | 0.012  | 0.005  | 0.011  | 0.01   | t | 66004  | TRCFDS                     | Homo sapiens          |
| 1 | 1.00 | 1 | 1 | -0.02 | -0.016 | -0.016 | -0.013 | -0.022 | t | 124061 | ELERIRRSIL<br>PYGD         | Homo sapiens          |
| 1 | 1.00 | 1 | 1 | 0.01  | 0.013  | 0.018  | 0.01   | 0.006  | t | 141053 | LTPDTQYE<br>FQVR           | Mus musculus          |
| 1 | 1.00 | 1 | 1 | -0.02 | -0.017 | -0.02  | -0.02  | -0.02  | t | 79215  | FNPVYP                     | Mus musculus          |

|   |      |   |   |       |        |        |        |        |   |        |                              |                                  |
|---|------|---|---|-------|--------|--------|--------|--------|---|--------|------------------------------|----------------------------------|
| 1 | 1.00 | 1 | 1 | -0.07 | -0.072 | -0.079 | -0.067 | -0.07  | t | 115540 | VKNKRTFL<br>SPWISNI          | Mus<br>musculu<br>s              |
| 1 | 1.00 | 1 | 1 | 0.01  | -0.002 | 0.005  | 0.01   | 0.01   | t | 65026  | TLQNQGA<br>W                 | Anas<br>platyrhy<br>nchos        |
| 1 | 1.00 | 1 | 1 | 0     | 0      | 0      | 0.007  | -0.001 | t | 118060 | PPPGMRP<br>P                 | Mus<br>musculu<br>s              |
| 1 | 1.00 | 1 | 1 | 0     | 0.004  | 0      | 0.007  | -0.001 | t | 117245 | VTWEVLE<br>GEVEKEAL<br>KKI   | Homo<br>sapiens                  |
| 1 | 1.00 | 1 | 1 | 0     | 0      | 0      | 0.007  | -0.001 | t | 117302 | GSGKGKV<br>QFQGKKT<br>KFASDD | Homo<br>sapiens                  |
| 1 | 1.00 | 1 | 1 | 0     | 0      | 0      | 0.007  | -0.001 | t | 117300 | GSGKGKV<br>QFQGKKT<br>KF     | Homo<br>sapiens                  |
| 1 | 1.00 | 1 | 1 | -0.02 | -0.022 | -0.03  | -0.017 | -0.02  | t | 52107  | QQPQRPF<br>AQQ               | Mus<br>musculu<br>s              |
| 1 | 1.00 | 1 | 1 | 0.06  | 0.064  | 0.05   | 0.061  | 0.06   | t | 80885  | DADIGNEY<br>DQVV             | Homo<br>sapiens                  |
| 1 | 1.00 | 1 | 1 | -0.01 | -0.012 | -0.02  | -0.007 | -0.01  | t | 6073   | CCRGRCN<br>KKGEQVG<br>M      | Homo<br>sapiens                  |
| 1 | 1.00 | 1 | 1 | 0     | -0.005 | -0.01  | 0      | 0      | t | 132826 | FPEDLGNK<br>SWQAYVV          | Trichosu<br>rus<br>vulpecul<br>a |
| 1 | 1.00 | 1 | 1 | 0.01  | 0.01   | -0.006 | 0.012  | 0.012  | t | 98956  | QGSVQPQ<br>QLPQF             | Homo<br>sapiens                  |
| 1 | 1.00 | 1 | 1 | 0.02  | 0.022  | 0.02   | 0.027  | 0.02   | t | 110104 | WQEGNVF                      | Homo<br>sapiens                  |
| 1 | 1.00 | 1 | 1 | -0.01 | -0.01  | -0.017 | -0.01  | -0.011 | t | 120146 | QGARVYA<br>YVF               | Mus<br>musculu<br>s              |
| 1 | 1.00 | 1 | 1 | -0.01 | -0.012 | -0.017 | -0.01  | -0.011 | t | 120146 | QGARVYA<br>YVF               | Oryctola<br>gus<br>cuniculu<br>s |
| 1 | 1.00 | 1 | 1 | 0.01  | 0.01   | 0.01   | 0.02   | 0.01   | t | 115291 | ILDKVGINY<br>W               | Homo<br>sapiens                  |

|   |      |   |   |       |        |        |        |        |   |        |                    |                                  |
|---|------|---|---|-------|--------|--------|--------|--------|---|--------|--------------------|----------------------------------|
| 1 | 1.00 | 1 | 1 | 0.02  | 0.024  | 0.015  | 0.027  | 0.02   | t | 136087 | VETDKATV<br>GF     | Homo<br>sapiens                  |
| 1 | 1.00 | 1 | 1 | -0.02 | -0.022 | -0.029 | -0.017 | -0.02  | t | 137132 | DINCFRPH<br>GVSA   | Sus<br>scrofa                    |
| 1 | 1.00 | 1 | 1 | 0.04  | 0.037  | 0.04   | 0.04   | 0.039  | t | 43575  | NEDNEKLR           | Oryctola<br>gus<br>cuniculu<br>s |
| 1 | 1.00 | 1 | 1 | -0.01 | -0.008 | -0.017 | -0.003 | -0.009 | t | 144594 | ARGISRTK<br>YW     | Homo<br>sapiens                  |
| 1 | 1.00 | 1 | 1 | -0.05 | -0.052 | -0.052 | -0.047 | -0.051 | t | 7559   | DAKFRPN            | Mus<br>musculu<br>s              |
| 1 | 1.00 | 1 | 1 | 0.02  | 0.02   | 0.02   | 0.02   | 0.02   | t | 117614 | QGFPFYDK<br>PMRI   | Homo<br>sapiens                  |
| 1 | 1.00 | 1 | 1 | 0.01  | 0.01   | 0.01   | 0.017  | 0.01   | t | 2039   | AINPESDQ<br>PDLSNF | Homo<br>sapiens                  |
| 1 | 1.00 | 1 | 1 | -0.04 | -0.04  | -0.04  | -0.03  | -0.04  | t | 115943 | RINKKIEKF<br>Q     | Homo<br>sapiens                  |
| 1 | 1.00 | 1 | 1 | 0.01  | 0.014  | 0.007  | 0.011  | 0.008  | t | 34639  | KYVTGIN            | Homo<br>sapiens                  |
| 1 | 1.00 | 1 | 1 | 0.03  | 0.028  | 0.016  | 0.033  | 0.032  | t | 95611  | NDPTTN             | Mus<br>musculu<br>s              |
| 1 | 1.00 | 1 | 1 | -0.01 | -0.012 | -0.013 | -0.011 | -0.012 | t | 151073 | YEDVNGIR<br>K      | Mus<br>musculu<br>s              |
| 1 | 1.00 | 1 | 1 | 0.04  | 0.04   | 0.03   | 0.04   | 0.04   | t | 23630  | HDKNNSDI           | Homo<br>sapiens                  |
| 1 | 1.00 | 1 | 1 | 0.01  | 0.008  | 0.012  | 0.009  | 0.008  | t | 122094 | FLALDVPTI<br>GLC   | Mus<br>musculu<br>s              |
| 1 | 1.00 | 1 | 1 | 0.07  | 0.07   | 0.068  | 0.073  | 0.071  | t | 123731 | SEESAEVA<br>TEEV   | Homo<br>sapiens                  |

|   |      |   |   |       |        |        |        |        |   |        |                      |                       |
|---|------|---|---|-------|--------|--------|--------|--------|---|--------|----------------------|-----------------------|
| 1 | 1.00 | 1 | 1 | 0.02  | 0.017  | 0.009  | 0.02   | 0.02   | t | 20562  | GKFLEGA              | Oryctolagus cuniculus |
| 1 | 1.00 | 1 | 1 | 0.02  | 0.02   | 0.009  | 0.02   | 0.02   | t | 20562  | GKFLEGA              | Mus musculus          |
| 1 | 1.00 | 1 | 1 | 0.05  | 0.053  | 0.044  | 0.05   | 0.05   | t | 54504  | RLDGTTLV             | Mus musculus          |
| 1 | 1.00 | 1 | 1 | 0.02  | 0.018  | 0.011  | 0.02   | 0.02   | t | 90069  | VKASAE               | Mus musculus          |
| 1 | 1.00 | 1 | 1 | 0.02  | 0.023  | 0.011  | 0.019  | 0.02   | t | 41143  | MATAGVA<br>AVVKRKEEN | Mus musculus          |
| 1 | 1.00 | 1 | 1 | 0.01  | 0.014  | -0.002 | 0.009  | 0.011  | t | 141560 | SDEALPPG<br>SPR      | Mus musculus          |
| 1 | 1.00 | 1 | 1 | -0.03 | -0.027 | -0.044 | -0.03  | -0.029 | t | 94513  | FHPDK                | Mus musculus          |
| 1 | 1.00 | 1 | 1 | -0.01 | -0.007 | -0.022 | -0.007 | -0.01  | t | 47710  | PGNKPRIEM            | Capra hircus          |
| 1 | 1.00 | 1 | 1 | 0.01  | 0.007  | 0.005  | 0.01   | 0.008  | t | 65238  | TMPFSPDF<br>SNVD     | Oryctolagus cuniculus |
| 1 | 1.00 | 1 | 1 | 0.01  | 0.01   | 0.002  | 0.013  | 0.009  | t | 63165  | TDHAGSN<br>DNIALLVQ  | Homo sapiens          |
| 1 | 1.00 | 1 | 1 | 0.04  | 0.042  | 0.036  | 0.037  | 0.037  | t | 25997  | IETWNPN<br>NQEFECAG  | Homo sapiens          |
| 1 | 1.00 | 1 | 1 | -0.04 | -0.042 | -0.045 | -0.037 | -0.04  | t | 108976 | FPGARGPP             | Rattus norvegicus     |
| 1 | 1.00 | 1 | 1 | -0.01 | -0.006 | -0.012 | -0.009 | -0.011 | t | 38404  | LPALSTGL             | Homo sapiens          |
| 1 | 1.00 | 1 | 1 | -0.01 | -0.01  | -0.017 | -0.01  | -0.01  | t | 130806 | EMDVVRF<br>DD        | Homo sapiens          |



|   |      |   |   |       |        |        |        |        |   |        |                             |                       |
|---|------|---|---|-------|--------|--------|--------|--------|---|--------|-----------------------------|-----------------------|
| 1 | 1.00 | 1 | 1 | -0.04 | -0.039 | -0.041 | -0.037 | -0.041 | t | 99389  | KMYACR                      | Equus caballus        |
| 1 | 1.00 | 1 | 1 | -0.01 | -0.008 | -0.009 | -0.003 | -0.012 | t | 124198 | GLLFGLIAL<br>AEEVRKLK<br>AR | Homo sapiens          |
| 1 | 1.00 | 1 | 1 | 0.02  | 0.022  | 0.013  | 0.023  | 0.022  | t | 77842  | AYIDFEMK<br>I               | Homo sapiens          |
| 1 | 1.00 | 1 | 1 | -0.03 | -0.027 | -0.039 | -0.03  | -0.03  | t | 25414  | IARLTDKK                    | Mus musculus          |
| 1 | 1.00 | 1 | 1 | -0.03 | -0.03  | -0.039 | -0.03  | -0.03  | t | 25414  | IARLTDKK                    | Mus musculus          |
| 1 | 1.00 | 1 | 1 | 0.06  | 0.06   | 0.06   | 0.06   | 0.057  | t | 118373 | GIEADDDR<br>LNKWISE         | Homo sapiens          |
| 1 | 1.00 | 1 | 1 | 0.02  | 0.02   | 0.016  | 0.017  | 0.018  | t | 23562  | HASARQQ<br>WEL              | Homo sapiens          |
| 1 | 1.00 | 1 | 1 | 0.01  | 0.014  | 0.01   | 0.017  | 0.01   | t | 123522 | MTQAPRI<br>M                | Homo sapiens          |
| 1 | 1.00 | 1 | 1 | -0.01 | -0.013 | -0.012 | -0.01  | -0.013 | t | 14899  | EVVLQNR<br>RGLDLL           | Oryctolagus cuniculus |
| 1 | 1.00 | 1 | 1 | -0.01 | -0.01  | -0.012 | -0.01  | -0.013 | t | 14899  | EVVLQNR<br>RGLDLL           | Oryctolagus cuniculus |
| 1 | 1.00 | 1 | 1 | -0.01 | -0.01  | -0.012 | -0.01  | -0.013 | t | 14899  | EVVLQNR<br>RGLDLL           | Oryctolagus cuniculus |
| 1 | 1.00 | 1 | 1 | -0.02 | -0.02  | -0.02  | -0.013 | -0.02  | t | 117300 | GSGKGKV<br>QFQGKKT<br>KF    | Homo sapiens          |
| 1 | 1.00 | 1 | 1 | -0.03 | -0.03  | -0.04  | -0.027 | -0.03  | t | 20663  | GKPVVQTI<br>LA              | Homo sapiens          |
| 1 | 1.00 | 1 | 1 | 0.02  | 0.023  | 0.014  | 0.02   | 0.021  | t | 9591   | DPAKAAF<br>D                | Mus musculus          |

|   |      |   |   |       |        |        |       |        |   |        |                |                       |
|---|------|---|---|-------|--------|--------|-------|--------|---|--------|----------------|-----------------------|
| 1 | 1.00 | 1 | 1 | 0.04  | 0.038  | 0.028  | 0.033 | 0.038  | t | 144641 | FFENKD         | Mus musculus          |
| 1 | 1.00 | 1 | 1 | 0     | 0      | -0.007 | 0.004 | 0      | t | 35006  | LAVLLGAC       | Homo sapiens          |
| 1 | 1.00 | 1 | 1 | 0.01  | 0.01   | -0.002 | 0.01  | 0.012  | t | 120646 | ITEHEGEIGK     | Mus musculus          |
| 1 | 1.00 | 1 | 1 | -0.02 | -0.02  | -0.035 | -0.02 | -0.02  | t | 52186  | QRANLGA FQN    | Homo sapiens          |
| 1 | 1.00 | 1 | 1 | -0.02 | -0.02  | -0.018 | -0.02 | -0.021 | t | 120173 | RLMRYWA NFA    | Mus musculus          |
| 1 | 1.00 | 1 | 1 | -0.01 | -0.01  | -0.01  | -0.01 | -0.013 | t | 131100 | TDSEMDV VRFD   | Mus musculus          |
| 1 | 1.00 | 1 | 1 | 0.02  | 0.016  | 0.018  | 0.02  | 0.018  | t | 29567  | IYDKLTVQ TTG   | Oryctolagus cuniculus |
| 1 | 1.00 | 1 | 1 | -0.02 | -0.014 | -0.023 | -0.02 | -0.02  | t | 139855 | PSAFHFL        | Ovis aries            |
| 1 | 1.00 | 1 | 1 | 0.01  | 0.01   | 0.01   | 0.01  | 0.01   | t | 135507 | VVGAGP         | Oryctolagus cuniculus |
| 1 | 1.00 | 1 | 1 | 0.03  | 0.03   | 0.019  | 0.03  | 0.03   | t | 94621  | NPACGPK YSC    | Capra hircus          |
| 1 | 1.00 | 1 | 1 | 0.03  | 0.028  | 0.022  | 0.029 | 0.03   | t | 22783  | GTPLDIDT ASESS | Mus musculus          |
| 1 | 1.00 | 1 | 1 | 0.01  | 0.012  | 0.01   | 0.013 | 0.01   | t | 134418 | KGAIIGLM VGGVV | Homo sapiens          |
| 1 | 1.00 | 1 | 1 | 0     | 0      | 0      | 0     | -0.004 | t | 138194 | IIPKSSWS       | Homo sapiens          |
| 1 | 1.00 | 1 | 1 | 0     | 0      | 0      | 0     | -0.004 | t | 99922  | DAEFRHDSGY     | Mus musculus          |

|   |      |   |   |       |        |        |        |        |   |        |                       |                       |
|---|------|---|---|-------|--------|--------|--------|--------|---|--------|-----------------------|-----------------------|
| 1 | 1.00 | 1 | 1 | 0     | 0      | 0      | 0      | -0.004 | t | 105127 | DAEFRHD               | Mus musculus          |
| 1 | 1.00 | 1 | 1 | 0     | 0      | 0      | 0      | -0.004 | t | 115652 | SSRISYWTIVKP          | Homo sapiens          |
| 1 | 1.00 | 1 | 1 | 0     | 0      | 0      | 0      | -0.004 | t | 115630 | NFDKLYIWG             | Homo sapiens          |
| 1 | 1.00 | 1 | 1 | 0     | 0      | 0      | 0      | -0.004 | t | 99922  | DAEFRHDSGY            | Mus musculus          |
| 1 | 1.00 | 1 | 1 | 0.01  | 0.014  | 0.01   | 0.017  | 0.01   | t | 113193 | TGEIKALAGCDFLTI       | Homo sapiens          |
| 1 | 1.00 | 1 | 1 | 0     | 0.002  | 0      | 0.003  | 0      | t | 8473   | DGQPAGDR              | Homo sapiens          |
| 1 | 1.00 | 1 | 1 | 0     | -0.004 | 0      | 0.003  | -0.003 | t | 34965  | LASLRKAFADTVPVRPSPNY  | Oryctolagus cuniculus |
| 1 | 1.00 | 1 | 1 | 0     | -0.004 | 0      | 0.003  | -0.003 | t | 28075  | IPSTAFTDI AWWRLPNHY   | Oryctolagus cuniculus |
| 1 | 1.00 | 1 | 1 | 0.01  | 0.013  | -0.001 | 0.01   | 0.009  | t | 123282 | HACQKKLLKFEALQQE EGEE | Mus musculus          |
| 1 | 1.00 | 1 | 1 | 0.02  | 0.018  | 0.019  | 0.019  | 0.02   | t | 56788  | SAFVFPTKD             | Mus musculus          |
| 1 | 1.00 | 1 | 1 | 0.06  | 0.06   | 0.06   | 0.063  | 0.06   | t | 149103 | SGPNPTQ               | Sus scrofa            |
| 1 | 1.00 | 1 | 1 | 0     | -0.004 | -0.006 | 0.003  | 0      | t | 95092  | GYQKTVDHTKVNSK        | Oryctolagus cuniculus |
| 1 | 1.00 | 1 | 1 | -0.01 | -0.012 | -0.01  | -0.009 | -0.011 | t | 130454 | CLFPNNSYC             | Mus musculus          |
| 1 | 1.00 | 1 | 1 | 0     | 0      | -0.005 | 0.006  | 0      | t | 109175 | GPEGAQGP              | Rattus norvegicus     |
| 1 | 1.00 | 1 | 1 | 0.03  | 0.032  | 0.023  | 0.037  | 0.031  | t | 136546 | PFGPVIINGRCCLEEKVCSLL | Homo sapiens          |

|   |      |   |   |       |        |       |        |        |   |        |                    |                                  |
|---|------|---|---|-------|--------|-------|--------|--------|---|--------|--------------------|----------------------------------|
| 1 | 1.00 | 1 | 1 | 0.01  | 0.01   | 0.005 | 0.01   | 0.009  | t | 97331  | GFLKLNIG<br>D      | Oryctola<br>gus<br>cuniculu<br>s |
| 1 | 1.00 | 1 | 1 | 0.02  | 0.02   | 0.008 | 0.02   | 0.02   | t | 105076 | AFNHFGE<br>GLMQR   | Homo<br>sapiens                  |
| 1 | 1.00 | 1 | 1 | 0.03  | 0.028  | 0.031 | 0.033  | 0.03   | t | 142316 | TTDLICYE<br>QLND   | Homo<br>sapiens                  |
| 1 | 1.00 | 1 | 1 | 0.04  | 0.042  | 0.046 | 0.047  | 0.037  | t | 2039   | AINPESDQ<br>PDLSNF | Homo<br>sapiens                  |
| 1 | 1.00 | 1 | 1 | -0.02 | -0.02  | -0.02 | -0.02  | -0.022 | t | 133156 | IRLR               | Oryctola<br>gus<br>cuniculu<br>s |
| 1 | 1.00 | 1 | 1 | -0.01 | -0.008 | -0.01 | -0.007 | -0.011 | t | 11819  | EENVEHD<br>A       | Homo<br>sapiens                  |
| 1 | 1.00 | 1 | 1 | 0.01  | 0.01   | 0.01  | 0.01   | 0.008  | t | 50929  | QGPGAP             | Mus<br>musculu<br>s              |
| 1 | 1.00 | 1 | 1 | 0.05  | 0.048  | 0.056 | 0.053  | 0.05   | t | 67967  | VDGSDP             | Mus<br>musculu<br>s              |
| 1 | 1.00 | 1 | 1 | 0.03  | 0.027  | 0.013 | 0.03   | 0.032  | t | 97023  | VATRSQTD<br>TSEKDC | Oryctola<br>gus<br>cuniculu<br>s |
| 1 | 1.00 | 1 | 1 | 0     | 0      | 0     | 0      | -0.004 | t | 151763 | WYRATHQ<br>E       | Mus<br>musculu<br>s              |
| 1 | 1.00 | 1 | 1 | 0     | 0      | 0     | 0      | -0.004 | t | 143676 | DRVGLRNL<br>RGYY   | Mus<br>musculu<br>s              |
| 1 | 1.00 | 1 | 1 | 0     | 0      | 0     | 0      | -0.004 | t | 140701 | LNEDLRS<br>WTA     | Mus<br>musculu<br>s              |
| 1 | 1.00 | 1 | 1 | 0     | 0      | 0     | 0      | -0.004 | t | 140730 | QFAYDGK<br>DY      | Mus<br>musculu<br>s              |
| 1 | 1.00 | 1 | 1 | 0     | 0      | 0     | 0      | -0.004 | t | 143687 | FRVNLRTL<br>RRYY   | Mus<br>musculu<br>s              |

|   |      |   |   |   |   |   |   |        |   |        |                             |                                  |
|---|------|---|---|---|---|---|---|--------|---|--------|-----------------------------|----------------------------------|
| 1 | 1.00 | 1 | 1 | 0 | 0 | 0 | 0 | -0.004 | t | 137866 | GDTRPRFL                    | Oryctola<br>gus<br>cuniculu<br>s |
| 1 | 1.00 | 1 | 1 | 0 | 0 | 0 | 0 | -0.004 | t | 140665 | DTAAQI                      | Mus<br>musculu<br>s              |
| 1 | 1.00 | 1 | 1 | 0 | 0 | 0 | 0 | -0.004 | t | 137962 | RDSPEDFV                    | Oryctola<br>gus<br>cuniculu<br>s |
| 1 | 1.00 | 1 | 1 | 0 | 0 | 0 | 0 | -0.004 | t | 133622 | KPGDPSAL<br>HVVRCWI<br>C    | Mus<br>musculu<br>s              |
| 1 | 1.00 | 1 | 1 | 0 | 0 | 0 | 0 | -0.004 | t | 122377 | GLPRLETP<br>ADLSTAIA<br>SRS | Oryctola<br>gus<br>cuniculu<br>s |
| 1 | 1.00 | 1 | 1 | 0 | 0 | 0 | 0 | -0.004 | t | 133528 | CADQKPG<br>EC               | Mus<br>musculu<br>s              |
| 1 | 1.00 | 1 | 1 | 0 | 0 | 0 | 0 | -0.004 | t | 125015 | DNESSYSR<br>GFDMTYT<br>E    | Mus<br>musculu<br>s              |
| 1 | 1.00 | 1 | 1 | 0 | 0 | 0 | 0 | -0.004 | t | 133535 | CKPGEVQ<br>QC               | Mus<br>musculu<br>s              |
| 1 | 1.00 | 1 | 1 | 0 | 0 | 0 | 0 | -0.004 | t | 133531 | CDTLKPGE<br>C               | Mus<br>musculu<br>s              |
| 1 | 1.00 | 1 | 1 | 0 | 0 | 0 | 0 | -0.004 | t | 133554 | EGLYSPW<br>WPRSLPVL         | Mus<br>musculu<br>s              |
| 1 | 1.00 | 1 | 1 | 0 | 0 | 0 | 0 | -0.004 | t | 133580 | GFLSSCNF<br>RFCELV          | Mus<br>musculu<br>s              |
| 1 | 1.00 | 1 | 1 | 0 | 0 | 0 | 0 | -0.004 | t | 133642 | MCPEMS<br>FVAVHSCA<br>R     | Mus<br>musculu<br>s              |
| 1 | 1.00 | 1 | 1 | 0 | 0 | 0 | 0 | -0.004 | t | 133542 | DGRRDVV<br>VRSATFY          | Mus<br>musculu<br>s              |
| 1 | 1.00 | 1 | 1 | 0 | 0 | 0 | 0 | -0.004 | t | 122749 | EIIGFGQEL<br>KNPQEE         | Oryctola<br>gus<br>cuniculu<br>s |
| 1 | 1.00 | 1 | 1 | 0 | 0 | 0 | 0 | -0.004 | t | 133536 | CKPVENRA<br>C               | Mus<br>musculu<br>s              |

|   |      |   |   |   |   |   |   |        |   |        |                              |                                  |
|---|------|---|---|---|---|---|---|--------|---|--------|------------------------------|----------------------------------|
| 1 | 1.00 | 1 | 1 | 0 | 0 | 0 | 0 | -0.004 | t | 133538 | CNKPGERT<br>C                | Mus<br>musculu<br>s              |
| 1 | 1.00 | 1 | 1 | 0 | 0 | 0 | 0 | -0.004 | t | 117520 | GSFSDADL<br>AD               | Mus<br>musculu<br>s              |
| 1 | 1.00 | 1 | 1 | 0 | 0 | 0 | 0 | -0.004 | t | 122746 | EEQEDEIIG<br>FGQELKN         | Oryctola<br>gus<br>cuniculu<br>s |
| 1 | 1.00 | 1 | 1 | 0 | 0 | 0 | 0 | -0.004 | t | 117506 | GGAHFSVS<br>SLAEG            | Mus<br>musculu<br>s              |
| 1 | 1.00 | 1 | 1 | 0 | 0 | 0 | 0 | -0.004 | t | 125136 | LGSISESRR<br>ALQDSQR         | Oryctola<br>gus<br>cuniculu<br>s |
| 1 | 1.00 | 1 | 1 | 0 | 0 | 0 | 0 | -0.004 | t | 122780 | GQELKNP<br>QEETLQAF<br>DSHYD | Oryctola<br>gus<br>cuniculu<br>s |
| 1 | 1.00 | 1 | 1 | 0 | 0 | 0 | 0 | -0.004 | t | 133623 | KPGEMR                       | Mus<br>musculu<br>s              |
| 1 | 1.00 | 1 | 1 | 0 | 0 | 0 | 0 | -0.004 | t | 133665 | PVLLFCFLA<br>GRCVSV          | Mus<br>musculu<br>s              |
| 1 | 1.00 | 1 | 1 | 0 | 0 | 0 | 0 | -0.004 | t | 97287  | ETPLTETAL<br>KWH             | Mus<br>musculu<br>s              |
| 1 | 1.00 | 1 | 1 | 0 | 0 | 0 | 0 | -0.004 | t | 97252  | DTPLTTAA<br>LRLV             | Mus<br>musculu<br>s              |
| 1 | 1.00 | 1 | 1 | 0 | 0 | 0 | 0 | -0.004 | t | 97594  | QTPLTETA<br>LKWH             | Mus<br>musculu<br>s              |
| 1 | 1.00 | 1 | 1 | 0 | 0 | 0 | 0 | -0.004 | t | 97595  | QTPLTMA<br>ALELF             | Mus<br>musculu<br>s              |
| 1 | 1.00 | 1 | 1 | 0 | 0 | 0 | 0 | -0.004 | t | 57542  | SELSQLS                      | Mus<br>musculu<br>s              |
| 1 | 1.00 | 1 | 1 | 0 | 0 | 0 | 0 | -0.004 | t | 38522  | LPHSNL                       | Rattus<br>norvegic<br>us         |
| 1 | 1.00 | 1 | 1 | 0 | 0 | 0 | 0 | -0.004 | t | 57542  | SELSQLS                      | Mus<br>musculu<br>s              |

|   |      |   |   |      |        |       |       |        |   |        |                              |                                  |
|---|------|---|---|------|--------|-------|-------|--------|---|--------|------------------------------|----------------------------------|
| 1 | 1.00 | 1 | 1 | 0    | 0      | 0     | 0     | -0.004 | t | 30173  | KDILEDER<br>AAVDTYC          | Oryctola<br>gus<br>cuniculu<br>s |
| 1 | 1.00 | 1 | 1 | 0    | 0      | 0     | 0     | -0.004 | t | 30200  | KDLLEQKR<br>AAVDTYC          | Oryctola<br>gus<br>cuniculu<br>s |
| 1 | 1.00 | 1 | 1 | 0    | 0      | 0     | 0     | -0.004 | t | 28589  | ISLNFENYV                    | Rattus<br>norvegic<br>us         |
| 1 | 1.00 | 1 | 1 | 0    | 0      | 0     | 0     | -0.004 | t | 10433  | DTNNN                        | Mus<br>musculu<br>s              |
| 1 | 1.00 | 1 | 1 | 0    | 0      | 0     | 0     | -0.004 | t | 10908  | DYKDDDD<br>K                 | Mus<br>musculu<br>s              |
| 1 | 1.00 | 1 | 1 | 0    | -0.003 | 0     | 0     | -0.004 | t | 23975  | HHAEMQ<br>NPVYLIPET<br>VPYIK | Oryctola<br>gus<br>cuniculu<br>s |
| 1 | 1.00 | 1 | 1 | 0    | 0      | 0     | 0     | -0.004 | t | 4429   | ASGQ                         | Mus<br>musculu<br>s              |
| 1 | 1.00 | 1 | 1 | 0.01 | 0.01   | 0.007 | 0.013 | 0.01   | t | 78839  | SRNLGKVI<br>DTLTCGFA         | Homo<br>sapiens                  |
| 1 | 1.00 | 1 | 1 | 0.04 | 0.042  | 0.041 | 0.047 | 0.04   | t | 133822 | ERPLKQIA<br>FNGGLEP          | Homo<br>sapiens                  |
| 1 | 1.00 | 1 | 1 | 0.04 | 0.042  | 0.038 | 0.047 | 0.041  | t | 125201 | PPQTEHIE<br>L                | Homo<br>sapiens                  |
| 1 | 1.00 | 1 | 1 | 0.02 | 0.02   | 0.01  | 0.02  | 0.02   | t | 10496  | DTTIP                        | Mus<br>musculu<br>s              |
| 1 | 1.00 | 1 | 1 | 0.02 | 0.02   | 0.02  | 0.026 | 0.02   | t | 41948  | MLGNAPS<br>VVPNTTLG<br>M     | Homo<br>sapiens                  |
| 1 | 1.00 | 1 | 1 | 0.02 | 0.023  | 0.014 | 0.02  | 0.02   | t | 84184  | KASAEG                       | Mus<br>musculu<br>s              |

|   |      |   |   |       |        |        |        |        |   |        |                            |                                  |
|---|------|---|---|-------|--------|--------|--------|--------|---|--------|----------------------------|----------------------------------|
| 1 | 1.00 | 1 | 1 | 0.02  | 0.023  | 0.014  | 0.02   | 0.02   | t | 84184  | KASAEG                     | Mus<br>musculu<br>s              |
| 1 | 1.00 | 1 | 1 | 0     | 0      | 0      | 0      | -0.001 | t | 9611   | DPDKDVDI<br>MV             | Mus<br>musculu<br>s              |
| 1 | 1.00 | 1 | 1 | 0.02  | 0.024  | 0.02   | 0.021  | 0.02   | t | 48778  | PPFSLSPV<br>PTL            | Homo<br>sapiens                  |
| 1 | 1.00 | 1 | 1 | 0.01  | 0.01   | -0.004 | 0.01   | 0.01   | t | 133952 | WIFQNF                     | Mus<br>musculu<br>s              |
| 1 | 1.00 | 1 | 1 | -0.01 | -0.014 | -0.015 | -0.01  | -0.009 | t | 41665  | MHLPATIG<br>DY             | Mus<br>musculu<br>s              |
| 1 | 1.00 | 1 | 1 | 0     | 0      | 0.002  | 0      | -0.005 | t | 25140  | HWSYGLR<br>PG              | Mus<br>musculu<br>s              |
| 1 | 1.00 | 1 | 1 | -0.03 | -0.032 | -0.024 | -0.029 | -0.032 | t | 79042  | PKSKPFA                    | Mus<br>musculu<br>s              |
| 1 | 1.00 | 1 | 1 | 0.03  | 0.031  | 0.029  | 0.033  | 0.029  | t | 99279  | GHPQEI                     | Equus<br>caballus                |
| 1 | 1.00 | 1 | 1 | -0.04 | -0.043 | -0.048 | -0.04  | -0.042 | t | 111052 | VKSEKDST<br>NNNKYTV<br>TLK | Oryctola<br>gus<br>cuniculu<br>s |
| 1 | 1.00 | 1 | 1 | -0.04 | -0.043 | -0.048 | -0.04  | -0.042 | t | 111052 | VKSEKDST<br>NNNKYTV<br>TLK | Oryctola<br>gus<br>cuniculu<br>s |
| 1 | 1.00 | 1 | 1 | 0.03  | 0.026  | 0.022  | 0.029  | 0.03   | t | 39708  | LSTLSYLG                   | Oryctola<br>gus<br>cuniculu<br>s |
| 1 | 1.00 | 1 | 1 | 0.08  | 0.078  | 0.068  | 0.073  | 0.08   | t | 134794 | SEATVAES<br>DSF            | Mus<br>musculu<br>s              |
| 1 | 1.00 | 1 | 1 | -0.01 | -0.013 | -0.017 | -0.01  | -0.011 | t | 55263  | RPPPAPCL                   | Oryctola<br>gus<br>cuniculu<br>s |



|   |      |   |   |       |        |        |        |        |   |        |                              |                                  |
|---|------|---|---|-------|--------|--------|--------|--------|---|--------|------------------------------|----------------------------------|
| 1 | 1.00 | 1 | 1 | 0.09  | 0.092  | 0.083  | 0.097  | 0.091  | t | 136499 | LVNCDRD<br>NLESSAM<br>DCEDDE | Homo<br>sapiens                  |
| 1 | 1.00 | 1 | 1 | 0.03  | 0.032  | 0.023  | 0.033  | 0.029  | t | 130608 | SIDLKDKYK<br>NIGA            | Homo<br>sapiens                  |
| 1 | 1.00 | 1 | 1 | -0.03 | -0.026 | -0.045 | -0.03  | -0.029 | t | 136080 | RAGTDEGF<br>G                | Homo<br>sapiens                  |
| 1 | 1.00 | 1 | 1 | -0.02 | -0.02  | -0.023 | -0.01  | -0.02  | t | 98869  | LEKFDKAL<br>KA               | Homo<br>sapiens                  |
| 1 | 1.00 | 1 | 1 | -0.01 | -0.007 | -0.017 | -0.01  | -0.008 | t | 88382  | SATAIF                       | Mus<br>musculu<br>s              |
| 1 | 1.00 | 1 | 1 | 0.01  | 0.014  | 0.01   | 0.013  | 0.008  | t | 136081 | RTTLQSDQ<br>EEIDY            | Homo<br>sapiens                  |
| 1 | 1.00 | 1 | 1 | 0.04  | 0.04   | 0.04   | 0.04   | 0.04   | t | 107702 | YVDGVQV                      | Homo<br>sapiens                  |
| 1 | 1.00 | 1 | 1 | 0.04  | 0.036  | 0.033  | 0.043  | 0.04   | t | 71548  | VTVDDVH<br>KACERFEQ          | Oryctola<br>gus<br>cuniculu<br>s |
| 1 | 1.00 | 1 | 1 | -0.01 | -0.01  | -0.01  | -0.01  | -0.013 | t | 122465 | LKRDMKS<br>AHLLEPH           | Homo<br>sapiens                  |
| 1 | 1.00 | 1 | 1 | -0.01 | -0.01  | -0.009 | -0.004 | -0.011 | t | 55581  | RRGPRLGV<br>RATRKTS          | Homo<br>sapiens                  |
| 1 | 1.00 | 1 | 1 | -0.01 | -0.01  | -0.009 | -0.004 | -0.011 | t | 55581  | RRGPRLGV<br>RATRKTS          | Homo<br>sapiens                  |
| 1 | 1.00 | 1 | 1 | 0.03  | 0.03   | 0.019  | 0.027  | 0.03   | t | 25538  | IDANDCLV<br>TPSVK            | Homo<br>sapiens                  |
| 1 | 1.00 | 1 | 1 | 0.03  | 0.032  | 0.027  | 0.03   | 0.03   | t | 48990  | PQEIPQPQ                     | Anas<br>platyrhy<br>nchos        |
| 1 | 1.00 | 1 | 1 | 0     | 0.003  | 0      | 0      | 0      | t | 131772 | YPGAVTV                      | Mus<br>musculu<br>s              |

|   |      |   |   |       |        |        |        |       |   |        |                           |                                  |
|---|------|---|---|-------|--------|--------|--------|-------|---|--------|---------------------------|----------------------------------|
| 1 | 1.00 | 1 | 1 | 0.02  | 0.017  | 0.013  | 0.02   | 0.019 | t | 138081 | VTENTNGL<br>KTML          | Oryctola<br>gus<br>cuniculu<br>s |
| 1 | 1.00 | 1 | 1 | 0.02  | 0.006  | 0.013  | 0.02   | 0.019 | t | 138081 | VTENTNGL<br>KTML          | Oryctola<br>gus<br>cuniculu<br>s |
| 1 | 1.00 | 1 | 1 | 0.02  | 0.02   | 0.009  | 0.02   | 0.02  | t | 94472  | CNPACGP<br>KY             | Capra<br>hircus                  |
| 1 | 1.00 | 1 | 1 | 0.02  | 0.02   | 0.009  | 0.02   | 0.02  | t | 94472  | CNPACGP<br>KY             | Oryctola<br>gus<br>cuniculu<br>s |
| 1 | 1.00 | 1 | 1 | 0.02  | 0.027  | 0.009  | 0.02   | 0.02  | t | 94472  | CNPACGP<br>KY             | Capra<br>hircus                  |
| 1 | 1.00 | 1 | 1 | -0.01 | -0.01  | -0.012 | -0.01  | -0.01 | t | 40123  | LTPRPIIHA<br>V            | Homo<br>sapiens                  |
| 1 | 1.00 | 1 | 1 | 0.02  | 0.02   | 0.02   | 0.02   | 0.018 | t | 118783 | EIIVTHFPF<br>DEQNCSM<br>K | Rattus<br>norvegic<br>us         |
| 1 | 1.00 | 1 | 1 | 0.03  | 0.028  | 0.021  | 0.029  | 0.029 | t | 61007  | SSFSSYGEI                 | Mus<br>musculu<br>s              |
| 1 | 1.00 | 1 | 1 | 0.02  | 0.018  | 0.013  | 0.023  | 0.02  | t | 125565 | STDDYASF<br>SRAL          | Mus<br>musculu<br>s              |
| 1 | 1.00 | 1 | 1 | -0.01 | -0.01  | -0.025 | -0.01  | -0.01 | t | 65252  | TMQYVD<br>MI              | Homo<br>sapiens                  |
| 1 | 1.00 | 1 | 1 | 0.01  | 0.006  | -0.007 | 0.007  | 0.011 | t | 117451 | DDGFFYIP<br>KD            | Oryctola<br>gus<br>cuniculu<br>s |
| 1 | 1.00 | 1 | 1 | 0.02  | 0.016  | 0.012  | 0.019  | 0.02  | t | 57292  | SDSSFFSY<br>GEIPFG        | Oryctola<br>gus<br>cuniculu<br>s |
| 1 | 1.00 | 1 | 1 | 0.01  | 0.008  | -0.001 | 0.007  | 0.01  | t | 47969  | PIQPQQPF<br>PQ            | Mus<br>musculu<br>s              |
| 1 | 1.00 | 1 | 1 | -0.01 | -0.008 | -0.01  | -0.003 | -0.01 | t | 119678 | YKCKVSNK                  | Homo<br>sapiens                  |

|   |      |   |   |       |        |        |        |        |   |        |                     |                       |
|---|------|---|---|-------|--------|--------|--------|--------|---|--------|---------------------|-----------------------|
| 1 | 1.00 | 1 | 1 | -0.01 | -0.006 | -0.01  | -0.003 | -0.01  | t | 119678 | YKCKVSNK            | Homo sapiens          |
| 1 | 1.00 | 1 | 1 | 0.06  | 0.06   | 0.06   | 0.06   | 0.06   | t | 104771 | FA                  | Mus musculus          |
| 1 | 1.00 | 1 | 1 | 0.03  | 0.03   | 0.022  | 0.03   | 0.03   | t | 57766  | SFFSYGEI            | Mus musculus          |
| 1 | 1.00 | 1 | 1 | 0     | 0.004  | -0.01  | 0.001  | 0      | t | 155744 | SAHSTPS             | Homo sapiens          |
| 1 | 1.00 | 1 | 1 | 0.05  | 0.046  | 0.048  | 0.053  | 0.052  | t | 99737  | TVKVG D             | Oryctolagus cuniculus |
| 1 | 1.00 | 1 | 1 | 0.01  | 0.012  | 0.003  | 0.017  | 0.01   | t | 133787 | CQALVRMLAKKPGWK     | Homo sapiens          |
| 1 | 1.00 | 1 | 1 | 0     | -0.002 | -0.011 | -0.001 | 0      | t | 26328  | IGTLKKILD ETVKDKLAK | Mus musculus          |
| 1 | 1.00 | 1 | 1 | 0     | 0      | 0      | 0      | -0.001 | t | 13525  | ENMYRYPNQVYY        | Mus musculus          |
| 1 | 1.00 | 1 | 1 | 0.02  | 0.006  | 0.003  | 0.017  | 0.021  | t | 115640 | QKSQRSQDEN          | Macaca mulatta        |
| 1 | 1.00 | 1 | 1 | 0.02  | 0.016  | 0.003  | 0.017  | 0.021  | t | 115640 | QKSQRSQDEN          | Oryctolagus cuniculus |
| 1 | 1.00 | 1 | 1 | 0.01  | 0.012  | 0.008  | 0.017  | 0.01   | t | 126201 | GYKEKSKFQDTHNNA     | Homo sapiens          |
| 1 | 1.00 | 1 | 1 | 0.04  | 0.042  | 0.033  | 0.041  | 0.04   | t | 61157  | SSLGNGV             | Homo sapiens          |
| 1 | 1.00 | 1 | 1 | 0     | 0.014  | 0.005  | 0.007  | 0      | t | 108921 | EPQVYTL             | Homo sapiens          |
| 1 | 1.00 | 1 | 1 | 0.03  | 0.03   | 0.022  | 0.027  | 0.032  | t | 623    | ADALLEKG            | Homo sapiens          |
| 1 | 1.00 | 1 | 1 | -0.01 | -0.009 | -0.011 | -0.009 | -0.012 | t | 73770  | YETGWGCNPPDC        | Myodes glareolus      |

|   |      |   |   |       |        |        |        |        |   |        |                      |                                  |
|---|------|---|---|-------|--------|--------|--------|--------|---|--------|----------------------|----------------------------------|
| 1 | 1.00 | 1 | 1 | -0.02 | -0.02  | -0.02  | -0.017 | -0.02  | t | 25094  | HVSPTHYV<br>P        | Homo<br>sapiens                  |
| 1 | 1.00 | 1 | 1 | 0.04  | 0.04   | 0.033  | 0.041  | 0.04   | t | 49214  | PRLLYDEL             | Homo<br>sapiens                  |
| 1 | 1.00 | 1 | 1 | 0.06  | 0.06   | 0.056  | 0.06   | 0.06   | t | 11927  | EEVVGEEK<br>LVSEEIVT | Mus<br>musculu<br>s              |
| 1 | 1.00 | 1 | 1 | -0.02 | -0.02  | -0.015 | -0.02  | -0.022 | t | 108227 | YIHEGLK              | Mus<br>musculu<br>s              |
| 1 | 1.00 | 1 | 1 | -0.02 | -0.02  | -0.02  | -0.02  | -0.024 | t | 28589  | ISLNFENYV            | Rattus<br>norvegic<br>us         |
| 1 | 1.00 | 1 | 1 | 0.05  | 0.05   | 0.045  | 0.054  | 0.05   | t | 133776 | AGDLSKVD<br>AKQPGDY  | Homo<br>sapiens                  |
| 1 | 1.00 | 1 | 1 | -0.01 | -0.006 | -0.01  | -0.003 | -0.01  | t | 136070 | KTNLIVNY<br>LP       | Homo<br>sapiens                  |
| 1 | 1.00 | 1 | 1 | -0.02 | -0.018 | -0.019 | -0.014 | -0.02  | t | 109751 | QGPRGEP<br>G         | Rattus<br>norvegic<br>us         |
| 1 | 1.00 | 1 | 1 | 0.03  | 0.03   | 0.03   | 0.029  | 0.027  | t | 9585   | DPAF                 | Mus<br>musculu<br>s              |
| 1 | 1.00 | 1 | 1 | 0     | 0.002  | 0      | 0.007  | -0.001 | t | 108104 | RRLPFGSQ<br>M        | Homo<br>sapiens                  |
| 1 | 1.00 | 1 | 1 | 0.03  | 0.033  | 0.033  | 0.03   | 0.03   | t | 49878  | PVGTPE               | Mus<br>musculu<br>s              |
| 1 | 1.00 | 1 | 1 | 0.03  | 0.03   | 0.033  | 0.03   | 0.03   | t | 49878  | PVGTPE               | Mus<br>musculu<br>s              |
| 1 | 1.00 | 1 | 1 | 0.05  | 0.05   | 0.048  | 0.05   | 0.051  | t | 10320  | DTDSGYD<br>VPDY      | Mus<br>musculu<br>s              |
| 1 | 1.00 | 1 | 1 | 0.03  | 0.026  | 0.03   | 0.023  | 0.03   | t | 107784 | DGSFFLY              | Oryctola<br>gus<br>cuniculu<br>s |
| 1 | 1.00 | 1 | 1 | 0.02  | 0.015  | 0.016  | 0.019  | 0.02   | t | 71568  | VTVVTTSG<br>S        | Bos<br>taurus                    |

|   |      |   |   |       |        |        |        |        |   |        |                            |                                  |
|---|------|---|---|-------|--------|--------|--------|--------|---|--------|----------------------------|----------------------------------|
| 1 | 1.00 | 1 | 1 | 0     | -0.004 | -0.006 | 0.003  | 0      | t | 95087  | GPIKNKMS<br>ESPNT          | Oryctola<br>gus<br>cuniculu<br>s |
| 1 | 1.00 | 1 | 1 | 0.05  | 0.048  | 0.041  | 0.05   | 0.05   | t | 100635 | VTNYLVDG<br>NG             | Mus<br>musculu<br>s              |
| 1 | 1.00 | 1 | 1 | -0.03 | -0.025 | -0.037 | -0.029 | -0.03  | t | 72236  | WAKHMW<br>NFI              | Homo<br>sapiens                  |
| 1 | 1.00 | 1 | 1 | 0     | 0      | -0.007 | 0      | -0.001 | t | 39980  | LTIVSGGP<br>TLFS           | Mus<br>musculu<br>s              |
| 1 | 1.00 | 1 | 1 | 0     | 0      | -0.007 | 0      | -0.001 | t | 39980  | LTIVSGGP<br>TLFS           | Mus<br>musculu<br>s              |
| 1 | 1.00 | 1 | 1 | 0.03  | 0.027  | 0.019  | 0.033  | 0.031  | t | 142141 | EIDGPAGQ<br>AEPD           | Homo<br>sapiens                  |
| 1 | 1.00 | 1 | 1 | 0     | 0.002  | -0.001 | -0.003 | -0.002 | t | 102271 | YYNSLGFN<br>IK             | Homo<br>sapiens                  |
| 1 | 1.00 | 1 | 1 | -0.01 | -0.01  | -0.024 | -0.01  | -0.01  | t | 78424  | IPRSRQIDL<br>QIG           | Mus<br>musculu<br>s              |
| 1 | 1.00 | 1 | 1 | 0.05  | 0.048  | 0.043  | 0.05   | 0.05   | t | 50872  | QGGNIVDI<br>DFDSVP         | Oryctola<br>gus<br>cuniculu<br>s |
| 1 | 1.00 | 1 | 1 | 0.01  | 0.006  | 0.003  | 0.01   | 0.008  | t | 153904 | VVEQLGH<br>ETQIHQIP        | Mus<br>musculu<br>s              |
| 1 | 1.00 | 1 | 1 | 0.03  | 0.028  | 0.032  | 0.031  | 0.028  | t | 70946  | VSGDPRG<br>RYEDI           | Mus<br>musculu<br>s              |
| 1 | 1.00 | 1 | 1 | 0.03  | 0.028  | 0.027  | 0.034  | 0.03   | t | 120167 | RFQSSAV<br>MALQEAC<br>EAYL | Mus<br>musculu<br>s              |
| 1 | 1.00 | 1 | 1 | -0.01 | -0.011 | -0.022 | -0.009 | -0.01  | t | 1022   | AEKQKAAE<br>ATKVAE         | Homo<br>sapiens                  |
| 1 | 1.00 | 1 | 1 | -0.01 | -0.01  | -0.01  | -0.004 | -0.01  | t | 118384 | GMKFDRG<br>YISPYF          | Homo<br>sapiens                  |

|   |      |   |   |       |        |        |        |        |   |        |                             |                       |
|---|------|---|---|-------|--------|--------|--------|--------|---|--------|-----------------------------|-----------------------|
| 1 | 1.00 | 1 | 1 | 0.03  | 0.03   | 0.012  | 0.024  | 0.03   | t | 49046  | PQPELPYP                    | Homo sapiens          |
| 1 | 1.00 | 1 | 1 | 0.04  | 0.037  | 0.036  | 0.04   | 0.04   | t | 94484  | DDYRQK                      | Oryctolagus cuniculus |
| 1 | 1.00 | 1 | 1 | -0.01 | -0.008 | -0.014 | -0.007 | -0.01  | t | 60752  | SRPGLKPD<br>LTGTSKS         | Homo sapiens          |
| 1 | 1.00 | 1 | 1 | 0.07  | 0.07   | 0.07   | 0.077  | 0.07   | t | 122746 | EEQEDEIIG<br>FGQELKN        | Homo sapiens          |
| 1 | 1.00 | 1 | 1 | 0.02  | 0.019  | 0.012  | 0.019  | 0.02   | t | 57771  | SFFVKDW<br>SERIREF          | Myodes glareolus      |
| 1 | 1.00 | 1 | 1 | 0.02  | 0.019  | 0.012  | 0.019  | 0.02   | t | 57771  | SFFVKDW<br>SERIREF          | Myodes glareolus      |
| 1 | 1.00 | 1 | 1 | 0.01  | 0.01   | 0.001  | 0.01   | 0.009  | t | 56432  | RVTTRSQA<br>QDAAGLK<br>EKAD | Mus musculus          |
| 1 | 1.00 | 1 | 1 | 0.01  | 0.014  | 0.002  | 0.01   | 0.01   | t | 140594 | RELVLAGTI                   | Cavia porcellus       |
| 1 | 1.00 | 1 | 1 | -0.01 | -0.01  | -0.02  | -0.01  | -0.01  | t | 25627  | IDLTKNA<br>AKLRGD           | Homo sapiens          |
| 1 | 1.00 | 1 | 1 | -0.02 | -0.016 | -0.02  | -0.013 | -0.018 | t | 131686 | SYLSLTP                     | Homo sapiens          |
| 1 | 1.00 | 1 | 1 | 0.07  | 0.07   | 0.062  | 0.07   | 0.07   | t | 106378 | EEVKTEQ<br>KR               | Homo sapiens          |
| 1 | 1.00 | 1 | 1 | -0.02 | -0.02  | -0.02  | -0.02  | -0.023 | t | 64552  | TKEPGVL<br>MGGQSES<br>V     | Mus musculus          |
| 1 | 1.00 | 1 | 1 | -0.01 | -0.01  | -0.01  | -0.001 | -0.008 | t | 131041 | RLVGQQV<br>MQ               | Homo sapiens          |
| 1 | 1.00 | 1 | 1 | -0.03 | -0.03  | -0.035 | -0.03  | -0.032 | t | 55232  | RPMIHF                      | Mus musculus          |

|   |      |   |   |       |        |        |        |        |   |        |                          |                                  |
|---|------|---|---|-------|--------|--------|--------|--------|---|--------|--------------------------|----------------------------------|
| 1 | 1.00 | 1 | 1 | 0.03  | 0.032  | 0.028  | 0.037  | 0.029  | t | 51852  | QPHDLGK<br>VGEVIVTK<br>D | Homo<br>sapiens                  |
| 1 | 1.00 | 1 | 1 | -0.02 | -0.022 | -0.033 | -0.021 | -0.021 | t | 144798 | TKYTMM                   | Mus<br>musculu<br>s              |
| 1 | 1.00 | 1 | 1 | 0.01  | 0.008  | -0.005 | 0.009  | 0.01   | t | 71163  | VSTQSAKN<br>PPGATVP      | Mus<br>musculu<br>s              |
| 1 | 1.00 | 1 | 1 | 0.04  | 0.04   | 0.04   | 0.044  | 0.04   | t | 135975 | PTLAFLQD<br>VMNI         | Homo<br>sapiens                  |
| 1 | 1.00 | 1 | 1 | 0.03  | 0.032  | 0.03   | 0.037  | 0.03   | t | 131769 | YDSYAIA                  | Homo<br>sapiens                  |
| 1 | 1.00 | 1 | 1 | -0.03 | -0.03  | -0.03  | -0.03  | -0.03  | t | 78504  | RLFLHV                   | Mus<br>musculu<br>s              |
| 1 | 1.00 | 1 | 1 | 0     | 0      | 0      | 0.006  | -0.001 | t | 20064  | GGVATY                   | Homo<br>sapiens                  |
| 1 | 1.00 | 1 | 1 | 0.05  | 0.054  | 0.039  | 0.047  | 0.05   | t | 78104  | APPASEQE<br>T            | Homo<br>sapiens                  |
| 1 | 1.00 | 1 | 1 | -0.01 | -0.013 | -0.017 | -0.01  | -0.011 | t | 55263  | RPPAPCL                  | Oryctola<br>gus<br>cuniculu<br>s |
| 1 | 1.00 | 1 | 1 | 0.01  | 0.005  | 0      | 0.01   | 0.011  | t | 127847 | SYNSTADE<br>WLPV         | Trichosu<br>rus<br>vulpecul<br>a |
| 1 | 1.00 | 1 | 1 | 0     | 0      | -0.019 | 0      | 0.002  | t | 7756   | DDDMGFG<br>LFD           | Homo<br>sapiens                  |
| 1 | 1.00 | 1 | 1 | -0.02 | -0.018 | -0.026 | -0.019 | -0.022 | t | 141580 | YIGVAPRK<br>AIPA         | Homo<br>sapiens                  |
| 1 | 1.00 | 1 | 1 | 0.08  | 0.08   | 0.073  | 0.08   | 0.08   | t | 105803 | GAE                      | Mus<br>musculu<br>s              |
| 1 | 1.00 | 1 | 1 | -0.01 | -0.013 | -0.014 | -0.01  | -0.01  | t | 141953 | LTACKV                   | Oryctola<br>gus<br>cuniculu<br>s |
| 1 | 1.00 | 1 | 1 | 0.01  | 0.012  | 0.008  | 0.017  | 0.011  | t | 132683 | SRyderPG<br>PS           | Homo<br>sapiens                  |

|   |      |   |   |       |        |        |        |        |   |        |                           |                                  |
|---|------|---|---|-------|--------|--------|--------|--------|---|--------|---------------------------|----------------------------------|
| 1 | 1.00 | 1 | 1 | 0.01  | 0.008  | 0.008  | 0.013  | 0.009  | t | 1199   | AETRLNPD<br>LQ            | Mus<br>musculu<br>s              |
| 1 | 1.00 | 1 | 1 | -0.01 | -0.01  | -0.02  | -0.01  | -0.01  | t | 104161 | NVVLKTIT<br>ESATSPPT      | Oryctola<br>gus<br>cuniculu<br>s |
| 1 | 1.00 | 1 | 1 | 0.04  | 0.04   | 0.033  | 0.039  | 0.039  | t | 137867 | GEIKFEAV<br>EGAV          | Homo<br>sapiens                  |
| 1 | 1.00 | 1 | 1 | 0     | -0.012 | 0.002  | 0      | 0      | t | 40755  | LYFP                      | Mus<br>musculu<br>s              |
| 1 | 1.00 | 1 | 1 | 0.03  | 0.032  | 0.029  | 0.027  | 0.028  | t | 102265 | YSCGENSF<br>MD            | Homo<br>sapiens                  |
| 1 | 1.00 | 1 | 1 | -0.03 | -0.026 | -0.035 | -0.033 | -0.033 | t | 116029 | YAKPAAVR<br>SP            | Homo<br>sapiens                  |
| 1 | 1.00 | 1 | 1 | -0.03 | -0.032 | -0.035 | -0.033 | -0.033 | t | 116029 | YAKPAAVR<br>SP            | Homo<br>sapiens                  |
| 1 | 1.00 | 1 | 1 | 0.03  | 0.028  | 0.01   | 0.023  | 0.03   | t | 127933 | APDDSFKK<br>LEDRTNL<br>KF | Mus<br>musculu<br>s              |
| 1 | 1.00 | 1 | 1 | 0.05  | 0.05   | 0.047  | 0.047  | 0.05   | t | 61997  | STVTEN                    | Homo<br>sapiens                  |
| 1 | 1.00 | 1 | 1 | 0.01  | 0.01   | 0.016  | 0.01   | 0.01   | t | 17271  | FPDLGV                    | Homo<br>sapiens                  |
| 1 | 1.00 | 1 | 1 | 0.01  | 0.012  | 0.01   | 0.011  | 0.01   | t | 98938  | PQP                       | Homo<br>sapiens                  |
| 1 | 1.00 | 1 | 1 | 0     | -0.002 | -0.007 | -0.003 | -0.002 | t | 33244  | KRVVIN                    | Mus<br>musculu<br>s              |
| 1 | 1.00 | 1 | 1 | 0.02  | 0.021  | 0.019  | 0.023  | 0.019  | t | 99279  | GHPQEI                    | Equus<br>caballus                |
| 1 | 1.00 | 1 | 1 | -0.03 | -0.037 | -0.037 | -0.023 | -0.028 | t | 156885 | GYRAR                     | Homo<br>sapiens                  |
| 1 | 1.00 | 1 | 1 | 0.05  | 0.05   | 0.055  | 0.06   | 0.053  | t | 115912 | QAPEY                     | Homo<br>sapiens                  |
| 1 | 1.00 | 1 | 1 | -0.01 | -0.01  | -0.01  | -0.01  | -0.012 | t | 133379 | SRPYMA                    | Homo<br>sapiens                  |



|   |      |   |   |       |        |        |        |        |   |        |                  |                       |
|---|------|---|---|-------|--------|--------|--------|--------|---|--------|------------------|-----------------------|
| 1 | 1.00 | 1 | 1 | 0.05  | 0.048  | 0.04   | 0.047  | 0.05   | t | 52572  | QTMEEINT         | Anas platyrhynchos    |
| 1 | 1.00 | 1 | 1 | 0.03  | 0.03   | 0.03   | 0.03   | 0.028  | t | 7673   | DAVTE            | Mus musculus          |
| 1 | 1.00 | 1 | 1 | 0.04  | 0.036  | 0.04   | 0.033  | 0.038  | t | 122872 | PLTLEL           | Oryctolagus cuniculus |
| 1 | 1.00 | 1 | 1 | 0.04  | 0.04   | 0.04   | 0.044  | 0.04   | t | 135893 | AFLQDVMNILLQ     | Homo sapiens          |
| 1 | 1.00 | 1 | 1 | 0.02  | 0.023  | 0.015  | 0.02   | 0.02   | t | 114224 | PQDENPVVHF       | Mus musculus          |
| 1 | 1.00 | 1 | 1 | 0.01  | 0.01   | 0.011  | 0.01   | 0.008  | t | 49     | AAALPGKCGV       | Homo sapiens          |
| 1 | 1.00 | 1 | 1 | 0.02  | 0.024  | 0.028  | 0.027  | 0.02   | t | 124205 | GPLQLGM          | Homo sapiens          |
| 1 | 1.00 | 1 | 1 | 0     | 0.004  | 0.009  | 0.007  | -0.001 | t | 119452 | FRKTSKGG S       | Homo sapiens          |
| 1 | 1.00 | 1 | 1 | 0.02  | 0.022  | 0.013  | 0.023  | 0.02   | t | 144682 | HLVGSALSDP       | Homo sapiens          |
| 1 | 1.00 | 1 | 1 | 0.01  | 0.01   | 0.005  | 0.01   | 0.01   | t | 67278  | TWLVNASNVD       | Homo sapiens          |
| 1 | 1.00 | 1 | 1 | -0.04 | -0.035 | -0.054 | -0.037 | -0.04  | t | 39196  | LRRRLRTACERAKRTL | Homo sapiens          |
| 1 | 1.00 | 1 | 1 | -0.05 | -0.05  | -0.055 | -0.05  | -0.05  | t | 129244 | LINRAKAVK        | Mus musculus          |
| 1 | 1.00 | 1 | 1 | 0.04  | 0.04   | 0.044  | 0.04   | 0.038  | t | 102279 | AAANQT           | Mus musculus          |
| 1 | 1.00 | 1 | 1 | -0.04 | -0.04  | -0.047 | -0.03  | -0.037 | t | 113577 | KNIVTPRTPPPSQGKG | Homo sapiens          |
| 1 | 1.00 | 1 | 1 | 0.01  | 0.008  | 0.012  | 0.009  | 0.01   | t | 1666   | AGRMIPKG         | Anas platyrhynchos    |

|   |      |   |   |       |        |        |        |        |   |        |                              |                                  |
|---|------|---|---|-------|--------|--------|--------|--------|---|--------|------------------------------|----------------------------------|
| 1 | 1.00 | 1 | 1 | -0.01 | -0.008 | -0.021 | -0.007 | -0.01  | t | 110602 | GLKAKPKF<br>TLGKRKAT<br>PTT  | Homo<br>sapiens                  |
| 1 | 1.00 | 1 | 1 | -0.02 | -0.02  | -0.02  | -0.02  | -0.021 | t | 122033 | WKKKLGA<br>SP                | Mus<br>musculu<br>s              |
| 1 | 1.00 | 1 | 1 | 0.04  | 0.04   | 0.035  | 0.037  | 0.04   | t | 9822   | DQAMEDI<br>KQM               | Homo<br>sapiens                  |
| 1 | 1.00 | 1 | 1 | 0.03  | 0.028  | 0.024  | 0.027  | 0.027  | t | 151711 | RATHQE                       | Mus<br>musculu<br>s              |
| 1 | 1.00 | 1 | 1 | 0.01  | 0.01   | 0.01   | 0.01   | 0.006  | t | 42757  | MTDVIRYR<br>YSNNYEAE<br>SHIS | Aotus<br>nancyma<br>ae           |
| 1 | 1.00 | 1 | 1 | 0     | -0.004 | -0.009 | 0      | 0      | t | 43545  | NDYCLREC<br>KQQGYKG          | Mus<br>musculu<br>s              |
| 1 | 1.00 | 1 | 1 | 0.07  | 0.07   | 0.063  | 0.07   | 0.07   | t | 105802 | GAD                          | Mus<br>musculu<br>s              |
| 1 | 1.00 | 1 | 1 | 0.03  | 0.034  | 0.023  | 0.033  | 0.03   | t | 124186 | GFTPGGG<br>GS                | Homo<br>sapiens                  |
| 1 | 1.00 | 1 | 1 | 0.02  | 0.025  | 0.013  | 0.023  | 0.02   | t | 48548  | PMEKKVIV<br>WGAETA           | Homo<br>sapiens                  |
| 1 | 1.00 | 1 | 1 | 0     | 0      | 0      | 0      | -0.004 | t | 97771  | WYGYHHS<br>N                 | Mus<br>musculu<br>s              |
| 1 | 1.00 | 1 | 1 | 0.04  | 0.04   | 0.04   | 0.04   | 0.039  | t | 99029  | TPGQFEDF<br>FP               | Homo<br>sapiens                  |
| 1 | 1.00 | 1 | 1 | 0     | -0.002 | 0.008  | -0.001 | -0.006 | t | 30986  | KGIYPLSYE                    | Mus<br>musculu<br>s              |
| 1 | 1.00 | 1 | 1 | 0.05  | 0.055  | 0.032  | 0.05   | 0.052  | t | 78603  | AELGEYEK<br>LLNSVLEPI        | Canis<br>familiari<br>s          |
| 1 | 1.00 | 1 | 1 | -0.03 | -0.033 | -0.043 | -0.03  | -0.03  | t | 55640  | RRLGAALL<br>QS               | Oryctola<br>gus<br>cuniculu<br>s |
| 1 | 1.00 | 1 | 1 | 0     | 0      | 0      | 0      | -0.004 | t | 14435  | ETIYNTTLK<br>Y               | Homo<br>sapiens                  |

|   |      |   |   |       |        |        |        |        |   |        |                           |                       |
|---|------|---|---|-------|--------|--------|--------|--------|---|--------|---------------------------|-----------------------|
| 1 | 1.00 | 1 | 1 | 0.01  | 0.012  | 0.004  | 0.01   | 0.01   | t | 39254  | LRYLEA                    | Homo sapiens          |
| 1 | 1.00 | 1 | 1 | 0     | -0.002 | -0.01  | 0.003  | -0.001 | t | 58036  | SGFSETVTI<br>VEDTRP       | Mus musculus          |
| 1 | 1.00 | 1 | 1 | 0.04  | 0.041  | 0.028  | 0.04   | 0.04   | t | 12551  | EIPQPQW<br>TPEEDQK        | Oryctolagus cuniculus |
| 1 | 1.00 | 1 | 1 | 0.04  | 0.039  | 0.039  | 0.041  | 0.04   | t | 66316  | TSLSVS                    | Homo sapiens          |
| 1 | 1.00 | 1 | 1 | 0.01  | 0.006  | 0.007  | 0.01   | 0.01   | t | 100249 | LDPLSEKG<br>LTTY          | Oryctolagus cuniculus |
| 1 | 1.00 | 1 | 1 | 0.01  | 0.01   | -0.006 | 0.013  | 0.012  | t | 57910  | SFSSIPNG                  | Homo sapiens          |
| 1 | 1.00 | 1 | 1 | 0.01  | 0.012  | 0.01   | 0.011  | 0.009  | t | 252    | AAKLQD                    | Homo sapiens          |
| 1 | 1.00 | 1 | 1 | 0.01  | 0.01   | -0.004 | 0.01   | 0.01   | t | 133952 | WIFQNF                    | Mus musculus          |
| 1 | 1.00 | 1 | 1 | 0     | 0      | 0      | 0.006  | 0      | t | 112841 | SSKRGRQT<br>PVLAYML<br>DH | Rattus norvegicus     |
| 1 | 1.00 | 1 | 1 | -0.02 | -0.022 | -0.027 | -0.02  | -0.018 | t | 20674  | GKREMVII<br>TF            | Mus musculus          |
| 1 | 1.00 | 1 | 1 | -0.02 | -0.018 | -0.025 | -0.019 | -0.018 | t | 25328  | IAKTTLKI                  | Homo sapiens          |
| 1 | 1.00 | 1 | 1 | 0.03  | 0.028  | 0.027  | 0.033  | 0.029  | t | 67163  | TVSRPVTP<br>LSEPIPV       | Sus scrofa            |
| 1 | 1.00 | 1 | 1 | 0     | -0.003 | -0.014 | 0      | 0      | t | 21715  | GPNNSEAI<br>PALTAAE       | Rattus norvegicus     |
| 1 | 1.00 | 1 | 1 | 0.01  | 0.012  | 0.003  | 0.011  | 0.009  | t | 99009  | SNALSKRL                  | Homo sapiens          |

|   |      |   |   |       |        |        |        |        |   |        |                             |                                  |
|---|------|---|---|-------|--------|--------|--------|--------|---|--------|-----------------------------|----------------------------------|
| 1 | 1.00 | 1 | 1 | -0.01 | -0.01  | -0.02  | -0.01  | -0.01  | t | 52720  | QVKARNII<br>SPVMG           | Mus                              |
| 1 | 1.00 | 1 | 1 | 0.03  | 0.036  | 0.037  | 0.037  | 0.03   | t | 127650 | FEPFSNKG                    | Homo<br>sapiens                  |
| 1 | 1.00 | 1 | 1 | -0.01 | -0.006 | -0.017 | -0.01  | -0.01  | t | 48827  | PPLPHV                      | Cavia<br>porcellu<br>s           |
| 1 | 1.00 | 1 | 1 | -0.01 | -0.013 | -0.02  | -0.01  | -0.01  | t | 140836 | DEAAYSKN<br>RRAV            | Oryctola<br>gus<br>cuniculu<br>s |
| 1 | 1.00 | 1 | 1 | 0.03  | 0.034  | 0.03   | 0.037  | 0.029  | t | 134209 | RDLASGLI<br>GPLLICYS<br>SVD | Homo<br>sapiens                  |
| 1 | 1.00 | 1 | 1 | -0.02 | -0.018 | -0.02  | -0.017 | -0.021 | t | 40724  | LYCGGPM<br>FNSKGAQ          | Homo<br>sapiens                  |
| 1 | 1.00 | 1 | 1 | 0.01  | 0.008  | 0.002  | 0.007  | 0.01   | t | 22656  | GTGFSLSD<br>LP              | Mus<br>musculu<br>s              |
| 1 | 1.00 | 1 | 1 | 0.01  | 0.012  | 0.002  | 0.007  | 0.008  | t | 13252  | ELRNLPQQ<br>CGLRAPQ         | Homo<br>sapiens                  |
| 1 | 1.00 | 1 | 1 | 0.01  | 0.012  | 0.002  | 0.007  | 0.008  | t | 13252  | ELRNLPQQ<br>CGLRAPQ         | Homo<br>sapiens                  |
| 1 | 1.00 | 1 | 1 | -0.01 | -0.012 | -0.017 | -0.01  | -0.011 | t | 120146 | QGARYVYA<br>YVF             | Oryctola<br>gus<br>cuniculu<br>s |
| 1 | 1.00 | 1 | 1 | 0     | 0      | 0      | 0      | -0.004 | t | 28299  | IRGDTFAT<br>R               | Mus<br>musculu<br>s              |
| 1 | 1.00 | 1 | 1 | 0     | 0      | 0      | 0      | -0.004 | t | 7492   | DAEFRHDS<br>GYEVHHQ<br>KL   | Mus<br>musculu<br>s              |
| 1 | 1.00 | 1 | 1 | 0     | 0      | 0      | 0      | -0.004 | t | 7492   | DAEFRHDS<br>GYEVHHQ<br>KL   | Mus<br>musculu<br>s              |
| 1 | 1.00 | 1 | 1 | -0.05 | -0.048 | -0.057 | -0.043 | -0.049 | t | 106114 | SLNPERMF<br>RKP             | Homo<br>sapiens                  |
| 1 | 1.00 | 1 | 1 | 0     | -0.003 | -0.013 | 0      | 0      | t | 105874 | IEADVNTF                    | Oryctola<br>gus<br>cuniculu<br>s |

|   |      |   |   |       |        |        |        |        |   |        |                          |                          |
|---|------|---|---|-------|--------|--------|--------|--------|---|--------|--------------------------|--------------------------|
| 1 | 1.00 | 1 | 1 | 0     | 0      | -0.002 | 0.006  | 0      | t | 116096 | GFGYGGR<br>ASDYKSAH<br>K | Rattus<br>norvegicus     |
| 1 | 1.00 | 1 | 1 | 0     | 0      | -0.007 | 0      | -0.001 | t | 105763 | EVHHQK                   | Mus<br>musculus          |
| 1 | 1.00 | 1 | 1 | 0.03  | 0.028  | 0.025  | 0.031  | 0.031  | t | 28413  | IRVEES                   | Homo<br>sapiens          |
| 1 | 1.00 | 1 | 1 | 0.02  | 0.018  | 0.008  | 0.019  | 0.02   | t | 72690  | WKNAYFD<br>K             | Mus<br>musculus          |
| 1 | 1.00 | 1 | 1 | 0.01  | 0.012  | 0.01   | 0.017  | 0.01   | t | 96455  | KGKNVLIN<br>KD           | Homo<br>sapiens          |
| 1 | 1.00 | 1 | 1 | 0     | 0      | 0      | 0      | -0.004 | t | 151813 | CGADSYE<br>MEEDGVR<br>KC | Mus<br>musculus          |
| 1 | 1.00 | 1 | 1 | 0     | 0      | 0      | 0      | -0.004 | t | 151731 | SAQSQRA<br>PDR           | Mus<br>musculus          |
| 1 | 1.00 | 1 | 1 | -0.02 | -0.02  | -0.035 | -0.02  | -0.02  | t | 64454  | TISADSKKT<br>KDLVFL      | Mus<br>musculus          |
| 1 | 1.00 | 1 | 1 | 0.04  | 0.036  | 0.033  | 0.039  | 0.041  | t | 58728  | SITTPSQ                  | Oryctolagus<br>cuniculus |
| 1 | 1.00 | 1 | 1 | -0.02 | -0.02  | -0.027 | -0.02  | -0.017 | t | 96548  | LFLAAH                   | Mus<br>musculus          |
| 1 | 1.00 | 1 | 1 | -0.03 | -0.029 | -0.031 | -0.027 | -0.031 | t | 99172  | ECRNAM                   | Equus<br>caballus        |
| 1 | 1.00 | 1 | 1 | 0.04  | 0.036  | 0.033  | 0.043  | 0.04   | t | 51868  | QPLEQIKLES               | Oryctolagus<br>cuniculus |
| 1 | 1.00 | 1 | 1 | -0.01 | -0.005 | -0.024 | -0.013 | -0.01  | t | 95498  | KIPAVF                   | Homo<br>sapiens          |
| 1 | 1.00 | 1 | 1 | 0.02  | 0.024  | 0.02   | 0.021  | 0.02   | t | 48778  | PPFSLSPV<br>PTL          | Homo<br>sapiens          |

|   |      |   |   |       |        |        |       |        |   |        |                              |                                  |
|---|------|---|---|-------|--------|--------|-------|--------|---|--------|------------------------------|----------------------------------|
| 1 | 1.00 | 1 | 1 | 0     | 0.002  | 0      | 0.007 | 0      | t | 108302 | CNFASRN<br>DYSYWLST<br>PEPMP | Homo<br>sapiens                  |
| 1 | 1.00 | 1 | 1 | 0     | 0      | 0.001  | 0     | -0.004 | t | 145746 | DPEIVMHS<br>F                | Mus<br>musculu<br>s              |
| 1 | 1.00 | 1 | 1 | 0     | -0.002 | 0      | 0.005 | -0.002 | t | 40110  | LTPLEELY                     | Mus<br>musculu<br>s              |
| 1 | 1.00 | 1 | 1 | 0.01  | 0.008  | 0.01   | 0.009 | 0.01   | t | 69860  | VL YEAFDE                    | Mus<br>musculu<br>s              |
| 1 | 1.00 | 1 | 1 | 0.01  | 0.008  | 0.01   | 0.009 | 0.01   | t | 69860  | VL YEAFDE                    | Mus<br>musculu<br>s              |
| 1 | 1.00 | 1 | 1 | 0     | 0      | -0.002 | 0     | 0      | t | 17504  | FQNEKWD<br>L                 | Mus<br>musculu<br>s              |
| 1 | 1.00 | 1 | 1 | -0.01 | -0.01  | -0.017 | -0.01 | -0.01  | t | 130806 | EMDVVRF<br>DD                | Homo<br>sapiens                  |
| 1 | 1.00 | 1 | 1 | 0.02  | 0.016  | 0.015  | 0.023 | 0.022  | t | 8800   | DITKD                        | Oryctola<br>gus<br>cuniculu<br>s |
| 1 | 1.00 | 1 | 1 | 0.02  | 0.022  | 0.013  | 0.017 | 0.018  | t | 106595 | LDGETKTG<br>PQRV             | Homo<br>sapiens                  |
| 1 | 1.00 | 1 | 1 | -0.04 | -0.037 | -0.046 | -0.04 | -0.04  | t | 65429  | TNSKRK                       | Mus<br>musculu<br>s              |
| 1 | 1.00 | 1 | 1 | -0.04 | -0.037 | -0.046 | -0.04 | -0.04  | t | 65429  | TNSKRK                       | Mus<br>musculu<br>s              |
| 1 | 1.00 | 1 | 1 | 0.01  | 0.006  | 0.001  | 0.009 | 0.01   | t | 801    | ADYHRVM<br>YAS               | Oryctola<br>gus<br>cuniculu<br>s |
| 1 | 1.00 | 1 | 1 | 0.05  | 0.048  | 0.033  | 0.047 | 0.051  | t | 78148  | ENQANPT<br>TAET              | Mus<br>musculu<br>s              |
| 1 | 1.00 | 1 | 1 | 0.01  | 0.014  | 0.01   | 0.007 | 0.007  | t | 50823  | QFYQKFP<br>QYL               | Homo<br>sapiens                  |

|   |      |   |   |       |        |        |        |        |   |        |                             |                                  |
|---|------|---|---|-------|--------|--------|--------|--------|---|--------|-----------------------------|----------------------------------|
| 1 | 1.00 | 1 | 1 | 0.02  | 0.022  | 0.013  | 0.021  | 0.02   | t | 98340  | PNPATAA<br>GKI              | Homo<br>sapiens                  |
| 1 | 1.00 | 1 | 1 | -0.02 | -0.023 | -0.022 | -0.02  | -0.021 | t | 95034  | PKPAKSP                     | Oryctola<br>gus<br>cuniculu<br>s |
| 1 | 1.00 | 1 | 1 | -0.02 | -0.023 | -0.022 | -0.02  | -0.021 | t | 95034  | PKPAKSP                     | Oryctola<br>gus<br>cuniculu<br>s |
| 1 | 1.00 | 1 | 1 | -0.02 | -0.02  | -0.022 | -0.02  | -0.021 | t | 95034  | PKPAKSP                     | Mus<br>musculu<br>s              |
| 1 | 1.00 | 1 | 1 | -0.02 | -0.02  | -0.022 | -0.02  | -0.021 | t | 95034  | PKPAKSP                     | Mus<br>musculu<br>s              |
| 1 | 1.00 | 1 | 1 | 0.04  | 0.041  | 0.039  | 0.043  | 0.039  | t | 99158  | DRLLSQIKS<br>EGHPQE         | Equus<br>caballus                |
| 1 | 1.00 | 1 | 1 | 0     | 0      | 0      | 0      | -0.003 | t | 119272 | MGPPIGLP<br>PAR             | Homo<br>sapiens                  |
| 1 | 1.00 | 1 | 1 | -0.01 | -0.008 | -0.017 | -0.003 | -0.009 | t | 144594 | ARGISRTK<br>YW              | Homo<br>sapiens                  |
| 1 | 1.00 | 1 | 1 | 0.02  | 0.022  | 0.02   | 0.027  | 0.02   | t | 103960 | GTYFLRS                     | Homo<br>sapiens                  |
| 1 | 1.00 | 1 | 1 | 0     | 0      | 0      | 0      | -0.004 | t | 39183  | LRRDLAS<br>REAKKQVE<br>KALE | Homo<br>sapiens                  |
| 1 | 1.00 | 1 | 1 | 0.01  | 0.012  | 0.01   | 0.011  | 0.01   | t | 36071  | LGDDTGII<br>VI              | Homo<br>sapiens                  |
| 1 | 1.00 | 1 | 1 | 0.01  | 0.008  | 0.01   | 0.011  | 0.01   | t | 36071  | LGDDTGII<br>VI              | Homo<br>sapiens                  |
| 1 | 1.00 | 1 | 1 | -0.01 | -0.01  | -0.01  | -0.009 | -0.013 | t | 105163 | EFRHD                       | Mus<br>musculu<br>s              |
| 1 | 1.00 | 1 | 1 | 0.01  | 0.006  | 0.012  | 0.01   | 0.008  | t | 100034 | FFAEDVGS<br>NK              | Oryctola<br>gus<br>cuniculu<br>s |
| 1 | 1.00 | 1 | 1 | -0.03 | -0.028 | -0.023 | -0.023 | -0.032 | t | 113371 | EPARSRSR                    | Homo<br>sapiens                  |

|   |      |   |   |       |        |        |       |        |   |        |                             |                                  |
|---|------|---|---|-------|--------|--------|-------|--------|---|--------|-----------------------------|----------------------------------|
| 1 | 1.00 | 1 | 1 | -0.02 | -0.023 | -0.033 | -0.02 | -0.02  | t | 105889 | IVGFFSKI                    | Oryctola<br>gus<br>cuniculu<br>s |
| 1 | 1.00 | 1 | 1 | 0.05  | 0.048  | 0.056  | 0.049 | 0.048  | t | 67967  | VDGSDP                      | Mus<br>musculu<br>s              |
| 1 | 1.00 | 1 | 1 | 0.02  | 0.014  | 0.008  | 0.02  | 0.02   | t | 57120  | SCNATQY<br>NQLST            | Oryctola<br>gus<br>cuniculu<br>s |
| 1 | 1.00 | 1 | 1 | 0.02  | 0.027  | 0.009  | 0.02  | 0.02   | t | 94452  | CCNPACG<br>PKY              | Capra<br>hircus                  |
| 1 | 1.00 | 1 | 1 | 0.02  | 0.02   | 0.009  | 0.02  | 0.02   | t | 94452  | CCNPACG<br>PKY              | Capra<br>hircus                  |
| 1 | 1.00 | 1 | 1 | 0.03  | 0.022  | 0.03   | 0.03  | 0.029  | t | 125055 | FVYGGCQ<br>GNN              | Mus<br>musculu<br>s              |
| 1 | 1.00 | 1 | 1 | 0     | -0.012 | -0.016 | 0     | 0.002  | t | 66873  | TTTSSHPV                    | Macaca<br>mulatta                |
| 1 | 1.00 | 1 | 1 | 0.03  | 0.03   | 0.025  | 0.036 | 0.03   | t | 13986  | EREVSVPA                    | Homo<br>sapiens                  |
| 1 | 1.00 | 1 | 1 | 0.06  | 0.062  | 0.057  | 0.057 | 0.058  | t | 114859 | ICGTDGVT<br>YT              | Homo<br>sapiens                  |
| 1 | 1.00 | 1 | 1 | 0.07  | 0.066  | 0.066  | 0.069 | 0.07   | t | 65840  | TQETGDTT<br>PSAYSMS         | Oryctola<br>gus<br>cuniculu<br>s |
| 1 | 1.00 | 1 | 1 | 0.03  | 0.03   | 0.03   | 0.032 | 0.03   | t | 60364  | SQAEEAAL<br>NL              | Homo<br>sapiens                  |
| 1 | 1.00 | 1 | 1 | 0.04  | 0.042  | 0.045  | 0.047 | 0.04   | t | 109530 | LTKNQVS                     | Homo<br>sapiens                  |
| 1 | 1.00 | 1 | 1 | -0.04 | -0.043 | -0.052 | -0.04 | -0.041 | t | 111051 | VGPLEVIP<br>EAVDPAG<br>SSIV | Oryctola<br>gus<br>cuniculu<br>s |
| 1 | 1.00 | 1 | 1 | 0     | 0.004  | 0      | 0.007 | 0      | t | 123610 | PPGAMPP<br>Q                | Homo<br>sapiens                  |



|   |      |   |   |       |        |        |        |        |   |        |                             |                       |
|---|------|---|---|-------|--------|--------|--------|--------|---|--------|-----------------------------|-----------------------|
| 1 | 1.00 | 1 | 1 | 0.06  | 0.062  | 0.05   | 0.061  | 0.061  | t | 34154  | KVPEDTLN                    | Homo sapiens          |
| 1 | 1.00 | 1 | 1 | -0.03 | -0.026 | -0.037 | -0.027 | -0.031 | t | 115591 | APEYRGRT<br>ELLK            | Homo sapiens          |
| 1 | 1.00 | 1 | 1 | 0     | 0      | -0.007 | 0      | -0.001 | t | 133664 | PPPPPPPP<br>PP              | Mus musculus          |
| 1 | 1.00 | 1 | 1 | 0.03  | 0.03   | 0.015  | 0.033  | 0.032  | t | 76307  | YVKELPTE<br>VQKLKEK         | Homo sapiens          |
| 1 | 1.00 | 1 | 1 | -0.03 | -0.031 | -0.038 | -0.03  | -0.03  | t | 50836  | QGAWPA<br>GA                | Anas platyrhynchos    |
| 1 | 1.00 | 1 | 1 | -0.03 | -0.028 | -0.034 | -0.029 | -0.03  | t | 53883  | RGIDKSVK<br>SV              | Homo sapiens          |
| 1 | 1.00 | 1 | 1 | -0.02 | -0.024 | -0.017 | -0.02  | -0.022 | t | 41544  | MFTKYNG<br>NLNTI            | Oryctolagus cuniculus |
| 1 | 1.00 | 1 | 1 | 0.02  | 0.022  | 0.015  | 0.021  | 0.02   | t | 56079  | RTIGGSQA<br>QT              | Homo sapiens          |
| 1 | 1.00 | 1 | 1 | 0.04  | 0.038  | 0.033  | 0.041  | 0.041  | t | 131217 | EDISAYLL                    | Mus musculus          |
| 1 | 1.00 | 1 | 1 | -0.03 | -0.03  | -0.037 | -0.027 | -0.03  | t | 96071  | AGIRPKGA<br>FQ              | Homo sapiens(human)   |
| 1 | 1.00 | 1 | 1 | -0.01 | -0.014 | -0.014 | -0.007 | -0.011 | t | 63195  | TDLLAGGK<br>DDVK            | Oryctolagus cuniculus |
| 1 | 1.00 | 1 | 1 | 0     | -0.003 | -0.01  | 0      | 0      | t | 140936 | YLAGKGV<br>DAGKL            | Oryctolagus cuniculus |
| 1 | 1.00 | 1 | 1 | 0.03  | 0.033  | 0.029  | 0.03   | 0.027  | t | 133611 | IVSYLCDLA<br>PEAPPPTL<br>PP | Mus musculus          |
| 1 | 1.00 | 1 | 1 | 0     | 0.002  | 0.005  | 0.007  | 0      | t | 112408 | YGIGVGW                     | Homo sapiens          |

|   |      |   |   |       |        |        |        |        |   |        |                     |                       |
|---|------|---|---|-------|--------|--------|--------|--------|---|--------|---------------------|-----------------------|
| 1 | 1.00 | 1 | 1 | 0.04  | 0.042  | 0.043  | 0.041  | 0.04   | t | 61485  | SSYGFAQ             | Homo sapiens          |
| 1 | 1.00 | 1 | 1 | -0.02 | -0.016 | -0.02  | -0.019 | -0.022 | t | 96102  | APPLLPH             | Homo sapiens          |
| 1 | 1.00 | 1 | 1 | 0.02  | 0.02   | 0.026  | 0.02   | 0.018  | t | 46443  | NVPEKQT             | Mus musculus          |
| 1 | 1.00 | 1 | 1 | 0.02  | 0.02   | 0.026  | 0.02   | 0.018  | t | 46443  | NVPEKQT             | Mus musculus          |
| 1 | 1.00 | 1 | 1 | 0.04  | 0.04   | 0.037  | 0.04   | 0.037  | t | 114559 | RAESEGFE<br>WVAFKTN | Homo sapiens          |
| 1 | 1.00 | 1 | 1 | -0.03 | -0.028 | -0.036 | -0.027 | -0.031 | t | 72335  | WDVRPLT<br>ETRGLFS  | Homo sapiens          |
| 1 | 1.00 | 1 | 1 | 0.01  | 0.007  | 0.001  | 0.01   | 0.01   | t | 67445  | TYRATYQD<br>FD      | Oryctolagus cuniculus |
| 1 | 1.00 | 1 | 1 | -0.02 | -0.015 | -0.024 | -0.017 | -0.021 | t | 77801  | SVKKCLFE<br>KC      | Homo sapiens          |
| 1 | 1.00 | 1 | 1 | 0     | 0.002  | -0.001 | 0.001  | -0.001 | t | 19893  | GGIVTC              | Homo sapiens          |
| 1 | 1.00 | 1 | 1 | 0.02  | 0.022  | 0.017  | 0.021  | 0.019  | t | 103301 | KAMLFDG<br>RSGEPFPY | Homo sapiens          |
| 1 | 1.00 | 1 | 1 | 0.03  | 0.029  | 0.03   | 0.031  | 0.03   | t | 8355   | DGAVQPD<br>GG       | Canis lupus           |
| 1 | 1.00 | 1 | 1 | 0.02  | 0.023  | 0.008  | 0.02   | 0.02   | t | 153425 | MQIFVKTL<br>TGKTITL | Mus musculus          |
| 1 | 1.00 | 1 | 1 | 0.02  | 0.02   | 0.008  | 0.02   | 0.02   | t | 153425 | MQIFVKTL<br>TGKTITL | Mus musculus          |
| 1 | 1.00 | 1 | 1 | 0.03  | 0.03   | 0.029  | 0.04   | 0.032  | t | 106648 | MHNPSM<br>T         | Homo sapiens          |

|   |      |   |   |       |        |        |        |        |   |        |                |                                  |
|---|------|---|---|-------|--------|--------|--------|--------|---|--------|----------------|----------------------------------|
| 1 | 1.00 | 1 | 1 | 0.03  | 0.023  | 0.019  | 0.03   | 0.03   | t | 94473  | CNPACGP<br>KYS | Oryctola<br>gus<br>cuniculu<br>s |
| 1 | 1.00 | 1 | 1 | 0.03  | 0.03   | 0.019  | 0.03   | 0.03   | t | 94473  | CNPACGP<br>KYS | Capra<br>hircus                  |
| 1 | 1.00 | 1 | 1 | 0.03  | 0.03   | 0.019  | 0.03   | 0.03   | t | 94473  | CNPACGP<br>KYS | Oryctola<br>gus<br>cuniculu<br>s |
| 1 | 1.00 | 1 | 1 | 0.05  | 0.05   | 0.05   | 0.045  | 0.046  | t | 116085 | EPANPSEK       | Mus<br>musculu<br>s              |
| 1 | 1.00 | 1 | 1 | -0.06 | -0.056 | -0.049 | -0.06  | -0.065 | t | 123279 | GYWKIRGL<br>A  | Ovis<br>aries                    |
| 1 | 1.00 | 1 | 1 | 0.01  | 0.01   | -0.003 | 0.007  | 0.01   | t | 147200 | PQQLPQ         | Homo<br>sapiens                  |
| 1 | 1.00 | 1 | 1 | 0.02  | 0.025  | 0.016  | 0.021  | 0.02   | t | 26308  | IGQMFETT<br>MR | Homo<br>sapiens                  |
| 1 | 1.00 | 1 | 1 | -0.02 | -0.018 | -0.02  | -0.013 | -0.018 | t | 133638 | LTSRPA         | Homo<br>sapiens                  |
| 1 | 1.00 | 1 | 1 | 0.01  | 0.013  | 0.004  | 0.01   | 0.01   | t | 43548  | NDYEDRY<br>RE  | Mus<br>musculu<br>s              |
| 1 | 1.00 | 1 | 1 | 0.06  | 0.062  | 0.053  | 0.059  | 0.059  | t | 135805 | YVNSTEAE       | Homo<br>sapiens                  |
| 1 | 1.00 | 1 | 1 | -0.05 | -0.052 | -0.044 | -0.049 | -0.052 | t | 79042  | PKSKPFA        | Mus<br>musculu<br>s              |
| 1 | 1.00 | 1 | 1 | 0.01  | 0.01   | -0.003 | 0.01   | 0.012  | t | 7274   | CVKKQCPE       | Mus<br>musculu<br>s              |
| 1 | 1.00 | 1 | 1 | 0.01  | 0.012  | 0.005  | 0.011  | 0.01   | t | 19096  | GDRADGQ<br>PA  | Homo<br>sapiens                  |
| 1 | 1.00 | 1 | 1 | 0.06  | 0.06   | 0.06   | 0.063  | 0.06   | t | 149035 | EGSGTTK        | Sus<br>scrofa                    |

|   |      |   |   |       |        |        |        |        |   |        |                              |                                  |
|---|------|---|---|-------|--------|--------|--------|--------|---|--------|------------------------------|----------------------------------|
| 1 | 1.00 | 1 | 1 | 0.05  | 0.054  | 0.043  | 0.053  | 0.05   | t | 131657 | SGLQAEDE<br>ADYYCSSY         | Homo<br>sapiens                  |
| 1 | 1.00 | 1 | 1 | -0.02 | -0.018 | -0.022 | -0.02  | -0.021 | t | 118548 | PAPGMRP<br>P                 | Homo<br>sapiens                  |
| 1 | 1.00 | 1 | 1 | 0.03  | 0.03   | 0.03   | 0.03   | 0.03   | t | 105813 | GELPNIEA                     | Oryctola<br>gus<br>cuniculu<br>s |
| 1 | 1.00 | 1 | 1 | 0.03  | 0.028  | 0.031  | 0.029  | 0.03   | t | 41350  | MEEINTLQ                     | Anas<br>platyrhy<br>nchos        |
| 1 | 1.00 | 1 | 1 | -0.01 | -0.008 | -0.01  | -0.01  | -0.014 | t | 141749 | SNLDHI                       | Rattus<br>norvegic<br>us         |
| 1 | 1.00 | 1 | 1 | 0.05  | 0.05   | 0.043  | 0.059  | 0.052  | t | 136590 | RDYFEEYG<br>KIDTIEIT         | Homo<br>sapiens                  |
| 1 | 1.00 | 1 | 1 | -0.01 | -0.012 | -0.017 | -0.007 | -0.011 | t | 108323 | DTPPPCPR<br>CP               | Mus<br>musculu<br>s              |
| 1 | 1.00 | 1 | 1 | 0     | -0.007 | 0      | 0      | -0.001 | t | 153841 | KCLKFYSKI<br>SEYRHY          | Oryctola<br>gus<br>cuniculu<br>s |
| 1 | 1.00 | 1 | 1 | 0.03  | 0.03   | 0.03   | 0.03   | 0.03   | t | 78399  | GLLNDS                       | Mus<br>musculu<br>s              |
| 1 | 1.00 | 1 | 1 | 0     | 0      | 0      | 0.004  | -0.002 | t | 125411 | FQGLCNET<br>LTLKLYNN<br>GFTS | Homo<br>sapiens                  |
| 1 | 1.00 | 1 | 1 | -0.04 | -0.038 | -0.047 | -0.033 | -0.039 | t | 121692 | PAPPKPEP<br>KPKKAPA          | Homo<br>sapiens                  |
| 1 | 1.00 | 1 | 1 | 0.02  | 0.016  | 0.015  | 0.023  | 0.021  | t | 100320 | NCDFSQT<br>ATLTN             | Oryctola<br>gus<br>cuniculu<br>s |
| 1 | 1.00 | 1 | 1 | 0.02  | 0.013  | 0.009  | 0.02   | 0.02   | t | 94452  | CCNPACG<br>PKY               | Oryctola<br>gus<br>cuniculu<br>s |
| 1 | 1.00 | 1 | 1 | 0.02  | 0.027  | 0.009  | 0.02   | 0.02   | t | 94452  | CCNPACG<br>PKY               | Capra<br>hircus                  |

|   |      |   |   |       |        |        |        |        |   |        |                           |                                  |
|---|------|---|---|-------|--------|--------|--------|--------|---|--------|---------------------------|----------------------------------|
| 1 | 1.00 | 1 | 1 | 0     | -0.003 | -0.01  | 0      | 0      | t | 755    | ADQLPNV<br>G              | Oryctola<br>gus<br>cuniculu<br>s |
| 1 | 1.00 | 1 | 1 | 0     | 0      | -0.01  | 0      | 0      | t | 755    | ADQLPNV<br>G              | Oryctola<br>gus<br>cuniculu<br>s |
| 1 | 1.00 | 1 | 1 | -0.03 | -0.028 | -0.03  | -0.023 | -0.032 | t | 134765 | PTPGPSRR<br>GPSLGAS       | Homo<br>sapiens                  |
| 1 | 1.00 | 1 | 1 | 0.02  | 0.02   | 0.02   | 0.027  | 0.02   | t | 136006 | VETGHTSQ<br>VTPS          | Homo<br>sapiens                  |
| 1 | 1.00 | 1 | 1 | -0.02 | -0.024 | -0.028 | -0.021 | -0.022 | t | 2215   | AKKPAGK<br>GSPSTLQT<br>PG | Oryctola<br>gus<br>cuniculu<br>s |
| 1 | 1.00 | 1 | 1 | 0.01  | 0.011  | 0      | 0.011  | 0.01   | t | 72182  | VYVGNYD<br>FW             | Homo<br>sapiens                  |
| 1 | 1.00 | 1 | 1 | 0.05  | 0.05   | 0.048  | 0.047  | 0.048  | t | 98725  | DDEALEKF<br>DK            | Homo<br>sapiens                  |
| 1 | 1.00 | 1 | 1 | 0.02  | 0.02   | 0.02   | 0.03   | 0.023  | t | 141707 | MPEEVHH<br>GEEEV          | Homo<br>sapiens                  |
| 1 | 1.00 | 1 | 1 | 0.02  | 0.022  | 0.02   | 0.027  | 0.02   | t | 138219 | PTPETGPL<br>QR            | Homo<br>sapiens                  |
| 1 | 1.00 | 1 | 1 | -0.02 | -0.016 | -0.02  | -0.013 | -0.02  | t | 123579 | PGMIPPP<br>G              | Homo<br>sapiens                  |
| 1 | 1.00 | 1 | 1 | -0.04 | -0.041 | -0.05  | -0.04  | -0.04  | t | 34081  | KVKTTVVY<br>GRRRSK        | Anas<br>platyrhy<br>nchos        |
| 1 | 1.00 | 1 | 1 | -0.02 | -0.018 | -0.003 | -0.013 | -0.021 | t | 109251 | GSFFLYS                   | Homo<br>sapiens                  |
| 1 | 1.00 | 1 | 1 | 0     | 0.004  | -0.005 | -0.003 | -0.002 | t | 5385   | AVIRGKKG<br>SG            | Homo<br>sapiens                  |
| 1 | 1.00 | 1 | 1 | 0.02  | 0.026  | 0.017  | 0.02   | 0.02   | t | 139896 | SLNSSAQ                   | Ovis<br>aries                    |

|   |      |   |   |       |        |        |        |        |   |        |                            |                     |
|---|------|---|---|-------|--------|--------|--------|--------|---|--------|----------------------------|---------------------|
| 1 | 1.00 | 1 | 1 | 0.01  | 0.013  | 0.001  | 0.01   | 0.01   | t | 13735  | EPQVYTLP<br>PSR            | Mus<br>musculu<br>s |
| 1 | 1.00 | 1 | 1 | -0.01 | -0.006 | -0.022 | -0.011 | -0.01  | t | 141560 | SDEALPPG<br>SPR            | Mus<br>musculu<br>s |
| 1 | 1.00 | 1 | 1 | 0.01  | 0.008  | 0.001  | 0.01   | 0.01   | t | 82594  | GDKVAS                     | Mus<br>musculu<br>s |
| 1 | 1.00 | 1 | 1 | 0     | 0      | -0.005 | 0      | 0      | t | 18363  | FWRGDLV<br>FDFQV           | Homo<br>sapiens     |
| 1 | 1.00 | 1 | 1 | 0.02  | 0.018  | 0.013  | 0.013  | 0.016  | t | 128612 | FDSHY                      | Mus<br>musculu<br>s |
| 1 | 1.00 | 1 | 1 | 0.01  | 0.01   | 0.008  | 0.014  | 0.01   | t | 47591  | PFVQWFM<br>GL              | Homo<br>sapiens     |
| 1 | 1.00 | 1 | 1 | 0.01  | 0.01   | 0.003  | 0.01   | 0.01   | t | 138258 | VMHEALH                    | Homo<br>sapiens     |
| 1 | 1.00 | 1 | 1 | 0.01  | 0.012  | 0.015  | 0.017  | 0.011  | t | 112814 | PEQPPIH                    | Homo<br>sapiens     |
| 1 | 1.00 | 1 | 1 | 0     | 0      | 0      | 0      | -0.003 | t | 50931  | QGPGAPQ<br>GPGAPQG<br>PGAP | Mus<br>musculu<br>s |
| 1 | 1.00 | 1 | 1 | 0     | 0      | 0      | 0      | -0.003 | t | 50931  | QGPGAPQ<br>GPGAPQG<br>PGAP | Mus<br>musculu<br>s |
| 1 | 1.00 | 1 | 1 | 0.03  | 0.034  | 0.023  | 0.033  | 0.032  | t | 142474 | SSTTGVA<br>M               | Homo<br>sapiens     |
| 1 | 1.00 | 1 | 1 | -0.02 | -0.022 | -0.029 | -0.017 | -0.02  | t | 115540 | VKNKRTFL<br>SPWISNI        | Mus<br>musculu<br>s |
| 1 | 1.00 | 1 | 1 | 0     | 0.002  | 0      | 0.003  | -0.002 | t | 119633 | QYTGHIT<br>WTPPAIFK<br>S   | Homo<br>sapiens     |
| 1 | 1.00 | 1 | 1 | -0.01 | -0.01  | -0.014 | -0.01  | -0.011 | t | 110873 | GSGTGGR<br>TGYIPL          | Mus<br>musculu<br>s |
| 1 | 1.00 | 1 | 1 | 0     | 0      | -0.005 | 0      | -0.001 | t | 3880   | APTYSWG<br>A               | Mus<br>musculu<br>s |
| 1 | 1.00 | 1 | 1 | 0.02  | 0.02   | 0.02   | 0.031  | 0.02   | t | 118645 | VAVSAAP<br>GSAAPAA<br>G    | Homo<br>sapiens     |

|   |      |   |   |       |        |        |        |        |   |        |               |                       |
|---|------|---|---|-------|--------|--------|--------|--------|---|--------|---------------|-----------------------|
| 1 | 1.00 | 1 | 1 | 0     | 0.005  | -0.012 | -0.001 | 0.002  | t | 99226  | ERQLKSA       | Gallus gallus         |
| 1 | 1.00 | 1 | 1 | 0     | 0.003  | 0      | 0      | 0      | t | 31373  | KINSLS        | Mus musculus          |
| 1 | 1.00 | 1 | 1 | 0     | 0.002  | -0.005 | -0.003 | -0.002 | t | 98740  | EALEKFDKAL    | Homo sapiens          |
| 1 | 1.00 | 1 | 1 | 0.01  | 0.01   | -0.001 | 0.01   | 0.01   | t | 94620  | NPACGPKY      | Capra hircus          |
| 1 | 1.00 | 1 | 1 | 0.01  | 0.017  | -0.001 | 0.01   | 0.01   | t | 94620  | NPACGPKY      | Capra hircus          |
| 1 | 1.00 | 1 | 1 | 0     | -0.002 | 0      | 0      | -0.004 | t | 137401 | FEDVW         | Mus musculus          |
| 1 | 1.00 | 1 | 1 | 0.05  | 0.05   | 0.042  | 0.05   | 0.05   | t | 59430  | SLRECCQELQEV  | Homo sapiens          |
| 1 | 1.00 | 1 | 1 | 0.02  | 0.02   | 0.006  | 0.02   | 0.023  | t | 109349 | IPVDLL        | Mus musculus          |
| 1 | 1.00 | 1 | 1 | -0.02 | -0.02  | -0.021 | -0.02  | -0.02  | t | 48762  | PPDHSA        | Homo sapiens          |
| 1 | 1.00 | 1 | 1 | -0.03 | -0.028 | -0.032 | -0.023 | -0.029 | t | 127643 | ERPLELRVRVLDI | Homo sapiens          |
| 1 | 1.00 | 1 | 1 | 0.02  | 0.02   | 0.02   | 0.02   | 0.019  | t | 115060 | GYLEQL        | Homo sapiens          |
| 1 | 1.00 | 1 | 1 | 0     | 0      | 0      | 0      | -0.004 | t | 143676 | DRVGLRNLRGYY  | Mus musculus          |
| 1 | 1.00 | 1 | 1 | 0.01  | 0.008  | 0.008  | 0.009  | 0.008  | t | 25002  | HTVTTTTK      | Mus musculus          |
| 1 | 1.00 | 1 | 1 | 0.01  | 0.007  | 0.01   | 0.01   | 0.009  | t | 135562 | IHAMDIPPTG    | Oryctolagus cuniculus |
| 1 | 1.00 | 1 | 1 | 0.02  | 0.02   | 0.015  | 0.023  | 0.02   | t | 38764  | LPVWARP D     | Homo sapiens          |

|   |      |   |   |       |        |        |        |        |   |        |                              |                                  |
|---|------|---|---|-------|--------|--------|--------|--------|---|--------|------------------------------|----------------------------------|
| 1 | 1.00 | 1 | 1 | -0.03 | -0.028 | -0.032 | -0.023 | -0.03  | t | 112403 | WWNDNK<br>F                  | Homo<br>sapiens                  |
| 1 | 1.00 | 1 | 1 | 0.01  | 0.015  | 0.013  | 0.01   | 0.01   | t | 48452  | PLPPVA                       | Cavia<br>porcellu<br>s           |
| 1 | 1.00 | 1 | 1 | 0     | 0      | -0.005 | -0.003 | -0.002 | t | 42159  | MMNWSP<br>T                  | Homo<br>sapiens                  |
| 1 | 1.00 | 1 | 1 | 0     | -0.003 | 0      | 0      | -0.004 | t | 134078 | GYYPSPDP<br>NTFYAPPY<br>Q    | Oryctola<br>gus<br>cuniculu<br>s |
| 1 | 1.00 | 1 | 1 | 0     | -0.003 | 0      | 0      | -0.004 | t | 134188 | PMSTPSAT<br>SVR              | Oryctola<br>gus<br>cuniculu<br>s |
| 1 | 1.00 | 1 | 1 | 0     | -0.003 | 0      | 0      | -0.004 | t | 59922  | SNTFINNA                     | Oryctola<br>gus<br>cuniculu<br>s |
| 1 | 1.00 | 1 | 1 | 0     | -0.004 | 0      | 0      | -0.004 | t | 58975  | SKYSNTFNI<br>NAYNMVI<br>RRSM | Aotus<br>sp.                     |
| 1 | 1.00 | 1 | 1 | 0     | -0.004 | 0      | 0      | -0.004 | t | 51125  | QIPYNLKIR<br>AGGLDGG<br>KKLV | Aotus<br>sp.                     |
| 1 | 1.00 | 1 | 1 | 0     | -0.004 | 0      | 0      | -0.004 | t | 42761  | MTDVIRYR<br>YSNNYEAS<br>DHIS | Aotus<br>sp.                     |
| 1 | 1.00 | 1 | 1 | 0     | -0.005 | 0      | 0      | -0.004 | t | 58975  | SKYSNTFNI<br>NAYNMVI<br>RRSM | Aotus<br>sp.                     |
| 1 | 1.00 | 1 | 1 | 0     | 0      | 0      | 0      | -0.004 | t | 42780  | MTDVNRY<br>RYSNNYEE<br>QPHIS | Aotus<br>nancyma<br>ae           |
| 1 | 1.00 | 1 | 1 | -0.02 | -0.02  | -0.035 | -0.02  | -0.02  | t | 51971  | QPSSRRYP<br>F                | Homo<br>sapiens                  |
| 1 | 1.00 | 1 | 1 | -0.01 | -0.006 | -0.017 | -0.007 | -0.011 | t | 115645 | RNGKDQD<br>GDQAP             | Homo<br>sapiens                  |
| 1 | 1.00 | 1 | 1 | -0.01 | 0.004  | -0.017 | -0.007 | -0.011 | t | 115645 | RNGKDQD<br>GDQAP             | Homo<br>sapiens                  |
| 1 | 1.00 | 1 | 1 | -0.03 | -0.032 | -0.03  | -0.027 | -0.03  | t | 45816  | NSGCFRHL                     | Mus<br>musculu<br>s              |



|   |      |   |   |       |        |        |       |        |   |        |                             |                                  |
|---|------|---|---|-------|--------|--------|-------|--------|---|--------|-----------------------------|----------------------------------|
| 1 | 1.00 | 1 | 1 | 0.01  | 0.01   | 0.01   | 0.01  | 0.011  | t | 115566 | YKKYLLFC<br>ME              | Homo<br>sapiens                  |
| 1 | 1.00 | 1 | 1 | 0.02  | 0.017  | 0.014  | 0.02  | 0.018  | t | 7864   | DDQPSSH<br>QPLFY            | Oryctola<br>gus<br>cuniculu<br>s |
| 1 | 1.00 | 1 | 1 | -0.01 | -0.01  | -0.02  | -0.01 | -0.01  | t | 104161 | NVVLKTIT<br>ESATSPPT        | Oryctola<br>gus<br>cuniculu<br>s |
| 1 | 1.00 | 1 | 1 | 0.04  | 0.036  | 0.032  | 0.039 | 0.04   | t | 98061  | GFSGSVQF<br>VP              | Oryctola<br>gus<br>cuniculu<br>s |
| 1 | 1.00 | 1 | 1 | 0.04  | 0.038  | 0.032  | 0.039 | 0.04   | t | 98061  | GFSGSVQF<br>VP              | Mus<br>musculu<br>s              |
| 1 | 1.00 | 1 | 1 | -0.01 | -0.01  | -0.015 | -0.01 | -0.012 | t | 125055 | FVYGGCQ<br>GNN              | Mus<br>musculu<br>s              |
| 1 | 1.00 | 1 | 1 | -0.01 | -0.008 | -0.01  | -0.01 | -0.01  | t | 107368 | FSSAP                       | Rattus<br>norvegic<br>us         |
| 1 | 1.00 | 1 | 1 | 0.02  | 0.024  | 0.02   | 0.027 | 0.02   | t | 131700 | TGVTTQG<br>VKSLTSM<br>YVKEF | Homo<br>sapiens                  |
| 1 | 1.00 | 1 | 1 | 0.02  | 0.02   | 0.022  | 0.02  | 0.018  | t | 72911  | WNSTTFH<br>QTLQDP           | Mus<br>musculu<br>s              |
| 1 | 1.00 | 1 | 1 | 0.01  | 0.01   | 0.008  | 0.01  | 0.006  | t | 97769  | WNPSLLG<br>N                | Mus<br>musculu<br>s              |
| 1 | 1.00 | 1 | 1 | 0.01  | 0.01   | 0.008  | 0.01  | 0.006  | t | 97769  | WNPSLLG<br>N                | Mus<br>musculu<br>s              |
| 1 | 1.00 | 1 | 1 | 0.01  | 0.01   | 0.005  | 0.007 | 0.008  | t | 38630  | LPPTVMFP<br>PQ              | Homo<br>sapiens                  |
| 1 | 1.00 | 1 | 1 | 0.03  | 0.033  | 0.022  | 0.03  | 0.032  | t | 65974  | TQYERE                      | Mus<br>musculu<br>s              |
| 1 | 1.00 | 1 | 1 | 0     | 0      | 0      | 0     | 0      | t | 27421  | ILYEAFDE<br>M               | Homo<br>sapiens                  |

|   |      |   |   |       |        |        |        |        |   |        |                              |                                  |
|---|------|---|---|-------|--------|--------|--------|--------|---|--------|------------------------------|----------------------------------|
| 1 | 1.00 | 1 | 1 | 0.03  | 0.03   | 0.022  | 0.03   | 0.029  | t | 26375  | IHFGSDYE<br>DRYY             | Mus<br>musculu<br>s              |
| 1 | 1.00 | 1 | 1 | 0.05  | 0.05   | 0.048  | 0.05   | 0.051  | t | 10320  | DTDSGYD<br>VPDY              | Mus<br>musculu<br>s              |
| 1 | 1.00 | 1 | 1 | 0.06  | 0.064  | 0.052  | 0.06   | 0.062  | t | 1450   | AGAPSAE<br>QRER              | Mus<br>musculu<br>s              |
| 1 | 1.00 | 1 | 1 | 0.01  | 0.006  | 0.001  | 0.007  | 0.008  | t | 95334  | EDVPQPP<br>VSQFH             | Oryctola<br>gus<br>cuniculu<br>s |
| 1 | 1.00 | 1 | 1 | 0     | 0      | 0      | 0      | -0.004 | t | 7502   | DAEVAGT<br>QWFTPSG<br>KTPVFG | Aotus<br>nancyma<br>ae           |
| 1 | 1.00 | 1 | 1 | 0.04  | 0.04   | 0.04   | 0.04   | 0.04   | t | 78399  | GLLNDS                       | Mus<br>musculu<br>s              |
| 1 | 1.00 | 1 | 1 | -0.01 | -0.01  | -0.01  | 0      | -0.01  | t | 98973  | QSLACQCL<br>VR               | Homo<br>sapiens                  |
| 1 | 1.00 | 1 | 1 | -0.01 | -0.01  | -0.01  | 0      | -0.01  | t | 115197 | CVKKILDK<br>VG               | Homo<br>sapiens                  |
| 1 | 1.00 | 1 | 1 | -0.01 | -0.014 | -0.019 | -0.011 | -0.01  | t | 29803  | KAFRELAD<br>AL               | Oryctola<br>gus<br>cuniculu<br>s |
| 1 | 1.00 | 1 | 1 | -0.01 | -0.008 | -0.009 | -0.004 | -0.01  | t | 109030 | GAQGPRG<br>E                 | Rattus<br>norvegic<br>us         |
| 1 | 1.00 | 1 | 1 | -0.05 | -0.05  | -0.047 | -0.043 | -0.049 | t | 105966 | MKKRH                        | Homo<br>sapiens                  |
| 1 | 1.00 | 1 | 1 | -0.01 | -0.013 | -0.01  | -0.01  | -0.011 | t | 105982 | NKGAIIGL<br>MVG              | Oryctola<br>gus<br>cuniculu<br>s |
| 1 | 1.00 | 1 | 1 | -0.02 | -0.016 | -0.016 | -0.013 | -0.02  | t | 144700 | KEWAKRA<br>ALP               | Homo<br>sapiens                  |
| 1 | 1.00 | 1 | 1 | 0     | -0.006 | -0.016 | 0      | 0.002  | t | 41169  | MAVPAFS<br>DIAKSAND<br>LLNKD | Oryctola<br>gus<br>cuniculu<br>s |

|   |      |   |   |       |        |        |        |        |   |        |                              |                              |
|---|------|---|---|-------|--------|--------|--------|--------|---|--------|------------------------------|------------------------------|
| 1 | 1.00 | 1 | 1 | 0     | 0.001  | -0.007 | -0.003 | 0      | t | 130464 | DFRVT                        | Mus<br>musculus              |
| 1 | 1.00 | 1 | 1 | 0.01  | 0.008  | 0.006  | 0.009  | 0.01   | t | 48279  | PLATQPPV<br>LAL              | Mus<br>musculus              |
| 1 | 1.00 | 1 | 1 | 0.03  | 0.03   | 0.03   | 0.033  | 0.03   | t | 149114 | STPRLPD                      | Sus<br>scrofa                |
| 1 | 1.00 | 1 | 1 | 0.02  | 0.023  | 0.013  | 0.02   | 0.018  | t | 134654 | DQQNQFQ<br>KAET              | Mus<br>musculus              |
| 1 | 1.00 | 1 | 1 | -0.06 | -0.062 | -0.06  | -0.053 | -0.06  | t | 123244 | GMIPPPGL                     | Homo<br>sapiens              |
| 1 | 1.00 | 1 | 1 | 0.02  | 0.024  | 0.005  | 0.017  | 0.02   | t | 111588 | NLIQHVKG<br>GTPKRPN          | Homo<br>sapiens              |
| 1 | 1.00 | 1 | 1 | 0.04  | 0.038  | 0.032  | 0.043  | 0.042  | t | 95933  | TTSDVA                       | Mus<br>musculus              |
| 1 | 1.00 | 1 | 1 | 0.04  | 0.041  | 0.044  | 0.039  | 0.038  | t | 41131  | MASRPAA<br>SSPVE             | Oryctola<br>gus<br>cuniculus |
| 1 | 1.00 | 1 | 1 | 0.01  | 0.011  | -0.006 | 0.007  | 0.01   | t | 78835  | SPDKLLTFI<br>ASDTCPLV        | Canis<br>familiaris          |
| 1 | 1.00 | 1 | 1 | 0.03  | 0.032  | 0.029  | 0.031  | 0.03   | t | 2133   | AIYGAA                       | Homo<br>sapiens              |
| 1 | 1.00 | 1 | 1 | 0.02  | 0.021  | 0.019  | 0.023  | 0.019  | t | 99631  | RQGAKEP<br>YPEFVDRL          | Equus<br>caballus            |
| 1 | 1.00 | 1 | 1 | -0.01 | -0.01  | -0.017 | -0.001 | -0.01  | t | 130971 | MILHPDV<br>QRRVQQEI<br>DDVIG | Homo<br>sapiens              |
| 1 | 1.00 | 1 | 1 | 0     | 0.004  | 0.009  | 0.007  | -0.001 | t | 119452 | FRKTSKGG<br>S                | Homo<br>sapiens              |
| 1 | 1.00 | 1 | 1 | 0.01  | 0.01   | 0.01   | 0.02   | 0.01   | t | 114987 | YANTTSED<br>GK               | Homo<br>sapiens              |
| 1 | 1.00 | 1 | 1 | -0.01 | -0.008 | -0.016 | -0.007 | -0.01  | t | 144823 | YWEGSGI<br>GAI               | Homo<br>sapiens              |

|   |      |   |   |       |        |        |        |        |   |        |                  |                       |
|---|------|---|---|-------|--------|--------|--------|--------|---|--------|------------------|-----------------------|
| 1 | 1.00 | 1 | 1 | -0.01 | -0.006 | -0.008 | -0.009 | -0.01  | t | 74217  | YIGGPL           | Homo sapiens          |
| 1 | 1.00 | 1 | 1 | 0.04  | 0.036  | 0.03   | 0.04   | 0.04   | t | 64905  | TLLGEATA         | Oryctolagus cuniculus |
| 1 | 1.00 | 1 | 1 | -0.01 | -0.01  | -0.015 | -0.012 | -0.012 | t | 100398 | PTTPATPT PTPK    | Homo sapiens          |
| 1 | 1.00 | 1 | 1 | -0.03 | -0.028 | -0.038 | -0.027 | -0.029 | t | 114450 | LEIIEEFFK NKSLK  | Homo sapiens          |
| 1 | 1.00 | 1 | 1 | 0     | 0.003  | -0.001 | -0.001 | 0      | t | 41043  | MAGKRE MVII      | Mus musculus          |
| 1 | 1.00 | 1 | 1 | -0.01 | -0.01  | -0.01  | 0.001  | -0.008 | t | 118585 | RNPLIAGK         | Homo sapiens          |
| 1 | 1.00 | 1 | 1 | 0.05  | 0.05   | 0.047  | 0.05   | 0.05   | t | 94606  | LTGGFYEP L       | Mus musculus          |
| 1 | 1.00 | 1 | 1 | -0.02 | -0.024 | -0.02  | -0.017 | -0.022 | t | 156860 | DRWNSM WKESLL    | Bos taurus            |
| 1 | 1.00 | 1 | 1 | 0     | 0      | 0      | 0      | -0.003 | t | 45407  | NPNANPN A        | Mus musculus          |
| 1 | 1.00 | 1 | 1 | 0.01  | 0.01   | -0.006 | 0.008  | 0.01   | t | 67745  | VASGGSG NSRRTNPS | Homo sapiens          |
| 1 | 1.00 | 1 | 1 | -0.01 | -0.01  | -0.022 | -0.01  | -0.011 | t | 72544  | WHLKSIG QLVIE    | Mus musculus          |
| 1 | 1.00 | 1 | 1 | -0.01 | -0.012 | -0.022 | -0.01  | -0.011 | t | 72544  | WHLKSIG QLVIE    | Oryctolagus cuniculus |
| 1 | 1.00 | 1 | 1 | 0.01  | 0.01   | 0.01   | 0.01   | 0.009  | t | 21601  | GPEET            | Mus musculus          |
| 1 | 1.00 | 1 | 1 | 0.01  | 0.013  | 0.01   | 0.01   | 0.009  | t | 21601  | GPEET            | Mus musculus          |

|   |      |   |   |       |        |        |        |        |   |        |                              |                                  |
|---|------|---|---|-------|--------|--------|--------|--------|---|--------|------------------------------|----------------------------------|
| 1 | 1.00 | 1 | 1 | 0     | 0      | -0.014 | 0      | 0.001  | t | 120522 | FALAPSLTE<br>I               | Mus<br>musculu<br>s              |
| 1 | 1.00 | 1 | 1 | -0.01 | -0.01  | -0.01  | -0.01  | -0.011 | t | 119581 | FSCSVMH<br>E                 | Homo<br>sapiens                  |
| 1 | 1.00 | 1 | 1 | -0.01 | -0.01  | -0.01  | 0      | -0.01  | t | 114965 | TSEDGKV<br>MVL               | Homo<br>sapiens                  |
| 1 | 1.00 | 1 | 1 | 0     | 0      | 0      | 0      | -0.004 | t | 25140  | HWSYGLR<br>PG                | Rattus<br>norvegic<br>us         |
| 1 | 1.00 | 1 | 1 | 0.02  | 0.02   | 0.016  | 0.02   | 0.02   | t | 58648  | SIP                          | Homo<br>sapiens                  |
| 1 | 1.00 | 1 | 1 | 0     | 0      | 0      | 0      | -0.003 | t | 108622 | SHQESTRG<br>RSRGRS           | Homo<br>sapiens                  |
| 1 | 1.00 | 1 | 1 | 0.05  | 0.05   | 0.05   | 0.05   | 0.05   | t | 159282 | EENW                         | Oryctola<br>gus<br>cuniculu<br>s |
| 1 | 1.00 | 1 | 1 | -0.01 | -0.008 | -0.01  | -0.007 | -0.01  | t | 69828  | VLVLFGFF<br>TLSPWY           | Homo<br>sapiens                  |
| 1 | 1.00 | 1 | 1 | -0.04 | -0.04  | -0.04  | -0.033 | -0.04  | t | 119475 | KKIK                         | Homo<br>sapiens                  |
| 1 | 1.00 | 1 | 1 | -0.02 | -0.016 | -0.02  | -0.014 | -0.021 | t | 107503 | LFPPKPK                      | Homo<br>sapiens                  |
| 1 | 1.00 | 1 | 1 | 0.03  | 0.032  | 0.03   | 0.037  | 0.028  | t | 121879 | SSQFDPNK<br>QTPSGKK          | Homo<br>sapiens                  |
| 1 | 1.00 | 1 | 1 | 0.03  | 0.032  | 0.027  | 0.033  | 0.03   | t | 49920  | PVNPSTAP<br>APAPTPT          | Homo<br>sapiens                  |
| 1 | 1.00 | 1 | 1 | 0.03  | 0.03   | 0.035  | 0.03   | 0.03   | t | 137748 | DTQLTLEA<br>LKLK             | Mus<br>musculu<br>s              |
| 1 | 1.00 | 1 | 1 | -0.02 | -0.017 | -0.036 | -0.02  | -0.019 | t | 119301 | PEVVVLGS<br>QEGAMHT          | Mus<br>musculu<br>s              |
| 1 | 1.00 | 1 | 1 | 0.03  | 0.03   | 0.017  | 0.03   | 0.03   | t | 52494  | QTDEIKND<br>NIQTDEIK<br>NDNI | Oryctola<br>gus<br>cuniculu<br>s |

|   |      |   |   |       |        |        |        |       |   |        |                              |                                  |
|---|------|---|---|-------|--------|--------|--------|-------|---|--------|------------------------------|----------------------------------|
| 1 | 1.00 | 1 | 1 | 0.03  | 0.033  | 0.017  | 0.03   | 0.03  | t | 52494  | QTDEIKND<br>NIQTDEIK<br>NDNI | Mus<br>musculu<br>s              |
| 1 | 1.00 | 1 | 1 | 0.01  | 0.007  | 0.004  | 0.01   | 0.008 | t | 133618 | KKLLVRGL<br>YRISFTTYK        | Oryctola<br>gus<br>cuniculu<br>s |
| 1 | 1.00 | 1 | 1 | 0.03  | 0.03   | 0.023  | 0.03   | 0.031 | t | 78136  | EEPKHETK<br>ETE              | Homo<br>sapiens                  |
| 1 | 1.00 | 1 | 1 | 0.04  | 0.042  | 0.031  | 0.037  | 0.04  | t | 64998  | TLPDTEKQ<br>I                | Homo<br>sapiens                  |
| 1 | 1.00 | 1 | 1 | 0.04  | 0.042  | 0.031  | 0.037  | 0.04  | t | 64998  | TLPDTEKQ<br>I                | Homo<br>sapiens                  |
| 1 | 1.00 | 1 | 1 | -0.01 | -0.008 | -0.017 | -0.003 | -0.01 | t | 132304 | FMIHQLM<br>GNGVWH<br>FGET    | Homo<br>sapiens                  |
| 1 | 1.00 | 1 | 1 | 0.02  | 0.018  | 0.02   | 0.019  | 0.02  | t | 69883  | VLYQEFDE                     | Mus<br>musculu<br>s              |
| 1 | 1.00 | 1 | 1 | 0.05  | 0.053  | 0.045  | 0.05   | 0.048 | t | 78703  | KKKKTDEA<br>QP               | Mus<br>musculu<br>s              |
| 1 | 1.00 | 1 | 1 | 0.04  | 0.04   | 0.04   | 0.047  | 0.04  | t | 119506 | PIVET                        | Homo<br>sapiens                  |
| 1 | 1.00 | 1 | 1 | 0.04  | 0.036  | 0.035  | 0.037  | 0.04  | t | 115135 | YSYDVNST<br>EKG              | Oryctola<br>gus<br>cuniculu<br>s |
| 1 | 1.00 | 1 | 1 | 0.04  | 0.036  | 0.035  | 0.037  | 0.04  | t | 115135 | YSYDVNST<br>EKG              | Oryctola<br>gus<br>cuniculu<br>s |
| 1 | 1.00 | 1 | 1 | 0.07  | 0.072  | 0.069  | 0.071  | 0.07  | t | 69624  | VLLQME                       | Homo<br>sapiens                  |
| 1 | 1.00 | 1 | 1 | 0.03  | 0.032  | 0.025  | 0.027  | 0.028 | t | 13509  | ENLCSTFC<br>KE               | Homo<br>sapiens                  |
| 1 | 1.00 | 1 | 1 | 0.01  | 0.006  | 0.008  | 0.013  | 0.011 | t | 99662  | SEVIFR                       | Oryctola<br>gus<br>cuniculu<br>s |
| 1 | 1.00 | 1 | 1 | 0     | 0      | 0.001  | 0      | 0     | t | 15334  | FCLFFAFSV<br>AAP             | Oryctola<br>gus<br>cuniculu<br>s |

|   |      |   |   |       |        |        |        |        |   |        |                      |                    |
|---|------|---|---|-------|--------|--------|--------|--------|---|--------|----------------------|--------------------|
| 1 | 1.00 | 1 | 1 | -0.01 | -0.008 | -0.001 | -0.003 | -0.011 | t | 119513 | RGLKSKIAM            | Homo sapiens       |
| 1 | 1.00 | 1 | 1 | -0.01 | -0.006 | -0.001 | -0.003 | -0.011 | t | 119513 | RGLKSKIAM            | Homo sapiens       |
| 1 | 1.00 | 1 | 1 | 0.01  | 0.01   | 0.01   | 0.01   | 0.01   | t | 146020 | TCPDIIIPK            | Mus musculus       |
| 1 | 1.00 | 1 | 1 | 0.02  | 0.024  | 0.014  | 0.017  | 0.018  | t | 30115  | KDASIQVVS            | Homo sapiens       |
| 1 | 1.00 | 1 | 1 | 0.04  | 0.038  | 0.036  | 0.037  | 0.04   | t | 1391   | AFRRYQEE             | Anas platyrhynchos |
| 1 | 1.00 | 1 | 1 | -0.01 | -0.011 | -0.02  | -0.01  | -0.01  | t | 73074  | WSGKFPTL             | Anas platyrhynchos |
| 1 | 1.00 | 1 | 1 | 0.03  | 0.028  | 0.027  | 0.027  | 0.028  | t | 122167 | PPPITQGECKQL         | Mus musculus       |
| 1 | 1.00 | 1 | 1 | 0.01  | 0.012  | 0.022  | 0.017  | 0.01   | t | 130859 | GLLAQQMDY            | Homo sapiens       |
| 1 | 1.00 | 1 | 1 | 0.02  | 0.023  | 0.012  | 0.02   | 0.019  | t | 102334 | CETDKWKYENPCKKMCTVSD | Mus musculus       |
| 1 | 1.00 | 1 | 1 | 0.02  | 0.02   | 0.012  | 0.02   | 0.019  | t | 102334 | CETDKWKYENPCKKMCTVSD | Mus musculus       |
| 1 | 1.00 | 1 | 1 | 0.02  | 0.02   | 0.012  | 0.02   | 0.019  | t | 102334 | CETDKWKYENPCKKMCTVSD | Mus musculus       |
| 1 | 1.00 | 1 | 1 | 0.01  | 0.01   | 0.003  | 0.01   | 0.01   | t | 138258 | VMHEALH              | Homo sapiens       |
| 1 | 1.00 | 1 | 1 | 0     | 0.002  | 0      | 0.007  | 0.003  | t | 107479 | KFNWYVD              | Homo sapiens       |
| 1 | 1.00 | 1 | 1 | 0.04  | 0.04   | 0.04   | 0.042  | 0.04   | t | 71321  | VTGGAAA              | Homo sapiens       |
| 1 | 1.00 | 1 | 1 | 0.01  | 0.012  | 0.005  | 0.007  | 0.008  | t | 98696  | AMAASDISLL           | Homo sapiens       |

|   |      |   |   |       |        |        |        |        |   |        |                            |                       |
|---|------|---|---|-------|--------|--------|--------|--------|---|--------|----------------------------|-----------------------|
| 1 | 1.00 | 1 | 1 | -0.03 | -0.025 | -0.037 | -0.027 | -0.028 | t | 60780  | SRRFAPAL                   | Homo sapiens          |
| 1 | 1.00 | 1 | 1 | -0.01 | -0.008 | -0.017 | -0.007 | -0.011 | t | 144594 | ARGISRTK<br>YW             | Homo sapiens          |
| 1 | 1.00 | 1 | 1 | -0.02 | -0.011 | -0.028 | -0.02  | -0.02  | t | 45115  | NNGTWSK<br>HKAEVKKF<br>L   | Gallus gallus         |
| 1 | 1.00 | 1 | 1 | 0     | 0.002  | 0      | 0.001  | 0      | t | 69125  | VITGTI                     | Homo sapiens          |
| 1 | 1.00 | 1 | 1 | 0.01  | 0.01   | 0      | 0.01   | 0.009  | t | 139730 | EQLAGNLR<br>ENIE           | Mus musculus          |
| 1 | 1.00 | 1 | 1 | -0.02 | -0.02  | -0.023 | -0.018 | -0.02  | t | 48343  | PLGLKRGIE<br>K             | Homo sapiens          |
| 1 | 1.00 | 1 | 1 | 0.02  | 0.02   | 0.025  | 0.02   | 0.02   | t | 137749 | DTQLTYAG<br>LKL V          | Mus musculus          |
| 1 | 1.00 | 1 | 1 | 0     | -0.004 | -0.007 | 0.003  | 0      | t | 35006  | LAVLLGAC                   | Oryctolagus cuniculus |
| 1 | 1.00 | 1 | 1 | 0.01  | 0.01   | 0.01   | 0.01   | 0.009  | t | 119995 | KNEELRLY<br>HHLFNNY        | Rattus norvegicus     |
| 1 | 1.00 | 1 | 1 | -0.01 | -0.008 | -0.017 | -0.007 | -0.01  | t | 121161 | AVEKVKRT<br>KDE            | Homo sapiens          |
| 1 | 1.00 | 1 | 1 | 0     | 0      | -0.018 | 0      | 0.002  | t | 56599  | RYNLVFSG<br>DSDRICSN<br>RA | Mus musculus          |
| 1 | 1.00 | 1 | 1 | -0.03 | -0.034 | -0.036 | -0.031 | -0.032 | t | 20796  | GLDGT VW<br>AQSAKFP        | Oryctolagus cuniculus |
| 1 | 1.00 | 1 | 1 | -0.01 | -0.017 | -0.027 | -0.013 | -0.007 | t | 110795 | CDLIPNLKL<br>NNG           | Macaca                |



|   |      |   |   |       |        |        |        |        |   |        |                         |                                  |
|---|------|---|---|-------|--------|--------|--------|--------|---|--------|-------------------------|----------------------------------|
| 1 | 1.00 | 1 | 1 | -0.01 | -0.012 | -0.019 | -0.011 | -0.01  | t | 41043  | MAGKRE<br>MVII          | Mus<br>musculu<br>s              |
| 1 | 1.00 | 1 | 1 | 0     | 0.003  | -0.006 | 0      | 0      | t | 54504  | RLDGTTL<br>V            | Mus<br>musculu<br>s              |
| 1 | 1.00 | 1 | 1 | -0.02 | -0.02  | -0.025 | -0.013 | -0.02  | t | 118144 | SLCQSLR<br>R            | Homo<br>sapiens                  |
| 1 | 1.00 | 1 | 1 | 0.02  | 0.02   | 0.006  | 0.02   | 0.023  | t | 109348 | IPVDL                   | Mus<br>musculu<br>s              |
| 1 | 1.00 | 1 | 1 | -0.02 | -0.02  | -0.018 | -0.019 | -0.021 | t | 64377  | TIMAKN                  | Homo<br>sapiens                  |
| 1 | 1.00 | 1 | 1 | 0.02  | 0.022  | 0.002  | 0.019  | 0.021  | t | 98686  | AHGRSQV<br>LQQST        | Homo<br>sapiens                  |
| 1 | 1.00 | 1 | 1 | 0.01  | 0.01   | 0.01   | 0.01   | 0.007  | t | 61778  | STNDNIK<br>LLD          | Oryctola<br>gus<br>cuniculu<br>s |
| 1 | 1.00 | 1 | 1 | 0.01  | 0.012  | 0.01   | 0.017  | 0.01   | t | 119579 | FKDYSSV<br>RPVEDHR<br>Q | Homo<br>sapiens                  |
| 1 | 1.00 | 1 | 1 | 0     | 0.002  | 0.007  | 0      | -0.005 | t | 123013 | AIFSQFG<br>QILDILV      | Oryctola<br>gus<br>cuniculu<br>s |
| 1 | 1.00 | 1 | 1 | -0.02 | -0.016 | -0.019 | -0.013 | -0.023 | t | 134682 | GPSRRGP<br>SLGASSHQ     | Homo<br>sapiens                  |
| 1 | 1.00 | 1 | 1 | 0.04  | 0.04   | 0.029  | 0.037  | 0.042  | t | 63196  | TDLNILER<br>FNYEEAQT    | Homo<br>sapiens                  |
| 1 | 1.00 | 1 | 1 | -0.01 | -0.008 | -0.018 | -0.007 | -0.008 | t | 110912 | KATPNDG<br>YFWED        | Homo<br>sapiens                  |
| 1 | 1.00 | 1 | 1 | 0     | -0.004 | -0.007 | 0.003  | 0      | t | 125441 | HPLTCDD<br>PFRFQ        | Oryctola<br>gus<br>cuniculu<br>s |

|   |      |   |   |       |        |        |        |        |   |        |                           |                                  |
|---|------|---|---|-------|--------|--------|--------|--------|---|--------|---------------------------|----------------------------------|
| 1 | 1.00 | 1 | 1 | 0.01  | 0.008  | 0      | 0.009  | 0.012  | t | 25060  | HVL DHVQ<br>T             | Anas<br>platyrh<br>nchos         |
| 1 | 1.00 | 1 | 1 | -0.01 | -0.01  | -0.019 | -0.01  | -0.01  | t | 97020  | TVTRGTIS<br>DP            | Oryctola<br>gus<br>cuniculu<br>s |
| 1 | 1.00 | 1 | 1 | 0.01  | 0.012  | 0.012  | 0.011  | 0.008  | t | 40611  | LVT KDIDF<br>D            | Homo<br>sapiens                  |
| 1 | 1.00 | 1 | 1 | 0.03  | 0.034  | 0.032  | 0.031  | 0.029  | t | 30199  | KDLLED                    | Homo<br>sapiens                  |
| 1 | 1.00 | 1 | 1 | 0.01  | 0.008  | 0.01   | 0.009  | 0.01   | t | 46969  | PATIGDYT<br>DF            | Mus<br>musculu<br>s              |
| 1 | 1.00 | 1 | 1 | 0     | -0.002 | -0.02  | -0.007 | 0      | t | 128152 | YIFSEEAQ<br>VKDVPVVT      | Mus<br>musculu<br>s              |
| 1 | 1.00 | 1 | 1 | -0.05 | -0.052 | -0.052 | -0.047 | -0.05  | t | 7559   | DAKFRPN                   | Mus<br>musculu<br>s              |
| 1 | 1.00 | 1 | 1 | 0.03  | 0.033  | 0.03   | 0.03   | 0.03   | t | 143682 | EEIEKE                    | Mus<br>musculu<br>s              |
| 1 | 1.00 | 1 | 1 | 0     | 0.003  | -0.01  | 0      | 0      | t | 48715  | PNVDPN                    | Mus<br>musculu<br>s              |
| 1 | 1.00 | 1 | 1 | 0     | 0.002  | -0.007 | 0.007  | 0.001  | t | 114196 | CKPISGHN<br>SLFQWYR<br>QT | Homo<br>sapiens                  |
| 1 | 1.00 | 1 | 1 | -0.01 | -0.01  | -0.02  | -0.013 | -0.01  | t | 49993  | PVVAESPK<br>KP            | Homo<br>sapiens                  |
| 1 | 1.00 | 1 | 1 | 0     | 0      | -0.002 | -0.003 | -0.002 | t | 98904  | MKGLDIQ<br>KVA            | Homo<br>sapiens                  |
| 1 | 1.00 | 1 | 1 | 0     | 0.003  | -0.009 | 0      | 0      | t | 71300  | VTFGDMR                   | Mus<br>musculu<br>s              |
| 1 | 1.00 | 1 | 1 | 0     | -0.01  | 0      | 0.001  | -0.002 | t | 24694  | HRMAWD<br>MMM             | Homo<br>sapiens                  |

|   |      |   |   |       |        |        |        |        |   |        |                              |                       |
|---|------|---|---|-------|--------|--------|--------|--------|---|--------|------------------------------|-----------------------|
| 1 | 1.00 | 1 | 1 | 0.02  | 0.024  | 0.02   | 0.021  | 0.02   | t | 14405  | ETHVTGG                      | Homo sapiens          |
| 1 | 1.00 | 1 | 1 | -0.01 | -0.01  | -0.01  | -0.007 | -0.011 | t | 11819  | EENVEHD<br>A                 | Homo sapiens          |
| 1 | 1.00 | 1 | 1 | 0.05  | 0.047  | 0.043  | 0.05   | 0.05   | t | 108185 | VEHSDLSF<br>S                | Oryctolagus cuniculus |
| 1 | 1.00 | 1 | 1 | 0.01  | 0.014  | 0.001  | 0.01   | 0.009  | t | 113539 | IIPKVEGKT<br>IAEQILQY<br>GSM | Cavia porcellus       |
| 1 | 1.00 | 1 | 1 | 0.01  | 0.014  | 0.001  | 0.01   | 0.009  | t | 113539 | IIPKVEGKT<br>IAEQILQY<br>GSM | Cavia porcellus       |
| 1 | 1.00 | 1 | 1 | 0.02  | 0.022  | 0.02   | 0.027  | 0.021  | t | 107758 | AWNCCVK<br>QTP               | Homo sapiens          |
| 1 | 1.00 | 1 | 1 | 0.04  | 0.043  | 0.029  | 0.04   | 0.042  | t | 111725 | RHGEEYDL<br>QFIFQLC          | Mus musculus          |
| 1 | 1.00 | 1 | 1 | 0     | 0      | 0      | 0      | -0.004 | t | 78939  | CINHRGY<br>WVC               | Mus musculus          |
| 1 | 1.00 | 1 | 1 | 0.01  | 0.012  | 0.01   | 0.017  | 0.01   | t | 107878 | GWVAMH<br>PQGDL              | Homo sapiens          |
| 1 | 1.00 | 1 | 1 | 0.02  | 0.022  | 0.02   | 0.021  | 0.02   | t | 58129  | SGLTSLF                      | Homo sapiens          |
| 1 | 1.00 | 1 | 1 | 0.03  | 0.032  | 0.023  | 0.033  | 0.032  | t | 77858  | DYPSLSAT<br>DI               | Homo sapiens          |
| 1 | 1.00 | 1 | 1 | 0     | 0.002  | -0.011 | -0.003 | 0      | t | 159063 | RKAADTFN<br>FKTFFHT          | Homo sapiens          |
| 1 | 1.00 | 1 | 1 | 0     | 0.004  | 0      | 0.007  | 0      | t | 108844 | DAGVIQSP<br>RHEVTEM<br>G     | Homo sapiens          |
| 1 | 1.00 | 1 | 1 | 0     | -0.002 | 0      | 0.009  | 0      | t | 38304  | LNPKTNK<br>WEDK              | Mus musculus          |

|   |      |   |   |       |        |        |        |        |   |        |                            |                                  |
|---|------|---|---|-------|--------|--------|--------|--------|---|--------|----------------------------|----------------------------------|
| 1 | 1.00 | 1 | 1 | 0     | -0.002 | 0      | 0.009  | 0      | t | 27728  | INQQLNPK<br>TNKWEDK        | Mus<br>musculu<br>s              |
| 1 | 1.00 | 1 | 1 | 0     | -0.002 | 0      | 0.009  | 0      | t | 27727  | INQQLNPK                   | Mus<br>musculu<br>s              |
| 1 | 1.00 | 1 | 1 | -0.01 | -0.01  | -0.004 | -0.007 | -0.01  | t | 48414  | PLLVETWK                   | Homo<br>sapiens                  |
| 1 | 1.00 | 1 | 1 | 0.01  | 0.008  | -0.004 | 0.003  | 0.009  | t | 121100 | YYFAPDHR<br>TV             | Mus<br>musculu<br>s              |
| 1 | 1.00 | 1 | 1 | 0.01  | 0.007  | 0.01   | 0.01   | 0.007  | t | 12951  | ELAPEDPE<br>DS             | Oryctola<br>gus<br>cuniculu<br>s |
| 1 | 1.00 | 1 | 1 | 0.03  | 0.041  | 0.03   | 0.03   | 0.028  | t | 156886 | HGLYGS                     | Gallus<br>gallus                 |
| 1 | 1.00 | 1 | 1 | 0.03  | 0.028  | 0.025  | 0.031  | 0.03   | t | 76192  | YTTSEYPS<br>QPPS           | Homo<br>sapiens                  |
| 1 | 1.00 | 1 | 1 | 0.01  | 0.012  | 0.01   | 0.014  | 0.009  | t | 111028 | SRALAREV<br>DLKDYED<br>QQK | Homo<br>sapiens                  |
| 1 | 1.00 | 1 | 1 | -0.01 | -0.01  | -0.002 | -0.003 | -0.014 | t | 122512 | PEPAKSAP<br>APKKGSK        | Mus<br>musculu<br>s              |
| 1 | 1.00 | 1 | 1 | 0.03  | 0.028  | 0.024  | 0.029  | 0.03   | t | 27681  | INLLDDSD<br>F              | Sus<br>scrofa                    |
| 1 | 1.00 | 1 | 1 | 0.01  | 0.007  | -0.002 | 0.01   | 0.01   | t | 136832 | EVVRAEIM<br>RS             | Oryctola<br>gus<br>cuniculu<br>s |
| 1 | 1.00 | 1 | 1 | -0.01 | -0.01  | -0.01  | -0.01  | -0.007 | t | 107784 | DGSFFLY                    | Homo<br>sapiens                  |
| 1 | 1.00 | 1 | 1 | 0.01  | 0.005  | 0.01   | 0.011  | 0.008  | t | 100297 | LVFFAEDV<br>GS             | Oryctola<br>gus<br>cuniculu<br>s |
| 1 | 1.00 | 1 | 1 | 0.02  | 0.02   | 0.009  | 0.02   | 0.02   | t | 56059  | RTGEGL                     | Homo<br>sapiens                  |

|   |      |   |   |       |        |        |        |        |   |        |                             |                                  |
|---|------|---|---|-------|--------|--------|--------|--------|---|--------|-----------------------------|----------------------------------|
| 1 | 1.00 | 1 | 1 | -0.01 | -0.01  | -0.02  | -0.01  | -0.01  | t | 112897 | AATGAAT<br>AAA              | Mus<br>musculu<br>s              |
| 1 | 1.00 | 1 | 1 | 0.02  | 0.02   | 0.02   | 0.02   | 0.02   | t | 48778  | PPFSLSPV<br>PTL             | Oryctola<br>gus<br>cuniculu<br>s |
| 1 | 1.00 | 1 | 1 | 0.01  | 0.01   | -0.003 | 0.007  | 0.01   | t | 147197 | PLVQEQQ<br>F                | Homo<br>sapiens                  |
| 1 | 1.00 | 1 | 1 | 0.05  | 0.047  | 0.052  | 0.05   | 0.05   | t | 78806  | QSQIESR                     | Oryctola<br>gus<br>cuniculu<br>s |
| 1 | 1.00 | 1 | 1 | 0.03  | 0.032  | 0.028  | 0.027  | 0.028  | t | 50863  | QGFSRNTL<br>EAAFNAE         | Homo<br>sapiens                  |
| 1 | 1.00 | 1 | 1 | 0.02  | 0.024  | 0.017  | 0.021  | 0.019  | t | 103301 | KAMLFDG<br>RSGEPFPY         | Homo<br>sapiens                  |
| 1 | 1.00 | 1 | 1 | -0.03 | -0.032 | -0.046 | -0.027 | -0.028 | t | 33436  | KSMDVRRRI                   | Anas<br>platyrhy<br>nchos        |
| 1 | 1.00 | 1 | 1 | -0.03 | -0.032 | -0.046 | -0.027 | -0.028 | t | 33436  | KSMDVRRRI                   | Anas<br>platyrhy<br>nchos        |
| 1 | 1.00 | 1 | 1 | -0.02 | -0.022 | -0.02  | -0.02  | -0.02  | t | 117931 | IMAPPPG<br>MRP              | Mus<br>musculu<br>s              |
| 1 | 1.00 | 1 | 1 | 0     | 0.003  | -0.002 | 0      | 0      | t | 30716  | KFDWNT<br>PD                | Equus<br>caballus                |
| 1 | 1.00 | 1 | 1 | 0.04  | 0.044  | 0.033  | 0.047  | 0.042  | t | 104569 | MASPGSG<br>FWSFGSE<br>DGS   | Homo<br>sapiens                  |
| 1 | 1.00 | 1 | 1 | 0.01  | 0.012  | 0.01   | 0.013  | 0.008  | t | 136092 | YKSQYLNN<br>GPQRIGRK<br>YKK | Homo<br>sapiens                  |
| 1 | 1.00 | 1 | 1 | 0     | -0.002 | -0.003 | -0.001 | -0.002 | t | 58872  | SKKSVTV                     | Mus<br>musculu<br>s              |
| 1 | 1.00 | 1 | 1 | 0.04  | 0.042  | 0.034  | 0.041  | 0.04   | t | 133540 | DALVAKA<br>QEVs             | Homo<br>sapiens                  |

|   |      |   |   |       |        |        |        |        |   |        |                             |                                  |
|---|------|---|---|-------|--------|--------|--------|--------|---|--------|-----------------------------|----------------------------------|
| 1 | 1.00 | 1 | 1 | -0.01 | -0.01  | -0.01  | -0.01  | -0.01  | t | 105717 | DPSIMAKF                    | Oryctola<br>gus<br>cuniculu<br>s |
| 1 | 1.00 | 1 | 1 | 0     | 0.008  | -0.007 | 0      | -0.001 | t | 125246 | RRQPHVM<br>S                | Macaca<br>fascicula<br>ris       |
| 1 | 1.00 | 1 | 1 | 0.01  | 0.01   | 0.01   | 0.013  | 0.01   | t | 149099 | RVLTSMD                     | Sus<br>scrofa                    |
| 1 | 1.00 | 1 | 1 | 0     | 0      | 0.005  | 0.001  | -0.001 | t | 138238 | SMLDTPT                     | Mus<br>musculu<br>s              |
| 1 | 1.00 | 1 | 1 | 0.01  | 0.006  | -0.004 | 0.009  | 0.01   | t | 33424  | KSLSTLSY                    | Oryctola<br>gus<br>cuniculu<br>s |
| 1 | 1.00 | 1 | 1 | 0.01  | 0.01   | 0.01   | 0.01   | 0.01   | t | 23223  | GVYLLPRR<br>GP              | Homo<br>sapiens                  |
| 1 | 1.00 | 1 | 1 | -0.01 | -0.01  | -0.014 | -0.01  | -0.011 | t | 120700 | KNAIEGIK                    | Rattus<br>norvegic<br>us         |
| 1 | 1.00 | 1 | 1 | 0     | 0.002  | 0      | 0.007  | 0.001  | t | 121287 | EYFIRK                      | Homo<br>sapiens                  |
| 1 | 1.00 | 1 | 1 | -0.01 | -0.012 | -0.017 | -0.007 | -0.01  | t | 37316  | LLGCIGSTC<br>A              | Mus<br>musculu<br>s              |
| 1 | 1.00 | 1 | 1 | 0.03  | 0.028  | 0.02   | 0.029  | 0.03   | t | 78687  | IRVRKRKG<br>SNKKAEDT<br>LED | Mus<br>musculu<br>s              |
| 1 | 1.00 | 1 | 1 | 0.07  | 0.075  | 0.066  | 0.071  | 0.07   | t | 38201  | LNEEQD                      | Homo<br>sapiens                  |
| 1 | 1.00 | 1 | 1 | 0     | 0.002  | -0.002 | 0.007  | 0      | t | 122904 | SNTRVFPN<br>PNNKQAL<br>Y    | Homo<br>sapiens                  |
| 1 | 1.00 | 1 | 1 | 0.01  | 0.01   | 0.006  | 0.01   | 0.007  | t | 22792  | GTQETGD<br>TTPSAYSM<br>S    | Oryctola<br>gus<br>cuniculu<br>s |
| 1 | 1.00 | 1 | 1 | 0     | 0      | 0      | 0      | 0      | t | 50102  | PYIEQGM<br>ML               | Homo<br>sapiens                  |

|   |      |   |   |       |        |        |        |        |   |        |                  |                     |
|---|------|---|---|-------|--------|--------|--------|--------|---|--------|------------------|---------------------|
| 1 | 1.00 | 1 | 1 | 0     | 0      | -0.008 | 0      | 0      | t | 106301 | CDIKTTLPP<br>I   | Homo<br>sapiens     |
| 1 | 1.00 | 1 | 1 | 0.04  | 0.043  | 0.038  | 0.04   | 0.04   | t | 89661  | TQLTSSYE<br>DYML | Mus<br>musculu<br>s |
| 1 | 1.00 | 1 | 1 | 0.05  | 0.05   | 0.05   | 0.046  | 0.048  | t | 118014 | MDC              | Homo<br>sapiens     |
| 1 | 1.00 | 1 | 1 | 0.01  | 0.012  | 0.006  | 0.013  | 0.009  | t | 19517  | GFEKISKG<br>AN   | Homo<br>sapiens     |
| 1 | 1.00 | 1 | 1 | -0.01 | -0.006 | -0.019 | -0.01  | -0.01  | t | 23947  | HGRVGIYF<br>GMK  | MD                  |
| 1 | 1.00 | 1 | 1 | 0     | 0.002  | -0.011 | -0.003 | -0.002 | t | 68001  | VDKRHD           | Homo<br>sapiens     |
| 1 | 1.00 | 1 | 1 | 0.01  | 0.013  | -0.002 | 0.01   | 0.01   | t | 97654  | SMGAKPT<br>G     | Mus<br>musculu<br>s |
| 1 | 1.00 | 1 | 1 | -0.02 | -0.017 | -0.03  | -0.02  | -0.02  | t | 66743  | TTNRFAKY         | Mus<br>musculu<br>s |
| 1 | 1.00 | 1 | 1 | -0.02 | -0.014 | -0.03  | -0.02  | -0.02  | t | 66743  | TTNRFAKY         | Equus<br>caballus   |
| 1 | 1.00 | 1 | 1 | -0.03 | -0.03  | -0.039 | -0.026 | -0.03  | t | 136003 | TRKDINTV<br>TTVA | Homo<br>sapiens     |
| 1 | 1.00 | 1 | 1 | 0     | 0.002  | 0      | 0.001  | 0      | t | 38522  | LPHSNL           | Homo<br>sapiens     |
| 1 | 1.00 | 1 | 1 | 0     | 0.002  | 0      | 0.001  | 0      | t | 38522  | LPHSNL           | Homo<br>sapiens     |
| 1 | 1.00 | 1 | 1 | -0.02 | -0.02  | -0.02  | -0.01  | -0.02  | t | 98903  | MHIRLSFN<br>PT   | Homo<br>sapiens     |

|   |      |   |   |       |        |        |        |        |   |        |                         |                                  |
|---|------|---|---|-------|--------|--------|--------|--------|---|--------|-------------------------|----------------------------------|
| 1 | 1.00 | 1 | 1 | 0.05  | 0.048  | 0.043  | 0.047  | 0.049  | t | 12185  | EGHTDSV<br>GTDAYNQ<br>K | Mus<br>musculu<br>s              |
| 1 | 1.00 | 1 | 1 | 0.01  | 0.01   | 0.007  | 0.01   | 0.01   | t | 11411  | EDPASR                  | Mus<br>musculu<br>s              |
| 1 | 1.00 | 1 | 1 | -0.02 | -0.02  | -0.037 | -0.026 | -0.02  | t | 8730   | DINKRKYD                | Homo<br>sapiens                  |
| 1 | 1.00 | 1 | 1 | -0.01 | -0.01  | -0.01  | -0.006 | -0.012 | t | 13688  | EPLEPFPT<br>QIHKDYK     | Homo<br>sapiens                  |
| 1 | 1.00 | 1 | 1 | 0.03  | 0.03   | 0.023  | 0.03   | 0.03   | t | 138245 | SVMHEAL                 | Homo<br>sapiens                  |
| 1 | 1.00 | 1 | 1 | 0.03  | 0.027  | 0.016  | 0.03   | 0.033  | t | 64045  | THKVGTSF<br>TFES        | Oryctola<br>gus<br>cuniculu<br>s |
| 1 | 1.00 | 1 | 1 | 0.03  | 0.027  | 0.024  | 0.031  | 0.029  | t | 105647 | ADVNTFV<br>A            | Oryctola<br>gus<br>cuniculu<br>s |
| 1 | 1.00 | 1 | 1 | 0.05  | 0.05   | 0.05   | 0.045  | 0.046  | t | 116085 | EPANPSEK                | Mus<br>musculu<br>s              |
| 1 | 1.00 | 1 | 1 | 0.01  | 0.008  | -0.002 | 0.013  | 0.011  | t | 107149 | GIAGFKGE<br>QGPKGET     | Mus<br>musculu<br>s              |
| 1 | 1.00 | 1 | 1 | -0.01 | -0.006 | -0.01  | -0.003 | -0.009 | t | 107520 | LTVLHQN                 | Homo<br>sapiens                  |
| 1 | 1.00 | 1 | 1 | -0.02 | -0.02  | -0.027 | -0.014 | -0.019 | t | 117336 | NGWSHKD<br>LLR          | Homo<br>sapiens                  |
| 1 | 1.00 | 1 | 1 | 0.01  | 0.016  | 0      | 0.01   | 0.01   | t | 91344  | FYETVLFK<br>GFESI       | Equus<br>caballus                |
| 1 | 1.00 | 1 | 1 | -0.01 | -0.01  | -0.01  | -0.01  | -0.013 | t | 4530   | ASLKMAD<br>PNRFR        | Mus<br>musculu<br>s              |
| 1 | 1.00 | 1 | 1 | 0     | 0      | -0.005 | 0.003  | 0      | t | 64093  | THVTGGA                 | Homo<br>sapiens                  |
| 1 | 1.00 | 1 | 1 | 0     | 0      | 0      | 0      | -0.002 | t | 99037  | VFKIDALN<br>EN          | Homo<br>sapiens                  |



|   |      |   |   |       |        |        |        |        |   |        |                               |                      |
|---|------|---|---|-------|--------|--------|--------|--------|---|--------|-------------------------------|----------------------|
| 1 | 1.00 | 1 | 1 | -0.01 | -0.012 | -0.008 | -0.003 | -0.01  | t | 130752 | CLAVLWV<br>VKSTPAS            | Mus<br>musculus      |
| 1 | 1.00 | 1 | 1 | 0.02  | 0.018  | 0.003  | 0.013  | 0.021  | t | 122543 | QRSQDEN                       | Rattus<br>norvegicus |
| 1 | 1.00 | 1 | 1 | 0.01  | 0.012  | 0.003  | 0.017  | 0.01   | t | 139494 | ERGSAGH<br>WTSESSVS           | Homo<br>sapiens      |
| 1 | 1.00 | 1 | 1 | 0.01  | 0.01   | 0.005  | 0.01   | 0.008  | t | 140674 | ESQPDPKP<br>DELHKS            | Mus<br>musculus      |
| 1 | 1.00 | 1 | 1 | 0.02  | 0.02   | 0.015  | 0.022  | 0.02   | t | 48384  | PLKQIAFN<br>SG                | Homo<br>sapiens      |
| 1 | 1.00 | 1 | 1 | 0     | 0      | -0.007 | 0.004  | 0      | t | 55838  | RSFQNKKS<br>LVAFKIMP<br>LEDLM | Homo<br>sapiens      |
| 1 | 1.00 | 1 | 1 | 0.02  | 0.02   | 0.02   | 0.02   | 0.02   | t | 30808  | KFPGGGQI                      | Homo<br>sapiens      |
| 1 | 1.00 | 1 | 1 | -0.03 | -0.03  | -0.037 | -0.033 | -0.032 | t | 14100  | ERYLGYLE<br>QLRLK             | Homo<br>sapiens      |
| 1 | 1.00 | 1 | 1 | 0     | 0      | -0.015 | 0.003  | 0.002  | t | 60664  | SRGAPGG<br>GFVPSMQ            | Homo<br>sapiens      |
| 1 | 1.00 | 1 | 1 | 0.04  | 0.038  | 0.033  | 0.041  | 0.041  | t | 131217 | EDISAYLL                      | Mus<br>musculus      |
| 1 | 1.00 | 1 | 1 | 0     | 0      | 0      | 0      | -0.004 | t | 63122  | TDAYNQKL<br>SERRAN            | Mus<br>musculus      |
| 1 | 1.00 | 1 | 1 | 0     | 0      | 0      | 0      | -0.004 | t | 63038  | TAVSPTTL<br>RTEVVK            | Sus<br>scrofa        |
| 1 | 1.00 | 1 | 1 | 0     | 0      | 0      | 0      | -0.004 | t | 43317  | NATAEGR<br>AINRRVE            | Mus<br>musculus      |
| 1 | 1.00 | 1 | 1 | 0     | 0      | 0      | 0      | -0.004 | t | 43317  | NATAEGR<br>AINRRVE            | Mus<br>musculus      |
| 1 | 1.00 | 1 | 1 | 0     | 0      | 0      | 0      | -0.004 | t | 48858  | PPPPNPN<br>DPPPPNP<br>ND      | Mus<br>musculus      |
| 1 | 1.00 | 1 | 1 | 0     | 0      | 0      | 0      | -0.004 | t | 46444  | NVPEKQT<br>RGIFGAIA<br>GFIE   | Mus<br>musculus      |

|   |      |   |   |       |        |        |        |        |   |        |                             |                                  |
|---|------|---|---|-------|--------|--------|--------|--------|---|--------|-----------------------------|----------------------------------|
| 1 | 1.00 | 1 | 1 | 0     | 0      | 0      | 0      | -0.004 | t | 48858  | PPPPNPN<br>DPPPPNP<br>ND    | Mus<br>musculu<br>s              |
| 1 | 1.00 | 1 | 1 | 0     | 0      | 0      | 0      | -0.004 | t | 46841  | PAKLLKER<br>GFFGAIAG<br>FLE | Mus<br>musculu<br>s              |
| 1 | 1.00 | 1 | 1 | 0     | 0      | 0      | 0      | -0.004 | t | 43317  | NATAEGR<br>AINRRVE          | Mus<br>musculu<br>s              |
| 1 | 1.00 | 1 | 1 | 0     | 0      | 0      | 0      | -0.004 | t | 43317  | NATAEGR<br>AINRRVE          | Mus<br>musculu<br>s              |
| 1 | 1.00 | 1 | 1 | 0     | 0      | 0      | 0      | -0.004 | t | 27725  | INQDPDKI<br>LTY             | Mus<br>musculu<br>s              |
| 1 | 1.00 | 1 | 1 | 0     | 0.002  | -0.013 | 0.001  | 0.004  | t | 45589  | NQMHML<br>SNKS              | Homo<br>sapiens                  |
| 1 | 1.00 | 1 | 1 | -0.03 | -0.028 | -0.03  | -0.023 | -0.032 | t | 120952 | SLGSRRTL<br>MLLAQM          | Homo<br>sapiens                  |
| 1 | 1.00 | 1 | 1 | -0.06 | -0.058 | -0.067 | -0.053 | -0.06  | t | 107828 | ERGLKGHR<br>GFT             | Homo<br>sapiens                  |
| 1 | 1.00 | 1 | 1 | 0.02  | 0.022  | 0.018  | 0.023  | 0.019  | t | 10932  | DYNPLLVE                    | Homo<br>sapiens                  |
| 1 | 1.00 | 1 | 1 | 0.02  | 0.022  | 0.012  | 0.021  | 0.019  | t | 41177  | MAYRFNG<br>IGVTQNV<br>L YE  | Homo<br>sapiens                  |
| 1 | 1.00 | 1 | 1 | 0.06  | 0.06   | 0.06   | 0.063  | 0.06   | t | 48518  | PLVAEEDE                    | Homo<br>sapiens                  |
| 1 | 1.00 | 1 | 1 | 0.03  | 0.028  | 0.017  | 0.027  | 0.03   | t | 63089  | TCPDKKST<br>A               | Mus<br>musculu<br>s              |
| 1 | 1.00 | 1 | 1 | 0.02  | 0.02   | 0.006  | 0.02   | 0.022  | t | 58906  | SKNLAPI                     | Mus<br>musculu<br>s              |
| 1 | 1.00 | 1 | 1 | 0.01  | 0.008  | 0.012  | 0.009  | 0.008  | t | 122094 | FLALDVPTI<br>GLC            | Mus<br>musculu<br>s              |
| 1 | 1.00 | 1 | 1 | -0.02 | -0.023 | -0.03  | -0.02  | -0.02  | t | 98434  | RYMDQPS<br>RD               | Oryctola<br>gus<br>cuniculu<br>s |
| 1 | 1.00 | 1 | 1 | 0.01  | 0.01   | 0.004  | 0.01   | 0.012  | t | 56788  | SAFVFPTK<br>D               | Mus<br>musculu<br>s              |

|   |      |   |   |       |        |        |        |        |   |        |                              |                                  |
|---|------|---|---|-------|--------|--------|--------|--------|---|--------|------------------------------|----------------------------------|
| 1 | 1.00 | 1 | 1 | 0.03  | 0.026  | 0.023  | 0.033  | 0.03   | t | 95558  | LNAASAYC<br>ST               | Oryctola<br>gus<br>cuniculu<br>s |
| 1 | 1.00 | 1 | 1 | 0     | 0.004  | -0.005 | 0.007  | 0.002  | t | 37659  | LLPHSNLD<br>HILEPSIPW<br>K   | Homo<br>sapiens                  |
| 1 | 1.00 | 1 | 1 | 0     | 0      | -0.007 | 0.004  | 0      | t | 117688 | VSLVCEKL<br>CNEKLLKK<br>ARIH | Homo<br>sapiens                  |
| 1 | 1.00 | 1 | 1 | -0.01 | -0.012 | -0.01  | -0.007 | -0.01  | t | 95824  | SDVAGL                       | Mus<br>musculu<br>s              |
| 1 | 1.00 | 1 | 1 | 0.03  | 0.034  | 0.03   | 0.037  | 0.03   | t | 118497 | LNGKNIED<br>VIAQGIG          | Homo<br>sapiens                  |
| 1 | 1.00 | 1 | 1 | 0.02  | 0.02   | 0.013  | 0.02   | 0.02   | t | 78375  | EPGITTNY<br>DT               | Mus<br>musculu<br>s              |
| 1 | 1.00 | 1 | 1 | 0.03  | 0.023  | 0.023  | 0.03   | 0.03   | t | 159284 | FSLRLMEE<br>NWNAEKR<br>S     | Oryctola<br>gus<br>cuniculu<br>s |
| 1 | 1.00 | 1 | 1 | 0.03  | 0.023  | 0.023  | 0.03   | 0.03   | t | 159284 | FSLRLMEE<br>NWNAEKR<br>S     | Oryctola<br>gus<br>cuniculu<br>s |
| 1 | 1.00 | 1 | 1 | -0.02 | -0.014 | -0.02  | -0.019 | -0.023 | t | 134830 | YSPCAWE<br>VVR               | MD                               |
| 1 | 1.00 | 1 | 1 | 0.01  | 0.01   | 0.001  | 0.01   | 0.01   | t | 125400 | ELLKLLIEA                    | Mus<br>musculu<br>s              |
| 1 | 1.00 | 1 | 1 | 0.01  | 0.01   | 0.001  | 0.01   | 0.01   | t | 125400 | ELLKLLIEA                    | Mus<br>musculu<br>s              |
| 1 | 1.00 | 1 | 1 | 0     | 0      | 0      | 0      | -0.004 | t | 23464  | GYSLFQKE<br>MKTHNEG<br>TSGTA | Aotus<br>nancyma<br>ae           |
| 1 | 1.00 | 1 | 1 | 0.02  | 0.016  | 0      | 0.013  | 0.02   | t | 127980 | FPVIPGINI<br>EQKNACS         | Oryctola<br>gus<br>cuniculu<br>s |

|   |      |   |   |       |        |        |        |        |   |        |                              |                                  |
|---|------|---|---|-------|--------|--------|--------|--------|---|--------|------------------------------|----------------------------------|
| 1 | 1.00 | 1 | 1 | 0.02  | 0.018  | 0      | 0.013  | 0.02   | t | 127980 | FPVIPGINI<br>EQKNACS         | Mus<br>musculu<br>s              |
| 1 | 1.00 | 1 | 1 | -0.01 | -0.014 | -0.01  | -0.01  | -0.012 | t | 70396  | VPNLRGD<br>RQALA             | Mus<br>musculu<br>s              |
| 1 | 1.00 | 1 | 1 | 0.01  | 0.01   | 0.008  | 0.014  | 0.01   | t | 47593  | PFVQWFV<br>GL                | Homo<br>sapiens                  |
| 1 | 1.00 | 1 | 1 | 0.03  | 0.034  | 0.03   | 0.037  | 0.03   | t | 116681 | CFEGQEKA<br>HNQDLGL          | Homo<br>sapiens                  |
| 1 | 1.00 | 1 | 1 | 0.02  | 0.016  | 0.018  | 0.02   | 0.018  | t | 29567  | IYDKLTVQ<br>TTG              | Oryctola<br>gus<br>cuniculu<br>s |
| 1 | 1.00 | 1 | 1 | 0.02  | 0.02   | 0.02   | 0.023  | 0.021  | t | 72087  | VYLLPR                       | Homo<br>sapiens                  |
| 1 | 1.00 | 1 | 1 | 0.02  | 0.02   | 0.02   | 0.023  | 0.02   | t | 149114 | STPRLPD                      | Sus<br>scrofa                    |
| 1 | 1.00 | 1 | 1 | 0.02  | 0.02   | 0      | 0.02   | 0.022  | t | 151601 | ADLSLEKA<br>ANVQWD<br>E      | Homo<br>sapiens                  |
| 1 | 1.00 | 1 | 1 | 0.01  | 0.012  | 0.003  | 0.013  | 0.009  | t | 135914 | EEIAQVATI<br>SAN             | Homo<br>sapiens                  |
| 1 | 1.00 | 1 | 1 | 0.02  | 0.022  | 0.02   | 0.023  | 0.019  | t | 133995 | AEVETDKA<br>TVGFE            | Homo<br>sapiens                  |
| 1 | 1.00 | 1 | 1 | 0     | -0.004 | -0.001 | -0.001 | -0.004 | t | 1257   | AFASNRTF<br>DITVSGLG<br>TAPK | Oryctola<br>gus<br>cuniculu<br>s |
| 1 | 1.00 | 1 | 1 | -0.02 | -0.022 | -0.029 | -0.02  | -0.02  | t | 100052 | GALMLPH<br>FNSKAMVI<br>VVVNK | Homo<br>sapiens                  |
| 1 | 1.00 | 1 | 1 | -0.03 | -0.03  | -0.031 | -0.026 | -0.03  | t | 14261  | ESRRAL                       | Homo<br>sapiens                  |
| 1 | 1.00 | 1 | 1 | -0.03 | -0.03  | -0.031 | -0.026 | -0.03  | t | 14261  | ESRRAL                       | Homo<br>sapiens                  |
| 1 | 1.00 | 1 | 1 | -0.03 | -0.03  | -0.031 | -0.026 | -0.03  | t | 14261  | ESRRAL                       | Homo<br>sapiens                  |
| 1 | 1.00 | 1 | 1 | 0.03  | 0.03   | 0.02   | 0.027  | 0.028  | t | 38962  | LQQQEIQK<br>GEEV             | Homo<br>sapiens                  |

|   |      |   |   |       |        |        |        |        |   |        |                      |                       |
|---|------|---|---|-------|--------|--------|--------|--------|---|--------|----------------------|-----------------------|
| 1 | 1.00 | 1 | 1 | 0.01  | 0.01   | 0.01   | 0.01   | 0.01   | t | 1771   | AHHAAD               | Oryctolagus cuniculus |
| 1 | 1.00 | 1 | 1 | 0.06  | 0.064  | 0.06   | 0.067  | 0.058  | t | 131981 | NGWKSTEEEDQGSAT      | Homo sapiens          |
| 1 | 1.00 | 1 | 1 | 0     | 0      | 0      | 0.004  | -0.001 | t | 119622 | NVNHKPSN             | Homo sapiens          |
| 1 | 1.00 | 1 | 1 | 0.05  | 0.05   | 0.05   | 0.05   | 0.05   | t | 140378 | TAEETKQ              | Oryctolagus cuniculus |
| 1 | 1.00 | 1 | 1 | 0.02  | 0.02   | 0.012  | 0.02   | 0.02   | t | 9886   | DQPKQYEQHLTDYEKIKEG  | Mus musculus          |
| 1 | 1.00 | 1 | 1 | 0.02  | 0.017  | 0.012  | 0.02   | 0.02   | t | 9886   | DQPKQYEQHLTDYEKIKEG  | Oryctolagus cuniculus |
| 1 | 1.00 | 1 | 1 | 0     | 0.008  | 0      | 0      | -0.002 | t | 156864 | EPNPTRL              | Gallus gallus         |
| 1 | 1.00 | 1 | 1 | -0.03 | -0.03  | -0.03  | -0.022 | -0.032 | t | 137399 | FCGLPRLE             | Homo sapiens          |
| 1 | 1.00 | 1 | 1 | 0     | 0      | -0.008 | 0      | 0.001  | t | 79111  | VNKGYTG Y            | Mus musculus          |
| 1 | 1.00 | 1 | 1 | 0.06  | 0.06   | 0.052  | 0.066  | 0.062  | t | 105319 | LVFFAEDVGSNK         | Homo sapiens          |
| 1 | 1.00 | 1 | 1 | -0.01 | -0.008 | -0.01  | -0.003 | -0.01  | t | 107758 | AWNCCVKQTP           | Homo sapiens          |
| 1 | 1.00 | 1 | 1 | -0.01 | -0.008 | -0.01  | -0.003 | -0.01  | t | 107758 | AWNCCVKQTP           | Homo sapiens          |
| 1 | 1.00 | 1 | 1 | 0.05  | 0.043  | 0.043  | 0.057  | 0.052  | t | 136724 | VLDSEDLQDMSLMTLSTKTP | Homo sapiens          |
| 1 | 1.00 | 1 | 1 | 0     | 0      | 0      | 0      | 0.001  | t | 115342 | LDTDYKKYLL           | Homo sapiens          |
| 1 | 1.00 | 1 | 1 | 0.01  | 0.01   | 0.008  | 0.017  | 0.01   | t | 120548 | GAGAPVYLAAVLEYLTAE   | Homo sapiens          |

|   |      |   |   |       |        |        |        |        |   |        |                   |                                  |
|---|------|---|---|-------|--------|--------|--------|--------|---|--------|-------------------|----------------------------------|
| 1 | 1.00 | 1 | 1 | -0.04 | -0.038 | -0.045 | -0.037 | -0.041 | t | 45054  | NNDFHFE<br>VFNFV  | Homo<br>sapiens                  |
| 1 | 1.00 | 1 | 1 | -0.01 | -0.01  | -0.01  | -0.007 | -0.013 | t | 146901 | ETHGGED<br>VAVFAR | Homo<br>sapiens                  |
| 1 | 1.00 | 1 | 1 | 0.05  | 0.048  | 0.05   | 0.047  | 0.05   | t | 134028 | DDTIS             | Mus<br>musculu<br>s              |
| 1 | 1.00 | 1 | 1 | 0.04  | 0.04   | 0.045  | 0.05   | 0.043  | t | 115671 | AAMEL             | Homo<br>sapiens                  |
| 1 | 1.00 | 1 | 1 | 0.04  | 0.042  | 0.034  | 0.043  | 0.042  | t | 40076  | LTPCD             | Homo<br>sapiens                  |
| 1 | 1.00 | 1 | 1 | 0.03  | 0.028  | 0.025  | 0.029  | 0.03   | t | 70812  | VRRIEGGE          | Anas<br>platyrhy<br>nchos        |
| 1 | 1.00 | 1 | 1 | 0.08  | 0.082  | 0.071  | 0.077  | 0.08   | t | 11210  | EAVESTVA<br>TLED  | Homo<br>sapiens                  |
| 1 | 1.00 | 1 | 1 | 0.08  | 0.084  | 0.071  | 0.077  | 0.08   | t | 11210  | EAVESTVA<br>TLED  | Homo<br>sapiens                  |
| 1 | 1.00 | 1 | 1 | 0.02  | 0.02   | 0.015  | 0.02   | 0.02   | t | 35611  | LEN               | Mus<br>musculu<br>s              |
| 1 | 1.00 | 1 | 1 | 0.02  | 0.024  | 0.02   | 0.021  | 0.02   | t | 21173  | GLTSLFT           | Homo<br>sapiens                  |
| 1 | 1.00 | 1 | 1 | 0.06  | 0.06   | 0.06   | 0.06   | 0.06   | t | 79403  | SVGDYG            | Mus<br>musculu<br>s              |
| 1 | 1.00 | 1 | 1 | 0.02  | 0.022  | 0.02   | 0.027  | 0.02   | t | 107446 | IEKTISK           | Homo<br>sapiens                  |
| 1 | 1.00 | 1 | 1 | 0.04  | 0.04   | 0.036  | 0.04   | 0.04   | t | 5670   | AWITEDCP<br>VP    | Homo<br>sapiens                  |
| 1 | 1.00 | 1 | 1 | 0.05  | 0.052  | 0.038  | 0.05   | 0.05   | t | 136896 | VLHDDLLE<br>A     | Homo<br>sapiens                  |
| 1 | 1.00 | 1 | 1 | 0.05  | 0.047  | 0.043  | 0.05   | 0.05   | t | 79158  | ASPYGNA           | Oryctola<br>gus<br>cuniculu<br>s |

|   |      |   |   |       |        |        |        |        |   |        |                  |                                  |
|---|------|---|---|-------|--------|--------|--------|--------|---|--------|------------------|----------------------------------|
| 1 | 1.00 | 1 | 1 | 0.05  | 0.047  | 0.043  | 0.05   | 0.05   | t | 79158  | ASPYGNA          | Oryctola<br>gus<br>cuniculu<br>s |
| 1 | 1.00 | 1 | 1 | -0.01 | -0.012 | -0.01  | -0.009 | -0.014 | t | 96457  | KGTVNLT<br>WSR   | Mus<br>musculu<br>s              |
| 1 | 1.00 | 1 | 1 | -0.02 | -0.017 | -0.024 | -0.02  | -0.022 | t | 139198 | QARNRPT<br>T     | Mus<br>musculu<br>s              |
| 1 | 1.00 | 1 | 1 | 0.02  | 0.02   | 0.013  | 0.02   | 0.021  | t | 78143  | EKIEKTEEP<br>AP  | Homo<br>sapiens                  |
| 1 | 1.00 | 1 | 1 | 0.01  | 0.008  | 0.012  | 0.009  | 0.01   | t | 15807  | FFFDIDLLL        | Mus<br>musculu<br>s              |
| 1 | 1.00 | 1 | 1 | 0.03  | 0.03   | 0.03   | 0.03   | 0.03   | t | 9588   | DPAFSL           | Mus<br>musculu<br>s              |
| 1 | 1.00 | 1 | 1 | 0.03  | 0.03   | 0.03   | 0.03   | 0.03   | t | 9588   | DPAFSL           | Mus<br>musculu<br>s              |
| 1 | 1.00 | 1 | 1 | 0.05  | 0.052  | 0.05   | 0.057  | 0.05   | t | 117613 | QEKLQVAL<br>GE   | Homo<br>sapiens                  |
| 1 | 1.00 | 1 | 1 | 0.05  | 0.052  | 0.05   | 0.057  | 0.05   | t | 117613 | QEKLQVAL<br>GE   | Homo<br>sapiens                  |
| 1 | 1.00 | 1 | 1 | -0.02 | -0.017 | -0.025 | -0.013 | -0.019 | t | 131994 | PAKSAPAP<br>KK   | Mus<br>musculu<br>s              |
| 1 | 1.00 | 1 | 1 | 0.01  | -0.004 | 0.015  | 0.01   | 0.009  | t | 21990  | GRAIN            | Mus<br>musculu<br>s              |
| 1 | 1.00 | 1 | 1 | -0.05 | -0.05  | -0.05  | -0.041 | -0.05  | t | 135642 | CKNKEKCC         | Homo<br>sapiens                  |
| 1 | 1.00 | 1 | 1 | 0.08  | 0.08   | 0.075  | 0.08   | 0.08   | t | 115035 | ASSDSSNT<br>E    | Rattus<br>norvegic<br>us         |
| 1 | 1.00 | 1 | 1 | 0     | 0.002  | -0.004 | -0.003 | -0.002 | t | 51872  | QPLPPTV<br>MFPPQ | Homo<br>sapiens                  |
| 1 | 1.00 | 1 | 1 | 0.02  | 0.016  | 0.009  | 0.019  | 0.02   | t | 61006  | SSFSPNNT         | Oryctola<br>gus<br>cuniculu<br>s |

|   |      |   |   |       |        |        |        |        |   |        |                              |                                  |
|---|------|---|---|-------|--------|--------|--------|--------|---|--------|------------------------------|----------------------------------|
| 1 | 1.00 | 1 | 1 | 0.04  | 0.038  | 0.028  | 0.043  | 0.042  | t | 11092  | EAKKQVEK<br>ALEE             | Mus<br>musculu<br>s              |
| 1 | 1.00 | 1 | 1 | 0     | 0      | 0      | 0.002  | 0      | t | 66311  | TSLNLQKD<br>EPN              | Equus<br>caballus                |
| 1 | 1.00 | 1 | 1 | 0.04  | 0.036  | 0.033  | 0.039  | 0.039  | t | 137867 | GEIKFEAV<br>EGAV             | Oryctola<br>gus<br>cuniculu<br>s |
| 1 | 1.00 | 1 | 1 | -0.01 | -0.01  | -0.017 | -0.01  | -0.012 | t | 122486 | MILHPDV<br>QRRVQQEI<br>DDVI  | Homo<br>sapiens                  |
| 1 | 1.00 | 1 | 1 | 0     | -0.004 | -0.01  | -0.001 | 0      | t | 26244  | IGILGGK                      | Oryctola<br>gus<br>cuniculu<br>s |
| 1 | 1.00 | 1 | 1 | -0.01 | -0.012 | -0.015 | -0.006 | -0.011 | t | 13992  | ERFSFPR                      | Mus<br>musculu<br>s              |
| 1 | 1.00 | 1 | 1 | 0.03  | 0.032  | 0.025  | 0.037  | 0.032  | t | 141604 | APPDDGP<br>P                 | Homo<br>sapiens                  |
| 1 | 1.00 | 1 | 1 | 0.01  | 0.01   | -0.005 | 0.007  | 0.011  | t | 52043  | QQIPQQQ                      | Homo<br>sapiens                  |
| 1 | 1.00 | 1 | 1 | 0.02  | 0.018  | 0.02   | 0.019  | 0.02   | t | 69883  | VLYQEFDE                     | Mus<br>musculu<br>s              |
| 1 | 1.00 | 1 | 1 | -0.01 | -0.012 | -0.02  | -0.011 | -0.012 | t | 5429   | AVLFFGRC<br>VS               | Mus<br>musculu<br>s              |
| 1 | 1.00 | 1 | 1 | 0     | 0      | -0.007 | 0      | -0.001 | t | 119496 | MFPEVKEK<br>GMAAL            | Homo<br>sapiens                  |
| 1 | 1.00 | 1 | 1 | 0     | -0.002 | 0.002  | -0.001 | 0      | t | 40755  | LYFP                         | Mus<br>musculu<br>s              |
| 1 | 1.00 | 1 | 1 | 0.02  | 0.02   | 0.018  | 0.02   | 0.02   | t | 62286  | SVPNP                        | Mus<br>musculu<br>s              |
| 1 | 1.00 | 1 | 1 | 0.04  | 0.042  | 0.029  | 0.043  | 0.041  | t | 111585 | NKSEVPLD<br>ICTSICKYP<br>DYI | Cavia<br>porcellu<br>s           |
| 1 | 1.00 | 1 | 1 | 0.02  | 0.02   | 0.02   | 0.02   | 0.018  | t | 51296  | QLCQLL                       | Mus<br>musculu<br>s              |



|   |      |   |   |       |        |        |        |        |   |        |                             |                                  |
|---|------|---|---|-------|--------|--------|--------|--------|---|--------|-----------------------------|----------------------------------|
| 1 | 1.00 | 1 | 1 | -0.01 | -0.01  | -0.019 | -0.01  | -0.01  | t | 66101  | TRSQSGLT<br>FA              | Oryctola<br>gus<br>cuniculu<br>s |
| 1 | 1.00 | 1 | 1 | 0.01  | 0.01   | 0.01   | 0.01   | 0.01   | t | 98938  | PQP                         | Mus<br>musculu<br>s              |
| 1 | 1.00 | 1 | 1 | 0.03  | 0.028  | 0.021  | 0.029  | 0.03   | t | 98408  | QYEADLAA<br>VK              | Mus<br>musculu<br>s              |
| 1 | 1.00 | 1 | 1 | -0.06 | -0.062 | -0.06  | -0.053 | -0.06  | t | 123244 | GMIPPPGL                    | Homo<br>sapiens                  |
| 1 | 1.00 | 1 | 1 | 0.01  | 0.008  | 0.015  | 0.009  | 0.008  | t | 25002  | HTVTTTTK                    | Mus<br>musculu<br>s              |
| 1 | 1.00 | 1 | 1 | -0.03 | -0.034 | -0.034 | -0.03  | -0.03  | t | 47859  | PHWA                        | Mus<br>musculu<br>s              |
| 1 | 1.00 | 1 | 1 | -0.02 | -0.018 | -0.026 | -0.019 | -0.02  | t | 71687  | VVHGCPLP<br>PTKAPP          | Homo<br>sapiens                  |
| 1 | 1.00 | 1 | 1 | -0.02 | -0.018 | -0.026 | -0.019 | -0.02  | t | 71687  | VVHGCPLP<br>PTKAPP          | Homo<br>sapiens                  |
| 1 | 1.00 | 1 | 1 | -0.01 | -0.006 | -0.01  | -0.003 | -0.01  | t | 144101 | TMMQTM<br>SFLRGF            | Homo<br>sapiens                  |
| 1 | 1.00 | 1 | 1 | -0.02 | -0.018 | -0.031 | -0.017 | -0.02  | t | 110602 | GLKAKPKF<br>TLGKRKAT<br>PTT | Homo<br>sapiens                  |
| 1 | 1.00 | 1 | 1 | -0.02 | -0.016 | -0.025 | -0.017 | -0.022 | t | 118144 | SLCQSLRE<br>R               | Homo<br>sapiens                  |
| 1 | 1.00 | 1 | 1 | 0     | 0      | 0      | 0      | -0.002 | t | 133722 | TSKSKYPL<br>VV              | Mus<br>musculu<br>s              |
| 1 | 1.00 | 1 | 1 | -0.02 | -0.02  | -0.034 | -0.02  | -0.02  | t | 9523   | DNNYGKTI<br>INNDFNF         | Mus<br>musculu<br>s              |

|   |      |   |   |       |        |        |        |       |   |        |                         |                                  |
|---|------|---|---|-------|--------|--------|--------|-------|---|--------|-------------------------|----------------------------------|
| 1 | 1.00 | 1 | 1 | -0.02 | -0.018 | -0.022 | -0.013 | -0.02 | t | 132078 | SQGWGDP<br>PKSNQSLG     | Homo<br>sapiens                  |
| 1 | 1.00 | 1 | 1 | 0.01  | 0.01   | 0.012  | 0.01   | 0.007 | t | 7230   | CTTPAQG<br>NSMFPS       | Mus<br>musculu<br>s              |
| 1 | 1.00 | 1 | 1 | 0.01  | 0.012  | 0.004  | 0.011  | 0.009 | t | 133618 | KKLLVRGL<br>YRISFTTYK   | Homo<br>sapiens                  |
| 1 | 1.00 | 1 | 1 | 0.09  | 0.09   | 0.09   | 0.09   | 0.09  | t | 139771 | GYSFSTS                 | Ovis<br>aries                    |
| 1 | 1.00 | 1 | 1 | 0.01  | 0.008  | -0.004 | 0.009  | 0.01  | t | 48108  | PKNTLTPL<br>EELYPTN     | Mus<br>musculu<br>s              |
| 1 | 1.00 | 1 | 1 | 0.02  | 0.023  | 0.013  | 0.02   | 0.02  | t | 150858 | ISSLYNLVK<br>SS         | Mus<br>musculu<br>s              |
| 1 | 1.00 | 1 | 1 | -0.01 | -0.008 | -0.003 | -0.003 | -0.01 | t | 141969 | NGTYQTW                 | Homo<br>sapiens                  |
| 1 | 1.00 | 1 | 1 | 0.01  | 0.014  | 0.012  | 0.011  | 0.007 | t | 103170 | FGDVDAH<br>GAMIRAQ<br>A | Homo<br>sapiens                  |
| 1 | 1.00 | 1 | 1 | 0.06  | 0.06   | 0.053  | 0.06   | 0.061 | t | 78255  | QTTPEEKP<br>AEP         | Homo<br>sapiens                  |
| 1 | 1.00 | 1 | 1 | 0.06  | 0.06   | 0.06   | 0.06   | 0.06  | t | 141067 | PLSLEPDP                | Mus<br>musculu<br>s              |
| 1 | 1.00 | 1 | 1 | 0.03  | 0.03   | 0.03   | 0.03   | 0.03  | t | 78637  | EKSLTSLSE               | Oryctola<br>gus<br>cuniculu<br>s |
| 1 | 1.00 | 1 | 1 | 0.01  | 0.01   | 0.01   | 0.01   | 0.009 | t | 117232 | SAPDTRPA<br>P           | Mus<br>musculu<br>s              |
| 1 | 1.00 | 1 | 1 | 0.03  | 0.034  | 0.026  | 0.03   | 0.03  | t | 112486 | DTYRF                   | Cavia<br>porcellu<br>s           |
| 1 | 1.00 | 1 | 1 | 0.03  | 0.028  | 0.026  | 0.03   | 0.03  | t | 112486 | DTYRF                   | Oryctola<br>gus<br>cuniculu<br>s |
| 1 | 1.00 | 1 | 1 | -0.01 | -0.01  | -0.024 | -0.01  | -0.01 | t | 133952 | WIFQNF                  | Mus<br>musculu<br>s              |

|   |      |   |   |      |        |        |        |        |   |        |                            |                       |
|---|------|---|---|------|--------|--------|--------|--------|---|--------|----------------------------|-----------------------|
| 1 | 1.00 | 1 | 1 | 0.01 | 0.012  | 0.003  | 0.007  | 0.01   | t | 58882  | SKLIKIFQD<br>H             | Homo sapiens          |
| 1 | 1.00 | 1 | 1 | 0.02 | 0.02   | 0.015  | 0.026  | 0.021  | t | 107064 | AGAPGFP<br>G               | Rattus norvegicus     |
| 1 | 1.00 | 1 | 1 | 0.03 | 0.03   | 0.023  | 0.036  | 0.03   | t | 125357 | AEIETDKA<br>TIGFEVQE<br>EG | Homo sapiens          |
| 1 | 1.00 | 1 | 1 | 0    | 0      | 0      | 0.006  | -0.001 | t | 53195  | RARGRGR<br>GRGEKRP         | Homo sapiens          |
| 1 | 1.00 | 1 | 1 | 0    | 0      | 0      | 0.006  | -0.001 | t | 55585  | RRGRGRE<br>RARGGSRE        | Homo sapiens          |
| 1 | 1.00 | 1 | 1 | 0.01 | 0.012  | 0.003  | 0.007  | 0.007  | t | 106977 | VQGKEKEP<br>SK             | Homo sapiens          |
| 1 | 1.00 | 1 | 1 | 0.04 | 0.043  | 0.028  | 0.04   | 0.042  | t | 95416  | GLQNDP                     | Mus musculus          |
| 1 | 1.00 | 1 | 1 | 0.01 | 0.012  | 0.01   | 0.01   | 0.008  | t | 3274   | ANETIYNT<br>TLKYGDV        | MD                    |
| 1 | 1.00 | 1 | 1 | 0.01 | 0.014  | 0.005  | 0.01   | 0.009  | t | 24602  | HQQILLQK<br>YQVIKV         | Capra hircus          |
| 1 | 1.00 | 1 | 1 | 0.05 | 0.045  | 0.042  | 0.053  | 0.052  | t | 157743 | PLATQSYG<br>FGSD           | Canis lupus           |
| 1 | 1.00 | 1 | 1 | 0.02 | 0.02   | 0.02   | 0.02   | 0.02   | t | 50098  | PYIEQAQV<br>I              | Homo sapiens          |
| 1 | 1.00 | 1 | 1 | 0.04 | 0.042  | 0.039  | 0.043  | 0.039  | t | 47858  | PHVVDL                     | Homo sapiens          |
| 1 | 1.00 | 1 | 1 | 0    | -0.003 | 0      | 0      | -0.002 | t | 73489  | YCDKLCKD<br>KKADSGY        | Oryctolagus cuniculus |
| 1 | 1.00 | 1 | 1 | 0    | -0.004 | -0.009 | -0.001 | 0      | t | 596    | ACSFSSIPN<br>G             | Oryctolagus cuniculus |
| 1 | 1.00 | 1 | 1 | 0.02 | 0.021  | 0.019  | 0.023  | 0.019  | t | 99579  | QNIRQGA<br>KEPYPEFV        | Equus caballus        |

|   |      |   |   |       |        |        |        |        |   |        |                         |                                  |
|---|------|---|---|-------|--------|--------|--------|--------|---|--------|-------------------------|----------------------------------|
| 1 | 1.00 | 1 | 1 | 0     | -0.003 | -0.013 | 0      | 0      | t | 61827  | STPPLPWP<br>WSPAAL      | Oryctola<br>gus<br>cuniculu<br>s |
| 1 | 1.00 | 1 | 1 | 0     | -0.003 | -0.013 | 0      | 0      | t | 61827  | STPPLPWP<br>WSPAAL      | Oryctola<br>gus<br>cuniculu<br>s |
| 1 | 1.00 | 1 | 1 | 0.01  | 0.01   | 0.004  | 0.009  | 0.01   | t | 39254  | LRYLA                   | Homo<br>sapiens                  |
| 1 | 1.00 | 1 | 1 | -0.03 | -0.033 | -0.032 | -0.029 | -0.033 | t | 103503 | PVIAENRA<br>ELMILIA     | Homo<br>sapiens                  |
| 1 | 1.00 | 1 | 1 | 0     | 0      | 0      | 0.004  | 0      | t | 136063 | FIRFDKRIE<br>AEE        | Homo<br>sapiens                  |
| 1 | 1.00 | 1 | 1 | 0.05  | 0.046  | 0.049  | 0.05   | 0.048  | t | 123849 | WQDE                    | Mus<br>musculu<br>s              |
| 1 | 1.00 | 1 | 1 | 0.06  | 0.058  | 0.05   | 0.053  | 0.06   | t | 118029 | NAGG                    | Mus<br>musculu<br>s              |
| 1 | 1.00 | 1 | 1 | -0.01 | -0.01  | -0.015 | -0.01  | -0.01  | t | 125791 | CSFWSKYI<br>QTLK        | Mus<br>musculu<br>s              |
| 1 | 1.00 | 1 | 1 | -0.01 | -0.008 | -0.012 | -0.003 | -0.012 | t | 122341 | ESGFLREV<br>LNAVPLLL    | Homo<br>sapiens                  |
| 1 | 1.00 | 1 | 1 | 0.03  | 0.032  | 0.025  | 0.033  | 0.03   | t | 50272  | QAGQEMI<br>LAVQGVQ<br>D | Homo<br>sapiens                  |
| 1 | 1.00 | 1 | 1 | 0.02  | 0.022  | 0.013  | 0.021  | 0.02   | t | 69908  | VLYSPNVS<br>VPSSSS      | Homo<br>sapiens                  |
| 1 | 1.00 | 1 | 1 | -0.04 | -0.04  | -0.04  | -0.04  | -0.044 | t | 26372  | IHFG                    | Mus<br>musculu<br>s              |
| 1 | 1.00 | 1 | 1 | -0.03 | -0.027 | -0.035 | -0.03  | -0.032 | t | 126921 | RERRGIAL<br>D           | Mus<br>musculu<br>s              |
| 1 | 1.00 | 1 | 1 | 0     | 0      | 0      | 0      | 0      | t | 47119  | PDKEILYEA               | Homo<br>sapiens                  |

|   |      |   |   |       |        |        |        |        |   |        |                              |                         |
|---|------|---|---|-------|--------|--------|--------|--------|---|--------|------------------------------|-------------------------|
| 1 | 1.00 | 1 | 1 | 0.03  | 0.032  | 0.025  | 0.033  | 0.03   | t | 141604 | APPDDGP<br>P                 | Homo<br>sapiens         |
| 1 | 1.00 | 1 | 1 | -0.01 | -0.01  | -0.025 | -0.007 | -0.008 | t | 53823  | RGAPGG                       | Homo<br>sapiens         |
| 1 | 1.00 | 1 | 1 | 0     | 0.002  | -0.007 | 0.003  | -0.001 | t | 121589 | LRKFKNISY<br>FPGKLR          | Homo<br>sapiens         |
| 1 | 1.00 | 1 | 1 | -0.02 | -0.016 | -0.016 | -0.013 | -0.02  | t | 144700 | KEWAKRA<br>ALP               | Homo<br>sapiens         |
| 1 | 1.00 | 1 | 1 | 0     | 0      | -0.005 | -0.002 | 0      | t | 62065  | SVCGPVYC<br>FT               | Homo<br>sapiens         |
| 1 | 1.00 | 1 | 1 | 0.02  | 0.022  | 0.016  | 0.017  | 0.02   | t | 112837 | SGYIPANT<br>TIPF             | Homo<br>sapiens         |
| 1 | 1.00 | 1 | 1 | 0     | 0      | 0      | 0      | -0.004 | t | 56771  | SAFDDNLT<br>AANAMGL<br>ILNKR | Aotus<br>nancyma<br>ae  |
| 1 | 1.00 | 1 | 1 | 0     | 0      | -0.005 | 0      | 0      | t | 60663  | SRGAPGG<br>GFVPSLQG<br>VP    | Homo<br>sapiens         |
| 1 | 1.00 | 1 | 1 | -0.02 | -0.02  | -0.02  | -0.011 | -0.02  | t | 135642 | CKNKEKCC                     | Homo<br>sapiens         |
| 1 | 1.00 | 1 | 1 | 0.02  | 0.02   | 0.022  | 0.031  | 0.02   | t | 118587 | RPRVNYLQ<br>DFSYQRS          | Homo<br>sapiens         |
| 1 | 1.00 | 1 | 1 | -0.01 | -0.01  | -0.017 | -0.014 | -0.01  | t | 131249 | LVVGLC                       | Homo<br>sapiens         |
| 1 | 1.00 | 1 | 1 | 0.04  | 0.04   | 0.044  | 0.04   | 0.038  | t | 102280 | AAANQTE<br>V                 | Mus<br>musculu<br>s     |
| 1 | 1.00 | 1 | 1 | -0.01 | -0.013 | -0.021 | -0.01  | -0.009 | t | 9472   | DNIDSPNA<br>PWVFAC           | Myodes<br>glareolu<br>s |
| 1 | 1.00 | 1 | 1 | -0.03 | -0.028 | -0.03  | -0.023 | -0.031 | t | 120699 | KMFPEVKE<br>KGMAALP<br>RL    | Homo<br>sapiens         |
| 1 | 1.00 | 1 | 1 | 0.01  | 0.01   | 0.002  | 0.007  | 0.008  | t | 13252  | ELRNLPQQ<br>CGLRAPQ          | Homo<br>sapiens         |
| 1 | 1.00 | 1 | 1 | 0.01  | 0.01   | -0.006 | 0.01   | 0.013  | t | 10801  | DWEDRY<br>RE                 | Mus<br>musculu<br>s     |

|   |      |   |   |       |        |        |        |        |   |        |                                      |                                  |
|---|------|---|---|-------|--------|--------|--------|--------|---|--------|--------------------------------------|----------------------------------|
| 1 | 1.00 | 1 | 1 | 0.01  | 0.007  | -0.006 | 0.01   | 0.013  | t | 10801  | DWEDRY<br>RE                         | Oryctola<br>gus<br>cuniculu<br>s |
| 1 | 1.00 | 1 | 1 | 0     | 0.002  | 0      | 0.007  | 0      | t | 11571  | EEEDDD<br>MGFLFD                     | Homo<br>sapiens                  |
| 1 | 1.00 | 1 | 1 | 0     | -0.002 | -0.012 | -0.003 | 0      | t | 95253  | AQKKII                               | Homo<br>sapiens                  |
| 1 | 1.00 | 1 | 1 | -0.01 | -0.01  | -0.01  | -0.01  | -0.01  | t | 79118  | WKSLPF                               | Mus<br>musculu<br>s              |
| 1 | 1.00 | 1 | 1 | 0.01  | 0.012  | -0.001 | 0.011  | 0.01   | t | 110589 | GDICNT<br>MHTNWT<br>HYICEE           | Homo<br>sapiens                  |
| 1 | 1.00 | 1 | 1 | 0.01  | 0.01   | 0.019  | 0.014  | 0.01   | t | 75560  | YQTEKF<br>VK                         | Homo<br>sapiens                  |
| 1 | 1.00 | 1 | 1 | -0.04 | -0.04  | -0.045 | -0.04  | -0.041 | t | 26372  | IHFG                                 | Mus<br>musculu<br>s              |
| 1 | 1.00 | 1 | 1 | 0.06  | 0.06   | 0.06   | 0.06   | 0.062  | t | 127822 | SIYAYD<br>NF<br>GV                   | Homo<br>sapiens                  |
| 1 | 1.00 | 1 | 1 | -0.01 | -0.01  | -0.01  | -0.01  | -0.011 | t | 159294 | QPLWLL                               | Oryctola<br>gus<br>cuniculu<br>s |
| 1 | 1.00 | 1 | 1 | 0.03  | 0.034  | 0.031  | 0.037  | 0.03   | t | 127961 | ELLADV<br>QF<br>ALGLPF<br>YF<br>AYEG | Homo<br>sapiens                  |
| 1 | 1.00 | 1 | 1 | 0.01  | 0.008  | 0.002  | 0.009  | 0.01   | t | 62831  | TAEGRA<br>IN<br>RRVE                 | Mus<br>musculu<br>s              |
| 1 | 1.00 | 1 | 1 | -0.01 | -0.007 | -0.019 | -0.01  | -0.011 | t | 63757  | TFTNKL<br>KS<br>KHTDLG<br>K          | Mus<br>musculu<br>s              |
| 1 | 1.00 | 1 | 1 | 0.01  | 0.01   | -0.003 | 0.004  | 0.008  | t | 95674  | PNNLCC<br>S<br>QWG                   | Homo<br>sapiens                  |
| 1 | 1.00 | 1 | 1 | -0.02 | -0.02  | -0.015 | -0.02  | -0.023 | t | 108382 | GGVVIA                               | Mus<br>musculu<br>s              |

|   |      |   |   |       |        |        |        |        |   |        |                              |                       |
|---|------|---|---|-------|--------|--------|--------|--------|---|--------|------------------------------|-----------------------|
| 1 | 1.00 | 1 | 1 | -0.02 | -0.02  | -0.015 | -0.02  | -0.023 | t | 108382 | GGVVIA                       | Mus musculus          |
| 1 | 1.00 | 1 | 1 | 0.03  | 0.03   | 0.03   | 0.029  | 0.027  | t | 9585   | DPAF                         | Mus musculus          |
| 1 | 1.00 | 1 | 1 | -0.01 | -0.008 | -0.016 | -0.009 | -0.012 | t | 36893  | LKILPQSGP<br>IGGIKSMG<br>ITT | Homo sapiens          |
| 1 | 1.00 | 1 | 1 | -0.01 | -0.012 | -0.011 | -0.011 | -0.01  | t | 73301  | WYWGPSL<br>YSI               | Mus musculus          |
| 1 | 1.00 | 1 | 1 | -0.02 | -0.027 | -0.028 | -0.02  | -0.02  | t | 110913 | KDIKANPE<br>NYFT             | Macaca                |
| 1 | 1.00 | 1 | 1 | 0     | 0.001  | -0.016 | -0.003 | 0      | t | 78843  | TAAQITAG<br>IALHQS<br>NLN    | Canis familiaris      |
| 1 | 1.00 | 1 | 1 | -0.02 | -0.016 | -0.02  | -0.013 | -0.02  | t | 123512 | MPPPGMI<br>P                 | Homo sapiens          |
| 1 | 1.00 | 1 | 1 | -0.03 | -0.028 | -0.025 | -0.023 | -0.03  | t | 121892 | TALLRNLG                     | Homo sapiens          |
| 1 | 1.00 | 1 | 1 | 0     | 0      | 0      | 0.003  | 0      | t | 15438  | FDPLVAEE                     | Homo sapiens          |
| 1 | 1.00 | 1 | 1 | 0.02  | 0.02   | 0.02   | 0.02   | 0.02   | t | 48778  | PPFSLSPV<br>PTL              | Oryctolagus cuniculus |
| 1 | 1.00 | 1 | 1 | 0     | 0.003  | 0      | 0      | 0      | t | 135457 | FGF                          | Mus musculus          |
| 1 | 1.00 | 1 | 1 | 0.02  | 0.02   | 0.007  | 0.02   | 0.02   | t | 67444  | TYRATYQD                     | Homo sapiens          |
| 1 | 1.00 | 1 | 1 | 0.02  | 0.02   | 0.019  | 0.018  | 0.02   | t | 32494  | KNFNFEVE                     | Homo sapiens          |
| 1 | 1.00 | 1 | 1 | 0     | 0.003  | -0.008 | 0      | 0      | t | 64644  | TKPTDPTG<br>IE               | Mus musculus          |

|   |      |   |   |       |        |        |        |        |   |        |                            |                                  |
|---|------|---|---|-------|--------|--------|--------|--------|---|--------|----------------------------|----------------------------------|
| 1 | 1.00 | 1 | 1 | 0     | -0.001 | -0.008 | 0      | 0      | t | 64644  | TKPTDPTG<br>IE             | Mus<br>musculu<br>s              |
| 1 | 1.00 | 1 | 1 | 0.01  | 0.01   | -0.003 | 0.009  | 0.011  | t | 146390 | KFTFLFCGS<br>MMATG         | Homo<br>sapiens                  |
| 1 | 1.00 | 1 | 1 | 0.02  | 0.02   | 0.016  | 0.02   | 0.022  | t | 150850 | GY                         | Mus<br>musculu<br>s              |
| 1 | 1.00 | 1 | 1 | 0     | -0.001 | 0.005  | 0.001  | 0      | t | 73991  | YGFQYS                     | Homo<br>sapiens                  |
| 1 | 1.00 | 1 | 1 | 0.01  | 0.01   | 0.006  | 0.01   | 0.01   | t | 6093   | CDCDRTA<br>A               | Mus<br>musculu<br>s              |
| 1 | 1.00 | 1 | 1 | -0.01 | -0.013 | -0.018 | -0.01  | -0.011 | t | 153392 | GNTLQCI<br>MLVYCFLG<br>YCC | Oryctola<br>gus<br>cuniculu<br>s |
| 1 | 1.00 | 1 | 1 | 0     | 0      | -0.002 | 0      | -0.002 | t | 57648  | SETLKS                     | Mus<br>musculu<br>s              |
| 1 | 1.00 | 1 | 1 | 0.03  | 0.026  | 0.033  | 0.029  | 0.028  | t | 15529  | FEFPPPT<br>DE              | Oryctola<br>gus<br>cuniculu<br>s |
| 1 | 1.00 | 1 | 1 | 0.01  | 0.012  | 0.01   | 0.011  | 0.011  | t | 39663  | LSSKAV                     | Homo<br>sapiens                  |
| 1 | 1.00 | 1 | 1 | 0     | 0      | 0      | 0.004  | -0.002 | t | 117660 | TVETQNLE<br>GLHH           | Homo<br>sapiens                  |
| 1 | 1.00 | 1 | 1 | -0.03 | -0.03  | -0.037 | -0.024 | -0.03  | t | 107087 | ARGLTGRP<br>GDA            | Homo<br>sapiens                  |
| 1 | 1.00 | 1 | 1 | 0.04  | 0.038  | 0.028  | 0.033  | 0.039  | t | 144641 | FFENKD                     | Mus<br>musculu<br>s              |
| 1 | 1.00 | 1 | 1 | 0.02  | 0.02   | 0.012  | 0.02   | 0.02   | t | 32138  | KLRPFERDI                  | Mus<br>musculu<br>s              |
| 1 | 1.00 | 1 | 1 | 0.02  | 0.018  | 0.018  | 0.021  | 0.018  | t | 21480  | GNNLEDP<br>ASRDL           | Mus<br>musculu<br>s              |
| 1 | 1.00 | 1 | 1 | 0.01  | 0.013  | 0.001  | 0.01   | 0.01   | t | 57288  | SDSQKECT                   | Mus<br>musculu<br>s              |



|   |      |   |   |       |        |        |        |        |   |        |                    |                                  |
|---|------|---|---|-------|--------|--------|--------|--------|---|--------|--------------------|----------------------------------|
| 1 | 1.00 | 1 | 1 | 0.01  | 0.01   | 0.01   | 0.01   | 0.006  | t | 19636  | GFTTNEER<br>YNVFAE | Mus<br>musculu<br>s              |
| 1 | 1.00 | 1 | 1 | -0.01 | -0.006 | -0.015 | -0.007 | -0.01  | t | 70241  | VPAEILRK           | Homo<br>sapiens                  |
| 1 | 1.00 | 1 | 1 | 0.05  | 0.048  | 0.041  | 0.05   | 0.05   | t | 33424  | KSLSTLSY           | Oryctola<br>gus<br>cuniculu<br>s |
| 1 | 1.00 | 1 | 1 | 0.03  | 0.026  | 0.018  | 0.029  | 0.03   | t | 12248  | EGQKSAVT<br>EY     | Oryctola<br>gus<br>cuniculu<br>s |
| 1 | 1.00 | 1 | 1 | 0.02  | 0.018  | 0.02   | 0.023  | 0.02   | t | 75151  | YNGEEYLIL<br>S     | Mus<br>musculu<br>s              |
| 1 | 1.00 | 1 | 1 | 0.08  | 0.08   | 0.08   | 0.08   | 0.08   | t | 141893 | FEEETESSA<br>SSES  | Mus<br>musculu<br>s              |
| 1 | 1.00 | 1 | 1 | -0.02 | -0.018 | -0.018 | -0.017 | -0.022 | t | 120612 | IFNLFSTKD<br>SSAAW | Homo<br>sapiens                  |
| 1 | 1.00 | 1 | 1 | 0.02  | 0.024  | 0.015  | 0.021  | 0.02   | t | 52814  | QVVYDYQ<br>H       | Homo<br>sapiens                  |
| 1 | 1.00 | 1 | 1 | 0.01  | 0.008  | 0.011  | 0.013  | 0.01   | t | 142307 | TLHEYMLD<br>LQPE   | Homo<br>sapiens                  |
| 1 | 1.00 | 1 | 1 | 0.01  | 0.01   | 0.008  | 0.01   | 0.008  | t | 97282  | ESNNL              | Oryctola<br>gus<br>cuniculu<br>s |
| 1 | 1.00 | 1 | 1 | 0.01  | 0.008  | 0.009  | 0.01   | 0.009  | t | 95092  | GYQKTVD<br>HTKVNSK | Oryctola<br>gus<br>cuniculu<br>s |
| 1 | 1.00 | 1 | 1 | 0     | 0.004  | -0.011 | 0      | 0.001  | t | 93328  | LSKVVDNY<br>EL     | Ovis<br>aries                    |
| 1 | 1.00 | 1 | 1 | 0.02  | 0.02   | 0.02   | 0.026  | 0.02   | t | 108790 | AQGPRGE<br>P       | Rattus<br>norvegic<br>us         |

|   |      |   |   |       |        |        |        |        |   |        |                 |                       |
|---|------|---|---|-------|--------|--------|--------|--------|---|--------|-----------------|-----------------------|
| 1 | 1.00 | 1 | 1 | 0.01  | 0.007  | 0.01   | 0.01   | 0.007  | t | 73131  | WTGVAQD         | Oryctolagus cuniculus |
| 1 | 1.00 | 1 | 1 | 0.01  | 0.007  | 0.01   | 0.01   | 0.007  | t | 73131  | WTGVAQD         | Oryctolagus cuniculus |
| 1 | 1.00 | 1 | 1 | 0     | 0      | 0      | 0.006  | -0.001 | t | 11813  | EENVEENV        | Homo sapiens          |
| 1 | 1.00 | 1 | 1 | 0     | -0.004 | -0.009 | -0.001 | 0      | t | 51474  | QLPNVGITQGIV    | Bos taurus            |
| 1 | 1.00 | 1 | 1 | 0.01  | 0.014  | 0.01   | 0.017  | 0.01   | t | 119676 | WQQGNVFS        | Homo sapiens          |
| 1 | 1.00 | 1 | 1 | -0.02 | -0.022 | -0.025 | -0.023 | -0.023 | t | 115828 | KPAAVRSPAQ      | Homo sapiens          |
| 1 | 1.00 | 1 | 1 | -0.02 | -0.02  | -0.02  | -0.02  | -0.023 | t | 151729 | RYSPSLNTRL      | Mus musculus          |
| 1 | 1.00 | 1 | 1 | 0.01  | 0.013  | 0.001  | 0.01   | 0.01   | t | 96874  | SIAPDLSLDFEKLNV | Mus musculus          |
| 1 | 1.00 | 1 | 1 | -0.02 | -0.013 | -0.019 | -0.021 | -0.021 | t | 55193  | RPKPG           | Gallus gallus         |
| 1 | 1.00 | 1 | 1 | 0.01  | 0.014  | 0.025  | 0.017  | 0.009  | t | 104014 | KPQ             | Homo sapiens          |
| 1 | 1.00 | 1 | 1 | -0.08 | -0.08  | -0.099 | -0.077 | -0.078 | t | 96059  | AANNAKN AAL     | Homo sapiens(human)   |
| 1 | 1.00 | 1 | 1 | 0.02  | 0.02   | 0.007  | 0.019  | 0.021  | t | 146516 | RAVPYYGPGVDYRN  | Homo sapiens          |
| 1 | 1.00 | 1 | 1 | -0.04 | -0.044 | -0.046 | -0.04  | -0.042 | t | 94979  | YNKRFPGFVSP     | Oryctolagus cuniculus |
| 1 | 1.00 | 1 | 1 | 0     | 0      | 0      | 0      | 0      | t | 54291  | RISNLND         | Homo sapiens          |

|   |      |   |   |       |        |        |        |        |   |        |                              |                                  |
|---|------|---|---|-------|--------|--------|--------|--------|---|--------|------------------------------|----------------------------------|
| 1 | 1.00 | 1 | 1 | 0     | 0      | -0.016 | 0.002  | 0.003  | t | 98976  | QYPLGQG<br>SFRPS             | Homo<br>sapiens                  |
| 1 | 1.00 | 1 | 1 | 0.05  | 0.05   | 0.05   | 0.05   | 0.05   | t | 38662  | LPQVVM                       | Homo<br>sapiens                  |
| 1 | 1.00 | 1 | 1 | -0.04 | -0.042 | -0.035 | -0.037 | -0.042 | t | 26360  | IH                           | Mus<br>musculu<br>s              |
| 1 | 1.00 | 1 | 1 | -0.02 | -0.016 | -0.013 | -0.013 | -0.021 | t | 106491 | GWGQLFQ                      | Homo<br>sapiens                  |
| 1 | 1.00 | 1 | 1 | -0.02 | -0.018 | -0.025 | -0.023 | -0.02  | t | 115090 | NLLRFFVA<br>PFPE             | Homo<br>sapiens                  |
| 1 | 1.00 | 1 | 1 | 0.02  | 0.021  | 0.021  | 0.023  | 0.02   | t | 57506  | SEKSKCEE<br>NTMFQPY          | Equus<br>caballus                |
| 1 | 1.00 | 1 | 1 | 0.01  | 0.01   | 0.016  | 0.01   | 0.004  | t | 50959  | QGSNWI                       | Homo<br>sapiens                  |
| 1 | 1.00 | 1 | 1 | 0.03  | 0.03   | 0.044  | 0.03   | 0.026  | t | 146012 | SSPSTPLLY                    | Mus<br>musculu<br>s              |
| 1 | 1.00 | 1 | 1 | -0.01 | -0.006 | -0.005 | -0.003 | -0.01  | t | 138205 | MHEALHN                      | Homo<br>sapiens                  |
| 1 | 1.00 | 1 | 1 | 0.05  | 0.054  | 0.039  | 0.047  | 0.05   | t | 78104  | APPASEQE<br>T                | Homo<br>sapiens                  |
| 1 | 1.00 | 1 | 1 | -0.01 | -0.013 | -0.014 | -0.01  | -0.012 | t | 45357  | NPGISGSR<br>LLGT             | Oryctola<br>gus<br>cuniculu<br>s |
| 1 | 1.00 | 1 | 1 | 0     | 0      | 0      | 0      | -0.004 | t | 79303  | LVAAGVD<br>YEDERISF<br>QDWPK | Rattus<br>norvegic<br>us         |
| 1 | 1.00 | 1 | 1 | 0.01  | 0.012  | -0.009 | 0.007  | 0.012  | t | 52028  | QQFPQQQ                      | Homo<br>sapiens                  |
| 1 | 1.00 | 1 | 1 | 0.02  | 0.022  | 0.02   | 0.017  | 0.018  | t | 106562 | KKCDIKTTL<br>P               | Homo<br>sapiens                  |
| 1 | 1.00 | 1 | 1 | 0.02  | 0.022  | 0.02   | 0.017  | 0.018  | t | 106562 | KKCDIKTTL<br>P               | Homo<br>sapiens                  |

|   |      |   |   |       |        |        |        |        |   |        |                              |                                  |
|---|------|---|---|-------|--------|--------|--------|--------|---|--------|------------------------------|----------------------------------|
| 1 | 1.00 | 1 | 1 | 0.01  | 0.014  | 0.001  | 0.01   | 0.01   | t | 113666 | NNGLYDIY<br>ADDFITDT<br>STTP | Cavia<br>porcellu<br>s           |
| 1 | 1.00 | 1 | 1 | 0.01  | 0.014  | 0.001  | 0.01   | 0.01   | t | 113666 | NNGLYDIY<br>ADDFITDT<br>STTP | Cavia<br>porcellu<br>s           |
| 1 | 1.00 | 1 | 1 | 0     | 0      | -0.012 | 0      | 0      | t | 10126  | DSGDGRQ<br>TITNP             | Mus<br>musculu<br>s              |
| 1 | 1.00 | 1 | 1 | 0.02  | 0.023  | 0.012  | 0.02   | 0.022  | t | 76268  | YVFDKSEL<br>TN               | Mus<br>musculu<br>s              |
| 1 | 1.00 | 1 | 1 | 0.02  | 0.022  | 0.015  | 0.021  | 0.02   | t | 142008 | SEATGLSS<br>EKITKL           | Homo<br>sapiens                  |
| 1 | 1.00 | 1 | 1 | -0.02 | -0.022 | -0.02  | -0.021 | -0.02  | t | 40922  | LYREFD                       | Mus<br>musculu<br>s              |
| 1 | 1.00 | 1 | 1 | -0.01 | -0.01  | -0.015 | -0.011 | -0.012 | t | 31075  | KGTMDSG<br>QTKR              | Mus<br>musculu<br>s              |
| 1 | 1.00 | 1 | 1 | 0.02  | 0.017  | 0.015  | 0.02   | 0.02   | t | 56079  | RTIGGSQA<br>QT               | Oryctola<br>gus<br>cuniculu<br>s |
| 1 | 1.00 | 1 | 1 | 0     | 0      | -0.02  | 0      | 0.002  | t | 11269  | ECTGLAW<br>EWWR              | Mus<br>musculu<br>s              |
| 1 | 1.00 | 1 | 1 | 0.03  | 0.028  | 0.021  | 0.03   | 0.03   | t | 100629 | VRKQYKR<br>DIQ               | Mus<br>musculu<br>s              |
| 1 | 1.00 | 1 | 1 | 0.02  | 0.022  | 0.007  | 0.021  | 0.022  | t | 110437 | TLHEYMLD<br>LQ               | Homo<br>sapiens                  |
| 1 | 1.00 | 1 | 1 | 0.02  | 0.017  | 0.011  | 0.02   | 0.019  | t | 115265 | GKDITADN<br>K                | Oryctola<br>gus<br>cuniculu<br>s |
| 1 | 1.00 | 1 | 1 | 0     | 0      | -0.005 | 0      | 0      | t | 23185  | GVTTSLSY<br>F                | Homo<br>sapiens                  |
| 1 | 1.00 | 1 | 1 | -0.01 | -0.013 | -0.023 | -0.01  | -0.008 | t | 96849  | SAETIF                       | Oryctola<br>gus<br>cuniculu<br>s |

|   |      |   |   |       |        |        |        |        |   |        |                             |                                  |
|---|------|---|---|-------|--------|--------|--------|--------|---|--------|-----------------------------|----------------------------------|
| 1 | 1.00 | 1 | 1 | -0.01 | -0.01  | -0.023 | -0.01  | -0.008 | t | 96849  | SAETIF                      | Mus<br>musculu<br>s              |
| 1 | 1.00 | 1 | 1 | -0.01 | -0.01  | -0.023 | -0.01  | -0.008 | t | 96849  | SAETIF                      | Mus<br>musculu<br>s              |
| 1 | 1.00 | 1 | 1 | 0.01  | 0.01   | 0.01   | 0.01   | 0.01   | t | 105937 | LPNIEADV                    | Oryctola<br>gus<br>cuniculu<br>s |
| 1 | 1.00 | 1 | 1 | 0.07  | 0.07   | 0.065  | 0.072  | 0.07   | t | 28505  | ISGDLKTQI<br>DQVEST         | Homo<br>sapiens                  |
| 1 | 1.00 | 1 | 1 | -0.02 | -0.018 | -0.028 | -0.017 | -0.018 | t | 110913 | KDIKANPE<br>NYFT            | Homo<br>sapiens                  |
| 1 | 1.00 | 1 | 1 | -0.02 | -0.017 | -0.029 | -0.02  | -0.02  | t | 100385 | PKTFQFIN<br>DQ              | Mus<br>musculu<br>s              |
| 1 | 1.00 | 1 | 1 | 0.02  | 0.022  | 0.016  | 0.02   | 0.019  | t | 65638  | TPLGPPDA<br>EYW             | Homo<br>sapiens                  |
| 1 | 1.00 | 1 | 1 | 0.01  | 0.008  | 0.008  | 0.013  | 0.011  | t | 99643  | RRVEIEVK                    | Mus<br>musculu<br>s              |
| 1 | 1.00 | 1 | 1 | 0.03  | 0.033  | 0.03   | 0.03   | 0.03   | t | 8355   | DGAVQPD<br>GG               | Mus<br>musculu<br>s              |
| 1 | 1.00 | 1 | 1 | 0.03  | 0.03   | 0.03   | 0.03   | 0.03   | t | 8355   | DGAVQPD<br>GG               | Oryctola<br>gus<br>cuniculu<br>s |
| 1 | 1.00 | 1 | 1 | 0.04  | 0.026  | 0.039  | 0.039  | 0.04   | t | 9802   | DPVIDLLQ                    | Macaca<br>mulatta                |
| 1 | 1.00 | 1 | 1 | -0.01 | -0.008 | -0.01  | -0.003 | -0.01  | t | 151795 | APDDRSYK<br>SQY             | Homo<br>sapiens                  |
| 1 | 1.00 | 1 | 1 | 0.02  | 0.022  | 0.018  | 0.027  | 0.019  | t | 118335 | EQLRILGEK<br>EAKLAQQS<br>QA | Homo<br>sapiens                  |
| 1 | 1.00 | 1 | 1 | 0.04  | 0.042  | 0.04   | 0.047  | 0.042  | t | 131048 | RQSDGQY<br>QM               | Homo<br>sapiens                  |

|   |      |   |   |       |        |        |        |        |   |        |                              |                                  |
|---|------|---|---|-------|--------|--------|--------|--------|---|--------|------------------------------|----------------------------------|
| 1 | 1.00 | 1 | 1 | 0.05  | 0.047  | 0.041  | 0.05   | 0.051  | t | 10336  | DTFNPVYP<br>YDTE             | Mus<br>musculu<br>s              |
| 1 | 1.00 | 1 | 1 | 0     | 0      | 0      | 0      | -0.003 | t | 110833 | EQFNWVS<br>RLANLTQG<br>EDQYY | Mus<br>musculu<br>s              |
| 1 | 1.00 | 1 | 1 | 0.02  | 0.02   | 0.02   | 0.02   | 0.02   | t | 60358  | SQAAPYIE<br>Q                | Homo<br>sapiens                  |
| 1 | 1.00 | 1 | 1 | 0.02  | 0.02   | 0.02   | 0.023  | 0.02   | t | 149026 | ANITQSS                      | Sus<br>scrofa                    |
| 1 | 1.00 | 1 | 1 | 0.01  | -0.003 | 0.005  | 0.01   | 0.01   | t | 19096  | GDRADGQ<br>PA                | Aotus<br>griseime<br>mbra        |
| 1 | 1.00 | 1 | 1 | 0.01  | -0.003 | 0.005  | 0.01   | 0.01   | t | 19096  | GDRADGQ<br>PA                | Aotus<br>griseime<br>mbra        |
| 1 | 1.00 | 1 | 1 | 0.01  | -0.003 | 0.005  | 0.01   | 0.01   | t | 19096  | GDRADGQ<br>PA                | Aotus<br>griseime<br>mbra        |
| 1 | 1.00 | 1 | 1 | -0.01 | -0.013 | -0.013 | -0.01  | -0.013 | t | 7208   | CTSPYDGK<br>YWSMYSR<br>L     | Oryctola<br>gus<br>cuniculu<br>s |
| 1 | 1.00 | 1 | 1 | -0.05 | -0.048 | -0.058 | -0.049 | -0.05  | t | 8216   | DEWWKVI<br>KKDVWNV<br>ISWVF  | Homo<br>sapiens                  |
| 1 | 1.00 | 1 | 1 | -0.02 | -0.02  | -0.02  | -0.02  | -0.022 | t | 78628  | DQKPPSR                      | Oryctola<br>gus<br>cuniculu<br>s |
| 1 | 1.00 | 1 | 1 | 0     | -0.002 | -0.009 | 0.001  | 0      | t | 155856 | SSWSDH                       | Mus<br>musculu<br>s              |
| 1 | 1.00 | 1 | 1 | 0.03  | 0.034  | 0.024  | 0.03   | 0.03   | t | 92786  | GDGNDIIT<br>DS               | Ovis<br>aries                    |
| 1 | 1.00 | 1 | 1 | -0.01 | -0.013 | -0.013 | -0.01  | -0.012 | t | 39916  | LTGISICNP<br>GSSLC           | Oryctola<br>gus<br>cuniculu<br>s |
| 1 | 1.00 | 1 | 1 | -0.01 | -0.013 | -0.013 | -0.01  | -0.012 | t | 39916  | LTGISICNP<br>GSSLC           | Oryctola<br>gus<br>cuniculu<br>s |
| 1 | 1.00 | 1 | 1 | 0.02  | 0.02   | 0.015  | 0.02   | 0.018  | t | 156903 | KNRGIKTF<br>SN               | Mus<br>musculu<br>s              |

|   |      |   |   |       |        |        |        |        |   |        |                  |                       |
|---|------|---|---|-------|--------|--------|--------|--------|---|--------|------------------|-----------------------|
| 1 | 1.00 | 1 | 1 | 0.01  | 0.008  | 0.005  | 0.011  | 0.011  | t | 29939  | KASAAC           | Homo sapiens          |
| 1 | 1.00 | 1 | 1 | -0.02 | -0.018 | -0.027 | -0.017 | -0.021 | t | 135902 | AVSAHGCL<br>FDRR | Homo sapiens          |
| 1 | 1.00 | 1 | 1 | -0.02 | -0.017 | -0.029 | -0.02  | -0.02  | t | 99892  | ALLHEHYV<br>YA   | Mus musculus          |
| 1 | 1.00 | 1 | 1 | 0.01  | 0.012  | 0.01   | 0.013  | 0.01   | t | 94685  | SICSNNPT<br>CWAJ | Homo sapiens          |
| 1 | 1.00 | 1 | 1 | 0     | -0.002 | -0.01  | 0.001  | 0.001  | t | 9474   | DNIGNANI<br>GFGN | Homo sapiens          |
| 1 | 1.00 | 1 | 1 | 0.01  | 0.01   | 0.01   | 0.01   | 0.008  | t | 21407  | GNDYEDR<br>YYREN | Mus musculus          |
| 1 | 1.00 | 1 | 1 | 0.01  | 0.013  | 0.01   | 0.01   | 0.008  | t | 21407  | GNDYEDR<br>YYREN | Mus musculus          |
| 1 | 1.00 | 1 | 1 | 0.03  | 0.033  | 0.038  | 0.03   | 0.027  | t | 79891  | KSADVESD<br>V    | Mus musculus          |
| 1 | 1.00 | 1 | 1 | 0.04  | 0.04   | 0.04   | 0.04   | 0.038  | t | 107107 | EAIQP            | Rattus norvegicus     |
| 1 | 1.00 | 1 | 1 | 0.03  | 0.026  | 0.02   | 0.033  | 0.03   | t | 48176  | PKYEQGG<br>NIV   | Oryctolagus cuniculus |
| 1 | 1.00 | 1 | 1 | 0.02  | 0.027  | 0.009  | 0.02   | 0.02   | t | 94621  | NPACGPK<br>YSC   | Capra hircus          |
| 1 | 1.00 | 1 | 1 | 0.03  | 0.028  | 0.031  | 0.029  | 0.03   | t | 35983  | LFSLNAPG<br>L    | Rattus norvegicus     |
| 1 | 1.00 | 1 | 1 | -0.04 | -0.04  | -0.045 | -0.04  | -0.041 | t | 26372  | IHFG             | Mus musculus          |
| 1 | 1.00 | 1 | 1 | 0.02  | 0.018  | 0.029  | 0.019  | 0.016  | t | 13675  | EPIVGAET<br>F    | Mus musculus          |

|   |      |   |   |       |        |        |        |        |   |        |                     |                                  |
|---|------|---|---|-------|--------|--------|--------|--------|---|--------|---------------------|----------------------------------|
| 1 | 1.00 | 1 | 1 | 0     | -0.007 | -0.006 | 0.007  | 0.002  | t | 133798 | DKIRGEG<br>MRYIIILD | Homo<br>sapiens                  |
| 1 | 1.00 | 1 | 1 | -0.01 | -0.008 | -0.007 | -0.009 | -0.01  | t | 34278  | KVYVGNY<br>DF       | Homo<br>sapiens                  |
| 1 | 1.00 | 1 | 1 | 0.01  | 0.012  | 0.003  | 0.011  | 0.009  | t | 19637  | GFTTNEPR<br>YNVFAE  | Homo<br>sapiens                  |
| 1 | 1.00 | 1 | 1 | 0.01  | 0.012  | 0.009  | 0.011  | 0.012  | t | 47426  | PESPFA              | Homo<br>sapiens                  |
| 1 | 1.00 | 1 | 1 | -0.02 | -0.02  | -0.007 | -0.012 | -0.023 | t | 98824  | IIAEKTKIP<br>A      | Homo<br>sapiens                  |
| 1 | 1.00 | 1 | 1 | -0.02 | -0.02  | -0.025 | -0.02  | -0.021 | t | 14447  | ETKRKDGD            | Mus<br>musculu<br>s              |
| 1 | 1.00 | 1 | 1 | -0.02 | -0.017 | -0.025 | -0.02  | -0.021 | t | 14447  | ETKRKDGD            | Equus<br>caballus                |
| 1 | 1.00 | 1 | 1 | 0     | 0      | -0.005 | -0.003 | -0.002 | t | 5385   | AVIRGKKG<br>SG      | Homo<br>sapiens                  |
| 1 | 1.00 | 1 | 1 | 0.01  | 0.01   | 0.01   | 0.01   | 0.01   | t | 135504 | VPGVGGL<br>G        | Oryctola<br>gus<br>cuniculu<br>s |
| 1 | 1.00 | 1 | 1 | 0.01  | 0.007  | 0.002  | 0.01   | 0.008  | t | 65492  | TPADPAAS<br>SSERG   | Oryctola<br>gus<br>cuniculu<br>s |
| 1 | 1.00 | 1 | 1 | 0.01  | 0.01   | 0.002  | 0.01   | 0.008  | t | 65492  | TPADPAAS<br>SSERG   | Mus<br>musculu<br>s              |
| 1 | 1.00 | 1 | 1 | 0     | -0.002 | -0.004 | -0.003 | 0      | t | 18953  | GDDPLL<br>N         | Anas<br>platyrhy<br>nchos        |
| 1 | 1.00 | 1 | 1 | 0.02  | 0.018  | 0.012  | 0.019  | 0.02   | t | 5311   | AVEVDPD<br>DVN      | Mus<br>musculu<br>s              |
| 1 | 1.00 | 1 | 1 | 0.03  | 0.03   | 0.031  | 0.03   | 0.03   | t | 41629  | MGSSYG              | Homo<br>sapiens                  |



|   |      |   |   |       |        |        |       |        |   |        |                    |                                  |
|---|------|---|---|-------|--------|--------|-------|--------|---|--------|--------------------|----------------------------------|
| 1 | 1.00 | 1 | 1 | 0.01  | 0.01   | 0.006  | 0.016 | 0.009  | t | 67069  | TVLGCALP<br>PTPQTP | Homo<br>sapiens                  |
| 1 | 1.00 | 1 | 1 | 0     | 0.008  | 0.011  | 0     | -0.008 | t | 24215  | HLGLMAM<br>DHLPW   | Gallus<br>gallus                 |
| 1 | 1.00 | 1 | 1 | 0.01  | 0.014  | -0.001 | 0.01  | 0.011  | t | 93326  | LSFSDSNL<br>KD     | Ovis<br>aries                    |
| 1 | 1.00 | 1 | 1 | 0     | 0.004  | 0      | 0.007 | 0.001  | t | 108074 | PQVYTLP            | Homo<br>sapiens                  |
| 1 | 1.00 | 1 | 1 | 0     | 0.002  | 0      | 0.007 | 0.001  | t | 108074 | PQVYTLP            | Homo<br>sapiens                  |
| 1 | 1.00 | 1 | 1 | -0.01 | -0.011 | -0.012 | -0.01 | -0.01  | t | 26222  | IGFK               | Mus<br>musculu<br>s              |
| 1 | 1.00 | 1 | 1 | 0     | 0      | 0      | 0     | 0      | t | 50102  | PYIEQGM<br>ML      | Homo<br>sapiens                  |
| 1 | 1.00 | 1 | 1 | -0.01 | -0.018 | -0.022 | -0.01 | -0.01  | t | 47131  | PDKILTYIA<br>ADHC  | Mus<br>musculu<br>s              |
| 1 | 1.00 | 1 | 1 | 0.03  | 0.032  | 0.028  | 0.027 | 0.028  | t | 43392  | NCSSYA             | Homo<br>sapiens                  |
| 1 | 1.00 | 1 | 1 | -0.04 | -0.04  | -0.047 | -0.04 | -0.041 | t | 95041  | SLAGKRE<br>MA      | Oryctola<br>gus<br>cuniculu<br>s |
| 1 | 1.00 | 1 | 1 | -0.04 | -0.042 | -0.047 | -0.04 | -0.041 | t | 95041  | SLAGKRE<br>MA      | Oryctola<br>gus<br>cuniculu<br>s |
| 1 | 1.00 | 1 | 1 | 0.02  | 0.022  | 0.013  | 0.021 | 0.021  | t | 1022   | AEKQKAAE<br>ATKVAE | Homo<br>sapiens                  |
| 1 | 1.00 | 1 | 1 | 0.02  | 0.02   | 0.025  | 0.02  | 0.02   | t | 127585 | ASFEPFSN           | Homo<br>sapiens                  |
| 1 | 1.00 | 1 | 1 | 0.02  | 0.022  | 0.02   | 0.023 | 0.018  | t | 151609 | DETPMRG<br>ETRKV   | Homo<br>sapiens                  |

|   |      |   |   |       |        |        |        |        |   |        |                     |                                  |
|---|------|---|---|-------|--------|--------|--------|--------|---|--------|---------------------|----------------------------------|
| 1 | 1.00 | 1 | 1 | 0     | -0.002 | -0.005 | 0.001  | 0      | t | 123380 | KLPGKF              | Homo sapiens                     |
| 1 | 1.00 | 1 | 1 | -0.06 | -0.06  | -0.07  | -0.06  | -0.061 | t | 63237  | TDSPRNPV<br>TR      | Oryctola<br>gus<br>cuniculu<br>s |
| 1 | 1.00 | 1 | 1 | -0.01 | -0.01  | -0.01  | -0.007 | -0.011 | t | 24105  | HITHYFVV<br>PSVS    | Homo sapiens                     |
| 1 | 1.00 | 1 | 1 | 0.01  | 0      | 0.003  | 0.007  | 0.01   | t | 57990  | SGAWYYV<br>PLG      | Homo sapiens                     |
| 1 | 1.00 | 1 | 1 | -0.01 | -0.013 | -0.013 | -0.01  | -0.01  | t | 48409  | PLLRTQF             | Oryctola<br>gus<br>cuniculu<br>s |
| 1 | 1.00 | 1 | 1 | 0.04  | 0.038  | 0.04   | 0.037  | 0.037  | t | 135864 | VNDIFERI            | Mus<br>musculu<br>s              |
| 1 | 1.00 | 1 | 1 | -0.01 | -0.006 | -0.01  | -0.003 | -0.01  | t | 103830 | CHAVKVG<br>NPSC     | Homo sapiens                     |
| 1 | 1.00 | 1 | 1 | 0.01  | 0.006  | -0.006 | 0.013  | 0.012  | t | 57911  | SFSSIPNGT<br>Y      | Oryctola<br>gus<br>cuniculu<br>s |
| 1 | 1.00 | 1 | 1 | 0.02  | 0.019  | 0.008  | 0.021  | 0.022  | t | 7901   | DEADRYFT<br>YEPP    | Bos<br>taurus                    |
| 1 | 1.00 | 1 | 1 | 0.08  | 0.078  | 0.081  | 0.083  | 0.08   | t | 142335 | YEQLNDSS<br>EEED    | Homo sapiens                     |
| 1 | 1.00 | 1 | 1 | 0     | -0.002 | -0.011 | -0.001 | 0      | t | 12216  | EGLKEVIN<br>DRYDMLN | Mus<br>musculu<br>s              |
| 1 | 1.00 | 1 | 1 | -0.05 | -0.052 | -0.06  | -0.047 | -0.05  | t | 72924  | WPAGAGR<br>R        | Anas<br>platyrhy<br>nchos        |
| 1 | 1.00 | 1 | 1 | -0.03 | -0.027 | -0.034 | -0.03  | -0.03  | t | 65653  | TPLQCTM             | Mus<br>musculu<br>s              |
| 1 | 1.00 | 1 | 1 | 0     | 0      | 0      | 0      | -0.004 | t | 106221 | AAVTPEER            | Mus<br>musculu<br>s              |

|   |      |   |   |       |        |        |        |        |   |        |                             |                                  |
|---|------|---|---|-------|--------|--------|--------|--------|---|--------|-----------------------------|----------------------------------|
| 1 | 1.00 | 1 | 1 | 0     | 0      | 0      | 0      | -0.004 | t | 116286 | CGKGLSAT<br>VTGGQKG<br>RGSR | Oryctola<br>gus<br>cuniculu<br>s |
| 1 | 1.00 | 1 | 1 | 0     | 0      | 0      | 0      | -0.004 | t | 28299  | IRGDTFAT<br>R               | Mus<br>musculu<br>s              |
| 1 | 1.00 | 1 | 1 | -0.01 | -0.008 | 0.005  | -0.013 | -0.019 | t | 45770  | NSARVGTS<br>SCRI            | Homo<br>sapiens                  |
| 1 | 1.00 | 1 | 1 | 0     | 0.004  | 0      | 0.001  | 0      | t | 5380   | AVILLMCA<br>VHPTLV          | Homo<br>sapiens                  |
| 1 | 1.00 | 1 | 1 | 0     | 0      | 0      | 0.009  | 0      | t | 119474 | KIRY                        | Homo<br>sapiens                  |
| 1 | 1.00 | 1 | 1 | -0.02 | -0.02  | -0.036 | -0.018 | -0.017 | t | 98976  | QYPLGQG<br>SFRPS            | Homo<br>sapiens                  |
| 1 | 1.00 | 1 | 1 | -0.03 | -0.032 | -0.027 | -0.031 | -0.03  | t | 122138 | LKKDV                       | Mus<br>musculu<br>s              |
| 1 | 1.00 | 1 | 1 | 0     | -0.004 | -0.004 | 0.003  | 0.002  | t | 106146 | TQFAGKDL                    | Oryctola<br>gus<br>cuniculu<br>s |
| 1 | 1.00 | 1 | 1 | 0.06  | 0.052  | 0.06   | 0.06   | 0.06   | t | 156756 | SGPSYTT                     | Mus<br>musculu<br>s              |
| 1 | 1.00 | 1 | 1 | 0     | 0      | 0      | 0      | -0.002 | t | 140247 | KAAESEIEK<br>LTTK           | Oryctola<br>gus<br>cuniculu<br>s |
| 1 | 1.00 | 1 | 1 | -0.02 | -0.016 | -0.02  | -0.013 | -0.02  | t | 123244 | GMIPPPGL                    | Homo<br>sapiens                  |
| 1 | 1.00 | 1 | 1 | 0.06  | 0.06   | 0.06   | 0.06   | 0.06   | t | 144898 | GQSRGQS<br>RG               | Homo<br>sapiens                  |
| 1 | 1.00 | 1 | 1 | -0.02 | -0.018 | -0.02  | -0.017 | -0.02  | t | 73298  | WYTTVPK<br>YVATQGYL         | Homo<br>sapiens                  |
| 1 | 1.00 | 1 | 1 | 0     | 0      | -0.003 | 0.003  | 0      | t | 32809  | KPNNDFH<br>FEVFN            | Homo<br>sapiens                  |

|   |      |   |   |       |        |        |        |        |   |        |                              |                                  |
|---|------|---|---|-------|--------|--------|--------|--------|---|--------|------------------------------|----------------------------------|
| 1 | 1.00 | 1 | 1 | 0.03  | 0.027  | 0.023  | 0.03   | 0.028  | t | 116974 | FKEQFLDG<br>DGW              | Oryctola<br>gus<br>cuniculu<br>s |
| 1 | 1.00 | 1 | 1 | -0.01 | -0.024 | -0.021 | -0.013 | -0.01  | t | 28607  | ISMDVNKS                     | Macaca<br>mulatta                |
| 1 | 1.00 | 1 | 1 | 0     | 0      | -0.008 | 0.006  | 0.002  | t | 72259  | WARPDYN<br>P                 | Homo<br>sapiens                  |
| 1 | 1.00 | 1 | 1 | -0.01 | -0.003 | -0.011 | -0.011 | -0.012 | t | 27720  | INPSPFAQ<br>TR               | Gallus<br>gallus                 |
| 1 | 1.00 | 1 | 1 | 0.01  | 0.012  | 0.01   | 0.017  | 0.01   | t | 107478 | KEYKCKV                      | Homo<br>sapiens                  |
| 1 | 1.00 | 1 | 1 | 0.01  | 0.014  | 0.01   | 0.017  | 0.01   | t | 107478 | KEYKCKV                      | Homo<br>sapiens                  |
| 1 | 1.00 | 1 | 1 | 0.04  | 0.04   | 0.04   | 0.04   | 0.039  | t | 143362 | ETPLMKE                      | Mus<br>musculu<br>s              |
| 1 | 1.00 | 1 | 1 | 0.04  | 0.04   | 0.04   | 0.049  | 0.042  | t | 134253 | VFFSGYTF<br>KHKMVYE<br>DTLTL | Homo<br>sapiens                  |
| 1 | 1.00 | 1 | 1 | 0.11  | 0.112  | 0.105  | 0.107  | 0.11   | t | 96171  | DEEDKEED<br>EE               | Homo<br>sapiens                  |
| 1 | 1.00 | 1 | 1 | 0.03  | 0.038  | 0.023  | 0.03   | 0.028  | t | 106495 | GYEVHHQ<br>KLVF              | Gallus<br>gallus                 |
| 1 | 1.00 | 1 | 1 | -0.01 | -0.014 | -0.005 | -0.007 | -0.012 | t | 95752  | RAGFITELS<br>EFI             | Oryctola<br>gus<br>cuniculu<br>s |
| 1 | 1.00 | 1 | 1 | 0.04  | 0.04   | 0.026  | 0.037  | 0.04   | t | 52043  | QQIPQQQ                      | Homo<br>sapiens                  |
| 1 | 1.00 | 1 | 1 | 0.03  | 0.03   | 0.022  | 0.026  | 0.03   | t | 110964 | PNLKLNN<br>GTDYK             | Homo<br>sapiens                  |
| 1 | 1.00 | 1 | 1 | 0.02  | 0.02   | 0.02   | 0.02   | 0.02   | t | 140916 | VSYGEEKP<br>AVLG             | Oryctola<br>gus<br>cuniculu<br>s |

|   |      |   |   |       |        |        |        |       |   |        |                             |                          |
|---|------|---|---|-------|--------|--------|--------|-------|---|--------|-----------------------------|--------------------------|
| 1 | 1.00 | 1 | 1 | 0.02  | 0.02   | 0.003  | 0.02   | 0.022 | t | 114125 | HYGSLPQK<br>SQRSQDE<br>NPV  | Rattus<br>norvegicus     |
| 1 | 1.00 | 1 | 1 | 0.03  | 0.03   | 0.017  | 0.03   | 0.03  | t | 5609   | AVVYNNE<br>GTNVELG          | Mus<br>musculus          |
| 1 | 1.00 | 1 | 1 | 0.02  | 0.02   | 0.021  | 0.02   | 0.02  | t | 53145  | RALEDGIN<br>FA              | Homo<br>sapiens          |
| 1 | 1.00 | 1 | 1 | -0.03 | -0.03  | -0.035 | -0.03  | -0.03 | t | 117601 | PKKKRKV                     | Homo<br>sapiens          |
| 1 | 1.00 | 1 | 1 | -0.03 | -0.03  | -0.035 | -0.03  | -0.03 | t | 117601 | PKKKRKV                     | Homo<br>sapiens          |
| 1 | 1.00 | 1 | 1 | 0.03  | 0.03   | 0.03   | 0.03   | 0.03  | t | 105715 | DLESIKGT                    | Oryctolagus<br>cuniculus |
| 1 | 1.00 | 1 | 1 | 0.03  | 0.023  | 0.03   | 0.03   | 0.031 | t | 114008 | VSLVEETSF<br>I              | Oryctolagus<br>cuniculus |
| 1 | 1.00 | 1 | 1 | -0.02 | -0.018 | -0.027 | -0.017 | -0.02 | t | 138807 | RLQGISPKI                   | Homo<br>sapiens          |
| 1 | 1.00 | 1 | 1 | 0.04  | 0.042  | 0.037  | 0.043  | 0.04  | t | 107800 | DSRGNPT<br>VE               | Homo<br>sapiens          |
| 1 | 1.00 | 1 | 1 | 0.01  | 0.008  | 0      | 0.009  | 0.01  | t | 37354  | LLGNQSL                     | Anas<br>platyrhynchos    |
| 1 | 1.00 | 1 | 1 | 0.02  | 0.016  | 0.014  | 0.019  | 0.018 | t | 57184  | SDEVKRHT<br>YNLTIA          | Oryctolagus<br>cuniculus |
| 1 | 1.00 | 1 | 1 | 0     | -0.002 | 0      | -0.001 | 0     | t | 64418  | TIPPSSPP                    | Anas<br>platyrhynchos    |
| 1 | 1.00 | 1 | 1 | 0.02  | 0.02   | 0.015  | 0.02   | 0.021 | t | 114224 | PQDENPV<br>VHF              | Mus<br>musculus          |
| 1 | 1.00 | 1 | 1 | 0.02  | 0.022  | 0.016  | 0.027  | 0.02  | t | 11035  | EAESISSE<br>EIVPNSVE<br>QKH | Homo<br>sapiens          |
| 1 | 1.00 | 1 | 1 | 0.02  | 0.018  | 0.014  | 0.019  | 0.02  | t | 29703  | IYTINDKILS                  | Mus<br>musculus          |

|   |      |   |   |       |        |        |        |        |   |        |                             |                                  |
|---|------|---|---|-------|--------|--------|--------|--------|---|--------|-----------------------------|----------------------------------|
| 1 | 1.00 | 1 | 1 | 0     | 0.002  | 0.005  | 0.007  | 0      | t | 134073 | GRTCPKPD<br>DLP             | Homo<br>sapiens                  |
| 1 | 1.00 | 1 | 1 | -0.04 | -0.038 | -0.04  | -0.033 | -0.04  | t | 134764 | PTPGPSRR<br>GP              | Homo<br>sapiens                  |
| 1 | 1.00 | 1 | 1 | 0.01  | 0.003  | 0.003  | 0.01   | 0.01   | t | 159296 | SFSKPSNS<br>WFPVEGP         | Oryctola<br>gus<br>cuniculu<br>s |
| 1 | 1.00 | 1 | 1 | -0.01 | -0.012 | -0.014 | -0.013 | -0.01  | t | 1118   | AEPLLSC                     | Mus<br>musculu<br>s              |
| 1 | 1.00 | 1 | 1 | -0.01 | -0.01  | -0.01  | -0.01  | -0.012 | t | 140460 | EKLKHS                      | Mus<br>musculu<br>s              |
| 1 | 1.00 | 1 | 1 | 0.03  | 0.03   | 0.03   | 0.03   | 0.03   | t | 32683  | KPDYEPPV                    | Homo<br>sapiens                  |
| 1 | 1.00 | 1 | 1 | -0.02 | -0.018 | -0.031 | -0.017 | -0.02  | t | 110602 | GLKAKPKF<br>TLGKRKAT<br>PTT | Homo<br>sapiens                  |
| 1 | 1.00 | 1 | 1 | -0.03 | -0.032 | -0.03  | -0.023 | -0.03  | t | 123643 | PYMPPPG<br>M                | Homo<br>sapiens                  |
| 1 | 1.00 | 1 | 1 | 0.07  | 0.068  | 0.056  | 0.067  | 0.07   | t | 53957  | RGQSATA<br>TYTNLQNS<br>YYNG | Mus<br>musculu<br>s              |
| 1 | 1.00 | 1 | 1 | 0     | 0.003  | 0      | 0.007  | 0      | t | 118059 | PPPGMRP                     | Mus<br>musculu<br>s              |
| 1 | 1.00 | 1 | 1 | 0     | -0.002 | 0      | 0.003  | -0.003 | t | 137395 | EESEDEKR<br>RWGQRD<br>N     | Mus<br>musculu<br>s              |
| 1 | 1.00 | 1 | 1 | 0     | -0.004 | 0      | 0.003  | -0.003 | t | 111682 | QNFGFLFYP<br>NKQPVYQ        | Oryctola<br>gus<br>cuniculu<br>s |
| 1 | 1.00 | 1 | 1 | 0     | -0.004 | 0      | 0.003  | -0.003 | t | 111970 | YNQNLIRH<br>VGGGTPR         | Oryctola<br>gus<br>cuniculu<br>s |
| 1 | 1.00 | 1 | 1 | 0     | -0.004 | 0      | 0.003  | -0.003 | t | 111593 | NNIARMR<br>LYDPNQA<br>A     | Oryctola<br>gus<br>cuniculu<br>s |

|   |      |   |   |       |        |        |        |        |   |        |                              |                                  |
|---|------|---|---|-------|--------|--------|--------|--------|---|--------|------------------------------|----------------------------------|
| 1 | 1.00 | 1 | 1 | 0     | -0.004 | 0      | 0.003  | -0.003 | t | 94838  | GTSSCRLV<br>P                | Oryctola<br>gus<br>cuniculu<br>s |
| 1 | 1.00 | 1 | 1 | 0     | -0.002 | 0      | 0.003  | -0.003 | t | 56807  | SAHGTSTG<br>VRGP             | Mus<br>musculu<br>s              |
| 1 | 1.00 | 1 | 1 | 0     | -0.002 | 0      | 0.003  | -0.003 | t | 1367   | AFNQFGP<br>NAGQR             | Mus<br>musculu<br>s              |
| 1 | 1.00 | 1 | 1 | 0.02  | 0.02   | 0.02   | 0.02   | 0.018  | t | 122569 | SFQDENFV<br>FEEF             | Rattus<br>norvegic<br>us         |
| 1 | 1.00 | 1 | 1 | 0.02  | 0.018  | 0.015  | 0.023  | 0.02   | t | 125565 | STDDYASF<br>SRAL             | Mus<br>musculu<br>s              |
| 1 | 1.00 | 1 | 1 | 0     | -0.002 | 0.001  | -0.001 | 0      | t | 56788  | SAFVFPTK<br>D                | Mus<br>musculu<br>s              |
| 1 | 1.00 | 1 | 1 | -0.02 | -0.02  | -0.033 | -0.023 | -0.02  | t | 70490  | VPTAVYFS<br>EK               | Homo<br>sapiens                  |
| 1 | 1.00 | 1 | 1 | -0.01 | -0.01  | -0.021 | -0.01  | -0.01  | t | 14210  | ESMAGKR<br>EMV               | Mus<br>musculu<br>s              |
| 1 | 1.00 | 1 | 1 | 0.02  | 0.018  | 0.022  | 0.02   | 0.019  | t | 112123 | GERGAAGI<br>AGPK             | Mus<br>musculu<br>s              |
| 1 | 1.00 | 1 | 1 | 0.01  | 0.01   | -0.002 | 0.01   | 0.01   | t | 120839 | NLTEFQHA<br>FS               | Mus<br>musculu<br>s              |
| 1 | 1.00 | 1 | 1 | 0.03  | 0.033  | 0.023  | 0.03   | 0.032  | t | 113139 | QSYKFIPAL<br>E               | Mus<br>musculu<br>s              |
| 1 | 1.00 | 1 | 1 | -0.06 | -0.059 | -0.071 | -0.06  | -0.061 | t | 11370  | EDKLADYK<br>RRMADA           | Myodes<br>glareolu<br>s          |
| 1 | 1.00 | 1 | 1 | 0.04  | 0.025  | 0.032  | 0.039  | 0.04   | t | 12125  | EGAPPA                       | Marmot<br>a monax                |
| 1 | 1.00 | 1 | 1 | 0.01  | 0.014  | -0.003 | 0.01   | 0.01   | t | 10551  | DVDGINY<br>WTKAITG<br>GGEFTD | Ovis<br>aries                    |
| 1 | 1.00 | 1 | 1 | 0.01  | 0.007  | -0.003 | 0.01   | 0.01   | t | 10551  | DVDGINY<br>WTKAITG<br>GGEFTD | Oryctola<br>gus<br>cuniculu<br>s |

|   |      |   |   |       |        |        |        |        |   |        |                              |                                  |
|---|------|---|---|-------|--------|--------|--------|--------|---|--------|------------------------------|----------------------------------|
| 1 | 1.00 | 1 | 1 | -0.01 | -0.006 | -0.019 | -0.01  | -0.011 | t | 113660 | NIPLVSGP<br>DIPINITDQ<br>APS | Cavia<br>porcellu<br>s           |
| 1 | 1.00 | 1 | 1 | -0.01 | -0.008 | -0.015 | -0.007 | -0.01  | t | 48828  | PPLPPV                       | Homo<br>sapiens                  |
| 1 | 1.00 | 1 | 1 | 0.03  | 0.033  | 0.03   | 0.03   | 0.03   | t | 131487 | IPDRFSG                      | Mus<br>musculu<br>s              |
| 1 | 1.00 | 1 | 1 | 0     | -0.002 | 0      | 0.001  | 0      | t | 49296  | PSAPPLPH<br>VV               | Homo<br>sapiens                  |
| 1 | 1.00 | 1 | 1 | -0.02 | -0.018 | -0.027 | -0.017 | -0.02  | t | 138807 | RLQGISPKE                    | Homo<br>sapiens                  |
| 1 | 1.00 | 1 | 1 | -0.01 | -0.01  | -0.014 | -0.013 | -0.012 | t | 14609  | ETYKFIPSL<br>EAA             | Homo<br>sapiens                  |
| 1 | 1.00 | 1 | 1 | 0.03  | 0.029  | 0.022  | 0.031  | 0.03   | t | 62967  | TAQAAPV<br>QEG               | Homo<br>sapiens                  |
| 1 | 1.00 | 1 | 1 | 0     | 0      | 0      | 0.004  | -0.002 | t | 118185 | TSQFTGLK<br>C                | Homo<br>sapiens                  |
| 1 | 1.00 | 1 | 1 | 0.01  | 0.01   | 0.01   | 0.01   | 0.008  | t | 21868  | GQGGSHS<br>QWNKP             | Oryctola<br>gus<br>cuniculu<br>s |
| 1 | 1.00 | 1 | 1 | 0.01  | 0.01   | 0      | 0.01   | 0.011  | t | 50609  | QEGVQQE<br>GA                | Mus<br>musculu<br>s              |
| 1 | 1.00 | 1 | 1 | 0     | -0.005 | -0.006 | 0      | -0.002 | t | 71545  | VTV                          | Bos<br>taurus                    |
| 1 | 1.00 | 1 | 1 | 0     | 0      | 0      | 0.003  | 0      | t | 54431  | RKTKRNTN                     | Homo<br>sapiens                  |
| 1 | 1.00 | 1 | 1 | 0.03  | 0.03   | 0.021  | 0.03   | 0.03   | t | 17531  | FQSFPAGE<br>PSNSKLSG<br>FFQS | Homo<br>sapiens                  |
| 1 | 1.00 | 1 | 1 | 0     | 0.002  | 0      | 0.006  | -0.001 | t | 3274   | ANETIYNT<br>TLKYGDV          | MD                               |
| 1 | 1.00 | 1 | 1 | 0.02  | 0.02   | 0.023  | 0.02   | 0.015  | t | 19617  | GFSGNMV<br>ETEDTKEP          | Mus<br>musculu<br>s              |



|   |      |   |   |       |        |        |        |        |   |        |                              |                                  |
|---|------|---|---|-------|--------|--------|--------|--------|---|--------|------------------------------|----------------------------------|
| 1 | 1.00 | 1 | 1 | 0.02  | 0.02   | 0.023  | 0.02   | 0.015  | t | 19617  | GFSGNMV<br>ETEDTKEP          | Mus<br>musculu<br>s              |
| 1 | 1.00 | 1 | 1 | 0     | 0      | -0.013 | 0      | 0      | t | 158923 | KSCTWPET<br>HTLWGDA<br>V     | Mus<br>musculu<br>s              |
| 1 | 1.00 | 1 | 1 | -0.02 | -0.014 | -0.026 | -0.02  | -0.02  | t | 123437 | LKMWSDF<br>LG                | Ovis<br>aries                    |
| 1 | 1.00 | 1 | 1 | 0.02  | 0.017  | 0.008  | 0.02   | 0.02   | t | 32     | AAAETGV<br>GVIKSIAP          | Oryctola<br>gus<br>cuniculu<br>s |
| 1 | 1.00 | 1 | 1 | 0.03  | 0.032  | 0.032  | 0.03   | 0.027  | t | 118577 | RCPAKPEE<br>EGMMINI          | Homo<br>sapiens                  |
| 1 | 1.00 | 1 | 1 | 0     | 0      | 0      | 0      | -0.002 | t | 15205  | FAKY                         | Mus<br>musculu<br>s              |
| 1 | 1.00 | 1 | 1 | -0.02 | -0.034 | -0.026 | -0.021 | -0.02  | t | 33661  | KTFESYRV                     | Macaca<br>mulatta                |
| 1 | 1.00 | 1 | 1 | -0.02 | -0.02  | -0.02  | -0.013 | -0.02  | t | 135993 | SGGLRLLL<br>CLLL             | Homo<br>sapiens                  |
| 1 | 1.00 | 1 | 1 | 0.07  | 0.07   | 0.07   | 0.073  | 0.07   | t | 149035 | EGSGTTK                      | Sus<br>scrofa                    |
| 1 | 1.00 | 1 | 1 | -0.02 | -0.016 | -0.03  | -0.019 | -0.02  | t | 12388  | EIAKTLLK                     | Homo<br>sapiens                  |
| 1 | 1.00 | 1 | 1 | 0     | -0.003 | 0.002  | 0      | -0.001 | t | 38747  | LPVCPL                       | Oryctola<br>gus<br>cuniculu<br>s |
| 1 | 1.00 | 1 | 1 | -0.01 | -0.014 | -0.011 | -0.011 | -0.014 | t | 1257   | AFASNRTF<br>DITVSGLG<br>TAPK | Oryctola<br>gus<br>cuniculu<br>s |
| 1 | 1.00 | 1 | 1 | -0.02 | -0.018 | -0.02  | -0.019 | -0.022 | t | 96102  | APPLLPH                      | Homo<br>sapiens                  |
| 1 | 1.00 | 1 | 1 | -0.01 | -0.012 | -0.02  | -0.007 | -0.009 | t | 69183  | VKAVTTLL<br>KA               | Mus<br>musculu<br>s              |

|   |      |   |   |       |        |        |        |        |   |        |                              |                                  |
|---|------|---|---|-------|--------|--------|--------|--------|---|--------|------------------------------|----------------------------------|
| 1 | 1.00 | 1 | 1 | -0.02 | -0.024 | -0.026 | -0.017 | -0.021 | t | 7558   | DAKDGKEI<br>DTKHLPS<br>T C   | Oryctola<br>gus<br>cuniculu<br>s |
| 1 | 1.00 | 1 | 1 | 0     | 0.004  | 0      | 0      | -0.003 | t | 25645  | IDPRGKM<br>V                 | MD                               |
| 1 | 1.00 | 1 | 1 | 0.02  | 0.018  | 0.02   | 0.017  | 0.018  | t | 69025  | VILFVVIVG                    | Mus<br>musculu<br>s              |
| 1 | 1.00 | 1 | 1 | 0.04  | 0.04   | 0.033  | 0.04   | 0.039  | t | 57747  | SFEEDTEK<br>DK               | Oryctola<br>gus<br>cuniculu<br>s |
| 1 | 1.00 | 1 | 1 | 0.04  | 0.04   | 0.033  | 0.04   | 0.039  | t | 57747  | SFEEDTEK<br>DK               | Oryctola<br>gus<br>cuniculu<br>s |
| 1 | 1.00 | 1 | 1 | -0.01 | -0.007 | -0.019 | -0.01  | -0.01  | t | 100288 | LSKINQPY<br>QK               | Mus<br>musculu<br>s              |
| 1 | 1.00 | 1 | 1 | -0.02 | -0.013 | -0.009 | -0.02  | -0.024 | t | 141052 | LRDIFAW<br>E P               | Ovis<br>aries                    |
| 1 | 1.00 | 1 | 1 | 0.04  | 0.04   | 0.031  | 0.04   | 0.04   | t | 135941 | ITTQECAN<br>VVVG             | Homo<br>sapiens                  |
| 1 | 1.00 | 1 | 1 | 0.02  | 0.018  | 0.013  | 0.02   | 0.022  | t | 45303  | NPASTTNK<br>DK               | Mus<br>musculu<br>s              |
| 1 | 1.00 | 1 | 1 | 0.01  | 0.01   | 0.01   | 0.013  | 0.012  | t | 45392  | NPLLVE<br>T W                | Homo<br>sapiens                  |
| 1 | 1.00 | 1 | 1 | 0     | 0      | 0      | 0.008  | 0      | t | 38810  | LQAMRKY<br>SPFRNGY<br>MEPTLG | Homo<br>sapiens                  |
| 1 | 1.00 | 1 | 1 | 0     | 0      | 0      | 0.008  | 0      | t | 47984  | PISLLFNEK<br>EADDNDH<br>EPQI | Homo<br>sapiens                  |
| 1 | 1.00 | 1 | 1 | 0     | 0      | 0      | 0.008  | 0      | t | 60062  | SPGGLEPP<br>SEKHFRET<br>EV   | Homo<br>sapiens                  |

|   |      |   |   |       |        |        |        |        |   |        |                               |                                  |
|---|------|---|---|-------|--------|--------|--------|--------|---|--------|-------------------------------|----------------------------------|
| 1 | 1.00 | 1 | 1 | 0     | 0      | 0      | 0.008  | 0      | t | 23722  | HEPQISPG<br>GLEPPSEK<br>HFRE  | Homo<br>sapiens                  |
| 1 | 1.00 | 1 | 1 | 0.02  | 0.018  | 0.008  | 0.021  | 0.023  | t | 70384  | VPNLQGV<br>PESPFSRT           | Homo<br>sapiens                  |
| 1 | 1.00 | 1 | 1 | -0.03 | -0.026 | -0.041 | -0.027 | -0.03  | t | 18053  | FTQCSTMN<br>VVSRTLFR<br>KSPIY | Homo<br>sapiens                  |
| 1 | 1.00 | 1 | 1 | 0.02  | 0.02   | 0.02   | 0.02   | 0.018  | t | 78703  | KKKKTDEA<br>QP                | Mus<br>musculu<br>s              |
| 1 | 1.00 | 1 | 1 | 0.01  | 0.01   | 0.005  | 0.01   | 0.01   | t | 134087 | IGTLCADA<br>R                 | Oryctola<br>gus<br>cuniculu<br>s |
| 1 | 1.00 | 1 | 1 | 0.01  | 0.01   | 0.01   | 0.01   | 0.008  | t | 6455   | CITQYERES<br>QAYY             | Mus<br>musculu<br>s              |
| 1 | 1.00 | 1 | 1 | 0.02  | 0.02   | 0.03   | 0.02   | 0.017  | t | 26024  | IEYKVQFA<br>TK                | Mus<br>musculu<br>s              |
| 1 | 1.00 | 1 | 1 | 0.02  | 0.02   | 0.012  | 0.02   | 0.02   | t | 19269  | GEGAPPA<br>KRARTDQ<br>ME      | Homo<br>sapiens                  |
| 1 | 1.00 | 1 | 1 | -0.01 | -0.008 | -0.007 | -0.009 | -0.01  | t | 59112  | SLFTPGP                       | Homo<br>sapiens                  |
| 1 | 1.00 | 1 | 1 | 0.03  | 0.03   | 0.022  | 0.03   | 0.03   | t | 106302 | CDIKTTLPP<br>ITA              | Homo<br>sapiens                  |
| 1 | 1.00 | 1 | 1 | -0.02 | -0.024 | -0.019 | -0.021 | -0.022 | t | 44276  | NILISLTDL<br>EIW              | Oryctola<br>gus<br>cuniculu<br>s |
| 1 | 1.00 | 1 | 1 | 0.02  | 0.022  | 0.013  | 0.021  | 0.019  | t | 137828 | DVLLAGN<br>AEADR              | Homo<br>sapiens                  |
| 1 | 1.00 | 1 | 1 | 0.02  | 0.01   | 0.013  | 0.021  | 0.019  | t | 137828 | DVLLAGN<br>AEADR              | Homo<br>sapiens                  |
| 1 | 1.00 | 1 | 1 | 0.02  | 0.02   | 0.009  | 0.02   | 0.021  | t | 125176 | NNSTGDFE<br>L                 | Mus<br>musculu<br>s              |

|   |      |   |   |       |        |        |        |        |   |        |                              |                                  |
|---|------|---|---|-------|--------|--------|--------|--------|---|--------|------------------------------|----------------------------------|
| 1 | 1.00 | 1 | 1 | -0.01 | -0.008 | -0.014 | -0.002 | -0.011 | t | 1219   | AEVLKDAI<br>KDLVMTK<br>PAPTC | Homo<br>sapiens                  |
| 1 | 1.00 | 1 | 1 | 0.05  | 0.05   | 0.05   | 0.056  | 0.05   | t | 118533 | NEEAGDG<br>TTTATV            | Homo<br>sapiens                  |
| 1 | 1.00 | 1 | 1 | 0     | -0.002 | 0      | -0.001 | 0      | t | 46969  | PATIGDYT<br>DF               | Mus<br>musculu<br>s              |
| 1 | 1.00 | 1 | 1 | -0.01 | -0.008 | -0.015 | -0.01  | -0.008 | t | 21055  | GLPAA                        | Homo<br>sapiens                  |
| 1 | 1.00 | 1 | 1 | 0     | -0.002 | 0      | 0.001  | 0      | t | 49296  | PSAPPLPH<br>VV               | Homo<br>sapiens                  |
| 1 | 1.00 | 1 | 1 | 0.06  | 0.06   | 0.06   | 0.063  | 0.06   | t | 149102 | SGPNATQ                      | Sus<br>scrofa                    |
| 1 | 1.00 | 1 | 1 | -0.01 | -0.008 | -0.017 | -0.011 | -0.01  | t | 135804 | YTNIFLKF                     | Homo<br>sapiens                  |
| 1 | 1.00 | 1 | 1 | 0.04  | 0.033  | 0.04   | 0.04   | 0.04   | t | 113894 | STIDPAEEI<br>E               | Oryctola<br>gus<br>cuniculu<br>s |
| 1 | 1.00 | 1 | 1 | -0.02 | -0.02  | -0.02  | -0.02  | -0.023 | t | 106976 | VPTQLYNL<br>YPPL             | Mus<br>musculu<br>s              |
| 1 | 1.00 | 1 | 1 | 0.02  | 0.018  | 0.02   | 0.019  | 0.02   | t | 46353  | NVDPN                        | Mus<br>musculu<br>s              |
| 1 | 1.00 | 1 | 1 | 0     | 0      | 0      | 0.004  | -0.002 | t | 118381 | GKTCPKKI<br>PKGSKNT          | Homo<br>sapiens                  |
| 1 | 1.00 | 1 | 1 | 0     | 0      | 0      | 0.004  | -0.002 | t | 117246 | VTWEVLE<br>GEVEKEAL<br>KKI   | Homo<br>sapiens                  |
| 1 | 1.00 | 1 | 1 | 0     | 0.002  | 0      | 0      | 0      | t | 69125  | VITGTI                       | Homo<br>sapiens                  |
| 1 | 1.00 | 1 | 1 | 0     | -0.007 | 0      | 0      | 0      | t | 69125  | VITGTI                       | Homo<br>sapiens                  |
| 1 | 1.00 | 1 | 1 | 0.01  | 0.01   | 0.01   | 0.013  | 0.009  | t | 42696  | MSTNPKP<br>QRKTKRNT          | Homo<br>sapiens                  |

|   |      |   |   |       |        |        |        |        |   |        |                          |                         |
|---|------|---|---|-------|--------|--------|--------|--------|---|--------|--------------------------|-------------------------|
| 1 | 1.00 | 1 | 1 | 0     | 0.002  | -0.007 | -0.003 | -0.002 | t | 118387 | GPKGRTVII<br>EQSW        | Homo<br>sapiens         |
| 1 | 1.00 | 1 | 1 | -0.06 | -0.056 | -0.06  | -0.053 | -0.062 | t | 122748 | EHRMTW<br>DPAQPPR        | Homo<br>sapiens         |
| 1 | 1.00 | 1 | 1 | 0.02  | 0.022  | 0.023  | 0.021  | 0.022  | t | 45033  | NMTVM                    | Homo<br>sapiens         |
| 1 | 1.00 | 1 | 1 | -0.01 | -0.01  | -0.01  | -0.01  | -0.013 | t | 3399   | ANRAVKP<br>TGSAAIL       | Homo<br>sapiens         |
| 1 | 1.00 | 1 | 1 | 0.02  | 0.018  | 0.02   | 0.027  | 0.02   | t | 122996 | AAFQQGKI<br>PP           | Homo<br>sapiens         |
| 1 | 1.00 | 1 | 1 | 0     | -0.01  | -0.007 | 0.001  | -0.001 | t | 137892 | HGHGAFR<br>QQFQY         | Homo<br>sapiens         |
| 1 | 1.00 | 1 | 1 | 0     | 0.002  | -0.007 | 0.001  | -0.001 | t | 137892 | HGHGAFR<br>QQFQY         | Homo<br>sapiens         |
| 1 | 1.00 | 1 | 1 | 0.01  | 0.009  | 0.01   | 0.008  | 0.008  | t | 65796  | TPVCQFD<br>GNTIS         | Myodes<br>glareolu<br>s |
| 1 | 1.00 | 1 | 1 | 0.02  | 0.02   | 0.015  | 0.027  | 0.021  | t | 119749 | ALQEACEA<br>YLVGLF       | Mus<br>musculu<br>s     |
| 1 | 1.00 | 1 | 1 | 0.03  | 0.032  | 0.032  | 0.037  | 0.03   | t | 125320 | YDGPR                    | Homo<br>sapiens         |
| 1 | 1.00 | 1 | 1 | 0     | 0.005  | -0.004 | 0.003  | 0      | t | 77801  | SVKKCLFE<br>KC           | Homo<br>sapiens         |
| 1 | 1.00 | 1 | 1 | 0.02  | 0.02   | 0.02   | 0.02   | 0.02   | t | 60358  | SQAAPYIE<br>Q            | Homo<br>sapiens         |
| 1 | 1.00 | 1 | 1 | 0.01  | 0.01   | 0.01   | 0.01   | 0.007  | t | 70389  | VPNLRGDL<br>QVLAQKV<br>A | Cavia<br>porcellu<br>s  |
| 1 | 1.00 | 1 | 1 | 0.01  | 0.01   | 0.01   | 0.01   | 0.007  | t | 70389  | VPNLRGDL<br>QVLAQKV<br>A | Cavia<br>porcellu<br>s  |

|   |      |   |   |       |        |        |        |        |   |        |                              |                       |
|---|------|---|---|-------|--------|--------|--------|--------|---|--------|------------------------------|-----------------------|
| 1 | 1.00 | 1 | 1 | 0     | 0.004  | -0.012 | 0.001  | 0      | t | 55706  | RRRAGRCP                     | Homo sapiens          |
| 1 | 1.00 | 1 | 1 | -0.01 | -0.008 | -0.004 | -0.009 | -0.01  | t | 744    | ADPPFS                       | Homo sapiens          |
| 1 | 1.00 | 1 | 1 | -0.06 | -0.063 | -0.065 | -0.06  | -0.063 | t | 132846 | KAKRLHLS<br>PVRLAE           | Oryctolagus cuniculus |
| 1 | 1.00 | 1 | 1 | 0.04  | 0.038  | 0.045  | 0.043  | 0.04   | t | 138765 | EEIKMDIS<br>KLNA             | Mus musculus          |
| 1 | 1.00 | 1 | 1 | 0     | 0      | 0      | 0      | -0.004 | t | 125212 | QHWSYGL<br>RPGQHWS<br>YGLRPG | Sus scrofa            |
| 1 | 1.00 | 1 | 1 | 0.08  | 0.08   | 0.08   | 0.077  | 0.078  | t | 135570 | LFDASDSS<br>S                | Oryctolagus cuniculus |
| 1 | 1.00 | 1 | 1 | 0.03  | 0.03   | 0.03   | 0.03   | 0.031  | t | 115342 | LTDYKKY<br>LL                | Homo sapiens          |
| 1 | 1.00 | 1 | 1 | 0     | 0.004  | -0.009 | 0      | 0      | t | 112443 | ACQKHTP<br>PAP               | Cavia porcellus       |
| 1 | 1.00 | 1 | 1 | 0     | 0.004  | -0.009 | 0      | 0      | t | 112443 | ACQKHTP<br>PAP               | Cavia porcellus       |
| 1 | 1.00 | 1 | 1 | 0.04  | 0.038  | 0.038  | 0.037  | 0.04   | t | 38463  | LPET                         | Mus musculus          |
| 1 | 1.00 | 1 | 1 | 0     | 0      | 0      | 0      | -0.004 | t | 21408  | GNDYEDR<br>YYRENMY<br>RYPNQ  | Mus musculus          |
| 1 | 1.00 | 1 | 1 | 0.02  | 0.022  | 0.013  | 0.021  | 0.02   | t | 151032 | LYQNADTY<br>VFVGSSR          | Homo sapiens          |
| 1 | 1.00 | 1 | 1 | 0     | -0.002 | -0.013 | -0.001 | 0      | t | 65514  | TPAYYTKD<br>TNNNLTLV         | Mus musculus          |
| 1 | 1.00 | 1 | 1 | 0.06  | 0.062  | 0.055  | 0.057  | 0.058  | t | 98682  | AEPEQSLA<br>CQ               | Homo sapiens          |
| 1 | 1.00 | 1 | 1 | 0.01  | 0.01   | 0.01   | 0.013  | 0.01   | t | 149028 | AVTNATQ                      | Sus scrofa            |

|   |      |   |   |       |        |        |        |        |   |        |                              |                                  |
|---|------|---|---|-------|--------|--------|--------|--------|---|--------|------------------------------|----------------------------------|
| 1 | 1.00 | 1 | 1 | 0.05  | 0.054  | 0.042  | 0.051  | 0.05   | t | 3893   | APVQEGV<br>QQE               | Homo<br>sapiens                  |
| 1 | 1.00 | 1 | 1 | 0.05  | 0.052  | 0.042  | 0.051  | 0.05   | t | 3893   | APVQEGV<br>QQE               | Homo<br>sapiens                  |
| 1 | 1.00 | 1 | 1 | 0.04  | 0.04   | 0.04   | 0.04   | 0.041  | t | 57504  | SEKSEEIN                     | Oryctola<br>gus<br>cuniculu<br>s |
| 1 | 1.00 | 1 | 1 | -0.01 | -0.008 | -0.01  | -0.003 | -0.01  | t | 107660 | VLHQNWL                      | Homo<br>sapiens                  |
| 1 | 1.00 | 1 | 1 | 0     | 0.002  | -0.014 | 0.001  | 0      | t | 18025  | FTNKLKEK<br>HTDLG            | Homo<br>sapiens                  |
| 1 | 1.00 | 1 | 1 | -0.01 | -0.012 | -0.012 | -0.007 | -0.009 | t | 99774  | VVLGYTDR                     | Mus<br>musculu<br>s              |
| 1 | 1.00 | 1 | 1 | 0.01  | 0.012  | 0      | 0.013  | 0.01   | t | 6702   | CNKKGEQ<br>VGMSRPG<br>L      | Homo<br>sapiens                  |
| 1 | 1.00 | 1 | 1 | 0.04  | 0.037  | 0.035  | 0.04   | 0.041  | t | 50872  | QGGNIVDI<br>DFDSVP           | Oryctola<br>gus<br>cuniculu<br>s |
| 1 | 1.00 | 1 | 1 | 0     | 0.004  | -0.005 | 0      | -0.002 | t | 57766  | SFFSYGEI                     | MD                               |
| 1 | 1.00 | 1 | 1 | -0.01 | -0.012 | -0.02  | -0.013 | -0.01  | t | 49993  | PVVAESPK<br>KP               | Mus<br>musculu<br>s              |
| 1 | 1.00 | 1 | 1 | 0.02  | 0.024  | 0.013  | 0.027  | 0.021  | t | 102441 | FRERQSSK<br>NLLSCENS<br>DRDA | Homo<br>sapiens                  |
| 1 | 1.00 | 1 | 1 | -0.02 | -0.02  | -0.02  | -0.02  | -0.023 | t | 151729 | RYSPSLNT<br>RL               | Mus<br>musculu<br>s              |
| 1 | 1.00 | 1 | 1 | 0.01  | 0.007  | 0.01   | 0.01   | 0.008  | t | 30299  | KEALDKYE<br>LENHD            | Oryctola<br>gus<br>cuniculu<br>s |
| 1 | 1.00 | 1 | 1 | -0.03 | -0.027 | -0.038 | -0.03  | -0.03  | t | 38434  | LPDKFNAY<br>LANKWV           | Mus<br>musculu<br>s              |

|   |      |   |   |       |        |        |        |        |   |        |                     |                    |
|---|------|---|---|-------|--------|--------|--------|--------|---|--------|---------------------|--------------------|
| 1 | 1.00 | 1 | 1 | 0.03  | 0.021  | 0.027  | 0.03   | 0.03   | t | 45628  | NQSLLETH            | Anas platyrhynchos |
| 1 | 1.00 | 1 | 1 | 0.06  | 0.053  | 0.058  | 0.06   | 0.06   | t | 18105  | FTYEPPNDGEER        | Bos taurus         |
| 1 | 1.00 | 1 | 1 | 0.06  | 0.061  | 0.058  | 0.06   | 0.06   | t | 18105  | FTYEPPNDGEER        | Capra hircus       |
| 1 | 1.00 | 1 | 1 | -0.02 | -0.02  | -0.025 | -0.02  | -0.021 | t | 112507 | FAVLKLMGRGTK        | Rattus norvegicus  |
| 1 | 1.00 | 1 | 1 | 0.02  | 0.02   | 0.02   | 0.02   | 0.018  | t | 78479  | PETLPYL             | Mus musculus       |
| 1 | 1.00 | 1 | 1 | -0.02 | -0.022 | -0.04  | -0.027 | -0.02  | t | 128043 | LDAMPAGNPAFPVIPG    | Mus musculus       |
| 1 | 1.00 | 1 | 1 | 0.03  | 0.018  | 0.028  | 0.03   | 0.029  | t | 137827 | DVKSIAIEG           | Rattus norvegicus  |
| 1 | 1.00 | 1 | 1 | -0.02 | -0.02  | -0.025 | -0.02  | -0.023 | t | 58465  | SICSNNPTCWAICKR     | Mus musculus       |
| 1 | 1.00 | 1 | 1 | 0     | -0.002 | 0      | 0.001  | -0.001 | t | 130449 | CFFPNLSYC           | Mus musculus       |
| 1 | 1.00 | 1 | 1 | 0.02  | 0.022  | 0.013  | 0.021  | 0.019  | t | 18743  | GAQLNAMKPDQLQNTL    | Homo sapiens       |
| 1 | 1.00 | 1 | 1 | 0.03  | 0.03   | 0.026  | 0.04   | 0.033  | t | 106738 | QKRAAYDQYGHAAFE     | Homo sapiens       |
| 1 | 1.00 | 1 | 1 | 0     | 0      | 0      | 0.008  | 0      | t | 117773 | CNSRQTDREDELI       | Homo sapiens       |
| 1 | 1.00 | 1 | 1 | -0.02 | -0.02  | -0.02  | -0.016 | -0.02  | t | 71192  | VSVK                | Homo sapiens       |
| 1 | 1.00 | 1 | 1 | 0.01  | 0.01   | 0.007  | 0.01   | 0.009  | t | 98834  | IRLSFNPTQL          | Homo sapiens       |
| 1 | 1.00 | 1 | 1 | 0.09  | 0.09   | 0.088  | 0.09   | 0.09   | t | 120412 | ASKEKQENKIFADDIDISD | Mus musculus       |



|   |      |   |   |       |        |        |        |        |   |        |                              |                                  |
|---|------|---|---|-------|--------|--------|--------|--------|---|--------|------------------------------|----------------------------------|
| 1 | 1.00 | 1 | 1 | 0     | -0.002 | 0      | -0.001 | 0      | t | 46969  | PATIGDYT<br>DF               | Mus<br>musculu<br>s              |
| 1 | 1.00 | 1 | 1 | 0.01  | 0.012  | 0.006  | 0.011  | 0.012  | t | 44740  | NLIDTS                       | Homo<br>sapiens                  |
| 1 | 1.00 | 1 | 1 | 0.03  | 0.034  | 0.03   | 0.027  | 0.027  | t | 22620  | GTDGV                        | Homo<br>sapiens                  |
| 1 | 1.00 | 1 | 1 | 0     | 0.004  | 0      | 0.008  | 0.002  | t | 131818 | AKEERRY                      | Homo<br>sapiens                  |
| 1 | 1.00 | 1 | 1 | 0.02  | 0.027  | 0.014  | 0.02   | 0.02   | t | 48452  | PLPPVA                       | Cavia<br>porcellu<br>s           |
| 1 | 1.00 | 1 | 1 | 0     | 0.002  | 0.005  | 0.007  | 0      | t | 109589 | MHEGLHN                      | Homo<br>sapiens                  |
| 1 | 1.00 | 1 | 1 | 0     | 0.002  | 0.005  | 0.007  | 0      | t | 109589 | MHEGLHN                      | Homo<br>sapiens                  |
| 1 | 1.00 | 1 | 1 | 0.01  | 0.008  | 0.015  | 0.009  | 0.01   | t | 104238 | SDWWDF                       | Mus<br>musculu<br>s              |
| 1 | 1.00 | 1 | 1 | -0.01 | -0.007 | -0.019 | -0.01  | -0.011 | t | 63756  | TFTNKLKE<br>KHTDLGK          | Mus<br>musculu<br>s              |
| 1 | 1.00 | 1 | 1 | -0.02 | -0.018 | -0.02  | -0.013 | -0.02  | t | 152051 | PVVNSLDP<br>PLL              | Homo<br>sapiens                  |
| 1 | 1.00 | 1 | 1 | 0.01  | 0.012  | -0.007 | 0.011  | 0.012  | t | 32686  | KPEASSSD                     | Homo<br>sapiens                  |
| 1 | 1.00 | 1 | 1 | 0.03  | 0.028  | 0.01   | 0.023  | 0.03   | t | 128146 | WSVCVGL<br>TTYVNDYV<br>LPYLA | Mus<br>musculu<br>s              |
| 1 | 1.00 | 1 | 1 | 0.05  | 0.046  | 0.049  | 0.049  | 0.05   | t | 94746  | YREDMEY                      | Oryctola<br>gus<br>cuniculu<br>s |
| 1 | 1.00 | 1 | 1 | 0.02  | 0.02   | 0.02   | 0.02   | 0.02   | t | 60472  | SQKIQLI                      | Homo<br>sapiens                  |

|   |      |   |   |       |        |        |        |        |   |        |                         |                          |
|---|------|---|---|-------|--------|--------|--------|--------|---|--------|-------------------------|--------------------------|
| 1 | 1.00 | 1 | 1 | -0.01 | -0.008 | -0.023 | -0.01  | -0.009 | t | 68846  | VHFFKNIV<br>TPRTP       | Rattus<br>norvegicus     |
| 1 | 1.00 | 1 | 1 | -0.02 | -0.018 | -0.015 | -0.013 | -0.022 | t | 104586 | NRVAPNV<br>RQ           | Homo<br>sapiens          |
| 1 | 1.00 | 1 | 1 | 0.01  | 0.012  | 0.014  | 0.011  | 0.01   | t | 10278  | DSYIII                  | Homo<br>sapiens          |
| 1 | 1.00 | 1 | 1 | 0.05  | 0.05   | 0.045  | 0.05   | 0.049  | t | 131023 | QTTANPSC<br>PE          | Rattus<br>norvegicus     |
| 1 | 1.00 | 1 | 1 | -0.02 | -0.022 | -0.022 | -0.018 | -0.02  | t | 48732  | PPA                     | Mus<br>musculus          |
| 1 | 1.00 | 1 | 1 | -0.02 | -0.023 | -0.032 | -0.02  | -0.02  | t | 65401  | TNQALKKE                | Oryctolagus<br>cuniculus |
| 1 | 1.00 | 1 | 1 | -0.01 | -0.01  | -0.005 | -0.01  | -0.012 | t | 95979  | VPQPPVS<br>QFHIQ        | Homo<br>sapiens          |
| 1 | 1.00 | 1 | 1 | 0     | -0.002 | 0      | 0.003  | -0.001 | t | 70459  | VPQYLRW<br>FEEWAE       | Rattus<br>norvegicus     |
| 1 | 1.00 | 1 | 1 | -0.05 | -0.048 | -0.048 | -0.043 | -0.05  | t | 127963 | EPKPKKAP<br>AKKGEKV     | Homo<br>sapiens          |
| 1 | 1.00 | 1 | 1 | 0.03  | 0.032  | 0.028  | 0.03   | 0.03   | t | 122876 | PSPDSKPT                | Rattus<br>norvegicus     |
| 1 | 1.00 | 1 | 1 | 0.01  | 0.01   | 0.01   | 0.01   | 0.01   | t | 66542  | TTASPISSIF              | Mus<br>musculus          |
| 1 | 1.00 | 1 | 1 | 0.01  | 0.01   | -0.006 | 0.012  | 0.013  | t | 98954  | QEQVPLV<br>QQQQF        | Homo<br>sapiens          |
| 1 | 1.00 | 1 | 1 | 0.01  | 0.01   | -0.006 | 0.012  | 0.013  | t | 98956  | QGSVQPQ<br>QLPQF        | Homo<br>sapiens          |
| 1 | 1.00 | 1 | 1 | 0     | 0.002  | -0.007 | 0.007  | 0      | t | 144801 | TPPSVVGGLGVTMVH<br>GNLT | Homo<br>sapiens          |
| 1 | 1.00 | 1 | 1 | -0.04 | -0.044 | -0.04  | -0.043 | -0.043 | t | 5109   | ATPYHPPA<br>TP          | Oryctolagus<br>cuniculus |

|   |      |   |   |       |        |        |        |        |   |        |                             |                                  |
|---|------|---|---|-------|--------|--------|--------|--------|---|--------|-----------------------------|----------------------------------|
| 1 | 1.00 | 1 | 1 | -0.01 | -0.012 | -0.013 | -0.011 | -0.012 | t | 151073 | YEDVNGIR<br>K               | Mus<br>musculu<br>s              |
| 1 | 1.00 | 1 | 1 | 0.01  | 0.013  | 0.004  | 0.01   | 0.01   | t | 43549  | NDYEDRYY<br>REN             | Mus<br>musculu<br>s              |
| 1 | 1.00 | 1 | 1 | 0.03  | 0.026  | 0.022  | 0.033  | 0.032  | t | 111177 | CVQSTHV<br>DIRTLEDLL        | Oryctola<br>gus<br>cuniculu<br>s |
| 1 | 1.00 | 1 | 1 | -0.02 | -0.023 | -0.024 | -0.02  | -0.022 | t | 45357  | NPGISGSR<br>LLGT            | Oryctola<br>gus<br>cuniculu<br>s |
| 1 | 1.00 | 1 | 1 | 0.03  | 0.028  | 0.021  | 0.03   | 0.029  | t | 44471  | NKDARELL                    | Oryctola<br>gus<br>cuniculu<br>s |
| 1 | 1.00 | 1 | 1 | 0.01  | 0.01   | 0.01   | 0.01   | 0.009  | t | 108499 | KKGKKKDP                    | Homo<br>sapiens                  |
| 1 | 1.00 | 1 | 1 | 0.03  | 0.028  | 0.01   | 0.023  | 0.03   | t | 128136 | VFIADSDG<br>KLNFKES<br>VCVG | Mus<br>musculu<br>s              |
| 1 | 1.00 | 1 | 1 | 0     | 0      | -0.008 | 0      | 0.002  | t | 133546 | DSARAAY                     | Mus<br>musculu<br>s              |
| 1 | 1.00 | 1 | 1 | 0.01  | 0.012  | 0.01   | 0.011  | 0.007  | t | 19636  | GFTTNEER<br>YNVFAE          | Homo<br>sapiens                  |
| 1 | 1.00 | 1 | 1 | -0.02 | -0.016 | -0.02  | -0.013 | -0.02  | t | 143932 | HNIWSAP<br>RLIFN            | Homo<br>sapiens                  |
| 1 | 1.00 | 1 | 1 | -0.03 | -0.032 | -0.03  | -0.027 | -0.03  | t | 45816  | NSGCFRHL                    | Mus<br>musculu<br>s              |
| 1 | 1.00 | 1 | 1 | 0.02  | 0.02   | 0.02   | 0.02   | 0.017  | t | 134704 | KFFNSNKK<br>KRDDFEKL        | Oryctola<br>gus<br>cuniculu<br>s |
| 1 | 1.00 | 1 | 1 | 0     | 0.004  | -0.002 | 0.003  | 0      | t | 25030  | HVDTESYF<br>IVLSIAY         | Homo<br>sapiens                  |

|   |      |   |   |       |       |        |        |        |   |        |                         |                                  |
|---|------|---|---|-------|-------|--------|--------|--------|---|--------|-------------------------|----------------------------------|
| 1 | 1.00 | 1 | 1 | 0.02  | 0.024 | 0.02   | 0.027  | 0.019  | t | 131969 | LSQLNQLS<br>QISQLQR     | Homo sapiens                     |
| 1 | 1.00 | 1 | 1 | 0     | 0     | 0      | 0.002  | -0.002 | t | 70953  | VSGHRMA<br>WD           | Homo sapiens                     |
| 1 | 1.00 | 1 | 1 | 0.02  | 0.017 | 0.022  | 0.02   | 0.019  | t | 40448  | LVLLDYQG<br>MLPVCPL     | Oryctola<br>gus<br>cuniculu<br>s |
| 1 | 1.00 | 1 | 1 | 0.03  | 0.033 | 0.038  | 0.03   | 0.028  | t | 79891  | KSADVESD<br>V           | Mus<br>musculu<br>s              |
| 1 | 1.00 | 1 | 1 | -0.01 | -0.01 | -0.01  | -0.007 | -0.01  | t | 55135  | RPDYNPLL                | Homo sapiens                     |
| 1 | 1.00 | 1 | 1 | 0.02  | 0.017 | 0.021  | 0.02   | 0.02   | t | 11199  | EATALDTS                | Oryctola<br>gus<br>cuniculu<br>s |
| 1 | 1.00 | 1 | 1 | 0.01  | 0.01  | 0.006  | 0.012  | 0.009  | t | 19517  | GFEKISKG<br>AN          | Homo sapiens                     |
| 1 | 1.00 | 1 | 1 | 0.03  | 0.03  | 0.02   | 0.03   | 0.03   | t | 31406  | KIQRDEDS<br>YGRDPYS     | Oryctola<br>gus<br>cuniculu<br>s |
| 1 | 1.00 | 1 | 1 | 0.01  | 0.014 | 0.01   | 0.017  | 0.01   | t | 112935 | DFLTISPKL<br>LGELLQ     | Homo sapiens                     |
| 1 | 1.00 | 1 | 1 | 0     | 0.002 | 0.002  | 0.007  | 0.002  | t | 119648 | SWNSGAL<br>T            | Homo sapiens                     |
| 1 | 1.00 | 1 | 1 | 0     | 0.004 | -0.013 | 0.001  | 0      | t | 67167  | TVSSNGDR                | Homo sapiens                     |
| 1 | 1.00 | 1 | 1 | 0.02  | 0.023 | 0.021  | 0.023  | 0.02   | t | 78270  | SIPIGS                  | Equus caballus                   |
| 1 | 1.00 | 1 | 1 | 0.03  | 0.042 | 0.037  | 0.03   | 0.028  | t | 4702   | ASQKIQLV                | Pan troglodytes                  |
| 1 | 1.00 | 1 | 1 | 0     | 0.002 | -0.002 | 0.007  | 0      | t | 131936 | KPVSSPD<br>WNKQQDI<br>V | Homo sapiens                     |

|   |      |   |   |       |        |        |        |        |   |        |                              |                              |
|---|------|---|---|-------|--------|--------|--------|--------|---|--------|------------------------------|------------------------------|
| 1 | 1.00 | 1 | 1 | -0.03 | -0.03  | -0.037 | -0.03  | -0.032 | t | 49645  | PTGTAAAN<br>YKTP             | Mus<br>musculus              |
| 1 | 1.00 | 1 | 1 | 0.04  | 0.04   | 0.024  | 0.042  | 0.043  | t | 99046  | VQQQQFL<br>GQQQP             | Homo<br>sapiens              |
| 1 | 1.00 | 1 | 1 | 0.04  | 0.037  | 0.034  | 0.04   | 0.04   | t | 57766  | SFFSYGEI                     | Oryctola<br>gus<br>cuniculus |
| 1 | 1.00 | 1 | 1 | 0.04  | 0.044  | 0.034  | 0.04   | 0.04   | t | 57766  | SFFSYGEI                     | MD                           |
| 1 | 1.00 | 1 | 1 | 0.01  | 0.01   | 0.019  | 0.01   | 0.007  | t | 19256  | GEEYLILSA<br>R               | Mus<br>musculus              |
| 1 | 1.00 | 1 | 1 | 0     | 0.004  | 0      | 0.007  | 0      | t | 134217 | RNVILFSVF<br>DENRSWY<br>LTEN | Homo<br>sapiens              |
| 1 | 1.00 | 1 | 1 | 0.02  | 0.02   | 0.005  | 0.012  | 0.021  | t | 98781  | FPSQQPYL<br>QLQP             | Homo<br>sapiens              |
| 1 | 1.00 | 1 | 1 | 0.05  | 0.05   | 0.05   | 0.053  | 0.05   | t | 149103 | SGPNPTQ                      | Sus<br>scrofa                |
| 1 | 1.00 | 1 | 1 | 0.01  | 0.01   | 0.01   | 0.01   | 0.01   | t | 127906 | YVKLFPSN<br>LD               | Homo<br>sapiens              |
| 1 | 1.00 | 1 | 1 | -0.01 | -0.012 | -0.011 | -0.009 | -0.009 | t | 69106  | VIRVQY                       | Homo<br>sapiens              |
| 1 | 1.00 | 1 | 1 | 0.01  | 0.01   | 0.01   | 0.01   | 0.007  | t | 137432 | NHNYPPLS<br>LLTF             | Mus<br>musculus              |
| 1 | 1.00 | 1 | 1 | -0.02 | -0.02  | -0.028 | -0.02  | -0.021 | t | 119656 | TVDKSRW<br>Q                 | Homo<br>sapiens              |
| 1 | 1.00 | 1 | 1 | 0.01  | 0.013  | 0.01   | 0.01   | 0.01   | t | 134702 | KEKKYS                       | Mus<br>musculus              |

|   |      |   |   |       |        |        |        |        |   |        |                              |                                  |
|---|------|---|---|-------|--------|--------|--------|--------|---|--------|------------------------------|----------------------------------|
| 1 | 1.00 | 1 | 1 | -0.02 | -0.02  | -0.02  | -0.02  | -0.021 | t | 9759   | DPRVRGLY<br>LPA              | Mus<br>musculu<br>s              |
| 1 | 1.00 | 1 | 1 | 0.01  | 0.007  | 0.015  | 0.01   | 0.007  | t | 70249  | VPANIKSM<br>ALSG             | Oryctola<br>gus<br>cuniculu<br>s |
| 1 | 1.00 | 1 | 1 | 0     | -0.002 | -0.007 | 0.003  | 0.002  | t | 100432 | QLYAPEAF<br>NY               | Mus<br>musculu<br>s              |
| 1 | 1.00 | 1 | 1 | -0.02 | -0.02  | -0.022 | -0.023 | -0.022 | t | 98851  | KKIIAEKTKI                   | Homo<br>sapiens                  |
| 1 | 1.00 | 1 | 1 | 0.04  | 0.038  | 0.028  | 0.033  | 0.039  | t | 144641 | FFENKD                       | Mus<br>musculu<br>s              |
| 1 | 1.00 | 1 | 1 | -0.05 | -0.048 | -0.05  | -0.043 | -0.05  | t | 119596 | IHIPSEKIW<br>RPDLVLY         | Homo<br>sapiens                  |
| 1 | 1.00 | 1 | 1 | -0.01 | -0.01  | -0.01  | -0.006 | -0.012 | t | 118614 | SSPSAKDIK<br>KILDSV          | Homo<br>sapiens                  |
| 1 | 1.00 | 1 | 1 | 0.05  | 0.046  | 0.046  | 0.053  | 0.052  | t | 106001 | PNIEADV N                    | Oryctola<br>gus<br>cuniculu<br>s |
| 1 | 1.00 | 1 | 1 | 0.05  | 0.05   | 0.038  | 0.05   | 0.051  | t | 17629  | FRPSQQN                      | Oryctola<br>gus<br>cuniculu<br>s |
| 1 | 1.00 | 1 | 1 | 0.03  | 0.024  | 0.03   | 0.033  | 0.028  | t | 123565 | NVKDYYQ<br>KWM               | Oryctola<br>gus<br>cuniculu<br>s |
| 1 | 1.00 | 1 | 1 | 0.05  | 0.052  | 0.05   | 0.057  | 0.05   | t | 107501 | LDGKEYK                      | Homo<br>sapiens                  |
| 1 | 1.00 | 1 | 1 | 0.01  | 0.008  | 0.01   | 0.013  | 0.01   | t | 58371  | SHITSYPAY<br>FW              | Mus<br>musculu<br>s              |
| 1 | 1.00 | 1 | 1 | -0.04 | -0.044 | -0.046 | -0.041 | -0.041 | t | 27553  | IMSALAM<br>VYLGAK            | Oryctola<br>gus<br>cuniculu<br>s |
| 1 | 1.00 | 1 | 1 | 0     | -0.002 | -0.007 | -0.001 | -0.002 | t | 57259  | SDPPLVAN<br>QVVTCPD<br>KKSTA | Rattus<br>norvegic<br>us         |
| 1 | 1.00 | 1 | 1 | 0.03  | 0.018  | 0.025  | 0.03   | 0.03   | t | 27748  | INTLQNQG                     | Anas<br>platyrhy<br>nchos        |

|   |      |   |   |       |        |        |        |        |   |        |                      |                                  |
|---|------|---|---|-------|--------|--------|--------|--------|---|--------|----------------------|----------------------------------|
| 1 | 1.00 | 1 | 1 | -0.02 | -0.023 | -0.027 | -0.02  | -0.023 | t | 108164 | TLVCLATG<br>FFPDHVEL | Oryctola<br>gus<br>cuniculu<br>s |
| 1 | 1.00 | 1 | 1 | 0.01  | 0.009  | 0.002  | 0.01   | 0.01   | t | 4227   | ARQQTVS<br>ALE       | Mus<br>musculu<br>s              |
| 1 | 1.00 | 1 | 1 | 0.04  | 0.038  | 0.036  | 0.039  | 0.038  | t | 30001  | KAVYNFAT<br>C        | Mus<br>musculu<br>s              |
| 1 | 1.00 | 1 | 1 | 0.02  | 0.023  | 0.015  | 0.02   | 0.021  | t | 65982  | TQYQKES<br>QAYY      | Mus<br>musculu<br>s              |
| 1 | 1.00 | 1 | 1 | 0.01  | 0.008  | 0.001  | 0.01   | 0.01   | t | 100427 | QKNAPKTF<br>QF       | Mus<br>musculu<br>s              |
| 1 | 1.00 | 1 | 1 | 0.05  | 0.048  | 0.03   | 0.043  | 0.053  | t | 136118 | AEFPLDIT             | Mus<br>musculu<br>s              |
| 1 | 1.00 | 1 | 1 | 0.05  | 0.05   | 0.043  | 0.05   | 0.05   | t | 138765 | EEIKMDIS<br>KLNA     | Mus<br>musculu<br>s              |
| 1 | 1.00 | 1 | 1 | 0.02  | 0.022  | 0.009  | 0.017  | 0.02   | t | 159060 | RELDAET<br>KAFLKAG   | Homo<br>sapiens                  |
| 1 | 1.00 | 1 | 1 | 0     | 0      | -0.003 | 0      | 0      | t | 384    | AAQAALG<br>LLQTASR   | Homo<br>sapiens                  |
| 1 | 1.00 | 1 | 1 | 0.05  | 0.05   | 0.052  | 0.05   | 0.052  | t | 70654  | VQTMEEI<br>N         | Anas<br>platyrhy<br>nchos        |
| 1 | 1.00 | 1 | 1 | -0.02 | -0.016 | -0.02  | -0.013 | -0.02  | t | 116685 | CPAGWISL<br>WKGFS    | Homo<br>sapiens                  |
| 1 | 1.00 | 1 | 1 | 0     | 0.002  | -0.004 | -0.003 | -0.002 | t | 114946 | SEYPKPDC<br>TA       | Homo<br>sapiens                  |
| 1 | 1.00 | 1 | 1 | -0.02 | -0.016 | -0.015 | -0.013 | -0.021 | t | 115591 | APEYRGRT<br>ELLK     | Homo<br>sapiens                  |

|   |      |   |   |       |        |        |        |        |   |        |                             |                                  |
|---|------|---|---|-------|--------|--------|--------|--------|---|--------|-----------------------------|----------------------------------|
| 1 | 1.00 | 1 | 1 | -0.02 | -0.006 | -0.015 | -0.013 | -0.021 | t | 115591 | APEYRGRT<br>ELLK            | Homo<br>sapiens                  |
| 1 | 1.00 | 1 | 1 | -0.02 | -0.018 | -0.015 | -0.013 | -0.021 | t | 115591 | APEYRGRT<br>ELLK            | Homo<br>sapiens                  |
| 1 | 1.00 | 1 | 1 | 0.06  | 0.06   | 0.064  | 0.06   | 0.06   | t | 78806  | QSQIESR                     | Oryctola<br>gus<br>cuniculu<br>s |
| 1 | 1.00 | 1 | 1 | -0.01 | -0.008 | -0.01  | -0.003 | -0.009 | t | 10594  | DVFQNGF<br>TAWGNN<br>D      | Homo<br>sapiens                  |
| 1 | 1.00 | 1 | 1 | 0.02  | 0.02   | 0.02   | 0.02   | 0.02   | t | 72087  | VYLLPR                      | Homo<br>sapiens                  |
| 1 | 1.00 | 1 | 1 | 0     | 0.004  | 0      | 0.007  | 0.002  | t | 131818 | AKEERRY                     | Homo<br>sapiens                  |
| 1 | 1.00 | 1 | 1 | 0.04  | 0.038  | 0.04   | 0.037  | 0.039  | t | 51147  | QIVGGVYL<br>L               | Mus<br>musculu<br>s              |
| 1 | 1.00 | 1 | 1 | 0.02  | 0.02   | 0.012  | 0.02   | 0.019  | t | 41177  | MAYRFNG<br>IGVTQNVL<br>YE   | Mus<br>musculu<br>s              |
| 1 | 1.00 | 1 | 1 | 0.01  | 0.01   | -0.003 | 0.01   | 0.01   | t | 5205   | ATVSSNG<br>D                | Homo<br>sapiens                  |
| 1 | 1.00 | 1 | 1 | 0     | 0      | 0      | 0.003  | -0.002 | t | 62353  | SVTEEIAEE<br>DKSVTEEI<br>AV | Homo<br>sapiens                  |
| 1 | 1.00 | 1 | 1 | 0     | 0      | 0      | 0.003  | -0.002 | t | 51372  | QLINTNGS<br>WHINSTA         | Homo<br>sapiens                  |
| 1 | 1.00 | 1 | 1 | -0.01 | -0.01  | -0.017 | -0.01  | -0.01  | t | 46859  | PALTAVET<br>GATNPL          | Homo<br>sapiens                  |
| 1 | 1.00 | 1 | 1 | 0.02  | 0.02   | 0.02   | 0.02   | 0.019  | t | 121690 | PAIALREY                    | Homo<br>sapiens                  |
| 1 | 1.00 | 1 | 1 | 0.01  | 0.01   | 0.002  | 0.01   | 0.01   | t | 106302 | CDIKTTLPP<br>ITA            | Homo<br>sapiens                  |
| 1 | 1.00 | 1 | 1 | 0.07  | 0.07   | 0.07   | 0.07   | 0.069  | t | 136365 | IDSNHVYK<br>DFLT            | Mus<br>musculu<br>s              |



|   |      |   |   |       |        |        |        |        |   |        |                              |                     |
|---|------|---|---|-------|--------|--------|--------|--------|---|--------|------------------------------|---------------------|
| 1 | 1.00 | 1 | 1 | 0     | 0.002  | 0      | 0      | -0.001 | t | 117208 | GLSLSRFS<br>WGA              | Homo<br>sapiens     |
| 1 | 1.00 | 1 | 1 | -0.01 | -0.008 | -0.01  | -0.003 | -0.01  | t | 119618 | NHYTQKSL                     | Homo<br>sapiens     |
| 1 | 1.00 | 1 | 1 | 0     | 0.003  | -0.008 | 0      | -0.002 | t | 51463  | QLPFPQQ<br>PQQ               | Mus<br>musculu<br>s |
| 1 | 1.00 | 1 | 1 | -0.01 | -0.007 | -0.019 | -0.01  | -0.011 | t | 63756  | TFTNKLKE<br>KHTDLGK          | Mus<br>musculu<br>s |
| 1 | 1.00 | 1 | 1 | 0     | 0      | -0.007 | 0.003  | 0      | t | 125791 | CSFWSKYI<br>QTLK             | Mus<br>musculu<br>s |
| 1 | 1.00 | 1 | 1 | 0     | 0.002  | -0.002 | 0.003  | -0.001 | t | 75937  | YTAADCP<br>GLLYLCP           | Homo<br>sapiens     |
| 1 | 1.00 | 1 | 1 | 0.02  | 0.023  | 0.016  | 0.021  | 0.02   | t | 41868  | MKNNPVY<br>SESL              | Equus<br>caballus   |
| 1 | 1.00 | 1 | 1 | 0.02  | 0.023  | 0.016  | 0.021  | 0.02   | t | 41868  | MKNNPVY<br>SESL              | Equus<br>caballus   |
| 1 | 1.00 | 1 | 1 | 0     | -0.012 | -0.006 | 0      | -0.002 | t | 19266  | GEFPRHVK<br>LKNEIENLL<br>DQV | Mus<br>musculu<br>s |
| 1 | 1.00 | 1 | 1 | 0.02  | 0.022  | 0.009  | 0.021  | 0.02   | t | 110571 | EKTGILTVT<br>YHSETQRT<br>K   | Homo<br>sapiens     |
| 1 | 1.00 | 1 | 1 | 0.03  | 0.03   | 0.021  | 0.03   | 0.03   | t | 69312  | VKSASPHG<br>ESNSSEE          | Mus<br>musculu<br>s |
| 1 | 1.00 | 1 | 1 | 0.03  | 0.03   | 0.017  | 0.028  | 0.03   | t | 12931  | ELADALLE                     | Homo<br>sapiens     |
| 1 | 1.00 | 1 | 1 | 0     | 0.002  | 0      | 0.007  | 0      | t | 9278   | DLSLLGKA<br>RKVVVTKD         | Homo<br>sapiens     |
| 1 | 1.00 | 1 | 1 | 0.05  | 0.048  | 0.05   | 0.043  | 0.046  | t | 117520 | GSFSDADL<br>AD               | Mus<br>musculu<br>s |

|   |      |   |   |       |        |        |        |        |   |        |                              |                       |
|---|------|---|---|-------|--------|--------|--------|--------|---|--------|------------------------------|-----------------------|
| 1 | 1.00 | 1 | 1 | 0     | 0      | -0.006 | 0      | 0      | t | 42603  | MSLSLLDL<br>YLGRGYN          | Homo sapiens          |
| 1 | 1.00 | 1 | 1 | -0.01 | -0.008 | -0.015 | -0.009 | -0.012 | t | 29287  | IVGGVYLL<br>PR               | Homo sapiens          |
| 1 | 1.00 | 1 | 1 | -0.03 | -0.025 | -0.039 | -0.029 | -0.03  | t | 4467   | ASICQMFC<br>FWRGDLV<br>FDFQV | Homo sapiens          |
| 1 | 1.00 | 1 | 1 | 0.01  | 0.013  | 0.002  | 0.01   | 0.01   | t | 51463  | QLPFPQQ<br>PQQ               | Mus musculus          |
| 1 | 1.00 | 1 | 1 | 0.01  | 0.01   | 0      | 0.01   | 0.01   | t | 98737  | DPIELINLC<br>TNALG           | Oryctolagus cuniculus |
| 1 | 1.00 | 1 | 1 | 0.03  | 0.03   | 0.03   | 0.033  | 0.03   | t | 149026 | ANITQSS                      | Sus scrofa            |
| 1 | 1.00 | 1 | 1 | 0     | -0.003 | 0.002  | 0      | -0.003 | t | 55719  | RRRLRGTV<br>WV               | Oryctolagus cuniculus |
| 1 | 1.00 | 1 | 1 | 0     | 0      | -0.007 | 0      | -0.001 | t | 105763 | EVHHQK                       | Mus musculus          |
| 1 | 1.00 | 1 | 1 | -0.01 | -0.014 | -0.01  | -0.007 | -0.012 | t | 156871 | FQNIASMP<br>HLYV             | Bos taurus            |
| 1 | 1.00 | 1 | 1 | 0.03  | 0.034  | 0.022  | 0.031  | 0.03   | t | 62967  | TAQAAPV<br>QEG               | Homo sapiens          |
| 1 | 1.00 | 1 | 1 | 0.03  | 0.032  | 0.022  | 0.031  | 0.03   | t | 62967  | TAQAAPV<br>QEG               | Homo sapiens          |
| 1 | 1.00 | 1 | 1 | -0.03 | -0.026 | -0.029 | -0.023 | -0.03  | t | 128073 | PKKSAKKT<br>PKKAKKP          | Homo sapiens          |
| 1 | 1.00 | 1 | 1 | 0.02  | 0.023  | 0.023  | 0.02   | 0.02   | t | 15395  | FDGTNP                       | Mus musculus          |
| 1 | 1.00 | 1 | 1 | 0.01  | 0.014  | 0.01   | 0.017  | 0.01   | t | 123576 | PGAMPPQ<br>Q                 | Homo sapiens          |

|   |      |   |   |       |        |        |        |        |   |        |                      |                     |
|---|------|---|---|-------|--------|--------|--------|--------|---|--------|----------------------|---------------------|
| 1 | 1.00 | 1 | 1 | -0.03 | -0.025 | -0.034 | -0.027 | -0.031 | t | 77793  | PKSKLSVK<br>KC       | Homo<br>sapiens     |
| 1 | 1.00 | 1 | 1 | -0.04 | -0.036 | -0.035 | -0.033 | -0.041 | t | 115607 | GPRHPIRA<br>LVGD     | Homo<br>sapiens     |
| 1 | 1.00 | 1 | 1 | 0.01  | 0.013  | 0.01   | 0.01   | 0.008  | t | 78623  | DMDDFSR<br>QLQ       | Mus<br>musculu<br>s |
| 1 | 1.00 | 1 | 1 | 0.01  | 0.007  | 0.01   | 0.01   | 0.008  | t | 78623  | DMDDFSR<br>QLQ       | Mus<br>musculu<br>s |
| 1 | 1.00 | 1 | 1 | 0.01  | 0.01   | 0.01   | 0.01   | 0.008  | t | 78623  | DMDDFSR<br>QLQ       | Mus<br>musculu<br>s |
| 1 | 1.00 | 1 | 1 | 0     | -0.002 | -0.002 | -0.001 | 0      | t | 97181  | AFPLPTDA             | Mus<br>musculu<br>s |
| 1 | 1.00 | 1 | 1 | 0     | -0.002 | -0.002 | -0.001 | 0      | t | 97181  | AFPLPTDA             | Mus<br>musculu<br>s |
| 1 | 1.00 | 1 | 1 | 0.02  | 0.024  | 0.009  | 0.017  | 0.018  | t | 38582  | LPLPLLQS<br>WM       | Homo<br>sapiens     |
| 1 | 1.00 | 1 | 1 | -0.02 | -0.018 | -0.019 | -0.019 | -0.023 | t | 65694  | TPPPRRRR<br>TVGLSE   | Homo<br>sapiens     |
| 1 | 1.00 | 1 | 1 | 0.02  | -0.005 | 0.02   | 0.02   | 0.02   | t | 19268  | GEGAPP               | Marmot<br>a monax   |
| 1 | 1.00 | 1 | 1 | 0.02  | 0.009  | 0.02   | 0.02   | 0.02   | t | 19268  | GEGAPP               | Marmot<br>a monax   |
| 1 | 1.00 | 1 | 1 | 0.01  | 0.012  | 0.015  | 0.017  | 0.008  | t | 118288 | DDRNLNKVI<br>SELNGKN | Homo<br>sapiens     |
| 1 | 1.00 | 1 | 1 | 0.03  | 0.03   | 0.03   | 0.034  | 0.031  | t | 110104 | WQEGNVF              | Homo<br>sapiens     |
| 1 | 1.00 | 1 | 1 | 0.03  | 0.032  | 0.028  | 0.029  | 0.033  | t | 131878 | FLMLVGG<br>STL       | Homo<br>sapiens     |

|   |      |   |   |       |        |        |        |        |   |        |                 |                       |
|---|------|---|---|-------|--------|--------|--------|--------|---|--------|-----------------|-----------------------|
| 1 | 1.00 | 1 | 1 | 0     | 0      | -0.013 | 0      | 0      | t | 105340 | MPRCRHGY        | Homo sapiens          |
| 1 | 1.00 | 1 | 1 | 0.04  | 0.036  | 0.04   | 0.033  | 0.038  | t | 134037 | DYDDTIS         | Oryctolagus cuniculus |
| 1 | 1.00 | 1 | 1 | 0     | -0.001 | 0      | 0.004  | 0      | t | 6721   | CNPPDCPGVGTG    | Myodes glareolus      |
| 1 | 1.00 | 1 | 1 | 0.02  | 0.02   | 0.017  | 0.02   | 0.02   | t | 46786  | PAEVTQLKGLS     | Mus musculus          |
| 1 | 1.00 | 1 | 1 | -0.01 | -0.01  | -0.01  | -0.01  | -0.013 | t | 75949  | YTASARGDLAHL    | Mus musculus          |
| 1 | 1.00 | 1 | 1 | 0.02  | 0.02   | 0.02   | 0.02   | 0.018  | t | 104132 | MSENVEQHNPINAGT | Oryctolagus cuniculus |
| 1 | 1.00 | 1 | 1 | -0.03 | -0.032 | -0.039 | -0.031 | -0.03  | t | 74478  | YKLTRPYMARC     | Mus musculus          |
| 1 | 1.00 | 1 | 1 | -0.01 | -0.01  | -0.014 | -0.007 | -0.008 | t | 5286   | AVCLGGLIGIPALIC | Homo sapiens          |
| 1 | 1.00 | 1 | 1 | 0.04  | 0.04   | 0.03   | 0.037  | 0.04   | t | 47907  | PIGSENSEKT      | Homo sapiens          |
| 1 | 1.00 | 1 | 1 | 0.01  | 0.01   | 0.02   | 0.01   | 0.007  | t | 95161  | TYGKFCIKP       | Mus musculus          |
| 1 | 1.00 | 1 | 1 | 0     | 0      | -0.003 | 0      | 0      | t | 21845  | GQAAWKEARA      | Mus musculus          |
| 1 | 1.00 | 1 | 1 | 0     | 0      | -0.003 | 0      | 0      | t | 21845  | GQAAWKEARA      | Mus musculus          |
| 1 | 1.00 | 1 | 1 | 0.04  | 0.04   | 0.038  | 0.04   | 0.041  | t | 130741 | ATGFVKKDAQ      | Mus musculus          |

|   |      |   |   |       |        |        |        |        |   |        |                              |                                  |
|---|------|---|---|-------|--------|--------|--------|--------|---|--------|------------------------------|----------------------------------|
| 1 | 1.00 | 1 | 1 | 0     | 0.002  | -0.007 | -0.003 | 0      | t | 116039 | YPSYGLNY<br>YQ               | Homo<br>sapiens                  |
| 1 | 1.00 | 1 | 1 | -0.01 | -0.006 | -0.013 | -0.009 | -0.013 | t | 103549 | RHGLSSLG<br>WNLCRIF          | Homo<br>sapiens                  |
| 1 | 1.00 | 1 | 1 | 0     | 0.003  | -0.008 | 0      | 0      | t | 27935  | IPLNVGK                      | Mus<br>musculu<br>s              |
| 1 | 1.00 | 1 | 1 | 0.04  | 0.028  | 0.034  | 0.04   | 0.04   | t | 28898  | ITFKSGATF<br>Q               | Mus<br>musculu<br>s              |
| 1 | 1.00 | 1 | 1 | 0     | 0      | 0      | 0.008  | 0      | t | 110869 | GQAEPDR<br>AHYNIVTF<br>CCKCD | Mus<br>musculu<br>s              |
| 1 | 1.00 | 1 | 1 | 0     | 0      | 0      | 0.008  | 0      | t | 110828 | EIDGPAGQ<br>AEPDRAH<br>YNI   | Mus<br>musculu<br>s              |
| 1 | 1.00 | 1 | 1 | 0     | 0      | 0      | 0.008  | 0      | t | 110974 | QDIVLHLE<br>PQNEIPVD<br>LL   | Mus<br>musculu<br>s              |
| 1 | 1.00 | 1 | 1 | 0     | 0      | 0      | 0.008  | 0      | t | 110869 | GQAEPDR<br>AHYNIVTF<br>CCKCD | Mus<br>musculu<br>s              |
| 1 | 1.00 | 1 | 1 | 0     | 0      | 0      | 0.008  | 0      | t | 41660  | MHGDTPT<br>LHEYMLDL<br>QPETT | Mus<br>musculu<br>s              |
| 1 | 1.00 | 1 | 1 | 0     | 0      | 0      | 0.008  | 0      | t | 41660  | MHGDTPT<br>LHEYMLDL<br>QPETT | Mus<br>musculu<br>s              |
| 1 | 1.00 | 1 | 1 | 0     | 0      | 0      | 0.008  | 0      | t | 23178  | GVTAPDTR<br>RPAGSTA          | Mus<br>musculu<br>s              |
| 1 | 1.00 | 1 | 1 | 0.03  | 0.03   | 0.026  | 0.03   | 0.028  | t | 60535  | SQQPQQP<br>FPQ               | Mus<br>musculu<br>s              |
| 1 | 1.00 | 1 | 1 | 0.01  | 0.01   | 0.001  | 0.01   | 0.01   | t | 47315  | PEKAFREL                     | Homo<br>sapiens                  |
| 1 | 1.00 | 1 | 1 | -0.01 | -0.014 | -0.022 | -0.011 | -0.01  | t | 60445  | SQHI                         | Oryctola<br>gus<br>cuniculu<br>s |
| 1 | 1.00 | 1 | 1 | 0.02  | 0.016  | 0.005  | 0.019  | 0.021  | t | 21816  | GPVEESVE<br>RAMVRVA          | Oryctola<br>gus<br>cuniculu<br>s |

|   |      |   |   |       |        |        |        |        |   |        |                              |                                  |
|---|------|---|---|-------|--------|--------|--------|--------|---|--------|------------------------------|----------------------------------|
| 1 | 1.00 | 1 | 1 | 0     | -0.004 | 0      | 0.003  | -0.002 | t | 71809  | VVRFDKLP<br>GFGDSIE          | Oryctola<br>gus<br>cuniculu<br>s |
| 1 | 1.00 | 1 | 1 | 0     | -0.004 | 0      | 0.003  | -0.002 | t | 94838  | GTSSCRLV<br>P                | Oryctola<br>gus<br>cuniculu<br>s |
| 1 | 1.00 | 1 | 1 | 0     | -0.004 | 0      | 0.003  | -0.002 | t | 76332  | YVLDGDKL<br>LPKVAPQAL        | Oryctola<br>gus<br>cuniculu<br>s |
| 1 | 1.00 | 1 | 1 | 0     | -0.004 | 0      | 0.003  | -0.002 | t | 27553  | IMSALAM<br>VYLGAK            | Oryctola<br>gus<br>cuniculu<br>s |
| 1 | 1.00 | 1 | 1 | 0     | -0.004 | 0      | 0.003  | -0.002 | t | 10254  | DSTRTQIN<br>K                | Oryctola<br>gus<br>cuniculu<br>s |
| 1 | 1.00 | 1 | 1 | -0.01 | -0.012 | -0.03  | -0.017 | -0.01  | t | 128043 | LDAMPAG<br>NPAFPVIP<br>G     | Mus<br>musculu<br>s              |
| 1 | 1.00 | 1 | 1 | -0.04 | -0.038 | -0.049 | -0.04  | -0.038 | t | 34792  | LAGRMIPK                     | Anas<br>platyrhy<br>nchos        |
| 1 | 1.00 | 1 | 1 | -0.02 | -0.017 | -0.02  | -0.02  | -0.023 | t | 20836  | GLFGAIAG<br>F                | Mus<br>musculu<br>s              |
| 1 | 1.00 | 1 | 1 | 0.01  | 0.012  | 0.003  | 0.013  | 0.012  | t | 78068  | VYDYNCH<br>VDL               | Homo<br>sapiens                  |
| 1 | 1.00 | 1 | 1 | -0.01 | -0.012 | -0.01  | -0.009 | -0.011 | t | 130449 | CFFPNLSY<br>C                | Mus<br>musculu<br>s              |
| 1 | 1.00 | 1 | 1 | 0.01  | 0.003  | 0.003  | 0.009  | 0.008  | t | 52414  | QSQLERA<br>NLRPCEQH          | Oryctola<br>gus<br>cuniculu<br>s |
| 1 | 1.00 | 1 | 1 | 0     | 0      | 0      | 0      | 0      | t | 8697   | DILFPA                       | Homo<br>sapiens                  |
| 1 | 1.00 | 1 | 1 | 0     | 0.002  | 0      | 0.009  | 0      | t | 122445 | KQYSIEAA<br>LRCRRISKE<br>EYH | Homo<br>sapiens                  |
| 1 | 1.00 | 1 | 1 | 0     | 0      | 0      | 0.009  | 0      | t | 122445 | KQYSIEAA<br>LRCRRISKE<br>EYH | Homo<br>sapiens                  |

|   |      |   |   |       |        |        |        |        |   |        |                              |                                  |
|---|------|---|---|-------|--------|--------|--------|--------|---|--------|------------------------------|----------------------------------|
| 1 | 1.00 | 1 | 1 | 0.02  | 0.02   | 0.023  | 0.026  | 0.019  | t | 23162  | GVSYNIGS<br>QEWYTTV          | Homo<br>sapiens                  |
| 1 | 1.00 | 1 | 1 | -0.01 | -0.008 | -0.014 | -0.009 | -0.01  | t | 12625  | EKAFREL                      | Homo<br>sapiens                  |
| 1 | 1.00 | 1 | 1 | -0.01 | -0.006 | -0.022 | -0.009 | -0.01  | t | 7099   | CSVTCGVG<br>VRVRRRV<br>NAANK | Homo<br>sapiens                  |
| 1 | 1.00 | 1 | 1 | -0.01 | -0.006 | -0.022 | -0.009 | -0.01  | t | 7099   | CSVTCGVG<br>VRVRRRV<br>NAANK | Homo<br>sapiens                  |
| 1 | 1.00 | 1 | 1 | 0.05  | 0.05   | 0.039  | 0.05   | 0.052  | t | 111309 | GDTPTLHE<br>YMLDLQ           | Oryctola<br>gus<br>cuniculu<br>s |
| 1 | 1.00 | 1 | 1 | 0     | 0.002  | -0.006 | 0.003  | 0      | t | 118824 | GRRPFFHP<br>VGEADYFE<br>YHQE | Homo<br>sapiens                  |
| 1 | 1.00 | 1 | 1 | 0.02  | 0.016  | 0.019  | 0.019  | 0.02   | t | 78609  | ANPSPHQ<br>VYN               | Oryctola<br>gus<br>cuniculu<br>s |
| 1 | 1.00 | 1 | 1 | -0.01 | -0.012 | -0.01  | -0.007 | -0.01  | t | 73785  | YEVARNVSG<br>IYHVT           | Homo<br>sapiens                  |
| 1 | 1.00 | 1 | 1 | -0.01 | -0.01  | -0.012 | -0.003 | -0.01  | t | 125462 | KLPLSLSFL<br>HLTRADLS<br>YPS | Homo<br>sapiens                  |
| 1 | 1.00 | 1 | 1 | -0.01 | -0.013 | -0.012 | -0.01  | -0.011 | t | 56107  | RTLKIPAM<br>TI               | Oryctola<br>gus<br>cuniculu<br>s |
| 1 | 1.00 | 1 | 1 | 0     | 0      | 0.013  | 0.008  | -0.003 | t | 98923  | PAVFKIDA<br>LN               | Homo<br>sapiens                  |
| 1 | 1.00 | 1 | 1 | 0.05  | 0.05   | 0.05   | 0.05   | 0.05   | t | 159291 | MQVTDD                       | Oryctola<br>gus<br>cuniculu<br>s |
| 1 | 1.00 | 1 | 1 | 0     | 0.004  | 0      | 0.007  | 0.001  | t | 118904 | MERKRRE                      | Homo<br>sapiens                  |

|   |      |   |   |       |        |        |        |        |   |        |                      |                       |
|---|------|---|---|-------|--------|--------|--------|--------|---|--------|----------------------|-----------------------|
| 1 | 1.00 | 1 | 1 | 0.02  | 0.014  | 0.011  | 0.02   | 0.019  | t | 113861 | SISTTNFTNP           | Oryctolagus cuniculus |
| 1 | 1.00 | 1 | 1 | -0.01 | -0.012 | -0.026 | -0.011 | -0.009 | t | 6210   | CEYNVFHNKTFELPRA     | Mus musculus          |
| 1 | 1.00 | 1 | 1 | -0.01 | -0.013 | -0.017 | -0.01  | -0.011 | t | 135507 | VVGAGP               | Oryctolagus cuniculus |
| 1 | 1.00 | 1 | 1 | 0     | 0      | -0.007 | 0      | 0.002  | t | 12105  | EFVVEFDLPGIKA        | Homo sapiens          |
| 1 | 1.00 | 1 | 1 | -0.04 | -0.038 | -0.047 | -0.039 | -0.04  | t | 55781  | RRYPF                | Homo sapiens          |
| 1 | 1.00 | 1 | 1 | 0     | 0      | 0      | 0      | 0      | t | 112853 | TPTFMYF              | Homo sapiens          |
| 1 | 1.00 | 1 | 1 | 0.05  | 0.055  | 0.042  | 0.053  | 0.05   | t | 95428  | GSGGDDDDPHGVPVQLSYYD | Homo sapiens          |
| 1 | 1.00 | 1 | 1 | 0     | -0.007 | -0.005 | 0.001  | 0      | t | 147284 | SIFGLAPSKALDS        | Homo sapiens          |
| 1 | 1.00 | 1 | 1 | -0.03 | -0.028 | -0.037 | -0.023 | -0.03  | t | 116927 | AVCRTSMCSIQSAPP      | Homo sapiens          |
| 1 | 1.00 | 1 | 1 | 0     | -0.002 | -0.008 | -0.002 | -0.001 | t | 25118  | HVVVNNKVATH          | Mus musculus          |
| 1 | 1.00 | 1 | 1 | 0     | 0.002  | -0.011 | -0.003 | -0.002 | t | 114977 | VMVLCNRNRAF          | Homo sapiens          |
| 1 | 1.00 | 1 | 1 | 0.02  | 0.02   | 0.009  | 0.02   | 0.02   | t | 43157  | NAGTSL               | Mus musculus          |
| 1 | 1.00 | 1 | 1 | 0.01  | 0.01   | 0.008  | 0.013  | 0.01   | t | 12570  | EIRPSA               | Homo sapiens          |
| 1 | 1.00 | 1 | 1 | 0.01  | 0.01   | 0.002  | 0.013  | 0.01   | t | 63165  | TDHAGSNDNIALLVQ      | Homo sapiens          |



|   |      |   |   |       |        |        |        |        |   |        |                              |                                  |
|---|------|---|---|-------|--------|--------|--------|--------|---|--------|------------------------------|----------------------------------|
| 1 | 1.00 | 1 | 1 | 0.02  | 0.024  | -0.001 | 0.017  | 0.023  | t | 153886 | SEEKANQR<br>EEAYKEQ          | Homo<br>sapiens                  |
| 1 | 1.00 | 1 | 1 | 0.01  | 0.013  | 0.011  | 0.01   | 0.008  | t | 59757  | SMSYTWT<br>GA                | Mus<br>musculu<br>s              |
| 1 | 1.00 | 1 | 1 | -0.02 | -0.018 | -0.02  | -0.013 | -0.02  | t | 121975 | VHPAIALR                     | Homo<br>sapiens                  |
| 1 | 1.00 | 1 | 1 | 0.03  | 0.026  | 0.03   | 0.027  | 0.028  | t | 64638  | TKPSDGNC<br>T                | Oryctola<br>gus<br>cuniculu<br>s |
| 1 | 1.00 | 1 | 1 | 0.03  | 0.03   | 0.03   | 0.03   | 0.031  | t | 115194 | CNISCDKF<br>LD               | Homo<br>sapiens                  |
| 1 | 1.00 | 1 | 1 | 0.02  | 0.02   | 0.01   | 0.02   | 0.02   | t | 68764  | VGPQSVG<br>PLSVGPQS<br>VGPLS | Mus<br>musculu<br>s              |
| 1 | 1.00 | 1 | 1 | 0.01  | 0.01   | 0.001  | 0.013  | 0.01   | t | 22708  | GTIINQDP<br>DKILTYI          | Homo<br>sapiens                  |
| 1 | 1.00 | 1 | 1 | 0.01  | 0.01   | 0.01   | 0.01   | 0.01   | t | 127856 | TDVRYKD                      | Mus<br>musculu<br>s              |
| 1 | 1.00 | 1 | 1 | 0.01  | 0.01   | 0.01   | 0.01   | 0.01   | t | 127856 | TDVRYKD                      | Mus<br>musculu<br>s              |
| 1 | 1.00 | 1 | 1 | -0.06 | -0.062 | -0.078 | -0.059 | -0.058 | t | 99842  | RPQQPYP                      | Mus<br>musculu<br>s              |
| 1 | 1.00 | 1 | 1 | 0.04  | 0.039  | 0.033  | 0.04   | 0.04   | t | 55248  | RPPETTTI                     | Anas<br>platyrhy<br>nchos        |
| 1 | 1.00 | 1 | 1 | 0.01  | 0.01   | 0.01   | 0.01   | 0.009  | t | 119998 | KQQWVDY<br>NLKWNPD<br>DY     | Rattus<br>norvegic<br>us         |
| 1 | 1.00 | 1 | 1 | 0.01  | 0.008  | 0.01   | 0.01   | 0.009  | t | 119998 | KQQWVDY<br>NLKWNPD<br>DY     | Oryctola<br>gus<br>cuniculu<br>s |
| 1 | 1.00 | 1 | 1 | 0.01  | 0.01   | 0.01   | 0.01   | 0.009  | t | 119998 | KQQWVDY<br>NLKWNPD<br>DY     | Mus<br>musculu<br>s              |
| 1 | 1.00 | 1 | 1 | 0.03  | 0.03   | 0.03   | 0.03   | 0.028  | t | 7673   | DAVTE                        | Mus<br>musculu<br>s              |

|   |      |   |   |       |        |        |        |        |   |        |                         |                                  |
|---|------|---|---|-------|--------|--------|--------|--------|---|--------|-------------------------|----------------------------------|
| 1 | 1.00 | 1 | 1 | -0.05 | -0.05  | -0.05  | -0.043 | -0.051 | t | 119823 | EDDDMGF<br>GLFD         | Homo<br>sapiens                  |
| 1 | 1.00 | 1 | 1 | 0.01  | 0.008  | 0.006  | 0.009  | 0.008  | t | 59757  | SMSYTW<br>TGA           | Mus<br>musculu<br>s              |
| 1 | 1.00 | 1 | 1 | 0     | -0.002 | 0.004  | 0.003  | -0.002 | t | 34169  | KVPTL                   | Mus<br>musculu<br>s              |
| 1 | 1.00 | 1 | 1 | 0.01  | 0.01   | 0.01   | 0.01   | 0.01   | t | 96735  | PKVTKEK<br>P            | Homo<br>sapiens(<br>human)       |
| 1 | 1.00 | 1 | 1 | -0.02 | -0.017 | -0.034 | -0.02  | -0.018 | t | 99982  | EFLKKL<br>KLDI          | Mus<br>musculu<br>s              |
| 1 | 1.00 | 1 | 1 | -0.02 | -0.022 | -0.027 | -0.017 | -0.019 | t | 106873 | SSTGSID<br>MVD          | Mus<br>musculu<br>s              |
| 1 | 1.00 | 1 | 1 | 0.01  | 0.007  | 0.01   | 0.01   | 0.007  | t | 37311  | LLGACSF<br>SSI          | Oryctola<br>gus<br>cuniculu<br>s |
| 1 | 1.00 | 1 | 1 | -0.02 | -0.02  | -0.02  | -0.016 | -0.02  | t | 135955 | LRLLLCL<br>LLLS         | Homo<br>sapiens                  |
| 1 | 1.00 | 1 | 1 | -0.01 | -0.01  | -0.009 | -0.006 | -0.01  | t | 30945  | KGGRKP                  | Homo<br>sapiens                  |
| 1 | 1.00 | 1 | 1 | 0.02  | 0.032  | 0.02   | 0.026  | 0.02   | t | 109736 | PTGASG<br>PL            | Rattus<br>norvegic<br>us         |
| 1 | 1.00 | 1 | 1 | 0.02  | 0.023  | 0.02   | 0.02   | 0.018  | t | 101953 | PDPLSP<br>GE            | Mus<br>musculu<br>s              |
| 1 | 1.00 | 1 | 1 | 0.01  | 0.01   | 0.01   | 0.01   | 0.008  | t | 119658 | TYGIVLL<br>SGV          | Homo<br>sapiens                  |
| 1 | 1.00 | 1 | 1 | 0.01  | 0.002  | -0.005 | 0.01   | 0.013  | t | 95142  | RIKNTDG<br>SIS          | Mus<br>musculu<br>s              |
| 1 | 1.00 | 1 | 1 | 0.03  | 0.03   | 0.03   | 0.03   | 0.029  | t | 108897 | EIDGPAG<br>QAEP         | Mus<br>musculu<br>s              |
| 1 | 1.00 | 1 | 1 | 0     | 0.004  | 0      | 0.007  | 0      | t | 134707 | KLPFSRL<br>A<br>REICVKF | Homo<br>sapiens                  |

|   |      |   |   |      |        |        |       |        |   |        |                             |                                  |
|---|------|---|---|------|--------|--------|-------|--------|---|--------|-----------------------------|----------------------------------|
| 1 | 1.00 | 1 | 1 | 0.04 | 0.04   | 0.021  | 0.04  | 0.043  | t | 71328  | VTGKVEYT<br>KYND DD         | Mus<br>musculu<br>s              |
| 1 | 1.00 | 1 | 1 | 0.05 | 0.047  | 0.043  | 0.05  | 0.05   | t | 130908 | ITRTTLQSD<br>QEEIDY         | Oryctola<br>gus<br>cuniculu<br>s |
| 1 | 1.00 | 1 | 1 | 0.02 | 0.022  | 0.02   | 0.023 | 0.02   | t | 25795  | IEEVALSTT<br>GEIPF          | Homo<br>sapiens                  |
| 1 | 1.00 | 1 | 1 | 0    | -0.004 | 0      | 0.003 | -0.002 | t | 71353  | VTHESYQE<br>LVKKLEALE<br>DA | Oryctola<br>gus<br>cuniculu<br>s |
| 1 | 1.00 | 1 | 1 | 0    | -0.002 | 0      | 0.003 | -0.002 | t | 62779  | TAADTPTA<br>TESISPSP        | Mus<br>musculu<br>s              |
| 1 | 1.00 | 1 | 1 | 0.03 | 0.03   | 0.018  | 0.03  | 0.032  | t | 81782  | EQVEYPLK<br>PI              | Oryctola<br>gus<br>cuniculu<br>s |
| 1 | 1.00 | 1 | 1 | 0    | 0      | -0.005 | 0     | 0.002  | t | 54157  | RIGYFGHQ                    | Homo<br>sapiens                  |
| 1 | 1.00 | 1 | 1 | 0    | 0      | 0.002  | 0     | -0.002 | t | 121773 | QYVAMVA<br>DRLFLY           | Rattus<br>norvegic<br>us         |
| 1 | 1.00 | 1 | 1 | 0    | -0.004 | -0.007 | 0.003 | 0      | t | 35007  | LAVLLGAC<br>SF              | Oryctola<br>gus<br>cuniculu<br>s |
| 1 | 1.00 | 1 | 1 | 0.01 | 0.01   | 0.006  | 0.01  | 0.007  | t | 22792  | GTQETGD<br>TTPSAYSMS        | Oryctola<br>gus<br>cuniculu<br>s |
| 1 | 1.00 | 1 | 1 | 0    | 0.004  | 0      | 0.003 | -0.001 | t | 118568 | QKIGIEIKR<br>TLK            | Homo<br>sapiens                  |
| 1 | 1.00 | 1 | 1 | 0.05 | 0.05   | 0.043  | 0.05  | 0.049  | t | 57746  | SFEEDTEE<br>DK              | Oryctola<br>gus<br>cuniculu<br>s |
| 1 | 1.00 | 1 | 1 | 0.05 | 0.05   | 0.043  | 0.05  | 0.049  | t | 57746  | SFEEDTEE<br>DK              | Oryctola<br>gus<br>cuniculu<br>s |

|   |      |   |   |       |        |        |        |        |   |        |                            |                                  |
|---|------|---|---|-------|--------|--------|--------|--------|---|--------|----------------------------|----------------------------------|
| 1 | 1.00 | 1 | 1 | -0.01 | -0.013 | -0.022 | -0.01  | -0.008 | t | 42251  | MNYLLFCL<br>FFAF           | Oryctola<br>gus<br>cuniculu<br>s |
| 1 | 1.00 | 1 | 1 | -0.01 | -0.01  | -0.022 | -0.01  | -0.008 | t | 42251  | MNYLLFCL<br>FFAF           | Mus<br>musculu<br>s              |
| 1 | 1.00 | 1 | 1 | 0.02  | 0.02   | 0.02   | 0.02   | 0.019  | t | 119632 | QYNSTYRV                   | Homo<br>sapiens                  |
| 1 | 1.00 | 1 | 1 | 0.02  | 0.016  | 0.011  | 0.023  | 0.022  | t | 30516  | KELSQKTL                   | Oryctola<br>gus<br>cuniculu<br>s |
| 1 | 1.00 | 1 | 1 | 0.02  | 0.02   | 0.021  | 0.021  | 0.02   | t | 13266  | ELRWDLT<br>DIYNL           | Mus<br>musculu<br>s              |
| 1 | 1.00 | 1 | 1 | 0.02  | 0.02   | 0.021  | 0.021  | 0.02   | t | 13266  | ELRWDLT<br>DIYNL           | Mus<br>musculu<br>s              |
| 1 | 1.00 | 1 | 1 | 0.04  | 0.04   | 0.035  | 0.04   | 0.039  | t | 36953  | LKLYDDKN<br>ASL            | Mus<br>musculu<br>s              |
| 1 | 1.00 | 1 | 1 | 0.01  | 0.01   | 0.006  | 0.01   | 0.008  | t | 49108  | PQQQPFP<br>QPQ             | Mus<br>musculu<br>s              |
| 1 | 1.00 | 1 | 1 | 0.02  | 0.02   | 0.017  | 0.02   | 0.02   | t | 47140  | PDLIPLL                    | Mus<br>musculu<br>s              |
| 1 | 1.00 | 1 | 1 | 0.02  | 0.017  | 0.017  | 0.02   | 0.02   | t | 47140  | PDLIPLL                    | Oryctola<br>gus<br>cuniculu<br>s |
| 1 | 1.00 | 1 | 1 | -0.03 | -0.03  | -0.039 | -0.023 | -0.03  | t | 20065  | GGVAVIKA<br>GA             | Homo<br>sapiens                  |
| 1 | 1.00 | 1 | 1 | -0.05 | -0.05  | -0.063 | -0.053 | -0.05  | t | 72280  | WCRCGD                     | Homo<br>sapiens                  |
| 1 | 1.00 | 1 | 1 | 0.03  | 0.03   | 0.03   | 0.036  | 0.03   | t | 94481  | CSNNPTC<br>WAICK           | Homo<br>sapiens                  |
| 1 | 1.00 | 1 | 1 | 0     | 0      | 0      | 0.004  | -0.001 | t | 122947 | WTQEPQP<br>LEEKWQH<br>RVVE | Homo<br>sapiens                  |
| 1 | 1.00 | 1 | 1 | 0.06  | 0.06   | 0.06   | 0.063  | 0.06   | t | 149035 | EGSGTTK                    | Sus<br>scrofa                    |
| 1 | 1.00 | 1 | 1 | -0.02 | -0.02  | -0.02  | -0.02  | -0.02  | t | 118556 | PPPGMIPP                   | Homo<br>sapiens                  |

|   |      |   |   |       |        |        |        |       |   |        |                              |                          |
|---|------|---|---|-------|--------|--------|--------|-------|---|--------|------------------------------|--------------------------|
| 1 | 1.00 | 1 | 1 | 0.02  | 0.022  | 0.004  | 0.02   | 0.022 | t | 134684 | GSLPQKSQ<br>RDEN             | Rattus<br>norvegicus     |
| 1 | 1.00 | 1 | 1 | 0     | -0.004 | -0.013 | -0.001 | 0     | t | 65794  | TPVAPTQE<br>VK               | Oryctolagus<br>cuniculus |
| 1 | 1.00 | 1 | 1 | 0.04  | 0.04   | 0.033  | 0.04   | 0.039 | t | 137444 | SDEALPLG<br>SPRCD            | Mus<br>musculus          |
| 1 | 1.00 | 1 | 1 | 0     | 0      | 0      | 0.007  | 0     | t | 138812 | SSVLYGGP<br>PSAA             | Rattus<br>norvegicus     |
| 1 | 1.00 | 1 | 1 | -0.02 | -0.018 | -0.022 | -0.013 | -0.02 | t | 132079 | SQLQRLLA<br>QQQRAQS          | Homo<br>sapiens          |
| 1 | 1.00 | 1 | 1 | 0.01  | 0.01   | 0.01   | 0.01   | 0.011 | t | 115190 | CDKFLDDD<br>LT               | Homo<br>sapiens          |
| 1 | 1.00 | 1 | 1 | 0.03  | 0.03   | 0.023  | 0.03   | 0.03  | t | 78375  | EPGITTNY<br>DT               | Mus<br>musculus          |
| 1 | 1.00 | 1 | 1 | 0     | 0.004  | 0      | 0.007  | 0     | t | 136419 | KIHAREIFD<br>SRGNPTVE        | Homo<br>sapiens          |
| 1 | 1.00 | 1 | 1 | 0     | 0.004  | 0      | 0.007  | 0     | t | 136418 | KIHAREIFD<br>SRGNPTVE        | Homo<br>sapiens          |
| 1 | 1.00 | 1 | 1 | 0     | 0.015  | 0      | 0.007  | 0     | t | 125610 | YYVFFEEQ<br>EDEIIGFG<br>QELK | Homo<br>sapiens          |
| 1 | 1.00 | 1 | 1 | 0     | 0.015  | 0      | 0.007  | 0     | t | 125478 | LHQEYEEN<br>LGDSIVGY<br>KEKS | Homo<br>sapiens          |
| 1 | 1.00 | 1 | 1 | 0     | 0      | 0      | 0.007  | 0     | t | 118060 | PPPGMRP<br>P                 | Mus<br>musculus          |
| 1 | 1.00 | 1 | 1 | 0     | 0.015  | 0      | 0.007  | 0     | t | 125540 | QSLRQRKS<br>VNALNSPL<br>HQEY | Homo<br>sapiens          |
| 1 | 1.00 | 1 | 1 | 0     | 0.015  | 0      | 0.007  | 0     | t | 122780 | GQELKNP<br>QEETLQAF<br>DSHYD | Homo<br>sapiens          |

|   |      |   |   |   |       |   |       |   |   |        |                              |                     |
|---|------|---|---|---|-------|---|-------|---|---|--------|------------------------------|---------------------|
| 1 | 1.00 | 1 | 1 | 0 | 0.004 | 0 | 0.007 | 0 | t | 123511 | MPPMTQ<br>AP                 | Homo<br>sapiens     |
| 1 | 1.00 | 1 | 1 | 0 | 0.002 | 0 | 0.007 | 0 | t | 117550 | KREAVAG<br>RGRGRGR<br>G      | Homo<br>sapiens     |
| 1 | 1.00 | 1 | 1 | 0 | 0     | 0 | 0.007 | 0 | t | 117380 | TKPAIRRL<br>ARRGGVK<br>RIS   | Mus<br>musculu<br>s |
| 1 | 1.00 | 1 | 1 | 0 | 0.002 | 0 | 0.007 | 0 | t | 108629 | SHQESTRG<br>RSRGRSGR<br>SGS  | Homo<br>sapiens     |
| 1 | 1.00 | 1 | 1 | 0 | 0     | 0 | 0.007 | 0 | t | 117300 | GSGKGKV<br>QFQGKKT<br>KF     | Homo<br>sapiens     |
| 1 | 1.00 | 1 | 1 | 0 | 0     | 0 | 0.007 | 0 | t | 105967 | MKRGLTV<br>AVAGAAIL<br>VAGLS | Homo<br>sapiens     |
| 1 | 1.00 | 1 | 1 | 0 | 0.004 | 0 | 0.007 | 0 | t | 117245 | VTWEVLE<br>GEVEKEAL<br>KKI   | Homo<br>sapiens     |
| 1 | 1.00 | 1 | 1 | 0 | 0.002 | 0 | 0.007 | 0 | t | 108629 | SHQESTRG<br>RSRGRSGR<br>SGS  | Homo<br>sapiens     |
| 1 | 1.00 | 1 | 1 | 0 | 0     | 0 | 0.007 | 0 | t | 117295 | GITKPAIRR<br>LARRGG          | Mus<br>musculu<br>s |
| 1 | 1.00 | 1 | 1 | 0 | 0     | 0 | 0.007 | 0 | t | 67607  | VAGLSGCS<br>SNKSTTGS<br>GETT | Homo<br>sapiens     |
| 1 | 1.00 | 1 | 1 | 0 | 0     | 0 | 0.007 | 0 | t | 42633  | MSPVNKS<br>FEIEVTCS          | Homo<br>sapiens     |
| 1 | 1.00 | 1 | 1 | 0 | 0     | 0 | 0.007 | 0 | t | 58388  | SHLVEALY<br>LVCGERG          | Mus<br>musculu<br>s |
| 1 | 1.00 | 1 | 1 | 0 | 0     | 0 | 0.007 | 0 | t | 58388  | SHLVEALY<br>LVCGERG          | Mus<br>musculu<br>s |
| 1 | 1.00 | 1 | 1 | 0 | 0     | 0 | 0.007 | 0 | t | 30661  | KEVPALTA<br>VETGAT           | Homo<br>sapiens     |
| 1 | 1.00 | 1 | 1 | 0 | 0     | 0 | 0.007 | 0 | t | 25315  | IAIGGAAT<br>GIAAVLTD<br>GNPP | Homo<br>sapiens     |

|   |      |   |   |       |        |        |       |        |   |        |                              |                |
|---|------|---|---|-------|--------|--------|-------|--------|---|--------|------------------------------|----------------|
| 1 | 1.00 | 1 | 1 | 0     | 0      | 0      | 0.007 | 0      | t | 4334   | ASATKDGS<br>HYKITGTA<br>TGVD | Homo sapiens   |
| 1 | 1.00 | 1 | 1 | 0     | 0      | 0      | 0.007 | 0      | t | 433    | AASGPKVV<br>IDGKDQN<br>VTGSV | Homo sapiens   |
| 1 | 1.00 | 1 | 1 | 0     | 0      | 0      | 0.007 | 0      | t | 4990   | ATGVDMA<br>NPMSPVN<br>KSFEIE | Homo sapiens   |
| 1 | 1.00 | 1 | 1 | 0.03  | 0.032  | 0.03   | 0.037 | 0.031  | t | 124590 | PSPRSQT                      | Homo sapiens   |
| 1 | 1.00 | 1 | 1 | 0.01  | 0.01   | 0.005  | 0.01  | 0.01   | t | 22303  | GSDYEDRY<br>YRENM            | Mus musculus   |
| 1 | 1.00 | 1 | 1 | 0.01  | 0.01   | 0.005  | 0.01  | 0.01   | t | 22303  | GSDYEDRY<br>YRENM            | Mus musculus   |
| 1 | 1.00 | 1 | 1 | 0.01  | 0.01   | 0.005  | 0.01  | 0.01   | t | 22303  | GSDYEDRY<br>YRENM            | Mus musculus   |
| 1 | 1.00 | 1 | 1 | -0.01 | -0.01  | -0.01  | -0.01 | -0.013 | t | 115531 | VAPFPEVF<br>GKEKVNEL<br>SKDI | Homo sapiens   |
| 1 | 1.00 | 1 | 1 | 0.02  | 0.018  | 0.025  | 0.019 | 0.018  | t | 40938  | LYRPSDSSL<br>AGP             | Mus musculus   |
| 1 | 1.00 | 1 | 1 | -0.01 | -0.01  | -0.01  | -0.01 | -0.01  | t | 46860  | PALVPDKE<br>V                | Homo sapiens   |
| 1 | 1.00 | 1 | 1 | 0.03  | 0.03   | 0.03   | 0.033 | 0.03   | t | 149118 | TFGNRTQ                      | Sus scrofa     |
| 1 | 1.00 | 1 | 1 | -0.01 | -0.01  | -0.022 | -0.01 | -0.011 | t | 78635  | EKIERNNK<br>LKQPPPPP<br>NPN  | Mus musculus   |
| 1 | 1.00 | 1 | 1 | -0.02 | -0.017 | -0.02  | -0.02 | -0.02  | t | 135457 | FGF                          | Mus musculus   |
| 1 | 1.00 | 1 | 1 | 0     | 0      | 0      | 0     | 0      | t | 132411 | KMKGTFV<br>E                 | Homo sapiens   |
| 1 | 1.00 | 1 | 1 | 0.03  | 0.018  | 0.03   | 0.03  | 0.03   | t | 61391  | SSTISSCT                     | Macaca mulatta |

|   |      |   |   |       |        |        |        |        |   |        |                   |                       |
|---|------|---|---|-------|--------|--------|--------|--------|---|--------|-------------------|-----------------------|
| 1 | 1.00 | 1 | 1 | 0.02  | 0.024  | 0.006  | 0.02   | 0.021  | t | 45931  | NSNNKEYT          | Cavia porcellus       |
| 1 | 1.00 | 1 | 1 | -0.02 | -0.02  | -0.029 | -0.017 | -0.02  | t | 6983   | CSETFTNK LKEKH    | Homo sapiens          |
| 1 | 1.00 | 1 | 1 | 0.05  | 0.053  | 0.038  | 0.05   | 0.05   | t | 102524 | IDDL              | Mus musculus          |
| 1 | 1.00 | 1 | 1 | -0.01 | -0.008 | -0.018 | -0.009 | -0.01  | t | 70481  | VPSPDPN NSPARP    | Homo sapiens          |
| 1 | 1.00 | 1 | 1 | 0.03  | 0.03   | 0.025  | 0.033  | 0.03   | t | 50272  | QAGQEMI LAVQGVQ D | Homo sapiens          |
| 1 | 1.00 | 1 | 1 | -0.03 | -0.03  | -0.032 | -0.03  | -0.032 | t | 55232  | RPMIHF            | Mus musculus          |
| 1 | 1.00 | 1 | 1 | 0.04  | 0.037  | 0.04   | 0.04   | 0.04   | t | 43575  | NEDNEKLR          | Oryctolagus cuniculus |
| 1 | 1.00 | 1 | 1 | -0.01 | -0.012 | -0.003 | -0.009 | -0.01  | t | 79011  | LDPAFG            | Mus musculus          |
| 1 | 1.00 | 1 | 1 | -0.05 | -0.048 | -0.055 | -0.049 | -0.051 | t | 50494  | QDMRNTI MASKTVG   | Homo sapiens          |
| 1 | 1.00 | 1 | 1 | 0.01  | 0.012  | 0.019  | 0.017  | 0.012  | t | 108895 | EGNVFSC           | Homo sapiens          |
| 1 | 1.00 | 1 | 1 | 0     | 0      | -0.011 | 0      | 0      | t | 111497 | LMGTLGIV CPICSQKP | Oryctolagus cuniculus |
| 1 | 1.00 | 1 | 1 | 0.02  | 0.02   | 0.025  | 0.02   | 0.02   | t | 9026   | DLAPEA            | Homo sapiens          |
| 1 | 1.00 | 1 | 1 | -0.01 | -0.012 | -0.02  | -0.011 | -0.01  | t | 26244  | IGILGGK           | Mus musculus          |
| 1 | 1.00 | 1 | 1 | -0.01 | -0.014 | -0.02  | -0.011 | -0.01  | t | 26244  | IGILGGK           | Oryctolagus cuniculus |
| 1 | 1.00 | 1 | 1 | 0.03  | 0.03   | 0.03   | 0.03   | 0.031  | t | 115340 | LDDDLTDD IM       | Homo sapiens          |



|   |      |   |   |       |        |        |        |        |   |        |                               |                       |
|---|------|---|---|-------|--------|--------|--------|--------|---|--------|-------------------------------|-----------------------|
| 1 | 1.00 | 1 | 1 | 0.06  | 0.06   | 0.053  | 0.061  | 0.059  | t | 64600  | TKKNYSEL<br>DDEEPMELDYP       | Homo sapiens          |
| 1 | 1.00 | 1 | 1 | -0.01 | -0.011 | -0.002 | -0.01  | -0.012 | t | 25649  | IDPY                          | Mus musculus          |
| 1 | 1.00 | 1 | 1 | 0.02  | 0.022  | 0.017  | 0.021  | 0.019  | t | 103304 | KGLMNIAL<br>AISAQQV           | Homo sapiens          |
| 1 | 1.00 | 1 | 1 | 0.06  | 0.058  | 0.064  | 0.063  | 0.06   | t | 8119   | DEPAGE                        | Mus musculus          |
| 1 | 1.00 | 1 | 1 | -0.02 | -0.018 | -0.029 | -0.023 | -0.023 | t | 105997 | PFKFFVPP<br>SEQSLRA           | Homo sapiens          |
| 1 | 1.00 | 1 | 1 | 0.05  | 0.054  | 0.038  | 0.05   | 0.05   | t | 34137  | KVNGGNL<br>FDVSRVTF           | Capra hircus          |
| 1 | 1.00 | 1 | 1 | 0.07  | 0.068  | 0.058  | 0.063  | 0.07   | t | 134794 | SEATVAES<br>DSF               | Mus musculus          |
| 1 | 1.00 | 1 | 1 | 0.02  | 0.018  | 0.006  | 0.013  | 0.019  | t | 120584 | HKTEKNKT<br>EK                | Mus musculus          |
| 1 | 1.00 | 1 | 1 | -0.01 | -0.012 | -0.011 | -0.009 | -0.009 | t | 69106  | VIRVQY                        | Homo sapiens          |
| 1 | 1.00 | 1 | 1 | -0.03 | -0.026 | -0.03  | -0.023 | -0.031 | t | 134039 | EDWDYAP<br>LV LAPDDR<br>SYKSQ | Homo sapiens          |
| 1 | 1.00 | 1 | 1 | -0.01 | -0.012 | -0.01  | -0.009 | -0.01  | t | 98383  | QPFPQPQ<br>LPYP               | Mus musculus          |
| 1 | 1.00 | 1 | 1 | -0.02 | -0.018 | -0.02  | -0.013 | -0.021 | t | 108104 | RRLPFGSQ<br>M                 | Homo sapiens          |
| 1 | 1.00 | 1 | 1 | 0.01  | 0.01   | 0.01   | 0.01   | 0.01   | t | 6059   | CCDLAP                        | Homo sapiens          |
| 1 | 1.00 | 1 | 1 | 0     | 0      | -0.003 | 0      | 0      | t | 38273  | LNLTTWN<br>PTLLG              | Oryctolagus cuniculus |

|   |      |   |   |       |        |        |        |        |   |        |                     |                       |
|---|------|---|---|-------|--------|--------|--------|--------|---|--------|---------------------|-----------------------|
| 1 | 1.00 | 1 | 1 | 0.01  | 0.01   | 0.01   | 0.006  | 0.008  | t | 117456 | DGQFCH              | Homo sapiens          |
| 1 | 1.00 | 1 | 1 | 0     | 0.003  | 0.001  | 0.003  | 0      | t | 78292  | VPTKYH              | Equus caballus        |
| 1 | 1.00 | 1 | 1 | 0.07  | 0.07   | 0.061  | 0.07   | 0.07   | t | 133698 | SLLTEVETP<br>IRNEWG | Mus musculus          |
| 1 | 1.00 | 1 | 1 | 0.01  | 0.014  | 0.006  | 0.011  | 0.01   | t | 71838  | VVSTLP              | Homo sapiens          |
| 1 | 1.00 | 1 | 1 | 0     | 0      | -0.012 | 0      | 0      | t | 105341 | MPRCRRG<br>Y        | Homo sapiens          |
| 1 | 1.00 | 1 | 1 | -0.02 | -0.022 | -0.029 | -0.017 | -0.02  | t | 115351 | LKQKSSNS<br>RKKRSTS | Mus musculus          |
| 1 | 1.00 | 1 | 1 | 0     | -0.01  | 0      | 0.003  | 0      | t | 24694  | HRMAWD<br>MMM       | Homo sapiens          |
| 1 | 1.00 | 1 | 1 | 0.08  | 0.08   | 0.078  | 0.074  | 0.078  | t | 7959   | DEEEYDE<br>DEYEDYDE | Homo sapiens          |
| 1 | 1.00 | 1 | 1 | -0.01 | -0.008 | -0.01  | -0.009 | -0.013 | t | 146963 | GGEDVAV<br>FARGPQ   | Homo sapiens          |
| 1 | 1.00 | 1 | 1 | -0.01 | -0.012 | -0.019 | -0.01  | -0.01  | t | 100629 | VRKQYKR<br>DIQ      | Mus musculus          |
| 1 | 1.00 | 1 | 1 | 0.02  | 0.017  | 0.011  | 0.02   | 0.022  | t | 20473  | GIVEFYTD            | Oryctolagus cuniculus |
| 1 | 1.00 | 1 | 1 | 0.02  | 0.023  | 0.018  | 0.02   | 0.017  | t | 68858  | VHILCYCY<br>GLPDSEP | Equus caballus        |
| 1 | 1.00 | 1 | 1 | -0.04 | -0.04  | -0.055 | -0.04  | -0.04  | t | 25900  | IENAIRMIS<br>D      | Homo sapiens          |
| 1 | 1.00 | 1 | 1 | -0.03 | -0.03  | -0.035 | -0.03  | -0.031 | t | 55232  | RPMIHF              | Mus musculus          |
| 1 | 1.00 | 1 | 1 | 0.01  | 0.012  | 0.004  | 0.011  | 0.012  | t | 57215  | SDIEKKVN            | Homo sapiens          |

|   |      |   |   |       |        |        |        |        |   |        |                              |                                  |
|---|------|---|---|-------|--------|--------|--------|--------|---|--------|------------------------------|----------------------------------|
| 1 | 1.00 | 1 | 1 | -0.01 | -0.013 | -0.02  | -0.01  | -0.01  | t | 140836 | DEAAYSKN<br>RRAV             | Oryctola<br>gus<br>cuniculu<br>s |
| 1 | 1.00 | 1 | 1 | 0.04  | 0.042  | 0.04   | 0.043  | 0.04   | t | 131762 | YAASSYL                      | Homo<br>sapiens                  |
| 1 | 1.00 | 1 | 1 | 0.02  | 0.02   | 0.02   | 0.02   | 0.02   | t | 134752 | MGPKRRQ<br>LTF               | Homo<br>sapiens                  |
| 1 | 1.00 | 1 | 1 | 0.03  | 0.03   | 0.027  | 0.03   | 0.03   | t | 61824  | STPLLYPSL<br>A               | Mus<br>musculu<br>s              |
| 1 | 1.00 | 1 | 1 | 0     | -0.004 | -0.012 | 0.003  | 0      | t | 106779 | RKPLSPG<br>MTGR              | Oryctola<br>gus<br>cuniculu<br>s |
| 1 | 1.00 | 1 | 1 | -0.03 | -0.026 | -0.039 | -0.033 | -0.033 | t | 117396 | VKNLHNQ<br>ARS               | Homo<br>sapiens                  |
| 1 | 1.00 | 1 | 1 | -0.01 | -0.01  | -0.015 | -0.01  | -0.011 | t | 46806  | PAGGAYS<br>MYTNWE<br>QD      | Homo<br>sapiens                  |
| 1 | 1.00 | 1 | 1 | -0.02 | -0.02  | -0.027 | -0.02  | -0.021 | t | 130543 | LLKGKGDK<br>AQIEKRI          | Homo<br>sapiens                  |
| 1 | 1.00 | 1 | 1 | 0     | -0.002 | -0.008 | -0.001 | 0      | t | 64644  | TKPTDPTG<br>IE               | Mus<br>musculu<br>s              |
| 1 | 1.00 | 1 | 1 | 0.04  | 0.044  | 0.04   | 0.043  | 0.038  | t | 21738  | GPPVDPTS<br>G                | Homo<br>sapiens                  |
| 1 | 1.00 | 1 | 1 | -0.04 | -0.04  | -0.046 | -0.04  | -0.042 | t | 33548  | KSVIIGCTG<br>GSPEKHHC        | Rattus<br>norvegic<br>us         |
| 1 | 1.00 | 1 | 1 | 0.03  | 0.03   | 0.03   | 0.03   | 0.03   | t | 74727  | YLKASA                       | Homo<br>sapiens                  |
| 1 | 1.00 | 1 | 1 | -0.01 | -0.008 | -0.013 | -0.007 | -0.01  | t | 52898  | QYENLKYT<br>VIITVHT          | Homo<br>sapiens                  |
| 1 | 1.00 | 1 | 1 | 0.05  | 0.047  | 0.042  | 0.05   | 0.049  | t | 153445 | QMTKLAT<br>TEELPDEF<br>VVVTA | Oryctola<br>gus<br>cuniculu<br>s |

|   |      |   |   |       |        |        |        |        |   |        |                              |                       |
|---|------|---|---|-------|--------|--------|--------|--------|---|--------|------------------------------|-----------------------|
| 1 | 1.00 | 1 | 1 | -0.01 | -0.01  | -0.018 | -0.007 | -0.01  | t | 46473  | NVSAIFMA<br>VLLTLQT          | Homo sapiens          |
| 1 | 1.00 | 1 | 1 | -0.01 | -0.01  | -0.01  | -0.01  | -0.012 | t | 131100 | TDSEMDV<br>VRFD              | Mus musculus          |
| 1 | 1.00 | 1 | 1 | -0.02 | -0.02  | -0.02  | -0.02  | -0.023 | t | 115396 | NLLRFFVA<br>PFPEVFGK<br>EKVN | Homo sapiens          |
| 1 | 1.00 | 1 | 1 | 0.05  | 0.048  | 0.05   | 0.047  | 0.048  | t | 110877 | GTVGENV<br>PDDLYIKG          | Mus musculus          |
| 1 | 1.00 | 1 | 1 | 0.04  | 0.043  | 0.04   | 0.04   | 0.037  | t | 105702 | CVYDQYG<br>TEFEDYSY<br>ES    | Mus musculus          |
| 1 | 1.00 | 1 | 1 | -0.03 | -0.03  | -0.03  | -0.026 | -0.031 | t | 119605 | KSRWQQG<br>N                 | Homo sapiens          |
| 1 | 1.00 | 1 | 1 | 0.01  | 0.006  | 0      | 0.013  | 0.01   | t | 67941  | VDFEEDTL<br>PK               | Oryctolagus cuniculus |
| 1 | 1.00 | 1 | 1 | -0.02 | -0.016 | -0.022 | -0.023 | -0.02  | t | 139939 | VLPWPWE                      | Ovis aries            |
| 1 | 1.00 | 1 | 1 | 0.03  | 0.033  | 0.021  | 0.03   | 0.03   | t | 99945  | DIRDLSSEE<br>E               | Mus musculus          |
| 1 | 1.00 | 1 | 1 | 0.02  | 0.02   | 0.029  | 0.027  | 0.02   | t | 135975 | PTLAFLQD<br>VMNI             | Homo sapiens          |
| 1 | 1.00 | 1 | 1 | 0.05  | 0.052  | 0.062  | 0.057  | 0.05   | t | 130859 | GLLAQQM<br>DY                | Homo sapiens          |
| 1 | 1.00 | 1 | 1 | 0.01  | 0.014  | -0.003 | 0.007  | 0.012  | t | 65983  | TQYTDAPS<br>FS               | Homo sapiens          |
| 1 | 1.00 | 1 | 1 | 0.01  | 0.003  | 0.003  | 0.017  | 0.012  | t | 156799 | VYATRSSA<br>VRLRSSV          | Homo sapiens          |

|   |      |   |   |       |        |        |        |        |   |        |                            |                              |
|---|------|---|---|-------|--------|--------|--------|--------|---|--------|----------------------------|------------------------------|
| 1 | 1.00 | 1 | 1 | -0.02 | -0.016 | -0.035 | -0.02  | -0.02  | t | 43796  | NEYGVEG<br>GRVNAV          | Mus<br>musculus              |
| 1 | 1.00 | 1 | 1 | -0.02 | -0.016 | -0.035 | -0.02  | -0.02  | t | 43796  | NEYGVEG<br>GRVNAV          | Mus<br>musculus              |
| 1 | 1.00 | 1 | 1 | -0.02 | -0.02  | -0.024 | -0.02  | -0.023 | t | 18524  | GAARQPD                    | Mus<br>musculus              |
| 1 | 1.00 | 1 | 1 | 0.04  | 0.04   | 0.04   | 0.046  | 0.04   | t | 118567 | QIEKRIQEII<br>EQL          | Homo<br>sapiens              |
| 1 | 1.00 | 1 | 1 | -0.01 | -0.01  | -0.01  | -0.007 | -0.01  | t | 125791 | CSFWSKYI<br>QTLK           | Mus<br>musculus              |
| 1 | 1.00 | 1 | 1 | 0.03  | 0.032  | 0.028  | 0.027  | 0.027  | t | 116740 | GRDPYSPS<br>QDPYSPS        | Homo<br>sapiens              |
| 1 | 1.00 | 1 | 1 | 0     | 0.002  | -0.012 | 0.001  | 0.002  | t | 96453  | KFKEAFLR<br>SV             | Homo<br>sapiens(<br>human)   |
| 1 | 1.00 | 1 | 1 | -0.02 | -0.016 | -0.02  | -0.023 | -0.023 | t | 70443  | VPQKAVP<br>YPQRD           | Homo<br>sapiens              |
| 1 | 1.00 | 1 | 1 | 0     | -0.002 | 0      | 0.003  | -0.002 | t | 43233  | NANP                       | Mus<br>musculus              |
| 1 | 1.00 | 1 | 1 | 0     | -0.004 | 0      | 0.003  | -0.002 | t | 34965  | LASLRKAF<br>ADTVPV<br>PSNY | Oryctola<br>gus<br>cuniculus |
| 1 | 1.00 | 1 | 1 | 0     | -0.004 | 0      | 0.003  | -0.002 | t | 28075  | IPSTAFTDI<br>AWVRLPN<br>HY | Oryctola<br>gus<br>cuniculus |
| 1 | 1.00 | 1 | 1 | 0     | -0.002 | 0      | 0.003  | -0.002 | t | 6402   | CHPSDGK<br>CN              | Mus<br>musculus              |
| 1 | 1.00 | 1 | 1 | 0     | -0.002 | 0      | 0.003  | -0.002 | t | 10069  | DRYIPYSP                   | Mus<br>musculus              |

|   |      |   |   |       |        |        |        |        |   |        |                              |                                  |
|---|------|---|---|-------|--------|--------|--------|--------|---|--------|------------------------------|----------------------------------|
| 1 | 1.00 | 1 | 1 | 0.01  | 0.01   | -0.001 | 0.01   | 0.01   | t | 123282 | HACQKKLL<br>KFEALQQE<br>EGEE | Mus<br>musculu<br>s              |
| 1 | 1.00 | 1 | 1 | 0.01  | 0.008  | -0.001 | 0.01   | 0.01   | t | 123282 | HACQKKLL<br>KFEALQQE<br>EGEE | Oryctola<br>gus<br>cuniculu<br>s |
| 1 | 1.00 | 1 | 1 | 0.01  | 0.013  | -0.001 | 0.01   | 0.01   | t | 123282 | HACQKKLL<br>KFEALQQE<br>EGEE | Mus<br>musculu<br>s              |
| 1 | 1.00 | 1 | 1 | 0     | 0      | 0      | 0      | -0.003 | t | 9754   | DPRVRGLY<br>F                | Mus<br>musculu<br>s              |
| 1 | 1.00 | 1 | 1 | 0.01  | 0.012  | -0.001 | 0.011  | 0.01   | t | 110571 | EKTGILTVT<br>YHSETQRT<br>K   | Homo<br>sapiens                  |
| 1 | 1.00 | 1 | 1 | -0.01 | -0.008 | -0.005 | -0.003 | -0.013 | t | 49763  | PTRAETRE<br>ERMERKR<br>REKIE | Homo<br>sapiens                  |
| 1 | 1.00 | 1 | 1 | 0.01  | 0.01   | -0.002 | 0.01   | 0.01   | t | 153441 | QKESTLHL<br>VLRLRGG          | Mus<br>musculu<br>s              |
| 1 | 1.00 | 1 | 1 | 0.07  | 0.078  | 0.07   | 0.07   | 0.069  | t | 136365 | IDSNHVYK<br>DFLT             | Gallus<br>gallus                 |
| 1 | 1.00 | 1 | 1 | -0.03 | -0.028 | -0.023 | -0.027 | -0.034 | t | 142007 | SDWRFLR<br>GYHQYA            | Homo<br>sapiens                  |
| 1 | 1.00 | 1 | 1 | -0.01 | -0.014 | -0.013 | -0.011 | -0.012 | t | 111820 | TEAVPGDP<br>DVNRF            | Oryctola<br>gus<br>cuniculu<br>s |
| 1 | 1.00 | 1 | 1 | 0     | 0.003  | 0.006  | 0      | -0.005 | t | 122912 | TDVRYKD<br>DMYHFFC<br>PAIQA  | Mus<br>musculu<br>s              |
| 1 | 1.00 | 1 | 1 | 0     | 0      | 0      | 0.004  | 0      | t | 135953 | LLQYVVK<br>S<br>FDRS         | Homo<br>sapiens                  |
| 1 | 1.00 | 1 | 1 | 0     | -0.005 | -0.009 | -0.002 | 0      | t | 51474  | QLPNVGIT<br>QGIV             | Bos<br>taurus                    |
| 1 | 1.00 | 1 | 1 | 0.02  | 0.02   | 0.014  | 0.02   | 0.02   | t | 22063  | GRGYNVSS<br>IVTMTSQ          | Homo<br>sapiens                  |
| 1 | 1.00 | 1 | 1 | -0.03 | -0.03  | -0.031 | -0.03  | -0.031 | t | 118822 | GPPRPGM<br>MPA               | Homo<br>sapiens                  |
| 1 | 1.00 | 1 | 1 | 0.01  | 0.012  | 0.006  | 0.007  | 0.008  | t | 303    | AALTKAIT<br>AMTQA            | Homo<br>sapiens                  |

|   |      |   |   |       |        |        |        |        |   |        |                     |                                  |
|---|------|---|---|-------|--------|--------|--------|--------|---|--------|---------------------|----------------------------------|
| 1 | 1.00 | 1 | 1 | 0.01  | 0.013  | 0.003  | 0.01   | 0.01   | t | 105704 | DEAFRHDS<br>GY      | Mus<br>musculu<br>s              |
| 1 | 1.00 | 1 | 1 | -0.03 | -0.028 | -0.031 | -0.023 | -0.03  | t | 134803 | THLLIRKLP<br>FSRLAR | Homo<br>sapiens                  |
| 1 | 1.00 | 1 | 1 | 0.02  | 0.022  | 0.013  | 0.021  | 0.02   | t | 98059  | GEWAGKD<br>KIE      | Homo<br>sapiens                  |
| 1 | 1.00 | 1 | 1 | 0.02  | 0.023  | 0.02   | 0.02   | 0.02   | t | 7532   | DAHHAAD             | Mus<br>musculu<br>s              |
| 1 | 1.00 | 1 | 1 | -0.02 | -0.032 | -0.02  | -0.02  | -0.022 | t | 9756   | DPRVRGLY<br>FPAGG   | Mus<br>musculu<br>s              |
| 1 | 1.00 | 1 | 1 | -0.02 | -0.032 | -0.02  | -0.02  | -0.022 | t | 9756   | DPRVRGLY<br>FPAGG   | Mus<br>musculu<br>s              |
| 1 | 1.00 | 1 | 1 | -0.02 | -0.032 | -0.02  | -0.02  | -0.022 | t | 9756   | DPRVRGLY<br>FPAGG   | Mus<br>musculu<br>s              |
| 1 | 1.00 | 1 | 1 | -0.03 | -0.027 | -0.039 | -0.03  | -0.03  | t | 99946  | DIYGKDAL<br>LH      | Mus<br>musculu<br>s              |
| 1 | 1.00 | 1 | 1 | -0.02 | -0.02  | -0.032 | -0.02  | -0.02  | t | 134656 | DSDMGR<br>MGPI      | Oryctola<br>gus<br>cuniculu<br>s |
| 1 | 1.00 | 1 | 1 | 0.01  | 0.01   | 0.01   | 0.01   | 0.01   | t | 19735  | GGFVQFV<br>TSTRNA   | Oryctola<br>gus<br>cuniculu<br>s |
| 1 | 1.00 | 1 | 1 | 0.01  | 0.01   | 0.01   | 0.01   | 0.01   | t | 19735  | GGFVQFV<br>TSTRNA   | Oryctola<br>gus<br>cuniculu<br>s |
| 1 | 1.00 | 1 | 1 | 0.02  | 0.022  | 0.009  | 0.017  | 0.018  | t | 6985   | CSEYPKPD<br>CTAE    | Homo<br>sapiens                  |
| 1 | 1.00 | 1 | 1 | 0.03  | 0.032  | 0.035  | 0.037  | 0.03   | t | 126903 | QVINVREG            | Homo<br>sapiens                  |
| 1 | 1.00 | 1 | 1 | 0.02  | 0.019  | 0.011  | 0.02   | 0.02   | t | 49690  | PTLDHVLD            | Anas<br>platyrhy<br>nchos        |

|   |      |   |   |      |       |        |       |        |   |        |                              |                                  |
|---|------|---|---|------|-------|--------|-------|--------|---|--------|------------------------------|----------------------------------|
| 1 | 1.00 | 1 | 1 | 0.06 | 0.06  | 0.06   | 0.063 | 0.059  | t | 78872  | VIPDREVL<br>YQEFDEM<br>EECAS | Homo<br>sapiens                  |
| 1 | 1.00 | 1 | 1 | 0.04 | 0.042 | 0.04   | 0.043 | 0.041  | t | 68017  | VDLPQL                       | Homo<br>sapiens                  |
| 1 | 1.00 | 1 | 1 | 0.01 | 0.01  | 0.01   | 0.01  | 0.007  | t | 140605 | TLYDALGA<br>V                | Mus<br>musculu<br>s              |
| 1 | 1.00 | 1 | 1 | 0.06 | 0.06  | 0.06   | 0.06  | 0.06   | t | 79403  | SVGDYG                       | Mus<br>musculu<br>s              |
| 1 | 1.00 | 1 | 1 | 0.01 | 0.012 | -0.002 | 0.001 | 0.008  | t | 115795 | IPTINTIAS<br>G               | Homo<br>sapiens                  |
| 1 | 1.00 | 1 | 1 | 0.05 | 0.048 | 0.056  | 0.053 | 0.051  | t | 67967  | VDGSDP                       | Mus<br>musculu<br>s              |
| 1 | 1.00 | 1 | 1 | 0.03 | 0.03  | 0.03   | 0.03  | 0.03   | t | 140462 | FNTKHDM<br>QGDS              | Mus<br>musculu<br>s              |
| 1 | 1.00 | 1 | 1 | 0.03 | 0.027 | 0.013  | 0.03  | 0.033  | t | 97023  | VATRSQTD<br>TSEKDC           | Oryctola<br>gus<br>cuniculu<br>s |
| 1 | 1.00 | 1 | 1 | 0    | 0     | 0      | 0     | -0.004 | t | 141726 | PTAPPLLP<br>HS               | Rattus<br>norvegic<br>us         |
| 1 | 1.00 | 1 | 1 | 0    | 0     | 0      | 0     | -0.004 | t | 141067 | PLSLEPDP                     | Mus<br>musculu<br>s              |
| 1 | 1.00 | 1 | 1 | 0    | 0     | 0      | 0     | -0.004 | t | 139935 | VIAIALFGT<br>IATANAAD        | Homo<br>sapiens                  |
| 1 | 1.00 | 1 | 1 | 0    | 0     | 0      | 0     | -0.004 | t | 137962 | RDSPEDFV                     | Oryctola<br>gus<br>cuniculu<br>s |
| 1 | 1.00 | 1 | 1 | 0    | 0     | 0      | 0     | -0.004 | t | 139830 | MKKISSVI<br>AIALFGTIA        | Homo<br>sapiens                  |
| 1 | 1.00 | 1 | 1 | 0    | 0     | 0      | 0     | -0.004 | t | 137401 | FEDVW                        | Mus<br>musculu<br>s              |
| 1 | 1.00 | 1 | 1 | 0    | 0     | 0      | 0     | -0.004 | t | 144364 | ITDAVITVP<br>AYFND           | Mus<br>musculu<br>s              |



|   |      |   |   |   |       |   |   |        |   |        |                         |                                  |
|---|------|---|---|---|-------|---|---|--------|---|--------|-------------------------|----------------------------------|
| 1 | 1.00 | 1 | 1 | 0 | 0.004 | 0 | 0 | -0.004 | t | 144364 | ITDAVITVP<br>AYFND      | Mus<br>musculu<br>s              |
| 1 | 1.00 | 1 | 1 | 0 | 0     | 0 | 0 | -0.004 | t | 141004 | EPDP                    | Mus<br>musculu<br>s              |
| 1 | 1.00 | 1 | 1 | 0 | 0     | 0 | 0 | -0.004 | t | 141760 | TAPPLLPH                | Rattus<br>norvegic<br>us         |
| 1 | 1.00 | 1 | 1 | 0 | 0     | 0 | 0 | -0.004 | t | 141761 | TAPPLLPH<br>SNLD        | Rattus<br>norvegic<br>us         |
| 1 | 1.00 | 1 | 1 | 0 | 0     | 0 | 0 | -0.004 | t | 142006 | SDSAQGS<br>DVSLTA       | Oryctola<br>gus<br>cuniculu<br>s |
| 1 | 1.00 | 1 | 1 | 0 | 0     | 0 | 0 | -0.004 | t | 151327 | PDGAAAG<br>GG           | Mus<br>musculu<br>s              |
| 1 | 1.00 | 1 | 1 | 0 | 0     | 0 | 0 | -0.004 | t | 151763 | WYRATHQ<br>E            | Mus<br>musculu<br>s              |
| 1 | 1.00 | 1 | 1 | 0 | 0     | 0 | 0 | -0.004 | t | 137866 | GDTRPRFL                | Oryctola<br>gus<br>cuniculu<br>s |
| 1 | 1.00 | 1 | 1 | 0 | 0     | 0 | 0 | -0.004 | t | 141605 | APPLLPHS<br>NL          | Mus<br>musculu<br>s              |
| 1 | 1.00 | 1 | 1 | 0 | 0     | 0 | 0 | -0.004 | t | 141859 | ASSNSAQ<br>GSDESLIA     | Oryctola<br>gus<br>cuniculu<br>s |
| 1 | 1.00 | 1 | 1 | 0 | 0     | 0 | 0 | -0.004 | t | 122749 | EIIGFGQEL<br>KNPQEE     | Oryctola<br>gus<br>cuniculu<br>s |
| 1 | 1.00 | 1 | 1 | 0 | 0     | 0 | 0 | -0.004 | t | 133642 | MCPEMSF<br>VAVHSCA<br>R | Mus<br>musculu<br>s              |
| 1 | 1.00 | 1 | 1 | 0 | 0     | 0 | 0 | -0.004 | t | 133531 | CDTLKPGE<br>C           | Mus<br>musculu<br>s              |

|   |      |   |   |   |        |   |   |        |   |        |                              |                                   |
|---|------|---|---|---|--------|---|---|--------|---|--------|------------------------------|-----------------------------------|
| 1 | 1.00 | 1 | 1 | 0 | 0      | 0 | 0 | -0.004 | t | 133705 | SSKTRSG<br>VHLVGPY           | Mus<br>musculu<br>s               |
| 1 | 1.00 | 1 | 1 | 0 | 0      | 0 | 0 | -0.004 | t | 131956 | LPKSAKPV<br>SQMRMA<br>TPLL   | Oryctola<br>gus<br>cuniculu<br>s  |
| 1 | 1.00 | 1 | 1 | 0 | -0.003 | 0 | 0 | -0.004 | t | 122780 | GQELKNP<br>QEETLQAF<br>DSHYD | Oryctola<br>gus<br>cuniculu<br>s  |
| 1 | 1.00 | 1 | 1 | 0 | 0      | 0 | 0 | -0.004 | t | 133632 | LRCYSHCT<br>FYFASST          | Mus<br>musculu<br>s               |
| 1 | 1.00 | 1 | 1 | 0 | 0      | 0 | 0 | -0.004 | t | 133528 | CADQKPG<br>EC                | Mus<br>musculu<br>s               |
| 1 | 1.00 | 1 | 1 | 0 | 0      | 0 | 0 | -0.004 | t | 133554 | EGLYSPW<br>WPRSLPVL          | Mus<br>musculu<br>s               |
| 1 | 1.00 | 1 | 1 | 0 | 0      | 0 | 0 | -0.004 | t | 133630 | LPPGLHVF<br>PLASNRS          | Mus<br>musculu<br>s               |
| 1 | 1.00 | 1 | 1 | 0 | 0      | 0 | 0 | -0.004 | t | 125478 | LHQEYEEN<br>LGDSIVGY<br>KEKS | Cricetulu<br>s<br>migrator<br>ius |
| 1 | 1.00 | 1 | 1 | 0 | 0      | 0 | 0 | -0.004 | t | 125478 | LHQEYEEN<br>LGDSIVGY<br>KEKS | Mus<br>musculu<br>s               |
| 1 | 1.00 | 1 | 1 | 0 | 0      | 0 | 0 | -0.004 | t | 132045 | RMATPLL<br>MRPMSM            | Oryctola<br>gus<br>cuniculu<br>s  |
| 1 | 1.00 | 1 | 1 | 0 | 0      | 0 | 0 | -0.004 | t | 122780 | GQELKNP<br>QEETLQAF<br>DSHYD | Oryctola<br>gus<br>cuniculu<br>s  |
| 1 | 1.00 | 1 | 1 | 0 | 0      | 0 | 0 | -0.004 | t | 133580 | GFLSSCNF<br>RFCELVR          | Mus<br>musculu<br>s               |
| 1 | 1.00 | 1 | 1 | 0 | 0      | 0 | 0 | -0.004 | t | 133624 | KPGEMRG<br>AA                | Mus<br>musculu<br>s               |
| 1 | 1.00 | 1 | 1 | 0 | 0      | 0 | 0 | -0.004 | t | 133539 | CYKPGEW<br>AC                | Mus<br>musculu<br>s               |
| 1 | 1.00 | 1 | 1 | 0 | 0      | 0 | 0 | -0.004 | t | 133698 | SLLTEVETP<br>IRNEWG          | Mus<br>musculu<br>s               |

|   |      |   |   |   |        |   |   |        |   |        |                              |                                  |
|---|------|---|---|---|--------|---|---|--------|---|--------|------------------------------|----------------------------------|
| 1 | 1.00 | 1 | 1 | 0 | 0      | 0 | 0 | -0.004 | t | 133542 | DGRRDVV<br>VRSATFYL          | Mus<br>musculu<br>s              |
| 1 | 1.00 | 1 | 1 | 0 | 0      | 0 | 0 | -0.004 | t | 122861 | NALNSPLH<br>QEYEENL          | Oryctola<br>gus<br>cuniculu<br>s |
| 1 | 1.00 | 1 | 1 | 0 | 0      | 0 | 0 | -0.004 | t | 122377 | GLPRLETP<br>ADLSTAIA<br>SRS  | Oryctola<br>gus<br>cuniculu<br>s |
| 1 | 1.00 | 1 | 1 | 0 | 0      | 0 | 0 | -0.004 | t | 133622 | KPGDPSAL<br>HVVRCWI<br>C     | Mus<br>musculu<br>s              |
| 1 | 1.00 | 1 | 1 | 0 | 0      | 0 | 0 | -0.004 | t | 125015 | DNESSYSR<br>GFDMTYT<br>E     | Mus<br>musculu<br>s              |
| 1 | 1.00 | 1 | 1 | 0 | -0.003 | 0 | 0 | -0.004 | t | 122780 | GQELKNP<br>QEETLQAF<br>DSHYD | Oryctola<br>gus<br>cuniculu<br>s |
| 1 | 1.00 | 1 | 1 | 0 | 0      | 0 | 0 | -0.004 | t | 133536 | CKPVENRA<br>C                | Mus<br>musculu<br>s              |
| 1 | 1.00 | 1 | 1 | 0 | 0      | 0 | 0 | -0.004 | t | 122392 | HARLRDSG<br>RAY              | Homo<br>sapiens                  |
| 1 | 1.00 | 1 | 1 | 0 | 0      | 0 | 0 | -0.004 | t | 122377 | GLPRLETP<br>ADLSTAIA<br>SRS  | Oryctola<br>gus<br>cuniculu<br>s |
| 1 | 1.00 | 1 | 1 | 0 | 0      | 0 | 0 | -0.004 | t | 108600 | QLINTNGS                     | Capra<br>hircus                  |
| 1 | 1.00 | 1 | 1 | 0 | 0      | 0 | 0 | -0.004 | t | 100508 | SGYEVHH<br>QKL               | Mus<br>musculu<br>s              |
| 1 | 1.00 | 1 | 1 | 0 | 0      | 0 | 0 | -0.004 | t | 104695 | YLLYYTEFT<br>PTEK            | Mus<br>musculu<br>s              |
| 1 | 1.00 | 1 | 1 | 0 | 0      | 0 | 0 | -0.004 | t | 115035 | ASSDSSNT<br>E                | Rattus<br>norvegic<br>us         |
| 1 | 1.00 | 1 | 1 | 0 | 0      | 0 | 0 | -0.004 | t | 113628 | LRLIHYSYD<br>VN              | Oryctola<br>gus<br>cuniculu<br>s |
| 1 | 1.00 | 1 | 1 | 0 | 0      | 0 | 0 | -0.004 | t | 97594  | QTPLTETA<br>LKWH             | Mus<br>musculu<br>s              |

|   |      |   |   |   |   |   |   |        |   |       |                              |                                  |
|---|------|---|---|---|---|---|---|--------|---|-------|------------------------------|----------------------------------|
| 1 | 1.00 | 1 | 1 | 0 | 0 | 0 | 0 | -0.004 | t | 76275 | YVFYSGNG<br>PKASGGD<br>YCIQS | Oryctola<br>gus<br>cuniculu<br>s |
| 1 | 1.00 | 1 | 1 | 0 | 0 | 0 | 0 | -0.004 | t | 62003 | STWHVLVS<br>PNVSVPS<br>SSTP  | Homo<br>sapiens                  |
| 1 | 1.00 | 1 | 1 | 0 | 0 | 0 | 0 | -0.004 | t | 75441 | YPYDVPDY<br>A                | Mus<br>musculu<br>s              |
| 1 | 1.00 | 1 | 1 | 0 | 0 | 0 | 0 | -0.004 | t | 91100 | AFQTPVHS                     | Mus<br>musculu<br>s              |
| 1 | 1.00 | 1 | 1 | 0 | 0 | 0 | 0 | -0.004 | t | 97595 | QTPLTMA<br>ALELF             | Mus<br>musculu<br>s              |
| 1 | 1.00 | 1 | 1 | 0 | 0 | 0 | 0 | -0.004 | t | 97726 | VETPIRN                      | Mus<br>musculu<br>s              |
| 1 | 1.00 | 1 | 1 | 0 | 0 | 0 | 0 | -0.004 | t | 62289 | SVPSSSS                      | Mus<br>musculu<br>s              |
| 1 | 1.00 | 1 | 1 | 0 | 0 | 0 | 0 | -0.004 | t | 61824 | STPLLYPSL<br>A               | Mus<br>musculu<br>s              |
| 1 | 1.00 | 1 | 1 | 0 | 0 | 0 | 0 | -0.004 | t | 97777 | YKNMILGT<br>SVNIYEYIG<br>KLQ | Oryctola<br>gus<br>cuniculu<br>s |
| 1 | 1.00 | 1 | 1 | 0 | 0 | 0 | 0 | -0.004 | t | 62859 | TAGLVGLL<br>TPGA             | Mus<br>musculu<br>s              |
| 1 | 1.00 | 1 | 1 | 0 | 0 | 0 | 0 | -0.004 | t | 75802 | YSLRLTPRP<br>VSRFLGNN<br>SIL | Oryctola<br>gus<br>cuniculu<br>s |
| 1 | 1.00 | 1 | 1 | 0 | 0 | 0 | 0 | -0.004 | t | 91109 | AHFVQQT<br>P                 | Mus<br>musculu<br>s              |
| 1 | 1.00 | 1 | 1 | 0 | 0 | 0 | 0 | -0.004 | t | 74798 | YLLPRRGP<br>RL               | Homo<br>sapiens                  |
| 1 | 1.00 | 1 | 1 | 0 | 0 | 0 | 0 | -0.004 | t | 97287 | ETPLTETAL<br>KWH             | Mus<br>musculu<br>s              |

|   |      |   |   |   |   |   |   |        |   |       |                              |                                  |
|---|------|---|---|---|---|---|---|--------|---|-------|------------------------------|----------------------------------|
| 1 | 1.00 | 1 | 1 | 0 | 0 | 0 | 0 | -0.004 | t | 97605 | RIVRGPAN<br>LRNLKEFK<br>E    | Oryctola<br>gus<br>cuniculu<br>s |
| 1 | 1.00 | 1 | 1 | 0 | 0 | 0 | 0 | -0.004 | t | 97288 | ETQLTTAG<br>LRLL             | Mus<br>musculu<br>s              |
| 1 | 1.00 | 1 | 1 | 0 | 0 | 0 | 0 | -0.004 | t | 75441 | YPYDVDPY<br>A                | Mus<br>musculu<br>s              |
| 1 | 1.00 | 1 | 1 | 0 | 0 | 0 | 0 | -0.004 | t | 66600 | TTETGKGV                     | Mus<br>musculu<br>s              |
| 1 | 1.00 | 1 | 1 | 0 | 0 | 0 | 0 | -0.004 | t | 92794 | GENKRPN<br>DKAGEV            | Mus<br>musculu<br>s              |
| 1 | 1.00 | 1 | 1 | 0 | 0 | 0 | 0 | -0.004 | t | 66841 | TTTCFRDT<br>DTGK             | Oryctola<br>gus<br>cuniculu<br>s |
| 1 | 1.00 | 1 | 1 | 0 | 0 | 0 | 0 | -0.004 | t | 75441 | YPYDVDPY<br>A                | Mus<br>musculu<br>s              |
| 1 | 1.00 | 1 | 1 | 0 | 0 | 0 | 0 | -0.004 | t | 76491 | YYDGRRS                      | Mus<br>musculu<br>s              |
| 1 | 1.00 | 1 | 1 | 0 | 0 | 0 | 0 | -0.004 | t | 76491 | YYDGRRS                      | Mus<br>musculu<br>s              |
| 1 | 1.00 | 1 | 1 | 0 | 0 | 0 | 0 | -0.004 | t | 74798 | YLLPRRGP<br>RL               | Homo<br>sapiens                  |
| 1 | 1.00 | 1 | 1 | 0 | 0 | 0 | 0 | -0.004 | t | 97650 | SLLTEVET                     | Mus<br>musculu<br>s              |
| 1 | 1.00 | 1 | 1 | 0 | 0 | 0 | 0 | -0.004 | t | 41826 | MKHM                         | Mus<br>musculu<br>s              |
| 1 | 1.00 | 1 | 1 | 0 | 0 | 0 | 0 | -0.004 | t | 57812 | SFKVTALN<br>VVSRRYLA<br>SLHK | Sus<br>scrofa                    |
| 1 | 1.00 | 1 | 1 | 0 | 0 | 0 | 0 | -0.004 | t | 38522 | LPHSNL                       | Rattus<br>norvegic<br>us         |
| 1 | 1.00 | 1 | 1 | 0 | 0 | 0 | 0 | -0.004 | t | 52792 | QVSLESVD<br>VYFQDVF<br>GTMWC | Oryctola<br>gus<br>cuniculu<br>s |

|   |      |   |   |   |        |   |   |        |   |       |                              |                              |
|---|------|---|---|---|--------|---|---|--------|---|-------|------------------------------|------------------------------|
| 1 | 1.00 | 1 | 1 | 0 | 0      | 0 | 0 | -0.004 | t | 38628 | LPPTAPPLL                    | Mus<br>musculus              |
| 1 | 1.00 | 1 | 1 | 0 | 0      | 0 | 0 | -0.004 | t | 48557 | PMIHFGN<br>DWEDRYR<br>REN    | Mus<br>musculus              |
| 1 | 1.00 | 1 | 1 | 0 | -0.003 | 0 | 0 | -0.004 | t | 49539 | PSTSSKLRP<br>RWTFTSPP<br>VTT | Oryctola<br>gus<br>cuniculus |
| 1 | 1.00 | 1 | 1 | 0 | 0      | 0 | 0 | -0.004 | t | 57542 | SELSQLS                      | Mus<br>musculus              |
| 1 | 1.00 | 1 | 1 | 0 | 0      | 0 | 0 | -0.004 | t | 37793 | LLSHSNLD<br>HI               | Mus<br>musculus              |
| 1 | 1.00 | 1 | 1 | 0 | 0.004  | 0 | 0 | -0.004 | t | 46371 | NVESQPG<br>GQPNT             | Mus<br>musculus              |
| 1 | 1.00 | 1 | 1 | 0 | 0      | 0 | 0 | -0.004 | t | 45597 | NQNNFVH<br>DCVNITIK<br>QHTVT | Mus<br>musculus              |
| 1 | 1.00 | 1 | 1 | 0 | 0      | 0 | 0 | -0.004 | t | 59374 | SLNTGWL<br>AGLFY             | Mus<br>musculus              |
| 1 | 1.00 | 1 | 1 | 0 | 0      | 0 | 0 | -0.004 | t | 37660 | LLPHSNLD<br>HILEPSIPW<br>KSK | Mus<br>musculus              |
| 1 | 1.00 | 1 | 1 | 0 | 0      | 0 | 0 | -0.004 | t | 37656 | LLPHSNLD                     | Mus<br>musculus              |
| 1 | 1.00 | 1 | 1 | 0 | 0      | 0 | 0 | -0.004 | t | 40938 | LYRPSDSSL<br>AGP             | Mus<br>musculus              |
| 1 | 1.00 | 1 | 1 | 0 | 0      | 0 | 0 | -0.004 | t | 37660 | LLPHSNLD<br>HILEPSIPW<br>KSK | Mus<br>musculus              |
| 1 | 1.00 | 1 | 1 | 0 | 0      | 0 | 0 | -0.004 | t | 46371 | NVESQPG<br>GQPNT             | Mus<br>musculus              |
| 1 | 1.00 | 1 | 1 | 0 | 0      | 0 | 0 | -0.004 | t | 37660 | LLPHSNLD<br>HILEPSIPW<br>KSK | Mus<br>musculus              |

|   |      |   |   |   |       |   |   |        |   |       |                              |                                  |
|---|------|---|---|---|-------|---|---|--------|---|-------|------------------------------|----------------------------------|
| 1 | 1.00 | 1 | 1 | 0 | 0     | 0 | 0 | -0.004 | t | 37660 | LLPHSNLD<br>HILEPSIPW<br>KSK | Mus<br>musculu<br>s              |
| 1 | 1.00 | 1 | 1 | 0 | 0     | 0 | 0 | -0.004 | t | 44920 | NLVPMVA<br>TV                | Homo<br>sapiens                  |
| 1 | 1.00 | 1 | 1 | 0 | 0.002 | 0 | 0 | -0.004 | t | 38522 | LPHSNL                       | Rattus<br>norvegic<br>us         |
| 1 | 1.00 | 1 | 1 | 0 | 0     | 0 | 0 | -0.004 | t | 59374 | SLNTGWL<br>AGLFY             | Mus<br>musculu<br>s              |
| 1 | 1.00 | 1 | 1 | 0 | 0     | 0 | 0 | -0.004 | t | 33206 | KRPNDKA<br>G                 | Mus<br>musculu<br>s              |
| 1 | 1.00 | 1 | 1 | 0 | 0     | 0 | 0 | -0.004 | t | 23975 | HHAEMQ<br>NPVYLIPET<br>VPYIK | Oryctola<br>gus<br>cuniculu<br>s |
| 1 | 1.00 | 1 | 1 | 0 | 0     | 0 | 0 | -0.004 | t | 21407 | GNDYEDR<br>YYREN             | Mus<br>musculu<br>s              |
| 1 | 1.00 | 1 | 1 | 0 | 0     | 0 | 0 | -0.004 | t | 20089 | GGWNTG<br>GSR                | Mus<br>musculu<br>s              |
| 1 | 1.00 | 1 | 1 | 0 | 0     | 0 | 0 | -0.004 | t | 23254 | GWGQPH<br>GGGWGQ<br>PHG      | Mus<br>musculu<br>s              |
| 1 | 1.00 | 1 | 1 | 0 | 0     | 0 | 0 | -0.004 | t | 15509 | FEDVKGTG<br>GESRDLP<br>SQQG  | Mus<br>musculu<br>s              |
| 1 | 1.00 | 1 | 1 | 0 | 0     | 0 | 0 | -0.004 | t | 10888 | DYGGDSTT<br>PRPRYNAT<br>TYLP | Oryctola<br>gus<br>cuniculu<br>s |
| 1 | 1.00 | 1 | 1 | 0 | 0     | 0 | 0 | -0.004 | t | 10987 | EAAGIGILT<br>V               | Homo<br>sapiens                  |
| 1 | 1.00 | 1 | 1 | 0 | 0     | 0 | 0 | -0.004 | t | 14686 | EVETPIRN                     | Mus<br>musculu<br>s              |
| 1 | 1.00 | 1 | 1 | 0 | 0     | 0 | 0 | -0.004 | t | 14686 | EVETPIRN                     | Mus<br>musculu<br>s              |
| 1 | 1.00 | 1 | 1 | 0 | 0     | 0 | 0 | -0.004 | t | 24402 | HNQWNK<br>PSK                | Mus<br>musculu<br>s              |

|   |      |   |   |   |        |   |   |        |   |       |                              |                                  |
|---|------|---|---|---|--------|---|---|--------|---|-------|------------------------------|----------------------------------|
| 1 | 1.00 | 1 | 1 | 0 | 0      | 0 | 0 | -0.004 | t | 30200 | KDLLEQKR<br>AAVDTYC          | Oryctola<br>gus<br>cuniculu<br>s |
| 1 | 1.00 | 1 | 1 | 0 | 0      | 0 | 0 | -0.004 | t | 14435 | ETIYNTTLK<br>Y               | Homo<br>sapiens                  |
| 1 | 1.00 | 1 | 1 | 0 | 0      | 0 | 0 | -0.004 | t | 14686 | EVETPIRN                     | Mus<br>musculu<br>s              |
| 1 | 1.00 | 1 | 1 | 0 | 0      | 0 | 0 | -0.004 | t | 10815 | DWIWNQ<br>MHIDEEK<br>NE      | Rattus<br>norvegic<br>us         |
| 1 | 1.00 | 1 | 1 | 0 | 0      | 0 | 0 | -0.004 | t | 10908 | DYKDDDD<br>K                 | Mus<br>musculu<br>s              |
| 1 | 1.00 | 1 | 1 | 0 | 0      | 0 | 0 | -0.004 | t | 11571 | EEEDDDM<br>GFGFLFD           | Mus<br>musculu<br>s              |
| 1 | 1.00 | 1 | 1 | 0 | -0.003 | 0 | 0 | -0.004 | t | 23975 | HHAEMQ<br>NPVYLIPET<br>VPYIK | Oryctola<br>gus<br>cuniculu<br>s |
| 1 | 1.00 | 1 | 1 | 0 | 0      | 0 | 0 | -0.004 | t | 11571 | EEEDDDM<br>GFGFLFD           | Mus<br>musculu<br>s              |
| 1 | 1.00 | 1 | 1 | 0 | 0      | 0 | 0 | -0.004 | t | 12941 | ELAGIGILT<br>V               | Homo<br>sapiens                  |
| 1 | 1.00 | 1 | 1 | 0 | 0      | 0 | 0 | -0.004 | t | 22280 | GSAMSRPI<br>IHFGSDYE<br>DRYY | Mus<br>musculu<br>s              |
| 1 | 1.00 | 1 | 1 | 0 | 0      | 0 | 0 | -0.004 | t | 6479  | CKGKIQAL<br>CENPEWA          | Mus<br>musculu<br>s              |
| 1 | 1.00 | 1 | 1 | 0 | 0      | 0 | 0 | -0.004 | t | 1165  | AESPKKP                      | Homo<br>sapiens                  |
| 1 | 1.00 | 1 | 1 | 0 | 0      | 0 | 0 | -0.004 | t | 6479  | CKGKIQAL<br>CENPEWA          | Mus<br>musculu<br>s              |
| 1 | 1.00 | 1 | 1 | 0 | 0      | 0 | 0 | -0.004 | t | 4429  | ASGQ                         | Mus<br>musculu<br>s              |
| 1 | 1.00 | 1 | 1 | 0 | 0      | 0 | 0 | -0.004 | t | 1257  | AFASNRTF<br>DITVSGLG<br>TAPK | Oryctola<br>gus<br>cuniculu<br>s |
| 1 | 1.00 | 1 | 1 | 0 | 0      | 0 | 0 | -0.004 | t | 6457  | CITQYQRE<br>SQAYYQR<br>G     | Mus<br>musculu<br>s              |



|   |      |   |   |       |        |        |        |        |   |        |                              |                                  |
|---|------|---|---|-------|--------|--------|--------|--------|---|--------|------------------------------|----------------------------------|
| 1 | 1.00 | 1 | 1 | 0     | 0      | 0      | 0      | -0.004 | t | 4397   | ASFEAQG<br>ALANIAVD<br>KA    | Mus<br>musculu<br>s              |
| 1 | 1.00 | 1 | 1 | 0     | 0      | -0.007 | 0      | 0      | t | 145508 | SARIPCFLA<br>G               | Homo<br>sapiens                  |
| 1 | 1.00 | 1 | 1 | -0.03 | -0.031 | -0.04  | -0.029 | -0.03  | t | 42618  | MSPARR                       | Homo<br>sapiens                  |
| 1 | 1.00 | 1 | 1 | 0.03  | 0.027  | 0.019  | 0.03   | 0.03   | t | 144776 | SEISTGLVG<br>ITSVAS          | Oryctola<br>gus<br>cuniculu<br>s |
| 1 | 1.00 | 1 | 1 | 0.01  | 0.014  | 0.01   | 0.017  | 0.01   | t | 119925 | HFPFDEQ<br>NGSMKLG<br>TWT    | Homo<br>sapiens                  |
| 1 | 1.00 | 1 | 1 | 0.01  | 0.012  | 0.01   | 0.017  | 0.01   | t | 119925 | HFPFDEQ<br>NGSMKLG<br>TWT    | Homo<br>sapiens                  |
| 1 | 1.00 | 1 | 1 | -0.01 | -0.01  | -0.01  | -0.01  | -0.013 | t | 134704 | KFFNSNKK<br>KRDDFEKL         | Oryctola<br>gus<br>cuniculu<br>s |
| 1 | 1.00 | 1 | 1 | 0.01  | 0.01   | 0.009  | 0.013  | 0.01   | t | 62500  | SWVDIV                       | Homo<br>sapiens                  |
| 1 | 1.00 | 1 | 1 | 0.01  | 0.007  | -0.001 | 0.01   | 0.009  | t | 36043  | LGAALLQS<br>AR               | Oryctola<br>gus<br>cuniculu<br>s |
| 1 | 1.00 | 1 | 1 | -0.01 | -0.01  | -0.02  | -0.013 | -0.012 | t | 47897  | PIFKSGRG<br>CGSCFEI          | Homo<br>sapiens                  |
| 1 | 1.00 | 1 | 1 | 0.01  | 0.01   | 0      | 0.007  | 0.01   | t | 96085  | ALCSEKLD<br>QWLCEKL          | Homo<br>sapiens                  |
| 1 | 1.00 | 1 | 1 | 0.02  | 0.018  | 0.013  | 0.021  | 0.02   | t | 3592   | APHLPYIE<br>QGMQLAE<br>QFKQK | Homo<br>sapiens                  |
| 1 | 1.00 | 1 | 1 | 0     | 0      | 0      | 0      | 0      | t | 74415  | YIWPRND<br>YDG               | Mus<br>musculu<br>s              |
| 1 | 1.00 | 1 | 1 | 0     | 0      | 0      | 0      | 0      | t | 9611   | DPDKDVDI<br>MV               | Mus<br>musculu<br>s              |

|   |      |   |   |       |        |        |        |        |   |        |                              |                                  |
|---|------|---|---|-------|--------|--------|--------|--------|---|--------|------------------------------|----------------------------------|
| 1 | 1.00 | 1 | 1 | 0.02  | 0.02   | 0.02   | 0.023  | 0.02   | t | 149028 | AVTNATQ                      | Sus<br>scrofa                    |
| 1 | 1.00 | 1 | 1 | 0.03  | 0.028  | 0.019  | 0.029  | 0.03   | t | 47136  | PDLERYAG                     | Mus<br>musculu<br>s              |
| 1 | 1.00 | 1 | 1 | 0.02  | 0.018  | 0.011  | 0.017  | 0.02   | t | 79622  | NYARTGG<br>QVTAG             | Mus<br>musculu<br>s              |
| 1 | 1.00 | 1 | 1 | 0.01  | 0.01   | 0.014  | 0.01   | 0.01   | t | 73974  | YGAAFS                       | Homo<br>sapiens                  |
| 1 | 1.00 | 1 | 1 | -0.02 | -0.015 | -0.024 | -0.017 | -0.021 | t | 77808  | YGCWKGL<br>VGR               | Homo<br>sapiens                  |
| 1 | 1.00 | 1 | 1 | -0.01 | -0.013 | -0.01  | -0.007 | -0.012 | t | 134189 | PPPSLPGP<br>PRPG             | Oryctola<br>gus<br>cuniculu<br>s |
| 1 | 1.00 | 1 | 1 | 0.03  | 0.028  | 0.03   | 0.031  | 0.03   | t | 86716  | NFNSNNY<br>TYD               | Homo<br>sapiens                  |
| 1 | 1.00 | 1 | 1 | 0     | 0      | -0.015 | 0      | 0      | t | 71354  | VTHESYQE<br>LVKKLEALE<br>DAV | Mus<br>musculu<br>s              |
| 1 | 1.00 | 1 | 1 | 0     | 0.003  | -0.015 | 0      | 0      | t | 71354  | VTHESYQE<br>LVKKLEALE<br>DAV | Mus<br>musculu<br>s              |
| 1 | 1.00 | 1 | 1 | -0.02 | -0.014 | -0.013 | -0.013 | -0.02  | t | 127676 | GTIFDNFLI<br>T               | Homo<br>sapiens                  |
| 1 | 1.00 | 1 | 1 | 0.01  | 0.008  | 0.001  | 0.01   | 0.01   | t | 81325  | DVKASA                       | Mus<br>musculu<br>s              |
| 1 | 1.00 | 1 | 1 | -0.01 | -0.008 | -0.017 | -0.007 | -0.01  | t | 41604  | MGLKVVN<br>SAIFMAVL          | Homo<br>sapiens                  |
| 1 | 1.00 | 1 | 1 | 0     | -0.003 | 0      | 0      | -0.004 | t | 64628  | TKNTNNN<br>LTL               | Oryctola<br>gus<br>cuniculu<br>s |
| 1 | 1.00 | 1 | 1 | -0.02 | -0.012 | -0.02  | -0.02  | -0.022 | t | 156945 | QLHTSI                       | Gallus<br>gallus                 |

|   |      |   |   |       |        |        |        |        |   |        |                              |                     |
|---|------|---|---|-------|--------|--------|--------|--------|---|--------|------------------------------|---------------------|
| 1 | 1.00 | 1 | 1 | 0     | 0.003  | -0.007 | 0      | -0.002 | t | 41430  | MERVVEQ<br>MCITQYQ<br>RESQAY | Mus<br>musculu<br>s |
| 1 | 1.00 | 1 | 1 | 0.05  | 0.052  | 0.057  | 0.057  | 0.05   | t | 138217 | PREQQFN                      | Homo<br>sapiens     |
| 1 | 1.00 | 1 | 1 | 0.03  | 0.032  | 0.023  | 0.033  | 0.03   | t | 130608 | SIDLKDKYK<br>NIGA            | Homo<br>sapiens     |
| 1 | 1.00 | 1 | 1 | 0.01  | 0.01   | -0.001 | 0.01   | 0.011  | t | 79898  | LDPLVTAL<br>LGAFD            | Mus<br>musculu<br>s |
| 1 | 1.00 | 1 | 1 | 0.01  | 0.01   | -0.001 | 0.01   | 0.011  | t | 79898  | LDPLVTAL<br>LGAFD            | Mus<br>musculu<br>s |
| 1 | 1.00 | 1 | 1 | 0     | -0.002 | -0.01  | 0.003  | 0      | t | 58036  | SGFSETVTI<br>VEDTRP          | Mus<br>musculu<br>s |
| 1 | 1.00 | 1 | 1 | 0.03  | 0.032  | 0.013  | 0.031  | 0.032  | t | 151070 | WTLVEPG<br>DKITFEAT          | Homo<br>sapiens     |
| 1 | 1.00 | 1 | 1 | 0.01  | 0.012  | -0.004 | 0.007  | 0.011  | t | 78412  | GYKDVDK<br>APFNGMT<br>GCG    | Homo<br>sapiens     |
| 1 | 1.00 | 1 | 1 | -0.03 | -0.03  | -0.048 | -0.033 | -0.03  | t | 63798  | TGCRAM                       | Homo<br>sapiens     |
| 1 | 1.00 | 1 | 1 | 0     | -0.002 | 0      | 0.001  | -0.003 | t | 131101 | TDSEMDV<br>VRFDDDN<br>S      | Mus<br>musculu<br>s |
| 1 | 1.00 | 1 | 1 | -0.03 | -0.03  | -0.03  | -0.029 | -0.03  | t | 61553  | STDKNRGF                     | Homo<br>sapiens     |
| 1 | 1.00 | 1 | 1 | 0.02  | 0.022  | 0.013  | 0.021  | 0.019  | t | 18743  | GAQLNAM<br>KPDQLQNTL         | Homo<br>sapiens     |
| 1 | 1.00 | 1 | 1 | 0.02  | 0.018  | 0.01   | 0.023  | 0.02   | t | 69171  | VIYSKYGG<br>TE               | Mus<br>musculu<br>s |
| 1 | 1.00 | 1 | 1 | 0     | 0.004  | -0.003 | 0.001  | -0.003 | t | 103548 | RGLRAAAE<br>AGVRLAF          | Homo<br>sapiens     |

|   |      |   |   |       |        |        |        |        |   |        |                 |                       |
|---|------|---|---|-------|--------|--------|--------|--------|---|--------|-----------------|-----------------------|
| 1 | 1.00 | 1 | 1 | 0.04  | 0.042  | 0.045  | 0.041  | 0.04   | t | 17557  | FQYSPG          | Homo sapiens          |
| 1 | 1.00 | 1 | 1 | 0     | 0      | -0.005 | -0.003 | -0.002 | t | 42162  | MMNWSPTTC       | Homo sapiens          |
| 1 | 1.00 | 1 | 1 | 0.01  | 0.007  | 0.008  | 0.01   | 0.008  | t | 141622 | DPNGWTGTDNNFSI  | Oryctolagus cuniculus |
| 1 | 1.00 | 1 | 1 | 0.01  | 0.014  | 0.002  | 0.01   | 0.01   | t | 140594 | RELVLAGTI       | Cavia porcellus       |
| 1 | 1.00 | 1 | 1 | 0.01  | 0.014  | -0.004 | 0.01   | 0.01   | t | 21956  | GQSFQNTWEGQAASA | Mus musculus          |
| 1 | 1.00 | 1 | 1 | 0.01  | 0.011  | -0.004 | 0.01   | 0.01   | t | 21956  | GQSFQNTWEGQAASA | Oryctolagus cuniculus |
| 1 | 1.00 | 1 | 1 | -0.01 | -0.013 | -0.005 | -0.01  | -0.012 | t | 95979  | VPQPPVSQFHIQ    | Oryctolagus cuniculus |
| 1 | 1.00 | 1 | 1 | 0.01  | 0.008  | 0.009  | 0.01   | 0.009  | t | 95092  | GYQKTVDHTKVNSK  | Oryctolagus cuniculus |
| 1 | 1.00 | 1 | 1 | -0.01 | -0.01  | -0.01  | -0.01  | -0.012 | t | 122465 | LKRDMKSAHLLPEH  | Homo sapiens          |
| 1 | 1.00 | 1 | 1 | 0     | -0.003 | -0.01  | 0      | 0.002  | t | 72903  | WNPTLLGE        | Oryctolagus cuniculus |
| 1 | 1.00 | 1 | 1 | 0.01  | 0.007  | -0.005 | 0.009  | 0.01   | t | 68584  | VFTKENTI        | Oryctolagus cuniculus |
| 1 | 1.00 | 1 | 1 | -0.04 | -0.042 | -0.044 | -0.037 | -0.037 | t | 78186  | KMDKLELKG       | Mus musculus          |
| 1 | 1.00 | 1 | 1 | -0.01 | -0.01  | -0.01  | -0.01  | -0.01  | t | 46860  | PALVPDKEV       | Homo sapiens          |

|   |      |   |   |       |        |        |        |        |   |        |                            |                                  |
|---|------|---|---|-------|--------|--------|--------|--------|---|--------|----------------------------|----------------------------------|
| 1 | 1.00 | 1 | 1 | 0.02  | 0.017  | 0.016  | 0.02   | 0.02   | t | 76350  | YVLLSEKKI<br>S             | Oryctola<br>gus<br>cuniculu<br>s |
| 1 | 1.00 | 1 | 1 | 0.03  | 0.026  | 0.023  | 0.033  | 0.032  | t | 20464  | GITQGIVE                   | Oryctola<br>gus<br>cuniculu<br>s |
| 1 | 1.00 | 1 | 1 | 0.03  | 0.03   | 0.021  | 0.03   | 0.03   | t | 119599 | KAEEYILKK<br>PRSELMFE<br>E | Mus<br>musculu<br>s              |
| 1 | 1.00 | 1 | 1 | 0.02  | 0.02   | 0.02   | 0.02   | 0.019  | t | 119593 | HYTQKSLS                   | Homo<br>sapiens                  |
| 1 | 1.00 | 1 | 1 | 0.02  | 0.018  | 0.028  | 0.021  | 0.018  | t | 138930 | WDPEEGQ<br>IVP             | Mus<br>musculu<br>s              |
| 1 | 1.00 | 1 | 1 | 0.05  | 0.049  | 0.04   | 0.05   | 0.05   | t | 12435  | EIEDTEGLK<br>EVIN          | Mus<br>musculu<br>s              |
| 1 | 1.00 | 1 | 1 | 0.03  | 0.041  | 0.03   | 0.03   | 0.028  | t | 156965 | SVQERYYA<br>FWST           | Gallus<br>gallus                 |
| 1 | 1.00 | 1 | 1 | -0.01 | -0.008 | -0.009 | -0.003 | -0.01  | t | 98435  | RYPHYSSLI<br>KPESSL        | Homo<br>sapiens                  |
| 1 | 1.00 | 1 | 1 | 0     | -0.003 | 0      | 0      | -0.004 | t | 135921 | EVGWYRS<br>PF              | Oryctola<br>gus<br>cuniculu<br>s |
| 1 | 1.00 | 1 | 1 | 0.01  | 0.01   | 0.01   | 0.017  | 0.01   | t | 118266 | APAAGSA<br>PAAAEKK         | Homo<br>sapiens                  |
| 1 | 1.00 | 1 | 1 | 0.01  | 0.007  | -0.004 | 0.01   | 0.012  | t | 72903  | WNPTLLG<br>E               | Oryctola<br>gus<br>cuniculu<br>s |
| 1 | 1.00 | 1 | 1 | 0.03  | 0.032  | 0.03   | 0.037  | 0.032  | t | 107315 | DGKEYKC                    | Homo<br>sapiens                  |
| 1 | 1.00 | 1 | 1 | 0     | 0      | -0.002 | 0.007  | 0      | t | 120420 | AVTYTEHA<br>KRKTVTA<br>M   | Homo<br>sapiens                  |

|   |      |   |   |      |        |       |       |        |   |        |                      |                       |
|---|------|---|---|------|--------|-------|-------|--------|---|--------|----------------------|-----------------------|
| 1 | 1.00 | 1 | 1 | 0    | 0.002  | 0     | 0     | 0      | t | 69124  | VITGSI               | Homo sapiens          |
| 1 | 1.00 | 1 | 1 | 0.01 | 0.013  | 0.012 | 0.01  | 0.01   | t | 126328 | ISHG                 | Mus musculus          |
| 1 | 1.00 | 1 | 1 | 0    | 0      | 0     | 0     | -0.002 | t | 48597  | PNANPN               | Mus musculus          |
| 1 | 1.00 | 1 | 1 | 0.02 | 0.02   | 0.005 | 0.016 | 0.02   | t | 71162  | VSTQSAKN<br>PPGATV   | Homo sapiens          |
| 1 | 1.00 | 1 | 1 | 0.03 | 0.03   | 0.03  | 0.03  | 0.03   | t | 43746  | NESKYSNT             | Mus musculus          |
| 1 | 1.00 | 1 | 1 | 0.05 | 0.05   | 0.039 | 0.05  | 0.052  | t | 111790 | SLVEETSFI<br>DAGAPTS | Oryctolagus cuniculus |
| 1 | 1.00 | 1 | 1 | 0.01 | 0.014  | 0.019 | 0.017 | 0.009  | t | 119549 | YRKTAKEG<br>T        | Homo sapiens          |
| 1 | 1.00 | 1 | 1 | 0.01 | 0.012  | 0.019 | 0.017 | 0.009  | t | 119549 | YRKTAKEG<br>T        | Homo sapiens          |
| 1 | 1.00 | 1 | 1 | 0.01 | 0.012  | 0.019 | 0.017 | 0.009  | t | 119549 | YRKTAKEG<br>T        | Homo sapiens          |
| 1 | 1.00 | 1 | 1 | 0.03 | 0.032  | 0.039 | 0.031 | 0.027  | t | 82611  | GEQQEAIK<br>SA       | Homo sapiens          |
| 1 | 1.00 | 1 | 1 | 0.01 | 0.01   | 0.003 | 0.01  | 0.009  | t | 19637  | GFTTNEPR<br>YNVFAE   | Mus musculus          |
| 1 | 1.00 | 1 | 1 | 0.01 | 0.01   | 0.003 | 0.01  | 0.009  | t | 19637  | GFTTNEPR<br>YNVFAE   | Homo sapiens          |
| 1 | 1.00 | 1 | 1 | 0    | -0.003 | 0.005 | 0.003 | 0      | t | 74374  | YISPYFINT<br>S       | Homo sapiens          |

|   |      |   |   |      |        |        |        |       |   |        |                            |                                  |
|---|------|---|---|------|--------|--------|--------|-------|---|--------|----------------------------|----------------------------------|
| 1 | 1.00 | 1 | 1 | 0.03 | 0.033  | 0.019  | 0.03   | 0.032 | t | 111742 | RRETQ                      | Mus<br>musculu<br>s              |
| 1 | 1.00 | 1 | 1 | 0    | -0.003 | -0.011 | 0      | 0     | t | 144748 | QAVNPNA<br>GN              | Oryctola<br>gus<br>cuniculu<br>s |
| 1 | 1.00 | 1 | 1 | 0.06 | 0.058  | 0.053  | 0.057  | 0.062 | t | 14576  | ETTTIPPS                   | Anas<br>platyrhy<br>nchos        |
| 1 | 1.00 | 1 | 1 | 0.03 | 0.03   | 0.03   | 0.03   | 0.029 | t | 136648 | SPLNNFYK<br>TQLR           | Mus<br>musculu<br>s              |
| 1 | 1.00 | 1 | 1 | 0.03 | 0.032  | 0.03   | 0.037  | 0.03  | t | 106223 | ADGGAQG<br>TA              | Homo<br>sapiens                  |
| 1 | 1.00 | 1 | 1 | 0    | -0.006 | -0.012 | 0      | 0     | t | 12375  | EHWSYGL<br>RPG             | Canis<br>lupus                   |
| 1 | 1.00 | 1 | 1 | 0    | -0.002 | -0.012 | 0      | 0     | t | 12375  | EHWSYGL<br>RPG             | Mus<br>musculu<br>s              |
| 1 | 1.00 | 1 | 1 | 0.03 | 0.032  | 0.022  | 0.031  | 0.03  | t | 13460  | ENDVLNQ<br>ETEEEMEK        | Homo<br>sapiens                  |
| 1 | 1.00 | 1 | 1 | 0    | 0.001  | -0.011 | -0.001 | 0     | t | 73973  | YFYVGLDY                   | Equus<br>caballus                |
| 1 | 1.00 | 1 | 1 | 0.03 | 0.03   | 0.013  | 0.03   | 0.032 | t | 30181  | KDKIAKEQ<br>ENKETIGTL<br>K | Mus<br>musculu<br>s              |
| 1 | 1.00 | 1 | 1 | 0    | 0      | 0      | 0.004  | 0     | t | 136063 | FIRFDKRIE<br>AEE           | Homo<br>sapiens                  |
| 1 | 1.00 | 1 | 1 | 0    | -0.002 | -0.01  | -0.001 | 0     | t | 51168  | QKAREAFR                   | Anas<br>platyrhy<br>nchos        |
| 1 | 1.00 | 1 | 1 | 0    | -0.002 | -0.008 | 0.003  | 0     | t | 45556  | NQGAWP<br>AG               | Anas<br>platyrhy<br>nchos        |
| 1 | 1.00 | 1 | 1 | 0.03 | 0.03   | 0.03   | 0.03   | 0.031 | t | 131107 | TGVEAAA                    | Homo<br>sapiens                  |

|   |      |   |   |       |        |        |        |        |   |        |                              |                                  |
|---|------|---|---|-------|--------|--------|--------|--------|---|--------|------------------------------|----------------------------------|
| 1 | 1.00 | 1 | 1 | 0.01  | 0.013  | 0.01   | 0.01   | 0.008  | t | 79285  | LDPEYWN<br>FRNGDLT           | Mus<br>musculu<br>s              |
| 1 | 1.00 | 1 | 1 | 0.02  | 0.022  | 0.009  | 0.023  | 0.02   | t | 57508  | SEKTIWSLI<br>AWQRSNA<br>EFEQ | Homo<br>sapiens                  |
| 1 | 1.00 | 1 | 1 | -0.03 | -0.032 | -0.031 | -0.03  | -0.03  | t | 73745  | YEQGGNIV<br>DI               | Oryctola<br>gus<br>cuniculu<br>s |
| 1 | 1.00 | 1 | 1 | -0.03 | -0.033 | -0.031 | -0.03  | -0.03  | t | 73745  | YEQGGNIV<br>DI               | Oryctola<br>gus<br>cuniculu<br>s |
| 1 | 1.00 | 1 | 1 | -0.03 | -0.033 | -0.031 | -0.03  | -0.03  | t | 73745  | YEQGGNIV<br>DI               | Oryctola<br>gus<br>cuniculu<br>s |
| 1 | 1.00 | 1 | 1 | -0.02 | -0.019 | -0.036 | -0.021 | -0.018 | t | 15289  | FATNREK<br>M                 | Homo<br>sapiens                  |
| 1 | 1.00 | 1 | 1 | -0.01 | -0.013 | -0.014 | -0.01  | -0.009 | t | 141953 | LTACKV                       | Oryctola<br>gus<br>cuniculu<br>s |
| 1 | 1.00 | 1 | 1 | 0     | 0.002  | -0.01  | 0.003  | 0      | t | 2981   | ALVREGLR<br>NV               | Homo<br>sapiens                  |
| 1 | 1.00 | 1 | 1 | 0     | 0.002  | -0.007 | 0      | 0      | t | 140601 | SLYSFPEPE<br>A               | Homo<br>sapiens                  |
| 1 | 1.00 | 1 | 1 | 0     | 0      | 0      | 0      | 0      | t | 117621 | QVKGFB                       | Homo<br>sapiens                  |
| 1 | 1.00 | 1 | 1 | -0.02 | -0.017 | -0.025 | -0.02  | -0.019 | t | 126828 | PKYA                         | Mus<br>musculu<br>s              |
| 1 | 1.00 | 1 | 1 | 0.01  | 0.012  | 0.005  | 0.011  | 0.01   | t | 141967 | NGDKSTQ<br>KYNELKT           | Homo<br>sapiens                  |
| 1 | 1.00 | 1 | 1 | 0.04  | 0.04   | 0.04   | 0.04   | 0.04   | t | 141067 | PLSLEPDP                     | Mus<br>musculu<br>s              |
| 1 | 1.00 | 1 | 1 | -0.04 | -0.04  | -0.038 | -0.038 | -0.04  | t | 7830   | DDMPGCY<br>PMCTLNK           | Homo<br>sapiens                  |



|   |      |   |   |       |        |        |        |        |   |        |                             |                                  |
|---|------|---|---|-------|--------|--------|--------|--------|---|--------|-----------------------------|----------------------------------|
| 1 | 1.00 | 1 | 1 | 0.04  | 0.04   | 0.033  | 0.04   | 0.04   | t | 133611 | IVSYLCDLA<br>PEAPPPTL<br>PP | Mus<br>musculu<br>s              |
| 1 | 1.00 | 1 | 1 | 0.03  | 0.028  | 0.009  | 0.027  | 0.032  | t | 153828 | ERAEERAE<br>TGESKI          | Homo<br>sapiens                  |
| 1 | 1.00 | 1 | 1 | 0.01  | 0.013  | 0.011  | 0.01   | 0.01   | t | 30863  | KFTEPVKDI<br>M              | Mus<br>musculu<br>s              |
| 1 | 1.00 | 1 | 1 | 0.04  | 0.038  | 0.052  | 0.043  | 0.039  | t | 78403  | GLQNDF                      | Mus<br>musculu<br>s              |
| 1 | 1.00 | 1 | 1 | -0.02 | -0.023 | -0.022 | -0.02  | -0.021 | t | 131316 | TLMVMVS<br>K                | Oryctola<br>gus<br>cuniculu<br>s |
| 1 | 1.00 | 1 | 1 | 0     | 0      | 0      | 0.001  | -0.003 | t | 103838 | DAEFRHDS<br>GYEV            | Mus<br>musculu<br>s              |
| 1 | 1.00 | 1 | 1 | 0.04  | 0.04   | 0.038  | 0.04   | 0.04   | t | 56711  | SAAQEKIS<br>F               | Mus<br>musculu<br>s              |
| 1 | 1.00 | 1 | 1 | -0.04 | -0.038 | -0.04  | -0.033 | -0.041 | t | 108152 | TCPPCPAP<br>ELLGG           | Homo<br>sapiens                  |
| 1 | 1.00 | 1 | 1 | 0.02  | 0.028  | 0.02   | 0.02   | 0.018  | t | 156961 | SLLASTT                     | Gallus<br>gallus                 |
| 1 | 1.00 | 1 | 1 | 0.04  | 0.036  | 0.038  | 0.043  | 0.041  | t | 99265  | GDKELF                      | Oryctola<br>gus<br>cuniculu<br>s |
| 1 | 1.00 | 1 | 1 | 0.02  | 0.02   | 0.018  | 0.017  | 0.018  | t | 16955  | FLVLLLFSL<br>L              | Homo<br>sapiens                  |
| 1 | 1.00 | 1 | 1 | 0.02  | 0.019  | 0.008  | 0.02   | 0.022  | t | 7901   | DEADRYFT<br>YEEP            | Bos<br>taurus                    |
| 1 | 1.00 | 1 | 1 | 0.02  | 0.02   | 0.011  | 0.02   | 0.019  | t | 137937 | NKIFADDI                    | Rattus<br>norvegic<br>us         |
| 1 | 1.00 | 1 | 1 | 0.01  | 0.012  | 0.016  | 0.011  | 0.009  | t | 60810  | SRSTSL                      | Homo<br>sapiens                  |
| 1 | 1.00 | 1 | 1 | 0.01  | 0.012  | 0.016  | 0.011  | 0.009  | t | 60810  | SRSTSL                      | Homo<br>sapiens                  |

|   |      |   |   |       |        |        |        |        |   |        |                            |                       |
|---|------|---|---|-------|--------|--------|--------|--------|---|--------|----------------------------|-----------------------|
| 1 | 1.00 | 1 | 1 | 0     | 0      | 0      | 0      | 0      | t | 48753  | PPAYEK                     | Mus musculus          |
| 1 | 1.00 | 1 | 1 | 0     | 0      | 0.002  | 0.011  | 0      | t | 118566 | QDFSQYRS<br>LKFRPKG        | Homo sapiens          |
| 1 | 1.00 | 1 | 1 | 0.02  | 0.022  | 0.019  | 0.021  | 0.019  | t | 65479  | TNVVIRAC<br>NFELCDNPF      | Homo sapiens          |
| 1 | 1.00 | 1 | 1 | -0.01 | -0.01  | -0.015 | -0.009 | -0.01  | t | 122442 | KPMSNFR<br>FGENHA          | Rattus norvegicus     |
| 1 | 1.00 | 1 | 1 | -0.03 | -0.028 | -0.028 | -0.03  | -0.031 | t | 114223 | PFSRVVHL                   | Rattus norvegicus     |
| 1 | 1.00 | 1 | 1 | 0.03  | 0.032  | 0.025  | 0.031  | 0.03   | t | 2979   | ALVPDKEVL                  | Homo sapiens          |
| 1 | 1.00 | 1 | 1 | 0.03  | 0.03   | 0.021  | 0.03   | 0.032  | t | 8475   | DGQPAGD<br>RADGQPA<br>GDRA | Mus musculus          |
| 1 | 1.00 | 1 | 1 | 0     | 0.002  | 0      | 0.007  | 0      | t | 108104 | RRLPFGSQ<br>M              | Homo sapiens          |
| 1 | 1.00 | 1 | 1 | 0.01  | 0.014  | 0.009  | 0.011  | 0.012  | t | 9719   | DPPFSP                     | Homo sapiens          |
| 1 | 1.00 | 1 | 1 | 0.03  | 0.03   | 0.03   | 0.03   | 0.03   | t | 105853 | GVTHDQL<br>N               | Oryctolagus cuniculus |
| 1 | 1.00 | 1 | 1 | 0.02  | 0.023  | 0.01   | 0.02   | 0.022  | t | 120919 | RLNEAVKY<br>TG             | Mus musculus          |
| 1 | 1.00 | 1 | 1 | 0.04  | 0.04   | 0.04   | 0.04   | 0.04   | t | 111690 | QTATLTY                    | Homo sapiens          |
| 1 | 1.00 | 1 | 1 | -0.01 | -0.007 | -0.01  | -0.007 | -0.01  | t | 11819  | EENVEHDA                   | Aotus                 |
| 1 | 1.00 | 1 | 1 | 0.03  | 0.026  | 0.03   | 0.023  | 0.031  | t | 107784 | DGSFFLY                    | Oryctolagus cuniculus |

|   |      |   |   |       |        |        |        |        |   |        |                            |                                  |
|---|------|---|---|-------|--------|--------|--------|--------|---|--------|----------------------------|----------------------------------|
| 1 | 1.00 | 1 | 1 | 0.05  | 0.046  | 0.052  | 0.053  | 0.051  | t | 99359  | IVDDVNC                    | Oryctola<br>gus<br>cuniculu<br>s |
| 1 | 1.00 | 1 | 1 | 0     | -0.002 | 0      | -0.001 | 0.002  | t | 68548  | VFPTKDVA<br>L              | Mus<br>musculu<br>s              |
| 1 | 1.00 | 1 | 1 | -0.01 | -0.007 | -0.025 | -0.01  | -0.008 | t | 104298 | TEATAIRP<br>AQVGYNT        | Sus<br>scrofa                    |
| 1 | 1.00 | 1 | 1 | 0.03  | 0.026  | 0.03   | 0.033  | 0.028  | t | 156843 | AHSEMG<br>T<br>RATMT       | Bos<br>taurus                    |
| 1 | 1.00 | 1 | 1 | 0.01  | 0.008  | 0.004  | 0.007  | 0.009  | t | 49377  | PSGLVIP                    | Mus<br>musculu<br>s              |
| 1 | 1.00 | 1 | 1 | -0.01 | -0.012 | -0.02  | -0.007 | -0.008 | t | 39980  | LTIVSGGP<br>TLFS           | Mus<br>musculu<br>s              |
| 1 | 1.00 | 1 | 1 | 0.05  | 0.048  | 0.041  | 0.05   | 0.051  | t | 100635 | VTNYLVDG<br>NG             | Mus<br>musculu<br>s              |
| 1 | 1.00 | 1 | 1 | 0     | -0.002 | -0.008 | 0.003  | 0.002  | t | 95323  | DPTTNV                     | Mus<br>musculu<br>s              |
| 1 | 1.00 | 1 | 1 | 0.01  | 0.007  | 0.015  | 0.01   | 0.006  | t | 6385   | CHGIFTLT<br>WEIWGY         | Oryctola<br>gus<br>cuniculu<br>s |
| 1 | 1.00 | 1 | 1 | 0.03  | 0.026  | 0.023  | 0.029  | 0.028  | t | 116974 | FKEQFLDG<br>DGW            | Oryctola<br>gus<br>cuniculu<br>s |
| 1 | 1.00 | 1 | 1 | 0.02  | 0.02   | 0.011  | 0.02   | 0.019  | t | 48858  | PPPPNPN<br>DPPPPNP<br>ND   | Mus<br>musculu<br>s              |
| 1 | 1.00 | 1 | 1 | 0.04  | 0.04   | 0.04   | 0.04   | 0.041  | t | 115308 | KFLDDDLT<br>DD             | Homo<br>sapiens                  |
| 1 | 1.00 | 1 | 1 | -0.01 | -0.012 | -0.018 | -0.011 | -0.012 | t | 22784  | GTPNPNP<br>NPNPNPN<br>PGTT | Mus<br>musculu<br>s              |
| 1 | 1.00 | 1 | 1 | 0     | 0      | -0.004 | -0.004 | 0.001  | t | 134143 | LMPPKY                     | Homo<br>sapiens                  |

|   |      |   |   |       |        |        |        |        |   |        |                    |                                  |
|---|------|---|---|-------|--------|--------|--------|--------|---|--------|--------------------|----------------------------------|
| 1 | 1.00 | 1 | 1 | 0.02  | 0.022  | 0.013  | 0.023  | 0.021  | t | 144682 | HLVGSALS<br>DP     | Homo<br>sapiens                  |
| 1 | 1.00 | 1 | 1 | 0.01  | 0.01   | -0.002 | 0.008  | 0.01   | t | 54923  | RMMATK<br>DSFQSFN  | Homo<br>sapiens                  |
| 1 | 1.00 | 1 | 1 | -0.01 | -0.01  | -0.008 | -0.01  | -0.014 | t | 125052 | FSLRLMEE<br>NW     | Mus<br>musculu<br>s              |
| 1 | 1.00 | 1 | 1 | 0     | 0.005  | -0.002 | 0.003  | 0      | t | 33748  | KTKRSAS            | Homo<br>sapiens                  |
| 1 | 1.00 | 1 | 1 | -0.02 | -0.018 | -0.029 | -0.021 | -0.02  | t | 53693  | RFDRGYIS           | Homo<br>sapiens                  |
| 1 | 1.00 | 1 | 1 | 0.03  | 0.03   | 0.03   | 0.03   | 0.029  | t | 119576 | EYKCKVSN           | Homo<br>sapiens                  |
| 1 | 1.00 | 1 | 1 | 0.03  | 0.032  | 0.025  | 0.031  | 0.03   | t | 97598  | RDLLKKG<br>VDA     | Homo<br>sapiens                  |
| 1 | 1.00 | 1 | 1 | 0.01  | 0.01   | 0.003  | 0.01   | 0.009  | t | 130585 | QKKIRGILE          | Mus<br>musculu<br>s              |
| 1 | 1.00 | 1 | 1 | 0.01  | 0.006  | -0.002 | 0.009  | 0.01   | t | 17545  | FQVEVP             | Oryctola<br>gus<br>cuniculu<br>s |
| 1 | 1.00 | 1 | 1 | -0.01 | -0.01  | -0.024 | -0.01  | -0.009 | t | 78424  | IPRSRQIDL<br>QIG   | Mus<br>musculu<br>s              |
| 1 | 1.00 | 1 | 1 | 0.06  | 0.06   | 0.05   | 0.06   | 0.06   | t | 49646  | PTGTPLDI<br>DTASE  | Mus<br>musculu<br>s              |
| 1 | 1.00 | 1 | 1 | 0.05  | 0.052  | 0.04   | 0.053  | 0.052  | t | 125229 | RDSEGDV<br>AEKLGPI | Homo<br>sapiens                  |
| 1 | 1.00 | 1 | 1 | 0.01  | 0.012  | -0.002 | 0.001  | 0.008  | t | 115700 | CEKDERFF<br>SD     | Homo<br>sapiens                  |
| 1 | 1.00 | 1 | 1 | 0.03  | 0.028  | 0.025  | 0.029  | 0.03   | t | 4448   | ASHLEQYG<br>TNEYS  | Mus<br>musculu<br>s              |
| 1 | 1.00 | 1 | 1 | -0.01 | -0.011 | -0.022 | -0.009 | -0.009 | t | 1022   | AEKQKAAE<br>ATKVAE | Homo<br>sapiens                  |

|   |      |   |   |       |        |        |        |        |   |        |                            |                                  |
|---|------|---|---|-------|--------|--------|--------|--------|---|--------|----------------------------|----------------------------------|
| 1 | 1.00 | 1 | 1 | 0.03  | 0.028  | 0.023  | 0.029  | 0.03   | t | 88388  | SAWNSDS<br>EKPFDDHL        | Mus<br>musculu<br>s              |
| 1 | 1.00 | 1 | 1 | -0.02 | -0.02  | -0.02  | -0.014 | -0.021 | t | 19737  | GGGAGAG<br>GAGAGGG<br>GR   | Homo<br>sapiens                  |
| 1 | 1.00 | 1 | 1 | 0.04  | 0.04   | 0.032  | 0.04   | 0.04   | t | 6953   | CRTNYGYS                   | Oryctola<br>gus<br>cuniculu<br>s |
| 1 | 1.00 | 1 | 1 | -0.02 | -0.016 | -0.02  | -0.017 | -0.02  | t | 41659  | MHGDTPPT<br>LHEYM          | Homo<br>sapiens                  |
| 1 | 1.00 | 1 | 1 | -0.03 | -0.025 | -0.027 | -0.032 | -0.033 | t | 157292 | GAIIGLM                    | Homo<br>sapiens                  |
| 1 | 1.00 | 1 | 1 | 0.06  | 0.06   | 0.063  | 0.062  | 0.06   | t | 142225 | LNDSSEEE<br>DEID           | Homo<br>sapiens                  |
| 1 | 1.00 | 1 | 1 | -0.05 | -0.052 | -0.054 | -0.051 | -0.05  | t | 145934 | PDIIPK                     | Mus<br>musculu<br>s              |
| 1 | 1.00 | 1 | 1 | 0.04  | 0.036  | 0.042  | 0.039  | 0.04   | t | 32116  | KLQPGDD<br>PLLG            | Oryctola<br>gus<br>cuniculu<br>s |
| 1 | 1.00 | 1 | 1 | 0     | 0      | 0      | 0.004  | -0.002 | t | 110284 | HKSAIVTLT<br>YDSEWQR<br>DQ | Homo<br>sapiens                  |
| 1 | 1.00 | 1 | 1 | 0     | 0.003  | -0.003 | 0.003  | 0      | t | 73254  | WWYEGLP<br>QQHYIGLV<br>A   | Equus<br>caballus                |
| 1 | 1.00 | 1 | 1 | 0     | 0      | 0      | 0      | -0.003 | t | 130567 | NPCEDI                     | Mus<br>musculu<br>s              |
| 1 | 1.00 | 1 | 1 | 0     | 0      | 0      | 0      | -0.003 | t | 130559 | NAHYVFF<br>EEQE            | Mus<br>musculu<br>s              |
| 1 | 1.00 | 1 | 1 | 0     | 0      | 0      | 0      | -0.003 | t | 130581 | QAFDSH                     | Mus<br>musculu<br>s              |
| 1 | 1.00 | 1 | 1 | 0     | 0      | 0      | 0      | -0.003 | t | 130625 | TVIDKDAF<br>G              | Mus<br>musculu<br>s              |

|   |      |   |   |   |   |   |   |        |   |        |                                  |                 |
|---|------|---|---|---|---|---|---|--------|---|--------|----------------------------------|-----------------|
| 1 | 1.00 | 1 | 1 | 0 | 0 | 0 | 0 | -0.003 | t | 130916 | KEDFDIYD<br>EDE                  | Mus<br>musculus |
| 1 | 1.00 | 1 | 1 | 0 | 0 | 0 | 0 | -0.003 | t | 133372 | SPSPTPTP<br>GPSRRG               | Homo<br>sapiens |
| 1 | 1.00 | 1 | 1 | 0 | 0 | 0 | 0 | -0.003 | t | 122562 | RRQPHVV<br>SQW                   | Mus<br>musculus |
| 1 | 1.00 | 1 | 1 | 0 | 0 | 0 | 0 | -0.003 | t | 130585 | QKKIRGILE                        | Mus<br>musculus |
| 1 | 1.00 | 1 | 1 | 0 | 0 | 0 | 0 | -0.003 | t | 110760 | ACKDSDW<br>PFCSD<br>EDWDW<br>PFC | Mus<br>musculus |
| 1 | 1.00 | 1 | 1 | 0 | 0 | 0 | 0 | -0.003 | t | 115399 | NMAINPS<br>KENLCSTF<br>CKEVV     | Homo<br>sapiens |
| 1 | 1.00 | 1 | 1 | 0 | 0 | 0 | 0 | -0.003 | t | 113731 | PTSPQQSG<br>QGQQPG<br>QGQQ       | Homo<br>sapiens |
| 1 | 1.00 | 1 | 1 | 0 | 0 | 0 | 0 | -0.003 | t | 110946 | MSTRSVSS<br>SSYRRMFG<br>GPGT     | Mus<br>musculus |
| 1 | 1.00 | 1 | 1 | 0 | 0 | 0 | 0 | -0.003 | t | 110833 | EQFNWVS<br>RLANLTQG<br>EDQYY     | Mus<br>musculus |
| 1 | 1.00 | 1 | 1 | 0 | 0 | 0 | 0 | -0.003 | t | 115379 | MAIPPKKN<br>QDKTEIPTI<br>NTI     | Homo<br>sapiens |
| 1 | 1.00 | 1 | 1 | 0 | 0 | 0 | 0 | -0.003 | t | 110821 | DVRQQYE<br>SVAAKNL<br>QEAEW      | Mus<br>musculus |
| 1 | 1.00 | 1 | 1 | 0 | 0 | 0 | 0 | -0.003 | t | 110794 | CDDDDDN<br>DGVPSR<br>DNCRLV      | Mus<br>musculus |
| 1 | 1.00 | 1 | 1 | 0 | 0 | 0 | 0 | -0.003 | t | 109917 | SHQESTRG<br>RSRGRSGR<br>SGS      | Mus<br>musculus |
| 1 | 1.00 | 1 | 1 | 0 | 0 | 0 | 0 | -0.003 | t | 110946 | MSTRSVSS<br>SSYRRMFG<br>GPGT     | Mus<br>musculus |
| 1 | 1.00 | 1 | 1 | 0 | 0 | 0 | 0 | -0.003 | t | 111042 | TIHAHPGS<br>RRGGRHG<br>YHH       | Mus<br>musculus |
| 1 | 1.00 | 1 | 1 | 0 | 0 | 0 | 0 | -0.003 | t | 110820 | DVRQQYE<br>SVAAKNL<br>QEAEW      | Mus<br>musculus |
| 1 | 1.00 | 1 | 1 | 0 | 0 | 0 | 0 | -0.003 | t | 110798 | CPTGCQL<br>QEALLQQE<br>RPIRN     | Mus<br>musculus |

|   |      |   |   |       |       |        |       |        |   |        |                              |                                  |
|---|------|---|---|-------|-------|--------|-------|--------|---|--------|------------------------------|----------------------------------|
| 1 | 1.00 | 1 | 1 | 0     | 0     | 0      | 0     | -0.003 | t | 110997 | RCHAANP<br>NGRYYWG<br>GQYTWD | Mus<br>musculu<br>s              |
| 1 | 1.00 | 1 | 1 | 0     | 0     | 0      | 0     | -0.003 | t | 115532 | VATEEVKI<br>TVDDKHY<br>QKALN | Homo<br>sapiens                  |
| 1 | 1.00 | 1 | 1 | 0     | 0     | 0      | 0     | -0.003 | t | 110834 | EQLKGQG<br>KSRLGDLY<br>EEEMR | Mus<br>musculu<br>s              |
| 1 | 1.00 | 1 | 1 | 0     | 0     | 0      | 0     | -0.003 | t | 110999 | REEAENTL<br>QSFRQDV<br>NTLQS | Mus<br>musculu<br>s              |
| 1 | 1.00 | 1 | 1 | 0     | 0     | 0      | 0     | -0.003 | t | 111033 | STYDRDN<br>DGWLTSD<br>PRKQCS | Mus<br>musculu<br>s              |
| 1 | 1.00 | 1 | 1 | 0     | 0     | 0      | 0     | -0.003 | t | 110820 | DVRQQYE<br>SVAAKNL<br>QEAEW  | Mus<br>musculu<br>s              |
| 1 | 1.00 | 1 | 1 | 0     | 0     | 0      | 0     | -0.003 | t | 110955 | NQNPGSP<br>RPGSTGT<br>WNPSS  | Mus<br>musculu<br>s              |
| 1 | 1.00 | 1 | 1 | 0     | 0     | 0      | 0     | -0.003 | t | 113580 | KPQQQSP<br>QQQFPQQ<br>QIPQQQ | Homo<br>sapiens                  |
| 1 | 1.00 | 1 | 1 | 0     | 0     | 0      | 0     | -0.003 | t | 115437 | QKALNEIN<br>QFYQKFP<br>QYLQY | Homo<br>sapiens                  |
| 1 | 1.00 | 1 | 1 | 0     | 0     | 0      | 0     | -0.003 | t | 78939  | CINHRGY<br>WVC               | Mus<br>musculu<br>s              |
| 1 | 1.00 | 1 | 1 | 0     | 0     | 0      | 0     | -0.003 | t | 51827  | QPFPQPQ<br>LPYPQPQ           | Mus<br>musculu<br>s              |
| 1 | 1.00 | 1 | 1 | 0     | 0     | 0      | 0     | -0.003 | t | 8756   | DIPNPIGSE<br>NSEKTTM<br>PLW  | Homo<br>sapiens                  |
| 1 | 1.00 | 1 | 1 | 0     | 0     | 0      | 0.001 | 0      | t | 66311  | TSLNLQKD<br>EPN              | Equus<br>caballus                |
| 1 | 1.00 | 1 | 1 | 0.01  | 0.003 | 0.01   | 0.01  | 0.009  | t | 153838 | HQKRTAM<br>FQDPQER           | Oryctola<br>gus<br>cuniculu<br>s |
| 1 | 1.00 | 1 | 1 | -0.04 | -0.04 | -0.047 | -0.04 | -0.041 | t | 95041  | SLAGKRE<br>MA                | Oryctola<br>gus<br>cuniculu<br>s |

|   |      |   |   |       |        |        |        |        |   |        |                              |                      |
|---|------|---|---|-------|--------|--------|--------|--------|---|--------|------------------------------|----------------------|
| 1 | 1.00 | 1 | 1 | 0     | 0      | -0.007 | 0      | 0      | t | 112841 | SSKRGRQT<br>PVLYAML<br>DH    | Rattus<br>norvegicus |
| 1 | 1.00 | 1 | 1 | 0.08  | 0.08   | 0.08   | 0.08   | 0.078  | t | 129058 | KEESEED<br>EDMGFGL           | Homo<br>sapiens      |
| 1 | 1.00 | 1 | 1 | 0.01  | 0.005  | -0.005 | 0.013  | 0.012  | t | 95277  | CGTTDSTA<br>TTKISEVFT<br>E   | Bos<br>taurus        |
| 1 | 1.00 | 1 | 1 | 0.01  | 0.014  | 0.011  | 0.007  | 0.008  | t | 30141  | KDERFFSD<br>KI               | Homo<br>sapiens      |
| 1 | 1.00 | 1 | 1 | 0.04  | 0.038  | 0.033  | 0.043  | 0.04   | t | 13984  | ERESQAY                      | Mus<br>musculus      |
| 1 | 1.00 | 1 | 1 | 0     | 0      | -0.013 | 0      | 0      | t | 159083 | RYKYPET<br>PKQLAKVV          | Mus<br>musculus      |
| 1 | 1.00 | 1 | 1 | -0.02 | -0.018 | -0.031 | -0.019 | -0.02  | t | 110468 | YYVLHLCL<br>AATKYPLL<br>KLLG | Homo<br>sapiens      |
| 1 | 1.00 | 1 | 1 | 0     | 0      | -0.007 | 0      | 0      | t | 70439  | VPPVIKQV<br>SA               | Homo<br>sapiens      |
| 1 | 1.00 | 1 | 1 | 0.01  | 0.013  | 0.001  | 0.01   | 0.01   | t | 96874  | SIAPDLSLD<br>FEKLVN          | Mus<br>musculus      |
| 1 | 1.00 | 1 | 1 | 0.01  | 0.013  | 0.001  | 0.01   | 0.01   | t | 96874  | SIAPDLSLD<br>FEKLVN          | Mus<br>musculus      |
| 1 | 1.00 | 1 | 1 | 0     | 0      | 0      | 0      | -0.001 | t | 133539 | CYKPGEW<br>AC                | Mus<br>musculus      |
| 1 | 1.00 | 1 | 1 | 0     | 0      | 0      | 0.006  | 0      | t | 43242  | NANPNAN<br>PNANP             | Homo<br>sapiens      |
| 1 | 1.00 | 1 | 1 | 0     | 0      | 0      | 0.006  | 0      | t | 43242  | NANPNAN<br>PNANP             | Homo<br>sapiens      |
| 1 | 1.00 | 1 | 1 | -0.03 | -0.032 | -0.034 | -0.031 | -0.031 | t | 31834  | KLFAVWKI<br>TYKDT            | Mus<br>musculus      |



|   |      |   |   |       |        |        |        |        |   |        |                           |                                  |
|---|------|---|---|-------|--------|--------|--------|--------|---|--------|---------------------------|----------------------------------|
| 1 | 1.00 | 1 | 1 | 0.01  | 0.01   | 0.01   | 0.01   | 0.01   | t | 23223  | GVYLLPRR<br>GP            | Homo<br>sapiens                  |
| 1 | 1.00 | 1 | 1 | 0     | 0      | -0.019 | 0      | 0.003  | t | 7756   | DDDMGFG<br>LFD            | Homo<br>sapiens                  |
| 1 | 1.00 | 1 | 1 | 0.01  | 0.013  | 0.01   | 0.01   | 0.008  | t | 135501 | SQWNKP                    | Mus<br>musculu<br>s              |
| 1 | 1.00 | 1 | 1 | 0     | -0.02  | -0.003 | 0.001  | -0.002 | t | 111240 | EGTEAVPG<br>DPDVNRF       | Cricetina<br>e                   |
| 1 | 1.00 | 1 | 1 | 0.02  | 0.016  | 0.014  | 0.019  | 0.02   | t | 42985  | MVQVVYD<br>YQH            | Oryctola<br>gus<br>cuniculu<br>s |
| 1 | 1.00 | 1 | 1 | 0     | 0.001  | -0.001 | 0.003  | -0.001 | t | 99579  | QNIRQGA<br>KEPYPEFV       | Equus<br>caballus                |
| 1 | 1.00 | 1 | 1 | 0.01  | 0.01   | 0.005  | 0.004  | 0.007  | t | 115675 | AFLLYQEP<br>VL            | Homo<br>sapiens                  |
| 1 | 1.00 | 1 | 1 | 0.03  | 0.027  | 0.022  | 0.03   | 0.03   | t | 62967  | TAQAAPV<br>QEG            | Mus<br>musculu<br>s              |
| 1 | 1.00 | 1 | 1 | -0.01 | -0.006 | -0.002 | -0.003 | -0.01  | t | 121473 | KKAKAKAK                  | Homo<br>sapiens                  |
| 1 | 1.00 | 1 | 1 | -0.01 | -0.01  | -0.01  | -0.006 | -0.01  | t | 119578 | FAIVKFTKV<br>LLQYTGH      | Homo<br>sapiens                  |
| 1 | 1.00 | 1 | 1 | 0.06  | 0.069  | 0.054  | 0.06   | 0.06   | t | 64557  | TKEYEDIV                  | Oryctola<br>gus<br>cuniculu<br>s |
| 1 | 1.00 | 1 | 1 | 0     | 0.002  | 0      | -0.003 | -0.002 | t | 25445  | IAT                       | Homo<br>sapiens                  |
| 1 | 1.00 | 1 | 1 | 0.02  | 0.018  | 0.016  | 0.017  | 0.019  | t | 52420  | QSRGEAR                   | Mus<br>musculu<br>s              |
| 1 | 1.00 | 1 | 1 | 0.03  | 0.028  | 0.02   | 0.027  | 0.031  | t | 72065  | VYKLDISEA                 | Mus<br>musculu<br>s              |
| 1 | 1.00 | 1 | 1 | 0.01  | 0.01   | 0.01   | 0.021  | 0.012  | t | 118441 | IWLWNKQ<br>KYEAGTYP<br>QT | Homo<br>sapiens                  |

|   |      |   |   |       |        |        |        |        |   |        |                     |                       |
|---|------|---|---|-------|--------|--------|--------|--------|---|--------|---------------------|-----------------------|
| 1 | 1.00 | 1 | 1 | 0.01  | 0.012  | 0.005  | 0.013  | 0.011  | t | 114318 | ELLHQRFF<br>KNVESTP | Homo sapiens          |
| 1 | 1.00 | 1 | 1 | 0     | -0.003 | -0.001 | 0      | 0      | t | 30145  | KDFLEVTF            | Oryctolagus cuniculus |
| 1 | 1.00 | 1 | 1 | -0.01 | -0.01  | -0.01  | -0.01  | -0.01  | t | 47124  | PDKEVLYQ<br>Q       | Homo sapiens          |
| 1 | 1.00 | 1 | 1 | 0.03  | 0.028  | 0.022  | 0.029  | 0.031  | t | 10336  | DTFNPVYP<br>YDTE    | Mus musculus          |
| 1 | 1.00 | 1 | 1 | 0.03  | 0.03   | 0.026  | 0.03   | 0.032  | t | 66385  | TSQGMYG<br>GTYLVEKP | Homo sapiens          |
| 1 | 1.00 | 1 | 1 | -0.01 | -0.006 | -0.017 | -0.007 | -0.008 | t | 144700 | KEWAKRA<br>ALP      | Homo sapiens          |
| 1 | 1.00 | 1 | 1 | -0.05 | -0.05  | -0.059 | -0.046 | -0.05  | t | 136002 | TKQMVQ<br>MRRKLE    | Homo sapiens          |
| 1 | 1.00 | 1 | 1 | -0.01 | -0.014 | -0.006 | -0.007 | -0.01  | t | 97207  | APAFADV<br>VI       | Oryctolagus cuniculus |
| 1 | 1.00 | 1 | 1 | 0     | 0.002  | -0.017 | 0.001  | 0.002  | t | 32687  | KPEASSTN            | Homo sapiens          |
| 1 | 1.00 | 1 | 1 | -0.01 | -0.01  | -0.01  | -0.01  | -0.012 | t | 63037  | TAVSPTTL<br>R       | Mus musculus          |
| 1 | 1.00 | 1 | 1 | 0     | 0      | 0      | 0.011  | 0.002  | t | 118601 | SGKGKVQ<br>FQGKKTKF | Homo sapiens          |
| 1 | 1.00 | 1 | 1 | 0     | -0.003 | -0.009 | 0      | 0      | t | 27959  | IPNGTYRA            | Oryctolagus cuniculus |
| 1 | 1.00 | 1 | 1 | 0     | 0      | 0      | 0      | -0.002 | t | 43704  | NENLLRFF<br>VAPFPE  | Homo sapiens          |
| 1 | 1.00 | 1 | 1 | -0.01 | -0.01  | -0.023 | -0.01  | -0.008 | t | 96849  | SAETIF              | Mus musculus          |

|   |      |   |   |       |        |        |        |        |   |        |                       |                       |
|---|------|---|---|-------|--------|--------|--------|--------|---|--------|-----------------------|-----------------------|
| 1 | 1.00 | 1 | 1 | -0.01 | -0.01  | -0.023 | -0.01  | -0.008 | t | 96849  | SAETIF                | Mus musculus          |
| 1 | 1.00 | 1 | 1 | -0.01 | -0.013 | -0.023 | -0.01  | -0.008 | t | 96849  | SAETIF                | Oryctolagus cuniculus |
| 1 | 1.00 | 1 | 1 | 0.02  | 0.017  | 0.007  | 0.02   | 0.022  | t | 82932  | GTNVELG<br>GRLSI      | Oryctolagus cuniculus |
| 1 | 1.00 | 1 | 1 | -0.01 | -0.014 | -0.011 | -0.011 | -0.012 | t | 78615  | CPGHANR<br>KQCGG      | Oryctolagus cuniculus |
| 1 | 1.00 | 1 | 1 | 0.02  | 0.02   | 0.02   | 0.02   | 0.02   | t | 18808  | GAVDSI                | Homo sapiens          |
| 1 | 1.00 | 1 | 1 | 0.04  | 0.038  | 0.025  | 0.043  | 0.042  | t | 33717  | KTIINNDF<br>NFDDYNY   | Mus musculus          |
| 1 | 1.00 | 1 | 1 | -0.01 | -0.01  | -0.005 | -0.003 | -0.012 | t | 29265  | IVFKT                 | Homo sapiens          |
| 1 | 1.00 | 1 | 1 | 0.01  | 0.006  | -0.008 | 0.01   | 0.012  | t | 49636  | PTGPTIAA<br>GGEQPPS   | Bos taurus            |
| 1 | 1.00 | 1 | 1 | -0.01 | -0.006 | -0.01  | -0.007 | -0.011 | t | 118430 | ISDAMKKV<br>GRKGV     | Homo sapiens          |
| 1 | 1.00 | 1 | 1 | 0.01  | 0.008  | 0.006  | 0.013  | 0.01   | t | 158947 | LDIDIDPKV<br>KVATLS   | Mus musculus          |
| 1 | 1.00 | 1 | 1 | 0.03  | 0.026  | 0.023  | 0.027  | 0.03   | t | 49703  | PTLLGEAT              | Oryctolagus cuniculus |
| 1 | 1.00 | 1 | 1 | 0     | 0      | 0      | 0.004  | -0.001 | t | 117315 | KALSVETE<br>KLLKYLEAV | Homo sapiens          |
| 1 | 1.00 | 1 | 1 | 0     | 0      | 0      | 0.004  | -0.001 | t | 117336 | NGWSHKD<br>LLR        | Homo sapiens          |
| 1 | 1.00 | 1 | 1 | 0     | 0      | 0      | 0      | 0      | t | 6059   | CCDLAP                | Homo sapiens          |
| 1 | 1.00 | 1 | 1 | -0.03 | -0.03  | -0.035 | -0.03  | -0.03  | t | 107126 | GAPGTPG<br>PQG        | Mus musculus          |

|   |      |   |   |       |        |        |        |        |   |        |                              |                                  |
|---|------|---|---|-------|--------|--------|--------|--------|---|--------|------------------------------|----------------------------------|
| 1 | 1.00 | 1 | 1 | -0.03 | -0.028 | -0.027 | -0.029 | -0.032 | t | 41171  | MAWDM<br>MMNW                | Homo<br>sapiens                  |
| 1 | 1.00 | 1 | 1 | 0     | 0      | -0.002 | 0      | -0.002 | t | 53481  | REEAYKEQ<br>IKTLTNK          | Homo<br>sapiens                  |
| 1 | 1.00 | 1 | 1 | -0.01 | -0.01  | -0.023 | -0.003 | -0.008 | t | 14426  | ETIGTLKKI<br>LDETVK          | Homo<br>sapiens                  |
| 1 | 1.00 | 1 | 1 | 0.01  | 0.008  | 0.007  | 0.013  | 0.01   | t | 52825  | QVYYRPV<br>DQ                | Mus<br>musculu<br>s              |
| 1 | 1.00 | 1 | 1 | 0.02  | 0.02   | 0.02   | 0.017  | 0.017  | t | 111030 | SRGSEGFF<br>SPMLGEFV<br>SETE | Mus<br>musculu<br>s              |
| 1 | 1.00 | 1 | 1 | 0.01  | 0.008  | 0.012  | 0.013  | 0.011  | t | 98980  | RELSA                        | Mus<br>musculu<br>s              |
| 1 | 1.00 | 1 | 1 | 0     | 0      | 0      | 0.007  | 0      | t | 125552 | RRFEYDDP<br>RFLRLDLA<br>QEG  | Homo<br>sapiens                  |
| 1 | 1.00 | 1 | 1 | 0     | 0      | -0.002 | 0      | 0.001  | t | 17504  | FQNEKWD<br>L                 | Mus<br>musculu<br>s              |
| 1 | 1.00 | 1 | 1 | -0.03 | -0.034 | -0.03  | -0.03  | -0.032 | t | 70395  | VPNLRGD<br>RHALA             | Mus<br>musculu<br>s              |
| 1 | 1.00 | 1 | 1 | 0.03  | 0.026  | 0.02   | 0.033  | 0.03   | t | 11090  | EAKESPAN<br>NPGLSTV          | Oryctola<br>gus<br>cuniculu<br>s |
| 1 | 1.00 | 1 | 1 | 0.02  | 0.02   | 0.015  | 0.02   | 0.021  | t | 114224 | PQDENPV<br>VHF               | Mus<br>musculu<br>s              |
| 1 | 1.00 | 1 | 1 | 0.03  | 0.034  | 0.023  | 0.033  | 0.033  | t | 142474 | SSTTGVA<br>M                 | Homo<br>sapiens                  |
| 1 | 1.00 | 1 | 1 | 0     | 0.002  | -0.005 | 0.001  | 0      | t | 44144  | NHIHSV                       | Homo<br>sapiens                  |
| 1 | 1.00 | 1 | 1 | 0.06  | 0.06   | 0.058  | 0.06   | 0.062  | t | 137209 | ITANVTDE<br>SYLY             | Sus<br>scrofa                    |
| 1 | 1.00 | 1 | 1 | 0.01  | 0.01   | 0.01   | 0.01   | 0.01   | t | 96715  | NVPKVTKE<br>KP               | Homo<br>sapiens(<br>human)       |

|   |      |   |   |       |        |        |        |        |   |        |                               |                       |
|---|------|---|---|-------|--------|--------|--------|--------|---|--------|-------------------------------|-----------------------|
| 1 | 1.00 | 1 | 1 | -0.01 | -0.01  | -0.01  | -0.01  | -0.01  | t | 35247  | LDPAFR                        | Mus musculus          |
| 1 | 1.00 | 1 | 1 | 0.03  | 0.03   | 0.018  | 0.03   | 0.034  | t | 133552 | ECAYCLTI                      | Mus musculus          |
| 1 | 1.00 | 1 | 1 | 0.04  | 0.038  | 0.035  | 0.037  | 0.037  | t | 116000 | TPTTEAVE<br>ST                | Homo sapiens          |
| 1 | 1.00 | 1 | 1 | 0     | -0.002 | -0.02  | -0.007 | 0      | t | 127950 | DVPVVTSTV<br>TTAGVGPS<br>PDIT | Mus musculus          |
| 1 | 1.00 | 1 | 1 | 0     | 0.004  | 0.002  | 0.007  | -0.001 | t | 119453 | FSNHGEIK<br>WIDFVRG<br>AKEGI  | Homo sapiens          |
| 1 | 1.00 | 1 | 1 | -0.01 | -0.019 | -0.02  | -0.01  | -0.008 | t | 60478  | SQKNGGY<br>V                  | Macaca mulatta        |
| 1 | 1.00 | 1 | 1 | -0.01 | -0.01  | -0.007 | -0.01  | -0.01  | t | 59112  | SLFTPGP                       | Homo sapiens          |
| 1 | 1.00 | 1 | 1 | 0.02  | 0.017  | 0.013  | 0.02   | 0.019  | t | 137828 | DVLLAGN<br>AEADR              | Oryctolagus cuniculus |
| 1 | 1.00 | 1 | 1 | 0.02  | 0.006  | 0.013  | 0.02   | 0.019  | t | 137828 | DVLLAGN<br>AEADR              | Oryctolagus cuniculus |
| 1 | 1.00 | 1 | 1 | 0.01  | 0.008  | 0.002  | 0.009  | 0.011  | t | 11744  | EELFKEYK                      | Mus musculus          |
| 1 | 1.00 | 1 | 1 | -0.02 | -0.02  | -0.025 | -0.02  | -0.021 | t | 12539  | EIPALTAVE                     | Mus musculus          |
| 1 | 1.00 | 1 | 1 | 0.05  | 0.046  | 0.041  | 0.05   | 0.05   | t | 20046  | GGTEESVV<br>TASRS             | Bos taurus            |
| 1 | 1.00 | 1 | 1 | 0.03  | 0.03   | 0.023  | 0.03   | 0.03   | t | 63662  | TFGLQLEL<br>T                 | Rattus norvegicus     |
| 1 | 1.00 | 1 | 1 | 0.01  | 0.008  | 0      | 0.007  | 0.01   | t | 32787  | KPLEDKILV<br>Q                | Mus musculus          |
| 1 | 1.00 | 1 | 1 | 0     | 0      | 0      | 0.004  | 0      | t | 117140 | DWEYSVW<br>LSN                | Homo sapiens          |

|   |      |   |   |       |        |        |        |        |   |        |                  |                       |
|---|------|---|---|-------|--------|--------|--------|--------|---|--------|------------------|-----------------------|
| 1 | 1.00 | 1 | 1 | 0.02  | 0.02   | 0.008  | 0.017  | 0.02   | t | 75991  | YTDAPSFSDIPNPI   | Homo sapiens          |
| 1 | 1.00 | 1 | 1 | -0.03 | -0.028 | -0.037 | -0.029 | -0.03  | t | 98354  | PVVRNNIYHI       | Homo sapiens          |
| 1 | 1.00 | 1 | 1 | 0     | -0.002 | -0.004 | -0.003 | 0      | t | 67297  | TWSGKFPT         | Anas platyrhynchos    |
| 1 | 1.00 | 1 | 1 | 0.01  | 0.01   | 0.003  | 0.01   | 0.009  | t | 159050 | PKRLTATTEKLEIGWK | Mus musculus          |
| 1 | 1.00 | 1 | 1 | -0.01 | -0.01  | -0.022 | -0.008 | -0.008 | t | 96453  | KFKEAFLRSV       | Homo sapiens(human)   |
| 1 | 1.00 | 1 | 1 | 0     | -0.004 | -0.012 | -0.007 | -0.003 | t | 131015 | QDRRLDEN         | Oryctolagus cuniculus |
| 1 | 1.00 | 1 | 1 | -0.03 | -0.027 | -0.037 | -0.03  | -0.031 | t | 33794  | KTNMKHM          | Mus musculus          |
| 1 | 1.00 | 1 | 1 | 0.02  | 0.015  | 0.022  | 0.02   | 0.02   | t | 45462  | NPQVNLVD         | Bos taurus            |
| 1 | 1.00 | 1 | 1 | 0.02  | 0.015  | 0.022  | 0.02   | 0.02   | t | 45462  | NPQVNLVD         | Bos taurus            |
| 1 | 1.00 | 1 | 1 | -0.01 | -0.008 | -0.025 | -0.013 | -0.01  | t | 38937  | LQPFQPQE         | Homo sapiens          |
| 1 | 1.00 | 1 | 1 | 0.01  | 0.012  | 0.009  | 0.011  | 0.012  | t | 47426  | PESPFA           | Homo sapiens          |
| 1 | 1.00 | 1 | 1 | -0.01 | -0.007 | -0.01  | -0.01  | -0.011 | t | 78344  | AEIRGERK         | Mus musculus          |
| 1 | 1.00 | 1 | 1 | 0.01  | 0.012  | 0.012  | 0.011  | 0.009  | t | 40611  | LVTKDIDFD        | Homo sapiens          |
| 1 | 1.00 | 1 | 1 | 0.03  | 0.032  | 0.026  | 0.027  | 0.027  | t | 114761 | DCSEYPKPDC       | Homo sapiens          |
| 1 | 1.00 | 1 | 1 | 0.02  | 0.017  | 0.013  | 0.02   | 0.018  | t | 101309 | TPIESHQVEKR      | Oryctolagus cuniculus |

|   |      |   |   |       |        |        |        |        |   |        |                             |                                  |
|---|------|---|---|-------|--------|--------|--------|--------|---|--------|-----------------------------|----------------------------------|
| 1 | 1.00 | 1 | 1 | -0.03 | -0.028 | -0.041 | -0.03  | -0.03  | t | 54095  | RHRQPRG<br>WEQ              | Homo<br>sapiens                  |
| 1 | 1.00 | 1 | 1 | -0.03 | -0.028 | -0.041 | -0.03  | -0.03  | t | 54095  | RHRQPRG<br>WEQ              | Homo<br>sapiens                  |
| 1 | 1.00 | 1 | 1 | -0.04 | -0.043 | -0.052 | -0.04  | -0.04  | t | 111051 | VGPLEVIP<br>EAVDPAG<br>SSIV | Oryctola<br>gus<br>cuniculu<br>s |
| 1 | 1.00 | 1 | 1 | -0.04 | -0.043 | -0.052 | -0.04  | -0.04  | t | 111051 | VGPLEVIP<br>EAVDPAG<br>SSIV | Oryctola<br>gus<br>cuniculu<br>s |
| 1 | 1.00 | 1 | 1 | 0     | -0.003 | -0.008 | 0      | 0      | t | 84250  | KEVAREAS<br>KKK             | Oryctola<br>gus<br>cuniculu<br>s |
| 1 | 1.00 | 1 | 1 | -0.01 | -0.008 | -0.018 | -0.013 | -0.012 | t | 13911  | EQQRFRN<br>CQRYV            | Homo<br>sapiens                  |
| 1 | 1.00 | 1 | 1 | 0     | -0.002 | 0      | 0.006  | -0.001 | t | 3236   | ANCASILC<br>KCYTTGT         | Mus<br>musculu<br>s              |
| 1 | 1.00 | 1 | 1 | 0     | -0.002 | 0      | 0.006  | -0.001 | t | 3236   | ANCASILC<br>KCYTTGT         | Mus<br>musculu<br>s              |
| 1 | 1.00 | 1 | 1 | -0.02 | -0.02  | -0.028 | -0.02  | -0.021 | t | 63967  | TGSQDFV<br>RSIG             | Mus<br>musculu<br>s              |
| 1 | 1.00 | 1 | 1 | -0.03 | -0.03  | -0.025 | -0.023 | -0.031 | t | 140672 | EQIYRVDL<br>RTLRL           | Rattus<br>norvegic<br>us         |
| 1 | 1.00 | 1 | 1 | 0.02  | 0.022  | 0.013  | 0.027  | 0.021  | t | 121475 | KKGEKVPK<br>GKKGKAD         | Homo<br>sapiens                  |
| 1 | 1.00 | 1 | 1 | 0     | 0.002  | 0.007  | 0.001  | -0.003 | t | 49764  | PTRTIGGS<br>QA              | Homo<br>sapiens                  |
| 1 | 1.00 | 1 | 1 | 0.02  | 0.02   | 0.016  | 0.02   | 0.02   | t | 76350  | YVLLSEKKI<br>S              | Homo<br>sapiens                  |
| 1 | 1.00 | 1 | 1 | 0.03  | 0.03   | 0.017  | 0.023  | 0.03   | t | 141931 | ITKLTPEEL<br>ENLAK          | Homo<br>sapiens                  |
| 1 | 1.00 | 1 | 1 | 0.07  | 0.07   | 0.07   | 0.07   | 0.07   | t | 142449 | NNQNLSV<br>VQALL            | Mus<br>musculu<br>s              |

|   |      |   |   |       |        |        |        |        |   |        |                          |                                  |
|---|------|---|---|-------|--------|--------|--------|--------|---|--------|--------------------------|----------------------------------|
| 1 | 1.00 | 1 | 1 | 0     | 0.003  | -0.005 | 0      | 0.001  | t | 141567 | TQDGLYH<br>NKN           | Mus<br>musculu<br>s              |
| 1 | 1.00 | 1 | 1 | -0.01 | -0.012 | -0.019 | -0.007 | -0.007 | t | 115483 | SFFDIGGS<br>VSAGFSN      | Mus<br>musculu<br>s              |
| 1 | 1.00 | 1 | 1 | 0     | 0.002  | -0.017 | 0      | 0.003  | t | 68833  | VHASFFDI<br>G            | Homo<br>sapiens                  |
| 1 | 1.00 | 1 | 1 | 0     | 0      | -0.017 | 0      | 0.003  | t | 68833  | VHASFFDI<br>G            | Mus<br>musculu<br>s              |
| 1 | 1.00 | 1 | 1 | 0.05  | 0.053  | 0.042  | 0.05   | 0.05   | t | 3893   | APVQEGV<br>QQE           | Mus<br>musculu<br>s              |
| 1 | 1.00 | 1 | 1 | 0.05  | 0.05   | 0.042  | 0.05   | 0.05   | t | 3893   | APVQEGV<br>QQE           | Mus<br>musculu<br>s              |
| 1 | 1.00 | 1 | 1 | 0     | 0.006  | -0.01  | 0      | 0      | t | 91345  | FYQEVLFK<br>GFEAV        | Equus<br>caballus                |
| 1 | 1.00 | 1 | 1 | 0     | 0      | -0.014 | 0      | 0      | t | 18025  | FTNKLKEK<br>HTDLG        | Mus<br>musculu<br>s              |
| 1 | 1.00 | 1 | 1 | 0.06  | 0.06   | 0.06   | 0.064  | 0.06   | t | 144812 | VTGCIPT<br>EQ            | Homo<br>sapiens                  |
| 1 | 1.00 | 1 | 1 | 0.01  | 0.008  | -0.006 | 0.003  | 0.01   | t | 98364  | QFVPIQNS<br>KS           | Mus<br>musculu<br>s              |
| 1 | 1.00 | 1 | 1 | 0.04  | 0.042  | 0.042  | 0.039  | 0.037  | t | 96828  | RLKEEED<br>KK            | Homo<br>sapiens                  |
| 1 | 1.00 | 1 | 1 | 0     | -0.003 | 0      | -0.003 | -0.005 | t | 99922  | DAEFRHDS<br>GY           | Oryctola<br>gus<br>cuniculu<br>s |
| 1 | 1.00 | 1 | 1 | 0.01  | 0.01   | 0.007  | 0.01   | 0.009  | t | 98763  | ENKVLVLD<br>TD           | Homo<br>sapiens                  |
| 1 | 1.00 | 1 | 1 | -0.02 | -0.024 | -0.026 | -0.017 | -0.021 | t | 7558   | DAKDGKEI<br>DTKHLPT<br>C | Oryctola<br>gus<br>cuniculu<br>s |



|   |      |   |   |       |        |        |        |        |   |        |                              |                                  |
|---|------|---|---|-------|--------|--------|--------|--------|---|--------|------------------------------|----------------------------------|
| 1 | 1.00 | 1 | 1 | 0.02  | 0.017  | 0.006  | 0.019  | 0.02   | t | 14227  | ESPANNP<br>GLSTVRDE          | Oryctola<br>gus<br>cuniculu<br>s |
| 1 | 1.00 | 1 | 1 | -0.02 | -0.018 | -0.02  | -0.019 | -0.02  | t | 51428  | QLLRIPQAI<br>MDM             | Homo<br>sapiens                  |
| 1 | 1.00 | 1 | 1 | -0.04 | -0.043 | -0.043 | -0.04  | -0.039 | t | 124708 | SFERFEIF                     | Oryctola<br>gus<br>cuniculu<br>s |
| 1 | 1.00 | 1 | 1 | 0.01  | 0.014  | 0.017  | 0.011  | 0.01   | t | 43693  | NEMVLL                       | Homo<br>sapiens                  |
| 1 | 1.00 | 1 | 1 | 0.04  | 0.04   | 0.033  | 0.04   | 0.039  | t | 57747  | SFEEDTEK<br>DK               | Oryctola<br>gus<br>cuniculu<br>s |
| 1 | 1.00 | 1 | 1 | -0.03 | -0.027 | -0.039 | -0.03  | -0.03  | t | 100318 | NAPKTFQF<br>IN               | Mus<br>musculu<br>s              |
| 1 | 1.00 | 1 | 1 | -0.02 | -0.016 | -0.038 | -0.023 | -0.02  | t | 20683  | GKSMANT<br>WPYFGYY<br>MGGNML | Homo<br>sapiens                  |
| 1 | 1.00 | 1 | 1 | 0.04  | 0.042  | 0.04   | 0.043  | 0.041  | t | 68017  | VDLPQL                       | Homo<br>sapiens                  |
| 1 | 1.00 | 1 | 1 | 0     | -0.003 | 0      | 0      | -0.003 | t | 11815  | EENVEENV<br>EENVEENV         | Oryctola<br>gus<br>cuniculu<br>s |
| 1 | 1.00 | 1 | 1 | 0.01  | 0.013  | 0.004  | 0.01   | 0.013  | t | 94564  | KIAKEQ                       | Mus<br>musculu<br>s              |
| 1 | 1.00 | 1 | 1 | 0.01  | 0.008  | -0.01  | 0.003  | 0.01   | t | 128090 | QYYRLPM<br>NAYRDFTS<br>EPLNS | Mus<br>musculu<br>s              |
| 1 | 1.00 | 1 | 1 | 0.01  | 0.008  | 0.01   | 0.017  | 0.01   | t | 122996 | AAFQQGKI<br>PP               | Homo<br>sapiens                  |
| 1 | 1.00 | 1 | 1 | 0.01  | 0.014  | 0.007  | 0.01   | 0.01   | t | 123117 | EEVKGDYL<br>K                | Ovis<br>aries                    |
| 1 | 1.00 | 1 | 1 | 0.05  | 0.052  | 0.045  | 0.051  | 0.05   | t | 16144  | FHSTSSES<br>N                | Homo<br>sapiens                  |

|   |      |   |   |       |        |        |        |        |   |        |                      |                                  |
|---|------|---|---|-------|--------|--------|--------|--------|---|--------|----------------------|----------------------------------|
| 1 | 1.00 | 1 | 1 | -0.01 | -0.012 | -0.01  | -0.011 | -0.01  | t | 46969  | PATIGDYT<br>DF       | Mus<br>musculu<br>s              |
| 1 | 1.00 | 1 | 1 | 0.01  | 0.012  | 0.01   | 0.011  | 0.01   | t | 60709  | SRKAYDH<br>NSP       | Homo<br>sapiens                  |
| 1 | 1.00 | 1 | 1 | 0.01  | 0.008  | 0.01   | 0.011  | 0.01   | t | 60709  | SRKAYDH<br>NSP       | Homo<br>sapiens                  |
| 1 | 1.00 | 1 | 1 | 0.02  | 0.02   | 0.016  | 0.02   | 0.02   | t | 152053 | PYCLGSPS<br>QDGY     | Sus<br>scrofa                    |
| 1 | 1.00 | 1 | 1 | 0.01  | 0.008  | 0.01   | 0.013  | 0.01   | t | 51929  | QPQQPQQ<br>SFP       | Mus<br>musculu<br>s              |
| 1 | 1.00 | 1 | 1 | 0.01  | 0.008  | -0.006 | 0.003  | 0.01   | t | 98378  | QNSKSAYT<br>PA       | Mus<br>musculu<br>s              |
| 1 | 1.00 | 1 | 1 | 0     | 0.003  | 0.002  | 0.007  | 0.002  | t | 104895 | LVEALYLV<br>CGERG    | Mus<br>musculu<br>s              |
| 1 | 1.00 | 1 | 1 | -0.01 | -0.012 | -0.01  | -0.013 | -0.013 | t | 131656 | SGKLEEFV<br>Q        | Mus<br>musculu<br>s              |
| 1 | 1.00 | 1 | 1 | 0.03  | 0.027  | 0.03   | 0.03   | 0.027  | t | 106764 | QYTSIHG<br>VVE       | Oryctola<br>gus<br>cuniculu<br>s |
| 1 | 1.00 | 1 | 1 | 0.03  | 0.038  | 0.03   | 0.03   | 0.029  | t | 136648 | SPLNNFYK<br>TQLR     | Gallus<br>gallus                 |
| 1 | 1.00 | 1 | 1 | 0.01  | 0.012  | 0.003  | 0.017  | 0.011  | t | 121474 | KKAPAKKG<br>EKVPKGK  | Homo<br>sapiens                  |
| 1 | 1.00 | 1 | 1 | -0.01 | -0.01  | -0.015 | -0.007 | -0.011 | t | 56804  | SAGRSTGS<br>LVRLFAPG | Homo<br>sapiens                  |
| 1 | 1.00 | 1 | 1 | -0.03 | -0.033 | -0.041 | -0.03  | -0.03  | t | 6540   | CLAVLLGA             | Oryctola<br>gus<br>cuniculu<br>s |
| 1 | 1.00 | 1 | 1 | 0.05  | 0.05   | 0.044  | 0.044  | 0.049  | t | 12187  | EGIHAQQ<br>KEP       | Homo<br>sapiens                  |
| 1 | 1.00 | 1 | 1 | 0.04  | 0.04   | 0.04   | 0.04   | 0.04   | t | 132268 | ENGYLME<br>AAP       | Homo<br>sapiens                  |

|   |      |   |   |       |        |        |        |        |   |        |                           |                                  |
|---|------|---|---|-------|--------|--------|--------|--------|---|--------|---------------------------|----------------------------------|
| 1 | 1.00 | 1 | 1 | 0     | 0.006  | -0.018 | 0      | 0.002  | t | 92556  | EIIGQNGE<br>RI            | Ovis<br>aries                    |
| 1 | 1.00 | 1 | 1 | 0.02  | 0.02   | 0.026  | 0.021  | 0.02   | t | 34238  | KVVLPE                    | Homo<br>sapiens                  |
| 1 | 1.00 | 1 | 1 | -0.02 | -0.022 | -0.025 | -0.021 | -0.02  | t | 74476  | YKLPDHVR<br>T             | Mus<br>musculu<br>s              |
| 1 | 1.00 | 1 | 1 | 0.05  | 0.05   | 0.041  | 0.048  | 0.05   | t | 135974 | PSNSASVP<br>ALTA          | Homo<br>sapiens                  |
| 1 | 1.00 | 1 | 1 | 0.05  | 0.048  | 0.05   | 0.049  | 0.05   | t | 48900  | PPQWKLP<br>P              | Anas<br>platyrhy<br>nchos        |
| 1 | 1.00 | 1 | 1 | 0.01  | 0.006  | -0.002 | 0.009  | 0.01   | t | 60446  | SQHIDS                    | Oryctola<br>gus<br>cuniculu<br>s |
| 1 | 1.00 | 1 | 1 | -0.01 | -0.01  | -0.01  | -0.01  | -0.012 | t | 67605  | VAGLEK                    | Mus<br>musculu<br>s              |
| 1 | 1.00 | 1 | 1 | 0     | -0.004 | -0.005 | 0.003  | 0      | t | 95414  | GLDLDVN<br>VFR            | Oryctola<br>gus<br>cuniculu<br>s |
| 1 | 1.00 | 1 | 1 | 0.04  | 0.04   | 0.04   | 0.04   | 0.04   | t | 124015 | DKTEDVDI<br>EE            | Homo<br>sapiens                  |
| 1 | 1.00 | 1 | 1 | 0     | 0      | 0      | 0.007  | 0      | t | 138812 | SSVLYGGP<br>PSAA          | Rattus<br>norvegic<br>us         |
| 1 | 1.00 | 1 | 1 | 0     | 0      | 0      | 0.007  | 0      | t | 140718 | NKWERAR<br>YAER           | Rattus<br>norvegic<br>us         |
| 1 | 1.00 | 1 | 1 | 0     | 0      | 0      | 0.007  | 0      | t | 140672 | EQIYRVDL<br>RTLRL         | Rattus<br>norvegic<br>us         |
| 1 | 1.00 | 1 | 1 | 0     | 0      | 0      | 0.007  | 0      | t | 140681 | GPEYWEQ<br>QTRIAKEW<br>EQ | Rattus<br>norvegic<br>us         |
| 1 | 1.00 | 1 | 1 | 0     | 0      | 0      | 0.011  | 0      | t | 103892 | ERYWLRS                   | Homo<br>sapiens                  |

|   |      |   |   |       |        |        |        |        |   |        |                              |                                  |
|---|------|---|---|-------|--------|--------|--------|--------|---|--------|------------------------------|----------------------------------|
| 1 | 1.00 | 1 | 1 | 0.02  | 0.022  | 0.009  | 0.021  | 0.02   | t | 110571 | EKTGILTVT<br>YHSETQRT<br>K   | Homo<br>sapiens                  |
| 1 | 1.00 | 1 | 1 | 0.02  | 0.017  | 0.017  | 0.02   | 0.02   | t | 62830  | TAEGRain                     | Mus<br>musculu<br>s              |
| 1 | 1.00 | 1 | 1 | 0     | 0      | 0      | 0.007  | 0      | t | 18441  | FYNQKFKG<br>KATL             | Mus<br>musculu<br>s              |
| 1 | 1.00 | 1 | 1 | 0.02  | 0.018  | 0.022  | 0.017  | 0.019  | t | 73312  | YAADITNG<br>L                | Mus<br>musculu<br>s              |
| 1 | 1.00 | 1 | 1 | 0.02  | 0.02   | 0.025  | 0.02   | 0.016  | t | 25139  | HWSISKPQ                     | Mus<br>musculu<br>s              |
| 1 | 1.00 | 1 | 1 | -0.01 | -0.008 | -0.008 | -0.009 | -0.01  | t | 20082  | GGVYLLPR                     | Homo<br>sapiens                  |
| 1 | 1.00 | 1 | 1 | -0.02 | -0.02  | -0.027 | -0.02  | -0.022 | t | 95294  | CSNGGLDL<br>DV               | Homo<br>sapiens                  |
| 1 | 1.00 | 1 | 1 | 0     | 0      | 0      | 0.004  | 0      | t | 132098 | TLLLEGVM<br>AA               | Homo<br>sapiens                  |
| 1 | 1.00 | 1 | 1 | -0.03 | -0.028 | -0.03  | -0.029 | -0.03  | t | 55382  | RPYCWHY<br>PP                | Homo<br>sapiens                  |
| 1 | 1.00 | 1 | 1 | 0.01  | 0.014  | 0.004  | 0.017  | 0.012  | t | 55838  | RSFQNKKS<br>LVAFKIMP<br>LEDm | Homo<br>sapiens                  |
| 1 | 1.00 | 1 | 1 | -0.01 | -0.01  | -0.017 | -0.01  | -0.009 | t | 130806 | EMDVVRF<br>DD                | Homo<br>sapiens                  |
| 1 | 1.00 | 1 | 1 | 0.08  | 0.08   | 0.08   | 0.08   | 0.081  | t | 117235 | SS                           | Mus<br>musculu<br>s              |
| 1 | 1.00 | 1 | 1 | 0.01  | 0.008  | 0.01   | 0.013  | 0.01   | t | 51925  | QPQQPFP<br>QSQ               | Mus<br>musculu<br>s              |
| 1 | 1.00 | 1 | 1 | 0     | 0      | -0.005 | 0.001  | 0      | t | 50168  | PYSASFT                      | Mus<br>musculu<br>s              |
| 1 | 1.00 | 1 | 1 | 0.01  | 0.007  | 0.003  | 0.01   | 0.011  | t | 114740 | AQGHRPQ<br>DE                | Oryctola<br>gus<br>cuniculu<br>s |

|   |      |   |   |       |        |        |        |        |   |        |                              |                                  |
|---|------|---|---|-------|--------|--------|--------|--------|---|--------|------------------------------|----------------------------------|
| 1 | 1.00 | 1 | 1 | 0.01  | 0.007  | 0.003  | 0.01   | 0.011  | t | 114740 | AQGHRPQ<br>DE                | Oryctola<br>gus<br>cuniculu<br>s |
| 1 | 1.00 | 1 | 1 | 0.01  | -0.002 | 0.003  | 0.01   | 0.011  | t | 114740 | AQGHRPQ<br>DE                | Macaca<br>mulatta                |
| 1 | 1.00 | 1 | 1 | 0.01  | 0.013  | 0.01   | 0.01   | 0.01   | t | 21601  | GPEET                        | Mus<br>musculu<br>s              |
| 1 | 1.00 | 1 | 1 | 0.01  | 0.01   | 0.01   | 0.01   | 0.01   | t | 21601  | GPEET                        | Mus<br>musculu<br>s              |
| 1 | 1.00 | 1 | 1 | 0.01  | 0.013  | 0.01   | 0.01   | 0.01   | t | 21601  | GPEET                        | Mus<br>musculu<br>s              |
| 1 | 1.00 | 1 | 1 | 0     | -0.003 | -0.01  | 0.001  | 0      | t | 38369  | LNVSREVL<br>QESRILRVI<br>KKK | Canis<br>lupus                   |
| 1 | 1.00 | 1 | 1 | -0.02 | -0.02  | -0.02  | -0.013 | -0.023 | t | 119455 | GGQFNFD<br>EGTP              | Homo<br>sapiens                  |
| 1 | 1.00 | 1 | 1 | -0.03 | -0.03  | -0.037 | -0.03  | -0.03  | t | 119475 | KKIK                         | Homo<br>sapiens                  |
| 1 | 1.00 | 1 | 1 | 0.02  | 0.018  | 0.02   | 0.014  | 0.019  | t | 119888 | GARVYAY<br>VFE               | Oryctola<br>gus<br>cuniculu<br>s |
| 1 | 1.00 | 1 | 1 | 0     | 0      | 0      | 0      | 0      | t | 4486   | ASINKFVV                     | Mus<br>musculu<br>s              |
| 1 | 1.00 | 1 | 1 | 0     | 0      | 0      | 0      | 0      | t | 25254  | IAEHQFKE<br>K                | Homo<br>sapiens                  |
| 1 | 1.00 | 1 | 1 | -0.02 | -0.023 | -0.014 | -0.02  | -0.022 | t | 139062 | GIWPEKIC                     | Mus<br>musculu<br>s              |
| 1 | 1.00 | 1 | 1 | 0.01  | 0.006  | 0.012  | 0.011  | 0.01   | t | 43110  | NAAFS                        | Bos<br>taurus                    |
| 1 | 1.00 | 1 | 1 | -0.02 | -0.018 | -0.026 | -0.019 | -0.022 | t | 141580 | YIGVAPRK<br>AIPA             | Homo<br>sapiens                  |
| 1 | 1.00 | 1 | 1 | 0.01  | 0.01   | 0.003  | 0.014  | 0.009  | t | 139494 | ERGSAGH<br>WTSESSVS          | Homo<br>sapiens                  |

|   |      |   |   |       |        |        |        |        |   |        |                     |                     |
|---|------|---|---|-------|--------|--------|--------|--------|---|--------|---------------------|---------------------|
| 1 | 1.00 | 1 | 1 | 0     | 0      | 0      | 0      | 0      | t | 131852 | DVDEPLEV<br>FISA    | Homo<br>sapiens     |
| 1 | 1.00 | 1 | 1 | 0.03  | 0.03   | 0.03   | 0.03   | 0.031  | t | 115308 | KFLDDDLT<br>DD      | Homo<br>sapiens     |
| 1 | 1.00 | 1 | 1 | 0.01  | 0.01   | 0.01   | 0.01   | 0.011  | t | 115201 | DDIMCVK<br>KIL      | Homo<br>sapiens     |
| 1 | 1.00 | 1 | 1 | 0     | -0.002 | 0      | 0.003  | -0.002 | t | 60722  | SRLGRSSA<br>WV      | Mus<br>musculu<br>s |
| 1 | 1.00 | 1 | 1 | -0.02 | -0.016 | -0.02  | -0.013 | -0.02  | t | 123579 | PGMIPPP<br>G        | Homo<br>sapiens     |
| 1 | 1.00 | 1 | 1 | -0.04 | -0.04  | -0.041 | -0.044 | -0.041 | t | 118947 | PFSAPPPA            | Homo<br>sapiens     |
| 1 | 1.00 | 1 | 1 | 0.05  | 0.05   | 0.05   | 0.05   | 0.05   | t | 106598 | LEAYAFDI<br>AA      | Homo<br>sapiens     |
| 1 | 1.00 | 1 | 1 | 0.03  | 0.028  | 0.024  | 0.027  | 0.03   | t | 54302  | RITYLTETKI          | Mus<br>musculu<br>s |
| 1 | 1.00 | 1 | 1 | -0.03 | -0.028 | -0.03  | -0.023 | -0.032 | t | 137399 | FCGLPRLE            | Homo<br>sapiens     |
| 1 | 1.00 | 1 | 1 | 0     | 0.004  | 0      | 0.001  | -0.003 | t | 36959  | LKMADPN<br>RFRGKD   | MD                  |
| 1 | 1.00 | 1 | 1 | -0.02 | -0.021 | -0.035 | -0.02  | -0.02  | t | 13897  | EQPFPSRL<br>GPLVTLE | Bos<br>taurus       |
| 1 | 1.00 | 1 | 1 | 0     | -0.02  | -0.003 | 0.001  | -0.002 | t | 111106 | AKIQLPTL<br>NEDLT   | Cricetina<br>e      |
| 1 | 1.00 | 1 | 1 | 0.02  | 0.018  | 0.016  | 0.012  | 0.016  | t | 144324 | GVSTITAD<br>EIR     | Mus<br>musculu<br>s |
| 1 | 1.00 | 1 | 1 | 0     | 0.002  | 0.009  | 0.006  | -0.001 | t | 65050  | TLRVYK              | Homo<br>sapiens     |
| 1 | 1.00 | 1 | 1 | 0     | 0.004  | -0.001 | 0.001  | 0.002  | t | 71545  | VTV                 | Homo<br>sapiens     |

|   |      |   |   |       |        |        |        |        |   |        |                              |                          |
|---|------|---|---|-------|--------|--------|--------|--------|---|--------|------------------------------|--------------------------|
| 1 | 1.00 | 1 | 1 | 0.01  | 0.01   | -0.002 | 0.01   | 0.01   | t | 104520 | IAKEQENK<br>ETIGTLKKI<br>LDE | Rattus<br>norvegicus     |
| 1 | 1.00 | 1 | 1 | 0.06  | 0.058  | 0.072  | 0.063  | 0.06   | t | 138763 | DWEYSEGL                     | Mus<br>musculus          |
| 1 | 1.00 | 1 | 1 | 0.02  | 0.022  | 0.02   | 0.023  | 0.02   | t | 156603 | AEVLRDGD<br>DCP              | Homo<br>sapiens          |
| 1 | 1.00 | 1 | 1 | 0     | 0      | 0      | 0      | 0      | t | 146337 | IPEEIKQL                     | Mus<br>musculus          |
| 1 | 1.00 | 1 | 1 | 0.04  | 0.042  | 0.033  | 0.038  | 0.038  | t | 106501 | HCGIVDSK<br>LP               | Homo<br>sapiens          |
| 1 | 1.00 | 1 | 1 | 0     | -0.004 | 0.007  | 0      | -0.002 | t | 10853  | DYAWDQTH<br>HQ               | Mus<br>musculus          |
| 1 | 1.00 | 1 | 1 | 0.02  | 0.022  | 0.02   | 0.027  | 0.02   | t | 119617 | NGQPENNY                     | Homo<br>sapiens          |
| 1 | 1.00 | 1 | 1 | 0.03  | 0.03   | 0.028  | 0.03   | 0.03   | t | 56700  | SAAGLEVR<br>YV               | Homo<br>sapiens          |
| 1 | 1.00 | 1 | 1 | 0.01  | 0.013  | 0      | 0.01   | 0.011  | t | 93373  | MDKVLNRE<br>EESL             | Mus<br>musculus          |
| 1 | 1.00 | 1 | 1 | 0.02  | 0.02   | 0.005  | 0.017  | 0.021  | t | 100    | AAEAACFK                     | Homo<br>sapiens          |
| 1 | 1.00 | 1 | 1 | 0.01  | 0.014  | 0.01   | 0.017  | 0.012  | t | 130407 | YSSIAWL                      | MD                       |
| 1 | 1.00 | 1 | 1 | 0     | 0      | -0.016 | 0.002  | 0.002  | t | 98686  | AHGRSQVL<br>LQQST            | Homo<br>sapiens          |
| 1 | 1.00 | 1 | 1 | 0.05  | 0.046  | 0.048  | 0.053  | 0.051  | t | 99274  | GGFSEV                       | Oryctolagus<br>cuniculus |
| 1 | 1.00 | 1 | 1 | -0.02 | -0.027 | -0.022 | -0.023 | -0.02  | t | 46722  | NYVLMVP<br>K                 | Homo<br>sapiens          |
| 1 | 1.00 | 1 | 1 | -0.01 | -0.01  | -0.01  | -0.008 | -0.01  | t | 16443  | FKQKALGL<br>LQTATK           | Homo<br>sapiens          |

|   |      |   |   |       |        |        |        |        |   |        |                              |                                  |
|---|------|---|---|-------|--------|--------|--------|--------|---|--------|------------------------------|----------------------------------|
| 1 | 1.00 | 1 | 1 | 0.05  | 0.052  | 0.042  | 0.051  | 0.05   | t | 7383   | CYGVSATK<br>LNDLCFSN<br>V    | Homo<br>sapiens                  |
| 1 | 1.00 | 1 | 1 | 0.01  | 0.01   | 0.01   | 0.01   | 0.01   | t | 77781  | GLVGRPKS<br>KL               | Homo<br>sapiens                  |
| 1 | 1.00 | 1 | 1 | 0.05  | 0.052  | 0.051  | 0.051  | 0.049  | t | 56386  | RVQYEG                       | Homo<br>sapiens                  |
| 1 | 1.00 | 1 | 1 | 0.05  | 0.05   | 0.05   | 0.05   | 0.049  | t | 134421 | KQIPECEN<br>VKTTQCVF         | Mus<br>musculu<br>s              |
| 1 | 1.00 | 1 | 1 | -0.02 | -0.018 | -0.027 | -0.019 | -0.021 | t | 137837 | EGAVALA<br>DRASS             | Homo<br>sapiens                  |
| 1 | 1.00 | 1 | 1 | 0.02  | 0.02   | 0.02   | 0.024  | 0.02   | t | 135956 | LRQLTPEQ<br>LSTL             | Homo<br>sapiens                  |
| 1 | 1.00 | 1 | 1 | 0.01  | 0.01   | -0.007 | 0.01   | 0.011  | t | 49325  | PSDKHIEQ<br>YLKKIQNSL<br>STE | Homo<br>sapiens                  |
| 1 | 1.00 | 1 | 1 | 0.01  | 0.01   | 0.006  | 0.01   | 0.008  | t | 51922  | QPQQPFP<br>QPQ               | Mus<br>musculu<br>s              |
| 1 | 1.00 | 1 | 1 | 0.05  | 0.038  | 0.045  | 0.051  | 0.05   | t | 50156  | PYQGSQK<br>GVS               | Mus<br>musculu<br>s              |
| 1 | 1.00 | 1 | 1 | 0.02  | 0.02   | 0.02   | 0.02   | 0.02   | t | 140461 | EVSLHDM<br>NLATH             | Mus<br>musculu<br>s              |
| 1 | 1.00 | 1 | 1 | -0.03 | -0.032 | -0.042 | -0.027 | -0.028 | t | 95920  | TNVARP                       | Mus<br>musculu<br>s              |
| 1 | 1.00 | 1 | 1 | -0.04 | -0.037 | -0.039 | -0.037 | -0.04  | t | 78220  | NKWTWYL                      | Equus<br>caballus                |
| 1 | 1.00 | 1 | 1 | 0.02  | 0.024  | 0.017  | 0.021  | 0.019  | t | 103457 | PAEFLENF<br>VRSSNLK          | Homo<br>sapiens                  |
| 1 | 1.00 | 1 | 1 | 0.05  | 0.046  | 0.038  | 0.049  | 0.051  | t | 17629  | FRPSQQN                      | Oryctola<br>gus<br>cuniculu<br>s |
| 1 | 1.00 | 1 | 1 | 0     | -0.003 | 0      | 0      | -0.003 | t | 110385 | QLYKTCKQ<br>AGTCPPDII<br>PKV | Oryctola<br>gus<br>cuniculu<br>s |



|   |      |   |   |   |        |   |   |        |   |        |                              |                                  |
|---|------|---|---|---|--------|---|---|--------|---|--------|------------------------------|----------------------------------|
| 1 | 1.00 | 1 | 1 | 0 | -0.003 | 0 | 0 | -0.003 | t | 116677 | ASATQLYK<br>TCKQAGT<br>CPPD  | Oryctola<br>gus<br>cuniculu<br>s |
| 1 | 1.00 | 1 | 1 | 0 | 0.008  | 0 | 0 | -0.003 | t | 70390  | VPNLRGDL<br>QVLAQKV<br>ART   | Cavia<br>porcellu<br>s           |
| 1 | 1.00 | 1 | 1 | 0 | -0.003 | 0 | 0 | -0.003 | t | 95040  | SHRPREAK                     | Oryctola<br>gus<br>cuniculu<br>s |
| 1 | 1.00 | 1 | 1 | 0 | -0.004 | 0 | 0 | -0.003 | t | 70391  | VPNLRGDL<br>QVLAQKV<br>ARTLP | Mus<br>musculu<br>s              |
| 1 | 1.00 | 1 | 1 | 0 | -0.017 | 0 | 0 | -0.003 | t | 75571  | YQWLTRV<br>GKYRPQD<br>KPNT   | Oryctola<br>gus<br>cuniculu<br>s |
| 1 | 1.00 | 1 | 1 | 0 | -0.003 | 0 | 0 | -0.003 | t | 95032  | PAGTGDRL                     | Oryctola<br>gus<br>cuniculu<br>s |
| 1 | 1.00 | 1 | 1 | 0 | -0.003 | 0 | 0 | -0.003 | t | 64396  | TINKPKGY<br>VGKE             | Oryctola<br>gus<br>cuniculu<br>s |
| 1 | 1.00 | 1 | 1 | 0 | -0.004 | 0 | 0 | -0.003 | t | 70391  | VPNLRGDL<br>QVLAQKV<br>ARTLP | Mus<br>musculu<br>s              |
| 1 | 1.00 | 1 | 1 | 0 | 0.004  | 0 | 0 | -0.003 | t | 91165  | CCELCNP<br>ACAGCY            | Sus<br>scrofa                    |
| 1 | 1.00 | 1 | 1 | 0 | 0.003  | 0 | 0 | -0.003 | t | 63038  | TAVSPTTL<br>RTEVVK           | Sus<br>scrofa                    |
| 1 | 1.00 | 1 | 1 | 0 | -0.004 | 0 | 0 | -0.003 | t | 70391  | VPNLRGDL<br>QVLAQKV<br>ARTLP | Mus<br>musculu<br>s              |
| 1 | 1.00 | 1 | 1 | 0 | 0.003  | 0 | 0 | -0.003 | t | 63038  | TAVSPTTL<br>RTEVVK           | Sus<br>scrofa                    |

|   |      |   |   |   |        |   |   |        |   |       |                             |                                  |
|---|------|---|---|---|--------|---|---|--------|---|-------|-----------------------------|----------------------------------|
| 1 | 1.00 | 1 | 1 | 0 | 0.008  | 0 | 0 | -0.003 | t | 70390 | VPNLRGDL<br>QVLAQKV<br>ART  | Cavia<br>porcellu<br>s           |
| 1 | 1.00 | 1 | 1 | 0 | -0.003 | 0 | 0 | -0.003 | t | 59922 | SNTFINNA                    | Oryctola<br>gus<br>cuniculu<br>s |
| 1 | 1.00 | 1 | 1 | 0 | 0.008  | 0 | 0 | -0.003 | t | 54058 | RHKQKIVA<br>PVKQTL          | Cavia<br>porcellu<br>s           |
| 1 | 1.00 | 1 | 1 | 0 | -0.007 | 0 | 0 | -0.003 | t | 54058 | RHKQKIVA<br>PVKQTL          | Oryctola<br>gus<br>cuniculu<br>s |
| 1 | 1.00 | 1 | 1 | 0 | 0.001  | 0 | 0 | -0.003 | t | 46094 | NTFYCCEL<br>CCNPACA<br>GCY  | Oryctola<br>gus<br>cuniculu<br>s |
| 1 | 1.00 | 1 | 1 | 0 | 0.001  | 0 | 0 | -0.003 | t | 46094 | NTFYCCEL<br>CCNPACA<br>GCY  | Oryctola<br>gus<br>cuniculu<br>s |
| 1 | 1.00 | 1 | 1 | 0 | -0.003 | 0 | 0 | -0.003 | t | 58783 | SKAFSNCY<br>PYDVPDYA<br>SL  | Oryctola<br>gus<br>cuniculu<br>s |
| 1 | 1.00 | 1 | 1 | 0 | 0.008  | 0 | 0 | -0.003 | t | 54058 | RHKQKIVA<br>PVKQTL          | Cavia<br>porcellu<br>s           |
| 1 | 1.00 | 1 | 1 | 0 | -0.003 | 0 | 0 | -0.003 | t | 49006 | PQGQGV<br>T                 | Oryctola<br>gus<br>cuniculu<br>s |
| 1 | 1.00 | 1 | 1 | 0 | -0.017 | 0 | 0 | -0.003 | t | 55818 | RSDYKFYE<br>DANGTRD<br>HKKG | Oryctola<br>gus<br>cuniculu<br>s |
| 1 | 1.00 | 1 | 1 | 0 | -0.007 | 0 | 0 | -0.003 | t | 54058 | RHKQKIVA<br>PVKQTL          | Oryctola<br>gus<br>cuniculu<br>s |

|   |      |   |   |       |        |        |        |        |   |        |                              |                                  |
|---|------|---|---|-------|--------|--------|--------|--------|---|--------|------------------------------|----------------------------------|
| 1 | 1.00 | 1 | 1 | 0     | -0.004 | 0      | 0      | -0.003 | t | 22360  | GSGVRGD<br>FGSLAPRV<br>ARQL  | Mus<br>musculu<br>s              |
| 1 | 1.00 | 1 | 1 | 0     | -0.003 | 0      | 0      | -0.003 | t | 9516   | DNNLVSG<br>P                 | Oryctola<br>gus<br>cuniculu<br>s |
| 1 | 1.00 | 1 | 1 | 0     | -0.003 | 0      | 0      | -0.003 | t | 1330   | AFKGGNG<br>AKKG              | Oryctola<br>gus<br>cuniculu<br>s |
| 1 | 1.00 | 1 | 1 | 0     | 0      | 0      | 0      | 0      | t | 45407  | NPNANPN<br>A                 | Mus<br>musculu<br>s              |
| 1 | 1.00 | 1 | 1 | 0     | 0.002  | -0.001 | 0.001  | 0      | t | 19893  | GGIVTC                       | Homo<br>sapiens                  |
| 1 | 1.00 | 1 | 1 | 0     | 0      | 0      | 0.009  | 0      | t | 131874 | EVFISAPR                     | Homo<br>sapiens                  |
| 1 | 1.00 | 1 | 1 | -0.02 | -0.017 | -0.027 | -0.02  | -0.022 | t | 33795  | KTNMKH<br>MAGA               | Mus<br>musculu<br>s              |
| 1 | 1.00 | 1 | 1 | 0     | -0.003 | 0.006  | 0      | -0.002 | t | 139191 | NYTCCKLQ                     | Mus<br>musculu<br>s              |
| 1 | 1.00 | 1 | 1 | 0.04  | 0.042  | 0.044  | 0.041  | 0.039  | t | 45659  | NRDFVE                       | Homo<br>sapiens                  |
| 1 | 1.00 | 1 | 1 | 0     | 0      | 0      | 0      | 0      | t | 65555  | TPEMDIPG<br>QV               | Mus<br>musculu<br>s              |
| 1 | 1.00 | 1 | 1 | 0     | 0      | 0      | 0      | 0      | t | 65555  | TPEMDIPG<br>QV               | Mus<br>musculu<br>s              |
| 1 | 1.00 | 1 | 1 | 0.04  | 0.044  | 0.04   | 0.043  | 0.04   | t | 118567 | QIEKRIQEII<br>EQL            | Homo<br>sapiens                  |
| 1 | 1.00 | 1 | 1 | 0.01  | 0.013  | 0.01   | 0.01   | 0.008  | t | 140892 | QILDAHAA<br>YLNATPAA<br>KVLV | Mus<br>musculu<br>s              |
| 1 | 1.00 | 1 | 1 | -0.01 | -0.012 | -0.02  | -0.011 | -0.01  | t | 34435  | KYGGTEIK<br>YN               | Mus<br>musculu<br>s              |

|   |      |   |   |       |        |        |        |        |   |        |                             |                                  |
|---|------|---|---|-------|--------|--------|--------|--------|---|--------|-----------------------------|----------------------------------|
| 1 | 1.00 | 1 | 1 | 0.01  | 0.012  | -0.002 | 0.007  | 0.009  | t | 257    | AAKVLVEG<br>NTDERGT         | Homo<br>sapiens                  |
| 1 | 1.00 | 1 | 1 | 0.01  | 0.012  | 0.006  | 0.007  | 0.008  | t | 114920 | PVCGTDG<br>VTY              | Homo<br>sapiens                  |
| 1 | 1.00 | 1 | 1 | 0.01  | 0.007  | -0.002 | 0.01   | 0.011  | t | 36543  | LIGVKGSS                    | Oryctola<br>gus<br>cuniculu<br>s |
| 1 | 1.00 | 1 | 1 | -0.01 | -0.01  | -0.015 | -0.01  | -0.011 | t | 125055 | FVYGGCQ<br>GNN              | Mus<br>musculu<br>s              |
| 1 | 1.00 | 1 | 1 | -0.03 | -0.03  | -0.032 | -0.027 | -0.03  | t | 7055   | CSPHHTAL<br>RQ              | Homo<br>sapiens                  |
| 1 | 1.00 | 1 | 1 | 0.01  | 0.01   | 0.01   | 0.01   | 0.01   | t | 60449  | SQHLPYIE<br>Q               | Homo<br>sapiens                  |
| 1 | 1.00 | 1 | 1 | 0.01  | 0.01   | 0.01   | 0.01   | 0.01   | t | 60449  | SQHLPYIE<br>Q               | Homo<br>sapiens                  |
| 1 | 1.00 | 1 | 1 | 0.06  | 0.062  | 0.053  | 0.059  | 0.06   | t | 135805 | YVNSTEAE                    | Homo<br>sapiens                  |
| 1 | 1.00 | 1 | 1 | 0.06  | 0.062  | 0.053  | 0.059  | 0.06   | t | 135805 | YVNSTEAE                    | Homo<br>sapiens                  |
| 1 | 1.00 | 1 | 1 | 0.02  | 0.02   | 0.02   | 0.02   | 0.018  | t | 50505  | QDPR                        | Mus<br>musculu<br>s              |
| 1 | 1.00 | 1 | 1 | 0.02  | 0.02   | 0.025  | 0.024  | 0.021  | t | 122194 | STVQDCV                     | Homo<br>sapiens                  |
| 1 | 1.00 | 1 | 1 | 0.05  | 0.05   | 0.045  | 0.054  | 0.05   | t | 76307  | YVKELPTE<br>VQKLKEK         | Homo<br>sapiens                  |
| 1 | 1.00 | 1 | 1 | -0.02 | -0.018 | -0.02  | -0.017 | -0.021 | t | 7046   | CSNKSKR                     | Homo<br>sapiens                  |
| 1 | 1.00 | 1 | 1 | -0.01 | -0.018 | -0.018 | -0.01  | -0.011 | t | 32138  | KLRPFERDI                   | Mus<br>musculu<br>s              |
| 1 | 1.00 | 1 | 1 | -0.01 | -0.006 | -0.017 | -0.007 | -0.008 | t | 144816 | WSHNFTN<br>MLG              | Homo<br>sapiens                  |
| 1 | 1.00 | 1 | 1 | 0.03  | 0.03   | 0.03   | 0.038  | 0.03   | t | 110909 | IVTFCKKC<br>DSTLRLCV<br>QST | Mus<br>musculu<br>s              |

|   |      |   |   |       |        |        |        |        |   |        |                     |                       |
|---|------|---|---|-------|--------|--------|--------|--------|---|--------|---------------------|-----------------------|
| 1 | 1.00 | 1 | 1 | -0.01 | -0.01  | -0.01  | -0.01  | -0.01  | t | 26619  | IIPDREVLVY          | Homo sapiens          |
| 1 | 1.00 | 1 | 1 | -0.01 | -0.014 | -0.017 | -0.011 | -0.01  | t | 46859  | PALTAVET<br>GATNPL  | Oryctolagus cuniculus |
| 1 | 1.00 | 1 | 1 | 0.03  | 0.032  | 0.023  | 0.027  | 0.028  | t | 58037  | SGFTLEFLE<br>HAFSVD | Homo sapiens          |
| 1 | 1.00 | 1 | 1 | 0.01  | 0.012  | 0.011  | 0.011  | 0.01   | t | 66539  | TTASGKLIT           | Homo sapiens          |
| 1 | 1.00 | 1 | 1 | -0.03 | -0.03  | -0.03  | -0.023 | -0.028 | t | 118061 | PPPGMRP<br>PMG      | Mus musculus          |
| 1 | 1.00 | 1 | 1 | -0.02 | -0.018 | -0.026 | -0.02  | -0.02  | t | 122843 | LNAGNQL<br>S        | Rattus norvegicus     |
| 1 | 1.00 | 1 | 1 | -0.02 | -0.02  | -0.023 | -0.023 | -0.023 | t | 115630 | NFDKLYIW<br>G       | Homo sapiens          |
| 1 | 1.00 | 1 | 1 | 0     | -0.004 | -0.011 | -0.007 | -0.002 | t | 98434  | RYMDQPS<br>RD       | Oryctolagus cuniculus |
| 1 | 1.00 | 1 | 1 | -0.03 | -0.024 | -0.036 | -0.03  | -0.03  | t | 123438 | LKMWSNF<br>LG       | Ovis aries            |
| 1 | 1.00 | 1 | 1 | 0.04  | 0.037  | 0.033  | 0.04   | 0.04   | t | 79158  | ASPYGNA             | Oryctolagus cuniculus |
| 1 | 1.00 | 1 | 1 | -0.02 | -0.02  | -0.022 | -0.02  | -0.02  | t | 118548 | PAPGMRP<br>P        | Homo sapiens          |
| 1 | 1.00 | 1 | 1 | -0.02 | -0.018 | -0.022 | -0.02  | -0.02  | t | 118548 | PAPGMRP<br>P        | Homo sapiens          |
| 1 | 1.00 | 1 | 1 | 0.03  | 0.03   | 0.026  | 0.03   | 0.029  | t | 14841  | EVPGSQ              | Oryctolagus cuniculus |
| 1 | 1.00 | 1 | 1 | 0.03  | 0.03   | 0.022  | 0.03   | 0.03   | t | 26375  | IHFGSDYE<br>DRYY    | Mus musculus          |

|   |      |   |   |       |       |       |        |        |   |        |                     |                                  |
|---|------|---|---|-------|-------|-------|--------|--------|---|--------|---------------------|----------------------------------|
| 1 | 1.00 | 1 | 1 | 0.03  | 0.03  | 0.022 | 0.03   | 0.03   | t | 26375  | IHFGSDYE<br>DRYY    | Mus<br>musculu<br>s              |
| 1 | 1.00 | 1 | 1 | 0     | 0     | 0     | 0      | -0.003 | t | 135939 | IPVLDENG<br>LFAP    | Mus<br>musculu<br>s              |
| 1 | 1.00 | 1 | 1 | 0     | 0     | 0     | 0      | -0.003 | t | 139846 | PEWWLEE<br>PPFISSGK | Mus<br>musculu<br>s              |
| 1 | 1.00 | 1 | 1 | 0     | 0     | 0     | 0      | -0.003 | t | 141683 | KDWG                | Mus<br>musculu<br>s              |
| 1 | 1.00 | 1 | 1 | 0     | 0     | 0     | 0      | -0.003 | t | 141693 | KTWG                | Mus<br>musculu<br>s              |
| 1 | 1.00 | 1 | 1 | 0     | 0     | 0     | 0      | -0.003 | t | 139841 | PAGRQAR<br>RPATVPEG | Mus<br>musculu<br>s              |
| 1 | 1.00 | 1 | 1 | 0     | 0     | 0     | 0      | -0.003 | t | 95051  | YSQFEKSY            | Oryctola<br>gus<br>cuniculu<br>s |
| 1 | 1.00 | 1 | 1 | 0     | 0     | 0     | 0      | -0.003 | t | 95032  | PAGTGDR             | Oryctola<br>gus<br>cuniculu<br>s |
| 1 | 1.00 | 1 | 1 | 0     | 0     | 0     | 0      | -0.003 | t | 30262  | KDTNNN              | Mus<br>musculu<br>s              |
| 1 | 1.00 | 1 | 1 | 0     | 0     | 0     | 0      | -0.003 | t | 7674   | DAVTELDK<br>N       | Mus<br>musculu<br>s              |
| 1 | 1.00 | 1 | 1 | 0     | 0     | 0     | 0      | -0.003 | t | 4429   | ASGQ                | Mus<br>musculu<br>s              |
| 1 | 1.00 | 1 | 1 | 0     | 0     | 0     | 0      | -0.003 | t | 7673   | DAVTE               | Mus<br>musculu<br>s              |
| 1 | 1.00 | 1 | 1 | -0.02 | -0.02 | -0.02 | -0.014 | -0.02  | t | 158670 | ADTFNFKT<br>FFHTIGF | Homo<br>sapiens                  |
| 1 | 1.00 | 1 | 1 | 0     | 0.003 | 0     | 0      | -0.002 | t | 49270  | PRVRGLY             | Mus<br>musculu<br>s              |

|   |      |   |   |       |        |        |        |        |   |        |                     |                           |
|---|------|---|---|-------|--------|--------|--------|--------|---|--------|---------------------|---------------------------|
| 1 | 1.00 | 1 | 1 | 0     | 0      | -0.011 | 0      | 0      | t | 774    | ADSVGGK<br>D        | Mus<br>musculu<br>s       |
| 1 | 1.00 | 1 | 1 | -0.02 | -0.017 | -0.015 | -0.02  | -0.024 | t | 138227 | QKRAA               | Mus<br>musculu<br>s       |
| 1 | 1.00 | 1 | 1 | -0.05 | -0.048 | -0.05  | -0.043 | -0.05  | t | 118361 | FRFLALKLY<br>FSFTRP | Homo<br>sapiens           |
| 1 | 1.00 | 1 | 1 | -0.02 | -0.02  | -0.02  | -0.02  | -0.02  | t | 118779 | EEAKKFLA<br>PK      | Mus<br>musculu<br>s       |
| 1 | 1.00 | 1 | 1 | -0.01 | -0.012 | -0.017 | -0.007 | -0.01  | t | 108323 | DTPPPCPR<br>CP      | Mus<br>musculu<br>s       |
| 1 | 1.00 | 1 | 1 | 0.03  | 0.028  | 0.022  | 0.03   | 0.03   | t | 48396  | PLLGNQSL            | Anas<br>platyrhy<br>nchos |
| 1 | 1.00 | 1 | 1 | 0.03  | 0.03   | 0.025  | 0.03   | 0.03   | t | 72466  | WGENDTD<br>VFVLNNTR | Mus<br>musculu<br>s       |
| 1 | 1.00 | 1 | 1 | 0.02  | 0.02   | 0.018  | 0.02   | 0.02   | t | 122799 | IKYIAEQLE<br>S      | Rattus<br>norvegic<br>us  |
| 1 | 1.00 | 1 | 1 | 0.04  | 0.04   | 0.032  | 0.04   | 0.04   | t | 141748 | SLLTEVETP           | Mus<br>musculu<br>s       |
| 1 | 1.00 | 1 | 1 | 0.02  | 0.02   | 0.005  | 0.012  | 0.021  | t | 98783  | FQQPLQQ<br>YPLGQ    | Homo<br>sapiens           |
| 1 | 1.00 | 1 | 1 | 0.03  | 0.032  | 0.035  | 0.033  | 0.028  | t | 121347 | GPLTVAQK<br>KAQNIME | Homo<br>sapiens           |
| 1 | 1.00 | 1 | 1 | 0.03  | 0.032  | 0.035  | 0.033  | 0.028  | t | 121347 | GPLTVAQK<br>KAQNIME | Homo<br>sapiens           |
| 1 | 1.00 | 1 | 1 | 0.03  | 0.03   | 0.021  | 0.026  | 0.03   | t | 20064  | GGVATY              | Homo<br>sapiens           |
| 1 | 1.00 | 1 | 1 | -0.01 | -0.01  | -0.01  | -0.01  | -0.01  | t | 47119  | PDKEILYEA           | Homo<br>sapiens           |
| 1 | 1.00 | 1 | 1 | 0.01  | 0.012  | 0.008  | 0.007  | 0.007  | t | 105977 | NHEQEFLR<br>YQQQSRR | Homo<br>sapiens           |

|   |      |   |   |       |        |        |        |        |   |        |                              |                                  |
|---|------|---|---|-------|--------|--------|--------|--------|---|--------|------------------------------|----------------------------------|
| 1 | 1.00 | 1 | 1 | -0.01 | -0.014 | -0.017 | -0.011 | -0.01  | t | 52694  | QVEVPG                       | Oryctola<br>gus<br>cuniculu<br>s |
| 1 | 1.00 | 1 | 1 | -0.01 | -0.008 | -0.011 | -0.009 | -0.01  | t | 40213  | LTTAATRFM                    | Homo<br>sapiens                  |
| 1 | 1.00 | 1 | 1 | -0.02 | -0.02  | -0.028 | -0.02  | -0.02  | t | 14844  | EVPLGVAA<br>DANK             | Oryctola<br>gus<br>cuniculu<br>s |
| 1 | 1.00 | 1 | 1 | 0.01  | 0.01   | -0.002 | 0.01   | 0.01   | t | 120396 | AGYIPFDQ<br>DL               | Mus<br>musculu<br>s              |
| 1 | 1.00 | 1 | 1 | -0.01 | -0.01  | -0.01  | -0.01  | -0.013 | t | 140458 | EHNDFPM<br>YTWRP             | Mus<br>musculu<br>s              |
| 1 | 1.00 | 1 | 1 | 0.02  | 0.02   | 0.024  | 0.019  | 0.02   | t | 32418  | KMVYATN                      | Homo<br>sapiens                  |
| 1 | 1.00 | 1 | 1 | 0.01  | 0.01   | 0.022  | 0.02   | 0.012  | t | 138553 | PVPHGTQ                      | Homo<br>sapiens                  |
| 1 | 1.00 | 1 | 1 | -0.02 | -0.02  | -0.02  | -0.02  | -0.023 | t | 106976 | VPTQLYNL<br>YPPL             | Mus<br>musculu<br>s              |
| 1 | 1.00 | 1 | 1 | 0.02  | 0.018  | 0.022  | 0.019  | 0.02   | t | 73312  | YAADITNG<br>L                | Mus<br>musculu<br>s              |
| 1 | 1.00 | 1 | 1 | 0.01  | 0.006  | 0.002  | 0.009  | 0.01   | t | 51463  | QLPFPQQ<br>PQQ               | Mus<br>musculu<br>s              |
| 1 | 1.00 | 1 | 1 | 0.01  | 0.01   | -0.003 | 0.01   | 0.01   | t | 159172 | TTDSGKLV<br>TDWCCRS<br>C     | Mus<br>musculu<br>s              |
| 1 | 1.00 | 1 | 1 | -0.02 | -0.022 | -0.025 | -0.021 | -0.021 | t | 56699  | SAAFYYRV                     | Mus<br>musculu<br>s              |
| 1 | 1.00 | 1 | 1 | 0.02  | 0.02   | 0.013  | 0.026  | 0.02   | t | 57632  | SESTEGDA<br>MEDIKQM<br>EAESI | Homo<br>sapiens                  |
| 1 | 1.00 | 1 | 1 | 0.03  | 0.03   | 0.022  | 0.03   | 0.03   | t | 62967  | TAQAAPV<br>QEG               | Mus<br>musculu<br>s              |



|   |      |   |   |       |        |        |        |        |   |        |                     |                           |
|---|------|---|---|-------|--------|--------|--------|--------|---|--------|---------------------|---------------------------|
| 1 | 1.00 | 1 | 1 | -0.06 | -0.058 | -0.07  | -0.059 | -0.062 | t | 103143 | EMIEAVGY<br>RSWPRYF | Homo<br>sapiens           |
| 1 | 1.00 | 1 | 1 | 0     | 0      | -0.009 | 0      | 0.002  | t | 94553  | IFD                 | Mus<br>musculu<br>s       |
| 1 | 1.00 | 1 | 1 | -0.03 | -0.026 | -0.029 | -0.023 | -0.03  | t | 113211 | VPVLAFDA<br>ARLRLLE | Homo<br>sapiens           |
| 1 | 1.00 | 1 | 1 | -0.01 | -0.008 | -0.013 | -0.009 | -0.01  | t | 67168  | TVSSQSFR            | Homo<br>sapiens           |
| 1 | 1.00 | 1 | 1 | -0.01 | -0.008 | -0.017 | -0.007 | -0.011 | t | 135935 | IEQGWGS<br>PKVTK    | Homo<br>sapiens           |
| 1 | 1.00 | 1 | 1 | 0.06  | 0.058  | 0.055  | 0.057  | 0.06   | t | 12507  | EILLNQLA            | Anas<br>platyrhy<br>nchos |
| 1 | 1.00 | 1 | 1 | -0.01 | -0.006 | -0.022 | -0.011 | -0.009 | t | 141560 | SDEALPPG<br>SPR     | Mus<br>musculu<br>s       |
| 1 | 1.00 | 1 | 1 | 0     | 0      | -0.005 | 0      | 0.001  | t | 18363  | FWRGDLV<br>FDFQV    | Homo<br>sapiens           |
| 1 | 1.00 | 1 | 1 | -0.02 | -0.02  | -0.018 | -0.02  | -0.02  | t | 139500 | FHTHISV             | Homo<br>sapiens           |
| 1 | 1.00 | 1 | 1 | -0.01 | -0.008 | -0.016 | -0.007 | -0.009 | t | 144823 | YWEGSGI<br>GAI      | Homo<br>sapiens           |
| 1 | 1.00 | 1 | 1 | -0.01 | -0.007 | -0.018 | -0.01  | -0.01  | t | 45156  | NNKTPNSI<br>AA      | Mus<br>musculu<br>s       |
| 1 | 1.00 | 1 | 1 | 0.02  | 0.02   | 0.02   | 0.019  | 0.02   | t | 19268  | GEGAPP              | Marmot<br>a monax         |
| 1 | 1.00 | 1 | 1 | -0.01 | -0.01  | -0.008 | -0.007 | -0.012 | t | 13728  | EPPVVHG<br>C        | Homo<br>sapiens           |
| 1 | 1.00 | 1 | 1 | 0.03  | 0.028  | 0.025  | 0.029  | 0.03   | t | 4448   | ASHLEQYG<br>TNEYS   | Mus<br>musculu<br>s       |
| 1 | 1.00 | 1 | 1 | -0.03 | -0.031 | -0.04  | -0.03  | -0.03  | t | 53449  | REAFRRYQ            | Anas<br>platyrhy<br>nchos |

|   |      |   |   |       |        |        |        |        |   |        |                 |                       |
|---|------|---|---|-------|--------|--------|--------|--------|---|--------|-----------------|-----------------------|
| 1 | 1.00 | 1 | 1 | 0     | 0.004  | 0      | 0      | 0.002  | t | 139840 | PAAFAFL         | Ovis aries            |
| 1 | 1.00 | 1 | 1 | 0.02  | 0.023  | 0.023  | 0.02   | 0.019  | t | 125127 | LDPENLTL        | Mus musculus          |
| 1 | 1.00 | 1 | 1 | -0.03 | -0.03  | -0.031 | -0.03  | -0.03  | t | 122715 | AKHDLDIKPT      | Rattus norvegicus     |
| 1 | 1.00 | 1 | 1 | 0.01  | 0.013  | 0.01   | 0.01   | 0.01   | t | 134702 | KEKKYS          | Mus musculus          |
| 1 | 1.00 | 1 | 1 | 0.01  | 0.01   | 0.008  | 0.01   | 0.009  | t | 97282  | ESNNL           | Oryctolagus cuniculus |
| 1 | 1.00 | 1 | 1 | -0.05 | -0.048 | -0.053 | -0.053 | -0.052 | t | 111135 | AWLAQFVLP       | Homo sapiens          |
| 1 | 1.00 | 1 | 1 | 0.05  | 0.05   | 0.05   | 0.05   | 0.049  | t | 119519 | RKVVTSL E       | Homo sapiens          |
| 1 | 1.00 | 1 | 1 | 0.05  | 0.05   | 0.038  | 0.05   | 0.051  | t | 17629  | FRPSQQN         | Oryctolagus cuniculus |
| 1 | 1.00 | 1 | 1 | 0.02  | 0.024  | 0.018  | 0.023  | 0.019  | t | 119855 | FAESRIRRETIAAED | Homo sapiens          |
| 1 | 1.00 | 1 | 1 | 0.02  | 0.022  | 0.018  | 0.023  | 0.019  | t | 119855 | FAESRIRRETIAAED | Homo sapiens          |
| 1 | 1.00 | 1 | 1 | 0     | 0      | 0      | 0      | 0.001  | t | 115335 | KYLLFCMENS      | Homo sapiens          |
| 1 | 1.00 | 1 | 1 | 0.02  | 0.018  | 0.015  | 0.023  | 0.02   | t | 55048  | RNQE            | Mus musculus          |
| 1 | 1.00 | 1 | 1 | 0.02  | 0.016  | 0.007  | 0.019  | 0.02   | t | 67445  | TYRATYQDFD      | Oryctolagus cuniculus |
| 1 | 1.00 | 1 | 1 | 0.01  | 0.01   | 0.01   | 0.01   | 0.008  | t | 78479  | PETLPYL         | Mus musculus          |

|   |      |   |   |       |        |        |        |        |   |        |                               |                                  |
|---|------|---|---|-------|--------|--------|--------|--------|---|--------|-------------------------------|----------------------------------|
| 1 | 1.00 | 1 | 1 | 0     | -0.002 | 0      | 0.007  | 0      | t | 110817 | DSTLRLCV<br>QSTHVDIR<br>TLE   | Mus<br>musculu<br>s              |
| 1 | 1.00 | 1 | 1 | 0     | -0.002 | 0      | 0.007  | 0      | t | 110869 | GQAEPDR<br>AHYNIVTF<br>CCKCD  | Mus<br>musculu<br>s              |
| 1 | 1.00 | 1 | 1 | 0.01  | 0.006  | 0.001  | 0.009  | 0.01   | t | 47315  | PEKAFREL                      | Oryctola<br>gus<br>cuniculu<br>s |
| 1 | 1.00 | 1 | 1 | 0.01  | 0.014  | 0.01   | 0.007  | 0.008  | t | 106330 | DFDCSKIQ<br>ST                | Homo<br>sapiens                  |
| 1 | 1.00 | 1 | 1 | 0.01  | 0.01   | 0.01   | 0.01   | 0.009  | t | 5562   | AVTKGTIN<br>DPEA              | Oryctola<br>gus<br>cuniculu<br>s |
| 1 | 1.00 | 1 | 1 | 0.01  | 0.01   | 0.004  | 0.01   | 0.01   | t | 42951  | MVIITFKS<br>GA                | Mus<br>musculu<br>s              |
| 1 | 1.00 | 1 | 1 | -0.01 | -0.008 | -0.019 | -0.007 | -0.01  | t | 18053  | FTQCSTMN<br>VVSKTLFR<br>KSPIY | Homo<br>sapiens                  |
| 1 | 1.00 | 1 | 1 | 0.01  | 0.006  | 0.005  | 0.011  | 0.008  | t | 133775 | AETNRAPF<br>DLAEAE            | Oryctola<br>gus<br>cuniculu<br>s |
| 1 | 1.00 | 1 | 1 | 0     | -0.002 | 0.006  | -0.001 | -0.002 | t | 14009  | ERKIKV                        | Mus<br>musculu<br>s              |
| 1 | 1.00 | 1 | 1 | 0.04  | 0.038  | 0.028  | 0.039  | 0.04   | t | 66183  | TSEEFQVK<br>ETSSGT            | Mus<br>musculu<br>s              |
| 1 | 1.00 | 1 | 1 | -0.02 | -0.02  | -0.036 | -0.018 | -0.017 | t | 99014  | SQCQAIH<br>NVVHA              | Homo<br>sapiens                  |
| 1 | 1.00 | 1 | 1 | 0.02  | 0.02   | 0.011  | 0.02   | 0.02   | t | 12258  | EGRFKSQD                      | Homo<br>sapiens                  |
| 1 | 1.00 | 1 | 1 | 0.04  | 0.04   | 0.039  | 0.051  | 0.043  | t | 132014 | PQIVPEPM                      | Homo<br>sapiens                  |
| 1 | 1.00 | 1 | 1 | 0.02  | 0.027  | 0.016  | 0.023  | 0.02   | t | 7996   | DEGESPTP<br>AT                | Capra<br>hircus                  |

|   |      |   |   |       |        |        |        |        |   |        |                      |                                  |
|---|------|---|---|-------|--------|--------|--------|--------|---|--------|----------------------|----------------------------------|
| 1 | 1.00 | 1 | 1 | -0.02 | -0.023 | -0.028 | -0.02  | -0.022 | t | 6953   | CRTNYGYS             | Oryctola<br>gus<br>cuniculu<br>s |
| 1 | 1.00 | 1 | 1 | 0.03  | 0.03   | 0.03   | 0.034  | 0.03   | t | 115605 | GDEVELPC<br>RISP     | Homo<br>sapiens                  |
| 1 | 1.00 | 1 | 1 | 0.04  | 0.036  | 0.033  | 0.043  | 0.04   | t | 107254 | TQSPGTLS<br>LSPGERAT | Oryctola<br>gus<br>cuniculu<br>s |
| 1 | 1.00 | 1 | 1 | -0.04 | -0.038 | -0.047 | -0.043 | -0.039 | t | 51431  | QLRLKKY<br>KV        | Homo<br>sapiens                  |
| 1 | 1.00 | 1 | 1 | -0.01 | -0.01  | -0.017 | -0.014 | -0.013 | t | 131038 | RKIAKDEG<br>AK       | Homo<br>sapiens                  |
| 1 | 1.00 | 1 | 1 | -0.01 | -0.013 | -0.014 | -0.01  | -0.01  | t | 12625  | EKAFAEL              | Oryctola<br>gus<br>cuniculu<br>s |
| 1 | 1.00 | 1 | 1 | -0.01 | -0.013 | -0.014 | -0.01  | -0.01  | t | 12625  | EKAFAEL              | Oryctola<br>gus<br>cuniculu<br>s |
| 1 | 1.00 | 1 | 1 | 0.02  | 0.017  | 0.02   | 0.02   | 0.02   | t | 119923 | GYISKAQE<br>YFN      | Oryctola<br>gus<br>cuniculu<br>s |
| 1 | 1.00 | 1 | 1 | -0.04 | -0.04  | -0.038 | -0.04  | -0.04  | t | 119411 | YKYFPEVK<br>TKGMA    | Homo<br>sapiens                  |
| 1 | 1.00 | 1 | 1 | -0.01 | -0.014 | -0.012 | -0.011 | -0.012 | t | 120889 | QISYSCNV<br>LIYPS    | Oryctola<br>gus<br>cuniculu<br>s |
| 1 | 1.00 | 1 | 1 | 0.03  | 0.026  | 0.023  | 0.031  | 0.033  | t | 131117 | TRDL                 | Oryctola<br>gus<br>cuniculu<br>s |
| 1 | 1.00 | 1 | 1 | -0.01 | -0.012 | -0.007 | -0.011 | -0.014 | t | 46488  | NVSVSPSPS<br>STPLLY  | Mus<br>musculu<br>s              |
| 1 | 1.00 | 1 | 1 | 0     | 0      | -0.002 | 0      | -0.002 | t | 78028  | TCRNNDT<br>CRAPD     | Mus<br>musculu<br>s              |
| 1 | 1.00 | 1 | 1 | 0     | 0.002  | 0      | 0.003  | -0.003 | t | 134088 | IHGKTQG<br>ARQKFSS   | Homo<br>sapiens                  |

|   |      |   |   |       |        |        |        |        |   |        |                       |                                  |
|---|------|---|---|-------|--------|--------|--------|--------|---|--------|-----------------------|----------------------------------|
| 1 | 1.00 | 1 | 1 | -0.02 | -0.02  | -0.02  | -0.02  | -0.022 | t | 117565 | LKAVKMTL<br>KNREP     | Homo<br>sapiens                  |
| 1 | 1.00 | 1 | 1 | 0.02  | 0.02   | 0.02   | 0.02   | 0.021  | t | 115234 | EQLTKCEV<br>FR        | Homo<br>sapiens                  |
| 1 | 1.00 | 1 | 1 | 0     | 0      | -0.015 | 0      | 0.001  | t | 122048 | YCEIIV                | Oryctola<br>gus<br>cuniculu<br>s |
| 1 | 1.00 | 1 | 1 | -0.01 | -0.013 | -0.018 | -0.01  | -0.01  | t | 12417  | EIDKGIYQT<br>SNFRVVPS | Oryctola<br>gus<br>cuniculu<br>s |
| 1 | 1.00 | 1 | 1 | 0.01  | 0.006  | 0.015  | 0.009  | 0.008  | t | 53894  | RGKDLPVL<br>DQLTD     | Oryctola<br>gus<br>cuniculu<br>s |
| 1 | 1.00 | 1 | 1 | 0.04  | 0.04   | 0.04   | 0.04   | 0.04   | t | 117464 | DVEPKVKS<br>KKREAVA   | Homo<br>sapiens                  |
| 1 | 1.00 | 1 | 1 | 0.04  | 0.04   | 0.04   | 0.04   | 0.04   | t | 117465 | DVEPKVKS<br>KKREAVA   | Homo<br>sapiens                  |
| 1 | 1.00 | 1 | 1 | -0.02 | -0.017 | -0.031 | -0.02  | -0.018 | t | 111382 | GTLGIVCPI<br>CSQKP    | Mus<br>musculu<br>s              |
| 1 | 1.00 | 1 | 1 | 0.04  | 0.042  | 0.031  | 0.037  | 0.041  | t | 64998  | TLPDTEKQ<br>I         | Homo<br>sapiens                  |
| 1 | 1.00 | 1 | 1 | -0.02 | -0.018 | -0.028 | -0.017 | -0.02  | t | 27244  | ILPGGGTA<br>LIRC      | Homo<br>sapiens                  |
| 1 | 1.00 | 1 | 1 | 0     | 0.003  | -0.006 | 0      | 0.002  | t | 133725 | TVCTYRDF<br>MY        | Mus<br>musculu<br>s              |
| 1 | 1.00 | 1 | 1 | 0.01  | 0.008  | 0.001  | 0.013  | 0.01   | t | 125575 | THDALKAV<br>KQLIKT    | Mus<br>musculu<br>s              |
| 1 | 1.00 | 1 | 1 | 0.02  | 0.022  | 0.022  | 0.027  | 0.02   | t | 119560 | DLVLYNNA<br>DGDFAIVK  | Homo<br>sapiens                  |
| 1 | 1.00 | 1 | 1 | 0.02  | 0.024  | 0.022  | 0.027  | 0.02   | t | 119560 | DLVLYNNA<br>DGDFAIVK  | Homo<br>sapiens                  |

|   |      |   |   |       |        |        |        |        |   |        |                     |                                  |
|---|------|---|---|-------|--------|--------|--------|--------|---|--------|---------------------|----------------------------------|
| 1 | 1.00 | 1 | 1 | -0.03 | -0.03  | -0.037 | -0.023 | -0.03  | t | 116927 | AVCRTSM<br>CSIQSAPP | Homo<br>sapiens                  |
| 1 | 1.00 | 1 | 1 | 0.02  | 0.02   | 0.02   | 0.023  | 0.02   | t | 23174  | GVTRPS              | Homo<br>sapiens                  |
| 1 | 1.00 | 1 | 1 | -0.01 | -0.007 | -0.019 | -0.01  | -0.01  | t | 63756  | TFTNKLKE<br>KHTDLGK | Mus<br>musculu<br>s              |
| 1 | 1.00 | 1 | 1 | -0.01 | -0.01  | -0.015 | -0.011 | -0.011 | t | 31075  | KGTMDSG<br>QTKR     | Mus<br>musculu<br>s              |
| 1 | 1.00 | 1 | 1 | 0.04  | 0.04   | 0.037  | 0.04   | 0.04   | t | 61996  | STVSSEAN<br>AEDVVC  | Homo<br>sapiens                  |
| 1 | 1.00 | 1 | 1 | -0.06 | -0.058 | -0.043 | -0.059 | -0.07  | t | 948    | AEGGTWR<br>I        | Homo<br>sapiens                  |
| 1 | 1.00 | 1 | 1 | 0.05  | 0.048  | 0.05   | 0.047  | 0.047  | t | 135854 | IQQSIERL            | Mus<br>musculu<br>s              |
| 1 | 1.00 | 1 | 1 | 0.02  | 0.024  | 0.02   | 0.027  | 0.02   | t | 123511 | MPPMTQ<br>AP        | Homo<br>sapiens                  |
| 1 | 1.00 | 1 | 1 | 0     | 0      | -0.012 | 0      | 0      | t | 30799  | KFNPDLAG<br>G       | Homo<br>sapiens                  |
| 1 | 1.00 | 1 | 1 | 0.04  | 0.04   | 0.033  | 0.04   | 0.04   | t | 123278 | GYLKDLPT<br>T       | Ovis<br>aries                    |
| 1 | 1.00 | 1 | 1 | 0.03  | 0.028  | 0.025  | 0.029  | 0.03   | t | 4448   | ASHLEQYG<br>TNEYS   | Mus<br>musculu<br>s              |
| 1 | 1.00 | 1 | 1 | 0     | -0.004 | -0.001 | -0.001 | 0      | t | 78836  | SPKRIGTG<br>DR      | Oryctola<br>gus<br>cuniculu<br>s |
| 1 | 1.00 | 1 | 1 | 0     | 0.002  | 0      | 0.003  | 0.001  | t | 52420  | QSRGEAR             | Homo<br>sapiens                  |
| 1 | 1.00 | 1 | 1 | 0.05  | 0.046  | 0.047  | 0.05   | 0.05   | t | 141004 | EPDP                | Mus<br>musculu<br>s              |
| 1 | 1.00 | 1 | 1 | -0.06 | -0.058 | -0.07  | -0.059 | -0.061 | t | 96133  | AYGIKSNV<br>VR      | Homo<br>sapiens(<br>human)       |

|   |      |   |   |       |        |        |        |        |   |        |                     |                       |
|---|------|---|---|-------|--------|--------|--------|--------|---|--------|---------------------|-----------------------|
| 1 | 1.00 | 1 | 1 | -0.01 | -0.008 | -0.01  | -0.003 | -0.009 | t | 107479 | KFNWYVD             | Homo sapiens          |
| 1 | 1.00 | 1 | 1 | 0.01  | 0.01   | 0.01   | 0.01   | 0.01   | t | 156886 | HGLYGS              | Gallus gallus         |
| 1 | 1.00 | 1 | 1 | -0.02 | -0.017 | -0.018 | -0.02  | -0.021 | t | 120077 | LMRYWAN<br>FAR      | Mus musculus          |
| 1 | 1.00 | 1 | 1 | -0.01 | -0.01  | -0.008 | -0.01  | -0.013 | t | 156975 | WSSTVLRV<br>SPTRTV  | Mus musculus          |
| 1 | 1.00 | 1 | 1 | -0.02 | -0.018 | -0.025 | -0.019 | -0.02  | t | 21497  | GNPNRPD<br>GGILT    | Homo sapiens          |
| 1 | 1.00 | 1 | 1 | 0     | 0.002  | -0.009 | -0.003 | -0.002 | t | 60019  | SPDRKRRA<br>DEEEYD  | Homo sapiens          |
| 1 | 1.00 | 1 | 1 | -0.02 | -0.02  | -0.02  | -0.02  | -0.021 | t | 9132   | DLIPLLR             | Oryctolagus cuniculus |
| 1 | 1.00 | 1 | 1 | -0.05 | -0.048 | -0.05  | -0.043 | -0.05  | t | 107607 | RVVSVLT             | Homo sapiens          |
| 1 | 1.00 | 1 | 1 | -0.02 | -0.018 | -0.033 | -0.019 | -0.02  | t | 137946 | PGYYRLTLI<br>ANG    | Homo sapiens          |
| 1 | 1.00 | 1 | 1 | 0.01  | 0.007  | 0.004  | 0.01   | 0.01   | t | 54908  | RMKDTL              | Oryctolagus cuniculus |
| 1 | 1.00 | 1 | 1 | -0.03 | -0.028 | -0.03  | -0.037 | -0.036 | t | 23176  | GVTRPSAP<br>PLPHVV  | Homo sapiens          |
| 1 | 1.00 | 1 | 1 | 0.01  | 0.01   | 0      | 0.01   | 0.01   | t | 15523  | FEEVNGIR<br>KP      | Mus musculus          |
| 1 | 1.00 | 1 | 1 | 0.01  | 0.01   | 0      | 0.01   | 0.01   | t | 15517  | FEEINGIRK<br>P      | Mus musculus          |
| 1 | 1.00 | 1 | 1 | 0.05  | 0.05   | 0.05   | 0.05   | 0.05   | t | 141894 | FEQEPSSE<br>EPKDSKL | Mus musculus          |
| 1 | 1.00 | 1 | 1 | 0.05  | 0.05   | 0.05   | 0.05   | 0.05   | t | 141894 | FEQEPSSE<br>EPKDSKL | Mus musculus          |

|   |      |   |   |       |        |        |        |        |   |        |                     |                                  |
|---|------|---|---|-------|--------|--------|--------|--------|---|--------|---------------------|----------------------------------|
| 1 | 1.00 | 1 | 1 | 0.01  | 0.014  | 0.001  | 0.011  | 0.011  | t | 13735  | EPQVYTLP<br>PSR     | Homo<br>sapiens                  |
| 1 | 1.00 | 1 | 1 | -0.01 | -0.006 | -0.01  | -0.003 | -0.011 | t | 117298 | GPSRRGPS<br>LGASSH  | Homo<br>sapiens                  |
| 1 | 1.00 | 1 | 1 | -0.01 | -0.008 | -0.01  | -0.003 | -0.011 | t | 117298 | GPSRRGPS<br>LGASSH  | Homo<br>sapiens                  |
| 1 | 1.00 | 1 | 1 | 0.05  | 0.05   | 0.05   | 0.05   | 0.05   | t | 137888 | GTEYTV EV           | Homo<br>sapiens                  |
| 1 | 1.00 | 1 | 1 | 0     | 0      | -0.007 | 0      | -0.001 | t | 141523 | ALEPPHNL<br>PVP     | Mus<br>musculu<br>s              |
| 1 | 1.00 | 1 | 1 | -0.01 | -0.014 | -0.016 | -0.009 | -0.01  | t | 22835  | GTSMDDE<br>ADRYF    | Bos<br>taurus                    |
| 1 | 1.00 | 1 | 1 | 0     | 0      | -0.002 | 0      | 0      | t | 78379  | FEPSKSISG<br>VSHYLL | Mus<br>musculu<br>s              |
| 1 | 1.00 | 1 | 1 | 0.03  | 0.032  | 0.021  | 0.033  | 0.033  | t | 110733 | VGENVPD<br>DLYIKGSG | Homo<br>sapiens                  |
| 1 | 1.00 | 1 | 1 | 0     | -0.002 | -0.017 | -0.003 | 0      | t | 60098  | SPKGGAI SI<br>KDS   | Mus<br>musculu<br>s              |
| 1 | 1.00 | 1 | 1 | 0     | 0      | 0.005  | 0.001  | 0      | t | 138238 | SMLDTP T            | Mus<br>musculu<br>s              |
| 1 | 1.00 | 1 | 1 | -0.01 | -0.008 | -0.01  | -0.004 | -0.011 | t | 138190 | HNAKTKL             | Homo<br>sapiens                  |
| 1 | 1.00 | 1 | 1 | -0.02 | -0.018 | -0.02  | -0.017 | -0.02  | t | 51976  | QPTLTFGA<br>GVNVPAG | Homo<br>sapiens                  |
| 1 | 1.00 | 1 | 1 | -0.02 | -0.022 | -0.02  | -0.017 | -0.02  | t | 51976  | QPTLTFGA<br>GVNVPAG | Homo<br>sapiens                  |
| 1 | 1.00 | 1 | 1 | 0     | 0      | 0      | 0.004  | -0.001 | t | 135449 | CATLRVYK<br>GG      | Homo<br>sapiens                  |
| 1 | 1.00 | 1 | 1 | 0.02  | 0.017  | 0.012  | 0.02   | 0.019  | t | 10326  | DTEEDKPK<br>YE      | Oryctola<br>gus<br>cuniculu<br>s |



|   |      |   |   |       |        |        |        |        |   |        |                              |                       |
|---|------|---|---|-------|--------|--------|--------|--------|---|--------|------------------------------|-----------------------|
| 1 | 1.00 | 1 | 1 | 0.03  | 0.035  | 0.035  | 0.034  | 0.03   | t | 720    | ADLPQP                       | Homo sapiens          |
| 1 | 1.00 | 1 | 1 | -0.01 | -0.017 | -0.017 | -0.003 | -0.008 | t | 156799 | VYATRSSA<br>VRLRSSV          | Homo sapiens          |
| 1 | 1.00 | 1 | 1 | 0.03  | 0.028  | 0.025  | 0.029  | 0.03   | t | 4448   | ASHLEQYG<br>TNEYS            | Mus musculus          |
| 1 | 1.00 | 1 | 1 | 0.01  | 0.01   | 0.012  | 0.01   | 0.01   | t | 53924  | RGLYFPAG                     | Mus musculus          |
| 1 | 1.00 | 1 | 1 | -0.01 | -0.01  | -0.01  | -0.01  | -0.01  | t | 47119  | PDKEILYEA                    | Homo sapiens          |
| 1 | 1.00 | 1 | 1 | 0.01  | 0.015  | 0.003  | 0.011  | 0.01   | t | 14074  | ERSDLEPSI<br>PSEYM           | Homo sapiens          |
| 1 | 1.00 | 1 | 1 | -0.05 | -0.05  | -0.05  | -0.05  | -0.052 | t | 145831 | IPLGTRP                      | Mus musculus          |
| 1 | 1.00 | 1 | 1 | 0.05  | 0.05   | 0.045  | 0.05   | 0.05   | t | 51072  | QIGNTVTP<br>TVTFTMD<br>GDTMT | Mus musculus          |
| 1 | 1.00 | 1 | 1 | 0.05  | 0.05   | 0.045  | 0.05   | 0.05   | t | 51072  | QIGNTVTP<br>TVTFTMD<br>GDTMT | Mus musculus          |
| 1 | 1.00 | 1 | 1 | 0.05  | 0.05   | 0.045  | 0.05   | 0.05   | t | 51072  | QIGNTVTP<br>TVTFTMD<br>GDTMT | Mus musculus          |
| 1 | 1.00 | 1 | 1 | 0.02  | 0.02   | 0.019  | 0.02   | 0.02   | t | 32331  | KMITEFEN                     | Homo sapiens          |
| 1 | 1.00 | 1 | 1 | 0.01  | 0.01   | 0.01   | 0.01   | 0.008  | t | 42984  | MVQVVYD                      | Oryctolagus cuniculus |
| 1 | 1.00 | 1 | 1 | 0.01  | 0.01   | 0.001  | 0.01   | 0.01   | t | 135990 | SASVPALT<br>AVET             | Homo sapiens          |
| 1 | 1.00 | 1 | 1 | 0.01  | 0.009  | 0.012  | 0.01   | 0.009  | t | 95521  | KQTLPPSV                     | Bos taurus            |

|   |      |   |   |       |        |        |        |        |   |        |                              |                                  |
|---|------|---|---|-------|--------|--------|--------|--------|---|--------|------------------------------|----------------------------------|
| 1 | 1.00 | 1 | 1 | 0.04  | 0.04   | 0.04   | 0.04   | 0.04   | t | 153865 | PETTDLYC<br>Y                | Cavia<br>porcellu<br>s           |
| 1 | 1.00 | 1 | 1 | 0.01  | 0.008  | 0.004  | 0.013  | 0.01   | t | 95676  | PPRPTRPT<br>TLPPTPLLT        | Homo<br>sapiens                  |
| 1 | 1.00 | 1 | 1 | -0.03 | -0.026 | -0.03  | -0.023 | -0.03  | t | 113001 | GIRKFAAD<br>AVKLERM          | Homo<br>sapiens                  |
| 1 | 1.00 | 1 | 1 | 0     | 0.008  | -0.002 | 0      | -0.003 | t | 146808 | CTPKSDEF<br>NPCEDIM<br>GYKFL | Gallus<br>gallus                 |
| 1 | 1.00 | 1 | 1 | -0.02 | -0.02  | -0.019 | -0.02  | -0.023 | t | 20523  | GKCGVSIP<br>YK               | Homo<br>sapiens                  |
| 1 | 1.00 | 1 | 1 | 0     | 0      | -0.008 | 0      | 0.002  | t | 133546 | DSARAAY                      | Mus<br>musculu<br>s              |
| 1 | 1.00 | 1 | 1 | 0.02  | 0.017  | 0.024  | 0.02   | 0.018  | t | 100074 | GNINYACG<br>QGID             | Oryctola<br>gus<br>cuniculu<br>s |
| 1 | 1.00 | 1 | 1 | 0     | 0.002  | 0      | 0.001  | 0      | t | 23689  | HEHHGVY<br>NQG               | Homo<br>sapiens                  |
| 1 | 1.00 | 1 | 1 | 0.02  | 0.022  | 0.01   | 0.021  | 0.02   | t | 103641 | TDVIPETD<br>GAKEGPT          | Homo<br>sapiens                  |
| 1 | 1.00 | 1 | 1 | -0.01 | -0.022 | -0.022 | -0.01  | -0.01  | t | 115610 | GSLPQKA<br>QGHRPQD<br>EN     | Macaca<br>mulatta                |
| 1 | 1.00 | 1 | 1 | 0.02  | 0.018  | 0.021  | 0.021  | 0.02   | t | 13266  | ELRWDLT<br>DIYNL             | Mus<br>musculu<br>s              |
| 1 | 1.00 | 1 | 1 | -0.02 | -0.02  | -0.027 | -0.02  | -0.019 | t | 150972 | CKLRGVAP<br>LHLGKC           | Mus<br>musculu<br>s              |
| 1 | 1.00 | 1 | 1 | 0.05  | 0.05   | 0.05   | 0.05   | 0.05   | t | 111573 | MSSQFYQ                      | Homo<br>sapiens                  |
| 1 | 1.00 | 1 | 1 | 0.01  | 0.01   | 0.011  | 0.007  | 0.01   | t | 55293  | RPQDVKEP                     | Homo<br>sapiens                  |
| 1 | 1.00 | 1 | 1 | 0.01  | 0.008  | 0.012  | 0.009  | 0.009  | t | 122094 | FLALDVPTI<br>GLC             | Mus<br>musculu<br>s              |

|   |      |   |   |       |        |        |        |        |   |        |                            |                                  |
|---|------|---|---|-------|--------|--------|--------|--------|---|--------|----------------------------|----------------------------------|
| 1 | 1.00 | 1 | 1 | 0.03  | 0.028  | 0.019  | 0.029  | 0.03   | t | 54004  | RGTYETGN<br>KKVHGN         | Mus<br>musculu<br>s              |
| 1 | 1.00 | 1 | 1 | 0.03  | 0.03   | 0.022  | 0.03   | 0.03   | t | 21675  | GPKLSTDLI<br>KNQCVNF<br>NF | Mus<br>musculu<br>s              |
| 1 | 1.00 | 1 | 1 | 0.02  | 0.02   | 0.02   | 0.02   | 0.02   | t | 109756 | QKSLSLS                    | Homo<br>sapiens                  |
| 1 | 1.00 | 1 | 1 | 0.01  | 0.014  | 0.01   | 0.013  | 0.01   | t | 117329 | MAVPETR<br>PNHT            | Homo<br>sapiens                  |
| 1 | 1.00 | 1 | 1 | -0.01 | -0.012 | -0.021 | -0.007 | -0.008 | t | 111745 | RSSRTR                     | Mus<br>musculu<br>s              |
| 1 | 1.00 | 1 | 1 | 0     | 0.002  | 0      | 0.007  | 0      | t | 119410 | YKMFPEVK<br>EKGMA          | Homo<br>sapiens                  |
| 1 | 1.00 | 1 | 1 | 0     | 0.004  | 0      | 0.007  | 0      | t | 119410 | YKMFPEVK<br>EKGMA          | Homo<br>sapiens                  |
| 1 | 1.00 | 1 | 1 | 0.05  | 0.05   | 0.047  | 0.05   | 0.051  | t | 94606  | LTGGFYEP<br>L              | Mus<br>musculu<br>s              |
| 1 | 1.00 | 1 | 1 | -0.02 | -0.02  | -0.02  | -0.017 | -0.021 | t | 117300 | GSGKGKV<br>QFQGKKT<br>KF   | Homo<br>sapiens                  |
| 1 | 1.00 | 1 | 1 | -0.01 | -0.01  | -0.01  | -0.01  | -0.012 | t | 117809 | EALTKHFQ<br>D              | Homo<br>sapiens                  |
| 1 | 1.00 | 1 | 1 | 0     | -0.006 | -0.005 | 0      | 0      | t | 139764 | GNYDRLE<br>QLAGN           | Oryctola<br>gus<br>cuniculu<br>s |
| 1 | 1.00 | 1 | 1 | 0.02  | 0.025  | 0.002  | 0.02   | 0.022  | t | 78835  | SPDKLLTFI<br>ASDTCPLV      | Canis<br>familiari<br>s          |
| 1 | 1.00 | 1 | 1 | 0.01  | 0.01   | 0.007  | 0.01   | 0.01   | t | 13775  | EPTPNAYY<br>EGVFCSSS<br>S  | Mus<br>musculu<br>s              |
| 1 | 1.00 | 1 | 1 | 0.01  | 0.01   | 0.007  | 0.01   | 0.01   | t | 13775  | EPTPNAYY<br>EGVFCSSS<br>S  | Mus<br>musculu<br>s              |
| 1 | 1.00 | 1 | 1 | 0.01  | 0.01   | 0.007  | 0.01   | 0.01   | t | 13775  | EPTPNAYY<br>EGVFCSSS<br>S  | Mus<br>musculu<br>s              |

|   |      |   |   |       |        |        |        |       |   |        |                              |                       |
|---|------|---|---|-------|--------|--------|--------|-------|---|--------|------------------------------|-----------------------|
| 1 | 1.00 | 1 | 1 | -0.03 | -0.028 | -0.037 | -0.029 | -0.03 | t | 55782  | RRYPFVKF<br>T                | Homo sapiens          |
| 1 | 1.00 | 1 | 1 | 0.01  | 0.01   | 0.01   | 0.01   | 0.008 | t | 125869 | EEEEEE                       | Mus musculus          |
| 1 | 1.00 | 1 | 1 | 0.05  | 0.05   | 0.041  | 0.05   | 0.05  | t | 136006 | VETGHTSQ<br>VTPS             | Homo sapiens          |
| 1 | 1.00 | 1 | 1 | 0.02  | 0.02   | 0.02   | 0.031  | 0.022 | t | 118621 | TGEVYRGK<br>LIEAED           | Homo sapiens          |
| 1 | 1.00 | 1 | 1 | 0     | 0      | -0.008 | 0.003  | 0.002 | t | 72255  | WAQPGYP<br>W                 | Homo sapiens          |
| 1 | 1.00 | 1 | 1 | -0.03 | -0.03  | -0.039 | -0.03  | -0.03 | t | 135923 | FRIPVTINA<br>PLQ             | Homo sapiens          |
| 1 | 1.00 | 1 | 1 | 0.01  | 0.014  | 0.01   | 0.01   | 0.01  | t | 136436 | KPVVGMPI<br>VEVW             | Gallus gallus         |
| 1 | 1.00 | 1 | 1 | 0.01  | 0.014  | 0.001  | 0.01   | 0.01  | t | 113539 | IIPKVEGKT<br>IAEQILQY<br>GSM | Cavia porcellus       |
| 1 | 1.00 | 1 | 1 | 0.01  | 0.014  | 0.001  | 0.01   | 0.01  | t | 113539 | IIPKVEGKT<br>IAEQILQY<br>GSM | Cavia porcellus       |
| 1 | 1.00 | 1 | 1 | -0.03 | -0.03  | -0.03  | -0.03  | -0.03 | t | 136077 | PPPTPPP                      | Oryctolagus cuniculus |
| 1 | 1.00 | 1 | 1 | -0.03 | -0.028 | -0.03  | -0.023 | -0.03 | t | 107534 | NWYVDGV                      | Homo sapiens          |
| 1 | 1.00 | 1 | 1 | 0.02  | 0.022  | 0.013  | 0.021  | 0.02  | t | 34297  | KWGVTTSL                     | Homo sapiens          |
| 1 | 1.00 | 1 | 1 | 0.01  | 0.01   | 0.003  | 0.01   | 0.01  | t | 130585 | QKKIRGILE                    | Mus musculus          |
| 1 | 1.00 | 1 | 1 | 0.02  | 0.02   | 0.02   | 0.02   | 0.02  | t | 73384  | YALADASL<br>KMAD             | Oryctolagus cuniculus |
| 1 | 1.00 | 1 | 1 | 0.02  | 0.02   | 0.02   | 0.02   | 0.02  | t | 73384  | YALADASL<br>KMAD             | Oryctolagus cuniculus |
| 1 | 1.00 | 1 | 1 | 0.01  | 0.008  | 0.005  | 0.009  | 0.01  | t | 9614   | DPDKILTYI<br>AA              | Mus musculus          |

|   |      |   |   |       |        |        |        |        |   |        |                            |                                  |
|---|------|---|---|-------|--------|--------|--------|--------|---|--------|----------------------------|----------------------------------|
| 1 | 1.00 | 1 | 1 | -0.04 | -0.04  | -0.042 | -0.04  | -0.04  | t | 73033  | WRIGYFG<br>H               | Homo<br>sapiens                  |
| 1 | 1.00 | 1 | 1 | -0.02 | -0.022 | -0.029 | -0.017 | -0.02  | t | 6983   | CSETFTNK<br>LKEKH          | Mus<br>musculu<br>s              |
| 1 | 1.00 | 1 | 1 | 0     | 0      | 0.002  | 0      | -0.004 | t | 6479   | CKGKIQAL<br>CENPEWA        | Mus<br>musculu<br>s              |
| 1 | 1.00 | 1 | 1 | 0.07  | 0.068  | 0.061  | 0.066  | 0.07   | t | 110884 | HEYMLDL<br>QPETTDLY<br>CYE | Mus<br>musculu<br>s              |
| 1 | 1.00 | 1 | 1 | 0.07  | 0.068  | 0.061  | 0.066  | 0.07   | t | 110884 | HEYMLDL<br>QPETTDLY<br>CYE | Mus<br>musculu<br>s              |
| 1 | 1.00 | 1 | 1 | 0.01  | 0.01   | -0.001 | 0.011  | 0.01   | t | 134859 | AGENLNTS<br>KFKKNEF        | Sus<br>scrofa                    |
| 1 | 1.00 | 1 | 1 | -0.01 | -0.01  | -0.014 | -0.01  | -0.009 | t | 41529  | MFNPV                      | Mus<br>musculu<br>s              |
| 1 | 1.00 | 1 | 1 | 0     | 0.004  | 0.009  | 0.007  | -0.001 | t | 119548 | YRKKSSAE<br>L              | Homo<br>sapiens                  |
| 1 | 1.00 | 1 | 1 | 0     | 0.002  | 0.009  | 0.007  | -0.001 | t | 119548 | YRKKSSAE<br>L              | Homo<br>sapiens                  |
| 1 | 1.00 | 1 | 1 | -0.02 | -0.02  | -0.02  | -0.02  | -0.02  | t | 39167  | LRPTFDTR<br>LM             | Mus<br>musculu<br>s              |
| 1 | 1.00 | 1 | 1 | -0.01 | -0.01  | -0.012 | -0.013 | -0.012 | t | 44035  | NGNATPQ<br>LTKNA           | Homo<br>sapiens                  |
| 1 | 1.00 | 1 | 1 | 0.01  | 0.01   | 0.01   | 0.01   | 0.007  | t | 136753 | YHKYTFYK<br>YD             | Homo<br>sapiens                  |
| 1 | 1.00 | 1 | 1 | 0.07  | 0.064  | 0.069  | 0.069  | 0.072  | t | 99136  | DDDTFT                     | Oryctola<br>gus<br>cuniculu<br>s |
| 1 | 1.00 | 1 | 1 | 0.04  | 0.04   | 0.028  | 0.04   | 0.043  | t | 27068  | ILGGVATY<br>GA             | Homo<br>sapiens                  |

|   |      |   |   |       |        |        |        |        |   |        |                              |                                  |
|---|------|---|---|-------|--------|--------|--------|--------|---|--------|------------------------------|----------------------------------|
| 1 | 1.00 | 1 | 1 | -0.01 | -0.009 | -0.021 | -0.01  | -0.011 | t | 22037  | GRFRTIVC<br>GLFPTQ           | Myodes<br>glareolu<br>s          |
| 1 | 1.00 | 1 | 1 | 0.02  | 0.024  | 0.02   | 0.027  | 0.02   | t | 123610 | PPGAMPP<br>Q                 | Homo<br>sapiens                  |
| 1 | 1.00 | 1 | 1 | 0.04  | 0.042  | 0.023  | 0.041  | 0.042  | t | 151071 | YAADLKST<br>QNAIDEI          | Homo<br>sapiens                  |
| 1 | 1.00 | 1 | 1 | 0.02  | 0.02   | -0.013 | 0.02   | 0.027  | t | 102172 | VDQQQQP<br>TQGDT             | Mus<br>musculu<br>s              |
| 1 | 1.00 | 1 | 1 | 0.02  | 0.018  | 0.02   | 0.019  | 0.018  | t | 55825  | RSELSQLS                     | Mus<br>musculu<br>s              |
| 1 | 1.00 | 1 | 1 | -0.02 | -0.02  | -0.02  | -0.013 | -0.02  | t | 136003 | TRKDINTV<br>TTVA             | Homo<br>sapiens                  |
| 1 | 1.00 | 1 | 1 | 0.02  | 0.024  | 0.02   | 0.027  | 0.022  | t | 132064 | SLLGQLSG<br>QV               | Homo<br>sapiens                  |
| 1 | 1.00 | 1 | 1 | -0.01 | -0.01  | -0.013 | -0.01  | -0.01  | t | 98851  | KKIIAEKTKI                   | Homo<br>sapiens                  |
| 1 | 1.00 | 1 | 1 | 0.01  | 0.015  | 0.002  | 0.013  | 0.01   | t | 75203  | YNPLYGSR<br>LGVPDTLG<br>GDPK | Homo<br>sapiens                  |
| 1 | 1.00 | 1 | 1 | 0.03  | 0.026  | 0.021  | 0.029  | 0.03   | t | 10785  | DVVTGAT<br>V                 | Oryctola<br>gus<br>cuniculu<br>s |
| 1 | 1.00 | 1 | 1 | -0.02 | -0.015 | -0.02  | -0.019 | -0.021 | t | 97018  | TVTFKATA<br>AT               | Homo<br>sapiens(<br>human)       |
| 1 | 1.00 | 1 | 1 | -0.04 | -0.04  | -0.043 | -0.04  | -0.042 | t | 136074 | LVKK                         | Mus<br>musculu<br>s              |
| 1 | 1.00 | 1 | 1 | 0.05  | 0.048  | 0.048  | 0.049  | 0.05   | t | 15323  | FCETNGLE<br>YI               | Mus<br>musculu<br>s              |
| 1 | 1.00 | 1 | 1 | 0.05  | 0.05   | 0.05   | 0.05   | 0.049  | t | 112282 | QYLSSFT                      | Homo<br>sapiens                  |
| 1 | 1.00 | 1 | 1 | 0     | 0.002  | -0.007 | 0.001  | -0.001 | t | 138082 | VVGCGSS<br>HHETH             | Homo<br>sapiens                  |

|   |      |   |   |       |        |        |        |        |   |        |                              |                                  |
|---|------|---|---|-------|--------|--------|--------|--------|---|--------|------------------------------|----------------------------------|
| 1 | 1.00 | 1 | 1 | 0     | -0.01  | -0.007 | 0.001  | -0.001 | t | 138082 | VVGCGSS<br>HHETH             | Homo<br>sapiens                  |
| 1 | 1.00 | 1 | 1 | 0.01  | 0.01   | 0.008  | 0.01   | 0.008  | t | 20052  | GGTHSQW<br>NKPSKP            | Mus<br>musculu<br>s              |
| 1 | 1.00 | 1 | 1 | -0.02 | -0.02  | -0.029 | -0.02  | -0.02  | t | 66792  | TTQTKPKS<br>AF               | Mus<br>musculu<br>s              |
| 1 | 1.00 | 1 | 1 | 0.02  | 0.02   | 0.016  | 0.023  | 0.018  | t | 58377  | SHLKLFTIK<br>YVDVNTN<br>ELLK | Homo<br>sapiens                  |
| 1 | 1.00 | 1 | 1 | 0.05  | 0.05   | 0.052  | 0.05   | 0.052  | t | 70654  | VQTMEEI<br>N                 | Anas<br>platyrhy<br>nchos        |
| 1 | 1.00 | 1 | 1 | -0.05 | -0.048 | -0.056 | -0.049 | -0.051 | t | 78370  | EFMKEAD<br>KEAY              | Homo<br>sapiens                  |
| 1 | 1.00 | 1 | 1 | 0.01  | 0.013  | 0.009  | 0.01   | 0.009  | t | 24841  | HSQWNKP<br>SKP               | Mus<br>musculu<br>s              |
| 1 | 1.00 | 1 | 1 | 0.03  | 0.028  | 0.023  | 0.029  | 0.03   | t | 1794   | AHLKAYAK<br>INEESL           | Anas<br>platyrhy<br>nchos        |
| 1 | 1.00 | 1 | 1 | 0     | 0.006  | -0.014 | 0      | 0      | t | 142324 | VELAILIDN<br>INNTLVNL<br>EWL | Felis<br>catus                   |
| 1 | 1.00 | 1 | 1 | -0.01 | -0.01  | -0.012 | -0.01  | -0.013 | t | 151652 | HWWRAE<br>SDEARRCY<br>NDPKC  | Mus<br>musculu<br>s              |
| 1 | 1.00 | 1 | 1 | 0.05  | 0.047  | 0.043  | 0.05   | 0.05   | t | 130908 | ITRTTLQSD<br>QEEIDY          | Oryctola<br>gus<br>cuniculu<br>s |
| 1 | 1.00 | 1 | 1 | 0     | 0      | -0.005 | 0      | -0.002 | t | 124925 | YYVFFEEQ<br>EDEIIGF          | Oryctola<br>gus<br>cuniculu<br>s |
| 1 | 1.00 | 1 | 1 | 0     | 0.002  | 0      | 0.001  | 0      | t | 59922  | SNTFINNA                     | Homo<br>sapiens                  |
| 1 | 1.00 | 1 | 1 | 0.02  | 0.022  | 0.015  | 0.019  | 0.02   | t | 96964  | TKAAEKQ<br>MKD               | Homo<br>sapiens                  |

|   |      |   |   |       |        |        |        |        |   |        |                            |                                  |
|---|------|---|---|-------|--------|--------|--------|--------|---|--------|----------------------------|----------------------------------|
| 1 | 1.00 | 1 | 1 | -0.02 | -0.02  | -0.02  | -0.02  | -0.022 | t | 151729 | RYSPSLNT<br>RL             | Mus<br>musculu<br>s              |
| 1 | 1.00 | 1 | 1 | 0.03  | 0.032  | 0.016  | 0.03   | 0.032  | t | 140080 | YEKEPTTP<br>TRTPDQ         | Rattus<br>norvegic<br>us         |
| 1 | 1.00 | 1 | 1 | 0.03  | 0.032  | 0.016  | 0.03   | 0.032  | t | 140080 | YEKEPTTP<br>TRTPDQ         | Rattus<br>norvegic<br>us         |
| 1 | 1.00 | 1 | 1 | 0     | -0.004 | -0.002 | -0.001 | 0      | t | 47363  | PEMVDVV<br>T               | Oryctola<br>gus<br>cuniculu<br>s |
| 1 | 1.00 | 1 | 1 | 0.02  | 0.018  | 0.012  | 0.023  | 0.022  | t | 111253 | ENDEIDGV<br>NHQHLP         | Mus<br>musculu<br>s              |
| 1 | 1.00 | 1 | 1 | 0.01  | 0.01   | 0.008  | 0.007  | 0.007  | t | 29810  | KAGNEGLE<br>WVEL           | Homo<br>sapiens                  |
| 1 | 1.00 | 1 | 1 | 0.02  | 0.02   | 0.015  | 0.02   | 0.02   | t | 158924 | KSCTWPET<br>HTLWGDG<br>I   | Mus<br>musculu<br>s              |
| 1 | 1.00 | 1 | 1 | 0.02  | 0.02   | 0.014  | 0.02   | 0.02   | t | 122293 | CTYVLDPE<br>NLTLKAPY<br>EA | Mus<br>musculu<br>s              |
| 1 | 1.00 | 1 | 1 | 0.01  | 0.004  | 0.008  | 0.01   | 0.011  | t | 74008  | YGGL                       | Oryctola<br>gus<br>cuniculu<br>s |
| 1 | 1.00 | 1 | 1 | 0.01  | 0.01   | 0.008  | 0.01   | 0.011  | t | 74008  | YGGL                       | Oryctola<br>gus<br>cuniculu<br>s |
| 1 | 1.00 | 1 | 1 | -0.01 | -0.013 | -0.003 | -0.006 | -0.012 | t | 130622 | TGLVAQG<br>TDSIG           | Camelus<br>dromed<br>arius       |
| 1 | 1.00 | 1 | 1 | 0.05  | 0.048  | 0.043  | 0.051  | 0.05   | t | 131128 | VEMKKED<br>FDIYDEDE        | Mus<br>musculu<br>s              |
| 1 | 1.00 | 1 | 1 | 0.05  | 0.046  | 0.043  | 0.051  | 0.05   | t | 131128 | VEMKKED<br>FDIYDEDE        | Oryctola<br>gus<br>cuniculu<br>s |
| 1 | 1.00 | 1 | 1 | -0.01 | -0.017 | -0.024 | -0.01  | -0.01  | t | 149980 | TLKIPSVHF<br>GSPSGS        | Oryctola<br>gus<br>cuniculu<br>s |



|   |      |   |   |       |        |        |        |        |   |        |                             |                                  |
|---|------|---|---|-------|--------|--------|--------|--------|---|--------|-----------------------------|----------------------------------|
| 1 | 1.00 | 1 | 1 | -0.01 | -0.008 | -0.017 | -0.007 | -0.01  | t | 144594 | ARGISRTK<br>YW              | Homo<br>sapiens                  |
| 1 | 1.00 | 1 | 1 | 0.02  | 0.02   | 0.02   | 0.02   | 0.02   | t | 156858 | DMSYYYAL<br>PTYT            | Gallus<br>gallus                 |
| 1 | 1.00 | 1 | 1 | 0.01  | 0.012  | 0.01   | 0.017  | 0.013  | t | 144325 | GVTTV                       | Homo<br>sapiens                  |
| 1 | 1.00 | 1 | 1 | -0.03 | -0.03  | -0.045 | -0.03  | -0.028 | t | 104295 | TAIRPAQV<br>GYNTPYM<br>NF   | Oryctola<br>gus<br>cuniculu<br>s |
| 1 | 1.00 | 1 | 1 | -0.01 | -0.01  | -0.01  | -0.01  | -0.01  | t | 134769 | QIFNL                       | Mus<br>musculu<br>s              |
| 1 | 1.00 | 1 | 1 | 0.02  | 0.02   | 0.02   | 0.02   | 0.018  | t | 100153 | INDQIKFII<br>N              | Mus<br>musculu<br>s              |
| 1 | 1.00 | 1 | 1 | 0.01  | 0.014  | 0.01   | 0.017  | 0.01   | t | 112931 | DATTNPSL<br>ILAAQM          | Homo<br>sapiens                  |
| 1 | 1.00 | 1 | 1 | 0.03  | 0.03   | 0.024  | 0.03   | 0.03   | t | 84461  | KLEFFTYLR<br>FDLELT         | Homo<br>sapiens                  |
| 1 | 1.00 | 1 | 1 | 0.01  | 0.013  | 0.005  | 0.01   | 0.008  | t | 78687  | IRVRKRKG<br>SNKKAEDT<br>LED | Mus<br>musculu<br>s              |
| 1 | 1.00 | 1 | 1 | -0.05 | -0.05  | -0.053 | -0.05  | -0.051 | t | 98849  | KIPAVFKID<br>A              | Homo<br>sapiens                  |
| 1 | 1.00 | 1 | 1 | -0.02 | -0.022 | -0.034 | -0.021 | -0.02  | t | 14772  | EVLTRRQS<br>QDPKYVT<br>QRIS | Mus<br>musculu<br>s              |
| 1 | 1.00 | 1 | 1 | 0.01  | 0.012  | -0.01  | 0.007  | 0.012  | t | 74475  | YKLNIFYD<br>LLRAKL          | Homo<br>sapiens                  |
| 1 | 1.00 | 1 | 1 | -0.02 | -0.016 | -0.015 | -0.013 | -0.022 | t | 134815 | VKDEPQR<br>RSA              | Homo<br>sapiens                  |
| 1 | 1.00 | 1 | 1 | -0.01 | -0.012 | -0.022 | -0.01  | -0.01  | t | 114041 | YGSLPQKA<br>QGHRPQD<br>EN   | Oryctola<br>gus<br>cuniculu<br>s |

|   |      |   |   |       |        |        |        |        |   |        |                             |                              |
|---|------|---|---|-------|--------|--------|--------|--------|---|--------|-----------------------------|------------------------------|
| 1 | 1.00 | 1 | 1 | 0.04  | 0.038  | 0.04   | 0.039  | 0.04   | t | 62289  | SVPSSSS                     | Mus<br>musculus              |
| 1 | 1.00 | 1 | 1 | 0.02  | 0.023  | 0.019  | 0.02   | 0.02   | t | 6455   | CITQYERES<br>QAYY           | Mus<br>musculus              |
| 1 | 1.00 | 1 | 1 | 0     | 0.002  | -0.014 | 0.003  | 0.002  | t | 7705   | DCHLLGTE<br>ELSGIPPP<br>RGV | Homo<br>sapiens              |
| 1 | 1.00 | 1 | 1 | 0     | 0      | 0      | 0.002  | 0      | t | 32635  | KNVVTGE<br>VQVLYTA          | Homo<br>sapiens              |
| 1 | 1.00 | 1 | 1 | 0.03  | 0.033  | 0.021  | 0.03   | 0.03   | t | 100477 | RNKTQEE<br>HLK              | Mus<br>musculus              |
| 1 | 1.00 | 1 | 1 | 0.04  | 0.043  | 0.035  | 0.04   | 0.038  | t | 138316 | DALGNVTS                    | Mus<br>musculus              |
| 1 | 1.00 | 1 | 1 | 0     | 0      | -0.009 | 0      | 0      | t | 135923 | FRIPVTINA<br>PLQ            | Homo<br>sapiens              |
| 1 | 1.00 | 1 | 1 | -0.04 | -0.044 | -0.04  | -0.043 | -0.042 | t | 5109   | ATPYHPPA<br>TP              | Oryctola<br>gus<br>cuniculus |
| 1 | 1.00 | 1 | 1 | 0.01  | 0.013  | -0.002 | 0.01   | 0.011  | t | 125209 | QFQIHGPR                    | Mus<br>musculus              |
| 1 | 1.00 | 1 | 1 | 0.02  | 0.022  | 0.014  | 0.023  | 0.022  | t | 115148 | KAVSEKKA<br>KGLGESRK<br>DKK | Homo<br>sapiens              |
| 1 | 1.00 | 1 | 1 | 0     | 0      | 0.005  | 0      | 0      | t | 115047 | ELQFPFLQ<br>D               | Mus<br>musculus              |
| 1 | 1.00 | 1 | 1 | -0.01 | -0.01  | -0.01  | -0.01  | -0.01  | t | 131413 | ERILTIS                     | Homo<br>sapiens              |
| 1 | 1.00 | 1 | 1 | 0.01  | 0.013  | 0.011  | 0.01   | 0.008  | t | 140610 | TQWQGFS<br>VA               | Mus<br>musculus              |
| 1 | 1.00 | 1 | 1 | -0.02 | -0.022 | -0.023 | -0.021 | -0.022 | t | 151073 | YEDVNGIR<br>K               | Mus<br>musculus              |

|   |      |   |   |       |        |        |        |        |   |        |                             |                                  |
|---|------|---|---|-------|--------|--------|--------|--------|---|--------|-----------------------------|----------------------------------|
| 1 | 1.00 | 1 | 1 | 0.04  | 0.04   | 0.033  | 0.04   | 0.039  | t | 137859 | FTPGTEYT<br>VEVR            | Oryctola<br>gus<br>cuniculu<br>s |
| 1 | 1.00 | 1 | 1 | -0.04 | -0.035 | -0.054 | -0.039 | -0.04  | t | 39196  | LRLRTAC<br>ERAKRTL          | Homo<br>sapiens                  |
| 1 | 1.00 | 1 | 1 | 0.04  | 0.035  | 0.032  | 0.043  | 0.042  | t | 157364 | GYPKNPEE<br>AYAD            | Canis<br>lupus                   |
| 1 | 1.00 | 1 | 1 | 0.03  | 0.033  | 0.032  | 0.03   | 0.03   | t | 127253 | TTYGNA                      | Mus<br>musculu<br>s              |
| 1 | 1.00 | 1 | 1 | 0.01  | 0.012  | 0.006  | 0.011  | 0.01   | t | 38814  | LQDCTM                      | Homo<br>sapiens                  |
| 1 | 1.00 | 1 | 1 | -0.02 | -0.018 | -0.005 | -0.023 | -0.029 | t | 45768  | NSARARA<br>DSCRI            | Homo<br>sapiens                  |
| 1 | 1.00 | 1 | 1 | -0.01 | -0.008 | -0.021 | -0.009 | -0.01  | t | 110602 | GLKAKPKF<br>TLGKRKAT<br>PTT | Homo<br>sapiens                  |
| 1 | 1.00 | 1 | 1 | 0.02  | 0.018  | 0.012  | 0.023  | 0.022  | t | 95198  | AAPTTS                      | Mus<br>musculu<br>s              |
| 1 | 1.00 | 1 | 1 | 0.02  | 0.016  | 0.008  | 0.013  | 0.019  | t | 30299  | KEALDKYE<br>LENHD           | Oryctola<br>gus<br>cuniculu<br>s |
| 1 | 1.00 | 1 | 1 | 0     | 0      | 0      | 0      | -0.003 | t | 51371  | QLINTNGS<br>WHIN            | Rattus<br>norvegic<br>us         |
| 1 | 1.00 | 1 | 1 | 0.02  | 0.02   | 0.02   | 0.02   | 0.02   | t | 112395 | VYFCHQY                     | Homo<br>sapiens                  |
| 1 | 1.00 | 1 | 1 | -0.01 | -0.01  | -0.019 | -0.01  | -0.009 | t | 97020  | TVTRGTIS<br>DP              | Oryctola<br>gus<br>cuniculu<br>s |
| 1 | 1.00 | 1 | 1 | 0.01  | 0.01   | 0.003  | 0.01   | 0.009  | t | 72503  | WGQGG                       | Mus<br>musculu<br>s              |
| 1 | 1.00 | 1 | 1 | 0.02  | 0.018  | 0.013  | 0.024  | 0.02   | t | 31076  | KGTPTAEN<br>PEYLGLDV<br>PV  | Mus<br>musculu<br>s              |
| 1 | 1.00 | 1 | 1 | -0.01 | -0.01  | -0.01  | -0.01  | -0.012 | t | 66060  | TRLNPD                      | Mus<br>musculu<br>s              |

|   |      |   |   |       |        |        |        |        |   |        |                            |                         |
|---|------|---|---|-------|--------|--------|--------|--------|---|--------|----------------------------|-------------------------|
| 1 | 1.00 | 1 | 1 | 0.02  | 0.016  | 0.019  | 0.02   | 0.018  | t | 123838 | VWQDE                      | Mus musculus            |
| 1 | 1.00 | 1 | 1 | 0.01  | 0.008  | 0.013  | 0.014  | 0.009  | t | 10692  | DVPDYASL                   | Mus musculus            |
| 1 | 1.00 | 1 | 1 | -0.02 | -0.022 | -0.02  | -0.021 | -0.022 | t | 46868  | PANCPKS                    | Mus musculus            |
| 1 | 1.00 | 1 | 1 | 0.03  | 0.034  | 0.032  | 0.031  | 0.03   | t | 30199  | KDLLED                     | Homo sapiens            |
| 1 | 1.00 | 1 | 1 | 0.01  | 0.01   | 0.012  | 0.012  | 0.009  | t | 21887  | GQICYGR<br>DAYLCFL         | Homo sapiens            |
| 1 | 1.00 | 1 | 1 | 0.03  | 0.032  | 0.023  | 0.037  | 0.03   | t | 117015 | KEQFLDGD<br>GWTSRWI<br>ESK | Homo sapiens            |
| 1 | 1.00 | 1 | 1 | 0.01  | 0.01   | 0.006  | 0.007  | 0.008  | t | 303    | AALTKAIT<br>AMTQA          | Homo sapiens            |
| 1 | 1.00 | 1 | 1 | -0.02 | -0.02  | -0.02  | -0.02  | -0.02  | t | 96521  | KVTKEKPT<br>PP             | Homo sapiens(<br>human) |
| 1 | 1.00 | 1 | 1 | 0.03  | 0.042  | 0.032  | 0.03   | 0.029  | t | 4702   | ASQKIQLV                   | Pan troglodytes         |
| 1 | 1.00 | 1 | 1 | -0.01 | -0.012 | -0.019 | -0.01  | -0.009 | t | 33143  | KRGPGSG                    | Mus musculus            |
| 1 | 1.00 | 1 | 1 | -0.01 | -0.007 | -0.013 | -0.01  | -0.011 | t | 136074 | LVKK                       | Mus musculus            |
| 1 | 1.00 | 1 | 1 | 0     | 0      | 0      | 0      | -0.003 | t | 33148  | KRHDGGC<br>RKE             | Homo sapiens            |
| 1 | 1.00 | 1 | 1 | 0     | 0      | -0.007 | 0      | -0.002 | t | 147559 | CTVRGLG                    | Rattus norvegicus       |
| 1 | 1.00 | 1 | 1 | -0.01 | -0.01  | -0.019 | -0.01  | -0.011 | t | 45252  | NNSTNSGI                   | Mus musculus            |

|   |      |   |   |       |        |        |        |        |   |        |                  |                    |
|---|------|---|---|-------|--------|--------|--------|--------|---|--------|------------------|--------------------|
| 1 | 1.00 | 1 | 1 | 0.02  | 0.02   | 0.02   | 0.023  | 0.02   | t | 71636  | VVDLPQ           | Homo sapiens       |
| 1 | 1.00 | 1 | 1 | -0.01 | -0.01  | -0.01  | -0.01  | -0.01  | t | 46825  | PAIIPDREV        | Homo sapiens       |
| 1 | 1.00 | 1 | 1 | -0.01 | -0.01  | -0.023 | -0.008 | -0.007 | t | 98832  | IPPYCTIAP<br>FGI | Homo sapiens       |
| 1 | 1.00 | 1 | 1 | 0     | 0.004  | 0      | -0.001 | -0.004 | t | 40938  | LYRPSDSSL<br>AGP | Mus musculus       |
| 1 | 1.00 | 1 | 1 | 0     | 0.004  | 0      | -0.001 | -0.004 | t | 46371  | NVESQPG<br>GQPNT | Mus musculus       |
| 1 | 1.00 | 1 | 1 | 0.01  | 0.012  | 0.01   | 0.017  | 0.011  | t | 107878 | GWVAMH<br>PQGD   | Homo sapiens       |
| 1 | 1.00 | 1 | 1 | -0.01 | -0.01  | -0.021 | -0.004 | -0.008 | t | 114463 | LTSRPAHG         | Homo sapiens       |
| 1 | 1.00 | 1 | 1 | -0.04 | -0.04  | -0.043 | -0.04  | -0.042 | t | 136074 | LVKK             | Mus musculus       |
| 1 | 1.00 | 1 | 1 | -0.02 | -0.022 | -0.019 | -0.021 | -0.02  | t | 44268  | NIKPLEDKI<br>L   | Mus musculus       |
| 1 | 1.00 | 1 | 1 | 0.03  | 0.03   | 0.03   | 0.03   | 0.03   | t | 131107 | TGVEAAA          | Homo sapiens       |
| 1 | 1.00 | 1 | 1 | 0     | -0.002 | -0.004 | -0.003 | 0      | t | 18954  | GDDPLL<br>NQ     | Anas platyrhynchos |
| 1 | 1.00 | 1 | 1 | -0.01 | -0.01  | -0.016 | -0.011 | -0.01  | t | 81337  | DVTLYGTI<br>KAGV | Homo sapiens       |
| 1 | 1.00 | 1 | 1 | -0.03 | -0.03  | -0.037 | -0.03  | -0.03  | t | 119475 | KKIK             | Homo sapiens       |
| 1 | 1.00 | 1 | 1 | 0     | -0.002 | 0      | 0.003  | -0.002 | t | 21254  | GMDGTQL<br>DRW   | Mus musculus       |
| 1 | 1.00 | 1 | 1 | -0.02 | -0.02  | -0.02  | -0.02  | -0.02  | t | 158610 | SFGTFLW          | Homo sapiens       |
| 1 | 1.00 | 1 | 1 | 0     | -0.002 | 0      | 0.009  | 0.001  | t | 38304  | LNPKTNK<br>WEDK  | Mus musculus       |

|   |      |   |   |       |        |        |        |        |   |        |                    |                       |
|---|------|---|---|-------|--------|--------|--------|--------|---|--------|--------------------|-----------------------|
| 1 | 1.00 | 1 | 1 | 0     | -0.002 | 0      | 0.009  | 0.001  | t | 6986   | CSEYREPLLC         | Mus musculus          |
| 1 | 1.00 | 1 | 1 | 0.01  | 0.008  | -0.004 | 0.003  | 0.01   | t | 121100 | YYFAPDHRTV         | Mus musculus          |
| 1 | 1.00 | 1 | 1 | 0     | 0      | 0      | 0      | -0.001 | t | 153381 | ETPLTIAGLKLK       | Mus musculus          |
| 1 | 1.00 | 1 | 1 | 0.03  | 0.032  | 0.03   | 0.037  | 0.029  | t | 107345 | EQRRAA             | Homo sapiens          |
| 1 | 1.00 | 1 | 1 | 0.01  | 0.012  | 0.002  | 0.013  | 0.012  | t | 110876 | GTDRETTSQMIV       | Homo sapiens          |
| 1 | 1.00 | 1 | 1 | -0.08 | -0.082 | -0.094 | -0.077 | -0.08  | t | 95920  | TNVARP             | Mus musculus          |
| 1 | 1.00 | 1 | 1 | 0.05  | 0.044  | 0.049  | 0.049  | 0.052  | t | 99137  | DDTFTV             | Oryctolagus cuniculus |
| 1 | 1.00 | 1 | 1 | 0.06  | 0.062  | 0.055  | 0.061  | 0.059  | t | 19723  | GGESSEELSESSFFNLIT | Homo sapiens          |
| 1 | 1.00 | 1 | 1 | -0.01 | -0.012 | -0.01  | -0.01  | -0.01  | t | 98383  | QPFPPQQLPYP        | Mus musculus          |
| 1 | 1.00 | 1 | 1 | 0.03  | 0.03   | 0.023  | 0.03   | 0.03   | t | 127650 | FEPFSNKG           | Homo sapiens          |
| 1 | 1.00 | 1 | 1 | 0     | 0      | -0.004 | 0      | -0.002 | t | 52158  | QQTFPQQPQL         | Mus musculus          |
| 1 | 1.00 | 1 | 1 | 0.03  | 0.032  | 0.024  | 0.031  | 0.03   | t | 25404  | IAQVATVS           | Homo sapiens          |
| 1 | 1.00 | 1 | 1 | 0     | -0.007 | -0.005 | 0.001  | 0      | t | 147284 | SIFGLAPSKALDS      | Homo sapiens          |
| 1 | 1.00 | 1 | 1 | 0     | 0      | 0      | 0      | -0.003 | t | 59971  | SPAFTKGEKVD        | Oryctolagus cuniculus |
| 1 | 1.00 | 1 | 1 | 0.01  | 0.012  | 0.01   | 0.017  | 0.011  | t | 132690 | TCSADGGTLFYNLCL    | Homo sapiens          |

|   |      |   |   |       |        |        |        |        |   |        |                          |                          |
|---|------|---|---|-------|--------|--------|--------|--------|---|--------|--------------------------|--------------------------|
| 1 | 1.00 | 1 | 1 | 0.04  | 0.038  | 0.041  | 0.039  | 0.04   | t | 121054 | VTGEVIFQ<br>TPL          | Rattus<br>norvegicus     |
| 1 | 1.00 | 1 | 1 | 0.04  | 0.036  | 0.041  | 0.039  | 0.04   | t | 121054 | VTGEVIFQ<br>TPL          | Oryctolagus<br>cuniculus |
| 1 | 1.00 | 1 | 1 | 0.04  | 0.038  | 0.039  | 0.039  | 0.042  | t | 56711  | SAAQEKIS<br>F            | Mus<br>musculus          |
| 1 | 1.00 | 1 | 1 | -0.02 | -0.018 | -0.02  | -0.019 | -0.021 | t | 40724  | LYCGGPM<br>FNSKGAQ       | Homo<br>sapiens          |
| 1 | 1.00 | 1 | 1 | 0.01  | 0.008  | 0.008  | 0.013  | 0.011  | t | 99419  | LGYTDRIG                 | Mus<br>musculus          |
| 1 | 1.00 | 1 | 1 | 0.01  | 0.01   | 0.01   | 0.01   | 0.01   | t | 113778 | QQPGQ                    | Homo<br>sapiens          |
| 1 | 1.00 | 1 | 1 | 0.02  | 0.021  | 0.013  | 0.019  | 0.022  | t | 19118  | GDSSNAG<br>T             | Equus<br>caballus        |
| 1 | 1.00 | 1 | 1 | 0.02  | 0.018  | 0.013  | 0.019  | 0.022  | t | 19118  | GDSSNAG<br>T             | Mus<br>musculus          |
| 1 | 1.00 | 1 | 1 | 0.01  | 0.01   | 0.01   | 0.01   | 0.01   | t | 140841 | EKPAVLG<br>HDEA          | Oryctolagus<br>cuniculus |
| 1 | 1.00 | 1 | 1 | -0.05 | -0.05  | -0.05  | -0.05  | -0.053 | t | 117557 | KVQLLRN<br>WH            | Homo<br>sapiens          |
| 1 | 1.00 | 1 | 1 | 0.01  | 0.012  | 0.01   | 0.013  | 0.01   | t | 43567  | NEDEQIGA<br>RIVL         | Homo<br>sapiens          |
| 1 | 1.00 | 1 | 1 | 0     | 0      | 0.002  | 0      | -0.004 | t | 32807  | KPNLSSKR<br>SELSQLS      | Mus<br>musculus          |
| 1 | 1.00 | 1 | 1 | -0.01 | -0.01  | -0.023 | -0.01  | -0.01  | t | 158836 | IHNDVEA<br>WIDRYKYL<br>P | Mus<br>musculus          |
| 1 | 1.00 | 1 | 1 | 0.01  | 0.012  | 0.005  | 0.007  | 0.008  | t | 115760 | GLNYYQQ<br>KPV           | Homo<br>sapiens          |

|   |      |   |   |       |        |        |        |        |   |        |                       |                       |
|---|------|---|---|-------|--------|--------|--------|--------|---|--------|-----------------------|-----------------------|
| 1 | 1.00 | 1 | 1 | 0     | -0.007 | 0.009  | 0.007  | 0      | t | 109286 | HEGLHNNH              | Homo sapiens          |
| 1 | 1.00 | 1 | 1 | 0.01  | 0.01   | 0.017  | 0.019  | 0.009  | t | 107744 | APVDSRTY<br>TRVADHI   | Homo sapiens          |
| 1 | 1.00 | 1 | 1 | 0.02  | 0.02   | 0.012  | 0.021  | 0.02   | t | 39216  | LRSSSGCV              | Homo sapiens          |
| 1 | 1.00 | 1 | 1 | 0     | 0      | -0.007 | 0      | 0      | t | 125246 | RRQPHVMS              | Mus musculus          |
| 1 | 1.00 | 1 | 1 | 0     | 0.008  | -0.007 | 0      | 0      | t | 125246 | RRQPHVMS              | Macaca fascicularis   |
| 1 | 1.00 | 1 | 1 | 0     | 0      | 0.005  | 0.001  | 0      | t | 138238 | SMLDTPT               | Mus musculus          |
| 1 | 1.00 | 1 | 1 | -0.03 | -0.03  | -0.03  | -0.03  | -0.032 | t | 103940 | GLTLPGYK<br>YLGPGNSLD | Oryctolagus cuniculus |
| 1 | 1.00 | 1 | 1 | -0.01 | -0.01  | -0.018 | -0.014 | -0.01  | t | 110932 | LNLKIDGL<br>KISV      | Homo sapiens          |
| 1 | 1.00 | 1 | 1 | 0.01  | 0.012  | 0.004  | 0.011  | 0.012  | t | 47324  | PEKGGR                | Homo sapiens          |
| 1 | 1.00 | 1 | 1 | 0.03  | 0.03   | 0.03   | 0.03   | 0.029  | t | 143362 | ETPLMKE               | Mus musculus          |
| 1 | 1.00 | 1 | 1 | 0.03  | 0.03   | 0.03   | 0.03   | 0.029  | t | 143362 | ETPLMKE               | Mus musculus          |
| 1 | 1.00 | 1 | 1 | 0.01  | 0.014  | 0.01   | 0.017  | 0.009  | t | 116682 | CHGRGTC<br>NYYANAYS   | Homo sapiens          |
| 1 | 1.00 | 1 | 1 | 0.02  | 0.02   | 0.015  | 0.02   | 0.019  | t | 156903 | KNRGIKTF<br>SN        | Mus musculus          |
| 1 | 1.00 | 1 | 1 | 0.01  | 0.012  | 0.01   | 0.009  | 0.007  | t | 136566 | PYKYTFYK<br>YD        | Homo sapiens          |
| 1 | 1.00 | 1 | 1 | 0     | 0      | -0.014 | 0      | 0.001  | t | 51942  | QPQRPFQ<br>QQP        | Mus musculus          |
| 1 | 1.00 | 1 | 1 | 0.04  | 0.04   | 0.045  | 0.04   | 0.04   | t | 17557  | FQYSPG                | Homo sapiens          |



|   |      |   |   |       |        |        |        |        |   |        |                          |                          |
|---|------|---|---|-------|--------|--------|--------|--------|---|--------|--------------------------|--------------------------|
| 1 | 1.00 | 1 | 1 | -0.03 | -0.028 | -0.046 | -0.023 | -0.026 | t | 135911 | DRVRSITL<br>GNST         | Homo<br>sapiens          |
| 1 | 1.00 | 1 | 1 | -0.01 | -0.01  | -0.01  | -0.004 | -0.01  | t | 158695 | ASKSADDV<br>KKAFKVI      | Homo<br>sapiens          |
| 1 | 1.00 | 1 | 1 | 0.05  | 0.05   | 0.05   | 0.05   | 0.049  | t | 120342 | YNAEEVEF<br>TFAVDND      | Rattus<br>norvegic<br>us |
| 1 | 1.00 | 1 | 1 | 0.05  | 0.05   | 0.05   | 0.05   | 0.049  | t | 120342 | YNAEEVEF<br>TFAVDND      | Rattus<br>norvegic<br>us |
| 1 | 1.00 | 1 | 1 | -0.02 | -0.018 | -0.025 | -0.019 | -0.02  | t | 54862  | RMAWDM<br>MMN            | Homo<br>sapiens          |
| 1 | 1.00 | 1 | 1 | 0.04  | 0.04   | 0.033  | 0.04   | 0.04   | t | 132793 | DLQEAKYE<br>TFS          | Mus<br>musculu<br>s      |
| 1 | 1.00 | 1 | 1 | 0.01  | 0.012  | 0.017  | 0.013  | 0.006  | t | 14435  | ETIYNTTLK<br>Y           | Homo<br>sapiens          |
| 1 | 1.00 | 1 | 1 | -0.05 | -0.046 | -0.057 | -0.043 | -0.048 | t | 133231 | MGPRRRS<br>RKP           | Homo<br>sapiens          |
| 1 | 1.00 | 1 | 1 | 0.03  | 0.033  | 0.04   | 0.03   | 0.026  | t | 61824  | STPLLYPSL<br>A           | Mus<br>musculu<br>s      |
| 1 | 1.00 | 1 | 1 | -0.01 | -0.008 | -0.01  | -0.003 | -0.01  | t | 104343 | VSGGPFI                  | Homo<br>sapiens          |
| 1 | 1.00 | 1 | 1 | -0.03 | -0.028 | -0.037 | -0.023 | -0.029 | t | 118348 | FHSGKHY<br>WEVDVTG<br>KE | Homo<br>sapiens          |
| 1 | 1.00 | 1 | 1 | 0     | 0      | 0      | 0.006  | 0      | t | 77841  | AYDFLYNY<br>L            | Homo<br>sapiens          |
| 1 | 1.00 | 1 | 1 | 0.01  | 0.011  | 0.006  | 0.009  | 0.01   | t | 41449  | METMKL<br>MMEKVD         | Equus<br>caballus        |
| 1 | 1.00 | 1 | 1 | 0.03  | 0.03   | 0.03   | 0.034  | 0.03   | t | 109425 | KNQVSLT                  | Homo<br>sapiens          |
| 1 | 1.00 | 1 | 1 | 0     | 0      | 0      | 0      | 0      | t | 98939  | PQPGP                    | Mus<br>musculu<br>s      |
| 1 | 1.00 | 1 | 1 | 0.02  | 0.021  | 0.006  | 0.023  | 0.022  | t | 30140  | KDEPNGR<br>ASDT          | Equus<br>caballus        |

|   |      |   |   |       |        |        |        |        |   |        |                             |                       |
|---|------|---|---|-------|--------|--------|--------|--------|---|--------|-----------------------------|-----------------------|
| 1 | 1.00 | 1 | 1 | 0.01  | 0.012  | -0.004 | 0.013  | 0.012  | t | 15519  | FEELCGELF<br>RGTLQPV        | Homo sapiens          |
| 1 | 1.00 | 1 | 1 | 0     | 0.002  | 0      | 0.001  | 0.001  | t | 38522  | LPHSNL                      | Homo sapiens          |
| 1 | 1.00 | 1 | 1 | 0     | 0.002  | 0      | 0.001  | 0.001  | t | 38522  | LPHSNL                      | Homo sapiens          |
| 1 | 1.00 | 1 | 1 | 0.01  | 0.016  | 0.011  | 0.011  | 0.01   | t | 99208  | EKMYAC                      | Equus caballus        |
| 1 | 1.00 | 1 | 1 | 0     | 0.004  | 0      | 0.007  | 0      | t | 127926 | AKKGEKVP<br>KGKKGKA         | Homo sapiens          |
| 1 | 1.00 | 1 | 1 | 0.01  | 0.012  | 0.01   | 0.011  | 0.008  | t | 58076  | SGHRMA<br>WDM               | Homo sapiens          |
| 1 | 1.00 | 1 | 1 | 0.01  | 0.01   | 0.007  | 0.01   | 0.011  | t | 11411  | EDPASR                      | Mus musculus          |
| 1 | 1.00 | 1 | 1 | -0.02 | -0.018 | -0.02  | -0.013 | -0.019 | t | 113514 | HHPARTA<br>HYGSLPQK         | Homo sapiens          |
| 1 | 1.00 | 1 | 1 | -0.02 | -0.018 | -0.02  | -0.013 | -0.019 | t | 113514 | HHPARTA<br>HYGSLPQK         | Homo sapiens          |
| 1 | 1.00 | 1 | 1 | 0     | 0      | 0      | 0.001  | -0.002 | t | 46841  | PAKLLKER<br>GFFGAIA<br>GFLE | Mus musculus          |
| 1 | 1.00 | 1 | 1 | 0.01  | 0.01   | 0.002  | 0.01   | 0.01   | t | 88060  | RMAFTEIK<br>VQ              | Homo sapiens          |
| 1 | 1.00 | 1 | 1 | 0.03  | 0.026  | 0.03   | 0.028  | 0.031  | t | 142443 | LSTTEVAM                    | Oryctolagus cuniculus |
| 1 | 1.00 | 1 | 1 | -0.01 | -0.01  | -0.01  | -0.01  | -0.01  | t | 159294 | QPLWLL                      | Oryctolagus cuniculus |
| 1 | 1.00 | 1 | 1 | 0.01  | 0.008  | 0.003  | 0.009  | 0.009  | t | 19637  | GFTTNEPR<br>YNVFAE          | Mus musculus          |

|   |      |   |   |       |        |        |        |        |   |        |                              |                                  |
|---|------|---|---|-------|--------|--------|--------|--------|---|--------|------------------------------|----------------------------------|
| 1 | 1.00 | 1 | 1 | 0     | 0      | 0      | 0.004  | 0      | t | 118610 | SPGFNDG<br>GKNTAPLT<br>LC    | Homo<br>sapiens                  |
| 1 | 1.00 | 1 | 1 | -0.02 | -0.018 | -0.017 | -0.013 | -0.023 | t | 30302  | KEALISLT<br>RGKLYTQ<br>Q     | Homo<br>sapiens                  |
| 1 | 1.00 | 1 | 1 | 0.04  | 0.04   | 0.04   | 0.04   | 0.04   | t | 112392 | VTMTCKS                      | Homo<br>sapiens                  |
| 1 | 1.00 | 1 | 1 | 0.03  | 0.027  | 0.022  | 0.03   | 0.03   | t | 13460  | ENDVLNQ<br>ETEEEMEK          | Oryctola<br>gus<br>cuniculu<br>s |
| 1 | 1.00 | 1 | 1 | 0     | 0      | 0      | 0      | -0.003 | t | 48597  | PNANPN                       | Mus<br>musculu<br>s              |
| 1 | 1.00 | 1 | 1 | -0.03 | -0.024 | -0.023 | -0.026 | -0.03  | t | 123878 | YMPPPGM<br>I                 | Homo<br>sapiens                  |
| 1 | 1.00 | 1 | 1 | -0.02 | -0.02  | -0.022 | -0.02  | -0.019 | t | 78457  | LRLPPAP                      | Mus<br>musculu<br>s              |
| 1 | 1.00 | 1 | 1 | 0.02  | 0.024  | -0.001 | 0.017  | 0.022  | t | 75645  | YRNILYFP<br>NHLPEELR<br>KQTK | Homo<br>sapiens                  |
| 1 | 1.00 | 1 | 1 | 0     | 0.002  | -0.005 | 0.001  | 0      | t | 142047 | TYFKGVST<br>ELKDKK           | Homo<br>sapiens                  |
| 1 | 1.00 | 1 | 1 | 0.02  | 0.024  | 0.016  | 0.021  | 0.02   | t | 23048  | GVLSVDLS<br>LTVELKI          | Homo<br>sapiens                  |
| 1 | 1.00 | 1 | 1 | -0.01 | -0.007 | -0.01  | -0.01  | -0.011 | t | 48911  | PPSDIKGK                     | Mus<br>musculu<br>s              |
| 1 | 1.00 | 1 | 1 | 0.01  | 0.012  | 0.003  | 0.017  | 0.01   | t | 116171 | TQDQDPB<br>BHFFKNIV<br>TPR   | Homo<br>sapiens                  |
| 1 | 1.00 | 1 | 1 | 0.03  | 0.033  | 0.048  | 0.03   | 0.02   | t | 54348  | RKGRGGA<br>NPVFRPTG<br>GTEVF | Mus<br>musculu<br>s              |
| 1 | 1.00 | 1 | 1 | 0     | 0.002  | -0.003 | 0.003  | 0.002  | t | 61124  | SSIVYEAA<br>DMIMHT           | Homo<br>sapiens                  |

|   |      |   |   |       |       |        |       |        |   |        |                            |                              |
|---|------|---|---|-------|-------|--------|-------|--------|---|--------|----------------------------|------------------------------|
| 1 | 1.00 | 1 | 1 | 0.04  | 0.04  | 0.04   | 0.04  | 0.04   | t | 79403  | SVGDYDG                    | Mus<br>musculus              |
| 1 | 1.00 | 1 | 1 | 0.02  | 0.02  | 0.02   | 0.02  | 0.02   | t | 140830 | AVLGHDE<br>AAYSK           | Oryctola<br>gus<br>cuniculus |
| 1 | 1.00 | 1 | 1 | 0.03  | 0.03  | 0.03   | 0.03  | 0.03   | t | 117546 | KIRRSKPK<br>LPEVT          | Homo<br>sapiens              |
| 1 | 1.00 | 1 | 1 | 0.02  | 0.02  | 0.015  | 0.02  | 0.02   | t | 73636  | YEDRYRE                    | Mus<br>musculus              |
| 1 | 1.00 | 1 | 1 | 0     | 0     | -0.016 | 0     | 0.002  | t | 64057  | THNQWN<br>KPSKPKTN<br>LK   | Oryctola<br>gus<br>cuniculus |
| 1 | 1.00 | 1 | 1 | 0     | 0     | -0.016 | 0     | 0.002  | t | 64057  | THNQWN<br>KPSKPKTN<br>LK   | Oryctola<br>gus<br>cuniculus |
| 1 | 1.00 | 1 | 1 | 0.02  | 0.02  | 0.02   | 0.02  | 0.02   | t | 78552  | VERLG DYLI<br>DQGL         | Homo<br>sapiens              |
| 1 | 1.00 | 1 | 1 | -0.01 | -0.01 | -0.001 | -0.01 | -0.01  | t | 48418  | PLLYPS                     | Homo<br>sapiens              |
| 1 | 1.00 | 1 | 1 | 0.03  | 0.028 | 0.031  | 0.033 | 0.032  | t | 11377  | EDLDGA                     | Mus<br>musculus              |
| 1 | 1.00 | 1 | 1 | 0     | 0     | -0.004 | 0     | -0.002 | t | 52085  | QQPFPQP<br>QQQ             | Mus<br>musculus              |
| 1 | 1.00 | 1 | 1 | 0     | 0     | -0.004 | 0     | -0.002 | t | 51929  | QPQQPQQ<br>SFP             | Mus<br>musculus              |
| 1 | 1.00 | 1 | 1 | 0     | 0     | -0.004 | 0     | -0.002 | t | 52089  | QQPFPQS<br>QQP             | Mus<br>musculus              |
| 1 | 1.00 | 1 | 1 | 0.05  | 0.05  | 0.05   | 0.05  | 0.05   | t | 40380  | LVGVVT                     | Homo<br>sapiens              |
| 1 | 1.00 | 1 | 1 | 0.01  | 0.008 | 0.006  | 0.009 | 0.008  | t | 65698  | TPPRPAGD<br>NATVAAG<br>HAT | Mus<br>musculus              |

|   |      |   |   |       |        |        |        |        |   |        |                            |                                  |
|---|------|---|---|-------|--------|--------|--------|--------|---|--------|----------------------------|----------------------------------|
| 1 | 1.00 | 1 | 1 | 0.02  | 0.018  | 0.015  | 0.019  | 0.02   | t | 74708  | YLILSARDV<br>L             | Mus<br>musculu<br>s              |
| 1 | 1.00 | 1 | 1 | 0.03  | 0.03   | 0.03   | 0.036  | 0.03   | t | 158753 | FIEVEELKL<br>FLQNFC        | Homo<br>sapiens                  |
| 1 | 1.00 | 1 | 1 | 0     | -0.004 | -0.009 | -0.001 | 0.001  | t | 51473  | QLPNVGIT                   | Oryctola<br>gus<br>cuniculu<br>s |
| 1 | 1.00 | 1 | 1 | -0.02 | -0.022 | -0.027 | -0.021 | -0.02  | t | 19093  | GDRAAGQ<br>PAGDRAA<br>GQPA | Mus<br>musculu<br>s              |
| 1 | 1.00 | 1 | 1 | -0.02 | -0.022 | -0.027 | -0.021 | -0.02  | t | 19093  | GDRAAGQ<br>PAGDRAA<br>GQPA | Mus<br>musculu<br>s              |
| 1 | 1.00 | 1 | 1 | -0.02 | -0.022 | -0.027 | -0.021 | -0.02  | t | 19093  | GDRAAGQ<br>PAGDRAA<br>GQPA | Mus<br>musculu<br>s              |
| 1 | 1.00 | 1 | 1 | -0.02 | -0.022 | -0.027 | -0.021 | -0.02  | t | 19093  | GDRAAGQ<br>PAGDRAA<br>GQPA | Mus<br>musculu<br>s              |
| 1 | 1.00 | 1 | 1 | -0.02 | -0.022 | -0.027 | -0.021 | -0.02  | t | 19093  | GDRAAGQ<br>PAGDRAA<br>GQPA | Mus<br>musculu<br>s              |
| 1 | 1.00 | 1 | 1 | 0.01  | 0.012  | 0.005  | 0.011  | 0.01   | t | 66082  | TRQAQDI<br>QP              | Homo<br>sapiens                  |
| 1 | 1.00 | 1 | 1 | 0.03  | 0.03   | 0.03   | 0.03   | 0.03   | t | 60364  | SQAEAALE<br>NL             | Homo<br>sapiens                  |
| 1 | 1.00 | 1 | 1 | 0.03  | 0.026  | 0.033  | 0.029  | 0.029  | t | 15529  | FEFPPPT<br>DE              | Oryctola<br>gus<br>cuniculu<br>s |
| 1 | 1.00 | 1 | 1 | 0.06  | 0.062  | 0.059  | 0.067  | 0.063  | t | 144320 | GSEN                       | Homo<br>sapiens                  |
| 1 | 1.00 | 1 | 1 | -0.01 | -0.01  | -0.01  | -0.016 | -0.012 | t | 67916  | VDCSRFPN<br>A              | Homo<br>sapiens                  |
| 1 | 1.00 | 1 | 1 | 0     | 0.004  | 0.007  | -0.001 | -0.003 | t | 131129 | VFQSYFSM<br>PTPAHL         | Homo<br>sapiens                  |
| 1 | 1.00 | 1 | 1 | 0.03  | 0.03   | 0.029  | 0.03   | 0.029  | t | 10550  | DVCSDSD<br>NDGVCDN<br>V    | Mus<br>musculu<br>s              |
| 1 | 1.00 | 1 | 1 | 0.02  | 0.02   | 0.02   | 0.02   | 0.019  | t | 119620 | NPDDYGG<br>VK              | Rattus<br>norvegic<br>us         |

|   |      |   |   |       |        |        |        |        |   |        |                               |                                  |
|---|------|---|---|-------|--------|--------|--------|--------|---|--------|-------------------------------|----------------------------------|
| 1 | 1.00 | 1 | 1 | 0.02  | 0.02   | 0.02   | 0.02   | 0.019  | t | 24035  | HIDSQK                        | Oryctola<br>gus<br>cuniculu<br>s |
| 1 | 1.00 | 1 | 1 | -0.01 | -0.012 | -0.026 | -0.017 | -0.01  | t | 97916  | AVVGKPG<br>SDV                | Mus<br>musculu<br>s              |
| 1 | 1.00 | 1 | 1 | -0.01 | -0.014 | -0.026 | -0.017 | -0.01  | t | 97916  | AVVGKPG<br>SDV                | Oryctola<br>gus<br>cuniculu<br>s |
| 1 | 1.00 | 1 | 1 | 0.03  | 0.03   | 0.021  | 0.027  | 0.03   | t | 71902  | VVYDYQH<br>K                  | Homo<br>sapiens                  |
| 1 | 1.00 | 1 | 1 | 0.01  | 0.006  | 0.005  | 0.011  | 0.009  | t | 133775 | AETNRAPF<br>DLAEAE            | Oryctola<br>gus<br>cuniculu<br>s |
| 1 | 1.00 | 1 | 1 | -0.01 | -0.008 | -0.01  | -0.011 | -0.013 | t | 28911  | ITGHRMA<br>WMMMM<br>NWS       | Homo<br>sapiens                  |
| 1 | 1.00 | 1 | 1 | 0.02  | 0.022  | 0.018  | 0.023  | 0.02   | t | 10932  | DYNPLLVE                      | Homo<br>sapiens                  |
| 1 | 1.00 | 1 | 1 | 0     | 0      | 0      | 0      | -0.002 | t | 48001  | PITNDQKK                      | Mus<br>musculu<br>s              |
| 1 | 1.00 | 1 | 1 | 0.02  | 0.022  | 0.012  | 0.021  | 0.02   | t | 41177  | MAYRFNG<br>IGVTQNV<br>L<br>YE | Homo<br>sapiens                  |
| 1 | 1.00 | 1 | 1 | 0     | 0      | -0.005 | -0.002 | 0      | t | 17271  | FPDLGV                        | Homo<br>sapiens                  |
| 1 | 1.00 | 1 | 1 | -0.04 | -0.04  | -0.04  | -0.04  | -0.043 | t | 110789 | ARLKSWFE<br>PLVEDMQ<br>RQWAG  | Mus<br>musculu<br>s              |
| 1 | 1.00 | 1 | 1 | -0.02 | -0.02  | -0.028 | -0.02  | -0.02  | t | 21424  | GNFGDQD<br>LIRQGTDY<br>KHW    | Homo<br>sapiens                  |
| 1 | 1.00 | 1 | 1 | 0.04  | 0.038  | 0.038  | 0.039  | 0.04   | t | 56711  | SAAQEKIS<br>F                 | Mus<br>musculu<br>s              |
| 1 | 1.00 | 1 | 1 | 0.01  | 0.01   | 0.002  | 0.013  | 0.012  | t | 111663 | QDKILTHY<br>ENDSTD            | Homo<br>sapiens                  |

|   |      |   |   |       |        |        |        |        |   |        |                     |                                  |
|---|------|---|---|-------|--------|--------|--------|--------|---|--------|---------------------|----------------------------------|
| 1 | 1.00 | 1 | 1 | -0.02 | -0.014 | -0.032 | -0.019 | -0.02  | t | 15461  | FDSSGSFL<br>GHI     | Equus<br>caballus                |
| 1 | 1.00 | 1 | 1 | 0     | -0.004 | -0.003 | 0      | 0      | t | 100454 | RAVPYYGP<br>GVDYKN  | Oryctola<br>gus<br>cuniculu<br>s |
| 1 | 1.00 | 1 | 1 | -0.01 | -0.013 | -0.01  | -0.01  | -0.009 | t | 113527 | HYGSLPQK            | Oryctola<br>gus<br>cuniculu<br>s |
| 1 | 1.00 | 1 | 1 | -0.04 | -0.036 | -0.047 | -0.039 | -0.041 | t | 138028 | SAGALQLL<br>VVGC    | Homo<br>sapiens                  |
| 1 | 1.00 | 1 | 1 | 0.03  | 0.032  | 0.026  | 0.027  | 0.028  | t | 106904 | THEGGQL<br>HCT      | Homo<br>sapiens                  |
| 1 | 1.00 | 1 | 1 | 0.01  | 0.009  | 0.003  | 0.007  | 0.01   | t | 65006  | TLPIILKALY<br>MLST  | Myodes<br>glareolu<br>s          |
| 1 | 1.00 | 1 | 1 | 0.03  | 0.027  | 0.022  | 0.03   | 0.03   | t | 4534   | ASLLTTAE<br>VV      | Oryctola<br>gus<br>cuniculu<br>s |
| 1 | 1.00 | 1 | 1 | 0.05  | 0.052  | 0.047  | 0.051  | 0.05   | t | 8371   | DGEGAP              | Homo<br>sapiens                  |
| 1 | 1.00 | 1 | 1 | 0.03  | 0.03   | 0.03   | 0.03   | 0.03   | t | 135465 | GSDYEDRY<br>YREN    | Mus<br>musculu<br>s              |
| 1 | 1.00 | 1 | 1 | 0.05  | 0.052  | 0.038  | 0.051  | 0.052  | t | 22398  | GSKVPEDT            | Homo<br>sapiens                  |
| 1 | 1.00 | 1 | 1 | 0.01  | 0.01   | 0.01   | 0.01   | 0.008  | t | 124560 | NGVELRD             | Mus<br>musculu<br>s              |
| 1 | 1.00 | 1 | 1 | 0     | 0      | 0      | 0.007  | 0      | t | 135908 | DINTVTTV<br>AQSR    | Homo<br>sapiens                  |
| 1 | 1.00 | 1 | 1 | 0.01  | 0.014  | 0.003  | 0.011  | 0.012  | t | 42580  | MSKAKQY<br>NICCKFKE | Homo<br>sapiens                  |

|   |      |   |   |       |        |        |        |        |   |        |                     |                                  |
|---|------|---|---|-------|--------|--------|--------|--------|---|--------|---------------------|----------------------------------|
| 1 | 1.00 | 1 | 1 | 0.02  | 0.024  | 0.013  | 0.021  | 0.02   | t | 79926  | MASMTG<br>GQQMG     | MD                               |
| 1 | 1.00 | 1 | 1 | 0.01  | 0.01   | -0.003 | 0.01   | 0.01   | t | 110198 | CPPDIIPKV<br>EGKTIA | Mus<br>musculu<br>s              |
| 1 | 1.00 | 1 | 1 | 0.01  | 0.007  | -0.003 | 0.01   | 0.01   | t | 110198 | CPPDIIPKV<br>EGKTIA | Oryctola<br>gus<br>cuniculu<br>s |
| 1 | 1.00 | 1 | 1 | 0     | 0      | -0.002 | 0      | -0.003 | t | 119052 | WNPADYG<br>GIK      | Rattus<br>norvegic<br>us         |
| 1 | 1.00 | 1 | 1 | 0.01  | 0.01   | 0.001  | 0.01   | 0.01   | t | 135987 | RSITLGNST<br>ITT    | Homo<br>sapiens                  |
| 1 | 1.00 | 1 | 1 | 0     | 0.002  | -0.007 | 0.003  | 0.001  | t | 144772 | SAHTSHLV<br>GS      | Homo<br>sapiens                  |
| 1 | 1.00 | 1 | 1 | 0.02  | 0.024  | 0.01   | 0.02   | 0.022  | t | 20769  | GLAQALID<br>QKVKEI  | Myodes<br>glareolu<br>s          |
| 1 | 1.00 | 1 | 1 | 0     | 0.004  | -0.007 | 0.007  | 0      | t | 139601 | SCSRALAR<br>EVDLKDY | Homo<br>sapiens                  |
| 1 | 1.00 | 1 | 1 | 0.04  | 0.04   | 0.047  | 0.049  | 0.042  | t | 130850 | GGIYQDLV<br>S       | Homo<br>sapiens                  |
| 1 | 1.00 | 1 | 1 | 0.05  | 0.052  | 0.05   | 0.051  | 0.05   | t | 98786  | GASEL               | Homo<br>sapiens                  |
| 1 | 1.00 | 1 | 1 | -0.02 | -0.018 | -0.03  | -0.017 | -0.021 | t | 61412  | SSTSIVYILI<br>AVCLG | Homo<br>sapiens                  |
| 1 | 1.00 | 1 | 1 | -0.02 | -0.02  | -0.025 | -0.017 | -0.02  | t | 52680  | QVCGPVY<br>CFT      | Homo<br>sapiens                  |
| 1 | 1.00 | 1 | 1 | 0     | 0      | 0      | 0.004  | -0.001 | t | 43242  | NANPNAN<br>PNANP    | Homo<br>sapiens                  |
| 1 | 1.00 | 1 | 1 | 0     | 0      | 0      | 0.004  | -0.001 | t | 43242  | NANPNAN<br>PNANP    | Homo<br>sapiens                  |
| 1 | 1.00 | 1 | 1 | 0     | 0      | 0      | 0.004  | -0.001 | t | 43242  | NANPNAN<br>PNANP    | Homo<br>sapiens                  |



|   |      |   |   |       |        |        |       |        |   |        |                              |                       |
|---|------|---|---|-------|--------|--------|-------|--------|---|--------|------------------------------|-----------------------|
| 1 | 1.00 | 1 | 1 | 0     | 0      | 0      | 0.004 | -0.001 | t | 43242  | NANPNAN<br>PNANP             | Homo sapiens          |
| 1 | 1.00 | 1 | 1 | 0     | 0      | 0      | 0.004 | -0.001 | t | 43242  | NANPNAN<br>PNANP             | Homo sapiens          |
| 1 | 1.00 | 1 | 1 | 0.01  | 0.013  | 0.01   | 0.01  | 0.012  | t | 110229 | FTEPSVLH                     | Mus musculus          |
| 1 | 1.00 | 1 | 1 | 0.01  | 0.016  | 0.017  | 0.017 | 0.01   | t | 127663 | GGYVKLFP<br>NS               | Homo sapiens          |
| 1 | 1.00 | 1 | 1 | 0     | 0.002  | -0.011 | 0.001 | -0.001 | t | 57296  | SDSVGQQI<br>KVIPVDPY<br>FFQM | Homo sapiens          |
| 1 | 1.00 | 1 | 1 | -0.03 | -0.03  | -0.03  | -0.03 | -0.033 | t | 95387  | FLKKISQRY<br>Q               | Homo sapiens          |
| 1 | 1.00 | 1 | 1 | -0.01 | -0.01  | -0.022 | -0.01 | -0.01  | t | 104521 | IGTLKKILD<br>ETVKDKIA<br>KEQ | Rattus norvegicus     |
| 1 | 1.00 | 1 | 1 | 0.03  | 0.03   | 0.021  | 0.023 | 0.031  | t | 110982 | QYNKPLCD<br>LL               | Homo sapiens          |
| 1 | 1.00 | 1 | 1 | 0.03  | 0.03   | 0.021  | 0.023 | 0.031  | t | 110982 | QYNKPLCD<br>LL               | Homo sapiens          |
| 1 | 1.00 | 1 | 1 | -0.01 | -0.008 | -0.007 | -0.01 | -0.012 | t | 132885 | PVRLAE                       | Oryctolagus cuniculus |
| 1 | 1.00 | 1 | 1 | 0.03  | 0.026  | 0.029  | 0.029 | 0.028  | t | 110862 | GGPTLVSL<br>HELPAETP         | Oryctolagus cuniculus |
| 1 | 1.00 | 1 | 1 | 0.01  | 0.01   | -0.01  | 0.003 | 0.01   | t | 107824 | ELWDKRY<br>GGRSNI            | Homo sapiens          |
| 1 | 1.00 | 1 | 1 | 0.03  | 0.028  | 0.025  | 0.033 | 0.029  | t | 16396  | FKLEKEVA<br>E                | Mus musculus          |
| 1 | 1.00 | 1 | 1 | -0.03 | -0.032 | -0.03  | -0.03 | -0.032 | t | 111211 | DPVGPSD<br>PSIVSLVEE<br>TSF  | Oryctolagus cuniculus |

|   |      |   |   |       |        |        |        |        |   |        |                              |                                  |
|---|------|---|---|-------|--------|--------|--------|--------|---|--------|------------------------------|----------------------------------|
| 1 | 1.00 | 1 | 1 | 0     | 0.002  | 0      | 0.007  | -0.002 | t | 121925 | TPFLPKIFIK<br>PNAQK          | Homo<br>sapiens                  |
| 1 | 1.00 | 1 | 1 | 0.02  | 0.022  | 0.009  | 0.021  | 0.02   | t | 110589 | GDICNTM<br>HYTNWTH<br>IYICEE | Homo<br>sapiens                  |
| 1 | 1.00 | 1 | 1 | 0     | 0      | -0.007 | 0      | -0.002 | t | 122430 | KGLRRDLD<br>ASREAK           | Mus<br>musculu<br>s              |
| 1 | 1.00 | 1 | 1 | -0.01 | -0.01  | -0.01  | -0.01  | -0.009 | t | 115342 | LDTDYKKY<br>LL               | Homo<br>sapiens                  |
| 1 | 1.00 | 1 | 1 | 0.03  | 0.03   | 0.036  | 0.03   | 0.03   | t | 14992  | EYEDLLKA                     | Mus<br>musculu<br>s              |
| 1 | 1.00 | 1 | 1 | 0.02  | 0.022  | 0.014  | 0.021  | 0.02   | t | 58903  | SKNFNFV                      | Homo<br>sapiens                  |
| 1 | 1.00 | 1 | 1 | -0.01 | -0.01  | -0.01  | -0.01  | -0.01  | t | 46825  | PAIIPDREV                    | Homo<br>sapiens                  |
| 1 | 1.00 | 1 | 1 | -0.05 | -0.05  | -0.051 | -0.047 | -0.05  | t | 35252  | LDPHAFHL<br>LL               | Homo<br>sapiens                  |
| 1 | 1.00 | 1 | 1 | 0     | -0.002 | -0.009 | 0.003  | 0.002  | t | 47014  | PAYYTKDT<br>NNNLTL           | Mus<br>musculu<br>s              |
| 1 | 1.00 | 1 | 1 | 0.01  | 0.01   | 0.003  | 0.01   | 0.01   | t | 39174  | LRQLDFVE<br>EVLRKHPD<br>KVE  | Homo<br>sapiens                  |
| 1 | 1.00 | 1 | 1 | -0.01 | -0.013 | -0.026 | -0.01  | -0.008 | t | 31067  | KGTAPFGV<br>AFGNS            | Oryctola<br>gus<br>cuniculu<br>s |
| 1 | 1.00 | 1 | 1 | -0.01 | -0.008 | -0.003 | -0.003 | -0.01  | t | 108007 | LLPWLDG<br>HPM               | Homo<br>sapiens                  |
| 1 | 1.00 | 1 | 1 | 0.01  | 0.012  | 0.003  | 0.017  | 0.011  | t | 105886 | IPSTVKAG<br>ELEKI            | Homo<br>sapiens                  |
| 1 | 1.00 | 1 | 1 | 0.02  | 0.024  | 0.018  | 0.027  | 0.02   | t | 132044 | RLRKWTT<br>VDSISVNT          | Homo<br>sapiens                  |
| 1 | 1.00 | 1 | 1 | -0.01 | -0.008 | -0.005 | -0.003 | -0.012 | t | 122943 | WDPAQPP<br>RD                | Homo<br>sapiens                  |

|   |      |   |   |       |        |        |        |        |   |        |                       |                       |
|---|------|---|---|-------|--------|--------|--------|--------|---|--------|-----------------------|-----------------------|
| 1 | 1.00 | 1 | 1 | 0.06  | 0.06   | 0.053  | 0.06   | 0.06   | t | 121130 | AICSQCSD              | Homo sapiens          |
| 1 | 1.00 | 1 | 1 | 0.01  | 0.01   | 0.01   | 0.01   | 0.01   | t | 105068 | AEFDLD                | Oryctolagus cuniculus |
| 1 | 1.00 | 1 | 1 | 0     | 0      | -0.007 | 0      | -0.001 | t | 122375 | GLINRAKAVKQFEESQ<br>G | Mus musculus          |
| 1 | 1.00 | 1 | 1 | 0     | -0.002 | 0      | -0.001 | -0.003 | t | 11571  | EEEDDDMGFGLFD         | Mus musculus          |
| 1 | 1.00 | 1 | 1 | -0.01 | -0.01  | -0.02  | -0.01  | -0.008 | t | 60959  | SSDSQTITNPAY          | Oryctolagus cuniculus |
| 1 | 1.00 | 1 | 1 | 0.04  | 0.04   | 0.04   | 0.04   | 0.04   | t | 119753 | AQGARVYAYV            | Mus musculus          |
| 1 | 1.00 | 1 | 1 | 0.04  | 0.043  | 0.04   | 0.04   | 0.04   | t | 119753 | AQGARVYAYV            | Mus musculus          |
| 1 | 1.00 | 1 | 1 | 0.04  | 0.04   | 0.04   | 0.04   | 0.04   | t | 119753 | AQGARVYAYV            | Oryctolagus cuniculus |
| 1 | 1.00 | 1 | 1 | 0.01  | 0.01   | 0.01   | 0.01   | 0.01   | t | 62907  | TALDTSNK              | Oryctolagus cuniculus |
| 1 | 1.00 | 1 | 1 | -0.01 | -0.016 | -0.024 | -0.01  | -0.01  | t | 43153  | NAGKEGAIIFQQ          | Oryctolagus cuniculus |
| 1 | 1.00 | 1 | 1 | 0     | -0.004 | -0.002 | 0.003  | 0.001  | t | 99761  | VKVGDK                | Oryctolagus cuniculus |
| 1 | 1.00 | 1 | 1 | 0.02  | 0.018  | 0.028  | 0.019  | 0.018  | t | 79040  | PGQNLCYTK             | Mus musculus          |
| 1 | 1.00 | 1 | 1 | 0     | -0.004 | 0      | 0.003  | -0.002 | t | 71199  | VSVNDPFI<br>DLEYM     | Oryctolagus cuniculus |
| 1 | 1.00 | 1 | 1 | 0     | -0.002 | 0      | 0.003  | -0.002 | t | 43233  | NANP                  | Mus musculus          |

|   |      |   |   |       |        |        |        |        |   |        |                              |                                  |
|---|------|---|---|-------|--------|--------|--------|--------|---|--------|------------------------------|----------------------------------|
| 1 | 1.00 | 1 | 1 | 0     | -0.004 | 0      | 0.003  | -0.002 | t | 46895  | PAPQAPY<br>QGYQEPP<br>APQAPY | Oryctola<br>gus<br>cuniculu<br>s |
| 1 | 1.00 | 1 | 1 | 0     | -0.004 | 0      | 0.003  | -0.002 | t | 34045  | KVIHDKFEI<br>VE              | Oryctola<br>gus<br>cuniculu<br>s |
| 1 | 1.00 | 1 | 1 | 0     | -0.004 | 0      | 0.003  | -0.002 | t | 8942   | DKNEKGQ<br>HEIVEVEEI<br>LPE  | Oryctola<br>gus<br>cuniculu<br>s |
| 1 | 1.00 | 1 | 1 | 0.04  | 0.04   | 0.031  | 0.04   | 0.04   | t | 135951 | LLESQIATI<br>EQT             | Homo<br>sapiens                  |
| 1 | 1.00 | 1 | 1 | -0.01 | -0.006 | -0.016 | -0.009 | -0.011 | t | 47662  | PGGGQIV<br>GGVYLLPR<br>R     | Homo<br>sapiens                  |
| 1 | 1.00 | 1 | 1 | -0.01 | -0.008 | -0.016 | -0.009 | -0.011 | t | 47662  | PGGGQIV<br>GGVYLLPR<br>R     | Homo<br>sapiens                  |
| 1 | 1.00 | 1 | 1 | -0.01 | -0.008 | -0.016 | -0.009 | -0.011 | t | 47662  | PGGGQIV<br>GGVYLLPR<br>R     | Homo<br>sapiens                  |
| 1 | 1.00 | 1 | 1 | 0.03  | 0.03   | 0.03   | 0.041  | 0.032  | t | 118624 | TLDPDTAN<br>PWLILSE          | Homo<br>sapiens                  |
| 1 | 1.00 | 1 | 1 | 0.01  | 0.01   | 0.003  | 0.01   | 0.01   | t | 72503  | WGQGG                        | Mus<br>musculu<br>s              |
| 1 | 1.00 | 1 | 1 | 0     | 0      | -0.001 | 0.006  | 0      | t | 30661  | KEVPALTA<br>VETGAT           | Homo<br>sapiens                  |
| 1 | 1.00 | 1 | 1 | 0.04  | 0.038  | 0.031  | 0.037  | 0.04   | t | 13657  | EPGVLMG<br>GQSESVEF<br>T     | Mus<br>musculu<br>s              |
| 1 | 1.00 | 1 | 1 | -0.04 | -0.04  | -0.052 | -0.038 | -0.038 | t | 96320  | GKKPNIW<br>YSL               | Homo<br>sapiens(<br>human)       |
| 1 | 1.00 | 1 | 1 | 0.01  | 0.007  | -0.001 | 0.009  | 0.01   | t | 41117  | MASEAKES<br>PANNPGL          | Oryctola<br>gus<br>cuniculu<br>s |
| 1 | 1.00 | 1 | 1 | 0.02  | 0.02   | 0.02   | 0.02   | 0.022  | t | 136088 | VPPTPQ                       | Oryctola<br>gus<br>cuniculu<br>s |

|   |      |   |   |       |        |        |       |        |   |        |                   |                       |
|---|------|---|---|-------|--------|--------|-------|--------|---|--------|-------------------|-----------------------|
| 1 | 1.00 | 1 | 1 | 0.02  | 0.02   | 0.02   | 0.023 | 0.02   | t | 49295  | PSAPPL            | Homo sapiens          |
| 1 | 1.00 | 1 | 1 | 0.02  | 0.02   | 0.02   | 0.023 | 0.02   | t | 49295  | PSAPPL            | Homo sapiens          |
| 1 | 1.00 | 1 | 1 | 0     | 0.004  | 0.001  | 0.003 | 0      | t | 34215  | KVTKDGVTV A       | Homo sapiens          |
| 1 | 1.00 | 1 | 1 | 0     | 0.002  | 0.001  | 0.003 | 0      | t | 34215  | KVTKDGVTV A       | Homo sapiens          |
| 1 | 1.00 | 1 | 1 | 0.01  | 0.01   | 0.005  | 0.01  | 0.01   | t | 145838 | IVSLVEETS FIDAGAP | Mus musculus          |
| 1 | 1.00 | 1 | 1 | 0     | 0.004  | 0      | 0.003 | -0.001 | t | 118434 | ISKGANPVEIRRG     | Homo sapiens          |
| 1 | 1.00 | 1 | 1 | 0.02  | 0.023  | 0.011  | 0.02  | 0.02   | t | 100501 | SEEEKELLNR        | Mus musculus          |
| 1 | 1.00 | 1 | 1 | -0.02 | -0.021 | -0.027 | -0.02 | -0.02  | t | 41609  | MGQHPAKS          | Anas platyrhynchos    |
| 1 | 1.00 | 1 | 1 | 0     | 0      | -0.003 | 0     | 0      | t | 22217  | GRTPFII           | Homo sapiens          |
| 1 | 1.00 | 1 | 1 | -0.04 | -0.04  | -0.038 | -0.04 | -0.04  | t | 120249 | TPVLVWIYGG        | Mus musculus          |
| 1 | 1.00 | 1 | 1 | -0.04 | -0.043 | -0.038 | -0.04 | -0.04  | t | 120249 | TPVLVWIYGG        | Oryctolagus cuniculus |
| 1 | 1.00 | 1 | 1 | -0.01 | -0.013 | -0.015 | -0.01 | -0.012 | t | 54975  | RNCKKLGP RENVA    | Oryctolagus cuniculus |
| 1 | 1.00 | 1 | 1 | 0.06  | 0.06   | 0.06   | 0.06  | 0.062  | t | 127610 | AVYFKEQF LD       | Homo sapiens          |
| 1 | 1.00 | 1 | 1 | 0.01  | 0.012  | -0.01  | 0.007 | 0.012  | t | 75541  | YQQYPQQ           | Homo sapiens          |
| 1 | 1.00 | 1 | 1 | 0.03  | 0.028  | 0.028  | 0.029 | 0.03   | t | 45496  | NPTPQEIP          | Anas platyrhynchos    |

|   |      |   |   |       |        |        |        |        |   |        |                             |                                  |
|---|------|---|---|-------|--------|--------|--------|--------|---|--------|-----------------------------|----------------------------------|
| 1 | 1.00 | 1 | 1 | 0.04  | 0.038  | 0.031  | 0.039  | 0.04   | t | 25060  | HVL DHVQ<br>T               | Anas<br>platyrh<br>nchos         |
| 1 | 1.00 | 1 | 1 | 0.02  | 0.02   | 0.02   | 0.023  | 0.02   | t | 19310  | GEIRPS                      | Homo<br>sapiens                  |
| 1 | 1.00 | 1 | 1 | -0.01 | -0.008 | -0.021 | -0.013 | -0.009 | t | 6219   | CFDVFKE<br>L                | Homo<br>sapiens                  |
| 1 | 1.00 | 1 | 1 | -0.03 | -0.026 | -0.03  | -0.033 | -0.032 | t | 106340 | DIMPCLHF<br>VKGE            | Homo<br>sapiens                  |
| 1 | 1.00 | 1 | 1 | 0.07  | 0.07   | 0.074  | 0.07   | 0.072  | t | 136059 | EGY                         | Rattus<br>norvegic<br>us         |
| 1 | 1.00 | 1 | 1 | 0.02  | 0.02   | 0.013  | 0.02   | 0.018  | t | 72908  | WNSQKDI<br>LEQARA           | Mus<br>musculu<br>s              |
| 1 | 1.00 | 1 | 1 | 0.01  | 0.01   | 0.002  | 0.01   | 0.009  | t | 102333 | CCKRNDE<br>VLFRLNH<br>AETLR | Mus<br>musculu<br>s              |
| 1 | 1.00 | 1 | 1 | 0.01  | 0.013  | 0.002  | 0.01   | 0.009  | t | 102333 | CCKRNDE<br>VLFRLNH<br>AETLR | Mus<br>musculu<br>s              |
| 1 | 1.00 | 1 | 1 | 0.01  | 0.01   | 0.002  | 0.01   | 0.009  | t | 102333 | CCKRNDE<br>VLFRLNH<br>AETLR | Mus<br>musculu<br>s              |
| 1 | 1.00 | 1 | 1 | 0.05  | 0.05   | 0.05   | 0.054  | 0.05   | t | 135914 | EEIAQVATI<br>SAN            | Homo<br>sapiens                  |
| 1 | 1.00 | 1 | 1 | 0.05  | 0.05   | 0.043  | 0.047  | 0.05   | t | 42678  | MSTLQEL<br>QENITA           | Homo<br>sapiens                  |
| 1 | 1.00 | 1 | 1 | 0     | 0      | 0      | 0.006  | 0      | t | 118490 | LKDKYKNI<br>GAKLV           | Homo<br>sapiens                  |
| 1 | 1.00 | 1 | 1 | 0.01  | 0.007  | -0.006 | 0.01   | 0.014  | t | 10801  | DWEDRY<br>RE                | Oryctola<br>gus<br>cuniculu<br>s |
| 1 | 1.00 | 1 | 1 | -0.01 | -0.01  | -0.01  | -0.004 | -0.01  | t | 77842  | AYIDFEMK<br>I               | Homo<br>sapiens                  |
| 1 | 1.00 | 1 | 1 | -0.03 | -0.032 | -0.039 | -0.027 | -0.027 | t | 115483 | SFFDIGGS<br>VSAGFSN         | Mus<br>musculu<br>s              |
| 1 | 1.00 | 1 | 1 | 0.01  | 0.013  | 0.008  | 0.01   | 0.01   | t | 53906  | RGLAQSLI<br>DQ              | Mus<br>musculu<br>s              |

|   |      |   |   |       |        |        |        |        |   |        |                           |                                  |
|---|------|---|---|-------|--------|--------|--------|--------|---|--------|---------------------------|----------------------------------|
| 1 | 1.00 | 1 | 1 | 0     | 0      | -0.005 | 0      | 0      | t | 133870 | LAKLAGGV<br>AVICAGA       | Homo<br>sapiens                  |
| 1 | 1.00 | 1 | 1 | 0     | 0      | -0.005 | 0      | 0      | t | 133870 | LAKLAGGV<br>AVICAGA       | Homo<br>sapiens                  |
| 1 | 1.00 | 1 | 1 | 0     | -0.002 | -0.005 | -0.001 | 0      | t | 27896  | IPKGTLTW                  | Anas<br>platyrhy<br>nchos        |
| 1 | 1.00 | 1 | 1 | -0.01 | -0.01  | -0.003 | -0.01  | -0.012 | t | 95750  | QYLYQGPI<br>VL            | Homo<br>sapiens                  |
| 1 | 1.00 | 1 | 1 | -0.01 | -0.012 | -0.02  | -0.007 | -0.008 | t | 69183  | VKAVTTLL<br>KA            | Mus<br>musculu<br>s              |
| 1 | 1.00 | 1 | 1 | 0.01  | 0.01   | 0.01   | 0.01   | 0.01   | t | 140934 | YGEEKPAV<br>LGHD          | Oryctola<br>gus<br>cuniculu<br>s |
| 1 | 1.00 | 1 | 1 | 0.01  | 0.01   | 0.01   | 0.01   | 0.01   | t | 78517  | SGPISKY                   | Mus<br>musculu<br>s              |
| 1 | 1.00 | 1 | 1 | 0     | -0.004 | -0.009 | -0.007 | -0.002 | t | 133880 | LKLLLKEYV                 | Oryctola<br>gus<br>cuniculu<br>s |
| 1 | 1.00 | 1 | 1 | 0     | 0.002  | 0      | 0.001  | 0      | t | 47289  | PEGRTWA<br>Q              | Homo<br>sapiens                  |
| 1 | 1.00 | 1 | 1 | 0     | 0      | 0      | -0.001 | -0.004 | t | 105127 | DAEFRHD                   | Mus<br>musculu<br>s              |
| 1 | 1.00 | 1 | 1 | 0.04  | 0.04   | 0.04   | 0.04   | 0.038  | t | 78001  | SEGLKEET                  | Mus<br>musculu<br>s              |
| 1 | 1.00 | 1 | 1 | -0.04 | -0.04  | -0.045 | -0.04  | -0.04  | t | 26372  | IHFG                      | Mus<br>musculu<br>s              |
| 1 | 1.00 | 1 | 1 | -0.04 | -0.04  | -0.045 | -0.04  | -0.04  | t | 26372  | IHFG                      | Mus<br>musculu<br>s              |
| 1 | 1.00 | 1 | 1 | -0.02 | -0.018 | -0.032 | -0.029 | -0.022 | t | 115694 | AVPYPQR<br>DMP            | Homo<br>sapiens                  |
| 1 | 1.00 | 1 | 1 | 0     | 0.002  | -0.008 | 0.001  | 0      | t | 1460   | AGCLIGAE<br>HVDTSYEC<br>D | Homo<br>sapiens                  |

|   |      |   |   |       |        |        |        |        |   |        |                             |                              |
|---|------|---|---|-------|--------|--------|--------|--------|---|--------|-----------------------------|------------------------------|
| 1 | 1.00 | 1 | 1 | 0.05  | 0.05   | 0.045  | 0.05   | 0.05   | t | 145838 | IVSLVEETS<br>FIDAGAP        | Mus<br>musculus              |
| 1 | 1.00 | 1 | 1 | 0     | 0      | -0.008 | 0      | 0      | t | 86504  | MSAAYDN<br>IYT              | Homo<br>sapiens              |
| 1 | 1.00 | 1 | 1 | 0     | 0.005  | -0.017 | 0      | 0.002  | t | 32687  | KPEASSTN                    | Homo<br>sapiens              |
| 1 | 1.00 | 1 | 1 | -0.02 | -0.02  | -0.032 | -0.014 | -0.018 | t | 106634 | LVGPRGER<br>GFP             | Homo<br>sapiens              |
| 1 | 1.00 | 1 | 1 | -0.02 | -0.022 | -0.027 | -0.027 | -0.021 | t | 108064 | PGPPGPP                     | Mus<br>musculus              |
| 1 | 1.00 | 1 | 1 | 0     | 0      | 0      | -0.006 | -0.006 | t | 125209 | QFQIHGPR                    | Mus<br>musculus              |
| 1 | 1.00 | 1 | 1 | 0     | 0      | 0      | -0.006 | -0.006 | t | 117140 | DWEYSVW<br>LSN              | Mus<br>musculus              |
| 1 | 1.00 | 1 | 1 | 0     | 0      | 0      | -0.006 | -0.006 | t | 117223 | NTWTTCD<br>SIAFPSK          | Mus<br>musculus              |
| 1 | 1.00 | 1 | 1 | 0     | 0      | 0      | -0.006 | -0.006 | t | 113879 | SQRSQDE<br>N                | Rattus<br>norvegicus         |
| 1 | 1.00 | 1 | 1 | 0     | 0      | 0      | -0.006 | -0.006 | t | 113966 | TTHYGSLP<br>QKAQGHR<br>PQDE | Oryctola<br>gus<br>cuniculus |
| 1 | 1.00 | 1 | 1 | 0     | 0      | 0      | -0.006 | -0.006 | t | 113013 | GSLPQKSQ<br>RSQDEN          | Rattus<br>norvegicus         |
| 1 | 1.00 | 1 | 1 | 0     | 0      | 0      | -0.006 | -0.006 | t | 107242 | SQTTANPS<br>CPEGT           | Rattus<br>norvegicus         |
| 1 | 1.00 | 1 | 1 | 0     | 0      | 0      | -0.006 | -0.006 | t | 113966 | TTHYGSLP<br>QKAQGHR<br>PQDE | Oryctola<br>gus<br>cuniculus |
| 1 | 1.00 | 1 | 1 | 0     | 0      | 0      | -0.006 | -0.006 | t | 107951 | KTTICGKG<br>LSATVT          | Mus<br>musculus              |
| 1 | 1.00 | 1 | 1 | 0     | 0      | 0      | -0.006 | -0.006 | t | 108200 | VSLGKWL<br>GHPDKF           | Mus<br>musculus              |



|   |      |   |   |       |        |        |        |        |   |        |                          |                                  |
|---|------|---|---|-------|--------|--------|--------|--------|---|--------|--------------------------|----------------------------------|
| 1 | 1.00 | 1 | 1 | 0     | 0      | 0      | -0.006 | -0.006 | t | 18441  | FYNQKFKG<br>KATL         | Mus<br>musculu<br>s              |
| 1 | 1.00 | 1 | 1 | 0.01  | 0.01   | 0.003  | 0.013  | 0.01   | t | 26839  | IKLKDCP                  | Homo<br>sapiens                  |
| 1 | 1.00 | 1 | 1 | 0.01  | 0.01   | 0.01   | 0.021  | 0.012  | t | 118281 | CPLNIGSQ<br>GSTDY        | Homo<br>sapiens                  |
| 1 | 1.00 | 1 | 1 | -0.01 | -0.01  | -0.005 | -0.01  | -0.013 | t | 122766 | FQGLCNET<br>LTLKLYN      | Mus<br>musculu<br>s              |
| 1 | 1.00 | 1 | 1 | -0.01 | -0.011 | -0.011 | -0.01  | -0.01  | t | 49377  | PSGLVIP                  | Mus<br>musculu<br>s              |
| 1 | 1.00 | 1 | 1 | 0     | -0.002 | -0.001 | 0      | 0      | t | 48401  | PLLPIF                   | Mus<br>musculu<br>s              |
| 1 | 1.00 | 1 | 1 | 0.02  | 0.018  | 0.022  | 0.023  | 0.02   | t | 75151  | YNGEEYLIL<br>S           | Mus<br>musculu<br>s              |
| 1 | 1.00 | 1 | 1 | 0.02  | 0.018  | 0.013  | 0.02   | 0.019  | t | 120108 | NFMESGE<br>WVIKESRG<br>W | Oryctola<br>gus<br>cuniculu<br>s |
| 1 | 1.00 | 1 | 1 | 0.02  | 0.02   | 0.013  | 0.02   | 0.019  | t | 120108 | NFMESGE<br>WVIKESRG<br>W | Rattus<br>norvegic<br>us         |
| 1 | 1.00 | 1 | 1 | 0.02  | 0.02   | 0.013  | 0.02   | 0.019  | t | 120108 | NFMESGE<br>WVIKESRG<br>W | Mus<br>musculu<br>s              |
| 1 | 1.00 | 1 | 1 | 0.03  | 0.032  | 0.028  | 0.027  | 0.028  | t | 14638  | EVDDEALE<br>KF           | Homo<br>sapiens                  |
| 1 | 1.00 | 1 | 1 | 0.02  | 0.02   | 0.015  | 0.02   | 0.018  | t | 59873  | SNNVQIVR<br>QQSYSI       | Mus<br>musculu<br>s              |
| 1 | 1.00 | 1 | 1 | -0.01 | -0.006 | -0.003 | -0.007 | -0.01  | t | 30710  | KFDRGYIS<br>PY           | Homo<br>sapiens                  |
| 1 | 1.00 | 1 | 1 | -0.02 | -0.009 | -0.026 | -0.02  | -0.02  | t | 41126  | MASLIYRQ<br>LL           | Gallus<br>gallus                 |
| 1 | 1.00 | 1 | 1 | 0.03  | 0.03   | 0.025  | 0.03   | 0.03   | t | 35172  | LDGRPLST<br>TQ           | Homo<br>sapiens                  |

|   |      |   |   |       |        |        |        |        |   |        |                               |                       |
|---|------|---|---|-------|--------|--------|--------|--------|---|--------|-------------------------------|-----------------------|
| 1 | 1.00 | 1 | 1 | 0.05  | 0.05   | 0.035  | 0.047  | 0.05   | t | 44339  | NISGHCS<br>CTFLGEE            | Homo sapiens          |
| 1 | 1.00 | 1 | 1 | 0     | -0.001 | 0      | 0.003  | -0.002 | t | 130612 | SPNTAHIT<br>SKSL              | Camelus dromedarius   |
| 1 | 1.00 | 1 | 1 | -0.01 | -0.004 | -0.003 | -0.003 | -0.012 | t | 127727 | LQEGLRRA                      | Homo sapiens          |
| 1 | 1.00 | 1 | 1 | 0     | 0      | -0.005 | 0      | -0.002 | t | 51439  | QLLTAIDL<br>ADNT              | Oryctolagus cuniculus |
| 1 | 1.00 | 1 | 1 | 0.01  | 0.014  | 0.01   | 0.007  | 0.009  | t | 74687  | YLGYLEQL<br>LR                | Homo sapiens          |
| 1 | 1.00 | 1 | 1 | -0.02 | -0.02  | -0.025 | -0.02  | -0.021 | t | 107219 | PAGGPGF<br>PG                 | Rattus norvegicus     |
| 1 | 1.00 | 1 | 1 | 0.02  | 0.02   | 0.01   | 0.02   | 0.02   | t | 32787  | KPLEDKILV<br>Q                | Mus musculus          |
| 1 | 1.00 | 1 | 1 | -0.03 | -0.03  | -0.02  | -0.023 | -0.032 | t | 14013  | ERKRR                         | Homo sapiens          |
| 1 | 1.00 | 1 | 1 | 0.03  | 0.03   | 0.03   | 0.034  | 0.031  | t | 108360 | FEDMAKS<br>DKARYDRE           | Homo sapiens          |
| 1 | 1.00 | 1 | 1 | -0.02 | -0.018 | -0.027 | -0.019 | -0.02  | t | 44911  | NLVDWLR<br>QY                 | Homo sapiens          |
| 1 | 1.00 | 1 | 1 | -0.01 | -0.01  | -0.014 | -0.01  | -0.01  | t | 106349 | DPLRPQRE<br>GC                | Oryctolagus cuniculus |
| 1 | 1.00 | 1 | 1 | -0.03 | -0.028 | -0.039 | -0.022 | -0.027 | t | 110965 | PNNNKILV<br>PKVSGQLQY<br>RVFR | Homo sapiens          |
| 1 | 1.00 | 1 | 1 | 0.05  | 0.05   | 0.041  | 0.048  | 0.05   | t | 135974 | PSNSASVP<br>ALTA              | Homo sapiens          |
| 1 | 1.00 | 1 | 1 | 0.01  | 0.008  | -0.01  | 0.003  | 0.01   | t | 128010 | GRWGSQR<br>AVNVSGG<br>FQF     | Mus musculus          |

|   |      |   |   |       |        |        |       |        |   |        |                           |              |
|---|------|---|---|-------|--------|--------|-------|--------|---|--------|---------------------------|--------------|
| 1 | 1.00 | 1 | 1 | 0.02  | 0.02   | 0.02   | 0.02  | 0.02   | t | 11583  | EEEIAQVA                  | Homo sapiens |
| 1 | 1.00 | 1 | 1 | 0     | 0.002  | -0.005 | 0.003 | 0      | t | 106634 | LVGPRGER<br>GFP           | Homo sapiens |
| 1 | 1.00 | 1 | 1 | -0.02 | -0.017 | -0.03  | -0.02 | -0.021 | t | 64899  | TLLDKNKKI<br>EE           | Mus musculus |
| 1 | 1.00 | 1 | 1 | 0.02  | 0.018  | 0.018  | 0.023 | 0.021  | t | 99637  | RRAQSVV<br>D              | Mus musculus |
| 1 | 1.00 | 1 | 1 | 0.01  | 0.012  | 0.01   | 0.013 | 0.009  | t | 96455  | KGKNVLIN<br>KD            | Homo sapiens |
| 1 | 1.00 | 1 | 1 | 0.03  | 0.028  | 0.023  | 0.027 | 0.031  | t | 42042  | MLQGVD                    | Mus musculus |
| 1 | 1.00 | 1 | 1 | 0.04  | 0.042  | 0.04   | 0.039 | 0.037  | t | 134166 | MPKFYCD<br>YCDTYLTH<br>DS | Homo sapiens |
| 1 | 1.00 | 1 | 1 | 0     | 0      | 0      | 0.006 | 0      | t | 118324 | EIIKRTLKIP<br>AMT         | Homo sapiens |
| 1 | 1.00 | 1 | 1 | 0     | 0      | 0      | 0.006 | 0      | t | 118440 | IVLGGGCA<br>LLRCI         | Homo sapiens |
| 1 | 1.00 | 1 | 1 | 0     | 0      | 0      | 0.006 | 0      | t | 118510 | LVLNRLKV<br>GLQVV         | Homo sapiens |
| 1 | 1.00 | 1 | 1 | 0     | 0      | 0      | 0.006 | 0      | t | 118451 | KGIIDPTKV<br>VRTA         | Homo sapiens |
| 1 | 1.00 | 1 | 1 | 0     | 0      | 0      | 0.006 | 0      | t | 118491 | LKVGLQVV<br>AVKAP         | Homo sapiens |
| 1 | 1.00 | 1 | 1 | 0     | 0      | 0      | 0.006 | 0      | t | 118275 | ATVLARSI<br>AKEGF         | Homo sapiens |
| 1 | 1.00 | 1 | 1 | 0     | 0      | 0      | 0.006 | 0      | t | 118443 | KAPGFGD<br>NRKNQL         | Homo sapiens |
| 1 | 1.00 | 1 | 1 | 0     | 0      | 0      | 0.006 | 0      | t | 118540 | NPVEIRRG<br>VMLAV         | Homo sapiens |
| 1 | 1.00 | 1 | 1 | 0     | 0      | 0      | 0.006 | 0      | t | 118487 | LEIANAHR<br>KPLVI         | Homo sapiens |
| 1 | 1.00 | 1 | 1 | 0     | 0      | 0      | 0.006 | 0      | t | 118459 | KKVGRKG<br>VITVKD         | Homo sapiens |
| 1 | 1.00 | 1 | 1 | 0     | 0      | 0      | 0.006 | 0      | t | 118490 | LKDYYKNI<br>GAKLV         | Homo sapiens |
| 1 | 1.00 | 1 | 1 | 0     | 0      | 0      | 0.006 | 0      | t | 118313 | EALSTLVL<br>NRLKV         | Homo sapiens |
| 1 | 1.00 | 1 | 1 | 0     | 0      | 0      | 0.006 | 0      | t | 118430 | ISDAMKKV<br>GRKGV         | Homo sapiens |
| 1 | 1.00 | 1 | 1 | 0     | 0      | 0      | 0.006 | 0      | t | 118568 | QKIGIEIKR<br>TLK          | Homo sapiens |

|   |      |   |   |   |   |   |       |   |   |        |                              |                 |
|---|------|---|---|---|---|---|-------|---|---|--------|------------------------------|-----------------|
| 1 | 1.00 | 1 | 1 | 0 | 0 | 0 | 0.006 | 0 | t | 118284 | DAYVLLSE<br>KKISS            | Homo<br>sapiens |
| 1 | 1.00 | 1 | 1 | 0 | 0 | 0 | 0.006 | 0 | t | 94481  | CSNNPTC<br>WAICK             | Homo<br>sapiens |
| 1 | 1.00 | 1 | 1 | 0 | 0 | 0 | 0.006 | 0 | t | 94651  | PTCWAICK<br>RIPN             | Homo<br>sapiens |
| 1 | 1.00 | 1 | 1 | 0 | 0 | 0 | 0.006 | 0 | t | 66933  | TVAEEHVE<br>EPTVAEE          | Homo<br>sapiens |
| 1 | 1.00 | 1 | 1 | 0 | 0 | 0 | 0.006 | 0 | t | 94613  | NNPTCWA<br>ICKRI             | Homo<br>sapiens |
| 1 | 1.00 | 1 | 1 | 0 | 0 | 0 | 0.006 | 0 | t | 94695  | SNNPTCW<br>AICKR             | Homo<br>sapiens |
| 1 | 1.00 | 1 | 1 | 0 | 0 | 0 | 0.006 | 0 | t | 48681  | PNNDFHF<br>EVFNF             | Homo<br>sapiens |
| 1 | 1.00 | 1 | 1 | 0 | 0 | 0 | 0.006 | 0 | t | 54214  | RIPNKKPG<br>KKT              | Homo<br>sapiens |
| 1 | 1.00 | 1 | 1 | 0 | 0 | 0 | 0.006 | 0 | t | 45054  | NNDFHFE<br>VFNFV             | Homo<br>sapiens |
| 1 | 1.00 | 1 | 1 | 0 | 0 | 0 | 0.006 | 0 | t | 42416  | MQTLWDE<br>IMDINKRK          | Homo<br>sapiens |
| 1 | 1.00 | 1 | 1 | 0 | 0 | 0 | 0.006 | 0 | t | 43242  | NANPNAN<br>PNANP             | Homo<br>sapiens |
| 1 | 1.00 | 1 | 1 | 0 | 0 | 0 | 0.006 | 0 | t | 51729  | QNKPPNK<br>PNNDF             | Homo<br>sapiens |
| 1 | 1.00 | 1 | 1 | 0 | 0 | 0 | 0.006 | 0 | t | 44571  | NKPPNKP<br>NNDFH             | Homo<br>sapiens |
| 1 | 1.00 | 1 | 1 | 0 | 0 | 0 | 0.006 | 0 | t | 46895  | PAPQAPY<br>QGYQEPP<br>APQAPY | Homo<br>sapiens |
| 1 | 1.00 | 1 | 1 | 0 | 0 | 0 | 0.006 | 0 | t | 44569  | NKPNNDF<br>HFEVF             | Homo<br>sapiens |
| 1 | 1.00 | 1 | 1 | 0 | 0 | 0 | 0.006 | 0 | t | 49137  | PQTTKPKE<br>VPTT             | Homo<br>sapiens |

|   |      |   |   |       |        |        |        |        |   |        |                              |                          |
|---|------|---|---|-------|--------|--------|--------|--------|---|--------|------------------------------|--------------------------|
| 1 | 1.00 | 1 | 1 | 0     | 0      | 0      | 0.006  | 0      | t | 16103  | FHFEVFNF<br>VPCS             | Homo sapiens             |
| 1 | 1.00 | 1 | 1 | 0     | 0      | 0      | 0.006  | 0      | t | 29965  | KATYEA AV<br>AANNAKN<br>AALT | Homo sapiens(<br>human)  |
| 1 | 1.00 | 1 | 1 | 0     | 0      | 0      | 0.006  | 0      | t | 18588  | GAGGGAG<br>GAGAGGG<br>AGGAGA | Homo sapiens             |
| 1 | 1.00 | 1 | 1 | 0     | 0      | 0      | 0.006  | 0      | t | 23770  | HFEVFNFV<br>PCSI             | Homo sapiens             |
| 1 | 1.00 | 1 | 1 | 0     | 0      | 0      | 0.006  | 0      | t | 27463  | IMDINKRK<br>YDSLK            | Homo sapiens             |
| 1 | 1.00 | 1 | 1 | 0     | 0      | 0      | 0.006  | 0      | t | 32809  | KPNNDFH<br>FEVFN             | Homo sapiens             |
| 1 | 1.00 | 1 | 1 | 0     | 0      | 0      | 0.006  | 0      | t | 32827  | KPPNKPN<br>NDFHF             | Homo sapiens             |
| 1 | 1.00 | 1 | 1 | 0     | 0      | 0      | 0.006  | 0      | t | 1433   | AGAGGGA<br>GGAGAGG<br>GAGGAG | Homo sapiens             |
| 1 | 1.00 | 1 | 1 | 0     | 0      | 0      | 0.006  | 0      | t | 1433   | AGAGGGA<br>GGAGAGG<br>GAGGAG | Homo sapiens             |
| 1 | 1.00 | 1 | 1 | 0     | 0      | 0      | 0.006  | 0      | t | 8275   | DFHFEVFN<br>FVPC             | Homo sapiens             |
| 1 | 1.00 | 1 | 1 | 0.07  | 0.07   | 0.063  | 0.07   | 0.07   | t | 119480 | KQQKTEN<br>GAGDQ             | Homo sapiens             |
| 1 | 1.00 | 1 | 1 | -0.02 | -0.018 | -0.027 | -0.023 | -0.022 | t | 95999  | WDLNAAS<br>AYC               | Homo sapiens             |
| 1 | 1.00 | 1 | 1 | 0.02  | 0.018  | 0.013  | 0.019  | 0.021  | t | 67325  | TYEAALKQ<br>YEADL            | Mus musculus             |
| 1 | 1.00 | 1 | 1 | 0     | -0.004 | -0.008 | -0.001 | 0      | t | 97963  | DVYYAGL<br>NYK               | Oryctolagus<br>cuniculus |
| 1 | 1.00 | 1 | 1 | 0     | -0.002 | -0.008 | -0.001 | 0      | t | 97963  | DVYYAGL<br>NYK               | Mus musculus             |
| 1 | 1.00 | 1 | 1 | 0.04  | 0.042  | 0.03   | 0.037  | 0.04   | t | 159145 | TDAETKAF<br>LKAGDAD          | Homo sapiens             |

|   |      |   |   |       |        |        |        |        |   |        |                             |                       |
|---|------|---|---|-------|--------|--------|--------|--------|---|--------|-----------------------------|-----------------------|
| 1 | 1.00 | 1 | 1 | -0.03 | -0.026 | -0.032 | -0.033 | -0.03  | t | 139943 | VPTWYRA                     | Ovis aries            |
| 1 | 1.00 | 1 | 1 | -0.01 | -0.01  | -0.017 | -0.01  | -0.01  | t | 108998 | FVCGDRG<br>FYFNK            | Mus musculus          |
| 1 | 1.00 | 1 | 1 | -0.01 | -0.01  | -0.02  | -0.004 | -0.008 | t | 52184  | QRAKEALD<br>KYELENH         | Homo sapiens          |
| 1 | 1.00 | 1 | 1 | -0.02 | -0.013 | -0.019 | -0.021 | -0.02  | t | 55193  | RPKPG                       | Gallus gallus         |
| 1 | 1.00 | 1 | 1 | 0.04  | 0.041  | 0.039  | 0.043  | 0.04   | t | 99096  | AGQKQILL<br>DAIDKIA         | Equus caballus        |
| 1 | 1.00 | 1 | 1 | 0.03  | 0.032  | 0.019  | 0.031  | 0.032  | t | 36042  | LGAALLQS                    | Homo sapiens          |
| 1 | 1.00 | 1 | 1 | 0.06  | 0.06   | 0.06   | 0.06   | 0.06   | t | 104181 | PPSLASSS<br>ASQLSAPS<br>LKA | Homo sapiens          |
| 1 | 1.00 | 1 | 1 | 0.03  | 0.032  | 0.026  | 0.027  | 0.028  | t | 58038  | SGFTPEFLE<br>QAFQVD         | Homo sapiens          |
| 1 | 1.00 | 1 | 1 | -0.02 | -0.02  | -0.025 | -0.024 | -0.02  | t | 123442 | LLKDLRKN                    | Homo sapiens          |
| 1 | 1.00 | 1 | 1 | 0.04  | 0.038  | 0.053  | 0.043  | 0.039  | t | 138862 | KFPED                       | Mus musculus          |
| 1 | 1.00 | 1 | 1 | 0.02  | 0.02   | 0.013  | 0.019  | 0.019  | t | 137828 | DVLLAGN<br>AEADR            | Homo sapiens          |
| 1 | 1.00 | 1 | 1 | 0     | -0.003 | 0      | 0.006  | 0      | t | 118970 | PPPGRRP                     | Oryctolagus cuniculus |
| 1 | 1.00 | 1 | 1 | 0     | 0.012  | 0      | 0.006  | 0      | t | 109030 | GAQGPRG<br>E                | Rattus norvegicus     |
| 1 | 1.00 | 1 | 1 | 0     | 0.012  | 0      | 0.006  | 0      | t | 108790 | AQGPRGE<br>P                | Rattus norvegicus     |
| 1 | 1.00 | 1 | 1 | -0.01 | -0.011 | -0.007 | -0.01  | -0.01  | t | 39697  | LSTGLIHL                    | Homo sapiens          |

|   |      |   |   |       |        |        |        |        |   |       |              |                       |
|---|------|---|---|-------|--------|--------|--------|--------|---|-------|--------------|-----------------------|
| 1 | 1.00 | 1 | 1 | 0.02  | 0.018  | 0.022  | 0.019  | 0.02   | t | 79011 | LDPAFG       | Mus musculus          |
| 1 | 1.00 | 1 | 1 | 0     | -0.001 | -0.003 | -0.001 | 0      | t | 38273 | LNLTTWNPTLLG | Bos taurus            |
| 1 | 1.00 | 1 | 1 | -0.05 | -0.05  | -0.05  | -0.05  | -0.052 | t | 25086 | HVSGHRMAW    | Homo sapiens          |
| 1 | 1.00 | 1 | 1 | 0.06  | 0.06   | 0.04   | 0.053  | 0.062  | t | 14006 | ERKDRVED     | Homo sapiens          |
| 1 | 1.00 | 1 | 1 | 0.04  | 0.042  | 0.034  | 0.043  | 0.042  | t | 40077 | LTPCDN       | Homo sapiens          |
| 1 | 1.00 | 1 | 1 | -0.01 | -0.01  | -0.008 | -0.01  | -0.012 | t | 79760 | ASSPDAHVPFCF | Mus musculus          |
| 1 | 1.00 | 1 | 1 | 0.05  | 0.046  | 0.044  | 0.047  | 0.05   | t | 48606 | PNATQPPEL    | Oryctolagus cuniculus |
| 1 | 1.00 | 1 | 1 | 0     | 0.007  | 0      | 0.001  | 0      | t | 66105 | TRTFTSL      | Homo sapiens          |
| 1 | 1.00 | 1 | 1 | 0.03  | 0.028  | 0.03   | 0.029  | 0.03   | t | 29758 | KAAQIYSEP    | Mus musculus          |
| 1 | 1.00 | 1 | 1 | 0.03  | 0.028  | 0.03   | 0.029  | 0.03   | t | 29758 | KAAQIYSEP    | Mus musculus          |
| 1 | 1.00 | 1 | 1 | -0.01 | -0.012 | -0.002 | -0.011 | -0.012 | t | 74674 | YLGLTPM      | Mus musculus          |
| 1 | 1.00 | 1 | 1 | 0.01  | 0.01   | 0.007  | 0.014  | 0.01   | t | 51263 | QKTYMVVDVT   | Homo sapiens          |
| 1 | 1.00 | 1 | 1 | -0.01 | -0.014 | -0.017 | -0.011 | -0.01  | t | 35312 | LDTSNKFA     | Oryctolagus cuniculus |
| 1 | 1.00 | 1 | 1 | 0.01  | 0.01   | 0.002  | 0.01   | 0.012  | t | 43212 | NALSFTNK     | Mus musculus          |

|   |      |   |   |       |        |        |        |        |   |        |                           |                                  |
|---|------|---|---|-------|--------|--------|--------|--------|---|--------|---------------------------|----------------------------------|
| 1 | 1.00 | 1 | 1 | 0.02  | 0.02   | 0.02   | 0.02   | 0.022  | t | 136089 | VPPTPQP                   | Oryctola<br>gus<br>cuniculu<br>s |
| 1 | 1.00 | 1 | 1 | 0     | -0.003 | 0.007  | 0      | -0.003 | t | 49764  | PTRTIGGS<br>QA            | Oryctola<br>gus<br>cuniculu<br>s |
| 1 | 1.00 | 1 | 1 | -0.01 | -0.01  | -0.021 | -0.016 | -0.01  | t | 53152  | RALLGLAV<br>CLFLMALC<br>T | Homo<br>sapiens                  |
| 1 | 1.00 | 1 | 1 | 0.01  | 0.013  | 0.008  | 0.01   | 0.01   | t | 12539  | EIPALTAVE                 | Mus<br>musculu<br>s              |
| 1 | 1.00 | 1 | 1 | -0.05 | -0.076 | -0.054 | -0.053 | -0.052 | t | 106524 | HWR                       | Homo<br>sapiens                  |
| 1 | 1.00 | 1 | 1 | -0.05 | -0.048 | -0.054 | -0.053 | -0.052 | t | 106524 | HWR                       | Homo<br>sapiens                  |
| 1 | 1.00 | 1 | 1 | 0.05  | 0.053  | 0.052  | 0.05   | 0.049  | t | 73601  | YDVDPYAS                  | Mus<br>musculu<br>s              |
| 1 | 1.00 | 1 | 1 | -0.01 | -0.01  | -0.01  | -0.01  | -0.014 | t | 130872 | GSFLTKEP<br>SKLNDRA       | Mus<br>musculu<br>s              |
| 1 | 1.00 | 1 | 1 | 0.02  | 0.02   | 0.018  | 0.02   | 0.019  | t | 144791 | STIDYFQP<br>NNKR          | Sus<br>scrofa                    |
| 1 | 1.00 | 1 | 1 | 0     | -0.002 | -0.005 | -0.001 | 0.001  | t | 141567 | TQDGLYH<br>NKN            | Mus<br>musculu<br>s              |
| 1 | 1.00 | 1 | 1 | 0.01  | 0.01   | 0.005  | 0.01   | 0.01   | t | 23184  | GVTTSLs                   | Homo<br>sapiens                  |
| 1 | 1.00 | 1 | 1 | 0     | -0.002 | -0.002 | -0.001 | 0      | t | 89292  | SYHAGFNY<br>KNGG          | Mus<br>musculu<br>s              |
| 1 | 1.00 | 1 | 1 | 0     | 0      | -0.002 | -0.001 | 0      | t | 89292  | SYHAGFNY<br>KNGG          | Homo<br>sapiens                  |
| 1 | 1.00 | 1 | 1 | 0.03  | 0.03   | 0.03   | 0.03   | 0.03   | t | 125880 | EEMTMQ<br>QAK             | Homo<br>sapiens                  |



|   |      |   |   |       |        |        |        |        |   |        |                              |                                  |
|---|------|---|---|-------|--------|--------|--------|--------|---|--------|------------------------------|----------------------------------|
| 1 | 1.00 | 1 | 1 | 0     | 0      | -0.007 | -0.001 | -0.001 | t | 137892 | HGHGAFR<br>QQFQY             | Homo<br>sapiens                  |
| 1 | 1.00 | 1 | 1 | -0.02 | -0.02  | -0.02  | -0.011 | -0.019 | t | 135642 | CKNKEKCC                     | Homo<br>sapiens                  |
| 1 | 1.00 | 1 | 1 | -0.04 | -0.034 | -0.058 | -0.04  | -0.038 | t | 92565  | EKVTIQN<br>WFR               | Ovis<br>aries                    |
| 1 | 1.00 | 1 | 1 | 0     | -0.002 | -0.005 | 0.001  | 0      | t | 17128  | FNASDSVG<br>QQIKVIP          | Mus<br>musculu<br>s              |
| 1 | 1.00 | 1 | 1 | 0.03  | 0.028  | 0.009  | 0.027  | 0.032  | t | 153829 | ERSVQKLQ<br>KEVDRLED<br>E    | Homo<br>sapiens                  |
| 1 | 1.00 | 1 | 1 | 0     | 0.002  | -0.005 | -0.003 | 0      | t | 17964  | FTGIQIICL<br>A               | Homo<br>sapiens                  |
| 1 | 1.00 | 1 | 1 | 0.01  | 0.01   | 0.005  | 0.017  | 0.01   | t | 118220 | WKFLEHK<br>GPVFAPPY<br>EPLPE | Homo<br>sapiens                  |
| 1 | 1.00 | 1 | 1 | -0.01 | -0.01  | -0.022 | -0.012 | -0.01  | t | 96453  | KFKEAFLR<br>SV               | Homo<br>sapiens(<br>human)       |
| 1 | 1.00 | 1 | 1 | 0.01  | 0.008  | 0.017  | 0.011  | 0.01   | t | 78923  | AFGANS                       | Mus<br>musculu<br>s              |
| 1 | 1.00 | 1 | 1 | 0.02  | 0.018  | 0.019  | 0.02   | 0.019  | t | 95146  | SESPNK                       | Oryctola<br>gus<br>cuniculu<br>s |
| 1 | 1.00 | 1 | 1 | 0     | 0.002  | 0      | -0.003 | -0.002 | t | 59922  | SNTFINNA                     | Homo<br>sapiens                  |
| 1 | 1.00 | 1 | 1 | 0.04  | 0.042  | 0.041  | 0.041  | 0.039  | t | 56386  | RVQYEG                       | Homo<br>sapiens                  |
| 1 | 1.00 | 1 | 1 | -0.01 | -0.01  | -0.01  | -0.01  | -0.013 | t | 72249  | WAP                          | Mus<br>musculu<br>s              |
| 1 | 1.00 | 1 | 1 | 0     | 0.003  | -0.018 | 0      | 0.002  | t | 41537  | MFSGGGG<br>PLSPGGKS          | Mus<br>musculu<br>s              |

|   |      |   |   |       |        |        |        |        |   |        |                             |                                  |
|---|------|---|---|-------|--------|--------|--------|--------|---|--------|-----------------------------|----------------------------------|
| 1 | 1.00 | 1 | 1 | 0.02  | 0.02   | 0.02   | 0.02   | 0.017  | t | 131032 | RDEIESVKE<br>LKDTGKDA<br>VN | Oryctola<br>gus<br>cuniculu<br>s |
| 1 | 1.00 | 1 | 1 | -0.01 | -0.012 | -0.01  | -0.011 | -0.014 | t | 46488  | NVSVSPSPS<br>STPLLY         | Mus<br>musculu<br>s              |
| 1 | 1.00 | 1 | 1 | 0.03  | 0.03   | 0.023  | 0.036  | 0.032  | t | 106990 | VYATRSSA<br>VRLRSSVP        | Homo<br>sapiens                  |
| 1 | 1.00 | 1 | 1 | 0     | -0.004 | -0.005 | -0.003 | -0.002 | t | 130537 | LCENIANH<br>LK              | Oryctola<br>gus<br>cuniculu<br>s |
| 1 | 1.00 | 1 | 1 | 0     | -0.002 | -0.005 | -0.003 | -0.002 | t | 130537 | LCENIANH<br>LK              | Rattus<br>norvegic<br>us         |
| 1 | 1.00 | 1 | 1 | 0     | 0.003  | -0.006 | 0      | 0      | t | 53587  | REMVIITFK<br>S              | Mus<br>musculu<br>s              |
| 1 | 1.00 | 1 | 1 | 0     | 0      | 0      | 0.004  | -0.001 | t | 151101 | AAA                         | Homo<br>sapiens                  |
| 1 | 1.00 | 1 | 1 | 0     | 0      | 0      | 0.004  | -0.001 | t | 151101 | AAA                         | Homo<br>sapiens                  |
| 1 | 1.00 | 1 | 1 | 0     | 0      | 0      | 0.004  | -0.001 | t | 131504 | KATLVCLIS<br>DFYPGAV        | Homo<br>sapiens                  |
| 1 | 1.00 | 1 | 1 | 0     | 0      | 0      | 0.004  | -0.001 | t | 122892 | RSILPYGDS<br>MDRIE          | Homo<br>sapiens                  |
| 1 | 1.00 | 1 | 1 | 0     | 0      | 0      | 0.004  | -0.001 | t | 121542 | LFKPPKYH<br>PDVPYVKR        | Homo<br>sapiens                  |
| 1 | 1.00 | 1 | 1 | 0     | 0      | 0      | 0.004  | -0.001 | t | 117742 | AKAQTD<br>EDLRTLLRY         | Homo<br>sapiens                  |
| 1 | 1.00 | 1 | 1 | 0     | 0      | 0      | 0.004  | -0.001 | t | 131628 | RGYDSYA                     | Homo<br>sapiens                  |
| 1 | 1.00 | 1 | 1 | 0     | 0      | 0      | 0.004  | -0.001 | t | 117773 | CNSRQTD<br>REDELI           | Homo<br>sapiens                  |
| 1 | 1.00 | 1 | 1 | 0     | 0      | 0      | 0.004  | -0.001 | t | 131457 | GSHTRGD                     | Homo<br>sapiens                  |

|   |      |   |   |       |        |        |        |        |   |        |                             |                                  |
|---|------|---|---|-------|--------|--------|--------|--------|---|--------|-----------------------------|----------------------------------|
| 1 | 1.00 | 1 | 1 | 0     | 0      | 0      | 0.004  | -0.001 | t | 131657 | SGLQAEDE<br>ADYYCSSY        | Homo<br>sapiens                  |
| 1 | 1.00 | 1 | 1 | 0     | 0      | 0      | 0.004  | -0.001 | t | 108834 | CKPISGHN<br>SLFWYRQT        | Homo<br>sapiens                  |
| 1 | 1.00 | 1 | 1 | -0.01 | -0.008 | -0.01  | -0.009 | -0.01  | t | 64659  | TKRNTNR                     | Homo<br>sapiens                  |
| 1 | 1.00 | 1 | 1 | 0.06  | 0.06   | 0.051  | 0.06   | 0.06   | t | 135951 | LLESQIATI<br>EQT            | Homo<br>sapiens                  |
| 1 | 1.00 | 1 | 1 | -0.01 | -0.016 | -0.012 | -0.01  | -0.013 | t | 57119  | SCMVCVD<br>RSSLSWS          | Oryctola<br>gus<br>cuniculu<br>s |
| 1 | 1.00 | 1 | 1 | -0.05 | -0.046 | -0.062 | -0.049 | -0.05  | t | 9804   | DPVIDRLY<br>LSSHRGV         | Homo<br>sapiens                  |
| 1 | 1.00 | 1 | 1 | 0     | -0.002 | -0.003 | 0.003  | 0.002  | t | 45573  | NQLAGRM<br>IP               | Anas<br>platyrhy<br>nchos        |
| 1 | 1.00 | 1 | 1 | 0.02  | 0.02   | 0.013  | 0.02   | 0.02   | t | 78630  | DYGEILTEK<br>VEDLYKGV<br>LL | Mus<br>musculu<br>s              |
| 1 | 1.00 | 1 | 1 | 0.03  | 0.03   | 0.019  | 0.03   | 0.032  | t | 111772 | SGFSITTST<br>DTTPA          | Oryctola<br>gus<br>cuniculu<br>s |
| 1 | 1.00 | 1 | 1 | -0.02 | -0.02  | -0.02  | -0.014 | -0.02  | t | 118275 | ATVLARSI<br>AKEGF           | Homo<br>sapiens                  |
| 1 | 1.00 | 1 | 1 | -0.05 | -0.057 | -0.041 | -0.043 | -0.05  | t | 108867 | DKSRWQE                     | Homo<br>sapiens                  |
| 1 | 1.00 | 1 | 1 | -0.04 | -0.042 | -0.052 | -0.043 | -0.04  | t | 95564  | LPMHIR                      | Homo<br>sapiens                  |
| 1 | 1.00 | 1 | 1 | -0.04 | -0.04  | -0.04  | -0.04  | -0.041 | t | 119607 | KTHTCPPC                    | Homo<br>sapiens                  |
| 1 | 1.00 | 1 | 1 | -0.04 | -0.037 | -0.04  | -0.04  | -0.04  | t | 134017 | CFHQGKEY<br>APG             | Mus<br>musculu<br>s              |
| 1 | 1.00 | 1 | 1 | 0.01  | 0.012  | 0.005  | 0.013  | 0.01   | t | 159048 | PKARELTD<br>AETKAFL         | Homo<br>sapiens                  |

|   |      |   |   |       |        |        |        |        |   |        |                              |                    |
|---|------|---|---|-------|--------|--------|--------|--------|---|--------|------------------------------|--------------------|
| 1 | 1.00 | 1 | 1 | 0     | 0      | 0      | 0.004  | 0.002  | t | 121713 | PLTALLRN                     | Homo sapiens       |
| 1 | 1.00 | 1 | 1 | 0.04  | 0.04   | 0.04   | 0.04   | 0.04   | t | 135959 | LTRAYAKD<br>VKFG             | Homo sapiens       |
| 1 | 1.00 | 1 | 1 | 0.03  | 0.03   | 0.025  | 0.023  | 0.028  | t | 142383 | AEQIQAE<br>LQKVKA            | Homo sapiens       |
| 1 | 1.00 | 1 | 1 | -0.02 | -0.02  | -0.02  | -0.014 | -0.02  | t | 158775 | FNFKTFFH<br>TIGFASK          | Homo sapiens       |
| 1 | 1.00 | 1 | 1 | -0.01 | -0.012 | -0.008 | -0.007 | -0.011 | t | 25180  | HYLVQSP<br>PW                | Mus musculus       |
| 1 | 1.00 | 1 | 1 | -0.01 | -0.012 | -0.01  | -0.013 | -0.011 | t | 96526  | LAANNPA                      | Mus musculus       |
| 1 | 1.00 | 1 | 1 | 0.01  | 0.013  | 0.007  | 0.01   | 0.01   | t | 46235  | NTQIYTIN<br>DK               | Mus musculus       |
| 1 | 1.00 | 1 | 1 | 0     | 0.002  | -0.002 | 0.001  | 0.001  | t | 23685  | HEGKAYFP<br>REGV             | Homo sapiens       |
| 1 | 1.00 | 1 | 1 | 0.01  | -0.003 | 0.005  | 0.01   | 0.011  | t | 19096  | GDRADGQ<br>PA                | Aotus griseimembra |
| 1 | 1.00 | 1 | 1 | 0.02  | 0.026  | 0.008  | 0.021  | 0.02   | t | 48643  | PNGRASD<br>TAGQ              | Equus caballus     |
| 1 | 1.00 | 1 | 1 | 0.02  | 0.02   | 0.026  | 0.02   | 0.02   | t | 34238  | KVVLPE                       | Homo sapiens       |
| 1 | 1.00 | 1 | 1 | -0.01 | -0.012 | -0.019 | -0.011 | -0.01  | t | 133590 | GMVDGW<br>YG                 | Mus musculus       |
| 1 | 1.00 | 1 | 1 | -0.01 | -0.01  | -0.008 | -0.01  | -0.012 | t | 79755  | AMKPYEV<br>TPTRM             | Mus musculus       |
| 1 | 1.00 | 1 | 1 | 0.06  | 0.06   | 0.06   | 0.061  | 0.06   | t | 78748  | MISGPCPK<br>DGQPSLVL<br>QSSS | Homo sapiens       |

|   |      |   |   |       |        |        |        |        |   |        |                              |                                  |
|---|------|---|---|-------|--------|--------|--------|--------|---|--------|------------------------------|----------------------------------|
| 1 | 1.00 | 1 | 1 | -0.04 | -0.038 | -0.048 | -0.039 | -0.04  | t | 12531  | EINHVQD<br>HALPKENI          | Homo<br>sapiens                  |
| 1 | 1.00 | 1 | 1 | 0.01  | 0.012  | 0.008  | 0.011  | 0.006  | t | 9511   | DNNDSGH<br>STGADTG           | Homo<br>sapiens                  |
| 1 | 1.00 | 1 | 1 | -0.01 | -0.007 | -0.014 | -0.01  | -0.008 | t | 39085  | LRFGSK                       | Mus<br>musculu<br>s              |
| 1 | 1.00 | 1 | 1 | 0.02  | 0.013  | 0.013  | 0.027  | 0.022  | t | 136153 | CLEEKVCS<br>LLEPLGLQ<br>CTFI | Homo<br>sapiens                  |
| 1 | 1.00 | 1 | 1 | 0.01  | 0.01   | 0.004  | 0.01   | 0.01   | t | 22063  | GRGYNVSS<br>IVTMTSQ          | Homo<br>sapiens                  |
| 1 | 1.00 | 1 | 1 | 0.02  | 0.027  | 0.027  | 0.021  | 0.018  | t | 136302 | GALIYTPEK<br>YTI             | Gallus<br>gallus                 |
| 1 | 1.00 | 1 | 1 | 0.01  | 0.013  | 0.011  | 0.01   | 0.009  | t | 59757  | SMSYTWT<br>GA                | Mus<br>musculu<br>s              |
| 1 | 1.00 | 1 | 1 | 0.02  | 0.016  | 0.013  | 0.017  | 0.019  | t | 135445 | AKAAQFG                      | Oryctola<br>gus<br>cuniculu<br>s |
| 1 | 1.00 | 1 | 1 | -0.01 | -0.01  | -0.01  | -0.014 | -0.01  | t | 139511 | GPM                          | Homo<br>sapiens                  |
| 1 | 1.00 | 1 | 1 | -0.03 | -0.03  | -0.03  | -0.03  | -0.03  | t | 55382  | RPYCWHP<br>PP                | Homo<br>sapiens                  |
| 1 | 1.00 | 1 | 1 | -0.02 | -0.02  | -0.027 | -0.01  | -0.018 | t | 106990 | VYATRSSA<br>VRLRSSVP         | Homo<br>sapiens                  |
| 1 | 1.00 | 1 | 1 | 0.04  | 0.046  | 0.043  | 0.04   | 0.04   | t | 141046 | KEVTVVTT<br>S                | Ovis<br>aries                    |
| 1 | 1.00 | 1 | 1 | -0.01 | -0.01  | -0.017 | -0.01  | -0.01  | t | 122900 | SEVATEVP<br>FRLMH            | Rattus<br>norvegic<br>us         |
| 1 | 1.00 | 1 | 1 | -0.03 | -0.025 | -0.043 | -0.033 | -0.032 | t | 157808 | QQDRHQK<br>IRHFR             | Homo<br>sapiens                  |

|   |      |   |   |       |        |        |        |        |   |        |                       |                       |
|---|------|---|---|-------|--------|--------|--------|--------|---|--------|-----------------------|-----------------------|
| 1 | 1.00 | 1 | 1 | -0.01 | -0.01  | -0.013 | -0.01  | -0.01  | t | 60914  | SSATK                 | Homo sapiens          |
| 1 | 1.00 | 1 | 1 | 0.03  | 0.028  | 0.033  | 0.033  | 0.028  | t | 33222  | KRTISIWG<br>T         | Mus musculus          |
| 1 | 1.00 | 1 | 1 | 0.03  | 0.033  | 0.03   | 0.03   | 0.031  | t | 14951  | EWSPCSVT<br>CGK       | Mus musculus          |
| 1 | 1.00 | 1 | 1 | 0.05  | 0.053  | 0.053  | 0.05   | 0.048  | t | 139732 | ERETQKAK<br>G         | Mus musculus          |
| 1 | 1.00 | 1 | 1 | 0     | -0.004 | -0.003 | 0.001  | 0      | t | 22718  | GTK                   | Bos taurus            |
| 1 | 1.00 | 1 | 1 | 0.04  | 0.04   | 0.04   | 0.04   | 0.039  | t | 107107 | EAIQP                 | Rattus norvegicus     |
| 1 | 1.00 | 1 | 1 | 0.02  | 0.02   | 0.02   | 0.02   | 0.019  | t | 105566 | VFFAE                 | Mus musculus          |
| 1 | 1.00 | 1 | 1 | 0.02  | 0.02   | 0.02   | 0.02   | 0.02   | t | 123091 | DLPNLPYYI             | Ovis aries            |
| 1 | 1.00 | 1 | 1 | 0.01  | 0.008  | 0.006  | 0.009  | 0.009  | t | 59757  | SMSYTW<br>TGA         | Mus musculus          |
| 1 | 1.00 | 1 | 1 | 0.02  | 0.022  | 0.004  | 0.026  | 0.026  | t | 134684 | GSLPQKSQ<br>RDEN      | Rattus norvegicus     |
| 1 | 1.00 | 1 | 1 | -0.01 | -0.01  | -0.01  | -0.01  | -0.011 | t | 60795  | SRSERR                | Homo sapiens          |
| 1 | 1.00 | 1 | 1 | -0.04 | -0.04  | -0.04  | -0.04  | -0.042 | t | 101716 | HQPTPAA               | Mus musculus          |
| 1 | 1.00 | 1 | 1 | 0     | 0      | 0      | 0      | 0      | t | 47189  | PDREVL<br>YRE         | Homo sapiens          |
| 1 | 1.00 | 1 | 1 | -0.01 | -0.014 | -0.019 | -0.007 | -0.01  | t | 71653  | VVERLG<br>DYLLEQGM    | Oryctolagus cuniculus |
| 1 | 1.00 | 1 | 1 | 0.04  | 0.042  | 0.032  | 0.041  | 0.04   | t | 7383   | CYGV<br>SATKLNDLCFSNV | Homo sapiens          |

|   |      |   |   |       |        |        |        |        |   |        |                           |                                  |
|---|------|---|---|-------|--------|--------|--------|--------|---|--------|---------------------------|----------------------------------|
| 1 | 1.00 | 1 | 1 | 0.04  | 0.042  | 0.032  | 0.041  | 0.04   | t | 7383   | CYGVSATK<br>LNDLCFSN<br>V | Homo<br>sapiens                  |
| 1 | 1.00 | 1 | 1 | -0.04 | -0.036 | -0.04  | -0.043 | -0.043 | t | 115574 | YWLAHKA<br>LCS            | Homo<br>sapiens                  |
| 1 | 1.00 | 1 | 1 | 0.01  | 0.01   | 0.01   | 0.01   | 0.009  | t | 99209  | ELFTNR                    | Oryctola<br>gus<br>cuniculu<br>s |
| 1 | 1.00 | 1 | 1 | 0.01  | 0.012  | 0.003  | 0.007  | 0.007  | t | 141640 | ETTKQVQ<br>RYRARLSP       | Homo<br>sapiens                  |
| 1 | 1.00 | 1 | 1 | 0.06  | 0.063  | 0.062  | 0.06   | 0.058  | t | 121024 | VDEVNQIV<br>ET            | Mus<br>musculu<br>s              |
| 1 | 1.00 | 1 | 1 | 0     | 0      | 0      | 0      | 0      | t | 78825  | SFPPSPG<br>PSCPT          | Homo<br>sapiens                  |
| 1 | 1.00 | 1 | 1 | 0     | -0.004 | -0.004 | 0.003  | -0.001 | t | 108327 | DTYDALH<br>MQTLAPR        | Oryctola<br>gus<br>cuniculu<br>s |
| 1 | 1.00 | 1 | 1 | 0.07  | 0.07   | 0.07   | 0.07   | 0.07   | t | 138854 | GAGAGAG<br>A              | Mus<br>musculu<br>s              |
| 1 | 1.00 | 1 | 1 | 0.01  | 0.01   | 0.009  | 0.01   | 0.012  | t | 105828 | GKDLESIK                  | Oryctola<br>gus<br>cuniculu<br>s |
| 1 | 1.00 | 1 | 1 | -0.02 | -0.023 | -0.026 | -0.02  | -0.022 | t | 141580 | YIGVAPRK<br>AIPA          | Oryctola<br>gus<br>cuniculu<br>s |
| 1 | 1.00 | 1 | 1 | 0.01  | 0.014  | 0.015  | 0.013  | 0.009  | t | 115608 | GRTELLKD<br>AIGE          | Homo<br>sapiens                  |
| 1 | 1.00 | 1 | 1 | 0.01  | 0.024  | 0.015  | 0.013  | 0.009  | t | 115608 | GRTELLKD<br>AIGE          | Homo<br>sapiens                  |
| 1 | 1.00 | 1 | 1 | 0.03  | 0.03   | 0.02   | 0.03   | 0.03   | t | 57542  | SELSQLS                   | Mus<br>musculu<br>s              |
| 1 | 1.00 | 1 | 1 | 0.03  | 0.03   | 0.02   | 0.03   | 0.03   | t | 57542  | SELSQLS                   | Mus<br>musculu<br>s              |

|   |      |   |   |       |        |        |        |        |   |        |                           |                                  |
|---|------|---|---|-------|--------|--------|--------|--------|---|--------|---------------------------|----------------------------------|
| 1 | 1.00 | 1 | 1 | 0.02  | 0.018  | 0.02   | 0.019  | 0.02   | t | 46424  | NVLQNFS<br>VF             | Aotus<br>sp.                     |
| 1 | 1.00 | 1 | 1 | -0.04 | -0.038 | -0.04  | -0.033 | -0.042 | t | 134763 | PSLGASSH<br>QHSRRRQ       | Homo<br>sapiens                  |
| 1 | 1.00 | 1 | 1 | 0.01  | 0.01   | 0.01   | 0.01   | 0.01   | t | 30333  | KEDVPSE<br>R YL           | Homo<br>sapiens                  |
| 1 | 1.00 | 1 | 1 | 0     | 0.003  | 0.002  | 0      | -0.001 | t | 120014 | LAAQG<br>AR VYA           | Mus<br>musculu<br>s              |
| 1 | 1.00 | 1 | 1 | 0.03  | 0.03   | 0.03   | 0.03   | 0.03   | t | 78403  | GLQNDF                    | Mus<br>musculu<br>s              |
| 1 | 1.00 | 1 | 1 | 0.01  | 0.013  | 0.01   | 0.01   | 0.01   | t | 41233  | MDIDPYKE<br>FGA           | Mus<br>musculu<br>s              |
| 1 | 1.00 | 1 | 1 | 0.02  | 0.02   | 0.02   | 0.024  | 0.02   | t | 115626 | LKDAIGEG<br>KVTL          | Homo<br>sapiens                  |
| 1 | 1.00 | 1 | 1 | 0.03  | 0.032  | 0.016  | 0.027  | 0.03   | t | 138844 | EVVETDGK<br>KKECSS        | Homo<br>sapiens                  |
| 1 | 1.00 | 1 | 1 | 0.04  | 0.042  | 0.04   | 0.043  | 0.039  | t | 117948 | KFVETPGQ<br>KYKETDL       | Homo<br>sapiens                  |
| 1 | 1.00 | 1 | 1 | 0.03  | 0.03   | 0.028  | 0.03   | 0.028  | t | 99935  | DFSQTATL<br>TNTN          | Oryctola<br>gus<br>cuniculu<br>s |
| 1 | 1.00 | 1 | 1 | 0     | 0.006  | -0.005 | 0      | 0      | t | 35282  | LDRLVESA<br>KREMAQK<br>LA | Equus<br>caballus                |
| 1 | 1.00 | 1 | 1 | 0.1   | 0.1    | 0.1    | 0.1    | 0.1    | t | 116005 | TTEAVEST<br>VA            | Homo<br>sapiens                  |
| 1 | 1.00 | 1 | 1 | -0.02 | -0.018 | -0.02  | -0.017 | -0.02  | t | 40724  | LYCGGPM<br>FNSKGAQ        | Homo<br>sapiens                  |
| 1 | 1.00 | 1 | 1 | 0.01  | 0.01   | 0.003  | 0.01   | 0.011  | t | 36406  | LHNNEAG<br>RTTVFS         | Mus<br>musculu<br>s              |
| 1 | 1.00 | 1 | 1 | 0.04  | 0.038  | 0.035  | 0.037  | 0.04   | t | 70812  | VRRIEGGE                  | Anas<br>platyrhy<br>nchos        |



|   |      |   |   |       |        |       |        |        |   |        |                              |                                  |
|---|------|---|---|-------|--------|-------|--------|--------|---|--------|------------------------------|----------------------------------|
| 1 | 1.00 | 1 | 1 | 0.01  | 0.013  | 0.005 | 0.01   | 0.01   | t | 120527 | FEYMNKLE<br>KG               | Mus<br>musculu<br>s              |
| 1 | 1.00 | 1 | 1 | 0.05  | 0.052  | 0.052 | 0.057  | 0.05   | t | 122551 | RGQYLQL<br>QELECDW<br>EEVTTS | Homo<br>sapiens                  |
| 1 | 1.00 | 1 | 1 | -0.03 | -0.028 | -0.03 | -0.023 | -0.03  | t | 131075 | SQSYPEPA<br>RGSVPMP          | Homo<br>sapiens                  |
| 1 | 1.00 | 1 | 1 | 0     | 0      | 0     | 0      | 0      | t | 120862 | PDVKS AIE<br>GV              | Rattus<br>norvegic<br>us         |
| 1 | 1.00 | 1 | 1 | 0.02  | 0.021  | 0.019 | 0.023  | 0.019  | t | 99341  | ILSVDCTSE<br>EMNAFL          | Equus<br>caballus                |
| 1 | 1.00 | 1 | 1 | 0     | 0      | 0     | 0      | -0.003 | t | 142913 | MVLNEGT<br>SGTA              | Oryctola<br>gus<br>cuniculu<br>s |
| 1 | 1.00 | 1 | 1 | 0     | 0      | 0     | 0      | -0.003 | t | 134767 | QDPYVKE<br>AENLK KYF<br>NAG  | Mus<br>musculu<br>s              |
| 1 | 1.00 | 1 | 1 | 0     | 0      | 0     | 0      | -0.003 | t | 134654 | DQQNQFQ<br>KAET              | Mus<br>musculu<br>s              |
| 1 | 1.00 | 1 | 1 | 0     | 0      | 0     | 0      | -0.003 | t | 134699 | KDRHDFG<br>F                 | Mus<br>musculu<br>s              |
| 1 | 1.00 | 1 | 1 | 0     | 0      | 0     | 0      | -0.003 | t | 139029 | DLQVLT                       | Mus<br>musculu<br>s              |
| 1 | 1.00 | 1 | 1 | 0     | 0      | 0     | 0      | -0.003 | t | 134702 | KEKKYS                       | Mus<br>musculu<br>s              |
| 1 | 1.00 | 1 | 1 | 0     | 0      | 0     | 0      | -0.003 | t | 146337 | IPEEIKQL                     | Mus<br>musculu<br>s              |
| 1 | 1.00 | 1 | 1 | 0     | 0      | 0     | 0      | -0.003 | t | 151713 | RGEARK                       | Homo<br>sapiens                  |
| 1 | 1.00 | 1 | 1 | 0     | 0      | 0     | 0      | -0.003 | t | 140459 | EHWSHD<br>MFSPGD             | Mus<br>musculu<br>s              |

|   |      |   |   |   |   |   |   |        |   |        |                              |                                  |
|---|------|---|---|---|---|---|---|--------|---|--------|------------------------------|----------------------------------|
| 1 | 1.00 | 1 | 1 | 0 | 0 | 0 | 0 | -0.003 | t | 134148 | LQSDQEEI<br>DY               | Oryctola<br>gus<br>cuniculu<br>s |
| 1 | 1.00 | 1 | 1 | 0 | 0 | 0 | 0 | -0.003 | t | 136353 | HGNAEVH<br>ASFFDIGG<br>S     | Oryctola<br>gus<br>cuniculu<br>s |
| 1 | 1.00 | 1 | 1 | 0 | 0 | 0 | 0 | -0.003 | t | 134804 | TIFILFCCSK<br>EKRRKKQA<br>AT | Mus<br>musculu<br>s              |
| 1 | 1.00 | 1 | 1 | 0 | 0 | 0 | 0 | -0.003 | t | 150200 | FGEHKQEK<br>DLEYGAC          | Mus<br>musculu<br>s              |
| 1 | 1.00 | 1 | 1 | 0 | 0 | 0 | 0 | -0.003 | t | 137432 | NHNYPPLS<br>LLTF             | Mus<br>musculu<br>s              |
| 1 | 1.00 | 1 | 1 | 0 | 0 | 0 | 0 | -0.003 | t | 140460 | EKLKHSM                      | Mus<br>musculu<br>s              |
| 1 | 1.00 | 1 | 1 | 0 | 0 | 0 | 0 | -0.003 | t | 134669 | FGFPQE                       | Mus<br>musculu<br>s              |
| 1 | 1.00 | 1 | 1 | 0 | 0 | 0 | 0 | -0.003 | t | 134770 | QIFNLFSTK<br>DSSAA           | Mus<br>musculu<br>s              |
| 1 | 1.00 | 1 | 1 | 0 | 0 | 0 | 0 | -0.003 | t | 138162 | EKKYSPCA<br>WEVVRAE          | Mus<br>musculu<br>s              |
| 1 | 1.00 | 1 | 1 | 0 | 0 | 0 | 0 | -0.003 | t | 134037 | DYDDTIS                      | Oryctola<br>gus<br>cuniculu<br>s |
| 1 | 1.00 | 1 | 1 | 0 | 0 | 0 | 0 | -0.003 | t | 118877 | LDVEQLGI<br>PEQEYSC          | Mus<br>musculu<br>s              |
| 1 | 1.00 | 1 | 1 | 0 | 0 | 0 | 0 | -0.003 | t | 128955 | ILFSVFD                      | MD                               |
| 1 | 1.00 | 1 | 1 | 0 | 0 | 0 | 0 | -0.003 | t | 133611 | IVSYLCDLA<br>PEAPPPTL<br>PP  | Mus<br>musculu<br>s              |
| 1 | 1.00 | 1 | 1 | 0 | 0 | 0 | 0 | -0.003 | t | 130757 | CQEPGGL<br>VVPPTDAP          | Mus<br>musculu<br>s              |
| 1 | 1.00 | 1 | 1 | 0 | 0 | 0 | 0 | -0.003 | t | 130518 | ITQSTQSF<br>NDFTRVV          | Mus<br>musculu<br>s              |

|   |      |   |   |   |   |   |   |        |   |        |                              |                                  |
|---|------|---|---|---|---|---|---|--------|---|--------|------------------------------|----------------------------------|
| 1 | 1.00 | 1 | 1 | 0 | 0 | 0 | 0 | -0.003 | t | 122780 | GQELKNP<br>QEETLQAF<br>DSHYD | Oryctola<br>gus<br>cuniculu<br>s |
| 1 | 1.00 | 1 | 1 | 0 | 0 | 0 | 0 | -0.003 | t | 130605 | SCRLFGKT<br>YLCH             | Mus<br>musculu<br>s              |
| 1 | 1.00 | 1 | 1 | 0 | 0 | 0 | 0 | -0.003 | t | 119187 | GNAEVHA<br>SFFDIGG           | Oryctola<br>gus<br>cuniculu<br>s |
| 1 | 1.00 | 1 | 1 | 0 | 0 | 0 | 0 | -0.003 | t | 130583 | QCQTFGK<br>TMLCT             | Mus<br>musculu<br>s              |
| 1 | 1.00 | 1 | 1 | 0 | 0 | 0 | 0 | -0.003 | t | 134028 | DDTIS                        | Mus<br>musculu<br>s              |
| 1 | 1.00 | 1 | 1 | 0 | 0 | 0 | 0 | -0.003 | t | 131100 | TDSEMDV<br>VRFD              | Mus<br>musculu<br>s              |
| 1 | 1.00 | 1 | 1 | 0 | 0 | 0 | 0 | -0.003 | t | 130473 | ECIVYGKT<br>ALCT             | Mus<br>musculu<br>s              |
| 1 | 1.00 | 1 | 1 | 0 | 0 | 0 | 0 | -0.003 | t | 125610 | YYVFFEEQ<br>EDEIIGFG<br>QELK | Oryctola<br>gus<br>cuniculu<br>s |
| 1 | 1.00 | 1 | 1 | 0 | 0 | 0 | 0 | -0.003 | t | 120109 | NIHPKAPI<br>WGIITSNF         | Rattus<br>norvegic<br>us         |
| 1 | 1.00 | 1 | 1 | 0 | 0 | 0 | 0 | -0.003 | t | 131967 | LRLDCRHE<br>N                | Mus<br>musculu<br>s              |
| 1 | 1.00 | 1 | 1 | 0 | 0 | 0 | 0 | -0.003 | t | 125441 | HPLTCDDP<br>RFQ              | Oryctola<br>gus<br>cuniculu<br>s |
| 1 | 1.00 | 1 | 1 | 0 | 0 | 0 | 0 | -0.003 | t | 133707 | STRKEEKQ<br>RNGT             | Mus<br>musculu<br>s              |
| 1 | 1.00 | 1 | 1 | 0 | 0 | 0 | 0 | -0.003 | t | 125127 | LDPENLTL                     | Mus<br>musculu<br>s              |
| 1 | 1.00 | 1 | 1 | 0 | 0 | 0 | 0 | -0.003 | t | 134017 | CFHQGKEY<br>APG              | Mus<br>musculu<br>s              |
| 1 | 1.00 | 1 | 1 | 0 | 0 | 0 | 0 | -0.003 | t | 129973 | SPRSFQKK<br>T                | Oryctola<br>gus<br>cuniculu<br>s |

|   |      |   |   |   |        |   |   |        |   |        |                             |                                  |
|---|------|---|---|---|--------|---|---|--------|---|--------|-----------------------------|----------------------------------|
| 1 | 1.00 | 1 | 1 | 0 | 0      | 0 | 0 | -0.003 | t | 124713 | SGEQPSDE<br>QPSGEHG         | Mus<br>musculu<br>s              |
| 1 | 1.00 | 1 | 1 | 0 | 0      | 0 | 0 | -0.003 | t | 125004 | DAPDTDW<br>CDSIP            | Mus<br>musculu<br>s              |
| 1 | 1.00 | 1 | 1 | 0 | 0      | 0 | 0 | -0.003 | t | 131128 | VEMKKED<br>FDIYDEDE         | Mus<br>musculu<br>s              |
| 1 | 1.00 | 1 | 1 | 0 | 0      | 0 | 0 | -0.003 | t | 130787 | EDFDIYDE<br>DE              | Mus<br>musculu<br>s              |
| 1 | 1.00 | 1 | 1 | 0 | 0      | 0 | 0 | -0.003 | t | 125015 | DNESSYSR<br>GFDMTYT<br>E    | Mus<br>musculu<br>s              |
| 1 | 1.00 | 1 | 1 | 0 | 0      | 0 | 0 | -0.003 | t | 125021 | DWC                         | Mus<br>musculu<br>s              |
| 1 | 1.00 | 1 | 1 | 0 | 0      | 0 | 0 | -0.003 | t | 124925 | YYVFFEEQ<br>EDEIIGF         | Oryctola<br>gus<br>cuniculu<br>s |
| 1 | 1.00 | 1 | 1 | 0 | 0      | 0 | 0 | -0.003 | t | 126201 | GYKEKSKF<br>QDTHNNA         | Oryctola<br>gus<br>cuniculu<br>s |
| 1 | 1.00 | 1 | 1 | 0 | 0      | 0 | 0 | -0.003 | t | 124588 | PQEETLQA<br>FDSHYDYT        | Oryctola<br>gus<br>cuniculu<br>s |
| 1 | 1.00 | 1 | 1 | 0 | -0.003 | 0 | 0 | -0.003 | t | 131128 | VEMKKED<br>FDIYDEDE         | Oryctola<br>gus<br>cuniculu<br>s |
| 1 | 1.00 | 1 | 1 | 0 | 0      | 0 | 0 | -0.003 | t | 130912 | KADILPEM<br>NSMRADR<br>M    | Mus<br>musculu<br>s              |
| 1 | 1.00 | 1 | 1 | 0 | 0      | 0 | 0 | -0.003 | t | 125415 | FSPDGKPC<br>TPPALNCY<br>W   | Mus<br>musculu<br>s              |
| 1 | 1.00 | 1 | 1 | 0 | 0      | 0 | 0 | -0.003 | t | 133551 | EAPPPTLP<br>PDMAQVT<br>VGPG | Mus<br>musculu<br>s              |
| 1 | 1.00 | 1 | 1 | 0 | 0      | 0 | 0 | -0.003 | t | 129978 | SQFIIMY                     | MD                               |
| 1 | 1.00 | 1 | 1 | 0 | 0      | 0 | 0 | -0.003 | t | 130916 | KEDFDIYD<br>EDE             | Mus<br>musculu<br>s              |

|   |      |   |   |   |   |   |   |        |   |        |                              |                                  |
|---|------|---|---|---|---|---|---|--------|---|--------|------------------------------|----------------------------------|
| 1 | 1.00 | 1 | 1 | 0 | 0 | 0 | 0 | -0.003 | t | 119538 | VEDGECYI<br>QF               | Oryctola<br>gus<br>cuniculu<br>s |
| 1 | 1.00 | 1 | 1 | 0 | 0 | 0 | 0 | -0.003 | t | 122842 | LLDLPRDL<br>GGMGCSS<br>PPCE  | Oryctola<br>gus<br>cuniculu<br>s |
| 1 | 1.00 | 1 | 1 | 0 | 0 | 0 | 0 | -0.003 | t | 123849 | WQDE                         | Mus<br>musculu<br>s              |
| 1 | 1.00 | 1 | 1 | 0 | 0 | 0 | 0 | -0.003 | t | 131217 | EDISAYLL                     | Mus<br>musculu<br>s              |
| 1 | 1.00 | 1 | 1 | 0 | 0 | 0 | 0 | -0.003 | t | 130590 | RCKTFGKT<br>TLCS             | Mus<br>musculu<br>s              |
| 1 | 1.00 | 1 | 1 | 0 | 0 | 0 | 0 | -0.003 | t | 119322 | QRVFKEKV<br>DTKAPEPP         | Mus<br>musculu<br>s              |
| 1 | 1.00 | 1 | 1 | 0 | 0 | 0 | 0 | -0.003 | t | 130610 | SMCMHG<br>GAYCFP             | Mus<br>musculu<br>s              |
| 1 | 1.00 | 1 | 1 | 0 | 0 | 0 | 0 | -0.003 | t | 113365 | EHPVTGC<br>GERTEGRC<br>LHYTV | Mus<br>musculu<br>s              |
| 1 | 1.00 | 1 | 1 | 0 | 0 | 0 | 0 | -0.003 | t | 110733 | VGENVPD<br>DLYIKGSG          | Mus<br>musculu<br>s              |
| 1 | 1.00 | 1 | 1 | 0 | 0 | 0 | 0 | -0.003 | t | 113365 | EHPVTGC<br>GERTEGRC<br>LHYTV | Mus<br>musculu<br>s              |
| 1 | 1.00 | 1 | 1 | 0 | 0 | 0 | 0 | -0.003 | t | 117235 | SS                           | Mus<br>musculu<br>s              |
| 1 | 1.00 | 1 | 1 | 0 | 0 | 0 | 0 | -0.003 | t | 99849  | VNSTEAET<br>I                | Homo<br>sapiens                  |
| 1 | 1.00 | 1 | 1 | 0 | 0 | 0 | 0 | -0.003 | t | 99975  | EEKELLKRI<br>Q               | Mus<br>musculu<br>s              |
| 1 | 1.00 | 1 | 1 | 0 | 0 | 0 | 0 | -0.003 | t | 110385 | QLYKTCKQ<br>AGTCPPDII<br>PKV | Oryctola<br>gus<br>cuniculu<br>s |
| 1 | 1.00 | 1 | 1 | 0 | 0 | 0 | 0 | -0.003 | t | 116677 | ASATQLYK<br>TCKQAGT<br>CPPD  | Mus<br>musculu<br>s              |
| 1 | 1.00 | 1 | 1 | 0 | 0 | 0 | 0 | -0.003 | t | 103998 | IVKWDRD<br>M                 | Mus<br>musculu<br>s              |

|   |      |   |   |   |   |   |   |        |   |        |                          |                                  |
|---|------|---|---|---|---|---|---|--------|---|--------|--------------------------|----------------------------------|
| 1 | 1.00 | 1 | 1 | 0 | 0 | 0 | 0 | -0.003 | t | 99945  | DIRDSLSEE<br>E           | Mus<br>musculu<br>s              |
| 1 | 1.00 | 1 | 1 | 0 | 0 | 0 | 0 | -0.003 | t | 104443 | DAEFRHDS<br>GYE          | Homo<br>sapiens                  |
| 1 | 1.00 | 1 | 1 | 0 | 0 | 0 | 0 | -0.003 | t | 100153 | INDQIKFII<br>N           | Mus<br>musculu<br>s              |
| 1 | 1.00 | 1 | 1 | 0 | 0 | 0 | 0 | -0.003 | t | 99210  | ELFTNRW<br>NLQSLL        | Oryctola<br>gus<br>cuniculu<br>s |
| 1 | 1.00 | 1 | 1 | 0 | 0 | 0 | 0 | -0.003 | t | 102510 | HHQKLVFF<br>AEDVGSN<br>K | Mus<br>musculu<br>s              |
| 1 | 1.00 | 1 | 1 | 0 | 0 | 0 | 0 | -0.003 | t | 117195 | DT                       | Mus<br>musculu<br>s              |
| 1 | 1.00 | 1 | 1 | 0 | 0 | 0 | 0 | -0.003 | t | 106322 | DAEFRHDS<br>G            | Oryctola<br>gus<br>cuniculu<br>s |
| 1 | 1.00 | 1 | 1 | 0 | 0 | 0 | 0 | -0.003 | t | 98822  | IEAGAIGFK<br>IHEDWG      | Mus<br>musculu<br>s              |
| 1 | 1.00 | 1 | 1 | 0 | 0 | 0 | 0 | -0.003 | t | 100777 | DIDFLIEIE<br>RLGQDL      | Oryctola<br>gus<br>cuniculu<br>s |
| 1 | 1.00 | 1 | 1 | 0 | 0 | 0 | 0 | -0.003 | t | 61394  | SSTKNLIY                 | Mus<br>musculu<br>s              |
| 1 | 1.00 | 1 | 1 | 0 | 0 | 0 | 0 | -0.003 | t | 61317  | SSRGKVVE                 | Mus<br>musculu<br>s              |
| 1 | 1.00 | 1 | 1 | 0 | 0 | 0 | 0 | -0.003 | t | 68524  | VFMVPQY<br>GYL           | Mus<br>musculu<br>s              |
| 1 | 1.00 | 1 | 1 | 0 | 0 | 0 | 0 | -0.003 | t | 71798  | VVQAMYV<br>PPGAPNP<br>KE | Oryctola<br>gus<br>cuniculu<br>s |

|   |      |   |   |   |        |   |   |        |   |       |                              |                       |
|---|------|---|---|---|--------|---|---|--------|---|-------|------------------------------|-----------------------|
| 1 | 1.00 | 1 | 1 | 0 | 0      | 0 | 0 | -0.003 | t | 96367 | HSNLDHI                      | Homo sapiens          |
| 1 | 1.00 | 1 | 1 | 0 | 0      | 0 | 0 | -0.003 | t | 95044 | SSRGK                        | Mus musculus          |
| 1 | 1.00 | 1 | 1 | 0 | 0      | 0 | 0 | -0.003 | t | 66108 | TRTNPWP<br>ALAEGEF           | Oryctolagus cuniculus |
| 1 | 1.00 | 1 | 1 | 0 | 0      | 0 | 0 | -0.003 | t | 72065 | VYKLDISEA                    | Mus musculus          |
| 1 | 1.00 | 1 | 1 | 0 | -0.003 | 0 | 0 | -0.003 | t | 95142 | RIKNTDGSIS                   | Oryctolagus cuniculus |
| 1 | 1.00 | 1 | 1 | 0 | 0      | 0 | 0 | -0.003 | t | 63736 | TFQVEVPG<br>SQHIDS           | Oryctolagus cuniculus |
| 1 | 1.00 | 1 | 1 | 0 | 0      | 0 | 0 | -0.003 | t | 80014 | RNYPTGAE<br>FLGEG            | Oryctolagus cuniculus |
| 1 | 1.00 | 1 | 1 | 0 | 0      | 0 | 0 | -0.003 | t | 74497 | YKQKIIAP                     | Mus musculus          |
| 1 | 1.00 | 1 | 1 | 0 | 0      | 0 | 0 | -0.003 | t | 80002 | RKADLEKA<br>LEGAM            | Oryctolagus cuniculus |
| 1 | 1.00 | 1 | 1 | 0 | 0      | 0 | 0 | -0.003 | t | 94483 | CYKKVWR<br>DHRGTIIER<br>GC   | Mus musculus          |
| 1 | 1.00 | 1 | 1 | 0 | 0      | 0 | 0 | -0.003 | t | 69178 | VKAETRLN<br>PDLQPTTE         | Mus musculus          |
| 1 | 1.00 | 1 | 1 | 0 | 0      | 0 | 0 | -0.003 | t | 70656 | VQTRHVV<br>QHRSRSES<br>SIESF | Oryctolagus cuniculus |
| 1 | 1.00 | 1 | 1 | 0 | 0      | 0 | 0 | -0.003 | t | 95524 | KRQIYTDIE<br>MNRLGK          | Mus musculus          |

|   |      |   |   |   |   |   |   |        |   |       |                             |                                  |
|---|------|---|---|---|---|---|---|--------|---|-------|-----------------------------|----------------------------------|
| 1 | 1.00 | 1 | 1 | 0 | 0 | 0 | 0 | -0.003 | t | 66304 | TSLNDRQ<br>GNATK            | Oryctola<br>gus<br>cuniculu<br>s |
| 1 | 1.00 | 1 | 1 | 0 | 0 | 0 | 0 | -0.003 | t | 66976 | TVDNPA<br>STTNKDKLFA<br>VWK | Rattus<br>norvegic<br>us         |
| 1 | 1.00 | 1 | 1 | 0 | 0 | 0 | 0 | -0.003 | t | 73487 | YCCELC<br>CN PACAGCY        | Mus<br>musculu<br>s              |
| 1 | 1.00 | 1 | 1 | 0 | 0 | 0 | 0 | -0.003 | t | 97348 | GLFGAIA<br>G FIEGGW         | Oryctola<br>gus<br>cuniculu<br>s |
| 1 | 1.00 | 1 | 1 | 0 | 0 | 0 | 0 | -0.003 | t | 95524 | KRQIYTD<br>IE MNRLGK        | Oryctola<br>gus<br>cuniculu<br>s |
| 1 | 1.00 | 1 | 1 | 0 | 0 | 0 | 0 | -0.003 | t | 76290 | YVHDNC                      | Mus<br>musculu<br>s              |
| 1 | 1.00 | 1 | 1 | 0 | 0 | 0 | 0 | -0.003 | t | 71328 | VTGKVEY<br>T KYNDDD         | Oryctola<br>gus<br>cuniculu<br>s |
| 1 | 1.00 | 1 | 1 | 0 | 0 | 0 | 0 | -0.003 | t | 70390 | VPNLRGDL<br>QVLAQKV<br>ART  | Ovis<br>aries                    |
| 1 | 1.00 | 1 | 1 | 0 | 0 | 0 | 0 | -0.003 | t | 74009 | YGGPANK<br>KNAG             | Mus<br>musculu<br>s              |
| 1 | 1.00 | 1 | 1 | 0 | 0 | 0 | 0 | -0.003 | t | 78424 | IPRSRQID<br>L QIG           | Mus<br>musculu<br>s              |
| 1 | 1.00 | 1 | 1 | 0 | 0 | 0 | 0 | -0.003 | t | 75949 | YTASARGD<br>LAHL            | Mus<br>musculu<br>s              |
| 1 | 1.00 | 1 | 1 | 0 | 0 | 0 | 0 | -0.003 | t | 63037 | TAVSPTTL<br>R               | Oryctola<br>gus<br>cuniculu<br>s |
| 1 | 1.00 | 1 | 1 | 0 | 0 | 0 | 0 | -0.003 | t | 69175 | VKAETRLN                    | Mus<br>musculu<br>s              |



|   |      |   |   |   |      |   |   |        |   |       |                              |                       |
|---|------|---|---|---|------|---|---|--------|---|-------|------------------------------|-----------------------|
| 1 | 1.00 | 1 | 1 | 0 | 0    | 0 | 0 | -0.003 | t | 61394 | SSTKNLIY                     | Mus musculus          |
| 1 | 1.00 | 1 | 1 | 0 | 0    | 0 | 0 | -0.003 | t | 70656 | VQTRHVV<br>QHRSRSES<br>SIESF | Rattus norvegicus     |
| 1 | 1.00 | 1 | 1 | 0 | 0    | 0 | 0 | -0.003 | t | 58511 | SIFYTYGTA<br>PARISVPY<br>VGI | Oryctolagus cuniculus |
| 1 | 1.00 | 1 | 1 | 0 | 0    | 0 | 0 | -0.003 | t | 56373 | RVNQVAE<br>VLQL              | Mus musculus          |
| 1 | 1.00 | 1 | 1 | 0 | 0    | 0 | 0 | -0.003 | t | 38522 | LPHSNL                       | Homo sapiens          |
| 1 | 1.00 | 1 | 1 | 0 | 0    | 0 | 0 | -0.003 | t | 51371 | QLINTNGS<br>WHIN             | Rattus norvegicus     |
| 1 | 1.00 | 1 | 1 | 0 | 0    | 0 | 0 | -0.003 | t | 54057 | RHKQKIVA<br>PVK              | Oryctolagus cuniculus |
| 1 | 1.00 | 1 | 1 | 0 | 0    | 0 | 0 | -0.003 | t | 43242 | NANPNAN<br>PNANP             | Oryctolagus cuniculus |
| 1 | 1.00 | 1 | 1 | 0 | 0    | 0 | 0 | -0.003 | t | 57726 | SFANTNTN<br>TNSK             | Mus musculus          |
| 1 | 1.00 | 1 | 1 | 0 | 0    | 0 | 0 | -0.003 | t | 57542 | SELSQLS                      | Mus musculus          |
| 1 | 1.00 | 1 | 1 | 0 | 0.01 | 0 | 0 | -0.003 | t | 59967 | SNYYSDNE<br>IEQHTAKQ<br>PKL  | Oryctolagus cuniculus |
| 1 | 1.00 | 1 | 1 | 0 | 0    | 0 | 0 | -0.003 | t | 45932 | NSNNPDW<br>DF                | Mus musculus          |

|   |      |   |   |   |        |   |   |        |   |       |                              |                                  |
|---|------|---|---|---|--------|---|---|--------|---|-------|------------------------------|----------------------------------|
| 1 | 1.00 | 1 | 1 | 0 | 0      | 0 | 0 | -0.003 | t | 43730 | NEREDERT<br>LTKEYEDIV<br>LK  | Oryctola<br>gus<br>cuniculu<br>s |
| 1 | 1.00 | 1 | 1 | 0 | -0.003 | 0 | 0 | -0.003 | t | 39092 | LRGDLQVL<br>AQKVARTL         | Oryctola<br>gus<br>cuniculu<br>s |
| 1 | 1.00 | 1 | 1 | 0 | 0      | 0 | 0 | -0.003 | t | 49629 | PTGDRHK<br>QPLVAPAK<br>QLL   | Mus<br>musculu<br>s              |
| 1 | 1.00 | 1 | 1 | 0 | 0      | 0 | 0 | -0.003 | t | 39092 | LRGDLQVL<br>AQKVARTL         | Mus<br>musculu<br>s              |
| 1 | 1.00 | 1 | 1 | 0 | 0      | 0 | 0 | -0.003 | t | 56734 | SADNNNS<br>EYSWT             | Mus<br>musculu<br>s              |
| 1 | 1.00 | 1 | 1 | 0 | 0.002  | 0 | 0 | -0.003 | t | 58511 | SIFYTYGTA<br>PARISVPY<br>VGI | Rattus<br>norvegic<br>us         |
| 1 | 1.00 | 1 | 1 | 0 | 0      | 0 | 0 | -0.003 | t | 51775 | QNTRNIVP<br>VSIVSR           | Mus<br>musculu<br>s              |
| 1 | 1.00 | 1 | 1 | 0 | 0.002  | 0 | 0 | -0.003 | t | 44474 | NKDKLFAV<br>WK               | Rattus<br>norvegic<br>us         |
| 1 | 1.00 | 1 | 1 | 0 | 0      | 0 | 0 | -0.003 | t | 58511 | SIFYTYGTA<br>PARISVPY<br>VGI | Rattus<br>norvegic<br>us         |
| 1 | 1.00 | 1 | 1 | 0 | 0      | 0 | 0 | -0.003 | t | 37698 | LLQAHRQL<br>EER              | Mus<br>musculu<br>s              |
| 1 | 1.00 | 1 | 1 | 0 | 0      | 0 | 0 | -0.003 | t | 56699 | SAAFYYRV                     | Mus<br>musculu<br>s              |
| 1 | 1.00 | 1 | 1 | 0 | 0      | 0 | 0 | -0.003 | t | 43576 | NEDNEKLR<br>KPKHKKLK<br>QPG  | Mus<br>musculu<br>s              |
| 1 | 1.00 | 1 | 1 | 0 | 0      | 0 | 0 | -0.003 | t | 43191 | NAKATYEA<br>ALKQYEAD<br>LAA  | Mus<br>musculu<br>s              |

|   |      |   |   |   |        |   |   |        |   |       |                              |                                  |
|---|------|---|---|---|--------|---|---|--------|---|-------|------------------------------|----------------------------------|
| 1 | 1.00 | 1 | 1 | 0 | 0      | 0 | 0 | -0.003 | t | 41608 | MGPNLVL<br>PDQKPPS           | Mus<br>musculu<br>s              |
| 1 | 1.00 | 1 | 1 | 0 | 0      | 0 | 0 | -0.003 | t | 59810 | SNEFAPVQ<br>NLTGSSVG         | Mus<br>musculu<br>s              |
| 1 | 1.00 | 1 | 1 | 0 | -0.003 | 0 | 0 | -0.003 | t | 46960 | PASTTNKD<br>KL               | Oryctola<br>gus<br>cuniculu<br>s |
| 1 | 1.00 | 1 | 1 | 0 | 0      | 0 | 0 | -0.003 | t | 38522 | LPHSNL                       | Rattus<br>norvegic<br>us         |
| 1 | 1.00 | 1 | 1 | 0 | 0      | 0 | 0 | -0.003 | t | 32808 | KPNLSSKR<br>SELSQLSM<br>YRVF | Mus<br>musculu<br>s              |
| 1 | 1.00 | 1 | 1 | 0 | 0      | 0 | 0 | -0.003 | t | 11463 | EDVNGIRK<br>PK               | Mus<br>musculu<br>s              |
| 1 | 1.00 | 1 | 1 | 0 | 0      | 0 | 0 | -0.003 | t | 23975 | HHAEMQ<br>NPVYLIPET<br>VPYIK | Mus<br>musculu<br>s              |
| 1 | 1.00 | 1 | 1 | 0 | 0      | 0 | 0 | -0.003 | t | 10433 | DTNNN                        | Mus<br>musculu<br>s              |
| 1 | 1.00 | 1 | 1 | 0 | 0      | 0 | 0 | -0.003 | t | 21856 | GQDLTAH                      | Mus<br>musculu<br>s              |
| 1 | 1.00 | 1 | 1 | 0 | 0      | 0 | 0 | -0.003 | t | 28277 | IRECTGLA<br>WEWWRT<br>V      | Mus<br>musculu<br>s              |
| 1 | 1.00 | 1 | 1 | 0 | 0      | 0 | 0 | -0.003 | t | 34537 | KYNDDDT<br>FTVKVGD           | Oryctola<br>gus<br>cuniculu<br>s |
| 1 | 1.00 | 1 | 1 | 0 | 0      | 0 | 0 | -0.003 | t | 34965 | LASLRKAF<br>ADTVVPRP<br>PSNY | Homo<br>sapiens                  |
| 1 | 1.00 | 1 | 1 | 0 | 0      | 0 | 0 | -0.003 | t | 21763 | GPRLQPY                      | Mus<br>musculu<br>s              |
| 1 | 1.00 | 1 | 1 | 0 | 0      | 0 | 0 | -0.003 | t | 13290 | ELTIPIFAT<br>NSDCELIV<br>KA  | Oryctola<br>gus<br>cuniculu<br>s |

|   |      |   |   |   |   |   |   |        |   |       |                              |                                  |
|---|------|---|---|---|---|---|---|--------|---|-------|------------------------------|----------------------------------|
| 1 | 1.00 | 1 | 1 | 0 | 0 | 0 | 0 | -0.003 | t | 20710 | GKVEYTKY<br>NDDDTFT<br>VKVGD | Oryctola<br>gus<br>cuniculu<br>s |
| 1 | 1.00 | 1 | 1 | 0 | 0 | 0 | 0 | -0.003 | t | 25146 | HWYISKPQ                     | Mus<br>musculu<br>s              |
| 1 | 1.00 | 1 | 1 | 0 | 0 | 0 | 0 | -0.003 | t | 31916 | KLILAYTPP<br>GARGPQD         | Oryctola<br>gus<br>cuniculu<br>s |
| 1 | 1.00 | 1 | 1 | 0 | 0 | 0 | 0 | -0.003 | t | 31105 | KHFRETEV                     | Mus<br>musculu<br>s              |
| 1 | 1.00 | 1 | 1 | 0 | 0 | 0 | 0 | -0.003 | t | 14808 | EVLYLKPLA<br>GVYRSLKK<br>QLE | Mus<br>musculu<br>s              |
| 1 | 1.00 | 1 | 1 | 0 | 0 | 0 | 0 | -0.003 | t | 22401 | GSLAAR                       | Mus<br>musculu<br>s              |
| 1 | 1.00 | 1 | 1 | 0 | 0 | 0 | 0 | -0.003 | t | 11270 | ECTGLAW<br>EWWRT             | Mus<br>musculu<br>s              |
| 1 | 1.00 | 1 | 1 | 0 | 0 | 0 | 0 | -0.003 | t | 25108 | HVTSTLTSL<br>F               | Mus<br>musculu<br>s              |
| 1 | 1.00 | 1 | 1 | 0 | 0 | 0 | 0 | -0.003 | t | 14808 | EVLYLKPLA<br>GVYRSLKK<br>QLE | Mus<br>musculu<br>s              |
| 1 | 1.00 | 1 | 1 | 0 | 0 | 0 | 0 | -0.003 | t | 24970 | HTRVTGG<br>VQG               | Mus<br>musculu<br>s              |
| 1 | 1.00 | 1 | 1 | 0 | 0 | 0 | 0 | -0.003 | t | 21763 | GPRLQPY                      | Mus<br>musculu<br>s              |
| 1 | 1.00 | 1 | 1 | 0 | 0 | 0 | 0 | -0.003 | t | 14809 | EVLYLKPLA<br>GVYRSLKK<br>QLE | Mus<br>musculu<br>s              |
| 1 | 1.00 | 1 | 1 | 0 | 0 | 0 | 0 | -0.003 | t | 35852 | LFIG                         | Mus<br>musculu<br>s              |

|   |      |   |   |   |        |   |   |        |   |       |                             |                       |
|---|------|---|---|---|--------|---|---|--------|---|-------|-----------------------------|-----------------------|
| 1 | 1.00 | 1 | 1 | 0 | 0      | 0 | 0 | -0.003 | t | 25139 | HWSISKPQ                    | Mus musculus          |
| 1 | 1.00 | 1 | 1 | 0 | 0      | 0 | 0 | -0.003 | t | 34912 | LAPRVAR                     | Mus musculus          |
| 1 | 1.00 | 1 | 1 | 0 | 0      | 0 | 0 | -0.003 | t | 25807 | IEFQQKNN<br>RLLEITREF       | Mus musculus          |
| 1 | 1.00 | 1 | 1 | 0 | 0      | 0 | 0 | -0.003 | t | 22360 | GSGVRGD<br>FGSLAPRV<br>ARQL | Cavia porcellus       |
| 1 | 1.00 | 1 | 1 | 0 | 0      | 0 | 0 | -0.003 | t | 11208 | EAVEAERA<br>GRGTG           | Mus musculus          |
| 1 | 1.00 | 1 | 1 | 0 | 0      | 0 | 0 | -0.003 | t | 10579 | DVELSLRS<br>SDIA            | Homo sapiens          |
| 1 | 1.00 | 1 | 1 | 0 | 0.004  | 0 | 0 | -0.003 | t | 25807 | IEFQQKNN<br>RLLEITREF       | Mus musculus          |
| 1 | 1.00 | 1 | 1 | 0 | 0      | 0 | 0 | -0.003 | t | 6226  | CFGNSEY                     | Mus musculus          |
| 1 | 1.00 | 1 | 1 | 0 | 0      | 0 | 0 | -0.003 | t | 6093  | CDCDRTA<br>A                | Mus musculus          |
| 1 | 1.00 | 1 | 1 | 0 | -0.003 | 0 | 0 | -0.003 | t | 9520  | DNNQTSP                     | Oryctolagus cuniculus |
| 1 | 1.00 | 1 | 1 | 0 | 0      | 0 | 0 | -0.003 | t | 3274  | ANETIYNT<br>TLKYGDV         | MD                    |
| 1 | 1.00 | 1 | 1 | 0 | 0      | 0 | 0 | -0.003 | t | 9520  | DNNQTSP                     | Mus musculus          |
| 1 | 1.00 | 1 | 1 | 0 | 0      | 0 | 0 | -0.003 | t | 1190  | AETIHELLV<br>RM             | Mus musculus          |

|   |      |   |   |      |        |      |        |        |   |        |                              |                                  |
|---|------|---|---|------|--------|------|--------|--------|---|--------|------------------------------|----------------------------------|
| 1 | 1.00 | 1 | 1 | 0    | 0      | 0    | 0      | -0.003 | t | 6832   | CPRPPRAV<br>AAYGPGV<br>DYK   | Oryctola<br>gus<br>cuniculu<br>s |
| 1 | 1.00 | 1 | 1 | 0    | 0      | 0    | 0      | -0.003 | t | 9723   | DPPPPNP<br>NDPPPPN<br>PND    | Mus<br>musculu<br>s              |
| 1 | 1.00 | 1 | 1 | 0    | 0      | 0    | 0      | -0.003 | t | 4149   | ARGSLAVT<br>I                | Mus<br>musculu<br>s              |
| 1 | 1.00 | 1 | 1 | 0    | 0.002  | 0    | 0      | -0.003 | t | 279    | AALGDSLY<br>GAASLNDF<br>GILA | Rattus<br>norvegic<br>us         |
| 1 | 1.00 | 1 | 1 | 0    | 0      | 0    | 0      | -0.003 | t | 279    | AALGDSLY<br>GAASLNDF<br>GILA | Rattus<br>norvegic<br>us         |
| 1 | 1.00 | 1 | 1 | 0    | 0      | 0    | 0      | -0.003 | t | 7313   | CVTIMTVD<br>NPASTTNK<br>DK   | Oryctola<br>gus<br>cuniculu<br>s |
| 1 | 1.00 | 1 | 1 | 0    | 0      | 0    | 0      | -0.003 | t | 6139   | CDSSDRPR<br>VYTIT            | Mus<br>musculu<br>s              |
| 1 | 1.00 | 1 | 1 | 0    | 0      | 0    | 0      | -0.003 | t | 9524   | DNPASTT<br>NKDK              | Mus<br>musculu<br>s              |
| 1 | 1.00 | 1 | 1 | 0    | 0      | 0    | 0      | -0.003 | t | 4331   | ASARGDLA<br>HLTTTHAR<br>HLP  | Mus<br>musculu<br>s              |
| 1 | 1.00 | 1 | 1 | 0    | 0      | 0    | 0      | -0.003 | t | 6139   | CDSSDRPR<br>VYTIT            | Mus<br>musculu<br>s              |
| 1 | 1.00 | 1 | 1 | 0.01 | 0.01   | 0.01 | 0.01   | 0.009  | t | 6455   | CITQYERES<br>QAYY            | Mus<br>musculu<br>s              |
| 1 | 1.00 | 1 | 1 | 0    | -0.002 | 0    | -0.003 | -0.004 | t | 16101  | FHENWPS                      | Mus<br>musculu<br>s              |
| 1 | 1.00 | 1 | 1 | 0    | 0.004  | 0    | 0.007  | 0      | t | 112972 | FHAIDEYK<br>PQDATTN          | Homo<br>sapiens                  |
| 1 | 1.00 | 1 | 1 | 0.01 | 0.013  | 0.01 | 0.01   | 0.008  | t | 135501 | SQWNKP                       | Mus<br>musculu<br>s              |

|   |      |   |   |       |        |        |        |        |   |        |                              |                                  |
|---|------|---|---|-------|--------|--------|--------|--------|---|--------|------------------------------|----------------------------------|
| 1 | 1.00 | 1 | 1 | 0.01  | 0.007  | 0.014  | 0.01   | 0.008  | t | 100074 | GNINYACG<br>QGID             | Oryctola<br>gus<br>cuniculu<br>s |
| 1 | 1.00 | 1 | 1 | 0     | 0      | 0.005  | 0      | -0.002 | t | 130474 | ECLLLSKYC<br>MPS             | Mus<br>musculu<br>s              |
| 1 | 1.00 | 1 | 1 | 0.04  | 0.04   | 0.04   | 0.04   | 0.04   | t | 111444 | KDQTNYP                      | Homo<br>sapiens                  |
| 1 | 1.00 | 1 | 1 | -0.01 | -0.01  | -0.022 | -0.01  | -0.01  | t | 62845  | TAFSKN                       | Homo<br>sapiens                  |
| 1 | 1.00 | 1 | 1 | -0.02 | -0.018 | -0.016 | -0.013 | -0.021 | t | 119400 | WPGAGPP<br>PPGRVLYG<br>G     | Homo<br>sapiens                  |
| 1 | 1.00 | 1 | 1 | 0     | 0.003  | 0.002  | 0.007  | 0      | t | 117331 | MKLVRFL<br>MKLSHETV<br>TIELK | Mus<br>musculu<br>s              |
| 1 | 1.00 | 1 | 1 | 0     | 0      | 0.002  | 0.007  | 0      | t | 117331 | MKLVRFL<br>MKLSHETV<br>TIELK | Mus<br>musculu<br>s              |
| 1 | 1.00 | 1 | 1 | 0.01  | 0.014  | 0.014  | 0.01   | 0.008  | t | 134335 | CTKPSDGN<br>CT               | Homo<br>sapiens                  |
| 1 | 1.00 | 1 | 1 | 0.01  | 0.006  | 0.001  | 0.009  | 0.01   | t | 63038  | TAVSPTTL<br>RTEVVK           | Oryctola<br>gus<br>cuniculu<br>s |
| 1 | 1.00 | 1 | 1 | -0.04 | -0.037 | -0.045 | -0.033 | -0.04  | t | 117380 | TKPAIRRL<br>ARRGGVK<br>RIS   | Mus<br>musculu<br>s              |
| 1 | 1.00 | 1 | 1 | 0     | 0.002  | -0.013 | 0.001  | 0.004  | t | 23249  | GWGNGC                       | Homo<br>sapiens                  |
| 1 | 1.00 | 1 | 1 | 0.01  | 0.012  | 0.008  | 0.007  | 0.007  | t | 105746 | EETICTASF<br>KKNIGR          | Homo<br>sapiens                  |
| 1 | 1.00 | 1 | 1 | 0.02  | 0.02   | 0.02   | 0.02   | 0.018  | t | 145827 | IIPKVEGK                     | Mus<br>musculu<br>s              |
| 1 | 1.00 | 1 | 1 | 0.05  | 0.047  | 0.042  | 0.05   | 0.05   | t | 7383   | CYGVSATK<br>LNDLCFSN<br>V    | Oryctola<br>gus<br>cuniculu<br>s |
| 1 | 1.00 | 1 | 1 | -0.01 | -0.01  | -0.013 | -0.004 | -0.01  | t | 48343  | PLGLKRGIE<br>K               | Homo<br>sapiens                  |

|   |      |   |   |       |        |        |        |        |   |        |                            |                     |
|---|------|---|---|-------|--------|--------|--------|--------|---|--------|----------------------------|---------------------|
| 1 | 1.00 | 1 | 1 | 0     | 0      | -0.003 | 0.003  | -0.001 | t | 16006  | FGLQLELT<br>EGMRFDK        | Homo<br>sapiens     |
| 1 | 1.00 | 1 | 1 | 0     | 0      | 0      | 0.004  | -0.001 | t | 122947 | WTQEPQP<br>LEEKWQH<br>RVVE | Homo<br>sapiens     |
| 1 | 1.00 | 1 | 1 | 0     | 0      | 0      | 0.004  | -0.001 | t | 65050  | TLRVYK                     | Homo<br>sapiens     |
| 1 | 1.00 | 1 | 1 | -0.01 | -0.012 | -0.01  | -0.013 | -0.011 | t | 72251  | WAPSV                      | Mus<br>musculu<br>s |
| 1 | 1.00 | 1 | 1 | -0.01 | -0.015 | -0.018 | -0.007 | -0.008 | t | 158290 | SQQAPAV<br>PPLPQ           | Canis<br>lupus      |
| 1 | 1.00 | 1 | 1 | -0.01 | -0.012 | -0.01  | -0.009 | -0.011 | t | 130461 | CWNYCLP                    | Mus<br>musculu<br>s |
| 1 | 1.00 | 1 | 1 | 0     | 0      | -0.014 | 0      | 0.002  | t | 28350  | IRNVPHPF<br>VALGLKQ        | Mus<br>musculu<br>s |
| 1 | 1.00 | 1 | 1 | 0     | 0      | -0.014 | 0      | 0.002  | t | 28350  | IRNVPHPF<br>VALGLKQ        | Mus<br>musculu<br>s |
| 1 | 1.00 | 1 | 1 | 0     | 0      | 0      | 0      | 0      | t | 63043  | TAWDFG                     | Homo<br>sapiens     |
| 1 | 1.00 | 1 | 1 | 0.03  | 0.03   | 0.03   | 0.03   | 0.03   | t | 79528  | CPSKKPYE<br>EVTC           | Mus<br>musculu<br>s |
| 1 | 1.00 | 1 | 1 | 0.04  | 0.038  | 0.035  | 0.041  | 0.04   | t | 39888  | LTEVETPIR<br>NEWGC         | Mus<br>musculu<br>s |
| 1 | 1.00 | 1 | 1 | 0.02  | 0.023  | 0.016  | 0.02   | 0.02   | t | 41866  | MKNNPIYS<br>EGSL           | Equus<br>caballus   |
| 1 | 1.00 | 1 | 1 | 0.02  | 0.023  | 0.016  | 0.02   | 0.02   | t | 41866  | MKNNPIYS<br>EGSL           | Equus<br>caballus   |
| 1 | 1.00 | 1 | 1 | 0.02  | 0.02   | 0.02   | 0.024  | 0.02   | t | 133795 | DFTYDQV<br>AFNGLPQF        | Homo<br>sapiens     |
| 1 | 1.00 | 1 | 1 | 0     | -0.002 | 0      | -0.003 | -0.004 | t | 141282 | GETRK                      | Mus<br>musculu<br>s |
| 1 | 1.00 | 1 | 1 | 0     | -0.002 | 0      | -0.003 | -0.004 | t | 140665 | DTAAQI                     | Mus<br>musculu<br>s |



|   |      |   |   |       |        |        |        |        |   |        |                              |                                  |
|---|------|---|---|-------|--------|--------|--------|--------|---|--------|------------------------------|----------------------------------|
| 1 | 1.00 | 1 | 1 | -0.01 | -0.006 | -0.003 | -0.009 | -0.017 | t | 23226  | GVYLLPRR<br>GPRLGVRA<br>TRKT | Homo<br>sapiens                  |
| 1 | 1.00 | 1 | 1 | -0.01 | -0.01  | -0.01  | -0.006 | -0.01  | t | 135975 | PTLAFLQD<br>VMNI             | Homo<br>sapiens                  |
| 1 | 1.00 | 1 | 1 | 0.02  | 0.022  | 0.02   | 0.023  | 0.018  | t | 104443 | DAEFRHDS<br>GYE              | Homo<br>sapiens                  |
| 1 | 1.00 | 1 | 1 | -0.01 | -0.012 | -0.012 | -0.011 | -0.01  | t | 97377  | GYKGVAFP                     | Mus<br>musculu<br>s              |
| 1 | 1.00 | 1 | 1 | 0.02  | 0.022  | 0.018  | 0.027  | 0.02   | t | 118335 | EQLRILGEK<br>EAKLAQQS<br>QA  | Homo<br>sapiens                  |
| 1 | 1.00 | 1 | 1 | -0.01 | -0.01  | -0.024 | -0.01  | -0.01  | t | 78937  | AYSDDFFV<br>GRV              | Mus<br>musculu<br>s              |
| 1 | 1.00 | 1 | 1 | 0.01  | 0.01   | -0.001 | 0.01   | 0.01   | t | 111746 | RSSRTRRE<br>TQ               | Oryctola<br>gus<br>cuniculu<br>s |
| 1 | 1.00 | 1 | 1 | 0.01  | 0.006  | -0.008 | 0.01   | 0.012  | t | 49636  | PTGPTIAA<br>GGEQPPS          | Bos<br>taurus                    |
| 1 | 1.00 | 1 | 1 | -0.01 | -0.013 | -0.023 | -0.01  | -0.009 | t | 571    | ACKSTQDP<br>MFTPKGCDN        | Oryctola<br>gus<br>cuniculu<br>s |
| 1 | 1.00 | 1 | 1 | -0.03 | -0.03  | -0.03  | -0.03  | -0.03  | t | 145934 | PDIIPK                       | Mus<br>musculu<br>s              |
| 1 | 1.00 | 1 | 1 | 0     | 0.002  | 0      | 0.003  | -0.001 | t | 108874 | DPISGHVS<br>LF               | Homo<br>sapiens                  |
| 1 | 1.00 | 1 | 1 | -0.02 | -0.018 | -0.034 | -0.019 | -0.02  | t | 31005  | KGLRRDL<br>ASREAKKQ          | Homo<br>sapiens                  |
| 1 | 1.00 | 1 | 1 | -0.02 | -0.024 | -0.016 | -0.019 | -0.022 | t | 65618  | TPKGP                        | Bos<br>taurus                    |
| 1 | 1.00 | 1 | 1 | -0.01 | -0.012 | -0.01  | -0.007 | -0.01  | t | 67222  | TVYFGFDK<br>YD               | Mus<br>musculu<br>s              |
| 1 | 1.00 | 1 | 1 | 0.03  | 0.032  | 0.03   | 0.037  | 0.03   | t | 107497 | KVSNKAL                      | Homo<br>sapiens                  |

|   |      |   |   |       |        |        |        |        |   |        |                          |                                  |
|---|------|---|---|-------|--------|--------|--------|--------|---|--------|--------------------------|----------------------------------|
| 1 | 1.00 | 1 | 1 | -0.01 | -0.013 | -0.013 | -0.01  | -0.012 | t | 7208   | CTSPYDGK<br>YWSMYSR<br>L | Oryctola<br>gus<br>cuniculu<br>s |
| 1 | 1.00 | 1 | 1 | -0.01 | -0.01  | -0.014 | -0.01  | -0.012 | t | 47545  | PFPQPQQ<br>QFP           | Mus<br>musculu<br>s              |
| 1 | 1.00 | 1 | 1 | -0.01 | -0.012 | -0.024 | -0.011 | -0.01  | t | 28107  | IPVSDAQR                 | Mus<br>musculu<br>s              |
| 1 | 1.00 | 1 | 1 | 0.02  | 0.02   | 0.02   | 0.02   | 0.02   | t | 106042 | QLKNNNP<br>FKFFVPPS      | Homo<br>sapiens                  |
| 1 | 1.00 | 1 | 1 | -0.01 | -0.014 | -0.019 | -0.007 | -0.01  | t | 115058 | GNAEVHA<br>SFFDIGGS      | Oryctola<br>gus<br>cuniculu<br>s |
| 1 | 1.00 | 1 | 1 | 0.02  | 0.02   | 0.026  | 0.021  | 0.02   | t | 34238  | KVVLPE                   | Homo<br>sapiens                  |
| 1 | 1.00 | 1 | 1 | 0     | -0.003 | 0      | 0      | -0.001 | t | 24009  | HHPSTDKE<br>QTNLY        | Oryctola<br>gus<br>cuniculu<br>s |
| 1 | 1.00 | 1 | 1 | 0     | -0.003 | 0      | 0      | -0.001 | t | 24009  | HHPSTDKE<br>QTNLY        | Oryctola<br>gus<br>cuniculu<br>s |
| 1 | 1.00 | 1 | 1 | -0.01 | -0.008 | -0.017 | -0.003 | -0.006 | t | 135897 | APKRPGPA<br>GELL         | Homo<br>sapiens                  |
| 1 | 1.00 | 1 | 1 | 0.06  | 0.062  | 0.056  | 0.057  | 0.058  | t | 114848 | GVTYDNE<br>CLL           | Homo<br>sapiens                  |
| 1 | 1.00 | 1 | 1 | -0.02 | -0.018 | -0.02  | -0.019 | -0.02  | t | 9268   | DLRSSGCG                 | Homo<br>sapiens                  |
| 1 | 1.00 | 1 | 1 | 0.01  | 0.014  | 0.017  | 0.007  | 0.006  | t | 106762 | QYFALEAY<br>AF           | Homo<br>sapiens                  |
| 1 | 1.00 | 1 | 1 | 0.01  | 0.006  | 0.008  | 0.009  | 0.01   | t | 45693  | NRKNQLK<br>DMA           | Oryctola<br>gus<br>cuniculu<br>s |

|   |      |   |   |       |        |        |        |        |   |        |                              |                                  |
|---|------|---|---|-------|--------|--------|--------|--------|---|--------|------------------------------|----------------------------------|
| 1 | 1.00 | 1 | 1 | 0.03  | 0.028  | 0.03   | 0.03   | 0.03   | t | 107086 | ANYGYTFG<br>SG               | Oryctola<br>gus<br>cuniculu<br>s |
| 1 | 1.00 | 1 | 1 | 0.02  | 0.024  | 0.013  | 0.021  | 0.02   | t | 79926  | MASMTG<br>GQQMG              | MD                               |
| 1 | 1.00 | 1 | 1 | -0.01 | -0.012 | -0.012 | -0.007 | -0.008 | t | 99774  | VVLGYTDR                     | Mus<br>musculu<br>s              |
| 1 | 1.00 | 1 | 1 | 0.01  | 0.01   | 0.003  | 0.019  | 0.012  | t | 131053 | RRVQQEID<br>DVIGQVRR<br>PEMG | Homo<br>sapiens                  |
| 1 | 1.00 | 1 | 1 | 0.03  | 0.03   | 0.03   | 0.03   | 0.03   | t | 112371 | TYYCARM                      | Homo<br>sapiens                  |
| 1 | 1.00 | 1 | 1 | -0.05 | -0.05  | -0.055 | -0.048 | -0.05  | t | 67569  | VAEKVRNL<br>PA               | Homo<br>sapiens                  |
| 1 | 1.00 | 1 | 1 | 0.03  | 0.03   | 0.03   | 0.032  | 0.032  | t | 70270  | VPDKEVLY<br>QQYDEM           | Homo<br>sapiens                  |
| 1 | 1.00 | 1 | 1 | 0.03  | 0.027  | 0.029  | 0.03   | 0.03   | t | 63818  | TGFADPNT<br>TTG              | Oryctola<br>gus<br>cuniculu<br>s |
| 1 | 1.00 | 1 | 1 | 0.02  | 0.018  | 0.01   | 0.017  | 0.02   | t | 59880  | SNPTPQEI                     | Anas<br>platyrhy<br>nchos        |
| 1 | 1.00 | 1 | 1 | 0.02  | 0.019  | 0.01   | 0.017  | 0.02   | t | 59880  | SNPTPQEI                     | Anas<br>platyrhy<br>nchos        |
| 1 | 1.00 | 1 | 1 | 0.01  | 0.006  | 0.001  | 0.009  | 0.01   | t | 20284  | GIGPEKAF<br>RE               | Oryctola<br>gus<br>cuniculu<br>s |
| 1 | 1.00 | 1 | 1 | -0.03 | -0.03  | -0.03  | -0.03  | -0.03  | t | 56133  | RTMQYVD<br>M                 | Homo<br>sapiens                  |
| 1 | 1.00 | 1 | 1 | -0.04 | -0.04  | -0.029 | -0.039 | -0.04  | t | 41541  | MFTCKK                       | Homo<br>sapiens                  |
| 1 | 1.00 | 1 | 1 | 0.03  | 0.032  | 0.031  | 0.031  | 0.03   | t | 9929   | DQYCADV<br>AAEELMN<br>A      | Homo<br>sapiens                  |
| 1 | 1.00 | 1 | 1 | -0.03 | -0.03  | -0.03  | -0.03  | -0.03  | t | 60751  | SRNWLP<br>PCY                | Mus<br>musculu<br>s              |

|   |      |   |   |       |        |        |        |        |   |        |                             |                                  |
|---|------|---|---|-------|--------|--------|--------|--------|---|--------|-----------------------------|----------------------------------|
| 1 | 1.00 | 1 | 1 | 0.01  | 0.003  | 0.003  | 0.01   | 0.011  | t | 159296 | SFSKPSNS<br>WFPVEGP         | Oryctola<br>gus<br>cuniculu<br>s |
| 1 | 1.00 | 1 | 1 | 0     | -0.002 | 0      | -0.001 | 0.001  | t | 48598  | PNANPNA                     | Mus<br>musculu<br>s              |
| 1 | 1.00 | 1 | 1 | 0.01  | 0.007  | -0.005 | 0.003  | 0.01   | t | 104036 | LHSDIMFY<br>TIENAVPIH<br>LL | Oryctola<br>gus<br>cuniculu<br>s |
| 1 | 1.00 | 1 | 1 | 0.02  | 0.016  | 0.018  | 0.02   | 0.02   | t | 22835  | GTSMDDE<br>ADRYF            | Bos<br>taurus                    |
| 1 | 1.00 | 1 | 1 | -0.02 | -0.02  | -0.032 | -0.023 | -0.02  | t | 71192  | VSVK                        | Homo<br>sapiens                  |
| 1 | 1.00 | 1 | 1 | 0.01  | 0.012  | -0.007 | 0.011  | 0.012  | t | 151068 | VGSSRYSK<br>KFKPEIA         | Homo<br>sapiens                  |
| 1 | 1.00 | 1 | 1 | 0.02  | 0.02   | 0.02   | 0.02   | 0.02   | t | 139191 | NYTCCKLQ                    | Mus<br>musculu<br>s              |
| 1 | 1.00 | 1 | 1 | 0     | 0      | 0      | 0      | 0      | t | 107655 | VFLFPPK                     | Homo<br>sapiens                  |
| 1 | 1.00 | 1 | 1 | 0.04  | 0.042  | 0.035  | 0.041  | 0.04   | t | 16143  | FHSTSSEG<br>N               | Homo<br>sapiens                  |
| 1 | 1.00 | 1 | 1 | -0.01 | -0.013 | -0.011 | -0.01  | -0.014 | t | 30200  | KDLLEQKR<br>AAVDTYC         | Oryctola<br>gus<br>cuniculu<br>s |
| 1 | 1.00 | 1 | 1 | 0.02  | 0.018  | 0.01   | 0.023  | 0.02   | t | 30774  | KFLNPDRE<br>YDFRDLT         | Mus<br>musculu<br>s              |
| 1 | 1.00 | 1 | 1 | 0.01  | 0.013  | 0.01   | 0.01   | 0.008  | t | 64541  | TKDTNNN<br>L                | Mus<br>musculu<br>s              |
| 1 | 1.00 | 1 | 1 | -0.02 | -0.016 | -0.026 | -0.021 | -0.023 | t | 50814  | QFQGQQ<br>QFPF              | Homo<br>sapiens                  |
| 1 | 1.00 | 1 | 1 | -0.01 | -0.008 | -0.023 | -0.009 | -0.01  | t | 21277  | GMGVSCT<br>VTREDGT<br>NRR   | Homo<br>sapiens                  |

|   |      |   |   |       |        |        |        |        |   |        |                              |                                  |
|---|------|---|---|-------|--------|--------|--------|--------|---|--------|------------------------------|----------------------------------|
| 1 | 1.00 | 1 | 1 | 0.02  | 0.017  | 0.018  | 0.02   | 0.02   | t | 57680  | SEWRSPA<br>DTSPRPLP          | Oryctola<br>gus<br>cuniculu<br>s |
| 1 | 1.00 | 1 | 1 | 0.02  | 0.016  | 0.018  | 0.02   | 0.02   | t | 57680  | SEWRSPA<br>DTSPRPLP          | Oryctola<br>gus<br>cuniculu<br>s |
| 1 | 1.00 | 1 | 1 | -0.01 | -0.01  | -0.01  | -0.01  | -0.012 | t | 72910  | WNSTTFH<br>QTL               | Mus<br>musculu<br>s              |
| 1 | 1.00 | 1 | 1 | 0     | 0.002  | 0      | 0.007  | 0.001  | t | 140547 | CSIGEALS<br>HGC              | Homo<br>sapiens                  |
| 1 | 1.00 | 1 | 1 | -0.03 | -0.032 | -0.033 | -0.029 | -0.03  | t | 133749 | YNLLMHLS<br>SML              | Mus<br>musculu<br>s              |
| 1 | 1.00 | 1 | 1 | 0.01  | 0.01   | 0.016  | 0.01   | 0.01   | t | 50536  | QDVVVLG<br>S                 | Homo<br>sapiens                  |
| 1 | 1.00 | 1 | 1 | 0     | 0      | -0.011 | 0      | 0.001  | t | 17467  | FQDMLNIS                     | Mus<br>musculu<br>s              |
| 1 | 1.00 | 1 | 1 | -0.01 | -0.008 | -0.014 | -0.012 | -0.013 | t | 105490 | QSRATLGI                     | Homo<br>sapiens                  |
| 1 | 1.00 | 1 | 1 | 0.01  | 0.01   | 0.01   | 0.014  | 0.01   | t | 135969 | PPEPRPRD<br>RSGL             | Homo<br>sapiens                  |
| 1 | 1.00 | 1 | 1 | 0.01  | 0.01   | 0.001  | 0.01   | 0.01   | t | 70945  | VSGCPMR<br>LNMASLEE<br>KGRHF | Homo<br>sapiens                  |
| 1 | 1.00 | 1 | 1 | 0     | 0.003  | -0.006 | 0      | 0.002  | t | 66061  | TRLNPDLQ                     | Mus<br>musculu<br>s              |
| 1 | 1.00 | 1 | 1 | -0.02 | -0.005 | -0.024 | -0.019 | -0.02  | t | 60792  | SRRYPFVK<br>F                | Homo<br>sapiens                  |
| 1 | 1.00 | 1 | 1 | -0.02 | -0.024 | -0.018 | -0.021 | -0.02  | t | 139500 | FHTHISV                      | Oryctola<br>gus<br>cuniculu<br>s |
| 1 | 1.00 | 1 | 1 | 0.01  | 0.012  | 0.003  | 0.008  | 0.008  | t | 106595 | LDGETKTG<br>PQRV             | Homo<br>sapiens                  |
| 1 | 1.00 | 1 | 1 | 0     | 0      | 0      | 0.007  | 0      | t | 119474 | KIRY                         | Homo<br>sapiens                  |

|   |      |   |   |       |        |        |        |        |   |        |                              |                                  |
|---|------|---|---|-------|--------|--------|--------|--------|---|--------|------------------------------|----------------------------------|
| 1 | 1.00 | 1 | 1 | 0.01  | 0.006  | 0.003  | 0.013  | 0.01   | t | 96017  | YHLYNSQD<br>HG               | Oryctola<br>gus<br>cuniculu<br>s |
| 1 | 1.00 | 1 | 1 | 0.01  | 0.01   | 0.006  | 0.016  | 0.01   | t | 67069  | TVLGICALP<br>PTPQTP          | Homo<br>sapiens                  |
| 1 | 1.00 | 1 | 1 | 0.05  | 0.048  | 0.045  | 0.047  | 0.049  | t | 134131 | LEEAKTQG<br>PYDVVVL          | Mus<br>musculu<br>s              |
| 1 | 1.00 | 1 | 1 | -0.03 | -0.027 | -0.037 | -0.03  | -0.028 | t | 113049 | KLDAAYKL<br>AY               | Mus<br>musculu<br>s              |
| 1 | 1.00 | 1 | 1 | 0.02  | 0.022  | 0.029  | 0.027  | 0.022  | t | 109780 | QVYTLPP                      | Homo<br>sapiens                  |
| 1 | 1.00 | 1 | 1 | -0.01 | -0.01  | -0.01  | -0.01  | -0.01  | t | 128024 | IKKVATPK<br>KASPKK           | Homo<br>sapiens                  |
| 1 | 1.00 | 1 | 1 | 0     | 0      | -0.001 | 0      | -0.002 | t | 137944 | PGTEYT                       | Oryctola<br>gus<br>cuniculu<br>s |
| 1 | 1.00 | 1 | 1 | 0.02  | 0.022  | 0.022  | 0.027  | 0.02   | t | 119598 | INPESDQP<br>DLSNFMES<br>G    | Homo<br>sapiens                  |
| 1 | 1.00 | 1 | 1 | 0.02  | 0.02   | 0.02   | 0.02   | 0.019  | t | 118783 | EIIVTHFPF<br>DEQNCSM<br>K    | Rattus<br>norvegic<br>us         |
| 1 | 1.00 | 1 | 1 | 0     | 0      | 0      | 0      | 0      | t | 56246  | RVCEKM                       | Homo<br>sapiens                  |
| 1 | 1.00 | 1 | 1 | 0     | 0      | -0.01  | -0.001 | 0      | t | 57875  | SFQSFNLT<br>EPHIT            | Homo<br>sapiens                  |
| 1 | 1.00 | 1 | 1 | -0.01 | -0.008 | -0.007 | -0.003 | -0.01  | t | 128101 | SFSRALEN<br>ATRDYFIIC<br>PII | Homo<br>sapiens                  |
| 1 | 1.00 | 1 | 1 | 0.06  | 0.06   | 0.053  | 0.06   | 0.063  | t | 96170  | DEDSYERD<br>P                | Mus<br>musculu<br>s              |
| 1 | 1.00 | 1 | 1 | 0.02  | 0.016  | 0.015  | 0.023  | 0.02   | t | 95263  | ATYHLYNS<br>QD               | Oryctola<br>gus<br>cuniculu<br>s |

|   |      |   |   |       |        |        |        |        |   |        |                              |                       |
|---|------|---|---|-------|--------|--------|--------|--------|---|--------|------------------------------|-----------------------|
| 1 | 1.00 | 1 | 1 | -0.04 | -0.038 | -0.034 | -0.039 | -0.047 | t | 61516  | STAIHADQ<br>LTPAWRIY         | Homo sapiens          |
| 1 | 1.00 | 1 | 1 | 0     | 0      | -0.004 | -0.003 | 0      | t | 39136  | LRLKKYKV<br>PQ               | Homo sapiens          |
| 1 | 1.00 | 1 | 1 | 0     | 0      | 0      | 0.006  | 0      | t | 117773 | CNSRQTD<br>REDELI            | Homo sapiens          |
| 1 | 1.00 | 1 | 1 | 0     | 0      | 0      | 0.006  | 0      | t | 43248  | NANPNAN<br>PNANPNA<br>NPNANP | Homo sapiens          |
| 1 | 1.00 | 1 | 1 | 0.01  | 0.008  | -0.004 | 0.007  | 0.01   | t | 75532  | YQPQQPF<br>PQP               | Mus musculus          |
| 1 | 1.00 | 1 | 1 | 0     | 0.002  | -0.002 | 0.003  | 0      | t | 118196 | VEPTGKRF<br>L                | Homo sapiens          |
| 1 | 1.00 | 1 | 1 | 0.02  | 0.023  | 0.02   | 0.02   | 0.02   | t | 7532   | DAHHAAD                      | Mus musculus          |
| 1 | 1.00 | 1 | 1 | 0.04  | 0.042  | 0.038  | 0.043  | 0.04   | t | 78478  | PDSDPQI                      | Homo sapiens          |
| 1 | 1.00 | 1 | 1 | 0.04  | 0.042  | 0.038  | 0.043  | 0.04   | t | 78478  | PDSDPQI                      | Homo sapiens          |
| 1 | 1.00 | 1 | 1 | 0     | -0.009 | -0.016 | 0      | 0.002  | t | 65218  | TMKNNLQ<br>T                 | Macaca mulatta        |
| 1 | 1.00 | 1 | 1 | 0.03  | 0.034  | 0.035  | 0.031  | 0.029  | t | 58779  | SKAALIEEG                    | Homo sapiens          |
| 1 | 1.00 | 1 | 1 | 0     | 0      | 0      | 0      | 0.001  | t | 59024  | SLAYGLR                      | Oryctolagus cuniculus |
| 1 | 1.00 | 1 | 1 | -0.01 | -0.01  | -0.01  | -0.01  | -0.01  | t | 47189  | PDREVLRYR<br>E               | Homo sapiens          |

|   |      |   |   |       |        |        |        |        |   |        |                             |                                  |
|---|------|---|---|-------|--------|--------|--------|--------|---|--------|-----------------------------|----------------------------------|
| 1 | 1.00 | 1 | 1 | -0.04 | -0.038 | -0.04  | -0.037 | -0.041 | t | 134418 | KGAIIGLM<br>VGGVV           | Homo<br>sapiens                  |
| 1 | 1.00 | 1 | 1 | 0.04  | 0.044  | 0.04   | 0.041  | 0.04   | t | 18511  | GAALLQSA                    | Homo<br>sapiens                  |
| 1 | 1.00 | 1 | 1 | -0.02 | -0.02  | -0.011 | -0.02  | -0.025 | t | 134492 | QIQRPS<br>M                 | Mus<br>musculu<br>s              |
| 1 | 1.00 | 1 | 1 | 0.01  | 0.003  | 0.004  | 0.007  | 0.009  | t | 44920  | NLVPMVA<br>TV               | Homo<br>sapiens                  |
| 1 | 1.00 | 1 | 1 | 0.01  | 0.006  | 0.009  | 0.009  | 0.01   | t | 58950  | SKTNIFWA<br>GDLL            | Oryctola<br>gus<br>cuniculu<br>s |
| 1 | 1.00 | 1 | 1 | 0.01  | 0.008  | 0.009  | 0.009  | 0.01   | t | 58950  | SKTNIFWA<br>GDLL            | Mus<br>musculu<br>s              |
| 1 | 1.00 | 1 | 1 | 0.05  | 0.048  | 0.045  | 0.051  | 0.05   | t | 39888  | LTEVETPIR<br>NEWGC          | Mus<br>musculu<br>s              |
| 1 | 1.00 | 1 | 1 | 0.01  | 0.004  | 0.01   | 0.01   | 0.01   | t | 123259 | GQPPYMP<br>P                | Oryctola<br>gus<br>cuniculu<br>s |
| 1 | 1.00 | 1 | 1 | 0.05  | 0.054  | 0.061  | 0.051  | 0.049  | t | 44699  | NLEYTI                      | Homo<br>sapiens                  |
| 1 | 1.00 | 1 | 1 | -0.01 | -0.01  | -0.023 | -0.01  | -0.01  | t | 159137 | STFVVDGP<br>ETAECPS         | Mus<br>musculu<br>s              |
| 1 | 1.00 | 1 | 1 | 0     | 0      | 0      | 0      | -0.003 | t | 137407 | GPEYWDG<br>ETRKVKA          | Oryctola<br>gus<br>cuniculu<br>s |
| 1 | 1.00 | 1 | 1 | 0     | 0      | 0      | 0      | -0.003 | t | 122748 | EHRMTW<br>DPAQPPR           | Homo<br>sapiens                  |
| 1 | 1.00 | 1 | 1 | 0     | -0.003 | 0      | 0      | -0.003 | t | 105830 | GKSGDRS<br>GYSSPGSP<br>GTPG | Oryctola<br>gus<br>cuniculu<br>s |
| 1 | 1.00 | 1 | 1 | 0     | 0      | 0      | 0      | -0.003 | t | 102344 | DAEFR                       | Mus<br>musculu<br>s              |



|   |      |   |   |   |        |   |   |        |   |       |                              |                                  |
|---|------|---|---|---|--------|---|---|--------|---|-------|------------------------------|----------------------------------|
| 1 | 1.00 | 1 | 1 | 0 | -0.003 | 0 | 0 | -0.003 | t | 78940 | CRRHNYG<br>FWVC              | Oryctola<br>gus<br>cuniculu<br>s |
| 1 | 1.00 | 1 | 1 | 0 | 0      | 0 | 0 | -0.003 | t | 94580 | LDNKYAGK<br>GY               | Mus<br>musculu<br>s              |
| 1 | 1.00 | 1 | 1 | 0 | 0      | 0 | 0 | -0.003 | t | 76577 | YYQQTDE<br>ANK               | Oryctola<br>gus<br>cuniculu<br>s |
| 1 | 1.00 | 1 | 1 | 0 | 0      | 0 | 0 | -0.003 | t | 63604 | TEYYLNHG<br>KWPN             | Oryctola<br>gus<br>cuniculu<br>s |
| 1 | 1.00 | 1 | 1 | 0 | 0      | 0 | 0 | -0.003 | t | 79303 | LVAAGVD<br>YEDERISF<br>QDWPK | Rattus<br>norvegic<br>us         |
| 1 | 1.00 | 1 | 1 | 0 | -0.003 | 0 | 0 | -0.003 | t | 78939 | CINHRGY<br>WVC               | Oryctola<br>gus<br>cuniculu<br>s |
| 1 | 1.00 | 1 | 1 | 0 | 0      | 0 | 0 | -0.003 | t | 63811 | TGEDPGFF<br>NV               | Oryctola<br>gus<br>cuniculu<br>s |
| 1 | 1.00 | 1 | 1 | 0 | 0      | 0 | 0 | -0.003 | t | 48093 | PKKPENK<br>LKQPNE            | Oryctola<br>gus<br>cuniculu<br>s |
| 1 | 1.00 | 1 | 1 | 0 | 0      | 0 | 0 | -0.003 | t | 48912 | PPSDIKGK<br>YVKEVEVK         | Oryctola<br>gus<br>cuniculu<br>s |
| 1 | 1.00 | 1 | 1 | 0 | 0      | 0 | 0 | -0.003 | t | 38422 | LPAYQDYT<br>ARAQVSE          | Oryctola<br>gus<br>cuniculu<br>s |
| 1 | 1.00 | 1 | 1 | 0 | 0      | 0 | 0 | -0.003 | t | 40194 | LTTDATTF<br>EEVATAEK<br>LV   | Oryctola<br>gus<br>cuniculu<br>s |
| 1 | 1.00 | 1 | 1 | 0 | 0      | 0 | 0 | -0.003 | t | 48093 | PKKPENK<br>LKQPNE            | Mus<br>musculu<br>s              |

|   |      |   |   |   |        |   |   |        |   |       |                              |                                  |
|---|------|---|---|---|--------|---|---|--------|---|-------|------------------------------|----------------------------------|
| 1 | 1.00 | 1 | 1 | 0 | 0      | 0 | 0 | -0.003 | t | 48093 | PKKPENK<br>LKQPNE            | Oryctola<br>gus<br>cuniculu<br>s |
| 1 | 1.00 | 1 | 1 | 0 | -0.003 | 0 | 0 | -0.003 | t | 48670 | PNLRGDL<br>QVLAQKV<br>ARTLP  | Oryctola<br>gus<br>cuniculu<br>s |
| 1 | 1.00 | 1 | 1 | 0 | 0      | 0 | 0 | -0.003 | t | 54975 | RNCKKLGP<br>RENV A           | Oryctola<br>gus<br>cuniculu<br>s |
| 1 | 1.00 | 1 | 1 | 0 | 0      | 0 | 0 | -0.003 | t | 55621 | RRKAHAG<br>NKKAEDLT<br>MDDLE | Mus<br>musculu<br>s              |
| 1 | 1.00 | 1 | 1 | 0 | 0      | 0 | 0 | -0.003 | t | 55621 | RRKAHAG<br>NKKAEDLT<br>MDDLE | Oryctola<br>gus<br>cuniculu<br>s |
| 1 | 1.00 | 1 | 1 | 0 | 0      | 0 | 0 | -0.003 | t | 55621 | RRKAHAG<br>NKKAEDLT<br>MDDLE | Oryctola<br>gus<br>cuniculu<br>s |
| 1 | 1.00 | 1 | 1 | 0 | 0      | 0 | 0 | -0.003 | t | 43242 | NANPNAN<br>PNANP             | Oryctola<br>gus<br>cuniculu<br>s |
| 1 | 1.00 | 1 | 1 | 0 | 0      | 0 | 0 | -0.003 | t | 48912 | PPSDIKGK<br>YVKEVEVK         | Oryctola<br>gus<br>cuniculu<br>s |
| 1 | 1.00 | 1 | 1 | 0 | 0      | 0 | 0 | -0.003 | t | 53326 | RDALPNTE<br>ASGPTHSK<br>E    | Rattus<br>norvegic<br>us         |
| 1 | 1.00 | 1 | 1 | 0 | 0      | 0 | 0 | -0.003 | t | 41610 | MGQHPAK<br>SMDVRR            | Oryctola<br>gus<br>cuniculu<br>s |
| 1 | 1.00 | 1 | 1 | 0 | 0      | 0 | 0 | -0.003 | t | 50180 | PYVEPTAP<br>QVL              | Homo<br>sapiens                  |
| 1 | 1.00 | 1 | 1 | 0 | 0      | 0 | 0 | -0.003 | t | 43242 | NANPNAN<br>PNANP             | Homo<br>sapiens                  |

|   |      |   |   |   |        |   |   |        |   |       |                              |                                  |
|---|------|---|---|---|--------|---|---|--------|---|-------|------------------------------|----------------------------------|
| 1 | 1.00 | 1 | 1 | 0 | 0      | 0 | 0 | -0.003 | t | 50180 | PYVEPTAP<br>QVL              | Oryctola<br>gus<br>cuniculu<br>s |
| 1 | 1.00 | 1 | 1 | 0 | 0      | 0 | 0 | -0.003 | t | 55621 | RRKAHAG<br>NKKAEDLT<br>MDDLE | Oryctola<br>gus<br>cuniculu<br>s |
| 1 | 1.00 | 1 | 1 | 0 | 0      | 0 | 0 | -0.003 | t | 43242 | NANPNAN<br>PNANP             | Mus<br>musculu<br>s              |
| 1 | 1.00 | 1 | 1 | 0 | -0.003 | 0 | 0 | -0.003 | t | 48670 | PNLRGDL<br>QVLAQKV<br>ARTLP  | Oryctola<br>gus<br>cuniculu<br>s |
| 1 | 1.00 | 1 | 1 | 0 | 0      | 0 | 0 | -0.003 | t | 10639 | DVKFPGG<br>GQIVGGV<br>YLLPRR | Mus<br>musculu<br>s              |
| 1 | 1.00 | 1 | 1 | 0 | -0.003 | 0 | 0 | -0.003 | t | 32844 | KPQEEKEK<br>ITKEILNGK        | Oryctola<br>gus<br>cuniculu<br>s |
| 1 | 1.00 | 1 | 1 | 0 | -0.003 | 0 | 0 | -0.003 | t | 19636 | GFTTNEER<br>YNVFAE           | Oryctola<br>gus<br>cuniculu<br>s |
| 1 | 1.00 | 1 | 1 | 0 | 0      | 0 | 0 | -0.003 | t | 11815 | EENVEENV<br>EENVEENV         | Mus<br>musculu<br>s              |
| 1 | 1.00 | 1 | 1 | 0 | 0      | 0 | 0 | -0.003 | t | 27965 | IPNPLLGL<br>D                | Mus<br>musculu<br>s              |
| 1 | 1.00 | 1 | 1 | 0 | -0.003 | 0 | 0 | -0.003 | t | 19636 | GFTTNEER<br>YNVFAE           | Oryctola<br>gus<br>cuniculu<br>s |
| 1 | 1.00 | 1 | 1 | 0 | -0.003 | 0 | 0 | -0.003 | t | 9722  | DPPPPNP<br>NDPPPPN<br>PN     | Oryctola<br>gus<br>cuniculu<br>s |
| 1 | 1.00 | 1 | 1 | 0 | 0      | 0 | 0 | -0.003 | t | 5728  | AYANSTQE<br>ETF              | Oryctola<br>gus<br>cuniculu<br>s |
| 1 | 1.00 | 1 | 1 | 0 | 0      | 0 | 0 | -0.003 | t | 8475  | DGQPAGD<br>RADGQPA<br>GDRA   | Mus<br>musculu<br>s              |

|   |      |   |   |      |       |       |       |        |   |        |                                  |                       |
|---|------|---|---|------|-------|-------|-------|--------|---|--------|----------------------------------|-----------------------|
| 1 | 1.00 | 1 | 1 | 0    | 0     | 0     | 0     | -0.003 | t | 9753   | DPRVRGLY                         | Mus musculus          |
| 1 | 1.00 | 1 | 1 | 0    | 0     | 0     | 0     | -0.003 | t | 9753   | DPRVRGLY                         | Mus musculus          |
| 1 | 1.00 | 1 | 1 | 0    | 0     | 0     | 0     | -0.003 | t | 7558   | DAKDGKEI<br>DTKHLPS<br>TC        | Oryctolagus cuniculus |
| 1 | 1.00 | 1 | 1 | 0    | 0     | 0     | 0     | -0.003 | t | 6338   | CGQPVTR<br>TDDDTVA               | Oryctolagus cuniculus |
| 1 | 1.00 | 1 | 1 | 0.06 | 0.06  | 0.06  | 0.06  | 0.06   | t | 78746  | MDTWNP<br>PLGSTSQ<br>P<br>CLFQTP | Homo sapiens          |
| 1 | 1.00 | 1 | 1 | 0    | 0     | 0     | 0.006 | 0      | t | 110938 | LYIKGSGST<br>ANLASSNY<br>FPT     | Homo sapiens          |
| 1 | 1.00 | 1 | 1 | 0    | 0     | 0     | 0.006 | 0      | t | 110965 | PNNNKILV<br>PKVSG<br>LQY<br>RVFR | Homo sapiens          |
| 1 | 1.00 | 1 | 1 | 0.02 | 0.02  | 0.013 | 0.02  | 0.02   | t | 7005   | CSGPTTIR<br>GQFS                 | Mus musculus          |
| 1 | 1.00 | 1 | 1 | 0.02 | 0.02  | 0.013 | 0.02  | 0.02   | t | 7005   | CSGPTTIR<br>GQFS                 | Mus musculus          |
| 1 | 1.00 | 1 | 1 | 0    | 0.002 | 0     | 0.001 | -0.002 | t | 54860  | RMAWDM<br>M                      | Homo sapiens          |
| 1 | 1.00 | 1 | 1 | 0.04 | 0.048 | 0.04  | 0.04  | 0.038  | t | 156866 | FGSSSAG                          | Gallus gallus         |
| 1 | 1.00 | 1 | 1 | 0.07 | 0.07  | 0.07  | 0.07  | 0.07   | t | 125799 | DDDRYSDL                         | Oryctolagus cuniculus |
| 1 | 1.00 | 1 | 1 | 0.08 | 0.082 | 0.069 | 0.081 | 0.08   | t | 60441  | SQGISDDD<br>NDSAVAEF<br>FQSF     | Homo sapiens          |
| 1 | 1.00 | 1 | 1 | 0.01 | 0.01  | 0.003 | 0.02  | 0.012  | t | 106990 | VYATRSSA<br>VRLRSSVP             | Homo sapiens          |
| 1 | 1.00 | 1 | 1 | 0.01 | 0.008 | 0.005 | 0.011 | 0.01   | t | 123144 | ENPTMAG<br>YR                    | Homo sapiens          |

|   |      |   |   |       |        |        |        |        |   |        |                              |                       |
|---|------|---|---|-------|--------|--------|--------|--------|---|--------|------------------------------|-----------------------|
| 1 | 1.00 | 1 | 1 | 0.01  | 0.012  | 0.01   | 0.011  | 0.009  | t | 51483  | QLPQGTTL<br>PKGIFYAE         | Homo sapiens          |
| 1 | 1.00 | 1 | 1 | -0.04 | -0.04  | -0.044 | -0.037 | -0.04  | t | 48864  | PPPPPPPP<br>PPPPPPPP<br>PPPP | Homo sapiens          |
| 1 | 1.00 | 1 | 1 | 0     | 0      | -0.008 | 0      | 0      | t | 106715 | PSKECCSG<br>TKKL             | Homo sapiens          |
| 1 | 1.00 | 1 | 1 | -0.02 | -0.018 | -0.02  | -0.02  | -0.022 | t | 122886 | RGTDEYFI<br>RKPP             | Rattus norvegicus     |
| 1 | 1.00 | 1 | 1 | -0.02 | -0.018 | -0.03  | -0.017 | -0.02  | t | 73298  | WYTTVPK<br>YVATQGYL          | Homo sapiens          |
| 1 | 1.00 | 1 | 1 | 0     | 0      | 0      | 0      | 0      | t | 13525  | ENMYRYP<br>NQVYY             | Mus musculus          |
| 1 | 1.00 | 1 | 1 | 0     | 0      | 0      | 0      | 0      | t | 13525  | ENMYRYP<br>NQVYY             | Mus musculus          |
| 1 | 1.00 | 1 | 1 | 0.03  | 0.032  | 0.024  | 0.031  | 0.031  | t | 144925 | NETIYNTTL<br>K               | Homo sapiens          |
| 1 | 1.00 | 1 | 1 | -0.03 | -0.034 | -0.019 | -0.031 | -0.032 | t | 26926  | IKVFG                        | Oryctolagus cuniculus |
| 1 | 1.00 | 1 | 1 | 0.04  | 0.036  | 0.04   | 0.039  | 0.04   | t | 46348  | NVDENAN<br>A                 | Oryctolagus cuniculus |
| 1 | 1.00 | 1 | 1 | 0.06  | 0.062  | 0.056  | 0.057  | 0.06   | t | 11927  | EEVVGEEK<br>LVSEEIVT         | Homo sapiens          |
| 1 | 1.00 | 1 | 1 | 0.02  | 0.021  | 0.02   | 0.019  | 0.02   | t | 57147  | SCTVTRED<br>GT               | Oryctolagus cuniculus |
| 1 | 1.00 | 1 | 1 | -0.04 | -0.036 | -0.036 | -0.033 | -0.04  | t | 144614 | DMMYGG<br>MRGM               | Homo sapiens          |
| 1 | 1.00 | 1 | 1 | -0.01 | -0.008 | -0.005 | -0.009 | -0.011 | t | 39883  | LTERLY                       | Homo sapiens          |

|   |      |   |   |       |        |        |        |        |   |        |                              |                                  |
|---|------|---|---|-------|--------|--------|--------|--------|---|--------|------------------------------|----------------------------------|
| 1 | 1.00 | 1 | 1 | 0.02  | 0.023  | 0.015  | 0.02   | 0.021  | t | 141567 | TQDGLYH<br>NKN               | Mus<br>musculu<br>s              |
| 1 | 1.00 | 1 | 1 | -0.01 | -0.01  | -0.01  | -0.001 | -0.012 | t | 131815 | AHELWKV<br>PLPPKNIT          | Homo<br>sapiens                  |
| 1 | 1.00 | 1 | 1 | 0.06  | 0.06   | 0.06   | 0.06   | 0.06   | t | 48518  | PLVAEEDE                     | Homo<br>sapiens                  |
| 1 | 1.00 | 1 | 1 | -0.01 | -0.008 | -0.01  | -0.003 | -0.01  | t | 130737 | AS AISVAR                    | Homo<br>sapiens                  |
| 1 | 1.00 | 1 | 1 | 0     | 0      | -0.01  | -0.003 | -0.002 | t | 69619  | VLLPDE                       | Homo<br>sapiens                  |
| 1 | 1.00 | 1 | 1 | 0.03  | 0.032  | 0.019  | 0.031  | 0.03   | t | 110589 | GDICNTM<br>HYTNWTH<br>IYICEE | Homo<br>sapiens                  |
| 1 | 1.00 | 1 | 1 | 0     | -0.001 | 0.005  | -0.003 | 0      | t | 73991  | YGFQYS                       | Homo<br>sapiens                  |
| 1 | 1.00 | 1 | 1 | 0.05  | 0.05   | 0.039  | 0.053  | 0.052  | t | 50746  | QFDEMEE<br>CSRHIPYLA<br>EGQQ | Homo<br>sapiens                  |
| 1 | 1.00 | 1 | 1 | -0.01 | -0.013 | -0.021 | -0.01  | -0.006 | t | 133629 | LPLRF                        | Oryctola<br>gus<br>cuniculu<br>s |
| 1 | 1.00 | 1 | 1 | 0.01  | 0.01   | 0.01   | 0.01   | 0.01   | t | 42694  | MSTNPKP<br>QRKTK             | Homo<br>sapiens                  |
| 1 | 1.00 | 1 | 1 | 0     | -0.003 | -0.005 | 0      | -0.001 | t | 138157 | DPNAPPP<br>PPADPNA           | Oryctola<br>gus<br>cuniculu<br>s |
| 1 | 1.00 | 1 | 1 | 0.03  | 0.026  | 0.029  | 0.029  | 0.029  | t | 110862 | GGPTLVSL<br>HELPAETP         | Oryctola<br>gus<br>cuniculu<br>s |
| 1 | 1.00 | 1 | 1 | 0.01  | 0.01   | 0.006  | 0.015  | 0.009  | t | 55670  | RRPFFHPV<br>GEADYFEY<br>HQEG | Homo<br>sapiens                  |
| 1 | 1.00 | 1 | 1 | -0.02 | -0.016 | -0.011 | -0.013 | -0.021 | t | 119547 | YKKGARPI<br>Q                | Homo<br>sapiens                  |
| 1 | 1.00 | 1 | 1 | 0     | 0      | 0      | 0      | 0      | t | 43703  | NENLLRFF<br>VA               | Homo<br>sapiens                  |
| 1 | 1.00 | 1 | 1 | -0.03 | -0.032 | -0.025 | -0.031 | -0.03  | t | 104139 | MW NDFW                      | Mus<br>musculu<br>s              |

|   |      |   |   |       |        |        |        |        |   |        |                   |                                  |
|---|------|---|---|-------|--------|--------|--------|--------|---|--------|-------------------|----------------------------------|
| 1 | 1.00 | 1 | 1 | -0.01 | -0.01  | -0.01  | -0.01  | -0.011 | t | 55071  | RNTNRRP<br>QDVKF  | Homo<br>sapiens                  |
| 1 | 1.00 | 1 | 1 | 0.02  | 0.024  | 0.006  | 0.02   | 0.022  | t | 45931  | NSNNKEYT          | Cavia<br>porcellu<br>s           |
| 1 | 1.00 | 1 | 1 | 0     | 0      | 0      | 0      | 0      | t | 51505  | QLQFPQP<br>P      | Homo<br>sapiens                  |
| 1 | 1.00 | 1 | 1 | 0.05  | 0.046  | 0.05   | 0.049  | 0.05   | t | 137888 | GTEYTV EV         | Oryctola<br>gus<br>cuniculu<br>s |
| 1 | 1.00 | 1 | 1 | -0.01 | -0.006 | -0.016 | -0.01  | -0.01  | t | 22835  | GTSMDDE<br>ADRYF  | Capra<br>hircus                  |
| 1 | 1.00 | 1 | 1 | -0.02 | -0.017 | -0.023 | -0.02  | -0.022 | t | 66841  | TTTCFRDT<br>DTGK  | Mus<br>musculu<br>s              |
| 1 | 1.00 | 1 | 1 | 0.01  | 0.01   | 0.004  | 0.01   | 0.01   | t | 55751  | RRTQSMG<br>IQL    | Mus<br>musculu<br>s              |
| 1 | 1.00 | 1 | 1 | 0.03  | 0.028  | 0.023  | 0.023  | 0.027  | t | 108202 | VVSHFND           | Mus<br>musculu<br>s              |
| 1 | 1.00 | 1 | 1 | 0     | 0.002  | -0.007 | -0.003 | -0.001 | t | 118387 | GPKGRTVII<br>EQSW | Homo<br>sapiens                  |
| 1 | 1.00 | 1 | 1 | -0.03 | -0.028 | -0.029 | -0.029 | -0.031 | t | 63082  | TCKKNM            | Homo<br>sapiens                  |
| 1 | 1.00 | 1 | 1 | -0.02 | -0.018 | -0.02  | -0.017 | -0.02  | t | 131358 | APSVTLF           | Homo<br>sapiens                  |
| 1 | 1.00 | 1 | 1 | 0.01  | 0.01   | 0.008  | 0.01   | 0.008  | t | 97282  | ESNNL             | Oryctola<br>gus<br>cuniculu<br>s |
| 1 | 1.00 | 1 | 1 | 0.05  | 0.048  | 0.048  | 0.049  | 0.053  | t | 103117 | DTDY              | Mus<br>musculu<br>s              |
| 1 | 1.00 | 1 | 1 | 0.02  | 0.008  | 0.011  | 0.02   | 0.02   | t | 66741  | TTNQALKK          | Macaca<br>mulatta                |

|   |      |   |   |       |        |        |        |       |   |        |                              |                         |
|---|------|---|---|-------|--------|--------|--------|-------|---|--------|------------------------------|-------------------------|
| 1 | 1.00 | 1 | 1 | 0.02  | 0.005  | 0.011  | 0.02   | 0.02  | t | 66741  | TTNQALKK                     | Macaca mulatta          |
| 1 | 1.00 | 1 | 1 | -0.01 | -0.008 | -0.01  | -0.002 | -0.01 | t | 110938 | LYIKGSGST<br>ANLASSNY<br>FPT | Homo sapiens            |
| 1 | 1.00 | 1 | 1 | -0.01 | -0.008 | -0.01  | -0.002 | -0.01 | t | 110938 | LYIKGSGST<br>ANLASSNY<br>FPT | Homo sapiens            |
| 1 | 1.00 | 1 | 1 | 0     | 0.002  | -0.005 | 0.003  | 0     | t | 20391  | GIPDGWP                      | Felis catus             |
| 1 | 1.00 | 1 | 1 | 0.03  | 0.028  | 0.041  | 0.033  | 0.028 | t | 111486 | LIEESAIINA<br>GAP            | Mus musculus            |
| 1 | 1.00 | 1 | 1 | -0.02 | -0.016 | -0.016 | -0.013 | -0.02 | t | 144609 | DEKLRDYI<br>WN               | Homo sapiens            |
| 1 | 1.00 | 1 | 1 | 0.01  | 0.01   | 0.001  | 0.004  | 0.008 | t | 95334  | EDVPQPP<br>VSQFH             | Homo sapiens            |
| 1 | 1.00 | 1 | 1 | 0.02  | 0.018  | 0.013  | 0.023  | 0.021 | t | 106947 | VATWLNP<br>DPSQK             | Mus musculus            |
| 1 | 1.00 | 1 | 1 | -0.02 | -0.017 | -0.03  | -0.02  | -0.02 | t | 45492  | NPTIAG                       | Mus musculus            |
| 1 | 1.00 | 1 | 1 | -0.02 | -0.017 | -0.03  | -0.02  | -0.02 | t | 45492  | NPTIAG                       | Mus musculus            |
| 1 | 1.00 | 1 | 1 | -0.02 | -0.017 | -0.03  | -0.02  | -0.02 | t | 45492  | NPTIAG                       | Mus musculus            |
| 1 | 1.00 | 1 | 1 | -0.01 | -0.01  | -0.01  | -0.01  | -0.01 | t | 96239  | EKPTPPVK<br>PT               | Homo sapiens(<br>human) |
| 1 | 1.00 | 1 | 1 | 0.01  | 0.008  | 0.014  | 0.007  | 0.008 | t | 25002  | HTVTTTTK                     | Mus musculus            |
| 1 | 1.00 | 1 | 1 | -0.08 | -0.078 | -0.087 | -0.077 | -0.08 | t | 135961 | MRRPRRP<br>GGLGG             | Homo sapiens            |



|   |      |   |   |       |        |        |        |        |   |        |                              |                                  |
|---|------|---|---|-------|--------|--------|--------|--------|---|--------|------------------------------|----------------------------------|
| 1 | 1.00 | 1 | 1 | 0.05  | 0.048  | 0.045  | 0.049  | 0.05   | t | 51072  | QIGNTVTP<br>TVTFTMD<br>GDTMT | Mus<br>musculu<br>s              |
| 1 | 1.00 | 1 | 1 | 0.05  | 0.048  | 0.045  | 0.049  | 0.05   | t | 51072  | QIGNTVTP<br>TVTFTMD<br>GDTMT | Mus<br>musculu<br>s              |
| 1 | 1.00 | 1 | 1 | 0.01  | 0.014  | 0.01   | 0.013  | 0.01   | t | 117736 | AEMKSLEE<br>KIGCLLK          | Homo<br>sapiens                  |
| 1 | 1.00 | 1 | 1 | -0.01 | -0.01  | -0.01  | -0.01  | -0.01  | t | 121708 | PKPEPKPK                     | Homo<br>sapiens                  |
| 1 | 1.00 | 1 | 1 | 0.01  | 0.01   | 0.01   | 0.01   | 0.009  | t | 11814  | EENVEENV<br>EENV             | Oryctola<br>gus<br>cuniculu<br>s |
| 1 | 1.00 | 1 | 1 | 0.01  | 0.013  | 0.01   | 0.01   | 0.008  | t | 140933 | YDITGEYV<br>QILDAHAA<br>YLNA | Mus<br>musculu<br>s              |
| 1 | 1.00 | 1 | 1 | -0.05 | -0.048 | -0.05  | -0.043 | -0.051 | t | 117229 | RHGFLPRH<br>RD               | Homo<br>sapiens                  |
| 1 | 1.00 | 1 | 1 | 0     | -0.004 | 0      | 0.003  | -0.002 | t | 53334  | RDEDSYER<br>DPYSPSQ          | Oryctola<br>gus<br>cuniculu<br>s |
| 1 | 1.00 | 1 | 1 | 0     | -0.002 | 0      | 0.003  | -0.002 | t | 31885  | KLKFGAA<br>RV                | Mus<br>musculu<br>s              |
| 1 | 1.00 | 1 | 1 | -0.04 | -0.038 | -0.047 | -0.037 | -0.039 | t | 144652 | GMRGMK<br>GLVY               | Homo<br>sapiens                  |
| 1 | 1.00 | 1 | 1 | 0.01  | 0.012  | 0.003  | 0.009  | 0.01   | t | 73590  | YDTADII                      | Felis<br>catus                   |
| 1 | 1.00 | 1 | 1 | 0.01  | 0.014  | 0.01   | 0.017  | 0.01   | t | 132036 | QVNTNKG<br>GGVWESG<br>A      | Homo<br>sapiens                  |
| 1 | 1.00 | 1 | 1 | 0.01  | 0.012  | 0.003  | 0.011  | 0.009  | t | 39732  | LSVDLSLTV<br>ELKIKI          | Homo<br>sapiens                  |
| 1 | 1.00 | 1 | 1 | 0.01  | 0.01   | 0.01   | 0.01   | 0.008  | t | 32807  | KPNLSSKR<br>SELSQLS          | Mus<br>musculu<br>s              |

|   |      |   |   |       |        |        |        |        |   |        |                      |                       |
|---|------|---|---|-------|--------|--------|--------|--------|---|--------|----------------------|-----------------------|
| 1 | 1.00 | 1 | 1 | -0.02 | -0.02  | -0.032 | -0.02  | -0.02  | t | 78452  | LNVAHQLA             | Mus musculus          |
| 1 | 1.00 | 1 | 1 | 0.01  | 0.008  | 0.011  | 0.007  | 0.01   | t | 55293  | RPQDVKFP             | Mus musculus          |
| 1 | 1.00 | 1 | 1 | -0.01 | -0.01  | -0.009 | -0.01  | -0.01  | t | 76606  | YYSPAF               | Mus musculus          |
| 1 | 1.00 | 1 | 1 | 0.02  | 0.016  | 0.009  | 0.017  | 0.02   | t | 20562  | GKFLEGA              | Oryctolagus cuniculus |
| 1 | 1.00 | 1 | 1 | 0.02  | 0.018  | 0.009  | 0.017  | 0.02   | t | 20562  | GKFLEGA              | Mus musculus          |
| 1 | 1.00 | 1 | 1 | -0.01 | -0.01  | -0.018 | -0.01  | -0.01  | t | 86551  | MTAEPKTVL            | Homo sapiens          |
| 1 | 1.00 | 1 | 1 | 0.02  | 0.017  | 0.02   | 0.02   | 0.02   | t | 119923 | GYISKAQEYFN          | Oryctolagus cuniculus |
| 1 | 1.00 | 1 | 1 | 0.01  | 0.01   | 0.01   | 0.01   | 0.009  | t | 153474 | TLITHIAPYIQT         | Mus musculus          |
| 1 | 1.00 | 1 | 1 | -0.01 | -0.006 | -0.013 | -0.003 | -0.01  | t | 124068 | ELMALHTGQSLEQIER     | Homo sapiens          |
| 1 | 1.00 | 1 | 1 | 0.05  | 0.05   | 0.047  | 0.05   | 0.05   | t | 20047  | GGTEIKYNGE           | Mus musculus          |
| 1 | 1.00 | 1 | 1 | 0     | 0.004  | -0.011 | 0      | 0      | t | 110562 | DIILECVYCKQQLLRREVYD | Cavia porcellus       |
| 1 | 1.00 | 1 | 1 | -0.02 | -0.016 | -0.031 | -0.02  | -0.019 | t | 93332  | LSSLQFARAA           | Ovis aries            |
| 1 | 1.00 | 1 | 1 | 0.04  | 0.038  | 0.04   | 0.039  | 0.04   | t | 110877 | GTVGENVPDDLYIKG      | Mus musculus          |
| 1 | 1.00 | 1 | 1 | 0     | 0.002  | -0.009 | -0.002 | -0.001 | t | 110828 | EIDGPAGQAEPDRAHYNI   | Homo sapiens          |

|   |      |   |   |       |        |        |        |        |   |        |                           |                                  |
|---|------|---|---|-------|--------|--------|--------|--------|---|--------|---------------------------|----------------------------------|
| 1 | 1.00 | 1 | 1 | 0.01  | 0.01   | 0.01   | 0.01   | 0.01   | t | 51505  | QLQFPQP<br>P              | Homo<br>sapiens                  |
| 1 | 1.00 | 1 | 1 | -0.03 | -0.031 | -0.03  | -0.03  | -0.031 | t | 22753  | GTLTWSG<br>K              | Anas<br>platyrhy<br>nchos        |
| 1 | 1.00 | 1 | 1 | -0.02 | -0.018 | -0.022 | -0.013 | -0.02  | t | 133871 | LAKLGGAG<br>QAARAGT       | Homo<br>sapiens                  |
| 1 | 1.00 | 1 | 1 | -0.02 | -0.021 | -0.029 | -0.021 | -0.021 | t | 52891  | QYDSNGT<br>KLE            | Mus<br>musculu<br>s              |
| 1 | 1.00 | 1 | 1 | -0.03 | -0.032 | -0.038 | -0.031 | -0.03  | t | 27416  | ILYAVFK                   | Mus<br>musculu<br>s              |
| 1 | 1.00 | 1 | 1 | 0     | 0      | -0.016 | 0      | 0.001  | t | 140573 | LCRSACVIY<br>IKYSSA       | Mus<br>musculu<br>s              |
| 1 | 1.00 | 1 | 1 | -0.03 | -0.028 | -0.03  | -0.023 | -0.029 | t | 113321 | DENPVVH<br>FFKNIVTP<br>RT | Homo<br>sapiens                  |
| 1 | 1.00 | 1 | 1 | -0.03 | -0.028 | -0.03  | -0.023 | -0.029 | t | 113321 | DENPVVH<br>FFKNIVTP<br>RT | Homo<br>sapiens                  |
| 1 | 1.00 | 1 | 1 | -0.03 | -0.033 | -0.037 | -0.03  | -0.032 | t | 41610  | MGQHPAK<br>SMDVRR         | Oryctola<br>gus<br>cuniculu<br>s |
| 1 | 1.00 | 1 | 1 | -0.05 | -0.053 | -0.066 | -0.05  | -0.048 | t | 65905  | TQNRQIDR                  | Oryctola<br>gus<br>cuniculu<br>s |
| 1 | 1.00 | 1 | 1 | -0.02 | -0.017 | -0.02  | -0.02  | -0.02  | t | 6276   | CGAVIDDC                  | Mus<br>musculu<br>s              |
| 1 | 1.00 | 1 | 1 | -0.02 | -0.017 | -0.02  | -0.02  | -0.02  | t | 6276   | CGAVIDDC                  | Mus<br>musculu<br>s              |
| 1 | 1.00 | 1 | 1 | 0.06  | 0.06   | 0.06   | 0.06   | 0.059  | t | 112278 | QSVLYSS                   | Homo<br>sapiens                  |
| 1 | 1.00 | 1 | 1 | 0.01  | 0.012  | 0.003  | 0.013  | 0.01   | t | 133787 | CQALVRM<br>LAKKPGW<br>K   | Homo<br>sapiens                  |
| 1 | 1.00 | 1 | 1 | -0.01 | -0.013 | -0.018 | -0.01  | -0.011 | t | 94945  | TLGASSGY<br>LKGN          | Oryctola<br>gus<br>cuniculu<br>s |

|   |      |   |   |       |        |        |        |        |   |        |                             |                       |
|---|------|---|---|-------|--------|--------|--------|--------|---|--------|-----------------------------|-----------------------|
| 1 | 1.00 | 1 | 1 | -0.01 | -0.01  | -0.017 | -0.01  | -0.013 | t | 133577 | FVVDMMERLRISQKVRVA          | Mus musculus          |
| 1 | 1.00 | 1 | 1 | 0     | 0      | 0      | 0.006  | 0      | t | 108125 | SHQESTRG<br>RSRGRSGR<br>SGS | Homo sapiens          |
| 1 | 1.00 | 1 | 1 | 0     | 0      | 0      | 0.006  | 0      | t | 65423  | TNSHVPIL<br>QERPPLE         | Homo sapiens          |
| 1 | 1.00 | 1 | 1 | -0.01 | -0.008 | -0.012 | -0.003 | -0.01  | t | 48779  | PPFSLSPV<br>PTLGSRSR<br>R   | Homo sapiens          |
| 1 | 1.00 | 1 | 1 | -0.01 | -0.01  | -0.015 | -0.003 | -0.01  | t | 117972 | LAVTKYKQ<br>RNGWSHK         | Homo sapiens          |
| 1 | 1.00 | 1 | 1 | 0.02  | 0.017  | 0.015  | 0.02   | 0.02   | t | 25587  | IDIDLCDIC<br>TNTMDV         | Oryctolagus cuniculus |
| 1 | 1.00 | 1 | 1 | 0.02  | 0.02   | 0.015  | 0.02   | 0.02   | t | 25587  | IDIDLCDIC<br>TNTMDV         | Mus musculus          |
| 1 | 1.00 | 1 | 1 | -0.04 | -0.038 | -0.04  | -0.033 | -0.04  | t | 144619 | DYIWNTL<br>NSG              | Homo sapiens          |
| 1 | 1.00 | 1 | 1 | 0.01  | 0.007  | -0.005 | 0.003  | 0.01   | t | 104051 | LPSDPIGG<br>KSNMHFM<br>NTL  | Oryctolagus cuniculus |
| 1 | 1.00 | 1 | 1 | 0     | 0.003  | 0.007  | 0      | -0.002 | t | 78695  | KDTNNNL<br>YNGK             | Mus musculus          |
| 1 | 1.00 | 1 | 1 | 0.01  | 0.012  | 0.01   | 0.007  | 0.01   | t | 43255  | NANPNVD<br>P                | Homo sapiens          |
| 1 | 1.00 | 1 | 1 | 0.05  | 0.05   | 0.041  | 0.05   | 0.05   | t | 135920 | ETSLSAAG<br>NSII            | Homo sapiens          |
| 1 | 1.00 | 1 | 1 | 0     | 0      | -0.015 | 0.001  | 0.001  | t | 78896  | YTKDTNN<br>NLTL             | Mus musculus          |

|   |      |   |   |       |        |        |        |        |   |        |                              |                       |
|---|------|---|---|-------|--------|--------|--------|--------|---|--------|------------------------------|-----------------------|
| 1 | 1.00 | 1 | 1 | 0.05  | 0.052  | 0.05   | 0.051  | 0.05   | t | 98786  | GASEL                        | Homo sapiens          |
| 1 | 1.00 | 1 | 1 | 0.02  | 0.02   | 0.018  | 0.02   | 0.02   | t | 66343  | TSNPLGFF<br>PDHQLDP          | Mus musculus          |
| 1 | 1.00 | 1 | 1 | 0.04  | 0.04   | 0.04   | 0.04   | 0.04   | t | 134781 | RGDGPFRLL<br>GG              | Homo sapiens          |
| 1 | 1.00 | 1 | 1 | 0.01  | 0.012  | 0.015  | 0.011  | 0.01   | t | 67450  | TYRGFTSL                     | Homo sapiens          |
| 1 | 1.00 | 1 | 1 | 0     | 0      | -0.009 | 0      | 0      | t | 73611  | YDYQHKE<br>G                 | Homo sapiens          |
| 1 | 1.00 | 1 | 1 | 0     | 0      | 0      | 0      | -0.003 | t | 115434 | QEKDMAI<br>NPSKENLC<br>STFCK | Homo sapiens          |
| 1 | 1.00 | 1 | 1 | -0.04 | -0.036 | -0.039 | -0.033 | -0.042 | t | 123985 | CPCGSCCS<br>WWKWLL<br>GLLL   | Homo sapiens          |
| 1 | 1.00 | 1 | 1 | 0.02  | 0.02   | 0.013  | 0.021  | 0.021  | t | 106357 | DTWEPF                       | Mus musculus          |
| 1 | 1.00 | 1 | 1 | 0     | 0      | -0.003 | 0      | 0.002  | t | 137770 | TLARSFII<br>CIQM             | Mus musculus          |
| 1 | 1.00 | 1 | 1 | 0.02  | 0.022  | 0.021  | 0.017  | 0.02   | t | 7713   | DCLLCAYSI<br>EF              | Homo sapiens          |
| 1 | 1.00 | 1 | 1 | 0.04  | 0.04   | 0.031  | 0.04   | 0.04   | t | 135958 | LTAVETGH<br>TSQV             | Homo sapiens          |
| 1 | 1.00 | 1 | 1 | -0.02 | -0.022 | -0.03  | -0.017 | -0.018 | t | 52107  | QQPQRPF<br>AQQ               | Mus musculus          |
| 1 | 1.00 | 1 | 1 | 0.04  | 0.04   | 0.031  | 0.043  | 0.04   | t | 22708  | GTIINQDP<br>DKILTYI          | Homo sapiens          |
| 1 | 1.00 | 1 | 1 | -0.03 | -0.036 | -0.033 | -0.03  | -0.03  | t | 31743  | KLAAAVLN                     | Oryctolagus cuniculus |
| 1 | 1.00 | 1 | 1 | -0.04 | -0.036 | -0.058 | -0.039 | -0.038 | t | 22809  | GTSAPSGS<br>GTSPSSR          | Homo sapiens          |
| 1 | 1.00 | 1 | 1 | 0     | 0      | 0      | 0.003  | -0.002 | t | 36124  | LGGKPAIV<br>PDKEVLYQ<br>QYDE | Homo sapiens          |

|   |      |   |   |       |        |        |        |       |   |        |                      |                     |
|---|------|---|---|-------|--------|--------|--------|-------|---|--------|----------------------|---------------------|
| 1 | 1.00 | 1 | 1 | 0.01  | 0.01   | 0.01   | 0.01   | 0.011 | t | 115278 | GYGGVSLP<br>EW       | Homo<br>sapiens     |
| 1 | 1.00 | 1 | 1 | 0     | 0      | 0      | 0      | 0     | t | 135893 | AFLQDVM<br>NILLQ     | Homo<br>sapiens     |
| 1 | 1.00 | 1 | 1 | 0.02  | 0.02   | -0.001 | 0.014  | 0.023 | t | 47747  | PGSANKPK<br>DELDYEND | Homo<br>sapiens     |
| 1 | 1.00 | 1 | 1 | 0.02  | 0.022  | 0.015  | 0.021  | 0.02  | t | 141926 | ILAALSEAA<br>NKIEN   | Homo<br>sapiens     |
| 1 | 1.00 | 1 | 1 | 0.02  | 0.022  | 0.015  | 0.021  | 0.02  | t | 141926 | ILAALSEAA<br>NKIEN   | Homo<br>sapiens     |
| 1 | 1.00 | 1 | 1 | -0.02 | -0.018 | -0.026 | -0.019 | -0.02 | t | 47239  | PEARQA               | Homo<br>sapiens     |
| 1 | 1.00 | 1 | 1 | 0.02  | 0.02   | 0.02   | 0.02   | 0.02  | t | 153380 | ETELTIAAL<br>KYV     | Mus<br>musculu<br>s |
| 1 | 1.00 | 1 | 1 | 0     | 0.002  | -0.007 | 0.003  | 0     | t | 116927 | AVCRTSM<br>CSIQSAPP  | Homo<br>sapiens     |
| 1 | 1.00 | 1 | 1 | 0     | -0.002 | -0.002 | -0.001 | 0     | t | 10835  | DWVKGF<br>IDSSC      | Mus<br>musculu<br>s |
| 1 | 1.00 | 1 | 1 | -0.02 | -0.018 | -0.017 | -0.017 | -0.02 | t | 94626  | NPTCWAI<br>CKRIP     | Homo<br>sapiens     |
| 1 | 1.00 | 1 | 1 | 0.02  | 0.02   | 0.022  | 0.02   | 0.019 | t | 4701   | ASQKIQLI             | Mus<br>musculu<br>s |
| 1 | 1.00 | 1 | 1 | -0.05 | -0.048 | -0.05  | -0.043 | -0.05 | t | 117602 | PKVKSKKR<br>EAVAGRG  | Homo<br>sapiens     |
| 1 | 1.00 | 1 | 1 | -0.05 | -0.048 | -0.05  | -0.043 | -0.05 | t | 117603 | PKVKSKKR<br>EAVAGRG  | Homo<br>sapiens     |
| 1 | 1.00 | 1 | 1 | 0.04  | 0.038  | 0.04   | 0.041  | 0.04  | t | 149435 | QPQYSQP<br>QQP       | Mus<br>musculu<br>s |
| 1 | 1.00 | 1 | 1 | 0.01  | 0.01   | 0.01   | 0.01   | 0.009 | t | 139616 | SYNRGDST<br>FESKSYK  | Homo<br>sapiens     |
| 1 | 1.00 | 1 | 1 | 0.02  | 0.02   | 0.02   | 0.02   | 0.021 | t | 115278 | GYGGVSLP<br>EW       | Homo<br>sapiens     |

|   |      |   |   |       |        |        |        |        |   |        |                              |              |
|---|------|---|---|-------|--------|--------|--------|--------|---|--------|------------------------------|--------------|
| 1 | 1.00 | 1 | 1 | 0     | 0.004  | 0.002  | 0.007  | 0      | t | 433    | AASGPKVV<br>IDGKDQN<br>VTGSV | Homo sapiens |
| 1 | 1.00 | 1 | 1 | -0.01 | -0.01  | -0.014 | -0.01  | -0.012 | t | 49070  | PQPQQQF<br>PQP               | Mus musculus |
| 1 | 1.00 | 1 | 1 | 0     | 0      | 0.009  | 0.007  | 0      | t | 65050  | TLRVYK                       | Homo sapiens |
| 1 | 1.00 | 1 | 1 | 0.01  | 0.008  | 0.015  | 0.007  | 0.008  | t | 25002  | HTVTTTTK                     | Mus musculus |
| 1 | 1.00 | 1 | 1 | -0.02 | -0.02  | -0.02  | -0.02  | -0.02  | t | 46825  | PAIIPDREV                    | Homo sapiens |
| 1 | 1.00 | 1 | 1 | 0     | -0.002 | 0      | -0.002 | -0.004 | t | 138166 | FHEFWPT                      | Mus musculus |
| 1 | 1.00 | 1 | 1 | 0     | -0.002 | 0      | -0.002 | -0.004 | t | 138238 | SMLDTPT                      | Mus musculus |
| 1 | 1.00 | 1 | 1 | 0     | -0.002 | 0      | -0.002 | -0.004 | t | 138189 | HILGSTA                      | Mus musculus |
| 1 | 1.00 | 1 | 1 | 0     | -0.002 | 0      | -0.002 | -0.004 | t | 138202 | LPTITNT                      | Mus musculus |
| 1 | 1.00 | 1 | 1 | 0     | 0.002  | 0      | -0.002 | -0.004 | t | 138191 | HPTWSSL                      | MD           |
| 1 | 1.00 | 1 | 1 | 0     | -0.002 | 0      | -0.002 | -0.004 | t | 138192 | HQTPLST                      | Mus musculus |
| 1 | 1.00 | 1 | 1 | 0.01  | 0.01   | 0.01   | 0.013  | 0.01   | t | 42696  | MSTNPKP<br>QRKTKRNT          | Homo sapiens |
| 1 | 1.00 | 1 | 1 | 0     | 0      | 0      | 0.009  | -0.002 | t | 131889 | GKTFTNG<br>WKSTEEED          | Homo sapiens |
| 1 | 1.00 | 1 | 1 | 0.01  | 0.01   | 0.012  | 0.01   | 0.008  | t | 7230   | CTTPAQG<br>NSMFPSC           | Mus musculus |
| 1 | 1.00 | 1 | 1 | -0.02 | -0.018 | -0.031 | -0.019 | -0.02  | t | 110602 | GLKAKPKF<br>TLGKRKAT<br>PTT  | Homo sapiens |
| 1 | 1.00 | 1 | 1 | -0.02 | -0.016 | -0.009 | -0.013 | -0.02  | t | 138171 | FRVVSVL                      | Homo sapiens |
| 1 | 1.00 | 1 | 1 | -0.01 | -0.01  | -0.017 | -0.01  | -0.009 | t | 46859  | PALTAVET<br>GATNPL           | Homo sapiens |

|   |      |   |   |       |        |        |        |        |   |        |                       |                       |
|---|------|---|---|-------|--------|--------|--------|--------|---|--------|-----------------------|-----------------------|
| 1 | 1.00 | 1 | 1 | 0.01  | 0.012  | 0.004  | 0.011  | 0.01   | t | 133618 | KKLLVRGL<br>YRISFTTYK | Homo sapiens          |
| 1 | 1.00 | 1 | 1 | 0.05  | 0.05   | 0.046  | 0.05   | 0.05   | t | 36805  | LKASAA                | Homo sapiens          |
| 1 | 1.00 | 1 | 1 | 0     | 0      | 0      | 0      | -0.003 | t | 150874 | NWFDISK<br>WLWYI      | Homo sapiens          |
| 1 | 1.00 | 1 | 1 | -0.02 | -0.023 | -0.018 | -0.02  | -0.022 | t | 127927 | AKPAPPKP<br>EPKPKKA   | Oryctolagus cuniculus |
| 1 | 1.00 | 1 | 1 | 0     | -0.002 | -0.003 | 0.003  | 0      | t | 18955  | GDDPLL<br>NQSLL       | Mus musculus          |
| 1 | 1.00 | 1 | 1 | 0.01  | 0.014  | 0.007  | 0.011  | 0.01   | t | 34639  | KYVTGIN               | Homo sapiens          |
| 1 | 1.00 | 1 | 1 | 0.02  | 0.018  | 0.022  | 0.023  | 0.018  | t | 55785  | RRYQKSTEL             | Mus musculus          |
| 1 | 1.00 | 1 | 1 | 0.02  | 0.02   | 0.02   | 0.02   | 0.02   | t | 156919 | MLHTSM                | Gallus gallus         |
| 1 | 1.00 | 1 | 1 | -0.02 | -0.022 | -0.04  | -0.027 | -0.018 | t | 44555  | NKNDKN<br>D           | Mus musculus          |
| 1 | 1.00 | 1 | 1 | 0     | 0      | 0      | 0      | -0.002 | t | 73785  | YEVARNVSG<br>IYHVT    | Homo sapiens          |
| 1 | 1.00 | 1 | 1 | 0     | 0.004  | 0      | 0      | -0.003 | t | 70387  | VPNLRGDL<br>QV        | Cavia porcellus       |
| 1 | 1.00 | 1 | 1 | 0.02  | 0.019  | 0.028  | 0.021  | 0.02   | t | 67345  | TYGLASL               | Homo sapiens          |
| 1 | 1.00 | 1 | 1 | -0.04 | -0.04  | -0.035 | -0.037 | -0.04  | t | 46817  | PAHYANYLP             | Homo sapiens          |
| 1 | 1.00 | 1 | 1 | -0.01 | -0.015 | -0.006 | -0.006 | -0.012 | t | 34170  | KVPTLK                | Bos taurus            |



|   |      |   |   |       |        |        |        |        |   |        |                             |                                  |
|---|------|---|---|-------|--------|--------|--------|--------|---|--------|-----------------------------|----------------------------------|
| 1 | 1.00 | 1 | 1 | 0.05  | 0.052  | 0.048  | 0.051  | 0.048  | t | 22755  | GTLVKTIT<br>DDQIEV          | Homo<br>sapiens                  |
| 1 | 1.00 | 1 | 1 | 0.02  | 0.023  | 0.02   | 0.02   | 0.019  | t | 107517 | LSTNEVA<br>M                | Mus<br>musculu<br>s              |
| 1 | 1.00 | 1 | 1 | -0.02 | -0.023 | -0.026 | -0.02  | -0.022 | t | 100351 | NQILKPKLI<br>SYTLPVVG       | Oryctola<br>gus<br>cuniculu<br>s |
| 1 | 1.00 | 1 | 1 | -0.05 | -0.048 | -0.045 | -0.043 | -0.05  | t | 117169 | RYHRFKEL<br>STLRR           | Homo<br>sapiens                  |
| 1 | 1.00 | 1 | 1 | 0     | 0      | 0      | 0      | -0.001 | t | 121287 | EYFIRK                      | Rattus<br>norvegic<br>us         |
| 1 | 1.00 | 1 | 1 | 0     | 0      | 0.003  | 0.001  | 0      | t | 64697  | TKVTLDGR<br>PL              | Homo<br>sapiens                  |
| 1 | 1.00 | 1 | 1 | 0     | -0.002 | -0.005 | -0.001 | 0      | t | 78708  | KLVEYCDF<br>LTTFVHAK<br>KKE | Mus<br>musculu<br>s              |
| 1 | 1.00 | 1 | 1 | 0     | -0.004 | -0.005 | -0.001 | 0      | t | 78708  | KLVEYCDF<br>LTTFVHAK<br>KKE | Oryctola<br>gus<br>cuniculu<br>s |
| 1 | 1.00 | 1 | 1 | 0     | 0      | 0      | -0.006 | -0.006 | t | 113879 | SQRSQDE<br>N                | Rattus<br>norvegic<br>us         |
| 1 | 1.00 | 1 | 1 | 0     | 0      | -0.013 | -0.007 | 0      | t | 141932 | KDKKDDKY<br>TKILAA          | Homo<br>sapiens                  |
| 1 | 1.00 | 1 | 1 | 0.06  | 0.06   | 0.06   | 0.06   | 0.06   | t | 135981 | QYVISQE<br>MERIP            | Homo<br>sapiens                  |
| 1 | 1.00 | 1 | 1 | 0.01  | 0.01   | 0.01   | 0.01   | 0.009  | t | 43729  | NEREDERT                    | Oryctola<br>gus<br>cuniculu<br>s |
| 1 | 1.00 | 1 | 1 | 0     | 0.004  | 0      | 0.007  | -0.001 | t | 132031 | QPPAQPLS<br>SSQPNLR         | Homo<br>sapiens                  |

|   |      |   |   |       |        |        |        |        |   |        |                              |                    |
|---|------|---|---|-------|--------|--------|--------|--------|---|--------|------------------------------|--------------------|
| 1 | 1.00 | 1 | 1 | 0.03  | 0.032  | 0.025  | 0.031  | 0.029  | t | 75851  | YSPGQR                       | Homo sapiens       |
| 1 | 1.00 | 1 | 1 | -0.01 | -0.01  | -0.01  | -0.004 | -0.01  | t | 118451 | KGIIDPTKV<br>VRTA            | Homo sapiens       |
| 1 | 1.00 | 1 | 1 | 0.02  | 0.024  | 0.02   | 0.017  | 0.018  | t | 106457 | GIVDSKLP<br>PIDV             | Homo sapiens       |
| 1 | 1.00 | 1 | 1 | 0.02  | 0.019  | 0.011  | 0.02   | 0.021  | t | 49690  | PTLDHVLD                     | Anas platyrhynchos |
| 1 | 1.00 | 1 | 1 | 0.05  | 0.05   | 0.035  | 0.05   | 0.052  | t | 17333  | FPLQPQQ<br>PFP               | Mus musculus       |
| 1 | 1.00 | 1 | 1 | -0.01 | -0.01  | -0.005 | -0.001 | -0.01  | t | 133798 | DKIRGEG<br>MRYIIILD          | Homo sapiens       |
| 1 | 1.00 | 1 | 1 | -0.01 | -0.01  | -0.01  | -0.003 | -0.01  | t | 125416 | FYNLSKVT<br>HIEIRNTR<br>NLTY | Homo sapiens       |
| 1 | 1.00 | 1 | 1 | -0.03 | -0.03  | -0.03  | -0.03  | -0.032 | t | 119658 | TYGIVLLSG<br>V               | Homo sapiens       |
| 1 | 1.00 | 1 | 1 | 0.05  | 0.05   | 0.05   | 0.053  | 0.05   | t | 111041 | TIGRLQDEI<br>QNMKEE<br>MARHL | Mus musculus       |
| 1 | 1.00 | 1 | 1 | 0.05  | 0.05   | 0.05   | 0.053  | 0.05   | t | 111041 | TIGRLQDEI<br>QNMKEE<br>MARHL | Mus musculus       |
| 1 | 1.00 | 1 | 1 | -0.04 | -0.038 | -0.033 | -0.033 | -0.04  | t | 142058 | VLGNKTW                      | Homo sapiens       |
| 1 | 1.00 | 1 | 1 | 0.03  | 0.033  | 0.014  | 0.036  | 0.037  | t | 136062 | FGISETQA<br>EAILE            | Mus musculus       |
| 1 | 1.00 | 1 | 1 | 0.01  | 0.01   | 0.01   | 0.01   | 0.01   | t | 129066 | KFKSV                        | Homo sapiens       |
| 1 | 1.00 | 1 | 1 | 0.03  | 0.034  | 0.029  | 0.03   | 0.029  | t | 56019  | RTAPGPGE                     | Homo sapiens       |
| 1 | 1.00 | 1 | 1 | 0     | 0.004  | 0.007  | 0.003  | -0.005 | t | 135449 | CATLRVYK<br>GG               | Homo sapiens       |
| 1 | 1.00 | 1 | 1 | 0     | 0      | 0      | 0.002  | 0      | t | 67492  | TYTWGEN<br>EKDVFL            | Homo sapiens       |

|   |      |   |   |       |        |        |        |        |   |        |                              |                                  |
|---|------|---|---|-------|--------|--------|--------|--------|---|--------|------------------------------|----------------------------------|
| 1 | 1.00 | 1 | 1 | 0.03  | 0.03   | 0.023  | 0.037  | 0.03   | t | 117015 | KEQFLDGD<br>GWTSRWI<br>ESK   | Homo<br>sapiens                  |
| 1 | 1.00 | 1 | 1 | 0     | 0.014  | 0      | 0.003  | 0      | t | 42795  | MTEQQW<br>NFAGIEAA<br>AS     | Homo<br>sapiens                  |
| 1 | 1.00 | 1 | 1 | 0.03  | 0.03   | 0.028  | 0.03   | 0.029  | t | 66344  | TSNQRGV<br>GSTVVILD          | Sus<br>scrofa                    |
| 1 | 1.00 | 1 | 1 | 0.02  | 0.016  | 0.018  | 0.023  | 0.021  | t | 99259  | FTVKVGDK<br>ELF              | Oryctola<br>gus<br>cuniculu<br>s |
| 1 | 1.00 | 1 | 1 | 0.04  | 0.04   | 0.035  | 0.033  | 0.038  | t | 142382 | AEDAAEEA<br>KEAAKK           | Homo<br>sapiens                  |
| 1 | 1.00 | 1 | 1 | 0.05  | 0.046  | 0.035  | 0.05   | 0.052  | t | 73649  | YEEPNDGE<br>ERQS             | Bos<br>taurus                    |
| 1 | 1.00 | 1 | 1 | 0.05  | 0.054  | 0.035  | 0.05   | 0.052  | t | 73649  | YEEPNDGE<br>ERQS             | Capra<br>hircus                  |
| 1 | 1.00 | 1 | 1 | 0     | 0.002  | -0.007 | -0.003 | -0.003 | t | 106513 | HKARLERP<br>QI               | Homo<br>sapiens                  |
| 1 | 1.00 | 1 | 1 | -0.01 | -0.013 | -0.01  | -0.01  | -0.01  | t | 72484  | WGNGCGL<br>FG                | Mus<br>musculu<br>s              |
| 1 | 1.00 | 1 | 1 | -0.03 | -0.03  | -0.037 | -0.036 | -0.032 | t | 49368  | PSFSDIPN<br>PI               | Homo<br>sapiens                  |
| 1 | 1.00 | 1 | 1 | 0     | -0.003 | -0.01  | 0      | 0      | t | 140908 | TVYFGFDK<br>YDITGEYV<br>QILD | Oryctola<br>gus<br>cuniculu<br>s |
| 1 | 1.00 | 1 | 1 | 0.01  | 0.013  | -0.001 | 0.01   | 0.011  | t | 43191  | NAKATYEA<br>ALKQYEAD<br>LAA  | Mus<br>musculu<br>s              |
| 1 | 1.00 | 1 | 1 | 0.04  | 0.038  | 0.033  | 0.039  | 0.041  | t | 19998  | GGRGDSG                      | Mus<br>musculu<br>s              |
| 1 | 1.00 | 1 | 1 | -0.01 | -0.01  | -0.025 | -0.01  | -0.01  | t | 43226  | NANANPN                      | Mus<br>musculu<br>s              |
| 1 | 1.00 | 1 | 1 | 0.01  | 0.004  | 0.01   | 0.01   | 0.01   | t | 123259 | GQPPYMP<br>P                 | Oryctola<br>gus<br>cuniculu<br>s |

|   |      |   |   |       |        |        |        |        |   |        |                            |                              |
|---|------|---|---|-------|--------|--------|--------|--------|---|--------|----------------------------|------------------------------|
| 1 | 1.00 | 1 | 1 | 0.01  | 0.01   | 0.01   | 0.01   | 0.01   | t | 73432  | YARFMDT<br>DPD             | Mus<br>musculus              |
| 1 | 1.00 | 1 | 1 | 0     | 0.002  | -0.009 | -0.003 | -0.002 | t | 60019  | SPDRKRRA<br>DEEEEYD        | Homo<br>sapiens              |
| 1 | 1.00 | 1 | 1 | 0.02  | 0.02   | 0.02   | 0.02   | 0.02   | t | 134050 | FKPPKY                     | Homo<br>sapiens              |
| 1 | 1.00 | 1 | 1 | 0.05  | 0.052  | 0.043  | 0.053  | 0.052  | t | 142448 | NKYRGTA<br>GNALMDG<br>ASQL | Homo<br>sapiens              |
| 1 | 1.00 | 1 | 1 | -0.03 | -0.03  | -0.03  | -0.03  | -0.03  | t | 79219  | FWLAVR                     | Mus<br>musculus              |
| 1 | 1.00 | 1 | 1 | -0.01 | -0.01  | -0.017 | -0.01  | -0.012 | t | 106375 | EDHAGTY<br>GLGDRK          | Mus<br>musculus              |
| 1 | 1.00 | 1 | 1 | 0     | -0.004 | -0.003 | -0.001 | -0.003 | t | 150860 | IYLNVLKP<br>DEKIH          | Oryctola<br>gus<br>cuniculus |
| 1 | 1.00 | 1 | 1 | 0.02  | 0.02   | 0.02   | 0.02   | 0.02   | t | 149048 | FSTQKSI                    | Sus<br>scrofa                |
| 1 | 1.00 | 1 | 1 | 0.03  | 0.03   | 0.03   | 0.03   | 0.03   | t | 44881  | NLSSKA                     | Homo<br>sapiens              |
| 1 | 1.00 | 1 | 1 | -0.02 | -0.02  | -0.012 | -0.02  | -0.02  | t | 115096 | PPSLLFLP                   | Mus<br>musculus              |
| 1 | 1.00 | 1 | 1 | -0.02 | -0.02  | -0.025 | -0.02  | -0.02  | t | 112507 | FAVLKLM<br>GRGTK           | Rattus<br>norvegicus         |
| 1 | 1.00 | 1 | 1 | 0.01  | 0.012  | 0.002  | 0.011  | 0.009  | t | 14208  | ESLTTTSTA<br>LGKLQDVV      | Homo<br>sapiens              |
| 1 | 1.00 | 1 | 1 | 0.02  | 0.018  | 0.022  | 0.023  | 0.018  | t | 26076  | IFGVDANT<br>GNVL           | Rattus<br>norvegicus         |
| 1 | 1.00 | 1 | 1 | 0.01  | 0.01   | 0.001  | 0.01   | 0.012  | t | 68182  | VEFPLDITA<br>G             | Mus<br>musculus              |
| 1 | 1.00 | 1 | 1 | 0     | 0      | 0.002  | 0      | -0.001 | t | 121773 | QYVAMVA<br>DRLFLY          | Rattus<br>norvegicus         |
| 1 | 1.00 | 1 | 1 | -0.01 | -0.006 | -0.025 | -0.013 | -0.01  | t | 111588 | NLIQHVKG<br>GTPKRPN        | Homo<br>sapiens              |

|   |      |   |   |       |        |        |        |        |   |        |                              |                       |
|---|------|---|---|-------|--------|--------|--------|--------|---|--------|------------------------------|-----------------------|
| 1 | 1.00 | 1 | 1 | -0.01 | -0.01  | -0.015 | -0.01  | -0.012 | t | 131015 | QDRRLDEN                     | Oryctolagus cuniculus |
| 1 | 1.00 | 1 | 1 | 0     | 0.004  | 0      | 0.003  | 0      | t | 118568 | QKIGIEIKRTLK                 | Homo sapiens          |
| 1 | 1.00 | 1 | 1 | 0     | 0.002  | -0.002 | 0.001  | -0.001 | t | 76170  | YTRTWSEVDA                   | Homo sapiens          |
| 1 | 1.00 | 1 | 1 | 0.05  | 0.056  | 0.057  | 0.053  | 0.052  | t | 78154  | FEDETW                       | Equus caballus        |
| 1 | 1.00 | 1 | 1 | 0     | 0.002  | 0      | 0.003  | 0.002  | t | 8473   | DGQPAGDR                     | Homo sapiens          |
| 1 | 1.00 | 1 | 1 | 0     | 0      | 0      | 0.008  | 0.001  | t | 117742 | AKAQTDREDLRTLLRY             | Homo sapiens          |
| 1 | 1.00 | 1 | 1 | 0     | 0      | 0      | 0.008  | 0.001  | t | 117773 | CNSRQTDREDELI                | Homo sapiens          |
| 1 | 1.00 | 1 | 1 | 0     | -0.012 | -0.002 | 0      | 0      | t | 64308  | TIGKVSQK                     | Macaca mulatta        |
| 1 | 1.00 | 1 | 1 | 0     | -0.012 | -0.002 | 0      | 0      | t | 64308  | TIGKVSQK                     | Macaca mulatta        |
| 1 | 1.00 | 1 | 1 | 0.01  | 0.014  | 0.005  | 0.007  | 0.01   | t | 48026  | PKAFDEKLFT                   | Homo sapiens          |
| 1 | 1.00 | 1 | 1 | -0.01 | -0.01  | 0      | -0.01  | -0.012 | t | 95161  | TYGKFCIKP                    | Mus musculus          |
| 1 | 1.00 | 1 | 1 | -0.01 | -0.008 | -0.01  | -0.007 | -0.01  | t | 118189 | TYYIKEQKLG                   | Homo sapiens          |
| 1 | 1.00 | 1 | 1 | -0.01 | -0.012 | -0.021 | -0.011 | -0.01  | t | 41840  | MKIRLHTL<br>LAVLTAAP<br>LLLA | Mus musculus          |

|   |      |   |   |       |        |        |        |        |   |        |                          |                     |
|---|------|---|---|-------|--------|--------|--------|--------|---|--------|--------------------------|---------------------|
| 1 | 1.00 | 1 | 1 | -0.01 | -0.012 | -0.014 | -0.011 | -0.01  | t | 17136  | FNCLGMS<br>SRDFIEGA      | Mus<br>musculu<br>s |
| 1 | 1.00 | 1 | 1 | -0.01 | -0.012 | -0.014 | -0.011 | -0.01  | t | 17136  | FNCLGMS<br>SRDFIEGA      | Mus<br>musculu<br>s |
| 1 | 1.00 | 1 | 1 | -0.01 | -0.007 | -0.014 | -0.011 | -0.01  | t | 17136  | FNCLGMS<br>SRDFIEGA      | Mus<br>musculu<br>s |
| 1 | 1.00 | 1 | 1 | 0.02  | 0.018  | 0.013  | 0.013  | 0.016  | t | 128612 | FDSHY                    | Mus<br>musculu<br>s |
| 1 | 1.00 | 1 | 1 | -0.01 | -0.01  | -0.01  | -0.01  | -0.01  | t | 134769 | QIFNL                    | Mus<br>musculu<br>s |
| 1 | 1.00 | 1 | 1 | -0.01 | -0.01  | -0.01  | -0.01  | -0.01  | t | 134769 | QIFNL                    | Mus<br>musculu<br>s |
| 1 | 1.00 | 1 | 1 | -0.01 | -0.01  | -0.01  | -0.01  | -0.01  | t | 134769 | QIFNL                    | Mus<br>musculu<br>s |
| 1 | 1.00 | 1 | 1 | -0.01 | -0.012 | -0.02  | -0.013 | -0.01  | t | 48858  | PPPPNPN<br>DPPPPNP<br>ND | Mus<br>musculu<br>s |
| 1 | 1.00 | 1 | 1 | 0.01  | 0.01   | 0.01   | 0.012  | 0.01   | t | 63540  | TESTLSTAL<br>AELAT       | Homo<br>sapiens     |
| 1 | 1.00 | 1 | 1 | -0.01 | -0.012 | -0.022 | -0.01  | -0.01  | t | 100559 | TKVTSKVRI<br>YMKPK       | Homo<br>sapiens     |
| 1 | 1.00 | 1 | 1 | 0     | -0.002 | 0      | 0.006  | 0      | t | 21254  | GMDGTQL<br>DRW           | Mus<br>musculu<br>s |
| 1 | 1.00 | 1 | 1 | 0     | -0.002 | 0      | 0.006  | 0      | t | 21254  | GMDGTQL<br>DRW           | Mus<br>musculu<br>s |
| 1 | 1.00 | 1 | 1 | -0.01 | -0.008 | -0.012 | -0.003 | -0.009 | t | 119741 | AIFKSYGEII<br>VTHFPFD    | Homo<br>sapiens     |
| 1 | 1.00 | 1 | 1 | -0.01 | -0.006 | -0.012 | -0.003 | -0.009 | t | 119741 | AIFKSYGEII<br>VTHFPFD    | Homo<br>sapiens     |
| 1 | 1.00 | 1 | 1 | -0.01 | -0.008 | -0.012 | -0.003 | -0.009 | t | 119741 | AIFKSYGEII<br>VTHFPFD    | Homo<br>sapiens     |

|   |      |   |   |       |        |        |        |        |   |        |                           |                                  |
|---|------|---|---|-------|--------|--------|--------|--------|---|--------|---------------------------|----------------------------------|
| 1 | 1.00 | 1 | 1 | 0.03  | 0.03   | 0.03   | 0.03   | 0.029  | t | 49533  | PSTPGDNP<br>LV            | Homo<br>sapiens                  |
| 1 | 1.00 | 1 | 1 | 0.02  | 0.02   | 0.013  | 0.02   | 0.018  | t | 124720 | SILPYGDS<br>MDRIEK        | Homo<br>sapiens                  |
| 1 | 1.00 | 1 | 1 | -0.01 | -0.007 | -0.019 | -0.01  | -0.01  | t | 63756  | TFTNKLKE<br>KHTDLGK       | Mus<br>musculu<br>s              |
| 1 | 1.00 | 1 | 1 | 0     | 0      | 0      | 0.004  | 0      | t | 135959 | LTRAYAKD<br>VKFG          | Homo<br>sapiens                  |
| 1 | 1.00 | 1 | 1 | 0     | 0      | 0      | 0.004  | 0      | t | 135922 | FFRMVISN<br>PAAT          | Homo<br>sapiens                  |
| 1 | 1.00 | 1 | 1 | 0.02  | 0.024  | 0.018  | 0.027  | 0.022  | t | 131955 | LPHGNALV<br>RYSSKEE       | Homo<br>sapiens                  |
| 1 | 1.00 | 1 | 1 | -0.01 | -0.01  | -0.01  | -0.01  | -0.012 | t | 51084  | QIISQQPF<br>PL            | Mus<br>musculu<br>s              |
| 1 | 1.00 | 1 | 1 | -0.01 | -0.01  | -0.022 | -0.01  | -0.01  | t | 114041 | YGSLPQKA<br>QGHRPQD<br>EN | Rattus<br>norvegic<br>us         |
| 1 | 1.00 | 1 | 1 | -0.01 | -0.01  | -0.022 | -0.01  | -0.01  | t | 114041 | YGSLPQKA<br>QGHRPQD<br>EN | Rattus<br>norvegic<br>us         |
| 1 | 1.00 | 1 | 1 | -0.01 | -0.012 | -0.022 | -0.01  | -0.01  | t | 114041 | YGSLPQKA<br>QGHRPQD<br>EN | Oryctola<br>gus<br>cuniculu<br>s |
| 1 | 1.00 | 1 | 1 | 0     | -0.002 | -0.005 | -0.001 | 0      | t | 20137  | GHGSETA<br>WGT            | Mus<br>musculu<br>s              |
| 1 | 1.00 | 1 | 1 | 0.01  | 0.01   | 0.001  | 0.008  | 0.01   | t | 135936 | IERAVVHV<br>ADTM          | Homo<br>sapiens                  |
| 1 | 1.00 | 1 | 1 | -0.01 | -0.007 | -0.003 | -0.011 | -0.012 | t | 33222  | KRTISIWG<br>T             | Mus<br>musculu<br>s              |
| 1 | 1.00 | 1 | 1 | -0.01 | -0.01  | -0.01  | -0.007 | -0.01  | t | 76114  | YTLDDR                    | Homo<br>sapiens                  |
| 1 | 1.00 | 1 | 1 | -0.02 | -0.02  | -0.02  | -0.02  | -0.02  | t | 21758  | GPRLGVRA<br>TR            | Homo<br>sapiens                  |
| 1 | 1.00 | 1 | 1 | -0.06 | -0.056 | -0.06  | -0.053 | -0.06  | t | 145639 | WTPGVKR<br>NGF            | Homo<br>sapiens                  |

|   |      |   |   |       |        |        |        |        |   |        |                         |                          |
|---|------|---|---|-------|--------|--------|--------|--------|---|--------|-------------------------|--------------------------|
| 1 | 1.00 | 1 | 1 | 0.01  | 0.01   | 0.005  | 0.01   | 0.011  | t | 22303  | GSDYEDRY<br>YRENM       | Mus<br>musculu<br>s      |
| 1 | 1.00 | 1 | 1 | 0     | 0      | -0.007 | 0      | 0      | t | 141523 | ALEPPHNL<br>PVP         | Mus<br>musculu<br>s      |
| 1 | 1.00 | 1 | 1 | -0.01 | -0.01  | -0.024 | -0.01  | -0.009 | t | 78937  | AYSDDFFV<br>GRV         | Mus<br>musculu<br>s      |
| 1 | 1.00 | 1 | 1 | -0.03 | -0.032 | -0.032 | -0.027 | -0.032 | t | 72922  | WPACYCY<br>GLPNWVK<br>V | Mus<br>musculu<br>s      |
| 1 | 1.00 | 1 | 1 | -0.04 | -0.038 | -0.035 | -0.047 | -0.049 | t | 131022 | QSGRKGA<br>DIM          | Homo<br>sapiens          |
| 1 | 1.00 | 1 | 1 | -0.04 | -0.038 | -0.037 | -0.037 | -0.038 | t | 24694  | HRMAWD<br>MMM           | Homo<br>sapiens          |
| 1 | 1.00 | 1 | 1 | 0     | -0.002 | 0      | 0.003  | 0      | t | 70459  | VPQYLRW<br>FEEWAE       | Rattus<br>norvegic<br>us |
| 1 | 1.00 | 1 | 1 | 0     | 0.003  | -0.011 | 0      | 0      | t | 79867  | INNLEVELI<br>RGT        | Mus<br>musculu<br>s      |
| 1 | 1.00 | 1 | 1 | 0.02  | 0.01   | 0.014  | 0.021  | 0.02   | t | 55066  | RNTIMASK<br>TVGTAE      | Homo<br>sapiens          |
| 1 | 1.00 | 1 | 1 | 0.01  | 0.014  | 0.003  | 0.007  | 0.007  | t | 50172  | PYSPSQDP<br>YSPSQDP     | Homo<br>sapiens          |
| 1 | 1.00 | 1 | 1 | 0.03  | 0.03   | 0.03   | 0.03   | 0.03   | t | 112158 | HQYLSSF                 | Homo<br>sapiens          |
| 1 | 1.00 | 1 | 1 | 0.03  | 0.03   | 0.014  | 0.02   | 0.028  | t | 116691 | DNAMDR<br>ADTLEQQ<br>NK | Homo<br>sapiens          |
| 1 | 1.00 | 1 | 1 | 0.04  | 0.043  | 0.04   | 0.04   | 0.04   | t | 10757  | DVTTLN                  | Mus<br>musculu<br>s      |
| 1 | 1.00 | 1 | 1 | -0.01 | -0.008 | -0.012 | -0.009 | -0.01  | t | 38632  | LPPVADLP<br>QPGLRR      | Homo<br>sapiens          |
| 1 | 1.00 | 1 | 1 | -0.01 | -0.008 | -0.012 | -0.009 | -0.01  | t | 38632  | LPPVADLP<br>QPGLRR      | Homo<br>sapiens          |



|   |      |   |   |       |        |        |        |        |   |        |                        |                       |
|---|------|---|---|-------|--------|--------|--------|--------|---|--------|------------------------|-----------------------|
| 1 | 1.00 | 1 | 1 | 0     | 0      | -0.007 | 0      | 0      | t | 105763 | EVHHQK                 | Mus musculus          |
| 1 | 1.00 | 1 | 1 | -0.01 | -0.01  | -0.007 | -0.01  | -0.01  | t | 746    | ADPSIMAK               | Oryctolagus cuniculus |
| 1 | 1.00 | 1 | 1 | 0     | -0.001 | -0.008 | 0      | 0      | t | 11353  | EDINGIRRPK             | Mus musculus          |
| 1 | 1.00 | 1 | 1 | 0.02  | 0.025  | 0.012  | 0.021  | 0.018  | t | 48307  | PLENPSSSLFDLVARIKNLKLK | Homo sapiens          |
| 1 | 1.00 | 1 | 1 | 0.02  | 0.025  | 0.012  | 0.021  | 0.018  | t | 48307  | PLENPSSSLFDLVARIKNLKLK | Homo sapiens          |
| 1 | 1.00 | 1 | 1 | 0.03  | 0.038  | 0.03   | 0.03   | 0.029  | t | 156965 | SVQERYYAFWST           | Gallus gallus         |
| 1 | 1.00 | 1 | 1 | -0.02 | -0.02  | -0.031 | -0.02  | -0.02  | t | 37165  | LLDKIYTSPLC            | Mus musculus          |
| 1 | 1.00 | 1 | 1 | -0.02 | -0.018 | -0.02  | -0.019 | -0.02  | t | 25101  | HVTGGAA                | Homo sapiens          |
| 1 | 1.00 | 1 | 1 | 0     | 0      | -0.018 | 0      | 0.002  | t | 76248  | YVDISLDAGQYVLVMKANSS   | Oryctolagus cuniculus |
| 1 | 1.00 | 1 | 1 | 0     | 0      | 0      | 0.001  | -0.002 | t | 60116  | SPLLGCIGSTCAE          | Mus musculus          |
| 1 | 1.00 | 1 | 1 | 0     | 0      | 0      | 0.001  | -0.002 | t | 40110  | LTPLEELY               | Mus musculus          |
| 1 | 1.00 | 1 | 1 | 0.01  | 0.01   | 0.007  | 0.01   | 0.01   | t | 22332  | GSGASDLR               | Homo sapiens          |
| 1 | 1.00 | 1 | 1 | 0.02  | 0.018  | 0      | 0.013  | 0.02   | t | 128090 | QYYRLPMNAYRDFTSEPLNS   | Mus musculus          |
| 1 | 1.00 | 1 | 1 | -0.02 | -0.022 | -0.025 | -0.021 | -0.02  | t | 57941  | SFVTRRYLSQLC           | Mus musculus          |

|   |      |   |   |       |       |        |        |        |   |        |                           |                                  |
|---|------|---|---|-------|-------|--------|--------|--------|---|--------|---------------------------|----------------------------------|
| 1 | 1.00 | 1 | 1 | 0     | 0.002 | 0      | -0.001 | -0.003 | t | 136568 | PYYRVFYK<br>YD            | Homo<br>sapiens                  |
| 1 | 1.00 | 1 | 1 | 0.02  | 0.02  | 0.02   | 0.02   | 0.018  | t | 145827 | IIPKVEGK                  | Mus<br>musculu<br>s              |
| 1 | 1.00 | 1 | 1 | 0.03  | 0.03  | 0.03   | 0.03   | 0.03   | t | 133398 | TKEQTTFP<br>P             | Homo<br>sapiens                  |
| 1 | 1.00 | 1 | 1 | 0.01  | 0.01  | 0.017  | 0.01   | 0.008  | t | 106225 | ADIWLTPD<br>PTTP          | Mus<br>musculu<br>s              |
| 1 | 1.00 | 1 | 1 | 0.01  | 0.01  | 0.017  | 0.01   | 0.008  | t | 106225 | ADIWLTPD<br>PTTP          | Mus<br>musculu<br>s              |
| 1 | 1.00 | 1 | 1 | 0     | 0.002 | -0.011 | 0      | 0.002  | t | 87725  | QTEVAATL<br>AYRF          | Homo<br>sapiens                  |
| 1 | 1.00 | 1 | 1 | -0.01 | -0.01 | -0.01  | -0.01  | -0.011 | t | 15981  | FGGETFTP<br>DWMMEV        | Mus<br>musculu<br>s              |
| 1 | 1.00 | 1 | 1 | 0.02  | 0.02  | 0.02   | 0.02   | 0.022  | t | 45637  | NQVYYRP                   | Mus<br>musculu<br>s              |
| 1 | 1.00 | 1 | 1 | 0.01  | 0.012 | 0.002  | 0.011  | 0.009  | t | 62872  | TAGWTFG<br>AGAALQIP<br>FA | Homo<br>sapiens                  |
| 1 | 1.00 | 1 | 1 | -0.01 | -0.01 | -0.017 | -0.01  | -0.012 | t | 106374 | EDHAGTY<br>GLGDRK         | Mus<br>musculu<br>s              |
| 1 | 1.00 | 1 | 1 | 0     | 0.004 | -0.002 | 0.001  | 0      | t | 60614  | SRAATLTP<br>AA            | Homo<br>sapiens                  |
| 1 | 1.00 | 1 | 1 | 0.04  | 0.036 | 0.044  | 0.043  | 0.04   | t | 97437  | LEIQGEGQ<br>F             | Oryctola<br>gus<br>cuniculu<br>s |
| 1 | 1.00 | 1 | 1 | 0.03  | 0.026 | 0.033  | 0.027  | 0.028  | t | 15529  | FEFPPPT<br>DE             | Oryctola<br>gus<br>cuniculu<br>s |
| 1 | 1.00 | 1 | 1 | -0.02 | -0.02 | -0.02  | -0.02  | -0.02  | t | 140936 | YLAGKGV<br>DAGKL          | Oryctola<br>gus<br>cuniculu<br>s |
| 1 | 1.00 | 1 | 1 | -0.02 | -0.02 | -0.027 | -0.02  | -0.02  | t | 121977 | VHWKNQF<br>DHY            | Mus<br>musculu<br>s              |
| 1 | 1.00 | 1 | 1 | 0.03  | 0.03  | 0.03   | 0.03   | 0.03   | t | 156858 | DMSYYYYAL<br>PTYT         | Gallus<br>gallus                 |

|   |      |   |   |       |        |        |        |        |   |        |                              |                                  |
|---|------|---|---|-------|--------|--------|--------|--------|---|--------|------------------------------|----------------------------------|
| 1 | 1.00 | 1 | 1 | -0.02 | -0.018 | -0.019 | -0.013 | -0.02  | t | 98435  | RYPHYSSLI<br>KPESSL          | Homo<br>sapiens                  |
| 1 | 1.00 | 1 | 1 | -0.02 | -0.018 | -0.026 | -0.013 | -0.02  | t | 118809 | GGRPGAP<br>GGSGSGP<br>RHRDGV | Homo<br>sapiens                  |
| 1 | 1.00 | 1 | 1 | 0     | 0      | 0      | 0      | -0.003 | t | 149298 | ELDKWAS                      | Homo<br>sapiens                  |
| 1 | 1.00 | 1 | 1 | 0.03  | 0.034  | 0.03   | 0.037  | 0.03   | t | 117363 | RPDAEYW<br>NSQKDLLE<br>QKRGR | Homo<br>sapiens                  |
| 1 | 1.00 | 1 | 1 | 0     | -0.002 | 0.005  | -0.001 | 0      | t | 4488   | ASINKV                       | Mus<br>musculu<br>s              |
| 1 | 1.00 | 1 | 1 | -0.04 | -0.037 | -0.038 | -0.04  | -0.041 | t | 120189 | RVYAYVFE<br>HR               | Mus<br>musculu<br>s              |
| 1 | 1.00 | 1 | 1 | -0.04 | -0.04  | -0.038 | -0.04  | -0.041 | t | 120189 | RVYAYVFE<br>HR               | Mus<br>musculu<br>s              |
| 1 | 1.00 | 1 | 1 | -0.04 | -0.04  | -0.038 | -0.04  | -0.041 | t | 120189 | RVYAYVFE<br>HR               | Oryctola<br>gus<br>cuniculu<br>s |
| 1 | 1.00 | 1 | 1 | -0.04 | -0.04  | -0.038 | -0.04  | -0.041 | t | 120189 | RVYAYVFE<br>HR               | Mus<br>musculu<br>s              |
| 1 | 1.00 | 1 | 1 | -0.04 | -0.043 | -0.038 | -0.04  | -0.041 | t | 120189 | RVYAYVFE<br>HR               | Oryctola<br>gus<br>cuniculu<br>s |
| 1 | 1.00 | 1 | 1 | -0.04 | -0.04  | -0.035 | -0.037 | -0.04  | t | 46817  | PAHYANYL<br>P                | Homo<br>sapiens                  |
| 1 | 1.00 | 1 | 1 | 0.01  | 0.013  | 0.005  | 0.01   | 0.009  | t | 57062  | SAYTPAYY<br>TKDTNNN<br>LTL   | Mus<br>musculu<br>s              |
| 1 | 1.00 | 1 | 1 | 0.01  | 0.014  | 0.005  | 0.01   | 0.009  | t | 57062  | SAYTPAYY<br>TKDTNNN<br>LTL   | Homo<br>sapiens                  |

|   |      |   |   |       |        |        |        |        |   |        |                     |                       |
|---|------|---|---|-------|--------|--------|--------|--------|---|--------|---------------------|-----------------------|
| 1 | 1.00 | 1 | 1 | -0.03 | -0.026 | -0.045 | -0.03  | -0.027 | t | 136080 | RAGTDEFG            | Homo sapiens          |
| 1 | 1.00 | 1 | 1 | 0.02  | 0.016  | 0.011  | 0.019  | 0.02   | t | 47316  | PEKAFRELAD          | Oryctolagus cuniculus |
| 1 | 1.00 | 1 | 1 | 0.01  | 0.01   | 0.01   | 0.01   | 0.008  | t | 117642 | SKKREAVAGRGRG       | Homo sapiens          |
| 1 | 1.00 | 1 | 1 | 0.01  | 0.012  | 0.012  | 0.011  | 0.01   | t | 66457  | TSTFTSL             | Homo sapiens          |
| 1 | 1.00 | 1 | 1 | 0     | 0      | -0.011 | 0      | 0.002  | t | 17467  | FQDMLNIS            | Mus musculus          |
| 1 | 1.00 | 1 | 1 | 0.01  | 0.014  | 0.01   | 0.013  | 0.01   | t | 136081 | RTTLQSDQEEIDY       | Homo sapiens          |
| 1 | 1.00 | 1 | 1 | 0.08  | 0.076  | 0.08   | 0.077  | 0.077  | t | 134148 | LQSDQEEIDY          | Oryctolagus cuniculus |
| 1 | 1.00 | 1 | 1 | 0.03  | 0.03   | 0.03   | 0.034  | 0.03   | t | 132260 | EKIERRQQEV          | Homo sapiens          |
| 1 | 1.00 | 1 | 1 | -0.04 | -0.042 | -0.045 | -0.039 | -0.04  | t | 133836 | GKKRKRSRKE          | Mus musculus          |
| 1 | 1.00 | 1 | 1 | -0.03 | -0.03  | -0.037 | -0.03  | -0.032 | t | 32233  | KLVLSLCFLFSGCF      | Homo sapiens          |
| 1 | 1.00 | 1 | 1 | 0.05  | 0.048  | 0.05   | 0.05   | 0.05   | t | 117835 | EQEAKQKLEEDAEMK     | Mus musculus          |
| 1 | 1.00 | 1 | 1 | -0.01 | -0.01  | -0.012 | -0.01  | -0.013 | t | 151652 | HWWRAESDEARRCYNDPKC | Mus musculus          |
| 1 | 1.00 | 1 | 1 | 0.01  | 0.006  | 0.002  | 0.007  | 0.01   | t | 70795  | VRPATTLADG          | Oryctolagus cuniculus |
| 1 | 1.00 | 1 | 1 | 0.01  | 0.012  | 0.004  | 0.011  | 0.01   | t | 56895  | SAMILAAYHPQQFIYAGSL | Homo sapiens          |
| 1 | 1.00 | 1 | 1 | 0.01  | 0.012  | 0.004  | 0.011  | 0.01   | t | 56895  | SAMILAAYHPQQFIYAGSL | Homo sapiens          |
| 1 | 1.00 | 1 | 1 | -0.01 | -0.01  | -0.01  | -0.006 | -0.01  | t | 115603 | ELKVEDPFYWVS        | Homo sapiens          |

|   |      |   |   |       |        |        |        |        |   |        |                   |                       |
|---|------|---|---|-------|--------|--------|--------|--------|---|--------|-------------------|-----------------------|
| 1 | 1.00 | 1 | 1 | 0.12  | 0.12   | 0.12   | 0.12   | 0.12   | t | 104496 | GDD               | Mus musculus          |
| 1 | 1.00 | 1 | 1 | 0.02  | 0.018  | 0.023  | 0.023  | 0.019  | t | 10691  | DVPDYAS           | Mus musculus          |
| 1 | 1.00 | 1 | 1 | 0.01  | 0.008  | 0.01   | 0.013  | 0.011  | t | 58371  | SHITSYPAYFW       | Mus musculus          |
| 1 | 1.00 | 1 | 1 | 0.05  | 0.048  | 0.043  | 0.053  | 0.051  | t | 106790 | RSFTLASSETGVG     | Mus musculus          |
| 1 | 1.00 | 1 | 1 | -0.03 | -0.034 | -0.045 | -0.027 | -0.029 | t | 42274  | MPGGMPGGMPGGMPGG  | Oryctolagus cuniculus |
| 1 | 1.00 | 1 | 1 | -0.04 | -0.037 | -0.041 | -0.04  | -0.042 | t | 56075  | RTHRQLY           | Mus musculus          |
| 1 | 1.00 | 1 | 1 | 0.01  | 0.01   | -0.001 | 0.011  | 0.01   | t | 134859 | AGENLNTSKFKKNEF   | Sus scrofa            |
| 1 | 1.00 | 1 | 1 | -0.02 | -0.02  | -0.017 | -0.02  | -0.022 | t | 14202  | ESLNTGWLGLF       | Rattus norvegicus     |
| 1 | 1.00 | 1 | 1 | -0.02 | -0.024 | -0.026 | -0.021 | -0.02  | t | 12900  | EKVSRRSNFEF       | Oryctolagus cuniculus |
| 1 | 1.00 | 1 | 1 | 0.02  | 0.021  | 0.021  | 0.02   | 0.02   | t | 57506  | SESKCEE NTMFQPY   | Equus caballus        |
| 1 | 1.00 | 1 | 1 | 0     | 0      | 0      | 0.001  | -0.002 | t | 24591  | HQLDPAF GANSTNP D | Mus musculus          |
| 1 | 1.00 | 1 | 1 | -0.02 | -0.023 | -0.027 | -0.02  | -0.022 | t | 108164 | TLVCLATGFFPDHVEL  | Oryctolagus cuniculus |
| 1 | 1.00 | 1 | 1 | 0.04  | 0.045  | 0.038  | 0.037  | 0.038  | t | 157929 | SFEDQGRR          | Homo sapiens          |
| 1 | 1.00 | 1 | 1 | 0     | 0      | -0.004 | -0.001 | 0      | t | 106522 | HVTPISKLMWFN      | Mus musculus          |

|   |      |   |   |       |        |        |        |       |   |        |                               |                                  |
|---|------|---|---|-------|--------|--------|--------|-------|---|--------|-------------------------------|----------------------------------|
| 1 | 1.00 | 1 | 1 | -0.01 | -0.008 | -0.01  | -0.007 | -0.01 | t | 119578 | FAIVKFTKV<br>LLQYTGH          | Homo<br>sapiens                  |
| 1 | 1.00 | 1 | 1 | 0.03  | 0.026  | 0.021  | 0.027  | 0.03  | t | 71902  | VVYDYQH<br>K                  | Oryctola<br>gus<br>cuniculu<br>s |
| 1 | 1.00 | 1 | 1 | -0.01 | -0.02  | -0.013 | -0.009 | -0.01 | t | 22217  | GRTPFII                       | Homo<br>sapiens                  |
| 1 | 1.00 | 1 | 1 | 0.03  | 0.029  | 0.026  | 0.03   | 0.03  | t | 48900  | PPQWKLP                       | Anas<br>platyrhy<br>nchos        |
| 1 | 1.00 | 1 | 1 | 0.01  | 0.012  | 0.002  | 0.007  | 0.01  | t | 36840  | LKEPTNED<br>ILPNHNP           | Homo<br>sapiens                  |
| 1 | 1.00 | 1 | 1 | 0     | 0      | -0.015 | -0.001 | 0     | t | 1480   | AGDSSTKN<br>LIYTSTLCE<br>LNV  | Mus<br>musculu<br>s              |
| 1 | 1.00 | 1 | 1 | 0.03  | 0.03   | 0.035  | 0.033  | 0.03  | t | 720    | ADLPQP                        | Homo<br>sapiens                  |
| 1 | 1.00 | 1 | 1 | -0.02 | -0.02  | -0.02  | -0.02  | -0.02 | t | 6524   | CKTC                          | Mus<br>musculu<br>s              |
| 1 | 1.00 | 1 | 1 | 0     | 0      | 0      | 0.002  | 0     | t | 22123  | GRLGTYRY<br>VSSGER            | Homo<br>sapiens                  |
| 1 | 1.00 | 1 | 1 | 0.01  | 0.01   | 0.005  | 0.01   | 0.01  | t | 114581 | RNIGYIFFK<br>NSTIDI           | Homo<br>sapiens                  |
| 1 | 1.00 | 1 | 1 | 0.03  | 0.032  | 0.018  | 0.027  | 0.032 | t | 49858  | PVESKVT                       | Homo<br>sapiens                  |
| 1 | 1.00 | 1 | 1 | 0.02  | 0.023  | 0.006  | 0.02   | 0.022 | t | 96674  | NGDGNPR<br>EVIED              | Mus<br>musculu<br>s              |
| 1 | 1.00 | 1 | 1 | 0.02  | 0.02   | 0.012  | 0.02   | 0.02  | t | 41177  | MAYRFNG<br>IGVTQNV<br>L<br>YE | Mus<br>musculu<br>s              |
| 1 | 1.00 | 1 | 1 | -0.01 | -0.009 | -0.01  | -0.007 | -0.01 | t | 78244  | PMWPME                        | Equus<br>caballus                |

|   |      |   |   |       |        |        |        |        |   |        |                            |                                  |
|---|------|---|---|-------|--------|--------|--------|--------|---|--------|----------------------------|----------------------------------|
| 1 | 1.00 | 1 | 1 | 0     | 0.002  | 0      | 0.007  | 0      | t | 156675 | GPRVVER<br>HQSACKD<br>S    | Homo<br>sapiens                  |
| 1 | 1.00 | 1 | 1 | -0.01 | -0.012 | -0.016 | -0.011 | -0.011 | t | 39182  | LRRDLAS<br>REAKKQVE<br>KAL | Mus<br>musculu<br>s              |
| 1 | 1.00 | 1 | 1 | -0.02 | -0.02  | -0.025 | -0.02  | -0.02  | t | 58103  | SGKGVSFQ<br>LVKLG VW       | Homo<br>sapiens                  |
| 1 | 1.00 | 1 | 1 | -0.03 | -0.032 | -0.036 | -0.027 | -0.031 | t | 58942  | SKSSRC                     | Mus<br>musculu<br>s              |
| 1 | 1.00 | 1 | 1 | -0.02 | -0.022 | -0.02  | -0.017 | -0.02  | t | 22881  | GTVVAVG<br>PGR             | Mus<br>musculu<br>s              |
| 1 | 1.00 | 1 | 1 | -0.01 | -0.01  | -0.017 | -0.01  | -0.009 | t | 46859  | PALTAVET<br>GATNPL         | Homo<br>sapiens                  |
| 1 | 1.00 | 1 | 1 | 0.02  | 0.02   | 0.016  | 0.02   | 0.02   | t | 71298  | VTFDGGK<br>MVQ             | Oryctola<br>gus<br>cuniculu<br>s |
| 1 | 1.00 | 1 | 1 | 0     | 0      | -0.016 | 0      | 0.002  | t | 76491  | YYDGRRS                    | Mus<br>musculu<br>s              |
| 1 | 1.00 | 1 | 1 | 0.02  | 0.02   | 0.02   | 0.02   | 0.022  | t | 75202  | YNPLL VET                  | Homo<br>sapiens                  |
| 1 | 1.00 | 1 | 1 | 0.01  | 0.008  | 0.01   | 0.011  | 0.01   | t | 86748  | NHIENDPL<br>KI             | Homo<br>sapiens                  |
| 1 | 1.00 | 1 | 1 | 0.05  | 0.05   | 0.05   | 0.05   | 0.049  | t | 120342 | YNAEEVEF<br>TFAVDND        | Rattus<br>norvegic<br>us         |
| 1 | 1.00 | 1 | 1 | -0.02 | -0.02  | -0.02  | -0.02  | -0.022 | t | 79213  | FGMLPVP<br>QQPMGP<br>Q     | Oryctola<br>gus<br>cuniculu<br>s |
| 1 | 1.00 | 1 | 1 | 0.05  | 0.036  | 0.047  | 0.05   | 0.05   | t | 8371   | DGEGAP                     | Marmot<br>a monax                |
| 1 | 1.00 | 1 | 1 | 0.02  | 0.018  | 0.02   | 0.019  | 0.018  | t | 47096  | PDFYGDPL<br>E              | Mus<br>musculu<br>s              |

|   |      |   |   |       |       |       |        |        |   |        |                            |                                  |
|---|------|---|---|-------|-------|-------|--------|--------|---|--------|----------------------------|----------------------------------|
| 1 | 1.00 | 1 | 1 | 0.01  | 0.014 | 0.009 | 0.017  | 0.012  | t | 130283 | VRGVGGP<br>S               | Homo<br>sapiens                  |
| 1 | 1.00 | 1 | 1 | -0.01 | -0.01 | -0.01 | -0.01  | -0.013 | t | 106941 | TVKQLYTL<br>YPAA           | Mus<br>musculu<br>s              |
| 1 | 1.00 | 1 | 1 | 0     | 0.003 | 0.003 | 0      | -0.002 | t | 14749  | EVKKKSDS                   | Mus<br>musculu<br>s              |
| 1 | 1.00 | 1 | 1 | 0.01  | 0.01  | 0.01  | 0.01   | 0.01   | t | 105068 | AEFDLD                     | Oryctola<br>gus<br>cuniculu<br>s |
| 1 | 1.00 | 1 | 1 | -0.03 | -0.03 | -0.03 | -0.03  | -0.03  | t | 145947 | PPDIIPK                    | Mus<br>musculu<br>s              |
| 1 | 1.00 | 1 | 1 | -0.01 | -0.01 | -0.01 | -0.006 | -0.01  | t | 157127 | CFNLFLNS<br>QEKHY          | Homo<br>sapiens                  |
| 1 | 1.00 | 1 | 1 | 0.02  | 0.02  | 0.02  | 0.02   | 0.018  | t | 100549 | TEEKEFLKK<br>L             | Mus<br>musculu<br>s              |
| 1 | 1.00 | 1 | 1 | 0.01  | 0.012 | 0.003 | 0.011  | 0.009  | t | 56796  | SAGGQLFY<br>SRPVVSAN<br>GE | Homo<br>sapiens                  |
| 1 | 1.00 | 1 | 1 | 0.04  | 0.042 | 0.049 | 0.047  | 0.04   | t | 112348 | TEDLAVY                    | Homo<br>sapiens                  |
| 1 | 1.00 | 1 | 1 | 0     | 0     | 0     | 0      | -0.003 | t | 132860 | LKKLKPGL<br>EKDF           | Rattus<br>norvegic<br>us         |
| 1 | 1.00 | 1 | 1 | 0     | 0     | 0     | 0      | -0.003 | t | 104461 | EFRHDS                     | Mus<br>musculu<br>s              |
| 1 | 1.00 | 1 | 1 | 0     | 0     | 0     | 0      | -0.003 | t | 102344 | DAEFR                      | Mus<br>musculu<br>s              |
| 1 | 1.00 | 1 | 1 | 0     | 0     | 0     | 0      | -0.003 | t | 106535 | IFPSFLRPD<br>PPL           | Mus<br>musculu<br>s              |
| 1 | 1.00 | 1 | 1 | 0     | 0     | 0     | 0      | -0.003 | t | 106487 | GTSTEVWL<br>APDP           | Mus<br>musculu<br>s              |
| 1 | 1.00 | 1 | 1 | 0     | 0     | 0     | 0      | -0.003 | t | 105163 | EFRHD                      | Mus<br>musculu<br>s              |
| 1 | 1.00 | 1 | 1 | 0     | 0     | 0     | 0      | -0.003 | t | 106515 | HLPSFLRP<br>DPPL           | Mus<br>musculu<br>s              |



|   |      |   |   |       |        |       |       |        |   |        |                          |                          |
|---|------|---|---|-------|--------|-------|-------|--------|---|--------|--------------------------|--------------------------|
| 1 | 1.00 | 1 | 1 | 0     | 0      | 0     | 0     | -0.003 | t | 105090 | AIIGLMVG<br>GVVIA        | Mus<br>musculu<br>s      |
| 1 | 1.00 | 1 | 1 | 0     | 0      | 0     | 0     | -0.003 | t | 106225 | ADIWLTDP<br>PTTP         | Mus<br>musculu<br>s      |
| 1 | 1.00 | 1 | 1 | 0     | 0      | 0     | 0     | -0.003 | t | 64587  | TKINADNP<br>VPILELE      | Mus<br>musculu<br>s      |
| 1 | 1.00 | 1 | 1 | 0     | 0      | 0     | 0     | -0.003 | t | 64587  | TKINADNP<br>VPILELE      | Mus<br>musculu<br>s      |
| 1 | 1.00 | 1 | 1 | 0     | 0      | 0     | 0     | -0.003 | t | 64587  | TKINADNP<br>VPILELE      | Mus<br>musculu<br>s      |
| 1 | 1.00 | 1 | 1 | 0     | 0      | 0     | 0     | -0.003 | t | 43411  | NDDASVD<br>FVAEPVK       | Mus<br>musculu<br>s      |
| 1 | 1.00 | 1 | 1 | 0     | 0      | 0     | 0     | -0.003 | t | 56469  | RWAPTGA<br>PADVTDQ<br>L  | Mus<br>musculu<br>s      |
| 1 | 1.00 | 1 | 1 | 0     | 0      | 0     | 0     | -0.003 | t | 43411  | NDDASVD<br>FVAEPVK       | Mus<br>musculu<br>s      |
| 1 | 1.00 | 1 | 1 | 0     | 0      | 0     | 0     | -0.003 | t | 7491   | DAEFRHDS<br>GYEVHHQ<br>K | Mus<br>musculu<br>s      |
| 1 | 1.00 | 1 | 1 | 0     | 0      | 0     | 0     | -0.003 | t | 7491   | DAEFRHDS<br>GYEVHHQ<br>K | Mus<br>musculu<br>s      |
| 1 | 1.00 | 1 | 1 | -0.01 | -0.008 | -0.01 | -0.01 | -0.012 | t | 141749 | SNLDHI                   | Rattus<br>norvegic<br>us |
| 1 | 1.00 | 1 | 1 | 0.03  | 0.03   | 0.03  | 0.03  | 0.03   | t | 108897 | EIDGPAGQ<br>AEP          | Mus<br>musculu<br>s      |

|   |      |   |   |       |        |        |        |        |   |        |                             |                                  |
|---|------|---|---|-------|--------|--------|--------|--------|---|--------|-----------------------------|----------------------------------|
| 1 | 1.00 | 1 | 1 | 0.03  | 0.03   | 0.03   | 0.03   | 0.03   | t | 108897 | EIDGPAGQ<br>AEP             | Mus<br>musculu<br>s              |
| 1 | 1.00 | 1 | 1 | 0.02  | 0.02   | 0.02   | 0.02   | 0.02   | t | 144800 | TNMLGYT<br>DHQ              | Homo<br>sapiens                  |
| 1 | 1.00 | 1 | 1 | 0     | 0      | -0.007 | 0.007  | 0      | t | 139601 | SCSRALAR<br>EVDLKDY         | Homo<br>sapiens                  |
| 1 | 1.00 | 1 | 1 | -0.03 | -0.028 | -0.03  | -0.023 | -0.03  | t | 131075 | SQSYPEPA<br>RGSVPMP         | Homo<br>sapiens                  |
| 1 | 1.00 | 1 | 1 | 0.05  | 0.048  | 0.05   | 0.043  | 0.046  | t | 117520 | GSFSDADL<br>AD              | Mus<br>musculu<br>s              |
| 1 | 1.00 | 1 | 1 | 0     | -0.002 | 0      | 0.003  | -0.001 | t | 63843  | TGGVYHF<br>VKKHVHES         | Rattus<br>norvegic<br>us         |
| 1 | 1.00 | 1 | 1 | 0     | -0.004 | 0      | 0.003  | -0.001 | t | 71353  | VTHESYQE<br>LVKKLEALE<br>DA | Oryctola<br>gus<br>cuniculu<br>s |
| 1 | 1.00 | 1 | 1 | 0     | -0.002 | 0      | 0.003  | -0.001 | t | 62779  | TAADTPTA<br>TESISPSP        | Mus<br>musculu<br>s              |
| 1 | 1.00 | 1 | 1 | 0     | -0.008 | 0      | 0.003  | -0.001 | t | 20064  | GGVATY                      | Macaca                           |
| 1 | 1.00 | 1 | 1 | -0.01 | -0.013 | -0.003 | -0.006 | -0.012 | t | 130622 | TGLVAQG<br>TDSIG            | Camelus<br>dromed<br>arius       |
| 1 | 1.00 | 1 | 1 | -0.03 | -0.033 | -0.022 | -0.03  | -0.037 | t | 45317  | NPDKAREL<br>LNK             | Oryctola<br>gus<br>cuniculu<br>s |
| 1 | 1.00 | 1 | 1 | 0     | 0      | 0      | 0      | -0.003 | t | 130590 | RCKTFGKT<br>TLCS            | Mus<br>musculu<br>s              |
| 1 | 1.00 | 1 | 1 | 0     | -0.003 | 0.002  | 0      | -0.002 | t | 55719  | RRRLRG<br>T WV              | Oryctola<br>gus<br>cuniculu<br>s |
| 1 | 1.00 | 1 | 1 | 0.03  | 0.028  | 0.025  | 0.027  | 0.03   | t | 68725  | VGLSNPTP                    | Anas<br>platyrhy<br>nchos        |
| 1 | 1.00 | 1 | 1 | -0.01 | -0.013 | -0.015 | -0.01  | -0.01  | t | 59985  | SPAQDIW<br>GTSAAAYF<br>VG   | Oryctola<br>gus<br>cuniculu<br>s |

|   |      |   |   |       |        |        |        |        |   |        |                              |                                  |
|---|------|---|---|-------|--------|--------|--------|--------|---|--------|------------------------------|----------------------------------|
| 1 | 1.00 | 1 | 1 | 0     | -0.003 | -0.011 | 0      | 0      | t | 58511  | SIFYTYGTA<br>PARISVPY<br>VGI | Oryctola<br>gus<br>cuniculu<br>s |
| 1 | 1.00 | 1 | 1 | -0.01 | -0.009 | -0.011 | -0.009 | -0.01  | t | 73770  | YETGWGC<br>NPPDC             | Myodes<br>glareolu<br>s          |
| 1 | 1.00 | 1 | 1 | -0.03 | -0.025 | -0.034 | -0.027 | -0.03  | t | 77793  | PKSKLSVK<br>KC               | Homo<br>sapiens                  |
| 1 | 1.00 | 1 | 1 | 0.08  | 0.078  | 0.075  | 0.079  | 0.082  | t | 25080  | HVQTMEEI                     | Anas<br>platyrhy<br>nchos        |
| 1 | 1.00 | 1 | 1 | 0.02  | 0.02   | 0.021  | 0.027  | 0.02   | t | 52184  | QRAKEALD<br>KYELENH          | Homo<br>sapiens                  |
| 1 | 1.00 | 1 | 1 | -0.02 | -0.017 | -0.018 | -0.02  | -0.021 | t | 119861 | FHRWSSY<br>MVH               | Mus<br>musculu<br>s              |
| 1 | 1.00 | 1 | 1 | -0.02 | -0.02  | -0.018 | -0.02  | -0.021 | t | 119861 | FHRWSSY<br>MVH               | Mus<br>musculu<br>s              |
| 1 | 1.00 | 1 | 1 | -0.02 | -0.02  | -0.018 | -0.02  | -0.021 | t | 119861 | FHRWSSY<br>MVH               | Oryctola<br>gus<br>cuniculu<br>s |
| 1 | 1.00 | 1 | 1 | -0.02 | -0.02  | -0.018 | -0.02  | -0.021 | t | 119861 | FHRWSSY<br>MVH               | Mus<br>musculu<br>s              |
| 1 | 1.00 | 1 | 1 | -0.02 | -0.02  | -0.018 | -0.02  | -0.021 | t | 119861 | FHRWSSY<br>MVH               | Mus<br>musculu<br>s              |
| 1 | 1.00 | 1 | 1 | -0.02 | -0.02  | -0.018 | -0.02  | -0.021 | t | 119861 | FHRWSSY<br>MVH               | Mus<br>musculu<br>s              |
| 1 | 1.00 | 1 | 1 | -0.01 | -0.01  | -0.013 | -0.006 | -0.01  | t | 25315  | IAIGGAAT<br>GIAAVLTD<br>GNPP | Homo<br>sapiens                  |
| 1 | 1.00 | 1 | 1 | 0     | 0      | -0.003 | -0.001 | 0      | t | 22217  | GRTPFII                      | Homo<br>sapiens                  |

|   |      |   |   |       |        |        |        |        |   |        |                              |                       |
|---|------|---|---|-------|--------|--------|--------|--------|---|--------|------------------------------|-----------------------|
| 1 | 1.00 | 1 | 1 | 0.01  | 0.01   | 0.01   | 0.01   | 0.008  | t | 117666 | VAGRGRG<br>RGRGRG            | Homo sapiens          |
| 1 | 1.00 | 1 | 1 | 0.02  | 0.018  | 0.012  | 0.02   | 0.02   | t | 7846   | DDPLLGN<br>Q                 | Anas platyrhynchos    |
| 1 | 1.00 | 1 | 1 | 0.02  | 0.024  | 0.021  | 0.021  | 0.017  | t | 53429  | RDTLPQSP<br>GPAFP            | Homo sapiens          |
| 1 | 1.00 | 1 | 1 | -0.04 | -0.044 | -0.04  | -0.043 | -0.042 | t | 5109   | ATPYHPPA<br>TP               | Oryctolagus cuniculus |
| 1 | 1.00 | 1 | 1 | 0.04  | 0.043  | 0.034  | 0.04   | 0.04   | t | 84184  | KASAEG                       | Mus musculus          |
| 1 | 1.00 | 1 | 1 | 0.04  | 0.043  | 0.034  | 0.04   | 0.04   | t | 84184  | KASAEG                       | Mus musculus          |
| 1 | 1.00 | 1 | 1 | 0     | 0      | 0      | 0.004  | -0.001 | t | 122445 | KQYSIEAA<br>LRCRRISKE<br>EYH | Homo sapiens          |
| 1 | 1.00 | 1 | 1 | 0     | -0.002 | -0.001 | 0      | -0.001 | t | 95092  | GYQKTVD<br>HTKVNSK           | Oryctolagus cuniculus |
| 1 | 1.00 | 1 | 1 | 0     | 0      | -0.001 | 0      | 0      | t | 39885  | LTETKIDKL<br>C               | Mus musculus          |
| 1 | 1.00 | 1 | 1 | 0.04  | 0.026  | 0.035  | 0.04   | 0.041  | t | 134021 | CQSIAAP<br>KTS               | Oryctolagus cuniculus |
| 1 | 1.00 | 1 | 1 | -0.03 | -0.033 | -0.039 | -0.03  | -0.032 | t | 15973  | FGEWRER<br>VLLNR             | Oryctolagus cuniculus |
| 1 | 1.00 | 1 | 1 | 0.04  | 0.038  | 0.037  | 0.043  | 0.041  | t | 105072 | AEPRQEFE<br>V                | Mus musculus          |
| 1 | 1.00 | 1 | 1 | 0.01  | 0.01   | 0.01   | 0.01   | 0.01   | t | 79284  | LDAVPL                       | Mus musculus          |
| 1 | 1.00 | 1 | 1 | 0     | 0.002  | -0.011 | -0.003 | -0.002 | t | 33148  | KRHDGGC<br>RKE               | Homo sapiens          |

|   |      |   |   |       |        |        |       |        |   |        |                            |                                  |
|---|------|---|---|-------|--------|--------|-------|--------|---|--------|----------------------------|----------------------------------|
| 1 | 1.00 | 1 | 1 | 0.01  | 0.01   | 0.01   | 0.01  | 0.011  | t | 9941   | DRADGQP<br>AG              | Mus<br>musculu<br>s              |
| 1 | 1.00 | 1 | 1 | 0     | -0.003 | 0      | 0     | 0      | t | 156862 | DVGDPRLR                   | Oryctola<br>gus<br>cuniculu<br>s |
| 1 | 1.00 | 1 | 1 | 0     | 0      | 0      | 0     | -0.002 | t | 10800  | DWEDRY                     | Mus<br>musculu<br>s              |
| 1 | 1.00 | 1 | 1 | 0.03  | 0.03   | 0.036  | 0.03  | 0.03   | t | 18039  | FTPGPSQ                    | Homo<br>sapiens                  |
| 1 | 1.00 | 1 | 1 | 0     | 0      | 0      | 0     | 0      | t | 140834 | DAVKGYLE<br>GKGV           | Oryctola<br>gus<br>cuniculu<br>s |
| 1 | 1.00 | 1 | 1 | 0.01  | 0.01   | 0.005  | 0.01  | 0.011  | t | 22303  | GSDYEDRY<br>YREN           | Mus<br>musculu<br>s              |
| 1 | 1.00 | 1 | 1 | -0.01 | -0.01  | -0.022 | -0.01 | -0.01  | t | 78635  | EKIERNNK<br>LKQPPPP<br>NPN | Mus<br>musculu<br>s              |
| 1 | 1.00 | 1 | 1 | -0.01 | 0.004  | -0.016 | -0.01 | -0.011 | t | 47662  | PGGGQIV<br>GGVYLLPR<br>R   | Pan<br>troglody<br>tes           |
| 1 | 1.00 | 1 | 1 | -0.01 | 0.002  | -0.016 | -0.01 | -0.011 | t | 47662  | PGGGQIV<br>GGVYLLPR<br>R   | Pan<br>troglody<br>tes           |
| 1 | 1.00 | 1 | 1 | 0     | 0      | 0      | 0     | -0.003 | t | 140725 | PDELHK                     | Mus<br>musculu<br>s              |
| 1 | 1.00 | 1 | 1 | 0     | 0      | 0      | 0     | -0.003 | t | 137743 | DTPLTIAGL<br>KLV           | Mus<br>musculu<br>s              |
| 1 | 1.00 | 1 | 1 | 0     | 0      | 0      | 0     | -0.003 | t | 137770 | TLARSFICI<br>QM            | Mus<br>musculu<br>s              |
| 1 | 1.00 | 1 | 1 | 0     | 0      | 0      | 0     | -0.003 | t | 138862 | KFPED                      | Mus<br>musculu<br>s              |
| 1 | 1.00 | 1 | 1 | 0     | 0      | 0      | 0     | -0.003 | t | 150858 | ISSLYNLVK<br>SS            | Mus<br>musculu<br>s              |
| 1 | 1.00 | 1 | 1 | 0     | 0      | 0      | 0     | -0.003 | t | 135569 | KTNMK                      | Mus<br>musculu<br>s              |

|   |      |   |   |   |   |   |   |        |   |        |                          |                     |
|---|------|---|---|---|---|---|---|--------|---|--------|--------------------------|---------------------|
| 1 | 1.00 | 1 | 1 | 0 | 0 | 0 | 0 | -0.003 | t | 140674 | ESQPDPKP<br>DELHKS       | Mus<br>musculu<br>s |
| 1 | 1.00 | 1 | 1 | 0 | 0 | 0 | 0 | -0.003 | t | 151813 | CGADSYE<br>MEEDGVR<br>KC | Mus<br>musculu<br>s |
| 1 | 1.00 | 1 | 1 | 0 | 0 | 0 | 0 | -0.003 | t | 117495 | ERDRKREK<br>RKPKS        | Mus<br>musculu<br>s |
| 1 | 1.00 | 1 | 1 | 0 | 0 | 0 | 0 | -0.003 | t | 131217 | EDISAYLL                 | Mus<br>musculu<br>s |
| 1 | 1.00 | 1 | 1 | 0 | 0 | 0 | 0 | -0.003 | t | 118060 | PPPGMRP<br>P             | Homo<br>sapiens     |
| 1 | 1.00 | 1 | 1 | 0 | 0 | 0 | 0 | -0.003 | t | 117614 | QGFPFYDK<br>PMRI         | Mus<br>musculu<br>s |
| 1 | 1.00 | 1 | 1 | 0 | 0 | 0 | 0 | -0.003 | t | 108382 | GGVVIA                   | Mus<br>musculu<br>s |
| 1 | 1.00 | 1 | 1 | 0 | 0 | 0 | 0 | -0.003 | t | 105163 | EFRHD                    | Mus<br>musculu<br>s |
| 1 | 1.00 | 1 | 1 | 0 | 0 | 0 | 0 | -0.003 | t | 102423 | FEYQD                    | Mus<br>musculu<br>s |
| 1 | 1.00 | 1 | 1 | 0 | 0 | 0 | 0 | -0.003 | t | 102931 | WQALCAY<br>QAE           | Mus<br>musculu<br>s |
| 1 | 1.00 | 1 | 1 | 0 | 0 | 0 | 0 | -0.003 | t | 67967  | VDGSDP                   | Mus<br>musculu<br>s |
| 1 | 1.00 | 1 | 1 | 0 | 0 | 0 | 0 | -0.003 | t | 75441  | YPYDVPDY<br>A            | Mus<br>musculu<br>s |
| 1 | 1.00 | 1 | 1 | 0 | 0 | 0 | 0 | -0.003 | t | 60917  | SSAVVDNK<br>LKI          | Mus<br>musculu<br>s |
| 1 | 1.00 | 1 | 1 | 0 | 0 | 0 | 0 | -0.003 | t | 63839  | TGGSTDG<br>KQG           | Mus<br>musculu<br>s |
| 1 | 1.00 | 1 | 1 | 0 | 0 | 0 | 0 | -0.003 | t | 43242  | NANPNAN<br>PNANP         | Mus<br>musculu<br>s |
| 1 | 1.00 | 1 | 1 | 0 | 0 | 0 | 0 | -0.003 | t | 45932  | NSNNPDW<br>DF            | Mus<br>musculu<br>s |

|   |      |   |   |   |   |   |   |        |   |       |                              |                       |
|---|------|---|---|---|---|---|---|--------|---|-------|------------------------------|-----------------------|
| 1 | 1.00 | 1 | 1 | 0 | 0 | 0 | 0 | -0.003 | t | 40332 | LVFFAEDV                     | Mus musculus          |
| 1 | 1.00 | 1 | 1 | 0 | 0 | 0 | 0 | -0.003 | t | 40332 | LVFFAEDV                     | Mus musculus          |
| 1 | 1.00 | 1 | 1 | 0 | 0 | 0 | 0 | -0.003 | t | 50637 | QELDCWHYQHVCVTS<br>TKS       | MD                    |
| 1 | 1.00 | 1 | 1 | 0 | 0 | 0 | 0 | -0.003 | t | 46054 | NTANPDW                      | Mus musculus          |
| 1 | 1.00 | 1 | 1 | 0 | 0 | 0 | 0 | -0.003 | t | 38304 | LNPKTNK<br>WEDK              | Homo sapiens          |
| 1 | 1.00 | 1 | 1 | 0 | 0 | 0 | 0 | -0.003 | t | 51853 | QPHGGGW                      | Mus musculus          |
| 1 | 1.00 | 1 | 1 | 0 | 0 | 0 | 0 | -0.003 | t | 30093 | KCTSDQDE<br>QFIPKGC<br>SK    | Oryctolagus cuniculus |
| 1 | 1.00 | 1 | 1 | 0 | 0 | 0 | 0 | -0.003 | t | 11571 | EEEDDDMGFLFD                 | Mus musculus          |
| 1 | 1.00 | 1 | 1 | 0 | 0 | 0 | 0 | -0.003 | t | 17262 | FPCDRLSG<br>YWERGIP<br>PCVR  | Homo sapiens          |
| 1 | 1.00 | 1 | 1 | 0 | 0 | 0 | 0 | -0.003 | t | 11571 | EEEDDDMGFLFD                 | Mus musculus          |
| 1 | 1.00 | 1 | 1 | 0 | 0 | 0 | 0 | -0.003 | t | 11571 | EEEDDDMGFLFD                 | Homo sapiens          |
| 1 | 1.00 | 1 | 1 | 0 | 0 | 0 | 0 | -0.003 | t | 32808 | KPNLSSKR<br>SELSQLSM<br>YRVF | Mus musculus          |
| 1 | 1.00 | 1 | 1 | 0 | 0 | 0 | 0 | -0.003 | t | 22586 | GSYNRSSF<br>ESSSGLV          | Mus musculus          |
| 1 | 1.00 | 1 | 1 | 0 | 0 | 0 | 0 | -0.003 | t | 28299 | IRGDTFAT<br>R                | Mus musculus          |
| 1 | 1.00 | 1 | 1 | 0 | 0 | 0 | 0 | -0.003 | t | 7492  | DAEFRHDS<br>GYEVHHQ<br>KL    | Mus musculus          |

|   |      |   |   |       |        |        |        |        |   |        |                              |                 |
|---|------|---|---|-------|--------|--------|--------|--------|---|--------|------------------------------|-----------------|
| 1 | 1.00 | 1 | 1 | 0     | 0      | 0      | 0      | -0.003 | t | 4401   | ASFFD                        | Mus musculus    |
| 1 | 1.00 | 1 | 1 | 0     | 0      | 0      | 0      | -0.003 | t | 7491   | DAEFRHDS<br>GYEVHHQ<br>K     | Mus musculus    |
| 1 | 1.00 | 1 | 1 | 0     | 0      | 0      | 0      | -0.003 | t | 4907   | ATCDKLFG<br>YYERGIPLP<br>CAL | Homo sapiens    |
| 1 | 1.00 | 1 | 1 | 0     | 0      | 0      | 0      | -0.003 | t | 3952   | AQEPPRQ                      | Mus musculus    |
| 1 | 1.00 | 1 | 1 | 0     | 0      | 0      | 0      | -0.003 | t | 7491   | DAEFRHDS<br>GYEVHHQ<br>K     | Mus musculus    |
| 1 | 1.00 | 1 | 1 | 0.05  | 0.05   | 0.051  | 0.05   | 0.05   | t | 63542  | TESTVSSAL<br>AELAT           | Homo sapiens    |
| 1 | 1.00 | 1 | 1 | 0.04  | 0.04   | 0.039  | 0.04   | 0.04   | t | 48849  | PPPAPDPS<br>PT               | Homo sapiens    |
| 1 | 1.00 | 1 | 1 | 0     | 0      | 0      | 0      | 0      | t | 153841 | KCLKFYSKI<br>SEYRHY          | Cavia porcellus |
| 1 | 1.00 | 1 | 1 | -0.02 | -0.016 | -0.026 | -0.019 | -0.021 | t | 12247  | EGQDRGY<br>SY                | Homo sapiens    |
| 1 | 1.00 | 1 | 1 | 0.03  | 0.028  | 0.026  | 0.033  | 0.03   | t | 123851 | WTEVSEV<br>ATEV              | Homo sapiens    |
| 1 | 1.00 | 1 | 1 | 0.02  | 0.02   | 0.02   | 0.02   | 0.02   | t | 138080 | VSLGQNVL                     | Homo sapiens    |
| 1 | 1.00 | 1 | 1 | -0.03 | -0.032 | -0.037 | -0.027 | -0.031 | t | 53876  | RGGIPSLK<br>KGKDIKV          | Mus musculus    |
| 1 | 1.00 | 1 | 1 | 0     | 0      | 0      | 0      | -0.002 | t | 45405  | NPNANP                       | Mus musculus    |



|   |      |   |   |       |        |        |        |        |   |        |                              |                       |
|---|------|---|---|-------|--------|--------|--------|--------|---|--------|------------------------------|-----------------------|
| 1 | 1.00 | 1 | 1 | 0.01  | 0.013  | 0.005  | 0.01   | 0.01   | t | 37656  | LLPHSNLD                     | Mus musculus          |
| 1 | 1.00 | 1 | 1 | -0.04 | -0.038 | -0.045 | -0.037 | -0.042 | t | 134076 | GWLGFNK<br>ERGLHQ            | Homo sapiens          |
| 1 | 1.00 | 1 | 1 | -0.02 | -0.02  | -0.02  | -0.02  | -0.018 | t | 135457 | FGF                          | Mus musculus          |
| 1 | 1.00 | 1 | 1 | 0.01  | 0.01   | 0.003  | 0.01   | 0.01   | t | 55162  | RPGLPVEY<br>LQVPSEA          | Homo sapiens          |
| 1 | 1.00 | 1 | 1 | 0     | 0.002  | 0      | 0.009  | 0.001  | t | 122445 | KQYSIEAA<br>LRCRRISKE<br>EYH | Homo sapiens          |
| 1 | 1.00 | 1 | 1 | 0     | 0      | 0      | 0.009  | 0.001  | t | 122445 | KQYSIEAA<br>LRCRRISKE<br>EYH | Homo sapiens          |
| 1 | 1.00 | 1 | 1 | 0     | -0.002 | 0      | 0      | -0.002 | t | 137401 | FEDVW                        | Mus musculus          |
| 1 | 1.00 | 1 | 1 | 0.03  | 0.032  | 0.03   | 0.031  | 0.032  | t | 10636  | DVKFPGG<br>GQI               | Homo sapiens          |
| 1 | 1.00 | 1 | 1 | 0     | 0.002  | 0.005  | 0.007  | -0.003 | t | 131897 | GQMPNN<br>QSINSKVS<br>G      | Homo sapiens          |
| 1 | 1.00 | 1 | 1 | 0.01  | 0.006  | 0.005  | 0.009  | 0.01   | t | 97404  | ISPNDNTF<br>V                | Oryctolagus cuniculus |
| 1 | 1.00 | 1 | 1 | -0.04 | -0.036 | -0.047 | -0.039 | -0.041 | t | 138028 | SAGALQLL<br>VVGK             | Homo sapiens          |
| 1 | 1.00 | 1 | 1 | 0.05  | 0.053  | 0.039  | 0.05   | 0.053  | t | 111309 | GDTPTLHE<br>YMLDLQ           | Mus musculus          |
| 1 | 1.00 | 1 | 1 | -0.04 | -0.038 | -0.049 | -0.037 | -0.04  | t | 63098  | TCRRMLAF<br>LKDKENR          | Homo sapiens          |
| 1 | 1.00 | 1 | 1 | 0     | 0.002  | -0.006 | 0.003  | 0.001  | t | 118824 | GRRPFHP<br>VGEADYFE<br>YHQE  | Homo sapiens          |
| 1 | 1.00 | 1 | 1 | -0.02 | -0.017 | -0.029 | -0.027 | -0.022 | t | 134509 | RHFFNRSG<br>TV               | Mus musculus          |

|   |      |   |   |       |        |        |        |        |   |        |                             |                                  |
|---|------|---|---|-------|--------|--------|--------|--------|---|--------|-----------------------------|----------------------------------|
| 1 | 1.00 | 1 | 1 | 0.05  | 0.051  | 0.043  | 0.05   | 0.05   | t | 45571  | NQITSALS<br>TQ              | Mus<br>musculu<br>s              |
| 1 | 1.00 | 1 | 1 | -0.01 | -0.007 | -0.019 | -0.01  | -0.01  | t | 100502 | SEEGRGLL<br>KK              | Mus<br>musculu<br>s              |
| 1 | 1.00 | 1 | 1 | 0.02  | 0.018  | 0.022  | 0.019  | 0.021  | t | 62641  | SYLPQLG                     | Mus<br>musculu<br>s              |
| 1 | 1.00 | 1 | 1 | 0.08  | 0.082  | 0.075  | 0.081  | 0.08   | t | 20174  | GHQVGDDG<br>E               | Homo<br>sapiens                  |
| 1 | 1.00 | 1 | 1 | -0.01 | -0.008 | -0.018 | -0.009 | -0.01  | t | 30304  | KEAPTTKP<br>TEKP            | Homo<br>sapiens                  |
| 1 | 1.00 | 1 | 1 | 0.01  | 0.016  | 0      | 0.01   | 0.01   | t | 139100 | ITGRLAAL<br>NAYVSQTL<br>TQY | Felis<br>catus                   |
| 1 | 1.00 | 1 | 1 | -0.02 | -0.02  | -0.021 | -0.02  | -0.02  | t | 7057   | CSPRTG                      | Homo<br>sapiens                  |
| 1 | 1.00 | 1 | 1 | 0.01  | 0.01   | 0.006  | 0.013  | 0.009  | t | 67069  | TVLGALP<br>PTPQTP           | Homo<br>sapiens                  |
| 1 | 1.00 | 1 | 1 | 0.07  | 0.07   | 0.077  | 0.079  | 0.072  | t | 131048 | RQSDGQY<br>QM               | Homo<br>sapiens                  |
| 1 | 1.00 | 1 | 1 | 0.02  | 0.018  | 0.015  | 0.023  | 0.019  | t | 23694  | HEIAWFTE<br>RSDKSYEH<br>QT  | Mus<br>musculu<br>s              |
| 1 | 1.00 | 1 | 1 | 0.02  | 0.018  | 0.015  | 0.023  | 0.019  | t | 23694  | HEIAWFTE<br>RSDKSYEH<br>QT  | Mus<br>musculu<br>s              |
| 1 | 1.00 | 1 | 1 | 0.02  | 0.016  | 0.016  | 0.023  | 0.022  | t | 106073 | RGVTHDQ<br>L                | Oryctola<br>gus<br>cuniculu<br>s |
| 1 | 1.00 | 1 | 1 | -0.06 | -0.06  | -0.063 | -0.06  | -0.063 | t | 110390 | QWGRL                       | Mus<br>musculu<br>s              |

|   |      |   |   |       |        |        |        |        |   |        |                              |                                  |
|---|------|---|---|-------|--------|--------|--------|--------|---|--------|------------------------------|----------------------------------|
| 1 | 1.00 | 1 | 1 | 0.02  | 0.02   | 0.02   | 0.02   | 0.021  | t | 73384  | YALADASL<br>KMAD             | Oryctola<br>gus<br>cuniculu<br>s |
| 1 | 1.00 | 1 | 1 | -0.02 | -0.02  | -0.02  | -0.02  | -0.02  | t | 156909 | LAHPFTP                      | Gallus<br>gallus                 |
| 1 | 1.00 | 1 | 1 | 0     | -0.004 | -0.005 | 0.003  | 0      | t | 76396  | YVRGGGA<br>VP                | Oryctola<br>gus<br>cuniculu<br>s |
| 1 | 1.00 | 1 | 1 | 0     | -0.004 | -0.005 | 0.003  | 0      | t | 70153  | VNPNNAA<br>AL                | Oryctola<br>gus<br>cuniculu<br>s |
| 1 | 1.00 | 1 | 1 | 0.01  | 0.008  | 0.002  | 0.009  | 0.01   | t | 2220   | AKKQVEK<br>ALEEANSK<br>LAALE | Mus<br>musculu<br>s              |
| 1 | 1.00 | 1 | 1 | 0.06  | 0.062  | 0.055  | 0.061  | 0.06   | t | 19723  | GGESSEEL<br>SESSFFNLI<br>T   | Homo<br>sapiens                  |
| 1 | 1.00 | 1 | 1 | 0.02  | 0.018  | -0.001 | 0.017  | 0.022  | t | 153829 | ERSVQKLQ<br>KEVDRLD<br>E     | Homo<br>sapiens                  |
| 1 | 1.00 | 1 | 1 | -0.01 | -0.012 | -0.012 | -0.007 | -0.01  | t | 51529  | QLRRKLEF<br>FTYVRFD          | Mus<br>musculu<br>s              |
| 1 | 1.00 | 1 | 1 | 0.02  | 0.016  | 0.018  | 0.023  | 0.02   | t | 95480  | ITELSEFIP<br>GAS             | Oryctola<br>gus<br>cuniculu<br>s |
| 1 | 1.00 | 1 | 1 | 0.01  | 0.006  | -0.002 | 0.009  | 0.01   | t | 24878  | HSWYNDL<br>LVDFDSKD<br>IVDKY | Oryctola<br>gus<br>cuniculu<br>s |
| 1 | 1.00 | 1 | 1 | 0     | 0      | 0      | 0      | -0.002 | t | 119633 | QYTGHIT<br>WTPPAIFK<br>S     | Mus<br>musculu<br>s              |
| 1 | 1.00 | 1 | 1 | 0     | -0.002 | 0      | 0.003  | -0.001 | t | 157702 | NKFAVETL                     | Chloroce<br>bus<br>aethiops      |
| 1 | 1.00 | 1 | 1 | 0.01  | 0.012  | 0.012  | 0.011  | 0.009  | t | 103185 | FRMELLSL<br>PQDEWAG          | Homo<br>sapiens                  |
| 1 | 1.00 | 1 | 1 | 0.03  | 0.028  | 0.03   | 0.029  | 0.03   | t | 22494  | GSRYPGQ<br>GSPG              | Mus<br>musculu<br>s              |

|   |      |   |   |       |        |        |        |        |   |        |                              |                                  |
|---|------|---|---|-------|--------|--------|--------|--------|---|--------|------------------------------|----------------------------------|
| 1 | 1.00 | 1 | 1 | 0     | -0.005 | -0.008 | 0.003  | 0.002  | t | 157772 | QGMMSPP<br>GRSEK             | Canis<br>lupus                   |
| 1 | 1.00 | 1 | 1 | 0.03  | 0.034  | 0.03   | 0.037  | 0.03   | t | 117364 | RPDAEYW<br>NSQKDLLE<br>QRRAA | Homo<br>sapiens                  |
| 1 | 1.00 | 1 | 1 | 0.01  | 0.01   | 0.007  | 0.014  | 0.01   | t | 23171  | GVTLLQAA<br>PT               | Homo<br>sapiens                  |
| 1 | 1.00 | 1 | 1 | 0.01  | 0.006  | 0.006  | 0.013  | 0.009  | t | 105684 | ASFDKVKG<br>DPVGILYA<br>VFKA | Oryctola<br>gus<br>cuniculu<br>s |
| 1 | 1.00 | 1 | 1 | -0.03 | -0.028 | -0.039 | -0.029 | -0.03  | t | 110427 | STWPTTTP<br>RPIPKPSP<br>WAPK | Homo<br>sapiens                  |
| 1 | 1.00 | 1 | 1 | -0.01 | -0.008 | -0.014 | -0.007 | -0.008 | t | 60752  | SRPGLKPD<br>LTGTSKS          | Homo<br>sapiens                  |
| 1 | 1.00 | 1 | 1 | 0.02  | 0.023  | 0.013  | 0.02   | 0.021  | t | 150858 | ISSLYNLVK<br>SS              | Mus<br>musculu<br>s              |
| 1 | 1.00 | 1 | 1 | 0.01  | 0.013  | 0.01   | 0.01   | 0.008  | t | 26046  | IFDT                         | Mus<br>musculu<br>s              |
| 1 | 1.00 | 1 | 1 | 0.04  | 0.038  | 0.04   | 0.037  | 0.04   | t | 51147  | QIVGGVYL<br>L                | Mus<br>musculu<br>s              |
| 1 | 1.00 | 1 | 1 | 0     | 0.01   | 0      | -0.001 | -0.001 | t | 55070  | RNTNRRP<br>QDV               | Pan<br>troglody<br>tes           |
| 1 | 1.00 | 1 | 1 | 0.06  | 0.062  | 0.059  | 0.057  | 0.058  | t | 55861  | RSILDLDLT<br>K               | Homo<br>sapiens                  |
| 1 | 1.00 | 1 | 1 | 0.01  | 0.01   | 0.005  | 0.01   | 0.01   | t | 153440 | PRLKNPPK<br>KPKDDY           | Mus<br>musculu<br>s              |
| 1 | 1.00 | 1 | 1 | -0.04 | -0.038 | -0.037 | -0.033 | -0.04  | t | 119609 | LHQDWLN<br>G                 | Homo<br>sapiens                  |
| 1 | 1.00 | 1 | 1 | 0     | 0      | -0.006 | 0.003  | 0.002  | t | 12258  | EGRFKSQD                     | Homo<br>sapiens                  |

|   |      |   |   |       |        |        |       |        |   |        |                         |                                  |
|---|------|---|---|-------|--------|--------|-------|--------|---|--------|-------------------------|----------------------------------|
| 1 | 1.00 | 1 | 1 | 0.03  | 0.03   | 0.03   | 0.034 | 0.03   | t | 34935  | LAQMYQA<br>NDNSLED<br>V | Homo<br>sapiens                  |
| 1 | 1.00 | 1 | 1 | -0.01 | -0.01  | -0.01  | -0.01 | -0.01  | t | 54430  | RKTKRNT                 | Homo<br>sapiens                  |
| 1 | 1.00 | 1 | 1 | 0.07  | 0.07   | 0.07   | 0.077 | 0.072  | t | 122746 | EEQEDEIIG<br>FGQELKN    | Homo<br>sapiens                  |
| 1 | 1.00 | 1 | 1 | 0.04  | 0.041  | 0.039  | 0.043 | 0.04   | t | 99450  | LRPEDTLE<br>EKMYACR     | Equus<br>caballus                |
| 1 | 1.00 | 1 | 1 | -0.03 | -0.033 | -0.037 | -0.03 | -0.031 | t | 41610  | MGQHPAK<br>SMDVRR       | Oryctola<br>gus<br>cuniculu<br>s |
| 1 | 1.00 | 1 | 1 | 0.01  | 0.01   | 0.008  | 0.01  | 0.008  | t | 38702  | LPSDFFPS<br>VRDL        | Mus<br>musculu<br>s              |
| 1 | 1.00 | 1 | 1 | -0.02 | -0.02  | -0.02  | -0.02 | -0.019 | t | 115349 | LKGYGGVS<br>LP          | Homo<br>sapiens                  |
| 1 | 1.00 | 1 | 1 | 0     | 0      | 0      | 0.004 | -0.001 | t | 43242  | NANPNAN<br>PNANP        | Homo<br>sapiens                  |
| 1 | 1.00 | 1 | 1 | 0     | 0      | 0      | 0.004 | -0.001 | t | 11819  | EENVEHD<br>A            | Homo<br>sapiens                  |
| 1 | 1.00 | 1 | 1 | 0     | 0      | 0      | 0.004 | -0.001 | t | 11819  | EENVEHD<br>A            | Homo<br>sapiens                  |
| 1 | 1.00 | 1 | 1 | -0.01 | -0.01  | -0.022 | -0.01 | -0.01  | t | 116971 | FAVLKLM<br>GRGTKF       | Rattus<br>norvegic<br>us         |
| 1 | 1.00 | 1 | 1 | 0.03  | 0.026  | 0.024  | 0.023 | 0.029  | t | 105884 | IMAKFTQF                | Oryctola<br>gus<br>cuniculu<br>s |
| 1 | 1.00 | 1 | 1 | 0.01  | 0.01   | 0.005  | 0.007 | 0.008  | t | 98734  | DLEILLQK<br>WE          | Homo<br>sapiens                  |
| 1 | 1.00 | 1 | 1 | 0.01  | 0.012  | 0.012  | 0.017 | 0.011  | t | 122730 | DPAQPPR<br>D            | Homo<br>sapiens                  |

|   |      |   |   |       |        |        |        |        |   |        |                             |                                  |
|---|------|---|---|-------|--------|--------|--------|--------|---|--------|-----------------------------|----------------------------------|
| 1 | 1.00 | 1 | 1 | 0     | 0.004  | -0.003 | 0.007  | 0      | t | 121051 | VSEGTKAV<br>TKYTSSK         | Homo<br>sapiens                  |
| 1 | 1.00 | 1 | 1 | 0     | 0.002  | -0.003 | 0.007  | 0      | t | 121051 | VSEGTKAV<br>TKYTSSK         | Homo<br>sapiens                  |
| 1 | 1.00 | 1 | 1 | 0.01  | 0.01   | 0.006  | 0.01   | 0.01   | t | 46858  | PALTAET<br>G                | Homo<br>sapiens                  |
| 1 | 1.00 | 1 | 1 | 0.03  | 0.029  | 0.025  | 0.03   | 0.03   | t | 19301  | GEILLNQL                    | Anas<br>platyrhy<br>nchos        |
| 1 | 1.00 | 1 | 1 | -0.03 | -0.034 | -0.043 | -0.033 | -0.03  | t | 55640  | RRLGAALL<br>QS              | Oryctola<br>gus<br>cuniculu<br>s |
| 1 | 1.00 | 1 | 1 | -0.03 | -0.028 | -0.03  | -0.023 | -0.029 | t | 113321 | DENPVVH<br>FFKNIVTP<br>RT   | Homo<br>sapiens                  |
| 1 | 1.00 | 1 | 1 | -0.03 | -0.028 | -0.03  | -0.023 | -0.029 | t | 113321 | DENPVVH<br>FFKNIVTP<br>RT   | Homo<br>sapiens                  |
| 1 | 1.00 | 1 | 1 | -0.04 | -0.04  | -0.054 | -0.04  | -0.04  | t | 39196  | LRRRLTAC<br>ERAKRTL         | Homo<br>sapiens                  |
| 1 | 1.00 | 1 | 1 | -0.01 | -0.008 | -0.019 | -0.01  | -0.01  | t | 51474  | QLPNVGIT<br>QGIV            | Ovis<br>aries                    |
| 1 | 1.00 | 1 | 1 | -0.05 | -0.05  | -0.05  | -0.043 | -0.05  | t | 119823 | EDDDMGF<br>GLFD             | Homo<br>sapiens                  |
| 1 | 1.00 | 1 | 1 | 0.01  | 0.01   | 0      | 0.009  | 0.012  | t | 24449  | HPFVALGL<br>KQPKEIK         | Mus<br>musculu<br>s              |
| 1 | 1.00 | 1 | 1 | 0.03  | 0.028  | 0.026  | 0.033  | 0.03   | t | 58212  | SGQTPQ<br>VETEDTKE          | Mus<br>musculu<br>s              |
| 1 | 1.00 | 1 | 1 | -0.04 | -0.037 | -0.05  | -0.04  | -0.04  | t | 47157  | PDPLKPTK<br>R               | Mus<br>musculu<br>s              |
| 1 | 1.00 | 1 | 1 | 0.03  | 0.03   | 0.028  | 0.027  | 0.028  | t | 14638  | EVDDEALE<br>KF              | Homo<br>sapiens                  |
| 1 | 1.00 | 1 | 1 | -0.01 | -0.008 | -0.01  | -0.007 | -0.011 | t | 918    | AEGEFATA<br>PPSHYSW<br>DPAK | Homo<br>sapiens                  |

|   |      |   |   |       |        |        |        |        |   |        |                              |                                  |
|---|------|---|---|-------|--------|--------|--------|--------|---|--------|------------------------------|----------------------------------|
| 1 | 1.00 | 1 | 1 | 0.01  | 0.003  | 0.004  | 0.01   | 0.01   | t | 86742  | NGVWVM<br>MDGNEQ<br>VEYPLK   | Oryctola<br>gus<br>cuniculu<br>s |
| 1 | 1.00 | 1 | 1 | -0.04 | -0.038 | -0.047 | -0.037 | -0.038 | t | 77826  | AFLRHAAL                     | Homo<br>sapiens                  |
| 1 | 1.00 | 1 | 1 | 0     | 0      | 0.002  | 0      | -0.001 | t | 112134 | GLVGPRGE<br>RGF              | Mus<br>musculu<br>s              |
| 1 | 1.00 | 1 | 1 | 0     | -0.014 | -0.011 | -0.001 | 0      | t | 51259  | QKTLTKTS                     | Macaca<br>mulatta                |
| 1 | 1.00 | 1 | 1 | 0.01  | 0.01   | 0.004  | 0.007  | 0.01   | t | 44172  | NHVADIDK<br>LIDYAA           | Homo<br>sapiens                  |
| 1 | 1.00 | 1 | 1 | 0.03  | 0.03   | 0.022  | 0.033  | 0.032  | t | 34942  | LARGSPPS<br>LASSASQ<br>LSA   | Homo<br>sapiens                  |
| 1 | 1.00 | 1 | 1 | 0     | 0.004  | -0.003 | -0.003 | -0.002 | t | 115300 | ISCDKFLD<br>DD               | Homo<br>sapiens                  |
| 1 | 1.00 | 1 | 1 | -0.01 | -0.01  | -0.012 | -0.01  | -0.013 | t | 35060  | LCKDKKAD<br>SGYCYWV          | Mus<br>musculu<br>s              |
| 1 | 1.00 | 1 | 1 | -0.01 | -0.01  | -0.012 | -0.01  | -0.013 | t | 35060  | LCKDKKAD<br>SGYCYWV          | Mus<br>musculu<br>s              |
| 1 | 1.00 | 1 | 1 | 0.01  | 0.014  | 0.01   | 0.017  | 0.009  | t | 122874 | PPARALKR<br>SLWVEVD<br>LLIGS | Homo<br>sapiens                  |
| 1 | 1.00 | 1 | 1 | 0.05  | 0.046  | 0.049  | 0.05   | 0.049  | t | 123849 | WQDE                         | Mus<br>musculu<br>s              |
| 1 | 1.00 | 1 | 1 | -0.01 | -0.012 | -0.019 | -0.011 | -0.008 | t | 63967  | TGSQDFFV<br>RSIG             | Mus<br>musculu<br>s              |
| 1 | 1.00 | 1 | 1 | 0.01  | 0.012  | 0.004  | 0.011  | 0.009  | t | 36950  | LKLSIPVAE<br>RAKPRK          | Homo<br>sapiens                  |
| 1 | 1.00 | 1 | 1 | 0.04  | 0.04   | 0.04   | 0.044  | 0.04   | t | 115631 | NVRFSDEG<br>GFTC             | Homo<br>sapiens                  |
| 1 | 1.00 | 1 | 1 | 0.01  | 0.008  | 0.006  | 0.009  | 0.012  | t | 60917  | SSAVVDNK<br>LKI              | Mus<br>musculu<br>s              |

|   |      |   |   |       |        |        |        |        |   |        |                              |                                  |
|---|------|---|---|-------|--------|--------|--------|--------|---|--------|------------------------------|----------------------------------|
| 1 | 1.00 | 1 | 1 | 0.02  | 0.022  | 0.015  | 0.017  | 0.018  | t | 98696  | AMAASDIS<br>LL               | Homo<br>sapiens                  |
| 1 | 1.00 | 1 | 1 | 0     | 0.002  | -0.012 | 0.001  | 0.001  | t | 63217  | TDQMEVD<br>SGPRKRPL<br>RGG   | Homo<br>sapiens                  |
| 1 | 1.00 | 1 | 1 | -0.03 | -0.03  | -0.03  | -0.03  | -0.032 | t | 94741  | WEQWW                        | Mus<br>musculu<br>s              |
| 1 | 1.00 | 1 | 1 | 0.01  | 0.014  | -0.001 | 0.01   | 0.01   | t | 110562 | DIILECVYC<br>KQQLLRRE<br>VVD | Cavia<br>porcellu<br>s           |
| 1 | 1.00 | 1 | 1 | -0.01 | -0.01  | -0.024 | -0.01  | -0.008 | t | 8267   | DFFVRSIG<br>SKGGKL           | Mus<br>musculu<br>s              |
| 1 | 1.00 | 1 | 1 | -0.02 | -0.02  | -0.027 | -0.02  | -0.02  | t | 44911  | NLVDWLR<br>QY                | Homo<br>sapiens                  |
| 1 | 1.00 | 1 | 1 | -0.03 | -0.032 | -0.03  | -0.026 | -0.03  | t | 117885 | GMRPPM<br>GPPI               | Mus<br>musculu<br>s              |
| 1 | 1.00 | 1 | 1 | 0.02  | 0.02   | 0.025  | 0.022  | 0.018  | t | 96081  | AKIDDPTD<br>SK               | Homo<br>sapiens                  |
| 1 | 1.00 | 1 | 1 | -0.03 | -0.028 | -0.032 | -0.027 | -0.03  | t | 51361  | QLGPRR                       | Homo<br>sapiens                  |
| 1 | 1.00 | 1 | 1 | -0.03 | -0.028 | -0.032 | -0.027 | -0.03  | t | 51361  | QLGPRR                       | Homo<br>sapiens                  |
| 1 | 1.00 | 1 | 1 | 0     | 0      | 0      | 0      | 0      | t | 42493  | MRQLDTN<br>VER               | Homo<br>sapiens                  |
| 1 | 1.00 | 1 | 1 | -0.03 | -0.029 | -0.03  | -0.027 | -0.03  | t | 78281  | TKLPAA                       | Equus<br>caballus                |
| 1 | 1.00 | 1 | 1 | -0.01 | -0.01  | -0.02  | -0.01  | -0.009 | t | 104161 | NVVLKIT<br>ESATSPPT          | Oryctola<br>gus<br>cuniculu<br>s |
| 1 | 1.00 | 1 | 1 | -0.01 | -0.01  | -0.014 | -0.01  | -0.012 | t | 73021  | WRCVVYP<br>GNGFVSAS<br>IFGFQ | Oryctola<br>gus<br>cuniculu<br>s |
| 1 | 1.00 | 1 | 1 | 0     | -0.003 | 0      | 0      | -0.003 | t | 105127 | DAEFRHD                      | Oryctola<br>gus<br>cuniculu<br>s |
| 1 | 1.00 | 1 | 1 | 0.03  | 0.026  | 0.032  | 0.029  | 0.03   | t | 78637  | EKSLTSLSE                    | Oryctola<br>gus<br>cuniculu<br>s |



|   |      |   |   |       |        |        |        |        |   |        |                             |                                  |
|---|------|---|---|-------|--------|--------|--------|--------|---|--------|-----------------------------|----------------------------------|
| 1 | 1.00 | 1 | 1 | 0.07  | 0.068  | 0.065  | 0.067  | 0.07   | t | 12498  | EIKYNGEE<br>YL              | Mus<br>musculu<br>s              |
| 1 | 1.00 | 1 | 1 | 0.02  | 0.022  | 0.014  | 0.023  | 0.022  | t | 133795 | DFTYDQV<br>AFNGLPQF         | Homo<br>sapiens                  |
| 1 | 1.00 | 1 | 1 | 0.04  | 0.037  | 0.032  | 0.04   | 0.04   | t | 34217  | KVTLADAG<br>FMKQYGE<br>CL   | Oryctola<br>gus<br>cuniculu<br>s |
| 1 | 1.00 | 1 | 1 | 0.04  | 0.04   | 0.032  | 0.04   | 0.04   | t | 34217  | KVTLADAG<br>FMKQYGE<br>CL   | Mus<br>musculu<br>s              |
| 1 | 1.00 | 1 | 1 | -0.01 | -0.007 | -0.014 | -0.01  | -0.01  | t | 50177  | PYTSTLLP                    | Mus<br>musculu<br>s              |
| 1 | 1.00 | 1 | 1 | 0.02  | 0.024  | 0.02   | 0.027  | 0.021  | t | 131700 | TGVTTQG<br>VKSLTSM<br>YVKEF | Homo<br>sapiens                  |
| 1 | 1.00 | 1 | 1 | -0.02 | -0.018 | -0.03  | -0.017 | -0.018 | t | 47643  | PGFGDRR<br>KAM              | Homo<br>sapiens                  |
| 1 | 1.00 | 1 | 1 | 0.02  | 0.022  | 0.023  | 0.021  | 0.02   | t | 51454  | QLNPKDN<br>DVEL             | Homo<br>sapiens                  |
| 1 | 1.00 | 1 | 1 | 0.03  | 0.028  | 0.038  | 0.029  | 0.03   | t | 30986  | KGIYPLSYE                   | Mus<br>musculu<br>s              |
| 1 | 1.00 | 1 | 1 | 0     | 0.002  | -0.008 | 0.001  | -0.001 | t | 62872  | TAGWTFG<br>AGAALQIP<br>FA   | Homo<br>sapiens                  |
| 1 | 1.00 | 1 | 1 | -0.01 | -0.014 | -0.01  | -0.007 | -0.012 | t | 156911 | LGMSTNP<br>GPRIL            | Bos<br>taurus                    |
| 1 | 1.00 | 1 | 1 | 0.01  | 0.01   | 0.01   | 0.01   | 0.01   | t | 96126  | AVNVPKV<br>TKE              | Homo<br>sapiens(<br>human)       |
| 1 | 1.00 | 1 | 1 | -0.04 | -0.038 | -0.041 | -0.039 | -0.041 | t | 120410 | ARLVVLAS<br>GTGSLLR         | Homo<br>sapiens                  |
| 1 | 1.00 | 1 | 1 | -0.01 | -0.01  | -0.013 | -0.01  | -0.012 | t | 60992  | SSFFSYGEI<br>P              | Oryctola<br>gus<br>cuniculu<br>s |

|   |      |   |   |       |        |        |       |        |   |        |                              |                                  |
|---|------|---|---|-------|--------|--------|-------|--------|---|--------|------------------------------|----------------------------------|
| 1 | 1.00 | 1 | 1 | 0.01  | 0.012  | 0.003  | 0.017 | 0.012  | t | 142386 | ANKYQISV<br>NKYRGTA<br>GNAL  | Homo<br>sapiens                  |
| 1 | 1.00 | 1 | 1 | 0.03  | 0.028  | 0.022  | 0.029 | 0.03   | t | 57196  | SDFTDSVR<br>DPKTS            | Mus<br>musculu<br>s              |
| 1 | 1.00 | 1 | 1 | 0.02  | 0.016  | 0.007  | 0.02  | 0.02   | t | 149731 | GVSDYHK<br>NLINN             | Mus<br>musculu<br>s              |
| 1 | 1.00 | 1 | 1 | 0.06  | 0.06   | 0.052  | 0.063 | 0.062  | t | 26235  | IGGSQAQT<br>AS               | Homo<br>sapiens                  |
| 1 | 1.00 | 1 | 1 | 0.02  | 0.016  | 0.013  | 0.017 | 0.02   | t | 135448 | AKYGAA                       | Oryctola<br>gus<br>cuniculu<br>s |
| 1 | 1.00 | 1 | 1 | 0.06  | 0.06   | 0.06   | 0.06  | 0.06   | t | 79652  | SSFSPST                      | Oryctola<br>gus<br>cuniculu<br>s |
| 1 | 1.00 | 1 | 1 | 0.03  | 0.027  | 0.028  | 0.03  | 0.03   | t | 127185 | TCDDPRF<br>QDSS              | Oryctola<br>gus<br>cuniculu<br>s |
| 1 | 1.00 | 1 | 1 | 0.03  | 0.03   | 0.031  | 0.033 | 0.028  | t | 59983  | SPAPPPPE<br>HRGGPEEF<br>EGAG | Homo<br>sapiens                  |
| 1 | 1.00 | 1 | 1 | -0.01 | -0.01  | -0.01  | -0.01 | -0.014 | t | 133630 | LPPGLHVF<br>PLASNRS          | Mus<br>musculu<br>s              |
| 1 | 1.00 | 1 | 1 | -0.01 | -0.001 | -0.022 | -0.01 | -0.01  | t | 115593 | AQGHRPQ<br>DEN               | Oryctola<br>gus<br>cuniculu<br>s |
| 1 | 1.00 | 1 | 1 | -0.01 | 0.002  | -0.022 | -0.01 | -0.01  | t | 115593 | AQGHRPQ<br>DEN               | Rattus<br>norvegic<br>us         |
| 1 | 1.00 | 1 | 1 | -0.01 | -0.019 | -0.022 | -0.01 | -0.01  | t | 115593 | AQGHRPQ<br>DEN               | Macaca<br>mulatta                |
| 1 | 1.00 | 1 | 1 | -0.01 | -0.01  | -0.022 | -0.01 | -0.01  | t | 115593 | AQGHRPQ<br>DEN               | Macaca<br>mulatta                |
| 1 | 1.00 | 1 | 1 | -0.01 | -0.01  | -0.022 | -0.01 | -0.01  | t | 115593 | AQGHRPQ<br>DEN               | Oryctola<br>gus<br>cuniculu<br>s |

|   |      |   |   |       |       |        |        |        |   |        |                              |                       |
|---|------|---|---|-------|-------|--------|--------|--------|---|--------|------------------------------|-----------------------|
| 1 | 1.00 | 1 | 1 | 0.04  | 0.04  | 0.033  | 0.04   | 0.041  | t | 130567 | NPCEDI                       | Mus musculus          |
| 1 | 1.00 | 1 | 1 | -0.01 | -0.01 | -0.02  | -0.013 | -0.012 | t | 32975  | KQEVQRG<br>GRYNQ             | Homo sapiens          |
| 1 | 1.00 | 1 | 1 | 0.03  | 0.027 | 0.019  | 0.03   | 0.032  | t | 36042  | LGAALLQS                     | Oryctolagus cuniculus |
| 1 | 1.00 | 1 | 1 | 0.03  | 0.03  | 0.019  | 0.03   | 0.032  | t | 36042  | LGAALLQS                     | Oryctolagus cuniculus |
| 1 | 1.00 | 1 | 1 | 0.01  | 0.01  | -0.001 | 0.01   | 0.01   | t | 95100  | IMPATSDS<br>VPLIAQYF<br>ASTM | Rattus norvegicus     |
| 1 | 1.00 | 1 | 1 | 0.03  | 0.026 | 0.013  | 0.03   | 0.032  | t | 35098  | LCSGGYTV<br>SKSK             | Mus musculus          |
| 1 | 1.00 | 1 | 1 | 0.03  | 0.023 | 0.013  | 0.03   | 0.032  | t | 35098  | LCSGGYTV<br>SKSK             | Oryctolagus cuniculus |
| 1 | 1.00 | 1 | 1 | 0     | 0.002 | 0      | 0.007  | 0.001  | t | 108629 | SHQESTRG<br>RSRGRSGR<br>SGS  | Homo sapiens          |
| 1 | 1.00 | 1 | 1 | 0     | 0.002 | 0      | 0.007  | 0.001  | t | 108629 | SHQESTRG<br>RSRGRSGR<br>SGS  | Homo sapiens          |
| 1 | 1.00 | 1 | 1 | 0     | 0.002 | 0      | 0.001  | 0      | t | 20850  | GLFGKG                       | Homo sapiens          |
| 1 | 1.00 | 1 | 1 | 0.02  | 0.016 | 0.013  | 0.019  | 0.019  | t | 137828 | DVLLAGN<br>AEADR             | Oryctolagus cuniculus |
| 1 | 1.00 | 1 | 1 | 0.01  | 0.007 | -0.004 | 0.01   | 0.011  | t | 21807  | GPTEESVE<br>RAMGRVA          | Oryctolagus cuniculus |
| 1 | 1.00 | 1 | 1 | -0.02 | -0.02 | -0.02  | -0.02  | -0.02  | t | 133156 | IRLR                         | Oryctolagus cuniculus |
| 1 | 1.00 | 1 | 1 | 0     | 0     | -0.019 | 0      | 0.002  | t | 45162  | NNLGLLCE<br>YQAIGSA          | Homo sapiens          |

|   |      |   |   |       |        |        |        |        |   |        |                     |                                  |
|---|------|---|---|-------|--------|--------|--------|--------|---|--------|---------------------|----------------------------------|
| 1 | 1.00 | 1 | 1 | -0.01 | -0.01  | -0.008 | -0.01  | -0.011 | t | 119827 | EFHRWSSY<br>MV      | Mus<br>musculu<br>s              |
| 1 | 1.00 | 1 | 1 | -0.01 | -0.01  | -0.008 | -0.01  | -0.011 | t | 119827 | EFHRWSSY<br>MV      | Oryctola<br>gus<br>cuniculu<br>s |
| 1 | 1.00 | 1 | 1 | -0.01 | -0.01  | -0.008 | -0.01  | -0.011 | t | 119827 | EFHRWSSY<br>MV      | Mus<br>musculu<br>s              |
| 1 | 1.00 | 1 | 1 | 0.03  | 0.032  | 0.03   | 0.031  | 0.03   | t | 111693 | QVILCPTS<br>VFSSNEV | Homo<br>sapiens                  |
| 1 | 1.00 | 1 | 1 | 0.01  | 0.012  | 0.003  | 0.017  | 0.011  | t | 139493 | EQSADSSR<br>HSGSGH  | Homo<br>sapiens                  |
| 1 | 1.00 | 1 | 1 | 0     | 0      | 0      | 0      | 0      | t | 129025 | KAFDKHM<br>N        | Homo<br>sapiens                  |
| 1 | 1.00 | 1 | 1 | -0.04 | -0.036 | -0.036 | -0.033 | -0.04  | t | 144614 | DMMYGG<br>MRGM      | Homo<br>sapiens                  |
| 1 | 1.00 | 1 | 1 | 0     | 0.01   | 0      | -0.001 | 0      | t | 48496  | PLTDFDQG<br>WG      | Pan<br>troglody<br>tes           |
| 1 | 1.00 | 1 | 1 | 0.03  | 0.03   | 0.03   | 0.03   | 0.029  | t | 7673   | DAVTE               | Mus<br>musculu<br>s              |
| 1 | 1.00 | 1 | 1 | 0.03  | 0.03   | 0.03   | 0.03   | 0.031  | t | 115308 | KFLDDDLT<br>DD      | Homo<br>sapiens                  |
| 1 | 1.00 | 1 | 1 | 0     | 0.004  | 0      | 0.007  | 0      | t | 123048 | ATKKAVQ<br>G        | Homo<br>sapiens                  |
| 1 | 1.00 | 1 | 1 | 0.05  | 0.05   | 0.05   | 0.05   | 0.05   | t | 139770 | GWYSFQH             | Ovis<br>aries                    |
| 1 | 1.00 | 1 | 1 | 0.02  | 0.022  | 0.016  | 0.017  | 0.02   | t | 112837 | SGYIPANT<br>TIPF    | Homo<br>sapiens                  |
| 1 | 1.00 | 1 | 1 | -0.06 | -0.059 | -0.067 | -0.06  | -0.061 | t | 11370  | EDKLADYK<br>RRMADA  | Myodes<br>glareolu<br>s          |
| 1 | 1.00 | 1 | 1 | 0.01  | 0.01   | 0.005  | 0.016  | 0.016  | t | 125209 | QFQIHGPR            | Mus<br>musculu<br>s              |

|   |      |   |   |       |        |        |        |        |   |        |                       |                       |
|---|------|---|---|-------|--------|--------|--------|--------|---|--------|-----------------------|-----------------------|
| 1 | 1.00 | 1 | 1 | -0.01 | -0.008 | -0.012 | -0.007 | -0.01  | t | 44175  | NHVSPTHY<br>VPESDAAAR | Homo sapiens          |
| 1 | 1.00 | 1 | 1 | 0.01  | 0.01   | 0.009  | 0.01   | 0.008  | t | 72503  | WGQGG                 | Mus musculus          |
| 1 | 1.00 | 1 | 1 | 0.01  | 0.006  | 0.008  | 0.013  | 0.01   | t | 41544  | MFTKYNG<br>NLNTI      | Oryctolagus cuniculus |
| 1 | 1.00 | 1 | 1 | 0     | 0.002  | -0.005 | 0.001  | -0.001 | t | 59944  | SNVPFSPD<br>GKPCTPPAL | Homo sapiens          |
| 1 | 1.00 | 1 | 1 | -0.02 | -0.022 | -0.027 | -0.017 | -0.019 | t | 107124 | GAPGLRG<br>GAG        | Mus musculus          |
| 1 | 1.00 | 1 | 1 | 0.03  | 0.027  | 0.019  | 0.03   | 0.031  | t | 144776 | SEISTGLVG<br>ITSVAS   | Oryctolagus cuniculus |
| 1 | 1.00 | 1 | 1 | 0     | 0      | -0.012 | 0      | 0      | t | 153370 | DKEGIPPD<br>QQRLIFA   | Mus musculus          |
| 1 | 1.00 | 1 | 1 | -0.02 | -0.02  | -0.02  | -0.02  | -0.023 | t | 95739  | QRYQKFAL<br>PQ        | Homo sapiens          |
| 1 | 1.00 | 1 | 1 | 0.03  | 0.021  | 0.025  | 0.03   | 0.03   | t | 29972  | KAVEKVTE<br>TLLKGAK   | Rattus norvegicus     |
| 1 | 1.00 | 1 | 1 | -0.02 | -0.016 | -0.015 | -0.017 | -0.022 | t | 65476  | TNVGLKIR<br>QLLW      | Homo sapiens          |
| 1 | 1.00 | 1 | 1 | -0.02 | -0.018 | -0.015 | -0.017 | -0.022 | t | 65476  | TNVGLKIR<br>QLLW      | Homo sapiens          |
| 1 | 1.00 | 1 | 1 | 0.01  | 0.007  | 0.007  | 0.01   | 0.008  | t | 111820 | TEAVPGDP<br>DVNRF     | Oryctolagus cuniculus |
| 1 | 1.00 | 1 | 1 | 0     | 0      | 0      | 0      | -0.003 | t | 48597  | PNANPN                | Mus musculus          |
| 1 | 1.00 | 1 | 1 | -0.01 | -0.01  | -0.01  | -0.01  | -0.013 | t | 97348  | GLFGAIAG<br>FIEGGW    | Oryctolagus cuniculus |

|   |      |   |   |       |        |        |        |        |   |        |                             |                       |
|---|------|---|---|-------|--------|--------|--------|--------|---|--------|-----------------------------|-----------------------|
| 1 | 1.00 | 1 | 1 | 0     | 0      | 0      | 0      | -0.001 | t | 156907 | KVGDPLW                     | Mus musculus          |
| 1 | 1.00 | 1 | 1 | 0.01  | 0.01   | 0.016  | 0.011  | 0.01   | t | 29463  | IVTCAM                      | Homo sapiens          |
| 1 | 1.00 | 1 | 1 | 0.01  | 0.01   | 0.01   | 0.012  | 0.01   | t | 24881  | HSYSPGEI<br>NRVASC          | Homo sapiens          |
| 1 | 1.00 | 1 | 1 | -0.02 | -0.017 | -0.022 | -0.019 | -0.019 | t | 48732  | PPA                         | Mus musculus          |
| 1 | 1.00 | 1 | 1 | 0     | 0      | 0      | 0      | -0.002 | t | 10538  | DVAGLEK<br>DPVA             | Mus musculus          |
| 1 | 1.00 | 1 | 1 | -0.03 | -0.032 | -0.042 | -0.031 | -0.03  | t | 133647 | MMHVER<br>KEC               | Mus musculus          |
| 1 | 1.00 | 1 | 1 | 0.02  | 0.024  | 0.016  | 0.017  | 0.018  | t | 50863  | QGFSRNTL<br>EAAFNAE         | Homo sapiens          |
| 1 | 1.00 | 1 | 1 | 0.01  | 0.01   | 0.01   | 0.01   | 0.01   | t | 44554  | NKND                        | Mus musculus          |
| 1 | 1.00 | 1 | 1 | 0     | 0      | 0      | 0      | -0.001 | t | 120681 | KILPEVKEK<br>H              | Oryctolagus cuniculus |
| 1 | 1.00 | 1 | 1 | 0.02  | 0.016  | 0.023  | 0.023  | 0.02   | t | 115265 | GKDITADN<br>K               | Oryctolagus cuniculus |
| 1 | 1.00 | 1 | 1 | 0     | 0      | 0      | 0      | -0.001 | t | 101983 | PVYQQQP                     | Mus musculus          |
| 1 | 1.00 | 1 | 1 | -0.01 | -0.013 | -0.016 | -0.01  | -0.01  | t | 29824  | KAIERM                      | Oryctolagus cuniculus |
| 1 | 1.00 | 1 | 1 | -0.02 | -0.02  | -0.02  | -0.02  | -0.02  | t | 112853 | TPTFMYF                     | Homo sapiens          |
| 1 | 1.00 | 1 | 1 | 0     | 0      | 0      | -0.006 | -0.006 | t | 113966 | TTHYGSLP<br>QKAQGHR<br>PQDE | Oryctolagus cuniculus |
| 1 | 1.00 | 1 | 1 | 0     | 0      | 0      | -0.006 | -0.006 | t | 113879 | SQRSQDE<br>N                | Rattus norvegicus     |

|   |      |   |   |       |        |        |        |        |   |        |                              |                                  |
|---|------|---|---|-------|--------|--------|--------|--------|---|--------|------------------------------|----------------------------------|
| 1 | 1.00 | 1 | 1 | 0     | 0      | 0      | -0.006 | -0.006 | t | 113966 | TTHYGLSP<br>QKAQGHR<br>PQDE  | Oryctola<br>gus<br>cuniculu<br>s |
| 1 | 1.00 | 1 | 1 | 0.04  | 0.04   | 0.04   | 0.036  | 0.04   | t | 131688 | SYSCQVT                      | Homo<br>sapiens                  |
| 1 | 1.00 | 1 | 1 | 0.02  | 0.02   | 0.021  | 0.023  | 0.02   | t | 35139  | LDEGKQSL<br>TKLAAAW<br>G     | Homo<br>sapiens                  |
| 1 | 1.00 | 1 | 1 | 0.06  | 0.05   | 0.06   | 0.067  | 0.06   | t | 134265 | VQLEDPEF<br>QASNIMH<br>SINGY | Homo<br>sapiens                  |
| 1 | 1.00 | 1 | 1 | 0     | 0.002  | 0.005  | 0.001  | -0.002 | t | 72321  | WDMMM<br>NWSP                | Homo<br>sapiens                  |
| 1 | 1.00 | 1 | 1 | 0.01  | 0.022  | -0.006 | 0.01   | 0.01   | t | 21373  | GNAEKYD<br>KMDEPQH<br>YGKS   | Mus<br>musculu<br>s              |
| 1 | 1.00 | 1 | 1 | 0     | 0      | 0      | 0.001  | -0.002 | t | 40332  | LVFFAEDV                     | Mus<br>musculu<br>s              |
| 1 | 1.00 | 1 | 1 | 0     | 0      | -0.001 | 0      | 0      | t | 126328 | ISHG                         | Mus<br>musculu<br>s              |
| 1 | 1.00 | 1 | 1 | -0.02 | -0.02  | -0.02  | -0.02  | -0.02  | t | 32648  | KPAIIPDRE                    | Homo<br>sapiens                  |
| 1 | 1.00 | 1 | 1 | 0.03  | 0.027  | 0.029  | 0.03   | 0.031  | t | 63811  | TGEDPGFF<br>NV               | Oryctola<br>gus<br>cuniculu<br>s |
| 1 | 1.00 | 1 | 1 | -0.05 | -0.048 | -0.054 | -0.053 | -0.052 | t | 114454 | LIYIERGRG<br>ITGVLF          | Homo<br>sapiens                  |
| 1 | 1.00 | 1 | 1 | 0.03  | 0.027  | 0.019  | 0.03   | 0.03   | t | 16120  | FHLGDDM<br>DPELRGL           | Oryctola<br>gus<br>cuniculu<br>s |
| 1 | 1.00 | 1 | 1 | 0.03  | 0.031  | 0.019  | 0.03   | 0.03   | t | 16120  | FHLGDDM<br>DPELRGL           | Myodes<br>glareolu<br>s          |
| 1 | 1.00 | 1 | 1 | 0.01  | 0.008  | 0.001  | 0.013  | 0.01   | t | 11148  | EANNREG<br>VEG               | Mus<br>musculu<br>s              |
| 1 | 1.00 | 1 | 1 | 0     | 0.003  | -0.011 | 0      | 0      | t | 42382  | MQKGFVSI<br>NDNKHYF<br>DDSG  | Mus<br>musculu<br>s              |

|   |      |   |   |       |        |        |        |        |   |        |                           |                                  |
|---|------|---|---|-------|--------|--------|--------|--------|---|--------|---------------------------|----------------------------------|
| 1 | 1.00 | 1 | 1 | 0.06  | 0.057  | 0.064  | 0.06   | 0.06   | t | 78806  | QSQIESR                   | Oryctola<br>gus<br>cuniculu<br>s |
| 1 | 1.00 | 1 | 1 | 0.06  | 0.06   | 0.064  | 0.06   | 0.06   | t | 78806  | QSQIESR                   | Oryctola<br>gus<br>cuniculu<br>s |
| 1 | 1.00 | 1 | 1 | 0     | 0      | -0.007 | 0      | -0.001 | t | 158938 | KTQNQGP<br>WDEGRVE<br>ID  | Mus<br>musculu<br>s              |
| 1 | 1.00 | 1 | 1 | 0.04  | 0.04   | 0.033  | 0.04   | 0.041  | t | 96788  | QQEQQFK                   | Mus<br>musculu<br>s              |
| 1 | 1.00 | 1 | 1 | -0.02 | -0.02  | -0.02  | -0.02  | -0.02  | t | 128088 | QVYYRPV                   | Ovis<br>aries                    |
| 1 | 1.00 | 1 | 1 | -0.02 | -0.018 | -0.02  | -0.013 | -0.02  | t | 108104 | RRLPFGSQ<br>M             | Homo<br>sapiens                  |
| 1 | 1.00 | 1 | 1 | 0.05  | 0.054  | 0.047  | 0.047  | 0.05   | t | 13587  | ENSEKTTM<br>PL            | Homo<br>sapiens                  |
| 1 | 1.00 | 1 | 1 | 0.01  | 0.01   | -0.003 | 0.013  | 0.012  | t | 73036  | WRIYSTGN<br>NVFQTQA<br>GC | Homo<br>sapiens                  |
| 1 | 1.00 | 1 | 1 | 0.01  | 0.01   | -0.003 | 0.013  | 0.012  | t | 73036  | WRIYSTGN<br>NVFQTQA<br>GC | Homo<br>sapiens                  |
| 1 | 1.00 | 1 | 1 | 0.03  | 0.033  | 0.024  | 0.031  | 0.03   | t | 41868  | MKNNPVY<br>SESL           | Equus<br>caballus                |
| 1 | 1.00 | 1 | 1 | -0.01 | -0.008 | -0.014 | -0.007 | -0.008 | t | 20152  | GHLAPL                    | Homo<br>sapiens                  |
| 1 | 1.00 | 1 | 1 | 0     | -0.003 | 0      | 0      | -0.003 | t | 6884   | CQKAGGV<br>AL             | Oryctola<br>gus<br>cuniculu<br>s |
| 1 | 1.00 | 1 | 1 | 0.02  | 0.02   | 0.02   | 0.02   | 0.02   | t | 21720  | GPPAAEY                   | Homo<br>sapiens                  |
| 1 | 1.00 | 1 | 1 | 0     | -0.009 | 0.001  | 0      | 0      | t | 109750 | QGPKGEP<br>G              | Macaca<br>mulatta                |



|   |      |   |   |       |        |        |        |        |   |        |                              |                       |
|---|------|---|---|-------|--------|--------|--------|--------|---|--------|------------------------------|-----------------------|
| 1 | 1.00 | 1 | 1 | 0     | 0      | -0.005 | -0.003 | -0.002 | t | 76131  | YTNGPQEI<br>YIQQGNG          | Homo sapiens          |
| 1 | 1.00 | 1 | 1 | 0     | 0      | 0      | 0.004  | -0.001 | t | 71284  | VTEEI                        | Homo sapiens          |
| 1 | 1.00 | 1 | 1 | 0.02  | 0.02   | 0.031  | 0.02   | 0.02   | t | 71855  | VVTLYL                       | Homo sapiens          |
| 1 | 1.00 | 1 | 1 | 0.03  | 0.03   | 0.023  | 0.03   | 0.029  | t | 131114 | TQLDELLT<br>EHRMTW<br>DPAQPP | Homo sapiens          |
| 1 | 1.00 | 1 | 1 | 0     | 0      | -0.004 | 0.003  | 0.002  | t | 38496  | LPGCSFSIF<br>LLA             | Homo sapiens          |
| 1 | 1.00 | 1 | 1 | -0.03 | -0.028 | -0.031 | -0.023 | -0.03  | t | 144759 | RAALPSHV<br>VT               | Homo sapiens          |
| 1 | 1.00 | 1 | 1 | 0.01  | 0.01   | 0.01   | 0.01   | 0.01   | t | 79462  | VTSTYH                       | Mus musculus          |
| 1 | 1.00 | 1 | 1 | 0.05  | 0.046  | 0.047  | 0.05   | 0.05   | t | 141067 | PLSLEPDP                     | Mus musculus          |
| 1 | 1.00 | 1 | 1 | 0.02  | 0.02   | 0.02   | 0.02   | 0.02   | t | 99276  | GGKGPLLS<br>ILKAFN           | Homo sapiens          |
| 1 | 1.00 | 1 | 1 | -0.02 | -0.02  | -0.02  | -0.02  | -0.019 | t | 115202 | DDLTDI<br>MCV                | Homo sapiens          |
| 1 | 1.00 | 1 | 1 | -0.03 | -0.03  | -0.036 | -0.033 | -0.03  | t | 9633   | DPFFPWP<br>RTTFD             | Homo sapiens          |
| 1 | 1.00 | 1 | 1 | 0.07  | 0.066  | 0.07   | 0.069  | 0.068  | t | 122746 | EEQEDEIIG<br>FGQELKN         | Oryctolagus cuniculus |
| 1 | 1.00 | 1 | 1 | 0.03  | 0.03   | 0.03   | 0.03   | 0.03   | t | 135465 | GSDYEDRY<br>YREN             | Mus musculus          |
| 1 | 1.00 | 1 | 1 | 0.02  | 0.018  | 0.009  | 0.023  | 0.02   | t | 46072  | NTDGSTDY<br>GILQINSR         | Mus musculus          |
| 1 | 1.00 | 1 | 1 | 0.01  | 0.008  | 0.005  | 0.011  | 0.011  | t | 30629  | KETLHSTS<br>PEGN             | Homo sapiens          |
| 1 | 1.00 | 1 | 1 | -0.01 | -0.008 | -0.011 | -0.003 | -0.01  | t | 134799 | SRKPEAPR<br>RRSPSPT          | Homo sapiens          |

|   |      |   |   |       |        |        |        |        |   |        |                          |                                  |
|---|------|---|---|-------|--------|--------|--------|--------|---|--------|--------------------------|----------------------------------|
| 1 | 1.00 | 1 | 1 | 0.02  | 0.017  | 0.022  | 0.02   | 0.02   | t | 57289  | SDSQTITN<br>PAYD         | Oryctola<br>gus<br>cuniculu<br>s |
| 1 | 1.00 | 1 | 1 | -0.03 | -0.03  | -0.033 | -0.03  | -0.03  | t | 29825  | KAIERMKD<br>TL           | Mus<br>musculu<br>s              |
| 1 | 1.00 | 1 | 1 | 0.01  | 0.014  | 0.019  | 0.01   | 0.006  | t | 140730 | QFAYDGK<br>DY            | Mus<br>musculu<br>s              |
| 1 | 1.00 | 1 | 1 | 0     | 0      | 0      | 0      | 0      | t | 77781  | GLVGRPKS<br>KL           | Homo<br>sapiens                  |
| 1 | 1.00 | 1 | 1 | 0     | 0      | 0      | 0      | 0      | t | 3288   | ANGAGNQ<br>PG            | Homo<br>sapiens                  |
| 1 | 1.00 | 1 | 1 | 0     | 0      | 0      | 0      | 0      | t | 3288   | ANGAGNQ<br>PG            | Homo<br>sapiens                  |
| 1 | 1.00 | 1 | 1 | 0     | 0      | 0      | 0      | 0      | t | 3288   | ANGAGNQ<br>PG            | Homo<br>sapiens                  |
| 1 | 1.00 | 1 | 1 | 0.02  | 0.02   | 0.02   | 0.02   | 0.018  | t | 61842  | STPVAPTQ<br>EV           | Oryctola<br>gus<br>cuniculu<br>s |
| 1 | 1.00 | 1 | 1 | 0.01  | 0.01   | 0.01   | 0.01   | 0.007  | t | 46774  | PAEEEEK                  | Mus<br>musculu<br>s              |
| 1 | 1.00 | 1 | 1 | 0.01  | 0.014  | 0.01   | 0.013  | 0.01   | t | 131978 | MLVGGST<br>LCV           | Homo<br>sapiens                  |
| 1 | 1.00 | 1 | 1 | 0.02  | 0.02   | 0.014  | 0.02   | 0.018  | t | 64032  | THGQWN<br>KPSKPKTN<br>MK | Oryctola<br>gus<br>cuniculu<br>s |
| 1 | 1.00 | 1 | 1 | -0.03 | -0.026 | -0.039 | -0.033 | -0.032 | t | 117396 | VKNLHNQ<br>ARS           | Homo<br>sapiens                  |
| 1 | 1.00 | 1 | 1 | -0.02 | -0.02  | -0.033 | -0.023 | -0.02  | t | 147033 | IILHQQHH                 | Homo<br>sapiens                  |
| 1 | 1.00 | 1 | 1 | -0.01 | -0.008 | -0.005 | -0.007 | -0.011 | t | 102563 | KKRPPKG                  | Homo<br>sapiens                  |
| 1 | 1.00 | 1 | 1 | 0.02  | 0.02   | 0.029  | 0.02   | 0.02   | t | 39936  | LTGYGT                   | Homo<br>sapiens                  |

|   |      |   |   |       |        |        |        |        |   |        |                          |                       |
|---|------|---|---|-------|--------|--------|--------|--------|---|--------|--------------------------|-----------------------|
| 1 | 1.00 | 1 | 1 | 0.04  | 0.038  | 0.04   | 0.033  | 0.038  | t | 117509 | GQIPPGAM                 | Mus musculus          |
| 1 | 1.00 | 1 | 1 | 0.03  | 0.032  | 0.039  | 0.037  | 0.032  | t | 109779 | QVSLTCL                  | Homo sapiens          |
| 1 | 1.00 | 1 | 1 | 0.03  | 0.03   | 0.03   | 0.03   | 0.03   | t | 112854 | TSPSVAY                  | Homo sapiens          |
| 1 | 1.00 | 1 | 1 | 0.03  | 0.03   | 0.03   | 0.033  | 0.03   | t | 149093 | QGRNPTQ                  | Sus scrofa            |
| 1 | 1.00 | 1 | 1 | 0.01  | 0.012  | 0.008  | 0.013  | 0.01   | t | 115619 | IRALVGDEVELP             | Homo sapiens          |
| 1 | 1.00 | 1 | 1 | 0.02  | 0.016  | 0.018  | 0.019  | 0.018  | t | 72507  | WGQGGT<br>HGQWNK<br>PSK  | Oryctolagus cuniculus |
| 1 | 1.00 | 1 | 1 | 0.02  | 0.016  | 0.018  | 0.019  | 0.018  | t | 72507  | WGQGGT<br>HGQWNK<br>PSK  | Oryctolagus cuniculus |
| 1 | 1.00 | 1 | 1 | -0.01 | -0.022 | -0.008 | -0.01  | -0.013 | t | 146185 | DAEFGH                   | Macaca mulatta        |
| 1 | 1.00 | 1 | 1 | -0.04 | -0.042 | -0.044 | -0.043 | -0.04  | t | 65114  | TLTWSGKF                 | Anas platyrhynchos    |
| 1 | 1.00 | 1 | 1 | -0.03 | -0.026 | -0.041 | -0.029 | -0.03  | t | 18053  | FTQC<br>SMNVVSKTLFRKSPIY | Homo sapiens          |
| 1 | 1.00 | 1 | 1 | -0.01 | -0.011 | -0.007 | -0.007 | -0.01  | t | 29744  | KAAASKVK<br>ANLLSV       | Homo sapiens          |
| 1 | 1.00 | 1 | 1 | 0.02  | 0.022  | 0.013  | 0.017  | 0.017  | t | 141751 | SQIQRPVK<br>ELAFPGS      | Homo sapiens          |
| 1 | 1.00 | 1 | 1 | 0.05  | 0.05   | 0.041  | 0.046  | 0.05   | t | 135990 | SASVPALT<br>AVET         | Homo sapiens          |
| 1 | 1.00 | 1 | 1 | 0.01  | 0.01   | 0.008  | 0.01   | 0.01   | t | 117551 | KREAVAG<br>RGRGRGRG      | Mus musculus          |
| 1 | 1.00 | 1 | 1 | 0.05  | 0.051  | 0.049  | 0.05   | 0.05   | t | 63979  | TGTIINQD<br>PDKILTY      | Mus musculus          |
| 1 | 1.00 | 1 | 1 | -0.02 | -0.02  | -0.02  | -0.02  | -0.019 | t | 115347 | LIVTQTMKGL               | Homo sapiens          |

|   |      |   |   |       |        |        |        |        |   |        |                              |                       |
|---|------|---|---|-------|--------|--------|--------|--------|---|--------|------------------------------|-----------------------|
| 1 | 1.00 | 1 | 1 | 0     | 0.004  | 0.007  | 0.007  | 0.001  | t | 135546 | DWEYS                        | Homo sapiens          |
| 1 | 1.00 | 1 | 1 | -0.01 | -0.01  | -0.013 | -0.011 | -0.01  | t | 60914  | SSATK                        | Homo sapiens          |
| 1 | 1.00 | 1 | 1 | 0.04  | 0.04   | 0.04   | 0.04   | 0.04   | t | 99185  | EENEGGNI<br>FSGFTPE          | Homo sapiens          |
| 1 | 1.00 | 1 | 1 | 0.04  | 0.044  | 0.033  | 0.041  | 0.04   | t | 137859 | FTPGTEYT<br>VEVR             | Homo sapiens          |
| 1 | 1.00 | 1 | 1 | 0.05  | 0.05   | 0.05   | 0.05   | 0.049  | t | 53923  | RGLTSLFS<br>AFSAQ            | Homo sapiens          |
| 1 | 1.00 | 1 | 1 | 0.01  | 0.014  | 0.01   | 0.011  | 0.01   | t | 155473 | PSTP                         | Homo sapiens          |
| 1 | 1.00 | 1 | 1 | 0.01  | 0.01   | 0.01   | 0.01   | 0.007  | t | 149298 | ELDKWAS                      | Homo sapiens          |
| 1 | 1.00 | 1 | 1 | 0.03  | 0.026  | 0.021  | 0.029  | 0.03   | t | 12259  | EGRFKSQD<br>AD               | Oryctolagus cuniculus |
| 1 | 1.00 | 1 | 1 | 0     | 0.003  | 0      | 0      | -0.002 | t | 44554  | NKND                         | Mus musculus          |
| 1 | 1.00 | 1 | 1 | -0.02 | -0.024 | -0.019 | -0.023 | -0.022 | t | 44276  | NILISLTDL<br>EIW             | Oryctolagus cuniculus |
| 1 | 1.00 | 1 | 1 | 0.03  | 0.032  | 0.028  | 0.027  | 0.028  | t | 116740 | GRDPYSPS<br>QDPYSPS          | Homo sapiens          |
| 1 | 1.00 | 1 | 1 | 0.02  | 0.02   | 0.02   | 0.02   | 0.018  | t | 42425  | MQWNST                       | Mus musculus          |
| 1 | 1.00 | 1 | 1 | 0.03  | 0.026  | 0.023  | 0.033  | 0.03   | t | 106789 | RSFFSFLGE<br>AFDGARD<br>M    | Oryctolagus cuniculus |
| 1 | 1.00 | 1 | 1 | -0.03 | -0.03  | -0.03  | -0.023 | -0.029 | t | 110385 | QLYKTCKQ<br>AGTCPPDII<br>PKV | Homo sapiens          |

|   |      |   |   |       |        |        |        |        |   |        |                              |                                  |
|---|------|---|---|-------|--------|--------|--------|--------|---|--------|------------------------------|----------------------------------|
| 1 | 1.00 | 1 | 1 | -0.02 | -0.018 | -0.02  | -0.023 | -0.022 | t | 70443  | VPQKAVP<br>YPQRD             | Homo<br>sapiens                  |
| 1 | 1.00 | 1 | 1 | 0.01  | 0.008  | -0.001 | 0.01   | 0.011  | t | 123282 | HACQKKLL<br>KFEALQQE<br>EGEE | Oryctola<br>gus<br>cuniculu<br>s |
| 1 | 1.00 | 1 | 1 | 0.01  | 0.01   | -0.001 | 0.01   | 0.011  | t | 123282 | HACQKKLL<br>KFEALQQE<br>EGEE | Oryctola<br>gus<br>cuniculu<br>s |
| 1 | 1.00 | 1 | 1 | 0     | 0      | -0.008 | 0      | 0.002  | t | 38700  | LPSAVK                       | Mus<br>musculu<br>s              |
| 1 | 1.00 | 1 | 1 | 0.04  | 0.037  | 0.032  | 0.04   | 0.04   | t | 7383   | CYGVSA TK<br>LNDLCFSN<br>V   | Oryctola<br>gus<br>cuniculu<br>s |
| 1 | 1.00 | 1 | 1 | 0.04  | 0.037  | 0.032  | 0.04   | 0.04   | t | 7383   | CYGVSA TK<br>LNDLCFSN<br>V   | Oryctola<br>gus<br>cuniculu<br>s |
| 1 | 1.00 | 1 | 1 | 0     | 0.002  | -0.005 | 0.003  | 0      | t | 44569  | NKPNNDF<br>HFEVF             | Homo<br>sapiens                  |
| 1 | 1.00 | 1 | 1 | 0     | 0      | 0      | 0      | -0.002 | t | 137734 | DTALT KAA<br>LKL V           | Mus<br>musculu<br>s              |
| 1 | 1.00 | 1 | 1 | -0.01 | -0.01  | -0.01  | -0.01  | -0.011 | t | 112816 | PGKVC GS<br>NLLSICKTA<br>EF  | Mus<br>musculu<br>s              |
| 1 | 1.00 | 1 | 1 | 0.04  | 0.04   | 0.042  | 0.04   | 0.04   | t | 139029 | DLQVLT                       | Mus<br>musculu<br>s              |
| 1 | 1.00 | 1 | 1 | -0.01 | -0.01  | -0.026 | -0.014 | -0.008 | t | 59212  | SLKEKLQK                     | Homo<br>sapiens                  |
| 1 | 1.00 | 1 | 1 | -0.01 | -0.006 | -0.016 | -0.003 | -0.008 | t | 8930   | DKLKQQR<br>DTLSTQKE<br>T     | Homo<br>sapiens                  |
| 1 | 1.00 | 1 | 1 | -0.02 | -0.02  | -0.02  | -0.02  | -0.023 | t | 111589 | NLIRHVGG<br>GTPR             | Homo<br>sapiens                  |

|   |      |   |   |       |        |        |        |        |   |        |                              |                                  |
|---|------|---|---|-------|--------|--------|--------|--------|---|--------|------------------------------|----------------------------------|
| 1 | 1.00 | 1 | 1 | -0.01 | -0.01  | -0.008 | -0.01  | -0.013 | t | 70391  | VPNLRGDL<br>QVLAQKV<br>ARTLP | Cavia<br>porcellu<br>s           |
| 1 | 1.00 | 1 | 1 | 0.01  | 0.017  | 0.01   | 0.01   | 0.01   | t | 7171   | CTKPTDG<br>NC                | Cavia<br>porcellu<br>s           |
| 1 | 1.00 | 1 | 1 | 0.01  | 0.017  | 0.01   | 0.01   | 0.01   | t | 7171   | CTKPTDG<br>NC                | Capra<br>hircus                  |
| 1 | 1.00 | 1 | 1 | 0     | -0.003 | -0.011 | 0      | 0.001  | t | 144748 | QAVNPNA<br>GN                | Oryctola<br>gus<br>cuniculu<br>s |
| 1 | 1.00 | 1 | 1 | 0     | -0.002 | -0.002 | -0.001 | 0      | t | 10835  | DWVKGFP<br>IDSSC             | Mus<br>musculu<br>s              |
| 1 | 1.00 | 1 | 1 | 0     | -0.004 | -0.002 | -0.001 | 0      | t | 10835  | DWVKGFP<br>IDSSC             | Oryctola<br>gus<br>cuniculu<br>s |
| 1 | 1.00 | 1 | 1 | -0.02 | -0.016 | -0.025 | -0.019 | -0.02  | t | 53763  | RFQEALKK<br>SLKKP            | Homo<br>sapiens                  |
| 1 | 1.00 | 1 | 1 | 0.07  | 0.067  | 0.055  | 0.063  | 0.07   | t | 104057 | LTEPTTEG<br>DQHPGTL<br>PAANT | Oryctola<br>gus<br>cuniculu<br>s |
| 1 | 1.00 | 1 | 1 | -0.01 | -0.006 | -0.01  | -0.007 | -0.01  | t | 118430 | ISDAMKKV<br>GRKGV            | Homo<br>sapiens                  |
| 1 | 1.00 | 1 | 1 | 0     | 0      | 0.002  | 0      | 0      | t | 79428  | TKLKGESG<br>Y                | Oryctola<br>gus<br>cuniculu<br>s |
| 1 | 1.00 | 1 | 1 | 0.01  | 0.008  | 0      | 0.013  | 0.01   | t | 8475   | DGQPAGD<br>RADGQPA<br>GDRA   | Mus<br>musculu<br>s              |
| 1 | 1.00 | 1 | 1 | 0.05  | 0.05   | 0.038  | 0.046  | 0.05   | t | 28907  | ITGEYVQIL<br>DAHAAY          | Homo<br>sapiens                  |

|   |      |   |   |       |        |        |        |        |   |        |                          |                                  |
|---|------|---|---|-------|--------|--------|--------|--------|---|--------|--------------------------|----------------------------------|
| 1 | 1.00 | 1 | 1 | 0.05  | 0.05   | 0.05   | 0.05   | 0.048  | t | 153460 | SFEVDPID<br>ENSG         | Mus<br>musculu<br>s              |
| 1 | 1.00 | 1 | 1 | 0.04  | 0.042  | 0.04   | 0.047  | 0.04   | t | 139616 | SYNRGDST<br>FESKSYK      | Homo<br>sapiens                  |
| 1 | 1.00 | 1 | 1 | 0.01  | 0.01   | 0.011  | 0.01   | 0.008  | t | 60594  | SQWNKPS<br>K             | Mus<br>musculu<br>s              |
| 1 | 1.00 | 1 | 1 | 0     | 0      | 0.003  | 0      | 0      | t | 68763  | VGPQSVG<br>PL            | Mus<br>musculu<br>s              |
| 1 | 1.00 | 1 | 1 | -0.01 | -0.009 | -0.014 | -0.009 | -0.01  | t | 52058  | QQLIVARQ<br>KL           | Homo<br>sapiens                  |
| 1 | 1.00 | 1 | 1 | 0.01  | 0.01   | 0.01   | 0.014  | 0.01   | t | 119579 | FKDYSSVV<br>RPVEDHR<br>Q | Homo<br>sapiens                  |
| 1 | 1.00 | 1 | 1 | 0.01  | 0.008  | 0.006  | 0.007  | 0.01   | t | 55761  | RRVGLSNP<br>T            | Anas<br>platyrhy<br>nchos        |
| 1 | 1.00 | 1 | 1 | 0.03  | 0.026  | 0.029  | 0.029  | 0.028  | t | 65944  | TQTADVPT<br>EAL          | Oryctola<br>gus<br>cuniculu<br>s |
| 1 | 1.00 | 1 | 1 | 0     | -0.002 | 0      | -0.001 | -0.003 | t | 58409  | SHSAFNM<br>FDFGVGPP      | Mus<br>musculu<br>s              |
| 1 | 1.00 | 1 | 1 | 0     | -0.002 | 0      | -0.001 | -0.003 | t | 58416  | SHSQLGPP<br>VGGPP        | Mus<br>musculu<br>s              |
| 1 | 1.00 | 1 | 1 | 0     | -0.002 | 0      | -0.001 | -0.003 | t | 21026  | GLLRHYTY<br>ARFG         | Mus<br>musculu<br>s              |
| 1 | 1.00 | 1 | 1 | 0     | -0.002 | 0      | -0.001 | -0.003 | t | 18363  | FWRGDLV<br>FDFQV         | Mus<br>musculu<br>s              |
| 1 | 1.00 | 1 | 1 | 0.03  | 0.027  | 0.03   | 0.03   | 0.028  | t | 125414 | FSEEKLVFS<br>LRLMEEN     | Oryctola<br>gus<br>cuniculu<br>s |
| 1 | 1.00 | 1 | 1 | -0.03 | -0.03  | -0.031 | -0.027 | -0.03  | t | 51841  | QPGLRR                   | Homo<br>sapiens                  |
| 1 | 1.00 | 1 | 1 | -0.02 | -0.02  | -0.015 | -0.02  | -0.022 | t | 140488 | MSLLGHK                  | Mus<br>musculu<br>s              |
| 1 | 1.00 | 1 | 1 | -0.04 | -0.062 | -0.047 | -0.033 | -0.04  | t | 127733 | LWRCALR<br>WAERQVG<br>A  | Homo<br>sapiens                  |

|   |      |   |   |       |        |        |        |        |   |        |                              |                                  |
|---|------|---|---|-------|--------|--------|--------|--------|---|--------|------------------------------|----------------------------------|
| 1 | 1.00 | 1 | 1 | 0.02  | 0.02   | 0.02   | 0.02   | 0.02   | t | 133371 | SPSPTPTP<br>GP               | Homo<br>sapiens                  |
| 1 | 1.00 | 1 | 1 | 0.02  | 0.02   | 0.015  | 0.02   | 0.02   | t | 12688  | EKFVKEQR                     | Homo<br>sapiens                  |
| 1 | 1.00 | 1 | 1 | -0.02 | -0.02  | -0.02  | -0.016 | -0.02  | t | 70975  | VSHDRHFL<br>N                | Homo<br>sapiens                  |
| 1 | 1.00 | 1 | 1 | -0.03 | -0.026 | -0.037 | -0.027 | -0.028 | t | 144594 | ARGISRTK<br>YW               | Homo<br>sapiens                  |
| 1 | 1.00 | 1 | 1 | -0.01 | -0.014 | -0.022 | -0.011 | -0.01  | t | 62845  | TAFSKN                       | Oryctola<br>gus<br>cuniculu<br>s |
| 1 | 1.00 | 1 | 1 | 0.01  | 0.013  | 0.003  | 0.01   | 0.012  | t | 113194 | TGGAYQSY<br>KF               | Mus<br>musculu<br>s              |
| 1 | 1.00 | 1 | 1 | 0     | -0.002 | -0.013 | -0.003 | 0      | t | 65514  | TPAYYTKD<br>TNNNLTLV         | Mus<br>musculu<br>s              |
| 1 | 1.00 | 1 | 1 | 0.03  | 0.028  | 0.03   | 0.033  | 0.03   | t | 6281   | CGELGVDC                     | Mus<br>musculu<br>s              |
| 1 | 1.00 | 1 | 1 | 0.02  | 0.02   | 0.009  | 0.02   | 0.02   | t | 138229 | QPAPNAQ<br>PAPGAPA           | Oryctola<br>gus<br>cuniculu<br>s |
| 1 | 1.00 | 1 | 1 | 0.01  | 0.01   | 0      | 0.007  | 0.011  | t | 96085  | ALCSEKLD<br>QWLCEKL          | Homo<br>sapiens                  |
| 1 | 1.00 | 1 | 1 | 0     | 0      | 0      | 0      | 0.001  | t | 9611   | DPDKDVDI<br>MV               | Mus<br>musculu<br>s              |
| 1 | 1.00 | 1 | 1 | 0     | -0.003 | 0      | 0      | -0.001 | t | 24652  | HQTLQDP<br>RVRGL             | Oryctola<br>gus<br>cuniculu<br>s |
| 1 | 1.00 | 1 | 1 | 0.03  | 0.03   | 0.024  | 0.03   | 0.03   | t | 55066  | RNTIMASK<br>TVGTAE           | Homo<br>sapiens                  |
| 1 | 1.00 | 1 | 1 | -0.02 | -0.018 | -0.03  | -0.019 | -0.02  | t | 50442  | QDAYNAA<br>GGHNAVF<br>NFPPNG | Homo<br>sapiens                  |



|   |      |   |   |       |        |        |        |        |   |        |                         |                                  |
|---|------|---|---|-------|--------|--------|--------|--------|---|--------|-------------------------|----------------------------------|
| 1 | 1.00 | 1 | 1 | 0.01  | 0.01   | 0.01   | 0.01   | 0.008  | t | 120920 | RLVEHLLD<br>PSRYNKLIR   | Oryctola<br>gus<br>cuniculu<br>s |
| 1 | 1.00 | 1 | 1 | 0     | 0.002  | 0.005  | 0.007  | 0.002  | t | 129718 | RATPPPGI                | Homo<br>sapiens                  |
| 1 | 1.00 | 1 | 1 | 0     | -0.003 | -0.005 | 0      | 0      | t | 57680  | SEWRSPA<br>DTSPRPLP     | Oryctola<br>gus<br>cuniculu<br>s |
| 1 | 1.00 | 1 | 1 | -0.02 | -0.015 | -0.024 | -0.017 | -0.02  | t | 77808  | YGCWKGL<br>VGR          | Homo<br>sapiens                  |
| 1 | 1.00 | 1 | 1 | 0.02  | 0.02   | 0.02   | 0.02   | 0.019  | t | 118196 | VEPTGKRF<br>L           | Homo<br>sapiens                  |
| 1 | 1.00 | 1 | 1 | -0.03 | -0.028 | -0.03  | -0.023 | -0.03  | t | 107366 | FPPKPKD                 | Homo<br>sapiens                  |
| 1 | 1.00 | 1 | 1 | -0.05 | -0.046 | -0.059 | -0.047 | -0.05  | t | 132763 | YMASLQM<br>RGNPGSH<br>F | Homo<br>sapiens                  |
| 1 | 1.00 | 1 | 1 | -0.02 | -0.02  | -0.02  | -0.02  | -0.021 | t | 136059 | EGY                     | Rattus<br>norvegic<br>us         |
| 1 | 1.00 | 1 | 1 | 0.05  | 0.048  | 0.056  | 0.049  | 0.05   | t | 67967  | VDGSDP                  | Mus<br>musculu<br>s              |
| 1 | 1.00 | 1 | 1 | 0.02  | 0.022  | 0.016  | 0.017  | 0.018  | t | 114948 | SIEFGTNIS<br>K          | Homo<br>sapiens                  |
| 1 | 1.00 | 1 | 1 | 0.04  | 0.04   | 0.044  | 0.046  | 0.04   | t | 109620 | NDGQPGP<br>A            | Rattus<br>norvegic<br>us         |
| 1 | 1.00 | 1 | 1 | 0.02  | 0.02   | 0.02   | 0.02   | 0.02   | t | 7058   | CSQAAPYI<br>E           | Homo<br>sapiens                  |
| 1 | 1.00 | 1 | 1 | 0     | 0      | -0.008 | 0      | 0      | t | 102942 | YGCYCGK<br>GG           | Mus<br>musculu<br>s              |
| 1 | 1.00 | 1 | 1 | 0     | 0      | -0.008 | 0      | 0      | t | 102942 | YGCYCGK<br>GG           | Mus<br>musculu<br>s              |

|   |      |   |   |       |        |        |        |        |   |        |                              |                                  |
|---|------|---|---|-------|--------|--------|--------|--------|---|--------|------------------------------|----------------------------------|
| 1 | 1.00 | 1 | 1 | -0.05 | -0.048 | -0.045 | -0.043 | -0.05  | t | 117169 | RYHRFKEL<br>STLRR            | Homo<br>sapiens                  |
| 1 | 1.00 | 1 | 1 | 0     | -0.003 | 0      | 0.001  | -0.002 | t | 7491   | DAEFRHDS<br>GYEVHHQ<br>K     | Oryctola<br>gus<br>cuniculu<br>s |
| 1 | 1.00 | 1 | 1 | 0.02  | 0.02   | 0.011  | 0.02   | 0.02   | t | 48858  | PPPPNPN<br>DPPPPNP<br>ND     | Mus<br>musculu<br>s              |
| 1 | 1.00 | 1 | 1 | 0.02  | 0.02   | 0.011  | 0.02   | 0.02   | t | 48858  | PPPPNPN<br>DPPPPNP<br>ND     | Mus<br>musculu<br>s              |
| 1 | 1.00 | 1 | 1 | -0.01 | -0.011 | -0.019 | -0.01  | -0.01  | t | 64752  | TLDHVLDH                     | Anas<br>platyrhy<br>nchos        |
| 1 | 1.00 | 1 | 1 | 0.03  | 0.03   | 0.027  | 0.03   | 0.027  | t | 114558 | QVVRPERS<br>RQEWERQ          | Homo<br>sapiens                  |
| 1 | 1.00 | 1 | 1 | -0.02 | -0.027 | -0.027 | -0.013 | -0.02  | t | 136137 | APDRKGFR<br>LLLASPRSC<br>YKL | Homo<br>sapiens                  |
| 1 | 1.00 | 1 | 1 | -0.04 | -0.04  | -0.043 | -0.04  | -0.041 | t | 136074 | LVKK                         | Mus<br>musculu<br>s              |
| 1 | 1.00 | 1 | 1 | 0     | 0      | 0      | 0      | -0.001 | t | 98981  | REEREEDW<br>RQP              | Homo<br>sapiens                  |
| 1 | 1.00 | 1 | 1 | -0.02 | -0.009 | -0.026 | -0.02  | -0.02  | t | 41126  | MASLIYRQ<br>LL               | Gallus<br>gallus                 |
| 1 | 1.00 | 1 | 1 | -0.02 | -0.02  | -0.034 | -0.02  | -0.02  | t | 31005  | KGLRRDLD<br>ASREAKKQ         | Mus<br>musculu<br>s              |
| 1 | 1.00 | 1 | 1 | 0.01  | 0.01   | 0.01   | 0.01   | 0.01   | t | 33834  | KTQYSKF                      | Mus<br>musculu<br>s              |
| 1 | 1.00 | 1 | 1 | 0     | 0.004  | -0.012 | -0.003 | -0.001 | t | 104996 | TAFCGPVG<br>AH               | Homo<br>sapiens                  |
| 1 | 1.00 | 1 | 1 | -0.02 | -0.02  | -0.02  | -0.02  | -0.021 | t | 48837  | PPNAPIL                      | Mus<br>musculu<br>s              |

|   |      |   |   |       |        |        |        |        |   |        |                              |                                  |
|---|------|---|---|-------|--------|--------|--------|--------|---|--------|------------------------------|----------------------------------|
| 1 | 1.00 | 1 | 1 | 0.05  | 0.036  | 0.045  | 0.05   | 0.05   | t | 50156  | PYQGSKG<br>GVS               | Oryctola<br>gus<br>cuniculu<br>s |
| 1 | 1.00 | 1 | 1 | 0     | -0.002 | -0.005 | -0.001 | 0      | t | 20137  | GHGSETA<br>WGT               | Mus<br>musculu<br>s              |
| 1 | 1.00 | 1 | 1 | 0     | 0.003  | -0.011 | 0      | 0.002  | t | 111510 | LPSEATVYL<br>PPVPVS          | Mus<br>musculu<br>s              |
| 1 | 1.00 | 1 | 1 | 0.02  | 0.02   | 0.02   | 0.02   | 0.017  | t | 115435 | QEQNQEQ<br>PIRCEKDE<br>RFFSD | Homo<br>sapiens                  |
| 1 | 1.00 | 1 | 1 | -0.02 | -0.018 | -0.029 | -0.021 | -0.019 | t | 53693  | RFDRGYIS                     | Homo<br>sapiens                  |
| 1 | 1.00 | 1 | 1 | 0.02  | 0.02   | 0.026  | 0.02   | 0.02   | t | 34238  | KVVLPE                       | Homo<br>sapiens                  |
| 1 | 1.00 | 1 | 1 | 0     | -0.004 | 0      | -0.001 | -0.001 | t | 24009  | HHPSTDKE<br>QTNLY            | Oryctola<br>gus<br>cuniculu<br>s |
| 1 | 1.00 | 1 | 1 | -0.06 | -0.057 | -0.065 | -0.06  | -0.062 | t | 131967 | LRLDCRHE<br>N                | Mus<br>musculu<br>s              |
| 1 | 1.00 | 1 | 1 | 0.01  | 0.01   | 0.01   | 0.01   | 0.008  | t | 146624 | WNWFDIT<br>N                 | Homo<br>sapiens                  |
| 1 | 1.00 | 1 | 1 | 0     | 0      | -0.006 | 0      | 0      | t | 102943 | YGCYCGLG<br>G                | Mus<br>musculu<br>s              |
| 1 | 1.00 | 1 | 1 | -0.03 | -0.024 | -0.039 | -0.031 | -0.031 | t | 11802  | EENKKPAE                     | Ovis<br>aries                    |
| 1 | 1.00 | 1 | 1 | -0.03 | -0.028 | -0.037 | -0.023 | -0.03  | t | 131053 | RRVQQEID<br>DVIGQVRR<br>PEMG | Homo<br>sapiens                  |
| 1 | 1.00 | 1 | 1 | -0.06 | -0.064 | -0.069 | -0.061 | -0.06  | t | 74135  | YHRVMYA<br>S                 | Oryctola<br>gus<br>cuniculu<br>s |

|   |      |   |   |       |        |        |        |        |   |        |                            |                                  |
|---|------|---|---|-------|--------|--------|--------|--------|---|--------|----------------------------|----------------------------------|
| 1 | 1.00 | 1 | 1 | 0     | 0.004  | -0.003 | 0.001  | 0      | t | 85032  | LCVYGKLQ<br>KN             | Homo<br>sapiens                  |
| 1 | 1.00 | 1 | 1 | 0.01  | 0.01   | 0.004  | 0.01   | 0.01   | t | 158910 | KNLDIDPK<br>LQEYLGK        | Mus<br>musculu<br>s              |
| 1 | 1.00 | 1 | 1 | -0.01 | -0.01  | -0.01  | -0.01  | -0.01  | t | 158610 | SFGTFLW                    | Homo<br>sapiens                  |
| 1 | 1.00 | 1 | 1 | -0.04 | -0.04  | -0.052 | -0.042 | -0.04  | t | 96028  | YSWRSKY<br>GWT             | Homo<br>sapiens                  |
| 1 | 1.00 | 1 | 1 | 0.02  | 0.016  | 0.007  | 0.021  | 0.021  | t | 68054  | VDREGRD<br>NVRSKGV         | Oryctola<br>gus<br>cuniculu<br>s |
| 1 | 1.00 | 1 | 1 | 0.01  | 0.01   | 0.007  | 0.01   | 0.01   | t | 98763  | ENKVLVLD<br>TD             | Homo<br>sapiens                  |
| 1 | 1.00 | 1 | 1 | 0.06  | 0.06   | 0.054  | 0.06   | 0.06   | t | 105979 | NIEADVNT                   | Oryctola<br>gus<br>cuniculu<br>s |
| 1 | 1.00 | 1 | 1 | -0.03 | -0.028 | -0.023 | -0.027 | -0.033 | t | 142007 | SDWRFLR<br>GYHQYA          | Homo<br>sapiens                  |
| 1 | 1.00 | 1 | 1 | 0     | 0.002  | 0.001  | 0.007  | 0      | t | 98387  | QPPCPNLV<br>SYSSYHAT<br>YS | Homo<br>sapiens                  |
| 1 | 1.00 | 1 | 1 | 0.02  | 0.02   | 0.02   | 0.019  | 0.018  | t | 50505  | QDPR                       | Mus<br>musculu<br>s              |
| 1 | 1.00 | 1 | 1 | 0.03  | 0.028  | 0.029  | 0.029  | 0.03   | t | 12953  | ELAPEDPE<br>DSALLED        | Mus<br>musculu<br>s              |
| 1 | 1.00 | 1 | 1 | 0     | 0      | 0      | 0      | 0.001  | t | 9934   | DRAAGQP<br>AG              | Mus<br>musculu<br>s              |
| 1 | 1.00 | 1 | 1 | 0     | 0      | 0      | 0      | 0.001  | t | 9934   | DRAAGQP<br>AG              | Mus<br>musculu<br>s              |
| 1 | 1.00 | 1 | 1 | 0.01  | 0.01   | 0.01   | 0.01   | 0.01   | t | 113778 | QQPGQ                      | Homo<br>sapiens                  |
| 1 | 1.00 | 1 | 1 | 0.04  | 0.04   | 0.045  | 0.04   | 0.038  | t | 120804 | MRSFSLST<br>NLQESL         | Homo<br>sapiens                  |

|   |      |   |   |       |        |        |        |        |   |        |                              |                     |
|---|------|---|---|-------|--------|--------|--------|--------|---|--------|------------------------------|---------------------|
| 1 | 1.00 | 1 | 1 | -0.01 | -0.007 | -0.015 | -0.01  | -0.01  | t | 105228 | GLMVGGV<br>V                 | Mus<br>musculu<br>s |
| 1 | 1.00 | 1 | 1 | -0.01 | -0.01  | -0.015 | -0.01  | -0.01  | t | 105228 | GLMVGGV<br>V                 | Mus<br>musculu<br>s |
| 1 | 1.00 | 1 | 1 | -0.01 | -0.01  | -0.01  | -0.01  | -0.011 | t | 24105  | HITHYFVV<br>PSVS             | Homo<br>sapiens     |
| 1 | 1.00 | 1 | 1 | 0.01  | 0.01   | -0.001 | 0.01   | 0.01   | t | 153469 | STETGNQ<br>HHYQTRV<br>VSNANK | Mus<br>musculu<br>s |
| 1 | 1.00 | 1 | 1 | -0.03 | -0.026 | -0.031 | -0.029 | -0.031 | t | 71262  | VTCAMF                       | Homo<br>sapiens     |
| 1 | 1.00 | 1 | 1 | -0.02 | -0.022 | -0.04  | -0.027 | -0.02  | t | 127950 | DVPVVTSV<br>TTAGVGPS<br>PDIT | Mus<br>musculu<br>s |
| 1 | 1.00 | 1 | 1 | 0.02  | 0.02   | 0.02   | 0.024  | 0.02   | t | 135926 | GADIKKT<br>MEGPV             | Homo<br>sapiens     |
| 1 | 1.00 | 1 | 1 | 0.01  | 0.009  | 0.002  | 0.007  | 0.01   | t | 37997  | LMCDIDG<br>NRL               | Homo<br>sapiens     |
| 1 | 1.00 | 1 | 1 | -0.04 | -0.04  | -0.052 | -0.04  | -0.039 | t | 53864  | RGFLGRM<br>LF                | Homo<br>sapiens     |
| 1 | 1.00 | 1 | 1 | -0.03 | -0.028 | -0.021 | -0.023 | -0.03  | t | 102643 | MASPGSG<br>FWSFG             | Homo<br>sapiens     |
| 1 | 1.00 | 1 | 1 | 0     | 0      | 0      | 0      | 0      | t | 112849 | TIKNTFF                      | Homo<br>sapiens     |
| 1 | 1.00 | 1 | 1 | -0.03 | -0.026 | -0.03  | -0.029 | -0.03  | t | 26234  | IGGPLT                       | Homo<br>sapiens     |
| 1 | 1.00 | 1 | 1 | 0.01  | 0.01   | 0.01   | 0.01   | 0.008  | t | 140507 | TKTWQSM                      | Mus<br>musculu<br>s |
| 1 | 1.00 | 1 | 1 | -0.02 | -0.018 | -0.015 | -0.013 | -0.019 | t | 122175 | RLGKRDS                      | Homo<br>sapiens     |
| 1 | 1.00 | 1 | 1 | 0.01  | 0.01   | 0.01   | 0.006  | 0.008  | t | 134006 | ALRMEVL<br>GCEAQDLY          | Homo<br>sapiens     |
| 1 | 1.00 | 1 | 1 | -0.01 | -0.01  | -0.017 | -0.01  | -0.01  | t | 96014  | YGWTAFC<br>GPV               | Homo<br>sapiens     |

|   |      |   |   |       |        |        |        |        |   |        |                              |                       |
|---|------|---|---|-------|--------|--------|--------|--------|---|--------|------------------------------|-----------------------|
| 1 | 1.00 | 1 | 1 | -0.01 | -0.01  | -0.01  | -0.012 | -0.01  | t | 40793  | LYIGGP                       | Homo sapiens          |
| 1 | 1.00 | 1 | 1 | 0.01  | 0.01   | 0.01   | 0.014  | 0.01   | t | 118615 | SVLTQSVK<br>NNTQ             | Homo sapiens          |
| 1 | 1.00 | 1 | 1 | -0.02 | -0.022 | -0.026 | -0.021 | -0.02  | t | 28389  | IRRPKHLY<br>VS               | Mus musculus          |
| 1 | 1.00 | 1 | 1 | 0.05  | 0.045  | 0.043  | 0.046  | 0.05   | t | 42678  | MSTLQEL<br>QENITA            | Mus                   |
| 1 | 1.00 | 1 | 1 | 0.03  | 0.03   | 0.018  | 0.03   | 0.031  | t | 9598   | DPAPPNA<br>NDPAPPN<br>AND    | Mus musculus          |
| 1 | 1.00 | 1 | 1 | 0.01  | 0.012  | 0.009  | 0.007  | 0.01   | t | 8383   | DGFKVSNS<br>SA               | Homo sapiens          |
| 1 | 1.00 | 1 | 1 | -0.01 | -0.013 | -0.023 | -0.01  | -0.01  | t | 21277  | GMGVSCT<br>VTREDGT<br>NRR    | Oryctolagus cuniculus |
| 1 | 1.00 | 1 | 1 | 0.01  | 0.013  | -0.003 | 0.01   | 0.01   | t | 7649   | DASREAKK<br>QVEKALEE<br>ANSK | Mus musculus          |
| 1 | 1.00 | 1 | 1 | 0.01  | 0.01   | 0.001  | 0.016  | 0.012  | t | 72252  | WAPTAPL<br>PGDMNPAN          | Homo sapiens          |
| 1 | 1.00 | 1 | 1 | -0.01 | -0.008 | -0.012 | -0.003 | -0.009 | t | 122732 | DRKASPPS<br>GLWSPAY          | Homo sapiens          |
| 1 | 1.00 | 1 | 1 | -0.01 | -0.01  | -0.01  | -0.01  | -0.013 | t | 156938 | PPEKIHV                      | Gallus gallus         |
| 1 | 1.00 | 1 | 1 | 0.02  | 0.022  | 0.013  | 0.027  | 0.022  | t | 142386 | ANKYQISV<br>NKYRGTA<br>GNAL  | Homo sapiens          |
| 1 | 1.00 | 1 | 1 | 0     | 0      | 0      | 0      | 0      | t | 140934 | YGEEKPAV<br>LGHD             | Oryctolagus cuniculus |
| 1 | 1.00 | 1 | 1 | 0.03  | 0.027  | 0.016  | 0.03   | 0.034  | t | 97247  | DNTFVTTS<br>L                | Oryctolagus cuniculus |

|   |      |   |   |       |        |        |        |        |   |        |                             |                       |
|---|------|---|---|-------|--------|--------|--------|--------|---|--------|-----------------------------|-----------------------|
| 1 | 1.00 | 1 | 1 | 0     | 0      | -0.005 | 0      | -0.002 | t | 62961  | TAPTDPTERTVWTFG             | Oryctolagus cuniculus |
| 1 | 1.00 | 1 | 1 | 0.01  | 0.013  | 0.004  | 0.01   | 0.012  | t | 133727 | VERKECAY                    | Mus musculus          |
| 1 | 1.00 | 1 | 1 | 0     | -0.003 | -0.011 | 0      | 0.001  | t | 144748 | QAVNPNA<br>GN               | Oryctolagus cuniculus |
| 1 | 1.00 | 1 | 1 | 0     | -0.002 | 0      | -0.001 | 0      | t | 48599  | PNANPNA<br>NPNA             | Mus musculus          |
| 1 | 1.00 | 1 | 1 | -0.04 | -0.036 | -0.047 | -0.033 | -0.038 | t | 133232 | MGPRRRS<br>RKPEA            | Homo sapiens          |
| 1 | 1.00 | 1 | 1 | -0.01 | -0.013 | -0.018 | -0.01  | -0.008 | t | 68182  | VEFPLDITAG                  | Oryctolagus cuniculus |
| 1 | 1.00 | 1 | 1 | -0.01 | -0.01  | -0.018 | -0.01  | -0.008 | t | 68182  | VEFPLDITAG                  | Mus musculus          |
| 1 | 1.00 | 1 | 1 | 0     | 0      | -0.012 | 0      | 0.001  | t | 12375  | EHWSYGL<br>RPG              | Canis familiaris      |
| 1 | 1.00 | 1 | 1 | 0     | 0.002  | -0.005 | 0      | 0      | t | 107246 | TEIPKEEKD<br>PGMGAM         | Rattus norvegicus     |
| 1 | 1.00 | 1 | 1 | -0.02 | -0.02  | -0.024 | -0.02  | -0.02  | t | 60792  | SRRYPFVK<br>F               | Homo sapiens          |
| 1 | 1.00 | 1 | 1 | 0     | 0.002  | 0      | 0.007  | 0.002  | t | 121287 | EYFIRK                      | Homo sapiens          |
| 1 | 1.00 | 1 | 1 | 0     | 0.002  | -0.017 | -0.003 | 0      | t | 32970  | KQEGDKC<br>VENPNPTC<br>NENN | Homo sapiens          |
| 1 | 1.00 | 1 | 1 | 0     | 0.003  | 0.005  | 0      | 0.001  | t | 116284 | CAYSVAHL<br>C               | Mus musculus          |

|   |      |   |   |       |        |        |        |        |   |        |                              |                       |
|---|------|---|---|-------|--------|--------|--------|--------|---|--------|------------------------------|-----------------------|
| 1 | 1.00 | 1 | 1 | 0.06  | 0.062  | 0.055  | 0.061  | 0.062  | t | 19621  | GFSYDT                       | Homo sapiens          |
| 1 | 1.00 | 1 | 1 | 0     | 0      | 0.001  | 0      | -0.001 | t | 6561   | CLFYASEM<br>SEKGFKVIF        | Oryctolagus cuniculus |
| 1 | 1.00 | 1 | 1 | 0.03  | 0.028  | 0.023  | 0.023  | 0.029  | t | 108131 | SKDWSFY                      | Mus musculus          |
| 1 | 1.00 | 1 | 1 | -0.02 | -0.02  | -0.02  | -0.02  | -0.02  | t | 99266  | GDLIAVPT<br>GVAFWLY          | Homo sapiens          |
| 1 | 1.00 | 1 | 1 | 0.01  | 0.012  | 0.003  | 0.011  | 0.01   | t | 54206  | RIPADVID<br>AFHAAT           | Homo sapiens          |
| 1 | 1.00 | 1 | 1 | 0.01  | 0.005  | 0.008  | 0.01   | 0.01   | t | 7761   | DDEADRYF<br>TYEE             | Bos taurus            |
| 1 | 1.00 | 1 | 1 | 0.04  | 0.042  | 0.04   | 0.047  | 0.042  | t | 117948 | KFVETPGQ<br>KYKETDL          | Homo sapiens          |
| 1 | 1.00 | 1 | 1 | 0.04  | 0.04   | 0.04   | 0.047  | 0.042  | t | 117948 | KFVETPGQ<br>KYKETDL          | Mus musculus          |
| 1 | 1.00 | 1 | 1 | 0.01  | 0.01   | 0.01   | 0.01   | 0.01   | t | 111089 | ADVMTYI<br>HSMNSTIL          | Mus musculus          |
| 1 | 1.00 | 1 | 1 | 0.01  | 0.01   | 0.01   | 0.01   | 0.01   | t | 111089 | ADVMTYI<br>HSMNSTIL          | Mus musculus          |
| 1 | 1.00 | 1 | 1 | 0.01  | 0.01   | 0.01   | 0.01   | 0.01   | t | 111089 | ADVMTYI<br>HSMNSTIL          | Mus musculus          |
| 1 | 1.00 | 1 | 1 | 0     | 0      | 0      | 0      | 0      | t | 52420  | QSRGEAR                      | Mus musculus          |
| 1 | 1.00 | 1 | 1 | 0.04  | 0.044  | 0.039  | 0.047  | 0.04   | t | 124367 | KLKARVDE<br>LERIRRS          | Homo sapiens          |
| 1 | 1.00 | 1 | 1 | 0     | -0.004 | -0.001 | -0.001 | -0.002 | t | 5904   | AYQQGVT<br>VDSIGMLP<br>RFIPE | Oryctolagus cuniculus |
| 1 | 1.00 | 1 | 1 | 0     | 0.002  | 0.004  | 0.007  | 0.002  | t | 145657 | YRSYNDSDP                    | Homo sapiens          |



|   |      |   |   |       |        |        |       |        |   |        |                            |                                  |
|---|------|---|---|-------|--------|--------|-------|--------|---|--------|----------------------------|----------------------------------|
| 1 | 1.00 | 1 | 1 | 0.01  | 0.014  | 0.007  | 0.013 | 0.01   | t | 67059  | TVLAQALV<br>RE             | Homo<br>sapiens                  |
| 1 | 1.00 | 1 | 1 | -0.03 | -0.033 | -0.035 | -0.03 | -0.027 | t | 133683 | RQRY                       | Oryctola<br>gus<br>cuniculu<br>s |
| 1 | 1.00 | 1 | 1 | -0.01 | -0.013 | -0.005 | -0.01 | -0.012 | t | 7143   | CTGDARH<br>C               | Oryctola<br>gus<br>cuniculu<br>s |
| 1 | 1.00 | 1 | 1 | -0.01 | -0.01  | -0.01  | -0.01 | -0.011 | t | 66060  | TRLNPD                     | Mus<br>musculu<br>s              |
| 1 | 1.00 | 1 | 1 | 0.02  | 0.024  | 0.011  | 0.02  | 0.02   | t | 139880 | RDEYDHVL<br>SAKLAEQY<br>DT | Ovis<br>aries                    |
| 1 | 1.00 | 1 | 1 | 0.01  | 0.013  | 0.01   | 0.01  | 0.011  | t | 21601  | GPEET                      | Mus<br>musculu<br>s              |
| 1 | 1.00 | 1 | 1 | 0.04  | 0.037  | 0.036  | 0.041 | 0.04   | t | 55627  | RRKLTNPA<br>NKEES          | Homo<br>sapiens                  |
| 1 | 1.00 | 1 | 1 | 0     | 0      | -0.004 | 0     | 0      | t | 106862 | SPEFRRD                    | Mus<br>musculu<br>s              |
| 1 | 1.00 | 1 | 1 | 0     | 0.002  | 0.007  | 0.007 | 0      | t | 141969 | NGTYQTW                    | Homo<br>sapiens                  |
| 1 | 1.00 | 1 | 1 | 0     | 0.002  | 0.007  | 0.007 | 0      | t | 141969 | NGTYQTW                    | Homo<br>sapiens                  |
| 1 | 1.00 | 1 | 1 | 0.03  | 0.034  | 0.03   | 0.031 | 0.03   | t | 134696 | ITLYLTEK                   | MD                               |
| 1 | 1.00 | 1 | 1 | -0.01 | -0.01  | -0.01  | -0.01 | -0.009 | t | 115304 | KCEVFREL<br>KD             | Homo<br>sapiens                  |
| 1 | 1.00 | 1 | 1 | 0.01  | 0.008  | 0.01   | 0.009 | 0.011  | t | 9934   | DRAAGQP<br>AG              | Mus<br>musculu<br>s              |
| 1 | 1.00 | 1 | 1 | 0     | 0      | 0      | 0     | -0.001 | t | 133722 | TSKSKYPL<br>VV             | Mus<br>musculu<br>s              |
| 1 | 1.00 | 1 | 1 | -0.06 | -0.06  | -0.06  | -0.06 | -0.06  | t | 78504  | RLFLHV                     | Mus<br>musculu<br>s              |

|   |      |   |   |       |        |        |        |        |   |        |                              |                                  |
|---|------|---|---|-------|--------|--------|--------|--------|---|--------|------------------------------|----------------------------------|
| 1 | 1.00 | 1 | 1 | 0.01  | 0.014  | 0.01   | 0.017  | 0.012  | t | 125600 | WESYPFRV<br>GTSL             | Homo<br>sapiens                  |
| 1 | 1.00 | 1 | 1 | 0.07  | 0.07   | 0.07   | 0.07   | 0.07   | t | 145172 | EPPDDDD<br>S                 | Mus<br>musculu<br>s              |
| 1 | 1.00 | 1 | 1 | -0.01 | -0.008 | -0.008 | -0.003 | -0.01  | t | 119674 | WNPDDYG<br>GVKKIHIPS         | Homo<br>sapiens                  |
| 1 | 1.00 | 1 | 1 | -0.01 | -0.006 | -0.013 | -0.009 | -0.011 | t | 103162 | FCGRIHTR<br>YSSAYEL          | Homo<br>sapiens                  |
| 1 | 1.00 | 1 | 1 | 0.02  | 0.02   | 0.02   | 0.02   | 0.02   | t | 121828 | RVYA                         | Mus<br>musculu<br>s              |
| 1 | 1.00 | 1 | 1 | -0.01 | -0.01  | -0.01  | -0.01  | -0.011 | t | 153393 | GPDAPRIP<br>LSKM             | Mus<br>musculu<br>s              |
| 1 | 1.00 | 1 | 1 | 0.05  | 0.046  | 0.047  | 0.05   | 0.05   | t | 141004 | EPDP                         | Mus<br>musculu<br>s              |
| 1 | 1.00 | 1 | 1 | 0     | 0      | -0.006 | 0      | 0      | t | 91966  | SLMVALDS<br>NNTMPFT          | Oryctola<br>gus<br>cuniculu<br>s |
| 1 | 1.00 | 1 | 1 | -0.02 | -0.018 | -0.016 | -0.013 | -0.02  | t | 144697 | IYRNLYWE<br>GS               | Homo<br>sapiens                  |
| 1 | 1.00 | 1 | 1 | -0.02 | -0.018 | -0.02  | -0.013 | -0.02  | t | 107364 | FNWYVDG                      | Homo<br>sapiens                  |
| 1 | 1.00 | 1 | 1 | 0.02  | 0.022  | 0.017  | 0.023  | 0.02   | t | 49954  | PVSATAM<br>APSVDP<br>SAEPTAP | Homo<br>sapiens                  |
| 1 | 1.00 | 1 | 1 | 0     | 0      | -0.007 | 0      | 0      | t | 76606  | YYSPAF                       | Mus<br>musculu<br>s              |
| 1 | 1.00 | 1 | 1 | 0.02  | 0.018  | 0.021  | 0.019  | 0.02   | t | 122156 | NLHIDPTLI                    | Mus<br>musculu<br>s              |
| 1 | 1.00 | 1 | 1 | 0.04  | 0.04   | 0.04   | 0.04   | 0.04   | t | 140507 | TKTWQSM                      | Mus<br>musculu<br>s              |

|   |      |   |   |       |        |        |        |        |   |        |                              |                                  |
|---|------|---|---|-------|--------|--------|--------|--------|---|--------|------------------------------|----------------------------------|
| 1 | 1.00 | 1 | 1 | 0     | -0.004 | -0.012 | 0.003  | 0      | t | 106398 | EQLAEVAV<br>SAKR             | Oryctola<br>gus<br>cuniculu<br>s |
| 1 | 1.00 | 1 | 1 | 0.02  | 0.023  | 0.019  | 0.019  | 0.02   | t | 76014  | YTESMAG<br>KRE               | Mus<br>musculu<br>s              |
| 1 | 1.00 | 1 | 1 | -0.01 | -0.014 | -0.015 | -0.007 | -0.01  | t | 60959  | SSDSQTIT<br>NPAY             | Oryctola<br>gus<br>cuniculu<br>s |
| 1 | 1.00 | 1 | 1 | 0.02  | 0.02   | 0.013  | 0.02   | 0.02   | t | 96210  | EDKEEDEE<br>ED               | Homo<br>sapiens                  |
| 1 | 1.00 | 1 | 1 | 0.02  | 0.022  | 0.013  | 0.023  | 0.02   | t | 117015 | KEQFLDGD<br>GWTSRWI<br>ESK   | Homo<br>sapiens                  |
| 1 | 1.00 | 1 | 1 | -0.01 | -0.01  | -0.018 | -0.01  | -0.012 | t | 89660  | TQKIPKAN<br>AADADTD<br>TT    | Mus<br>musculu<br>s              |
| 1 | 1.00 | 1 | 1 | -0.04 | -0.04  | -0.04  | -0.031 | -0.038 | t | 96808  | QVKSGTIF<br>DN               | Homo<br>sapiens                  |
| 1 | 1.00 | 1 | 1 | 0.04  | 0.04   | 0.04   | 0.04   | 0.04   | t | 18511  | GAALLQSA                     | Oryctola<br>gus<br>cuniculu<br>s |
| 1 | 1.00 | 1 | 1 | 0.01  | 0.012  | 0.006  | 0.007  | 0.008  | t | 10277  | DSYGRDPY<br>SPSQDPY          | Homo<br>sapiens                  |
| 1 | 1.00 | 1 | 1 | 0.02  | 0.02   | 0.02   | 0.023  | 0.02   | t | 49023  | PQLGPR                       | Homo<br>sapiens                  |
| 1 | 1.00 | 1 | 1 | 0.02  | 0.02   | 0.02   | 0.02   | 0.021  | t | 115519 | TPEVDDEA<br>LE               | Homo<br>sapiens                  |
| 1 | 1.00 | 1 | 1 | 0.02  | 0.02   | 0.017  | 0.024  | 0.02   | t | 78845  | TATKQAEA<br>AAPVVESK<br>WRA  | Homo<br>sapiens                  |
| 1 | 1.00 | 1 | 1 | -0.04 | -0.04  | -0.043 | -0.04  | -0.041 | t | 136074 | LVKK                         | Mus<br>musculu<br>s              |
| 1 | 1.00 | 1 | 1 | 0.01  | 0.006  | 0.002  | 0.009  | 0.01   | t | 15179  | FAGKDLESI<br>KGTAPFEI<br>HAN | Oryctola<br>gus<br>cuniculu<br>s |
| 1 | 1.00 | 1 | 1 | 0     | 0.002  | 0.005  | 0.007  | -0.003 | t | 126786 | NRYTGPYT                     | Homo<br>sapiens                  |

|   |      |   |   |       |        |        |       |        |   |        |                     |                       |
|---|------|---|---|-------|--------|--------|-------|--------|---|--------|---------------------|-----------------------|
| 1 | 1.00 | 1 | 1 | 0.03  | 0.026  | 0.03   | 0.027 | 0.029  | t | 64640  | TKPTDGN             | Oryctolagus cuniculus |
| 1 | 1.00 | 1 | 1 | 0.02  | 0.018  | 0.015  | 0.019 | 0.02   | t | 5350   | AVGPGRWDED          | Mus musculus          |
| 1 | 1.00 | 1 | 1 | 0.03  | 0.03   | 0.018  | 0.03  | 0.03   | t | 121732 | QAPEYRGRTTELLKESIGE | Rattus norvegicus     |
| 1 | 1.00 | 1 | 1 | -0.01 | -0.013 | -0.017 | -0.01 | -0.012 | t | 7313   | CVTIMTVDNPASTTNKDK  | Oryctolagus cuniculus |
| 1 | 1.00 | 1 | 1 | 0.02  | 0.016  | 0.024  | 0.023 | 0.02   | t | 97324  | GDSQATYNY           | Oryctolagus cuniculus |
| 1 | 1.00 | 1 | 1 | 0.02  | 0.02   | 0.02   | 0.02  | 0.02   | t | 33857  | KTSERSQPRG          | Homo sapiens          |
| 1 | 1.00 | 1 | 1 | 0.01  | 0.01   | 0.01   | 0.01  | 0.009  | t | 51483  | QLPQGTTLPKGFYAE     | Homo sapiens          |
| 1 | 1.00 | 1 | 1 | 0.02  | 0.018  | 0.02   | 0.017 | 0.017  | t | 134028 | DDTIS               | Mus musculus          |
| 1 | 1.00 | 1 | 1 | 0.02  | 0.02   | 0.018  | 0.02  | 0.022  | t | 5344   | AVGGYAISIS          | Homo sapiens          |
| 1 | 1.00 | 1 | 1 | 0.03  | 0.032  | 0.025  | 0.031 | 0.029  | t | 22223  | GRTWAQPGYPWP        | Homo sapiens          |
| 1 | 1.00 | 1 | 1 | 0.01  | 0.012  | -0.001 | 0.01  | 0.01   | t | 21807  | GPTEESVERAMGRVA     | Rattus norvegicus     |
| 1 | 1.00 | 1 | 1 | 0.02  | 0.021  | 0.017  | 0.019 | 0.021  | t | 14844  | EVPLGVAA DANK       | Oryctolagus cuniculus |
| 1 | 1.00 | 1 | 1 | 0.02  | 0.022  | 0.013  | 0.021 | 0.02   | t | 51572  | QLVLGENL DTERILAS   | Homo sapiens          |
| 1 | 1.00 | 1 | 1 | 0.02  | 0.022  | 0.013  | 0.021 | 0.02   | t | 51572  | QLVLGENL DTERILAS   | Homo sapiens          |
| 1 | 1.00 | 1 | 1 | 0     | 0      | -0.007 | 0     | 0      | t | 121812 | RRATQLAH            | Mus musculus          |

|   |      |   |   |       |        |        |        |        |   |        |                           |                       |
|---|------|---|---|-------|--------|--------|--------|--------|---|--------|---------------------------|-----------------------|
| 1 | 1.00 | 1 | 1 | 0     | 0      | 0      | 0      | -0.002 | t | 67160  | TVSPISSIFSR               | Mus musculus          |
| 1 | 1.00 | 1 | 1 | 0.03  | 0.03   | 0.03   | 0.03   | 0.03   | t | 9585   | DPAF                      | Mus musculus          |
| 1 | 1.00 | 1 | 1 | -0.03 | -0.033 | -0.03  | -0.03  | -0.03  | t | 135488 | PIFPGG                    | Oryctolagus cuniculus |
| 1 | 1.00 | 1 | 1 | -0.04 | -0.04  | -0.04  | -0.04  | -0.039 | t | 115197 | CVKKILDKVG                | Homo sapiens          |
| 1 | 1.00 | 1 | 1 | -0.01 | -0.01  | -0.01  | -0.01  | -0.01  | t | 156859 | DPHVFKS                   | Gallus gallus         |
| 1 | 1.00 | 1 | 1 | -0.04 | -0.038 | -0.049 | -0.043 | -0.043 | t | 105700 | CPSTYEEP<br>AQQGRRH       | Homo sapiens          |
| 1 | 1.00 | 1 | 1 | -0.01 | -0.01  | -0.013 | -0.007 | -0.01  | t | 78643  | EQGMQLA<br>EQFKQKAL<br>GL | Homo sapiens          |
| 1 | 1.00 | 1 | 1 | -0.01 | -0.007 | -0.008 | -0.01  | -0.01  | t | 146020 | TCPDIIIPK                 | Mus musculus          |
| 1 | 1.00 | 1 | 1 | -0.04 | -0.037 | -0.039 | -0.037 | -0.04  | t | 78218  | NKQWFT                    | Equus caballus        |
| 1 | 1.00 | 1 | 1 | -0.01 | -0.01  | -0.01  | -0.01  | -0.01  | t | 95824  | SDVAGL                    | Mus musculus          |
| 1 | 1.00 | 1 | 1 | 0.01  | 0.006  | 0.001  | 0.009  | 0.01   | t | 19901  | GGKMOVQ<br>VVYD           | Oryctolagus cuniculus |
| 1 | 1.00 | 1 | 1 | -0.02 | -0.018 | -0.016 | -0.019 | -0.02  | t | 6309   | CGLFGK                    | Homo sapiens          |
| 1 | 1.00 | 1 | 1 | 0.06  | 0.06   | 0.06   | 0.062  | 0.062  | t | 27557  | IMSGEVPS<br>TEDLVN        | Homo sapiens          |
| 1 | 1.00 | 1 | 1 | -0.02 | -0.022 | -0.021 | -0.017 | -0.02  | t | 67052  | TVKQHTVT<br>T             | Mus musculus          |
| 1 | 1.00 | 1 | 1 | 0.01  | 0.02   | 0.01   | 0.009  | 0.01   | t | 42694  | MSTNPKP<br>QRKTK          | Pan troglodytes       |

|   |      |   |   |       |        |        |        |        |   |        |                           |                                  |
|---|------|---|---|-------|--------|--------|--------|--------|---|--------|---------------------------|----------------------------------|
| 1 | 1.00 | 1 | 1 | 0.04  | 0.04   | 0.04   | 0.044  | 0.037  | t | 131929 | KGGGVWE<br>SGAANSQ<br>S   | Homo<br>sapiens                  |
| 1 | 1.00 | 1 | 1 | 0.05  | 0.048  | 0.045  | 0.043  | 0.048  | t | 132269 | EPVDGVVL<br>VDPE          | Mus<br>musculu<br>s              |
| 1 | 1.00 | 1 | 1 | 0     | -0.003 | 0.008  | 0      | -0.001 | t | 125211 | QHWSYGL<br>RPG            | Canis<br>lupus                   |
| 1 | 1.00 | 1 | 1 | 0.05  | 0.046  | 0.041  | 0.05   | 0.051  | t | 20046  | GGTEESVV<br>TASRS         | Bos<br>taurus                    |
| 1 | 1.00 | 1 | 1 | 0     | 0.002  | 0.002  | 0.003  | 0      | t | 45584  | NQLSCDLI<br>GQKLGLK       | Homo<br>sapiens                  |
| 1 | 1.00 | 1 | 1 | 0     | 0.002  | 0.002  | 0.003  | 0      | t | 45584  | NQLSCDLI<br>GQKLGLK       | Homo<br>sapiens                  |
| 1 | 1.00 | 1 | 1 | 0     | 0.002  | 0.002  | 0.003  | 0      | t | 45584  | NQLSCDLI<br>GQKLGLK       | Homo<br>sapiens                  |
| 1 | 1.00 | 1 | 1 | -0.02 | -0.017 | -0.025 | -0.02  | -0.02  | t | 14447  | ETKRKDGD                  | Equus<br>caballus                |
| 1 | 1.00 | 1 | 1 | -0.02 | -0.02  | -0.025 | -0.02  | -0.02  | t | 14447  | ETKRKDGD                  | Mus<br>musculu<br>s              |
| 1 | 1.00 | 1 | 1 | 0.01  | 0.01   | 0.001  | 0.01   | 0.01   | t | 79280  | LAPISGTV<br>QSAHLIRF<br>D | Mus<br>musculu<br>s              |
| 1 | 1.00 | 1 | 1 | 0     | 0      | 0      | 0      | -0.002 | t | 106256 | ANYGYTFG<br>SGTRLTVV      | Oryctola<br>gus<br>cuniculu<br>s |
| 1 | 1.00 | 1 | 1 | 0     | 0      | -0.009 | 0      | 0      | t | 136011 | VPALTAVE<br>TGHT          | Homo<br>sapiens                  |
| 1 | 1.00 | 1 | 1 | -0.01 | -0.014 | -0.021 | -0.011 | -0.01  | t | 99018  | SYSITTPSQ<br>FV           | Oryctola<br>gus<br>cuniculu<br>s |
| 1 | 1.00 | 1 | 1 | -0.04 | -0.032 | -0.04  | -0.04  | -0.042 | t | 156943 | QFTPDKH<br>MLMLP          | Gallus<br>gallus                 |

|   |      |   |   |       |        |        |        |        |   |        |                       |                       |
|---|------|---|---|-------|--------|--------|--------|--------|---|--------|-----------------------|-----------------------|
| 1 | 1.00 | 1 | 1 | 0.03  | 0.03   | 0.03   | 0.03   | 0.03   | t | 7841   | DDPF                  | Mus musculus          |
| 1 | 1.00 | 1 | 1 | 0     | 0      | 0      | 0      | -0.001 | t | 110085 | VYTLPPS               | Homo sapiens          |
| 1 | 1.00 | 1 | 1 | 0.01  | 0.012  | 0.003  | 0.011  | 0.009  | t | 3487   | APARGEP APG           | Homo sapiens          |
| 1 | 1.00 | 1 | 1 | 0.02  | 0.02   | 0.02   | 0.02   | 0.02   | t | 21951  | GQRVEF                | Homo sapiens          |
| 1 | 1.00 | 1 | 1 | 0.01  | 0.01   | 0.01   | 0.01   | 0.008  | t | 78696  | KEEGEDDT ARQEIRKA WVK | Oryctolagus cuniculus |
| 1 | 1.00 | 1 | 1 | -0.03 | -0.026 | -0.032 | -0.033 | -0.03  | t | 55822  | RSEFPIW MMF           | Homo sapiens          |
| 1 | 1.00 | 1 | 1 | 0.01  | 0.01   | 0.01   | 0.014  | 0.01   | t | 135982 | RDRSGLAP KRPG         | Homo sapiens          |
| 1 | 1.00 | 1 | 1 | 0.01  | 0.01   | 0.01   | 0.01   | 0.01   | t | 62328  | SVSLPYAN LATH         | Mus musculus          |
| 1 | 1.00 | 1 | 1 | 0.03  | 0.035  | 0.026  | 0.03   | 0.03   | t | 49883  | PVIGSQAR              | Homo sapiens          |
| 1 | 1.00 | 1 | 1 | 0.03  | 0.035  | 0.026  | 0.03   | 0.03   | t | 49883  | PVIGSQAR              | Homo sapiens          |
| 1 | 1.00 | 1 | 1 | 0.02  | 0.02   | 0.013  | 0.02   | 0.02   | t | 105076 | AFNHFGG GLMQR         | Homo sapiens          |
| 1 | 1.00 | 1 | 1 | -0.02 | -0.018 | -0.031 | -0.019 | -0.02  | t | 65881  | TQIQVRNI MSPVMG       | Homo sapiens          |
| 1 | 1.00 | 1 | 1 | 0.01  | 0.01   | 0.007  | 0.01   | 0.01   | t | 99052  | VTQTMKG LDI           | Homo sapiens          |
| 1 | 1.00 | 1 | 1 | -0.01 | -0.01  | -0.01  | -0.01  | -0.01  | t | 78503  | RFPYWFVL PPIATVD      | Mus musculus          |
| 1 | 1.00 | 1 | 1 | 0.01  | 0.013  | 0      | 0.01   | 0.009  | t | 111304 | GAVGENV PDDLVIK       | Mus musculus          |

|   |      |   |   |       |        |        |        |        |   |        |                      |                       |
|---|------|---|---|-------|--------|--------|--------|--------|---|--------|----------------------|-----------------------|
| 1 | 1.00 | 1 | 1 | -0.04 | -0.038 | -0.035 | -0.033 | -0.041 | t | 112405 | YCARMRD              | Homo sapiens          |
| 1 | 1.00 | 1 | 1 | 0.03  | 0.032  | 0.024  | 0.026  | 0.032  | t | 24445  | HPEYAVSVLL           | Homo sapiens          |
| 1 | 1.00 | 1 | 1 | -0.04 | -0.036 | -0.036 | -0.033 | -0.04  | t | 144644 | FRQQHGTKTVV          | Homo sapiens          |
| 1 | 1.00 | 1 | 1 | -0.01 | -0.013 | -0.02  | -0.01  | -0.01  | t | 140939 | YNIALGQRADA          | Oryctolagus cuniculus |
| 1 | 1.00 | 1 | 1 | -0.01 | -0.01  | -0.005 | -0.01  | -0.012 | t | 95752  | RAGFITELSEFI         | Homo sapiens          |
| 1 | 1.00 | 1 | 1 | -0.03 | -0.028 | -0.03  | -0.023 | -0.03  | t | 107031 | YTQKHKHQA            | Homo sapiens          |
| 1 | 1.00 | 1 | 1 | 0.01  | 0.01   | 0.006  | 0.016  | 0.01   | t | 55670  | RRPFFHPVGEADYFEYHQEG | Homo sapiens          |
| 1 | 1.00 | 1 | 1 | 0     | 0      | 0      | 0      | -0.003 | t | 140567 | KEAWLDS TKAT         | Mus musculus          |
| 1 | 1.00 | 1 | 1 | 0     | 0      | 0      | 0      | -0.003 | t | 138304 | ATVQLPQ              | Oryctolagus cuniculus |
| 1 | 1.00 | 1 | 1 | 0     | 0      | 0      | 0      | -0.003 | t | 138608 | RVGAHDP              | Oryctolagus cuniculus |
| 1 | 1.00 | 1 | 1 | 0     | 0      | 0      | 0      | -0.003 | t | 132843 | ITPWPHWLERSS         | Mus musculus          |
| 1 | 1.00 | 1 | 1 | 0     | 0      | 0      | 0      | -0.003 | t | 133372 | SPSPTPTPGPSRRG       | Homo sapiens          |
| 1 | 1.00 | 1 | 1 | 0     | 0      | 0      | 0      | -0.003 | t | 110390 | QWGRL                | Mus musculus          |
| 1 | 1.00 | 1 | 1 | 0     | 0      | 0      | 0      | -0.003 | t | 110332 | LYRWR                | Mus musculus          |
| 1 | 1.00 | 1 | 1 | 0     | 0      | 0      | 0      | -0.003 | t | 106374 | EDHAGTYGLGDRK        | Mus musculus          |



|   |      |   |   |   |   |   |   |        |   |        |                              |                     |
|---|------|---|---|---|---|---|---|--------|---|--------|------------------------------|---------------------|
| 1 | 1.00 | 1 | 1 | 0 | 0 | 0 | 0 | -0.003 | t | 110213 | EGHLIDLK<br>RV               | Mus<br>musculu<br>s |
| 1 | 1.00 | 1 | 1 | 0 | 0 | 0 | 0 | -0.003 | t | 64541  | TKDTNNN<br>L                 | Mus<br>musculu<br>s |
| 1 | 1.00 | 1 | 1 | 0 | 0 | 0 | 0 | -0.003 | t | 68322  | VEQKHIQK<br>EDVPSERY<br>LGYL | Homo<br>sapiens     |
| 1 | 1.00 | 1 | 1 | 0 | 0 | 0 | 0 | -0.003 | t | 64541  | TKDTNNN<br>L                 | Mus<br>musculu<br>s |
| 1 | 1.00 | 1 | 1 | 0 | 0 | 0 | 0 | -0.003 | t | 64541  | TKDTNNN<br>L                 | Mus<br>musculu<br>s |
| 1 | 1.00 | 1 | 1 | 0 | 0 | 0 | 0 | -0.003 | t | 68473  | VFGKEKVN<br>ELSKDIGSE<br>STE | Homo<br>sapiens     |
| 1 | 1.00 | 1 | 1 | 0 | 0 | 0 | 0 | -0.003 | t | 64541  | TKDTNNN<br>L                 | Mus<br>musculu<br>s |
| 1 | 1.00 | 1 | 1 | 0 | 0 | 0 | 0 | -0.003 | t | 68401  | VEVPGSQ<br>HIDSQKKA          | Mus<br>musculu<br>s |
| 1 | 1.00 | 1 | 1 | 0 | 0 | 0 | 0 | -0.003 | t | 43242  | NANPNAN<br>PNANP             | Mus<br>musculu<br>s |
| 1 | 1.00 | 1 | 1 | 0 | 0 | 0 | 0 | -0.003 | t | 43242  | NANPNAN<br>PNANP             | Mus<br>musculu<br>s |
| 1 | 1.00 | 1 | 1 | 0 | 0 | 0 | 0 | -0.003 | t | 38207  | LNENLLRF<br>FVAPFPEV<br>FGKE | Homo<br>sapiens     |
| 1 | 1.00 | 1 | 1 | 0 | 0 | 0 | 0 | -0.003 | t | 39183  | LRRDLAS<br>REAKKQVE<br>KALE  | Homo<br>sapiens     |
| 1 | 1.00 | 1 | 1 | 0 | 0 | 0 | 0 | -0.003 | t | 43242  | NANPNAN<br>PNANP             | Mus<br>musculu<br>s |
| 1 | 1.00 | 1 | 1 | 0 | 0 | 0 | 0 | -0.003 | t | 39183  | LRRDLAS<br>REAKKQVE<br>KALE  | Homo<br>sapiens     |

|   |      |   |   |       |        |       |        |        |   |        |                               |                                  |
|---|------|---|---|-------|--------|-------|--------|--------|---|--------|-------------------------------|----------------------------------|
| 1 | 1.00 | 1 | 1 | 0     | 0      | 0     | 0      | -0.003 | t | 39183  | LRRDLAS<br>REAKKQVE<br>KALE   | Homo<br>sapiens                  |
| 1 | 1.00 | 1 | 1 | 0     | 0      | 0     | 0      | -0.003 | t | 24814  | HSMKEGI<br>HAQQKEP<br>MIGVNVQ | Homo<br>sapiens                  |
| 1 | 1.00 | 1 | 1 | 0     | 0      | 0     | 0      | -0.003 | t | 23876  | HFVQQTP<br>KSQPTLV            | Mus<br>musculu<br>s              |
| 1 | 1.00 | 1 | 1 | 0     | 0      | 0     | 0      | -0.003 | t | 11035  | EAESISSE<br>EIVPNSVE<br>QKH   | Homo<br>sapiens                  |
| 1 | 1.00 | 1 | 1 | 0     | -0.002 | 0     | 0      | -0.003 | t | 28911  | ITGHRMA<br>WMMMM<br>NWS       | Mus<br>musculu<br>s              |
| 1 | 1.00 | 1 | 1 | 0     | 0      | 0     | 0      | -0.003 | t | 7491   | DAEFRHDS<br>GYEVHHQ<br>K      | Mus<br>musculu<br>s              |
| 1 | 1.00 | 1 | 1 | 0     | 0      | 0     | 0      | -0.003 | t | 7491   | DAEFRHDS<br>GYEVHHQ<br>K      | Mus<br>musculu<br>s              |
| 1 | 1.00 | 1 | 1 | 0     | 0      | 0     | 0      | -0.003 | t | 7491   | DAEFRHDS<br>GYEVHHQ<br>K      | Mus<br>musculu<br>s              |
| 1 | 1.00 | 1 | 1 | 0     | 0      | 0     | 0      | -0.003 | t | 655    | ADEEQQQ<br>ALSSQMG<br>F       | Homo<br>sapiens                  |
| 1 | 1.00 | 1 | 1 | 0     | 0      | 0     | 0      | -0.003 | t | 8756   | DIPNPIGSE<br>NSEKTTM<br>PLW   | Homo<br>sapiens                  |
| 1 | 1.00 | 1 | 1 | 0     | 0      | 0     | 0      | -0.002 | t | 66060  | TRLNPD                        | Mus<br>musculu<br>s              |
| 1 | 1.00 | 1 | 1 | 0.01  | 0.01   | 0.003 | 0.01   | 0.01   | t | 159050 | PKRLTATT<br>EKLEIGWK          | Mus<br>musculu<br>s              |
| 1 | 1.00 | 1 | 1 | 0     | -0.003 | 0     | 0      | -0.001 | t | 15205  | FAKY                          | Mus<br>musculu<br>s              |
| 1 | 1.00 | 1 | 1 | -0.02 | -0.02  | -0.02 | -0.011 | -0.018 | t | 96808  | QVKSGTIF<br>DN                | Homo<br>sapiens                  |
| 1 | 1.00 | 1 | 1 | 0.02  | 0.016  | 0.015 | 0.019  | 0.02   | t | 78876  | VLLGRKW<br>EDEVDDE<br>SYF     | Oryctola<br>gus<br>cuniculu<br>s |

|   |      |   |   |       |        |       |       |        |   |        |                             |                                  |
|---|------|---|---|-------|--------|-------|-------|--------|---|--------|-----------------------------|----------------------------------|
| 1 | 1.00 | 1 | 1 | 0.02  | 0.018  | 0.015 | 0.019 | 0.02   | t | 78876  | VLLGRKW<br>EDEVDPE<br>SYF   | Mus<br>musculu<br>s              |
| 1 | 1.00 | 1 | 1 | 0.01  | 0.01   | 0.01  | 0.01  | 0.01   | t | 140916 | VSYGEEKP<br>AVLG            | Oryctola<br>gus<br>cuniculu<br>s |
| 1 | 1.00 | 1 | 1 | 0.01  | 0.01   | 0.009 | 0.009 | 0.01   | t | 9673   | DPLLRTAP                    | Homo<br>sapiens                  |
| 1 | 1.00 | 1 | 1 | 0.04  | 0.04   | 0.038 | 0.04  | 0.04   | t | 116709 | EVHHQKL<br>VFFAEDVG<br>SNK  | Mus<br>musculu<br>s              |
| 1 | 1.00 | 1 | 1 | -0.03 | -0.022 | -0.03 | -0.03 | -0.032 | t | 156936 | PMPRFF                      | Gallus<br>gallus                 |
| 1 | 1.00 | 1 | 1 | 0     | 0      | 0     | 0     | -0.002 | t | 22360  | GSGVRGD<br>FGSLAPRV<br>ARQL | Cavia<br>porcellu<br>s           |
| 1 | 1.00 | 1 | 1 | 0.02  | 0.02   | 0.017 | 0.02  | 0.02   | t | 157219 | EQRCCNEL<br>NR              | Homo<br>sapiens                  |
| 1 | 1.00 | 1 | 1 | 0.01  | 0.01   | 0.01  | 0.01  | 0.008  | t | 138892 | REQAPNL<br>VY               | Mus<br>musculu<br>s              |
| 1 | 1.00 | 1 | 1 | 0.02  | 0.02   | 0.02  | 0.02  | 0.02   | t | 149434 | QPQPFLP<br>QQP              | Homo<br>sapiens                  |
| 1 | 1.00 | 1 | 1 | 0.02  | 0.02   | 0.02  | 0.02  | 0.02   | t | 149434 | QPQPFLP<br>QQP              | Mus<br>musculu<br>s              |
| 1 | 1.00 | 1 | 1 | -0.01 | -0.01  | -0.02 | -0.01 | -0.008 | t | 104161 | NVVLKTIT<br>ESATSPPT        | Oryctola<br>gus<br>cuniculu<br>s |
| 1 | 1.00 | 1 | 1 | 0     | 0      | 0     | 0     | 0      | t | 112090 | EDLAVYF                     | Homo<br>sapiens                  |
| 1 | 1.00 | 1 | 1 | 0.01  | 0.01   | 0.003 | 0.01  | 0.01   | t | 130585 | QKKIRGILE                   | Mus<br>musculu<br>s              |
| 1 | 1.00 | 1 | 1 | 0.01  | 0.008  | 0.007 | 0.009 | 0.008  | t | 28290  | IRFKDDSSY<br>EEVN           | Mus<br>musculu<br>s              |
| 1 | 1.00 | 1 | 1 | 0     | 0      | 0     | 0     | 0      | t | 133539 | CYKPGEW<br>AC               | Mus<br>musculu<br>s              |

|   |      |   |   |       |        |        |        |        |   |        |                        |                       |
|---|------|---|---|-------|--------|--------|--------|--------|---|--------|------------------------|-----------------------|
| 1 | 1.00 | 1 | 1 | 0     | -0.002 | 0      | -0.001 | -0.002 | t | 56686  | RYYRE                  | Mus musculus          |
| 1 | 1.00 | 1 | 1 | 0.01  | 0.01   | 0.007  | 0.007  | 0.009  | t | 63164  | TDGVITYTN DCL          | Homo sapiens          |
| 1 | 1.00 | 1 | 1 | -0.01 | -0.008 | -0.01  | -0.01  | -0.008 | t | 107368 | FSSAP                  | Rattus norvegicus     |
| 1 | 1.00 | 1 | 1 | -0.02 | -0.02  | -0.02  | -0.02  | -0.023 | t | 130605 | SCRLFCKT YLCH          | Mus musculus          |
| 1 | 1.00 | 1 | 1 | -0.05 | -0.048 | -0.051 | -0.049 | -0.051 | t | 120408 | APYNVRRRL PPPVVEP      | Homo sapiens          |
| 1 | 1.00 | 1 | 1 | 0     | 0      | 0      | 0      | -0.002 | t | 134411 | IPP                    | Mus musculus          |
| 1 | 1.00 | 1 | 1 | -0.02 | -0.02  | -0.017 | -0.024 | -0.026 | t | 74129  | YHPDVPYV KR            | Homo sapiens          |
| 1 | 1.00 | 1 | 1 | 0     | 0      | -0.006 | 0      | 0      | t | 2621   | ALIDQKVK EI            | Homo sapiens          |
| 1 | 1.00 | 1 | 1 | 0.02  | 0.02   | 0.022  | 0.02   | 0.02   | t | 72911  | WNSTTFH QTLQDP         | Mus musculus          |
| 1 | 1.00 | 1 | 1 | 0.02  | 0.02   | 0.022  | 0.02   | 0.02   | t | 72911  | WNSTTFH QTLQDP         | Mus musculus          |
| 1 | 1.00 | 1 | 1 | 0.02  | 0.017  | 0.023  | 0.02   | 0.02   | t | 127964 | EQLIEKLIE DDE          | Oryctolagus cuniculus |
| 1 | 1.00 | 1 | 1 | -0.01 | -0.008 | -0.01  | -0.003 | -0.008 | t | 107479 | KFNWYVD                | Homo sapiens          |
| 1 | 1.00 | 1 | 1 | -0.01 | -0.008 | -0.014 | -0.009 | -0.011 | t | 110869 | GQAEPDR AHYNIVTF CCKCD | Homo sapiens          |
| 1 | 1.00 | 1 | 1 | -0.05 | -0.048 | -0.049 | -0.043 | -0.049 | t | 121527 | LCNEKLLK KARIHPFH      | Homo sapiens          |
| 1 | 1.00 | 1 | 1 | 0     | 0.002  | -0.007 | -0.003 | -0.003 | t | 106568 | KLPPIDVN MDCK          | Homo sapiens          |

|   |      |   |   |       |        |        |        |        |   |        |                              |                       |
|---|------|---|---|-------|--------|--------|--------|--------|---|--------|------------------------------|-----------------------|
| 1 | 1.00 | 1 | 1 | 0.01  | 0.012  | 0.016  | 0.011  | 0.009  | t | 8857   | DKEILYEA                     | Homo sapiens          |
| 1 | 1.00 | 1 | 1 | 0.02  | 0.02   | 0.02   | 0.02   | 0.02   | t | 9609   | DPDI                         | Mus musculus          |
| 1 | 1.00 | 1 | 1 | 0     | 0.002  | 0      | 0.003  | 0      | t | 40076  | LTPCD                        | Homo sapiens          |
| 1 | 1.00 | 1 | 1 | 0.02  | 0.02   | 0.016  | 0.02   | 0.02   | t | 2237   | AKLQDC                       | Homo sapiens          |
| 1 | 1.00 | 1 | 1 | -0.01 | -0.01  | -0.01  | -0.01  | -0.011 | t | 122150 | MSKTLHA<br>QLGFKKT           | Oryctolagus cuniculus |
| 1 | 1.00 | 1 | 1 | 0.05  | 0.05   | 0.053  | 0.05   | 0.049  | t | 78938  | CAPGQNL<br>CY                | Mus musculus          |
| 1 | 1.00 | 1 | 1 | 0     | 0      | 0      | 0      | -0.002 | t | 135587 | QESYSSKK<br>L                | Oryctolagus cuniculus |
| 1 | 1.00 | 1 | 1 | 0     | -0.002 | -0.004 | -0.003 | 0      | t | 55760  | RRVGLSNP                     | Anas platyrhynchos    |
| 1 | 1.00 | 1 | 1 | 0     | 0      | 0      | 0      | -0.003 | t | 138456 | KEQFEFAL<br>TAVAEV           | Oryctolagus cuniculus |
| 1 | 1.00 | 1 | 1 | 0     | 0      | 0      | 0      | -0.003 | t | 144623 | EEAEGTTD<br>AQIDANRK<br>RESE | Mus musculus          |
| 1 | 1.00 | 1 | 1 | 0     | 0      | 0      | 0      | -0.003 | t | 137211 | KARIHPFH<br>VLIALETYR<br>AGH | Mus musculus          |
| 1 | 1.00 | 1 | 1 | 0     | 0      | 0      | 0      | -0.003 | t | 157811 | QRQCQQR<br>CER               | Homo sapiens          |
| 1 | 1.00 | 1 | 1 | 0     | 0      | 0      | 0      | -0.003 | t | 137734 | DTALTCAA<br>LKL              | Mus musculus          |
| 1 | 1.00 | 1 | 1 | 0     | 0      | 0      | 0      | -0.003 | t | 140546 | CNLWEVM<br>HGTC              | Mus musculus          |
| 1 | 1.00 | 1 | 1 | 0     | 0      | 0      | 0      | -0.003 | t | 137290 | SEIEKLKNK<br>YEVAGIP         | Mus musculus          |
| 1 | 1.00 | 1 | 1 | 0     | 0      | 0      | 0      | -0.003 | t | 141267 | FEGWFN                       | Capra hircus          |

|   |      |   |   |   |        |   |   |        |   |        |                         |                                  |
|---|------|---|---|---|--------|---|---|--------|---|--------|-------------------------|----------------------------------|
| 1 | 1.00 | 1 | 1 | 0 | 0      | 0 | 0 | -0.003 | t | 134492 | QIQRRPS<br>M            | Mus<br>musculu<br>s              |
| 1 | 1.00 | 1 | 1 | 0 | 0      | 0 | 0 | -0.003 | t | 145376 | NCWKPVQ<br>LHC          | Homo<br>sapiens                  |
| 1 | 1.00 | 1 | 1 | 0 | 0      | 0 | 0 | -0.003 | t | 137743 | DTPLTIAGL<br>KLV        | Mus<br>musculu<br>s              |
| 1 | 1.00 | 1 | 1 | 0 | 0      | 0 | 0 | -0.003 | t | 135569 | KTNMK                   | Mus<br>musculu<br>s              |
| 1 | 1.00 | 1 | 1 | 0 | 0      | 0 | 0 | -0.003 | t | 150883 | SDDEDLAT<br>S           | Mus<br>musculu<br>s              |
| 1 | 1.00 | 1 | 1 | 0 | 0      | 0 | 0 | -0.003 | t | 140606 | TMWDALE<br>AP           | Mus<br>musculu<br>s              |
| 1 | 1.00 | 1 | 1 | 0 | 0      | 0 | 0 | -0.003 | t | 145375 | NCSWCHV<br>LQRCS        | Homo<br>sapiens                  |
| 1 | 1.00 | 1 | 1 | 0 | 0      | 0 | 0 | -0.003 | t | 141296 | GPQQLE                  | Capra<br>hircus                  |
| 1 | 1.00 | 1 | 1 | 0 | 0      | 0 | 0 | -0.003 | t | 151023 | LCKLRGVA<br>PLHLGKC     | Mus<br>musculu<br>s              |
| 1 | 1.00 | 1 | 1 | 0 | 0      | 0 | 0 | -0.003 | t | 137395 | EESEDEKR<br>RWGQRD<br>N | Homo<br>sapiens                  |
| 1 | 1.00 | 1 | 1 | 0 | 0      | 0 | 0 | -0.003 | t | 141534 | DRMNLQT<br>LRGY         | Mus<br>musculu<br>s              |
| 1 | 1.00 | 1 | 1 | 0 | -0.003 | 0 | 0 | -0.003 | t | 142480 | VAAVTEKL<br>RAGT        | Oryctola<br>gus<br>cuniculu<br>s |
| 1 | 1.00 | 1 | 1 | 0 | -0.003 | 0 | 0 | -0.003 | t | 142441 | LFSPWLRV<br>QNH         | Oryctola<br>gus<br>cuniculu<br>s |
| 1 | 1.00 | 1 | 1 | 0 | 0      | 0 | 0 | -0.003 | t | 138862 | KFPED                   | Mus<br>musculu<br>s              |
| 1 | 1.00 | 1 | 1 | 0 | 0      | 0 | 0 | -0.003 | t | 135492 | RAEIM                   | Oryctola<br>gus<br>cuniculu<br>s |

|   |      |   |   |   |   |   |   |        |   |        |                          |                      |
|---|------|---|---|---|---|---|---|--------|---|--------|--------------------------|----------------------|
| 1 | 1.00 | 1 | 1 | 0 | 0 | 0 | 0 | -0.003 | t | 131420 | FDGYWGY<br>S             | Homo<br>sapiens      |
| 1 | 1.00 | 1 | 1 | 0 | 0 | 0 | 0 | -0.003 | t | 130063 | TEVPFRL                  | Rattus<br>norvegicus |
| 1 | 1.00 | 1 | 1 | 0 | 0 | 0 | 0 | -0.003 | t | 125230 | RERRGIAL                 | Mus<br>musculus      |
| 1 | 1.00 | 1 | 1 | 0 | 0 | 0 | 0 | -0.003 | t | 133556 | EGPEYWD<br>RNT           | Mus<br>musculus      |
| 1 | 1.00 | 1 | 1 | 0 | 0 | 0 | 0 | -0.003 | t | 133135 | HGTQCLA<br>MGWGRV<br>GAH | Homo<br>sapiens      |
| 1 | 1.00 | 1 | 1 | 0 | 0 | 0 | 0 | -0.003 | t | 132014 | PQIVPEPM                 | Homo<br>sapiens      |
| 1 | 1.00 | 1 | 1 | 0 | 0 | 0 | 0 | -0.003 | t | 131876 | FAKANKQ<br>VCTDI         | Mus<br>musculus      |
| 1 | 1.00 | 1 | 1 | 0 | 0 | 0 | 0 | -0.003 | t | 132737 | WIRSTLRR<br>VEAKGRP      | Homo<br>sapiens      |
| 1 | 1.00 | 1 | 1 | 0 | 0 | 0 | 0 | -0.003 | t | 126068 | FVFEEF                   | Rattus<br>norvegicus |
| 1 | 1.00 | 1 | 1 | 0 | 0 | 0 | 0 | -0.003 | t | 117921 | IGIIDLIEKR<br>KFNQ       | Mus<br>musculus      |
| 1 | 1.00 | 1 | 1 | 0 | 0 | 0 | 0 | -0.003 | t | 124008 | DGVVLVD                  | Rattus<br>norvegicus |
| 1 | 1.00 | 1 | 1 | 0 | 0 | 0 | 0 | -0.003 | t | 120436 | DGTKVSIS                 | Rattus<br>norvegicus |
| 1 | 1.00 | 1 | 1 | 0 | 0 | 0 | 0 | -0.003 | t | 131836 | CAPGSCFP<br>GV           | Mus<br>musculus      |
| 1 | 1.00 | 1 | 1 | 0 | 0 | 0 | 0 | -0.003 | t | 131381 | CTYVLDP<br>E NL          | Mus<br>musculus      |
| 1 | 1.00 | 1 | 1 | 0 | 0 | 0 | 0 | -0.003 | t | 131967 | LRLDCRHE<br>N            | Mus<br>musculus      |
| 1 | 1.00 | 1 | 1 | 0 | 0 | 0 | 0 | -0.003 | t | 132194 | CATRLFPD<br>FFTRVAL      | Homo<br>sapiens      |

|   |      |   |   |   |        |   |   |        |   |        |                              |                                  |
|---|------|---|---|---|--------|---|---|--------|---|--------|------------------------------|----------------------------------|
| 1 | 1.00 | 1 | 1 | 0 | -0.003 | 0 | 0 | -0.003 | t | 118105 | RKGHFLLS<br>SKSGFWTI<br>WL   | Oryctola<br>gus<br>cuniculu<br>s |
| 1 | 1.00 | 1 | 1 | 0 | 0      | 0 | 0 | -0.003 | t | 124008 | DGVVLVD                      | Mus<br>musculu<br>s              |
| 1 | 1.00 | 1 | 1 | 0 | 0      | 0 | 0 | -0.003 | t | 129661 | PVDGVVL<br>VD                | Mus<br>musculu<br>s              |
| 1 | 1.00 | 1 | 1 | 0 | 0      | 0 | 0 | -0.003 | t | 121187 | DDALETDE                     | Mus<br>musculu<br>s              |
| 1 | 1.00 | 1 | 1 | 0 | 0      | 0 | 0 | -0.003 | t | 130019 | STIIKEGI                     | Rattus<br>norvegic<br>us         |
| 1 | 1.00 | 1 | 1 | 0 | 0      | 0 | 0 | -0.003 | t | 133926 | RSSYWVYS<br>PWRFISR          | Mus<br>musculu<br>s              |
| 1 | 1.00 | 1 | 1 | 0 | 0      | 0 | 0 | -0.003 | t | 118763 | CYGSFARP<br>MN               | Mus<br>musculu<br>s              |
| 1 | 1.00 | 1 | 1 | 0 | 0      | 0 | 0 | -0.003 | t | 117940 | KARIHPFHI<br>LIALETYKT<br>GH | Mus<br>musculu<br>s              |
| 1 | 1.00 | 1 | 1 | 0 | 0      | 0 | 0 | -0.003 | t | 122269 | ARQNLKD<br>AGE               | Mus<br>musculu<br>s              |
| 1 | 1.00 | 1 | 1 | 0 | 0      | 0 | 0 | -0.003 | t | 125453 | KDRLQGM<br>APAAGAD           | Homo<br>sapiens                  |
| 1 | 1.00 | 1 | 1 | 0 | 0      | 0 | 0 | -0.003 | t | 119331 | RTVLVSM<br>NYR               | Oryctola<br>gus<br>cuniculu<br>s |
| 1 | 1.00 | 1 | 1 | 0 | 0      | 0 | 0 | -0.003 | t | 117399 | VMIKSLPA<br>LNSPTVEE         | Oryctola<br>gus<br>cuniculu<br>s |
| 1 | 1.00 | 1 | 1 | 0 | 0      | 0 | 0 | -0.003 | t | 119025 | SWTDTDG<br>TN                | Mus<br>musculu<br>s              |
| 1 | 1.00 | 1 | 1 | 0 | 0      | 0 | 0 | -0.003 | t | 122892 | RSILPYGDS<br>MDRIE           | Homo<br>sapiens                  |
| 1 | 1.00 | 1 | 1 | 0 | 0      | 0 | 0 | -0.003 | t | 129301 | LQELEKDE<br>REQ              | Homo<br>sapiens                  |



|   |      |   |   |   |   |   |   |        |   |        |                              |                                  |
|---|------|---|---|---|---|---|---|--------|---|--------|------------------------------|----------------------------------|
| 1 | 1.00 | 1 | 1 | 0 | 0 | 0 | 0 | -0.003 | t | 122430 | KGLRRDL<br>ASREAK            | Mus<br>musculu<br>s              |
| 1 | 1.00 | 1 | 1 | 0 | 0 | 0 | 0 | -0.003 | t | 119658 | TYGIVLLSG<br>V               | Homo<br>sapiens                  |
| 1 | 1.00 | 1 | 1 | 0 | 0 | 0 | 0 | -0.003 | t | 125127 | LDPENLTL                     | Mus<br>musculu<br>s              |
| 1 | 1.00 | 1 | 1 | 0 | 0 | 0 | 0 | -0.003 | t | 117495 | ERDRKREK<br>RKPKS            | Mus<br>musculu<br>s              |
| 1 | 1.00 | 1 | 1 | 0 | 0 | 0 | 0 | -0.003 | t | 118867 | KLSQTSNV<br>DKEEEAV          | Mus<br>musculu<br>s              |
| 1 | 1.00 | 1 | 1 | 0 | 0 | 0 | 0 | -0.003 | t | 120869 | PGYRSISG<br>PDPRIRKT         | Mus<br>musculu<br>s              |
| 1 | 1.00 | 1 | 1 | 0 | 0 | 0 | 0 | -0.003 | t | 122269 | ARQNLKD<br>AGE               | Mus<br>musculu<br>s              |
| 1 | 1.00 | 1 | 1 | 0 | 0 | 0 | 0 | -0.003 | t | 129973 | SPRSFQKK<br>T                | Oryctola<br>gus<br>cuniculu<br>s |
| 1 | 1.00 | 1 | 1 | 0 | 0 | 0 | 0 | -0.003 | t | 117949 | KGHFLLSS<br>KSGFWT           | Mus<br>musculu<br>s              |
| 1 | 1.00 | 1 | 1 | 0 | 0 | 0 | 0 | -0.003 | t | 122741 | DWRDAEK<br>CDIC              | Mus<br>musculu<br>s              |
| 1 | 1.00 | 1 | 1 | 0 | 0 | 0 | 0 | -0.003 | t | 120319 | WTPPAIFK<br>SYCEIIVTH<br>FPF | Mus<br>musculu<br>s              |
| 1 | 1.00 | 1 | 1 | 0 | 0 | 0 | 0 | -0.003 | t | 119499 | MTFSVPIS                     | Mus<br>musculu<br>s              |
| 1 | 1.00 | 1 | 1 | 0 | 0 | 0 | 0 | -0.003 | t | 132982 | AHCLRDIP<br>QRLVNV           | Homo<br>sapiens                  |
| 1 | 1.00 | 1 | 1 | 0 | 0 | 0 | 0 | -0.003 | t | 130916 | KEDFDIYD<br>EDE              | Mus<br>musculu<br>s              |
| 1 | 1.00 | 1 | 1 | 0 | 0 | 0 | 0 | -0.003 | t | 133551 | EAPPPTLP<br>PDMAQVT<br>VGPG  | Mus<br>musculu<br>s              |
| 1 | 1.00 | 1 | 1 | 0 | 0 | 0 | 0 | -0.003 | t | 129732 | RERRGIAL<br>DGKI             | Mus<br>musculu<br>s              |

|   |      |   |   |   |   |   |   |        |   |        |                      |                       |
|---|------|---|---|---|---|---|---|--------|---|--------|----------------------|-----------------------|
| 1 | 1.00 | 1 | 1 | 0 | 0 | 0 | 0 | -0.003 | t | 131874 | EVFISAPR             | Homo sapiens          |
| 1 | 1.00 | 1 | 1 | 0 | 0 | 0 | 0 | -0.003 | t | 119573 | EWEDTYGIVL           | Homo sapiens          |
| 1 | 1.00 | 1 | 1 | 0 | 0 | 0 | 0 | -0.003 | t | 122932 | VCTPKSDEFNFCEDIMGYK  | Oryctolagus cuniculus |
| 1 | 1.00 | 1 | 1 | 0 | 0 | 0 | 0 | -0.003 | t | 133668 | QEGPEYWDNRNT         | Mus musculus          |
| 1 | 1.00 | 1 | 1 | 0 | 0 | 0 | 0 | -0.003 | t | 130518 | ITQSTQSFNDFTRVV      | Mus musculus          |
| 1 | 1.00 | 1 | 1 | 0 | 0 | 0 | 0 | -0.003 | t | 120082 | LPTDSGEK             | Rattus norvegicus     |
| 1 | 1.00 | 1 | 1 | 0 | 0 | 0 | 0 | -0.003 | t | 122569 | SFQDENFVFEEF         | Rattus norvegicus     |
| 1 | 1.00 | 1 | 1 | 0 | 0 | 0 | 0 | -0.003 | t | 118829 | GVLAGQASQLNA         | Mus musculus          |
| 1 | 1.00 | 1 | 1 | 0 | 0 | 0 | 0 | -0.003 | t | 130591 | RCTVYGKTVLCT         | Mus musculus          |
| 1 | 1.00 | 1 | 1 | 0 | 0 | 0 | 0 | -0.003 | t | 125385 | DSMDRIEKDRLQGMAPAAG  | Homo sapiens          |
| 1 | 1.00 | 1 | 1 | 0 | 0 | 0 | 0 | -0.003 | t | 131217 | EDISAYLL             | Mus musculus          |
| 1 | 1.00 | 1 | 1 | 0 | 0 | 0 | 0 | -0.003 | t | 121064 | WKHWVYYTCCPDTPYLDITY | Mus musculus          |
| 1 | 1.00 | 1 | 1 | 0 | 0 | 0 | 0 | -0.003 | t | 120677 | KHPEVKSAIEGIKYI      | Rattus norvegicus     |
| 1 | 1.00 | 1 | 1 | 0 | 0 | 0 | 0 | -0.003 | t | 130741 | ATGFVKKDAQ           | Mus musculus          |
| 1 | 1.00 | 1 | 1 | 0 | 0 | 0 | 0 | -0.003 | t | 117383 | TLHKAFKGSIFVVFDSIESA | Homo sapiens          |
| 1 | 1.00 | 1 | 1 | 0 | 0 | 0 | 0 | -0.003 | t | 98822  | IEAGAIGFKIHEDWG      | Mus musculus          |

|   |      |   |   |   |        |   |   |        |   |        |                           |                              |
|---|------|---|---|---|--------|---|---|--------|---|--------|---------------------------|------------------------------|
| 1 | 1.00 | 1 | 1 | 0 | 0      | 0 | 0 | -0.003 | t | 104850 | KEGILQYC<br>QEVYPELQ      | Mus<br>musculus              |
| 1 | 1.00 | 1 | 1 | 0 | 0      | 0 | 0 | -0.003 | t | 99922  | DAEFRHDS<br>GY            | Oryctola<br>gus<br>cuniculus |
| 1 | 1.00 | 1 | 1 | 0 | 0      | 0 | 0 | -0.003 | t | 106196 | YGLPREQA<br>RQLKNNN       | Homo<br>sapiens              |
| 1 | 1.00 | 1 | 1 | 0 | 0      | 0 | 0 | -0.003 | t | 105702 | CVYDQYG<br>TEFEDYSY<br>ES | Mus<br>musculus              |
| 1 | 1.00 | 1 | 1 | 0 | 0      | 0 | 0 | -0.003 | t | 106057 | REFSPRGQ<br>HGRRERA       | Homo<br>sapiens              |
| 1 | 1.00 | 1 | 1 | 0 | 0      | 0 | 0 | -0.003 | t | 103998 | IVKWDRD<br>M              | Mus<br>musculus              |
| 1 | 1.00 | 1 | 1 | 0 | -0.003 | 0 | 0 | -0.003 | t | 103309 | KKNGRILT<br>LPRSNPS       | Oryctola<br>gus<br>cuniculus |
| 1 | 1.00 | 1 | 1 | 0 | 0      | 0 | 0 | -0.003 | t | 115271 | GQKGRGS<br>RG             | Oryctola<br>gus<br>cuniculus |
| 1 | 1.00 | 1 | 1 | 0 | 0      | 0 | 0 | -0.003 | t | 102423 | FEYQD                     | Mus<br>musculus              |
| 1 | 1.00 | 1 | 1 | 0 | 0      | 0 | 0 | -0.003 | t | 103993 | IPPSLRITLE<br>DNEERMS     | Homo<br>sapiens              |
| 1 | 1.00 | 1 | 1 | 0 | 0      | 0 | 0 | -0.003 | t | 106076 | RILSPDRKR<br>RQQYER       | Homo<br>sapiens              |
| 1 | 1.00 | 1 | 1 | 0 | 0      | 0 | 0 | -0.003 | t | 117195 | DT                        | Mus<br>musculus              |
| 1 | 1.00 | 1 | 1 | 0 | 0      | 0 | 0 | -0.003 | t | 99922  | DAEFRHDS<br>GY            | Oryctola<br>gus<br>cuniculus |
| 1 | 1.00 | 1 | 1 | 0 | 0      | 0 | 0 | -0.003 | t | 103551 | RILTLPRSN<br>PS           | Oryctola<br>gus<br>cuniculus |
| 1 | 1.00 | 1 | 1 | 0 | 0      | 0 | 0 | -0.003 | t | 106495 | GYESVHHQ<br>KLVF          | Gallus<br>gallus             |

|   |      |   |   |   |       |   |   |        |   |        |                              |                                  |
|---|------|---|---|---|-------|---|---|--------|---|--------|------------------------------|----------------------------------|
| 1 | 1.00 | 1 | 1 | 0 | 0     | 0 | 0 | -0.003 | t | 106122 | SRRSLPYS<br>PYSPQT           | Homo<br>sapiens                  |
| 1 | 1.00 | 1 | 1 | 0 | 0     | 0 | 0 | -0.003 | t | 108078 | PTSPSGVE<br>EWIVTQV<br>VPGVA | Oryctola<br>gus<br>cuniculu<br>s |
| 1 | 1.00 | 1 | 1 | 0 | 0     | 0 | 0 | -0.003 | t | 103830 | CHAVKVG<br>NPSC              | Oryctola<br>gus<br>cuniculu<br>s |
| 1 | 1.00 | 1 | 1 | 0 | 0     | 0 | 0 | -0.003 | t | 103309 | KKNGRILT<br>LPRSNPS          | Oryctola<br>gus<br>cuniculu<br>s |
| 1 | 1.00 | 1 | 1 | 0 | 0     | 0 | 0 | -0.003 | t | 106779 | RKPLSPG<br>MTGR              | Oryctola<br>gus<br>cuniculu<br>s |
| 1 | 1.00 | 1 | 1 | 0 | 0.002 | 0 | 0 | -0.003 | t | 116971 | FAVLKLM<br>GRGTKF            | Rattus<br>norvegic<br>us         |
| 1 | 1.00 | 1 | 1 | 0 | 0     | 0 | 0 | -0.003 | t | 106398 | EQLAEVAV<br>SAKR             | Oryctola<br>gus<br>cuniculu<br>s |
| 1 | 1.00 | 1 | 1 | 0 | 0     | 0 | 0 | -0.003 | t | 106621 | LRKRL                        | Gallus<br>gallus                 |
| 1 | 1.00 | 1 | 1 | 0 | 0     | 0 | 0 | -0.003 | t | 105570 | VGGVVIA                      | Mus<br>musculu<br>s              |
| 1 | 1.00 | 1 | 1 | 0 | 0     | 0 | 0 | -0.003 | t | 108622 | SHQESTRG<br>RSRGRS           | Homo<br>sapiens                  |
| 1 | 1.00 | 1 | 1 | 0 | 0     | 0 | 0 | -0.003 | t | 107482 | KGEPGLPG<br>RGFPGFP          | Mus<br>musculu<br>s              |
| 1 | 1.00 | 1 | 1 | 0 | 0     | 0 | 0 | -0.003 | t | 107013 | YGASSRAT<br>GIPDR            | Oryctola<br>gus<br>cuniculu<br>s |
| 1 | 1.00 | 1 | 1 | 0 | 0     | 0 | 0 | -0.003 | t | 100992 | KSLSRHDH<br>IH HH            | Ovis<br>aries                    |
| 1 | 1.00 | 1 | 1 | 0 | 0     | 0 | 0 | -0.003 | t | 105685 | ASFKNIG<br>RNRSPDI           | Homo<br>sapiens                  |

|   |      |   |   |   |   |   |   |        |   |        |                              |                                  |
|---|------|---|---|---|---|---|---|--------|---|--------|------------------------------|----------------------------------|
| 1 | 1.00 | 1 | 1 | 0 | 0 | 0 | 0 | -0.003 | t | 101412 | WIRNNF                       | Mus<br>musculu<br>s              |
| 1 | 1.00 | 1 | 1 | 0 | 0 | 0 | 0 | -0.003 | t | 102861 | TQSDIDFLI<br>EEIERLGQ<br>DL  | Oryctola<br>gus<br>cuniculu<br>s |
| 1 | 1.00 | 1 | 1 | 0 | 0 | 0 | 0 | -0.003 | t | 70656  | VQTRHVV<br>QHRSRSES<br>SIESF | Oryctola<br>gus<br>cuniculu<br>s |
| 1 | 1.00 | 1 | 1 | 0 | 0 | 0 | 0 | -0.003 | t | 64455  | TISANGDK<br>DIG              | Rattus<br>norvegic<br>us         |
| 1 | 1.00 | 1 | 1 | 0 | 0 | 0 | 0 | -0.003 | t | 74436  | YKDGTLP<br>LSTKDLTTY         | Rattus<br>norvegic<br>us         |
| 1 | 1.00 | 1 | 1 | 0 | 0 | 0 | 0 | -0.003 | t | 67967  | VDGSDP                       | Mus<br>musculu<br>s              |
| 1 | 1.00 | 1 | 1 | 0 | 0 | 0 | 0 | -0.003 | t | 79858  | IEELQSNH<br>GV               | Mus<br>musculu<br>s              |
| 1 | 1.00 | 1 | 1 | 0 | 0 | 0 | 0 | -0.003 | t | 79042  | PKSKPFA                      | Mus<br>musculu<br>s              |
| 1 | 1.00 | 1 | 1 | 0 | 0 | 0 | 0 | -0.003 | t | 78373  | EMDDDET<br>EYE               | Mus<br>musculu<br>s              |
| 1 | 1.00 | 1 | 1 | 0 | 0 | 0 | 0 | -0.003 | t | 96367  | HSNLDHI                      | Homo<br>sapiens                  |
| 1 | 1.00 | 1 | 1 | 0 | 0 | 0 | 0 | -0.003 | t | 64086  | THTPLPRG<br>IGY              | Mus<br>musculu<br>s              |
| 1 | 1.00 | 1 | 1 | 0 | 0 | 0 | 0 | -0.003 | t | 78077  | YPYSMWK<br>NLWPS             | Mus<br>musculu<br>s              |
| 1 | 1.00 | 1 | 1 | 0 | 0 | 0 | 0 | -0.003 | t | 61549  | STDEPAGE<br>SA               | Oryctola<br>gus<br>cuniculu<br>s |

|   |      |   |   |   |       |   |   |        |   |       |                             |                                  |
|---|------|---|---|---|-------|---|---|--------|---|-------|-----------------------------|----------------------------------|
| 1 | 1.00 | 1 | 1 | 0 | 0     | 0 | 0 | -0.003 | t | 95524 | KRQIYTDIE<br>MNRLGK         | Mus<br>musculu<br>s              |
| 1 | 1.00 | 1 | 1 | 0 | 0     | 0 | 0 | -0.003 | t | 60526 | SQPNT EQS<br>PAIVLPF        | Mus<br>musculu<br>s              |
| 1 | 1.00 | 1 | 1 | 0 | 0     | 0 | 0 | -0.003 | t | 66976 | TVDNPAST<br>TNKDKLFA<br>VWK | Oryctola<br>gus<br>cuniculu<br>s |
| 1 | 1.00 | 1 | 1 | 0 | 0     | 0 | 0 | -0.003 | t | 61549 | STDEPAGE<br>SA              | Oryctola<br>gus<br>cuniculu<br>s |
| 1 | 1.00 | 1 | 1 | 0 | 0.002 | 0 | 0 | -0.003 | t | 66976 | TVDNPAST<br>TNKDKLFA<br>VWK | Rattus<br>norvegic<br>us         |
| 1 | 1.00 | 1 | 1 | 0 | 0     | 0 | 0 | -0.003 | t | 92586 | ENPSQFYE<br>RL              | Oryctola<br>gus<br>cuniculu<br>s |
| 1 | 1.00 | 1 | 1 | 0 | 0     | 0 | 0 | -0.003 | t | 70387 | VPNLRGDL<br>QV              | Cavia<br>porcellu<br>s           |
| 1 | 1.00 | 1 | 1 | 0 | 0     | 0 | 0 | -0.003 | t | 65996 | TRAPRREE<br>LEWDD E<br>H    | Oryctola<br>gus<br>cuniculu<br>s |
| 1 | 1.00 | 1 | 1 | 0 | 0     | 0 | 0 | -0.003 | t | 80102 | YDDAASES<br>SDDDDIDA<br>LI  | Mus<br>musculu<br>s              |
| 1 | 1.00 | 1 | 1 | 0 | 0     | 0 | 0 | -0.003 | t | 63037 | TAVSPTTL<br>R               | Oryctola<br>gus<br>cuniculu<br>s |
| 1 | 1.00 | 1 | 1 | 0 | 0     | 0 | 0 | -0.003 | t | 76290 | YVHDNC                      | Mus<br>musculu<br>s              |
| 1 | 1.00 | 1 | 1 | 0 | 0     | 0 | 0 | -0.003 | t | 97348 | GLFGA IAG<br>FIEGGW         | Oryctola<br>gus<br>cuniculu<br>s |

|   |      |   |   |   |        |   |   |        |   |       |                           |                                  |
|---|------|---|---|---|--------|---|---|--------|---|-------|---------------------------|----------------------------------|
| 1 | 1.00 | 1 | 1 | 0 | 0      | 0 | 0 | -0.003 | t | 71798 | VVQAMYV<br>PPGAPNP<br>KE  | Oryctola<br>gus<br>cuniculu<br>s |
| 1 | 1.00 | 1 | 1 | 0 | 0      | 0 | 0 | -0.003 | t | 63758 | TFTNPVVS<br>TTQWSAP       | Oryctola<br>gus<br>cuniculu<br>s |
| 1 | 1.00 | 1 | 1 | 0 | 0      | 0 | 0 | -0.003 | t | 96457 | KGTVNLT<br>WSR            | Mus<br>musculu<br>s              |
| 1 | 1.00 | 1 | 1 | 0 | 0      | 0 | 0 | -0.003 | t | 70387 | VPNLRGDL<br>QV            | Cavia<br>porcellu<br>s           |
| 1 | 1.00 | 1 | 1 | 0 | 0      | 0 | 0 | -0.003 | t | 80063 | VDEDEDSD                  | Mus<br>musculu<br>s              |
| 1 | 1.00 | 1 | 1 | 0 | -0.003 | 0 | 0 | -0.003 | t | 78940 | CRRHNYG<br>FWVC           | Oryctola<br>gus<br>cuniculu<br>s |
| 1 | 1.00 | 1 | 1 | 0 | 0      | 0 | 0 | -0.003 | t | 65050 | TLRVYK                    | Mus<br>musculu<br>s              |
| 1 | 1.00 | 1 | 1 | 0 | 0      | 0 | 0 | -0.003 | t | 63037 | TAVSPTTL<br>R             | Mus<br>musculu<br>s              |
| 1 | 1.00 | 1 | 1 | 0 | 0      | 0 | 0 | -0.003 | t | 94979 | YNKRFPGF<br>VSP           | Oryctola<br>gus<br>cuniculu<br>s |
| 1 | 1.00 | 1 | 1 | 0 | 0.002  | 0 | 0 | -0.003 | t | 74436 | YKDGTLTP<br>LSTKDLTTY     | Rattus<br>norvegic<br>us         |
| 1 | 1.00 | 1 | 1 | 0 | 0      | 0 | 0 | -0.003 | t | 97256 | EGAKGEN<br>KRPNDKA<br>GEV | Mus<br>musculu<br>s              |
| 1 | 1.00 | 1 | 1 | 0 | 0      | 0 | 0 | -0.003 | t | 76523 | YYIPLEAVK<br>F            | Homo<br>sapiens                  |
| 1 | 1.00 | 1 | 1 | 0 | 0      | 0 | 0 | -0.003 | t | 79926 | MASMTG<br>GQQMG           | Oryctola<br>gus<br>cuniculu<br>s |

|   |      |   |   |   |        |   |   |        |   |       |                               |                                  |
|---|------|---|---|---|--------|---|---|--------|---|-------|-------------------------------|----------------------------------|
| 1 | 1.00 | 1 | 1 | 0 | 0      | 0 | 0 | -0.003 | t | 63037 | TAVSPTTL<br>R                 | Mus<br>musculu<br>s              |
| 1 | 1.00 | 1 | 1 | 0 | 0      | 0 | 0 | -0.003 | t | 79584 | KGDKAQIE<br>KRIQEIIIEQ<br>LDV | Mus<br>musculu<br>s              |
| 1 | 1.00 | 1 | 1 | 0 | 0      | 0 | 0 | -0.003 | t | 74614 | YLEAFY                        | Mus<br>musculu<br>s              |
| 1 | 1.00 | 1 | 1 | 0 | 0      | 0 | 0 | -0.003 | t | 94501 | EKQISDAS<br>RQGLRRD           | Mus<br>musculu<br>s              |
| 1 | 1.00 | 1 | 1 | 0 | 0      | 0 | 0 | -0.003 | t | 70656 | VQTRHVV<br>QHRSRSES<br>SIESF  | Rattus<br>norvegic<br>us         |
| 1 | 1.00 | 1 | 1 | 0 | -0.003 | 0 | 0 | -0.003 | t | 78939 | CINHGRY<br>WVC                | Oryctola<br>gus<br>cuniculu<br>s |
| 1 | 1.00 | 1 | 1 | 0 | 0      | 0 | 0 | -0.003 | t | 65360 | TNLEDPAS<br>RDLVVS            | Mus<br>musculu<br>s              |
| 1 | 1.00 | 1 | 1 | 0 | 0      | 0 | 0 | -0.003 | t | 64454 | TISADSKKT<br>KDLVFL           | Mus<br>musculu<br>s              |
| 1 | 1.00 | 1 | 1 | 0 | 0      | 0 | 0 | -0.003 | t | 63391 | TEHRDYHP<br>QQRG              | Mus<br>musculu<br>s              |
| 1 | 1.00 | 1 | 1 | 0 | 0      | 0 | 0 | -0.003 | t | 94564 | KIAKEQ                        | Mus<br>musculu<br>s              |
| 1 | 1.00 | 1 | 1 | 0 | -0.008 | 0 | 0 | -0.003 | t | 97231 | CNTKCQTP                      | Mus<br>musculu<br>s              |
| 1 | 1.00 | 1 | 1 | 0 | 0      | 0 | 0 | -0.003 | t | 72249 | WAP                           | Mus<br>musculu<br>s              |
| 1 | 1.00 | 1 | 1 | 0 | 0      | 0 | 0 | -0.003 | t | 74436 | YKDGTLP<br>LSTKDLTTY          | Oryctola<br>gus<br>cuniculu<br>s |
| 1 | 1.00 | 1 | 1 | 0 | 0      | 0 | 0 | -0.003 | t | 61686 | STKAAKKP<br>EAKREAI           | Mus<br>musculu<br>s              |
| 1 | 1.00 | 1 | 1 | 0 | 0      | 0 | 0 | -0.003 | t | 79153 | ALQREAAE<br>RSEDEIK           | Oryctola<br>gus<br>cuniculu<br>s |



|   |      |   |   |   |       |   |   |        |   |       |                              |                      |
|---|------|---|---|---|-------|---|---|--------|---|-------|------------------------------|----------------------|
| 1 | 1.00 | 1 | 1 | 0 | 0     | 0 | 0 | -0.003 | t | 37172 | LLDPSFDY<br>FQLYTTS          | Mus<br>musculus      |
| 1 | 1.00 | 1 | 1 | 0 | 0     | 0 | 0 | -0.003 | t | 44474 | NKDKLFAV<br>WK               | Rattus<br>norvegicus |
| 1 | 1.00 | 1 | 1 | 0 | 0     | 0 | 0 | -0.003 | t | 39164 | LRPGPVSQ<br>PYHHWDT<br>DK    | Mus<br>musculus      |
| 1 | 1.00 | 1 | 1 | 0 | 0     | 0 | 0 | -0.003 | t | 48595 | PNAN                         | Mus<br>musculus      |
| 1 | 1.00 | 1 | 1 | 0 | 0     | 0 | 0 | -0.003 | t | 48933 | PPTAPPLL<br>PHSNL            | Homo<br>sapiens      |
| 1 | 1.00 | 1 | 1 | 0 | 0     | 0 | 0 | -0.003 | t | 48996 | PQFKPQ                       | Mus<br>musculus      |
| 1 | 1.00 | 1 | 1 | 0 | 0     | 0 | 0 | -0.003 | t | 39169 | LRPTFDTR<br>LMRLEDE<br>MKEGR | Mus<br>musculus      |
| 1 | 1.00 | 1 | 1 | 0 | 0     | 0 | 0 | -0.003 | t | 47859 | PHWA                         | Mus<br>musculus      |
| 1 | 1.00 | 1 | 1 | 0 | 0     | 0 | 0 | -0.003 | t | 38214 | LNFGQTG<br>DADSV             | Mus<br>musculus      |
| 1 | 1.00 | 1 | 1 | 0 | 0     | 0 | 0 | -0.003 | t | 45033 | NMTVM                        | Homo<br>sapiens      |
| 1 | 1.00 | 1 | 1 | 0 | 0     | 0 | 0 | -0.003 | t | 44498 | NKGVNPD<br>E                 | Mus<br>musculus      |
| 1 | 1.00 | 1 | 1 | 0 | 0.002 | 0 | 0 | -0.003 | t | 44474 | NKDKLFAV<br>WK               | Rattus<br>norvegicus |
| 1 | 1.00 | 1 | 1 | 0 | 0     | 0 | 0 | -0.003 | t | 50609 | QEGVQQE<br>GA                | Mus<br>musculus      |
| 1 | 1.00 | 1 | 1 | 0 | 0     | 0 | 0 | -0.003 | t | 50901 | QGLRGEE<br>MEEMV             | Homo<br>sapiens      |

|   |      |   |   |   |        |   |   |        |   |       |                              |                                  |
|---|------|---|---|---|--------|---|---|--------|---|-------|------------------------------|----------------------------------|
| 1 | 1.00 | 1 | 1 | 0 | 0      | 0 | 0 | -0.003 | t | 56373 | RVNQVAE<br>VLQL              | Mus<br>musculu<br>s              |
| 1 | 1.00 | 1 | 1 | 0 | 0      | 0 | 0 | -0.003 | t | 44559 | NKNLQEEI<br>SDLTEQLG<br>SS   | Homo<br>sapiens                  |
| 1 | 1.00 | 1 | 1 | 0 | 0.008  | 0 | 0 | -0.003 | t | 44221 | NIETVIEFQ<br>QKNNRLL         | Cavia<br>porcellu<br>s           |
| 1 | 1.00 | 1 | 1 | 0 | 0      | 0 | 0 | -0.003 | t | 39070 | LREGVTLG<br>VGASFDT<br>QKL   | Oryctola<br>gus<br>cuniculu<br>s |
| 1 | 1.00 | 1 | 1 | 0 | -0.003 | 0 | 0 | -0.003 | t | 51252 | QKSKQNIG<br>ALKQEL           | Oryctola<br>gus<br>cuniculu<br>s |
| 1 | 1.00 | 1 | 1 | 0 | 0      | 0 | 0 | -0.003 | t | 56807 | SAHGTSTG<br>VRGP             | Mus<br>musculu<br>s              |
| 1 | 1.00 | 1 | 1 | 0 | 0      | 0 | 0 | -0.003 | t | 51853 | QPHGGG<br>W                  | Mus<br>musculu<br>s              |
| 1 | 1.00 | 1 | 1 | 0 | 0      | 0 | 0 | -0.003 | t | 51854 | QPHGGSW                      | Mus<br>musculu<br>s              |
| 1 | 1.00 | 1 | 1 | 0 | 0      | 0 | 0 | -0.003 | t | 43242 | NANPNAN<br>PNANP             | Oryctola<br>gus<br>cuniculu<br>s |
| 1 | 1.00 | 1 | 1 | 0 | 0      | 0 | 0 | -0.003 | t | 43512 | NDPPPPN<br>PNDPAPP<br>QG     | Mus<br>musculu<br>s              |
| 1 | 1.00 | 1 | 1 | 0 | 0      | 0 | 0 | -0.003 | t | 45627 | NQSLDLAE<br>QELVDCAS<br>QHGC | Oryctola<br>gus<br>cuniculu<br>s |
| 1 | 1.00 | 1 | 1 | 0 | 0      | 0 | 0 | -0.003 | t | 38304 | LNPKTNK<br>WEDK              | Homo<br>sapiens                  |
| 1 | 1.00 | 1 | 1 | 0 | 0      | 0 | 0 | -0.003 | t | 58511 | SIFYTYGTA<br>PARISVPY<br>VGI | Rattus<br>norvegic<br>us         |
| 1 | 1.00 | 1 | 1 | 0 | 0      | 0 | 0 | -0.003 | t | 58511 | SIFYTYGTA<br>PARISVPY<br>VGI | Oryctola<br>gus<br>cuniculu<br>s |

|   |      |   |   |   |   |   |   |        |   |       |                              |                                  |
|---|------|---|---|---|---|---|---|--------|---|-------|------------------------------|----------------------------------|
| 1 | 1.00 | 1 | 1 | 0 | 0 | 0 | 0 | -0.003 | t | 53355 | RDGQLTIK<br>AERTEQKD<br>FDGR | Mus<br>musculu<br>s              |
| 1 | 1.00 | 1 | 1 | 0 | 0 | 0 | 0 | -0.003 | t | 43481 | NDLALPW<br>KHEGAQN<br>WNNAR  | Mus<br>musculu<br>s              |
| 1 | 1.00 | 1 | 1 | 0 | 0 | 0 | 0 | -0.003 | t | 55115 | RPAPPKPT<br>PQP              | Mus<br>musculu<br>s              |
| 1 | 1.00 | 1 | 1 | 0 | 0 | 0 | 0 | -0.003 | t | 41169 | MAVPAFS<br>DIAKSAND<br>LLNKD | Oryctola<br>gus<br>cuniculu<br>s |
| 1 | 1.00 | 1 | 1 | 0 | 0 | 0 | 0 | -0.003 | t | 57726 | SFANTNTN<br>TNSK             | Mus<br>musculu<br>s              |
| 1 | 1.00 | 1 | 1 | 0 | 0 | 0 | 0 | -0.003 | t | 45932 | NSNNPDW<br>DF                | Mus<br>musculu<br>s              |
| 1 | 1.00 | 1 | 1 | 0 | 0 | 0 | 0 | -0.003 | t | 60013 | SPDDPAFR<br>FAPYFTP          | Mus<br>musculu<br>s              |
| 1 | 1.00 | 1 | 1 | 0 | 0 | 0 | 0 | -0.003 | t | 50180 | PYVEPTAP<br>QVL              | Oryctola<br>gus<br>cuniculu<br>s |
| 1 | 1.00 | 1 | 1 | 0 | 0 | 0 | 0 | -0.003 | t | 44035 | NGNATPQ<br>LTKNA             | Homo<br>sapiens                  |
| 1 | 1.00 | 1 | 1 | 0 | 0 | 0 | 0 | -0.003 | t | 42717 | MSWQAY<br>V                  | Mus<br>musculu<br>s              |
| 1 | 1.00 | 1 | 1 | 0 | 0 | 0 | 0 | -0.003 | t | 44474 | NKDKLFAV<br>WK               | Oryctola<br>gus<br>cuniculu<br>s |
| 1 | 1.00 | 1 | 1 | 0 | 0 | 0 | 0 | -0.003 | t | 43551 | NEAALKEL<br>GEVAVHK<br>DS    | Oryctola<br>gus<br>cuniculu<br>s |
| 1 | 1.00 | 1 | 1 | 0 | 0 | 0 | 0 | -0.003 | t | 55671 | RRPFNIGI<br>NNQQ             | Homo<br>sapiens                  |

|   |      |   |   |   |   |   |   |        |   |       |                              |                                  |
|---|------|---|---|---|---|---|---|--------|---|-------|------------------------------|----------------------------------|
| 1 | 1.00 | 1 | 1 | 0 | 0 | 0 | 0 | -0.003 | t | 57618 | SERVQLLH<br>SQNTSLIN<br>QK   | Homo<br>sapiens                  |
| 1 | 1.00 | 1 | 1 | 0 | 0 | 0 | 0 | -0.003 | t | 46777 | PAEGEK                       | Mus<br>musculu<br>s              |
| 1 | 1.00 | 1 | 1 | 0 | 0 | 0 | 0 | -0.003 | t | 42400 | MQQLEND<br>LDQVQESL<br>LK    | Homo<br>sapiens                  |
| 1 | 1.00 | 1 | 1 | 0 | 0 | 0 | 0 | -0.003 | t | 50180 | PYVEPTAP<br>QVL              | Oryctola<br>gus<br>cuniculu<br>s |
| 1 | 1.00 | 1 | 1 | 0 | 0 | 0 | 0 | -0.003 | t | 56102 | RTLDQQYK<br>EVKRETDL<br>SHVQ | Mus<br>musculu<br>s              |
| 1 | 1.00 | 1 | 1 | 0 | 0 | 0 | 0 | -0.003 | t | 47650 | PGFMFSR<br>PSDPAFAA          | Mus<br>musculu<br>s              |
| 1 | 1.00 | 1 | 1 | 0 | 0 | 0 | 0 | -0.003 | t | 47651 | PGFMGRS<br>RPSDPAFA          | Mus<br>musculu<br>s              |
| 1 | 1.00 | 1 | 1 | 0 | 0 | 0 | 0 | -0.003 | t | 41870 | MKNYLSF<br>GMFALL            | Mus<br>musculu<br>s              |
| 1 | 1.00 | 1 | 1 | 0 | 0 | 0 | 0 | -0.003 | t | 38522 | LPHSNL                       | Homo<br>sapiens                  |
| 1 | 1.00 | 1 | 1 | 0 | 0 | 0 | 0 | -0.003 | t | 48906 | PPRRVS                       | Mus<br>musculu<br>s              |
| 1 | 1.00 | 1 | 1 | 0 | 0 | 0 | 0 | -0.003 | t | 10336 | DTFNPVYP<br>YDTE             | Mus<br>musculu<br>s              |
| 1 | 1.00 | 1 | 1 | 0 | 0 | 0 | 0 | -0.003 | t | 12632 | EKASVPGG<br>GDMGGM<br>DF     | Mus<br>musculu<br>s              |
| 1 | 1.00 | 1 | 1 | 0 | 0 | 0 | 0 | -0.003 | t | 12632 | EKASVPGG<br>GDMGGM<br>DF     | Mus<br>musculu<br>s              |
| 1 | 1.00 | 1 | 1 | 0 | 0 | 0 | 0 | -0.003 | t | 24168 | HKYSWK                       | Mus<br>musculu<br>s              |

|   |      |   |   |   |        |   |   |        |   |       |                            |                       |
|---|------|---|---|---|--------|---|---|--------|---|-------|----------------------------|-----------------------|
| 1 | 1.00 | 1 | 1 | 0 | 0      | 0 | 0 | -0.003 | t | 17350 | FPFPRP                     | Mus musculus          |
| 1 | 1.00 | 1 | 1 | 0 | 0      | 0 | 0 | -0.003 | t | 17360 | FPQFKPEE                   | Mus musculus          |
| 1 | 1.00 | 1 | 1 | 0 | 0      | 0 | 0 | -0.003 | t | 25647 | IDPSFYWA<br>PCRFSHC        | Mus musculus          |
| 1 | 1.00 | 1 | 1 | 0 | 0      | 0 | 0 | -0.003 | t | 35852 | LFIG                       | Mus musculus          |
| 1 | 1.00 | 1 | 1 | 0 | 0      | 0 | 0 | -0.003 | t | 28277 | IRECTGLA<br>WEWWRT<br>V    | Mus musculus          |
| 1 | 1.00 | 1 | 1 | 0 | 0      | 0 | 0 | -0.003 | t | 11571 | EEEDDDM<br>GFGFLD          | Homo sapiens          |
| 1 | 1.00 | 1 | 1 | 0 | 0      | 0 | 0 | -0.003 | t | 11570 | EEEDDD                     | Mus musculus          |
| 1 | 1.00 | 1 | 1 | 0 | 0      | 0 | 0 | -0.003 | t | 16496 | FLAEEADR<br>K              | Homo sapiens          |
| 1 | 1.00 | 1 | 1 | 0 | 0      | 0 | 0 | -0.003 | t | 22357 | GSGVRGD<br>FG              | Cavia porcellus       |
| 1 | 1.00 | 1 | 1 | 0 | -0.003 | 0 | 0 | -0.003 | t | 36045 | LGAARGYT<br>FGAC           | Oryctolagus cuniculus |
| 1 | 1.00 | 1 | 1 | 0 | 0      | 0 | 0 | -0.003 | t | 36353 | LGWLWG                     | Mus musculus          |
| 1 | 1.00 | 1 | 1 | 0 | 0      | 0 | 0 | -0.003 | t | 26330 | IGTRYLTR                   | Mus musculus          |
| 1 | 1.00 | 1 | 1 | 0 | 0      | 0 | 0 | -0.003 | t | 36045 | LGAARGYT<br>FGAC           | Mus musculus          |
| 1 | 1.00 | 1 | 1 | 0 | 0      | 0 | 0 | -0.003 | t | 27965 | IPNPLLGL<br>D              | Mus musculus          |
| 1 | 1.00 | 1 | 1 | 0 | 0      | 0 | 0 | -0.003 | t | 11532 | EECQLPSL<br>KIFIAGNSA<br>Y | Mus musculus          |

|   |      |   |   |   |       |   |   |        |   |       |                          |                          |
|---|------|---|---|---|-------|---|---|--------|---|-------|--------------------------|--------------------------|
| 1 | 1.00 | 1 | 1 | 0 | 0.002 | 0 | 0 | -0.003 | t | 21816 | GPVEESVE<br>RAMVRVA      | Rattus<br>norvegicus     |
| 1 | 1.00 | 1 | 1 | 0 | 0     | 0 | 0 | -0.003 | t | 10614 | DVIAILPVD<br>ELKALFQEKLE | Mus<br>musculus          |
| 1 | 1.00 | 1 | 1 | 0 | 0     | 0 | 0 | -0.003 | t | 11081 | EAIPALTA<br>VETGHTSQV    | Oryctolagus<br>cuniculus |
| 1 | 1.00 | 1 | 1 | 0 | 0     | 0 | 0 | -0.003 | t | 20129 | GHETQI                   | Mus<br>musculus          |
| 1 | 1.00 | 1 | 1 | 0 | 0     | 0 | 0 | -0.003 | t | 16101 | FHENWPS                  | Mus<br>musculus          |
| 1 | 1.00 | 1 | 1 | 0 | 0     | 0 | 0 | -0.003 | t | 31105 | KHFRETEV                 | Mus<br>musculus          |
| 1 | 1.00 | 1 | 1 | 0 | 0     | 0 | 0 | -0.003 | t | 32808 | KPNLSSKR<br>SELSQLSMYRVF | Mus<br>musculus          |
| 1 | 1.00 | 1 | 1 | 0 | 0     | 0 | 0 | -0.003 | t | 11216 | EAVRRHARAYNATVI          | Mus<br>musculus          |
| 1 | 1.00 | 1 | 1 | 0 | 0     | 0 | 0 | -0.003 | t | 11815 | EENVEENV<br>EENVEENV     | Mus<br>musculus          |
| 1 | 1.00 | 1 | 1 | 0 | 0     | 0 | 0 | -0.003 | t | 17262 | FPCDRLSG<br>YWERGIPSPCVR | Homo<br>sapiens          |
| 1 | 1.00 | 1 | 1 | 0 | 0     | 0 | 0 | -0.003 | t | 30302 | KEALISLT<br>RGKLYTQQA    | Homo<br>sapiens          |
| 1 | 1.00 | 1 | 1 | 0 | 0     | 0 | 0 | -0.003 | t | 35787 | LFAAFPSF<br>AGLRPTFDTRLM | Mus<br>musculus          |
| 1 | 1.00 | 1 | 1 | 0 | 0     | 0 | 0 | -0.003 | t | 34502 | KYLGFBVQDA<br>AA         | Homo<br>sapiens          |
| 1 | 1.00 | 1 | 1 | 0 | 0     | 0 | 0 | -0.003 | t | 33234 | KRVLEPLGL                | Mus<br>musculus          |

|   |      |   |   |   |       |   |   |        |   |       |                              |                                  |
|---|------|---|---|---|-------|---|---|--------|---|-------|------------------------------|----------------------------------|
| 1 | 1.00 | 1 | 1 | 0 | 0     | 0 | 0 | -0.003 | t | 12307 | EGVQQEG<br>AQQPA             | Homo<br>sapiens                  |
| 1 | 1.00 | 1 | 1 | 0 | 0     | 0 | 0 | -0.003 | t | 23125 | GVRLLSGV<br>FSDPAFA          | Mus<br>musculu<br>s              |
| 1 | 1.00 | 1 | 1 | 0 | 0     | 0 | 0 | -0.003 | t | 18036 | FTPFYYQS<br>SRTR             | Mus<br>musculu<br>s              |
| 1 | 1.00 | 1 | 1 | 0 | 0     | 0 | 0 | -0.003 | t | 19728 | GGFSSDPG<br>FLLRPRG          | Mus<br>musculu<br>s              |
| 1 | 1.00 | 1 | 1 | 0 | 0     | 0 | 0 | -0.003 | t | 19729 | GGFSSDPG<br>FLLRPRV          | Mus<br>musculu<br>s              |
| 1 | 1.00 | 1 | 1 | 0 | 0     | 0 | 0 | -0.003 | t | 21856 | GQDLTAH                      | Mus<br>musculu<br>s              |
| 1 | 1.00 | 1 | 1 | 0 | 0     | 0 | 0 | -0.003 | t | 33222 | KRTISIWG<br>T                | Mus<br>musculu<br>s              |
| 1 | 1.00 | 1 | 1 | 0 | 0     | 0 | 0 | -0.003 | t | 14809 | EVLYLKPLA<br>GVYRSLKK<br>QLE | Mus<br>musculu<br>s              |
| 1 | 1.00 | 1 | 1 | 0 | 0     | 0 | 0 | -0.003 | t | 19737 | GGGAGAG<br>GAGAGGG<br>GR     | Oryctola<br>gus<br>cuniculu<br>s |
| 1 | 1.00 | 1 | 1 | 0 | 0     | 0 | 0 | -0.003 | t | 22357 | GSGVRGD<br>FG                | Cavia<br>porcellu<br>s           |
| 1 | 1.00 | 1 | 1 | 0 | 0     | 0 | 0 | -0.003 | t | 31916 | KLILAYTPP<br>GARGPQD         | Oryctola<br>gus<br>cuniculu<br>s |
| 1 | 1.00 | 1 | 1 | 0 | 0     | 0 | 0 | -0.003 | t | 10040 | DRRCQSQ<br>LER               | Homo<br>sapiens                  |
| 1 | 1.00 | 1 | 1 | 0 | 0     | 0 | 0 | -0.003 | t | 9589  | DPAFSLNS<br>RAFPAPF          | Mus<br>musculu<br>s              |
| 1 | 1.00 | 1 | 1 | 0 | 0.002 | 0 | 0 | -0.003 | t | 6832  | CPRPPRAV<br>AYYGPGV<br>DYK   | Rattus<br>norvegic<br>us         |

|   |      |   |   |   |   |   |   |        |   |       |                              |                                  |
|---|------|---|---|---|---|---|---|--------|---|-------|------------------------------|----------------------------------|
| 1 | 1.00 | 1 | 1 | 0 | 0 | 0 | 0 | -0.003 | t | 3886  | APVDSVFD<br>RAFSAYL          | Mus<br>musculu<br>s              |
| 1 | 1.00 | 1 | 1 | 0 | 0 | 0 | 0 | -0.003 | t | 279   | AALGDSLY<br>GAASLNDF<br>GILA | Oryctola<br>gus<br>cuniculu<br>s |
| 1 | 1.00 | 1 | 1 | 0 | 0 | 0 | 0 | -0.003 | t | 6832  | CPRPPRAV<br>AAYGPGV<br>DYK   | Rattus<br>norvegic<br>us         |
| 1 | 1.00 | 1 | 1 | 0 | 0 | 0 | 0 | -0.003 | t | 3698  | APPQA                        | Mus<br>musculu<br>s              |
| 1 | 1.00 | 1 | 1 | 0 | 0 | 0 | 0 | -0.003 | t | 6763  | CPFLKQNE<br>PEDIDCW          | Mus<br>musculu<br>s              |
| 1 | 1.00 | 1 | 1 | 0 | 0 | 0 | 0 | -0.003 | t | 3693  | APPPPEHR<br>GGPEEFEG<br>AGDG | Mus<br>musculu<br>s              |
| 1 | 1.00 | 1 | 1 | 0 | 0 | 0 | 0 | -0.003 | t | 6832  | CPRPPRAV<br>AAYGPGV<br>DYK   | Oryctola<br>gus<br>cuniculu<br>s |
| 1 | 1.00 | 1 | 1 | 0 | 0 | 0 | 0 | -0.003 | t | 9588  | DPAFSL                       | Mus<br>musculu<br>s              |
| 1 | 1.00 | 1 | 1 | 0 | 0 | 0 | 0 | -0.003 | t | 915   | AEGDDPA<br>KA                | Mus<br>musculu<br>s              |
| 1 | 1.00 | 1 | 1 | 0 | 0 | 0 | 0 | -0.003 | t | 1433  | AGAGGGA<br>GGAGAGG<br>GAGGAG | Oryctola<br>gus<br>cuniculu<br>s |
| 1 | 1.00 | 1 | 1 | 0 | 0 | 0 | 0 | -0.003 | t | 6093  | CDCDRTA<br>A                 | Mus<br>musculu<br>s              |
| 1 | 1.00 | 1 | 1 | 0 | 0 | 0 | 0 | -0.003 | t | 6226  | CFGNSEY                      | Mus<br>musculu<br>s              |
| 1 | 1.00 | 1 | 1 | 0 | 0 | 0 | 0 | -0.003 | t | 10227 | DSSAHGTP<br>STPA             | Mus<br>musculu<br>s              |
| 1 | 1.00 | 1 | 1 | 0 | 0 | 0 | 0 | -0.003 | t | 8132  | DEQFIPK                      | Mus<br>musculu<br>s              |



|   |      |   |   |   |        |   |   |        |   |      |                            |                                  |
|---|------|---|---|---|--------|---|---|--------|---|------|----------------------------|----------------------------------|
| 1 | 1.00 | 1 | 1 | 0 | -0.003 | 0 | 0 | -0.003 | t | 4225 | ARQPYGFF<br>LETEEVYQ<br>PG | Oryctola<br>gus<br>cuniculu<br>s |
| 1 | 1.00 | 1 | 1 | 0 | 0      | 0 | 0 | -0.003 | t | 9611 | DPDKDVDI<br>MV             | Mus<br>musculu<br>s              |
| 1 | 1.00 | 1 | 1 | 0 | 0      | 0 | 0 | -0.003 | t | 7313 | CVTIMTVD<br>NPASTTNK<br>DK | Oryctola<br>gus<br>cuniculu<br>s |
| 1 | 1.00 | 1 | 1 | 0 | 0      | 0 | 0 | -0.003 | t | 7313 | CVTIMTVD<br>NPASTTNK<br>DK | Rattus<br>norvegic<br>us         |
| 1 | 1.00 | 1 | 1 | 0 | 0      | 0 | 0 | -0.003 | t | 8273 | DFGSLAPR<br>VA             | Cavia<br>porcellu<br>s           |
| 1 | 1.00 | 1 | 1 | 0 | 0      | 0 | 0 | -0.003 | t | 6632 | CLTFGRET<br>VIEY           | Mus<br>musculu<br>s              |
| 1 | 1.00 | 1 | 1 | 0 | 0      | 0 | 0 | -0.003 | t | 6249 | CFPYCYP<br>ESA             | Mus<br>musculu<br>s              |
| 1 | 1.00 | 1 | 1 | 0 | 0      | 0 | 0 | -0.003 | t | 9520 | DNNQTSP                    | Mus<br>musculu<br>s              |
| 1 | 1.00 | 1 | 1 | 0 | 0      | 0 | 0 | -0.003 | t | 1367 | AFNQFGP<br>NAGQR           | Homo<br>sapiens                  |
| 1 | 1.00 | 1 | 1 | 0 | 0      | 0 | 0 | -0.003 | t | 9586 | DPAFR                      | Mus<br>musculu<br>s              |
| 1 | 1.00 | 1 | 1 | 0 | 0      | 0 | 0 | -0.003 | t | 8271 | DFGPLFSD<br>PGFRSAS        | Mus<br>musculu<br>s              |
| 1 | 1.00 | 1 | 1 | 0 | 0      | 0 | 0 | -0.003 | t | 3542 | APETEK                     | Mus<br>musculu<br>s              |
| 1 | 1.00 | 1 | 1 | 0 | 0      | 0 | 0 | -0.003 | t | 5865 | AYLSPIDL<br>QLAK           | Oryctola<br>gus<br>cuniculu<br>s |
| 1 | 1.00 | 1 | 1 | 0 | 0      | 0 | 0 | -0.003 | t | 9591 | DPAKAAF<br>D               | Mus<br>musculu<br>s              |
| 1 | 1.00 | 1 | 1 | 0 | 0      | 0 | 0 | -0.003 | t | 7673 | DAVTE                      | Mus<br>musculu<br>s              |

|   |      |   |   |       |        |        |        |        |   |        |                              |                                  |
|---|------|---|---|-------|--------|--------|--------|--------|---|--------|------------------------------|----------------------------------|
| 1 | 1.00 | 1 | 1 | 0     | 0      | 0      | 0      | -0.003 | t | 4907   | ATCDKLFG<br>YYERGIPLP<br>CAL | Homo<br>sapiens                  |
| 1 | 1.00 | 1 | 1 | 0.04  | 0.04   | 0.04   | 0.04   | 0.04   | t | 5206   | ATVSSQSF                     | Oryctola<br>gus<br>cuniculu<br>s |
| 1 | 1.00 | 1 | 1 | 0     | 0      | -0.006 | 0      | -0.001 | t | 149681 | ELAEAKVL<br>ANRE             | Mus<br>musculu<br>s              |
| 1 | 1.00 | 1 | 1 | 0.01  | 0.006  | 0.002  | 0.013  | 0.01   | t | 70437  | VPPTQSKK<br>KNKNET           | Oryctola<br>gus<br>cuniculu<br>s |
| 1 | 1.00 | 1 | 1 | 0     | -0.003 | -0.005 | 0      | -0.002 | t | 13233  | ELQGDRR<br>CQSQLERA          | Oryctola<br>gus<br>cuniculu<br>s |
| 1 | 1.00 | 1 | 1 | 0.01  | 0.01   | 0.01   | 0.01   | 0.01   | t | 57556  | SEMPQLP                      | Mus<br>musculu<br>s              |
| 1 | 1.00 | 1 | 1 | 0.01  | 0.01   | 0.008  | 0.01   | 0.008  | t | 100074 | GNINYACG<br>QGID             | Oryctola<br>gus<br>cuniculu<br>s |
| 1 | 1.00 | 1 | 1 | -0.02 | -0.018 | -0.02  | -0.019 | -0.019 | t | 51428  | QLLRIPQAI<br>MDM             | Homo<br>sapiens                  |
| 1 | 1.00 | 1 | 1 | 0.06  | 0.06   | 0.06   | 0.06   | 0.06   | t | 78748  | MISGPCPK<br>DGQPSLVL<br>QSSS | Homo<br>sapiens                  |
| 1 | 1.00 | 1 | 1 | 0     | -0.002 | -0.008 | 0.003  | 0.002  | t | 111801 | SSILEDWN<br>FGVPPPT<br>TSLV  | Mus<br>musculu<br>s              |
| 1 | 1.00 | 1 | 1 | -0.04 | -0.043 | -0.043 | -0.04  | -0.038 | t | 124708 | SFERFEIF                     | Oryctola<br>gus<br>cuniculu<br>s |
| 1 | 1.00 | 1 | 1 | -0.01 | -0.006 | -0.016 | -0.003 | -0.009 | t | 134804 | TIFILCCSK<br>EKRRKKQA<br>AT  | Homo<br>sapiens                  |
| 1 | 1.00 | 1 | 1 | -0.03 | -0.016 | -0.036 | -0.027 | -0.03  | t | 58087  | SGIKDFLP<br>VLQQ             | Homo<br>sapiens                  |

|   |      |   |   |       |        |        |        |        |   |        |                            |                       |
|---|------|---|---|-------|--------|--------|--------|--------|---|--------|----------------------------|-----------------------|
| 1 | 1.00 | 1 | 1 | 0.03  | 0.03   | 0.032  | 0.033  | 0.032  | t | 98786  | GASEL                      | Homo sapiens          |
| 1 | 1.00 | 1 | 1 | 0.02  | 0.02   | 0.02   | 0.022  | 0.022  | t | 70273  | VPDREVLV<br>REFDEM         | Homo sapiens          |
| 1 | 1.00 | 1 | 1 | 0.02  | 0.018  | 0.016  | 0.017  | 0.02   | t | 52420  | QSRGEAR                    | Mus musculus          |
| 1 | 1.00 | 1 | 1 | 0     | 0.002  | -0.006 | 0.003  | -0.001 | t | 24508  | HPSVRYVC<br>LPPERD         | Homo sapiens          |
| 1 | 1.00 | 1 | 1 | -0.03 | -0.032 | -0.03  | -0.031 | -0.031 | t | 22753  | GTLTWSG<br>K               | Anas platyrhynchos    |
| 1 | 1.00 | 1 | 1 | 0.02  | 0.027  | 0.015  | 0.019  | 0.018  | t | 22395  | GSKPPSGS<br>PETGAG         | Gallus gallus         |
| 1 | 1.00 | 1 | 1 | -0.04 | -0.04  | -0.04  | -0.04  | -0.04  | t | 100125 | HVGLGTAF                   | Mus musculus          |
| 1 | 1.00 | 1 | 1 | -0.04 | -0.038 | -0.035 | -0.039 | -0.046 | t | 62334  | SVSRARTR<br>HLLLCL         | Homo sapiens          |
| 1 | 1.00 | 1 | 1 | -0.01 | -0.008 | -0.017 | -0.013 | -0.01  | t | 116040 | YQQKPVALIN                 | Homo sapiens          |
| 1 | 1.00 | 1 | 1 | 0     | 0.002  | -0.018 | 0.001  | 0.002  | t | 58196  | SGPSGTPTS<br>GTSGPSG       | Homo sapiens          |
| 1 | 1.00 | 1 | 1 | 0     | 0      | 0      | 0      | 0      | t | 140894 | QRRADAV<br>KGYLA           | Oryctolagus cuniculus |
| 1 | 1.00 | 1 | 1 | -0.03 | -0.03  | -0.03  | -0.026 | -0.03  | t | 135997 | SLEKKMSN<br>YIQF           | Homo sapiens          |
| 1 | 1.00 | 1 | 1 | 0     | 0      | -0.005 | 0.006  | 0      | t | 45053  | NNCTRVEI<br>AEYRLL         | Homo sapiens          |
| 1 | 1.00 | 1 | 1 | 0     | 0.002  | -0.007 | 0      | 0      | t | 107266 | VNMVEKG<br>IIDPTKVV        | Rattus norvegicus     |
| 1 | 1.00 | 1 | 1 | 0.03  | 0.03   | 0.029  | 0.03   | 0.03   | t | 3650   | APLTAVAP<br>AHDTPPV<br>PDV | Homo sapiens          |

|   |      |   |   |       |        |        |        |        |   |        |                           |                                  |
|---|------|---|---|-------|--------|--------|--------|--------|---|--------|---------------------------|----------------------------------|
| 1 | 1.00 | 1 | 1 | 0.01  | 0.013  | 0.015  | 0.01   | 0.008  | t | 49967  | PVSLGGDV<br>PNS           | Mus<br>musculu<br>s              |
| 1 | 1.00 | 1 | 1 | 0.01  | 0.01   | 0.015  | 0.01   | 0.008  | t | 49967  | PVSLGGDV<br>PNS           | Mus<br>musculu<br>s              |
| 1 | 1.00 | 1 | 1 | 0.03  | 0.032  | 0.025  | 0.037  | 0.034  | t | 141604 | APPDDGP<br>P              | Homo<br>sapiens                  |
| 1 | 1.00 | 1 | 1 | -0.01 | -0.013 | -0.012 | -0.01  | -0.01  | t | 56107  | RTLKIPAM<br>TI            | Oryctola<br>gus<br>cuniculu<br>s |
| 1 | 1.00 | 1 | 1 | 0.04  | 0.04   | 0.051  | 0.04   | 0.04   | t | 55508  | RQWFLD                    | Homo<br>sapiens                  |
| 1 | 1.00 | 1 | 1 | 0.02  | 0.02   | 0.015  | 0.02   | 0.02   | t | 73636  | YEDRYRE                   | Mus<br>musculu<br>s              |
| 1 | 1.00 | 1 | 1 | -0.02 | -0.023 | -0.024 | -0.02  | -0.022 | t | 122734 | DSVPKWD<br>RLPC           | Oryctola<br>gus<br>cuniculu<br>s |
| 1 | 1.00 | 1 | 1 | 0     | 0.002  | -0.004 | -0.003 | 0      | t | 76352  | YVLMVPK<br>Q              | Homo<br>sapiens                  |
| 1 | 1.00 | 1 | 1 | 0     | 0.004  | -0.012 | 0.003  | 0      | t | 97605  | RIVRGPAN<br>LRNLKEFK<br>E | Homo<br>sapiens                  |
| 1 | 1.00 | 1 | 1 | -0.02 | -0.02  | -0.026 | -0.017 | -0.018 | t | 29802  | KAFRELAD                  | Homo<br>sapiens                  |
| 1 | 1.00 | 1 | 1 | -0.01 | -0.012 | -0.01  | -0.009 | -0.01  | t | 73785  | YEVARNVSG<br>IYHVT        | Homo<br>sapiens                  |
| 1 | 1.00 | 1 | 1 | -0.01 | -0.013 | -0.017 | -0.01  | -0.01  | t | 135507 | VVGAGP                    | Oryctola<br>gus<br>cuniculu<br>s |
| 1 | 1.00 | 1 | 1 | 0     | 0      | -0.002 | -0.002 | -0.002 | t | 130990 | NVLRGMG<br>GAF            | Homo<br>sapiens                  |
| 1 | 1.00 | 1 | 1 | 0.01  | 0.008  | 0.006  | 0.013  | 0.011  | t | 158947 | LDIDIDPKV<br>KVATLS       | Mus<br>musculu<br>s              |

|   |      |   |   |       |        |        |       |        |   |        |                      |                       |
|---|------|---|---|-------|--------|--------|-------|--------|---|--------|----------------------|-----------------------|
| 1 | 1.00 | 1 | 1 | 0     | 0      | -0.002 | 0     | -0.002 | t | 150855 | HPGGSQPP             | Mus musculus          |
| 1 | 1.00 | 1 | 1 | 0     | 0.004  | 0.002  | 0.003 | 0      | t | 119641 | SEHETRLVAKLFKDYS     | Homo sapiens          |
| 1 | 1.00 | 1 | 1 | 0.01  | 0.01   | 0.011  | 0.01  | 0.008  | t | 31555  | KKGSSGYS             | Mus musculus          |
| 1 | 1.00 | 1 | 1 | 0.01  | 0.006  | 0.013  | 0.013 | 0.009  | t | 30036  | KAYSNCYPYDVPDY       | Oryctolagus cuniculus |
| 1 | 1.00 | 1 | 1 | 0.02  | 0.02   | 0.014  | 0.02  | 0.022  | t | 79524  | CHTTATIPSSAVTC       | Mus musculus          |
| 1 | 1.00 | 1 | 1 | 0.01  | 0.012  | 0.01   | 0.01  | 0.013  | t | 128955 | ILFSVFD              | MD                    |
| 1 | 1.00 | 1 | 1 | 0     | 0      | 0      | 0.004 | 0      | t | 117315 | KALSVETEKLLKYLEAV    | Homo sapiens          |
| 1 | 1.00 | 1 | 1 | 0     | 0      | 0      | 0.004 | 0      | t | 109850 | RQHARQQDKERLAALGPEGA | Homo sapiens          |
| 1 | 1.00 | 1 | 1 | -0.01 | -0.007 | -0.017 | -0.01 | -0.011 | t | 72889  | WNK                  | Mus musculus          |
| 1 | 1.00 | 1 | 1 | 0.04  | 0.036  | 0.042  | 0.043 | 0.041  | t | 99422  | LKGESGY              | Oryctolagus cuniculus |
| 1 | 1.00 | 1 | 1 | 0.06  | 0.06   | 0.053  | 0.06  | 0.06   | t | 133707 | STRKEEKQRNGT         | Mus musculus          |
| 1 | 1.00 | 1 | 1 | 0.04  | 0.037  | 0.038  | 0.04  | 0.038  | t | 35662  | LEQPVSNDLS           | Oryctolagus cuniculus |
| 1 | 1.00 | 1 | 1 | 0.01  | 0.005  | 0.002  | 0.013 | 0.012  | t | 157357 | GVAPPGWYDPPVQ        | Canis lupus           |
| 1 | 1.00 | 1 | 1 | -0.01 | -0.01  | -0.017 | -0.01 | -0.01  | t | 41143  | MATAGVA<br>AVVKRKEEN | Mus musculus          |

|   |      |   |   |       |        |        |        |        |   |        |                          |                                  |
|---|------|---|---|-------|--------|--------|--------|--------|---|--------|--------------------------|----------------------------------|
| 1 | 1.00 | 1 | 1 | -0.01 | -0.01  | -0.017 | -0.01  | -0.01  | t | 41143  | MATAGVA<br>AVVKRKEE<br>N | Mus<br>musculu<br>s              |
| 1 | 1.00 | 1 | 1 | -0.01 | -0.01  | -0.017 | -0.01  | -0.01  | t | 41143  | MATAGVA<br>AVVKRKEE<br>N | Mus<br>musculu<br>s              |
| 1 | 1.00 | 1 | 1 | 0.02  | 0.019  | 0.015  | 0.021  | 0.022  | t | 47101  | PDGSKVFA<br>GS           | Homo<br>sapiens                  |
| 1 | 1.00 | 1 | 1 | 0.02  | 0.016  | 0.006  | 0.017  | 0.02   | t | 14227  | ESPANNP<br>GLSTVRDE      | Oryctola<br>gus<br>cuniculu<br>s |
| 1 | 1.00 | 1 | 1 | 0.02  | 0.016  | 0.022  | 0.023  | 0.021  | t | 99760  | VKDGVIYD                 | Oryctola<br>gus<br>cuniculu<br>s |
| 1 | 1.00 | 1 | 1 | -0.02 | -0.022 | -0.022 | -0.017 | -0.019 | t | 99126  | CLAPDRRV                 | Mus<br>musculu<br>s              |
| 1 | 1.00 | 1 | 1 | 0.01  | 0.014  | 0.01   | 0.011  | 0.009  | t | 48382  | PLKPTKRS<br>FIEDLLF      | Homo<br>sapiens                  |
| 1 | 1.00 | 1 | 1 | 0.01  | 0.01   | 0.01   | 0.01   | 0.009  | t | 11814  | EENVEENV<br>EENV         | Oryctola<br>gus<br>cuniculu<br>s |
| 1 | 1.00 | 1 | 1 | -0.01 | -0.012 | -0.001 | -0.003 | -0.011 | t | 113659 | NIKNREG<br>YEMVFDG<br>KP | Homo<br>sapiens                  |
| 1 | 1.00 | 1 | 1 | 0     | 0      | 0      | 0      | 0      | t | 55698  | RRQPIPKA<br>RRPE         | Homo<br>sapiens                  |
| 1 | 1.00 | 1 | 1 | -0.04 | -0.044 | -0.046 | -0.043 | -0.041 | t | 27553  | IMSALAM<br>VYLGA         | Oryctola<br>gus<br>cuniculu<br>s |
| 1 | 1.00 | 1 | 1 | -0.01 | -0.007 | -0.009 | -0.01  | -0.01  | t | 76606  | YYSPAF                   | Mus<br>musculu<br>s              |
| 1 | 1.00 | 1 | 1 | -0.01 | -0.01  | -0.009 | -0.01  | -0.01  | t | 76606  | YYSPAF                   | Mus<br>musculu<br>s              |
| 1 | 1.00 | 1 | 1 | -0.04 | -0.042 | -0.048 | -0.041 | -0.04  | t | 27416  | ILYAVFK                  | Mus<br>musculu<br>s              |

|   |      |   |   |       |        |        |        |        |   |        |                     |                       |
|---|------|---|---|-------|--------|--------|--------|--------|---|--------|---------------------|-----------------------|
| 1 | 1.00 | 1 | 1 | -0.04 | -0.042 | -0.048 | -0.041 | -0.04  | t | 27416  | ILYAVFK             | Mus musculus          |
| 1 | 1.00 | 1 | 1 | -0.01 | -0.01  | -0.01  | -0.01  | -0.008 | t | 63882  | TGLIHLHQ            | Homo sapiens          |
| 1 | 1.00 | 1 | 1 | 0.06  | 0.056  | 0.059  | 0.053  | 0.059  | t | 118991 | RAEDNADTLALVFEA     | Oryctolagus cuniculus |
| 1 | 1.00 | 1 | 1 | -0.01 | -0.01  | -0.01  | -0.01  | -0.012 | t | 75949  | YTASARGDLAHL        | Mus musculus          |
| 1 | 1.00 | 1 | 1 | -0.02 | -0.017 | -0.024 | -0.02  | -0.02  | t | 139198 | QARNRPTT            | Mus musculus          |
| 1 | 1.00 | 1 | 1 | -0.01 | -0.008 | -0.018 | -0.014 | -0.01  | t | 110971 | PVSDLNLKIDGL        | Homo sapiens          |
| 1 | 1.00 | 1 | 1 | 0.03  | 0.028  | 0.029  | 0.029  | 0.028  | t | 133611 | IVSYLCDLAPEAPPPTLPP | Mus musculus          |
| 1 | 1.00 | 1 | 1 | -0.01 | -0.01  | -0.018 | -0.01  | -0.01  | t | 10821  | DWPERIRDFM          | Mus musculus          |
| 1 | 1.00 | 1 | 1 | 0.03  | 0.03   | 0.03   | 0.03   | 0.029  | t | 138088 | WLDLSKT             | Mus musculus          |
| 1 | 1.00 | 1 | 1 | -0.01 | -0.01  | -0.004 | -0.01  | -0.011 | t | 150371 | LLELDKWA<br>SLW     | Homo sapiens          |
| 1 | 1.00 | 1 | 1 | 0.03  | 0.033  | 0.015  | 0.03   | 0.036  | t | 40029  | LTLSIDLPL           | Mus musculus          |
| 1 | 1.00 | 1 | 1 | -0.01 | -0.006 | 0.001  | -0.009 | -0.011 | t | 26338  | IGVIIT              | Homo sapiens          |
| 1 | 1.00 | 1 | 1 | 0.01  | 0.008  | -0.001 | 0.009  | 0.01   | t | 26306  | IGQLVIEHY<br>ADT    | Mus musculus          |

|   |      |   |   |       |        |        |        |        |   |        |                         |                       |
|---|------|---|---|-------|--------|--------|--------|--------|---|--------|-------------------------|-----------------------|
| 1 | 1.00 | 1 | 1 | 0.03  | 0.042  | 0.037  | 0.03   | 0.029  | t | 4702   | ASQKIQLV                | Pan troglodytes       |
| 1 | 1.00 | 1 | 1 | 0.02  | 0.022  | 0.022  | 0.023  | 0.016  | t | 46000  | NSTGADA<br>ADSGGRT      | Homo sapiens          |
| 1 | 1.00 | 1 | 1 | 0.01  | 0.01   | 0      | 0.01   | 0.01   | t | 67933  | VDENANAN                | Oryctolagus cuniculus |
| 1 | 1.00 | 1 | 1 | -0.02 | -0.02  | -0.025 | -0.02  | -0.021 | t | 70010  | VMPVGG<br>QSSFYS<br>DWY | Homo sapiens          |
| 1 | 1.00 | 1 | 1 | -0.01 | -0.01  | -0.022 | -0.01  | -0.008 | t | 71139  | VSSQSFRRLG              | Oryctolagus cuniculus |
| 1 | 1.00 | 1 | 1 | 0.03  | 0.03   | 0.024  | 0.03   | 0.031  | t | 19375  | GENK                    | Mus musculus          |
| 1 | 1.00 | 1 | 1 | 0     | 0.003  | -0.014 | 0      | 0.002  | t | 99964  | DVGMHVK<br>EKE          | Mus musculus          |
| 1 | 1.00 | 1 | 1 | -0.02 | -0.02  | -0.025 | -0.02  | -0.02  | t | 12539  | EIPALTAVE               | Mus musculus          |
| 1 | 1.00 | 1 | 1 | 0     | 0      | -0.007 | -0.001 | -0.001 | t | 138082 | VVGCGSSHETH             | Homo sapiens          |
| 1 | 1.00 | 1 | 1 | 0.01  | 0.01   | 0.01   | 0.01   | 0.01   | t | 31322  | KILIGV                  | Homo sapiens          |
| 1 | 1.00 | 1 | 1 | 0.01  | 0.014  | 0.007  | 0.011  | 0.009  | t | 103550 | RIFYKDAF<br>AKHQELF     | Homo sapiens          |
| 1 | 1.00 | 1 | 1 | 0.02  | 0.02   | 0.02   | 0.02   | 0.02   | t | 103420 | MSFVTIQPVVLAAT          | Homo sapiens          |
| 1 | 1.00 | 1 | 1 | 0     | -0.002 | 0.001  | -0.001 | 0      | t | 70101  | VNIKPLEDKI              | Mus musculus          |
| 1 | 1.00 | 1 | 1 | 0.01  | 0.01   | 0.01   | 0.01   | 0.01   | t | 107745 | ARGAQGP<br>PGATGFP      | Homo sapiens          |



|   |      |   |   |       |        |        |        |        |   |        |                              |                       |
|---|------|---|---|-------|--------|--------|--------|--------|---|--------|------------------------------|-----------------------|
| 1 | 1.00 | 1 | 1 | 0.02  | 0.02   | 0.02   | 0.02   | 0.019  | t | 51296  | QLCQLL                       | Mus musculus          |
| 1 | 1.00 | 1 | 1 | 0.02  | 0.022  | 0.02   | 0.021  | 0.017  | t | 118478 | KVISELNG<br>KNIEDVI          | Homo sapiens          |
| 1 | 1.00 | 1 | 1 | 0.01  | 0.01   | 0.006  | 0.01   | 0.009  | t | 120060 | LGSSESRR<br>ALQDSQR          | Homo sapiens          |
| 1 | 1.00 | 1 | 1 | 0     | 0.003  | -0.01  | 0      | -0.001 | t | 139404 | YIDINKTIA<br>DMLEQYN<br>PNYT | Felis catus           |
| 1 | 1.00 | 1 | 1 | -0.01 | -0.007 | -0.003 | -0.01  | -0.012 | t | 74940  | YLTHMRD                      | Mus musculus          |
| 1 | 1.00 | 1 | 1 | 0.01  | 0.01   | 0.011  | 0.01   | 0.009  | t | 79166  | CEGNLACLS                    | Mus musculus          |
| 1 | 1.00 | 1 | 1 | -0.02 | -0.022 | -0.026 | -0.021 | -0.02  | t | 51799  | QPDLIPL                      | Mus musculus          |
| 1 | 1.00 | 1 | 1 | -0.02 | -0.024 | -0.026 | -0.021 | -0.02  | t | 51799  | QPDLIPL                      | Oryctolagus cuniculus |
| 1 | 1.00 | 1 | 1 | -0.02 | -0.02  | -0.029 | -0.02  | -0.02  | t | 110424 | SGTGGRT<br>GYIPLGTR<br>PPT   | Mus musculus          |
| 1 | 1.00 | 1 | 1 | -0.01 | -0.01  | -0.022 | -0.013 | -0.01  | t | 84698  | KSDYLGVN<br>KIAE             | Homo sapiens          |
| 1 | 1.00 | 1 | 1 | -0.02 | -0.02  | -0.022 | -0.02  | -0.022 | t | 145    | AAGANPL<br>GLKRGIEK<br>AV    | Mus musculus          |
| 1 | 1.00 | 1 | 1 | 0.02  | 0.018  | 0.013  | 0.02   | 0.021  | t | 95047  | VEVPGSQ<br>HIDSQ             | Oryctolagus cuniculus |
| 1 | 1.00 | 1 | 1 | 0.02  | 0.018  | 0.013  | 0.02   | 0.021  | t | 95047  | VEVPGSQ<br>HIDSQ             | Oryctolagus cuniculus |
| 1 | 1.00 | 1 | 1 | 0.02  | 0.017  | 0.013  | 0.02   | 0.021  | t | 95047  | VEVPGSQ<br>HIDSQ             | Oryctolagus cuniculus |

|   |      |   |   |       |        |        |        |        |   |        |                              |                     |
|---|------|---|---|-------|--------|--------|--------|--------|---|--------|------------------------------|---------------------|
| 1 | 1.00 | 1 | 1 | 0     | 0      | 0      | 0.003  | -0.001 | t | 136080 | RAGTDEGF<br>G                | Homo<br>sapiens     |
| 1 | 1.00 | 1 | 1 | -0.02 | -0.016 | -0.009 | -0.013 | -0.02  | t | 138171 | FRVVSVL                      | Homo<br>sapiens     |
| 1 | 1.00 | 1 | 1 | 0.01  | 0.012  | -0.003 | 0.011  | 0.01   | t | 138094 | YGYATLSY<br>ADYW             | Homo<br>sapiens     |
| 1 | 1.00 | 1 | 1 | 0.03  | 0.03   | 0.026  | 0.03   | 0.03   | t | 102722 | PNKPVEPT<br>YEVIPTPT<br>DPV  | Mus<br>musculu<br>s |
| 1 | 1.00 | 1 | 1 | -0.03 | -0.03  | -0.026 | -0.03  | -0.03  | t | 71877  | VVVLGS                       | Homo<br>sapiens     |
| 1 | 1.00 | 1 | 1 | 0.04  | 0.035  | 0.035  | 0.04   | 0.04   | t | 15176  | FAGDSDSS<br>SSADDAA<br>GKATV | Canis<br>lupus      |
| 1 | 1.00 | 1 | 1 | 0.04  | 0.04   | 0.04   | 0.036  | 0.04   | t | 117509 | GQIPPGA<br>M                 | Homo<br>sapiens     |
| 1 | 1.00 | 1 | 1 | -0.04 | -0.038 | -0.04  | -0.033 | -0.04  | t | 138152 | CSVMHEA                      | Homo<br>sapiens     |
| 1 | 1.00 | 1 | 1 | 0     | 0      | -0.013 | 0      | 0      | t | 110248 | GGLGIGTG<br>SGTGGRT<br>GYIPL | Mus<br>musculu<br>s |
| 1 | 1.00 | 1 | 1 | -0.02 | -0.02  | -0.02  | -0.02  | -0.02  | t | 111762 | SCFFGRL                      | Homo<br>sapiens     |
| 1 | 1.00 | 1 | 1 | 0.01  | 0.01   | 0.01   | 0.016  | 0.013  | t | 141638 | EIHSKTKS                     | Homo<br>sapiens     |
| 1 | 1.00 | 1 | 1 | 0     | -0.002 | 0      | 0.007  | 0      | t | 123760 | SSYAKVSIC<br>LPMDTETP<br>LAL | Homo<br>sapiens     |
| 1 | 1.00 | 1 | 1 | -0.02 | -0.02  | -0.023 | -0.018 | -0.02  | t | 6233   | CFKKPPKY<br>PPALPI           | Homo<br>sapiens     |
| 1 | 1.00 | 1 | 1 | 0.04  | 0.042  | 0.031  | 0.037  | 0.042  | t | 64998  | TLPDTEKQ<br>I                | Homo<br>sapiens     |
| 1 | 1.00 | 1 | 1 | -0.08 | -0.077 | -0.08  | -0.08  | -0.082 | t | 143687 | FRVNLRTL<br>RRYY             | Mus<br>musculu<br>s |

|   |      |   |   |       |        |        |        |        |   |        |                      |                       |
|---|------|---|---|-------|--------|--------|--------|--------|---|--------|----------------------|-----------------------|
| 1 | 1.00 | 1 | 1 | 0     | 0      | 0      | 0      | -0.003 | t | 105127 | DAEFRHD              | Mus musculus          |
| 1 | 1.00 | 1 | 1 | -0.02 | -0.018 | -0.018 | -0.019 | -0.02  | t | 51849  | QPGYPWPL             | Homo sapiens          |
| 1 | 1.00 | 1 | 1 | 0     | 0.002  | 0.003  | 0.001  | 0      | t | 54603  | RLIVFP               | Homo sapiens          |
| 1 | 1.00 | 1 | 1 | 0     | 0      | 0      | 0.009  | 0.002  | t | 96211  | EDKKRKEE             | Homo sapiens          |
| 1 | 1.00 | 1 | 1 | 0.02  | 0.022  | 0.02   | 0.027  | 0.019  | t | 130933 | KVFQGNQDSFTPVVNSLDPP | Homo sapiens          |
| 1 | 1.00 | 1 | 1 | 0.01  | 0.008  | 0.003  | 0.013  | 0.012  | t | 106265 | ARGLT                | Mus musculus          |
| 1 | 1.00 | 1 | 1 | 0.01  | 0.01   | 0.01   | 0.01   | 0.01   | t | 52094  | QQPP                 | Mus musculus          |
| 1 | 1.00 | 1 | 1 | -0.03 | -0.028 | -0.039 | -0.027 | -0.03  | t | 110602 | GLKAKPKFTLGKRKATPTT  | Homo sapiens          |
| 1 | 1.00 | 1 | 1 | 0.03  | 0.032  | 0.028  | 0.033  | 0.03   | t | 78478  | PDSDPQI              | Homo sapiens          |
| 1 | 1.00 | 1 | 1 | -0.01 | -0.01  | -0.014 | -0.013 | -0.011 | t | 44227  | NIFSGFTPEFLEQAF      | Homo sapiens          |
| 1 | 1.00 | 1 | 1 | 0.05  | 0.05   | 0.048  | 0.05   | 0.048  | t | 22755  | GTLVKTITDDQIEV       | Mus musculus          |
| 1 | 1.00 | 1 | 1 | 0.05  | 0.05   | 0.048  | 0.05   | 0.048  | t | 22755  | GTLVKTITDDQIEV       | Mus musculus          |
| 1 | 1.00 | 1 | 1 | -0.01 | -0.01  | -0.024 | -0.01  | -0.01  | t | 120624 | IKSGVATKGL           | Mus musculus          |
| 1 | 1.00 | 1 | 1 | -0.04 | -0.04  | -0.041 | -0.04  | -0.038 | t | 105954 | MAKFTQFA             | Oryctolagus cuniculus |
| 1 | 1.00 | 1 | 1 | 0     | 0      | -0.008 | 0      | 0      | t | 47072  | PDDHLKERSS           | Mus musculus          |

|   |      |   |   |       |        |        |        |        |   |        |                          |                                  |
|---|------|---|---|-------|--------|--------|--------|--------|---|--------|--------------------------|----------------------------------|
| 1 | 1.00 | 1 | 1 | 0     | -0.001 | -0.008 | 0      | 0      | t | 47078  | PDDVNKN<br>TLQ           | Mus<br>musculu<br>s              |
| 1 | 1.00 | 1 | 1 | 0     | 0      | -0.008 | 0      | 0      | t | 11353  | EDINGIRR<br>PK           | Mus<br>musculu<br>s              |
| 1 | 1.00 | 1 | 1 | 0     | 0      | -0.008 | 0      | 0      | t | 8918   | DKLADYKR<br>RM           | Mus<br>musculu<br>s              |
| 1 | 1.00 | 1 | 1 | -0.05 | -0.052 | -0.042 | -0.049 | -0.054 | t | 149384 | MSLPGRW<br>KPK           | Mus<br>musculu<br>s              |
| 1 | 1.00 | 1 | 1 | -0.03 | -0.024 | -0.025 | -0.03  | -0.03  | t | 54748  | RLRVKN                   | Equus<br>caballus                |
| 1 | 1.00 | 1 | 1 | 0.01  | 0.01   | 0.01   | 0.01   | 0.008  | t | 140548 | CSLSDAFN<br>GSC          | Mus<br>musculu<br>s              |
| 1 | 1.00 | 1 | 1 | -0.01 | -0.01  | -0.022 | -0.01  | -0.01  | t | 115610 | GSLPQKA<br>QGHRPQD<br>EN | Oryctola<br>gus<br>cuniculu<br>s |
| 1 | 1.00 | 1 | 1 | -0.01 | -0.001 | -0.022 | -0.01  | -0.01  | t | 115610 | GSLPQKA<br>QGHRPQD<br>EN | Oryctola<br>gus<br>cuniculu<br>s |
| 1 | 1.00 | 1 | 1 | -0.01 | -0.01  | -0.022 | -0.01  | -0.01  | t | 115610 | GSLPQKA<br>QGHRPQD<br>EN | Macaca<br>mulatta                |
| 1 | 1.00 | 1 | 1 | -0.01 | -0.019 | -0.022 | -0.01  | -0.01  | t | 115610 | GSLPQKA<br>QGHRPQD<br>EN | Macaca<br>mulatta                |
| 1 | 1.00 | 1 | 1 | -0.01 | -0.008 | -0.022 | -0.01  | -0.01  | t | 115610 | GSLPQKA<br>QGHRPQD<br>EN | Rattus<br>norvegic<br>us         |
| 1 | 1.00 | 1 | 1 | -0.01 | -0.01  | -0.022 | -0.01  | -0.01  | t | 115610 | GSLPQKA<br>QGHRPQD<br>EN | Oryctola<br>gus<br>cuniculu<br>s |
| 1 | 1.00 | 1 | 1 | 0.02  | 0.02   | 0.029  | 0.02   | 0.02   | t | 139801 | LGSYSFI                  | Ovis<br>aries                    |
| 1 | 1.00 | 1 | 1 | 0.02  | 0.026  | 0.029  | 0.02   | 0.02   | t | 139801 | LGSYSFI                  | Ovis<br>aries                    |

|   |      |   |   |       |        |        |        |        |   |        |                            |                                  |
|---|------|---|---|-------|--------|--------|--------|--------|---|--------|----------------------------|----------------------------------|
| 1 | 1.00 | 1 | 1 | 0.03  | 0.03   | 0.022  | 0.03   | 0.03   | t | 84698  | KSDYLGVN<br>KIAE           | Homo<br>sapiens                  |
| 1 | 1.00 | 1 | 1 | 0.02  | 0.02   | 0.018  | 0.021  | 0.02   | t | 144791 | STIDYFQP<br>NNKR           | Sus<br>scrofa                    |
| 1 | 1.00 | 1 | 1 | 0     | -0.002 | 0.005  | 0.003  | -0.003 | t | 94837  | GTCKELKK<br>L              | Mus<br>musculu<br>s              |
| 1 | 1.00 | 1 | 1 | 0.03  | 0.028  | 0.027  | 0.027  | 0.03   | t | 122167 | PPFITQGE<br>CKQL           | Mus<br>musculu<br>s              |
| 1 | 1.00 | 1 | 1 | 0     | 0.003  | 0.002  | 0      | -0.001 | t | 135842 | NTYGDFM<br>VKSPN           | Mus<br>musculu<br>s              |
| 1 | 1.00 | 1 | 1 | 0     | 0.003  | 0.002  | 0      | -0.001 | t | 135842 | NTYGDFM<br>VKSPN           | Mus<br>musculu<br>s              |
| 1 | 1.00 | 1 | 1 | 0.01  | 0.01   | 0.01   | 0.01   | 0.008  | t | 107856 | GGQGSRH<br>QQAR            | Homo<br>sapiens                  |
| 1 | 1.00 | 1 | 1 | -0.02 | -0.018 | -0.009 | -0.019 | -0.024 | t | 35352  | LEAFWHK<br>HM              | Homo<br>sapiens                  |
| 1 | 1.00 | 1 | 1 | 0.02  | 0.028  | 0.027  | 0.02   | 0.018  | t | 136302 | GALIYTPEK<br>YTI           | Gallus<br>gallus                 |
| 1 | 1.00 | 1 | 1 | -0.02 | -0.024 | -0.026 | -0.017 | -0.02  | t | 7558   | DAKDGKEI<br>DTKHLPS<br>T C | Oryctola<br>gus<br>cuniculu<br>s |
| 1 | 1.00 | 1 | 1 | -0.08 | -0.084 | -0.072 | -0.077 | -0.082 | t | 58956  | SKVALAAL<br>PA             | Oryctola<br>gus<br>cuniculu<br>s |
| 1 | 1.00 | 1 | 1 | 0     | 0      | 0      | 0      | 0      | t | 105246 | ILDVTT                     | Oryctola<br>gus<br>cuniculu<br>s |
| 1 | 1.00 | 1 | 1 | 0     | 0.002  | 0      | 0.007  | 0      | t | 107875 | GTYKAGN<br>QHNHVKY<br>G    | Homo<br>sapiens                  |
| 1 | 1.00 | 1 | 1 | -0.03 | -0.028 | -0.035 | -0.029 | -0.03  | t | 142055 | VKDTPRLI<br>KLIKNS         | Homo<br>sapiens                  |

|   |      |   |   |       |        |        |        |        |   |        |                              |                                  |
|---|------|---|---|-------|--------|--------|--------|--------|---|--------|------------------------------|----------------------------------|
| 1 | 1.00 | 1 | 1 | 0.02  | 0.024  | 0.025  | 0.017  | 0.017  | t | 59576  | SLVYFPFG<br>PIPNSL           | Homo<br>sapiens                  |
| 1 | 1.00 | 1 | 1 | -0.01 | -0.01  | -0.01  | -0.01  | -0.012 | t | 33794  | KTNMKH<br>M                  | Mus<br>musculu<br>s              |
| 1 | 1.00 | 1 | 1 | 0.01  | 0.007  | 0.008  | 0.01   | 0.007  | t | 62953  | TAPPLLPH<br>SNLDHILE         | Oryctola<br>gus<br>cuniculu<br>s |
| 1 | 1.00 | 1 | 1 | 0.07  | 0.07   | 0.07   | 0.07   | 0.07   | t | 99578  | QNANEE                       | Equus<br>caballus                |
| 1 | 1.00 | 1 | 1 | 0.03  | 0.029  | 0.029  | 0.03   | 0.03   | t | 432    | AASGDPTS<br>PDNIDS           | Myodes<br>glareolu<br>s          |
| 1 | 1.00 | 1 | 1 | -0.04 | -0.04  | -0.04  | -0.04  | -0.043 | t | 121643 | NEMHLLIQ<br>QAREMPL          | Homo<br>sapiens                  |
| 1 | 1.00 | 1 | 1 | 0.06  | 0.057  | 0.055  | 0.06   | 0.058  | t | 105963 | MDPGLKE<br>SPLQTPAD<br>DGSE  | Oryctola<br>gus<br>cuniculu<br>s |
| 1 | 1.00 | 1 | 1 | -0.02 | -0.02  | -0.016 | -0.02  | -0.02  | t | 41310  | MEDKAW                       | Homo<br>sapiens                  |
| 1 | 1.00 | 1 | 1 | 0.01  | 0.012  | 0.01   | 0.013  | 0.011  | t | 18031  | FTDPYQV<br>PF                | Homo<br>sapiens                  |
| 1 | 1.00 | 1 | 1 | 0.01  | 0.01   | 0.01   | 0.01   | 0.01   | t | 100287 | LSEKGLTTY                    | Oryctola<br>gus<br>cuniculu<br>s |
| 1 | 1.00 | 1 | 1 | -0.02 | -0.02  | -0.024 | -0.02  | -0.018 | t | 129911 | SHYKVG                       | Homo<br>sapiens                  |
| 1 | 1.00 | 1 | 1 | -0.04 | -0.035 | -0.044 | -0.037 | -0.04  | t | 77800  | RGCTFYGC<br>WK               | Homo<br>sapiens                  |
| 1 | 1.00 | 1 | 1 | -0.01 | -0.01  | -0.015 | -0.013 | -0.01  | t | 125791 | CSFWSKYI<br>QTLK             | Mus<br>musculu<br>s              |
| 1 | 1.00 | 1 | 1 | 0     | 0      | 0      | -0.003 | -0.004 | t | 37660  | LLPHSNLD<br>HILEPSIPW<br>KSK | Homo<br>sapiens                  |

|   |      |   |   |       |        |        |        |        |   |        |                              |                                  |
|---|------|---|---|-------|--------|--------|--------|--------|---|--------|------------------------------|----------------------------------|
| 1 | 1.00 | 1 | 1 | 0     | 0      | 0      | -0.003 | -0.004 | t | 48779  | PPFSLSPV<br>PTLGSRSR<br>R    | Homo<br>sapiens                  |
| 1 | 1.00 | 1 | 1 | 0.02  | 0.016  | 0.017  | 0.02   | 0.02   | t | 100387 | PLKTDAND<br>QIGDSL           | Oryctola<br>gus<br>cuniculu<br>s |
| 1 | 1.00 | 1 | 1 | 0     | 0      | 0      | 0      | 0      | t | 62720  | SYTESMA<br>GKR               | Mus<br>musculu<br>s              |
| 1 | 1.00 | 1 | 1 | 0.05  | 0.05   | 0.046  | 0.054  | 0.05   | t | 46417  | NVLDVNAI<br>DIEEPS           | Homo<br>sapiens                  |
| 1 | 1.00 | 1 | 1 | 0     | 0.002  | -0.009 | 0.003  | 0      | t | 29965  | KATYEA AV<br>AANNAKN<br>AALT | Homo<br>sapiens(<br>human)       |
| 1 | 1.00 | 1 | 1 | 0.03  | 0.03   | 0.022  | 0.029  | 0.03   | t | 80395  | ALYASVAV<br>QQQD             | Homo<br>sapiens                  |
| 1 | 1.00 | 1 | 1 | -0.01 | -0.012 | -0.01  | -0.013 | -0.012 | t | 131656 | SGKLEEFV<br>Q                | Mus<br>musculu<br>s              |
| 1 | 1.00 | 1 | 1 | 0     | 0      | 0      | 0      | 0      | t | 50067  | PYCWHYA<br>P                 | Homo<br>sapiens                  |
| 1 | 1.00 | 1 | 1 | -0.01 | -0.012 | -0.03  | -0.017 | -0.01  | t | 127944 | DLVNCNL<br>NTNCVAV<br>AFSLPD | Mus<br>musculu<br>s              |
| 1 | 1.00 | 1 | 1 | -0.01 | -0.008 | -0.017 | -0.003 | -0.01  | t | 125401 | ELLTEHRM<br>TWDPAQP<br>PRDLT | Homo<br>sapiens                  |
| 1 | 1.00 | 1 | 1 | -0.01 | -0.008 | -0.017 | -0.003 | -0.01  | t | 125401 | ELLTEHRM<br>TWDPAQP<br>PRDLT | Homo<br>sapiens                  |
| 1 | 1.00 | 1 | 1 | -0.01 | -0.007 | -0.021 | -0.01  | -0.01  | t | 29897  | KANADAK<br>AAYEAAV<br>AANNA  | Mus<br>musculu<br>s              |
| 1 | 1.00 | 1 | 1 | 0.01  | 0.007  | 0.01   | 0.01   | 0.007  | t | 107375 | GDDNLAP<br>NTANVQ<br>MT      | Oryctola<br>gus<br>cuniculu<br>s |
| 1 | 1.00 | 1 | 1 | 0     | 0.002  | -0.005 | 0.001  | 0      | t | 42248  | MNWSPTT<br>CL                | Homo<br>sapiens                  |

|   |      |   |   |       |        |        |        |        |   |        |                              |                                  |
|---|------|---|---|-------|--------|--------|--------|--------|---|--------|------------------------------|----------------------------------|
| 1 | 1.00 | 1 | 1 | 0.02  | 0.02   | 0.003  | 0.014  | 0.02   | t | 39597  | LSQDEIDR<br>MVNDAEK<br>Y     | Homo<br>sapiens                  |
| 1 | 1.00 | 1 | 1 | 0     | -0.002 | 0.002  | 0.011  | 0.003  | t | 118599 | SAPAPKKG<br>SKKAV            | Mus<br>musculu<br>s              |
| 1 | 1.00 | 1 | 1 | 0     | 0      | 0      | 0      | -0.002 | t | 47013  | PAYYTKDT<br>NNNLT            | Mus<br>musculu<br>s              |
| 1 | 1.00 | 1 | 1 | -0.01 | -0.005 | -0.01  | -0.01  | -0.01  | t | 134510 | RIIWRSTQ                     | Homo<br>sapiens                  |
| 1 | 1.00 | 1 | 1 | 0     | 0      | 0      | 0      | -0.003 | t | 57631  | SESTEDQA<br>MEDIKQM<br>EAESI | Homo<br>sapiens                  |
| 1 | 1.00 | 1 | 1 | -0.03 | -0.034 | -0.03  | -0.027 | -0.032 | t | 156850 | APHNKWP<br>HLNPP             | Bos<br>taurus                    |
| 1 | 1.00 | 1 | 1 | 0.01  | 0.01   | 0.008  | 0.01   | 0.009  | t | 32807  | KPNLSSKR<br>SELSQLS          | Mus<br>musculu<br>s              |
| 1 | 1.00 | 1 | 1 | -0.01 | -0.01  | -0.01  | -0.01  | -0.011 | t | 48782  | PPFTSAVG<br>GVDHRS           | Mus<br>musculu<br>s              |
| 1 | 1.00 | 1 | 1 | 0.01  | 0.01   | 0.001  | 0.01   | 0.01   | t | 135986 | RSGPSNSA<br>SVPA             | Homo<br>sapiens                  |
| 1 | 1.00 | 1 | 1 | 0     | 0      | 0      | 0      | -0.003 | t | 156939 | PPEKSHL                      | Gallus<br>gallus                 |
| 1 | 1.00 | 1 | 1 | 0     | 0      | 0      | 0      | -0.003 | t | 136595 | RHYQQYF<br>QHF               | Homo<br>sapiens                  |
| 1 | 1.00 | 1 | 1 | 0.04  | 0.04   | 0.04   | 0.04   | 0.041  | t | 124015 | DKTEDVDI<br>EE               | Homo<br>sapiens                  |
| 1 | 1.00 | 1 | 1 | 0.02  | 0.02   | 0.022  | 0.02   | 0.02   | t | 110613 | GPPGPQG<br>ATGPLGPK          | Mus<br>musculu<br>s              |
| 1 | 1.00 | 1 | 1 | 0     | 0      | 0      | 0.007  | 0.001  | t | 138812 | SSVLYGGP<br>PSAA             | Rattus<br>norvegic<br>us         |
| 1 | 1.00 | 1 | 1 | 0     | 0.002  | -0.009 | -0.002 | -0.001 | t | 110828 | EIDGPAGQ<br>AEPDRAH<br>YNI   | Homo<br>sapiens                  |
| 1 | 1.00 | 1 | 1 | -0.03 | -0.034 | -0.03  | -0.027 | -0.033 | t | 111590 | NLIRHVGG<br>GTPRRPG          | Oryctola<br>gus<br>cuniculu<br>s |



|   |      |   |   |       |        |        |        |        |   |        |                              |                                  |
|---|------|---|---|-------|--------|--------|--------|--------|---|--------|------------------------------|----------------------------------|
| 1 | 1.00 | 1 | 1 | 0     | 0      | 0      | 0.007  | 0.001  | t | 117211 | GYYSWI<br>RQPPGKG<br>EEWIG   | Mus<br>musculu<br>s              |
| 1 | 1.00 | 1 | 1 | 0     | 0      | 0      | 0.007  | 0.001  | t | 18441  | FYNQKFKG<br>KATL             | Mus<br>musculu<br>s              |
| 1 | 1.00 | 1 | 1 | -0.01 | -0.013 | -0.016 | -0.01  | -0.01  | t | 31491  | KKAIER                       | Oryctola<br>gus<br>cuniculu<br>s |
| 1 | 1.00 | 1 | 1 | 0.02  | 0.022  | 0.021  | 0.017  | 0.02   | t | 8478   | DGRGAQV<br>YINGG             | Homo<br>sapiens                  |
| 1 | 1.00 | 1 | 1 | 0.01  | 0.01   | 0.01   | 0.01   | 0.01   | t | 19005  | GDINKVLE<br>KLGYS            | Mus<br>musculu<br>s              |
| 1 | 1.00 | 1 | 1 | 0.01  | 0.01   | 0.01   | 0.01   | 0.01   | t | 19005  | GDINKVLE<br>KLGYS            | Mus<br>musculu<br>s              |
| 1 | 1.00 | 1 | 1 | 0.02  | 0.018  | 0.02   | 0.019  | 0.018  | t | 123856 | YCDYCDTY<br>LT               | Homo<br>sapiens                  |
| 1 | 1.00 | 1 | 1 | -0.05 | -0.048 | -0.05  | -0.043 | -0.049 | t | 118361 | FRFLALKLY<br>FSFTRP          | Homo<br>sapiens                  |
| 1 | 1.00 | 1 | 1 | 0.03  | 0.03   | 0.023  | 0.03   | 0.029  | t | 131114 | TQLDELLT<br>EHRMTW<br>DPAQPP | Homo<br>sapiens                  |
| 1 | 1.00 | 1 | 1 | 0.06  | 0.058  | 0.061  | 0.053  | 0.06   | t | 134786 | RPVDQY                       | Mus<br>musculu<br>s              |
| 1 | 1.00 | 1 | 1 | 0.02  | 0.024  | 0.015  | 0.017  | 0.017  | t | 115228 | ELKDLKGY<br>GG               | Homo<br>sapiens                  |
| 1 | 1.00 | 1 | 1 | 0.02  | 0.018  | 0.012  | 0.017  | 0.019  | t | 73311  | YAAANPT<br>GPASVQG<br>MSQDPV | Mus<br>musculu<br>s              |
| 1 | 1.00 | 1 | 1 | 0.01  | 0.01   | 0.01   | 0.008  | 0.01   | t | 6059   | CCDLAP                       | Homo<br>sapiens                  |
| 1 | 1.00 | 1 | 1 | 0     | 0.002  | -0.005 | -0.003 | 0      | t | 159063 | RKAADTFN<br>FKTFFHT          | Homo<br>sapiens                  |
| 1 | 1.00 | 1 | 1 | -0.01 | -0.008 | -0.01  | -0.009 | -0.012 | t | 146963 | GGEDVAV<br>FARGPQ            | Homo<br>sapiens                  |
| 1 | 1.00 | 1 | 1 | -0.02 | -0.018 | -0.025 | -0.019 | -0.02  | t | 20084  | GGVYLLPR<br>RGPRLG           | Homo<br>sapiens                  |

|   |      |   |   |       |        |        |        |        |   |        |                            |                       |
|---|------|---|---|-------|--------|--------|--------|--------|---|--------|----------------------------|-----------------------|
| 1 | 1.00 | 1 | 1 | 0.01  | 0.012  | 0.019  | 0.011  | 0.01   | t | 75560  | YQTEKFVK                   | Homo sapiens          |
| 1 | 1.00 | 1 | 1 | -0.01 | -0.012 | -0.018 | -0.011 | -0.012 | t | 2040   | AINRRVE                    | Mus musculus          |
| 1 | 1.00 | 1 | 1 | 0     | 0.002  | 0      | 0.003  | -0.001 | t | 35397  | LEDPASRD<br>LV             | Homo sapiens          |
| 1 | 1.00 | 1 | 1 | 0.01  | 0.008  | 0.003  | 0.013  | 0.012  | t | 100477 | RNKTQEE<br>HLK             | Mus musculus          |
| 1 | 1.00 | 1 | 1 | 0.04  | 0.037  | 0.046  | 0.04   | 0.039  | t | 12981  | ELDGDQM<br>I               | Oryctolagus cuniculus |
| 1 | 1.00 | 1 | 1 | 0     | -0.01  | 0      | 0.001  | 0      | t | 24693  | HRMAWD<br>MM               | Homo sapiens          |
| 1 | 1.00 | 1 | 1 | 0.05  | 0.048  | 0.043  | 0.053  | 0.053  | t | 106771 | RERMS                      | Mus musculus          |
| 1 | 1.00 | 1 | 1 | 0     | 0.002  | 0.005  | 0.001  | 0      | t | 23128  | GVRVCE                     | Homo sapiens          |
| 1 | 1.00 | 1 | 1 | 0.08  | 0.083  | 0.08   | 0.08   | 0.078  | t | 113679 | PEVPEVED<br>E              | Mus musculus          |
| 1 | 1.00 | 1 | 1 | 0     | -0.01  | 0      | 0.001  | 0      | t | 24694  | HRMAWD<br>MMM              | Homo sapiens          |
| 1 | 1.00 | 1 | 1 | 0.02  | 0.02   | 0.02   | 0.026  | 0.02   | t | 76350  | YVLLSEKKI<br>S             | Homo sapiens          |
| 1 | 1.00 | 1 | 1 | -0.03 | -0.028 | -0.03  | -0.029 | -0.03  | t | 48005  | PIVATNW<br>QK              | Homo sapiens          |
| 1 | 1.00 | 1 | 1 | 0.02  | 0.02   | 0.02   | 0.02   | 0.018  | t | 75391  | YPQPQFP<br>SQ              | Mus musculus          |
| 1 | 1.00 | 1 | 1 | 0     | 0      | 0.003  | 0.003  | -0.004 | t | 115628 | LPCRISPGK<br>NAT           | Homo sapiens          |
| 1 | 1.00 | 1 | 1 | 0     | 0      | -0.017 | 0      | 0.002  | t | 8920   | DKLAKEQK<br>SKQNIGAL<br>KQ | Mus musculus          |

|   |      |   |   |       |        |        |        |       |   |        |                              |                                  |
|---|------|---|---|-------|--------|--------|--------|-------|---|--------|------------------------------|----------------------------------|
| 1 | 1.00 | 1 | 1 | 0     | 0      | -0.017 | 0      | 0.002 | t | 8920   | DKLAKEQK<br>SKQNIGAL<br>KQ   | Mus<br>musculu<br>s              |
| 1 | 1.00 | 1 | 1 | -0.04 | -0.038 | -0.042 | -0.036 | -0.04 | t | 107305 | CKVSNKA                      | Homo<br>sapiens                  |
| 1 | 1.00 | 1 | 1 | 0.04  | 0.042  | 0.033  | 0.037  | 0.037 | t | 106569 | KLSEEVKT<br>TEQK             | Homo<br>sapiens                  |
| 1 | 1.00 | 1 | 1 | 0.01  | 0.007  | -0.002 | 0.01   | 0.011 | t | 36543  | LIGVKGSS                     | Oryctola<br>gus<br>cuniculu<br>s |
| 1 | 1.00 | 1 | 1 | 0.03  | 0.032  | 0.024  | 0.03   | 0.032 | t | 122786 | HESNEMQ<br>PT                | Rattus<br>norvegic<br>us         |
| 1 | 1.00 | 1 | 1 | 0.06  | 0.06   | 0.062  | 0.06   | 0.059 | t | 114193 | AEYYNKQY<br>LEQTRAEL<br>DT   | Mus<br>musculu<br>s              |
| 1 | 1.00 | 1 | 1 | 0.07  | 0.072  | 0.062  | 0.071  | 0.07  | t | 66906  | TTVSTEQN<br>VPDPQVGI<br>TTMK | Homo<br>sapiens                  |
| 1 | 1.00 | 1 | 1 | -0.02 | -0.022 | -0.025 | -0.021 | -0.02 | t | 56699  | SAAFYYRV                     | Mus<br>musculu<br>s              |
| 1 | 1.00 | 1 | 1 | -0.02 | -0.018 | -0.011 | -0.013 | -0.02 | t | 108895 | EGNVFSC                      | Homo<br>sapiens                  |
| 1 | 1.00 | 1 | 1 | 0     | 0      | -0.007 | 0      | 0     | t | 67986  | VDINPEL                      | Mus<br>musculu<br>s              |
| 1 | 1.00 | 1 | 1 | 0     | 0      | -0.007 | 0      | 0     | t | 53596  | RENP                         | Mus<br>musculu<br>s              |
| 1 | 1.00 | 1 | 1 | 0     | 0      | -0.007 | 0      | 0     | t | 13532  | ENP                          | Mus<br>musculu<br>s              |
| 1 | 1.00 | 1 | 1 | 0     | 0      | -0.007 | 0      | 0     | t | 29875  | KALRENP                      | Mus<br>musculu<br>s              |
| 1 | 1.00 | 1 | 1 | 0     | 0      | -0.007 | 0      | 0     | t | 13058  | ELFSEIQEI<br>R               | Mus<br>musculu<br>s              |
| 1 | 1.00 | 1 | 1 | 0     | 0      | -0.007 | 0      | 0     | t | 29875  | KALRENP                      | Mus<br>musculu<br>s              |
| 1 | 1.00 | 1 | 1 | 0     | 0      | -0.007 | 0      | 0     | t | 29875  | KALRENP                      | Mus<br>musculu<br>s              |

|   |      |   |   |       |        |        |        |        |   |        |                              |                          |
|---|------|---|---|-------|--------|--------|--------|--------|---|--------|------------------------------|--------------------------|
| 1 | 1.00 | 1 | 1 | -0.02 | -0.02  | -0.023 | -0.02  | -0.023 | t | 125238 | RLPLPPNQ<br>KR               | Mus<br>musculu<br>s      |
| 1 | 1.00 | 1 | 1 | 0.02  | 0.024  | 0.006  | 0.02   | 0.022  | t | 45931  | NSNNKEYT                     | Cavia<br>porcellu<br>s   |
| 1 | 1.00 | 1 | 1 | 0     | 0      | 0      | 0      | -0.002 | t | 62858  | TAGLVGLL<br>TPG              | Rattus<br>norvegic<br>us |
| 1 | 1.00 | 1 | 1 | 0.01  | 0.012  | 0.015  | 0.011  | 0.01   | t | 56273  | RVEFLV                       | Homo<br>sapiens          |
| 1 | 1.00 | 1 | 1 | 0     | -0.002 | -0.008 | -0.001 | 0      | t | 11353  | EDINGIRR<br>PK               | Mus<br>musculu<br>s      |
| 1 | 1.00 | 1 | 1 | 0.01  | 0.01   | 0.008  | 0.017  | 0.01   | t | 127938 | AWAKRAR<br>GNVFMYP<br>APENYG | Homo<br>sapiens          |
| 1 | 1.00 | 1 | 1 | 0.02  | 0.02   | 0.02   | 0.024  | 0.02   | t | 135933 | GVELRQLT<br>PEQL             | Homo<br>sapiens          |
| 1 | 1.00 | 1 | 1 | 0.02  | 0.02   | 0.02   | 0.024  | 0.02   | t | 131437 | GASVKVT                      | Homo<br>sapiens          |
| 1 | 1.00 | 1 | 1 | -0.01 | -0.008 | -0.01  | -0.013 | -0.013 | t | 78145  | EKPAEEEE<br>P                | Homo<br>sapiens          |
| 1 | 1.00 | 1 | 1 | 0.02  | 0.02   | 0.018  | 0.017  | 0.018  | t | 55861  | RSILDLDLT<br>K               | Homo<br>sapiens          |
| 1 | 1.00 | 1 | 1 | 0.08  | 0.08   | 0.08   | 0.08   | 0.08   | t | 99596  | RADEEEEE<br>DEDEYEEY         | Homo<br>sapiens          |
| 1 | 1.00 | 1 | 1 | 0     | -0.002 | -0.006 | -0.001 | 0      | t | 133724 | TVCAGYC<br>MTRDVN            | Mus<br>musculu<br>s      |
| 1 | 1.00 | 1 | 1 | -0.01 | -0.008 | -0.005 | -0.003 | -0.01  | t | 132268 | ENGYLME<br>AAP               | Homo<br>sapiens          |
| 1 | 1.00 | 1 | 1 | 0     | 0.002  | 0      | 0.003  | 0      | t | 36278  | LGQGSFRP<br>SQQN             | Homo<br>sapiens          |
| 1 | 1.00 | 1 | 1 | 0.01  | 0.008  | -0.006 | 0.007  | 0.01   | t | 10876  | DYEKQINK<br>LKN              | Mus<br>musculu<br>s      |
| 1 | 1.00 | 1 | 1 | 0.06  | 0.06   | 0.051  | 0.063  | 0.06   | t | 68883  | VHRLEGVS<br>YNIGSQE          | Homo<br>sapiens          |
| 1 | 1.00 | 1 | 1 | 0     | 0      | 0      | 0.003  | -0.001 | t | 44920  | NLVPMVA<br>TV                | Homo<br>sapiens          |

|   |      |   |   |       |        |        |        |        |   |        |                             |                                  |
|---|------|---|---|-------|--------|--------|--------|--------|---|--------|-----------------------------|----------------------------------|
| 1 | 1.00 | 1 | 1 | 0.01  | 0.007  | 0.002  | 0.01   | 0.009  | t | 62872  | TAGWTFG<br>AGAALQIP<br>FA   | Oryctola<br>gus<br>cuniculu<br>s |
| 1 | 1.00 | 1 | 1 | 0.01  | 0.01   | 0.01   | 0.016  | 0.012  | t | 53281  | RCIPALDSL<br>T              | Homo<br>sapiens                  |
| 1 | 1.00 | 1 | 1 | -0.02 | -0.024 | -0.021 | -0.019 | -0.021 | t | 43825  | NFELCDNP<br>FFAVSKPM<br>G   | Oryctola<br>gus<br>cuniculu<br>s |
| 1 | 1.00 | 1 | 1 | -0.06 | -0.06  | -0.059 | -0.06  | -0.062 | t | 49     | AAALPGKC<br>GV              | Homo<br>sapiens                  |
| 1 | 1.00 | 1 | 1 | 0     | -0.002 | 0      | -0.001 | -0.003 | t | 39183  | LRRDLAS<br>REAKKQVE<br>KALE | Mus<br>musculu<br>s              |
| 1 | 1.00 | 1 | 1 | 0     | -0.002 | 0      | -0.001 | -0.003 | t | 39183  | LRRDLAS<br>REAKKQVE<br>KALE | Mus<br>musculu<br>s              |
| 1 | 1.00 | 1 | 1 | 0     | -0.002 | 0      | -0.001 | -0.003 | t | 39183  | LRRDLAS<br>REAKKQVE<br>KALE | Mus<br>musculu<br>s              |
| 1 | 1.00 | 1 | 1 | 0.02  | 0.024  | 0.011  | 0.017  | 0.018  | t | 113756 | QGQQSGQ<br>GQQGYYS          | Homo<br>sapiens                  |
| 1 | 1.00 | 1 | 1 | -0.05 | -0.046 | -0.062 | -0.053 | -0.052 | t | 104993 | SWRSKYG<br>WTA              | Homo<br>sapiens                  |
| 1 | 1.00 | 1 | 1 | 0     | -0.003 | 0.002  | 0      | -0.001 | t | 120314 | WKAEFHR<br>WSS              | Oryctola<br>gus<br>cuniculu<br>s |
| 1 | 1.00 | 1 | 1 | 0.02  | 0.022  | 0.013  | 0.021  | 0.02   | t | 51572  | QLVLGENL<br>DTERILAS        | Homo<br>sapiens                  |
| 1 | 1.00 | 1 | 1 | 0     | 0.002  | 0.005  | 0.007  | -0.002 | t | 122341 | ESGFLREV<br>LNAVPLLL        | Homo<br>sapiens                  |
| 1 | 1.00 | 1 | 1 | 0.01  | 0.01   | 0.01   | 0.01   | 0.009  | t | 32807  | KPNLSSKR<br>SELSQLS         | Mus<br>musculu<br>s              |
| 1 | 1.00 | 1 | 1 | 0     | 0.003  | -0.014 | 0      | 0      | t | 39788  | LTAELKIYS<br>VIQAEINK<br>HL | Mus<br>musculu<br>s              |

|   |      |   |   |       |        |        |        |        |   |        |                             |                                  |
|---|------|---|---|-------|--------|--------|--------|--------|---|--------|-----------------------------|----------------------------------|
| 1 | 1.00 | 1 | 1 | 0.02  | 0.02   | 0.022  | 0.02   | 0.017  | t | 103544 | RGEHRDE<br>HTQDAGD<br>K     | Homo<br>sapiens                  |
| 1 | 1.00 | 1 | 1 | 0.03  | 0.03   | 0.03   | 0.03   | 0.028  | t | 106850 | SLQQLYDE<br>YGP             | Mus<br>musculu<br>s              |
| 1 | 1.00 | 1 | 1 | 0.05  | 0.05   | 0.057  | 0.05   | 0.05   | t | 130850 | GGIYQDLV<br>S               | Homo<br>sapiens                  |
| 1 | 1.00 | 1 | 1 | 0.02  | 0.018  | 0.024  | 0.017  | 0.018  | t | 6068   | CCPDKNKS                    | Mus<br>musculu<br>s              |
| 1 | 1.00 | 1 | 1 | 0     | 0      | 0      | 0.003  | -0.001 | t | 62353  | SVTEEIAEE<br>DKSVTEEI<br>AV | Homo<br>sapiens                  |
| 1 | 1.00 | 1 | 1 | 0     | -0.003 | 0      | 0.003  | -0.001 | t | 11819  | EENVEHD<br>A                | Homo<br>sapiens                  |
| 1 | 1.00 | 1 | 1 | 0.02  | 0.019  | 0.016  | 0.023  | 0.02   | t | 73191  | WVFACAP<br>DRCPTC           | Myodes<br>glareolu<br>s          |
| 1 | 1.00 | 1 | 1 | 0     | 0.003  | 0      | 0      | 0.001  | t | 146337 | IPEEIKQL                    | Mus<br>musculu<br>s              |
| 1 | 1.00 | 1 | 1 | 0     | 0      | 0      | 0      | 0.001  | t | 146337 | IPEEIKQL                    | Mus<br>musculu<br>s              |
| 1 | 1.00 | 1 | 1 | 0     | 0      | 0      | 0      | 0.001  | t | 115376 | LTKCEVFR<br>EL              | Homo<br>sapiens                  |
| 1 | 1.00 | 1 | 1 | -0.01 | -0.011 | -0.003 | -0.008 | -0.012 | t | 130513 | IGYQPSMP<br>LDMP            | Camelus<br>dromed<br>arius       |
| 1 | 1.00 | 1 | 1 | -0.01 | -0.01  | -0.017 | -0.01  | -0.008 | t | 7489   | DADYHRV<br>MYA              | Oryctola<br>gus<br>cuniculu<br>s |
| 1 | 1.00 | 1 | 1 | 0.04  | 0.038  | 0.038  | 0.041  | 0.04   | t | 142125 | DLASREA<br>KKQLEAEQ<br>QKLE | Homo<br>sapiens                  |
| 1 | 1.00 | 1 | 1 | 0     | 0.003  | 0      | 0      | 0      | t | 14436  | ETKAVYPY                    | Equus<br>caballus                |

|   |      |   |   |       |        |        |        |        |   |        |                          |                              |
|---|------|---|---|-------|--------|--------|--------|--------|---|--------|--------------------------|------------------------------|
| 1 | 1.00 | 1 | 1 | 0     | 0      | 0      | 0      | 0      | t | 14436  | ETKAVYPY                 | Equus<br>caballus            |
| 1 | 1.00 | 1 | 1 | 0     | 0      | 0      | 0      | 0      | t | 14436  | ETKAVYPY                 | Mus<br>musculus              |
| 1 | 1.00 | 1 | 1 | 0.04  | 0.045  | 0.045  | 0.04   | 0.04   | t | 31056  | KGSDVESY<br>SSMPPL       | Homo<br>sapiens              |
| 1 | 1.00 | 1 | 1 | 0.01  | 0.012  | 0.01   | 0.011  | 0.01   | t | 41015  | MADNGTI<br>TVEELKQL<br>L | Homo<br>sapiens              |
| 1 | 1.00 | 1 | 1 | -0.03 | -0.032 | -0.022 | -0.029 | -0.034 | t | 149384 | MSLPGRW<br>KPK           | Mus<br>musculus              |
| 1 | 1.00 | 1 | 1 | 0.01  | 0.014  | 0.01   | 0.007  | 0.009  | t | 106330 | DFDCSKIQ<br>ST           | Homo<br>sapiens              |
| 1 | 1.00 | 1 | 1 | -0.03 | -0.028 | -0.03  | -0.023 | -0.03  | t | 134782 | RGRGRGG<br>PRR           | Homo<br>sapiens              |
| 1 | 1.00 | 1 | 1 | 0.02  | 0.025  | 0.013  | 0.02   | 0.02   | t | 138937 | YIGEVLSV<br>V            | Homo<br>sapiens              |
| 1 | 1.00 | 1 | 1 | 0.04  | 0.04   | 0.04   | 0.04   | 0.04   | t | 18494  | GAAAAGA<br>VVGGLG        | Oryctola<br>gus<br>cuniculus |
| 1 | 1.00 | 1 | 1 | 0     | 0.004  | 0      | 0.001  | -0.002 | t | 61186  | SSLRDHIN<br>VIVS         | Homo<br>sapiens              |
| 1 | 1.00 | 1 | 1 | -0.02 | -0.018 | -0.022 | -0.013 | -0.019 | t | 118200 | VGRATPPP<br>GIMA         | Homo<br>sapiens              |
| 1 | 1.00 | 1 | 1 | 0.02  | 0.023  | 0.012  | 0.02   | 0.024  | t | 76268  | YVFDKSEL<br>TN           | Mus<br>musculus              |
| 1 | 1.00 | 1 | 1 | 0     | 0      | 0      | 0      | 0      | t | 9896   | DQRPYCW<br>HYP           | Homo<br>sapiens              |
| 1 | 1.00 | 1 | 1 | -0.02 | -0.02  | -0.02  | -0.02  | -0.02  | t | 34310  | KWKYENP<br>CKKM          | Mus<br>musculus              |

|   |      |   |   |       |        |        |        |        |   |        |                           |                     |
|---|------|---|---|-------|--------|--------|--------|--------|---|--------|---------------------------|---------------------|
| 1 | 1.00 | 1 | 1 | -0.03 | -0.029 | -0.03  | -0.027 | -0.03  | t | 78244  | PMWPM                     | Equus<br>caballus   |
| 1 | 1.00 | 1 | 1 | -0.02 | -0.02  | -0.023 | -0.02  | -0.021 | t | 28371  | IRQGTDYK<br>HWPQIAQ<br>FA | Homo<br>sapiens     |
| 1 | 1.00 | 1 | 1 | 0.06  | 0.06   | 0.052  | 0.06   | 0.06   | t | 106606 | LHFVKGEE<br>KEPS          | Homo<br>sapiens     |
| 1 | 1.00 | 1 | 1 | 0.03  | 0.034  | 0.02   | 0.027  | 0.03   | t | 31406  | KIQRDEDS<br>YGRDPYS       | Homo<br>sapiens     |
| 1 | 1.00 | 1 | 1 | 0.02  | 0.022  | 0.02   | 0.021  | 0.02   | t | 34963  | LASLCNPK<br>PSDAPVT       | Homo<br>sapiens     |
| 1 | 1.00 | 1 | 1 | 0.02  | 0.024  | 0.02   | 0.021  | 0.02   | t | 34963  | LASLCNPK<br>PSDAPVT       | Homo<br>sapiens     |
| 1 | 1.00 | 1 | 1 | 0.03  | 0.032  | 0.023  | 0.026  | 0.028  | t | 50504  | QDPDRRD<br>PYSPSPYD       | Homo<br>sapiens     |
| 1 | 1.00 | 1 | 1 | 0.05  | 0.05   | 0.05   | 0.05   | 0.05   | t | 134421 | KQIPECEN<br>VKTTQCVF      | Mus<br>musculu<br>s |
| 1 | 1.00 | 1 | 1 | 0.05  | 0.05   | 0.05   | 0.05   | 0.05   | t | 134421 | KQIPECEN<br>VKTTQCVF      | Mus<br>musculu<br>s |
| 1 | 1.00 | 1 | 1 | -0.02 | -0.018 | -0.02  | -0.017 | -0.02  | t | 49707  | PTLSEIKGV<br>IVHRLE       | Homo<br>sapiens     |
| 1 | 1.00 | 1 | 1 | 0.01  | 0.021  | 0.01   | 0.01   | 0.008  | t | 156896 | KHTSLAS                   | Gallus<br>gallus    |
| 1 | 1.00 | 1 | 1 | 0     | -0.002 | -0.004 | -0.001 | 0      | t | 10824  | DWSERIRE<br>FM            | Mus<br>musculu<br>s |
| 1 | 1.00 | 1 | 1 | -0.01 | -0.005 | -0.017 | -0.007 | -0.01  | t | 33747  | KTKRNTNR<br>RPQDVKF       | Homo<br>sapiens     |
| 1 | 1.00 | 1 | 1 | -0.02 | -0.016 | -0.016 | -0.013 | -0.02  | t | 144644 | FRQQHKGK<br>TVV           | Homo<br>sapiens     |



|   |      |   |   |       |        |       |        |        |   |        |                              |                                  |
|---|------|---|---|-------|--------|-------|--------|--------|---|--------|------------------------------|----------------------------------|
| 1 | 1.00 | 1 | 1 | 0.01  | 0.024  | 0.01  | 0.01   | 0.009  | t | 134128 | LASAHRPQ<br>GPAD             | Rattus<br>rattus                 |
| 1 | 1.00 | 1 | 1 | 0.01  | 0.01   | 0.008 | 0.01   | 0.008  | t | 55936  | RSQSRESQ<br>CKLG             | Homo<br>sapiens                  |
| 1 | 1.00 | 1 | 1 | 0.01  | 0.008  | 0.006 | 0.007  | 0.008  | t | 79624  | PEEQVPQL<br>IPPPIIPRA<br>G   | Mus<br>musculu<br>s              |
| 1 | 1.00 | 1 | 1 | 0     | 0      | 0     | 0      | -0.002 | t | 70390  | VPNLRGDL<br>QVLAQKV<br>ART   | Cavia<br>porcellu<br>s           |
| 1 | 1.00 | 1 | 1 | 0     | 0      | 0     | 0      | -0.002 | t | 70390  | VPNLRGDL<br>QVLAQKV<br>ART   | Bos<br>taurus                    |
| 1 | 1.00 | 1 | 1 | 0     | 0      | 0     | 0      | -0.002 | t | 70390  | VPNLRGDL<br>QVLAQKV<br>ART   | Cavia<br>porcellu<br>s           |
| 1 | 1.00 | 1 | 1 | 0     | 0      | 0     | 0      | -0.002 | t | 70390  | VPNLRGDL<br>QVLAQKV<br>ART   | Bos<br>taurus                    |
| 1 | 1.00 | 1 | 1 | 0     | 0      | 0     | 0      | -0.002 | t | 54058  | RHKQKIVA<br>PVKQTL           | Cavia<br>porcellu<br>s           |
| 1 | 1.00 | 1 | 1 | 0     | 0      | 0     | 0      | -0.002 | t | 54058  | RHKQKIVA<br>PVKQTL           | Cavia<br>porcellu<br>s           |
| 1 | 1.00 | 1 | 1 | 0     | 0      | 0     | 0      | -0.002 | t | 135970 | PPGMRPP<br>MGPMGIP<br>P      | Homo<br>sapiens                  |
| 1 | 1.00 | 1 | 1 | -0.03 | -0.026 | -0.03 | -0.027 | -0.03  | t | 136415 | KFAGRNF<br>R<br>NPLAK        | Homo<br>sapiens                  |
| 1 | 1.00 | 1 | 1 | 0     | -0.003 | 0     | 0      | -0.002 | t | 110385 | QLYKTCKQ<br>AGTCPPDII<br>PKV | Oryctola<br>gus<br>cuniculu<br>s |

|   |      |   |   |       |        |       |       |        |   |       |                              |                                  |
|---|------|---|---|-------|--------|-------|-------|--------|---|-------|------------------------------|----------------------------------|
| 1 | 1.00 | 1 | 1 | 0     | 0      | 0     | 0     | -0.002 | t | 70390 | VPNLRGDL<br>QVLAQKV<br>ART   | Ovis<br>aries                    |
| 1 | 1.00 | 1 | 1 | 0     | -0.003 | 0     | 0     | -0.002 | t | 95040 | SHRPREAK                     | Oryctola<br>gus<br>cuniculu<br>s |
| 1 | 1.00 | 1 | 1 | 0     | -0.004 | 0     | 0     | -0.002 | t | 70391 | VPNLRGDL<br>QVLAQKV<br>ARTLP | Mus<br>musculu<br>s              |
| 1 | 1.00 | 1 | 1 | 0     | 0      | 0     | 0     | -0.002 | t | 70390 | VPNLRGDL<br>QVLAQKV<br>ART   | Ovis<br>aries                    |
| 1 | 1.00 | 1 | 1 | 0     | -0.003 | 0     | 0     | -0.002 | t | 95032 | PAGTGDR                      | Oryctola<br>gus<br>cuniculu<br>s |
| 1 | 1.00 | 1 | 1 | 0     | -0.003 | 0     | 0     | -0.002 | t | 71328 | VTGKVEYT<br>KYND             | Oryctola<br>gus<br>cuniculu<br>s |
| 1 | 1.00 | 1 | 1 | 0     | 0      | 0     | 0     | -0.002 | t | 36958 | LKMADPN<br>RFRGKD            | Mus<br>musculu<br>s              |
| 1 | 1.00 | 1 | 1 | 0     | -0.004 | 0     | 0     | -0.002 | t | 54058 | RHKQKIVA<br>PVKQTL           | Mus<br>musculu<br>s              |
| 1 | 1.00 | 1 | 1 | 0     | -0.003 | 0     | 0     | -0.002 | t | 34537 | KYNDDDT<br>FTVKVGD           | Oryctola<br>gus<br>cuniculu<br>s |
| 1 | 1.00 | 1 | 1 | 0     | -0.003 | 0     | 0     | -0.002 | t | 20710 | GKVEYTKY<br>NDDDTFT<br>VKVGD | Oryctola<br>gus<br>cuniculu<br>s |
| 1 | 1.00 | 1 | 1 | 0.03  | 0.03   | 0.025 | 0.027 | 0.031  | t | 50901 | QGLRGEE<br>MEEMV             | Homo<br>sapiens                  |
| 1 | 1.00 | 1 | 1 | -0.01 | -0.01  | -0.01 | -0.01 | -0.01  | t | 78455 | LPTNLTQ                      | Mus<br>musculu<br>s              |

|   |      |   |   |       |        |        |        |        |   |        |                    |                       |
|---|------|---|---|-------|--------|--------|--------|--------|---|--------|--------------------|-----------------------|
| 1 | 1.00 | 1 | 1 | -0.04 | -0.042 | -0.041 | -0.041 | -0.042 | t | 56075  | RTHRQLY            | Mus musculus          |
| 1 | 1.00 | 1 | 1 | 0     | 0      | -0.009 | 0      | 0      | t | 64534  | TKDASIDYHE         | Mus musculus          |
| 1 | 1.00 | 1 | 1 | 0.04  | 0.04   | 0.04   | 0.04   | 0.04   | t | 115671 | AAMEL              | Homo sapiens          |
| 1 | 1.00 | 1 | 1 | 0.04  | 0.04   | 0.04   | 0.04   | 0.04   | t | 115671 | AAMEL              | Homo sapiens          |
| 1 | 1.00 | 1 | 1 | 0.03  | 0.034  | 0.03   | 0.031  | 0.03   | t | 137882 | GQNVLSAD           | Homo sapiens          |
| 1 | 1.00 | 1 | 1 | 0.03  | 0.03   | 0.03   | 0.03   | 0.03   | t | 156923 | NLHTSF             | Gallus gallus         |
| 1 | 1.00 | 1 | 1 | -0.02 | -0.016 | -0.02  | -0.023 | -0.022 | t | 106408 | EVPPKKCDIKTTL      | Homo sapiens          |
| 1 | 1.00 | 1 | 1 | -0.03 | -0.028 | -0.03  | -0.023 | -0.03  | t | 119580 | FMESGEWVIKESRGWVKH | Homo sapiens          |
| 1 | 1.00 | 1 | 1 | 0.03  | 0.03   | 0.03   | 0.03   | 0.028  | t | 4429   | ASGQ               | Mus musculus          |
| 1 | 1.00 | 1 | 1 | 0.07  | 0.07   | 0.066  | 0.07   | 0.07   | t | 157173 | DSDDTEEGEDEG       | Canis lupus           |
| 1 | 1.00 | 1 | 1 | -0.02 | -0.023 | -0.027 | -0.02  | -0.021 | t | 61308  | SSQSFRRL           | Oryctolagus cuniculus |
| 1 | 1.00 | 1 | 1 | -0.03 | -0.03  | -0.04  | -0.027 | -0.028 | t | 52186  | QRANLGA FQN        | Homo sapiens          |
| 1 | 1.00 | 1 | 1 | 0.02  | 0.02   | 0.017  | 0.02   | 0.02   | t | 98677  | AASDISLLDA         | Homo sapiens          |
| 1 | 1.00 | 1 | 1 | -0.01 | -0.006 | -0.003 | -0.013 | -0.012 | t | 106411 | FALEAYAFDI         | Homo sapiens          |
| 1 | 1.00 | 1 | 1 | 0.01  | 0.008  | 0.01   | 0.017  | 0.01   | t | 123701 | RGVGGPSQ           | Homo sapiens          |

|   |      |   |   |       |        |        |        |        |   |        |                          |                                  |
|---|------|---|---|-------|--------|--------|--------|--------|---|--------|--------------------------|----------------------------------|
| 1 | 1.00 | 1 | 1 | 0.02  | 0.024  | 0.008  | 0.021  | 0.022  | t | 7765   | DDEHVEEP<br>TVA          | Homo<br>sapiens                  |
| 1 | 1.00 | 1 | 1 | 0.02  | 0.022  | 0.008  | 0.021  | 0.022  | t | 7765   | DDEHVEEP<br>TVA          | Homo<br>sapiens                  |
| 1 | 1.00 | 1 | 1 | 0.01  | 0.01   | 0.005  | 0.01   | 0.008  | t | 151672 | KLYTLVLT<br>PDAPSRK      | Mus<br>musculu<br>s              |
| 1 | 1.00 | 1 | 1 | 0     | 0      | 0      | 0.009  | 0      | t | 132099 | TLNELPNR<br>T            | Homo<br>sapiens                  |
| 1 | 1.00 | 1 | 1 | 0.01  | 0.006  | 0.008  | 0.009  | 0.01   | t | 45693  | NRKNQLK<br>DMA           | Oryctola<br>gus<br>cuniculu<br>s |
| 1 | 1.00 | 1 | 1 | 0     | 0      | 0      | 0      | 0      | t | 117909 | HKGFKGV<br>D             | Homo<br>sapiens                  |
| 1 | 1.00 | 1 | 1 | 0.03  | 0.03   | 0.03   | 0.034  | 0.03   | t | 135988 | RTALLDAA<br>GVAS         | Homo<br>sapiens                  |
| 1 | 1.00 | 1 | 1 | 0.03  | 0.037  | 0.033  | 0.033  | 0.029  | t | 64573  | TKGENFTE<br>TD           | Gallus<br>gallus                 |
| 1 | 1.00 | 1 | 1 | -0.01 | -0.01  | -0.01  | -0.006 | -0.01  | t | 135971 | PRPRDRSG<br>LAPK         | Homo<br>sapiens                  |
| 1 | 1.00 | 1 | 1 | 0.01  | 0.01   | 0.01   | 0.01   | 0.009  | t | 33122  | KRELRLNP<br>QQ           | Homo<br>sapiens                  |
| 1 | 1.00 | 1 | 1 | -0.02 | -0.02  | -0.033 | -0.02  | -0.02  | t | 159035 | NRFEHQM<br>WESVRDE<br>LN | Mus<br>musculu<br>s              |
| 1 | 1.00 | 1 | 1 | -0.02 | -0.024 | -0.025 | -0.021 | -0.02  | t | 69666  | VLNLTTW<br>N             | Oryctola<br>gus<br>cuniculu<br>s |
| 1 | 1.00 | 1 | 1 | 0.01  | 0.01   | 0.019  | 0.01   | 0.01   | t | 139800 | LGPYSFV                  | Ovis<br>aries                    |
| 1 | 1.00 | 1 | 1 | 0.02  | 0.018  | 0.022  | 0.023  | 0.021  | t | 99604  | REDLR                    | Mus<br>musculu<br>s              |
| 1 | 1.00 | 1 | 1 | -0.07 | -0.072 | -0.079 | -0.067 | -0.067 | t | 115540 | VKNKRTEFL<br>SPWISNI     | Mus<br>musculu<br>s              |

|   |      |   |   |       |        |        |        |        |   |        |                         |                                  |
|---|------|---|---|-------|--------|--------|--------|--------|---|--------|-------------------------|----------------------------------|
| 1 | 1.00 | 1 | 1 | -0.08 | -0.082 | -0.079 | -0.081 | -0.082 | t | 59326  | SLLTYMK<br>M            | Mus<br>musculu<br>s              |
| 1 | 1.00 | 1 | 1 | -0.01 | -0.006 | -0.02  | -0.009 | -0.01  | t | 58403  | SHRGVIAD<br>NQAKWA<br>V | Homo<br>sapiens                  |
| 1 | 1.00 | 1 | 1 | -0.01 | -0.008 | -0.02  | -0.009 | -0.01  | t | 58403  | SHRGVIAD<br>NQAKWA<br>V | Homo<br>sapiens                  |
| 1 | 1.00 | 1 | 1 | -0.01 | -0.008 | -0.02  | -0.009 | -0.01  | t | 58403  | SHRGVIAD<br>NQAKWA<br>V | Homo<br>sapiens                  |
| 1 | 1.00 | 1 | 1 | 0.01  | 0.01   | 0.003  | 0.01   | 0.01   | t | 72503  | WGQGG                   | Mus<br>musculu<br>s              |
| 1 | 1.00 | 1 | 1 | 0.03  | 0.03   | 0.026  | 0.03   | 0.03   | t | 14841  | EVPGSQ                  | Oryctola<br>gus<br>cuniculu<br>s |
| 1 | 1.00 | 1 | 1 | 0     | -0.003 | 0      | 0      | -0.002 | t | 64628  | TKNTNNN<br>LTL          | Oryctola<br>gus<br>cuniculu<br>s |
| 1 | 1.00 | 1 | 1 | 0     | -0.003 | 0      | 0      | -0.002 | t | 95051  | YSQFEKSY                | Oryctola<br>gus<br>cuniculu<br>s |
| 1 | 1.00 | 1 | 1 | 0     | -0.003 | 0      | 0      | -0.002 | t | 64628  | TKNTNNN<br>LTL          | Oryctola<br>gus<br>cuniculu<br>s |
| 1 | 1.00 | 1 | 1 | 0     | -0.003 | 0      | 0      | -0.002 | t | 95032  | PAGTGDR                 | Oryctola<br>gus<br>cuniculu<br>s |
| 1 | 1.00 | 1 | 1 | 0.03  | 0.034  | 0.03   | 0.031  | 0.028  | t | 118497 | LNGKNIED<br>VIAQGIG     | Homo<br>sapiens                  |
| 1 | 1.00 | 1 | 1 | 0.07  | 0.072  | 0.07   | 0.071  | 0.069  | t | 150971 | CDNTCME<br>SVKNGTYD     | Homo<br>sapiens                  |
| 1 | 1.00 | 1 | 1 | 0.01  | 0.012  | 0.01   | 0.011  | 0.01   | t | 50215  | QAAPYIEQ<br>A           | Homo<br>sapiens                  |
| 1 | 1.00 | 1 | 1 | 0.04  | 0.04   | 0.04   | 0.037  | 0.04   | t | 62447  | SWGANDT<br>DVFVL        | Homo<br>sapiens                  |

|   |      |   |   |       |        |        |        |        |   |        |                              |                                  |
|---|------|---|---|-------|--------|--------|--------|--------|---|--------|------------------------------|----------------------------------|
| 1 | 1.00 | 1 | 1 | -0.03 | -0.03  | -0.026 | -0.03  | -0.032 | t | 78628  | DQKPPSR                      | Oryctola<br>gus<br>cuniculu<br>s |
| 1 | 1.00 | 1 | 1 | -0.01 | -0.012 | -0.005 | -0.01  | -0.01  | t | 138440 | IKRYNSTA                     | Oryctola<br>gus<br>cuniculu<br>s |
| 1 | 1.00 | 1 | 1 | -0.04 | -0.044 | -0.06  | -0.047 | -0.04  | t | 127986 | FVGVGAD<br>YRHASCPI<br>DYIIA | Oryctola<br>gus<br>cuniculu<br>s |
| 1 | 1.00 | 1 | 1 | -0.04 | -0.042 | -0.06  | -0.047 | -0.04  | t | 127986 | FVGVGAD<br>YRHASCPI<br>DYIIA | Mus<br>musculu<br>s              |
| 1 | 1.00 | 1 | 1 | 0     | 0.003  | -0.006 | 0      | 0      | t | 28537  | ISIKYDPRK<br>DSEVFA          | Mus<br>musculu<br>s              |
| 1 | 1.00 | 1 | 1 | 0     | -0.002 | 0.003  | -0.001 | -0.002 | t | 14749  | EVKKKSDS                     | Mus<br>musculu<br>s              |
| 1 | 1.00 | 1 | 1 | 0.06  | 0.06   | 0.06   | 0.06   | 0.06   | t | 137551 | PEEVLANA<br>FQISRED          | Homo<br>sapiens                  |
| 1 | 1.00 | 1 | 1 | 0.03  | 0.034  | 0.034  | 0.031  | 0.03   | t | 45659  | NRDFVE                       | Homo<br>sapiens                  |
| 1 | 1.00 | 1 | 1 | 0.03  | 0.03   | 0.02   | 0.033  | 0.032  | t | 34942  | LARGSPPS<br>LASSSASQ<br>LSA  | Homo<br>sapiens                  |
| 1 | 1.00 | 1 | 1 | 0     | 0.002  | -0.002 | 0.003  | 0.003  | t | 9586   | DPAFR                        | Homo<br>sapiens                  |
| 1 | 1.00 | 1 | 1 | 0.01  | 0.006  | -0.002 | 0.009  | 0.01   | t | 10785  | DVVTGAT<br>V                 | Oryctola<br>gus<br>cuniculu<br>s |
| 1 | 1.00 | 1 | 1 | 0     | 0      | -0.017 | 0      | 0.001  | t | 56102  | RTLDQQYK<br>EVKRETDL<br>SHVQ | Mus<br>musculu<br>s              |
| 1 | 1.00 | 1 | 1 | -0.01 | -0.01  | -0.012 | -0.01  | -0.013 | t | 95728  | QPPVSQF<br>HIQGQ             | Homo<br>sapiens                  |
| 1 | 1.00 | 1 | 1 | -0.02 | -0.02  | -0.033 | -0.018 | -0.017 | t | 98697  | AMCNVYI<br>PPYCT             | Homo<br>sapiens                  |

|   |      |   |   |       |        |        |       |        |   |        |                              |                                  |
|---|------|---|---|-------|--------|--------|-------|--------|---|--------|------------------------------|----------------------------------|
| 1 | 1.00 | 1 | 1 | 0.04  | 0.04   | 0.042  | 0.04  | 0.04   | t | 95008  | EDVFQNG<br>FTAW              | Mus<br>musculu<br>s              |
| 1 | 1.00 | 1 | 1 | 0.04  | 0.036  | 0.045  | 0.04  | 0.04   | t | 146471 | NFDIPEEI                     | Oryctola<br>gus<br>cuniculu<br>s |
| 1 | 1.00 | 1 | 1 | 0.01  | 0.014  | -0.001 | 0.007 | 0.01   | t | 21184  | GLVDCYIN<br>L                | Homo<br>sapiens                  |
| 1 | 1.00 | 1 | 1 | -0.02 | -0.02  | -0.029 | -0.02 | -0.02  | t | 102535 | INLVHWN<br>KKKYSSYEE<br>AKKH | Mus<br>musculu<br>s              |
| 1 | 1.00 | 1 | 1 | 0     | 0      | -0.004 | 0     | -0.001 | t | 52082  | QQFPF                        | Mus<br>musculu<br>s              |
| 1 | 1.00 | 1 | 1 | 0.04  | 0.04   | 0.034  | 0.04  | 0.042  | t | 40076  | LTPCD                        | Mus<br>musculu<br>s              |
| 1 | 1.00 | 1 | 1 | 0.03  | 0.03   | 0.03   | 0.03  | 0.028  | t | 137284 | RTNTTQG<br>KVPSQ             | Sus<br>scrofa                    |
| 1 | 1.00 | 1 | 1 | -0.03 | -0.027 | -0.031 | -0.03 | -0.032 | t | 94513  | FHPDK                        | Mus<br>musculu<br>s              |
| 1 | 1.00 | 1 | 1 | 0.03  | 0.03   | 0.03   | 0.041 | 0.032  | t | 118439 | IVLERSES<br>WNLKDLDI         | Homo<br>sapiens                  |
| 1 | 1.00 | 1 | 1 | 0.02  | 0.02   | 0.02   | 0.02  | 0.018  | t | 118762 | CYGSFAKP<br>TN               | Mus<br>musculu<br>s              |
| 1 | 1.00 | 1 | 1 | -0.02 | -0.024 | -0.03  | -0.02 | -0.02  | t | 64752  | TLDHVLHD                     | Anas<br>platyrhy<br>nchos        |
| 1 | 1.00 | 1 | 1 | 0.02  | 0.022  | 0.025  | 0.021 | 0.02   | t | 41057  | MAKNEV                       | Homo<br>sapiens                  |
| 1 | 1.00 | 1 | 1 | 0.03  | 0.026  | 0.011  | 0.027 | 0.032  | t | 427    | AASDYFAD<br>ATLGKDIS<br>GLDE | Oryctola<br>gus<br>cuniculu<br>s |
| 1 | 1.00 | 1 | 1 | 0.03  | 0.036  | 0.03   | 0.03  | 0.03   | t | 123594 | PLNSWIAS<br>F                | Ovis<br>aries                    |

|   |      |   |   |       |        |        |        |        |   |        |                              |                                  |
|---|------|---|---|-------|--------|--------|--------|--------|---|--------|------------------------------|----------------------------------|
| 1 | 1.00 | 1 | 1 | 0.01  | 0.012  | 0.012  | 0.009  | 0.007  | t | 96808  | QVKSGTIF<br>DN               | Homo<br>sapiens                  |
| 1 | 1.00 | 1 | 1 | 0.03  | 0.028  | 0.018  | 0.031  | 0.03   | t | 34927  | LAQEAGN<br>FERISGDL          | Homo<br>sapiens                  |
| 1 | 1.00 | 1 | 1 | -0.03 | -0.03  | -0.03  | -0.03  | -0.033 | t | 45005  | NMMNYI<br>MDPRTH             | Oryctola<br>gus<br>cuniculu<br>s |
| 1 | 1.00 | 1 | 1 | -0.03 | -0.027 | -0.03  | -0.03  | -0.033 | t | 45005  | NMMNYI<br>MDPRTH             | Mus<br>musculu<br>s              |
| 1 | 1.00 | 1 | 1 | 0.02  | 0.018  | 0.012  | 0.019  | 0.02   | t | 73311  | YAAANPT<br>GPASVQG<br>MSQDPV | Mus<br>musculu<br>s              |
| 1 | 1.00 | 1 | 1 | -0.01 | -0.008 | -0.015 | -0.007 | -0.01  | t | 121034 | VHPDTGIS<br>SKAMGIM<br>N     | Homo<br>sapiens                  |
| 1 | 1.00 | 1 | 1 | 0.02  | 0.016  | 0.016  | 0.017  | 0.018  | t | 53409  | RDPYSPSQ<br>DPYSPSQ          | Oryctola<br>gus<br>cuniculu<br>s |
| 1 | 1.00 | 1 | 1 | 0     | 0.004  | 0.002  | 0.001  | 0      | t | 62447  | SWGANDT<br>DVFVL             | Homo<br>sapiens                  |
| 1 | 1.00 | 1 | 1 | 0     | 0      | -0.01  | -0.003 | -0.001 | t | 24104  | HITHSGME<br>GMGVSCT          | Homo<br>sapiens                  |
| 1 | 1.00 | 1 | 1 | 0.02  | 0.018  | 0.021  | 0.017  | 0.019  | t | 144364 | ITDAVITVP<br>AYFND           | Mus<br>musculu<br>s              |
| 1 | 1.00 | 1 | 1 | 0.02  | 0.015  | 0.021  | 0.017  | 0.019  | t | 144364 | ITDAVITVP<br>AYFND           | Bos<br>taurus                    |
| 1 | 1.00 | 1 | 1 | 0.01  | 0.015  | 0.017  | 0.01   | 0.008  | t | 132869 | LSPLGEEM                     | Mus<br>musculu<br>s              |
| 1 | 1.00 | 1 | 1 | -0.01 | -0.01  | -0.01  | -0.01  | -0.01  | t | 132885 | PVRLAE                       | Oryctola<br>gus<br>cuniculu<br>s |



|   |      |   |   |       |        |        |        |        |   |        |                          |                                  |
|---|------|---|---|-------|--------|--------|--------|--------|---|--------|--------------------------|----------------------------------|
| 1 | 1.00 | 1 | 1 | 0     | -0.01  | -0.005 | 0.001  | 0      | t | 75863  | YSPSRFSY<br>FYPFRL       | Homo<br>sapiens                  |
| 1 | 1.00 | 1 | 1 | 0.02  | 0.018  | 0.013  | 0.02   | 0.019  | t | 38422  | LPAYQDYT<br>ARAQVSE      | Oryctola<br>gus<br>cuniculu<br>s |
| 1 | 1.00 | 1 | 1 | 0.06  | 0.06   | 0.043  | 0.06   | 0.062  | t | 48898  | PPQQPPQ<br>QPPQQPP<br>QQ | Mus<br>musculu<br>s              |
| 1 | 1.00 | 1 | 1 | 0     | -0.004 | -0.005 | -0.001 | -0.002 | t | 39087  | LRFPRGQG<br>VPINTNS      | Oryctola<br>gus<br>cuniculu<br>s |
| 1 | 1.00 | 1 | 1 | 0.01  | 0.008  | 0.01   | 0.009  | 0.008  | t | 66894  | TTVNAHQI<br>LPKV         | Mus<br>musculu<br>s              |
| 1 | 1.00 | 1 | 1 | 0.03  | 0.032  | 0.03   | 0.033  | 0.03   | t | 62993  | TASITSPLT<br>TQNTL       | Homo<br>sapiens                  |
| 1 | 1.00 | 1 | 1 | 0.03  | 0.032  | 0.03   | 0.037  | 0.03   | t | 107345 | EQRRAA                   | Homo<br>sapiens                  |
| 1 | 1.00 | 1 | 1 | 0.03  | 0.032  | 0.03   | 0.037  | 0.03   | t | 107345 | EQRRAA                   | Homo<br>sapiens                  |
| 1 | 1.00 | 1 | 1 | 0.03  | 0.026  | 0.032  | 0.033  | 0.032  | t | 8156   | DERTLTKE                 | Oryctola<br>gus<br>cuniculu<br>s |
| 1 | 1.00 | 1 | 1 | 0.02  | 0.018  | 0.017  | 0.013  | 0.019  | t | 125400 | ELLKLLIEA                | Mus<br>musculu<br>s              |
| 1 | 1.00 | 1 | 1 | 0.02  | 0.02   | 0.019  | 0.02   | 0.019  | t | 21722  | GPPAAEY<br>WNSQ          | Homo<br>sapiens                  |
| 1 | 1.00 | 1 | 1 | 0     | 0      | 0      | 0      | -0.002 | t | 108202 | VVSHFND                  | Mus<br>musculu<br>s              |
| 1 | 1.00 | 1 | 1 | 0.01  | 0.01   | 0.003  | 0.014  | 0.009  | t | 44917  | NLVLNRDV<br>SFQDL        | Homo<br>sapiens                  |
| 1 | 1.00 | 1 | 1 | 0.03  | 0.032  | 0.03   | 0.031  | 0.03   | t | 116947 | DIDYSDYS<br>TR           | Homo<br>sapiens                  |
| 1 | 1.00 | 1 | 1 | -0.02 | -0.017 | -0.02  | -0.02  | -0.022 | t | 72153  | VYRYDSRP                 | Mus<br>musculu<br>s              |

|   |      |   |   |       |        |        |        |        |   |        |                              |                       |
|---|------|---|---|-------|--------|--------|--------|--------|---|--------|------------------------------|-----------------------|
| 1 | 1.00 | 1 | 1 | -0.02 | -0.017 | -0.02  | -0.02  | -0.022 | t | 72153  | VYRYDSRP                     | Mus musculus          |
| 1 | 1.00 | 1 | 1 | 0     | -0.002 | 0      | -0.007 | -0.006 | t | 125297 | VFFEEQED<br>EIIGFG           | Mus musculus          |
| 1 | 1.00 | 1 | 1 | 0.05  | 0.054  | 0.05   | 0.053  | 0.05   | t | 117315 | KALSVETE<br>KLLKYLEAV        | Homo sapiens          |
| 1 | 1.00 | 1 | 1 | -0.02 | -0.016 | -0.025 | -0.019 | -0.018 | t | 26961  | ILALLPQG<br>VF               | Homo sapiens          |
| 1 | 1.00 | 1 | 1 | 0.04  | 0.042  | 0.031  | 0.041  | 0.04   | t | 45603  | NQPGVHI<br>QVFEGERA<br>MTKDC | Homo sapiens          |
| 1 | 1.00 | 1 | 1 | 0.04  | 0.037  | 0.031  | 0.041  | 0.04   | t | 45603  | NQPGVHI<br>QVFEGERA<br>MTKDC | Canis lupus           |
| 1 | 1.00 | 1 | 1 | 0.02  | 0.018  | 0.025  | 0.027  | 0.021  | t | 66161  | TSAPDTRP<br>AP               | Mus musculus          |
| 1 | 1.00 | 1 | 1 | 0.03  | 0.033  | 0.026  | 0.029  | 0.031  | t | 28537  | ISIKYDPRK<br>DSEVFA          | Mus musculus          |
| 1 | 1.00 | 1 | 1 | -0.03 | -0.026 | -0.03  | -0.023 | -0.03  | t | 122842 | LLDLPRDL<br>GGMGCSS<br>PPCE  | Homo sapiens          |
| 1 | 1.00 | 1 | 1 | 0.02  | 0.023  | 0.023  | 0.02   | 0.02   | t | 125127 | LDPENLTL                     | Mus musculus          |
| 1 | 1.00 | 1 | 1 | -0.01 | -0.01  | -0.01  | -0.01  | -0.013 | t | 136754 | YHWKVIFY<br>KYD              | Homo sapiens          |
| 1 | 1.00 | 1 | 1 | 0.02  | 0.016  | 0.023  | 0.023  | 0.02   | t | 111255 | ENQKAGGI<br>EQNFGLF          | Oryctolagus cuniculus |
| 1 | 1.00 | 1 | 1 | 0.03  | 0.028  | 0.028  | 0.031  | 0.03   | t | 20288  | GIGVTQN<br>VLYENQK<br>QIA    | Homo sapiens          |

|   |      |   |   |       |       |        |       |        |   |        |                            |                                  |
|---|------|---|---|-------|-------|--------|-------|--------|---|--------|----------------------------|----------------------------------|
| 1 | 1.00 | 1 | 1 | 0     | 0     | 0      | 0     | 0      | t | 140861 | GTVSYGEE<br>KPAV           | Oryctola<br>gus<br>cuniculu<br>s |
| 1 | 1.00 | 1 | 1 | -0.03 | -0.03 | -0.025 | -0.03 | -0.034 | t | 133542 | DGRRDVV<br>VRSATFYL        | Mus<br>musculu<br>s              |
| 1 | 1.00 | 1 | 1 | 0.01  | 0.012 | 0.006  | 0.011 | 0.01   | t | 28340  | IRMISDQR<br>AN             | Homo<br>sapiens                  |
| 1 | 1.00 | 1 | 1 | 0.01  | 0.007 | 0.005  | 0.01  | 0.01   | t | 65238  | TMPFSPDF<br>SNVD           | Oryctola<br>gus<br>cuniculu<br>s |
| 1 | 1.00 | 1 | 1 | 0     | 0.003 | 0      | 0     | 0      | t | 141017 | FTTWSPW<br>SQPLA           | Mus<br>musculu<br>s              |
| 1 | 1.00 | 1 | 1 | 0.01  | 0.01  | 0.01   | 0.014 | 0.01   | t | 107892 | HSASQDG<br>QDTIRGHP<br>GSS | Homo<br>sapiens                  |
| 1 | 1.00 | 1 | 1 | 0.03  | 0.03  | 0.027  | 0.034 | 0.03   | t | 33831  | KTQIDQVE<br>STAGSLQ        | Homo<br>sapiens                  |
| 1 | 1.00 | 1 | 1 | 0.05  | 0.047 | 0.043  | 0.05  | 0.049  | t | 137469 | YPPEEETG<br>ERV            | Oryctola<br>gus<br>cuniculu<br>s |
| 1 | 1.00 | 1 | 1 | 0.03  | 0.032 | 0.031  | 0.031 | 0.03   | t | 68800  | VGTAEEKL<br>KKKSSF         | Homo<br>sapiens                  |
| 1 | 1.00 | 1 | 1 | 0.02  | 0.02  | 0.02   | 0.02  | 0.02   | t | 79828  | FLGPKQLT<br>FEGK           | Mus<br>musculu<br>s              |
| 1 | 1.00 | 1 | 1 | 0.02  | 0.018 | 0.027  | 0.021 | 0.02   | t | 78923  | AFGANS                     | Mus<br>musculu<br>s              |
| 1 | 1.00 | 1 | 1 | 0.02  | 0.017 | 0.009  | 0.02  | 0.021  | t | 80002  | RKADLEKA<br>LEGAM          | Oryctola<br>gus<br>cuniculu<br>s |
| 1 | 1.00 | 1 | 1 | -0.02 | -0.02 | -0.032 | -0.02 | -0.02  | t | 34490  | KYKVPQLE<br>IV             | Homo<br>sapiens                  |
| 1 | 1.00 | 1 | 1 | 0.03  | 0.027 | 0.024  | 0.03  | 0.03   | t | 105647 | ADVNTFV<br>A               | Oryctola<br>gus<br>cuniculu<br>s |

|   |      |   |   |       |        |        |        |        |   |        |                         |                                  |
|---|------|---|---|-------|--------|--------|--------|--------|---|--------|-------------------------|----------------------------------|
| 1 | 1.00 | 1 | 1 | -0.05 | -0.048 | -0.05  | -0.043 | -0.05  | t | 145149 | DRQHLPLI<br>K           | Homo<br>sapiens                  |
| 1 | 1.00 | 1 | 1 | -0.04 | -0.042 | -0.04  | -0.037 | -0.04  | t | 103912 | FWLDFW                  | Mus<br>musculu<br>s              |
| 1 | 1.00 | 1 | 1 | 0.07  | 0.07   | 0.055  | 0.07   | 0.072  | t | 33715  | KTIENINEL<br>IEES       | Homo<br>sapiens                  |
| 1 | 1.00 | 1 | 1 | -0.01 | -0.01  | -0.01  | -0.01  | -0.012 | t | 12625  | EKAFREL                 | Oryctola<br>gus<br>cuniculu<br>s |
| 1 | 1.00 | 1 | 1 | 0.04  | 0.043  | 0.045  | 0.04   | 0.04   | t | 138228 | QLDFEDV                 | Mus<br>musculu<br>s              |
| 1 | 1.00 | 1 | 1 | -0.02 | -0.017 | -0.027 | -0.017 | -0.02  | t | 76165  | YTQQRRI<br>GEFR         | Capra<br>hircus                  |
| 1 | 1.00 | 1 | 1 | 0.02  | 0.017  | 0.018  | 0.02   | 0.019  | t | 105867 | HTDFAGA<br>E            | Oryctola<br>gus<br>cuniculu<br>s |
| 1 | 1.00 | 1 | 1 | 0.02  | 0.02   | 0.022  | 0.02   | 0.02   | t | 110611 | GPKGQAG<br>EPIAGFK      | Mus<br>musculu<br>s              |
| 1 | 1.00 | 1 | 1 | 0.01  | 0.01   | 0.01   | 0.01   | 0.01   | t | 5562   | AVTKGTIN<br>DPEA        | Oryctola<br>gus<br>cuniculu<br>s |
| 1 | 1.00 | 1 | 1 | 0.01  | 0.01   | 0.01   | 0.01   | 0.01   | t | 5562   | AVTKGTIN<br>DPEA        | Oryctola<br>gus<br>cuniculu<br>s |
| 1 | 1.00 | 1 | 1 | -0.03 | -0.018 | -0.028 | -0.027 | -0.03  | t | 55761  | RRVGLSNP<br>T           | Anas<br>platyrhy<br>nchos        |
| 1 | 1.00 | 1 | 1 | 0.01  | 0.01   | 0.01   | 0.014  | 0.01   | t | 131038 | RKIAKDEG<br>AK          | Homo<br>sapiens                  |
| 1 | 1.00 | 1 | 1 | 0.02  | 0.022  | 0.016  | 0.017  | 0.018  | t | 52106  | QQPQQSF<br>PQQ          | Homo<br>sapiens                  |
| 1 | 1.00 | 1 | 1 | -0.02 | -0.018 | -0.023 | -0.013 | -0.018 | t | 120805 | MSGRGKQ<br>GGKARAK<br>A | Homo<br>sapiens                  |

|   |      |   |   |       |        |        |       |        |   |        |                         |                       |
|---|------|---|---|-------|--------|--------|-------|--------|---|--------|-------------------------|-----------------------|
| 1 | 1.00 | 1 | 1 | -0.01 | -0.01  | -0.01  | -0.01 | -0.012 | t | 105651 | AEFRHDS                 | Mus musculus          |
| 1 | 1.00 | 1 | 1 | 0.01  | 0.009  | 0.007  | 0.011 | 0.012  | t | 36805  | LKASAA                  | Homo sapiens          |
| 1 | 1.00 | 1 | 1 | 0.04  | 0.038  | 0.033  | 0.039 | 0.038  | t | 133684 | RRIASQVK<br>YAGSQVASTSE | Mus musculus          |
| 1 | 1.00 | 1 | 1 | 0.01  | 0.01   | 0.01   | 0.01  | 0.01   | t | 16960  | FLVNTW                  | Homo sapiens          |
| 1 | 1.00 | 1 | 1 | 0.02  | 0.022  | 0.019  | 0.021 | 0.022  | t | 63878  | TGLDFN                  | Homo sapiens          |
| 1 | 1.00 | 1 | 1 | 0     | -0.002 | 0      | 0.001 | -0.002 | t | 99921  | DAEFRHDS                | Mus musculus          |
| 1 | 1.00 | 1 | 1 | 0.03  | 0.032  | 0.032  | 0.031 | 0.029  | t | 103393 | LTTYILLPS<br>QDLPLL     | Homo sapiens          |
| 1 | 1.00 | 1 | 1 | 0.02  | 0.02   | 0.016  | 0.017 | 0.02   | t | 74075  | YGRDPYSP<br>SQDPYSP     | Homo sapiens          |
| 1 | 1.00 | 1 | 1 | -0.03 | -0.033 | -0.041 | -0.03 | -0.03  | t | 6541   | CLAVLLGACS              | Oryctolagus cuniculus |
| 1 | 1.00 | 1 | 1 | -0.02 | -0.016 | -0.024 | -0.02 | -0.021 | t | 79054  | QPDGGQP<br>AVRNERAT     | MD                    |
| 1 | 1.00 | 1 | 1 | -0.02 | -0.022 | -0.024 | -0.02 | -0.021 | t | 79054  | QPDGGQP<br>AVRNERAT     | Oryctolagus cuniculus |
| 1 | 1.00 | 1 | 1 | 0.04  | 0.04   | 0.031  | 0.04  | 0.04   | t | 22691  | GTHPSSSA<br>GLKNDLLEN   | Mus musculus          |
| 1 | 1.00 | 1 | 1 | 0     | -0.003 | 0.005  | 0     | -0.003 | t | 29218  | IVCIDRASLST             | Oryctolagus cuniculus |
| 1 | 1.00 | 1 | 1 | 0.02  | 0.016  | 0.02   | 0.023 | 0.023  | t | 115397 | NLLSICKTAEF             | Oryctolagus cuniculus |
| 1 | 1.00 | 1 | 1 | 0.02  | 0.022  | 0.02   | 0.021 | 0.019  | t | 150965 | AKSFYKNLI<br>WLVKKG     | Homo sapiens          |

|   |      |   |   |       |        |        |        |        |   |        |                             |                                  |
|---|------|---|---|-------|--------|--------|--------|--------|---|--------|-----------------------------|----------------------------------|
| 1 | 1.00 | 1 | 1 | -0.01 | -0.014 | -0.004 | -0.007 | -0.01  | t | 36834  | LKEYKDK                     | Oryctola<br>gus<br>cuniculu<br>s |
| 1 | 1.00 | 1 | 1 | 0.03  | 0.034  | 0.025  | 0.027  | 0.028  | t | 71669  | VVGDEGR<br>SVFDD            | Homo<br>sapiens                  |
| 1 | 1.00 | 1 | 1 | 0.01  | 0.007  | -0.002 | 0.01   | 0.01   | t | 30993  | KGKKVDLY<br>GAYGYQ<br>CAGGT | Oryctola<br>gus<br>cuniculu<br>s |
| 1 | 1.00 | 1 | 1 | 0     | -0.004 | 0.007  | 0.003  | 0      | t | 697    | ADKSSILFL<br>CDD            | Oryctola<br>gus<br>cuniculu<br>s |
| 1 | 1.00 | 1 | 1 | -0.04 | -0.04  | -0.047 | -0.04  | -0.041 | t | 138028 | SAGALQLL<br>VVGC            | Oryctola<br>gus<br>cuniculu<br>s |
| 1 | 1.00 | 1 | 1 | 0     | 0      | 0      | 0      | -0.002 | t | 117675 | VEPKVKSK<br>KREAV           | Homo<br>sapiens                  |
| 1 | 1.00 | 1 | 1 | 0.07  | 0.07   | 0.07   | 0.07   | 0.07   | t | 99007  | SLQPED                      | Homo<br>sapiens                  |
| 1 | 1.00 | 1 | 1 | 0.02  | 0.02   | 0.02   | 0.02   | 0.019  | t | 119516 | RKLAHPGT<br>S               | Homo<br>sapiens                  |
| 1 | 1.00 | 1 | 1 | 0.02  | 0.018  | 0.01   | 0.019  | 0.02   | t | 26700  | IITFKSGAT<br>F              | Mus<br>musculu<br>s              |
| 1 | 1.00 | 1 | 1 | 0.08  | 0.08   | 0.075  | 0.08   | 0.08   | t | 20174  | GHQVGDG<br>E                | Homo<br>sapiens                  |
| 1 | 1.00 | 1 | 1 | 0     | 0      | 0      | 0      | -0.002 | t | 158947 | LDIDIDPKV<br>KVATLS         | Mus<br>musculu<br>s              |
| 1 | 1.00 | 1 | 1 | 0     | 0      | 0      | 0      | -0.002 | t | 139154 | KWEAARE<br>AEQRR            | Oryctola<br>gus<br>cuniculu<br>s |
| 1 | 1.00 | 1 | 1 | 0     | 0      | 0      | 0      | -0.002 | t | 118877 | LDVEQLGI<br>PEQEYSC         | Oryctola<br>gus<br>cuniculu<br>s |

|   |      |   |   |   |   |   |   |        |   |        |                              |                                  |
|---|------|---|---|---|---|---|---|--------|---|--------|------------------------------|----------------------------------|
| 1 | 1.00 | 1 | 1 | 0 | 0 | 0 | 0 | -0.002 | t | 124588 | PQEETLQA<br>FDSHYDYT         | Oryctola<br>gus<br>cuniculu<br>s |
| 1 | 1.00 | 1 | 1 | 0 | 0 | 0 | 0 | -0.002 | t | 122842 | LLDLPRDL<br>GGMGCCSS<br>PPCE | Oryctola<br>gus<br>cuniculu<br>s |
| 1 | 1.00 | 1 | 1 | 0 | 0 | 0 | 0 | -0.002 | t | 117520 | GSFSDADL<br>AD               | Mus<br>musculu<br>s              |
| 1 | 1.00 | 1 | 1 | 0 | 0 | 0 | 0 | -0.002 | t | 131406 | EGEGSGFI<br>REDPIGAG<br>A    | Oryctola<br>gus<br>cuniculu<br>s |
| 1 | 1.00 | 1 | 1 | 0 | 0 | 0 | 0 | -0.002 | t | 120172 | RKIPKRPG<br>SVHRTPSR<br>Q    | Oryctola<br>gus<br>cuniculu<br>s |
| 1 | 1.00 | 1 | 1 | 0 | 0 | 0 | 0 | -0.002 | t | 131717 | TTLVNPNK<br>KNSYPHY          | Oryctola<br>gus<br>cuniculu<br>s |
| 1 | 1.00 | 1 | 1 | 0 | 0 | 0 | 0 | -0.002 | t | 122790 | HQEEDFR<br>VTCKDIQR          | Oryctola<br>gus<br>cuniculu<br>s |
| 1 | 1.00 | 1 | 1 | 0 | 0 | 0 | 0 | -0.002 | t | 120769 | LLVDVEPK<br>VKSKKRE          | Mus<br>musculu<br>s              |
| 1 | 1.00 | 1 | 1 | 0 | 0 | 0 | 0 | -0.002 | t | 122746 | EEQEDEIIG<br>FGQELKN         | Oryctola<br>gus<br>cuniculu<br>s |
| 1 | 1.00 | 1 | 1 | 0 | 0 | 0 | 0 | -0.002 | t | 120705 | KNQFDHY<br>SRHESCAE<br>L     | Oryctola<br>gus<br>cuniculu<br>s |
| 1 | 1.00 | 1 | 1 | 0 | 0 | 0 | 0 | -0.002 | t | 119052 | WNPADYG<br>GIK               | Rattus<br>norvegic<br>us         |
| 1 | 1.00 | 1 | 1 | 0 | 0 | 0 | 0 | -0.002 | t | 126201 | GYKEKSKF<br>QDTHNNA          | Oryctola<br>gus<br>cuniculu<br>s |
| 1 | 1.00 | 1 | 1 | 0 | 0 | 0 | 0 | -0.002 | t | 131701 | THHINNM<br>KPSFTREN<br>T     | Oryctola<br>gus<br>cuniculu<br>s |

|   |      |   |   |   |   |   |   |        |   |        |                           |                                  |
|---|------|---|---|---|---|---|---|--------|---|--------|---------------------------|----------------------------------|
| 1 | 1.00 | 1 | 1 | 0 | 0 | 0 | 0 | -0.002 | t | 127643 | ERPLELRV<br>RVLDI         | Homo<br>sapiens                  |
| 1 | 1.00 | 1 | 1 | 0 | 0 | 0 | 0 | -0.002 | t | 133775 | AETNRAPF<br>DLAEAE        | Oryctola<br>gus<br>cuniculu<br>s |
| 1 | 1.00 | 1 | 1 | 0 | 0 | 0 | 0 | -0.002 | t | 124384 | KRSRHF                    | Oryctola<br>gus<br>cuniculu<br>s |
| 1 | 1.00 | 1 | 1 | 0 | 0 | 0 | 0 | -0.002 | t | 132848 | KKEDFDIY<br>DEDENQS<br>PR | Mus<br>musculu<br>s              |
| 1 | 1.00 | 1 | 1 | 0 | 0 | 0 | 0 | -0.002 | t | 117506 | GGAHFSVS<br>SLAEG         | Mus<br>musculu<br>s              |
| 1 | 1.00 | 1 | 1 | 0 | 0 | 0 | 0 | -0.002 | t | 119382 | VISCAKDAI<br>EDEEGSC      | Oryctola<br>gus<br>cuniculu<br>s |
| 1 | 1.00 | 1 | 1 | 0 | 0 | 0 | 0 | -0.002 | t | 122861 | NALNSPLH<br>QEYEENL       | Oryctola<br>gus<br>cuniculu<br>s |
| 1 | 1.00 | 1 | 1 | 0 | 0 | 0 | 0 | -0.002 | t | 102384 | EFRH                      | Mus<br>musculu<br>s              |
| 1 | 1.00 | 1 | 1 | 0 | 0 | 0 | 0 | -0.002 | t | 103309 | KKNGRILT<br>LPRSNPS       | Mus<br>musculu<br>s              |
| 1 | 1.00 | 1 | 1 | 0 | 0 | 0 | 0 | -0.002 | t | 113129 | QLELPAVT<br>PEDDGE        | Mus<br>musculu<br>s              |
| 1 | 1.00 | 1 | 1 | 0 | 0 | 0 | 0 | -0.002 | t | 111193 | DGPAGQA<br>EPDRAHY<br>NI  | Mus<br>musculu<br>s              |
| 1 | 1.00 | 1 | 1 | 0 | 0 | 0 | 0 | -0.002 | t | 100777 | DIDFLIEIE<br>RLGQDL       | Oryctola<br>gus<br>cuniculu<br>s |
| 1 | 1.00 | 1 | 1 | 0 | 0 | 0 | 0 | -0.002 | t | 112958 | ELRPELSW<br>LGHE          | Mus<br>musculu<br>s              |
| 1 | 1.00 | 1 | 1 | 0 | 0 | 0 | 0 | -0.002 | t | 106494 | GYENPTYK<br>FFEQMQN       | Oryctola<br>gus<br>cuniculu<br>s |
| 1 | 1.00 | 1 | 1 | 0 | 0 | 0 | 0 | -0.002 | t | 108522 | LHEYMLDL<br>QPETDL        | Mus<br>musculu<br>s              |



|   |      |   |   |   |   |   |   |        |   |        |                              |                                  |
|---|------|---|---|---|---|---|---|--------|---|--------|------------------------------|----------------------------------|
| 1 | 1.00 | 1 | 1 | 0 | 0 | 0 | 0 | -0.002 | t | 106842 | SKDEIDSA<br>VKMLVSLK<br>MSY  | Mus<br>musculu<br>s              |
| 1 | 1.00 | 1 | 1 | 0 | 0 | 0 | 0 | -0.002 | t | 104569 | MASPGSG<br>FWSFGSE<br>DGS    | Mus<br>musculu<br>s              |
| 1 | 1.00 | 1 | 1 | 0 | 0 | 0 | 0 | -0.002 | t | 103496 | PRGYPGQ<br>V                 | Mus<br>musculu<br>s              |
| 1 | 1.00 | 1 | 1 | 0 | 0 | 0 | 0 | -0.002 | t | 106349 | DPLRPQRE<br>GC               | Oryctola<br>gus<br>cuniculu<br>s |
| 1 | 1.00 | 1 | 1 | 0 | 0 | 0 | 0 | -0.002 | t | 97348  | GLFGAIAG<br>FIEGGW           | Oryctola<br>gus<br>cuniculu<br>s |
| 1 | 1.00 | 1 | 1 | 0 | 0 | 0 | 0 | -0.002 | t | 94836  | GSSK                         | Oryctola<br>gus<br>cuniculu<br>s |
| 1 | 1.00 | 1 | 1 | 0 | 0 | 0 | 0 | -0.002 | t | 69175  | VKAETRLN                     | Mus<br>musculu<br>s              |
| 1 | 1.00 | 1 | 1 | 0 | 0 | 0 | 0 | -0.002 | t | 94979  | YNKRFPGF<br>VSP              | Oryctola<br>gus<br>cuniculu<br>s |
| 1 | 1.00 | 1 | 1 | 0 | 0 | 0 | 0 | -0.002 | t | 60751  | SRNWLPG<br>PCY               | Mus<br>musculu<br>s              |
| 1 | 1.00 | 1 | 1 | 0 | 0 | 0 | 0 | -0.002 | t | 94606  | LTGGFYEP<br>L                | Mus<br>musculu<br>s              |
| 1 | 1.00 | 1 | 1 | 0 | 0 | 0 | 0 | -0.002 | t | 95048  | VIFQTPLIK<br>NPDVKSAL<br>EG  | Rattus<br>norvegic<br>us         |
| 1 | 1.00 | 1 | 1 | 0 | 0 | 0 | 0 | -0.002 | t | 95004  | DEESSNAA<br>EEWKYVA<br>MVIDH | Rattus<br>norvegic<br>us         |
| 1 | 1.00 | 1 | 1 | 0 | 0 | 0 | 0 | -0.002 | t | 75278  | YPEKAVLD<br>EYDYRYNR<br>PK   | Mus<br>musculu<br>s              |
| 1 | 1.00 | 1 | 1 | 0 | 0 | 0 | 0 | -0.002 | t | 95524  | KRQIYTDIE<br>MNRLGK          | Oryctola<br>gus<br>cuniculu<br>s |

|   |      |   |   |   |        |   |   |        |   |       |                             |                                  |
|---|------|---|---|---|--------|---|---|--------|---|-------|-----------------------------|----------------------------------|
| 1 | 1.00 | 1 | 1 | 0 | 0      | 0 | 0 | -0.002 | t | 94496 | EEEEYMP<br>MEDLYLDI<br>LPEE | Oryctola<br>gus<br>cuniculu<br>s |
| 1 | 1.00 | 1 | 1 | 0 | 0      | 0 | 0 | -0.002 | t | 43232 | NANNPD<br>WDF               | Mus<br>musculu<br>s              |
| 1 | 1.00 | 1 | 1 | 0 | 0      | 0 | 0 | -0.002 | t | 37698 | LLQAHRQL<br>EER             | Mus<br>musculu<br>s              |
| 1 | 1.00 | 1 | 1 | 0 | 0      | 0 | 0 | -0.002 | t | 48906 | PPRRVS                      | Mus<br>musculu<br>s              |
| 1 | 1.00 | 1 | 1 | 0 | 0      | 0 | 0 | -0.002 | t | 48876 | PPPQAPY<br>QGY              | Mus<br>musculu<br>s              |
| 1 | 1.00 | 1 | 1 | 0 | 0      | 0 | 0 | -0.002 | t | 46894 | PAPQAPY<br>QGY              | Mus<br>musculu<br>s              |
| 1 | 1.00 | 1 | 1 | 0 | -0.003 | 0 | 0 | -0.002 | t | 55389 | RQAESSEA<br>MAAWSER<br>AGEA | Oryctola<br>gus<br>cuniculu<br>s |
| 1 | 1.00 | 1 | 1 | 0 | 0      | 0 | 0 | -0.002 | t | 41537 | MFSGGGG<br>PLSPGGKS         | Mus<br>musculu<br>s              |
| 1 | 1.00 | 1 | 1 | 0 | 0      | 0 | 0 | -0.002 | t | 56734 | SADNNNS<br>EYSWT            | Mus<br>musculu<br>s              |
| 1 | 1.00 | 1 | 1 | 0 | 0.004  | 0 | 0 | -0.002 | t | 49680 | PTKEFFRE<br>A               | Mus<br>musculu<br>s              |
| 1 | 1.00 | 1 | 1 | 0 | 0      | 0 | 0 | -0.002 | t | 48779 | PPFSLSPV<br>PTLGSRSR<br>R   | Oryctola<br>gus<br>cuniculu<br>s |
| 1 | 1.00 | 1 | 1 | 0 | 0      | 0 | 0 | -0.002 | t | 13837 | EQHHRRT<br>DN               | Mus<br>musculu<br>s              |
| 1 | 1.00 | 1 | 1 | 0 | 0      | 0 | 0 | -0.002 | t | 28676 | ISQAVHAA<br>HAEINEAG<br>R   | Homo<br>sapiens                  |
| 1 | 1.00 | 1 | 1 | 0 | -0.003 | 0 | 0 | -0.002 | t | 28676 | ISQAVHAA<br>HAEINEAG<br>R   | Oryctola<br>gus<br>cuniculu<br>s |

|   |      |   |   |      |        |       |      |        |   |        |                             |                        |
|---|------|---|---|------|--------|-------|------|--------|---|--------|-----------------------------|------------------------|
| 1 | 1.00 | 1 | 1 | 0    | 0      | 0     | 0    | -0.002 | t | 19067  | GDPEDL                      | Mus musculus           |
| 1 | 1.00 | 1 | 1 | 0    | 0      | 0     | 0    | -0.002 | t | 30661  | KEVPALTA<br>VETGAT          | Oryctolagus cuniculus  |
| 1 | 1.00 | 1 | 1 | 0    | 0      | 0     | 0    | -0.002 | t | 36729  | LITNTIAGV                   | Mus musculus           |
| 1 | 1.00 | 1 | 1 | 0    | 0      | 0     | 0    | -0.002 | t | 9044   | DLDGAA                      | Mus musculus           |
| 1 | 1.00 | 1 | 1 | 0    | 0      | 0     | 0    | -0.002 | t | 9620   | DPEDLD                      | Mus musculus           |
| 1 | 1.00 | 1 | 1 | 0.01 | 0.01   | 0.01  | 0.01 | 0.01   | t | 99267  | GEPDLSNN<br>FGKLFEV         | Homo sapiens           |
| 1 | 1.00 | 1 | 1 | 0.01 | 0.01   | 0.003 | 0.01 | 0.013  | t | 116169 | TPRTPPPS<br>QGKG            | Oryctolagus cuniculus  |
| 1 | 1.00 | 1 | 1 | 0.01 | 0.021  | 0.003 | 0.01 | 0.013  | t | 116169 | TPRTPPPS<br>QGKG            | Gallus gallus          |
| 1 | 1.00 | 1 | 1 | 0    | -0.003 | 0     | 0    | 0      | t | 7849   | DDPPATVY<br>RYD             | Oryctolagus cuniculus  |
| 1 | 1.00 | 1 | 1 | 0.07 | 0.059  | 0.07  | 0.07 | 0.07   | t | 125610 | YYVFEEQ<br>EDEIIGFG<br>QELK | Cricetulus migratorius |
| 1 | 1.00 | 1 | 1 | 0    | 0      | 0     | 0    | -0.002 | t | 151731 | SAQSQRA<br>PDR              | Mus musculus           |
| 1 | 1.00 | 1 | 1 | 0    | 0      | 0     | 0    | -0.002 | t | 120849 | NSQPEILE<br>RTRAELD         | Mus musculus           |
| 1 | 1.00 | 1 | 1 | 0    | 0      | 0     | 0    | -0.002 | t | 123562 | NSSSQFQ<br>IHGPR            | Mus musculus           |
| 1 | 1.00 | 1 | 1 | 0    | 0      | 0     | 0    | -0.002 | t | 120849 | NSQPEILE<br>RTRAELD         | Mus musculus           |
| 1 | 1.00 | 1 | 1 | 0    | 0      | 0     | 0    | -0.002 | t | 120849 | NSQPEILE<br>RTRAELD         | Mus musculus           |

|   |      |   |   |       |        |        |        |        |   |        |                              |                                  |
|---|------|---|---|-------|--------|--------|--------|--------|---|--------|------------------------------|----------------------------------|
| 1 | 1.00 | 1 | 1 | -0.02 | -0.02  | -0.02  | -0.02  | -0.018 | t | 123294 | HMPGQPP<br>Y                 | Oryctola<br>gus<br>cuniculu<br>s |
| 1 | 1.00 | 1 | 1 | 0.01  | 0      | 0.01   | 0.017  | 0.01   | t | 134205 | QRGNQIM<br>SDKRNVIL<br>FSVFD | Homo<br>sapiens                  |
| 1 | 1.00 | 1 | 1 | -0.03 | -0.028 | -0.037 | -0.023 | -0.028 | t | 118348 | FHSGKHY<br>WEVDVTG<br>KE     | Homo<br>sapiens                  |
| 1 | 1.00 | 1 | 1 | 0.02  | 0.022  | 0.016  | 0.017  | 0.017  | t | 114762 | DCTAEDRP<br>LC               | Homo<br>sapiens                  |
| 1 | 1.00 | 1 | 1 | -0.01 | -0.002 | -0.01  | -0.01  | -0.012 | t | 156974 | WGTHTSY<br>PWRLS             | Gallus<br>gallus                 |
| 1 | 1.00 | 1 | 1 | 0     | 0      | -0.009 | -0.003 | 0      | t | 53109  | RAGVCY                       | Homo<br>sapiens                  |
| 1 | 1.00 | 1 | 1 | -0.01 | -0.01  | -0.024 | -0.01  | -0.01  | t | 6832   | CPRPPRAV<br>AAYGPGV<br>DYK   | Oryctola<br>gus<br>cuniculu<br>s |
| 1 | 1.00 | 1 | 1 | 0     | 0.003  | 0      | 0      | -0.002 | t | 9106   | DLGSIA                       | Mus<br>musculu<br>s              |
| 1 | 1.00 | 1 | 1 | 0.03  | 0.03   | 0.03   | 0.037  | 0.03   | t | 117364 | RPDAEYW<br>NSQKDLLE<br>QRRAA | Homo<br>sapiens                  |
| 1 | 1.00 | 1 | 1 | 0.02  | 0.022  | 0.023  | 0.023  | 0.019  | t | 23162  | GVSYNIGS<br>QEWYTTV          | Homo<br>sapiens                  |
| 1 | 1.00 | 1 | 1 | 0.01  | 0.007  | 0.01   | 0.01   | 0.01   | t | 76616  | YYTKDTNN<br>NL               | Oryctola<br>gus<br>cuniculu<br>s |
| 1 | 1.00 | 1 | 1 | 0.01  | 0.01   | 0.01   | 0.01   | 0.01   | t | 76616  | YYTKDTNN<br>NL               | Mus<br>musculu<br>s              |
| 1 | 1.00 | 1 | 1 | 0     | 0      | 0      | 0.003  | -0.001 | t | 117300 | GSGKGKV<br>QFQGKKT<br>KF     | Homo<br>sapiens                  |
| 1 | 1.00 | 1 | 1 | -0.03 | -0.03  | -0.034 | -0.03  | -0.03  | t | 106861 | SPDWFRH                      | Mus<br>musculu<br>s              |
| 1 | 1.00 | 1 | 1 | 0.02  | 0.022  | 0.01   | 0.017  | 0.02   | t | 37997  | LMCDIDG<br>NRL               | Homo<br>sapiens                  |

|   |      |   |   |       |        |        |        |        |   |        |                              |                       |
|---|------|---|---|-------|--------|--------|--------|--------|---|--------|------------------------------|-----------------------|
| 1 | 1.00 | 1 | 1 | 0.05  | 0.048  | 0.057  | 0.049  | 0.05   | t | 78499  | QVADKE                       | Mus musculus          |
| 1 | 1.00 | 1 | 1 | 0.02  | 0.02   | 0.02   | 0.02   | 0.02   | t | 149046 | FQINPTQ                      | Sus scrofa            |
| 1 | 1.00 | 1 | 1 | 0     | -0.004 | -0.006 | 0.003  | 0.002  | t | 12258  | EGRFKSQD                     | Oryctolagus cuniculus |
| 1 | 1.00 | 1 | 1 | 0.03  | 0.023  | 0.025  | 0.03   | 0.03   | t | 136705 | VEEERFHQ<br>QGAPRA           | Oryctolagus cuniculus |
| 1 | 1.00 | 1 | 1 | -0.01 | -0.006 | -0.008 | -0.009 | -0.01  | t | 46297  | NTTYILVK<br>GK               | Homo sapiens          |
| 1 | 1.00 | 1 | 1 | -0.01 | -0.011 | -0.013 | -0.01  | -0.011 | t | 12537  | EINTLQNQ                     | Anas platyrhynchos    |
| 1 | 1.00 | 1 | 1 | -0.06 | -0.058 | -0.06  | -0.053 | -0.059 | t | 126137 | GLKKMLRT<br>CAVHITL          | Homo sapiens          |
| 1 | 1.00 | 1 | 1 | 0     | -0.004 | 0      | 0.003  | -0.001 | t | 19738  | GGGAGGA<br>GAGGGAG<br>GAG    | Oryctolagus cuniculus |
| 1 | 1.00 | 1 | 1 | 0     | -0.004 | 0      | 0.003  | -0.001 | t | 34965  | LASLRKAF<br>ADTVVPRP<br>PSNY | Oryctolagus cuniculus |
| 1 | 1.00 | 1 | 1 | 0     | -0.004 | 0      | 0.003  | -0.001 | t | 28075  | IPSTAFTDI<br>AWVRLPN<br>HY   | Oryctolagus cuniculus |
| 1 | 1.00 | 1 | 1 | 0.03  | 0.03   | 0.03   | 0.027  | 0.03   | t | 51148  | QIVGGVYL<br>LP               | Homo sapiens          |
| 1 | 1.00 | 1 | 1 | 0.02  | 0.016  | 0.008  | 0.017  | 0.02   | t | 140865 | GYLAGKG<br>VDAGKLG<br>TVSYGE | Oryctolagus cuniculus |
| 1 | 1.00 | 1 | 1 | 0.02  | 0.023  | 0.02   | 0.017  | 0.019  | t | 135569 | KTNMK                        | Mus musculus          |
| 1 | 1.00 | 1 | 1 | 0     | 0      | 0      | 0      | 0      | t | 156864 | EPNPTRL                      | Gallus gallus         |

|   |      |   |   |       |        |        |        |        |   |        |                              |                                  |
|---|------|---|---|-------|--------|--------|--------|--------|---|--------|------------------------------|----------------------------------|
| 1 | 1.00 | 1 | 1 | 0     | 0.003  | -0.009 | 0      | 0      | t | 78627  | DPDPPDA<br>NDPAPPN<br>AN     | Mus<br>musculu<br>s              |
| 1 | 1.00 | 1 | 1 | -0.01 | -0.006 | 0.001  | -0.003 | -0.009 | t | 122071 | AALGSAI                      | Homo<br>sapiens                  |
| 1 | 1.00 | 1 | 1 | 0.01  | -0.001 | 0.012  | 0.01   | 0.008  | t | 40074  | LTPANLIR<br>GDNA             | Oryctola<br>gus<br>cuniculu<br>s |
| 1 | 1.00 | 1 | 1 | 0.01  | 0.013  | 0.01   | 0.01   | 0.008  | t | 156905 | KPGDPRQ                      | Mus<br>musculu<br>s              |
| 1 | 1.00 | 1 | 1 | -0.01 | -0.01  | -0.01  | -0.006 | -0.01  | t | 103830 | CHAVKVG<br>NPSC              | Homo<br>sapiens                  |
| 1 | 1.00 | 1 | 1 | -0.02 | -0.02  | -0.02  | -0.02  | -0.02  | t | 9132   | DLIPLLR                      | Oryctola<br>gus<br>cuniculu<br>s |
| 1 | 1.00 | 1 | 1 | 0.02  | 0.02   | 0.009  | 0.019  | 0.02   | t | 54095  | RHRQPRG<br>WEQ               | Homo<br>sapiens                  |
| 1 | 1.00 | 1 | 1 | 0.07  | 0.07   | 0.07   | 0.07   | 0.07   | t | 118392 | GVGGPSQ<br>Q                 | Homo<br>sapiens                  |
| 1 | 1.00 | 1 | 1 | 0.05  | 0.05   | 0.05   | 0.05   | 0.05   | t | 112090 | EDLAVYF                      | Homo<br>sapiens                  |
| 1 | 1.00 | 1 | 1 | 0.03  | 0.03   | 0.03   | 0.03   | 0.03   | t | 117341 | PGSALLFDI<br>PEF             | Homo<br>sapiens                  |
| 1 | 1.00 | 1 | 1 | -0.01 | -0.01  | -0.018 | -0.01  | -0.01  | t | 57767  | SFFVKDW<br>PER               | Mus<br>musculu<br>s              |
| 1 | 1.00 | 1 | 1 | 0.03  | 0.03   | 0.031  | 0.033  | 0.03   | t | 50989  | QGYQEPP<br>PPQAPYQ<br>GYQEPP | Homo<br>sapiens                  |
| 1 | 1.00 | 1 | 1 | -0.01 | -0.014 | -0.019 | -0.011 | -0.01  | t | 51474  | QLPNVGIT<br>QGIV             | Oryctola<br>gus<br>cuniculu<br>s |
| 1 | 1.00 | 1 | 1 | 0     | 0.002  | -0.002 | 0      | 0      | t | 10714  | DVRRIEGG                     | Anas<br>platyrhy<br>nchos        |
| 1 | 1.00 | 1 | 1 | 0.04  | 0.04   | 0.031  | 0.038  | 0.04   | t | 135931 | GDVEEAIE<br>RAVV             | Homo<br>sapiens                  |

|   |      |   |   |       |        |        |        |        |   |        |                   |                       |
|---|------|---|---|-------|--------|--------|--------|--------|---|--------|-------------------|-----------------------|
| 1 | 1.00 | 1 | 1 | 0.01  | 0.013  | 0.022  | 0.01   | 0.007  | t | 110761 | AENPTNY           | Mus musculus          |
| 1 | 1.00 | 1 | 1 | -0.01 | -0.008 | -0.017 | -0.007 | -0.009 | t | 144594 | ARGISRTK YW       | Homo sapiens          |
| 1 | 1.00 | 1 | 1 | 0.03  | 0.028  | 0.014  | 0.023  | 0.029  | t | 136062 | FGISETQA EAILE    | Mus musculus          |
| 1 | 1.00 | 1 | 1 | 0     | 0.001  | 0      | 0      | -0.002 | t | 56564  | RYKQKIIAP AKQ     | Oryctolagus cuniculus |
| 1 | 1.00 | 1 | 1 | 0.01  | 0.007  | 0.007  | 0.01   | 0.01   | t | 97485  | LVSEGFLKL         | Oryctolagus cuniculus |
| 1 | 1.00 | 1 | 1 | 0.01  | 0.01   | 0.003  | 0.01   | 0.009  | t | 158723 | DTGCAIDIS RQELRCG | Mus musculus          |
| 1 | 1.00 | 1 | 1 | 0.01  | 0.014  | 0.001  | 0.011  | 0.012  | t | 13735  | EPQVYTLP PSR      | Homo sapiens          |
| 1 | 1.00 | 1 | 1 | -0.01 | -0.006 | -0.01  | -0.003 | -0.01  | t | 117298 | GPSRRGPS LGASSH   | Homo sapiens          |
| 1 | 1.00 | 1 | 1 | 0     | 0.003  | -0.006 | 0      | 0      | t | 32617  | KNTLQAR QQT       | Mus musculus          |
| 1 | 1.00 | 1 | 1 | 0.02  | 0.024  | 0.009  | 0.021  | 0.022  | t | 111663 | QDKILTHY ENDSTD   | Homo sapiens          |
| 1 | 1.00 | 1 | 1 | -0.01 | -0.012 | -0.02  | -0.013 | -0.01  | t | 59650  | SMDVRRIE          | Anas platyrhynchos    |
| 1 | 1.00 | 1 | 1 | 0.03  | 0.03   | 0.03   | 0.03   | 0.028  | t | 129543 | PAAAAAP AKVEAKEE  | Homo sapiens          |
| 1 | 1.00 | 1 | 1 | 0.01  | 0.01   | 0.008  | 0.009  | 0.01   | t | 22119  | GRLDA             | Homo sapiens          |
| 1 | 1.00 | 1 | 1 | 0.06  | 0.062  | 0.06   | 0.059  | 0.06   | t | 151945 | KFSSLYISQ FI      | Homo sapiens          |

|   |      |   |   |       |        |        |        |        |   |        |                              |                       |
|---|------|---|---|-------|--------|--------|--------|--------|---|--------|------------------------------|-----------------------|
| 1 | 1.00 | 1 | 1 | -0.01 | -0.012 | -0.01  | -0.004 | -0.01  | t | 138190 | HNAKTKL                      | Homo sapiens          |
| 1 | 1.00 | 1 | 1 | 0     | 0      | -0.005 | 0.002  | 0      | t | 118217 | VTKYITKG<br>WKEVH            | Homo sapiens          |
| 1 | 1.00 | 1 | 1 | -0.03 | -0.03  | -0.034 | -0.031 | -0.03  | t | 106523 | HWHHTIL                      | Mus musculus          |
| 1 | 1.00 | 1 | 1 | 0     | 0      | -0.006 | -0.006 | -0.001 | t | 30661  | KEVPALTA<br>VETGAT           | Homo sapiens          |
| 1 | 1.00 | 1 | 1 | -0.04 | -0.042 | -0.038 | -0.04  | -0.042 | t | 120598 | IARFKMFP<br>EVKEKGM<br>A     | Oryctolagus cuniculus |
| 1 | 1.00 | 1 | 1 | 0     | 0      | 0.005  | 0.01   | 0.003  | t | 116024 | VTLRI                        | Homo sapiens          |
| 1 | 1.00 | 1 | 1 | -0.01 | -0.017 | -0.024 | -0.01  | -0.01  | t | 149725 | GSEKEAPS<br>KDFYLKN          | Oryctolagus cuniculus |
| 1 | 1.00 | 1 | 1 | 0     | -0.002 | -0.012 | -0.007 | -0.001 | t | 102439 | FQLKTADL<br>PAGRDETT<br>SFVL | Mus musculus          |
| 1 | 1.00 | 1 | 1 | 0     | -0.002 | -0.012 | -0.007 | -0.001 | t | 102439 | FQLKTADL<br>PAGRDETT<br>SFVL | Mus musculus          |
| 1 | 1.00 | 1 | 1 | -0.01 | -0.01  | -0.023 | -0.007 | -0.008 | t | 66934  | TVAELQRL<br>KMKVGKT<br>REL   | Homo sapiens          |
| 1 | 1.00 | 1 | 1 | -0.01 | -0.01  | -0.023 | -0.007 | -0.008 | t | 66934  | TVAELQRL<br>KMKVGKT<br>REL   | Homo sapiens          |
| 1 | 1.00 | 1 | 1 | 0     | 0      | 0      | 0      | 0      | t | 60795  | SRSERR                       | Homo sapiens          |
| 1 | 1.00 | 1 | 1 | 0.05  | 0.05   | 0.043  | 0.05   | 0.049  | t | 136590 | RDYFEEYG<br>KIDTIEIT         | Mus musculus          |
| 1 | 1.00 | 1 | 1 | 0.01  | 0.008  | 0.01   | 0.009  | 0.009  | t | 38434  | LPDKFNAY<br>LANKWV           | Mus musculus          |
| 1 | 1.00 | 1 | 1 | 0.02  | 0.02   | 0.02   | 0.02   | 0.019  | t | 135837 | DMYGDIRL<br>TGLI             | Mus musculus          |



|   |      |   |   |       |        |        |        |        |   |        |                         |                     |
|---|------|---|---|-------|--------|--------|--------|--------|---|--------|-------------------------|---------------------|
| 1 | 1.00 | 1 | 1 | -0.01 | -0.01  | -0.008 | 0      | -0.007 | t | 106114 | SLNPERMF<br>RKP         | Homo<br>sapiens     |
| 1 | 1.00 | 1 | 1 | 0.04  | 0.04   | 0.04   | 0.04   | 0.041  | t | 114764 | DENPVVH<br>FFK          | Mus<br>musculu<br>s |
| 1 | 1.00 | 1 | 1 | 0.01  | 0.01   | 0.01   | 0.01   | 0.01   | t | 127585 | ASFEPFSN                | Homo<br>sapiens     |
| 1 | 1.00 | 1 | 1 | 0.01  | 0.008  | 0.008  | 0.009  | 0.009  | t | 74794  | YLLPAIVHI               | Mus<br>musculu<br>s |
| 1 | 1.00 | 1 | 1 | 0     | 0      | 0      | 0.001  | -0.002 | t | 103838 | DAEFRHDS<br>GYEV        | Mus<br>musculu<br>s |
| 1 | 1.00 | 1 | 1 | 0     | 0      | 0      | 0.001  | -0.002 | t | 70621  | VQPDGGQ<br>PAVRNER<br>A | Mus<br>musculu<br>s |
| 1 | 1.00 | 1 | 1 | 0     | 0      | 0      | 0.001  | -0.002 | t | 62050  | SVARTRGL<br>YDDG        | Mus<br>musculu<br>s |
| 1 | 1.00 | 1 | 1 | 0     | 0      | 0      | 0.001  | -0.002 | t | 47670  | PGGRERGI<br>YHIE        | Mus<br>musculu<br>s |
| 1 | 1.00 | 1 | 1 | 0     | 0      | 0      | 0.001  | -0.002 | t | 48395  | PLLGCIGST<br>CAEDGN     | Mus<br>musculu<br>s |
| 1 | 1.00 | 1 | 1 | 0     | 0      | 0      | 0.001  | -0.002 | t | 53194  | RARGIYET<br>ETRA        | Mus<br>musculu<br>s |
| 1 | 1.00 | 1 | 1 | 0     | 0.003  | 0      | 0.001  | -0.002 | t | 21838  | GPWSPIDI<br>HHLS        | Mus<br>musculu<br>s |
| 1 | 1.00 | 1 | 1 | 0     | 0      | 0      | 0.001  | -0.002 | t | 21838  | GPWSPIDI<br>HHLS        | Mus<br>musculu<br>s |
| 1 | 1.00 | 1 | 1 | 0     | 0      | 0      | 0.001  | -0.002 | t | 1448   | AGAPDRA<br>RGQYP        | Mus<br>musculu<br>s |
| 1 | 1.00 | 1 | 1 | -0.03 | -0.03  | -0.03  | -0.026 | -0.03  | t | 115658 | VGWYRPP<br>FSRVV        | Homo<br>sapiens     |
| 1 | 1.00 | 1 | 1 | -0.04 | -0.04  | -0.05  | -0.04  | -0.04  | t | 13589  | ENSGCFRH                | Mus<br>musculu<br>s |
| 1 | 1.00 | 1 | 1 | 0.03  | 0.03   | 0.03   | 0.03   | 0.03   | t | 99293  | GQEEENE<br>GGNIFSGF     | Homo<br>sapiens     |
| 1 | 1.00 | 1 | 1 | -0.01 | -0.008 | -0.025 | -0.011 | -0.01  | t | 45589  | NQMHML<br>SNKS          | Homo<br>sapiens     |

|   |      |   |   |       |        |        |        |        |   |        |                              |                   |
|---|------|---|---|-------|--------|--------|--------|--------|---|--------|------------------------------|-------------------|
| 1 | 1.00 | 1 | 1 | 0.05  | 0.05   | 0.052  | 0.053  | 0.051  | t | 99007  | SLQPED                       | Homo sapiens      |
| 1 | 1.00 | 1 | 1 | 0     | 0.004  | -0.003 | -0.003 | -0.003 | t | 115403 | NQELAYFY<br>PELFRQFY<br>QLDA | Homo sapiens      |
| 1 | 1.00 | 1 | 1 | 0.01  | 0.012  | 0.006  | 0.013  | 0.008  | t | 3676   | APPGSPAP<br>PPPEHRG<br>GPEEF | Homo sapiens      |
| 1 | 1.00 | 1 | 1 | -0.01 | -0.012 | -0.006 | -0.011 | -0.012 | t | 48359  | PLIHFGND                     | Mus musculus      |
| 1 | 1.00 | 1 | 1 | 0     | 0.008  | -0.002 | 0      | -0.002 | t | 146808 | CTPKSDEF<br>NPCEDIM<br>GYKFL | Gallus gallus     |
| 1 | 1.00 | 1 | 1 | 0.05  | 0.05   | 0.05   | 0.052  | 0.052  | t | 27555  | IMSGEKPT<br>VEDVVN           | Homo sapiens      |
| 1 | 1.00 | 1 | 1 | -0.02 | -0.02  | -0.019 | -0.02  | -0.022 | t | 20523  | GKCGVSIP<br>YK               | Homo sapiens      |
| 1 | 1.00 | 1 | 1 | 0.01  | 0.01   | 0.01   | 0.014  | 0.01   | t | 135930 | GDKVSFFC<br>KNKEKCC          | Homo sapiens      |
| 1 | 1.00 | 1 | 1 | 0.02  | 0.024  | 0.02   | 0.021  | 0.02   | t | 21466  | GNLLFT                       | Homo sapiens      |
| 1 | 1.00 | 1 | 1 | -0.03 | -0.03  | -0.041 | -0.03  | -0.03  | t | 74478  | YKLTRPYM<br>ARC              | Mus musculus      |
| 1 | 1.00 | 1 | 1 | 0.01  | 0.008  | 0.015  | 0.009  | 0.009  | t | 53894  | RGKDLPVL<br>DQLTD            | Mus musculus      |
| 1 | 1.00 | 1 | 1 | -0.01 | -0.01  | -0.01  | -0.01  | -0.012 | t | 68184  | VEFTKDTQ<br>TGMSGQT          | Mus musculus      |
| 1 | 1.00 | 1 | 1 | -0.02 | -0.02  | -0.017 | -0.02  | -0.022 | t | 14204  | ESLNTGW<br>LAGLP             | Rattus norvegicus |
| 1 | 1.00 | 1 | 1 | 0.02  | 0.02   | 0.023  | 0.02   | 0.02   | t | 51454  | QLNPKDN<br>DVEL              | Mus musculus      |
| 1 | 1.00 | 1 | 1 | 0.02  | 0.02   | 0.023  | 0.02   | 0.02   | t | 51454  | QLNPKDN<br>DVEL              | Homo sapiens      |

|   |      |   |   |       |        |        |        |        |   |        |                 |                       |
|---|------|---|---|-------|--------|--------|--------|--------|---|--------|-----------------|-----------------------|
| 1 | 1.00 | 1 | 1 | -0.02 | -0.022 | -0.011 | -0.013 | -0.02  | t | 112423 | YYCARMR         | Homo sapiens          |
| 1 | 1.00 | 1 | 1 | 0.01  | 0.008  | -0.014 | 0.013  | 0.016  | t | 20521  | GKAVTKEQL       | Mus musculus          |
| 1 | 1.00 | 1 | 1 | 0     | 0.002  | 0.007  | 0.007  | -0.001 | t | 65050  | TLRVYK          | Homo sapiens          |
| 1 | 1.00 | 1 | 1 | -0.01 | -0.008 | -0.01  | -0.013 | -0.012 | t | 25445  | IAT             | Homo sapiens          |
| 1 | 1.00 | 1 | 1 | 0.04  | 0.04   | 0.04   | 0.04   | 0.04   | t | 149078 | NITQEAF         | Sus scrofa            |
| 1 | 1.00 | 1 | 1 | 0.04  | 0.037  | 0.033  | 0.037  | 0.04   | t | 57504  | SEKSEEIN        | Mus musculus          |
| 1 | 1.00 | 1 | 1 | -0.01 | -0.01  | -0.01  | -0.01  | -0.013 | t | 51853  | QPHGGGW         | Mus musculus          |
| 1 | 1.00 | 1 | 1 | -0.01 | -0.01  | -0.01  | -0.01  | -0.01  | t | 31667  | KKPTFK          | Mus musculus          |
| 1 | 1.00 | 1 | 1 | 0     | -0.004 | -0.006 | -0.001 | 0      | t | 21911  | GQLQAVNPNAGNRGQ | Oryctolagus cuniculus |
| 1 | 1.00 | 1 | 1 | 0.01  | 0.01   | 0.01   | 0.01   | 0.01   | t | 99255  | FSEVIF          | Oryctolagus cuniculus |
| 1 | 1.00 | 1 | 1 | 0.06  | 0.056  | 0.052  | 0.063  | 0.062  | t | 26235  | IGGSQAQTAS      | Oryctolagus cuniculus |
| 1 | 1.00 | 1 | 1 | -0.02 | -0.015 | -0.018 | -0.017 | -0.02  | t | 55625  | RRKAMLQDMA      | Homo sapiens          |
| 1 | 1.00 | 1 | 1 | -0.04 | -0.038 | -0.042 | -0.039 | -0.04  | t | 71192  | VSVK            | Homo sapiens          |
| 1 | 1.00 | 1 | 1 | 0.04  | 0.04   | 0.04   | 0.04   | 0.039  | t | 75847  | YSPELE          | Mus musculus          |
| 1 | 1.00 | 1 | 1 | 0.02  | 0.017  | 0.011  | 0.02   | 0.02   | t | 113861 | SISTTNFTNP      | Oryctolagus cuniculus |

|   |      |   |   |       |        |        |        |        |   |        |                              |                          |
|---|------|---|---|-------|--------|--------|--------|--------|---|--------|------------------------------|--------------------------|
| 1 | 1.00 | 1 | 1 | 0     | 0      | -0.011 | 0      | 0.002  | t | 17467  | FQDMLNIS                     | Mus musculus             |
| 1 | 1.00 | 1 | 1 | -0.01 | -0.01  | -0.019 | -0.01  | -0.01  | t | 45252  | NNSTNSGI                     | Mus musculus             |
| 1 | 1.00 | 1 | 1 | -0.01 | -0.01  | -0.01  | -0.004 | -0.01  | t | 119278 | MSKTEWN<br>ASQLPRLG<br>GKEDR | Rattus norvegicus        |
| 1 | 1.00 | 1 | 1 | 0.01  | 0.01   | 0.01   | 0.01   | 0.01   | t | 112398 | WFAYWG<br>Q                  | Homo sapiens             |
| 1 | 1.00 | 1 | 1 | 0.07  | 0.073  | 0.065  | 0.07   | 0.07   | t | 52313  | QSESVEFT<br>KDTQTGM<br>S     | Mus musculus             |
| 1 | 1.00 | 1 | 1 | -0.01 | -0.007 | -0.017 | -0.011 | -0.01  | t | 67583  | VAFGNPG<br>DTPVTGD<br>W      | Capra hircus             |
| 1 | 1.00 | 1 | 1 | -0.01 | -0.017 | -0.017 | -0.011 | -0.01  | t | 67583  | VAFGNPG<br>DTPVTGD<br>W      | Oncorhynchus tshawytscha |
| 1 | 1.00 | 1 | 1 | 0     | -0.002 | -0.001 | -0.001 | -0.001 | t | 72251  | WAPSV                        | Mus musculus             |
| 1 | 1.00 | 1 | 1 | 0.03  | 0.026  | 0.028  | 0.03   | 0.03   | t | 142146 | EQKLISEED<br>L               | Mus musculus             |
| 1 | 1.00 | 1 | 1 | -0.02 | -0.022 | -0.018 | -0.021 | -0.02  | t | 55272  | RPPRYMV<br>QS                | Mus musculus             |
| 1 | 1.00 | 1 | 1 | -0.02 | -0.02  | -0.02  | -0.02  | -0.019 | t | 39167  | LRPTFDTR<br>LM               | Mus musculus             |
| 1 | 1.00 | 1 | 1 | 0.02  | 0.016  | 0.012  | 0.02   | 0.02   | t | 52602  | QTQSQVQ<br>DNVKQQQ<br>D      | Bos taurus               |
| 1 | 1.00 | 1 | 1 | 0.01  | 0.01   | 0.01   | 0.01   | 0.01   | t | 119480 | KQQKTEN<br>GAGDQ             | Homo sapiens             |
| 1 | 1.00 | 1 | 1 | -0.03 | -0.026 | -0.026 | -0.023 | -0.03  | t | 144772 | SAHTSHLV<br>GS               | Homo sapiens             |

|   |      |   |   |       |        |        |        |        |   |        |                      |                      |
|---|------|---|---|-------|--------|--------|--------|--------|---|--------|----------------------|----------------------|
| 1 | 1.00 | 1 | 1 | -0.03 | -0.028 | -0.023 | -0.023 | -0.029 | t | 122127 | KRSRLDV              | Homo sapiens         |
| 1 | 1.00 | 1 | 1 | 0.05  | 0.062  | 0.044  | 0.05   | 0.05   | t | 66733  | TTNDAEAS             | Mus musculus         |
| 1 | 1.00 | 1 | 1 | 0     | -0.002 | -0.001 | -0.001 | -0.001 | t | 65000  | TLPERVRP<br>PDDWAT   | Mus musculus         |
| 1 | 1.00 | 1 | 1 | 0.04  | 0.04   | 0.04   | 0.04   | 0.04   | t | 149435 | QPQYSQP<br>QQP       | Mus musculus         |
| 1 | 1.00 | 1 | 1 | 0.04  | 0.04   | 0.04   | 0.04   | 0.04   | t | 149435 | QPQYSQP<br>QQP       | Homo sapiens         |
| 1 | 1.00 | 1 | 1 | -0.05 | -0.049 | -0.055 | -0.05  | -0.05  | t | 50494  | QDMRNTI<br>MASKTVG   | Myodes glareolus     |
| 1 | 1.00 | 1 | 1 | 0.02  | 0.018  | 0.027  | 0.023  | 0.02   | t | 97205  | ANYTTAV<br>D         | Mus musculus         |
| 1 | 1.00 | 1 | 1 | 0     | -0.001 | 0.005  | -0.003 | 0      | t | 73991  | YGFQYS               | Homo sapiens         |
| 1 | 1.00 | 1 | 1 | 0.02  | 0.018  | 0.02   | 0.012  | 0.017  | t | 144385 | KPLEEVLN<br>L        | Mus musculus         |
| 1 | 1.00 | 1 | 1 | 0.03  | 0.026  | 0.028  | 0.03   | 0.03   | t | 55965  | RSSRPLSEE<br>NGEREYN | Mesocricetus auratus |
| 1 | 1.00 | 1 | 1 | 0.01  | 0.012  | 0.006  | 0.011  | 0.01   | t | 56200  | RTTSGLT              | Homo sapiens         |
| 1 | 1.00 | 1 | 1 | 0.01  | 0.013  | 0.011  | 0.01   | 0.009  | t | 75371  | YPNQVYYR<br>PVDQYSN  | Mus musculus         |
| 1 | 1.00 | 1 | 1 | 0.01  | 0.012  | 0.01   | 0.017  | 0.01   | t | 108082 | QKTTTRPY<br>PNLQIDP  | Homo sapiens         |
| 1 | 1.00 | 1 | 1 | -0.02 | -0.017 | -0.021 | -0.02  | -0.022 | t | 22027  | GREVKAET<br>RLNP     | Mus musculus         |

|   |      |   |   |       |        |        |        |        |   |        |                     |                            |
|---|------|---|---|-------|--------|--------|--------|--------|---|--------|---------------------|----------------------------|
| 1 | 1.00 | 1 | 1 | 0     | 0      | 0.005  | 0      | -0.002 | t | 72321  | WMMMM<br>NWSP       | Homo<br>sapiens            |
| 1 | 1.00 | 1 | 1 | -0.04 | -0.038 | -0.049 | -0.033 | -0.037 | t | 63098  | TCRRMLAF<br>LKDKENR | Homo<br>sapiens            |
| 1 | 1.00 | 1 | 1 | 0.05  | 0.05   | 0.05   | 0.05   | 0.049  | t | 119574 | EWESNGQ<br>P        | Homo<br>sapiens            |
| 1 | 1.00 | 1 | 1 | -0.02 | -0.015 | -0.02  | -0.019 | -0.02  | t | 97018  | TVTFKATA<br>AT      | Homo<br>sapiens(<br>human) |
| 1 | 1.00 | 1 | 1 | 0     | 0.002  | -0.009 | 0.001  | 0.001  | t | 64534  | TKDASIDY<br>HE      | Homo<br>sapiens            |
| 1 | 1.00 | 1 | 1 | 0     | 0.002  | -0.009 | 0.001  | 0.001  | t | 64534  | TKDASIDY<br>HE      | Homo<br>sapiens            |
| 1 | 1.00 | 1 | 1 | 0     | 0      | 0      | 0      | 0      | t | 108632 | SKEENTPE<br>VKA     | Canis<br>lupus             |
| 1 | 1.00 | 1 | 1 | 0     | 0      | 0      | 0      | 0      | t | 118258 | AKSPEKAK            | Homo<br>sapiens            |
| 1 | 1.00 | 1 | 1 | 0.01  | 0.01   | 0.017  | 0.01   | 0.009  | t | 105890 | IVYVGDGV<br>C       | Mus<br>musculu<br>s        |
| 1 | 1.00 | 1 | 1 | -0.01 | -0.007 | -0.011 | -0.01  | -0.012 | t | 53634  | RESQAYYQ<br>R       | Mus<br>musculu<br>s        |
| 1 | 1.00 | 1 | 1 | 0     | 0.006  | 0      | 0      | 0      | t | 123833 | VSHVDFM<br>VY       | Ovis<br>aries              |
| 1 | 1.00 | 1 | 1 | 0.02  | 0.027  | 0.02   | 0.02   | 0.02   | t | 39091  | LRGDLQVL<br>AQ      | Cavia<br>porcellu<br>s     |
| 1 | 1.00 | 1 | 1 | 0.02  | 0.027  | 0.02   | 0.02   | 0.02   | t | 39091  | LRGDLQVL<br>AQ      | Cavia<br>porcellu<br>s     |
| 1 | 1.00 | 1 | 1 | 0.02  | 0.02   | 0.018  | 0.02   | 0.02   | t | 21422  | GNFERISG<br>DLKTQID | Homo<br>sapiens            |

|   |      |   |   |       |        |        |        |        |   |        |                              |                            |
|---|------|---|---|-------|--------|--------|--------|--------|---|--------|------------------------------|----------------------------|
| 1 | 1.00 | 1 | 1 | 0     | 0      | 0      | 0.003  | -0.001 | t | 123540 | NIFEYEVD<br>AEPLRPCE<br>LER  | Mus<br>musculu<br>s        |
| 1 | 1.00 | 1 | 1 | 0     | 0      | 0      | 0.003  | -0.001 | t | 105207 | GAIIGLMV<br>GGVVIA           | Mus<br>musculu<br>s        |
| 1 | 1.00 | 1 | 1 | 0.02  | 0.02   | 0.008  | 0.02   | 0.022  | t | 150200 | FGEHKQEK<br>DLEYGAC          | Mus<br>musculu<br>s        |
| 1 | 1.00 | 1 | 1 | -0.02 | -0.018 | -0.02  | -0.017 | -0.02  | t | 96487  | KPTAPTKP<br>TY               | Homo<br>sapiens(<br>human) |
| 1 | 1.00 | 1 | 1 | 0.01  | 0.014  | 0.016  | 0.013  | 0.01   | t | 1254   | AFAQAPT<br>HQLSL             | Homo<br>sapiens            |
| 1 | 1.00 | 1 | 1 | 0.02  | 0.02   | 0.015  | 0.02   | 0.018  | t | 151676 | KVDFPQD<br>QLATLTGR<br>I     | Mus<br>musculu<br>s        |
| 1 | 1.00 | 1 | 1 | -0.03 | -0.03  | -0.035 | -0.03  | -0.032 | t | 24970  | HTRVTGG<br>VQG               | Mus<br>musculu<br>s        |
| 1 | 1.00 | 1 | 1 | 0.06  | 0.063  | 0.05   | 0.06   | 0.06   | t | 37377  | LLGYKKGE<br>GNTCVEN<br>NNPTC | Mus<br>musculu<br>s        |
| 1 | 1.00 | 1 | 1 | 0.06  | 0.06   | 0.05   | 0.06   | 0.06   | t | 37377  | LLGYKKGE<br>GNTCVEN<br>NNPTC | Mus<br>musculu<br>s        |
| 1 | 1.00 | 1 | 1 | 0.06  | 0.063  | 0.05   | 0.06   | 0.06   | t | 37377  | LLGYKKGE<br>GNTCVEN<br>NNPTC | Mus<br>musculu<br>s        |
| 1 | 1.00 | 1 | 1 | 0     | -0.002 | 0      | 0.003  | -0.001 | t | 48618  | PNDPNRN<br>VD                | Mus<br>musculu<br>s        |
| 1 | 1.00 | 1 | 1 | 0     | -0.002 | 0      | 0.003  | -0.001 | t | 6402   | CHPSDGK<br>CN                | Mus<br>musculu<br>s        |
| 1 | 1.00 | 1 | 1 | 0.04  | 0.04   | 0.036  | 0.04   | 0.04   | t | 80440  | AQQPSTA<br>TSVDAP            | Homo<br>sapiens            |
| 1 | 1.00 | 1 | 1 | 0.04  | 0.04   | 0.04   | 0.044  | 0.04   | t | 115602 | EAAAMELK<br>VEDP             | Homo<br>sapiens            |
| 1 | 1.00 | 1 | 1 | -0.02 | -0.022 | -0.021 | -0.017 | -0.02  | t | 106535 | IFPSFLRPD<br>PPL             | Mus<br>musculu<br>s        |

|   |      |   |   |       |        |        |        |        |   |        |                              |                              |
|---|------|---|---|-------|--------|--------|--------|--------|---|--------|------------------------------|------------------------------|
| 1 | 1.00 | 1 | 1 | 0.03  | 0.03   | 0.023  | 0.03   | 0.03   | t | 140681 | GPEYWEQ<br>QTRIAKEW<br>EQ    | Rattus<br>norvegicus         |
| 1 | 1.00 | 1 | 1 | 0.04  | 0.042  | 0.041  | 0.043  | 0.04   | t | 133822 | ERPLKQIA<br>FNGGLEP          | Homo<br>sapiens              |
| 1 | 1.00 | 1 | 1 | -0.02 | -0.016 | -0.025 | -0.019 | -0.02  | t | 6365   | CGWAGW<br>LLSPRG             | Homo<br>sapiens              |
| 1 | 1.00 | 1 | 1 | 0.05  | 0.047  | 0.041  | 0.047  | 0.05   | t | 78177  | HVTDLDKE<br>FL               | Mus<br>musculus              |
| 1 | 1.00 | 1 | 1 | 0     | 0.002  | -0.004 | -0.003 | 0      | t | 52082  | QQPFP                        | Homo<br>sapiens              |
| 1 | 1.00 | 1 | 1 | 0     | -0.002 | -0.005 | -0.001 | 0      | t | 17128  | FNASDSVG<br>QQIKVIP          | Mus<br>musculus              |
| 1 | 1.00 | 1 | 1 | 0.01  | 0.01   | 0.008  | 0.007  | 0.008  | t | 29810  | KAGNEGLE<br>WVEL             | Homo<br>sapiens              |
| 1 | 1.00 | 1 | 1 | 0.03  | 0.028  | 0.037  | 0.031  | 0.03   | t | 78971  | FGANST                       | Mus<br>musculus              |
| 1 | 1.00 | 1 | 1 | -0.02 | -0.02  | -0.03  | -0.022 | -0.02  | t | 12388  | EIAKTLLK                     | Homo<br>sapiens              |
| 1 | 1.00 | 1 | 1 | 0.06  | 0.065  | 0.061  | 0.06   | 0.06   | t | 29899  | KANGNGS<br>GDNGDTT<br>W      | Homo<br>sapiens              |
| 1 | 1.00 | 1 | 1 | 0     | 0      | 0      | 0.002  | 0      | t | 28909  | ITGHRMA<br>WDM               | Homo<br>sapiens              |
| 1 | 1.00 | 1 | 1 | -0.01 | -0.01  | -0.01  | -0.01  | -0.013 | t | 106941 | TVKQLYTL<br>YPAA             | Mus<br>musculus              |
| 1 | 1.00 | 1 | 1 | 0.06  | 0.06   | 0.06   | 0.06   | 0.059  | t | 78872  | VIPDREVL<br>YQEFDEM<br>EECAS | Homo<br>sapiens              |
| 1 | 1.00 | 1 | 1 | 0.03  | 0.026  | 0.028  | 0.029  | 0.03   | t | 57281  | SDSGSDSG<br>ASST             | Oryctola<br>gus<br>cuniculus |
| 1 | 1.00 | 1 | 1 | 0     | 0      | 0      | 0      | -0.001 | t | 130637 | WSSCVFSV<br>SYCL             | Mus<br>musculus              |



|   |      |   |   |       |        |        |        |        |   |        |                              |                                  |
|---|------|---|---|-------|--------|--------|--------|--------|---|--------|------------------------------|----------------------------------|
| 1 | 1.00 | 1 | 1 | -0.02 | -0.018 | -0.025 | -0.019 | -0.02  | t | 65414  | TNRRPQD<br>VKFPGGG<br>Q      | Homo<br>sapiens                  |
| 1 | 1.00 | 1 | 1 | 0     | 0.004  | 0      | 0.003  | 0      | t | 118434 | ISKGANPV<br>EIRRG            | Homo<br>sapiens                  |
| 1 | 1.00 | 1 | 1 | 0.11  | 0.108  | 0.096  | 0.103  | 0.112  | t | 125871 | EEEEEEEE<br>E                | Mus<br>musculu<br>s              |
| 1 | 1.00 | 1 | 1 | 0.02  | 0.02   | 0.019  | 0.024  | 0.02   | t | 127987 | FYQALQNS<br>LGGEDSD<br>ARVEA | Homo<br>sapiens                  |
| 1 | 1.00 | 1 | 1 | 0.01  | 0.014  | 0      | 0.007  | 0.01   | t | 11731  | E EKPAVLG<br>HDEAAYS         | Homo<br>sapiens                  |
| 1 | 1.00 | 1 | 1 | 0.02  | 0.02   | 0.02   | 0.02   | 0.018  | t | 52086  | QQPFPQQ<br>PQQ               | Mus<br>musculu<br>s              |
| 1 | 1.00 | 1 | 1 | -0.04 | -0.04  | -0.04  | -0.04  | -0.042 | t | 26372  | IHFG                         | Mus<br>musculu<br>s              |
| 1 | 1.00 | 1 | 1 | -0.01 | -0.006 | -0.008 | -0.009 | -0.011 | t | 4885   | ATALDTSN<br>KFADFLQI         | Ovis<br>aries                    |
| 1 | 1.00 | 1 | 1 | 0     | 0      | 0      | -0.003 | -0.004 | t | 62003  | STWHVLVS<br>PNVSVPS<br>SSTP  | Homo<br>sapiens                  |
| 1 | 1.00 | 1 | 1 | 0     | 0      | 0      | -0.002 | 0      | t | 6059   | CCDLAP                       | Homo<br>sapiens                  |
| 1 | 1.00 | 1 | 1 | 0.06  | 0.06   | 0.06   | 0.06   | 0.06   | t | 137945 | PGTEYTV                      | Homo<br>sapiens                  |
| 1 | 1.00 | 1 | 1 | 0.01  | 0.007  | 0.007  | 0.01   | 0.008  | t | 7216   | CTTFDDV<br>QAPNYTQ<br>HTSSMR | Oryctola<br>gus<br>cuniculu<br>s |
| 1 | 1.00 | 1 | 1 | 0     | 0.004  | 0      | 0.001  | 0.002  | t | 67181  | TVTPID                       | Homo<br>sapiens                  |
| 1 | 1.00 | 1 | 1 | 0.02  | 0.02   | 0.02   | 0.02   | 0.02   | t | 35973  | LFSGDEDS<br>DSSDGY           | Homo<br>sapiens                  |
| 1 | 1.00 | 1 | 1 | 0.01  | 0.01   | 0.006  | 0.007  | 0.008  | t | 195    | AAHASAR<br>QQWELQ<br>GD      | Homo<br>sapiens                  |

|   |      |   |   |       |        |        |        |        |   |        |                              |                       |
|---|------|---|---|-------|--------|--------|--------|--------|---|--------|------------------------------|-----------------------|
| 1 | 1.00 | 1 | 1 | 0     | 0      | 0      | 0      | -0.001 | t | 49505  | PSSKRFQP<br>FQQFGRD          | Homo sapiens          |
| 1 | 1.00 | 1 | 1 | -0.02 | -0.019 | -0.031 | -0.02  | -0.018 | t | 56089  | RTIVCGLFP<br>TQIQV           | Myodes glareolus      |
| 1 | 1.00 | 1 | 1 | 0.03  | 0.032  | 0.029  | 0.031  | 0.032  | t | 44778  | NLLFTG                       | Homo sapiens          |
| 1 | 1.00 | 1 | 1 | -0.02 | -0.019 | -0.02  | -0.017 | -0.02  | t | 78243  | PLFRPS                       | Equus caballus        |
| 1 | 1.00 | 1 | 1 | 0.01  | 0.01   | 0      | 0.01   | 0.01   | t | 25291  | IAGKTSVL<br>RAIP             | Homo sapiens          |
| 1 | 1.00 | 1 | 1 | 0.01  | 0.012  | 0.003  | 0.013  | 0.01   | t | 73298  | WYTTVPK<br>YVATQGYL          | Homo sapiens          |
| 1 | 1.00 | 1 | 1 | 0.01  | 0.013  | 0.005  | 0.01   | 0.013  | t | 123479 | LYEPPASLP                    | Mus musculus          |
| 1 | 1.00 | 1 | 1 | -0.03 | -0.034 | -0.033 | -0.031 | -0.031 | t | 67169  | TVSSQSFR<br>RL               | Oryctolagus cuniculus |
| 1 | 1.00 | 1 | 1 | 0     | 0      | -0.009 | 0.005  | 0.003  | t | 110828 | EIDGPAGQ<br>AEPDRAH<br>YNI   | Mus musculus          |
| 1 | 1.00 | 1 | 1 | -0.01 | -0.006 | -0.016 | -0.003 | -0.009 | t | 134804 | TIFILFCCSK<br>EKRRKKQA<br>AT | Homo sapiens          |
| 1 | 1.00 | 1 | 1 | -0.01 | -0.01  | -0.01  | -0.01  | -0.01  | t | 9591   | DPAKAAF<br>D                 | Mus musculus          |
| 1 | 1.00 | 1 | 1 | 0     | 0      | 0      | 0      | 0      | t | 112055 | AWFAYW<br>G                  | Homo sapiens          |
| 1 | 1.00 | 1 | 1 | 0.01  | 0.014  | 0.01   | 0.011  | 0.01   | t | 137858 | FTPGTEYT                     | Homo sapiens          |
| 1 | 1.00 | 1 | 1 | 0.01  | 0.012  | 0.005  | 0.011  | 0.01   | t | 142047 | TYFKGVST<br>ELKDKK           | Homo sapiens          |
| 1 | 1.00 | 1 | 1 | -0.01 | -0.014 | -0.012 | -0.007 | -0.01  | t | 95973  | VNPLGFFK<br>KEAL             | Oryctolagus cuniculus |

|   |      |   |   |       |        |        |        |        |   |        |                              |                                  |
|---|------|---|---|-------|--------|--------|--------|--------|---|--------|------------------------------|----------------------------------|
| 1 | 1.00 | 1 | 1 | 0     | 0      | 0.005  | 0      | 0.001  | t | 115047 | ELQFPFLQ<br>D                | Mus<br>musculu<br>s              |
| 1 | 1.00 | 1 | 1 | -0.01 | -0.008 | -0.022 | -0.009 | -0.01  | t | 35982  | LFSLMPDV<br>AHSLA            | Homo<br>sapiens                  |
| 1 | 1.00 | 1 | 1 | 0.03  | 0.03   | 0.022  | 0.033  | 0.032  | t | 42308  | MPPYPTG<br>GPPPV             | Homo<br>sapiens                  |
| 1 | 1.00 | 1 | 1 | 0.01  | 0.008  | -0.001 | 0.009  | 0.011  | t | 140573 | LCRSACVIY<br>IKYSSA          | Mus<br>musculu<br>s              |
| 1 | 1.00 | 1 | 1 | 0     | -0.003 | -0.011 | 0      | 0      | t | 58511  | SIFYTYGTA<br>PARISVPY<br>VGI | Oryctola<br>gus<br>cuniculu<br>s |
| 1 | 1.00 | 1 | 1 | 0.01  | 0.008  | 0.004  | 0.013  | 0.01   | t | 32817  | KPNYAPA<br>NCPKS             | Mus<br>musculu<br>s              |
| 1 | 1.00 | 1 | 1 | 0.02  | 0.02   | 0.02   | 0.02   | 0.02   | t | 78506  | RSDVVGL<br>QSLFCCEI          | Mus<br>musculu<br>s              |
| 1 | 1.00 | 1 | 1 | 0.02  | 0.02   | 0.016  | 0.017  | 0.02   | t | 21653  | GPGVAGS<br>G                 | Homo<br>sapiens                  |
| 1 | 1.00 | 1 | 1 | 0.04  | 0.04   | 0.033  | 0.04   | 0.04   | t | 137859 | FTPGTEYT<br>VEVR             | Oryctola<br>gus<br>cuniculu<br>s |
| 1 | 1.00 | 1 | 1 | 0.01  | 0.013  | 0.004  | 0.01   | 0.012  | t | 66062  | TRLNPDQL<br>PTE              | Mus<br>musculu<br>s              |
| 1 | 1.00 | 1 | 1 | 0     | 0      | -0.006 | 0      | 0      | t | 83209  | HQVQEGL<br>NIEKY             | Homo<br>sapiens                  |
| 1 | 1.00 | 1 | 1 | 0     | 0.002  | 0      | 0.007  | 0.002  | t | 11571  | EEEDDDM<br>GGLFD             | Homo<br>sapiens                  |
| 1 | 1.00 | 1 | 1 | -0.02 | -0.02  | -0.02  | -0.02  | -0.022 | t | 10892  | DYHRVMY                      | Oryctola<br>gus<br>cuniculu<br>s |

|   |      |   |   |       |        |        |        |        |   |        |                     |                       |
|---|------|---|---|-------|--------|--------|--------|--------|---|--------|---------------------|-----------------------|
| 1 | 1.00 | 1 | 1 | 0     | -0.002 | -0.005 | -0.001 | 0      | t | 14398  | ETHPLYQS            | Anas platyrhynchos    |
| 1 | 1.00 | 1 | 1 | 0.01  | 0.01   | 0.003  | 0.01   | 0.01   | t | 96171  | DEEDKEED<br>EE      | Homo sapiens          |
| 1 | 1.00 | 1 | 1 | 0.02  | 0.02   | 0.012  | 0.02   | 0.02   | t | 106913 | TLPPITADF<br>DCS    | Homo sapiens          |
| 1 | 1.00 | 1 | 1 | 0.01  | 0.012  | 0.01   | 0.011  | 0.009  | t | 58076  | SGHRMA<br>WDM       | Homo sapiens          |
| 1 | 1.00 | 1 | 1 | -0.01 | -0.008 | -0.017 | -0.003 | -0.009 | t | 139496 | ESSRDGSR<br>HPRSHD  | Homo sapiens          |
| 1 | 1.00 | 1 | 1 | 0.02  | 0.02   | 0.009  | 0.017  | 0.018  | t | 38582  | LPLPLLQS<br>WM      | Homo sapiens          |
| 1 | 1.00 | 1 | 1 | 0.05  | 0.048  | 0.043  | 0.047  | 0.048  | t | 48754  | PPAYEKLS<br>AEQSPPP | Mus musculus          |
| 1 | 1.00 | 1 | 1 | 0.03  | 0.019  | 0.028  | 0.03   | 0.03   | t | 27048  | ILFPAD              | Marmota monax         |
| 1 | 1.00 | 1 | 1 | 0.03  | 0.03   | 0.03   | 0.03   | 0.03   | t | 108420 | HELGDIAI<br>A       | Homo sapiens          |
| 1 | 1.00 | 1 | 1 | 0.03  | 0.03   | 0.03   | 0.03   | 0.03   | t | 105901 | KGTAPEFI            | Oryctolagus cuniculus |
| 1 | 1.00 | 1 | 1 | 0.02  | 0.02   | 0.02   | 0.02   | 0.02   | t | 10782  | DVVSTL              | Homo sapiens          |
| 1 | 1.00 | 1 | 1 | -0.04 | -0.04  | -0.051 | -0.04  | -0.04  | t | 21026  | GLLRHYTY<br>ARFG    | Homo sapiens          |
| 1 | 1.00 | 1 | 1 | -0.02 | -0.022 | -0.015 | -0.017 | -0.021 | t | 141726 | PTAPPLLP<br>HS      | Rattus norvegicus     |
| 1 | 1.00 | 1 | 1 | 0     | 0      | -0.01  | -0.006 | -0.002 | t | 60327  | SPVTKRAS<br>LKIDSKK | Homo sapiens          |
| 1 | 1.00 | 1 | 1 | -0.02 | -0.014 | -0.013 | -0.017 | -0.02  | t | 78220  | NKTWYL              | Equus caballus        |
| 1 | 1.00 | 1 | 1 | 0.01  | 0.01   | 0.008  | 0.01   | 0.009  | t | 97282  | ESNNL               | Oryctolagus cuniculus |

|   |      |   |   |       |        |        |       |        |   |        |                            |                                  |
|---|------|---|---|-------|--------|--------|-------|--------|---|--------|----------------------------|----------------------------------|
| 1 | 1.00 | 1 | 1 | 0.01  | 0.012  | 0.01   | 0.011 | 0.01   | t | 51014  | QHLPYIEQ<br>G              | Homo<br>sapiens                  |
| 1 | 1.00 | 1 | 1 | -0.02 | -0.026 | -0.029 | -0.02 | -0.021 | t | 113862 | SITSGPMA<br>RP             | Oryctola<br>gus<br>cuniculu<br>s |
| 1 | 1.00 | 1 | 1 | 0.03  | 0.03   | 0.03   | 0.029 | 0.029  | t | 9585   | DPAF                       | Mus<br>musculu<br>s              |
| 1 | 1.00 | 1 | 1 | 0.01  | 0.009  | 0.005  | 0.007 | 0.01   | t | 53464  | RECCNEIR<br>DVK            | Homo<br>sapiens                  |
| 1 | 1.00 | 1 | 1 | 0.03  | 0.03   | 0.03   | 0.03  | 0.029  | t | 112309 | SGFSLTT                    | Homo<br>sapiens                  |
| 1 | 1.00 | 1 | 1 | -0.01 | -0.01  | -0.01  | -0.01 | -0.01  | t | 79253  | IARLIS                     | Mus<br>musculu<br>s              |
| 1 | 1.00 | 1 | 1 | 0.03  | 0.032  | 0.023  | 0.037 | 0.031  | t | 117015 | KEQFLDGD<br>GWTSRWI<br>ESK | Homo<br>sapiens                  |
| 1 | 1.00 | 1 | 1 | -0.02 | -0.027 | -0.028 | -0.02 | -0.018 | t | 110913 | KDIKANPE<br>NYFT           | Macaca                           |
| 1 | 1.00 | 1 | 1 | 0.02  | 0.023  | 0.022  | 0.02  | 0.018  | t | 47338  | PELAPEDP<br>EDSALL         | Mus<br>musculu<br>s              |
| 1 | 1.00 | 1 | 1 | 0.02  | 0.02   | 0.02   | 0.02  | 0.02   | t | 127718 | KSTPQFT                    | Homo<br>sapiens                  |
| 1 | 1.00 | 1 | 1 | 0.02  | 0.02   | 0.016  | 0.02  | 0.02   | t | 51939  | QPQQTFP<br>QPQ             | Mus<br>musculu<br>s              |
| 1 | 1.00 | 1 | 1 | 0.02  | 0.02   | 0.016  | 0.02  | 0.02   | t | 51939  | QPQQTFP<br>QPQ             | Mus<br>musculu<br>s              |
| 1 | 1.00 | 1 | 1 | 0     | 0      | 0      | 0     | 0      | t | 78207  | MLPLKS                     | Equus<br>caballus                |
| 1 | 1.00 | 1 | 1 | -0.03 | -0.03  | -0.027 | -0.03 | -0.03  | t | 73739  | YEPGRSL<br>W               | Mus<br>musculu<br>s              |
| 1 | 1.00 | 1 | 1 | -0.02 | -0.02  | -0.025 | -0.02 | -0.02  | t | 53763  | RFQEALKK<br>SLKKP          | Homo<br>sapiens                  |
| 1 | 1.00 | 1 | 1 | -0.01 | -0.01  | -0.012 | -0.01 | -0.01  | t | 49748  | PTPSAPAR<br>GE             | Homo<br>sapiens                  |

|   |      |   |   |       |        |        |        |        |   |        |                            |                                  |
|---|------|---|---|-------|--------|--------|--------|--------|---|--------|----------------------------|----------------------------------|
| 1 | 1.00 | 1 | 1 | -0.03 | -0.03  | -0.041 | -0.027 | -0.03  | t | 74503  | YKRRMAD<br>AVSRKKM         | Homo<br>sapiens                  |
| 1 | 1.00 | 1 | 1 | 0     | -0.002 | -0.01  | 0.003  | 0.001  | t | 35956  | LFREDGSA<br>CR             | Mus<br>musculu<br>s              |
| 1 | 1.00 | 1 | 1 | -0.02 | -0.019 | -0.017 | -0.021 | -0.022 | t | 54763  | RLSGVFLIE<br>LDKLII        | Oryctola<br>gus<br>cuniculu<br>s |
| 1 | 1.00 | 1 | 1 | -0.02 | -0.024 | -0.017 | -0.021 | -0.022 | t | 54763  | RLSGVFLIE<br>LDKLII        | Oryctola<br>gus<br>cuniculu<br>s |
| 1 | 1.00 | 1 | 1 | 0     | 0      | 0      | 0      | 0      | t | 9895   | DQRPYCW<br>HYA             | Homo<br>sapiens                  |
| 1 | 1.00 | 1 | 1 | -0.04 | -0.028 | -0.038 | -0.037 | -0.04  | t | 55760  | RRVGLSNP                   | Anas<br>platyrhy<br>nchos        |
| 1 | 1.00 | 1 | 1 | 0.03  | 0.032  | 0.03   | 0.032  | 0.032  | t | 156603 | AEVLRDG<br>DCP             | Homo<br>sapiens                  |
| 1 | 1.00 | 1 | 1 | 0     | 0      | -0.003 | 0      | -0.002 | t | 91996  | SSLDRRYL<br>DGLEVC         | Oryctola<br>gus<br>cuniculu<br>s |
| 1 | 1.00 | 1 | 1 | 0.02  | 0.018  | 0.02   | 0.02   | 0.016  | t | 34068  | KVKILPKD<br>RWTQHTT<br>TGG | Oryctola<br>gus<br>cuniculu<br>s |
| 1 | 1.00 | 1 | 1 | -0.03 | -0.03  | -0.025 | -0.023 | -0.03  | t | 140672 | EQIYRVDL<br>RTLRL          | Rattus<br>norvegic<br>us         |
| 1 | 1.00 | 1 | 1 | -0.01 | -0.01  | -0.01  | -0.01  | -0.012 | t | 78560  | VTSRGNV                    | Mus<br>musculu<br>s              |
| 1 | 1.00 | 1 | 1 | 0.02  | 0.02   | 0.02   | 0.02   | 0.02   | t | 78396  | GLANDV                     | Mus<br>musculu<br>s              |
| 1 | 1.00 | 1 | 1 | 0.02  | 0.015  | 0.022  | 0.018  | 0.02   | t | 45462  | NPQVNLV<br>D               | Bos<br>taurus                    |
| 1 | 1.00 | 1 | 1 | 0.02  | 0.016  | 0.018  | 0.019  | 0.02   | t | 69201  | VKDYTEKL<br>HEGVAK         | Oryctola<br>gus<br>cuniculu<br>s |
| 1 | 1.00 | 1 | 1 | -0.05 | -0.051 | -0.045 | -0.049 | -0.05  | t | 50067  | PYCWHYA<br>P               | Homo<br>sapiens                  |

|   |      |   |   |       |        |        |        |        |   |        |                              |                                  |
|---|------|---|---|-------|--------|--------|--------|--------|---|--------|------------------------------|----------------------------------|
| 1 | 1.00 | 1 | 1 | 0.01  | 0.01   | 0.01   | 0.01   | 0.011  | t | 115234 | EQLTKCEV<br>FR               | Homo<br>sapiens                  |
| 1 | 1.00 | 1 | 1 | 0     | 0.005  | 0.008  | 0      | -0.002 | t | 50180  | PYVEPTAP<br>QVL              | Homo<br>sapiens                  |
| 1 | 1.00 | 1 | 1 | -0.03 | -0.026 | -0.038 | -0.03  | -0.03  | t | 140594 | RELVLAGTI                    | Cavia<br>porcellu<br>s           |
| 1 | 1.00 | 1 | 1 | -0.02 | -0.02  | -0.02  | -0.02  | -0.018 | t | 135457 | FGF                          | Mus<br>musculu<br>s              |
| 1 | 1.00 | 1 | 1 | 0     | 0      | -0.012 | 0.002  | 0.002  | t | 96806  | QTELARVQ<br>KA               | Homo<br>sapiens(<br>human)       |
| 1 | 1.00 | 1 | 1 | -0.04 | -0.035 | -0.038 | -0.04  | -0.042 | t | 132861 | LKRGIEKA<br>V                | Mus<br>musculu<br>s              |
| 1 | 1.00 | 1 | 1 | -0.02 | -0.02  | -0.02  | -0.017 | -0.02  | t | 27290  | ILRKSRRF                     | Homo<br>sapiens                  |
| 1 | 1.00 | 1 | 1 | 0     | -0.003 | -0.005 | 0      | 0      | t | 61818  | STPGIVI                      | Oryctola<br>gus<br>cuniculu<br>s |
| 1 | 1.00 | 1 | 1 | -0.02 | -0.016 | -0.026 | -0.013 | -0.019 | t | 134804 | TIFILFCCSK<br>EKRRKKQA<br>AT | Homo<br>sapiens                  |
| 1 | 1.00 | 1 | 1 | 0     | 0      | 0      | 0.004  | 0      | t | 38693  | LPRSNTSS<br>GAIPPAD          | Homo<br>sapiens                  |
| 1 | 1.00 | 1 | 1 | 0.02  | 0.02   | 0.02   | 0.02   | 0.02   | t | 79821  | FEGKPALE<br>LIRM             | Mus<br>musculu<br>s              |
| 1 | 1.00 | 1 | 1 | 0.02  | 0.022  | 0.013  | 0.027  | 0.022  | t | 130448 | AYAKDVKF<br>GADA             | Homo<br>sapiens                  |
| 1 | 1.00 | 1 | 1 | 0.01  | 0.006  | -0.007 | 0.003  | 0.011  | t | 117451 | DDGFFYIP<br>KD               | Oryctola<br>gus<br>cuniculu<br>s |
| 1 | 1.00 | 1 | 1 | -0.01 | -0.008 | -0.012 | -0.007 | -0.011 | t | 27961  | IPNKKPGK<br>KTTT             | Homo<br>sapiens                  |

|   |      |   |   |       |        |        |        |        |   |        |                              |                       |
|---|------|---|---|-------|--------|--------|--------|--------|---|--------|------------------------------|-----------------------|
| 1 | 1.00 | 1 | 1 | -0.02 | -0.016 | -0.005 | -0.013 | -0.021 | t | 104286 | SRL                          | Homo sapiens          |
| 1 | 1.00 | 1 | 1 | -0.01 | -0.013 | -0.015 | -0.01  | -0.01  | t | 58417  | SHSQWNK<br>PSKPKTN<br>MK     | Oryctolagus cuniculus |
| 1 | 1.00 | 1 | 1 | 0.02  | 0.02   | 0.02   | 0.02   | 0.02   | t | 144676 | GTHPSLQF<br>T                | Mus musculus          |
| 1 | 1.00 | 1 | 1 | 0.02  | 0.02   | 0.02   | 0.02   | 0.02   | t | 144676 | GTHPSLQF<br>T                | Mus musculus          |
| 1 | 1.00 | 1 | 1 | 0     | 0      | 0      | 0      | 0      | t | 153381 | ETPLTIAGL<br>KLK             | Mus musculus          |
| 1 | 1.00 | 1 | 1 | -0.01 | -0.007 | -0.019 | -0.01  | -0.008 | t | 63730  | TFPQPQQ<br>TYP               | Mus musculus          |
| 1 | 1.00 | 1 | 1 | 0.01  | 0.01   | 0.003  | 0.01   | 0.009  | t | 159173 | TTESGKLIT<br>DWCCRSC         | Mus musculus          |
| 1 | 1.00 | 1 | 1 | 0.04  | 0.04   | 0.039  | 0.04   | 0.04   | t | 132644 | SAKEK                        | Mus musculus          |
| 1 | 1.00 | 1 | 1 | 0.03  | 0.03   | 0.03   | 0.03   | 0.029  | t | 119518 | RKTALGTR<br>Q                | Homo sapiens          |
| 1 | 1.00 | 1 | 1 | 0.05  | 0.05   | 0.05   | 0.05   | 0.052  | t | 134673 | FVAQNKID<br>SLNLD            | Homo sapiens          |
| 1 | 1.00 | 1 | 1 | -0.02 | -0.02  | -0.026 | -0.02  | -0.02  | t | 48996  | PQFKPQ                       | Mus musculus          |
| 1 | 1.00 | 1 | 1 | 0.02  | 0.018  | 0      | 0.013  | 0.02   | t | 128079 | PSPDITSTT<br>KTRNFDLV<br>NCN | Mus musculus          |
| 1 | 1.00 | 1 | 1 | -0.03 | -0.022 | -0.03  | -0.03  | -0.032 | t | 156929 | PGPRFF                       | Gallus gallus         |
| 1 | 1.00 | 1 | 1 | -0.02 | -0.02  | -0.02  | -0.016 | -0.02  | t | 135926 | GADIKKT<br>MEGPV             | Homo sapiens          |
| 1 | 1.00 | 1 | 1 | 0.02  | 0.02   | 0.02   | 0.02   | 0.02   | t | 100580 | TVDDFGVL<br>AVRVVN           | Homo sapiens          |



|   |      |   |   |       |        |        |        |       |   |        |                              |                                  |
|---|------|---|---|-------|--------|--------|--------|-------|---|--------|------------------------------|----------------------------------|
| 1 | 1.00 | 1 | 1 | 0.02  | 0.02   | 0.016  | 0.02   | 0.02  | t | 51940  | QPQQTFP<br>QQP               | Mus<br>musculu<br>s              |
| 1 | 1.00 | 1 | 1 | 0.02  | 0.02   | 0.016  | 0.02   | 0.02  | t | 51940  | QPQQTFP<br>QQP               | Mus<br>musculu<br>s              |
| 1 | 1.00 | 1 | 1 | 0.03  | 0.034  | 0.02   | 0.027  | 0.03  | t | 31406  | KIQRDEDS<br>YGRDPYS          | Homo<br>sapiens                  |
| 1 | 1.00 | 1 | 1 | 0.03  | 0.033  | 0.031  | 0.03   | 0.031 | t | 127958 | EHP                          | Mus<br>musculu<br>s              |
| 1 | 1.00 | 1 | 1 | 0.03  | 0.03   | 0.031  | 0.03   | 0.031 | t | 127958 | EHP                          | Oryctola<br>gus<br>cuniculu<br>s |
| 1 | 1.00 | 1 | 1 | -0.01 | -0.013 | -0.02  | -0.01  | -0.01 | t | 140835 | DAVKGYLA<br>GKGVDAG<br>KLGTV | Oryctola<br>gus<br>cuniculu<br>s |
| 1 | 1.00 | 1 | 1 | -0.01 | -0.006 | -0.008 | -0.007 | -0.01 | t | 120904 | RALKRRNA<br>RTKAR            | Homo<br>sapiens                  |
| 1 | 1.00 | 1 | 1 | 0.01  | 0.008  | 0.009  | 0.009  | 0.01  | t | 21763  | GPRLQPY                      | Mus<br>musculu<br>s              |
| 1 | 1.00 | 1 | 1 | 0     | 0      | -0.01  | 0      | 0     | t | 54909  | RMKDTLRI<br>TY               | Mus<br>musculu<br>s              |
| 1 | 1.00 | 1 | 1 | -0.03 | -0.034 | -0.03  | -0.033 | -0.03 | t | 131316 | TLMVMVS<br>K                 | Oryctola<br>gus<br>cuniculu<br>s |
| 1 | 1.00 | 1 | 1 | 0     | 0      | -0.005 | 0      | 0     | t | 153483 | TRDGKLPT<br>TQLRR            | Mus<br>musculu<br>s              |
| 1 | 1.00 | 1 | 1 | 0.03  | 0.033  | 0.023  | 0.03   | 0.028 | t | 8567   | DHSDLVAE<br>KQRLEDLG<br>QKFE | Mus<br>musculu<br>s              |
| 1 | 1.00 | 1 | 1 | 0.02  | 0.02   | 0.01   | 0.021  | 0.019 | t | 135390 | YYLVSLGP<br>DLIKDSQ          | Sus<br>scrofa                    |

|   |      |   |   |       |        |        |        |        |   |        |                             |                                  |
|---|------|---|---|-------|--------|--------|--------|--------|---|--------|-----------------------------|----------------------------------|
| 1 | 1.00 | 1 | 1 | -0.01 | -0.01  | -0.017 | -0.01  | -0.009 | t | 97628  | SAAANYTT                    | Mus<br>musculu<br>s              |
| 1 | 1.00 | 1 | 1 | 0     | 0      | 0.002  | 0.001  | -0.002 | t | 153251 | AKAFSYW<br>TPFDGKSL<br>YSST | Mus<br>musculu<br>s              |
| 1 | 1.00 | 1 | 1 | 0.01  | 0.014  | 0.01   | 0.013  | 0.012  | t | 134116 | KGDVTAQI<br>ALQ             | Homo<br>sapiens                  |
| 1 | 1.00 | 1 | 1 | 0.01  | 0.008  | -0.002 | 0.009  | 0.01   | t | 66025  | TRFVNASP<br>TGYD            | Mus<br>musculu<br>s              |
| 1 | 1.00 | 1 | 1 | 0.01  | 0.014  | -0.001 | 0.007  | 0.01   | t | 43191  | NAKATYEA<br>ALKQYEAD<br>LAA | Homo<br>sapiens                  |
| 1 | 1.00 | 1 | 1 | -0.02 | -0.026 | -0.029 | -0.02  | -0.02  | t | 68855  | VHHANENI<br>FYCPIA          | Oryctola<br>gus<br>cuniculu<br>s |
| 1 | 1.00 | 1 | 1 | 0.01  | 0.013  | 0.01   | 0.01   | 0.012  | t | 137401 | FEDVW                       | Mus<br>musculu<br>s              |
| 1 | 1.00 | 1 | 1 | 0     | 0      | 0      | 0      | -0.002 | t | 117512 | GRGRGRG<br>RGGPRR           | Homo<br>sapiens                  |
| 1 | 1.00 | 1 | 1 | 0     | -0.004 | 0      | -0.001 | -0.003 | t | 61589  | STEQNVP<br>DPQVG            | Oryctola<br>gus<br>cuniculu<br>s |
| 1 | 1.00 | 1 | 1 | 0     | -0.003 | 0      | -0.001 | -0.003 | t | 7491   | DAEFRHDS<br>GYEVHHQ<br>K    | Oryctola<br>gus<br>cuniculu<br>s |
| 1 | 1.00 | 1 | 1 | 0.01  | 0.008  | 0.006  | 0.007  | 0.009  | t | 79624  | PEEQVPQL<br>IPPIIPRA<br>G   | Mus<br>musculu<br>s              |
| 1 | 1.00 | 1 | 1 | -0.02 | -0.02  | -0.021 | -0.019 | -0.021 | t | 43825  | NFELCDNP<br>FFAVSKPM<br>G   | Homo<br>sapiens                  |
| 1 | 1.00 | 1 | 1 | 0.01  | 0.012  | 0.003  | 0.013  | 0.01   | t | 133787 | CQALVRM<br>LAKKPGW<br>K     | Homo<br>sapiens                  |

|   |      |   |   |       |        |        |        |        |   |        |                              |                                  |
|---|------|---|---|-------|--------|--------|--------|--------|---|--------|------------------------------|----------------------------------|
| 1 | 1.00 | 1 | 1 | -0.02 | -0.023 | -0.025 | -0.02  | -0.021 | t | 60992  | SSFFSYGEI<br>P               | Oryctola<br>gus<br>cuniculu<br>s |
| 1 | 1.00 | 1 | 1 | -0.05 | -0.046 | -0.06  | -0.049 | -0.051 | t | 111233 | EEASVTVV<br>EGQVDYY          | Homo<br>sapiens                  |
| 1 | 1.00 | 1 | 1 | 0     | 0.002  | 0.005  | 0.007  | -0.002 | t | 122930 | TWDPAQP<br>PRD               | Homo<br>sapiens                  |
| 1 | 1.00 | 1 | 1 | -0.05 | -0.05  | -0.05  | -0.05  | -0.052 | t | 117557 | KVQLLRN<br>WH                | Homo<br>sapiens                  |
| 1 | 1.00 | 1 | 1 | 0     | 0      | -0.005 | -0.007 | -0.002 | t | 142385 | AKTAATN<br>AEKKKTK           | Homo<br>sapiens                  |
| 1 | 1.00 | 1 | 1 | -0.02 | -0.02  | -0.027 | -0.013 | -0.018 | t | 127046 | SAPATGG<br>VKKPHRYR<br>PGT   | Mus<br>musculu<br>s              |
| 1 | 1.00 | 1 | 1 | -0.01 | -0.012 | -0.015 | -0.007 | -0.01  | t | 28721  | ISSISART                     | Mus<br>musculu<br>s              |
| 1 | 1.00 | 1 | 1 | 0.03  | 0.032  | 0.026  | 0.027  | 0.029  | t | 58038  | SGFTPEFLE<br>QAFQVD          | Homo<br>sapiens                  |
| 1 | 1.00 | 1 | 1 | 0     | -0.003 | -0.005 | 0      | 0      | t | 79622  | NYARTGG<br>QVTAG             | Oryctola<br>gus<br>cuniculu<br>s |
| 1 | 1.00 | 1 | 1 | 0.02  | 0.006  | 0.003  | 0.013  | 0.021  | t | 115640 | QKSQRSQ<br>DEN               | Macaca<br>mulatta                |
| 1 | 1.00 | 1 | 1 | -0.01 | -0.008 | -0.003 | -0.003 | -0.01  | t | 108052 | NWLSLITA<br>AR               | Homo<br>sapiens                  |
| 1 | 1.00 | 1 | 1 | 0     | 0      | 0.002  | 0.006  | 0      | t | 117331 | MKLVRFL<br>MKLSHETV<br>TIELK | Mus<br>musculu<br>s              |
| 1 | 1.00 | 1 | 1 | 0.02  | 0.026  | 0.023  | 0.02   | 0.02   | t | 141021 | GHKEVT<br>VT                 | Ovis<br>aries                    |
| 1 | 1.00 | 1 | 1 | 0.01  | 0.007  | 0.01   | 0.01   | 0.009  | t | 131579 | PDIITGFSS                    | Oryctola<br>gus<br>cuniculu<br>s |

|   |      |   |   |       |        |        |        |        |   |        |                              |                                  |
|---|------|---|---|-------|--------|--------|--------|--------|---|--------|------------------------------|----------------------------------|
| 1 | 1.00 | 1 | 1 | -0.02 | -0.022 | -0.018 | -0.021 | -0.02  | t | 22199  | GRRVGLS<br>N                 | Anas<br>platyrhy<br>nchos        |
| 1 | 1.00 | 1 | 1 | 0.03  | 0.026  | 0.02   | 0.033  | 0.03   | t | 63736  | TFQVEVPG<br>SQHIDS           | Oryctola<br>gus<br>cuniculu<br>s |
| 1 | 1.00 | 1 | 1 | 0.01  | 0.012  | 0.003  | 0.007  | 0.008  | t | 53282  | RCKANKIQ<br>DK               | Homo<br>sapiens                  |
| 1 | 1.00 | 1 | 1 | 0     | 0      | 0      | 0      | -0.002 | t | 145831 | IPLGTRP                      | Mus<br>musculu<br>s              |
| 1 | 1.00 | 1 | 1 | 0.01  | 0.012  | 0.005  | 0.011  | 0.01   | t | 50442  | QDAYNAA<br>GGHNAVF<br>NFPPNG | Homo<br>sapiens                  |
| 1 | 1.00 | 1 | 1 | -0.03 | -0.03  | -0.03  | -0.03  | -0.03  | t | 119478 | KNDK                         | Homo<br>sapiens                  |
| 1 | 1.00 | 1 | 1 | 0.05  | 0.048  | 0.035  | 0.053  | 0.052  | t | 52357  | QSKSTSAA<br>STSDELSG<br>SEGP | Mus<br>musculu<br>s              |
| 1 | 1.00 | 1 | 1 | -0.07 | -0.068 | -0.07  | -0.063 | -0.07  | t | 107858 | GHAKSRP<br>VRG               | Homo<br>sapiens                  |
| 1 | 1.00 | 1 | 1 | 0.01  | 0.006  | -0.007 | 0.007  | 0.013  | t | 117451 | DDGFFYIP<br>KD               | Oryctola<br>gus<br>cuniculu<br>s |
| 1 | 1.00 | 1 | 1 | -0.01 | -0.008 | -0.017 | -0.013 | -0.011 | t | 28575  | ISLIFIYETF                   | Homo<br>sapiens                  |
| 1 | 1.00 | 1 | 1 | 0.03  | 0.034  | 0.023  | 0.031  | 0.029  | t | 59016  | SLAQVKYT<br>SASSI            | Homo<br>sapiens                  |
| 1 | 1.00 | 1 | 1 | 0.03  | 0.03   | 0.025  | 0.028  | 0.03   | t | 71786  | VVPLATYS<br>LTGLWS           | Homo<br>sapiens                  |
| 1 | 1.00 | 1 | 1 | 0.01  | 0.01   | 0.008  | 0.01   | 0.009  | t | 32807  | KPNLSSKR<br>SELSQLS          | Mus<br>musculu<br>s              |
| 1 | 1.00 | 1 | 1 | 0.03  | 0.026  | 0.029  | 0.029  | 0.029  | t | 110862 | GGPTLVSL<br>HELPAETP         | Oryctola<br>gus<br>cuniculu<br>s |
| 1 | 1.00 | 1 | 1 | 0.01  | 0.012  | 0.01   | 0.017  | 0.01   | t | 108141 | SPSDAKSH<br>VRVADLI          | Homo<br>sapiens                  |

|   |      |   |   |       |        |        |        |        |   |        |                              |                                  |
|---|------|---|---|-------|--------|--------|--------|--------|---|--------|------------------------------|----------------------------------|
| 1 | 1.00 | 1 | 1 | 0     | 0      | 0.005  | 0      | -0.002 | t | 122745 | EEKPTSAP<br>S                | Oryctola<br>gus<br>cuniculu<br>s |
| 1 | 1.00 | 1 | 1 | 0.03  | 0.03   | 0.03   | 0.03   | 0.032  | t | 129695 | QLYKQK                       | Homo<br>sapiens                  |
| 1 | 1.00 | 1 | 1 | 0.03  | 0.03   | 0.036  | 0.03   | 0.031  | t | 14992  | EYEDLLKA                     | Mus<br>musculu<br>s              |
| 1 | 1.00 | 1 | 1 | -0.01 | -0.01  | -0.01  | -0.01  | -0.011 | t | 131903 | GVMAARG<br>QL                | Homo<br>sapiens                  |
| 1 | 1.00 | 1 | 1 | -0.01 | -0.01  | -0.007 | -0.01  | -0.013 | t | 114454 | LIYERGRG<br>ITGVLF           | Homo<br>sapiens                  |
| 1 | 1.00 | 1 | 1 | 0     | 0.002  | -0.017 | 0.001  | 0.002  | t | 151069 | WTGMVD<br>GWYGYHH<br>QN      | Homo<br>sapiens                  |
| 1 | 1.00 | 1 | 1 | 0.05  | 0.05   | 0.05   | 0.05   | 0.05   | t | 118806 | GGPDGEP<br>DVPPGAIE<br>QGPAD | Homo<br>sapiens                  |
| 1 | 1.00 | 1 | 1 | 0.03  | 0.03   | 0.03   | 0.03   | 0.03   | t | 121843 | SGLGLFPY<br>SSFIWSC          | Mus<br>musculu<br>s              |
| 1 | 1.00 | 1 | 1 | 0.03  | 0.03   | 0.03   | 0.03   | 0.03   | t | 121843 | SGLGLFPY<br>SSFIWSC          | Mus<br>musculu<br>s              |
| 1 | 1.00 | 1 | 1 | 0.01  | 0.01   | 0.01   | 0.01   | 0.01   | t | 114920 | PVCGTDG<br>VTY               | Homo<br>sapiens                  |
| 1 | 1.00 | 1 | 1 | -0.01 | -0.01  | -0.02  | -0.01  | -0.01  | t | 140725 | PDELHK                       | Mus<br>musculu<br>s              |
| 1 | 1.00 | 1 | 1 | -0.01 | -0.006 | -0.01  | -0.013 | -0.011 | t | 24812  | HSMKEGI<br>HAQ               | Homo<br>sapiens                  |
| 1 | 1.00 | 1 | 1 | 0.06  | 0.062  | 0.061  | 0.061  | 0.061  | t | 11456  | EDTVTP                       | Homo<br>sapiens                  |
| 1 | 1.00 | 1 | 1 | 0.02  | 0.017  | 0.02   | 0.02   | 0.02   | t | 42273  | MPFVTHN                      | Oryctola<br>gus<br>cuniculu<br>s |
| 1 | 1.00 | 1 | 1 | 0     | 0.003  | -0.005 | 0      | -0.002 | t | 126921 | RERRGIAL<br>D                | Mus<br>musculu<br>s              |

|   |      |   |   |       |        |        |        |        |   |        |                              |                                  |
|---|------|---|---|-------|--------|--------|--------|--------|---|--------|------------------------------|----------------------------------|
| 1 | 1.00 | 1 | 1 | 0.01  | 0.011  | 0.01   | 0.01   | 0.009  | t | 99386  | KLKGESG                      | Oryctola<br>gus<br>cuniculu<br>s |
| 1 | 1.00 | 1 | 1 | 0.02  | 0.018  | 0.025  | 0.019  | 0.015  | t | 74762  | YLLARGHD<br>PAFVHMS          | Mus<br>musculu<br>s              |
| 1 | 1.00 | 1 | 1 | -0.01 | -0.008 | -0.009 | -0.007 | -0.011 | t | 53995  | RGTARTPP<br>TDPKTHPH<br>GPAD | Homo<br>sapiens                  |
| 1 | 1.00 | 1 | 1 | 0.01  | 0.01   | 0.005  | 0.008  | 0.008  | t | 96352  | GVTKAAEK<br>QM               | Homo<br>sapiens                  |
| 1 | 1.00 | 1 | 1 | 0.07  | 0.07   | 0.07   | 0.07   | 0.069  | t | 112279 | QTEDLAV                      | Homo<br>sapiens                  |
| 1 | 1.00 | 1 | 1 | 0.01  | 0.01   | 0.01   | 0.01   | 0.008  | t | 47778  | PGVLMGG<br>QSESVEFT          | Mus<br>musculu<br>s              |
| 1 | 1.00 | 1 | 1 | 0.01  | 0.01   | 0.01   | 0.01   | 0.008  | t | 54862  | RMAWDM<br>MMN                | Homo<br>sapiens                  |
| 1 | 1.00 | 1 | 1 | -0.01 | -0.01  | -0.015 | -0.01  | -0.01  | t | 112461 | AVLKLMG<br>RGTKF             | Rattus<br>norvegic<br>us         |
| 1 | 1.00 | 1 | 1 | -0.01 | -0.008 | -0.005 | -0.013 | -0.012 | t | 95979  | VPQPPVS<br>QFHIQ             | Homo<br>sapiens                  |
| 1 | 1.00 | 1 | 1 | 0.04  | 0.04   | 0.046  | 0.04   | 0.037  | t | 114404 | IESWDPN<br>NQQFQCA<br>G      | Homo<br>sapiens                  |
| 1 | 1.00 | 1 | 1 | -0.02 | -0.02  | -0.02  | -0.02  | -0.02  | t | 91876  | RALGLPPF<br>LNSLPQS          | Oryctola<br>gus<br>cuniculu<br>s |
| 1 | 1.00 | 1 | 1 | -0.05 | -0.05  | -0.062 | -0.054 | -0.05  | t | 96239  | EKPTPPVK<br>PT               | Homo<br>sapiens(<br>human)       |
| 1 | 1.00 | 1 | 1 | 0.06  | 0.06   | 0.065  | 0.06   | 0.059  | t | 97596  | QTPLTMA<br>ALELL             | Mus<br>musculu<br>s              |
| 1 | 1.00 | 1 | 1 | 0.02  | 0.02   | 0.025  | 0.02   | 0.018  | t | 134188 | PMSTPSAT<br>SVR              | Oryctola<br>gus<br>cuniculu<br>s |
| 1 | 1.00 | 1 | 1 | 0.03  | 0.03   | 0.03   | 0.03   | 0.03   | t | 131697 | TGTSSDVG<br>GYNYVSW<br>Y     | Homo<br>sapiens                  |

|   |      |   |   |       |        |        |        |        |   |        |                             |                       |
|---|------|---|---|-------|--------|--------|--------|--------|---|--------|-----------------------------|-----------------------|
| 1 | 1.00 | 1 | 1 | 0.03  | 0.032  | 0.017  | 0.031  | 0.032  | t | 137939 | NVLSADFT                    | Homo sapiens          |
| 1 | 1.00 | 1 | 1 | 0     | 0      | -0.011 | 0      | 0      | t | 106842 | SKDEIDSA<br>VKMLVSLK<br>MSY | Mus musculus          |
| 1 | 1.00 | 1 | 1 | -0.05 | -0.049 | -0.057 | -0.051 | -0.05  | t | 59854  | SNKFADFL                    | Oryctolagus cuniculus |
| 1 | 1.00 | 1 | 1 | -0.03 | -0.03  | -0.03  | -0.03  | -0.03  | t | 26234  | IGGPLT                      | Homo sapiens          |
| 1 | 1.00 | 1 | 1 | 0.01  | 0.01   | 0.009  | 0.02   | 0.012  | t | 107031 | YTQKHKKH<br>QA              | Homo sapiens          |
| 1 | 1.00 | 1 | 1 | -0.02 | -0.02  | -0.022 | -0.02  | -0.022 | t | 21471  | GNLNTIRT<br>RVHE            | Oryctolagus cuniculus |
| 1 | 1.00 | 1 | 1 | -0.02 | -0.02  | -0.022 | -0.02  | -0.022 | t | 21471  | GNLNTIRT<br>RVHE            | Oryctolagus cuniculus |
| 1 | 1.00 | 1 | 1 | 0.01  | 0.006  | 0.009  | 0.009  | 0.008  | t | 6953   | CRTNYGYS                    | Oryctolagus cuniculus |
| 1 | 1.00 | 1 | 1 | 0.01  | 0.008  | 0.013  | 0.014  | 0.01   | t | 10692  | DVPDYASL                    | Mus musculus          |
| 1 | 1.00 | 1 | 1 | 0     | 0      | 0      | 0      | -0.002 | t | 151731 | SAQSQRA<br>PDR              | Mus musculus          |
| 1 | 1.00 | 1 | 1 | 0     | 0      | 0      | 0      | -0.002 | t | 68401  | VEVPGSQ<br>HIDSQKKA         | Mus musculus          |
| 1 | 1.00 | 1 | 1 | 0.02  | 0.02   | 0.02   | 0.02   | 0.02   | t | 78396  | GLANDV                      | Mus musculus          |
| 1 | 1.00 | 1 | 1 | 0.02  | 0.02   | 0.007  | 0.02   | 0.021  | t | 68054  | VDREGRD<br>NVRSKGV          | Homo sapiens          |
| 1 | 1.00 | 1 | 1 | -0.02 | -0.02  | -0.028 | -0.02  | -0.021 | t | 94573  | KRIPNKKP<br>GKKT            | Mus musculus          |
| 1 | 1.00 | 1 | 1 | 0.02  | 0.017  | 0.013  | 0.02   | 0.02   | t | 79926  | MASMTG<br>GQQMG             | Oryctolagus cuniculus |

|   |      |   |   |       |        |        |        |        |   |        |                              |                       |
|---|------|---|---|-------|--------|--------|--------|--------|---|--------|------------------------------|-----------------------|
| 1 | 1.00 | 1 | 1 | 0.03  | 0.03   | 0.03   | 0.03   | 0.03   | t | 112150 | GVPDRFT                      | Homo sapiens          |
| 1 | 1.00 | 1 | 1 | 0.02  | 0.016  | 0.018  | 0.019  | 0.02   | t | 120407 | APGYKHEI<br>KYNC             | Oryctolagus cuniculus |
| 1 | 1.00 | 1 | 1 | 0.02  | 0.018  | 0.018  | 0.019  | 0.02   | t | 120407 | APGYKHEI<br>KYNC             | Mus musculus          |
| 1 | 1.00 | 1 | 1 | 0     | -0.002 | 0      | -0.001 | -0.003 | t | 79303  | LVAAGVD<br>YEDERISF<br>QDWP  | Rattus norvegicus     |
| 1 | 1.00 | 1 | 1 | 0     | -0.004 | 0      | -0.001 | -0.003 | t | 73385  | YALADASL<br>KMADPNR<br>FRGKD | Oryctolagus cuniculus |
| 1 | 1.00 | 1 | 1 | 0     | -0.002 | 0      | -0.001 | -0.003 | t | 19636  | GFTTNEER<br>YNVFAE           | Mus musculus          |
| 1 | 1.00 | 1 | 1 | 0.03  | 0.03   | 0.03   | 0.03   | 0.031  | t | 127185 | TCDDPRF<br>QDSS              | Oryctolagus cuniculus |
| 1 | 1.00 | 1 | 1 | 0.02  | 0.022  | 0.013  | 0.023  | 0.02   | t | 130448 | AYAKDVKF<br>GADA             | Homo sapiens          |
| 1 | 1.00 | 1 | 1 | 0.04  | 0.038  | 0.033  | 0.037  | 0.041  | t | 131217 | EDISAYLL                     | Mus musculus          |
| 1 | 1.00 | 1 | 1 | 0     | 0      | 0      | 0      | -0.002 | t | 14435  | ETIYNTTLK<br>Y               | Homo sapiens          |
| 1 | 1.00 | 1 | 1 | -0.03 | -0.03  | -0.03  | -0.03  | -0.03  | t | 45816  | NSGCFRHL                     | Mus musculus          |
| 1 | 1.00 | 1 | 1 | -0.03 | -0.027 | -0.03  | -0.03  | -0.03  | t | 45816  | NSGCFRHL                     | Mus musculus          |
| 1 | 1.00 | 1 | 1 | 0     | -0.003 | -0.008 | 0      | -0.001 | t | 153392 | GNTLQCI<br>MLVYCFLG<br>YCC   | Oryctolagus cuniculus |
| 1 | 1.00 | 1 | 1 | -0.01 | -0.01  | -0.01  | -0.008 | -0.01  | t | 22123  | GRLGTYRY<br>VSSGER           | Homo sapiens          |



|   |      |   |   |       |        |        |        |        |   |        |                              |                                  |
|---|------|---|---|-------|--------|--------|--------|--------|---|--------|------------------------------|----------------------------------|
| 1 | 1.00 | 1 | 1 | 0.01  | 0.012  | 0      | 0.011  | 0.01   | t | 53191  | RARFEELC<br>GDLFRSTI<br>QPVE | Homo<br>sapiens                  |
| 1 | 1.00 | 1 | 1 | 0     | 0      | 0      | 0      | -0.002 | t | 48597  | PNANPN                       | Mus<br>musculu<br>s              |
| 1 | 1.00 | 1 | 1 | 0     | -0.002 | -0.003 | -0.001 | 0      | t | 32809  | KPNNDFH<br>FEVFN             | Mus<br>musculu<br>s              |
| 1 | 1.00 | 1 | 1 | 0     | 0      | 0      | 0      | 0      | t | 130453 | CLFFQNGK<br>VKCAAC           | Homo<br>sapiens                  |
| 1 | 1.00 | 1 | 1 | 0.02  | 0.024  | 0.02   | 0.027  | 0.02   | t | 117888 | GQILDILVS<br>RSLK            | Homo<br>sapiens                  |
| 1 | 1.00 | 1 | 1 | -0.01 | -0.013 | -0.013 | -0.01  | -0.011 | t | 7208   | CTSPYDGK<br>YWSMYSR<br>L     | Oryctola<br>gus<br>cuniculu<br>s |
| 1 | 1.00 | 1 | 1 | 0     | -0.003 | 0      | 0      | -0.001 | t | 24652  | HQTLQDP<br>RVRGL             | Oryctola<br>gus<br>cuniculu<br>s |
| 1 | 1.00 | 1 | 1 | 0.02  | 0.023  | 0.018  | 0.02   | 0.018  | t | 22015  | GREGYPA<br>DSKGCKIT          | Equus<br>caballus                |
| 1 | 1.00 | 1 | 1 | 0     | 0      | -0.017 | -0.004 | 0      | t | 32970  | KQEGDKC<br>VENPNPTC<br>NENN  | Homo<br>sapiens                  |
| 1 | 1.00 | 1 | 1 | -0.02 | -0.02  | -0.02  | -0.016 | -0.02  | t | 143932 | HNIWSAP<br>RLIFN             | Homo<br>sapiens                  |
| 1 | 1.00 | 1 | 1 | -0.02 | -0.02  | -0.015 | -0.01  | -0.021 | t | 115109 | SKIFKLGGR<br>DSRSGSP<br>MARR | Homo<br>sapiens                  |
| 1 | 1.00 | 1 | 1 | 0.01  | 0.014  | 0.008  | 0.013  | 0.011  | t | 11286  | EDAKELLE<br>SSDQILR          | Homo<br>sapiens                  |
| 1 | 1.00 | 1 | 1 | 0     | 0      | 0      | -0.001 | -0.003 | t | 105863 | HHQKLVFF<br>AEDVGSN          | Mus<br>musculu<br>s              |
| 1 | 1.00 | 1 | 1 | 0.03  | 0.028  | 0.027  | 0.03   | 0.03   | t | 120167 | RFQSSAV<br>MALQEAC<br>EAYL   | Mus<br>musculu<br>s              |

|   |      |   |   |       |        |        |        |        |   |        |                      |                                  |
|---|------|---|---|-------|--------|--------|--------|--------|---|--------|----------------------|----------------------------------|
| 1 | 1.00 | 1 | 1 | 0.02  | 0.02   | 0.02   | 0.02   | 0.02   | t | 106991 | WASDLM<br>HRLY       | Homo<br>sapiens                  |
| 1 | 1.00 | 1 | 1 | -0.01 | -0.013 | -0.013 | -0.01  | -0.01  | t | 39916  | LTGISICNP<br>GSSLC   | Oryctola<br>gus<br>cuniculu<br>s |
| 1 | 1.00 | 1 | 1 | 0.02  | 0.018  | 0.02   | 0.019  | 0.018  | t | 123361 | KFYCDYCD<br>TY       | Homo<br>sapiens                  |
| 1 | 1.00 | 1 | 1 | 0.03  | 0.028  | 0.031  | 0.033  | 0.033  | t | 11377  | EDLDGA               | Mus<br>musculu<br>s              |
| 1 | 1.00 | 1 | 1 | 0.02  | 0.024  | 0.028  | 0.027  | 0.022  | t | 124205 | GPLQLGM              | Homo<br>sapiens                  |
| 1 | 1.00 | 1 | 1 | 0.01  | 0.013  | 0.008  | 0.009  | 0.01   | t | 7761   | DDEADRYF<br>TYEE     | Capra<br>hircus                  |
| 1 | 1.00 | 1 | 1 | -0.03 | -0.026 | -0.03  | -0.033 | -0.031 | t | 106340 | DIMPCLHF<br>VKGE     | Homo<br>sapiens                  |
| 1 | 1.00 | 1 | 1 | 0     | 0      | 0      | 0      | -0.002 | t | 48006  | PIVKNQSC<br>SISNIETV | Mus<br>musculu<br>s              |
| 1 | 1.00 | 1 | 1 | -0.01 | -0.012 | -0.01  | -0.011 | -0.011 | t | 49191  | PRGRRQPI             | Mus<br>musculu<br>s              |
| 1 | 1.00 | 1 | 1 | 0     | 0      | -0.005 | 0      | 0.002  | t | 133608 | INTTVCAG<br>Y        | Mus<br>musculu<br>s              |
| 1 | 1.00 | 1 | 1 | 0     | 0      | 0      | 0      | -0.002 | t | 117515 | GRGRGRG<br>RGRGRG    | Homo<br>sapiens                  |
| 1 | 1.00 | 1 | 1 | -0.01 | -0.01  | -0.01  | -0.01  | -0.011 | t | 69175  | VKAETRLN             | Mus<br>musculu<br>s              |
| 1 | 1.00 | 1 | 1 | -0.05 | -0.05  | -0.05  | -0.05  | -0.05  | t | 54401  | RKPARL               | Homo<br>sapiens                  |
| 1 | 1.00 | 1 | 1 | 0.01  | 0.005  | 0.006  | 0.013  | 0.012  | t | 157466 | KLDITGKP<br>MV       | Canis<br>lupus                   |

|   |      |   |   |       |        |        |       |        |   |        |                              |                                  |
|---|------|---|---|-------|--------|--------|-------|--------|---|--------|------------------------------|----------------------------------|
| 1 | 1.00 | 1 | 1 | 0.01  | 0.01   | 0.01   | 0.01  | 0.011  | t | 115202 | DDLTDDI<br>MCV               | Homo<br>sapiens                  |
| 1 | 1.00 | 1 | 1 | 0.02  | 0.02   | 0.02   | 0.02  | 0.02   | t | 24035  | HIDSQK                       | Oryctola<br>gus<br>cuniculu<br>s |
| 1 | 1.00 | 1 | 1 | -0.01 | -0.01  | -0.017 | -0.01 | -0.011 | t | 25140  | HWSYGLR<br>PG                | Mus<br>musculu<br>s              |
| 1 | 1.00 | 1 | 1 | 0.01  | 0.01   | 0.009  | 0.02  | 0.012  | t | 105976 | NGVTLGYT<br>SGTCQGN<br>ASATK | Homo<br>sapiens                  |
| 1 | 1.00 | 1 | 1 | 0.02  | 0.022  | 0.029  | 0.027 | 0.02   | t | 102706 | PAESGGS<br>QPPRA             | Homo<br>sapiens                  |
| 1 | 1.00 | 1 | 1 | 0.03  | 0.03   | 0.031  | 0.03  | 0.028  | t | 31555  | KKGSSGYS                     | Mus<br>musculu<br>s              |
| 1 | 1.00 | 1 | 1 | -0.03 | -0.03  | -0.03  | -0.03 | -0.033 | t | 117695 | YITTIAGV<br>M                | Homo<br>sapiens                  |
| 1 | 1.00 | 1 | 1 | 0.01  | 0.01   | 0.01   | 0.01  | 0.01   | t | 115923 | QPLPPTV<br>MFP               | Homo<br>sapiens                  |
| 1 | 1.00 | 1 | 1 | 0.08  | 0.08   | 0.068  | 0.08  | 0.082  | t | 20167  | GHNSVDF<br>EED               | Oryctola<br>gus<br>cuniculu<br>s |
| 1 | 1.00 | 1 | 1 | -0.02 | -0.021 | -0.022 | -0.02 | -0.021 | t | 11273  | ECTLKKS<br>SGYCAWP           | Equus<br>caballus                |
| 1 | 1.00 | 1 | 1 | -0.02 | -0.026 | -0.022 | -0.02 | -0.021 | t | 11273  | ECTLKKS<br>SGYCAWP           | Oryctola<br>gus<br>cuniculu<br>s |
| 1 | 1.00 | 1 | 1 | 0.01  | 0.018  | 0.01   | 0.01  | 0.008  | t | 156958 | SLHSSVQ                      | Gallus<br>gallus                 |
| 1 | 1.00 | 1 | 1 | 0     | 0.003  | 0      | 0     | -0.003 | t | 80000  | RGTGSYNR<br>SSFES            | Mus<br>musculu<br>s              |
| 1 | 1.00 | 1 | 1 | 0.01  | 0.013  | 0.01   | 0.011 | 0.009  | t | 103838 | DAEFRHDS<br>GYEV             | Mus<br>musculu<br>s              |
| 1 | 1.00 | 1 | 1 | 0.01  | 0.01   | 0.008  | 0.013 | 0.01   | t | 71921  | VWARPDY<br>N                 | Homo<br>sapiens                  |

|   |      |   |   |       |        |        |        |        |   |        |                         |                              |
|---|------|---|---|-------|--------|--------|--------|--------|---|--------|-------------------------|------------------------------|
| 1 | 1.00 | 1 | 1 | -0.01 | -0.01  | -0.013 | -0.01  | -0.013 | t | 41601  | MGLIAGA<br>VGGSLLAALV   | Mus<br>musculus              |
| 1 | 1.00 | 1 | 1 | -0.01 | -0.012 | -0.01  | -0.011 | -0.011 | t | 153393 | GPDAPRIP<br>LSKM        | Mus<br>musculus              |
| 1 | 1.00 | 1 | 1 | 0     | 0      | 0      | 0.007  | 0.002  | t | 125551 | RNLTYIDP<br>DALKEPLLKFL | Homo<br>sapiens              |
| 1 | 1.00 | 1 | 1 | 0.04  | 0.04   | 0.044  | 0.04   | 0.04   | t | 23207  | GVVTLY                  | Homo<br>sapiens              |
| 1 | 1.00 | 1 | 1 | 0     | -0.003 | 0.005  | 0      | -0.002 | t | 146795 | CCELCNP<br>QCAGCY       | Oryctola<br>gus<br>cuniculus |
| 1 | 1.00 | 1 | 1 | -0.03 | -0.029 | -0.031 | -0.027 | -0.031 | t | 99622  | RNFRPLTP<br>RGYTTWV     | Equus<br>caballus            |
| 1 | 1.00 | 1 | 1 | -0.01 | -0.016 | -0.01  | -0.01  | -0.01  | t | 123787 | TPATKKAV                | Oryctola<br>gus<br>cuniculus |
| 1 | 1.00 | 1 | 1 | 0     | 0      | 0      | 0      | -0.001 | t | 133623 | KPGEMR                  | Mus<br>musculus              |
| 1 | 1.00 | 1 | 1 | -0.01 | -0.008 | -0.028 | -0.009 | -0.008 | t | 58197  | SGPSGTSP<br>SSRSNTL     | Homo<br>sapiens              |
| 1 | 1.00 | 1 | 1 | -0.01 | -0.01  | -0.01  | -0.01  | -0.01  | t | 140864 | GYLAGKG<br>VDAGK        | Oryctola<br>gus<br>cuniculus |
| 1 | 1.00 | 1 | 1 | 0.01  | 0.01   | 0.007  | 0.016  | 0.01   | t | 21109  | GLRNVAA<br>GAN          | Homo<br>sapiens              |
| 1 | 1.00 | 1 | 1 | 0     | 0      | 0      | 0      | 0.001  | t | 61394  | SSTKNLIY                | Mus<br>musculus              |
| 1 | 1.00 | 1 | 1 | 0     | 0      | 0      | 0      | 0.001  | t | 61394  | SSTKNLIY                | Mus<br>musculus              |

|   |      |   |   |       |        |        |        |        |   |        |                             |                                  |
|---|------|---|---|-------|--------|--------|--------|--------|---|--------|-----------------------------|----------------------------------|
| 1 | 1.00 | 1 | 1 | 0.02  | 0.018  | 0.001  | 0.013  | 0.02   | t | 127933 | APDDSFKK<br>LEDRFTNL<br>KF  | Mus<br>musculu<br>s              |
| 1 | 1.00 | 1 | 1 | 0.01  | 0.019  | 0.004  | 0.01   | 0.01   | t | 65096  | TLTKEYED                    | Oryctola<br>gus<br>cuniculu<br>s |
| 1 | 1.00 | 1 | 1 | -0.02 | -0.02  | -0.02  | -0.02  | -0.021 | t | 48837  | PPNAPIL                     | Mus<br>musculu<br>s              |
| 1 | 1.00 | 1 | 1 | -0.03 | -0.027 | -0.046 | -0.031 | -0.03  | t | 8370   | DGEERQSY<br>WFEN            | Capra<br>hircus                  |
| 1 | 1.00 | 1 | 1 | 0     | -0.002 | 0.002  | -0.001 | 0      | t | 3180   | AMQWNS<br>TAFH              | Mus<br>musculu<br>s              |
| 1 | 1.00 | 1 | 1 | 0.02  | 0.02   | 0.013  | 0.022  | 0.02   | t | 117015 | KEQFLDGD<br>GWTSRWI<br>ESK  | Homo<br>sapiens                  |
| 1 | 1.00 | 1 | 1 | 0     | 0      | 0.009  | 0      | -0.005 | t | 48085  | PKINRSAS<br>EPSL            | Oryctola<br>gus<br>cuniculu<br>s |
| 1 | 1.00 | 1 | 1 | 0.01  | 0.01   | 0.01   | 0.01   | 0.009  | t | 133624 | KPGEMRG<br>AA               | Mus<br>musculu<br>s              |
| 1 | 1.00 | 1 | 1 | 0.01  | 0.01   | 0.005  | 0.01   | 0.01   | t | 137909 | KPSEDELT<br>AEK             | Homo<br>sapiens                  |
| 1 | 1.00 | 1 | 1 | 0     | 0      | 0      | 0      | -0.002 | t | 151813 | CGADSYE<br>MEEDGVR<br>KC    | Mus<br>musculu<br>s              |
| 1 | 1.00 | 1 | 1 | 0     | 0      | 0      | 0      | -0.002 | t | 137770 | TLARSFICI<br>QM             | Mus<br>musculu<br>s              |
| 1 | 1.00 | 1 | 1 | 0     | 0      | 0      | 0      | -0.002 | t | 55818  | RSDYKFYE<br>DANGTRD<br>HKKG | Chinchill<br>a<br>lanigera       |
| 1 | 1.00 | 1 | 1 | 0     | 0      | 0      | 0      | -0.002 | t | 55818  | RSDYKFYE<br>DANGTRD<br>HKKG | Chinchill<br>a<br>lanigera       |
| 1 | 1.00 | 1 | 1 | 0     | 0      | 0      | 0      | -0.002 | t | 36959  | LKMADPN<br>RFRGKD           | Mus<br>musculu<br>s              |
| 1 | 1.00 | 1 | 1 | 0     | 0      | 0      | 0      | -0.002 | t | 25139  | HWSISKPQ                    | Mus<br>musculu<br>s              |

|   |      |   |   |       |        |        |        |        |   |        |                              |                                  |
|---|------|---|---|-------|--------|--------|--------|--------|---|--------|------------------------------|----------------------------------|
| 1 | 1.00 | 1 | 1 | 0     | 0      | 0      | 0      | -0.002 | t | 7492   | DAEFRHDS<br>GYEVHHQ<br>KL    | Mus<br>musculu<br>s              |
| 1 | 1.00 | 1 | 1 | 0     | 0      | 0      | 0      | -0.002 | t | 7492   | DAEFRHDS<br>GYEVHHQ<br>KL    | Mus<br>musculu<br>s              |
| 1 | 1.00 | 1 | 1 | -0.04 | -0.04  | -0.052 | -0.04  | -0.039 | t | 53864  | RGFLGRM<br>LF                | Homo<br>sapiens                  |
| 1 | 1.00 | 1 | 1 | 0.01  | 0.01   | 0.01   | 0.01   | 0.01   | t | 119673 | WNPDDYG<br>GVK               | Homo<br>sapiens                  |
| 1 | 1.00 | 1 | 1 | -0.01 | -0.022 | -0.01  | -0.007 | -0.01  | t | 156911 | LGMSTNP<br>GPRIL             | Bos<br>taurus                    |
| 1 | 1.00 | 1 | 1 | 0.03  | 0.03   | 0.03   | 0.03   | 0.028  | t | 120649 | ITVGLQLIQ<br>LISVDEVN<br>QIV | Mus<br>musculu<br>s              |
| 1 | 1.00 | 1 | 1 | -0.01 | -0.008 | -0.01  | -0.003 | -0.01  | t | 107357 | EYKCKVS                      | Homo<br>sapiens                  |
| 1 | 1.00 | 1 | 1 | -0.01 | -0.008 | -0.014 | -0.009 | -0.01  | t | 55293  | RPQDVKEP                     | Homo<br>sapiens                  |
| 1 | 1.00 | 1 | 1 | 0.01  | 0.012  | 0.006  | 0.018  | 0.01   | t | 47984  | PISLLFNEK<br>EADDNDH<br>EPQI | Homo<br>sapiens                  |
| 1 | 1.00 | 1 | 1 | -0.04 | -0.044 | -0.04  | -0.047 | -0.042 | t | 122320 | DVTVGPLI<br>FL               | Oryctola<br>gus<br>cuniculu<br>s |
| 1 | 1.00 | 1 | 1 | 0.03  | 0.03   | 0.03   | 0.03   | 0.03   | t | 99839  | QSPF                         | Mus<br>musculu<br>s              |
| 1 | 1.00 | 1 | 1 | -0.03 | -0.03  | -0.03  | -0.027 | -0.03  | t | 118491 | LKVGLQVV<br>AVKAP            | Homo<br>sapiens                  |
| 1 | 1.00 | 1 | 1 | 0     | 0.002  | 0      | 0.001  | -0.002 | t | 149304 | ENTTTLKG<br>DSFYYGK          | Cavia<br>porcellu<br>s           |
| 1 | 1.00 | 1 | 1 | 0     | -0.002 | 0      | 0      | -0.002 | t | 3245   | ANDVDNS<br>NPVVQAE<br>QLNWL  | Mus<br>musculu<br>s              |
| 1 | 1.00 | 1 | 1 | -0.02 | -0.018 | -0.027 | -0.017 | -0.02  | t | 135934 | GWGSPKV<br>TKDGV             | Homo<br>sapiens                  |

|   |      |   |   |       |        |        |       |        |   |        |                       |                                  |
|---|------|---|---|-------|--------|--------|-------|--------|---|--------|-----------------------|----------------------------------|
| 1 | 1.00 | 1 | 1 | 0.01  | 0.012  | -0.002 | 0.007 | 0.01   | t | 257    | AAKVLVEG<br>NTDERGT   | Homo<br>sapiens                  |
| 1 | 1.00 | 1 | 1 | 0.01  | 0.006  | -0.001 | 0.009 | 0.01   | t | 99018  | SYSITTPSQ<br>FV       | Oryctola<br>gus<br>cuniculu<br>s |
| 1 | 1.00 | 1 | 1 | 0.05  | 0.05   | 0.05   | 0.05  | 0.05   | t | 79346  | QCETESDL<br>LIPSCP    | Mus<br>musculu<br>s              |
| 1 | 1.00 | 1 | 1 | 0.03  | 0.03   | 0.026  | 0.03  | 0.03   | t | 49107  | PQQQFPQ<br>TQQ        | Mus<br>musculu<br>s              |
| 1 | 1.00 | 1 | 1 | -0.01 | -0.01  | -0.01  | -0.01 | -0.01  | t | 112414 | YLSSFTF               | Homo<br>sapiens                  |
| 1 | 1.00 | 1 | 1 | 0.02  | 0.018  | 0.013  | 0.019 | 0.019  | t | 27795  | IPALTAVET<br>GATNPL   | Mus<br>musculu<br>s              |
| 1 | 1.00 | 1 | 1 | -0.04 | -0.041 | -0.05  | -0.04 | -0.039 | t | 139752 | FRYPRPKH<br>CHTQVA    | Canis<br>lupus                   |
| 1 | 1.00 | 1 | 1 | 0.03  | 0.028  | 0.028  | 0.033 | 0.032  | t | 105869 | IAGFKGEQ<br>GPK       | Mus<br>musculu<br>s              |
| 1 | 1.00 | 1 | 1 | 0     | -0.003 | 0      | 0     | 0      | t | 75044  | YMDLGMK               | Oryctola<br>gus<br>cuniculu<br>s |
| 1 | 1.00 | 1 | 1 | 0.04  | 0.04   | 0.035  | 0.04  | 0.04   | t | 33319  | KSGATFQV<br>EV        | Mus<br>musculu<br>s              |
| 1 | 1.00 | 1 | 1 | 0     | 0      | 0      | 0     | -0.002 | t | 151731 | SAQSQRA<br>PDR        | Mus<br>musculu<br>s              |
| 1 | 1.00 | 1 | 1 | 0     | 0      | 0      | 0     | -0.002 | t | 142810 | KEWEQIYR              | Rattus<br>norvegic<br>us         |
| 1 | 1.00 | 1 | 1 | 0     | 0      | 0      | 0     | -0.002 | t | 119488 | LGIWTYDG<br>TKVSISPES | Mus<br>musculu<br>s              |
| 1 | 1.00 | 1 | 1 | 0     | 0      | 0      | 0     | -0.002 | t | 119488 | LGIWTYDG<br>TKVSISPES | Mus<br>musculu<br>s              |

|   |      |   |   |       |        |       |       |        |   |        |                             |                                  |
|---|------|---|---|-------|--------|-------|-------|--------|---|--------|-----------------------------|----------------------------------|
| 1 | 1.00 | 1 | 1 | 0     | 0      | 0     | 0     | -0.002 | t | 119488 | LGIWTYDG<br>TKVSISPES       | Mus<br>musculu<br>s              |
| 1 | 1.00 | 1 | 1 | 0     | 0      | 0     | 0     | -0.002 | t | 120849 | NSQPEILE<br>RTRAELD         | Mus<br>musculu<br>s              |
| 1 | 1.00 | 1 | 1 | 0     | 0      | 0     | 0     | -0.002 | t | 119488 | LGIWTYDG<br>TKVSISPES       | Mus<br>musculu<br>s              |
| 1 | 1.00 | 1 | 1 | 0     | 0      | 0     | 0     | -0.002 | t | 120849 | NSQPEILE<br>RTRAELD         | Mus<br>musculu<br>s              |
| 1 | 1.00 | 1 | 1 | 0     | 0      | 0     | 0     | -0.002 | t | 119405 | YAIVHMTK<br>LLDYGKI         | Rattus<br>norvegic<br>us         |
| 1 | 1.00 | 1 | 1 | 0     | 0      | 0     | 0     | -0.002 | t | 45130  | NNIMFKLD<br>GCRDTHR<br>YIWI | Mus<br>musculu<br>s              |
| 1 | 1.00 | 1 | 1 | 0     | 0      | 0     | 0     | -0.002 | t | 45130  | NNIMFKLD<br>GCRDTHR<br>YIWI | Mus<br>musculu<br>s              |
| 1 | 1.00 | 1 | 1 | 0     | 0      | 0     | 0     | -0.002 | t | 34612  | KYTMFHYL<br>RAQFEH<br>GKSR  | Mus<br>musculu<br>s              |
| 1 | 1.00 | 1 | 1 | 0     | -0.003 | 0     | 0     | -0.002 | t | 24786  | HSLGKWL<br>GHPDKF           | Oryctola<br>gus<br>cuniculu<br>s |
| 1 | 1.00 | 1 | 1 | 0     | 0      | 0     | 0     | -0.002 | t | 34612  | KYTMFHYL<br>RAQFEH<br>GKSR  | Mus<br>musculu<br>s              |
| 1 | 1.00 | 1 | 1 | 0     | 0      | 0     | 0     | -0.002 | t | 34612  | KYTMFHYL<br>RAQFEH<br>GKSR  | Mus<br>musculu<br>s              |
| 1 | 1.00 | 1 | 1 | 0     | 0      | 0     | 0     | -0.002 | t | 34612  | KYTMFHYL<br>RAQFEH<br>GKSR  | Mus<br>musculu<br>s              |
| 1 | 1.00 | 1 | 1 | -0.02 | -0.02  | -0.02 | -0.02 | -0.021 | t | 24590  | HQLDPAF<br>GAN              | Mus<br>musculu<br>s              |



|   |      |   |   |       |        |        |        |        |   |        |                              |                                  |
|---|------|---|---|-------|--------|--------|--------|--------|---|--------|------------------------------|----------------------------------|
| 1 | 1.00 | 1 | 1 | 0.06  | 0.06   | 0.06   | 0.06   | 0.058  | t | 107892 | HSASQDG<br>QDTIRGHP<br>GSS   | Homo<br>sapiens                  |
| 1 | 1.00 | 1 | 1 | 0.03  | 0.03   | 0.032  | 0.03   | 0.031  | t | 153270 | LVAQINLE<br>M                | Mus<br>musculu<br>s              |
| 1 | 1.00 | 1 | 1 | -0.04 | -0.047 | -0.047 | -0.033 | -0.038 | t | 156885 | GYRAR                        | Homo<br>sapiens                  |
| 1 | 1.00 | 1 | 1 | -0.03 | -0.03  | -0.03  | -0.03  | -0.029 | t | 60751  | SRNWLPG<br>PCY               | Mus<br>musculu<br>s              |
| 1 | 1.00 | 1 | 1 | 0     | 0.002  | -0.011 | 0.001  | 0      | t | 57296  | SDSVGQQI<br>KVIPVDPY<br>FFQM | Homo<br>sapiens                  |
| 1 | 1.00 | 1 | 1 | 0.04  | 0.04   | 0.043  | 0.04   | 0.04   | t | 48606  | PNATQPEL                     | Oryctola<br>gus<br>cuniculu<br>s |
| 1 | 1.00 | 1 | 1 | 0     | -0.003 | 0.014  | 0      | -0.001 | t | 60590  | SQW                          | Oryctola<br>gus<br>cuniculu<br>s |
| 1 | 1.00 | 1 | 1 | 0.01  | 0.008  | -0.001 | 0.009  | 0.01   | t | 21807  | GPTEESVE<br>RAMGRVA          | Rattus<br>norvegic<br>us         |
| 1 | 1.00 | 1 | 1 | -0.01 | -0.005 | -0.01  | -0.01  | -0.01  | t | 39354  | LSFTLTGN<br>PNRP             | Homo<br>sapiens                  |
| 1 | 1.00 | 1 | 1 | 0.02  | 0.02   | 0.013  | 0.02   | 0.02   | t | 51572  | QLVLGENL<br>DTERILAS         | Homo<br>sapiens                  |
| 1 | 1.00 | 1 | 1 | 0.04  | 0.04   | 0.036  | 0.04   | 0.04   | t | 102723 | PPTPTPDQ<br>PEPNKPVE<br>PTYE | Mus<br>musculu<br>s              |
| 1 | 1.00 | 1 | 1 | 0.02  | 0.02   | 0.02   | 0.02   | 0.021  | t | 115245 | EYGLFQIN<br>NK               | Homo<br>sapiens                  |
| 1 | 1.00 | 1 | 1 | -0.01 | -0.01  | -0.014 | -0.01  | -0.01  | t | 157683 | MRTSTDM<br>PSQHI             | Canis<br>lupus                   |
| 1 | 1.00 | 1 | 1 | 0.02  | 0.02   | 0.02   | 0.02   | 0.019  | t | 98842  | KDLAFPGS<br>GE               | Homo<br>sapiens                  |
| 1 | 1.00 | 1 | 1 | -0.01 | -0.012 | -0.011 | -0.007 | -0.01  | t | 32817  | KPNYAPA<br>NCPKS             | Mus<br>musculu<br>s              |

|   |      |   |   |       |        |        |        |        |   |        |                              |                                  |
|---|------|---|---|-------|--------|--------|--------|--------|---|--------|------------------------------|----------------------------------|
| 1 | 1.00 | 1 | 1 | 0.03  | 0.028  | 0.025  | 0.033  | 0.03   | t | 16396  | FKLEKEVA<br>E                | Mus<br>musculu<br>s              |
| 1 | 1.00 | 1 | 1 | 0.03  | 0.028  | 0.025  | 0.033  | 0.03   | t | 16396  | FKLEKEVA<br>E                | Mus<br>musculu<br>s              |
| 1 | 1.00 | 1 | 1 | 0.02  | 0.024  | 0.027  | 0.017  | 0.018  | t | 107011 | YFALEAYA<br>FD               | Homo<br>sapiens                  |
| 1 | 1.00 | 1 | 1 | 0.02  | 0.018  | 0.015  | 0.02   | 0.021  | t | 117598 | PEPAKSAP<br>APKKG            | Mus<br>musculu<br>s              |
| 1 | 1.00 | 1 | 1 | 0.04  | 0.04   | 0.036  | 0.037  | 0.04   | t | 54145  | RIESEGGYI<br>ETWNPN          | Homo<br>sapiens                  |
| 1 | 1.00 | 1 | 1 | 0.03  | 0.03   | 0.03   | 0.03   | 0.03   | t | 135454 | DYEDRY                       | Mus<br>musculu<br>s              |
| 1 | 1.00 | 1 | 1 | 0     | 0      | 0.005  | 0      | -0.006 | t | 35398  | LEDPASRD<br>LVVSY            | Homo<br>sapiens                  |
| 1 | 1.00 | 1 | 1 | 0.04  | 0.038  | 0.033  | 0.043  | 0.042  | t | 13657  | EPGVLMG<br>GQSESVEF<br>T     | Mus<br>musculu<br>s              |
| 1 | 1.00 | 1 | 1 | 0.03  | 0.034  | 0.031  | 0.037  | 0.03   | t | 127957 | EESRGRTS<br>SKTAFYQA<br>LQNS | Homo<br>sapiens                  |
| 1 | 1.00 | 1 | 1 | 0.01  | 0.01   | 0.01   | 0.01   | 0.008  | t | 68865  | VHLDSAF<br>WVRTDF<br>D       | Mus<br>musculu<br>s              |
| 1 | 1.00 | 1 | 1 | 0.01  | 0.007  | 0.003  | 0.01   | 0.01   | t | 9305   | DLTNITHV<br>EKLC             | Oryctola<br>gus<br>cuniculu<br>s |
| 1 | 1.00 | 1 | 1 | -0.01 | -0.009 | -0.01  | -0.007 | -0.01  | t | 78281  | TKLPAA                       | Equus<br>caballus                |
| 1 | 1.00 | 1 | 1 | 0.01  | 0.01   | 0.003  | 0.01   | 0.01   | t | 19637  | GFTTNEPR<br>YNVFAE           | Mus<br>musculu<br>s              |
| 1 | 1.00 | 1 | 1 | -0.01 | -0.01  | -0.01  | -0.01  | -0.013 | t | 136594 | RHYQNFQ<br>FHF               | Homo<br>sapiens                  |
| 1 | 1.00 | 1 | 1 | -0.01 | -0.008 | -0.003 | -0.003 | -0.009 | t | 108007 | LLPWLDG<br>HPM               | Homo<br>sapiens                  |

|   |      |   |   |       |        |        |        |        |   |        |                           |                                  |
|---|------|---|---|-------|--------|--------|--------|--------|---|--------|---------------------------|----------------------------------|
| 1 | 1.00 | 1 | 1 | -0.02 | -0.016 | -0.016 | -0.013 | -0.02  | t | 144644 | FRQQHGK<br>TVV            | Homo<br>sapiens                  |
| 1 | 1.00 | 1 | 1 | 0.01  | 0.013  | 0.012  | 0.01   | 0.009  | t | 135845 | WTEIHDW<br>EAAME          | Mus<br>musculu<br>s              |
| 1 | 1.00 | 1 | 1 | 0.01  | 0.013  | 0.012  | 0.01   | 0.009  | t | 135845 | WTEIHDW<br>EAAME          | Mus<br>musculu<br>s              |
| 1 | 1.00 | 1 | 1 | 0     | 0      | -0.002 | 0      | -0.002 | t | 100320 | NCDFSQT<br>ATLTN          | Oryctola<br>gus<br>cuniculu<br>s |
| 1 | 1.00 | 1 | 1 | -0.03 | -0.032 | -0.03  | -0.03  | -0.03  | t | 2040   | AINRRVE                   | Mus<br>musculu<br>s              |
| 1 | 1.00 | 1 | 1 | 0.03  | 0.03   | 0.03   | 0.03   | 0.03   | t | 131892 | GNDTSSVS<br>GWGDPKP       | Homo<br>sapiens                  |
| 1 | 1.00 | 1 | 1 | -0.02 | -0.02  | -0.034 | -0.017 | -0.018 | t | 71138  | VSSQSFR                   | Homo<br>sapiens                  |
| 1 | 1.00 | 1 | 1 | 0     | 0      | 0      | 0.004  | 0      | t | 32113  | KLQPAEIET<br>CMKTIT       | Homo<br>sapiens                  |
| 1 | 1.00 | 1 | 1 | 0.02  | 0.022  | 0.014  | 0.019  | 0.02   | t | 48452  | PLPPVA                    | Cavia<br>porcellu<br>s           |
| 1 | 1.00 | 1 | 1 | 0     | 0      | -0.007 | 0      | 0      | t | 122375 | GLINRAKA<br>VKQFEESQ<br>G | Mus<br>musculu<br>s              |
| 1 | 1.00 | 1 | 1 | 0     | 0      | -0.007 | 0      | 0      | t | 125791 | CSFWSKYI<br>QTLK          | Mus<br>musculu<br>s              |
| 1 | 1.00 | 1 | 1 | 0     | 0      | -0.007 | 0      | 0      | t | 122375 | GLINRAKA<br>VKQFEESQ<br>G | Mus<br>musculu<br>s              |
| 1 | 1.00 | 1 | 1 | 0     | 0      | -0.007 | 0      | 0      | t | 122375 | GLINRAKA<br>VKQFEESQ<br>G | Mus<br>musculu<br>s              |
| 1 | 1.00 | 1 | 1 | 0     | 0      | -0.007 | 0      | 0      | t | 114223 | PFSRVVHL                  | Rattus<br>norvegic<br>us         |

|   |      |   |   |       |        |        |        |        |   |        |                              |                      |
|---|------|---|---|-------|--------|--------|--------|--------|---|--------|------------------------------|----------------------|
| 1 | 1.00 | 1 | 1 | 0     | 0      | -0.007 | 0      | 0      | t | 114236 | VGWYRSP<br>FSR               | Rattus<br>norvegicus |
| 1 | 1.00 | 1 | 1 | 0     | 0      | -0.007 | 0      | 0      | t | 112842 | SSKRGRQT<br>PVLAYML<br>DHSRS | Mus<br>musculus      |
| 1 | 1.00 | 1 | 1 | 0.01  | 0.012  | 0.01   | 0.01   | 0.01   | t | 3274   | ANETIYNT<br>TLKYGDV          | MD                   |
| 1 | 1.00 | 1 | 1 | -0.02 | -0.02  | -0.028 | -0.02  | -0.021 | t | 3539   | APENKGT<br>G                 | Mus<br>musculus      |
| 1 | 1.00 | 1 | 1 | 0     | 0      | 0      | 0      | 0      | t | 106780 | RKYFG                        | Homo<br>sapiens      |
| 1 | 1.00 | 1 | 1 | -0.03 | -0.03  | -0.03  | -0.03  | -0.033 | t | 107156 | GLAGAPGL<br>R                | Mus<br>musculus      |
| 1 | 1.00 | 1 | 1 | -0.02 | -0.02  | -0.02  | -0.013 | -0.02  | t | 135987 | RSITLGNST<br>ITT             | Homo<br>sapiens      |
| 1 | 1.00 | 1 | 1 | 0     | 0      | 0      | 0      | -0.002 | t | 151731 | SAQSQRA<br>PDR               | Mus<br>musculus      |
| 1 | 1.00 | 1 | 1 | 0     | 0      | 0      | 0      | -0.002 | t | 120109 | NIHPKAPI<br>WGIITSNF         | Rattus<br>norvegicus |
| 1 | 1.00 | 1 | 1 | 0     | 0      | 0      | 0      | -0.002 | t | 106487 | GTSTEVWL<br>APDP             | Mus<br>musculus      |
| 1 | 1.00 | 1 | 1 | 0     | 0      | 0      | 0      | -0.002 | t | 106690 | NSDHFLQP<br>DPPL             | Mus<br>musculus      |
| 1 | 1.00 | 1 | 1 | 0     | 0      | 0      | 0      | -0.002 | t | 106363 | DVYWLMP<br>DPPTS             | Mus<br>musculus      |
| 1 | 1.00 | 1 | 1 | 0     | 0      | 0      | 0      | -0.002 | t | 106225 | ADIWLTPD<br>PTTP             | Mus<br>musculus      |
| 1 | 1.00 | 1 | 1 | 0     | 0      | 0      | 0      | -0.002 | t | 106535 | IFPSFLRPD<br>PPL             | Mus<br>musculus      |
| 1 | 1.00 | 1 | 1 | -0.03 | -0.028 | -0.037 | -0.033 | -0.03  | t | 28575  | ISLIFIYETF                   | Homo<br>sapiens      |
| 1 | 1.00 | 1 | 1 | 0.05  | 0.05   | 0.055  | 0.056  | 0.053  | t | 115912 | QAPEY                        | Homo<br>sapiens      |

|   |      |   |   |       |        |        |        |        |   |        |                             |                                  |
|---|------|---|---|-------|--------|--------|--------|--------|---|--------|-----------------------------|----------------------------------|
| 1 | 1.00 | 1 | 1 | 0.01  | 0.007  | 0.01   | 0.01   | 0.01   | t | 13974  | EREDERTL                    | Oryctola<br>gus<br>cuniculu<br>s |
| 1 | 1.00 | 1 | 1 | 0.01  | 0.01   | 0.01   | 0.01   | 0.01   | t | 13974  | EREDERTL                    | Oryctola<br>gus<br>cuniculu<br>s |
| 1 | 1.00 | 1 | 1 | -0.04 | -0.037 | -0.038 | -0.04  | -0.041 | t | 133749 | YNLLMHLS<br>SML             | Mus<br>musculu<br>s              |
| 1 | 1.00 | 1 | 1 | 0.04  | 0.04   | 0.042  | 0.042  | 0.04   | t | 55834  | RSFGSSSTS<br>GITGD          | Homo<br>sapiens                  |
| 1 | 1.00 | 1 | 1 | 0.01  | 0.012  | 0.01   | 0.017  | 0.012  | t | 120210 | SQKDLLEQ<br>RRAAVDTY        | Homo<br>sapiens                  |
| 1 | 1.00 | 1 | 1 | 0     | 0.004  | 0      | 0.001  | 0.002  | t | 5380   | AVILLMCA<br>VHPTLV          | Homo<br>sapiens                  |
| 1 | 1.00 | 1 | 1 | -0.01 | -0.01  | -0.01  | -0.01  | -0.012 | t | 133231 | MGPRRRS<br>RKP              | Homo<br>sapiens                  |
| 1 | 1.00 | 1 | 1 | 0     | 0.004  | 0      | 0.007  | 0      | t | 116684 | CNYYSNSY<br>SFWLASLD<br>PKR | Homo<br>sapiens                  |
| 1 | 1.00 | 1 | 1 | 0.01  | 0.01   | 0.01   | 0.01   | 0.01   | t | 33745  | KTKRNTN                     | Homo<br>sapiens                  |
| 1 | 1.00 | 1 | 1 | 0.01  | 0.006  | 0.009  | 0.009  | 0.01   | t | 40718  | LYATFDEF<br>PPP             | Oryctola<br>gus<br>cuniculu<br>s |
| 1 | 1.00 | 1 | 1 | 0     | 0      | -0.009 | -0.003 | 0      | t | 27959  | IPNGTYRA                    | Homo<br>sapiens                  |
| 1 | 1.00 | 1 | 1 | 0.04  | 0.04   | 0.04   | 0.04   | 0.04   | t | 158603 | PVELQLY                     | Homo<br>sapiens                  |
| 1 | 1.00 | 1 | 1 | 0     | 0      | 0      | 0.007  | 0      | t | 136010 | VMIKSLPA<br>LNSPTVEE<br>C   | Homo<br>sapiens                  |
| 1 | 1.00 | 1 | 1 | -0.02 | -0.017 | -0.02  | -0.02  | -0.021 | t | 105701 | CVVGC GG<br>GV              | Mus<br>musculu<br>s              |
| 1 | 1.00 | 1 | 1 | 0.04  | 0.038  | 0.038  | 0.039  | 0.043  | t | 103117 | DTDY                        | Mus<br>musculu<br>s              |

|   |      |   |   |       |        |        |       |       |   |        |                              |                       |
|---|------|---|---|-------|--------|--------|-------|-------|---|--------|------------------------------|-----------------------|
| 1 | 1.00 | 1 | 1 | 0     | 0.002  | -0.009 | 0.001 | 0.003 | t | 110967 | PRKLPQLC<br>TELQTTI          | Homo sapiens          |
| 1 | 1.00 | 1 | 1 | 0.03  | 0.03   | 0.03   | 0.03  | 0.03  | t | 132813 | FGENNNM                      | Homo sapiens          |
| 1 | 1.00 | 1 | 1 | 0.04  | 0.04   | 0.028  | 0.04  | 0.042 | t | 72143  | VYQVNNL<br>EEIC              | Mus musculus          |
| 1 | 1.00 | 1 | 1 | 0     | -0.004 | 0.002  | 0.003 | 0.001 | t | 99367  | KDGYIVD                      | Oryctolagus cuniculus |
| 1 | 1.00 | 1 | 1 | 0.02  | 0.021  | 0.02   | 0.021 | 0.02  | t | 4884   | ATALDTSN                     | Oryctolagus cuniculus |
| 1 | 1.00 | 1 | 1 | 0.04  | 0.038  | 0.031  | 0.039 | 0.04  | t | 65403  | TNQEQTSL<br>YV               | Mus musculus          |
| 1 | 1.00 | 1 | 1 | 0.01  | 0.011  | 0      | 0.01  | 0.012 | t | 22037  | GRFRTIVC<br>GLFPTQ           | Myodes glareolus      |
| 1 | 1.00 | 1 | 1 | 0.02  | 0.02   | 0.02   | 0.02  | 0.019 | t | 112150 | GVPDRFT                      | Homo sapiens          |
| 1 | 1.00 | 1 | 1 | 0     | 0      | -0.007 | 0     | 0     | t | 20088  | GGWGQP<br>HGGGWG<br>QG       | Mus musculus          |
| 1 | 1.00 | 1 | 1 | 0.02  | 0.02   | 0.017  | 0.026 | 0.022 | t | 74322  | YINNELIPS<br>MNQLSC          | Homo sapiens          |
| 1 | 1.00 | 1 | 1 | -0.01 | -0.01  | -0.017 | -0.01 | -0.01 | t | 4027   | AQPHEPG<br>SYTNVFDH<br>LDWIK | Oryctolagus cuniculus |
| 1 | 1.00 | 1 | 1 | 0.02  | 0.016  | 0.013  | 0.023 | 0.02  | t | 107013 | YGASSRAT<br>GIPDR            | Oryctolagus cuniculus |
| 1 | 1.00 | 1 | 1 | 0.06  | 0.064  | 0.067  | 0.061 | 0.06  | t | 73605  | YDVVST                       | Homo sapiens          |
| 1 | 1.00 | 1 | 1 | 0.06  | 0.062  | 0.067  | 0.061 | 0.06  | t | 73605  | YDVVST                       | Homo sapiens          |

|   |      |   |   |       |        |        |        |        |   |        |                         |                       |
|---|------|---|---|-------|--------|--------|--------|--------|---|--------|-------------------------|-----------------------|
| 1 | 1.00 | 1 | 1 | 0.02  | 0.02   | 0.014  | 0.017  | 0.021  | t | 67729  | VAQYKALP<br>VVLENA      | Homo sapiens          |
| 1 | 1.00 | 1 | 1 | 0.01  | 0.012  | 0.005  | 0.013  | 0.01   | t | 60285  | SPTHYVPE<br>SDAAAR      | Homo sapiens          |
| 1 | 1.00 | 1 | 1 | 0.01  | 0.012  | 0.005  | 0.013  | 0.01   | t | 60285  | SPTHYVPE<br>SDAAAR      | Homo sapiens          |
| 1 | 1.00 | 1 | 1 | 0.01  | 0.012  | 0.005  | 0.013  | 0.01   | t | 60285  | SPTHYVPE<br>SDAAAR      | Homo sapiens          |
| 1 | 1.00 | 1 | 1 | 0.01  | 0.012  | 0.005  | 0.013  | 0.01   | t | 60285  | SPTHYVPE<br>SDAAAR      | Homo sapiens          |
| 1 | 1.00 | 1 | 1 | -0.01 | -0.006 | 0.019  | -0.01  | -0.018 | t | 31772  | KLCGVL                  | Homo sapiens          |
| 1 | 1.00 | 1 | 1 | 0     | 0.004  | -0.009 | -0.003 | -0.002 | t | 113857 | SGYYPTSP<br>QQPGQG      | Homo sapiens          |
| 1 | 1.00 | 1 | 1 | -0.01 | -0.014 | -0.007 | -0.007 | -0.012 | t | 29379  | IVNTLNGF<br>YRSL        | Oryctolagus cuniculus |
| 1 | 1.00 | 1 | 1 | 0.02  | 0.022  | 0.013  | 0.017  | 0.018  | t | 106891 | TADFDCSK<br>IQST        | Homo sapiens          |
| 1 | 1.00 | 1 | 1 | -0.01 | -0.013 | -0.009 | -0.01  | -0.012 | t | 5924   | AYSMSFS<br>WDWSGH<br>NY | Oryctolagus cuniculus |
| 1 | 1.00 | 1 | 1 | -0.01 | -0.013 | -0.009 | -0.01  | -0.012 | t | 5924   | AYSMSFS<br>WDWSGH<br>NY | Oryctolagus cuniculus |
| 1 | 1.00 | 1 | 1 | 0     | 0.003  | 0.002  | 0      | -0.002 | t | 60991  | SSFFSYGEI               | Mus musculus          |
| 1 | 1.00 | 1 | 1 | -0.02 | -0.02  | -0.032 | -0.026 | -0.02  | t | 31141  | KHPIKHQG<br>LP          | Homo sapiens          |
| 1 | 1.00 | 1 | 1 | 0     | -0.002 | 0      | 0.005  | 0      | t | 40110  | LTPLEELY                | Mus musculus          |

|   |      |   |   |       |        |        |        |        |   |        |                              |                                  |
|---|------|---|---|-------|--------|--------|--------|--------|---|--------|------------------------------|----------------------------------|
| 1 | 1.00 | 1 | 1 | -0.02 | -0.018 | -0.031 | -0.023 | -0.02  | t | 158933 | KTFFHTIGF<br>ASKSADDV<br>K   | Homo<br>sapiens                  |
| 1 | 1.00 | 1 | 1 | -0.01 | -0.01  | -0.018 | -0.01  | -0.01  | t | 88083  | RNHKYDIK<br>LT               | Homo<br>sapiens                  |
| 1 | 1.00 | 1 | 1 | -0.01 | -0.007 | -0.017 | -0.01  | -0.008 | t | 100414 | QFINDQIK<br>FI               | Mus<br>musculu<br>s              |
| 1 | 1.00 | 1 | 1 | 0     | -0.002 | 0      | 0.003  | -0.001 | t | 125538 | QQQFPF                       | Mus<br>musculu<br>s              |
| 1 | 1.00 | 1 | 1 | 0.02  | 0.024  | 0.021  | 0.021  | 0.02   | t | 40070  | LTNSKG                       | Homo<br>sapiens                  |
| 1 | 1.00 | 1 | 1 | -0.03 | -0.03  | -0.03  | -0.03  | -0.03  | t | 140840 | EAAYSKNR<br>RAVL             | Oryctola<br>gus<br>cuniculu<br>s |
| 1 | 1.00 | 1 | 1 | 0     | 0      | -0.002 | 0      | 0.002  | t | 17504  | FQNEKWD<br>L                 | Mus<br>musculu<br>s              |
| 1 | 1.00 | 1 | 1 | 0.01  | 0.012  | 0.017  | 0.017  | 0.01   | t | 138217 | PREQQFN                      | Homo<br>sapiens                  |
| 1 | 1.00 | 1 | 1 | -0.01 | -0.012 | -0.01  | -0.009 | -0.013 | t | 45597  | NQNNFVH<br>DCVNITIK<br>QHTVT | Mus<br>musculu<br>s              |
| 1 | 1.00 | 1 | 1 | 0     | -0.002 | 0      | -0.001 | -0.003 | t | 97231  | CNTKCQTP                     | Mus<br>musculu<br>s              |
| 1 | 1.00 | 1 | 1 | 0     | -0.002 | 0      | -0.001 | -0.003 | t | 68054  | VDREGRD<br>NVRSGKV           | Mus<br>musculu<br>s              |
| 1 | 1.00 | 1 | 1 | 0     | -0.002 | 0      | -0.001 | -0.003 | t | 58582  | SIKEDVQF                     | Mus<br>musculu<br>s              |
| 1 | 1.00 | 1 | 1 | 0     | -0.002 | 0      | -0.001 | -0.003 | t | 40922  | LYREFD                       | Mus<br>musculu<br>s              |
| 1 | 1.00 | 1 | 1 | 0     | -0.004 | 0      | -0.001 | -0.003 | t | 1022   | AEKQKAAE<br>ATKVAE           | Oryctola<br>gus<br>cuniculu<br>s |



|   |      |   |   |       |        |        |       |        |   |        |                            |                           |
|---|------|---|---|-------|--------|--------|-------|--------|---|--------|----------------------------|---------------------------|
| 1 | 1.00 | 1 | 1 | 0.03  | 0.03   | 0.021  | 0.03  | 0.033  | t | 8475   | DGQPAGD<br>RADGQPA<br>GDRA | Mus<br>musculu<br>s       |
| 1 | 1.00 | 1 | 1 | -0.01 | -0.01  | -0.01  | -0.01 | -0.01  | t | 27291  | ILRKSRRFA<br>QALPV         | Homo<br>sapiens           |
| 1 | 1.00 | 1 | 1 | 0.02  | 0.009  | 0.02   | 0.02  | 0.021  | t | 19268  | GEGAPP                     | Marmot<br>a monax         |
| 1 | 1.00 | 1 | 1 | 0.05  | 0.05   | 0.052  | 0.05  | 0.049  | t | 73601  | YDVDPYAS                   | Mus<br>musculu<br>s       |
| 1 | 1.00 | 1 | 1 | 0.03  | 0.03   | 0.021  | 0.028 | 0.03   | t | 135931 | GDVEEAIE<br>RAVV           | Homo<br>sapiens           |
| 1 | 1.00 | 1 | 1 | 0.01  | -0.002 | 0.01   | 0.013 | 0.01   | t | 156843 | AHSEMG<br>T RATMT          | Bos<br>taurus             |
| 1 | 1.00 | 1 | 1 | 0.01  | 0.008  | 0      | 0.009 | 0.012  | t | 37354  | LLGNQSL                    | Anas<br>platyrhy<br>nchos |
| 1 | 1.00 | 1 | 1 | -0.05 | -0.05  | -0.05  | -0.05 | -0.051 | t | 105697 | CCAVLNG<br>AY              | Mus<br>musculu<br>s       |
| 1 | 1.00 | 1 | 1 | 0.04  | 0.043  | 0.037  | 0.04  | 0.042  | t | 37029  | LKTAAESA                   | Mus<br>musculu<br>s       |
| 1 | 1.00 | 1 | 1 | 0     | 0      | 0      | 0.004 | 0.001  | t | 118374 | GKALCWV<br>CAQSRKH<br>RD   | Homo<br>sapiens           |
| 1 | 1.00 | 1 | 1 | 0.01  | 0.012  | 0.01   | 0.011 | 0.009  | t | 41016  | MADNGTI<br>TVEELKQ<br>LEQ  | Homo<br>sapiens           |
| 1 | 1.00 | 1 | 1 | 0     | 0      | -0.012 | 0     | 0      | t | 20088  | GGWGQP<br>HGGGWG<br>QG     | Mus<br>musculu<br>s       |
| 1 | 1.00 | 1 | 1 | -0.04 | -0.04  | -0.057 | -0.04 | -0.036 | t | 145729 | CPPDIIPK                   | Mus<br>musculu<br>s       |
| 1 | 1.00 | 1 | 1 | 0     | 0.002  | 0.005  | 0.007 | 0.002  | t | 134073 | GRTCPKPD<br>DLP            | Homo<br>sapiens           |
| 1 | 1.00 | 1 | 1 | 0.05  | 0.048  | 0.045  | 0.051 | 0.051  | t | 39887  | LTEVETPIR<br>NEWG          | Mus<br>musculu<br>s       |

|   |      |   |   |       |        |        |        |        |   |        |                               |                                  |
|---|------|---|---|-------|--------|--------|--------|--------|---|--------|-------------------------------|----------------------------------|
| 1 | 1.00 | 1 | 1 | -0.01 | -0.014 | -0.024 | -0.007 | -0.008 | t | 58664  | SIPNGTYR<br>AT                | Oryctola<br>gus<br>cuniculu<br>s |
| 1 | 1.00 | 1 | 1 | -0.01 | -0.008 | -0.012 | -0.003 | -0.009 | t | 48779  | PPFSLSPV<br>PTLGSRSR<br>R     | Homo<br>sapiens                  |
| 1 | 1.00 | 1 | 1 | 0     | 0      | -0.001 | 0      | 0      | t | 50823  | QFYQKFP<br>QYL                | Homo<br>sapiens                  |
| 1 | 1.00 | 1 | 1 | -0.04 | -0.038 | -0.04  | -0.033 | -0.04  | t | 104348 | WHNAPNI                       | Homo<br>sapiens                  |
| 1 | 1.00 | 1 | 1 | -0.04 | -0.038 | -0.04  | -0.033 | -0.04  | t | 104348 | WHNAPNI                       | Homo<br>sapiens                  |
| 1 | 1.00 | 1 | 1 | 0     | 0      | -0.006 | 0      | 0      | t | 84461  | KLEFFTYLR<br>FDLELT           | Homo<br>sapiens                  |
| 1 | 1.00 | 1 | 1 | 0     | 0.002  | 0      | 0.001  | 0.001  | t | 47289  | PEGRTWA<br>Q                  | Homo<br>sapiens                  |
| 1 | 1.00 | 1 | 1 | 0     | 0      | 0      | 0      | 0      | t | 156919 | MLHTSM                        | Gallus<br>gallus                 |
| 1 | 1.00 | 1 | 1 | 0.01  | 0.01   | 0.02   | 0.01   | 0.009  | t | 95161  | TYGKFCIKP                     | Mus<br>musculu<br>s              |
| 1 | 1.00 | 1 | 1 | -0.01 | -0.008 | -0.019 | -0.009 | -0.01  | t | 18053  | FTQCSTMN<br>VVSRTLFR<br>KSPIY | Homo<br>sapiens                  |
| 1 | 1.00 | 1 | 1 | -0.01 | -0.008 | -0.019 | -0.009 | -0.01  | t | 18053  | FTQCSTMN<br>VVSRTLFR<br>KSPIY | Homo<br>sapiens                  |
| 1 | 1.00 | 1 | 1 | -0.04 | -0.04  | -0.045 | -0.04  | -0.038 | t | 145831 | IPLGTRP                       | Mus<br>musculu<br>s              |
| 1 | 1.00 | 1 | 1 | 0.01  | 0.014  | 0.006  | 0.011  | 0.011  | t | 46858  | PALTAET<br>G                  | Homo<br>sapiens                  |
| 1 | 1.00 | 1 | 1 | 0     | 0      | -0.006 | 0      | 0      | t | 72484  | WGNGCGL<br>FG                 | Mus<br>musculu<br>s              |

|   |      |   |   |       |        |        |        |        |   |        |                              |                                  |
|---|------|---|---|-------|--------|--------|--------|--------|---|--------|------------------------------|----------------------------------|
| 1 | 1.00 | 1 | 1 | 0.01  | 0.01   | 0.005  | 0.008  | 0.01   | t | 78925  | AGTYDFAI<br>AAPQANA<br>KIWIA | Homo<br>sapiens                  |
| 1 | 1.00 | 1 | 1 | -0.01 | -0.01  | -0.01  | -0.009 | -0.011 | t | 105163 | EFRHD                        | Mus<br>musculu<br>s              |
| 1 | 1.00 | 1 | 1 | 0     | 0      | 0      | -0.001 | -0.003 | t | 67615  | VAGRKKLE<br>ELERDLRK<br>TK   | Homo<br>sapiens                  |
| 1 | 1.00 | 1 | 1 | 0     | 0      | 0      | -0.001 | -0.003 | t | 63217  | TDQMEVD<br>SGPRKRPL<br>RGG   | Homo<br>sapiens                  |
| 1 | 1.00 | 1 | 1 | 0     | 0      | 0      | -0.001 | -0.003 | t | 29852  | KALENKKK<br>QLSAGGK<br>NLS   | Homo<br>sapiens                  |
| 1 | 1.00 | 1 | 1 | -0.02 | -0.022 | -0.027 | -0.027 | -0.02  | t | 108064 | PGPPGPP                      | Mus<br>musculu<br>s              |
| 1 | 1.00 | 1 | 1 | 0.01  | 0.01   | 0.003  | 0.01   | 0.01   | t | 95371  | EYCSPDHN<br>CQ               | Homo<br>sapiens                  |
| 1 | 1.00 | 1 | 1 | -0.03 | -0.03  | -0.03  | -0.03  | -0.03  | t | 54402  | RKPARLIVF<br>PDL             | Homo<br>sapiens                  |
| 1 | 1.00 | 1 | 1 | 0     | 0      | -0.004 | 0      | 0      | t | 11286  | EDAKELLE<br>SSDQILR          | Homo<br>sapiens                  |
| 1 | 1.00 | 1 | 1 | -0.01 | -0.01  | -0.01  | -0.01  | -0.01  | t | 140836 | DEAAYSKN<br>RRAV             | Oryctola<br>gus<br>cuniculu<br>s |
| 1 | 1.00 | 1 | 1 | 0     | 0.003  | -0.006 | 0      | 0      | t | 84184  | KASAEG                       | Mus<br>musculu<br>s              |
| 1 | 1.00 | 1 | 1 | 0     | 0.003  | -0.006 | 0      | 0      | t | 84184  | KASAEG                       | Mus<br>musculu<br>s              |
| 1 | 1.00 | 1 | 1 | -0.01 | -0.007 | -0.01  | -0.01  | -0.01  | t | 78413  | HFYSGTER                     | Mus<br>musculu<br>s              |
| 1 | 1.00 | 1 | 1 | 0     | -0.002 | 0      | 0.003  | -0.001 | t | 146990 | GPGTIKKIS<br>F               | Mus<br>musculu<br>s              |
| 1 | 1.00 | 1 | 1 | 0     | -0.002 | 0      | 0.003  | -0.001 | t | 146906 | EVDHTNFK<br>YNYSVIEG         | Mus<br>musculu<br>s              |

|   |      |   |   |   |        |   |       |        |   |        |                             |                                  |
|---|------|---|---|---|--------|---|-------|--------|---|--------|-----------------------------|----------------------------------|
| 1 | 1.00 | 1 | 1 | 0 | -0.002 | 0 | 0.003 | -0.001 | t | 146967 | GGPIGDTL<br>EKISNEIK        | Mus<br>musculu<br>s              |
| 1 | 1.00 | 1 | 1 | 0 | -0.002 | 0 | 0.003 | -0.001 | t | 72178  | VYVEELKP<br>TPEGDL<br>LQK   | Mus<br>musculu<br>s              |
| 1 | 1.00 | 1 | 1 | 0 | -0.002 | 0 | 0.003 | -0.001 | t | 60722  | SRLGRSSA<br>WV              | Mus<br>musculu<br>s              |
| 1 | 1.00 | 1 | 1 | 0 | -0.004 | 0 | 0.003 | -0.001 | t | 72178  | VYVEELKP<br>TPEGDL<br>LQK   | Oryctola<br>gus<br>cuniculu<br>s |
| 1 | 1.00 | 1 | 1 | 0 | -0.004 | 0 | 0.003 | -0.001 | t | 45768  | NSARARA<br>DSCRI            | Oryctola<br>gus<br>cuniculu<br>s |
| 1 | 1.00 | 1 | 1 | 0 | -0.002 | 0 | 0.003 | -0.001 | t | 54786  | RLTENTEP<br>LL              | Mus<br>musculu<br>s              |
| 1 | 1.00 | 1 | 1 | 0 | -0.002 | 0 | 0.003 | -0.001 | t | 56807  | SAHGTSTG<br>VRGP            | Mus<br>musculu<br>s              |
| 1 | 1.00 | 1 | 1 | 0 | -0.004 | 0 | 0.003 | -0.001 | t | 56195  | RTTPDRQ<br>AA               | Oryctola<br>gus<br>cuniculu<br>s |
| 1 | 1.00 | 1 | 1 | 0 | -0.004 | 0 | 0.003 | -0.001 | t | 56185  | RTTADRQT<br>A               | Oryctola<br>gus<br>cuniculu<br>s |
| 1 | 1.00 | 1 | 1 | 0 | -0.002 | 0 | 0.003 | -0.001 | t | 39349  | LSFNPTQL<br>EEQCHI          | Mus<br>musculu<br>s              |
| 1 | 1.00 | 1 | 1 | 0 | -0.004 | 0 | 0.003 | -0.001 | t | 51847  | QPGVDIIE<br>GPVKNA<br>VPLY  | Oryctola<br>gus<br>cuniculu<br>s |
| 1 | 1.00 | 1 | 1 | 0 | -0.004 | 0 | 0.003 | -0.001 | t | 45768  | NSARARA<br>DSCRI            | Oryctola<br>gus<br>cuniculu<br>s |
| 1 | 1.00 | 1 | 1 | 0 | -0.002 | 0 | 0.003 | -0.001 | t | 41204  | MCQCQVQK<br>YGTEFCKK<br>RLA | Mus<br>musculu<br>s              |
| 1 | 1.00 | 1 | 1 | 0 | -0.002 | 0 | 0.003 | -0.001 | t | 43159  | NAGVLTC<br>LSK              | Mus<br>musculu<br>s              |

|   |      |   |   |       |        |        |        |        |   |        |                              |                                  |
|---|------|---|---|-------|--------|--------|--------|--------|---|--------|------------------------------|----------------------------------|
| 1 | 1.00 | 1 | 1 | 0     | -0.004 | 0      | 0.003  | -0.001 | t | 59387  | SLPGQTKIL<br>AKVFGYGEN       | Oryctola<br>gus<br>cuniculu<br>s |
| 1 | 1.00 | 1 | 1 | 0     | -0.002 | 0      | 0.003  | -0.001 | t | 28676  | ISQAVHAA<br>HAEINEAG<br>R    | Mus<br>musculu<br>s              |
| 1 | 1.00 | 1 | 1 | 0     | -0.002 | 0      | 0.003  | -0.001 | t | 20097  | GGYGDGG<br>AHGGGYG<br>G      | Mus<br>musculu<br>s              |
| 1 | 1.00 | 1 | 1 | 0     | -0.002 | 0      | 0.003  | -0.001 | t | 1367   | AFNQFGP<br>NAGQR             | Mus<br>musculu<br>s              |
| 1 | 1.00 | 1 | 1 | 0     | -0.002 | 0      | 0.003  | -0.001 | t | 8756   | DIPNPIGSE<br>NSEKTTM<br>PLW  | Mus<br>musculu<br>s              |
| 1 | 1.00 | 1 | 1 | 0.01  | 0.014  | 0.015  | 0.011  | 0.01   | t | 56888  | SALYVGDL<br>CG               | Homo<br>sapiens                  |
| 1 | 1.00 | 1 | 1 | -0.01 | -0.013 | -0.01  | -0.01  | -0.01  | t | 135489 | QFPLGGV                      | Oryctola<br>gus<br>cuniculu<br>s |
| 1 | 1.00 | 1 | 1 | -0.01 | -0.011 | -0.02  | -0.007 | -0.008 | t | 52456  | QSYLRRTQ<br>SMGIQL           | Myodes<br>glareolu<br>s          |
| 1 | 1.00 | 1 | 1 | 0.04  | 0.04   | 0.04   | 0.04   | 0.04   | t | 112058 | AYWGQGT                      | Homo<br>sapiens                  |
| 1 | 1.00 | 1 | 1 | 0     | -0.002 | 0      | -0.007 | -0.002 | t | 135496 | RYPNQVY                      | Mus<br>musculu<br>s              |
| 1 | 1.00 | 1 | 1 | 0.01  | 0.01   | 0.01   | 0.01   | 0.01   | t | 139865 | QGAFASPI<br>QLQR             | Mus<br>musculu<br>s              |
| 1 | 1.00 | 1 | 1 | 0.01  | 0.009  | 0      | 0.01   | 0.01   | t | 41284  | MDVRRIE<br>G                 | Anas<br>platyrhy<br>nchos        |
| 1 | 1.00 | 1 | 1 | 0.03  | 0.022  | 0.03   | 0.03   | 0.031  | t | 125055 | FVYGGCQ<br>GNN               | Mus<br>musculu<br>s              |
| 1 | 1.00 | 1 | 1 | -0.05 | -0.05  | -0.05  | -0.04  | -0.048 | t | 108610 | RKALRLSA<br>S                | Homo<br>sapiens                  |
| 1 | 1.00 | 1 | 1 | 0.01  | 0.01   | 0.01   | 0.01   | 0.007  | t | 119448 | EQHLPDD<br>DKTMPSE<br>RLDD   | Homo<br>sapiens                  |
| 1 | 1.00 | 1 | 1 | 0.01  | 0.01   | -0.004 | 0.01   | 0.01   | t | 346    | AAPANDK<br>FTVFEEAF<br>NDAIK | Mus<br>musculu<br>s              |

|   |      |   |   |       |        |        |        |        |   |        |                              |                                  |
|---|------|---|---|-------|--------|--------|--------|--------|---|--------|------------------------------|----------------------------------|
| 1 | 1.00 | 1 | 1 | 0.01  | 0.01   | -0.004 | 0.01   | 0.01   | t | 346    | AAPANDK<br>FTVFEEAF<br>NDAIK | Mus<br>musculu<br>s              |
| 1 | 1.00 | 1 | 1 | -0.03 | -0.03  | -0.038 | -0.03  | -0.03  | t | 82608  | GENKFVAT<br>AASV             | Homo<br>sapiens                  |
| 1 | 1.00 | 1 | 1 | 0.01  | 0.012  | 0.006  | 0.013  | 0.012  | t | 23080  | GVNVPAG<br>AGAAILTP          | Homo<br>sapiens                  |
| 1 | 1.00 | 1 | 1 | 0.02  | 0.023  | 0.018  | 0.02   | 0.018  | t | 7381   | CYGVDPHI<br>KVWDYAT          | Equus<br>caballus                |
| 1 | 1.00 | 1 | 1 | -0.02 | -0.016 | -0.02  | -0.019 | -0.02  | t | 37055  | LKVIRK                       | Homo<br>sapiens                  |
| 1 | 1.00 | 1 | 1 | -0.02 | -0.016 | -0.02  | -0.019 | -0.02  | t | 37055  | LKVIRK                       | Homo<br>sapiens                  |
| 1 | 1.00 | 1 | 1 | 0.04  | 0.039  | 0.039  | 0.04   | 0.041  | t | 65193  | TMEEINTL                     | Anas<br>platyrhy<br>nchos        |
| 1 | 1.00 | 1 | 1 | 0.03  | 0.03   | 0.023  | 0.03   | 0.029  | t | 131652 | SFDSSNPE<br>YFDGYWG<br>YS    | Oryctola<br>gus<br>cuniculu<br>s |
| 1 | 1.00 | 1 | 1 | 0.02  | 0.021  | 0.019  | 0.023  | 0.019  | t | 99425  | LLDAIDKIA<br>DDWDNR          | Equus<br>caballus                |
| 1 | 1.00 | 1 | 1 | 0.01  | 0.006  | 0.015  | 0.007  | 0.008  | t | 53894  | RGKDLPVL<br>DQLTD            | Oryctola<br>gus<br>cuniculu<br>s |
| 1 | 1.00 | 1 | 1 | 0.06  | 0.064  | 0.048  | 0.057  | 0.062  | t | 65565  | TPEVDDEA<br>LEK              | Homo<br>sapiens                  |
| 1 | 1.00 | 1 | 1 | 0.02  | 0.02   | 0.02   | 0.02   | 0.02   | t | 113942 | TQDENPV<br>VHF               | Homo<br>sapiens                  |
| 1 | 1.00 | 1 | 1 | 0.01  | 0.01   | 0.005  | 0.01   | 0.008  | t | 151671 | KLIVINGKPI<br>TIFQERD        | Mus<br>musculu<br>s              |
| 1 | 1.00 | 1 | 1 | -0.05 | -0.05  | -0.046 | -0.047 | -0.051 | t | 22756  | GTLVRMA<br>PVIG              | Homo<br>sapiens                  |

|   |      |   |   |       |        |        |        |        |   |        |                              |                       |
|---|------|---|---|-------|--------|--------|--------|--------|---|--------|------------------------------|-----------------------|
| 1 | 1.00 | 1 | 1 | 0     | -0.002 | 0      | -0.007 | -0.006 | t | 119673 | WNPDDYGVK                    | Rattus norvegicus     |
| 1 | 1.00 | 1 | 1 | 0     | -0.004 | 0      | -0.007 | -0.006 | t | 124925 | YYVFFEEQ<br>EDEIIGF          | Oryctolagus cuniculus |
| 1 | 1.00 | 1 | 1 | 0     | 0      | 0      | 0      | -0.002 | t | 68369  | VETEDTKE<br>PGVLMGG          | Mus musculus          |
| 1 | 1.00 | 1 | 1 | 0.02  | 0.02   | 0.02   | 0.02   | 0.02   | t | 113783 | QQSGQGQ                      | Homo sapiens          |
| 1 | 1.00 | 1 | 1 | 0.01  | 0.01   | 0.004  | 0.01   | 0.009  | t | 74942  | YLTIGKNP<br>DFKSTFAV<br>LWEP | Oryctolagus cuniculus |
| 1 | 1.00 | 1 | 1 | 0     | 0      | -0.007 | 0      | 0      | t | 123037 | AQPVRLFLE                    | Ovis aries            |
| 1 | 1.00 | 1 | 1 | 0.01  | 0.01   | 0.01   | 0.01   | 0.009  | t | 48382  | PLKPTKRS<br>FIEDLLF          | Homo sapiens          |
| 1 | 1.00 | 1 | 1 | -0.02 | -0.022 | -0.027 | -0.019 | -0.02  | t | 47054  | PCVREGN<br>ASRCW             | Homo sapiens          |
| 1 | 1.00 | 1 | 1 | 0.05  | 0.05   | 0.05   | 0.05   | 0.05   | t | 81191  | DNIYTFVPEK                   | Homo sapiens          |
| 1 | 1.00 | 1 | 1 | 0.03  | 0.03   | 0.03   | 0.03   | 0.03   | t | 142449 | NNQNLSV<br>VQALL             | Mus musculus          |
| 1 | 1.00 | 1 | 1 | 0.01  | 0.01   | 0.01   | 0.01   | 0.01   | t | 1660   | AGRDLL                       | Equus caballus        |
| 1 | 1.00 | 1 | 1 | 0.02  | 0.018  | 0.02   | 0.019  | 0.02   | t | 72292  | WDEEDGEK                     | Mus musculus          |
| 1 | 1.00 | 1 | 1 | -0.02 | -0.023 | -0.025 | -0.02  | -0.02  | t | 53763  | RFQEALKK<br>SLKKP            | Mus                   |
| 1 | 1.00 | 1 | 1 | -0.02 | -0.02  | -0.025 | -0.02  | -0.02  | t | 53763  | RFQEALKK<br>SLKKP            | Mus                   |

|   |      |   |   |       |        |        |        |        |   |        |                         |                                  |
|---|------|---|---|-------|--------|--------|--------|--------|---|--------|-------------------------|----------------------------------|
| 1 | 1.00 | 1 | 1 | 0.02  | 0.023  | 0.025  | 0.02   | 0.02   | t | 138138 | ALDLL                   | Mus<br>musculu<br>s              |
| 1 | 1.00 | 1 | 1 | -0.01 | -0.006 | -0.011 | -0.013 | -0.012 | t | 32708  | KPFQCAG<br>VALSRCTL     | Homo<br>sapiens                  |
| 1 | 1.00 | 1 | 1 | -0.01 | -0.008 | -0.011 | -0.013 | -0.012 | t | 32708  | KPFQCAG<br>VALSRCTL     | Homo<br>sapiens                  |
| 1 | 1.00 | 1 | 1 | 0.02  | 0.02   | 0.02   | 0.02   | 0.02   | t | 105566 | VFFAE                   | Mus<br>musculu<br>s              |
| 1 | 1.00 | 1 | 1 | -0.01 | -0.01  | -0.015 | -0.008 | -0.012 | t | 146852 | DVAVFAR<br>GPQ AHL      | Homo<br>sapiens                  |
| 1 | 1.00 | 1 | 1 | 0.01  | 0.01   | 0.01   | 0.01   | 0.01   | t | 21868  | GQGGSHS<br>QWNKP        | Oryctola<br>gus<br>cuniculu<br>s |
| 1 | 1.00 | 1 | 1 | -0.01 | -0.01  | -0.01  | -0.01  | -0.01  | t | 134152 | LRRVLLP                 | Homo<br>sapiens                  |
| 1 | 1.00 | 1 | 1 | -0.06 | -0.057 | -0.065 | -0.06  | -0.062 | t | 131967 | LRLDCRHE<br>N           | Mus<br>musculu<br>s              |
| 1 | 1.00 | 1 | 1 | 0.01  | 0.01   | 0.01   | 0.01   | 0.008  | t | 55477  | RQQWELQ<br>GDRRCQS<br>Q | Homo<br>sapiens                  |
| 1 | 1.00 | 1 | 1 | 0.06  | 0.06   | 0.06   | 0.06   | 0.06   | t | 79504  | ADCTTPT                 | Oryctola<br>gus<br>cuniculu<br>s |
| 1 | 1.00 | 1 | 1 | 0.04  | 0.038  | 0.033  | 0.043  | 0.044  | t | 78148  | ENQANPT<br>TAET         | Mus<br>musculu<br>s              |
| 1 | 1.00 | 1 | 1 | 0.04  | 0.04   | 0.047  | 0.046  | 0.039  | t | 55174  | RPIDDFDQ<br>GWGPITY     | Homo<br>sapiens                  |
| 1 | 1.00 | 1 | 1 | 0.01  | 0.011  | 0.01   | 0.011  | 0.01   | t | 51473  | QLPNVGIT                | Oryctola<br>gus<br>cuniculu<br>s |
| 1 | 1.00 | 1 | 1 | 0.03  | 0.034  | 0.023  | 0.027  | 0.028  | t | 50504  | QDPDRRD<br>PYSPSPYD     | Homo<br>sapiens                  |



|   |      |   |   |       |        |        |        |        |   |        |                      |                                  |
|---|------|---|---|-------|--------|--------|--------|--------|---|--------|----------------------|----------------------------------|
| 1 | 1.00 | 1 | 1 | 0.01  | 0.008  | 0.01   | 0.007  | 0.008  | t | 74488  | YKPLGALT<br>H        | Mus<br>musculu<br>s              |
| 1 | 1.00 | 1 | 1 | -0.02 | -0.016 | -0.026 | -0.02  | -0.018 | t | 123437 | LKMWSDF<br>LG        | Ovis<br>aries                    |
| 1 | 1.00 | 1 | 1 | 0.01  | 0.01   | 0.01   | 0.01   | 0.01   | t | 130598 | RQFECYTT<br>CVG      | Mus<br>musculu<br>s              |
| 1 | 1.00 | 1 | 1 | 0.03  | 0.034  | 0.035  | 0.037  | 0.03   | t | 122145 | LTLFPSRDT<br>PLSSQTD | Homo<br>sapiens                  |
| 1 | 1.00 | 1 | 1 | 0.02  | 0.02   | 0.025  | 0.03   | 0.023  | t | 115832 | KTGQFL               | Homo<br>sapiens                  |
| 1 | 1.00 | 1 | 1 | -0.02 | -0.019 | -0.021 | -0.017 | -0.021 | t | 99194  | EFVDRLLS<br>QIKSEGH  | Equus<br>caballus                |
| 1 | 1.00 | 1 | 1 | -0.02 | -0.018 | -0.02  | -0.019 | -0.02  | t | 96102  | APLLPH               | Homo<br>sapiens                  |
| 1 | 1.00 | 1 | 1 | 0.01  | 0.014  | 0.01   | 0.01   | 0.011  | t | 22357  | GSGVRGD<br>FG        | Cavia<br>porcellu<br>s           |
| 1 | 1.00 | 1 | 1 | 0.01  | 0.014  | 0.005  | 0.011  | 0.01   | t | 66107  | TRTIGGSQ<br>AQ       | Homo<br>sapiens                  |
| 1 | 1.00 | 1 | 1 | 0     | 0      | 0      | -0.003 | -0.003 | t | 71284  | VTEEI                | Homo<br>sapiens                  |
| 1 | 1.00 | 1 | 1 | 0     | 0      | 0      | 0      | -0.002 | t | 38022  | LMGGQSE<br>SVEFTKDT  | Mus<br>musculu<br>s              |
| 1 | 1.00 | 1 | 1 | 0     | -0.003 | -0.006 | 0      | 0      | t | 1584   | AGKREM               | Oryctola<br>gus<br>cuniculu<br>s |
| 1 | 1.00 | 1 | 1 | 0.03  | 0.03   | 0.03   | 0.03   | 0.03   | t | 107109 | EFRHDS               | Mus<br>musculu<br>s              |
| 1 | 1.00 | 1 | 1 | 0.02  | 0.02   | 0.015  | 0.02   | 0.018  | t | 32818  | KPPFSGM<br>TGCGNT    | Homo<br>sapiens                  |

|   |      |   |   |       |        |        |       |        |   |        |                             |                                  |
|---|------|---|---|-------|--------|--------|-------|--------|---|--------|-----------------------------|----------------------------------|
| 1 | 1.00 | 1 | 1 | 0.04  | 0.04   | 0.028  | 0.04  | 0.041  | t | 40194  | LTDDATTF<br>EEVATAEK<br>LV  | Oryctola<br>gus<br>cuniculu<br>s |
| 1 | 1.00 | 1 | 1 | 0.01  | 0.012  | 0.016  | 0.011 | 0.009  | t | 8857   | DKEILYEAF                   | Homo<br>sapiens                  |
| 1 | 1.00 | 1 | 1 | 0.03  | 0.032  | 0.021  | 0.031 | 0.033  | t | 110733 | VGENVPD<br>DLYIKGSG         | Homo<br>sapiens                  |
| 1 | 1.00 | 1 | 1 | 0     | -0.003 | 0      | 0     | -0.002 | t | 105228 | GLMVGGV<br>V                | Oryctola<br>gus<br>cuniculu<br>s |
| 1 | 1.00 | 1 | 1 | 0     | -0.003 | 0      | 0     | -0.002 | t | 48093  | PKKPENK<br>LKQPNE           | Oryctola<br>gus<br>cuniculu<br>s |
| 1 | 1.00 | 1 | 1 | 0     | 0.012  | 0      | 0     | -0.002 | t | 9757   | DPRVRGLY<br>FPAGGSSS<br>GTV | Pan<br>troglody<br>tes           |
| 1 | 1.00 | 1 | 1 | -0.04 | -0.04  | -0.043 | -0.04 | -0.04  | t | 2271   | AKQYNICC<br>KFKELLD         | Mus<br>musculu<br>s              |
| 1 | 1.00 | 1 | 1 | 0.02  | 0.011  | 0.026  | 0.02  | 0.02   | t | 35231  | LDNAKYQ<br>A                | Macaca<br>mulatta                |
| 1 | 1.00 | 1 | 1 | 0     | 0      | 0      | 0     | 0      | t | 156859 | DPHVFKS                     | Gallus<br>gallus                 |
| 1 | 1.00 | 1 | 1 | 0.01  | 0.01   | 0.009  | 0.01  | 0.01   | t | 10075  | DRYYREN                     | Mus<br>musculu<br>s              |
| 1 | 1.00 | 1 | 1 | 0.01  | 0.012  | 0.005  | 0.007 | 0.01   | t | 19503  | GFAVVLKA<br>GNEG            | Homo<br>sapiens                  |
| 1 | 1.00 | 1 | 1 | 0.01  | 0.012  | 0.005  | 0.007 | 0.01   | t | 19503  | GFAVVLKA<br>GNEG            | Homo<br>sapiens                  |
| 1 | 1.00 | 1 | 1 | 0.05  | 0.05   | 0.053  | 0.05  | 0.049  | t | 78938  | CAPGQNL<br>CY               | Mus<br>musculu<br>s              |
| 1 | 1.00 | 1 | 1 | 0.03  | 0.023  | 0.03   | 0.031 | 0.032  | t | 8355   | DGAVQPD<br>GG               | Canis<br>lupus                   |

|   |      |   |   |       |        |        |        |        |   |        |                              |                                  |
|---|------|---|---|-------|--------|--------|--------|--------|---|--------|------------------------------|----------------------------------|
| 1 | 1.00 | 1 | 1 | 0.03  | 0.029  | 0.03   | 0.031  | 0.032  | t | 8355   | DGAVQPD<br>GG                | Canis<br>lupus                   |
| 1 | 1.00 | 1 | 1 | -0.02 | -0.018 | -0.02  | -0.017 | -0.019 | t | 55799  | RSAPRITF<br>G                | Homo<br>sapiens                  |
| 1 | 1.00 | 1 | 1 | 0.02  | 0.018  | 0      | 0.013  | 0.02   | t | 128115 | SSHRGNICI<br>GATNYVA<br>DN   | Mus<br>musculu<br>s              |
| 1 | 1.00 | 1 | 1 | 0     | 0.003  | 0.007  | 0      | -0.002 | t | 78695  | KDTNNNL<br>YNGK              | Mus<br>musculu<br>s              |
| 1 | 1.00 | 1 | 1 | -0.01 | -0.01  | -0.01  | -0.01  | -0.011 | t | 107147 | GIAGFKGE<br>QGPK             | Mus<br>musculu<br>s              |
| 1 | 1.00 | 1 | 1 | -0.01 | -0.01  | -0.01  | -0.01  | -0.011 | t | 107147 | GIAGFKGE<br>QGPK             | Mus<br>musculu<br>s              |
| 1 | 1.00 | 1 | 1 | -0.02 | -0.024 | -0.027 | -0.021 | -0.02  | t | 141792 | YYLWKQY<br>NPTGKGID<br>D     | Oryctola<br>gus<br>cuniculu<br>s |
| 1 | 1.00 | 1 | 1 | -0.03 | -0.03  | -0.03  | -0.03  | -0.033 | t | 125472 | LDAVYLNK<br>NKYLTVID<br>KDAF | Homo<br>sapiens                  |
| 1 | 1.00 | 1 | 1 | 0     | 0.015  | 0      | 0.007  | 0.001  | t | 125478 | LHQEYEEN<br>LGDSIVGY<br>KEKS | Homo<br>sapiens                  |
| 1 | 1.00 | 1 | 1 | 0     | 0.002  | 0      | 0.002  | -0.001 | t | 7491   | DAEFRHDS<br>GYEVHHQ<br>K     | Homo<br>sapiens                  |
| 1 | 1.00 | 1 | 1 | -0.01 | -0.002 | -0.01  | -0.01  | -0.012 | t | 156861 | DSQKPCKC<br>HCTMTQ           | Gallus<br>gallus                 |
| 1 | 1.00 | 1 | 1 | 0.03  | 0.028  | 0.028  | 0.029  | 0.03   | t | 94743  | YGTDEWE<br>QWW               | Mus<br>musculu<br>s              |
| 1 | 1.00 | 1 | 1 | 0.01  | 0.012  | 0.003  | 0.008  | 0.008  | t | 106821 | SDPAHKAR<br>LE               | Homo<br>sapiens                  |
| 1 | 1.00 | 1 | 1 | 0     | 0      | 0      | 0      | -0.002 | t | 69175  | VKAETRLN                     | Mus<br>musculu<br>s              |
| 1 | 1.00 | 1 | 1 | 0     | 0      | 0.002  | 0.002  | 0      | t | 50477  | QDIQPAV<br>QASWPKV           | Homo<br>sapiens                  |

|   |      |   |   |       |        |        |        |        |   |        |                    |                                  |
|---|------|---|---|-------|--------|--------|--------|--------|---|--------|--------------------|----------------------------------|
| 1 | 1.00 | 1 | 1 | -0.02 | -0.018 | -0.02  | -0.017 | -0.019 | t | 40724  | LYCGGPM<br>FNSKGAQ | Homo<br>sapiens                  |
| 1 | 1.00 | 1 | 1 | -0.01 | -0.014 | -0.006 | -0.007 | -0.01  | t | 97760  | VTLPSSGGA<br>V     | Oryctola<br>gus<br>cuniculu<br>s |
| 1 | 1.00 | 1 | 1 | -0.03 | -0.03  | -0.03  | -0.03  | -0.03  | t | 79219  | FWLAVR             | Mus<br>musculu<br>s              |
| 1 | 1.00 | 1 | 1 | 0     | 0.004  | -0.003 | 0      | 0      | t | 123397 | KSRIEDLPK          | Ovis<br>aries                    |
| 1 | 1.00 | 1 | 1 | 0.04  | 0.04   | 0.04   | 0.04   | 0.041  | t | 115427 | PTQLEEQC<br>HI     | Homo<br>sapiens                  |
| 1 | 1.00 | 1 | 1 | 0.01  | 0.01   | 0.01   | 0.013  | 0.011  | t | 72087  | VYLLPR             | Homo<br>sapiens                  |
| 1 | 1.00 | 1 | 1 | 0.02  | 0.02   | 0.016  | 0.02   | 0.02   | t | 51949  | QPRGGQA            | Mus<br>musculu<br>s              |
| 1 | 1.00 | 1 | 1 | -0.01 | -0.012 | -0.022 | -0.011 | -0.01  | t | 101164 | QGEGGSR<br>WTM     | Mus<br>musculu<br>s              |
| 1 | 1.00 | 1 | 1 | -0.05 | -0.043 | -0.042 | -0.051 | -0.052 | t | 8130   | DEQDYQIR           | Gallus<br>gallus                 |
| 1 | 1.00 | 1 | 1 | -0.05 | -0.052 | -0.042 | -0.051 | -0.052 | t | 8130   | DEQDYQIR           | Mus<br>musculu<br>s              |
| 1 | 1.00 | 1 | 1 | 0.04  | 0.04   | 0.04   | 0.04   | 0.04   | t | 133373 | SPTPTPGP<br>SR     | Homo<br>sapiens                  |
| 1 | 1.00 | 1 | 1 | 0.02  | 0.02   | 0.016  | 0.02   | 0.02   | t | 17368  | FPQPQQT<br>FPQ     | Mus<br>musculu<br>s              |
| 1 | 1.00 | 1 | 1 | 0.02  | 0.02   | 0.016  | 0.02   | 0.02   | t | 17368  | FPQPQQT<br>FPQ     | Mus<br>musculu<br>s              |
| 1 | 1.00 | 1 | 1 | 0.01  | 0.01   | 0.01   | 0.01   | 0.01   | t | 98931  | PGDYDDD<br>RRQ     | Homo<br>sapiens                  |
| 1 | 1.00 | 1 | 1 | 0.01  | 0.01   | 0.01   | 0.01   | 0.01   | t | 108662 | TPEVKAED<br>LQPAVD | Canis<br>lupus                   |
| 1 | 1.00 | 1 | 1 | 0.01  | 0.01   | 0.001  | 0.008  | 0.01   | t | 135990 | SASVPALT<br>AVET   | Homo<br>sapiens                  |

|   |      |   |   |       |        |        |        |        |   |        |                     |                       |
|---|------|---|---|-------|--------|--------|--------|--------|---|--------|---------------------|-----------------------|
| 1 | 1.00 | 1 | 1 | -0.01 | -0.006 | -0.003 | -0.009 | -0.009 | t | 18177  | FVGLFTP             | Homo sapiens          |
| 1 | 1.00 | 1 | 1 | -0.02 | -0.017 | -0.02  | -0.02  | -0.022 | t | 113345 | DTPTLH              | Mus musculus          |
| 1 | 1.00 | 1 | 1 | 0.01  | 0.01   | 0.01   | 0.01   | 0.01   | t | 6455   | CITQYERESQAYY       | Mus musculus          |
| 1 | 1.00 | 1 | 1 | 0.03  | 0.03   | 0.03   | 0.03   | 0.028  | t | 137387 | DFESCDSITGM         | Oryctolagus cuniculus |
| 1 | 1.00 | 1 | 1 | 0     | -0.002 | 0      | -0.003 | -0.004 | t | 16101  | FHENWPS             | Mus musculus          |
| 1 | 1.00 | 1 | 1 | 0.05  | 0.05   | 0.05   | 0.05   | 0.05   | t | 126897 | QSQQFSVSENLLKEA     | Mus musculus          |
| 1 | 1.00 | 1 | 1 | 0.01  | 0.01   | 0.011  | 0.01   | 0.009  | t | 158910 | KNLDIDPKLQEYLGK     | Mus musculus          |
| 1 | 1.00 | 1 | 1 | 0     | -0.004 | -0.002 | 0.003  | 0      | t | 70153  | VNPNNAAAL           | Oryctolagus cuniculus |
| 1 | 1.00 | 1 | 1 | 0.02  | 0.02   | 0.018  | 0.02   | 0.02   | t | 144791 | STIDYFQPNKR         | Sus scrofa            |
| 1 | 1.00 | 1 | 1 | 0.02  | 0.018  | 0.015  | 0.019  | 0.018  | t | 32585  | KNPFLFGSNRFETLF     | Sus scrofa            |
| 1 | 1.00 | 1 | 1 | 0.01  | 0.01   | 0.01   | 0.01   | 0.01   | t | 79245  | HCDSFWIPPPVCK       | Mus musculus          |
| 1 | 1.00 | 1 | 1 | -0.02 | -0.02  | -0.02  | -0.02  | -0.02  | t | 107247 | TFGSGTRLTV          | Oryctolagus cuniculus |
| 1 | 1.00 | 1 | 1 | -0.01 | -0.007 | -0.021 | -0.01  | -0.008 | t | 111176 | CTSICKYPDYIKMVS     | Mus musculus          |
| 1 | 1.00 | 1 | 1 | 0.03  | 0.032  | 0.025  | 0.031  | 0.03   | t | 69905  | VLYREFDEMEECSQLPYIE | Homo sapiens          |

|   |      |   |   |       |        |        |       |        |   |        |                            |                       |
|---|------|---|---|-------|--------|--------|-------|--------|---|--------|----------------------------|-----------------------|
| 1 | 1.00 | 1 | 1 | -0.01 | -0.008 | -0.01  | -0.01 | -0.011 | t | 141749 | SNLDHI                     | Rattus norvegicus     |
| 1 | 1.00 | 1 | 1 | -0.03 | -0.033 | -0.035 | -0.03 | -0.03  | t | 52472  | QTAPKAPTEA                 | Oryctolagus cuniculus |
| 1 | 1.00 | 1 | 1 | 0.04  | 0.042  | 0.041  | 0.041 | 0.04   | t | 56386  | RVQYEG                     | Homo sapiens          |
| 1 | 1.00 | 1 | 1 | -0.01 | -0.01  | -0.01  | -0.01 | -0.012 | t | 72249  | WAP                        | Mus musculus          |
| 1 | 1.00 | 1 | 1 | 0     | 0.003  | -0.018 | 0     | 0.003  | t | 41537  | MFSGGGGPLSPGGKS            | Mus musculus          |
| 1 | 1.00 | 1 | 1 | 0.09  | 0.088  | 0.09   | 0.092 | 0.09   | t | 110460 | YEQLNDSS<br>EEDEIDG        | Mus musculus          |
| 1 | 1.00 | 1 | 1 | 0     | 0      | 0      | 0.004 | 0      | t | 135945 | KFGADAR<br>ALMLQ           | Homo sapiens          |
| 1 | 1.00 | 1 | 1 | 0     | 0      | 0      | 0.004 | 0      | t | 141604 | APPDDGPP                   | Homo sapiens          |
| 1 | 1.00 | 1 | 1 | 0     | 0      | 0      | 0.004 | 0      | t | 144644 | FRQQHGTK<br>TVV            | Homo sapiens          |
| 1 | 1.00 | 1 | 1 | 0     | 0      | 0      | 0.004 | 0      | t | 142447 | NKYRGTA<br>GNALMDG<br>ASQL | Homo sapiens          |
| 1 | 1.00 | 1 | 1 | 0     | 0      | 0      | 0.004 | 0      | t | 142447 | NKYRGTA<br>GNALMDG<br>ASQL | Homo sapiens          |
| 1 | 1.00 | 1 | 1 | 0     | 0      | 0      | 0.004 | 0      | t | 142448 | NKYRGTA<br>GNALMDG<br>ASQL | Homo sapiens          |
| 1 | 1.00 | 1 | 1 | 0     | 0      | 0      | 0.004 | 0      | t | 141611 | CETNTGEV                   | Homo sapiens          |
| 1 | 1.00 | 1 | 1 | 0     | 0      | 0      | 0.004 | 0      | t | 135449 | CATLRVYK<br>GG             | Homo sapiens          |
| 1 | 1.00 | 1 | 1 | 0     | 0      | 0      | 0.004 | 0      | t | 135944 | KEQFEFAL<br>TAVAEVC        | Homo sapiens          |
| 1 | 1.00 | 1 | 1 | 0     | 0      | 0      | 0.004 | 0      | t | 144616 | DPRYTCQREF                 | Homo sapiens          |
| 1 | 1.00 | 1 | 1 | 0     | 0      | 0      | 0.004 | 0      | t | 135942 | KDVKFGA<br>DARAL           | Homo sapiens          |
| 1 | 1.00 | 1 | 1 | 0     | 0      | 0      | 0.004 | 0      | t | 144619 | DYIWNTL<br>NSG             | Homo sapiens          |

|   |      |   |   |   |   |   |       |   |   |        |                              |              |
|---|------|---|---|---|---|---|-------|---|---|--------|------------------------------|--------------|
| 1 | 1.00 | 1 | 1 | 0 | 0 | 0 | 0.004 | 0 | t | 137161 | FTTYIIMN<br>RWALGNL<br>ACDLW | Homo sapiens |
| 1 | 1.00 | 1 | 1 | 0 | 0 | 0 | 0.004 | 0 | t | 134112 | KDKATF                       | Homo sapiens |
| 1 | 1.00 | 1 | 1 | 0 | 0 | 0 | 0.004 | 0 | t | 138304 | ATVQLPQ                      | Homo sapiens |
| 1 | 1.00 | 1 | 1 | 0 | 0 | 0 | 0.004 | 0 | t | 144639 | FAQAYAR<br>GIS               | Homo sapiens |
| 1 | 1.00 | 1 | 1 | 0 | 0 | 0 | 0.004 | 0 | t | 135958 | LTAVETGH<br>TSQV             | Homo sapiens |
| 1 | 1.00 | 1 | 1 | 0 | 0 | 0 | 0.004 | 0 | t | 144700 | KEWAKRA<br>ALP               | Homo sapiens |
| 1 | 1.00 | 1 | 1 | 0 | 0 | 0 | 0.004 | 0 | t | 136474 | LLDTSNLEL<br>PEAVVFQ<br>DSVV | Homo sapiens |
| 1 | 1.00 | 1 | 1 | 0 | 0 | 0 | 0.004 | 0 | t | 136003 | TRKDINTV<br>TTVA             | Homo sapiens |
| 1 | 1.00 | 1 | 1 | 0 | 0 | 0 | 0.004 | 0 | t | 144816 | WSHNFTN<br>MLG               | Homo sapiens |
| 1 | 1.00 | 1 | 1 | 0 | 0 | 0 | 0.004 | 0 | t | 135990 | SASVPALT<br>AVET             | Homo sapiens |
| 1 | 1.00 | 1 | 1 | 0 | 0 | 0 | 0.004 | 0 | t | 136134 | ANGWGV<br>MVSHRSG<br>ETEDT   | Homo sapiens |
| 1 | 1.00 | 1 | 1 | 0 | 0 | 0 | 0.004 | 0 | t | 135914 | EEIAQVATI<br>SAN             | Homo sapiens |
| 1 | 1.00 | 1 | 1 | 0 | 0 | 0 | 0.004 | 0 | t | 135650 | DKVSFFCK<br>NKEKKC           | Homo sapiens |
| 1 | 1.00 | 1 | 1 | 0 | 0 | 0 | 0.004 | 0 | t | 136397 | IQVVGDDL<br>TVTNPKRI<br>AKA  | Homo sapiens |
| 1 | 1.00 | 1 | 1 | 0 | 0 | 0 | 0.004 | 0 | t | 144811 | VSWLSKE<br>WAK               | Homo sapiens |
| 1 | 1.00 | 1 | 1 | 0 | 0 | 0 | 0.004 | 0 | t | 144759 | RAALPSHV<br>VT               | Homo sapiens |
| 1 | 1.00 | 1 | 1 | 0 | 0 | 0 | 0.004 | 0 | t | 135999 | SQIATIEQT<br>APS             | Homo sapiens |
| 1 | 1.00 | 1 | 1 | 0 | 0 | 0 | 0.004 | 0 | t | 134136 | LKTPRV                       | Homo sapiens |
| 1 | 1.00 | 1 | 1 | 0 | 0 | 0 | 0.004 | 0 | t | 141780 | WSKAHPP<br>E                 | Homo sapiens |
| 1 | 1.00 | 1 | 1 | 0 | 0 | 0 | 0.004 | 0 | t | 136080 | RAGTDEGF<br>G                | Homo sapiens |

|   |      |   |   |   |   |   |       |   |   |        |                              |                 |
|---|------|---|---|---|---|---|-------|---|---|--------|------------------------------|-----------------|
| 1 | 1.00 | 1 | 1 | 0 | 0 | 0 | 0.004 | 0 | t | 136415 | KFAGRNFR<br>NPLAK            | Homo<br>sapiens |
| 1 | 1.00 | 1 | 1 | 0 | 0 | 0 | 0.004 | 0 | t | 144600 | CQREFALK<br>HL               | Homo<br>sapiens |
| 1 | 1.00 | 1 | 1 | 0 | 0 | 0 | 0.004 | 0 | t | 141629 | EEEEEDGE<br>M                | Homo<br>sapiens |
| 1 | 1.00 | 1 | 1 | 0 | 0 | 0 | 0.004 | 0 | t | 136524 | NFREAMRI<br>GAEVYHN<br>LKN   | Homo<br>sapiens |
| 1 | 1.00 | 1 | 1 | 0 | 0 | 0 | 0.004 | 0 | t | 144783 | SHVVTML<br>DNF               | Homo<br>sapiens |
| 1 | 1.00 | 1 | 1 | 0 | 0 | 0 | 0.004 | 0 | t | 136197 | EKGVPLYR<br>HIADLAGN<br>SE   | Homo<br>sapiens |
| 1 | 1.00 | 1 | 1 | 0 | 0 | 0 | 0.004 | 0 | t | 144823 | YWEGSGI<br>GAI               | Homo<br>sapiens |
| 1 | 1.00 | 1 | 1 | 0 | 0 | 0 | 0.004 | 0 | t | 135897 | APKRP GPA<br>GELL            | Homo<br>sapiens |
| 1 | 1.00 | 1 | 1 | 0 | 0 | 0 | 0.004 | 0 | t | 135982 | RDRSGLAP<br>KRP G            | Homo<br>sapiens |
| 1 | 1.00 | 1 | 1 | 0 | 0 | 0 | 0.004 | 0 | t | 136203 | EPLGLQCT<br>FINDFFTY<br>HIRH | Homo<br>sapiens |
| 1 | 1.00 | 1 | 1 | 0 | 0 | 0 | 0.004 | 0 | t | 136011 | VPALTAVE<br>TGHT             | Homo<br>sapiens |
| 1 | 1.00 | 1 | 1 | 0 | 0 | 0 | 0.004 | 0 | t | 144720 | LMKFVDSK<br>SG               | Homo<br>sapiens |
| 1 | 1.00 | 1 | 1 | 0 | 0 | 0 | 0.004 | 0 | t | 136731 | VRVFQATR<br>GKLSSKCS<br>VVLG | Homo<br>sapiens |
| 1 | 1.00 | 1 | 1 | 0 | 0 | 0 | 0.004 | 0 | t | 141638 | EIHSKTKS                     | Homo<br>sapiens |
| 1 | 1.00 | 1 | 1 | 0 | 0 | 0 | 0.004 | 0 | t | 141722 | PDGPDGP<br>E                 | Homo<br>sapiens |
| 1 | 1.00 | 1 | 1 | 0 | 0 | 0 | 0.004 | 0 | t | 141719 | NTEEYIDG                     | Homo<br>sapiens |
| 1 | 1.00 | 1 | 1 | 0 | 0 | 0 | 0.004 | 0 | t | 144614 | DMMYGG<br>MRGM               | Homo<br>sapiens |
| 1 | 1.00 | 1 | 1 | 0 | 0 | 0 | 0.004 | 0 | t | 137313 | VLVNTFCD<br>SCIPKTFW<br>NLGY | Homo<br>sapiens |
| 1 | 1.00 | 1 | 1 | 0 | 0 | 0 | 0.004 | 0 | t | 136421 | KIHAREIFD<br>SRGNPTVE        | Homo<br>sapiens |
| 1 | 1.00 | 1 | 1 | 0 | 0 | 0 | 0.004 | 0 | t | 135711 | LDETVKDK<br>LAKEQKSK<br>QNI  | Homo<br>sapiens |



|   |      |   |   |   |   |   |       |   |   |        |                              |              |
|---|------|---|---|---|---|---|-------|---|---|--------|------------------------------|--------------|
| 1 | 1.00 | 1 | 1 | 0 | 0 | 0 | 0.004 | 0 | t | 135710 | LAKEQKSK<br>QNIGALKQ<br>ELAK | Homo sapiens |
| 1 | 1.00 | 1 | 1 | 0 | 0 | 0 | 0.004 | 0 | t | 141634 | EELQKREE                     | Homo sapiens |
| 1 | 1.00 | 1 | 1 | 0 | 0 | 0 | 0.004 | 0 | t | 136419 | KIHAREIFD<br>SRGNPTVE        | Homo sapiens |
| 1 | 1.00 | 1 | 1 | 0 | 0 | 0 | 0.004 | 0 | t | 135983 | RLRPPEPR<br>PRDR             | Homo sapiens |
| 1 | 1.00 | 1 | 1 | 0 | 0 | 0 | 0.004 | 0 | t | 144652 | GMRGMK<br>GLVY               | Homo sapiens |
| 1 | 1.00 | 1 | 1 | 0 | 0 | 0 | 0.004 | 0 | t | 151101 | AAA                          | Homo sapiens |
| 1 | 1.00 | 1 | 1 | 0 | 0 | 0 | 0.004 | 0 | t | 121998 | VPPALADF<br>I                | Homo sapiens |
| 1 | 1.00 | 1 | 1 | 0 | 0 | 0 | 0.004 | 0 | t | 121527 | LCNEKLLK<br>KARIHPFH         | Homo sapiens |
| 1 | 1.00 | 1 | 1 | 0 | 0 | 0 | 0.004 | 0 | t | 117731 | AAFYKTFK<br>TV               | Homo sapiens |
| 1 | 1.00 | 1 | 1 | 0 | 0 | 0 | 0.004 | 0 | t | 133900 | NEHPVFAY<br>LKDKLP           | Homo sapiens |
| 1 | 1.00 | 1 | 1 | 0 | 0 | 0 | 0.004 | 0 | t | 118806 | GGPDGEP<br>DVPPGAIE<br>QGPAD | Homo sapiens |
| 1 | 1.00 | 1 | 1 | 0 | 0 | 0 | 0.004 | 0 | t | 117907 | HKAFKGSI                     | Homo sapiens |
| 1 | 1.00 | 1 | 1 | 0 | 0 | 0 | 0.004 | 0 | t | 118381 | GKTCPKEI<br>PKGSKNT          | Homo sapiens |
| 1 | 1.00 | 1 | 1 | 0 | 0 | 0 | 0.004 | 0 | t | 121879 | SSQFDPNK<br>QTPSGKK          | Homo sapiens |
| 1 | 1.00 | 1 | 1 | 0 | 0 | 0 | 0.004 | 0 | t | 133787 | CQALVRM<br>LAKKPGW<br>K      | Homo sapiens |
| 1 | 1.00 | 1 | 1 | 0 | 0 | 0 | 0.004 | 0 | t | 125229 | RDSEGDV<br>AEKLGPI           | Homo sapiens |
| 1 | 1.00 | 1 | 1 | 0 | 0 | 0 | 0.004 | 0 | t | 119855 | FAESRIRRE<br>TIAAED          | Homo sapiens |
| 1 | 1.00 | 1 | 1 | 0 | 0 | 0 | 0.004 | 0 | t | 133841 | GRGNLDP<br>GGGMEKD<br>G      | Homo sapiens |
| 1 | 1.00 | 1 | 1 | 0 | 0 | 0 | 0.004 | 0 | t | 133372 | SPSPTPTP<br>GPSRRG           | Homo sapiens |
| 1 | 1.00 | 1 | 1 | 0 | 0 | 0 | 0.004 | 0 | t | 118514 | MASAARL<br>TMMWEE            | Homo sapiens |

|   |      |   |   |   |   |   |       |   |   |        |                              |              |
|---|------|---|---|---|---|---|-------|---|---|--------|------------------------------|--------------|
| 1 | 1.00 | 1 | 1 | 0 | 0 | 0 | 0.004 | 0 | t | 118014 | MDC                          | Homo sapiens |
| 1 | 1.00 | 1 | 1 | 0 | 0 | 0 | 0.004 | 0 | t | 122947 | WTQEPQP<br>LEEKWQH<br>RVVE   | Homo sapiens |
| 1 | 1.00 | 1 | 1 | 0 | 0 | 0 | 0.004 | 0 | t | 132067 | SLVLTNL                      | Homo sapiens |
| 1 | 1.00 | 1 | 1 | 0 | 0 | 0 | 0.004 | 0 | t | 131697 | TGTSSDVG<br>GYNYVSW<br>Y     | Homo sapiens |
| 1 | 1.00 | 1 | 1 | 0 | 0 | 0 | 0.004 | 0 | t | 123731 | SEESAEVA<br>TEEV             | Homo sapiens |
| 1 | 1.00 | 1 | 1 | 0 | 0 | 0 | 0.004 | 0 | t | 118105 | RKGHFLLS<br>SKSGFWT<br>WL    | Homo sapiens |
| 1 | 1.00 | 1 | 1 | 0 | 0 | 0 | 0.004 | 0 | t | 131437 | GASVKVT                      | Homo sapiens |
| 1 | 1.00 | 1 | 1 | 0 | 0 | 0 | 0.004 | 0 | t | 118348 | FHSGKHY<br>WEVDVTG<br>KE     | Homo sapiens |
| 1 | 1.00 | 1 | 1 | 0 | 0 | 0 | 0.004 | 0 | t | 118333 | EPVSIECG<br>HSFCQECI         | Homo sapiens |
| 1 | 1.00 | 1 | 1 | 0 | 0 | 0 | 0.004 | 0 | t | 125118 | KVAAEQSL<br>ITVEGDK          | Homo sapiens |
| 1 | 1.00 | 1 | 1 | 0 | 0 | 0 | 0.004 | 0 | t | 118549 | PEPAKSAP<br>APKKGSKK<br>AV   | Mus musculus |
| 1 | 1.00 | 1 | 1 | 0 | 0 | 0 | 0.004 | 0 | t | 117742 | AKAQTDR<br>EDLRTLRY          | Homo sapiens |
| 1 | 1.00 | 1 | 1 | 0 | 0 | 0 | 0.004 | 0 | t | 118994 | RGRGRGR<br>GRGGGRP<br>GAPGGS | Homo sapiens |
| 1 | 1.00 | 1 | 1 | 0 | 0 | 0 | 0.004 | 0 | t | 118809 | GGRPGAP<br>GGSGSGP<br>RHRDGV | Homo sapiens |
| 1 | 1.00 | 1 | 1 | 0 | 0 | 0 | 0.004 | 0 | t | 119608 | LGTWTYD<br>GSVVAINP<br>ES    | Homo sapiens |
| 1 | 1.00 | 1 | 1 | 0 | 0 | 0 | 0.004 | 0 | t | 117742 | AKAQTDR<br>EDLRTLRY          | Homo sapiens |
| 1 | 1.00 | 1 | 1 | 0 | 0 | 0 | 0.004 | 0 | t | 121400 | IDNSNTPF<br>LPKIFIK          | Homo sapiens |
| 1 | 1.00 | 1 | 1 | 0 | 0 | 0 | 0.004 | 0 | t | 120738 | LAIRNDEE<br>LNKLLGKV         | Homo sapiens |
| 1 | 1.00 | 1 | 1 | 0 | 0 | 0 | 0.004 | 0 | t | 117888 | GQILDILVS<br>RSLK            | Homo sapiens |
| 1 | 1.00 | 1 | 1 | 0 | 0 | 0 | 0.004 | 0 | t | 117745 | ALLRNLGK<br>MTA              | Homo sapiens |

|   |      |   |   |   |   |   |       |   |   |        |                              |                     |
|---|------|---|---|---|---|---|-------|---|---|--------|------------------------------|---------------------|
| 1 | 1.00 | 1 | 1 | 0 | 0 | 0 | 0.004 | 0 | t | 120066 | LKQQWVD<br>YNLKWNP<br>DD     | Homo<br>sapiens     |
| 1 | 1.00 | 1 | 1 | 0 | 0 | 0 | 0.004 | 0 | t | 117746 | ALREYRKK<br>MDIPAK           | Homo<br>sapiens     |
| 1 | 1.00 | 1 | 1 | 0 | 0 | 0 | 0.004 | 0 | t | 118814 | GMMPAP<br>HM                 | Homo<br>sapiens     |
| 1 | 1.00 | 1 | 1 | 0 | 0 | 0 | 0.004 | 0 | t | 118004 | LRLSHLKPS                    | Homo<br>sapiens     |
| 1 | 1.00 | 1 | 1 | 0 | 0 | 0 | 0.004 | 0 | t | 117695 | YITTIAGV<br>M                | Homo<br>sapiens     |
| 1 | 1.00 | 1 | 1 | 0 | 0 | 0 | 0.004 | 0 | t | 131545 | LMKINS                       | Homo<br>sapiens     |
| 1 | 1.00 | 1 | 1 | 0 | 0 | 0 | 0.004 | 0 | t | 118144 | SLCQSLRE<br>R                | Homo<br>sapiens     |
| 1 | 1.00 | 1 | 1 | 0 | 0 | 0 | 0.004 | 0 | t | 120641 | IQTAVRLLL<br>PGELAKHA<br>VSE | Homo<br>sapiens     |
| 1 | 1.00 | 1 | 1 | 0 | 0 | 0 | 0.004 | 0 | t | 118549 | PEPAKSAP<br>APKKGSKK<br>AV   | Mus<br>musculu<br>s |
| 1 | 1.00 | 1 | 1 | 0 | 0 | 0 | 0.004 | 0 | t | 119580 | FMESGEW<br>VIKESRGW<br>KH    | Homo<br>sapiens     |
| 1 | 1.00 | 1 | 1 | 0 | 0 | 0 | 0.004 | 0 | t | 117973 | LCG                          | Homo<br>sapiens     |
| 1 | 1.00 | 1 | 1 | 0 | 0 | 0 | 0.004 | 0 | t | 123608 | PPAQPLSE                     | Homo<br>sapiens     |
| 1 | 1.00 | 1 | 1 | 0 | 0 | 0 | 0.004 | 0 | t | 118164 | STKQAAFK<br>AV               | Homo<br>sapiens     |
| 1 | 1.00 | 1 | 1 | 0 | 0 | 0 | 0.004 | 0 | t | 119579 | FKDYSSVV<br>RPVEDHR<br>Q     | Homo<br>sapiens     |
| 1 | 1.00 | 1 | 1 | 0 | 0 | 0 | 0.004 | 0 | t | 118947 | PFSAPPPA                     | Homo<br>sapiens     |
| 1 | 1.00 | 1 | 1 | 0 | 0 | 0 | 0.004 | 0 | t | 118827 | GSGPRHR<br>DGVRRPQ<br>KRPSCI | Homo<br>sapiens     |
| 1 | 1.00 | 1 | 1 | 0 | 0 | 0 | 0.004 | 0 | t | 121719 | PSGKKCIA<br>AKKIKQS          | Homo<br>sapiens     |
| 1 | 1.00 | 1 | 1 | 0 | 0 | 0 | 0.004 | 0 | t | 133776 | AGDLSKVD<br>AKQPGDY          | Homo<br>sapiens     |
| 1 | 1.00 | 1 | 1 | 0 | 0 | 0 | 0.004 | 0 | t | 119633 | QYTGHIT<br>WTPPAIFK<br>S     | Homo<br>sapiens     |
| 1 | 1.00 | 1 | 1 | 0 | 0 | 0 | 0.004 | 0 | t | 123386 | KPKSQETP                     | Homo<br>sapiens     |
| 1 | 1.00 | 1 | 1 | 0 | 0 | 0 | 0.004 | 0 | t | 118616 | SVSYDDW<br>DYSLEARV          | Homo<br>sapiens     |

|   |      |   |   |   |   |   |       |   |   |        |                              |                     |
|---|------|---|---|---|---|---|-------|---|---|--------|------------------------------|---------------------|
| 1 | 1.00 | 1 | 1 | 0 | 0 | 0 | 0.004 | 0 | t | 133995 | AEVETDKA<br>TVGFE            | Homo<br>sapiens     |
| 1 | 1.00 | 1 | 1 | 0 | 0 | 0 | 0.004 | 0 | t | 120772 | LMLLAQM<br>RRISLFS           | Homo<br>sapiens     |
| 1 | 1.00 | 1 | 1 | 0 | 0 | 0 | 0.004 | 0 | t | 120727 | KYFPEVKT<br>KGMAAVP<br>KL    | Homo<br>sapiens     |
| 1 | 1.00 | 1 | 1 | 0 | 0 | 0 | 0.004 | 0 | t | 131369 | AWHQQQ<br>P                  | Homo<br>sapiens     |
| 1 | 1.00 | 1 | 1 | 0 | 0 | 0 | 0.004 | 0 | t | 131413 | ERILTIS                      | Homo<br>sapiens     |
| 1 | 1.00 | 1 | 1 | 0 | 0 | 0 | 0.004 | 0 | t | 118021 | MKCGMW<br>GRA                | Homo<br>sapiens     |
| 1 | 1.00 | 1 | 1 | 0 | 0 | 0 | 0.004 | 0 | t | 122874 | PPARALKR<br>SLWVEVD<br>LLIGS | Homo<br>sapiens     |
| 1 | 1.00 | 1 | 1 | 0 | 0 | 0 | 0.004 | 0 | t | 124604 | QIERDTER<br>DRFLSAPE<br>AV   | Homo<br>sapiens     |
| 1 | 1.00 | 1 | 1 | 0 | 0 | 0 | 0.004 | 0 | t | 131766 | YCQTWGS                      | Homo<br>sapiens     |
| 1 | 1.00 | 1 | 1 | 0 | 0 | 0 | 0.004 | 0 | t | 131688 | SYSCQVT                      | Homo<br>sapiens     |
| 1 | 1.00 | 1 | 1 | 0 | 0 | 0 | 0.004 | 0 | t | 118550 | PEPAKSAP<br>APKKGSKK<br>AV   | Mus<br>musculu<br>s |
| 1 | 1.00 | 1 | 1 | 0 | 0 | 0 | 0.004 | 0 | t | 119563 | EDHRQVV<br>EVTVGLQL<br>I     | Homo<br>sapiens     |
| 1 | 1.00 | 1 | 1 | 0 | 0 | 0 | 0.004 | 0 | t | 131686 | SYLSLTP                      | Homo<br>sapiens     |
| 1 | 1.00 | 1 | 1 | 0 | 0 | 0 | 0.004 | 0 | t | 118335 | EQLRILGEK<br>EAKLAQQS<br>QA  | Homo<br>sapiens     |
| 1 | 1.00 | 1 | 1 | 0 | 0 | 0 | 0.004 | 0 | t | 132528 | PHGTQCL<br>AMGWGR<br>VG      | Homo<br>sapiens     |
| 1 | 1.00 | 1 | 1 | 0 | 0 | 0 | 0.004 | 0 | t | 132112 | VLLPAVDF<br>SL               | Homo<br>sapiens     |
| 1 | 1.00 | 1 | 1 | 0 | 0 | 0 | 0.004 | 0 | t | 121503 | KRLKISKKP<br>KDPEPP          | Homo<br>sapiens     |
| 1 | 1.00 | 1 | 1 | 0 | 0 | 0 | 0.004 | 0 | t | 121754 | QKQEKKRL<br>KISKKPK          | Homo<br>sapiens     |
| 1 | 1.00 | 1 | 1 | 0 | 0 | 0 | 0.004 | 0 | t | 119598 | INPESDQP<br>DLSNFMES<br>G    | Homo<br>sapiens     |
| 1 | 1.00 | 1 | 1 | 0 | 0 | 0 | 0.004 | 0 | t | 124068 | ELMALHT<br>GQSLEQIE<br>R     | Homo<br>sapiens     |

|   |      |   |   |   |   |   |       |   |   |        |                              |              |
|---|------|---|---|---|---|---|-------|---|---|--------|------------------------------|--------------|
| 1 | 1.00 | 1 | 1 | 0 | 0 | 0 | 0.004 | 0 | t | 122497 | NGSSESRR<br>ALQDSQR          | Homo sapiens |
| 1 | 1.00 | 1 | 1 | 0 | 0 | 0 | 0.004 | 0 | t | 125357 | AEIETDKA<br>TIGFEVQE<br>EG   | Homo sapiens |
| 1 | 1.00 | 1 | 1 | 0 | 0 | 0 | 0.004 | 0 | t | 121173 | CIAAKKIKQ<br>SVGNKS          | Homo sapiens |
| 1 | 1.00 | 1 | 1 | 0 | 0 | 0 | 0.004 | 0 | t | 130448 | AYAKDVKF<br>GADA             | Homo sapiens |
| 1 | 1.00 | 1 | 1 | 0 | 0 | 0 | 0.004 | 0 | t | 119274 | MNRWAL<br>GNLACDL<br>W       | Homo sapiens |
| 1 | 1.00 | 1 | 1 | 0 | 0 | 0 | 0.004 | 0 | t | 121925 | TPFLPKIFIK<br>PNAQK          | Homo sapiens |
| 1 | 1.00 | 1 | 1 | 0 | 0 | 0 | 0.004 | 0 | t | 131504 | KATLVCLIS<br>DFYPGAV         | Homo sapiens |
| 1 | 1.00 | 1 | 1 | 0 | 0 | 0 | 0.004 | 0 | t | 118554 | PPGIRGP                      | Homo sapiens |
| 1 | 1.00 | 1 | 1 | 0 | 0 | 0 | 0.004 | 0 | t | 117449 | CVP                          | Homo sapiens |
| 1 | 1.00 | 1 | 1 | 0 | 0 | 0 | 0.004 | 0 | t | 119011 | SGPEGSG<br>GSGPQRR<br>GGDNHG | Homo sapiens |
| 1 | 1.00 | 1 | 1 | 0 | 0 | 0 | 0.004 | 0 | t | 118648 | VCAVCRQ<br>RFLKNLR           | Homo sapiens |
| 1 | 1.00 | 1 | 1 | 0 | 0 | 0 | 0.004 | 0 | t | 132526 | PGSHFCG<br>GTLIHPSF          | Homo sapiens |
| 1 | 1.00 | 1 | 1 | 0 | 0 | 0 | 0.004 | 0 | t | 133870 | LAKLAGGV<br>AVICAGA          | Homo sapiens |
| 1 | 1.00 | 1 | 1 | 0 | 0 | 0 | 0.004 | 0 | t | 118185 | TSQFTGLK<br>C                | Homo sapiens |
| 1 | 1.00 | 1 | 1 | 0 | 0 | 0 | 0.004 | 0 | t | 119925 | HFPFDEQ<br>NGSMKLG<br>TWT    | Homo sapiens |
| 1 | 1.00 | 1 | 1 | 0 | 0 | 0 | 0.004 | 0 | t | 121542 | LFKPPKYH<br>PDVPYVKR         | Homo sapiens |
| 1 | 1.00 | 1 | 1 | 0 | 0 | 0 | 0.004 | 0 | t | 118374 | GKALCWV<br>CAQSRKH<br>RD     | Homo sapiens |
| 1 | 1.00 | 1 | 1 | 0 | 0 | 0 | 0.004 | 0 | t | 133798 | DKIRGEG<br>MRYIIILD          | Homo sapiens |
| 1 | 1.00 | 1 | 1 | 0 | 0 | 0 | 0.004 | 0 | t | 125515 | PDLTKVYS<br>TDIFFILEIT<br>DN | Homo sapiens |

|   |      |   |   |   |        |   |       |   |   |        |                              |                 |
|---|------|---|---|---|--------|---|-------|---|---|--------|------------------------------|-----------------|
| 1 | 1.00 | 1 | 1 | 0 | 0      | 0 | 0.004 | 0 | t | 120857 | PATGGVK<br>KPHRYRPG<br>T     | Homo<br>sapiens |
| 1 | 1.00 | 1 | 1 | 0 | 0      | 0 | 0.004 | 0 | t | 125413 | FRVTCDI<br>QRIPSLPPS<br>TQT  | Homo<br>sapiens |
| 1 | 1.00 | 1 | 1 | 0 | 0      | 0 | 0.004 | 0 | t | 125386 | DVSQTSVT<br>ALPSKGLE<br>HLKE | Homo<br>sapiens |
| 1 | 1.00 | 1 | 1 | 0 | 0      | 0 | 0.004 | 0 | t | 118930 | MSDEGPG<br>TGPGNGL<br>GEKGD  | Homo<br>sapiens |
| 1 | 1.00 | 1 | 1 | 0 | 0      | 0 | 0.004 | 0 | t | 122401 | HSEAETGP<br>P                | Homo<br>sapiens |
| 1 | 1.00 | 1 | 1 | 0 | 0      | 0 | 0.004 | 0 | t | 131318 | VPSTPPTP<br>SPSTPPTPS<br>PS  | Homo<br>sapiens |
| 1 | 1.00 | 1 | 1 | 0 | 0      | 0 | 0.004 | 0 | t | 122145 | LTLFPSRDT<br>PLSSQTD         | Homo<br>sapiens |
| 1 | 1.00 | 1 | 1 | 0 | 0      | 0 | 0.004 | 0 | t | 117540 | KEEGSRSN<br>LGWL             | Homo<br>sapiens |
| 1 | 1.00 | 1 | 1 | 0 | -0.002 | 0 | 0.004 | 0 | t | 117736 | AEMKSLEE<br>KIGCLLK          | Mus<br>musculus |
| 1 | 1.00 | 1 | 1 | 0 | 0      | 0 | 0.004 | 0 | t | 121858 | SKLIKIFQD<br>HPLQKTYN        | Homo<br>sapiens |
| 1 | 1.00 | 1 | 1 | 0 | 0      | 0 | 0.004 | 0 | t | 118824 | GRRPFFHP<br>VGEADYFE<br>YHQE | Homo<br>sapiens |
| 1 | 1.00 | 1 | 1 | 0 | 0      | 0 | 0.004 | 0 | t | 117736 | AEMKSLEE<br>KIGCLLK          | Homo<br>sapiens |
| 1 | 1.00 | 1 | 1 | 0 | 0      | 0 | 0.004 | 0 | t | 121357 | GTQVHGTI                     | Homo<br>sapiens |
| 1 | 1.00 | 1 | 1 | 0 | 0      | 0 | 0.004 | 0 | t | 117594 | NWHQLH<br>GKKEAY             | Homo<br>sapiens |
| 1 | 1.00 | 1 | 1 | 0 | 0      | 0 | 0.004 | 0 | t | 131412 | ERGLRYL                      | Homo<br>sapiens |
| 1 | 1.00 | 1 | 1 | 0 | 0      | 0 | 0.004 | 0 | t | 130538 | LDVPPALA<br>DFIHQQR          | Homo<br>sapiens |
| 1 | 1.00 | 1 | 1 | 0 | 0      | 0 | 0.004 | 0 | t | 132729 | VVTFFCRP<br>HNICTFV          | Homo<br>sapiens |
| 1 | 1.00 | 1 | 1 | 0 | 0      | 0 | 0.004 | 0 | t | 121034 | VHPDTGIS<br>SKAMGIM<br>N     | Homo<br>sapiens |
| 1 | 1.00 | 1 | 1 | 0 | 0      | 0 | 0.004 | 0 | t | 118189 | TYYIKEQKL<br>GL              | Homo<br>sapiens |
| 1 | 1.00 | 1 | 1 | 0 | 0      | 0 | 0.004 | 0 | t | 118217 | VTKYITKG<br>WKEVH            | Homo<br>sapiens |

|   |      |   |   |   |   |   |       |   |   |        |                              |                 |
|---|------|---|---|---|---|---|-------|---|---|--------|------------------------------|-----------------|
| 1 | 1.00 | 1 | 1 | 0 | 0 | 0 | 0.004 | 0 | t | 122135 | LDSRRSYR<br>VRESGLNG<br>VVKH | Homo<br>sapiens |
| 1 | 1.00 | 1 | 1 | 0 | 0 | 0 | 0.004 | 0 | t | 117456 | DGQFCH                       | Homo<br>sapiens |
| 1 | 1.00 | 1 | 1 | 0 | 0 | 0 | 0.004 | 0 | t | 121945 | TYKTGHGL<br>RGKLKWR<br>P     | Homo<br>sapiens |
| 1 | 1.00 | 1 | 1 | 0 | 0 | 0 | 0.004 | 0 | t | 133822 | ERPLKQIA<br>FNGGLEP          | Homo<br>sapiens |
| 1 | 1.00 | 1 | 1 | 0 | 0 | 0 | 0.004 | 0 | t | 118948 | PGAIEQGP<br>ADDPGEG<br>PSTGP | Homo<br>sapiens |
| 1 | 1.00 | 1 | 1 | 0 | 0 | 0 | 0.004 | 0 | t | 133638 | LTSRPA                       | Homo<br>sapiens |
| 1 | 1.00 | 1 | 1 | 0 | 0 | 0 | 0.004 | 0 | t | 117910 | HLLTNHLK<br>SKEVWKA<br>L     | Homo<br>sapiens |
| 1 | 1.00 | 1 | 1 | 0 | 0 | 0 | 0.004 | 0 | t | 132575 | QMRGNP<br>GSHFCGG<br>TL      | Homo<br>sapiens |
| 1 | 1.00 | 1 | 1 | 0 | 0 | 0 | 0.004 | 0 | t | 131010 | PSTRWTEL<br>DDVKRLLK<br>GSRS | Homo<br>sapiens |
| 1 | 1.00 | 1 | 1 | 0 | 0 | 0 | 0.004 | 0 | t | 132099 | TLNELPNR<br>T                | Homo<br>sapiens |
| 1 | 1.00 | 1 | 1 | 0 | 0 | 0 | 0.004 | 0 | t | 117509 | GQIPPGA<br>M                 | Homo<br>sapiens |
| 1 | 1.00 | 1 | 1 | 0 | 0 | 0 | 0.004 | 0 | t | 133871 | LAKLGGAG<br>QAARAGT          | Homo<br>sapiens |
| 1 | 1.00 | 1 | 1 | 0 | 0 | 0 | 0.004 | 0 | t | 125411 | FQGLCNET<br>LTLKLYNN<br>GFTS | Homo<br>sapiens |
| 1 | 1.00 | 1 | 1 | 0 | 0 | 0 | 0.004 | 0 | t | 121589 | LRKFKNISY<br>FPGKLR          | Homo<br>sapiens |
| 1 | 1.00 | 1 | 1 | 0 | 0 | 0 | 0.004 | 0 | t | 125540 | QSLRQRKS<br>VNALNSPL<br>HQEY | Homo<br>sapiens |
| 1 | 1.00 | 1 | 1 | 0 | 0 | 0 | 0.004 | 0 | t | 131358 | APSVTLF                      | Homo<br>sapiens |
| 1 | 1.00 | 1 | 1 | 0 | 0 | 0 | 0.004 | 0 | t | 122271 | ASRETKEL<br>RQEERQP          | Homo<br>sapiens |
| 1 | 1.00 | 1 | 1 | 0 | 0 | 0 | 0.004 | 0 | t | 120711 | KQLATKAA<br>RKSAPAT          | Homo<br>sapiens |
| 1 | 1.00 | 1 | 1 | 0 | 0 | 0 | 0.004 | 0 | t | 131365 | ATLVCLI                      | Homo<br>sapiens |
| 1 | 1.00 | 1 | 1 | 0 | 0 | 0 | 0.004 | 0 | t | 131753 | WKAPSSP                      | Homo<br>sapiens |

|   |      |   |   |   |   |   |       |   |   |        |                              |              |
|---|------|---|---|---|---|---|-------|---|---|--------|------------------------------|--------------|
| 1 | 1.00 | 1 | 1 | 0 | 0 | 0 | 0.004 | 0 | t | 120930 | RYRPGTVA<br>LREIRRYQ         | Homo sapiens |
| 1 | 1.00 | 1 | 1 | 0 | 0 | 0 | 0.004 | 0 | t | 120612 | IFNLFSTKD<br>SSAAW           | Homo sapiens |
| 1 | 1.00 | 1 | 1 | 0 | 0 | 0 | 0.004 | 0 | t | 122825 | KSTAKDCT<br>FKPDFEMT<br>VKE  | Homo sapiens |
| 1 | 1.00 | 1 | 1 | 0 | 0 | 0 | 0.004 | 0 | t | 118133 | SESQTLDK<br>VYQM             | Homo sapiens |
| 1 | 1.00 | 1 | 1 | 0 | 0 | 0 | 0.004 | 0 | t | 119741 | AIFKSYGEII<br>VTHFPFD        | Homo sapiens |
| 1 | 1.00 | 1 | 1 | 0 | 0 | 0 | 0.004 | 0 | t | 119641 | SEHETRLV<br>AKLFKDYS         | Homo sapiens |
| 1 | 1.00 | 1 | 1 | 0 | 0 | 0 | 0.004 | 0 | t | 121161 | AVEKVKRT<br>KDE              | Homo sapiens |
| 1 | 1.00 | 1 | 1 | 0 | 0 | 0 | 0.004 | 0 | t | 133795 | DFTYDQV<br>AFNGLPQF          | Homo sapiens |
| 1 | 1.00 | 1 | 1 | 0 | 0 | 0 | 0.004 | 0 | t | 123851 | WTEVSEV<br>ATEV              | Homo sapiens |
| 1 | 1.00 | 1 | 1 | 0 | 0 | 0 | 0.004 | 0 | t | 118817 | GNGLGEK<br>GDTSGPE<br>GSGGSG | Homo sapiens |
| 1 | 1.00 | 1 | 1 | 0 | 0 | 0 | 0.004 | 0 | t | 125395 | EHLKELIAR<br>NTWTLKKL<br>PLS | Homo sapiens |
| 1 | 1.00 | 1 | 1 | 0 | 0 | 0 | 0.004 | 0 | t | 121112 | AACDPRH<br>GRYLTV            | Homo sapiens |
| 1 | 1.00 | 1 | 1 | 0 | 0 | 0 | 0.004 | 0 | t | 118770 | DPGEGPST<br>GPRGQGD<br>GGRRK | Homo sapiens |
| 1 | 1.00 | 1 | 1 | 0 | 0 | 0 | 0.004 | 0 | t | 118158 | SRNLYDIG<br>E                | Homo sapiens |
| 1 | 1.00 | 1 | 1 | 0 | 0 | 0 | 0.004 | 0 | t | 121136 | ALAVTKYK<br>QRNGWS<br>HK     | Homo sapiens |
| 1 | 1.00 | 1 | 1 | 0 | 0 | 0 | 0.004 | 0 | t | 117773 | CNSRQTD<br>REDELI            | Homo sapiens |
| 1 | 1.00 | 1 | 1 | 0 | 0 | 0 | 0.004 | 0 | t | 131344 | AIGDRSKT<br>DRENSVSI<br>G    | Homo sapiens |
| 1 | 1.00 | 1 | 1 | 0 | 0 | 0 | 0.004 | 0 | t | 128512 | EGPPPKDT                     | Homo sapiens |



|   |      |   |   |   |        |   |       |   |   |        |                              |                     |
|---|------|---|---|---|--------|---|-------|---|---|--------|------------------------------|---------------------|
| 1 | 1.00 | 1 | 1 | 0 | 0      | 0 | 0.004 | 0 | t | 120699 | KMFPEVKE<br>KGMAALP<br>RL    | Homo<br>sapiens     |
| 1 | 1.00 | 1 | 1 | 0 | 0      | 0 | 0.004 | 0 | t | 131657 | SGLQAEDE<br>ADYYCSSY         | Homo<br>sapiens     |
| 1 | 1.00 | 1 | 1 | 0 | 0      | 0 | 0.004 | 0 | t | 122198 | TEADVNP<br>KPIPSQMPT<br>SP   | Homo<br>sapiens     |
| 1 | 1.00 | 1 | 1 | 0 | 0      | 0 | 0.004 | 0 | t | 122173 | QSIQQSIE<br>RLWCRLW<br>PLPFP | Homo<br>sapiens     |
| 1 | 1.00 | 1 | 1 | 0 | 0      | 0 | 0.004 | 0 | t | 132262 | ELNVTVVT<br>FFCRPHN          | Homo<br>sapiens     |
| 1 | 1.00 | 1 | 1 | 0 | 0      | 0 | 0.004 | 0 | t | 119013 | SGSPRRRP<br>PPGRRPFF<br>HPVG | Homo<br>sapiens     |
| 1 | 1.00 | 1 | 1 | 0 | 0      | 0 | 0.004 | 0 | t | 122377 | GLPRLETP<br>ADLSTAIA<br>SRS  | Homo<br>sapiens     |
| 1 | 1.00 | 1 | 1 | 0 | 0      | 0 | 0.004 | 0 | t | 119004 | RRPQKRPS<br>CIGCKGTH<br>GGTG | Homo<br>sapiens     |
| 1 | 1.00 | 1 | 1 | 0 | -0.002 | 0 | 0.004 | 0 | t | 117948 | KFVETPGQ<br>KYKETDL          | Mus<br>musculu<br>s |
| 1 | 1.00 | 1 | 1 | 0 | 0      | 0 | 0.004 | 0 | t | 120168 | RGWKHSV<br>TYSGGPD<br>TPY    | Homo<br>sapiens     |
| 1 | 1.00 | 1 | 1 | 0 | 0      | 0 | 0.004 | 0 | t | 121347 | GPLTVAQK<br>KAQNIME          | Homo<br>sapiens     |
| 1 | 1.00 | 1 | 1 | 0 | 0      | 0 | 0.004 | 0 | t | 120682 | KILPEVKEK<br>HEFLSRL         | Homo<br>sapiens     |
| 1 | 1.00 | 1 | 1 | 0 | 0      | 0 | 0.004 | 0 | t | 121444 | KAKSETFR<br>LLHAKNI          | Homo<br>sapiens     |
| 1 | 1.00 | 1 | 1 | 0 | 0      | 0 | 0.004 | 0 | t | 121499 | KQKKHLNT<br>QQLTAFQ          | Homo<br>sapiens     |
| 1 | 1.00 | 1 | 1 | 0 | 0      | 0 | 0.004 | 0 | t | 121715 | PNKQTPS<br>GKKCIAAK          | Homo<br>sapiens     |
| 1 | 1.00 | 1 | 1 | 0 | 0      | 0 | 0.004 | 0 | t | 117781 | DCT                          | Homo<br>sapiens     |
| 1 | 1.00 | 1 | 1 | 0 | 0      | 0 | 0.004 | 0 | t | 117779 | CVSYRNPA<br>E                | Homo<br>sapiens     |
| 1 | 1.00 | 1 | 1 | 0 | 0      | 0 | 0.004 | 0 | t | 119837 | ELIPSTSSA<br>VPLIGK          | Homo<br>sapiens     |

|   |      |   |   |   |   |   |       |   |   |        |                              |                 |
|---|------|---|---|---|---|---|-------|---|---|--------|------------------------------|-----------------|
| 1 | 1.00 | 1 | 1 | 0 | 0 | 0 | 0.004 | 0 | t | 114207 | FLGELTSSE<br>VATEV           | Homo<br>sapiens |
| 1 | 1.00 | 1 | 1 | 0 | 0 | 0 | 0.004 | 0 | t | 115631 | NVRFSDEG<br>GFTC             | Homo<br>sapiens |
| 1 | 1.00 | 1 | 1 | 0 | 0 | 0 | 0.004 | 0 | t | 103834 | CPRDLNGK<br>SGC              | Homo<br>sapiens |
| 1 | 1.00 | 1 | 1 | 0 | 0 | 0 | 0.004 | 0 | t | 107856 | GGQGSRH<br>QQAR              | Homo<br>sapiens |
| 1 | 1.00 | 1 | 1 | 0 | 0 | 0 | 0.004 | 0 | t | 117140 | DWEYSVW<br>LSN               | Homo<br>sapiens |
| 1 | 1.00 | 1 | 1 | 0 | 0 | 0 | 0.004 | 0 | t | 112319 | SKIFKLGGR<br>DSRSGSP<br>MARR | Homo<br>sapiens |
| 1 | 1.00 | 1 | 1 | 0 | 0 | 0 | 0.004 | 0 | t | 115784 | HRTFE                        | Homo<br>sapiens |
| 1 | 1.00 | 1 | 1 | 0 | 0 | 0 | 0.004 | 0 | t | 116927 | AVCRTSM<br>CSIQSAPP          | Homo<br>sapiens |
| 1 | 1.00 | 1 | 1 | 0 | 0 | 0 | 0.004 | 0 | t | 113209 | VIVEMNSS<br>VEAIEGSH<br>VSL  | Homo<br>sapiens |
| 1 | 1.00 | 1 | 1 | 0 | 0 | 0 | 0.004 | 0 | t | 104798 | GERAKRS                      | Homo<br>sapiens |
| 1 | 1.00 | 1 | 1 | 0 | 0 | 0 | 0.004 | 0 | t | 114973 | VHFFKNIV<br>TPRTE            | Homo<br>sapiens |
| 1 | 1.00 | 1 | 1 | 0 | 0 | 0 | 0.004 | 0 | t | 108874 | DPISGHVS<br>LF               | Homo<br>sapiens |
| 1 | 1.00 | 1 | 1 | 0 | 0 | 0 | 0.004 | 0 | t | 109767 | QPLKEQPA<br>LNDSTRYCL        | Homo<br>sapiens |
| 1 | 1.00 | 1 | 1 | 0 | 0 | 0 | 0.004 | 0 | t | 109865 | RSLDFQAT<br>TMF              | Homo<br>sapiens |
| 1 | 1.00 | 1 | 1 | 0 | 0 | 0 | 0.004 | 0 | t | 115601 | DPFYWVS<br>PGVLV             | Homo<br>sapiens |
| 1 | 1.00 | 1 | 1 | 0 | 0 | 0 | 0.004 | 0 | t | 117315 | KALSVETE<br>KLLKYLEAV        | Homo<br>sapiens |
| 1 | 1.00 | 1 | 1 | 0 | 0 | 0 | 0.004 | 0 | t | 115912 | QAPEY                        | Homo<br>sapiens |
| 1 | 1.00 | 1 | 1 | 0 | 0 | 0 | 0.004 | 0 | t | 102316 | AQVATISA<br>NGDK             | Homo<br>sapiens |
| 1 | 1.00 | 1 | 1 | 0 | 0 | 0 | 0.004 | 0 | t | 115153 | MKGVVCT<br>RIYEKV            | Homo<br>sapiens |
| 1 | 1.00 | 1 | 1 | 0 | 0 | 0 | 0.004 | 0 | t | 106990 | VYATRSSA<br>VRLRSSVP         | Homo<br>sapiens |
| 1 | 1.00 | 1 | 1 | 0 | 0 | 0 | 0.004 | 0 | t | 109938 | SPRSGDLS<br>VY               | Homo<br>sapiens |
| 1 | 1.00 | 1 | 1 | 0 | 0 | 0 | 0.004 | 0 | t | 117141 | FQFFQRD<br>AEELEKW           | Homo<br>sapiens |

|   |      |   |   |   |   |   |       |   |   |        |                             |                 |
|---|------|---|---|---|---|---|-------|---|---|--------|-----------------------------|-----------------|
| 1 | 1.00 | 1 | 1 | 0 | 0 | 0 | 0.004 | 0 | t | 115603 | ELKVEDPF<br>YWVS            | Homo<br>sapiens |
| 1 | 1.00 | 1 | 1 | 0 | 0 | 0 | 0.004 | 0 | t | 115653 | SSYAGQFR<br>VIGP            | Homo<br>sapiens |
| 1 | 1.00 | 1 | 1 | 0 | 0 | 0 | 0.004 | 0 | t | 117246 | VTWEVLE<br>GEVEKEAL<br>KKI  | Homo<br>sapiens |
| 1 | 1.00 | 1 | 1 | 0 | 0 | 0 | 0.004 | 0 | t | 108498 | KIHAREIFD<br>SRGNPTV        | Homo<br>sapiens |
| 1 | 1.00 | 1 | 1 | 0 | 0 | 0 | 0.004 | 0 | t | 115628 | LPCRISPGK<br>NAT            | Homo<br>sapiens |
| 1 | 1.00 | 1 | 1 | 0 | 0 | 0 | 0.004 | 0 | t | 110082 | VYFCASSF<br>STCSANYG        | Homo<br>sapiens |
| 1 | 1.00 | 1 | 1 | 0 | 0 | 0 | 0.004 | 0 | t | 109427 | KPISGHNS<br>LF              | Homo<br>sapiens |
| 1 | 1.00 | 1 | 1 | 0 | 0 | 0 | 0.004 | 0 | t | 112945 | DSYTLTEEL<br>AYAEIRVK       | Homo<br>sapiens |
| 1 | 1.00 | 1 | 1 | 0 | 0 | 0 | 0.004 | 0 | t | 117348 | PTRAPSGP<br>RPP             | Homo<br>sapiens |
| 1 | 1.00 | 1 | 1 | 0 | 0 | 0 | 0.004 | 0 | t | 106634 | LVGPRGER<br>GFP             | Homo<br>sapiens |
| 1 | 1.00 | 1 | 1 | 0 | 0 | 0 | 0.004 | 0 | t | 115607 | GPRHPIRA<br>LVGD            | Homo<br>sapiens |
| 1 | 1.00 | 1 | 1 | 0 | 0 | 0 | 0.004 | 0 | t | 107896 | HSTSQEG<br>QDTIHHG<br>RGS   | Homo<br>sapiens |
| 1 | 1.00 | 1 | 1 | 0 | 0 | 0 | 0.004 | 0 | t | 107087 | ARGLTGRP<br>GDA             | Homo<br>sapiens |
| 1 | 1.00 | 1 | 1 | 0 | 0 | 0 | 0.004 | 0 | t | 107892 | HSASQDG<br>QDTIRGHP<br>GSS  | Homo<br>sapiens |
| 1 | 1.00 | 1 | 1 | 0 | 0 | 0 | 0.004 | 0 | t | 115057 | GLSLSRFS<br>WGAEGQR<br>PGFG | Homo<br>sapiens |
| 1 | 1.00 | 1 | 1 | 0 | 0 | 0 | 0.004 | 0 | t | 115639 | QFRVIGPR<br>HPIR            | Homo<br>sapiens |
| 1 | 1.00 | 1 | 1 | 0 | 0 | 0 | 0.004 | 0 | t | 109917 | SHQESTRG<br>RSRGRSGR<br>SGS | Homo<br>sapiens |
| 1 | 1.00 | 1 | 1 | 0 | 0 | 0 | 0.004 | 0 | t | 115598 | ATGMEVG<br>WYRPP            | Homo<br>sapiens |
| 1 | 1.00 | 1 | 1 | 0 | 0 | 0 | 0.004 | 0 | t | 115626 | LKDAIGEG<br>KVTL            | Homo<br>sapiens |
| 1 | 1.00 | 1 | 1 | 0 | 0 | 0 | 0.004 | 0 | t | 115832 | KTGQFL                      | Homo<br>sapiens |

|   |      |   |   |   |   |   |       |   |   |        |                              |              |
|---|------|---|---|---|---|---|-------|---|---|--------|------------------------------|--------------|
| 1 | 1.00 | 1 | 1 | 0 | 0 | 0 | 0.004 | 0 | t | 104926 | PDGSRLV                      | Homo sapiens |
| 1 | 1.00 | 1 | 1 | 0 | 0 | 0 | 0.004 | 0 | t | 117366 | RRREGPDR<br>SPR              | Homo sapiens |
| 1 | 1.00 | 1 | 1 | 0 | 0 | 0 | 0.004 | 0 | t | 115677 | AHRET                        | Homo sapiens |
| 1 | 1.00 | 1 | 1 | 0 | 0 | 0 | 0.004 | 0 | t | 104938 | PSRLVNQ                      | Homo sapiens |
| 1 | 1.00 | 1 | 1 | 0 | 0 | 0 | 0.004 | 0 | t | 106675 | NEEGFFSA<br>RGHRPLDK<br>K    | Homo sapiens |
| 1 | 1.00 | 1 | 1 | 0 | 0 | 0 | 0.004 | 0 | t | 117315 | KALSVETE<br>KLLKYLEAV        | Homo sapiens |
| 1 | 1.00 | 1 | 1 | 0 | 0 | 0 | 0.004 | 0 | t | 108834 | CKPISGHN<br>SLFWYRQT         | Homo sapiens |
| 1 | 1.00 | 1 | 1 | 0 | 0 | 0 | 0.004 | 0 | t | 115619 | IRALVGDE<br>VELP             | Homo sapiens |
| 1 | 1.00 | 1 | 1 | 0 | 0 | 0 | 0.004 | 0 | t | 115649 | SPGKNAT<br>GMEVG             | Homo sapiens |
| 1 | 1.00 | 1 | 1 | 0 | 0 | 0 | 0.004 | 0 | t | 116024 | VTLRI                        | Homo sapiens |
| 1 | 1.00 | 1 | 1 | 0 | 0 | 0 | 0.004 | 0 | t | 115633 | PPFSRVVH<br>LYRN             | Homo sapiens |
| 1 | 1.00 | 1 | 1 | 0 | 0 | 0 | 0.004 | 0 | t | 117300 | GSGKGKV<br>QFQGKKT<br>KF     | Homo sapiens |
| 1 | 1.00 | 1 | 1 | 0 | 0 | 0 | 0.004 | 0 | t | 107799 | DSGHRGY<br>SGSQASD<br>NEGH   | Homo sapiens |
| 1 | 1.00 | 1 | 1 | 0 | 0 | 0 | 0.004 | 0 | t | 109948 | SRYCLSSRL<br>RVSATFW         | Homo sapiens |
| 1 | 1.00 | 1 | 1 | 0 | 0 | 0 | 0.004 | 0 | t | 108844 | DAGVIQSP<br>RHEVTEM<br>G     | Homo sapiens |
| 1 | 1.00 | 1 | 1 | 0 | 0 | 0 | 0.004 | 0 | t | 114941 | RQDENYEE<br>AIVHLKVA<br>ALGS | Homo sapiens |
| 1 | 1.00 | 1 | 1 | 0 | 0 | 0 | 0.004 | 0 | t | 115645 | RNGKDQD<br>GDQAP             | Homo sapiens |
| 1 | 1.00 | 1 | 1 | 0 | 0 | 0 | 0.004 | 0 | t | 115605 | GDEVELPC<br>RISP             | Homo sapiens |
| 1 | 1.00 | 1 | 1 | 0 | 0 | 0 | 0.004 | 0 | t | 107800 | DSRGNPT<br>VE                | Homo sapiens |

|   |      |   |   |   |        |   |       |   |   |        |                              |                     |
|---|------|---|---|---|--------|---|-------|---|---|--------|------------------------------|---------------------|
| 1 | 1.00 | 1 | 1 | 0 | 0      | 0 | 0.004 | 0 | t | 113912 | TCFFRDHS<br>YQEE             | Homo<br>sapiens     |
| 1 | 1.00 | 1 | 1 | 0 | 0      | 0 | 0.004 | 0 | t | 114746 | ASQKRPSQ<br>RSKYLATA<br>STMD | Homo<br>sapiens     |
| 1 | 1.00 | 1 | 1 | 0 | 0      | 0 | 0.004 | 0 | t | 117329 | MAVPETR<br>PNHT              | Homo<br>sapiens     |
| 1 | 1.00 | 1 | 1 | 0 | 0      | 0 | 0.004 | 0 | t | 117331 | MKLVRFL<br>MKLSHETV<br>TIELK | Homo<br>sapiens     |
| 1 | 1.00 | 1 | 1 | 0 | 0      | 0 | 0.004 | 0 | t | 115785 | HSYQE                        | Homo<br>sapiens     |
| 1 | 1.00 | 1 | 1 | 0 | 0      | 0 | 0.004 | 0 | t | 105031 | VRGRGSK                      | Homo<br>sapiens     |
| 1 | 1.00 | 1 | 1 | 0 | 0      | 0 | 0.004 | 0 | t | 108363 | FLAEGGGV<br>RGPRVVER<br>H    | Homo<br>sapiens     |
| 1 | 1.00 | 1 | 1 | 0 | 0      | 0 | 0.004 | 0 | t | 117333 | MVTSTITE<br>KLLKNLVKI        | Homo<br>sapiens     |
| 1 | 1.00 | 1 | 1 | 0 | -0.002 | 0 | 0.004 | 0 | t | 108834 | CKPISGHN<br>SLFWYRQT         | Mus<br>musculu<br>s |
| 1 | 1.00 | 1 | 1 | 0 | 0      | 0 | 0.004 | 0 | t | 115674 | ADARM                        | Homo<br>sapiens     |
| 1 | 1.00 | 1 | 1 | 0 | 0      | 0 | 0.004 | 0 | t | 115591 | APEYRGRT<br>ELLK             | Homo<br>sapiens     |
| 1 | 1.00 | 1 | 1 | 0 | 0      | 0 | 0.004 | 0 | t | 115148 | KAVSEKKA<br>KGLGESRK<br>DKK  | Homo<br>sapiens     |
| 1 | 1.00 | 1 | 1 | 0 | 0      | 0 | 0.004 | 0 | t | 108125 | SHQESTRG<br>RSRGRSGR<br>SGS  | Homo<br>sapiens     |
| 1 | 1.00 | 1 | 1 | 0 | 0      | 0 | 0.004 | 0 | t | 113081 | LSYSHSDY<br>DLGKRPTK<br>DSYT | Homo<br>sapiens     |
| 1 | 1.00 | 1 | 1 | 0 | 0      | 0 | 0.004 | 0 | t | 115658 | VGWYRPP<br>FSRVV             | Homo<br>sapiens     |
| 1 | 1.00 | 1 | 1 | 0 | 0      | 0 | 0.004 | 0 | t | 115600 | DHSYQEEA<br>AMEL             | Homo<br>sapiens     |
| 1 | 1.00 | 1 | 1 | 0 | 0      | 0 | 0.004 | 0 | t | 115056 | GLSLSRFS<br>WGAEGQR<br>PGFG  | Homo<br>sapiens     |
| 1 | 1.00 | 1 | 1 | 0 | 0      | 0 | 0.004 | 0 | t | 115657 | TLRIRNVR<br>FSDE             | Homo<br>sapiens     |
| 1 | 1.00 | 1 | 1 | 0 | 0      | 0 | 0.004 | 0 | t | 74871  | YLPVGGLR<br>RIGG             | Homo<br>sapiens     |
| 1 | 1.00 | 1 | 1 | 0 | 0      | 0 | 0.004 | 0 | t | 65050  | TLRVYK                       | Homo<br>sapiens     |

|   |      |   |   |       |       |       |       |        |   |        |                           |                     |
|---|------|---|---|-------|-------|-------|-------|--------|---|--------|---------------------------|---------------------|
| 1 | 1.00 | 1 | 1 | 0     | 0     | 0     | 0.004 | 0      | t | 96211  | EDKKRKEE<br>EE            | Homo<br>sapiens     |
| 1 | 1.00 | 1 | 1 | 0     | 0     | 0     | 0.004 | 0      | t | 96455  | KGKNVLIN<br>KD            | Homo<br>sapiens     |
| 1 | 1.00 | 1 | 1 | 0     | 0     | 0     | 0.004 | 0      | t | 63098  | TCRRMLAF<br>LKDKENR       | Homo<br>sapiens     |
| 1 | 1.00 | 1 | 1 | 0     | 0     | 0     | 0.004 | 0      | t | 30661  | KEVPALTA<br>VETGAT        | Homo<br>sapiens     |
| 1 | 1.00 | 1 | 1 | 0     | 0     | 0     | 0.004 | 0      | t | 32159  | KLSEGDLL<br>AEIETDK       | Homo<br>sapiens     |
| 1 | 1.00 | 1 | 1 | 0     | 0     | 0     | 0.004 | 0      | t | 34833  | LAKLAGGV<br>AV            | Homo<br>sapiens     |
| 1 | 1.00 | 1 | 1 | 0     | 0     | 0     | 0.004 | 0      | t | 29197  | IVAGGGVT<br>LL            | Homo<br>sapiens     |
| 1 | 1.00 | 1 | 1 | 0     | 0     | 0     | 0.004 | 0      | t | 29342  | IVLGGGCA<br>LL            | Homo<br>sapiens     |
| 1 | 1.00 | 1 | 1 | 0     | 0     | 0     | 0.004 | 0      | t | 14426  | ETIGTLKKI<br>LDETVK       | Homo<br>sapiens     |
| 1 | 1.00 | 1 | 1 | 0     | 0     | 0     | 0.004 | 0      | t | 34836  | LAKLSDGV<br>AV            | Homo<br>sapiens     |
| 1 | 1.00 | 1 | 1 | 0     | 0     | 0     | 0.004 | 0      | t | 32159  | KLSEGDLL<br>AEIETDK       | Homo<br>sapiens     |
| 1 | 1.00 | 1 | 1 | 0     | 0     | 0     | 0.004 | 0      | t | 11081  | EAIPALTA<br>VETGHTSQ<br>V | Homo<br>sapiens     |
| 1 | 1.00 | 1 | 1 | 0     | 0     | 0     | 0.004 | 0      | t | 32159  | KLSEGDLL<br>AEIETDK       | Homo<br>sapiens     |
| 1 | 1.00 | 1 | 1 | 0     | 0     | 0     | 0.004 | 0      | t | 23171  | GVTLQAA<br>PT             | Homo<br>sapiens     |
| 1 | 1.00 | 1 | 1 | 0     | 0     | 0     | 0.004 | 0      | t | 8930   | DKLKQQR<br>DTLSTQKE<br>T  | Homo<br>sapiens     |
| 1 | 1.00 | 1 | 1 | 0.02  | 0.018 | 0.006 | 0.013 | 0.019  | t | 121071 | YAINSEQS<br>KE            | Mus<br>musculu<br>s |
| 1 | 1.00 | 1 | 1 | 0.02  | 0.022 | 0.02  | 0.023 | 0.019  | t | 104443 | DAEFRHDS<br>GYE           | Homo<br>sapiens     |
| 1 | 1.00 | 1 | 1 | -0.01 | -0.01 | -0.01 | -0.01 | -0.012 | t | 136392 | IPKSRKRRI<br>PQR          | Mus<br>musculu<br>s |

|   |      |   |   |       |        |        |        |       |   |        |                         |                                  |
|---|------|---|---|-------|--------|--------|--------|-------|---|--------|-------------------------|----------------------------------|
| 1 | 1.00 | 1 | 1 | 0.02  | 0.02   | 0.02   | 0.02   | 0.02  | t | 79383  | SCDVFLTM<br>FYPGCK      | Mus<br>musculu<br>s              |
| 1 | 1.00 | 1 | 1 | -0.01 | -0.007 | -0.017 | -0.01  | -0.01 | t | 153904 | VVEQLGH<br>ETQIHQIP     | Mus<br>musculu<br>s              |
| 1 | 1.00 | 1 | 1 | 0.03  | 0.034  | 0.03   | 0.031  | 0.03  | t | 134696 | ITLYLTEK                | MD                               |
| 1 | 1.00 | 1 | 1 | -0.03 | -0.03  | -0.036 | -0.036 | -0.03 | t | 35962  | LFRQFYQL<br>DA          | Homo<br>sapiens                  |
| 1 | 1.00 | 1 | 1 | -0.03 | -0.03  | -0.033 | -0.03  | -0.03 | t | 36991  | LKPIFKLPL<br>GINITNFR   | Homo<br>sapiens                  |
| 1 | 1.00 | 1 | 1 | -0.03 | -0.026 | -0.025 | -0.027 | -0.03 | t | 35193  | LDKAFHLL<br>L           | Homo<br>sapiens                  |
| 1 | 1.00 | 1 | 1 | -0.01 | -0.01  | -0.01  | -0.01  | -0.01 | t | 5780   | AYFYPELF<br>RQ          | Homo<br>sapiens                  |
| 1 | 1.00 | 1 | 1 | 0.01  | 0.01   | 0.01   | 0.01   | 0.01  | t | 133737 | VTPYFSYP<br>VA          | Mus<br>musculu<br>s              |
| 1 | 1.00 | 1 | 1 | 0     | 0.003  | -0.003 | 0      | 0.002 | t | 74068  | YGPQVDY                 | Mus<br>musculu<br>s              |
| 1 | 1.00 | 1 | 1 | 0.05  | 0.05   | 0.05   | 0.05   | 0.051 | t | 72534  | WHETDST<br>YFRLP        | Rattus<br>norvegic<br>us         |
| 1 | 1.00 | 1 | 1 | -0.02 | -0.02  | -0.021 | -0.014 | -0.02 | t | 65953  | TQTPVNG<br>NSPWAPT<br>A | Homo<br>sapiens                  |
| 1 | 1.00 | 1 | 1 | 0.01  | 0.01   | 0.008  | 0.01   | 0.009 | t | 65974  | TQYERE                  | Mus<br>musculu<br>s              |
| 1 | 1.00 | 1 | 1 | 0.06  | 0.056  | 0.058  | 0.063  | 0.058 | t | 95563  | LNTVNGTT<br>RTVN        | Oryctola<br>gus<br>cuniculu<br>s |
| 1 | 1.00 | 1 | 1 | 0.01  | 0.01   | 0.01   | 0.01   | 0.009 | t | 10801  | DWEDRY<br>RE            | Mus<br>musculu<br>s              |
| 1 | 1.00 | 1 | 1 | 0.02  | 0.02   | 0.02   | 0.027  | 0.022 | t | 125284 | TYICEVED<br>QKEE        | Mus<br>musculu<br>s              |

|   |      |   |   |       |        |        |        |        |   |        |                            |                                  |
|---|------|---|---|-------|--------|--------|--------|--------|---|--------|----------------------------|----------------------------------|
| 1 | 1.00 | 1 | 1 | -0.04 | -0.038 | -0.04  | -0.033 | -0.04  | t | 119913 | GSLDSLRR<br>EIEQMRR        | Homo<br>sapiens                  |
| 1 | 1.00 | 1 | 1 | -0.04 | -0.036 | -0.04  | -0.033 | -0.04  | t | 119913 | GSLDSLRR<br>EIEQMRR        | Homo<br>sapiens                  |
| 1 | 1.00 | 1 | 1 | -0.04 | -0.038 | -0.04  | -0.033 | -0.04  | t | 119913 | GSLDSLRR<br>EIEQMRR        | Homo<br>sapiens                  |
| 1 | 1.00 | 1 | 1 | 0.03  | 0.03   | 0.022  | 0.033  | 0.032  | t | 68900  | VIAEHQFK<br>E              | Homo<br>sapiens                  |
| 1 | 1.00 | 1 | 1 | -0.01 | -0.007 | -0.01  | -0.01  | -0.011 | t | 53634  | RESQAYYQ<br>R              | Mus<br>musculu<br>s              |
| 1 | 1.00 | 1 | 1 | 0.03  | 0.03   | 0.03   | 0.03   | 0.03   | t | 123225 | GGATPVV<br>G               | Oryctola<br>gus<br>cuniculu<br>s |
| 1 | 1.00 | 1 | 1 | 0.03  | 0.027  | 0.018  | 0.03   | 0.033  | t | 114142 | PQKSQRS<br>QDEN            | Oryctola<br>gus<br>cuniculu<br>s |
| 1 | 1.00 | 1 | 1 | 0.03  | 0.018  | 0.018  | 0.03   | 0.033  | t | 114142 | PQKSQRS<br>QDEN            | Macaca<br>mulatta                |
| 1 | 1.00 | 1 | 1 | 0.07  | 0.07   | 0.061  | 0.063  | 0.07   | t | 110884 | HEYMLDL<br>QPETTDLY<br>CYE | Homo<br>sapiens                  |
| 1 | 1.00 | 1 | 1 | 0.07  | 0.07   | 0.061  | 0.063  | 0.07   | t | 110884 | HEYMLDL<br>QPETTDLY<br>CYE | Homo<br>sapiens                  |
| 1 | 1.00 | 1 | 1 | 0.07  | 0.07   | 0.061  | 0.063  | 0.07   | t | 110884 | HEYMLDL<br>QPETTDLY<br>CYE | Homo<br>sapiens                  |
| 1 | 1.00 | 1 | 1 | 0.01  | 0.007  | 0.01   | 0.01   | 0.009  | t | 122289 | CSNSSSQ<br>FQIHGP          | Oryctola<br>gus<br>cuniculu<br>s |
| 1 | 1.00 | 1 | 1 | 0.02  | 0.018  | 0.02   | 0.017  | 0.017  | t | 922    | AEGEFDYA<br>WDQTHQ<br>DPAK | Mus<br>musculu<br>s              |
| 1 | 1.00 | 1 | 1 | -0.02 | -0.02  | -0.002 | -0.019 | -0.023 | t | 57860  | SFP                        | Mus<br>musculu<br>s              |
| 1 | 1.00 | 1 | 1 | -0.02 | -0.02  | -0.002 | -0.019 | -0.023 | t | 57860  | SFP                        | Mus<br>musculu<br>s              |



|   |      |   |   |       |        |        |        |        |   |        |                             |                       |
|---|------|---|---|-------|--------|--------|--------|--------|---|--------|-----------------------------|-----------------------|
| 1 | 1.00 | 1 | 1 | 0.01  | 0.01   | -0.01  | 0.01   | 0.012  | t | 20012  | GGSGGSV<br>ASGGSVAS         | Homo sapiens          |
| 1 | 1.00 | 1 | 1 | 0     | -0.002 | -0.005 | 0.001  | 0      | t | 107087 | ARGLTGRP<br>GDA             | Mus musculus          |
| 1 | 1.00 | 1 | 1 | -0.01 | -0.012 | -0.021 | -0.011 | -0.01  | t | 29897  | KANADAK<br>AAYEAAV<br>AANNA | Mus musculus          |
| 1 | 1.00 | 1 | 1 | 0.02  | 0.02   | 0.02   | 0.02   | 0.02   | t | 111351 | GLQPPPG<br>GTLED TYR        | Mus musculus          |
| 1 | 1.00 | 1 | 1 | 0.02  | 0.02   | 0.02   | 0.02   | 0.02   | t | 111351 | GLQPPPG<br>GTLED TYR        | Mus musculus          |
| 1 | 1.00 | 1 | 1 | 0.01  | 0.012  | 0.002  | 0.011  | 0.01   | t | 1460   | AGCLIGAE<br>HVDTSYEC<br>D   | Homo sapiens          |
| 1 | 1.00 | 1 | 1 | 0     | 0.002  | 0      | 0.003  | 0      | t | 28912  | ITGHRMA<br>WDMMM<br>NWSPTT  | Homo sapiens          |
| 1 | 1.00 | 1 | 1 | -0.04 | -0.04  | -0.047 | -0.049 | -0.043 | t | 130922 | KGMLPDP<br>KNV              | Homo sapiens          |
| 1 | 1.00 | 1 | 1 | -0.01 | -0.01  | -0.009 | -0.011 | -0.01  | t | 42633  | MSPVNKS<br>FEIEVTCS         | Homo sapiens          |
| 1 | 1.00 | 1 | 1 | 0     | 0.002  | -0.003 | 0      | 0.001  | t | 50621  | QEIPQPQ<br>W                | Anas platyrhynchos    |
| 1 | 1.00 | 1 | 1 | -0.02 | -0.02  | -0.008 | -0.014 | -0.021 | t | 109245 | GSAGAPGI                    | Rattus norvegicus     |
| 1 | 1.00 | 1 | 1 | 0.04  | 0.038  | 0.035  | 0.039  | 0.04   | t | 78876  | VLLGRKW<br>EDEVD DPE<br>SYF | Mus musculus          |
| 1 | 1.00 | 1 | 1 | 0.04  | 0.036  | 0.035  | 0.039  | 0.04   | t | 78876  | VLLGRKW<br>EDEVD DPE<br>SYF | Oryctolagus cuniculus |
| 1 | 1.00 | 1 | 1 | 0.03  | 0.032  | 0.039  | 0.037  | 0.031  | t | 122194 | STVQDCV                     | Homo sapiens          |

|   |      |   |   |       |        |        |        |        |   |        |                              |                                  |
|---|------|---|---|-------|--------|--------|--------|--------|---|--------|------------------------------|----------------------------------|
| 1 | 1.00 | 1 | 1 | -0.01 | -0.013 | -0.017 | -0.01  | -0.012 | t | 7313   | CVTIMTVD<br>NPASTTNK<br>DK   | Oryctola<br>gus<br>cuniculu<br>s |
| 1 | 1.00 | 1 | 1 | 0.04  | 0.04   | 0.04   | 0.04   | 0.04   | t | 103426 | MTLLELSD<br>FVKKFEE          | Homo<br>sapiens                  |
| 1 | 1.00 | 1 | 1 | 0.04  | 0.04   | 0.04   | 0.04   | 0.04   | t | 78177  | HVTDLDE<br>FL                | Mus<br>musculu<br>s              |
| 1 | 1.00 | 1 | 1 | 0     | 0      | 0      | 0      | -0.002 | t | 21408  | GNDYEDR<br>YYRENMY<br>RYPNQ  | Mus<br>musculu<br>s              |
| 1 | 1.00 | 1 | 1 | 0     | 0.002  | 0.002  | 0.007  | 0.003  | t | 119641 | SEHETRLV<br>AKLFKDYS         | Homo<br>sapiens                  |
| 1 | 1.00 | 1 | 1 | 0.03  | 0.034  | 0.027  | 0.027  | 0.027  | t | 115485 | SGEPTSTP<br>TTEAVEST<br>VATL | Homo<br>sapiens                  |
| 1 | 1.00 | 1 | 1 | 0.01  | 0.01   | 0.01   | 0.01   | 0.01   | t | 113779 | QQPGQG<br>QQ                 | Homo<br>sapiens                  |
| 1 | 1.00 | 1 | 1 | 0.01  | 0.01   | 0.01   | 0.01   | 0.01   | t | 113779 | QQPGQG<br>QQ                 | Homo<br>sapiens                  |
| 1 | 1.00 | 1 | 1 | 0     | 0      | -0.009 | -0.003 | -0.001 | t | 110828 | EIDGPAGQ<br>AEPDRAH<br>YNI   | Mus<br>musculu<br>s              |
| 1 | 1.00 | 1 | 1 | -0.02 | -0.02  | -0.02  | -0.02  | -0.021 | t | 97020  | TVTRGTIS<br>DP               | Oryctola<br>gus<br>cuniculu<br>s |
| 1 | 1.00 | 1 | 1 | -0.02 | -0.018 | -0.015 | -0.013 | -0.023 | t | 131898 | GRPLSVQ<br>QQMMMQ<br>SR      | Homo<br>sapiens                  |
| 1 | 1.00 | 1 | 1 | -0.02 | -0.022 | -0.029 | -0.017 | -0.017 | t | 115540 | VKNKRTFL<br>SPWISNI          | Mus<br>musculu<br>s              |
| 1 | 1.00 | 1 | 1 | 0.1   | 0.1    | 0.098  | 0.1    | 0.101  | t | 114234 | TQDENP                       | Mus<br>musculu<br>s              |
| 1 | 1.00 | 1 | 1 | -0.02 | -0.018 | -0.015 | -0.013 | -0.021 | t | 129659 | PTQYPPGR                     | Homo<br>sapiens                  |

|   |      |   |   |       |        |        |        |        |   |        |                             |                                  |
|---|------|---|---|-------|--------|--------|--------|--------|---|--------|-----------------------------|----------------------------------|
| 1 | 1.00 | 1 | 1 | 0.02  | 0.022  | 0.013  | 0.023  | 0.02   | t | 69049  | VINMSLG<br>GPSGSAAAL        | Cavia<br>porcellu<br>s           |
| 1 | 1.00 | 1 | 1 | -0.03 | -0.032 | -0.033 | -0.031 | -0.03  | t | 75661  | YRPPNAPI<br>L               | Mus<br>musculu<br>s              |
| 1 | 1.00 | 1 | 1 | 0.02  | 0.02   | 0.017  | 0.02   | 0.02   | t | 50307  | QALIDQKV<br>KEISNQ          | Homo<br>sapiens                  |
| 1 | 1.00 | 1 | 1 | 0.02  | 0.022  | 0.013  | 0.023  | 0.021  | t | 122377 | GLPRLETP<br>ADLSTAIA<br>SRS | Homo<br>sapiens                  |
| 1 | 1.00 | 1 | 1 | 0.01  | 0.008  | 0.004  | 0.007  | 0.01   | t | 36444  | LHYTAVVK<br>KSSAV           | Mus<br>musculu<br>s              |
| 1 | 1.00 | 1 | 1 | -0.01 | -0.008 | -0.015 | -0.009 | -0.011 | t | 56804  | SAGRSTGS<br>LVRLFAPG        | Homo<br>sapiens                  |
| 1 | 1.00 | 1 | 1 | -0.01 | -0.01  | -0.01  | -0.01  | -0.012 | t | 152777 | LLNIDKDIR<br>K              | Homo<br>sapiens                  |
| 1 | 1.00 | 1 | 1 | 0.03  | 0.03   | 0.03   | 0.03   | 0.03   | t | 147290 | SKSYTSILY<br>GNP            | Homo<br>sapiens                  |
| 1 | 1.00 | 1 | 1 | 0.03  | 0.03   | 0.03   | 0.03   | 0.03   | t | 103687 | VCAVDMP<br>YLTVELIE         | Homo<br>sapiens                  |
| 1 | 1.00 | 1 | 1 | 0.01  | 0.01   | 0.01   | 0.01   | 0.01   | t | 112336 | SSQSVLY                     | Homo<br>sapiens                  |
| 1 | 1.00 | 1 | 1 | -0.05 | -0.052 | -0.067 | -0.053 | -0.049 | t | 35956  | LFREDGSA<br>CR              | Mus<br>musculu<br>s              |
| 1 | 1.00 | 1 | 1 | 0     | 0      | -0.005 | 0      | 0      | t | 95414  | GLDLNVN<br>VFR              | Oryctola<br>gus<br>cuniculu<br>s |
| 1 | 1.00 | 1 | 1 | -0.02 | -0.018 | -0.016 | -0.013 | -0.019 | t | 144697 | IYRNLYWE<br>GS              | Homo<br>sapiens                  |
| 1 | 1.00 | 1 | 1 | 0     | 0      | 0      | 0.001  | -0.001 | t | 60116  | SPLLGCIGS<br>TCAE           | Mus<br>musculu<br>s              |
| 1 | 1.00 | 1 | 1 | 0     | 0      | 0      | 0      | 0      | t | 153837 | HGRLVTLK<br>DIVLDLQP        | Cavia<br>porcellu<br>s           |

|   |      |   |   |       |        |        |        |        |   |        |                         |                                  |
|---|------|---|---|-------|--------|--------|--------|--------|---|--------|-------------------------|----------------------------------|
| 1 | 1.00 | 1 | 1 | 0     | 0      | 0      | 0      | 0      | t | 153837 | HGRLVTLK<br>DIVLDLQP    | Cavia<br>porcellu<br>s           |
| 1 | 1.00 | 1 | 1 | 0.03  | 0.03   | 0.032  | 0.03   | 0.029  | t | 119845 | ESDQPDL<br>NFMESGE<br>W | Oryctola<br>gus<br>cuniculu<br>s |
| 1 | 1.00 | 1 | 1 | 0.03  | 0.027  | 0.032  | 0.03   | 0.029  | t | 119845 | ESDQPDL<br>NFMESGE<br>W | Oryctola<br>gus<br>cuniculu<br>s |
| 1 | 1.00 | 1 | 1 | 0.03  | 0.03   | 0.032  | 0.03   | 0.029  | t | 119845 | ESDQPDL<br>NFMESGE<br>W | Mus<br>musculu<br>s              |
| 1 | 1.00 | 1 | 1 | 0.03  | 0.032  | 0.032  | 0.03   | 0.029  | t | 119845 | ESDQPDL<br>NFMESGE<br>W | Rattus<br>norvegic<br>us         |
| 1 | 1.00 | 1 | 1 | 0.03  | 0.03   | 0.032  | 0.03   | 0.029  | t | 119845 | ESDQPDL<br>NFMESGE<br>W | Mus<br>musculu<br>s              |
| 1 | 1.00 | 1 | 1 | 0.03  | 0.033  | 0.032  | 0.03   | 0.029  | t | 119845 | ESDQPDL<br>NFMESGE<br>W | Mus<br>musculu<br>s              |
| 1 | 1.00 | 1 | 1 | -0.01 | -0.01  | -0.01  | -0.01  | -0.01  | t | 60795  | SRSEER                  | Homo<br>sapiens                  |
| 1 | 1.00 | 1 | 1 | -0.02 | -0.017 | -0.015 | -0.02  | -0.022 | t | 19626  | GFTDRAF<br>WVCPGVV<br>C | Mus<br>musculu<br>s              |
| 1 | 1.00 | 1 | 1 | 0     | -0.002 | 0.005  | -0.001 | 0      | t | 70162  | VNPTYGN                 | Mus<br>musculu<br>s              |
| 1 | 1.00 | 1 | 1 | -0.02 | -0.02  | -0.02  | -0.023 | -0.021 | t | 66932  | TVAEEHV                 | Homo<br>sapiens                  |
| 1 | 1.00 | 1 | 1 | -0.03 | -0.028 | -0.037 | -0.027 | -0.029 | t | 144816 | WSHNFTN<br>MLG          | Homo<br>sapiens                  |
| 1 | 1.00 | 1 | 1 | -0.03 | -0.028 | -0.025 | -0.023 | -0.031 | t | 126757 | NKPLITVT<br>NSKY        | Homo<br>sapiens                  |
| 1 | 1.00 | 1 | 1 | 0.06  | 0.06   | 0.06   | 0.06   | 0.058  | t | 99945  | DIRDLSSEE<br>E          | Mus<br>musculu<br>s              |

|   |      |   |   |       |        |        |        |        |   |        |                              |                     |
|---|------|---|---|-------|--------|--------|--------|--------|---|--------|------------------------------|---------------------|
| 1 | 1.00 | 1 | 1 | 0     | -0.002 | 0      | 0.003  | -0.001 | t | 122406 | IEIGLEGKG<br>FEPTLEALF<br>GK | Mus<br>musculu<br>s |
| 1 | 1.00 | 1 | 1 | 0     | 0      | 0      | 0      | 0      | t | 102371 | DSVFYLDN<br>LLPSTLDYF<br>TYL | Mus<br>musculu<br>s |
| 1 | 1.00 | 1 | 1 | -0.02 | -0.018 | -0.02  | -0.017 | -0.018 | t | 133638 | LTSRPA                       | Homo<br>sapiens     |
| 1 | 1.00 | 1 | 1 | 0.01  | 0.01   | 0.012  | 0.013  | 0.011  | t | 139499 | FGEFSFQY<br>DCSSWGC          | Homo<br>sapiens     |
| 1 | 1.00 | 1 | 1 | 0.01  | 0.01   | 0.015  | 0.01   | 0.01   | t | 56273  | RVEFLV                       | Homo<br>sapiens     |
| 1 | 1.00 | 1 | 1 | 0.01  | 0.01   | 0.01   | 0.01   | 0.006  | t | 151731 | SAQSQRA<br>PDR               | Mus<br>musculu<br>s |
| 1 | 1.00 | 1 | 1 | -0.01 | -0.01  | -0.01  | -0.01  | -0.01  | t | 156909 | LAHPFTP                      | Gallus<br>gallus    |
| 1 | 1.00 | 1 | 1 | -0.01 | -0.01  | -0.01  | -0.01  | -0.01  | t | 106780 | RKYFG                        | Homo<br>sapiens     |
| 1 | 1.00 | 1 | 1 | 0.04  | 0.033  | 0.036  | 0.04   | 0.04   | t | 55627  | RRKLTNPA<br>NKEES            | Mus                 |
| 1 | 1.00 | 1 | 1 | 0.02  | 0.018  | 0.02   | 0.019  | 0.02   | t | 1109   | AENSAPTA                     | Mus<br>musculu<br>s |
| 1 | 1.00 | 1 | 1 | -0.01 | -0.008 | -0.015 | -0.007 | -0.01  | t | 20391  | GIPDGWP                      | Felis<br>catus      |
| 1 | 1.00 | 1 | 1 | 0.05  | 0.05   | 0.048  | 0.049  | 0.052  | t | 153265 | ILETLPANP<br>PPASTN          | Mus<br>musculu<br>s |
| 1 | 1.00 | 1 | 1 | -0.01 | -0.008 | -0.007 | -0.007 | -0.01  | t | 94613  | NNPTCWA<br>ICKRI             | Homo<br>sapiens     |
| 1 | 1.00 | 1 | 1 | -0.01 | -0.01  | -0.007 | -0.01  | -0.008 | t | 14907  | EVWVTPVI                     | Homo<br>sapiens     |

|   |      |   |   |       |        |        |        |        |   |        |                      |                       |
|---|------|---|---|-------|--------|--------|--------|--------|---|--------|----------------------|-----------------------|
| 1 | 1.00 | 1 | 1 | 0.02  | 0.022  | 0.017  | 0.02   | 0.02   | t | 46165  | NTLQNQGA             | Anas platyrhynchos    |
| 1 | 1.00 | 1 | 1 | 0     | -0.003 | 0      | 0      | -0.001 | t | 32889  | KPTDG                | Oryctolagus cuniculus |
| 1 | 1.00 | 1 | 1 | 0.03  | 0.03   | 0.03   | 0.03   | 0.029  | t | 95300  | DALNEN               | Homo sapiens          |
| 1 | 1.00 | 1 | 1 | 0.01  | 0.01   | 0.01   | 0.01   | 0.008  | t | 10853  | DYAWDQTHQ            | Mus musculus          |
| 1 | 1.00 | 1 | 1 | 0.03  | 0.032  | 0.024  | 0.027  | 0.028  | t | 6722   | CNRAFNPVCGTDGVTYDN   | Homo sapiens          |
| 1 | 1.00 | 1 | 1 | 0.01  | 0.013  | 0.01   | 0.01   | 0.011  | t | 41233  | MDIDPYKEFGA          | Mus musculus          |
| 1 | 1.00 | 1 | 1 | 0.02  | 0.02   | 0.02   | 0.02   | 0.02   | t | 156877 | GLHSGIQ              | Gallus gallus         |
| 1 | 1.00 | 1 | 1 | 0.03  | 0.03   | 0.03   | 0.03   | 0.03   | t | 118824 | GRRPFFHPVGEADYFEYHQE | Homo sapiens          |
| 1 | 1.00 | 1 | 1 | 0.03  | 0.03   | 0.03   | 0.03   | 0.03   | t | 118824 | GRRPFFHPVGEADYFEYHQE | Homo sapiens          |
| 1 | 1.00 | 1 | 1 | 0     | 0      | -0.011 | 0      | 0      | t | 38753  | LPVGQIRNVPHPFVA      | Mus musculus          |
| 1 | 1.00 | 1 | 1 | 0     | 0.002  | 0      | 0.001  | 0      | t | 63831  | TGGAAAR              | Homo sapiens          |
| 1 | 1.00 | 1 | 1 | -0.02 | -0.022 | -0.02  | -0.023 | -0.02  | t | 122138 | LKKDV                | Mus musculus          |
| 1 | 1.00 | 1 | 1 | 0.01  | 0.008  | -0.009 | 0.013  | 0.013  | t | 33450  | KSNAATSYINAIINSKSVSD | Rattus norvegicus     |
| 1 | 1.00 | 1 | 1 | 0.01  | 0.006  | 0.004  | 0.013  | 0.012  | t | 12259  | EGRFSQDAD            | Oryctolagus cuniculus |
| 1 | 1.00 | 1 | 1 | 0.02  | 0.02   | 0.017  | 0.023  | 0.02   | t | 78845  | TATKQAEA AAPVVESKWRA | Homo sapiens          |

|   |      |   |   |       |        |        |        |        |   |        |                           |                       |
|---|------|---|---|-------|--------|--------|--------|--------|---|--------|---------------------------|-----------------------|
| 1 | 1.00 | 1 | 1 | 0.01  | 0.012  | 0.008  | 0.017  | 0.01   | t | 6918   | CRFPNITN<br>SHVPILQE      | Homo sapiens          |
| 1 | 1.00 | 1 | 1 | 0     | 0.002  | 0      | 0.003  | 0      | t | 42696  | MSTNPKP<br>QRKTKRNT       | Homo sapiens          |
| 1 | 1.00 | 1 | 1 | 0     | -0.002 | -0.012 | -0.003 | 0      | t | 79867  | INNLEVELI<br>RGT          | Mus musculus          |
| 1 | 1.00 | 1 | 1 | 0.03  | 0.035  | 0.037  | 0.03   | 0.028  | t | 132869 | LSPLGEEM                  | Mus musculus          |
| 1 | 1.00 | 1 | 1 | -0.03 | -0.028 | -0.03  | -0.023 | -0.029 | t | 131075 | SQSYPEPA<br>RGSVPMP       | Homo sapiens          |
| 1 | 1.00 | 1 | 1 | -0.02 | -0.02  | -0.032 | -0.02  | -0.02  | t | 159035 | NRFEHQM<br>WESVRDE<br>LN  | Mus musculus          |
| 1 | 1.00 | 1 | 1 | -0.01 | -0.01  | -0.015 | -0.01  | -0.01  | t | 125055 | FVYGGCQ<br>GNN            | Mus musculus          |
| 1 | 1.00 | 1 | 1 | 0.02  | 0.018  | 0.02   | 0.019  | 0.02   | t | 75151  | YNGEEYLIL<br>S            | Mus musculus          |
| 1 | 1.00 | 1 | 1 | -0.01 | -0.01  | -0.01  | -0.013 | -0.01  | t | 26619  | IIPDREVLV                 | Homo sapiens          |
| 1 | 1.00 | 1 | 1 | 0.01  | 0.009  | 0.003  | 0.01   | 0.01   | t | 25654  | IDQLTADK<br>AKADAELA<br>A | Equus caballus        |
| 1 | 1.00 | 1 | 1 | 0     | 0      | 0      | 0      | -0.002 | t | 136686 | TLHDMGIF<br>SITSSDS       | Mus musculus          |
| 1 | 1.00 | 1 | 1 | 0     | 0      | 0      | 0      | -0.002 | t | 147083 | LCSEYRNT<br>QIYTIN        | Oryctolagus cuniculus |
| 1 | 1.00 | 1 | 1 | 0     | 0      | 0      | 0      | -0.002 | t | 134333 | CIPIPSSW<br>AFARFLW       | Homo sapiens          |
| 1 | 1.00 | 1 | 1 | 0     | 0      | 0      | 0      | -0.002 | t | 151816 | CLTSQAAK<br>QRLE          | Sus scrofa            |
| 1 | 1.00 | 1 | 1 | 0     | 0      | 0      | 0      | -0.002 | t | 150200 | FGEHKQEK<br>DLEYGAC       | Mus musculus          |

|   |      |   |   |   |   |   |   |        |   |        |                            |                       |
|---|------|---|---|---|---|---|---|--------|---|--------|----------------------------|-----------------------|
| 1 | 1.00 | 1 | 1 | 0 | 0 | 0 | 0 | -0.002 | t | 140033 | HDFR                       | Homo sapiens          |
| 1 | 1.00 | 1 | 1 | 0 | 0 | 0 | 0 | -0.002 | t | 136686 | TLHDMGIF<br>SITSSDS        | Mus musculus          |
| 1 | 1.00 | 1 | 1 | 0 | 0 | 0 | 0 | -0.002 | t | 151609 | DETPMRG<br>ETRKV           | Homo sapiens          |
| 1 | 1.00 | 1 | 1 | 0 | 0 | 0 | 0 | -0.002 | t | 152057 | QAARQRL<br>EPGRN           | Sus scrofa            |
| 1 | 1.00 | 1 | 1 | 0 | 0 | 0 | 0 | -0.002 | t | 140256 | KYEQGGNI<br>ID             | Mus musculus          |
| 1 | 1.00 | 1 | 1 | 0 | 0 | 0 | 0 | -0.002 | t | 136686 | TLHDMGIF<br>SITSSDS        | Mus musculus          |
| 1 | 1.00 | 1 | 1 | 0 | 0 | 0 | 0 | -0.002 | t | 140479 | KHGLLSM                    | Mus musculus          |
| 1 | 1.00 | 1 | 1 | 0 | 0 | 0 | 0 | -0.002 | t | 151817 | CLTSQAAS<br>QRLE           | Sus scrofa            |
| 1 | 1.00 | 1 | 1 | 0 | 0 | 0 | 0 | -0.002 | t | 138840 | DREQAPN<br>LVYM            | Mus musculus          |
| 1 | 1.00 | 1 | 1 | 0 | 0 | 0 | 0 | -0.002 | t | 134702 | KEKKYS                     | Mus musculus          |
| 1 | 1.00 | 1 | 1 | 0 | 0 | 0 | 0 | -0.002 | t | 141963 | MVDRGW<br>G                | Mus musculus          |
| 1 | 1.00 | 1 | 1 | 0 | 0 | 0 | 0 | -0.002 | t | 140026 | FVFNKLD<br>MFSRANR<br>KRKA | Oryctolagus cuniculus |
| 1 | 1.00 | 1 | 1 | 0 | 0 | 0 | 0 | -0.002 | t | 136315 | GGGTGPA<br>DGTNATTI        | Mus musculus          |
| 1 | 1.00 | 1 | 1 | 0 | 0 | 0 | 0 | -0.002 | t | 140479 | KHGLLSM                    | Mus musculus          |
| 1 | 1.00 | 1 | 1 | 0 | 0 | 0 | 0 | -0.002 | t | 141786 | YGEESRR<br>GDLAALAR<br>RV  | Mus musculus          |
| 1 | 1.00 | 1 | 1 | 0 | 0 | 0 | 0 | -0.002 | t | 141726 | PTAPPLLP<br>HS             | Rattus norvegicus     |



|   |      |   |   |   |   |   |   |        |   |        |                              |                                  |
|---|------|---|---|---|---|---|---|--------|---|--------|------------------------------|----------------------------------|
| 1 | 1.00 | 1 | 1 | 0 | 0 | 0 | 0 | -0.002 | t | 134767 | QDPYVKE<br>AENLKKYF<br>NAG   | Mus<br>musculu<br>s              |
| 1 | 1.00 | 1 | 1 | 0 | 0 | 0 | 0 | -0.002 | t | 140258 | KYEQGGNI<br>VD               | Mus<br>musculu<br>s              |
| 1 | 1.00 | 1 | 1 | 0 | 0 | 0 | 0 | -0.002 | t | 140488 | MSLLGHK                      | Mus<br>musculu<br>s              |
| 1 | 1.00 | 1 | 1 | 0 | 0 | 0 | 0 | -0.002 | t | 150163 | DGYPTFGE<br>HKQEKDL          | Mus<br>musculu<br>s              |
| 1 | 1.00 | 1 | 1 | 0 | 0 | 0 | 0 | -0.002 | t | 137759 | NQEDAEAI<br>THLF             | Mus<br>musculu<br>s              |
| 1 | 1.00 | 1 | 1 | 0 | 0 | 0 | 0 | -0.002 | t | 136686 | TLHDMGIF<br>SITSSDS          | Mus<br>musculu<br>s              |
| 1 | 1.00 | 1 | 1 | 0 | 0 | 0 | 0 | -0.002 | t | 152903 | PYSDFEKV<br>TGRIDKNV         | Homo<br>sapiens                  |
| 1 | 1.00 | 1 | 1 | 0 | 0 | 0 | 0 | -0.002 | t | 153251 | AKAFSYW<br>TPFDGKSL<br>YSST  | Mus<br>musculu<br>s              |
| 1 | 1.00 | 1 | 1 | 0 | 0 | 0 | 0 | -0.002 | t | 134685 | GVSSYMK<br>VSICLPMD<br>VE    | Oryctola<br>gus<br>cuniculu<br>s |
| 1 | 1.00 | 1 | 1 | 0 | 0 | 0 | 0 | -0.002 | t | 152917 | QLPELKQK<br>SSNSRKKR<br>STSA | Homo<br>sapiens                  |
| 1 | 1.00 | 1 | 1 | 0 | 0 | 0 | 0 | -0.002 | t | 149403 | PCKSNT                       | Mus<br>musculu<br>s              |
| 1 | 1.00 | 1 | 1 | 0 | 0 | 0 | 0 | -0.002 | t | 136353 | HGNAEVH<br>ASFFDIGG<br>S     | Oryctola<br>gus<br>cuniculu<br>s |
| 1 | 1.00 | 1 | 1 | 0 | 0 | 0 | 0 | -0.002 | t | 145725 | CKQAGTC<br>PP                | Mus<br>musculu<br>s              |
| 1 | 1.00 | 1 | 1 | 0 | 0 | 0 | 0 | -0.002 | t | 135576 | LRYSTGTV<br>SG               | Oryctola<br>gus<br>cuniculu<br>s |
| 1 | 1.00 | 1 | 1 | 0 | 0 | 0 | 0 | -0.002 | t | 140258 | KYEQGGNI<br>VD               | Mus<br>musculu<br>s              |

|   |      |   |   |   |   |   |   |        |   |        |                             |                                  |
|---|------|---|---|---|---|---|---|--------|---|--------|-----------------------------|----------------------------------|
| 1 | 1.00 | 1 | 1 | 0 | 0 | 0 | 0 | -0.002 | t | 137180 | GVSAAQE<br>KISFG            | Sus<br>scrofa                    |
| 1 | 1.00 | 1 | 1 | 0 | 0 | 0 | 0 | -0.002 | t | 140489 | MSQDGHT                     | Mus<br>musculu<br>s              |
| 1 | 1.00 | 1 | 1 | 0 | 0 | 0 | 0 | -0.002 | t | 146337 | IPEEIKQL                    | Mus<br>musculu<br>s              |
| 1 | 1.00 | 1 | 1 | 0 | 0 | 0 | 0 | -0.002 | t | 140507 | TKTWQSM                     | Mus<br>musculu<br>s              |
| 1 | 1.00 | 1 | 1 | 0 | 0 | 0 | 0 | -0.002 | t | 138047 | SSKPVSY                     | Mus<br>musculu<br>s              |
| 1 | 1.00 | 1 | 1 | 0 | 0 | 0 | 0 | -0.002 | t | 141523 | ALEPPHNL<br>PVP             | Mus<br>musculu<br>s              |
| 1 | 1.00 | 1 | 1 | 0 | 0 | 0 | 0 | -0.002 | t | 135586 | PFMLAQF<br>DG               | Oryctola<br>gus<br>cuniculu<br>s |
| 1 | 1.00 | 1 | 1 | 0 | 0 | 0 | 0 | -0.002 | t | 136315 | GGGTGPA<br>DGTNATTI         | Mus<br>musculu<br>s              |
| 1 | 1.00 | 1 | 1 | 0 | 0 | 0 | 0 | -0.002 | t | 141622 | DPNGWTG<br>TDNNFSI          | Oryctola<br>gus<br>cuniculu<br>s |
| 1 | 1.00 | 1 | 1 | 0 | 0 | 0 | 0 | -0.002 | t | 150204 | FHSVHTL<br>LEWLMEK<br>ELMV  | Mus<br>musculu<br>s              |
| 1 | 1.00 | 1 | 1 | 0 | 0 | 0 | 0 | -0.002 | t | 137284 | RTNTTQG<br>KVPSQ            | Sus<br>scrofa                    |
| 1 | 1.00 | 1 | 1 | 0 | 0 | 0 | 0 | -0.002 | t | 150858 | ISSLYNLVK<br>SS             | Mus<br>musculu<br>s              |
| 1 | 1.00 | 1 | 1 | 0 | 0 | 0 | 0 | -0.002 | t | 145841 | KEDFRYAIS<br>STNEIGLLG<br>A | Sus<br>scrofa                    |
| 1 | 1.00 | 1 | 1 | 0 | 0 | 0 | 0 | -0.002 | t | 151601 | ADLSLEKA<br>ANVQWD<br>E     | Homo<br>sapiens                  |
| 1 | 1.00 | 1 | 1 | 0 | 0 | 0 | 0 | -0.002 | t | 143362 | ETPLMKE                     | Mus<br>musculu<br>s              |
| 1 | 1.00 | 1 | 1 | 0 | 0 | 0 | 0 | -0.002 | t | 140254 | KYEHGGNI<br>ID              | Mus<br>musculu<br>s              |

|   |      |   |   |   |   |   |   |        |   |        |                              |                                  |
|---|------|---|---|---|---|---|---|--------|---|--------|------------------------------|----------------------------------|
| 1 | 1.00 | 1 | 1 | 0 | 0 | 0 | 0 | -0.002 | t | 134337 | CYCQDPYV<br>KEAENLKK<br>YFNA | Oryctola<br>gus<br>cuniculu<br>s |
| 1 | 1.00 | 1 | 1 | 0 | 0 | 0 | 0 | -0.002 | t | 140510 | TTTHFLAT<br>KFYK             | Mus<br>musculu<br>s              |
| 1 | 1.00 | 1 | 1 | 0 | 0 | 0 | 0 | -0.002 | t | 136341 | GTTMPLH<br>AAPHS             | Homo<br>sapiens                  |
| 1 | 1.00 | 1 | 1 | 0 | 0 | 0 | 0 | -0.002 | t | 145704 | AEGLT<br>TTWKDYDHN<br>LQ     | Sus<br>scrofa                    |
| 1 | 1.00 | 1 | 1 | 0 | 0 | 0 | 0 | -0.002 | t | 134418 | KGAIIGLM<br>VGGVV            | Homo<br>sapiens                  |
| 1 | 1.00 | 1 | 1 | 0 | 0 | 0 | 0 | -0.002 | t | 136315 | GGGTGPA<br>DGTNATTI          | Mus<br>musculu<br>s              |
| 1 | 1.00 | 1 | 1 | 0 | 0 | 0 | 0 | -0.002 | t | 143362 | ETPLMKE                      | Mus<br>musculu<br>s              |
| 1 | 1.00 | 1 | 1 | 0 | 0 | 0 | 0 | -0.002 | t | 141620 | DNPRPND<br>KTGS              | Oryctola<br>gus<br>cuniculu<br>s |
| 1 | 1.00 | 1 | 1 | 0 | 0 | 0 | 0 | -0.002 | t | 135572 | LLCEDGCL<br>AL               | Oryctola<br>gus<br>cuniculu<br>s |
| 1 | 1.00 | 1 | 1 | 0 | 0 | 0 | 0 | -0.002 | t | 140167 | AYNNGQEI<br>NGFKA            | Oryctola<br>gus<br>cuniculu<br>s |
| 1 | 1.00 | 1 | 1 | 0 | 0 | 0 | 0 | -0.002 | t | 145831 | IPLGTRP                      | Mus<br>musculu<br>s              |
| 1 | 1.00 | 1 | 1 | 0 | 0 | 0 | 0 | -0.002 | t | 140461 | EVSLHDM<br>NLATH             | Mus<br>musculu<br>s              |
| 1 | 1.00 | 1 | 1 | 0 | 0 | 0 | 0 | -0.002 | t | 152777 | LLNIDKDIR<br>K               | Homo<br>sapiens                  |
| 1 | 1.00 | 1 | 1 | 0 | 0 | 0 | 0 | -0.002 | t | 149989 | TRNSSKPA<br>KRKKIKA          | Oryctola<br>gus<br>cuniculu<br>s |
| 1 | 1.00 | 1 | 1 | 0 | 0 | 0 | 0 | -0.002 | t | 140378 | TAEETKQ                      | Oryctola<br>gus<br>cuniculu<br>s |

|   |      |   |   |   |   |   |   |        |   |        |                              |                                  |
|---|------|---|---|---|---|---|---|--------|---|--------|------------------------------|----------------------------------|
| 1 | 1.00 | 1 | 1 | 0 | 0 | 0 | 0 | -0.002 | t | 136749 | WMLRAAE<br>EYSMNLG<br>F      | Mus<br>musculu<br>s              |
| 1 | 1.00 | 1 | 1 | 0 | 0 | 0 | 0 | -0.002 | t | 136749 | WMLRAAE<br>EYSMNLG<br>F      | Mus<br>musculu<br>s              |
| 1 | 1.00 | 1 | 1 | 0 | 0 | 0 | 0 | -0.002 | t | 134860 | AGPKAQV<br>EAIQKY            | Mus<br>musculu<br>s              |
| 1 | 1.00 | 1 | 1 | 0 | 0 | 0 | 0 | -0.002 | t | 134335 | CTKPSDGN<br>CT               | Homo<br>sapiens                  |
| 1 | 1.00 | 1 | 1 | 0 | 0 | 0 | 0 | -0.002 | t | 134478 | PSCCCTKP<br>SD               | Homo<br>sapiens                  |
| 1 | 1.00 | 1 | 1 | 0 | 0 | 0 | 0 | -0.002 | t | 141706 | MLEPFQIL                     | Mus<br>musculu<br>s              |
| 1 | 1.00 | 1 | 1 | 0 | 0 | 0 | 0 | -0.002 | t | 139725 | EMRTRIRY<br>NRRS             | Mus<br>musculu<br>s              |
| 1 | 1.00 | 1 | 1 | 0 | 0 | 0 | 0 | -0.002 | t | 145827 | IIPKVEGK                     | Mus<br>musculu<br>s              |
| 1 | 1.00 | 1 | 1 | 0 | 0 | 0 | 0 | -0.002 | t | 134557 | TCTIPAQG<br>TSMFPSC          | Homo<br>sapiens                  |
| 1 | 1.00 | 1 | 1 | 0 | 0 | 0 | 0 | -0.002 | t | 140381 | TKTVNENK<br>QNVDKVK<br>A     | Oryctola<br>gus<br>cuniculu<br>s |
| 1 | 1.00 | 1 | 1 | 0 | 0 | 0 | 0 | -0.002 | t | 136827 | DFGSVGG<br>VL                | Mus<br>musculu<br>s              |
| 1 | 1.00 | 1 | 1 | 0 | 0 | 0 | 0 | -0.002 | t | 140247 | KAAESEIEK<br>LTTK            | Oryctola<br>gus<br>cuniculu<br>s |
| 1 | 1.00 | 1 | 1 | 0 | 0 | 0 | 0 | -0.002 | t | 134337 | CYCQDPYV<br>KEAENLKK<br>YFNA | Oryctola<br>gus<br>cuniculu<br>s |
| 1 | 1.00 | 1 | 1 | 0 | 0 | 0 | 0 | -0.002 | t | 150108 | AGGTGTE<br>DSHPYKQ           | Mus<br>musculu<br>s              |
| 1 | 1.00 | 1 | 1 | 0 | 0 | 0 | 0 | -0.002 | t | 137401 | FEDVW                        | Mus<br>musculu<br>s              |
| 1 | 1.00 | 1 | 1 | 0 | 0 | 0 | 0 | -0.002 | t | 151895 | GSPSQDG<br>YWSFF             | Sus<br>scrofa                    |

|   |      |   |   |   |   |   |   |        |   |        |                              |                          |
|---|------|---|---|---|---|---|---|--------|---|--------|------------------------------|--------------------------|
| 1 | 1.00 | 1 | 1 | 0 | 0 | 0 | 0 | -0.002 | t | 141761 | TAPPLPH<br>SNLD              | Rattus<br>norvegicus     |
| 1 | 1.00 | 1 | 1 | 0 | 0 | 0 | 0 | -0.002 | t | 150850 | GY                           | Mus<br>musculus          |
| 1 | 1.00 | 1 | 1 | 0 | 0 | 0 | 0 | -0.002 | t | 136315 | GGGTGPA<br>DGTNATTI          | Mus<br>musculus          |
| 1 | 1.00 | 1 | 1 | 0 | 0 | 0 | 0 | -0.002 | t | 141760 | TAPPLPH                      | Rattus<br>norvegicus     |
| 1 | 1.00 | 1 | 1 | 0 | 0 | 0 | 0 | -0.002 | t | 151713 | RGEARK                       | Homo<br>sapiens          |
| 1 | 1.00 | 1 | 1 | 0 | 0 | 0 | 0 | -0.002 | t | 149247 | AEQQWAL<br>YADGSIRP<br>Q     | Mus<br>musculus          |
| 1 | 1.00 | 1 | 1 | 0 | 0 | 0 | 0 | -0.002 | t | 141758 | SWRNNILR<br>TQES             | Oryctolagus<br>cuniculus |
| 1 | 1.00 | 1 | 1 | 0 | 0 | 0 | 0 | -0.002 | t | 135587 | QESYSSKK<br>L                | Oryctolagus<br>cuniculus |
| 1 | 1.00 | 1 | 1 | 0 | 0 | 0 | 0 | -0.002 | t | 138097 | YPYPLIS                      | Mus<br>musculus          |
| 1 | 1.00 | 1 | 1 | 0 | 0 | 0 | 0 | -0.002 | t | 137180 | GVSAAQE<br>KISFG             | Sus<br>scrofa            |
| 1 | 1.00 | 1 | 1 | 0 | 0 | 0 | 0 | -0.002 | t | 139358 | VLKTDVНК<br>E                | Mus<br>musculus          |
| 1 | 1.00 | 1 | 1 | 0 | 0 | 0 | 0 | -0.002 | t | 146624 | WNWFDIT<br>N                 | Homo<br>sapiens          |
| 1 | 1.00 | 1 | 1 | 0 | 0 | 0 | 0 | -0.002 | t | 140081 | YFVPNLKD<br>MFSRAVT<br>MTAAS | Oryctolagus<br>cuniculus |
| 1 | 1.00 | 1 | 1 | 0 | 0 | 0 | 0 | -0.002 | t | 140459 | EHWSHD<br>MFSPGD             | Mus<br>musculus          |

|   |      |   |   |   |   |   |   |        |   |        |                              |                                  |
|---|------|---|---|---|---|---|---|--------|---|--------|------------------------------|----------------------------------|
| 1 | 1.00 | 1 | 1 | 0 | 0 | 0 | 0 | -0.002 | t | 136484 | LPSSSTPF<br>LSG              | Homo<br>sapiens                  |
| 1 | 1.00 | 1 | 1 | 0 | 0 | 0 | 0 | -0.002 | t | 137432 | NHNYPPLS<br>LLTF             | Mus<br>musculu<br>s              |
| 1 | 1.00 | 1 | 1 | 0 | 0 | 0 | 0 | -0.002 | t | 134804 | TIFILCCSK<br>EKRRKKQA<br>AT  | Mus<br>musculu<br>s              |
| 1 | 1.00 | 1 | 1 | 0 | 0 | 0 | 0 | -0.002 | t | 134784 | RKRSQML<br>FRGRRASQ          | Mus<br>musculu<br>s              |
| 1 | 1.00 | 1 | 1 | 0 | 0 | 0 | 0 | -0.002 | t | 139324 | TRLIDERA<br>AH               | Mus<br>musculu<br>s              |
| 1 | 1.00 | 1 | 1 | 0 | 0 | 0 | 0 | -0.002 | t | 137286 | RVTAAQG<br>RIYTR             | Sus<br>scrofa                    |
| 1 | 1.00 | 1 | 1 | 0 | 0 | 0 | 0 | -0.002 | t | 151944 | KFPSESRP<br>NVVK             | Sus<br>scrofa                    |
| 1 | 1.00 | 1 | 1 | 0 | 0 | 0 | 0 | -0.002 | t | 146795 | CCELCCNP<br>QCAGCY           | Oryctola<br>gus<br>cuniculu<br>s |
| 1 | 1.00 | 1 | 1 | 0 | 0 | 0 | 0 | -0.002 | t | 141605 | APPLLPHS<br>NL               | Mus<br>musculu<br>s              |
| 1 | 1.00 | 1 | 1 | 0 | 0 | 0 | 0 | -0.002 | t | 153294 | TYNHDYKT<br>GMVIYSPF<br>MTYP | Mus<br>musculu<br>s              |
| 1 | 1.00 | 1 | 1 | 0 | 0 | 0 | 0 | -0.002 | t | 138194 | IIPKSSWS                     | Homo<br>sapiens                  |
| 1 | 1.00 | 1 | 1 | 0 | 0 | 0 | 0 | -0.002 | t | 140144 | ADVEADD<br>FKGLGLK           | Oryctola<br>gus<br>cuniculu<br>s |
| 1 | 1.00 | 1 | 1 | 0 | 0 | 0 | 0 | -0.002 | t | 138892 | REQAPNL<br>VY                | Mus<br>musculu<br>s              |
| 1 | 1.00 | 1 | 1 | 0 | 0 | 0 | 0 | -0.002 | t | 134472 | PLLPGTST<br>STGPCKT          | Homo<br>sapiens                  |
| 1 | 1.00 | 1 | 1 | 0 | 0 | 0 | 0 | -0.002 | t | 134133 | LGGAKQA<br>GDV               | Mus<br>musculu<br>s              |

|   |      |   |   |   |   |   |   |        |   |        |                              |                                  |
|---|------|---|---|---|---|---|---|--------|---|--------|------------------------------|----------------------------------|
| 1 | 1.00 | 1 | 1 | 0 | 0 | 0 | 0 | -0.002 | t | 141750 | SNLDHILE<br>PSI              | Oryctola<br>gus<br>cuniculu<br>s |
| 1 | 1.00 | 1 | 1 | 0 | 0 | 0 | 0 | -0.002 | t | 141701 | LNDKHSN<br>GTIKDRSP<br>YR    | Oryctola<br>gus<br>cuniculu<br>s |
| 1 | 1.00 | 1 | 1 | 0 | 0 | 0 | 0 | -0.002 | t | 156905 | KPGDPRQ                      | Mus<br>musculu<br>s              |
| 1 | 1.00 | 1 | 1 | 0 | 0 | 0 | 0 | -0.002 | t | 135562 | IHAMDIPP<br>PTG              | Oryctola<br>gus<br>cuniculu<br>s |
| 1 | 1.00 | 1 | 1 | 0 | 0 | 0 | 0 | -0.002 | t | 140053 | MEDDYNL<br>KDMFSRA<br>VTM    | Oryctola<br>gus<br>cuniculu<br>s |
| 1 | 1.00 | 1 | 1 | 0 | 0 | 0 | 0 | -0.002 | t | 140458 | EHNDFPM<br>YTWRP             | Mus<br>musculu<br>s              |
| 1 | 1.00 | 1 | 1 | 0 | 0 | 0 | 0 | -0.002 | t | 135560 | IEQAIGRV<br>TPIF             | Oryctola<br>gus<br>cuniculu<br>s |
| 1 | 1.00 | 1 | 1 | 0 | 0 | 0 | 0 | -0.002 | t | 138089 | WLRPPTS                      | Mus<br>musculu<br>s              |
| 1 | 1.00 | 1 | 1 | 0 | 0 | 0 | 0 | -0.002 | t | 153472 | TGLRNGIT<br>NKVNSVIE<br>KAA  | Mus<br>musculu<br>s              |
| 1 | 1.00 | 1 | 1 | 0 | 0 | 0 | 0 | -0.002 | t | 151842 | EHSGQAA<br>WKQVV             | Sus<br>scrofa                    |
| 1 | 1.00 | 1 | 1 | 0 | 0 | 0 | 0 | -0.002 | t | 138088 | WLDLSKT                      | Mus<br>musculu<br>s              |
| 1 | 1.00 | 1 | 1 | 0 | 0 | 0 | 0 | -0.002 | t | 140248 | KAGETIYDI<br>DEDGTITK<br>KD  | Oryctola<br>gus<br>cuniculu<br>s |
| 1 | 1.00 | 1 | 1 | 0 | 0 | 0 | 0 | -0.002 | t | 125411 | FQGLCNET<br>LTLKLYNN<br>GFTS | Homo<br>sapiens                  |
| 1 | 1.00 | 1 | 1 | 0 | 0 | 0 | 0 | -0.002 | t | 130637 | WSSCVFSV<br>SYCL             | Mus<br>musculu<br>s              |

|   |      |   |   |   |   |   |   |        |   |        |                              |                                  |
|---|------|---|---|---|---|---|---|--------|---|--------|------------------------------|----------------------------------|
| 1 | 1.00 | 1 | 1 | 0 | 0 | 0 | 0 | -0.002 | t | 119143 | EPTITFGTA<br>I               | Oryctola<br>gus<br>cuniculu<br>s |
| 1 | 1.00 | 1 | 1 | 0 | 0 | 0 | 0 | -0.002 | t | 123838 | VWQDE                        | Mus<br>musculu<br>s              |
| 1 | 1.00 | 1 | 1 | 0 | 0 | 0 | 0 | -0.002 | t | 118963 | PNYKVVN<br>YAVTK             | Mus<br>musculu<br>s              |
| 1 | 1.00 | 1 | 1 | 0 | 0 | 0 | 0 | -0.002 | t | 119187 | GNAEVHA<br>SFFDIGG           | Mus<br>musculu<br>s              |
| 1 | 1.00 | 1 | 1 | 0 | 0 | 0 | 0 | -0.002 | t | 125250 | SDEFNPCE<br>DIMGYK           | Mus<br>musculu<br>s              |
| 1 | 1.00 | 1 | 1 | 0 | 0 | 0 | 0 | -0.002 | t | 125250 | SDEFNPCE<br>DIMGYK           | Mus<br>musculu<br>s              |
| 1 | 1.00 | 1 | 1 | 0 | 0 | 0 | 0 | -0.002 | t | 131879 | FLVAHTRA<br>RAPSAGER<br>ARRS | Mus<br>musculu<br>s              |
| 1 | 1.00 | 1 | 1 | 0 | 0 | 0 | 0 | -0.002 | t | 122083 | DPNIKLV<br>DDCWATS           | Oryctola<br>gus<br>cuniculu<br>s |
| 1 | 1.00 | 1 | 1 | 0 | 0 | 0 | 0 | -0.002 | t | 127986 | FVGVGAD<br>YRHASCPI<br>DYIIA | Mus<br>musculu<br>s              |
| 1 | 1.00 | 1 | 1 | 0 | 0 | 0 | 0 | -0.002 | t | 123849 | WQDE                         | Mus<br>musculu<br>s              |
| 1 | 1.00 | 1 | 1 | 0 | 0 | 0 | 0 | -0.002 | t | 125055 | FVYGGCQ<br>GNN               | Mus<br>musculu<br>s              |
| 1 | 1.00 | 1 | 1 | 0 | 0 | 0 | 0 | -0.002 | t | 125321 | YFLHWWY<br>DKK               | Mus<br>musculu<br>s              |
| 1 | 1.00 | 1 | 1 | 0 | 0 | 0 | 0 | -0.002 | t | 119601 | KGNNVHG<br>FQKQIIRSF<br>Y    | Rattus<br>norvegic<br>us         |
| 1 | 1.00 | 1 | 1 | 0 | 0 | 0 | 0 | -0.002 | t | 122842 | LLDLPRDL<br>GGMGCSS<br>PPCE  | Oryctola<br>gus<br>cuniculu<br>s |
| 1 | 1.00 | 1 | 1 | 0 | 0 | 0 | 0 | -0.002 | t | 120109 | NIHPKAPI<br>WGIITSNF         | Rattus<br>norvegic<br>us         |



|   |      |   |   |   |        |   |   |        |   |        |                              |                                  |
|---|------|---|---|---|--------|---|---|--------|---|--------|------------------------------|----------------------------------|
| 1 | 1.00 | 1 | 1 | 0 | 0      | 0 | 0 | -0.002 | t | 130449 | CFFPNLSY<br>C                | Mus<br>musculu<br>s              |
| 1 | 1.00 | 1 | 1 | 0 | 0      | 0 | 0 | -0.002 | t | 120109 | NIHPKAPI<br>WGIITSNF         | Rattus<br>norvegic<br>us         |
| 1 | 1.00 | 1 | 1 | 0 | 0      | 0 | 0 | -0.002 | t | 122780 | GQELKNP<br>QEETLQAF<br>DSHYD | Oryctola<br>gus<br>cuniculu<br>s |
| 1 | 1.00 | 1 | 1 | 0 | -0.003 | 0 | 0 | -0.002 | t | 122780 | GQELKNP<br>QEETLQAF<br>DSHYD | Oryctola<br>gus<br>cuniculu<br>s |
| 1 | 1.00 | 1 | 1 | 0 | 0      | 0 | 0 | -0.002 | t | 130474 | ECLLLSKYC<br>MPS             | Mus<br>musculu<br>s              |
| 1 | 1.00 | 1 | 1 | 0 | 0      | 0 | 0 | -0.002 | t | 124069 | ELQIAKDE<br>RYGS             | Oryctola<br>gus<br>cuniculu<br>s |
| 1 | 1.00 | 1 | 1 | 0 | 0      | 0 | 0 | -0.002 | t | 119187 | GNAEVHA<br>SFFDIGG           | Oryctola<br>gus<br>cuniculu<br>s |
| 1 | 1.00 | 1 | 1 | 0 | 0      | 0 | 0 | -0.002 | t | 124713 | SGEQPSDE<br>QPSGEHG          | Mus<br>musculu<br>s              |
| 1 | 1.00 | 1 | 1 | 0 | 0      | 0 | 0 | -0.002 | t | 125415 | FSPDGKPC<br>TPPALNCY<br>W    | Mus<br>musculu<br>s              |
| 1 | 1.00 | 1 | 1 | 0 | 0      | 0 | 0 | -0.002 | t | 132039 | QYFVGKRT<br>VPPGECFI<br>QFLS | Oryctola<br>gus<br>cuniculu<br>s |
| 1 | 1.00 | 1 | 1 | 0 | 0      | 0 | 0 | -0.002 | t | 127984 | FTNLKFKV<br>RKITSSHR<br>GN   | Mus<br>musculu<br>s              |
| 1 | 1.00 | 1 | 1 | 0 | 0      | 0 | 0 | -0.002 | t | 119038 | TSTNGIKKI<br>LIF             | Mus<br>musculu<br>s              |
| 1 | 1.00 | 1 | 1 | 0 | 0      | 0 | 0 | -0.002 | t | 133707 | STRKEEKQ<br>RNGT             | Mus<br>musculu<br>s              |
| 1 | 1.00 | 1 | 1 | 0 | 0      | 0 | 0 | -0.002 | t | 125608 | YYKKHIS                      | Mus<br>musculu<br>s              |
| 1 | 1.00 | 1 | 1 | 0 | 0      | 0 | 0 | -0.002 | t | 130454 | CLFPNNSY<br>C                | Mus<br>musculu<br>s              |

|   |      |   |   |   |   |   |   |        |   |        |                              |                          |
|---|------|---|---|---|---|---|---|--------|---|--------|------------------------------|--------------------------|
| 1 | 1.00 | 1 | 1 | 0 | 0 | 0 | 0 | -0.002 | t | 125127 | LDPENLTL                     | Mus<br>musculus          |
| 1 | 1.00 | 1 | 1 | 0 | 0 | 0 | 0 | -0.002 | t | 119135 | EGVKYVLN<br>ETTNWLW<br>AFLAR | Mus<br>musculus          |
| 1 | 1.00 | 1 | 1 | 0 | 0 | 0 | 0 | -0.002 | t | 130568 | NQYCIYAG<br>RYC              | Mus<br>musculus          |
| 1 | 1.00 | 1 | 1 | 0 | 0 | 0 | 0 | -0.002 | t | 127933 | APDDSFKK<br>LEDRTNL<br>KF    | Mus<br>musculus          |
| 1 | 1.00 | 1 | 1 | 0 | 0 | 0 | 0 | -0.002 | t | 125454 | KDYKTMV<br>KFCN              | Mus<br>musculus          |
| 1 | 1.00 | 1 | 1 | 0 | 0 | 0 | 0 | -0.002 | t | 125384 | DSHYDYTI<br>CGDSEDM<br>VCTPK | Homo<br>sapiens          |
| 1 | 1.00 | 1 | 1 | 0 | 0 | 0 | 0 | -0.002 | t | 130622 | TGLVAQG<br>TDSIG             | Camelus<br>dromedarius   |
| 1 | 1.00 | 1 | 1 | 0 | 0 | 0 | 0 | -0.002 | t | 125015 | DNESSYSR<br>GFDMTYT<br>E     | Mus<br>musculus          |
| 1 | 1.00 | 1 | 1 | 0 | 0 | 0 | 0 | -0.002 | t | 130555 | MHNRTQA<br>LEDSR             | Camelus<br>dromedarius   |
| 1 | 1.00 | 1 | 1 | 0 | 0 | 0 | 0 | -0.002 | t | 127944 | DLVNCNL<br>NTNCVAV<br>AFSLPD | Mus<br>musculus          |
| 1 | 1.00 | 1 | 1 | 0 | 0 | 0 | 0 | -0.002 | t | 122291 | CTYILDPEK<br>LTLRATYD<br>N   | Oryctolagus<br>cuniculus |
| 1 | 1.00 | 1 | 1 | 0 | 0 | 0 | 0 | -0.002 | t | 125051 | FQSKANCL<br>NT               | Mus<br>musculus          |
| 1 | 1.00 | 1 | 1 | 0 | 0 | 0 | 0 | -0.002 | t | 128135 | VCTPKSDE<br>FNPCEDIM<br>GYKF | Homo<br>sapiens          |
| 1 | 1.00 | 1 | 1 | 0 | 0 | 0 | 0 | -0.002 | t | 133272 | PFFSQPG                      | Mus<br>musculus          |
| 1 | 1.00 | 1 | 1 | 0 | 0 | 0 | 0 | -0.002 | t | 125318 | WWYDKK<br>DNTC               | Mus<br>musculus          |
| 1 | 1.00 | 1 | 1 | 0 | 0 | 0 | 0 | -0.002 | t | 130457 | CRQPGNN<br>YC                | Mus<br>musculus          |

|   |      |   |   |   |        |   |   |        |   |        |                              |                                  |
|---|------|---|---|---|--------|---|---|--------|---|--------|------------------------------|----------------------------------|
| 1 | 1.00 | 1 | 1 | 0 | 0      | 0 | 0 | -0.002 | t | 133722 | TSKSKYPL<br>VV               | Mus<br>musculu<br>s              |
| 1 | 1.00 | 1 | 1 | 0 | 0      | 0 | 0 | -0.002 | t | 125607 | YVSIDVTL<br>QQLESHSF<br>YNLS | Homo<br>sapiens                  |
| 1 | 1.00 | 1 | 1 | 0 | 0      | 0 | 0 | -0.002 | t | 122292 | CTYILDPEK<br>LTLRVPYK<br>A   | Oryctola<br>gus<br>cuniculu<br>s |
| 1 | 1.00 | 1 | 1 | 0 | -0.003 | 0 | 0 | -0.002 | t | 125610 | YYVFEEQ<br>EDEIIGFG<br>QELK  | Oryctola<br>gus<br>cuniculu<br>s |
| 1 | 1.00 | 1 | 1 | 0 | -0.003 | 0 | 0 | -0.002 | t | 125472 | LDAVYLNK<br>NKYLTVID<br>KDAF | Oryctola<br>gus<br>cuniculu<br>s |
| 1 | 1.00 | 1 | 1 | 0 | 0      | 0 | 0 | -0.002 | t | 128043 | LDAMPAG<br>NPAFPVIP<br>G     | Mus<br>musculu<br>s              |
| 1 | 1.00 | 1 | 1 | 0 | 0      | 0 | 0 | -0.002 | t | 130787 | EDFDIYDE<br>DE               | Mus<br>musculu<br>s              |
| 1 | 1.00 | 1 | 1 | 0 | -0.002 | 0 | 0 | -0.002 | t | 118963 | PNYKVVV<br>YAVTK             | Mus<br>musculu<br>s              |
| 1 | 1.00 | 1 | 1 | 0 | 0      | 0 | 0 | -0.002 | t | 126201 | GYKEKSKF<br>QDTHNNA          | Oryctola<br>gus<br>cuniculu<br>s |
| 1 | 1.00 | 1 | 1 | 0 | 0      | 0 | 0 | -0.002 | t | 125109 | KKDNTCS<br>MFV               | Mus<br>musculu<br>s              |
| 1 | 1.00 | 1 | 1 | 0 | 0      | 0 | 0 | -0.002 | t | 124232 | GSITRDSIF<br>RLR             | Oryctola<br>gus<br>cuniculu<br>s |
| 1 | 1.00 | 1 | 1 | 0 | 0      | 0 | 0 | -0.002 | t | 128084 | QKNACSF<br>DLCNSYDV<br>L     | Mus<br>musculu<br>s              |
| 1 | 1.00 | 1 | 1 | 0 | 0      | 0 | 0 | -0.002 | t | 119322 | QRVFKEKV<br>DTKAPEPP         | Mus<br>musculu<br>s              |
| 1 | 1.00 | 1 | 1 | 0 | 0      | 0 | 0 | -0.002 | t | 133676 | RIYMRMK<br>HVR               | Mus<br>musculu<br>s              |

|   |      |   |   |   |        |   |   |        |   |        |                              |                                  |
|---|------|---|---|---|--------|---|---|--------|---|--------|------------------------------|----------------------------------|
| 1 | 1.00 | 1 | 1 | 0 | 0      | 0 | 0 | -0.002 | t | 123979 | CGTAKRVT<br>GNQAV            | Oryctola<br>gus<br>cuniculu<br>s |
| 1 | 1.00 | 1 | 1 | 0 | 0      | 0 | 0 | -0.002 | t | 131710 | TPDAPGET<br>V                | Mus<br>musculu<br>s              |
| 1 | 1.00 | 1 | 1 | 0 | 0      | 0 | 0 | -0.002 | t | 124925 | YYVFEEQ<br>EDEIIGF           | Oryctola<br>gus<br>cuniculu<br>s |
| 1 | 1.00 | 1 | 1 | 0 | -0.003 | 0 | 0 | -0.002 | t | 125610 | YYVFEEQ<br>EDEIIGFG<br>QELK  | Oryctola<br>gus<br>cuniculu<br>s |
| 1 | 1.00 | 1 | 1 | 0 | 0      | 0 | 0 | -0.002 | t | 125448 | IRGILESLM<br>CNESSMQ<br>SLRQ | Oryctola<br>gus<br>cuniculu<br>s |
| 1 | 1.00 | 1 | 1 | 0 | 0      | 0 | 0 | -0.002 | t | 130487 | FCQPHLSC<br>YILP             | Mus<br>musculu<br>s              |
| 1 | 1.00 | 1 | 1 | 0 | 0      | 0 | 0 | -0.002 | t | 125472 | LDAVYLNK<br>NKYLTVID<br>KDAF | Oryctola<br>gus<br>cuniculu<br>s |
| 1 | 1.00 | 1 | 1 | 0 | 0      | 0 | 0 | -0.002 | t | 128146 | WSVCVGL<br>TTYVNDYV<br>LPYLA | Mus<br>musculu<br>s              |
| 1 | 1.00 | 1 | 1 | 0 | 0      | 0 | 0 | -0.002 | t | 125441 | HPLTCDDP<br>RFQ              | Oryctola<br>gus<br>cuniculu<br>s |
| 1 | 1.00 | 1 | 1 | 0 | 0      | 0 | 0 | -0.002 | t | 128136 | VFIADSDG<br>KLNFKES<br>VCVG  | Mus<br>musculu<br>s              |
| 1 | 1.00 | 1 | 1 | 0 | 0      | 0 | 0 | -0.002 | t | 122202 | TSPPLLWD<br>SVHL             | Mus<br>musculu<br>s              |
| 1 | 1.00 | 1 | 1 | 0 | 0      | 0 | 0 | -0.002 | t | 125267 | TCSMFVY<br>GGC               | Mus<br>musculu<br>s              |
| 1 | 1.00 | 1 | 1 | 0 | 0      | 0 | 0 | -0.002 | t | 131101 | TDSEMDV<br>VRFDDDN<br>S      | Mus<br>musculu<br>s              |
| 1 | 1.00 | 1 | 1 | 0 | 0      | 0 | 0 | -0.002 | t | 130461 | CWNYCLP                      | Mus<br>musculu<br>s              |

|   |      |   |   |   |   |   |   |        |   |        |                              |                                  |
|---|------|---|---|---|---|---|---|--------|---|--------|------------------------------|----------------------------------|
| 1 | 1.00 | 1 | 1 | 0 | 0 | 0 | 0 | -0.002 | t | 130614 | STLPYLPTY<br>SKH             | Camelus<br>dromed<br>arius       |
| 1 | 1.00 | 1 | 1 | 0 | 0 | 0 | 0 | -0.002 | t | 130610 | SMCMHG<br>GAYCFP             | Mus<br>musculu<br>s              |
| 1 | 1.00 | 1 | 1 | 0 | 0 | 0 | 0 | -0.002 | t | 122790 | HQEEDFR<br>VTCKDIQR          | Oryctola<br>gus<br>cuniculu<br>s |
| 1 | 1.00 | 1 | 1 | 0 | 0 | 0 | 0 | -0.002 | t | 122857 | MGCSSPP<br>CECHQEE           | Mus<br>musculu<br>s              |
| 1 | 1.00 | 1 | 1 | 0 | 0 | 0 | 0 | -0.002 | t | 122857 | MGCSSPP<br>CECHQEE           | Mus<br>musculu<br>s              |
| 1 | 1.00 | 1 | 1 | 0 | 0 | 0 | 0 | -0.002 | t | 131582 | PEEDDITW<br>TSDQRHG<br>VIGS  | Mus<br>musculu<br>s              |
| 1 | 1.00 | 1 | 1 | 0 | 0 | 0 | 0 | -0.002 | t | 125552 | RRFEYDDP<br>RFLRLDLA<br>QEG  | Homo<br>sapiens                  |
| 1 | 1.00 | 1 | 1 | 0 | 0 | 0 | 0 | -0.002 | t | 121292 | FATFVYAK                     | Mus<br>musculu<br>s              |
| 1 | 1.00 | 1 | 1 | 0 | 0 | 0 | 0 | -0.002 | t | 125552 | RRFEYDDP<br>RFLRLDLA<br>QEG  | Homo<br>sapiens                  |
| 1 | 1.00 | 1 | 1 | 0 | 0 | 0 | 0 | -0.002 | t | 125478 | LHQEYEEN<br>LGDSIVGY<br>KEKS | Homo<br>sapiens                  |
| 1 | 1.00 | 1 | 1 | 0 | 0 | 0 | 0 | -0.002 | t | 130469 | DQPPTSrv<br>PSLR             | Camelus<br>dromed<br>arius       |
| 1 | 1.00 | 1 | 1 | 0 | 0 | 0 | 0 | -0.002 | t | 125297 | VFFEEQED<br>EIIGFG           | Mus<br>musculu<br>s              |
| 1 | 1.00 | 1 | 1 | 0 | 0 | 0 | 0 | -0.002 | t | 130612 | SPNTAHIT<br>SKSL             | Camelus<br>dromed<br>arius       |
| 1 | 1.00 | 1 | 1 | 0 | 0 | 0 | 0 | -0.002 | t | 130513 | IGYQPSMP<br>LDMP             | Camelus<br>dromed<br>arius       |
| 1 | 1.00 | 1 | 1 | 0 | 0 | 0 | 0 | -0.002 | t | 108846 | DALQFVC<br>GDRGFY            | Mus<br>musculu<br>s              |
| 1 | 1.00 | 1 | 1 | 0 | 0 | 0 | 0 | -0.002 | t | 110116 | YCAPLKPA<br>KSA              | Mus<br>musculu<br>s              |

|   |      |   |   |   |   |   |   |        |   |        |                     |                                  |
|---|------|---|---|---|---|---|---|--------|---|--------|---------------------|----------------------------------|
| 1 | 1.00 | 1 | 1 | 0 | 0 | 0 | 0 | -0.002 | t | 111486 | LIEESAIINA<br>GAP   | Mus<br>musculu<br>s              |
| 1 | 1.00 | 1 | 1 | 0 | 0 | 0 | 0 | -0.002 | t | 102384 | EFRH                | Mus<br>musculu<br>s              |
| 1 | 1.00 | 1 | 1 | 0 | 0 | 0 | 0 | -0.002 | t | 100153 | INDQIKFII<br>N      | Mus<br>musculu<br>s              |
| 1 | 1.00 | 1 | 1 | 0 | 0 | 0 | 0 | -0.002 | t | 111772 | SGFSITTST<br>DTTPA  | Oryctola<br>gus<br>cuniculu<br>s |
| 1 | 1.00 | 1 | 1 | 0 | 0 | 0 | 0 | -0.002 | t | 99975  | EEKELLKRI<br>Q      | Mus<br>musculu<br>s              |
| 1 | 1.00 | 1 | 1 | 0 | 0 | 0 | 0 | -0.002 | t | 102384 | EFRH                | Mus<br>musculu<br>s              |
| 1 | 1.00 | 1 | 1 | 0 | 0 | 0 | 0 | -0.002 | t | 107202 | LKFVEQNE            | Homo<br>sapiens                  |
| 1 | 1.00 | 1 | 1 | 0 | 0 | 0 | 0 | -0.002 | t | 110198 | CPPDIIPKV<br>EGKTIA | Mus<br>musculu<br>s              |
| 1 | 1.00 | 1 | 1 | 0 | 0 | 0 | 0 | -0.002 | t | 99975  | EEKELLKRI<br>Q      | Mus<br>musculu<br>s              |
| 1 | 1.00 | 1 | 1 | 0 | 0 | 0 | 0 | -0.002 | t | 98822  | IEAGAIGFK<br>IHEDWG | Mus<br>musculu<br>s              |
| 1 | 1.00 | 1 | 1 | 0 | 0 | 0 | 0 | -0.002 | t | 110198 | CPPDIIPKV<br>EGKTIA | Oryctola<br>gus<br>cuniculu<br>s |
| 1 | 1.00 | 1 | 1 | 0 | 0 | 0 | 0 | -0.002 | t | 115406 | NRKVKPTT<br>EGGVETE | Oryctola<br>gus<br>cuniculu<br>s |
| 1 | 1.00 | 1 | 1 | 0 | 0 | 0 | 0 | -0.002 | t | 106429 | FVLPWRI             | Homo<br>sapiens                  |
| 1 | 1.00 | 1 | 1 | 0 | 0 | 0 | 0 | -0.002 | t | 102384 | EFRH                | Mus<br>musculu<br>s              |
| 1 | 1.00 | 1 | 1 | 0 | 0 | 0 | 0 | -0.002 | t | 100549 | TEEKEFLKK<br>L      | Mus<br>musculu<br>s              |
| 1 | 1.00 | 1 | 1 | 0 | 0 | 0 | 0 | -0.002 | t | 105207 | GAIIGLMV<br>GGVVIA  | Mus<br>musculu<br>s              |

|   |      |   |   |   |        |   |   |        |   |        |                              |                                  |
|---|------|---|---|---|--------|---|---|--------|---|--------|------------------------------|----------------------------------|
| 1 | 1.00 | 1 | 1 | 0 | 0      | 0 | 0 | -0.002 | t | 115302 | IVTAGEER<br>AVTT             | Oryctola<br>gus<br>cuniculu<br>s |
| 1 | 1.00 | 1 | 1 | 0 | 0      | 0 | 0 | -0.002 | t | 103998 | IVKWDRD<br>M                 | Mus<br>musculu<br>s              |
| 1 | 1.00 | 1 | 1 | 0 | 0      | 0 | 0 | -0.002 | t | 111486 | LIEESAIINA<br>GAP            | Oryctola<br>gus<br>cuniculu<br>s |
| 1 | 1.00 | 1 | 1 | 0 | 0      | 0 | 0 | -0.002 | t | 110275 | GPVGPSD<br>PSIVSLVEE<br>TSFI | Mus<br>musculu<br>s              |
| 1 | 1.00 | 1 | 1 | 0 | 0      | 0 | 0 | -0.002 | t | 111486 | LIEESAIINA<br>GAP            | Oryctola<br>gus<br>cuniculu<br>s |
| 1 | 1.00 | 1 | 1 | 0 | 0      | 0 | 0 | -0.002 | t | 105651 | AEFRHDS                      | Mus<br>musculu<br>s              |
| 1 | 1.00 | 1 | 1 | 0 | -0.003 | 0 | 0 | -0.002 | t | 110424 | SGTGGRT<br>GYIPLGTR<br>PPT   | Oryctola<br>gus<br>cuniculu<br>s |
| 1 | 1.00 | 1 | 1 | 0 | 0      | 0 | 0 | -0.002 | t | 115540 | VKNKRTEL<br>SPWISNI          | Mus<br>musculu<br>s              |
| 1 | 1.00 | 1 | 1 | 0 | 0      | 0 | 0 | -0.002 | t | 111486 | LIEESAIINA<br>GAP            | Mus<br>musculu<br>s              |
| 1 | 1.00 | 1 | 1 | 0 | 0      | 0 | 0 | -0.002 | t | 113913 | TCKQAGT<br>CPP               | Mus<br>musculu<br>s              |
| 1 | 1.00 | 1 | 1 | 0 | 0      | 0 | 0 | -0.002 | t | 98434  | RYMDQPS<br>RD                | Oryctola<br>gus<br>cuniculu<br>s |
| 1 | 1.00 | 1 | 1 | 0 | 0      | 0 | 0 | -0.002 | t | 104327 | VEQHNPIN<br>AGTELSAT         | Oryctola<br>gus<br>cuniculu<br>s |
| 1 | 1.00 | 1 | 1 | 0 | 0      | 0 | 0 | -0.002 | t | 111790 | SLVEETSFI<br>DAGAPTS         | Oryctola<br>gus<br>cuniculu<br>s |
| 1 | 1.00 | 1 | 1 | 0 | 0      | 0 | 0 | -0.002 | t | 113365 | EHPVTGC<br>GERTEGRC<br>LHYTV | Mus<br>musculu<br>s              |

|   |      |   |   |   |   |   |   |        |   |        |                              |                                  |
|---|------|---|---|---|---|---|---|--------|---|--------|------------------------------|----------------------------------|
| 1 | 1.00 | 1 | 1 | 0 | 0 | 0 | 0 | -0.002 | t | 113365 | EHPVTGC<br>GERTEGRC<br>LHYTV | Mus<br>musculu<br>s              |
| 1 | 1.00 | 1 | 1 | 0 | 0 | 0 | 0 | -0.002 | t | 113365 | EHPVTGC<br>GERTEGRC<br>LHYTV | Mus<br>musculu<br>s              |
| 1 | 1.00 | 1 | 1 | 0 | 0 | 0 | 0 | -0.002 | t | 115488 | SKDNGWE<br>KDDNVSKS          | Oryctola<br>gus<br>cuniculu<br>s |
| 1 | 1.00 | 1 | 1 | 0 | 0 | 0 | 0 | -0.002 | t | 111486 | LIEESAIINA<br>GAP            | Oryctola<br>gus<br>cuniculu<br>s |
| 1 | 1.00 | 1 | 1 | 0 | 0 | 0 | 0 | -0.002 | t | 115265 | GKDITADN<br>K                | Oryctola<br>gus<br>cuniculu<br>s |
| 1 | 1.00 | 1 | 1 | 0 | 0 | 0 | 0 | -0.002 | t | 108832 | CGDRGFYF<br>NKPTG            | Mus<br>musculu<br>s              |
| 1 | 1.00 | 1 | 1 | 0 | 0 | 0 | 0 | -0.002 | t | 107307 | DAEFGHD<br>SGF               | Mus<br>musculu<br>s              |
| 1 | 1.00 | 1 | 1 | 0 | 0 | 0 | 0 | -0.002 | t | 115351 | LKQKSSNS<br>RKKRSTS          | Mus<br>musculu<br>s              |
| 1 | 1.00 | 1 | 1 | 0 | 0 | 0 | 0 | -0.002 | t | 102510 | HHQKLVFF<br>AEDVGSN<br>K     | Mus<br>musculu<br>s              |
| 1 | 1.00 | 1 | 1 | 0 | 0 | 0 | 0 | -0.002 | t | 108412 | GTTDHVG<br>VPTYDWG<br>K      | Capra<br>hircus                  |
| 1 | 1.00 | 1 | 1 | 0 | 0 | 0 | 0 | -0.002 | t | 104132 | MSENVEQ<br>HNPINAGT          | Oryctola<br>gus<br>cuniculu<br>s |
| 1 | 1.00 | 1 | 1 | 0 | 0 | 0 | 0 | -0.002 | t | 108482 | IINPSENG<br>DTSTNGIK<br>K    | Mus<br>musculu<br>s              |
| 1 | 1.00 | 1 | 1 | 0 | 0 | 0 | 0 | -0.002 | t | 103972 | HNPINAGT<br>ELSATGN          | Oryctola<br>gus<br>cuniculu<br>s |
| 1 | 1.00 | 1 | 1 | 0 | 0 | 0 | 0 | -0.002 | t | 111486 | LIEESAIINA<br>GAP            | Mus<br>musculu<br>s              |
| 1 | 1.00 | 1 | 1 | 0 | 0 | 0 | 0 | -0.002 | t | 111486 | LIEESAIINA<br>GAP            | Mus<br>musculu<br>s              |



|   |      |   |   |   |        |   |   |        |   |        |                              |                                  |
|---|------|---|---|---|--------|---|---|--------|---|--------|------------------------------|----------------------------------|
| 1 | 1.00 | 1 | 1 | 0 | 0      | 0 | 0 | -0.002 | t | 104175 | PINAGTEL<br>SATGNESG         | Oryctola<br>gus<br>cuniculu<br>s |
| 1 | 1.00 | 1 | 1 | 0 | 0      | 0 | 0 | -0.002 | t | 102384 | EFRH                         | Mus<br>musculu<br>s              |
| 1 | 1.00 | 1 | 1 | 0 | 0      | 0 | 0 | -0.002 | t | 104327 | VEQHNPIN<br>AGTELSAT         | Sus<br>scrofa                    |
| 1 | 1.00 | 1 | 1 | 0 | 0      | 0 | 0 | -0.002 | t | 108998 | FVCGDRG<br>FYFNK             | Mus<br>musculu<br>s              |
| 1 | 1.00 | 1 | 1 | 0 | 0      | 0 | 0 | -0.002 | t | 98093  | HGFTEQN<br>SG                | Oryctola<br>gus<br>cuniculu<br>s |
| 1 | 1.00 | 1 | 1 | 0 | -0.004 | 0 | 0 | -0.002 | t | 110980 | QPLGVGIS<br>GHPLLNLK<br>DDTE | Mus<br>musculu<br>s              |
| 1 | 1.00 | 1 | 1 | 0 | 0      | 0 | 0 | -0.002 | t | 102384 | EFRH                         | Mus<br>musculu<br>s              |
| 1 | 1.00 | 1 | 1 | 0 | 0      | 0 | 0 | -0.002 | t | 100635 | VTNYLVDG<br>NG               | Mus<br>musculu<br>s              |
| 1 | 1.00 | 1 | 1 | 0 | 0      | 0 | 0 | -0.002 | t | 103886 | EQHNPINA<br>GTELSAT          | Oryctola<br>gus<br>cuniculu<br>s |
| 1 | 1.00 | 1 | 1 | 0 | 0      | 0 | 0 | -0.002 | t | 110424 | SGTGGRT<br>GYIPLGTR<br>PPT   | Oryctola<br>gus<br>cuniculu<br>s |
| 1 | 1.00 | 1 | 1 | 0 | 0      | 0 | 0 | -0.002 | t | 116080 | ATGGTLQ<br>QLFYSTITV<br>GQV  | Mus<br>musculu<br>s              |
| 1 | 1.00 | 1 | 1 | 0 | 0      | 0 | 0 | -0.002 | t | 107156 | GLAGAPGL<br>R                | Mus<br>musculu<br>s              |
| 1 | 1.00 | 1 | 1 | 0 | 0      | 0 | 0 | -0.002 | t | 110980 | QPLGVGIS<br>GHPLLNLK<br>DDTE | Mus<br>musculu<br>s              |
| 1 | 1.00 | 1 | 1 | 0 | 0      | 0 | 0 | -0.002 | t | 111013 | RTGYIPLG<br>TRPPT            | Oryctola<br>gus<br>cuniculu<br>s |
| 1 | 1.00 | 1 | 1 | 0 | 0      | 0 | 0 | -0.002 | t | 115058 | GNAEVHA<br>SFFDIGGS          | Oryctola<br>gus<br>cuniculu<br>s |

|   |      |   |   |   |        |   |   |        |   |        |                              |                                  |
|---|------|---|---|---|--------|---|---|--------|---|--------|------------------------------|----------------------------------|
| 1 | 1.00 | 1 | 1 | 0 | 0      | 0 | 0 | -0.002 | t | 112316 | SIKNPTNA<br>K                | Mus<br>musculu<br>s              |
| 1 | 1.00 | 1 | 1 | 0 | 0      | 0 | 0 | -0.002 | t | 106642 | MHLNTPP                      | Homo<br>sapiens                  |
| 1 | 1.00 | 1 | 1 | 0 | 0      | 0 | 0 | -0.002 | t | 102344 | DAEFR                        | Mus<br>musculu<br>s              |
| 1 | 1.00 | 1 | 1 | 0 | -0.003 | 0 | 0 | -0.002 | t | 111380 | GTGSGTG<br>GRTGYIPL          | Oryctola<br>gus<br>cuniculu<br>s |
| 1 | 1.00 | 1 | 1 | 0 | 0      | 0 | 0 | -0.002 | t | 99760  | VKDGYIVD                     | Oryctola<br>gus<br>cuniculu<br>s |
| 1 | 1.00 | 1 | 1 | 0 | 0      | 0 | 0 | -0.002 | t | 99945  | DIRDSLSEE<br>E               | Mus<br>musculu<br>s              |
| 1 | 1.00 | 1 | 1 | 0 | -0.003 | 0 | 0 | -0.002 | t | 110248 | GGLGIGTG<br>SGTGGRT<br>GYIPL | Oryctola<br>gus<br>cuniculu<br>s |
| 1 | 1.00 | 1 | 1 | 0 | 0      | 0 | 0 | -0.002 | t | 112352 | TGNKYPGY<br>P                | Mus<br>musculu<br>s              |
| 1 | 1.00 | 1 | 1 | 0 | 0      | 0 | 0 | -0.002 | t | 105319 | LVFFAEDV<br>GSNK             | Homo<br>sapiens                  |
| 1 | 1.00 | 1 | 1 | 0 | 0      | 0 | 0 | -0.002 | t | 109177 | GPETLCGA<br>ELVD             | Mus<br>musculu<br>s              |
| 1 | 1.00 | 1 | 1 | 0 | 0      | 0 | 0 | -0.002 | t | 108600 | QLINTNGS                     | Capra<br>hircus                  |
| 1 | 1.00 | 1 | 1 | 0 | 0      | 0 | 0 | -0.002 | t | 105163 | EFRHD                        | Mus<br>musculu<br>s              |
| 1 | 1.00 | 1 | 1 | 0 | 0      | 0 | 0 | -0.002 | t | 106634 | LVGPRGER<br>GFP              | Mus<br>musculu<br>s              |
| 1 | 1.00 | 1 | 1 | 0 | 0      | 0 | 0 | -0.002 | t | 110248 | GGLGIGTG<br>SGTGGRT<br>GYIPL | Oryctola<br>gus<br>cuniculu<br>s |
| 1 | 1.00 | 1 | 1 | 0 | 0      | 0 | 0 | -0.002 | t | 111381 | GTGSGTG<br>GRTGYVPL          | Oryctola<br>gus<br>cuniculu<br>s |
| 1 | 1.00 | 1 | 1 | 0 | 0      | 0 | 0 | -0.002 | t | 110812 | DPVGPLDP<br>SIVSLVEES<br>SFI | Oryctola<br>gus<br>cuniculu<br>s |

|   |      |   |   |   |        |   |   |        |   |        |                              |                       |
|---|------|---|---|---|--------|---|---|--------|---|--------|------------------------------|-----------------------|
| 1 | 1.00 | 1 | 1 | 0 | 0      | 0 | 0 | -0.002 | t | 102344 | DAEFR                        | Mus musculus          |
| 1 | 1.00 | 1 | 1 | 0 | 0      | 0 | 0 | -0.002 | t | 110733 | VGENVPD<br>DLYIKGSG          | Mus musculus          |
| 1 | 1.00 | 1 | 1 | 0 | -0.003 | 0 | 0 | -0.002 | t | 98093  | HGFTEQNSG                    | Oryctolagus cuniculus |
| 1 | 1.00 | 1 | 1 | 0 | 0      | 0 | 0 | -0.002 | t | 103643 | TGALQERSK                    | Mus musculus          |
| 1 | 1.00 | 1 | 1 | 0 | 0      | 0 | 0 | -0.002 | t | 110308 | KTCKQAGT<br>CPPDIIPKVEG      | Mus musculus          |
| 1 | 1.00 | 1 | 1 | 0 | -0.003 | 0 | 0 | -0.002 | t | 111013 | RTGYIPLG<br>TRPPT            | Oryctolagus cuniculus |
| 1 | 1.00 | 1 | 1 | 0 | 0      | 0 | 0 | -0.002 | t | 110248 | GGLGIGTG<br>SGTGGRT<br>GYIPL | Mus musculus          |
| 1 | 1.00 | 1 | 1 | 0 | 0      | 0 | 0 | -0.002 | t | 106646 | MHLTQSP                      | Homo sapiens          |
| 1 | 1.00 | 1 | 1 | 0 | 0      | 0 | 0 | -0.002 | t | 110385 | QLYKTCKQ<br>AGTCPPDIIPKV     | Mus musculus          |
| 1 | 1.00 | 1 | 1 | 0 | 0      | 0 | 0 | -0.002 | t | 110385 | QLYKTCKQ<br>AGTCPPDIIPKV     | Oryctolagus cuniculus |
| 1 | 1.00 | 1 | 1 | 0 | 0      | 0 | 0 | -0.002 | t | 108551 | NDSLNTGFLAFLFYTKK            | Capra hircus          |
| 1 | 1.00 | 1 | 1 | 0 | -0.003 | 0 | 0 | -0.002 | t | 117220 | LYKTCKQAGTCPPD               | Oryctolagus cuniculus |
| 1 | 1.00 | 1 | 1 | 0 | 0      | 0 | 0 | -0.002 | t | 111211 | DPVGPSD<br>PSIVSLVEETSF      | Oryctolagus cuniculus |
| 1 | 1.00 | 1 | 1 | 0 | 0      | 0 | 0 | -0.002 | t | 117220 | LYKTCKQAGTCPPD               | Oryctolagus cuniculus |
| 1 | 1.00 | 1 | 1 | 0 | 0      | 0 | 0 | -0.002 | t | 110385 | QLYKTCKQ<br>AGTCPPDIIPKV     | Oryctolagus cuniculus |

|   |      |   |   |   |        |   |   |        |   |        |                              |                                  |
|---|------|---|---|---|--------|---|---|--------|---|--------|------------------------------|----------------------------------|
| 1 | 1.00 | 1 | 1 | 0 | 0      | 0 | 0 | -0.002 | t | 105021 | VHHQKLV<br>FFAEDVGS<br>NK    | Homo<br>sapiens                  |
| 1 | 1.00 | 1 | 1 | 0 | 0      | 0 | 0 | -0.002 | t | 110812 | DPVGPLDP<br>SIVSLVEES<br>SFI | Oryctola<br>gus<br>cuniculu<br>s |
| 1 | 1.00 | 1 | 1 | 0 | 0      | 0 | 0 | -0.002 | t | 67373  | TYKADGET<br>ATEKT            | Mus<br>musculu<br>s              |
| 1 | 1.00 | 1 | 1 | 0 | 0      | 0 | 0 | -0.002 | t | 75418  | YPTFGEHK<br>QEKDLEY          | Mus<br>musculu<br>s              |
| 1 | 1.00 | 1 | 1 | 0 | 0      | 0 | 0 | -0.002 | t | 70391  | VPNLRGDL<br>QVLAQKV<br>ARTLP | Mus<br>musculu<br>s              |
| 1 | 1.00 | 1 | 1 | 0 | -0.004 | 0 | 0 | -0.002 | t | 64698  | TKWCPPG<br>QLVNLHDF<br>RSDEI | Oryctola<br>gus<br>cuniculu<br>s |
| 1 | 1.00 | 1 | 1 | 0 | 0      | 0 | 0 | -0.002 | t | 74430  | YKAYVSYK<br>KRKAQEK          | Oryctola<br>gus<br>cuniculu<br>s |
| 1 | 1.00 | 1 | 1 | 0 | -0.002 | 0 | 0 | -0.002 | t | 64698  | TKWCPPG<br>QLVNLHDF<br>RSDEI | Mus<br>musculu<br>s              |
| 1 | 1.00 | 1 | 1 | 0 | 0      | 0 | 0 | -0.002 | t | 79292  | LKTDLELKY<br>KQTADFS         | Oryctola<br>gus<br>cuniculu<br>s |
| 1 | 1.00 | 1 | 1 | 0 | 0      | 0 | 0 | -0.002 | t | 60722  | SRLGRSSA<br>WV               | Mus<br>musculu<br>s              |
| 1 | 1.00 | 1 | 1 | 0 | 0      | 0 | 0 | -0.002 | t | 67253  | TWEVLH                       | Mus<br>musculu<br>s              |
| 1 | 1.00 | 1 | 1 | 0 | 0      | 0 | 0 | -0.002 | t | 69175  | VKAETRLN                     | Mus<br>musculu<br>s              |
| 1 | 1.00 | 1 | 1 | 0 | 0      | 0 | 0 | -0.002 | t | 70729  | VRGLYFP                      | Mus<br>musculu<br>s              |

|   |      |   |   |   |   |   |   |        |   |       |                              |                                  |
|---|------|---|---|---|---|---|---|--------|---|-------|------------------------------|----------------------------------|
| 1 | 1.00 | 1 | 1 | 0 | 0 | 0 | 0 | -0.002 | t | 70391 | VPNLRGDL<br>QVLAQKV<br>ARTLP | Mus<br>musculu<br>s              |
| 1 | 1.00 | 1 | 1 | 0 | 0 | 0 | 0 | -0.002 | t | 62264 | SVNPKMV<br>R                 | Mus<br>musculu<br>s              |
| 1 | 1.00 | 1 | 1 | 0 | 0 | 0 | 0 | -0.002 | t | 75923 | YSWKTWG                      | Mus<br>musculu<br>s              |
| 1 | 1.00 | 1 | 1 | 0 | 0 | 0 | 0 | -0.002 | t | 67253 | TWEVLH                       | Mus<br>musculu<br>s              |
| 1 | 1.00 | 1 | 1 | 0 | 0 | 0 | 0 | -0.002 | t | 60917 | SSAVVDNK<br>LKI              | Mus<br>musculu<br>s              |
| 1 | 1.00 | 1 | 1 | 0 | 0 | 0 | 0 | -0.002 | t | 94580 | LDNKYAGK<br>GY               | Mus<br>musculu<br>s              |
| 1 | 1.00 | 1 | 1 | 0 | 0 | 0 | 0 | -0.002 | t | 74476 | YKLPDHVR<br>T                | Mus<br>musculu<br>s              |
| 1 | 1.00 | 1 | 1 | 0 | 0 | 0 | 0 | -0.002 | t | 78615 | CPGHANR<br>KQCGG             | Oryctola<br>gus<br>cuniculu<br>s |
| 1 | 1.00 | 1 | 1 | 0 | 0 | 0 | 0 | -0.002 | t | 70391 | VPNLRGDL<br>QVLAQKV<br>ARTLP | Mus<br>musculu<br>s              |
| 1 | 1.00 | 1 | 1 | 0 | 0 | 0 | 0 | -0.002 | t | 65421 | TNSGINNS                     | Mus<br>musculu<br>s              |
| 1 | 1.00 | 1 | 1 | 0 | 0 | 0 | 0 | -0.002 | t | 70391 | VPNLRGDL<br>QVLAQKV<br>ARTLP | Mus<br>musculu<br>s              |
| 1 | 1.00 | 1 | 1 | 0 | 0 | 0 | 0 | -0.002 | t | 62077 | SVDFEED                      | Mus<br>musculu<br>s              |
| 1 | 1.00 | 1 | 1 | 0 | 0 | 0 | 0 | -0.002 | t | 87356 | PNCHGPD<br>WASPVQC<br>RHS    | Mus<br>musculu<br>s              |

|   |      |   |   |   |        |   |   |        |   |       |                             |                                  |
|---|------|---|---|---|--------|---|---|--------|---|-------|-----------------------------|----------------------------------|
| 1 | 1.00 | 1 | 1 | 0 | 0      | 0 | 0 | -0.002 | t | 93007 | INNGLPPI<br>QNTRNI          | Mus<br>musculu<br>s              |
| 1 | 1.00 | 1 | 1 | 0 | 0      | 0 | 0 | -0.002 | t | 71506 | VTSTLTSLF<br>RPGASQKI<br>QL | Mus<br>musculu<br>s              |
| 1 | 1.00 | 1 | 1 | 0 | -0.002 | 0 | 0 | -0.002 | t | 69178 | VKAETRLN<br>PDLQPTE         | Homo<br>sapiens                  |
| 1 | 1.00 | 1 | 1 | 0 | 0      | 0 | 0 | -0.002 | t | 67170 | TVSTEQNV<br>PDPQVGI         | Mus<br>musculu<br>s              |
| 1 | 1.00 | 1 | 1 | 0 | 0      | 0 | 0 | -0.002 | t | 97484 | LVEETSFID<br>AGAP           | Mus<br>musculu<br>s              |
| 1 | 1.00 | 1 | 1 | 0 | 0      | 0 | 0 | -0.002 | t | 67170 | TVSTEQNV<br>PDPQVGI         | Mus<br>musculu<br>s              |
| 1 | 1.00 | 1 | 1 | 0 | 0      | 0 | 0 | -0.002 | t | 79287 | LEVTVML<br>NKRLPDSR<br>TS   | Oryctola<br>gus<br>cuniculu<br>s |
| 1 | 1.00 | 1 | 1 | 0 | 0      | 0 | 0 | -0.002 | t | 73433 | YARFMDT<br>DPDRYGIL<br>PSNF | Mus<br>musculu<br>s              |
| 1 | 1.00 | 1 | 1 | 0 | 0      | 0 | 0 | -0.002 | t | 73433 | YARFMDT<br>DPDRYGIL<br>PSNF | Mus<br>musculu<br>s              |
| 1 | 1.00 | 1 | 1 | 0 | 0      | 0 | 0 | -0.002 | t | 76606 | YYSPAF                      | Mus<br>musculu<br>s              |
| 1 | 1.00 | 1 | 1 | 0 | 0      | 0 | 0 | -0.002 | t | 78627 | DPDPPDA<br>NDPAPPN<br>AN    | Mus<br>musculu<br>s              |
| 1 | 1.00 | 1 | 1 | 0 | 0      | 0 | 0 | -0.002 | t | 95058 | AGLQND                      | Mus<br>musculu<br>s              |
| 1 | 1.00 | 1 | 1 | 0 | 0      | 0 | 0 | -0.002 | t | 61801 | STNSGINN                    | Mus<br>musculu<br>s              |
| 1 | 1.00 | 1 | 1 | 0 | 0      | 0 | 0 | -0.002 | t | 65238 | TMPFSPDF<br>SNVD            | Oryctola<br>gus<br>cuniculu<br>s |
| 1 | 1.00 | 1 | 1 | 0 | 0      | 0 | 0 | -0.002 | t | 62730 | SYTVTNLV<br>QTQSQVQ         | Mus<br>musculu<br>s              |

|   |      |   |   |   |        |   |   |        |   |       |                              |                                  |
|---|------|---|---|---|--------|---|---|--------|---|-------|------------------------------|----------------------------------|
| 1 | 1.00 | 1 | 1 | 0 | 0.004  | 0 | 0 | -0.002 | t | 62730 | SYTVTNLV<br>QTQSQVQ          | Mus<br>musculu<br>s              |
| 1 | 1.00 | 1 | 1 | 0 | 0      | 0 | 0 | -0.002 | t | 78629 | DQKPPSR<br>QSQIESR           | Oryctola<br>gus<br>cuniculu<br>s |
| 1 | 1.00 | 1 | 1 | 0 | 0      | 0 | 0 | -0.002 | t | 70437 | VPPTQSKK<br>KNKNET           | Oryctola<br>gus<br>cuniculu<br>s |
| 1 | 1.00 | 1 | 1 | 0 | 0      | 0 | 0 | -0.002 | t | 82891 | GSPNCHG<br>PDWASPV<br>CQRHS  | Mus<br>musculu<br>s              |
| 1 | 1.00 | 1 | 1 | 0 | 0      | 0 | 0 | -0.002 | t | 71693 | VVIANNV<br>DKFVSWG<br>ITDFEM | Rattus<br>norvegic<br>us         |
| 1 | 1.00 | 1 | 1 | 0 | 0      | 0 | 0 | -0.002 | t | 70391 | VPNLRGDL<br>QVLAQKV<br>ARTLP | Cavia<br>porcellu<br>s           |
| 1 | 1.00 | 1 | 1 | 0 | 0      | 0 | 0 | -0.002 | t | 69178 | VKAETRLN<br>PDLQPT           | Mus<br>musculu<br>s              |
| 1 | 1.00 | 1 | 1 | 0 | 0      | 0 | 0 | -0.002 | t | 73021 | WRCVVYP<br>GNGFVSAS<br>IFGFQ | Oryctola<br>gus<br>cuniculu<br>s |
| 1 | 1.00 | 1 | 1 | 0 | 0      | 0 | 0 | -0.002 | t | 62150 | SVIALGSQ<br>EGALHQAL<br>AGAI | Equus<br>caballus                |
| 1 | 1.00 | 1 | 1 | 0 | -0.006 | 0 | 0 | -0.002 | t | 78843 | TAAQITAG<br>IALHQS<br>NLN    | Canis<br>lupus                   |
| 1 | 1.00 | 1 | 1 | 0 | 0.002  | 0 | 0 | -0.002 | t | 78843 | TAAQITAG<br>IALHQS<br>NLN    | Cavia<br>porcellu<br>s           |
| 1 | 1.00 | 1 | 1 | 0 | 0      | 0 | 0 | -0.002 | t | 94513 | FHPDK                        | Mus<br>musculu<br>s              |
| 1 | 1.00 | 1 | 1 | 0 | 0      | 0 | 0 | -0.002 | t | 72911 | WNSTTFH<br>QTLQDP            | Mus<br>musculu<br>s              |
| 1 | 1.00 | 1 | 1 | 0 | 0      | 0 | 0 | -0.002 | t | 64985 | TLNPTI                       | Mus<br>musculu<br>s              |

|   |      |   |   |   |   |   |   |        |   |       |                              |                                  |
|---|------|---|---|---|---|---|---|--------|---|-------|------------------------------|----------------------------------|
| 1 | 1.00 | 1 | 1 | 0 | 0 | 0 | 0 | -0.002 | t | 60623 | SRALRGD<br>MANLTNQ           | Oryctola<br>gus<br>cuniculu<br>s |
| 1 | 1.00 | 1 | 1 | 0 | 0 | 0 | 0 | -0.002 | t | 71490 | VTSGSTKD                     | Homo<br>sapiens                  |
| 1 | 1.00 | 1 | 1 | 0 | 0 | 0 | 0 | -0.002 | t | 78635 | EKIERNNK<br>LKQPPPPP<br>NPN  | Mus<br>musculu<br>s              |
| 1 | 1.00 | 1 | 1 | 0 | 0 | 0 | 0 | -0.002 | t | 77827 | AKALKVEV                     | Mus<br>musculu<br>s              |
| 1 | 1.00 | 1 | 1 | 0 | 0 | 0 | 0 | -0.002 | t | 69178 | VKAETRLN<br>PDLQPT           | Oryctola<br>gus<br>cuniculu<br>s |
| 1 | 1.00 | 1 | 1 | 0 | 0 | 0 | 0 | -0.002 | t | 70391 | VPNLRGDL<br>QVLAQKV<br>ARTLP | Cavia<br>porcellu<br>s           |
| 1 | 1.00 | 1 | 1 | 0 | 0 | 0 | 0 | -0.002 | t | 94491 | DRGWGN<br>HCGLFGK<br>GSI     | Mus<br>musculu<br>s              |
| 1 | 1.00 | 1 | 1 | 0 | 0 | 0 | 0 | -0.002 | t | 78638 | EKSLTSLSE<br>VVLQNR<br>GLD   | Oryctola<br>gus<br>cuniculu<br>s |
| 1 | 1.00 | 1 | 1 | 0 | 0 | 0 | 0 | -0.002 | t | 72320 | WDMMM<br>NW                  | Homo<br>sapiens                  |
| 1 | 1.00 | 1 | 1 | 0 | 0 | 0 | 0 | -0.002 | t | 74009 | YGGPANK<br>KNAG              | Mus<br>musculu<br>s              |
| 1 | 1.00 | 1 | 1 | 0 | 0 | 0 | 0 | -0.002 | t | 63038 | TAVSPTTL<br>RTEVVK           | Sus<br>scrofa                    |
| 1 | 1.00 | 1 | 1 | 0 | 0 | 0 | 0 | -0.002 | t | 64587 | TKINADNP<br>VPILELE          | Mus<br>musculu<br>s              |
| 1 | 1.00 | 1 | 1 | 0 | 0 | 0 | 0 | -0.002 | t | 63038 | TAVSPTTL<br>RTEVVK           | Sus<br>scrofa                    |
| 1 | 1.00 | 1 | 1 | 0 | 0 | 0 | 0 | -0.002 | t | 66060 | TRLNPD                       | Mus<br>musculu<br>s              |



|   |      |   |   |   |        |   |   |        |   |       |                              |                                  |
|---|------|---|---|---|--------|---|---|--------|---|-------|------------------------------|----------------------------------|
| 1 | 1.00 | 1 | 1 | 0 | 0      | 0 | 0 | -0.002 | t | 64587 | TKINADNP<br>VPILELE          | Mus<br>musculu<br>s              |
| 1 | 1.00 | 1 | 1 | 0 | 0      | 0 | 0 | -0.002 | t | 72910 | WNSTTFH<br>QTL               | Mus<br>musculu<br>s              |
| 1 | 1.00 | 1 | 1 | 0 | 0      | 0 | 0 | -0.002 | t | 69183 | VKAVTTLL<br>KA               | Oryctola<br>gus<br>cuniculu<br>s |
| 1 | 1.00 | 1 | 1 | 0 | 0      | 0 | 0 | -0.002 | t | 64985 | TLNPTI                       | Mus<br>musculu<br>s              |
| 1 | 1.00 | 1 | 1 | 0 | 0      | 0 | 0 | -0.002 | t | 72911 | WNSTTFH<br>QTLQDP            | Mus<br>musculu<br>s              |
| 1 | 1.00 | 1 | 1 | 0 | 0      | 0 | 0 | -0.002 | t | 94661 | QPDFGGF<br>WDA               | Mus<br>musculu<br>s              |
| 1 | 1.00 | 1 | 1 | 0 | 0      | 0 | 0 | -0.002 | t | 71284 | VTEEI                        | Oryctola<br>gus<br>cuniculu<br>s |
| 1 | 1.00 | 1 | 1 | 0 | 0      | 0 | 0 | -0.002 | t | 71284 | VTEEI                        | Homo<br>sapiens                  |
| 1 | 1.00 | 1 | 1 | 0 | -0.003 | 0 | 0 | -0.002 | t | 69183 | VKAVTTLL<br>KA               | Oryctola<br>gus<br>cuniculu<br>s |
| 1 | 1.00 | 1 | 1 | 0 | 0      | 0 | 0 | -0.002 | t | 67875 | VCRQGVV<br>DRGWGN<br>GCGLFGK | Equus<br>caballus                |
| 1 | 1.00 | 1 | 1 | 0 | 0      | 0 | 0 | -0.002 | t | 82657 | GGYEFLLA<br>NDVDNSN<br>PVVQ  | Rattus<br>norvegic<br>us         |
| 1 | 1.00 | 1 | 1 | 0 | 0      | 0 | 0 | -0.002 | t | 70489 | VPSYSFIRA<br>HDSEVQD<br>LIA  | Rattus<br>norvegic<br>us         |
| 1 | 1.00 | 1 | 1 | 0 | 0      | 0 | 0 | -0.002 | t | 61783 | STNKAVVS<br>LS               | Bos<br>taurus                    |
| 1 | 1.00 | 1 | 1 | 0 | 0      | 0 | 0 | -0.002 | t | 77970 | PQTQQFIP                     | Mus<br>musculu<br>s              |

|   |      |   |   |   |        |   |   |        |   |       |                              |                       |
|---|------|---|---|---|--------|---|---|--------|---|-------|------------------------------|-----------------------|
| 1 | 1.00 | 1 | 1 | 0 | 0      | 0 | 0 | -0.002 | t | 76290 | YVHDNC                       | Mus musculus          |
| 1 | 1.00 | 1 | 1 | 0 | 0      | 0 | 0 | -0.002 | t | 62353 | SVTEEIAEE<br>DKSVTEEEI<br>AV | Homo sapiens          |
| 1 | 1.00 | 1 | 1 | 0 | 0      | 0 | 0 | -0.002 | t | 66841 | TTTCFRDT<br>DTGK             | Mus musculus          |
| 1 | 1.00 | 1 | 1 | 0 | 0      | 0 | 0 | -0.002 | t | 70489 | VPSYSFIRA<br>HDSEVQD<br>LIA  | Rattus norvegicus     |
| 1 | 1.00 | 1 | 1 | 0 | -0.007 | 0 | 0 | -0.002 | t | 61945 | STTNKDK                      | Oryctolagus cuniculus |
| 1 | 1.00 | 1 | 1 | 0 | 0      | 0 | 0 | -0.002 | t | 75951 | YTASARGD<br>LAHLTTTH<br>AR   | Cavia porcellus       |
| 1 | 1.00 | 1 | 1 | 0 | 0      | 0 | 0 | -0.002 | t | 96367 | HSNLDHI                      | Homo sapiens          |
| 1 | 1.00 | 1 | 1 | 0 | 0      | 0 | 0 | -0.002 | t | 64010 | TGYRYDSR<br>TGFFATN          | Mus musculus          |
| 1 | 1.00 | 1 | 1 | 0 | 0      | 0 | 0 | -0.002 | t | 61589 | STEQNVP<br>DPQVG             | Oryctolagus cuniculus |
| 1 | 1.00 | 1 | 1 | 0 | 0      | 0 | 0 | -0.002 | t | 66304 | TSLNDRQ<br>GNATK             | Oryctolagus cuniculus |
| 1 | 1.00 | 1 | 1 | 0 | 0      | 0 | 0 | -0.002 | t | 70489 | VPSYSFIRA<br>HDSEVQD<br>LIA  | Rattus norvegicus     |
| 1 | 1.00 | 1 | 1 | 0 | 0      | 0 | 0 | -0.002 | t | 93172 | KTSLWKE<br>MQYNRDI           | Mus musculus          |
| 1 | 1.00 | 1 | 1 | 0 | 0      | 0 | 0 | -0.002 | t | 79054 | QPDGGQP<br>AVRNERAT          | Oryctolagus cuniculus |

|   |      |   |   |   |        |   |   |        |   |       |                              |                                  |
|---|------|---|---|---|--------|---|---|--------|---|-------|------------------------------|----------------------------------|
| 1 | 1.00 | 1 | 1 | 0 | -0.006 | 0 | 0 | -0.002 | t | 79054 | QPDGGQP<br>AVRNERAT          | Oryctola<br>gus<br>cuniculu<br>s |
| 1 | 1.00 | 1 | 1 | 0 | 0      | 0 | 0 | -0.002 | t | 70489 | VPSYSFIRA<br>HDSEVQD<br>LIA  | Rattus<br>norvegic<br>us         |
| 1 | 1.00 | 1 | 1 | 0 | 0      | 0 | 0 | -0.002 | t | 78836 | SPKRIGTG<br>DR               | Oryctola<br>gus<br>cuniculu<br>s |
| 1 | 1.00 | 1 | 1 | 0 | 0      | 0 | 0 | -0.002 | t | 97650 | SLLTEVET                     | Mus<br>musculu<br>s              |
| 1 | 1.00 | 1 | 1 | 0 | 0      | 0 | 0 | -0.002 | t | 77974 | PVKDSSKQ                     | Mus<br>musculu<br>s              |
| 1 | 1.00 | 1 | 1 | 0 | 0      | 0 | 0 | -0.002 | t | 70391 | VPNLRGDL<br>QVLAQKV<br>ARTLP | Oryctola<br>gus<br>cuniculu<br>s |
| 1 | 1.00 | 1 | 1 | 0 | -0.003 | 0 | 0 | -0.002 | t | 76275 | YVFYSGNG<br>PKASGGD<br>YCIQS | Oryctola<br>gus<br>cuniculu<br>s |
| 1 | 1.00 | 1 | 1 | 0 | 0      | 0 | 0 | -0.002 | t | 72065 | VYKLDISEA                    | Mus<br>musculu<br>s              |
| 1 | 1.00 | 1 | 1 | 0 | 0      | 0 | 0 | -0.002 | t | 78001 | SEGLKEET                     | Mus<br>musculu<br>s              |
| 1 | 1.00 | 1 | 1 | 0 | 0      | 0 | 0 | -0.002 | t | 63756 | TFTNKLKE<br>KHTDLGK          | Mus<br>musculu<br>s              |
| 1 | 1.00 | 1 | 1 | 0 | 0      | 0 | 0 | -0.002 | t | 70391 | VPNLRGDL<br>QVLAQKV<br>ARTLP | Cavia<br>porcellu<br>s           |
| 1 | 1.00 | 1 | 1 | 0 | 0      | 0 | 0 | -0.002 | t | 75923 | YSWKTWG                      | Mus<br>musculu<br>s              |
| 1 | 1.00 | 1 | 1 | 0 | 0      | 0 | 0 | -0.002 | t | 61589 | STEQNVP<br>DPQVG             | Mus<br>musculu<br>s              |

|   |      |   |   |   |   |   |   |        |   |       |                              |                                  |
|---|------|---|---|---|---|---|---|--------|---|-------|------------------------------|----------------------------------|
| 1 | 1.00 | 1 | 1 | 0 | 0 | 0 | 0 | -0.002 | t | 70391 | VPNLRGDL<br>QVLAQKV<br>ARTLP | Cavia<br>porcellu<br>s           |
| 1 | 1.00 | 1 | 1 | 0 | 0 | 0 | 0 | -0.002 | t | 61589 | STEQNVP<br>DPQVG             | Cavia<br>porcellu<br>s           |
| 1 | 1.00 | 1 | 1 | 0 | 0 | 0 | 0 | -0.002 | t | 63562 | TETPLRKH<br>FNLTPV           | Ovis<br>aries                    |
| 1 | 1.00 | 1 | 1 | 0 | 0 | 0 | 0 | -0.002 | t | 79040 | PGQNLCYT<br>K                | Mus<br>musculu<br>s              |
| 1 | 1.00 | 1 | 1 | 0 | 0 | 0 | 0 | -0.002 | t | 78424 | IPRSRQIDL<br>QIG             | Mus<br>musculu<br>s              |
| 1 | 1.00 | 1 | 1 | 0 | 0 | 0 | 0 | -0.002 | t | 63562 | TETPLRKH<br>FNLTPV           | Ovis<br>aries                    |
| 1 | 1.00 | 1 | 1 | 0 | 0 | 0 | 0 | -0.002 | t | 73889 | YFRTLEDA<br>AH               | Mus<br>musculu<br>s              |
| 1 | 1.00 | 1 | 1 | 0 | 0 | 0 | 0 | -0.002 | t | 73889 | YFRTLEDA<br>AH               | Mus<br>musculu<br>s              |
| 1 | 1.00 | 1 | 1 | 0 | 0 | 0 | 0 | -0.002 | t | 73889 | YFRTLEDA<br>AH               | Mus<br>musculu<br>s              |
| 1 | 1.00 | 1 | 1 | 0 | 0 | 0 | 0 | -0.002 | t | 68837 | VHDCVNIT<br>IKQ              | Mus<br>musculu<br>s              |
| 1 | 1.00 | 1 | 1 | 0 | 0 | 0 | 0 | -0.002 | t | 94483 | CYKKVWR<br>DHRGTIER<br>GC    | Mus<br>musculu<br>s              |
| 1 | 1.00 | 1 | 1 | 0 | 0 | 0 | 0 | -0.002 | t | 66539 | TTASGKLIT                    | Mus<br>musculu<br>s              |
| 1 | 1.00 | 1 | 1 | 0 | 0 | 0 | 0 | -0.002 | t | 78011 | SPSTSASS                     | Mus<br>musculu<br>s              |
| 1 | 1.00 | 1 | 1 | 0 | 0 | 0 | 0 | -0.002 | t | 78115 | DDPPATVY<br>RYDSRPP          | Oryctola<br>gus<br>cuniculu<br>s |

|   |      |   |   |   |        |   |   |        |   |       |                              |                          |
|---|------|---|---|---|--------|---|---|--------|---|-------|------------------------------|--------------------------|
| 1 | 1.00 | 1 | 1 | 0 | 0      | 0 | 0 | -0.002 | t | 71693 | VVIANNV<br>DKFVSWG<br>TDFEM  | Rattus<br>norvegicus     |
| 1 | 1.00 | 1 | 1 | 0 | 0      | 0 | 0 | -0.002 | t | 63250 | TDTRKDIN<br>TVTTVAQS         | Oryctolagus<br>cuniculus |
| 1 | 1.00 | 1 | 1 | 0 | 0      | 0 | 0 | -0.002 | t | 70391 | VPNLRGDL<br>QVLAQKV<br>ARTLP | Mus<br>musculus          |
| 1 | 1.00 | 1 | 1 | 0 | -0.003 | 0 | 0 | -0.002 | t | 61589 | STEQNVP<br>DPQVG             | Oryctolagus<br>cuniculus |
| 1 | 1.00 | 1 | 1 | 0 | 0      | 0 | 0 | -0.002 | t | 61589 | STEQNVP<br>DPQVG             | Oryctolagus<br>cuniculus |
| 1 | 1.00 | 1 | 1 | 0 | 0      | 0 | 0 | -0.002 | t | 96854 | SAPSISTE                     | Mus<br>musculus          |
| 1 | 1.00 | 1 | 1 | 0 | 0      | 0 | 0 | -0.002 | t | 97484 | LVEETSFID<br>AGAP            | Homo<br>sapiens          |
| 1 | 1.00 | 1 | 1 | 0 | 0      | 0 | 0 | -0.002 | t | 94743 | YGTDEWE<br>QWW               | Mus<br>musculus          |
| 1 | 1.00 | 1 | 1 | 0 | 0      | 0 | 0 | -0.002 | t | 97484 | LVEETSFID<br>AGAP            | Oryctolagus<br>cuniculus |
| 1 | 1.00 | 1 | 1 | 0 | 0      | 0 | 0 | -0.002 | t | 75696 | YSAGGTG<br>RRGDLGPL<br>A     | Mus<br>musculus          |
| 1 | 1.00 | 1 | 1 | 0 | 0      | 0 | 0 | -0.002 | t | 70050 | VNATKP                       | Mus<br>musculus          |
| 1 | 1.00 | 1 | 1 | 0 | 0      | 0 | 0 | -0.002 | t | 78107 | ATYQSEYL<br>AHRRIPP          | Oryctolagus<br>cuniculus |
| 1 | 1.00 | 1 | 1 | 0 | 0      | 0 | 0 | -0.002 | t | 69178 | VKAETRLN<br>PDLQPTE          | Oryctolagus<br>cuniculus |

|   |      |   |   |   |        |   |   |        |   |       |                              |                                  |
|---|------|---|---|---|--------|---|---|--------|---|-------|------------------------------|----------------------------------|
| 1 | 1.00 | 1 | 1 | 0 | 0      | 0 | 0 | -0.002 | t | 73385 | YALADASL<br>KMADPNR<br>FRGKD | Oryctola<br>gus<br>cuniculu<br>s |
| 1 | 1.00 | 1 | 1 | 0 | 0      | 0 | 0 | -0.002 | t | 73385 | YALADASL<br>KMADPNR<br>FRGKD | Oryctola<br>gus<br>cuniculu<br>s |
| 1 | 1.00 | 1 | 1 | 0 | 0      | 0 | 0 | -0.002 | t | 69178 | VKAETRLN<br>PDLQPT           | Cavia<br>porcellu<br>s           |
| 1 | 1.00 | 1 | 1 | 0 | 0      | 0 | 0 | -0.002 | t | 69178 | VKAETRLN<br>PDLQPT           | Mus<br>musculu<br>s              |
| 1 | 1.00 | 1 | 1 | 0 | 0      | 0 | 0 | -0.002 | t | 78707 | KLRLRLKQ<br>R                | Oryctola<br>gus<br>cuniculu<br>s |
| 1 | 1.00 | 1 | 1 | 0 | -0.006 | 0 | 0 | -0.002 | t | 79026 | MSDGAVQ<br>PDGGQPA<br>V      | Oryctola<br>gus<br>cuniculu<br>s |
| 1 | 1.00 | 1 | 1 | 0 | 0      | 0 | 0 | -0.002 | t | 79026 | MSDGAVQ<br>PDGGQPA<br>V      | Oryctola<br>gus<br>cuniculu<br>s |
| 1 | 1.00 | 1 | 1 | 0 | -0.007 | 0 | 0 | -0.002 | t | 66649 | TTIHELLVR<br>MKRAELYC<br>PRP | Oryctola<br>gus<br>cuniculu<br>s |
| 1 | 1.00 | 1 | 1 | 0 | 0      | 0 | 0 | -0.002 | t | 80002 | RKADLEKA<br>LEGAM            | Oryctola<br>gus<br>cuniculu<br>s |
| 1 | 1.00 | 1 | 1 | 0 | 0      | 0 | 0 | -0.002 | t | 63970 | TGT                          | Mus<br>musculu<br>s              |
| 1 | 1.00 | 1 | 1 | 0 | 0      | 0 | 0 | -0.002 | t | 67214 | TVWRNRE<br>TLMEFEFP<br>HATKQ | Equus<br>caballus                |
| 1 | 1.00 | 1 | 1 | 0 | 0      | 0 | 0 | -0.002 | t | 60783 | SRRGDLGS<br>LATRVATQ         | Bos<br>taurus                    |
| 1 | 1.00 | 1 | 1 | 0 | 0      | 0 | 0 | -0.002 | t | 78159 | GALATYQS<br>EYLAHRRP<br>PP   | Oryctola<br>gus<br>cuniculu<br>s |

|   |      |   |   |   |        |   |   |        |   |       |                              |                                  |
|---|------|---|---|---|--------|---|---|--------|---|-------|------------------------------|----------------------------------|
| 1 | 1.00 | 1 | 1 | 0 | 0      | 0 | 0 | -0.002 | t | 66649 | TTIHELLVR<br>MKRAELYC<br>PRP | Oryctola<br>gus<br>cuniculu<br>s |
| 1 | 1.00 | 1 | 1 | 0 | -0.003 | 0 | 0 | -0.002 | t | 66649 | TTIHELLVR<br>MKRAELYC<br>PRP | Oryctola<br>gus<br>cuniculu<br>s |
| 1 | 1.00 | 1 | 1 | 0 | 0      | 0 | 0 | -0.002 | t | 61945 | STTNKDK                      | Oryctola<br>gus<br>cuniculu<br>s |
| 1 | 1.00 | 1 | 1 | 0 | 0      | 0 | 0 | -0.002 | t | 64545 | TKEEVPPA<br>DLSDQVP          | Mus<br>musculu<br>s              |
| 1 | 1.00 | 1 | 1 | 0 | 0      | 0 | 0 | -0.002 | t | 66108 | TRTNPWP<br>ALAEGEF           | Oryctola<br>gus<br>cuniculu<br>s |
| 1 | 1.00 | 1 | 1 | 0 | 0      | 0 | 0 | -0.002 | t | 60722 | SRLGRSSA<br>WV               | Mus<br>musculu<br>s              |
| 1 | 1.00 | 1 | 1 | 0 | 0      | 0 | 0 | -0.002 | t | 61945 | STTNKDK                      | Cavia<br>porcellu<br>s           |
| 1 | 1.00 | 1 | 1 | 0 | 0      | 0 | 0 | -0.002 | t | 64985 | TLNPTI                       | Mus<br>musculu<br>s              |
| 1 | 1.00 | 1 | 1 | 0 | 0      | 0 | 0 | -0.002 | t | 73131 | WTGVAQ<br>D                  | Oryctola<br>gus<br>cuniculu<br>s |
| 1 | 1.00 | 1 | 1 | 0 | 0      | 0 | 0 | -0.002 | t | 96102 | APPLLPH                      | Homo<br>sapiens                  |
| 1 | 1.00 | 1 | 1 | 0 | 0      | 0 | 0 | -0.002 | t | 61945 | STTNKDK                      | Oryctola<br>gus<br>cuniculu<br>s |
| 1 | 1.00 | 1 | 1 | 0 | 0      | 0 | 0 | -0.002 | t | 79009 | KTWCD<br>WCG                 | Mus<br>musculu<br>s              |
| 1 | 1.00 | 1 | 1 | 0 | 0      | 0 | 0 | -0.002 | t | 78711 | KQYDPDR<br>P                 | Oryctola<br>gus<br>cuniculu<br>s |

|   |      |   |   |   |   |   |   |        |   |       |                              |                       |
|---|------|---|---|---|---|---|---|--------|---|-------|------------------------------|-----------------------|
| 1 | 1.00 | 1 | 1 | 0 | 0 | 0 | 0 | -0.002 | t | 74497 | YKQKIIAP                     | Mus musculus          |
| 1 | 1.00 | 1 | 1 | 0 | 0 | 0 | 0 | -0.002 | t | 70391 | VPNLRGDL<br>QVLAQKV<br>ARTLP | Mus musculus          |
| 1 | 1.00 | 1 | 1 | 0 | 0 | 0 | 0 | -0.002 | t | 63697 | TFLARG                       | Mus musculus          |
| 1 | 1.00 | 1 | 1 | 0 | 0 | 0 | 0 | -0.002 | t | 78044 | TTASSMSS                     | Mus musculus          |
| 1 | 1.00 | 1 | 1 | 0 | 0 | 0 | 0 | -0.002 | t | 95142 | RIKNTDGSIS                   | Oryctolagus cuniculus |
| 1 | 1.00 | 1 | 1 | 0 | 0 | 0 | 0 | -0.002 | t | 70391 | VPNLRGDL<br>QVLAQKV<br>ARTLP | Mus musculus          |
| 1 | 1.00 | 1 | 1 | 0 | 0 | 0 | 0 | -0.002 | t | 63022 | TATRLLSST<br>NSRLC           | Mus musculus          |
| 1 | 1.00 | 1 | 1 | 0 | 0 | 0 | 0 | -0.002 | t | 65684 | TPPHSARS<br>KFGYGA           | Mus musculus          |
| 1 | 1.00 | 1 | 1 | 0 | 0 | 0 | 0 | -0.002 | t | 73132 | WTGVTQN                      | Mus musculus          |
| 1 | 1.00 | 1 | 1 | 0 | 0 | 0 | 0 | -0.002 | t | 70391 | VPNLRGDL<br>QVLAQKV<br>ARTLP | Cavia porcellus       |
| 1 | 1.00 | 1 | 1 | 0 | 0 | 0 | 0 | -0.002 | t | 70391 | VPNLRGDL<br>QVLAQKV<br>ARTLP | Cavia porcellus       |
| 1 | 1.00 | 1 | 1 | 0 | 0 | 0 | 0 | -0.002 | t | 70391 | VPNLRGDL<br>QVLAQKV<br>ARTLP | Cavia porcellus       |



|   |      |   |   |   |   |   |   |        |   |       |                      |                       |
|---|------|---|---|---|---|---|---|--------|---|-------|----------------------|-----------------------|
| 1 | 1.00 | 1 | 1 | 0 | 0 | 0 | 0 | -0.002 | t | 73132 | WTGVTQN              | Mus musculus          |
| 1 | 1.00 | 1 | 1 | 0 | 0 | 0 | 0 | -0.002 | t | 73132 | WTGVTQN              | Mus musculus          |
| 1 | 1.00 | 1 | 1 | 0 | 0 | 0 | 0 | -0.002 | t | 73132 | WTGVTQN              | Mus musculus          |
| 1 | 1.00 | 1 | 1 | 0 | 0 | 0 | 0 | -0.002 | t | 73132 | WTGVTQN              | Mus musculus          |
| 1 | 1.00 | 1 | 1 | 0 | 0 | 0 | 0 | -0.002 | t | 64534 | TKDASIDYHE           | Mus musculus          |
| 1 | 1.00 | 1 | 1 | 0 | 0 | 0 | 0 | -0.002 | t | 91165 | CCELCCNPACAGCY       | Sus scrofa            |
| 1 | 1.00 | 1 | 1 | 0 | 0 | 0 | 0 | -0.002 | t | 97348 | GLFGAIAGFIEGGW       | Oryctolagus cuniculus |
| 1 | 1.00 | 1 | 1 | 0 | 0 | 0 | 0 | -0.002 | t | 63736 | TFQVEVPGSQHIDS       | Oryctolagus cuniculus |
| 1 | 1.00 | 1 | 1 | 0 | 0 | 0 | 0 | -0.002 | t | 96874 | SIAPDLSLDFEKLNV      | Mus musculus          |
| 1 | 1.00 | 1 | 1 | 0 | 0 | 0 | 0 | -0.002 | t | 70391 | VPNLRGDLQVLAQKVARTLP | Cavia porcellus       |
| 1 | 1.00 | 1 | 1 | 0 | 0 | 0 | 0 | -0.002 | t | 70391 | VPNLRGDLQVLAQKVARTLP | Mus musculus          |
| 1 | 1.00 | 1 | 1 | 0 | 0 | 0 | 0 | -0.002 | t | 61779 | STNDNIKDLLDWYSSG     | Oryctolagus cuniculus |
| 1 | 1.00 | 1 | 1 | 0 | 0 | 0 | 0 | -0.002 | t | 70390 | VPNLRGDLQVLAQKVART   | Cavia porcellus       |

|   |      |   |   |   |   |   |   |        |   |       |                              |                                  |
|---|------|---|---|---|---|---|---|--------|---|-------|------------------------------|----------------------------------|
| 1 | 1.00 | 1 | 1 | 0 | 0 | 0 | 0 | -0.002 | t | 79437 | TTQATLITS<br>PFTFSYIRE<br>DD | Oryctola<br>gus<br>cuniculu<br>s |
| 1 | 1.00 | 1 | 1 | 0 | 0 | 0 | 0 | -0.002 | t | 63037 | TAVSPTTL<br>R                | Oryctola<br>gus<br>cuniculu<br>s |
| 1 | 1.00 | 1 | 1 | 0 | 0 | 0 | 0 | -0.002 | t | 67605 | VAGLEK                       | Mus<br>musculu<br>s              |
| 1 | 1.00 | 1 | 1 | 0 | 0 | 0 | 0 | -0.002 | t | 62340 | SVSVGMP<br>PSPRP             | Mus<br>musculu<br>s              |
| 1 | 1.00 | 1 | 1 | 0 | 0 | 0 | 0 | -0.002 | t | 78177 | HVTDLDKE<br>FL               | Mus<br>musculu<br>s              |
| 1 | 1.00 | 1 | 1 | 0 | 0 | 0 | 0 | -0.002 | t | 79217 | FTWSWES<br>GKYTTETF<br>ATNS  | Oryctola<br>gus<br>cuniculu<br>s |
| 1 | 1.00 | 1 | 1 | 0 | 0 | 0 | 0 | -0.002 | t | 94741 | WEQWW                        | Mus<br>musculu<br>s              |
| 1 | 1.00 | 1 | 1 | 0 | 0 | 0 | 0 | -0.002 | t | 75776 | YSKFN                        | Mus<br>musculu<br>s              |
| 1 | 1.00 | 1 | 1 | 0 | 0 | 0 | 0 | -0.002 | t | 70391 | VPNLRGDL<br>QVLAQKV<br>ARTLP | Cavia<br>porcellu<br>s           |
| 1 | 1.00 | 1 | 1 | 0 | 0 | 0 | 0 | -0.002 | t | 95058 | AGLQND                       | Mus<br>musculu<br>s              |
| 1 | 1.00 | 1 | 1 | 0 | 0 | 0 | 0 | -0.002 | t | 65535 | TPDNNQT<br>SPARR             | Oryctola<br>gus<br>cuniculu<br>s |
| 1 | 1.00 | 1 | 1 | 0 | 0 | 0 | 0 | -0.002 | t | 66850 | TTTGNV<br>APS                | Oryctola<br>gus<br>cuniculu<br>s |
| 1 | 1.00 | 1 | 1 | 0 | 0 | 0 | 0 | -0.002 | t | 78946 | DAWCGR<br>GK                 | Mus<br>musculu<br>s              |

|   |      |   |   |   |        |   |   |        |   |       |                              |                                  |
|---|------|---|---|---|--------|---|---|--------|---|-------|------------------------------|----------------------------------|
| 1 | 1.00 | 1 | 1 | 0 | -0.007 | 0 | 0 | -0.002 | t | 65535 | TPDNNQT<br>SPARR             | Oryctola<br>gus<br>cuniculu<br>s |
| 1 | 1.00 | 1 | 1 | 0 | 0      | 0 | 0 | -0.002 | t | 91109 | AHFVQQT<br>P                 | Mus<br>musculu<br>s              |
| 1 | 1.00 | 1 | 1 | 0 | 0      | 0 | 0 | -0.002 | t | 72143 | VYQVNNL<br>EEIC              | Mus<br>musculu<br>s              |
| 1 | 1.00 | 1 | 1 | 0 | 0      | 0 | 0 | -0.002 | t | 70391 | VPNLRGDL<br>QVLAQKV<br>ARTLP | Oryctola<br>gus<br>cuniculu<br>s |
| 1 | 1.00 | 1 | 1 | 0 | 0      | 0 | 0 | -0.002 | t | 62997 | TASNKNR<br>GIKTFS            | Mus<br>musculu<br>s              |
| 1 | 1.00 | 1 | 1 | 0 | 0      | 0 | 0 | -0.002 | t | 91100 | AFQTPVHS                     | Mus<br>musculu<br>s              |
| 1 | 1.00 | 1 | 1 | 0 | 0      | 0 | 0 | -0.002 | t | 70390 | VPNLRGDL<br>QVLAQKV<br>ART   | Bos<br>taurus                    |
| 1 | 1.00 | 1 | 1 | 0 | 0      | 0 | 0 | -0.002 | t | 43152 | NAGGNAG<br>GNAGGNA<br>GGNAGG | Mus<br>musculu<br>s              |
| 1 | 1.00 | 1 | 1 | 0 | 0      | 0 | 0 | -0.002 | t | 51772 | QNTEEME<br>NLSDRVAS          | Mus<br>musculu<br>s              |
| 1 | 1.00 | 1 | 1 | 0 | 0      | 0 | 0 | -0.002 | t | 43730 | NEREDERT<br>LTKEYEDIV<br>LK  | Oryctola<br>gus<br>cuniculu<br>s |
| 1 | 1.00 | 1 | 1 | 0 | 0      | 0 | 0 | -0.002 | t | 57542 | SELSQLS                      | Mus<br>musculu<br>s              |
| 1 | 1.00 | 1 | 1 | 0 | 0      | 0 | 0 | -0.002 | t | 49539 | PSTSSKLRP<br>RWTFTSPP<br>VTT | Oryctola<br>gus<br>cuniculu<br>s |

|   |      |   |   |   |        |   |   |        |   |       |                              |                                  |
|---|------|---|---|---|--------|---|---|--------|---|-------|------------------------------|----------------------------------|
| 1 | 1.00 | 1 | 1 | 0 | 0      | 0 | 0 | -0.002 | t | 49629 | PTGDRHK<br>QPLVAPAK<br>QLL   | Mus<br>musculu<br>s              |
| 1 | 1.00 | 1 | 1 | 0 | 0      | 0 | 0 | -0.002 | t | 48715 | PNVDPN                       | Mus<br>musculu<br>s              |
| 1 | 1.00 | 1 | 1 | 0 | 0      | 0 | 0 | -0.002 | t | 51772 | QNTEEME<br>NLSDRVAS          | Mus<br>musculu<br>s              |
| 1 | 1.00 | 1 | 1 | 0 | -0.007 | 0 | 0 | -0.002 | t | 60415 | SQDRHKQ<br>KIIAPAKQL<br>L    | Oryctola<br>gus<br>cuniculu<br>s |
| 1 | 1.00 | 1 | 1 | 0 | 0      | 0 | 0 | -0.002 | t | 46960 | PASTTNKD<br>KL               | Oryctola<br>gus<br>cuniculu<br>s |
| 1 | 1.00 | 1 | 1 | 0 | 0      | 0 | 0 | -0.002 | t | 47108 | PDHVRTK<br>GPGRCH            | Mus<br>musculu<br>s              |
| 1 | 1.00 | 1 | 1 | 0 | 0      | 0 | 0 | -0.002 | t | 56699 | SAAFYYRV                     | Mus<br>musculu<br>s              |
| 1 | 1.00 | 1 | 1 | 0 | 0      | 0 | 0 | -0.002 | t | 48147 | PKSGKELG<br>ETQ              | Mus<br>musculu<br>s              |
| 1 | 1.00 | 1 | 1 | 0 | 0      | 0 | 0 | -0.002 | t | 38946 | LQPGKTS                      | Mus<br>musculu<br>s              |
| 1 | 1.00 | 1 | 1 | 0 | 0      | 0 | 0 | -0.002 | t | 45416 | NPNANPN<br>ANPNANP<br>NENPNA | Homo<br>sapiens                  |
| 1 | 1.00 | 1 | 1 | 0 | 0      | 0 | 0 | -0.002 | t | 39183 | LRRDLAS<br>REAKKQVE<br>KALE  | Homo<br>sapiens                  |
| 1 | 1.00 | 1 | 1 | 0 | 0      | 0 | 0 | -0.002 | t | 55825 | RSELSQLS                     | Mus<br>musculu<br>s              |
| 1 | 1.00 | 1 | 1 | 0 | 0      | 0 | 0 | -0.002 | t | 38919 | LQNDPTT<br>NVA               | Mus<br>musculu<br>s              |

|   |      |   |   |   |       |   |   |        |   |       |                      |                       |
|---|------|---|---|---|-------|---|---|--------|---|-------|----------------------|-----------------------|
| 1 | 1.00 | 1 | 1 | 0 | 0     | 0 | 0 | -0.002 | t | 40739 | LYDSYAYYG            | Mus musculus          |
| 1 | 1.00 | 1 | 1 | 0 | 0     | 0 | 0 | -0.002 | t | 45407 | NPNANPNA             | Mus musculus          |
| 1 | 1.00 | 1 | 1 | 0 | 0     | 0 | 0 | -0.002 | t | 44978 | NMGLIAGAVG           | Oryctolagus cuniculus |
| 1 | 1.00 | 1 | 1 | 0 | 0     | 0 | 0 | -0.002 | t | 51371 | QLINTNGSWHIN         | Rattus norvegicus     |
| 1 | 1.00 | 1 | 1 | 0 | 0     | 0 | 0 | -0.002 | t | 50759 | QFGGHNSVDFEEDT       | Oryctolagus cuniculus |
| 1 | 1.00 | 1 | 1 | 0 | 0     | 0 | 0 | -0.002 | t | 47063 | PDCAICWEPSPPWAPPE    | Oryctolagus cuniculus |
| 1 | 1.00 | 1 | 1 | 0 | 0     | 0 | 0 | -0.002 | t | 39182 | LRRDLASREAKKQVEKAL   | Mus musculus          |
| 1 | 1.00 | 1 | 1 | 0 | 0.012 | 0 | 0 | -0.002 | t | 43233 | NANP                 | Mus musculus          |
| 1 | 1.00 | 1 | 1 | 0 | 0     | 0 | 0 | -0.002 | t | 38918 | LQND                 | Mus musculus          |
| 1 | 1.00 | 1 | 1 | 0 | 0     | 0 | 0 | -0.002 | t | 57569 | SENHGNYSAQVGASQ      | Mus musculus          |
| 1 | 1.00 | 1 | 1 | 0 | 0     | 0 | 0 | -0.002 | t | 50931 | QGPGAPQGGPGAPQGGPGAP | Mus musculus          |
| 1 | 1.00 | 1 | 1 | 0 | 0     | 0 | 0 | -0.002 | t | 58802 | SKDVKIEVYL           | Homo sapiens          |
| 1 | 1.00 | 1 | 1 | 0 | 0     | 0 | 0 | -0.002 | t | 50396 | QAYQQGVTVTD          | Oryctolagus cuniculus |

|   |      |   |   |   |   |   |   |        |   |       |                              |                                  |
|---|------|---|---|---|---|---|---|--------|---|-------|------------------------------|----------------------------------|
| 1 | 1.00 | 1 | 1 | 0 | 0 | 0 | 0 | -0.002 | t | 43248 | NANPNAN<br>PNANPNA<br>NPNANP | Mus<br>musculu<br>s              |
| 1 | 1.00 | 1 | 1 | 0 | 0 | 0 | 0 | -0.002 | t | 50931 | QGPGAPQ<br>GPGAPQG<br>PGAP   | Mus<br>musculu<br>s              |
| 1 | 1.00 | 1 | 1 | 0 | 0 | 0 | 0 | -0.002 | t | 43248 | NANPNAN<br>PNANPNA<br>NPNANP | Mus<br>musculu<br>s              |
| 1 | 1.00 | 1 | 1 | 0 | 0 | 0 | 0 | -0.002 | t | 50931 | QGPGAPQ<br>GPGAPQG<br>PGAP   | Mus<br>musculu<br>s              |
| 1 | 1.00 | 1 | 1 | 0 | 0 | 0 | 0 | -0.002 | t | 57569 | SENHGNY<br>SAQVGAS<br>Q      | Mus<br>musculu<br>s              |
| 1 | 1.00 | 1 | 1 | 0 | 0 | 0 | 0 | -0.002 | t | 40619 | LVTVNPV<br>SVATANS           | Mus<br>musculu<br>s              |
| 1 | 1.00 | 1 | 1 | 0 | 0 | 0 | 0 | -0.002 | t | 43212 | NALSFTNK                     | Mus<br>musculu<br>s              |
| 1 | 1.00 | 1 | 1 | 0 | 0 | 0 | 0 | -0.002 | t | 58582 | SIKEDVQF                     | Oryctola<br>gus<br>cuniculu<br>s |
| 1 | 1.00 | 1 | 1 | 0 | 0 | 0 | 0 | -0.002 | t | 45405 | NPNANP                       | Mus<br>musculu<br>s              |
| 1 | 1.00 | 1 | 1 | 0 | 0 | 0 | 0 | -0.002 | t | 43248 | NANPNAN<br>PNANPNA<br>NPNANP | Mus<br>musculu<br>s              |
| 1 | 1.00 | 1 | 1 | 0 | 0 | 0 | 0 | -0.002 | t | 60024 | SPDVDLG<br>DISGINAS          | Mus<br>musculu<br>s              |
| 1 | 1.00 | 1 | 1 | 0 | 0 | 0 | 0 | -0.002 | t | 43191 | NAKATYEA<br>ALKQYEAD<br>LAA  | Mus<br>musculu<br>s              |
| 1 | 1.00 | 1 | 1 | 0 | 0 | 0 | 0 | -0.002 | t | 49629 | PTGDRHK<br>QPLVAPAK<br>QLL   | Mus<br>musculu<br>s              |

|   |      |   |   |   |        |   |   |        |   |       |                             |                                  |
|---|------|---|---|---|--------|---|---|--------|---|-------|-----------------------------|----------------------------------|
| 1 | 1.00 | 1 | 1 | 0 | 0      | 0 | 0 | -0.002 | t | 60024 | SPDVDLG<br>DISGINAS         | Mus<br>musculu<br>s              |
| 1 | 1.00 | 1 | 1 | 0 | 0      | 0 | 0 | -0.002 | t | 58783 | SKAFSNCY<br>PYDVDPDYA<br>SL | Oryctola<br>gus<br>cuniculu<br>s |
| 1 | 1.00 | 1 | 1 | 0 | -0.004 | 0 | 0 | -0.002 | t | 48670 | PNLRGDL<br>QVLAQKV<br>ARTLP | Mus<br>musculu<br>s              |
| 1 | 1.00 | 1 | 1 | 0 | 0      | 0 | 0 | -0.002 | t | 51371 | QLINTNGS<br>WHIN            | Mus<br>musculu<br>s              |
| 1 | 1.00 | 1 | 1 | 0 | 0      | 0 | 0 | -0.002 | t | 52425 | QSRRRGD<br>MST              | Oryctola<br>gus<br>cuniculu<br>s |
| 1 | 1.00 | 1 | 1 | 0 | 0      | 0 | 0 | -0.002 | t | 48912 | PPSDIKGK<br>YVKEVEVK        | Oryctola<br>gus<br>cuniculu<br>s |
| 1 | 1.00 | 1 | 1 | 0 | 0      | 0 | 0 | -0.002 | t | 48912 | PPSDIKGK<br>YVKEVEVK        | Oryctola<br>gus<br>cuniculu<br>s |
| 1 | 1.00 | 1 | 1 | 0 | 0      | 0 | 0 | -0.002 | t | 43242 | NANPNAN<br>PNANP            | Oryctola<br>gus<br>cuniculu<br>s |
| 1 | 1.00 | 1 | 1 | 0 | 0      | 0 | 0 | -0.002 | t | 48670 | PNLRGDL<br>QVLAQKV<br>ARTLP | Cavia<br>porcellu<br>s           |
| 1 | 1.00 | 1 | 1 | 0 | 0      | 0 | 0 | -0.002 | t | 43242 | NANPNAN<br>PNANP            | Homo<br>sapiens                  |
| 1 | 1.00 | 1 | 1 | 0 | 0.004  | 0 | 0 | -0.002 | t | 53839 | RGDLQVL<br>AQK              | Mus<br>musculu<br>s              |
| 1 | 1.00 | 1 | 1 | 0 | 0      | 0 | 0 | -0.002 | t | 43242 | NANPNAN<br>PNANP            | Homo<br>sapiens                  |

|   |      |   |   |   |        |   |   |        |   |       |                           |                                  |
|---|------|---|---|---|--------|---|---|--------|---|-------|---------------------------|----------------------------------|
| 1 | 1.00 | 1 | 1 | 0 | 0      | 0 | 0 | -0.002 | t | 51371 | QLINTNGS<br>WHIN          | Mus<br>musculu<br>s              |
| 1 | 1.00 | 1 | 1 | 0 | -0.007 | 0 | 0 | -0.002 | t | 45931 | NSNNKEYT                  | Oryctola<br>gus<br>cuniculu<br>s |
| 1 | 1.00 | 1 | 1 | 0 | 0      | 0 | 0 | -0.002 | t | 51371 | QLINTNGS<br>WHIN          | Mus<br>musculu<br>s              |
| 1 | 1.00 | 1 | 1 | 0 | 0      | 0 | 0 | -0.002 | t | 60415 | SQDRHKQ<br>KIIAPAKQL<br>L | Oryctola<br>gus<br>cuniculu<br>s |
| 1 | 1.00 | 1 | 1 | 0 | 0      | 0 | 0 | -0.002 | t | 51371 | QLINTNGS<br>WHIN          | Mus<br>musculu<br>s              |
| 1 | 1.00 | 1 | 1 | 0 | 0      | 0 | 0 | -0.002 | t | 43242 | NANPNAN<br>PNANP          | Homo<br>sapiens                  |
| 1 | 1.00 | 1 | 1 | 0 | 0      | 0 | 0 | -0.002 | t | 59374 | SLNTGWL<br>AGLFY          | Mus<br>musculu<br>s              |
| 1 | 1.00 | 1 | 1 | 0 | 0      | 0 | 0 | -0.002 | t | 39164 | LRPGPVSQ<br>PYHHWDT<br>DK | Homo<br>sapiens                  |
| 1 | 1.00 | 1 | 1 | 0 | 0      | 0 | 0 | -0.002 | t | 59374 | SLNTGWL<br>AGLFY          | Rattus<br>norvegic<br>us         |
| 1 | 1.00 | 1 | 1 | 0 | 0      | 0 | 0 | -0.002 | t | 51371 | QLINTNGS<br>WHIN          | Mus<br>musculu<br>s              |
| 1 | 1.00 | 1 | 1 | 0 | 0      | 0 | 0 | -0.002 | t | 56657 | RYSRNAV<br>NV             | Bos<br>taurus                    |
| 1 | 1.00 | 1 | 1 | 0 | 0      | 0 | 0 | -0.002 | t | 48536 | PLYISNPN<br>Y             | Macaca<br>fascicula<br>ris       |
| 1 | 1.00 | 1 | 1 | 0 | 0      | 0 | 0 | -0.002 | t | 59374 | SLNTGWL<br>AGLFY          | Mus<br>musculu<br>s              |
| 1 | 1.00 | 1 | 1 | 0 | 0      | 0 | 0 | -0.002 | t | 51286 | QLAKDKV<br>NE             | MD                               |



|   |      |   |   |   |   |   |   |        |   |       |                              |                          |
|---|------|---|---|---|---|---|---|--------|---|-------|------------------------------|--------------------------|
| 1 | 1.00 | 1 | 1 | 0 | 0 | 0 | 0 | -0.002 | t | 57812 | SFKVTALN<br>VVSRRYLA<br>SLHK | Sus<br>scrofa            |
| 1 | 1.00 | 1 | 1 | 0 | 0 | 0 | 0 | -0.002 | t | 38522 | LPHSNL                       | Rattus<br>norvegicus     |
| 1 | 1.00 | 1 | 1 | 0 | 0 | 0 | 0 | -0.002 | t | 57608 | SERQPSL                      | Mus<br>musculus          |
| 1 | 1.00 | 1 | 1 | 0 | 0 | 0 | 0 | -0.002 | t | 56885 | SALTSAIA<br>GFVFSC           | Ovis<br>aries            |
| 1 | 1.00 | 1 | 1 | 0 | 0 | 0 | 0 | -0.002 | t | 49450 | PSNQDSF<br>QWQ               | Mus<br>musculus          |
| 1 | 1.00 | 1 | 1 | 0 | 0 | 0 | 0 | -0.002 | t | 43246 | NANPNAN<br>PNANPNA<br>NP     | Mus<br>musculus          |
| 1 | 1.00 | 1 | 1 | 0 | 0 | 0 | 0 | -0.002 | t | 56885 | SALTSAIA<br>GFVFSC           | Ovis<br>aries            |
| 1 | 1.00 | 1 | 1 | 0 | 0 | 0 | 0 | -0.002 | t | 44978 | NMGLIAG<br>AVG               | Oryctolagus<br>cuniculus |
| 1 | 1.00 | 1 | 1 | 0 | 0 | 0 | 0 | -0.002 | t | 39504 | LSN                          | Mus<br>musculus          |
| 1 | 1.00 | 1 | 1 | 0 | 0 | 0 | 0 | -0.002 | t | 46094 | NTFYCCEL<br>CCNPACA<br>GCY   | Oryctolagus<br>cuniculus |
| 1 | 1.00 | 1 | 1 | 0 | 0 | 0 | 0 | -0.002 | t | 56657 | RYSRNAV<br>NV                | Mus<br>musculus          |
| 1 | 1.00 | 1 | 1 | 0 | 0 | 0 | 0 | -0.002 | t | 46094 | NTFYCCEL<br>CCNPACA<br>GCY   | Oryctolagus<br>cuniculus |

|   |      |   |   |   |        |   |   |        |   |       |                            |                                  |
|---|------|---|---|---|--------|---|---|--------|---|-------|----------------------------|----------------------------------|
| 1 | 1.00 | 1 | 1 | 0 | 0      | 0 | 0 | -0.002 | t | 49629 | PTGDRHK<br>QPLVAPAK<br>QLL | Mus<br>musculu<br>s              |
| 1 | 1.00 | 1 | 1 | 0 | 0      | 0 | 0 | -0.002 | t | 51393 | QLKLNWF<br>KKGSS           | Oryctola<br>gus<br>cuniculu<br>s |
| 1 | 1.00 | 1 | 1 | 0 | 0      | 0 | 0 | -0.002 | t | 46094 | NTFYCCEL<br>CCNPACA<br>GCY | Oryctola<br>gus<br>cuniculu<br>s |
| 1 | 1.00 | 1 | 1 | 0 | 0      | 0 | 0 | -0.002 | t | 56657 | RYSRNAV<br>NV              | Mus<br>musculu<br>s              |
| 1 | 1.00 | 1 | 1 | 0 | 0      | 0 | 0 | -0.002 | t | 46094 | NTFYCCEL<br>CCNPACA<br>GCY | Bos<br>taurus                    |
| 1 | 1.00 | 1 | 1 | 0 | 0      | 0 | 0 | -0.002 | t | 60024 | SPDVDLG<br>DISGINAS        | Mus<br>musculu<br>s              |
| 1 | 1.00 | 1 | 1 | 0 | 0      | 0 | 0 | -0.002 | t | 49015 | PQIPP<br>NW<br>HIP         | Oryctola<br>gus<br>cuniculu<br>s |
| 1 | 1.00 | 1 | 1 | 0 | -0.005 | 0 | 0 | -0.002 | t | 46094 | NTFYCCEL<br>CCNPACA<br>GCY | Bos<br>taurus                    |
| 1 | 1.00 | 1 | 1 | 0 | 0      | 0 | 0 | -0.002 | t | 45202 | NNNSTNS<br>G               | Mus<br>musculu<br>s              |
| 1 | 1.00 | 1 | 1 | 0 | 0      | 0 | 0 | -0.002 | t | 49015 | PQIPP<br>NW<br>HIP         | Oryctola<br>gus<br>cuniculu<br>s |
| 1 | 1.00 | 1 | 1 | 0 | 0      | 0 | 0 | -0.002 | t | 46094 | NTFYCCEL<br>CCNPACA<br>GCY | Sus<br>scrofa                    |
| 1 | 1.00 | 1 | 1 | 0 | 0      | 0 | 0 | -0.002 | t | 45303 | NPASTTNK<br>DK             | Mus<br>musculu<br>s              |
| 1 | 1.00 | 1 | 1 | 0 | 0      | 0 | 0 | -0.002 | t | 60024 | SPDVDLG<br>DISGINAS        | Mus<br>musculu<br>s              |

|   |      |   |   |   |   |   |   |        |   |       |                              |                                  |
|---|------|---|---|---|---|---|---|--------|---|-------|------------------------------|----------------------------------|
| 1 | 1.00 | 1 | 1 | 0 | 0 | 0 | 0 | -0.002 | t | 44142 | NHGNYS<br>A QVGASQ           | Mus<br>musculu<br>s              |
| 1 | 1.00 | 1 | 1 | 0 | 0 | 0 | 0 | -0.002 | t | 59210 | SLKAVNPS<br>DPLVYKRQ<br>TAKF | Ovis<br>aries                    |
| 1 | 1.00 | 1 | 1 | 0 | 0 | 0 | 0 | -0.002 | t | 59210 | SLKAVNPS<br>DPLVYKRQ<br>TAKF | Ovis<br>aries                    |
| 1 | 1.00 | 1 | 1 | 0 | 0 | 0 | 0 | -0.002 | t | 46094 | NTFYCCEL<br>CCNPACA<br>GCY   | Oryctola<br>gus<br>cuniculu<br>s |
| 1 | 1.00 | 1 | 1 | 0 | 0 | 0 | 0 | -0.002 | t | 44142 | NHGNYS<br>A QVGASQ           | Mus<br>musculu<br>s              |
| 1 | 1.00 | 1 | 1 | 0 | 0 | 0 | 0 | -0.002 | t | 37656 | LLPHSNLD                     | Mus<br>musculu<br>s              |
| 1 | 1.00 | 1 | 1 | 0 | 0 | 0 | 0 | -0.002 | t | 51775 | QNTRNIVP<br>VSIVSR           | Oryctola<br>gus<br>cuniculu<br>s |
| 1 | 1.00 | 1 | 1 | 0 | 0 | 0 | 0 | -0.002 | t | 50929 | QGPGAP                       | Mus<br>musculu<br>s              |
| 1 | 1.00 | 1 | 1 | 0 | 0 | 0 | 0 | -0.002 | t | 43246 | NANPNAN<br>PNANPNA<br>NP     | Mus<br>musculu<br>s              |
| 1 | 1.00 | 1 | 1 | 0 | 0 | 0 | 0 | -0.002 | t | 50929 | QGPGAP                       | Mus<br>musculu<br>s              |
| 1 | 1.00 | 1 | 1 | 0 | 0 | 0 | 0 | -0.002 | t | 58409 | SHSAFNM<br>FDFGVGPP          | Mus<br>musculu<br>s              |
| 1 | 1.00 | 1 | 1 | 0 | 0 | 0 | 0 | -0.002 | t | 40110 | LTPLEELY                     | Mus<br>musculu<br>s              |
| 1 | 1.00 | 1 | 1 | 0 | 0 | 0 | 0 | -0.002 | t | 51775 | QNTRNIVP<br>VSIVSR           | Mus<br>musculu<br>s              |

|   |      |   |   |   |   |   |   |        |   |       |                             |                                  |
|---|------|---|---|---|---|---|---|--------|---|-------|-----------------------------|----------------------------------|
| 1 | 1.00 | 1 | 1 | 0 | 0 | 0 | 0 | -0.002 | t | 49772 | PTSGDKID<br>MTPRAGV<br>LMLE | Mus<br>musculu<br>s              |
| 1 | 1.00 | 1 | 1 | 0 | 0 | 0 | 0 | -0.002 | t | 46095 | NTFYCCCL<br>CCYPACAG<br>CN  | Homo<br>sapiens                  |
| 1 | 1.00 | 1 | 1 | 0 | 0 | 0 | 0 | -0.002 | t | 58923 | SKPTTKQR<br>QNKPPSKP        | Mus<br>musculu<br>s              |
| 1 | 1.00 | 1 | 1 | 0 | 0 | 0 | 0 | -0.002 | t | 40111 | LTPLEELYP                   | Mus<br>musculu<br>s              |
| 1 | 1.00 | 1 | 1 | 0 | 0 | 0 | 0 | -0.002 | t | 38434 | LPDKFNAY<br>LANKWV          | Mus<br>musculu<br>s              |
| 1 | 1.00 | 1 | 1 | 0 | 0 | 0 | 0 | -0.002 | t | 56564 | RYKQKIIAP<br>AKQ            | Oryctola<br>gus<br>cuniculu<br>s |
| 1 | 1.00 | 1 | 1 | 0 | 0 | 0 | 0 | -0.002 | t | 50666 | QEPIVA                      | Mus<br>musculu<br>s              |
| 1 | 1.00 | 1 | 1 | 0 | 0 | 0 | 0 | -0.002 | t | 60024 | SPDVDLG<br>DISGINAS         | Mus<br>musculu<br>s              |
| 1 | 1.00 | 1 | 1 | 0 | 0 | 0 | 0 | -0.002 | t | 58416 | SHSQLGPP<br>VGGPP           | Mus<br>musculu<br>s              |
| 1 | 1.00 | 1 | 1 | 0 | 0 | 0 | 0 | -0.002 | t | 59229 | SLKMADP<br>NRFRGKDL<br>P    | Mus<br>musculu<br>s              |
| 1 | 1.00 | 1 | 1 | 0 | 0 | 0 | 0 | -0.002 | t | 44865 | NLSDAHKK<br>NLYDHAL         | Oryctola<br>gus<br>cuniculu<br>s |
| 1 | 1.00 | 1 | 1 | 0 | 0 | 0 | 0 | -0.002 | t | 46677 | NYNWKR                      | Mus<br>musculu<br>s              |
| 1 | 1.00 | 1 | 1 | 0 | 0 | 0 | 0 | -0.002 | t | 43589 | NEECTKLK<br>GESGYCQ         | Mus<br>musculu<br>s              |
| 1 | 1.00 | 1 | 1 | 0 | 0 | 0 | 0 | -0.002 | t | 51390 | QLKLDWF<br>KKGSS            | Mus<br>musculu<br>s              |
| 1 | 1.00 | 1 | 1 | 0 | 0 | 0 | 0 | -0.002 | t | 57320 | SDYEDRY<br>REN              | Mus<br>musculu<br>s              |

|   |      |   |   |   |        |   |   |        |   |       |                             |                                  |
|---|------|---|---|---|--------|---|---|--------|---|-------|-----------------------------|----------------------------------|
| 1 | 1.00 | 1 | 1 | 0 | 0      | 0 | 0 | -0.002 | t | 57306 | SDVEGLQ<br>NDP              | Mus<br>musculu<br>s              |
| 1 | 1.00 | 1 | 1 | 0 | 0      | 0 | 0 | -0.002 | t | 48597 | PNANPN                      | Mus<br>musculu<br>s              |
| 1 | 1.00 | 1 | 1 | 0 | 0      | 0 | 0 | -0.002 | t | 50884 | QGILFLQW<br>VRDIIDDF        | Mus<br>musculu<br>s              |
| 1 | 1.00 | 1 | 1 | 0 | -0.007 | 0 | 0 | -0.002 | t | 44865 | NLSDAHKK<br>NLYDHAL         | Oryctola<br>gus<br>cuniculu<br>s |
| 1 | 1.00 | 1 | 1 | 0 | 0      | 0 | 0 | -0.002 | t | 56565 | RYKQKIIAP<br>AKQLL          | Bos<br>taurus                    |
| 1 | 1.00 | 1 | 1 | 0 | 0      | 0 | 0 | -0.002 | t | 43190 | NAKATYEA<br>ALKQYEAD<br>L   | Mus<br>musculu<br>s              |
| 1 | 1.00 | 1 | 1 | 0 | 0      | 0 | 0 | -0.002 | t | 57303 | SDVAGLEK<br>DPVAN           | Mus<br>musculu<br>s              |
| 1 | 1.00 | 1 | 1 | 0 | 0      | 0 | 0 | -0.002 | t | 48027 | PKALFTQQ<br>GGAYGRC         | Oryctola<br>gus<br>cuniculu<br>s |
| 1 | 1.00 | 1 | 1 | 0 | 0      | 0 | 0 | -0.002 | t | 57292 | SDSSFFSY<br>GEIPFG          | Oryctola<br>gus<br>cuniculu<br>s |
| 1 | 1.00 | 1 | 1 | 0 | 0      | 0 | 0 | -0.002 | t | 43576 | NEDNEKLR<br>KPKHKKLK<br>QPG | Mus<br>musculu<br>s              |
| 1 | 1.00 | 1 | 1 | 0 | 0      | 0 | 0 | -0.002 | t | 39092 | LRGDLQVL<br>AQKVARTL        | Oryctola<br>gus<br>cuniculu<br>s |
| 1 | 1.00 | 1 | 1 | 0 | 0      | 0 | 0 | -0.002 | t | 43246 | NANPNAN<br>PNANPNA<br>NP    | Mus<br>musculu<br>s              |
| 1 | 1.00 | 1 | 1 | 0 | 0      | 0 | 0 | -0.002 | t | 48620 | PNDPPP                      | Mus<br>musculu<br>s              |

|   |      |   |   |   |        |   |   |        |   |       |                   |                       |
|---|------|---|---|---|--------|---|---|--------|---|-------|-------------------|-----------------------|
| 1 | 1.00 | 1 | 1 | 0 | 0      | 0 | 0 | -0.002 | t | 57754 | SFFD              | Mus musculus          |
| 1 | 1.00 | 1 | 1 | 0 | 0      | 0 | 0 | -0.002 | t | 41019 | MADPNRFRG         | Mus musculus          |
| 1 | 1.00 | 1 | 1 | 0 | 0      | 0 | 0 | -0.002 | t | 41019 | MADPNRFRG         | Mus musculus          |
| 1 | 1.00 | 1 | 1 | 0 | 0      | 0 | 0 | -0.002 | t | 54003 | RGTPPAYG          | Mus musculus          |
| 1 | 1.00 | 1 | 1 | 0 | 0      | 0 | 0 | -0.002 | t | 44250 | NIIRTKKQ          | Mus musculus          |
| 1 | 1.00 | 1 | 1 | 0 | 0      | 0 | 0 | -0.002 | t | 57864 | SFPMNEESPLGFSPE   | Mus musculus          |
| 1 | 1.00 | 1 | 1 | 0 | 0      | 0 | 0 | -0.002 | t | 39092 | LRGDLQVLAQKVARTL  | Mus musculus          |
| 1 | 1.00 | 1 | 1 | 0 | 0      | 0 | 0 | -0.002 | t | 39092 | LRGDLQVLAQKVARTL  | Oryctolagus cuniculus |
| 1 | 1.00 | 1 | 1 | 0 | -0.003 | 0 | 0 | -0.002 | t | 39092 | LRGDLQVLAQKVARTL  | Oryctolagus cuniculus |
| 1 | 1.00 | 1 | 1 | 0 | -0.003 | 0 | 0 | -0.002 | t | 39092 | LRGDLQVLAQKVARTL  | Oryctolagus cuniculus |
| 1 | 1.00 | 1 | 1 | 0 | 0      | 0 | 0 | -0.002 | t | 43190 | NAKATYEAALKQYEADL | Mus musculus          |
| 1 | 1.00 | 1 | 1 | 0 | 0      | 0 | 0 | -0.002 | t | 47427 | PESRESLAWQTATNP   | Mus musculus          |
| 1 | 1.00 | 1 | 1 | 0 | 0      | 0 | 0 | -0.002 | t | 57766 | SFFSYGEI          | MD                    |

|   |      |   |   |   |        |   |   |        |   |       |                              |                                  |
|---|------|---|---|---|--------|---|---|--------|---|-------|------------------------------|----------------------------------|
| 1 | 1.00 | 1 | 1 | 0 | 0      | 0 | 0 | -0.002 | t | 41608 | MGPNLVL<br>PDQKPPS           | Mus<br>musculu<br>s              |
| 1 | 1.00 | 1 | 1 | 0 | 0      | 0 | 0 | -0.002 | t | 56657 | RYSRNAV<br>NV                | Bos<br>taurus                    |
| 1 | 1.00 | 1 | 1 | 0 | -0.004 | 0 | 0 | -0.002 | t | 56602 | RYNRNAV<br>PNLRGDL<br>QVLAQK | Sus<br>scrofa                    |
| 1 | 1.00 | 1 | 1 | 0 | 0      | 0 | 0 | -0.002 | t | 56602 | RYNRNAV<br>PNLRGDL<br>QVLAQK | Cavia<br>porcellu<br>s           |
| 1 | 1.00 | 1 | 1 | 0 | -0.003 | 0 | 0 | -0.002 | t | 55951 | RSRSES                       | Oryctola<br>gus<br>cuniculu<br>s |
| 1 | 1.00 | 1 | 1 | 0 | 0      | 0 | 0 | -0.002 | t | 55951 | RSRSES                       | Oryctola<br>gus<br>cuniculu<br>s |
| 1 | 1.00 | 1 | 1 | 0 | 0      | 0 | 0 | -0.002 | t | 57864 | SFPMNEES<br>PLGFSPE          | Mus<br>musculu<br>s              |
| 1 | 1.00 | 1 | 1 | 0 | -0.003 | 0 | 0 | -0.002 | t | 55951 | RSRSES                       | Oryctola<br>gus<br>cuniculu<br>s |
| 1 | 1.00 | 1 | 1 | 0 | -0.007 | 0 | 0 | -0.002 | t | 55951 | RSRSES                       | Oryctola<br>gus<br>cuniculu<br>s |
| 1 | 1.00 | 1 | 1 | 0 | 0      | 0 | 0 | -0.002 | t | 55951 | RSRSES                       | Oryctola<br>gus<br>cuniculu<br>s |
| 1 | 1.00 | 1 | 1 | 0 | 0      | 0 | 0 | -0.002 | t | 54058 | RHKQKIVA<br>PVKQTL           | Cavia<br>porcellu<br>s           |
| 1 | 1.00 | 1 | 1 | 0 | 0      | 0 | 0 | -0.002 | t | 56583 | RYLQEKYN<br>LYNSDVF<br>GKVQ  | Oryctola<br>gus<br>cuniculu<br>s |

|   |      |   |   |   |        |   |   |        |   |       |                            |                                  |
|---|------|---|---|---|--------|---|---|--------|---|-------|----------------------------|----------------------------------|
| 1 | 1.00 | 1 | 1 | 0 | 0      | 0 | 0 | -0.002 | t | 54058 | RHKQKIVA<br>PVKQTL         | Bos<br>taurus                    |
| 1 | 1.00 | 1 | 1 | 0 | 0      | 0 | 0 | -0.002 | t | 56657 | RYSRNAV<br>NV              | Bos<br>taurus                    |
| 1 | 1.00 | 1 | 1 | 0 | 0      | 0 | 0 | -0.002 | t | 54057 | RHKQKIVA<br>PVK            | Mus<br>musculu<br>s              |
| 1 | 1.00 | 1 | 1 | 0 | -0.003 | 0 | 0 | -0.002 | t | 54057 | RHKQKIVA<br>PVK            | Oryctola<br>gus<br>cuniculu<br>s |
| 1 | 1.00 | 1 | 1 | 0 | 0      | 0 | 0 | -0.002 | t | 46006 | NSTLGVKS<br>AREF           | Mus<br>musculu<br>s              |
| 1 | 1.00 | 1 | 1 | 0 | 0      | 0 | 0 | -0.002 | t | 45420 | NPNDPP                     | Mus<br>musculu<br>s              |
| 1 | 1.00 | 1 | 1 | 0 | 0      | 0 | 0 | -0.002 | t | 41126 | MASLIYRQ<br>LL             | Mus<br>musculu<br>s              |
| 1 | 1.00 | 1 | 1 | 0 | 0      | 0 | 0 | -0.002 | t | 56599 | RYNLVFSG<br>DSDRICSN<br>RA | Mus<br>musculu<br>s              |
| 1 | 1.00 | 1 | 1 | 0 | -0.003 | 0 | 0 | -0.002 | t | 55952 | RSRSESSIE<br>SF            | Oryctola<br>gus<br>cuniculu<br>s |
| 1 | 1.00 | 1 | 1 | 0 | 0      | 0 | 0 | -0.002 | t | 43177 | NAINPRLT<br>PWTYRN         | Mus<br>musculu<br>s              |
| 1 | 1.00 | 1 | 1 | 0 | 0      | 0 | 0 | -0.002 | t | 59757 | SMSYTW<br>TGA              | Mus<br>musculu<br>s              |
| 1 | 1.00 | 1 | 1 | 0 | 0      | 0 | 0 | -0.002 | t | 44251 | NIISCNKN<br>DKNQ           | Oryctola<br>gus<br>cuniculu<br>s |
| 1 | 1.00 | 1 | 1 | 0 | 0      | 0 | 0 | -0.002 | t | 43227 | NANDPP                     | Mus<br>musculu<br>s              |



|   |      |   |   |   |   |   |   |        |   |       |                           |                                  |
|---|------|---|---|---|---|---|---|--------|---|-------|---------------------------|----------------------------------|
| 1 | 1.00 | 1 | 1 | 0 | 0 | 0 | 0 | -0.002 | t | 53838 | RGDLGPLA<br>AR            | Mus<br>musculu<br>s              |
| 1 | 1.00 | 1 | 1 | 0 | 0 | 0 | 0 | -0.002 | t | 42264 | MPDHALR<br>PQYSI          | Mus<br>musculu<br>s              |
| 1 | 1.00 | 1 | 1 | 0 | 0 | 0 | 0 | -0.002 | t | 53122 | RAISSWKQ<br>RNRWEW<br>RPD | Felis<br>catus                   |
| 1 | 1.00 | 1 | 1 | 0 | 0 | 0 | 0 | -0.002 | t | 60116 | SPLLGIGS<br>TCAE          | Mus<br>musculu<br>s              |
| 1 | 1.00 | 1 | 1 | 0 | 0 | 0 | 0 | -0.002 | t | 45630 | NQSTVKT                   | Mus<br>musculu<br>s              |
| 1 | 1.00 | 1 | 1 | 0 | 0 | 0 | 0 | -0.002 | t | 58422 | SHSVTKSL<br>RVFGGPP       | Mus<br>musculu<br>s              |
| 1 | 1.00 | 1 | 1 | 0 | 0 | 0 | 0 | -0.002 | t | 38522 | LPHSNL                    | Homo<br>sapiens                  |
| 1 | 1.00 | 1 | 1 | 0 | 0 | 0 | 0 | -0.002 | t | 50872 | QGGNIVDI<br>DFDSVP        | Oryctola<br>gus<br>cuniculu<br>s |
| 1 | 1.00 | 1 | 1 | 0 | 0 | 0 | 0 | -0.002 | t | 43085 | MYRYPNQ<br>VYYRPV         | Mus<br>musculu<br>s              |
| 1 | 1.00 | 1 | 1 | 0 | 0 | 0 | 0 | -0.002 | t | 37657 | LLPHSNLD<br>HI            | Oryctola<br>gus<br>cuniculu<br>s |
| 1 | 1.00 | 1 | 1 | 0 | 0 | 0 | 0 | -0.002 | t | 51372 | QLINTNGS<br>WHINSTA       | Homo<br>sapiens                  |
| 1 | 1.00 | 1 | 1 | 0 | 0 | 0 | 0 | -0.002 | t | 51372 | QLINTNGS<br>WHINSTA       | Homo<br>sapiens                  |
| 1 | 1.00 | 1 | 1 | 0 | 0 | 0 | 0 | -0.002 | t | 44904 | NLTQHPSA<br>PTMP          | Oryctola<br>gus<br>cuniculu<br>s |

|   |      |   |   |   |        |   |   |        |   |       |                    |                       |
|---|------|---|---|---|--------|---|---|--------|---|-------|--------------------|-----------------------|
| 1 | 1.00 | 1 | 1 | 0 | 0      | 0 | 0 | -0.002 | t | 43764 | NETIYNTLKYGDV      | Homo sapiens          |
| 1 | 1.00 | 1 | 1 | 0 | 0      | 0 | 0 | -0.002 | t | 46008 | NSTNSGIN           | Mus musculus          |
| 1 | 1.00 | 1 | 1 | 0 | -0.003 | 0 | 0 | -0.002 | t | 44904 | NLTQHPSA PTMP      | Oryctolagus cuniculus |
| 1 | 1.00 | 1 | 1 | 0 | 0      | 0 | 0 | -0.002 | t | 51372 | QLINTNGS WHINSTA   | Homo sapiens          |
| 1 | 1.00 | 1 | 1 | 0 | 0      | 0 | 0 | -0.002 | t | 51372 | QLINTNGS WHINSTA   | Homo sapiens          |
| 1 | 1.00 | 1 | 1 | 0 | 0      | 0 | 0 | -0.002 | t | 11821 | EENVEHD AEENVEH DA | Mus musculus          |
| 1 | 1.00 | 1 | 1 | 0 | 0      | 0 | 0 | -0.002 | t | 13912 | EQQRYLN NFRFIELV   | Mus musculus          |
| 1 | 1.00 | 1 | 1 | 0 | 0      | 0 | 0 | -0.002 | t | 23269 | GWLAGLF YQHKF      | Rattus norvegicus     |
| 1 | 1.00 | 1 | 1 | 0 | 0      | 0 | 0 | -0.002 | t | 18707 | GANTE              | Mus musculus          |
| 1 | 1.00 | 1 | 1 | 0 | 0      | 0 | 0 | -0.002 | t | 17470 | FQEPFWLE DG        | Mus musculus          |
| 1 | 1.00 | 1 | 1 | 0 | 0      | 0 | 0 | -0.002 | t | 11821 | EENVEHD AEENVEH DA | Mus musculus          |
| 1 | 1.00 | 1 | 1 | 0 | -0.003 | 0 | 0 | -0.002 | t | 19983 | GGQPAVR NER        | Oryctolagus cuniculus |
| 1 | 1.00 | 1 | 1 | 0 | 0      | 0 | 0 | -0.002 | t | 19983 | GGQPAVR NER        | Oryctolagus cuniculus |
| 1 | 1.00 | 1 | 1 | 0 | 0      | 0 | 0 | -0.002 | t | 24006 | HHPITDSD QTRLY     | Oryctolagus cuniculus |

|   |      |   |   |   |        |   |   |        |   |       |                              |                                  |
|---|------|---|---|---|--------|---|---|--------|---|-------|------------------------------|----------------------------------|
| 1 | 1.00 | 1 | 1 | 0 | 0      | 0 | 0 | -0.002 | t | 22494 | GSRYPGQ<br>GSPG              | Mus<br>musculu<br>s              |
| 1 | 1.00 | 1 | 1 | 0 | 0      | 0 | 0 | -0.002 | t | 11208 | EAVEAERA<br>GRGTG            | Mus<br>musculu<br>s              |
| 1 | 1.00 | 1 | 1 | 0 | 0      | 0 | 0 | -0.002 | t | 17470 | FQEPFWLE<br>DG               | Mus<br>musculu<br>s              |
| 1 | 1.00 | 1 | 1 | 0 | 0      | 0 | 0 | -0.002 | t | 33780 | KTN                          | Mus<br>musculu<br>s              |
| 1 | 1.00 | 1 | 1 | 0 | 0      | 0 | 0 | -0.002 | t | 23975 | HHAEMQ<br>NPVYLIPET<br>VPYIK | Oryctola<br>gus<br>cuniculu<br>s |
| 1 | 1.00 | 1 | 1 | 0 | -0.007 | 0 | 0 | -0.002 | t | 34933 | LAQKVART<br>LP               | Oryctola<br>gus<br>cuniculu<br>s |
| 1 | 1.00 | 1 | 1 | 0 | 0      | 0 | 0 | -0.002 | t | 34933 | LAQKVART<br>LP               | Oryctola<br>gus<br>cuniculu<br>s |
| 1 | 1.00 | 1 | 1 | 0 | 0      | 0 | 0 | -0.002 | t | 32570 | KNNNSTN<br>S                 | Mus<br>musculu<br>s              |
| 1 | 1.00 | 1 | 1 | 0 | 0      | 0 | 0 | -0.002 | t | 23975 | HHAEMQ<br>NPVYLIPET<br>VPYIK | Mus<br>musculu<br>s              |
| 1 | 1.00 | 1 | 1 | 0 | 0      | 0 | 0 | -0.002 | t | 34341 | KWYISKPQ                     | Mus<br>musculu<br>s              |
| 1 | 1.00 | 1 | 1 | 0 | 0      | 0 | 0 | -0.002 | t | 11208 | EAVEAERA<br>GRGTG            | Mus<br>musculu<br>s              |
| 1 | 1.00 | 1 | 1 | 0 | -0.002 | 0 | 0 | -0.002 | t | 11208 | EAVEAERA<br>GRGTG            | Mus<br>musculu<br>s              |
| 1 | 1.00 | 1 | 1 | 0 | 0      | 0 | 0 | -0.002 | t | 21763 | GPRLQPY                      | Mus<br>musculu<br>s              |

|   |      |   |   |   |        |   |   |        |   |       |                               |                                  |
|---|------|---|---|---|--------|---|---|--------|---|-------|-------------------------------|----------------------------------|
| 1 | 1.00 | 1 | 1 | 0 | 0      | 0 | 0 | -0.002 | t | 11821 | EENVEHD<br>AEENVEH<br>DA      | Mus<br>musculu<br>s              |
| 1 | 1.00 | 1 | 1 | 0 | 0      | 0 | 0 | -0.002 | t | 21763 | GPRLQPY                       | Mus<br>musculu<br>s              |
| 1 | 1.00 | 1 | 1 | 0 | 0      | 0 | 0 | -0.002 | t | 29378 | IVNTLNEIY<br>RYLYVR           | Mus<br>musculu<br>s              |
| 1 | 1.00 | 1 | 1 | 0 | 0      | 0 | 0 | -0.002 | t | 34965 | LASLRKAF<br>ADTVPVVRP<br>PSNY | Homo<br>sapiens                  |
| 1 | 1.00 | 1 | 1 | 0 | 0      | 0 | 0 | -0.002 | t | 23973 | HGYEKPEE<br>LWTAKSR<br>VHPL   | Homo<br>sapiens                  |
| 1 | 1.00 | 1 | 1 | 0 | 0      | 0 | 0 | -0.002 | t | 12219 | EGLQND                        | Mus<br>musculu<br>s              |
| 1 | 1.00 | 1 | 1 | 0 | -0.003 | 0 | 0 | -0.002 | t | 14670 | EVDNEQP<br>TTRAQKLF<br>A      | Oryctola<br>gus<br>cuniculu<br>s |
| 1 | 1.00 | 1 | 1 | 0 | 0      | 0 | 0 | -0.002 | t | 30349 | KEEKEEKE<br>EKEEKEKE<br>KE    | Oryctola<br>gus<br>cuniculu<br>s |
| 1 | 1.00 | 1 | 1 | 0 | 0      | 0 | 0 | -0.002 | t | 11819 | EENVEHD<br>A                  | Homo<br>sapiens                  |
| 1 | 1.00 | 1 | 1 | 0 | 0      | 0 | 0 | -0.002 | t | 11819 | EENVEHD<br>A                  | Mus<br>musculu<br>s              |
| 1 | 1.00 | 1 | 1 | 0 | 0      | 0 | 0 | -0.002 | t | 11819 | EENVEHD<br>A                  | Oryctola<br>gus<br>cuniculu<br>s |
| 1 | 1.00 | 1 | 1 | 0 | 0      | 0 | 0 | -0.002 | t | 11819 | EENVEHD<br>A                  | Mus<br>musculu<br>s              |
| 1 | 1.00 | 1 | 1 | 0 | 0      | 0 | 0 | -0.002 | t | 17408 | FPSPYYSP<br>AFTKGKDV<br>DL    | Mus<br>musculu<br>s              |

|   |      |   |   |   |        |   |   |        |   |       |                       |                          |
|---|------|---|---|---|--------|---|---|--------|---|-------|-----------------------|--------------------------|
| 1 | 1.00 | 1 | 1 | 0 | 0      | 0 | 0 | -0.002 | t | 23269 | GWLAGLF<br>YQHKF      | Rattus<br>norvegicus     |
| 1 | 1.00 | 1 | 1 | 0 | 0      | 0 | 0 | -0.002 | t | 27113 | ILIRGIHHV<br>L        | Mus<br>musculus          |
| 1 | 1.00 | 1 | 1 | 0 | 0      | 0 | 0 | -0.002 | t | 12951 | ELAPEDPE<br>DS        | Oryctolagus<br>cuniculus |
| 1 | 1.00 | 1 | 1 | 0 | -0.004 | 0 | 0 | -0.002 | t | 14670 | EVDNEQP<br>TTRAQKLFA  | Mus<br>musculus          |
| 1 | 1.00 | 1 | 1 | 0 | 0      | 0 | 0 | -0.002 | t | 13482 | ENHTKFTS              | Mus<br>musculus          |
| 1 | 1.00 | 1 | 1 | 0 | 0      | 0 | 0 | -0.002 | t | 14670 | EVDNEQP<br>TTRAQKLFA  | Oryctolagus<br>cuniculus |
| 1 | 1.00 | 1 | 1 | 0 | 0      | 0 | 0 | -0.002 | t | 17642 | FRRYQEER              | Mus<br>musculus          |
| 1 | 1.00 | 1 | 1 | 0 | 0      | 0 | 0 | -0.002 | t | 11819 | EENVEHDA              | Homo<br>sapiens          |
| 1 | 1.00 | 1 | 1 | 0 | 0      | 0 | 0 | -0.002 | t | 25807 | IEFQQKNN<br>RLLEITREF | Mus<br>musculus          |
| 1 | 1.00 | 1 | 1 | 0 | 0      | 0 | 0 | -0.002 | t | 13460 | ENDVLNQ<br>ETEEEMEKEK | Oryctolagus<br>cuniculus |
| 1 | 1.00 | 1 | 1 | 0 | 0      | 0 | 0 | -0.002 | t | 12225 | EGLTATTF<br>EEDGVAA   | Mus<br>musculus          |
| 1 | 1.00 | 1 | 1 | 0 | 0      | 0 | 0 | -0.002 | t | 14749 | EVKKKSDS              | Mus<br>musculus          |
| 1 | 1.00 | 1 | 1 | 0 | 0      | 0 | 0 | -0.002 | t | 18363 | FWRGDLV<br>FDFQV      | Mus<br>musculus          |
| 1 | 1.00 | 1 | 1 | 0 | 0      | 0 | 0 | -0.002 | t | 12951 | ELAPEDPE<br>DS        | Oryctolagus<br>cuniculus |

|   |      |   |   |   |        |   |   |        |   |       |                              |                                  |
|---|------|---|---|---|--------|---|---|--------|---|-------|------------------------------|----------------------------------|
| 1 | 1.00 | 1 | 1 | 0 | -0.003 | 0 | 0 | -0.002 | t | 14670 | EVDNEQP<br>TTRAQKLF<br>A     | Oryctola<br>gus<br>cuniculu<br>s |
| 1 | 1.00 | 1 | 1 | 0 | 0      | 0 | 0 | -0.002 | t | 21553 | GNYNKY<br>RYLRHGKL<br>RPFER  | Cavia<br>porcellu<br>s           |
| 1 | 1.00 | 1 | 1 | 0 | 0      | 0 | 0 | -0.002 | t | 17187 | FNKTLME                      | Homo<br>sapiens                  |
| 1 | 1.00 | 1 | 1 | 0 | 0      | 0 | 0 | -0.002 | t | 15961 | FGDKLIIPD<br>IEKYQS          | Mus<br>musculu<br>s              |
| 1 | 1.00 | 1 | 1 | 0 | 0      | 0 | 0 | -0.002 | t | 10648 | DVKTGAE                      | Mus<br>musculu<br>s              |
| 1 | 1.00 | 1 | 1 | 0 | 0      | 0 | 0 | -0.002 | t | 34965 | LASLRKAF<br>ADTVVPRP<br>PSNY | Oryctola<br>gus<br>cuniculu<br>s |
| 1 | 1.00 | 1 | 1 | 0 | 0      | 0 | 0 | -0.002 | t | 23934 | HGPDWAS<br>P                 | Mus<br>musculu<br>s              |
| 1 | 1.00 | 1 | 1 | 0 | 0      | 0 | 0 | -0.002 | t | 31069 | KGTFDPLQ<br>EPRT             | Mus<br>musculu<br>s              |
| 1 | 1.00 | 1 | 1 | 0 | 0      | 0 | 0 | -0.002 | t | 31069 | KGTFDPLQ<br>EPRT             | Mus<br>musculu<br>s              |
| 1 | 1.00 | 1 | 1 | 0 | 0      | 0 | 0 | -0.002 | t | 14670 | EVDNEQP<br>TTRAQKLF<br>A     | Mus<br>musculu<br>s              |
| 1 | 1.00 | 1 | 1 | 0 | 0      | 0 | 0 | -0.002 | t | 10803 | DWEDRYR<br>RENMYR            | Mus<br>musculu<br>s              |
| 1 | 1.00 | 1 | 1 | 0 | 0      | 0 | 0 | -0.002 | t | 29138 | ITVNPVTE<br>KDSPVNIE         | Mus<br>musculu<br>s              |
| 1 | 1.00 | 1 | 1 | 0 | 0      | 0 | 0 | -0.002 | t | 29138 | ITVNPVTE<br>KDSPVNIE         | Mus<br>musculu<br>s              |
| 1 | 1.00 | 1 | 1 | 0 | 0      | 0 | 0 | -0.002 | t | 32535 | KNKLEEK<br>AKAMININ          | Mus<br>musculu<br>s              |
| 1 | 1.00 | 1 | 1 | 0 | 0      | 0 | 0 | -0.002 | t | 11814 | EENVEENV<br>EENV             | Oryctola<br>gus<br>cuniculu<br>s |

|   |      |   |   |   |        |   |   |        |   |       |                             |                                  |
|---|------|---|---|---|--------|---|---|--------|---|-------|-----------------------------|----------------------------------|
| 1 | 1.00 | 1 | 1 | 0 | 0      | 0 | 0 | -0.002 | t | 12248 | EGQKSAVT<br>EY              | Oryctola<br>gus<br>cuniculu<br>s |
| 1 | 1.00 | 1 | 1 | 0 | 0      | 0 | 0 | -0.002 | t | 28075 | IPSTAFTDI<br>AWVRLPN<br>HY  | Oryctola<br>gus<br>cuniculu<br>s |
| 1 | 1.00 | 1 | 1 | 0 | 0      | 0 | 0 | -0.002 | t | 11813 | EENVEENV                    | Homo<br>sapiens                  |
| 1 | 1.00 | 1 | 1 | 0 | 0      | 0 | 0 | -0.002 | t | 21763 | GPRLQPY                     | Mus<br>musculu<br>s              |
| 1 | 1.00 | 1 | 1 | 0 | 0      | 0 | 0 | -0.002 | t | 22360 | GSGVRGD<br>FGSLAPRV<br>ARQL | Cavia<br>porcellu<br>s           |
| 1 | 1.00 | 1 | 1 | 0 | -0.002 | 0 | 0 | -0.002 | t | 22756 | GTLVRMA<br>PVIG             | Mus<br>musculu<br>s              |
| 1 | 1.00 | 1 | 1 | 0 | 0      | 0 | 0 | -0.002 | t | 30902 | KGAV                        | Mus<br>musculu<br>s              |
| 1 | 1.00 | 1 | 1 | 0 | 0      | 0 | 0 | -0.002 | t | 22756 | GTLVRMA<br>PVIG             | Mus<br>musculu<br>s              |
| 1 | 1.00 | 1 | 1 | 0 | 0      | 0 | 0 | -0.002 | t | 19723 | GGESSEEL<br>SESSFFNLI<br>T  | Homo<br>sapiens                  |
| 1 | 1.00 | 1 | 1 | 0 | 0      | 0 | 0 | -0.002 | t | 19623 | GFSYYRPP<br>WIL             | Mus<br>musculu<br>s              |
| 1 | 1.00 | 1 | 1 | 0 | 0      | 0 | 0 | -0.002 | t | 28299 | IRGDTFAT<br>R               | Mus<br>musculu<br>s              |
| 1 | 1.00 | 1 | 1 | 0 | 0      | 0 | 0 | -0.002 | t | 22360 | GSGVRGD<br>FGSLAPRV<br>ARQL | Cavia<br>porcellu<br>s           |
| 1 | 1.00 | 1 | 1 | 0 | 0      | 0 | 0 | -0.002 | t | 21084 | GLQN                        | Mus<br>musculu<br>s              |

|   |      |   |   |   |        |   |   |        |   |       |                              |                                  |
|---|------|---|---|---|--------|---|---|--------|---|-------|------------------------------|----------------------------------|
| 1 | 1.00 | 1 | 1 | 0 | 0      | 0 | 0 | -0.002 | t | 17524 | FQQFGRD<br>VSDFTDSV<br>RDPKT | Mus<br>musculu<br>s              |
| 1 | 1.00 | 1 | 1 | 0 | 0      | 0 | 0 | -0.002 | t | 28331 | IRLRHENK<br>DLKARLEN<br>AMEV | Mus<br>musculu<br>s              |
| 1 | 1.00 | 1 | 1 | 0 | 0      | 0 | 0 | -0.002 | t | 13688 | EPLEPFPT<br>QIHKDYK          | Homo<br>sapiens                  |
| 1 | 1.00 | 1 | 1 | 0 | 0      | 0 | 0 | -0.002 | t | 29899 | KANGNGS<br>GDNGDTT<br>W      | Oryctola<br>gus<br>cuniculu<br>s |
| 1 | 1.00 | 1 | 1 | 0 | -0.003 | 0 | 0 | -0.002 | t | 32280 | KMADPNR<br>FRGKDLPV          | Oryctola<br>gus<br>cuniculu<br>s |
| 1 | 1.00 | 1 | 1 | 0 | 0      | 0 | 0 | -0.002 | t | 28075 | IPSTAFTDI<br>AWVRLPN<br>HY   | Homo<br>sapiens                  |
| 1 | 1.00 | 1 | 1 | 0 | 0      | 0 | 0 | -0.002 | t | 13688 | EPLEPFPT<br>QIHKDYK          | Homo<br>sapiens                  |
| 1 | 1.00 | 1 | 1 | 0 | 0      | 0 | 0 | -0.002 | t | 24564 | HPYISKPQ                     | Mus<br>musculu<br>s              |
| 1 | 1.00 | 1 | 1 | 0 | 0      | 0 | 0 | -0.002 | t | 21928 | GQPAVRN<br>ERATGS            | Mus<br>musculu<br>s              |
| 1 | 1.00 | 1 | 1 | 0 | 0      | 0 | 0 | -0.002 | t | 36413 | LHQPPPQI<br>FLKILPQSG<br>PIG | Homo<br>sapiens                  |
| 1 | 1.00 | 1 | 1 | 0 | 0      | 0 | 0 | -0.002 | t | 11821 | EENVEHD<br>AEENVEH<br>DA     | Mus<br>musculu<br>s              |
| 1 | 1.00 | 1 | 1 | 0 | 0      | 0 | 0 | -0.002 | t | 22360 | GSGVRGD<br>FGSLAPRV<br>ARQL  | Cavia<br>porcellu<br>s           |
| 1 | 1.00 | 1 | 1 | 0 | 0      | 0 | 0 | -0.002 | t | 23510 | GYYPSPDP<br>NTFFYAPP<br>YSA  | Sus<br>scrofa                    |
| 1 | 1.00 | 1 | 1 | 0 | 0      | 0 | 0 | -0.002 | t | 23269 | GWLAGLF<br>YQHKF             | Mus<br>musculu<br>s              |



|   |      |   |   |   |   |   |   |        |   |       |                              |                                  |
|---|------|---|---|---|---|---|---|--------|---|-------|------------------------------|----------------------------------|
| 1 | 1.00 | 1 | 1 | 0 | 0 | 0 | 0 | -0.002 | t | 21191 | GLVGLLTP<br>GAKQN            | Oryctola<br>gus<br>cuniculu<br>s |
| 1 | 1.00 | 1 | 1 | 0 | 0 | 0 | 0 | -0.002 | t | 22784 | GTPNPNP<br>NPNPNPN<br>PGTT   | Mus<br>musculu<br>s              |
| 1 | 1.00 | 1 | 1 | 0 | 0 | 0 | 0 | -0.002 | t | 27997 | IPQPQWT<br>P                 | Mus<br>musculu<br>s              |
| 1 | 1.00 | 1 | 1 | 0 | 0 | 0 | 0 | -0.002 | t | 24243 | HLKYATYP<br>PYPQ             | Mus<br>musculu<br>s              |
| 1 | 1.00 | 1 | 1 | 0 | 0 | 0 | 0 | -0.002 | t | 26849 | IKMVSSLK<br>TKIT             | Oryctola<br>gus<br>cuniculu<br>s |
| 1 | 1.00 | 1 | 1 | 0 | 0 | 0 | 0 | -0.002 | t | 11821 | EENVEHD<br>AEENVEH<br>DA     | Mus<br>musculu<br>s              |
| 1 | 1.00 | 1 | 1 | 0 | 0 | 0 | 0 | -0.002 | t | 31772 | KLCGVL                       | Homo<br>sapiens                  |
| 1 | 1.00 | 1 | 1 | 0 | 0 | 0 | 0 | -0.002 | t | 25146 | HWYISKPQ                     | Mus<br>musculu<br>s              |
| 1 | 1.00 | 1 | 1 | 0 | 0 | 0 | 0 | -0.002 | t | 13899 | EQPTTRA<br>Q                 | Oryctola<br>gus<br>cuniculu<br>s |
| 1 | 1.00 | 1 | 1 | 0 | 0 | 0 | 0 | -0.002 | t | 30036 | KAYSNCYP<br>YDVPDY           | Oryctola<br>gus<br>cuniculu<br>s |
| 1 | 1.00 | 1 | 1 | 0 | 0 | 0 | 0 | -0.002 | t | 23526 | HAEL                         | Mus<br>musculu<br>s              |
| 1 | 1.00 | 1 | 1 | 0 | 0 | 0 | 0 | -0.002 | t | 14592 | ETVKTNKK<br>NVTVQEL<br>DLQAR | Oryctola<br>gus<br>cuniculu<br>s |
| 1 | 1.00 | 1 | 1 | 0 | 0 | 0 | 0 | -0.002 | t | 22401 | GSLAAR                       | Mus<br>musculu<br>s              |
| 1 | 1.00 | 1 | 1 | 0 | 0 | 0 | 0 | -0.002 | t | 14592 | ETVKTNKK<br>NVTVQEL<br>DLQAR | Oryctola<br>gus<br>cuniculu<br>s |

|   |      |   |   |   |        |   |   |        |   |       |                              |                                  |
|---|------|---|---|---|--------|---|---|--------|---|-------|------------------------------|----------------------------------|
| 1 | 1.00 | 1 | 1 | 0 | -0.007 | 0 | 0 | -0.002 | t | 13900 | EQPTTRA<br>QKLFAMW<br>RI     | Oryctola<br>gus<br>cuniculu<br>s |
| 1 | 1.00 | 1 | 1 | 0 | 0      | 0 | 0 | -0.002 | t | 13900 | EQPTTRA<br>QKLFAMW<br>RI     | Oryctola<br>gus<br>cuniculu<br>s |
| 1 | 1.00 | 1 | 1 | 0 | 0      | 0 | 0 | -0.002 | t | 31018 | KGNCSGPT<br>TIR              | Oryctola<br>gus<br>cuniculu<br>s |
| 1 | 1.00 | 1 | 1 | 0 | 0      | 0 | 0 | -0.002 | t | 33163 | KRIPNKKP<br>GKKTTT           | Oryctola<br>gus<br>cuniculu<br>s |
| 1 | 1.00 | 1 | 1 | 0 | 0      | 0 | 0 | -0.002 | t | 14670 | EVDNEQP<br>TTRAQKLF<br>A     | Mus<br>musculu<br>s              |
| 1 | 1.00 | 1 | 1 | 0 | 0      | 0 | 0 | -0.002 | t | 19023 | GDLGSIA                      | Oryctola<br>gus<br>cuniculu<br>s |
| 1 | 1.00 | 1 | 1 | 0 | 0      | 0 | 0 | -0.002 | t | 10770 | DVVGVR<br>L                  | Mus<br>musculu<br>s              |
| 1 | 1.00 | 1 | 1 | 0 | 0      | 0 | 0 | -0.002 | t | 14435 | ETIYNTTLK<br>Y               | Homo<br>sapiens                  |
| 1 | 1.00 | 1 | 1 | 0 | 0      | 0 | 0 | -0.002 | t | 14435 | ETIYNTTLK<br>Y               | Homo<br>sapiens                  |
| 1 | 1.00 | 1 | 1 | 0 | 0      | 0 | 0 | -0.002 | t | 26024 | IEYKVQFA<br>TK               | Mus<br>musculu<br>s              |
| 1 | 1.00 | 1 | 1 | 0 | 0      | 0 | 0 | -0.002 | t | 19266 | GEFPRHVK<br>LKNEIENLL<br>DQV | Mus<br>musculu<br>s              |
| 1 | 1.00 | 1 | 1 | 0 | 0      | 0 | 0 | -0.002 | t | 12992 | ELDLQARR                     | Mus<br>musculu<br>s              |
| 1 | 1.00 | 1 | 1 | 0 | 0      | 0 | 0 | -0.002 | t | 19620 | GFSPEEME<br>AVASKFR          | Mus<br>musculu<br>s              |

|   |      |   |   |   |        |   |   |        |   |       |                          |                                  |
|---|------|---|---|---|--------|---|---|--------|---|-------|--------------------------|----------------------------------|
| 1 | 1.00 | 1 | 1 | 0 | 0      | 0 | 0 | -0.002 | t | 22813 | GTSESTET<br>SEVSTYSMS    | Oryctola<br>gus<br>cuniculu<br>s |
| 1 | 1.00 | 1 | 1 | 0 | 0      | 0 | 0 | -0.002 | t | 11723 | EEKKVPINL<br>WLDGKQNTVPL | Oryctola<br>gus<br>cuniculu<br>s |
| 1 | 1.00 | 1 | 1 | 0 | -0.003 | 0 | 0 | -0.002 | t | 30716 | KFDWNTPD                 | Mus<br>musculu<br>s              |
| 1 | 1.00 | 1 | 1 | 0 | 0      | 0 | 0 | -0.002 | t | 34290 | KWEDSTST<br>LTISADSKKTKD | Mus<br>musculu<br>s              |
| 1 | 1.00 | 1 | 1 | 0 | 0      | 0 | 0 | -0.002 | t | 30716 | KFDWNTPD                 | Mus<br>musculu<br>s              |
| 1 | 1.00 | 1 | 1 | 0 | -0.007 | 0 | 0 | -0.002 | t | 13899 | EQPTTRAQ                 | Oryctola<br>gus<br>cuniculu<br>s |
| 1 | 1.00 | 1 | 1 | 0 | -0.003 | 0 | 0 | -0.002 | t | 20179 | GHRMAW<br>DMM            | Oryctola<br>gus<br>cuniculu<br>s |
| 1 | 1.00 | 1 | 1 | 0 | 0      | 0 | 0 | -0.002 | t | 30299 | KEALDKYE<br>LENHD        | Oryctola<br>gus<br>cuniculu<br>s |
| 1 | 1.00 | 1 | 1 | 0 | 0      | 0 | 0 | -0.002 | t | 30716 | KFDWNTPD                 | Mus<br>musculu<br>s              |
| 1 | 1.00 | 1 | 1 | 0 | 0      | 0 | 0 | -0.002 | t | 11723 | EEKKVPINL<br>WLDGKQNTVPL | Oryctola<br>gus<br>cuniculu<br>s |
| 1 | 1.00 | 1 | 1 | 0 | 0      | 0 | 0 | -0.002 | t | 11815 | EENVEENV<br>EENVEENV     | Oryctola<br>gus<br>cuniculu<br>s |
| 1 | 1.00 | 1 | 1 | 0 | 0.001  | 0 | 0 | -0.002 | t | 27997 | IPQPQWTP                 | Mus<br>musculu<br>s              |

|   |      |   |   |   |       |   |   |        |   |       |                              |                                  |
|---|------|---|---|---|-------|---|---|--------|---|-------|------------------------------|----------------------------------|
| 1 | 1.00 | 1 | 1 | 0 | 0     | 0 | 0 | -0.002 | t | 11148 | EANNREG<br>VEG               | Mus<br>musculu<br>s              |
| 1 | 1.00 | 1 | 1 | 0 | 0     | 0 | 0 | -0.002 | t | 17135 | FNCLGMS<br>NRDFLEGV<br>SGATW | Equus<br>caballus                |
| 1 | 1.00 | 1 | 1 | 0 | 0     | 0 | 0 | -0.002 | t | 11148 | EANNREG<br>VEG               | Mus<br>musculu<br>s              |
| 1 | 1.00 | 1 | 1 | 0 | 0     | 0 | 0 | -0.002 | t | 10801 | DWEDRYR<br>RE                | Oryctola<br>gus<br>cuniculu<br>s |
| 1 | 1.00 | 1 | 1 | 0 | 0     | 0 | 0 | -0.002 | t | 10539 | DVAGLEK<br>DPVAN             | Mus<br>musculu<br>s              |
| 1 | 1.00 | 1 | 1 | 0 | 0     | 0 | 0 | -0.002 | t | 32280 | KMADPNR<br>FRGKDLPV          | Oryctola<br>gus<br>cuniculu<br>s |
| 1 | 1.00 | 1 | 1 | 0 | 0     | 0 | 0 | -0.002 | t | 19481 | GEYGEVTV<br>DCEPRSGI<br>DTNA | Equus<br>caballus                |
| 1 | 1.00 | 1 | 1 | 0 | 0     | 0 | 0 | -0.002 | t | 27997 | IPQPQWT<br>P                 | Mus<br>musculu<br>s              |
| 1 | 1.00 | 1 | 1 | 0 | 0     | 0 | 0 | -0.002 | t | 28313 | IRHQMVL<br>QL                | Mus<br>musculu<br>s              |
| 1 | 1.00 | 1 | 1 | 0 | 0     | 0 | 0 | -0.002 | t | 22282 | GSAMSRP<br>MIHF              | Mus<br>musculu<br>s              |
| 1 | 1.00 | 1 | 1 | 0 | 0.001 | 0 | 0 | -0.002 | t | 27997 | IPQPQWT<br>P                 | Mus<br>musculu<br>s              |
| 1 | 1.00 | 1 | 1 | 0 | 0     | 0 | 0 | -0.002 | t | 27675 | INKRKYDS<br>LKEKL            | Homo<br>sapiens                  |
| 1 | 1.00 | 1 | 1 | 0 | 0     | 0 | 0 | -0.002 | t | 19983 | GGQPAVR<br>NER               | Mus<br>musculu<br>s              |
| 1 | 1.00 | 1 | 1 | 0 | 0     | 0 | 0 | -0.002 | t | 9524  | DNPASTT<br>NKDK              | Oryctola<br>gus<br>cuniculu<br>s |
| 1 | 1.00 | 1 | 1 | 0 | 0     | 0 | 0 | -0.002 | t | 4149  | ARGSLAVT<br>I                | Mus<br>musculu<br>s              |

|   |      |   |   |   |        |   |   |        |   |      |                             |                                  |
|---|------|---|---|---|--------|---|---|--------|---|------|-----------------------------|----------------------------------|
| 1 | 1.00 | 1 | 1 | 0 | -0.008 | 0 | 0 | -0.002 | t | 4149 | ARGSLAVT<br>I               | Mus<br>musculu<br>s              |
| 1 | 1.00 | 1 | 1 | 0 | 0      | 0 | 0 | -0.002 | t | 9524 | DNPASTT<br>NKDK             | Oryctola<br>gus<br>cuniculu<br>s |
| 1 | 1.00 | 1 | 1 | 0 | 0      | 0 | 0 | -0.002 | t | 9524 | DNPASTT<br>NKDK             | Mus<br>musculu<br>s              |
| 1 | 1.00 | 1 | 1 | 0 | 0      | 0 | 0 | -0.002 | t | 9524 | DNPASTT<br>NKDK             | Mus<br>musculu<br>s              |
| 1 | 1.00 | 1 | 1 | 0 | 0      | 0 | 0 | -0.002 | t | 9103 | DLGPLAAR                    | Mus<br>musculu<br>s              |
| 1 | 1.00 | 1 | 1 | 0 | 0      | 0 | 0 | -0.002 | t | 3245 | ANDVDNS<br>NPVVQAE<br>QLNWL | Mus<br>musculu<br>s              |
| 1 | 1.00 | 1 | 1 | 0 | 0      | 0 | 0 | -0.002 | t | 9524 | DNPASTT<br>NKDK             | Mus<br>musculu<br>s              |
| 1 | 1.00 | 1 | 1 | 0 | 0      | 0 | 0 | -0.002 | t | 1822 | AHTTSDP<br>WHPPG            | Mus<br>musculu<br>s              |
| 1 | 1.00 | 1 | 1 | 0 | 0      | 0 | 0 | -0.002 | t | 4702 | ASQKIQLV                    | Pan<br>troglody<br>tes           |
| 1 | 1.00 | 1 | 1 | 0 | 0      | 0 | 0 | -0.002 | t | 4149 | ARGSLAVT<br>I               | Mus<br>musculu<br>s              |
| 1 | 1.00 | 1 | 1 | 0 | 0      | 0 | 0 | -0.002 | t | 4331 | ASARGDLA<br>HLTTTHAR<br>HLP | Mus<br>musculu<br>s              |
| 1 | 1.00 | 1 | 1 | 0 | 0      | 0 | 0 | -0.002 | t | 5507 | AVPNVRG<br>DLQ              | Mus<br>musculu<br>s              |
| 1 | 1.00 | 1 | 1 | 0 | 0      | 0 | 0 | -0.002 | t | 7461 | DAADL                       | Mus<br>musculu<br>s              |
| 1 | 1.00 | 1 | 1 | 0 | 0      | 0 | 0 | -0.002 | t | 9526 | DNPASTT<br>NKDKL            | Oryctola<br>gus<br>cuniculu<br>s |

|   |      |   |   |   |        |   |   |        |   |      |                              |                                  |
|---|------|---|---|---|--------|---|---|--------|---|------|------------------------------|----------------------------------|
| 1 | 1.00 | 1 | 1 | 0 | 0      | 0 | 0 | -0.002 | t | 3236 | ANCASILC<br>KCYTTGT          | Mus<br>musculu<br>s              |
| 1 | 1.00 | 1 | 1 | 0 | 0      | 0 | 0 | -0.002 | t | 1547 | AGHATLRE<br>HLRDIKAE<br>NTDA | Mus<br>musculu<br>s              |
| 1 | 1.00 | 1 | 1 | 0 | 0      | 0 | 0 | -0.002 | t | 3236 | ANCASILC<br>KCYTTGT          | Mus<br>musculu<br>s              |
| 1 | 1.00 | 1 | 1 | 0 | 0      | 0 | 0 | -0.002 | t | 428  | AASEALDP<br>HAFHLLN<br>TYGR  | Homo<br>sapiens                  |
| 1 | 1.00 | 1 | 1 | 0 | 0      | 0 | 0 | -0.002 | t | 9516 | DNNLVSG<br>P                 | Oryctola<br>gus<br>cuniculu<br>s |
| 1 | 1.00 | 1 | 1 | 0 | 0      | 0 | 0 | -0.002 | t | 3236 | ANCASILC<br>KCYTTGT          | Mus<br>musculu<br>s              |
| 1 | 1.00 | 1 | 1 | 0 | 0      | 0 | 0 | -0.002 | t | 9723 | DPPPPNP<br>NDPPPPN<br>PND    | Mus<br>musculu<br>s              |
| 1 | 1.00 | 1 | 1 | 0 | 0      | 0 | 0 | -0.002 | t | 9621 | DPEDSALL                     | Mus<br>musculu<br>s              |
| 1 | 1.00 | 1 | 1 | 0 | 0      | 0 | 0 | -0.002 | t | 8567 | DHSDLVAE<br>KQRLEDLG<br>QKFE | Mus<br>musculu<br>s              |
| 1 | 1.00 | 1 | 1 | 0 | 0      | 0 | 0 | -0.002 | t | 3825 | APSSPGTP<br>GVAAATQ<br>AANGG | Mus<br>musculu<br>s              |
| 1 | 1.00 | 1 | 1 | 0 | 0      | 0 | 0 | -0.002 | t | 9106 | DLGSIA                       | Mus<br>musculu<br>s              |
| 1 | 1.00 | 1 | 1 | 0 | 0      | 0 | 0 | -0.002 | t | 89   | AADKPTLD<br>IRMMNIE<br>A     | Mus<br>musculu<br>s              |
| 1 | 1.00 | 1 | 1 | 0 | -0.002 | 0 | 0 | -0.002 | t | 7850 | DDPPATVY<br>RYDSRPPE<br>D    | Mus<br>musculu<br>s              |
| 1 | 1.00 | 1 | 1 | 0 | 0      | 0 | 0 | -0.002 | t | 6015 | CAPESIEFP<br>VSEARVLE<br>D   | Homo<br>sapiens                  |
| 1 | 1.00 | 1 | 1 | 0 | -0.007 | 0 | 0 | -0.002 | t | 9557 | DNTVRET                      | Oryctola<br>gus<br>cuniculu<br>s |

|   |      |   |   |   |        |   |   |        |   |       |                              |                                  |
|---|------|---|---|---|--------|---|---|--------|---|-------|------------------------------|----------------------------------|
| 1 | 1.00 | 1 | 1 | 0 | 0      | 0 | 0 | -0.002 | t | 4331  | ASARGDLA<br>HLTTTHAR<br>HLP  | Mus<br>musculu<br>s              |
| 1 | 1.00 | 1 | 1 | 0 | 0      | 0 | 0 | -0.002 | t | 7850  | DDPPATVY<br>RYDSRPPE<br>D    | Mus<br>musculu<br>s              |
| 1 | 1.00 | 1 | 1 | 0 | 0      | 0 | 0 | -0.002 | t | 4331  | ASARGDLA<br>HLTTTHAR<br>HLP  | Mus<br>musculu<br>s              |
| 1 | 1.00 | 1 | 1 | 0 | 0      | 0 | 0 | -0.002 | t | 7492  | DAEFRHDS<br>GYEVHHQ<br>KL    | Mus<br>musculu<br>s              |
| 1 | 1.00 | 1 | 1 | 0 | 0      | 0 | 0 | -0.002 | t | 10171 | DSLSEEEKE<br>LLNRIQVD<br>S   | Mus<br>musculu<br>s              |
| 1 | 1.00 | 1 | 1 | 0 | -0.007 | 0 | 0 | -0.002 | t | 9557  | DNTVRET                      | Oryctola<br>gus<br>cuniculu<br>s |
| 1 | 1.00 | 1 | 1 | 0 | -0.003 | 0 | 0 | -0.002 | t | 8355  | DGAVQPD<br>GG                | Oryctola<br>gus<br>cuniculu<br>s |
| 1 | 1.00 | 1 | 1 | 0 | 0      | 0 | 0 | -0.002 | t | 8355  | DGAVQPD<br>GG                | Oryctola<br>gus<br>cuniculu<br>s |
| 1 | 1.00 | 1 | 1 | 0 | 0      | 0 | 0 | -0.002 | t | 33    | AAAGAVV<br>GGLGGYM<br>LG     | Mus<br>musculu<br>s              |
| 1 | 1.00 | 1 | 1 | 0 | 0      | 0 | 0 | -0.002 | t | 5109  | ATPYHPPA<br>TP               | Oryctola<br>gus<br>cuniculu<br>s |
| 1 | 1.00 | 1 | 1 | 0 | 0      | 0 | 0 | -0.002 | t | 632   | ADASLKM<br>ADPNRFR<br>GKDLP  | Mus<br>musculu<br>s              |
| 1 | 1.00 | 1 | 1 | 0 | 0      | 0 | 0 | -0.002 | t | 7629  | DARSVNG<br>EFPRHVKL<br>KNEIE | Mus<br>musculu<br>s              |
| 1 | 1.00 | 1 | 1 | 0 | -0.007 | 0 | 0 | -0.002 | t | 8356  | DGAVQPD<br>GGQPAVR<br>NERA   | Oryctola<br>gus<br>cuniculu<br>s |

|   |      |   |   |   |        |   |   |        |   |       |                              |                       |
|---|------|---|---|---|--------|---|---|--------|---|-------|------------------------------|-----------------------|
| 1 | 1.00 | 1 | 1 | 0 | 0      | 0 | 0 | -0.002 | t | 9018  | DLAHLTA                      | Oryctolagus cuniculus |
| 1 | 1.00 | 1 | 1 | 0 | 0      | 0 | 0 | -0.002 | t | 4331  | ASARGDLA<br>HLTTTHAR<br>HLP  | Mus musculus          |
| 1 | 1.00 | 1 | 1 | 0 | 0      | 0 | 0 | -0.002 | t | 6093  | CDCDRTA<br>A                 | Mus musculus          |
| 1 | 1.00 | 1 | 1 | 0 | 0      | 0 | 0 | -0.002 | t | 8356  | DGAVQPD<br>GGQPAVR<br>NERA   | Cavia porcellus       |
| 1 | 1.00 | 1 | 1 | 0 | 0      | 0 | 0 | -0.002 | t | 10069 | DRYIPYSP                     | Mus musculus          |
| 1 | 1.00 | 1 | 1 | 0 | 0      | 0 | 0 | -0.002 | t | 89    | AADKPTLD<br>IRMMNIE<br>A     | Mus musculus          |
| 1 | 1.00 | 1 | 1 | 0 | 0      | 0 | 0 | -0.002 | t | 89    | AADKPTLD<br>IRMMNIE<br>A     | Mus musculus          |
| 1 | 1.00 | 1 | 1 | 0 | 0      | 0 | 0 | -0.002 | t | 4401  | ASFFD                        | Mus musculus          |
| 1 | 1.00 | 1 | 1 | 0 | 0      | 0 | 0 | -0.002 | t | 3275  | ANETIYNT<br>TLKYGDVV<br>GVNT | Homo sapiens          |
| 1 | 1.00 | 1 | 1 | 0 | -0.008 | 0 | 0 | -0.002 | t | 6139  | CDSSDRPR<br>VYTIT            | Mus musculus          |
| 1 | 1.00 | 1 | 1 | 0 | -0.008 | 0 | 0 | -0.002 | t | 4149  | ARGSLAVT<br>I                | Mus musculus          |
| 1 | 1.00 | 1 | 1 | 0 | 0      | 0 | 0 | -0.002 | t | 9585  | DPAF                         | Mus musculus          |
| 1 | 1.00 | 1 | 1 | 0 | 0      | 0 | 0 | -0.002 | t | 6479  | CKGKIQAL<br>CENPEWA          | Mus musculus          |
| 1 | 1.00 | 1 | 1 | 0 | 0      | 0 | 0 | -0.002 | t | 6226  | CFGNSEY                      | Mus musculus          |



|   |      |   |   |       |        |        |        |        |   |        |                             |                                  |
|---|------|---|---|-------|--------|--------|--------|--------|---|--------|-----------------------------|----------------------------------|
| 1 | 1.00 | 1 | 1 | 0     | 0      | 0      | 0      | -0.002 | t | 6139   | CDSSDRPR<br>VYTIT           | Mus<br>musculu<br>s              |
| 1 | 1.00 | 1 | 1 | 0     | 0      | 0      | 0      | -0.002 | t | 6139   | CDSSDRPR<br>VYTIT           | Mus<br>musculu<br>s              |
| 1 | 1.00 | 1 | 1 | 0     | 0      | 0      | 0      | -0.002 | t | 4038   | AQPVKIDN<br>ASPAST          | Oryctola<br>gus<br>cuniculu<br>s |
| 1 | 1.00 | 1 | 1 | 0     | 0      | 0      | 0      | -0.002 | t | 9753   | DPRVRGLY                    | Mus<br>musculu<br>s              |
| 1 | 1.00 | 1 | 1 | 0     | 0      | 0      | 0      | -0.002 | t | 9524   | DNPASTT<br>NKDK             | Cavia<br>porcellu<br>s           |
| 1 | 1.00 | 1 | 1 | 0     | -0.003 | -0.007 | 0      | -0.002 | t | 103166 | FEKVVNKE<br>SLVISGLRH       | Oryctola<br>gus<br>cuniculu<br>s |
| 1 | 1.00 | 1 | 1 | -0.01 | -0.01  | -0.017 | -0.01  | -0.01  | t | 114149 | YGSLPQKA<br>QGHRPQD<br>E    | Rattus<br>norvegic<br>us         |
| 1 | 1.00 | 1 | 1 | -0.01 | -0.013 | -0.017 | -0.01  | -0.01  | t | 114149 | YGSLPQKA<br>QGHRPQD<br>E    | Oryctola<br>gus<br>cuniculu<br>s |
| 1 | 1.00 | 1 | 1 | -0.01 | -0.002 | -0.01  | -0.01  | -0.012 | t | 156935 | PLSKMHI                     | Gallus<br>gallus                 |
| 1 | 1.00 | 1 | 1 | 0.05  | 0.05   | 0.054  | 0.052  | 0.05   | t | 70952  | VSGGSWV<br>DIVLE            | Homo<br>sapiens                  |
| 1 | 1.00 | 1 | 1 | 0.02  | 0.02   | 0.02   | 0.02   | 0.02   | t | 78398  | GLKND<br>SA<br>VLVYL<br>VGS | Mus<br>musculu<br>s              |
| 1 | 1.00 | 1 | 1 | 0     | 0      | 0      | 0      | 0      | t | 119621 | NVFSCSV<br>M                | Homo<br>sapiens                  |
| 1 | 1.00 | 1 | 1 | -0.01 | -0.01  | -0.01  | -0.01  | -0.01  | t | 125791 | CSFWSKYI<br>QTLK            | Mus<br>musculu<br>s              |
| 1 | 1.00 | 1 | 1 | 0.03  | 0.033  | 0.03   | 0.03   | 0.028  | t | 138315 | DAFGGVYS                    | Mus<br>musculu<br>s              |
| 1 | 1.00 | 1 | 1 | -0.01 | -0.008 | -0.027 | -0.013 | -0.01  | t | 11439  | EDSGSSRK<br>KITCECTK<br>PDS | Homo<br>sapiens                  |

|   |      |   |   |       |        |        |        |        |   |        |                              |                                  |
|---|------|---|---|-------|--------|--------|--------|--------|---|--------|------------------------------|----------------------------------|
| 1 | 1.00 | 1 | 1 | 0.01  | 0.008  | 0.008  | 0.009  | 0.01   | t | 120407 | APGYKHEI<br>KYNC             | Mus<br>musculu<br>s              |
| 1 | 1.00 | 1 | 1 | -0.02 | -0.018 | -0.019 | -0.019 | -0.02  | t | 470    | AATRFMK<br>DLY               | Homo<br>sapiens                  |
| 1 | 1.00 | 1 | 1 | 0.02  | 0.02   | 0.02   | 0.023  | 0.02   | t | 4210   | ARPDYNPL                     | Homo<br>sapiens                  |
| 1 | 1.00 | 1 | 1 | 0     | 0      | 0      | -0.003 | -0.003 | t | 37660  | LLPHSNLD<br>HILEPSIPW<br>KSK | Homo<br>sapiens                  |
| 1 | 1.00 | 1 | 1 | 0.02  | 0.02   | 0.009  | 0.02   | 0.022  | t | 111790 | SLVEETSFI<br>DAGAPTS         | Oryctola<br>gus<br>cuniculu<br>s |
| 1 | 1.00 | 1 | 1 | -0.03 | -0.028 | -0.04  | -0.029 | -0.031 | t | 65863  | TQGVVKE<br>RRWTLVN<br>ENRPIW | Homo<br>sapiens                  |
| 1 | 1.00 | 1 | 1 | 0.02  | 0.015  | 0.02   | 0.021  | 0.018  | t | 99874  | AEDVGSN<br>KGA               | Oryctola<br>gus<br>cuniculu<br>s |
| 1 | 1.00 | 1 | 1 | 0.02  | 0.023  | 0.02   | 0.02   | 0.021  | t | 135569 | KTNMK                        | Mus<br>musculu<br>s              |
| 1 | 1.00 | 1 | 1 | 0     | 0      | 0      | 0      | -0.002 | t | 151731 | SAQSQRA<br>PDR               | Mus<br>musculu<br>s              |
| 1 | 1.00 | 1 | 1 | 0     | 0      | 0      | 0      | -0.002 | t | 105163 | EFRHD                        | Mus<br>musculu<br>s              |
| 1 | 1.00 | 1 | 1 | 0     | 0      | 0      | 0      | -0.002 | t | 104461 | EFRHDS                       | Mus<br>musculu<br>s              |
| 1 | 1.00 | 1 | 1 | -0.03 | -0.032 | -0.03  | -0.023 | -0.03  | t | 123636 | PVGPAPG<br>MRP               | Homo<br>sapiens                  |
| 1 | 1.00 | 1 | 1 | 0     | 0      | -0.007 | 0      | 0      | t | 28742  | ISTEPFPN<br>QKHKDLQ          | Homo<br>sapiens                  |
| 1 | 1.00 | 1 | 1 | 0     | 0      | -0.007 | 0      | 0      | t | 28742  | ISTEPFPN<br>QKHKDLQ          | Homo<br>sapiens                  |

|   |      |   |   |       |       |        |        |        |   |        |                              |                                  |
|---|------|---|---|-------|-------|--------|--------|--------|---|--------|------------------------------|----------------------------------|
| 1 | 1.00 | 1 | 1 | 0.01  | 0.006 | 0.002  | 0.013  | 0.01   | t | 70437  | VPPTQSKK<br>KNKNET           | Oryctola<br>gus<br>cuniculu<br>s |
| 1 | 1.00 | 1 | 1 | 0     | 0     | 0      | 0      | 0      | t | 27727  | INQQLNPK                     | Mus<br>musculu<br>s              |
| 1 | 1.00 | 1 | 1 | 0     | 0     | 0      | 0      | 0      | t | 27727  | INQQLNPK                     | Homo<br>sapiens                  |
| 1 | 1.00 | 1 | 1 | 0     | 0     | 0      | 0      | 0      | t | 27727  | INQQLNPK                     | Mus<br>musculu<br>s              |
| 1 | 1.00 | 1 | 1 | 0.04  | 0.048 | 0.04   | 0.04   | 0.038  | t | 156939 | PPEKSHL                      | Gallus<br>gallus                 |
| 1 | 1.00 | 1 | 1 | 0.05  | 0.047 | 0.043  | 0.05   | 0.05   | t | 125799 | DDDRYSDL                     | Oryctola<br>gus<br>cuniculu<br>s |
| 1 | 1.00 | 1 | 1 | 0.03  | 0.03  | 0.03   | 0.03   | 0.03   | t | 137556 | QGEGMTG<br>ISYPGCPE          | Homo<br>sapiens                  |
| 1 | 1.00 | 1 | 1 | -0.01 | -0.01 | -0.01  | -0.01  | -0.01  | t | 117049 | NYKSPLFA<br>VPMT             | Mus<br>musculu<br>s              |
| 1 | 1.00 | 1 | 1 | -0.01 | -0.01 | -0.01  | -0.01  | -0.01  | t | 117049 | NYKSPLFA<br>VPMT             | Homo<br>sapiens                  |
| 1 | 1.00 | 1 | 1 | 0     | 0     | 0      | 0      | 0      | t | 7061   | CSQHLPYI<br>E                | Homo<br>sapiens                  |
| 1 | 1.00 | 1 | 1 | -0.02 | -0.02 | -0.031 | -0.018 | -0.019 | t | 67569  | VAEKVRNL<br>PA               | Homo<br>sapiens                  |
| 1 | 1.00 | 1 | 1 | 0.06  | 0.056 | 0.053  | 0.06   | 0.063  | t | 111039 | TGVPIDPA<br>VPDSSIVPL<br>LES | Bos<br>taurus                    |
| 1 | 1.00 | 1 | 1 | 0.03  | 0.032 | 0.022  | 0.03   | 0.032  | t | 48771  | PPETTTIP                     | Anas<br>platyrhy<br>nchos        |
| 1 | 1.00 | 1 | 1 | 0.01  | 0.01  | 0.001  | 0.004  | 0.01   | t | 30318  | KECEKYYK<br>EKKGRER          | Homo<br>sapiens                  |

|   |      |   |   |       |        |        |        |        |   |        |                              |                                  |
|---|------|---|---|-------|--------|--------|--------|--------|---|--------|------------------------------|----------------------------------|
| 1 | 1.00 | 1 | 1 | 0.07  | 0.073  | 0.065  | 0.07   | 0.07   | t | 52313  | QSESVFT<br>KDTQTGM<br>S      | Mus<br>musculu<br>s              |
| 1 | 1.00 | 1 | 1 | -0.01 | -0.01  | -0.008 | -0.004 | -0.008 | t | 48981  | PQDVKFP                      | Homo<br>sapiens                  |
| 1 | 1.00 | 1 | 1 | 0.03  | 0.03   | 0.021  | 0.03   | 0.033  | t | 110941 | MHGDTPT<br>LHEYMLDL<br>QPE   | Mus<br>musculu<br>s              |
| 1 | 1.00 | 1 | 1 | -0.04 | -0.038 | -0.04  | -0.039 | -0.042 | t | 119910 | GQYFAKPR<br>NQGG             | Homo<br>sapiens                  |
| 1 | 1.00 | 1 | 1 | -0.01 | -0.01  | -0.01  | -0.01  | -0.012 | t | 97348  | GLFGAIAG<br>FIEGGW           | Oryctola<br>gus<br>cuniculu<br>s |
| 1 | 1.00 | 1 | 1 | 0     | 0      | 0      | 0.009  | 0.001  | t | 132064 | SLLGQLSG<br>QV               | Homo<br>sapiens                  |
| 1 | 1.00 | 1 | 1 | 0.02  | 0.022  | 0.02   | 0.021  | 0.02   | t | 32470  | KNEEEIAQ                     | Homo<br>sapiens                  |
| 1 | 1.00 | 1 | 1 | 0.04  | 0.038  | 0.027  | 0.037  | 0.041  | t | 3474   | APAEPEAP<br>APETEKAE<br>EVEK | Mus<br>musculu<br>s              |
| 1 | 1.00 | 1 | 1 | -0.02 | -0.02  | -0.027 | -0.02  | -0.02  | t | 74476  | YKLPDHVR<br>T                | Mus<br>musculu<br>s              |
| 1 | 1.00 | 1 | 1 | 0.03  | 0.03   | 0.024  | 0.03   | 0.03   | t | 91203  | DNLAPMS<br>DGAVQPD<br>G      | Oryctola<br>gus<br>cuniculu<br>s |
| 1 | 1.00 | 1 | 1 | 0.05  | 0.054  | 0.053  | 0.057  | 0.05   | t | 124702 | SDDNYDK<br>TED               | Homo<br>sapiens                  |
| 1 | 1.00 | 1 | 1 | -0.02 | -0.022 | -0.019 | -0.023 | -0.02  | t | 44268  | NIKPLEDKI<br>L               | Mus<br>musculu<br>s              |
| 1 | 1.00 | 1 | 1 | 0.02  | 0.02   | 0.017  | 0.02   | 0.021  | t | 133531 | CDTLKPGE<br>C                | Mus<br>musculu<br>s              |
| 1 | 1.00 | 1 | 1 | 0.03  | 0.03   | 0.03   | 0.03   | 0.03   | t | 137882 | GQNVLSA<br>D                 | Homo<br>sapiens                  |
| 1 | 1.00 | 1 | 1 | -0.02 | -0.018 | -0.026 | -0.019 | -0.02  | t | 63551  | TETFLRGFL                    | Homo<br>sapiens                  |

|   |      |   |   |       |        |        |        |        |   |        |                              |                                  |
|---|------|---|---|-------|--------|--------|--------|--------|---|--------|------------------------------|----------------------------------|
| 1 | 1.00 | 1 | 1 | 0.04  | 0.04   | 0.04   | 0.04   | 0.038  | t | 145841 | KEDFRYAIS<br>STNEIGLLG<br>A  | Sus<br>scrofa                    |
| 1 | 1.00 | 1 | 1 | 0     | 0      | 0.006  | -0.003 | -0.001 | t | 66457  | TSTFTSL                      | Homo<br>sapiens                  |
| 1 | 1.00 | 1 | 1 | -0.02 | -0.023 | -0.018 | -0.02  | -0.023 | t | 9595   | DPALLLM<br>HELIHVLH<br>GLYG  | Oryctola<br>gus<br>cuniculu<br>s |
| 1 | 1.00 | 1 | 1 | -0.02 | -0.023 | -0.018 | -0.02  | -0.023 | t | 9595   | DPALLLM<br>HELIHVLH<br>GLYG  | Oryctola<br>gus<br>cuniculu<br>s |
| 1 | 1.00 | 1 | 1 | 0.02  | 0.017  | 0.021  | 0.02   | 0.022  | t | 11199  | EATALDTS                     | Oryctola<br>gus<br>cuniculu<br>s |
| 1 | 1.00 | 1 | 1 | 0     | 0      | -0.012 | 0      | 0      | t | 45464  | NPRENKLK<br>QPGDRAD<br>GQPAG | Homo<br>sapiens                  |
| 1 | 1.00 | 1 | 1 | 0.01  | 0.01   | 0.002  | 0.01   | 0.01   | t | 4268   | ARTGEG                       | Homo<br>sapiens                  |
| 1 | 1.00 | 1 | 1 | 0.02  | 0.023  | 0.008  | 0.02   | 0.022  | t | 7765   | DDEHVEEP<br>TVA              | Mus<br>musculu<br>s              |
| 1 | 1.00 | 1 | 1 | -0.05 | -0.048 | -0.05  | -0.047 | -0.052 | t | 120772 | LMLLAQM<br>RRISLFS           | Homo<br>sapiens                  |
| 1 | 1.00 | 1 | 1 | -0.03 | -0.027 | -0.042 | -0.03  | -0.028 | t | 95920  | TNVARP                       | Mus<br>musculu<br>s              |
| 1 | 1.00 | 1 | 1 | 0.03  | 0.03   | 0.03   | 0.03   | 0.03   | t | 108508 | KSGPIDIIG                    | Homo<br>sapiens                  |
| 1 | 1.00 | 1 | 1 | 0.01  | 0.01   | 0.01   | 0.01   | 0.01   | t | 78208  | MPTKSL                       | Equus<br>caballus                |
| 1 | 1.00 | 1 | 1 | 0.02  | 0.02   | 0.008  | 0.02   | 0.021  | t | 40194  | LTTDATTF<br>EEVATAEK<br>LV   | Oryctola<br>gus<br>cuniculu<br>s |
| 1 | 1.00 | 1 | 1 | -0.02 | -0.02  | -0.02  | -0.02  | -0.02  | t | 143959 | KFPHLAVG<br>F                | Oryctola<br>gus<br>cuniculu<br>s |

|   |      |   |   |       |        |        |        |        |   |        |                             |                                  |
|---|------|---|---|-------|--------|--------|--------|--------|---|--------|-----------------------------|----------------------------------|
| 1 | 1.00 | 1 | 1 | 0.01  | 0.014  | 0.01   | 0.007  | 0.01   | t | 60413  | SQDPYSPS<br>PY              | Homo<br>sapiens                  |
| 1 | 1.00 | 1 | 1 | 0.01  | 0.008  | 0.001  | 0.013  | 0.01   | t | 11148  | EANNREG<br>VEG              | Mus<br>musculu<br>s              |
| 1 | 1.00 | 1 | 1 | 0     | 0      | 0      | 0.004  | 0      | t | 142201 | KGLRRDL<br>ASREAKKQ<br>VEKA | Homo<br>sapiens                  |
| 1 | 1.00 | 1 | 1 | 0.02  | 0.022  | 0.02   | 0.019  | 0.018  | t | 51830  | QPFPSQQ<br>PYL              | Homo<br>sapiens                  |
| 1 | 1.00 | 1 | 1 | 0.02  | 0.02   | 0.02   | 0.02   | 0.02   | t | 131865 | EPLEVFISA                   | Homo<br>sapiens                  |
| 1 | 1.00 | 1 | 1 | 0.02  | 0.018  | 0.02   | 0.017  | 0.018  | t | 122129 | KTVTVKED<br>QVMQQN<br>PPKF  | Mus<br>musculu<br>s              |
| 1 | 1.00 | 1 | 1 | 0.01  | 0.013  | 0.017  | 0.01   | 0.009  | t | 75543  | YQRE                        | Mus<br>musculu<br>s              |
| 1 | 1.00 | 1 | 1 | 0.01  | 0.006  | 0.001  | 0.007  | 0.01   | t | 27960  | IPNGTYRA<br>TY              | Oryctola<br>gus<br>cuniculu<br>s |
| 1 | 1.00 | 1 | 1 | 0     | 0      | 0.016  | 0.003  | -0.003 | t | 39172  | LRQAILCW<br>GELM            | Homo<br>sapiens                  |
| 1 | 1.00 | 1 | 1 | -0.01 | -0.007 | -0.02  | -0.01  | -0.01  | t | 58403  | SHRGVIAD<br>NQAKWA<br>V     | Mus<br>musculu<br>s              |
| 1 | 1.00 | 1 | 1 | -0.01 | -0.01  | -0.02  | -0.01  | -0.01  | t | 58403  | SHRGVIAD<br>NQAKWA<br>V     | Mus<br>musculu<br>s              |
| 1 | 1.00 | 1 | 1 | 0     | -0.002 | -0.009 | -0.001 | 0      | t | 66382  | TSQDGNN<br>HQFT             | Mus<br>musculu<br>s              |
| 1 | 1.00 | 1 | 1 | -0.01 | -0.01  | -0.002 | -0.008 | -0.013 | t | 149255 | ALDKWD                      | Homo<br>sapiens                  |
| 1 | 1.00 | 1 | 1 | 0     | 0      | 0      | 0      | -0.002 | t | 144820 | YLEDWIKY<br>NNQK            | Mus<br>musculu<br>s              |

|   |      |   |   |   |   |   |   |        |   |        |                          |                     |
|---|------|---|---|---|---|---|---|--------|---|--------|--------------------------|---------------------|
| 1 | 1.00 | 1 | 1 | 0 | 0 | 0 | 0 | -0.002 | t | 156903 | KNRGIKTF<br>SN           | Mus<br>musculu<br>s |
| 1 | 1.00 | 1 | 1 | 0 | 0 | 0 | 0 | -0.002 | t | 151813 | CGADSYE<br>MEEDGVR<br>KC | Mus<br>musculu<br>s |
| 1 | 1.00 | 1 | 1 | 0 | 0 | 0 | 0 | -0.002 | t | 108155 | TDHGAE                   | Mus<br>musculu<br>s |
| 1 | 1.00 | 1 | 1 | 0 | 0 | 0 | 0 | -0.002 | t | 116085 | EPANPSEK                 | Mus<br>musculu<br>s |
| 1 | 1.00 | 1 | 1 | 0 | 0 | 0 | 0 | -0.002 | t | 99921  | DAEFRHDS                 | Mus<br>musculu<br>s |
| 1 | 1.00 | 1 | 1 | 0 | 0 | 0 | 0 | -0.002 | t | 103496 | PRGYPGQ<br>V             | Mus<br>musculu<br>s |
| 1 | 1.00 | 1 | 1 | 0 | 0 | 0 | 0 | -0.002 | t | 107084 | AKFRHD                   | Mus<br>musculu<br>s |
| 1 | 1.00 | 1 | 1 | 0 | 0 | 0 | 0 | -0.002 | t | 107228 | REEFRHEA                 | Mus<br>musculu<br>s |
| 1 | 1.00 | 1 | 1 | 0 | 0 | 0 | 0 | -0.002 | t | 105163 | EFRHD                    | Mus<br>musculu<br>s |
| 1 | 1.00 | 1 | 1 | 0 | 0 | 0 | 0 | -0.002 | t | 75950  | YTASARGD<br>LAHLTTT      | Mus<br>musculu<br>s |
| 1 | 1.00 | 1 | 1 | 0 | 0 | 0 | 0 | -0.002 | t | 68320  | VEQHHRR<br>TD            | Mus<br>musculu<br>s |
| 1 | 1.00 | 1 | 1 | 0 | 0 | 0 | 0 | -0.002 | t | 64031  | THGQWN<br>KPSK           | Mus<br>musculu<br>s |
| 1 | 1.00 | 1 | 1 | 0 | 0 | 0 | 0 | -0.002 | t | 74117  | YHLENEVA<br>RLKK         | MD                  |
| 1 | 1.00 | 1 | 1 | 0 | 0 | 0 | 0 | -0.002 | t | 51147  | QIVGGVYL<br>L            | Mus<br>musculu<br>s |
| 1 | 1.00 | 1 | 1 | 0 | 0 | 0 | 0 | -0.002 | t | 45932  | NSNNPDW<br>DF            | Mus<br>musculu<br>s |
| 1 | 1.00 | 1 | 1 | 0 | 0 | 0 | 0 | -0.002 | t | 14435  | ETIYNTTLK<br>Y           | Homo<br>sapiens     |

|   |      |   |   |       |        |        |        |        |   |        |                         |                                  |
|---|------|---|---|-------|--------|--------|--------|--------|---|--------|-------------------------|----------------------------------|
| 1 | 1.00 | 1 | 1 | 0     | 0      | 0      | 0      | -0.002 | t | 24591  | HQLDPAF<br>GANSTNP<br>D | Mus<br>musculu<br>s              |
| 1 | 1.00 | 1 | 1 | 0     | 0      | 0      | 0      | -0.002 | t | 11571  | EEEDDDM<br>GGLFD        | Mus<br>musculu<br>s              |
| 1 | 1.00 | 1 | 1 | 0     | -0.002 | 0      | -0.001 | -0.002 | t | 19636  | GFTTNEER<br>YNVFAE      | Mus<br>musculu<br>s              |
| 1 | 1.00 | 1 | 1 | 0.04  | 0.036  | 0.041  | 0.037  | 0.04   | t | 121054 | VTGEVIFQ<br>TPL         | Oryctola<br>gus<br>cuniculu<br>s |
| 1 | 1.00 | 1 | 1 | 0.07  | 0.07   | 0.07   | 0.07   | 0.069  | t | 110916 | KLDDTENA<br>SAYAANA     | Mus<br>musculu<br>s              |
| 1 | 1.00 | 1 | 1 | -0.06 | -0.058 | -0.06  | -0.053 | -0.06  | t | 121776 | RARARAR<br>A            | Homo<br>sapiens                  |
| 1 | 1.00 | 1 | 1 | -0.04 | -0.037 | -0.044 | -0.04  | -0.04  | t | 42676  | MSTLNTH<br>GAF          | Mus<br>musculu<br>s              |
| 1 | 1.00 | 1 | 1 | -0.04 | -0.04  | -0.044 | -0.04  | -0.04  | t | 42676  | MSTLNTH<br>GAF          | Oryctola<br>gus<br>cuniculu<br>s |
| 1 | 1.00 | 1 | 1 | -0.04 | -0.04  | -0.04  | -0.04  | -0.039 | t | 115317 | KKILDKVG<br>I<br>N      | Homo<br>sapiens                  |
| 1 | 1.00 | 1 | 1 | 0.03  | 0.03   | 0.03   | 0.03   | 0.033  | t | 59714  | SMMPQLA                 | Mus<br>musculu<br>s              |
| 1 | 1.00 | 1 | 1 | 0.02  | 0.022  | 0.022  | 0.021  | 0.02   | t | 66144  | TSAEGDLV<br>GWSPSP      | Homo<br>sapiens                  |
| 1 | 1.00 | 1 | 1 | -0.01 | -0.01  | -0.01  | -0.01  | -0.012 | t | 67931  | VDEKKM                  | Mus<br>musculu<br>s              |
| 1 | 1.00 | 1 | 1 | 0.04  | 0.04   | 0.04   | 0.04   | 0.04   | t | 149084 | NPTQHSY                 | Sus<br>scrofa                    |
| 1 | 1.00 | 1 | 1 | 0.05  | 0.05   | 0.05   | 0.05   | 0.05   | t | 30151  | KDGEA                   | Homo<br>sapiens                  |
| 1 | 1.00 | 1 | 1 | 0     | -0.029 | -0.014 | 0      | 0.002  | t | 127731 | LSQSPLVL<br>RSSP        | Trichosu<br>rus<br>vulpecul<br>a |



|   |      |   |   |       |        |        |        |        |   |        |                              |                                  |
|---|------|---|---|-------|--------|--------|--------|--------|---|--------|------------------------------|----------------------------------|
| 1 | 1.00 | 1 | 1 | 0     | 0.004  | 0      | 0.007  | 0.002  | t | 134217 | RNVILFSVF<br>DENRSWY<br>LTEN | Homo<br>sapiens                  |
| 1 | 1.00 | 1 | 1 | -0.02 | -0.024 | -0.017 | -0.017 | -0.022 | t | 29379  | IVNTLNGF<br>YRSL             | Oryctola<br>gus<br>cuniculu<br>s |
| 1 | 1.00 | 1 | 1 | 0     | 0.003  | 0      | 0      | -0.001 | t | 105232 | GSNKGAI<br>GLM               | Mus<br>musculu<br>s              |
| 1 | 1.00 | 1 | 1 | 0     | -0.004 | 0      | -0.001 | -0.002 | t | 61818  | STPGIVI                      | Oryctola<br>gus<br>cuniculu<br>s |
| 1 | 1.00 | 1 | 1 | 0     | 0      | 0      | 0.004  | 0      | t | 67299  | TWVAGVF<br>VYGGSKTS<br>LYNLR | Homo<br>sapiens                  |
| 1 | 1.00 | 1 | 1 | 0     | 0      | 0      | 0.004  | 0      | t | 53881  | RGGSRERA<br>RGRGRGR<br>GEKRP | Homo<br>sapiens                  |
| 1 | 1.00 | 1 | 1 | 0     | 0      | 0      | 0.004  | 0      | t | 47636  | PGEGPSTG<br>PRGQGDG<br>GRRKK | Homo<br>sapiens                  |
| 1 | 1.00 | 1 | 1 | 0     | 0      | 0      | 0.004  | 0      | t | 53963  | RGRGRGE<br>KRPRSPSS<br>QSSSS | Homo<br>sapiens                  |
| 1 | 1.00 | 1 | 1 | 0     | 0      | 0      | 0.004  | 0      | t | 58193  | SGPRHRD<br>GVRRPQK<br>RPSCIG | Homo<br>sapiens                  |
| 1 | 1.00 | 1 | 1 | 0     | 0      | 0      | 0.004  | 0      | t | 22447  | GSPPRRPP<br>PGRRPFFH<br>PVGE | Homo<br>sapiens                  |
| 1 | 1.00 | 1 | 1 | 0     | 0      | 0      | 0.004  | 0      | t | 18587  | GAGGGAG<br>AGGAGAG<br>GGGRGR | Homo<br>sapiens                  |
| 1 | 1.00 | 1 | 1 | 0     | 0      | 0      | 0.004  | 0      | t | 1433   | AGAGGGA<br>GGAGAGG<br>GAGGAG | Homo<br>sapiens                  |
| 1 | 1.00 | 1 | 1 | -0.04 | -0.044 | -0.045 | -0.037 | -0.04  | t | 95308  | DGKGYER<br>GHI               | Oryctola<br>gus<br>cuniculu<br>s |
| 1 | 1.00 | 1 | 1 | -0.02 | -0.016 | -0.013 | -0.013 | -0.021 | t | 108212 | WPPSFYW<br>HPQ               | Homo<br>sapiens                  |
| 1 | 1.00 | 1 | 1 | 0.01  | 0.01   | 0.003  | 0.01   | 0.011  | t | 73634  | YEDRY                        | Mus<br>musculu<br>s              |

|   |      |   |   |       |        |        |        |       |   |        |                          |                     |
|---|------|---|---|-------|--------|--------|--------|-------|---|--------|--------------------------|---------------------|
| 1 | 1.00 | 1 | 1 | 0.03  | 0.032  | 0.035  | 0.037  | 0.03  | t | 113212 | VPVLSAKA<br>AQASDLE      | Homo<br>sapiens     |
| 1 | 1.00 | 1 | 1 | 0.03  | 0.03   | 0.022  | 0.029  | 0.03  | t | 90599  | WLQEGKG<br>ENKFV         | Homo<br>sapiens     |
| 1 | 1.00 | 1 | 1 | 0     | -0.005 | -0.014 | 0.002  | 0.003 | t | 157091 | ANIKGVPT<br>RAET         | Canis<br>lupus      |
| 1 | 1.00 | 1 | 1 | 0.03  | 0.03   | 0.024  | 0.03   | 0.032 | t | 19375  | GENK                     | Mus<br>musculu<br>s |
| 1 | 1.00 | 1 | 1 | 0     | 0      | 0      | -0.001 | 0     | t | 66509  | TSYVG                    | Homo<br>sapiens     |
| 1 | 1.00 | 1 | 1 | -0.01 | -0.006 | -0.017 | -0.009 | -0.01 | t | 21497  | GNPNRPD<br>GGILT         | Homo<br>sapiens     |
| 1 | 1.00 | 1 | 1 | 0     | 0.002  | 0      | 0.007  | 0     | t | 107441 | HQNWLD<br>G              | Homo<br>sapiens     |
| 1 | 1.00 | 1 | 1 | 0.03  | 0.031  | 0.019  | 0.029  | 0.03  | t | 19118  | GDSSNAG<br>T             | Equus<br>caballus   |
| 1 | 1.00 | 1 | 1 | 0.03  | 0.028  | 0.019  | 0.029  | 0.03  | t | 19118  | GDSSNAG<br>T             | Mus<br>musculu<br>s |
| 1 | 1.00 | 1 | 1 | 0.01  | 0.01   | 0.003  | 0.003  | 0.01  | t | 119508 | QFIGYPI                  | Homo<br>sapiens     |
| 1 | 1.00 | 1 | 1 | 0.04  | 0.04   | 0.04   | 0.04   | 0.04  | t | 6457   | CITQYQRE<br>SQAYYQR<br>G | Mus<br>musculu<br>s |
| 1 | 1.00 | 1 | 1 | -0.03 | -0.03  | -0.03  | -0.03  | -0.03 | t | 118557 | PPPGMRG<br>P             | Homo<br>sapiens     |
| 1 | 1.00 | 1 | 1 | 0.02  | 0.024  | 0.02   | 0.021  | 0.02  | t | 36042  | LGAALLQS                 | Homo<br>sapiens     |
| 1 | 1.00 | 1 | 1 | 0.02  | 0.02   | 0.009  | 0.019  | 0.019 | t | 28350  | IRNVPHPF<br>VALGLKQ      | Mus<br>musculu<br>s |

|   |      |   |   |       |        |        |        |        |   |        |                              |                                  |
|---|------|---|---|-------|--------|--------|--------|--------|---|--------|------------------------------|----------------------------------|
| 1 | 1.00 | 1 | 1 | -0.02 | -0.023 | -0.027 | -0.02  | -0.021 | t | 108164 | TLVCLATG<br>FFPDHVEL         | Oryctola<br>gus<br>cuniculu<br>s |
| 1 | 1.00 | 1 | 1 | 0.03  | 0.033  | 0.018  | 0.03   | 0.03   | t | 34927  | LAQEAGN<br>FERISGDL          | Mus<br>musculu<br>s              |
| 1 | 1.00 | 1 | 1 | -0.01 | -0.012 | -0.007 | -0.013 | -0.014 | t | 46488  | NVSVSPSP<br>STPLLY           | Mus<br>musculu<br>s              |
| 1 | 1.00 | 1 | 1 | -0.01 | -0.013 | -0.022 | -0.011 | -0.01  | t | 51078  | QIHTLN                       | Oryctola<br>gus<br>cuniculu<br>s |
| 1 | 1.00 | 1 | 1 | -0.01 | -0.008 | -0.028 | -0.009 | -0.008 | t | 58195  | SGPSGPSG<br>TSPSSRS          | Homo<br>sapiens                  |
| 1 | 1.00 | 1 | 1 | 0.04  | 0.04   | 0.028  | 0.034  | 0.038  | t | 57661  | SEVEDVIP<br>EGWKADT<br>SYSAK | Homo<br>sapiens                  |
| 1 | 1.00 | 1 | 1 | 0     | -0.004 | 0      | 0.003  | -0.001 | t | 50846  | QGDRRCQ<br>SQLERANL          | Oryctola<br>gus<br>cuniculu<br>s |
| 1 | 1.00 | 1 | 1 | 0     | -0.004 | 0      | 0.003  | -0.001 | t | 50171  | PYSPSQDP<br>YSPSPYD          | Oryctola<br>gus<br>cuniculu<br>s |
| 1 | 1.00 | 1 | 1 | 0.02  | 0.02   | 0.02   | 0.02   | 0.02   | t | 78397  | GLKNDSA<br>VLVLVGS           | Mus<br>musculu<br>s              |
| 1 | 1.00 | 1 | 1 | 0.01  | 0.012  | 0.01   | 0.011  | 0.01   | t | 7680   | DAWREGE<br>EFVVEFDL          | Homo<br>sapiens                  |
| 1 | 1.00 | 1 | 1 | 0     | 0      | 0.002  | 0      | 0      | t | 65678  | TPPAYR                       | Mus<br>musculu<br>s              |
| 1 | 1.00 | 1 | 1 | 0.02  | 0.02   | 0.02   | 0.02   | 0.02   | t | 112855 | TTPLTNL                      | Homo<br>sapiens                  |
| 1 | 1.00 | 1 | 1 | -0.01 | -0.007 | -0.003 | -0.01  | -0.011 | t | 133748 | YNAELLV                      | Mus<br>musculu<br>s              |
| 1 | 1.00 | 1 | 1 | -0.01 | -0.008 | -0.022 | -0.009 | -0.01  | t | 44602  | NKSTLQNR<br>RAAVS            | Homo<br>sapiens                  |

|   |      |   |   |       |        |        |        |        |   |        |                              |                                  |
|---|------|---|---|-------|--------|--------|--------|--------|---|--------|------------------------------|----------------------------------|
| 1 | 1.00 | 1 | 1 | 0.03  | 0.03   | 0.028  | 0.03   | 0.028  | t | 136436 | KPVVGMPI<br>VEVW             | Gallus<br>gallus                 |
| 1 | 1.00 | 1 | 1 | -0.02 | -0.024 | -0.018 | -0.021 | -0.019 | t | 139500 | FHTHISV                      | Oryctola<br>gus<br>cuniculu<br>s |
| 1 | 1.00 | 1 | 1 | 0.03  | 0.03   | 0.03   | 0.034  | 0.029  | t | 131932 | KKEKPFSN<br>SKVECQ           | Homo<br>sapiens                  |
| 1 | 1.00 | 1 | 1 | -0.02 | -0.017 | -0.029 | -0.02  | -0.02  | t | 78635  | EKIERNNK<br>LKQPPPPP<br>NPN  | Mus<br>musculu<br>s              |
| 1 | 1.00 | 1 | 1 | -0.03 | -0.034 | -0.034 | -0.033 | -0.033 | t | 49015  | PQIPPNW<br>HIP               | Oryctola<br>gus<br>cuniculu<br>s |
| 1 | 1.00 | 1 | 1 | -0.07 | -0.077 | -0.061 | -0.063 | -0.07  | t | 109948 | SRYCLSSRL<br>RVSATFW         | Homo<br>sapiens                  |
| 1 | 1.00 | 1 | 1 | -0.02 | -0.02  | -0.021 | -0.02  | -0.02  | t | 126331 | ISLRPG                       | Mus<br>musculu<br>s              |
| 1 | 1.00 | 1 | 1 | 0.01  | 0.012  | 0.013  | 0.017  | 0.009  | t | 125453 | KDRLQGM<br>APAAGAD           | Homo<br>sapiens                  |
| 1 | 1.00 | 1 | 1 | -0.02 | -0.02  | -0.02  | -0.02  | -0.02  | t | 66932  | TVAEEHV                      | Homo<br>sapiens                  |
| 1 | 1.00 | 1 | 1 | -0.02 | -0.02  | -0.02  | -0.02  | -0.02  | t | 66932  | TVAEEHV                      | Homo<br>sapiens                  |
| 1 | 1.00 | 1 | 1 | 0.04  | 0.035  | 0.031  | 0.04   | 0.04   | t | 45603  | NQPGVHI<br>QVFEGERA<br>MTKDC | Canis<br>lupus                   |
| 1 | 1.00 | 1 | 1 | 0     | -0.003 | 0      | 0      | -0.002 | t | 45104  | NNFVHDC<br>VNI               | Oryctola<br>gus<br>cuniculu<br>s |
| 1 | 1.00 | 1 | 1 | 0     | 0      | 0      | 0      | -0.002 | t | 11447  | EDTKEPGV<br>LMGGQSE          | Mus<br>musculu<br>s              |

|   |      |   |   |       |        |        |        |        |   |        |                          |                                  |
|---|------|---|---|-------|--------|--------|--------|--------|---|--------|--------------------------|----------------------------------|
| 1 | 1.00 | 1 | 1 | 0     | 0      | 0      | 0      | -0.002 | t | 11447  | EDTKEPGV<br>LMGGQSE      | Mus<br>musculu<br>s              |
| 1 | 1.00 | 1 | 1 | -0.01 | -0.01  | -0.01  | -0.01  | -0.012 | t | 151816 | CLTSQAAK<br>QRLE         | Sus<br>scrofa                    |
| 1 | 1.00 | 1 | 1 | -0.01 | -0.006 | -0.013 | -0.003 | -0.009 | t | 124068 | ELMALHT<br>GQSLEQIE<br>R | Homo<br>sapiens                  |
| 1 | 1.00 | 1 | 1 | 0.05  | 0.05   | 0.047  | 0.05   | 0.051  | t | 20047  | GGTEIKYN<br>GE           | Mus<br>musculu<br>s              |
| 1 | 1.00 | 1 | 1 | -0.02 | -0.018 | -0.02  | -0.017 | -0.022 | t | 151609 | DETPMRG<br>ETRKV         | Homo<br>sapiens                  |
| 1 | 1.00 | 1 | 1 | 0     | -0.003 | -0.006 | 0      | 0      | t | 33125  | KREMAI                   | Oryctola<br>gus<br>cuniculu<br>s |
| 1 | 1.00 | 1 | 1 | -0.01 | -0.01  | -0.02  | -0.01  | -0.008 | t | 11313  | EDERTLTK                 | Oryctola<br>gus<br>cuniculu<br>s |
| 1 | 1.00 | 1 | 1 | 0     | 0.002  | 0      | 0.001  | -0.002 | t | 149364 | LGGPSGSA<br>ALKAAVD      | Cavia<br>porcellu<br>s           |
| 1 | 1.00 | 1 | 1 | 0.01  | 0.01   | 0.01   | 0.01   | 0.01   | t | 79646  | SLPTLTL                  | Oryctola<br>gus<br>cuniculu<br>s |
| 1 | 1.00 | 1 | 1 | 0.01  | 0.01   | 0.01   | 0.01   | 0.01   | t | 45004  | NMMKYIS<br>PPIFL         | Oryctola<br>gus<br>cuniculu<br>s |
| 1 | 1.00 | 1 | 1 | 0.01  | 0.01   | 0.01   | 0.01   | 0.01   | t | 45004  | NMMKYIS<br>PPIFL         | Oryctola<br>gus<br>cuniculu<br>s |
| 1 | 1.00 | 1 | 1 | 0.01  | 0.013  | 0.01   | 0.01   | 0.01   | t | 45004  | NMMKYIS<br>PPIFL         | Mus<br>musculu<br>s              |
| 1 | 1.00 | 1 | 1 | 0.01  | 0.01   | 0.01   | 0.01   | 0.01   | t | 45004  | NMMKYIS<br>PPIFL         | Mus<br>musculu<br>s              |

|   |      |   |   |       |        |        |        |        |   |        |                           |                                  |
|---|------|---|---|-------|--------|--------|--------|--------|---|--------|---------------------------|----------------------------------|
| 1 | 1.00 | 1 | 1 | 0.01  | 0.01   | 0.01   | 0.01   | 0.01   | t | 45004  | NMMKYIS<br>PPIFL          | Oryctola<br>gus<br>cuniculu<br>s |
| 1 | 1.00 | 1 | 1 | -0.02 | -0.016 | -0.016 | -0.017 | -0.02  | t | 144700 | KEWAKRA<br>ALP            | Homo<br>sapiens                  |
| 1 | 1.00 | 1 | 1 | 0.03  | 0.026  | 0.028  | 0.03   | 0.03   | t | 20288  | GIGVTQN<br>VLYENQK<br>QIA | Mus<br>musculu<br>s              |
| 1 | 1.00 | 1 | 1 | -0.01 | -0.007 | -0.019 | -0.01  | -0.009 | t | 63756  | TFTNKLKE<br>KHTDLGK       | Mus<br>musculu<br>s              |
| 1 | 1.00 | 1 | 1 | 0.05  | 0.053  | 0.045  | 0.05   | 0.05   | t | 78703  | KKKKTDEA<br>QP            | Mus<br>musculu<br>s              |
| 1 | 1.00 | 1 | 1 | 0.01  | 0.008  | 0.01   | 0.009  | 0.008  | t | 123856 | YCDYCDTY<br>LT            | Homo<br>sapiens                  |
| 1 | 1.00 | 1 | 1 | -0.01 | -0.01  | -0.023 | -0.008 | -0.007 | t | 98694  | ALQTLPA<br>MCNVY          | Homo<br>sapiens                  |
| 1 | 1.00 | 1 | 1 | -0.03 | -0.034 | -0.031 | -0.031 | -0.03  | t | 56365  | RVMYASS<br>GIG            | Oryctola<br>gus<br>cuniculu<br>s |
| 1 | 1.00 | 1 | 1 | -0.02 | -0.023 | -0.03  | -0.02  | -0.018 | t | 6762   | CPFIKPEVK<br>PGTPA        | Oryctola<br>gus<br>cuniculu<br>s |
| 1 | 1.00 | 1 | 1 | 0     | 0      | 0      | 0      | -0.002 | t | 151731 | SAQSQRA<br>PDR            | Mus<br>musculu<br>s              |
| 1 | 1.00 | 1 | 1 | 0     | 0      | 0      | 0      | -0.002 | t | 104895 | LVEALYLV<br>CGERG         | Mus<br>musculu<br>s              |
| 1 | 1.00 | 1 | 1 | 0     | 0      | 0      | 0      | -0.002 | t | 79528  | CPSKKPYE<br>EVTC          | Mus<br>musculu<br>s              |
| 1 | 1.00 | 1 | 1 | 0     | -0.003 | 0      | 0      | -0.002 | t | 79528  | CPSKKPYE<br>EVTC          | Oryctola<br>gus<br>cuniculu<br>s |
| 1 | 1.00 | 1 | 1 | 0     | 0      | 0      | 0      | -0.002 | t | 79528  | CPSKKPYE<br>EVTC          | Mus<br>musculu<br>s              |

|   |      |   |   |   |        |   |   |        |   |       |                             |                                  |
|---|------|---|---|---|--------|---|---|--------|---|-------|-----------------------------|----------------------------------|
| 1 | 1.00 | 1 | 1 | 0 | 0      | 0 | 0 | -0.002 | t | 79528 | CPSKKPYE<br>EVTC            | Mus<br>musculu<br>s              |
| 1 | 1.00 | 1 | 1 | 0 | 0      | 0 | 0 | -0.002 | t | 79524 | CHTTATIPS<br>SAVTC          | Mus<br>musculu<br>s              |
| 1 | 1.00 | 1 | 1 | 0 | 0      | 0 | 0 | -0.002 | t | 79619 | NHPPKRQ<br>PG               | Mus<br>musculu<br>s              |
| 1 | 1.00 | 1 | 1 | 0 | 0      | 0 | 0 | -0.002 | t | 79619 | NHPPKRQ<br>PG               | Mus<br>musculu<br>s              |
| 1 | 1.00 | 1 | 1 | 0 | -0.003 | 0 | 0 | -0.002 | t | 79619 | NHPPKRQ<br>PG               | Oryctola<br>gus<br>cuniculu<br>s |
| 1 | 1.00 | 1 | 1 | 0 | 0      | 0 | 0 | -0.002 | t | 79525 | CKMWAD<br>AFTSSRGK<br>VVECG | Mus<br>musculu<br>s              |
| 1 | 1.00 | 1 | 1 | 0 | 0      | 0 | 0 | -0.002 | t | 48858 | PPPPNPN<br>DPPPPNP<br>ND    | Mus<br>musculu<br>s              |
| 1 | 1.00 | 1 | 1 | 0 | -0.003 | 0 | 0 | -0.002 | t | 58783 | SKAFSNCY<br>PYDVDPYA<br>SL  | Oryctola<br>gus<br>cuniculu<br>s |
| 1 | 1.00 | 1 | 1 | 0 | -0.003 | 0 | 0 | -0.002 | t | 58783 | SKAFSNCY<br>PYDVDPYA<br>SL  | Oryctola<br>gus<br>cuniculu<br>s |
| 1 | 1.00 | 1 | 1 | 0 | 0      | 0 | 0 | -0.002 | t | 48858 | PPPPNPN<br>DPPPPNP<br>ND    | Mus<br>musculu<br>s              |
| 1 | 1.00 | 1 | 1 | 0 | 0      | 0 | 0 | -0.002 | t | 48858 | PPPPNPN<br>DPPPPNP<br>ND    | Mus<br>musculu<br>s              |
| 1 | 1.00 | 1 | 1 | 0 | 0      | 0 | 0 | -0.002 | t | 19636 | GFTTNEER<br>YNVFAE          | Mus<br>musculu<br>s              |
| 1 | 1.00 | 1 | 1 | 0 | 0      | 0 | 0 | -0.002 | t | 19636 | GFTTNEER<br>YNVFAE          | Mus<br>musculu<br>s              |

|   |      |   |   |       |        |        |        |        |   |        |                           |                                  |
|---|------|---|---|-------|--------|--------|--------|--------|---|--------|---------------------------|----------------------------------|
| 1 | 1.00 | 1 | 1 | 0     | 0      | 0      | 0      | -0.002 | t | 19637  | GFTTNEPR<br>YNVFAE        | Mus<br>musculu<br>s              |
| 1 | 1.00 | 1 | 1 | 0     | 0      | 0      | 0      | -0.002 | t | 19636  | GFTTNEER<br>YNVFAE        | Mus<br>musculu<br>s              |
| 1 | 1.00 | 1 | 1 | 0     | 0      | 0      | 0      | -0.002 | t | 9722   | DPPPPNP<br>NDPPPPN<br>PN  | Mus<br>musculu<br>s              |
| 1 | 1.00 | 1 | 1 | 0     | 0      | 0      | 0      | -0.002 | t | 9722   | DPPPPNP<br>NDPPPPN<br>PN  | Mus<br>musculu<br>s              |
| 1 | 1.00 | 1 | 1 | -0.04 | -0.042 | -0.047 | -0.043 | -0.04  | t | 11275  | ECWKNAV<br>FDK            | Mus<br>musculu<br>s              |
| 1 | 1.00 | 1 | 1 | 0.02  | 0.022  | 0.022  | 0.027  | 0.021  | t | 119598 | INPESDQP<br>DLSNFMES<br>G | Homo<br>sapiens                  |
| 1 | 1.00 | 1 | 1 | 0     | 0      | 0.002  | 0.007  | 0.001  | t | 119466 | IRGERA                    | Mus<br>musculu<br>s              |
| 1 | 1.00 | 1 | 1 | -0.04 | -0.04  | -0.04  | -0.04  | -0.038 | t | 129193 | KYYRMM                    | Homo<br>sapiens                  |
| 1 | 1.00 | 1 | 1 | 0     | 0      | 0      | 0      | 0      | t | 118536 | NITDHGSLI<br>YSFSECAF     | Homo<br>sapiens                  |
| 1 | 1.00 | 1 | 1 | 0.01  | 0.01   | 0.01   | 0.01   | 0.01   | t | 140907 | TVSYGEEK<br>PAVL          | Oryctola<br>gus<br>cuniculu<br>s |
| 1 | 1.00 | 1 | 1 | -0.01 | -0.01  | -0.01  | -0.01  | -0.01  | t | 8566   | DHSDLVAE<br>KQRL          | Mus<br>musculu<br>s              |
| 1 | 1.00 | 1 | 1 | 0.02  | 0.022  | 0.013  | 0.017  | 0.02   | t | 73233  | WVVKSTP<br>ASL            | Homo<br>sapiens                  |
| 1 | 1.00 | 1 | 1 | -0.07 | -0.065 | -0.07  | -0.07  | -0.07  | t | 49275  | PRVVYKA<br>AA             | Homo<br>sapiens                  |
| 1 | 1.00 | 1 | 1 | 0     | 0.002  | -0.009 | 0.003  | 0.001  | t | 142141 | EIDGPAGQ<br>AEPD          | Homo<br>sapiens                  |
| 1 | 1.00 | 1 | 1 | 0     | 0      | 0      | 0.004  | 0      | t | 135947 | KTGHPRYF<br>NQLS          | Homo<br>sapiens                  |



|   |      |   |   |       |        |        |       |        |   |        |                    |                       |
|---|------|---|---|-------|--------|--------|-------|--------|---|--------|--------------------|-----------------------|
| 1 | 1.00 | 1 | 1 | 0     | 0      | 0      | 0     | 0.001  | t | 61394  | SSTKNLIY           | Mus musculus          |
| 1 | 1.00 | 1 | 1 | 0     | 0      | 0      | 0     | 0.001  | t | 61394  | SSTKNLIY           | Mus musculus          |
| 1 | 1.00 | 1 | 1 | 0     | 0      | 0      | 0.006 | 0.001  | t | 117773 | CNSRQTDREDELI      | Homo sapiens          |
| 1 | 1.00 | 1 | 1 | 0     | 0      | 0      | 0.006 | 0.001  | t | 56335  | RVKTRWRMH          | Homo sapiens          |
| 1 | 1.00 | 1 | 1 | 0     | 0.002  | 0      | 0.006 | 0.001  | t | 3274   | ANETIYNTTLKYGDV    | MD                    |
| 1 | 1.00 | 1 | 1 | 0     | 0      | 0      | 0     | 0.001  | t | 115497 | SSNICNISCD         | Homo sapiens          |
| 1 | 1.00 | 1 | 1 | -0.02 | -0.02  | -0.02  | -0.02 | -0.019 | t | 115530 | VAGTWYSLAM         | Homo sapiens          |
| 1 | 1.00 | 1 | 1 | 0.01  | 0.01   | 0.01   | 0.01  | 0.01   | t | 10782  | DVVSTL             | Homo sapiens          |
| 1 | 1.00 | 1 | 1 | 0.06  | 0.06   | 0.058  | 0.06  | 0.06   | t | 118338 | ESEESDDDMGFLFD     | Homo sapiens          |
| 1 | 1.00 | 1 | 1 | 0     | 0      | 0      | 0     | -0.001 | t | 7238   | CTTSGFASLFRLGPSQK  | Mus musculus          |
| 1 | 1.00 | 1 | 1 | 0.04  | 0.04   | 0.043  | 0.04  | 0.039  | t | 125250 | SDEFNPCE<br>DIMGYK | Mus musculus          |
| 1 | 1.00 | 1 | 1 | -0.02 | -0.02  | -0.023 | -0.02 | -0.02  | t | 98729  | DIQKVAGTWY         | Homo sapiens          |
| 1 | 1.00 | 1 | 1 | 0     | -0.007 | 0.005  | 0     | 0      | t | 74374  | YISPYFINTS         | Oryctolagus cuniculus |
| 1 | 1.00 | 1 | 1 | 0     | -0.004 | 0.005  | 0     | 0      | t | 74374  | YISPYFINTS         | Mus musculus          |

|   |      |   |   |      |        |        |        |       |   |        |                            |                       |
|---|------|---|---|------|--------|--------|--------|-------|---|--------|----------------------------|-----------------------|
| 1 | 1.00 | 1 | 1 | 0.02 | 0.02   | 0.02   | 0.02   | 0.019 | t | 43237  | NANPDPN                    | Mus musculus          |
| 1 | 1.00 | 1 | 1 | 0    | -0.003 | -0.014 | 0      | 0     | t | 73577  | YDQLVTRV<br>VTHEMAH<br>A   | Oryctolagus cuniculus |
| 1 | 1.00 | 1 | 1 | 0.03 | 0.028  | 0.027  | 0.03   | 0.03  | t | 120167 | RFQSSAV<br>MALQEAC<br>EAYL | Mus musculus          |
| 1 | 1.00 | 1 | 1 | 0.02 | 0.02   | 0.016  | 0.02   | 0.018 | t | 18994  | GDGRQTIT<br>NPAYDE         | Mus musculus          |
| 1 | 1.00 | 1 | 1 | 0.03 | 0.03   | 0.03   | 0.03   | 0.03  | t | 130455 | CQGNQDS<br>FTPVVCAAC       | Homo sapiens          |
| 1 | 1.00 | 1 | 1 | 0.01 | 0.01   | 0.015  | 0.012  | 0.01  | t | 20657  | GKPALVPD<br>KE             | Homo sapiens          |
| 1 | 1.00 | 1 | 1 | 0.04 | 0.038  | 0.035  | 0.039  | 0.04  | t | 72688  | WKLQPGD<br>D               | Anas platyrhynchos    |
| 1 | 1.00 | 1 | 1 | 0.01 | 0.008  | 0.019  | 0.017  | 0.01  | t | 112422 | YWASTRE                    | Homo sapiens          |
| 1 | 1.00 | 1 | 1 | 0.04 | 0.04   | 0.04   | 0.04   | 0.04  | t | 13899  | EQPTTRA<br>Q               | Oryctolagus cuniculus |
| 1 | 1.00 | 1 | 1 | 0.04 | 0.04   | 0.04   | 0.04   | 0.04  | t | 13899  | EQPTTRA<br>Q               | Cavia porcellus       |
| 1 | 1.00 | 1 | 1 | 0.04 | 0.04   | 0.04   | 0.04   | 0.04  | t | 13899  | EQPTTRA<br>Q               | Oryctolagus cuniculus |
| 1 | 1.00 | 1 | 1 | 0.04 | 0.047  | 0.04   | 0.04   | 0.04  | t | 13899  | EQPTTRA<br>Q               | Cavia porcellus       |
| 1 | 1.00 | 1 | 1 | 0.01 | 0.01   | 0.01   | 0.01   | 0.008 | t | 106646 | MHLTQSP                    | Homo sapiens          |
| 1 | 1.00 | 1 | 1 | 0    | -0.002 | -0.008 | -0.003 | 0     | t | 31553  | KKGSGGIT<br>VK             | Homo sapiens          |

|   |      |   |   |       |        |        |        |        |   |        |                         |                                  |
|---|------|---|---|-------|--------|--------|--------|--------|---|--------|-------------------------|----------------------------------|
| 1 | 1.00 | 1 | 1 | 0     | 0.004  | -0.008 | -0.003 | 0      | t | 31553  | KKGSGGIT<br>VK          | Homo<br>sapiens                  |
| 1 | 1.00 | 1 | 1 | -0.03 | -0.032 | -0.03  | -0.023 | -0.033 | t | 134701 | KEIRKLQKS<br>THLLIR     | Homo<br>sapiens                  |
| 1 | 1.00 | 1 | 1 | -0.03 | -0.028 | -0.03  | -0.023 | -0.033 | t | 134701 | KEIRKLQKS<br>THLLIR     | Homo<br>sapiens                  |
| 1 | 1.00 | 1 | 1 | -0.04 | -0.038 | -0.04  | -0.033 | -0.039 | t | 144619 | DYIWNTL<br>NSG          | Homo<br>sapiens                  |
| 1 | 1.00 | 1 | 1 | -0.03 | -0.028 | -0.032 | -0.033 | -0.033 | t | 106089 | RRHQSQR<br>PPRRFQG<br>Q | Homo<br>sapiens                  |
| 1 | 1.00 | 1 | 1 | 0     | 0      | 0      | 0      | 0      | t | 132929 | WGENNY<br>M             | Homo<br>sapiens                  |
| 1 | 1.00 | 1 | 1 | 0.02  | 0.017  | 0.011  | 0.02   | 0.02   | t | 49691  | PTLDHVLD<br>HVQT        | Oryctola<br>gus<br>cuniculu<br>s |
| 1 | 1.00 | 1 | 1 | 0.02  | 0.022  | 0.02   | 0.027  | 0.023  | t | 140582 | PWATLVA<br>ES           | Homo<br>sapiens                  |
| 1 | 1.00 | 1 | 1 | 0.05  | 0.05   | 0.047  | 0.05   | 0.054  | t | 61997  | STVTEN                  | Homo<br>sapiens                  |
| 1 | 1.00 | 1 | 1 | 0.01  | 0.008  | 0.004  | 0.009  | 0.01   | t | 10824  | DWSERIRE<br>FM          | Mus<br>musculu<br>s              |
| 1 | 1.00 | 1 | 1 | 0     | -0.004 | 0      | -0.001 | -0.002 | t | 46859  | PALTAVET<br>GATNPL      | Oryctola<br>gus<br>cuniculu<br>s |
| 1 | 1.00 | 1 | 1 | -0.03 | -0.03  | -0.05  | -0.03  | -0.028 | t | 14678  | EVEEIVRD<br>GLVRSHFH    | Mus<br>musculu<br>s              |
| 1 | 1.00 | 1 | 1 | -0.01 | -0.01  | -0.012 | -0.01  | -0.01  | t | 78405  | GPGMKND<br>LVPPPSLT     | Mus<br>musculu<br>s              |
| 1 | 1.00 | 1 | 1 | -0.01 | -0.01  | -0.01  | -0.01  | -0.01  | t | 32648  | KPAIIPDRE               | Homo<br>sapiens                  |

|   |      |   |   |       |        |        |        |        |   |        |                         |                                  |
|---|------|---|---|-------|--------|--------|--------|--------|---|--------|-------------------------|----------------------------------|
| 1 | 1.00 | 1 | 1 | -0.02 | -0.022 | -0.028 | -0.021 | -0.02  | t | 83781  | INPWDSKS<br>DYLK        | Mus<br>musculu<br>s              |
| 1 | 1.00 | 1 | 1 | 0     | -0.004 | -0.009 | -0.003 | -0.001 | t | 132984 | AIQNIRLR<br>HENKDL      | Oryctola<br>gus<br>cuniculu<br>s |
| 1 | 1.00 | 1 | 1 | -0.04 | -0.038 | -0.025 | -0.033 | -0.041 | t | 104286 | SRL                     | Homo<br>sapiens                  |
| 1 | 1.00 | 1 | 1 | 0     | 0      | -0.007 | 0      | 0      | t | 128038 | KSPKKAKA<br>AKPKKAP     | Oryctola<br>gus<br>cuniculu<br>s |
| 1 | 1.00 | 1 | 1 | 0     | 0      | -0.007 | 0      | 0      | t | 128038 | KSPKKAKA<br>AKPKKAP     | Homo<br>sapiens                  |
| 1 | 1.00 | 1 | 1 | 0.01  | 0.012  | 0.006  | 0.007  | 0.008  | t | 6314   | CGLRAPQ<br>RCDLDVES     | Homo<br>sapiens                  |
| 1 | 1.00 | 1 | 1 | 0.01  | 0.014  | 0.01   | 0.01   | 0.01   | t | 57608  | SERQPSL                 | Mus<br>musculu<br>s              |
| 1 | 1.00 | 1 | 1 | -0.02 | -0.02  | -0.035 | -0.02  | -0.02  | t | 111347 | GLFFPDKR<br>PKYNLNF     | Homo<br>sapiens                  |
| 1 | 1.00 | 1 | 1 | 0.02  | 0.023  | 0.021  | 0.02   | 0.019  | t | 121471 | KIFQDHPL<br>QKTYNY      | Mus<br>musculu<br>s              |
| 1 | 1.00 | 1 | 1 | -0.04 | -0.038 | -0.051 | -0.039 | -0.04  | t | 44002  | NGIRRPKH<br>LYVSMP      | Homo<br>sapiens                  |
| 1 | 1.00 | 1 | 1 | 0     | 0      | 0      | -0.001 | -0.003 | t | 28911  | ITGHRMA<br>WDMMM<br>NWS | Homo<br>sapiens                  |
| 1 | 1.00 | 1 | 1 | -0.02 | -0.02  | -0.02  | -0.018 | -0.023 | t | 52121  | QQQPFPF<br>QQP          | Homo<br>sapiens                  |
| 1 | 1.00 | 1 | 1 | 0.04  | 0.04   | 0.036  | 0.04   | 0.04   | t | 41057  | MAKNEV                  | Homo<br>sapiens                  |
| 1 | 1.00 | 1 | 1 | -0.02 | -0.021 | -0.011 | -0.019 | -0.02  | t | 42965  | MVLLQM                  | Homo<br>sapiens                  |
| 1 | 1.00 | 1 | 1 | -0.02 | -0.018 | -0.02  | -0.02  | -0.021 | t | 122886 | RGTDEYFI<br>RKPP        | Rattus<br>norvegic<br>us         |

|   |      |   |   |       |        |        |        |        |   |        |                              |                                  |
|---|------|---|---|-------|--------|--------|--------|--------|---|--------|------------------------------|----------------------------------|
| 1 | 1.00 | 1 | 1 | 0     | 0      | -0.005 | 0.002  | 0      | t | 113400 | FKLGGRDS<br>R                | Homo<br>sapiens                  |
| 1 | 1.00 | 1 | 1 | 0.02  | 0.02   | 0.016  | 0.02   | 0.02   | t | 52106  | QQPQQSF<br>PQQ               | Mus<br>musculu<br>s              |
| 1 | 1.00 | 1 | 1 | 0.02  | 0.02   | 0.016  | 0.02   | 0.02   | t | 52106  | QQPQQSF<br>PQQ               | Mus<br>musculu<br>s              |
| 1 | 1.00 | 1 | 1 | 0     | 0      | 0      | 0      | 0      | t | 115824 | KIAKYIPQ<br>Y                | Homo<br>sapiens                  |
| 1 | 1.00 | 1 | 1 | 0     | 0.005  | 0      | 0.001  | -0.001 | t | 97018  | TVTFKATA<br>AT               | Homo<br>sapiens(<br>human)       |
| 1 | 1.00 | 1 | 1 | 0.01  | 0.006  | 0.01   | 0.007  | 0.009  | t | 134200 | PVVNSLDP<br>PLLTRY           | Oryctola<br>gus<br>cuniculu<br>s |
| 1 | 1.00 | 1 | 1 | 0.03  | 0.026  | 0.033  | 0.027  | 0.029  | t | 15529  | FEFPPPT<br>DE                | Oryctola<br>gus<br>cuniculu<br>s |
| 1 | 1.00 | 1 | 1 | 0     | -0.001 | 0.01   | -0.003 | -0.003 | t | 30243  | KDSKSRGA<br>T                | Homo<br>sapiens                  |
| 1 | 1.00 | 1 | 1 | -0.01 | -0.01  | -0.01  | -0.009 | -0.01  | t | 50156  | PYQGSGK<br>GVS               | Mus<br>musculu<br>s              |
| 1 | 1.00 | 1 | 1 | 0.02  | 0.022  | 0.02   | 0.019  | 0.02   | t | 149434 | QPQPFLP<br>QQP               | Homo<br>sapiens                  |
| 1 | 1.00 | 1 | 1 | 0.02  | 0.017  | 0.019  | 0.02   | 0.02   | t | 63818  | TGFADPNT<br>TTG              | Oryctola<br>gus<br>cuniculu<br>s |
| 1 | 1.00 | 1 | 1 | 0.01  | 0.01   | 0.01   | 0.01   | 0.01   | t | 98999  | SGTIK                        | Homo<br>sapiens                  |
| 1 | 1.00 | 1 | 1 | 0     | 0      | -0.012 | 0      | 0      | t | 58928  | SKQDIGAL<br>KQELAKKD<br>EGNK | Oryctola<br>gus<br>cuniculu<br>s |

|   |      |   |   |       |        |        |        |        |   |        |                            |                                  |
|---|------|---|---|-------|--------|--------|--------|--------|---|--------|----------------------------|----------------------------------|
| 1 | 1.00 | 1 | 1 | 0.03  | 0.03   | 0.03   | 0.038  | 0.032  | t | 110974 | QDIVLHLE<br>PQNEIPVD<br>LL | Mus<br>musculu<br>s              |
| 1 | 1.00 | 1 | 1 | 0.04  | 0.036  | 0.045  | 0.04   | 0.04   | t | 146471 | NFDIPEEI                   | Oryctola<br>gus<br>cuniculu<br>s |
| 1 | 1.00 | 1 | 1 | -0.01 | -0.01  | -0.01  | -0.01  | -0.01  | t | 110618 | GPVGPAG<br>GPGFP           | Mus<br>musculu<br>s              |
| 1 | 1.00 | 1 | 1 | 0.04  | 0.038  | 0.033  | 0.039  | 0.042  | t | 2550   | ALGALGRF<br>DEAMQD<br>Q    | Mus<br>musculu<br>s              |
| 1 | 1.00 | 1 | 1 | 0.04  | 0.036  | 0.033  | 0.039  | 0.042  | t | 2550   | ALGALGRF<br>DEAMQD<br>Q    | Oryctola<br>gus<br>cuniculu<br>s |
| 1 | 1.00 | 1 | 1 | -0.01 | -0.014 | -0.015 | -0.017 | -0.013 | t | 131104 | TGALFKHS<br>ENYK           | Oryctola<br>gus<br>cuniculu<br>s |
| 1 | 1.00 | 1 | 1 | 0     | 0      | 0      | 0      | -0.002 | t | 52692  | QVETEDTK<br>EPGVLMG        | Mus<br>musculu<br>s              |
| 1 | 1.00 | 1 | 1 | 0     | 0      | 0      | 0      | -0.002 | t | 52692  | QVETEDTK<br>EPGVLMG        | Mus<br>musculu<br>s              |
| 1 | 1.00 | 1 | 1 | -0.01 | -0.01  | -0.01  | -0.007 | -0.01  | t | 97065  | VPKVTKEK<br>PT             | Homo<br>sapiens(<br>human)       |
| 1 | 1.00 | 1 | 1 | 0.01  | 0.012  | 0.012  | 0.011  | 0.01   | t | 40611  | LVTKDIDF<br>D              | Homo<br>sapiens                  |
| 1 | 1.00 | 1 | 1 | 0.01  | 0.01   | 0.01   | 0.01   | 0.009  | t | 47045  | PCSICSNN<br>PTCWAICK       | Mus<br>musculu<br>s              |
| 1 | 1.00 | 1 | 1 | 0.03  | 0.036  | 0.033  | 0.03   | 0.03   | t | 141098 | VERSESAL<br>F              | Ovis<br>aries                    |
| 1 | 1.00 | 1 | 1 | 0.02  | 0.02   | 0.02   | 0.02   | 0.018  | t | 47546  | PFPQPQQ<br>QLP             | Mus<br>musculu<br>s              |
| 1 | 1.00 | 1 | 1 | -0.03 | -0.027 | -0.039 | -0.03  | -0.028 | t | 79815  | EVMLRAV<br>FMQQR           | Mus<br>musculu<br>s              |

|   |      |   |   |       |        |        |        |        |   |        |                              |                       |
|---|------|---|---|-------|--------|--------|--------|--------|---|--------|------------------------------|-----------------------|
| 1 | 1.00 | 1 | 1 | 0.05  | 0.05   | 0.05   | 0.05   | 0.05   | t | 104225 | RPAVIPDR<br>EVLYQEFD<br>EMEE | Homo sapiens          |
| 1 | 1.00 | 1 | 1 | 0.03  | 0.03   | 0.03   | 0.03   | 0.03   | t | 134789 | RRQGWLK<br>EIRKLQKS          | Homo sapiens          |
| 1 | 1.00 | 1 | 1 | 0.03  | 0.03   | 0.03   | 0.03   | 0.03   | t | 135899 | ASLYHVYE<br>VNLV             | Homo sapiens          |
| 1 | 1.00 | 1 | 1 | 0.03  | 0.03   | 0.026  | 0.03   | 0.03   | t | 60535  | SQQPQQP<br>FPQ               | Mus musculus          |
| 1 | 1.00 | 1 | 1 | 0.03  | 0.03   | 0.026  | 0.03   | 0.03   | t | 60535  | SQQPQQP<br>FPQ               | Mus musculus          |
| 1 | 1.00 | 1 | 1 | 0.03  | 0.028  | 0.032  | 0.029  | 0.03   | t | 70946  | VSGDPRG<br>RYEDI             | Mus musculus          |
| 1 | 1.00 | 1 | 1 | 0.01  | 0.01   | 0.005  | 0.01   | 0.011  | t | 73634  | YEDRY                        | Mus musculus          |
| 1 | 1.00 | 1 | 1 | -0.01 | -0.01  | -0.01  | -0.006 | -0.01  | t | 117591 | NTHLKAVK<br>MTLKN            | Homo sapiens          |
| 1 | 1.00 | 1 | 1 | -0.01 | -0.012 | -0.012 | -0.007 | -0.01  | t | 51529  | QLRRKLEF<br>FTYVRFD          | Mus musculus          |
| 1 | 1.00 | 1 | 1 | 0     | 0      | -0.003 | 0      | 0      | t | 35083  | LCPFGEVF<br>NATKFPSV<br>Y    | Homo sapiens          |
| 1 | 1.00 | 1 | 1 | 0.02  | 0.016  | 0.017  | 0.023  | 0.023  | t | 100321 | NDQIGDSL<br>YSAMTV           | Oryctolagus cuniculus |
| 1 | 1.00 | 1 | 1 | 0     | 0.002  | -0.005 | -0.003 | -0.001 | t | 115107 | SENSEKTT<br>MPLW             | Homo sapiens          |
| 1 | 1.00 | 1 | 1 | 0     | -0.012 | 0      | 0      | 0      | t | 5931   | AYSPASKT<br>F                | Macaca mulatta        |
| 1 | 1.00 | 1 | 1 | -0.01 | -0.012 | -0.019 | -0.011 | -0.01  | t | 47136  | PDLERYAG                     | Mus musculus          |
| 1 | 1.00 | 1 | 1 | -0.02 | -0.018 | -0.02  | -0.021 | -0.022 | t | 17365  | FPQPQFP<br>PQ                | Homo sapiens          |
| 1 | 1.00 | 1 | 1 | 0     | 0      | 0      | 0.004  | 0      | t | 114941 | RQDENYEE<br>AIVHLKVA<br>ALGS | Homo sapiens          |

|   |      |   |   |       |        |        |        |        |   |        |                              |                       |
|---|------|---|---|-------|--------|--------|--------|--------|---|--------|------------------------------|-----------------------|
| 1 | 1.00 | 1 | 1 | 0     | 0      | 0      | 0.004  | 0      | t | 18588  | GAGGGAG<br>GAGAGGG<br>AGGAGA | Homo sapiens          |
| 1 | 1.00 | 1 | 1 | 0     | 0      | 0      | 0.004  | 0      | t | 1433   | AGAGGGA<br>GGAGAGG<br>GAGGAG | Homo sapiens          |
| 1 | 1.00 | 1 | 1 | 0     | 0      | 0      | 0.004  | 0      | t | 1433   | AGAGGGA<br>GGAGAGG<br>GAGGAG | Homo sapiens          |
| 1 | 1.00 | 1 | 1 | 0     | 0      | 0      | 0.004  | 0      | t | 1433   | AGAGGGA<br>GGAGAGG<br>GAGGAG | Homo sapiens          |
| 1 | 1.00 | 1 | 1 | 0.04  | 0.038  | 0.053  | 0.039  | 0.038  | t | 138862 | KFPED                        | Mus musculus          |
| 1 | 1.00 | 1 | 1 | 0.03  | 0.032  | 0.023  | 0.027  | 0.028  | t | 106557 | KEKEPSKG<br>CCSG             | Homo sapiens          |
| 1 | 1.00 | 1 | 1 | 0.01  | 0.014  | 0.011  | 0.011  | 0.01   | t | 744    | ADPPFS                       | Homo sapiens          |
| 1 | 1.00 | 1 | 1 | 0.03  | 0.034  | 0.029  | 0.027  | 0.028  | t | 98174  | KNETPEVT                     | Homo sapiens          |
| 1 | 1.00 | 1 | 1 | 0.03  | 0.032  | 0.029  | 0.027  | 0.028  | t | 98174  | KNETPEVT                     | Homo sapiens          |
| 1 | 1.00 | 1 | 1 | -0.01 | -0.012 | -0.012 | -0.01  | -0.01  | t | 120172 | RKIPKRP<br>SVHRTPSR<br>Q     | Oryctolagus cuniculus |
| 1 | 1.00 | 1 | 1 | 0     | -0.002 | -0.007 | -0.001 | 0      | t | 70133  | VNNKN                        | Mus musculus          |
| 1 | 1.00 | 1 | 1 | -0.01 | -0.005 | -0.01  | -0.01  | -0.01  | t | 11819  | EENVEHD<br>A                 | Aotus                 |
| 1 | 1.00 | 1 | 1 | -0.04 | -0.042 | -0.042 | -0.041 | -0.04  | t | 38923  | LQNQGA<br>WP                 | Anas platyrhynchos    |
| 1 | 1.00 | 1 | 1 | 0.03  | 0.032  | 0.03   | 0.033  | 0.028  | t | 121879 | SSQFDPNK<br>QTPSGKK          | Homo sapiens          |
| 1 | 1.00 | 1 | 1 | -0.06 | -0.06  | -0.065 | -0.06  | -0.058 | t | 133676 | RIYMRMK<br>HVR               | Mus musculus          |



|   |      |   |   |       |        |        |        |        |   |        |                             |                       |
|---|------|---|---|-------|--------|--------|--------|--------|---|--------|-----------------------------|-----------------------|
| 1 | 1.00 | 1 | 1 | -0.01 | -0.008 | -0.014 | -0.009 | -0.008 | t | 12625  | EKAFREL                     | Homo sapiens          |
| 1 | 1.00 | 1 | 1 | -0.03 | -0.03  | -0.037 | -0.03  | -0.031 | t | 159026 | NLAIHSDL<br>SYWIESRL        | Mus musculus          |
| 1 | 1.00 | 1 | 1 | -0.06 | -0.06  | -0.06  | -0.056 | -0.06  | t | 115601 | DPFYWVS<br>PGVLV            | Homo sapiens          |
| 1 | 1.00 | 1 | 1 | 0.01  | 0.01   | 0.01   | 0.01   | 0.01   | t | 134077 | GYYPSPD<br>NT               | Mus musculus          |
| 1 | 1.00 | 1 | 1 | 0.02  | 0.022  | 0.016  | 0.017  | 0.018  | t | 114918 | PNATDKE<br>GKD              | Homo sapiens          |
| 1 | 1.00 | 1 | 1 | 0.06  | 0.06   | 0.06   | 0.06   | 0.06   | t | 103716 | VRERMTT<br>QDVEAITP         | Homo sapiens          |
| 1 | 1.00 | 1 | 1 | 0     | -0.003 | 0      | 0.001  | -0.001 | t | 7491   | DAEFRHDS<br>GYEVHHQ<br>K    | Oryctolagus cuniculus |
| 1 | 1.00 | 1 | 1 | 0.04  | 0.04   | 0.04   | 0.04   | 0.04   | t | 106909 | TISQLYSS<br>PSP             | Mus musculus          |
| 1 | 1.00 | 1 | 1 | -0.02 | -0.018 | -0.012 | -0.019 | -0.021 | t | 29147  | ITWIGM                      | Homo sapiens          |
| 1 | 1.00 | 1 | 1 | -0.01 | -0.012 | -0.01  | -0.009 | -0.01  | t | 131100 | TDSEMDV<br>VRFD             | Mus musculus          |
| 1 | 1.00 | 1 | 1 | 0.05  | 0.05   | 0.048  | 0.049  | 0.048  | t | 13984  | ERESQAY                     | Mus musculus          |
| 1 | 1.00 | 1 | 1 | 0.01  | 0.01   | 0.01   | 0.014  | 0.01   | t | 142200 | KGLRRDL<br>ASREAKKQ<br>LEAE | Homo sapiens          |
| 1 | 1.00 | 1 | 1 | 0.03  | 0.028  | 0.023  | 0.023  | 0.028  | t | 108202 | VVSHFND                     | Mus musculus          |
| 1 | 1.00 | 1 | 1 | 0.02  | 0.013  | 0.003  | 0.021  | 0.022  | t | 136315 | GGGTGPA<br>DGTNATTI         | Homo sapiens          |
| 1 | 1.00 | 1 | 1 | -0.01 | -0.022 | -0.01  | -0.007 | -0.01  | t | 156860 | DRWNSM<br>WKESLL            | Bos taurus            |
| 1 | 1.00 | 1 | 1 | 0     | 0.001  | -0.001 | 0.003  | -0.001 | t | 99529  | PGQAGQK<br>QILLDAID         | Equus caballus        |

|   |      |   |   |       |        |        |        |        |   |        |                              |                                  |
|---|------|---|---|-------|--------|--------|--------|--------|---|--------|------------------------------|----------------------------------|
| 1 | 1.00 | 1 | 1 | -0.02 | -0.016 | -0.02  | -0.013 | -0.019 | t | 131904 | HCQICHCD<br>VVNLTCE          | Homo<br>sapiens                  |
| 1 | 1.00 | 1 | 1 | -0.01 | -0.01  | -0.008 | -0.006 | -0.01  | t | 118432 | ISIGYHYPP<br>ICLGRA          | Homo<br>sapiens                  |
| 1 | 1.00 | 1 | 1 | -0.05 | -0.05  | -0.035 | -0.044 | -0.052 | t | 33732  | KTKIPAVFK<br>I               | Homo<br>sapiens                  |
| 1 | 1.00 | 1 | 1 | -0.07 | -0.072 | -0.077 | -0.071 | -0.072 | t | 1165   | AESPKKP                      | Homo<br>sapiens                  |
| 1 | 1.00 | 1 | 1 | 0     | -0.004 | 0      | 0.004  | 0      | t | 123565 | NVKDYYQ<br>KWM               | Oryctola<br>gus<br>cuniculu<br>s |
| 1 | 1.00 | 1 | 1 | 0     | -0.015 | 0      | -0.001 | 0      | t | 60795  | SRSERR                       | Marmot<br>a monax                |
| 1 | 1.00 | 1 | 1 | -0.03 | -0.03  | -0.03  | -0.03  | -0.029 | t | 115392 | NICNISCD<br>KF               | Homo<br>sapiens                  |
| 1 | 1.00 | 1 | 1 | 0     | 0.002  | -0.018 | -0.003 | 0.002  | t | 95834  | SGPSGTSG<br>PSGT             | Homo<br>sapiens                  |
| 1 | 1.00 | 1 | 1 | -0.03 | -0.033 | -0.03  | -0.03  | -0.031 | t | 153415 | LPKFHKSP<br>HFYR             | Oryctola<br>gus<br>cuniculu<br>s |
| 1 | 1.00 | 1 | 1 | 0.02  | 0.021  | 0.023  | 0.023  | 0.018  | t | 31504  | KKDGYPVE<br>YDNCAIYI         | Equus<br>caballus                |
| 1 | 1.00 | 1 | 1 | 0.03  | 0.029  | 0.036  | 0.031  | 0.03   | t | 69517  | VLGSQE                       | Homo<br>sapiens                  |
| 1 | 1.00 | 1 | 1 | -0.03 | -0.032 | -0.03  | -0.031 | -0.032 | t | 110385 | QLYKTCKQ<br>AGTCPPDII<br>PKV | Mus<br>musculu<br>s              |
| 1 | 1.00 | 1 | 1 | 0     | 0      | 0.006  | 0.006  | -0.001 | t | 4912   | ATCMQVN<br>LEIMTST           | Homo<br>sapiens                  |
| 1 | 1.00 | 1 | 1 | 0.04  | 0.036  | 0.035  | 0.033  | 0.04   | t | 115135 | YSYDVNST<br>EKG              | Oryctola<br>gus<br>cuniculu<br>s |
| 1 | 1.00 | 1 | 1 | 0     | 0      | 0      | 0      | -0.002 | t | 72805  | WLTEKEGS<br>YP               | Mus<br>musculu<br>s              |

|   |      |   |   |       |        |        |        |        |   |        |                             |                                  |
|---|------|---|---|-------|--------|--------|--------|--------|---|--------|-----------------------------|----------------------------------|
| 1 | 1.00 | 1 | 1 | 0     | 0      | 0      | 0      | -0.002 | t | 48858  | PPPPNPN<br>DPPPPNP<br>ND    | Mus<br>musculu<br>s              |
| 1 | 1.00 | 1 | 1 | 0     | 0      | 0      | 0      | -0.002 | t | 48858  | PPPPNPN<br>DPPPPNP<br>ND    | Mus<br>musculu<br>s              |
| 1 | 1.00 | 1 | 1 | 0     | 0      | 0      | 0      | -0.002 | t | 14457  | ETLGALAS<br>AIKETFEEG<br>TC | Mus<br>musculu<br>s              |
| 1 | 1.00 | 1 | 1 | 0     | 0      | 0      | 0      | -0.002 | t | 20838  | GLFGAIAG<br>FIE             | Mus<br>musculu<br>s              |
| 1 | 1.00 | 1 | 1 | 0     | 0      | 0      | 0      | -0.002 | t | 24012  | HHPSTNQ<br>EQTSLYVQ<br>AS   | Mus<br>musculu<br>s              |
| 1 | 1.00 | 1 | 1 | 0     | 0      | 0      | 0      | -0.002 | t | 20838  | GLFGAIAG<br>FIE             | Mus<br>musculu<br>s              |
| 1 | 1.00 | 1 | 1 | 0     | 0      | 0      | 0      | -0.002 | t | 24012  | HHPSTNQ<br>EQTSLYVQ<br>AS   | Mus<br>musculu<br>s              |
| 1 | 1.00 | 1 | 1 | 0     | 0      | 0      | 0      | -0.002 | t | 20838  | GLFGAIAG<br>FIE             | Mus<br>musculu<br>s              |
| 1 | 1.00 | 1 | 1 | 0     | 0      | 0      | 0      | -0.002 | t | 22755  | GTLVKTIT<br>DDQIEV          | Mus<br>musculu<br>s              |
| 1 | 1.00 | 1 | 1 | 0     | 0      | 0      | 0      | -0.002 | t | 9723   | DPPPPNP<br>NDPPPPN<br>PND   | Mus<br>musculu<br>s              |
| 1 | 1.00 | 1 | 1 | 0     | 0      | 0      | 0      | -0.002 | t | 9723   | DPPPPNP<br>NDPPPPN<br>PND   | Mus<br>musculu<br>s              |
| 1 | 1.00 | 1 | 1 | 0     | 0      | 0      | 0      | -0.002 | t | 9723   | DPPPPNP<br>NDPPPPN<br>PND   | Mus<br>musculu<br>s              |
| 1 | 1.00 | 1 | 1 | 0.05  | 0.047  | 0.052  | 0.05   | 0.05   | t | 71006  | VSKEEQYY<br>DYEDAT          | Oryctola<br>gus<br>cuniculu<br>s |
| 1 | 1.00 | 1 | 1 | -0.01 | -0.01  | -0.025 | -0.011 | -0.01  | t | 45589  | NQMHML<br>SNKS              | Mus<br>musculu<br>s              |
| 1 | 1.00 | 1 | 1 | -0.04 | -0.04  | -0.045 | -0.04  | -0.038 | t | 145832 | IPLGTRPP                    | Mus<br>musculu<br>s              |
| 1 | 1.00 | 1 | 1 | 0     | -0.012 | -0.006 | 0      | 0      | t | 27932  | IPLLRTQ                     | Mus<br>musculu<br>s              |

|   |      |   |   |       |        |       |        |        |   |        |                             |                                  |
|---|------|---|---|-------|--------|-------|--------|--------|---|--------|-----------------------------|----------------------------------|
| 1 | 1.00 | 1 | 1 | 0.06  | 0.06   | 0.053 | 0.057  | 0.059  | t | 64600  | TKKNYSEL<br>DDEEPME<br>LDYP | Homo<br>sapiens                  |
| 1 | 1.00 | 1 | 1 | 0.05  | 0.052  | 0.049 | 0.05   | 0.05   | t | 34065  | KVKEISNQ<br>EPLKI           | Myodes<br>glareolu<br>s          |
| 1 | 1.00 | 1 | 1 | -0.06 | -0.058 | -0.07 | -0.059 | -0.061 | t | 25138  | HWRCPPR<br>R                | Homo<br>sapiens                  |
| 1 | 1.00 | 1 | 1 | -0.01 | -0.012 | -0.02 | -0.013 | -0.01  | t | 21883  | GQHPAKS<br>M                | Anas<br>platyrhy<br>nchos        |
| 1 | 1.00 | 1 | 1 | 0.01  | 0.01   | 0     | 0.01   | 0.01   | t | 53209  | RASLETTN<br>QAIEAIR         | Homo<br>sapiens                  |
| 1 | 1.00 | 1 | 1 | 0.02  | 0.02   | 0.02  | 0.02   | 0.021  | t | 124702 | SDDNYDK<br>TED              | Homo<br>sapiens                  |
| 1 | 1.00 | 1 | 1 | 0.03  | 0.028  | 0.027 | 0.023  | 0.028  | t | 122167 | PPPITQGE<br>CKQL            | Mus<br>musculu<br>s              |
| 1 | 1.00 | 1 | 1 | 0.01  | 0.01   | 0.01  | 0.01   | 0.01   | t | 76617  | YYTKDTNN<br>NLT             | Mus<br>musculu<br>s              |
| 1 | 1.00 | 1 | 1 | 0.01  | 0.008  | 0.01  | 0.01   | 0.01   | t | 76617  | YYTKDTNN<br>NLT             | Mus<br>musculu<br>s              |
| 1 | 1.00 | 1 | 1 | 0     | -0.002 | 0.005 | -0.001 | -0.002 | t | 37657  | LLPHSNLD<br>HI              | Mus<br>musculu<br>s              |
| 1 | 1.00 | 1 | 1 | 0     | 0      | 0     | 0      | 0      | t | 112282 | QYLSSFT                     | Homo<br>sapiens                  |
| 1 | 1.00 | 1 | 1 | 0.03  | 0.026  | 0.03  | 0.029  | 0.03   | t | 46349  | NVDENAN<br>AN               | Oryctola<br>gus<br>cuniculu<br>s |
| 1 | 1.00 | 1 | 1 | 0.02  | 0.02   | 0.007 | 0.022  | 0.023  | t | 98969  | QQPISQQI<br>LQQI            | Homo<br>sapiens                  |
| 1 | 1.00 | 1 | 1 | 0.01  | 0.008  | 0.006 | 0.009  | 0.01   | t | 24918  | HTHADGE<br>VHC              | Mus<br>musculu<br>s              |

|   |      |   |   |       |        |        |        |        |   |        |                            |                                  |
|---|------|---|---|-------|--------|--------|--------|--------|---|--------|----------------------------|----------------------------------|
| 1 | 1.00 | 1 | 1 | -0.01 | -0.012 | -0.004 | -0.009 | -0.009 | t | 78924  | AGPEWLL                    | Mus<br>musculu<br>s              |
| 1 | 1.00 | 1 | 1 | 0.01  | 0.01   | 0.01   | 0.01   | 0.01   | t | 153474 | TLITHIAPYI<br>QT           | Mus<br>musculu<br>s              |
| 1 | 1.00 | 1 | 1 | 0.03  | 0.028  | 0.03   | 0.023  | 0.026  | t | 140014 | DSDVGE                     | Mus<br>musculu<br>s              |
| 1 | 1.00 | 1 | 1 | -0.04 | -0.04  | -0.03  | -0.04  | -0.043 | t | 60032  | SPEKPHFP<br>LA             | Sus<br>scrofa                    |
| 1 | 1.00 | 1 | 1 | -0.02 | -0.02  | -0.023 | -0.014 | -0.02  | t | 28134  | IQALSYAL<br>GGDINKV        | Homo<br>sapiens                  |
| 1 | 1.00 | 1 | 1 | 0     | 0      | -0.002 | 0      | 0      | t | 78416  | HPWWTW<br>VSDPNAT<br>QP    | Mus<br>musculu<br>s              |
| 1 | 1.00 | 1 | 1 | 0     | 0      | -0.002 | 0      | 0      | t | 78416  | HPWWTW<br>VSDPNAT<br>QP    | Mus<br>musculu<br>s              |
| 1 | 1.00 | 1 | 1 | -0.01 | -0.012 | -0.03  | -0.017 | -0.01  | t | 128067 | NYVADNF<br>FYNVEGR<br>WGSQ | Mus<br>musculu<br>s              |
| 1 | 1.00 | 1 | 1 | 0.02  | 0.018  | 0.022  | 0.02   | 0.019  | t | 122895 | RWLPPVY<br>EDGFS           | Oryctola<br>gus<br>cuniculu<br>s |
| 1 | 1.00 | 1 | 1 | 0     | -0.002 | 0      | 0.001  | -0.002 | t | 12184  | EGHRMA<br>WDMMM<br>NWS     | Homo<br>sapiens                  |
| 1 | 1.00 | 1 | 1 | 0.01  | 0.01   | 0.001  | 0.01   | 0.011  | t | 97023  | VATRSQTD<br>TSEKDC         | Oryctola<br>gus<br>cuniculu<br>s |
| 1 | 1.00 | 1 | 1 | 0.04  | 0.043  | 0.021  | 0.04   | 0.045  | t | 34537  | KYNDDDT<br>FTVKVGD         | Mus<br>musculu<br>s              |
| 1 | 1.00 | 1 | 1 | 0     | 0.004  | 0      | 0.001  | 0      | t | 51391  | QLKLNW                     | Homo<br>sapiens                  |
| 1 | 1.00 | 1 | 1 | -0.02 | -0.02  | -0.018 | -0.02  | -0.02  | t | 40563  | LVRMKRA                    | Mus<br>musculu<br>s              |

|   |      |   |   |       |        |        |        |        |   |        |                       |                       |
|---|------|---|---|-------|--------|--------|--------|--------|---|--------|-----------------------|-----------------------|
| 1 | 1.00 | 1 | 1 | -0.02 | -0.023 | -0.018 | -0.02  | -0.02  | t | 40563  | LVRMKRA               | Oryctolagus cuniculus |
| 1 | 1.00 | 1 | 1 | 0.03  | 0.03   | 0.03   | 0.03   | 0.028  | t | 106850 | SLQQLYDE YPGP         | Mus musculus          |
| 1 | 1.00 | 1 | 1 | 0.01  | 0.01   | 0.01   | 0.013  | 0.01   | t | 54431  | RKTKRNTN              | Homo sapiens          |
| 1 | 1.00 | 1 | 1 | -0.03 | -0.03  | -0.032 | -0.03  | -0.03  | t | 67916  | VDCSRFPN A            | Homo sapiens          |
| 1 | 1.00 | 1 | 1 | 0.05  | 0.053  | 0.048  | 0.05   | 0.047  | t | 6341   | CGRECGIK KGSSGYC      | Equus caballus        |
| 1 | 1.00 | 1 | 1 | 0.05  | 0.053  | 0.048  | 0.05   | 0.047  | t | 6341   | CGRECGIK KGSSGYC      | Equus caballus        |
| 1 | 1.00 | 1 | 1 | 0.03  | 0.032  | 0.024  | 0.027  | 0.028  | t | 6722   | CNRAFNP VCGTDGV TYDN  | Homo sapiens          |
| 1 | 1.00 | 1 | 1 | -0.02 | -0.018 | -0.017 | -0.017 | -0.02  | t | 151713 | RGEARK                | Homo sapiens          |
| 1 | 1.00 | 1 | 1 | -0.03 | -0.032 | -0.041 | -0.031 | -0.03  | t | 47491  | PFFRKYFG NDTA         | Mus musculus          |
| 1 | 1.00 | 1 | 1 | -0.01 | -0.008 | -0.007 | -0.011 | -0.01  | t | 45602  | NQPGHL                | Cavia porcellus       |
| 1 | 1.00 | 1 | 1 | -0.01 | -0.003 | -0.007 | -0.011 | -0.01  | t | 45602  | NQPGHL                | Cavia porcellus       |
| 1 | 1.00 | 1 | 1 | -0.01 | -0.014 | -0.009 | -0.013 | -0.01  | t | 25224  | IAAISM                | Oryctolagus cuniculus |
| 1 | 1.00 | 1 | 1 | 0.04  | 0.042  | 0.033  | 0.037  | 0.038  | t | 106378 | EEVKTTTEQ KR          | Homo sapiens          |
| 1 | 1.00 | 1 | 1 | 0.01  | 0.01   | 0.01   | 0.011  | 0.007  | t | 153251 | AKAFSYW TPFDGKSL YSST | Mus musculus          |
| 1 | 1.00 | 1 | 1 | -0.04 | -0.043 | -0.041 | -0.04  | -0.042 | t | 78115  | DDPPATVY RYDSRPP      | Oryctolagus cuniculus |

|   |      |   |   |       |        |        |       |        |   |        |                           |                       |
|---|------|---|---|-------|--------|--------|-------|--------|---|--------|---------------------------|-----------------------|
| 1 | 1.00 | 1 | 1 | 0.03  | 0.03   | 0.03   | 0.03  | 0.03   | t | 158602 | PLELSVY                   | Homo sapiens          |
| 1 | 1.00 | 1 | 1 | 0.03  | 0.03   | 0.03   | 0.03  | 0.03   | t | 78225  | PFSNLDFM                  | Homo sapiens          |
| 1 | 1.00 | 1 | 1 | 0.01  | 0.01   | 0.01   | 0.01  | 0.01   | t | 99325  | IAVPTGVAFWLYNDH           | Homo sapiens          |
| 1 | 1.00 | 1 | 1 | -0.01 | -0.013 | -0.01  | -0.01 | -0.009 | t | 72484  | WGNGCGLFG                 | Mus musculus          |
| 1 | 1.00 | 1 | 1 | -0.01 | -0.01  | -0.01  | -0.01 | -0.01  | t | 103002 | AAASLAAIAIAFLAG           | Homo sapiens          |
| 1 | 1.00 | 1 | 1 | 0.02  | 0.023  | 0.02   | 0.02  | 0.02   | t | 101953 | PDPLSPGE                  | Mus musculus          |
| 1 | 1.00 | 1 | 1 | 0     | 0      | 0      | 0     | 0      | t | 59209  | SLKAVNPSDPLVYK            | Ovis aries            |
| 1 | 1.00 | 1 | 1 | 0     | -0.003 | 0      | 0     | 0      | t | 156907 | KVGDPLW                   | Oryctolagus cuniculus |
| 1 | 1.00 | 1 | 1 | 0     | 0      | 0      | 0     | 0      | t | 156907 | KVGDPLW                   | Mus musculus          |
| 1 | 1.00 | 1 | 1 | -0.04 | -0.04  | -0.04  | -0.04 | -0.04  | t | 111561 | MPPCNYK                   | Homo sapiens          |
| 1 | 1.00 | 1 | 1 | 0.03  | 0.028  | 0.024  | 0.027 | 0.029  | t | 48858  | PPPPNPN<br>DPPPPNP<br>ND  | Mus musculus          |
| 1 | 1.00 | 1 | 1 | -0.01 | -0.01  | -0.025 | -0.01 | -0.009 | t | 43226  | NANANPN                   | Mus musculus          |
| 1 | 1.00 | 1 | 1 | 0     | -0.003 | 0      | 0     | -0.002 | t | 103839 | DAEFRHDS<br>GYEVH         | Oryctolagus cuniculus |
| 1 | 1.00 | 1 | 1 | 0.02  | 0.024  | 0.02   | 0.021 | 0.02   | t | 61112  | SSIPNGTY                  | Homo sapiens          |
| 1 | 1.00 | 1 | 1 | 0.02  | 0.02   | 0.017  | 0.024 | 0.02   | t | 33874  | KTSVDCN<br>MYICGDST<br>EC | Homo sapiens          |

|   |      |   |   |       |        |        |        |        |   |        |                          |                        |
|---|------|---|---|-------|--------|--------|--------|--------|---|--------|--------------------------|------------------------|
| 1 | 1.00 | 1 | 1 | 0     | -0.002 | 0      | -0.001 | 0      | t | 59374  | SLNTGWL<br>AGLFY         | Mus<br>musculu<br>s    |
| 1 | 1.00 | 1 | 1 | 0     | -0.002 | 0      | -0.001 | 0      | t | 59374  | SLNTGWL<br>AGLFY         | Mus<br>musculu<br>s    |
| 1 | 1.00 | 1 | 1 | -0.02 | -0.02  | -0.025 | -0.018 | -0.02  | t | 118144 | SLCQSLRE<br>R            | Homo<br>sapiens        |
| 1 | 1.00 | 1 | 1 | 0     | 0      | -0.001 | 0.004  | 0      | t | 30661  | KEVPALTA<br>VETGAT       | Homo<br>sapiens        |
| 1 | 1.00 | 1 | 1 | 0     | 0.002  | 0      | 0.003  | 0      | t | 63086  | TCMTTAQ<br>GTSMYPSC      | Homo<br>sapiens        |
| 1 | 1.00 | 1 | 1 | 0     | 0      | 0      | 0.003  | 0      | t | 7171   | CTKPTDG<br>NC            | Homo<br>sapiens        |
| 1 | 1.00 | 1 | 1 | 0     | 0.004  | -0.004 | -0.003 | 0.002  | t | 39083  | LRFFVAPF<br>PE           | Homo<br>sapiens        |
| 1 | 1.00 | 1 | 1 | -0.02 | -0.017 | -0.02  | -0.02  | -0.019 | t | 6276   | CGAVIDDC                 | Mus<br>musculu<br>s    |
| 1 | 1.00 | 1 | 1 | -0.02 | -0.02  | -0.02  | -0.02  | -0.019 | t | 115197 | CVKKILDK<br>VG           | Homo<br>sapiens        |
| 1 | 1.00 | 1 | 1 | 0.01  | 0.012  | 0.01   | 0.013  | 0.01   | t | 119579 | FKDYSSVV<br>RPVEDHR<br>Q | Homo<br>sapiens        |
| 1 | 1.00 | 1 | 1 | -0.04 | -0.04  | -0.054 | -0.04  | -0.039 | t | 13100  | ELIRGTG                  | Mus<br>musculu<br>s    |
| 1 | 1.00 | 1 | 1 | 0.02  | 0.02   | 0.02   | 0.02   | 0.02   | t | 78225  | PFSNLDF<br>M             | Homo<br>sapiens        |
| 1 | 1.00 | 1 | 1 | 0     | 0      | 0      | 0      | 0      | t | 106651 | MHSPLPI                  | Homo<br>sapiens        |
| 1 | 1.00 | 1 | 1 | 0     | 0      | 0      | 0      | 0      | t | 112392 | VTMTCKS                  | Homo<br>sapiens        |
| 1 | 1.00 | 1 | 1 | 0     | 0      | 0      | 0      | 0      | t | 106651 | MHSPLPI                  | Homo<br>sapiens        |
| 1 | 1.00 | 1 | 1 | 0.01  | 0.01   | 0.01   | 0.01   | 0.01   | t | 153838 | HQKRTAM<br>FQDPQER       | Cavia<br>porcellu<br>s |



|   |      |   |   |       |        |        |        |        |   |        |                              |                                  |
|---|------|---|---|-------|--------|--------|--------|--------|---|--------|------------------------------|----------------------------------|
| 1 | 1.00 | 1 | 1 | 0.01  | 0.003  | 0.01   | 0.01   | 0.01   | t | 153838 | HQKRTAM<br>FQDPQER           | Oryctola<br>gus<br>cuniculu<br>s |
| 1 | 1.00 | 1 | 1 | -0.01 | -0.008 | -0.01  | -0.01  | -0.01  | t | 12550  | EIPQPQW<br>T                 | Anas<br>platyrhy<br>nchos        |
| 1 | 1.00 | 1 | 1 | -0.01 | -0.01  | -0.01  | -0.013 | -0.013 | t | 110759 | AAHRKESY<br>SIYVYKVLK<br>QVH | Mus<br>musculu<br>s              |
| 1 | 1.00 | 1 | 1 | -0.02 | -0.02  | -0.02  | -0.02  | -0.021 | t | 106685 | NLLEFRH                      | Mus<br>musculu<br>s              |
| 1 | 1.00 | 1 | 1 | 0.01  | 0.013  | 0.002  | 0.01   | 0.008  | t | 24369  | HNDKRAD<br>PAFVCRQ<br>GVVDRG | Equus<br>caballus                |
| 1 | 1.00 | 1 | 1 | -0.02 | -0.016 | -0.018 | -0.02  | -0.019 | t | 136441 | KRQKRF                       | Gallus<br>gallus                 |
| 1 | 1.00 | 1 | 1 | -0.01 | -0.01  | -0.017 | -0.01  | -0.012 | t | 133577 | FVVDMMME<br>RLRISQKW<br>VRVA | Mus<br>musculu<br>s              |
| 1 | 1.00 | 1 | 1 | 0.01  | 0.01   | 0.008  | 0.01   | 0.01   | t | 110606 | GNPGLDGI<br>PGAKG            | Rattus<br>norvegic<br>us         |
| 1 | 1.00 | 1 | 1 | 0.02  | 0.02   | 0.015  | 0.018  | 0.02   | t | 52439  | QSSWPKLE<br>Q                | Homo<br>sapiens                  |
| 1 | 1.00 | 1 | 1 | 0.01  | 0.01   | 0.005  | 0.01   | 0.009  | t | 78687  | IRVRKRKG<br>SNKKAEDT<br>LED  | Mus<br>musculu<br>s              |
| 1 | 1.00 | 1 | 1 | -0.02 | -0.02  | -0.021 | -0.02  | -0.02  | t | 144804 | TVFVKPPP<br>EKSW             | Mus<br>musculu<br>s              |
| 1 | 1.00 | 1 | 1 | 0     | 0.001  | -0.001 | 0.003  | -0.001 | t | 99621  | RNAMRHL<br>RPEDTLEE          | Equus<br>caballus                |
| 1 | 1.00 | 1 | 1 | 0.01  | 0.01   | 0.006  | 0.01   | 0.01   | t | 56200  | RTTSGLT                      | Homo<br>sapiens                  |
| 1 | 1.00 | 1 | 1 | 0.04  | 0.042  | 0.036  | 0.037  | 0.038  | t | 114949 | SKEHDGEC<br>KE               | Homo<br>sapiens                  |
| 1 | 1.00 | 1 | 1 | 0.02  | 0.016  | 0.007  | 0.02   | 0.02   | t | 149731 | GVSDYHK<br>NLINN             | Mus<br>musculu<br>s              |
| 1 | 1.00 | 1 | 1 | 0.02  | 0.02   | 0.015  | 0.02   | 0.022  | t | 3881   | APTYSWG<br>E                 | Mus<br>musculu<br>s              |

|   |      |   |   |       |        |        |        |        |   |        |                             |                       |
|---|------|---|---|-------|--------|--------|--------|--------|---|--------|-----------------------------|-----------------------|
| 1 | 1.00 | 1 | 1 | 0.03  | 0.032  | 0.023  | 0.029  | 0.03   | t | 73590  | YDTADII                     | Felis catus           |
| 1 | 1.00 | 1 | 1 | 0     | 0      | 0      | 0      | -0.002 | t | 13656  | EPGVLMG<br>GQSESVEF         | Mus musculus          |
| 1 | 1.00 | 1 | 1 | -0.01 | -0.012 | -0.021 | -0.013 | -0.01  | t | 638    | ADAVSRKK<br>MD              | Mus musculus          |
| 1 | 1.00 | 1 | 1 | 0.02  | 0.023  | 0.021  | 0.02   | 0.019  | t | 15385  | FDFSGVVE<br>G               | Mus musculus          |
| 1 | 1.00 | 1 | 1 | 0.01  | 0.01   | 0.006  | 0.01   | 0.01   | t | 49108  | PQQQPF<br>PQPQ              | Mus musculus          |
| 1 | 1.00 | 1 | 1 | 0.01  | 0.01   | 0.006  | 0.01   | 0.01   | t | 49108  | PQQQPF<br>PQPQ              | Mus musculus          |
| 1 | 1.00 | 1 | 1 | -0.01 | -0.01  | -0.01  | -0.01  | -0.01  | t | 149345 | KDFPILPGE<br>IF             | Homo sapiens          |
| 1 | 1.00 | 1 | 1 | 0     | 0      | -0.001 | -0.006 | -0.002 | t | 20021  | GGSILSGFT<br>LEFL           | Homo sapiens          |
| 1 | 1.00 | 1 | 1 | 0.04  | 0.042  | 0.046  | 0.047  | 0.039  | t | 2039   | AINPESDQ<br>PDLSNF          | Homo sapiens          |
| 1 | 1.00 | 1 | 1 | 0.01  | 0.01   | 0.002  | 0.008  | 0.01   | t | 2220   | AKKQVEK<br>ALEEANSK<br>LALE | Homo sapiens          |
| 1 | 1.00 | 1 | 1 | 0.02  | 0.02   | 0.02   | 0.02   | 0.02   | t | 111556 | MPLQNSK                     | Homo sapiens          |
| 1 | 1.00 | 1 | 1 | 0.02  | 0.017  | 0.017  | 0.02   | 0.02   | t | 21501  | GNQHVDD<br>RPS              | Oryctolagus cuniculus |
| 1 | 1.00 | 1 | 1 | 0.01  | 0.01   | 0.015  | 0.016  | 0.013  | t | 115912 | QAPEY                       | Homo sapiens          |
| 1 | 1.00 | 1 | 1 | 0.03  | 0.034  | 0.03   | 0.031  | 0.03   | t | 19101  | GDREIGEK                    | Homo sapiens          |
| 1 | 1.00 | 1 | 1 | 0     | 0.002  | -0.013 | -0.003 | -0.001 | t | 115090 | NLLRFFVA<br>PFPE            | Homo sapiens          |

|   |      |   |   |       |        |        |        |        |   |        |                              |                                  |
|---|------|---|---|-------|--------|--------|--------|--------|---|--------|------------------------------|----------------------------------|
| 1 | 1.00 | 1 | 1 | -0.03 | -0.026 | -0.026 | -0.03  | -0.032 | t | 1463   | AGDCAVR<br>Q                 | Capra<br>hircus                  |
| 1 | 1.00 | 1 | 1 | -0.01 | -0.009 | -0.011 | -0.007 | -0.011 | t | 99090  | AFLDVVPG<br>QAGQKQI          | Equus<br>caballus                |
| 1 | 1.00 | 1 | 1 | 0     | 0.002  | 0.001  | -0.002 | -0.002 | t | 106825 | SEIYRKYFG<br>N               | Homo<br>sapiens                  |
| 1 | 1.00 | 1 | 1 | 0.01  | 0.008  | 0.006  | 0.013  | 0.01   | t | 35869  | LFKEYKLTR<br>PY              | Mus<br>musculu<br>s              |
| 1 | 1.00 | 1 | 1 | 0.02  | 0.022  | 0.008  | 0.021  | 0.022  | t | 7765   | DDEHVEEP<br>TVA              | Homo<br>sapiens                  |
| 1 | 1.00 | 1 | 1 | 0     | 0.004  | 0.007  | 0.003  | -0.001 | t | 55174  | RPIDDFDQ<br>GWGPITY          | Homo<br>sapiens                  |
| 1 | 1.00 | 1 | 1 | -0.01 | -0.01  | -0.01  | -0.01  | -0.01  | t | 79400  | SRPTML                       | Mus<br>musculu<br>s              |
| 1 | 1.00 | 1 | 1 | 0.01  | 0.01   | 0.008  | 0.01   | 0.009  | t | 65974  | TQYERE                       | Mus<br>musculu<br>s              |
| 1 | 1.00 | 1 | 1 | 0.02  | 0.017  | 0.018  | 0.02   | 0.018  | t | 79394  | SLNAGLAP<br>ETTQATLI         | Oryctola<br>gus<br>cuniculu<br>s |
| 1 | 1.00 | 1 | 1 | 0     | 0.015  | 0      | 0.007  | 0.002  | t | 125478 | LHQEYEEN<br>LGDSIVGY<br>KEKS | Homo<br>sapiens                  |
| 1 | 1.00 | 1 | 1 | 0.06  | 0.06   | 0.06   | 0.06   | 0.06   | t | 112146 | GSGTDFT                      | Homo<br>sapiens                  |
| 1 | 1.00 | 1 | 1 | 0.03  | 0.034  | 0.033  | 0.029  | 0.026  | t | 62289  | SVPSSSS                      | Mus<br>musculu<br>s              |
| 1 | 1.00 | 1 | 1 | -0.02 | -0.02  | -0.02  | -0.014 | -0.02  | t | 158703 | CKEADIKT<br>ALEARKA          | Homo<br>sapiens                  |
| 1 | 1.00 | 1 | 1 | -0.01 | -0.012 | -0.01  | -0.007 | -0.01  | t | 25852  | IEKKIAKM<br>EKASSVFN<br>VV   | Mus<br>musculu<br>s              |
| 1 | 1.00 | 1 | 1 | -0.04 | -0.038 | -0.041 | -0.033 | -0.04  | t | 144710 | KNPWPNV<br>DAH               | Homo<br>sapiens                  |

|   |      |   |   |       |        |        |        |        |   |        |                           |                       |
|---|------|---|---|-------|--------|--------|--------|--------|---|--------|---------------------------|-----------------------|
| 1 | 1.00 | 1 | 1 | -0.01 | -0.008 | -0.01  | -0.007 | -0.01  | t | 40578  | LVSFGVWI<br>RTPPAYRP      | Homo sapiens          |
| 1 | 1.00 | 1 | 1 | -0.01 | -0.008 | -0.01  | -0.007 | -0.01  | t | 40578  | LVSFGVWI<br>RTPPAYRP      | Homo sapiens          |
| 1 | 1.00 | 1 | 1 | 0.01  | 0.01   | 0.005  | 0.01   | 0.012  | t | 22303  | GSDYEDRY<br>YRENM         | Mus musculus          |
| 1 | 1.00 | 1 | 1 | 0     | 0.002  | -0.005 | 0.007  | 0      | t | 134410 | IIWRSTQG                  | Homo sapiens          |
| 1 | 1.00 | 1 | 1 | 0     | 0      | 0      | 0      | -0.001 | t | 153284 | PTPLSPPLR<br>NTHPQA       | Mus musculus          |
| 1 | 1.00 | 1 | 1 | 0     | -0.003 | 0      | 0      | -0.002 | t | 108382 | GGVVIA                    | Oryctolagus cuniculus |
| 1 | 1.00 | 1 | 1 | 0.01  | 0.014  | 0.01   | 0.011  | 0.01   | t | 57737  | SFDASQST<br>MA            | Homo sapiens          |
| 1 | 1.00 | 1 | 1 | 0     | 0      | -0.004 | -0.001 | -0.001 | t | 51296  | QLCQLL                    | Mus musculus          |
| 1 | 1.00 | 1 | 1 | 0.01  | 0.01   | 0.011  | 0.007  | 0.01   | t | 71049  | VSMFSVG<br>PSQ            | Homo sapiens          |
| 1 | 1.00 | 1 | 1 | 0.01  | 0.007  | -0.005 | 0.01   | 0.01   | t | 107422 | GQIPLRFN<br>GEVKNP<br>SVV | Oryctolagus cuniculus |
| 1 | 1.00 | 1 | 1 | 0.04  | 0.04   | 0.041  | 0.04   | 0.042  | t | 66387  | TSQKETLH<br>STSP          | Homo sapiens          |
| 1 | 1.00 | 1 | 1 | -0.02 | -0.017 | -0.014 | -0.02  | -0.021 | t | 69462  | VLELAA                    | Mus musculus          |
| 1 | 1.00 | 1 | 1 | -0.04 | -0.038 | -0.04  | -0.033 | -0.04  | t | 121811 | RRARARA<br>R              | Homo sapiens          |
| 1 | 1.00 | 1 | 1 | 0     | 0.004  | 0      | 0.003  | 0      | t | 108844 | DAGVIQSP<br>RHEVTE<br>MG  | Homo sapiens          |

|   |      |   |   |       |        |        |        |        |   |        |                          |                                  |
|---|------|---|---|-------|--------|--------|--------|--------|---|--------|--------------------------|----------------------------------|
| 1 | 1.00 | 1 | 1 | 0     | -0.004 | -0.007 | -0.003 | -0.001 | t | 135446 | AKAQLR                   | Oryctola<br>gus<br>cuniculu<br>s |
| 1 | 1.00 | 1 | 1 | 0.01  | 0.01   | 0.01   | 0.01   | 0.01   | t | 100216 | KLVFFAED<br>VG           | Homo<br>sapiens(<br>human)       |
| 1 | 1.00 | 1 | 1 | 0.01  | 0.01   | 0.01   | 0.01   | 0.01   | t | 111416 | IFQLCKITL<br>TADVMT      | Mus<br>musculu<br>s              |
| 1 | 1.00 | 1 | 1 | 0.01  | 0.014  | 0.01   | 0.017  | 0.011  | t | 120066 | LKQQWVD<br>YNLKWNPD<br>D | Homo<br>sapiens                  |
| 1 | 1.00 | 1 | 1 | 0.03  | 0.028  | 0.035  | 0.029  | 0.027  | t | 6361   | CGVVNNK<br>VAT           | Mus<br>musculu<br>s              |
| 1 | 1.00 | 1 | 1 | 0     | -0.002 | 0.001  | 0.003  | -0.001 | t | 9913   | DQTIDWF<br>QPNNKRN<br>Q  | Sus<br>scrofa                    |
| 1 | 1.00 | 1 | 1 | -0.01 | -0.012 | -0.013 | -0.007 | -0.009 | t | 116731 | GLGESRK                  | Mus<br>musculu<br>s              |
| 1 | 1.00 | 1 | 1 | -0.02 | -0.02  | -0.015 | -0.02  | -0.02  | t | 108382 | GGVVIA                   | Mus<br>musculu<br>s              |
| 1 | 1.00 | 1 | 1 | 0.01  | 0.006  | -0.003 | 0.007  | 0.01   | t | 12932  | ELADALLE<br>KG           | Oryctola<br>gus<br>cuniculu<br>s |
| 1 | 1.00 | 1 | 1 | 0     | 0      | 0      | 0.002  | 0      | t | 47026  | PCKPLLRD<br>DITFMV       | Homo<br>sapiens                  |
| 1 | 1.00 | 1 | 1 | -0.01 | -0.013 | -0.008 | -0.01  | -0.011 | t | 4885   | ATALDTSN<br>KFADFLQI     | Oryctola<br>gus<br>cuniculu<br>s |
| 1 | 1.00 | 1 | 1 | -0.01 | -0.01  | -0.006 | -0.01  | -0.012 | t | 43212  | NALSFTNK                 | Mus<br>musculu<br>s              |
| 1 | 1.00 | 1 | 1 | -0.01 | -0.007 | -0.006 | -0.01  | -0.012 | t | 43212  | NALSFTNK                 | Mus<br>musculu<br>s              |
| 1 | 1.00 | 1 | 1 | 0.02  | 0.02   | 0.02   | 0.02   | 0.02   | t | 134187 | PMSTPSAT                 | Mus<br>musculu<br>s              |

|   |      |   |   |       |        |        |        |        |   |        |                           |                                  |
|---|------|---|---|-------|--------|--------|--------|--------|---|--------|---------------------------|----------------------------------|
| 1 | 1.00 | 1 | 1 | 0     | -0.004 | 0      | -0.003 | -0.004 | t | 97605  | RIVRGPAN<br>LRNLKEFK<br>E | Oryctola<br>gus<br>cuniculu<br>s |
| 1 | 1.00 | 1 | 1 | 0     | -0.002 | 0      | -0.002 | -0.003 | t | 138192 | HQTPLST                   | Mus<br>musculu<br>s              |
| 1 | 1.00 | 1 | 1 | 0     | -0.002 | 0      | -0.002 | -0.003 | t | 138202 | LPTITNT                   | Mus<br>musculu<br>s              |
| 1 | 1.00 | 1 | 1 | 0     | -0.002 | 0      | -0.002 | -0.003 | t | 138198 | KPTSTLT                   | Mus<br>musculu<br>s              |
| 1 | 1.00 | 1 | 1 | 0     | -0.002 | 0      | -0.002 | -0.003 | t | 138166 | FHEFWPT                   | Mus<br>musculu<br>s              |
| 1 | 1.00 | 1 | 1 | 0.01  | 0.01   | 0.001  | 0.01   | 0.01   | t | 135974 | PSNSASVP<br>ALTA          | Homo<br>sapiens                  |
| 1 | 1.00 | 1 | 1 | 0.03  | 0.028  | 0.026  | 0.029  | 0.03   | t | 65664  | TPNATQPE<br>LAPEDPE       | Mus<br>musculu<br>s              |
| 1 | 1.00 | 1 | 1 | 0.03  | 0.026  | 0.026  | 0.029  | 0.03   | t | 65664  | TPNATQPE<br>LAPEDPE       | Oryctola<br>gus<br>cuniculu<br>s |
| 1 | 1.00 | 1 | 1 | -0.03 | -0.03  | -0.03  | -0.03  | -0.032 | t | 140556 | DWRHFME<br>S              | Mus<br>musculu<br>s              |
| 1 | 1.00 | 1 | 1 | 0.01  | 0.01   | 0.01   | 0.01   | 0.008  | t | 117695 | YITTIAGV<br>M             | Homo<br>sapiens                  |
| 1 | 1.00 | 1 | 1 | 0.01  | 0.01   | 0.01   | 0.01   | 0.008  | t | 117695 | YITTIAGV<br>M             | Homo<br>sapiens                  |
| 1 | 1.00 | 1 | 1 | 0.03  | 0.034  | 0.021  | 0.027  | 0.028  | t | 116834 | SPSQDPDR<br>RDPYSPS       | Homo<br>sapiens                  |
| 1 | 1.00 | 1 | 1 | 0     | -0.004 | 0      | -0.001 | -0.001 | t | 49505  | PSSKRFQP<br>FQQFGRD       | Oryctola<br>gus<br>cuniculu<br>s |
| 1 | 1.00 | 1 | 1 | -0.05 | -0.05  | -0.057 | -0.05  | -0.052 | t | 95583  | LYNSQDGH<br>GWD           | Homo<br>sapiens                  |
| 1 | 1.00 | 1 | 1 | 0     | 0      | 0      | 0      | 0.001  | t | 115256 | FRELKDLK<br>GY            | Homo<br>sapiens                  |

|   |      |   |   |       |        |        |        |        |   |        |                             |                                  |
|---|------|---|---|-------|--------|--------|--------|--------|---|--------|-----------------------------|----------------------------------|
| 1 | 1.00 | 1 | 1 | 0.01  | 0.013  | 0.01   | 0.01   | 0.01   | t | 21407  | GNDYEDR<br>YYREN            | Mus<br>musculu<br>s              |
| 1 | 1.00 | 1 | 1 | 0.04  | 0.04   | 0.04   | 0.04   | 0.04   | t | 112125 | GFSLTYY                     | Homo<br>sapiens                  |
| 1 | 1.00 | 1 | 1 | -0.01 | -0.011 | -0.002 | -0.01  | -0.01  | t | 25649  | IDPY                        | Mus<br>musculu<br>s              |
| 1 | 1.00 | 1 | 1 | -0.05 | -0.054 | -0.059 | -0.051 | -0.05  | t | 74136  | YHRVMYA<br>SSG              | Oryctola<br>gus<br>cuniculu<br>s |
| 1 | 1.00 | 1 | 1 | 0.01  | 0.012  | 0.014  | 0.01   | 0.008  | t | 137827 | DVKSALIEG                   | Rattus<br>norvegic<br>us         |
| 1 | 1.00 | 1 | 1 | 0     | 0      | 0      | 0      | -0.001 | t | 41014  | MADNGTI<br>TVEELKQL         | Homo<br>sapiens                  |
| 1 | 1.00 | 1 | 1 | 0.01  | 0.003  | 0.01   | 0.011  | 0.01   | t | 67514  | VAAEEYVE<br>VTRVGDF<br>HYVT | Homo<br>sapiens                  |
| 1 | 1.00 | 1 | 1 | 0.05  | 0.047  | 0.045  | 0.05   | 0.05   | t | 63242  | TDSSSDSQ<br>TITN            | Oryctola<br>gus<br>cuniculu<br>s |
| 1 | 1.00 | 1 | 1 | 0.01  | 0.01   | 0.01   | 0.01   | 0.01   | t | 137858 | FTPGTEYT                    | Oryctola<br>gus<br>cuniculu<br>s |
| 1 | 1.00 | 1 | 1 | 0.01  | 0.01   | 0.01   | 0.01   | 0.01   | t | 137858 | FTPGTEYT                    | Homo<br>sapiens                  |
| 1 | 1.00 | 1 | 1 | 0.04  | 0.04   | 0.04   | 0.044  | 0.04   | t | 135944 | KEQFEFAL<br>TAVAEVC         | Homo<br>sapiens                  |
| 1 | 1.00 | 1 | 1 | -0.01 | -0.01  | -0.01  | -0.01  | -0.011 | t | 16755  | FLLTRILTI                   | Mus<br>musculu<br>s              |
| 1 | 1.00 | 1 | 1 | 0.03  | 0.028  | 0.022  | 0.033  | 0.032  | t | 42308  | MPPYPTG<br>GPPPV            | Sus<br>scrofa                    |
| 1 | 1.00 | 1 | 1 | 0.03  | 0.028  | 0.022  | 0.033  | 0.032  | t | 42308  | MPPYPTG<br>GPPPV            | Mus<br>musculu<br>s              |
| 1 | 1.00 | 1 | 1 | 0     | 0      | -0.007 | 0      | 0      | t | 158924 | KSCTWPET<br>HTLWGDG<br>I    | Mus<br>musculu<br>s              |

|   |      |   |   |       |        |        |        |        |   |        |                              |                                  |
|---|------|---|---|-------|--------|--------|--------|--------|---|--------|------------------------------|----------------------------------|
| 1 | 1.00 | 1 | 1 | 0     | 0      | -0.017 | 0      | 0.002  | t | 31539  | KKFKAEIR<br>DFFKEMRI<br>QYAK | Homo<br>sapiens                  |
| 1 | 1.00 | 1 | 1 | 0.01  | 0.01   | 0.002  | 0.01   | 0.01   | t | 52789  | QVSFTPDI<br>EGYAELA<br>WGIAS | Oryctola<br>gus<br>cuniculu<br>s |
| 1 | 1.00 | 1 | 1 | -0.01 | -0.01  | -0.014 | -0.01  | -0.01  | t | 94445  | CCHPACG<br>KHF               | Capra<br>hircus                  |
| 1 | 1.00 | 1 | 1 | 0.06  | 0.056  | 0.053  | 0.063  | 0.061  | t | 97023  | VATRSQTD<br>TSEKDC           | Oryctola<br>gus<br>cuniculu<br>s |
| 1 | 1.00 | 1 | 1 | 0     | 0      | 0      | 0      | -0.002 | t | 41581  | MGGQSES<br>VEFTKDTQ          | Mus<br>musculu<br>s              |
| 1 | 1.00 | 1 | 1 | -0.01 | -0.01  | -0.01  | -0.006 | -0.01  | t | 115598 | ATGMEVG<br>WYRPP             | Homo<br>sapiens                  |
| 1 | 1.00 | 1 | 1 | -0.03 | -0.028 | -0.037 | -0.039 | -0.032 | t | 115763 | GPVRGPFP<br>II               | Homo<br>sapiens                  |
| 1 | 1.00 | 1 | 1 | 0.05  | 0.05   | 0.05   | 0.05   | 0.05   | t | 110067 | VSTLIELPD<br>EIP             | Mus<br>musculu<br>s              |
| 1 | 1.00 | 1 | 1 | 0.03  | 0.03   | 0.03   | 0.03   | 0.03   | t | 127885 | VTKWYSR                      | Homo<br>sapiens                  |
| 1 | 1.00 | 1 | 1 | 0.02  | 0.022  | 0.002  | 0.017  | 0.022  | t | 95834  | SGPSGTSG<br>PSGT             | Homo<br>sapiens                  |
| 1 | 1.00 | 1 | 1 | 0.03  | 0.03   | 0.03   | 0.03   | 0.029  | t | 133535 | CKPGEVQ<br>QC                | Mus<br>musculu<br>s              |
| 1 | 1.00 | 1 | 1 | 0.02  | 0.02   | 0.02   | 0.02   | 0.018  | t | 99836  | QPFPQPQ                      | Mus<br>musculu<br>s              |
| 1 | 1.00 | 1 | 1 | 0.02  | 0.034  | 0.014  | 0.023  | 0.02   | t | 52749  | QVMSRSA<br>NEGVD             | Homo<br>sapiens                  |
| 1 | 1.00 | 1 | 1 | -0.03 | -0.022 | -0.03  | -0.03  | -0.032 | t | 156868 | FHRHPLE                      | Gallus<br>gallus                 |
| 1 | 1.00 | 1 | 1 | 0.02  | 0.02   | 0.02   | 0.02   | 0.02   | t | 29751  | KAALIEEG<br>Q                | Homo<br>sapiens                  |



|   |      |   |   |       |        |        |        |        |   |        |                              |                                  |
|---|------|---|---|-------|--------|--------|--------|--------|---|--------|------------------------------|----------------------------------|
| 1 | 1.00 | 1 | 1 | 0.02  | 0.02   | 0.012  | 0.02   | 0.02   | t | 84698  | KSDYLGVN<br>KIAE             | Homo<br>sapiens                  |
| 1 | 1.00 | 1 | 1 | 0     | 0      | 0      | 0.006  | 0      | t | 106067 | RGGSGGR<br>GRGGSGG           | Homo<br>sapiens                  |
| 1 | 1.00 | 1 | 1 | 0.02  | 0.028  | 0.02   | 0.02   | 0.018  | t | 156846 | AKLITCSKT<br>CSKWQ           | Gallus<br>gallus                 |
| 1 | 1.00 | 1 | 1 | 0     | -0.002 | 0      | 0.003  | 0      | t | 45817  | NSGCFRHL<br>DEREECKC<br>LL   | Mus<br>musculu<br>s              |
| 1 | 1.00 | 1 | 1 | 0     | -0.004 | 0      | 0.003  | 0      | t | 45817  | NSGCFRHL<br>DEREECKC<br>LL   | Oryctola<br>gus<br>cuniculu<br>s |
| 1 | 1.00 | 1 | 1 | -0.03 | -0.03  | -0.037 | -0.03  | -0.031 | t | 130543 | LLKGKGDK<br>AQIEKRI          | Homo<br>sapiens                  |
| 1 | 1.00 | 1 | 1 | 0     | 0      | -0.017 | -0.004 | 0.001  | t | 49324  | PSDKHIEQ<br>YLKKIQNSL<br>S   | Homo<br>sapiens                  |
| 1 | 1.00 | 1 | 1 | 0.01  | 0.012  | 0.01   | 0.011  | 0.01   | t | 102153 | TQYTAYSP<br>VPLL             | Homo<br>sapiens                  |
| 1 | 1.00 | 1 | 1 | -0.01 | -0.005 | -0.003 | -0.01  | -0.012 | t | 132864 | LQEKLSPL                     | Mus<br>musculu<br>s              |
| 1 | 1.00 | 1 | 1 | 0.02  | 0.02   | 0.024  | 0.02   | 0.019  | t | 58060  | SGGSWV                       | Homo<br>sapiens                  |
| 1 | 1.00 | 1 | 1 | -0.03 | -0.033 | -0.033 | -0.03  | -0.03  | t | 97444  | LFKLGKLF<br>Q                | Oryctola<br>gus<br>cuniculu<br>s |
| 1 | 1.00 | 1 | 1 | 0     | -0.003 | -0.006 | 0      | 0      | t | 18787  | GATFQVE<br>VPGSQHID<br>SQKKA | Oryctola<br>gus<br>cuniculu<br>s |
| 1 | 1.00 | 1 | 1 | 0.02  | 0.02   | 0.018  | 0.019  | 0.02   | t | 69719  | VLQELNVT<br>V                | Homo<br>sapiens                  |
| 1 | 1.00 | 1 | 1 | 0.01  | 0.012  | -0.003 | 0.011  | 0.01   | t | 141734 | RADESKTD<br>PQTEA            | Homo<br>sapiens                  |

|   |      |   |   |       |        |        |        |        |   |        |                              |                                  |
|---|------|---|---|-------|--------|--------|--------|--------|---|--------|------------------------------|----------------------------------|
| 1 | 1.00 | 1 | 1 | 0.02  | 0.02   | 0.013  | 0.02   | 0.02   | t | 120108 | NFMESGE<br>WVIKESRG<br>W     | Mus<br>musculu<br>s              |
| 1 | 1.00 | 1 | 1 | 0     | 0.004  | 0      | 0.001  | 0      | t | 137820 | DFTPGTEY                     | Homo<br>sapiens                  |
| 1 | 1.00 | 1 | 1 | 0.03  | 0.03   | 0.03   | 0.03   | 0.029  | t | 95119  | MKKPGENI<br>KPLSCKYSY<br>PKH | Rattus<br>norvegic<br>us         |
| 1 | 1.00 | 1 | 1 | 0.03  | 0.032  | 0.029  | 0.03   | 0.03   | t | 56019  | RTAPGPGE                     | Homo<br>sapiens                  |
| 1 | 1.00 | 1 | 1 | 0.03  | 0.032  | 0.021  | 0.031  | 0.029  | t | 60669  | SRGGSQAS<br>SRSSSRSR         | Homo<br>sapiens                  |
| 1 | 1.00 | 1 | 1 | 0.03  | 0.032  | 0.021  | 0.031  | 0.029  | t | 60669  | SRGGSQAS<br>SRSSSRSR         | Homo<br>sapiens                  |
| 1 | 1.00 | 1 | 1 | 0.01  | 0.007  | 0.014  | 0.01   | 0.012  | t | 136053 | ALSPTMT                      | Oryctola<br>gus<br>cuniculu<br>s |
| 1 | 1.00 | 1 | 1 | 0     | 0.002  | 0      | -0.001 | -0.003 | t | 136595 | RHYQQYF<br>QHF               | Homo<br>sapiens                  |
| 1 | 1.00 | 1 | 1 | 0.04  | 0.04   | 0.04   | 0.04   | 0.04   | t | 99558  | QEEENQG<br>GKGPLLSI          | Homo<br>sapiens                  |
| 1 | 1.00 | 1 | 1 | -0.01 | -0.01  | -0.01  | -0.01  | -0.01  | t | 75409  | YPSGAWY<br>YVP               | Homo<br>sapiens                  |
| 1 | 1.00 | 1 | 1 | 0.03  | 0.03   | 0.023  | 0.037  | 0.031  | t | 117015 | KEQFLDGD<br>GWTSRWI<br>ESK   | Homo<br>sapiens                  |
| 1 | 1.00 | 1 | 1 | 0.04  | 0.042  | 0.042  | 0.039  | 0.037  | t | 96828  | RLKEEED<br>KK                | Homo<br>sapiens                  |
| 1 | 1.00 | 1 | 1 | 0.03  | 0.03   | 0.028  | 0.03   | 0.03   | t | 66344  | TSNQRGV<br>GSTVVILD          | Sus<br>scrofa                    |
| 1 | 1.00 | 1 | 1 | 0.05  | 0.048  | 0.041  | 0.049  | 0.05   | t | 60763  | SRPLNDLV<br>SQKTTQLS<br>DITS | Mus<br>musculu<br>s              |
| 1 | 1.00 | 1 | 1 | -0.03 | -0.032 | -0.027 | -0.031 | -0.03  | t | 73739  | YEPGRSL<br>W                 | Mus<br>musculu<br>s              |

|   |      |   |   |       |        |        |        |        |   |        |                            |                                  |
|---|------|---|---|-------|--------|--------|--------|--------|---|--------|----------------------------|----------------------------------|
| 1 | 1.00 | 1 | 1 | 0     | -0.002 | -0.008 | -0.001 | 0      | t | 57277  | SDSDNDG<br>VCDNVDK         | Mus<br>musculu<br>s              |
| 1 | 1.00 | 1 | 1 | 0.05  | 0.052  | 0.059  | 0.051  | 0.052  | t | 35777  | LEYTIV                     | Homo<br>sapiens                  |
| 1 | 1.00 | 1 | 1 | -0.01 | -0.01  | -0.015 | -0.01  | -0.01  | t | 33761  | KTLLSRFL<br>WWLCYL         | Homo<br>sapiens                  |
| 1 | 1.00 | 1 | 1 | 0.03  | 0.019  | 0.03   | 0.03   | 0.028  | t | 106494 | GYENPTYK<br>FFEQMQN        | Oryctola<br>gus<br>cuniculu<br>s |
| 1 | 1.00 | 1 | 1 | -0.02 | -0.022 | -0.018 | -0.017 | -0.02  | t | 22881  | GTVVAVG<br>PGR             | Mus<br>musculu<br>s              |
| 1 | 1.00 | 1 | 1 | 0.02  | 0.023  | 0.012  | 0.02   | 0.022  | t | 95198  | AAPTTS                     | Mus<br>musculu<br>s              |
| 1 | 1.00 | 1 | 1 | 0.01  | 0.01   | 0.012  | 0.01   | 0.008  | t | 7230   | CTTPAQG<br>NSMFPSC         | Mus<br>musculu<br>s              |
| 1 | 1.00 | 1 | 1 | 0     | 0.003  | -0.005 | 0      | -0.001 | t | 106327 | DDDKLEQI<br>RRDYTSGA       | Mus<br>musculu<br>s              |
| 1 | 1.00 | 1 | 1 | 0.03  | 0.03   | 0.029  | 0.031  | 0.031  | t | 58683  | SIQTKFAP                   | Sus<br>scrofa                    |
| 1 | 1.00 | 1 | 1 | 0     | 0.003  | 0.001  | 0      | -0.002 | t | 43894  | NFNGLTGT<br>GVLTPSSK<br>RF | Mus<br>musculu<br>s              |
| 1 | 1.00 | 1 | 1 | 0     | 0      | 0      | 0      | -0.002 | t | 70728  | VRGLYF                     | Mus<br>musculu<br>s              |
| 1 | 1.00 | 1 | 1 | 0.03  | 0.03   | 0.028  | 0.027  | 0.028  | t | 100571 | TPATPTPT<br>PKAA           | Homo<br>sapiens                  |
| 1 | 1.00 | 1 | 1 | 0.03  | 0.03   | 0.03   | 0.03   | 0.03   | t | 123526 | MVYEALD<br>CI              | Ovis<br>aries                    |
| 1 | 1.00 | 1 | 1 | 0     | 0      | -0.009 | 0      | -0.001 | t | 35810  | LFDGRDN<br>GAL             | Mus<br>musculu<br>s              |

|   |      |   |   |       |        |        |        |        |   |        |                              |                                  |
|---|------|---|---|-------|--------|--------|--------|--------|---|--------|------------------------------|----------------------------------|
| 1 | 1.00 | 1 | 1 | 0.02  | 0.02   | 0.02   | 0.02   | 0.02   | t | 67460  | TYSFVSLLS<br>PGAKQN          | Mus<br>musculu<br>s              |
| 1 | 1.00 | 1 | 1 | 0     | 0      | -0.011 | 0      | 0      | t | 95094  | IGFRGLDG<br>VHCTPTTD<br>SGVI | Rattus<br>norvegic<br>us         |
| 1 | 1.00 | 1 | 1 | -0.01 | -0.014 | -0.017 | -0.007 | -0.01  | t | 95874  | SQWGWG<br>GSTD               | Oryctola<br>gus<br>cuniculu<br>s |
| 1 | 1.00 | 1 | 1 | -0.01 | -0.008 | -0.01  | -0.007 | -0.011 | t | 96521  | KVTKEKPT<br>PP               | Homo<br>sapiens(<br>human)       |
| 1 | 1.00 | 1 | 1 | -0.02 | -0.02  | -0.012 | -0.02  | -0.019 | t | 115096 | PPSLLFLP                     | Mus<br>musculu<br>s              |
| 1 | 1.00 | 1 | 1 | 0.01  | 0.014  | 0      | 0.01   | 0.01   | t | 88617  | SGYDND<br>ALYASV             | Homo<br>sapiens                  |
| 1 | 1.00 | 1 | 1 | -0.05 | -0.054 | -0.052 | -0.047 | -0.052 | t | 95216  | AEGLYSML<br>VERD             | Oryctola<br>gus<br>cuniculu<br>s |
| 1 | 1.00 | 1 | 1 | -0.03 | -0.03  | -0.039 | -0.03  | -0.03  | t | 136003 | TRKDINTV<br>TTVA             | Homo<br>sapiens                  |
| 1 | 1.00 | 1 | 1 | 0.01  | 0.01   | 0.014  | 0.01   | 0.008  | t | 151817 | CLTSQAAS<br>QRLE             | Sus<br>scrofa                    |
| 1 | 1.00 | 1 | 1 | -0.01 | -0.012 | -0.015 | -0.011 | -0.01  | t | 58417  | SHSQWNK<br>PSKPKTN<br>MK     | Mus<br>musculu<br>s              |
| 1 | 1.00 | 1 | 1 | -0.01 | -0.014 | -0.015 | -0.011 | -0.01  | t | 58417  | SHSQWNK<br>PSKPKTN<br>MK     | Oryctola<br>gus<br>cuniculu<br>s |
| 1 | 1.00 | 1 | 1 | 0.01  | 0.012  | 0.002  | 0.011  | 0.01   | t | 14208  | ESLTTTSTA<br>LGKLQDVV        | Homo<br>sapiens                  |
| 1 | 1.00 | 1 | 1 | -0.01 | -0.01  | -0.01  | -0.01  | -0.01  | t | 5780   | AYFYPELF<br>RQ               | Homo<br>sapiens                  |
| 1 | 1.00 | 1 | 1 | 0.03  | 0.03   | 0.039  | 0.03   | 0.028  | t | 12225  | EGLTATTF<br>EEDGVAA          | Mus<br>musculu<br>s              |
| 1 | 1.00 | 1 | 1 | -0.01 | -0.003 | -0.002 | -0.007 | -0.013 | t | 68061  | VDRQYTIF<br>G                | Gallus<br>gallus                 |

|   |      |   |   |       |        |        |        |        |   |        |                            |                                  |
|---|------|---|---|-------|--------|--------|--------|--------|---|--------|----------------------------|----------------------------------|
| 1 | 1.00 | 1 | 1 | 0.01  | 0.012  | 0.007  | 0.011  | 0.012  | t | 61125  | SSIVYEAD<br>DVILHT         | Homo<br>sapiens                  |
| 1 | 1.00 | 1 | 1 | 0.01  | 0.01   | 0.004  | 0.01   | 0.01   | t | 32415  | KMVQVVY<br>D               | Homo<br>sapiens                  |
| 1 | 1.00 | 1 | 1 | 0.01  | 0.006  | 0.004  | 0.01   | 0.01   | t | 32415  | KMVQVVY<br>D               | Oryctola<br>gus<br>cuniculu<br>s |
| 1 | 1.00 | 1 | 1 | 0.04  | 0.038  | 0.04   | 0.047  | 0.041  | t | 123683 | QVPTTEVV<br>GTTPGQA<br>P   | Homo<br>sapiens                  |
| 1 | 1.00 | 1 | 1 | -0.01 | -0.006 | -0.007 | -0.009 | -0.01  | t | 7061   | CSQHLPYI<br>E              | Homo<br>sapiens                  |
| 1 | 1.00 | 1 | 1 | 0.01  | 0.01   | 0.01   | 0.01   | 0.008  | t | 51908  | QPQPFPS<br>QQP             | Mus<br>musculu<br>s              |
| 1 | 1.00 | 1 | 1 | -0.01 | -0.012 | -0.015 | -0.01  | -0.009 | t | 4710   | ASQKRPSQ<br>RHGSKY         | Rattus<br>norvegic<br>us         |
| 1 | 1.00 | 1 | 1 | 0.01  | 0.008  | 0.01   | 0.007  | 0.007  | t | 922    | AEGEFDYA<br>WDQTHQ<br>DPAK | Mus<br>musculu<br>s              |
| 1 | 1.00 | 1 | 1 | 0.06  | 0.06   | 0.06   | 0.06   | 0.06   | t | 106428 | FVEIYSP                    | Homo<br>sapiens                  |
| 1 | 1.00 | 1 | 1 | 0.06  | 0.06   | 0.06   | 0.06   | 0.06   | t | 106428 | FVEIYSP                    | Homo<br>sapiens                  |
| 1 | 1.00 | 1 | 1 | 0     | -0.002 | -0.001 | 0.003  | 0.002  | t | 54140  | RIEGGEIL                   | Anas<br>platyrhy<br>nchos        |
| 1 | 1.00 | 1 | 1 | 0.03  | 0.03   | 0.024  | 0.024  | 0.03   | t | 52180  | QQYPQQQ                    | Homo<br>sapiens                  |
| 1 | 1.00 | 1 | 1 | 0.01  | 0.01   | 0.017  | 0.01   | 0.007  | t | 132794 | DRLYAQYP<br>VPTP           | Mus<br>musculu<br>s              |
| 1 | 1.00 | 1 | 1 | 0.02  | 0.018  | 0.009  | 0.02   | 0.021  | t | 39485  | LSLRRQV<br>NEVA            | Oryctola<br>gus<br>cuniculu<br>s |
| 1 | 1.00 | 1 | 1 | 0.02  | 0.018  | 0.02   | 0.013  | 0.019  | t | 139618 | TGQLVHRF                   | Mus<br>musculu<br>s              |

|   |      |   |   |       |        |        |        |        |   |        |                              |                                  |
|---|------|---|---|-------|--------|--------|--------|--------|---|--------|------------------------------|----------------------------------|
| 1 | 1.00 | 1 | 1 | 0.01  | 0.01   | 0.002  | 0.01   | 0.01   | t | 80885  | DADIGNEY<br>DQVV             | Homo<br>sapiens                  |
| 1 | 1.00 | 1 | 1 | -0.01 | -0.01  | -0.01  | -0.008 | -0.01  | t | 135973 | PSKFTEPV<br>KDVM             | Homo<br>sapiens                  |
| 1 | 1.00 | 1 | 1 | 0.03  | 0.033  | 0.03   | 0.03   | 0.03   | t | 155333 | PADS                         | Mus<br>musculu<br>s              |
| 1 | 1.00 | 1 | 1 | 0     | 0.004  | -0.012 | 0.001  | 0.002  | t | 23048  | GVLSVDLS<br>LTVELKI          | Homo<br>sapiens                  |
| 1 | 1.00 | 1 | 1 | 0     | 0      | 0      | 0      | -0.001 | t | 9754   | DPRVRGLY<br>F                | Mus<br>musculu<br>s              |
| 1 | 1.00 | 1 | 1 | 0     | 0      | 0      | 0      | -0.001 | t | 9754   | DPRVRGLY<br>F                | Mus<br>musculu<br>s              |
| 1 | 1.00 | 1 | 1 | 0     | 0      | 0      | 0      | -0.001 | t | 9754   | DPRVRGLY<br>F                | Mus<br>musculu<br>s              |
| 1 | 1.00 | 1 | 1 | -0.01 | -0.01  | 0      | -0.01  | -0.011 | t | 95161  | TYGKFCIKP                    | Mus<br>musculu<br>s              |
| 1 | 1.00 | 1 | 1 | -0.01 | -0.01  | -0.008 | -0.006 | -0.01  | t | 118433 | ISIGYRYPPI<br>CLGRA          | Homo<br>sapiens                  |
| 1 | 1.00 | 1 | 1 | 0.02  | 0.02   | 0.022  | 0.027  | 0.019  | t | 104895 | LVEALYLV<br>CGERG            | Mus<br>musculu<br>s              |
| 1 | 1.00 | 1 | 1 | 0     | -0.003 | -0.012 | 0      | 0      | t | 30604  | KESHDQFL<br>QHTILFKG<br>FFTD | Oryctola<br>gus<br>cuniculu<br>s |
| 1 | 1.00 | 1 | 1 | 0     | -0.003 | -0.011 | -0.001 | -0.001 | t | 138175 | GAPPNGA<br>PPPPVDP           | Oryctola<br>gus<br>cuniculu<br>s |
| 1 | 1.00 | 1 | 1 | 0.07  | 0.07   | 0.07   | 0.07   | 0.07   | t | 79504  | ADCTTPT                      | Oryctola<br>gus<br>cuniculu<br>s |
| 1 | 1.00 | 1 | 1 | 0.03  | 0.03   | 0.03   | 0.03   | 0.03   | t | 123076 | DFMLYETL<br>D                | Ovis<br>aries                    |
| 1 | 1.00 | 1 | 1 | 0.03  | 0.03   | 0.03   | 0.03   | 0.03   | t | 49533  | PSTPGDNP<br>LV               | Homo<br>sapiens                  |

|   |      |   |   |       |        |        |        |        |   |        |                              |                                  |
|---|------|---|---|-------|--------|--------|--------|--------|---|--------|------------------------------|----------------------------------|
| 1 | 1.00 | 1 | 1 | 0.03  | 0.03   | 0.03   | 0.03   | 0.03   | t | 49533  | PSTPGDNP<br>LV               | Homo<br>sapiens                  |
| 1 | 1.00 | 1 | 1 | 0.01  | 0.01   | 0.01   | 0.01   | 0.01   | t | 114757 | CLLCAYSIE<br>F               | Homo<br>sapiens                  |
| 1 | 1.00 | 1 | 1 | 0     | 0      | -0.005 | 0      | 0      | t | 10868  | DYEDRYR<br>E                 | Mus<br>musculu<br>s              |
| 1 | 1.00 | 1 | 1 | 0.05  | 0.053  | 0.041  | 0.05   | 0.052  | t | 120886 | QDNEEFPE<br>KD               | Mus<br>musculu<br>s              |
| 1 | 1.00 | 1 | 1 | 0.04  | 0.04   | 0.045  | 0.04   | 0.04   | t | 28250  | IQWDGYA<br>RQ                | Mus<br>musculu<br>s              |
| 1 | 1.00 | 1 | 1 | -0.01 | -0.013 | -0.016 | -0.01  | -0.01  | t | 159024 | NKGAIIGL<br>MVGGVVI<br>A     | Oryctola<br>gus<br>cuniculu<br>s |
| 1 | 1.00 | 1 | 1 | 0     | -0.004 | 0      | 0.003  | 0      | t | 105851 | GTAPFEIH<br>ANRIVGFF<br>SKII | Oryctola<br>gus<br>cuniculu<br>s |
| 1 | 1.00 | 1 | 1 | 0.02  | 0.02   | 0.02   | 0.02   | 0.02   | t | 45538  | NQELAYFY<br>PE               | Homo<br>sapiens                  |
| 1 | 1.00 | 1 | 1 | -0.01 | -0.011 | -0.019 | -0.01  | -0.009 | t | 64752  | TLDHVLDH                     | Anas<br>platyrhy<br>nchos        |
| 1 | 1.00 | 1 | 1 | -0.01 | -0.008 | 0.002  | -0.007 | -0.01  | t | 8565   | DHSAPL                       | Homo<br>sapiens                  |
| 1 | 1.00 | 1 | 1 | 0.02  | 0.023  | 0.02   | 0.02   | 0.022  | t | 7532   | DAHHAAD                      | Mus<br>musculu<br>s              |
| 1 | 1.00 | 1 | 1 | 0.04  | 0.042  | 0.049  | 0.047  | 0.041  | t | 112348 | TEDLAVY                      | Homo<br>sapiens                  |
| 1 | 1.00 | 1 | 1 | 0.01  | 0.01   | 0.01   | 0.007  | 0.01   | t | 96755  | PTAPTKPT<br>YE               | Homo<br>sapiens(<br>human)       |
| 1 | 1.00 | 1 | 1 | 0.03  | 0.028  | 0.021  | 0.029  | 0.03   | t | 80408  | ANDVDNS<br>NPVVQ             | Rattus<br>norvegic<br>us         |
| 1 | 1.00 | 1 | 1 | 0.05  | 0.052  | 0.055  | 0.051  | 0.05   | t | 56272  | RVEESI                       | Homo<br>sapiens                  |

|   |      |   |   |       |        |        |        |        |   |        |                              |                                  |
|---|------|---|---|-------|--------|--------|--------|--------|---|--------|------------------------------|----------------------------------|
| 1 | 1.00 | 1 | 1 | -0.01 | -0.01  | -0.01  | -0.01  | -0.01  | t | 140823 | AGKGVDA<br>GKLG              | Oryctola<br>gus<br>cuniculu<br>s |
| 1 | 1.00 | 1 | 1 | -0.04 | -0.04  | -0.047 | -0.049 | -0.043 | t | 130922 | KGMLPDP<br>KNV               | Homo<br>sapiens                  |
| 1 | 1.00 | 1 | 1 | 0.02  | 0.02   | 0.02   | 0.02   | 0.02   | t | 127718 | KSTPQFT                      | Homo<br>sapiens                  |
| 1 | 1.00 | 1 | 1 | 0.02  | 0.02   | 0.02   | 0.02   | 0.02   | t | 117510 | GRGRGM<br>GRGNIFQK<br>R      | Homo<br>sapiens                  |
| 1 | 1.00 | 1 | 1 | 0     | 0      | 0      | 0      | 0      | t | 103378 | LPLLEKVG<br>AGKPLL           | Homo<br>sapiens                  |
| 1 | 1.00 | 1 | 1 | -0.03 | -0.028 | -0.03  | -0.033 | -0.033 | t | 106340 | DIMPCLHF<br>VKGE             | Homo<br>sapiens                  |
| 1 | 1.00 | 1 | 1 | 0.01  | 0.01   | 0.005  | 0.01   | 0.01   | t | 50442  | QDAYNAA<br>GGHNAVF<br>NFPPNG | Homo<br>sapiens                  |
| 1 | 1.00 | 1 | 1 | 0     | 0.003  | -0.011 | 0      | 0.001  | t | 79867  | INNLEVELI<br>RGT             | Mus<br>musculu<br>s              |
| 1 | 1.00 | 1 | 1 | 0     | -0.003 | 0      | 0      | -0.002 | t | 66841  | TTTCFRDT<br>DTGK             | Oryctola<br>gus<br>cuniculu<br>s |
| 1 | 1.00 | 1 | 1 | 0     | -0.008 | 0      | 0      | -0.002 | t | 21408  | GNDYEDR<br>YYRENNY<br>RYPNQ  | Mus<br>musculu<br>s              |
| 1 | 1.00 | 1 | 1 | -0.02 | -0.018 | -0.015 | -0.013 | -0.019 | t | 122179 | RQLGRGS                      | Homo<br>sapiens                  |
| 1 | 1.00 | 1 | 1 | 0.03  | 0.027  | 0.023  | 0.03   | 0.031  | t | 133862 | KLKKIDDL<br>DAKEN            | Oryctola<br>gus<br>cuniculu<br>s |
| 1 | 1.00 | 1 | 1 | 0.06  | 0.062  | 0.062  | 0.059  | 0.057  | t | 96823  | RKEEEEAE<br>DK               | Homo<br>sapiens                  |
| 1 | 1.00 | 1 | 1 | -0.05 | -0.048 | -0.062 | -0.049 | -0.05  | t | 20197  | GHWMDA<br>TFNTKTA            | Homo<br>sapiens                  |



|   |      |   |   |       |        |        |        |        |   |        |                       |                       |
|---|------|---|---|-------|--------|--------|--------|--------|---|--------|-----------------------|-----------------------|
| 1 | 1.00 | 1 | 1 | 0.03  | 0.03   | 0.03   | 0.03   | 0.03   | t | 79744  | AASSPDA               | Mus musculus          |
| 1 | 1.00 | 1 | 1 | 0.03  | 0.03   | 0.03   | 0.03   | 0.03   | t | 79744  | AASSPDA               | Mus musculus          |
| 1 | 1.00 | 1 | 1 | 0     | -0.004 | -0.007 | 0.003  | 0      | t | 96017  | YHLYNSQD HG           | Oryctolagus cuniculus |
| 1 | 1.00 | 1 | 1 | 0.04  | 0.042  | 0.045  | 0.04   | 0.04   | t | 117376 | TGALDVIR NFTLDMI      | Homo sapiens          |
| 1 | 1.00 | 1 | 1 | 0.03  | 0.03   | 0.03   | 0.03   | 0.03   | t | 7673   | DAVTE                 | Mus musculus          |
| 1 | 1.00 | 1 | 1 | 0.01  | 0.01   | 0.01   | 0.01   | 0.01   | t | 58148  | SGNLLF                | Homo sapiens          |
| 1 | 1.00 | 1 | 1 | 0.1   | 0.102  | 0.103  | 0.101  | 0.101  | t | 1157   | AESEE                 | Homo sapiens          |
| 1 | 1.00 | 1 | 1 | 0.03  | 0.026  | 0.027  | 0.03   | 0.03   | t | 141053 | LTPDTQYE FQVR         | Mus musculus          |
| 1 | 1.00 | 1 | 1 | -0.01 | -0.012 | -0.008 | -0.009 | -0.011 | t | 36372  | LHEQYYF               | Mus musculus          |
| 1 | 1.00 | 1 | 1 | 0.08  | 0.082  | 0.07   | 0.077  | 0.08   | t | 56145  | RTPEVDDE ALE          | Homo sapiens          |
| 1 | 1.00 | 1 | 1 | 0.01  | 0.01   | 0.01   | 0.011  | 0.011  | t | 51233  | QKPLK                 | Bos taurus            |
| 1 | 1.00 | 1 | 1 | 0.02  | 0.017  | 0.015  | 0.02   | 0.021  | t | 703    | ADLEKALE GAMC         | Oryctolagus cuniculus |
| 1 | 1.00 | 1 | 1 | 0     | -0.002 | -0.003 | 0.003  | 0      | t | 24425  | HPAKSMD V             | Anas platyrhynchos    |
| 1 | 1.00 | 1 | 1 | -0.02 | -0.022 | -0.034 | -0.021 | -0.02  | t | 70489  | VPSYSFIRA HDSEVQD LIA | Rattus norvegicus     |
| 1 | 1.00 | 1 | 1 | -0.01 | -0.01  | -0.015 | -0.007 | -0.01  | t | 62334  | SVSRARTR HLLLCL       | Homo sapiens          |

|   |      |   |   |       |        |        |        |        |   |        |                     |                          |
|---|------|---|---|-------|--------|--------|--------|--------|---|--------|---------------------|--------------------------|
| 1 | 1.00 | 1 | 1 | -0.02 | -0.018 | -0.02  | -0.013 | -0.02  | t | 131766 | YCQTWGS             | Homo sapiens             |
| 1 | 1.00 | 1 | 1 | 0.05  | 0.05   | 0.05   | 0.05   | 0.05   | t | 103731 | WISEYKEV<br>EILEADD | Homo sapiens             |
| 1 | 1.00 | 1 | 1 | 0.05  | 0.05   | 0.05   | 0.05   | 0.05   | t | 97760  | VTLPSSGGA<br>V      | Oryctolagus<br>cuniculus |
| 1 | 1.00 | 1 | 1 | 0.03  | 0.03   | 0.03   | 0.03   | 0.03   | t | 121842 | SGGVLLPC<br>YSFSWSC | Mus musculus             |
| 1 | 1.00 | 1 | 1 | 0.03  | 0.03   | 0.03   | 0.03   | 0.03   | t | 121842 | SGGVLLPC<br>YSFSWSC | Mus musculus             |
| 1 | 1.00 | 1 | 1 | 0     | 0      | -0.005 | 0      | 0      | t | 67039  | TVIYSKYG<br>GT      | Mus musculus             |
| 1 | 1.00 | 1 | 1 | -0.03 | -0.033 | -0.041 | -0.03  | -0.029 | t | 6540   | CLAVLLGA            | Oryctolagus<br>cuniculus |
| 1 | 1.00 | 1 | 1 | -0.01 | -0.01  | -0.023 | -0.017 | -0.01  | t | 141933 | KIENAAM<br>AIHLCFNN | Homo sapiens             |
| 1 | 1.00 | 1 | 1 | -0.01 | -0.008 | -0.025 | -0.009 | -0.009 | t | 32862  | KPRDTLPP<br>PLNRPPP | Homo sapiens             |
| 1 | 1.00 | 1 | 1 | 0.05  | 0.047  | 0.048  | 0.05   | 0.049  | t | 21933  | GQPQAQG<br>DGANA    | Oryctolagus<br>cuniculus |
| 1 | 1.00 | 1 | 1 | 0     | 0      | 0      | 0      | 0      | t | 101983 | PVYQQQP             | Mus musculus             |
| 1 | 1.00 | 1 | 1 | 0     | 0      | 0      | 0      | 0      | t | 101983 | PVYQQQP             | Mus musculus             |
| 1 | 1.00 | 1 | 1 | 0     | 0      | 0      | 0      | 0      | t | 101983 | PVYQQQP             | Mus musculus             |
| 1 | 1.00 | 1 | 1 | 0     | 0      | 0      | 0      | 0      | t | 2271   | AKQYNICC<br>KFKELLD | Mus musculus             |
| 1 | 1.00 | 1 | 1 | 0     | 0.002  | 0.008  | 0.001  | -0.002 | t | 29147  | ITWIGM              | Homo sapiens             |

|   |      |   |   |       |        |        |        |        |   |        |                 |              |
|---|------|---|---|-------|--------|--------|--------|--------|---|--------|-----------------|--------------|
| 1 | 1.00 | 1 | 1 | 0     | 0.002  | 0.008  | 0.001  | -0.002 | t | 29147  | ITWIGM          | Homo sapiens |
| 1 | 1.00 | 1 | 1 | 0     | 0.002  | 0.008  | 0.001  | -0.002 | t | 29147  | ITWIGM          | Homo sapiens |
| 1 | 1.00 | 1 | 1 | 0.03  | 0.032  | 0.031  | 0.028  | 0.028  | t | 106598 | LEAYAFDIAA      | Homo sapiens |
| 1 | 1.00 | 1 | 1 | -0.01 | -0.006 | -0.009 | -0.013 | -0.013 | t | 114732 | AEVDCSRFPN      | Homo sapiens |
| 1 | 1.00 | 1 | 1 | -0.01 | -0.006 | -0.009 | -0.013 | -0.013 | t | 114732 | AEVDCSRFPN      | Homo sapiens |
| 1 | 1.00 | 1 | 1 | 0     | 0.002  | 0      | 0      | -0.001 | t | 118579 | RDMLLANKVPAAARA | Homo sapiens |
| 1 | 1.00 | 1 | 1 | 0     | 0      | 0      | 0      | 0      | t | 135003 | HWDPFSL SAYFP   | Homo sapiens |
| 1 | 1.00 | 1 | 1 | 0     | 0      | 0      | 0      | 0      | t | 135002 | HWDPFSL SAYFP   | Homo sapiens |
| 1 | 1.00 | 1 | 1 | 0     | 0      | 0      | 0.004  | 0      | t | 144811 | VSWLSKEWAK      | Homo sapiens |
| 1 | 1.00 | 1 | 1 | 0     | 0      | 0      | 0.004  | 0      | t | 144783 | SHVVTMLDNF      | Homo sapiens |
| 1 | 1.00 | 1 | 1 | 0     | 0      | 0      | 0.004  | 0      | t | 144594 | ARGISRTKYW      | Homo sapiens |
| 1 | 1.00 | 1 | 1 | 0     | 0      | 0      | 0.004  | 0      | t | 144697 | IYRNLYWEGS      | Homo sapiens |
| 1 | 1.00 | 1 | 1 | 0     | 0      | 0      | 0.004  | 0      | t | 144614 | DMMYGGMRGM      | Homo sapiens |
| 1 | 1.00 | 1 | 1 | 0     | 0      | 0      | 0.004  | 0      | t | 144639 | FAQAYARGIS      | Homo sapiens |
| 1 | 1.00 | 1 | 1 | 0     | 0      | 0      | 0.004  | 0      | t | 144816 | WSHNFTNMLG      | Homo sapiens |
| 1 | 1.00 | 1 | 1 | 0     | 0      | 0      | 0.004  | 0      | t | 144619 | DYIWNTLNSG      | Homo sapiens |
| 1 | 1.00 | 1 | 1 | 0     | 0      | 0      | 0.004  | 0      | t | 144644 | FRQQHGKTVV      | Homo sapiens |
| 1 | 1.00 | 1 | 1 | 0     | 0      | 0      | 0.004  | 0      | t | 144823 | YWEGSGIGAI      | Homo sapiens |
| 1 | 1.00 | 1 | 1 | 0     | 0.003  | 0      | 0      | -0.002 | t | 135501 | SQWNKP          | Mus musculus |

|   |      |   |   |       |        |        |        |        |   |        |                              |                                  |
|---|------|---|---|-------|--------|--------|--------|--------|---|--------|------------------------------|----------------------------------|
| 1 | 1.00 | 1 | 1 | 0     | 0      | 0      | 0      | 0      | t | 144804 | TVFVKPPP<br>EKSW             | Mus<br>musculu<br>s              |
| 1 | 1.00 | 1 | 1 | 0.02  | 0.018  | 0.02   | 0.019  | 0.02   | t | 66397  | TSRFASLF<br>NLGPQQQ          | Mus<br>musculu<br>s              |
| 1 | 1.00 | 1 | 1 | 0.02  | 0.02   | 0.013  | 0.02   | 0.02   | t | 122719 | CGVDFEIK<br>AFATHSTD<br>VEED | Rattus<br>norvegic<br>us         |
| 1 | 1.00 | 1 | 1 | -0.01 | -0.01  | -0.01  | -0.01  | -0.01  | t | 15981  | FGGETFTP<br>DWMMEV           | Mus<br>musculu<br>s              |
| 1 | 1.00 | 1 | 1 | 0.03  | 0.03   | 0.03   | 0.03   | 0.029  | t | 107765 | CESAQRPF<br>GCC              | Mus<br>musculu<br>s              |
| 1 | 1.00 | 1 | 1 | 0.01  | 0.01   | 0.01   | 0.01   | 0.008  | t | 140610 | TQWQGF<br>SVA                | Mus<br>musculu<br>s              |
| 1 | 1.00 | 1 | 1 | 0.04  | 0.04   | 0.04   | 0.04   | 0.04   | t | 79413  | TCPLPDP<br>DSQYCE            | Mus<br>musculu<br>s              |
| 1 | 1.00 | 1 | 1 | 0.02  | 0.021  | 0.025  | 0.019  | 0.02   | t | 32680  | KPDSMP                       | Equus<br>caballus                |
| 1 | 1.00 | 1 | 1 | -0.01 | -0.01  | -0.011 | -0.006 | -0.011 | t | 125029 | EIERDTER<br>DRFLSADE<br>AV   | Homo<br>sapiens                  |
| 1 | 1.00 | 1 | 1 | -0.01 | -0.01  | -0.013 | -0.012 | -0.01  | t | 60914  | SSATK                        | Homo<br>sapiens                  |
| 1 | 1.00 | 1 | 1 | 0.05  | 0.05   | 0.039  | 0.05   | 0.05   | t | 42646  | MSRIAAG<br>DLESSVDD<br>PRSEE | Homo<br>sapiens                  |
| 1 | 1.00 | 1 | 1 | -0.02 | -0.02  | -0.02  | -0.02  | -0.022 | t | 123010 | AGAMIPP<br>PPS               | Oryctola<br>gus<br>cuniculu<br>s |
| 1 | 1.00 | 1 | 1 | -0.03 | -0.032 | -0.024 | -0.029 | -0.029 | t | 79042  | PKSKPFA                      | Mus<br>musculu<br>s              |
| 1 | 1.00 | 1 | 1 | -0.01 | -0.008 | -0.01  | -0.01  | -0.01  | t | 71965  | VWVTPVI<br>G                 | Homo<br>sapiens                  |
| 1 | 1.00 | 1 | 1 | -0.01 | -0.014 | -0.01  | -0.009 | -0.01  | t | 135606 | YSSKKLC                      | Oryctola<br>gus<br>cuniculu<br>s |

|   |      |   |   |       |        |        |        |        |   |        |                            |                                  |
|---|------|---|---|-------|--------|--------|--------|--------|---|--------|----------------------------|----------------------------------|
| 1 | 1.00 | 1 | 1 | -0.03 | -0.028 | -0.03  | -0.027 | -0.03  | t | 96489  | KPTPPVKP<br>TA             | Homo<br>sapiens(<br>human)       |
| 1 | 1.00 | 1 | 1 | 0.03  | 0.027  | 0.017  | 0.03   | 0.032  | t | 137939 | NVLSADFT                   | Oryctola<br>gus<br>cuniculu<br>s |
| 1 | 1.00 | 1 | 1 | -0.02 | -0.02  | -0.02  | -0.02  | -0.02  | t | 156945 | QLHTSI                     | Gallus<br>gallus                 |
| 1 | 1.00 | 1 | 1 | 0.07  | 0.07   | 0.07   | 0.07   | 0.07   | t | 153815 | CYEQLNDS<br>SEEDEI         | Oryctola<br>gus<br>cuniculu<br>s |
| 1 | 1.00 | 1 | 1 | 0.01  | 0.014  | 0.005  | 0.01   | 0.01   | t | 57062  | SAYTPAYY<br>TKDTNNN<br>LTL | Homo<br>sapiens                  |
| 1 | 1.00 | 1 | 1 | 0.03  | 0.032  | 0.039  | 0.037  | 0.03   | t | 112338 | SVLYSSD                    | Homo<br>sapiens                  |
| 1 | 1.00 | 1 | 1 | 0     | 0.002  | -0.005 | 0.001  | 0      | t | 142055 | VKDTPRLI<br>KLIKNS         | Homo<br>sapiens                  |
| 1 | 1.00 | 1 | 1 | 0     | 0      | 0      | 0      | -0.002 | t | 27998  | IPQQPQQ<br>PFP             | Mus<br>musculu<br>s              |
| 1 | 1.00 | 1 | 1 | 0     | 0.003  | 0.008  | 0      | 0      | t | 95051  | YSQFEKSY                   | Mus<br>musculu<br>s              |
| 1 | 1.00 | 1 | 1 | -0.04 | -0.038 | -0.04  | -0.034 | -0.04  | t | 138190 | HNAKTKL                    | Homo<br>sapiens                  |
| 1 | 1.00 | 1 | 1 | 0.02  | 0.02   | 0.02   | 0.02   | 0.02   | t | 31404  | KIQRDEDS<br>YE             | Homo<br>sapiens                  |
| 1 | 1.00 | 1 | 1 | 0     | 0.002  | 0.001  | -0.002 | -0.002 | t | 106529 | ICDRSYTTR<br>R             | Homo<br>sapiens                  |
| 1 | 1.00 | 1 | 1 | -0.02 | -0.022 | -0.018 | -0.021 | -0.02  | t | 55270  | RPPRYLAN<br>Q              | Mus<br>musculu<br>s              |
| 1 | 1.00 | 1 | 1 | -0.01 | -0.012 | -0.015 | -0.007 | -0.008 | t | 105090 | AIIGLMVG<br>GVVIA          | Mus<br>musculu<br>s              |

|   |      |   |   |       |        |        |        |        |   |        |                             |                       |
|---|------|---|---|-------|--------|--------|--------|--------|---|--------|-----------------------------|-----------------------|
| 1 | 1.00 | 1 | 1 | 0.04  | 0.042  | 0.04   | 0.04   | 0.04   | t | 118011 | LYKEKALS                    | Homo sapiens          |
| 1 | 1.00 | 1 | 1 | -0.03 | -0.03  | -0.03  | -0.03  | -0.03  | t | 145827 | IIPKVEGK                    | Mus musculus          |
| 1 | 1.00 | 1 | 1 | -0.01 | -0.01  | -0.01  | -0.01  | -0.012 | t | 35528  | LEIVPNSAE                   | Homo sapiens          |
| 1 | 1.00 | 1 | 1 | 0     | 0      | 0      | 0      | -0.002 | t | 63756  | TFTNKLKE<br>KHTDLGK         | Mus musculus          |
| 1 | 1.00 | 1 | 1 | 0.03  | 0.03   | 0.032  | 0.03   | 0.028  | t | 118577 | RCPAKPEE<br>EGMMINI         | Homo sapiens          |
| 1 | 1.00 | 1 | 1 | 0.04  | 0.037  | 0.029  | 0.04   | 0.04   | t | 10123  | DSGASSTA<br>SSSH            | Oryctolagus cuniculus |
| 1 | 1.00 | 1 | 1 | 0     | 0.002  | -0.002 | 0.001  | 0      | t | 23404  | GYLPISGE<br>MEKVT           | Homo sapiens          |
| 1 | 1.00 | 1 | 1 | -0.01 | -0.01  | -0.017 | -0.01  | -0.011 | t | 106375 | EDHAGTY<br>GLGDRK           | Mus musculus          |
| 1 | 1.00 | 1 | 1 | -0.03 | -0.028 | -0.03  | -0.023 | -0.029 | t | 131075 | SQSYPEPA<br>RGSVPMP         | Homo sapiens          |
| 1 | 1.00 | 1 | 1 | 0.03  | 0.03   | 0.025  | 0.03   | 0.03   | t | 29812  | KAGSTVYA<br>VTAVTSIFS<br>VG | Homo sapiens          |
| 1 | 1.00 | 1 | 1 | 0.01  | 0.01   | 0.032  | 0.01   | 0.006  | t | 144622 | EDVGSNK                     | Mus musculus          |
| 1 | 1.00 | 1 | 1 | -0.01 | -0.014 | -0.013 | -0.011 | -0.01  | t | 39916  | LTGISICNP<br>GSSLC          | Oryctolagus cuniculus |
| 1 | 1.00 | 1 | 1 | 0     | 0      | -0.006 | 0      | 0      | t | 159172 | TTDSGKLV<br>TDWCCRS<br>C    | Mus musculus          |
| 1 | 1.00 | 1 | 1 | 0.01  | 0.01   | 0.01   | 0.01   | 0.01   | t | 124720 | SILPYGDS<br>MDRIEK          | Homo sapiens          |
| 1 | 1.00 | 1 | 1 | 0.04  | 0.043  | 0.035  | 0.04   | 0.04   | t | 49006  | PQGQGV<br>T                 | Mus musculus          |
| 1 | 1.00 | 1 | 1 | 0     | 0      | 0      | 0      | 0      | t | 133722 | TSKSKYPL<br>VV              | Mus musculus          |

|   |      |   |   |       |        |        |        |        |   |        |                             |                              |
|---|------|---|---|-------|--------|--------|--------|--------|---|--------|-----------------------------|------------------------------|
| 1 | 1.00 | 1 | 1 | 0     | 0      | -0.007 | 0      | 0      | t | 158999 | LWGDGILE<br>SDLIIPVT        | Mus<br>musculus              |
| 1 | 1.00 | 1 | 1 | 0.01  | 0.008  | 0.01   | 0.003  | 0.008  | t | 128612 | FDSHY                       | Mus<br>musculus              |
| 1 | 1.00 | 1 | 1 | 0     | 0      | -0.009 | -0.007 | 0      | t | 111013 | RTGYIPLG<br>TRPPT           | Homo<br>sapiens              |
| 1 | 1.00 | 1 | 1 | -0.04 | -0.04  | -0.04  | -0.04  | -0.04  | t | 79249  | HFQYRM                      | Mus<br>musculus              |
| 1 | 1.00 | 1 | 1 | 0.02  | 0.013  | 0.013  | 0.019  | 0.02   | t | 91203  | DNLAPMS<br>DGAVQPD<br>G     | Oryctola<br>gus<br>cuniculus |
| 1 | 1.00 | 1 | 1 | -0.02 | -0.018 | -0.016 | -0.013 | -0.019 | t | 144697 | IYRNLYWE<br>GS              | Homo<br>sapiens              |
| 1 | 1.00 | 1 | 1 | 0     | -0.003 | -0.017 | 0      | 0.004  | t | 23252  | GWGQPH<br>GGGGWG<br>QPH     | Oryctola<br>gus<br>cuniculus |
| 1 | 1.00 | 1 | 1 | 0.07  | 0.07   | 0.07   | 0.07   | 0.07   | t | 52     | AAANTSDS<br>QKE             | Homo<br>sapiens              |
| 1 | 1.00 | 1 | 1 | 0.01  | 0.01   | 0.01   | 0.01   | 0.01   | t | 131983 | NKQEEAW<br>INPFVKQF         | Homo<br>sapiens              |
| 1 | 1.00 | 1 | 1 | 0.01  | 0.01   | 0.01   | 0.01   | 0.01   | t | 106995 | WMTYPDS<br>LIISA            | Mus<br>musculus              |
| 1 | 1.00 | 1 | 1 | 0.01  | 0.01   | -0.001 | 0.01   | 0.011  | t | 15402  | FDIAKFAS<br>NTDWEGK<br>DSKG | Oryctola<br>gus<br>cuniculus |
| 1 | 1.00 | 1 | 1 | 0.05  | 0.046  | 0.05   | 0.049  | 0.05   | t | 15775  | FEYVDTYG<br>DNAG            | Oryctola<br>gus<br>cuniculus |
| 1 | 1.00 | 1 | 1 | 0.02  | 0.02   | 0.015  | 0.02   | 0.02   | t | 54345  | RKFNDVV<br>QSDMKH<br>WPFKVT | Homo<br>sapiens              |
| 1 | 1.00 | 1 | 1 | -0.01 | -0.01  | -0.012 | -0.01  | -0.01  | t | 45506  | NPVIPFKD<br>GIYFAATE<br>K   | Homo<br>sapiens              |
| 1 | 1.00 | 1 | 1 | 0.04  | 0.04   | 0.038  | 0.04   | 0.04   | t | 6942   | CRSACVYF<br>TEYENSG         | Mus<br>musculus              |

|   |      |   |   |       |        |        |        |        |   |        |                            |                              |
|---|------|---|---|-------|--------|--------|--------|--------|---|--------|----------------------------|------------------------------|
| 1 | 1.00 | 1 | 1 | 0.02  | 0.023  | 0.013  | 0.02   | 0.022  | t | 150858 | ISSLYNLVKS<br>SS           | Mus<br>musculus              |
| 1 | 1.00 | 1 | 1 | 0.02  | 0.017  | 0.021  | 0.02   | 0.019  | t | 5771   | AYFLYQQ<br>QGRLDKL         | Oryctola<br>gus<br>cuniculus |
| 1 | 1.00 | 1 | 1 | -0.02 | -0.022 | -0.013 | -0.019 | -0.02  | t | 78994  | HQLDPA                     | Mus<br>musculus              |
| 1 | 1.00 | 1 | 1 | 0.01  | 0.008  | 0.003  | 0.013  | 0.012  | t | 106550 | IWYINCFG<br>CETHAML        | Mus<br>musculus              |
| 1 | 1.00 | 1 | 1 | 0     | 0      | 0      | 0      | -0.001 | t | 119622 | NVNHKPS<br>N               | Homo<br>sapiens              |
| 1 | 1.00 | 1 | 1 | 0.02  | 0.02   | 0.008  | 0.02   | 0.023  | t | 150200 | FGEHKQEK<br>DLEYGAC        | Mus<br>musculus              |
| 1 | 1.00 | 1 | 1 | 0.03  | 0.03   | 0.03   | 0.03   | 0.032  | t | 78637  | EKSLTSLSE                  | Oryctola<br>gus<br>cuniculus |
| 1 | 1.00 | 1 | 1 | 0.01  | 0.01   | 0.004  | 0.01   | 0.01   | t | 22799  | GTRIRFKD<br>DTSFED         | Homo<br>sapiens              |
| 1 | 1.00 | 1 | 1 | 0     | -0.002 | 0      | 0.001  | 0      | t | 149415 | PQQLPQFE<br>EI             | Mus<br>musculus              |
| 1 | 1.00 | 1 | 1 | -0.02 | -0.02  | -0.02  | -0.02  | -0.019 | t | 6524   | CKTC                       | Mus<br>musculus              |
| 1 | 1.00 | 1 | 1 | 0     | 0      | 0.002  | 0      | -0.002 | t | 34329  | KWSDKPK                    | Mus<br>musculus              |
| 1 | 1.00 | 1 | 1 | -0.01 | -0.01  | -0.01  | -0.01  | -0.011 | t | 131581 | PDSRAVTC<br>GMASLSA<br>EKV | Mus<br>musculus              |
| 1 | 1.00 | 1 | 1 | 0.03  | 0.027  | 0.023  | 0.03   | 0.031  | t | 76485  | YYALDVYA<br>YDVT           | Oryctola<br>gus<br>cuniculus |
| 1 | 1.00 | 1 | 1 | -0.01 | -0.008 | -0.01  | -0.009 | -0.01  | t | 42007  | MLMRTDP<br>FRELDRA         | Homo<br>sapiens              |



|   |      |   |   |       |        |        |        |        |   |        |                              |                       |
|---|------|---|---|-------|--------|--------|--------|--------|---|--------|------------------------------|-----------------------|
| 1 | 1.00 | 1 | 1 | -0.01 | -0.008 | -0.01  | -0.009 | -0.01  | t | 42007  | MLMRTDP<br>FRELD RFA         | Homo sapiens          |
| 1 | 1.00 | 1 | 1 | -0.04 | -0.037 | -0.039 | -0.04  | -0.04  | t | 1402   | AFSVAAPV<br>TVTR             | Mus musculus          |
| 1 | 1.00 | 1 | 1 | 0.03  | 0.03   | 0.023  | 0.03   | 0.031  | t | 131108 | TGVEAAA<br>ASAI S VAR        | Homo sapiens          |
| 1 | 1.00 | 1 | 1 | -0.01 | -0.01  | -0.01  | -0.01  | -0.012 | t | 103830 | CHAVKVG<br>NPSC              | Oryctolagus cuniculus |
| 1 | 1.00 | 1 | 1 | 0.01  | 0.01   | 0.01   | 0.01   | 0.012  | t | 127856 | TDVRYKD                      | Mus musculus          |
| 1 | 1.00 | 1 | 1 | 0     | 0      | 0      | 0      | 0      | t | 135755 | SALVLQYL                     | Homo sapiens          |
| 1 | 1.00 | 1 | 1 | 0     | 0      | 0      | 0      | 0      | t | 123092 | DLPTTMK<br>MW                | Ovis aries            |
| 1 | 1.00 | 1 | 1 | -0.03 | -0.032 | -0.036 | -0.027 | -0.03  | t | 58942  | SKSSRC                       | Mus musculus          |
| 1 | 1.00 | 1 | 1 | -0.01 | -0.01  | -0.01  | -0.01  | -0.01  | t | 16362  | FKEKVLGL<br>LQRATQ           | Homo sapiens          |
| 1 | 1.00 | 1 | 1 | 0.01  | 0.01   | -0.002 | 0.01   | 0.011  | t | 104520 | IAKEQENK<br>ETIGTLKKI<br>LDE | Rattus norvegicus     |
| 1 | 1.00 | 1 | 1 | -0.02 | -0.024 | -0.02  | -0.017 | -0.021 | t | 19737  | GGGAGAG<br>GAGAGGG<br>GR     | Oryctolagus cuniculus |
| 1 | 1.00 | 1 | 1 | 0.02  | 0.018  | 0.009  | 0.02   | 0.021  | t | 39485  | LSLLRRQV<br>NEVA             | Oryctolagus cuniculus |
| 1 | 1.00 | 1 | 1 | 0.02  | 0.027  | 0.02   | 0.02   | 0.02   | t | 39091  | LRGDLQVL<br>AQ               | Cavia porcellus       |
| 1 | 1.00 | 1 | 1 | 0.04  | 0.04   | 0.042  | 0.04   | 0.039  | t | 119914 | GSVVAINP<br>ESDQPDLS         | Mus musculus          |

|   |      |   |   |       |        |        |        |        |   |        |                              |                                  |
|---|------|---|---|-------|--------|--------|--------|--------|---|--------|------------------------------|----------------------------------|
| 1 | 1.00 | 1 | 1 | 0.01  | 0.01   | 0.023  | 0.018  | 0.007  | t | 98824  | IIAEKTKIP<br>A               | Homo<br>sapiens                  |
| 1 | 1.00 | 1 | 1 | 0.03  | 0.03   | 0.03   | 0.03   | 0.032  | t | 43746  | NESKYSNT                     | Mus<br>musculu<br>s              |
| 1 | 1.00 | 1 | 1 | 0.01  | 0.013  | -0.001 | 0.01   | 0.013  | t | 111309 | GDTPTLHE<br>YMLDLQ           | Mus<br>musculu<br>s              |
| 1 | 1.00 | 1 | 1 | 0.01  | 0.01   | 0.01   | 0.01   | 0.01   | t | 72088  | VYLLPRRG                     | Homo<br>sapiens                  |
| 1 | 1.00 | 1 | 1 | 0.04  | 0.04   | 0.045  | 0.046  | 0.043  | t | 115671 | AAMEL                        | Homo<br>sapiens                  |
| 1 | 1.00 | 1 | 1 | 0.02  | 0.018  | 0.013  | 0.02   | 0.019  | t | 123016 | AIYENEIHA<br>LWADLP          | Trichosu<br>rus<br>vulpecul<br>a |
| 1 | 1.00 | 1 | 1 | -0.01 | -0.012 | -0.03  | -0.017 | -0.01  | t | 128115 | SSHRGNICI<br>GATNYVA<br>DN   | Mus<br>musculu<br>s              |
| 1 | 1.00 | 1 | 1 | -0.01 | -0.008 | -0.019 | -0.01  | -0.009 | t | 51474  | QLPNVGIT<br>QGIV             | Ovis<br>aries                    |
| 1 | 1.00 | 1 | 1 | 0.01  | 0.012  | 0.007  | 0.011  | 0.008  | t | 35244  | LDNPLENP<br>SSFLDLVA<br>RIKN | Homo<br>sapiens                  |
| 1 | 1.00 | 1 | 1 | 0     | -0.002 | 0.003  | 0.003  | 0      | t | 52094  | QQPP                         | Mus<br>musculu<br>s              |
| 1 | 1.00 | 1 | 1 | -0.04 | -0.038 | -0.034 | -0.033 | -0.038 | t | 123643 | PYMPPPG<br>M                 | Homo<br>sapiens                  |
| 1 | 1.00 | 1 | 1 | 0.01  | 0.013  | 0.008  | 0.01   | 0.01   | t | 95132  | PYVTYG                       | Mus<br>musculu<br>s              |
| 1 | 1.00 | 1 | 1 | -0.01 | -0.008 | -0.01  | -0.009 | -0.01  | t | 117018 | KIVMFWH<br>EPVYA             | Homo<br>sapiens                  |
| 1 | 1.00 | 1 | 1 | 0.03  | 0.032  | 0.015  | 0.027  | 0.03   | t | 60424  | SQEIVQNE<br>SGTEEILE         | Homo<br>sapiens                  |

|   |      |   |   |       |        |       |        |        |   |        |                            |                                  |
|---|------|---|---|-------|--------|-------|--------|--------|---|--------|----------------------------|----------------------------------|
| 1 | 1.00 | 1 | 1 | 0     | 0.004  | 0.008 | 0.003  | -0.002 | t | 16114  | FHISCLTFG<br>RET           | Homo<br>sapiens                  |
| 1 | 1.00 | 1 | 1 | 0     | 0.001  | 0.008 | 0.003  | -0.002 | t | 16114  | FHISCLTFG<br>RET           | Homo<br>sapiens                  |
| 1 | 1.00 | 1 | 1 | 0     | 0      | 0     | 0      | -0.002 | t | 133722 | TSKSKYPL<br>VV             | Mus<br>musculu<br>s              |
| 1 | 1.00 | 1 | 1 | 0.02  | 0.022  | 0.018 | 0.021  | 0.02   | t | 38330  | LNRSGGN<br>YTKTDDEA        | Homo<br>sapiens                  |
| 1 | 1.00 | 1 | 1 | 0.03  | 0.026  | 0.028 | 0.027  | 0.03   | t | 120503 | ENKIFADDI<br>DIS           | Oryctola<br>gus<br>cuniculu<br>s |
| 1 | 1.00 | 1 | 1 | 0.03  | 0.028  | 0.028 | 0.027  | 0.03   | t | 120503 | ENKIFADDI<br>DIS           | Rattus<br>norvegic<br>us         |
| 1 | 1.00 | 1 | 1 | -0.01 | -0.006 | -0.01 | -0.009 | -0.01  | t | 60662  | SRGAPG                     | Homo<br>sapiens                  |
| 1 | 1.00 | 1 | 1 | -0.01 | -0.02  | -0.01 | -0.009 | -0.01  | t | 60662  | SRGAPG                     | Homo<br>sapiens                  |
| 1 | 1.00 | 1 | 1 | 0.04  | 0.04   | 0.035 | 0.037  | 0.039  | t | 115728 | EPFTESQS<br>LT             | Homo<br>sapiens                  |
| 1 | 1.00 | 1 | 1 | 0.02  | 0.028  | 0.02  | 0.02   | 0.018  | t | 136647 | SNNADYK<br>QSLLL           | Gallus<br>gallus                 |
| 1 | 1.00 | 1 | 1 | 0.01  | 0.01   | 0.01  | 0.01   | 0.01   | t | 123125 | EFPKLKEFK                  | Ovis<br>aries                    |
| 1 | 1.00 | 1 | 1 | 0.06  | 0.058  | 0.048 | 0.053  | 0.059  | t | 108170 | TTANPSCP<br>EGT            | Rattus<br>norvegic<br>us         |
| 1 | 1.00 | 1 | 1 | 0.03  | 0.028  | 0.022 | 0.029  | 0.03   | t | 17993  | FTKDTQTG<br>MSGQTTP        | Mus<br>musculu<br>s              |
| 1 | 1.00 | 1 | 1 | 0     | 0      | 0.002 | 0.001  | 0.001  | t | 65678  | TPPAYR                     | Mus<br>musculu<br>s              |
| 1 | 1.00 | 1 | 1 | 0.04  | 0.04   | 0.043 | 0.04   | 0.04   | t | 125250 | SDEFNPCE<br>DIMGYK         | Mus<br>musculu<br>s              |
| 1 | 1.00 | 1 | 1 | 0.01  | 0.012  | 0.003 | 0.011  | 0.01   | t | 56796  | SAGGQLFY<br>SRPVVSAN<br>GE | Homo<br>sapiens                  |

|   |      |   |   |       |        |        |        |        |   |        |                             |                            |
|---|------|---|---|-------|--------|--------|--------|--------|---|--------|-----------------------------|----------------------------|
| 1 | 1.00 | 1 | 1 | 0.03  | 0.032  | 0.028  | 0.033  | 0.029  | t | 48870  | PPPPSSPT<br>HDPDSD<br>PQIPP | Homo<br>sapiens            |
| 1 | 1.00 | 1 | 1 | 0.02  | 0.02   | 0.022  | 0.02   | 0.019  | t | 5962   | CAALASLF<br>LSLGPQQK        | Mus<br>musculu<br>s        |
| 1 | 1.00 | 1 | 1 | -0.04 | -0.038 | -0.047 | -0.039 | -0.04  | t | 97117  | YIQMKRIA<br>VG              | Homo<br>sapiens(<br>human) |
| 1 | 1.00 | 1 | 1 | 0.05  | 0.046  | 0.049  | 0.05   | 0.05   | t | 123849 | WQDE                        | Mus<br>musculu<br>s        |
| 1 | 1.00 | 1 | 1 | -0.03 | -0.03  | -0.03  | -0.03  | -0.03  | t | 22127  | GRLHLND<br>RV               | Homo<br>sapiens            |
| 1 | 1.00 | 1 | 1 | 0.02  | 0.018  | 0.02   | 0.019  | 0.018  | t | 150978 | EKNVTVTH<br>SVNLLED         | Mus<br>musculu<br>s        |
| 1 | 1.00 | 1 | 1 | 0.04  | 0.043  | 0.045  | 0.04   | 0.04   | t | 138153 | DGDYGA                      | Mus<br>musculu<br>s        |
| 1 | 1.00 | 1 | 1 | 0.03  | 0.035  | 0.038  | 0.027  | 0.028  | t | 157280 | FSGFDAEF<br>LADA            | Homo<br>sapiens            |
| 1 | 1.00 | 1 | 1 | 0     | 0      | 0      | 0      | -0.002 | t | 30262  | KDTNNN                      | Mus<br>musculu<br>s        |
| 1 | 1.00 | 1 | 1 | -0.03 | -0.028 | -0.03  | -0.029 | -0.03  | t | 48005  | PIVATNW<br>QK               | Homo<br>sapiens            |
| 1 | 1.00 | 1 | 1 | -0.03 | -0.026 | -0.03  | -0.029 | -0.03  | t | 48005  | PIVATNW<br>QK               | Homo<br>sapiens            |
| 1 | 1.00 | 1 | 1 | -0.03 | -0.028 | -0.03  | -0.023 | -0.029 | t | 131075 | SQSYPEPA<br>RGSVPMP         | Homo<br>sapiens            |
| 1 | 1.00 | 1 | 1 | -0.02 | -0.017 | -0.02  | -0.02  | -0.02  | t | 131346 | AIPDRFS                     | Mus<br>musculu<br>s        |
| 1 | 1.00 | 1 | 1 | 0     | 0      | -0.004 | 0      | 0      | t | 6139   | CDSSDRPR<br>VYTIT           | Mus<br>musculu<br>s        |

|   |      |   |   |       |        |        |        |        |   |        |                         |                          |
|---|------|---|---|-------|--------|--------|--------|--------|---|--------|-------------------------|--------------------------|
| 1 | 1.00 | 1 | 1 | 0     | 0.008  | -0.004 | 0      | 0      | t | 6139   | CDSSDRPR<br>VYTIT       | Gallus<br>gallus         |
| 1 | 1.00 | 1 | 1 | 0.01  | 0.01   | 0.01   | 0.01   | 0.01   | t | 99332  | IGTTKQ                  | Equus<br>caballus        |
| 1 | 1.00 | 1 | 1 | 0     | 0.003  | 0.003  | -0.001 | -0.001 | t | 157189 | EFRHDSGY                | Mus<br>musculu<br>s      |
| 1 | 1.00 | 1 | 1 | 0     | -0.002 | 0      | 0.003  | 0      | t | 69271  | VKMAETC<br>PIFYDVF      | Mus<br>musculu<br>s      |
| 1 | 1.00 | 1 | 1 | 0     | -0.008 | 0      | 0.003  | 0      | t | 20064  | GGVATY                  | Macaca                   |
| 1 | 1.00 | 1 | 1 | 0     | -0.002 | 0      | 0.003  | 0      | t | 31580  | KKIQDCYV<br>ENGLIS      | Mus<br>musculu<br>s      |
| 1 | 1.00 | 1 | 1 | 0     | -0.002 | 0      | 0.003  | 0      | t | 12408  | EICPAVKR<br>DVDLFLTG    | Mus<br>musculu<br>s      |
| 1 | 1.00 | 1 | 1 | 0.01  | 0.013  | 0.001  | 0.01   | 0.012  | t | 79963  | PGSSPME<br>VMLRA        | Mus<br>musculu<br>s      |
| 1 | 1.00 | 1 | 1 | -0.03 | -0.03  | -0.035 | -0.03  | -0.031 | t | 153366 | CFRKHPEA<br>TYSR        | Mus<br>musculu<br>s      |
| 1 | 1.00 | 1 | 1 | 0.01  | 0.01   | 0.01   | 0.01   | 0.009  | t | 103838 | DAEFRHDS<br>GYEV        | Mus<br>musculu<br>s      |
| 1 | 1.00 | 1 | 1 | 0     | 0.004  | 0      | 0.001  | -0.001 | t | 23068  | GVNLEDP<br>ASRDL        | Homo<br>sapiens          |
| 1 | 1.00 | 1 | 1 | 0.04  | 0.039  | 0.034  | 0.039  | 0.04   | t | 4228   | ARQQTVS<br>ALEDKLA      | Myodes<br>glareolu<br>s  |
| 1 | 1.00 | 1 | 1 | 0.03  | 0.028  | 0.018  | 0.039  | 0.037  | t | 107242 | SQTTANPS<br>CPEGT       | Rattus<br>norvegic<br>us |
| 1 | 1.00 | 1 | 1 | 0.03  | 0.028  | 0.018  | 0.039  | 0.037  | t | 107242 | SQTTANPS<br>CPEGT       | Rattus<br>norvegic<br>us |
| 1 | 1.00 | 1 | 1 | 0.03  | 0.032  | 0.022  | 0.027  | 0.028  | t | 114283 | CQIESWD<br>HNDQQFQ<br>C | Homo<br>sapiens          |
| 1 | 1.00 | 1 | 1 | 0.03  | 0.028  | 0.026  | 0.023  | 0.028  | t | 14009  | ERKIKV                  | Mus<br>musculu<br>s      |

|   |      |   |   |       |        |        |        |        |   |        |                              |                                  |
|---|------|---|---|-------|--------|--------|--------|--------|---|--------|------------------------------|----------------------------------|
| 1 | 1.00 | 1 | 1 | 0     | 0      | -0.002 | 0      | -0.003 | t | 19868  | GGGWGQ<br>PHGGGW<br>GQPH     | Mus<br>musculu<br>s              |
| 1 | 1.00 | 1 | 1 | -0.01 | -0.01  | -0.01  | -0.01  | -0.012 | t | 144663 | GREGYPA<br>DGGGCKIT<br>CFL   | Oryctola<br>gus<br>cuniculu<br>s |
| 1 | 1.00 | 1 | 1 | -0.01 | -0.013 | -0.01  | -0.01  | -0.012 | t | 144663 | GREGYPA<br>DGGGCKIT<br>CFL   | Oryctola<br>gus<br>cuniculu<br>s |
| 1 | 1.00 | 1 | 1 | 0     | 0      | 0.002  | 0.002  | 0      | t | 50477  | QDIQPAV<br>QASWPKV           | Homo<br>sapiens                  |
| 1 | 1.00 | 1 | 1 | -0.02 | -0.02  | -0.018 | -0.018 | -0.02  | t | 55625  | RRKAMLQ<br>DMA               | Homo<br>sapiens                  |
| 1 | 1.00 | 1 | 1 | -0.01 | -0.01  | -0.01  | -0.01  | -0.01  | t | 2378   | ALAELATK<br>TFGSSG           | Homo<br>sapiens                  |
| 1 | 1.00 | 1 | 1 | -0.03 | -0.032 | -0.03  | -0.027 | -0.03  | t | 110468 | YYVLHLCL<br>AATKYPLL<br>KLLG | Homo<br>sapiens                  |
| 1 | 1.00 | 1 | 1 | -0.02 | -0.02  | -0.025 | -0.02  | -0.019 | t | 14447  | ETKRKDGD                     | Mus<br>musculu<br>s              |
| 1 | 1.00 | 1 | 1 | -0.02 | -0.017 | -0.025 | -0.02  | -0.019 | t | 14447  | ETKRKDGD                     | Equus<br>caballus                |
| 1 | 1.00 | 1 | 1 | 0.01  | 0.01   | 0.01   | 0.01   | 0.01   | t | 25622  | IDLTKNA<br>A                 | Homo<br>sapiens                  |
| 1 | 1.00 | 1 | 1 | -0.01 | -0.01  | -0.015 | -0.01  | -0.01  | t | 95201  | AASAYCST<br>WD               | Homo<br>sapiens                  |
| 1 | 1.00 | 1 | 1 | 0.02  | 0.02   | 0.02   | 0.024  | 0.02   | t | 118019 | MGRGAPP<br>PGMMG             | Homo<br>sapiens                  |
| 1 | 1.00 | 1 | 1 | -0.02 | -0.024 | -0.026 | -0.017 | -0.018 | t | 29803  | KAFRELAD<br>AL               | Oryctola<br>gus<br>cuniculu<br>s |
| 1 | 1.00 | 1 | 1 | 0.01  | 0.01   | 0.01   | 0.01   | 0.01   | t | 106596 | LDLKRTTT<br>THTS             | Mus<br>musculu<br>s              |

|   |      |   |   |       |       |        |       |        |   |        |                            |                                  |
|---|------|---|---|-------|-------|--------|-------|--------|---|--------|----------------------------|----------------------------------|
| 1 | 1.00 | 1 | 1 | 0.01  | 0.01  | 0.01   | 0.01  | 0.01   | t | 25623  | IDLTKNA<br>AK              | Homo<br>sapiens                  |
| 1 | 1.00 | 1 | 1 | -0.01 | -0.01 | -0.01  | -0.01 | -0.01  | t | 105581 | VT                         | Oryctola<br>gus<br>cuniculu<br>s |
| 1 | 1.00 | 1 | 1 | 0     | 0     | 0      | 0     | -0.002 | t | 103496 | PRGYPGQ<br>V               | Mus<br>musculu<br>s              |
| 1 | 1.00 | 1 | 1 | 0     | 0     | 0      | 0     | -0.002 | t | 75950  | YTASARGD<br>LAHLTTT        | Mus<br>musculu<br>s              |
| 1 | 1.00 | 1 | 1 | 0     | 0     | 0      | 0     | -0.002 | t | 68320  | VEQHRR<br>TD               | Mus<br>musculu<br>s              |
| 1 | 1.00 | 1 | 1 | 0     | 0     | 0      | 0     | -0.002 | t | 75949  | YTASARGD<br>LAHL           | Mus<br>musculu<br>s              |
| 1 | 1.00 | 1 | 1 | 0     | 0     | 0      | 0     | -0.002 | t | 64031  | THGQWN<br>KPSK             | Mus<br>musculu<br>s              |
| 1 | 1.00 | 1 | 1 | 0     | 0     | 0      | 0     | -0.002 | t | 75950  | YTASARGD<br>LAHLTTT        | Mus<br>musculu<br>s              |
| 1 | 1.00 | 1 | 1 | 0     | 0     | 0      | 0     | -0.002 | t | 41290  | MDWNM<br>HAA               | Mus<br>musculu<br>s              |
| 1 | 1.00 | 1 | 1 | 0.03  | 0.032 | 0.025  | 0.033 | 0.032  | t | 141604 | APPDDGP<br>P               | Homo<br>sapiens                  |
| 1 | 1.00 | 1 | 1 | 0.02  | 0.017 | 0.017  | 0.02  | 0.02   | t | 97760  | VTLPSSGA<br>V              | Oryctola<br>gus<br>cuniculu<br>s |
| 1 | 1.00 | 1 | 1 | -0.04 | -0.04 | -0.045 | -0.04 | -0.04  | t | 16305  | FISP                       | Homo<br>sapiens                  |
| 1 | 1.00 | 1 | 1 | 0.01  | 0.01  | 0.01   | 0.013 | 0.01   | t | 11973  | EFDEMEEC<br>SQHLPYIE<br>QG | Homo<br>sapiens                  |
| 1 | 1.00 | 1 | 1 | 0.04  | 0.04  | 0.04   | 0.044 | 0.041  | t | 117700 | YSPTSPS                    | Homo<br>sapiens                  |

|   |      |   |   |       |        |        |        |        |   |        |                              |                                  |
|---|------|---|---|-------|--------|--------|--------|--------|---|--------|------------------------------|----------------------------------|
| 1 | 1.00 | 1 | 1 | 0     | -0.004 | -0.007 | -0.007 | -0.001 | t | 135468 | GVGLAP                       | Oryctola<br>gus<br>cuniculu<br>s |
| 1 | 1.00 | 1 | 1 | -0.03 | -0.032 | -0.03  | -0.037 | -0.033 | t | 139618 | TGQLVHRF                     | Mus<br>musculu<br>s              |
| 1 | 1.00 | 1 | 1 | -0.01 | -0.004 | 0.005  | -0.01  | -0.017 | t | 31063  | KGSSGYCA<br>WPACYCY          | Equus<br>caballus                |
| 1 | 1.00 | 1 | 1 | 0.04  | 0.042  | 0.032  | 0.037  | 0.038  | t | 114283 | CQIESWD<br>HNDQQFQ<br>C      | Homo<br>sapiens                  |
| 1 | 1.00 | 1 | 1 | -0.02 | -0.017 | -0.026 | -0.02  | -0.021 | t | 50814  | QFQGQQ<br>QPFP               | Mus<br>musculu<br>s              |
| 1 | 1.00 | 1 | 1 | -0.01 | -0.01  | -0.01  | -0.01  | -0.01  | t | 51710  | QNITDL                       | Oryctola<br>gus<br>cuniculu<br>s |
| 1 | 1.00 | 1 | 1 | -0.01 | -0.01  | 0.002  | -0.007 | -0.011 | t | 23160  | GVSWTM                       | Homo<br>sapiens                  |
| 1 | 1.00 | 1 | 1 | 0.01  | 0.01   | 0.01   | 0.013  | 0.007  | t | 146986 | GNGPGYA<br>LGGGSR            | Homo<br>sapiens                  |
| 1 | 1.00 | 1 | 1 | 0     | 0      | 0      | 0      | 0      | t | 130880 | HIDGPSLLI<br>EN              | Mus<br>musculu<br>s              |
| 1 | 1.00 | 1 | 1 | 0     | 0      | 0      | 0.004  | 0      | t | 122445 | KQYSIEAA<br>LRCRRISKE<br>EYH | Homo<br>sapiens                  |
| 1 | 1.00 | 1 | 1 | 0.01  | 0.007  | 0.01   | 0.01   | 0.009  | t | 106035 | QFAGKDLE                     | Oryctola<br>gus<br>cuniculu<br>s |
| 1 | 1.00 | 1 | 1 | 0.02  | 0.02   | 0.02   | 0.02   | 0.02   | t | 23190  | GVTYEIDL<br>TNKNA            | Homo<br>sapiens                  |
| 1 | 1.00 | 1 | 1 | -0.05 | -0.053 | -0.056 | -0.05  | -0.05  | t | 105896 | KFTQFAGK                     | Oryctola<br>gus<br>cuniculu<br>s |
| 1 | 1.00 | 1 | 1 | -0.05 | -0.053 | -0.056 | -0.05  | -0.05  | t | 105896 | KFTQFAGK                     | Oryctola<br>gus<br>cuniculu<br>s |



|   |      |   |   |       |        |        |        |        |   |        |                              |                              |
|---|------|---|---|-------|--------|--------|--------|--------|---|--------|------------------------------|------------------------------|
| 1 | 1.00 | 1 | 1 | 0.03  | 0.026  | 0.029  | 0.03   | 0.03   | t | 123838 | VWQDE                        | Mus<br>musculus              |
| 1 | 1.00 | 1 | 1 | 0     | 0.003  | 0.009  | 0      | 0      | t | 139227 | RGDLQVLT<br>PK               | Sus<br>scrofa                |
| 1 | 1.00 | 1 | 1 | 0     | 0.002  | 0      | 0.007  | 0.002  | t | 11571  | EEEDDDM<br>GFGFLD            | Homo<br>sapiens              |
| 1 | 1.00 | 1 | 1 | -0.05 | -0.05  | -0.055 | -0.05  | -0.05  | t | 67569  | VAEKVRNL<br>PA               | Homo<br>sapiens              |
| 1 | 1.00 | 1 | 1 | 0.01  | 0.01   | 0.01   | 0.01   | 0.011  | t | 79284  | LDAVPL                       | Mus<br>musculus              |
| 1 | 1.00 | 1 | 1 | 0     | -0.002 | 0      | -0.001 | -0.002 | t | 69833  | VLVLNPSV<br>AATLGFGA<br>YMSK | Mus<br>musculus              |
| 1 | 1.00 | 1 | 1 | 0     | -0.002 | 0      | -0.001 | -0.002 | t | 13735  | EPQVYTLP<br>PSR              | Mus<br>musculus              |
| 1 | 1.00 | 1 | 1 | 0     | -0.002 | 0      | -0.001 | -0.001 | t | 4737   | ASREAK                       | Mus<br>musculus              |
| 1 | 1.00 | 1 | 1 | -0.05 | -0.05  | -0.05  | -0.05  | -0.053 | t | 134333 | CIPIPSSW<br>AFARFLW          | Homo<br>sapiens              |
| 1 | 1.00 | 1 | 1 | 0.02  | 0.02   | 0.022  | 0.02   | 0.02   | t | 110610 | GPKGAPG<br>ERGPSGLA          | Mus<br>musculus              |
| 1 | 1.00 | 1 | 1 | -0.02 | -0.022 | -0.02  | -0.013 | -0.02  | t | 123636 | PVGPAPG<br>MRP               | Homo<br>sapiens              |
| 1 | 1.00 | 1 | 1 | -0.01 | -0.01  | -0.016 | -0.01  | -0.01  | t | 28691  | ISQHQCVK                     | Mus<br>musculus              |
| 1 | 1.00 | 1 | 1 | 0.01  | 0.005  | 0.005  | 0.011  | 0.01   | t | 100101 | HFYDGFAK<br>VPLKTD           | Oryctola<br>gus<br>cuniculus |
| 1 | 1.00 | 1 | 1 | 0.01  | 0.01   | 0.005  | 0.011  | 0.01   | t | 100101 | HFYDGFAK<br>VPLKTD           | Homo<br>sapiens              |
| 1 | 1.00 | 1 | 1 | 0.01  | 0.012  | 0.01   | 0.011  | 0.01   | t | 12951  | ELAPEDPE<br>DS               | Homo<br>sapiens              |

|   |      |   |   |       |        |        |        |        |   |        |                              |                                  |
|---|------|---|---|-------|--------|--------|--------|--------|---|--------|------------------------------|----------------------------------|
| 1 | 1.00 | 1 | 1 | 0     | -0.007 | 0      | 0      | 0      | t | 3381   | ANPNPYTS<br>RRSV             | Oryctola<br>gus<br>cuniculu<br>s |
| 1 | 1.00 | 1 | 1 | 0     | -0.001 | -0.004 | 0      | 0      | t | 30596  | KERSSLRY<br>GN               | Mus<br>musculu<br>s              |
| 1 | 1.00 | 1 | 1 | 0.01  | 0.013  | 0.01   | 0.01   | 0.008  | t | 140825 | AGKLGTVS<br>YGEEKPAV<br>LGHD | Mus<br>musculu<br>s              |
| 1 | 1.00 | 1 | 1 | 0.01  | 0.01   | 0.01   | 0.01   | 0.008  | t | 49085  | PQQPFPQ<br>QPE               | Mus<br>musculu<br>s              |
| 1 | 1.00 | 1 | 1 | 0.04  | 0.04   | 0.04   | 0.04   | 0.04   | t | 141660 | GMEKAKE<br>ELLETLQIV         | Rattus<br>norvegic<br>us         |
| 1 | 1.00 | 1 | 1 | 0.04  | 0.042  | 0.04   | 0.04   | 0.04   | t | 141660 | GMEKAKE<br>ELLETLQIV         | Rattus<br>norvegic<br>us         |
| 1 | 1.00 | 1 | 1 | 0.04  | 0.038  | 0.04   | 0.04   | 0.04   | t | 141660 | GMEKAKE<br>ELLETLQIV         | Oryctola<br>gus<br>cuniculu<br>s |
| 1 | 1.00 | 1 | 1 | 0.04  | 0.04   | 0.04   | 0.04   | 0.04   | t | 141660 | GMEKAKE<br>ELLETLQIV         | Oryctola<br>gus<br>cuniculu<br>s |
| 1 | 1.00 | 1 | 1 | -0.02 | -0.02  | -0.013 | -0.016 | -0.024 | t | 138249 | TFRVVSV                      | Homo<br>sapiens                  |
| 1 | 1.00 | 1 | 1 | 0.02  | 0.02   | 0.013  | 0.02   | 0.02   | t | 69210  | VKELPTEV<br>QKLKEK           | Homo<br>sapiens                  |
| 1 | 1.00 | 1 | 1 | 0.03  | 0.026  | 0.025  | 0.029  | 0.03   | t | 96     | AADQLPN<br>V                 | Oryctola<br>gus<br>cuniculu<br>s |
| 1 | 1.00 | 1 | 1 | -0.01 | -0.006 | -0.02  | -0.009 | -0.01  | t | 8594   | DICLGTDIS<br>VKQGDV          | Homo<br>sapiens                  |
| 1 | 1.00 | 1 | 1 | -0.01 | -0.008 | -0.017 | -0.013 | -0.013 | t | 106571 | KLVSEVPK<br>HCGI             | Homo<br>sapiens                  |
| 1 | 1.00 | 1 | 1 | 0.05  | 0.05   | 0.041  | 0.05   | 0.051  | t | 33206  | KRPNDKA<br>G                 | Mus<br>musculu<br>s              |

|   |      |   |   |       |       |        |        |        |   |        |                              |                                  |
|---|------|---|---|-------|-------|--------|--------|--------|---|--------|------------------------------|----------------------------------|
| 1 | 1.00 | 1 | 1 | 0     | 0.003 | -0.007 | 0      | 0      | t | 41421  | MEQFIRAF<br>IEIDKDNN<br>ELID | Mus<br>musculu<br>s              |
| 1 | 1.00 | 1 | 1 | -0.04 | -0.04 | -0.052 | -0.036 | -0.038 | t | 96260  | EPNANLSL<br>TTDGKFLK<br>ASA  | Homo<br>sapiens(<br>human)       |
| 1 | 1.00 | 1 | 1 | 0.03  | 0.03  | 0.03   | 0.03   | 0.03   | t | 138027 | SADFTPGT                     | Homo<br>sapiens                  |
| 1 | 1.00 | 1 | 1 | 0     | 0     | -0.006 | 0      | 0      | t | 158923 | KSCTWPET<br>HTLWGDA<br>V     | Mus<br>musculu<br>s              |
| 1 | 1.00 | 1 | 1 | 0     | 0.003 | 0      | -0.001 | -0.001 | t | 79111  | VNKGYTG<br>Y                 | Mus<br>musculu<br>s              |
| 1 | 1.00 | 1 | 1 | 0.02  | 0.02  | 0.009  | 0.02   | 0.02   | t | 75152  | YNGEEYLIL<br>SARDVL          | Homo<br>sapiens                  |
| 1 | 1.00 | 1 | 1 | 0.01  | 0.01  | 0.01   | 0.01   | 0.01   | t | 104161 | NVVLKTIT<br>ESATSPPT         | Oryctola<br>gus<br>cuniculu<br>s |
| 1 | 1.00 | 1 | 1 | -0.01 | -0.01 | -0.018 | -0.01  | -0.008 | t | 133635 | LSRSTKEY<br>NKLK             | Mus<br>musculu<br>s              |
| 1 | 1.00 | 1 | 1 | 0.03  | 0.03  | 0.029  | 0.03   | 0.03   | t | 10550  | DVCSDSD<br>NDGVCDN<br>V      | Mus<br>musculu<br>s              |
| 1 | 1.00 | 1 | 1 | 0     | 0     | 0.002  | 0.003  | 0      | t | 67270  | TWKKPDY<br>E                 | Homo<br>sapiens                  |
| 1 | 1.00 | 1 | 1 | 0     | 0     | 0      | 0      | -0.002 | t | 21408  | GNDYEDR<br>YYRENMY<br>RYPNQ  | Mus<br>musculu<br>s              |
| 1 | 1.00 | 1 | 1 | 0.02  | 0.02  | 0.022  | 0.021  | 0.02   | t | 71446  | VTPIDT                       | Homo<br>sapiens                  |
| 1 | 1.00 | 1 | 1 | 0.02  | 0.02  | 0.029  | 0.02   | 0.019  | t | 6129   | CDPTMDY                      | Mus<br>musculu<br>s              |
| 1 | 1.00 | 1 | 1 | 0.01  | 0.01  | 0.01   | 0.01   | 0.01   | t | 124275 | HPLAPLNF                     | Homo<br>sapiens                  |
| 1 | 1.00 | 1 | 1 | 0.01  | 0.01  | 0.009  | 0.01   | 0.009  | t | 72503  | WGQGG                        | Mus<br>musculu<br>s              |
| 1 | 1.00 | 1 | 1 | 0.03  | 0.03  | 0.03   | 0.029  | 0.033  | t | 153263 | HAGTFLQ<br>VA                | Mus<br>musculu<br>s              |

|   |      |   |   |       |        |        |        |        |   |        |                             |                     |
|---|------|---|---|-------|--------|--------|--------|--------|---|--------|-----------------------------|---------------------|
| 1 | 1.00 | 1 | 1 | -0.03 | -0.032 | -0.037 | -0.027 | -0.03  | t | 53876  | RGGIPSLK<br>KGKDIKV         | Mus<br>musculu<br>s |
| 1 | 1.00 | 1 | 1 | 0.07  | 0.07   | 0.07   | 0.07   | 0.07   | t | 123161 | EYLGEEYE<br>E               | Ovis<br>aries       |
| 1 | 1.00 | 1 | 1 | 0.05  | 0.05   | 0.05   | 0.05   | 0.05   | t | 79282  | LCEETPPN<br>ETTPCI          | Mus<br>musculu<br>s |
| 1 | 1.00 | 1 | 1 | 0.03  | 0.03   | 0.03   | 0.03   | 0.03   | t | 103929 | GKLPIPY                     | Homo<br>sapiens     |
| 1 | 1.00 | 1 | 1 | -0.01 | -0.01  | -0.01  | -0.01  | -0.01  | t | 101873 | LNKQEG<br>DK                | Homo<br>sapiens     |
| 1 | 1.00 | 1 | 1 | -0.01 | -0.012 | -0.022 | -0.007 | -0.01  | t | 8381   | DGERVPK<br>NNRLSKY<br>SELSE | Mus<br>musculu<br>s |
| 1 | 1.00 | 1 | 1 | -0.03 | -0.032 | -0.028 | -0.031 | -0.03  | t | 16123  | FHLPYNHN<br>WFAL            | Mus<br>musculu<br>s |
| 1 | 1.00 | 1 | 1 | 0     | 0      | 0      | 0      | 0      | t | 8636   | DIETPRAG<br>KKESTV          | Ovis<br>aries       |
| 1 | 1.00 | 1 | 1 | 0     | 0      | 0      | 0      | 0      | t | 98981  | REREEDW<br>RQP              | Homo<br>sapiens     |
| 1 | 1.00 | 1 | 1 | 0.02  | 0.02   | 0.011  | 0.018  | 0.02   | t | 135980 | QSRRRGD<br>MSTLN            | Homo<br>sapiens     |
| 1 | 1.00 | 1 | 1 | -0.02 | -0.022 | -0.015 | -0.017 | -0.02  | t | 141693 | KTWG                        | Mus<br>musculu<br>s |
| 1 | 1.00 | 1 | 1 | -0.02 | -0.018 | -0.02  | -0.023 | -0.023 | t | 78143  | EKIEKTEEP<br>AP             | Homo<br>sapiens     |
| 1 | 1.00 | 1 | 1 | -0.02 | -0.02  | -0.02  | -0.02  | -0.023 | t | 73080  | WSLDPHR                     | Mus<br>musculu<br>s |
| 1 | 1.00 | 1 | 1 | 0     | 0      | 0      | 0      | -0.002 | t | 21254  | GMDGTQL<br>DRW              | Mus<br>musculu<br>s |

|   |      |   |   |       |        |        |        |        |   |        |                            |                                  |
|---|------|---|---|-------|--------|--------|--------|--------|---|--------|----------------------------|----------------------------------|
| 1 | 1.00 | 1 | 1 | 0     | 0      | 0      | 0      | -0.002 | t | 21254  | GMDGTQL<br>DRW             | Mus<br>musculu<br>s              |
| 1 | 1.00 | 1 | 1 | -0.05 | -0.048 | -0.055 | -0.049 | -0.049 | t | 50494  | QDMRNTI<br>MASKTVG         | Homo<br>sapiens                  |
| 1 | 1.00 | 1 | 1 | -0.01 | -0.015 | -0.019 | -0.012 | -0.01  | t | 51474  | QLPNVGIT<br>QGIV           | Bos<br>taurus                    |
| 1 | 1.00 | 1 | 1 | -0.01 | -0.003 | -0.01  | -0.011 | -0.012 | t | 67187  | TVTTTTKG<br>ENFTETDI<br>KI | Gallus<br>gallus                 |
| 1 | 1.00 | 1 | 1 | 0.04  | 0.032  | 0.045  | 0.04   | 0.039  | t | 125063 | GDRAYVE<br>NELVA           | Mus<br>musculu<br>s              |
| 1 | 1.00 | 1 | 1 | -0.01 | -0.01  | -0.01  | -0.01  | -0.012 | t | 133668 | QEGPEYW<br>DRNT            | Mus<br>musculu<br>s              |
| 1 | 1.00 | 1 | 1 | 0.05  | 0.051  | 0.043  | 0.05   | 0.051  | t | 45571  | NQITSALS<br>TQ             | Mus<br>musculu<br>s              |
| 1 | 1.00 | 1 | 1 | -0.02 | -0.02  | -0.023 | -0.019 | -0.018 | t | 28351  | IRNW                       | Mus<br>musculu<br>s              |
| 1 | 1.00 | 1 | 1 | -0.02 | -0.023 | -0.023 | -0.019 | -0.018 | t | 28351  | IRNW                       | Mus<br>musculu<br>s              |
| 1 | 1.00 | 1 | 1 | -0.02 | -0.02  | -0.023 | -0.019 | -0.018 | t | 28351  | IRNW                       | Mus<br>musculu<br>s              |
| 1 | 1.00 | 1 | 1 | 0.01  | 0.01   | 0.008  | 0.01   | 0.009  | t | 79928  | MDRPTSM<br>KALDH           | Mus<br>musculu<br>s              |
| 1 | 1.00 | 1 | 1 | -0.02 | -0.02  | -0.02  | -0.02  | -0.022 | t | 106642 | MHLNTPP                    | Homo<br>sapiens                  |
| 1 | 1.00 | 1 | 1 | 0.05  | 0.046  | 0.044  | 0.047  | 0.052  | t | 21557  | GNYTKTD<br>DEANQLLS        | Oryctola<br>gus<br>cuniculu<br>s |
| 1 | 1.00 | 1 | 1 | -0.01 | -0.01  | -0.01  | -0.01  | -0.012 | t | 28693  | ISQQPFPL<br>QP             | Mus<br>musculu<br>s              |
| 1 | 1.00 | 1 | 1 | 0.01  | 0.01   | 0.006  | 0.01   | 0.012  | t | 6093   | CDCDRTA<br>A               | Mus<br>musculu<br>s              |

|   |      |   |   |       |        |        |        |        |   |        |                            |                                  |
|---|------|---|---|-------|--------|--------|--------|--------|---|--------|----------------------------|----------------------------------|
| 1 | 1.00 | 1 | 1 | 0.01  | 0.01   | 0.006  | 0.01   | 0.012  | t | 6093   | CDCDRTA<br>A               | Mus<br>musculu<br>s              |
| 1 | 1.00 | 1 | 1 | -0.03 | -0.032 | -0.037 | -0.031 | -0.03  | t | 4710   | ASQKRPSQ<br>RHGSKY         | Rattus<br>norvegic<br>us         |
| 1 | 1.00 | 1 | 1 | 0.06  | 0.06   | 0.06   | 0.06   | 0.06   | t | 146228 | EYSDSGIE<br>V              | Oryctola<br>gus<br>cuniculu<br>s |
| 1 | 1.00 | 1 | 1 | -0.03 | -0.024 | -0.039 | -0.031 | -0.03  | t | 11802  | EENKKPAE                   | Ovis<br>aries                    |
| 1 | 1.00 | 1 | 1 | 0.02  | 0.02   | 0.02   | 0.02   | 0.02   | t | 156946 | QLLYGS                     | Gallus<br>gallus                 |
| 1 | 1.00 | 1 | 1 | 0     | 0      | 0      | 0      | 0      | t | 132072 | SPFVPYDF<br>MNSSTSP        | Homo<br>sapiens                  |
| 1 | 1.00 | 1 | 1 | 0.01  | 0.01   | 0.006  | 0.013  | 0.01   | t | 67069  | TVLGALP<br>PTPQTP          | Homo<br>sapiens                  |
| 1 | 1.00 | 1 | 1 | -0.03 | -0.03  | -0.03  | -0.03  | -0.03  | t | 119844 | ERTVLVSM<br>NY             | Mus<br>musculu<br>s              |
| 1 | 1.00 | 1 | 1 | -0.03 | -0.03  | -0.03  | -0.03  | -0.03  | t | 119844 | ERTVLVSM<br>NY             | Mus<br>musculu<br>s              |
| 1 | 1.00 | 1 | 1 | 0.02  | 0.018  | 0.015  | 0.023  | 0.02   | t | 23694  | HEIAWFTE<br>RSDKSYEH<br>QT | Mus<br>musculu<br>s              |
| 1 | 1.00 | 1 | 1 | 0.02  | 0.018  | 0.015  | 0.023  | 0.02   | t | 23694  | HEIAWFTE<br>RSDKSYEH<br>QT | Mus<br>musculu<br>s              |
| 1 | 1.00 | 1 | 1 | 0.06  | 0.056  | 0.053  | 0.053  | 0.059  | t | 125330 | YVDTYGD<br>NAG             | Oryctola<br>gus<br>cuniculu<br>s |
| 1 | 1.00 | 1 | 1 | 0     | 0.004  | -0.005 | -0.003 | -0.003 | t | 141619 | DLNLIGFGI<br>NAKNNQ        | Homo<br>sapiens                  |

|   |      |   |   |       |        |        |        |        |   |        |                             |                                  |
|---|------|---|---|-------|--------|--------|--------|--------|---|--------|-----------------------------|----------------------------------|
| 1 | 1.00 | 1 | 1 | 0     | 0.002  | 0.007  | 0.007  | -0.002 | t | 113193 | TGEIKALA<br>GCDFLT1         | Homo<br>sapiens                  |
| 1 | 1.00 | 1 | 1 | 0.03  | 0.033  | 0.03   | 0.03   | 0.03   | t | 130871 | GSESGIFT<br>NTK             | Mus<br>musculu<br>s              |
| 1 | 1.00 | 1 | 1 | 0.03  | 0.03   | 0.03   | 0.03   | 0.03   | t | 130871 | GSESGIFT<br>NTK             | Mus<br>musculu<br>s              |
| 1 | 1.00 | 1 | 1 | -0.01 | -0.008 | -0.01  | -0.009 | -0.012 | t | 146901 | ETHGGED<br>VAVFAR           | Homo<br>sapiens                  |
| 1 | 1.00 | 1 | 1 | 0.06  | 0.062  | 0.06   | 0.067  | 0.062  | t | 132210 | DGPPGEL<br>GPD              | Homo<br>sapiens                  |
| 1 | 1.00 | 1 | 1 | 0.02  | 0.017  | 0.008  | 0.02   | 0.021  | t | 5728   | AYANSTQE<br>ETF             | Oryctola<br>gus<br>cuniculu<br>s |
| 1 | 1.00 | 1 | 1 | -0.01 | -0.013 | -0.015 | -0.01  | -0.01  | t | 58417  | SHSQWNK<br>PSKPKTN<br>MK    | Oryctola<br>gus<br>cuniculu<br>s |
| 1 | 1.00 | 1 | 1 | 0.02  | 0.024  | 0.018  | 0.021  | 0.02   | t | 14487  | ETMTPSGL<br>VIPENAK         | Homo<br>sapiens                  |
| 1 | 1.00 | 1 | 1 | 0.01  | 0.006  | -0.003 | 0.007  | 0.01   | t | 5207   | ATVSSQSF<br>RR              | Oryctola<br>gus<br>cuniculu<br>s |
| 1 | 1.00 | 1 | 1 | 0.01  | 0.008  | 0.001  | 0.003  | 0.01   | t | 120419 | AVKYTGTY<br>GG              | Mus<br>musculu<br>s              |
| 1 | 1.00 | 1 | 1 | 0.06  | 0.06   | 0.06   | 0.06   | 0.06   | t | 118902 | LVFEAPNQ<br>EKVSDYE         | Oryctola<br>gus<br>cuniculu<br>s |
| 1 | 1.00 | 1 | 1 | -0.03 | -0.03  | -0.011 | -0.03  | -0.041 | t | 26849  | IKMVSSLK<br>TKIT            | Mus<br>musculu<br>s              |
| 1 | 1.00 | 1 | 1 | -0.03 | -0.03  | -0.011 | -0.03  | -0.041 | t | 26849  | IKMVSSLK<br>TKIT            | Mus<br>musculu<br>s              |
| 1 | 1.00 | 1 | 1 | 0.04  | 0.038  | 0.033  | 0.043  | 0.041  | t | 107127 | GEPGDDA<br>PSGAEGPP<br>GPQG | Mus<br>musculu<br>s              |

|   |      |   |   |       |        |        |        |       |   |        |                              |                       |
|---|------|---|---|-------|--------|--------|--------|-------|---|--------|------------------------------|-----------------------|
| 1 | 1.00 | 1 | 1 | 0.01  | 0.014  | 0.006  | 0.013  | 0.01  | t | 71839  | VVSTLPQA<br>VMGSSY           | Homo sapiens          |
| 1 | 1.00 | 1 | 1 | 0.01  | 0.012  | 0.006  | 0.013  | 0.01  | t | 71839  | VVSTLPQA<br>VMGSSY           | Homo sapiens          |
| 1 | 1.00 | 1 | 1 | 0     | 0.01   | 0      | -0.001 | 0     | t | 55070  | RNTNRRP<br>QDV               | Pan troglodytes       |
| 1 | 1.00 | 1 | 1 | 0.01  | 0.01   | 0.01   | 0.01   | 0.008 | t | 78696  | KEEGEDDT<br>ARQEIRKA<br>WVK  | Oryctolagus cuniculus |
| 1 | 1.00 | 1 | 1 | 0.01  | 0.007  | 0.01   | 0.01   | 0.008 | t | 78696  | KEEGEDDT<br>ARQEIRKA<br>WVK  | Oryctolagus cuniculus |
| 1 | 1.00 | 1 | 1 | 0.03  | 0.03   | 0.037  | 0.03   | 0.03  | t | 71856  | VVTPDKEI<br>L                | Homo sapiens          |
| 1 | 1.00 | 1 | 1 | -0.01 | -0.01  | -0.01  | -0.007 | -0.01 | t | 97064  | VNVPKVTK<br>EK               | Homo sapiens(human)   |
| 1 | 1.00 | 1 | 1 | 0.02  | 0.023  | 0.02   | 0.02   | 0.018 | t | 140905 | TPAAKVLV<br>EGNTDER<br>GTPEY | Mus musculus          |
| 1 | 1.00 | 1 | 1 | -0.01 | -0.01  | -0.01  | -0.01  | -0.01 | t | 158609 | SFGTALW                      | Homo sapiens          |
| 1 | 1.00 | 1 | 1 | 0.01  | 0.01   | 0.01   | 0.01   | 0.012 | t | 131865 | EPLEVFISA                    | Homo sapiens          |
| 1 | 1.00 | 1 | 1 | -0.01 | -0.015 | -0.018 | -0.011 | -0.01 | t | 13678  | EPKIGLPG<br>PPSAPVP          | Bos taurus            |
| 1 | 1.00 | 1 | 1 | 0     | 0      | 0      | 0.004  | 0     | t | 142204 | KLEEQNKI<br>SEASRKGL<br>RRDL | Homo sapiens          |
| 1 | 1.00 | 1 | 1 | 0     | 0      | 0      | 0.004  | 0     | t | 142288 | SEASRKGL<br>RRDLASR<br>EAKK  | Homo sapiens          |
| 1 | 1.00 | 1 | 1 | 0     | 0      | 0      | 0.004  | 0     | t | 138910 | SEGGDEYV<br>TKGEVVET<br>D    | Homo sapiens          |



|   |      |   |   |   |   |   |       |   |   |        |                                  |              |
|---|------|---|---|---|---|---|-------|---|---|--------|----------------------------------|--------------|
| 1 | 1.00 | 1 | 1 | 0 | 0 | 0 | 0.004 | 0 | t | 142116 | ASRKGLRR<br>DLDA<br>SREAKKQV     | Homo sapiens |
| 1 | 1.00 | 1 | 1 | 0 | 0 | 0 | 0.004 | 0 | t | 142167 | GLRRDLDA<br>SREAKKQV<br>EKAL     | Homo sapiens |
| 1 | 1.00 | 1 | 1 | 0 | 0 | 0 | 0.004 | 0 | t | 142166 | GLRRDLDA<br>SREAKKQL<br>EAEQ     | Homo sapiens |
| 1 | 1.00 | 1 | 1 | 0 | 0 | 0 | 0.004 | 0 | t | 142217 | LDASREAK<br>KQLEAEQ<br>QKLEE     | Homo sapiens |
| 1 | 1.00 | 1 | 1 | 0 | 0 | 0 | 0.004 | 0 | t | 142282 | RRDLDA<br>SR<br>EAKKQLEA<br>EQQK | Homo sapiens |
| 1 | 1.00 | 1 | 1 | 0 | 0 | 0 | 0.004 | 0 | t | 142202 | KISEASRK<br>GLRRDLDA<br>SREA     | Homo sapiens |
| 1 | 1.00 | 1 | 1 | 0 | 0 | 0 | 0.004 | 0 | t | 142125 | DLDA<br>SREAKKQLEAEQ<br>QKLE     | Homo sapiens |
| 1 | 1.00 | 1 | 1 | 0 | 0 | 0 | 0.004 | 0 | t | 138884 | NKLLIAFGL<br>VILLVTLP<br>CAS     | Homo sapiens |
| 1 | 1.00 | 1 | 1 | 0 | 0 | 0 | 0.004 | 0 | t | 142201 | KGLRRDLDA<br>SREAKKQ<br>VEKA     | Homo sapiens |
| 1 | 1.00 | 1 | 1 | 0 | 0 | 0 | 0.004 | 0 | t | 110284 | HKSAIVTLT<br>YDSEWQR<br>DQ       | Homo sapiens |
| 1 | 1.00 | 1 | 1 | 0 | 0 | 0 | 0.004 | 0 | t | 112837 | SGYIPANT<br>TIPF                 | Homo sapiens |
| 1 | 1.00 | 1 | 1 | 0 | 0 | 0 | 0.004 | 0 | t | 110284 | HKSAIVTLT<br>YDSEWQR<br>DQ       | Homo sapiens |
| 1 | 1.00 | 1 | 1 | 0 | 0 | 0 | 0.004 | 0 | t | 65902  | TQNISGTQ<br>VYQDPAIV<br>QPK      | Homo sapiens |

|   |      |   |   |   |   |   |       |   |   |       |                              |              |
|---|------|---|---|---|---|---|-------|---|---|-------|------------------------------|--------------|
| 1 | 1.00 | 1 | 1 | 0 | 0 | 0 | 0.004 | 0 | t | 72294 | WDEGGEK<br>RIPLDVAE          | Homo sapiens |
| 1 | 1.00 | 1 | 1 | 0 | 0 | 0 | 0.004 | 0 | t | 71353 | VTHESYQE<br>LVKKLEALE<br>DA  | Homo sapiens |
| 1 | 1.00 | 1 | 1 | 0 | 0 | 0 | 0.004 | 0 | t | 70991 | VSILIIFILVS<br>GLSMFVD<br>QL | Homo sapiens |
| 1 | 1.00 | 1 | 1 | 0 | 0 | 0 | 0.004 | 0 | t | 68087 | VDVSEGDI<br>VIYSKYG          | Homo sapiens |
| 1 | 1.00 | 1 | 1 | 0 | 0 | 0 | 0.004 | 0 | t | 75152 | YNGEEYLIL<br>SARDVL          | Homo sapiens |
| 1 | 1.00 | 1 | 1 | 0 | 0 | 0 | 0.004 | 0 | t | 71284 | VTEEI                        | Homo sapiens |
| 1 | 1.00 | 1 | 1 | 0 | 0 | 0 | 0.004 | 0 | t | 69344 | VKYTS                        | Homo sapiens |
| 1 | 1.00 | 1 | 1 | 0 | 0 | 0 | 0.004 | 0 | t | 62779 | TAADTPTA<br>TESISPSP         | Homo sapiens |
| 1 | 1.00 | 1 | 1 | 0 | 0 | 0 | 0.004 | 0 | t | 67969 | VDGVHAP<br>DKEVKVH<br>ADKS   | Homo sapiens |
| 1 | 1.00 | 1 | 1 | 0 | 0 | 0 | 0.004 | 0 | t | 75152 | YNGEEYLIL<br>SARDVL          | Homo sapiens |
| 1 | 1.00 | 1 | 1 | 0 | 0 | 0 | 0.004 | 0 | t | 66933 | TVAEEHVE<br>EPTVAEE          | Homo sapiens |
| 1 | 1.00 | 1 | 1 | 0 | 0 | 0 | 0.004 | 0 | t | 97170 | ADQELGD<br>APFLDRLR<br>RDQKS | Homo sapiens |
| 1 | 1.00 | 1 | 1 | 0 | 0 | 0 | 0.004 | 0 | t | 67656 | VAKVNIKP<br>LEDKILV          | Homo sapiens |
| 1 | 1.00 | 1 | 1 | 0 | 0 | 0 | 0.004 | 0 | t | 66933 | TVAEEHVE<br>EPTVAEE          | Homo sapiens |

|   |      |   |   |   |   |   |       |   |   |       |                              |              |
|---|------|---|---|---|---|---|-------|---|---|-------|------------------------------|--------------|
| 1 | 1.00 | 1 | 1 | 0 | 0 | 0 | 0.004 | 0 | t | 41069 | MAKVKIKP<br>LEDKILV          | Homo sapiens |
| 1 | 1.00 | 1 | 1 | 0 | 0 | 0 | 0.004 | 0 | t | 38186 | LNDITKEYE<br>KLLNEI          | Homo sapiens |
| 1 | 1.00 | 1 | 1 | 0 | 0 | 0 | 0.004 | 0 | t | 44168 | NHSQTPR<br>YRRPKFP<br>WFK    | Homo sapiens |
| 1 | 1.00 | 1 | 1 | 0 | 0 | 0 | 0.004 | 0 | t | 39183 | LRRDLAS<br>REAKKQVE<br>KALE  | Homo sapiens |
| 1 | 1.00 | 1 | 1 | 0 | 0 | 0 | 0.004 | 0 | t | 54382 | RKLFLVAL<br>VLFTIGSLI<br>CAI | Homo sapiens |
| 1 | 1.00 | 1 | 1 | 0 | 0 | 0 | 0.004 | 0 | t | 42416 | MQTLWDE<br>IMDINKRK          | Homo sapiens |
| 1 | 1.00 | 1 | 1 | 0 | 0 | 0 | 0.004 | 0 | t | 55038 | RNNHPQN<br>TSDSQKEC<br>TDGNK | Homo sapiens |
| 1 | 1.00 | 1 | 1 | 0 | 0 | 0 | 0.004 | 0 | t | 38694 | LPRSNTSS<br>GASPPAD          | Homo sapiens |
| 1 | 1.00 | 1 | 1 | 0 | 0 | 0 | 0.004 | 0 | t | 43248 | NANPNAN<br>PNANPNA<br>NPNANP | Homo sapiens |
| 1 | 1.00 | 1 | 1 | 0 | 0 | 0 | 0.004 | 0 | t | 43248 | NANPNAN<br>PNANPNA<br>NPNANP | Homo sapiens |
| 1 | 1.00 | 1 | 1 | 0 | 0 | 0 | 0.004 | 0 | t | 46895 | PAPQAPY<br>QGYQEPP<br>APQAPY | Homo sapiens |
| 1 | 1.00 | 1 | 1 | 0 | 0 | 0 | 0.004 | 0 | t | 53152 | RALLGLAV<br>CLFLMALC<br>T    | Homo sapiens |
| 1 | 1.00 | 1 | 1 | 0 | 0 | 0 | 0.004 | 0 | t | 52411 | QSQDNSG<br>DQRQVDL<br>TPKK   | Homo sapiens |

|   |      |   |   |   |   |   |       |   |   |       |                             |                 |
|---|------|---|---|---|---|---|-------|---|---|-------|-----------------------------|-----------------|
| 1 | 1.00 | 1 | 1 | 0 | 0 | 0 | 0.004 | 0 | t | 42416 | MQTLWDE<br>IMDINKRK         | Homo<br>sapiens |
| 1 | 1.00 | 1 | 1 | 0 | 0 | 0 | 0.004 | 0 | t | 22882 | GTVVAVG<br>PGRWDED<br>G     | Homo<br>sapiens |
| 1 | 1.00 | 1 | 1 | 0 | 0 | 0 | 0.004 | 0 | t | 11821 | EENVEHD<br>AEENVEH<br>DA    | Homo<br>sapiens |
| 1 | 1.00 | 1 | 1 | 0 | 0 | 0 | 0.004 | 0 | t | 11815 | EENVEENV<br>EENVEENV        | Homo<br>sapiens |
| 1 | 1.00 | 1 | 1 | 0 | 0 | 0 | 0.004 | 0 | t | 20012 | GGSGGSV<br>ASGGSVAS         | Homo<br>sapiens |
| 1 | 1.00 | 1 | 1 | 0 | 0 | 0 | 0.004 | 0 | t | 35316 | LDVAEGDT<br>VIYSKYG         | Homo<br>sapiens |
| 1 | 1.00 | 1 | 1 | 0 | 0 | 0 | 0.004 | 0 | t | 11821 | EENVEHD<br>AEENVEH<br>DA    | Homo<br>sapiens |
| 1 | 1.00 | 1 | 1 | 0 | 0 | 0 | 0.004 | 0 | t | 11815 | EENVEENV<br>EENVEENV        | Homo<br>sapiens |
| 1 | 1.00 | 1 | 1 | 0 | 0 | 0 | 0.004 | 0 | t | 11815 | EENVEENV<br>EENVEENV        | Homo<br>sapiens |
| 1 | 1.00 | 1 | 1 | 0 | 0 | 0 | 0.004 | 0 | t | 22882 | GTVVAVG<br>PGRWDED<br>G     | Homo<br>sapiens |
| 1 | 1.00 | 1 | 1 | 0 | 0 | 0 | 0.004 | 0 | t | 22986 | GVGSSAVI<br>LDDNFVT         | Sus<br>scrofa   |
| 1 | 1.00 | 1 | 1 | 0 | 0 | 0 | 0.004 | 0 | t | 11815 | EENVEENV<br>EENVEENV        | Homo<br>sapiens |
| 1 | 1.00 | 1 | 1 | 0 | 0 | 0 | 0.004 | 0 | t | 35794 | LFKYAEE<br>VGEAVIDD<br>DFGY | Homo<br>sapiens |

|   |      |   |   |   |   |   |       |   |   |       |                            |                 |
|---|------|---|---|---|---|---|-------|---|---|-------|----------------------------|-----------------|
| 1 | 1.00 | 1 | 1 | 0 | 0 | 0 | 0.004 | 0 | t | 18761 | GASAQSG<br>TSGTSGTS        | Homo<br>sapiens |
| 1 | 1.00 | 1 | 1 | 0 | 0 | 0 | 0.004 | 0 | t | 23976 | HHAERNG<br>SQSTTSQS<br>N   | Homo<br>sapiens |
| 1 | 1.00 | 1 | 1 | 0 | 0 | 0 | 0.004 | 0 | t | 32596 | KNQLAGK<br>DEYEAKQK<br>EAE | Homo<br>sapiens |
| 1 | 1.00 | 1 | 1 | 0 | 0 | 0 | 0.004 | 0 | t | 11820 | EENVEHD<br>AEENVEEN<br>V   | Homo<br>sapiens |
| 1 | 1.00 | 1 | 1 | 0 | 0 | 0 | 0.004 | 0 | t | 30799 | KFNPDLAG<br>G              | Homo<br>sapiens |
| 1 | 1.00 | 1 | 1 | 0 | 0 | 0 | 0.004 | 0 | t | 11815 | EENVEENV<br>EENVEENV       | Homo<br>sapiens |
| 1 | 1.00 | 1 | 1 | 0 | 0 | 0 | 0.004 | 0 | t | 14016 | ERLAQHM<br>TDFDVTH<br>HR   | Homo<br>sapiens |
| 1 | 1.00 | 1 | 1 | 0 | 0 | 0 | 0.004 | 0 | t | 11815 | EENVEENV<br>EENVEENV       | Homo<br>sapiens |
| 1 | 1.00 | 1 | 1 | 0 | 0 | 0 | 0.004 | 0 | t | 12531 | EINHVQD<br>HALPKENI        | Homo<br>sapiens |
| 1 | 1.00 | 1 | 1 | 0 | 0 | 0 | 0.004 | 0 | t | 4132  | ARDVLAV<br>VSK             | Homo<br>sapiens |
| 1 | 1.00 | 1 | 1 | 0 | 0 | 0 | 0.004 | 0 | t | 4132  | ARDVLAV<br>VSK             | Homo<br>sapiens |
| 1 | 1.00 | 1 | 1 | 0 | 0 | 0 | 0.004 | 0 | t | 10098 | DSDSESDS<br>DSDSDSDS<br>D  | Homo<br>sapiens |
| 1 | 1.00 | 1 | 1 | 0 | 0 | 0 | 0.004 | 0 | t | 10106 | DSEPFPRQ<br>KHKKVD         | Homo<br>sapiens |

|   |      |   |   |       |        |        |        |        |   |        |                             |                                  |
|---|------|---|---|-------|--------|--------|--------|--------|---|--------|-----------------------------|----------------------------------|
| 1 | 1.00 | 1 | 1 | 0     | 0      | 0      | 0.004  | 0      | t | 8900   | DKILVQAN<br>EAETTTA         | Homo<br>sapiens                  |
| 1 | 1.00 | 1 | 1 | 0     | 0      | 0      | 0.004  | 0      | t | 8942   | DKNEKGQ<br>HEIVEVEEI<br>LPE | Homo<br>sapiens                  |
| 1 | 1.00 | 1 | 1 | 0     | 0      | 0      | 0.004  | 0      | t | 8360   | DGDGAAA<br>MRYTEAR<br>MTK   | Homo<br>sapiens                  |
| 1 | 1.00 | 1 | 1 | -0.01 | -0.01  | -0.012 | -0.014 | -0.01  | t | 39368  | LSGIQLFD<br>RI              | Homo<br>sapiens                  |
| 1 | 1.00 | 1 | 1 | 0.02  | 0.018  | 0.017  | 0.019  | 0.02   | t | 35723  | LETHPLYQ                    | Anas<br>platyrhy<br>nchos        |
| 1 | 1.00 | 1 | 1 | 0.05  | 0.052  | 0.038  | 0.047  | 0.053  | t | 28907  | ITGEYVQIL<br>DAHAAY         | Homo<br>sapiens                  |
| 1 | 1.00 | 1 | 1 | -0.01 | -0.013 | -0.022 | -0.01  | -0.009 | t | 116971 | FAVLKLM<br>GRGTKF           | Oryctola<br>gus<br>cuniculu<br>s |
| 1 | 1.00 | 1 | 1 | 0.03  | 0.026  | 0.033  | 0.033  | 0.03   | t | 115302 | IVTAGEER<br>AVTT            | Oryctola<br>gus<br>cuniculu<br>s |
| 1 | 1.00 | 1 | 1 | 0.01  | 0.003  | 0.004  | 0.007  | 0.01   | t | 44920  | NLVPMVA<br>TV               | Homo<br>sapiens                  |
| 1 | 1.00 | 1 | 1 | 0     | 0      | 0      | 0.006  | 0.001  | t | 11813  | EENVEENV                    | Homo<br>sapiens                  |
| 1 | 1.00 | 1 | 1 | 0.03  | 0.03   | 0.028  | 0.03   | 0.033  | t | 1      | AA                          | Oryctola<br>gus<br>cuniculu<br>s |
| 1 | 1.00 | 1 | 1 | 0.01  | 0.012  | 0.005  | 0.013  | 0.01   | t | 33107  | KRAASKVS<br>ARLLTV          | Homo<br>sapiens                  |
| 1 | 1.00 | 1 | 1 | 0.01  | 0.01   | 0.006  | 0.01   | 0.011  | t | 46858  | PALTA AET<br>G              | Homo<br>sapiens                  |
| 1 | 1.00 | 1 | 1 | 0.02  | 0.018  | 0.025  | 0.023  | 0.019  | t | 30307  | KEARDQE<br>MN               | Mus<br>musculu<br>s              |

|   |      |   |   |       |        |        |        |        |   |        |                             |                                  |
|---|------|---|---|-------|--------|--------|--------|--------|---|--------|-----------------------------|----------------------------------|
| 1 | 1.00 | 1 | 1 | 0     | -0.002 | -0.004 | -0.001 | 0      | t | 73028  | WRGSNHS<br>DQTII            | Mus<br>musculu<br>s              |
| 1 | 1.00 | 1 | 1 | -0.02 | -0.017 | -0.015 | -0.019 | -0.022 | t | 65476  | TNVGLKIR<br>QLLW            | Mus<br>musculu<br>s              |
| 1 | 1.00 | 1 | 1 | 0     | 0.002  | -0.002 | 0.003  | 0.001  | t | 75937  | YTAADCP<br>GLLYLCP          | Homo<br>sapiens                  |
| 1 | 1.00 | 1 | 1 | 0.02  | 0.023  | 0.019  | 0.02   | 0.019  | t | 140077 | VQIINKKL<br>DLSNVQSK<br>C   | Mus<br>musculu<br>s              |
| 1 | 1.00 | 1 | 1 | 0.02  | 0.02   | 0.02   | 0.023  | 0.02   | t | 96126  | AVNVPKV<br>TKE              | Homo<br>sapiens(<br>human)       |
| 1 | 1.00 | 1 | 1 | 0.01  | 0.008  | -0.004 | 0.009  | 0.01   | t | 75561  | YQTELARV<br>QKANADA<br>KATY | Mus<br>musculu<br>s              |
| 1 | 1.00 | 1 | 1 | 0     | 0      | 0.002  | 0      | 0      | t | 55680  | RRPQDVK<br>FPG              | Homo<br>sapiens                  |
| 1 | 1.00 | 1 | 1 | 0.06  | 0.06   | 0.06   | 0.06   | 0.06   | t | 75848  | YSPEVG                      | Mus<br>musculu<br>s              |
| 1 | 1.00 | 1 | 1 | 0.03  | 0.032  | 0.028  | 0.037  | 0.032  | t | 51852  | QPHDLGK<br>VGEVIVTK<br>D    | Homo<br>sapiens                  |
| 1 | 1.00 | 1 | 1 | -0.01 | -0.008 | -0.028 | -0.013 | -0.008 | t | 95833  | SGPSGPSG<br>PSGT            | Homo<br>sapiens                  |
| 1 | 1.00 | 1 | 1 | -0.01 | -0.01  | -0.01  | -0.01  | -0.01  | t | 42928  | MVDRGW                      | Homo<br>sapiens                  |
| 1 | 1.00 | 1 | 1 | 0.01  | 0.006  | 0.009  | 0.007  | 0.01   | t | 58950  | SKTNIFWA<br>GDLL            | Oryctola<br>gus<br>cuniculu<br>s |
| 1 | 1.00 | 1 | 1 | -0.01 | -0.014 | -0.008 | -0.01  | -0.01  | t | 7896   | DDYQSFF                     | Mus<br>musculu<br>s              |
| 1 | 1.00 | 1 | 1 | 0.02  | 0.016  | 0.02   | 0.017  | 0.02   | t | 119923 | GYISKAQE<br>YFN             | Oryctola<br>gus<br>cuniculu<br>s |

|   |      |   |   |       |        |        |        |        |   |        |                      |                       |
|---|------|---|---|-------|--------|--------|--------|--------|---|--------|----------------------|-----------------------|
| 1 | 1.00 | 1 | 1 | 0     | 0.002  | -0.007 | 0.003  | 0.004  | t | 133638 | LTSRPA               | Homo sapiens          |
| 1 | 1.00 | 1 | 1 | 0.01  | 0.01   | 0.01   | 0.01   | 0.01   | t | 98797  | GGFGP                | Mus musculus          |
| 1 | 1.00 | 1 | 1 | -0.02 | -0.016 | -0.023 | -0.023 | -0.023 | t | 69399  | VLCNRAFNPVCG         | Homo sapiens          |
| 1 | 1.00 | 1 | 1 | -0.01 | -0.008 | -0.013 | -0.007 | -0.012 | t | 47750  | PGSPAPPPPEHRGGPEEFEG | Homo sapiens          |
| 1 | 1.00 | 1 | 1 | -0.01 | -0.01  | -0.008 | -0.01  | -0.011 | t | 119735 | AEFHRWSYM            | Mus musculus          |
| 1 | 1.00 | 1 | 1 | -0.01 | -0.013 | -0.008 | -0.01  | -0.011 | t | 119735 | AEFHRWSYM            | Oryctolagus cuniculus |
| 1 | 1.00 | 1 | 1 | -0.01 | -0.01  | -0.008 | -0.01  | -0.011 | t | 119735 | AEFHRWSYM            | Mus musculus          |
| 1 | 1.00 | 1 | 1 | 0.04  | 0.04   | 0.04   | 0.04   | 0.04   | t | 98792  | GDTWDD               | Mus musculus          |
| 1 | 1.00 | 1 | 1 | -0.01 | -0.008 | -0.01  | -0.007 | -0.01  | t | 918    | AEGEFATAPPSHYSWDPAK  | Homo sapiens          |
| 1 | 1.00 | 1 | 1 | 0     | 0.008  | -0.001 | 0      | -0.003 | t | 19868  | GGGWGQPHGGGWGQPH     | Gallus gallus         |
| 1 | 1.00 | 1 | 1 | 0     | 0      | 0      | 0      | -0.002 | t | 36958  | LKMADPNRFRGKD        | Mus musculus          |
| 1 | 1.00 | 1 | 1 | 0     | -0.002 | -0.002 | 0.003  | 0      | t | 27690  | INNAYNMS             | Mus musculus          |
| 1 | 1.00 | 1 | 1 | 0.03  | 0.028  | 0.023  | 0.033  | 0.032  | t | 76395  | YVRFDLELTFVITST      | Mus musculus          |
| 1 | 1.00 | 1 | 1 | 0.01  | 0.008  | 0.01   | 0.013  | 0.01   | t | 11438  | EDSGSNGKKITCECTKPDS  | Mus musculus          |



|   |      |   |   |       |        |        |        |        |   |        |                              |                                  |
|---|------|---|---|-------|--------|--------|--------|--------|---|--------|------------------------------|----------------------------------|
| 1 | 1.00 | 1 | 1 | 0.01  | 0.006  | 0.01   | 0.013  | 0.01   | t | 11438  | EDSGSNG<br>KKITCECTK<br>PDS  | Oryctola<br>gus<br>cuniculu<br>s |
| 1 | 1.00 | 1 | 1 | 0.01  | 0.018  | 0.01   | 0.013  | 0.01   | t | 110912 | KATPNDG<br>YFWED             | Homo<br>sapiens                  |
| 1 | 1.00 | 1 | 1 | 0.01  | 0.01   | 0.014  | 0.01   | 0.008  | t | 74476  | YKLPDHVR<br>T                | Mus<br>musculu<br>s              |
| 1 | 1.00 | 1 | 1 | -0.02 | -0.023 | -0.035 | -0.02  | -0.019 | t | 43224  | NANANNA<br>VK                | Oryctola<br>gus<br>cuniculu<br>s |
| 1 | 1.00 | 1 | 1 | 0.02  | 0.02   | 0.02   | 0.024  | 0.022  | t | 34963  | LASLCNPK<br>PSDAPVT          | Homo<br>sapiens                  |
| 1 | 1.00 | 1 | 1 | 0     | 0      | -0.007 | 0      | 0      | t | 159079 | RSNHNRR<br>PGYKTQN<br>QG     | Mus<br>musculu<br>s              |
| 1 | 1.00 | 1 | 1 | -0.03 | -0.03  | -0.038 | -0.031 | -0.03  | t | 82608  | GENKFVAT<br>AASV             | Homo<br>sapiens                  |
| 1 | 1.00 | 1 | 1 | 0     | -0.004 | -0.002 | 0.003  | -0.002 | t | 95354  | ELSEFIPGA<br>SLR             | Oryctola<br>gus<br>cuniculu<br>s |
| 1 | 1.00 | 1 | 1 | -0.02 | -0.02  | -0.025 | -0.014 | -0.018 | t | 109091 | GFPGARG<br>P                 | Rattus<br>norvegic<br>us         |
| 1 | 1.00 | 1 | 1 | 0.01  | 0.01   | 0.01   | 0.01   | 0.01   | t | 72087  | VYLLPR                       | Homo<br>sapiens                  |
| 1 | 1.00 | 1 | 1 | 0.01  | 0.014  | 0.01   | 0.017  | 0.01   | t | 122874 | PPARALKR<br>SLWVEVD<br>LLIGS | Homo<br>sapiens                  |
| 1 | 1.00 | 1 | 1 | 0.01  | 0.014  | 0.01   | 0.017  | 0.01   | t | 122874 | PPARALKR<br>SLWVEVD<br>LLIGS | Homo<br>sapiens                  |
| 1 | 1.00 | 1 | 1 | 0.03  | 0.029  | 0.03   | 0.029  | 0.03   | t | 42531  | MSDLTDIQ<br>ED               | Myodes<br>glareolu<br>s          |
| 1 | 1.00 | 1 | 1 | 0.05  | 0.05   | 0.052  | 0.05   | 0.048  | t | 18595  | GAGKALT<br>GLSTGTSQ<br>NTRIS | Homo<br>sapiens                  |

|   |      |   |   |       |        |        |        |        |   |        |                              |                                  |
|---|------|---|---|-------|--------|--------|--------|--------|---|--------|------------------------------|----------------------------------|
| 1 | 1.00 | 1 | 1 | -0.02 | -0.02  | -0.022 | -0.017 | -0.02  | t | 70648  | VQSVASSR<br>RHKRFAG          | Homo<br>sapiens                  |
| 1 | 1.00 | 1 | 1 | 0.01  | 0.006  | -0.002 | 0.009  | 0.01   | t | 3972   | AQGQYSN<br>TLLRIYRDN<br>KTIN | Oryctola<br>gus<br>cuniculu<br>s |
| 1 | 1.00 | 1 | 1 | -0.01 | -0.01  | -0.01  | -0.001 | -0.009 | t | 135642 | CKNKEKCC                     | Homo<br>sapiens                  |
| 1 | 1.00 | 1 | 1 | 0.02  | 0.02   | 0.024  | 0.02   | 0.02   | t | 23139  | GVSGGS                       | Homo<br>sapiens                  |
| 1 | 1.00 | 1 | 1 | 0     | 0      | 0      | 0      | 0.001  | t | 139239 | RWPEFSKF<br>GGFDPQG          | Oryctola<br>gus<br>cuniculu<br>s |
| 1 | 1.00 | 1 | 1 | 0.01  | 0.01   | 0.01   | 0.01   | 0.01   | t | 123612 | PPGMIPPP                     | Oryctola<br>gus<br>cuniculu<br>s |
| 1 | 1.00 | 1 | 1 | -0.01 | -0.01  | -0.003 | -0.01  | -0.013 | t | 108825 | AVLMLPV<br>WACLS             | Mus<br>musculu<br>s              |
| 1 | 1.00 | 1 | 1 | -0.03 | -0.03  | -0.03  | -0.03  | -0.03  | t | 115874 | NQFLPYPY<br>YA               | Homo<br>sapiens                  |
| 1 | 1.00 | 1 | 1 | -0.04 | -0.042 | -0.034 | -0.041 | -0.044 | t | 133539 | CYKPGEW<br>AC                | Mus<br>musculu<br>s              |
| 1 | 1.00 | 1 | 1 | 0     | 0      | 0      | 0      | 0      | t | 70269  | VPDKEVLY<br>Q                | Homo<br>sapiens                  |
| 1 | 1.00 | 1 | 1 | 0.03  | 0.033  | 0.016  | 0.03   | 0.032  | t | 7134   | CTEKFTFSK<br>NPADTG          | Mus<br>musculu<br>s              |
| 1 | 1.00 | 1 | 1 | 0.03  | 0.033  | 0.016  | 0.03   | 0.032  | t | 7134   | CTEKFTFSK<br>NPADTG          | Mus<br>musculu<br>s              |
| 1 | 1.00 | 1 | 1 | 0.01  | 0.008  | 0.008  | 0.013  | 0.01   | t | 30194  | KDLEDGSK<br>YYFDEDTA         | Mus<br>musculu<br>s              |
| 1 | 1.00 | 1 | 1 | 0.04  | 0.037  | 0.034  | 0.04   | 0.042  | t | 133540 | DALVAKA<br>QEVs              | Oryctola<br>gus<br>cuniculu<br>s |
| 1 | 1.00 | 1 | 1 | -0.03 | -0.03  | -0.03  | -0.03  | -0.03  | t | 22127  | GRLHLND<br>RV                | Homo<br>sapiens                  |

|   |      |   |   |       |        |        |        |        |   |        |                              |                                  |
|---|------|---|---|-------|--------|--------|--------|--------|---|--------|------------------------------|----------------------------------|
| 1 | 1.00 | 1 | 1 | 0.02  | 0.023  | 0.024  | 0.02   | 0.018  | t | 106771 | RERMS                        | Mus<br>musculu<br>s              |
| 1 | 1.00 | 1 | 1 | 0.02  | 0.024  | 0.015  | 0.017  | 0.017  | t | 78111  | CLVRTPEV<br>DDEALEKF<br>DKAL | Homo<br>sapiens                  |
| 1 | 1.00 | 1 | 1 | 0.02  | 0.024  | 0.02   | 0.021  | 0.02   | t | 70664  | VQVVYDY<br>Q                 | Homo<br>sapiens                  |
| 1 | 1.00 | 1 | 1 | -0.03 | -0.028 | -0.03  | -0.027 | -0.031 | t | 120699 | KMFPEVKE<br>KGMAALP<br>RL    | Homo<br>sapiens                  |
| 1 | 1.00 | 1 | 1 | 0.06  | 0.065  | 0.053  | 0.061  | 0.061  | t | 138836 | CRTVYPSE<br>EETGE            | Homo<br>sapiens                  |
| 1 | 1.00 | 1 | 1 | 0     | 0      | 0.001  | 0      | -0.001 | t | 20526  | GKDDHYLL<br>EF               | Homo<br>sapiens                  |
| 1 | 1.00 | 1 | 1 | -0.01 | -0.013 | -0.007 | -0.01  | -0.012 | t | 18649  | GAKYMLV<br>QGEPGAV           | Oryctola<br>gus<br>cuniculu<br>s |
| 1 | 1.00 | 1 | 1 | 0.02  | 0.018  | 0.012  | 0.013  | 0.017  | t | 122205 | VFTLPPPL<br>PETH             | Mus<br>musculu<br>s              |
| 1 | 1.00 | 1 | 1 | 0     | 0      | 0      | 0      | 0      | t | 105583 | VTT                          | Oryctola<br>gus<br>cuniculu<br>s |
| 1 | 1.00 | 1 | 1 | 0     | -0.002 | 0      | 0.003  | 0      | t | 49321  | PSDKHIEQ<br>YLKKIKNSI<br>S   | Mus<br>musculu<br>s              |
| 1 | 1.00 | 1 | 1 | -0.02 | -0.02  | -0.02  | -0.02  | -0.02  | t | 117449 | CVP                          | Homo<br>sapiens                  |
| 1 | 1.00 | 1 | 1 | -0.02 | -0.02  | -0.02  | -0.02  | -0.02  | t | 117449 | CVP                          | Homo<br>sapiens                  |
| 1 | 1.00 | 1 | 1 | -0.02 | -0.016 | -0.021 | -0.023 | -0.021 | t | 39480  | LSLILNRLC                    | Homo<br>sapiens                  |
| 1 | 1.00 | 1 | 1 | 0.03  | 0.03   | 0.027  | 0.03   | 0.03   | t | 157833 | RDPYSPSQ<br>DPYSPS           | Homo<br>sapiens                  |
| 1 | 1.00 | 1 | 1 | 0.01  | 0.01   | 0.01   | 0.01   | 0.01   | t | 134151 | LRRVIGD                      | Homo<br>sapiens                  |

|   |      |   |   |       |        |        |       |        |   |        |                         |                          |
|---|------|---|---|-------|--------|--------|-------|--------|---|--------|-------------------------|--------------------------|
| 1 | 1.00 | 1 | 1 | 0     | 0      | 0.003  | 0     | -0.001 | t | 1602   | AGLLELNG<br>W           | Rattus<br>norvegicus     |
| 1 | 1.00 | 1 | 1 | -0.01 | -0.01  | -0.01  | -0.01 | -0.012 | t | 52138  | QQQTAPK<br>APT          | Oryctolagus<br>cuniculus |
| 1 | 1.00 | 1 | 1 | 0.01  | 0.01   | 0.01   | 0.01  | 0.011  | t | 117231 | RQIFGDYK<br>TTICGK      | Mus<br>musculus          |
| 1 | 1.00 | 1 | 1 | 0.02  | 0.017  | 0.006  | 0.02  | 0.024  | t | 97591  | QSATAVLG<br>A           | Oryctolagus<br>cuniculus |
| 1 | 1.00 | 1 | 1 | 0     | 0      | 0      | 0     | 0.001  | t | 42493  | MRQLDTN<br>VER          | Homo<br>sapiens          |
| 1 | 1.00 | 1 | 1 | 0.03  | 0.03   | 0.032  | 0.03  | 0.029  | t | 6948   | CRTCTTPA<br>QGTSMY      | Mus<br>musculus          |
| 1 | 1.00 | 1 | 1 | 0.06  | 0.06   | 0.06   | 0.06  | 0.06   | t | 103029 | AGTVNIGA<br>SDAYLSE     | Homo<br>sapiens          |
| 1 | 1.00 | 1 | 1 | 0.04  | 0.04   | 0.04   | 0.04  | 0.04   | t | 149082 | NPSQGPL                 | Sus<br>scrofa            |
| 1 | 1.00 | 1 | 1 | 0.04  | 0.04   | 0.04   | 0.04  | 0.04   | t | 103745 | YEEQMQD<br>AFETGVM<br>F | Homo<br>sapiens          |
| 1 | 1.00 | 1 | 1 | 0.02  | 0.02   | 0.02   | 0.02  | 0.02   | t | 157741 | PHYSNAP<br>QLVYI        | Homo<br>sapiens          |
| 1 | 1.00 | 1 | 1 | 0.02  | 0.02   | 0.02   | 0.02  | 0.02   | t | 133659 | NPWYNDL<br>SLLTA        | Homo<br>sapiens          |
| 1 | 1.00 | 1 | 1 | 0.02  | 0.02   | 0.02   | 0.02  | 0.02   | t | 114885 | LCAYSIEFG<br>T          | Homo<br>sapiens          |
| 1 | 1.00 | 1 | 1 | -0.05 | -0.043 | -0.036 | -0.05 | -0.056 | t | 4504   | ASKLCLG<br>WLWG         | Cavia<br>porcellus       |
| 1 | 1.00 | 1 | 1 | 0.01  | 0.01   | 0.01   | 0.01  | 0.01   | t | 136219 | FEEYGKIDT<br>IEIIT      | Homo<br>sapiens          |
| 1 | 1.00 | 1 | 1 | -0.01 | -0.01  | -0.01  | -0.01 | -0.01  | t | 54432  | RKTKRNTN<br>R           | Homo<br>sapiens          |
| 1 | 1.00 | 1 | 1 | 0     | 0      | -0.007 | 0     | 0.002  | t | 44342  | NISGTGEK<br>AQQHRKQ     | Homo<br>sapiens          |

|   |      |   |   |       |        |        |        |        |   |        |                              |                       |
|---|------|---|---|-------|--------|--------|--------|--------|---|--------|------------------------------|-----------------------|
| 1 | 1.00 | 1 | 1 | -0.04 | -0.04  | -0.043 | -0.04  | -0.041 | t | 136074 | LVKK                         | Mus musculus          |
| 1 | 1.00 | 1 | 1 | -0.01 | -0.01  | -0.01  | -0.01  | -0.01  | t | 127665 | GIQPTWV<br>PFHST             | Trichosurus vulpecula |
| 1 | 1.00 | 1 | 1 | 0     | -0.003 | 0      | 0      | -0.001 | t | 48992  | PQEQITQH<br>GSPYGRC          | Oryctolagus cuniculus |
| 1 | 1.00 | 1 | 1 | 0.01  | 0.01   | 0.01   | 0.01   | 0.008  | t | 39107  | LRGSGDLQ<br>EYLRHVTR         | Oryctolagus cuniculus |
| 1 | 1.00 | 1 | 1 | -0.04 | -0.04  | -0.04  | -0.044 | -0.04  | t | 139511 | GPM                          | Homo sapiens          |
| 1 | 1.00 | 1 | 1 | 0.04  | 0.042  | 0.04   | 0.039  | 0.04   | t | 149435 | QPQYSQP<br>QQP               | Homo sapiens          |
| 1 | 1.00 | 1 | 1 | 0     | 0      | -0.013 | 0.002  | 0.003  | t | 98891  | LQQQLIPC<br>MDVV             | Homo sapiens          |
| 1 | 1.00 | 1 | 1 | -0.01 | -0.008 | -0.012 | -0.007 | -0.01  | t | 13670  | EPIRDALN<br>AMTQNIR          | Homo sapiens          |
| 1 | 1.00 | 1 | 1 | 0.01  | 0.008  | -0.002 | 0.007  | 0.01   | t | 95742  | QSLACQ                       | Homo sapiens          |
| 1 | 1.00 | 1 | 1 | 0.05  | 0.05   | 0.05   | 0.05   | 0.048  | t | 140996 | EEIDYDDTI<br>SVEMKK          | Mus musculus          |
| 1 | 1.00 | 1 | 1 | 0.04  | 0.042  | 0.04   | 0.037  | 0.037  | t | 106315 | CSGTKKLS<br>EE               | Homo sapiens          |
| 1 | 1.00 | 1 | 1 | 0     | -0.003 | -0.012 | 0      | 0      | t | 112739 | YTTGAVR<br>QIFGDYKT<br>TICGK | Oryctolagus cuniculus |
| 1 | 1.00 | 1 | 1 | -0.04 | -0.038 | -0.04  | -0.033 | -0.039 | t | 144619 | DYIWNTL<br>NSG               | Homo sapiens          |
| 1 | 1.00 | 1 | 1 | -0.01 | -0.01  | -0.01  | -0.01  | -0.011 | t | 75949  | YTASARGD<br>LAHL             | Mus musculus          |
| 1 | 1.00 | 1 | 1 | 0.01  | 0.008  | 0.015  | 0.009  | 0.009  | t | 146839 | DLRTL                        | Mus musculus          |

|   |      |   |   |       |        |        |       |        |   |        |                              |                                  |
|---|------|---|---|-------|--------|--------|-------|--------|---|--------|------------------------------|----------------------------------|
| 1 | 1.00 | 1 | 1 | 0.01  | 0.013  | 0      | 0.01  | 0.01   | t | 44487  | NKENCGA<br>A                 | Mus<br>musculu<br>s              |
| 1 | 1.00 | 1 | 1 | 0.03  | 0.032  | 0.039  | 0.037 | 0.03   | t | 112336 | SSQSVLY                      | Homo<br>sapiens                  |
| 1 | 1.00 | 1 | 1 | 0.02  | 0.02   | 0.014  | 0.017 | 0.021  | t | 67729  | VAQYKALP<br>VVLENA           | Homo<br>sapiens                  |
| 1 | 1.00 | 1 | 1 | 0     | 0.008  | 0      | 0     | -0.002 | t | 156937 | PMSKSHL                      | Gallus<br>gallus                 |
| 1 | 1.00 | 1 | 1 | -0.03 | -0.036 | -0.044 | -0.03 | -0.03  | t | 53338  | RDEWWK<br>VIKKDVW<br>NVISWVF | Oryctola<br>gus<br>cuniculu<br>s |
| 1 | 1.00 | 1 | 1 | -0.03 | -0.033 | -0.044 | -0.03 | -0.03  | t | 53338  | RDEWWK<br>VIKKDVW<br>NVISWVF | Oryctola<br>gus<br>cuniculu<br>s |
| 1 | 1.00 | 1 | 1 | 0.03  | 0.03   | 0.03   | 0.03  | 0.03   | t | 158613 | SQSVAAS                      | Homo<br>sapiens                  |
| 1 | 1.00 | 1 | 1 | 0.01  | 0.01   | 0.01   | 0.01  | 0.01   | t | 149067 | LNFDPPS                      | Sus<br>scrofa                    |
| 1 | 1.00 | 1 | 1 | 0.01  | 0.01   | 0.01   | 0.01  | 0.01   | t | 114752 | AYSIEFGT<br>NI               | Homo<br>sapiens                  |
| 1 | 1.00 | 1 | 1 | -0.01 | -0.01  | -0.01  | -0.01 | -0.01  | t | 123798 | TTLKMWS<br>DF                | Ovis<br>aries                    |
| 1 | 1.00 | 1 | 1 | 0.04  | 0.04   | 0.034  | 0.04  | 0.041  | t | 13524  | ENMTPQD                      | Mus<br>musculu<br>s              |
| 1 | 1.00 | 1 | 1 | -0.02 | -0.02  | -0.02  | -0.02 | -0.02  | t | 96102  | APPLLPH                      | Homo<br>sapiens                  |
| 1 | 1.00 | 1 | 1 | 0.01  | 0.01   | 0.01   | 0.01  | 0.01   | t | 149934 | SGKFYPV                      | Capra<br>hircus                  |
| 1 | 1.00 | 1 | 1 | 0.02  | 0.016  | 0.018  | 0.019 | 0.019  | t | 122153 | NASGLSRP<br>SPSAH            | Oryctola<br>gus<br>cuniculu<br>s |
| 1 | 1.00 | 1 | 1 | 0.03  | 0.027  | 0.028  | 0.03  | 0.031  | t | 127185 | TCDDPRF<br>QDSS              | Oryctola<br>gus<br>cuniculu<br>s |

|   |      |   |   |       |        |        |        |        |   |        |                             |                                     |
|---|------|---|---|-------|--------|--------|--------|--------|---|--------|-----------------------------|-------------------------------------|
| 1 | 1.00 | 1 | 1 | -0.02 | -0.018 | -0.026 | -0.019 | -0.02  | t | 50203  | QAAAGDK<br>PS               | Homo<br>sapiens                     |
| 1 | 1.00 | 1 | 1 | 0.03  | 0.03   | 0.021  | 0.03   | 0.033  | t | 110733 | VGENVPD<br>DLYIKGSG         | Mus<br>musculu<br>s                 |
| 1 | 1.00 | 1 | 1 | 0     | -0.004 | 0      | -0.001 | -0.002 | t | 71353  | VTHESYQE<br>LVKKLEALE<br>DA | Oryctola<br>gus<br>cuniculu<br>s    |
| 1 | 1.00 | 1 | 1 | 0     | -0.002 | 0      | -0.001 | -0.002 | t | 62779  | TAADTPTA<br>TESISPSP        | Mus<br>musculu<br>s                 |
| 1 | 1.00 | 1 | 1 | 0     | 0.006  | 0      | -0.001 | -0.002 | t | 43242  | NANPNAN<br>PNANP            | Macaca<br>fascicula<br>ris          |
| 1 | 1.00 | 1 | 1 | 0     | 0      | -0.006 | 0      | 0.002  | t | 17328  | FPLDLT                      | Mus<br>musculu<br>s                 |
| 1 | 1.00 | 1 | 1 | 0.02  | 0.017  | 0.027  | 0.02   | 0.019  | t | 67189  | TVTYESFH<br>YFGSAPT         | Oncorhy<br>nchus<br>tshawyts<br>cha |
| 1 | 1.00 | 1 | 1 | 0.01  | 0.01   | 0.011  | 0.01   | 0.009  | t | 60594  | SQWNKPS<br>K                | Mus<br>musculu<br>s                 |
| 1 | 1.00 | 1 | 1 | 0.03  | 0.03   | 0.03   | 0.03   | 0.032  | t | 8355   | DGAVQPD<br>GG               | Oryctola<br>gus<br>cuniculu<br>s    |
| 1 | 1.00 | 1 | 1 | 0.03  | 0.033  | 0.03   | 0.03   | 0.032  | t | 8355   | DGAVQPD<br>GG               | Mus<br>musculu<br>s                 |
| 1 | 1.00 | 1 | 1 | -0.03 | -0.03  | -0.03  | -0.03  | -0.03  | t | 79463  | WALFRS                      | Mus<br>musculu<br>s                 |
| 1 | 1.00 | 1 | 1 | 0.02  | 0.02   | 0.018  | 0.017  | 0.018  | t | 100639 | WCVKPKG<br>VSDDQ            | Homo<br>sapiens                     |
| 1 | 1.00 | 1 | 1 | -0.03 | -0.029 | -0.041 | -0.031 | -0.032 | t | 59853  | SNKEGVA<br>ADGDALN<br>K     | Oryctola<br>gus<br>cuniculu<br>s    |
| 1 | 1.00 | 1 | 1 | 0.04  | 0.04   | 0.04   | 0.04   | 0.04   | t | 151035 | NGTYDYPK<br>YSEEAKL         | Homo<br>sapiens                     |

|   |      |   |   |       |        |        |        |        |   |        |                           |                     |
|---|------|---|---|-------|--------|--------|--------|--------|---|--------|---------------------------|---------------------|
| 1 | 1.00 | 1 | 1 | 0.02  | 0.02   | 0.02   | 0.02   | 0.02   | t | 99728  | TPEFLEQA<br>FQVDDRQ       | Homo<br>sapiens     |
| 1 | 1.00 | 1 | 1 | 0.01  | 0.008  | 0.007  | 0.013  | 0.012  | t | 52825  | QVYYRPV<br>DQ             | Mus<br>musculu<br>s |
| 1 | 1.00 | 1 | 1 | -0.04 | -0.04  | -0.04  | -0.033 | -0.041 | t | 117519 | GRGTVA<br>AAAAAT          | Mus<br>musculu<br>s |
| 1 | 1.00 | 1 | 1 | 0.05  | 0.048  | 0.035  | 0.053  | 0.052  | t | 52357  | QSKSTSAA<br>STDEL<br>SGP  | Mus<br>musculu<br>s |
| 1 | 1.00 | 1 | 1 | 0.02  | 0.02   | 0.012  | 0.019  | 0.019  | t | 65672  | TPNSIAAIS<br>M            | Mus<br>musculu<br>s |
| 1 | 1.00 | 1 | 1 | 0     | 0      | -0.004 | -0.003 | -0.002 | t | 32908  | KPTPEGDL<br>EILLQK        | Homo<br>sapiens     |
| 1 | 1.00 | 1 | 1 | -0.02 | -0.02  | -0.023 | -0.02  | -0.02  | t | 98974  | QTMKGLD<br>IQK            | Homo<br>sapiens     |
| 1 | 1.00 | 1 | 1 | -0.04 | -0.04  | -0.04  | -0.038 | -0.04  | t | 135894 | AHGCLFDR<br>RLCS          | Homo<br>sapiens     |
| 1 | 1.00 | 1 | 1 | 0     | -0.001 | -0.001 | 0      | 0      | t | 14749  | EVKKKSDS                  | Mus<br>musculu<br>s |
| 1 | 1.00 | 1 | 1 | 0.02  | 0.02   | 0.02   | 0.02   | 0.019  | t | 99836  | QPFPPQ                    | Mus<br>musculu<br>s |
| 1 | 1.00 | 1 | 1 | 0.02  | 0.022  | 0.011  | 0.02   | 0.023  | t | 110733 | VGENVPD<br>DLYIKGSG       | Homo<br>sapiens     |
| 1 | 1.00 | 1 | 1 | -0.04 | -0.04  | -0.04  | -0.037 | -0.04  | t | 149025 | ANILSRR                   | Sus<br>scrofa       |
| 1 | 1.00 | 1 | 1 | -0.02 | -0.02  | -0.038 | -0.02  | -0.018 | t | 13634  | EPEGIHYH<br>DKFE          | Mus<br>musculu<br>s |
| 1 | 1.00 | 1 | 1 | 0.03  | 0.028  | 0.032  | 0.029  | 0.03   | t | 53924  | RGLYFPAG                  | Mus<br>musculu<br>s |
| 1 | 1.00 | 1 | 1 | -0.01 | -0.01  | -0.01  | -0.007 | -0.01  | t | 22244  | GRVVLSGK<br>PAIPDREV<br>L | Homo<br>sapiens     |



|   |      |   |   |       |        |        |        |        |   |        |                         |                                  |
|---|------|---|---|-------|--------|--------|--------|--------|---|--------|-------------------------|----------------------------------|
| 1 | 1.00 | 1 | 1 | 0.03  | 0.033  | 0.029  | 0.03   | 0.028  | t | 98328  | PEVTKAEE                | Mus<br>musculu<br>s              |
| 1 | 1.00 | 1 | 1 | 0.03  | 0.03   | 0.029  | 0.03   | 0.028  | t | 98328  | PEVTKAEE                | Mus<br>musculu<br>s              |
| 1 | 1.00 | 1 | 1 | 0.04  | 0.042  | 0.04   | 0.041  | 0.039  | t | 150999 | IPSIQSRGL<br>FGAIAG     | Homo<br>sapiens                  |
| 1 | 1.00 | 1 | 1 | 0     | 0      | 0      | 0      | -0.001 | t | 119528 | SRKKTFTG<br>A           | Homo<br>sapiens                  |
| 1 | 1.00 | 1 | 1 | -0.02 | -0.024 | -0.01  | -0.02  | -0.022 | t | 74497  | YKQKIIAP                | Mus<br>musculu<br>s              |
| 1 | 1.00 | 1 | 1 | 0.01  | 0.012  | 0.003  | 0.007  | 0.01   | t | 73590  | YDTADII                 | Felis<br>catus                   |
| 1 | 1.00 | 1 | 1 | 0     | 0      | 0      | 0      | -0.002 | t | 48597  | PNANPN                  | Mus<br>musculu<br>s              |
| 1 | 1.00 | 1 | 1 | 0.03  | 0.03   | 0.03   | 0.03   | 0.03   | t | 150801 | EDDF                    | Homo<br>sapiens                  |
| 1 | 1.00 | 1 | 1 | 0.03  | 0.03   | 0.03   | 0.03   | 0.03   | t | 150801 | EDDF                    | Homo<br>sapiens                  |
| 1 | 1.00 | 1 | 1 | 0.03  | 0.034  | 0.022  | 0.031  | 0.032  | t | 73483  | YCADVAA<br>EELMNAL<br>V | Homo<br>sapiens                  |
| 1 | 1.00 | 1 | 1 | -0.02 | -0.02  | -0.02  | -0.02  | -0.02  | t | 78628  | DQKPPSR                 | Oryctola<br>gus<br>cuniculu<br>s |
| 1 | 1.00 | 1 | 1 | -0.02 | -0.02  | -0.02  | -0.02  | -0.02  | t | 78628  | DQKPPSR                 | Oryctola<br>gus<br>cuniculu<br>s |
| 1 | 1.00 | 1 | 1 | -0.02 | -0.018 | -0.016 | -0.019 | -0.02  | t | 51974  | QPTELRY<br>SW           | Homo<br>sapiens                  |
| 1 | 1.00 | 1 | 1 | -0.02 | -0.022 | -0.016 | -0.019 | -0.02  | t | 51974  | QPTELRY<br>SW           | Homo<br>sapiens                  |

|   |      |   |   |       |        |        |        |        |   |        |                              |                                  |
|---|------|---|---|-------|--------|--------|--------|--------|---|--------|------------------------------|----------------------------------|
| 1 | 1.00 | 1 | 1 | 0     | 0      | 0      | 0.004  | 0      | t | 48442  | PLPHVVDL<br>PQ               | Homo<br>sapiens                  |
| 1 | 1.00 | 1 | 1 | 0     | 0      | 0      | 0      | 0      | t | 120681 | KILPEVKEK<br>H               | Oryctola<br>gus<br>cuniculu<br>s |
| 1 | 1.00 | 1 | 1 | -0.01 | -0.01  | -0.01  | -0.006 | -0.01  | t | 118375 | GKALCWV<br>CAQSRKH<br>RDHAMV | Homo<br>sapiens                  |
| 1 | 1.00 | 1 | 1 | 0.01  | 0.01   | 0.01   | 0.01   | 0.009  | t | 153835 | HGDTPTLH<br>EYMLDLQ<br>P     | Cavia<br>porcellu<br>s           |
| 1 | 1.00 | 1 | 1 | -0.02 | -0.02  | -0.02  | -0.02  | -0.02  | t | 47789  | PGYPWPL<br>Y                 | Homo<br>sapiens                  |
| 1 | 1.00 | 1 | 1 | 0     | 0      | 0      | 0.001  | -0.001 | t | 7765   | DDEHVEEP<br>TVA              | Homo<br>sapiens                  |
| 1 | 1.00 | 1 | 1 | 0.01  | 0.014  | 0.01   | 0.017  | 0.011  | t | 122892 | RSILPYGDS<br>MDRIE           | Homo<br>sapiens                  |
| 1 | 1.00 | 1 | 1 | 0     | 0      | 0      | 0      | -0.002 | t | 9753   | DPRVRGLY                     | Mus<br>musculu<br>s              |
| 1 | 1.00 | 1 | 1 | 0.01  | 0.01   | 0.01   | 0.014  | 0.01   | t | 131250 | NHVQAW<br>EQFWDS             | Homo<br>sapiens                  |
| 1 | 1.00 | 1 | 1 | 0     | 0      | -0.005 | 0      | 0.002  | t | 133608 | INTTVCAG<br>Y                | Mus<br>musculu<br>s              |
| 1 | 1.00 | 1 | 1 | 0.02  | 0.018  | 0.019  | 0.02   | 0.022  | t | 134471 | PKPEQ                        | Mus<br>musculu<br>s              |
| 1 | 1.00 | 1 | 1 | 0.03  | 0.03   | 0.023  | 0.03   | 0.028  | t | 95897  | TDEYCSPD<br>HN               | Homo<br>sapiens                  |
| 1 | 1.00 | 1 | 1 | 0.05  | 0.046  | 0.041  | 0.05   | 0.052  | t | 20046  | GGTEESVV<br>TASRS            | Bos<br>taurus                    |
| 1 | 1.00 | 1 | 1 | -0.01 | -0.004 | -0.011 | -0.009 | -0.008 | t | 121074 | YDFAEAKS<br>GSSIPAK          | Equus<br>caballus                |
| 1 | 1.00 | 1 | 1 | -0.01 | -0.01  | -0.01  | -0.01  | -0.012 | t | 55305  | RPQQPFPL<br>QP               | Mus<br>musculu<br>s              |
| 1 | 1.00 | 1 | 1 | -0.01 | -0.012 | -0.008 | -0.011 | -0.01  | t | 73070  | WSFADGN                      | Mus<br>musculu<br>s              |

|   |      |   |   |       |        |        |        |        |   |        |                       |                |
|---|------|---|---|-------|--------|--------|--------|--------|---|--------|-----------------------|----------------|
| 1 | 1.00 | 1 | 1 | 0     | 0      | 0      | 0      | -0.001 | t | 61944  | STTNK                 | Mus musculus   |
| 1 | 1.00 | 1 | 1 | 0.02  | 0.02   | 0.02   | 0.02   | 0.02   | t | 95930  | TTLNPTI               | Mus musculus   |
| 1 | 1.00 | 1 | 1 | -0.01 | -0.005 | -0.007 | -0.014 | -0.01  | t | 25510  | ICLAVLWVVK            | Homo sapiens   |
| 1 | 1.00 | 1 | 1 | 0.02  | 0.02   | 0.017  | 0.013  | 0.017  | t | 115630 | NFDKLYIWG             | Homo sapiens   |
| 1 | 1.00 | 1 | 1 | 0     | -0.003 | -0.01  | 0.001  | 0      | t | 4763   | ASSAAEFLAAFNVFSEAAARC | Canis lupus    |
| 1 | 1.00 | 1 | 1 | 0.01  | 0.01   | 0.01   | 0.01   | 0.01   | t | 143845 | DLFVTAW               | Homo sapiens   |
| 1 | 1.00 | 1 | 1 | 0.01  | 0.01   | 0.01   | 0.01   | 0.01   | t | 98797  | GGFGP                 | Mus musculus   |
| 1 | 1.00 | 1 | 1 | 0     | 0.002  | -0.009 | 0.001  | -0.002 | t | 51793  | QPAPATAPSQGGV         | Homo sapiens   |
| 1 | 1.00 | 1 | 1 | 0     | 0.004  | -0.009 | 0.001  | -0.002 | t | 51793  | QPAPATAPSQGGV         | Homo sapiens   |
| 1 | 1.00 | 1 | 1 | 0.01  | 0.012  | 0.01   | 0.01   | 0.01   | t | 117749 | APAMIPP               | Homo sapiens   |
| 1 | 1.00 | 1 | 1 | 0.02  | 0.02   | 0.021  | 0.017  | 0.018  | t | 44227  | NIFSGFTPEFLEQAF       | Homo sapiens   |
| 1 | 1.00 | 1 | 1 | 0.02  | 0.021  | 0.006  | 0.017  | 0.02   | t | 35282  | LDRLVESA<br>KREMAQKLA | Equus caballus |
| 1 | 1.00 | 1 | 1 | 0.04  | 0.04   | 0.04   | 0.04   | 0.039  | t | 99775  | WELQGDRRCQSQLER       | Homo sapiens   |
| 1 | 1.00 | 1 | 1 | 0     | 0      | 0      | 0      | -0.001 | t | 138249 | TFRVVS                | Homo sapiens   |
| 1 | 1.00 | 1 | 1 | 0.02  | 0.02   | 0.02   | 0.02   | 0.02   | t | 79223  | GASHTV                | Mus musculus   |

|   |      |   |   |       |        |        |        |        |   |        |                            |                                  |
|---|------|---|---|-------|--------|--------|--------|--------|---|--------|----------------------------|----------------------------------|
| 1 | 1.00 | 1 | 1 | -0.02 | -0.018 | -0.027 | -0.017 | -0.018 | t | 49855  | PVEIRRGV<br>ML             | Homo<br>sapiens                  |
| 1 | 1.00 | 1 | 1 | 0.05  | 0.05   | 0.05   | 0.05   | 0.05   | t | 95928  | TSDVAG                     | Mus<br>musculu<br>s              |
| 1 | 1.00 | 1 | 1 | 0.03  | 0.03   | 0.03   | 0.03   | 0.03   | t | 132851 | KMSESGA<br>GVQFYLP         | Trichosu<br>rus<br>vulpecul<br>a |
| 1 | 1.00 | 1 | 1 | 0.03  | 0.03   | 0.03   | 0.03   | 0.03   | t | 99546  | PSQDPYSP<br>SPYDRRG        | Homo<br>sapiens                  |
| 1 | 1.00 | 1 | 1 | -0.02 | -0.018 | -0.02  | -0.019 | -0.02  | t | 4023   | AQPGYPW<br>PLY             | Homo<br>sapiens                  |
| 1 | 1.00 | 1 | 1 | 0.02  | 0.023  | 0.02   | 0.02   | 0.02   | t | 38918  | LQND                       | Mus<br>musculu<br>s              |
| 1 | 1.00 | 1 | 1 | 0.02  | 0.023  | 0.02   | 0.02   | 0.02   | t | 38918  | LQND                       | Mus<br>musculu<br>s              |
| 1 | 1.00 | 1 | 1 | -0.01 | -0.01  | -0.01  | -0.01  | -0.01  | t | 48782  | PPFTSAVG<br>GVDHRS         | Mus<br>musculu<br>s              |
| 1 | 1.00 | 1 | 1 | -0.02 | -0.02  | -0.02  | -0.02  | -0.02  | t | 134752 | MGPKRRQ<br>LTF             | Homo<br>sapiens                  |
| 1 | 1.00 | 1 | 1 | -0.01 | -0.008 | -0.007 | -0.009 | -0.008 | t | 34278  | KVYVGNY<br>DF              | Homo<br>sapiens                  |
| 1 | 1.00 | 1 | 1 | -0.01 | -0.006 | -0.01  | -0.007 | -0.011 | t | 110766 | AIKSEVSLT<br>GAL           | Homo<br>sapiens                  |
| 1 | 1.00 | 1 | 1 | 0.07  | 0.068  | 0.061  | 0.063  | 0.07   | t | 110884 | HEYMLDL<br>QPETTDLY<br>CYE | Mus<br>musculu<br>s              |
| 1 | 1.00 | 1 | 1 | 0.07  | 0.068  | 0.061  | 0.063  | 0.07   | t | 110884 | HEYMLDL<br>QPETTDLY<br>CYE | Mus<br>musculu<br>s              |
| 1 | 1.00 | 1 | 1 | 0.07  | 0.068  | 0.061  | 0.063  | 0.07   | t | 110884 | HEYMLDL<br>QPETTDLY<br>CYE | Mus<br>musculu<br>s              |
| 1 | 1.00 | 1 | 1 | -0.03 | -0.026 | -0.019 | -0.023 | -0.03  | t | 140413 | VVLGAHN<br>V               | Homo<br>sapiens                  |

|   |      |   |   |       |       |        |       |        |   |        |                         |                                  |
|---|------|---|---|-------|-------|--------|-------|--------|---|--------|-------------------------|----------------------------------|
| 1 | 1.00 | 1 | 1 | 0     | 0.002 | 0      | 0.001 | 0      | t | 65932  | TQSFLGTTI<br>SGVLW      | Homo<br>sapiens                  |
| 1 | 1.00 | 1 | 1 | -0.02 | -0.02 | -0.02  | -0.02 | -0.021 | t | 102005 | QPDQHHQ                 | Mus<br>musculu<br>s              |
| 1 | 1.00 | 1 | 1 | 0     | 0.004 | -0.015 | 0.001 | 0.003  | t | 60797  | SRSES RKN<br>RGGREEIL   | Homo<br>sapiens                  |
| 1 | 1.00 | 1 | 1 | 0.03  | 0.03  | 0.023  | 0.027 | 0.03   | t | 69827  | VLVLDTDY<br>K           | Homo<br>sapiens                  |
| 1 | 1.00 | 1 | 1 | 0.02  | 0.02  | 0.02   | 0.02  | 0.02   | t | 293    | AALLQSAR                | Oryctola<br>gus<br>cuniculu<br>s |
| 1 | 1.00 | 1 | 1 | 0.05  | 0.05  | 0.037  | 0.05  | 0.053  | t | 110389 | QTISTHLN                | Mus<br>musculu<br>s              |
| 1 | 1.00 | 1 | 1 | 0.03  | 0.032 | 0.028  | 0.031 | 0.029  | t | 28291  | IRFKDDTSF<br>EDING      | Homo<br>sapiens                  |
| 1 | 1.00 | 1 | 1 | 0.02  | 0.02  | 0.02   | 0.02  | 0.02   | t | 99053  | VVNKGTG<br>NLELVAVR     | Homo<br>sapiens                  |
| 1 | 1.00 | 1 | 1 | 0.02  | 0.02  | 0.02   | 0.02  | 0.02   | t | 79459  | VRDGYIV                 | Oryctola<br>gus<br>cuniculu<br>s |
| 1 | 1.00 | 1 | 1 | 0.02  | 0.02  | 0.02   | 0.02  | 0.02   | t | 78942  | CTLSVFGY<br>WVC         | Mus<br>musculu<br>s              |
| 1 | 1.00 | 1 | 1 | 0.02  | 0.02  | 0.02   | 0.02  | 0.02   | t | 79459  | VRDGYIV                 | Oryctola<br>gus<br>cuniculu<br>s |
| 1 | 1.00 | 1 | 1 | 0.01  | 0.012 | -0.008 | 0.007 | 0.012  | t | 95833  | SGPSGPSG<br>PSGT        | Homo<br>sapiens                  |
| 1 | 1.00 | 1 | 1 | 0.01  | 0.012 | -0.008 | 0.007 | 0.012  | t | 95833  | SGPSGPSG<br>PSGT        | Homo<br>sapiens                  |
| 1 | 1.00 | 1 | 1 | 0.02  | 0.009 | 0.024  | 0.02  | 0.018  | t | 23494  | GYVRSGG<br>AVPPACC<br>N | Oryctola<br>gus<br>cuniculu<br>s |

|   |      |   |   |       |        |        |        |        |   |        |                         |                                  |
|---|------|---|---|-------|--------|--------|--------|--------|---|--------|-------------------------|----------------------------------|
| 1 | 1.00 | 1 | 1 | 0.06  | 0.058  | 0.06   | 0.053  | 0.058  | t | 131128 | VEMKKED<br>FDIYDEDE     | Mus<br>musculu<br>s              |
| 1 | 1.00 | 1 | 1 | 0.06  | 0.056  | 0.06   | 0.053  | 0.058  | t | 131128 | VEMKKED<br>FDIYDEDE     | Oryctola<br>gus<br>cuniculu<br>s |
| 1 | 1.00 | 1 | 1 | 0.05  | 0.05   | 0.048  | 0.046  | 0.05   | t | 15323  | FCETNGLE<br>YI          | Homo<br>sapiens                  |
| 1 | 1.00 | 1 | 1 | -0.01 | -0.008 | -0.005 | -0.007 | -0.01  | t | 102563 | KKRPPKPG                | Homo<br>sapiens                  |
| 1 | 1.00 | 1 | 1 | 0     | 0      | 0      | 0.006  | 0.001  | t | 71284  | VTEEI                   | Homo<br>sapiens                  |
| 1 | 1.00 | 1 | 1 | 0     | -0.002 | -0.006 | -0.001 | 0      | t | 51161  | QIYTINDKI<br>L          | Mus<br>musculu<br>s              |
| 1 | 1.00 | 1 | 1 | 0.01  | 0.01   | 0.01   | 0.01   | 0.01   | t | 1062   | AELTGY                  | Homo<br>sapiens                  |
| 1 | 1.00 | 1 | 1 | 0     | 0      | 0      | -0.003 | 0      | t | 96714  | NVPKINPK<br>KD          | Homo<br>sapiens(<br>human)       |
| 1 | 1.00 | 1 | 1 | 0.06  | 0.048  | 0.058  | 0.06   | 0.06   | t | 55924  | RSQDACIE<br>FVQQEVD     | Mus<br>musculu<br>s              |
| 1 | 1.00 | 1 | 1 | 0.06  | 0.046  | 0.058  | 0.06   | 0.06   | t | 55924  | RSQDACIE<br>FVQQEVD     | Oryctola<br>gus<br>cuniculu<br>s |
| 1 | 1.00 | 1 | 1 | 0.01  | 0.012  | 0.008  | 0.007  | 0.007  | t | 105997 | PFKFFVPP<br>SEQSLRA     | Homo<br>sapiens                  |
| 1 | 1.00 | 1 | 1 | 0.02  | 0.02   | 0.02   | 0.02   | 0.018  | t | 118158 | SRNLYDIG<br>E           | Homo<br>sapiens                  |
| 1 | 1.00 | 1 | 1 | 0     | -0.002 | 0.01   | 0      | 0      | t | 138937 | YIGEVLS<br>V            | Homo<br>sapiens                  |
| 1 | 1.00 | 1 | 1 | 0     | 0      | 0      | 0      | -0.001 | t | 140510 | TTTHFLAT<br>KFYK        | Mus<br>musculu<br>s              |
| 1 | 1.00 | 1 | 1 | -0.01 | -0.022 | -0.008 | -0.01  | -0.012 | t | 146185 | DAEFGH                  | Macaca<br>mulatta                |
| 1 | 1.00 | 1 | 1 | 0.02  | 0.018  | 0.018  | 0.017  | 0.022  | t | 120609 | IFAD                    | Rattus<br>norvegic<br>us         |
| 1 | 1.00 | 1 | 1 | 0.01  | 0.01   | 0.002  | 0.01   | 0.013  | t | 110976 | QKSQRSQ<br>DENPVVH<br>F | Rattus<br>norvegic<br>us         |

|   |      |   |   |   |   |   |   |        |   |        |                           |                                  |
|---|------|---|---|---|---|---|---|--------|---|--------|---------------------------|----------------------------------|
| 1 | 1.00 | 1 | 1 | 0 | 0 | 0 | 0 | -0.002 | t | 144705 | KGTHSLYS<br>QIAG          | Mus<br>musculu<br>s              |
| 1 | 1.00 | 1 | 1 | 0 | 0 | 0 | 0 | -0.002 | t | 144654 | GPHPTLEV<br>VPMGRGS       | Mus<br>musculu<br>s              |
| 1 | 1.00 | 1 | 1 | 0 | 0 | 0 | 0 | -0.002 | t | 138626 | SQKDILER<br>KRAAVDR<br>VC | Oryctola<br>gus<br>cuniculu<br>s |
| 1 | 1.00 | 1 | 1 | 0 | 0 | 0 | 0 | -0.002 | t | 134909 | EEKLVF                    | Mus<br>musculu<br>s              |
| 1 | 1.00 | 1 | 1 | 0 | 0 | 0 | 0 | -0.002 | t | 136381 | IKHRKRRL<br>RMIL          | Mus<br>musculu<br>s              |
| 1 | 1.00 | 1 | 1 | 0 | 0 | 0 | 0 | -0.002 | t | 144599 | CNGTHPSL<br>RLC           | Mus<br>musculu<br>s              |
| 1 | 1.00 | 1 | 1 | 0 | 0 | 0 | 0 | -0.002 | t | 138628 | SQKEVLER<br>TRAELDTV<br>C | Oryctola<br>gus<br>cuniculu<br>s |
| 1 | 1.00 | 1 | 1 | 0 | 0 | 0 | 0 | -0.002 | t | 141683 | KDWG                      | Mus<br>musculu<br>s              |
| 1 | 1.00 | 1 | 1 | 0 | 0 | 0 | 0 | -0.002 | t | 142913 | MVLNEGT<br>SGTA           | Oryctola<br>gus<br>cuniculu<br>s |
| 1 | 1.00 | 1 | 1 | 0 | 0 | 0 | 0 | -0.002 | t | 136649 | SPQRRKRT<br>RQIR          | Mus<br>musculu<br>s              |
| 1 | 1.00 | 1 | 1 | 0 | 0 | 0 | 0 | -0.002 | t | 149684 | EPAGSNR                   | Mus<br>musculu<br>s              |
| 1 | 1.00 | 1 | 1 | 0 | 0 | 0 | 0 | -0.002 | t | 144797 | TGGCTHG<br>CLAVP          | Mus<br>musculu<br>s              |
| 1 | 1.00 | 1 | 1 | 0 | 0 | 0 | 0 | -0.002 | t | 144778 | SGTHPFLD<br>KSFS          | Mus<br>musculu<br>s              |
| 1 | 1.00 | 1 | 1 | 0 | 0 | 0 | 0 | -0.002 | t | 144676 | GTHPSLQF<br>T             | Mus<br>musculu<br>s              |
| 1 | 1.00 | 1 | 1 | 0 | 0 | 0 | 0 | -0.002 | t | 144598 | CFVGTHP<br>QLRC           | Mus<br>musculu<br>s              |
| 1 | 1.00 | 1 | 1 | 0 | 0 | 0 | 0 | -0.002 | t | 141693 | KTWG                      | Mus<br>musculu<br>s              |

|   |      |   |   |   |        |   |   |        |   |        |                           |                       |
|---|------|---|---|---|--------|---|---|--------|---|--------|---------------------------|-----------------------|
| 1 | 1.00 | 1 | 1 | 0 | 0      | 0 | 0 | -0.002 | t | 138862 | KFPED                     | Mus musculus          |
| 1 | 1.00 | 1 | 1 | 0 | 0      | 0 | 0 | -0.002 | t | 144809 | VLAPGGT<br>HSRGLLE<br>M   | Mus musculus          |
| 1 | 1.00 | 1 | 1 | 0 | 0      | 0 | 0 | -0.002 | t | 144777 | SGTHMNL<br>YLHDTAFA       | Mus musculus          |
| 1 | 1.00 | 1 | 1 | 0 | 0      | 0 | 0 | -0.002 | t | 138627 | SQKEVLEG<br>ARASVDR<br>VC | Oryctolagus cuniculus |
| 1 | 1.00 | 1 | 1 | 0 | 0      | 0 | 0 | -0.002 | t | 144685 | HVGTHPM<br>LQPSF          | Mus musculus          |
| 1 | 1.00 | 1 | 1 | 0 | 0      | 0 | 0 | -0.002 | t | 135569 | KTNMK                     | Mus musculus          |
| 1 | 1.00 | 1 | 1 | 0 | 0      | 0 | 0 | -0.002 | t | 144793 | SYGGRKGT<br>HPGLEMP       | Mus musculus          |
| 1 | 1.00 | 1 | 1 | 0 | 0      | 0 | 0 | -0.002 | t | 144601 | CSGTHPSIS<br>SC           | Mus musculus          |
| 1 | 1.00 | 1 | 1 | 0 | 0      | 0 | 0 | -0.002 | t | 136551 | PIQRKRRQ<br>MPLS          | Mus musculus          |
| 1 | 1.00 | 1 | 1 | 0 | 0      | 0 | 0 | -0.002 | t | 144756 | QVGTHPG<br>LANDYEYT       | Mus musculus          |
| 1 | 1.00 | 1 | 1 | 0 | 0      | 0 | 0 | -0.002 | t | 135799 | YGKDVKDL<br>FDYAEQ        | Mus musculus          |
| 1 | 1.00 | 1 | 1 | 0 | 0      | 0 | 0 | -0.002 | t | 136358 | HMRKRTKI<br>KKIR          | Mus musculus          |
| 1 | 1.00 | 1 | 1 | 0 | 0      | 0 | 0 | -0.002 | t | 144678 | GTQPTLEV<br>VPMGRGS       | Mus musculus          |
| 1 | 1.00 | 1 | 1 | 0 | -0.003 | 0 | 0 | -0.002 | t | 142441 | LFSPWLRV<br>QNHF          | Oryctolagus cuniculus |
| 1 | 1.00 | 1 | 1 | 0 | 0      | 0 | 0 | -0.002 | t | 144656 | GPTHAMF<br>DSSGP          | Mus musculus          |
| 1 | 1.00 | 1 | 1 | 0 | 0      | 0 | 0 | -0.002 | t | 136392 | IPKSRKRRI<br>PQR          | Mus musculus          |



|   |      |   |   |   |        |   |   |        |   |        |                              |                          |
|---|------|---|---|---|--------|---|---|--------|---|--------|------------------------------|--------------------------|
| 1 | 1.00 | 1 | 1 | 0 | 0      | 0 | 0 | -0.002 | t | 134945 | FKAPRP                       | Mus<br>musculus          |
| 1 | 1.00 | 1 | 1 | 0 | 0      | 0 | 0 | -0.002 | t | 139029 | DLQVLT                       | Mus<br>musculus          |
| 1 | 1.00 | 1 | 1 | 0 | 0      | 0 | 0 | -0.002 | t | 127643 | ERPLELRV<br>RVLDI            | Homo<br>sapiens          |
| 1 | 1.00 | 1 | 1 | 0 | 0      | 0 | 0 | -0.002 | t | 125085 | GTPSHSRR<br>QPHVMS           | Macaca<br>fascicularis   |
| 1 | 1.00 | 1 | 1 | 0 | 0      | 0 | 0 | -0.002 | t | 133156 | IRLR                         | Oryctolagus<br>cuniculus |
| 1 | 1.00 | 1 | 1 | 0 | -0.003 | 0 | 0 | -0.002 | t | 125602 | WMSYPDR<br>TLRTS             | Oryctolagus<br>cuniculus |
| 1 | 1.00 | 1 | 1 | 0 | 0      | 0 | 0 | -0.002 | t | 132233 | DSGCVIN<br>WKGRELK<br>C      | Mus<br>musculus          |
| 1 | 1.00 | 1 | 1 | 0 | 0      | 0 | 0 | -0.002 | t | 127857 | TDVRYKD<br>DMYHFFC<br>PAIQAQ | Mus<br>musculus          |
| 1 | 1.00 | 1 | 1 | 0 | 0      | 0 | 0 | -0.002 | t | 122871 | PETQPGPL<br>TLELQIAK<br>DK   | Oryctolagus<br>cuniculus |
| 1 | 1.00 | 1 | 1 | 0 | 0      | 0 | 0 | -0.002 | t | 119304 | PNQEKVS<br>GIPEQEYS<br>C     | Oryctolagus<br>cuniculus |
| 1 | 1.00 | 1 | 1 | 0 | 0      | 0 | 0 | -0.002 | t | 119048 | VSDYEMKL<br>MDLDVEQ          | Mus<br>musculus          |
| 1 | 1.00 | 1 | 1 | 0 | 0      | 0 | 0 | -0.002 | t | 132984 | AIQNIRLR<br>HENKDL           | Oryctolagus<br>cuniculus |
| 1 | 1.00 | 1 | 1 | 0 | 0      | 0 | 0 | -0.002 | t | 125600 | WESYPFRV<br>GTSL             | Mus<br>musculus          |
| 1 | 1.00 | 1 | 1 | 0 | 0      | 0 | 0 | -0.002 | t | 122375 | GLINRAKA<br>VKQFEESQ<br>G    | Mus<br>musculus          |

|   |      |   |   |   |   |   |   |        |   |        |                         |                              |
|---|------|---|---|---|---|---|---|--------|---|--------|-------------------------|------------------------------|
| 1 | 1.00 | 1 | 1 | 0 | 0 | 0 | 0 | -0.002 | t | 132147 | AHLDETV<br>WERPHEFW     | Mus<br>musculus              |
| 1 | 1.00 | 1 | 1 | 0 | 0 | 0 | 0 | -0.002 | t | 125363 | APKTYVSV<br>SGMV        | Mus<br>musculus              |
| 1 | 1.00 | 1 | 1 | 0 | 0 | 0 | 0 | -0.002 | t | 125209 | QFQIHGPR                | Mus<br>musculus              |
| 1 | 1.00 | 1 | 1 | 0 | 0 | 0 | 0 | -0.002 | t | 133157 | IRLRHENK<br>DLKARL      | Oryctola<br>gus<br>cuniculus |
| 1 | 1.00 | 1 | 1 | 0 | 0 | 0 | 0 | -0.002 | t | 117940 | KARIHPFHI<br>LIALETYKTH | Mus<br>musculus              |
| 1 | 1.00 | 1 | 1 | 0 | 0 | 0 | 0 | -0.002 | t | 119220 | ISCAKDGG<br>IPEQEYSC    | Oryctola<br>gus<br>cuniculus |
| 1 | 1.00 | 1 | 1 | 0 | 0 | 0 | 0 | -0.002 | t | 132660 | SKAVHAD<br>MGYWIESE     | Mus<br>musculus              |
| 1 | 1.00 | 1 | 1 | 0 | 0 | 0 | 0 | -0.002 | t | 122512 | PEPAKSAP<br>APKKGSK     | Mus<br>musculus              |
| 1 | 1.00 | 1 | 1 | 0 | 0 | 0 | 0 | -0.002 | t | 129732 | RERRGIAL<br>DGKI        | Mus<br>musculus              |
| 1 | 1.00 | 1 | 1 | 0 | 0 | 0 | 0 | -0.002 | t | 132727 | VTNEVHT<br>WTEQYKFQ     | Mus<br>musculus              |
| 1 | 1.00 | 1 | 1 | 0 | 0 | 0 | 0 | -0.002 | t | 132397 | KEENLVKS<br>LVSAGSG     | Mus<br>musculus              |
| 1 | 1.00 | 1 | 1 | 0 | 0 | 0 | 0 | -0.002 | t | 125602 | WMSYPDR<br>TLRTS        | Mus<br>musculus              |
| 1 | 1.00 | 1 | 1 | 0 | 0 | 0 | 0 | -0.002 | t | 125004 | DAPDTDW<br>CDSIP        | Mus<br>musculus              |
| 1 | 1.00 | 1 | 1 | 0 | 0 | 0 | 0 | -0.002 | t | 131576 | NSRQTDR<br>EDELI        | Rattus<br>norvegicus         |
| 1 | 1.00 | 1 | 1 | 0 | 0 | 0 | 0 | -0.002 | t | 131654 | SGFGVVKK<br>PNY         | Oryctola<br>gus<br>cuniculus |

|   |      |   |   |   |   |   |   |        |   |        |                              |                                  |
|---|------|---|---|---|---|---|---|--------|---|--------|------------------------------|----------------------------------|
| 1 | 1.00 | 1 | 1 | 0 | 0 | 0 | 0 | -0.002 | t | 127852 | TCTIKVVG<br>GYQVNIRV<br>GDTT | Mus<br>musculu<br>s              |
| 1 | 1.00 | 1 | 1 | 0 | 0 | 0 | 0 | -0.002 | t | 117506 | GGAHFSVS<br>SLAEG            | Mus<br>musculu<br>s              |
| 1 | 1.00 | 1 | 1 | 0 | 0 | 0 | 0 | -0.002 | t | 118877 | LDVEQLGI<br>PEQEYSC          | Oryctola<br>gus<br>cuniculu<br>s |
| 1 | 1.00 | 1 | 1 | 0 | 0 | 0 | 0 | -0.002 | t | 127856 | TDVRYKD                      | Mus<br>musculu<br>s              |
| 1 | 1.00 | 1 | 1 | 0 | 0 | 0 | 0 | -0.002 | t | 124713 | SGEQPSDE<br>QPSGEHG          | Mus<br>musculu<br>s              |
| 1 | 1.00 | 1 | 1 | 0 | 0 | 0 | 0 | -0.002 | t | 120869 | PGYRSISG<br>PDPRIKRT         | Mus<br>musculu<br>s              |
| 1 | 1.00 | 1 | 1 | 0 | 0 | 0 | 0 | -0.002 | t | 132276 | ERIIYHFV                     | Mus<br>musculu<br>s              |
| 1 | 1.00 | 1 | 1 | 0 | 0 | 0 | 0 | -0.002 | t | 122712 | ADPEGPLP<br>FPYFERQ          | Mus<br>musculu<br>s              |
| 1 | 1.00 | 1 | 1 | 0 | 0 | 0 | 0 | -0.002 | t | 132687 | STQTAGP<br>WHLGKLEL          | Mus<br>musculu<br>s              |
| 1 | 1.00 | 1 | 1 | 0 | 0 | 0 | 0 | -0.002 | t | 132200 | CGNRGPSL<br>RTTTVTG          | Mus<br>musculu<br>s              |
| 1 | 1.00 | 1 | 1 | 0 | 0 | 0 | 0 | -0.002 | t | 123849 | WQDE                         | Mus<br>musculu<br>s              |
| 1 | 1.00 | 1 | 1 | 0 | 0 | 0 | 0 | -0.002 | t | 119382 | VISCAKDAI<br>EDEEGSC         | Oryctola<br>gus<br>cuniculu<br>s |
| 1 | 1.00 | 1 | 1 | 0 | 0 | 0 | 0 | -0.002 | t | 118599 | SAPAPKKG<br>SKKAV            | Mus<br>musculu<br>s              |
| 1 | 1.00 | 1 | 1 | 0 | 0 | 0 | 0 | -0.002 | t | 123734 | SFSKASNS<br>WFPVEGP<br>ADICQ | marmos<br>ets                    |
| 1 | 1.00 | 1 | 1 | 0 | 0 | 0 | 0 | -0.002 | t | 131381 | CTYVLDP<br>E<br>NL           | Mus<br>musculu<br>s              |
| 1 | 1.00 | 1 | 1 | 0 | 0 | 0 | 0 | -0.002 | t | 125052 | FSLRLMEE<br>NW               | Mus<br>musculu<br>s              |

|   |      |   |   |   |   |   |   |        |   |        |                            |                                  |
|---|------|---|---|---|---|---|---|--------|---|--------|----------------------------|----------------------------------|
| 1 | 1.00 | 1 | 1 | 0 | 0 | 0 | 0 | -0.002 | t | 130524 | KFHPKDIP<br>YQVW           | Mus<br>musculu<br>s              |
| 1 | 1.00 | 1 | 1 | 0 | 0 | 0 | 0 | -0.002 | t | 118867 | KLSQTSNV<br>DKEEEAV        | Mus<br>musculu<br>s              |
| 1 | 1.00 | 1 | 1 | 0 | 0 | 0 | 0 | -0.002 | t | 125021 | DWC                        | Mus<br>musculu<br>s              |
| 1 | 1.00 | 1 | 1 | 0 | 0 | 0 | 0 | -0.002 | t | 131374 | CKAKAQT<br>DREDLRTL<br>LRY | Rattus<br>norvegic<br>us         |
| 1 | 1.00 | 1 | 1 | 0 | 0 | 0 | 0 | -0.002 | t | 117520 | GSFSDADL<br>AD             | Mus<br>musculu<br>s              |
| 1 | 1.00 | 1 | 1 | 0 | 0 | 0 | 0 | -0.002 | t | 108382 | GGVVIA                     | Mus<br>musculu<br>s              |
| 1 | 1.00 | 1 | 1 | 0 | 0 | 0 | 0 | -0.002 | t | 103998 | IVKWDRD<br>M               | Mus<br>musculu<br>s              |
| 1 | 1.00 | 1 | 1 | 0 | 0 | 0 | 0 | -0.002 | t | 104443 | DAEFRHDS<br>GYE            | Homo<br>sapiens                  |
| 1 | 1.00 | 1 | 1 | 0 | 0 | 0 | 0 | -0.002 | t | 108378 | GFAGQAG<br>PAGATGA<br>PGRP | Mus<br>musculu<br>s              |
| 1 | 1.00 | 1 | 1 | 0 | 0 | 0 | 0 | -0.002 | t | 105561 | VAVVRTPP<br>KSPSSAK        | Mus<br>musculu<br>s              |
| 1 | 1.00 | 1 | 1 | 0 | 0 | 0 | 0 | -0.002 | t | 106321 | DAEFRH                     | Mus<br>musculu<br>s              |
| 1 | 1.00 | 1 | 1 | 0 | 0 | 0 | 0 | -0.002 | t | 99922  | DAEFRHDS<br>GY             | Mus<br>musculu<br>s              |
| 1 | 1.00 | 1 | 1 | 0 | 0 | 0 | 0 | -0.002 | t | 108382 | GGVVIA                     | Mus<br>musculu<br>s              |
| 1 | 1.00 | 1 | 1 | 0 | 0 | 0 | 0 | -0.002 | t | 108382 | GGVVIA                     | Mus<br>musculu<br>s              |
| 1 | 1.00 | 1 | 1 | 0 | 0 | 0 | 0 | -0.002 | t | 105748 | EFRHDSGY<br>EVHHQK         | Mus<br>musculu<br>s              |
| 1 | 1.00 | 1 | 1 | 0 | 0 | 0 | 0 | -0.002 | t | 103830 | CHAVKVG<br>NPSC            | Oryctola<br>gus<br>cuniculu<br>s |

|   |      |   |   |   |   |   |   |        |   |        |                             |                                  |
|---|------|---|---|---|---|---|---|--------|---|--------|-----------------------------|----------------------------------|
| 1 | 1.00 | 1 | 1 | 0 | 0 | 0 | 0 | -0.002 | t | 115271 | GQKGRGS<br>RG               | Oryctola<br>gus<br>cuniculu<br>s |
| 1 | 1.00 | 1 | 1 | 0 | 0 | 0 | 0 | -0.002 | t | 102510 | HHQKLVFF<br>AEDVGSN<br>K    | Mus<br>musculu<br>s              |
| 1 | 1.00 | 1 | 1 | 0 | 0 | 0 | 0 | -0.002 | t | 107744 | APVDSRTY<br>TRVADHI         | Homo<br>sapiens                  |
| 1 | 1.00 | 1 | 1 | 0 | 0 | 0 | 0 | -0.002 | t | 100378 | PGSGFWS<br>FGSEDGSG<br>DSEN | Mus<br>musculu<br>s              |
| 1 | 1.00 | 1 | 1 | 0 | 0 | 0 | 0 | -0.002 | t | 100070 | GLMVGGV<br>VIA              | Oryctola<br>gus<br>cuniculu<br>s |
| 1 | 1.00 | 1 | 1 | 0 | 0 | 0 | 0 | -0.002 | t | 106321 | DAEFRH                      | Mus<br>musculu<br>s              |
| 1 | 1.00 | 1 | 1 | 0 | 0 | 0 | 0 | -0.002 | t | 99922  | DAEFRHDS<br>GY              | Oryctola<br>gus<br>cuniculu<br>s |
| 1 | 1.00 | 1 | 1 | 0 | 0 | 0 | 0 | -0.002 | t | 100070 | GLMVGGV<br>VIA              | Oryctola<br>gus<br>cuniculu<br>s |
| 1 | 1.00 | 1 | 1 | 0 | 0 | 0 | 0 | -0.002 | t | 107166 | GPPGPQG                     | Mus<br>musculu<br>s              |
| 1 | 1.00 | 1 | 1 | 0 | 0 | 0 | 0 | -0.002 | t | 105562 | VAVVRTPP<br>KSPSSAK         | Oryctola<br>gus<br>cuniculu<br>s |
| 1 | 1.00 | 1 | 1 | 0 | 0 | 0 | 0 | -0.002 | t | 102564 | KKRPKPGG<br>GWNT            | Mus<br>musculu<br>s              |
| 1 | 1.00 | 1 | 1 | 0 | 0 | 0 | 0 | -0.002 | t | 102423 | FEYQD                       | Mus<br>musculu<br>s              |
| 1 | 1.00 | 1 | 1 | 0 | 0 | 0 | 0 | -0.002 | t | 104906 | MVGGVVI<br>A                | Mus<br>musculu<br>s              |
| 1 | 1.00 | 1 | 1 | 0 | 0 | 0 | 0 | -0.002 | t | 99134  | DAEFRHDS<br>GYEVHHQ         | Mus<br>musculu<br>s              |
| 1 | 1.00 | 1 | 1 | 0 | 0 | 0 | 0 | -0.002 | t | 100992 | KSLSRHDH<br>IHHH            | Ovis<br>aries                    |

|   |      |   |   |   |        |   |   |        |   |        |                              |                      |
|---|------|---|---|---|--------|---|---|--------|---|--------|------------------------------|----------------------|
| 1 | 1.00 | 1 | 1 | 0 | 0      | 0 | 0 | -0.002 | t | 107242 | SQTTANPS<br>CPEGT            | Rattus<br>norvegicus |
| 1 | 1.00 | 1 | 1 | 0 | 0.003  | 0 | 0 | -0.002 | t | 105561 | VAVVRTPP<br>KSPSSAK          | Mus<br>musculus      |
| 1 | 1.00 | 1 | 1 | 0 | 0.004  | 0 | 0 | -0.002 | t | 100992 | KSLSRHDH<br>IHHS             | Ovis<br>aries        |
| 1 | 1.00 | 1 | 1 | 0 | 0      | 0 | 0 | -0.002 | t | 110948 | MVTSDAQ<br>IFNKPYWL          | Mus<br>musculus      |
| 1 | 1.00 | 1 | 1 | 0 | 0      | 0 | 0 | -0.002 | t | 106092 | RSGYSSPG<br>SPGTPGSR<br>SR   | Mus<br>musculus      |
| 1 | 1.00 | 1 | 1 | 0 | 0      | 0 | 0 | -0.002 | t | 79858  | IEELQSNH<br>GV               | Mus<br>musculus      |
| 1 | 1.00 | 1 | 1 | 0 | -0.008 | 0 | 0 | -0.002 | t | 97231  | CNTKCQTP                     | Mus<br>musculus      |
| 1 | 1.00 | 1 | 1 | 0 | 0      | 0 | 0 | -0.002 | t | 93373  | MDKVLNR<br>EESL              | Mus<br>musculus      |
| 1 | 1.00 | 1 | 1 | 0 | 0      | 0 | 0 | -0.002 | t | 79806  | EKPAKTYD<br>DAAS             | Mus<br>musculus      |
| 1 | 1.00 | 1 | 1 | 0 | 0      | 0 | 0 | -0.002 | t | 74035  | YGLFHKEK<br>MIL              | Mus<br>musculus      |
| 1 | 1.00 | 1 | 1 | 0 | 0      | 0 | 0 | -0.002 | t | 79782  | DNDGPVA<br>AGEARPVP<br>EEYLQ | Mus<br>musculus      |
| 1 | 1.00 | 1 | 1 | 0 | 0      | 0 | 0 | -0.002 | t | 80102  | YDDAASES<br>SDDDDIDA<br>LI   | Mus<br>musculus      |
| 1 | 1.00 | 1 | 1 | 0 | 0      | 0 | 0 | -0.002 | t | 71004  | VSISPESDR<br>PDLSTF          | Mus<br>musculus      |
| 1 | 1.00 | 1 | 1 | 0 | 0      | 0 | 0 | -0.002 | t | 65409  | TNRNPQ                       | Mus<br>musculus      |

|   |      |   |   |   |      |   |   |        |   |       |                             |                                  |
|---|------|---|---|---|------|---|---|--------|---|-------|-----------------------------|----------------------------------|
| 1 | 1.00 | 1 | 1 | 0 | 0    | 0 | 0 | -0.002 | t | 68524 | VFMVPQY<br>GYL              | Mus<br>musculu<br>s              |
| 1 | 1.00 | 1 | 1 | 0 | 0    | 0 | 0 | -0.002 | t | 96526 | LAANNPA                     | Mus<br>musculu<br>s              |
| 1 | 1.00 | 1 | 1 | 0 | 0    | 0 | 0 | -0.002 | t | 94836 | GSSK                        | Oryctola<br>gus<br>cuniculu<br>s |
| 1 | 1.00 | 1 | 1 | 0 | 0    | 0 | 0 | -0.002 | t | 74036 | YGLFHKEK<br>MLL             | Mus<br>musculu<br>s              |
| 1 | 1.00 | 1 | 1 | 0 | 0    | 0 | 0 | -0.002 | t | 65409 | TNRNPQ                      | Mus<br>musculu<br>s              |
| 1 | 1.00 | 1 | 1 | 0 | 0    | 0 | 0 | -0.002 | t | 63037 | TAVSPTTL<br>R               | Mus<br>musculu<br>s              |
| 1 | 1.00 | 1 | 1 | 0 | 0    | 0 | 0 | -0.002 | t | 41232 | MDIDPYKE<br>FG              | Mus<br>musculu<br>s              |
| 1 | 1.00 | 1 | 1 | 0 | 0    | 0 | 0 | -0.002 | t | 44498 | NKGVNPD<br>E                | Mus<br>musculu<br>s              |
| 1 | 1.00 | 1 | 1 | 0 | 0.01 | 0 | 0 | -0.002 | t | 59967 | SNYYSDNE<br>IEQHTAKQ<br>PKL | Oryctola<br>gus<br>cuniculu<br>s |
| 1 | 1.00 | 1 | 1 | 0 | 0    | 0 | 0 | -0.002 | t | 46317 | NTWTTTCQ<br>SIAFPSK         | Mus<br>musculu<br>s              |
| 1 | 1.00 | 1 | 1 | 0 | 0    | 0 | 0 | -0.002 | t | 41537 | MFSGGGG<br>PLSPGGKS         | Mus<br>musculu<br>s              |
| 1 | 1.00 | 1 | 1 | 0 | 0    | 0 | 0 | -0.002 | t | 39164 | LRPGPVSQ<br>PYHHWDT<br>DK   | Mus<br>musculu<br>s              |
| 1 | 1.00 | 1 | 1 | 0 | 0    | 0 | 0 | -0.002 | t | 48627 | PNEPDDAL<br>AMRIIRI         | Mus<br>musculu<br>s              |
| 1 | 1.00 | 1 | 1 | 0 | 0    | 0 | 0 | -0.002 | t | 39695 | LSTFMESG<br>EWVMK           | Mus<br>musculu<br>s              |

|   |      |   |   |   |        |   |   |        |   |       |                             |                                  |
|---|------|---|---|---|--------|---|---|--------|---|-------|-----------------------------|----------------------------------|
| 1 | 1.00 | 1 | 1 | 0 | 0      | 0 | 0 | -0.002 | t | 48933 | PPTAPPLL<br>PHSNL           | Homo<br>sapiens                  |
| 1 | 1.00 | 1 | 1 | 0 | 0      | 0 | 0 | -0.002 | t | 56699 | SAAFYYRV                    | Mus<br>musculu<br>s              |
| 1 | 1.00 | 1 | 1 | 0 | 0      | 0 | 0 | -0.002 | t | 43730 | NEREDERT<br>LTKEYEDIV<br>LK | Oryctola<br>gus<br>cuniculu<br>s |
| 1 | 1.00 | 1 | 1 | 0 | 0      | 0 | 0 | -0.002 | t | 55799 | RSAPRITF<br>G               | Homo<br>sapiens                  |
| 1 | 1.00 | 1 | 1 | 0 | 0      | 0 | 0 | -0.002 | t | 51775 | QNTRNIVP<br>VSIVSR          | Mus<br>musculu<br>s              |
| 1 | 1.00 | 1 | 1 | 0 | -0.004 | 0 | 0 | -0.002 | t | 51233 | QKPLK                       | Mus<br>musculu<br>s              |
| 1 | 1.00 | 1 | 1 | 0 | 0      | 0 | 0 | -0.002 | t | 55115 | RPAPPKPT<br>PQP             | Mus<br>musculu<br>s              |
| 1 | 1.00 | 1 | 1 | 0 | 0      | 0 | 0 | -0.002 | t | 50502 | QDPDNTD<br>DNGPQDP<br>DNTD  | Mus<br>musculu<br>s              |
| 1 | 1.00 | 1 | 1 | 0 | 0      | 0 | 0 | -0.002 | t | 58388 | SHLVEALY<br>LVCGERG         | Mus<br>musculu<br>s              |
| 1 | 1.00 | 1 | 1 | 0 | 0      | 0 | 0 | -0.002 | t | 51233 | QKPLK                       | Mus<br>musculu<br>s              |
| 1 | 1.00 | 1 | 1 | 0 | 0      | 0 | 0 | -0.002 | t | 50222 | QACKGKIQ<br>ALCEN           | Mus<br>musculu<br>s              |
| 1 | 1.00 | 1 | 1 | 0 | 0      | 0 | 0 | -0.002 | t | 51827 | QFPQPQ<br>LPYPQPQ           | Mus<br>musculu<br>s              |
| 1 | 1.00 | 1 | 1 | 0 | 0      | 0 | 0 | -0.002 | t | 11463 | EDVNGIRK<br>PK              | Mus<br>musculu<br>s              |
| 1 | 1.00 | 1 | 1 | 0 | 0      | 0 | 0 | -0.002 | t | 12982 | ELDGSKNE<br>WGWSKSK         | Mus<br>musculu<br>s              |



|   |      |   |   |   |        |   |   |        |   |       |                              |                       |
|---|------|---|---|---|--------|---|---|--------|---|-------|------------------------------|-----------------------|
| 1 | 1.00 | 1 | 1 | 0 | 0      | 0 | 0 | -0.002 | t | 16101 | FHENWPS                      | Mus musculus          |
| 1 | 1.00 | 1 | 1 | 0 | 0      | 0 | 0 | -0.002 | t | 23599 | HCLGKWL<br>GHPDKF            | Mus musculus          |
| 1 | 1.00 | 1 | 1 | 0 | 0      | 0 | 0 | -0.002 | t | 31105 | KHFRETEV                     | Mus musculus          |
| 1 | 1.00 | 1 | 1 | 0 | 0      | 0 | 0 | -0.002 | t | 11815 | EENVEENV<br>EENVEENV         | Mus musculus          |
| 1 | 1.00 | 1 | 1 | 0 | 0      | 0 | 0 | -0.002 | t | 18036 | FTPFYYQS<br>SRTR             | Mus musculus          |
| 1 | 1.00 | 1 | 1 | 0 | 0      | 0 | 0 | -0.002 | t | 12632 | EKASVPGG<br>GDMGGM<br>DF     | Mus musculus          |
| 1 | 1.00 | 1 | 1 | 0 | -0.003 | 0 | 0 | -0.002 | t | 5967  | CADARMY<br>GVLPWNA<br>FPGKVC | Oryctolagus cuniculus |
| 1 | 1.00 | 1 | 1 | 0 | 0      | 0 | 0 | -0.002 | t | 5865  | AYLSPIDLN<br>QLAK            | Oryctolagus cuniculus |
| 1 | 1.00 | 1 | 1 | 0 | 0      | 0 | 0 | -0.002 | t | 10227 | DSSAHGTP<br>STPA             | Mus musculus          |
| 1 | 1.00 | 1 | 1 | 0 | 0      | 0 | 0 | -0.002 | t | 1433  | AGAGGGA<br>GGAGAGG<br>GAGGAG | Oryctolagus cuniculus |
| 1 | 1.00 | 1 | 1 | 0 | 0      | 0 | 0 | -0.002 | t | 9723  | DPPPPNP<br>NDPPPPN<br>PND    | Mus musculus          |
| 1 | 1.00 | 1 | 1 | 0 | 0      | 0 | 0 | -0.002 | t | 9524  | DNPASTT<br>NKDK              | Mus musculus          |
| 1 | 1.00 | 1 | 1 | 0 | 0      | 0 | 0 | -0.002 | t | 7491  | DAEFRHDS<br>GYEVHHQ<br>K     | Homo sapiens          |
| 1 | 1.00 | 1 | 1 | 0 | 0      | 0 | 0 | -0.002 | t | 9723  | DPPPPNP<br>NDPPPPN<br>PND    | Mus musculus          |
| 1 | 1.00 | 1 | 1 | 0 | 0      | 0 | 0 | -0.002 | t | 2780  | ALNGNGD<br>PNNMDKA<br>VKLY   | Mus musculus          |

|   |      |   |   |      |       |        |        |        |   |        |                           |                 |
|---|------|---|---|------|-------|--------|--------|--------|---|--------|---------------------------|-----------------|
| 1 | 1.00 | 1 | 1 | 0    | 0     | 0      | 0      | -0.002 | t | 7048   | CSNSDKPK<br>CGGS          | Mus<br>musculus |
| 1 | 1.00 | 1 | 1 | 0    | 0     | 0      | 0      | -0.002 | t | 7492   | DAEFRHDS<br>GYEVHHQ<br>KL | Mus<br>musculus |
| 1 | 1.00 | 1 | 1 | 0    | 0     | 0      | 0      | -0.002 | t | 3274   | ANETIYNT<br>TLKYGDV       | MD              |
| 1 | 1.00 | 1 | 1 | 0.03 | 0.03  | 0.03   | 0.03   | 0.03   | t | 115796 | IQAFLLYQ<br>EP            | Homo<br>sapiens |
| 1 | 1.00 | 1 | 1 | 0.01 | 0.01  | 0.01   | 0.01   | 0.01   | t | 115675 | AFLLYQEP<br>VL            | Homo<br>sapiens |
| 1 | 1.00 | 1 | 1 | 0.01 | 0.01  | 0.006  | 0.007  | 0.01   | t | 86504  | MSAAYDN<br>IYT            | Homo<br>sapiens |
| 1 | 1.00 | 1 | 1 | 0.04 | 0.04  | 0.04   | 0.04   | 0.04   | t | 21548  | GNYD                      | Homo<br>sapiens |
| 1 | 1.00 | 1 | 1 | 0    | 0.002 | 0.008  | 0.001  | -0.002 | t | 3820   | APSQGGV<br>NSPVNV         | Homo<br>sapiens |
| 1 | 1.00 | 1 | 1 | 0.03 | 0.03  | 0.015  | 0.03   | 0.032  | t | 95850  | SGTSGTSG<br>TSGT          | Homo<br>sapiens |
| 1 | 1.00 | 1 | 1 | 0    | 0     | 0      | -0.002 | 0      | t | 71838  | VVSTLP                    | Homo<br>sapiens |
| 1 | 1.00 | 1 | 1 | 0.03 | 0.03  | 0.03   | 0.03   | 0.03   | t | 135454 | DYEDRY                    | Mus<br>musculus |
| 1 | 1.00 | 1 | 1 | 0.01 | 0.01  | 0.008  | 0.01   | 0.009  | t | 20052  | GGTHSQW<br>NKPSKP         | Mus<br>musculus |
| 1 | 1.00 | 1 | 1 | 0    | 0.001 | -0.006 | 0      | -0.002 | t | 18952  | GDDPAKA<br>AFDSLQAS       | Mus<br>musculus |
| 1 | 1.00 | 1 | 1 | 0.02 | 0.02  | 0.022  | 0.02   | 0.02   | t | 4701   | ASQKIQLI                  | Mus<br>musculus |
| 1 | 1.00 | 1 | 1 | 0    | 0     | -0.007 | 0      | -0.002 | t | 106375 | EDHAGTY<br>GLGDRK         | Mus<br>musculus |
| 1 | 1.00 | 1 | 1 | 0.02 | 0.018 | 0.017  | 0.021  | 0.022  | t | 5670   | AWITEDCP<br>VP            | Homo<br>sapiens |
| 1 | 1.00 | 1 | 1 | 0.01 | 0.012 | -0.003 | 0.007  | 0.01   | t | 115068 | KEKVNELS<br>KDIG          | Homo<br>sapiens |

|   |      |   |   |       |        |        |        |        |   |        |                              |                                  |
|---|------|---|---|-------|--------|--------|--------|--------|---|--------|------------------------------|----------------------------------|
| 1 | 1.00 | 1 | 1 | -0.03 | -0.03  | -0.03  | -0.026 | -0.03  | t | 75149  | YNGANGA<br>MKH               | Homo<br>sapiens                  |
| 1 | 1.00 | 1 | 1 | 0.07  | 0.07   | 0.07   | 0.07   | 0.07   | t | 117547 | KLEVQATD<br>REENKQIA<br>LGTS | Homo<br>sapiens                  |
| 1 | 1.00 | 1 | 1 | -0.01 | -0.025 | -0.01  | -0.011 | -0.01  | t | 60795  | SRSERR                       | Marmot<br>a monax                |
| 1 | 1.00 | 1 | 1 | -0.02 | -0.02  | -0.013 | -0.02  | -0.021 | t | 122477 | LSLSLDLLT<br>FRT             | Homo<br>sapiens                  |
| 1 | 1.00 | 1 | 1 | 0.02  | 0.02   | 0.02   | 0.02   | 0.02   | t | 103516 | QDPEGW<br>GKSPGFGT<br>T      | Homo<br>sapiens                  |
| 1 | 1.00 | 1 | 1 | 0.01  | 0.01   | 0.01   | 0.01   | 0.01   | t | 156923 | NLHTSF                       | Gallus<br>gallus                 |
| 1 | 1.00 | 1 | 1 | 0     | 0      | -0.005 | 0      | 0      | t | 124925 | YYVFFEEQ<br>EDEIIGF          | Oryctola<br>gus<br>cuniculu<br>s |
| 1 | 1.00 | 1 | 1 | 0     | 0      | 0      | 0.009  | 0.002  | t | 131116 | TQSYPPPP<br>AWRAASR          | Homo<br>sapiens                  |
| 1 | 1.00 | 1 | 1 | -0.01 | -0.01  | -0.015 | -0.01  | -0.01  | t | 59374  | SLNTGWL<br>AGLFY             | Mus<br>musculu<br>s              |
| 1 | 1.00 | 1 | 1 | -0.01 | -0.01  | -0.008 | -0.01  | -0.01  | t | 125791 | CSFWSKYI<br>QTLK             | Mus<br>musculu<br>s              |
| 1 | 1.00 | 1 | 1 | -0.02 | -0.02  | -0.035 | -0.02  | -0.017 | t | 64454  | TISADSKKT<br>KDLVFL          | Mus<br>musculu<br>s              |
| 1 | 1.00 | 1 | 1 | 0.02  | 0.022  | 0.018  | 0.017  | 0.018  | t | 14639  | EVDDEALE<br>KFDKAL           | Homo<br>sapiens                  |
| 1 | 1.00 | 1 | 1 | 0.01  | 0.01   | 0.015  | 0.01   | 0.01   | t | 56888  | SALYVGDL<br>CG               | Homo<br>sapiens                  |
| 1 | 1.00 | 1 | 1 | 0.01  | 0.01   | 0.015  | 0.01   | 0.009  | t | 49967  | PVSLGGDV<br>PNS              | Mus<br>musculu<br>s              |
| 1 | 1.00 | 1 | 1 | 0.01  | 0.013  | 0.015  | 0.01   | 0.009  | t | 49967  | PVSLGGDV<br>PNS              | Mus<br>musculu<br>s              |
| 1 | 1.00 | 1 | 1 | 0.01  | 0.01   | 0.006  | 0.01   | 0.01   | t | 72693  | WKSCKN                       | Homo<br>sapiens                  |

|   |      |   |   |       |        |        |        |        |   |        |                              |                                  |
|---|------|---|---|-------|--------|--------|--------|--------|---|--------|------------------------------|----------------------------------|
| 1 | 1.00 | 1 | 1 | 0     | 0      | 0.002  | 0.001  | -0.002 | t | 153251 | AKAFSYW<br>TPFDGKSL<br>YSST  | Mus<br>musculu<br>s              |
| 1 | 1.00 | 1 | 1 | -0.01 | -0.014 | -0.018 | -0.013 | -0.01  | t | 70795  | VRPATTL<br>ADG               | Oryctola<br>gus<br>cuniculu<br>s |
| 1 | 1.00 | 1 | 1 | 0.01  | 0.01   | 0.01   | 0.01   | 0.01   | t | 23193  | GVTYEIDL<br>TNKNAAKL         | Homo<br>sapiens                  |
| 1 | 1.00 | 1 | 1 | 0.04  | 0.037  | 0.037  | 0.04   | 0.04   | t | 97741  | VLDFSTAQ<br>Q                | Oryctola<br>gus<br>cuniculu<br>s |
| 1 | 1.00 | 1 | 1 | 0     | 0      | -0.016 | 0      | 0.004  | t | 30611  | KESQAYYD<br>GRR              | Mus<br>musculu<br>s              |
| 1 | 1.00 | 1 | 1 | -0.03 | -0.03  | -0.03  | -0.03  | -0.03  | t | 8918   | DKLADYKR<br>RM               | Mus<br>musculu<br>s              |
| 1 | 1.00 | 1 | 1 | -0.03 | -0.03  | -0.03  | -0.03  | -0.03  | t | 8918   | DKLADYKR<br>RM               | Mus<br>musculu<br>s              |
| 1 | 1.00 | 1 | 1 | 0     | -0.003 | -0.011 | 0      | 0.002  | t | 144748 | QAVNPNA<br>GN                | Oryctola<br>gus<br>cuniculu<br>s |
| 1 | 1.00 | 1 | 1 | 0     | -0.002 | 0.007  | 0.003  | -0.003 | t | 44021  | NGKVNNK<br>VAY               | Mus<br>musculu<br>s              |
| 1 | 1.00 | 1 | 1 | 0.03  | 0.03   | 0.03   | 0.03   | 0.031  | t | 136648 | SPLNNFYK<br>TQLR             | Mus<br>musculu<br>s              |
| 1 | 1.00 | 1 | 1 | 0.03  | 0.026  | 0.03   | 0.03   | 0.031  | t | 136648 | SPLNNFYK<br>TQLR             | Bos<br>taurus                    |
| 1 | 1.00 | 1 | 1 | 0.01  | 0.006  | -0.002 | 0.009  | 0.01   | t | 3971   | AQGQYSN<br>TLLRIYRDN<br>KSIN | Oryctola<br>gus<br>cuniculu<br>s |
| 1 | 1.00 | 1 | 1 | -0.02 | -0.02  | -0.032 | -0.02  | -0.02  | t | 120450 | DQDLSKK<br>HGQ               | Mus<br>musculu<br>s              |
| 1 | 1.00 | 1 | 1 | 0.05  | 0.05   | 0.05   | 0.054  | 0.05   | t | 115600 | DHSYQEEA<br>AMEL             | Homo<br>sapiens                  |

|   |      |   |   |       |        |        |        |        |   |        |                              |                       |
|---|------|---|---|-------|--------|--------|--------|--------|---|--------|------------------------------|-----------------------|
| 1 | 1.00 | 1 | 1 | 0.02  | 0.022  | 0.02   | 0.021  | 0.02   | t | 98796  | GGAVP                        | Homo sapiens          |
| 1 | 1.00 | 1 | 1 | 0.02  | 0.02   | 0.02   | 0.02   | 0.019  | t | 139494 | ERGSAGH<br>WTSESSVS          | Homo sapiens          |
| 1 | 1.00 | 1 | 1 | 0     | 0      | -0.001 | 0.003  | 0      | t | 48494  | PLTASPPA<br>TAPGPSAA<br>NVSV | Homo sapiens          |
| 1 | 1.00 | 1 | 1 | 0.02  | 0.018  | 0.024  | 0.017  | 0.017  | t | 66833  | TTSTGPCK<br>TCTTPAQ          | Mus musculus          |
| 1 | 1.00 | 1 | 1 | -0.03 | -0.03  | -0.03  | -0.03  | -0.03  | t | 55067  | RNTNRRP                      | Homo sapiens          |
| 1 | 1.00 | 1 | 1 | 0.03  | 0.03   | 0.03   | 0.03   | 0.03   | t | 10041  | DRRCQSQ<br>LERANLRP          | Homo sapiens          |
| 1 | 1.00 | 1 | 1 | 0.01  | 0.01   | 0.01   | 0.01   | 0.01   | t | 156425 | QQEQQGS<br>GNNVFSG<br>F      | Homo sapiens          |
| 1 | 1.00 | 1 | 1 | 0     | 0      | 0      | 0      | 0      | t | 140247 | KAAESEIEK<br>LTTK            | Oryctolagus cuniculus |
| 1 | 1.00 | 1 | 1 | 0     | 0      | 0      | 0      | 0      | t | 140247 | KAAESEIEK<br>LTTK            | Oryctolagus cuniculus |
| 1 | 1.00 | 1 | 1 | 0.01  | 0.013  | -0.001 | 0.01   | 0.012  | t | 111733 | RKATPTTS<br>STSTTAK          | Mus musculus          |
| 1 | 1.00 | 1 | 1 | -0.01 | -0.014 | -0.017 | -0.017 | -0.011 | t | 108131 | SKDWSFY                      | Oryctolagus cuniculus |
| 1 | 1.00 | 1 | 1 | 0     | 0      | 0      | 0      | 0      | t | 109996 | TRLSRTIGY<br>TVK             | Mus musculus          |
| 1 | 1.00 | 1 | 1 | 0.01  | 0.008  | 0.01   | 0.009  | 0.011  | t | 41233  | MDIDPYKE<br>FGA              | Mus musculus          |
| 1 | 1.00 | 1 | 1 | -0.02 | -0.02  | -0.026 | -0.02  | -0.02  | t | 91575  | KIVYEKSQL<br>APRKLY          | Oryctolagus cuniculus |

|   |      |   |   |       |        |        |        |        |   |        |                              |                                  |
|---|------|---|---|-------|--------|--------|--------|--------|---|--------|------------------------------|----------------------------------|
| 1 | 1.00 | 1 | 1 | -0.04 | -0.038 | -0.022 | -0.039 | -0.049 | t | 134679 | GGSGPQR<br>RGG               | Homo<br>sapiens                  |
| 1 | 1.00 | 1 | 1 | 0     | 0.004  | 0      | 0.001  | 0      | t | 20283  | GIGPEKAF                     | Homo<br>sapiens                  |
| 1 | 1.00 | 1 | 1 | 0     | 0      | 0      | 0      | 0      | t | 139090 | IKRSNSTA                     | Oryctola<br>gus<br>cuniculu<br>s |
| 1 | 1.00 | 1 | 1 | -0.02 | -0.023 | -0.027 | -0.02  | -0.021 | t | 79277  | KRDGYIV                      | Oryctola<br>gus<br>cuniculu<br>s |
| 1 | 1.00 | 1 | 1 | -0.02 | -0.023 | -0.027 | -0.02  | -0.021 | t | 79277  | KRDGYIV                      | Oryctola<br>gus<br>cuniculu<br>s |
| 1 | 1.00 | 1 | 1 | -0.05 | -0.049 | -0.051 | -0.047 | -0.051 | t | 99138  | DDWDNR<br>HPLPNAPL<br>V      | Equus<br>caballus                |
| 1 | 1.00 | 1 | 1 | 0     | -0.002 | 0.002  | -0.001 | 0      | t | 10770  | DVVGVGRL                     | Mus<br>musculu<br>s              |
| 1 | 1.00 | 1 | 1 | 0     | 0      | -0.015 | 0      | 0.002  | t | 43222  | NANADPN                      | Mus<br>musculu<br>s              |
| 1 | 1.00 | 1 | 1 | 0     | -0.002 | 0      | -0.001 | 0      | t | 57977  | SGAPTYS<br>W                 | Mus<br>musculu<br>s              |
| 1 | 1.00 | 1 | 1 | -0.02 | -0.02  | -0.018 | -0.02  | -0.021 | t | 60762  | SRPLIHFGS<br>DYEDR           | Mus<br>musculu<br>s              |
| 1 | 1.00 | 1 | 1 | -0.02 | -0.015 | -0.027 | -0.013 | -0.02  | t | 136634 | SINASPGV<br>VVDIAHSP<br>PAKK | Homo<br>sapiens                  |
| 1 | 1.00 | 1 | 1 | 0.02  | 0.02   | 0.02   | 0.02   | 0.02   | t | 79386  | SCSPTVYLT<br>STKCP           | Mus<br>musculu<br>s              |
| 1 | 1.00 | 1 | 1 | 0     | 0      | 0      | 0      | 0      | t | 79086  | SLYPGHVS<br>GHRMAW<br>DMMM   | Homo<br>sapiens                  |
| 1 | 1.00 | 1 | 1 | 0.01  | 0.014  | 0.01   | 0.011  | 0.01   | t | 69277  | VKNEEEIA                     | Homo<br>sapiens                  |

|   |      |   |   |       |        |        |        |        |   |        |                              |              |
|---|------|---|---|-------|--------|--------|--------|--------|---|--------|------------------------------|--------------|
| 1 | 1.00 | 1 | 1 | 0     | 0.002  | -0.008 | -0.003 | 0.001  | t | 11615  | EEFFFQGP<br>EWRKEKE          | Homo sapiens |
| 1 | 1.00 | 1 | 1 | -0.03 | -0.03  | -0.03  | -0.03  | -0.031 | t | 9794   | DPVAALFF<br>F                | Mus musculus |
| 1 | 1.00 | 1 | 1 | -0.01 | -0.01  | -0.01  | -0.014 | -0.009 | t | 134257 | VKSTP                        | Homo sapiens |
| 1 | 1.00 | 1 | 1 | 0.03  | 0.033  | 0.031  | 0.03   | 0.028  | t | 117530 | IEFRSDA<br>ESSDGEDF<br>IVEE  | Mus musculus |
| 1 | 1.00 | 1 | 1 | 0     | -0.002 | 0      | -0.001 | -0.002 | t | 136686 | TLHDMGIF<br>SITSSDS          | Mus musculus |
| 1 | 1.00 | 1 | 1 | 0     | -0.002 | 0      | -0.001 | -0.002 | t | 136315 | GGGTGPA<br>DGTNATTI          | Mus musculus |
| 1 | 1.00 | 1 | 1 | 0     | -0.002 | 0      | -0.001 | -0.002 | t | 136749 | WMLRAAE<br>EYSMNLG<br>F      | Mus musculus |
| 1 | 1.00 | 1 | 1 | 0     | -0.002 | 0      | -0.001 | -0.002 | t | 136749 | WMLRAAE<br>EYSMNLG<br>F      | Mus musculus |
| 1 | 1.00 | 1 | 1 | 0     | -0.002 | 0      | -0.001 | -0.002 | t | 128004 | GMIEVQS<br>NYGFVWD<br>VSLKKV | Mus musculus |
| 1 | 1.00 | 1 | 1 | 0     | -0.002 | 0      | -0.001 | -0.002 | t | 130994 | PDQRPYC<br>WHYPPKP<br>C      | Mus musculus |
| 1 | 1.00 | 1 | 1 | 0     | -0.002 | 0      | -0.001 | -0.002 | t | 127984 | FTNLKFKV<br>RKITSSHR<br>GN   | Mus musculus |
| 1 | 1.00 | 1 | 1 | 0     | -0.002 | 0      | -0.001 | -0.002 | t | 127919 | AFSLPDRS<br>LSAIPFDV<br>SFE  | Mus musculus |
| 1 | 1.00 | 1 | 1 | 0     | -0.002 | 0      | -0.001 | -0.002 | t | 127944 | DLVNCNL<br>NTNCVAV<br>AFSLPD | Mus musculus |
| 1 | 1.00 | 1 | 1 | 0     | -0.002 | 0      | -0.001 | -0.002 | t | 110733 | VGENVPD<br>DLYIKGSG          | Mus musculus |

|   |      |   |   |   |        |   |        |        |   |        |                              |                                  |
|---|------|---|---|---|--------|---|--------|--------|---|--------|------------------------------|----------------------------------|
| 1 | 1.00 | 1 | 1 | 0 | -0.004 | 0 | -0.001 | -0.002 | t | 111013 | RTGYIPLG<br>TRPPT            | Oryctola<br>gus<br>cuniculu<br>s |
| 1 | 1.00 | 1 | 1 | 0 | -0.002 | 0 | -0.001 | -0.002 | t | 75923  | YSWKTWG                      | Mus<br>musculu<br>s              |
| 1 | 1.00 | 1 | 1 | 0 | -0.002 | 0 | -0.001 | -0.002 | t | 67170  | TVSTEQNV<br>PDPQVGI          | Mus<br>musculu<br>s              |
| 1 | 1.00 | 1 | 1 | 0 | -0.004 | 0 | -0.001 | -0.002 | t | 73385  | YALADASL<br>KMADPNR<br>FRGKD | Oryctola<br>gus<br>cuniculu<br>s |
| 1 | 1.00 | 1 | 1 | 0 | -0.002 | 0 | -0.001 | -0.002 | t | 66539  | TTASGKLIT                    | Mus<br>musculu<br>s              |
| 1 | 1.00 | 1 | 1 | 0 | -0.004 | 0 | -0.001 | -0.002 | t | 73385  | YALADASL<br>KMADPNR<br>FRGKD | Oryctola<br>gus<br>cuniculu<br>s |
| 1 | 1.00 | 1 | 1 | 0 | -0.004 | 0 | -0.001 | -0.002 | t | 74430  | YKAYVSYK<br>KRKAQEK          | Oryctola<br>gus<br>cuniculu<br>s |
| 1 | 1.00 | 1 | 1 | 0 | -0.004 | 0 | -0.001 | -0.002 | t | 70437  | VPPTQSKK<br>KNKNET           | Oryctola<br>gus<br>cuniculu<br>s |
| 1 | 1.00 | 1 | 1 | 0 | -0.002 | 0 | -0.001 | -0.002 | t | 58416  | SHSQLGPP<br>VGGPP            | Mus<br>musculu<br>s              |
| 1 | 1.00 | 1 | 1 | 0 | -0.002 | 0 | -0.001 | -0.002 | t | 58418  | SHSSESHR<br>VKSAGPP          | Mus<br>musculu<br>s              |
| 1 | 1.00 | 1 | 1 | 0 | -0.004 | 0 | -0.001 | -0.002 | t | 36974  | LKNKIFPKK<br>KEDNQAV<br>DT   | Oryctola<br>gus<br>cuniculu<br>s |
| 1 | 1.00 | 1 | 1 | 0 | -0.004 | 0 | -0.001 | -0.002 | t | 13460  | ENDVLNQ<br>ETEEEMEK          | Oryctola<br>gus<br>cuniculu<br>s |
| 1 | 1.00 | 1 | 1 | 0 | -0.004 | 0 | -0.001 | -0.002 | t | 20179  | GHRMAW<br>DMM                | Oryctola<br>gus<br>cuniculu<br>s |
| 1 | 1.00 | 1 | 1 | 0 | -0.004 | 0 | -0.001 | -0.002 | t | 12951  | ELAPEDPE<br>DS               | Oryctola<br>gus<br>cuniculu<br>s |



|   |      |   |   |       |        |        |        |        |   |        |                             |                                  |
|---|------|---|---|-------|--------|--------|--------|--------|---|--------|-----------------------------|----------------------------------|
| 1 | 1.00 | 1 | 1 | 0     | -0.004 | 0      | -0.001 | -0.002 | t | 12951  | ELAPEDPE<br>DS              | Oryctola<br>gus<br>cuniculu<br>s |
| 1 | 1.00 | 1 | 1 | 0     | -0.004 | 0      | -0.001 | -0.002 | t | 30349  | KEEKEEKE<br>EKEEKEKE<br>KE  | Oryctola<br>gus<br>cuniculu<br>s |
| 1 | 1.00 | 1 | 1 | 0     | -0.004 | 0      | -0.001 | -0.002 | t | 29899  | KANGNGS<br>GDNGDTT<br>W     | Oryctola<br>gus<br>cuniculu<br>s |
| 1 | 1.00 | 1 | 1 | 0     | -0.002 | 0      | -0.001 | -0.002 | t | 3245   | ANDVDNS<br>NPVVQAE<br>QLNWL | Mus<br>musculu<br>s              |
| 1 | 1.00 | 1 | 1 | 0     | 0.001  | 0      | -0.001 | -0.002 | t | 8355   | DGAVQPD<br>GG               | Oryctola<br>gus<br>cuniculu<br>s |
| 1 | 1.00 | 1 | 1 | -0.01 | -0.007 | -0.007 | -0.01  | -0.012 | t | 24970  | HTRVTGG<br>VQG              | Mus<br>musculu<br>s              |
| 1 | 1.00 | 1 | 1 | -0.02 | -0.018 | -0.02  | -0.019 | -0.02  | t | 10813  | DWICTVLT<br>DFKTWL          | Homo<br>sapiens                  |
| 1 | 1.00 | 1 | 1 | 0     | 0      | 0.005  | 0.01   | 0.003  | t | 115785 | HSYQE                       | Homo<br>sapiens                  |
| 1 | 1.00 | 1 | 1 | 0.02  | 0.022  | 0.027  | 0.023  | 0.02   | t | 56448  | RVVVTPDK<br>EILYEA          | Homo<br>sapiens                  |
| 1 | 1.00 | 1 | 1 | -0.02 | -0.018 | -0.027 | -0.019 | -0.018 | t | 138028 | SAGALQLL<br>VVGC            | Homo<br>sapiens                  |
| 1 | 1.00 | 1 | 1 | 0.02  | 0.022  | 0.021  | 0.021  | 0.02   | t | 7778   | DDGDKGS<br>DVESYSSM<br>PPLE | Homo<br>sapiens                  |
| 1 | 1.00 | 1 | 1 | 0.04  | 0.034  | 0.04   | 0.04   | 0.04   | t | 123184 | FLTNLPEE                    | Oryctola<br>gus<br>cuniculu<br>s |
| 1 | 1.00 | 1 | 1 | -0.02 | -0.02  | -0.013 | -0.02  | -0.02  | t | 119450 | FRKADKFP<br>M               | Homo<br>sapiens                  |
| 1 | 1.00 | 1 | 1 | -0.02 | -0.022 | -0.027 | -0.023 | -0.018 | t | 65779  | TPTAWKP<br>N                | Mus<br>musculu<br>s              |

|   |      |   |   |       |        |        |        |        |   |        |                          |                                  |
|---|------|---|---|-------|--------|--------|--------|--------|---|--------|--------------------------|----------------------------------|
| 1 | 1.00 | 1 | 1 | 0     | 0      | 0      | 0      | 0      | t | 140914 | VLGHDEA<br>AYSKN         | Oryctola<br>gus<br>cuniculu<br>s |
| 1 | 1.00 | 1 | 1 | -0.01 | -0.008 | -0.003 | -0.007 | -0.009 | t | 139202 | QIWYERTL<br>PFTF         | Homo<br>sapiens                  |
| 1 | 1.00 | 1 | 1 | -0.01 | -0.006 | -0.003 | -0.007 | -0.009 | t | 139202 | QIWYERTL<br>PFTF         | Homo<br>sapiens                  |
| 1 | 1.00 | 1 | 1 | 0     | -0.003 | 0.007  | 0.004  | -0.002 | t | 130607 | SHNLVSSA<br>FPSA         | Camelus<br>dromed<br>arius       |
| 1 | 1.00 | 1 | 1 | 0.03  | 0.03   | 0.018  | 0.03   | 0.033  | t | 114142 | PQKSQRS<br>QDEN          | Rattus<br>norvegic<br>us         |
| 1 | 1.00 | 1 | 1 | 0.01  | 0.018  | 0.01   | 0.01   | 0.009  | t | 156896 | KHTSLAS                  | Gallus<br>gallus                 |
| 1 | 1.00 | 1 | 1 | -0.04 | -0.044 | -0.034 | -0.037 | -0.043 | t | 49015  | PQIPPNW<br>HIP           | Oryctola<br>gus<br>cuniculu<br>s |
| 1 | 1.00 | 1 | 1 | 0.03  | 0.032  | 0.027  | 0.031  | 0.03   | t | 32912  | KPTTFMLK<br>YDENGIT<br>D | Homo<br>sapiens                  |
| 1 | 1.00 | 1 | 1 | 0.02  | 0.013  | 0.015  | 0.023  | 0.019  | t | 34115  | KVLSPLQD<br>NNDSGH       | Homo<br>sapiens                  |
| 1 | 1.00 | 1 | 1 | -0.03 | -0.027 | -0.03  | -0.03  | -0.032 | t | 135501 | SQWNKP                   | Mus<br>musculu<br>s              |
| 1 | 1.00 | 1 | 1 | -0.02 | -0.022 | -0.019 | -0.017 | -0.02  | t | 41810  | MKDTLRIT<br>YL           | Mus<br>musculu<br>s              |
| 1 | 1.00 | 1 | 1 | -0.01 | -0.008 | -0.008 | -0.009 | -0.01  | t | 23689  | HEHHGVY<br>NQG           | Homo<br>sapiens                  |
| 1 | 1.00 | 1 | 1 | 0     | 0.002  | -0.006 | 0.003  | 0.002  | t | 133798 | DKIRGEG<br>MRYIIILD      | Homo<br>sapiens                  |
| 1 | 1.00 | 1 | 1 | -0.03 | -0.03  | -0.03  | -0.027 | -0.032 | t | 134198 | PVGPAPG<br>MRPPMG<br>G   | Oryctola<br>gus<br>cuniculu<br>s |
| 1 | 1.00 | 1 | 1 | 0.02  | 0.02   | 0.02   | 0.02   | 0.02   | t | 53069  | RAALIEEG<br>QRIAEM       | Homo<br>sapiens                  |

|   |      |   |   |       |        |       |        |        |   |        |                         |                       |
|---|------|---|---|-------|--------|-------|--------|--------|---|--------|-------------------------|-----------------------|
| 1 | 1.00 | 1 | 1 | 0     | 0      | 0     | 0      | 0      | t | 47494  | PFGDSY                  | Homo sapiens          |
| 1 | 1.00 | 1 | 1 | 0.04  | 0.044  | 0.038 | 0.04   | 0.04   | t | 49510  | PSSLVDSL                | Equus caballus        |
| 1 | 1.00 | 1 | 1 | 0     | 0      | 0     | 0      | 0      | t | 132468 | LYWFTLY                 | Homo sapiens          |
| 1 | 1.00 | 1 | 1 | -0.04 | -0.044 | -0.04 | -0.043 | -0.042 | t | 143962 | KIWKAPH<br>VAKYFDD<br>Q | Oryctolagus cuniculus |
| 1 | 1.00 | 1 | 1 | 0.02  | 0.02   | 0.015 | 0.02   | 0.018  | t | 32818  | KPPFSGM<br>TGCGNT       | Homo sapiens          |
| 1 | 1.00 | 1 | 1 | 0.01  | 0.006  | 0.007 | 0.01   | 0.01   | t | 100135 | IEVDNEQP<br>TTRAQK      | Oryctolagus cuniculus |
| 1 | 1.00 | 1 | 1 | 0.01  | 0.012  | 0.002 | 0.011  | 0.01   | t | 42999  | MVTILLCC<br>MTSCCSCLK   | Homo sapiens          |
| 1 | 1.00 | 1 | 1 | 0.01  | 0.012  | 0.002 | 0.011  | 0.01   | t | 42999  | MVTILLCC<br>MTSCCSCLK   | Homo sapiens          |
| 1 | 1.00 | 1 | 1 | 0     | -0.003 | 0     | 0      | 0      | t | 135440 | AFPAVT                  | Oryctolagus cuniculus |
| 1 | 1.00 | 1 | 1 | -0.02 | -0.02  | -0.02 | -0.02  | -0.02  | t | 136059 | EGY                     | Rattus norvegicus     |
| 1 | 1.00 | 1 | 1 | 0.07  | 0.068  | 0.065 | 0.069  | 0.07   | t | 52313  | QSESVEFT<br>KDTQTGMS    | Mus musculus          |
| 1 | 1.00 | 1 | 1 | 0.01  | 0.012  | 0.006 | 0.007  | 0.009  | t | 39742  | LSVPDGFK<br>VS          | Homo sapiens          |
| 1 | 1.00 | 1 | 1 | 0.05  | 0.048  | 0.056 | 0.049  | 0.051  | t | 67967  | VDGSDP                  | Mus musculus          |
| 1 | 1.00 | 1 | 1 | -0.04 | -0.038 | -0.04 | -0.033 | -0.038 | t | 134764 | PTPGPSRR<br>GP          | Homo sapiens          |
| 1 | 1.00 | 1 | 1 | 0.02  | 0.02   | 0.02  | 0.02   | 0.02   | t | 79344  | QCDAFAV<br>PVEGACM      | Mus musculus          |
| 1 | 1.00 | 1 | 1 | 0.02  | 0.02   | 0.02  | 0.02   | 0.019  | t | 130925 | KLLPEDDE<br>SRTYHTV     | Homo sapiens          |

|   |      |   |   |       |        |        |        |        |   |        |                              |              |
|---|------|---|---|-------|--------|--------|--------|--------|---|--------|------------------------------|--------------|
| 1 | 1.00 | 1 | 1 | -0.01 | -0.01  | -0.01  | -0.01  | -0.01  | t | 140460 | EKLKHS                       | Mus musculus |
| 1 | 1.00 | 1 | 1 | -0.01 | -0.01  | -0.01  | -0.01  | -0.01  | t | 140460 | EKLKHS                       | Mus musculus |
| 1 | 1.00 | 1 | 1 | -0.01 | -0.01  | -0.01  | -0.01  | -0.01  | t | 111794 | SPIAPPR                      | Homo sapiens |
| 1 | 1.00 | 1 | 1 | 0.04  | 0.04   | 0.04   | 0.044  | 0.04   | t | 134020 | CPEEPQLR<br>MKNNEEA<br>EDYDD | Homo sapiens |
| 1 | 1.00 | 1 | 1 | 0.01  | 0.01   | 0.01   | 0.012  | 0.01   | t | 37021  | LKSKIQGLL<br>QQASK           | Homo sapiens |
| 1 | 1.00 | 1 | 1 | 0     | 0      | -0.008 | 0      | 0.001  | t | 102942 | YGCYCGK<br>GG                | Mus musculus |
| 1 | 1.00 | 1 | 1 | 0     | 0      | -0.006 | 0      | 0      | t | 158836 | IHNDVEA<br>WIDRYKYL<br>P     | Mus musculus |
| 1 | 1.00 | 1 | 1 | 0     | 0      | 0      | 0.004  | 0      | t | 56918  | SANNDAEI<br>GNLI             | Homo sapiens |
| 1 | 1.00 | 1 | 1 | 0     | 0      | 0      | 0.004  | 0      | t | 5054   | ATLVVNRI<br>RGGF             | Homo sapiens |
| 1 | 1.00 | 1 | 1 | -0.01 | -0.01  | -0.01  | -0.006 | -0.01  | t | 58859  | SKIYQDAA<br>GAAGGMP<br>G     | Homo sapiens |
| 1 | 1.00 | 1 | 1 | 0.01  | 0.01   | 0.01   | 0.01   | 0.01   | t | 51483  | QLPQGTTL<br>PKGFYAE          | Homo sapiens |
| 1 | 1.00 | 1 | 1 | -0.01 | -0.018 | -0.014 | -0.01  | -0.008 | t | 29160  | ITYGACPR<br>YVK              | Mus musculus |
| 1 | 1.00 | 1 | 1 | -0.01 | -0.018 | -0.014 | -0.01  | -0.008 | t | 29160  | ITYGACPR<br>YVK              | Mus musculus |
| 1 | 1.00 | 1 | 1 | -0.01 | -0.018 | -0.014 | -0.01  | -0.008 | t | 29160  | ITYGACPR<br>YVK              | Mus musculus |
| 1 | 1.00 | 1 | 1 | 0.03  | 0.032  | 0.03   | 0.031  | 0.03   | t | 116930 | AYKLPQTD<br>DST              | Homo sapiens |
| 1 | 1.00 | 1 | 1 | 0     | 0      | 0      | 0      | -0.002 | t | 144820 | YLEDWIKY<br>NNQK             | Mus musculus |

|   |      |   |   |       |        |        |       |        |   |        |                   |                       |
|---|------|---|---|-------|--------|--------|-------|--------|---|--------|-------------------|-----------------------|
| 1 | 1.00 | 1 | 1 | 0     | 0      | 0      | 0     | -0.002 | t | 103147 | EQKLISEEDLN       | Mus musculus          |
| 1 | 1.00 | 1 | 1 | 0     | 0      | 0      | 0     | -0.002 | t | 108202 | VVSHFND           | Mus musculus          |
| 1 | 1.00 | 1 | 1 | 0     | 0      | 0      | 0     | -0.002 | t | 103372 | LPGEEDLPG         | Mus musculus          |
| 1 | 1.00 | 1 | 1 | 0.01  | 0.01   | 0.01   | 0.01  | 0.01   | t | 132103 | TQKVSFSGQPQNITT   | Homo sapiens          |
| 1 | 1.00 | 1 | 1 | 0.01  | 0.01   | 0.01   | 0.01  | 0.01   | t | 104128 | MNKVYLP           | Homo sapiens          |
| 1 | 1.00 | 1 | 1 | 0.01  | 0.01   | 0.01   | 0.01  | 0.01   | t | 79567  | HSYTLMF           | Oryctolagus cuniculus |
| 1 | 1.00 | 1 | 1 | 0.01  | 0.01   | 0.006  | 0.01  | 0.01   | t | 47545  | PFPQPQQQFP        | Mus musculus          |
| 1 | 1.00 | 1 | 1 | 0     | 0.002  | -0.009 | 0.003 | 0      | t | 70261  | VPCSTCEGNLACLSLQ  | Ovis aries            |
| 1 | 1.00 | 1 | 1 | 0.04  | 0.04   | 0.04   | 0.04  | 0.04   | t | 135502 | SSSQHL            | Oryctolagus cuniculus |
| 1 | 1.00 | 1 | 1 | 0.03  | 0.028  | 0.041  | 0.029 | 0.028  | t | 15383  | FDFASGLD          | Mus musculus          |
| 1 | 1.00 | 1 | 1 | 0.03  | 0.032  | 0.041  | 0.029 | 0.028  | t | 15383  | FDFASGLD          | MD                    |
| 1 | 1.00 | 1 | 1 | -0.01 | -0.01  | -0.012 | -0.01 | -0.01  | t | 48410  | PLLSAGIFGAKPLQSLQ | Mus musculus          |
| 1 | 1.00 | 1 | 1 | 0.02  | 0.016  | 0.017  | 0.019 | 0.021  | t | 76577  | YYQQTDEANK        | Oryctolagus cuniculus |
| 1 | 1.00 | 1 | 1 | -0.02 | -0.023 | -0.021 | -0.02 | -0.022 | t | 71199  | VSVNDPFI DLEYM    | Oryctolagus cuniculus |
| 1 | 1.00 | 1 | 1 | 0     | 0      | 0      | 0     | 0      | t | 1396   | AFSKIRDF          | Mus musculus          |

|   |      |   |   |       |        |        |        |        |   |        |                          |                              |
|---|------|---|---|-------|--------|--------|--------|--------|---|--------|--------------------------|------------------------------|
| 1 | 1.00 | 1 | 1 | 0.02  | 0.022  | 0.004  | 0.026  | 0.027  | t | 134684 | GSLPQKSQ<br>RDEN         | Rattus<br>norvegicus         |
| 1 | 1.00 | 1 | 1 | 0.02  | 0.024  | 0.011  | 0.017  | 0.018  | t | 113755 | QGQQPG<br>QGQQPG<br>QG   | Homo<br>sapiens              |
| 1 | 1.00 | 1 | 1 | 0     | 0      | 0.001  | 0      | 0.002  | t | 29703  | IYTINDKILS               | Mus<br>musculus              |
| 1 | 1.00 | 1 | 1 | -0.02 | -0.02  | -0.02  | -0.024 | -0.019 | t | 134050 | FKPPKY                   | Homo<br>sapiens              |
| 1 | 1.00 | 1 | 1 | 0.02  | 0.024  | 0.02   | 0.021  | 0.02   | t | 12931  | ELADALLE                 | Homo<br>sapiens              |
| 1 | 1.00 | 1 | 1 | 0.01  | 0.01   | 0.01   | 0.01   | 0.009  | t | 38304  | LNPKTNK<br>WEDK          | Homo<br>sapiens              |
| 1 | 1.00 | 1 | 1 | 0.02  | 0.017  | 0.012  | 0.02   | 0.02   | t | 84229  | KEEGGKET<br>KDADVDR<br>R | Oryctola<br>gus<br>cuniculus |
| 1 | 1.00 | 1 | 1 | 0.01  | 0.011  | 0.009  | 0.013  | 0.009  | t | 99285  | GLGVPRER<br>QMEPAFD      | Equus<br>caballus            |
| 1 | 1.00 | 1 | 1 | 0     | 0      | 0      | 0      | 0      | t | 141979 | PKKRVVNP<br>FERKG        | Mus<br>musculus              |
| 1 | 1.00 | 1 | 1 | 0     | -0.004 | 0.007  | 0      | 0      | t | 10853  | DYAWDQT<br>HQ            | Mus<br>musculus              |
| 1 | 1.00 | 1 | 1 | 0     | -0.001 | -0.005 | -0.003 | 0      | t | 60319  | SPVMGVI<br>GFSFFVK       | Myodes<br>glareolus          |
| 1 | 1.00 | 1 | 1 | -0.01 | -0.01  | -0.01  | -0.01  | -0.012 | t | 153378 | EIDLKLEPG<br>TRV         | Mus<br>musculus              |
| 1 | 1.00 | 1 | 1 | 0.02  | 0.02   | 0.02   | 0.02   | 0.02   | t | 132526 | PGSHFCG<br>GTLIHPSF      | Homo<br>sapiens              |
| 1 | 1.00 | 1 | 1 | 0.02  | 0.02   | 0.02   | 0.02   | 0.02   | t | 132526 | PGSHFCG<br>GTLIHPSF      | Homo<br>sapiens              |
| 1 | 1.00 | 1 | 1 | 0.02  | 0.02   | 0.02   | 0.02   | 0.02   | t | 7515   | DAGDSGY<br>LT            | Mus<br>musculus              |

|   |      |   |   |       |        |        |        |        |   |        |                              |                                  |
|---|------|---|---|-------|--------|--------|--------|--------|---|--------|------------------------------|----------------------------------|
| 1 | 1.00 | 1 | 1 | 0     | 0      | 0      | 0      | 0      | t | 120448 | DPEFLNLIK<br>S               | Mus<br>musculu<br>s              |
| 1 | 1.00 | 1 | 1 | 0.01  | 0.01   | 0.009  | 0.01   | 0.01   | t | 6455   | CITQYERES<br>QAYY            | Mus<br>musculu<br>s              |
| 1 | 1.00 | 1 | 1 | -0.01 | -0.008 | -0.007 | -0.009 | -0.01  | t | 55678  | RRPQDVK<br>F                 | Homo<br>sapiens                  |
| 1 | 1.00 | 1 | 1 | 0.01  | 0.008  | -0.002 | 0.01   | 0.011  | t | 21518  | GNSIIHYT<br>NINYYKDA<br>ASNS | Homo<br>sapiens                  |
| 1 | 1.00 | 1 | 1 | -0.02 | -0.02  | -0.022 | -0.024 | -0.02  | t | 39368  | LSGIQLFD<br>RI               | Homo<br>sapiens                  |
| 1 | 1.00 | 1 | 1 | 0.01  | 0.01   | 0.01   | 0.01   | 0.01   | t | 382    | AAPYIEQA<br>Q                | Homo<br>sapiens                  |
| 1 | 1.00 | 1 | 1 | 0.02  | 0.019  | 0.021  | 0.023  | 0.02   | t | 7084   | CSSLEKTK<br>HRLQNEIE<br>DL   | Homo<br>sapiens                  |
| 1 | 1.00 | 1 | 1 | 0     | 0      | -0.003 | 0      | 0      | t | 98974  | QTMKGLD<br>IQK               | Homo<br>sapiens                  |
| 1 | 1.00 | 1 | 1 | 0.05  | 0.05   | 0.05   | 0.05   | 0.05   | t | 139619 | TGSSTGGR<br>QGSHHE           | Homo<br>sapiens                  |
| 1 | 1.00 | 1 | 1 | 0.01  | 0.006  | 0.005  | 0.009  | 0.01   | t | 97732  | VGSAAPAF<br>A                | Oryctola<br>gus<br>cuniculu<br>s |
| 1 | 1.00 | 1 | 1 | 0.01  | 0.006  | 0.005  | 0.009  | 0.01   | t | 97732  | VGSAAPAF<br>A                | Oryctola<br>gus<br>cuniculu<br>s |
| 1 | 1.00 | 1 | 1 | -0.04 | -0.042 | -0.035 | -0.041 | -0.04  | t | 53924  | RGLYFPAG                     | Mus<br>musculu<br>s              |
| 1 | 1.00 | 1 | 1 | -0.01 | -0.01  | -0.01  | -0.01  | -0.01  | t | 56715  | SAASCNGF<br>LYFVIF           | Homo<br>sapiens                  |
| 1 | 1.00 | 1 | 1 | -0.01 | -0.01  | -0.01  | -0.01  | -0.011 | t | 33794  | KTNMKH<br>M                  | Mus<br>musculu<br>s              |
| 1 | 1.00 | 1 | 1 | 0     | 0      | 0.006  | 0      | -0.002 | t | 18955  | GDDPLL<br>G<br>NQSL          | Mus<br>musculu<br>s              |
| 1 | 1.00 | 1 | 1 | 0.05  | 0.05   | 0.05   | 0.05   | 0.05   | t | 104950 | QGERSGP                      | Homo<br>sapiens                  |

|   |      |   |   |       |        |        |        |        |   |        |                         |                |
|---|------|---|---|-------|--------|--------|--------|--------|---|--------|-------------------------|----------------|
| 1 | 1.00 | 1 | 1 | -0.01 | -0.009 | -0.021 | -0.011 | -0.01  | t | 53342  | RDFSIRES                | Equus caballus |
| 1 | 1.00 | 1 | 1 | 0.01  | 0.01   | 0.006  | 0.01   | 0.01   | t | 51922  | QPQQPFP<br>QPQ          | Mus musculus   |
| 1 | 1.00 | 1 | 1 | 0.01  | 0.01   | 0.006  | 0.01   | 0.01   | t | 51922  | QPQQPFP<br>QPQ          | Mus musculus   |
| 1 | 1.00 | 1 | 1 | -0.03 | -0.028 | -0.031 | -0.029 | -0.03  | t | 71262  | VTCAMF                  | Homo sapiens   |
| 1 | 1.00 | 1 | 1 | -0.02 | -0.018 | -0.021 | -0.019 | -0.021 | t | 40837  | LYLGAM                  | Homo sapiens   |
| 1 | 1.00 | 1 | 1 | 0     | 0.002  | -0.01  | 0.001  | 0      | t | 10581  | DVENVDG<br>LSLWEMY<br>K | Homo sapiens   |
| 1 | 1.00 | 1 | 1 | -0.02 | -0.022 | -0.026 | -0.023 | -0.02  | t | 50255  | QAGDQSY<br>FLR          | Mus musculus   |
| 1 | 1.00 | 1 | 1 | 0.01  | 0.012  | 0.01   | 0.013  | 0.012  | t | 18031  | FTPDYQV<br>PF           | Homo sapiens   |
| 1 | 1.00 | 1 | 1 | -0.02 | -0.017 | -0.027 | -0.02  | -0.02  | t | 33795  | KTNMKH<br>MAGA          | Mus musculus   |
| 1 | 1.00 | 1 | 1 | 0     | -0.003 | 0      | 0      | 0      | t | 15205  | FAKY                    | Mus musculus   |
| 1 | 1.00 | 1 | 1 | 0     | 0      | 0      | 0      | 0      | t | 15205  | FAKY                    | Mus musculus   |
| 1 | 1.00 | 1 | 1 | 0.02  | 0.02   | 0.025  | 0.02   | 0.018  | t | 117600 | PKKAK                   | Homo sapiens   |
| 1 | 1.00 | 1 | 1 | 0     | 0      | 0      | 0      | 0.002  | t | 65555  | TPEMDIPG<br>QV          | Mus musculus   |
| 1 | 1.00 | 1 | 1 | 0.05  | 0.053  | 0.053  | 0.05   | 0.05   | t | 78938  | CAPGQNL<br>CY           | Mus musculus   |



|   |      |   |   |       |        |        |        |        |   |        |                         |                                  |
|---|------|---|---|-------|--------|--------|--------|--------|---|--------|-------------------------|----------------------------------|
| 1 | 1.00 | 1 | 1 | 0.02  | 0.02   | 0.02   | 0.02   | 0.02   | t | 136827 | DFGSVGG<br>VL           | Mus<br>musculu<br>s              |
| 1 | 1.00 | 1 | 1 | -0.02 | -0.012 | -0.02  | -0.017 | -0.02  | t | 110954 | NNKYTVTL<br>KATP        | Homo<br>sapiens                  |
| 1 | 1.00 | 1 | 1 | -0.02 | -0.02  | -0.033 | -0.017 | -0.017 | t | 141646 | FSKWRKN<br>HMRQKSN<br>K | Homo<br>sapiens                  |
| 1 | 1.00 | 1 | 1 | 0.01  | 0.01   | 0.01   | 0.01   | 0.009  | t | 138892 | REQAPNL<br>VY           | Mus<br>musculu<br>s              |
| 1 | 1.00 | 1 | 1 | 0     | -0.002 | -0.007 | 0      | 0      | t | 45495  | NPTLLGEA                | Oryctola<br>gus<br>cuniculu<br>s |
| 1 | 1.00 | 1 | 1 | 0.01  | 0.01   | -0.002 | 0.004  | 0.009  | t | 27725  | INQDPDKI<br>LTY         | Mus<br>musculu<br>s              |
| 1 | 1.00 | 1 | 1 | -0.01 | -0.009 | -0.01  | -0.01  | -0.012 | t | 14397  | ETHPLYQ                 | Mus<br>musculu<br>s              |
| 1 | 1.00 | 1 | 1 | 0.01  | 0.008  | 0.008  | 0.009  | 0.01   | t | 97431  | KTFSMGA<br>K            | Mus<br>musculu<br>s              |
| 1 | 1.00 | 1 | 1 | 0.01  | 0.008  | 0.008  | 0.009  | 0.01   | t | 97431  | KTFSMGA<br>K            | Mus<br>musculu<br>s              |
| 1 | 1.00 | 1 | 1 | 0.01  | 0.022  | 0.01   | 0.01   | 0.008  | t | 136363 | IDPLMFKY<br>WSNM        | Gallus<br>gallus                 |
| 1 | 1.00 | 1 | 1 | 0.01  | 0.018  | 0.01   | 0.01   | 0.008  | t | 136363 | IDPLMFKY<br>WSNM        | Gallus<br>gallus                 |
| 1 | 1.00 | 1 | 1 | -0.01 | -0.002 | -0.01  | -0.01  | -0.012 | t | 156938 | PPEKIHV                 | Gallus<br>gallus                 |
| 1 | 1.00 | 1 | 1 | -0.01 | -0.01  | -0.01  | -0.01  | -0.012 | t | 47544  | PFPQPQQ<br>PFC          | Mus<br>musculu<br>s              |
| 1 | 1.00 | 1 | 1 | 0.04  | 0.04   | 0.04   | 0.04   | 0.04   | t | 79375  | RNYTLT                  | Mus<br>musculu<br>s              |
| 1 | 1.00 | 1 | 1 | 0     | -0.002 | -0.007 | -0.003 | -0.001 | t | 86999  | NQKNVRT<br>LEEWE        | Mus<br>musculu<br>s              |

|   |      |   |   |       |        |        |        |        |   |        |                              |                       |
|---|------|---|---|-------|--------|--------|--------|--------|---|--------|------------------------------|-----------------------|
| 1 | 1.00 | 1 | 1 | 0.02  | 0.02   | 0.02   | 0.02   | 0.02   | t | 104226 | RPQDVKFP<br>GGGQIVG<br>GVYLL | Homo sapiens          |
| 1 | 1.00 | 1 | 1 | -0.01 | -0.01  | -0.01  | -0.01  | -0.01  | t | 133116 | GPSRRGPS<br>LG               | Homo sapiens          |
| 1 | 1.00 | 1 | 1 | 0.02  | 0.02   | 0.019  | 0.02   | 0.02   | t | 55473  | RQQQQQ<br>GLRGEEM            | Homo sapiens          |
| 1 | 1.00 | 1 | 1 | 0.02  | 0.02   | 0.02   | 0.02   | 0.021  | t | 137407 | GPEYWDG<br>ETRKVKA           | Oryctolagus cuniculus |
| 1 | 1.00 | 1 | 1 | 0.01  | 0.014  | 0.01   | 0.011  | 0.008  | t | 23246  | GWGLHQP<br>PPQIFLKIL<br>PQSG | Homo sapiens          |
| 1 | 1.00 | 1 | 1 | -0.01 | -0.01  | -0.01  | -0.01  | -0.01  | t | 15981  | FGGETFTP<br>DWMMEV           | Mus musculus          |
| 1 | 1.00 | 1 | 1 | -0.03 | -0.027 | -0.03  | -0.03  | -0.031 | t | 105859 | HARGNYD<br>AAKR              | Mus musculus          |
| 1 | 1.00 | 1 | 1 | -0.05 | -0.052 | -0.044 | -0.049 | -0.049 | t | 79042  | PKSKPFA                      | Mus musculus          |
| 1 | 1.00 | 1 | 1 | 0     | 0      | 0      | 0      | -0.001 | t | 134411 | IPP                          | Mus musculus          |
| 1 | 1.00 | 1 | 1 | 0     | -0.003 | 0.013  | 0      | -0.001 | t | 38747  | LPVCPL                       | Oryctolagus cuniculus |
| 1 | 1.00 | 1 | 1 | 0     | -0.004 | 0      | -0.001 | -0.001 | t | 7807   | DDKDPQF<br>KDNVILLN<br>K     | Oryctolagus cuniculus |
| 1 | 1.00 | 1 | 1 | -0.03 | -0.03  | -0.028 | -0.03  | -0.031 | t | 1522   | AGGGHNG<br>VFDFPDSG          | Homo sapiens          |
| 1 | 1.00 | 1 | 1 | -0.03 | -0.03  | -0.028 | -0.03  | -0.031 | t | 1522   | AGGGHNG<br>VFDFPDSG          | Homo sapiens          |

|   |      |   |   |       |        |        |        |        |   |        |                              |                                  |
|---|------|---|---|-------|--------|--------|--------|--------|---|--------|------------------------------|----------------------------------|
| 1 | 1.00 | 1 | 1 | 0     | 0.004  | 0      | 0      | 0      | t | 25645  | IDPRGKM<br>V                 | MD                               |
| 1 | 1.00 | 1 | 1 | -0.03 | -0.03  | -0.03  | -0.03  | -0.03  | t | 126926 | RGWNPGE<br>LYNGFP            | Oryctola<br>gus<br>cuniculu<br>s |
| 1 | 1.00 | 1 | 1 | -0.02 | -0.023 | -0.028 | -0.02  | -0.02  | t | 27244  | ILPGGGTA<br>LIRC             | Oryctola<br>gus<br>cuniculu<br>s |
| 1 | 1.00 | 1 | 1 | 0.02  | 0.02   | 0.017  | 0.03   | 0.022  | t | 58022  | SGETTTAA<br>GTTASPGA<br>ASGP | Homo<br>sapiens                  |
| 1 | 1.00 | 1 | 1 | 0.03  | 0.03   | 0.03   | 0.038  | 0.032  | t | 110909 | IVTFCKKC<br>DSTLRCLV<br>QST  | Mus<br>musculu<br>s              |
| 1 | 1.00 | 1 | 1 | -0.04 | -0.04  | -0.044 | -0.04  | -0.04  | t | 48864  | PPPPPPPP<br>PPPPPPPP<br>pppp | Homo<br>sapiens                  |
| 1 | 1.00 | 1 | 1 | 0.01  | 0.01   | 0.019  | 0.01   | 0.01   | t | 20793  | GLDFNE                       | Homo<br>sapiens                  |
| 1 | 1.00 | 1 | 1 | 0     | 0      | 0      | 0      | -0.002 | t | 41014  | MADNGTI<br>TVEELKQL          | Homo<br>sapiens                  |
| 1 | 1.00 | 1 | 1 | 0     | -0.002 | 0.005  | 0.003  | 0      | t | 115260 | GAEGQRP<br>GFGYGG            | Mus<br>musculu<br>s              |
| 1 | 1.00 | 1 | 1 | -0.01 | -0.01  | -0.01  | -0.01  | -0.009 | t | 115266 | GLFQINN<br>K IW              | Homo<br>sapiens                  |
| 1 | 1.00 | 1 | 1 | -0.02 | -0.014 | -0.02  | -0.021 | -0.02  | t | 131294 | DWGLPIPS<br>PSP              | Homo<br>sapiens                  |
| 1 | 1.00 | 1 | 1 | 0.03  | 0.028  | 0.03   | 0.029  | 0.03   | t | 116947 | DIDYS<br>DYS TR              | Mus<br>musculu<br>s              |
| 1 | 1.00 | 1 | 1 | 0.02  | 0.02   | 0.02   | 0.02   | 0.021  | t | 9609   | DPDI                         | Mus<br>musculu<br>s              |
| 1 | 1.00 | 1 | 1 | -0.03 | -0.026 | -0.036 | -0.03  | -0.028 | t | 123438 | LKMWSNF<br>LG                | Ovis<br>aries                    |

|   |      |   |   |       |        |        |        |        |   |        |                              |                |
|---|------|---|---|-------|--------|--------|--------|--------|---|--------|------------------------------|----------------|
| 1 | 1.00 | 1 | 1 | 0.02  | 0.024  | 0.011  | 0.017  | 0.018  | t | 113754 | QGGQPG<br>QGGQGG<br>QP       | Homo sapiens   |
| 1 | 1.00 | 1 | 1 | 0     | 0      | 0      | 0      | 0      | t | 98731  | DITNPINLR<br>E               | Homo sapiens   |
| 1 | 1.00 | 1 | 1 | 0.03  | 0.028  | 0.023  | 0.023  | 0.03   | t | 108131 | SKDWSFY                      | Mus musculus   |
| 1 | 1.00 | 1 | 1 | 0.03  | 0.028  | 0.023  | 0.023  | 0.03   | t | 108131 | SKDWSFY                      | Mus musculus   |
| 1 | 1.00 | 1 | 1 | 0.03  | 0.028  | 0.023  | 0.023  | 0.03   | t | 108131 | SKDWSFY                      | Mus musculus   |
| 1 | 1.00 | 1 | 1 | 0     | 0.004  | 0      | 0.007  | 0.001  | t | 131698 | TGVDVSM<br>NTHLKAVK<br>MTLKN | Homo sapiens   |
| 1 | 1.00 | 1 | 1 | 0.01  | 0.013  | -0.004 | 0.01   | 0.01   | t | 94548  | HYTQMV<br>WGKTKEIG<br>CGSIKY | Mus musculus   |
| 1 | 1.00 | 1 | 1 | 0.01  | -0.004 | 0.002  | 0.009  | 0.01   | t | 57908  | SFSPNNTN                     | Macaca mulatta |
| 1 | 1.00 | 1 | 1 | 0     | 0.004  | 0      | 0.001  | 0      | t | 595    | ACSFSSIP                     | Homo sapiens   |
| 1 | 1.00 | 1 | 1 | 0     | 0      | 0      | 0      | 0      | t | 32783  | KPLDKFGN<br>IYDYHYEH         | Mus musculus   |
| 1 | 1.00 | 1 | 1 | 0     | 0      | 0      | 0      | 0      | t | 32783  | KPLDKFGN<br>IYDYHYEH         | Mus musculus   |
| 1 | 1.00 | 1 | 1 | 0.02  | 0.02   | 0.02   | 0.022  | 0.02   | t | 135991 | SEKKISSIQ<br>SIV             | Homo sapiens   |
| 1 | 1.00 | 1 | 1 | -0.05 | -0.048 | -0.05  | -0.043 | -0.048 | t | 118361 | FRFLALKLY<br>FSFTRP          | Homo sapiens   |
| 1 | 1.00 | 1 | 1 | 0     | 0.004  | -0.004 | 0.001  | 0      | t | 18764  | GASDLRSS                     | Homo sapiens   |

|   |      |   |   |       |        |        |        |       |   |        |                     |                       |
|---|------|---|---|-------|--------|--------|--------|-------|---|--------|---------------------|-----------------------|
| 1 | 1.00 | 1 | 1 | 0.02  | 0.022  | 0.018  | 0.021  | 0.022 | t | 28505  | ISGDLKTQI<br>DQVEST | Homo sapiens          |
| 1 | 1.00 | 1 | 1 | 0.03  | 0.035  | 0.039  | 0.031  | 0.03  | t | 65860  | TQGSNW              | Homo sapiens          |
| 1 | 1.00 | 1 | 1 | 0     | 0.004  | -0.001 | 0.007  | 0.001 | t | 122732 | DRKASPPS<br>GLWSPAY | Homo sapiens          |
| 1 | 1.00 | 1 | 1 | 0     | 0.002  | -0.011 | -0.001 | 0     | t | 13248  | ELRGLAQA<br>LIDQKVK | Homo sapiens          |
| 1 | 1.00 | 1 | 1 | 0.01  | 0.014  | -0.007 | 0.01   | 0.011 | t | 51286  | QLAKDKV<br>NE       | MD                    |
| 1 | 1.00 | 1 | 1 | 0.01  | 0.01   | 0.012  | 0.011  | 0.014 | t | 45591  | NQMIITM             | Mus musculus          |
| 1 | 1.00 | 1 | 1 | 0.01  | 0.012  | 0.01   | 0.011  | 0.01  | t | 21466  | GNLLFT              | Homo sapiens          |
| 1 | 1.00 | 1 | 1 | -0.01 | -0.006 | -0.014 | -0.01  | -0.01 | t | 71182  | VSVAFGNP<br>GDTPVTG | Capra hircus          |
| 1 | 1.00 | 1 | 1 | -0.01 | -0.003 | -0.014 | -0.01  | -0.01 | t | 71182  | VSVAFGNP<br>GDTPVTG | Capra hircus          |
| 1 | 1.00 | 1 | 1 | 0.01  | 0.01   | 0.017  | 0.01   | 0.009 | t | 105890 | IVYVG DGVC          | Mus musculus          |
| 1 | 1.00 | 1 | 1 | 0.02  | 0.018  | 0.02   | 0.02   | 0.02  | t | 118023 | MRPPMG<br>PPIG      | Mus musculus          |
| 1 | 1.00 | 1 | 1 | 0.02  | 0.023  | 0.021  | 0.021  | 0.018 | t | 99227  | ERQMEPA<br>FDQFRQTY | Equus caballus        |
| 1 | 1.00 | 1 | 1 | 0.04  | 0.04   | 0.04   | 0.04   | 0.04  | t | 79547  | FHQMPDA             | Oryctolagus cuniculus |
| 1 | 1.00 | 1 | 1 | 0.02  | 0.02   | 0.02   | 0.02   | 0.02  | t | 119583 | GNVFSCSV            | Homo sapiens          |

|   |      |   |   |       |        |        |        |        |   |        |                              |                                  |
|---|------|---|---|-------|--------|--------|--------|--------|---|--------|------------------------------|----------------------------------|
| 1 | 1.00 | 1 | 1 | 0.01  | 0.01   | 0.01   | 0.01   | 0.01   | t | 22123  | GRLGTYRY<br>VSSGER           | Homo<br>sapiens                  |
| 1 | 1.00 | 1 | 1 | -0.03 | -0.03  | -0.033 | -0.03  | -0.03  | t | 50741  | QFAPSASA<br>FFGMSRIG<br>M    | Homo<br>sapiens                  |
| 1 | 1.00 | 1 | 1 | 0.02  | 0.024  | 0.024  | 0.021  | 0.022  | t | 24703  | HRQWFL                       | Homo<br>sapiens                  |
| 1 | 1.00 | 1 | 1 | 0.08  | 0.083  | 0.08   | 0.08   | 0.079  | t | 113679 | PEVPEVED<br>E                | Mus<br>musculu<br>s              |
| 1 | 1.00 | 1 | 1 | 0.03  | 0.03   | 0.035  | 0.03   | 0.03   | t | 53032  | QYSPGQ                       | Homo<br>sapiens                  |
| 1 | 1.00 | 1 | 1 | 0.01  | 0.01   | 0.01   | 0.01   | 0.01   | t | 156899 | KLGDPLA                      | Oryctola<br>gus<br>cuniculu<br>s |
| 1 | 1.00 | 1 | 1 | 0.01  | 0.007  | 0.01   | 0.01   | 0.01   | t | 156899 | KLGDPLA                      | Oryctola<br>gus<br>cuniculu<br>s |
| 1 | 1.00 | 1 | 1 | 0     | 0      | -0.006 | 0      | 0      | t | 1379   | AFQNRLES<br>IK               | Homo<br>sapiens                  |
| 1 | 1.00 | 1 | 1 | -0.03 | -0.028 | -0.036 | -0.023 | -0.028 | t | 38208  | LNENLLRF<br>FVAPFPQV<br>FGKE | Homo<br>sapiens                  |
| 1 | 1.00 | 1 | 1 | -0.01 | -0.01  | -0.01  | -0.01  | -0.01  | t | 153393 | GPDAPRIP<br>LSKM             | Mus<br>musculu<br>s              |
| 1 | 1.00 | 1 | 1 | -0.03 | -0.032 | -0.042 | -0.033 | -0.032 | t | 89067  | SRTRTTSV<br>GDKQVAS<br>KV    | Mus<br>musculu<br>s              |
| 1 | 1.00 | 1 | 1 | 0.03  | 0.032  | 0.02   | 0.027  | 0.028  | t | 63287  | TEAEDVIP<br>EGWKADT<br>SYESK | Homo<br>sapiens                  |
| 1 | 1.00 | 1 | 1 | -0.08 | -0.078 | -0.087 | -0.081 | -0.082 | t | 131052 | RRRMMM<br>QSGR               | Homo<br>sapiens                  |
| 1 | 1.00 | 1 | 1 | 0     | -0.006 | 0      | 0      | 0      | t | 123226 | GGGATPV<br>V                 | Oryctola<br>gus<br>cuniculu<br>s |

|   |      |   |   |       |        |        |        |        |   |        |                              |                     |
|---|------|---|---|-------|--------|--------|--------|--------|---|--------|------------------------------|---------------------|
| 1 | 1.00 | 1 | 1 | 0.01  | -0.002 | 0.01   | 0.013  | 0.01   | t | 156980 | YTLGHFHG<br>QPQL             | Bos<br>taurus       |
| 1 | 1.00 | 1 | 1 | 0.01  | 0.012  | 0.008  | 0.011  | 0.009  | t | 53355  | RDGQLTIK<br>AERTEQKD<br>FDGR | Homo<br>sapiens     |
| 1 | 1.00 | 1 | 1 | 0.04  | 0.042  | 0.04   | 0.033  | 0.04   | t | 123441 | LLEYLGEEY                    | Ovis<br>aries       |
| 1 | 1.00 | 1 | 1 | 0.01  | 0.012  | 0.01   | 0.011  | 0.01   | t | 58076  | SGHRMA<br>WDM                | Homo<br>sapiens     |
| 1 | 1.00 | 1 | 1 | 0.02  | 0.02   | 0.02   | 0.02   | 0.019  | t | 118762 | CYGSFAKP<br>TN               | Mus<br>musculu<br>s |
| 1 | 1.00 | 1 | 1 | 0     | 0.002  | 0      | 0.003  | 0      | t | 108874 | DPISGHVS<br>LF               | Homo<br>sapiens     |
| 1 | 1.00 | 1 | 1 | 0.03  | 0.03   | 0.031  | 0.033  | 0.03   | t | 31133  | KHLYVSM<br>PTAQSTM           | Homo<br>sapiens     |
| 1 | 1.00 | 1 | 1 | 0.01  | 0.01   | 0.01   | 0.01   | 0.011  | t | 115304 | KCEVFREL<br>KD               | Homo<br>sapiens     |
| 1 | 1.00 | 1 | 1 | 0.05  | 0.05   | 0.05   | 0.05   | 0.05   | t | 115605 | GDEVELPC<br>RISP             | Homo<br>sapiens     |
| 1 | 1.00 | 1 | 1 | 0.05  | 0.05   | 0.05   | 0.05   | 0.05   | t | 115605 | GDEVELPC<br>RISP             | Homo<br>sapiens     |
| 1 | 1.00 | 1 | 1 | 0.03  | 0.03   | 0.03   | 0.03   | 0.03   | t | 112190 | KVTMTCK                      | Homo<br>sapiens     |
| 1 | 1.00 | 1 | 1 | 0.01  | 0.008  | 0.009  | 0.013  | 0.01   | t | 106515 | HLPSFLRP<br>DPPL             | Mus<br>musculu<br>s |
| 1 | 1.00 | 1 | 1 | 0.01  | 0.012  | 0.015  | 0.013  | 0.011  | t | 134031 | DEYDEVA<br>MP                | Homo<br>sapiens     |
| 1 | 1.00 | 1 | 1 | 0.01  | 0.01   | 0.01   | 0.01   | 0.01   | t | 108036 | MSVPQTT<br>YSKITELI          | Homo<br>sapiens     |
| 1 | 1.00 | 1 | 1 | -0.01 | -0.008 | -0.006 | -0.009 | -0.011 | t | 35994  | LFTGHL                       | Homo<br>sapiens     |
| 1 | 1.00 | 1 | 1 | -0.01 | -0.01  | -0.01  | -0.01  | -0.01  | t | 132933 | WGQNSFP                      | Homo<br>sapiens     |
| 1 | 1.00 | 1 | 1 | 0.01  | 0.013  | 0.009  | 0.01   | 0.008  | t | 4528   | ASLKDALL<br>KYIYDNRG<br>TLI  | Equus<br>caballus   |

|   |      |   |   |       |        |        |        |        |   |        |                             |                                  |
|---|------|---|---|-------|--------|--------|--------|--------|---|--------|-----------------------------|----------------------------------|
| 1 | 1.00 | 1 | 1 | 0.01  | 0.018  | 0.009  | 0.01   | 0.008  | t | 4528   | ASLKDALL<br>KYIYDNRG<br>TLI | Gallus<br>gallus                 |
| 1 | 1.00 | 1 | 1 | -0.02 | -0.018 | -0.02  | -0.019 | -0.02  | t | 51575  | QLVNTNG<br>SWHIN            | Homo<br>sapiens                  |
| 1 | 1.00 | 1 | 1 | -0.02 | -0.018 | -0.02  | -0.019 | -0.02  | t | 51575  | QLVNTNG<br>SWHIN            | Homo<br>sapiens                  |
| 1 | 1.00 | 1 | 1 | 0.03  | 0.028  | 0.016  | 0.023  | 0.032  | t | 120951 | SLDPEFLN<br>LI              | Mus<br>musculu<br>s              |
| 1 | 1.00 | 1 | 1 | -0.02 | -0.023 | -0.024 | -0.02  | -0.021 | t | 122734 | DSVPKWD<br>RLPC             | Oryctola<br>gus<br>cuniculu<br>s |
| 1 | 1.00 | 1 | 1 | 0.02  | 0.02   | 0.015  | 0.02   | 0.02   | t | 95263  | ATYHLYNS<br>QD              | Oryctola<br>gus<br>cuniculu<br>s |
| 1 | 1.00 | 1 | 1 | 0.02  | 0.02   | 0.015  | 0.02   | 0.02   | t | 95263  | ATYHLYNS<br>QD              | Homo<br>sapiens                  |
| 1 | 1.00 | 1 | 1 | 0.02  | 0.018  | 0.02   | 0.019  | 0.02   | t | 23983  | HHDSLESR<br>RLREEED         | Mus<br>musculu<br>s              |
| 1 | 1.00 | 1 | 1 | 0     | 0.002  | -0.003 | -0.003 | -0.002 | t | 111822 | TEHNATIL<br>FLKSDM          | Homo<br>sapiens                  |
| 1 | 1.00 | 1 | 1 | -0.03 | -0.026 | -0.013 | -0.023 | -0.033 | t | 117449 | CVP                         | Homo<br>sapiens                  |
| 1 | 1.00 | 1 | 1 | -0.05 | -0.046 | -0.05  | -0.049 | -0.05  | t | 66137  | TRYNDALS<br>HDRL            | Homo<br>sapiens                  |
| 1 | 1.00 | 1 | 1 | -0.01 | -0.014 | -0.014 | -0.011 | -0.01  | t | 52472  | QTAPKAPT<br>EA              | Oryctola<br>gus<br>cuniculu<br>s |
| 1 | 1.00 | 1 | 1 | 0.01  | 0.012  | 0.01   | 0.011  | 0.009  | t | 19636  | GFTTNEER<br>YNVFAE          | Homo<br>sapiens                  |
| 1 | 1.00 | 1 | 1 | 0.01  | 0.012  | 0.01   | 0.011  | 0.009  | t | 19636  | GFTTNEER<br>YNVFAE          | Homo<br>sapiens                  |



|   |      |   |   |       |        |        |        |        |   |        |                              |                   |
|---|------|---|---|-------|--------|--------|--------|--------|---|--------|------------------------------|-------------------|
| 1 | 1.00 | 1 | 1 | 0     | 0.003  | -0.002 | 0      | 0      | t | 49270  | PRVRGLY                      | Mus musculus      |
| 1 | 1.00 | 1 | 1 | 0.02  | 0.022  | 0.019  | 0.023  | 0.02   | t | 1497   | AGEPYVIE<br>QGMMDP<br>AK     | Homo sapiens      |
| 1 | 1.00 | 1 | 1 | 0     | 0.002  | 0.005  | 0.001  | 0      | t | 109908 | SFFLYSK                      | Homo sapiens      |
| 1 | 1.00 | 1 | 1 | 0     | 0.002  | 0      | 0.001  | 0      | t | 117103 | TYQDFSTR<br>PRSF             | Homo sapiens      |
| 1 | 1.00 | 1 | 1 | 0.02  | 0.02   | 0.02   | 0.02   | 0.02   | t | 142381 | AAEFATEV<br>KKAT             | Homo sapiens      |
| 1 | 1.00 | 1 | 1 | 0.01  | 0.008  | 0.01   | 0.009  | 0.009  | t | 42697  | MSTNPKP<br>QRKTKRNT<br>N     | Mus musculus      |
| 1 | 1.00 | 1 | 1 | -0.01 | -0.012 | -0.005 | -0.011 | -0.012 | t | 27678  | INKVVRFD                     | Mus musculus      |
| 1 | 1.00 | 1 | 1 | 0.02  | 0.02   | 0.02   | 0.02   | 0.021  | t | 115277 | GYDTQAIV<br>QN               | Homo sapiens      |
| 1 | 1.00 | 1 | 1 | -0.04 | -0.037 | -0.04  | -0.04  | -0.039 | t | 134017 | CFHQGKEY<br>APG              | Mus musculus      |
| 1 | 1.00 | 1 | 1 | -0.01 | -0.006 | -0.01  | -0.007 | -0.011 | t | 110949 | NAEKVLEK<br>LGYA             | Homo sapiens      |
| 1 | 1.00 | 1 | 1 | 0.01  | 0.01   | 0.01   | 0.01   | 0.01   | t | 156876 | GLHANLQ                      | Gallus gallus     |
| 1 | 1.00 | 1 | 1 | -0.01 | -0.007 | -0.01  | -0.01  | -0.012 | t | 140839 | DERGTPEY<br>NIALGQRR<br>ADAV | Mus musculus      |
| 1 | 1.00 | 1 | 1 | -0.01 | -0.01  | -0.01  | -0.01  | -0.012 | t | 131849 | DPYVTPGS<br>VINNLSI          | Homo sapiens      |
| 1 | 1.00 | 1 | 1 | 0.04  | 0.04   | 0.04   | 0.04   | 0.04   | t | 108785 | APGPAGEE                     | Rattus norvegicus |
| 1 | 1.00 | 1 | 1 | 0.04  | 0.04   | 0.04   | 0.04   | 0.04   | t | 103105 | DGYPIINYE<br>YAIVNN          | Homo sapiens      |

|   |      |   |   |       |        |        |        |        |   |        |                              |                                  |
|---|------|---|---|-------|--------|--------|--------|--------|---|--------|------------------------------|----------------------------------|
| 1 | 1.00 | 1 | 1 | 0     | -0.004 | 0.004  | 0      | 0      | t | 21841  | GPYAGPM<br>ERQKPLK           | Bos<br>taurus                    |
| 1 | 1.00 | 1 | 1 | 0.01  | 0.012  | 0.01   | 0.013  | 0.01   | t | 131628 | RGYDSYA                      | Homo<br>sapiens                  |
| 1 | 1.00 | 1 | 1 | -0.01 | -0.012 | -0.004 | -0.007 | -0.009 | t | 56942  | SAPSSKN                      | Homo<br>sapiens                  |
| 1 | 1.00 | 1 | 1 | -0.01 | -0.008 | -0.004 | -0.007 | -0.009 | t | 56942  | SAPSSKN                      | Homo<br>sapiens                  |
| 1 | 1.00 | 1 | 1 | -0.04 | -0.039 | -0.051 | -0.04  | -0.04  | t | 44002  | NGIRRPKH<br>LYVSMP           | Myodes<br>glareolu<br>s          |
| 1 | 1.00 | 1 | 1 | 0     | 0      | 0      | 0.004  | 0      | t | 136522 | NDFFTYHI<br>RHGEVHC<br>GTNVR | Homo<br>sapiens                  |
| 1 | 1.00 | 1 | 1 | 0.01  | 0.01   | 0.01   | 0.01   | 0.01   | t | 111552 | MKVSNSK                      | Homo<br>sapiens                  |
| 1 | 1.00 | 1 | 1 | -0.01 | -0.01  | -0.017 | -0.01  | -0.01  | t | 40453  | LVLNRLKV<br>GLQVVAV<br>KAPGF | Mus<br>musculu<br>s              |
| 1 | 1.00 | 1 | 1 | 0.01  | 0.014  | 0.012  | 0.013  | 0.012  | t | 74449  | YKFEQPTL<br>TFGAGVN          | Homo<br>sapiens                  |
| 1 | 1.00 | 1 | 1 | 0.03  | 0.032  | 0.025  | 0.031  | 0.03   | t | 22223  | GRTWAQP<br>GYPWP             | Homo<br>sapiens                  |
| 1 | 1.00 | 1 | 1 | 0     | 0      | -0.025 | -0.01  | 0.002  | t | 69261  | VKLQCV                       | Homo<br>sapiens                  |
| 1 | 1.00 | 1 | 1 | 0.01  | 0.01   | 0.01   | 0.01   | 0.01   | t | 44555  | NKNDNKN<br>D                 | Mus<br>musculu<br>s              |
| 1 | 1.00 | 1 | 1 | 0.01  | 0.007  | 0.01   | 0.01   | 0.01   | t | 44555  | NKNDNKN<br>D                 | Oryctola<br>gus<br>cuniculu<br>s |
| 1 | 1.00 | 1 | 1 | 0.01  | 0.01   | 0.01   | 0.01   | 0.01   | t | 44555  | NKNDNKN<br>D                 | Mus<br>musculu<br>s              |
| 1 | 1.00 | 1 | 1 | 0.01  | 0.007  | 0.01   | 0.01   | 0.01   | t | 44555  | NKNDNKN<br>D                 | Oryctola<br>gus<br>cuniculu<br>s |

|   |      |   |   |       |        |        |        |        |   |        |                            |                                  |
|---|------|---|---|-------|--------|--------|--------|--------|---|--------|----------------------------|----------------------------------|
| 1 | 1.00 | 1 | 1 | 0.01  | 0.01   | 0.01   | 0.01   | 0.01   | t | 11814  | EENVEENV<br>EENV           | Oryctola<br>gus<br>cuniculu<br>s |
| 1 | 1.00 | 1 | 1 | 0.01  | 0.01   | 0.01   | 0.01   | 0.01   | t | 11814  | EENVEENV<br>EENV           | Oryctola<br>gus<br>cuniculu<br>s |
| 1 | 1.00 | 1 | 1 | 0.01  | 0.01   | 0.01   | 0.01   | 0.01   | t | 11814  | EENVEENV<br>EENV           | Oryctola<br>gus<br>cuniculu<br>s |
| 1 | 1.00 | 1 | 1 | -0.02 | -0.02  | -0.02  | -0.02  | -0.02  | t | 5674   | AWLVHR                     | Homo<br>sapiens                  |
| 1 | 1.00 | 1 | 1 | 0.01  | 0.016  | 0.007  | 0.01   | 0.01   | t | 49877  | PVGSQGIR<br>LSWEVQ         | Ovis<br>aries                    |
| 1 | 1.00 | 1 | 1 | 0.02  | 0.008  | 0.02   | 0.023  | 0.02   | t | 156872 | FSKSSWE<br>SWLP            | Bos<br>taurus                    |
| 1 | 1.00 | 1 | 1 | 0     | -0.006 | 0      | 0      | 0      | t | 123225 | GGATPVV<br>G               | Oryctola<br>gus<br>cuniculu<br>s |
| 1 | 1.00 | 1 | 1 | 0     | 0      | 0      | 0      | 0      | t | 153867 | QLLRREIK<br>NT             | Cavia<br>porcellu<br>s           |
| 1 | 1.00 | 1 | 1 | 0     | 0      | 0      | 0      | -0.002 | t | 118185 | TSQFTGLK<br>C              | Homo<br>sapiens                  |
| 1 | 1.00 | 1 | 1 | 0.01  | 0.01   | -0.001 | 0.01   | 0.011  | t | 21807  | GPTEESVE<br>RAMGRVA        | Oryctola<br>gus<br>cuniculu<br>s |
| 1 | 1.00 | 1 | 1 | 0     | 0      | -0.005 | 0      | 0.002  | t | 3880   | APTYSWG<br>A               | Mus<br>musculu<br>s              |
| 1 | 1.00 | 1 | 1 | 0.01  | 0.01   | 0.01   | 0.014  | 0.01   | t | 28912  | ITGHRMA<br>WDMMM<br>NWSPTT | Homo<br>sapiens                  |
| 1 | 1.00 | 1 | 1 | 0.02  | 0.02   | 0.02   | 0.02   | 0.02   | t | 4884   | ATALDTSN                   | Oryctola<br>gus<br>cuniculu<br>s |
| 1 | 1.00 | 1 | 1 | -0.01 | -0.01  | -0.003 | -0.001 | -0.01  | t | 119477 | KKTKGLVT<br>T              | Homo<br>sapiens                  |
| 1 | 1.00 | 1 | 1 | 0.01  | 0.012  | 0.015  | 0.01   | 0.008  | t | 94641  | PESWHTR<br>WDE             | Homo<br>sapiens                  |

|   |      |   |   |      |        |       |        |        |   |        |                             |                                  |
|---|------|---|---|------|--------|-------|--------|--------|---|--------|-----------------------------|----------------------------------|
| 1 | 1.00 | 1 | 1 | 0    | 0      | 0     | 0      | -0.002 | t | 49297  | PSAPPLPH<br>VVDLPQLG<br>PRR | Cavia<br>porcellu<br>s           |
| 1 | 1.00 | 1 | 1 | 0.01 | 0.01   | 0.01  | 0.01   | 0.009  | t | 146624 | WNWFDIT<br>N                | Homo<br>sapiens                  |
| 1 | 1.00 | 1 | 1 | 0.05 | 0.05   | 0.05  | 0.05   | 0.05   | t | 78562  | VYASPNTT<br>GLNDIL          | Mus<br>musculu<br>s              |
| 1 | 1.00 | 1 | 1 | 0    | 0      | 0.001 | 0      | -0.002 | t | 137942 | PGSEYT                      | Oryctola<br>gus<br>cuniculu<br>s |
| 1 | 1.00 | 1 | 1 | 0.01 | 0.01   | 0.01  | 0.01   | 0.01   | t | 132933 | WGQNSFP                     | Homo<br>sapiens                  |
| 1 | 1.00 | 1 | 1 | 0.03 | 0.033  | 0.029 | 0.03   | 0.029  | t | 133737 | VTPYFSYP<br>VA              | Mus<br>musculu<br>s              |
| 1 | 1.00 | 1 | 1 | 0.02 | 0.018  | 0.023 | 0.019  | 0.018  | t | 51262  | QKTTS                       | Mus<br>musculu<br>s              |
| 1 | 1.00 | 1 | 1 | 0    | -0.003 | 0     | -0.001 | -0.002 | t | 7491   | DAEFRHDS<br>GYEVHHQ<br>K    | Oryctola<br>gus<br>cuniculu<br>s |
| 1 | 1.00 | 1 | 1 | 0.04 | 0.038  | 0.032 | 0.037  | 0.04   | t | 70070  | VNGENLV<br>GDDVVLA<br>T     | Mus<br>musculu<br>s              |
| 1 | 1.00 | 1 | 1 | 0.04 | 0.038  | 0.032 | 0.037  | 0.04   | t | 70070  | VNGENLV<br>GDDVVLA<br>T     | Mus<br>musculu<br>s              |
| 1 | 1.00 | 1 | 1 | 0.04 | 0.038  | 0.032 | 0.037  | 0.04   | t | 70070  | VNGENLV<br>GDDVVLA<br>T     | Mus<br>musculu<br>s              |
| 1 | 1.00 | 1 | 1 | 0.04 | 0.038  | 0.032 | 0.037  | 0.04   | t | 70070  | VNGENLV<br>GDDVVLA<br>T     | Mus<br>musculu<br>s              |
| 1 | 1.00 | 1 | 1 | 0.01 | 0.006  | 0.004 | 0.007  | 0.008  | t | 74436  | YKDGTLP<br>LSTKDLTTY        | Oryctola<br>gus<br>cuniculu<br>s |
| 1 | 1.00 | 1 | 1 | 0    | -0.002 | 0     | 0.003  | 0      | t | 69271  | VKMAETC<br>PIFYDVF          | Mus<br>musculu<br>s              |
| 1 | 1.00 | 1 | 1 | 0    | -0.002 | 0     | 0.003  | 0      | t | 31580  | KKIQDCYV<br>ENGLIS          | Mus<br>musculu<br>s              |

|   |      |   |   |       |        |        |        |        |   |        |                           |                                  |
|---|------|---|---|-------|--------|--------|--------|--------|---|--------|---------------------------|----------------------------------|
| 1 | 1.00 | 1 | 1 | 0     | -0.002 | 0      | 0.003  | 0      | t | 12408  | EICPAVKR<br>DVDLFLTG      | Mus<br>musculu<br>s              |
| 1 | 1.00 | 1 | 1 | -0.02 | -0.02  | -0.02  | -0.02  | -0.021 | t | 151729 | RYSPSLNT<br>RL            | Mus<br>musculu<br>s              |
| 1 | 1.00 | 1 | 1 | 0.01  | 0.01   | 0.01   | 0.01   | 0.009  | t | 153836 | HGPKATL<br>QDIVLHLE<br>P  | Cavia<br>porcellu<br>s           |
| 1 | 1.00 | 1 | 1 | -0.03 | -0.03  | -0.023 | -0.03  | -0.033 | t | 30261  | KDTLRITYL<br>T            | Mus<br>musculu<br>s              |
| 1 | 1.00 | 1 | 1 | -0.02 | -0.023 | -0.015 | -0.02  | -0.022 | t | 7143   | CTGDARH<br>C              | Oryctola<br>gus<br>cuniculu<br>s |
| 1 | 1.00 | 1 | 1 | -0.03 | -0.032 | -0.025 | -0.033 | -0.033 | t | 109386 | KATTVR                    | Mus<br>musculu<br>s              |
| 1 | 1.00 | 1 | 1 | -0.02 | -0.018 | -0.021 | -0.019 | -0.02  | t | 63043  | TAWDFG                    | Homo<br>sapiens                  |
| 1 | 1.00 | 1 | 1 | 0.05  | 0.048  | 0.047  | 0.047  | 0.051  | t | 94606  | LTGGFYEP<br>L             | Mus<br>musculu<br>s              |
| 1 | 1.00 | 1 | 1 | 0     | -0.004 | -0.015 | -0.007 | -0.001 | t | 103986 | IHVLNSES<br>GSAGQMV<br>QD | Oryctola<br>gus<br>cuniculu<br>s |
| 1 | 1.00 | 1 | 1 | 0     | 0.002  | -0.008 | 0.003  | 0      | t | 110957 | PAAVTLAE<br>ADRT          | Homo<br>sapiens                  |
| 1 | 1.00 | 1 | 1 | -0.01 | 0.002  | -0.013 | -0.01  | -0.01  | t | 68023  | VDMIAGA<br>HWG            | Pan<br>troglody<br>tes           |
| 1 | 1.00 | 1 | 1 | 0.02  | 0.018  | 0.022  | 0.019  | 0.02   | t | 78854  | TKDTNNN<br>LKG            | Mus<br>musculu<br>s              |
| 1 | 1.00 | 1 | 1 | 0     | 0      | -0.005 | 0      | 0      | t | 60991  | SSFFSYGEI                 | Mus<br>musculu<br>s              |

|   |      |   |   |       |        |        |        |        |   |        |                              |                                  |
|---|------|---|---|-------|--------|--------|--------|--------|---|--------|------------------------------|----------------------------------|
| 1 | 1.00 | 1 | 1 | 0     | -0.003 | -0.005 | 0      | 0      | t | 51286  | QLAKDKV<br>NE                | Oryctola<br>gus<br>cuniculu<br>s |
| 1 | 1.00 | 1 | 1 | 0     | 0.004  | -0.005 | 0      | 0      | t | 51286  | QLAKDKV<br>NE                | MD                               |
| 1 | 1.00 | 1 | 1 | 0     | -0.003 | -0.005 | 0      | 0      | t | 57766  | SFFSYGEI                     | Oryctola<br>gus<br>cuniculu<br>s |
| 1 | 1.00 | 1 | 1 | 0     | 0.004  | -0.005 | 0      | 0      | t | 57766  | SFFSYGEI                     | MD                               |
| 1 | 1.00 | 1 | 1 | 0.01  | 0.01   | 0.01   | 0.01   | 0.01   | t | 915    | AEGDDPA<br>KA                | Mus<br>musculu<br>s              |
| 1 | 1.00 | 1 | 1 | 0.02  | 0.018  | 0.006  | 0.013  | 0.022  | t | 120460 | DYDLFALA<br>PS               | Mus<br>musculu<br>s              |
| 1 | 1.00 | 1 | 1 | -0.03 | -0.03  | -0.03  | -0.03  | -0.032 | t | 142485 | YNIYSEKEK                    | Homo<br>sapiens                  |
| 1 | 1.00 | 1 | 1 | -0.03 | -0.028 | -0.03  | -0.023 | -0.029 | t | 131075 | SQSYPEPA<br>RGSVPMP          | Homo<br>sapiens                  |
| 1 | 1.00 | 1 | 1 | 0.01  | 0.01   | 0.01   | 0.014  | 0.01   | t | 142166 | GLRRDLDA<br>SREAKKQL<br>EAEQ | Homo<br>sapiens                  |
| 1 | 1.00 | 1 | 1 | -0.02 | -0.02  | -0.022 | -0.024 | -0.02  | t | 39368  | LSGIQLFD<br>RI               | Homo<br>sapiens                  |
| 1 | 1.00 | 1 | 1 | -0.01 | -0.013 | -0.014 | -0.01  | -0.008 | t | 12625  | EKAFREL                      | Oryctola<br>gus<br>cuniculu<br>s |
| 1 | 1.00 | 1 | 1 | 0.01  | 0.007  | 0.01   | 0.01   | 0.01   | t | 30299  | KEALDKYE<br>LENHD            | Oryctola<br>gus<br>cuniculu<br>s |
| 1 | 1.00 | 1 | 1 | -0.01 | -0.01  | -0.01  | -0.01  | -0.01  | t | 111295 | FVAHSPP                      | Homo<br>sapiens                  |

|   |      |   |   |       |        |        |        |        |   |        |                              |                       |
|---|------|---|---|-------|--------|--------|--------|--------|---|--------|------------------------------|-----------------------|
| 1 | 1.00 | 1 | 1 | -0.03 | -0.03  | -0.03  | -0.03  | -0.03  | t | 111559 | MPLVSQK                      | Homo sapiens          |
| 1 | 1.00 | 1 | 1 | -0.05 | -0.05  | -0.05  | -0.05  | -0.05  | t | 111560 | MPMTPAK                      | Homo sapiens          |
| 1 | 1.00 | 1 | 1 | -0.01 | -0.01  | -0.01  | -0.01  | -0.013 | t | 45597  | NQNNFVH<br>DCVNITIK<br>QHTVT | Mus musculus          |
| 1 | 1.00 | 1 | 1 | -0.01 | -0.008 | -0.01  | -0.013 | -0.013 | t | 78142  | EKEEPTAA<br>PAE              | Homo sapiens          |
| 1 | 1.00 | 1 | 1 | 0.01  | 0.008  | 0.002  | 0.009  | 0.01   | t | 97960  | DTNNNLTL<br>VP               | Mus musculus          |
| 1 | 1.00 | 1 | 1 | 0.03  | 0.03   | 0.034  | 0.033  | 0.031  | t | 53494  | REEVSFRV<br>GLHEYP           | Homo sapiens          |
| 1 | 1.00 | 1 | 1 | 0.01  | 0.006  | 0.016  | 0.011  | 0.01   | t | 32382  | KMPMYIA<br>GYKTFDGR          | Mus musculus          |
| 1 | 1.00 | 1 | 1 | -0.03 | -0.033 | -0.03  | -0.03  | -0.03  | t | 116855 | WPVGGEH                      | Oryctolagus cuniculus |
| 1 | 1.00 | 1 | 1 | 0.03  | 0.026  | 0.018  | 0.029  | 0.03   | t | 21462  | GNLADDTI<br>N                | Oryctolagus cuniculus |
| 1 | 1.00 | 1 | 1 | -0.03 | -0.027 | -0.038 | -0.03  | -0.028 | t | 38434  | LPDKFNAY<br>LANKWV           | Mus musculus          |
| 1 | 1.00 | 1 | 1 | 0     | 0      | 0      | 0.001  | -0.001 | t | 48395  | PLLGIGST<br>CAEDGN           | Mus musculus          |
| 1 | 1.00 | 1 | 1 | 0     | 0      | 0      | 0.001  | -0.001 | t | 37316  | LLGIGSTC<br>A                | Mus musculus          |
| 1 | 1.00 | 1 | 1 | -0.01 | -0.007 | -0.01  | -0.01  | -0.008 | t | 139526 | ISVRTVYPP<br>E               | Mus musculus          |
| 1 | 1.00 | 1 | 1 | 0.07  | 0.072  | 0.068  | 0.073  | 0.07   | t | 114207 | FLGELTSSE<br>VATEV           | Homo sapiens          |
| 1 | 1.00 | 1 | 1 | 0.01  | 0.01   | 0.01   | 0.01   | 0.009  | t | 12951  | ELAPEDPE<br>DS               | Oryctolagus cuniculus |

|   |      |   |   |       |        |        |        |        |   |        |                          |                                  |
|---|------|---|---|-------|--------|--------|--------|--------|---|--------|--------------------------|----------------------------------|
| 1 | 1.00 | 1 | 1 | 0.03  | 0.032  | 0.024  | 0.026  | 0.033  | t | 24445  | HPEYAVSV<br>LL           | Homo<br>sapiens                  |
| 1 | 1.00 | 1 | 1 | 0.02  | 0.02   | 0.02   | 0.02   | 0.019  | t | 140570 | KMEMFTYI<br>RCDMELT      | Mus<br>musculu<br>s              |
| 1 | 1.00 | 1 | 1 | 0     | 0      | -0.013 | 0      | 0      | t | 159078 | RSKHNRRE<br>GYKVQVQ<br>G | Mus<br>musculu<br>s              |
| 1 | 1.00 | 1 | 1 | 0.04  | 0.04   | 0.031  | 0.036  | 0.04   | t | 135941 | ITTQECAN<br>VVVG         | Homo<br>sapiens                  |
| 1 | 1.00 | 1 | 1 | -0.01 | -0.012 | -0.005 | -0.011 | -0.012 | t | 63885  | TGLPSSDR<br>AFLVSVS      | Mus<br>musculu<br>s              |
| 1 | 1.00 | 1 | 1 | -0.02 | -0.022 | -0.02  | -0.017 | -0.022 | t | 52121  | QQQPFP<br>QQP            | Mus<br>musculu<br>s              |
| 1 | 1.00 | 1 | 1 | 0     | 0      | 0      | 0      | -0.002 | t | 51939  | QPQQTFP<br>QPQ           | Mus<br>musculu<br>s              |
| 1 | 1.00 | 1 | 1 | 0.05  | 0.052  | 0.041  | 0.05   | 0.052  | t | 20046  | GGTEESVV<br>TASRS        | Homo<br>sapiens                  |
| 1 | 1.00 | 1 | 1 | 0.03  | 0.03   | 0.03   | 0.03   | 0.03   | t | 111573 | MSSQFYQ                  | Homo<br>sapiens                  |
| 1 | 1.00 | 1 | 1 | 0.03  | 0.03   | 0.03   | 0.03   | 0.03   | t | 111738 | RPGKEIEA<br>YIFEMFN      | Oryctola<br>gus<br>cuniculu<br>s |
| 1 | 1.00 | 1 | 1 | 0.03  | 0.03   | 0.03   | 0.03   | 0.03   | t | 112402 | WNDNKFY                  | Homo<br>sapiens                  |
| 1 | 1.00 | 1 | 1 | 0.03  | 0.03   | 0.037  | 0.03   | 0.029  | t | 120020 | LEDPASRD<br>LVVN         | Mus<br>musculu<br>s              |
| 1 | 1.00 | 1 | 1 | 0.03  | 0.033  | 0.037  | 0.03   | 0.029  | t | 120020 | LEDPASRD<br>LVVN         | Mus<br>musculu<br>s              |
| 1 | 1.00 | 1 | 1 | 0.01  | 0.01   | 0.01   | 0.01   | 0.01   | t | 79547  | FHQMPDA                  | Oryctola<br>gus<br>cuniculu<br>s |



|   |      |   |   |       |        |        |        |        |   |        |                            |                          |
|---|------|---|---|-------|--------|--------|--------|--------|---|--------|----------------------------|--------------------------|
| 1 | 1.00 | 1 | 1 | -0.04 | -0.038 | -0.038 | -0.039 | -0.041 | t | 103331 | LAALPDFL<br>GGFAGLP        | Homo<br>sapiens          |
| 1 | 1.00 | 1 | 1 | 0.04  | 0.042  | 0.035  | 0.037  | 0.039  | t | 7902   | DEAEEEDE<br>NPYVFED        | Homo<br>sapiens          |
| 1 | 1.00 | 1 | 1 | 0.02  | 0.018  | 0.015  | 0.021  | 0.022  | t | 130905 | IRCFKRHG<br>AEVIDTPV<br>FE | Mus<br>musculu<br>s      |
| 1 | 1.00 | 1 | 1 | -0.06 | -0.06  | -0.065 | -0.06  | -0.059 | t | 133667 | QDVCTYR<br>DFMYK           | Mus<br>musculu<br>s      |
| 1 | 1.00 | 1 | 1 | 0     | 0      | 0      | 0      | 0      | t | 1115   | AEPKPAEP<br>KS             | Homo<br>sapiens          |
| 1 | 1.00 | 1 | 1 | 0.02  | 0.022  | 0.027  | 0.02   | 0.019  | t | 120679 | KIFADDID                   | Rattus<br>norvegic<br>us |
| 1 | 1.00 | 1 | 1 | 0     | 0      | -0.002 | 0      | -0.001 | t | 119052 | WNPADYG<br>GIK             | Rattus<br>norvegic<br>us |
| 1 | 1.00 | 1 | 1 | 0     | 0      | -0.002 | 0      | -0.001 | t | 119052 | WNPADYG<br>GIK             | Rattus<br>norvegic<br>us |
| 1 | 1.00 | 1 | 1 | 0.03  | 0.03   | 0.03   | 0.03   | 0.03   | t | 109947 | SRWQEGN                    | Homo<br>sapiens          |
| 1 | 1.00 | 1 | 1 | 0     | -0.002 | 0      | -0.001 | -0.002 | t | 22755  | GTLVKTIT<br>DDQIEV         | Mus<br>musculu<br>s      |
| 1 | 1.00 | 1 | 1 | 0     | -0.002 | 0      | -0.001 | -0.002 | t | 24012  | HHPSTNQ<br>EQTSLYVQ<br>AS  | Mus<br>musculu<br>s      |
| 1 | 1.00 | 1 | 1 | 0.01  | 0.012  | 0.01   | 0.013  | 0.009  | t | 56730  | SADGTTVT<br>SGSTKDT<br>LQ  | Homo<br>sapiens          |
| 1 | 1.00 | 1 | 1 | 0.01  | 0.01   | 0.004  | 0.01   | 0.01   | t | 6479   | CKGKIQUAL<br>CENPEWA       | Mus<br>musculu<br>s      |
| 1 | 1.00 | 1 | 1 | 0.02  | 0.022  | 0.02   | 0.021  | 0.02   | t | 58434  | SHVPLATS<br>RTLA           | Homo<br>sapiens          |
| 1 | 1.00 | 1 | 1 | -0.02 | -0.018 | -0.02  | -0.019 | -0.02  | t | 116978 | FPSHYWLY<br>PPPT           | Homo<br>sapiens          |
| 1 | 1.00 | 1 | 1 | -0.02 | -0.02  | -0.02  | -0.011 | -0.018 | t | 96463  | KIKDPDAS<br>KP             | Homo<br>sapiens          |

|   |      |   |   |       |        |        |        |        |   |        |                              |                                  |
|---|------|---|---|-------|--------|--------|--------|--------|---|--------|------------------------------|----------------------------------|
| 1 | 1.00 | 1 | 1 | -0.03 | -0.029 | -0.041 | -0.03  | -0.03  | t | 51942  | QPQRPFQ<br>QQP               | Mus<br>musculu<br>s              |
| 1 | 1.00 | 1 | 1 | 0.01  | 0.01   | 0.007  | 0.01   | 0.01   | t | 73637  | YEDRYRE<br>NM                | Mus<br>musculu<br>s              |
| 1 | 1.00 | 1 | 1 | 0.01  | 0.01   | 0.007  | 0.01   | 0.01   | t | 73637  | YEDRYRE<br>NM                | Mus<br>musculu<br>s              |
| 1 | 1.00 | 1 | 1 | 0.02  | 0.02   | 0.02   | 0.02   | 0.02   | t | 112125 | GFSLTYY                      | Homo<br>sapiens                  |
| 1 | 1.00 | 1 | 1 | -0.01 | -0.01  | -0.022 | -0.01  | -0.009 | t | 104521 | IGTLKKILD<br>ETVKDKIA<br>KEQ | Rattus<br>norvegic<br>us         |
| 1 | 1.00 | 1 | 1 | -0.02 | -0.016 | -0.02  | -0.013 | -0.018 | t | 134219 | RPYNIYPH<br>GITDVRPL<br>YSRR | Homo<br>sapiens                  |
| 1 | 1.00 | 1 | 1 | 0.02  | 0.02   | 0.018  | 0.021  | 0.021  | t | 144791 | STIDYFQP<br>NNKR             | Sus<br>scrofa                    |
| 1 | 1.00 | 1 | 1 | 0.03  | 0.032  | 0.032  | 0.033  | 0.03   | t | 122892 | RSILPYGDS<br>MDRIE           | Homo<br>sapiens                  |
| 1 | 1.00 | 1 | 1 | 0.01  | -0.002 | 0.016  | 0.01   | 0.01   | t | 35231  | LDNAKYQ<br>A                 | Macaca<br>mulatta                |
| 1 | 1.00 | 1 | 1 | 0.01  | 0.001  | 0.016  | 0.01   | 0.01   | t | 35231  | LDNAKYQ<br>A                 | Macaca<br>mulatta                |
| 1 | 1.00 | 1 | 1 | 0.01  | 0.006  | 0.001  | 0.009  | 0.008  | t | 63038  | TAVSPTTL<br>RTEVVK           | Oryctola<br>gus<br>cuniculu<br>s |
| 1 | 1.00 | 1 | 1 | -0.01 | -0.008 | -0.01  | -0.003 | -0.007 | t | 107479 | KFNWYVD                      | Homo<br>sapiens                  |
| 1 | 1.00 | 1 | 1 | 0     | 0      | 0      | 0      | -0.001 | t | 68018  | VDLPQLGL<br>RR               | Mus<br>musculu<br>s              |
| 1 | 1.00 | 1 | 1 | 0.02  | 0.023  | 0.02   | 0.02   | 0.018  | t | 135458 | FGSDYEDR<br>YYR              | Mus<br>musculu<br>s              |

|   |      |   |   |       |        |        |        |        |   |        |                              |                        |
|---|------|---|---|-------|--------|--------|--------|--------|---|--------|------------------------------|------------------------|
| 1 | 1.00 | 1 | 1 | 0.01  | 0.005  | 0.01   | 0.01   | 0.01   | t | 119564 | EDPSVEEE<br>EIAPPLPP         | Canis<br>lupus         |
| 1 | 1.00 | 1 | 1 | 0.01  | 0.01   | 0.01   | 0.01   | 0.01   | t | 119564 | EDPSVEEE<br>EIAPPLPP         | Homo<br>sapiens        |
| 1 | 1.00 | 1 | 1 | -0.02 | -0.019 | -0.021 | -0.017 | -0.021 | t | 99088  | AFDQFRQ<br>TYRQWIIE          | Equus<br>caballus      |
| 1 | 1.00 | 1 | 1 | 0.01  | 0.01   | 0.01   | 0.01   | 0.01   | t | 42683  | MSTNPKP<br>QKKNKRN<br>T      | Homo<br>sapiens        |
| 1 | 1.00 | 1 | 1 | 0     | 0.003  | -0.014 | -0.003 | 0      | t | 142324 | VELAILDN<br>INNTLVNL<br>EWL  | Felis<br>catus         |
| 1 | 1.00 | 1 | 1 | -0.01 | -0.01  | -0.014 | -0.01  | -0.01  | t | 94444  | CCHPACG<br>KH                | Capra<br>hircus        |
| 1 | 1.00 | 1 | 1 | 0.04  | 0.042  | 0.005  | 0.041  | 0.05   | t | 44172  | NHVADIDK<br>LIDYAA           | Homo<br>sapiens        |
| 1 | 1.00 | 1 | 1 | 0.03  | 0.034  | 0.031  | 0.031  | 0.03   | t | 49261  | PRTGLD                       | Homo<br>sapiens        |
| 1 | 1.00 | 1 | 1 | 0     | 0.002  | 0      | 0.001  | -0.002 | t | 149468 | SKHPNWT<br>NTQVRSSL          | Cavia<br>porcellu<br>s |
| 1 | 1.00 | 1 | 1 | 0.02  | 0.024  | 0.015  | 0.021  | 0.019  | t | 56017  | RTALNCN<br>DSLQTGFL<br>AALFY | Homo<br>sapiens        |
| 1 | 1.00 | 1 | 1 | 0     | 0      | 0      | 0      | -0.002 | t | 130289 | VSAAPGSA<br>APAAGSA          | Homo<br>sapiens        |
| 1 | 1.00 | 1 | 1 | -0.05 | -0.048 | -0.05  | -0.043 | -0.048 | t | 107607 | RVVSVLT                      | Homo<br>sapiens        |
| 1 | 1.00 | 1 | 1 | 0.02  | 0.022  | 0.014  | 0.023  | 0.02   | t | 58381  | SHLPYIEQ<br>GMQLAEQ<br>F     | Homo<br>sapiens        |
| 1 | 1.00 | 1 | 1 | 0.02  | 0.018  | 0.01   | 0.021  | 0.022  | t | 21653  | GPGVAGS<br>G                 | Homo<br>sapiens        |

|   |      |   |   |       |        |        |       |        |   |        |                            |                                  |
|---|------|---|---|-------|--------|--------|-------|--------|---|--------|----------------------------|----------------------------------|
| 1 | 1.00 | 1 | 1 | -0.01 | -0.01  | -0.005 | -0.01 | -0.011 | t | 39160  | LRPFHQILY<br>GMS           | Mus<br>musculu<br>s              |
| 1 | 1.00 | 1 | 1 | 0     | 0.012  | 0      | 0     | -0.002 | t | 136364 | IDPLMFKY<br>WYNM           | Gallus<br>gallus                 |
| 1 | 1.00 | 1 | 1 | 0     | 0.012  | 0      | 0     | -0.002 | t | 136162 | DAWKMRLL<br>SQMYD          | Gallus<br>gallus                 |
| 1 | 1.00 | 1 | 1 | 0     | 0      | 0      | 0     | -0.002 | t | 136162 | DAWKMRLL<br>SQMYD          | Gallus<br>gallus                 |
| 1 | 1.00 | 1 | 1 | 0     | -0.003 | 0      | 0     | -0.002 | t | 142480 | VAAVTEKL<br>RAGT           | Oryctola<br>gus<br>cuniculu<br>s |
| 1 | 1.00 | 1 | 1 | 0     | 0      | 0      | 0     | -0.002 | t | 145150 | DSSTYQYIY<br>NLT           | Mus<br>musculu<br>s              |
| 1 | 1.00 | 1 | 1 | 0     | 0      | 0      | 0     | -0.002 | t | 136364 | IDPLMFKY<br>WYNM           | Gallus<br>gallus                 |
| 1 | 1.00 | 1 | 1 | 0     | 0      | 0      | 0     | -0.002 | t | 141683 | KDWG                       | Mus<br>musculu<br>s              |
| 1 | 1.00 | 1 | 1 | 0     | 0      | 0      | 0     | -0.002 | t | 136071 | LLYGEVGD<br>TLLIIFK        | Oryctola<br>gus<br>cuniculu<br>s |
| 1 | 1.00 | 1 | 1 | 0     | 0      | 0      | 0     | -0.002 | t | 134237 | SQWN                       | Mus<br>musculu<br>s              |
| 1 | 1.00 | 1 | 1 | 0     | 0      | 0      | 0     | -0.002 | t | 148632 | IDSEELIN<br>KKR            | Mus<br>musculu<br>s              |
| 1 | 1.00 | 1 | 1 | 0     | 0      | 0      | 0     | -0.002 | t | 137747 | DTPLTYAG<br>LRLV           | Mus<br>musculu<br>s              |
| 1 | 1.00 | 1 | 1 | 0     | 0      | 0      | 0     | -0.002 | t | 138840 | DREQAPN<br>LVYM            | Mus<br>musculu<br>s              |
| 1 | 1.00 | 1 | 1 | 0     | 0      | 0      | 0     | -0.002 | t | 136064 | HQIALRME<br>VLGCEAQ<br>DLY | Oryctola<br>gus<br>cuniculu<br>s |
| 1 | 1.00 | 1 | 1 | 0     | 0      | 0      | 0     | -0.002 | t | 143959 | KFPHLAVG<br>F              | Oryctola<br>gus<br>cuniculu<br>s |
| 1 | 1.00 | 1 | 1 | 0     | 0      | 0      | 0     | -0.002 | t | 145643 | YDASLEDQ<br>KGLVA          | Oryctola<br>gus<br>cuniculu<br>s |

|   |      |   |   |   |   |   |   |        |   |        |                              |                                  |
|---|------|---|---|---|---|---|---|--------|---|--------|------------------------------|----------------------------------|
| 1 | 1.00 | 1 | 1 | 0 | 0 | 0 | 0 | -0.002 | t | 150978 | EKNVTVTH<br>SVNLLED          | Mus<br>musculu<br>s              |
| 1 | 1.00 | 1 | 1 | 0 | 0 | 0 | 0 | -0.002 | t | 136082 | SDDPSPGA<br>IDSNNS           | Oryctola<br>gus<br>cuniculu<br>s |
| 1 | 1.00 | 1 | 1 | 0 | 0 | 0 | 0 | -0.002 | t | 145539 | SSTLCFWF<br>PLAH             | Mus<br>musculu<br>s              |
| 1 | 1.00 | 1 | 1 | 0 | 0 | 0 | 0 | -0.002 | t | 142006 | SDSAQGS<br>DVSLTA            | Oryctola<br>gus<br>cuniculu<br>s |
| 1 | 1.00 | 1 | 1 | 0 | 0 | 0 | 0 | -0.002 | t | 139618 | TGQLVHRF                     | Mus<br>musculu<br>s              |
| 1 | 1.00 | 1 | 1 | 0 | 0 | 0 | 0 | -0.002 | t | 145655 | YQYIYNLT<br>CEL              | Mus<br>musculu<br>s              |
| 1 | 1.00 | 1 | 1 | 0 | 0 | 0 | 0 | -0.002 | t | 141523 | ALEPPHNL<br>PVP              | Mus<br>musculu<br>s              |
| 1 | 1.00 | 1 | 1 | 0 | 0 | 0 | 0 | -0.002 | t | 153472 | TGLRNGIT<br>NKVNSVIE<br>KAA  | Mus<br>musculu<br>s              |
| 1 | 1.00 | 1 | 1 | 0 | 0 | 0 | 0 | -0.002 | t | 135076 | KNDVVNS<br>QNKTEKTE          | Sus<br>scrofa                    |
| 1 | 1.00 | 1 | 1 | 0 | 0 | 0 | 0 | -0.002 | t | 145531 | SPLLRSPIQ<br>R               | Oryctola<br>gus<br>cuniculu<br>s |
| 1 | 1.00 | 1 | 1 | 0 | 0 | 0 | 0 | -0.002 | t | 134075 | GWGQGG<br>THSQWN             | Mus<br>musculu<br>s              |
| 1 | 1.00 | 1 | 1 | 0 | 0 | 0 | 0 | -0.002 | t | 150204 | FHSVVTHTL<br>LEWLMEK<br>ELMV | Mus<br>musculu<br>s              |
| 1 | 1.00 | 1 | 1 | 0 | 0 | 0 | 0 | -0.002 | t | 147083 | LCSEYRNT<br>QIYTIN           | Oryctola<br>gus<br>cuniculu<br>s |
| 1 | 1.00 | 1 | 1 | 0 | 0 | 0 | 0 | -0.002 | t | 134860 | AGPKAQV<br>EAIQKY            | Mus<br>musculu<br>s              |

|   |      |   |   |   |        |   |   |        |   |        |                             |                                  |
|---|------|---|---|---|--------|---|---|--------|---|--------|-----------------------------|----------------------------------|
| 1 | 1.00 | 1 | 1 | 0 | 0      | 0 | 0 | -0.002 | t | 136818 | ANFIIFRPV<br>V              | Mus<br>musculu<br>s              |
| 1 | 1.00 | 1 | 1 | 0 | 0      | 0 | 0 | -0.002 | t | 141693 | KTWG                        | Mus<br>musculu<br>s              |
| 1 | 1.00 | 1 | 1 | 0 | 0      | 0 | 0 | -0.002 | t | 134492 | QIQRPS<br>M                 | Mus<br>musculu<br>s              |
| 1 | 1.00 | 1 | 1 | 0 | 0      | 0 | 0 | -0.002 | t | 156373 | LTNKITAW<br>KSQQ            | Mus<br>musculu<br>s              |
| 1 | 1.00 | 1 | 1 | 0 | 0      | 0 | 0 | -0.002 | t | 159296 | SFSKPSNS<br>WFPVEGP         | Oryctola<br>gus<br>cuniculu<br>s |
| 1 | 1.00 | 1 | 1 | 0 | 0.012  | 0 | 0 | -0.002 | t | 136648 | SPLNNFYK<br>TQLR            | Gallus<br>gallus                 |
| 1 | 1.00 | 1 | 1 | 0 | 0.012  | 0 | 0 | -0.002 | t | 136727 | VNWNSW<br>HKTNLS            | Gallus<br>gallus                 |
| 1 | 1.00 | 1 | 1 | 0 | 0      | 0 | 0 | -0.002 | t | 140674 | ESQPDPKP<br>DELHKS          | Mus<br>musculu<br>s              |
| 1 | 1.00 | 1 | 1 | 0 | 0      | 0 | 0 | -0.002 | t | 145369 | MWCKIGH<br>DRCEE            | Mus<br>musculu<br>s              |
| 1 | 1.00 | 1 | 1 | 0 | 0      | 0 | 0 | -0.002 | t | 136685 | TLFTPKS<br>PAKT             | Gallus<br>gallus                 |
| 1 | 1.00 | 1 | 1 | 0 | 0      | 0 | 0 | -0.002 | t | 138456 | KEQFEFAL<br>TAVAEV          | Oryctola<br>gus<br>cuniculu<br>s |
| 1 | 1.00 | 1 | 1 | 0 | -0.003 | 0 | 0 | -0.002 | t | 138456 | KEQFEFAL<br>TAVAEV          | Oryctola<br>gus<br>cuniculu<br>s |
| 1 | 1.00 | 1 | 1 | 0 | 0      | 0 | 0 | -0.002 | t | 134200 | PVVNSLDP<br>PLLTRY          | Oryctola<br>gus<br>cuniculu<br>s |
| 1 | 1.00 | 1 | 1 | 0 | 0      | 0 | 0 | -0.002 | t | 136083 | SEGAEYDD<br>QTSQREKE<br>DDK | Oryctola<br>gus<br>cuniculu<br>s |
| 1 | 1.00 | 1 | 1 | 0 | 0      | 0 | 0 | -0.002 | t | 142435 | KTDGKGEE<br>SE              | Homo<br>sapiens                  |

|   |      |   |   |   |       |   |   |        |   |        |                              |                              |
|---|------|---|---|---|-------|---|---|--------|---|--------|------------------------------|------------------------------|
| 1 | 1.00 | 1 | 1 | 0 | 0     | 0 | 0 | -0.002 | t | 144467 | RPWLVHP<br>RHRY              | Mus<br>musculus              |
| 1 | 1.00 | 1 | 1 | 0 | 0     | 0 | 0 | -0.002 | t | 137735 | DTALTREA<br>LRLV             | Mus<br>musculus              |
| 1 | 1.00 | 1 | 1 | 0 | 0     | 0 | 0 | -0.002 | t | 137827 | DVKSAIEG                     | Rattus<br>norvegicus         |
| 1 | 1.00 | 1 | 1 | 0 | 0     | 0 | 0 | -0.002 | t | 136066 | IETDKTSV<br>QV               | Rattus<br>norvegicus         |
| 1 | 1.00 | 1 | 1 | 0 | 0     | 0 | 0 | -0.002 | t | 136302 | GALIYTPEK<br>YTI             | Gallus<br>gallus             |
| 1 | 1.00 | 1 | 1 | 0 | 0     | 0 | 0 | -0.002 | t | 138886 | NVGGDNV<br>DIHSIVPV<br>GQDPH | Mus<br>musculus              |
| 1 | 1.00 | 1 | 1 | 0 | 0     | 0 | 0 | -0.002 | t | 144623 | EEAEGTTD<br>AQIDANRK<br>RESE | Mus<br>musculus              |
| 1 | 1.00 | 1 | 1 | 0 | 0     | 0 | 0 | -0.002 | t | 145376 | NCWKPVQ<br>LHC               | Homo<br>sapiens              |
| 1 | 1.00 | 1 | 1 | 0 | 0     | 0 | 0 | -0.002 | t | 148701 | PAELMRRF<br>ELYF             | Mus<br>musculus              |
| 1 | 1.00 | 1 | 1 | 0 | 0     | 0 | 0 | -0.002 | t | 136081 | RTTLQSDQ<br>EEIDY            | Oryctola<br>gus<br>cuniculus |
| 1 | 1.00 | 1 | 1 | 0 | 0     | 0 | 0 | -0.002 | t | 156601 | ADEPNNL<br>NSK               | Oryctola<br>gus<br>cuniculus |
| 1 | 1.00 | 1 | 1 | 0 | 0     | 0 | 0 | -0.002 | t | 134220 | RQGAEP<br>KNFVKPNE<br>TKTY   | Oryctola<br>gus<br>cuniculus |
| 1 | 1.00 | 1 | 1 | 0 | 0     | 0 | 0 | -0.002 | t | 145239 | HHQIDGG<br>NWFHL             | Mus<br>musculus              |
| 1 | 1.00 | 1 | 1 | 0 | 0.002 | 0 | 0 | -0.002 | t | 136066 | IETDKTSV<br>QV               | Rattus<br>norvegicus         |
| 1 | 1.00 | 1 | 1 | 0 | 0     | 0 | 0 | -0.002 | t | 137748 | DTQLTLEA<br>LKL              | Mus<br>musculus              |

|   |      |   |   |   |        |   |   |        |   |        |                             |                                  |
|---|------|---|---|---|--------|---|---|--------|---|--------|-----------------------------|----------------------------------|
| 1 | 1.00 | 1 | 1 | 0 | 0      | 0 | 0 | -0.002 | t | 150987 | GKCPKYVK<br>STKLRLA         | Mus<br>musculu<br>s              |
| 1 | 1.00 | 1 | 1 | 0 | 0.012  | 0 | 0 | -0.002 | t | 136635 | SIPTYTPDK<br>VTY            | Gallus<br>gallus                 |
| 1 | 1.00 | 1 | 1 | 0 | -0.003 | 0 | 0 | -0.002 | t | 142441 | LFSPWLRV<br>QNHF            | Oryctola<br>gus<br>cuniculu<br>s |
| 1 | 1.00 | 1 | 1 | 0 | 0      | 0 | 0 | -0.002 | t | 134220 | RQGAEPR<br>KNFVKPNE<br>TKTY | Oryctola<br>gus<br>cuniculu<br>s |
| 1 | 1.00 | 1 | 1 | 0 | 0      | 0 | 0 | -0.002 | t | 151023 | LCKLRGVA<br>PLHLGKC         | Mus<br>musculu<br>s              |
| 1 | 1.00 | 1 | 1 | 0 | 0      | 0 | 0 | -0.002 | t | 136138 | APYDTPW<br>PSPSL            | Gallus<br>gallus                 |
| 1 | 1.00 | 1 | 1 | 0 | 0      | 0 | 0 | -0.002 | t | 146795 | CCELCCNP<br>QCAGCY          | Oryctola<br>gus<br>cuniculu<br>s |
| 1 | 1.00 | 1 | 1 | 0 | 0      | 0 | 0 | -0.002 | t | 119410 | YKMFPEVK<br>EKGMA           | Oryctola<br>gus<br>cuniculu<br>s |
| 1 | 1.00 | 1 | 1 | 0 | -0.003 | 0 | 0 | -0.002 | t | 125246 | RRQPHVM<br>S                | Oryctola<br>gus<br>cuniculu<br>s |
| 1 | 1.00 | 1 | 1 | 0 | -0.003 | 0 | 0 | -0.002 | t | 119331 | RTVLVSM<br>NYR              | Oryctola<br>gus<br>cuniculu<br>s |
| 1 | 1.00 | 1 | 1 | 0 | 0      | 0 | 0 | -0.002 | t | 119378 | VDYNLKW<br>NPDDYGG<br>VK    | Rattus<br>norvegic<br>us         |
| 1 | 1.00 | 1 | 1 | 0 | 0      | 0 | 0 | -0.002 | t | 130607 | SHNLVSSA<br>FPSA            | Camelus<br>dromed<br>arius       |
| 1 | 1.00 | 1 | 1 | 0 | 0      | 0 | 0 | -0.002 | t | 127980 | FPVIPGINI<br>EQKNACS        | Mus<br>musculu<br>s              |
| 1 | 1.00 | 1 | 1 | 0 | 0      | 0 | 0 | -0.002 | t | 131010 | PSTRWTEL<br>DDVKRLK<br>GSRs | Homo<br>sapiens                  |
| 1 | 1.00 | 1 | 1 | 0 | 0      | 0 | 0 | -0.002 | t | 132849 | KKVLGEKT<br>ENPKKFK         | Oryctola<br>gus<br>cuniculu<br>s |



|   |      |   |   |   |        |   |   |        |   |        |                              |                                  |
|---|------|---|---|---|--------|---|---|--------|---|--------|------------------------------|----------------------------------|
| 1 | 1.00 | 1 | 1 | 0 | -0.003 | 0 | 0 | -0.002 | t | 133469 | YYNETKL<br>KESYKVKD          | Oryctola<br>gus<br>cuniculu<br>s |
| 1 | 1.00 | 1 | 1 | 0 | 0      | 0 | 0 | -0.002 | t | 123193 | FQIHGPR                      | Rattus<br>norvegic<br>us         |
| 1 | 1.00 | 1 | 1 | 0 | 0      | 0 | 0 | -0.002 | t | 123193 | FQIHGPR                      | Rattus<br>norvegic<br>us         |
| 1 | 1.00 | 1 | 1 | 0 | 0      | 0 | 0 | -0.002 | t | 128066 | NSYDVLSA<br>LSGNLKL          | Mus<br>musculu<br>s              |
| 1 | 1.00 | 1 | 1 | 0 | 0      | 0 | 0 | -0.002 | t | 128004 | GMIEVQS<br>NYGFVWD<br>VSLKKV | Mus<br>musculu<br>s              |
| 1 | 1.00 | 1 | 1 | 0 | 0      | 0 | 0 | -0.002 | t | 128079 | PSPDITSTT<br>KTRNFDLV<br>NCN | Mus<br>musculu<br>s              |
| 1 | 1.00 | 1 | 1 | 0 | 0      | 0 | 0 | -0.002 | t | 128115 | SSHRGNICI<br>GATNYVA<br>DN   | Mus<br>musculu<br>s              |
| 1 | 1.00 | 1 | 1 | 0 | 0      | 0 | 0 | -0.002 | t | 125015 | DNESSYSR<br>GFDMTYT<br>E     | Mus<br>musculu<br>s              |
| 1 | 1.00 | 1 | 1 | 0 | 0      | 0 | 0 | -0.002 | t | 122269 | ARQNLKD<br>AGE               | Mus<br>musculu<br>s              |
| 1 | 1.00 | 1 | 1 | 0 | -0.003 | 0 | 0 | -0.002 | t | 133041 | DHVVDYK<br>ESNETKLK          | Oryctola<br>gus<br>cuniculu<br>s |
| 1 | 1.00 | 1 | 1 | 0 | 0      | 0 | 0 | -0.002 | t | 131524 | KPREE                        | Mus<br>musculu<br>s              |
| 1 | 1.00 | 1 | 1 | 0 | 0      | 0 | 0 | -0.002 | t | 128043 | LDAMPAG<br>NPAFPVIP<br>G     | Mus<br>musculu<br>s              |
| 1 | 1.00 | 1 | 1 | 0 | 0      | 0 | 0 | -0.002 | t | 122932 | VCTPKSDE<br>FNPCEDIM<br>GYK  | Homo<br>sapiens                  |
| 1 | 1.00 | 1 | 1 | 0 | -0.003 | 0 | 0 | -0.002 | t | 122932 | VCTPKSDE<br>FNPCEDIM<br>GYK  | Oryctola<br>gus<br>cuniculu<br>s |

|   |      |   |   |   |   |   |   |        |   |        |                              |                              |
|---|------|---|---|---|---|---|---|--------|---|--------|------------------------------|------------------------------|
| 1 | 1.00 | 1 | 1 | 0 | 0 | 0 | 0 | -0.002 | t | 122932 | VCTPKSDE<br>FNPCE<br>DIMGYK  | Mus<br>musculus              |
| 1 | 1.00 | 1 | 1 | 0 | 0 | 0 | 0 | -0.002 | t | 122269 | ARQNLK<br>DAGE               | Mus<br>musculus              |
| 1 | 1.00 | 1 | 1 | 0 | 0 | 0 | 0 | -0.002 | t | 122471 | LLTEHRMT<br>WDPAQPP<br>RDL   | Homo<br>sapiens              |
| 1 | 1.00 | 1 | 1 | 0 | 0 | 0 | 0 | -0.002 | t | 123442 | LLKDRLKN                     | Homo<br>sapiens              |
| 1 | 1.00 | 1 | 1 | 0 | 0 | 0 | 0 | -0.002 | t | 128071 | PIDYIIANS<br>QANPEVFI<br>ADS | Mus<br>musculus              |
| 1 | 1.00 | 1 | 1 | 0 | 0 | 0 | 0 | -0.002 | t | 125055 | FVYGGCQ<br>GNN               | Mus<br>musculus              |
| 1 | 1.00 | 1 | 1 | 0 | 0 | 0 | 0 | -0.002 | t | 118077 | QEMPLTA<br>LLRNLGK<br>MT     | Mus<br>musculus              |
| 1 | 1.00 | 1 | 1 | 0 | 0 | 0 | 0 | -0.002 | t | 118991 | RAEDNAD<br>TLALVFEA          | Oryctola<br>gus<br>cuniculus |
| 1 | 1.00 | 1 | 1 | 0 | 0 | 0 | 0 | -0.002 | t | 128152 | YIFSEEAQ<br>VKDVPVVT         | Mus<br>musculus              |
| 1 | 1.00 | 1 | 1 | 0 | 0 | 0 | 0 | -0.002 | t | 124560 | NGVELRD                      | Mus<br>musculus              |
| 1 | 1.00 | 1 | 1 | 0 | 0 | 0 | 0 | -0.002 | t | 131818 | AKEERRY                      | Homo<br>sapiens              |
| 1 | 1.00 | 1 | 1 | 0 | 0 | 0 | 0 | -0.002 | t | 118829 | GVLGQA<br>SQLNA              | Mus<br>musculus              |
| 1 | 1.00 | 1 | 1 | 0 | 0 | 0 | 0 | -0.002 | t | 132352 | GQELKNP<br>Q                 | Mus<br>musculus              |
| 1 | 1.00 | 1 | 1 | 0 | 0 | 0 | 0 | -0.002 | t | 133181 | KPEAPRRR<br>SP               | Homo<br>sapiens              |
| 1 | 1.00 | 1 | 1 | 0 | 0 | 0 | 0 | -0.002 | t | 133289 | PRSPKM                       | Mus<br>musculus              |
| 1 | 1.00 | 1 | 1 | 0 | 0 | 0 | 0 | -0.002 | t | 119048 | VSDYEMKL<br>MDLDVEQ          | Mus<br>musculus              |

|   |      |   |   |   |   |   |   |        |   |        |                              |                        |
|---|------|---|---|---|---|---|---|--------|---|--------|------------------------------|------------------------|
| 1 | 1.00 | 1 | 1 | 0 | 0 | 0 | 0 | -0.002 | t | 118362 | FTQLNPTD<br>GGSA             | Mus<br>musculus        |
| 1 | 1.00 | 1 | 1 | 0 | 0 | 0 | 0 | -0.002 | t | 118258 | AKSPEKAK                     | Homo<br>sapiens        |
| 1 | 1.00 | 1 | 1 | 0 | 0 | 0 | 0 | -0.002 | t | 123380 | KLPGKF                       | Homo<br>sapiens        |
| 1 | 1.00 | 1 | 1 | 0 | 0 | 0 | 0 | -0.002 | t | 132269 | EPVDGVVL<br>VDPE             | Mus<br>musculus        |
| 1 | 1.00 | 1 | 1 | 0 | 0 | 0 | 0 | -0.002 | t | 122094 | FLALDVPTI<br>GLC             | Mus<br>musculus        |
| 1 | 1.00 | 1 | 1 | 0 | 0 | 0 | 0 | -0.002 | t | 133877 | LEAKICHQI<br>EYYFGDFN<br>L   | Mus<br>musculus        |
| 1 | 1.00 | 1 | 1 | 0 | 0 | 0 | 0 | -0.002 | t | 128067 | NYVADNF<br>FYNVEGR<br>WGSQ   | Mus<br>musculus        |
| 1 | 1.00 | 1 | 1 | 0 | 0 | 0 | 0 | -0.002 | t | 119378 | VDYNLKW<br>NPDDYGG<br>VK     | Rattus<br>norvegicus   |
| 1 | 1.00 | 1 | 1 | 0 | 0 | 0 | 0 | -0.002 | t | 128146 | WSVCVGL<br>TTYVNDYV<br>LPYLA | Mus<br>musculus        |
| 1 | 1.00 | 1 | 1 | 0 | 0 | 0 | 0 | -0.002 | t | 120649 | ITVGLQLIQ<br>LISDEVN<br>QIV  | Mus<br>musculus        |
| 1 | 1.00 | 1 | 1 | 0 | 0 | 0 | 0 | -0.002 | t | 117509 | GQIPPGAM                     | Mus<br>musculus        |
| 1 | 1.00 | 1 | 1 | 0 | 0 | 0 | 0 | -0.002 | t | 122778 | GMTHMTS<br>RDIEVQGF<br>RI    | Homo<br>sapiens        |
| 1 | 1.00 | 1 | 1 | 0 | 0 | 0 | 0 | -0.002 | t | 130614 | STLPYLPTY<br>SKH             | Camelus<br>dromedarius |
| 1 | 1.00 | 1 | 1 | 0 | 0 | 0 | 0 | -0.002 | t | 119499 | MTFSVPIS                     | Mus<br>musculus        |
| 1 | 1.00 | 1 | 1 | 0 | 0 | 0 | 0 | -0.002 | t | 121292 | FATFVYAK                     | Mus<br>musculus        |
| 1 | 1.00 | 1 | 1 | 0 | 0 | 0 | 0 | -0.002 | t | 118060 | PPPGMRP<br>P                 | Homo<br>sapiens        |

|   |      |   |   |   |   |   |   |        |   |        |                       |                       |
|---|------|---|---|---|---|---|---|--------|---|--------|-----------------------|-----------------------|
| 1 | 1.00 | 1 | 1 | 0 | 0 | 0 | 0 | -0.002 | t | 132644 | SAKEK                 | Mus musculus          |
| 1 | 1.00 | 1 | 1 | 0 | 0 | 0 | 0 | -0.002 | t | 123758 | SSSSQFQIHGPRQ         | Mus musculus          |
| 1 | 1.00 | 1 | 1 | 0 | 0 | 0 | 0 | -0.002 | t | 122399 | HPQPEDPDTAKE          | Mus musculus          |
| 1 | 1.00 | 1 | 1 | 0 | 0 | 0 | 0 | -0.002 | t | 123826 | VPRESY                | Homo sapiens          |
| 1 | 1.00 | 1 | 1 | 0 | 0 | 0 | 0 | -0.002 | t | 130622 | TGLVAQGTDSIG          | Camelus dromedarius   |
| 1 | 1.00 | 1 | 1 | 0 | 0 | 0 | 0 | -0.002 | t | 128005 | GNLKLCFCGDYIFSEE      | Mus musculus          |
| 1 | 1.00 | 1 | 1 | 0 | 0 | 0 | 0 | -0.002 | t | 125250 | SDEFNPCEDIMGYK        | Mus musculus          |
| 1 | 1.00 | 1 | 1 | 0 | 0 | 0 | 0 | -0.002 | t | 118141 | SKGRRFKG              | Mus musculus          |
| 1 | 1.00 | 1 | 1 | 0 | 0 | 0 | 0 | -0.002 | t | 124008 | DGVVLVD               | Mus musculus          |
| 1 | 1.00 | 1 | 1 | 0 | 0 | 0 | 0 | -0.002 | t | 134015 | CDKNTGDYYEDSYED       | Oryctolagus cuniculus |
| 1 | 1.00 | 1 | 1 | 0 | 0 | 0 | 0 | -0.002 | t | 119642 | SEHETRLVANLLENNYKQVIR | Mus musculus          |
| 1 | 1.00 | 1 | 1 | 0 | 0 | 0 | 0 | -0.002 | t | 125250 | SDEFNPCEDIMGYK        | Mus musculus          |
| 1 | 1.00 | 1 | 1 | 0 | 0 | 0 | 0 | -0.002 | t | 119331 | RTVLVSMNYR            | Oryctolagus cuniculus |
| 1 | 1.00 | 1 | 1 | 0 | 0 | 0 | 0 | -0.002 | t | 122138 | LKKDV                 | Mus musculus          |
| 1 | 1.00 | 1 | 1 | 0 | 0 | 0 | 0 | -0.002 | t | 122205 | VFTLPPPLPETH          | Mus musculus          |
| 1 | 1.00 | 1 | 1 | 0 | 0 | 0 | 0 | -0.002 | t | 122943 | WDPAQPPRD             | Homo sapiens          |

|   |      |   |   |   |       |   |   |        |   |        |                              |                                  |
|---|------|---|---|---|-------|---|---|--------|---|--------|------------------------------|----------------------------------|
| 1 | 1.00 | 1 | 1 | 0 | 0     | 0 | 0 | -0.002 | t | 117437 | AIALREYRK<br>KMDIPA          | Mus<br>musculu<br>s              |
| 1 | 1.00 | 1 | 1 | 0 | 0     | 0 | 0 | -0.002 | t | 118867 | KLSQTSNV<br>DKEEEAV          | Mus<br>musculu<br>s              |
| 1 | 1.00 | 1 | 1 | 0 | 0     | 0 | 0 | -0.002 | t | 120946 | SISPESDRP<br>DLSTFMES<br>GEW | Mus<br>musculu<br>s              |
| 1 | 1.00 | 1 | 1 | 0 | 0     | 0 | 0 | -0.002 | t | 134020 | CPEEPQLR<br>MKNNEEA<br>EDYDD | Oryctola<br>gus<br>cuniculu<br>s |
| 1 | 1.00 | 1 | 1 | 0 | 0     | 0 | 0 | -0.002 | t | 123359 | KFPEDFES<br>C                | Mus<br>musculu<br>s              |
| 1 | 1.00 | 1 | 1 | 0 | 0     | 0 | 0 | -0.002 | t | 122748 | EHRMTW<br>DPAQPPR            | Homo<br>sapiens                  |
| 1 | 1.00 | 1 | 1 | 0 | 0     | 0 | 0 | -0.002 | t | 119229 | KHARKER<br>NITGGH            | Mus<br>musculu<br>s              |
| 1 | 1.00 | 1 | 1 | 0 | 0     | 0 | 0 | -0.002 | t | 117399 | VMIKSLPA<br>LNSPTVEE         | Oryctola<br>gus<br>cuniculu<br>s |
| 1 | 1.00 | 1 | 1 | 0 | 0     | 0 | 0 | -0.002 | t | 125230 | RERRGIAL                     | Mus<br>musculu<br>s              |
| 1 | 1.00 | 1 | 1 | 0 | 0.006 | 0 | 0 | -0.002 | t | 124588 | PQEETLQA<br>FDSHYDYT         | Ovis<br>aries                    |
| 1 | 1.00 | 1 | 1 | 0 | 0     | 0 | 0 | -0.002 | t | 118499 | LQEMPTL<br>ALLRNLGK<br>M     | Oryctola<br>gus<br>cuniculu<br>s |
| 1 | 1.00 | 1 | 1 | 0 | 0     | 0 | 0 | -0.002 | t | 120920 | RLVEHLLD<br>PSRYNKLIR        | Oryctola<br>gus<br>cuniculu<br>s |
| 1 | 1.00 | 1 | 1 | 0 | 0     | 0 | 0 | -0.002 | t | 122486 | MILHPDV<br>QRRVQQEI<br>DDVI  | Homo<br>sapiens                  |
| 1 | 1.00 | 1 | 1 | 0 | 0     | 0 | 0 | -0.002 | t | 127986 | FVGVGAD<br>YRHASCPI<br>DYIIA | Mus<br>musculu<br>s              |

|   |      |   |   |   |   |   |   |        |   |        |                        |                        |
|---|------|---|---|---|---|---|---|--------|---|--------|------------------------|------------------------|
| 1 | 1.00 | 1 | 1 | 0 | 0 | 0 | 0 | -0.002 | t | 120436 | DGTKVSIS               | Rattus norvegicus      |
| 1 | 1.00 | 1 | 1 | 0 | 0 | 0 | 0 | -0.002 | t | 130513 | IGYQPSMP LDMP          | Camelus dromedarius    |
| 1 | 1.00 | 1 | 1 | 0 | 0 | 0 | 0 | -0.002 | t | 127944 | DLVNCNL NTNCVAV AFSLPD | Mus musculus           |
| 1 | 1.00 | 1 | 1 | 0 | 0 | 0 | 0 | -0.002 | t | 119025 | SWTDTDG TN             | Mus musculus           |
| 1 | 1.00 | 1 | 1 | 0 | 0 | 0 | 0 | -0.002 | t | 122892 | RSILPYGDS MDRIE        | Homo sapiens           |
| 1 | 1.00 | 1 | 1 | 0 | 0 | 0 | 0 | -0.002 | t | 118678 | WPLHDGG AVNRR          | Mus musculus           |
| 1 | 1.00 | 1 | 1 | 0 | 0 | 0 | 0 | -0.002 | t | 120416 | AVALREYR KKMDIPA       | Mus musculus           |
| 1 | 1.00 | 1 | 1 | 0 | 0 | 0 | 0 | -0.002 | t | 118763 | CYGSFARP MN            | Mus musculus           |
| 1 | 1.00 | 1 | 1 | 0 | 0 | 0 | 0 | -0.002 | t | 121070 | WVYYTCC PDTPYL         | Rattus norvegicus      |
| 1 | 1.00 | 1 | 1 | 0 | 0 | 0 | 0 | -0.002 | t | 117614 | QGFPFYDK PMRI          | Mus musculus           |
| 1 | 1.00 | 1 | 1 | 0 | 0 | 0 | 0 | -0.002 | t | 122129 | KTVTVKED QVMQQN PPKF   | Mus musculus           |
| 1 | 1.00 | 1 | 1 | 0 | 0 | 0 | 0 | -0.002 | t | 133231 | MGPRRRS RKP            | Homo sapiens           |
| 1 | 1.00 | 1 | 1 | 0 | 0 | 0 | 0 | -0.002 | t | 125472 | LDAVYLNK NKYLTVID KDAF | Homo sapiens           |
| 1 | 1.00 | 1 | 1 | 0 | 0 | 0 | 0 | -0.002 | t | 119378 | VDYNLKW NPDDYGG VK     | Rattus norvegicus      |
| 1 | 1.00 | 1 | 1 | 0 | 0 | 0 | 0 | -0.002 | t | 125478 | LHQEYEEN LGDSIVGY KEKS | Cricetulus migratorius |
| 1 | 1.00 | 1 | 1 | 0 | 0 | 0 | 0 | -0.002 | t | 129301 | LQELEKDE REQ           | Homo sapiens           |

|   |      |   |   |   |        |   |   |        |   |        |                              |                                  |
|---|------|---|---|---|--------|---|---|--------|---|--------|------------------------------|----------------------------------|
| 1 | 1.00 | 1 | 1 | 0 | 0      | 0 | 0 | -0.002 | t | 128010 | GRWGSQR<br>AVNVSGG<br>FQF    | Mus<br>musculu<br>s              |
| 1 | 1.00 | 1 | 1 | 0 | 0      | 0 | 0 | -0.002 | t | 122167 | PPPITQGE<br>CKQL             | Mus<br>musculu<br>s              |
| 1 | 1.00 | 1 | 1 | 0 | 0      | 0 | 0 | -0.002 | t | 120528 | FIEWLKVKI<br>LPEVKEK         | Oryctola<br>gus<br>cuniculu<br>s |
| 1 | 1.00 | 1 | 1 | 0 | 0      | 0 | 0 | -0.002 | t | 118633 | TNSFNDSG<br>SAPH             | Mus<br>musculu<br>s              |
| 1 | 1.00 | 1 | 1 | 0 | -0.003 | 0 | 0 | -0.002 | t | 119410 | YKMFPEVK<br>EKGMA            | Oryctola<br>gus<br>cuniculu<br>s |
| 1 | 1.00 | 1 | 1 | 0 | 0      | 0 | 0 | -0.002 | t | 118146 | SNLDHILE<br>PSIP             | Homo<br>sapiens                  |
| 1 | 1.00 | 1 | 1 | 0 | 0      | 0 | 0 | -0.002 | t | 128089 | QVYYRPV<br>DQYSNQN           | Ovis<br>aries                    |
| 1 | 1.00 | 1 | 1 | 0 | 0      | 0 | 0 | -0.002 | t | 122430 | KGLRRDLD<br>ASREAK           | Mus<br>musculu<br>s              |
| 1 | 1.00 | 1 | 1 | 0 | 0      | 0 | 0 | -0.002 | t | 128084 | QKNACSF<br>DLCNSYDV<br>L     | Mus<br>musculu<br>s              |
| 1 | 1.00 | 1 | 1 | 0 | 0      | 0 | 0 | -0.002 | t | 118762 | CYGSAKP<br>TN                | Mus<br>musculu<br>s              |
| 1 | 1.00 | 1 | 1 | 0 | 0      | 0 | 0 | -0.002 | t | 128133 | TSEPLNSES<br>EVTDGMIE<br>VQS | Mus<br>musculu<br>s              |
| 1 | 1.00 | 1 | 1 | 0 | 0      | 0 | 0 | -0.002 | t | 130555 | MHNRTQA<br>LEDSR             | Camelus<br>dromed<br>arius       |
| 1 | 1.00 | 1 | 1 | 0 | 0      | 0 | 0 | -0.002 | t | 126151 | GMGCSSP<br>PCECHQEE          | Mus<br>musculu<br>s              |
| 1 | 1.00 | 1 | 1 | 0 | 0      | 0 | 0 | -0.002 | t | 127933 | APDDSFKK<br>LEDRTNL<br>KF    | Mus<br>musculu<br>s              |

|   |      |   |   |   |   |   |   |        |   |        |                               |                                  |
|---|------|---|---|---|---|---|---|--------|---|--------|-------------------------------|----------------------------------|
| 1 | 1.00 | 1 | 1 | 0 | 0 | 0 | 0 | -0.002 | t | 118764 | CYGSFARP<br>TN                | Mus<br>musculu<br>s              |
| 1 | 1.00 | 1 | 1 | 0 | 0 | 0 | 0 | -0.002 | t | 118381 | GKTCPEI<br>PKGSKNT            | Homo<br>sapiens                  |
| 1 | 1.00 | 1 | 1 | 0 | 0 | 0 | 0 | -0.002 | t | 117613 | QEKLQVAL<br>GE                | Homo<br>sapiens                  |
| 1 | 1.00 | 1 | 1 | 0 | 0 | 0 | 0 | -0.002 | t | 123144 | ENPTMAG<br>YR                 | Homo<br>sapiens                  |
| 1 | 1.00 | 1 | 1 | 0 | 0 | 0 | 0 | -0.002 | t | 127950 | DVPVVTSTV<br>TTAGVGPS<br>PDIT | Mus<br>musculu<br>s              |
| 1 | 1.00 | 1 | 1 | 0 | 0 | 0 | 0 | -0.002 | t | 117348 | PTRAPSGP<br>RPP               | Oryctola<br>gus<br>cuniculu<br>s |
| 1 | 1.00 | 1 | 1 | 0 | 0 | 0 | 0 | -0.002 | t | 104367 | YSNGGPFL<br>TPIVPTAD          | Oryctola<br>gus<br>cuniculu<br>s |
| 1 | 1.00 | 1 | 1 | 0 | 0 | 0 | 0 | -0.002 | t | 105803 | GAE                           | Mus<br>musculu<br>s              |
| 1 | 1.00 | 1 | 1 | 0 | 0 | 0 | 0 | -0.002 | t | 107303 | AWKYENG<br>NDKHYAD<br>SVNG    | Oryctola<br>gus<br>cuniculu<br>s |
| 1 | 1.00 | 1 | 1 | 0 | 0 | 0 | 0 | -0.002 | t | 115155 | NNQRKKA<br>KNTPFNM<br>LKRERN  | Mus<br>musculu<br>s              |
| 1 | 1.00 | 1 | 1 | 0 | 0 | 0 | 0 | -0.002 | t | 110920 | KPSPWAP<br>KKHRRLS            | Mus<br>musculu<br>s              |
| 1 | 1.00 | 1 | 1 | 0 | 0 | 0 | 0 | -0.002 | t | 98841  | KAMVIVV<br>VNKGTGN<br>LELVAV  | Homo<br>sapiens                  |
| 1 | 1.00 | 1 | 1 | 0 | 0 | 0 | 0 | -0.002 | t | 110980 | QPLGVGIS<br>GHPLLNL<br>DDTE   | Mus<br>musculu<br>s              |
| 1 | 1.00 | 1 | 1 | 0 | 0 | 0 | 0 | -0.002 | t | 111051 | VGPLEVIP<br>EAVDPAG<br>SSIV   | Oryctola<br>gus<br>cuniculu<br>s |
| 1 | 1.00 | 1 | 1 | 0 | 0 | 0 | 0 | -0.002 | t | 110824 | EDEIDGPA<br>GQAEPDR<br>AHYNI  | Mus<br>musculu<br>s              |



|   |      |   |   |   |        |   |   |        |   |        |                             |                                  |
|---|------|---|---|---|--------|---|---|--------|---|--------|-----------------------------|----------------------------------|
| 1 | 1.00 | 1 | 1 | 0 | 0      | 0 | 0 | -0.002 | t | 104851 | KGAIIGLM<br>VGGVVI          | Mus<br>musculu<br>s              |
| 1 | 1.00 | 1 | 1 | 0 | 0      | 0 | 0 | -0.002 | t | 104051 | LPSDPIGG<br>KSNMHFM<br>NTL  | Oryctola<br>gus<br>cuniculu<br>s |
| 1 | 1.00 | 1 | 1 | 0 | 0      | 0 | 0 | -0.002 | t | 110862 | GGPTLVSL<br>HELPAETP        | Oryctola<br>gus<br>cuniculu<br>s |
| 1 | 1.00 | 1 | 1 | 0 | 0      | 0 | 0 | -0.002 | t | 103965 | GYKYLPGP<br>NSLDQGE<br>PT   | Oryctola<br>gus<br>cuniculu<br>s |
| 1 | 1.00 | 1 | 1 | 0 | 0      | 0 | 0 | -0.002 | t | 99838  | QQRPFI                      | Mus<br>musculu<br>s              |
| 1 | 1.00 | 1 | 1 | 0 | 0      | 0 | 0 | -0.002 | t | 115540 | VKNKRTEL<br>SPWISNI         | Mus<br>musculu<br>s              |
| 1 | 1.00 | 1 | 1 | 0 | 0      | 0 | 0 | -0.002 | t | 110126 | YIK                         | Mus<br>musculu<br>s              |
| 1 | 1.00 | 1 | 1 | 0 | 0      | 0 | 0 | -0.002 | t | 105653 | AEIVYKSP<br>VVSGD           | Mus<br>musculu<br>s              |
| 1 | 1.00 | 1 | 1 | 0 | 0      | 0 | 0 | -0.002 | t | 103792 | AGTELSAT<br>GNESGGG         | Oryctola<br>gus<br>cuniculu<br>s |
| 1 | 1.00 | 1 | 1 | 0 | 0      | 0 | 0 | -0.002 | t | 107346 | ERMFRK                      | Rattus<br>norvegic<br>us         |
| 1 | 1.00 | 1 | 1 | 0 | -0.004 | 0 | 0 | -0.002 | t | 110980 | QPLGVGIS<br>GHPLLNL<br>DDTE | Mus<br>musculu<br>s              |
| 1 | 1.00 | 1 | 1 | 0 | 0      | 0 | 0 | -0.002 | t | 108551 | NDSLNTGF<br>LAFLEYTKK       | Capra<br>hircus                  |
| 1 | 1.00 | 1 | 1 | 0 | 0      | 0 | 0 | -0.002 | t | 111050 | VGPLDIVP<br>EVADPGG<br>PTLV | Oryctola<br>gus<br>cuniculu<br>s |
| 1 | 1.00 | 1 | 1 | 0 | 0      | 0 | 0 | -0.002 | t | 110903 | IDGP                        | Mus<br>musculu<br>s              |
| 1 | 1.00 | 1 | 1 | 0 | 0      | 0 | 0 | -0.002 | t | 107448 | IPSTVKA                     | Rattus<br>norvegic<br>us         |

|   |      |   |   |   |        |   |   |        |   |        |                             |                              |
|---|------|---|---|---|--------|---|---|--------|---|--------|-----------------------------|------------------------------|
| 1 | 1.00 | 1 | 1 | 0 | 0      | 0 | 0 | -0.002 | t | 110856 | FSADLDQF<br>PLGRKFL         | Mus<br>musculus              |
| 1 | 1.00 | 1 | 1 | 0 | -0.003 | 0 | 0 | -0.002 | t | 111050 | VGPLDIVP<br>EVADPGG<br>PTLV | Oryctola<br>gus<br>cuniculus |
| 1 | 1.00 | 1 | 1 | 0 | 0      | 0 | 0 | -0.002 | t | 104850 | KEGILQYC<br>QEVYPELQ        | Mus<br>musculus              |
| 1 | 1.00 | 1 | 1 | 0 | 0      | 0 | 0 | -0.002 | t | 104049 | LPPKLLTEP<br>TTEGDQH<br>PGT | Oryctola<br>gus<br>cuniculus |
| 1 | 1.00 | 1 | 1 | 0 | 0      | 0 | 0 | -0.002 | t | 101490 | ASGEVPVK<br>PSEG            | Mus<br>musculus              |
| 1 | 1.00 | 1 | 1 | 0 | 0      | 0 | 0 | -0.002 | t | 103972 | HNPINAGT<br>ELSATGN         | Oryctola<br>gus<br>cuniculus |
| 1 | 1.00 | 1 | 1 | 0 | 0      | 0 | 0 | -0.002 | t | 101558 | DQPDQHQ                     | Mus<br>musculus              |
| 1 | 1.00 | 1 | 1 | 0 | 0      | 0 | 0 | -0.002 | t | 101689 | GNNNDST<br>GSSDV            | Mus<br>musculus              |
| 1 | 1.00 | 1 | 1 | 0 | 0      | 0 | 0 | -0.002 | t | 107852 | GEQSSIIQ<br>Y               | Mus<br>musculus              |
| 1 | 1.00 | 1 | 1 | 0 | 0      | 0 | 0 | -0.002 | t | 116971 | FAVLKLM<br>GRGTKF           | Rattus<br>norvegicus         |
| 1 | 1.00 | 1 | 1 | 0 | 0      | 0 | 0 | -0.002 | t | 104327 | VEQHNPIN<br>AGTELSAT        | Oryctola<br>gus<br>cuniculus |
| 1 | 1.00 | 1 | 1 | 0 | 0      | 0 | 0 | -0.002 | t | 107326 | DVSDMF<br>SK                | Rattus<br>norvegicus         |
| 1 | 1.00 | 1 | 1 | 0 | 0      | 0 | 0 | -0.002 | t | 112584 | LPWNAFP<br>GK               | Rattus<br>norvegicus         |
| 1 | 1.00 | 1 | 1 | 0 | 0      | 0 | 0 | -0.002 | t | 110916 | KLDDTENA<br>SAYAANA         | Mus<br>musculus              |
| 1 | 1.00 | 1 | 1 | 0 | 0      | 0 | 0 | -0.002 | t | 99833  | PPFSQQ                      | Mus<br>musculus              |

|   |      |   |   |   |   |   |   |        |   |        |                               |                                  |
|---|------|---|---|---|---|---|---|--------|---|--------|-------------------------------|----------------------------------|
| 1 | 1.00 | 1 | 1 | 0 | 0 | 0 | 0 | -0.002 | t | 108482 | IINPSENG<br>DTSTNGIK<br>K     | Mus<br>musculu<br>s              |
| 1 | 1.00 | 1 | 1 | 0 | 0 | 0 | 0 | -0.002 | t | 98822  | IEAGAIGFK<br>IHEDWG           | Mus<br>musculu<br>s              |
| 1 | 1.00 | 1 | 1 | 0 | 0 | 0 | 0 | -0.002 | t | 107668 | VSETLK                        | Rattus<br>norvegic<br>us         |
| 1 | 1.00 | 1 | 1 | 0 | 0 | 0 | 0 | -0.002 | t | 106375 | EDHAGTY<br>GLGDRK             | Mus<br>musculu<br>s              |
| 1 | 1.00 | 1 | 1 | 0 | 0 | 0 | 0 | -0.002 | t | 99834  | QGGQGY<br>P                   | Mus<br>musculu<br>s              |
| 1 | 1.00 | 1 | 1 | 0 | 0 | 0 | 0 | -0.002 | t | 108164 | TLVCLATG<br>FFPDHVEL          | Oryctola<br>gus<br>cuniculu<br>s |
| 1 | 1.00 | 1 | 1 | 0 | 0 | 0 | 0 | -0.002 | t | 99134  | DAEFRHDS<br>GYEVHHQ           | Mus<br>musculu<br>s              |
| 1 | 1.00 | 1 | 1 | 0 | 0 | 0 | 0 | -0.002 | t | 107517 | LSTNEVA<br>M                  | Mus<br>musculu<br>s              |
| 1 | 1.00 | 1 | 1 | 0 | 0 | 0 | 0 | -0.002 | t | 102130 | TKLYQNPT<br>TYISVGT           | Mus<br>musculu<br>s              |
| 1 | 1.00 | 1 | 1 | 0 | 0 | 0 | 0 | -0.002 | t | 113257 | ADNKAPQ<br>GLLC               | Rattus                           |
| 1 | 1.00 | 1 | 1 | 0 | 0 | 0 | 0 | -0.002 | t | 107487 | KKPTPSTL                      | Rattus<br>norvegic<br>us         |
| 1 | 1.00 | 1 | 1 | 0 | 0 | 0 | 0 | -0.002 | t | 110855 | FNRAAGTV<br>GENVPDD<br>LYIKGS | Mus<br>musculu<br>s              |
| 1 | 1.00 | 1 | 1 | 0 | 0 | 0 | 0 | -0.002 | t | 110385 | QLYKTCKQ<br>AGTCPPDII<br>PKV  | Mus<br>musculu<br>s              |
| 1 | 1.00 | 1 | 1 | 0 | 0 | 0 | 0 | -0.002 | t | 104362 | YNDDEPN<br>GAIRFTMG           | Oryctola<br>gus<br>cuniculu<br>s |
| 1 | 1.00 | 1 | 1 | 0 | 0 | 0 | 0 | -0.002 | t | 110910 | KAKPKFTL<br>GKRKATP           | Mus<br>musculu<br>s              |
| 1 | 1.00 | 1 | 1 | 0 | 0 | 0 | 0 | -0.002 | t | 110824 | EDEIDGPA<br>GQAEPDR<br>AHYNI  | Mus<br>musculu<br>s              |

|   |      |   |   |   |   |   |   |        |   |        |                              |                                  |
|---|------|---|---|---|---|---|---|--------|---|--------|------------------------------|----------------------------------|
| 1 | 1.00 | 1 | 1 | 0 | 0 | 0 | 0 | -0.002 | t | 104213 | QQFNQQA<br>PLNLENTN<br>NGTL  | Oryctola<br>gus<br>cuniculu<br>s |
| 1 | 1.00 | 1 | 1 | 0 | 0 | 0 | 0 | -0.002 | t | 101716 | HQPTPAA                      | Mus<br>musculu<br>s              |
| 1 | 1.00 | 1 | 1 | 0 | 0 | 0 | 0 | -0.002 | t | 106313 | CQQYGSS<br>PQTFG             | Oryctola<br>gus<br>cuniculu<br>s |
| 1 | 1.00 | 1 | 1 | 0 | 0 | 0 | 0 | -0.002 | t | 104231 | SAADEKFI<br>KETEHAKE<br>YG   | Oryctola<br>gus<br>cuniculu<br>s |
| 1 | 1.00 | 1 | 1 | 0 | 0 | 0 | 0 | -0.002 | t | 108897 | EIDGPAGQ<br>AEP              | Mus<br>musculu<br>s              |
| 1 | 1.00 | 1 | 1 | 0 | 0 | 0 | 0 | -0.002 | t | 108291 | AVGADES<br>VVKEAHRE<br>VINS  | Mus<br>musculu<br>s              |
| 1 | 1.00 | 1 | 1 | 0 | 0 | 0 | 0 | -0.002 | t | 104175 | PINAGTEL<br>SATGNESG         | Oryctola<br>gus<br>cuniculu<br>s |
| 1 | 1.00 | 1 | 1 | 0 | 0 | 0 | 0 | -0.002 | t | 107358 | FGEL                         | Rattus<br>norvegic<br>us         |
| 1 | 1.00 | 1 | 1 | 0 | 0 | 0 | 0 | -0.002 | t | 110824 | EDEIDGPA<br>GQAEPDR<br>AHYNI | Mus<br>musculu<br>s              |
| 1 | 1.00 | 1 | 1 | 0 | 0 | 0 | 0 | -0.002 | t | 106256 | ANYGYTFG<br>SGTRLTVV         | Oryctola<br>gus<br>cuniculu<br>s |
| 1 | 1.00 | 1 | 1 | 0 | 0 | 0 | 0 | -0.002 | t | 104057 | LTEPTTEG<br>DQHPGTL<br>PAANT | Oryctola<br>gus<br>cuniculu<br>s |
| 1 | 1.00 | 1 | 1 | 0 | 0 | 0 | 0 | -0.002 | t | 98822  | IEAGAIGFK<br>IHEDWG          | Mus<br>musculu<br>s              |
| 1 | 1.00 | 1 | 1 | 0 | 0 | 0 | 0 | -0.002 | t | 101983 | PVYQQQP                      | Mus<br>musculu<br>s              |
| 1 | 1.00 | 1 | 1 | 0 | 0 | 0 | 0 | -0.002 | t | 107201 | LIVPEGAR<br>TSLN             | Oryctola<br>gus<br>cuniculu<br>s |

|   |      |   |   |   |   |   |   |        |   |        |                              |                                  |
|---|------|---|---|---|---|---|---|--------|---|--------|------------------------------|----------------------------------|
| 1 | 1.00 | 1 | 1 | 0 | 0 | 0 | 0 | -0.002 | t | 117344 | PPGMRPP                      | Oryctola<br>gus<br>cuniculu<br>s |
| 1 | 1.00 | 1 | 1 | 0 | 0 | 0 | 0 | -0.002 | t | 107194 | LEQTELSV<br>TRET             | Oryctola<br>gus<br>cuniculu<br>s |
| 1 | 1.00 | 1 | 1 | 0 | 0 | 0 | 0 | -0.002 | t | 107486 | KKPTPST                      | Rattus<br>norvegic<br>us         |
| 1 | 1.00 | 1 | 1 | 0 | 0 | 0 | 0 | -0.002 | t | 117366 | RRREGPDR<br>SPR              | Oryctola<br>gus<br>cuniculu<br>s |
| 1 | 1.00 | 1 | 1 | 0 | 0 | 0 | 0 | -0.002 | t | 101582 | EEDLRTR                      | Mus<br>musculu<br>s              |
| 1 | 1.00 | 1 | 1 | 0 | 0 | 0 | 0 | -0.002 | t | 110824 | EDEIDGPA<br>GQAEPDR<br>AHYNI | Mus<br>musculu<br>s              |
| 1 | 1.00 | 1 | 1 | 0 | 0 | 0 | 0 | -0.002 | t | 103998 | IVKWDRD<br>M                 | Mus<br>musculu<br>s              |
| 1 | 1.00 | 1 | 1 | 0 | 0 | 0 | 0 | -0.002 | t | 101962 | PEPVQEP                      | Mus<br>musculu<br>s              |
| 1 | 1.00 | 1 | 1 | 0 | 0 | 0 | 0 | -0.002 | t | 115483 | SFFDIGGS<br>VSAGFSN          | Mus<br>musculu<br>s              |
| 1 | 1.00 | 1 | 1 | 0 | 0 | 0 | 0 | -0.002 | t | 107536 | PAPDTLKE                     | Rattus<br>norvegic<br>us         |
| 1 | 1.00 | 1 | 1 | 0 | 0 | 0 | 0 | -0.002 | t | 107324 | DTLKAGLI<br>R                | Rattus<br>norvegic<br>us         |
| 1 | 1.00 | 1 | 1 | 0 | 0 | 0 | 0 | -0.002 | t | 104216 | RAFAPKLS<br>ETDSPT           | Oryctola<br>gus<br>cuniculu<br>s |
| 1 | 1.00 | 1 | 1 | 0 | 0 | 0 | 0 | -0.002 | t | 105163 | EFRHD                        | Mus<br>musculu<br>s              |
| 1 | 1.00 | 1 | 1 | 0 | 0 | 0 | 0 | -0.002 | t | 101953 | PDPLSPGE                     | Mus<br>musculu<br>s              |
| 1 | 1.00 | 1 | 1 | 0 | 0 | 0 | 0 | -0.002 | t | 107229 | RHEVTEM<br>GQEV              | Oryctola<br>gus<br>cuniculu<br>s |

|   |      |   |   |   |   |   |   |        |   |        |                              |                              |
|---|------|---|---|---|---|---|---|--------|---|--------|------------------------------|------------------------------|
| 1 | 1.00 | 1 | 1 | 0 | 0 | 0 | 0 | -0.002 | t | 117383 | TLHKAFKG<br>SIFVVFDSI<br>ESA | Homo<br>sapiens              |
| 1 | 1.00 | 1 | 1 | 0 | 0 | 0 | 0 | -0.002 | t | 107618 | SKPQSETL                     | Rattus<br>norvegicus         |
| 1 | 1.00 | 1 | 1 | 0 | 0 | 0 | 0 | -0.002 | t | 107309 | DAGPYVSP<br>TFFAH            | Oryctola<br>gus<br>cuniculus |
| 1 | 1.00 | 1 | 1 | 0 | 0 | 0 | 0 | -0.002 | t | 104327 | VEQHNPIN<br>AGTELSAT         | Sus<br>scrofa                |
| 1 | 1.00 | 1 | 1 | 0 | 0 | 0 | 0 | -0.002 | t | 110975 | QIFNKPY<br>WLQRAQGH          | Mus<br>musculus              |
| 1 | 1.00 | 1 | 1 | 0 | 0 | 0 | 0 | -0.002 | t | 110845 | EYMLD                        | Mus<br>musculus              |
| 1 | 1.00 | 1 | 1 | 0 | 0 | 0 | 0 | -0.002 | t | 110877 | GTVGENV<br>PDDLVIKG          | Mus<br>musculus              |
| 1 | 1.00 | 1 | 1 | 0 | 0 | 0 | 0 | -0.002 | t | 103986 | IHVLNSES<br>GSAGQMVD<br>QD   | Oryctola<br>gus<br>cuniculus |
| 1 | 1.00 | 1 | 1 | 0 | 0 | 0 | 0 | -0.002 | t | 110845 | EYMLD                        | Mus<br>musculus              |
| 1 | 1.00 | 1 | 1 | 0 | 0 | 0 | 0 | -0.002 | t | 99134  | DAEFRHDS<br>GYEVHHQ          | Mus<br>musculus              |
| 1 | 1.00 | 1 | 1 | 0 | 0 | 0 | 0 | -0.002 | t | 104695 | YLLYYTEFT<br>PTEK            | Mus<br>musculus              |
| 1 | 1.00 | 1 | 1 | 0 | 0 | 0 | 0 | -0.002 | t | 100129 | HYKWLND<br>PLAAW             | Ovis<br>aries                |
| 1 | 1.00 | 1 | 1 | 0 | 0 | 0 | 0 | -0.002 | t | 115351 | LKQKSSNS<br>RKKRSTS          | Mus<br>musculus              |
| 1 | 1.00 | 1 | 1 | 0 | 0 | 0 | 0 | -0.002 | t | 107378 | GELP                         | Rattus<br>norvegicus         |
| 1 | 1.00 | 1 | 1 | 0 | 0 | 0 | 0 | -0.002 | t | 103940 | GLTLPGYK<br>YLGPGNSLD        | Oryctola<br>gus<br>cuniculus |
| 1 | 1.00 | 1 | 1 | 0 | 0 | 0 | 0 | -0.002 | t | 110284 | HKSAIVTLT<br>YDSEWQR<br>DQ   | Homo<br>sapiens              |

|   |      |   |   |   |        |   |   |        |   |        |                               |                                  |
|---|------|---|---|---|--------|---|---|--------|---|--------|-------------------------------|----------------------------------|
| 1 | 1.00 | 1 | 1 | 0 | 0      | 0 | 0 | -0.002 | t | 110284 | HKSAIVTLT<br>YDSEWQR<br>DQ    | Homo<br>sapiens                  |
| 1 | 1.00 | 1 | 1 | 0 | 0      | 0 | 0 | -0.002 | t | 102093 | STGSSDV                       | Mus<br>musculu<br>s              |
| 1 | 1.00 | 1 | 1 | 0 | 0      | 0 | 0 | -0.002 | t | 105971 | MVGGVVI<br>AT                 | Mus<br>musculu<br>s              |
| 1 | 1.00 | 1 | 1 | 0 | 0      | 0 | 0 | -0.002 | t | 110762 | AGSSIVPLE<br>EYPAEIP          | Oryctola<br>gus<br>cuniculu<br>s |
| 1 | 1.00 | 1 | 1 | 0 | 0      | 0 | 0 | -0.002 | t | 104834 | HQKLVFFA<br>E                 | Mus<br>musculu<br>s              |
| 1 | 1.00 | 1 | 1 | 0 | 0      | 0 | 0 | -0.002 | t | 101412 | WIRNNF                        | Mus<br>musculu<br>s              |
| 1 | 1.00 | 1 | 1 | 0 | 0      | 0 | 0 | -0.002 | t | 110248 | GGLGIGTG<br>SGTGGRT<br>GYIPL  | Oryctola<br>gus<br>cuniculu<br>s |
| 1 | 1.00 | 1 | 1 | 0 | 0      | 0 | 0 | -0.002 | t | 110248 | GGLGIGTG<br>SGTGGRT<br>GYIPL  | Oryctola<br>gus<br>cuniculu<br>s |
| 1 | 1.00 | 1 | 1 | 0 | -0.004 | 0 | 0 | -0.002 | t | 110855 | FNRA GTV<br>GENVPDD<br>LYIKGS | Mus<br>musculu<br>s              |
| 1 | 1.00 | 1 | 1 | 0 | 0      | 0 | 0 | -0.002 | t | 107455 | KAKGQPR                       | Mus<br>musculu<br>s              |
| 1 | 1.00 | 1 | 1 | 0 | 0      | 0 | 0 | -0.002 | t | 107013 | YGASSRAT<br>GIPDR             | Oryctola<br>gus<br>cuniculu<br>s |
| 1 | 1.00 | 1 | 1 | 0 | 0      | 0 | 0 | -0.002 | t | 107368 | FSSAP                         | Rattus<br>norvegic<br>us         |
| 1 | 1.00 | 1 | 1 | 0 | 0      | 0 | 0 | -0.002 | t | 116286 | CGKGLSAT<br>VTGGQKG<br>RGSR   | Oryctola<br>gus<br>cuniculu<br>s |
| 1 | 1.00 | 1 | 1 | 0 | 0      | 0 | 0 | -0.002 | t | 111272 | FGAMDFT<br>TLQANKSE           | Mus<br>musculu<br>s              |
| 1 | 1.00 | 1 | 1 | 0 | 0      | 0 | 0 | -0.002 | t | 111272 | FGAMDFT<br>TLQANKSE           | Mus<br>musculu<br>s              |

|   |      |   |   |   |   |   |   |        |   |        |                            |                                  |
|---|------|---|---|---|---|---|---|--------|---|--------|----------------------------|----------------------------------|
| 1 | 1.00 | 1 | 1 | 0 | 0 | 0 | 0 | -0.002 | t | 117246 | VTWEVLE<br>GEVEKEAL<br>KKI | Homo<br>sapiens                  |
| 1 | 1.00 | 1 | 1 | 0 | 0 | 0 | 0 | -0.002 | t | 102172 | VDQQQQP<br>TQGDT           | Mus<br>musculu<br>s              |
| 1 | 1.00 | 1 | 1 | 0 | 0 | 0 | 0 | -0.002 | t | 99842  | RPQQPYP                    | Mus<br>musculu<br>s              |
| 1 | 1.00 | 1 | 1 | 0 | 0 | 0 | 0 | -0.002 | t | 105090 | AIIGLMVG<br>GVVIA          | Mus<br>musculu<br>s              |
| 1 | 1.00 | 1 | 1 | 0 | 0 | 0 | 0 | -0.002 | t | 102390 | EHRAW                      | Sus<br>scrofa                    |
| 1 | 1.00 | 1 | 1 | 0 | 0 | 0 | 0 | -0.002 | t | 97484  | LVEETSFID<br>AGAP          | Mus<br>musculu<br>s              |
| 1 | 1.00 | 1 | 1 | 0 | 0 | 0 | 0 | -0.002 | t | 61801  | STNSGINN                   | Mus<br>musculu<br>s              |
| 1 | 1.00 | 1 | 1 | 0 | 0 | 0 | 0 | -0.002 | t | 97370  | GTVLVTRK<br>AL             | Mus<br>musculu<br>s              |
| 1 | 1.00 | 1 | 1 | 0 | 0 | 0 | 0 | -0.002 | t | 94553  | IFD                        | Mus<br>musculu<br>s              |
| 1 | 1.00 | 1 | 1 | 0 | 0 | 0 | 0 | -0.002 | t | 75991  | YTDAPSF<br>DIPNPI          | Homo<br>sapiens                  |
| 1 | 1.00 | 1 | 1 | 0 | 0 | 0 | 0 | -0.002 | t | 96874  | SIAPDLSLD<br>FEKLN         | Mus<br>musculu<br>s              |
| 1 | 1.00 | 1 | 1 | 0 | 0 | 0 | 0 | -0.002 | t | 64396  | TINKPKGY<br>VGKE           | Oryctola<br>gus<br>cuniculu<br>s |
| 1 | 1.00 | 1 | 1 | 0 | 0 | 0 | 0 | -0.002 | t | 63022  | TATRLLSST<br>NSRLC         | Mus<br>musculu<br>s              |
| 1 | 1.00 | 1 | 1 | 0 | 0 | 0 | 0 | -0.002 | t | 67253  | TWEVLH                     | Mus<br>musculu<br>s              |



|   |      |   |   |   |   |   |   |        |   |       |                                  |                                  |
|---|------|---|---|---|---|---|---|--------|---|-------|----------------------------------|----------------------------------|
| 1 | 1.00 | 1 | 1 | 0 | 0 | 0 | 0 | -0.002 | t | 67253 | TWEVLH                           | Mus<br>musculu<br>s              |
| 1 | 1.00 | 1 | 1 | 0 | 0 | 0 | 0 | -0.002 | t | 79153 | ALQREAAE<br>RSEDEIK              | Oryctola<br>gus<br>cuniculu<br>s |
| 1 | 1.00 | 1 | 1 | 0 | 0 | 0 | 0 | -0.002 | t | 71312 | VTGATVS                          | Oryctola<br>gus<br>cuniculu<br>s |
| 1 | 1.00 | 1 | 1 | 0 | 0 | 0 | 0 | -0.002 | t | 64032 | THGQWN<br>KPSKPKTN<br>MK         | Oryctola<br>gus<br>cuniculu<br>s |
| 1 | 1.00 | 1 | 1 | 0 | 0 | 0 | 0 | -0.002 | t | 61410 | SSTRGGS<br>R<br>VEGIFAGL<br>FMNA | Oryctola<br>gus<br>cuniculu<br>s |
| 1 | 1.00 | 1 | 1 | 0 | 0 | 0 | 0 | -0.002 | t | 64045 | THKVGTSF<br>TFES                 | Oryctola<br>gus<br>cuniculu<br>s |
| 1 | 1.00 | 1 | 1 | 0 | 0 | 0 | 0 | -0.002 | t | 70038 | VMYASSG                          | Oryctola<br>gus<br>cuniculu<br>s |
| 1 | 1.00 | 1 | 1 | 0 | 0 | 0 | 0 | -0.002 | t | 60596 | SQWNKPS<br>KPKTN                 | Oryctola<br>gus<br>cuniculu<br>s |
| 1 | 1.00 | 1 | 1 | 0 | 0 | 0 | 0 | -0.002 | t | 63756 | TFTNKLKE<br>KHTDLGK              | Mus<br>musculu<br>s              |
| 1 | 1.00 | 1 | 1 | 0 | 0 | 0 | 0 | -0.002 | t | 66050 | TRLENLM<br>WK                    | Mus<br>musculu<br>s              |
| 1 | 1.00 | 1 | 1 | 0 | 0 | 0 | 0 | -0.002 | t | 60596 | SQWNKPS<br>KPKTN                 | Oryctola<br>gus<br>cuniculu<br>s |
| 1 | 1.00 | 1 | 1 | 0 | 0 | 0 | 0 | -0.002 | t | 67253 | TWEVLH                           | Mus<br>musculu<br>s              |
| 1 | 1.00 | 1 | 1 | 0 | 0 | 0 | 0 | -0.002 | t | 75391 | YPQPQFP<br>SQ                    | Mus<br>musculu<br>s              |

|   |      |   |   |   |        |   |   |        |   |       |                              |                                  |
|---|------|---|---|---|--------|---|---|--------|---|-------|------------------------------|----------------------------------|
| 1 | 1.00 | 1 | 1 | 0 | 0      | 0 | 0 | -0.002 | t | 67564 | VAEFIEKVS<br>RR              | Oryctola<br>gus<br>cuniculu<br>s |
| 1 | 1.00 | 1 | 1 | 0 | 0      | 0 | 0 | -0.002 | t | 60480 | SQKSADQ<br>SIDFGQL           | Oryctola<br>gus<br>cuniculu<br>s |
| 1 | 1.00 | 1 | 1 | 0 | 0      | 0 | 0 | -0.002 | t | 65000 | TLPERVRP<br>PDDWAT           | Mus<br>musculu<br>s              |
| 1 | 1.00 | 1 | 1 | 0 | 0      | 0 | 0 | -0.002 | t | 75391 | YPQPQPFP<br>SQ               | Mus<br>musculu<br>s              |
| 1 | 1.00 | 1 | 1 | 0 | 0      | 0 | 0 | -0.002 | t | 71354 | VTHESYQE<br>LVKKLEALE<br>DAV | Mus<br>musculu<br>s              |
| 1 | 1.00 | 1 | 1 | 0 | 0      | 0 | 0 | -0.002 | t | 60527 | SQPQQPFP<br>PQQ              | Mus<br>musculu<br>s              |
| 1 | 1.00 | 1 | 1 | 0 | 0      | 0 | 0 | -0.002 | t | 66833 | TTSTGPCK<br>TCTTPAQ          | Mus<br>musculu<br>s              |
| 1 | 1.00 | 1 | 1 | 0 | 0      | 0 | 0 | -0.002 | t | 70038 | VMYASSG                      | Oryctola<br>gus<br>cuniculu<br>s |
| 1 | 1.00 | 1 | 1 | 0 | 0      | 0 | 0 | -0.002 | t | 68415 | VEYTKYND<br>DDTFT            | Oryctola<br>gus<br>cuniculu<br>s |
| 1 | 1.00 | 1 | 1 | 0 | 0      | 0 | 0 | -0.002 | t | 73430 | YAQYMSR<br>AYAFLGE<br>DPGSG  | Mus<br>musculu<br>s              |
| 1 | 1.00 | 1 | 1 | 0 | 0      | 0 | 0 | -0.002 | t | 75392 | YPQPQPFR<br>PQ               | Mus<br>musculu<br>s              |
| 1 | 1.00 | 1 | 1 | 0 | 0      | 0 | 0 | -0.002 | t | 82843 | GQPAADH<br>YYSKVT            | Oryctola<br>gus<br>cuniculu<br>s |
| 1 | 1.00 | 1 | 1 | 0 | 0      | 0 | 0 | -0.002 | t | 78424 | IPRSRQIDL<br>QIG             | Mus<br>musculu<br>s              |
| 1 | 1.00 | 1 | 1 | 0 | -0.003 | 0 | 0 | -0.002 | t | 64396 | TINKPKG<br>YVGKE             | Oryctola<br>gus<br>cuniculu<br>s |

|   |      |   |   |   |   |   |   |        |   |       |                              |                       |
|---|------|---|---|---|---|---|---|--------|---|-------|------------------------------|-----------------------|
| 1 | 1.00 | 1 | 1 | 0 | 0 | 0 | 0 | -0.002 | t | 74068 | YGPQVDY                      | Mus musculus          |
| 1 | 1.00 | 1 | 1 | 0 | 0 | 0 | 0 | -0.002 | t | 76290 | YVHDNC                       | Mus musculus          |
| 1 | 1.00 | 1 | 1 | 0 | 0 | 0 | 0 | -0.002 | t | 69568 | VLKLSI                       | Mus musculus          |
| 1 | 1.00 | 1 | 1 | 0 | 0 | 0 | 0 | -0.002 | t | 61800 | STNS                         | Mus musculus          |
| 1 | 1.00 | 1 | 1 | 0 | 0 | 0 | 0 | -0.002 | t | 78159 | GALATYQS<br>EYLAHRRIP        | Oryctolagus cuniculus |
| 1 | 1.00 | 1 | 1 | 0 | 0 | 0 | 0 | -0.002 | t | 76453 | YWERGIPLP                    | Homo sapiens          |
| 1 | 1.00 | 1 | 1 | 0 | 0 | 0 | 0 | -0.002 | t | 67967 | VDGSDP                       | Mus musculus          |
| 1 | 1.00 | 1 | 1 | 0 | 0 | 0 | 0 | -0.002 | t | 63122 | TDAYNQKL<br>SERRAN           | Mus musculus          |
| 1 | 1.00 | 1 | 1 | 0 | 0 | 0 | 0 | -0.002 | t | 65421 | TNSGINNS                     | Mus musculus          |
| 1 | 1.00 | 1 | 1 | 0 | 0 | 0 | 0 | -0.002 | t | 67931 | VDEKKM                       | Mus musculus          |
| 1 | 1.00 | 1 | 1 | 0 | 0 | 0 | 0 | -0.002 | t | 66480 | TSVENAQ<br>QDKGIAIP<br>HDIDL | Cavia porcellus       |
| 1 | 1.00 | 1 | 1 | 0 | 0 | 0 | 0 | -0.002 | t | 75409 | YPSGAWY<br>YVP               | Homo sapiens          |
| 1 | 1.00 | 1 | 1 | 0 | 0 | 0 | 0 | -0.002 | t | 60596 | SQWNKPS<br>KPKTN             | Oryctolagus cuniculus |
| 1 | 1.00 | 1 | 1 | 0 | 0 | 0 | 0 | -0.002 | t | 65790 | TPTPVNPS<br>TAPAPAPT<br>PTFA | Homo sapiens          |
| 1 | 1.00 | 1 | 1 | 0 | 0 | 0 | 0 | -0.002 | t | 71312 | VTGATVS                      | Oryctolagus cuniculus |

|   |      |   |   |   |   |   |   |        |   |       |                              |                                  |
|---|------|---|---|---|---|---|---|--------|---|-------|------------------------------|----------------------------------|
| 1 | 1.00 | 1 | 1 | 0 | 0 | 0 | 0 | -0.002 | t | 64057 | THNQWN<br>KPSKPKTN<br>LK     | Oryctola<br>gus<br>cuniculu<br>s |
| 1 | 1.00 | 1 | 1 | 0 | 0 | 0 | 0 | -0.002 | t | 97348 | GLFGAIAG<br>FIEGGW           | Oryctola<br>gus<br>cuniculu<br>s |
| 1 | 1.00 | 1 | 1 | 0 | 0 | 0 | 0 | -0.002 | t | 60721 | SRKSYKKM<br>LKEMGEV<br>APEYR | Oryctola<br>gus<br>cuniculu<br>s |
| 1 | 1.00 | 1 | 1 | 0 | 0 | 0 | 0 | -0.002 | t | 64057 | THNQWN<br>KPSKPKTN<br>LK     | Oryctola<br>gus<br>cuniculu<br>s |
| 1 | 1.00 | 1 | 1 | 0 | 0 | 0 | 0 | -0.002 | t | 72910 | WNSTTFH<br>QTL               | Mus<br>musculu<br>s              |
| 1 | 1.00 | 1 | 1 | 0 | 0 | 0 | 0 | -0.002 | t | 73784 | YEVRAELP<br>GVDPKDK<br>VDIMV | Mus<br>musculu<br>s              |
| 1 | 1.00 | 1 | 1 | 0 | 0 | 0 | 0 | -0.002 | t | 70437 | VPPTQSKK<br>KNKNET           | Oryctola<br>gus<br>cuniculu<br>s |
| 1 | 1.00 | 1 | 1 | 0 | 0 | 0 | 0 | -0.002 | t | 64032 | THGQWN<br>KPSKPKTN<br>MK     | Oryctola<br>gus<br>cuniculu<br>s |
| 1 | 1.00 | 1 | 1 | 0 | 0 | 0 | 0 | -0.002 | t | 64057 | THNQWN<br>KPSKPKTN<br>LK     | Oryctola<br>gus<br>cuniculu<br>s |
| 1 | 1.00 | 1 | 1 | 0 | 0 | 0 | 0 | -0.002 | t | 75659 | YRPLGPGT<br>PPMRARL<br>PA    | Oryctola<br>gus<br>cuniculu<br>s |
| 1 | 1.00 | 1 | 1 | 0 | 0 | 0 | 0 | -0.002 | t | 71531 | VTTSGGRR<br>Q                | Oryctola<br>gus<br>cuniculu<br>s |
| 1 | 1.00 | 1 | 1 | 0 | 0 | 0 | 0 | -0.002 | t | 92303 | AKRFKINAI                    | Mus<br>musculu<br>s              |
| 1 | 1.00 | 1 | 1 | 0 | 0 | 0 | 0 | -0.002 | t | 95008 | EDVFQNG<br>FTAW              | Mus<br>musculu<br>s              |

|   |      |   |   |   |        |   |   |        |   |       |                              |                                  |
|---|------|---|---|---|--------|---|---|--------|---|-------|------------------------------|----------------------------------|
| 1 | 1.00 | 1 | 1 | 0 | 0      | 0 | 0 | -0.002 | t | 67931 | VDEKKM                       | Mus<br>musculu<br>s              |
| 1 | 1.00 | 1 | 1 | 0 | 0      | 0 | 0 | -0.002 | t | 61686 | STKAAKKP<br>EAKREAI          | Mus<br>musculu<br>s              |
| 1 | 1.00 | 1 | 1 | 0 | 0      | 0 | 0 | -0.002 | t | 85833 | LSIIAEQSN<br>STVDNQK         | Oryctola<br>gus<br>cuniculu<br>s |
| 1 | 1.00 | 1 | 1 | 0 | 0      | 0 | 0 | -0.002 | t | 63102 | TCTTPAQG<br>NSMFPS           | Mus<br>musculu<br>s              |
| 1 | 1.00 | 1 | 1 | 0 | 0      | 0 | 0 | -0.002 | t | 65733 | TPRAQATL<br>LR               | Mus<br>musculu<br>s              |
| 1 | 1.00 | 1 | 1 | 0 | -0.003 | 0 | 0 | -0.002 | t | 85833 | LSIIAEQSN<br>STVDNQK         | Oryctola<br>gus<br>cuniculu<br>s |
| 1 | 1.00 | 1 | 1 | 0 | 0.003  | 0 | 0 | -0.002 | t | 66050 | TRLENLM<br>WK                | Mus<br>musculu<br>s              |
| 1 | 1.00 | 1 | 1 | 0 | 0      | 0 | 0 | -0.002 | t | 63391 | TEHRDYHP<br>QQRG             | Mus<br>musculu<br>s              |
| 1 | 1.00 | 1 | 1 | 0 | 0      | 0 | 0 | -0.002 | t | 60917 | SSAVVDNK<br>LKI              | Mus<br>musculu<br>s              |
| 1 | 1.00 | 1 | 1 | 0 | 0      | 0 | 0 | -0.002 | t | 63038 | TAVSPTTL<br>RTEVVK           | Oryctola<br>gus<br>cuniculu<br>s |
| 1 | 1.00 | 1 | 1 | 0 | 0      | 0 | 0 | -0.002 | t | 73636 | YEDRYRE                      | Mus<br>musculu<br>s              |
| 1 | 1.00 | 1 | 1 | 0 | 0      | 0 | 0 | -0.002 | t | 64663 | TKRRITPK<br>D                | Mus<br>musculu<br>s              |
| 1 | 1.00 | 1 | 1 | 0 | 0      | 0 | 0 | -0.002 | t | 65556 | TPEMDIPG<br>QVNNLME<br>IAEVD | Mus<br>musculu<br>s              |
| 1 | 1.00 | 1 | 1 | 0 | 0      | 0 | 0 | -0.002 | t | 74430 | YKAYVSYK<br>KRKAQEK          | Oryctola<br>gus<br>cuniculu<br>s |
| 1 | 1.00 | 1 | 1 | 0 | 0      | 0 | 0 | -0.002 | t | 74687 | YLGYLEQL<br>LR               | Homo<br>sapiens                  |

|   |      |   |   |   |   |   |   |        |   |       |                              |                                  |
|---|------|---|---|---|---|---|---|--------|---|-------|------------------------------|----------------------------------|
| 1 | 1.00 | 1 | 1 | 0 | 0 | 0 | 0 | -0.002 | t | 64056 | THNQWN<br>KPSKPKTN<br>FK     | Gallus<br>gallus                 |
| 1 | 1.00 | 1 | 1 | 0 | 0 | 0 | 0 | -0.002 | t | 96409 | INDMPITN<br>DQKKL            | Oryctola<br>gus<br>cuniculu<br>s |
| 1 | 1.00 | 1 | 1 | 0 | 0 | 0 | 0 | -0.002 | t | 68200 | VEGMQFD<br>RGYLSPYF          | Mus<br>musculu<br>s              |
| 1 | 1.00 | 1 | 1 | 0 | 0 | 0 | 0 | -0.002 | t | 72911 | WNSTTFH<br>QTLQDP            | Mus<br>musculu<br>s              |
| 1 | 1.00 | 1 | 1 | 0 | 0 | 0 | 0 | -0.002 | t | 75418 | YPTFGEHK<br>QEKDLEY          | Mus<br>musculu<br>s              |
| 1 | 1.00 | 1 | 1 | 0 | 0 | 0 | 0 | -0.002 | t | 94943 | TKVSNGAF<br>VPNM             | Oryctola<br>gus<br>cuniculu<br>s |
| 1 | 1.00 | 1 | 1 | 0 | 0 | 0 | 0 | -0.002 | t | 72911 | WNSTTFH<br>QTLQDP            | Mus<br>musculu<br>s              |
| 1 | 1.00 | 1 | 1 | 0 | 0 | 0 | 0 | -0.002 | t | 66072 | TRNTGQP<br>ATDHYYSN<br>V     | Oryctola<br>gus<br>cuniculu<br>s |
| 1 | 1.00 | 1 | 1 | 0 | 0 | 0 | 0 | -0.002 | t | 67931 | VDEKKM                       | Mus<br>musculu<br>s              |
| 1 | 1.00 | 1 | 1 | 0 | 0 | 0 | 0 | -0.002 | t | 67615 | VAGRKKLE<br>ELERDLRK<br>TK   | Homo<br>sapiens                  |
| 1 | 1.00 | 1 | 1 | 0 | 0 | 0 | 0 | -0.002 | t | 65770 | TPSPDRDE<br>RGALGWG          | Mus<br>musculu<br>s              |
| 1 | 1.00 | 1 | 1 | 0 | 0 | 0 | 0 | -0.002 | t | 94832 | GLFGNNE<br>NQTKV             | Oryctola<br>gus<br>cuniculu<br>s |
| 1 | 1.00 | 1 | 1 | 0 | 0 | 0 | 0 | -0.002 | t | 64978 | TLNKDQLL<br>SSSKYTIQR<br>STG | Oryctola<br>gus<br>cuniculu<br>s |
| 1 | 1.00 | 1 | 1 | 0 | 0 | 0 | 0 | -0.002 | t | 65779 | TPTAWKP<br>N                 | Mus<br>musculu<br>s              |

|   |      |   |   |   |        |   |   |        |   |       |                              |                                  |
|---|------|---|---|---|--------|---|---|--------|---|-------|------------------------------|----------------------------------|
| 1 | 1.00 | 1 | 1 | 0 | -0.003 | 0 | 0 | -0.002 | t | 88388 | SAWNSDS<br>EKPFDDHL          | Oryctola<br>gus<br>cuniculu<br>s |
| 1 | 1.00 | 1 | 1 | 0 | -0.003 | 0 | 0 | -0.002 | t | 79622 | NYARTGG<br>QVTAG             | Oryctola<br>gus<br>cuniculu<br>s |
| 1 | 1.00 | 1 | 1 | 0 | 0      | 0 | 0 | -0.002 | t | 73131 | WTGVAQ<br>D                  | Oryctola<br>gus<br>cuniculu<br>s |
| 1 | 1.00 | 1 | 1 | 0 | 0      | 0 | 0 | -0.002 | t | 75318 | YPHQPPQ<br>QFP               | Mus<br>musculu<br>s              |
| 1 | 1.00 | 1 | 1 | 0 | 0      | 0 | 0 | -0.002 | t | 60592 | SQWGWG<br>GSTDEYCS<br>PDHNCQ | Mus<br>musculu<br>s              |
| 1 | 1.00 | 1 | 1 | 0 | 0      | 0 | 0 | -0.002 | t | 95058 | AGLQND                       | Mus<br>musculu<br>s              |
| 1 | 1.00 | 1 | 1 | 0 | 0      | 0 | 0 | -0.002 | t | 70729 | VRGLYFP                      | Mus<br>musculu<br>s              |
| 1 | 1.00 | 1 | 1 | 0 | 0      | 0 | 0 | -0.002 | t | 63730 | TFPQPQQ<br>TYP               | Mus<br>musculu<br>s              |
| 1 | 1.00 | 1 | 1 | 0 | 0      | 0 | 0 | -0.002 | t | 63037 | TAVSPTTL<br>R                | Oryctola<br>gus<br>cuniculu<br>s |
| 1 | 1.00 | 1 | 1 | 0 | 0      | 0 | 0 | -0.002 | t | 64010 | TGYRYDSR<br>TGFFATN          | Mus<br>musculu<br>s              |
| 1 | 1.00 | 1 | 1 | 0 | -0.003 | 0 | 0 | -0.002 | t | 65568 | TPFHHQH<br>STGFT             | Oryctola<br>gus<br>cuniculu<br>s |
| 1 | 1.00 | 1 | 1 | 0 | 0      | 0 | 0 | -0.002 | t | 72087 | VYLLPR                       | Homo<br>sapiens                  |
| 1 | 1.00 | 1 | 1 | 0 | 0      | 0 | 0 | -0.002 | t | 96457 | KGTVNLT<br>WSR               | Mus<br>musculu<br>s              |

|   |      |   |   |   |   |   |   |        |   |       |                              |                                  |
|---|------|---|---|---|---|---|---|--------|---|-------|------------------------------|----------------------------------|
| 1 | 1.00 | 1 | 1 | 0 | 0 | 0 | 0 | -0.002 | t | 64010 | TGYRYDSR<br>TGFFATN          | Mus<br>musculu<br>s              |
| 1 | 1.00 | 1 | 1 | 0 | 0 | 0 | 0 | -0.002 | t | 74488 | YKPLGALT<br>H                | Mus<br>musculu<br>s              |
| 1 | 1.00 | 1 | 1 | 0 | 0 | 0 | 0 | -0.002 | t | 94580 | LDNKYAGK<br>GY               | Mus<br>musculu<br>s              |
| 1 | 1.00 | 1 | 1 | 0 | 0 | 0 | 0 | -0.002 | t | 64057 | THNQWN<br>KPSKPKTN<br>LK     | Oryctola<br>gus<br>cuniculu<br>s |
| 1 | 1.00 | 1 | 1 | 0 | 0 | 0 | 0 | -0.002 | t | 72504 | WGQGGG<br>H                  | Mus<br>musculu<br>s              |
| 1 | 1.00 | 1 | 1 | 0 | 0 | 0 | 0 | -0.002 | t | 64032 | THGQWN<br>KPSKPKTN<br>MK     | Oryctola<br>gus<br>cuniculu<br>s |
| 1 | 1.00 | 1 | 1 | 0 | 0 | 0 | 0 | -0.002 | t | 75372 | YPNQVYYR<br>PVDRYSN<br>QNNFV | Oryctola<br>gus<br>cuniculu<br>s |
| 1 | 1.00 | 1 | 1 | 0 | 0 | 0 | 0 | -0.002 | t | 66767 | TTPKNPTK<br>RRITPKDVI        | Oryctola<br>gus<br>cuniculu<br>s |
| 1 | 1.00 | 1 | 1 | 0 | 0 | 0 | 0 | -0.002 | t | 78077 | YPYSMWK<br>NLWPS             | Mus<br>musculu<br>s              |
| 1 | 1.00 | 1 | 1 | 0 | 0 | 0 | 0 | -0.002 | t | 63604 | TEYYLNHG<br>KWPEN            | Oryctola<br>gus<br>cuniculu<br>s |
| 1 | 1.00 | 1 | 1 | 0 | 0 | 0 | 0 | -0.002 | t | 64985 | TLNPTI                       | Mus<br>musculu<br>s              |
| 1 | 1.00 | 1 | 1 | 0 | 0 | 0 | 0 | -0.002 | t | 65555 | TPEMDIPG<br>QV               | Mus<br>musculu<br>s              |
| 1 | 1.00 | 1 | 1 | 0 | 0 | 0 | 0 | -0.002 | t | 64985 | TLNPTI                       | Mus<br>musculu<br>s              |



|   |      |   |   |   |        |   |   |        |   |       |                              |                                  |
|---|------|---|---|---|--------|---|---|--------|---|-------|------------------------------|----------------------------------|
| 1 | 1.00 | 1 | 1 | 0 | -0.003 | 0 | 0 | -0.002 | t | 67187 | TVTTTTKG<br>ENFTETDI<br>KI   | Oryctola<br>gus<br>cuniculu<br>s |
| 1 | 1.00 | 1 | 1 | 0 | 0      | 0 | 0 | -0.002 | t | 68200 | VEGMQFD<br>RGYLSPYF          | Mus<br>musculu<br>s              |
| 1 | 1.00 | 1 | 1 | 0 | 0      | 0 | 0 | -0.002 | t | 79111 | VNKGYTG<br>Y                 | Mus<br>musculu<br>s              |
| 1 | 1.00 | 1 | 1 | 0 | 0      | 0 | 0 | -0.002 | t | 60753 | SRPGSTTP<br>SGNSARYG<br>NNT  | Mus<br>musculu<br>s              |
| 1 | 1.00 | 1 | 1 | 0 | 0      | 0 | 0 | -0.002 | t | 61843 | STPVAPTQ<br>EVKK             | Oryctola<br>gus<br>cuniculu<br>s |
| 1 | 1.00 | 1 | 1 | 0 | 0      | 0 | 0 | -0.002 | t | 68895 | VHTWTEQ<br>YK                | Mus<br>musculu<br>s              |
| 1 | 1.00 | 1 | 1 | 0 | 0      | 0 | 0 | -0.002 | t | 74415 | YIWPRND<br>YDG               | Mus<br>musculu<br>s              |
| 1 | 1.00 | 1 | 1 | 0 | 0      | 0 | 0 | -0.002 | t | 70391 | VPNLRGDL<br>QVLAQKV<br>ARTLP | Oryctola<br>gus<br>cuniculu<br>s |
| 1 | 1.00 | 1 | 1 | 0 | 0      | 0 | 0 | -0.002 | t | 67930 | VDEKKK                       | Mus<br>musculu<br>s              |
| 1 | 1.00 | 1 | 1 | 0 | 0      | 0 | 0 | -0.002 | t | 67932 | VDEKNM                       | Mus<br>musculu<br>s              |
| 1 | 1.00 | 1 | 1 | 0 | 0      | 0 | 0 | -0.002 | t | 70391 | VPNLRGDL<br>QVLAQKV<br>ARTLP | Oryctola<br>gus<br>cuniculu<br>s |
| 1 | 1.00 | 1 | 1 | 0 | 0      | 0 | 0 | -0.002 | t | 64985 | TLNPTI                       | Mus<br>musculu<br>s              |
| 1 | 1.00 | 1 | 1 | 0 | 0      | 0 | 0 | -0.002 | t | 68052 | VDQYSNQ<br>NNF               | Oryctola<br>gus<br>cuniculu<br>s |

|   |      |   |   |   |   |   |   |        |   |       |                            |                                  |
|---|------|---|---|---|---|---|---|--------|---|-------|----------------------------|----------------------------------|
| 1 | 1.00 | 1 | 1 | 0 | 0 | 0 | 0 | -0.002 | t | 72961 | WPQRVVT<br>KKGRTFL         | Mus<br>musculu<br>s              |
| 1 | 1.00 | 1 | 1 | 0 | 0 | 0 | 0 | -0.002 | t | 97484 | LVEETSFID<br>AGAP          | Oryctola<br>gus<br>cuniculu<br>s |
| 1 | 1.00 | 1 | 1 | 0 | 0 | 0 | 0 | -0.002 | t | 91109 | AHFVQQT<br>P               | Mus<br>musculu<br>s              |
| 1 | 1.00 | 1 | 1 | 0 | 0 | 0 | 0 | -0.002 | t | 97256 | EGAKGEN<br>KRPNDKA<br>GEV  | Mus<br>musculu<br>s              |
| 1 | 1.00 | 1 | 1 | 0 | 0 | 0 | 0 | -0.002 | t | 64884 | TLKREIEKD<br>G             | Mus<br>musculu<br>s              |
| 1 | 1.00 | 1 | 1 | 0 | 0 | 0 | 0 | -0.002 | t | 63604 | TEYYLNHG<br>KWPEN          | Oryctola<br>gus<br>cuniculu<br>s |
| 1 | 1.00 | 1 | 1 | 0 | 0 | 0 | 0 | -0.002 | t | 74009 | YGGPANK<br>KNAG            | Aotus<br>nancyma<br>ae           |
| 1 | 1.00 | 1 | 1 | 0 | 0 | 0 | 0 | -0.002 | t | 94956 | TTGNAAA<br>PSTL            | Oryctola<br>gus<br>cuniculu<br>s |
| 1 | 1.00 | 1 | 1 | 0 | 0 | 0 | 0 | -0.002 | t | 67187 | TVTTTTKG<br>ENFTETDI<br>KI | Oryctola<br>gus<br>cuniculu<br>s |
| 1 | 1.00 | 1 | 1 | 0 | 0 | 0 | 0 | -0.002 | t | 78253 | QGGCGRG<br>WAFSATG<br>AIEA | Mus<br>musculu<br>s              |
| 1 | 1.00 | 1 | 1 | 0 | 0 | 0 | 0 | -0.002 | t | 66539 | TTASGKLIT                  | Mus<br>musculu<br>s              |
| 1 | 1.00 | 1 | 1 | 0 | 0 | 0 | 0 | -0.002 | t | 66539 | TTASGKLIT                  | Mus<br>musculu<br>s              |
| 1 | 1.00 | 1 | 1 | 0 | 0 | 0 | 0 | -0.002 | t | 79648 | SPLLGCIGS<br>TCA           | Mus<br>musculu<br>s              |
| 1 | 1.00 | 1 | 1 | 0 | 0 | 0 | 0 | -0.002 | t | 60526 | SQPNTeqs<br>PAIVLPF        | Mus<br>musculu<br>s              |
| 1 | 1.00 | 1 | 1 | 0 | 0 | 0 | 0 | -0.002 | t | 65974 | TQYERE                     | Mus<br>musculu<br>s              |

|   |      |   |   |   |   |   |   |        |   |       |                            |                                  |
|---|------|---|---|---|---|---|---|--------|---|-------|----------------------------|----------------------------------|
| 1 | 1.00 | 1 | 1 | 0 | 0 | 0 | 0 | -0.002 | t | 91100 | AFQTPVHS                   | Mus<br>musculu<br>s              |
| 1 | 1.00 | 1 | 1 | 0 | 0 | 0 | 0 | -0.002 | t | 95058 | AGLQND                     | Mus<br>musculu<br>s              |
| 1 | 1.00 | 1 | 1 | 0 | 0 | 0 | 0 | -0.002 | t | 94430 | AIFD                       | Mus<br>musculu<br>s              |
| 1 | 1.00 | 1 | 1 | 0 | 0 | 0 | 0 | -0.002 | t | 66841 | TTTCFRDT<br>DTGK           | Mus<br>musculu<br>s              |
| 1 | 1.00 | 1 | 1 | 0 | 0 | 0 | 0 | -0.002 | t | 75791 | YSLFQKEK<br>MVL            | Aotus<br>nancyma<br>ae           |
| 1 | 1.00 | 1 | 1 | 0 | 0 | 0 | 0 | -0.002 | t | 73365 | YAHHAHH<br>A               | Mus<br>musculu<br>s              |
| 1 | 1.00 | 1 | 1 | 0 | 0 | 0 | 0 | -0.002 | t | 96701 | NQSLAFIR<br>KSDEL          | Oryctola<br>gus<br>cuniculu<br>s |
| 1 | 1.00 | 1 | 1 | 0 | 0 | 0 | 0 | -0.002 | t | 63217 | TDQMEVD<br>SGPRKRPL<br>RGG | Homo<br>sapiens                  |
| 1 | 1.00 | 1 | 1 | 0 | 0 | 0 | 0 | -0.002 | t | 61818 | STPGIVI                    | Oryctola<br>gus<br>cuniculu<br>s |
| 1 | 1.00 | 1 | 1 | 0 | 0 | 0 | 0 | -0.002 | t | 73889 | YFRTLEDA<br>AH             | Mus<br>musculu<br>s              |
| 1 | 1.00 | 1 | 1 | 0 | 0 | 0 | 0 | -0.002 | t | 60663 | SRGAPGG<br>GFVPSLQG<br>VP  | Homo<br>sapiens                  |
| 1 | 1.00 | 1 | 1 | 0 | 0 | 0 | 0 | -0.002 | t | 64587 | TKINADNP<br>VPILELE        | Mus<br>musculu<br>s              |
| 1 | 1.00 | 1 | 1 | 0 | 0 | 0 | 0 | -0.002 | t | 68969 | VIGHEITH<br>GFD            | Oryctola<br>gus<br>cuniculu<br>s |

|   |      |   |   |   |        |   |   |        |   |       |                              |                                  |
|---|------|---|---|---|--------|---|---|--------|---|-------|------------------------------|----------------------------------|
| 1 | 1.00 | 1 | 1 | 0 | 0      | 0 | 0 | -0.002 | t | 94884 | MRRAHRR<br>RRRASHRR<br>MRGG  | Mus<br>musculu<br>s              |
| 1 | 1.00 | 1 | 1 | 0 | -0.004 | 0 | 0 | -0.002 | t | 64698 | TKWCPPG<br>QLVNLHDF<br>RSDEI | Oryctola<br>gus<br>cuniculu<br>s |
| 1 | 1.00 | 1 | 1 | 0 | 0      | 0 | 0 | -0.002 | t | 97035 | VGINYWL<br>AHK               | Homo<br>sapiens                  |
| 1 | 1.00 | 1 | 1 | 0 | 0      | 0 | 0 | -0.002 | t | 60595 | SQWNKPS<br>KPKT              | Mus<br>musculu<br>s              |
| 1 | 1.00 | 1 | 1 | 0 | 0      | 0 | 0 | -0.002 | t | 71681 | VVGYGWV<br>PAY               | Mus<br>musculu<br>s              |
| 1 | 1.00 | 1 | 1 | 0 | 0      | 0 | 0 | -0.002 | t | 97075 | VSCYGKTK<br>CTASNKNR         | Oryctola<br>gus<br>cuniculu<br>s |
| 1 | 1.00 | 1 | 1 | 0 | 0      | 0 | 0 | -0.002 | t | 63758 | TFTNPVVS<br>TTQWSAP          | Oryctola<br>gus<br>cuniculu<br>s |
| 1 | 1.00 | 1 | 1 | 0 | 0      | 0 | 0 | -0.002 | t | 65920 | TQQPFPLQ<br>PQ               | Mus<br>musculu<br>s              |
| 1 | 1.00 | 1 | 1 | 0 | 0      | 0 | 0 | -0.002 | t | 94041 | TKRFKINAI                    | Mus<br>musculu<br>s              |
| 1 | 1.00 | 1 | 1 | 0 | 0      | 0 | 0 | -0.002 | t | 63146 | TDELNQQ<br>RDDITRAI          | Oryctola<br>gus<br>cuniculu<br>s |
| 1 | 1.00 | 1 | 1 | 0 | 0      | 0 | 0 | -0.002 | t | 96102 | APLLPH                       | Homo<br>sapiens                  |
| 1 | 1.00 | 1 | 1 | 0 | 0      | 0 | 0 | -0.002 | t | 63760 | TFTVKVGD<br>KELFT            | Oryctola<br>gus<br>cuniculu<br>s |
| 1 | 1.00 | 1 | 1 | 0 | 0      | 0 | 0 | -0.002 | t | 70937 | VSFQYNA<br>VGPYLNIN<br>FFDSS | Mus<br>musculu<br>s              |
| 1 | 1.00 | 1 | 1 | 0 | 0      | 0 | 0 | -0.002 | t | 65409 | TNRNPQ                       | Oryctola<br>gus<br>cuniculu<br>s |

|   |      |   |   |   |        |   |   |        |   |       |                           |                                  |
|---|------|---|---|---|--------|---|---|--------|---|-------|---------------------------|----------------------------------|
| 1 | 1.00 | 1 | 1 | 0 | 0      | 0 | 0 | -0.002 | t | 68813 | VGVIKSIAP<br>ASKNL        | Oryctola<br>gus<br>cuniculu<br>s |
| 1 | 1.00 | 1 | 1 | 0 | 0      | 0 | 0 | -0.002 | t | 71212 | VSVTDHKK<br>WQFNSPF<br>VP | Mus<br>musculu<br>s              |
| 1 | 1.00 | 1 | 1 | 0 | 0      | 0 | 0 | -0.002 | t | 66357 | TSPFTEEYL<br>LPPK         | Mus<br>musculu<br>s              |
| 1 | 1.00 | 1 | 1 | 0 | 0      | 0 | 0 | -0.002 | t | 97177 | AELPF                     | Mus<br>musculu<br>s              |
| 1 | 1.00 | 1 | 1 | 0 | 0      | 0 | 0 | -0.002 | t | 75532 | YQPQQPF<br>PQP            | Mus<br>musculu<br>s              |
| 1 | 1.00 | 1 | 1 | 0 | 0      | 0 | 0 | -0.002 | t | 64587 | TKINADNP<br>VPILELE       | Mus<br>musculu<br>s              |
| 1 | 1.00 | 1 | 1 | 0 | 0      | 0 | 0 | -0.002 | t | 65050 | TLRVYK                    | Mus<br>musculu<br>s              |
| 1 | 1.00 | 1 | 1 | 0 | 0      | 0 | 0 | -0.002 | t | 60535 | SQQPQQP<br>FPQ            | Mus<br>musculu<br>s              |
| 1 | 1.00 | 1 | 1 | 0 | 0      | 0 | 0 | -0.002 | t | 51906 | QPQPFPP<br>QLP            | Mus<br>musculu<br>s              |
| 1 | 1.00 | 1 | 1 | 0 | -0.003 | 0 | 0 | -0.002 | t | 51454 | QLNPKDN<br>DVEL           | Oryctola<br>gus<br>cuniculu<br>s |
| 1 | 1.00 | 1 | 1 | 0 | 0      | 0 | 0 | -0.002 | t | 51001 | QHGHMH<br>GS              | Mus<br>musculu<br>s              |
| 1 | 1.00 | 1 | 1 | 0 | 0      | 0 | 0 | -0.002 | t | 51001 | QHGHMH<br>GS              | Mus<br>musculu<br>s              |
| 1 | 1.00 | 1 | 1 | 0 | 0      | 0 | 0 | -0.002 | t | 37055 | LKVIRK                    | Mus<br>musculu<br>s              |
| 1 | 1.00 | 1 | 1 | 0 | 0      | 0 | 0 | -0.002 | t | 38313 | LNPTIA                    | Mus<br>musculu<br>s              |

|   |      |   |   |   |   |   |   |        |   |       |                             |                                  |
|---|------|---|---|---|---|---|---|--------|---|-------|-----------------------------|----------------------------------|
| 1 | 1.00 | 1 | 1 | 0 | 0 | 0 | 0 | -0.002 | t | 60348 | SPYQPQQ<br>PFP              | Mus<br>musculu<br>s              |
| 1 | 1.00 | 1 | 1 | 0 | 0 | 0 | 0 | -0.002 | t | 37055 | LKVIRK                      | Homo<br>sapiens                  |
| 1 | 1.00 | 1 | 1 | 0 | 0 | 0 | 0 | -0.002 | t | 51906 | QPQPFPP<br>QLP              | Mus<br>musculu<br>s              |
| 1 | 1.00 | 1 | 1 | 0 | 0 | 0 | 0 | -0.002 | t | 39916 | LTGISICNP<br>GSSLC          | Oryctola<br>gus<br>cuniculu<br>s |
| 1 | 1.00 | 1 | 1 | 0 | 0 | 0 | 0 | -0.002 | t | 44742 | NLIESEHS<br>NNNN            | Mus<br>musculu<br>s              |
| 1 | 1.00 | 1 | 1 | 0 | 0 | 0 | 0 | -0.002 | t | 51912 | QPQPFRR<br>QQP              | Mus<br>musculu<br>s              |
| 1 | 1.00 | 1 | 1 | 0 | 0 | 0 | 0 | -0.002 | t | 56469 | RWAPTGA<br>PADVTDQ<br>L     | Mus<br>musculu<br>s              |
| 1 | 1.00 | 1 | 1 | 0 | 0 | 0 | 0 | -0.002 | t | 45420 | NPNDPP                      | Mus<br>musculu<br>s              |
| 1 | 1.00 | 1 | 1 | 0 | 0 | 0 | 0 | -0.002 | t | 52086 | QQPFPQQ<br>PQQ              | Mus<br>musculu<br>s              |
| 1 | 1.00 | 1 | 1 | 0 | 0 | 0 | 0 | -0.002 | t | 51828 | QPFPQPQ<br>QTF              | Mus<br>musculu<br>s              |
| 1 | 1.00 | 1 | 1 | 0 | 0 | 0 | 0 | -0.002 | t | 48715 | PNVDPN                      | Mus<br>musculu<br>s              |
| 1 | 1.00 | 1 | 1 | 0 | 0 | 0 | 0 | -0.002 | t | 51463 | QLPFPQQ<br>PQQ              | Mus<br>musculu<br>s              |
| 1 | 1.00 | 1 | 1 | 0 | 0 | 0 | 0 | -0.002 | t | 46795 | PAFLGCSS<br>RFSGSFSG<br>VEP | Mus<br>musculu<br>s              |
| 1 | 1.00 | 1 | 1 | 0 | 0 | 0 | 0 | -0.002 | t | 43247 | NANPNAN<br>PNANPNA<br>NPNA  | Oryctola<br>gus<br>cuniculu<br>s |

|   |      |   |   |   |   |   |   |        |   |       |                          |                                  |
|---|------|---|---|---|---|---|---|--------|---|-------|--------------------------|----------------------------------|
| 1 | 1.00 | 1 | 1 | 0 | 0 | 0 | 0 | -0.002 | t | 52157 | QQTFPQP<br>QQT           | Mus<br>musculu<br>s              |
| 1 | 1.00 | 1 | 1 | 0 | 0 | 0 | 0 | -0.002 | t | 40922 | LYREFD                   | Mus<br>musculu<br>s              |
| 1 | 1.00 | 1 | 1 | 0 | 0 | 0 | 0 | -0.002 | t | 49928 | PVPAPRRK<br>VGSDCGS      | Mus<br>musculu<br>s              |
| 1 | 1.00 | 1 | 1 | 0 | 0 | 0 | 0 | -0.002 | t | 49108 | PQQQPFP<br>QPQ           | Mus<br>musculu<br>s              |
| 1 | 1.00 | 1 | 1 | 0 | 0 | 0 | 0 | -0.002 | t | 48933 | PPTAPPLL<br>PHSNL        | Homo<br>sapiens                  |
| 1 | 1.00 | 1 | 1 | 0 | 0 | 0 | 0 | -0.002 | t | 48912 | PPSDIKGK<br>YVKEVEVK     | Oryctola<br>gus<br>cuniculu<br>s |
| 1 | 1.00 | 1 | 1 | 0 | 0 | 0 | 0 | -0.002 | t | 58402 | SHRELWA<br>K             | Mus<br>musculu<br>s              |
| 1 | 1.00 | 1 | 1 | 0 | 0 | 0 | 0 | -0.002 | t | 38313 | LNPTIA                   | Mus<br>musculu<br>s              |
| 1 | 1.00 | 1 | 1 | 0 | 0 | 0 | 0 | -0.002 | t | 58582 | SIKEDVQF                 | Mus<br>musculu<br>s              |
| 1 | 1.00 | 1 | 1 | 0 | 0 | 0 | 0 | -0.002 | t | 38313 | LNPTIA                   | Mus<br>musculu<br>s              |
| 1 | 1.00 | 1 | 1 | 0 | 0 | 0 | 0 | -0.002 | t | 51942 | QPQRPFQ<br>QQP           | Mus<br>musculu<br>s              |
| 1 | 1.00 | 1 | 1 | 0 | 0 | 0 | 0 | -0.002 | t | 49967 | PVSLGGDV<br>PNS          | Mus<br>musculu<br>s              |
| 1 | 1.00 | 1 | 1 | 0 | 0 | 0 | 0 | -0.002 | t | 49119 | PQRPQQP<br>FPQ           | Mus<br>musculu<br>s              |
| 1 | 1.00 | 1 | 1 | 0 | 0 | 0 | 0 | -0.002 | t | 43246 | NANPNAN<br>PNANPNA<br>NP | Mus<br>musculu<br>s              |

|   |      |   |   |   |   |   |   |        |   |       |                              |                        |
|---|------|---|---|---|---|---|---|--------|---|-------|------------------------------|------------------------|
| 1 | 1.00 | 1 | 1 | 0 | 0 | 0 | 0 | -0.002 | t | 51939 | QPQQTFP<br>QPQ               | Mus<br>musculu<br>s    |
| 1 | 1.00 | 1 | 1 | 0 | 0 | 0 | 0 | -0.002 | t | 46371 | NVESQPG<br>GQPNT             | Mus<br>musculu<br>s    |
| 1 | 1.00 | 1 | 1 | 0 | 0 | 0 | 0 | -0.002 | t | 52161 | QQTQQPF<br>PLQ               | Mus<br>musculu<br>s    |
| 1 | 1.00 | 1 | 1 | 0 | 0 | 0 | 0 | -0.002 | t | 45422 | NPNEPSN<br>PNEPSNP<br>NEPS   | Mus<br>musculu<br>s    |
| 1 | 1.00 | 1 | 1 | 0 | 0 | 0 | 0 | -0.002 | t | 48690 | PNPNDP                       | Mus<br>musculu<br>s    |
| 1 | 1.00 | 1 | 1 | 0 | 0 | 0 | 0 | -0.002 | t | 55261 | RPPNAPIL                     | Mus<br>musculu<br>s    |
| 1 | 1.00 | 1 | 1 | 0 | 0 | 0 | 0 | -0.002 | t | 58833 | SKGATKEA<br>ST               | Homo<br>sapiens        |
| 1 | 1.00 | 1 | 1 | 0 | 0 | 0 | 0 | -0.002 | t | 45422 | NPNEPSN<br>PNEPSNP<br>NEPS   | Mus<br>musculu<br>s    |
| 1 | 1.00 | 1 | 1 | 0 | 0 | 0 | 0 | -0.002 | t | 45422 | NPNEPSN<br>PNEPSNP<br>NEPS   | Mus<br>musculu<br>s    |
| 1 | 1.00 | 1 | 1 | 0 | 0 | 0 | 0 | -0.002 | t | 45422 | NPNEPSN<br>PNEPSNP<br>NEPS   | Mus<br>musculu<br>s    |
| 1 | 1.00 | 1 | 1 | 0 | 0 | 0 | 0 | -0.002 | t | 49099 | PQQPQQS<br>FPQ               | Mus<br>musculu<br>s    |
| 1 | 1.00 | 1 | 1 | 0 | 0 | 0 | 0 | -0.002 | t | 55305 | RPQQPFPL<br>QP               | Mus<br>musculu<br>s    |
| 1 | 1.00 | 1 | 1 | 0 | 0 | 0 | 0 | -0.002 | t | 46786 | PAEVTQLK<br>GLS              | Mus<br>musculu<br>s    |
| 1 | 1.00 | 1 | 1 | 0 | 0 | 0 | 0 | -0.002 | t | 52445 | QSTVAELQ<br>RLKMKVG<br>KTREL | Cavia<br>porcellu<br>s |
| 1 | 1.00 | 1 | 1 | 0 | 0 | 0 | 0 | -0.002 | t | 58863 | SKKHKDNE<br>DAESVK           | Homo<br>sapiens        |
| 1 | 1.00 | 1 | 1 | 0 | 0 | 0 | 0 | -0.002 | t | 47045 | PCSICSNN<br>PTCWAICK         | Homo<br>sapiens        |



|   |      |   |   |   |   |   |   |        |   |       |                      |                 |
|---|------|---|---|---|---|---|---|--------|---|-------|----------------------|-----------------|
| 1 | 1.00 | 1 | 1 | 0 | 0 | 0 | 0 | -0.002 | t | 59922 | SNTFINNA             | Mus<br>musculus |
| 1 | 1.00 | 1 | 1 | 0 | 0 | 0 | 0 | -0.002 | t | 52088 | QQPFPQR<br>PQQ       | Mus<br>musculus |
| 1 | 1.00 | 1 | 1 | 0 | 0 | 0 | 0 | -0.002 | t | 38946 | LQPGKTS              | Mus<br>musculus |
| 1 | 1.00 | 1 | 1 | 0 | 0 | 0 | 0 | -0.002 | t | 50814 | QFQGQQ<br>QPFP       | Mus<br>musculus |
| 1 | 1.00 | 1 | 1 | 0 | 0 | 0 | 0 | -0.002 | t | 50814 | QFQGQQ<br>QPFP       | Mus<br>musculus |
| 1 | 1.00 | 1 | 1 | 0 | 0 | 0 | 0 | -0.002 | t | 51772 | QNTEEME<br>NLSDRVAS  | Mus<br>musculus |
| 1 | 1.00 | 1 | 1 | 0 | 0 | 0 | 0 | -0.002 | t | 51772 | QNTEEME<br>NLSDRVAS  | Mus<br>musculus |
| 1 | 1.00 | 1 | 1 | 0 | 0 | 0 | 0 | -0.002 | t | 52085 | QQPFPQP<br>QQQ       | Mus<br>musculus |
| 1 | 1.00 | 1 | 1 | 0 | 0 | 0 | 0 | -0.002 | t | 47045 | PCSICSNN<br>PTCWAICK | Mus<br>musculus |
| 1 | 1.00 | 1 | 1 | 0 | 0 | 0 | 0 | -0.002 | t | 46868 | PANCPKS              | Mus<br>musculus |
| 1 | 1.00 | 1 | 1 | 0 | 0 | 0 | 0 | -0.002 | t | 40739 | LYDSYAYY<br>G        | Mus<br>musculus |
| 1 | 1.00 | 1 | 1 | 0 | 0 | 0 | 0 | -0.002 | t | 47045 | PCSICSNN<br>PTCWAICK | Mus<br>musculus |
| 1 | 1.00 | 1 | 1 | 0 | 0 | 0 | 0 | -0.002 | t | 45443 | NPNVDP               | Mus<br>musculus |

|   |      |   |   |   |        |   |   |        |   |       |                     |                                  |
|---|------|---|---|---|--------|---|---|--------|---|-------|---------------------|----------------------------------|
| 1 | 1.00 | 1 | 1 | 0 | -0.003 | 0 | 0 | -0.002 | t | 38919 | LQNDPTT<br>NVA      | Oryctola<br>gus<br>cuniculu<br>s |
| 1 | 1.00 | 1 | 1 | 0 | 0      | 0 | 0 | -0.002 | t | 53977 | RGSGPEP             | Mus<br>musculu<br>s              |
| 1 | 1.00 | 1 | 1 | 0 | 0      | 0 | 0 | -0.002 | t | 49576 | PTAGAQIA<br>A       | Mus<br>musculu<br>s              |
| 1 | 1.00 | 1 | 1 | 0 | 0      | 0 | 0 | -0.002 | t | 38919 | LQNDPTT<br>NVA      | Oryctola<br>gus<br>cuniculu<br>s |
| 1 | 1.00 | 1 | 1 | 0 | 0.012  | 0 | 0 | -0.002 | t | 43233 | NANP                | Mus<br>musculu<br>s              |
| 1 | 1.00 | 1 | 1 | 0 | 0      | 0 | 0 | -0.002 | t | 59922 | SNTFINNA            | Mus<br>musculu<br>s              |
| 1 | 1.00 | 1 | 1 | 0 | 0      | 0 | 0 | -0.002 | t | 43233 | NANP                | Mus<br>musculu<br>s              |
| 1 | 1.00 | 1 | 1 | 0 | 0      | 0 | 0 | -0.002 | t | 55307 | RPQQPFP<br>QQP      | Mus<br>musculu<br>s              |
| 1 | 1.00 | 1 | 1 | 0 | 0      | 0 | 0 | -0.002 | t | 49097 | PQQPQQP<br>FPQ      | Mus<br>musculu<br>s              |
| 1 | 1.00 | 1 | 1 | 0 | 0      | 0 | 0 | -0.002 | t | 51772 | QNTEEME<br>NLSDRVAS | Mus<br>musculu<br>s              |
| 1 | 1.00 | 1 | 1 | 0 | 0      | 0 | 0 | -0.002 | t | 38313 | LNPTIA              | Mus<br>musculu<br>s              |
| 1 | 1.00 | 1 | 1 | 0 | 0      | 0 | 0 | -0.002 | t | 39504 | LSN                 | Mus<br>musculu<br>s              |
| 1 | 1.00 | 1 | 1 | 0 | 0      | 0 | 0 | -0.002 | t | 55193 | RPKPG               | Gallus<br>gallus                 |

|   |      |   |   |   |   |   |   |        |   |       |                              |                                  |
|---|------|---|---|---|---|---|---|--------|---|-------|------------------------------|----------------------------------|
| 1 | 1.00 | 1 | 1 | 0 | 0 | 0 | 0 | -0.002 | t | 53355 | RDGQLTIK<br>AERTEQKD<br>FDGR | Mus<br>musculu<br>s              |
| 1 | 1.00 | 1 | 1 | 0 | 0 | 0 | 0 | -0.002 | t | 41183 | MCAVRDP<br>AFSRSRLS          | Mus<br>musculu<br>s              |
| 1 | 1.00 | 1 | 1 | 0 | 0 | 0 | 0 | -0.002 | t | 40718 | LYATFDEF<br>PPP              | Oryctola<br>gus<br>cuniculu<br>s |
| 1 | 1.00 | 1 | 1 | 0 | 0 | 0 | 0 | -0.002 | t | 53859 | RGETPGQL<br>LPEIMQ           | Oryctola<br>gus<br>cuniculu<br>s |
| 1 | 1.00 | 1 | 1 | 0 | 0 | 0 | 0 | -0.002 | t | 52148 | QQSFPQQ<br>PQR               | Mus<br>musculu<br>s              |
| 1 | 1.00 | 1 | 1 | 0 | 0 | 0 | 0 | -0.002 | t | 41921 | MLDMVD<br>GRP                | Mus<br>musculu<br>s              |
| 1 | 1.00 | 1 | 1 | 0 | 0 | 0 | 0 | -0.002 | t | 42984 | MVQVVYD                      | Oryctola<br>gus<br>cuniculu<br>s |
| 1 | 1.00 | 1 | 1 | 0 | 0 | 0 | 0 | -0.002 | t | 52089 | QQPFPQS<br>QQP               | Mus<br>musculu<br>s              |
| 1 | 1.00 | 1 | 1 | 0 | 0 | 0 | 0 | -0.002 | t | 49110 | PQQSFPQ<br>PQH               | Mus<br>musculu<br>s              |
| 1 | 1.00 | 1 | 1 | 0 | 0 | 0 | 0 | -0.002 | t | 49107 | PQQQFPQ<br>TQQ               | Mus<br>musculu<br>s              |
| 1 | 1.00 | 1 | 1 | 0 | 0 | 0 | 0 | -0.002 | t | 44852 | NLQKDEP<br>NGRASDT           | Oryctola<br>gus<br>cuniculu<br>s |
| 1 | 1.00 | 1 | 1 | 0 | 0 | 0 | 0 | -0.002 | t | 38918 | LQND                         | Mus<br>musculu<br>s              |
| 1 | 1.00 | 1 | 1 | 0 | 0 | 0 | 0 | -0.002 | t | 50396 | QAYQQGV<br>TVD               | Oryctola<br>gus<br>cuniculu<br>s |

|   |      |   |   |   |   |   |   |        |   |       |                            |                                  |
|---|------|---|---|---|---|---|---|--------|---|-------|----------------------------|----------------------------------|
| 1 | 1.00 | 1 | 1 | 0 | 0 | 0 | 0 | -0.002 | t | 41870 | MKNYLSF<br>GMFALL          | Mus<br>musculu<br>s              |
| 1 | 1.00 | 1 | 1 | 0 | 0 | 0 | 0 | -0.002 | t | 47549 | PFPQRPQ<br>QPF             | Mus<br>musculu<br>s              |
| 1 | 1.00 | 1 | 1 | 0 | 0 | 0 | 0 | -0.002 | t | 38918 | LQND                       | Mus<br>musculu<br>s              |
| 1 | 1.00 | 1 | 1 | 0 | 0 | 0 | 0 | -0.002 | t | 58404 | SHRLHNT<br>MPSES           | Mus<br>musculu<br>s              |
| 1 | 1.00 | 1 | 1 | 0 | 0 | 0 | 0 | -0.002 | t | 52084 | QQPFPQP<br>QQP             | Mus<br>musculu<br>s              |
| 1 | 1.00 | 1 | 1 | 0 | 0 | 0 | 0 | -0.002 | t | 38950 | LQPQQPF<br>PQQ             | Mus<br>musculu<br>s              |
| 1 | 1.00 | 1 | 1 | 0 | 0 | 0 | 0 | -0.002 | t | 39070 | LREGVTLG<br>VGASFDT<br>QKL | Oryctola<br>gus<br>cuniculu<br>s |
| 1 | 1.00 | 1 | 1 | 0 | 0 | 0 | 0 | -0.002 | t | 38953 | LQPQQSFP<br>QP             | Mus<br>musculu<br>s              |
| 1 | 1.00 | 1 | 1 | 0 | 0 | 0 | 0 | -0.002 | t | 57880 | SFRGSAQG<br>IEGS           | Homo<br>sapiens                  |
| 1 | 1.00 | 1 | 1 | 0 | 0 | 0 | 0 | -0.002 | t | 54393 | RKLWCHH<br>FC              | Mus<br>musculu<br>s              |
| 1 | 1.00 | 1 | 1 | 0 | 0 | 0 | 0 | -0.002 | t | 60170 | SPNVSVPS<br>SSSTPLLY       | Oryctola<br>gus<br>cuniculu<br>s |
| 1 | 1.00 | 1 | 1 | 0 | 0 | 0 | 0 | -0.002 | t | 60170 | SPNVSVPS<br>SSSTPLLY       | Oryctola<br>gus<br>cuniculu<br>s |
| 1 | 1.00 | 1 | 1 | 0 | 0 | 0 | 0 | -0.002 | t | 44554 | NKND                       | Mus<br>musculu<br>s              |

|   |      |   |   |   |        |   |   |        |   |       |                              |                                  |
|---|------|---|---|---|--------|---|---|--------|---|-------|------------------------------|----------------------------------|
| 1 | 1.00 | 1 | 1 | 0 | 0      | 0 | 0 | -0.002 | t | 46758 | PADAQSD<br>CKILCFVSA<br>CNDF | Mus<br>musculu<br>s              |
| 1 | 1.00 | 1 | 1 | 0 | 0      | 0 | 0 | -0.002 | t | 54393 | RKLWCHH<br>FC                | Mus<br>musculu<br>s              |
| 1 | 1.00 | 1 | 1 | 0 | 0      | 0 | 0 | -0.002 | t | 39169 | LRPTFDTR<br>LMRLEDE<br>MKEGR | Mus<br>musculu<br>s              |
| 1 | 1.00 | 1 | 1 | 0 | 0.004  | 0 | 0 | -0.002 | t | 54393 | RKLWCHH<br>FC                | Mus<br>musculu<br>s              |
| 1 | 1.00 | 1 | 1 | 0 | -0.003 | 0 | 0 | -0.002 | t | 60170 | SPNVSVPS<br>SSSTPLLY         | Oryctola<br>gus<br>cuniculu<br>s |
| 1 | 1.00 | 1 | 1 | 0 | 0      | 0 | 0 | -0.002 | t | 58990 | SLAELLNA<br>GLGGS            | Mus<br>musculu<br>s              |
| 1 | 1.00 | 1 | 1 | 0 | 0      | 0 | 0 | -0.002 | t | 48906 | PPRRVS                       | Mus<br>musculu<br>s              |
| 1 | 1.00 | 1 | 1 | 0 | 0      | 0 | 0 | -0.002 | t | 39167 | LRPTFDTR<br>LM               | Mus<br>musculu<br>s              |
| 1 | 1.00 | 1 | 1 | 0 | 0.008  | 0 | 0 | -0.002 | t | 53839 | RGDLQVL<br>AQK               | Cavia<br>porcellu<br>s           |
| 1 | 1.00 | 1 | 1 | 0 | 0.008  | 0 | 0 | -0.002 | t | 53839 | RGDLQVL<br>AQK               | Cavia<br>porcellu<br>s           |
| 1 | 1.00 | 1 | 1 | 0 | 0      | 0 | 0 | -0.002 | t | 51929 | QPQQPQQ<br>SFP               | Mus<br>musculu<br>s              |
| 1 | 1.00 | 1 | 1 | 0 | 0      | 0 | 0 | -0.002 | t | 57874 | SFQQPQQ<br>QYP               | Mus<br>musculu<br>s              |
| 1 | 1.00 | 1 | 1 | 0 | 0      | 0 | 0 | -0.002 | t | 57874 | SFQQPQQ<br>QYP               | Mus<br>musculu<br>s              |

|   |      |   |   |   |   |   |   |        |   |       |                              |                                  |
|---|------|---|---|---|---|---|---|--------|---|-------|------------------------------|----------------------------------|
| 1 | 1.00 | 1 | 1 | 0 | 0 | 0 | 0 | -0.002 | t | 48670 | PNLRGDL<br>QVLAQKV<br>ARTLP  | Oryctola<br>gus<br>cuniculu<br>s |
| 1 | 1.00 | 1 | 1 | 0 | 0 | 0 | 0 | -0.002 | t | 43242 | NANPNAN<br>PNANP             | Homo<br>sapiens                  |
| 1 | 1.00 | 1 | 1 | 0 | 0 | 0 | 0 | -0.002 | t | 52090 | QQPFSQP<br>QQP               | Mus<br>musculu<br>s              |
| 1 | 1.00 | 1 | 1 | 0 | 0 | 0 | 0 | -0.002 | t | 52850 | QWNKPSK<br>PKTNM             | Oryctola<br>gus<br>cuniculu<br>s |
| 1 | 1.00 | 1 | 1 | 0 | 0 | 0 | 0 | -0.002 | t | 55365 | RPVDQYS                      | Mus<br>musculu<br>s              |
| 1 | 1.00 | 1 | 1 | 0 | 0 | 0 | 0 | -0.002 | t | 37755 | LLRRQVNE<br>VA               | Oryctola<br>gus<br>cuniculu<br>s |
| 1 | 1.00 | 1 | 1 | 0 | 0 | 0 | 0 | -0.002 | t | 40579 | LVSFGVWI<br>RTPPAYRP<br>PN   | Mus<br>musculu<br>s              |
| 1 | 1.00 | 1 | 1 | 0 | 0 | 0 | 0 | -0.002 | t | 52865 | QWVMAG<br>LVSA               | Mus<br>musculu<br>s              |
| 1 | 1.00 | 1 | 1 | 0 | 0 | 0 | 0 | -0.002 | t | 40579 | LVSFGVWI<br>RTPPAYRP<br>PN   | Mus<br>musculu<br>s              |
| 1 | 1.00 | 1 | 1 | 0 | 0 | 0 | 0 | -0.002 | t | 38314 | LNPTIAGA<br>GDV              | Oryctola<br>gus<br>cuniculu<br>s |
| 1 | 1.00 | 1 | 1 | 0 | 0 | 0 | 0 | -0.002 | t | 41169 | MAVPAFS<br>DIAKSAND<br>LLNKD | Oryctola<br>gus<br>cuniculu<br>s |
| 1 | 1.00 | 1 | 1 | 0 | 0 | 0 | 0 | -0.002 | t | 49629 | PTGDRHK<br>QPLVAPAK<br>QLL   | Mus<br>musculu<br>s              |
| 1 | 1.00 | 1 | 1 | 0 | 0 | 0 | 0 | -0.002 | t | 43242 | NANPNAN<br>PNANP             | Homo<br>sapiens                  |

|   |      |   |   |   |        |   |   |        |   |       |                             |                                  |
|---|------|---|---|---|--------|---|---|--------|---|-------|-----------------------------|----------------------------------|
| 1 | 1.00 | 1 | 1 | 0 | 0      | 0 | 0 | -0.002 | t | 51896 | QPQLPFP<br>QQP              | Mus<br>musculu<br>s              |
| 1 | 1.00 | 1 | 1 | 0 | 0      | 0 | 0 | -0.002 | t | 47546 | PFPQPQQ<br>QLP              | Mus<br>musculu<br>s              |
| 1 | 1.00 | 1 | 1 | 0 | 0      | 0 | 0 | -0.002 | t | 49629 | PTGDRHK<br>QPLVAPAK<br>QLL  | Mus<br>musculu<br>s              |
| 1 | 1.00 | 1 | 1 | 0 | 0      | 0 | 0 | -0.002 | t | 50929 | QGPGAP                      | Mus<br>musculu<br>s              |
| 1 | 1.00 | 1 | 1 | 0 | 0      | 0 | 0 | -0.002 | t | 46276 | NTTASDQL<br>LVENAAG<br>HRVA | Cavia<br>porcellu<br>s           |
| 1 | 1.00 | 1 | 1 | 0 | 0      | 0 | 0 | -0.002 | t | 49298 | PSAPPLPP<br>VADLPQP<br>GLRR | Cavia<br>porcellu<br>s           |
| 1 | 1.00 | 1 | 1 | 0 | 0      | 0 | 0 | -0.002 | t | 55106 | RPADKTRH<br>KFPTNINK<br>Q   | Oryctola<br>gus<br>cuniculu<br>s |
| 1 | 1.00 | 1 | 1 | 0 | 0      | 0 | 0 | -0.002 | t | 47545 | PFPQPQQ<br>QFP              | Mus<br>musculu<br>s              |
| 1 | 1.00 | 1 | 1 | 0 | 0      | 0 | 0 | -0.002 | t | 42493 | MRQLDTN<br>VER              | Homo<br>sapiens                  |
| 1 | 1.00 | 1 | 1 | 0 | 0      | 0 | 0 | -0.002 | t | 40074 | LTPANLIR<br>GDNA            | Oryctola<br>gus<br>cuniculu<br>s |
| 1 | 1.00 | 1 | 1 | 0 | 0      | 0 | 0 | -0.002 | t | 41019 | MADPNRF<br>RG               | Mus<br>musculu<br>s              |
| 1 | 1.00 | 1 | 1 | 0 | 0      | 0 | 0 | -0.002 | t | 56686 | RYYRE                       | Mus<br>musculu<br>s              |
| 1 | 1.00 | 1 | 1 | 0 | -0.003 | 0 | 0 | -0.002 | t | 49005 | PQGPGAP<br>QGPGAPQ<br>GPGAP | Oryctola<br>gus<br>cuniculu<br>s |
| 1 | 1.00 | 1 | 1 | 0 | 0      | 0 | 0 | -0.002 | t | 47653 | PGFTVMA<br>AIL              | Mus<br>musculu<br>s              |

|   |      |   |   |   |        |   |   |        |   |       |                          |                                  |
|---|------|---|---|---|--------|---|---|--------|---|-------|--------------------------|----------------------------------|
| 1 | 1.00 | 1 | 1 | 0 | 0      | 0 | 0 | -0.002 | t | 38314 | LNPTIAGA<br>GDV          | Oryctola<br>gus<br>cuniculu<br>s |
| 1 | 1.00 | 1 | 1 | 0 | 0      | 0 | 0 | -0.002 | t | 51925 | QPQQPFP<br>QSQ           | Mus<br>musculu<br>s              |
| 1 | 1.00 | 1 | 1 | 0 | 0      | 0 | 0 | -0.002 | t | 49092 | PQQPFSQ<br>QPQ           | Mus<br>musculu<br>s              |
| 1 | 1.00 | 1 | 1 | 0 | 0      | 0 | 0 | -0.002 | t | 56610 | RYPGQGS<br>PGGNRY<br>PQG | Mus<br>musculu<br>s              |
| 1 | 1.00 | 1 | 1 | 0 | 0      | 0 | 0 | -0.002 | t | 59922 | SNTFINNA                 | Mus<br>musculu<br>s              |
| 1 | 1.00 | 1 | 1 | 0 | 0      | 0 | 0 | -0.002 | t | 58417 | SHSQWNK<br>PSKPKTN<br>MK | Oryctola<br>gus<br>cuniculu<br>s |
| 1 | 1.00 | 1 | 1 | 0 | 0      | 0 | 0 | -0.002 | t | 58916 | SKPKTNM<br>KHM           | Mus<br>musculu<br>s              |
| 1 | 1.00 | 1 | 1 | 0 | 0      | 0 | 0 | -0.002 | t | 49006 | PQGQGV<br>T              | Oryctola<br>gus<br>cuniculu<br>s |
| 1 | 1.00 | 1 | 1 | 0 | 0      | 0 | 0 | -0.002 | t | 45252 | NNSTNSGI                 | Mus<br>musculu<br>s              |
| 1 | 1.00 | 1 | 1 | 0 | -0.003 | 0 | 0 | -0.002 | t | 49006 | PQGQGV<br>T              | Oryctola<br>gus<br>cuniculu<br>s |
| 1 | 1.00 | 1 | 1 | 0 | 0      | 0 | 0 | -0.002 | t | 45721 | NRQDFTQ<br>DPG           | Mus<br>musculu<br>s              |
| 1 | 1.00 | 1 | 1 | 0 | 0      | 0 | 0 | -0.002 | t | 58417 | SHSQWNK<br>PSKPKTN<br>MK | Oryctola<br>gus<br>cuniculu<br>s |
| 1 | 1.00 | 1 | 1 | 0 | 0      | 0 | 0 | -0.002 | t | 40104 | LTPKELD                  | Homo<br>sapiens                  |
| 1 | 1.00 | 1 | 1 | 0 | 0      | 0 | 0 | -0.002 | t | 52121 | QQQPFP<br>QQP            | Mus<br>musculu<br>s              |



|   |      |   |   |   |   |   |   |        |   |       |                             |                                  |
|---|------|---|---|---|---|---|---|--------|---|-------|-----------------------------|----------------------------------|
| 1 | 1.00 | 1 | 1 | 0 | 0 | 0 | 0 | -0.002 | t | 39465 | LSKSFLEA<br>GGVSK           | Oryctola<br>gus<br>cuniculu<br>s |
| 1 | 1.00 | 1 | 1 | 0 | 0 | 0 | 0 | -0.002 | t | 56610 | RYPGQGS<br>PGGNRYP<br>PQG   | Oryctola<br>gus<br>cuniculu<br>s |
| 1 | 1.00 | 1 | 1 | 0 | 0 | 0 | 0 | -0.002 | t | 39423 | LSHNPGAS<br>ALL             | Mus<br>musculu<br>s              |
| 1 | 1.00 | 1 | 1 | 0 | 0 | 0 | 0 | -0.002 | t | 51924 | QPQQPFP<br>QRP              | Mus<br>musculu<br>s              |
| 1 | 1.00 | 1 | 1 | 0 | 0 | 0 | 0 | -0.002 | t | 43481 | NDLALPW<br>KHEGAQN<br>WNNAR | Mus<br>musculu<br>s              |
| 1 | 1.00 | 1 | 1 | 0 | 0 | 0 | 0 | -0.002 | t | 41826 | MKHM                        | Mus<br>musculu<br>s              |
| 1 | 1.00 | 1 | 1 | 0 | 0 | 0 | 0 | -0.002 | t | 56807 | SAHGTSTG<br>VRGP            | Mus<br>musculu<br>s              |
| 1 | 1.00 | 1 | 1 | 0 | 0 | 0 | 0 | -0.002 | t | 38522 | LPHSNL                      | Rattus<br>norvegic<br>us         |
| 1 | 1.00 | 1 | 1 | 0 | 0 | 0 | 0 | -0.002 | t | 51958 | QPRKTKPV<br>KSLPERK         | Mus<br>musculu<br>s              |
| 1 | 1.00 | 1 | 1 | 0 | 0 | 0 | 0 | -0.002 | t | 45405 | NPNANP                      | Mus<br>musculu<br>s              |
| 1 | 1.00 | 1 | 1 | 0 | 0 | 0 | 0 | -0.002 | t | 47544 | PFPQPQQ<br>PFC              | Mus<br>musculu<br>s              |
| 1 | 1.00 | 1 | 1 | 0 | 0 | 0 | 0 | -0.002 | t | 49961 | PVSGPFGP<br>LPSLAFA<br>VPAD | Mus<br>musculu<br>s              |
| 1 | 1.00 | 1 | 1 | 0 | 0 | 0 | 0 | -0.002 | t | 36974 | LKNKIFPKK<br>KEDNQAV<br>DT  | Oryctola<br>gus<br>cuniculu<br>s |

|   |      |   |   |   |   |   |   |        |   |       |                              |                                  |
|---|------|---|---|---|---|---|---|--------|---|-------|------------------------------|----------------------------------|
| 1 | 1.00 | 1 | 1 | 0 | 0 | 0 | 0 | -0.002 | t | 37657 | LLPHSNLD<br>HI               | Oryctola<br>gus<br>cuniculu<br>s |
| 1 | 1.00 | 1 | 1 | 0 | 0 | 0 | 0 | -0.002 | t | 41118 | MASENKQ<br>RPGSPGPT          | Mus<br>musculu<br>s              |
| 1 | 1.00 | 1 | 1 | 0 | 0 | 0 | 0 | -0.002 | t | 43411 | NDDASVD<br>FVAEPVK           | Mus<br>musculu<br>s              |
| 1 | 1.00 | 1 | 1 | 0 | 0 | 0 | 0 | -0.002 | t | 45104 | NNFVHDC<br>VNI               | Oryctola<br>gus<br>cuniculu<br>s |
| 1 | 1.00 | 1 | 1 | 0 | 0 | 0 | 0 | -0.002 | t | 43411 | NDDASVD<br>FVAEPVK           | Mus<br>musculu<br>s              |
| 1 | 1.00 | 1 | 1 | 0 | 0 | 0 | 0 | -0.002 | t | 46258 | NTSDSQKE                     | Mus<br>musculu<br>s              |
| 1 | 1.00 | 1 | 1 | 0 | 0 | 0 | 0 | -0.002 | t | 59729 | SMNRGRG<br>THPSLIW<br>MC     | Mus<br>musculu<br>s              |
| 1 | 1.00 | 1 | 1 | 0 | 0 | 0 | 0 | -0.002 | t | 41430 | MERVVEQ<br>MCITQYQ<br>RESQAY | Mus<br>musculu<br>s              |
| 1 | 1.00 | 1 | 1 | 0 | 0 | 0 | 0 | -0.002 | t | 51084 | QIISQQPF<br>PL               | Mus<br>musculu<br>s              |
| 1 | 1.00 | 1 | 1 | 0 | 0 | 0 | 0 | -0.002 | t | 59227 | SLKLMATL<br>FSTYASAD         | Mus<br>musculu<br>s              |
| 1 | 1.00 | 1 | 1 | 0 | 0 | 0 | 0 | -0.002 | t | 41431 | MERVVEQ<br>MCVTQYQ<br>KESQAY | Oryctola<br>gus<br>cuniculu<br>s |
| 1 | 1.00 | 1 | 1 | 0 | 0 | 0 | 0 | -0.002 | t | 46258 | NTSDSQKE                     | Mus<br>musculu<br>s              |
| 1 | 1.00 | 1 | 1 | 0 | 0 | 0 | 0 | -0.002 | t | 52239 | QRPFGQQ<br>PEQ               | Mus<br>musculu<br>s              |

|   |      |   |   |   |   |   |   |        |   |       |                           |                                  |
|---|------|---|---|---|---|---|---|--------|---|-------|---------------------------|----------------------------------|
| 1 | 1.00 | 1 | 1 | 0 | 0 | 0 | 0 | -0.002 | t | 48854 | PPPLSEAA<br>PKPRAAA       | Mus<br>musculu<br>s              |
| 1 | 1.00 | 1 | 1 | 0 | 0 | 0 | 0 | -0.002 | t | 52891 | QYDSNGT<br>KLE            | Mus<br>musculu<br>s              |
| 1 | 1.00 | 1 | 1 | 0 | 0 | 0 | 0 | -0.002 | t | 38422 | LPAYQDYT<br>ARAQVSE       | Oryctola<br>gus<br>cuniculu<br>s |
| 1 | 1.00 | 1 | 1 | 0 | 0 | 0 | 0 | -0.002 | t | 38304 | LNPKTNK<br>WEDK           | Homo<br>sapiens                  |
| 1 | 1.00 | 1 | 1 | 0 | 0 | 0 | 0 | -0.002 | t | 37361 | LLGPYELW<br>ELSH          | Homo<br>sapiens                  |
| 1 | 1.00 | 1 | 1 | 0 | 0 | 0 | 0 | -0.002 | t | 50945 | QGQQQPF<br>PPQ            | Mus<br>musculu<br>s              |
| 1 | 1.00 | 1 | 1 | 0 | 0 | 0 | 0 | -0.002 | t | 50945 | QGQQQPF<br>PPQ            | Mus<br>musculu<br>s              |
| 1 | 1.00 | 1 | 1 | 0 | 0 | 0 | 0 | -0.002 | t | 55048 | RNQE                      | Mus<br>musculu<br>s              |
| 1 | 1.00 | 1 | 1 | 0 | 0 | 0 | 0 | -0.002 | t | 52083 | QQPFPLQ<br>PQQ            | Mus<br>musculu<br>s              |
| 1 | 1.00 | 1 | 1 | 0 | 0 | 0 | 0 | -0.002 | t | 43411 | NDDASVD<br>FVAEPVK        | Mus<br>musculu<br>s              |
| 1 | 1.00 | 1 | 1 | 0 | 0 | 0 | 0 | -0.002 | t | 38825 | LQDPRVR<br>GLYFPAGG       | Oryctola<br>gus<br>cuniculu<br>s |
| 1 | 1.00 | 1 | 1 | 0 | 0 | 0 | 0 | -0.002 | t | 43411 | NDDASVD<br>FVAEPVK        | Mus<br>musculu<br>s              |
| 1 | 1.00 | 1 | 1 | 0 | 0 | 0 | 0 | -0.002 | t | 59229 | SLKMADP<br>NRFRGKDL<br>P  | Mus<br>musculu<br>s              |
| 1 | 1.00 | 1 | 1 | 0 | 0 | 0 | 0 | -0.002 | t | 50637 | QELDCWH<br>YQHCVTS<br>TKS | MD                               |

|   |      |   |   |   |        |   |   |        |   |       |                              |                                  |
|---|------|---|---|---|--------|---|---|--------|---|-------|------------------------------|----------------------------------|
| 1 | 1.00 | 1 | 1 | 0 | 0      | 0 | 0 | -0.002 | t | 55671 | RRPFNIGI<br>NNQQ             | Homo<br>sapiens                  |
| 1 | 1.00 | 1 | 1 | 0 | 0      | 0 | 0 | -0.002 | t | 48597 | PNANPN                       | Mus<br>musculu<br>s              |
| 1 | 1.00 | 1 | 1 | 0 | 0      | 0 | 0 | -0.002 | t | 51922 | QPQQPFP<br>QPQ               | Mus<br>musculu<br>s              |
| 1 | 1.00 | 1 | 1 | 0 | 0      | 0 | 0 | -0.002 | t | 57320 | SDYEDRYY<br>REN              | Mus<br>musculu<br>s              |
| 1 | 1.00 | 1 | 1 | 0 | 0      | 0 | 0 | -0.002 | t | 47969 | PIQPQQPF<br>PQ               | Mus<br>musculu<br>s              |
| 1 | 1.00 | 1 | 1 | 0 | 0      | 0 | 0 | -0.002 | t | 54348 | RKGRGGA<br>NPVFRPTG<br>GTEVF | Mus<br>musculu<br>s              |
| 1 | 1.00 | 1 | 1 | 0 | 0      | 0 | 0 | -0.002 | t | 41754 | MINVQAK<br>PAAAAS            | Oryctola<br>gus<br>cuniculu<br>s |
| 1 | 1.00 | 1 | 1 | 0 | 0      | 0 | 0 | -0.002 | t | 47821 | PHGPADA<br>PPGSPAPP<br>PPEHR | Homo<br>sapiens                  |
| 1 | 1.00 | 1 | 1 | 0 | 0      | 0 | 0 | -0.002 | t | 49068 | PQPQQPF<br>CQQ               | Mus<br>musculu<br>s              |
| 1 | 1.00 | 1 | 1 | 0 | 0      | 0 | 0 | -0.002 | t | 57306 | SDVEGLQ<br>NDP               | Oryctola<br>gus<br>cuniculu<br>s |
| 1 | 1.00 | 1 | 1 | 0 | -0.003 | 0 | 0 | -0.002 | t | 57306 | SDVEGLQ<br>NDP               | Oryctola<br>gus<br>cuniculu<br>s |
| 1 | 1.00 | 1 | 1 | 0 | 0      | 0 | 0 | -0.002 | t | 41728 | MIKASFPD<br>TGAFKSPR<br>YKSH | Oryctola<br>gus<br>cuniculu<br>s |
| 1 | 1.00 | 1 | 1 | 0 | 0      | 0 | 0 | -0.002 | t | 38522 | LPHSNL                       | Homo<br>sapiens                  |
| 1 | 1.00 | 1 | 1 | 0 | 0      | 0 | 0 | -0.002 | t | 41713 | MIHFGND                      | Mus<br>musculu<br>s              |

|   |      |   |   |   |        |   |   |        |   |       |                             |                       |
|---|------|---|---|---|--------|---|---|--------|---|-------|-----------------------------|-----------------------|
| 1 | 1.00 | 1 | 1 | 0 | 0      | 0 | 0 | -0.002 | t | 38522 | LPHSNL                      | Rattus norvegicus     |
| 1 | 1.00 | 1 | 1 | 0 | 0      | 0 | 0 | -0.002 | t | 49297 | PSAPPLPH<br>VVDLPQLG<br>PRR | Cavia porcellus       |
| 1 | 1.00 | 1 | 1 | 0 | 0      | 0 | 0 | -0.002 | t | 41126 | MASLIYRQ<br>LL              | Mus musculus          |
| 1 | 1.00 | 1 | 1 | 0 | 0      | 0 | 0 | -0.002 | t | 49085 | PQQPFPQ<br>QPE              | Mus musculus          |
| 1 | 1.00 | 1 | 1 | 0 | 0      | 0 | 0 | -0.002 | t | 58802 | SKDVKIEV<br>YL              | Homo sapiens          |
| 1 | 1.00 | 1 | 1 | 0 | 0      | 0 | 0 | -0.002 | t | 54058 | RHKQKIVA<br>PVKQTL          | Oryctolagus cuniculus |
| 1 | 1.00 | 1 | 1 | 0 | 0      | 0 | 0 | -0.002 | t | 45165 | NNLMEIAE<br>VD              | Mus musculus          |
| 1 | 1.00 | 1 | 1 | 0 | 0      | 0 | 0 | -0.002 | t | 51921 | QPQQPFP<br>LQP              | Mus musculus          |
| 1 | 1.00 | 1 | 1 | 0 | 0      | 0 | 0 | -0.002 | t | 49070 | PQPQQQF<br>PQP              | Mus musculus          |
| 1 | 1.00 | 1 | 1 | 0 | -0.003 | 0 | 0 | -0.002 | t | 50934 | QGPHVISR<br>IYQTAT          | Oryctolagus cuniculus |
| 1 | 1.00 | 1 | 1 | 0 | 0      | 0 | 0 | -0.002 | t | 52304 | QSCSISNIE<br>TVIEFQQ        | Mus musculus          |
| 1 | 1.00 | 1 | 1 | 0 | 0      | 0 | 0 | -0.002 | t | 48620 | PNDPPP                      | Mus musculus          |
| 1 | 1.00 | 1 | 1 | 0 | 0      | 0 | 0 | -0.002 | t | 45643 | NQWNKPS<br>KPKTN            | Oryctolagus cuniculus |
| 1 | 1.00 | 1 | 1 | 0 | 0      | 0 | 0 | -0.002 | t | 49071 | PQPQQQL<br>PLQ              | Mus musculus          |

|   |      |   |   |   |   |   |   |        |   |       |                             |                                  |
|---|------|---|---|---|---|---|---|--------|---|-------|-----------------------------|----------------------------------|
| 1 | 1.00 | 1 | 1 | 0 | 0 | 0 | 0 | -0.002 | t | 39092 | LRGDLQVL<br>AQKVARTL        | Cavia<br>porcellu<br>s           |
| 1 | 1.00 | 1 | 1 | 0 | 0 | 0 | 0 | -0.002 | t | 48017 | PIYGKTIST<br>PSDYM          | Mus<br>musculu<br>s              |
| 1 | 1.00 | 1 | 1 | 0 | 0 | 0 | 0 | -0.002 | t | 50934 | QGPHVISR<br>IYQTAT          | Mus<br>musculu<br>s              |
| 1 | 1.00 | 1 | 1 | 0 | 0 | 0 | 0 | -0.002 | t | 38271 | LNLTASV<br>PMLRWYA<br>ERFCF | Mus<br>musculu<br>s              |
| 1 | 1.00 | 1 | 1 | 0 | 0 | 0 | 0 | -0.002 | t | 48017 | PIYGKTIST<br>PSDYM          | Mus<br>musculu<br>s              |
| 1 | 1.00 | 1 | 1 | 0 | 0 | 0 | 0 | -0.002 | t | 48017 | PIYGKTIST<br>PSDYM          | Mus<br>musculu<br>s              |
| 1 | 1.00 | 1 | 1 | 0 | 0 | 0 | 0 | -0.002 | t | 57218 | SDIKTTTSS<br>HPVSSLT        | Mus<br>musculu<br>s              |
| 1 | 1.00 | 1 | 1 | 0 | 0 | 0 | 0 | -0.002 | t | 39092 | LRGDLQVL<br>AQKVARTL        | Oryctola<br>gus<br>cuniculu<br>s |
| 1 | 1.00 | 1 | 1 | 0 | 0 | 0 | 0 | -0.002 | t | 49368 | PSFSDIPN<br>PI              | Homo<br>sapiens                  |
| 1 | 1.00 | 1 | 1 | 0 | 0 | 0 | 0 | -0.002 | t | 43747 | NESKYSNT<br>FINNAYN<br>MSIR | Mus<br>musculu<br>s              |
| 1 | 1.00 | 1 | 1 | 0 | 0 | 0 | 0 | -0.002 | t | 37029 | LKTAAESA                    | Mus<br>musculu<br>s              |
| 1 | 1.00 | 1 | 1 | 0 | 0 | 0 | 0 | -0.002 | t | 49079 | PQQPFCQ<br>QPQ              | Mus<br>musculu<br>s              |
| 1 | 1.00 | 1 | 1 | 0 | 0 | 0 | 0 | -0.002 | t | 37315 | LLGCIGSTC                   | Mus<br>musculu<br>s              |

|   |      |   |   |   |   |   |   |        |   |       |                             |                 |
|---|------|---|---|---|---|---|---|--------|---|-------|-----------------------------|-----------------|
| 1 | 1.00 | 1 | 1 | 0 | 0 | 0 | 0 | -0.002 | t | 48006 | PIV NKQSC<br>SISNIETV       | Mus<br>musculus |
| 1 | 1.00 | 1 | 1 | 0 | 0 | 0 | 0 | -0.002 | t | 51816 | QPFPLQP<br>QQP              | Mus<br>musculus |
| 1 | 1.00 | 1 | 1 | 0 | 0 | 0 | 0 | -0.002 | t | 46026 | NSVGANA<br>PNADTIAS         | Mus<br>musculus |
| 1 | 1.00 | 1 | 1 | 0 | 0 | 0 | 0 | -0.002 | t | 51908 | QPQPFPS<br>QQP              | Mus<br>musculus |
| 1 | 1.00 | 1 | 1 | 0 | 0 | 0 | 0 | -0.002 | t | 46026 | NSVGANA<br>PNADTIAS         | Mus<br>musculus |
| 1 | 1.00 | 1 | 1 | 0 | 0 | 0 | 0 | -0.002 | t | 43227 | NANDPP                      | Mus<br>musculus |
| 1 | 1.00 | 1 | 1 | 0 | 0 | 0 | 0 | -0.002 | t | 49082 | PQQPFPPQ<br>PQQ             | Mus<br>musculus |
| 1 | 1.00 | 1 | 1 | 0 | 0 | 0 | 0 | -0.002 | t | 45202 | NNNSTNS<br>G                | Mus<br>musculus |
| 1 | 1.00 | 1 | 1 | 0 | 0 | 0 | 0 | -0.002 | t | 38952 | LQPQQPFS<br>QQ              | Mus<br>musculus |
| 1 | 1.00 | 1 | 1 | 0 | 0 | 0 | 0 | -0.002 | t | 49950 | PVRVAWS<br>SPVQNCEP<br>WIPP | Mus<br>musculus |
| 1 | 1.00 | 1 | 1 | 0 | 0 | 0 | 0 | -0.002 | t | 52107 | QQPQRPF<br>AQQ              | Mus<br>musculus |
| 1 | 1.00 | 1 | 1 | 0 | 0 | 0 | 0 | -0.002 | t | 51833 | QPFRPQQ<br>PYP              | Mus<br>musculus |
| 1 | 1.00 | 1 | 1 | 0 | 0 | 0 | 0 | -0.002 | t | 45422 | NPNEPSN<br>PNEPSNP<br>NEPS  | Mus<br>musculus |
| 1 | 1.00 | 1 | 1 | 0 | 0 | 0 | 0 | -0.002 | t | 48001 | PITNDQKK                    | Mus<br>musculus |

|   |      |   |   |   |   |   |   |        |   |       |                              |                                  |
|---|------|---|---|---|---|---|---|--------|---|-------|------------------------------|----------------------------------|
| 1 | 1.00 | 1 | 1 | 0 | 0 | 0 | 0 | -0.002 | t | 53009 | QYNLAFSD<br>RQSAQ            | Mus<br>musculu<br>s              |
| 1 | 1.00 | 1 | 1 | 0 | 0 | 0 | 0 | -0.002 | t | 49291 | PSAEECGY<br>SDRVSITL<br>GNS  | Mus<br>musculu<br>s              |
| 1 | 1.00 | 1 | 1 | 0 | 0 | 0 | 0 | -0.002 | t | 25649 | IDPY                         | Mus<br>musculu<br>s              |
| 1 | 1.00 | 1 | 1 | 0 | 0 | 0 | 0 | -0.002 | t | 12632 | EKASVPGG<br>GDMGGM<br>DF     | Mus<br>musculu<br>s              |
| 1 | 1.00 | 1 | 1 | 0 | 0 | 0 | 0 | -0.002 | t | 11704 | EEIVPNSV<br>EQ               | Homo<br>sapiens                  |
| 1 | 1.00 | 1 | 1 | 0 | 0 | 0 | 0 | -0.002 | t | 24786 | HSLGKWL<br>GHPDKF            | Mus<br>musculu<br>s              |
| 1 | 1.00 | 1 | 1 | 0 | 0 | 0 | 0 | -0.002 | t | 20051 | GGTHSQW<br>NKP               | Mus<br>musculu<br>s              |
| 1 | 1.00 | 1 | 1 | 0 | 0 | 0 | 0 | -0.002 | t | 26372 | IHFG                         | Mus<br>musculu<br>s              |
| 1 | 1.00 | 1 | 1 | 0 | 0 | 0 | 0 | -0.002 | t | 24006 | HHPITDSD<br>QTRLY            | Oryctola<br>gus<br>cuniculu<br>s |
| 1 | 1.00 | 1 | 1 | 0 | 0 | 0 | 0 | -0.002 | t | 15911 | FFTEEFKRK<br>NKGKNLAS<br>SHR | Canis<br>lupus                   |
| 1 | 1.00 | 1 | 1 | 0 | 0 | 0 | 0 | -0.002 | t | 19833 | GGGGWG<br>QGGSHSQ<br>WNK     | Mus<br>musculu<br>s              |
| 1 | 1.00 | 1 | 1 | 0 | 0 | 0 | 0 | -0.002 | t | 24786 | HSLGKWL<br>GHPDKF            | Mus<br>musculu<br>s              |
| 1 | 1.00 | 1 | 1 | 0 | 0 | 0 | 0 | -0.002 | t | 32902 | KPTKKPTF<br>KTTKKDLK<br>PQ   | Oryctola<br>gus<br>cuniculu<br>s |
| 1 | 1.00 | 1 | 1 | 0 | 0 | 0 | 0 | -0.002 | t | 31072 | KGTHSLYS<br>QIAGC            | Mus<br>musculu<br>s              |
| 1 | 1.00 | 1 | 1 | 0 | 0 | 0 | 0 | -0.002 | t | 10868 | DYEDRYR<br>E                 | Mus<br>musculu<br>s              |



|   |      |   |   |   |   |   |   |        |   |       |                          |                                  |
|---|------|---|---|---|---|---|---|--------|---|-------|--------------------------|----------------------------------|
| 1 | 1.00 | 1 | 1 | 0 | 0 | 0 | 0 | -0.002 | t | 10868 | DYEDRYYR<br>E            | Mus<br>musculu<br>s              |
| 1 | 1.00 | 1 | 1 | 0 | 0 | 0 | 0 | -0.002 | t | 35530 | LEIVPNSAE<br>ERL         | Homo<br>sapiens                  |
| 1 | 1.00 | 1 | 1 | 0 | 0 | 0 | 0 | -0.002 | t | 21791 | GPSNSEQI<br>PALTAVE      | Rattus<br>norvegic<br>us         |
| 1 | 1.00 | 1 | 1 | 0 | 0 | 0 | 0 | -0.002 | t | 19737 | GGGAGAG<br>GAGAGGG<br>GR | Oryctola<br>gus<br>cuniculu<br>s |
| 1 | 1.00 | 1 | 1 | 0 | 0 | 0 | 0 | -0.002 | t | 32571 | KNNNSTN<br>SGI           | Mus<br>musculu<br>s              |
| 1 | 1.00 | 1 | 1 | 0 | 0 | 0 | 0 | -0.002 | t | 35672 | LEQWNLVI<br>GFLFL        | Mus<br>musculu<br>s              |
| 1 | 1.00 | 1 | 1 | 0 | 0 | 0 | 0 | -0.002 | t | 14992 | EYEDLLKA                 | Mus<br>musculu<br>s              |
| 1 | 1.00 | 1 | 1 | 0 | 0 | 0 | 0 | -0.002 | t | 30036 | KAYSNCYP<br>YDVPDY       | Oryctola<br>gus<br>cuniculu<br>s |
| 1 | 1.00 | 1 | 1 | 0 | 0 | 0 | 0 | -0.002 | t | 32783 | KPLDKFGN<br>IYDYHYEH     | Mus<br>musculu<br>s              |
| 1 | 1.00 | 1 | 1 | 0 | 0 | 0 | 0 | -0.002 | t | 15122 | EYYLN                    | Mus<br>musculu<br>s              |
| 1 | 1.00 | 1 | 1 | 0 | 0 | 0 | 0 | -0.002 | t | 32783 | KPLDKFGN<br>IYDYHYEH     | Mus<br>musculu<br>s              |
| 1 | 1.00 | 1 | 1 | 0 | 0 | 0 | 0 | -0.002 | t | 24918 | HTHADGE<br>VHC           | Mus<br>musculu<br>s              |
| 1 | 1.00 | 1 | 1 | 0 | 0 | 0 | 0 | -0.002 | t | 13272 | ELSKDIGSE<br>S           | Homo<br>sapiens                  |
| 1 | 1.00 | 1 | 1 | 0 | 0 | 0 | 0 | -0.002 | t | 30236 | KDRTLIEQ<br>K            | Mus<br>musculu<br>s              |
| 1 | 1.00 | 1 | 1 | 0 | 0 | 0 | 0 | -0.002 | t | 11571 | EEEDDDM<br>GGLFD         | Homo<br>sapiens                  |

|   |      |   |   |   |   |   |   |        |   |       |                              |                                  |
|---|------|---|---|---|---|---|---|--------|---|-------|------------------------------|----------------------------------|
| 1 | 1.00 | 1 | 1 | 0 | 0 | 0 | 0 | -0.002 | t | 35473 | LEGAAR                       | Mus<br>musculu<br>s              |
| 1 | 1.00 | 1 | 1 | 0 | 0 | 0 | 0 | -0.002 | t | 11203 | EATPAAEA<br>PASEAPAA<br>EAAP | Mus<br>musculu<br>s              |
| 1 | 1.00 | 1 | 1 | 0 | 0 | 0 | 0 | -0.002 | t | 19729 | GGFSSDPG<br>FLLRPRV          | Mus<br>musculu<br>s              |
| 1 | 1.00 | 1 | 1 | 0 | 0 | 0 | 0 | -0.002 | t | 32783 | KPLDKFGN<br>IYDYHYEH         | Mus<br>musculu<br>s              |
| 1 | 1.00 | 1 | 1 | 0 | 0 | 0 | 0 | -0.002 | t | 28290 | IRFKDDSSY<br>EEVN            | Mus<br>musculu<br>s              |
| 1 | 1.00 | 1 | 1 | 0 | 0 | 0 | 0 | -0.002 | t | 24786 | HSLGKWL<br>GHPDKF            | Mus<br>musculu<br>s              |
| 1 | 1.00 | 1 | 1 | 0 | 0 | 0 | 0 | -0.002 | t | 34806 | LAHLTTTH<br>ARHLP            | Mus<br>musculu<br>s              |
| 1 | 1.00 | 1 | 1 | 0 | 0 | 0 | 0 | -0.002 | t | 28694 | ISQQPQQ<br>PFP               | Mus<br>musculu<br>s              |
| 1 | 1.00 | 1 | 1 | 0 | 0 | 0 | 0 | -0.002 | t | 30716 | KFDWNT<br>PD                 | Mus<br>musculu<br>s              |
| 1 | 1.00 | 1 | 1 | 0 | 0 | 0 | 0 | -0.002 | t | 29852 | KALENKKK<br>QLSAGGK<br>NLS   | Homo<br>sapiens                  |
| 1 | 1.00 | 1 | 1 | 0 | 0 | 0 | 0 | -0.002 | t | 24014 | HHQPQQT<br>FPQ               | Mus<br>musculu<br>s              |
| 1 | 1.00 | 1 | 1 | 0 | 0 | 0 | 0 | -0.002 | t | 12900 | EKVSRRSN<br>FEF              | Oryctola<br>gus<br>cuniculu<br>s |
| 1 | 1.00 | 1 | 1 | 0 | 0 | 0 | 0 | -0.002 | t | 30611 | KESQAYYD<br>GRR              | Mus<br>musculu<br>s              |
| 1 | 1.00 | 1 | 1 | 0 | 0 | 0 | 0 | -0.002 | t | 14702 | EVGKVA                       | Homo<br>sapiens                  |

|   |      |   |   |   |        |   |   |        |   |       |                              |                                  |
|---|------|---|---|---|--------|---|---|--------|---|-------|------------------------------|----------------------------------|
| 1 | 1.00 | 1 | 1 | 0 | 0      | 0 | 0 | -0.002 | t | 24694 | HRMAWD<br>MMM                | Homo<br>sapiens                  |
| 1 | 1.00 | 1 | 1 | 0 | 0      | 0 | 0 | -0.002 | t | 35923 | LFNLWGP<br>AFHERYPN<br>VTITA | Mus<br>musculu<br>s              |
| 1 | 1.00 | 1 | 1 | 0 | 0      | 0 | 0 | -0.002 | t | 36123 | LGGKFLE                      | Mus<br>musculu<br>s              |
| 1 | 1.00 | 1 | 1 | 0 | 0      | 0 | 0 | -0.002 | t | 31723 | KKTTTKPT<br>KKPTFKTT<br>KK   | Oryctola<br>gus<br>cuniculu<br>s |
| 1 | 1.00 | 1 | 1 | 0 | 0      | 0 | 0 | -0.002 | t | 18500 | GAAALRA<br>HVSGRRA           | Oryctola<br>gus<br>cuniculu<br>s |
| 1 | 1.00 | 1 | 1 | 0 | 0      | 0 | 0 | -0.002 | t | 19868 | GGGWGQ<br>PHGGGW<br>GQPH     | Oryctola<br>gus<br>cuniculu<br>s |
| 1 | 1.00 | 1 | 1 | 0 | 0      | 0 | 0 | -0.002 | t | 17365 | FPQPQFP<br>PQ                | Mus<br>musculu<br>s              |
| 1 | 1.00 | 1 | 1 | 0 | -0.003 | 0 | 0 | -0.002 | t | 19868 | GGGWGQ<br>PHGGGW<br>GQPH     | Oryctola<br>gus<br>cuniculu<br>s |
| 1 | 1.00 | 1 | 1 | 0 | 0      | 0 | 0 | -0.002 | t | 18994 | GDGRQTIT<br>NPAYDE           | Mus<br>musculu<br>s              |
| 1 | 1.00 | 1 | 1 | 0 | 0      | 0 | 0 | -0.002 | t | 36353 | LGWLWG                       | Mus<br>musculu<br>s              |
| 1 | 1.00 | 1 | 1 | 0 | 0      | 0 | 0 | -0.002 | t | 13460 | ENDVLNQ<br>ETEEEMEK          | Oryctola<br>gus<br>cuniculu<br>s |
| 1 | 1.00 | 1 | 1 | 0 | 0      | 0 | 0 | -0.002 | t | 19866 | GGGWGQ<br>GGGTHNQ<br>WNK     | Gallus<br>gallus                 |
| 1 | 1.00 | 1 | 1 | 0 | 0      | 0 | 0 | -0.002 | t | 31160 | KHVAGAA<br>AAGAVVG<br>GLGGY  | Oryctola<br>gus<br>cuniculu<br>s |
| 1 | 1.00 | 1 | 1 | 0 | 0      | 0 | 0 | -0.002 | t | 14435 | ETIYNTTLK<br>Y               | Homo<br>sapiens                  |

|   |      |   |   |   |        |   |   |        |   |       |                           |                                  |
|---|------|---|---|---|--------|---|---|--------|---|-------|---------------------------|----------------------------------|
| 1 | 1.00 | 1 | 1 | 0 | 0      | 0 | 0 | -0.002 | t | 27999 | IPQQTQQ<br>PFP            | Mus<br>musculu<br>s              |
| 1 | 1.00 | 1 | 1 | 0 | 0.001  | 0 | 0 | -0.002 | t | 17642 | FRRYQEER                  | Mus<br>musculu<br>s              |
| 1 | 1.00 | 1 | 1 | 0 | 0      | 0 | 0 | -0.002 | t | 19868 | GGGWGQ<br>PHGGGW<br>GQPH  | Mus<br>musculu<br>s              |
| 1 | 1.00 | 1 | 1 | 0 | 0      | 0 | 0 | -0.002 | t | 21571 | GPARRGA<br>PY             | Macaca<br>mulatta                |
| 1 | 1.00 | 1 | 1 | 0 | 0      | 0 | 0 | -0.002 | t | 35247 | LDPAFR                    | Mus<br>musculu<br>s              |
| 1 | 1.00 | 1 | 1 | 0 | 0      | 0 | 0 | -0.002 | t | 32844 | KPQEEKEK<br>ITKEILNGK     | Rattus<br>norvegic<br>us         |
| 1 | 1.00 | 1 | 1 | 0 | 0      | 0 | 0 | -0.002 | t | 14561 | ETTET                     | Mus<br>musculu<br>s              |
| 1 | 1.00 | 1 | 1 | 0 | 0      | 0 | 0 | -0.002 | t | 30093 | KCTSDQDE<br>QFIPKGCS<br>K | Oryctola<br>gus<br>cuniculu<br>s |
| 1 | 1.00 | 1 | 1 | 0 | 0      | 0 | 0 | -0.002 | t | 21868 | GQGGSHS<br>QWNKP          | Oryctola<br>gus<br>cuniculu<br>s |
| 1 | 1.00 | 1 | 1 | 0 | 0      | 0 | 0 | -0.002 | t | 31555 | KKGSSGYS                  | Mus<br>musculu<br>s              |
| 1 | 1.00 | 1 | 1 | 0 | 0      | 0 | 0 | -0.002 | t | 11819 | EENVEHD<br>A              | Homo<br>sapiens                  |
| 1 | 1.00 | 1 | 1 | 0 | 0      | 0 | 0 | -0.002 | t | 11819 | EENVEHD<br>A              | Homo<br>sapiens                  |
| 1 | 1.00 | 1 | 1 | 0 | -0.003 | 0 | 0 | -0.002 | t | 32844 | KPQEEKEK<br>ITKEILNGK     | Oryctola<br>gus<br>cuniculu<br>s |
| 1 | 1.00 | 1 | 1 | 0 | 0      | 0 | 0 | -0.002 | t | 30863 | KFTEPVKDI<br>M            | Mus<br>musculu<br>s              |

|   |      |   |   |   |        |   |   |        |   |       |                              |                   |
|---|------|---|---|---|--------|---|---|--------|---|-------|------------------------------|-------------------|
| 1 | 1.00 | 1 | 1 | 0 | 0      | 0 | 0 | -0.002 | t | 15887 | FFRDEKEL                     | Mus musculus      |
| 1 | 1.00 | 1 | 1 | 0 | 0      | 0 | 0 | -0.002 | t | 14013 | ERKRR                        | Homo sapiens      |
| 1 | 1.00 | 1 | 1 | 0 | 0      | 0 | 0 | -0.002 | t | 35420 | LEDVRN                       | Mus musculus      |
| 1 | 1.00 | 1 | 1 | 0 | 0      | 0 | 0 | -0.002 | t | 35413 | LEDRSTQA<br>SLEEAILR         | Mus musculus      |
| 1 | 1.00 | 1 | 1 | 0 | 0      | 0 | 0 | -0.002 | t | 17366 | FPQPQQP<br>QQS               | Mus musculus      |
| 1 | 1.00 | 1 | 1 | 0 | 0      | 0 | 0 | -0.002 | t | 17333 | FPLQPQQ<br>PFP               | Mus musculus      |
| 1 | 1.00 | 1 | 1 | 0 | 0      | 0 | 0 | -0.002 | t | 22280 | GSAMSRPI<br>IHFGSDYE<br>DRYY | Mus musculus      |
| 1 | 1.00 | 1 | 1 | 0 | 0      | 0 | 0 | -0.002 | t | 18588 | GAGGGAG<br>GAGAGGG<br>AGGAGA | Homo sapiens      |
| 1 | 1.00 | 1 | 1 | 0 | 0      | 0 | 0 | -0.002 | t | 21815 | GPVEDAIT<br>AAIGRVA          | Rattus norvegicus |
| 1 | 1.00 | 1 | 1 | 0 | 0      | 0 | 0 | -0.002 | t | 21816 | GPVEESVE<br>RAMVRVA          | Rattus norvegicus |
| 1 | 1.00 | 1 | 1 | 0 | 0      | 0 | 0 | -0.002 | t | 20854 | GLFHKEK<br>MILNEEIT<br>TKGA  | Mus musculus      |
| 1 | 1.00 | 1 | 1 | 0 | 0      | 0 | 0 | -0.002 | t | 35495 | LEGTTNPN<br>G                | Homo sapiens      |
| 1 | 1.00 | 1 | 1 | 0 | -0.008 | 0 | 0 | -0.002 | t | 16551 | FLDLMRA<br>VA                | Mus musculus      |
| 1 | 1.00 | 1 | 1 | 0 | 0      | 0 | 0 | -0.002 | t | 16569 | FLEGAAR                      | Mus musculus      |
| 1 | 1.00 | 1 | 1 | 0 | 0      | 0 | 0 | -0.002 | t | 22134 | GRLITVNPI<br>VT              | Mus musculus      |

|   |      |   |   |   |   |   |   |        |   |       |                              |                                  |
|---|------|---|---|---|---|---|---|--------|---|-------|------------------------------|----------------------------------|
| 1 | 1.00 | 1 | 1 | 0 | 0 | 0 | 0 | -0.002 | t | 11081 | EAIPALTA<br>VETGHTSQ<br>V    | Oryctola<br>gus<br>cuniculu<br>s |
| 1 | 1.00 | 1 | 1 | 0 | 0 | 0 | 0 | -0.002 | t | 35252 | LDPHAFHL<br>LL               | Homo<br>sapiens                  |
| 1 | 1.00 | 1 | 1 | 0 | 0 | 0 | 0 | -0.002 | t | 18385 | FYEPLVRR<br>C                | Mus<br>musculu<br>s              |
| 1 | 1.00 | 1 | 1 | 0 | 0 | 0 | 0 | -0.002 | t | 10876 | DYEKQINK<br>LKN              | Mus<br>musculu<br>s              |
| 1 | 1.00 | 1 | 1 | 0 | 0 | 0 | 0 | -0.002 | t | 10892 | DYHRVMY                      | Oryctola<br>gus<br>cuniculu<br>s |
| 1 | 1.00 | 1 | 1 | 0 | 0 | 0 | 0 | -0.002 | t | 12843 | EKPNLSSK<br>RSE              | Oryctola<br>gus<br>cuniculu<br>s |
| 1 | 1.00 | 1 | 1 | 0 | 0 | 0 | 0 | -0.002 | t | 21930 | GQPGPSG<br>AAQGQVIS<br>N     | Mus<br>musculu<br>s              |
| 1 | 1.00 | 1 | 1 | 0 | 0 | 0 | 0 | -0.002 | t | 19696 | GGDDPDH<br>DPDHPHD<br>L      | Mus<br>musculu<br>s              |
| 1 | 1.00 | 1 | 1 | 0 | 0 | 0 | 0 | -0.002 | t | 21867 | GQGGGTH<br>NQWNKP            | Oryctola<br>gus<br>cuniculu<br>s |
| 1 | 1.00 | 1 | 1 | 0 | 0 | 0 | 0 | -0.002 | t | 19833 | GGGGWG<br>QGGSHSQ<br>WNK     | Oryctola<br>gus<br>cuniculu<br>s |
| 1 | 1.00 | 1 | 1 | 0 | 0 | 0 | 0 | -0.002 | t | 10529 | DTYRYI                       | Mus<br>musculu<br>s              |
| 1 | 1.00 | 1 | 1 | 0 | 0 | 0 | 0 | -0.002 | t | 21928 | GQPAVRN<br>ERATGS            | Mus<br>musculu<br>s              |
| 1 | 1.00 | 1 | 1 | 0 | 0 | 0 | 0 | -0.002 | t | 11571 | EEEDDDM<br>GGLFD             | Homo<br>sapiens                  |
| 1 | 1.00 | 1 | 1 | 0 | 0 | 0 | 0 | -0.002 | t | 18509 | GAAILVAG<br>LSGCSSNK<br>STTG | Mus<br>musculu<br>s              |
| 1 | 1.00 | 1 | 1 | 0 | 0 | 0 | 0 | -0.002 | t | 16101 | FHENWPS                      | Mus<br>musculu<br>s              |

|   |      |   |   |   |        |   |   |        |   |       |                              |                          |
|---|------|---|---|---|--------|---|---|--------|---|-------|------------------------------|--------------------------|
| 1 | 1.00 | 1 | 1 | 0 | 0      | 0 | 0 | -0.002 | t | 11497 | EEAIRPLR<br>VQGKRAK          | Mus<br>musculus          |
| 1 | 1.00 | 1 | 1 | 0 | 0      | 0 | 0 | -0.002 | t | 13871 | EQLIEKLIE<br>DDKNSQ          | Papio<br>cynocephalus    |
| 1 | 1.00 | 1 | 1 | 0 | -0.037 | 0 | 0 | -0.002 | t | 13871 | EQLIEKLIE<br>DDKNSQ          | Papio<br>cynocephalus    |
| 1 | 1.00 | 1 | 1 | 0 | 0      | 0 | 0 | -0.002 | t | 18833 | GAVVGGL<br>GGYML             | Mus<br>musculus          |
| 1 | 1.00 | 1 | 1 | 0 | 0      | 0 | 0 | -0.002 | t | 24697 | HRMQEAV<br>EAERAGR<br>GTGH   | Mus<br>musculus          |
| 1 | 1.00 | 1 | 1 | 0 | 0      | 0 | 0 | -0.002 | t | 13984 | ERESQAY                      | Mus<br>musculus          |
| 1 | 1.00 | 1 | 1 | 0 | 0      | 0 | 0 | -0.002 | t | 10639 | DVKFPGG<br>GQIVGGV<br>YLLPRR | Mus<br>musculus          |
| 1 | 1.00 | 1 | 1 | 0 | -0.003 | 0 | 0 | -0.002 | t | 19833 | GGGGWG<br>QGGSHSQ<br>WNK     | Oryctolagus<br>cuniculus |
| 1 | 1.00 | 1 | 1 | 0 | 0      | 0 | 0 | -0.002 | t | 26046 | IFDT                         | Mus<br>musculus          |
| 1 | 1.00 | 1 | 1 | 0 | 0      | 0 | 0 | -0.002 | t | 27608 | INDISHTQ<br>SVSSKQRV<br>TGLD | Oryctolagus<br>cuniculus |
| 1 | 1.00 | 1 | 1 | 0 | -0.003 | 0 | 0 | -0.002 | t | 33859 | KTSERSQP<br>RGRRRQIP<br>KARR | Oryctolagus<br>cuniculus |
| 1 | 1.00 | 1 | 1 | 0 | 0      | 0 | 0 | -0.002 | t | 24600 | HQPQQQF<br>PQT               | Mus<br>musculus          |
| 1 | 1.00 | 1 | 1 | 0 | 0      | 0 | 0 | -0.002 | t | 26046 | IFDT                         | Mus<br>musculus          |
| 1 | 1.00 | 1 | 1 | 0 | 0      | 0 | 0 | -0.002 | t | 17376 | FPQQPQR<br>PFA               | Mus<br>musculus          |

|   |      |   |   |   |        |   |   |        |   |       |                            |                                  |
|---|------|---|---|---|--------|---|---|--------|---|-------|----------------------------|----------------------------------|
| 1 | 1.00 | 1 | 1 | 0 | 0      | 0 | 0 | -0.002 | t | 32844 | KPQEEKEK<br>ITKEILNGK      | Oryctola<br>gus<br>cuniculu<br>s |
| 1 | 1.00 | 1 | 1 | 0 | 0.002  | 0 | 0 | -0.002 | t | 32844 | KPQEEKEK<br>ITKEILNGK      | Rattus<br>norvegic<br>us         |
| 1 | 1.00 | 1 | 1 | 0 | 0      | 0 | 0 | -0.002 | t | 17408 | FPSPYYSP<br>AFTKGEKV<br>DL | Oryctola<br>gus<br>cuniculu<br>s |
| 1 | 1.00 | 1 | 1 | 0 | 0      | 0 | 0 | -0.002 | t | 26046 | IFDT                       | Mus<br>musculu<br>s              |
| 1 | 1.00 | 1 | 1 | 0 | -0.003 | 0 | 0 | -0.002 | t | 17408 | FPSPYYSP<br>AFTKGEKV<br>DL | Oryctola<br>gus<br>cuniculu<br>s |
| 1 | 1.00 | 1 | 1 | 0 | 0      | 0 | 0 | -0.002 | t | 24842 | HSQWNKP<br>SKPKTNM<br>K    | Oryctola<br>gus<br>cuniculu<br>s |
| 1 | 1.00 | 1 | 1 | 0 | -0.003 | 0 | 0 | -0.002 | t | 31330 | KILPEVKEK<br>HEF           | Oryctola<br>gus<br>cuniculu<br>s |
| 1 | 1.00 | 1 | 1 | 0 | 0      | 0 | 0 | -0.002 | t | 31330 | KILPEVKEK<br>HEF           | Oryctola<br>gus<br>cuniculu<br>s |
| 1 | 1.00 | 1 | 1 | 0 | 0      | 0 | 0 | -0.002 | t | 31067 | KGTAPFGV<br>AFGNS          | Oryctola<br>gus<br>cuniculu<br>s |
| 1 | 1.00 | 1 | 1 | 0 | 0.001  | 0 | 0 | -0.002 | t | 27997 | IPQPQWT<br>P               | Mus<br>musculu<br>s              |
| 1 | 1.00 | 1 | 1 | 0 | 0      | 0 | 0 | -0.002 | t | 30661 | KEVPALTA<br>VETGAT         | Oryctola<br>gus<br>cuniculu<br>s |
| 1 | 1.00 | 1 | 1 | 0 | 0      | 0 | 0 | -0.002 | t | 27997 | IPQPQWT<br>P               | Mus<br>musculu<br>s              |
| 1 | 1.00 | 1 | 1 | 0 | 0      | 0 | 0 | -0.002 | t | 21715 | GPNNSEAI<br>PALTAEE        | Rattus<br>norvegic<br>us         |



|   |      |   |   |   |        |   |   |        |   |       |                              |                                  |
|---|------|---|---|---|--------|---|---|--------|---|-------|------------------------------|----------------------------------|
| 1 | 1.00 | 1 | 1 | 0 | 0      | 0 | 0 | -0.002 | t | 35310 | LDTNGGT<br>GTAIV             | Oryctola<br>gus<br>cuniculu<br>s |
| 1 | 1.00 | 1 | 1 | 0 | 0      | 0 | 0 | -0.002 | t | 18529 | GAATAAA<br>GGYKA             | Homo<br>sapiens                  |
| 1 | 1.00 | 1 | 1 | 0 | 0.004  | 0 | 0 | -0.002 | t | 11241 | ECFPWDR<br>KL                | Mus<br>musculu<br>s              |
| 1 | 1.00 | 1 | 1 | 0 | 0      | 0 | 0 | -0.002 | t | 21084 | GLQN                         | Mus<br>musculu<br>s              |
| 1 | 1.00 | 1 | 1 | 0 | -0.003 | 0 | 0 | -0.002 | t | 33859 | KTSESRQP<br>RGRRQPIP<br>KARR | Oryctola<br>gus<br>cuniculu<br>s |
| 1 | 1.00 | 1 | 1 | 0 | 0      | 0 | 0 | -0.002 | t | 19735 | GGFVQFV<br>TSTRNA            | Oryctola<br>gus<br>cuniculu<br>s |
| 1 | 1.00 | 1 | 1 | 0 | 0      | 0 | 0 | -0.002 | t | 35662 | LEQPVSND<br>LS               | Oryctola<br>gus<br>cuniculu<br>s |
| 1 | 1.00 | 1 | 1 | 0 | 0      | 0 | 0 | -0.002 | t | 33163 | KRIPNKKP<br>GKKTTT           | Oryctola<br>gus<br>cuniculu<br>s |
| 1 | 1.00 | 1 | 1 | 0 | 0      | 0 | 0 | -0.002 | t | 30661 | KEVPALTA<br>VETGAT           | Oryctola<br>gus<br>cuniculu<br>s |
| 1 | 1.00 | 1 | 1 | 0 | 0      | 0 | 0 | -0.002 | t | 24168 | HKYSWK                       | Mus<br>musculu<br>s              |
| 1 | 1.00 | 1 | 1 | 0 | 0      | 0 | 0 | -0.002 | t | 22305 | GSDYEDRY<br>YRENMHR<br>YPNQ  | Mus<br>musculu<br>s              |
| 1 | 1.00 | 1 | 1 | 0 | 0      | 0 | 0 | -0.002 | t | 10801 | DWEDRYR<br>RE                | Oryctola<br>gus<br>cuniculu<br>s |
| 1 | 1.00 | 1 | 1 | 0 | 0      | 0 | 0 | -0.002 | t | 30661 | KEVPALTA<br>VETGAT           | Oryctola<br>gus<br>cuniculu<br>s |

|   |      |   |   |   |       |   |   |        |   |       |                          |                                  |
|---|------|---|---|---|-------|---|---|--------|---|-------|--------------------------|----------------------------------|
| 1 | 1.00 | 1 | 1 | 0 | 0     | 0 | 0 | -0.002 | t | 36307 | LGRPDEDS<br>SSSSSSC      | Oryctola<br>gus<br>cuniculu<br>s |
| 1 | 1.00 | 1 | 1 | 0 | 0     | 0 | 0 | -0.002 | t | 27998 | IPQQPQQ<br>PFP           | Mus<br>musculu<br>s              |
| 1 | 1.00 | 1 | 1 | 0 | 0     | 0 | 0 | -0.002 | t | 11815 | EENVEENV<br>EENVEENV     | Homo<br>sapiens                  |
| 1 | 1.00 | 1 | 1 | 0 | 0     | 0 | 0 | -0.002 | t | 32914 | KPTTKQRQ<br>NKPPNKP<br>N | Oryctola<br>gus<br>cuniculu<br>s |
| 1 | 1.00 | 1 | 1 | 0 | 0     | 0 | 0 | -0.002 | t | 19269 | GEGAPPA<br>KRARTDQ<br>ME | Homo<br>sapiens                  |
| 1 | 1.00 | 1 | 1 | 0 | 0.002 | 0 | 0 | -0.002 | t | 21715 | GPNNSEAI<br>PALTAAE      | Rattus<br>norvegic<br>us         |
| 1 | 1.00 | 1 | 1 | 0 | 0     | 0 | 0 | -0.002 | t | 11815 | EENVEENV<br>EENVEENV     | Homo<br>sapiens                  |
| 1 | 1.00 | 1 | 1 | 0 | 0     | 0 | 0 | -0.002 | t | 7112  | CTASNKNR<br>GIKTFSNG     | Mus<br>musculu<br>s              |
| 1 | 1.00 | 1 | 1 | 0 | 0     | 0 | 0 | -0.002 | t | 9524  | DNPASTT<br>NKDK          | Mus<br>musculu<br>s              |
| 1 | 1.00 | 1 | 1 | 0 | 0     | 0 | 0 | -0.002 | t | 1367  | AFNQFGP<br>NAGQR         | Mus<br>musculu<br>s              |
| 1 | 1.00 | 1 | 1 | 0 | 0     | 0 | 0 | -0.002 | t | 10126 | DSGDGRQ<br>TITNP         | Mus<br>musculu<br>s              |
| 1 | 1.00 | 1 | 1 | 0 | 0     | 0 | 0 | -0.002 | t | 9524  | DNPASTT<br>NKDK          | Mus<br>musculu<br>s              |
| 1 | 1.00 | 1 | 1 | 0 | 0     | 0 | 0 | -0.002 | t | 7665  | DAVP                     | Mus<br>musculu<br>s              |
| 1 | 1.00 | 1 | 1 | 0 | 0     | 0 | 0 | -0.002 | t | 4038  | AQPVKIDN<br>ASPAST       | Oryctola<br>gus<br>cuniculu<br>s |

|   |      |   |   |   |   |   |   |        |   |       |                              |                                  |
|---|------|---|---|---|---|---|---|--------|---|-------|------------------------------|----------------------------------|
| 1 | 1.00 | 1 | 1 | 0 | 0 | 0 | 0 | -0.002 | t | 7851  | DDPPATVY<br>RYDSRPPE<br>DV   | Oryctola<br>gus<br>cuniculu<br>s |
| 1 | 1.00 | 1 | 1 | 0 | 0 | 0 | 0 | -0.002 | t | 8066  | DELEAETQ<br>NVYAA            | Aotus<br>nancyma<br>ae           |
| 1 | 1.00 | 1 | 1 | 0 | 0 | 0 | 0 | -0.002 | t | 5261  | AVALADLG<br>DFENSA           | Oryctola<br>gus<br>cuniculu<br>s |
| 1 | 1.00 | 1 | 1 | 0 | 0 | 0 | 0 | -0.002 | t | 8076  | DELKDQM<br>EED               | Mus<br>musculu<br>s              |
| 1 | 1.00 | 1 | 1 | 0 | 0 | 0 | 0 | -0.002 | t | 9661  | DPKSLSKG<br>EIASTFESQ<br>NST | Mus<br>musculu<br>s              |
| 1 | 1.00 | 1 | 1 | 0 | 0 | 0 | 0 | -0.002 | t | 4331  | ASARGDLA<br>HLTTTHAR<br>HLP  | Mus<br>musculu<br>s              |
| 1 | 1.00 | 1 | 1 | 0 | 0 | 0 | 0 | -0.002 | t | 774   | ADSVGGK<br>D                 | Mus<br>musculu<br>s              |
| 1 | 1.00 | 1 | 1 | 0 | 0 | 0 | 0 | -0.002 | t | 9847  | DQGPPLM<br>TDGGGGD<br>PH     | Mus<br>musculu<br>s              |
| 1 | 1.00 | 1 | 1 | 0 | 0 | 0 | 0 | -0.002 | t | 7558  | DAKDGKEI<br>DTKHL PST<br>C   | Oryctola<br>gus<br>cuniculu<br>s |
| 1 | 1.00 | 1 | 1 | 0 | 0 | 0 | 0 | -0.002 | t | 6338  | CGQPVTR<br>TDDDTVA           | Oryctola<br>gus<br>cuniculu<br>s |
| 1 | 1.00 | 1 | 1 | 0 | 0 | 0 | 0 | -0.002 | t | 10064 | DRVVKEM<br>RRQLEMID<br>KLTT  | Mus<br>musculu<br>s              |
| 1 | 1.00 | 1 | 1 | 0 | 0 | 0 | 0 | -0.002 | t | 9352  | DMANPM<br>SPVNKSFEI<br>EVTCS | Mus<br>musculu<br>s              |
| 1 | 1.00 | 1 | 1 | 0 | 0 | 0 | 0 | -0.002 | t | 7318  | CVTQYQKE<br>SQAYYD           | Oryctola<br>gus<br>cuniculu<br>s |
| 1 | 1.00 | 1 | 1 | 0 | 0 | 0 | 0 | -0.002 | t | 431   | AASGDGTI<br>TFTGKVID<br>APCG | Mus<br>musculu<br>s              |

|   |      |   |   |   |   |   |   |        |   |      |                             |                                  |
|---|------|---|---|---|---|---|---|--------|---|------|-----------------------------|----------------------------------|
| 1 | 1.00 | 1 | 1 | 0 | 0 | 0 | 0 | -0.002 | t | 7674 | DAVTELDK<br>N               | Mus<br>musculu<br>s              |
| 1 | 1.00 | 1 | 1 | 0 | 0 | 0 | 0 | -0.002 | t | 7532 | DAHHAAD                     | Mus<br>musculu<br>s              |
| 1 | 1.00 | 1 | 1 | 0 | 0 | 0 | 0 | -0.002 | t | 709  | ADLIAAQK<br>LASKP           | Mus<br>musculu<br>s              |
| 1 | 1.00 | 1 | 1 | 0 | 0 | 0 | 0 | -0.002 | t | 7675 | DAVTPLRI<br>FIVPPPA<br>EYEQ | Oryctola<br>gus<br>cuniculu<br>s |
| 1 | 1.00 | 1 | 1 | 0 | 0 | 0 | 0 | -0.002 | t | 7535 | DAHHAHH<br>A                | Mus<br>musculu<br>s              |
| 1 | 1.00 | 1 | 1 | 0 | 0 | 0 | 0 | -0.002 | t | 6205 | CETEFSKLY                   | Mus<br>musculu<br>s              |
| 1 | 1.00 | 1 | 1 | 0 | 0 | 0 | 0 | -0.002 | t | 2319 | AKVNIKPL<br>EDKIL           | Oryctola<br>gus<br>cuniculu<br>s |
| 1 | 1.00 | 1 | 1 | 0 | 0 | 0 | 0 | -0.002 | t | 5481 | AVNDT                       | Mus<br>musculu<br>s              |
| 1 | 1.00 | 1 | 1 | 0 | 0 | 0 | 0 | -0.002 | t | 145  | AAGANPL<br>GLKRGIEK<br>AV   | Mus<br>musculu<br>s              |
| 1 | 1.00 | 1 | 1 | 0 | 0 | 0 | 0 | -0.002 | t | 5109 | ATPYHPPA<br>TP              | Oryctola<br>gus<br>cuniculu<br>s |
| 1 | 1.00 | 1 | 1 | 0 | 0 | 0 | 0 | -0.002 | t | 5582 | AVTRGTIN<br>DPQRAKE         | Oryctola<br>gus<br>cuniculu<br>s |
| 1 | 1.00 | 1 | 1 | 0 | 0 | 0 | 0 | -0.002 | t | 3242 | ANDPPP                      | Mus<br>musculu<br>s              |
| 1 | 1.00 | 1 | 1 | 0 | 0 | 0 | 0 | -0.002 | t | 8119 | DEPAGE                      | Homo<br>sapiens                  |
| 1 | 1.00 | 1 | 1 | 0 | 0 | 0 | 0 | -0.002 | t | 7208 | CTSPYDGK<br>YWSMYSR<br>L    | Oryctola<br>gus<br>cuniculu<br>s |

|   |      |   |   |   |        |   |   |        |   |      |                            |                                  |
|---|------|---|---|---|--------|---|---|--------|---|------|----------------------------|----------------------------------|
| 1 | 1.00 | 1 | 1 | 0 | 0      | 0 | 0 | -0.002 | t | 6093 | CDCDRTA<br>A               | Mus<br>musculu<br>s              |
| 1 | 1.00 | 1 | 1 | 0 | 0      | 0 | 0 | -0.002 | t | 7851 | DDPPATVY<br>RYDSRPPE<br>DV | Oryctola<br>gus<br>cuniculu<br>s |
| 1 | 1.00 | 1 | 1 | 0 | 0      | 0 | 0 | -0.002 | t | 8475 | DGQPAGD<br>RADGQPA<br>GDRA | Mus<br>musculu<br>s              |
| 1 | 1.00 | 1 | 1 | 0 | 0      | 0 | 0 | -0.002 | t | 4401 | ASFFD                      | Mus<br>musculu<br>s              |
| 1 | 1.00 | 1 | 1 | 0 | 0      | 0 | 0 | -0.002 | t | 5575 | AVTPLGPP<br>AAEY           | Oryctola<br>gus<br>cuniculu<br>s |
| 1 | 1.00 | 1 | 1 | 0 | 0      | 0 | 0 | -0.002 | t | 9586 | DPAFR                      | Mus<br>musculu<br>s              |
| 1 | 1.00 | 1 | 1 | 0 | 0      | 0 | 0 | -0.002 | t | 5597 | AVVGGLG<br>GY              | Mus<br>musculu<br>s              |
| 1 | 1.00 | 1 | 1 | 0 | 0      | 0 | 0 | -0.002 | t | 9611 | DPDKDVDI<br>MV             | Mus<br>musculu<br>s              |
| 1 | 1.00 | 1 | 1 | 0 | -0.003 | 0 | 0 | -0.002 | t | 6249 | CFPYCYP<br>ESA             | Oryctola<br>gus<br>cuniculu<br>s |
| 1 | 1.00 | 1 | 1 | 0 | 0      | 0 | 0 | -0.002 | t | 6015 | CAPESIEFP<br>VSEARVLE<br>D | Homo<br>sapiens                  |
| 1 | 1.00 | 1 | 1 | 0 | 0      | 0 | 0 | -0.002 | t | 9516 | DNNLVSG<br>P               | Oryctola<br>gus<br>cuniculu<br>s |
| 1 | 1.00 | 1 | 1 | 0 | 0      | 0 | 0 | -0.002 | t | 8132 | DEQFIPK                    | Mus<br>musculu<br>s              |
| 1 | 1.00 | 1 | 1 | 0 | 0      | 0 | 0 | -0.002 | t | 6883 | CQIYPPNA<br>NKIREALA<br>Q  | Oryctola<br>gus<br>cuniculu<br>s |
| 1 | 1.00 | 1 | 1 | 0 | 0      | 0 | 0 | -0.002 | t | 9585 | DPAF                       | Mus<br>musculu<br>s              |

|   |      |   |   |   |   |   |   |        |   |       |                              |                                  |
|---|------|---|---|---|---|---|---|--------|---|-------|------------------------------|----------------------------------|
| 1 | 1.00 | 1 | 1 | 0 | 0 | 0 | 0 | -0.002 | t | 6455  | CITQYERES<br>QAYY            | Mus<br>musculu<br>s              |
| 1 | 1.00 | 1 | 1 | 0 | 0 | 0 | 0 | -0.002 | t | 8388  | DGGGGHS<br>HDSGHGG<br>GD     | Mus<br>musculu<br>s              |
| 1 | 1.00 | 1 | 1 | 0 | 0 | 0 | 0 | -0.002 | t | 1725  | AGWISPG<br>G                 | Mus<br>musculu<br>s              |
| 1 | 1.00 | 1 | 1 | 0 | 0 | 0 | 0 | -0.002 | t | 6068  | CCPDKNKS                     | Mus<br>musculu<br>s              |
| 1 | 1.00 | 1 | 1 | 0 | 0 | 0 | 0 | -0.002 | t | 7782  | DDGKGDR<br>SHKNEDES<br>ALASK | Mus<br>musculu<br>s              |
| 1 | 1.00 | 1 | 1 | 0 | 0 | 0 | 0 | -0.002 | t | 6226  | CFGNSEY                      | Mus<br>musculu<br>s              |
| 1 | 1.00 | 1 | 1 | 0 | 0 | 0 | 0 | -0.002 | t | 10168 | DSLPHPQ<br>QATDDSG<br>H      | Mus<br>musculu<br>s              |
| 1 | 1.00 | 1 | 1 | 0 | 0 | 0 | 0 | -0.002 | t | 4507  | ASKNLDLT<br>NITHVE           | Oryctola<br>gus<br>cuniculu<br>s |
| 1 | 1.00 | 1 | 1 | 0 | 0 | 0 | 0 | -0.002 | t | 7491  | DAEFRHDS<br>GYEVHHQ<br>K     | Homo<br>sapiens                  |
| 1 | 1.00 | 1 | 1 | 0 | 0 | 0 | 0 | -0.002 | t | 435   | AASKSCPL<br>PQVRALES<br>LESL | Oryctola<br>gus<br>cuniculu<br>s |
| 1 | 1.00 | 1 | 1 | 0 | 0 | 0 | 0 | -0.002 | t | 5609  | AVVYNNE<br>GTNVELG           | Mus<br>musculu<br>s              |
| 1 | 1.00 | 1 | 1 | 0 | 0 | 0 | 0 | -0.002 | t | 8607  | DIDPYKEF<br>G                | Mus<br>musculu<br>s              |
| 1 | 1.00 | 1 | 1 | 0 | 0 | 0 | 0 | -0.002 | t | 3952  | AQEPPRQ                      | Mus<br>musculu<br>s              |
| 1 | 1.00 | 1 | 1 | 0 | 0 | 0 | 0 | -0.002 | t | 5387  | AVIRRANN<br>VLKNEMK<br>RYKGL | Oryctola<br>gus<br>cuniculu<br>s |

|   |      |   |   |       |       |        |       |        |   |        |                      |              |
|---|------|---|---|-------|-------|--------|-------|--------|---|--------|----------------------|--------------|
| 1 | 1.00 | 1 | 1 | 0     | 0     | 0      | 0     | -0.002 | t | 7673   | DAVTE                | Mus musculus |
| 1 | 1.00 | 1 | 1 | 0     | 0     | 0      | 0     | -0.002 | t | 9754   | DPRVRGLYF            | Mus musculus |
| 1 | 1.00 | 1 | 1 | 0     | 0     | 0      | 0     | -0.002 | t | 1045   | AELGGQFHHKSENG       | Mus musculus |
| 1 | 1.00 | 1 | 1 | 0     | 0     | 0      | 0     | -0.002 | t | 9754   | DPRVRGLYF            | Mus musculus |
| 1 | 1.00 | 1 | 1 | 0     | 0     | 0      | 0     | -0.002 | t | 952    | AEGQLG               | Mus musculus |
| 1 | 1.00 | 1 | 1 | 0     | 0     | 0      | 0     | -0.002 | t | 8644   | DIFTNSRGKRASKG       | Mus musculus |
| 1 | 1.00 | 1 | 1 | 0     | 0     | 0      | 0     | -0.002 | t | 8218   | DEYDDAADAAGDRAP      | Mus musculus |
| 1 | 1.00 | 1 | 1 | 0     | 0     | 0      | 0     | -0.002 | t | 8920   | DKLAKEQKSKQNIQK      | Mus musculus |
| 1 | 1.00 | 1 | 1 | 0     | 0     | 0      | 0     | -0.002 | t | 8217   | DEYCSPDHNCQSNCKDSGEG | Mus musculus |
| 1 | 1.00 | 1 | 1 | 0     | 0     | -0.006 | 0     | 0      | t | 149681 | ELAEAKVLANRE         | Mus musculus |
| 1 | 1.00 | 1 | 1 | 0.01  | 0.01  | 0.01   | 0.01  | 0.01   | t | 134231 | SIGAQTDFLSVFFSGYTFKH | Homo sapiens |
| 1 | 1.00 | 1 | 1 | 0.01  | 0.01  | 0.006  | 0.01  | 0.01   | t | 52157  | QQTFPQQT             | Mus musculus |
| 1 | 1.00 | 1 | 1 | 0.01  | 0.01  | 0.006  | 0.01  | 0.01   | t | 52157  | QQTFPQQT             | Mus musculus |
| 1 | 1.00 | 1 | 1 | -0.01 | -0.01 | -0.01  | -0.01 | -0.012 | t | 91100  | AFQTPVHS             | Mus musculus |
| 1 | 1.00 | 1 | 1 | 0.01  | 0.01  | 0.01   | 0.01  | 0.011  | t | 57556  | SEMPQLP              | Mus musculus |

|   |      |   |   |       |        |        |        |        |   |        |                             |                                  |
|---|------|---|---|-------|--------|--------|--------|--------|---|--------|-----------------------------|----------------------------------|
| 1 | 1.00 | 1 | 1 | -0.01 | -0.01  | -0.01  | -0.01  | -0.011 | t | 33794  | KTNMKH<br>M                 | Mus<br>musculu<br>s              |
| 1 | 1.00 | 1 | 1 | 0.03  | 0.03   | 0.036  | 0.028  | 0.03   | t | 18039  | FTPGPSQ                     | Homo<br>sapiens                  |
| 1 | 1.00 | 1 | 1 | 0     | -0.002 | -0.001 | 0.003  | 0      | t | 14905  | EVWREEA<br>YHAADIKD         | Mus<br>musculu<br>s              |
| 1 | 1.00 | 1 | 1 | -0.01 | -0.01  | -0.01  | -0.006 | -0.01  | t | 30472  | KEKLQERL                    | Homo<br>sapiens                  |
| 1 | 1.00 | 1 | 1 | -0.04 | -0.04  | -0.034 | -0.04  | -0.043 | t | 79484  | YMGAIWA<br>GDW              | Mus<br>musculu<br>s              |
| 1 | 1.00 | 1 | 1 | 0     | 0      | -0.012 | 0      | 0      | t | 121732 | QAPEYRG<br>RTELLKESI<br>GE  | Rattus<br>norvegic<br>us         |
| 1 | 1.00 | 1 | 1 | 0     | 0      | 0.007  | 0.003  | 0      | t | 47792  | PGYPWPL<br>YGNeg            | Homo<br>sapiens                  |
| 1 | 1.00 | 1 | 1 | 0.02  | 0.022  | 0.009  | 0.011  | 0.017  | t | 6985   | CSEYPKPD<br>CTAE            | Homo<br>sapiens                  |
| 1 | 1.00 | 1 | 1 | 0     | 0      | 0.009  | 0.003  | -0.003 | t | 110821 | DVRQQYE<br>SVAAKNL<br>QEAEW | Mus<br>musculu<br>s              |
| 1 | 1.00 | 1 | 1 | 0     | 0      | 0.009  | 0.003  | -0.003 | t | 110820 | DVRQQYE<br>SVAAKNL<br>QEAEW | Mus<br>musculu<br>s              |
| 1 | 1.00 | 1 | 1 | 0     | 0      | 0      | 0      | -0.002 | t | 130473 | ECIVYGKT<br>ALCT            | Mus<br>musculu<br>s              |
| 1 | 1.00 | 1 | 1 | 0     | -0.004 | 0      | 0.003  | -0.001 | t | 78411  | GTKPTFHV<br>EKGSNPNY<br>LA  | Oryctola<br>gus<br>cuniculu<br>s |
| 1 | 1.00 | 1 | 1 | 0.04  | 0.04   | 0.04   | 0.04   | 0.04   | t | 153265 | ILETLPANP<br>PPASTN         | Mus<br>musculu<br>s              |
| 1 | 1.00 | 1 | 1 | 0.02  | 0.02   | 0.02   | 0.02   | 0.02   | t | 117664 | VAARGRG<br>RGMGRG<br>NI     | Homo<br>sapiens                  |
| 1 | 1.00 | 1 | 1 | 0.02  | 0.02   | 0.02   | 0.02   | 0.02   | t | 114970 | VDCSRFPN<br>AT              | Homo<br>sapiens                  |



|   |      |   |   |       |        |        |        |        |   |        |                         |                                  |
|---|------|---|---|-------|--------|--------|--------|--------|---|--------|-------------------------|----------------------------------|
| 1 | 1.00 | 1 | 1 | 0.02  | 0.02   | 0.02   | 0.02   | 0.02   | t | 92973  | IFKGSKFN<br>DA          | Ovis<br>aries                    |
| 1 | 1.00 | 1 | 1 | 0     | 0      | 0      | 0      | 0      | t | 110613 | GPPGPQG<br>ATGPLGPK     | Mus<br>musculu<br>s              |
| 1 | 1.00 | 1 | 1 | -0.05 | -0.052 | -0.06  | -0.057 | -0.05  | t | 12992  | ELDLQARR                | Mus<br>musculu<br>s              |
| 1 | 1.00 | 1 | 1 | 0.02  | 0.02   | 0.02   | 0.02   | 0.019  | t | 25145  | HWYDAEV<br>L            | Mus<br>musculu<br>s              |
| 1 | 1.00 | 1 | 1 | 0     | 0.003  | 0.007  | 0.007  | 0      | t | 119466 | IRGERA                  | Mus<br>musculu<br>s              |
| 1 | 1.00 | 1 | 1 | -0.02 | -0.02  | -0.015 | -0.017 | -0.018 | t | 36947  | LKLNWF                  | Homo<br>sapiens                  |
| 1 | 1.00 | 1 | 1 | 0     | 0      | -0.009 | -0.004 | 0      | t | 135941 | ITTQECAN<br>VVVG        | Homo<br>sapiens                  |
| 1 | 1.00 | 1 | 1 | -0.01 | -0.01  | -0.003 | -0.01  | -0.013 | t | 108825 | AVLMLPV<br>WACLS        | Mus<br>musculu<br>s              |
| 1 | 1.00 | 1 | 1 | 0     | 0      | -0.017 | 0.002  | 0.002  | t | 136749 | WMLRAAE<br>EYSMNLG<br>F | Homo<br>sapiens                  |
| 1 | 1.00 | 1 | 1 | 0     | 0      | 0      | 0      | -0.001 | t | 61397  | SSTKNLIYT<br>STLCELNV   | Sus<br>scrofa                    |
| 1 | 1.00 | 1 | 1 | 0.01  | 0.012  | 0.02   | 0.013  | 0.01   | t | 140665 | DTAAQI                  | Homo<br>sapiens                  |
| 1 | 1.00 | 1 | 1 | -0.02 | -0.022 | -0.037 | -0.023 | -0.017 | t | 118151 | SRFSWGA<br>E            | Rattus<br>norvegic<br>us         |
| 1 | 1.00 | 1 | 1 | 0.01  | 0.014  | 0.01   | 0.01   | 0.012  | t | 137402 | FIDSYICQV               | Homo<br>sapiens                  |
| 1 | 1.00 | 1 | 1 | 0.01  | 0.01   | 0.01   | 0.01   | 0.01   | t | 51473  | QLPNVGIT                | Oryctola<br>gus<br>cuniculu<br>s |

|   |      |   |   |       |        |        |        |        |   |        |                             |                                  |
|---|------|---|---|-------|--------|--------|--------|--------|---|--------|-----------------------------|----------------------------------|
| 1 | 1.00 | 1 | 1 | -0.01 | -0.01  | -0.009 | -0.013 | -0.012 | t | 5512   | AVPTGVAF<br>WLYNDHD         | Homo<br>sapiens                  |
| 1 | 1.00 | 1 | 1 | 0.02  | 0.022  | 0.018  | 0.017  | 0.02   | t | 96114  | ASFAEAPF<br>SN              | Homo<br>sapiens                  |
| 1 | 1.00 | 1 | 1 | 0     | 0      | -0.003 | 0      | 0      | t | 65296  | TNCYKKR<br>WRDHRGY<br>RTE   | Oryctola<br>gus<br>cuniculu<br>s |
| 1 | 1.00 | 1 | 1 | 0.01  | 0.01   | 0.01   | 0.01   | 0.01   | t | 42984  | MVQVVYD                     | Oryctola<br>gus<br>cuniculu<br>s |
| 1 | 1.00 | 1 | 1 | 0     | 0      | 0      | 0.001  | -0.001 | t | 130518 | ITQSTQSF<br>NDFTRVV         | Mus<br>musculu<br>s              |
| 1 | 1.00 | 1 | 1 | 0     | 0      | 0      | 0.001  | -0.001 | t | 66257  | TSHHDSH<br>GLHRV            | Mus<br>musculu<br>s              |
| 1 | 1.00 | 1 | 1 | 0     | 0      | 0      | 0.001  | -0.001 | t | 13481  | ENHSPVNI<br>AHKL            | Mus<br>musculu<br>s              |
| 1 | 1.00 | 1 | 1 | 0     | 0.003  | -0.011 | 0      | 0      | t | 111193 | DGPAGQA<br>EPDRAHY<br>NI    | Mus<br>musculu<br>s              |
| 1 | 1.00 | 1 | 1 | 0.02  | 0.02   | 0.02   | 0.02   | 0.019  | t | 144778 | SGTHPFLD<br>KSFS            | Mus<br>musculu<br>s              |
| 1 | 1.00 | 1 | 1 | -0.01 | -0.012 | -0.017 | -0.01  | -0.009 | t | 95029  | KNTLRIAYL<br>TEAKVEKL       | Oryctola<br>gus<br>cuniculu<br>s |
| 1 | 1.00 | 1 | 1 | 0     | 0      | 0      | 0      | -0.002 | t | 54860  | RMAWDM<br>M                 | Homo<br>sapiens                  |
| 1 | 1.00 | 1 | 1 | -0.01 | -0.01  | -0.01  | -0.01  | -0.01  | t | 136823 | ASIILEFFL                   | Mus<br>musculu<br>s              |
| 1 | 1.00 | 1 | 1 | 0     | -0.004 | -0.007 | 0.001  | -0.001 | t | 131194 | ALGAQKE<br>AISPPDAA<br>SAAP | Oryctola<br>gus<br>cuniculu<br>s |
| 1 | 1.00 | 1 | 1 | 0.05  | 0.047  | 0.041  | 0.05   | 0.05   | t | 79292  | LKTDLELKY<br>KQTADFS        | Oryctola<br>gus<br>cuniculu<br>s |

|   |      |   |   |       |        |        |        |        |   |        |                              |                                  |
|---|------|---|---|-------|--------|--------|--------|--------|---|--------|------------------------------|----------------------------------|
| 1 | 1.00 | 1 | 1 | 0     | 0      | 0      | 0      | -0.002 | t | 51925  | QPQQPFP<br>QSQ               | Mus<br>musculu<br>s              |
| 1 | 1.00 | 1 | 1 | 0     | 0.002  | -0.007 | -0.003 | -0.001 | t | 118630 | TLNLEDVQ<br>PHDLG            | Homo<br>sapiens                  |
| 1 | 1.00 | 1 | 1 | 0.03  | 0.03   | 0.03   | 0.03   | 0.03   | t | 51837  | QPGHLA                       | Homo<br>sapiens                  |
| 1 | 1.00 | 1 | 1 | 0.01  | 0.01   | 0.01   | 0.01   | 0.01   | t | 149087 | NPTQSPP                      | Sus<br>scrofa                    |
| 1 | 1.00 | 1 | 1 | -0.02 | -0.022 | -0.016 | -0.021 | -0.02  | t | 10075  | DRYYREN                      | Mus<br>musculu<br>s              |
| 1 | 1.00 | 1 | 1 | 0.05  | 0.05   | 0.043  | 0.05   | 0.05   | t | 119480 | KQQKTEN<br>GAGDQ             | Homo<br>sapiens                  |
| 1 | 1.00 | 1 | 1 | 0     | 0.002  | 0.002  | 0.003  | 0.001  | t | 119641 | SEHETRLV<br>AKLFKDYS         | Homo<br>sapiens                  |
| 1 | 1.00 | 1 | 1 | 0.03  | 0.027  | 0.018  | 0.03   | 0.031  | t | 78394  | GEAVTVTI<br>TDDNEEPI<br>APY  | Oryctola<br>gus<br>cuniculu<br>s |
| 1 | 1.00 | 1 | 1 | 0.01  | 0.01   | 0.01   | 0.01   | 0.009  | t | 135477 | LGAGLG                       | Mus<br>musculu<br>s              |
| 1 | 1.00 | 1 | 1 | 0.02  | 0.019  | 0.018  | 0.021  | 0.02   | t | 49872  | PVGGQSSF<br>YSDWYSP<br>ACGKA | Homo<br>sapiens                  |
| 1 | 1.00 | 1 | 1 | 0     | -0.002 | -0.001 | -0.003 | -0.002 | t | 7065   | CSQNPLAE<br>LKCSVKSF<br>E I  | Mus<br>musculu<br>s              |
| 1 | 1.00 | 1 | 1 | -0.03 | -0.025 | -0.023 | -0.03  | -0.032 | t | 132912 | VKAKVQP                      | Mus<br>musculu<br>s              |
| 1 | 1.00 | 1 | 1 | 0     | 0      | 0      | 0      | -0.002 | t | 74036  | YGLFHKEK<br>MLL              | Mus<br>musculu<br>s              |
| 1 | 1.00 | 1 | 1 | 0     | 0      | 0      | 0      | -0.002 | t | 75791  | YSLFQKEK<br>MVL              | Mus<br>musculu<br>s              |
| 1 | 1.00 | 1 | 1 | 0     | 0      | 0      | 0      | -0.002 | t | 75791  | YSLFQKEK<br>MVL              | Mus<br>musculu<br>s              |

|   |      |   |   |       |        |        |        |        |   |        |                              |                                  |
|---|------|---|---|-------|--------|--------|--------|--------|---|--------|------------------------------|----------------------------------|
| 1 | 1.00 | 1 | 1 | 0     | 0      | 0      | 0      | -0.002 | t | 74035  | YGLFHKEK<br>MIL              | Mus<br>musculu<br>s              |
| 1 | 1.00 | 1 | 1 | 0.04  | 0.038  | 0.04   | 0.037  | 0.041  | t | 51147  | QIVGGVYL<br>L                | Mus<br>musculu<br>s              |
| 1 | 1.00 | 1 | 1 | -0.01 | -0.008 | -0.01  | -0.003 | -0.011 | t | 132552 | PSPLPHRD<br>RD               | Homo<br>sapiens                  |
| 1 | 1.00 | 1 | 1 | -0.01 | -0.01  | -0.011 | -0.01  | -0.01  | t | 144803 | TSAHSKLA<br>VAAL             | Mus<br>musculu<br>s              |
| 1 | 1.00 | 1 | 1 | -0.02 | -0.02  | -0.025 | -0.02  | -0.019 | t | 107218 | PAGGPGF<br>P                 | Rattus<br>norvegic<br>us         |
| 1 | 1.00 | 1 | 1 | -0.01 | -0.006 | -0.019 | -0.007 | -0.01  | t | 136011 | VPALTAVE<br>TGHT             | Homo<br>sapiens                  |
| 1 | 1.00 | 1 | 1 | -0.03 | -0.03  | -0.039 | -0.03  | -0.031 | t | 12852  | EKQISDAS<br>RQ               | Mus<br>musculu<br>s              |
| 1 | 1.00 | 1 | 1 | 0.01  | 0.01   | 0.001  | 0.013  | 0.01   | t | 65797  | TPVGLAVD<br>TPWVEKES<br>ALSI | Homo<br>sapiens                  |
| 1 | 1.00 | 1 | 1 | 0     | 0      | 0      | 0.007  | 0.002  | t | 99134  | DAEFRHDS<br>GYEVHHQ          | Mus<br>musculu<br>s              |
| 1 | 1.00 | 1 | 1 | 0     | 0.002  | 0      | 0.001  | 0      | t | 153359 | ALLPFKDH<br>LPYPGGGS         | Homo<br>sapiens                  |
| 1 | 1.00 | 1 | 1 | 0.03  | 0.03   | 0.025  | 0.03   | 0.03   | t | 122956 | YYVFFEEQ<br>EDEIIGFG         | Oryctola<br>gus<br>cuniculu<br>s |
| 1 | 1.00 | 1 | 1 | 0.05  | 0.044  | 0.05   | 0.05   | 0.05   | t | 123375 | KKDELKKS<br>L                | Oryctola<br>gus<br>cuniculu<br>s |
| 1 | 1.00 | 1 | 1 | 0.05  | 0.044  | 0.05   | 0.05   | 0.05   | t | 123375 | KKDELKKS<br>L                | Oryctola<br>gus<br>cuniculu<br>s |
| 1 | 1.00 | 1 | 1 | 0.06  | 0.06   | 0.053  | 0.06   | 0.061  | t | 133707 | STRKEEKQ<br>RNGT             | Mus<br>musculu<br>s              |

|   |      |   |   |       |        |        |        |        |   |        |                               |                       |
|---|------|---|---|-------|--------|--------|--------|--------|---|--------|-------------------------------|-----------------------|
| 1 | 1.00 | 1 | 1 | -0.02 | -0.02  | -0.02  | -0.02  | -0.021 | t | 117829 | EKVKRTKD<br>ELEVIH            | Homo sapiens          |
| 1 | 1.00 | 1 | 1 | -0.02 | -0.016 | -0.014 | -0.019 | -0.02  | t | 32287  | KMALYD                        | Homo sapiens          |
| 1 | 1.00 | 1 | 1 | 0.03  | 0.03   | 0.032  | 0.03   | 0.03   | t | 133634 | LSQDVCTY                      | Mus musculus          |
| 1 | 1.00 | 1 | 1 | 0     | -0.002 | -0.005 | 0.003  | 0.002  | t | 58832  | SKGANPVE<br>IR                | Homo sapiens          |
| 1 | 1.00 | 1 | 1 | 0     | 0.004  | -0.005 | 0.003  | 0.002  | t | 58832  | SKGANPVE<br>IR                | Homo sapiens          |
| 1 | 1.00 | 1 | 1 | 0.02  | 0.024  | 0.024  | 0.021  | 0.02   | t | 2237   | AKLQDC                        | Homo sapiens          |
| 1 | 1.00 | 1 | 1 | 0     | 0      | 0      | 0      | 0      | t | 130454 | CLFPNNSY<br>C                 | Mus musculus          |
| 1 | 1.00 | 1 | 1 | 0     | 0      | 0      | 0      | 0      | t | 130454 | CLFPNNSY<br>C                 | Mus musculus          |
| 1 | 1.00 | 1 | 1 | 0     | 0      | 0      | 0      | 0      | t | 108261 | ADASVPV<br>MP                 | Homo sapiens          |
| 1 | 1.00 | 1 | 1 | 0.04  | 0.033  | 0.035  | 0.047  | 0.04   | t | 55187  | RPKHPIKH<br>QGLPQEV<br>L NENL | Homo sapiens          |
| 1 | 1.00 | 1 | 1 | -0.01 | -0.014 | -0.014 | -0.011 | -0.012 | t | 111792 | SNPSAAG<br>DWIRRN<br>V        | Oryctolagus cuniculus |
| 1 | 1.00 | 1 | 1 | 0     | 0.004  | -0.002 | 0      | -0.001 | t | 76195  | YTTSTRGD<br>LAHVTAT           | Cavia porcellus       |
| 1 | 1.00 | 1 | 1 | 0     | 0.004  | -0.002 | 0      | -0.001 | t | 76195  | YTTSTRGD<br>LAHVTAT           | Cavia porcellus       |
| 1 | 1.00 | 1 | 1 | 0.04  | 0.04   | 0.04   | 0.051  | 0.042  | t | 118448 | KEISQEAR<br>EGTQGER<br>CAV    | Homo sapiens          |

|   |      |   |   |       |        |        |        |        |   |        |                              |                 |
|---|------|---|---|-------|--------|--------|--------|--------|---|--------|------------------------------|-----------------|
| 1 | 1.00 | 1 | 1 | -0.02 | -0.016 | -0.02  | -0.013 | -0.019 | t | 131904 | HCQICHCD<br>VVNLTCE          | Homo sapiens    |
| 1 | 1.00 | 1 | 1 | 0.03  | 0.042  | 0.037  | 0.03   | 0.03   | t | 4702   | ASQKIQLV                     | Pan troglodytes |
| 1 | 1.00 | 1 | 1 | 0.01  | 0.008  | 0.01   | 0.013  | 0.01   | t | 63344  | TEEIDEIES<br>VTEEVVE         | Mus musculus    |
| 1 | 1.00 | 1 | 1 | -0.04 | -0.04  | -0.041 | -0.034 | -0.04  | t | 144710 | KNPWPNV<br>DAH               | Homo sapiens    |
| 1 | 1.00 | 1 | 1 | 0     | 0.014  | 0.005  | 0.006  | 0      | t | 60170  | SPNVSVPS<br>SSSTPLLY         | Homo sapiens    |
| 1 | 1.00 | 1 | 1 | 0     | 0      | 0.005  | 0.006  | 0      | t | 60170  | SPNVSVPS<br>SSSTPLLY         | Homo sapiens    |
| 1 | 1.00 | 1 | 1 | -0.04 | -0.04  | -0.049 | -0.04  | -0.037 | t | 141683 | KDWG                         | Mus musculus    |
| 1 | 1.00 | 1 | 1 | 0     | 0      | 0      | 0      | -0.002 | t | 45540  | NQELAYFY<br>PELFRQ           | Homo sapiens    |
| 1 | 1.00 | 1 | 1 | -0.03 | -0.031 | -0.03  | -0.023 | -0.03  | t | 72515  | WGRRLMI<br>GTAAAVVL<br>PGLVG | Homo sapiens    |
| 1 | 1.00 | 1 | 1 | -0.01 | -0.01  | -0.014 | -0.01  | -0.01  | t | 58382  | SHLQLIYNL                    | Sus scrofa      |
| 1 | 1.00 | 1 | 1 | -0.01 | -0.01  | -0.014 | -0.01  | -0.01  | t | 58382  | SHLQLIYNL                    | Sus scrofa      |
| 1 | 1.00 | 1 | 1 | 0     | 0      | 0      | 0      | -0.002 | t | 49068  | PQPQQPF<br>CQQ               | Mus musculus    |
| 1 | 1.00 | 1 | 1 | 0.02  | 0.022  | 0.014  | 0.021  | 0.02   | t | 64651  | TKPVASDY<br>WDGYSGQ<br>LVCII | Homo sapiens    |

|   |      |   |   |      |        |       |       |        |   |        |                              |                                  |
|---|------|---|---|------|--------|-------|-------|--------|---|--------|------------------------------|----------------------------------|
| 1 | 1.00 | 1 | 1 | 0.03 | 0.03   | 0.03  | 0.03  | 0.03   | t | 136855 | LRPASAW<br>TL                | Mus<br>musculu<br>s              |
| 1 | 1.00 | 1 | 1 | 0.03 | 0.03   | 0.03  | 0.03  | 0.03   | t | 103165 | FEETF EVT<br>AAPVAV          | Homo<br>sapiens                  |
| 1 | 1.00 | 1 | 1 | 0.03 | 0.03   | 0.03  | 0.03  | 0.03   | t | 115467 | RFFVAPFP<br>EVFGKEKV<br>NELS | Homo<br>sapiens                  |
| 1 | 1.00 | 1 | 1 | 0.03 | 0.028  | 0.031 | 0.029 | 0.031  | t | 120436 | DGTKVSIS                     | Rattus<br>norvegic<br>us         |
| 1 | 1.00 | 1 | 1 | 0    | 0      | 0     | 0     | -0.002 | t | 150883 | SDDEDLAT<br>S                | Mus<br>musculu<br>s              |
| 1 | 1.00 | 1 | 1 | 0    | 0      | 0     | 0     | -0.002 | t | 135799 | YGKDVKDL<br>FDYAEQ           | Mus<br>musculu<br>s              |
| 1 | 1.00 | 1 | 1 | 0    | 0      | 0     | 0     | -0.002 | t | 136353 | HGNAEVH<br>ASFFDIGG<br>S     | Oryctola<br>gus<br>cuniculu<br>s |
| 1 | 1.00 | 1 | 1 | 0    | 0      | 0     | 0     | -0.002 | t | 142913 | MVLNEG<br>TSGTA              | Oryctola<br>gus<br>cuniculu<br>s |
| 1 | 1.00 | 1 | 1 | 0    | 0      | 0     | 0     | -0.002 | t | 130524 | KFHPKDIP<br>YQVW             | Mus<br>musculu<br>s              |
| 1 | 1.00 | 1 | 1 | 0    | 0      | 0     | 0     | -0.002 | t | 99210  | ELFTNRW<br>NLQSLL            | Oryctola<br>gus<br>cuniculu<br>s |
| 1 | 1.00 | 1 | 1 | 0    | -0.002 | 0     | 0     | -0.002 | t | 72805  | WLTEKEGS<br>YP               | Mus<br>musculu<br>s              |
| 1 | 1.00 | 1 | 1 | 0    | 0      | 0     | 0     | -0.002 | t | 97547  | PFVPRADE<br>PARKGKV<br>H     | Mus<br>musculu<br>s              |
| 1 | 1.00 | 1 | 1 | 0    | 0      | 0     | 0     | -0.002 | t | 36958  | LKMADPN<br>RFRGKD            | Mus<br>musculu<br>s              |
| 1 | 1.00 | 1 | 1 | 0    | 0      | 0     | 0     | -0.002 | t | 21254  | GMDGTQL<br>DRW               | Mus<br>musculu<br>s              |
| 1 | 1.00 | 1 | 1 | 0    | 0      | 0     | 0     | -0.002 | t | 11463  | EDVNGIRK<br>PK               | Mus<br>musculu<br>s              |

|   |      |   |   |       |        |        |        |        |   |        |                         |                                  |
|---|------|---|---|-------|--------|--------|--------|--------|---|--------|-------------------------|----------------------------------|
| 1 | 1.00 | 1 | 1 | 0     | 0      | 0      | 0      | -0.002 | t | 21254  | GMDGTQL<br>DRW          | Mus<br>musculu<br>s              |
| 1 | 1.00 | 1 | 1 | 0     | 0      | 0      | 0      | -0.002 | t | 7674   | DAVTELDK<br>N           | Mus<br>musculu<br>s              |
| 1 | 1.00 | 1 | 1 | 0.01  | 0.006  | 0.01   | 0.013  | 0.01   | t | 106313 | CQQYGSS<br>PQTFG        | Oryctola<br>gus<br>cuniculu<br>s |
| 1 | 1.00 | 1 | 1 | 0     | -0.004 | 0.003  | -0.001 | 0      | t | 59854  | SNKFADFL                | Oryctola<br>gus<br>cuniculu<br>s |
| 1 | 1.00 | 1 | 1 | 0     | -0.003 | 0      | 0      | -0.001 | t | 43215  | NALTQPV<br>DQLLK        | Mus<br>musculu<br>s              |
| 1 | 1.00 | 1 | 1 | 0.02  | 0.02   | 0.02   | 0.02   | 0.02   | t | 111577 | NAMSPPA                 | Homo<br>sapiens                  |
| 1 | 1.00 | 1 | 1 | 0     | 0      | 0      | 0      | 0      | t | 108622 | SHQESTRG<br>RSRGRS      | Homo<br>sapiens                  |
| 1 | 1.00 | 1 | 1 | 0     | 0      | 0      | 0      | 0      | t | 108622 | SHQESTRG<br>RSRGRS      | Homo<br>sapiens                  |
| 1 | 1.00 | 1 | 1 | 0     | -0.002 | 0      | -0.001 | 0      | t | 59929  | SNTNSVG<br>A            | Mus<br>musculu<br>s              |
| 1 | 1.00 | 1 | 1 | -0.02 | -0.018 | -0.011 | -0.013 | -0.019 | t | 108895 | EGNVFSC                 | Homo<br>sapiens                  |
| 1 | 1.00 | 1 | 1 | 0.02  | 0.02   | 0.012  | 0.02   | 0.02   | t | 65672  | TPNSIAAIS<br>M          | Mus<br>musculu<br>s              |
| 1 | 1.00 | 1 | 1 | -0.01 | -0.01  | -0.01  | -0.01  | -0.009 | t | 6924   | CRGDDFP<br>AWYC         | Mus<br>musculu<br>s              |
| 1 | 1.00 | 1 | 1 | -0.01 | -0.008 | -0.007 | -0.009 | -0.01  | t | 46194  | NTNRRPQ                 | Homo<br>sapiens                  |
| 1 | 1.00 | 1 | 1 | 0.03  | 0.032  | 0.021  | 0.024  | 0.029  | t | 151046 | RDQEGRM<br>NYYWTLV<br>E | Homo<br>sapiens                  |
| 1 | 1.00 | 1 | 1 | 0.03  | 0.028  | 0.019  | 0.033  | 0.033  | t | 108384 | GIAGFKGE<br>QGPKGEP     | Mus<br>musculu<br>s              |
| 1 | 1.00 | 1 | 1 | -0.02 | -0.02  | -0.02  | -0.02  | -0.018 | t | 39167  | LRPTFDTR<br>LM          | Mus<br>musculu<br>s              |



|   |      |   |   |       |        |        |        |        |   |        |                               |                                  |
|---|------|---|---|-------|--------|--------|--------|--------|---|--------|-------------------------------|----------------------------------|
| 1 | 1.00 | 1 | 1 | 0.02  | 0.02   | 0.02   | 0.02   | 0.02   | t | 123618 | PPPGLAPG                      | Oryctola<br>gus<br>cuniculu<br>s |
| 1 | 1.00 | 1 | 1 | -0.01 | -0.01  | -0.01  | -0.01  | -0.011 | t | 153837 | HGRLVTLK<br>DIVLDLQP          | Cavia<br>porcellu<br>s           |
| 1 | 1.00 | 1 | 1 | -0.01 | -0.01  | -0.003 | -0.01  | -0.01  | t | 30710  | KFDRGYIS<br>PY                | Oryctola<br>gus<br>cuniculu<br>s |
| 1 | 1.00 | 1 | 1 | 0.01  | 0.01   | 0.01   | 0.01   | 0.009  | t | 137432 | NHNYPPLS<br>LLTF              | Mus<br>musculu<br>s              |
| 1 | 1.00 | 1 | 1 | 0.01  | 0.014  | 0.006  | 0.011  | 0.011  | t | 46858  | PALTAET<br>G                  | Homo<br>sapiens                  |
| 1 | 1.00 | 1 | 1 | 0.01  | 0.012  | 0.007  | 0.011  | 0.008  | t | 103493 | PPTPISVIF<br>RSDKSG           | Homo<br>sapiens                  |
| 1 | 1.00 | 1 | 1 | 0.04  | 0.042  | 0.04   | 0.047  | 0.041  | t | 141680 | ITKHNDDE<br>QYA               | Homo<br>sapiens                  |
| 1 | 1.00 | 1 | 1 | 0.02  | 0.024  | 0.012  | 0.021  | 0.019  | t | 31116  | KHIDAYKT<br>FPPTPEPKK<br>DKKK | Homo<br>sapiens                  |
| 1 | 1.00 | 1 | 1 | 0.03  | 0.028  | 0.028  | 0.029  | 0.03   | t | 78752  | NKGKWKE<br>HIKEVTEKL<br>KKA   | Mus<br>musculu<br>s              |
| 1 | 1.00 | 1 | 1 | -0.03 | -0.032 | -0.036 | -0.027 | -0.028 | t | 38953  | LQPQQSFP<br>QP                | Mus<br>musculu<br>s              |
| 1 | 1.00 | 1 | 1 | 0     | -0.004 | -0.005 | -0.001 | 0      | t | 78875  | VLHSDYCI<br>VPNKGGT<br>SIGS   | Oryctola<br>gus<br>cuniculu<br>s |
| 1 | 1.00 | 1 | 1 | 0     | -0.002 | -0.005 | -0.001 | 0      | t | 78875  | VLHSDYCI<br>VPNKGGT<br>SIGS   | Mus<br>musculu<br>s              |
| 1 | 1.00 | 1 | 1 | 0.11  | 0.11   | 0.11   | 0.11   | 0.112  | t | 143682 | EEIEKE                        | Mus<br>musculu<br>s              |

|   |      |   |   |       |        |        |        |        |   |        |                      |                       |
|---|------|---|---|-------|--------|--------|--------|--------|---|--------|----------------------|-----------------------|
| 1 | 1.00 | 1 | 1 | 0     | 0      | 0      | 0.003  | 0      | t | 117742 | AKAQTDREDLRTLLRY     | Homo sapiens          |
| 1 | 1.00 | 1 | 1 | 0     | 0      | 0      | 0.003  | 0      | t | 117773 | CNSRQTDREDELI        | Homo sapiens          |
| 1 | 1.00 | 1 | 1 | 0     | 0      | 0      | 0.003  | 0      | t | 124604 | QIERDTERDRFLSAPEAV   | Homo sapiens          |
| 1 | 1.00 | 1 | 1 | 0.04  | 0.04   | 0.04   | 0.04   | 0.04   | t | 20144  | GHIELGGKPALVPDKEVLYQ | Homo sapiens          |
| 1 | 1.00 | 1 | 1 | 0.02  | 0.02   | 0.02   | 0.02   | 0.02   | t | 78225  | PFSNLDFM             | Homo sapiens          |
| 1 | 1.00 | 1 | 1 | 0.02  | 0.02   | 0.02   | 0.02   | 0.02   | t | 93925  | SMLDQSLSL            | Ovis aries            |
| 1 | 1.00 | 1 | 1 | 0     | 0      | -0.005 | 0      | 0      | t | 59939  | SNTVKVVGKGGHS        | Homo sapiens          |
| 1 | 1.00 | 1 | 1 | -0.02 | -0.018 | -0.03  | -0.019 | -0.018 | t | 47643  | PGFGDRRKAM           | Homo sapiens          |
| 1 | 1.00 | 1 | 1 | 0.05  | 0.05   | 0.039  | 0.05   | 0.05   | t | 42646  | MSRIAAGDLESSVDDPRSEE | Homo sapiens          |
| 1 | 1.00 | 1 | 1 | 0.01  | 0.01   | 0.01   | 0.01   | 0.008  | t | 138622 | SKDQFEFALTAV         | Oryctolagus cuniculus |
| 1 | 1.00 | 1 | 1 | -0.01 | -0.012 | -0.002 | -0.011 | -0.01  | t | 25649  | IDPY                 | Mus musculus          |
| 1 | 1.00 | 1 | 1 | -0.08 | -0.082 | -0.08  | -0.081 | -0.079 | t | 75195  | YNMSIRRS             | Mus musculus          |
| 1 | 1.00 | 1 | 1 | 0.02  | 0.022  | 0.02   | 0.021  | 0.02   | t | 133553 | EDMSYWH EWNP         | Homo sapiens          |
| 1 | 1.00 | 1 | 1 | 0     | -0.003 | 0.001  | 0      | -0.003 | t | 52414  | QSQLERANLRPCEQH      | Oryctolagus cuniculus |

|   |      |   |   |       |        |        |        |        |   |        |                              |                              |
|---|------|---|---|-------|--------|--------|--------|--------|---|--------|------------------------------|------------------------------|
| 1 | 1.00 | 1 | 1 | 0.02  | 0.02   | 0.02   | 0.02   | 0.02   | t | 95155  | TDHYLQW<br>NVSE              | Rattus<br>norvegicus         |
| 1 | 1.00 | 1 | 1 | -0.01 | -0.01  | -0.005 | -0.007 | -0.012 | t | 1465   | AGDGEPP<br>EDDSDAT<br>GLAFRT | Homo<br>sapiens              |
| 1 | 1.00 | 1 | 1 | -0.04 | -0.04  | -0.049 | -0.04  | -0.04  | t | 135911 | DRVRSITL<br>GNST             | Homo<br>sapiens              |
| 1 | 1.00 | 1 | 1 | 0.01  | 0.006  | 0.01   | 0.009  | 0.01   | t | 137858 | FTPGTEYT                     | Oryctola<br>gus<br>cuniculus |
| 1 | 1.00 | 1 | 1 | 0.02  | 0.022  | 0.013  | 0.017  | 0.02   | t | 46676  | NYNVLMV<br>PKP               | Homo<br>sapiens              |
| 1 | 1.00 | 1 | 1 | 0.07  | 0.066  | 0.07   | 0.067  | 0.068  | t | 142006 | SDSAQGS<br>DVSLTA            | Oryctola<br>gus<br>cuniculus |
| 1 | 1.00 | 1 | 1 | -0.04 | -0.044 | -0.054 | -0.041 | -0.04  | t | 9154   | DLKTNNE<br>GLK               | Oryctola<br>gus<br>cuniculus |
| 1 | 1.00 | 1 | 1 | 0.03  | 0.026  | 0.026  | 0.033  | 0.03   | t | 12050  | EFMEKECP<br>FIKPEV           | Oryctola<br>gus<br>cuniculus |
| 1 | 1.00 | 1 | 1 | 0.03  | 0.033  | 0.029  | 0.03   | 0.032  | t | 34539  | KYNGEELY<br>L                | Mus<br>musculus              |
| 1 | 1.00 | 1 | 1 | 0.02  | 0.016  | 0.014  | 0.019  | 0.02   | t | 57505  | SEKSEEINE<br>KDLRKKSE<br>LQG | Oryctola<br>gus<br>cuniculus |
| 1 | 1.00 | 1 | 1 | 0     | 0.003  | 0      | 0      | 0      | t | 73189  | WVEWA                        | Equus<br>caballus            |
| 1 | 1.00 | 1 | 1 | -0.04 | -0.04  | -0.04  | -0.04  | -0.04  | t | 104149 | NHYFLRS                      | Homo<br>sapiens              |
| 1 | 1.00 | 1 | 1 | -0.03 | -0.03  | -0.031 | -0.03  | -0.03  | t | 33818  | KTPNSIAAI<br>S               | Mus<br>musculus              |
| 1 | 1.00 | 1 | 1 | -0.01 | -0.01  | -0.01  | -0.01  | -0.01  | t | 149116 | SYAAVAS                      | Sus<br>scrofa                |
| 1 | 1.00 | 1 | 1 | 0.01  | 0.002  | 0.009  | 0.01   | 0.01   | t | 24841  | HSQWNKP<br>SKP               | Mus<br>musculus              |

|   |      |   |   |       |        |        |        |        |   |        |                           |                                  |
|---|------|---|---|-------|--------|--------|--------|--------|---|--------|---------------------------|----------------------------------|
| 1 | 1.00 | 1 | 1 | 0.01  | 0.013  | 0.009  | 0.01   | 0.01   | t | 24841  | HSQWNKP<br>SKP            | Mus<br>musculu<br>s              |
| 1 | 1.00 | 1 | 1 | -0.05 | -0.046 | -0.062 | -0.053 | -0.051 | t | 104993 | SWRSKYG<br>WTA            | Homo<br>sapiens                  |
| 1 | 1.00 | 1 | 1 | 0.01  | 0.01   | 0.01   | 0.01   | 0.011  | t | 52094  | QQPP                      | Mus<br>musculu<br>s              |
| 1 | 1.00 | 1 | 1 | -0.02 | -0.023 | -0.019 | -0.02  | -0.023 | t | 30260  | KDTRLRIAYL<br>TEAKVEKL    | Oryctola<br>gus<br>cuniculu<br>s |
| 1 | 1.00 | 1 | 1 | 0.02  | 0.02   | 0.02   | 0.02   | 0.02   | t | 135496 | RYPNQVY                   | Mus<br>musculu<br>s              |
| 1 | 1.00 | 1 | 1 | 0.01  | 0.012  | -0.006 | 0.007  | 0.011  | t | 27675  | INKRKYDS<br>LKEKL         | Homo<br>sapiens                  |
| 1 | 1.00 | 1 | 1 | 0     | 0      | -0.005 | 0      | 0      | t | 122730 | DPAQPPR<br>D              | Oryctola<br>gus<br>cuniculu<br>s |
| 1 | 1.00 | 1 | 1 | 0     | 0      | -0.005 | 0      | 0      | t | 122956 | YYVFEEQ<br>EDEIIGFG       | Oryctola<br>gus<br>cuniculu<br>s |
| 1 | 1.00 | 1 | 1 | 0     | 0.011  | -0.005 | 0      | 0      | t | 113527 | HYGSLPQK                  | Gallus<br>gallus                 |
| 1 | 1.00 | 1 | 1 | 0     | 0      | -0.005 | 0      | 0      | t | 107087 | ARGLTGRP<br>GDA           | Mus<br>musculu<br>s              |
| 1 | 1.00 | 1 | 1 | 0     | 0      | -0.005 | 0      | 0      | t | 107087 | ARGLTGRP<br>GDA           | Mus<br>musculu<br>s              |
| 1 | 1.00 | 1 | 1 | 0.02  | 0.018  | 0.009  | 0.02   | 0.02   | t | 39251  | LRYGNVLD<br>VN            | Mus<br>musculu<br>s              |
| 1 | 1.00 | 1 | 1 | 0     | 0      | 0.001  | 0      | -0.002 | t | 60596  | SQWNKPS<br>KPKTN          | Oryctola<br>gus<br>cuniculu<br>s |
| 1 | 1.00 | 1 | 1 | 0     | 0.008  | 0.001  | 0      | -0.002 | t | 56610  | RYPGQGS<br>PGGNRYP<br>PQG | Gallus<br>gallus                 |

|   |      |   |   |      |       |       |       |        |   |        |                             |                                  |
|---|------|---|---|------|-------|-------|-------|--------|---|--------|-----------------------------|----------------------------------|
| 1 | 1.00 | 1 | 1 | 0    | 0.008 | 0.001 | 0     | -0.002 | t | 19868  | GGGWGQ<br>PHGGGW<br>GQPH    | Gallus<br>gallus                 |
| 1 | 1.00 | 1 | 1 | 0.03 | 0.025 | 0.02  | 0.029 | 0.03   | t | 51791  | QPADGSS<br>AGGQQQE<br>SS    | Bos<br>taurus                    |
| 1 | 1.00 | 1 | 1 | 0.03 | 0.026 | 0.02  | 0.029 | 0.03   | t | 51791  | QPADGSS<br>AGGQQQE<br>SS    | Oryctola<br>gus<br>cuniculu<br>s |
| 1 | 1.00 | 1 | 1 | 0.01 | 0.004 | 0.01  | 0.01  | 0.01   | t | 123209 | GATPVVG<br>A                | Oryctola<br>gus<br>cuniculu<br>s |
| 1 | 1.00 | 1 | 1 | 0    | 0     | 0     | 0.003 | 0      | t | 144467 | RPWLVHP<br>RHRY             | Sus<br>scrofa                    |
| 1 | 1.00 | 1 | 1 | 0    | 0.003 | 0     | 0.003 | 0      | t | 142292 | SHLQLIYNL<br>TLCELNGT<br>DW | Sus<br>scrofa                    |
| 1 | 1.00 | 1 | 1 | 0    | 0.003 | 0     | 0.003 | 0      | t | 142325 | VIIKRGKV<br>EVEGHLID        | Sus<br>scrofa                    |
| 1 | 1.00 | 1 | 1 | 0    | 0     | 0     | 0.003 | 0      | t | 140567 | KEAWLDS<br>TKAT             | Sus<br>scrofa                    |
| 1 | 1.00 | 1 | 1 | 0    | 0.003 | 0     | 0.003 | 0      | t | 142224 | LLDTKGGL<br>YRWRSVPV        | Sus<br>scrofa                    |
| 1 | 1.00 | 1 | 1 | 0    | 0     | 0     | 0.003 | 0      | t | 73254  | WWYEGLP<br>QQHYIGLV<br>A    | Equus<br>caballus                |
| 1 | 1.00 | 1 | 1 | 0    | 0     | 0     | 0.003 | 0      | t | 74004  | YGGIPGGI<br>STPITQQS<br>EK  | Equus<br>caballus                |
| 1 | 1.00 | 1 | 1 | 0    | 0     | 0     | 0.003 | 0      | t | 64601  | TKKPGGP<br>GKNRAIN<br>M     | Homo<br>sapiens                  |
| 1 | 1.00 | 1 | 1 | 0    | 0     | 0     | 0.003 | 0      | t | 72517  | WGSFPGC<br>RPFQNYFS<br>YET  | Equus<br>caballus                |

|   |      |   |   |   |        |   |       |   |   |       |                                 |                   |
|---|------|---|---|---|--------|---|-------|---|---|-------|---------------------------------|-------------------|
| 1 | 1.00 | 1 | 1 | 0 | 0      | 0 | 0.003 | 0 | t | 62353 | SVTEEIAEE<br>DKSVTEEI<br>AV     | Homo<br>sapiens   |
| 1 | 1.00 | 1 | 1 | 0 | 0.003  | 0 | 0.003 | 0 | t | 50027 | PWFLAHH<br>TGGD                 | Sus<br>scrofa     |
| 1 | 1.00 | 1 | 1 | 0 | 0      | 0 | 0.003 | 0 | t | 42592 | MSLLDGR<br>GPVRFVLA             | Homo<br>sapiens   |
| 1 | 1.00 | 1 | 1 | 0 | 0      | 0 | 0.003 | 0 | t | 37123 | LLCNNNS<br>NNYN                 | Equus<br>caballus |
| 1 | 1.00 | 1 | 1 | 0 | 0      | 0 | 0.003 | 0 | t | 51372 | QLINTNGS<br>WHINSTA             | Homo<br>sapiens   |
| 1 | 1.00 | 1 | 1 | 0 | 0      | 0 | 0.003 | 0 | t | 51372 | QLINTNGS<br>WHINSTA             | Homo<br>sapiens   |
| 1 | 1.00 | 1 | 1 | 0 | 0      | 0 | 0.003 | 0 | t | 42977 | MVNINDT<br>DTWIPKG<br>CNE       | Equus<br>caballus |
| 1 | 1.00 | 1 | 1 | 0 | 0      | 0 | 0.003 | 0 | t | 50072 | PYCYNNDS<br>KNSMAES<br>KEAR     | Equus<br>caballus |
| 1 | 1.00 | 1 | 1 | 0 | -0.002 | 0 | 0.003 | 0 | t | 51837 | QPGHLA                          | Homo<br>sapiens   |
| 1 | 1.00 | 1 | 1 | 0 | 0      | 0 | 0.003 | 0 | t | 46466 | NVRRNLIN<br>RKDYTGII<br>QVP     | Equus<br>caballus |
| 1 | 1.00 | 1 | 1 | 0 | -0.002 | 0 | 0.003 | 0 | t | 48452 | PLPPVA                          | Homo<br>sapiens   |
| 1 | 1.00 | 1 | 1 | 0 | -0.002 | 0 | 0.003 | 0 | t | 48827 | PPLPHV                          | Homo<br>sapiens   |
| 1 | 1.00 | 1 | 1 | 0 | 0      | 0 | 0.003 | 0 | t | 35068 | LCLAGTTG<br>GILWWYE             | Equus<br>caballus |
| 1 | 1.00 | 1 | 1 | 0 | -0.006 | 0 | 0.003 | 0 | t | 15509 | FEDVKGTG<br>GESRDLP<br>S<br>GQG | Papio             |
| 1 | 1.00 | 1 | 1 | 0 | 0      | 0 | 0.003 | 0 | t | 20650 | GKNRAIN<br>MLKRGLP<br>R         | Homo<br>sapiens   |

|   |      |   |   |       |        |        |        |        |   |        |                              |                                  |
|---|------|---|---|-------|--------|--------|--------|--------|---|--------|------------------------------|----------------------------------|
| 1 | 1.00 | 1 | 1 | 0     | -0.006 | 0      | 0.003  | 0      | t | 6925   | CRGFTSFK<br>KPPTPPPE<br>PET  | Papio                            |
| 1 | 1.00 | 1 | 1 | 0     | 0      | 0      | 0.003  | 0      | t | 3528   | APEDQSPE<br>TRRLDRL<br>SR    | Sus<br>scrofa                    |
| 1 | 1.00 | 1 | 1 | 0     | -0.008 | 0      | 0.003  | 0      | t | 3528   | APEDQSPE<br>TRRLDRL<br>SR    | Sus<br>scrofa                    |
| 1 | 1.00 | 1 | 1 | 0     | 0      | 0      | 0.003  | 0      | t | 784    | ADTSRIGN<br>CGPTIFLG<br>VLED | Equus<br>caballus                |
| 1 | 1.00 | 1 | 1 | 0     | 0      | 0      | 0      | -0.002 | t | 135562 | IHAMDIPP<br>PTG              | Oryctola<br>gus<br>cuniculu<br>s |
| 1 | 1.00 | 1 | 1 | 0.01  | 0.01   | 0.01   | 0.01   | 0.011  | t | 6546   | CLDDREC                      | Mus<br>musculu<br>s              |
| 1 | 1.00 | 1 | 1 | -0.02 | -0.017 | -0.033 | -0.02  | -0.017 | t | 26075  | IFGFNALV<br>DR               | Oryctola<br>gus<br>cuniculu<br>s |
| 1 | 1.00 | 1 | 1 | 0     | 0.003  | 0.001  | 0.001  | -0.002 | t | 99566  | QFRQTYR<br>QWIEAM<br>S       | Equus<br>caballus                |
| 1 | 1.00 | 1 | 1 | 0     | 0      | 0      | 0      | 0.002  | t | 128358 | CDEFKIK                      | Homo<br>sapiens                  |
| 1 | 1.00 | 1 | 1 | 0.02  | 0.017  | 0.022  | 0.02   | 0.019  | t | 95043  | SPHQVYN                      | Oryctola<br>gus<br>cuniculu<br>s |
| 1 | 1.00 | 1 | 1 | 0.02  | 0.02   | 0.022  | 0.02   | 0.019  | t | 95043  | SPHQVYN                      | Mus<br>musculu<br>s              |
| 1 | 1.00 | 1 | 1 | 0     | -0.002 | 0.001  | -0.001 | 0      | t | 96593  | LPHSNLDH<br>IL               | Rattus<br>norvegic<br>us         |
| 1 | 1.00 | 1 | 1 | 0.02  | 0.02   | 0.02   | 0.02   | 0.02   | t | 109944 | SREEMTK                      | Homo<br>sapiens                  |
| 1 | 1.00 | 1 | 1 | -0.01 | -0.01  | -0.012 | -0.01  | -0.01  | t | 156755 | SGFSY                        | Mus<br>musculu<br>s              |
| 1 | 1.00 | 1 | 1 | -0.01 | -0.01  | -0.012 | -0.01  | -0.01  | t | 156755 | SGFSY                        | Mus<br>musculu<br>s              |

|   |      |   |   |       |        |        |        |        |   |        |                              |                                  |
|---|------|---|---|-------|--------|--------|--------|--------|---|--------|------------------------------|----------------------------------|
| 1 | 1.00 | 1 | 1 | -0.02 | -0.018 | -0.02  | -0.017 | -0.02  | t | 48944  | PPVLYLPW<br>LPWGPSV          | Homo<br>sapiens                  |
| 1 | 1.00 | 1 | 1 | -0.01 | -0.01  | -0.014 | -0.01  | -0.01  | t | 77968  | PPPYAPNP<br>GPPPPYTG<br>A    | Sus<br>scrofa                    |
| 1 | 1.00 | 1 | 1 | -0.01 | -0.01  | -0.014 | -0.01  | -0.01  | t | 77968  | PPPYAPNP<br>GPPPPYTG<br>A    | Mus<br>musculu<br>s              |
| 1 | 1.00 | 1 | 1 | -0.01 | -0.01  | -0.01  | -0.01  | -0.013 | t | 130872 | GSFLTGRP<br>SKLNDRA          | Mus<br>musculu<br>s              |
| 1 | 1.00 | 1 | 1 | 0.01  | 0.008  | 0.015  | 0.013  | 0.01   | t | 158999 | LWGDGILE<br>SDLIIPVT         | Mus<br>musculu<br>s              |
| 1 | 1.00 | 1 | 1 | -0.01 | -0.01  | -0.011 | -0.004 | -0.01  | t | 52597  | QTPVNGN<br>SPWAPTA<br>PLPGDM | Homo<br>sapiens                  |
| 1 | 1.00 | 1 | 1 | -0.02 | -0.012 | -0.02  | -0.02  | -0.022 | t | 156957 | SLHSHLS                      | Gallus<br>gallus                 |
| 1 | 1.00 | 1 | 1 | 0.02  | 0.018  | 0.025  | 0.02   | 0.019  | t | 132032 | QPPPPQAQ<br>PLLPQ            | Oryctola<br>gus<br>cuniculu<br>s |
| 1 | 1.00 | 1 | 1 | -0.04 | -0.036 | -0.043 | -0.039 | -0.04  | t | 88259  | RTLVMMA<br>NTG               | Homo<br>sapiens                  |
| 1 | 1.00 | 1 | 1 | -0.02 | -0.018 | -0.025 | -0.019 | -0.018 | t | 63882  | TGLIHLHQ                     | Homo<br>sapiens                  |
| 1 | 1.00 | 1 | 1 | 0     | -0.004 | -0.007 | -0.001 | 0      | t | 20167  | GHNSVDF<br>EED               | Oryctola<br>gus<br>cuniculu<br>s |
| 1 | 1.00 | 1 | 1 | 0     | -0.012 | -0.006 | 0      | 0      | t | 19266  | GEFPRHVK<br>LKNEIENLL<br>DQV | Mus<br>musculu<br>s              |
| 1 | 1.00 | 1 | 1 | 0.01  | 0.008  | 0.01   | 0.013  | 0.01   | t | 95828  | SGASAQS<br>GTSAQ             | Mus<br>musculu<br>s              |



|   |      |   |   |       |        |        |        |        |   |        |                              |                       |
|---|------|---|---|-------|--------|--------|--------|--------|---|--------|------------------------------|-----------------------|
| 1 | 1.00 | 1 | 1 | 0.03  | 0.03   | 0.038  | 0.031  | 0.029  | t | 18764  | GASDLRSS                     | Homo sapiens          |
| 1 | 1.00 | 1 | 1 | 0     | 0      | -0.01  | 0      | 0      | t | 67934  | VDENANANN                    | Oryctolagus cuniculus |
| 1 | 1.00 | 1 | 1 | -0.04 | -0.04  | -0.028 | -0.03  | -0.038 | t | 138545 | PRRKAGI                      | Homo sapiens          |
| 1 | 1.00 | 1 | 1 | 0     | 0.004  | 0      | 0.007  | 0.001  | t | 118058 | PPPGIRGP                     | Homo sapiens          |
| 1 | 1.00 | 1 | 1 | 0     | 0      | 0      | 0      | -0.001 | t | 144598 | CFVGTHPQLRC                  | Mus musculus          |
| 1 | 1.00 | 1 | 1 | -0.01 | -0.01  | -0.02  | -0.016 | -0.012 | t | 32975  | KQEVQRGGRYNQ                 | Homo sapiens          |
| 1 | 1.00 | 1 | 1 | -0.01 | -0.012 | -0.014 | -0.007 | -0.008 | t | 30421  | KEGYLVDKNT                   | Mus musculus          |
| 1 | 1.00 | 1 | 1 | 0.01  | 0.013  | 0.002  | 0.01   | 0.01   | t | 50296  | QAKLEAEA<br>KALKEQLA<br>KQAE | Mus musculus          |
| 1 | 1.00 | 1 | 1 | 0.03  | 0.03   | 0.023  | 0.03   | 0.03   | t | 58931  | SKQPTIDIDLCDICT              | Oryctolagus cuniculus |
| 1 | 1.00 | 1 | 1 | 0.05  | 0.05   | 0.05   | 0.05   | 0.05   | t | 92477  | DQSLSSLQFA                   | Ovis aries            |
| 1 | 1.00 | 1 | 1 | 0.03  | 0.03   | 0.03   | 0.03   | 0.03   | t | 104180 | PNAPDAS                      | Mus musculus          |
| 1 | 1.00 | 1 | 1 | 0.01  | 0.01   | 0.01   | 0.01   | 0.01   | t | 119619 | NNYKTPP                      | Homo sapiens          |
| 1 | 1.00 | 1 | 1 | 0.01  | 0.01   | 0.01   | 0.01   | 0.01   | t | 78973  | FGLGGIGVLTPDNYLITPAL         | Homo sapiens          |
| 1 | 1.00 | 1 | 1 | 0     | 0      | -0.007 | 0      | 0.001  | t | 141523 | ALEPPHNL<br>PVP              | Mus musculus          |

|   |      |   |   |       |        |        |        |        |   |        |                             |                                  |
|---|------|---|---|-------|--------|--------|--------|--------|---|--------|-----------------------------|----------------------------------|
| 1 | 1.00 | 1 | 1 | 0     | 0      | 0      | 0      | 0      | t | 70387  | VPNLRGDL<br>QV              | Cavia<br>porcellu<br>s           |
| 1 | 1.00 | 1 | 1 | 0     | 0      | 0      | 0      | 0      | t | 70387  | VPNLRGDL<br>QV              | Cavia<br>porcellu<br>s           |
| 1 | 1.00 | 1 | 1 | 0     | 0      | 0      | 0      | 0      | t | 23397  | GYLEQLLR<br>LK              | Homo<br>sapiens                  |
| 1 | 1.00 | 1 | 1 | 0.01  | 0.01   | 0.01   | 0.01   | 0.012  | t | 131891 | GLLETNFT<br>A               | Homo<br>sapiens                  |
| 1 | 1.00 | 1 | 1 | -0.01 | -0.014 | -0.016 | -0.011 | -0.01  | t | 416    | AARQPDL                     | Oryctola<br>gus<br>cuniculu<br>s |
| 1 | 1.00 | 1 | 1 | -0.01 | -0.012 | -0.016 | -0.011 | -0.01  | t | 416    | AARQPDL                     | Mus<br>musculu<br>s              |
| 1 | 1.00 | 1 | 1 | 0.03  | 0.027  | 0.03   | 0.03   | 0.029  | t | 125414 | FSEEKLVFS<br>LRLMEEN        | Oryctola<br>gus<br>cuniculu<br>s |
| 1 | 1.00 | 1 | 1 | -0.04 | -0.042 | -0.044 | -0.041 | -0.04  | t | 42676  | MSTLNTH<br>GAF              | Mus<br>musculu<br>s              |
| 1 | 1.00 | 1 | 1 | -0.04 | -0.044 | -0.044 | -0.041 | -0.04  | t | 42676  | MSTLNTH<br>GAF              | Oryctola<br>gus<br>cuniculu<br>s |
| 1 | 1.00 | 1 | 1 | 0.02  | 0.023  | 0.015  | 0.02   | 0.022  | t | 33161  | KRIPLDVA<br>EG              | Mus<br>musculu<br>s              |
| 1 | 1.00 | 1 | 1 | 0.03  | 0.03   | 0.03   | 0.041  | 0.032  | t | 118539 | NNGNLQL<br>RNKEVTW<br>EVLEG | Homo<br>sapiens                  |
| 1 | 1.00 | 1 | 1 | 0.07  | 0.072  | 0.075  | 0.077  | 0.07   | t | 114207 | FLGELTSSE<br>VATEV          | Homo<br>sapiens                  |
| 1 | 1.00 | 1 | 1 | -0.05 | -0.046 | -0.058 | -0.049 | -0.048 | t | 20638  | GKMVQVV<br>Y                | Homo<br>sapiens                  |
| 1 | 1.00 | 1 | 1 | 0     | -0.002 | 0      | -0.001 | 0      | t | 45695  | NRLGGLFN<br>FGPKQKI         | Mus<br>musculu<br>s              |

|   |      |   |   |       |        |        |        |        |   |        |                              |                              |
|---|------|---|---|-------|--------|--------|--------|--------|---|--------|------------------------------|------------------------------|
| 1 | 1.00 | 1 | 1 | 0.01  | 0.018  | 0.01   | 0.01   | 0.008  | t | 156843 | AHSEMG<br>RATMT              | Gallus<br>gallus             |
| 1 | 1.00 | 1 | 1 | 0.02  | 0.02   | 0.017  | 0.021  | 0.02   | t | 47399  | PERLASCR<br>PL               | Homo<br>sapiens              |
| 1 | 1.00 | 1 | 1 | 0     | -0.002 | -0.011 | -0.001 | 0      | t | 95094  | IGFRGLDG<br>VHCTPTTD<br>SGVI | Rattus<br>norvegicus         |
| 1 | 1.00 | 1 | 1 | 0.05  | 0.05   | 0.05   | 0.05   | 0.049  | t | 78455  | LPTNLTQ                      | Mus<br>musculus              |
| 1 | 1.00 | 1 | 1 | -0.06 | -0.062 | -0.055 | -0.06  | -0.063 | t | 125230 | RERRGIAL                     | Mus<br>musculus              |
| 1 | 1.00 | 1 | 1 | -0.03 | -0.032 | -0.04  | -0.029 | -0.028 | t | 63850  | TGHWRC<br>P                  | Homo<br>sapiens              |
| 1 | 1.00 | 1 | 1 | 0.01  | 0.01   | 0.01   | 0.01   | 0.008  | t | 38952  | LQPQQPFS<br>QQ               | Mus<br>musculus              |
| 1 | 1.00 | 1 | 1 | -0.01 | -0.013 | -0.01  | -0.01  | -0.012 | t | 125052 | FSLRLMEE<br>NW               | Oryctola<br>gus<br>cuniculus |
| 1 | 1.00 | 1 | 1 | 0     | 0      | 0      | 0      | 0      | t | 123858 | YDPKFEQL<br>K                | Ovis<br>aries                |
| 1 | 1.00 | 1 | 1 | -0.02 | -0.02  | -0.02  | -0.02  | -0.02  | t | 79515  | ALSIIGK                      | Oryctola<br>gus<br>cuniculus |
| 1 | 1.00 | 1 | 1 | 0.01  | 0.01   | 0.002  | 0.01   | 0.01   | t | 14208  | ESLTTTSTA<br>LGKLQDVV        | Mus<br>musculus              |
| 1 | 1.00 | 1 | 1 | 0.03  | 0.03   | 0.023  | 0.03   | 0.03   | t | 124588 | PQEETLQA<br>FDSHYDYT         | Homo<br>sapiens              |
| 1 | 1.00 | 1 | 1 | 0.07  | 0.073  | 0.064  | 0.07   | 0.069  | t | 78429  | KEQLPTSY<br>PPERAGW          | Mus<br>musculus              |
| 1 | 1.00 | 1 | 1 | 0.02  | 0.02   | 0.02   | 0.026  | 0.02   | t | 158669 | ADIKTALE<br>ARKAADT          | Homo<br>sapiens              |
| 1 | 1.00 | 1 | 1 | -0.01 | 0.002  | -0.008 | -0.01  | -0.012 | t | 156975 | WSSTVLRV<br>SPTRTVP          | Gallus<br>gallus             |

|   |      |   |   |       |        |        |        |        |   |        |                              |                     |
|---|------|---|---|-------|--------|--------|--------|--------|---|--------|------------------------------|---------------------|
| 1 | 1.00 | 1 | 1 | 0     | 0.002  | -0.003 | -0.001 | -0.002 | t | 56885  | SALTSAIA<br>GFVFSC           | Ovis<br>aries       |
| 1 | 1.00 | 1 | 1 | -0.04 | -0.04  | -0.042 | -0.044 | -0.04  | t | 69856  | VLWVVK<br>TPA                | Homo<br>sapiens     |
| 1 | 1.00 | 1 | 1 | 0     | 0      | -0.004 | -0.003 | 0      | t | 86551  | MTAEPKTI<br>VL               | Homo<br>sapiens     |
| 1 | 1.00 | 1 | 1 | 0     | 0      | -0.004 | -0.003 | 0      | t | 86870  | NLFGATLV<br>NA               | Homo<br>sapiens     |
| 1 | 1.00 | 1 | 1 | 0.01  | 0.01   | 0.01   | 0.01   | 0.01   | t | 24881  | HSYSPGEI<br>NRVASC           | Homo<br>sapiens     |
| 1 | 1.00 | 1 | 1 | 0.02  | 0.022  | 0.018  | 0.017  | 0.018  | t | 58037  | SGFTLEFLE<br>HAFSVD          | Homo<br>sapiens     |
| 1 | 1.00 | 1 | 1 | 0.02  | 0.02   | 0.02   | 0.02   | 0.019  | t | 144778 | SGTHPFLD<br>KSFS             | Mus<br>musculu<br>s |
| 1 | 1.00 | 1 | 1 | 0.05  | 0.05   | 0.052  | 0.053  | 0.052  | t | 99007  | SLQPED                       | Homo<br>sapiens     |
| 1 | 1.00 | 1 | 1 | 0.01  | 0.01   | 0      | 0.01   | 0.01   | t | 9661   | DPKSLSKG<br>EIASTFESQ<br>NST | Mus<br>musculu<br>s |
| 1 | 1.00 | 1 | 1 | 0.01  | 0.01   | 0.01   | 0.01   | 0.009  | t | 24243  | HLKYATYP<br>PYPQ             | Mus<br>musculu<br>s |
| 1 | 1.00 | 1 | 1 | -0.02 | -0.018 | -0.02  | -0.017 | -0.019 | t | 7046   | CSNKSKR                      | Homo<br>sapiens     |
| 1 | 1.00 | 1 | 1 | -0.01 | -0.01  | -0.01  | 0.001  | -0.01  | t | 104045 | LMEPCYA<br>WGCTGPK           | Homo<br>sapiens     |
| 1 | 1.00 | 1 | 1 | 0     | 0      | 0.002  | 0      | -0.002 | t | 23510  | GYYPSPDP<br>NTFFYAPP<br>YSA  | Sus<br>scrofa       |
| 1 | 1.00 | 1 | 1 | 0     | 0      | 0      | 0      | -0.001 | t | 137743 | DTPLTIAGL<br>KLV             | Mus<br>musculu<br>s |
| 1 | 1.00 | 1 | 1 | 0.02  | 0.022  | 0.02   | 0.023  | 0.021  | t | 51307  | QLDPAFG<br>A                 | Homo<br>sapiens     |
| 1 | 1.00 | 1 | 1 | 0.03  | 0.028  | 0.03   | 0.029  | 0.03   | t | 155333 | PADS                         | Mus<br>musculu<br>s |

|   |      |   |   |       |        |        |        |        |   |        |                              |                                  |
|---|------|---|---|-------|--------|--------|--------|--------|---|--------|------------------------------|----------------------------------|
| 1 | 1.00 | 1 | 1 | 0     | 0      | -0.012 | 0      | 0.002  | t | 23048  | GVLSVDLS<br>LTVELKI          | Oryctola<br>gus<br>cuniculu<br>s |
| 1 | 1.00 | 1 | 1 | -0.01 | -0.01  | -0.009 | -0.01  | -0.011 | t | 64541  | TKDTNNN<br>L                 | Mus<br>musculu<br>s              |
| 1 | 1.00 | 1 | 1 | 0.02  | 0.02   | 0.025  | 0.02   | 0.02   | t | 108267 | AGQRGIV                      | Mus<br>musculu<br>s              |
| 1 | 1.00 | 1 | 1 | 0.02  | 0.023  | 0.02   | 0.02   | 0.018  | t | 140842 | EGNTDER<br>GTPEYNIA<br>LGQRR | Mus<br>musculu<br>s              |
| 1 | 1.00 | 1 | 1 | 0     | 0.008  | 0      | 0      | -0.002 | t | 156939 | PPEKSHL                      | Gallus<br>gallus                 |
| 1 | 1.00 | 1 | 1 | 0.03  | 0.028  | 0.032  | 0.029  | 0.029  | t | 49749  | PTPSDNPF<br>SKLYKETIE<br>TFD | Mus<br>musculu<br>s              |
| 1 | 1.00 | 1 | 1 | 0.05  | 0.05   | 0.05   | 0.05   | 0.05   | t | 149083 | NPTQGSP                      | Sus<br>scrofa                    |
| 1 | 1.00 | 1 | 1 | 0.05  | 0.05   | 0.05   | 0.05   | 0.05   | t | 112115 | FSLTTYG                      | Homo<br>sapiens                  |
| 1 | 1.00 | 1 | 1 | 0.03  | 0.03   | 0.03   | 0.03   | 0.03   | t | 149079 | NLTQTQM                      | Sus<br>scrofa                    |
| 1 | 1.00 | 1 | 1 | -0.02 | -0.022 | -0.025 | -0.017 | -0.018 | t | 28719  | ISSIFSR                      | Mus<br>musculu<br>s              |
| 1 | 1.00 | 1 | 1 | -0.02 | -0.022 | -0.025 | -0.017 | -0.018 | t | 28719  | ISSIFSR                      | Mus<br>musculu<br>s              |
| 1 | 1.00 | 1 | 1 | -0.04 | -0.04  | -0.043 | -0.04  | -0.04  | t | 50741  | QFAPSASA<br>FFGMSRIG<br>M    | Homo<br>sapiens                  |
| 1 | 1.00 | 1 | 1 | 0.04  | 0.04   | 0.037  | 0.04   | 0.04   | t | 98772  | FCMENSA<br>EPE               | Homo<br>sapiens                  |
| 1 | 1.00 | 1 | 1 | 0.03  | 0.028  | 0.025  | 0.031  | 0.031  | t | 14774  | EVLYEAFD<br>EMEECASK<br>AALI | Homo<br>sapiens                  |
| 1 | 1.00 | 1 | 1 | -0.01 | -0.01  | -0.01  | -0.01  | -0.01  | t | 52476  | QTASGLVS<br>MF               | Homo<br>sapiens                  |
| 1 | 1.00 | 1 | 1 | -0.02 | -0.022 | -0.02  | -0.021 | -0.02  | t | 46868  | PANCPKS                      | Mus<br>musculu<br>s              |

|   |      |   |   |       |        |        |        |        |   |        |                              |                                  |
|---|------|---|---|-------|--------|--------|--------|--------|---|--------|------------------------------|----------------------------------|
| 1 | 1.00 | 1 | 1 | 0.06  | 0.057  | 0.06   | 0.06   | 0.06   | t | 153451 | QTAPSPQ<br>DTVVS             | Oryctola<br>gus<br>cuniculu<br>s |
| 1 | 1.00 | 1 | 1 | 0.02  | 0.02   | 0.02   | 0.02   | 0.02   | t | 104132 | MSENVEQ<br>HNPINAGT          | Oryctola<br>gus<br>cuniculu<br>s |
| 1 | 1.00 | 1 | 1 | 0.03  | 0.03   | 0.023  | 0.03   | 0.03   | t | 131114 | TQLDELLT<br>EHRMTW<br>DPAQPP | Homo<br>sapiens                  |
| 1 | 1.00 | 1 | 1 | 0.02  | 0.026  | 0.02   | 0.02   | 0.02   | t | 123339 | ISYDPKFE<br>Q                | Ovis<br>aries                    |
| 1 | 1.00 | 1 | 1 | -0.04 | -0.042 | -0.037 | -0.037 | -0.043 | t | 11497  | EEAILRPLR<br>VQGKRAK         | Mus<br>musculu<br>s              |
| 1 | 1.00 | 1 | 1 | 0     | -0.008 | 0      | 0      | 0      | t | 60116  | SPLLGCIGS<br>TCAE            | Mus<br>musculu<br>s              |
| 1 | 1.00 | 1 | 1 | -0.01 | -0.013 | -0.022 | -0.01  | -0.01  | t | 44602  | NKSTLQNR<br>RAAVS            | Mus                              |
| 1 | 1.00 | 1 | 1 | -0.03 | -0.026 | -0.038 | -0.029 | -0.028 | t | 98062  | GGVAGMK<br>AHK               | Homo<br>sapiens                  |
| 1 | 1.00 | 1 | 1 | -0.01 | -0.01  | -0.01  | -0.01  | -0.01  | t | 142022 | SRIFRGDN                     | Mus<br>musculu<br>s              |
| 1 | 1.00 | 1 | 1 | -0.03 | -0.03  | -0.03  | -0.03  | -0.03  | t | 53068  | RAAKLQ                       | Homo<br>sapiens                  |
| 1 | 1.00 | 1 | 1 | -0.01 | -0.01  | -0.01  | -0.01  | -0.012 | t | 52312  | QSESVEFT<br>KDTQTGM          | Mus<br>musculu<br>s              |
| 1 | 1.00 | 1 | 1 | 0.01  | 0.01   | 0.01   | 0.01   | 0.009  | t | 125384 | DSHYDYTI<br>CGDSEDM<br>VCTPK | Homo<br>sapiens                  |
| 1 | 1.00 | 1 | 1 | 0.01  | 0.006  | 0      | 0.01   | 0.012  | t | 58440  | SIAADQLP                     | Oryctola<br>gus<br>cuniculu<br>s |
| 1 | 1.00 | 1 | 1 | 0.04  | 0.037  | 0.046  | 0.04   | 0.04   | t | 12981  | ELDGDQM<br>I                 | Oryctola<br>gus<br>cuniculu<br>s |
| 1 | 1.00 | 1 | 1 | 0.02  | 0.02   | 0.02   | 0.02   | 0.02   | t | 132929 | WGENNY<br>M                  | Homo<br>sapiens                  |

|   |      |   |   |       |        |        |        |        |   |        |                              |                       |
|---|------|---|---|-------|--------|--------|--------|--------|---|--------|------------------------------|-----------------------|
| 1 | 1.00 | 1 | 1 | 0     | 0      | 0      | 0      | 0      | t | 104344 | VTGFTMT                      | Mus musculus          |
| 1 | 1.00 | 1 | 1 | -0.03 | -0.03  | -0.036 | -0.033 | -0.03  | t | 66410  | TSRVEHAV<br>VYYVYSP          | Homo sapiens          |
| 1 | 1.00 | 1 | 1 | 0.02  | 0.024  | 0.022  | 0.023  | 0.02   | t | 120168 | RGWKHSV<br>TYSGGPDTPY        | Homo sapiens          |
| 1 | 1.00 | 1 | 1 | 0     | 0      | 0      | -0.001 | -0.002 | t | 28911  | ITGHRMA<br>WMMMMNWS          | Homo sapiens          |
| 1 | 1.00 | 1 | 1 | 0.04  | 0.04   | 0.04   | 0.036  | 0.04   | t | 157130 | CIIEEN                       | Homo sapiens          |
| 1 | 1.00 | 1 | 1 | 0.02  | 0.02   | 0.01   | 0.02   | 0.019  | t | 48093  | PKKPNENK<br>LKQPNE           | Mus musculus          |
| 1 | 1.00 | 1 | 1 | 0.02  | 0.017  | 0.01   | 0.02   | 0.019  | t | 48093  | PKKPNENK<br>LKQPNE           | Oryctolagus cuniculus |
| 1 | 1.00 | 1 | 1 | -0.03 | -0.03  | -0.025 | -0.032 | -0.032 | t | 41548  | MFVPHYTL<br>NANSIY           | Homo sapiens          |
| 1 | 1.00 | 1 | 1 | 0     | 0      | -0.005 | -0.001 | -0.004 | t | 138199 | KQYLERTR<br>AEVDTV           | Mus musculus          |
| 1 | 1.00 | 1 | 1 | 0.02  | 0.02   | 0.015  | 0.018  | 0.02   | t | 79047  | PSCSPTN<br>MIMDGTA<br>SVNIPA | Homo sapiens          |
| 1 | 1.00 | 1 | 1 | 0.02  | 0.017  | 0.012  | 0.02   | 0.022  | t | 97025  | VDDALIDS<br>TKIYSYFPS<br>V   | Oryctolagus cuniculus |
| 1 | 1.00 | 1 | 1 | -0.02 | -0.026 | -0.02  | -0.02  | -0.02  | t | 123676 | QPPYMPP<br>P                 | Oryctolagus cuniculus |
| 1 | 1.00 | 1 | 1 | 0     | 0      | 0      | 0      | 0      | t | 78364  | DQHGWD                       | Mus musculus          |
| 1 | 1.00 | 1 | 1 | 0.05  | 0.052  | 0.047  | 0.051  | 0.05   | t | 53933  | RGPEQTQ<br>GNFGDQD<br>LIR    | Homo sapiens          |
| 1 | 1.00 | 1 | 1 | 0.01  | 0.01   | 0.01   | 0.01   | 0.01   | t | 73663  | YEGFWTG<br>VTQNAKGI<br>T     | Mus musculus          |

|   |      |   |   |       |        |        |        |        |   |        |                              |                       |
|---|------|---|---|-------|--------|--------|--------|--------|---|--------|------------------------------|-----------------------|
| 1 | 1.00 | 1 | 1 | 0     | 0      | 0      | 0      | -0.001 | t | 110863 | GLKAKPKF<br>TLGKRKAT<br>PTTS | Homo sapiens          |
| 1 | 1.00 | 1 | 1 | -0.02 | -0.022 | -0.025 | -0.021 | -0.019 | t | 56699  | SAAFYYRV                     | Mus musculus          |
| 1 | 1.00 | 1 | 1 | 0.01  | 0.01   | 0.01   | 0.01   | 0.011  | t | 51233  | QKPLK                        | Bos taurus            |
| 1 | 1.00 | 1 | 1 | 0.01  | 0.018  | 0.01   | 0.01   | 0.011  | t | 51233  | QKPLK                        | Capra hircus          |
| 1 | 1.00 | 1 | 1 | 0.01  | 0.014  | 0.01   | 0.01   | 0.011  | t | 51233  | QKPLK                        | Mus musculus          |
| 1 | 1.00 | 1 | 1 | 0.04  | 0.044  | 0.04   | 0.043  | 0.039  | t | 111036 | TESTFTGE<br>AYSV             | Homo sapiens          |
| 1 | 1.00 | 1 | 1 | 0.01  | 0.01   | 0.01   | 0.01   | 0.011  | t | 115414 | PHSSNICNI<br>S               | Homo sapiens          |
| 1 | 1.00 | 1 | 1 | -0.02 | -0.006 | -0.015 | -0.017 | -0.021 | t | 115591 | APEYRGRT<br>ELLK             | Homo sapiens          |
| 1 | 1.00 | 1 | 1 | 0.01  | 0.01   | 0.008  | 0.01   | 0.011  | t | 53832  | RGD                          | Homo sapiens          |
| 1 | 1.00 | 1 | 1 | 0.03  | 0.033  | 0.03   | 0.03   | 0.03   | t | 119753 | AQGARVY<br>AYV               | Mus musculus          |
| 1 | 1.00 | 1 | 1 | 0.03  | 0.03   | 0.03   | 0.03   | 0.03   | t | 119753 | AQGARVY<br>AYV               | Mus musculus          |
| 1 | 1.00 | 1 | 1 | 0.03  | 0.03   | 0.03   | 0.03   | 0.03   | t | 119753 | AQGARVY<br>AYV               | Oryctolagus cuniculus |
| 1 | 1.00 | 1 | 1 | 0.03  | 0.027  | 0.03   | 0.03   | 0.03   | t | 119753 | AQGARVY<br>AYV               | Oryctolagus cuniculus |



|   |      |   |   |       |        |        |        |       |   |        |                     |                                  |
|---|------|---|---|-------|--------|--------|--------|-------|---|--------|---------------------|----------------------------------|
| 1 | 1.00 | 1 | 1 | 0.01  | 0.01   | 0.01   | 0.01   | 0.01  | t | 146979 | GLAPSKAL<br>DSKSY   | Homo<br>sapiens                  |
| 1 | 1.00 | 1 | 1 | 0.01  | 0.01   | 0.01   | 0.01   | 0.01  | t | 119754 | AQRLMRY<br>WAN      | Mus<br>musculu<br>s              |
| 1 | 1.00 | 1 | 1 | 0.01  | 0.01   | 0.01   | 0.01   | 0.01  | t | 119754 | AQRLMRY<br>WAN      | Oryctola<br>gus<br>cuniculu<br>s |
| 1 | 1.00 | 1 | 1 | 0.01  | 0.01   | 0.01   | 0.01   | 0.01  | t | 118556 | PPPGMIPP            | Homo<br>sapiens                  |
| 1 | 1.00 | 1 | 1 | 0.01  | 0.013  | 0.01   | 0.01   | 0.01  | t | 119754 | AQRLMRY<br>WAN      | Mus<br>musculu<br>s              |
| 1 | 1.00 | 1 | 1 | 0     | 0.004  | 0      | 0.001  | 0     | t | 138080 | VSLGQNVL            | Homo<br>sapiens                  |
| 1 | 1.00 | 1 | 1 | 0.04  | 0.04   | 0.035  | 0.034  | 0.041 | t | 115107 | SENSEKTT<br>MPLW    | Homo<br>sapiens                  |
| 1 | 1.00 | 1 | 1 | 0     | 0      | -0.002 | 0      | 0.001 | t | 97718  | VAFPLPTD            | Mus<br>musculu<br>s              |
| 1 | 1.00 | 1 | 1 | 0     | -0.002 | 0      | 0.009  | 0.003 | t | 38304  | LNPKTNK<br>WEDK     | Mus<br>musculu<br>s              |
| 1 | 1.00 | 1 | 1 | 0     | 0      | 0      | -0.002 | 0     | t | 3288   | ANGAGNQ<br>PG       | Homo<br>sapiens                  |
| 1 | 1.00 | 1 | 1 | 0     | 0      | 0      | 0      | 0     | t | 121870 | SPLIKHPEV<br>KSA    | Rattus<br>norvegic<br>us         |
| 1 | 1.00 | 1 | 1 | 0     | 0      | 0      | 0      | 0     | t | 60432  | SQERNFV<br>DSI      | Mus<br>musculu<br>s              |
| 1 | 1.00 | 1 | 1 | 0     | 0.003  | 0      | 0      | 0     | t | 60432  | SQERNFV<br>DSI      | Mus<br>musculu<br>s              |
| 1 | 1.00 | 1 | 1 | -0.03 | -0.026 | -0.039 | -0.029 | -0.03 | t | 60956  | SSDSNTKT<br>YADLKHR | Homo<br>sapiens                  |
| 1 | 1.00 | 1 | 1 | 0.02  | 0.024  | 0.02   | 0.021  | 0.02  | t | 67168  | TVSSQSFR            | Homo<br>sapiens                  |

|   |      |   |   |       |       |        |        |        |   |        |                              |                       |
|---|------|---|---|-------|-------|--------|--------|--------|---|--------|------------------------------|-----------------------|
| 1 | 1.00 | 1 | 1 | 0     | 0     | 0      | 0      | 0      | t | 137927 | LSADFTPG                     | Oryctolagus cuniculus |
| 1 | 1.00 | 1 | 1 | 0     | 0     | 0      | 0      | 0      | t | 137927 | LSADFTPG                     | Homo sapiens          |
| 1 | 1.00 | 1 | 1 | 0.02  | 0.019 | 0.017  | 0.021  | 0.02   | t | 49872  | PVGGQSSF<br>YSDWYSP<br>ACGKA | Homo sapiens          |
| 1 | 1.00 | 1 | 1 | 0.01  | 0.01  | 0.012  | 0.01   | 0.009  | t | 97177  | AELPF                        | Mus musculus          |
| 1 | 1.00 | 1 | 1 | -0.03 | -0.03 | -0.032 | -0.03  | -0.03  | t | 104780 | FRHDSGY                      | Mus musculus          |
| 1 | 1.00 | 1 | 1 | -0.03 | -0.03 | -0.032 | -0.03  | -0.03  | t | 104780 | FRHDSGY                      | Mus musculus          |
| 1 | 1.00 | 1 | 1 | -0.03 | -0.03 | -0.032 | -0.03  | -0.03  | t | 104780 | FRHDSGY                      | Mus musculus          |
| 1 | 1.00 | 1 | 1 | -0.03 | -0.03 | -0.032 | -0.03  | -0.03  | t | 104780 | FRHDSGY                      | Mus musculus          |
| 1 | 1.00 | 1 | 1 | 0.02  | 0.02  | 0.02   | 0.02   | 0.02   | t | 109252 | GSLPQKSQ<br>RSQDENP<br>V     | Rattus norvegicus     |
| 1 | 1.00 | 1 | 1 | -0.01 | -0.01 | -0.013 | -0.013 | -0.013 | t | 115652 | SSRISYWT<br>IVKP             | Homo sapiens          |
| 1 | 1.00 | 1 | 1 | 0.01  | 0.008 | -0.002 | 0.003  | 0.009  | t | 30300  | KEALDKYE<br>LENHDLKT<br>KN   | Mus musculus          |
| 1 | 1.00 | 1 | 1 | 0.01  | 0.01  | 0.01   | 0.01   | 0.008  | t | 48595  | PNAN                         | Mus musculus          |
| 1 | 1.00 | 1 | 1 | 0.02  | 0.02  | 0.027  | 0.02   | 0.019  | t | 107744 | APVDSRTY<br>TRVADHI          | Homo sapiens          |
| 1 | 1.00 | 1 | 1 | -0.02 | -0.02 | -0.02  | -0.02  | -0.022 | t | 140254 | KYEHGGNI<br>ID               | Mus musculus          |
| 1 | 1.00 | 1 | 1 | -0.02 | -0.02 | -0.02  | -0.02  | -0.02  | t | 47604  | PGACYSRP<br>LV               | Homo sapiens          |

|   |      |   |   |       |        |        |        |        |   |        |                              |                                  |
|---|------|---|---|-------|--------|--------|--------|--------|---|--------|------------------------------|----------------------------------|
| 1 | 1.00 | 1 | 1 | -0.01 | -0.01  | -0.01  | -0.01  | -0.012 | t | 38950  | LQPQQPF<br>PQQ               | Mus<br>musculu<br>s              |
| 1 | 1.00 | 1 | 1 | -0.01 | -0.01  | -0.01  | -0.01  | -0.012 | t | 49087  | PQQPFPQ<br>QPQ               | Mus<br>musculu<br>s              |
| 1 | 1.00 | 1 | 1 | 0.02  | 0.02   | 0.02   | 0.02   | 0.02   | t | 106855 | SMFTKYPT<br>QLLY             | Mus<br>musculu<br>s              |
| 1 | 1.00 | 1 | 1 | 0     | 0      | 0      | 0      | 0      | t | 107659 | VKFNWYV                      | Homo<br>sapiens                  |
| 1 | 1.00 | 1 | 1 | 0     | 0      | 0      | 0      | 0      | t | 111424 | IKMVSEPY<br>GDSLFFY          | Mus<br>musculu<br>s              |
| 1 | 1.00 | 1 | 1 | 0     | 0      | -0.004 | 0      | 0      | t | 52158  | QQTFPQQ<br>PQL               | Mus<br>musculu<br>s              |
| 1 | 1.00 | 1 | 1 | 0     | 0      | -0.004 | 0      | 0      | t | 52158  | QQTFPQQ<br>PQL               | Mus<br>musculu<br>s              |
| 1 | 1.00 | 1 | 1 | 0     | 0      | -0.005 | 0      | 0      | t | 24786  | HSLGKWL<br>GHPDKF            | Mus<br>musculu<br>s              |
| 1 | 1.00 | 1 | 1 | -0.02 | -0.018 | -0.031 | -0.023 | -0.02  | t | 37165  | LLDKIYTSP<br>LC              | Homo<br>sapiens                  |
| 1 | 1.00 | 1 | 1 | -0.01 | -0.01  | -0.013 | -0.013 | -0.01  | t | 60914  | SSATK                        | Homo<br>sapiens                  |
| 1 | 1.00 | 1 | 1 | 0     | -0.006 | 0      | 0      | 0      | t | 123570 | PATKKAV<br>Q                 | Oryctola<br>gus<br>cuniculu<br>s |
| 1 | 1.00 | 1 | 1 | 0.01  | 0.008  | 0.005  | 0.009  | 0.01   | t | 78876  | VLLGRKW<br>EDEVDDE<br>SYF    | Mus<br>musculu<br>s              |
| 1 | 1.00 | 1 | 1 | 0.03  | 0.03   | 0.03   | 0.026  | 0.031  | t | 134031 | DEYDEVA<br>MP                | Homo<br>sapiens                  |
| 1 | 1.00 | 1 | 1 | 0.01  | 0.008  | 0.026  | 0.017  | 0.01   | t | 113886 | SSAKSHCY<br>AFCSGLP          | Homo<br>sapiens                  |
| 1 | 1.00 | 1 | 1 | 0.01  | 0.012  | -0.001 | 0.013  | 0.01   | t | 23797  | HFLCTFTF<br>NSNNKEYT<br>FPIT | Homo<br>sapiens                  |

|   |      |   |   |       |        |        |        |        |   |        |                              |                                  |
|---|------|---|---|-------|--------|--------|--------|--------|---|--------|------------------------------|----------------------------------|
| 1 | 1.00 | 1 | 1 | 0.01  | 0.013  | 0.011  | 0.01   | 0.01   | t | 59757  | SMSYTW<br>TGA                | Mus<br>musculu<br>s              |
| 1 | 1.00 | 1 | 1 | 0     | -0.004 | -0.007 | -0.007 | -0.001 | t | 135470 | KAAQFG                       | Oryctola<br>gus<br>cuniculu<br>s |
| 1 | 1.00 | 1 | 1 | -0.03 | -0.028 | -0.03  | -0.023 | -0.031 | t | 139630 | VDIDIKIRS<br>CRGSCS          | Homo<br>sapiens                  |
| 1 | 1.00 | 1 | 1 | 0     | 0.003  | -0.014 | 0      | 0.001  | t | 39788  | LTAELKIYS<br>VIQAEINK<br>HL  | Mus<br>musculu<br>s              |
| 1 | 1.00 | 1 | 1 | 0     | 0      | 0      | 0      | -0.002 | t | 107486 | KKPTPST                      | Rattus<br>norvegic<br>us         |
| 1 | 1.00 | 1 | 1 | -0.03 | -0.03  | -0.03  | -0.027 | -0.03  | t | 96489  | KPTPPVKP<br>TA               | Homo<br>sapiens(<br>human)       |
| 1 | 1.00 | 1 | 1 | 0.04  | 0.034  | 0.033  | 0.033  | 0.039  | t | 127638 | ELQMTDP<br>SLIYS             | Trichosu<br>rus<br>vulpecul<br>a |
| 1 | 1.00 | 1 | 1 | 0.01  | 0.01   | 0.01   | 0.01   | 0.01   | t | 139924 | TMPWPFP                      | Ovis<br>aries                    |
| 1 | 1.00 | 1 | 1 | 0.04  | 0.04   | 0.036  | 0.04   | 0.041  | t | 115047 | ELQFPFLQ<br>D                | Mus<br>musculu<br>s              |
| 1 | 1.00 | 1 | 1 | 0.01  | 0.012  | 0.012  | 0.013  | 0.01   | t | 158834 | IGFASKSA<br>DDVKKAF          | Homo<br>sapiens                  |
| 1 | 1.00 | 1 | 1 | 0     | 0      | -0.007 | 0      | 0.001  | t | 105696 | CAPLKPAK<br>SA               | Mus<br>musculu<br>s              |
| 1 | 1.00 | 1 | 1 | -0.03 | -0.03  | -0.03  | -0.025 | -0.029 | t | 110385 | QLYKTCKQ<br>AGTCPPDII<br>PKV | Homo<br>sapiens                  |
| 1 | 1.00 | 1 | 1 | 0.01  | 0.008  | 0.015  | 0.013  | 0.01   | t | 44570  | NKPNWD<br>GYA                | Mus<br>musculu<br>s              |
| 1 | 1.00 | 1 | 1 | 0     | 0      | -0.011 | 0      | 0      | t | 95094  | IGFRGLDG<br>VHCTPTTD<br>SGVI | Rattus<br>norvegic<br>us         |
| 1 | 1.00 | 1 | 1 | -0.01 | -0.012 | -0.03  | -0.017 | -0.01  | t | 141676 | IKKLENGR<br>SLEGVYVP         | Rattus<br>norvegic<br>us         |

|   |      |   |   |       |        |        |        |        |   |        |                              |                                  |
|---|------|---|---|-------|--------|--------|--------|--------|---|--------|------------------------------|----------------------------------|
| 1 | 1.00 | 1 | 1 | -0.01 | -0.014 | -0.03  | -0.017 | -0.01  | t | 141676 | IKKLENGR<br>SLEGVYVP         | Oryctola<br>gus<br>cuniculu<br>s |
| 1 | 1.00 | 1 | 1 | 0.01  | 0.01   | 0.008  | 0.01   | 0.009  | t | 125051 | FQSKANCL<br>NT               | Mus<br>musculu<br>s              |
| 1 | 1.00 | 1 | 1 | 0.02  | 0.02   | 0.019  | 0.014  | 0.019  | t | 51613  | QMGVSEL<br>LIS               | Homo<br>sapiens                  |
| 1 | 1.00 | 1 | 1 | -0.03 | -0.03  | -0.029 | -0.03  | -0.031 | t | 76325  | YVKRVKT<br>W                 | Homo<br>sapiens                  |
| 1 | 1.00 | 1 | 1 | -0.03 | -0.03  | -0.03  | -0.03  | -0.03  | t | 103940 | GLTLPGYK<br>YLPGNSL<br>D     | Oryctola<br>gus<br>cuniculu<br>s |
| 1 | 1.00 | 1 | 1 | 0.03  | 0.03   | 0.025  | 0.03   | 0.031  | t | 19405  | GEQQEAIK<br>SAENATKV<br>EDIK | Oryctola<br>gus<br>cuniculu<br>s |
| 1 | 1.00 | 1 | 1 | 0.01  | 0.012  | -0.002 | 0.007  | 0.011  | t | 78412  | GYKDVDK<br>APFNGMT<br>GCG    | Homo<br>sapiens                  |
| 1 | 1.00 | 1 | 1 | 0.01  | 0.01   | 0.01   | 0.01   | 0.009  | t | 78535  | TPGYKND<br>ALSHFHLT          | Mus<br>musculu<br>s              |
| 1 | 1.00 | 1 | 1 | 0.01  | 0.008  | 0.006  | 0.009  | 0.01   | t | 59757  | SMSYTWT<br>GA                | Mus<br>musculu<br>s              |
| 1 | 1.00 | 1 | 1 | -0.04 | -0.037 | -0.049 | -0.04  | -0.04  | t | 79424  | TITLKKAPK<br>PK              | Mus<br>musculu<br>s              |
| 1 | 1.00 | 1 | 1 | 0.03  | 0.034  | 0.038  | 0.033  | 0.028  | t | 12119  | EGAGDGE<br>PPEDDDSA<br>TGLAF | Homo<br>sapiens                  |
| 1 | 1.00 | 1 | 1 | 0.03  | 0.032  | 0.023  | 0.029  | 0.03   | t | 79010  | KVDNAETI<br>KKELGLSLT<br>EP  | MD                               |
| 1 | 1.00 | 1 | 1 | 0.01  | 0.014  | 0.01   | 0.017  | 0.011  | t | 107651 | VDGVQVH                      | Homo<br>sapiens                  |
| 1 | 1.00 | 1 | 1 | -0.05 | -0.05  | -0.062 | -0.048 | -0.048 | t | 96071  | AGIRPKGA<br>FQ               | Homo<br>sapiens(<br>human)       |

|   |      |   |   |       |        |        |        |        |   |        |                            |                                  |
|---|------|---|---|-------|--------|--------|--------|--------|---|--------|----------------------------|----------------------------------|
| 1 | 1.00 | 1 | 1 | 0.02  | 0.02   | 0.02   | 0.02   | 0.02   | t | 135997 | SLEKKMSN<br>YIQF           | Homo<br>sapiens                  |
| 1 | 1.00 | 1 | 1 | 0.02  | 0.02   | 0.02   | 0.02   | 0.02   | t | 123127 | EGAAMD<br>LRI              | Ovis<br>aries                    |
| 1 | 1.00 | 1 | 1 | 0     | 0      | 0      | 0      | 0      | t | 156425 | QQEQQGS<br>GNNVFSG<br>F    | Homo<br>sapiens                  |
| 1 | 1.00 | 1 | 1 | 0     | 0      | 0      | 0      | 0      | t | 132524 | PGMMPV<br>GPAP             | Homo<br>sapiens                  |
| 1 | 1.00 | 1 | 1 | 0     | 0      | 0      | 0      | -0.001 | t | 69175  | VKAETRLN                   | Mus<br>musculu<br>s              |
| 1 | 1.00 | 1 | 1 | -0.04 | -0.036 | -0.035 | -0.037 | -0.041 | t | 115607 | GPRHPIRA<br>LVGD           | Homo<br>sapiens                  |
| 1 | 1.00 | 1 | 1 | 0.01  | -0.002 | 0.01   | 0.013  | 0.01   | t | 156843 | AHSEMGT<br>RATMT           | Bos<br>taurus                    |
| 1 | 1.00 | 1 | 1 | -0.02 | -0.019 | -0.014 | -0.02  | -0.021 | t | 56089  | RTIVCGLFP<br>TQIQV         | Myodes<br>glareolu<br>s          |
| 1 | 1.00 | 1 | 1 | 0.05  | 0.05   | 0.05   | 0.05   | 0.051  | t | 134421 | KQIPECEN<br>VKTTQCVF       | Mus<br>musculu<br>s              |
| 1 | 1.00 | 1 | 1 | 0     | 0      | 0      | 0      | -0.001 | t | 144598 | CFVGTHP<br>QLRC            | Mus<br>musculu<br>s              |
| 1 | 1.00 | 1 | 1 | 0     | 0.004  | -0.001 | -0.001 | -0.002 | t | 9524   | DNPASTT<br>NKDK            | Cavia<br>porcellu<br>s           |
| 1 | 1.00 | 1 | 1 | 0.01  | 0.01   | 0.011  | 0.007  | 0.008  | t | 98790  | GDKDNVI<br>DQIEKQAK        | Homo<br>sapiens                  |
| 1 | 1.00 | 1 | 1 | 0.04  | 0.036  | 0.029  | 0.039  | 0.04   | t | 10123  | DSGASSTA<br>SSSH           | Oryctola<br>gus<br>cuniculu<br>s |
| 1 | 1.00 | 1 | 1 | 0.02  | 0.02   | 0.015  | 0.018  | 0.02   | t | 78927  | ALLEETITA<br>KGVRSP<br>EAI | Homo<br>sapiens                  |
| 1 | 1.00 | 1 | 1 | 0     | 0      | -0.002 | 0      | 0      | t | 23404  | GYLPISGE<br>MEKVT          | Homo<br>sapiens                  |

|   |      |   |   |       |        |        |       |        |   |        |                              |                                  |
|---|------|---|---|-------|--------|--------|-------|--------|---|--------|------------------------------|----------------------------------|
| 1 | 1.00 | 1 | 1 | 0     | 0      | 0      | 0     | -0.001 | t | 9754   | DPRVRGLY<br>F                | Mus<br>musculu<br>s              |
| 1 | 1.00 | 1 | 1 | 0     | 0      | 0      | 0     | -0.001 | t | 9754   | DPRVRGLY<br>F                | Mus<br>musculu<br>s              |
| 1 | 1.00 | 1 | 1 | -0.05 | -0.05  | -0.057 | -0.04 | -0.049 | t | 117345 | PRRRSRKP<br>EAPRRRS          | Homo<br>sapiens                  |
| 1 | 1.00 | 1 | 1 | 0     | -0.004 | 0      | 0.003 | 0.002  | t | 63282  | TEAAILTQ<br>QAAQFDQ          | Oryctola<br>gus<br>cuniculu<br>s |
| 1 | 1.00 | 1 | 1 | 0     | -0.002 | 0      | 0.003 | 0.002  | t | 63282  | TEAAILTQ<br>QAAQFDQ          | Mus<br>musculu<br>s              |
| 1 | 1.00 | 1 | 1 | 0.07  | 0.066  | 0.07   | 0.07  | 0.07   | t | 110376 | QAEPD                        | Mus<br>musculu<br>s              |
| 1 | 1.00 | 1 | 1 | 0.07  | 0.066  | 0.07   | 0.07  | 0.07   | t | 110376 | QAEPD                        | Mus<br>musculu<br>s              |
| 1 | 1.00 | 1 | 1 | 0.07  | 0.066  | 0.07   | 0.07  | 0.07   | t | 110376 | QAEPD                        | Mus<br>musculu<br>s              |
| 1 | 1.00 | 1 | 1 | 0.01  | 0.012  | 0.002  | 0.011 | 0.011  | t | 60827  | SRVKNLNS<br>SEGVPDLL<br>V    | Homo<br>sapiens                  |
| 1 | 1.00 | 1 | 1 | 0     | 0      | -0.011 | 0.003 | 0.002  | t | 25293  | IAGLIAIVM<br>VTILLCCM        | Homo<br>sapiens                  |
| 1 | 1.00 | 1 | 1 | -0.02 | -0.016 | -0.024 | -0.02 | -0.02  | t | 14953  | EWSPCSVT<br>CGNGIQV<br>RIK   | Mus<br>musculu<br>s              |
| 1 | 1.00 | 1 | 1 | 0.02  | 0.021  | 0.015  | 0.022 | 0.022  | t | 74543  | YKYPYVLG<br>QGQDTLA<br>PELPI | Homo<br>sapiens                  |
| 1 | 1.00 | 1 | 1 | 0.04  | 0.04   | 0.04   | 0.04  | 0.039  | t | 112312 | SGSGTDF                      | Homo<br>sapiens                  |
| 1 | 1.00 | 1 | 1 | 0.01  | 0.01   | 0      | 0.016 | 0.017  | t | 142810 | KEWEQIYR                     | Rattus<br>norvegic<br>us         |
| 1 | 1.00 | 1 | 1 | 0.03  | 0.003  | 0.04   | 0.03  | 0.028  | t | 61824  | STPLLYPSL<br>A               | Mus<br>musculu<br>s              |

|   |      |   |   |      |        |        |       |       |   |        |                     |                                  |
|---|------|---|---|------|--------|--------|-------|-------|---|--------|---------------------|----------------------------------|
| 1 | 1.00 | 1 | 1 | 0.03 | 0.027  | 0.03   | 0.03  | 0.029 | t | 125414 | FSEKLVFS<br>LRLMEEN | Oryctola<br>gus<br>cuniculu<br>s |
| 1 | 1.00 | 1 | 1 | 0.02 | 0.027  | 0.02   | 0.02  | 0.021 | t | 34585  | KYQVIKVR<br>AYTYGV  | Capra<br>hircus                  |
| 1 | 1.00 | 1 | 1 | 0    | 0.004  | 0      | 0.007 | 0     | t | 107773 | CSVMHEG             | Homo<br>sapiens                  |
| 1 | 1.00 | 1 | 1 | 0    | 0.004  | 0      | 0.007 | 0     | t | 107773 | CSVMHEG             | Homo<br>sapiens                  |
| 1 | 1.00 | 1 | 1 | 0.01 | 0.013  | 0.012  | 0.01  | 0.01  | t | 4024   | AQPGYPW<br>PLYGNEG  | Mus<br>musculu<br>s              |
| 1 | 1.00 | 1 | 1 | 0    | -0.003 | -0.006 | 0     | 0     | t | 20673  | GKREMA              | Oryctola<br>gus<br>cuniculu<br>s |
| 1 | 1.00 | 1 | 1 | 0.02 | 0.02   | 0.032  | 0.02  | 0.018 | t | 19264  | GEFMFDF<br>DGDEIF   | Mus<br>musculu<br>s              |
| 1 | 1.00 | 1 | 1 | 0.04 | 0.044  | 0.037  | 0.041 | 0.039 | t | 103547 | RGLGEAQL<br>GNSSGNF | Homo<br>sapiens                  |
| 1 | 1.00 | 1 | 1 | 0.03 | 0.03   | 0.03   | 0.03  | 0.03  | t | 92807  | GGDGVDTI<br>YG      | Ovis<br>aries                    |
| 1 | 1.00 | 1 | 1 | 0.01 | 0.01   | 0.01   | 0.01  | 0.01  | t | 147038 | ILYGNGPG<br>YALGG   | Homo<br>sapiens                  |
| 1 | 1.00 | 1 | 1 | 0.01 | 0.01   | 0.01   | 0.01  | 0.01  | t | 132828 | FSTTSFPG<br>TVTCYDD | Trichosu<br>rus<br>vulpecul<br>a |
| 1 | 1.00 | 1 | 1 | 0.01 | 0.01   | 0.01   | 0.01  | 0.01  | t | 79188  | DSAVGY              | Mus<br>musculu<br>s              |
| 1 | 1.00 | 1 | 1 | 0.03 | 0.03   | 0.03   | 0.03  | 0.028 | t | 128740 | GLGPEKTS<br>FFQALGI | Homo<br>sapiens                  |
| 1 | 1.00 | 1 | 1 | 0    | 0      | -0.004 | 0.003 | 0.002 | t | 1385   | AFRELADA            | Homo<br>sapiens                  |



|   |      |   |   |       |        |        |        |        |   |        |                       |                                  |
|---|------|---|---|-------|--------|--------|--------|--------|---|--------|-----------------------|----------------------------------|
| 1 | 1.00 | 1 | 1 | 0.03  | 0.032  | 0.023  | 0.029  | 0.03   | t | 130608 | SIDLKDKYK<br>NIGA     | Homo<br>sapiens                  |
| 1 | 1.00 | 1 | 1 | -0.01 | -0.013 | -0.017 | -0.01  | -0.009 | t | 126926 | RGWNPGE<br>LYNGFP     | Oryctola<br>gus<br>cuniculu<br>s |
| 1 | 1.00 | 1 | 1 | 0.02  | 0.018  | 0.009  | 0.019  | 0.02   | t | 21791  | GPSNSEQI<br>PALTAVE   | Rattus<br>norvegic<br>us         |
| 1 | 1.00 | 1 | 1 | -0.01 | -0.01  | -0.01  | -0.01  | -0.011 | t | 106486 | GTQEFRH               | Mus<br>musculu<br>s              |
| 1 | 1.00 | 1 | 1 | -0.02 | -0.02  | -0.02  | -0.02  | -0.02  | t | 111558 | MPLTQKD               | Homo<br>sapiens                  |
| 1 | 1.00 | 1 | 1 | -0.01 | -0.008 | -0.007 | -0.007 | -0.012 | t | 55732  | RRRTPSPR<br>RRRS      | Homo<br>sapiens                  |
| 1 | 1.00 | 1 | 1 | 0.02  | 0.023  | 0.02   | 0.02   | 0.021  | t | 43834  | NFFSPQIIT<br>TDNTFVSG | Mus<br>musculu<br>s              |
| 1 | 1.00 | 1 | 1 | 0.02  | 0.024  | 0.02   | 0.02   | 0.022  | t | 139839 | PAAAQAL               | Ovis<br>aries                    |
| 1 | 1.00 | 1 | 1 | 0.04  | 0.036  | 0.046  | 0.043  | 0.04   | t | 30288  | KEAELDGD              | Oryctola<br>gus<br>cuniculu<br>s |
| 1 | 1.00 | 1 | 1 | 0     | 0.002  | 0      | 0      | 0      | t | 49690  | PTLDHVLD              | Anas<br>platyrhy<br>nchos        |
| 1 | 1.00 | 1 | 1 | -0.03 | -0.03  | -0.022 | -0.03  | -0.03  | t | 73301  | WYWGPSL<br>YSI        | Mus<br>musculu<br>s              |
| 1 | 1.00 | 1 | 1 | 0.07  | 0.072  | 0.07   | 0.071  | 0.07   | t | 133594 | GPLYQMN<br>DALLL      | Homo<br>sapiens                  |
| 1 | 1.00 | 1 | 1 | 0     | 0      | 0      | 0.002  | 0      | t | 65473  | TNVDQDL<br>VGWPAPP    | Homo<br>sapiens                  |
| 1 | 1.00 | 1 | 1 | 0.04  | 0.04   | 0.038  | 0.04   | 0.04   | t | 47137  | PDLGFISEP<br>S        | Homo<br>sapiens                  |
| 1 | 1.00 | 1 | 1 | -0.04 | -0.044 | -0.046 | -0.04  | -0.04  | t | 94979  | YNKRFPGE<br>VSP       | Oryctola<br>gus<br>cuniculu<br>s |

|   |      |   |   |       |        |        |        |        |   |        |                              |                                  |
|---|------|---|---|-------|--------|--------|--------|--------|---|--------|------------------------------|----------------------------------|
| 1 | 1.00 | 1 | 1 | 0.06  | 0.063  | 0.048  | 0.06   | 0.06   | t | 120247 | TPEDPTDP<br>TDPQDPSS         | Mus<br>musculu<br>s              |
| 1 | 1.00 | 1 | 1 | 0.06  | 0.063  | 0.048  | 0.06   | 0.06   | t | 120247 | TPEDPTDP<br>TDPQDPSS         | Mus<br>musculu<br>s              |
| 1 | 1.00 | 1 | 1 | -0.04 | -0.04  | -0.058 | -0.042 | -0.039 | t | 98783  | FQQPLQQ<br>YPLGQ             | Homo<br>sapiens                  |
| 1 | 1.00 | 1 | 1 | 0.03  | 0.03   | 0.026  | 0.03   | 0.03   | t | 5029   | ATLCSALY<br>VG               | Homo<br>sapiens                  |
| 1 | 1.00 | 1 | 1 | -0.05 | -0.047 | -0.042 | -0.05  | -0.052 | t | 53716  | RFI                          | Mus<br>musculu<br>s              |
| 1 | 1.00 | 1 | 1 | 0     | 0      | 0      | 0      | 0      | t | 91588  | KNVSINVE<br>LYFDAT           | Oryctola<br>gus<br>cuniculu<br>s |
| 1 | 1.00 | 1 | 1 | 0.04  | 0.043  | 0.042  | 0.04   | 0.04   | t | 142103 | ADKKPEEL<br>SVTLVEAY<br>TDVF | Felis<br>catus                   |
| 1 | 1.00 | 1 | 1 | -0.02 | -0.018 | -0.031 | -0.019 | -0.021 | t | 6777   | CPKDELRP<br>LEKVLESKT<br>RAI | Homo<br>sapiens                  |
| 1 | 1.00 | 1 | 1 | -0.02 | -0.016 | -0.013 | -0.013 | -0.019 | t | 106491 | GWGQLFQ                      | Homo<br>sapiens                  |
| 1 | 1.00 | 1 | 1 | 0.04  | 0.04   | 0.04   | 0.04   | 0.04   | t | 111742 | RRETQ                        | Mus<br>musculu<br>s              |
| 1 | 1.00 | 1 | 1 | -0.03 | -0.034 | -0.041 | -0.031 | -0.03  | t | 16058  | FGSKSPFF<br>RKYF             | Oryctola<br>gus<br>cuniculu<br>s |
| 1 | 1.00 | 1 | 1 | -0.03 | -0.032 | -0.041 | -0.031 | -0.03  | t | 16058  | FGSKSPFF<br>RKYF             | Mus<br>musculu<br>s              |
| 1 | 1.00 | 1 | 1 | 0.03  | 0.028  | 0.035  | 0.029  | 0.03   | t | 4543   | ASLQNLLS<br>AS               | Mus<br>musculu<br>s              |
| 1 | 1.00 | 1 | 1 | 0.02  | 0.02   | 0.02   | 0.02   | 0.02   | t | 77844  | CLAAPTGL<br>KLAP             | Mus<br>musculu<br>s              |

|   |      |   |   |       |        |        |        |       |   |        |                              |                                  |
|---|------|---|---|-------|--------|--------|--------|-------|---|--------|------------------------------|----------------------------------|
| 1 | 1.00 | 1 | 1 | 0.02  | 0.02   | 0.02   | 0.02   | 0.02  | t | 79469  | YCPPLLN<br>SGEPCS            | Mus<br>musculu<br>s              |
| 1 | 1.00 | 1 | 1 | 0.01  | 0.008  | 0.017  | 0.007  | 0.011 | t | 108107 | RYAFGSQI<br>A                | Mus<br>musculu<br>s              |
| 1 | 1.00 | 1 | 1 | -0.02 | -0.02  | -0.02  | -0.02  | -0.02 | t | 79537  | EHPWPLL                      | Oryctola<br>gus<br>cuniculu<br>s |
| 1 | 1.00 | 1 | 1 | 0     | 0.004  | 0      | 0.001  | 0.001 | t | 19639  | GFTWTGV<br>TQNG              | Homo<br>sapiens                  |
| 1 | 1.00 | 1 | 1 | 0.06  | 0.06   | 0.061  | 0.057  | 0.06  | t | 68900  | VIAEHQFK<br>E                | Homo<br>sapiens                  |
| 1 | 1.00 | 1 | 1 | 0.01  | 0.012  | 0.014  | 0.017  | 0.01  | t | 122198 | TEADVNP<br>KPIPSQMPT<br>SP   | Homo<br>sapiens                  |
| 1 | 1.00 | 1 | 1 | -0.01 | -0.008 | -0.013 | -0.003 | -0.01 | t | 120548 | GAGAPVYL<br>AAVLEYLT<br>AE   | Homo<br>sapiens                  |
| 1 | 1.00 | 1 | 1 | 0.04  | 0.036  | 0.035  | 0.033  | 0.041 | t | 119538 | VEDGECYI<br>QF               | Oryctola<br>gus<br>cuniculu<br>s |
| 1 | 1.00 | 1 | 1 | -0.03 | -0.028 | -0.035 | -0.029 | -0.03 | t | 59984  | SPAPSRPF<br>SVLRANDV<br>LWLS | Homo<br>sapiens                  |
| 1 | 1.00 | 1 | 1 | 0.01  | 0.01   | 0.008  | 0.01   | 0.01  | t | 110606 | GNPGTDGI<br>PGAKG            | Rattus<br>norvegic<br>us         |
| 1 | 1.00 | 1 | 1 | -0.01 | -0.008 | -0.013 | -0.007 | -0.01 | t | 48343  | PLGLKRGIE<br>K               | Homo<br>sapiens                  |
| 1 | 1.00 | 1 | 1 | 0.01  | 0.01   | 0.01   | 0.01   | 0.01  | t | 62830  | TAEGRain                     | Mus<br>musculu<br>s              |
| 1 | 1.00 | 1 | 1 | -0.01 | -0.01  | -0.005 | -0.008 | -0.01 | t | 10834  | DWVCTILT<br>DFKNWL           | Homo<br>sapiens                  |
| 1 | 1.00 | 1 | 1 | 0.05  | 0.048  | 0.056  | 0.049  | 0.051 | t | 67967  | VDGSDP                       | Mus<br>musculu<br>s              |

|   |      |   |   |       |        |        |        |        |   |        |                              |                                  |
|---|------|---|---|-------|--------|--------|--------|--------|---|--------|------------------------------|----------------------------------|
| 1 | 1.00 | 1 | 1 | 0.03  | 0.028  | 0.025  | 0.027  | 0.027  | t | 70444  | VPQLEIVP<br>NSAEERLH<br>SMKE | Homo<br>sapiens                  |
| 1 | 1.00 | 1 | 1 | 0.03  | 0.026  | 0.038  | 0.033  | 0.029  | t | 137393 | EDFESCDSI<br>TGMNLEA         | Oryctola<br>gus<br>cuniculu<br>s |
| 1 | 1.00 | 1 | 1 | -0.05 | -0.054 | -0.062 | -0.047 | -0.047 | t | 67200  | TVVQRQFS<br>EVWKPS<br>QVTVR  | Oryctola<br>gus<br>cuniculu<br>s |
| 1 | 1.00 | 1 | 1 | 0.01  | 0.012  | 0.017  | 0.013  | 0.01   | t | 57679  | SEVYCPRP<br>DRCLRAP          | Homo<br>sapiens                  |
| 1 | 1.00 | 1 | 1 | 0     | 0      | 0      | 0      | -0.001 | t | 120028 | LFNNYDPG<br>SRPVREP          | Rattus<br>norvegic<br>us         |
| 1 | 1.00 | 1 | 1 | 0.02  | 0.02   | 0.02   | 0.02   | 0.019  | t | 130925 | KLLPEDDE<br>SRTYHTV          | Homo<br>sapiens                  |
| 1 | 1.00 | 1 | 1 | -0.01 | -0.014 | -0.019 | -0.011 | -0.009 | t | 51474  | QLPNVGIT<br>QGIV             | Oryctola<br>gus<br>cuniculu<br>s |
| 1 | 1.00 | 1 | 1 | -0.02 | -0.024 | -0.029 | -0.021 | -0.02  | t | 73612  | YDYQHKE<br>GRF               | Oryctola<br>gus<br>cuniculu<br>s |
| 1 | 1.00 | 1 | 1 | 0.01  | 0.006  | 0.02   | 0.009  | 0.01   | t | 78668  | GPNLVLPD<br>QK               | Oryctola<br>gus<br>cuniculu<br>s |
| 1 | 1.00 | 1 | 1 | 0.03  | 0.03   | 0.03   | 0.03   | 0.03   | t | 115847 | LLYQEPVL<br>GP               | Homo<br>sapiens                  |
| 1 | 1.00 | 1 | 1 | 0.03  | 0.03   | 0.03   | 0.03   | 0.03   | t | 114967 | TYDNECLL<br>CA               | Homo<br>sapiens                  |
| 1 | 1.00 | 1 | 1 | 0.03  | 0.03   | 0.026  | 0.03   | 0.03   | t | 17366  | FPQPQQP<br>QQS               | Mus<br>musculu<br>s              |
| 1 | 1.00 | 1 | 1 | -0.01 | -0.01  | -0.01  | -0.01  | -0.01  | t | 117018 | KIVMFWH<br>EPVYA             | Homo<br>sapiens                  |
| 1 | 1.00 | 1 | 1 | -0.01 | -0.01  | -0.01  | -0.01  | -0.01  | t | 117018 | KIVMFWH<br>EPVYA             | Mus<br>musculu<br>s              |
| 1 | 1.00 | 1 | 1 | -0.01 | -0.01  | -0.01  | -0.01  | -0.01  | t | 79178  | DCEIPKIP<br>MDRKCW           | Mus<br>musculu<br>s              |

|   |      |   |   |       |        |        |        |        |   |        |                              |                                  |
|---|------|---|---|-------|--------|--------|--------|--------|---|--------|------------------------------|----------------------------------|
| 1 | 1.00 | 1 | 1 | 0.01  | 0.011  | 0.02   | 0.013  | 0.007  | t | 26989  | ILCYCYGLP<br>DSEPTK          | Equus<br>caballus                |
| 1 | 1.00 | 1 | 1 | 0.01  | 0.006  | 0.02   | 0.013  | 0.007  | t | 26989  | ILCYCYGLP<br>DSEPTK          | Oryctola<br>gus<br>cuniculu<br>s |
| 1 | 1.00 | 1 | 1 | 0     | 0.003  | -0.006 | 0      | 0.001  | t | 28537  | ISIKYDPRK<br>DSEVFA          | Mus<br>musculu<br>s              |
| 1 | 1.00 | 1 | 1 | -0.02 | -0.02  | -0.025 | -0.02  | -0.02  | t | 120516 | EWGWS                        | Mus<br>musculu<br>s              |
| 1 | 1.00 | 1 | 1 | 0.02  | 0.02   | 0.018  | 0.02   | 0.02   | t | 38330  | LNRSGGN<br>YTKTDDEA          | Mus<br>musculu<br>s              |
| 1 | 1.00 | 1 | 1 | -0.02 | -0.022 | -0.02  | -0.02  | -0.02  | t | 120173 | RLMRYWA<br>NFA               | Oryctola<br>gus<br>cuniculu<br>s |
| 1 | 1.00 | 1 | 1 | -0.02 | -0.02  | -0.02  | -0.02  | -0.02  | t | 120173 | RLMRYWA<br>NFA               | Mus<br>musculu<br>s              |
| 1 | 1.00 | 1 | 1 | 0.02  | 0.014  | 0.006  | 0.013  | 0.019  | t | 132888 | QAYVVDSE<br>GNEIFRC          | Trichosu<br>rus<br>vulpecul<br>a |
| 1 | 1.00 | 1 | 1 | 0.01  | 0.01   | 0.003  | 0.01   | 0.01   | t | 158723 | DTGCAIDIS<br>RQELRCG         | Mus<br>musculu<br>s              |
| 1 | 1.00 | 1 | 1 | -0.02 | -0.017 | -0.02  | -0.02  | -0.023 | t | 21930  | GQPGPSG<br>AAQGQVIS<br>N     | Mus<br>musculu<br>s              |
| 1 | 1.00 | 1 | 1 | 0.01  | 0.023  | -0.001 | 0.013  | 0.012  | t | 75571  | YQWLTRV<br>GKYRPQD<br>KPNT   | Chinchill<br>a<br>lanigera       |
| 1 | 1.00 | 1 | 1 | 0.01  | 0.006  | -0.001 | 0.013  | 0.012  | t | 75571  | YQWLTRV<br>GKYRPQD<br>KPNT   | Oryctola<br>gus<br>cuniculu<br>s |
| 1 | 1.00 | 1 | 1 | -0.01 | -0.012 | -0.012 | -0.008 | -0.01  | t | 125462 | KLPLSLSFL<br>HLTRADLS<br>YPS | Mus<br>musculu<br>s              |

|   |      |   |   |       |        |        |        |        |   |        |                              |                                  |
|---|------|---|---|-------|--------|--------|--------|--------|---|--------|------------------------------|----------------------------------|
| 1 | 1.00 | 1 | 1 | 0.02  | 0.015  | 0.02   | 0.02   | 0.02   | t | 108349 | EQEETNPE<br>VLIK             | Canis<br>lupus                   |
| 1 | 1.00 | 1 | 1 | 0     | -0.002 | 0      | -0.001 | 0      | t | 10124  | DSGCVVS<br>WK                | Mus<br>musculu<br>s              |
| 1 | 1.00 | 1 | 1 | 0.03  | 0.034  | 0.039  | 0.037  | 0.03   | t | 112421 | YSSDHKN                      | Homo<br>sapiens                  |
| 1 | 1.00 | 1 | 1 | -0.01 | -0.01  | -0.01  | -0.01  | -0.012 | t | 81790  | ERGGRKQ<br>RKE               | Oryctola<br>gus<br>cuniculu<br>s |
| 1 | 1.00 | 1 | 1 | 0     | 0      | -0.002 | -0.003 | -0.002 | t | 19551  | GFKAAVA<br>AAANA             | Homo<br>sapiens                  |
| 1 | 1.00 | 1 | 1 | -0.04 | -0.04  | -0.047 | -0.04  | -0.04  | t | 97117  | YIQMKRIA<br>VG               | Mus<br>musculu<br>s              |
| 1 | 1.00 | 1 | 1 | 0.01  | 0.01   | 0.01   | 0.01   | 0.01   | t | 6516   | CKRGPDS<br>G                 | Oryctola<br>gus<br>cuniculu<br>s |
| 1 | 1.00 | 1 | 1 | -0.03 | -0.033 | -0.042 | -0.03  | -0.03  | t | 78388  | FRRVKCKY<br>PDGTPKF<br>HV    | Oryctola<br>gus<br>cuniculu<br>s |
| 1 | 1.00 | 1 | 1 | 0.06  | 0.06   | 0.059  | 0.063  | 0.058  | t | 47267  | PEEFEGAG<br>DGEPPED<br>DDSAT | Homo<br>sapiens                  |
| 1 | 1.00 | 1 | 1 | 0     | 0      | 0      | 0      | -0.001 | t | 20051  | GGTHSQW<br>NKP               | Mus<br>musculu<br>s              |
| 1 | 1.00 | 1 | 1 | -0.02 | -0.02  | -0.02  | -0.016 | -0.02  | t | 135983 | RLRPPEPR<br>PRDR             | Homo<br>sapiens                  |
| 1 | 1.00 | 1 | 1 | 0.04  | 0.04   | 0.04   | 0.04   | 0.041  | t | 115212 | DTQAIVQ<br>NND               | Homo<br>sapiens                  |
| 1 | 1.00 | 1 | 1 | -0.04 | -0.042 | -0.038 | -0.04  | -0.041 | t | 120598 | IARFKMFP<br>EVKEKGM<br>A     | Oryctola<br>gus<br>cuniculu<br>s |
| 1 | 1.00 | 1 | 1 | -0.03 | -0.03  | -0.035 | -0.03  | -0.03  | t | 44231  | NIGFGNRG<br>DANI             | Homo<br>sapiens                  |

|   |      |   |   |       |       |        |        |        |   |        |                         |                     |
|---|------|---|---|-------|-------|--------|--------|--------|---|--------|-------------------------|---------------------|
| 1 | 1.00 | 1 | 1 | -0.01 | -0.01 | -0.015 | -0.013 | -0.011 | t | 115726 | ENLHLPLP<br>LL          | Homo<br>sapiens     |
| 1 | 1.00 | 1 | 1 | 0.04  | 0.04  | 0.04   | 0.04   | 0.04   | t | 99558  | QEEENQG<br>GKGPLLSI     | Homo<br>sapiens     |
| 1 | 1.00 | 1 | 1 | 0.04  | 0.04  | 0.04   | 0.04   | 0.04   | t | 62417  | SVYQEL                  | Homo<br>sapiens     |
| 1 | 1.00 | 1 | 1 | 0     | 0     | 0.009  | 0      | 0      | t | 102686 | NPKTSQYS<br>Y           | Mus<br>musculu<br>s |
| 1 | 1.00 | 1 | 1 | 0.02  | 0.02  | 0.018  | 0.02   | 0.02   | t | 114531 | QGQQEYE<br>QHRRQQQ<br>R | Homo<br>sapiens     |
| 1 | 1.00 | 1 | 1 | 0.02  | 0.02  | 0.02   | 0.02   | 0.02   | t | 101161 | QDLPTPPS<br>DP          | Mus<br>musculu<br>s |
| 1 | 1.00 | 1 | 1 | 0     | 0     | 0      | 0      | 0      | t | 135993 | SGGLRLLL<br>CLLL        | Homo<br>sapiens     |
| 1 | 1.00 | 1 | 1 | 0     | 0     | 0      | 0      | 0      | t | 123125 | EFPKLKEFK               | Ovis<br>aries       |
| 1 | 1.00 | 1 | 1 | 0     | 0     | -0.004 | 0      | 0      | t | 52082  | QQPFP                   | Mus<br>musculu<br>s |
| 1 | 1.00 | 1 | 1 | 0     | 0     | -0.004 | 0      | 0      | t | 51929  | QPQQPQQ<br>SFP          | Mus<br>musculu<br>s |
| 1 | 1.00 | 1 | 1 | 0     | 0     | -0.004 | 0      | 0      | t | 51929  | QPQQPQQ<br>SFP          | Mus<br>musculu<br>s |
| 1 | 1.00 | 1 | 1 | 0     | 0     | -0.004 | 0      | 0      | t | 52085  | QQPFPQP<br>QQQ          | Mus<br>musculu<br>s |
| 1 | 1.00 | 1 | 1 | 0     | 0     | -0.004 | 0      | 0      | t | 52089  | QQPFPQS<br>QQP          | Mus<br>musculu<br>s |
| 1 | 1.00 | 1 | 1 | 0.03  | 0.033 | 0.03   | 0.03   | 0.03   | t | 15122  | EYYLN                   | Mus<br>musculu<br>s |
| 1 | 1.00 | 1 | 1 | 0     | 0     | 0.002  | 0      | 0      | t | 96023  | YQKFPQYL<br>QY          | Homo<br>sapiens     |
| 1 | 1.00 | 1 | 1 | 0.01  | 0.01  | 0.007  | 0.01   | 0.01   | t | 98928  | PEQSLACQ<br>CL          | Homo<br>sapiens     |

|   |      |   |   |       |        |        |        |        |   |        |                         |                                  |
|---|------|---|---|-------|--------|--------|--------|--------|---|--------|-------------------------|----------------------------------|
| 1 | 1.00 | 1 | 1 | 0.01  | 0.01   | 0.01   | 0.01   | 0.008  | t | 38314  | LNPTIAGA<br>GDV         | Oryctola<br>gus<br>cuniculu<br>s |
| 1 | 1.00 | 1 | 1 | 0.01  | 0.01   | 0.01   | 0.01   | 0.008  | t | 38314  | LNPTIAGA<br>GDV         | Oryctola<br>gus<br>cuniculu<br>s |
| 1 | 1.00 | 1 | 1 | 0     | 0      | 0.016  | 0.01   | 0.002  | t | 116732 | GLGFYG                  | Homo<br>sapiens                  |
| 1 | 1.00 | 1 | 1 | 0.02  | 0.021  | 0.032  | 0.026  | 0.023  | t | 78200  | LQKTSG                  | Equus<br>caballus                |
| 1 | 1.00 | 1 | 1 | 0.02  | 0.02   | 0.024  | 0.02   | 0.018  | t | 99760  | VKDGIVVD                | Oryctola<br>gus<br>cuniculu<br>s |
| 1 | 1.00 | 1 | 1 | -0.02 | -0.012 | -0.02  | -0.02  | -0.022 | t | 156868 | FHRHPLE                 | Gallus<br>gallus                 |
| 1 | 1.00 | 1 | 1 | -0.05 | -0.05  | -0.057 | -0.052 | -0.051 | t | 137907 | KGSGPGYY<br>RLTL        | Homo<br>sapiens                  |
| 1 | 1.00 | 1 | 1 | 0.01  | 0.014  | 0.001  | 0.007  | 0.008  | t | 113753 | QGQQPG<br>QGQHGG<br>QP  | Homo<br>sapiens                  |
| 1 | 1.00 | 1 | 1 | 0.01  | 0.01   | 0.01   | 0.01   | 0.01   | t | 98108  | HTNSPLGD<br>MLRACQT     | Homo<br>sapiens                  |
| 1 | 1.00 | 1 | 1 | 0.01  | 0.01   | 0.01   | 0.01   | 0.01   | t | 24591  | HQLDPAF<br>GANSTNP<br>D | Mus<br>musculu<br>s              |
| 1 | 1.00 | 1 | 1 | 0.01  | 0.01   | 0.01   | 0.01   | 0.01   | t | 24591  | HQLDPAF<br>GANSTNP<br>D | Mus<br>musculu<br>s              |
| 1 | 1.00 | 1 | 1 | 0.01  | 0.013  | 0.01   | 0.01   | 0.01   | t | 24591  | HQLDPAF<br>GANSTNP<br>D | Mus<br>musculu<br>s              |
| 1 | 1.00 | 1 | 1 | 0     | 0.003  | 0      | 0      | -0.001 | t | 23068  | GVNLEDP<br>ASRDL        | Mus<br>musculu<br>s              |
| 1 | 1.00 | 1 | 1 | -0.02 | -0.02  | -0.02  | -0.02  | -0.021 | t | 153431 | NPDHPRV<br>PTFMA        | Mus<br>musculu<br>s              |



|   |      |   |   |       |        |        |        |        |   |        |                             |                                  |
|---|------|---|---|-------|--------|--------|--------|--------|---|--------|-----------------------------|----------------------------------|
| 1 | 1.00 | 1 | 1 | -0.02 | -0.017 | -0.02  | -0.02  | -0.021 | t | 106321 | DAEFRH                      | Mus<br>musculu<br>s              |
| 1 | 1.00 | 1 | 1 | -0.02 | -0.017 | -0.02  | -0.02  | -0.021 | t | 106321 | DAEFRH                      | Mus<br>musculu<br>s              |
| 1 | 1.00 | 1 | 1 | 0     | 0      | 0      | 0      | 0.002  | t | 127668 | GKFVLSSG<br>KF              | Homo<br>sapiens                  |
| 1 | 1.00 | 1 | 1 | 0.02  | 0.017  | 0.019  | 0.02   | 0.018  | t | 59853  | SNKEGVA<br>ADGDALN<br>K     | Oryctola<br>gus<br>cuniculu<br>s |
| 1 | 1.00 | 1 | 1 | -0.03 | -0.03  | -0.027 | -0.027 | -0.03  | t | 67552  | VADLPQ                      | Homo<br>sapiens                  |
| 1 | 1.00 | 1 | 1 | -0.02 | -0.016 | -0.026 | -0.02  | -0.021 | t | 32887  | KPSTLYKM<br>TVEAVK          | Ovis<br>aries                    |
| 1 | 1.00 | 1 | 1 | -0.03 | -0.03  | -0.046 | -0.03  | -0.03  | t | 110308 | KTCKQAGT<br>CPPDIIPKV<br>EG | Mus<br>musculu<br>s              |
| 1 | 1.00 | 1 | 1 | -0.03 | -0.028 | -0.037 | -0.027 | -0.03  | t | 116927 | AVCRTSM<br>CSIQSAPP         | Homo<br>sapiens                  |
| 1 | 1.00 | 1 | 1 | 0.03  | 0.03   | 0.03   | 0.03   | 0.03   | t | 4079   | AQTASGLV<br>SM              | Homo<br>sapiens                  |
| 1 | 1.00 | 1 | 1 | 0.01  | 0.013  | 0.01   | 0.01   | 0.01   | t | 6457   | CITQYQRE<br>SQAYYQR<br>G    | Mus<br>musculu<br>s              |
| 1 | 1.00 | 1 | 1 | 0     | -0.002 | -0.002 | -0.001 | 0      | t | 74895  | YLRHGKLR<br>PFERDISN<br>V   | Mus<br>musculu<br>s              |
| 1 | 1.00 | 1 | 1 | 0.01  | 0.01   | -0.002 | 0.01   | 0.01   | t | 51286  | QLAKDKV<br>NE               | Mus<br>musculu<br>s              |
| 1 | 1.00 | 1 | 1 | 0.04  | 0.037  | 0.04   | 0.04   | 0.042  | t | 43575  | NEDNEKLR                    | Oryctola<br>gus<br>cuniculu<br>s |
| 1 | 1.00 | 1 | 1 | 0     | 0      | 0      | 0.001  | -0.001 | t | 41826  | MKHM                        | Mus<br>musculu<br>s              |
| 1 | 1.00 | 1 | 1 | -0.01 | -0.009 | -0.021 | -0.01  | -0.01  | t | 39199  | LRRTQSM<br>GIQLDQR          | Myodes<br>glareolu<br>s          |

|   |      |   |   |       |        |        |        |        |   |        |                            |                       |
|---|------|---|---|-------|--------|--------|--------|--------|---|--------|----------------------------|-----------------------|
| 1 | 1.00 | 1 | 1 | 0.07  | 0.068  | 0.069  | 0.072  | 0.072  | t | 106247 | ALASQGQ                    | Mus musculus          |
| 1 | 1.00 | 1 | 1 | -0.02 | -0.022 | -0.015 | -0.017 | -0.02  | t | 115260 | GAEGQRP<br>GFGYGG          | Mus musculus          |
| 1 | 1.00 | 1 | 1 | -0.01 | -0.007 | -0.01  | -0.01  | -0.01  | t | 111176 | CTSICKYPD<br>YIKMVS        | Mus musculus          |
| 1 | 1.00 | 1 | 1 | -0.02 | -0.027 | -0.027 | -0.013 | -0.018 | t | 156956 | SGIGTLDG<br>FRHRHPD        | Homo sapiens          |
| 1 | 1.00 | 1 | 1 | 0.02  | 0.02   | 0.02   | 0.02   | 0.02   | t | 55825  | RSELSQLS                   | Mus musculus          |
| 1 | 1.00 | 1 | 1 | 0.04  | 0.044  | 0.032  | 0.04   | 0.042  | t | 140604 | TDQPLSAD                   | Cavia porcellus       |
| 1 | 1.00 | 1 | 1 | -0.03 | -0.03  | -0.023 | -0.03  | -0.034 | t | 133705 | SSKTRSG<br>VHLVGPY         | Mus musculus          |
| 1 | 1.00 | 1 | 1 | 0     | -0.003 | 0      | 0      | -0.002 | t | 144662 | GREGYPA<br>DGGDSVKI<br>WTS | Oryctolagus cuniculus |
| 1 | 1.00 | 1 | 1 | 0     | 0      | 0      | 0      | -0.002 | t | 144662 | GREGYPA<br>DGGDSVKI<br>WTS | Oryctolagus cuniculus |
| 1 | 1.00 | 1 | 1 | 0.05  | 0.05   | 0.05   | 0.05   | 0.05   | t | 99174  | EDEYEYDE<br>EDRRRGR        | Homo sapiens          |
| 1 | 1.00 | 1 | 1 | 0.05  | 0.05   | 0.05   | 0.05   | 0.05   | t | 95997  | WCGSTDE<br>YCS             | Homo sapiens          |
| 1 | 1.00 | 1 | 1 | 0.03  | 0.019  | 0.032  | 0.03   | 0.03   | t | 63215  | TDPTGIEP<br>DDHLKE         | Myodes glareolus      |
| 1 | 1.00 | 1 | 1 | 0.03  | 0.016  | 0.032  | 0.03   | 0.03   | t | 63215  | TDPTGIEP<br>DDHLKE         | Oryctolagus cuniculus |
| 1 | 1.00 | 1 | 1 | 0.03  | 0.034  | 0.032  | 0.03   | 0.03   | t | 63215  | TDPTGIEP<br>DDHLKE         | Myodes glareolus      |
| 1 | 1.00 | 1 | 1 | 0.01  | 0.01   | 0.01   | 0.01   | 0.01   | t | 135778 | VEGTSFLT                   | Homo sapiens          |

|   |      |   |   |       |        |        |        |        |   |        |                              |                          |
|---|------|---|---|-------|--------|--------|--------|--------|---|--------|------------------------------|--------------------------|
| 1 | 1.00 | 1 | 1 | 0.01  | 0.01   | 0.009  | 0.01   | 0.01   | t | 73636  | YEDRYRE                      | Mus musculus             |
| 1 | 1.00 | 1 | 1 | 0.05  | 0.044  | 0.048  | 0.05   | 0.05   | t | 67189  | TVYESFH<br>YFGSAPT           | Oncorhynchus tshawytscha |
| 1 | 1.00 | 1 | 1 | 0     | 0      | 0      | 0      | 0      | t | 48001  | PITNDQKK                     | Mus musculus             |
| 1 | 1.00 | 1 | 1 | -0.02 | -0.022 | -0.015 | -0.017 | -0.021 | t | 141605 | APLLPHS<br>NL                | Mus musculus             |
| 1 | 1.00 | 1 | 1 | 0.02  | 0.022  | 0.012  | 0.021  | 0.022  | t | 41177  | MAYRFNG<br>IGVTQNVLYE        | Homo sapiens             |
| 1 | 1.00 | 1 | 1 | 0.02  | 0.02   | 0.019  | 0.02   | 0.02   | t | 21722  | GPPAAEY<br>WNSQ              | Homo sapiens             |
| 1 | 1.00 | 1 | 1 | -0.02 | -0.018 | -0.023 | -0.019 | -0.02  | t | 7193   | CTPPALNC<br>YWPLNDYGF        | Homo sapiens             |
| 1 | 1.00 | 1 | 1 | -0.01 | -0.01  | -0.007 | -0.008 | -0.012 | t | 120426 | CVIQGVGV<br>TETPLMK          | Homo sapiens             |
| 1 | 1.00 | 1 | 1 | -0.02 | -0.02  | -0.02  | -0.02  | -0.02  | t | 58769  | SIYQCC                       | Homo sapiens             |
| 1 | 1.00 | 1 | 1 | -0.01 | -0.01  | -0.01  | -0.01  | -0.01  | t | 153867 | QLLRREIK<br>NT               | Cavia porcellus          |
| 1 | 1.00 | 1 | 1 | 0     | 0      | -0.008 | 0      | 0      | t | 39070  | LREGVTLG<br>VGASFTDQKL       | Oryctolagus cuniculus    |
| 1 | 1.00 | 1 | 1 | 0     | -0.004 | 0      | -0.007 | -0.005 | t | 123760 | SSYAKVSIC<br>LPMDTETPLAL     | Oryctolagus cuniculus    |
| 1 | 1.00 | 1 | 1 | -0.01 | -0.01  | -0.01  | -0.01  | -0.01  | t | 140869 | IALGQRRADAVK                 | Oryctolagus cuniculus    |
| 1 | 1.00 | 1 | 1 | 0.01  | 0.01   | 0.009  | 0.013  | 0.008  | t | 11983  | EFEGAGD<br>GEPPEDD<br>DSATGL | Homo sapiens             |
| 1 | 1.00 | 1 | 1 | 0.02  | 0.018  | 0.005  | 0.023  | 0.022  | t | 3493   | APAVKYTV<br>FETALKKAITAM     | Mus musculus             |

|   |      |   |   |       |       |       |        |        |   |        |                              |                          |
|---|------|---|---|-------|-------|-------|--------|--------|---|--------|------------------------------|--------------------------|
| 1 | 1.00 | 1 | 1 | 0.02  | 0.018 | 0.005 | 0.023  | 0.022  | t | 3493   | APAVKYTV<br>FETALKKAI<br>TAM | Mus<br>musculu<br>s      |
| 1 | 1.00 | 1 | 1 | -0.02 | -0.02 | -0.02 | -0.016 | -0.02  | t | 131412 | ERGLRYL                      | Homo<br>sapiens          |
| 1 | 1.00 | 1 | 1 | 0.04  | 0.04  | 0.04  | 0.04   | 0.04   | t | 95014  | GRLIELSQE<br>G               | Rattus<br>norvegic<br>us |
| 1 | 1.00 | 1 | 1 | 0     | 0     | 0     | 0      | -0.001 | t | 9942   | DRADGQP<br>AGDRAAG<br>QPAG   | Mus<br>musculu<br>s      |
| 1 | 1.00 | 1 | 1 | 0     | 0     | 0     | 0      | -0.001 | t | 9942   | DRADGQP<br>AGDRAAG<br>QPAG   | Mus<br>musculu<br>s      |
| 1 | 1.00 | 1 | 1 | 0     | 0     | 0     | 0      | -0.001 | t | 9942   | DRADGQP<br>AGDRAAG<br>QPAG   | Mus<br>musculu<br>s      |
| 1 | 1.00 | 1 | 1 | 0.05  | 0.053 | 0.039 | 0.05   | 0.052  | t | 111515 | LQPETTDL<br>YCYEQLND<br>SSEE | Mus<br>musculu<br>s      |
| 1 | 1.00 | 1 | 1 | 0.05  | 0.053 | 0.039 | 0.05   | 0.052  | t | 111515 | LQPETTDL<br>YCYEQLND<br>SSEE | Mus<br>musculu<br>s      |
| 1 | 1.00 | 1 | 1 | 0.02  | 0.02  | 0.02  | 0.02   | 0.02   | t | 137415 | HAPRYHY                      | Mus<br>musculu<br>s      |
| 1 | 1.00 | 1 | 1 | 0.02  | 0.02  | 0.02  | 0.02   | 0.02   | t | 123165 | FEQLKEGY<br>L                | Ovis<br>aries            |
| 1 | 1.00 | 1 | 1 | 0.02  | 0.02  | 0.02  | 0.02   | 0.02   | t | 112069 | CSFSGFS                      | Homo<br>sapiens          |
| 1 | 1.00 | 1 | 1 | 0     | 0     | 0     | 0      | 0      | t | 104126 | MNKTFWF                      | Homo<br>sapiens          |
| 1 | 1.00 | 1 | 1 | 0.01  | 0.01  | 0.015 | 0.01   | 0.01   | t | 127589 | ASKPEDW<br>DER               | Homo<br>sapiens          |
| 1 | 1.00 | 1 | 1 | 0.01  | 0.01  | 0.01  | 0.01   | 0.01   | t | 124560 | NGVELRD                      | Mus<br>musculu<br>s      |
| 1 | 1.00 | 1 | 1 | 0.01  | 0.01  | 0.01  | 0.01   | 0.01   | t | 43238  | NANPN                        | Mus<br>musculu<br>s      |
| 1 | 1.00 | 1 | 1 | -0.01 | -0.01 | -0.01 | -0.014 | -0.009 | t | 134273 | YHPDVP                       | Homo<br>sapiens          |

|   |      |   |   |       |        |        |        |        |   |        |                    |                       |
|---|------|---|---|-------|--------|--------|--------|--------|---|--------|--------------------|-----------------------|
| 1 | 1.00 | 1 | 1 | 0.01  | 0.01   | 0.011  | 0.01   | 0.01   | t | 97643  | SGSQGTVAL          | Oryctolagus cuniculus |
| 1 | 1.00 | 1 | 1 | -0.02 | -0.022 | -0.029 | -0.017 | -0.017 | t | 115351 | LKQKSSNSRKKRSTS    | Mus musculus          |
| 1 | 1.00 | 1 | 1 | 0     | 0.002  | 0.007  | 0.007  | -0.002 | t | 112982 | FTTVVADTGDFHAID    | Homo sapiens          |
| 1 | 1.00 | 1 | 1 | 0     | -0.004 | -0.012 | -0.001 | 0      | t | 10486  | DTSNKFAD           | Oryctolagus cuniculus |
| 1 | 1.00 | 1 | 1 | 0.07  | 0.076  | 0.07   | 0.07   | 0.07   | t | 123034 | APQCLEDFP          | Ovis aries            |
| 1 | 1.00 | 1 | 1 | 0.06  | 0.06   | 0.06   | 0.06   | 0.06   | t | 144812 | VTGCIPTREQ         | Homo sapiens          |
| 1 | 1.00 | 1 | 1 | 0.05  | 0.047  | 0.043  | 0.05   | 0.05   | t | 137469 | YPPEEETGERV        | Oryctolagus cuniculus |
| 1 | 1.00 | 1 | 1 | -0.03 | -0.028 | -0.035 | -0.029 | -0.031 | t | 74798  | YLLPRRGPRRL        | Homo sapiens          |
| 1 | 1.00 | 1 | 1 | -0.03 | -0.028 | -0.035 | -0.029 | -0.031 | t | 74798  | YLLPRRGPRRL        | Homo sapiens          |
| 1 | 1.00 | 1 | 1 | -0.01 | -0.008 | -0.013 | -0.007 | -0.01  | t | 48864  | PPPPPPPPPPPPPPPPPP | Homo sapiens          |
| 1 | 1.00 | 1 | 1 | -0.02 | -0.023 | -0.026 | -0.02  | -0.02  | t | 105795 | FTQFAGKD           | Oryctolagus cuniculus |
| 1 | 1.00 | 1 | 1 | 0.02  | 0.017  | 0.02   | 0.02   | 0.017  | t | 144597 | CFLTAAGYGGGLPDSVKI | Oryctolagus cuniculus |
| 1 | 1.00 | 1 | 1 | 0     | 0      | -0.018 | 0.007  | 0.01   | t | 103944 | GNYNLRR            | Homo sapiens          |
| 1 | 1.00 | 1 | 1 | 0.06  | 0.061  | 0.06   | 0.06   | 0.062  | t | 45059  | NNDNPQ             | Mus musculus          |
| 1 | 1.00 | 1 | 1 | 0.01  | 0.008  | 0.008  | 0.011  | 0.009  | t | 49333  | PSDLGGNNLPAKFLE    | Homo sapiens          |

|   |      |   |   |       |       |        |        |        |   |        |                              |                       |
|---|------|---|---|-------|-------|--------|--------|--------|---|--------|------------------------------|-----------------------|
| 1 | 1.00 | 1 | 1 | 0     | 0.008 | 0      | 0      | -0.002 | t | 156930 | PISKEHV                      | Gallus gallus         |
| 1 | 1.00 | 1 | 1 | 0.03  | 0.03  | 0.03   | 0.03   | 0.03   | t | 103040 | ALTGLGDK<br>FGESIVN          | Homo sapiens          |
| 1 | 1.00 | 1 | 1 | 0.01  | 0.01  | 0.01   | 0.01   | 0.01   | t | 149328 | GSFQPQQ<br>LPQ               | Mus musculus          |
| 1 | 1.00 | 1 | 1 | 0.01  | 0.01  | 0.01   | 0.01   | 0.01   | t | 114957 | SVDCSEYP<br>KP               | Homo sapiens          |
| 1 | 1.00 | 1 | 1 | 0.01  | 0.01  | 0.01   | 0.01   | 0.01   | t | 116025 | VYPFPGPI<br>PN               | Homo sapiens          |
| 1 | 1.00 | 1 | 1 | -0.01 | -0.01 | -0.01  | -0.006 | -0.01  | t | 135710 | LAKEQKSK<br>QNIGALKQ<br>ELAK | Homo sapiens          |
| 1 | 1.00 | 1 | 1 | 0.03  | 0.026 | 0.027  | 0.03   | 0.032  | t | 63555  | TETKIDKLC<br>V               | Mus musculus          |
| 1 | 1.00 | 1 | 1 | 0     | 0.003 | 0      | 0      | 0      | t | 31722  | KKTTTKPT<br>KKPT             | Mus musculus          |
| 1 | 1.00 | 1 | 1 | 0     | 0.002 | 0      | 0.003  | 0      | t | 3289   | ANGAGNQ<br>PGANGAG<br>GQAA   | Homo sapiens          |
| 1 | 1.00 | 1 | 1 | 0     | 0.001 | 0      | 0.001  | 0      | t | 38272  | LNLTTWN<br>P                 | Oryctolagus cuniculus |
| 1 | 1.00 | 1 | 1 | -0.01 | -0.01 | -0.004 | -0.01  | -0.012 | t | 6469   | CKALQEQC<br>RFPN             | Oryctolagus cuniculus |
| 1 | 1.00 | 1 | 1 | 0.03  | 0.028 | 0.031  | 0.023  | 0.03   | t | 134786 | RPVDQY                       | Mus musculus          |
| 1 | 1.00 | 1 | 1 | 0     | 0     | -0.01  | 0      | 0      | t | 44251  | NIISCNKN<br>DKNQ             | Oryctolagus cuniculus |
| 1 | 1.00 | 1 | 1 | 0.02  | 0.022 | 0.02   | 0.023  | 0.022  | t | 141272 | FNPCEDI                      | Homo sapiens          |

|   |      |   |   |       |        |        |        |        |   |        |                              |                                  |
|---|------|---|---|-------|--------|--------|--------|--------|---|--------|------------------------------|----------------------------------|
| 1 | 1.00 | 1 | 1 | 0.03  | 0.03   | 0.024  | 0.03   | 0.032  | t | 38599  | LPNNTAS<br>WFTALTQ<br>H      | Mus<br>musculu<br>s              |
| 1 | 1.00 | 1 | 1 | 0.03  | 0.03   | 0.024  | 0.03   | 0.032  | t | 38599  | LPNNTAS<br>WFTALTQ<br>H      | Mus<br>musculu<br>s              |
| 1 | 1.00 | 1 | 1 | -0.03 | -0.03  | -0.03  | -0.03  | -0.028 | t | 60751  | SRNWLPG<br>PCY               | Mus<br>musculu<br>s              |
| 1 | 1.00 | 1 | 1 | 0.03  | 0.027  | 0.027  | 0.03   | 0.03   | t | 8974   | DKQLLPV<br>NKQSCSIS          | Oryctola<br>gus<br>cuniculu<br>s |
| 1 | 1.00 | 1 | 1 | 0     | -0.002 | 0      | -0.001 | 0      | t | 9690   | DPNANPN<br>V                 | Mus<br>musculu<br>s              |
| 1 | 1.00 | 1 | 1 | -0.01 | -0.01  | -0.01  | -0.014 | -0.01  | t | 124319 | IREKIEDAK                    | Homo<br>sapiens                  |
| 1 | 1.00 | 1 | 1 | 0.01  | 0.01   | 0.005  | 0.01   | 0.009  | t | 34776  | LAGGAAT<br>AGAFSRPG<br>LPVEY | Homo<br>sapiens                  |
| 1 | 1.00 | 1 | 1 | -0.02 | -0.017 | -0.022 | -0.02  | -0.018 | t | 120516 | EWGWS                        | Mus<br>musculu<br>s              |
| 1 | 1.00 | 1 | 1 | -0.02 | -0.02  | -0.022 | -0.02  | -0.018 | t | 120516 | EWGWS                        | Oryctola<br>gus<br>cuniculu<br>s |
| 1 | 1.00 | 1 | 1 | 0.07  | 0.066  | 0.07   | 0.063  | 0.07   | t | 141884 | ESLIA                        | Oryctola<br>gus<br>cuniculu<br>s |
| 1 | 1.00 | 1 | 1 | -0.01 | -0.01  | -0.012 | -0.01  | -0.01  | t | 32826  | KPPKYHPD<br>VP               | Homo<br>sapiens                  |
| 1 | 1.00 | 1 | 1 | 0     | 0.002  | 0      | 0.001  | -0.001 | t | 51146  | QIVGGVYL                     | Homo<br>sapiens                  |
| 1 | 1.00 | 1 | 1 | -0.01 | -0.012 | -0.013 | -0.01  | -0.01  | t | 104369 | YTIENAVPI<br>HLLRTGDE<br>FS  | Oryctola<br>gus<br>cuniculu<br>s |
| 1 | 1.00 | 1 | 1 | 0.02  | 0.02   | 0.02   | 0.018  | 0.02   | t | 5367   | AVIEPIVAT                    | Homo<br>sapiens                  |

|   |      |   |   |       |        |        |        |        |   |        |                              |                                  |
|---|------|---|---|-------|--------|--------|--------|--------|---|--------|------------------------------|----------------------------------|
| 1 | 1.00 | 1 | 1 | 0     | 0      | -0.007 | 0      | 0      | t | 122430 | KGLRRDL<br>ASREAK            | Mus<br>musculu<br>s              |
| 1 | 1.00 | 1 | 1 | -0.01 | -0.012 | -0.03  | -0.017 | -0.01  | t | 141633 | EELLETLQ<br>VAEREAY          | Rattus<br>norvegic<br>us         |
| 1 | 1.00 | 1 | 1 | -0.01 | -0.014 | -0.03  | -0.017 | -0.01  | t | 141633 | EELLETLQ<br>VAEREAY          | Oryctola<br>gus<br>cuniculu<br>s |
| 1 | 1.00 | 1 | 1 | 0.03  | 0.03   | 0.036  | 0.03   | 0.032  | t | 14992  | EYEDLLKA                     | Mus<br>musculu<br>s              |
| 1 | 1.00 | 1 | 1 | 0.02  | 0.02   | 0.02   | 0.02   | 0.02   | t | 111796 | SPLFLDQR<br>SLTP             | Homo<br>sapiens                  |
| 1 | 1.00 | 1 | 1 | 0.02  | 0.02   | 0.02   | 0.02   | 0.02   | t | 79264  | KCMDAFVI<br>YETNCQ           | Mus<br>musculu<br>s              |
| 1 | 1.00 | 1 | 1 | 0.02  | 0.02   | 0.02   | 0.02   | 0.02   | t | 20012  | GGSGGSV<br>ASGGSVAS          | Homo<br>sapiens                  |
| 1 | 1.00 | 1 | 1 | 0     | 0      | 0      | 0      | 0      | t | 153280 | PLGFFPDH<br>QLDPAFR          | Mus<br>musculu<br>s              |
| 1 | 1.00 | 1 | 1 | 0.01  | 0.013  | 0.011  | 0.01   | 0.01   | t | 75371  | YPNQVYYR<br>PVDQYSN          | Mus<br>musculu<br>s              |
| 1 | 1.00 | 1 | 1 | 0.01  | 0.014  | 0.01   | 0.011  | 0.01   | t | 70038  | VMYASSG                      | Homo<br>sapiens                  |
| 1 | 1.00 | 1 | 1 | 0     | 0      | 0.002  | 0      | -0.002 | t | 134418 | KGAIIGLM<br>VGGVV            | Homo<br>sapiens                  |
| 1 | 1.00 | 1 | 1 | 0     | 0      | 0.009  | 0      | 0      | t | 26877  | IKPLEDKIL<br>V               | Mus<br>musculu<br>s              |
| 1 | 1.00 | 1 | 1 | 0     | 0      | 0      | 0      | -0.001 | t | 153865 | PETTDLYC<br>Y                | Cavia<br>porcellu<br>s           |
| 1 | 1.00 | 1 | 1 | 0     | 0      | 0      | 0      | -0.001 | t | 153827 | EQQYNKPL<br>CDL              | Cavia<br>porcellu<br>s           |
| 1 | 1.00 | 1 | 1 | 0     | 0      | 0      | 0      | -0.001 | t | 153885 | SEEEDEID<br>GPAGQAE<br>PDRAH | Cavia<br>porcellu<br>s           |



|   |      |   |   |   |        |   |   |        |   |        |                              |                                  |
|---|------|---|---|---|--------|---|---|--------|---|--------|------------------------------|----------------------------------|
| 1 | 1.00 | 1 | 1 | 0 | 0      | 0 | 0 | -0.001 | t | 153282 | PLRNTHPQ<br>AMQWNS<br>TTF    | Mus<br>musculu<br>s              |
| 1 | 1.00 | 1 | 1 | 0 | 0      | 0 | 0 | -0.001 | t | 141693 | KTWG                         | Mus<br>musculu<br>s              |
| 1 | 1.00 | 1 | 1 | 0 | -0.007 | 0 | 0 | -0.001 | t | 153841 | KCLKFYSKI<br>SEYRHY          | Oryctola<br>gus<br>cuniculu<br>s |
| 1 | 1.00 | 1 | 1 | 0 | 0      | 0 | 0 | -0.001 | t | 139154 | KWEAARE<br>AEQRR             | Oryctola<br>gus<br>cuniculu<br>s |
| 1 | 1.00 | 1 | 1 | 0 | 0      | 0 | 0 | -0.001 | t | 153839 | HQKRTAM<br>FQDPQER<br>PRKLPQ | Cavia<br>porcellu<br>s           |
| 1 | 1.00 | 1 | 1 | 0 | -0.007 | 0 | 0 | -0.001 | t | 153815 | CYEQLNDS<br>SEEEDEI          | Oryctola<br>gus<br>cuniculu<br>s |
| 1 | 1.00 | 1 | 1 | 0 | 0      | 0 | 0 | -0.001 | t | 153820 | DTPTLHEY<br>MLDLQP           | Oryctola<br>gus<br>cuniculu<br>s |
| 1 | 1.00 | 1 | 1 | 0 | 0      | 0 | 0 | -0.001 | t | 158947 | LDIDIDPKV<br>KVATLS          | Mus<br>musculu<br>s              |
| 1 | 1.00 | 1 | 1 | 0 | 0      | 0 | 0 | -0.001 | t | 158910 | KNLDIDPK<br>LQEYLGK          | Mus<br>musculu<br>s              |
| 1 | 1.00 | 1 | 1 | 0 | 0      | 0 | 0 | -0.001 | t | 139305 | TAAQITQR<br>KWEAARE<br>AEQRR | Oryctola<br>gus<br>cuniculu<br>s |
| 1 | 1.00 | 1 | 1 | 0 | 0      | 0 | 0 | -0.001 | t | 153284 | PTPLSPPLR<br>NTHPQA          | Mus<br>musculu<br>s              |
| 1 | 1.00 | 1 | 1 | 0 | -0.003 | 0 | 0 | -0.001 | t | 139203 | QIYKAQA<br>QTDRESLR<br>NLR   | Oryctola<br>gus<br>cuniculu<br>s |
| 1 | 1.00 | 1 | 1 | 0 | 0      | 0 | 0 | -0.001 | t | 153815 | CYEQLNDS<br>SEEEDEI          | Oryctola<br>gus<br>cuniculu<br>s |
| 1 | 1.00 | 1 | 1 | 0 | 0      | 0 | 0 | -0.001 | t | 153836 | HGPKATL<br>QDIVLHLE<br>P     | Cavia<br>porcellu<br>s           |

|   |      |   |   |   |        |   |   |        |   |        |                              |                                  |
|---|------|---|---|---|--------|---|---|--------|---|--------|------------------------------|----------------------------------|
| 1 | 1.00 | 1 | 1 | 0 | 0      | 0 | 0 | -0.001 | t | 153693 | RKIFIDTIP<br>N               | Mus<br>musculu<br>s              |
| 1 | 1.00 | 1 | 1 | 0 | -0.003 | 0 | 0 | -0.001 | t | 139305 | TAAQITQR<br>KWEAARE<br>AEQRR | Oryctola<br>gus<br>cuniculu<br>s |
| 1 | 1.00 | 1 | 1 | 0 | 0      | 0 | 0 | -0.001 | t | 153856 | MFQDPQE<br>R                 | Oryctola<br>gus<br>cuniculu<br>s |
| 1 | 1.00 | 1 | 1 | 0 | -0.007 | 0 | 0 | -0.001 | t | 153838 | HQKRTAM<br>FQDPQER           | Oryctola<br>gus<br>cuniculu<br>s |
| 1 | 1.00 | 1 | 1 | 0 | 0      | 0 | 0 | -0.001 | t | 158738 | EIVDLPKL<br>KQINLI           | Mus<br>musculu<br>s              |
| 1 | 1.00 | 1 | 1 | 0 | 0      | 0 | 0 | -0.001 | t | 139398 | YGCDVGP<br>DGRLLRGH<br>DQYAY | Oryctola<br>gus<br>cuniculu<br>s |
| 1 | 1.00 | 1 | 1 | 0 | 0      | 0 | 0 | -0.001 | t | 153837 | HGRLVTLK<br>DIVLDLQP         | Cavia<br>porcellu<br>s           |
| 1 | 1.00 | 1 | 1 | 0 | -0.003 | 0 | 0 | -0.001 | t | 139398 | YGCDVGP<br>DGRLLRGH<br>DQYAY | Oryctola<br>gus<br>cuniculu<br>s |
| 1 | 1.00 | 1 | 1 | 0 | 0      | 0 | 0 | -0.001 | t | 117569 | LKYYLAPKI<br>EDEEGS          | Oryctola<br>gus<br>cuniculu<br>s |
| 1 | 1.00 | 1 | 1 | 0 | 0      | 0 | 0 | -0.001 | t | 125250 | SDEFNPCE<br>DIMGYK           | Mus<br>musculu<br>s              |
| 1 | 1.00 | 1 | 1 | 0 | 0      | 0 | 0 | -0.001 | t | 122862 | NDEYFIRK                     | Rattus<br>norvegic<br>us         |
| 1 | 1.00 | 1 | 1 | 0 | 0      | 0 | 0 | -0.001 | t | 127643 | ERPLELRV<br>RVLDI            | Homo<br>sapiens                  |
| 1 | 1.00 | 1 | 1 | 0 | 0      | 0 | 0 | -0.001 | t | 122857 | MGCSSPP<br>CECHQEE           | Mus<br>musculu<br>s              |
| 1 | 1.00 | 1 | 1 | 0 | 0      | 0 | 0 | -0.001 | t | 120412 | ASKEKQEN<br>KIFADDIDI<br>SD  | Mus<br>musculu<br>s              |

|   |      |   |   |   |   |   |   |        |   |        |                              |                                  |
|---|------|---|---|---|---|---|---|--------|---|--------|------------------------------|----------------------------------|
| 1 | 1.00 | 1 | 1 | 0 | 0 | 0 | 0 | -0.001 | t | 122150 | MSKTLHA<br>QLGFKKT           | Oryctola<br>gus<br>cuniculu<br>s |
| 1 | 1.00 | 1 | 1 | 0 | 0 | 0 | 0 | -0.001 | t | 122210 | VRVIDPSL<br>GDRKDE           | Oryctola<br>gus<br>cuniculu<br>s |
| 1 | 1.00 | 1 | 1 | 0 | 0 | 0 | 0 | -0.001 | t | 122115 | IKGANDLA<br>KFHQMLM<br>KIIMK | Oryctola<br>gus<br>cuniculu<br>s |
| 1 | 1.00 | 1 | 1 | 0 | 0 | 0 | 0 | -0.001 | t | 122947 | WTQEPQP<br>LEEKWQH<br>RVVE   | Homo<br>sapiens                  |
| 1 | 1.00 | 1 | 1 | 0 | 0 | 0 | 0 | -0.001 | t | 119943 | IGLMVGG<br>VV                | Mus<br>musculu<br>s              |
| 1 | 1.00 | 1 | 1 | 0 | 0 | 0 | 0 | -0.001 | t | 122886 | RGTDEYFI<br>RKPP             | Rattus<br>norvegic<br>us         |
| 1 | 1.00 | 1 | 1 | 0 | 0 | 0 | 0 | -0.001 | t | 118058 | PPPGIRGP                     | Oryctola<br>gus<br>cuniculu<br>s |
| 1 | 1.00 | 1 | 1 | 0 | 0 | 0 | 0 | -0.001 | t | 133087 | ETKTYFWK<br>VQ               | Mus<br>musculu<br>s              |
| 1 | 1.00 | 1 | 1 | 0 | 0 | 0 | 0 | -0.001 | t | 131406 | EGEGSGFI<br>REDPIGAG<br>A    | Oryctola<br>gus<br>cuniculu<br>s |
| 1 | 1.00 | 1 | 1 | 0 | 0 | 0 | 0 | -0.001 | t | 120769 | LLVDVEPK<br>VKSCKRE          | Mus<br>musculu<br>s              |
| 1 | 1.00 | 1 | 1 | 0 | 0 | 0 | 0 | -0.001 | t | 122153 | NASGLSRP<br>SPSAH            | Oryctola<br>gus<br>cuniculu<br>s |
| 1 | 1.00 | 1 | 1 | 0 | 0 | 0 | 0 | -0.001 | t | 119048 | VSDYEMKL<br>MDLDVEQ          | Mus<br>musculu<br>s              |
| 1 | 1.00 | 1 | 1 | 0 | 0 | 0 | 0 | -0.001 | t | 124588 | PQEETLQA<br>FDSHYDYT         | Oryctola<br>gus<br>cuniculu<br>s |
| 1 | 1.00 | 1 | 1 | 0 | 0 | 0 | 0 | -0.001 | t | 131701 | THHINNM<br>KPSFTREN<br>T     | Oryctola<br>gus<br>cuniculu<br>s |

|   |      |   |   |   |   |   |   |        |   |        |                             |                                  |
|---|------|---|---|---|---|---|---|--------|---|--------|-----------------------------|----------------------------------|
| 1 | 1.00 | 1 | 1 | 0 | 0 | 0 | 0 | -0.001 | t | 122842 | LLDLPRDL<br>GGMGCSS<br>PPCE | Oryctola<br>gus<br>cuniculu<br>s |
| 1 | 1.00 | 1 | 1 | 0 | 0 | 0 | 0 | -0.001 | t | 122090 | ESPQEISK<br>HQALG           | Oryctola<br>gus<br>cuniculu<br>s |
| 1 | 1.00 | 1 | 1 | 0 | 0 | 0 | 0 | -0.001 | t | 127898 | YEENLGDS<br>IV              | Oryctola<br>gus<br>cuniculu<br>s |
| 1 | 1.00 | 1 | 1 | 0 | 0 | 0 | 0 | -0.001 | t | 131717 | TTLVNPKN<br>KNSYPHY         | Oryctola<br>gus<br>cuniculu<br>s |
| 1 | 1.00 | 1 | 1 | 0 | 0 | 0 | 0 | -0.001 | t | 131579 | PDIITGFSS                   | Oryctola<br>gus<br>cuniculu<br>s |
| 1 | 1.00 | 1 | 1 | 0 | 0 | 0 | 0 | -0.001 | t | 118902 | LVFEAPNQ<br>EKVSDYE         | Oryctola<br>gus<br>cuniculu<br>s |
| 1 | 1.00 | 1 | 1 | 0 | 0 | 0 | 0 | -0.001 | t | 122073 | AEEQARH<br>VKNGLE           | Oryctola<br>gus<br>cuniculu<br>s |
| 1 | 1.00 | 1 | 1 | 0 | 0 | 0 | 0 | -0.001 | t | 118783 | EIIVTHFPF<br>DEQNCSM<br>K   | Rattus<br>norvegic<br>us         |
| 1 | 1.00 | 1 | 1 | 0 | 0 | 0 | 0 | -0.001 | t | 122857 | MGCSSPP<br>CECHQEE          | Mus<br>musculu<br>s              |
| 1 | 1.00 | 1 | 1 | 0 | 0 | 0 | 0 | -0.001 | t | 121288 | EYILKKPRS                   | Rattus<br>norvegic<br>us         |
| 1 | 1.00 | 1 | 1 | 0 | 0 | 0 | 0 | -0.001 | t | 120716 | KSAIEGVK                    | Rattus<br>norvegic<br>us         |
| 1 | 1.00 | 1 | 1 | 0 | 0 | 0 | 0 | -0.001 | t | 118060 | PPPGMRP<br>P                | Oryctola<br>gus<br>cuniculu<br>s |
| 1 | 1.00 | 1 | 1 | 0 | 0 | 0 | 0 | -0.001 | t | 118877 | LDVEQLGI<br>PEQEYSC         | Oryctola<br>gus<br>cuniculu<br>s |

|   |      |   |   |   |   |   |   |        |   |        |                             |                                  |
|---|------|---|---|---|---|---|---|--------|---|--------|-----------------------------|----------------------------------|
| 1 | 1.00 | 1 | 1 | 0 | 0 | 0 | 0 | -0.001 | t | 119496 | MFPEVKEK<br>GMAAL           | Homo<br>sapiens                  |
| 1 | 1.00 | 1 | 1 | 0 | 0 | 0 | 0 | -0.001 | t | 118131 | SEESDDD<br>MGFGLFD          | Homo<br>sapiens                  |
| 1 | 1.00 | 1 | 1 | 0 | 0 | 0 | 0 | -0.001 | t | 118060 | PPPGMRP<br>P                | Oryctola<br>gus<br>cuniculu<br>s |
| 1 | 1.00 | 1 | 1 | 0 | 0 | 0 | 0 | -0.001 | t | 120970 | STHTMPQ<br>WVRKIFID<br>TIPN | Mus<br>musculu<br>s              |
| 1 | 1.00 | 1 | 1 | 0 | 0 | 0 | 0 | -0.001 | t | 117609 | PVQLETLSI<br>RGNNIR         | Mus<br>musculu<br>s              |
| 1 | 1.00 | 1 | 1 | 0 | 0 | 0 | 0 | -0.001 | t | 119048 | VSDYEMKL<br>MDLDVEQ         | Mus<br>musculu<br>s              |
| 1 | 1.00 | 1 | 1 | 0 | 0 | 0 | 0 | -0.001 | t | 122108 | GVGVELE<br>NSMGGLN<br>F     | Oryctola<br>gus<br>cuniculu<br>s |
| 1 | 1.00 | 1 | 1 | 0 | 0 | 0 | 0 | -0.001 | t | 125250 | SDEFNPCE<br>DIMGYK          | Mus<br>musculu<br>s              |
| 1 | 1.00 | 1 | 1 | 0 | 0 | 0 | 0 | -0.001 | t | 132045 | RMATPLL<br>MRPMSM           | Oryctola<br>gus<br>cuniculu<br>s |
| 1 | 1.00 | 1 | 1 | 0 | 0 | 0 | 0 | -0.001 | t | 119052 | WNPADYG<br>GIK              | Rattus<br>norvegic<br>us         |
| 1 | 1.00 | 1 | 1 | 0 | 0 | 0 | 0 | -0.001 | t | 133178 | KNFVKPNE<br>TKTYFWK         | Mus<br>musculu<br>s              |
| 1 | 1.00 | 1 | 1 | 0 | 0 | 0 | 0 | -0.001 | t | 126201 | GYKEKSKF<br>QDTHNNA         | Oryctola<br>gus<br>cuniculu<br>s |
| 1 | 1.00 | 1 | 1 | 0 | 0 | 0 | 0 | -0.001 | t | 118480 | KWNPDDY<br>GGVK             | Rattus<br>norvegic<br>us         |
| 1 | 1.00 | 1 | 1 | 0 | 0 | 0 | 0 | -0.001 | t | 122746 | EEQEDEIIG<br>FGQELKN        | Oryctola<br>gus<br>cuniculu<br>s |
| 1 | 1.00 | 1 | 1 | 0 | 0 | 0 | 0 | -0.001 | t | 118846 | ILKKVLEAL<br>KDLI           | Oryctola<br>gus<br>cuniculu<br>s |

|   |      |   |   |   |        |   |   |        |   |        |                           |                              |
|---|------|---|---|---|--------|---|---|--------|---|--------|---------------------------|------------------------------|
| 1 | 1.00 | 1 | 1 | 0 | 0      | 0 | 0 | -0.001 | t | 109905 | SEEEND                    | Mus<br>musculus              |
| 1 | 1.00 | 1 | 1 | 0 | 0      | 0 | 0 | -0.001 | t | 109905 | SEEEND                    | Mus<br>musculus              |
| 1 | 1.00 | 1 | 1 | 0 | 0      | 0 | 0 | -0.001 | t | 111497 | LMGTLGIV<br>CPICSQKP      | Oryctola<br>gus<br>cuniculus |
| 1 | 1.00 | 1 | 1 | 0 | 0      | 0 | 0 | -0.001 | t | 107214 | MVGGVV                    | Mus<br>musculus              |
| 1 | 1.00 | 1 | 1 | 0 | 0      | 0 | 0 | -0.001 | t | 104569 | MASPGSG<br>FWSFGSE<br>DGS | Mus<br>musculus              |
| 1 | 1.00 | 1 | 1 | 0 | 0      | 0 | 0 | -0.001 | t | 105763 | EVHHQK                    | Mus<br>musculus              |
| 1 | 1.00 | 1 | 1 | 0 | 0      | 0 | 0 | -0.001 | t | 101437 | YRSPFSRV<br>VHLYRNG<br>K  | Mus<br>musculus              |
| 1 | 1.00 | 1 | 1 | 0 | 0      | 0 | 0 | -0.001 | t | 110761 | AENPTNY                   | Mus<br>musculus              |
| 1 | 1.00 | 1 | 1 | 0 | 0      | 0 | 0 | -0.001 | t | 99833  | PPFSQQ                    | Mus<br>musculus              |
| 1 | 1.00 | 1 | 1 | 0 | 0      | 0 | 0 | -0.001 | t | 110962 | PIDVVP                    | Mus<br>musculus              |
| 1 | 1.00 | 1 | 1 | 0 | 0      | 0 | 0 | -0.001 | t | 106322 | DAEFRHDS<br>G             | Mus<br>musculus              |
| 1 | 1.00 | 1 | 1 | 0 | 0      | 0 | 0 | -0.001 | t | 104906 | MVGGVVI<br>A              | Mus<br>musculus              |
| 1 | 1.00 | 1 | 1 | 0 | 0      | 0 | 0 | -0.001 | t | 99834  | QGQQGY<br>P               | Mus<br>musculus              |
| 1 | 1.00 | 1 | 1 | 0 | 0      | 0 | 0 | -0.001 | t | 99836  | QFPQPQ                    | Mus<br>musculus              |
| 1 | 1.00 | 1 | 1 | 0 | -0.003 | 0 | 0 | -0.001 | t | 108131 | SKDWSFY                   | Oryctola<br>gus<br>cuniculus |

|   |      |   |   |   |        |   |   |        |   |        |                             |                                  |
|---|------|---|---|---|--------|---|---|--------|---|--------|-----------------------------|----------------------------------|
| 1 | 1.00 | 1 | 1 | 0 | -0.003 | 0 | 0 | -0.001 | t | 108019 | LSQPKIVK<br>WDR             | Oryctola<br>gus<br>cuniculu<br>s |
| 1 | 1.00 | 1 | 1 | 0 | 0      | 0 | 0 | -0.001 | t | 108019 | LSQPKIVK<br>WDR             | Oryctola<br>gus<br>cuniculu<br>s |
| 1 | 1.00 | 1 | 1 | 0 | 0      | 0 | 0 | -0.001 | t | 108019 | LSQPKIVK<br>WDR             | Oryctola<br>gus<br>cuniculu<br>s |
| 1 | 1.00 | 1 | 1 | 0 | 0      | 0 | 0 | -0.001 | t | 99842  | RPQQPYP                     | Mus<br>musculu<br>s              |
| 1 | 1.00 | 1 | 1 | 0 | -0.003 | 0 | 0 | -0.001 | t | 108131 | SKDWSFY                     | Oryctola<br>gus<br>cuniculu<br>s |
| 1 | 1.00 | 1 | 1 | 0 | 0      | 0 | 0 | -0.001 | t | 102384 | EFRH                        | Mus<br>musculu<br>s              |
| 1 | 1.00 | 1 | 1 | 0 | 0      | 0 | 0 | -0.001 | t | 102384 | EFRH                        | Mus<br>musculu<br>s              |
| 1 | 1.00 | 1 | 1 | 0 | 0      | 0 | 0 | -0.001 | t | 108131 | SKDWSFY                     | Oryctola<br>gus<br>cuniculu<br>s |
| 1 | 1.00 | 1 | 1 | 0 | 0      | 0 | 0 | -0.001 | t | 106842 | SKDEIDSA<br>VKMLVSLK<br>MSY | Mus<br>musculu<br>s              |
| 1 | 1.00 | 1 | 1 | 0 | 0      | 0 | 0 | -0.001 | t | 110376 | QAEPD                       | Mus<br>musculu<br>s              |
| 1 | 1.00 | 1 | 1 | 0 | 0      | 0 | 0 | -0.001 | t | 110376 | QAEPD                       | Mus<br>musculu<br>s              |
| 1 | 1.00 | 1 | 1 | 0 | 0      | 0 | 0 | -0.001 | t | 63604  | TEYYLNHG<br>KWPEN           | Oryctola<br>gus<br>cuniculu<br>s |
| 1 | 1.00 | 1 | 1 | 0 | 0      | 0 | 0 | -0.001 | t | 72251  | WAPSV                       | Mus<br>musculu<br>s              |
| 1 | 1.00 | 1 | 1 | 0 | 0      | 0 | 0 | -0.001 | t | 95048  | VIFQTPLIK<br>NPDVKSAL<br>EG | Rattus<br>norvegic<br>us         |

|   |      |   |   |   |   |   |   |        |   |       |                              |                       |
|---|------|---|---|---|---|---|---|--------|---|-------|------------------------------|-----------------------|
| 1 | 1.00 | 1 | 1 | 0 | 0 | 0 | 0 | -0.001 | t | 76491 | YYDGRRS                      | Mus musculus          |
| 1 | 1.00 | 1 | 1 | 0 | 0 | 0 | 0 | -0.001 | t | 75075 | YMLDLQP<br>ETT               | Cavia porcellus       |
| 1 | 1.00 | 1 | 1 | 0 | 0 | 0 | 0 | -0.001 | t | 68018 | VDLPQLGL<br>RR               | Mus musculus          |
| 1 | 1.00 | 1 | 1 | 0 | 0 | 0 | 0 | -0.001 | t | 73430 | YAQYMSR<br>AYAFLGE<br>DPGSG  | Mus musculus          |
| 1 | 1.00 | 1 | 1 | 0 | 0 | 0 | 0 | -0.001 | t | 69178 | VKAETRLN<br>PDLQPTE          | Oryctolagus cuniculus |
| 1 | 1.00 | 1 | 1 | 0 | 0 | 0 | 0 | -0.001 | t | 63604 | TEYYLNHG<br>KWPN             | Oryctolagus cuniculus |
| 1 | 1.00 | 1 | 1 | 0 | 0 | 0 | 0 | -0.001 | t | 95161 | TYGKFCIKP                    | Mus musculus          |
| 1 | 1.00 | 1 | 1 | 0 | 0 | 0 | 0 | -0.001 | t | 69175 | VKAETRLN                     | Mus musculus          |
| 1 | 1.00 | 1 | 1 | 0 | 0 | 0 | 0 | -0.001 | t | 89661 | TQLTSSYE<br>DYML             | Mus musculus          |
| 1 | 1.00 | 1 | 1 | 0 | 0 | 0 | 0 | -0.001 | t | 67040 | TVKAKLLS<br>VE               | Mus musculus          |
| 1 | 1.00 | 1 | 1 | 0 | 0 | 0 | 0 | -0.001 | t | 75203 | YNPLYGSR<br>LGVPDTLG<br>GDPK | Homo sapiens          |
| 1 | 1.00 | 1 | 1 | 0 | 0 | 0 | 0 | -0.001 | t | 94606 | LTGGFYEP<br>L                | Mus musculus          |
| 1 | 1.00 | 1 | 1 | 0 | 0 | 0 | 0 | -0.001 | t | 60663 | SRGAPGG<br>GFVPSLQG<br>VP    | Oryctolagus cuniculus |
| 1 | 1.00 | 1 | 1 | 0 | 0 | 0 | 0 | -0.001 | t | 60751 | SRNWLPG<br>PCY               | Mus musculus          |



|   |      |   |   |   |   |   |   |        |   |       |                              |                                  |
|---|------|---|---|---|---|---|---|--------|---|-------|------------------------------|----------------------------------|
| 1 | 1.00 | 1 | 1 | 0 | 0 | 0 | 0 | -0.001 | t | 84423 | KKGLQQL<br>QEWDW<br>VGWIGN   | Felis<br>catus                   |
| 1 | 1.00 | 1 | 1 | 0 | 0 | 0 | 0 | -0.001 | t | 63217 | TDQMEVD<br>SGPRKRPL<br>RGG   | Oryctola<br>gus<br>cuniculu<br>s |
| 1 | 1.00 | 1 | 1 | 0 | 0 | 0 | 0 | -0.001 | t | 66060 | TRLNPD                       | Mus<br>musculu<br>s              |
| 1 | 1.00 | 1 | 1 | 0 | 0 | 0 | 0 | -0.001 | t | 68548 | VFPTKDVA<br>L                | Mus<br>musculu<br>s              |
| 1 | 1.00 | 1 | 1 | 0 | 0 | 0 | 0 | -0.001 | t | 68019 | VDLPQPGL<br>RR               | Mus<br>musculu<br>s              |
| 1 | 1.00 | 1 | 1 | 0 | 0 | 0 | 0 | -0.001 | t | 95132 | PYVTYG                       | Mus<br>musculu<br>s              |
| 1 | 1.00 | 1 | 1 | 0 | 0 | 0 | 0 | -0.001 | t | 73636 | YEDRYRE                      | Mus<br>musculu<br>s              |
| 1 | 1.00 | 1 | 1 | 0 | 0 | 0 | 0 | -0.001 | t | 95058 | AGLQND                       | Mus<br>musculu<br>s              |
| 1 | 1.00 | 1 | 1 | 0 | 0 | 0 | 0 | -0.001 | t | 73889 | YFRTLEDA<br>AH               | Mus<br>musculu<br>s              |
| 1 | 1.00 | 1 | 1 | 0 | 0 | 0 | 0 | -0.001 | t | 73433 | YARFMDT<br>DPDRYGIL<br>PSNF  | Mus<br>musculu<br>s              |
| 1 | 1.00 | 1 | 1 | 0 | 0 | 0 | 0 | -0.001 | t | 73433 | YARFMDT<br>DPDRYGIL<br>PSNF  | Mus<br>musculu<br>s              |
| 1 | 1.00 | 1 | 1 | 0 | 0 | 0 | 0 | -0.001 | t | 65974 | TQYERE                       | Mus<br>musculu<br>s              |
| 1 | 1.00 | 1 | 1 | 0 | 0 | 0 | 0 | -0.001 | t | 70391 | VPNLRGDL<br>QVLAQKV<br>ARTLP | Oryctola<br>gus<br>cuniculu<br>s |
| 1 | 1.00 | 1 | 1 | 0 | 0 | 0 | 0 | -0.001 | t | 97348 | GLFGAIAG<br>FIEGGW           | Oryctola<br>gus<br>cuniculu<br>s |

|   |      |   |   |   |        |   |   |        |   |       |                              |                                  |
|---|------|---|---|---|--------|---|---|--------|---|-------|------------------------------|----------------------------------|
| 1 | 1.00 | 1 | 1 | 0 | 0      | 0 | 0 | -0.001 | t | 95058 | AGLQND                       | Mus<br>musculu<br>s              |
| 1 | 1.00 | 1 | 1 | 0 | 0      | 0 | 0 | -0.001 | t | 72065 | VYKLDISEA                    | Mus<br>musculu<br>s              |
| 1 | 1.00 | 1 | 1 | 0 | 0      | 0 | 0 | -0.001 | t | 70391 | VPNLRGDL<br>QVLAQKV<br>ARTLP | Oryctola<br>gus<br>cuniculu<br>s |
| 1 | 1.00 | 1 | 1 | 0 | 0      | 0 | 0 | -0.001 | t | 73889 | YFRTLEDA<br>AH               | Mus<br>musculu<br>s              |
| 1 | 1.00 | 1 | 1 | 0 | 0      | 0 | 0 | -0.001 | t | 65684 | TPPHSARS<br>KFGYGA           | Mus<br>musculu<br>s              |
| 1 | 1.00 | 1 | 1 | 0 | 0      | 0 | 0 | -0.001 | t | 64086 | THTPLPRG<br>IGY              | Mus<br>musculu<br>s              |
| 1 | 1.00 | 1 | 1 | 0 | 0      | 0 | 0 | -0.001 | t | 74068 | YGPQVDY                      | Mus<br>musculu<br>s              |
| 1 | 1.00 | 1 | 1 | 0 | 0      | 0 | 0 | -0.001 | t | 56962 | SARDGIRD<br>AMIGLREE<br>MIEK | Mus<br>musculu<br>s              |
| 1 | 1.00 | 1 | 1 | 0 | 0      | 0 | 0 | -0.001 | t | 41537 | MFSGGGG<br>PLSPGGKS          | Mus<br>musculu<br>s              |
| 1 | 1.00 | 1 | 1 | 0 | 0      | 0 | 0 | -0.001 | t | 59229 | SLKMADP<br>NRFRGKDL<br>P     | Mus<br>musculu<br>s              |
| 1 | 1.00 | 1 | 1 | 0 | 0      | 0 | 0 | -0.001 | t | 48332 | PLGFFPDH<br>QLDPAFG          | Mus<br>musculu<br>s              |
| 1 | 1.00 | 1 | 1 | 0 | -0.007 | 0 | 0 | -0.001 | t | 55951 | RSRSES                       | Oryctola<br>gus<br>cuniculu<br>s |
| 1 | 1.00 | 1 | 1 | 0 | -0.003 | 0 | 0 | -0.001 | t | 55951 | RSRSES                       | Oryctola<br>gus<br>cuniculu<br>s |
| 1 | 1.00 | 1 | 1 | 0 | 0      | 0 | 0 | -0.001 | t | 55951 | RSRSES                       | Oryctola<br>gus<br>cuniculu<br>s |

|   |      |   |   |   |        |   |   |        |   |       |                           |                                  |
|---|------|---|---|---|--------|---|---|--------|---|-------|---------------------------|----------------------------------|
| 1 | 1.00 | 1 | 1 | 0 | -0.003 | 0 | 0 | -0.001 | t | 51393 | QLKLNWF<br>KKGSS          | Oryctola<br>gus<br>cuniculu<br>s |
| 1 | 1.00 | 1 | 1 | 0 | 0      | 0 | 0 | -0.001 | t | 43215 | NALTQPV<br>DQLLK          | Mus<br>musculu<br>s              |
| 1 | 1.00 | 1 | 1 | 0 | 0      | 0 | 0 | -0.001 | t | 59229 | SLKMADP<br>NRFRGKDL<br>P  | Mus<br>musculu<br>s              |
| 1 | 1.00 | 1 | 1 | 0 | 0      | 0 | 0 | -0.001 | t | 50977 | QGVPESPF<br>SRTGEGLD      | Oryctola<br>gus<br>cuniculu<br>s |
| 1 | 1.00 | 1 | 1 | 0 | 0      | 0 | 0 | -0.001 | t | 56734 | SADNNNS<br>EYSWT          | Mus<br>musculu<br>s              |
| 1 | 1.00 | 1 | 1 | 0 | 0      | 0 | 0 | -0.001 | t | 50636 | QELDCWH<br>YHQYCITS       | Capra<br>hircus                  |
| 1 | 1.00 | 1 | 1 | 0 | 0      | 0 | 0 | -0.001 | t | 50636 | QELDCWH<br>YHQYCITS       | Capra<br>hircus                  |
| 1 | 1.00 | 1 | 1 | 0 | 0      | 0 | 0 | -0.001 | t | 41826 | MKHM                      | Mus<br>musculu<br>s              |
| 1 | 1.00 | 1 | 1 | 0 | 0      | 0 | 0 | -0.001 | t | 58295 | SGVMTRG<br>RL             | Mus<br>musculu<br>s              |
| 1 | 1.00 | 1 | 1 | 0 | 0      | 0 | 0 | -0.001 | t | 39164 | LRPGPVSQ<br>PYHHWDT<br>DK | Homo<br>sapiens                  |
| 1 | 1.00 | 1 | 1 | 0 | 0      | 0 | 0 | -0.001 | t | 53634 | RESQAYYQ<br>R             | Mus<br>musculu<br>s              |
| 1 | 1.00 | 1 | 1 | 0 | 0      | 0 | 0 | -0.001 | t | 46859 | PALTAVET<br>GATNPL        | Oryctola<br>gus<br>cuniculu<br>s |
| 1 | 1.00 | 1 | 1 | 0 | 0      | 0 | 0 | -0.001 | t | 48279 | PLATQPPV<br>LAL           | Mus<br>musculu<br>s              |
| 1 | 1.00 | 1 | 1 | 0 | 0      | 0 | 0 | -0.001 | t | 56622 | RYPNQVYY<br>RPV           | Mus<br>musculu<br>s              |
| 1 | 1.00 | 1 | 1 | 0 | 0      | 0 | 0 | -0.001 | t | 46786 | PAEVTQLK<br>GLS           | Mus<br>musculu<br>s              |

|   |      |   |   |   |        |   |   |        |   |       |                              |                                  |
|---|------|---|---|---|--------|---|---|--------|---|-------|------------------------------|----------------------------------|
| 1 | 1.00 | 1 | 1 | 0 | -0.003 | 0 | 0 | -0.001 | t | 55389 | RQAESSEA<br>MAAWSER<br>AGEA  | Oryctola<br>gus<br>cuniculu<br>s |
| 1 | 1.00 | 1 | 1 | 0 | 0      | 0 | 0 | -0.001 | t | 48912 | PPSDIKGK<br>YVKEVEVK         | Oryctola<br>gus<br>cuniculu<br>s |
| 1 | 1.00 | 1 | 1 | 0 | 0      | 0 | 0 | -0.001 | t | 51393 | QLKLNWF<br>KKGSS             | Mus<br>musculu<br>s              |
| 1 | 1.00 | 1 | 1 | 0 | 0      | 0 | 0 | -0.001 | t | 48557 | PMIHFGN<br>DWEDRYR<br>REN    | Mus<br>musculu<br>s              |
| 1 | 1.00 | 1 | 1 | 0 | 0      | 0 | 0 | -0.001 | t | 56788 | SAFVFPTK<br>D                | Mus<br>musculu<br>s              |
| 1 | 1.00 | 1 | 1 | 0 | 0      | 0 | 0 | -0.001 | t | 51393 | QLKLNWF<br>KKGSS             | Oryctola<br>gus<br>cuniculu<br>s |
| 1 | 1.00 | 1 | 1 | 0 | 0      | 0 | 0 | -0.001 | t | 48876 | PPPQAPY<br>QGY               | Mus<br>musculu<br>s              |
| 1 | 1.00 | 1 | 1 | 0 | 0      | 0 | 0 | -0.001 | t | 37660 | LLPHSNLD<br>HILEPSIPW<br>KSK | Mus<br>musculu<br>s              |
| 1 | 1.00 | 1 | 1 | 0 | 0      | 0 | 0 | -0.001 | t | 54058 | RHKQKIVA<br>PVKQTL           | Oryctola<br>gus<br>cuniculu<br>s |
| 1 | 1.00 | 1 | 1 | 0 | 0      | 0 | 0 | -0.001 | t | 58077 | SGHRMA<br>WDMMM<br>NW        | Mus<br>musculu<br>s              |
| 1 | 1.00 | 1 | 1 | 0 | 0      | 0 | 0 | -0.001 | t | 45597 | NQNNFVH<br>DCVNITIK<br>QHTVT | Mus<br>musculu<br>s              |
| 1 | 1.00 | 1 | 1 | 0 | 0      | 0 | 0 | -0.001 | t | 38271 | LNLTTASV<br>PMLRWYA<br>ERFCF | Mus<br>musculu<br>s              |
| 1 | 1.00 | 1 | 1 | 0 | 0      | 0 | 0 | -0.001 | t | 50490 | QDLPGND<br>NNSTATLC          | Oryctola<br>gus<br>cuniculu<br>s |
| 1 | 1.00 | 1 | 1 | 0 | 0      | 0 | 0 | -0.001 | t | 38422 | LPAYQDYT<br>ARAQVSE          | Oryctola<br>gus<br>cuniculu<br>s |

|   |      |   |   |   |   |   |   |        |   |       |                              |                       |
|---|------|---|---|---|---|---|---|--------|---|-------|------------------------------|-----------------------|
| 1 | 1.00 | 1 | 1 | 0 | 0 | 0 | 0 | -0.001 | t | 48906 | PPRRVS                       | Mus musculus          |
| 1 | 1.00 | 1 | 1 | 0 | 0 | 0 | 0 | -0.001 | t | 53122 | RAISSWKQ<br>RNRWEW<br>RPD    | Felis catus           |
| 1 | 1.00 | 1 | 1 | 0 | 0 | 0 | 0 | -0.001 | t | 39664 | LSSKAVNH<br>IRSVWKDL<br>LEDT | Mus musculus          |
| 1 | 1.00 | 1 | 1 | 0 | 0 | 0 | 0 | -0.001 | t | 37660 | LLPHSNLD<br>HILEPSIPW<br>KSK | Oryctolagus cuniculus |
| 1 | 1.00 | 1 | 1 | 0 | 0 | 0 | 0 | -0.001 | t | 38918 | LQND                         | Mus musculus          |
| 1 | 1.00 | 1 | 1 | 0 | 0 | 0 | 0 | -0.001 | t | 48912 | PPSDIKGK<br>YVKEVEVK         | Oryctolagus cuniculus |
| 1 | 1.00 | 1 | 1 | 0 | 0 | 0 | 0 | -0.001 | t | 56599 | RYNLVFSG<br>DSDRICSN<br>RA   | Mus musculus          |
| 1 | 1.00 | 1 | 1 | 0 | 0 | 0 | 0 | -0.001 | t | 49749 | PTPSDNPF<br>SKLYKETIE<br>TFD | Mus musculus          |
| 1 | 1.00 | 1 | 1 | 0 | 0 | 0 | 0 | -0.001 | t | 40332 | LVFFAEDV                     | Mus musculus          |
| 1 | 1.00 | 1 | 1 | 0 | 0 | 0 | 0 | -0.001 | t | 57320 | SDYEDRYY<br>REN              | Mus musculus          |
| 1 | 1.00 | 1 | 1 | 0 | 0 | 0 | 0 | -0.001 | t | 46894 | PAPQAPY<br>QGY               | Mus musculus          |
| 1 | 1.00 | 1 | 1 | 0 | 0 | 0 | 0 | -0.001 | t | 13525 | ENMYRYP<br>NQVYY             | Mus musculus          |
| 1 | 1.00 | 1 | 1 | 0 | 0 | 0 | 0 | -0.001 | t | 19067 | GDPEDL                       | Mus musculus          |
| 1 | 1.00 | 1 | 1 | 0 | 0 | 0 | 0 | -0.001 | t | 19862 | GGGTHNQ<br>WKNPSKP<br>KTNLKH | Mus musculus          |
| 1 | 1.00 | 1 | 1 | 0 | 0 | 0 | 0 | -0.001 | t | 18706 | GANSNNP<br>DWD FNP           | Mus musculus          |

|   |      |   |   |   |        |   |   |        |   |       |                              |                                  |
|---|------|---|---|---|--------|---|---|--------|---|-------|------------------------------|----------------------------------|
| 1 | 1.00 | 1 | 1 | 0 | 0      | 0 | 0 | -0.001 | t | 23973 | HGYEKPEE<br>LWTAKSR<br>VHPL  | Homo<br>sapiens                  |
| 1 | 1.00 | 1 | 1 | 0 | 0      | 0 | 0 | -0.001 | t | 11819 | EENVEHD<br>A                 | Oryctola<br>gus<br>cuniculu<br>s |
| 1 | 1.00 | 1 | 1 | 0 | 0      | 0 | 0 | -0.001 | t | 10869 | DYEDRYR<br>EN                | Mus<br>musculu<br>s              |
| 1 | 1.00 | 1 | 1 | 0 | 0      | 0 | 0 | -0.001 | t | 15807 | FFFDIDLLL                    | Mus<br>musculu<br>s              |
| 1 | 1.00 | 1 | 1 | 0 | 0      | 0 | 0 | -0.001 | t | 36413 | LHQPPPQI<br>FLKILPQSG<br>PIG | Homo<br>sapiens                  |
| 1 | 1.00 | 1 | 1 | 0 | 0      | 0 | 0 | -0.001 | t | 24402 | HNQWNK<br>PSK                | Mus<br>musculu<br>s              |
| 1 | 1.00 | 1 | 1 | 0 | 0      | 0 | 0 | -0.001 | t | 20052 | GGTHSQW<br>NKPSKP            | Mus<br>musculu<br>s              |
| 1 | 1.00 | 1 | 1 | 0 | 0      | 0 | 0 | -0.001 | t | 30661 | KEVPALTA<br>VETGAT           | Oryctola<br>gus<br>cuniculu<br>s |
| 1 | 1.00 | 1 | 1 | 0 | 0      | 0 | 0 | -0.001 | t | 10529 | DTYRYI                       | Mus<br>musculu<br>s              |
| 1 | 1.00 | 1 | 1 | 0 | 0      | 0 | 0 | -0.001 | t | 36729 | LITNTIAGV                    | Mus<br>musculu<br>s              |
| 1 | 1.00 | 1 | 1 | 0 | 0      | 0 | 0 | -0.001 | t | 24334 | HMAGAAA<br>A                 | Mus<br>musculu<br>s              |
| 1 | 1.00 | 1 | 1 | 0 | 0      | 0 | 0 | -0.001 | t | 14435 | ETIYNTTLK<br>Y               | Homo<br>sapiens                  |
| 1 | 1.00 | 1 | 1 | 0 | 0      | 0 | 0 | -0.001 | t | 22135 | GRLKAEST<br>V                | Mus<br>musculu<br>s              |
| 1 | 1.00 | 1 | 1 | 0 | -0.003 | 0 | 0 | -0.001 | t | 28676 | ISQAVHAA<br>HAEINEAG<br>R    | Oryctola<br>gus<br>cuniculu<br>s |
| 1 | 1.00 | 1 | 1 | 0 | 0      | 0 | 0 | -0.001 | t | 14435 | ETIYNTTLK<br>Y               | Homo<br>sapiens                  |
| 1 | 1.00 | 1 | 1 | 0 | 0      | 0 | 0 | -0.001 | t | 10868 | DYEDRYR<br>E                 | Mus<br>musculu<br>s              |

|   |      |   |   |   |        |   |   |        |   |       |                          |                                  |
|---|------|---|---|---|--------|---|---|--------|---|-------|--------------------------|----------------------------------|
| 1 | 1.00 | 1 | 1 | 0 | 0      | 0 | 0 | -0.001 | t | 19269 | GEGAPPA<br>KRARTDQ<br>ME | Oryctola<br>gus<br>cuniculu<br>s |
| 1 | 1.00 | 1 | 1 | 0 | -0.003 | 0 | 0 | -0.001 | t | 11813 | EENVEENV                 | Oryctola<br>gus<br>cuniculu<br>s |
| 1 | 1.00 | 1 | 1 | 0 | 0      | 0 | 0 | -0.001 | t | 24841 | HSQWNKP<br>SKP           | Mus<br>musculu<br>s              |
| 1 | 1.00 | 1 | 1 | 0 | 0      | 0 | 0 | -0.001 | t | 11377 | EDLDGA                   | Mus<br>musculu<br>s              |
| 1 | 1.00 | 1 | 1 | 0 | 0      | 0 | 0 | -0.001 | t | 13837 | EQHHRRT<br>DN            | Mus<br>musculu<br>s              |
| 1 | 1.00 | 1 | 1 | 0 | 0      | 0 | 0 | -0.001 | t | 17470 | FQEPFWLE<br>DG           | Mus<br>musculu<br>s              |
| 1 | 1.00 | 1 | 1 | 0 | 0      | 0 | 0 | -0.001 | t | 11148 | EANNREG<br>VEG           | Mus<br>musculu<br>s              |
| 1 | 1.00 | 1 | 1 | 0 | 0      | 0 | 0 | -0.001 | t | 17470 | FQEPFWLE<br>DG           | Mus<br>musculu<br>s              |
| 1 | 1.00 | 1 | 1 | 0 | 0      | 0 | 0 | -0.001 | t | 11148 | EANNREG<br>VEG           | Mus<br>musculu<br>s              |
| 1 | 1.00 | 1 | 1 | 0 | 0      | 0 | 0 | -0.001 | t | 9620  | DPEDLD                   | Mus<br>musculu<br>s              |
| 1 | 1.00 | 1 | 1 | 0 | 0      | 0 | 0 | -0.001 | t | 6559  | CLFKDWEE<br>LGEEIRLKV    | Mus<br>musculu<br>s              |
| 1 | 1.00 | 1 | 1 | 0 | 0      | 0 | 0 | -0.001 | t | 5771  | AYFLYQQ<br>QGRLDKL       | Oryctola<br>gus<br>cuniculu<br>s |
| 1 | 1.00 | 1 | 1 | 0 | 0      | 0 | 0 | -0.001 | t | 9794  | DPVAALFF<br>F            | Mus<br>musculu<br>s              |
| 1 | 1.00 | 1 | 1 | 0 | 0      | 0 | 0 | -0.001 | t | 9524  | DNPASTT<br>NKDK          | Mus<br>musculu<br>s              |
| 1 | 1.00 | 1 | 1 | 0 | 0      | 0 | 0 | -0.001 | t | 9524  | DNPASTT<br>NKDK          | Mus<br>musculu<br>s              |
| 1 | 1.00 | 1 | 1 | 0 | 0      | 0 | 0 | -0.001 | t | 7244  | CTWQQW<br>ERELQGYD       | Capra<br>hircus                  |

|   |      |   |   |       |        |        |        |        |   |        |                              |                                  |
|---|------|---|---|-------|--------|--------|--------|--------|---|--------|------------------------------|----------------------------------|
| 1 | 1.00 | 1 | 1 | 0     | 0      | 0      | 0      | -0.001 | t | 7244   | CTWQQW<br>ERELQGYD           | Capra<br>hircus                  |
| 1 | 1.00 | 1 | 1 | 0     | 0      | 0      | 0      | -0.001 | t | 7491   | DAEFRHDS<br>GYEVHHQ<br>K     | Mus<br>musculu<br>s              |
| 1 | 1.00 | 1 | 1 | 0     | 0      | 0      | 0      | -0.001 | t | 1450   | AGAPSAE<br>QRRER             | Mus<br>musculu<br>s              |
| 1 | 1.00 | 1 | 1 | 0     | 0      | 0      | 0      | -0.001 | t | 7491   | DAEFRHDS<br>GYEVHHQ<br>K     | Mus<br>musculu<br>s              |
| 1 | 1.00 | 1 | 1 | -0.03 | -0.03  | -0.037 | -0.039 | -0.033 | t | 130800 | EGAKAFFK<br>GA               | Homo<br>sapiens                  |
| 1 | 1.00 | 1 | 1 | 0.01  | 0.01   | 0.01   | 0.01   | 0.01   | t | 111230 | ECISMDYK<br>QTQLCLI          | Mus<br>musculu<br>s              |
| 1 | 1.00 | 1 | 1 | -0.01 | -0.01  | -0.01  | -0.01  | -0.01  | t | 131100 | TDSEMDV<br>VRFD              | Mus<br>musculu<br>s              |
| 1 | 1.00 | 1 | 1 | 0.01  | 0.013  | 0.011  | 0.01   | 0.01   | t | 149785 | KTVEGVKD<br>LQAQ             | Mus<br>musculu<br>s              |
| 1 | 1.00 | 1 | 1 | -0.01 | -0.007 | -0.015 | -0.01  | -0.01  | t | 134003 | AKTQGPY<br>DVVVLP<br>G       | Mus<br>musculu<br>s              |
| 1 | 1.00 | 1 | 1 | 0.03  | 0.034  | 0.035  | 0.031  | 0.03   | t | 61824  | STPLLYPSL<br>A               | Homo<br>sapiens                  |
| 1 | 1.00 | 1 | 1 | 0.03  | 0.027  | 0.019  | 0.03   | 0.03   | t | 52749  | QVMSRSA<br>NEGYD             | Oryctola<br>gus<br>cuniculu<br>s |
| 1 | 1.00 | 1 | 1 | -0.02 | -0.018 | -0.023 | -0.019 | -0.018 | t | 138884 | NKLLIAFGL<br>VILLVTLP<br>CAS | Homo<br>sapiens                  |
| 1 | 1.00 | 1 | 1 | 0     | 0      | -0.012 | 0      | 0      | t | 121795 | RISPGKNA<br>TGMEVG<br>WYRS   | Rattus<br>norvegic<br>us         |
| 1 | 1.00 | 1 | 1 | -0.03 | -0.032 | -0.04  | -0.031 | -0.03  | t | 13763  | EPSGQTA<br>DWY               | Mus<br>musculu<br>s              |
| 1 | 1.00 | 1 | 1 | 0.06  | 0.064  | 0.059  | 0.057  | 0.058  | t | 98527  | TKTEEPAA                     | Homo<br>sapiens                  |



|   |      |   |   |       |        |        |        |        |   |        |                              |              |
|---|------|---|---|-------|--------|--------|--------|--------|---|--------|------------------------------|--------------|
| 1 | 1.00 | 1 | 1 | 0.06  | 0.062  | 0.059  | 0.057  | 0.058  | t | 98527  | TKTEEPAA                     | Homo sapiens |
| 1 | 1.00 | 1 | 1 | -0.01 | -0.008 | -0.005 | -0.003 | -0.01  | t | 122943 | WDPAQPPRD                    | Homo sapiens |
| 1 | 1.00 | 1 | 1 | 0.02  | 0.018  | 0.01   | 0.019  | 0.02   | t | 68996  | VIITFKSGAT                   | Mus musculus |
| 1 | 1.00 | 1 | 1 | -0.02 | -0.018 | -0.02  | -0.019 | -0.02  | t | 53939  | RGPRLGVR                     | Homo sapiens |
| 1 | 1.00 | 1 | 1 | 0.04  | 0.04   | 0.038  | 0.038  | 0.04   | t | 33987  | KVFAGSLFES                   | Homo sapiens |
| 1 | 1.00 | 1 | 1 | -0.01 | -0.01  | -0.015 | -0.01  | -0.01  | t | 66385  | TSQGMYG<br>GTYLVEKP          | Homo sapiens |
| 1 | 1.00 | 1 | 1 | 0     | 0      | 0      | 0      | -0.001 | t | 100508 | SGYEVHH<br>QKL               | Mus musculus |
| 1 | 1.00 | 1 | 1 | 0     | 0      | 0      | 0      | -0.001 | t | 73070  | WSFADGN                      | Mus musculus |
| 1 | 1.00 | 1 | 1 | 0     | 0      | 0      | 0      | -0.001 | t | 51949  | QPRGGQA                      | Mus musculus |
| 1 | 1.00 | 1 | 1 | 0     | 0      | 0      | 0      | -0.001 | t | 51296  | QLCQLL                       | Mus musculus |
| 1 | 1.00 | 1 | 1 | 0     | 0      | 0      | 0      | -0.001 | t | 6546   | CLDDREC                      | Mus musculus |
| 1 | 1.00 | 1 | 1 | 0     | 0      | 0      | 0      | -0.001 | t | 1578   | AGKNQSQ<br>K K K K           | Mus musculus |
| 1 | 1.00 | 1 | 1 | -0.01 | -0.007 | -0.01  | -0.01  | -0.012 | t | 140853 | GEYVQILD<br>AHAAYLN<br>ATPAA | Mus musculus |
| 1 | 1.00 | 1 | 1 | -0.01 | -0.01  | -0.01  | -0.01  | -0.01  | t | 157277 | FRAISTPRT<br>GTMP            | Canis lupus  |
| 1 | 1.00 | 1 | 1 | 0.04  | 0.04   | 0.034  | 0.042  | 0.04   | t | 68987  | VIIEQSWG<br>SP               | Homo sapiens |
| 1 | 1.00 | 1 | 1 | 0     | 0.003  | 0.006  | 0      | 0      | t | 18786  | GATFQVE<br>VPG               | Mus musculus |

|   |      |   |   |       |       |        |       |        |   |        |                              |                              |
|---|------|---|---|-------|-------|--------|-------|--------|---|--------|------------------------------|------------------------------|
| 1 | 1.00 | 1 | 1 | 0.02  | 0.02  | 0.015  | 0.026 | 0.023  | t | 114450 | LEIIEEFFK<br>NKSLK           | Homo<br>sapiens              |
| 1 | 1.00 | 1 | 1 | 0.03  | 0.03  | 0.03   | 0.03  | 0.03   | t | 123273 | GTSVSHVD<br>F                | Ovis<br>aries                |
| 1 | 1.00 | 1 | 1 | 0.01  | 0.01  | 0.01   | 0.01  | 0.01   | t | 111157 | CMPYGSL<br>AC                | Homo<br>sapiens              |
| 1 | 1.00 | 1 | 1 | -0.01 | -0.01 | -0.01  | -0.01 | -0.01  | t | 135682 | GKVDAFC<br>G                 | Homo<br>sapiens              |
| 1 | 1.00 | 1 | 1 | -0.03 | -0.03 | -0.03  | -0.03 | -0.029 | t | 115239 | EVFRELKD<br>LK               | Homo<br>sapiens              |
| 1 | 1.00 | 1 | 1 | 0.04  | 0.042 | 0.035  | 0.04  | 0.038  | t | 136066 | IETDKTSV<br>QV               | Rattus<br>norvegicus         |
| 1 | 1.00 | 1 | 1 | 0     | 0     | -0.001 | 0.003 | 0      | t | 50027  | PWFLAHH<br>TGGD              | Sus<br>scrofa                |
| 1 | 1.00 | 1 | 1 | 0     | 0     | 0      | 0.003 | 0      | t | 135571 | LFRGRRAS<br>Q                | Oryctola<br>gus<br>cuniculus |
| 1 | 1.00 | 1 | 1 | 0     | 0     | 0      | 0.003 | 0      | t | 135595 | SNKKKRD<br>DFE               | Oryctola<br>gus<br>cuniculus |
| 1 | 1.00 | 1 | 1 | 0     | 0     | 0      | 0.003 | 0      | t | 134337 | CYCQDPYV<br>KEAENLKK<br>YFNA | Oryctola<br>gus<br>cuniculus |
| 1 | 1.00 | 1 | 1 | 0     | 0.002 | 0      | 0.003 | 0      | t | 157917 | RTVKKNIIE<br>EN              | Homo<br>sapiens              |
| 1 | 1.00 | 1 | 1 | 0     | 0     | 0      | 0.003 | 0      | t | 134337 | CYCQDPYV<br>KEAENLKK<br>YFNA | Oryctola<br>gus<br>cuniculus |
| 1 | 1.00 | 1 | 1 | 0     | 0.002 | 0      | 0.003 | 0      | t | 157147 | CSRTVKKN<br>IIEEN            | Homo<br>sapiens              |
| 1 | 1.00 | 1 | 1 | 0     | 0     | 0      | 0.003 | 0      | t | 123016 | AIYENEIHA<br>LWADLP          | Trichosu<br>rus<br>vulpecula |

|   |      |   |   |   |        |   |       |   |   |        |                              |                                  |
|---|------|---|---|---|--------|---|-------|---|---|--------|------------------------------|----------------------------------|
| 1 | 1.00 | 1 | 1 | 0 | 0      | 0 | 0.003 | 0 | t | 125793 | CSFWSKYI<br>SSLKTSAD<br>GAK  | Mus<br>musculu<br>s              |
| 1 | 1.00 | 1 | 1 | 0 | 0      | 0 | 0.003 | 0 | t | 125462 | KLPLSLSL<br>HLTRADLS<br>YPS  | Mus<br>musculu<br>s              |
| 1 | 1.00 | 1 | 1 | 0 | 0      | 0 | 0.003 | 0 | t | 123809 | VAVESRN<br>GSRLHFNK          | Trichosu<br>rus<br>vulpecul<br>a |
| 1 | 1.00 | 1 | 1 | 0 | 0      | 0 | 0.003 | 0 | t | 125791 | CSFWSKYI<br>QTLK             | Mus<br>musculu<br>s              |
| 1 | 1.00 | 1 | 1 | 0 | 0      | 0 | 0.003 | 0 | t | 123540 | NIFEYEVD<br>AEPLRPCE<br>LER  | Mus<br>musculu<br>s              |
| 1 | 1.00 | 1 | 1 | 0 | 0.015  | 0 | 0.003 | 0 | t | 125540 | QSLRQRKS<br>VNALNSPL<br>HQEY | Homo<br>sapiens                  |
| 1 | 1.00 | 1 | 1 | 0 | 0      | 0 | 0.003 | 0 | t | 107307 | DAEFGHD<br>SGF               | Mus<br>musculu<br>s              |
| 1 | 1.00 | 1 | 1 | 0 | 0      | 0 | 0.003 | 0 | t | 105207 | GAIIGLMV<br>GGVVIA           | Mus<br>musculu<br>s              |
| 1 | 1.00 | 1 | 1 | 0 | 0      | 0 | 0.003 | 0 | t | 105207 | GAIIGLMV<br>GGVVIA           | Mus<br>musculu<br>s              |
| 1 | 1.00 | 1 | 1 | 0 | -0.002 | 0 | 0.003 | 0 | t | 111583 | NKFGFPDT<br>SFYNPDTQ<br>RLVW | Homo<br>sapiens                  |
| 1 | 1.00 | 1 | 1 | 0 | -0.002 | 0 | 0.003 | 0 | t | 111450 | KGSPCTNV<br>AVNPGDC<br>PPLEL | Homo<br>sapiens                  |
| 1 | 1.00 | 1 | 1 | 0 | 0      | 0 | 0.003 | 0 | t | 105207 | GAIIGLMV<br>GGVVIA           | Mus<br>musculu<br>s              |
| 1 | 1.00 | 1 | 1 | 0 | -0.002 | 0 | 0.003 | 0 | t | 110685 | PMDTFIVS<br>TNPNTVTS<br>STPI | Homo<br>sapiens                  |
| 1 | 1.00 | 1 | 1 | 0 | 0      | 0 | 0.003 | 0 | t | 100508 | SGYEVHH<br>QKL               | Mus<br>musculu<br>s              |
| 1 | 1.00 | 1 | 1 | 0 | -0.002 | 0 | 0.003 | 0 | t | 111088 | ACQKHTP<br>PAPKEDDP<br>LKKYT | Homo<br>sapiens                  |
| 1 | 1.00 | 1 | 1 | 0 | -0.002 | 0 | 0.003 | 0 | t | 110652 | LCLIGCKPP<br>IGEHWGK<br>GSPC | Homo<br>sapiens                  |

|   |      |   |   |       |        |        |        |        |   |        |                              |                                  |
|---|------|---|---|-------|--------|--------|--------|--------|---|--------|------------------------------|----------------------------------|
| 1 | 1.00 | 1 | 1 | 0     | 0      | 0      | 0.003  | 0      | t | 110884 | HEYMLDL<br>QPETTDLY<br>CYE   | Mus<br>musculu<br>s              |
| 1 | 1.00 | 1 | 1 | 0     | 0      | 0      | 0.003  | 0      | t | 107307 | DAEFGHD<br>SGF               | Mus<br>musculu<br>s              |
| 1 | 1.00 | 1 | 1 | 0     | -0.002 | 0      | 0.003  | 0      | t | 111915 | VHTGFGA<br>MDFTTLQ<br>ANKSEV | Homo<br>sapiens                  |
| 1 | 1.00 | 1 | 1 | 0     | 0      | 0      | 0.003  | 0      | t | 45013  | NMPASMK<br>RVRIE             | Rattus<br>norvegic<br>us         |
| 1 | 1.00 | 1 | 1 | 0     | 0      | 0      | 0.003  | 0      | t | 21254  | GMDGTQL<br>DRW               | Homo<br>sapiens                  |
| 1 | 1.00 | 1 | 1 | 0     | 0      | 0      | 0.003  | 0      | t | 30661  | KEVPALTA<br>VETGAT           | Homo<br>sapiens                  |
| 1 | 1.00 | 1 | 1 | 0     | 0      | 0      | 0.003  | 0      | t | 35646  | LEPGVVAE<br>KVRNLPAG         | Rattus<br>norvegic<br>us         |
| 1 | 1.00 | 1 | 1 | -0.01 | -0.013 | -0.022 | -0.01  | -0.009 | t | 10683  | DVNKSAQ<br>L                 | Oryctola<br>gus<br>cuniculu<br>s |
| 1 | 1.00 | 1 | 1 | 0.01  | 0.01   | 0.006  | 0.012  | 0.01   | t | 71839  | VVSTLPQA<br>VMGSSY           | Homo<br>sapiens                  |
| 1 | 1.00 | 1 | 1 | 0.01  | 0.014  | 0.01   | 0.017  | 0.01   | t | 135498 | SCKLPVKK<br>ATVVQGE<br>RVKIQ | Homo<br>sapiens                  |
| 1 | 1.00 | 1 | 1 | 0     | 0      | 0      | 0      | 0      | t | 132938 | WGSNPA<br>M                  | Homo<br>sapiens                  |
| 1 | 1.00 | 1 | 1 | -0.01 | -0.011 | -0.013 | -0.01  | -0.01  | t | 12537  | EINTLQNNQ                    | Anas<br>platyrhy<br>nchos        |
| 1 | 1.00 | 1 | 1 | -0.06 | -0.058 | -0.081 | -0.063 | -0.059 | t | 53483  | REECKCLL<br>NYKQEGD<br>KCVE  | Homo<br>sapiens                  |
| 1 | 1.00 | 1 | 1 | -0.01 | -0.008 | -0.01  | -0.003 | -0.009 | t | 108135 | SLITAARG<br>APS              | Homo<br>sapiens                  |
| 1 | 1.00 | 1 | 1 | 0     | -0.002 | 0      | 0.003  | 0      | t | 142288 | SEASRKGL<br>RRDLASR<br>EAKK  | Mus<br>musculu<br>s              |

|   |      |   |   |   |        |   |       |   |   |        |                              |                                  |
|---|------|---|---|---|--------|---|-------|---|---|--------|------------------------------|----------------------------------|
| 1 | 1.00 | 1 | 1 | 0 | -0.002 | 0 | 0.003 | 0 | t | 142167 | GLRRDLDA<br>SREAKKQV<br>EKAL | Mus<br>musculu<br>s              |
| 1 | 1.00 | 1 | 1 | 0 | -0.002 | 0 | 0.003 | 0 | t | 142200 | KGLRRDLDA<br>SREAKKQ<br>LEAE | Mus<br>musculu<br>s              |
| 1 | 1.00 | 1 | 1 | 0 | -0.002 | 0 | 0.003 | 0 | t | 142201 | KGLRRDLDA<br>SREAKKQ<br>VEKA | Mus<br>musculu<br>s              |
| 1 | 1.00 | 1 | 1 | 0 | -0.002 | 0 | 0.003 | 0 | t | 142217 | LDASREAK<br>KQLEAEQ<br>QKLEE | Mus<br>musculu<br>s              |
| 1 | 1.00 | 1 | 1 | 0 | -0.002 | 0 | 0.003 | 0 | t | 142202 | KISEASRK<br>GLRRDLDA<br>SREA | Mus<br>musculu<br>s              |
| 1 | 1.00 | 1 | 1 | 0 | -0.002 | 0 | 0.003 | 0 | t | 142116 | ASRKGLRR<br>DLDA<br>SREAKKQV | Mus<br>musculu<br>s              |
| 1 | 1.00 | 1 | 1 | 0 | -0.004 | 0 | 0.003 | 0 | t | 118490 | LKDKYKNI<br>GAKLV            | Oryctola<br>gus<br>cuniculu<br>s |
| 1 | 1.00 | 1 | 1 | 0 | -0.004 | 0 | 0.003 | 0 | t | 118275 | ATVLARSI<br>AKEGF            | Oryctola<br>gus<br>cuniculu<br>s |
| 1 | 1.00 | 1 | 1 | 0 | -0.004 | 0 | 0.003 | 0 | t | 118451 | KGIIDPTKV<br>VRTA            | Oryctola<br>gus<br>cuniculu<br>s |
| 1 | 1.00 | 1 | 1 | 0 | -0.002 | 0 | 0.003 | 0 | t | 95819  | SAQSGTSG<br>TSGT             | Mus<br>musculu<br>s              |
| 1 | 1.00 | 1 | 1 | 0 | -0.002 | 0 | 0.003 | 0 | t | 70537  | VQDGSVT<br>EQIIEELFP         | Mus<br>musculu<br>s              |
| 1 | 1.00 | 1 | 1 | 0 | -0.002 | 0 | 0.003 | 0 | t | 95818  | SAQSGTSG<br>TSAQ             | Mus<br>musculu<br>s              |
| 1 | 1.00 | 1 | 1 | 0 | -0.002 | 0 | 0.003 | 0 | t | 72476  | WGILSRAA<br>TNSGWVG<br>LIPHK | Rattus<br>norvegic<br>us         |

|   |      |   |   |   |        |   |       |   |   |       |                              |                                  |
|---|------|---|---|---|--------|---|-------|---|---|-------|------------------------------|----------------------------------|
| 1 | 1.00 | 1 | 1 | 0 | -0.002 | 0 | 0.003 | 0 | t | 95818 | SAQSGTSG<br>TSAQ             | Mus<br>musculu<br>s              |
| 1 | 1.00 | 1 | 1 | 0 | -0.002 | 0 | 0.003 | 0 | t | 94738 | WAICKRIP<br>NKKP             | Mus<br>musculu<br>s              |
| 1 | 1.00 | 1 | 1 | 0 | -0.002 | 0 | 0.003 | 0 | t | 94613 | NNPTCWA<br>ICKRI             | Mus<br>musculu<br>s              |
| 1 | 1.00 | 1 | 1 | 0 | -0.002 | 0 | 0.003 | 0 | t | 75273 | YPEELVEE<br>VIPEELVEE<br>VIP | Mus<br>musculu<br>s              |
| 1 | 1.00 | 1 | 1 | 0 | -0.004 | 0 | 0.003 | 0 | t | 70537 | VQDGSVT<br>EQIIEELFP         | Oryctola<br>gus<br>cuniculu<br>s |
| 1 | 1.00 | 1 | 1 | 0 | -0.002 | 0 | 0.003 | 0 | t | 94651 | PTCWAICK<br>RIPN             | Mus<br>musculu<br>s              |
| 1 | 1.00 | 1 | 1 | 0 | -0.002 | 0 | 0.003 | 0 | t | 62912 | TALKKAITA<br>MSQAQKA<br>AKPA | Mus<br>musculu<br>s              |
| 1 | 1.00 | 1 | 1 | 0 | -0.002 | 0 | 0.003 | 0 | t | 66682 | TTKPTKKP<br>TFKT             | Mus<br>musculu<br>s              |
| 1 | 1.00 | 1 | 1 | 0 | -0.002 | 0 | 0.003 | 0 | t | 65916 | TQPSKPTT<br>KQRQ             | Mus<br>musculu<br>s              |
| 1 | 1.00 | 1 | 1 | 0 | -0.002 | 0 | 0.003 | 0 | t | 94429 | AICKRIPNK<br>KPG             | Mus<br>musculu<br>s              |
| 1 | 1.00 | 1 | 1 | 0 | -0.002 | 0 | 0.003 | 0 | t | 69344 | VKYTS                        | Mus<br>musculu<br>s              |
| 1 | 1.00 | 1 | 1 | 0 | -0.002 | 0 | 0.003 | 0 | t | 69271 | VKMAETC<br>PIFYDVF           | Mus<br>musculu<br>s              |
| 1 | 1.00 | 1 | 1 | 0 | -0.004 | 0 | 0.003 | 0 | t | 62354 | SVTEEVVE<br>EEGPVDEE         | Oryctola<br>gus<br>cuniculu<br>s |
| 1 | 1.00 | 1 | 1 | 0 | -0.002 | 0 | 0.003 | 0 | t | 94626 | NPTCWAI<br>CKRIP             | Mus<br>musculu<br>s              |
| 1 | 1.00 | 1 | 1 | 0 | -0.002 | 0 | 0.003 | 0 | t | 75561 | YQTELARV<br>QKANADA<br>KATY  | Mus<br>musculu<br>s              |
| 1 | 1.00 | 1 | 1 | 0 | -0.002 | 0 | 0.003 | 0 | t | 94695 | SNNPTCW<br>AICKR             | Mus<br>musculu<br>s              |

|   |      |   |   |   |        |   |       |   |   |       |                               |                     |
|---|------|---|---|---|--------|---|-------|---|---|-------|-------------------------------|---------------------|
| 1 | 1.00 | 1 | 1 | 0 | -0.002 | 0 | 0.003 | 0 | t | 69324 | VKTKNTTT<br>TQTQ              | Mus<br>musculu<br>s |
| 1 | 1.00 | 1 | 1 | 0 | -0.002 | 0 | 0.003 | 0 | t | 63344 | TEEIDEIES<br>VTEEVVE          | Mus<br>musculu<br>s |
| 1 | 1.00 | 1 | 1 | 0 | -0.002 | 0 | 0.003 | 0 | t | 95827 | SGASAQSG<br>GASAQ             | Mus<br>musculu<br>s |
| 1 | 1.00 | 1 | 1 | 0 | -0.002 | 0 | 0.003 | 0 | t | 95827 | SGASAQSG<br>GASAQ             | Mus<br>musculu<br>s |
| 1 | 1.00 | 1 | 1 | 0 | -0.002 | 0 | 0.003 | 0 | t | 95901 | TEKPLEPA<br>PVEPSYEA<br>EPTP  | Mus<br>musculu<br>s |
| 1 | 1.00 | 1 | 1 | 0 | -0.002 | 0 | 0.003 | 0 | t | 75274 | YP EEVVVE<br>VVPEEVVE<br>EVVP | Mus<br>musculu<br>s |
| 1 | 1.00 | 1 | 1 | 0 | -0.002 | 0 | 0.003 | 0 | t | 64653 | TKQRQNK<br>PPNKP              | Mus<br>musculu<br>s |
| 1 | 1.00 | 1 | 1 | 0 | -0.002 | 0 | 0.003 | 0 | t | 94573 | KRIPNKKP<br>GKKT              | Mus<br>musculu<br>s |
| 1 | 1.00 | 1 | 1 | 0 | -0.002 | 0 | 0.003 | 0 | t | 95815 | SAQSGASA<br>QSGT              | Mus<br>musculu<br>s |
| 1 | 1.00 | 1 | 1 | 0 | -0.002 | 0 | 0.003 | 0 | t | 95815 | SAQSGASA<br>QSGT              | Mus<br>musculu<br>s |
| 1 | 1.00 | 1 | 1 | 0 | -0.002 | 0 | 0.003 | 0 | t | 71285 | VTEEIVTEE<br>IVTEEI           | Mus<br>musculu<br>s |
| 1 | 1.00 | 1 | 1 | 0 | -0.002 | 0 | 0.003 | 0 | t | 95830 | SGASAQSG<br>GTSGT             | Mus<br>musculu<br>s |
| 1 | 1.00 | 1 | 1 | 0 | -0.002 | 0 | 0.003 | 0 | t | 95815 | SAQSGASA<br>QSGT              | Mus<br>musculu<br>s |
| 1 | 1.00 | 1 | 1 | 0 | -0.002 | 0 | 0.003 | 0 | t | 71285 | VTEEIVTEE<br>IVTEEI           | Mus<br>musculu<br>s |

|   |      |   |   |   |        |   |       |   |   |       |                              |                                  |
|---|------|---|---|---|--------|---|-------|---|---|-------|------------------------------|----------------------------------|
| 1 | 1.00 | 1 | 1 | 0 | -0.002 | 0 | 0.003 | 0 | t | 95830 | SGASAQS<br>GTSGT             | Mus<br>musculu<br>s              |
| 1 | 1.00 | 1 | 1 | 0 | -0.002 | 0 | 0.003 | 0 | t | 75455 | YQAKLTAY<br>QTELARVQ<br>KAN  | Mus<br>musculu<br>s              |
| 1 | 1.00 | 1 | 1 | 0 | -0.002 | 0 | 0.003 | 0 | t | 75273 | YPEELVEE<br>VIPEELVEE<br>VIP | Mus<br>musculu<br>s              |
| 1 | 1.00 | 1 | 1 | 0 | -0.002 | 0 | 0.003 | 0 | t | 64606 | TKKPTFKT<br>TKKD             | Mus<br>musculu<br>s              |
| 1 | 1.00 | 1 | 1 | 0 | -0.004 | 0 | 0.003 | 0 | t | 62354 | SVTEEVVE<br>EEGPVDEE         | Oryctola<br>gus<br>cuniculu<br>s |
| 1 | 1.00 | 1 | 1 | 0 | -0.002 | 0 | 0.003 | 0 | t | 95842 | SGTSAQSG<br>TSGT             | Mus<br>musculu<br>s              |
| 1 | 1.00 | 1 | 1 | 0 | -0.002 | 0 | 0.003 | 0 | t | 66683 | TTKQRQN<br>KPPNK             | Mus<br>musculu<br>s              |
| 1 | 1.00 | 1 | 1 | 0 | -0.002 | 0 | 0.003 | 0 | t | 95829 | SGASAQS<br>GTSGP             | Mus<br>musculu<br>s              |
| 1 | 1.00 | 1 | 1 | 0 | -0.002 | 0 | 0.003 | 0 | t | 75274 | YPEEVVEE<br>VVPEEVVE<br>EVVP | Mus<br>musculu<br>s              |
| 1 | 1.00 | 1 | 1 | 0 | -0.002 | 0 | 0.003 | 0 | t | 71285 | VTEEIVTEE<br>IVTEEI          | Mus<br>musculu<br>s              |
| 1 | 1.00 | 1 | 1 | 0 | -0.002 | 0 | 0.003 | 0 | t | 95694 | PVKPTAPT<br>KPTYETEK<br>PLKP | Mus<br>musculu<br>s              |
| 1 | 1.00 | 1 | 1 | 0 | -0.002 | 0 | 0.003 | 0 | t | 95842 | SGTSAQSG<br>TSGT             | Mus<br>musculu<br>s              |
| 1 | 1.00 | 1 | 1 | 0 | -0.002 | 0 | 0.003 | 0 | t | 63345 | TEEIIQGES<br>KVEEVVE         | Mus<br>musculu<br>s              |
| 1 | 1.00 | 1 | 1 | 0 | -0.002 | 0 | 0.003 | 0 | t | 67054 | TVKTKNTT<br>TTQT             | Mus<br>musculu<br>s              |



|   |      |   |   |   |        |   |       |   |   |       |                          |                     |
|---|------|---|---|---|--------|---|-------|---|---|-------|--------------------------|---------------------|
| 1 | 1.00 | 1 | 1 | 0 | -0.002 | 0 | 0.003 | 0 | t | 95814 | SAQSGASA<br>QSGA         | Mus<br>musculu<br>s |
| 1 | 1.00 | 1 | 1 | 0 | -0.002 | 0 | 0.003 | 0 | t | 74475 | YKLNIFYD<br>LLRAKL       | Mus<br>musculu<br>s |
| 1 | 1.00 | 1 | 1 | 0 | -0.002 | 0 | 0.003 | 0 | t | 95828 | SGASAQS<br>G TSAQ        | Mus<br>musculu<br>s |
| 1 | 1.00 | 1 | 1 | 0 | -0.002 | 0 | 0.003 | 0 | t | 63345 | TEEIIQGES<br>KV EEVVE    | Mus<br>musculu<br>s |
| 1 | 1.00 | 1 | 1 | 0 | -0.002 | 0 | 0.003 | 0 | t | 62354 | SVTEEVVE<br>EEGPVDEE     | Mus<br>musculu<br>s |
| 1 | 1.00 | 1 | 1 | 0 | -0.002 | 0 | 0.003 | 0 | t | 94550 | ICKRIPNKK<br>PGK         | Mus<br>musculu<br>s |
| 1 | 1.00 | 1 | 1 | 0 | -0.002 | 0 | 0.003 | 0 | t | 71285 | VTEEIVTEE<br>IVTEEI      | Mus<br>musculu<br>s |
| 1 | 1.00 | 1 | 1 | 0 | -0.002 | 0 | 0.003 | 0 | t | 52245 | QRQNKPP<br>NKPNN         | Mus<br>musculu<br>s |
| 1 | 1.00 | 1 | 1 | 0 | -0.002 | 0 | 0.003 | 0 | t | 39597 | LSQDEIDR<br>MVNDAEK<br>Y | Mus<br>musculu<br>s |
| 1 | 1.00 | 1 | 1 | 0 | -0.002 | 0 | 0.003 | 0 | t | 47220 | PDVPYVKR<br>VK           | Mus<br>musculu<br>s |
| 1 | 1.00 | 1 | 1 | 0 | -0.004 | 0 | 0.003 | 0 | t | 39597 | LSQDEIDR<br>MVNDAEK<br>Y | Saimiri<br>sciureus |
| 1 | 1.00 | 1 | 1 | 0 | -0.002 | 0 | 0.003 | 0 | t | 39597 | LSQDEIDR<br>MVNDAEK<br>Y | Mus<br>musculu<br>s |
| 1 | 1.00 | 1 | 1 | 0 | -0.002 | 0 | 0.003 | 0 | t | 51967 | QPSKPTTK<br>QRQN         | Mus<br>musculu<br>s |
| 1 | 1.00 | 1 | 1 | 0 | -0.002 | 0 | 0.003 | 0 | t | 40575 | LVSEEIVTE<br>EGSVAQE     | Mus<br>musculu<br>s |

|   |      |   |   |   |        |   |       |   |   |       |                             |                                  |
|---|------|---|---|---|--------|---|-------|---|---|-------|-----------------------------|----------------------------------|
| 1 | 1.00 | 1 | 1 | 0 | -0.004 | 0 | 0.003 | 0 | t | 40575 | LVSEEVTE<br>EGSVAQE         | Oryctola<br>gus<br>cuniculu<br>s |
| 1 | 1.00 | 1 | 1 | 0 | -0.004 | 0 | 0.003 | 0 | t | 40575 | LVSEEVTE<br>EGSVAQE         | Oryctola<br>gus<br>cuniculu<br>s |
| 1 | 1.00 | 1 | 1 | 0 | -0.002 | 0 | 0.003 | 0 | t | 43116 | NAAGNAA<br>GNAAGNA<br>AG    | Mus<br>musculu<br>s              |
| 1 | 1.00 | 1 | 1 | 0 | -0.002 | 0 | 0.003 | 0 | t | 48662 | PNKKPGKK<br>TTTK            | Mus<br>musculu<br>s              |
| 1 | 1.00 | 1 | 1 | 0 | -0.002 | 0 | 0.003 | 0 | t | 40110 | LTPLEELY                    | Mus<br>musculu<br>s              |
| 1 | 1.00 | 1 | 1 | 0 | -0.002 | 0 | 0.003 | 0 | t | 44571 | NKPPNKP<br>NNDFH            | Mus<br>musculu<br>s              |
| 1 | 1.00 | 1 | 1 | 0 | -0.002 | 0 | 0.003 | 0 | t | 49683 | PTKKPTFK<br>TTKK            | Mus<br>musculu<br>s              |
| 1 | 1.00 | 1 | 1 | 0 | -0.004 | 0 | 0.003 | 0 | t | 58957 | SKVEEVVE<br>EQGSENEE        | Oryctola<br>gus<br>cuniculu<br>s |
| 1 | 1.00 | 1 | 1 | 0 | -0.004 | 0 | 0.003 | 0 | t | 58957 | SKVEEVVE<br>EQGSENEE        | Oryctola<br>gus<br>cuniculu<br>s |
| 1 | 1.00 | 1 | 1 | 0 | -0.002 | 0 | 0.003 | 0 | t | 43191 | NAKATYEA<br>ALKQYEAD<br>LAA | Mus<br>musculu<br>s              |
| 1 | 1.00 | 1 | 1 | 0 | -0.002 | 0 | 0.003 | 0 | t | 58957 | SKVEEVVE<br>EQGSENEE        | Mus<br>musculu<br>s              |
| 1 | 1.00 | 1 | 1 | 0 | -0.004 | 0 | 0.003 | 0 | t | 58251 | SGTEEILEK<br>VSASQEI        | Oryctola<br>gus<br>cuniculu<br>s |
| 1 | 1.00 | 1 | 1 | 0 | -0.002 | 0 | 0.003 | 0 | t | 58957 | SKVEEVVE<br>EQGSENEE        | Mus<br>musculu<br>s              |

|   |      |   |   |   |        |   |       |   |   |       |                              |                                  |
|---|------|---|---|---|--------|---|-------|---|---|-------|------------------------------|----------------------------------|
| 1 | 1.00 | 1 | 1 | 0 | -0.014 | 0 | 0.003 | 0 | t | 43233 | NANP                         | Macaca<br>mulatta                |
| 1 | 1.00 | 1 | 1 | 0 | -0.002 | 0 | 0.003 | 0 | t | 51729 | QNKPPNK<br>PNNDF             | Mus<br>musculu<br>s              |
| 1 | 1.00 | 1 | 1 | 0 | -0.004 | 0 | 0.003 | 0 | t | 58251 | SGTEEILEK<br>VSASQEI         | Oryctola<br>gus<br>cuniculu<br>s |
| 1 | 1.00 | 1 | 1 | 0 | -0.002 | 0 | 0.003 | 0 | t | 55457 | RQNKPPN<br>KPNND             | Mus<br>musculu<br>s              |
| 1 | 1.00 | 1 | 1 | 0 | -0.002 | 0 | 0.003 | 0 | t | 58251 | SGTEEILEK<br>VSASQEI         | Mus<br>musculu<br>s              |
| 1 | 1.00 | 1 | 1 | 0 | -0.002 | 0 | 0.003 | 0 | t | 58251 | SGTEEILEK<br>VSASQEI         | Mus<br>musculu<br>s              |
| 1 | 1.00 | 1 | 1 | 0 | -0.002 | 0 | 0.003 | 0 | t | 58921 | SKPTTKQR<br>QNKP             | Mus<br>musculu<br>s              |
| 1 | 1.00 | 1 | 1 | 0 | -0.002 | 0 | 0.003 | 0 | t | 45817 | NSGCFRHL<br>DEREECKC<br>LL   | Mus<br>musculu<br>s              |
| 1 | 1.00 | 1 | 1 | 0 | -0.002 | 0 | 0.003 | 0 | t | 49414 | PSKPTTKQ<br>RQNK             | Mus<br>musculu<br>s              |
| 1 | 1.00 | 1 | 1 | 0 | -0.004 | 0 | 0.003 | 0 | t | 43730 | NEREDERT<br>LTKEYEDIV<br>LK  | Oryctola<br>gus<br>cuniculu<br>s |
| 1 | 1.00 | 1 | 1 | 0 | -0.002 | 0 | 0.003 | 0 | t | 43730 | NEREDERT<br>LTKEYEDIV<br>LK  | Mus<br>musculu<br>s              |
| 1 | 1.00 | 1 | 1 | 0 | -0.002 | 0 | 0.003 | 0 | t | 43248 | NANPNAN<br>PNANPNA<br>NPNANP | Mus<br>musculu<br>s              |
| 1 | 1.00 | 1 | 1 | 0 | -0.004 | 0 | 0.003 | 0 | t | 60424 | SQEIVQNE<br>SGTEEILE         | Oryctola<br>gus<br>cuniculu<br>s |
| 1 | 1.00 | 1 | 1 | 0 | -0.002 | 0 | 0.003 | 0 | t | 48681 | PNNDFHF<br>EVFNF             | Mus<br>musculu<br>s              |

|   |      |   |   |   |        |   |       |   |   |       |                            |                                  |
|---|------|---|---|---|--------|---|-------|---|---|-------|----------------------------|----------------------------------|
| 1 | 1.00 | 1 | 1 | 0 | -0.002 | 0 | 0.003 | 0 | t | 60424 | SQEIVQNE<br>SGTEEILE       | Mus<br>musculu<br>s              |
| 1 | 1.00 | 1 | 1 | 0 | -0.002 | 0 | 0.003 | 0 | t | 49137 | PQTTKPKE<br>VPTT           | Mus<br>musculu<br>s              |
| 1 | 1.00 | 1 | 1 | 0 | -0.004 | 0 | 0.003 | 0 | t | 53195 | RARGRGR<br>GRGEKRP         | Oryctola<br>gus<br>cuniculu<br>s |
| 1 | 1.00 | 1 | 1 | 0 | -0.004 | 0 | 0.003 | 0 | t | 48618 | PNDPNRN<br>VD              | Oryctola<br>gus<br>cuniculu<br>s |
| 1 | 1.00 | 1 | 1 | 0 | -0.002 | 0 | 0.003 | 0 | t | 48618 | PNDPNRN<br>VD              | Mus<br>musculu<br>s              |
| 1 | 1.00 | 1 | 1 | 0 | -0.004 | 0 | 0.003 | 0 | t | 60424 | SQEIVQNE<br>SGTEEILE       | Oryctola<br>gus<br>cuniculu<br>s |
| 1 | 1.00 | 1 | 1 | 0 | -0.002 | 0 | 0.003 | 0 | t | 43435 | NDFHFEVF<br>NFVP           | Mus<br>musculu<br>s              |
| 1 | 1.00 | 1 | 1 | 0 | -0.002 | 0 | 0.003 | 0 | t | 60424 | SQEIVQNE<br>SGTEEILE       | Mus<br>musculu<br>s              |
| 1 | 1.00 | 1 | 1 | 0 | -0.004 | 0 | 0.003 | 0 | t | 45817 | NSGCFRHL<br>DEREECKC<br>LL | Oryctola<br>gus<br>cuniculu<br>s |
| 1 | 1.00 | 1 | 1 | 0 | -0.002 | 0 | 0.003 | 0 | t | 45054 | NNDFHFE<br>VFNFV           | Mus<br>musculu<br>s              |
| 1 | 1.00 | 1 | 1 | 0 | -0.002 | 0 | 0.003 | 0 | t | 48345 | PLGLRSEF<br>PI             | Mus<br>musculu<br>s              |
| 1 | 1.00 | 1 | 1 | 0 | -0.002 | 0 | 0.003 | 0 | t | 49786 | PTTKQRQ<br>NKPPN           | Mus<br>musculu<br>s              |
| 1 | 1.00 | 1 | 1 | 0 | -0.002 | 0 | 0.003 | 0 | t | 11927 | EEVVGEEK<br>LVSEEIVT       | Mus<br>musculu<br>s              |
| 1 | 1.00 | 1 | 1 | 0 | -0.002 | 0 | 0.003 | 0 | t | 11927 | EEVVGEEK<br>LVSEEIVT       | Mus<br>musculu<br>s              |

|   |      |   |   |   |        |   |       |   |   |       |                          |                                  |
|---|------|---|---|---|--------|---|-------|---|---|-------|--------------------------|----------------------------------|
| 1 | 1.00 | 1 | 1 | 0 | -0.004 | 0 | 0.003 | 0 | t | 11927 | EEVVGEEK<br>LVSEEIVT     | Oryctola<br>gus<br>cuniculu<br>s |
| 1 | 1.00 | 1 | 1 | 0 | -0.004 | 0 | 0.003 | 0 | t | 11927 | EEVVGEEK<br>LVSEEIVT     | Oryctola<br>gus<br>cuniculu<br>s |
| 1 | 1.00 | 1 | 1 | 0 | -0.002 | 0 | 0.003 | 0 | t | 18536 | GACAPYRR<br>LHLCD        | Rattus<br>norvegic<br>us         |
| 1 | 1.00 | 1 | 1 | 0 | -0.002 | 0 | 0.003 | 0 | t | 29248 | IVEEDAPA<br>TEEIDEIE     | Mus<br>musculu<br>s              |
| 1 | 1.00 | 1 | 1 | 0 | -0.002 | 0 | 0.003 | 0 | t | 29248 | IVEEDAPA<br>TEEIDEIE     | Mus<br>musculu<br>s              |
| 1 | 1.00 | 1 | 1 | 0 | -0.002 | 0 | 0.003 | 0 | t | 32827 | KPPNKPN<br>NDFHF         | Mus<br>musculu<br>s              |
| 1 | 1.00 | 1 | 1 | 0 | -0.002 | 0 | 0.003 | 0 | t | 23770 | HFEVFNFV<br>PCSI         | Mus<br>musculu<br>s              |
| 1 | 1.00 | 1 | 1 | 0 | -0.002 | 0 | 0.003 | 0 | t | 32723 | KPGKKTTT<br>KPTK         | Mus<br>musculu<br>s              |
| 1 | 1.00 | 1 | 1 | 0 | -0.002 | 0 | 0.003 | 0 | t | 34197 | KVSASQEI<br>VQDGSVT<br>E | Mus<br>musculu<br>s              |
| 1 | 1.00 | 1 | 1 | 0 | -0.002 | 0 | 0.003 | 0 | t | 13834 | EQGSENEE<br>IFVEEVSA     | Mus<br>musculu<br>s              |
| 1 | 1.00 | 1 | 1 | 0 | -0.002 | 0 | 0.003 | 0 | t | 13834 | EQGSENEE<br>IFVEEVSA     | Mus<br>musculu<br>s              |
| 1 | 1.00 | 1 | 1 | 0 | -0.004 | 0 | 0.003 | 0 | t | 13834 | EQGSENEE<br>IFVEEVSA     | Oryctola<br>gus<br>cuniculu<br>s |
| 1 | 1.00 | 1 | 1 | 0 | -0.002 | 0 | 0.003 | 0 | t | 34197 | KVSASQEI<br>VQDGSVT<br>E | Mus<br>musculu<br>s              |

|   |      |   |   |   |        |   |       |   |   |       |                          |                                  |
|---|------|---|---|---|--------|---|-------|---|---|-------|--------------------------|----------------------------------|
| 1 | 1.00 | 1 | 1 | 0 | -0.002 | 0 | 0.003 | 0 | t | 11821 | EENVEHD<br>AEENVEH<br>DA | Mus<br>musculu<br>s              |
| 1 | 1.00 | 1 | 1 | 0 | -0.004 | 0 | 0.003 | 0 | t | 11652 | EEGPVDEE<br>IVQEEGTV     | Oryctola<br>gus<br>cuniculu<br>s |
| 1 | 1.00 | 1 | 1 | 0 | -0.002 | 0 | 0.003 | 0 | t | 11652 | EEGPVDEE<br>IVQEEGTV     | Mus<br>musculu<br>s              |
| 1 | 1.00 | 1 | 1 | 0 | -0.004 | 0 | 0.003 | 0 | t | 29409 | IVQEEGTV<br>TEEIIQGE     | Oryctola<br>gus<br>cuniculu<br>s |
| 1 | 1.00 | 1 | 1 | 0 | -0.002 | 0 | 0.003 | 0 | t | 29409 | IVQEEGTV<br>TEEIIQGE     | Mus<br>musculu<br>s              |
| 1 | 1.00 | 1 | 1 | 0 | -0.002 | 0 | 0.003 | 0 | t | 29409 | IVQEEGTV<br>TEEIIQGE     | Mus<br>musculu<br>s              |
| 1 | 1.00 | 1 | 1 | 0 | -0.002 | 0 | 0.003 | 0 | t | 31254 | KIFQDHPL<br>QK           | Mus<br>musculu<br>s              |
| 1 | 1.00 | 1 | 1 | 0 | -0.002 | 0 | 0.003 | 0 | t | 29409 | IVQEEGTV<br>TEEIIQGE     | Mus<br>musculu<br>s              |
| 1 | 1.00 | 1 | 1 | 0 | -0.002 | 0 | 0.003 | 0 | t | 11652 | EEGPVDEE<br>IVQEEGTV     | Mus<br>musculu<br>s              |
| 1 | 1.00 | 1 | 1 | 0 | -0.004 | 0 | 0.003 | 0 | t | 11652 | EEGPVDEE<br>IVQEEGTV     | Oryctola<br>gus<br>cuniculu<br>s |
| 1 | 1.00 | 1 | 1 | 0 | -0.002 | 0 | 0.003 | 0 | t | 11652 | EEGPVDEE<br>IVQEEGTV     | Mus<br>musculu<br>s              |
| 1 | 1.00 | 1 | 1 | 0 | -0.002 | 0 | 0.003 | 0 | t | 11652 | EEGPVDEE<br>IVQEEGTV     | Mus<br>musculu<br>s              |
| 1 | 1.00 | 1 | 1 | 0 | -0.002 | 0 | 0.003 | 0 | t | 11820 | EENVEHD<br>AEENVEEN<br>V | Mus<br>musculu<br>s              |

|   |      |   |   |   |        |   |       |   |   |       |                                  |                                  |
|---|------|---|---|---|--------|---|-------|---|---|-------|----------------------------------|----------------------------------|
| 1 | 1.00 | 1 | 1 | 0 | -0.002 | 0 | 0.003 | 0 | t | 11661 | EEGSVAQE<br>IVEEDAPA             | Mus<br>musculu<br>s              |
| 1 | 1.00 | 1 | 1 | 0 | -0.002 | 0 | 0.003 | 0 | t | 11661 | EEGSVAQE<br>IVEEDAPA             | Mus<br>musculu<br>s              |
| 1 | 1.00 | 1 | 1 | 0 | -0.004 | 0 | 0.003 | 0 | t | 11661 | EEGSVAQE<br>IVEEDAPA             | Oryctola<br>gus<br>cuniculu<br>s |
| 1 | 1.00 | 1 | 1 | 0 | -0.002 | 0 | 0.003 | 0 | t | 11661 | EEGSVAQE<br>IVEEDAPA             | Mus<br>musculu<br>s              |
| 1 | 1.00 | 1 | 1 | 0 | -0.004 | 0 | 0.003 | 0 | t | 11661 | EEGSVAQE<br>IVEEDAPA             | Oryctola<br>gus<br>cuniculu<br>s |
| 1 | 1.00 | 1 | 1 | 0 | -0.002 | 0 | 0.003 | 0 | t | 17707 | FSFCETNG<br>LE                   | Mus<br>musculu<br>s              |
| 1 | 1.00 | 1 | 1 | 0 | -0.002 | 0 | 0.003 | 0 | t | 26870 | IKPGSANK<br>PKDEL<br>DYEN<br>DIE | Mus<br>musculu<br>s              |
| 1 | 1.00 | 1 | 1 | 0 | -0.004 | 0 | 0.003 | 0 | t | 26870 | IKPGSANK<br>PKDEL<br>DYEN<br>DIE | Saimiri<br>sciureus              |
| 1 | 1.00 | 1 | 1 | 0 | -0.002 | 0 | 0.003 | 0 | t | 16103 | FHFEVFN<br>FVPCS                 | Mus<br>musculu<br>s              |
| 1 | 1.00 | 1 | 1 | 0 | -0.002 | 0 | 0.003 | 0 | t | 27395 | ILVEGSVTE<br>EVVGEEK             | Mus<br>musculu<br>s              |
| 1 | 1.00 | 1 | 1 | 0 | -0.004 | 0 | 0.003 | 0 | t | 27395 | ILVEGSVTE<br>EVVGEEK             | Oryctola<br>gus<br>cuniculu<br>s |
| 1 | 1.00 | 1 | 1 | 0 | -0.002 | 0 | 0.003 | 0 | t | 27395 | ILVEGSVTE<br>EVVGEEK             | Mus<br>musculu<br>s              |
| 1 | 1.00 | 1 | 1 | 0 | -0.004 | 0 | 0.003 | 0 | t | 27395 | ILVEGSVTE<br>EVVGEEK             | Oryctola<br>gus<br>cuniculu<br>s |

|   |      |   |   |   |        |   |       |   |   |       |                        |                       |
|---|------|---|---|---|--------|---|-------|---|---|-------|------------------------|-----------------------|
| 1 | 1.00 | 1 | 1 | 0 | -0.002 | 0 | 0.003 | 0 | t | 15323 | FCETNGLEYI             | Mus musculus          |
| 1 | 1.00 | 1 | 1 | 0 | -0.002 | 0 | 0.003 | 0 | t | 33892 | KTTTKPTK KPTF          | Mus musculus          |
| 1 | 1.00 | 1 | 1 | 0 | -0.002 | 0 | 0.003 | 0 | t | 15348 | FCSLTSLAT SCGAAVFI PFR | Rattus norvegicus     |
| 1 | 1.00 | 1 | 1 | 0 | -0.002 | 0 | 0.003 | 0 | t | 25852 | IEKKIAKM EKASSVFN VV   | Mus musculus          |
| 1 | 1.00 | 1 | 1 | 0 | -0.004 | 0 | 0.003 | 0 | t | 32769 | KPKHKKLK QPGDGNP       | Oryctolagus cuniculus |
| 1 | 1.00 | 1 | 1 | 0 | -0.002 | 0 | 0.003 | 0 | t | 32769 | KPKHKKLK QPGDGNP       | Mus musculus          |
| 1 | 1.00 | 1 | 1 | 0 | -0.002 | 0 | 0.003 | 0 | t | 32769 | KPKHKKLK QPGDGNP       | Mus musculus          |
| 1 | 1.00 | 1 | 1 | 0 | -0.002 | 0 | 0.003 | 0 | t | 32901 | KPTKKPTF KTTK          | Mus musculus          |
| 1 | 1.00 | 1 | 1 | 0 | -0.002 | 0 | 0.003 | 0 | t | 28075 | IPSTAFTDI AWRRLPNHY    | Rattus norvegicus     |
| 1 | 1.00 | 1 | 1 | 0 | -0.004 | 0 | 0.003 | 0 | t | 28075 | IPSTAFTDI AWRRLPNHY    | Oryctolagus cuniculus |
| 1 | 1.00 | 1 | 1 | 0 | -0.004 | 0 | 0.003 | 0 | t | 28075 | IPSTAFTDI AWRRLPNHY    | Oryctolagus cuniculus |
| 1 | 1.00 | 1 | 1 | 0 | -0.002 | 0 | 0.003 | 0 | t | 21373 | GNAEKYD KMDEPQHYGKS    | Mus musculus          |
| 1 | 1.00 | 1 | 1 | 0 | -0.004 | 0 | 0.003 | 0 | t | 21373 | GNAEKYD KMDEPQHYGKS    | Oryctolagus cuniculus |
| 1 | 1.00 | 1 | 1 | 0 | -0.002 | 0 | 0.003 | 0 | t | 28074 | IPSTACTDI AWRRLPCHYG   | Rattus norvegicus     |



|   |      |   |   |   |        |   |       |   |   |       |                              |                          |
|---|------|---|---|---|--------|---|-------|---|---|-------|------------------------------|--------------------------|
| 1 | 1.00 | 1 | 1 | 0 | -0.002 | 0 | 0.003 | 0 | t | 29965 | KATYEA<br>AANN<br>AKNAALT    | Mus<br>musculus          |
| 1 | 1.00 | 1 | 1 | 0 | -0.004 | 0 | 0.003 | 0 | t | 26178 | IFVEEVSAS<br>QEIVQNE         | Oryctolagus<br>cuniculus |
| 1 | 1.00 | 1 | 1 | 0 | -0.004 | 0 | 0.003 | 0 | t | 26178 | IFVEEVSAS<br>QEIVQNE         | Oryctolagus<br>cuniculus |
| 1 | 1.00 | 1 | 1 | 0 | -0.002 | 0 | 0.003 | 0 | t | 33063 | KQRQNK<br>PNKPN              | Mus<br>musculus          |
| 1 | 1.00 | 1 | 1 | 0 | -0.002 | 0 | 0.003 | 0 | t | 34948 | LARSFADI<br>GDIVRGK<br>DLY   | Rattus<br>norvegicus     |
| 1 | 1.00 | 1 | 1 | 0 | -0.002 | 0 | 0.003 | 0 | t | 27961 | IPNKKPGK<br>KTTT             | Mus<br>musculus          |
| 1 | 1.00 | 1 | 1 | 0 | -0.002 | 0 | 0.003 | 0 | t | 20012 | GGSGGSV<br>ASGGSVAS          | Mus<br>musculus          |
| 1 | 1.00 | 1 | 1 | 0 | -0.002 | 0 | 0.003 | 0 | t | 34965 | LASLRKAF<br>ADTVPVR<br>PSPNY | Rattus<br>norvegicus     |
| 1 | 1.00 | 1 | 1 | 0 | -0.002 | 0 | 0.003 | 0 | t | 12412 | EIDAPRVF<br>DARFSRHY<br>SVQL | Rattus<br>norvegicus     |
| 1 | 1.00 | 1 | 1 | 0 | -0.004 | 0 | 0.003 | 0 | t | 34965 | LASLRKAF<br>ADTVPVR<br>PSPNY | Oryctolagus<br>cuniculus |
| 1 | 1.00 | 1 | 1 | 0 | -0.002 | 0 | 0.003 | 0 | t | 13644 | EPERTAM<br>KKIQDCY           | Mus<br>musculus          |
| 1 | 1.00 | 1 | 1 | 0 | -0.004 | 0 | 0.003 | 0 | t | 34965 | LASLRKAF<br>ADTVPVR<br>PSPNY | Oryctolagus<br>cuniculus |
| 1 | 1.00 | 1 | 1 | 0 | -0.002 | 0 | 0.003 | 0 | t | 29897 | KANADAK<br>AAYEAAV<br>AANNA  | Mus<br>musculus          |
| 1 | 1.00 | 1 | 1 | 0 | -0.002 | 0 | 0.003 | 0 | t | 13438 | ENANANN<br>AV                | Mus<br>musculus          |

|   |      |   |   |   |        |   |       |   |   |       |                              |                                  |
|---|------|---|---|---|--------|---|-------|---|---|-------|------------------------------|----------------------------------|
| 1 | 1.00 | 1 | 1 | 0 | -0.002 | 0 | 0.003 | 0 | t | 12408 | EICPAVKR<br>DVDLFLTG         | Mus<br>musculu<br>s              |
| 1 | 1.00 | 1 | 1 | 0 | -0.002 | 0 | 0.003 | 0 | t | 31580 | KKIQDCYV<br>ENGLIS           | Mus<br>musculu<br>s              |
| 1 | 1.00 | 1 | 1 | 0 | -0.002 | 0 | 0.003 | 0 | t | 10069 | DRYIPYSP                     | Mus<br>musculu<br>s              |
| 1 | 1.00 | 1 | 1 | 0 | -0.002 | 0 | 0.003 | 0 | t | 9694  | DPNANPN<br>VDPNANP<br>NV     | Mus<br>musculu<br>s              |
| 1 | 1.00 | 1 | 1 | 0 | -0.002 | 0 | 0.003 | 0 | t | 6222  | CFDYAPYV<br>SAVDDIC          | Mus<br>musculu<br>s              |
| 1 | 1.00 | 1 | 1 | 0 | -0.002 | 0 | 0.003 | 0 | t | 751   | ADPVTTEG<br>DYVVKISEF<br>YGR | Mus<br>musculu<br>s              |
| 1 | 1.00 | 1 | 1 | 0 | -0.002 | 0 | 0.003 | 0 | t | 8448  | DGNCEDIP<br>HVNEFSAI<br>DL   | Mus<br>musculu<br>s              |
| 1 | 1.00 | 1 | 1 | 0 | -0.002 | 0 | 0.003 | 0 | t | 9694  | DPNANPN<br>VDPNANP<br>NV     | Mus<br>musculu<br>s              |
| 1 | 1.00 | 1 | 1 | 0 | -0.002 | 0 | 0.003 | 0 | t | 7971  | DEENRKRI<br>EARNLEN          | Mus<br>musculu<br>s              |
| 1 | 1.00 | 1 | 1 | 0 | -0.002 | 0 | 0.003 | 0 | t | 3221  | ANAANEAA<br>DYQAKLTA<br>YQTE | Mus<br>musculu<br>s              |
| 1 | 1.00 | 1 | 1 | 0 | -0.002 | 0 | 0.003 | 0 | t | 8448  | DGNCEDIP<br>HVNEFSAI<br>DL   | Mus<br>musculu<br>s              |
| 1 | 1.00 | 1 | 1 | 0 | -0.004 | 0 | 0.003 | 0 | t | 8448  | DGNCEDIP<br>HVNEFSAI<br>DL   | Oryctola<br>gus<br>cuniculu<br>s |
| 1 | 1.00 | 1 | 1 | 0 | -0.002 | 0 | 0.003 | 0 | t | 3221  | ANAANEAA<br>DYQAKLTA<br>YQTE | Mus<br>musculu<br>s              |
| 1 | 1.00 | 1 | 1 | 0 | -0.002 | 0 | 0.003 | 0 | t | 8448  | DGNCEDIP<br>HVNEFSAI<br>DL   | Mus<br>musculu<br>s              |

|   |      |   |   |       |        |        |        |        |   |        |                       |                       |
|---|------|---|---|-------|--------|--------|--------|--------|---|--------|-----------------------|-----------------------|
| 1 | 1.00 | 1 | 1 | 0     | -0.002 | 0      | 0.003  | 0      | t | 3221   | ANAANEADYQAKLTAYQTE   | Mus musculus          |
| 1 | 1.00 | 1 | 1 | 0     | -0.002 | 0      | 0.003  | 0      | t | 1975   | AIKKRNADAKADYEAKLAK   | Mus musculus          |
| 1 | 1.00 | 1 | 1 | 0     | -0.002 | 0      | 0.003  | 0      | t | 8448   | DGNCEDIPHVNEFSAILDL   | Mus musculus          |
| 1 | 1.00 | 1 | 1 | 0     | -0.002 | 0      | 0.003  | 0      | t | 333    | AANNAANAALTAENTAIAIKK | Mus musculus          |
| 1 | 1.00 | 1 | 1 | 0     | -0.002 | 0      | 0.003  | 0      | t | 8275   | DFHFEVFNFVPC          | Mus musculus          |
| 1 | 1.00 | 1 | 1 | -0.02 | -0.018 | -0.029 | -0.023 | -0.019 | t | 113535 | IGGRVHFFKDISPIA       | Homo sapiens          |
| 1 | 1.00 | 1 | 1 | -0.01 | -0.014 | -0.022 | -0.011 | -0.009 | t | 116971 | FAVLKLMGRGTKF         | Oryctolagus cuniculus |
| 1 | 1.00 | 1 | 1 | 0.03  | 0.026  | 0.03   | 0.03   | 0.029  | t | 123001 | AASEDP                | Mus musculus          |
| 1 | 1.00 | 1 | 1 | -0.02 | -0.02  | -0.02  | -0.02  | -0.021 | t | 105650 | AEFRH                 | Mus musculus          |
| 1 | 1.00 | 1 | 1 | -0.02 | -0.02  | -0.02  | -0.02  | -0.021 | t | 105650 | AEFRH                 | Mus musculus          |
| 1 | 1.00 | 1 | 1 | -0.02 | -0.02  | -0.02  | -0.02  | -0.021 | t | 105650 | AEFRH                 | Mus musculus          |
| 1 | 1.00 | 1 | 1 | 0.04  | 0.04   | 0.044  | 0.04   | 0.04   | t | 23207  | GVVTLY                | Homo sapiens          |
| 1 | 1.00 | 1 | 1 | 0.02  | 0.016  | 0.019  | 0.019  | 0.018  | t | 50396  | QAYQQGVTV             | Oryctolagus cuniculus |
| 1 | 1.00 | 1 | 1 | 0     | -0.006 | 0      | 0      | -0.002 | t | 123010 | AGAMIPPPS             | Oryctolagus cuniculus |
| 1 | 1.00 | 1 | 1 | 0     | 0      | -0.005 | 0      | 0      | t | 76396  | YVRGGGAVP             | Homo sapiens          |
| 1 | 1.00 | 1 | 1 | 0     | 0      | 0      | 0.004  | 0      | t | 135945 | KFGADARALMLQ          | Homo sapiens          |

|   |      |   |   |       |        |        |       |        |   |        |                          |                       |
|---|------|---|---|-------|--------|--------|-------|--------|---|--------|--------------------------|-----------------------|
| 1 | 1.00 | 1 | 1 | 0.03  | 0.03   | 0.039  | 0.03  | 0.03   | t | 55981  | RSTSLS                   | Homo sapiens          |
| 1 | 1.00 | 1 | 1 | 0.03  | 0.035  | 0.039  | 0.03  | 0.03   | t | 55981  | RSTSLS                   | Homo sapiens          |
| 1 | 1.00 | 1 | 1 | 0.02  | 0.022  | 0.016  | 0.023 | 0.02   | t | 39253  | LRYHNVY<br>CTTSKSA       | Homo sapiens          |
| 1 | 1.00 | 1 | 1 | -0.02 | -0.02  | -0.02  | -0.02 | -0.019 | t | 115427 | PTQLEEQC<br>HI           | Homo sapiens          |
| 1 | 1.00 | 1 | 1 | 0.02  | 0.02   | 0.018  | 0.02  | 0.02   | t | 95480  | ITELSEFIP<br>GAS         | Homo sapiens          |
| 1 | 1.00 | 1 | 1 | -0.01 | -0.01  | -0.01  | -0.01 | -0.012 | t | 5575   | AVTPLGPP<br>AAEY         | Oryctolagus cuniculus |
| 1 | 1.00 | 1 | 1 | 0.06  | 0.06   | 0.06   | 0.06  | 0.06   | t | 151612 | DPLLTGNY<br>KEAS         | Mus musculus          |
| 1 | 1.00 | 1 | 1 | 0.04  | 0.04   | 0.04   | 0.04  | 0.04   | t | 123278 | GYLKDLPT<br>T            | Ovis aries            |
| 1 | 1.00 | 1 | 1 | 0.02  | 0.02   | 0.02   | 0.02  | 0.02   | t | 102139 | TLQPDRS                  | Mus musculus          |
| 1 | 1.00 | 1 | 1 | 0.02  | 0.02   | 0.02   | 0.02  | 0.02   | t | 6292   | CGGTPPSL<br>PTC          | Homo sapiens          |
| 1 | 1.00 | 1 | 1 | 0.01  | 0.01   | 0      | 0.01  | 0.012  | t | 21673  | GPKGRNV<br>VLEKKWG<br>AP | Rattus norvegicus     |
| 1 | 1.00 | 1 | 1 | -0.02 | -0.028 | -0.022 | -0.02 | -0.021 | t | 97223  | AWNPSLL<br>G             | Mus musculus          |
| 1 | 1.00 | 1 | 1 | 0.04  | 0.042  | 0.04   | 0.047 | 0.04   | t | 103993 | IPPSLRITL<br>DNEERMS     | Homo sapiens          |
| 1 | 1.00 | 1 | 1 | -0.01 | -0.007 | -0.013 | -0.01 | -0.008 | t | 52825  | QVYYRPV<br>DQ            | Mus musculus          |
| 1 | 1.00 | 1 | 1 | 0.01  | 0.01   | 0.01   | 0.01  | 0.01   | t | 11699  | EEITQVATI<br>SANS DH     | Homo sapiens          |

|   |      |   |   |       |        |        |        |        |   |        |                              |                     |
|---|------|---|---|-------|--------|--------|--------|--------|---|--------|------------------------------|---------------------|
| 1 | 1.00 | 1 | 1 | 0     | 0.001  | -0.004 | 0.001  | 0      | t | 61192  | SSLRYGNV<br>LDVNAI           | Homo<br>sapiens     |
| 1 | 1.00 | 1 | 1 | 0     | 0.001  | -0.004 | 0.001  | 0      | t | 30597  | KERSSLRY<br>GNVLDV           | Homo<br>sapiens     |
| 1 | 1.00 | 1 | 1 | 0     | 0.001  | -0.004 | 0.001  | 0      | t | 22799  | GTRIRFKD<br>DTSFED           | Homo<br>sapiens     |
| 1 | 1.00 | 1 | 1 | 0     | 0.001  | -0.004 | 0.001  | 0      | t | 11354  | EDINGIRR<br>PKHLYV           | Homo<br>sapiens     |
| 1 | 1.00 | 1 | 1 | 0.02  | 0.022  | 0.016  | 0.014  | 0.02   | t | 112837 | SGYIPANT<br>TIPF             | Homo<br>sapiens     |
| 1 | 1.00 | 1 | 1 | 0.01  | 0.01   | 0.01   | 0.01   | 0.008  | t | 119573 | EWEDTYGI<br>VL               | Homo<br>sapiens     |
| 1 | 1.00 | 1 | 1 | 0.01  | 0.01   | 0.006  | 0.01   | 0.009  | t | 105684 | ASFDKVKG<br>DPVGILYA<br>VFKA | Homo<br>sapiens     |
| 1 | 1.00 | 1 | 1 | 0.01  | 0.01   | 0.01   | 0.01   | 0.01   | t | 23191  | GVTYEIDL<br>TNKNAA           | Homo<br>sapiens     |
| 1 | 1.00 | 1 | 1 | -0.03 | -0.032 | -0.024 | -0.029 | -0.029 | t | 79042  | PKSKPFA                      | Mus<br>musculu<br>s |
| 1 | 1.00 | 1 | 1 | 0     | 0.002  | -0.01  | 0.001  | 0.001  | t | 24012  | HHPSTNQ<br>EQTSLYVQ<br>AS    | Homo<br>sapiens     |
| 1 | 1.00 | 1 | 1 | 0.03  | 0.029  | 0.022  | 0.029  | 0.03   | t | 52477  | QTASQVET<br>EDTKEPG          | Mus<br>musculu<br>s |
| 1 | 1.00 | 1 | 1 | 0.01  | 0.01   | 0.01   | 0.01   | 0.01   | t | 128540 | EKTSFFQA<br>LGITTKI          | Homo<br>sapiens     |
| 1 | 1.00 | 1 | 1 | 0     | 0      | 0      | 0      | 0      | t | 33746  | KTKRNTNR                     | Homo<br>sapiens     |
| 1 | 1.00 | 1 | 1 | 0.05  | 0.05   | 0.05   | 0.05   | 0.05   | t | 115825 | KIEKFQSEE<br>Q               | Homo<br>sapiens     |
| 1 | 1.00 | 1 | 1 | 0.03  | 0.03   | 0.03   | 0.03   | 0.03   | t | 99602  | RDQSSYLQ<br>GFSRNTL          | Homo<br>sapiens     |
| 1 | 1.00 | 1 | 1 | 0.01  | 0.01   | 0.01   | 0.01   | 0.01   | t | 156927 | NTFQAFY                      | Gallus<br>gallus    |
| 1 | 1.00 | 1 | 1 | 0.01  | 0.012  | 0.01   | 0.01   | 0.01   | t | 117749 | APAMIPP                      | Homo<br>sapiens     |
| 1 | 1.00 | 1 | 1 | 0.01  | 0.01   | 0.01   | 0.01   | 0.01   | t | 117749 | APAMIPP                      | Homo<br>sapiens     |

|   |      |   |   |       |        |        |        |        |   |        |                              |                                  |
|---|------|---|---|-------|--------|--------|--------|--------|---|--------|------------------------------|----------------------------------|
| 1 | 1.00 | 1 | 1 | 0.01  | 0.01   | 0.01   | 0.01   | 0.01   | t | 16123  | FHLPYNHN<br>WFAL             | Mus<br>musculu<br>s              |
| 1 | 1.00 | 1 | 1 | 0.03  | 0.028  | 0.025  | 0.031  | 0.031  | t | 14774  | EVLYEAFD<br>EMEECASK<br>AALI | Homo<br>sapiens                  |
| 1 | 1.00 | 1 | 1 | -0.02 | -0.02  | -0.022 | -0.017 | -0.02  | t | 70648  | VQSVASSR<br>RHKRFAG          | Homo<br>sapiens                  |
| 1 | 1.00 | 1 | 1 | -0.03 | -0.03  | -0.036 | -0.03  | -0.032 | t | 59300  | SLLRRRRN<br>GEDVSV           | Oryctola<br>gus<br>cuniculu<br>s |
| 1 | 1.00 | 1 | 1 | -0.03 | -0.027 | -0.036 | -0.03  | -0.032 | t | 59300  | SLLRRRRN<br>GEDVSV           | Mus<br>musculu<br>s              |
| 1 | 1.00 | 1 | 1 | -0.01 | -0.008 | -0.008 | -0.007 | -0.01  | t | 13728  | EPPVVHGC                     | Homo<br>sapiens                  |
| 1 | 1.00 | 1 | 1 | 0.02  | 0.02   | 0.015  | 0.02   | 0.022  | t | 12182  | EGGTWRI<br>G                 | Homo<br>sapiens                  |
| 1 | 1.00 | 1 | 1 | 0.01  | 0.012  | 0.007  | 0.011  | 0.012  | t | 47200  | PDSDAESY<br>SSMPPL           | Homo<br>sapiens                  |
| 1 | 1.00 | 1 | 1 | 0.01  | 0.012  | 0.007  | 0.011  | 0.012  | t | 47200  | PDSDAESY<br>SSMPPL           | Homo<br>sapiens                  |
| 1 | 1.00 | 1 | 1 | -0.04 | -0.036 | -0.04  | -0.043 | -0.04  | t | 34180  | KVQYDMP<br>K                 | Homo<br>sapiens                  |
| 1 | 1.00 | 1 | 1 | 0     | 0.002  | 0      | 0.007  | 0.003  | t | 140606 | TMWDALE<br>AP                | Homo<br>sapiens                  |
| 1 | 1.00 | 1 | 1 | 0     | -0.003 | 0      | 0      | -0.001 | t | 130872 | GSFLTGP<br>SKLNDRA           | Oryctola<br>gus<br>cuniculu<br>s |
| 1 | 1.00 | 1 | 1 | 0     | -0.003 | 0      | 0      | -0.001 | t | 66841  | TTTCFRDT<br>DTGK             | Oryctola<br>gus<br>cuniculu<br>s |
| 1 | 1.00 | 1 | 1 | 0     | 0      | 0      | 0      | -0.001 | t | 48819  | PPLGNWF<br>G                 | Rattus<br>norvegic<br>us         |

|   |      |   |   |       |        |        |        |        |   |        |                              |                                  |
|---|------|---|---|-------|--------|--------|--------|--------|---|--------|------------------------------|----------------------------------|
| 1 | 1.00 | 1 | 1 | 0.03  | 0.03   | 0.017  | 0.032  | 0.033  | t | 98968  | QQNPQA<br>QGSVQP             | Homo<br>sapiens                  |
| 1 | 1.00 | 1 | 1 | 0.01  | -0.002 | 0.01   | 0.013  | 0.01   | t | 156871 | FQNIASM<br>PHLYV             | Bos<br>taurus                    |
| 1 | 1.00 | 1 | 1 | 0.01  | 0.01   | 0.007  | 0.01   | 0.011  | t | 62715  | SYSYNKDN<br>NELSHFA          | Mus<br>musculu<br>s              |
| 1 | 1.00 | 1 | 1 | -0.03 | -0.03  | -0.028 | -0.029 | -0.028 | t | 98839  | KALLYR                       | Homo<br>sapiens                  |
| 1 | 1.00 | 1 | 1 | -0.02 | -0.018 | -0.03  | -0.023 | -0.021 | t | 1740   | AHAAYLN<br>ATPAAKVL          | Homo<br>sapiens                  |
| 1 | 1.00 | 1 | 1 | 0.01  | 0.014  | 0.012  | 0.013  | 0.008  | t | 59983  | SPAPPPPE<br>HRGGPEEF<br>EGAG | Homo<br>sapiens                  |
| 1 | 1.00 | 1 | 1 | 0.03  | 0.032  | 0.029  | 0.031  | 0.03   | t | 40018  | LTLNLITE<br>MG               | Homo<br>sapiens                  |
| 1 | 1.00 | 1 | 1 | 0.02  | 0.024  | 0.02   | 0.021  | 0.02   | t | 137844 | EYETDPSV<br>TKMV             | Homo<br>sapiens                  |
| 1 | 1.00 | 1 | 1 | -0.02 | -0.02  | -0.025 | -0.026 | -0.022 | t | 115574 | YWLAHKA<br>LCS               | Homo<br>sapiens                  |
| 1 | 1.00 | 1 | 1 | 0.03  | 0.032  | 0.03   | 0.031  | 0.029  | t | 151005 | KEVLVLW<br>GIHPSTS           | Homo<br>sapiens                  |
| 1 | 1.00 | 1 | 1 | 0.02  | 0.02   | 0.02   | 0.02   | 0.02   | t | 70664  | VQVVYDY<br>Q                 | Oryctola<br>gus<br>cuniculu<br>s |
| 1 | 1.00 | 1 | 1 | 0.02  | 0.018  | 0.019  | 0.022  | 0.022  | t | 106599 | LEFRHSL                      | Mus<br>musculu<br>s              |
| 1 | 1.00 | 1 | 1 | 0     | 0      | -0.012 | -0.004 | 0      | t | 30799  | KFNPD LAP<br>G               | Homo<br>sapiens                  |
| 1 | 1.00 | 1 | 1 | -0.02 | -0.022 | -0.017 | -0.017 | -0.02  | t | 5597   | AVVGGLG<br>GY                | Mus<br>musculu<br>s              |
| 1 | 1.00 | 1 | 1 | 0.02  | 0.02   | 0.02   | 0.02   | 0.02   | t | 135837 | DMYGD IRL<br>TGLI            | Mus<br>musculu<br>s              |

|   |      |   |   |       |        |        |        |        |   |        |                          |                                  |
|---|------|---|---|-------|--------|--------|--------|--------|---|--------|--------------------------|----------------------------------|
| 1 | 1.00 | 1 | 1 | 0.02  | 0.02   | 0.02   | 0.02   | 0.02   | t | 135837 | DMYGDIRL<br>TGLI         | Mus<br>musculu<br>s              |
| 1 | 1.00 | 1 | 1 | 0.02  | 0.02   | 0.02   | 0.02   | 0.02   | t | 135837 | DMYGDIRL<br>TGLI         | Mus<br>musculu<br>s              |
| 1 | 1.00 | 1 | 1 | -0.01 | -0.01  | -0.01  | -0.01  | -0.01  | t | 118217 | VTKYITKG<br>WKEVH        | Homo<br>sapiens                  |
| 1 | 1.00 | 1 | 1 | 0.03  | 0.03   | 0.03   | 0.03   | 0.033  | t | 9588   | DPAFSL                   | Mus<br>musculu<br>s              |
| 1 | 1.00 | 1 | 1 | 0.02  | 0.009  | 0.016  | 0.02   | 0.02   | t | 147083 | LCSEYRNT<br>QIYTIN       | Oryctola<br>gus<br>cuniculu<br>s |
| 1 | 1.00 | 1 | 1 | -0.01 | -0.008 | -0.008 | -0.003 | -0.009 | t | 122793 | HTQNT                    | Homo<br>sapiens                  |
| 1 | 1.00 | 1 | 1 | 0.01  | 0.01   | 0.01   | 0.01   | 0.011  | t | 130598 | RQFECYTT<br>CVG          | Mus<br>musculu<br>s              |
| 1 | 1.00 | 1 | 1 | 0.04  | 0.04   | 0.04   | 0.04   | 0.04   | t | 107861 | GLEGQDT<br>KTITFDVS      | Homo<br>sapiens                  |
| 1 | 1.00 | 1 | 1 | 0.02  | 0.02   | 0.02   | 0.02   | 0.02   | t | 119592 | HTFPAVLQ                 | Homo<br>sapiens                  |
| 1 | 1.00 | 1 | 1 | 0.02  | 0.02   | 0.02   | 0.02   | 0.02   | t | 133956 | WIMSNF                   | Mus<br>musculu<br>s              |
| 1 | 1.00 | 1 | 1 | 0     | 0      | 0      | 0      | 0      | t | 141862 | CIKTLMTN<br>VETYFK       | Homo<br>sapiens                  |
| 1 | 1.00 | 1 | 1 | 0     | 0      | 0      | 0      | 0      | t | 140834 | DAVKGYLA<br>GKGV         | Oryctola<br>gus<br>cuniculu<br>s |
| 1 | 1.00 | 1 | 1 | 0.01  | 0.01   | 0.01   | 0.01   | 0.01   | t | 98953  | QEPDDLK<br>QKA           | Homo<br>sapiens                  |
| 1 | 1.00 | 1 | 1 | 0.02  | 0.02   | 0.021  | 0.02   | 0.02   | t | 35139  | LDEGKQSL<br>TKLAAAW<br>G | Homo<br>sapiens                  |
| 1 | 1.00 | 1 | 1 | 0     | 0      | 0.002  | 0      | -0.001 | t | 119900 | GKTINKIDI<br>DTEAYT      | Rattus<br>norvegic<br>us         |



|   |      |   |   |       |        |        |        |        |   |        |                             |                      |
|---|------|---|---|-------|--------|--------|--------|--------|---|--------|-----------------------------|----------------------|
| 1 | 1.00 | 1 | 1 | 0     | 0      | 0.002  | 0      | -0.001 | t | 119900 | GKTINKIDI<br>DTEAYT         | Rattus<br>norvegicus |
| 1 | 1.00 | 1 | 1 | 0     | 0.002  | 0.002  | 0      | -0.001 | t | 119900 | GKTINKIDI<br>DTEAYT         | Rattus<br>norvegicus |
| 1 | 1.00 | 1 | 1 | 0     | 0      | 0.002  | 0      | -0.001 | t | 119900 | GKTINKIDI<br>DTEAYT         | Rattus<br>norvegicus |
| 1 | 1.00 | 1 | 1 | 0     | 0      | 0.002  | 0      | -0.001 | t | 119900 | GKTINKIDI<br>DTEAYT         | Rattus<br>norvegicus |
| 1 | 1.00 | 1 | 1 | 0     | 0      | 0.002  | 0      | -0.001 | t | 119900 | GKTINKIDI<br>DTEAYT         | Rattus<br>norvegicus |
| 1 | 1.00 | 1 | 1 | 0     | 0.002  | 0.002  | 0      | -0.001 | t | 119900 | GKTINKIDI<br>DTEAYT         | Rattus<br>norvegicus |
| 1 | 1.00 | 1 | 1 | 0     | -0.003 | 0.007  | 0.001  | 0      | t | 5029   | ATLCSALY<br>VG              | Homo<br>sapiens      |
| 1 | 1.00 | 1 | 1 | -0.01 | -0.01  | -0.024 | -0.013 | -0.01  | t | 17795  | FSNVYLFA<br>KDKSGPLQ<br>PGV | Homo<br>sapiens      |
| 1 | 1.00 | 1 | 1 | -0.02 | -0.018 | -0.02  | -0.02  | -0.021 | t | 122886 | RGTDEYFI<br>RKPP            | Rattus<br>norvegicus |
| 1 | 1.00 | 1 | 1 | 0.05  | 0.049  | 0.059  | 0.051  | 0.05   | t | 783    | ADTQGS                      | Homo<br>sapiens      |
| 1 | 1.00 | 1 | 1 | -0.02 | -0.016 | -0.018 | -0.021 | -0.022 | t | 51830  | QPFPSQQ<br>PYL              | Homo<br>sapiens      |
| 1 | 1.00 | 1 | 1 | 0.01  | 0.012  | 0.01   | 0.01   | 0.01   | t | 118052 | PPGAMPP                     | Homo<br>sapiens      |
| 1 | 1.00 | 1 | 1 | -0.02 | -0.02  | -0.02  | -0.02  | -0.022 | t | 20523  | GKCGVSIP<br>YK              | Homo<br>sapiens      |

|   |      |   |   |       |       |       |       |        |   |        |                       |                                  |
|---|------|---|---|-------|-------|-------|-------|--------|---|--------|-----------------------|----------------------------------|
| 1 | 1.00 | 1 | 1 | 0.01  | 0.018 | 0.01  | 0.013 | 0.01   | t | 110957 | PAAVTLAE<br>ADRT      | Homo<br>sapiens                  |
| 1 | 1.00 | 1 | 1 | 0.01  | 0.01  | 0.01  | 0.014 | 0.011  | t | 135930 | GDKVSFFC<br>KNKEKCC   | Homo<br>sapiens                  |
| 1 | 1.00 | 1 | 1 | 0     | 0.003 | 0     | 0     | -0.002 | t | 135501 | SQWNKP                | Mus<br>musculu<br>s              |
| 1 | 1.00 | 1 | 1 | 0     | 0     | 0.006 | 0     | 0      | t | 37029  | LKTAAESA              | Mus<br>musculu<br>s              |
| 1 | 1.00 | 1 | 1 | 0.01  | 0.007 | 0.01  | 0.01  | 0.012  | t | 140934 | YGEEKPAV<br>LGHD      | Oryctola<br>gus<br>cuniculu<br>s |
| 1 | 1.00 | 1 | 1 | 0.06  | 0.06  | 0.06  | 0.06  | 0.062  | t | 27557  | IMSGEVPS<br>TEDLVN    | Homo<br>sapiens                  |
| 1 | 1.00 | 1 | 1 | 0.01  | 0.01  | 0.01  | 0.01  | 0.01   | t | 156923 | NLHTSF                | Gallus<br>gallus                 |
| 1 | 1.00 | 1 | 1 | 0.01  | 0.01  | 0.01  | 0.01  | 0.01   | t | 136126 | AKYNQLLR<br>IEEELGSKA | Homo<br>sapiens                  |
| 1 | 1.00 | 1 | 1 | -0.01 | -0.01 | -0.01 | -0.01 | -0.009 | t | 115392 | NICNISCD<br>KF        | Homo<br>sapiens                  |
| 1 | 1.00 | 1 | 1 | 0     | 0.003 | 0.002 | 0     | 0      | t | 119641 | SEHETRLV<br>AKLFKDYS  | Mus<br>musculu<br>s              |
| 1 | 1.00 | 1 | 1 | 0.07  | 0.07  | 0.07  | 0.07  | 0.07   | t | 96444  | KDEDEEDE<br>ED        | Homo<br>sapiens                  |
| 1 | 1.00 | 1 | 1 | 0.03  | 0.03  | 0.03  | 0.03  | 0.03   | t | 123278 | GYLKDLPT<br>T         | Ovis<br>aries                    |
| 1 | 1.00 | 1 | 1 | -0.01 | -0.01 | -0.01 | -0.01 | -0.01  | t | 113480 | GQQPGQG<br>QPGYYPT    | Homo<br>sapiens                  |
| 1 | 1.00 | 1 | 1 | -0.01 | -0.01 | -0.01 | -0.01 | -0.01  | t | 79586  | KIPIALS               | Oryctola<br>gus<br>cuniculu<br>s |
| 1 | 1.00 | 1 | 1 | -0.02 | -0.02 | -0.02 | -0.02 | -0.02  | t | 45637  | NQVYYRP               | Mus<br>musculu<br>s              |

|   |      |   |   |       |        |        |        |        |   |        |                              |                                  |
|---|------|---|---|-------|--------|--------|--------|--------|---|--------|------------------------------|----------------------------------|
| 1 | 1.00 | 1 | 1 | -0.01 | -0.007 | -0.003 | -0.01  | -0.01  | t | 21469  | GNLLLSCL                     | Sus<br>scrofa                    |
| 1 | 1.00 | 1 | 1 | -0.04 | -0.042 | -0.056 | -0.041 | -0.04  | t | 17376  | FPQQPQR<br>PFA               | Mus<br>musculu<br>s              |
| 1 | 1.00 | 1 | 1 | 0     | 0.002  | 0.007  | 0.007  | 0      | t | 65050  | TLRVYK                       | Homo<br>sapiens                  |
| 1 | 1.00 | 1 | 1 | 0.02  | 0.022  | 0.022  | 0.02   | 0.02   | t | 52844  | QWKLQPG<br>D                 | Anas<br>platyrhy<br>nchos        |
| 1 | 1.00 | 1 | 1 | -0.01 | -0.01  | -0.01  | -0.01  | -0.011 | t | 47160  | PDPPQPD<br>FPQLN             | Oryctola<br>gus<br>cuniculu<br>s |
| 1 | 1.00 | 1 | 1 | -0.01 | -0.012 | -0.005 | -0.011 | -0.011 | t | 48332  | PLGFFPDH<br>QLDPAFG          | Mus<br>musculu<br>s              |
| 1 | 1.00 | 1 | 1 | 0.02  | 0.017  | 0.01   | 0.02   | 0.02   | t | 140938 | YLNATPAA<br>KVLVEGNT<br>DERG | Oryctola<br>gus<br>cuniculu<br>s |
| 1 | 1.00 | 1 | 1 | -0.02 | -0.02  | -0.026 | -0.02  | -0.02  | t | 50203  | QAAAGDK<br>PS                | Homo<br>sapiens                  |
| 1 | 1.00 | 1 | 1 | -0.01 | -0.01  | -0.017 | -0.01  | -0.012 | t | 95543  | LCPNNLCC<br>SQ               | Homo<br>sapiens                  |
| 1 | 1.00 | 1 | 1 | -0.03 | -0.027 | -0.039 | -0.03  | -0.028 | t | 79995  | RAVFMQQ<br>RPLRM             | Mus<br>musculu<br>s              |
| 1 | 1.00 | 1 | 1 | -0.03 | -0.032 | -0.031 | -0.031 | -0.03  | t | 48869  | PPPPRVQP<br>RKTKSV           | Sus<br>scrofa                    |
| 1 | 1.00 | 1 | 1 | -0.01 | -0.013 | -0.01  | -0.01  | -0.012 | t | 133468 | YYYNEIKLK<br>ESYKLKD         | Oryctola<br>gus<br>cuniculu<br>s |
| 1 | 1.00 | 1 | 1 | 0.04  | 0.04   | 0.04   | 0.04   | 0.04   | t | 109476 | LDSDGSF                      | Homo<br>sapiens                  |
| 1 | 1.00 | 1 | 1 | 0.04  | 0.04   | 0.04   | 0.04   | 0.04   | t | 75847  | YSPELE                       | Mus<br>musculu<br>s              |

|   |      |   |   |       |        |        |        |        |   |        |                              |                       |
|---|------|---|---|-------|--------|--------|--------|--------|---|--------|------------------------------|-----------------------|
| 1 | 1.00 | 1 | 1 | 0.04  | 0.04   | 0.04   | 0.04   | 0.04   | t | 75847  | YSPELE                       | Mus musculus          |
| 1 | 1.00 | 1 | 1 | 0     | 0      | 0      | 0      | 0      | t | 139317 | TLLELPAAE                    | Oryctolagus cuniculus |
| 1 | 1.00 | 1 | 1 | -0.01 | -0.015 | -0.015 | -0.01  | -0.01  | t | 41294  | MDYVSCT<br>PGLRVELS<br>TVSNA | Canis lupus           |
| 1 | 1.00 | 1 | 1 | 0.03  | 0.029  | 0.032  | 0.033  | 0.03   | t | 5112   | ATQAATV<br>AVTPEETA<br>VASPP | Homo sapiens          |
| 1 | 1.00 | 1 | 1 | -0.04 | -0.038 | -0.045 | -0.037 | -0.04  | t | 62326  | SVSHARPR<br>WFWFCL           | Homo sapiens          |
| 1 | 1.00 | 1 | 1 | 0.02  | 0.023  | 0.011  | 0.02   | 0.019  | t | 78627  | DPDPPDA<br>NDPAPPN<br>AN     | Mus musculus          |
| 1 | 1.00 | 1 | 1 | 0.01  | 0.01   | 0.002  | 0.01   | 0.011  | t | 65492  | TPADPAAS<br>SSERG            | Mus musculus          |
| 1 | 1.00 | 1 | 1 | 0.02  | 0.018  | 0.017  | 0.023  | 0.022  | t | 66751  | TTPAQGTS<br>M                | Mus musculus          |
| 1 | 1.00 | 1 | 1 | 0.01  | 0.012  | 0.01   | 0.013  | 0.01   | t | 51145  | QIVGGV                       | Homo sapiens          |
| 1 | 1.00 | 1 | 1 | 0.01  | 0.008  | -0.002 | 0.011  | 0.012  | t | 96494  | KQMGQT<br>GGSY               | Mus musculus          |
| 1 | 1.00 | 1 | 1 | 0.01  | 0.01   | 0.01   | 0.01   | 0.01   | t | 32635  | KNVVTGE<br>VQVLYTA           | Homo sapiens          |
| 1 | 1.00 | 1 | 1 | -0.03 | -0.027 | -0.039 | -0.03  | -0.028 | t | 80090  | VTSVAMK<br>PYEVT             | Mus musculus          |
| 1 | 1.00 | 1 | 1 | -0.03 | -0.027 | -0.039 | -0.03  | -0.028 | t | 80090  | VTSVAMK<br>PYEVT             | Mus musculus          |
| 1 | 1.00 | 1 | 1 | 0.01  | 0.013  | 0.011  | 0.01   | 0.01   | t | 149785 | KTVEGVKD<br>LQAQ             | Mus musculus          |

|   |      |   |   |       |        |        |        |        |   |        |                              |                                  |
|---|------|---|---|-------|--------|--------|--------|--------|---|--------|------------------------------|----------------------------------|
| 1 | 1.00 | 1 | 1 | 0     | -0.004 | 0      | 0.001  | -0.001 | t | 131303 | PVPSTPPT<br>PSPSTPPT<br>PSPS | Oryctola<br>gus<br>cuniculu<br>s |
| 1 | 1.00 | 1 | 1 | 0     | -0.002 | 0      | 0.001  | -0.001 | t | 131101 | TDSEMDV<br>VRFDDDN<br>S      | Mus<br>musculu<br>s              |
| 1 | 1.00 | 1 | 1 | -0.03 | -0.03  | -0.03  | -0.03  | -0.031 | t | 119605 | KSRWQQG<br>N                 | Homo<br>sapiens                  |
| 1 | 1.00 | 1 | 1 | -0.04 | -0.036 | -0.04  | -0.04  | -0.041 | t | 122998 | AAMDRLR<br>IGF               | Ovis<br>aries                    |
| 1 | 1.00 | 1 | 1 | 0.03  | 0.03   | 0.028  | 0.033  | 0.03   | t | 54335  | RKDRVED<br>A                 | Homo<br>sapiens                  |
| 1 | 1.00 | 1 | 1 | 0.02  | 0.02   | 0.018  | 0.02   | 0.02   | t | 7155   | CTIAALGSS<br>DRDTVV          | Homo<br>sapiens                  |
| 1 | 1.00 | 1 | 1 | -0.01 | -0.01  | -0.01  | -0.01  | -0.01  | t | 88981  | SPTSVTVG<br>KGAFSFKR<br>E    | Aotus                            |
| 1 | 1.00 | 1 | 1 | 0     | -0.002 | -0.02  | -0.007 | 0      | t | 141778 | VYVPPRRQ<br>QLCLYELF         | Rattus<br>norvegic<br>us         |
| 1 | 1.00 | 1 | 1 | 0     | -0.004 | 0      | 0.003  | 0      | t | 76396  | YVRGGGA<br>VP                | Oryctola<br>gus<br>cuniculu<br>s |
| 1 | 1.00 | 1 | 1 | 0     | 0      | 0      | 0      | -0.002 | t | 63756  | TFTNKLKE<br>KHTDLGK          | Mus<br>musculu<br>s              |
| 1 | 1.00 | 1 | 1 | 0.01  | 0.01   | 0.01   | 0.01   | 0.01   | t | 142408 | DQVTKKEK<br>KTIKKA           | Homo<br>sapiens                  |
| 1 | 1.00 | 1 | 1 | 0.01  | 0.01   | 0.01   | 0.01   | 0.01   | t | 131883 | FVKQFSNI<br>SFSRDSP          | Homo<br>sapiens                  |
| 1 | 1.00 | 1 | 1 | 0.02  | 0.024  | 0.02   | 0.021  | 0.02   | t | 137882 | GQNVLSA<br>D                 | Homo<br>sapiens                  |
| 1 | 1.00 | 1 | 1 | 0.01  | 0.007  | 0.008  | 0.01   | 0.01   | t | 141622 | DPNGWTG<br>TDNNFSI           | Oryctola<br>gus<br>cuniculu<br>s |
| 1 | 1.00 | 1 | 1 | -0.04 | -0.04  | -0.043 | -0.04  | -0.04  | t | 8239   | DFCGKGY<br>HLMSFPQ<br>AAP    | Homo<br>sapiens                  |

|   |      |   |   |       |        |        |        |        |   |        |                            |                                  |
|---|------|---|---|-------|--------|--------|--------|--------|---|--------|----------------------------|----------------------------------|
| 1 | 1.00 | 1 | 1 | 0.02  | 0.02   | 0.02   | 0.02   | 0.021  | t | 144676 | GTHPSLQF<br>T              | Mus<br>musculu<br>s              |
| 1 | 1.00 | 1 | 1 | -0.02 | -0.022 | -0.011 | -0.017 | -0.021 | t | 106192 | YCHTFHGA<br>G              | Mus<br>musculu<br>s              |
| 1 | 1.00 | 1 | 1 | 0     | -0.01  | 0      | 0.001  | 0      | t | 51371  | QLINTNGS<br>WHIN           | Homo<br>sapiens                  |
| 1 | 1.00 | 1 | 1 | 0.04  | 0.043  | 0.04   | 0.04   | 0.04   | t | 126897 | QSQQFSVS<br>ENLLKEA        | Mus<br>musculu<br>s              |
| 1 | 1.00 | 1 | 1 | 0.02  | 0.023  | 0.02   | 0.02   | 0.02   | t | 43506  | NDPN                       | Mus<br>musculu<br>s              |
| 1 | 1.00 | 1 | 1 | -0.01 | -0.014 | -0.016 | -0.011 | -0.01  | t | 18512  | GAALLQSA<br>RR             | Oryctola<br>gus<br>cuniculu<br>s |
| 1 | 1.00 | 1 | 1 | -0.02 | -0.024 | -0.016 | -0.02  | -0.02  | t | 51974  | QPTELRY<br>S<br>W          | Mus<br>musculu<br>s              |
| 1 | 1.00 | 1 | 1 | -0.02 | -0.02  | -0.016 | -0.02  | -0.02  | t | 51974  | QPTELRY<br>S<br>W          | Mus<br>musculu<br>s              |
| 1 | 1.00 | 1 | 1 | -0.02 | -0.02  | -0.016 | -0.02  | -0.02  | t | 51974  | QPTELRY<br>S<br>W          | Mus<br>musculu<br>s              |
| 1 | 1.00 | 1 | 1 | 0     | -0.004 | 0      | -0.001 | 0      | t | 120681 | KILPEVKE<br>K<br>H         | Oryctola<br>gus<br>cuniculu<br>s |
| 1 | 1.00 | 1 | 1 | -0.02 | -0.023 | -0.028 | -0.02  | -0.021 | t | 153388 | GKFKKIVK<br>GTHHWM<br>LLTF | Oryctola<br>gus<br>cuniculu<br>s |
| 1 | 1.00 | 1 | 1 | 0.02  | 0.018  | 0.02   | 0.023  | 0.02   | t | 95842  | SGTSAQSG<br>TSGT           | Mus<br>musculu<br>s              |
| 1 | 1.00 | 1 | 1 | -0.01 | -0.012 | -0.012 | -0.007 | -0.009 | t | 99288  | GLSERRAQ                   | Mus<br>musculu<br>s              |
| 1 | 1.00 | 1 | 1 | 0     | -0.002 | 0.004  | -0.003 | 0      | t | 115053 | GGSYFMIS<br>R              | Mus<br>musculu<br>s              |
| 1 | 1.00 | 1 | 1 | 0     | -0.002 | 0.004  | -0.003 | 0      | t | 115053 | GGSYFMIS<br>R              | Mus<br>musculu<br>s              |

|   |      |   |   |       |        |        |        |        |   |        |                      |                                  |
|---|------|---|---|-------|--------|--------|--------|--------|---|--------|----------------------|----------------------------------|
| 1 | 1.00 | 1 | 1 | -0.02 | -0.018 | -0.023 | -0.023 | -0.022 | t | 50648  | QELQEVD<br>RRCRC     | Homo<br>sapiens                  |
| 1 | 1.00 | 1 | 1 | -0.02 | -0.02  | -0.025 | -0.02  | -0.02  | t | 55826  | RSELSQLS<br>MYRVFEV  | Homo<br>sapiens                  |
| 1 | 1.00 | 1 | 1 | 0     | 0.002  | 0.005  | 0.001  | 0      | t | 66435  | TSSLASL              | Homo<br>sapiens                  |
| 1 | 1.00 | 1 | 1 | -0.03 | -0.03  | -0.038 | -0.03  | -0.03  | t | 106739 | QKREACKC<br>IVRA     | Homo<br>sapiens                  |
| 1 | 1.00 | 1 | 1 | 0.03  | 0.03   | 0.03   | 0.03   | 0.029  | t | 75849  | YSPEVR               | Mus<br>musculu<br>s              |
| 1 | 1.00 | 1 | 1 | 0     | -0.002 | 0      | 0      | -0.001 | t | 7765   | DDEHVEEP<br>TVA      | Mus<br>musculu<br>s              |
| 1 | 1.00 | 1 | 1 | -0.01 | -0.014 | -0.008 | -0.011 | -0.011 | t | 4885   | ATALDTSN<br>KFADFLQI | Bos<br>taurus                    |
| 1 | 1.00 | 1 | 1 | 0     | 0      | 0      | 0      | 0.002  | t | 107479 | KFNWYVD              | Mus<br>musculu<br>s              |
| 1 | 1.00 | 1 | 1 | -0.03 | -0.029 | -0.011 | -0.024 | -0.03  | t | 78322  | YKGHLH               | Equus<br>caballus                |
| 1 | 1.00 | 1 | 1 | -0.01 | -0.008 | -0.01  | -0.009 | -0.01  | t | 22132  | GRLITV               | Homo<br>sapiens                  |
| 1 | 1.00 | 1 | 1 | 0     | -0.001 | -0.004 | 0      | 0      | t | 11353  | EDINGIRR<br>PK       | Mus<br>musculu<br>s              |
| 1 | 1.00 | 1 | 1 | 0     | 0.002  | 0.002  | -0.003 | -0.002 | t | 52600  | QTQQPQQ<br>PFP       | Homo<br>sapiens                  |
| 1 | 1.00 | 1 | 1 | 0.02  | 0.016  | 0.02   | 0.017  | 0.02   | t | 119923 | GYISKAQE<br>YFN      | Oryctola<br>gus<br>cuniculu<br>s |
| 1 | 1.00 | 1 | 1 | 0.02  | 0.02   | 0.02   | 0.02   | 0.02   | t | 123186 | FMVYEAL<br>DA        | Ovis<br>aries                    |
| 1 | 1.00 | 1 | 1 | 0.02  | 0.02   | 0.02   | 0.02   | 0.02   | t | 114823 | FNPVCGT<br>DGV       | Homo<br>sapiens                  |

|   |      |   |   |       |        |        |        |        |   |        |                              |                                  |
|---|------|---|---|-------|--------|--------|--------|--------|---|--------|------------------------------|----------------------------------|
| 1 | 1.00 | 1 | 1 | -0.01 | -0.024 | -0.01  | -0.01  | -0.01  | t | 137866 | GDTRPRFL                     | Oryctola<br>gus<br>cuniculu<br>s |
| 1 | 1.00 | 1 | 1 | 0.03  | 0.033  | 0.038  | 0.03   | 0.032  | t | 30986  | KGIYPLSYE                    | Mus<br>musculu<br>s              |
| 1 | 1.00 | 1 | 1 | 0     | 0      | -0.01  | 0      | 0      | t | 50957  | QGSGKGV<br>SFQLVKLG          | Homo<br>sapiens                  |
| 1 | 1.00 | 1 | 1 | 0.01  | 0.01   | 0.001  | 0.01   | 0.01   | t | 7809   | DDKEKDP<br>QYRALMG<br>ENQDLR | Mus<br>musculu<br>s              |
| 1 | 1.00 | 1 | 1 | 0.01  | 0.008  | 0.005  | 0.003  | 0.01   | t | 129661 | PVDGVVL<br>VD                | Mus<br>musculu<br>s              |
| 1 | 1.00 | 1 | 1 | 0     | 0      | -0.015 | 0      | 0.001  | t | 48618  | PNDPNRN<br>VD                | Mus<br>musculu<br>s              |
| 1 | 1.00 | 1 | 1 | 0.01  | 0.007  | -0.002 | 0.01   | 0.01   | t | 116169 | TPRTPPPS<br>QGKG             | Oryctola<br>gus<br>cuniculu<br>s |
| 1 | 1.00 | 1 | 1 | 0.01  | 0.018  | -0.002 | 0.01   | 0.01   | t | 116169 | TPRTPPPS<br>QGKG             | Gallus<br>gallus                 |
| 1 | 1.00 | 1 | 1 | 0.02  | 0.018  | 0.02   | 0.027  | 0.02   | t | 116434 | PGFGYGG<br>RASDYKSA<br>HKG   | Homo<br>sapiens                  |
| 1 | 1.00 | 1 | 1 | -0.02 | -0.024 | -0.013 | -0.021 | -0.022 | t | 44598  | NKSLGACP<br>IR               | Oryctola<br>gus<br>cuniculu<br>s |
| 1 | 1.00 | 1 | 1 | 0.01  | 0.008  | 0.011  | 0.013  | 0.011  | t | 66474  | TSTVQVFT<br>DSEYQLPY<br>VLGS | Homo<br>sapiens                  |
| 1 | 1.00 | 1 | 1 | 0.02  | 0.02   | 0.008  | 0.02   | 0.023  | t | 150200 | FGEHKQEK<br>DLEYGAC          | Mus<br>musculu<br>s              |
| 1 | 1.00 | 1 | 1 | 0.04  | 0.042  | 0.039  | 0.043  | 0.042  | t | 47858  | PHVVDL                       | Homo<br>sapiens                  |
| 1 | 1.00 | 1 | 1 | -0.01 | -0.012 | -0.015 | -0.011 | -0.01  | t | 78735  | LRVKIERD<br>DLSRETIQ<br>II   | Mus<br>musculu<br>s              |



|   |      |   |   |       |        |        |        |        |   |        |                           |                       |
|---|------|---|---|-------|--------|--------|--------|--------|---|--------|---------------------------|-----------------------|
| 1 | 1.00 | 1 | 1 | -0.01 | -0.01  | -0.01  | -0.01  | -0.01  | t | 133543 | DKAFAV                    | Mus musculus          |
| 1 | 1.00 | 1 | 1 | -0.04 | -0.042 | -0.049 | -0.037 | -0.037 | t | 96170  | DEDSYERDP                 | Mus musculus          |
| 1 | 1.00 | 1 | 1 | 0     | 0.002  | 0.005  | -0.003 | -0.002 | t | 95356  | ENGDTVFT<br>EVGY          | Homo sapiens          |
| 1 | 1.00 | 1 | 1 | -0.04 | -0.038 | -0.038 | -0.037 | -0.04  | t | 134418 | KGAIIGLM<br>VGGVV         | Homo sapiens          |
| 1 | 1.00 | 1 | 1 | 0.05  | 0.05   | 0.05   | 0.05   | 0.05   | t | 92811  | GGNGDDF<br>IDG            | Ovis aries            |
| 1 | 1.00 | 1 | 1 | 0.03  | 0.03   | 0.03   | 0.03   | 0.03   | t | 111791 | SNIQVLLD<br>VPRSDVQ       | Oryctolagus cuniculus |
| 1 | 1.00 | 1 | 1 | 0.04  | 0.042  | 0.04   | 0.043  | 0.04   | t | 151609 | DETPMRG<br>ETRKV          | Homo sapiens          |
| 1 | 1.00 | 1 | 1 | -0.04 | -0.04  | -0.043 | -0.04  | -0.04  | t | 50741  | QFAPSASA<br>FFGMSRIG<br>M | Homo sapiens          |
| 1 | 1.00 | 1 | 1 | 0     | 0.002  | 0      | 0.001  | 0      | t | 128066 | NSYDVLSA<br>LSGNLKL       | Homo sapiens          |
| 1 | 1.00 | 1 | 1 | 0     | 0      | 0      | 0      | 0      | t | 48597  | PNANPN                    | Mus musculus          |
| 1 | 1.00 | 1 | 1 | -0.01 | -0.01  | -0.01  | -0.01  | -0.009 | t | 65409  | TNRNPQ                    | Mus musculus          |
| 1 | 1.00 | 1 | 1 | -0.02 | -0.02  | -0.029 | -0.022 | -0.02  | t | 135913 | EEAIERAV<br>VHVA          | Homo sapiens          |
| 1 | 1.00 | 1 | 1 | 0.03  | 0.032  | 0.023  | 0.027  | 0.031  | t | 13908  | EQQKEQC<br>VKECEKYY       | Homo sapiens          |
| 1 | 1.00 | 1 | 1 | 0     | 0      | 0      | 0      | 0      | t | 38681  | LPRRGPRL                  | Homo sapiens          |
| 1 | 1.00 | 1 | 1 | 0     | 0      | 0      | 0      | 0      | t | 25624  | IDLTKNA<br>AKL            | Homo sapiens          |

|   |      |   |   |       |        |        |        |       |   |        |                              |                    |
|---|------|---|---|-------|--------|--------|--------|-------|---|--------|------------------------------|--------------------|
| 1 | 1.00 | 1 | 1 | 0     | -0.002 | -0.003 | 0.003  | 0.002 | t | 18954  | GDDPLLGNQ                    | Anas platyrhynchos |
| 1 | 1.00 | 1 | 1 | 0     | -0.002 | 0      | -0.001 | 0     | t | 45695  | NRLGGLFNFGPKQKI              | Mus musculus       |
| 1 | 1.00 | 1 | 1 | 0.03  | 0.034  | 0.035  | 0.027  | 0.03  | t | 70542  | VQDLMKSSGV                   | Homo sapiens       |
| 1 | 1.00 | 1 | 1 | 0     | 0      | 0      | 0      | 0     | t | 60116  | SPLLGICGSTCAE                | Mus musculus       |
| 1 | 1.00 | 1 | 1 | -0.02 | -0.018 | -0.015 | -0.019 | -0.02 | t | 67449  | TYRFVSL                      | Homo sapiens       |
| 1 | 1.00 | 1 | 1 | 0.06  | 0.06   | 0.06   | 0.06   | 0.06  | t | 78872  | VIPDREVL<br>YQEFDEM<br>EECAS | Homo sapiens       |
| 1 | 1.00 | 1 | 1 | 0.06  | 0.06   | 0.06   | 0.06   | 0.06  | t | 78872  | VIPDREVL<br>YQEFDEM<br>EECAS | Homo sapiens       |
| 1 | 1.00 | 1 | 1 | 0.02  | 0.02   | 0.02   | 0.02   | 0.02  | t | 153274 | NLSTSNPL<br>GFFPDHQ          | Mus musculus       |
| 1 | 1.00 | 1 | 1 | 0.02  | 0.02   | 0.02   | 0.02   | 0.02  | t | 115796 | IQAFLLYQ<br>EP               | Homo sapiens       |
| 1 | 1.00 | 1 | 1 | 0     | 0      | 0      | 0      | 0     | t | 130637 | WSSCVFSV<br>SYCL             | Mus musculus       |
| 1 | 1.00 | 1 | 1 | 0     | 0      | 0      | 0      | 0     | t | 108416 | HAKKTPPAS                    | Homo sapiens       |
| 1 | 1.00 | 1 | 1 | -0.02 | -0.02  | -0.02  | -0.02  | -0.02 | t | 114902 | NDCLLCAY<br>SI               | Homo sapiens       |
| 1 | 1.00 | 1 | 1 | -0.02 | -0.02  | -0.02  | -0.02  | -0.02 | t | 115865 | MPFPKYP<br>VEP               | Homo sapiens       |
| 1 | 1.00 | 1 | 1 | 0.01  | 0.011  | 0.009  | 0.011  | 0.01  | t | 39198  | LRRTQSM<br>GIQLDQ            | Homo sapiens       |
| 1 | 1.00 | 1 | 1 | 0.01  | 0.012  | 0.01   | 0.013  | 0.01  | t | 119925 | HFPEDEQ<br>NGSMKLG<br>TWT    | Homo sapiens       |
| 1 | 1.00 | 1 | 1 | 0.01  | 0.012  | 0.01   | 0.013  | 0.01  | t | 119925 | HFPEDEQ<br>NGSMKLG<br>TWT    | Homo sapiens       |

|   |      |   |   |       |        |        |        |        |   |        |                           |                                  |
|---|------|---|---|-------|--------|--------|--------|--------|---|--------|---------------------------|----------------------------------|
| 1 | 1.00 | 1 | 1 | 0.01  | 0.014  | 0.01   | 0.013  | 0.01   | t | 119925 | HFPFDEQ<br>NGSMKLG<br>TWT | Homo<br>sapiens                  |
| 1 | 1.00 | 1 | 1 | 0.02  | 0.018  | 0.018  | 0.023  | 0.02   | t | 158944 | KVQVQGP<br>WDEEDIKL<br>D  | Mus<br>musculu<br>s              |
| 1 | 1.00 | 1 | 1 | 0.01  | 0.008  | 0.007  | 0.009  | 0.01   | t | 43839  | NFGDQDLI<br>RQGTDYK       | Macaca<br>cyclopis               |
| 1 | 1.00 | 1 | 1 | 0     | -0.003 | -0.007 | 0      | 0      | t | 79329  | PDHVRTK                   | Oryctola<br>gus<br>cuniculu<br>s |
| 1 | 1.00 | 1 | 1 | 0     | 0      | 0.006  | 0      | 0      | t | 54838  | RLYIGG                    | Homo<br>sapiens                  |
| 1 | 1.00 | 1 | 1 | 0     | 0      | 0      | 0      | -0.001 | t | 108095 | RFTPEIAK                  | Mus<br>musculu<br>s              |
| 1 | 1.00 | 1 | 1 | 0.03  | 0.031  | 0.028  | 0.03   | 0.029  | t | 28291  | IRFKDDTSF<br>EDING        | Myodes<br>glareolu<br>s          |
| 1 | 1.00 | 1 | 1 | -0.01 | -0.01  | -0.01  | -0.01  | -0.01  | t | 98698  | APKPAPQP<br>GP            | Mus<br>musculu<br>s              |
| 1 | 1.00 | 1 | 1 | -0.04 | -0.04  | -0.043 | -0.04  | -0.04  | t | 98885  | LPMHIRLS<br>FN            | Homo<br>sapiens                  |
| 1 | 1.00 | 1 | 1 | 0     | 0.006  | 0      | 0      | 0      | t | 123227 | GGGDAPP<br>SH             | Ovis<br>aries                    |
| 1 | 1.00 | 1 | 1 | 0.03  | 0.034  | 0.039  | 0.037  | 0.03   | t | 117214 | KGEQGEP<br>GA             | Homo<br>sapiens                  |
| 1 | 1.00 | 1 | 1 | 0.01  | 0.01   | 0      | 0.01   | 0.011  | t | 119575 | EWESTYSIL<br>G            | Homo<br>sapiens                  |
| 1 | 1.00 | 1 | 1 | -0.05 | -0.048 | -0.06  | -0.049 | -0.051 | t | 97117  | YIQMKRIA<br>VG            | Homo<br>sapiens(<br>human)       |
| 1 | 1.00 | 1 | 1 | 0     | 0.003  | -0.007 | 0      | 0      | t | 72889  | WNK                       | Mus<br>musculu<br>s              |
| 1 | 1.00 | 1 | 1 | 0.01  | 0.01   | 0.01   | 0.01   | 0.01   | t | 65101  | TLTLSHF                   | Homo<br>sapiens                  |

|   |      |   |   |       |        |        |        |        |   |        |                              |                     |
|---|------|---|---|-------|--------|--------|--------|--------|---|--------|------------------------------|---------------------|
| 1 | 1.00 | 1 | 1 | 0.01  | 0.013  | 0.01   | 0.01   | 0.01   | t | 79285  | LDPEYWN<br>FRNGDLT           | Mus<br>musculu<br>s |
| 1 | 1.00 | 1 | 1 | 0.02  | 0.023  | 0.02   | 0.02   | 0.018  | t | 135465 | GSDYEDRY<br>YREN             | Mus<br>musculu<br>s |
| 1 | 1.00 | 1 | 1 | -0.01 | -0.008 | -0.01  | -0.009 | -0.01  | t | 116978 | FPSHYWLY<br>PPPT             | Homo<br>sapiens     |
| 1 | 1.00 | 1 | 1 | 0.01  | 0.01   | 0.011  | 0.016  | 0.008  | t | 8379   | DGEPPED<br>DDSATGLA<br>FRTPN | Homo<br>sapiens     |
| 1 | 1.00 | 1 | 1 | 0.03  | 0.03   | 0.03   | 0.03   | 0.03   | t | 158290 | SQQAPAV<br>PPLPQ             | Canis<br>lupus      |
| 1 | 1.00 | 1 | 1 | -0.04 | -0.038 | -0.041 | -0.039 | -0.04  | t | 120410 | ARLVVLAS<br>GTGSLLR          | Homo<br>sapiens     |
| 1 | 1.00 | 1 | 1 | 0.01  | 0.01   | -0.002 | 0.01   | 0.014  | t | 133537 | CLTINTTVC<br>A               | Mus<br>musculu<br>s |
| 1 | 1.00 | 1 | 1 | 0.03  | 0.033  | 0.035  | 0.03   | 0.03   | t | 61409  | SSTQVQHT<br>LLQT             | Mus<br>musculu<br>s |
| 1 | 1.00 | 1 | 1 | 0.03  | 0.03   | 0.03   | 0.03   | 0.03   | t | 138088 | WLDLSKT                      | Mus<br>musculu<br>s |
| 1 | 1.00 | 1 | 1 | 0.03  | 0.03   | 0.03   | 0.03   | 0.03   | t | 138088 | WLDLSKT                      | Mus<br>musculu<br>s |
| 1 | 1.00 | 1 | 1 | 0.03  | 0.03   | 0.03   | 0.03   | 0.03   | t | 138088 | WLDLSKT                      | Mus<br>musculu<br>s |
| 1 | 1.00 | 1 | 1 | 0.03  | 0.03   | 0.03   | 0.03   | 0.03   | t | 138088 | WLDLSKT                      | Mus<br>musculu<br>s |
| 1 | 1.00 | 1 | 1 | 0.01  | 0.01   | 0.01   | 0.01   | 0.01   | t | 107511 | LPAPIEK                      | Homo<br>sapiens     |
| 1 | 1.00 | 1 | 1 | 0.01  | 0.01   | 0.01   | 0.01   | 0.01   | t | 110616 | GPSGLAGP<br>KGANGDP          | Mus<br>musculu<br>s |
| 1 | 1.00 | 1 | 1 | 0.06  | 0.058  | 0.058  | 0.059  | 0.06   | t | 55924  | RSQDACIE<br>FVQQEVD          | Mus<br>musculu<br>s |
| 1 | 1.00 | 1 | 1 | -0.01 | -0.01  | -0.005 | -0.007 | -0.008 | t | 41541  | MFTCKK                       | Homo<br>sapiens     |

|   |      |   |   |       |        |        |        |        |   |        |                              |                                  |
|---|------|---|---|-------|--------|--------|--------|--------|---|--------|------------------------------|----------------------------------|
| 1 | 1.00 | 1 | 1 | -0.02 | -0.021 | -0.02  | -0.017 | -0.022 | t | 156860 | DRWNSM<br>WKESLL             | Bos<br>taurus                    |
| 1 | 1.00 | 1 | 1 | 0.03  | 0.028  | 0.025  | 0.029  | 0.03   | t | 22252  | GRWDEDG<br>EKRIPLDV<br>A     | Mus<br>musculu<br>s              |
| 1 | 1.00 | 1 | 1 | 0     | -0.002 | 0      | -0.001 | -0.002 | t | 97231  | CNTKCQTP                     | Mus<br>musculu<br>s              |
| 1 | 1.00 | 1 | 1 | 0     | -0.002 | 0      | -0.001 | -0.002 | t | 39164  | LRPGPVSQ<br>PYHHWDT<br>DK    | Mus<br>musculu<br>s              |
| 1 | 1.00 | 1 | 1 | 0     | 0      | 0      | 0      | 0      | t | 106441 | GDLKRTT                      | Mus<br>musculu<br>s              |
| 1 | 1.00 | 1 | 1 | 0     | 0      | 0      | 0      | 0      | t | 130805 | ELNPEPDT<br>EVFPMTF          | Homo<br>sapiens                  |
| 1 | 1.00 | 1 | 1 | -0.04 | -0.042 | -0.051 | -0.041 | -0.041 | t | 37698  | LLQAHRQL<br>EER              | Mus<br>musculu<br>s              |
| 1 | 1.00 | 1 | 1 | 0.03  | 0.032  | 0.021  | 0.024  | 0.029  | t | 151045 | PVHDCNT<br>TCQTPKGA          | Homo<br>sapiens                  |
| 1 | 1.00 | 1 | 1 | 0.06  | 0.057  | 0.062  | 0.06   | 0.06   | t | 132709 | TTTTGESA<br>DPVT             | Oryctola<br>gus<br>cuniculu<br>s |
| 1 | 1.00 | 1 | 1 | -0.04 | -0.04  | -0.036 | -0.04  | -0.042 | t | 138757 | AHWSGHCL                     | Mus<br>musculu<br>s              |
| 1 | 1.00 | 1 | 1 | 0.02  | 0.018  | 0.015  | 0.019  | 0.018  | t | 73784  | YEVRAELP<br>GVDPDKD<br>VDIMV | Mus<br>musculu<br>s              |
| 1 | 1.00 | 1 | 1 | 0.06  | 0.058  | 0.057  | 0.063  | 0.06   | t | 94572  | KQWEDEV<br>TEFNYKVG<br>LQNSN | Mus<br>musculu<br>s              |
| 1 | 1.00 | 1 | 1 | 0.01  | 0.01   | 0.01   | 0.01   | 0.011  | t | 99209  | ELFTNR                       | Oryctola<br>gus<br>cuniculu<br>s |
| 1 | 1.00 | 1 | 1 | -0.07 | -0.066 | -0.074 | -0.069 | -0.07  | t | 73020  | WRCPPRR<br>R                 | Homo<br>sapiens                  |

|   |      |   |   |       |        |        |        |        |   |        |                      |                                  |
|---|------|---|---|-------|--------|--------|--------|--------|---|--------|----------------------|----------------------------------|
| 1 | 1.00 | 1 | 1 | -0.01 | -0.012 | -0.011 | -0.011 | -0.01  | t | 60433  | SQERNFV<br>DSIGQS FQ | Mus<br>musculu<br>s              |
| 1 | 1.00 | 1 | 1 | 0     | -0.002 | 0      | 0.003  | 0      | t | 95818  | SAQSGTSG<br>TSAQ     | Mus<br>musculu<br>s              |
| 1 | 1.00 | 1 | 1 | 0.01  | 0.004  | 0.01   | 0.01   | 0.01   | t | 123210 | GAVQGPV<br>P         | Oryctola<br>gus<br>cuniculu<br>s |
| 1 | 1.00 | 1 | 1 | 0     | 0      | 0.012  | 0      | -0.004 | t | 20089  | GGWNTG<br>GSR        | Mus<br>musculu<br>s              |
| 1 | 1.00 | 1 | 1 | -0.03 | -0.03  | -0.031 | -0.027 | -0.03  | t | 65521  | TPCSK                | Homo<br>sapiens                  |
| 1 | 1.00 | 1 | 1 | 0.02  | 0.02   | 0.014  | 0.014  | 0.02   | t | 23078  | GVNQELA<br>YFY       | Homo<br>sapiens                  |
| 1 | 1.00 | 1 | 1 | 0     | 0.002  | 0      | 0.007  | 0.003  | t | 11571  | EEEDDDM<br>GFG LFD   | Homo<br>sapiens                  |
| 1 | 1.00 | 1 | 1 | 0.03  | 0.035  | 0.039  | 0.031  | 0.03   | t | 65861  | TQGSNWI<br>Q         | Homo<br>sapiens                  |
| 1 | 1.00 | 1 | 1 | 0.02  | 0.02   | 0.02   | 0.02   | 0.02   | t | 94451  | CCNPACG              | Oryctola<br>gus<br>cuniculu<br>s |
| 1 | 1.00 | 1 | 1 | 0.02  | 0.02   | 0.02   | 0.02   | 0.02   | t | 94451  | CCNPACG              | Capra<br>hircus                  |
| 1 | 1.00 | 1 | 1 | 0.02  | 0.027  | 0.02   | 0.02   | 0.02   | t | 94451  | CCNPACG              | Capra<br>hircus                  |
| 1 | 1.00 | 1 | 1 | -0.09 | -0.086 | -0.088 | -0.083 | -0.092 | t | 121503 | KRLKISKKP<br>KDPEPP  | Homo<br>sapiens                  |
| 1 | 1.00 | 1 | 1 | -0.01 | -0.01  | -0.01  | -0.01  | -0.012 | t | 49106  | PQQQFPQ<br>PQQ       | Mus<br>musculu<br>s              |

|   |      |   |   |       |       |        |        |        |   |        |                              |                     |
|---|------|---|---|-------|-------|--------|--------|--------|---|--------|------------------------------|---------------------|
| 1 | 1.00 | 1 | 1 | 0.04  | 0.04  | 0.04   | 0.04   | 0.04   | t | 137555 | QEWQQQ<br>DECQIDRL<br>D      | Homo<br>sapiens     |
| 1 | 1.00 | 1 | 1 | 0.02  | 0.02  | 0.02   | 0.02   | 0.02   | t | 134687 | GWLKEIRK<br>LQKSTHL          | Homo<br>sapiens     |
| 1 | 1.00 | 1 | 1 | 0.02  | 0.02  | 0.02   | 0.02   | 0.02   | t | 79384  | SCNSFMIP<br>AQPSC            | Mus<br>musculu<br>s |
| 1 | 1.00 | 1 | 1 | 0     | 0     | 0      | 0      | 0      | t | 79357  | RCDLRYDA<br>FVPWCP           | Mus<br>musculu<br>s |
| 1 | 1.00 | 1 | 1 | -0.02 | -0.02 | -0.024 | -0.02  | -0.02  | t | 47544  | PFPQPQQ<br>PFC               | Mus<br>musculu<br>s |
| 1 | 1.00 | 1 | 1 | -0.02 | -0.02 | -0.024 | -0.02  | -0.02  | t | 47544  | PFPQPQQ<br>PFC               | Mus<br>musculu<br>s |
| 1 | 1.00 | 1 | 1 | 0     | 0.003 | -0.01  | 0      | 0      | t | 139404 | YIDINKTIA<br>DMLEQYN<br>PNYT | Felis<br>catus      |
| 1 | 1.00 | 1 | 1 | -0.02 | -0.02 | -0.025 | -0.022 | -0.021 | t | 70010  | VMPVGG<br>QSSFYS<br>D<br>WY  | Homo<br>sapiens     |
| 1 | 1.00 | 1 | 1 | 0.03  | 0.03  | 0.03   | 0.03   | 0.03   | t | 111907 | VEVGRGQ<br>PLGVGISG          | Mus<br>musculu<br>s |
| 1 | 1.00 | 1 | 1 | 0.02  | 0.023 | 0.02   | 0.02   | 0.018  | t | 140854 | GFDKYDIT<br>GEYVQILD<br>AHAA | Mus<br>musculu<br>s |
| 1 | 1.00 | 1 | 1 | 0     | 0     | 0.005  | 0.01   | 0.003  | t | 115785 | HSYQE                        | Homo<br>sapiens     |
| 1 | 1.00 | 1 | 1 | 0.01  | 0.012 | 0.01   | 0.009  | 0.008  | t | 51908  | QPQPFPS<br>QQP               | Homo<br>sapiens     |
| 1 | 1.00 | 1 | 1 | 0.05  | 0.055 | 0.043  | 0.051  | 0.05   | t | 49890  | PVIVPDRE<br>VLYREFDE<br>MEEC | Homo<br>sapiens     |
| 1 | 1.00 | 1 | 1 | 0.05  | 0.055 | 0.043  | 0.051  | 0.05   | t | 49890  | PVIVPDRE<br>VLYREFDE<br>MEEC | Homo<br>sapiens     |
| 1 | 1.00 | 1 | 1 | -0.03 | -0.03 | -0.03  | -0.034 | -0.029 | t | 134233 | SKLIKIF                      | Homo<br>sapiens     |

|   |      |   |   |       |        |        |        |        |   |        |                           |                                  |
|---|------|---|---|-------|--------|--------|--------|--------|---|--------|---------------------------|----------------------------------|
| 1 | 1.00 | 1 | 1 | 0.01  | 0.007  | 0.011  | 0.01   | 0.01   | t | 50864  | QGGGGW<br>GQPHGGG         | Oryctola<br>gus<br>cuniculu<br>s |
| 1 | 1.00 | 1 | 1 | 0.01  | 0.01   | -0.001 | 0.01   | 0.012  | t | 144701 | KFGNYNH<br>TQLLGQLQ<br>AV | Oryctola<br>gus<br>cuniculu<br>s |
| 1 | 1.00 | 1 | 1 | 0.02  | 0.022  | 0.011  | 0.017  | 0.018  | t | 105700 | CPSTYEPP<br>AQQGRRH       | Homo<br>sapiens                  |
| 1 | 1.00 | 1 | 1 | 0.01  | 0.007  | 0.01   | 0.01   | 0.01   | t | 45948  | NSQLRLNY<br>EKSL          | Mus<br>musculu<br>s              |
| 1 | 1.00 | 1 | 1 | -0.01 | -0.01  | -0.01  | -0.01  | -0.01  | t | 120609 | IFAD                      | Rattus<br>norvegic<br>us         |
| 1 | 1.00 | 1 | 1 | -0.03 | -0.032 | -0.031 | -0.027 | -0.028 | t | 55460  | RQPDLIP                   | Mus<br>musculu<br>s              |
| 1 | 1.00 | 1 | 1 | 0.02  | 0.02   | 0.018  | 0.017  | 0.018  | t | 14639  | EVDDEALE<br>KFDKAL        | Homo<br>sapiens                  |
| 1 | 1.00 | 1 | 1 | 0.05  | 0.052  | 0.05   | 0.053  | 0.05   | t | 134015 | CDKNTGD<br>YYEDSYED       | Homo<br>sapiens                  |
| 1 | 1.00 | 1 | 1 | 0.01  | 0.008  | 0.015  | 0.009  | 0.009  | t | 49967  | PVSLGGDV<br>PNS           | Mus<br>musculu<br>s              |
| 1 | 1.00 | 1 | 1 | -0.02 | -0.02  | -0.025 | -0.023 | -0.021 | t | 49454  | PSPAPSRP<br>FSVLRAND<br>V | Homo<br>sapiens                  |
| 1 | 1.00 | 1 | 1 | -0.01 | -0.007 | -0.019 | -0.01  | -0.008 | t | 63757  | TFTNKLKS<br>KHTDLGK       | Mus<br>musculu<br>s              |
| 1 | 1.00 | 1 | 1 | -0.02 | -0.02  | -0.027 | -0.02  | -0.022 | t | 95543  | LCPNNLCC<br>SQ            | Homo<br>sapiens                  |
| 1 | 1.00 | 1 | 1 | 0.04  | 0.04   | 0.045  | 0.043  | 0.042  | t | 23349  | GYGTVT                    | Homo<br>sapiens                  |
| 1 | 1.00 | 1 | 1 | -0.01 | -0.012 | -0.002 | -0.011 | -0.012 | t | 73529  | YDDVNGIR<br>KP            | Mus<br>musculu<br>s              |
| 1 | 1.00 | 1 | 1 | 0.05  | 0.05   | 0.05   | 0.05   | 0.05   | t | 97476  | LSTTDSFS                  | Mus<br>musculu<br>s              |



|   |      |   |   |       |        |        |        |        |   |        |                             |                                  |
|---|------|---|---|-------|--------|--------|--------|--------|---|--------|-----------------------------|----------------------------------|
| 1 | 1.00 | 1 | 1 | -0.01 | -0.01  | -0.014 | -0.01  | -0.01  | t | 49097  | PQQPQQP<br>FPQ              | Mus<br>musculu<br>s              |
| 1 | 1.00 | 1 | 1 | -0.01 | -0.01  | -0.014 | -0.01  | -0.01  | t | 49097  | PQQPQQP<br>FPQ              | Mus<br>musculu<br>s              |
| 1 | 1.00 | 1 | 1 | 0.01  | 0.012  | 0.01   | 0.017  | 0.01   | t | 139614 | SSHHPGIA<br>EFPSRGK         | Homo<br>sapiens                  |
| 1 | 1.00 | 1 | 1 | 0.02  | 0.022  | 0.02   | 0.021  | 0.02   | t | 133553 | EDMSYWH<br>EWNP             | Homo<br>sapiens                  |
| 1 | 1.00 | 1 | 1 | -0.05 | -0.05  | -0.05  | -0.05  | -0.05  | t | 158610 | SFGTFLW                     | Homo<br>sapiens                  |
| 1 | 1.00 | 1 | 1 | -0.04 | -0.04  | -0.04  | -0.04  | -0.04  | t | 117546 | KIRRSKSP<br>LPEVT           | Homo<br>sapiens                  |
| 1 | 1.00 | 1 | 1 | 0.01  | 0.007  | 0.008  | 0.01   | 0.01   | t | 45693  | NRKNQLK<br>DMA              | Oryctola<br>gus<br>cuniculu<br>s |
| 1 | 1.00 | 1 | 1 | 0.02  | 0.02   | 0.02   | 0.02   | 0.02   | t | 132940 | WGSNVTS                     | Homo<br>sapiens                  |
| 1 | 1.00 | 1 | 1 | 0     | 0      | 0      | 0      | 0      | t | 475    | AATVLQLP<br>QGTTLPK         | Homo<br>sapiens                  |
| 1 | 1.00 | 1 | 1 | -0.02 | -0.02  | -0.02  | -0.02  | -0.02  | t | 131853 | DVDEPLEV<br>FISAPRS         | Homo<br>sapiens                  |
| 1 | 1.00 | 1 | 1 | 0     | 0      | 0      | 0.001  | -0.001 | t | 3245   | ANDVDNS<br>NPVVQAE<br>QLNWL | Homo<br>sapiens                  |
| 1 | 1.00 | 1 | 1 | -0.01 | -0.007 | -0.019 | -0.01  | -0.01  | t | 100283 | LPNIAEQY<br>TH              | Mus<br>musculu<br>s              |
| 1 | 1.00 | 1 | 1 | 0     | 0.002  | -0.003 | 0.001  | 0      | t | 21812  | GPTRTIGG<br>SQ              | Homo<br>sapiens                  |
| 1 | 1.00 | 1 | 1 | 0.02  | 0.02   | 0.01   | 0.02   | 0.02   | t | 33488  | KSQQARQ<br>VKNNNPF<br>S     | Homo<br>sapiens                  |
| 1 | 1.00 | 1 | 1 | 0.04  | 0.04   | 0.047  | 0.04   | 0.04   | t | 68171  | VEESYI                      | Homo<br>sapiens                  |
| 1 | 1.00 | 1 | 1 | -0.01 | -0.012 | -0.01  | -0.017 | -0.008 | t | 107784 | DGSFFLY                     | Mus<br>musculu<br>s              |

|   |      |   |   |       |        |        |        |        |   |        |                              |                                  |
|---|------|---|---|-------|--------|--------|--------|--------|---|--------|------------------------------|----------------------------------|
| 1 | 1.00 | 1 | 1 | 0     | -0.003 | 0      | 0      | -0.001 | t | 69183  | VKAVTTLL<br>KA               | Oryctola<br>gus<br>cuniculu<br>s |
| 1 | 1.00 | 1 | 1 | 0     | -0.003 | 0      | 0      | -0.001 | t | 26849  | IKMVSSLK<br>TKIT             | Oryctola<br>gus<br>cuniculu<br>s |
| 1 | 1.00 | 1 | 1 | 0.01  | 0.006  | 0.005  | 0.01   | 0.011  | t | 73784  | YEVRAELP<br>GVDPDKD<br>VDIMV | Mus<br>musculu<br>s              |
| 1 | 1.00 | 1 | 1 | 0.04  | 0.042  | 0.054  | 0.041  | 0.04   | t | 11877  | EESIYQ                       | Homo<br>sapiens                  |
| 1 | 1.00 | 1 | 1 | -0.02 | -0.018 | -0.02  | -0.013 | -0.021 | t | 139631 | VIQNRQD<br>GSVDFGRK          | Homo<br>sapiens                  |
| 1 | 1.00 | 1 | 1 | -0.04 | -0.038 | -0.034 | -0.039 | -0.042 | t | 1165   | AESPKKP                      | Homo<br>sapiens                  |
| 1 | 1.00 | 1 | 1 | 0.02  | 0.02   | 0.02   | 0.024  | 0.02   | t | 115657 | TLRIRNVR<br>FSDE             | Homo<br>sapiens                  |
| 1 | 1.00 | 1 | 1 | 0.01  | 0.014  | 0.007  | 0.01   | 0.008  | t | 110762 | AGSSIVPLE<br>EYPAEIP         | Oryctola<br>gus<br>cuniculu<br>s |
| 1 | 1.00 | 1 | 1 | -0.02 | -0.02  | -0.023 | -0.02  | -0.02  | t | 6233   | CFKKPPKY<br>PPALPI           | Homo<br>sapiens                  |
| 1 | 1.00 | 1 | 1 | 0     | -0.014 | 0      | 0.001  | -0.001 | t | 7491   | DAEFRHDS<br>GYEVHHQ<br>K     | Macaca<br>mulatta                |
| 1 | 1.00 | 1 | 1 | 0.06  | 0.06   | 0.06   | 0.06   | 0.06   | t | 115464 | QYTDAPSF<br>SDIPNPIGS<br>ENS | Homo<br>sapiens                  |
| 1 | 1.00 | 1 | 1 | 0.02  | 0.02   | 0.02   | 0.02   | 0.02   | t | 108518 | LGLHALQS<br>P                | Homo<br>sapiens                  |
| 1 | 1.00 | 1 | 1 | -0.02 | -0.016 | -0.023 | -0.019 | -0.019 | t | 55436  | RQKLKDAE<br>RAVEVD           | Homo<br>sapiens                  |
| 1 | 1.00 | 1 | 1 | -0.02 | -0.02  | -0.02  | -0.02  | -0.02  | t | 135755 | SALVLQYL                     | Homo<br>sapiens                  |
| 1 | 1.00 | 1 | 1 | -0.01 | -0.006 | -0.01  | -0.009 | -0.01  | t | 137927 | LSADFTPG                     | Homo<br>sapiens                  |

|   |      |   |   |       |        |        |        |       |   |        |                            |                                  |
|---|------|---|---|-------|--------|--------|--------|-------|---|--------|----------------------------|----------------------------------|
| 1 | 1.00 | 1 | 1 | 0.02  | 0.027  | 0.027  | 0.021  | 0.02  | t | 136302 | GALIYTPEK<br>YTI           | Gallus<br>gallus                 |
| 1 | 1.00 | 1 | 1 | 0.02  | 0.022  | 0.017  | 0.021  | 0.02  | t | 13421  | EMVDVVT<br>G               | Homo<br>sapiens                  |
| 1 | 1.00 | 1 | 1 | 0.02  | 0.022  | 0.017  | 0.021  | 0.02  | t | 13421  | EMVDVVT<br>G               | Homo<br>sapiens                  |
| 1 | 1.00 | 1 | 1 | 0.02  | 0.02   | 0.013  | 0.02   | 0.02  | t | 23594  | HCHTHAD<br>GEVHC           | Mus<br>musculu<br>s              |
| 1 | 1.00 | 1 | 1 | 0.01  | 0.014  | 0.001  | 0.007  | 0.008 | t | 113709 | PQQPGQG<br>QQPGQLQ         | Homo<br>sapiens                  |
| 1 | 1.00 | 1 | 1 | -0.01 | -0.01  | -0.01  | -0.01  | -0.01 | t | 132938 | WGSNPA<br>M                | Homo<br>sapiens                  |
| 1 | 1.00 | 1 | 1 | -0.01 | -0.01  | -0.01  | -0.01  | -0.01 | t | 70269  | VPDKEVLY<br>Q              | Homo<br>sapiens                  |
| 1 | 1.00 | 1 | 1 | 0.01  | 0.012  | 0.01   | 0.017  | 0.013 | t | 140582 | PWATLVA<br>ES              | Homo<br>sapiens                  |
| 1 | 1.00 | 1 | 1 | -0.01 | -0.008 | -0.01  | -0.003 | -0.01 | t | 108136 | SLNTADSK<br>TTTTPAR        | Homo<br>sapiens                  |
| 1 | 1.00 | 1 | 1 | 0.01  | 0.014  | 0.005  | 0.011  | 0.01  | t | 82831  | GPTHSKEI<br>PALTAVE        | Homo<br>sapiens                  |
| 1 | 1.00 | 1 | 1 | 0.02  | 0.018  | 0.02   | 0.012  | 0.018 | t | 144385 | KPLEEVLN<br>L              | Mus<br>musculu<br>s              |
| 1 | 1.00 | 1 | 1 | -0.03 | -0.03  | -0.035 | -0.03  | -0.03 | t | 57509  | SEKTTMPL<br>W              | Homo<br>sapiens                  |
| 1 | 1.00 | 1 | 1 | -0.03 | -0.034 | -0.035 | -0.031 | -0.03 | t | 97732  | VGSAAPAF<br>A              | Oryctola<br>gus<br>cuniculu<br>s |
| 1 | 1.00 | 1 | 1 | 0.06  | 0.06   | 0.053  | 0.051  | 0.06  | t | 119457 | GLELPE                     | Homo<br>sapiens                  |
| 1 | 1.00 | 1 | 1 | 0     | 0.001  | -0.002 | 0.003  | 0     | t | 72517  | WGSFPGC<br>RPFQNYFS<br>YET | Equus<br>caballus                |
| 1 | 1.00 | 1 | 1 | 0.02  | 0.017  | 0.02   | 0.02   | 0.017 | t | 144795 | TAAGYCNT<br>GGGLPDS<br>VKI | Oryctola<br>gus<br>cuniculu<br>s |
| 1 | 1.00 | 1 | 1 | 0.02  | 0.02   | 0.02   | 0.02   | 0.021 | t | 144676 | GTHPSLQF<br>T              | Mus<br>musculu<br>s              |

|   |      |   |   |       |        |        |        |        |   |        |                              |                                  |
|---|------|---|---|-------|--------|--------|--------|--------|---|--------|------------------------------|----------------------------------|
| 1 | 1.00 | 1 | 1 | 0.03  | 0.03   | 0.03   | 0.03   | 0.03   | t | 155334 | PADSS                        | Oryctola<br>gus<br>cuniculu<br>s |
| 1 | 1.00 | 1 | 1 | -0.03 | -0.032 | -0.03  | -0.029 | -0.03  | t | 149414 | PQLPYPQP<br>QP               | Mus<br>musculu<br>s              |
| 1 | 1.00 | 1 | 1 | -0.03 | -0.034 | -0.033 | -0.031 | -0.03  | t | 68970  | VIGHEYFH<br>NWT              | Oryctola<br>gus<br>cuniculu<br>s |
| 1 | 1.00 | 1 | 1 | 0     | 0      | 0      | 0      | 0      | t | 65411  | TNRRPQD                      | Homo<br>sapiens                  |
| 1 | 1.00 | 1 | 1 | -0.02 | -0.024 | -0.022 | -0.021 | -0.022 | t | 57733  | SFCIMPPSI<br>SEG             | Oryctola<br>gus<br>cuniculu<br>s |
| 1 | 1.00 | 1 | 1 | -0.02 | -0.023 | -0.027 | -0.02  | -0.018 | t | 138028 | SAGALQLL<br>VVG              | Oryctola<br>gus<br>cuniculu<br>s |
| 1 | 1.00 | 1 | 1 | 0.05  | 0.048  | 0.05   | 0.053  | 0.053  | t | 106509 | HGLTTE                       | Mus<br>musculu<br>s              |
| 1 | 1.00 | 1 | 1 | 0.02  | 0.02   | 0.018  | 0.017  | 0.018  | t | 24099  | HITDDNEE<br>PIAPYHF          | Homo<br>sapiens                  |
| 1 | 1.00 | 1 | 1 | -0.01 | -0.012 | -0.015 | -0.011 | -0.01  | t | 78647  | ETIIQIEYG<br>KKFNSSAG<br>D   | Mus<br>musculu<br>s              |
| 1 | 1.00 | 1 | 1 | -0.03 | -0.033 | -0.036 | -0.03  | -0.03  | t | 44598  | NKSLGACP<br>IR               | Oryctola<br>gus<br>cuniculu<br>s |
| 1 | 1.00 | 1 | 1 | -0.01 | -0.008 | -0.01  | -0.003 | -0.008 | t | 124703 | SDDNYDK<br>TEDVDIEE<br>MALKL | Homo<br>sapiens                  |
| 1 | 1.00 | 1 | 1 | -0.03 | -0.03  | -0.03  | -0.03  | -0.029 | t | 115317 | KKILDKVG<br>I<br>N           | Homo<br>sapiens                  |
| 1 | 1.00 | 1 | 1 | 0.03  | 0.03   | 0.03   | 0.03   | 0.03   | t | 119535 | TQDLGYSR<br>V                | Homo<br>sapiens                  |
| 1 | 1.00 | 1 | 1 | 0.03  | 0.03   | 0.03   | 0.03   | 0.03   | t | 130760 | CSFHYQNR<br>C                | Homo<br>sapiens                  |

|   |      |   |   |       |        |        |        |       |   |        |                         |                          |
|---|------|---|---|-------|--------|--------|--------|-------|---|--------|-------------------------|--------------------------|
| 1 | 1.00 | 1 | 1 | 0.01  | 0.012  | 0.01   | 0.01   | 0.01  | t | 141697 | LEGVYVPP<br>RRQQLCLY    | Rattus<br>norvegicus     |
| 1 | 1.00 | 1 | 1 | 0.01  | 0.008  | 0.01   | 0.01   | 0.01  | t | 141697 | LEGVYVPP<br>RRQQLCLY    | Oryctolagus<br>cuniculus |
| 1 | 1.00 | 1 | 1 | 0.01  | 0.01   | 0.01   | 0.01   | 0.01  | t | 141697 | LEGVYVPP<br>RRQQLCLY    | Oryctolagus<br>cuniculus |
| 1 | 1.00 | 1 | 1 | 0.01  | 0.01   | 0.01   | 0.01   | 0.01  | t | 141697 | LEGVYVPP<br>RRQQLCLY    | Rattus<br>norvegicus     |
| 1 | 1.00 | 1 | 1 | 0.01  | 0.01   | 0.01   | 0.01   | 0.01  | t | 123086 | DKFNMGL<br>DL           | Ovis<br>aries            |
| 1 | 1.00 | 1 | 1 | 0.01  | 0.01   | 0.01   | 0.01   | 0.01  | t | 119510 | QKKMVAL<br>SG           | Homo<br>sapiens          |
| 1 | 1.00 | 1 | 1 | 0.01  | 0.01   | 0.01   | 0.01   | 0.01  | t | 131275 | WHDDNPF<br>FFEAP        | Homo<br>sapiens          |
| 1 | 1.00 | 1 | 1 | 0.01  | 0.01   | 0.01   | 0.01   | 0.01  | t | 97691  | TKQPVLD<br>FS           | Oryctolagus<br>cuniculus |
| 1 | 1.00 | 1 | 1 | -0.01 | -0.01  | -0.01  | -0.01  | -0.01 | t | 135661 | EDAKPGQ<br>F            | Homo<br>sapiens          |
| 1 | 1.00 | 1 | 1 | 0.04  | 0.043  | 0.04   | 0.04   | 0.042 | t | 59946  | SNVQQDS<br>Q            | Mus<br>musculus          |
| 1 | 1.00 | 1 | 1 | -0.01 | -0.01  | -0.011 | -0.01  | -0.01 | t | 60249  | SPSAVPTD<br>HGAHL       | Homo<br>sapiens          |
| 1 | 1.00 | 1 | 1 | 0     | 0.003  | -0.009 | 0      | 0.002 | t | 79964  | PGSSPME<br>VMLRAVF      | Mus<br>musculus          |
| 1 | 1.00 | 1 | 1 | 0.01  | 0.01   | 0.01   | 0.01   | 0.009 | t | 55477  | RQQWELQ<br>GDRRCQS<br>Q | Homo<br>sapiens          |
| 1 | 1.00 | 1 | 1 | -0.03 | -0.024 | -0.039 | -0.031 | -0.03 | t | 11802  | EENKKPAE                | Ovis<br>aries            |

|   |      |   |   |       |        |        |        |        |   |        |                              |                                  |
|---|------|---|---|-------|--------|--------|--------|--------|---|--------|------------------------------|----------------------------------|
| 1 | 1.00 | 1 | 1 | 0     | 0.002  | -0.01  | 0.001  | 0      | t | 14380  | ETFTNKLK<br>EKHTD            | Homo<br>sapiens                  |
| 1 | 1.00 | 1 | 1 | -0.04 | -0.04  | -0.04  | -0.04  | -0.04  | t | 101716 | HQPTPAA                      | Mus<br>musculu<br>s              |
| 1 | 1.00 | 1 | 1 | -0.04 | -0.04  | -0.04  | -0.04  | -0.04  | t | 101716 | HQPTPAA                      | Mus<br>musculu<br>s              |
| 1 | 1.00 | 1 | 1 | 0.03  | 0.03   | 0.025  | 0.03   | 0.03   | t | 47398  | PERIKLDY<br>DQYCADV          | Homo<br>sapiens                  |
| 1 | 1.00 | 1 | 1 | 0     | 0.004  | 0      | 0.001  | 0      | t | 800    | ADYHRVM<br>Y                 | Homo<br>sapiens                  |
| 1 | 1.00 | 1 | 1 | -0.01 | -0.012 | -0.016 | -0.007 | -0.008 | t | 98653  | YYTKNTNN<br>NL               | Mus<br>musculu<br>s              |
| 1 | 1.00 | 1 | 1 | -0.01 | -0.014 | -0.016 | -0.007 | -0.008 | t | 98653  | YYTKNTNN<br>NL               | Oryctola<br>gus<br>cuniculu<br>s |
| 1 | 1.00 | 1 | 1 | -0.01 | -0.012 | -0.007 | -0.011 | -0.012 | t | 46488  | NVSVSPSP<br>STPLLY           | Mus<br>musculu<br>s              |
| 1 | 1.00 | 1 | 1 | 0.03  | 0.027  | 0.035  | 0.03   | 0.03   | t | 107086 | ANYGYTFG<br>SG               | Oryctola<br>gus<br>cuniculu<br>s |
| 1 | 1.00 | 1 | 1 | 0.01  | 0.008  | 0.01   | 0.007  | 0.009  | t | 74488  | YKPLGALT<br>H                | Mus<br>musculu<br>s              |
| 1 | 1.00 | 1 | 1 | -0.04 | -0.04  | -0.045 | -0.04  | -0.04  | t | 78117  | DIQKVAGT<br>WYSLAMA<br>A     | Mus<br>musculu<br>s              |
| 1 | 1.00 | 1 | 1 | 0.03  | 0.034  | 0.027  | 0.037  | 0.03   | t | 105976 | NGVTLGYT<br>SGTCQGN<br>ASATK | Homo<br>sapiens                  |
| 1 | 1.00 | 1 | 1 | 0.01  | 0.008  | 0.009  | 0.009  | 0.011  | t | 21763  | GPRLQPY                      | Mus<br>musculu<br>s              |
| 1 | 1.00 | 1 | 1 | -0.06 | -0.063 | -0.065 | -0.06  | -0.06  | t | 132846 | KAKRLHLS<br>PVRLAE           | Oryctola<br>gus<br>cuniculu<br>s |

|   |      |   |   |       |        |        |        |        |   |        |                     |                                  |
|---|------|---|---|-------|--------|--------|--------|--------|---|--------|---------------------|----------------------------------|
| 1 | 1.00 | 1 | 1 | 0     | 0      | 0      | -0.006 | -0.004 | t | 24786  | HSLGKWL<br>GHPDKF   | Mus<br>musculu<br>s              |
| 1 | 1.00 | 1 | 1 | 0.02  | 0.017  | 0.02   | 0.02   | 0.022  | t | 140843 | EKPAVLGH<br>DEAA    | Oryctola<br>gus<br>cuniculu<br>s |
| 1 | 1.00 | 1 | 1 | -0.03 | -0.028 | -0.031 | -0.029 | -0.028 | t | 25061  | HVLGRL              | Homo<br>sapiens                  |
| 1 | 1.00 | 1 | 1 | 0.04  | 0.04   | 0.04   | 0.04   | 0.04   | t | 103359 | LILTSYTS<br>EAMLDA  | Homo<br>sapiens                  |
| 1 | 1.00 | 1 | 1 | 0.02  | 0.02   | 0.02   | 0.02   | 0.02   | t | 153349 | ACTDFEG<br>MLCGGS   | Mus<br>musculu<br>s              |
| 1 | 1.00 | 1 | 1 | 0     | 0      | 0      | 0      | 0      | t | 135440 | AFPAVT              | Oryctola<br>gus<br>cuniculu<br>s |
| 1 | 1.00 | 1 | 1 | -0.02 | -0.02  | -0.02  | -0.02  | -0.02  | t | 104149 | NHYFLRS             | Homo<br>sapiens                  |
| 1 | 1.00 | 1 | 1 | 0     | 0      | 0      | 0      | 0      | t | 132098 | TLLLEGVM<br>AA      | Homo<br>sapiens                  |
| 1 | 1.00 | 1 | 1 | 0     | -0.004 | -0.012 | 0.003  | 0      | t | 106779 | RKPLSPG<br>MTGR     | Oryctola<br>gus<br>cuniculu<br>s |
| 1 | 1.00 | 1 | 1 | 0.03  | 0.032  | 0.027  | 0.027  | 0.028  | t | 95766  | RNANEEY<br>SI       | Homo<br>sapiens                  |
| 1 | 1.00 | 1 | 1 | 0.03  | 0.032  | 0.027  | 0.027  | 0.028  | t | 95766  | RNANEEY<br>SI       | Homo<br>sapiens                  |
| 1 | 1.00 | 1 | 1 | 0.04  | 0.04   | 0.039  | 0.04   | 0.037  | t | 124367 | KLKARVDE<br>LERIRRS | Oryctola<br>gus<br>cuniculu<br>s |
| 1 | 1.00 | 1 | 1 | 0     | 0      | 0.011  | 0      | -0.002 | t | 47006  | PAYEKL              | Mus<br>musculu<br>s              |
| 1 | 1.00 | 1 | 1 | -0.04 | -0.043 | -0.042 | -0.04  | -0.041 | t | 30116  | KDATGIDN<br>HREAKL  | Oryctola<br>gus<br>cuniculu<br>s |
| 1 | 1.00 | 1 | 1 | -0.03 | -0.027 | -0.03  | -0.03  | -0.03  | t | 131346 | AIPDRFS             | Mus<br>musculu<br>s              |

|   |      |   |   |       |        |        |        |        |   |        |                              |                       |
|---|------|---|---|-------|--------|--------|--------|--------|---|--------|------------------------------|-----------------------|
| 1 | 1.00 | 1 | 1 | -0.01 | -0.008 | -0.003 | -0.003 | -0.009 | t | 108052 | NWLSLITAR                    | Homo sapiens          |
| 1 | 1.00 | 1 | 1 | 0.03  | 0.03   | 0.03   | 0.03   | 0.03   | t | 129024 | KADQLYK                      | Homo sapiens          |
| 1 | 1.00 | 1 | 1 | 0.01  | 0.01   | 0.01   | 0.01   | 0.01   | t | 140559 | FPYELLMQ<br>G                | Mus musculus          |
| 1 | 1.00 | 1 | 1 | 0.02  | 0.02   | 0.015  | 0.02   | 0.019  | t | 107083 | AKDVKFG<br>ADARALML          | Rattus norvegicus     |
| 1 | 1.00 | 1 | 1 | 0.03  | 0.026  | 0.02   | 0.033  | 0.031  | t | 63736  | TFQVEVPG<br>SQHIDS           | Oryctolagus cuniculus |
| 1 | 1.00 | 1 | 1 | -0.02 | -0.02  | -0.02  | -0.02  | -0.022 | t | 137747 | DTPLTYAG<br>LRLV             | Mus musculus          |
| 1 | 1.00 | 1 | 1 | 0.04  | 0.04   | 0.044  | 0.04   | 0.04   | t | 25262  | IAETQHGT<br>I                | Mus musculus          |
| 1 | 1.00 | 1 | 1 | 0.01  | 0.01   | 0.01   | 0.01   | 0.01   | t | 115233 | EPMIGVN<br>QELAYFYP<br>ELFRQ | Homo sapiens          |
| 1 | 1.00 | 1 | 1 | -0.01 | -0.01  | -0.01  | -0.01  | -0.01  | t | 138203 | MGEFFMP<br>YPGTRIN           | Oryctolagus cuniculus |
| 1 | 1.00 | 1 | 1 | 0.01  | 0.007  | 0.005  | 0.01   | 0.01   | t | 138215 | PPVANDT<br>RIVMGRL           | Oryctolagus cuniculus |
| 1 | 1.00 | 1 | 1 | 0     | 0.002  | 0      | 0.007  | 0.003  | t | 110995 | RARPAKA<br>AATQKKVE<br>RKA   | Homo sapiens          |
| 1 | 1.00 | 1 | 1 | 0.03  | 0.03   | 0.03   | 0.03   | 0.03   | t | 116930 | AYKLPQTD<br>DST              | Homo sapiens          |
| 1 | 1.00 | 1 | 1 | 0.03  | 0.03   | 0.03   | 0.03   | 0.03   | t | 116930 | AYKLPQTD<br>DST              | Mus musculus          |
| 1 | 1.00 | 1 | 1 | 0.02  | 0.02   | 0.014  | 0.02   | 0.02   | t | 22685  | GTHNGQI<br>GNDPNRDI          | Mus musculus          |
| 1 | 1.00 | 1 | 1 | 0.04  | 0.04   | 0.04   | 0.04   | 0.042  | t | 45639  | NQVYYRP<br>MDEYSN            | Mus musculus          |
| 1 | 1.00 | 1 | 1 | 0.02  | 0.02   | 0.011  | 0.02   | 0.02   | t | 15991  | FGHQVGD<br>G                 | Homo sapiens          |



|   |      |   |   |      |       |        |        |       |   |       |                              |                     |
|---|------|---|---|------|-------|--------|--------|-------|---|-------|------------------------------|---------------------|
| 1 | 1.00 | 1 | 1 | 0.02 | 0.024 | 0.02   | 0.021  | 0.02  | t | 73611 | YDYQHKE<br>G                 | Homo<br>sapiens     |
| 1 | 1.00 | 1 | 1 | 0.02 | 0.024 | 0.02   | 0.021  | 0.02  | t | 4770  | ASSGIGPE                     | Homo<br>sapiens     |
| 1 | 1.00 | 1 | 1 | 0    | 0.004 | 0      | 0.001  | 0     | t | 38583 | LPLPWL                       | Homo<br>sapiens     |
| 1 | 1.00 | 1 | 1 | 0.01 | 0.011 | 0.01   | 0.007  | 0.008 | t | 8803  | DITPQEFS<br>KKYLQAP          | Homo<br>sapiens     |
| 1 | 1.00 | 1 | 1 | 0.02 | 0.023 | 0.011  | 0.02   | 0.021 | t | 75691 | YRYNIYSEK<br>EKSINIDF<br>N   | Equus<br>caballus   |
| 1 | 1.00 | 1 | 1 | 0    | 0.003 | 0      | 0      | 0     | t | 32913 | KPTTKQRQ<br>NKPP             | Mus<br>musculu<br>s |
| 1 | 1.00 | 1 | 1 | 0.03 | 0.032 | 0.036  | 0.033  | 0.029 | t | 13641 | EPEQVELQ<br>PPPQGG           | Homo<br>sapiens     |
| 1 | 1.00 | 1 | 1 | 0.04 | 0.042 | 0.04   | 0.042  | 0.038 | t | 48851 | PPPEHRG<br>GPEEFEGA<br>GDGEP | Homo<br>sapiens     |
| 1 | 1.00 | 1 | 1 | 0    | 0     | 0      | 0.002  | 0     | t | 22121 | GRLGIYRY<br>VSTGER           | Homo<br>sapiens     |
| 1 | 1.00 | 1 | 1 | 0.01 | 0.01  | 0.004  | 0.012  | 0.01  | t | 53267 | RCEPVVCY<br>LYGKRGG<br>GKSLT | Homo<br>sapiens     |
| 1 | 1.00 | 1 | 1 | 0    | 0.003 | 0.003  | 0      | 0     | t | 97181 | AFPLPTDA                     | Mus<br>musculu<br>s |
| 1 | 1.00 | 1 | 1 | 0    | 0.003 | 0.003  | 0      | 0     | t | 97181 | AFPLPTDA                     | Mus<br>musculu<br>s |
| 1 | 1.00 | 1 | 1 | 0    | 0.002 | -0.007 | -0.003 | 0.002 | t | 49621 | PTFKTTKK<br>DHKP             | Homo<br>sapiens     |

|   |      |   |   |       |        |        |        |        |   |        |                              |                                  |
|---|------|---|---|-------|--------|--------|--------|--------|---|--------|------------------------------|----------------------------------|
| 1 | 1.00 | 1 | 1 | 0.03  | 0.026  | 0.029  | 0.029  | 0.03   | t | 110862 | GGPTLVSL<br>HELPAETP         | Oryctola<br>gus<br>cuniculu<br>s |
| 1 | 1.00 | 1 | 1 | -0.01 | -0.007 | -0.008 | -0.01  | -0.011 | t | 7165   | CTKKKSS                      | Mus<br>musculu<br>s              |
| 1 | 1.00 | 1 | 1 | -0.02 | -0.017 | -0.02  | -0.02  | -0.021 | t | 113345 | DTPTLH                       | Mus<br>musculu<br>s              |
| 1 | 1.00 | 1 | 1 | 0     | 0.002  | -0.006 | 0.001  | 0      | t | 25054  | HVIWDVG<br>LQSS              | Homo<br>sapiens                  |
| 1 | 1.00 | 1 | 1 | 0.02  | 0.02   | 0.02   | 0.02   | 0.02   | t | 12931  | ELADALLE                     | Oryctola<br>gus<br>cuniculu<br>s |
| 1 | 1.00 | 1 | 1 | -0.05 | -0.05  | -0.05  | -0.05  | -0.051 | t | 114223 | PFSRVVHL                     | Rattus<br>norvegic<br>us         |
| 1 | 1.00 | 1 | 1 | 0.02  | 0.02   | 0.02   | 0.02   | 0.02   | t | 43159  | NAGVLTC<br>LSK               | Mus<br>musculu<br>s              |
| 1 | 1.00 | 1 | 1 | 0     | 0.002  | 0.005  | 0.007  | 0      | t | 127981 | FRRAVLM<br>GGSALSPA<br>AVISH | Homo<br>sapiens                  |
| 1 | 1.00 | 1 | 1 | -0.02 | -0.016 | -0.015 | -0.013 | -0.021 | t | 116434 | PGFGYGG<br>RASDYKSA<br>HKG   | Homo<br>sapiens                  |
| 1 | 1.00 | 1 | 1 | -0.06 | -0.056 | -0.06  | -0.053 | -0.061 | t | 134792 | RSPSPTPT<br>PGPSRRG          | Homo<br>sapiens                  |
| 1 | 1.00 | 1 | 1 | -0.05 | -0.052 | -0.042 | -0.049 | -0.053 | t | 149384 | MSLPGRW<br>KPK               | Mus<br>musculu<br>s              |
| 1 | 1.00 | 1 | 1 | 0.02  | 0.02   | 0.02   | 0.02   | 0.02   | t | 123299 | HVDFMLY<br>ET                | Ovis<br>aries                    |
| 1 | 1.00 | 1 | 1 | 0.02  | 0.02   | 0.02   | 0.02   | 0.02   | t | 131867 | EPSPESIRR<br>KMEIDD          | Homo<br>sapiens                  |
| 1 | 1.00 | 1 | 1 | 0.02  | 0.02   | 0.02   | 0.02   | 0.02   | t | 123300 | HVDFMVY<br>EA                | Ovis<br>aries                    |

|   |      |   |   |       |        |        |        |        |   |        |                              |                                  |
|---|------|---|---|-------|--------|--------|--------|--------|---|--------|------------------------------|----------------------------------|
| 1 | 1.00 | 1 | 1 | 0     | 0      | 0      | 0      | 0      | t | 128101 | SFSRALEN<br>ATRDYFIIC<br>PII | Homo<br>sapiens                  |
| 1 | 1.00 | 1 | 1 | 0     | 0      | 0      | 0      | 0      | t | 102245 | YNMPALL                      | Homo<br>sapiens                  |
| 1 | 1.00 | 1 | 1 | 0     | 0      | 0      | 0      | 0      | t | 79586  | KIPIALS                      | Oryctola<br>gus<br>cuniculu<br>s |
| 1 | 1.00 | 1 | 1 | -0.04 | -0.04  | -0.048 | -0.04  | -0.04  | t | 125454 | KDYKTMV<br>KFCN              | Mus<br>musculu<br>s              |
| 1 | 1.00 | 1 | 1 | -0.05 | -0.05  | -0.05  | -0.04  | -0.048 | t | 108608 | RGGIRRQS<br>L                | Homo<br>sapiens                  |
| 1 | 1.00 | 1 | 1 | -0.04 | -0.038 | -0.04  | -0.033 | -0.039 | t | 138218 | PTPAPGPG<br>RR               | Homo<br>sapiens                  |
| 1 | 1.00 | 1 | 1 | -0.01 | -0.01  | -0.01  | -0.01  | -0.01  | t | 98746  | EDWRRPS<br>HQQ               | Homo<br>sapiens                  |
| 1 | 1.00 | 1 | 1 | -0.01 | -0.01  | -0.012 | -0.013 | -0.012 | t | 23372  | GYIWIQRN<br>TG               | Homo<br>sapiens                  |
| 1 | 1.00 | 1 | 1 | -0.01 | -0.006 | -0.01  | -0.009 | -0.01  | t | 69595  | VLLGACSF                     | Homo<br>sapiens                  |
| 1 | 1.00 | 1 | 1 | -0.01 | -0.008 | -0.01  | -0.013 | -0.01  | t | 24812  | HSMKEGI<br>HAQ               | Homo<br>sapiens                  |
| 1 | 1.00 | 1 | 1 | 0.04  | 0.038  | 0.035  | 0.037  | 0.04   | t | 133634 | LSQDVCTY                     | Mus<br>musculu<br>s              |
| 1 | 1.00 | 1 | 1 | -0.03 | -0.03  | -0.034 | -0.03  | -0.03  | t | 120014 | LAAQGAR<br>VYA               | Mus<br>musculu<br>s              |
| 1 | 1.00 | 1 | 1 | 0     | 0      | 0      | -0.003 | -0.003 | t | 14435  | ETIYNTTLK<br>Y               | Homo<br>sapiens                  |
| 1 | 1.00 | 1 | 1 | 0     | 0      | -0.015 | 0      | 0.001  | t | 48618  | PNDPNRN<br>VD                | Mus<br>musculu<br>s              |
| 1 | 1.00 | 1 | 1 | 0     | -0.002 | 0      | 0.003  | 0      | t | 21254  | GMDGTQL<br>DRW               | Mus<br>musculu<br>s              |
| 1 | 1.00 | 1 | 1 | 0     | -0.002 | 0      | 0.003  | 0      | t | 21254  | GMDGTQL<br>DRW               | Mus<br>musculu<br>s              |

|   |      |   |   |       |        |        |        |        |   |        |                           |                                  |
|---|------|---|---|-------|--------|--------|--------|--------|---|--------|---------------------------|----------------------------------|
| 1 | 1.00 | 1 | 1 | 0.01  | 0.014  | 0.01   | 0.011  | 0.01   | t | 137883 | GQNVLSA<br>DFTPG          | Homo<br>sapiens                  |
| 1 | 1.00 | 1 | 1 | -0.04 | -0.04  | -0.04  | -0.04  | -0.041 | t | 112328 | SPKLLIY                   | Homo<br>sapiens                  |
| 1 | 1.00 | 1 | 1 | -0.03 | -0.032 | -0.033 | -0.031 | -0.03  | t | 31779  | KLCVWNN<br>KTP            | Mus<br>musculu<br>s              |
| 1 | 1.00 | 1 | 1 | -0.02 | -0.027 | -0.027 | -0.02  | -0.019 | t | 159284 | FSLRLMEE<br>NWNAEKR<br>S  | Oryctola<br>gus<br>cuniculu<br>s |
| 1 | 1.00 | 1 | 1 | 0     | 0      | -0.007 | 0      | 0.001  | t | 122375 | GLINRAKA<br>VKQFEESQ<br>G | Rattus<br>norvegic<br>us         |
| 1 | 1.00 | 1 | 1 | 0     | 0      | -0.007 | 0      | 0.001  | t | 122375 | GLINRAKA<br>VKQFEESQ<br>G | Mus<br>musculu<br>s              |
| 1 | 1.00 | 1 | 1 | 0     | 0      | -0.007 | 0      | 0.001  | t | 122375 | GLINRAKA<br>VKQFEESQ<br>G | Mus<br>musculu<br>s              |
| 1 | 1.00 | 1 | 1 | 0     | 0      | 0      | -0.009 | -0.002 | t | 130800 | EGAKAFFK<br>GA            | Homo<br>sapiens                  |
| 1 | 1.00 | 1 | 1 | -0.03 | -0.026 | -0.033 | -0.029 | -0.03  | t | 66163  | TSARPAV<br>MPMDAW<br>RE   | Homo<br>sapiens                  |
| 1 | 1.00 | 1 | 1 | 0.01  | 0.01   | 0.01   | 0.01   | 0.01   | t | 77872  | FGTSPTGL<br>KLAP          | Mus<br>musculu<br>s              |
| 1 | 1.00 | 1 | 1 | -0.01 | -0.01  | -0.01  | -0.01  | -0.01  | t | 116944 | DFRYSTRP<br>FAL           | Mus<br>musculu<br>s              |
| 1 | 1.00 | 1 | 1 | -0.01 | -0.01  | 0      | -0.01  | -0.011 | t | 95161  | TYGKFCIKP                 | Mus<br>musculu<br>s              |
| 1 | 1.00 | 1 | 1 | 0.03  | 0.03   | 0.03   | 0.03   | 0.03   | t | 96104  | APTKPTYE<br>TE            | Homo<br>sapiens(<br>human)       |
| 1 | 1.00 | 1 | 1 | -0.01 | -0.01  | -0.01  | -0.01  | -0.01  | t | 151031 | LVKKGNSY<br>PKLSKSY       | Homo<br>sapiens                  |
| 1 | 1.00 | 1 | 1 | -0.01 | -0.01  | -0.01  | -0.01  | -0.01  | t | 105889 | IVGFFSKI                  | Oryctola<br>gus<br>cuniculu<br>s |

|   |      |   |   |       |        |        |        |        |   |        |                           |                                  |
|---|------|---|---|-------|--------|--------|--------|--------|---|--------|---------------------------|----------------------------------|
| 1 | 1.00 | 1 | 1 | -0.01 | -0.01  | -0.01  | -0.01  | -0.01  | t | 23313  | GYCAWPA<br>CYCYGLPN       | Equus<br>caballus                |
| 1 | 1.00 | 1 | 1 | 0.04  | 0.036  | 0.044  | 0.039  | 0.038  | t | 155760 | SATQLYKT<br>CKQAGT        | Oryctola<br>gus<br>cuniculu<br>s |
| 1 | 1.00 | 1 | 1 | 0     | -0.002 | -0.004 | -0.008 | 0      | t | 67297  | TWSGKFP<br>T              | Anas<br>platyrhy<br>nchos        |
| 1 | 1.00 | 1 | 1 | -0.04 | -0.04  | -0.027 | -0.032 | -0.043 | t | 98691  | ALKALPM<br>HIR            | Homo<br>sapiens                  |
| 1 | 1.00 | 1 | 1 | 0.01  | 0.01   | 0.007  | 0.01   | 0.01   | t | 99005  | SLAMAAS<br>DIS            | Homo<br>sapiens                  |
| 1 | 1.00 | 1 | 1 | 0.01  | 0.012  | 0.017  | 0.017  | 0.008  | t | 113212 | VPVLSAKA<br>AQASDLE       | Homo<br>sapiens                  |
| 1 | 1.00 | 1 | 1 | 0     | 0.004  | 0      | 0.001  | 0      | t | 6540   | CLAVLLGA                  | Homo<br>sapiens                  |
| 1 | 1.00 | 1 | 1 | 0     | -0.002 | 0.006  | 0.001  | 0.001  | t | 78924  | AGPEWLL                   | Mus<br>musculu<br>s              |
| 1 | 1.00 | 1 | 1 | -0.01 | -0.01  | -0.016 | -0.01  | -0.01  | t | 159083 | RYKYLPET<br>PKQLAKVV      | Mus<br>musculu<br>s              |
| 1 | 1.00 | 1 | 1 | 0     | 0      | 0.005  | 0.002  | 0      | t | 57279  | SDSESCSS<br>MPPLEG        | Homo<br>sapiens                  |
| 1 | 1.00 | 1 | 1 | 0.01  | 0.008  | 0.008  | 0.013  | 0.011  | t | 99661  | SERRAQSV                  | Mus<br>musculu<br>s              |
| 1 | 1.00 | 1 | 1 | 0.06  | 0.06   | 0.065  | 0.06   | 0.06   | t | 97596  | QTPLTMA<br>ALELL          | Mus<br>musculu<br>s              |
| 1 | 1.00 | 1 | 1 | 0     | -0.002 | 0      | -0.003 | -0.001 | t | 49191  | PRGRRQPI                  | Mus<br>musculu<br>s              |
| 1 | 1.00 | 1 | 1 | 0.03  | 0.032  | 0.029  | 0.031  | 0.03   | t | 40018  | LTLNLITE<br>MG            | Homo<br>sapiens                  |
| 1 | 1.00 | 1 | 1 | 0.03  | 0.032  | 0.024  | 0.031  | 0.03   | t | 75920  | YSVLYNST<br>FFSTFKCY<br>G | Homo<br>sapiens                  |

|   |      |   |   |       |        |        |        |        |   |        |                             |                                  |
|---|------|---|---|-------|--------|--------|--------|--------|---|--------|-----------------------------|----------------------------------|
| 1 | 1.00 | 1 | 1 | 0     | 0      | -0.011 | 0      | 0.001  | t | 106842 | SKDEIDSA<br>VKMLVSLK<br>MSY | Mus<br>musculu<br>s              |
| 1 | 1.00 | 1 | 1 | 0     | 0.003  | -0.011 | 0      | 0.002  | t | 144735 | NSSNYCCE<br>LCCNPACT<br>GCY | Mus<br>musculu<br>s              |
| 1 | 1.00 | 1 | 1 | 0     | 0      | 0      | 0      | 0      | t | 9755   | DPRVRGLY<br>FPA             | Mus<br>musculu<br>s              |
| 1 | 1.00 | 1 | 1 | -0.02 | -0.022 | -0.033 | -0.017 | -0.017 | t | 141646 | FSKWRKN<br>HMRQKSN<br>K     | Mus<br>musculu<br>s              |
| 1 | 1.00 | 1 | 1 | 0     | 0.003  | 0.002  | 0.007  | 0.004  | t | 104895 | LVEALYLV<br>CGERG           | Mus<br>musculu<br>s              |
| 1 | 1.00 | 1 | 1 | -0.02 | -0.02  | -0.032 | -0.02  | -0.018 | t | 109534 | LVGPRGER<br>GFP             | Mus<br>musculu<br>s              |
| 1 | 1.00 | 1 | 1 | 0     | 0      | 0      | 0      | -0.001 | t | 149298 | ELDKWAS                     | Homo<br>sapiens                  |
| 1 | 1.00 | 1 | 1 | 0.06  | 0.06   | 0.06   | 0.06   | 0.06   | t | 103013 | AEGDTVIIY<br>SKYGGTE        | Homo<br>sapiens                  |
| 1 | 1.00 | 1 | 1 | 0.04  | 0.04   | 0.04   | 0.04   | 0.04   | t | 113861 | SISTTNFTN<br>P              | Oryctola<br>gus<br>cuniculu<br>s |
| 1 | 1.00 | 1 | 1 | 0.02  | 0.02   | 0.02   | 0.02   | 0.02   | t | 137891 | HETHYGYA<br>TLSY            | Homo<br>sapiens                  |
| 1 | 1.00 | 1 | 1 | 0     | 0      | 0      | 0      | 0      | t | 149415 | PQQLPQFE<br>EI              | Mus<br>musculu<br>s              |
| 1 | 1.00 | 1 | 1 | 0     | 0      | 0      | 0      | 0      | t | 149415 | PQQLPQFE<br>EI              | Homo<br>sapiens                  |
| 1 | 1.00 | 1 | 1 | -0.02 | -0.02  | -0.02  | -0.02  | -0.02  | t | 127719 | KWSFTPP                     | Homo<br>sapiens                  |

|   |      |   |   |       |        |        |        |        |   |        |                             |                                  |
|---|------|---|---|-------|--------|--------|--------|--------|---|--------|-----------------------------|----------------------------------|
| 1 | 1.00 | 1 | 1 | 0.01  | 0.014  | 0.007  | 0.007  | 0.007  | t | 115486 | SISSEEIVP<br>NSVEQKHI<br>QK | Homo<br>sapiens                  |
| 1 | 1.00 | 1 | 1 | -0.01 | -0.011 | -0.003 | -0.01  | -0.008 | t | 40236  | LTWSGKFP                    | Anas<br>platyrhy<br>nchos        |
| 1 | 1.00 | 1 | 1 | -0.03 | -0.027 | -0.03  | -0.03  | -0.03  | t | 119988 | KIFAQRLM<br>RY              | Mus<br>musculu<br>s              |
| 1 | 1.00 | 1 | 1 | -0.01 | -0.007 | -0.012 | -0.01  | -0.01  | t | 17642  | FRRYQEER                    | Mus<br>musculu<br>s              |
| 1 | 1.00 | 1 | 1 | -0.01 | -0.008 | -0.012 | -0.01  | -0.01  | t | 17642  | FRRYQEER                    | Anas<br>platyrhy<br>nchos        |
| 1 | 1.00 | 1 | 1 | 0.02  | 0.023  | 0.016  | 0.02   | 0.02   | t | 75318  | YPHQPPQ<br>QFP              | Mus<br>musculu<br>s              |
| 1 | 1.00 | 1 | 1 | 0     | 0      | 0.006  | 0.002  | 0      | t | 67732  | VARDDKG<br>RRYYLT           | Homo<br>sapiens                  |
| 1 | 1.00 | 1 | 1 | 0     | -0.004 | 0      | -0.003 | -0.003 | t | 71143  | VSSYHSKP<br>CNPAQPV         | Oryctola<br>gus<br>cuniculu<br>s |
| 1 | 1.00 | 1 | 1 | 0     | -0.004 | 0      | -0.003 | -0.003 | t | 38345  | LNTEPSQL<br>PPTAPP          | Oryctola<br>gus<br>cuniculu<br>s |
| 1 | 1.00 | 1 | 1 | 0     | -0.004 | 0      | -0.003 | -0.003 | t | 56614  | RYPHYSLIK<br>PESSL          | Oryctola<br>gus<br>cuniculu<br>s |
| 1 | 1.00 | 1 | 1 | 0     | -0.004 | 0      | -0.003 | -0.003 | t | 6918   | CRFPNITN<br>SHVPILQE        | Oryctola<br>gus<br>cuniculu<br>s |

|   |      |   |   |       |        |        |        |        |   |        |                              |                                  |
|---|------|---|---|-------|--------|--------|--------|--------|---|--------|------------------------------|----------------------------------|
| 1 | 1.00 | 1 | 1 | 0.03  | 0.034  | 0.041  | 0.031  | 0.029  | t | 44700  | NLEYTIVIT<br>P               | Homo<br>sapiens                  |
| 1 | 1.00 | 1 | 1 | -0.01 | -0.01  | 0.001  | -0.007 | -0.01  | t | 11029  | EAELTGYG                     | Homo<br>sapiens                  |
| 1 | 1.00 | 1 | 1 | 0     | 0      | -0.012 | 0      | 0.003  | t | 10126  | DSGDGRQ<br>TITNP             | Mus<br>musculu<br>s              |
| 1 | 1.00 | 1 | 1 | 0.01  | 0.01   | 0.01   | 0.012  | 0.01   | t | 25496  | ICESAGTQ<br>EDAASL           | Homo<br>sapiens                  |
| 1 | 1.00 | 1 | 1 | -0.01 | -0.014 | -0.011 | -0.011 | -0.01  | t | 78615  | CPGHANR<br>KQCGG             | Oryctola<br>gus<br>cuniculu<br>s |
| 1 | 1.00 | 1 | 1 | 0.05  | 0.054  | 0.054  | 0.05   | 0.05   | t | 19034  | GDLQVLA<br>QKV               | Cavia<br>porcellu<br>s           |
| 1 | 1.00 | 1 | 1 | 0     | 0      | 0      | 0.003  | 0      | t | 117773 | CNSRQTD<br>REDELI            | Homo<br>sapiens                  |
| 1 | 1.00 | 1 | 1 | 0     | 0      | 0      | 0.003  | 0      | t | 44920  | NLVPMVA<br>TV                | Homo<br>sapiens                  |
| 1 | 1.00 | 1 | 1 | 0.01  | 0.01   | 0.01   | 0.01   | 0.01   | t | 14475  | ETLVTF                       | Homo<br>sapiens                  |
| 1 | 1.00 | 1 | 1 | -0.02 | -0.017 | -0.014 | -0.02  | -0.021 | t | 69462  | VLELAA                       | Mus<br>musculu<br>s              |
| 1 | 1.00 | 1 | 1 | 0.02  | 0.016  | 0.023  | 0.023  | 0.02   | t | 115406 | NRKVKPTT<br>EGGVETE          | Oryctola<br>gus<br>cuniculu<br>s |
| 1 | 1.00 | 1 | 1 | 0.01  | 0.008  | -0.006 | 0.009  | 0.011  | t | 149247 | AEQQWAL<br>YADGSIRP<br>Q     | Mus<br>musculu<br>s              |
| 1 | 1.00 | 1 | 1 | 0.04  | 0.038  | 0.032  | 0.033  | 0.038  | t | 122167 | PPPITQGE<br>CKQL             | Mus<br>musculu<br>s              |
| 1 | 1.00 | 1 | 1 | 0.01  | 0.006  | 0.001  | 0.01   | 0.012  | t | 52441  | QSTHVDIR<br>TLEDLLMG<br>TLGI | Mus<br>musculu<br>s              |



|   |      |   |   |       |        |        |        |        |   |        |                              |                                  |
|---|------|---|---|-------|--------|--------|--------|--------|---|--------|------------------------------|----------------------------------|
| 1 | 1.00 | 1 | 1 | 0     | -0.002 | -0.002 | -0.001 | 0      | t | 97683  | TFSMGAK<br>P                 | Mus<br>musculu<br>s              |
| 1 | 1.00 | 1 | 1 | 0.03  | 0.03   | 0.03   | 0.03   | 0.03   | t | 41052  | MAILGD                       | Homo<br>sapiens                  |
| 1 | 1.00 | 1 | 1 | -0.01 | -0.013 | -0.013 | -0.01  | -0.01  | t | 7208   | CTSPYDGK<br>YWSMYSR<br>L     | Oryctola<br>gus<br>cuniculu<br>s |
| 1 | 1.00 | 1 | 1 | 0.01  | 0.01   | 0.01   | 0.01   | 0.01   | t | 119618 | NHYTQKSL                     | Homo<br>sapiens                  |
| 1 | 1.00 | 1 | 1 | -0.01 | -0.01  | -0.014 | -0.01  | -0.01  | t | 47545  | PFPQPQQ<br>QFP               | Mus<br>musculu<br>s              |
| 1 | 1.00 | 1 | 1 | -0.04 | -0.04  | -0.04  | -0.04  | -0.042 | t | 141621 | DNWHGS<br>NRP                | Oryctola<br>gus<br>cuniculu<br>s |
| 1 | 1.00 | 1 | 1 | 0     | 0      | 0      | 0      | 0      | t | 4732   | ASRAALIEE<br>GQRIA           | Homo<br>sapiens                  |
| 1 | 1.00 | 1 | 1 | 0.01  | 0      | 0.01   | 0.017  | 0.01   | t | 134194 | PTKSDPRC<br>LTRYSSFV<br>NME  | Homo<br>sapiens                  |
| 1 | 1.00 | 1 | 1 | 0.02  | 0.02   | 0.02   | 0.02   | 0.02   | t | 144873 | ATWVDLV<br>LEGDSCLTI         | Mus<br>musculu<br>s              |
| 1 | 1.00 | 1 | 1 | -0.01 | -0.002 | -0.01  | -0.01  | -0.012 | t | 156959 | SLHTTQR                      | Gallus<br>gallus                 |
| 1 | 1.00 | 1 | 1 | -0.02 | -0.02  | -0.02  | -0.02  | -0.02  | t | 111109 | AMGYQHP                      | Homo<br>sapiens                  |
| 1 | 1.00 | 1 | 1 | -0.02 | -0.012 | -0.02  | -0.02  | -0.022 | t | 156840 | AAPKMCS<br>TWCQMW<br>Q       | Gallus<br>gallus                 |
| 1 | 1.00 | 1 | 1 | -0.01 | -0.008 | -0.011 | -0.009 | -0.012 | t | 63973  | TGTDLELI<br>QILKDHYN<br>ISLD | Homo<br>sapiens                  |
| 1 | 1.00 | 1 | 1 | 0     | 0.002  | 0      | 0.003  | 0.001  | t | 60780  | SRRFAPAL                     | Homo<br>sapiens                  |
| 1 | 1.00 | 1 | 1 | 0     | 0      | 0      | 0      | 0      | t | 595    | ACSFSSIP                     | Oryctola<br>gus<br>cuniculu<br>s |
| 1 | 1.00 | 1 | 1 | 0.01  | 0.01   | 0.01   | 0.01   | 0.01   | t | 10040  | DRRCQSQ<br>LER               | Homo<br>sapiens                  |

|   |      |   |   |       |       |        |       |       |   |        |                             |                       |
|---|------|---|---|-------|-------|--------|-------|-------|---|--------|-----------------------------|-----------------------|
| 1 | 1.00 | 1 | 1 | 0.02  | 0.018 | 0.02   | 0.02  | 0.02  | t | 40359  | LVGATPE                     | Mus musculus          |
| 1 | 1.00 | 1 | 1 | 0.03  | 0.03  | 0.039  | 0.03  | 0.03  | t | 65860  | TQGSNW                      | Homo sapiens          |
| 1 | 1.00 | 1 | 1 | 0.03  | 0.035 | 0.039  | 0.03  | 0.03  | t | 65860  | TQGSNW                      | Homo sapiens          |
| 1 | 1.00 | 1 | 1 | 0.02  | 0.02  | 0.02   | 0.02  | 0.02  | t | 135899 | ASLYHVYE<br>VNLV            | Homo sapiens          |
| 1 | 1.00 | 1 | 1 | 0.02  | 0.02  | 0.02   | 0.02  | 0.02  | t | 133598 | HLNSLYYD<br>WTEP            | Homo sapiens          |
| 1 | 1.00 | 1 | 1 | 0.02  | 0.02  | 0.02   | 0.02  | 0.02  | t | 123165 | FEQLKEGY<br>L               | Ovis aries            |
| 1 | 1.00 | 1 | 1 | 0.02  | 0.02  | 0.02   | 0.02  | 0.02  | t | 78357  | DFPAGYLN<br>DSTLFPP         | Mus musculus          |
| 1 | 1.00 | 1 | 1 | 0.02  | 0.02  | 0.02   | 0.02  | 0.02  | t | 41948  | MLGNAPS<br>VVPNTTLG<br>M    | Homo sapiens          |
| 1 | 1.00 | 1 | 1 | 0.02  | 0.02  | 0.02   | 0.02  | 0.02  | t | 41948  | MLGNAPS<br>VVPNTTLG<br>M    | Homo sapiens          |
| 1 | 1.00 | 1 | 1 | 0     | 0     | 0      | 0     | 0     | t | 132933 | WGQNSFP                     | Homo sapiens          |
| 1 | 1.00 | 1 | 1 | 0     | 0     | 0      | 0     | 0     | t | 112360 | TMTCKSS                     | Homo sapiens          |
| 1 | 1.00 | 1 | 1 | -0.01 | -0.01 | -0.01  | -0.01 | -0.01 | t | 22122  | GRLGTYRY<br>VASGER          | Homo sapiens          |
| 1 | 1.00 | 1 | 1 | 0.01  | 0.007 | -0.003 | 0.01  | 0.01  | t | 105942 | LSADQIST<br>VQASFDK<br>VKGD | Oryctolagus cuniculus |
| 1 | 1.00 | 1 | 1 | 0.02  | 0.026 | 0.023  | 0.02  | 0.02  | t | 141098 | VERSESAL<br>F               | Ovis aries            |
| 1 | 1.00 | 1 | 1 | 0.02  | 0.024 | 0.023  | 0.02  | 0.02  | t | 141098 | VERSESAL<br>F               | Ovis aries            |
| 1 | 1.00 | 1 | 1 | 0.01  | 0.01  | 0.002  | 0.008 | 0.01  | t | 48052  | PKEITVATS<br>RTLSTYYKL      | Homo sapiens          |

|   |      |   |   |       |        |        |        |        |   |        |                            |                                  |
|---|------|---|---|-------|--------|--------|--------|--------|---|--------|----------------------------|----------------------------------|
| 1 | 1.00 | 1 | 1 | 0.01  | 0.007  | 0.008  | 0.01   | 0.01   | t | 125772 | CAPEPGIP<br>GETRG          | Oryctola<br>gus<br>cuniculu<br>s |
| 1 | 1.00 | 1 | 1 | 0.06  | 0.06   | 0.062  | 0.06   | 0.06   | t | 114193 | AEYYNKQY<br>LEQTRAE<br>LDT | Mus<br>musculu<br>s              |
| 1 | 1.00 | 1 | 1 | 0.01  | 0.01   | 0.01   | 0.01   | 0.01   | t | 14638  | EVDDEALE<br>KF             | Homo<br>sapiens                  |
| 1 | 1.00 | 1 | 1 | 0     | 0      | 0      | 0      | -0.001 | t | 56686  | RYYRE                      | Mus<br>musculu<br>s              |
| 1 | 1.00 | 1 | 1 | 0.02  | 0.02   | 0.02   | 0.02   | 0.018  | t | 64770  | TLEEWESG<br>KNPYEPRE       | Oryctola<br>gus<br>cuniculu<br>s |
| 1 | 1.00 | 1 | 1 | 0.02  | 0.016  | 0.015  | 0.021  | 0.023  | t | 134021 | CQSIAAPS<br>KTS            | Oryctola<br>gus<br>cuniculu<br>s |
| 1 | 1.00 | 1 | 1 | 0.01  | 0.01   | 0.01   | 0.012  | 0.01   | t | 4911   | ATCMQAD<br>LEVMTST         | Homo<br>sapiens                  |
| 1 | 1.00 | 1 | 1 | -0.01 | -0.01  | -0.026 | -0.008 | -0.007 | t | 99014  | SQCQAIH<br>NVVHA           | Homo<br>sapiens                  |
| 1 | 1.00 | 1 | 1 | 0.03  | 0.027  | 0.028  | 0.03   | 0.03   | t | 8526   | DGYPVEYD<br>NCAYICW        | Oryctola<br>gus<br>cuniculu<br>s |
| 1 | 1.00 | 1 | 1 | -0.02 | -0.018 | -0.027 | -0.024 | -0.021 | t | 138807 | RLQGISP<br>KI              | Homo<br>sapiens                  |
| 1 | 1.00 | 1 | 1 | -0.01 | -0.008 | -0.012 | -0.009 | -0.01  | t | 22882  | GTVVAVG<br>PGRWDED<br>G    | Homo<br>sapiens                  |
| 1 | 1.00 | 1 | 1 | 0.03  | 0.034  | 0.025  | 0.03   | 0.03   | t | 94037  | TIQNWFR<br>EAD             | Ovis<br>aries                    |
| 1 | 1.00 | 1 | 1 | -0.03 | -0.03  | -0.038 | -0.031 | -0.03  | t | 82909  | GTDSGWG<br>NRQSF           | Homo<br>sapiens                  |
| 1 | 1.00 | 1 | 1 | 0.01  | 0.01   | 0.009  | 0.006  | 0.01   | t | 55050  | RNQMGVS<br>ELL             | Homo<br>sapiens                  |

|   |      |   |   |       |        |        |        |        |   |        |                              |                       |
|---|------|---|---|-------|--------|--------|--------|--------|---|--------|------------------------------|-----------------------|
| 1 | 1.00 | 1 | 1 | 0.01  | 0.01   | 0.01   | 0.01   | 0.01   | t | 153824 | EKEKYKSIT<br>DELDQTFSE       | Homo sapiens          |
| 1 | 1.00 | 1 | 1 | 0.04  | 0.048  | 0.024  | 0.04   | 0.042  | t | 110138 | YMLDLQP<br>ETTDLYCY<br>EQLND | Gallus gallus         |
| 1 | 1.00 | 1 | 1 | 0.04  | 0.037  | 0.024  | 0.04   | 0.042  | t | 110138 | YMLDLQP<br>ETTDLYCY<br>EQLND | Oryctolagus cuniculus |
| 1 | 1.00 | 1 | 1 | 0.01  | 0.012  | 0.002  | 0.011  | 0.012  | t | 79279  | LADLVLI<br>AVIDHVTDL<br>DK   | Homo sapiens          |
| 1 | 1.00 | 1 | 1 | -0.05 | -0.05  | -0.05  | -0.05  | -0.05  | t | 115384 | MKPWIQP<br>KTKVIPYV<br>RYL   | Homo sapiens          |
| 1 | 1.00 | 1 | 1 | 0.02  | 0.02   | 0.02   | 0.02   | 0.019  | t | 77802  | TEYSASVK<br>GRFI             | Mus                   |
| 1 | 1.00 | 1 | 1 | -0.03 | -0.032 | -0.03  | -0.029 | -0.03  | t | 149371 | LPYPQPQP<br>FL               | Mus musculus          |
| 1 | 1.00 | 1 | 1 | -0.01 | -0.01  | -0.013 | -0.01  | -0.012 | t | 41601  | MGLIAGA<br>VGGSL<br>LAAVL    | Mus musculus          |
| 1 | 1.00 | 1 | 1 | 0.01  | 0.012  | 0.015  | 0.017  | 0.01   | t | 122655 | YKRGIIDR<br>GQYLQLQ<br>ELECD | Homo sapiens          |
| 1 | 1.00 | 1 | 1 | 0     | 0      | 0      | 0      | -0.002 | t | 49270  | PRVRGLY                      | Mus musculus          |
| 1 | 1.00 | 1 | 1 | -0.02 | -0.02  | -0.019 | -0.026 | -0.022 | t | 114939 | RPICGTDG<br>VT               | Homo sapiens          |
| 1 | 1.00 | 1 | 1 | 0.02  | 0.017  | 0.011  | 0.02   | 0.021  | t | 49691  | PTLDHVLD<br>HVQT             | Oryctolagus cuniculus |
| 1 | 1.00 | 1 | 1 | 0.01  | 0.01   | 0.01   | 0.01   | 0.01   | t | 136081 | RTTLQSDQ<br>EEIDY            | Oryctolagus cuniculus |
| 1 | 1.00 | 1 | 1 | 0.01  | 0.01   | 0.01   | 0.01   | 0.01   | t | 136081 | RTTLQSDQ<br>EEIDY            | Oryctolagus cuniculus |
| 1 | 1.00 | 1 | 1 | 0.01  | 0.01   | 0.01   | 0.01   | 0.01   | t | 136081 | RTTLQSDQ<br>EEIDY            | Homo sapiens          |

|   |      |   |   |       |        |        |        |        |   |        |                              |                                  |
|---|------|---|---|-------|--------|--------|--------|--------|---|--------|------------------------------|----------------------------------|
| 1 | 1.00 | 1 | 1 | -0.01 | -0.01  | -0.014 | -0.007 | -0.01  | t | 86674  | NDVFREA<br>QRSYL             | Homo<br>sapiens                  |
| 1 | 1.00 | 1 | 1 | 0     | 0      | 0      | 0      | 0      | t | 133623 | KPGEMR                       | Mus<br>musculu<br>s              |
| 1 | 1.00 | 1 | 1 | 0.03  | 0.028  | 0.023  | 0.023  | 0.029  | t | 108202 | VVSHFND                      | Mus<br>musculu<br>s              |
| 1 | 1.00 | 1 | 1 | -0.03 | -0.032 | -0.031 | -0.031 | -0.031 | t | 51958  | QPRKTKPV<br>KSLPERK          | Mus<br>musculu<br>s              |
| 1 | 1.00 | 1 | 1 | 0.07  | 0.07   | 0.07   | 0.07   | 0.07   | t | 123628 | PQQLMPG<br>Q                 | Oryctola<br>gus<br>cuniculu<br>s |
| 1 | 1.00 | 1 | 1 | -0.02 | -0.02  | -0.02  | -0.02  | -0.022 | t | 138626 | SQKDILER<br>KRAAVDR<br>VC    | Oryctola<br>gus<br>cuniculu<br>s |
| 1 | 1.00 | 1 | 1 | -0.01 | -0.01  | -0.01  | -0.01  | -0.01  | t | 115931 | QTPVVVPP<br>FL               | Homo<br>sapiens                  |
| 1 | 1.00 | 1 | 1 | -0.01 | -0.012 | -0.01  | -0.007 | -0.011 | t | 70541  | VQDKYGR<br>VCYGD             | Mus<br>musculu<br>s              |
| 1 | 1.00 | 1 | 1 | 0.02  | 0.02   | 0.02   | 0.016  | 0.018  | t | 122406 | IEIGLEGKG<br>FEPTLEALF<br>GK | Homo<br>sapiens                  |
| 1 | 1.00 | 1 | 1 | -0.03 | -0.04  | -0.03  | -0.023 | -0.03  | t | 134147 | LPKGVKHL<br>KDFPILPGE<br>IFK | Homo<br>sapiens                  |
| 1 | 1.00 | 1 | 1 | 0     | -0.005 | 0.002  | 0.003  | 0      | t | 20939  | GLIVDTRD<br>VEERVHV          | Bos<br>taurus                    |
| 1 | 1.00 | 1 | 1 | 0.03  | 0.028  | 0.017  | 0.033  | 0.032  | t | 5244   | AVAASNN<br>PELTTLTA<br>ALSGQ | Mus<br>musculu<br>s              |
| 1 | 1.00 | 1 | 1 | 0     | -0.005 | 0      | 0      | 0      | t | 108349 | EQEETNPE<br>VLIK             | Canis<br>lupus                   |
| 1 | 1.00 | 1 | 1 | 0     | 0      | 0      | 0      | 0      | t | 108349 | EQEETNPE<br>VLIK             | Canis<br>lupus                   |

|   |      |   |   |       |        |        |        |        |   |        |                            |                                  |
|---|------|---|---|-------|--------|--------|--------|--------|---|--------|----------------------------|----------------------------------|
| 1 | 1.00 | 1 | 1 | -0.01 | -0.01  | -0.01  | -0.01  | -0.01  | t | 72910  | WNSTTFH<br>QTL             | Mus<br>musculu<br>s              |
| 1 | 1.00 | 1 | 1 | -0.06 | -0.06  | -0.076 | -0.058 | -0.057 | t | 98924  | PCMDVVL<br>QQHNI           | Homo<br>sapiens                  |
| 1 | 1.00 | 1 | 1 | 0.02  | 0.016  | 0.008  | 0.013  | 0.018  | t | 132886 | PVRLAELH<br>SDLKIQE        | Oryctola<br>gus<br>cuniculu<br>s |
| 1 | 1.00 | 1 | 1 | -0.03 | -0.03  | -0.028 | -0.03  | -0.032 | t | 119467 | ISGKPGPP<br>PMGFHSP<br>LIK | Oryctola<br>gus<br>cuniculu<br>s |
| 1 | 1.00 | 1 | 1 | -0.04 | -0.044 | -0.04  | -0.047 | -0.041 | t | 122320 | DVTVGPLI<br>FL             | Oryctola<br>gus<br>cuniculu<br>s |
| 1 | 1.00 | 1 | 1 | 0.04  | 0.042  | 0.045  | 0.037  | 0.039  | t | 95077  | ETFTETWN<br>RFITHTE        | Homo<br>sapiens                  |
| 1 | 1.00 | 1 | 1 | -0.02 | -0.02  | -0.02  | -0.02  | -0.02  | t | 111166 | CPVYIKPC                   | Homo<br>sapiens                  |
| 1 | 1.00 | 1 | 1 | -0.01 | -0.01  | -0.006 | -0.007 | -0.01  | t | 24508  | HPSVRYVC<br>LPPERD         | Homo<br>sapiens                  |
| 1 | 1.00 | 1 | 1 | 0.06  | 0.048  | 0.055  | 0.06   | 0.06   | t | 50160  | PYQPVSNL<br>TATTQGQ        | Mus<br>musculu<br>s              |
| 1 | 1.00 | 1 | 1 | 0.02  | 0.02   | 0.02   | 0.02   | 0.02   | t | 122209 | VQKDVLL                    | Homo<br>sapiens                  |
| 1 | 1.00 | 1 | 1 | 0     | 0      | 0      | 0      | 0      | t | 147368 | VFSFGGYT<br>LRGTS          | Homo<br>sapiens                  |
| 1 | 1.00 | 1 | 1 | 0     | 0      | 0      | 0      | 0      | t | 117103 | TYQDFSTR<br>PRSF           | Homo<br>sapiens                  |
| 1 | 1.00 | 1 | 1 | 0     | 0      | 0      | 0      | 0      | t | 80178  | ADAPQGF<br>YVL             | Homo<br>sapiens                  |
| 1 | 1.00 | 1 | 1 | 0     | 0      | 0      | 0      | 0      | t | 97555  | PLPTDAGV                   | Mus<br>musculu<br>s              |
| 1 | 1.00 | 1 | 1 | 0     | 0      | 0      | 0      | 0      | t | 97555  | PLPTDAGV                   | Mus<br>musculu<br>s              |

|   |      |   |   |       |        |        |        |        |   |        |                              |                                  |
|---|------|---|---|-------|--------|--------|--------|--------|---|--------|------------------------------|----------------------------------|
| 1 | 1.00 | 1 | 1 | 0     | -0.002 | -0.007 | 0.003  | -0.001 | t | 5558   | AVTFASFD<br>VPSKQPT          | Mus<br>musculu<br>s              |
| 1 | 1.00 | 1 | 1 | 0     | -0.004 | -0.007 | 0.003  | -0.001 | t | 5558   | AVTFASFD<br>VPSKQPT          | Oryctola<br>gus<br>cuniculu<br>s |
| 1 | 1.00 | 1 | 1 | 0     | 0.005  | -0.002 | -0.003 | -0.002 | t | 99383  | KKNPQLQ<br>DLDMMLT<br>C      | Homo<br>sapiens                  |
| 1 | 1.00 | 1 | 1 | 0.01  | 0.01   | 0.005  | 0.008  | 0.01   | t | 5057   | ATMILAYA<br>MRVPEVI          | Homo<br>sapiens                  |
| 1 | 1.00 | 1 | 1 | -0.01 | -0.01  | -0.01  | -0.006 | -0.01  | t | 142202 | KISEASRK<br>GLRRDLDA<br>SREA | Homo<br>sapiens                  |
| 1 | 1.00 | 1 | 1 | -0.01 | -0.006 | -0.01  | -0.003 | -0.01  | t | 123636 | PVGPAPG<br>MRP               | Homo<br>sapiens                  |
| 1 | 1.00 | 1 | 1 | 0.01  | 0.01   | 0.008  | 0.01   | 0.01   | t | 110606 | GNPGTDGI<br>PGAKG            | Rattus<br>norvegic<br>us         |
| 1 | 1.00 | 1 | 1 | 0     | 0.004  | 0.004  | 0.007  | 0      | t | 133672 | RGGMR                        | Homo<br>sapiens                  |
| 1 | 1.00 | 1 | 1 | -0.01 | -0.01  | -0.001 | -0.01  | -0.012 | t | 46055  | NTANPDW<br>DF                | Mus<br>musculu<br>s              |
| 1 | 1.00 | 1 | 1 | -0.04 | -0.04  | -0.04  | -0.04  | -0.041 | t | 135722 | NGKVDAF<br>C                 | Homo<br>sapiens                  |
| 1 | 1.00 | 1 | 1 | 0     | -0.002 | 0.008  | -0.001 | -0.002 | t | 23913  | HGISEMW<br>YLTPK             | Mus<br>musculu<br>s              |
| 1 | 1.00 | 1 | 1 | -0.01 | -0.01  | -0.026 | -0.008 | -0.007 | t | 98814  | HNVVHAIL<br>LHQQ             | Homo<br>sapiens                  |
| 1 | 1.00 | 1 | 1 | 0     | 0      | 0      | 0      | -0.002 | t | 774    | ADSVGGK<br>D                 | Mus<br>musculu<br>s              |
| 1 | 1.00 | 1 | 1 | -0.01 | -0.008 | -0.01  | -0.009 | -0.01  | t | 65931  | TQSFLATC<br>VNGVCW           | Homo<br>sapiens                  |
| 1 | 1.00 | 1 | 1 | -0.01 | -0.01  | -0.01  | -0.01  | -0.01  | t | 71312  | VTGATVS                      | Oryctola<br>gus<br>cuniculu<br>s |

|   |      |   |   |       |        |        |        |        |   |        |                             |                       |
|---|------|---|---|-------|--------|--------|--------|--------|---|--------|-----------------------------|-----------------------|
| 1 | 1.00 | 1 | 1 | -0.01 | -0.01  | -0.01  | -0.01  | -0.01  | t | 71312  | VTGATVS                     | Oryctolagus cuniculus |
| 1 | 1.00 | 1 | 1 | -0.02 | -0.018 | -0.029 | -0.023 | -0.022 | t | 105940 | LRYQQQS<br>RRRSLPYS         | Homo sapiens          |
| 1 | 1.00 | 1 | 1 | -0.01 | -0.002 | -0.01  | -0.007 | -0.01  | t | 110839 | ETTSQMIV<br>KDIK            | Homo sapiens          |
| 1 | 1.00 | 1 | 1 | 0     | 0.003  | 0      | 0      | -0.002 | t | 135458 | FGSDYEDR<br>YYR             | Mus musculus          |
| 1 | 1.00 | 1 | 1 | 0.01  | 0.005  | -0.004 | 0.01   | 0.012  | t | 132789 | DGFMDFE<br>VYSHQTKP         | Trichosurus vulpecula |
| 1 | 1.00 | 1 | 1 | 0.01  | 0.012  | 0.015  | 0.011  | 0.01   | t | 65325  | TNGLASL                     | Homo sapiens          |
| 1 | 1.00 | 1 | 1 | 0.01  | 0.01   | 0.01   | 0.01   | 0.01   | t | 48382  | PLKPTKRS<br>FIEDLLF         | Homo sapiens          |
| 1 | 1.00 | 1 | 1 | 0.03  | 0.028  | 0.024  | 0.027  | 0.03   | t | 151711 | RATHQE                      | Mus musculus          |
| 1 | 1.00 | 1 | 1 | -0.06 | -0.058 | -0.081 | -0.063 | -0.058 | t | 53483  | REECKCLL<br>NYKQEGD<br>KCVE | Homo sapiens          |
| 1 | 1.00 | 1 | 1 | 0.02  | 0.025  | 0.023  | 0.016  | 0.02   | t | 48129  | PKQGPLP<br>N                | Homo sapiens          |
| 1 | 1.00 | 1 | 1 | -0.01 | -0.008 | -0.018 | -0.013 | -0.01  | t | 13911  | EQQRFRN<br>CQRYV            | Homo sapiens          |
| 1 | 1.00 | 1 | 1 | -0.04 | -0.04  | -0.032 | -0.043 | -0.046 | t | 30984  | KGITTKW<br>MA               | Homo sapiens          |
| 1 | 1.00 | 1 | 1 | 0.01  | 0.008  | 0.01   | 0.009  | 0.009  | t | 51147  | QIVGGVYL<br>L               | Mus musculus          |
| 1 | 1.00 | 1 | 1 | 0     | 0      | 0      | 0      | 0      | t | 24651  | HQTLQDP<br>RVRG             | Mus musculus          |



|   |      |   |   |       |       |        |       |       |   |        |                         |                                  |
|---|------|---|---|-------|-------|--------|-------|-------|---|--------|-------------------------|----------------------------------|
| 1 | 1.00 | 1 | 1 | 0     | 0     | 0      | 0     | 0     | t | 24651  | HQTLQDP<br>RVRG         | Mus<br>musculu<br>s              |
| 1 | 1.00 | 1 | 1 | 0     | 0     | 0      | 0     | 0     | t | 24651  | HQTLQDP<br>RVRG         | Mus<br>musculu<br>s              |
| 1 | 1.00 | 1 | 1 | 0.03  | 0.03  | 0.03   | 0.03  | 0.03  | t | 98986  | RKIRPEGR<br>EGEQEWG     | Homo<br>sapiens                  |
| 1 | 1.00 | 1 | 1 | 0.03  | 0.03  | 0.03   | 0.03  | 0.03  | t | 78299  | WHLAYSP                 | Homo<br>sapiens                  |
| 1 | 1.00 | 1 | 1 | 0     | 0     | -0.014 | 0     | 0     | t | 10799  | DWDFNPN<br>KDTWPDA<br>N | Mus<br>musculu<br>s              |
| 1 | 1.00 | 1 | 1 | 0.01  | 0.01  | 0.01   | 0.01  | 0.01  | t | 149078 | NITQEAF                 | Sus<br>scrofa                    |
| 1 | 1.00 | 1 | 1 | 0.01  | 0.01  | 0.01   | 0.01  | 0.01  | t | 105975 | NGIEETICT<br>ASFKN      | Homo<br>sapiens                  |
| 1 | 1.00 | 1 | 1 | 0.01  | 0.01  | 0.01   | 0.01  | 0.01  | t | 103687 | VCAVDMP<br>YLTVELIE     | Homo<br>sapiens                  |
| 1 | 1.00 | 1 | 1 | 0.01  | 0.01  | 0.01   | 0.01  | 0.01  | t | 78356  | DFLIRYLN<br>DSTPFPPF    | Mus<br>musculu<br>s              |
| 1 | 1.00 | 1 | 1 | 0     | 0.002 | 0.005  | 0.003 | 0.002 | t | 138238 | SMLDTPT                 | Homo<br>sapiens                  |
| 1 | 1.00 | 1 | 1 | -0.01 | -0.01 | -0.01  | -0.01 | -0.01 | t | 119578 | FAIVKFTKV<br>LLQYTGH    | Mus<br>musculu<br>s              |
| 1 | 1.00 | 1 | 1 | -0.01 | -0.01 | -0.01  | -0.01 | -0.01 | t | 119578 | FAIVKFTKV<br>LLQYTGH    | Homo<br>sapiens                  |
| 1 | 1.00 | 1 | 1 | -0.01 | -0.01 | -0.01  | -0.01 | -0.01 | t | 119578 | FAIVKFTKV<br>LLQYTGH    | Homo<br>sapiens                  |
| 1 | 1.00 | 1 | 1 | 0     | 0     | 0      | 0     | 0     | t | 140510 | TTTHFLAT<br>KFYK        | Mus<br>musculu<br>s              |
| 1 | 1.00 | 1 | 1 | 0.02  | 0.014 | 0.02   | 0.019 | 0.02  | t | 4884   | ATALDTSN                | Oryctola<br>gus<br>cuniculu<br>s |
| 1 | 1.00 | 1 | 1 | 0.03  | 0.028 | 0.025  | 0.033 | 0.031 | t | 16396  | FKLEKEVA<br>E           | Mus<br>musculu<br>s              |
| 1 | 1.00 | 1 | 1 | 0     | 0     | 0      | 0     | 0     | t | 149979 | TKLSHKN                 | Capra<br>hircus                  |

|   |      |   |   |       |        |        |        |        |   |        |                 |                       |
|---|------|---|---|-------|--------|--------|--------|--------|---|--------|-----------------|-----------------------|
| 1 | 1.00 | 1 | 1 | 0.02  | 0.02   | 0.018  | 0.02   | 0.019  | t | 22015  | GREGYPADSKGCKIT | Mus musculus          |
| 1 | 1.00 | 1 | 1 | 0     | 0.004  | 0      | 0.001  | 0      | t | 73449  | YASSGIGP        | Homo sapiens          |
| 1 | 1.00 | 1 | 1 | 0     | 0.002  | 0      | 0.001  | 0      | t | 54861  | RMAWDM MM       | Homo sapiens          |
| 1 | 1.00 | 1 | 1 | 0     | 0      | -0.01  | -0.001 | 0.002  | t | 57875  | SFQSFNLT EPHIT  | Homo sapiens          |
| 1 | 1.00 | 1 | 1 | -0.02 | -0.02  | -0.01  | -0.02  | -0.021 | t | 45420  | NPNDPP          | Mus musculus          |
| 1 | 1.00 | 1 | 1 | -0.01 | -0.008 | -0.019 | -0.013 | -0.012 | t | 106196 | YGLPREQARQLKNNN | Homo sapiens          |
| 1 | 1.00 | 1 | 1 | 0.08  | 0.074  | 0.074  | 0.073  | 0.082  | t | 127778 | PSEFEADL MLGP   | Trichosurus vulpecula |
| 1 | 1.00 | 1 | 1 | 0     | 0      | 0      | -0.003 | -0.003 | t | 72087  | VYLLPR          | Homo sapiens          |
| 1 | 1.00 | 1 | 1 | 0.02  | 0.023  | 0.02   | 0.02   | 0.022  | t | 7532   | DAHHAAD         | Mus musculus          |
| 1 | 1.00 | 1 | 1 | 0     | -0.003 | -0.014 | 0      | 0.004  | t | 97590  | QRDKVNLT        | Oryctolagus cuniculus |
| 1 | 1.00 | 1 | 1 | 0.01  | 0.008  | -0.005 | 0.009  | 0.011  | t | 36729  | LITNTIAGV       | Mus musculus          |
| 1 | 1.00 | 1 | 1 | -0.01 | -0.01  | 0      | -0.009 | -0.012 | t | 75286  | YPFMWG GAYCF    | Mus musculus          |
| 1 | 1.00 | 1 | 1 | 0.01  | 0.01   | 0.008  | 0.017  | 0.01   | t | 120805 | MSGRGKQGGKARAKA | Homo sapiens          |
| 1 | 1.00 | 1 | 1 | -0.03 | -0.032 | -0.022 | -0.029 | -0.033 | t | 149384 | MSLPGRW KPK     | Mus musculus          |

|   |      |   |   |       |        |        |        |        |   |        |                              |                                  |
|---|------|---|---|-------|--------|--------|--------|--------|---|--------|------------------------------|----------------------------------|
| 1 | 1.00 | 1 | 1 | 0.01  | 0.012  | 0.005  | 0.01   | 0.01   | t | 74162  | YIAGDPAL<br>AYGYAQD<br>QEPDA | Homo<br>sapiens                  |
| 1 | 1.00 | 1 | 1 | 0.02  | 0.02   | 0.02   | 0.02   | 0.02   | t | 92845  | GNGKITQ<br>DEL               | Ovis<br>aries                    |
| 1 | 1.00 | 1 | 1 | 0     | 0      | 0      | 0      | 0      | t | 1666   | AGRMIPK<br>G                 | Anas<br>platyrhy<br>nchos        |
| 1 | 1.00 | 1 | 1 | -0.01 | -0.022 | -0.008 | -0.01  | -0.012 | t | 146185 | DAEFGH                       | Macaca<br>mulatta                |
| 1 | 1.00 | 1 | 1 | 0.01  | 0.013  | 0.005  | 0.01   | 0.009  | t | 96216  | EEEELLKKS<br>ADTLWN<br>MQK   | Mus<br>musculu<br>s              |
| 1 | 1.00 | 1 | 1 | 0.01  | 0.012  | 0.015  | 0.007  | 0.008  | t | 18963  | GDEGRSVF<br>DDNV             | Homo<br>sapiens                  |
| 1 | 1.00 | 1 | 1 | -0.01 | -0.01  | -0.01  | -0.006 | -0.01  | t | 18759  | GASAQSG<br>ASAQSGAS          | Homo<br>sapiens                  |
| 1 | 1.00 | 1 | 1 | 0.01  | 0.013  | 0.012  | 0.01   | 0.01   | t | 135845 | WTEIHDW<br>EAAME             | Mus<br>musculu<br>s              |
| 1 | 1.00 | 1 | 1 | 0.02  | 0.02   | 0.02   | 0.02   | 0.019  | t | 49998  | PVVEVNG<br>VTIQVGSR          | Mus<br>musculu<br>s              |
| 1 | 1.00 | 1 | 1 | -0.01 | -0.013 | -0.01  | -0.01  | -0.01  | t | 50156  | PYQGSGK<br>GVS               | Oryctola<br>gus<br>cuniculu<br>s |
| 1 | 1.00 | 1 | 1 | 0.01  | 0.014  | 0.01   | 0.011  | 0.01   | t | 56364  | RVMYASS<br>G                 | Homo<br>sapiens                  |
| 1 | 1.00 | 1 | 1 | 0.03  | 0.03   | 0.03   | 0.03   | 0.03   | t | 145145 | DPPERPDS<br>P                | Mus<br>musculu<br>s              |
| 1 | 1.00 | 1 | 1 | 0.01  | 0.01   | 0.01   | 0.01   | 0.01   | t | 8514   | DGVMSTR<br>CPCGAAI           | Homo<br>sapiens                  |
| 1 | 1.00 | 1 | 1 | -0.01 | -0.01  | -0.01  | -0.01  | -0.01  | t | 107773 | CSVMHEG                      | Homo<br>sapiens                  |

|   |      |   |   |       |        |        |       |        |   |        |                              |                                  |
|---|------|---|---|-------|--------|--------|-------|--------|---|--------|------------------------------|----------------------------------|
| 1 | 1.00 | 1 | 1 | -0.01 | -0.014 | -0.021 | -0.01 | -0.01  | t | 28331  | IRLRHENK<br>DLKARLEN<br>AMEV | Mus<br>musculu<br>s              |
| 1 | 1.00 | 1 | 1 | -0.02 | -0.02  | -0.011 | -0.02 | -0.023 | t | 134492 | QIQRPS<br>M                  | Mus<br>musculu<br>s              |
| 1 | 1.00 | 1 | 1 | -0.04 | -0.043 | -0.043 | -0.04 | -0.037 | t | 124708 | SFERFEIF                     | Oryctola<br>gus<br>cuniculu<br>s |
| 1 | 1.00 | 1 | 1 | -0.03 | -0.03  | -0.031 | -0.03 | -0.03  | t | 127963 | EPKPKKAP<br>AKKGEKV          | Homo<br>sapiens                  |
| 1 | 1.00 | 1 | 1 | -0.03 | -0.027 | -0.044 | -0.03 | -0.028 | t | 100295 | LVDGNGR<br>FVF               | Mus<br>musculu<br>s              |
| 1 | 1.00 | 1 | 1 | 0     | 0.002  | 0      | 0.001 | 0      | t | 47260  | PEDTLNKV                     | Homo<br>sapiens                  |
| 1 | 1.00 | 1 | 1 | 0     | 0      | -0.016 | 0     | 0.004  | t | 76491  | YYDGRRS                      | Mus<br>musculu<br>s              |
| 1 | 1.00 | 1 | 1 | 0     | 0      | 0      | 0     | -0.001 | t | 102510 | HHQKLVFF<br>AEDVGSN<br>K     | Rattus<br>norvegic<br>us         |
| 1 | 1.00 | 1 | 1 | 0     | -0.003 | 0      | 0     | -0.001 | t | 102510 | HHQKLVFF<br>AEDVGSN<br>K     | Oryctola<br>gus<br>cuniculu<br>s |
| 1 | 1.00 | 1 | 1 | 0     | -0.003 | 0      | 0     | -0.001 | t | 68401  | VEVPGSQ<br>HIDSQKKA          | Oryctola<br>gus<br>cuniculu<br>s |
| 1 | 1.00 | 1 | 1 | 0     | 0.004  | 0      | 0     | -0.001 | t | 72805  | WLTEKEGS<br>YP               | Ovis<br>aries                    |
| 1 | 1.00 | 1 | 1 | 0     | -0.003 | 0      | 0     | -0.001 | t | 48670  | PNLRGDL<br>QVLAQKV<br>ARTLP  | Oryctola<br>gus<br>cuniculu<br>s |
| 1 | 1.00 | 1 | 1 | 0     | -0.003 | 0      | 0     | -0.001 | t | 48670  | PNLRGDL<br>QVLAQKV<br>ARTLP  | Oryctola<br>gus<br>cuniculu<br>s |

|   |      |   |   |       |        |       |       |        |   |        |                                |                                  |
|---|------|---|---|-------|--------|-------|-------|--------|---|--------|--------------------------------|----------------------------------|
| 1 | 1.00 | 1 | 1 | 0     | -0.003 | 0     | 0     | -0.001 | t | 11815  | EENVEENV<br>EENVEENV           | Oryctola<br>gus<br>cuniculu<br>s |
| 1 | 1.00 | 1 | 1 | 0     | 0      | 0     | 0     | -0.001 | t | 32844  | KPQEEKEK<br>ITKEILNGK          | Rattus<br>norvegic<br>us         |
| 1 | 1.00 | 1 | 1 | 0     | -0.003 | 0     | 0     | -0.001 | t | 32844  | KPQEEKEK<br>ITKEILNGK          | Oryctola<br>gus<br>cuniculu<br>s |
| 1 | 1.00 | 1 | 1 | 0     | -0.003 | 0     | 0     | -0.001 | t | 9106   | DLGSIA                         | Oryctola<br>gus<br>cuniculu<br>s |
| 1 | 1.00 | 1 | 1 | 0     | -0.002 | 0     | 0     | -0.001 | t | 7171   | CTKPTD<br>GNC                  | Mus<br>musculu<br>s              |
| 1 | 1.00 | 1 | 1 | 0     | 0.012  | 0     | 0     | -0.001 | t | 9757   | DPRVRGLY<br>FPAGGSSS<br>GTV    | Pan<br>troglody<br>tes           |
| 1 | 1.00 | 1 | 1 | 0.01  | 0.01   | 0.005 | 0.01  | 0.011  | t | 140674 | ESQPDPKP<br>DELHKS             | Mus<br>musculu<br>s              |
| 1 | 1.00 | 1 | 1 | 0.04  | 0.038  | 0.053 | 0.043 | 0.041  | t | 138862 | KFPED                          | Mus<br>musculu<br>s              |
| 1 | 1.00 | 1 | 1 | 0.01  | 0.01   | 0.01  | 0.013 | 0.01   | t | 96450  | KEKPTPPV<br>KP                 | Homo<br>sapiens(<br>human)       |
| 1 | 1.00 | 1 | 1 | -0.02 | -0.02  | -0.02 | -0.02 | -0.022 | t | 144661 | GREGYP<br>A<br>DGGCAWP<br>ACYC | Oryctola<br>gus<br>cuniculu<br>s |
| 1 | 1.00 | 1 | 1 | 0.03  | 0.03   | 0.03  | 0.03  | 0.03   | t | 141623 | DSKLNEIF<br>GSSDTNDI           | Rattus<br>norvegic<br>us         |
| 1 | 1.00 | 1 | 1 | 0.03  | 0.032  | 0.03  | 0.03  | 0.03   | t | 141623 | DSKLNEIF<br>GSSDTNDI           | Rattus<br>norvegic<br>us         |
| 1 | 1.00 | 1 | 1 | 0.03  | 0.03   | 0.03  | 0.03  | 0.03   | t | 75848  | YSPEVG                         | Mus<br>musculu<br>s              |
| 1 | 1.00 | 1 | 1 | 0.01  | 0.01   | 0.01  | 0.01  | 0.01   | t | 111156 | CMNKPAY<br>AC                  | Homo<br>sapiens                  |

|   |      |   |   |       |        |        |        |        |   |        |                              |                     |
|---|------|---|---|-------|--------|--------|--------|--------|---|--------|------------------------------|---------------------|
| 1 | 1.00 | 1 | 1 | 0     | 0      | -0.005 | 0      | 0.001  | t | 10868  | DYEDRYYR<br>E                | Mus<br>musculu<br>s |
| 1 | 1.00 | 1 | 1 | -0.03 | -0.03  | -0.03  | -0.03  | -0.03  | t | 156423 | QNQLDQV<br>PRRFYLAG          | Homo<br>sapiens     |
| 1 | 1.00 | 1 | 1 | -0.03 | -0.032 | -0.05  | -0.037 | -0.03  | t | 128043 | LDAMPAG<br>NPAFPVIP<br>G     | Mus<br>musculu<br>s |
| 1 | 1.00 | 1 | 1 | -0.01 | -0.01  | -0.023 | -0.008 | -0.008 | t | 14426  | ETIGTLKKI<br>LDETVK          | Homo<br>sapiens     |
| 1 | 1.00 | 1 | 1 | 0.01  | 0.013  | 0.015  | 0.01   | 0.008  | t | 124924 | YYVFFEEQ<br>EDE              | Mus<br>musculu<br>s |
| 1 | 1.00 | 1 | 1 | 0.01  | 0.009  | 0.012  | 0.011  | 0.009  | t | 24362  | HNASGKE<br>AKVCTISPI<br>MGYS | Homo<br>sapiens     |
| 1 | 1.00 | 1 | 1 | 0.02  | 0.02   | 0.013  | 0.02   | 0.022  | t | 7005   | CSGPTTIR<br>GQFS             | Mus<br>musculu<br>s |
| 1 | 1.00 | 1 | 1 | 0.04  | 0.04   | 0.04   | 0.04   | 0.04   | t | 156866 | FGSSSAG                      | Gallus<br>gallus    |
| 1 | 1.00 | 1 | 1 | 0     | -0.002 | 0.002  | -0.001 | 0      | t | 52021  | QQFGRDV<br>SDF               | Mus<br>musculu<br>s |
| 1 | 1.00 | 1 | 1 | 0.02  | 0.028  | 0.02   | 0.02   | 0.018  | t | 156848 | ALTVRCTA<br>PCPQRN           | Gallus<br>gallus    |
| 1 | 1.00 | 1 | 1 | -0.03 | -0.026 | -0.027 | -0.029 | -0.03  | t | 150874 | NWFDISK<br>WLWYI             | Homo<br>sapiens     |
| 1 | 1.00 | 1 | 1 | 0.02  | 0.022  | 0.01   | 0.017  | 0.02   | t | 158728 | DVKKAFKV<br>IDQDASG          | Homo<br>sapiens     |
| 1 | 1.00 | 1 | 1 | 0     | 0      | 0.002  | 0.001  | 0.001  | t | 65678  | TPPAYR                       | Mus<br>musculu<br>s |
| 1 | 1.00 | 1 | 1 | 0.01  | 0.01   | 0.005  | 0.01   | 0.01   | t | 102946 | YGCYCGV<br>GG                | Mus<br>musculu<br>s |
| 1 | 1.00 | 1 | 1 | 0.03  | 0.026  | 0.03   | 0.03   | 0.029  | t | 123001 | AASEDPR                      | Mus<br>musculu<br>s |

|   |      |   |   |       |        |        |        |        |   |        |                      |                       |
|---|------|---|---|-------|--------|--------|--------|--------|---|--------|----------------------|-----------------------|
| 1 | 1.00 | 1 | 1 | -0.01 | -0.01  | -0.014 | -0.01  | -0.013 | t | 114666 | VRSRPSRS<br>RSSRSER  | Homo sapiens          |
| 1 | 1.00 | 1 | 1 | -0.01 | -0.01  | -0.015 | -0.011 | -0.014 | t | 138242 | SQPEILERT<br>RAEVDTA | Mus musculus          |
| 1 | 1.00 | 1 | 1 | 0.02  | 0.02   | 0.02   | 0.02   | 0.02   | t | 65798  | TPVIGSQA             | Homo sapiens          |
| 1 | 1.00 | 1 | 1 | 0     | 0      | 0      | 0      | 0      | t | 73635  | YEDRY                | Mus musculus          |
| 1 | 1.00 | 1 | 1 | -0.01 | -0.008 | -0.01  | -0.009 | -0.009 | t | 46316  | NTWKSK               | Homo sapiens          |
| 1 | 1.00 | 1 | 1 | -0.03 | -0.03  | -0.028 | -0.03  | -0.029 | t | 16123  | FHLPYNHN<br>WFAL     | Homo sapiens          |
| 1 | 1.00 | 1 | 1 | 0.02  | 0.018  | 0.019  | 0.023  | 0.02   | t | 106690 | NSDHFLQP<br>DPPL     | Mus musculus          |
| 1 | 1.00 | 1 | 1 | 0.02  | 0.02   | 0.02   | 0.02   | 0.02   | t | 106921 | TPYTNNPD<br>LLFT     | Mus musculus          |
| 1 | 1.00 | 1 | 1 | 0.02  | 0.02   | 0.02   | 0.02   | 0.02   | t | 78260  | RIVSIT               | Equus caballus        |
| 1 | 1.00 | 1 | 1 | 0     | 0      | 0      | 0      | 0      | t | 148591 | FAQPQQL<br>FPE       | Homo sapiens          |
| 1 | 1.00 | 1 | 1 | 0.01  | 0.008  | 0.009  | 0.009  | 0.01   | t | 39349  | LSFNPTQL<br>EEQCHI   | Mus musculus          |
| 1 | 1.00 | 1 | 1 | 0.01  | 0.01   | 0.007  | 0.01   | 0.009  | t | 52910  | QYGLEKRD<br>NGHQGE   | Mus musculus          |
| 1 | 1.00 | 1 | 1 | -0.01 | -0.01  | -0.017 | -0.019 | -0.013 | t | 131038 | RKIAKDEG<br>AK       | Homo sapiens          |
| 1 | 1.00 | 1 | 1 | -0.01 | -0.006 | -0.013 | -0.01  | -0.008 | t | 123754 | SRISYDPKF            | Ovis aries            |
| 1 | 1.00 | 1 | 1 | 0.01  | 0.006  | 0.013  | 0.009  | 0.008  | t | 47863  | PHYSLIKPE<br>SSL     | Oryctolagus cuniculus |

|   |      |   |   |       |        |        |        |        |   |        |                              |                                  |
|---|------|---|---|-------|--------|--------|--------|--------|---|--------|------------------------------|----------------------------------|
| 1 | 1.00 | 1 | 1 | 0.02  | 0.014  | 0.018  | 0.02   | 0.02   | t | 32623  | KNTTTTQT<br>QPSKPTT          | Oryctola<br>gus<br>cuniculu<br>s |
| 1 | 1.00 | 1 | 1 | -0.06 | -0.058 | -0.059 | -0.059 | -0.061 | t | 3687   | APPLRTW<br>KSRARAV           | Homo<br>sapiens                  |
| 1 | 1.00 | 1 | 1 | 0.03  | 0.032  | 0.03   | 0.031  | 0.03   | t | 62993  | TASITSPLT<br>TQNTL           | Homo<br>sapiens                  |
| 1 | 1.00 | 1 | 1 | -0.02 | -0.02  | -0.022 | -0.02  | -0.021 | t | 120846 | NREPVQLE<br>TLSIRGN          | Mus<br>musculu<br>s              |
| 1 | 1.00 | 1 | 1 | 0.01  | 0.01   | 0.01   | 0.01   | 0.01   | t | 78141  | EKAEEVEK                     | Homo<br>sapiens                  |
| 1 | 1.00 | 1 | 1 | 0.01  | 0.01   | 0.01   | 0.01   | 0.01   | t | 55036  | RNNHPQN<br>TSDSQKEA<br>TD    | Oryctola<br>gus<br>cuniculu<br>s |
| 1 | 1.00 | 1 | 1 | 0.02  | 0.02   | 0.018  | 0.02   | 0.021  | t | 144791 | STIDYFQP<br>NNKR             | Sus<br>scrofa                    |
| 1 | 1.00 | 1 | 1 | -0.01 | -0.01  | -0.01  | -0.01  | -0.01  | t | 79552  | GEDVGAF<br>PPGKFVTA<br>AL    | Homo<br>sapiens                  |
| 1 | 1.00 | 1 | 1 | -0.01 | -0.012 | -0.01  | -0.007 | -0.01  | t | 95829  | SGASAQS<br>GTSGP             | Mus<br>musculu<br>s              |
| 1 | 1.00 | 1 | 1 | 0.03  | 0.038  | 0.023  | 0.03   | 0.031  | t | 106495 | GYEVHHQ<br>KLVF              | Gallus<br>gallus                 |
| 1 | 1.00 | 1 | 1 | 0     | 0      | -0.006 | 0.002  | 0      | t | 25004  | HTYARFGI<br>EIQVQINP<br>TPFQ | Homo<br>sapiens                  |
| 1 | 1.00 | 1 | 1 | -0.02 | -0.02  | -0.018 | -0.014 | -0.018 | t | 6233   | CFKKPPKY<br>PPALPI           | Homo<br>sapiens                  |
| 1 | 1.00 | 1 | 1 | -0.01 | -0.011 | -0.02  | -0.007 | -0.008 | t | 31502  | KKDGKKAE<br>PKNPRENK<br>LDQP | Homo<br>sapiens                  |
| 1 | 1.00 | 1 | 1 | 0.03  | 0.03   | 0.033  | 0.037  | 0.032  | t | 115649 | SPGKNAT<br>GMEVG             | Homo<br>sapiens                  |
| 1 | 1.00 | 1 | 1 | 0     | -0.004 | -0.007 | -0.001 | -0.001 | t | 46859  | PALTAVET<br>GATNPL           | Oryctola<br>gus<br>cuniculu<br>s |



|   |      |   |   |       |        |        |        |        |   |        |                              |                                  |
|---|------|---|---|-------|--------|--------|--------|--------|---|--------|------------------------------|----------------------------------|
| 1 | 1.00 | 1 | 1 | 0.02  | 0.023  | 0.02   | 0.02   | 0.021  | t | 43839  | NFGDQDLI<br>RQGTDYK          | Macaca<br>cyclopis               |
| 1 | 1.00 | 1 | 1 | 0.04  | 0.037  | 0.005  | 0.04   | 0.05   | t | 44172  | NHVADIDK<br>LIDYAA           | Oryctola<br>gus<br>cuniculu<br>s |
| 1 | 1.00 | 1 | 1 | 0.03  | 0.03   | 0.03   | 0.03   | 0.03   | t | 102248 | YNPTYLL                      | Homo<br>sapiens                  |
| 1 | 1.00 | 1 | 1 | 0.03  | 0.03   | 0.03   | 0.03   | 0.03   | t | 7514   | DAGDSAYS<br>Q                | Mus<br>musculu<br>s              |
| 1 | 1.00 | 1 | 1 | 0.01  | 0.01   | 0.01   | 0.01   | 0.01   | t | 134757 | PEAPRRRS<br>PSPTPTP          | Homo<br>sapiens                  |
| 1 | 1.00 | 1 | 1 | 0.01  | 0.01   | 0.01   | 0.01   | 0.009  | t | 7003   | CSGLSSLFT<br>PGPKQQI         | Mus<br>musculu<br>s              |
| 1 | 1.00 | 1 | 1 | 0.07  | 0.07   | 0.07   | 0.07   | 0.07   | t | 110916 | KLDDTENA<br>SAYAANA          | Mus<br>musculu<br>s              |
| 1 | 1.00 | 1 | 1 | 0.07  | 0.07   | 0.07   | 0.07   | 0.07   | t | 110916 | KLDDTENA<br>SAYAANA          | Mus<br>musculu<br>s              |
| 1 | 1.00 | 1 | 1 | 0.04  | 0.044  | 0.031  | 0.04   | 0.039  | t | 112581 | LKKYTFWE<br>VNLKEKFS<br>ADLD | Cavia<br>porcellu<br>s           |
| 1 | 1.00 | 1 | 1 | -0.02 | -0.018 | -0.025 | -0.019 | -0.022 | t | 56856  | SALEWIDL<br>DSSL             | Homo<br>sapiens                  |
| 1 | 1.00 | 1 | 1 | 0.01  | 0.01   | 0.005  | 0.01   | 0.01   | t | 134131 | LEEAKTQG<br>PYDVVVL          | Mus<br>musculu<br>s              |
| 1 | 1.00 | 1 | 1 | -0.04 | -0.04  | -0.04  | -0.033 | -0.04  | t | 135994 | SGLAPKRP<br>GPAG             | Homo<br>sapiens                  |
| 1 | 1.00 | 1 | 1 | 0.01  | 0.007  | 0.004  | 0.01   | 0.008  | t | 21911  | GQLQAVN<br>PNAGNRG<br>Q      | Oryctola<br>gus<br>cuniculu<br>s |
| 1 | 1.00 | 1 | 1 | 0     | -0.002 | 0      | -0.001 | -0.002 | t | 150987 | GKCPKYVK<br>STKLRLA          | Mus<br>musculu<br>s              |
| 1 | 1.00 | 1 | 1 | 0     | -0.002 | 0      | -0.001 | -0.002 | t | 150978 | EKNVTVTH<br>SVNLLED          | Mus<br>musculu<br>s              |
| 1 | 1.00 | 1 | 1 | 0     | -0.002 | 0      | -0.001 | -0.002 | t | 137290 | SEIEKLKNK<br>YEAGIP          | Mus<br>musculu<br>s              |

|   |      |   |   |   |        |   |        |        |   |        |                              |                                  |
|---|------|---|---|---|--------|---|--------|--------|---|--------|------------------------------|----------------------------------|
| 1 | 1.00 | 1 | 1 | 0 | -0.002 | 0 | -0.001 | -0.002 | t | 151023 | LCKLRGVA<br>PLHLGKC          | Mus<br>musculu<br>s              |
| 1 | 1.00 | 1 | 1 | 0 | -0.002 | 0 | -0.001 | -0.002 | t | 128004 | GMIEVQS<br>NYGFVWD<br>VSLKKV | Mus<br>musculu<br>s              |
| 1 | 1.00 | 1 | 1 | 0 | -0.004 | 0 | -0.001 | -0.002 | t | 133518 | ASDVVKK<br>MVGETVE<br>SA     | Oryctola<br>gus<br>cuniculu<br>s |
| 1 | 1.00 | 1 | 1 | 0 | -0.004 | 0 | -0.001 | -0.002 | t | 133733 | VKTLLPYG<br>SVINYGY<br>VKPG  | Oryctola<br>gus<br>cuniculu<br>s |
| 1 | 1.00 | 1 | 1 | 0 | -0.002 | 0 | -0.001 | -0.002 | t | 130994 | PDQRPYC<br>WHYPPKP<br>C      | Mus<br>musculu<br>s              |
| 1 | 1.00 | 1 | 1 | 0 | -0.002 | 0 | -0.001 | -0.002 | t | 128066 | NSYDVLSA<br>LSGNLKL          | Mus<br>musculu<br>s              |
| 1 | 1.00 | 1 | 1 | 0 | -0.004 | 0 | -0.001 | -0.002 | t | 133540 | DALVAKA<br>QEVs              | Oryctola<br>gus<br>cuniculu<br>s |
| 1 | 1.00 | 1 | 1 | 0 | -0.002 | 0 | -0.001 | -0.002 | t | 128084 | QKNACSF<br>DLCNSYDV<br>L     | Mus<br>musculu<br>s              |
| 1 | 1.00 | 1 | 1 | 0 | -0.002 | 0 | -0.001 | -0.002 | t | 127944 | DLVNCNL<br>NTNCVAV<br>AFSLPD | Mus<br>musculu<br>s              |
| 1 | 1.00 | 1 | 1 | 0 | -0.002 | 0 | -0.001 | -0.002 | t | 127984 | FTNLKFKV<br>RKITSSHR<br>GN   | Mus<br>musculu<br>s              |
| 1 | 1.00 | 1 | 1 | 0 | -0.002 | 0 | -0.001 | -0.002 | t | 103545 | RGIHVDIII<br>DRSHSKLT<br>FKQ | Mus<br>musculu<br>s              |
| 1 | 1.00 | 1 | 1 | 0 | -0.002 | 0 | -0.001 | -0.002 | t | 110920 | KPSPWAP<br>KKHRRLS           | Mus<br>musculu<br>s              |
| 1 | 1.00 | 1 | 1 | 0 | -0.002 | 0 | -0.001 | -0.002 | t | 103049 | ANYTNLSL<br>RLDNNL           | Mus<br>musculu<br>s              |

|   |      |   |   |   |        |   |        |        |   |        |                              |                                  |
|---|------|---|---|---|--------|---|--------|--------|---|--------|------------------------------|----------------------------------|
| 1 | 1.00 | 1 | 1 | 0 | -0.002 | 0 | -0.001 | -0.002 | t | 110284 | HKSAIVTLT<br>YDSEWQR<br>DQ   | Mus<br>musculu<br>s              |
| 1 | 1.00 | 1 | 1 | 0 | -0.004 | 0 | -0.001 | -0.002 | t | 117348 | PTRAPSGP<br>RPP              | Oryctola<br>gus<br>cuniculu<br>s |
| 1 | 1.00 | 1 | 1 | 0 | -0.004 | 0 | -0.001 | -0.002 | t | 111013 | RTGYIPLG<br>TRPPT            | Oryctola<br>gus<br>cuniculu<br>s |
| 1 | 1.00 | 1 | 1 | 0 | -0.002 | 0 | -0.001 | -0.002 | t | 103188 | FVLPQDRK<br>IAIQAVLEK<br>IQT | Mus<br>musculu<br>s              |
| 1 | 1.00 | 1 | 1 | 0 | -0.004 | 0 | -0.001 | -0.002 | t | 110284 | HKSAIVTLT<br>YDSEWQR<br>DQ   | Oryctola<br>gus<br>cuniculu<br>s |
| 1 | 1.00 | 1 | 1 | 0 | -0.002 | 0 | -0.001 | -0.002 | t | 107852 | GEPOSSIIQ<br>Y               | Mus<br>musculu<br>s              |
| 1 | 1.00 | 1 | 1 | 0 | -0.002 | 0 | -0.001 | -0.002 | t | 110284 | HKSAIVTLT<br>YDSEWQR<br>DQ   | Mus<br>musculu<br>s              |
| 1 | 1.00 | 1 | 1 | 0 | -0.004 | 0 | -0.001 | -0.002 | t | 71312  | VTGATVS                      | Oryctola<br>gus<br>cuniculu<br>s |
| 1 | 1.00 | 1 | 1 | 0 | -0.002 | 0 | -0.001 | -0.002 | t | 65360  | TNLEDPAS<br>RDLVVS           | Mus<br>musculu<br>s              |
| 1 | 1.00 | 1 | 1 | 0 | -0.004 | 0 | -0.001 | -0.002 | t | 85833  | LSIIAEQSN<br>STVDNQK         | Oryctola<br>gus<br>cuniculu<br>s |
| 1 | 1.00 | 1 | 1 | 0 | -0.004 | 0 | -0.001 | -0.002 | t | 64690  | TKVAEAEK<br>QKAAEA           | Oryctola<br>gus<br>cuniculu<br>s |
| 1 | 1.00 | 1 | 1 | 0 | -0.002 | 0 | -0.001 | -0.002 | t | 68895  | VHTWTEQ<br>YK                | Mus<br>musculu<br>s              |
| 1 | 1.00 | 1 | 1 | 0 | -0.004 | 0 | -0.001 | -0.002 | t | 64978  | TLNKDQLL<br>SSSKYTIQR<br>STG | Oryctola<br>gus<br>cuniculu<br>s |

|   |      |   |   |   |        |   |        |        |   |       |                              |                                  |
|---|------|---|---|---|--------|---|--------|--------|---|-------|------------------------------|----------------------------------|
| 1 | 1.00 | 1 | 1 | 0 | -0.004 | 0 | -0.001 | -0.002 | t | 70437 | VPPTQSKK<br>KNKNET           | Oryctola<br>gus<br>cuniculu<br>s |
| 1 | 1.00 | 1 | 1 | 0 | -0.004 | 0 | -0.001 | -0.002 | t | 61410 | SSTRGGSR<br>VEGIFAGL<br>FMNA | Oryctola<br>gus<br>cuniculu<br>s |
| 1 | 1.00 | 1 | 1 | 0 | -0.004 | 0 | -0.001 | -0.002 | t | 65298 | TNDEEDT<br>NDEEDTN<br>DEED   | Oryctola<br>gus<br>cuniculu<br>s |
| 1 | 1.00 | 1 | 1 | 0 | -0.004 | 0 | -0.001 | -0.002 | t | 67558 | VAEAEKQK<br>AAEATK           | Oryctola<br>gus<br>cuniculu<br>s |
| 1 | 1.00 | 1 | 1 | 0 | -0.002 | 0 | -0.001 | -0.002 | t | 79303 | LVAAGVD<br>YEDERISF<br>QDWPK | Rattus<br>norvegic<br>us         |
| 1 | 1.00 | 1 | 1 | 0 | -0.003 | 0 | -0.001 | -0.002 | t | 70937 | VSFQYNA<br>VGPYLNIN<br>FFDSS | Mus<br>musculu<br>s              |
| 1 | 1.00 | 1 | 1 | 0 | -0.002 | 0 | -0.001 | -0.002 | t | 66539 | TTASGKLIT                    | Mus<br>musculu<br>s              |
| 1 | 1.00 | 1 | 1 | 0 | -0.002 | 0 | -0.001 | -0.002 | t | 46258 | NTSDSQKE                     | Mus<br>musculu<br>s              |
| 1 | 1.00 | 1 | 1 | 0 | -0.004 | 0 | -0.001 | -0.002 | t | 51163 | QKAAEATK<br>VAEAEK           | Oryctola<br>gus<br>cuniculu<br>s |
| 1 | 1.00 | 1 | 1 | 0 | -0.006 | 0 | -0.001 | -0.002 | t | 44852 | NLQKDEP<br>NGRASDT           | Oryctola<br>gus<br>cuniculu<br>s |
| 1 | 1.00 | 1 | 1 | 0 | -0.004 | 0 | -0.001 | -0.002 | t | 51454 | QLNPKDN<br>DVEL              | Oryctola<br>gus<br>cuniculu<br>s |
| 1 | 1.00 | 1 | 1 | 0 | 0.004  | 0 | -0.001 | -0.002 | t | 46371 | NVESQPG<br>GQPNT             | Mus<br>musculu<br>s              |
| 1 | 1.00 | 1 | 1 | 0 | -0.004 | 0 | -0.001 | -0.002 | t | 36974 | LKNKIFPKK<br>KEDNQAV<br>DT   | Oryctola<br>gus<br>cuniculu<br>s |

|   |      |   |   |   |        |   |        |        |   |       |                               |                                  |
|---|------|---|---|---|--------|---|--------|--------|---|-------|-------------------------------|----------------------------------|
| 1 | 1.00 | 1 | 1 | 0 | -0.004 | 0 | -0.001 | -0.002 | t | 38345 | LNTEPSQL<br>PPTAPP            | Oryctola<br>gus<br>cuniculu<br>s |
| 1 | 1.00 | 1 | 1 | 0 | -0.002 | 0 | -0.001 | -0.002 | t | 39164 | LRPGPVSQ<br>PYHHWDT<br>DK     | Mus<br>musculu<br>s              |
| 1 | 1.00 | 1 | 1 | 0 | -0.004 | 0 | -0.001 | -0.002 | t | 46895 | PAPQAPY<br>QGYQEPP<br>APQAPY  | Oryctola<br>gus<br>cuniculu<br>s |
| 1 | 1.00 | 1 | 1 | 0 | -0.004 | 0 | -0.001 | -0.002 | t | 56614 | RYPHYSLIK<br>PESSL            | Oryctola<br>gus<br>cuniculu<br>s |
| 1 | 1.00 | 1 | 1 | 0 | -0.002 | 0 | -0.001 | -0.002 | t | 37055 | LKVIRK                        | Mus<br>musculu<br>s              |
| 1 | 1.00 | 1 | 1 | 0 | -0.004 | 0 | -0.001 | -0.002 | t | 44251 | NIISCNKN<br>DKNQ              | Oryctola<br>gus<br>cuniculu<br>s |
| 1 | 1.00 | 1 | 1 | 0 | -0.004 | 0 | -0.001 | -0.002 | t | 30349 | KEEKEEKE<br>EKEEKEKE<br>KE    | Oryctola<br>gus<br>cuniculu<br>s |
| 1 | 1.00 | 1 | 1 | 0 | -0.004 | 0 | -0.001 | -0.002 | t | 30988 | KGIYQTSN<br>FRVVPSPGD<br>VVRF | Oryctola<br>gus<br>cuniculu<br>s |
| 1 | 1.00 | 1 | 1 | 0 | -0.004 | 0 | -0.001 | -0.002 | t | 33859 | KTSERSQP<br>RGRRQPPI<br>KARR  | Oryctola<br>gus<br>cuniculu<br>s |
| 1 | 1.00 | 1 | 1 | 0 | -0.004 | 0 | -0.001 | -0.002 | t | 10892 | DYHRVMY                       | Oryctola<br>gus<br>cuniculu<br>s |
| 1 | 1.00 | 1 | 1 | 0 | -0.004 | 0 | -0.001 | -0.002 | t | 13460 | ENDVLNQ<br>ETEEEMEK           | Oryctola<br>gus<br>cuniculu<br>s |
| 1 | 1.00 | 1 | 1 | 0 | -0.002 | 0 | -0.001 | -0.002 | t | 35252 | LDPHAFHL<br>LL                | Mus<br>musculu<br>s              |
| 1 | 1.00 | 1 | 1 | 0 | 0.009  | 0 | -0.001 | -0.002 | t | 21571 | GPARRGA<br>PY                 | Oryctola<br>gus<br>cuniculu<br>s |

|   |      |   |   |       |        |        |        |        |   |        |                               |                                  |
|---|------|---|---|-------|--------|--------|--------|--------|---|--------|-------------------------------|----------------------------------|
| 1 | 1.00 | 1 | 1 | 0     | -0.004 | 0      | -0.001 | -0.002 | t | 12625  | EKAFREL                       | Oryctola<br>gus<br>cuniculu<br>s |
| 1 | 1.00 | 1 | 1 | 0     | -0.002 | 0      | -0.001 | -0.002 | t | 8119   | DEPAGE                        | Mus<br>musculu<br>s              |
| 1 | 1.00 | 1 | 1 | 0     | -0.004 | 0      | -0.001 | -0.002 | t | 8942   | DKNEKGQ<br>HEIVEVEEI<br>LPE   | Oryctola<br>gus<br>cuniculu<br>s |
| 1 | 1.00 | 1 | 1 | 0     | -0.002 | 0      | -0.001 | -0.002 | t | 6632   | CLTFGRET<br>VIEY              | Mus<br>musculu<br>s              |
| 1 | 1.00 | 1 | 1 | 0     | -0.004 | 0      | -0.001 | -0.002 | t | 5387   | AVIRRANN<br>VLKNEMK<br>RYKGL  | Oryctola<br>gus<br>cuniculu<br>s |
| 1 | 1.00 | 1 | 1 | 0     | -0.004 | 0      | -0.001 | -0.002 | t | 843    | AEATKVAE<br>AEKQKA            | Oryctola<br>gus<br>cuniculu<br>s |
| 1 | 1.00 | 1 | 1 | -0.01 | -0.01  | -0.014 | -0.01  | -0.01  | t | 157811 | QRQCQQR<br>CER                | Homo<br>sapiens                  |
| 1 | 1.00 | 1 | 1 | 0     | 0.002  | 0.001  | 0.007  | 0      | t | 122655 | YKRGII DR<br>GQYLQLQ<br>ELECD | Homo<br>sapiens                  |
| 1 | 1.00 | 1 | 1 | 0     | 0      | 0      | 0      | 0      | t | 117140 | DWEYSVW<br>LSN                | Homo<br>sapiens                  |
| 1 | 1.00 | 1 | 1 | 0     | 0      | 0      | 0      | 0      | t | 117140 | DWEYSVW<br>LSN                | Homo<br>sapiens                  |
| 1 | 1.00 | 1 | 1 | 0     | 0.004  | 0      | 0.001  | 0      | t | 22133  | GRLITVNP                      | MD                               |
| 1 | 1.00 | 1 | 1 | 0.02  | 0.02   | 0.027  | 0.02   | 0.02   | t | 4701   | ASQKIQLI                      | Mus<br>musculu<br>s              |
| 1 | 1.00 | 1 | 1 | 0.01  | 0.008  | 0.001  | 0.009  | 0.01   | t | 89     | AADKPTLD<br>IRMMNIE<br>A      | Mus<br>musculu<br>s              |
| 1 | 1.00 | 1 | 1 | 0.01  | 0.008  | 0.001  | 0.009  | 0.01   | t | 89     | AADKPTLD<br>IRMMNIE<br>A      | Mus<br>musculu<br>s              |
| 1 | 1.00 | 1 | 1 | 0.02  | 0.02   | 0.02   | 0.02   | 0.02   | t | 56862  | SALLED                        | Mus<br>musculu<br>s              |
| 1 | 1.00 | 1 | 1 | 0.02  | 0.02   | 0.02   | 0.02   | 0.02   | t | 56862  | SALLED                        | Mus<br>musculu<br>s              |

|   |      |   |   |       |        |        |        |        |   |        |                            |                                  |
|---|------|---|---|-------|--------|--------|--------|--------|---|--------|----------------------------|----------------------------------|
| 1 | 1.00 | 1 | 1 | 0     | 0      | 0      | 0      | 0      | t | 57705  | SEYPSQPL<br>S              | Homo<br>sapiens                  |
| 1 | 1.00 | 1 | 1 | 0     | 0      | 0      | 0      | 0      | t | 109996 | TRLRTIGY<br>TVK            | Mus<br>musculu<br>s              |
| 1 | 1.00 | 1 | 1 | -0.02 | -0.02  | -0.024 | -0.02  | -0.02  | t | 94445  | CCHPACG<br>KHF             | Capra<br>hircus                  |
| 1 | 1.00 | 1 | 1 | -0.02 | -0.013 | -0.024 | -0.02  | -0.02  | t | 94445  | CCHPACG<br>KHF             | Capra<br>hircus                  |
| 1 | 1.00 | 1 | 1 | 0.02  | 0.028  | 0.02   | 0.023  | 0.02   | t | 110922 | KQMDIKSI<br>NDLQ           | Homo<br>sapiens                  |
| 1 | 1.00 | 1 | 1 | -0.02 | -0.02  | -0.021 | -0.02  | -0.022 | t | 16043  | FGQIFRPD<br>NFVFGQS        | Mus<br>musculu<br>s              |
| 1 | 1.00 | 1 | 1 | 0.02  | 0.022  | 0.02   | 0.021  | 0.02   | t | 117097 | TLSTDQST<br>TRNW           | Homo<br>sapiens                  |
| 1 | 1.00 | 1 | 1 | 0.02  | 0.02   | 0.02   | 0.02   | 0.02   | t | 40292  | LVDADDPL                   | Homo<br>sapiens                  |
| 1 | 1.00 | 1 | 1 | -0.02 | -0.02  | -0.02  | -0.02  | -0.02  | t | 130453 | CLFFQNGK<br>VKCAAC         | Homo<br>sapiens                  |
| 1 | 1.00 | 1 | 1 | -0.04 | -0.04  | -0.04  | -0.036 | -0.04  | t | 115784 | HRTFE                      | Homo<br>sapiens                  |
| 1 | 1.00 | 1 | 1 | -0.01 | -0.002 | -0.01  | -0.01  | -0.012 | t | 156840 | AAPKMCS<br>TWCQMW<br>Q     | Gallus<br>gallus                 |
| 1 | 1.00 | 1 | 1 | -0.03 | -0.027 | -0.03  | -0.03  | -0.032 | t | 135501 | SQWNKP                     | Mus<br>musculu<br>s              |
| 1 | 1.00 | 1 | 1 | 0.02  | 0.02   | 0.02   | 0.02   | 0.02   | t | 139930 | TYDQIQKR<br>FEGATPSY<br>LS | Oryctola<br>gus<br>cuniculu<br>s |
| 1 | 1.00 | 1 | 1 | 0.02  | 0.02   | 0.02   | 0.02   | 0.02   | t | 135442 | AGLGGL                     | Oryctola<br>gus<br>cuniculu<br>s |
| 1 | 1.00 | 1 | 1 | 0.02  | 0.02   | 0.02   | 0.02   | 0.02   | t | 133955 | WIMNNF                     | Mus<br>musculu<br>s              |

|   |      |   |   |       |        |        |        |        |   |        |                              |                       |
|---|------|---|---|-------|--------|--------|--------|--------|---|--------|------------------------------|-----------------------|
| 1 | 1.00 | 1 | 1 | 0.02  | 0.02   | 0.02   | 0.02   | 0.02   | t | 103002 | AAASLAAI<br>AIAFLAG          | Homo sapiens          |
| 1 | 1.00 | 1 | 1 | 0.02  | 0.018  | 0.018  | 0.019  | 0.02   | t | 97565  | PTGSAAA<br>N                 | Mus musculus          |
| 1 | 1.00 | 1 | 1 | 0.03  | 0.034  | 0.042  | 0.031  | 0.03   | t | 17402  | FPSDEF                       | Homo sapiens          |
| 1 | 1.00 | 1 | 1 | -0.05 | -0.05  | -0.05  | -0.053 | -0.053 | t | 110997 | RCHAANP<br>NGRYYWG<br>GQYTWD | Mus musculus          |
| 1 | 1.00 | 1 | 1 | -0.03 | -0.034 | -0.039 | -0.031 | -0.031 | t | 71851  | VVTHEMA<br>HALG              | Oryctolagus cuniculus |
| 1 | 1.00 | 1 | 1 | 0     | 0      | 0      | 0      | 0.001  | t | 45410  | NPNANPN<br>ANPNA             | Mus musculus          |
| 1 | 1.00 | 1 | 1 | -0.01 | -0.01  | -0.01  | -0.01  | -0.01  | t | 136082 | SDDPSPGA<br>IDSNNS           | Oryctolagus cuniculus |
| 1 | 1.00 | 1 | 1 | -0.01 | -0.01  | -0.01  | -0.01  | -0.01  | t | 136082 | SDDPSPGA<br>IDSNNS           | Oryctolagus cuniculus |
| 1 | 1.00 | 1 | 1 | 0     | 0      | -0.007 | 0      | 0      | t | 158938 | KTQNQGP<br>WDEGRVE<br>ID     | Mus musculus          |
| 1 | 1.00 | 1 | 1 | -0.01 | -0.01  | -0.01  | -0.01  | -0.01  | t | 54224  | RIQLLEEDL<br>ER              | Homo sapiens          |
| 1 | 1.00 | 1 | 1 | -0.02 | -0.016 | -0.02  | -0.02  | -0.023 | t | 75951  | YTASARGD<br>LAHLTTTH<br>AR   | Cavia porcellus       |
| 1 | 1.00 | 1 | 1 | -0.02 | -0.016 | -0.02  | -0.02  | -0.023 | t | 75951  | YTASARGD<br>LAHLTTTH<br>AR   | Cavia porcellus       |



|   |      |   |   |       |        |        |        |        |   |        |                              |                                  |
|---|------|---|---|-------|--------|--------|--------|--------|---|--------|------------------------------|----------------------------------|
| 1 | 1.00 | 1 | 1 | 0.01  | 0.01   | 0.01   | 0.012  | 0.01   | t | 6060   | CCDLAPEA<br>RQAIKS           | Homo<br>sapiens                  |
| 1 | 1.00 | 1 | 1 | 0.03  | 0.028  | 0.023  | 0.023  | 0.03   | t | 130916 | KEDFDIYD<br>EDE              | Mus<br>musculu<br>s              |
| 1 | 1.00 | 1 | 1 | 0     | -0.002 | -0.017 | 0.001  | 0.002  | t | 136749 | WMLRAAE<br>EYSMNLG<br>F      | Mus<br>musculu<br>s              |
| 1 | 1.00 | 1 | 1 | 0.01  | 0.007  | 0.01   | 0.01   | 0.01   | t | 122289 | CSNSSSSQ<br>FQIHGP           | Oryctola<br>gus<br>cuniculu<br>s |
| 1 | 1.00 | 1 | 1 | 0.01  | 0.007  | 0.01   | 0.01   | 0.01   | t | 122289 | CSNSSSSQ<br>FQIHGP           | Oryctola<br>gus<br>cuniculu<br>s |
| 1 | 1.00 | 1 | 1 | 0     | 0.002  | -0.005 | -0.003 | -0.002 | t | 13233  | ELQGDRR<br>CQSQLERA          | Homo<br>sapiens                  |
| 1 | 1.00 | 1 | 1 | -0.02 | -0.022 | -0.03  | -0.021 | -0.02  | t | 13425  | EMVIITFKS<br>G               | Mus<br>musculu<br>s              |
| 1 | 1.00 | 1 | 1 | -0.02 | -0.022 | -0.03  | -0.021 | -0.02  | t | 13425  | EMVIITFKS<br>G               | Mus<br>musculu<br>s              |
| 1 | 1.00 | 1 | 1 | 0.01  | 0.01   | 0.01   | 0.01   | 0.01   | t | 135959 | LTRAYAKD<br>VKFG             | Homo<br>sapiens                  |
| 1 | 1.00 | 1 | 1 | -0.03 | -0.03  | -0.03  | -0.03  | -0.03  | t | 149067 | LNFDPPS                      | Sus<br>scrofa                    |
| 1 | 1.00 | 1 | 1 | 0.02  | 0.022  | 0.016  | 0.021  | 0.02   | t | 137919 | LGQNVLSA                     | Homo<br>sapiens                  |
| 1 | 1.00 | 1 | 1 | 0.01  | 0.009  | 0.007  | 0.01   | 0.01   | t | 28290  | IRFKDDSSY<br>EEVN            | Mus<br>musculu<br>s              |
| 1 | 1.00 | 1 | 1 | 0.01  | 0.01   | 0.01   | 0.01   | 0.009  | t | 58127  | SGLSSLFTP<br>GPKQQI          | Mus<br>musculu<br>s              |
| 1 | 1.00 | 1 | 1 | 0     | -0.002 | 0      | 0.003  | 0      | t | 137395 | EESEDEKR<br>RWGQRD<br>N      | Mus<br>musculu<br>s              |
| 1 | 1.00 | 1 | 1 | 0     | -0.002 | 0      | 0.003  | 0      | t | 148758 | QEQQQQL<br>QQQ               | Mus<br>musculu<br>s              |
| 1 | 1.00 | 1 | 1 | 0     | -0.004 | 0      | 0.003  | 0      | t | 105851 | GTAPFEIH<br>ANRIVGFF<br>SKII | Oryctola<br>gus<br>cuniculu<br>s |

|   |      |   |   |   |        |   |       |   |   |        |                              |                                  |
|---|------|---|---|---|--------|---|-------|---|---|--------|------------------------------|----------------------------------|
| 1 | 1.00 | 1 | 1 | 0 | -0.004 | 0 | 0.003 | 0 | t | 105684 | ASFDKVKG<br>DPVGILYA<br>VFKA | Oryctola<br>gus<br>cuniculu<br>s |
| 1 | 1.00 | 1 | 1 | 0 | -0.004 | 0 | 0.003 | 0 | t | 105814 | GELPNIEA<br>DVNTFVAS<br>HKPR | Oryctola<br>gus<br>cuniculu<br>s |
| 1 | 1.00 | 1 | 1 | 0 | -0.004 | 0 | 0.003 | 0 | t | 105718 | DPSIMAKF<br>TQFAGKDL<br>ESIK | Oryctola<br>gus<br>cuniculu<br>s |
| 1 | 1.00 | 1 | 1 | 0 | -0.004 | 0 | 0.003 | 0 | t | 105942 | LSADQIST<br>VQASFDK<br>VKGD  | Oryctola<br>gus<br>cuniculu<br>s |
| 1 | 1.00 | 1 | 1 | 0 | -0.002 | 0 | 0.003 | 0 | t | 98155  | KEEPTAAP                     | Mus<br>musculu<br>s              |
| 1 | 1.00 | 1 | 1 | 0 | -0.004 | 0 | 0.003 | 0 | t | 111752 | SAAGDWI<br>RRNVVAY<br>W      | Oryctola<br>gus<br>cuniculu<br>s |
| 1 | 1.00 | 1 | 1 | 0 | -0.002 | 0 | 0.003 | 0 | t | 98186  | KTEEPAAP                     | Mus<br>musculu<br>s              |
| 1 | 1.00 | 1 | 1 | 0 | -0.004 | 0 | 0.003 | 0 | t | 105854 | GVTHDQL<br>NNFRAGF<br>VSYMKA | Oryctola<br>gus<br>cuniculu<br>s |
| 1 | 1.00 | 1 | 1 | 0 | -0.004 | 0 | 0.003 | 0 | t | 95268  | CAQVYNKL<br>GMYP             | Oryctola<br>gus<br>cuniculu<br>s |
| 1 | 1.00 | 1 | 1 | 0 | -0.004 | 0 | 0.003 | 0 | t | 95201  | AASAYCST<br>WD               | Oryctola<br>gus<br>cuniculu<br>s |
| 1 | 1.00 | 1 | 1 | 0 | -0.002 | 0 | 0.003 | 0 | t | 65565  | TPEVDDEA<br>LEK              | Mus<br>musculu<br>s              |
| 1 | 1.00 | 1 | 1 | 0 | -0.002 | 0 | 0.003 | 0 | t | 72178  | VYVEELKP<br>TPEGDLIL<br>LQK  | Mus<br>musculu<br>s              |
| 1 | 1.00 | 1 | 1 | 0 | -0.004 | 0 | 0.003 | 0 | t | 95686  | PSLKFILNT<br>VNG             | Oryctola<br>gus<br>cuniculu<br>s |

|   |      |   |   |   |        |   |       |   |   |       |                              |                                  |
|---|------|---|---|---|--------|---|-------|---|---|-------|------------------------------|----------------------------------|
| 1 | 1.00 | 1 | 1 | 0 | -0.004 | 0 | 0.003 | 0 | t | 95987 | VTFTEVG<br>YTRAE             | Oryctola<br>gus<br>cuniculu<br>s |
| 1 | 1.00 | 1 | 1 | 0 | -0.004 | 0 | 0.003 | 0 | t | 64391 | TINGLART<br>TADRQTA          | Oryctola<br>gus<br>cuniculu<br>s |
| 1 | 1.00 | 1 | 1 | 0 | -0.004 | 0 | 0.003 | 0 | t | 70153 | VNPNNAA<br>AL                | Oryctola<br>gus<br>cuniculu<br>s |
| 1 | 1.00 | 1 | 1 | 0 | -0.004 | 0 | 0.003 | 0 | t | 96017 | YHLYNSQD<br>HG               | Oryctola<br>gus<br>cuniculu<br>s |
| 1 | 1.00 | 1 | 1 | 0 | -0.004 | 0 | 0.003 | 0 | t | 95752 | RAGFITELS<br>EFI             | Oryctola<br>gus<br>cuniculu<br>s |
| 1 | 1.00 | 1 | 1 | 0 | -0.004 | 0 | 0.003 | 0 | t | 70370 | VPLYNRFS<br>YIPNGALK<br>FVD  | Oryctola<br>gus<br>cuniculu<br>s |
| 1 | 1.00 | 1 | 1 | 0 | -0.002 | 0 | 0.003 | 0 | t | 62912 | TALKKAITA<br>MSQAQKA<br>AKPA | Mus<br>musculu<br>s              |
| 1 | 1.00 | 1 | 1 | 0 | -0.002 | 0 | 0.003 | 0 | t | 74689 | YLGYLEQL<br>LRLKKYKV<br>PQLE | Mus<br>musculu<br>s              |
| 1 | 1.00 | 1 | 1 | 0 | -0.004 | 0 | 0.003 | 0 | t | 95383 | FILNTVNG<br>TTRT             | Oryctola<br>gus<br>cuniculu<br>s |
| 1 | 1.00 | 1 | 1 | 0 | -0.004 | 0 | 0.003 | 0 | t | 95696 | PVSQFHIQ<br>GQVY             | Oryctola<br>gus<br>cuniculu<br>s |
| 1 | 1.00 | 1 | 1 | 0 | -0.004 | 0 | 0.003 | 0 | t | 66759 | TTPDRQA<br>AC                | Oryctola<br>gus<br>cuniculu<br>s |
| 1 | 1.00 | 1 | 1 | 0 | -0.004 | 0 | 0.003 | 0 | t | 96025 | YSMLVER<br>DHKNE             | Oryctola<br>gus<br>cuniculu<br>s |
| 1 | 1.00 | 1 | 1 | 0 | -0.004 | 0 | 0.003 | 0 | t | 76396 | YVRGGGA<br>VP                | Oryctola<br>gus<br>cuniculu<br>s |

|   |      |   |   |   |        |   |       |   |   |       |                              |                                  |
|---|------|---|---|---|--------|---|-------|---|---|-------|------------------------------|----------------------------------|
| 1 | 1.00 | 1 | 1 | 0 | -0.002 | 0 | 0.003 | 0 | t | 62912 | TALKKAITA<br>MSQAQKA<br>AKPA | Mus<br>musculu<br>s              |
| 1 | 1.00 | 1 | 1 | 0 | -0.004 | 0 | 0.003 | 0 | t | 95334 | EDVPQPP<br>VSQFH             | Oryctola<br>gus<br>cuniculu<br>s |
| 1 | 1.00 | 1 | 1 | 0 | -0.004 | 0 | 0.003 | 0 | t | 74075 | YGRDPYSP<br>SQDPYSP          | Oryctola<br>gus<br>cuniculu<br>s |
| 1 | 1.00 | 1 | 1 | 0 | -0.004 | 0 | 0.003 | 0 | t | 95216 | AEGLYSML<br>VERD             | Oryctola<br>gus<br>cuniculu<br>s |
| 1 | 1.00 | 1 | 1 | 0 | -0.004 | 0 | 0.003 | 0 | t | 95354 | ELSEFIPGA<br>SLR             | Oryctola<br>gus<br>cuniculu<br>s |
| 1 | 1.00 | 1 | 1 | 0 | -0.004 | 0 | 0.003 | 0 | t | 95728 | QPPVSQF<br>HIQGQ             | Oryctola<br>gus<br>cuniculu<br>s |
| 1 | 1.00 | 1 | 1 | 0 | -0.002 | 0 | 0.003 | 0 | t | 69271 | VKMAETC<br>PIFYDVF           | Mus<br>musculu<br>s              |
| 1 | 1.00 | 1 | 1 | 0 | -0.004 | 0 | 0.003 | 0 | t | 95417 | GLYSMLVE<br>RDHK             | Oryctola<br>gus<br>cuniculu<br>s |
| 1 | 1.00 | 1 | 1 | 0 | -0.004 | 0 | 0.003 | 0 | t | 95480 | ITELSEFIP<br>GAS             | Oryctola<br>gus<br>cuniculu<br>s |
| 1 | 1.00 | 1 | 1 | 0 | -0.002 | 0 | 0.003 | 0 | t | 60722 | SRLGRSSA<br>WV               | Mus<br>musculu<br>s              |
| 1 | 1.00 | 1 | 1 | 0 | -0.004 | 0 | 0.003 | 0 | t | 95979 | VPQPPVS<br>QFHIQ             | Oryctola<br>gus<br>cuniculu<br>s |
| 1 | 1.00 | 1 | 1 | 0 | -0.002 | 0 | 0.003 | 0 | t | 70444 | VPQLEIVP<br>NSAERLH<br>SMKE  | Mus<br>musculu<br>s              |
| 1 | 1.00 | 1 | 1 | 0 | -0.002 | 0 | 0.003 | 0 | t | 62912 | TALKKAITA<br>MSQAQKA<br>AKPA | Mus<br>musculu<br>s              |
| 1 | 1.00 | 1 | 1 | 0 | -0.004 | 0 | 0.003 | 0 | t | 95624 | NLCCSQW<br>GWC               | Oryctola<br>gus<br>cuniculu<br>s |

|   |      |   |   |   |        |   |       |   |   |       |                               |                                  |
|---|------|---|---|---|--------|---|-------|---|---|-------|-------------------------------|----------------------------------|
| 1 | 1.00 | 1 | 1 | 0 | -0.004 | 0 | 0.003 | 0 | t | 95406 | GFITELSEFI<br>PG              | Oryctola<br>gus<br>cuniculu<br>s |
| 1 | 1.00 | 1 | 1 | 0 | -0.002 | 0 | 0.003 | 0 | t | 68322 | VEQKHIQK<br>EDVPSERY<br>LGYL  | Mus<br>musculu<br>s              |
| 1 | 1.00 | 1 | 1 | 0 | -0.004 | 0 | 0.003 | 0 | t | 95263 | ATYHLYNS<br>QD                | Oryctola<br>gus<br>cuniculu<br>s |
| 1 | 1.00 | 1 | 1 | 0 | -0.004 | 0 | 0.003 | 0 | t | 95583 | LYNSQDHD<br>GWD               | Oryctola<br>gus<br>cuniculu<br>s |
| 1 | 1.00 | 1 | 1 | 0 | -0.004 | 0 | 0.003 | 0 | t | 95272 | CCSQWG<br>WCGS                | Oryctola<br>gus<br>cuniculu<br>s |
| 1 | 1.00 | 1 | 1 | 0 | -0.004 | 0 | 0.003 | 0 | t | 67324 | TYDNECLL<br>CAHKVE            | Oryctola<br>gus<br>cuniculu<br>s |
| 1 | 1.00 | 1 | 1 | 0 | -0.002 | 0 | 0.003 | 0 | t | 64783 | TLEVHGVK<br>PAAEEVKA<br>TPAG  | Mus<br>musculu<br>s              |
| 1 | 1.00 | 1 | 1 | 0 | -0.002 | 0 | 0.003 | 0 | t | 64783 | TLEVHGVK<br>PAAEEVKA<br>TPAG  | Mus<br>musculu<br>s              |
| 1 | 1.00 | 1 | 1 | 0 | -0.004 | 0 | 0.003 | 0 | t | 95370 | EVGYTRAE<br>GLYS              | Oryctola<br>gus<br>cuniculu<br>s |
| 1 | 1.00 | 1 | 1 | 0 | -0.002 | 0 | 0.003 | 0 | t | 55187 | RPKHPIKH<br>QGLPQEV<br>L NENL | Mus<br>musculu<br>s              |
| 1 | 1.00 | 1 | 1 | 0 | -0.004 | 0 | 0.003 | 0 | t | 50172 | PYSPSQDP<br>YSPSQDP           | Oryctola<br>gus<br>cuniculu<br>s |
| 1 | 1.00 | 1 | 1 | 0 | -0.002 | 0 | 0.003 | 0 | t | 50795 | QFKTTDVL<br>WFNFTTG           | Mus<br>musculu<br>s              |
| 1 | 1.00 | 1 | 1 | 0 | -0.002 | 0 | 0.003 | 0 | t | 53247 | RAYALWS<br>ARQQFKTT           | Mus<br>musculu<br>s              |

|   |      |   |   |   |        |   |       |   |   |       |                              |                                  |
|---|------|---|---|---|--------|---|-------|---|---|-------|------------------------------|----------------------------------|
| 1 | 1.00 | 1 | 1 | 0 | -0.002 | 0 | 0.003 | 0 | t | 47669 | PGGPDRFT<br>LLTPGSH          | Mus<br>musculu<br>s              |
| 1 | 1.00 | 1 | 1 | 0 | -0.002 | 0 | 0.003 | 0 | t | 37165 | LLDKIYTSP<br>LC              | Mus<br>musculu<br>s              |
| 1 | 1.00 | 1 | 1 | 0 | -0.004 | 0 | 0.003 | 0 | t | 38505 | LPGKCGV<br>NVPYKIST          | Oryctola<br>gus<br>cuniculu<br>s |
| 1 | 1.00 | 1 | 1 | 0 | -0.002 | 0 | 0.003 | 0 | t | 52106 | QQPQQSF<br>PQQ               | Mus<br>musculu<br>s              |
| 1 | 1.00 | 1 | 1 | 0 | -0.004 | 0 | 0.003 | 0 | t | 53247 | RAYALWS<br>ARQQFKTT          | Oryctola<br>gus<br>cuniculu<br>s |
| 1 | 1.00 | 1 | 1 | 0 | -0.002 | 0 | 0.003 | 0 | t | 50795 | QFKTTDVL<br>WFNFTTG          | Mus<br>musculu<br>s              |
| 1 | 1.00 | 1 | 1 | 0 | -0.004 | 0 | 0.003 | 0 | t | 48680 | PNNAAGL<br>PGKCGVN<br>V      | Oryctola<br>gus<br>cuniculu<br>s |
| 1 | 1.00 | 1 | 1 | 0 | -0.004 | 0 | 0.003 | 0 | t | 56195 | RTTPDRQ<br>AA                | Oryctola<br>gus<br>cuniculu<br>s |
| 1 | 1.00 | 1 | 1 | 0 | -0.002 | 0 | 0.003 | 0 | t | 52082 | QQPFP                        | Mus<br>musculu<br>s              |
| 1 | 1.00 | 1 | 1 | 0 | -0.004 | 0 | 0.003 | 0 | t | 60267 | SPSQDPYS<br>PSQDPDR          | Oryctola<br>gus<br>cuniculu<br>s |
| 1 | 1.00 | 1 | 1 | 0 | -0.002 | 0 | 0.003 | 0 | t | 41204 | MCQCVQK<br>YGTEFCKK<br>RLA   | Mus<br>musculu<br>s              |
| 1 | 1.00 | 1 | 1 | 0 | -0.002 | 0 | 0.003 | 0 | t | 38208 | LNENLLRF<br>FVAPFPQV<br>FGKE | Mus<br>musculu<br>s              |
| 1 | 1.00 | 1 | 1 | 0 | -0.004 | 0 | 0.003 | 0 | t | 50121 | PYKISTSTN<br>CATVK           | Oryctola<br>gus<br>cuniculu<br>s |

|   |      |   |   |   |        |   |       |   |   |       |                              |                                  |
|---|------|---|---|---|--------|---|-------|---|---|-------|------------------------------|----------------------------------|
| 1 | 1.00 | 1 | 1 | 0 | -0.002 | 0 | 0.003 | 0 | t | 50934 | QGPHVISR<br>IYQTAT           | Mus<br>musculu<br>s              |
| 1 | 1.00 | 1 | 1 | 0 | -0.004 | 0 | 0.003 | 0 | t | 50846 | QGDRRCQ<br>SQLERANL          | Oryctola<br>gus<br>cuniculu<br>s |
| 1 | 1.00 | 1 | 1 | 0 | -0.002 | 0 | 0.003 | 0 | t | 60374 | SQAQKAA<br>KPAAAAT<br>GTATAA | Mus<br>musculu<br>s              |
| 1 | 1.00 | 1 | 1 | 0 | -0.004 | 0 | 0.003 | 0 | t | 60414 | SQDPYSPS<br>QDPDRRD          | Oryctola<br>gus<br>cuniculu<br>s |
| 1 | 1.00 | 1 | 1 | 0 | -0.004 | 0 | 0.003 | 0 | t | 50934 | QGPHVISR<br>IYQTAT           | Oryctola<br>gus<br>cuniculu<br>s |
| 1 | 1.00 | 1 | 1 | 0 | -0.004 | 0 | 0.003 | 0 | t | 52194 | QRDEDSY<br>GRDPYSPS          | Oryctola<br>gus<br>cuniculu<br>s |
| 1 | 1.00 | 1 | 1 | 0 | -0.004 | 0 | 0.003 | 0 | t | 59387 | SLPGQTKIL<br>AKVfyGEN        | Oryctola<br>gus<br>cuniculu<br>s |
| 1 | 1.00 | 1 | 1 | 0 | -0.004 | 0 | 0.003 | 0 | t | 53409 | RDPYSPSQ<br>DPYSPSQ          | Oryctola<br>gus<br>cuniculu<br>s |
| 1 | 1.00 | 1 | 1 | 0 | -0.004 | 0 | 0.003 | 0 | t | 56185 | RTTADRQT<br>A                | Oryctola<br>gus<br>cuniculu<br>s |
| 1 | 1.00 | 1 | 1 | 0 | -0.002 | 0 | 0.003 | 0 | t | 52600 | QTQQPQQ<br>PFP               | Mus<br>musculu<br>s              |
| 1 | 1.00 | 1 | 1 | 0 | -0.004 | 0 | 0.003 | 0 | t | 47669 | PGGPDRFT<br>LLTPGSH          | Oryctola<br>gus<br>cuniculu<br>s |
| 1 | 1.00 | 1 | 1 | 0 | -0.004 | 0 | 0.003 | 0 | t | 55889 | RSLPPIVKD<br>ASIQVVSAI<br>R  | Oryctola<br>gus<br>cuniculu<br>s |
| 1 | 1.00 | 1 | 1 | 0 | -0.004 | 0 | 0.003 | 0 | t | 47770 | PGVDIIEG<br>PVKNV            | Oryctola<br>gus<br>cuniculu<br>s |

|   |      |   |   |   |        |   |       |   |   |       |                              |                                  |
|---|------|---|---|---|--------|---|-------|---|---|-------|------------------------------|----------------------------------|
| 1 | 1.00 | 1 | 1 | 0 | -0.004 | 0 | 0.003 | 0 | t | 58703 | SISGVNPN<br>NAAGLPG          | Oryctola<br>gus<br>cuniculu<br>s |
| 1 | 1.00 | 1 | 1 | 0 | -0.002 | 0 | 0.003 | 0 | t | 60374 | SQAQKAA<br>KPAAAAT<br>GTATAA | Mus<br>musculu<br>s              |
| 1 | 1.00 | 1 | 1 | 0 | -0.004 | 0 | 0.003 | 0 | t | 47024 | PCIGYVRS<br>GGAVPPA          | Oryctola<br>gus<br>cuniculu<br>s |
| 1 | 1.00 | 1 | 1 | 0 | -0.002 | 0 | 0.003 | 0 | t | 47669 | PGGPDRFT<br>LLTPGSH          | Mus<br>musculu<br>s              |
| 1 | 1.00 | 1 | 1 | 0 | -0.004 | 0 | 0.003 | 0 | t | 20770 | GLARTTAD<br>RQTACNC          | Oryctola<br>gus<br>cuniculu<br>s |
| 1 | 1.00 | 1 | 1 | 0 | -0.004 | 0 | 0.003 | 0 | t | 23169 | GVTHDQL<br>NNFR              | Oryctola<br>gus<br>cuniculu<br>s |
| 1 | 1.00 | 1 | 1 | 0 | -0.021 | 0 | 0.003 | 0 | t | 21851 | GQCKWV<br>NGREICND<br>RDRPTA | Mus<br>musculu<br>s              |
| 1 | 1.00 | 1 | 1 | 0 | -0.002 | 0 | 0.003 | 0 | t | 28676 | ISQAVHAA<br>HAEINEAG<br>R    | Mus<br>musculu<br>s              |
| 1 | 1.00 | 1 | 1 | 0 | -0.004 | 0 | 0.003 | 0 | t | 22771 | GTNISKEH<br>DGECKE           | Oryctola<br>gus<br>cuniculu<br>s |
| 1 | 1.00 | 1 | 1 | 0 | -0.004 | 0 | 0.003 | 0 | t | 17943 | FTEVGYTR<br>AEGL             | Oryctola<br>gus<br>cuniculu<br>s |
| 1 | 1.00 | 1 | 1 | 0 | -0.004 | 0 | 0.003 | 0 | t | 17795 | FSNVYLFA<br>KDKSGPLQ<br>PGV  | Oryctola<br>gus<br>cuniculu<br>s |
| 1 | 1.00 | 1 | 1 | 0 | -0.002 | 0 | 0.003 | 0 | t | 14906 | EVWREEA<br>YHACDIKD          | Mus<br>musculu<br>s              |
| 1 | 1.00 | 1 | 1 | 0 | -0.004 | 0 | 0.003 | 0 | t | 36137 | LGGWKLQ<br>SDPRAYAL          | Oryctola<br>gus<br>cuniculu<br>s |



|   |      |   |   |   |        |   |       |   |   |       |                           |                                  |
|---|------|---|---|---|--------|---|-------|---|---|-------|---------------------------|----------------------------------|
| 1 | 1.00 | 1 | 1 | 0 | -0.002 | 0 | 0.003 | 0 | t | 23169 | GVTHDQL<br>NNFR           | Mus<br>musculu<br>s              |
| 1 | 1.00 | 1 | 1 | 0 | -0.004 | 0 | 0.003 | 0 | t | 28676 | ISQAVHAA<br>HAEINEAG<br>R | Oryctola<br>gus<br>cuniculu<br>s |
| 1 | 1.00 | 1 | 1 | 0 | -0.004 | 0 | 0.003 | 0 | t | 14905 | EVWREEA<br>YHAADIKD       | Oryctola<br>gus<br>cuniculu<br>s |
| 1 | 1.00 | 1 | 1 | 0 | -0.002 | 0 | 0.003 | 0 | t | 12408 | EICPAVKR<br>DVDLFLTG      | Mus<br>musculu<br>s              |
| 1 | 1.00 | 1 | 1 | 0 | -0.002 | 0 | 0.003 | 0 | t | 34335 | KWVNGRE<br>I              | Mus<br>musculu<br>s              |
| 1 | 1.00 | 1 | 1 | 0 | -0.004 | 0 | 0.003 | 0 | t | 23077 | GVNPNNA<br>AGLPGKC<br>G   | Oryctola<br>gus<br>cuniculu<br>s |
| 1 | 1.00 | 1 | 1 | 0 | -0.002 | 0 | 0.003 | 0 | t | 26167 | IFSQNMNI<br>CLKMP         | Mus<br>musculu<br>s              |
| 1 | 1.00 | 1 | 1 | 0 | -0.002 | 0 | 0.003 | 0 | t | 34335 | KWVNGRE<br>I              | Mus<br>musculu<br>s              |
| 1 | 1.00 | 1 | 1 | 0 | -0.004 | 0 | 0.003 | 0 | t | 23494 | GYVRSGG<br>AVPPACC<br>N   | Oryctola<br>gus<br>cuniculu<br>s |
| 1 | 1.00 | 1 | 1 | 0 | -0.002 | 0 | 0.003 | 0 | t | 36137 | LGGWKLQ<br>SDPRAYAL       | Mus<br>musculu<br>s              |
| 1 | 1.00 | 1 | 1 | 0 | -0.002 | 0 | 0.003 | 0 | t | 20726 | GKVYLVG<br>GPELGGW<br>K   | Mus<br>musculu<br>s              |
| 1 | 1.00 | 1 | 1 | 0 | -0.004 | 0 | 0.003 | 0 | t | 20726 | GKVYLVG<br>GPELGGW<br>K   | Oryctola<br>gus<br>cuniculu<br>s |
| 1 | 1.00 | 1 | 1 | 0 | -0.002 | 0 | 0.003 | 0 | t | 31580 | KKIQDCYV<br>ENGLIS        | Mus<br>musculu<br>s              |

|   |      |   |   |   |        |   |       |   |   |       |                              |                                  |
|---|------|---|---|---|--------|---|-------|---|---|-------|------------------------------|----------------------------------|
| 1 | 1.00 | 1 | 1 | 0 | -0.021 | 0 | 0.003 | 0 | t | 34335 | KWVNGRE<br>I                 | Mus<br>musculu<br>s              |
| 1 | 1.00 | 1 | 1 | 0 | -0.002 | 0 | 0.003 | 0 | t | 24814 | HSMKEGI<br>HAQQKEP<br>MIGVNQ | Mus<br>musculu<br>s              |
| 1 | 1.00 | 1 | 1 | 0 | -0.002 | 0 | 0.003 | 0 | t | 14905 | EVWREEA<br>YHAADIKD          | Mus<br>musculu<br>s              |
| 1 | 1.00 | 1 | 1 | 0 | -0.002 | 0 | 0.003 | 0 | t | 26167 | IFSQNMNI<br>KLKMP            | Mus<br>musculu<br>s              |
| 1 | 1.00 | 1 | 1 | 0 | -0.002 | 0 | 0.003 | 0 | t | 11035 | EAESISSE<br>EIVPNSVE<br>QKH  | Mus<br>musculu<br>s              |
| 1 | 1.00 | 1 | 1 | 0 | -0.004 | 0 | 0.003 | 0 | t | 22372 | GSIGAAS<br>MEF               | Oryctola<br>gus<br>cuniculu<br>s |
| 1 | 1.00 | 1 | 1 | 0 | -0.004 | 0 | 0.003 | 0 | t | 13233 | ELQGDRR<br>CQSQLERA          | Oryctola<br>gus<br>cuniculu<br>s |
| 1 | 1.00 | 1 | 1 | 0 | -0.002 | 0 | 0.003 | 0 | t | 21851 | GQCKWV<br>NGREICND<br>RDRPTA | Mus<br>musculu<br>s              |
| 1 | 1.00 | 1 | 1 | 0 | -0.004 | 0 | 0.003 | 0 | t | 30872 | KFVDSTVV<br>ASVTIDRS<br>LP   | Oryctola<br>gus<br>cuniculu<br>s |
| 1 | 1.00 | 1 | 1 | 0 | -0.004 | 0 | 0.003 | 0 | t | 22621 | GTDGVTYT<br>NDCLLC           | Oryctola<br>gus<br>cuniculu<br>s |
| 1 | 1.00 | 1 | 1 | 0 | -0.002 | 0 | 0.003 | 0 | t | 26167 | IFSQNMNI<br>KLKMP            | Mus<br>musculu<br>s              |
| 1 | 1.00 | 1 | 1 | 0 | -0.002 | 0 | 0.003 | 0 | t | 346   | AAPANDK<br>FTVFEEAF<br>NDAIK | Mus<br>musculu<br>s              |
| 1 | 1.00 | 1 | 1 | 0 | -0.002 | 0 | 0.003 | 0 | t | 481   | AAVDSSKA<br>ALTSKLDA<br>AYKL | Mus<br>musculu<br>s              |
| 1 | 1.00 | 1 | 1 | 0 | -0.002 | 0 | 0.003 | 0 | t | 6895  | CQQTLSVR<br>ALC              | Mus<br>musculu<br>s              |
| 1 | 1.00 | 1 | 1 | 0 | -0.002 | 0 | 0.003 | 0 | t | 481   | AAVDSSKA<br>ALTSKLDA<br>AYKL | Mus<br>musculu<br>s              |

|   |      |   |   |   |        |   |       |   |   |       |                              |                                  |
|---|------|---|---|---|--------|---|-------|---|---|-------|------------------------------|----------------------------------|
| 1 | 1.00 | 1 | 1 | 0 | -0.004 | 0 | 0.003 | 0 | t | 751   | ADPVTTEG<br>DYVVKISEF<br>YGR | Oryctola<br>gus<br>cuniculu<br>s |
| 1 | 1.00 | 1 | 1 | 0 | -0.004 | 0 | 0.003 | 0 | t | 10277 | DSYGRDPY<br>SPSQDPY          | Oryctola<br>gus<br>cuniculu<br>s |
| 1 | 1.00 | 1 | 1 | 0 | -0.002 | 0 | 0.003 | 0 | t | 751   | ADPVTTEG<br>DYVVKISEF<br>YGR | Mus<br>musculu<br>s              |
| 1 | 1.00 | 1 | 1 | 0 | -0.002 | 0 | 0.003 | 0 | t | 346   | AAPANDK<br>FTVFEEAF<br>NDAIK | Mus<br>musculu<br>s              |
| 1 | 1.00 | 1 | 1 | 0 | -0.004 | 0 | 0.003 | 0 | t | 7947  | DEDSYGR<br>DPYSPSQD          | Oryctola<br>gus<br>cuniculu<br>s |
| 1 | 1.00 | 1 | 1 | 0 | -0.002 | 0 | 0.003 | 0 | t | 895   | AEEVKATP<br>AGELQVID<br>KVDA | Mus<br>musculu<br>s              |
| 1 | 1.00 | 1 | 1 | 0 | -0.002 | 0 | 0.003 | 0 | t | 4792  | ASTGGAY<br>QSYKFIPAL<br>EAAV | Mus<br>musculu<br>s              |
| 1 | 1.00 | 1 | 1 | 0 | -0.002 | 0 | 0.003 | 0 | t | 346   | AAPANDK<br>FTVFEEAF<br>NDAIK | Mus<br>musculu<br>s              |
| 1 | 1.00 | 1 | 1 | 0 | -0.002 | 0 | 0.003 | 0 | t | 6986  | CSEYREPLL<br>C               | Mus<br>musculu<br>s              |
| 1 | 1.00 | 1 | 1 | 0 | -0.002 | 0 | 0.003 | 0 | t | 4792  | ASTGGAY<br>QSYKFIPAL<br>EAAV | Mus<br>musculu<br>s              |
| 1 | 1.00 | 1 | 1 | 0 | -0.002 | 0 | 0.003 | 0 | t | 895   | AEEVKATP<br>AGELQVID<br>KVDA | Mus<br>musculu<br>s              |
| 1 | 1.00 | 1 | 1 | 0 | -0.002 | 0 | 0.003 | 0 | t | 3493  | APAVKYTV<br>FETALKKAI<br>TAM | Mus<br>musculu<br>s              |
| 1 | 1.00 | 1 | 1 | 0 | -0.002 | 0 | 0.003 | 0 | t | 895   | AEEVKATP<br>AGELQVID<br>KVDA | Mus<br>musculu<br>s              |
| 1 | 1.00 | 1 | 1 | 0 | -0.004 | 0 | 0.003 | 0 | t | 1206  | AEVDCSRF<br>PNATDK           | Oryctola<br>gus<br>cuniculu<br>s |
| 1 | 1.00 | 1 | 1 | 0 | -0.002 | 0 | 0.003 | 0 | t | 3493  | APAVKYTV<br>FETALKKAI<br>TAM | Mus<br>musculu<br>s              |

|   |      |   |   |       |        |        |        |        |   |        |                             |                                  |
|---|------|---|---|-------|--------|--------|--------|--------|---|--------|-----------------------------|----------------------------------|
| 1 | 1.00 | 1 | 1 | 0     | -0.002 | 0      | 0.003  | 0      | t | 8756   | DIPNPIGSE<br>NSEKTTM<br>PLW | Mus<br>musculu<br>s              |
| 1 | 1.00 | 1 | 1 | 0     | -0.004 | 0      | 0.003  | 0      | t | 10041  | DRRCQSQ<br>LERANLRP         | Oryctola<br>gus<br>cuniculu<br>s |
| 1 | 1.00 | 1 | 1 | 0     | -0.004 | 0      | 0.003  | 0      | t | 4923   | ATDKEGK<br>DVLVCNK          | Oryctola<br>gus<br>cuniculu<br>s |
| 1 | 1.00 | 1 | 1 | 0.01  | 0.017  | 0.018  | 0.01   | 0.009  | t | 110962 | PIDVVDP                     | Mus<br>musculu<br>s              |
| 1 | 1.00 | 1 | 1 | 0     | -0.003 | -0.004 | 0      | 0      | t | 122941 | VVKLLRP<br>YVEV             | Oryctola<br>gus<br>cuniculu<br>s |
| 1 | 1.00 | 1 | 1 | -0.01 | -0.012 | -0.01  | -0.013 | -0.009 | t | 96526  | LAANNPA                     | Mus<br>musculu<br>s              |
| 1 | 1.00 | 1 | 1 | 0.02  | 0.02   | 0.02   | 0.02   | 0.021  | t | 122569 | SFQDENFV<br>FEEF            | Rattus<br>norvegic<br>us         |
| 1 | 1.00 | 1 | 1 | -0.03 | -0.033 | -0.036 | -0.03  | -0.03  | t | 105895 | KDLESIKG                    | Oryctola<br>gus<br>cuniculu<br>s |
| 1 | 1.00 | 1 | 1 | 0.01  | 0.008  | 0.015  | 0.009  | 0.01   | t | 24950  | HTNLPQAL<br>WGMQ            | Mus<br>musculu<br>s              |
| 1 | 1.00 | 1 | 1 | 0     | 0      | 0      | 0      | 0      | t | 48598  | PNANPNA                     | Mus<br>musculu<br>s              |
| 1 | 1.00 | 1 | 1 | 0     | 0.01   | 0      | -0.001 | 0      | t | 68023  | VDMIAGA<br>HWG              | Pan<br>troglody<br>tes           |
| 1 | 1.00 | 1 | 1 | 0.02  | 0.018  | 0.022  | 0.021  | 0.021  | t | 78854  | TKDTNNN<br>LKG              | Mus<br>musculu<br>s              |
| 1 | 1.00 | 1 | 1 | -0.03 | -0.028 | -0.03  | -0.023 | -0.03  | t | 137399 | FCGLPRLE                    | Homo<br>sapiens                  |
| 1 | 1.00 | 1 | 1 | 0     | 0      | 0      | 0.004  | 0.001  | t | 135930 | GDKVSFFC<br>KNKEKCC         | Homo<br>sapiens                  |

|   |      |   |   |       |        |        |        |        |   |        |                              |                                  |
|---|------|---|---|-------|--------|--------|--------|--------|---|--------|------------------------------|----------------------------------|
| 1 | 1.00 | 1 | 1 | 0     | -0.003 | 0.008  | 0      | 0      | t | 125211 | QHWSYGL<br>RPG               | Canis<br>lupus                   |
| 1 | 1.00 | 1 | 1 | 0     | -0.003 | -0.002 | 0      | 0      | t | 135835 | CWAFSGV<br>AATESAY           | Oryctola<br>gus<br>cuniculu<br>s |
| 1 | 1.00 | 1 | 1 | 0.03  | 0.03   | 0.023  | 0.03   | 0.03   | t | 131652 | SFDSSNPE<br>YFDGYWG<br>YS    | Oryctola<br>gus<br>cuniculu<br>s |
| 1 | 1.00 | 1 | 1 | 0.03  | 0.028  | 0.026  | 0.027  | 0.03   | t | 1476   | AGDQSYFL                     | Mus<br>musculu<br>s              |
| 1 | 1.00 | 1 | 1 | -0.06 | -0.06  | -0.062 | -0.06  | -0.062 | t | 45610  | NQQIAGIG<br>AALIE            | Oryctola<br>gus<br>cuniculu<br>s |
| 1 | 1.00 | 1 | 1 | 0.02  | 0.02   | 0.02   | 0.02   | 0.02   | t | 114920 | PVCGTDG<br>VTY               | Homo<br>sapiens                  |
| 1 | 1.00 | 1 | 1 | 0     | 0      | 0      | 0      | 0      | t | 127961 | ELLADVQF<br>ALGLPFYP<br>AYEG | Homo<br>sapiens                  |
| 1 | 1.00 | 1 | 1 | -0.02 | -0.021 | -0.035 | -0.02  | -0.018 | t | 13897  | EQPFPSRL<br>GPLVTLE          | Bos<br>taurus                    |
| 1 | 1.00 | 1 | 1 | 0     | -0.002 | 0      | -0.007 | -0.005 | t | 119673 | WNPDDYG<br>GVK               | Rattus<br>norvegic<br>us         |
| 1 | 1.00 | 1 | 1 | 0.03  | 0.032  | 0.03   | 0.031  | 0.03   | t | 34935  | LAQMYQA<br>NDNSLED<br>V      | Homo<br>sapiens                  |
| 1 | 1.00 | 1 | 1 | 0.05  | 0.05   | 0.047  | 0.05   | 0.052  | t | 20047  | GGTEIKYN<br>GE               | Mus<br>musculu<br>s              |
| 1 | 1.00 | 1 | 1 | 0.01  | 0.01   | 0.004  | 0.01   | 0.01   | t | 74942  | YLTIGKNP<br>DFKSTFAV<br>LWEP | Oryctola<br>gus<br>cuniculu<br>s |
| 1 | 1.00 | 1 | 1 | 0     | 0.004  | -0.005 | 0.001  | 0      | t | 113400 | FKLGGRDS<br>R                | Homo<br>sapiens                  |

|   |      |   |   |       |        |        |        |        |   |        |                              |                       |
|---|------|---|---|-------|--------|--------|--------|--------|---|--------|------------------------------|-----------------------|
| 1 | 1.00 | 1 | 1 | 0.03  | 0.03   | 0.032  | 0.027  | 0.03   | t | 9118   | DLIAYKQ                      | Homo sapiens          |
| 1 | 1.00 | 1 | 1 | 0.02  | 0.025  | 0.034  | 0.02   | 0.018  | t | 132850 | KLDLYLSYP<br>QPY             | Mus musculus          |
| 1 | 1.00 | 1 | 1 | 0.01  | 0.016  | 0      | 0.01   | 0.011  | t | 139100 | ITGRLAAL<br>NAYVSQTL<br>TQY  | Felis catus           |
| 1 | 1.00 | 1 | 1 | 0     | 0      | 0      | 0.001  | -0.001 | t | 82078  | FHQNGQV<br>TEVTT             | Homo sapiens          |
| 1 | 1.00 | 1 | 1 | 0     | 0      | 0      | 0.001  | -0.001 | t | 70817  | VRRRVNA<br>ANKKPEDL<br>TLNDL | Homo sapiens          |
| 1 | 1.00 | 1 | 1 | 0     | 0      | 0      | 0.001  | -0.001 | t | 46792  | PAFGANS<br>NNPDWDF<br>NP     | Homo sapiens          |
| 1 | 1.00 | 1 | 1 | 0     | 0      | 0      | 0.001  | -0.001 | t | 18933  | GDAKKKK<br>DGKKAEPK<br>NPREN | Homo sapiens          |
| 1 | 1.00 | 1 | 1 | -0.04 | -0.04  | -0.038 | -0.04  | -0.04  | t | 125011 | DFHFEVFN<br>FVP              | Mus musculus          |
| 1 | 1.00 | 1 | 1 | 0.01  | 0.007  | 0.003  | 0.01   | 0.012  | t | 118385 | GMTSNGFI<br>ADPDDRGM<br>L    | Oryctolagus cuniculus |
| 1 | 1.00 | 1 | 1 | -0.01 | -0.014 | -0.013 | -0.011 | -0.01  | t | 37755  | LLRRQVNE<br>VA               | Oryctolagus cuniculus |
| 1 | 1.00 | 1 | 1 | 0.01  | 0.01   | 0.01   | 0.01   | 0.012  | t | 9941   | DRADGQP<br>AG                | Mus musculus          |
| 1 | 1.00 | 1 | 1 | -0.03 | -0.03  | -0.03  | -0.027 | -0.03  | t | 118540 | NPVEIRRG<br>VMLAV            | Homo sapiens          |
| 1 | 1.00 | 1 | 1 | 0.02  | 0.017  | 0.018  | 0.02   | 0.02   | t | 105867 | HTDFAGAE                     | Oryctolagus cuniculus |
| 1 | 1.00 | 1 | 1 | 0.01  | 0.01   | 0.01   | 0.01   | 0.01   | t | 23193  | GVTYEIDL<br>TNKNAAKL         | Homo sapiens          |

|   |      |   |   |       |        |        |        |        |   |        |                              |                                  |
|---|------|---|---|-------|--------|--------|--------|--------|---|--------|------------------------------|----------------------------------|
| 1 | 1.00 | 1 | 1 | 0.02  | 0.02   | 0.015  | 0.02   | 0.02   | t | 120403 | AMGSKGN<br>RTDSC             | Oryctola<br>gus<br>cuniculu<br>s |
| 1 | 1.00 | 1 | 1 | 0.02  | 0.023  | 0.015  | 0.02   | 0.02   | t | 120403 | AMGSKGN<br>RTDSC             | Mus<br>musculu<br>s              |
| 1 | 1.00 | 1 | 1 | 0.02  | 0.022  | 0.032  | 0.027  | 0.021  | t | 104569 | MASPGSG<br>FWSFGSE<br>DGS    | Homo<br>sapiens                  |
| 1 | 1.00 | 1 | 1 | 0.01  | 0.012  | 0.01   | 0.01   | 0.01   | t | 117924 | IIAKMKGT<br>F                | Homo<br>sapiens                  |
| 1 | 1.00 | 1 | 1 | 0     | -0.002 | 0.005  | -0.001 | -0.002 | t | 24249  | HLLRLSEI                     | Mus<br>musculu<br>s              |
| 1 | 1.00 | 1 | 1 | 0     | -0.001 | -0.006 | -0.001 | 0      | t | 25786  | IEEPSGQT<br>ADWYTI           | Myodes<br>glareolu<br>s          |
| 1 | 1.00 | 1 | 1 | 0.07  | 0.07   | 0.07   | 0.07   | 0.07   | t | 115514 | TLEDSPEVI<br>ESPPEINTV<br>QV | Homo<br>sapiens                  |
| 1 | 1.00 | 1 | 1 | 0.03  | 0.03   | 0.03   | 0.03   | 0.03   | t | 112119 | FYNTVLK                      | Homo<br>sapiens                  |
| 1 | 1.00 | 1 | 1 | 0.03  | 0.03   | 0.03   | 0.03   | 0.03   | t | 104870 | LATYHLYN<br>SQ               | Homo<br>sapiens                  |
| 1 | 1.00 | 1 | 1 | 0.03  | 0.03   | 0.03   | 0.03   | 0.03   | t | 79254  | ICADDEE<br>WYSAMCA           | Mus<br>musculu<br>s              |
| 1 | 1.00 | 1 | 1 | -0.03 | -0.03  | -0.03  | -0.03  | -0.03  | t | 99571  | QGRGYFG<br>LIFPGCPR          | Homo<br>sapiens                  |
| 1 | 1.00 | 1 | 1 | -0.01 | -0.01  | -0.005 | -0.013 | -0.012 | t | 66979  | TVDSNNLP<br>ILEF             | Homo<br>sapiens                  |
| 1 | 1.00 | 1 | 1 | -0.01 | -0.008 | -0.005 | -0.009 | -0.01  | t | 19491  | GFADLMG<br>YIP               | Homo<br>sapiens                  |
| 1 | 1.00 | 1 | 1 | 0.02  | 0.023  | 0.02   | 0.02   | 0.02   | t | 110275 | GPVGPSD<br>PSIVSLVEE<br>TSFI | Mus<br>musculu<br>s              |
| 1 | 1.00 | 1 | 1 | 0.02  | 0.02   | 0.02   | 0.02   | 0.02   | t | 110275 | GPVGPSD<br>PSIVSLVEE<br>TSFI | Mus<br>musculu<br>s              |

|   |      |   |   |       |        |        |        |        |   |        |                              |                            |
|---|------|---|---|-------|--------|--------|--------|--------|---|--------|------------------------------|----------------------------|
| 1 | 1.00 | 1 | 1 | 0     | 0.002  | 0      | 0.007  | 0      | t | 108072 | PPGPTGAS<br>G                | Homo<br>sapiens            |
| 1 | 1.00 | 1 | 1 | 0     | 0.004  | 0      | 0.007  | 0      | t | 108072 | PPGPTGAS<br>G                | Homo<br>sapiens            |
| 1 | 1.00 | 1 | 1 | 0     | -0.006 | 0      | 0      | 0      | t | 42795  | MTEQQW<br>NFAGIEAA<br>AS     | Homo<br>sapiens            |
| 1 | 1.00 | 1 | 1 | 0.01  | 0.01   | 0.01   | 0.01   | 0.009  | t | 55457  | RQNKPPN<br>KPNND             | Mus<br>musculu<br>s        |
| 1 | 1.00 | 1 | 1 | -0.01 | -0.007 | -0.01  | -0.01  | -0.01  | t | 53634  | RESQAYYQ<br>R                | Mus<br>musculu<br>s        |
| 1 | 1.00 | 1 | 1 | 0.02  | 0.018  | 0.022  | 0.019  | 0.02   | t | 75151  | YNGEEYLIL<br>S               | Mus<br>musculu<br>s        |
| 1 | 1.00 | 1 | 1 | -0.01 | -0.006 | -0.005 | -0.009 | -0.01  | t | 66105  | TRTFTSL                      | Homo<br>sapiens            |
| 1 | 1.00 | 1 | 1 | 0     | 0.004  | 0      | 0.001  | 0      | t | 141566 | SSIVIPAAV<br>GIKLNVT<br>E DA | Homo<br>sapiens            |
| 1 | 1.00 | 1 | 1 | 0     | 0      | 0      | 0      | 0      | t | 112841 | SSKRGRQT<br>PVLAMLDH         | Rattus<br>norvegic<br>us   |
| 1 | 1.00 | 1 | 1 | -0.03 | -0.03  | -0.026 | -0.03  | -0.032 | t | 105940 | LRYQQQS<br>RRRSLPYS          | Homo<br>sapiens            |
| 1 | 1.00 | 1 | 1 | 0.04  | 0.04   | 0.043  | 0.04   | 0.04   | t | 125250 | SDEFNPCE<br>DIMGYK           | Mus<br>musculu<br>s        |
| 1 | 1.00 | 1 | 1 | 0.03  | 0.03   | 0.013  | 0.03   | 0.032  | t | 96098  | ANEEIRKR<br>NA               | Homo<br>sapiens(<br>human) |
| 1 | 1.00 | 1 | 1 | 0.04  | 0.042  | 0.04   | 0.037  | 0.041  | t | 5990   | CAISGGYP<br>VC               | Homo<br>sapiens            |
| 1 | 1.00 | 1 | 1 | -0.01 | -0.007 | -0.01  | -0.01  | -0.011 | t | 21617  | GPFFLSPTS                    | Mus<br>musculu<br>s        |



|   |      |   |   |       |        |        |        |        |   |        |                              |                                  |
|---|------|---|---|-------|--------|--------|--------|--------|---|--------|------------------------------|----------------------------------|
| 1 | 1.00 | 1 | 1 | 0.03  | 0.026  | 0.03   | 0.033  | 0.033  | t | 115328 | KTSASIGSL<br>CADA            | Oryctola<br>gus<br>cuniculu<br>s |
| 1 | 1.00 | 1 | 1 | 0     | 0      | 0      | 0      | -0.001 | t | 134411 | IPP                          | Mus<br>musculu<br>s              |
| 1 | 1.00 | 1 | 1 | 0     | 0.004  | -0.002 | -0.003 | -0.002 | t | 100398 | PTTPATPT<br>PTPK             | Homo<br>sapiens                  |
| 1 | 1.00 | 1 | 1 | -0.01 | -0.017 | -0.017 | -0.003 | -0.008 | t | 156956 | SGIGTLDG<br>FRHRHPD          | Homo<br>sapiens                  |
| 1 | 1.00 | 1 | 1 | 0     | 0.004  | -0.002 | -0.003 | 0      | t | 21860  | GQFEHFRE<br>CC               | Homo<br>sapiens                  |
| 1 | 1.00 | 1 | 1 | -0.01 | -0.014 | -0.003 | -0.01  | -0.01  | t | 10860  | DYDGYGW<br>RE                | Mus<br>musculu<br>s              |
| 1 | 1.00 | 1 | 1 | -0.01 | -0.01  | -0.01  | -0.01  | -0.012 | t | 49082  | PQQPFPQ<br>PQQ               | Mus<br>musculu<br>s              |
| 1 | 1.00 | 1 | 1 | 0.08  | 0.08   | 0.08   | 0.08   | 0.08   | t | 79504  | ADCTTPT                      | Oryctola<br>gus<br>cuniculu<br>s |
| 1 | 1.00 | 1 | 1 | 0.04  | 0.04   | 0.04   | 0.04   | 0.04   | t | 153349 | ACTDFEG<br>MLCGGS            | Mus<br>musculu<br>s              |
| 1 | 1.00 | 1 | 1 | 0.04  | 0.04   | 0.04   | 0.04   | 0.04   | t | 115536 | VEELKPTP<br>EGDLEILLQ<br>KWE | Homo<br>sapiens                  |
| 1 | 1.00 | 1 | 1 | 0.02  | 0.02   | 0.02   | 0.02   | 0.02   | t | 103431 | MWELYLA<br>YSEAGFRS          | Homo<br>sapiens                  |
| 1 | 1.00 | 1 | 1 | -0.02 | -0.016 | -0.02  | -0.019 | -0.019 | t | 96102  | APLLPH                       | Homo<br>sapiens                  |
| 1 | 1.00 | 1 | 1 | -0.02 | -0.018 | -0.02  | -0.019 | -0.019 | t | 96102  | APLLPH                       | Homo<br>sapiens                  |
| 1 | 1.00 | 1 | 1 | -0.02 | -0.02  | -0.02  | -0.02  | -0.02  | t | 158596 | KFGTALW                      | Homo<br>sapiens                  |

|   |      |   |   |       |        |        |        |        |   |        |                     |                                  |
|---|------|---|---|-------|--------|--------|--------|--------|---|--------|---------------------|----------------------------------|
| 1 | 1.00 | 1 | 1 | 0     | -0.002 | 0      | 0.003  | 0      | t | 38304  | LNPKTNK<br>WEDK     | Mus<br>musculu<br>s              |
| 1 | 1.00 | 1 | 1 | 0     | 0      | 0.001  | 0      | 0      | t | 73635  | YEDRY               | Mus<br>musculu<br>s              |
| 1 | 1.00 | 1 | 1 | 0     | 0      | 0.001  | 0      | 0      | t | 73635  | YEDRY               | Mus<br>musculu<br>s              |
| 1 | 1.00 | 1 | 1 | 0.04  | 0.04   | 0.04   | 0.042  | 0.042  | t | 27494  | IMGGECPT<br>AEDMVN  | Homo<br>sapiens                  |
| 1 | 1.00 | 1 | 1 | 0     | 0.002  | -0.002 | -0.001 | 0      | t | 130990 | NVLRGMG<br>GAF      | Homo<br>sapiens                  |
| 1 | 1.00 | 1 | 1 | 0     | 0.004  | 0      | 0      | 0      | t | 25645  | IDPRGKM<br>V        | MD                               |
| 1 | 1.00 | 1 | 1 | 0.03  | 0.03   | 0.03   | 0.03   | 0.03   | t | 79969  | PKQLTFEG<br>K       | Mus<br>musculu<br>s              |
| 1 | 1.00 | 1 | 1 | 0.05  | 0.05   | 0.048  | 0.05   | 0.05   | t | 20197  | GHWMDA<br>TFNTKTA   | Homo<br>sapiens                  |
| 1 | 1.00 | 1 | 1 | -0.02 | -0.022 | -0.021 | -0.019 | -0.02  | t | 133909 | PEPAKKVP<br>APK     | Mus<br>musculu<br>s              |
| 1 | 1.00 | 1 | 1 | -0.02 | -0.024 | -0.021 | -0.019 | -0.02  | t | 133909 | PEPAKKVP<br>APK     | Oryctola<br>gus<br>cuniculu<br>s |
| 1 | 1.00 | 1 | 1 | 0.05  | 0.053  | 0.051  | 0.051  | 0.048  | t | 99741  | TWVNTIQ<br>TNGLLNEA | Equus<br>caballus                |
| 1 | 1.00 | 1 | 1 | 0.07  | 0.07   | 0.07   | 0.07   | 0.07   | t | 115745 | FTESQSLTL<br>T      | Homo<br>sapiens                  |
| 1 | 1.00 | 1 | 1 | 0     | 0.002  | -0.007 | -0.002 | -0.002 | t | 106822 | SDPAHKA<br>RLERP    | Homo<br>sapiens                  |
| 1 | 1.00 | 1 | 1 | 0.05  | 0.05   | 0.05   | 0.05   | 0.05   | t | 100291 | LSTEEKEFL<br>K      | Mus<br>musculu<br>s              |
| 1 | 1.00 | 1 | 1 | 0.03  | 0.03   | 0.03   | 0.03   | 0.03   | t | 77781  | GLVGRPKS<br>KL      | Homo<br>sapiens                  |
| 1 | 1.00 | 1 | 1 | 0.01  | 0.01   | 0.01   | 0.01   | 0.01   | t | 99122  | CESRCTKL<br>EYDPRCV | Homo<br>sapiens                  |

|   |      |   |   |       |        |        |        |        |   |        |                              |                                  |
|---|------|---|---|-------|--------|--------|--------|--------|---|--------|------------------------------|----------------------------------|
| 1 | 1.00 | 1 | 1 | 0.01  | 0.01   | 0.01   | 0.01   | 0.01   | t | 79828  | FLGPKQLT<br>FEGK             | Mus<br>musculu<br>s              |
| 1 | 1.00 | 1 | 1 | 0.01  | 0.01   | 0.01   | 0.01   | 0.01   | t | 92477  | DQSLSSLQ<br>FA               | Ovis<br>aries                    |
| 1 | 1.00 | 1 | 1 | -0.05 | -0.05  | -0.05  | -0.05  | -0.05  | t | 139892 | SKLPLAL                      | Ovis<br>aries                    |
| 1 | 1.00 | 1 | 1 | 0.01  | 0.002  | 0.008  | 0.01   | 0.01   | t | 95744  | QTLPPSVP                     | Bos<br>taurus                    |
| 1 | 1.00 | 1 | 1 | 0     | 0.002  | -0.012 | -0.003 | 0.001  | t | 51847  | QPGVDIIE<br>GPVKNVA<br>VPLY  | Homo<br>sapiens                  |
| 1 | 1.00 | 1 | 1 | 0     | 0.003  | -0.007 | 0      | 0      | t | 110810 | DNASLARL<br>DLERKVES<br>LQEE | Mus<br>musculu<br>s              |
| 1 | 1.00 | 1 | 1 | 0.02  | 0.017  | 0.02   | 0.02   | 0.02   | t | 23587  | HCDGFQNE                     | Oryctola<br>gus<br>cuniculu<br>s |
| 1 | 1.00 | 1 | 1 | 0     | 0.003  | 0      | 0      | 0      | t | 141074 | RHLEFEAR<br>TLSP             | Mus<br>musculu<br>s              |
| 1 | 1.00 | 1 | 1 | 0     | 0      | 0      | 0      | 0      | t | 60333  | SPWAPTA<br>PLPGDMN<br>P      | Homo<br>sapiens                  |
| 1 | 1.00 | 1 | 1 | 0.01  | 0.009  | 0.003  | 0.01   | 0.012  | t | 56768  | SAEYEKSK<br>VNKYLKTI<br>MPF  | Equus<br>caballus                |
| 1 | 1.00 | 1 | 1 | -0.04 | -0.042 | -0.045 | -0.047 | -0.043 | t | 124008 | DGVVLVD                      | Mus<br>musculu<br>s              |
| 1 | 1.00 | 1 | 1 | -0.03 | -0.029 | -0.031 | -0.027 | -0.031 | t | 99405  | KVMIGKPK<br>AQNIRQG          | Equus<br>caballus                |
| 1 | 1.00 | 1 | 1 | 0.04  | 0.04   | 0.04   | 0.04   | 0.04   | t | 142427 | KAEKDAEA<br>AQ               | Homo<br>sapiens                  |
| 1 | 1.00 | 1 | 1 | 0     | 0      | 0      | 0      | -0.001 | t | 144742 | PFYGYRE                      | Mus<br>musculu<br>s              |

|   |      |   |   |   |   |   |   |        |   |        |                             |                                  |
|---|------|---|---|---|---|---|---|--------|---|--------|-----------------------------|----------------------------------|
| 1 | 1.00 | 1 | 1 | 0 | 0 | 0 | 0 | -0.001 | t | 150858 | ISSLYNLVK<br>SS             | Mus<br>musculu<br>s              |
| 1 | 1.00 | 1 | 1 | 0 | 0 | 0 | 0 | -0.001 | t | 141786 | YGEESRRR<br>GDLAALAR<br>RV  | Mus<br>musculu<br>s              |
| 1 | 1.00 | 1 | 1 | 0 | 0 | 0 | 0 | -0.001 | t | 138194 | IIPKSSWS                    | Homo<br>sapiens                  |
| 1 | 1.00 | 1 | 1 | 0 | 0 | 0 | 0 | -0.001 | t | 141963 | MVDRGW<br>G                 | Mus<br>musculu<br>s              |
| 1 | 1.00 | 1 | 1 | 0 | 0 | 0 | 0 | -0.001 | t | 139029 | DLQVLT                      | Mus<br>musculu<br>s              |
| 1 | 1.00 | 1 | 1 | 0 | 0 | 0 | 0 | -0.001 | t | 134860 | AGPKAQV<br>EAIQKY           | Mus<br>musculu<br>s              |
| 1 | 1.00 | 1 | 1 | 0 | 0 | 0 | 0 | -0.001 | t | 142913 | MVLNEGT<br>SGTA             | Oryctola<br>gus<br>cuniculu<br>s |
| 1 | 1.00 | 1 | 1 | 0 | 0 | 0 | 0 | -0.001 | t | 141523 | ALEPPHNL<br>PVP             | Mus<br>musculu<br>s              |
| 1 | 1.00 | 1 | 1 | 0 | 0 | 0 | 0 | -0.001 | t | 150204 | FHSVVHTL<br>LEWLMEK<br>ELMV | Mus<br>musculu<br>s              |
| 1 | 1.00 | 1 | 1 | 0 | 0 | 0 | 0 | -0.001 | t | 125004 | DAPDTDW<br>CDSIP            | Mus<br>musculu<br>s              |
| 1 | 1.00 | 1 | 1 | 0 | 0 | 0 | 0 | -0.001 | t | 125021 | DWC                         | Mus<br>musculu<br>s              |
| 1 | 1.00 | 1 | 1 | 0 | 0 | 0 | 0 | -0.001 | t | 122292 | CTYILDPEK<br>LTLRPYK<br>A   | Oryctola<br>gus<br>cuniculu<br>s |
| 1 | 1.00 | 1 | 1 | 0 | 0 | 0 | 0 | -0.001 | t | 122291 | CTYILDPEK<br>LTLRATYD<br>N  | Oryctola<br>gus<br>cuniculu<br>s |
| 1 | 1.00 | 1 | 1 | 0 | 0 | 0 | 0 | -0.001 | t | 124069 | ELQIAKDE<br>RYGS            | Oryctola<br>gus<br>cuniculu<br>s |

|   |      |   |   |   |   |   |   |        |   |        |                      |                          |
|---|------|---|---|---|---|---|---|--------|---|--------|----------------------|--------------------------|
| 1 | 1.00 | 1 | 1 | 0 | 0 | 0 | 0 | -0.001 | t | 125608 | YYKKHIS              | Mus<br>musculus          |
| 1 | 1.00 | 1 | 1 | 0 | 0 | 0 | 0 | -0.001 | t | 122083 | DPNIKLVLD<br>DCWATS  | Oryctolagus<br>cuniculus |
| 1 | 1.00 | 1 | 1 | 0 | 0 | 0 | 0 | -0.001 | t | 122202 | TSPPLLWDS<br>VHL     | Mus<br>musculus          |
| 1 | 1.00 | 1 | 1 | 0 | 0 | 0 | 0 | -0.001 | t | 125454 | KDYKTMVK<br>FCN      | Mus<br>musculus          |
| 1 | 1.00 | 1 | 1 | 0 | 0 | 0 | 0 | -0.001 | t | 122083 | DPNIKLVLD<br>DCWATS  | Mus<br>musculus          |
| 1 | 1.00 | 1 | 1 | 0 | 0 | 0 | 0 | -0.001 | t | 124232 | GSITRDSIF<br>RLR     | Oryctolagus<br>cuniculus |
| 1 | 1.00 | 1 | 1 | 0 | 0 | 0 | 0 | -0.001 | t | 123849 | WQDE                 | Mus<br>musculus          |
| 1 | 1.00 | 1 | 1 | 0 | 0 | 0 | 0 | -0.001 | t | 124713 | SGEQPSDE<br>QPSGEHG  | Mus<br>musculus          |
| 1 | 1.00 | 1 | 1 | 0 | 0 | 0 | 0 | -0.001 | t | 122094 | FLALDVPTI<br>GLC     | Mus<br>musculus          |
| 1 | 1.00 | 1 | 1 | 0 | 0 | 0 | 0 | -0.001 | t | 103998 | IVKWDRDM             | Mus<br>musculus          |
| 1 | 1.00 | 1 | 1 | 0 | 0 | 0 | 0 | -0.001 | t | 102510 | HHQKLVEF<br>AEDVGSNK | Mus<br>musculus          |
| 1 | 1.00 | 1 | 1 | 0 | 0 | 0 | 0 | -0.001 | t | 107233 | RSFTLASSET<br>G      | Mus<br>musculus          |
| 1 | 1.00 | 1 | 1 | 0 | 0 | 0 | 0 | -0.001 | t | 105207 | GAIIGLMV<br>GGVIA    | Mus<br>musculus          |
| 1 | 1.00 | 1 | 1 | 0 | 0 | 0 | 0 | -0.001 | t | 104443 | DAEFRHDS<br>GYE      | Homo<br>sapiens          |
| 1 | 1.00 | 1 | 1 | 0 | 0 | 0 | 0 | -0.001 | t | 112352 | TGNKYPGP<br>P        | Mus<br>musculus          |
| 1 | 1.00 | 1 | 1 | 0 | 0 | 0 | 0 | -0.001 | t | 115630 | NFDKLYIW<br>G        | Homo<br>sapiens          |

|   |      |   |   |   |   |   |   |        |   |        |                              |                     |
|---|------|---|---|---|---|---|---|--------|---|--------|------------------------------|---------------------|
| 1 | 1.00 | 1 | 1 | 0 | 0 | 0 | 0 | -0.001 | t | 112316 | SIKNPTNA<br>K                | Mus<br>musculu<br>s |
| 1 | 1.00 | 1 | 1 | 0 | 0 | 0 | 0 | -0.001 | t | 106322 | DAEFRHDS<br>G                | Mus<br>musculu<br>s |
| 1 | 1.00 | 1 | 1 | 0 | 0 | 0 | 0 | -0.001 | t | 99922  | DAEFRHDS<br>GY               | Mus<br>musculu<br>s |
| 1 | 1.00 | 1 | 1 | 0 | 0 | 0 | 0 | -0.001 | t | 104443 | DAEFRHDS<br>GYE              | Mus<br>musculu<br>s |
| 1 | 1.00 | 1 | 1 | 0 | 0 | 0 | 0 | -0.001 | t | 108600 | QLINTNGS                     | Capra<br>hircus     |
| 1 | 1.00 | 1 | 1 | 0 | 0 | 0 | 0 | -0.001 | t | 104443 | DAEFRHDS<br>GYE              | Mus<br>musculu<br>s |
| 1 | 1.00 | 1 | 1 | 0 | 0 | 0 | 0 | -0.001 | t | 99922  | DAEFRHDS<br>GY               | Mus<br>musculu<br>s |
| 1 | 1.00 | 1 | 1 | 0 | 0 | 0 | 0 | -0.001 | t | 99922  | DAEFRHDS<br>GY               | Mus<br>musculu<br>s |
| 1 | 1.00 | 1 | 1 | 0 | 0 | 0 | 0 | -0.001 | t | 106322 | DAEFRHDS<br>G                | Mus<br>musculu<br>s |
| 1 | 1.00 | 1 | 1 | 0 | 0 | 0 | 0 | -0.001 | t | 115652 | SSRISIW<br>TIVKP             | Homo<br>sapiens     |
| 1 | 1.00 | 1 | 1 | 0 | 0 | 0 | 0 | -0.001 | t | 102344 | DAEFR                        | Mus<br>musculu<br>s |
| 1 | 1.00 | 1 | 1 | 0 | 0 | 0 | 0 | -0.001 | t | 61800  | STNS                         | Mus<br>musculu<br>s |
| 1 | 1.00 | 1 | 1 | 0 | 0 | 0 | 0 | -0.001 | t | 63756  | TFTNKLKE<br>KHTDLGK          | Mus<br>musculu<br>s |
| 1 | 1.00 | 1 | 1 | 0 | 0 | 0 | 0 | -0.001 | t | 78635  | EKIERNNK<br>LKQPPPP<br>NPN   | Mus<br>musculu<br>s |
| 1 | 1.00 | 1 | 1 | 0 | 0 | 0 | 0 | -0.001 | t | 71284  | VTEEI                        | Homo<br>sapiens     |
| 1 | 1.00 | 1 | 1 | 0 | 0 | 0 | 0 | -0.001 | t | 67875  | VCRQGVV<br>DRGWGN<br>GCGLFGK | Equus<br>caballus   |

|   |      |   |   |   |   |   |   |        |   |       |                              |                                  |
|---|------|---|---|---|---|---|---|--------|---|-------|------------------------------|----------------------------------|
| 1 | 1.00 | 1 | 1 | 0 | 0 | 0 | 0 | -0.001 | t | 62353 | SVTEEIAEE<br>DKSVTEEI<br>AV  | Homo<br>sapiens                  |
| 1 | 1.00 | 1 | 1 | 0 | 0 | 0 | 0 | -0.001 | t | 78627 | DPDPPDA<br>NDPAPPN<br>AN     | Mus<br>musculu<br>s              |
| 1 | 1.00 | 1 | 1 | 0 | 0 | 0 | 0 | -0.001 | t | 68524 | VFMVPQY<br>GYL               | Mus<br>musculu<br>s              |
| 1 | 1.00 | 1 | 1 | 0 | 0 | 0 | 0 | -0.001 | t | 65421 | TNSGINNS                     | Mus<br>musculu<br>s              |
| 1 | 1.00 | 1 | 1 | 0 | 0 | 0 | 0 | -0.001 | t | 67214 | TVWRNRE<br>TLMEFEEP<br>HATKQ | Equus<br>caballus                |
| 1 | 1.00 | 1 | 1 | 0 | 0 | 0 | 0 | -0.001 | t | 97484 | LVEETSFID<br>AGAP            | Oryctola<br>gus<br>cuniculu<br>s |
| 1 | 1.00 | 1 | 1 | 0 | 0 | 0 | 0 | -0.001 | t | 74871 | YLPVGGLR<br>RIGG             | Mus<br>musculu<br>s              |
| 1 | 1.00 | 1 | 1 | 0 | 0 | 0 | 0 | -0.001 | t | 78687 | IRVRKRKG<br>SNKKAEDT<br>LED  | Mus<br>musculu<br>s              |
| 1 | 1.00 | 1 | 1 | 0 | 0 | 0 | 0 | -0.001 | t | 61801 | STNSGINN                     | Mus<br>musculu<br>s              |
| 1 | 1.00 | 1 | 1 | 0 | 0 | 0 | 0 | -0.001 | t | 72485 | WGNGCGL<br>FGKGSIDT<br>CAKFA | Equus<br>caballus                |
| 1 | 1.00 | 1 | 1 | 0 | 0 | 0 | 0 | -0.001 | t | 74008 | YGGL                         | Mus<br>musculu<br>s              |
| 1 | 1.00 | 1 | 1 | 0 | 0 | 0 | 0 | -0.001 | t | 71284 | VTEEI                        | Oryctola<br>gus<br>cuniculu<br>s |
| 1 | 1.00 | 1 | 1 | 0 | 0 | 0 | 0 | -0.001 | t | 74009 | YGGPANK<br>KNAG              | Mus<br>musculu<br>s              |
| 1 | 1.00 | 1 | 1 | 0 | 0 | 0 | 0 | -0.001 | t | 45420 | NPNDPP                       | Mus<br>musculu<br>s              |

|   |      |   |   |   |   |   |   |        |   |       |                              |                                  |
|---|------|---|---|---|---|---|---|--------|---|-------|------------------------------|----------------------------------|
| 1 | 1.00 | 1 | 1 | 0 | 0 | 0 | 0 | -0.001 | t | 53447 | REACR                        | Mus<br>musculu<br>s              |
| 1 | 1.00 | 1 | 1 | 0 | 0 | 0 | 0 | -0.001 | t | 60024 | SPDVDLG<br>DISGINAS          | Mus<br>musculu<br>s              |
| 1 | 1.00 | 1 | 1 | 0 | 0 | 0 | 0 | -0.001 | t | 43242 | NANPNAN<br>PNANP             | Mus<br>musculu<br>s              |
| 1 | 1.00 | 1 | 1 | 0 | 0 | 0 | 0 | -0.001 | t | 39689 | LSSY                         | Mus<br>musculu<br>s              |
| 1 | 1.00 | 1 | 1 | 0 | 0 | 0 | 0 | -0.001 | t | 46008 | NSTNSGIN                     | Mus<br>musculu<br>s              |
| 1 | 1.00 | 1 | 1 | 0 | 0 | 0 | 0 | -0.001 | t | 43246 | NANPNAN<br>PNANPNA<br>NP     | Mus<br>musculu<br>s              |
| 1 | 1.00 | 1 | 1 | 0 | 0 | 0 | 0 | -0.001 | t | 43242 | NANPNAN<br>PNANP             | Mus<br>musculu<br>s              |
| 1 | 1.00 | 1 | 1 | 0 | 0 | 0 | 0 | -0.001 | t | 59967 | SNYYSDNE<br>IEQHTAKQ<br>PKL  | Oryctola<br>gus<br>cuniculu<br>s |
| 1 | 1.00 | 1 | 1 | 0 | 0 | 0 | 0 | -0.001 | t | 43242 | NANPNAN<br>PNANP             | Mus<br>musculu<br>s              |
| 1 | 1.00 | 1 | 1 | 0 | 0 | 0 | 0 | -0.001 | t | 45416 | NPNANPN<br>ANPNANP<br>NENPNA | Homo<br>sapiens                  |
| 1 | 1.00 | 1 | 1 | 0 | 0 | 0 | 0 | -0.001 | t | 43242 | NANPNAN<br>PNANP             | Mus<br>musculu<br>s              |
| 1 | 1.00 | 1 | 1 | 0 | 0 | 0 | 0 | -0.001 | t | 43152 | NAGGNAG<br>GNAGGNA<br>GGNAGG | Mus<br>musculu<br>s              |
| 1 | 1.00 | 1 | 1 | 0 | 0 | 0 | 0 | -0.001 | t | 43730 | NEREDERT<br>LTKEYEDIV<br>LK  | Oryctola<br>gus<br>cuniculu<br>s |



|   |      |   |   |   |   |   |   |        |   |       |                              |                                  |
|---|------|---|---|---|---|---|---|--------|---|-------|------------------------------|----------------------------------|
| 1 | 1.00 | 1 | 1 | 0 | 0 | 0 | 0 | -0.001 | t | 43248 | NANPNAN<br>PNANPNA<br>NPNANP | Mus<br>musculu<br>s              |
| 1 | 1.00 | 1 | 1 | 0 | 0 | 0 | 0 | -0.001 | t | 57644 | SETFTNKL<br>KEKHTDLG<br>KEG  | Mus<br>musculu<br>s              |
| 1 | 1.00 | 1 | 1 | 0 | 0 | 0 | 0 | -0.001 | t | 56699 | SAAFYYRV                     | Mus<br>musculu<br>s              |
| 1 | 1.00 | 1 | 1 | 0 | 0 | 0 | 0 | -0.001 | t | 60024 | SPDVDLG<br>DISGINAS          | Mus<br>musculu<br>s              |
| 1 | 1.00 | 1 | 1 | 0 | 0 | 0 | 0 | -0.001 | t | 43248 | NANPNAN<br>PNANPNA<br>NPNANP | Mus<br>musculu<br>s              |
| 1 | 1.00 | 1 | 1 | 0 | 0 | 0 | 0 | -0.001 | t | 50931 | QGPGAPQ<br>GPGAPQG<br>PGAP   | Mus<br>musculu<br>s              |
| 1 | 1.00 | 1 | 1 | 0 | 0 | 0 | 0 | -0.001 | t | 49450 | PSNQDSF<br>QWQ               | Mus<br>musculu<br>s              |
| 1 | 1.00 | 1 | 1 | 0 | 0 | 0 | 0 | -0.001 | t | 41019 | MADPNRF<br>RG                | Mus<br>musculu<br>s              |
| 1 | 1.00 | 1 | 1 | 0 | 0 | 0 | 0 | -0.001 | t | 57569 | SENHGNY<br>SAQVGAS<br>Q      | Mus<br>musculu<br>s              |
| 1 | 1.00 | 1 | 1 | 0 | 0 | 0 | 0 | -0.001 | t | 51775 | QNTRNIVP<br>VSIVSR           | Mus<br>musculu<br>s              |
| 1 | 1.00 | 1 | 1 | 0 | 0 | 0 | 0 | -0.001 | t | 49450 | PSNQDSF<br>QWQ               | Mus<br>musculu<br>s              |
| 1 | 1.00 | 1 | 1 | 0 | 0 | 0 | 0 | -0.001 | t | 51775 | QNTRNIVP<br>VSIVSR           | Oryctola<br>gus<br>cuniculu<br>s |
| 1 | 1.00 | 1 | 1 | 0 | 0 | 0 | 0 | -0.001 | t | 37660 | LLPHSNLD<br>HILEPSIPW<br>KSK | Mus<br>musculu<br>s              |
| 1 | 1.00 | 1 | 1 | 0 | 0 | 0 | 0 | -0.001 | t | 48690 | PNPNPD                       | Mus<br>musculu<br>s              |

|   |      |   |   |   |   |   |   |        |   |       |                              |                                  |
|---|------|---|---|---|---|---|---|--------|---|-------|------------------------------|----------------------------------|
| 1 | 1.00 | 1 | 1 | 0 | 0 | 0 | 0 | -0.001 | t | 45252 | NNSTNSGI                     | Mus<br>musculu<br>s              |
| 1 | 1.00 | 1 | 1 | 0 | 0 | 0 | 0 | -0.001 | t | 37660 | LLPHSNLD<br>HILEPSIPW<br>KSK | Mus<br>musculu<br>s              |
| 1 | 1.00 | 1 | 1 | 0 | 0 | 0 | 0 | -0.001 | t | 40739 | LYDSYAYY<br>G                | Mus<br>musculu<br>s              |
| 1 | 1.00 | 1 | 1 | 0 | 0 | 0 | 0 | -0.001 | t | 45276 | NNVARCS<br>YGADSTLG<br>PV    | Mus<br>musculu<br>s              |
| 1 | 1.00 | 1 | 1 | 0 | 0 | 0 | 0 | -0.001 | t | 48620 | PNDPPP                       | Mus<br>musculu<br>s              |
| 1 | 1.00 | 1 | 1 | 0 | 0 | 0 | 0 | -0.001 | t | 30716 | KFDWNTD                      | Mus<br>musculu<br>s              |
| 1 | 1.00 | 1 | 1 | 0 | 0 | 0 | 0 | -0.001 | t | 11813 | EENVEENV                     | Oryctola<br>gus<br>cuniculu<br>s |
| 1 | 1.00 | 1 | 1 | 0 | 0 | 0 | 0 | -0.001 | t | 11463 | EDVNGIRK<br>PK               | Mus<br>musculu<br>s              |
| 1 | 1.00 | 1 | 1 | 0 | 0 | 0 | 0 | -0.001 | t | 24369 | HNDKRAD<br>PAFVCRQ<br>GVVDRG | Equus<br>caballus                |
| 1 | 1.00 | 1 | 1 | 0 | 0 | 0 | 0 | -0.001 | t | 11813 | EENVEENV                     | Homo<br>sapiens                  |
| 1 | 1.00 | 1 | 1 | 0 | 0 | 0 | 0 | -0.001 | t | 11819 | EENVEHD<br>A                 | Mus<br>musculu<br>s              |
| 1 | 1.00 | 1 | 1 | 0 | 0 | 0 | 0 | -0.001 | t | 19481 | GEYGEVTV<br>DCEPRSGI<br>DTNA | Equus<br>caballus                |
| 1 | 1.00 | 1 | 1 | 0 | 0 | 0 | 0 | -0.001 | t | 11819 | EENVEHD<br>A                 | Mus<br>musculu<br>s              |

|   |      |   |   |   |   |   |   |        |   |       |                        |                       |
|---|------|---|---|---|---|---|---|--------|---|-------|------------------------|-----------------------|
| 1 | 1.00 | 1 | 1 | 0 | 0 | 0 | 0 | -0.001 | t | 11819 | EENVEHDA               | Mus musculus          |
| 1 | 1.00 | 1 | 1 | 0 | 0 | 0 | 0 | -0.001 | t | 31105 | KHFRETEV               | Mus musculus          |
| 1 | 1.00 | 1 | 1 | 0 | 0 | 0 | 0 | -0.001 | t | 11814 | EENVEENV EENV          | Oryctolagus cuniculus |
| 1 | 1.00 | 1 | 1 | 0 | 0 | 0 | 0 | -0.001 | t | 11815 | EENVEENV EENVEENV      | Oryctolagus cuniculus |
| 1 | 1.00 | 1 | 1 | 0 | 0 | 0 | 0 | -0.001 | t | 15205 | FAKY                   | Mus musculus          |
| 1 | 1.00 | 1 | 1 | 0 | 0 | 0 | 0 | -0.001 | t | 27675 | INKRKYDSL KEKL         | Homo sapiens          |
| 1 | 1.00 | 1 | 1 | 0 | 0 | 0 | 0 | -0.001 | t | 32570 | KNNNSTNS               | Mus musculus          |
| 1 | 1.00 | 1 | 1 | 0 | 0 | 0 | 0 | -0.001 | t | 10801 | DWEDRYRE               | Oryctolagus cuniculus |
| 1 | 1.00 | 1 | 1 | 0 | 0 | 0 | 0 | -0.001 | t | 11819 | EENVEHDA               | Oryctolagus cuniculus |
| 1 | 1.00 | 1 | 1 | 0 | 0 | 0 | 0 | -0.001 | t | 31018 | KGNCSGPT TIR           | Oryctolagus cuniculus |
| 1 | 1.00 | 1 | 1 | 0 | 0 | 0 | 0 | -0.001 | t | 27463 | IMDINKRKY DSLK         | Homo sapiens          |
| 1 | 1.00 | 1 | 1 | 0 | 0 | 0 | 0 | -0.001 | t | 17135 | FNCLGMS NRDFLEGV SGATW | Equus caballus        |

|   |      |   |   |      |       |       |       |        |   |        |                           |                                  |
|---|------|---|---|------|-------|-------|-------|--------|---|--------|---------------------------|----------------------------------|
| 1 | 1.00 | 1 | 1 | 0    | 0     | 0     | 0     | -0.001 | t | 1478   | AGDRAGD<br>R              | Mus<br>musculu<br>s              |
| 1 | 1.00 | 1 | 1 | 0    | 0     | 0     | 0     | -0.001 | t | 3242   | ANDPPP                    | Mus<br>musculu<br>s              |
| 1 | 1.00 | 1 | 1 | 0    | 0     | 0     | 0     | -0.001 | t | 9723   | DPPPPNP<br>NDPPPPN<br>PND | Mus<br>musculu<br>s              |
| 1 | 1.00 | 1 | 1 | 0    | 0     | 0     | 0     | -0.001 | t | 7491   | DAEFRHDS<br>GYEVHHQ<br>K  | Mus<br>musculu<br>s              |
| 1 | 1.00 | 1 | 1 | 0    | 0     | 0     | 0     | -0.001 | t | 9516   | DNNLVSG<br>P              | Mus<br>musculu<br>s              |
| 1 | 1.00 | 1 | 1 | 0    | 0     | 0     | 0     | -0.001 | t | 9516   | DNNLVSG<br>P              | Mus<br>musculu<br>s              |
| 1 | 1.00 | 1 | 1 | 0    | 0     | 0     | 0     | -0.001 | t | 3044   | ALYTDEDL<br>LFDLEKQK      | Oryctola<br>gus<br>cuniculu<br>s |
| 1 | 1.00 | 1 | 1 | 0    | 0     | 0     | 0     | -0.001 | t | 7492   | DAEFRHDS<br>GYEVHHQ<br>KL | Mus<br>musculu<br>s              |
| 1 | 1.00 | 1 | 1 | 0    | 0     | 0     | 0     | -0.001 | t | 7492   | DAEFRHDS<br>GYEVHHQ<br>KL | Mus<br>musculu<br>s              |
| 1 | 1.00 | 1 | 1 | 0    | 0     | 0     | 0     | -0.001 | t | 6402   | CHPSDGK<br>CN             | Mus<br>musculu<br>s              |
| 1 | 1.00 | 1 | 1 | 0    | 0     | 0     | 0     | -0.001 | t | 3274   | ANETIYNT<br>TLKYGDV       | MD                               |
| 1 | 1.00 | 1 | 1 | 0    | 0     | 0     | 0     | -0.001 | t | 9524   | DNPASTT<br>NKDK           | Mus<br>musculu<br>s              |
| 1 | 1.00 | 1 | 1 | 0.01 | 0.013 | 0.01  | 0.01  | 0.008  | t | 135458 | FGSDYEDR<br>YYR           | Mus<br>musculu<br>s              |
| 1 | 1.00 | 1 | 1 | 0.07 | 0.072 | 0.075 | 0.069 | 0.07   | t | 135786 | VNSTEAET                  | Homo<br>sapiens                  |
| 1 | 1.00 | 1 | 1 | 0    | 0     | 0     | 0     | 0      | t | 135451 | CLGKAC                    | Oryctola<br>gus<br>cuniculu<br>s |

|   |      |   |   |       |        |        |        |        |   |        |                               |                     |
|---|------|---|---|-------|--------|--------|--------|--------|---|--------|-------------------------------|---------------------|
| 1 | 1.00 | 1 | 1 | 0.03  | 0.033  | 0.029  | 0.03   | 0.03   | t | 133611 | IVSYLCDLA<br>PEAPPPTL<br>PP   | Mus<br>musculu<br>s |
| 1 | 1.00 | 1 | 1 | 0.05  | 0.05   | 0.05   | 0.05   | 0.052  | t | 27555  | IMSGEKPT<br>VEDVVN            | Homo<br>sapiens     |
| 1 | 1.00 | 1 | 1 | 0.02  | 0.018  | 0.009  | 0.019  | 0.02   | t | 39251  | LRYGNVLD<br>VN                | Mus<br>musculu<br>s |
| 1 | 1.00 | 1 | 1 | 0.03  | 0.026  | 0.027  | 0.03   | 0.028  | t | 140996 | EEIDYDDTI<br>SVEMKK           | Mus<br>musculu<br>s |
| 1 | 1.00 | 1 | 1 | 0.01  | 0.008  | 0.015  | 0.007  | 0.009  | t | 53894  | RGKDLPVL<br>DQLTD             | Mus<br>musculu<br>s |
| 1 | 1.00 | 1 | 1 | 0.04  | 0.04   | 0.04   | 0.04   | 0.04   | t | 140596 | SLDELDW<br>DSM                | Mus<br>musculu<br>s |
| 1 | 1.00 | 1 | 1 | 0.02  | 0.02   | 0.02   | 0.02   | 0.02   | t | 123424 | LGDKFNM<br>GL                 | Ovis<br>aries       |
| 1 | 1.00 | 1 | 1 | 0.02  | 0.02   | 0.02   | 0.02   | 0.02   | t | 123425 | LGEEYEEH<br>L                 | Ovis<br>aries       |
| 1 | 1.00 | 1 | 1 | -0.02 | -0.02  | -0.02  | -0.02  | -0.02  | t | 112308 | SFSGFSL                       | Homo<br>sapiens     |
| 1 | 1.00 | 1 | 1 | -0.04 | -0.04  | -0.04  | -0.04  | -0.04  | t | 149430 | QPFLPQQ<br>PYP                | Homo<br>sapiens     |
| 1 | 1.00 | 1 | 1 | -0.01 | -0.008 | -0.015 | -0.013 | -0.009 | t | 115256 | FRELKDLK<br>GY                | Homo<br>sapiens     |
| 1 | 1.00 | 1 | 1 | 0.01  | 0.013  | 0.01   | 0.01   | 0.008  | t | 140853 | GEYVQILD<br>AHAAYLN<br>ATPAA  | Mus<br>musculu<br>s |
| 1 | 1.00 | 1 | 1 | 0     | -0.002 | 0      | -0.002 | -0.002 | t | 122406 | IEIGLEGKG<br>FEPTLEALF<br>GK  | Mus<br>musculu<br>s |
| 1 | 1.00 | 1 | 1 | 0     | -0.004 | -0.012 | 0      | 0.001  | t | 42008  | MLMRTDP<br>FRELD RFA<br>EQVLG | Mus<br>musculu<br>s |
| 1 | 1.00 | 1 | 1 | 0     | -0.002 | -0.011 | -0.007 | 0      | t | 98434  | RYMDQPS<br>RD                 | Mus<br>musculu<br>s |

|   |      |   |   |       |        |        |        |        |   |        |                              |                                  |
|---|------|---|---|-------|--------|--------|--------|--------|---|--------|------------------------------|----------------------------------|
| 1 | 1.00 | 1 | 1 | -0.01 | -0.01  | -0.01  | -0.008 | -0.01  | t | 27598  | INCYTEGP<br>CVPKPP           | Homo<br>sapiens                  |
| 1 | 1.00 | 1 | 1 | -0.02 | -0.018 | -0.013 | -0.013 | -0.019 | t | 122179 | RQLGRGS                      | Homo<br>sapiens                  |
| 1 | 1.00 | 1 | 1 | -0.03 | -0.03  | -0.03  | -0.03  | -0.03  | t | 132430 | LGFA                         | Mus<br>musculu<br>s              |
| 1 | 1.00 | 1 | 1 | 0.03  | 0.03   | 0.023  | 0.027  | 0.032  | t | 50721  | QEVNLNENL<br>LR              | Homo<br>sapiens                  |
| 1 | 1.00 | 1 | 1 | 0.01  | 0.012  | 0.012  | 0.009  | 0.01   | t | 56885  | SALTSAIA<br>GFVFSC           | Ovis<br>aries                    |
| 1 | 1.00 | 1 | 1 | 0.04  | 0.038  | 0.053  | 0.039  | 0.039  | t | 138862 | KFPED                        | Mus<br>musculu<br>s              |
| 1 | 1.00 | 1 | 1 | 0.02  | 0.02   | 0.02   | 0.02   | 0.019  | t | 131437 | GASVKVT                      | Homo<br>sapiens                  |
| 1 | 1.00 | 1 | 1 | 0     | 0      | 0      | 0      | 0      | t | 79223  | GASHTV                       | Mus<br>musculu<br>s              |
| 1 | 1.00 | 1 | 1 | 0.01  | 0.012  | 0.008  | 0.007  | 0.009  | t | 105746 | EETICTASF<br>KKNIGR          | Homo<br>sapiens                  |
| 1 | 1.00 | 1 | 1 | -0.03 | -0.028 | -0.032 | -0.031 | -0.03  | t | 25015  | HVAGAAA<br>LILSKHPN          | Cavia<br>porcellu<br>s           |
| 1 | 1.00 | 1 | 1 | 0.04  | 0.035  | 0.044  | 0.039  | 0.04   | t | 34920  | LAPTVAHG<br>VFNPEFG          | Bos<br>taurus                    |
| 1 | 1.00 | 1 | 1 | 0.02  | 0.02   | 0.02   | 0.02   | 0.018  | t | 78073  | WWSPTM<br>LTQSKE             | Mus<br>musculu<br>s              |
| 1 | 1.00 | 1 | 1 | 0     | 0.004  | 0.002  | 0.007  | 0.002  | t | 433    | AASGPKVV<br>IDGKDQN<br>VTGSV | Homo<br>sapiens                  |
| 1 | 1.00 | 1 | 1 | 0.03  | 0.03   | 0.03   | 0.03   | 0.03   | t | 123791 | TPVVGAV<br>Q                 | Oryctola<br>gus<br>cuniculu<br>s |

|   |      |   |   |       |        |        |        |       |   |        |                              |                     |
|---|------|---|---|-------|--------|--------|--------|-------|---|--------|------------------------------|---------------------|
| 1 | 1.00 | 1 | 1 | 0.01  | 0.01   | 0.01   | 0.01   | 0.01  | t | 103457 | PAEFLENF<br>VRSSNLK          | Homo<br>sapiens     |
| 1 | 1.00 | 1 | 1 | -0.01 | -0.01  | -0.01  | -0.01  | -0.01 | t | 158597 | KWPIIDT                      | Homo<br>sapiens     |
| 1 | 1.00 | 1 | 1 | -0.01 | -0.01  | -0.01  | -0.01  | -0.01 | t | 135643 | CPFGFEGK                     | Homo<br>sapiens     |
| 1 | 1.00 | 1 | 1 | -0.01 | -0.01  | -0.01  | -0.01  | -0.01 | t | 117438 | AIVTKYITK<br>GWKEVHE<br>LYKE | Homo<br>sapiens     |
| 1 | 1.00 | 1 | 1 | -0.01 | -0.01  | -0.014 | -0.01  | -0.01 | t | 49070  | PQPQQQF<br>PQP               | Mus<br>musculu<br>s |
| 1 | 1.00 | 1 | 1 | -0.03 | -0.03  | -0.03  | -0.03  | -0.03 | t | 108555 | NKALTFFL<br>P                | Homo<br>sapiens     |
| 1 | 1.00 | 1 | 1 | -0.04 | -0.038 | -0.037 | -0.039 | -0.04 | t | 24696  | HRMAWN<br>MMMMNW<br>SPT      | Homo<br>sapiens     |
| 1 | 1.00 | 1 | 1 | 0.01  | 0.013  | 0.005  | 0.01   | 0.01  | t | 139866 | QGAFASPI<br>QLQRRNG<br>SKF   | Mus<br>musculu<br>s |
| 1 | 1.00 | 1 | 1 | 0     | 0      | 0      | 0.004  | 0.001 | t | 138608 | RVGAHDP                      | Homo<br>sapiens     |
| 1 | 1.00 | 1 | 1 | 0     | 0      | 0      | 0.004  | 0.001 | t | 135650 | DKVSFFCK<br>NKEKCC           | Homo<br>sapiens     |
| 1 | 1.00 | 1 | 1 | 0     | 0      | 0      | 0.004  | 0.001 | t | 135711 | LDETVKDK<br>LAKEQKSK<br>QNI  | Homo<br>sapiens     |
| 1 | 1.00 | 1 | 1 | 0     | 0      | 0      | 0.004  | 0.001 | t | 138304 | ATVQLPQ                      | Homo<br>sapiens     |
| 1 | 1.00 | 1 | 1 | 0     | 0      | 0      | 0.004  | 0.001 | t | 136420 | KIHAREIFD<br>SRGNPTVE        | Homo<br>sapiens     |
| 1 | 1.00 | 1 | 1 | 0     | 0      | 0      | 0.004  | 0.001 | t | 131762 | YAASSYL                      | Homo<br>sapiens     |
| 1 | 1.00 | 1 | 1 | 0     | 0      | 0      | 0.004  | 0.001 | t | 131878 | FLMLVGG<br>STL               | Homo<br>sapiens     |
| 1 | 1.00 | 1 | 1 | 0     | 0      | 0      | 0.004  | 0.001 | t | 131438 | GAVTVAW                      | Homo<br>sapiens     |
| 1 | 1.00 | 1 | 1 | 0     | 0      | 0      | 0.004  | 0.001 | t | 118383 | GLKKMLRT<br>CAVHITLD         | Homo<br>sapiens     |
| 1 | 1.00 | 1 | 1 | 0     | 0      | 0      | 0.004  | 0.001 | t | 117742 | AKAQTD<br>EDLRTLLRY          | Homo<br>sapiens     |
| 1 | 1.00 | 1 | 1 | 0     | 0      | 0      | 0.004  | 0.001 | t | 133372 | SPSPTPTP<br>GPSRRG           | Homo<br>sapiens     |

|   |      |   |   |   |        |   |       |       |   |        |                              |              |
|---|------|---|---|---|--------|---|-------|-------|---|--------|------------------------------|--------------|
| 1 | 1.00 | 1 | 1 | 0 | 0      | 0 | 0.004 | 0.001 | t | 133900 | NEHPVFAY<br>LKDKLP           | Homo sapiens |
| 1 | 1.00 | 1 | 1 | 0 | 0      | 0 | 0.004 | 0.001 | t | 131365 | ATLVCLI                      | Homo sapiens |
| 1 | 1.00 | 1 | 1 | 0 | 0      | 0 | 0.004 | 0.001 | t | 121112 | AACDPRH<br>GRYLTV            | Homo sapiens |
| 1 | 1.00 | 1 | 1 | 0 | 0      | 0 | 0.004 | 0.001 | t | 117907 | HKAFKGSI                     | Homo sapiens |
| 1 | 1.00 | 1 | 1 | 0 | 0      | 0 | 0.004 | 0.001 | t | 133776 | AGDLSKVD<br>AKQPGDY          | Homo sapiens |
| 1 | 1.00 | 1 | 1 | 0 | 0      | 0 | 0.004 | 0.001 | t | 122874 | PPARALKR<br>SLWVEVD<br>LLIGS | Homo sapiens |
| 1 | 1.00 | 1 | 1 | 0 | 0      | 0 | 0.004 | 0.001 | t | 125229 | RDSEGDV<br>AEKLGPI           | Homo sapiens |
| 1 | 1.00 | 1 | 1 | 0 | 0      | 0 | 0.004 | 0.001 | t | 131344 | AIGDRSKT<br>DRENSVSI<br>G    | Homo sapiens |
| 1 | 1.00 | 1 | 1 | 0 | 0      | 0 | 0.004 | 0.001 | t | 132029 | QLGPTCLS<br>SL               | Homo sapiens |
| 1 | 1.00 | 1 | 1 | 0 | 0      | 0 | 0.004 | 0.001 | t | 130987 | NPVENM<br>MDRDSQ             | Homo sapiens |
| 1 | 1.00 | 1 | 1 | 0 | 0      | 0 | 0.004 | 0.001 | t | 131978 | MLVGGST<br>LCV               | Homo sapiens |
| 1 | 1.00 | 1 | 1 | 0 | 0      | 0 | 0.004 | 0.001 | t | 118105 | RKGHFLLS<br>SKSGFWTI<br>WL   | Homo sapiens |
| 1 | 1.00 | 1 | 1 | 0 | 0      | 0 | 0.004 | 0.001 | t | 117773 | CNSRQTD<br>REDELI            | Homo sapiens |
| 1 | 1.00 | 1 | 1 | 0 | 0      | 0 | 0.004 | 0.001 | t | 117333 | MVTSTITE<br>KLLKNLVKI        | Homo sapiens |
| 1 | 1.00 | 1 | 1 | 0 | -0.002 | 0 | 0.004 | 0.001 | t | 108834 | CKPISGHN<br>SLFWYRQT         | Mus musculus |
| 1 | 1.00 | 1 | 1 | 0 | 0      | 0 | 0.004 | 0.001 | t | 106675 | NEEGFFSA<br>RGHRPLDK<br>K    | Homo sapiens |
| 1 | 1.00 | 1 | 1 | 0 | 0      | 0 | 0.004 | 0.001 | t | 117300 | GSGKGKV<br>QFQGKKT<br>KF     | Homo sapiens |
| 1 | 1.00 | 1 | 1 | 0 | 0      | 0 | 0.004 | 0.001 | t | 117015 | KEQFLDGD<br>GWTSRWI<br>ESK   | Homo sapiens |



|   |      |   |   |       |        |        |        |        |   |        |                              |                                  |
|---|------|---|---|-------|--------|--------|--------|--------|---|--------|------------------------------|----------------------------------|
| 1 | 1.00 | 1 | 1 | 0     | 0      | 0      | 0.004  | 0.001  | t | 117246 | VTWEVLE<br>GEVEKEAL<br>KKI   | Homo<br>sapiens                  |
| 1 | 1.00 | 1 | 1 | 0     | 0      | 0      | 0.004  | 0.001  | t | 63098  | TCRRMLAF<br>LKDKENR          | Homo<br>sapiens                  |
| 1 | 1.00 | 1 | 1 | 0     | 0      | 0      | 0.004  | 0.001  | t | 32159  | KLSEGDLL<br>AEIETDK          | Homo<br>sapiens                  |
| 1 | 1.00 | 1 | 1 | 0.04  | 0.038  | 0.032  | 0.04   | 0.042  | t | 141748 | SLLTEVETP                    | Oryctola<br>gus<br>cuniculu<br>s |
| 1 | 1.00 | 1 | 1 | 0.04  | 0.04   | 0.032  | 0.04   | 0.042  | t | 141748 | SLLTEVETP                    | Mus<br>musculu<br>s              |
| 1 | 1.00 | 1 | 1 | 0     | -0.003 | 0      | 0      | -0.002 | t | 118733 | ADVPLVVE<br>YKIADMG          | Oryctola<br>gus<br>cuniculu<br>s |
| 1 | 1.00 | 1 | 1 | -0.02 | -0.02  | -0.016 | -0.02  | -0.023 | t | 157808 | QQDRHQK<br>IRHFR             | Homo<br>sapiens                  |
| 1 | 1.00 | 1 | 1 | 0     | 0.004  | 0      | 0.001  | 0      | t | 52814  | QVVYDYQ<br>H                 | Homo<br>sapiens                  |
| 1 | 1.00 | 1 | 1 | -0.06 | -0.056 | -0.056 | -0.059 | -0.06  | t | 36304  | LGRLIT                       | Homo<br>sapiens                  |
| 1 | 1.00 | 1 | 1 | 0.02  | 0.02   | 0.02   | 0.016  | 0.021  | t | 134250 | TYNYNVL                      | Homo<br>sapiens                  |
| 1 | 1.00 | 1 | 1 | 0.05  | 0.05   | 0.048  | 0.049  | 0.049  | t | 13984  | ERESQAY                      | Mus<br>musculu<br>s              |
| 1 | 1.00 | 1 | 1 | 0.04  | 0.04   | 0.034  | 0.04   | 0.041  | t | 13524  | ENMTPQD                      | Mus<br>musculu<br>s              |
| 1 | 1.00 | 1 | 1 | -0.02 | -0.02  | -0.017 | -0.02  | -0.019 | t | 56995  | SASPIPR                      | Homo<br>sapiens                  |
| 1 | 1.00 | 1 | 1 | 0.02  | 0.022  | 0.02   | 0.023  | 0.02   | t | 16087  | FGYRKPLD<br>NIKDNVGK<br>MEDY | Aotus<br>nancyma<br>ae           |

|   |      |   |   |       |        |        |        |        |   |        |                              |                                  |
|---|------|---|---|-------|--------|--------|--------|--------|---|--------|------------------------------|----------------------------------|
| 1 | 1.00 | 1 | 1 | -0.03 | -0.032 | -0.042 | -0.033 | -0.032 | t | 89067  | SRTRTTSV<br>GDKQVAS<br>KV    | Mus<br>musculu<br>s              |
| 1 | 1.00 | 1 | 1 | 0.01  | 0.01   | 0.01   | 0.01   | 0.009  | t | 3514   | APDTR                        | Mus<br>musculu<br>s              |
| 1 | 1.00 | 1 | 1 | -0.03 | -0.033 | -0.033 | -0.03  | -0.03  | t | 97443  | LFILTRDG<br>M                | Oryctola<br>gus<br>cuniculu<br>s |
| 1 | 1.00 | 1 | 1 | 0.04  | 0.04   | 0.04   | 0.036  | 0.038  | t | 118563 | PVTTPEEIA<br>QVAT            | Homo<br>sapiens                  |
| 1 | 1.00 | 1 | 1 | -0.04 | -0.04  | -0.049 | -0.04  | -0.04  | t | 93546  | PDMAEEIA<br>ALVLAKLG<br>KDA  | Mus<br>musculu<br>s              |
| 1 | 1.00 | 1 | 1 | 0.02  | 0.02   | 0.013  | 0.02   | 0.02   | t | 133551 | EAPPPTLP<br>PDMAQVT<br>VGPG  | Mus<br>musculu<br>s              |
| 1 | 1.00 | 1 | 1 | 0.03  | 0.03   | 0.03   | 0.03   | 0.029  | t | 104225 | RPAVIPDR<br>EVLYQEFD<br>EMEE | Homo<br>sapiens                  |
| 1 | 1.00 | 1 | 1 | -0.01 | -0.01  | -0.01  | -0.01  | -0.011 | t | 140458 | EHNDFPM<br>YTWRP             | Mus<br>musculu<br>s              |
| 1 | 1.00 | 1 | 1 | -0.03 | -0.026 | -0.025 | -0.03  | -0.03  | t | 44015  | NGKKKNW<br>KKIM              | Mus<br>musculu<br>s              |
| 1 | 1.00 | 1 | 1 | 0.03  | 0.03   | 0.03   | 0.03   | 0.03   | t | 132608 | RKAGICFG<br>DSGGPLI          | Homo<br>sapiens                  |
| 1 | 1.00 | 1 | 1 | 0     | 0      | 0      | 0      | -0.002 | t | 135576 | LRYSTGTV<br>SG               | Oryctola<br>gus<br>cuniculu<br>s |
| 1 | 1.00 | 1 | 1 | -0.01 | -0.008 | -0.01  | -0.009 | -0.01  | t | 71862  | VVTVRAER<br>PGVDPDR          | Homo<br>sapiens                  |
| 1 | 1.00 | 1 | 1 | -0.05 | -0.05  | -0.058 | -0.05  | -0.048 | t | 20638  | GKMVQVV<br>Y                 | Oryctola<br>gus<br>cuniculu<br>s |
| 1 | 1.00 | 1 | 1 | -0.01 | -0.01  | -0.014 | -0.01  | -0.01  | t | 157091 | ANIKGVPT<br>RAET             | Canis<br>lupus                   |
| 1 | 1.00 | 1 | 1 | 0.05  | 0.054  | 0.038  | 0.047  | 0.052  | t | 70355  | VPLGTQYT<br>DA               | Homo<br>sapiens                  |

|   |      |   |   |       |        |        |        |        |   |        |                              |                          |
|---|------|---|---|-------|--------|--------|--------|--------|---|--------|------------------------------|--------------------------|
| 1 | 1.00 | 1 | 1 | 0     | 0.003  | 0.001  | 0.001  | -0.002 | t | 99636  | RQWIEA<br>MSEGIKVM           | Equus<br>caballus        |
| 1 | 1.00 | 1 | 1 | 0     | 0      | 0.003  | 0      | -0.001 | t | 133697 | SITTANPSS<br>FNKY            | Rattus<br>norvegicus     |
| 1 | 1.00 | 1 | 1 | 0     | 0      | 0      | 0      | 0      | t | 111172 | CTHPEILFC                    | Homo<br>sapiens          |
| 1 | 1.00 | 1 | 1 | 0     | 0.002  | 0.002  | 0.003  | -0.001 | t | 6623   | CLSATCDC<br>TLCGP            | Homo<br>sapiens          |
| 1 | 1.00 | 1 | 1 | 0.02  | 0.017  | 0.028  | 0.02   | 0.018  | t | 23049  | GVLSVVAAGNE                  | Oryctolagus<br>cuniculus |
| 1 | 1.00 | 1 | 1 | 0     | -0.002 | 0      | -0.001 | -0.001 | t | 56687  | RYYRENM                      | Mus<br>musculus          |
| 1 | 1.00 | 1 | 1 | 0     | 0      | 0      | 0      | -0.001 | t | 7000   | CSGFVGLF<br>SPGPSQRI         | Mus<br>musculus          |
| 1 | 1.00 | 1 | 1 | 0.02  | 0.018  | 0.022  | 0.02   | 0.019  | t | 122512 | PEPAKSAP<br>APKKGSK          | Mus<br>musculus          |
| 1 | 1.00 | 1 | 1 | 0.02  | 0.018  | 0.02   | 0.017  | 0.018  | t | 922    | AEGEFDYA<br>WDQTHQ<br>DPAK   | Mus<br>musculus          |
| 1 | 1.00 | 1 | 1 | 0.01  | 0.012  | 0.011  | 0.017  | 0.013  | t | 118776 | EADYFEYH<br>QEGGPDG<br>EPDVP | Homo<br>sapiens          |
| 1 | 1.00 | 1 | 1 | -0.01 | -0.006 | -0.01  | -0.009 | -0.01  | t | 71848  | VVTGATVS                     | Homo<br>sapiens          |
| 1 | 1.00 | 1 | 1 | -0.01 | -0.006 | -0.017 | -0.013 | -0.011 | t | 78341  | AALTAENT<br>AIKKNAD<br>AKA   | Homo<br>sapiens          |
| 1 | 1.00 | 1 | 1 | 0.01  | 0.01   | 0.01   | 0.01   | 0.01   | t | 32907  | KPTPEGDL<br>EI               | Homo<br>sapiens          |
| 1 | 1.00 | 1 | 1 | 0.01  | 0.01   | 0.01   | 0.01   | 0.01   | t | 22562  | GSVNSFFSR                    | Mus<br>musculus          |
| 1 | 1.00 | 1 | 1 | 0.01  | 0.01   | 0.01   | 0.01   | 0.01   | t | 22562  | GSVNSFFSR                    | Mus<br>musculus          |
| 1 | 1.00 | 1 | 1 | 0.01  | 0.01   | 0.01   | 0.01   | 0.01   | t | 22562  | GSVNSFFSR                    | Mus<br>musculus          |

|   |      |   |   |       |        |        |        |        |   |        |                            |                                  |
|---|------|---|---|-------|--------|--------|--------|--------|---|--------|----------------------------|----------------------------------|
| 1 | 1.00 | 1 | 1 | 0.01  | 0.01   | 0.01   | 0.012  | 0.01   | t | 10812  | DWICEVLS<br>DFKTWL         | Homo<br>sapiens                  |
| 1 | 1.00 | 1 | 1 | 0.01  | 0.008  | 0.004  | 0.009  | 0.01   | t | 20722  | GKVTNGS                    | Homo<br>sapiens                  |
| 1 | 1.00 | 1 | 1 | 0.03  | 0.03   | 0.03   | 0.03   | 0.03   | t | 31064  | KGSSIAAD                   | Oryctola<br>gus<br>cuniculu<br>s |
| 1 | 1.00 | 1 | 1 | 0.03  | 0.03   | 0.026  | 0.03   | 0.032  | t | 1476   | AGDQSYFL                   | Mus<br>musculu<br>s              |
| 1 | 1.00 | 1 | 1 | -0.01 | -0.013 | -0.003 | -0.01  | -0.012 | t | 130622 | TGLVAQG<br>TDSIG           | Camelus<br>dromed<br>arius       |
| 1 | 1.00 | 1 | 1 | -0.03 | -0.034 | -0.031 | -0.033 | -0.03  | t | 36659  | LIPLLRT                    | Oryctola<br>gus<br>cuniculu<br>s |
| 1 | 1.00 | 1 | 1 | -0.03 | -0.032 | -0.031 | -0.033 | -0.03  | t | 36659  | LIPLLRT                    | Mus<br>musculu<br>s              |
| 1 | 1.00 | 1 | 1 | 0.01  | 0.012  | 0.007  | 0.01   | 0.01   | t | 7846   | DDPLLGN<br>Q               | Anas<br>platyrhy<br>nchos        |
| 1 | 1.00 | 1 | 1 | 0     | 0.002  | -0.005 | 0.001  | 0      | t | 19093  | GDRAAGQ<br>PAGDRAA<br>GQPA | Homo<br>sapiens                  |
| 1 | 1.00 | 1 | 1 | 0     | 0.002  | -0.005 | 0.001  | 0      | t | 19093  | GDRAAGQ<br>PAGDRAA<br>GQPA | Homo<br>sapiens                  |
| 1 | 1.00 | 1 | 1 | 0     | 0.002  | -0.005 | 0.001  | 0      | t | 19093  | GDRAAGQ<br>PAGDRAA<br>GQPA | Homo<br>sapiens                  |
| 1 | 1.00 | 1 | 1 | 0.02  | 0.023  | 0.02   | 0.02   | 0.021  | t | 107517 | LSTNEVA<br>M               | Mus<br>musculu<br>s              |
| 1 | 1.00 | 1 | 1 | 0.03  | 0.028  | 0.04   | 0.029  | 0.026  | t | 97596  | QTPLTMA<br>ALELL           | Mus<br>musculu<br>s              |
| 1 | 1.00 | 1 | 1 | 0.03  | 0.028  | 0.04   | 0.029  | 0.026  | t | 97596  | QTPLTMA<br>ALELL           | Mus<br>musculu<br>s              |
| 1 | 1.00 | 1 | 1 | -0.03 | -0.028 | -0.027 | -0.029 | -0.03  | t | 26600  | IIMYAPTL<br>WARMIL         | Homo<br>sapiens                  |

|   |      |   |   |       |        |        |        |        |   |        |                              |                       |
|---|------|---|---|-------|--------|--------|--------|--------|---|--------|------------------------------|-----------------------|
| 1 | 1.00 | 1 | 1 | 0     | 0      | -0.005 | -0.003 | -0.002 | t | 6238   | CFLLFSGCF<br>ALREQA          | Homo sapiens          |
| 1 | 1.00 | 1 | 1 | 0.01  | 0.024  | -0.006 | 0.007  | 0.01   | t | 21373  | GNAEKYD<br>KMDEPQH<br>YGKS   | Homo sapiens          |
| 1 | 1.00 | 1 | 1 | 0.05  | 0.05   | 0.056  | 0.054  | 0.05   | t | 45965  | NSRSTS                       | Homo sapiens          |
| 1 | 1.00 | 1 | 1 | 0.01  | 0.009  | 0.007  | 0.013  | 0.01   | t | 8834   | DKAAEAIL<br>NELKKASK<br>KVGK | Homo sapiens          |
| 1 | 1.00 | 1 | 1 | 0     | 0      | -0.003 | 0.006  | 0      | t | 26801  | IKGVIVHRL<br>EGVSYN          | Homo sapiens          |
| 1 | 1.00 | 1 | 1 | -0.02 | -0.018 | -0.019 | -0.019 | -0.023 | t | 79575  | IPKARRPE<br>GRTWAQP<br>GY    | Homo sapiens          |
| 1 | 1.00 | 1 | 1 | 0.02  | 0.018  | 0.022  | 0.023  | 0.022  | t | 23354  | GYHGSSLY                     | Mus musculus          |
| 1 | 1.00 | 1 | 1 | -0.04 | -0.04  | -0.04  | -0.04  | -0.04  | t | 137391 | DTHKRDTY                     | Oryctolagus cuniculus |
| 1 | 1.00 | 1 | 1 | 0     | 0.004  | 0.003  | 0.001  | 0.002  | t | 64697  | TKVTLDGR<br>PL               | Homo sapiens          |
| 1 | 1.00 | 1 | 1 | -0.01 | -0.01  | -0.01  | -0.007 | -0.01  | t | 61124  | SSIVYEAA<br>DMIMHT           | Homo sapiens          |
| 1 | 1.00 | 1 | 1 | 0.03  | 0.03   | 0.035  | 0.033  | 0.03   | t | 18527  | GAASSYFE<br>YVDYTG           | Homo sapiens          |
| 1 | 1.00 | 1 | 1 | 0.05  | 0.053  | 0.056  | 0.05   | 0.05   | t | 53194  | RARGIYET<br>ETRA             | Mus musculus          |
| 1 | 1.00 | 1 | 1 | 0.03  | 0.03   | 0.03   | 0.03   | 0.03   | t | 123872 | YLKELPTTL                    | Ovis aries            |
| 1 | 1.00 | 1 | 1 | 0.03  | 0.03   | 0.03   | 0.03   | 0.03   | t | 115465 | RCEKDERF<br>FSDKIAKYI<br>PIQ | Homo sapiens          |
| 1 | 1.00 | 1 | 1 | 0.01  | 0.01   | 0.01   | 0.01   | 0.01   | t | 135755 | SALVLQYL                     | Homo sapiens          |

|   |      |   |   |       |        |        |        |        |   |        |                              |                          |
|---|------|---|---|-------|--------|--------|--------|--------|---|--------|------------------------------|--------------------------|
| 1 | 1.00 | 1 | 1 | 0.01  | 0.01   | 0.01   | 0.01   | 0.01   | t | 137733 | DTALTIQA<br>LKL V            | Mus<br>musculu<br>s      |
| 1 | 1.00 | 1 | 1 | 0.01  | 0.01   | 0.01   | 0.01   | 0.01   | t | 140586 | PWQLPLN<br>FQ                | Mus<br>musculu<br>s      |
| 1 | 1.00 | 1 | 1 | 0.01  | 0.01   | 0.01   | 0.01   | 0.01   | t | 140586 | PWQLPLN<br>FQ                | Mus<br>musculu<br>s      |
| 1 | 1.00 | 1 | 1 | 0.01  | 0.01   | 0.01   | 0.01   | 0.01   | t | 121778 | RDDPQLFA<br>EAYAFCF          | Mus<br>musculu<br>s      |
| 1 | 1.00 | 1 | 1 | 0.01  | 0.01   | 0.01   | 0.01   | 0.01   | t | 121778 | RDDPQLFA<br>EAYAFCF          | Mus<br>musculu<br>s      |
| 1 | 1.00 | 1 | 1 | 0.01  | 0.01   | 0.01   | 0.01   | 0.01   | t | 109700 | PLGPKGQT                     | Rattus<br>norvegic<br>us |
| 1 | 1.00 | 1 | 1 | 0     | 0.002  | 0.005  | 0.003  | 0.002  | t | 138238 | SMLDTPT                      | Homo<br>sapiens          |
| 1 | 1.00 | 1 | 1 | -0.01 | -0.01  | -0.01  | -0.01  | -0.01  | t | 135720 | MKGKYG IY                    | Homo<br>sapiens          |
| 1 | 1.00 | 1 | 1 | -0.01 | -0.01  | -0.01  | -0.01  | -0.01  | t | 98958  | QILQQILQ<br>QQLI             | Homo<br>sapiens          |
| 1 | 1.00 | 1 | 1 | -0.01 | -0.007 | -0.011 | -0.01  | -0.012 | t | 45646  | NQYGRIRV<br>LQRFNQR          | Sus<br>scrofa            |
| 1 | 1.00 | 1 | 1 | -0.02 | -0.019 | -0.022 | -0.017 | -0.023 | t | 64876  | TLKKGSSG<br>YCAWPAC          | Equus<br>caballus        |
| 1 | 1.00 | 1 | 1 | 0.03  | 0.028  | 0.027  | 0.023  | 0.029  | t | 122167 | PPPITQGE<br>CKQL             | Mus<br>musculu<br>s      |
| 1 | 1.00 | 1 | 1 | 0     | 0      | 0      | -0.008 | -0.005 | t | 23179  | GVTSAPDT<br>RPAGSTA          | Mus<br>musculu<br>s      |
| 1 | 1.00 | 1 | 1 | 0.01  | 0.008  | 0.017  | 0.013  | 0.01   | t | 97445  | LGNATALS                     | Mus<br>musculu<br>s      |
| 1 | 1.00 | 1 | 1 | 0     | -0.002 | 0      | -0.002 | -0.002 | t | 122406 | IEIGLEGKG<br>FEPTLEALF<br>GK | Mus<br>musculu<br>s      |
| 1 | 1.00 | 1 | 1 | 0     | 0      | 0      | 0      | 0      | t | 137448 | SHKLHKV                      | Mus<br>musculu<br>s      |

|   |      |   |   |       |        |        |        |        |   |        |                    |                       |
|---|------|---|---|-------|--------|--------|--------|--------|---|--------|--------------------|-----------------------|
| 1 | 1.00 | 1 | 1 | 0     | 0      | 0      | 0      | 0      | t | 132814 | FGENRPA            | Homo sapiens          |
| 1 | 1.00 | 1 | 1 | 0     | 0.003  | 0      | 0      | 0      | t | 72505  | WGQGGSHSQW         | Mus musculus          |
| 1 | 1.00 | 1 | 1 | -0.01 | -0.012 | -0.021 | -0.007 | -0.008 | t | 43317  | NATAEGR<br>AINRRVE | Mus musculus          |
| 1 | 1.00 | 1 | 1 | 0     | 0.002  | -0.007 | -0.003 | -0.001 | t | 57523  | SELLISTAV<br>Q     | Homo sapiens          |
| 1 | 1.00 | 1 | 1 | 0.01  | 0.013  | 0.01   | 0.01   | 0.011  | t | 144705 | KGTHSLYS<br>QIAG   | Mus musculus          |
| 1 | 1.00 | 1 | 1 | 0     | 0      | 0      | 0      | 0      | t | 21990  | GRAIN              | Mus musculus          |
| 1 | 1.00 | 1 | 1 | -0.02 | -0.02  | -0.02  | -0.02  | -0.02  | t | 97020  | TVTRGTIS<br>DP     | Oryctolagus cuniculus |
| 1 | 1.00 | 1 | 1 | -0.02 | -0.02  | -0.02  | -0.02  | -0.02  | t | 97020  | TVTRGTIS<br>DP     | Oryctolagus cuniculus |
| 1 | 1.00 | 1 | 1 | 0.03  | 0.032  | 0.03   | 0.031  | 0.03   | t | 133661 | NYSPLHNS<br>DITV   | Homo sapiens          |
| 1 | 1.00 | 1 | 1 | -0.01 | -0.014 | -0.01  | -0.011 | -0.01  | t | 52476  | QTASGLVS<br>MF     | Oryctolagus cuniculus |
| 1 | 1.00 | 1 | 1 | 0.03  | 0.033  | 0.014  | 0.036  | 0.039  | t | 136062 | FGISETQA<br>EAILE  | Mus musculus          |
| 1 | 1.00 | 1 | 1 | -0.04 | -0.04  | -0.036 | -0.034 | -0.038 | t | 53682  | RFAPALPV           | Homo sapiens          |
| 1 | 1.00 | 1 | 1 | 0.01  | 0.013  | 0.01   | 0.01   | 0.012  | t | 134702 | KEKKYS             | Mus musculus          |

|   |      |   |   |       |        |        |        |       |   |        |                              |                                  |
|---|------|---|---|-------|--------|--------|--------|-------|---|--------|------------------------------|----------------------------------|
| 1 | 1.00 | 1 | 1 | 0.01  | 0.008  | 0.007  | 0.013  | 0.009 | t | 23690  | HEHHGVY<br>NQGRGID<br>SGERLM | Mus<br>musculu<br>s              |
| 1 | 1.00 | 1 | 1 | 0.01  | 0.008  | 0.007  | 0.013  | 0.009 | t | 23690  | HEHHGVY<br>NQGRGID<br>SGERLM | Mus<br>musculu<br>s              |
| 1 | 1.00 | 1 | 1 | 0.02  | 0.02   | 0.02   | 0.02   | 0.02  | t | 106965 | VKGEEKEP<br>SK               | Homo<br>sapiens                  |
| 1 | 1.00 | 1 | 1 | -0.01 | -0.012 | -0.014 | -0.013 | -0.01 | t | 122197 | TDVVFNSK<br>GIGN             | Mus<br>musculu<br>s              |
| 1 | 1.00 | 1 | 1 | 0.02  | 0.018  | 0.015  | 0.013  | 0.017 | t | 108607 | RGAQGPP<br>GATGF             | Mus<br>musculu<br>s              |
| 1 | 1.00 | 1 | 1 | 0.02  | 0.02   | 0.02   | 0.02   | 0.02  | t | 122101 | GKGAGDL                      | Homo<br>sapiens                  |
| 1 | 1.00 | 1 | 1 | 0     | 0      | 0      | 0      | 0     | t | 153458 | SELSPAML<br>HFMFGGG<br>S     | Mus<br>musculu<br>s              |
| 1 | 1.00 | 1 | 1 | 0     | 0.003  | 0      | 0      | 0     | t | 105232 | GSNKGAI<br>GLM               | Mus<br>musculu<br>s              |
| 1 | 1.00 | 1 | 1 | 0     | 0.003  | 0      | 0      | 0     | t | 105232 | GSNKGAI<br>GLM               | Mus<br>musculu<br>s              |
| 1 | 1.00 | 1 | 1 | -0.01 | -0.008 | -0.015 | -0.009 | -0.01 | t | 56804  | SAGRSTGS<br>LVRLFAPG         | Homo<br>sapiens                  |
| 1 | 1.00 | 1 | 1 | 0.07  | 0.071  | 0.067  | 0.07   | 0.071 | t | 19405  | GEQQEAIK<br>SAENATKV<br>EDIK | Oryctola<br>gus<br>cuniculu<br>s |
| 1 | 1.00 | 1 | 1 | 0     | 0      | -0.007 | 0      | 0     | t | 124601 | QGPGLTD<br>WLFPRR            | Mus<br>musculu<br>s              |
| 1 | 1.00 | 1 | 1 | -0.01 | -0.01  | -0.01  | -0.01  | -0.01 | t | 9399   | DMRNTIM<br>ASK               | Homo<br>sapiens                  |
| 1 | 1.00 | 1 | 1 | 0.03  | 0.036  | 0.03   | 0.03   | 0.03  | t | 123520 | MSEKFNM<br>GL                | Ovis<br>aries                    |



|   |      |   |   |       |        |        |        |        |   |        |                      |                       |
|---|------|---|---|-------|--------|--------|--------|--------|---|--------|----------------------|-----------------------|
| 1 | 1.00 | 1 | 1 | 0.04  | 0.04   | 0.045  | 0.033  | 0.036  | t | 140665 | DTAAQI               | Mus musculus          |
| 1 | 1.00 | 1 | 1 | -0.03 | -0.03  | -0.037 | -0.036 | -0.03  | t | 49368  | PSFSDIPNPI           | Homo sapiens          |
| 1 | 1.00 | 1 | 1 | 0.03  | 0.028  | 0.03   | 0.037  | 0.03   | t | 123760 | SSYAKVSICLPMDTETPLAL | Homo sapiens          |
| 1 | 1.00 | 1 | 1 | -0.05 | -0.056 | -0.057 | -0.05  | -0.05  | t | 123035 | APRIMHHM             | Oryctolagus cuniculus |
| 1 | 1.00 | 1 | 1 | 0     | -0.003 | -0.006 | -0.001 | -0.001 | t | 105901 | KGTAPFEI             | Oryctolagus cuniculus |
| 1 | 1.00 | 1 | 1 | 0     | 0      | 0.007  | 0      | 0      | t | 119451 | FRKTSISGA            | Homo sapiens          |
| 1 | 1.00 | 1 | 1 | 0.01  | 0.012  | 0.005  | 0.011  | 0.009  | t | 25149  | HYAPRPCGI            | Homo sapiens          |
| 1 | 1.00 | 1 | 1 | 0.02  | 0.02   | 0.021  | 0.02   | 0.02   | t | 57638  | SESVEFTKDTQTGMSG     | Mus musculus          |
| 1 | 1.00 | 1 | 1 | -0.01 | -0.01  | -0.017 | -0.01  | -0.01  | t | 106375 | EDHAGTYGLGDRK        | Mus musculus          |
| 1 | 1.00 | 1 | 1 | 0.05  | 0.045  | 0.043  | 0.047  | 0.05   | t | 96229  | EGQLGD               | Oryctolagus cuniculus |
| 1 | 1.00 | 1 | 1 | 0.01  | 0.01   | 0.01   | 0.01   | 0.009  | t | 149298 | ELDKWAS              | Homo sapiens          |
| 1 | 1.00 | 1 | 1 | 0.02  | 0.022  | 0.015  | 0.019  | 0.02   | t | 100120 | HQKLVFFAED           | Homo sapiens(human)   |
| 1 | 1.00 | 1 | 1 | 0.01  | 0.01   | 0.01   | 0.01   | 0.01   | t | 135572 | LLCEDGCLAL           | Oryctolagus cuniculus |
| 1 | 1.00 | 1 | 1 | 0.01  | 0.01   | 0.01   | 0.01   | 0.01   | t | 135572 | LLCEDGCLAL           | Oryctolagus cuniculus |

|   |      |   |   |       |        |        |        |       |   |        |                              |              |
|---|------|---|---|-------|--------|--------|--------|-------|---|--------|------------------------------|--------------|
| 1 | 1.00 | 1 | 1 | 0.01  | 0.01   | 0.01   | 0.01   | 0.01  | t | 97564  | PTDAGVAT                     | Mus musculus |
| 1 | 1.00 | 1 | 1 | 0.01  | 0.01   | 0.01   | 0.01   | 0.01  | t | 49533  | PSTPGDNP<br>LV               | Homo sapiens |
| 1 | 1.00 | 1 | 1 | -0.01 | -0.01  | -0.014 | -0.01  | -0.01 | t | 49068  | PQPQQPF<br>CQQ               | Mus musculus |
| 1 | 1.00 | 1 | 1 | 0.02  | 0.02   | 0.026  | 0.02   | 0.02  | t | 86153  | MANTGAMELV                   | Homo sapiens |
| 1 | 1.00 | 1 | 1 | -0.01 | -0.008 | -0.003 | -0.01  | -0.01 | t | 95003  | CTKPSDGN<br>C                | Homo sapiens |
| 1 | 1.00 | 1 | 1 | -0.01 | -0.008 | -0.003 | -0.01  | -0.01 | t | 95003  | CTKPSDGN<br>C                | Homo sapiens |
| 1 | 1.00 | 1 | 1 | 0     | 0.001  | -0.001 | 0.001  | 0     | t | 13064  | ELGAFFSIL<br>QDMR            | Homo sapiens |
| 1 | 1.00 | 1 | 1 | -0.03 | -0.03  | -0.04  | -0.027 | -0.03 | t | 55987  | RSVHDVVL<br>VGGSTRIP<br>KVQS | Homo sapiens |
| 1 | 1.00 | 1 | 1 | -0.03 | -0.035 | -0.04  | -0.027 | -0.03 | t | 55987  | RSVHDVVL<br>VGGSTRIP<br>KVQS | Canis lupus  |
| 1 | 1.00 | 1 | 1 | 0.02  | 0.016  | 0.016  | 0.02   | 0.02  | t | 140761 | TYRVDVD<br>GYRND             | Bos taurus   |
| 1 | 1.00 | 1 | 1 | 0.02  | 0.016  | 0.016  | 0.02   | 0.02  | t | 140761 | TYRVDVD<br>GYRND             | Bos taurus   |
| 1 | 1.00 | 1 | 1 | 0     | 0      | -0.005 | 0      | 0     | t | 60991  | SSFFSYGEI                    | Mus musculus |
| 1 | 1.00 | 1 | 1 | 0.01  | 0.01   | 0.015  | 0.013  | 0.01  | t | 22658  | GTGGTAS<br>MSYKFPPV<br>PPENL | Homo sapiens |

|   |      |   |   |       |        |        |        |        |   |        |                     |                       |
|---|------|---|---|-------|--------|--------|--------|--------|---|--------|---------------------|-----------------------|
| 1 | 1.00 | 1 | 1 | 0     | 0.002  | 0      | 0.001  | 0      | t | 56958  | SAQSGTSG<br>TSAQSGT | Homo sapiens          |
| 1 | 1.00 | 1 | 1 | 0.02  | 0.024  | 0.022  | 0.021  | 0.02   | t | 74201  | YIEQGMQ<br>LAEQFKQ  | Homo sapiens          |
| 1 | 1.00 | 1 | 1 | 0     | -0.001 | 0.002  | 0.003  | 0      | t | 29005  | ITNDQKKL<br>MS      | Bos taurus            |
| 1 | 1.00 | 1 | 1 | 0     | 0.004  | 0.011  | 0.007  | 0.002  | t | 122209 | VQKDVLL             | Homo sapiens          |
| 1 | 1.00 | 1 | 1 | -0.02 | -0.02  | -0.02  | -0.02  | -0.02  | t | 141760 | TAPPLLPH            | Rattus norvegicus     |
| 1 | 1.00 | 1 | 1 | -0.02 | -0.02  | -0.02  | -0.02  | -0.02  | t | 141760 | TAPPLLPH            | Rattus norvegicus     |
| 1 | 1.00 | 1 | 1 | 0.03  | 0.03   | 0.034  | 0.03   | 0.032  | t | 136057 | DISAFAD             | Rattus norvegicus     |
| 1 | 1.00 | 1 | 1 | -0.02 | -0.025 | -0.03  | -0.02  | -0.019 | t | 132875 | NCTKDFM<br>SVSFSQIL | Trichosurus vulpecula |
| 1 | 1.00 | 1 | 1 | -0.04 | -0.038 | -0.048 | -0.043 | -0.04  | t | 12531  | EINHVQD<br>HALPKENI | Homo sapiens          |
| 1 | 1.00 | 1 | 1 | 0.02  | 0.02   | 0.025  | 0.02   | 0.021  | t | 122194 | STVQDCV             | Homo sapiens          |
| 1 | 1.00 | 1 | 1 | -0.02 | -0.016 | -0.018 | -0.02  | -0.018 | t | 136441 | KRQKRF              | Gallus gallus         |
| 1 | 1.00 | 1 | 1 | 0.04  | 0.04   | 0.028  | 0.036  | 0.041  | t | 117773 | CNSRQTD<br>REDELI   | Homo sapiens          |

|   |      |   |   |       |       |        |        |        |   |        |                     |                                  |
|---|------|---|---|-------|-------|--------|--------|--------|---|--------|---------------------|----------------------------------|
| 1 | 1.00 | 1 | 1 | -0.01 | -0.01 | -0.012 | -0.011 | -0.01  | t | 83781  | INPWDSKS<br>DYLK    | Homo<br>sapiens                  |
| 1 | 1.00 | 1 | 1 | 0     | 0     | 0      | 0      | 0      | t | 34709  | LADALLEK            | Oryctola<br>gus<br>cuniculu<br>s |
| 1 | 1.00 | 1 | 1 | -0.05 | -0.05 | -0.04  | -0.043 | -0.049 | t | 122136 | LGRGGSK             | Homo<br>sapiens                  |
| 1 | 1.00 | 1 | 1 | 0.02  | 0.03  | 0.02   | 0.019  | 0.02   | t | 65930  | TQSCNCSI<br>YP      | Pan<br>troglody<br>tes           |
| 1 | 1.00 | 1 | 1 | 0.02  | 0.02  | 0.02   | 0.02   | 0.02   | t | 79932  | MKPYEVT<br>PTRM     | Mus<br>musculu<br>s              |
| 1 | 1.00 | 1 | 1 | 0.01  | 0.01  | 0.011  | 0.003  | 0.01   | t | 55293  | RPQDVKFP            | Homo<br>sapiens                  |
| 1 | 1.00 | 1 | 1 | -0.01 | -0.01 | -0.002 | -0.008 | -0.013 | t | 149256 | ALDKWQN             | Homo<br>sapiens                  |
| 1 | 1.00 | 1 | 1 | 0     | 0     | 0      | 0      | -0.001 | t | 7001   | CSGFVSL<br>APGAKQN  | Mus<br>musculu<br>s              |
| 1 | 1.00 | 1 | 1 | 0.02  | 0.02  | 0.013  | 0.02   | 0.02   | t | 105835 | GLKGEQG<br>EPGA     | Mus<br>musculu<br>s              |
| 1 | 1.00 | 1 | 1 | 0.02  | 0.021 | 0.021  | 0.017  | 0.02   | t | 57506  | SEKSKCEE<br>NTMFQPY | Equus<br>caballus                |
| 1 | 1.00 | 1 | 1 | 0.04  | 0.04  | 0.04   | 0.04   | 0.04   | t | 156339 | KDDPTNKF<br>YQSUIQ  | Homo<br>sapiens                  |
| 1 | 1.00 | 1 | 1 | 0.04  | 0.04  | 0.04   | 0.04   | 0.04   | t | 133954 | WIKENF              | Mus<br>musculu<br>s              |
| 1 | 1.00 | 1 | 1 | 0     | 0     | 0      | 0      | 0      | t | 130805 | ELNPEPDT<br>EVFPMTF | Homo<br>sapiens                  |
| 1 | 1.00 | 1 | 1 | 0     | 0     | 0      | 0      | 0      | t | 130805 | ELNPEPDT<br>EVFPMTF | Homo<br>sapiens                  |
| 1 | 1.00 | 1 | 1 | 0     | 0     | 0      | 0      | 0      | t | 130805 | ELNPEPDT<br>EVFPMTF | Homo<br>sapiens                  |

|   |      |   |   |       |        |        |        |        |   |        |                              |                       |
|---|------|---|---|-------|--------|--------|--------|--------|---|--------|------------------------------|-----------------------|
| 1 | 1.00 | 1 | 1 | -0.02 | -0.02  | -0.02  | -0.02  | -0.02  | t | 135762 | SYVTPICI                     | Homo sapiens          |
| 1 | 1.00 | 1 | 1 | -0.04 | -0.038 | -0.04  | -0.033 | -0.04  | t | 107859 | GHRPLDKK<br>REEAPSLR<br>PA   | Homo sapiens          |
| 1 | 1.00 | 1 | 1 | -0.01 | -0.008 | -0.007 | -0.013 | -0.012 | t | 41056  | MAKLVLSL<br>CFLLFSG          | Homo sapiens          |
| 1 | 1.00 | 1 | 1 | 0.01  | 0.011  | 0.009  | 0.011  | 0.009  | t | 7092   | CSTKAIGR<br>TILKENIKY<br>EVA | Equus caballus        |
| 1 | 1.00 | 1 | 1 | -0.01 | -0.01  | -0.012 | -0.01  | -0.013 | t | 19504  | GFCDGYCK<br>THLKASS          | Mus musculus          |
| 1 | 1.00 | 1 | 1 | -0.02 | -0.02  | -0.023 | -0.027 | -0.023 | t | 115630 | NFDKLYIW<br>G                | Homo sapiens          |
| 1 | 1.00 | 1 | 1 | 0     | -0.003 | 0.003  | 0      | -0.003 | t | 111120 | ARMRLYD<br>PNQAALQ<br>A      | Oryctolagus cuniculus |
| 1 | 1.00 | 1 | 1 | 0.02  | 0.02   | 0.018  | 0.02   | 0.02   | t | 73092  | WSPQAQG<br>ILTTV             | Mus musculus          |
| 1 | 1.00 | 1 | 1 | 0     | 0      | 0      | 0.003  | 0      | t | 29937  | KARRPEGR<br>TWAQPGY          | Homo sapiens          |
| 1 | 1.00 | 1 | 1 | -0.01 | -0.008 | -0.005 | -0.007 | -0.01  | t | 57679  | SEVYCPRP<br>DRCLRAP          | Homo sapiens          |
| 1 | 1.00 | 1 | 1 | 0.05  | 0.05   | 0.05   | 0.05   | 0.05   | t | 158418 | VEGERVET<br>T                | Canis lupus           |
| 1 | 1.00 | 1 | 1 | -0.03 | -0.03  | -0.03  | -0.03  | -0.03  | t | 110618 | GPVGPAG<br>GPGFP             | Mus musculus          |
| 1 | 1.00 | 1 | 1 | 0     | 0      | 0      | 0      | -0.002 | t | 117625 | REAVAGR<br>GRGRGR            | Homo sapiens          |
| 1 | 1.00 | 1 | 1 | -0.03 | -0.032 | -0.05  | -0.037 | -0.028 | t | 44556  | NKNDNKN<br>DNKND             | Mus musculus          |
| 1 | 1.00 | 1 | 1 | -0.03 | -0.032 | -0.05  | -0.037 | -0.028 | t | 44556  | NKNDNKN<br>DNKND             | Mus musculus          |
| 1 | 1.00 | 1 | 1 | 0.05  | 0.05   | 0.05   | 0.05   | 0.05   | t | 108262 | AENGPRLL<br>VEAEQAK<br>VFS   | Mus musculus          |

|   |      |   |   |       |        |        |       |        |   |        |                             |                                  |
|---|------|---|---|-------|--------|--------|-------|--------|---|--------|-----------------------------|----------------------------------|
| 1 | 1.00 | 1 | 1 | 0.01  | 0.008  | 0.005  | 0.009 | 0.01   | t | 78752  | NKGKWKE<br>HIKEVTEKL<br>KKA | Mus<br>musculu<br>s              |
| 1 | 1.00 | 1 | 1 | 0.01  | 0.006  | 0.005  | 0.009 | 0.01   | t | 78752  | NKGKWKE<br>HIKEVTEKL<br>KKA | Oryctola<br>gus<br>cuniculu<br>s |
| 1 | 1.00 | 1 | 1 | -0.01 | -0.007 | -0.019 | -0.01 | -0.008 | t | 63756  | TFTNKLKE<br>KHTDLGK         | Mus<br>musculu<br>s              |
| 1 | 1.00 | 1 | 1 | 0.03  | 0.03   | 0.03   | 0.03  | 0.03   | t | 142415 | EVAKAEVL<br>NAEVK           | Homo<br>sapiens                  |
| 1 | 1.00 | 1 | 1 | -0.01 | -0.01  | -0.01  | -0.01 | -0.01  | t | 135464 | GLAPGV                      | Oryctola<br>gus<br>cuniculu<br>s |
| 1 | 1.00 | 1 | 1 | 0.01  | 0.012  | 0.01   | 0.011 | 0.009  | t | 58458  | SICGNNQL<br>CKSICKT         | Homo<br>sapiens                  |
| 1 | 1.00 | 1 | 1 | 0     | 0      | -0.004 | 0     | 0      | t | 15510  | FEDVNGIR<br>KP              | Mus<br>musculu<br>s              |
| 1 | 1.00 | 1 | 1 | 0     | 0      | -0.004 | 0     | 0      | t | 15510  | FEDVNGIR<br>KP              | Mus<br>musculu<br>s              |
| 1 | 1.00 | 1 | 1 | -0.02 | -0.02  | -0.019 | -0.02 | -0.02  | t | 70025  | VMTRSSH<br>QSLVIKLM         | Homo<br>sapiens                  |
| 1 | 1.00 | 1 | 1 | 0.05  | 0.05   | 0.05   | 0.05  | 0.05   | t | 79603  | LLTTDEL                     | Oryctola<br>gus<br>cuniculu<br>s |
| 1 | 1.00 | 1 | 1 | 0.03  | 0.03   | 0.03   | 0.03  | 0.03   | t | 98842  | KDLAFPGS<br>GE              | Homo<br>sapiens                  |
| 1 | 1.00 | 1 | 1 | 0.01  | 0.01   | 0.01   | 0.01  | 0.01   | t | 103348 | LGDVGEAF<br>VDSLTSQ         | Homo<br>sapiens                  |
| 1 | 1.00 | 1 | 1 | -0.01 | -0.01  | -0.01  | -0.01 | -0.01  | t | 119583 | GNVFSCSV                    | Homo<br>sapiens                  |
| 1 | 1.00 | 1 | 1 | -0.01 | -0.01  | -0.01  | -0.01 | -0.01  | t | 51084  | QIISQQPF<br>PL              | Mus<br>musculu<br>s              |

|   |      |   |   |       |        |       |        |        |   |        |                              |                                  |
|---|------|---|---|-------|--------|-------|--------|--------|---|--------|------------------------------|----------------------------------|
| 1 | 1.00 | 1 | 1 | -0.01 | -0.01  | -0.01 | -0.01  | -0.01  | t | 51084  | QIISQQPF<br>PL               | Mus<br>musculu<br>s              |
| 1 | 1.00 | 1 | 1 | 0     | -0.002 | 0     | 0.003  | 0      | t | 57631  | SESTEDQA<br>MEDIKQM<br>EAESI | Mus<br>musculu<br>s              |
| 1 | 1.00 | 1 | 1 | 0     | 0.002  | 0.008 | 0.001  | -0.001 | t | 146417 | LELDKWAS<br>L                | Homo<br>sapiens                  |
| 1 | 1.00 | 1 | 1 | 0.02  | 0.018  | 0.021 | 0.017  | 0.017  | t | 55785  | RRYQKSTE<br>L                | Mus<br>musculu<br>s              |
| 1 | 1.00 | 1 | 1 | 0     | -0.003 | 0     | 0      | 0      | t | 19927  | GGMPGG<br>MPGGMP<br>G        | Oryctola<br>gus<br>cuniculu<br>s |
| 1 | 1.00 | 1 | 1 | -0.01 | -0.01  | -0.01 | -0.007 | -0.01  | t | 24284  | HLPYIEQG<br>MMLAEQF<br>K     | Homo<br>sapiens                  |
| 1 | 1.00 | 1 | 1 | -0.01 | -0.01  | -0.01 | -0.007 | -0.01  | t | 24284  | HLPYIEQG<br>MMLAEQF<br>K     | Homo<br>sapiens                  |
| 1 | 1.00 | 1 | 1 | 0     | 0.004  | 0.002 | 0.003  | 0      | t | 78643  | EQGMQLA<br>EQFKQKAL<br>GL    | Homo<br>sapiens                  |
| 1 | 1.00 | 1 | 1 | 0.02  | 0.02   | 0.02  | 0.022  | 0.02   | t | 44232  | NIGGEGN<br>HNESPL            | Homo<br>sapiens                  |
| 1 | 1.00 | 1 | 1 | 0.02  | 0.02   | 0.02  | 0.02   | 0.018  | t | 123287 | HDSPSVRK<br>TH               | Oryctola<br>gus<br>cuniculu<br>s |
| 1 | 1.00 | 1 | 1 | 0     | 0      | 0     | 0.002  | 0      | t | 3507   | APDKEILYE<br>AFDEM           | Homo<br>sapiens                  |
| 1 | 1.00 | 1 | 1 | 0.02  | 0.023  | 0.02  | 0.02   | 0.018  | t | 135458 | FGSDYEDR<br>YYR              | Mus<br>musculu<br>s              |
| 1 | 1.00 | 1 | 1 | 0.01  | 0.01   | 0.011 | 0.01   | 0.01   | t | 43411  | NDDASVD<br>FVAEPVK           | Mus<br>musculu<br>s              |
| 1 | 1.00 | 1 | 1 | 0.01  | 0.01   | 0.011 | 0.01   | 0.01   | t | 43411  | NDDASVD<br>FVAEPVK           | Mus<br>musculu<br>s              |
| 1 | 1.00 | 1 | 1 | 0.01  | 0.01   | 0.01  | 0.01   | 0.01   | t | 144781 | SGVLLQYY<br>GM               | Homo<br>sapiens                  |

|   |      |   |   |       |        |        |        |        |   |        |                              |                          |
|---|------|---|---|-------|--------|--------|--------|--------|---|--------|------------------------------|--------------------------|
| 1 | 1.00 | 1 | 1 | -0.06 | -0.056 | -0.06  | -0.053 | -0.058 | t | 145639 | WTPGVKR<br>NGF               | Homo<br>sapiens          |
| 1 | 1.00 | 1 | 1 | 0     | -0.002 | -0.011 | -0.001 | 0      | t | 95094  | IGFRGLDG<br>VHCTPTTD<br>SGVI | Rattus<br>norvegicus     |
| 1 | 1.00 | 1 | 1 | -0.03 | -0.027 | -0.037 | -0.03  | -0.028 | t | 100318 | NAPKTFQF<br>IN               | Mus<br>musculus          |
| 1 | 1.00 | 1 | 1 | 0     | -0.004 | 0      | -0.003 | -0.003 | t | 71143  | VSSYHSKP<br>CNPAQPV          | Oryctolagus<br>cuniculus |
| 1 | 1.00 | 1 | 1 | 0     | -0.004 | 0      | -0.003 | -0.003 | t | 48779  | PPFSLSPV<br>PTLGSRSR<br>R    | Oryctolagus<br>cuniculus |
| 1 | 1.00 | 1 | 1 | 0.02  | 0.02   | 0.02   | 0.02   | 0.02   | t | 68631  | VGATPERP                     | Homo<br>sapiens          |
| 1 | 1.00 | 1 | 1 | 0.01  | 0.01   | 0.01   | 0.01   | 0.009  | t | 124736 | SPWSIGA                      | Homo<br>sapiens          |
| 1 | 1.00 | 1 | 1 | -0.01 | -0.01  | -0.006 | -0.01  | -0.008 | t | 136054 | APAPTP                       | Rattus<br>norvegicus     |
| 1 | 1.00 | 1 | 1 | -0.02 | -0.022 | -0.032 | -0.027 | -0.021 | t | 144604 | CYAIRN                       | Mus<br>musculus          |
| 1 | 1.00 | 1 | 1 | 0.01  | 0.014  | 0.017  | 0.007  | 0.009  | t | 106336 | DHFADGY<br>DEV               | Homo<br>sapiens          |
| 1 | 1.00 | 1 | 1 | 0.02  | 0.023  | 0.013  | 0.02   | 0.02   | t | 53633  | RESNGETK                     | Equus<br>caballus        |
| 1 | 1.00 | 1 | 1 | 0.02  | 0.02   | 0.013  | 0.02   | 0.02   | t | 53633  | RESNGETK                     | Mus<br>musculus          |
| 1 | 1.00 | 1 | 1 | -0.03 | -0.028 | -0.03  | -0.023 | -0.03  | t | 117432 | AARGRGR<br>GMGRGNIF          | Homo<br>sapiens          |



|   |      |   |   |       |        |        |        |        |   |        |                              |                   |
|---|------|---|---|-------|--------|--------|--------|--------|---|--------|------------------------------|-------------------|
| 1 | 1.00 | 1 | 1 | 0.04  | 0.038  | 0.042  | 0.037  | 0.04   | t | 139029 | DLQVLT                       | Mus musculus      |
| 1 | 1.00 | 1 | 1 | 0.04  | 0.04   | 0.04   | 0.04   | 0.04   | t | 35127  | LDDSYS                       | Homo sapiens      |
| 1 | 1.00 | 1 | 1 | 0     | 0      | 0      | 0      | 0      | t | 141052 | LRDIFAWEP                    | Ovis aries        |
| 1 | 1.00 | 1 | 1 | 0     | 0      | 0      | 0      | 0      | t | 115403 | NQELAYFY<br>PELFRQFY<br>QLDA | Homo sapiens      |
| 1 | 1.00 | 1 | 1 | 0     | 0      | 0      | 0      | 0      | t | 109189 | GPLGPKGQ                     | Rattus norvegicus |
| 1 | 1.00 | 1 | 1 | -0.02 | -0.018 | -0.033 | -0.019 | -0.018 | t | 137946 | PGYYRLTLI<br>ANG             | Homo sapiens      |
| 1 | 1.00 | 1 | 1 | -0.02 | -0.02  | -0.019 | -0.023 | -0.02  | t | 55577  | RRGPRLGV                     | Homo sapiens      |
| 1 | 1.00 | 1 | 1 | 0.03  | 0.032  | 0.03   | 0.033  | 0.028  | t | 107799 | DSGHRGY<br>SGSQASD<br>NEGH   | Homo sapiens      |
| 1 | 1.00 | 1 | 1 | 0     | 0.003  | -0.007 | 0      | -0.001 | t | 55106  | RPADKTRH<br>KFPTNINK<br>Q    | Equus caballus    |
| 1 | 1.00 | 1 | 1 | -0.01 | -0.01  | -0.01  | -0.01  | -0.011 | t | 91100  | AFQTPVHS                     | Mus musculus      |
| 1 | 1.00 | 1 | 1 | -0.02 | -0.02  | -0.023 | -0.02  | -0.02  | t | 98858  | LACQCLVR<br>TP               | Homo sapiens      |
| 1 | 1.00 | 1 | 1 | 0.01  | 0.012  | 0.01   | 0.011  | 0.01   | t | 98938  | PQP                          | Homo sapiens      |
| 1 | 1.00 | 1 | 1 | -0.03 | -0.03  | -0.033 | -0.032 | -0.03  | t | 98840  | KALPMHIR<br>LS               | Homo sapiens      |
| 1 | 1.00 | 1 | 1 | 0     | 0      | 0      | 0      | -0.001 | t | 3516   | APDTRP                       | Mus musculus      |
| 1 | 1.00 | 1 | 1 | -0.02 | -0.02  | -0.024 | -0.02  | -0.018 | t | 36890  | LKIKIASGF<br>GPLITH          | Homo sapiens      |
| 1 | 1.00 | 1 | 1 | 0     | 0      | 0      | 0      | 0.001  | t | 52082  | QQPFP                        | Mus musculus      |

|   |      |   |   |       |        |        |        |        |   |        |                             |                                  |
|---|------|---|---|-------|--------|--------|--------|--------|---|--------|-----------------------------|----------------------------------|
| 1 | 1.00 | 1 | 1 | 0     | 0      | 0.005  | 0      | -0.003 | t | 22305  | GSDYEDRY<br>YRENMHR<br>YPNQ | Mus<br>musculu<br>s              |
| 1 | 1.00 | 1 | 1 | 0     | 0      | -0.003 | 0.004  | 0      | t | 39732  | LSVDLSLTV<br>ELKIKI         | Homo<br>sapiens                  |
| 1 | 1.00 | 1 | 1 | 0.04  | 0.038  | 0.032  | 0.033  | 0.039  | t | 122167 | PPPITQGE<br>CKQL            | Mus<br>musculu<br>s              |
| 1 | 1.00 | 1 | 1 | -0.01 | -0.008 | -0.017 | -0.007 | -0.006 | t | 135896 | APHLTRAY<br>AKDV            | Homo<br>sapiens                  |
| 1 | 1.00 | 1 | 1 | -0.01 | -0.01  | -0.01  | -0.01  | -0.01  | t | 156874 | GHFPPTPI<br>KTLA            | Gallus<br>gallus                 |
| 1 | 1.00 | 1 | 1 | -0.02 | -0.02  | -0.025 | -0.02  | -0.018 | t | 44793  | NLLRFFVA<br>PF              | Homo<br>sapiens                  |
| 1 | 1.00 | 1 | 1 | 0     | 0.003  | -0.006 | 0      | 0.002  | t | 133724 | TVCAGYC<br>MTRDVN           | Mus<br>musculu<br>s              |
| 1 | 1.00 | 1 | 1 | -0.07 | -0.066 | -0.071 | -0.063 | -0.07  | t | 127963 | EPKPKKAP<br>AKKGEKV         | Homo<br>sapiens                  |
| 1 | 1.00 | 1 | 1 | 0.04  | 0.037  | 0.04   | 0.041  | 0.04   | t | 49147  | PQVNLVD<br>T                | Bos<br>taurus                    |
| 1 | 1.00 | 1 | 1 | 0     | 0      | -0.005 | 0      | 0.001  | t | 10801  | DWEDRY<br>RE                | Mus<br>musculu<br>s              |
| 1 | 1.00 | 1 | 1 | 0.01  | 0.007  | 0.002  | 0.01   | 0.011  | t | 60827  | SRVKNLNS<br>SEGVPDLL<br>V   | Oryctola<br>gus<br>cuniculu<br>s |
| 1 | 1.00 | 1 | 1 | -0.01 | -0.012 | -0.002 | -0.005 | -0.012 | t | 138841 | EASPQAW<br>WDESQ            | Mus<br>musculu<br>s              |
| 1 | 1.00 | 1 | 1 | -0.01 | -0.01  | -0.01  | -0.007 | -0.01  | t | 32109  | KLQKTYSQ<br>YKVQYDM         | Homo<br>sapiens                  |
| 1 | 1.00 | 1 | 1 | 0.04  | 0.042  | 0.04   | 0.042  | 0.04   | t | 13986  | EREVSVPA                    | Homo<br>sapiens                  |
| 1 | 1.00 | 1 | 1 | 0.05  | 0.05   | 0.05   | 0.05   | 0.05   | t | 122799 | IKYIAEQLE<br>S              | Rattus<br>norvegic<br>us         |

|   |      |   |   |       |       |        |        |        |   |        |                              |                          |
|---|------|---|---|-------|-------|--------|--------|--------|---|--------|------------------------------|--------------------------|
| 1 | 1.00 | 1 | 1 | 0.03  | 0.03  | 0.03   | 0.03   | 0.03   | t | 149041 | FLHTRLFV<br>SDWYNTP          | Rattus<br>norvegicus     |
| 1 | 1.00 | 1 | 1 | 0.01  | 0.01  | 0.01   | 0.01   | 0.01   | t | 123128 | EGAAMDLM<br>RM               | Ovis<br>aries            |
| 1 | 1.00 | 1 | 1 | 0.01  | 0.01  | 0.01   | 0.01   | 0.01   | t | 109027 | GAPGPAGE                     | Rattus<br>norvegicus     |
| 1 | 1.00 | 1 | 1 | 0.01  | 0.01  | 0.01   | 0.01   | 0.01   | t | 103246 | GYIPILGAP<br>WLADLV          | Homo<br>sapiens          |
| 1 | 1.00 | 1 | 1 | -0.01 | -0.01 | -0.01  | -0.01  | -0.01  | t | 115931 | QTPVVVPP<br>FL               | Homo<br>sapiens          |
| 1 | 1.00 | 1 | 1 | -0.01 | -0.01 | -0.01  | -0.01  | -0.01  | t | 99267  | GEPDLSNN<br>FGKLFV           | Homo<br>sapiens          |
| 1 | 1.00 | 1 | 1 | 0     | 0.004 | -0.003 | -0.003 | -0.003 | t | 115404 | NQEQPIRC<br>EKDERFFS<br>DKIA | Homo<br>sapiens          |
| 1 | 1.00 | 1 | 1 | 0.02  | 0.017 | 0.016  | 0.02   | 0.021  | t | 153286 | QKLVFFAE<br>DVGSNKG<br>A     | Oryctolagus<br>cuniculus |
| 1 | 1.00 | 1 | 1 | 0.01  | 0.006 | 0.01   | 0.013  | 0.011  | t | 57630  | SESTEDQA<br>MEDIKQMEAE       | Oryctolagus<br>cuniculus |
| 1 | 1.00 | 1 | 1 | -0.01 | -0.01 | -0.01  | -0.01  | -0.011 | t | 133536 | CKPVENRAC                    | Mus<br>musculus          |
| 1 | 1.00 | 1 | 1 | 0.01  | 0.011 | 0.003  | 0.007  | 0.013  | t | 130553 | MDPNCSC                      | Mus<br>musculus          |
| 1 | 1.00 | 1 | 1 | 0.01  | 0.013 | 0.003  | 0.01   | 0.008  | t | 45003  | NMLYKDD<br>FVGALIFSGAVI      | Mus<br>musculus          |
| 1 | 1.00 | 1 | 1 | 0.01  | 0.021 | 0.003  | 0.01   | 0.008  | t | 45003  | NMLYKDD<br>FVGALIFSGAVI      | Gallus<br>gallus         |
| 1 | 1.00 | 1 | 1 | 0.01  | 0.013 | 0.003  | 0.01   | 0.008  | t | 45003  | NMLYKDD<br>FVGALIFSGAVI      | Mus<br>musculus          |

|   |      |   |   |       |        |        |        |        |   |        |                             |                                  |
|---|------|---|---|-------|--------|--------|--------|--------|---|--------|-----------------------------|----------------------------------|
| 1 | 1.00 | 1 | 1 | 0.02  | 0.02   | 0.014  | 0.02   | 0.021  | t | 76185  | YTTGGAQS<br>HTLR            | Mus<br>musculu<br>s              |
| 1 | 1.00 | 1 | 1 | 0     | 0      | 0      | 0      | 0.001  | t | 153381 | ETPLTIAGL<br>KLK            | Mus<br>musculu<br>s              |
| 1 | 1.00 | 1 | 1 | -0.02 | -0.022 | -0.025 | -0.02  | -0.02  | t | 117295 | GITKPAIRR<br>LARRGG         | Mus<br>musculu<br>s              |
| 1 | 1.00 | 1 | 1 | 0     | 0      | 0      | 0.002  | 0      | t | 27554  | IMSGEKPS<br>MEDVVN          | Homo<br>sapiens                  |
| 1 | 1.00 | 1 | 1 | 0     | -0.004 | -0.004 | 0.003  | 0.002  | t | 1385   | AFRELADA                    | Oryctola<br>gus<br>cuniculu<br>s |
| 1 | 1.00 | 1 | 1 | -0.01 | -0.008 | -0.012 | -0.009 | -0.009 | t | 49748  | PTPSAPAR<br>GE              | Homo<br>sapiens                  |
| 1 | 1.00 | 1 | 1 | 0.03  | 0.032  | 0.04   | 0.033  | 0.03   | t | 60649  | SREQLNKL<br>FGIE            | Homo<br>sapiens                  |
| 1 | 1.00 | 1 | 1 | -0.06 | -0.06  | -0.06  | -0.06  | -0.061 | t | 105701 | CVVGCGG<br>GV               | Mus<br>musculu<br>s              |
| 1 | 1.00 | 1 | 1 | 0     | -0.002 | -0.005 | -0.007 | 0.001  | t | 124008 | DGVVLVD                     | Mus<br>musculu<br>s              |
| 1 | 1.00 | 1 | 1 | 0     | 0      | -0.005 | 0      | 0      | t | 132687 | STQTAGP<br>WHLGKLEL         | Mus<br>musculu<br>s              |
| 1 | 1.00 | 1 | 1 | -0.02 | -0.02  | -0.033 | -0.02  | -0.019 | t | 69323  | VKTIGDKR<br>TLTLNTTA<br>NYT | Mus<br>musculu<br>s              |
| 1 | 1.00 | 1 | 1 | 0     | 0      | -0.005 | 0      | -0.001 | t | 66683  | TTKQRQN<br>KPPNK            | Mus<br>musculu<br>s              |
| 1 | 1.00 | 1 | 1 | 0.02  | 0.02   | 0.012  | 0.019  | 0.02   | t | 80395  | ALYASVAV<br>QQQD            | Homo<br>sapiens                  |
| 1 | 1.00 | 1 | 1 | 0.02  | 0.02   | 0.017  | 0.02   | 0.022  | t | 133531 | CDTLKPGE<br>C               | Mus<br>musculu<br>s              |
| 1 | 1.00 | 1 | 1 | -0.05 | -0.05  | -0.05  | -0.05  | -0.05  | t | 145831 | IPLGTRP                     | Mus<br>musculu<br>s              |
| 1 | 1.00 | 1 | 1 | 0     | 0      | 0      | 0      | 0      | t | 66938  | TVAGCALP<br>PPKKTP          | Homo<br>sapiens                  |

|   |      |   |   |       |        |        |        |        |   |        |                              |                                  |
|---|------|---|---|-------|--------|--------|--------|--------|---|--------|------------------------------|----------------------------------|
| 1 | 1.00 | 1 | 1 | 0.01  | 0.01   | 0.011  | 0.016  | 0.01   | t | 71055  | VSNAPPV<br>ASPSILKPG<br>ASAA | Homo<br>sapiens                  |
| 1 | 1.00 | 1 | 1 | 0.01  | 0.01   | 0.003  | 0.001  | 0.01   | t | 119508 | QFIGYPI                      | Homo<br>sapiens                  |
| 1 | 1.00 | 1 | 1 | -0.02 | -0.018 | -0.018 | -0.02  | -0.022 | t | 9595   | DPALLLM<br>HELIHVLH<br>GLYG  | Homo<br>sapiens                  |
| 1 | 1.00 | 1 | 1 | -0.05 | -0.05  | -0.043 | -0.05  | -0.054 | t | 137866 | GDTRPRFL                     | Oryctola<br>gus<br>cuniculu<br>s |
| 1 | 1.00 | 1 | 1 | -0.01 | -0.006 | -0.009 | -0.013 | -0.01  | t | 36576  | LIKIFQDHP<br>L               | Homo<br>sapiens                  |
| 1 | 1.00 | 1 | 1 | -0.01 | -0.008 | -0.009 | -0.013 | -0.01  | t | 36576  | LIKIFQDHP<br>L               | Homo<br>sapiens                  |
| 1 | 1.00 | 1 | 1 | 0.01  | 0.01   | 0.01   | 0.01   | 0.011  | t | 50929  | QGPGAP                       | Mus<br>musculu<br>s              |
| 1 | 1.00 | 1 | 1 | 0.01  | 0.01   | 0.01   | 0.01   | 0.011  | t | 50929  | QGPGAP                       | Mus<br>musculu<br>s              |
| 1 | 1.00 | 1 | 1 | 0.02  | 0.018  | 0.015  | 0.019  | 0.02   | t | 78875  | VLHSDYCI<br>VPNKGGT<br>SIGS  | Mus<br>musculu<br>s              |
| 1 | 1.00 | 1 | 1 | 0     | 0.002  | 0.009  | 0.007  | 0      | t | 110868 | GNVSPGT<br>RREYHTEK<br>LVT   | Homo<br>sapiens                  |
| 1 | 1.00 | 1 | 1 | 0     | 0.002  | 0.009  | 0.007  | 0      | t | 110868 | GNVSPGT<br>RREYHTEK<br>LVT   | Homo<br>sapiens                  |
| 1 | 1.00 | 1 | 1 | 0.04  | 0.04   | 0.04   | 0.04   | 0.04   | t | 112396 | WASTRES                      | Homo<br>sapiens                  |
| 1 | 1.00 | 1 | 1 | 0.02  | 0.02   | 0.02   | 0.02   | 0.02   | t | 140585 | PWNTFAT<br>NA                | Mus<br>musculu<br>s              |
| 1 | 1.00 | 1 | 1 | 0.02  | 0.02   | 0.02   | 0.02   | 0.02   | t | 140585 | PWNTFAT<br>NA                | Mus<br>musculu<br>s              |
| 1 | 1.00 | 1 | 1 | 0.02  | 0.02   | 0.02   | 0.02   | 0.02   | t | 122458 | LEPETGKD<br>MSPYEAYK<br>RGII | Homo<br>sapiens                  |
| 1 | 1.00 | 1 | 1 | 0.02  | 0.02   | 0.02   | 0.02   | 0.02   | t | 92346  | APTSMLD<br>QSL               | Ovis<br>aries                    |

|   |      |   |   |       |        |        |        |        |   |        |                              |                                  |
|---|------|---|---|-------|--------|--------|--------|--------|---|--------|------------------------------|----------------------------------|
| 1 | 1.00 | 1 | 1 | 0     | 0      | 0      | 0      | 0      | t | 151070 | WTLVEPG<br>DKITFEAT          | Homo<br>sapiens                  |
| 1 | 1.00 | 1 | 1 | 0.01  | 0.012  | 0.011  | 0.013  | 0.01   | t | 31152  | KHSEWLN<br>KARGIESW          | Homo<br>sapiens                  |
| 1 | 1.00 | 1 | 1 | -0.04 | -0.04  | -0.04  | -0.033 | -0.04  | t | 117519 | GRGTVAA<br>AAAAAT            | Mus<br>musculu<br>s              |
| 1 | 1.00 | 1 | 1 | 0.02  | 0.022  | 0.022  | 0.021  | 0.019  | t | 103544 | RGEHRDE<br>HTQDAGD<br>K      | Homo<br>sapiens                  |
| 1 | 1.00 | 1 | 1 | 0.03  | 0.034  | 0.03   | 0.037  | 0.032  | t | 117363 | RPDAEYW<br>NSQKDLLE<br>QKRGR | Homo<br>sapiens                  |
| 1 | 1.00 | 1 | 1 | 0.01  | 0.01   | 0.01   | 0.01   | 0.01   | t | 30421  | KEGYLVDK<br>NT               | Mus<br>musculu<br>s              |
| 1 | 1.00 | 1 | 1 | 0.03  | 0.029  | 0.03   | 0.03   | 0.03   | t | 48771  | PPETTTIP                     | Anas<br>platyrhy<br>nchos        |
| 1 | 1.00 | 1 | 1 | 0.04  | 0.034  | 0.04   | 0.04   | 0.04   | t | 123395 | KSQETPAT                     | Oryctola<br>gus<br>cuniculu<br>s |
| 1 | 1.00 | 1 | 1 | 0.06  | 0.062  | 0.072  | 0.063  | 0.062  | t | 40254  | LVAEEDER                     | Homo<br>sapiens                  |
| 1 | 1.00 | 1 | 1 | 0.01  | 0.014  | 0.013  | 0.007  | 0.01   | t | 71140  | VSSSLAPCI<br>P               | Homo<br>sapiens                  |
| 1 | 1.00 | 1 | 1 | -0.01 | -0.012 | -0.01  | -0.009 | -0.01  | t | 149439 | QQQPLSQ<br>VSF               | Mus<br>musculu<br>s              |
| 1 | 1.00 | 1 | 1 | -0.01 | -0.006 | -0.008 | -0.009 | -0.01  | t | 120904 | RALKRRNA<br>RTKAR            | Homo<br>sapiens                  |
| 1 | 1.00 | 1 | 1 | -0.02 | -0.02  | -0.017 | -0.021 | -0.02  | t | 49883  | PVIGSQAR                     | Homo<br>sapiens                  |
| 1 | 1.00 | 1 | 1 | 0     | 0      | 0.005  | 0      | -0.001 | t | 107214 | MVGGVV                       | Mus<br>musculu<br>s              |

|   |      |   |   |       |        |       |        |        |   |        |                              |                                  |
|---|------|---|---|-------|--------|-------|--------|--------|---|--------|------------------------------|----------------------------------|
| 1 | 1.00 | 1 | 1 | 0     | 0.003  | 0.006 | 0      | -0.001 | t | 119322 | QRFVKEKV<br>DTKAPEPP         | Mus<br>musculu<br>s              |
| 1 | 1.00 | 1 | 1 | 0.01  | 0.014  | 0.016 | 0.011  | 0.01   | t | 53905  | RGLAQALI<br>DQ               | Homo<br>sapiens                  |
| 1 | 1.00 | 1 | 1 | 0.01  | 0.014  | 0.016 | 0.011  | 0.01   | t | 53905  | RGLAQALI<br>DQ               | Homo<br>sapiens                  |
| 1 | 1.00 | 1 | 1 | 0.03  | 0.03   | 0.03  | 0.03   | 0.03   | t | 115605 | GDEVELPC<br>RISP             | Homo<br>sapiens                  |
| 1 | 1.00 | 1 | 1 | 0.03  | 0.03   | 0.03  | 0.03   | 0.03   | t | 115605 | GDEVELPC<br>RISP             | Homo<br>sapiens                  |
| 1 | 1.00 | 1 | 1 | 0.03  | 0.03   | 0.03  | 0.03   | 0.03   | t | 79649  | SPSAPTH                      | Oryctola<br>gus<br>cuniculu<br>s |
| 1 | 1.00 | 1 | 1 | 0.01  | 0.01   | 0.01  | 0.01   | 0.01   | t | 115653 | SSYAGQFR<br>VIGP             | Homo<br>sapiens                  |
| 1 | 1.00 | 1 | 1 | 0.01  | 0.01   | 0.01  | 0.01   | 0.01   | t | 115653 | SSYAGQFR<br>VIGP             | Homo<br>sapiens                  |
| 1 | 1.00 | 1 | 1 | 0.01  | 0.01   | 0.01  | 0.01   | 0.01   | t | 103693 | VFGGAAS<br>CAAPIQAD          | Homo<br>sapiens                  |
| 1 | 1.00 | 1 | 1 | 0.01  | 0.012  | 0.01  | 0.01   | 0.01   | t | 82034  | FFVQYGG<br>AYKRH             | Homo<br>sapiens                  |
| 1 | 1.00 | 1 | 1 | 0     | 0      | 0     | 0      | 0.002  | t | 78558  | VSIFPPA                      | Mus<br>musculu<br>s              |
| 1 | 1.00 | 1 | 1 | 0.01  | 0.009  | 0.007 | 0.011  | 0.011  | t | 17129  | FNASDSVG<br>QQIKVIPV<br>DPYF | Homo<br>sapiens                  |
| 1 | 1.00 | 1 | 1 | -0.02 | -0.022 | -0.02 | -0.023 | -0.02  | t | 24749  | HSYHKKF                      | Mus<br>musculu<br>s              |
| 1 | 1.00 | 1 | 1 | 0.01  | 0.007  | 0.006 | 0.01   | 0.01   | t | 4074   | AQSTMKA<br>EELTPGR           | Myodes<br>glareolu<br>s          |
| 1 | 1.00 | 1 | 1 | 0.01  | 0.014  | 0.017 | 0.017  | 0.011  | t | 135547 | DWEYSVW<br>SLN               | Homo<br>sapiens                  |

|   |      |   |   |       |        |        |        |        |   |        |                              |                              |
|---|------|---|---|-------|--------|--------|--------|--------|---|--------|------------------------------|------------------------------|
| 1 | 1.00 | 1 | 1 | 0     | 0      | -0.002 | 0      | 0      | t | 110596 | GIAGFKGD<br>QGPKG            | Rattus<br>norvegicus         |
| 1 | 1.00 | 1 | 1 | -0.08 | -0.076 | -0.08  | -0.073 | -0.081 | t | 134147 | LPKGVKHL<br>KDFPILPGE<br>IFK | Homo<br>sapiens              |
| 1 | 1.00 | 1 | 1 | 0     | 0.003  | 0      | 0      | 0      | t | 60594  | SQWNKPS<br>K                 | Mus<br>musculus              |
| 1 | 1.00 | 1 | 1 | 0     | -0.001 | 0      | 0      | 0      | t | 57770  | SFFVKDW<br>SER               | Mus<br>musculus              |
| 1 | 1.00 | 1 | 1 | 0.02  | 0.02   | 0.02   | 0.02   | 0.02   | t | 109252 | GSLPQKSQ<br>RSQDENP<br>V     | Rattus<br>norvegicus         |
| 1 | 1.00 | 1 | 1 | 0.02  | 0.02   | 0.02   | 0.02   | 0.02   | t | 109252 | GSLPQKSQ<br>RSQDENP<br>V     | Rattus<br>norvegicus         |
| 1 | 1.00 | 1 | 1 | -0.03 | -0.03  | -0.037 | -0.03  | -0.03  | t | 159026 | NLAHSDL<br>SYWIESRL          | Mus<br>musculus              |
| 1 | 1.00 | 1 | 1 | 0.03  | 0.033  | 0.034  | 0.03   | 0.03   | t | 122857 | MGCSSPP<br>CECHQEE           | Mus<br>musculus              |
| 1 | 1.00 | 1 | 1 | 0.02  | 0.02   | 0.02   | 0.02   | 0.02   | t | 17843  | FSSIPNGT                     | Oryctola<br>gus<br>cuniculus |
| 1 | 1.00 | 1 | 1 | 0     | 0      | 0      | 0      | 0      | t | 73661  | YEGFSYGV<br>TNKAKGIT         | Mus<br>musculus              |
| 1 | 1.00 | 1 | 1 | -0.02 | -0.018 | -0.013 | -0.013 | -0.02  | t | 108212 | WPPSFWY<br>HPQ               | Homo<br>sapiens              |
| 1 | 1.00 | 1 | 1 | -0.02 | -0.016 | -0.013 | -0.013 | -0.02  | t | 108212 | WPPSFWY<br>HPQ               | Homo<br>sapiens              |
| 1 | 1.00 | 1 | 1 | 0.05  | 0.05   | 0.041  | 0.046  | 0.05   | t | 135990 | SASVPALT<br>AVET             | Homo<br>sapiens              |
| 1 | 1.00 | 1 | 1 | 0.04  | 0.042  | 0.043  | 0.04   | 0.038  | t | 58914  | SKPFATDS<br>GA               | Homo<br>sapiens              |
| 1 | 1.00 | 1 | 1 | 0     | 0      | 0.004  | 0.003  | 0      | t | 7868   | DDSEPVLK<br>GVKLHYT          | Homo<br>sapiens              |



|   |      |   |   |       |        |        |        |        |   |        |                          |                                  |
|---|------|---|---|-------|--------|--------|--------|--------|---|--------|--------------------------|----------------------------------|
| 1 | 1.00 | 1 | 1 | 0.02  | 0.018  | 0.025  | 0.023  | 0.019  | t | 159043 | NTFVVDG<br>PETKECPT<br>Q | Mus<br>musculu<br>s              |
| 1 | 1.00 | 1 | 1 | -0.03 | -0.026 | -0.02  | -0.03  | -0.032 | t | 68757  | VGPKASKK                 | MD                               |
| 1 | 1.00 | 1 | 1 | 0.01  | 0.01   | 0.007  | 0.01   | 0.01   | t | 25975  | IESPPEINT<br>VQVTS       | Homo<br>sapiens                  |
| 1 | 1.00 | 1 | 1 | 0.02  | 0.02   | 0.02   | 0.02   | 0.02   | t | 153257 | FNPKNKT<br>WPDANKV<br>G  | Mus<br>musculu<br>s              |
| 1 | 1.00 | 1 | 1 | 0     | 0      | 0      | 0      | 0      | t | 108074 | PQVYTLP                  | Oryctola<br>gus<br>cuniculu<br>s |
| 1 | 1.00 | 1 | 1 | 0     | 0      | 0      | 0      | 0      | t | 108074 | PQVYTLP                  | Mus<br>musculu<br>s              |
| 1 | 1.00 | 1 | 1 | -0.02 | -0.02  | -0.02  | -0.02  | -0.02  | t | 127778 | PSEFEADL<br>MLGP         | Trichosu<br>rus<br>vulpecul<br>a |
| 1 | 1.00 | 1 | 1 | -0.01 | -0.014 | -0.01  | -0.007 | -0.01  | t | 95749  | QVYNKLG<br>MYPPN         | Oryctola<br>gus<br>cuniculu<br>s |
| 1 | 1.00 | 1 | 1 | -0.01 | -0.01  | -0.01  | -0.01  | -0.01  | t | 63037  | TAVSPTTL<br>R            | Mus<br>musculu<br>s              |
| 1 | 1.00 | 1 | 1 | -0.01 | -0.01  | -0.01  | -0.01  | -0.01  | t | 117437 | AIALREYRK<br>KMDIPA      | Homo<br>sapiens                  |
| 1 | 1.00 | 1 | 1 | 0.01  | 0.01   | 0.003  | 0.01   | 0.01   | t | 50172  | PYSPSQDP<br>YSPSQDP      | Oryctola<br>gus<br>cuniculu<br>s |
| 1 | 1.00 | 1 | 1 | 0     | 0      | -0.006 | 0      | -0.002 | t | 916    | AEGDDPA<br>KAAFDSLQ      | Mus<br>musculu<br>s              |
| 1 | 1.00 | 1 | 1 | 0.01  | 0.012  | 0.01   | 0.011  | 0.01   | t | 117112 | WPMNDD<br>STRR           | Homo<br>sapiens                  |
| 1 | 1.00 | 1 | 1 | -0.02 | -0.024 | -0.026 | -0.021 | -0.018 | t | 12900  | EKVSRRSN<br>FEF          | Oryctola<br>gus<br>cuniculu<br>s |

|   |      |   |   |       |        |        |        |       |   |        |                             |                              |
|---|------|---|---|-------|--------|--------|--------|-------|---|--------|-----------------------------|------------------------------|
| 1 | 1.00 | 1 | 1 | -0.02 | -0.022 | -0.025 | -0.017 | -0.02 | t | 14487  | ETMTPSGL<br>VIPENAK         | Mus<br>musculus              |
| 1 | 1.00 | 1 | 1 | 0.01  | 0.01   | 0.002  | 0.009  | 0.01  | t | 83781  | INPWDSKS<br>DYLK            | Homo<br>sapiens              |
| 1 | 1.00 | 1 | 1 | 0.01  | 0.008  | 0.002  | 0.009  | 0.01  | t | 83781  | INPWDSKS<br>DYLK            | Mus<br>musculus              |
| 1 | 1.00 | 1 | 1 | 0.02  | 0.016  | 0.019  | 0.019  | 0.018 | t | 59853  | SNKEGVA<br>ADGDALN<br>K     | Oryctola<br>gus<br>cuniculus |
| 1 | 1.00 | 1 | 1 | 0.02  | 0.02   | 0.009  | 0.019  | 0.02  | t | 28350  | IRNVPHPF<br>VALGLKQ         | Mus<br>musculus              |
| 1 | 1.00 | 1 | 1 | -0.03 | -0.03  | -0.037 | -0.028 | -0.03 | t | 116927 | AVCRTSM<br>CSIQSAPP         | Homo<br>sapiens              |
| 1 | 1.00 | 1 | 1 | -0.02 | -0.023 | -0.027 | -0.02  | -0.02 | t | 108164 | TLVCLATG<br>FFPDHVEL        | Oryctola<br>gus<br>cuniculus |
| 1 | 1.00 | 1 | 1 | 0.02  | 0.022  | 0.021  | 0.017  | 0.017 | t | 106512 | HILRWGN<br>ESE              | Homo<br>sapiens              |
| 1 | 1.00 | 1 | 1 | 0.03  | 0.029  | 0.036  | 0.031  | 0.031 | t | 69517  | VLGSQE                      | Homo<br>sapiens              |
| 1 | 1.00 | 1 | 1 | 0.02  | 0.016  | 0.013  | 0.021  | 0.019 | t | 131194 | ALGAQKE<br>AISPPDAA<br>SAAP | Oryctola<br>gus<br>cuniculus |
| 1 | 1.00 | 1 | 1 | 0.02  | 0.017  | 0.017  | 0.02   | 0.02  | t | 52139  | QQQTAPK<br>APTE             | Oryctola<br>gus<br>cuniculus |
| 1 | 1.00 | 1 | 1 | 0.01  | 0.01   | 0.01   | 0.01   | 0.01  | t | 103245 | GVYKVCK<br>GLEKIPLL         | Homo<br>sapiens              |
| 1 | 1.00 | 1 | 1 | 0.01  | 0.01   | 0.01   | 0.01   | 0.01  | t | 79179  | DCFNSKN<br>WEHAQCT          | Mus<br>musculus              |
| 1 | 1.00 | 1 | 1 | -0.01 | -0.01  | -0.01  | -0.01  | -0.01 | t | 123859 | YEALDCIRY                   | Ovis<br>aries                |

|   |      |   |   |       |        |        |        |        |   |        |                           |                                  |
|---|------|---|---|-------|--------|--------|--------|--------|---|--------|---------------------------|----------------------------------|
| 1 | 1.00 | 1 | 1 | -0.01 | -0.01  | 0      | -0.009 | -0.011 | t | 75286  | YPFMWG<br>GAYCF           | Mus<br>musculu<br>s              |
| 1 | 1.00 | 1 | 1 | -0.01 | -0.01  | 0      | -0.009 | -0.011 | t | 75286  | YPFMWG<br>GAYCF           | Mus<br>musculu<br>s              |
| 1 | 1.00 | 1 | 1 | 0     | 0      | 0      | 0      | 0      | t | 137450 | SHRLPLK                   | Mus<br>musculu<br>s              |
| 1 | 1.00 | 1 | 1 | 0.03  | 0.034  | 0.022  | 0.027  | 0.03   | t | 47020  | PCEQHLM<br>QKIQRDED       | Homo<br>sapiens                  |
| 1 | 1.00 | 1 | 1 | 0.02  | 0.018  | 0.02   | 0.019  | 0.02   | t | 55825  | RSELSQLS                  | Mus<br>musculu<br>s              |
| 1 | 1.00 | 1 | 1 | 0     | 0.004  | 0      | 0.001  | 0      | t | 32415  | KMVQVVY<br>D              | Homo<br>sapiens                  |
| 1 | 1.00 | 1 | 1 | 0.04  | 0.036  | 0.033  | 0.039  | 0.04   | t | 84644  | KQLLTIEG<br>AYARTRTT      | Oryctola<br>gus<br>cuniculu<br>s |
| 1 | 1.00 | 1 | 1 | 0.03  | 0.029  | 0.026  | 0.03   | 0.032  | t | 48900  | PPQWKLP                   | Anas<br>platyrhy<br>nchos        |
| 1 | 1.00 | 1 | 1 | 0.02  | 0.023  | 0.023  | 0.02   | 0.02   | t | 97313  | FSMGAKP<br>T              | Mus<br>musculu<br>s              |
| 1 | 1.00 | 1 | 1 | -0.01 | -0.015 | -0.021 | -0.007 | -0.01  | t | 70261  | VPCSTCEG<br>NLACLSLC<br>Q | Bos<br>taurus                    |
| 1 | 1.00 | 1 | 1 | 0     | 0      | 0      | 0      | 0      | t | 36425  | LHSTSPEG<br>N             | Homo<br>sapiens                  |
| 1 | 1.00 | 1 | 1 | 0     | -0.002 | 0      | -0.007 | -0.002 | t | 132668 | SNYRAYA                   | Mus<br>musculu<br>s              |
| 1 | 1.00 | 1 | 1 | 0.02  | 0.02   | 0.012  | 0.02   | 0.022  | t | 41177  | MAYRFNG<br>IGVTQNVL<br>YE | Mus<br>musculu<br>s              |
| 1 | 1.00 | 1 | 1 | 0     | 0.002  | -0.004 | -0.003 | -0.001 | t | 52082  | QQPFP                     | Homo<br>sapiens                  |
| 1 | 1.00 | 1 | 1 | -0.02 | -0.02  | -0.02  | -0.02  | -0.018 | t | 49656  | PTIAGA                    | Mus<br>musculu<br>s              |

|   |      |   |   |       |        |        |        |        |   |        |                              |                                  |
|---|------|---|---|-------|--------|--------|--------|--------|---|--------|------------------------------|----------------------------------|
| 1 | 1.00 | 1 | 1 | 0.04  | 0.043  | 0.028  | 0.04   | 0.042  | t | 43215  | NALTQPV<br>DQLLK             | Equus<br>caballus                |
| 1 | 1.00 | 1 | 1 | 0     | 0      | 0      | 0      | 0      | t | 50535  | QDVVVL                       | Homo<br>sapiens                  |
| 1 | 1.00 | 1 | 1 | -0.02 | -0.023 | -0.023 | -0.02  | -0.02  | t | 7193   | CTPPALNC<br>YWPLNDY<br>GF    | Oryctola<br>gus<br>cuniculu<br>s |
| 1 | 1.00 | 1 | 1 | 0.01  | 0.01   | 0.01   | 0.01   | 0.009  | t | 138189 | HILGSTA                      | Mus<br>musculu<br>s              |
| 1 | 1.00 | 1 | 1 | -0.01 | -0.01  | -0.007 | -0.016 | -0.016 | t | 70792  | VRNSWDT<br>NWGDNG<br>Y       | Homo<br>sapiens                  |
| 1 | 1.00 | 1 | 1 | -0.01 | -0.01  | -0.01  | -0.01  | -0.012 | t | 106770 | RER                          | Mus<br>musculu<br>s              |
| 1 | 1.00 | 1 | 1 | 0.02  | 0.02   | 0.02   | 0.02   | 0.02   | t | 137923 | LMDAAVD<br>VFADG             | Homo<br>sapiens                  |
| 1 | 1.00 | 1 | 1 | 0.02  | 0.02   | 0.02   | 0.02   | 0.02   | t | 133953 | WIINNF                       | Mus<br>musculu<br>s              |
| 1 | 1.00 | 1 | 1 | 0     | 0      | 0      | 0      | 0      | t | 123859 | YEALDCIRY                    | Ovis<br>aries                    |
| 1 | 1.00 | 1 | 1 | 0     | 0      | 0      | 0      | 0      | t | 124284 | HPLPPAAT<br>F                | Homo<br>sapiens                  |
| 1 | 1.00 | 1 | 1 | 0     | 0      | 0      | 0      | 0      | t | 125515 | PDLTKVYS<br>TDIFFILEIT<br>DN | Homo<br>sapiens                  |
| 1 | 1.00 | 1 | 1 | 0     | 0      | 0      | 0      | 0      | t | 114885 | LCAYSIEFG<br>T               | Homo<br>sapiens                  |
| 1 | 1.00 | 1 | 1 | 0.02  | 0.024  | 0.02   | 0.027  | 0.02   | t | 131867 | EPSPESIRR<br>KMEIDD          | Homo<br>sapiens                  |
| 1 | 1.00 | 1 | 1 | -0.01 | -0.01  | -0.015 | -0.01  | -0.01  | t | 10803  | DWEDRYR<br>RENMYR            | Mus<br>musculu<br>s              |
| 1 | 1.00 | 1 | 1 | 0     | -0.003 | -0.001 | -0.001 | 0.002  | t | 99763  | VLGYTDRI                     | Mus<br>musculu<br>s              |

|   |      |   |   |       |        |        |       |        |   |        |                      |                                  |
|---|------|---|---|-------|--------|--------|-------|--------|---|--------|----------------------|----------------------------------|
| 1 | 1.00 | 1 | 1 | 0     | -0.003 | 0      | 0     | -0.001 | t | 69178  | VKAETRLN<br>PDLQPTE  | Oryctola<br>gus<br>cuniculu<br>s |
| 1 | 1.00 | 1 | 1 | 0     | -0.003 | 0      | 0     | -0.001 | t | 9524   | DNPASTT<br>NKDK      | Oryctola<br>gus<br>cuniculu<br>s |
| 1 | 1.00 | 1 | 1 | 0     | -0.003 | 0      | 0     | -0.001 | t | 9524   | DNPASTT<br>NKDK      | Oryctola<br>gus<br>cuniculu<br>s |
| 1 | 1.00 | 1 | 1 | 0.01  | 0.006  | 0.004  | 0.01  | 0.01   | t | 32416  | KMVQVVY<br>DYQ       | Oryctola<br>gus<br>cuniculu<br>s |
| 1 | 1.00 | 1 | 1 | 0.01  | 0.008  | 0.01   | 0.009 | 0.01   | t | 12280  | EGSNTNSV             | Mus<br>musculu<br>s              |
| 1 | 1.00 | 1 | 1 | 0.02  | 0.02   | 0.016  | 0.014 | 0.018  | t | 53409  | RDPYSPSQ<br>DPYSPSQ  | Homo<br>sapiens                  |
| 1 | 1.00 | 1 | 1 | 0     | 0      | 0      | 0     | 0.001  | t | 122895 | RWLPPVY<br>EDGFS     | Oryctola<br>gus<br>cuniculu<br>s |
| 1 | 1.00 | 1 | 1 | 0     | 0.002  | 0      | 0.001 | -0.001 | t | 51370  | QLINSNGS<br>WHIN     | Homo<br>sapiens                  |
| 1 | 1.00 | 1 | 1 | 0.02  | 0.02   | 0.02   | 0.02  | 0.02   | t | 135496 | RYPNQVY              | Mus<br>musculu<br>s              |
| 1 | 1.00 | 1 | 1 | 0.02  | 0.014  | 0.02   | 0.02  | 0.02   | t | 123779 | TMELMLS<br>M         | Oryctola<br>gus<br>cuniculu<br>s |
| 1 | 1.00 | 1 | 1 | 0     | 0      | -0.005 | 0     | 0      | t | 124925 | YYVFEEQ<br>EDEIIGF   | Oryctola<br>gus<br>cuniculu<br>s |
| 1 | 1.00 | 1 | 1 | 0.02  | 0.02   | 0.02   | 0.02  | 0.019  | t | 56718  | SAAYATSS<br>FSSLFTRG | Homo<br>sapiens                  |
| 1 | 1.00 | 1 | 1 | -0.02 | -0.02  | -0.02  | -0.02 | -0.021 | t | 100634 | VTNSKKFI<br>DI       | Mus<br>musculu<br>s              |
| 1 | 1.00 | 1 | 1 | -0.06 | -0.063 | -0.06  | -0.06 | -0.061 | t | 136058 | DKATV                | Oryctola<br>gus<br>cuniculu<br>s |

|   |      |   |   |       |        |        |        |        |   |        |                          |                                  |
|---|------|---|---|-------|--------|--------|--------|--------|---|--------|--------------------------|----------------------------------|
| 1 | 1.00 | 1 | 1 | -0.02 | -0.02  | -0.02  | -0.02  | -0.022 | t | 19737  | GGGAGAG<br>GAGAGGG<br>GR | Oryctola<br>gus<br>cuniculu<br>s |
| 1 | 1.00 | 1 | 1 | -0.03 | -0.028 | -0.032 | -0.031 | -0.03  | t | 25015  | HVAGAAA<br>LILSKHPN      | Cavia<br>porcellu<br>s           |
| 1 | 1.00 | 1 | 1 | -0.05 | -0.047 | -0.051 | -0.05  | -0.052 | t | 94741  | WEQWW                    | Mus<br>musculu<br>s              |
| 1 | 1.00 | 1 | 1 | 0.03  | 0.028  | 0.024  | 0.027  | 0.03   | t | 48858  | PPPPNPN<br>DPPPPNP<br>ND | Mus<br>musculu<br>s              |
| 1 | 1.00 | 1 | 1 | 0.03  | 0.028  | 0.024  | 0.027  | 0.03   | t | 48858  | PPPPNPN<br>DPPPPNP<br>ND | Mus<br>musculu<br>s              |
| 1 | 1.00 | 1 | 1 | 0.05  | 0.05   | 0.05   | 0.05   | 0.05   | t | 115906 | PVEPFTE<br>QS            | Homo<br>sapiens                  |
| 1 | 1.00 | 1 | 1 | 0.03  | 0.03   | 0.03   | 0.03   | 0.03   | t | 149077 | NATQERY                  | Sus<br>scrofa                    |
| 1 | 1.00 | 1 | 1 | 0     | 0.002  | 0      | 0      | -0.001 | t | 113879 | SQRSQDE<br>N             | Rattus<br>norvegic<br>us         |
| 1 | 1.00 | 1 | 1 | 0     | 0.002  | 0      | 0      | -0.001 | t | 113628 | LRLIHYSYD<br>VN          | Rattus<br>norvegic<br>us         |
| 1 | 1.00 | 1 | 1 | 0     | 0      | 0      | 0      | -0.001 | t | 102510 | HHQKLVFF<br>AEDVGSN<br>K | Rattus<br>norvegic<br>us         |
| 1 | 1.00 | 1 | 1 | 0     | -0.003 | 0      | 0      | -0.001 | t | 102510 | HHQKLVFF<br>AEDVGSN<br>K | Oryctola<br>gus<br>cuniculu<br>s |
| 1 | 1.00 | 1 | 1 | 0.01  | 0.01   | 0.01   | 0.01   | 0.01   | t | 117085 | SQMPEYLL<br>KADN         | Homo<br>sapiens                  |
| 1 | 1.00 | 1 | 1 | -0.01 | -0.01  | -0.01  | -0.01  | -0.01  | t | 97920  | AYTPAYYT<br>KN           | Oryctola<br>gus<br>cuniculu<br>s |
| 1 | 1.00 | 1 | 1 | -0.01 | -0.007 | -0.01  | -0.01  | -0.01  | t | 97920  | AYTPAYYT<br>KN           | Mus<br>musculu<br>s              |
| 1 | 1.00 | 1 | 1 | -0.01 | -0.01  | -0.01  | -0.01  | -0.01  | t | 97920  | AYTPAYYT<br>KN           | Mus<br>musculu<br>s              |

|   |      |   |   |       |        |        |        |        |   |        |                              |                       |
|---|------|---|---|-------|--------|--------|--------|--------|---|--------|------------------------------|-----------------------|
| 1 | 1.00 | 1 | 1 | -0.03 | -0.03  | -0.03  | -0.03  | -0.03  | t | 97371  | GVAFPLPT                     | Mus musculus          |
| 1 | 1.00 | 1 | 1 | -0.05 | -0.05  | -0.05  | -0.05  | -0.05  | t | 107570 | PSVFLFP                      | Homo sapiens          |
| 1 | 1.00 | 1 | 1 | 0.03  | 0.03   | 0.03   | 0.03   | 0.032  | t | 108897 | EIDGPAGQ<br>AEP              | Mus musculus          |
| 1 | 1.00 | 1 | 1 | 0.01  | 0.007  | 0.01   | 0.01   | 0.007  | t | 107422 | GQIPLRFN<br>GEVKNP<br>SVV    | Oryctolagus cuniculus |
| 1 | 1.00 | 1 | 1 | 0     | 0.003  | -0.009 | 0      | 0.001  | t | 78627  | DPDPPDA<br>NDPAPP<br>NAN     | Mus musculus          |
| 1 | 1.00 | 1 | 1 | -0.02 | -0.02  | -0.02  | -0.02  | -0.02  | t | 132927 | WGANVPS                      | Homo sapiens          |
| 1 | 1.00 | 1 | 1 | 0.01  | 0.014  | 0.01   | 0.017  | 0.009  | t | 107774 | DAGPQGK<br>VGPS              | Homo sapiens          |
| 1 | 1.00 | 1 | 1 | 0.03  | 0.023  | 0.027  | 0.031  | 0.028  | t | 73171  | WTWETKG<br>DLAEN             | Homo sapiens          |
| 1 | 1.00 | 1 | 1 | -0.01 | -0.01  | -0.017 | -0.006 | -0.01  | t | 122471 | LLTEHRMT<br>WDPAQPP<br>RDL   | Homo sapiens          |
| 1 | 1.00 | 1 | 1 | -0.01 | -0.01  | -0.017 | -0.006 | -0.01  | t | 122471 | LLTEHRMT<br>WDPAQPP<br>RDL   | Homo sapiens          |
| 1 | 1.00 | 1 | 1 | -0.01 | -0.014 | -0.004 | -0.011 | -0.012 | t | 6469   | CKALQEQC<br>RFPN             | Oryctolagus cuniculus |
| 1 | 1.00 | 1 | 1 | -0.01 | -0.013 | -0.003 | -0.006 | -0.01  | t | 130622 | TGLVAQG<br>TDSIG             | Camelus dromedarius   |
| 1 | 1.00 | 1 | 1 | 0     | 0      | 0      | 0      | 0      | t | 108651 | TGPSTRGR<br>QGSRHE           | Homo sapiens          |
| 1 | 1.00 | 1 | 1 | 0     | 0      | 0      | 0      | 0      | t | 108651 | TGPSTRGR<br>QGSRHE           | Homo sapiens          |
| 1 | 1.00 | 1 | 1 | 0.01  | 0.013  | 0.002  | 0.01   | 0.01   | t | 12415  | EIDGPAGQ<br>AEPDRAH<br>YNIVT | Mus musculus          |

|   |      |   |   |       |        |        |        |        |   |        |                              |                     |
|---|------|---|---|-------|--------|--------|--------|--------|---|--------|------------------------------|---------------------|
| 1 | 1.00 | 1 | 1 | 0.02  | 0.02   | 0.021  | 0.02   | 0.02   | t | 57637  | SESVEFTK<br>DTQTGMS          | Mus<br>musculu<br>s |
| 1 | 1.00 | 1 | 1 | -0.02 | -0.022 | -0.02  | -0.019 | -0.02  | t | 149519 | VRVPVPQL<br>QL               | Mus<br>musculu<br>s |
| 1 | 1.00 | 1 | 1 | 0.06  | 0.06   | 0.047  | 0.06   | 0.063  | t | 57716  | SEYSSQPS<br>S                | Homo<br>sapiens     |
| 1 | 1.00 | 1 | 1 | -0.05 | -0.045 | -0.045 | -0.042 | -0.048 | t | 144190 | ADGLAVIG<br>VLMK             | Homo<br>sapiens     |
| 1 | 1.00 | 1 | 1 | -0.05 | -0.053 | -0.045 | -0.042 | -0.048 | t | 144190 | ADGLAVIG<br>VLMK             | Homo<br>sapiens     |
| 1 | 1.00 | 1 | 1 | 0     | 0      | 0      | 0      | -0.001 | t | 51146  | QIVGGVYL                     | Mus<br>musculu<br>s |
| 1 | 1.00 | 1 | 1 | 0.02  | 0.02   | 0.02   | 0.02   | 0.02   | t | 140607 | TMYQAIT<br>QT                | Mus<br>musculu<br>s |
| 1 | 1.00 | 1 | 1 | 0.02  | 0.02   | 0.02   | 0.02   | 0.02   | t | 140607 | TMYQAIT<br>QT                | Mus<br>musculu<br>s |
| 1 | 1.00 | 1 | 1 | 0.02  | 0.023  | 0.02   | 0.02   | 0.02   | t | 120146 | QGARVYA<br>YVF               | Mus<br>musculu<br>s |
| 1 | 1.00 | 1 | 1 | 0.02  | 0.02   | 0.02   | 0.02   | 0.02   | t | 100153 | INDQIKFII<br>N               | Mus<br>musculu<br>s |
| 1 | 1.00 | 1 | 1 | 0.02  | 0.02   | 0.02   | 0.02   | 0.02   | t | 77801  | SVKKCLFE<br>KC               | Homo<br>sapiens     |
| 1 | 1.00 | 1 | 1 | 0     | 0      | 0      | 0      | 0      | t | 115554 | VVVPPFLQ<br>PEVMGVS<br>KVKEA | Homo<br>sapiens     |
| 1 | 1.00 | 1 | 1 | 0     | 0      | 0      | 0      | 0      | t | 80130  | AAGLIMTA<br>EP               | Homo<br>sapiens     |
| 1 | 1.00 | 1 | 1 | -0.01 | -0.01  | -0.01  | -0.01  | -0.01  | t | 22123  | GRLGTYRY<br>VSSGER           | Homo<br>sapiens     |
| 1 | 1.00 | 1 | 1 | 0     | 0.003  | 0.001  | 0.003  | 0      | t | 78139  | EGPRAG                       | Equus<br>caballus   |



|   |      |   |   |       |        |        |        |        |   |        |                              |                                  |
|---|------|---|---|-------|--------|--------|--------|--------|---|--------|------------------------------|----------------------------------|
| 1 | 1.00 | 1 | 1 | 0.02  | 0.018  | 0.02   | 0.019  | 0.018  | t | 123346 | KDYYQKW<br>MEE               | Homo<br>sapiens                  |
| 1 | 1.00 | 1 | 1 | 0.01  | 0.013  | 0.005  | 0.01   | 0.01   | t | 78687  | IRVRKRKG<br>SNKKAEDT<br>LED  | Mus<br>musculu<br>s              |
| 1 | 1.00 | 1 | 1 | 0.01  | 0.01   | 0.005  | 0.01   | 0.01   | t | 78687  | IRVRKRKG<br>SNKKAEDT<br>LED  | Mus<br>musculu<br>s              |
| 1 | 1.00 | 1 | 1 | 0.05  | 0.05   | 0.05   | 0.05   | 0.05   | t | 132377 | IERRQQEV<br>ET               | Homo<br>sapiens                  |
| 1 | 1.00 | 1 | 1 | 0     | 0.003  | 0.004  | 0      | 0      | t | 94825  | GGQFNP                       | Mus<br>musculu<br>s              |
| 1 | 1.00 | 1 | 1 | 0.06  | 0.058  | 0.059  | 0.063  | 0.062  | t | 70720  | VRFQEAA<br>NKQKQEL<br>D      | Mus<br>musculu<br>s              |
| 1 | 1.00 | 1 | 1 | -0.02 | -0.024 | -0.028 | -0.021 | -0.019 | t | 66902  | TTVQQQF<br>SEVWKPPF<br>QSTVR | Oryctola<br>gus<br>cuniculu<br>s |
| 1 | 1.00 | 1 | 1 | -0.03 | -0.03  | -0.011 | -0.03  | -0.04  | t | 26849  | IKMVSSLK<br>TKIT             | Mus<br>musculu<br>s              |
| 1 | 1.00 | 1 | 1 | 0.02  | 0.02   | 0.018  | 0.02   | 0.02   | t | 16057  | FGSKLELV<br>KK               | Mus<br>musculu<br>s              |
| 1 | 1.00 | 1 | 1 | 0.02  | 0.023  | 0.018  | 0.02   | 0.02   | t | 16057  | FGSKLELV<br>KK               | Mus<br>musculu<br>s              |
| 1 | 1.00 | 1 | 1 | -0.03 | -0.028 | -0.03  | -0.023 | -0.032 | t | 134701 | KEIRKLQKS<br>THLLIR          | Homo<br>sapiens                  |
| 1 | 1.00 | 1 | 1 | -0.01 | -0.012 | -0.01  | -0.011 | -0.012 | t | 46488  | NVSVSPSP<br>STPLLY           | Mus<br>musculu<br>s              |
| 1 | 1.00 | 1 | 1 | 0.03  | 0.036  | 0.02   | 0.03   | 0.03   | t | 139214 | QTKLNLTA<br>EIDQLEQR<br>ADNL | Felis<br>catus                   |
| 1 | 1.00 | 1 | 1 | 0.04  | 0.037  | 0.04   | 0.039  | 0.041  | t | 156601 | ADEPNNL<br>NSK               | Oryctola<br>gus<br>cuniculu<br>s |

|   |      |   |   |       |        |        |        |        |   |        |                              |                                  |
|---|------|---|---|-------|--------|--------|--------|--------|---|--------|------------------------------|----------------------------------|
| 1 | 1.00 | 1 | 1 | 0.02  | 0.018  | 0.02   | 0.019  | 0.02   | t | 20012  | GGSGGSV<br>ASGGSVAS          | Mus<br>musculu<br>s              |
| 1 | 1.00 | 1 | 1 | 0.03  | 0.03   | 0.03   | 0.03   | 0.03   | t | 126903 | QVINVREG                     | Homo<br>sapiens                  |
| 1 | 1.00 | 1 | 1 | -0.01 | -0.012 | -0.011 | -0.007 | -0.008 | t | 106862 | SPEFRRD                      | Mus<br>musculu<br>s              |
| 1 | 1.00 | 1 | 1 | -0.02 | -0.02  | -0.02  | -0.02  | -0.02  | t | 30472  | KEKLQERL                     | Homo<br>sapiens                  |
| 1 | 1.00 | 1 | 1 | 0.04  | 0.04   | 0.04   | 0.044  | 0.039  | t | 134051 | FPFSGETV<br>FMSMENP<br>GLWIL | Homo<br>sapiens                  |
| 1 | 1.00 | 1 | 1 | 0.03  | 0.036  | 0.03   | 0.03   | 0.03   | t | 123491 | MGLDLPN<br>LP                | Ovis<br>aries                    |
| 1 | 1.00 | 1 | 1 | -0.01 | -0.008 | -0.025 | -0.009 | -0.008 | t | 32862  | KPRDTLPP<br>PLNRPPP          | Homo<br>sapiens                  |
| 1 | 1.00 | 1 | 1 | -0.02 | -0.017 | -0.013 | -0.02  | -0.02  | t | 106380 | EFFRHNS                      | Mus<br>musculu<br>s              |
| 1 | 1.00 | 1 | 1 | 0.02  | 0.023  | 0.015  | 0.02   | 0.022  | t | 33161  | KRIPLDVA<br>EG               | Mus<br>musculu<br>s              |
| 1 | 1.00 | 1 | 1 | 0.01  | 0.01   | 0.006  | 0.01   | 0.01   | t | 36071  | LGDDTGIH<br>VI               | Homo<br>sapiens                  |
| 1 | 1.00 | 1 | 1 | 0.01  | 0.01   | 0.01   | 0.01   | 0.01   | t | 70038  | VMYASSG                      | Oryctola<br>gus<br>cuniculu<br>s |
| 1 | 1.00 | 1 | 1 | 0.01  | 0.01   | 0.01   | 0.01   | 0.01   | t | 70038  | VMYASSG                      | Oryctola<br>gus<br>cuniculu<br>s |
| 1 | 1.00 | 1 | 1 | -0.02 | -0.017 | -0.027 | -0.02  | -0.018 | t | 113183 | SYGAPATP<br>AA               | Mus<br>musculu<br>s              |
| 1 | 1.00 | 1 | 1 | 0     | 0      | 0      | -0.003 | -0.002 | t | 29810  | KAGNEGLE<br>WVEL             | Homo<br>sapiens                  |

|   |      |   |   |   |        |   |        |        |   |        |                              |                                  |
|---|------|---|---|---|--------|---|--------|--------|---|--------|------------------------------|----------------------------------|
| 1 | 1.00 | 1 | 1 | 0 | -0.002 | 0 | -0.001 | -0.001 | t | 136554 | PLDLPQIIE<br>R               | Mus<br>musculu<br>s              |
| 1 | 1.00 | 1 | 1 | 0 | -0.002 | 0 | -0.001 | -0.001 | t | 136573 | QLEKALDC<br>QIYG             | Mus<br>musculu<br>s              |
| 1 | 1.00 | 1 | 1 | 0 | 0.011  | 0 | -0.001 | -0.001 | t | 63217  | TDQMEVD<br>SGPRKRPL<br>RGG   | Oryctola<br>gus<br>cuniculu<br>s |
| 1 | 1.00 | 1 | 1 | 0 | -0.002 | 0 | -0.001 | -0.001 | t | 61124  | SSIVYEAA<br>DMIMHT           | Mus<br>musculu<br>s              |
| 1 | 1.00 | 1 | 1 | 0 | -0.004 | 0 | -0.001 | -0.001 | t | 60663  | SRGAPGG<br>GFVPSLQG<br>VP    | Oryctola<br>gus<br>cuniculu<br>s |
| 1 | 1.00 | 1 | 1 | 0 | 0.011  | 0 | -0.001 | -0.001 | t | 60663  | SRGAPGG<br>GFVPSLQG<br>VP    | Oryctola<br>gus<br>cuniculu<br>s |
| 1 | 1.00 | 1 | 1 | 0 | -0.004 | 0 | -0.001 | -0.001 | t | 38345  | LNTEPSQL<br>PPTAPP           | Oryctola<br>gus<br>cuniculu<br>s |
| 1 | 1.00 | 1 | 1 | 0 | -0.004 | 0 | -0.001 | -0.001 | t | 48779  | PPFSLSPV<br>PTLGSRSR<br>R    | Oryctola<br>gus<br>cuniculu<br>s |
| 1 | 1.00 | 1 | 1 | 0 | -0.004 | 0 | -0.001 | -0.001 | t | 56614  | RYPHYSLIK<br>PESSL           | Oryctola<br>gus<br>cuniculu<br>s |
| 1 | 1.00 | 1 | 1 | 0 | -0.002 | 0 | -0.001 | -0.001 | t | 58077  | SGHRMA<br>WDMMM<br>NW        | Mus<br>musculu<br>s              |
| 1 | 1.00 | 1 | 1 | 0 | -0.004 | 0 | -0.001 | -0.001 | t | 50977  | QGVPESPF<br>SRTGEGLD         | Oryctola<br>gus<br>cuniculu<br>s |
| 1 | 1.00 | 1 | 1 | 0 | -0.002 | 0 | -0.001 | -0.001 | t | 56962  | SARDGIRD<br>AMIGLREE<br>MIEK | Mus<br>musculu<br>s              |
| 1 | 1.00 | 1 | 1 | 0 | -0.004 | 0 | -0.001 | -0.001 | t | 46859  | PALTAVET<br>GATNPL           | Oryctola<br>gus<br>cuniculu<br>s |

|   |      |   |   |       |        |        |        |        |   |        |                             |                                  |
|---|------|---|---|-------|--------|--------|--------|--------|---|--------|-----------------------------|----------------------------------|
| 1 | 1.00 | 1 | 1 | 0     | 0.011  | 0      | -0.001 | -0.001 | t | 29852  | KALENKKK<br>QLSAGGK<br>NLS  | Oryctola<br>gus<br>cuniculu<br>s |
| 1 | 1.00 | 1 | 1 | 0     | -0.004 | 0      | -0.001 | -0.001 | t | 29852  | KALENKKK<br>QLSAGGK<br>NLS  | Oryctola<br>gus<br>cuniculu<br>s |
| 1 | 1.00 | 1 | 1 | 0     | 0.011  | 0      | -0.001 | -0.001 | t | 19269  | GEGAPPA<br>KRARTDQ<br>ME    | Oryctola<br>gus<br>cuniculu<br>s |
| 1 | 1.00 | 1 | 1 | 0     | -0.004 | 0      | -0.001 | -0.001 | t | 6429   | CILRQLRHL<br>PSRVRYPH<br>YS | Oryctola<br>gus<br>cuniculu<br>s |
| 1 | 1.00 | 1 | 1 | -0.05 | -0.048 | -0.063 | -0.05  | -0.05  | t | 18536  | GACAPYRR<br>LHLCD           | Rattus<br>norvegic<br>us         |
| 1 | 1.00 | 1 | 1 | 0.01  | 0.01   | 0.01   | 0.01   | 0.01   | t | 43190  | NAKATYEA<br>ALKQYEAD<br>L   | Mus<br>musculu<br>s              |
| 1 | 1.00 | 1 | 1 | -0.01 | -0.012 | -0.01  | -0.011 | -0.01  | t | 45695  | NRLGGLFN<br>FGPKQKI         | Mus<br>musculu<br>s              |
| 1 | 1.00 | 1 | 1 | -0.01 | -0.019 | -0.009 | -0.01  | -0.01  | t | 109030 | GAQGPRG<br>E                | Macaca<br>mulatta                |
| 1 | 1.00 | 1 | 1 | 0     | 0.002  | -0.002 | -0.003 | -0.002 | t | 45550  | NQFLPYPY<br>YAKPAA          | Homo<br>sapiens                  |
| 1 | 1.00 | 1 | 1 | 0.04  | 0.042  | 0.046  | 0.047  | 0.04   | t | 2039   | AINPESDQ<br>PDLSNF          | Homo<br>sapiens                  |
| 1 | 1.00 | 1 | 1 | -0.04 | -0.044 | -0.04  | -0.043 | -0.04  | t | 5109   | ATPYHPPA<br>TP              | Oryctola<br>gus<br>cuniculu<br>s |
| 1 | 1.00 | 1 | 1 | 0.05  | 0.05   | 0.05   | 0.05   | 0.05   | t | 103260 | HRSDGSG<br>DTFLFTQY         | Homo<br>sapiens                  |
| 1 | 1.00 | 1 | 1 | 0.01  | 0.01   | 0.008  | 0.01   | 0.01   | t | 114555 | QSENDHR<br>RSIVRVEG         | Homo<br>sapiens                  |

|   |      |   |   |       |        |        |        |        |   |        |                  |                       |
|---|------|---|---|-------|--------|--------|--------|--------|---|--------|------------------|-----------------------|
| 1 | 1.00 | 1 | 1 | 0.01  | 0.01   | 0.01   | 0.01   | 0.01   | t | 133786 | CMTSPWRC         | Mus musculus          |
| 1 | 1.00 | 1 | 1 | 0.01  | 0.01   | 0.01   | 0.01   | 0.01   | t | 99042  | VLQQSTYQLLQE     | Homo sapiens          |
| 1 | 1.00 | 1 | 1 | 0.01  | 0.01   | 0.01   | 0.01   | 0.01   | t | 47650  | PGFMFSRPSDPAFAA  | Mus musculus          |
| 1 | 1.00 | 1 | 1 | 0.01  | 0.01   | 0.01   | 0.01   | 0.01   | t | 47650  | PGFMFSRPSDPAFAA  | Mus musculus          |
| 1 | 1.00 | 1 | 1 | -0.01 | -0.01  | -0.01  | -0.01  | -0.01  | t | 132691 | TCSADGRTLFLYNLCL | Mus musculus          |
| 1 | 1.00 | 1 | 1 | -0.01 | -0.01  | -0.01  | -0.01  | -0.01  | t | 99752  | VEYTKY           | Oryctolagus cuniculus |
| 1 | 1.00 | 1 | 1 | -0.01 | -0.01  | -0.01  | -0.01  | -0.01  | t | 99436  | LPHFNSKAMVIVVVN  | Homo sapiens          |
| 1 | 1.00 | 1 | 1 | -0.01 | -0.007 | -0.01  | -0.01  | -0.01  | t | 97919  | AYTPAYYTKD       | Mus musculus          |
| 1 | 1.00 | 1 | 1 | -0.01 | -0.01  | -0.01  | -0.01  | -0.01  | t | 97919  | AYTPAYYTKD       | Mus musculus          |
| 1 | 1.00 | 1 | 1 | -0.04 | -0.034 | -0.033 | -0.033 | -0.042 | t | 127671 | GPDRSPRQPPVLPA   | Homo sapiens          |
| 1 | 1.00 | 1 | 1 | 0.01  | 0.01   | 0.01   | 0.01   | 0.009  | t | 137741 | DTPLTHAALLTLV    | Mus musculus          |
| 1 | 1.00 | 1 | 1 | -0.02 | -0.02  | -0.02  | -0.018 | -0.022 | t | 52121  | QQQPFPQQP        | Homo sapiens          |
| 1 | 1.00 | 1 | 1 | -0.02 | -0.016 | -0.022 | -0.02  | -0.021 | t | 61589  | STEQNVDPQVG      | Cavia porcellus       |
| 1 | 1.00 | 1 | 1 | 0.01  | 0.012  | 0.011  | 0.011  | 0.01   | t | 68541  | VFPDLG           | Homo sapiens          |
| 1 | 1.00 | 1 | 1 | 0.01  | 0.01   | 0.007  | 0.01   | 0.01   | t | 67059  | TVLAQALVRE       | Homo sapiens          |

|   |      |   |   |       |        |        |        |        |   |        |                              |                              |
|---|------|---|---|-------|--------|--------|--------|--------|---|--------|------------------------------|------------------------------|
| 1 | 1.00 | 1 | 1 | -0.04 | -0.037 | -0.045 | -0.04  | -0.038 | t | 51799  | QPDLIPL                      | Mus<br>musculus              |
| 1 | 1.00 | 1 | 1 | -0.04 | -0.04  | -0.045 | -0.04  | -0.038 | t | 51799  | QPDLIPL                      | Oryctola<br>gus<br>cuniculus |
| 1 | 1.00 | 1 | 1 | 0     | 0.005  | 0      | 0.001  | 0      | t | 97018  | TVTFKATA<br>AT               | Homo<br>sapiens(<br>human)   |
| 1 | 1.00 | 1 | 1 | 0.01  | 0.01   | 0.01   | 0.01   | 0.011  | t | 50929  | QGPGAP                       | Mus<br>musculus              |
| 1 | 1.00 | 1 | 1 | 0     | 0      | -0.005 | -0.002 | -0.003 | t | 142472 | SATAAETA<br>KNNAVS           | Homo<br>sapiens              |
| 1 | 1.00 | 1 | 1 | -0.01 | -0.007 | -0.01  | -0.01  | -0.011 | t | 72889  | WNK                          | Mus<br>musculus              |
| 1 | 1.00 | 1 | 1 | 0     | -0.003 | -0.013 | 0      | 0      | t | 106009 | PRGVTHD<br>Q                 | Oryctola<br>gus<br>cuniculus |
| 1 | 1.00 | 1 | 1 | 0.02  | 0.02   | 0.02   | 0.02   | 0.023  | t | 126068 | FVFEEF                       | Rattus<br>norvegicus         |
| 1 | 1.00 | 1 | 1 | 0     | -0.002 | -0.001 | 0.003  | 0      | t | 50027  | PWFLAHH<br>TGGD              | Sus<br>scrofa                |
| 1 | 1.00 | 1 | 1 | 0     | -0.002 | 0      | 0.002  | 0      | t | 110460 | YEQLNDSS<br>EEDEIDG          | Mus<br>musculus              |
| 1 | 1.00 | 1 | 1 | 0     | 0      | 0      | 0.002  | 0      | t | 18172  | FVGAGIAG<br>AAVGS            | Homo<br>sapiens              |
| 1 | 1.00 | 1 | 1 | 0     | 0.002  | -0.007 | 0.001  | 0      | t | 43084  | MYRVFEVS<br>VIRNPGL          | Homo<br>sapiens              |
| 1 | 1.00 | 1 | 1 | 0     | 0.002  | -0.01  | 0.007  | 0.002  | t | 138886 | NVGGDNV<br>DIHSIVPV<br>GQDPH | Homo<br>sapiens              |
| 1 | 1.00 | 1 | 1 | 0     | 0      | 0      | 0      | 0      | t | 133623 | KPGEMR                       | Mus<br>musculus              |
| 1 | 1.00 | 1 | 1 | 0     | 0      | 0      | 0      | 0      | t | 133623 | KPGEMR                       | Mus<br>musculus              |

|   |      |   |   |       |        |        |       |        |   |        |                              |                       |
|---|------|---|---|-------|--------|--------|-------|--------|---|--------|------------------------------|-----------------------|
| 1 | 1.00 | 1 | 1 | 0     | 0      | 0      | 0     | 0      | t | 133623 | KPGEMR                       | Mus musculus          |
| 1 | 1.00 | 1 | 1 | 0     | 0      | 0      | 0     | 0      | t | 133623 | KPGEMR                       | Mus musculus          |
| 1 | 1.00 | 1 | 1 | -0.01 | -0.01  | -0.01  | -0.01 | -0.011 | t | 72890  | WNKP                         | Oryctolagus cuniculus |
| 1 | 1.00 | 1 | 1 | -0.02 | -0.02  | -0.02  | -0.02 | -0.02  | t | 132793 | DLQEAKYE<br>TFS              | Mus musculus          |
| 1 | 1.00 | 1 | 1 | 0.03  | 0.027  | 0.027  | 0.03  | 0.03   | t | 97536  | NVTTNQTI<br>Q                | Oryctolagus cuniculus |
| 1 | 1.00 | 1 | 1 | -0.01 | -0.013 | -0.008 | -0.01 | -0.012 | t | 57184  | SDEV RKHT<br>YNLTIA          | Oryctolagus cuniculus |
| 1 | 1.00 | 1 | 1 | 0.01  | 0.007  | 0.01   | 0.01  | 0.007  | t | 144671 | GREGYPA<br>DGGYCNT<br>ECTL   | Oryctolagus cuniculus |
| 1 | 1.00 | 1 | 1 | 0     | -0.011 | 0      | 0     | 0.002  | t | 156862 | DVG DPLR                     | Oryctolagus cuniculus |
| 1 | 1.00 | 1 | 1 | 0.06  | 0.062  | 0.044  | 0.054 | 0.06   | t | 142217 | LDASREAK<br>KQLEAEQ<br>QKLEE | Homo sapiens          |
| 1 | 1.00 | 1 | 1 | 0     | 0      | 0      | 0     | 0      | t | 10800  | DWED RYY                     | Mus musculus          |
| 1 | 1.00 | 1 | 1 | -0.01 | -0.01  | -0.022 | -0.01 | -0.008 | t | 120984 | TESDIKRN<br>HK               | Mus musculus          |
| 1 | 1.00 | 1 | 1 | 0     | -0.003 | 0      | 0     | 0.002  | t | 140834 | DAVKGYLA<br>GKGV             | Oryctolagus cuniculus |
| 1 | 1.00 | 1 | 1 | 0.1   | 0.1    | 0.094  | 0.1   | 0.103  | t | 1157   | AESEE                        | Homo sapiens          |
| 1 | 1.00 | 1 | 1 | -0.02 | -0.02  | -0.02  | -0.02 | -0.02  | t | 142431 | KKAE EAKK<br>IVDKI           | Homo sapiens          |

|   |      |   |   |       |        |        |        |        |   |        |                              |                                  |
|---|------|---|---|-------|--------|--------|--------|--------|---|--------|------------------------------|----------------------------------|
| 1 | 1.00 | 1 | 1 | 0     | 0      | 0      | 0.004  | 0      | t | 135947 | KTGHPRYF<br>NQLS             | Homo<br>sapiens                  |
| 1 | 1.00 | 1 | 1 | -0.01 | -0.002 | -0.01  | -0.01  | -0.012 | t | 156911 | LGMSTNP<br>GPRIL             | Gallus<br>gallus                 |
| 1 | 1.00 | 1 | 1 | -0.04 | -0.038 | -0.041 | -0.033 | -0.039 | t | 144710 | KNPWPNV<br>DAH               | Homo<br>sapiens                  |
| 1 | 1.00 | 1 | 1 | -0.01 | -0.006 | -0.013 | -0.009 | -0.011 | t | 103549 | RHGLSSLG<br>WNLCRIF          | Homo<br>sapiens                  |
| 1 | 1.00 | 1 | 1 | 0     | 0      | 0      | 0      | 0      | t | 123078 | DFPKLKEF<br>K                | Ovis<br>aries                    |
| 1 | 1.00 | 1 | 1 | 0     | 0      | 0      | 0      | 0      | t | 103286 | ISMIDGPA<br>PDGYPII          | Homo<br>sapiens                  |
| 1 | 1.00 | 1 | 1 | 0     | 0      | 0      | 0      | 0      | t | 115874 | NQFLPPY<br>YA                | Homo<br>sapiens                  |
| 1 | 1.00 | 1 | 1 | -0.02 | -0.02  | -0.02  | -0.02  | -0.02  | t | 115935 | QYVLSRYP<br>SY               | Homo<br>sapiens                  |
| 1 | 1.00 | 1 | 1 | -0.04 | -0.04  | -0.04  | -0.04  | -0.04  | t | 135766 | TIYNNMFC                     | Homo<br>sapiens                  |
| 1 | 1.00 | 1 | 1 | 0     | 0      | 0      | 0.001  | 0      | t | 32890  | KPTDGN                       | Mus<br>musculu<br>s              |
| 1 | 1.00 | 1 | 1 | 0.01  | 0.01   | 0.01   | 0.01   | 0.01   | t | 125384 | DSHYDYTI<br>CGDSEDM<br>VCTPK | Homo<br>sapiens                  |
| 1 | 1.00 | 1 | 1 | 0     | 0.003  | 0      | 0      | 0.001  | t | 72504  | WGQGG<br>S<br>H              | Mus<br>musculu<br>s              |
| 1 | 1.00 | 1 | 1 | 0     | -0.003 | 0      | 0      | -0.001 | t | 137759 | NQEDAEAI<br>THLF             | Oryctola<br>gus<br>cuniculu<br>s |
| 1 | 1.00 | 1 | 1 | 0     | 0      | 0      | 0      | -0.001 | t | 75441  | YPYDVPDY<br>A                | Rattus<br>norvegic<br>us         |
| 1 | 1.00 | 1 | 1 | 0     | -0.003 | 0      | 0      | -0.001 | t | 79775  | DDATVAIR<br>SAINNLIVE<br>LIR | Oryctola<br>gus<br>cuniculu<br>s |
| 1 | 1.00 | 1 | 1 | 0     | -0.003 | 0      | 0      | -0.001 | t | 64628  | TKNTNNN<br>LTL               | Oryctola<br>gus<br>cuniculu<br>s |



|   |      |   |   |       |        |        |        |        |   |        |                              |                                  |
|---|------|---|---|-------|--------|--------|--------|--------|---|--------|------------------------------|----------------------------------|
| 1 | 1.00 | 1 | 1 | 0     | -0.003 | 0      | 0      | -0.001 | t | 75791  | YSLFQKEK<br>MVL              | Oryctola<br>gus<br>cuniculu<br>s |
| 1 | 1.00 | 1 | 1 | 0     | -0.017 | 0      | 0      | -0.001 | t | 55818  | RSDYKFYE<br>DANGTRD<br>HKKG  | Oryctola<br>gus<br>cuniculu<br>s |
| 1 | 1.00 | 1 | 1 | 0     | -0.003 | 0      | 0      | -0.001 | t | 43242  | NANPNAN<br>PNANP             | Oryctola<br>gus<br>cuniculu<br>s |
| 1 | 1.00 | 1 | 1 | 0     | 0      | 0      | 0      | -0.001 | t | 36958  | LKMADPN<br>RFRGKD            | Mus<br>musculu<br>s              |
| 1 | 1.00 | 1 | 1 | 0     | 0      | 0      | 0      | -0.001 | t | 51371  | QLINTNGS<br>WHIN             | Rattus<br>norvegic<br>us         |
| 1 | 1.00 | 1 | 1 | 0     | -0.003 | 0      | 0      | -0.001 | t | 52929  | QYIKANSK<br>FIGITE           | Oryctola<br>gus<br>cuniculu<br>s |
| 1 | 1.00 | 1 | 1 | 0     | -0.003 | 0      | 0      | -0.001 | t | 43242  | NANPNAN<br>PNANP             | Oryctola<br>gus<br>cuniculu<br>s |
| 1 | 1.00 | 1 | 1 | 0     | 0      | 0      | 0      | -0.001 | t | 36958  | LKMADPN<br>RFRGKD            | Mus<br>musculu<br>s              |
| 1 | 1.00 | 1 | 1 | 0     | 0.003  | -0.007 | 0      | 0.001  | t | 41430  | MERVVEQ<br>MCITQYQ<br>RESQAY | Mus<br>musculu<br>s              |
| 1 | 1.00 | 1 | 1 | -0.01 | -0.006 | -0.01  | -0.009 | -0.01  | t | 12625  | EKAFFREL                     | Homo<br>sapiens                  |
| 1 | 1.00 | 1 | 1 | -0.01 | -0.01  | -0.01  | -0.01  | -0.01  | t | 66060  | TRLNPD                       | Mus<br>musculu<br>s              |
| 1 | 1.00 | 1 | 1 | -0.01 | -0.008 | -0.01  | -0.01  | -0.01  | t | 28911  | ITGHRMA<br>WDMMM<br>NWS      | Homo<br>sapiens                  |
| 1 | 1.00 | 1 | 1 | -0.01 | -0.01  | -0.01  | -0.01  | -0.009 | t | 125529 | PVEGPAVI<br>CRCC             | Oryctola<br>gus<br>cuniculu<br>s |

|   |      |   |   |       |        |        |        |        |   |        |                              |                              |
|---|------|---|---|-------|--------|--------|--------|--------|---|--------|------------------------------|------------------------------|
| 1 | 1.00 | 1 | 1 | -0.02 | -0.022 | -0.04  | -0.027 | -0.02  | t | 141663 | GRSLEGVY<br>VPPRRQQ<br>L     | Rattus<br>norvegicus         |
| 1 | 1.00 | 1 | 1 | 0.03  | 0.034  | 0.019  | 0.03   | 0.03   | t | 114011 | VTTVTTHN<br>NPTFTDPS<br>VLQP | Cavia<br>porcellus           |
| 1 | 1.00 | 1 | 1 | -0.02 | -0.022 | -0.022 | -0.021 | -0.021 | t | 97223  | AWNPSLL<br>G                 | Mus<br>musculus              |
| 1 | 1.00 | 1 | 1 | 0.02  | 0.02   | 0.02   | 0.023  | 0.02   | t | 34910  | LAPNTPRP<br>PAQAPAK<br>DMPSG | Homo<br>sapiens              |
| 1 | 1.00 | 1 | 1 | 0.01  | 0.01   | 0.01   | 0.012  | 0.01   | t | 73614  | YEAADAIL<br>HTP              | Homo<br>sapiens              |
| 1 | 1.00 | 1 | 1 | 0     | 0.012  | 0.001  | -0.001 | 0      | t | 6139   | CDSSDRPR<br>VYTIT            | Gallus<br>gallus             |
| 1 | 1.00 | 1 | 1 | 0.03  | 0.027  | 0.018  | 0.031  | 0.032  | t | 1460   | AGCLIGAE<br>HVDTSYEC<br>D    | Homo<br>sapiens              |
| 1 | 1.00 | 1 | 1 | 0     | -0.012 | 0      | 0      | -0.001 | t | 71506  | VTSTLTSLF<br>RPGASQKI<br>QL  | Mus<br>musculus              |
| 1 | 1.00 | 1 | 1 | 0     | 0      | -0.004 | 0      | 0      | t | 61862  | STRGRQTV<br>KENKGT           | Myodes<br>glareolus          |
| 1 | 1.00 | 1 | 1 | 0     | -0.004 | -0.004 | 0      | 0      | t | 63215  | TDPTGIEP<br>DDHLKE           | Oryctola<br>gus<br>cuniculus |
| 1 | 1.00 | 1 | 1 | 0     | -0.004 | -0.004 | 0      | 0      | t | 64645  | TKPTDPTG<br>IEPDDH           | Oryctola<br>gus<br>cuniculus |
| 1 | 1.00 | 1 | 1 | 0     | 0      | -0.004 | 0      | 0      | t | 64645  | TKPTDPTG<br>IEPDDH           | Myodes<br>glareolus          |
| 1 | 1.00 | 1 | 1 | 0     | 0      | -0.004 | 0      | 0      | t | 66194  | TSFEDINGI<br>RRPKH           | Myodes<br>glareolus          |
| 1 | 1.00 | 1 | 1 | 0     | -0.004 | -0.004 | 0      | 0      | t | 61192  | SSLRYGNV<br>LDVNAI           | Oryctola<br>gus<br>cuniculus |
| 1 | 1.00 | 1 | 1 | 0     | 0      | -0.004 | 0      | 0      | t | 63215  | TDPTGIEP<br>DDHLKE           | Myodes<br>glareolus          |

|   |      |   |   |   |        |        |   |       |   |        |                     |                                  |
|---|------|---|---|---|--------|--------|---|-------|---|--------|---------------------|----------------------------------|
| 1 | 1.00 | 1 | 1 | 0 | 0      | -0.004 | 0 | 0     | t | 72183  | VYVIGFTLP<br>IILKA  | Myodes<br>glareolu<br>s          |
| 1 | 1.00 | 1 | 1 | 0 | 0      | -0.004 | 0 | 0     | t | 41979  | MLKRNKIY<br>FMQRQD  | Myodes<br>glareolu<br>s          |
| 1 | 1.00 | 1 | 1 | 0 | 0      | -0.004 | 0 | 0     | t | 52660  | QTVSALED<br>KLADYK  | Myodes<br>glareolu<br>s          |
| 1 | 1.00 | 1 | 1 | 0 | 0      | -0.004 | 0 | 0     | t | 55007  | RNKIYFMQ<br>RQDVLD  | Myodes<br>glareolu<br>s          |
| 1 | 1.00 | 1 | 1 | 0 | 0      | -0.004 | 0 | 0     | t | 28144  | IQEDITRHE<br>QQ LIV | Myodes<br>glareolu<br>s          |
| 1 | 1.00 | 1 | 1 | 0 | -0.004 | -0.004 | 0 | 0     | t | 14751  | EVKPGTPA<br>QEI EML | Oryctola<br>gus<br>cuniculu<br>s |
| 1 | 1.00 | 1 | 1 | 0 | 0      | -0.004 | 0 | 0     | t | 11370  | EDKLADYK<br>RRMADA  | Myodes<br>glareolu<br>s          |
| 1 | 1.00 | 1 | 1 | 0 | 0      | -0.004 | 0 | 0     | t | 11354  | EDINGIRR<br>PKHLYV  | Myodes<br>glareolu<br>s          |
| 1 | 1.00 | 1 | 1 | 0 | 0      | -0.004 | 0 | 0     | t | 26575  | IILKALYML<br>STRGR  | Myodes<br>glareolu<br>s          |
| 1 | 1.00 | 1 | 1 | 0 | 0      | -0.004 | 0 | 0     | t | 29578  | IYFMQRQ<br>DVLDKNH  | Myodes<br>glareolu<br>s          |
| 1 | 1.00 | 1 | 1 | 0 | 0      | -0.004 | 0 | 0     | t | 22178  | GRQTVKE<br>NKGTRIR  | Myodes<br>glareolu<br>s          |
| 1 | 1.00 | 1 | 1 | 0 | 0      | -0.004 | 0 | 0     | t | 30597  | KERSSLRY<br>GNVLDV  | Myodes<br>glareolu<br>s          |
| 1 | 1.00 | 1 | 1 | 0 | 0      | -0.004 | 0 | 0     | t | 22799  | GTRIRFKD<br>DTSFED  | Myodes<br>glareolu<br>s          |
| 1 | 1.00 | 1 | 1 | 0 | 0      | -0.004 | 0 | 0     | t | 26227  | IGFTLPILK<br>ALYM   | Myodes<br>glareolu<br>s          |
| 1 | 1.00 | 1 | 1 | 0 | 0      | -0.004 | 0 | 0     | t | 7885   | DDVNKNT<br>LQARQQT  | Myodes<br>glareolu<br>s          |
| 1 | 1.00 | 1 | 1 | 0 | 0      | -0.004 | 0 | 0     | t | 8804   | DITRHEQQ<br>LIVARQ  | Myodes<br>glareolu<br>s          |
| 1 | 1.00 | 1 | 1 | 0 | 0      | 0      | 0 | 0.001 | t | 108075 | PREPQVY             | Homo<br>sapiens                  |

|   |      |   |   |       |       |        |       |        |   |        |                             |                     |
|---|------|---|---|-------|-------|--------|-------|--------|---|--------|-----------------------------|---------------------|
| 1 | 1.00 | 1 | 1 | 0.01  | 0.01  | 0.01   | 0.01  | 0.01   | t | 76325  | YVKRVKT<br>W                | Homo<br>sapiens     |
| 1 | 1.00 | 1 | 1 | 0.03  | 0.028 | 0.03   | 0.031 | 0.03   | t | 149516 | VPVPQLQL<br>QN              | Mus<br>musculu<br>s |
| 1 | 1.00 | 1 | 1 | -0.01 | -0.01 | -0.01  | -0.01 | -0.01  | t | 145272 | KDLLPSRD<br>RQHLPLI         | Homo<br>sapiens     |
| 1 | 1.00 | 1 | 1 | 0.02  | 0.02  | 0.026  | 0.02  | 0.021  | t | 46443  | NVPEKQT                     | Mus<br>musculu<br>s |
| 1 | 1.00 | 1 | 1 | 0     | 0.004 | 0.004  | 0.001 | 0      | t | 23249  | GWGNGC                      | Homo<br>sapiens     |
| 1 | 1.00 | 1 | 1 | 0     | 0     | -0.01  | 0     | 0.001  | t | 24012  | HHPSTNQ<br>EQTSLYVQ<br>AS   | Mus<br>musculu<br>s |
| 1 | 1.00 | 1 | 1 | 0.01  | 0.01  | 0.01   | 0.01  | 0.01   | t | 149090 | NSTQGPV                     | Sus<br>scrofa       |
| 1 | 1.00 | 1 | 1 | 0.01  | 0.01  | 0.01   | 0.01  | 0.01   | t | 132934 | WGQNTS<br>M                 | Homo<br>sapiens     |
| 1 | 1.00 | 1 | 1 | 0.01  | 0.01  | 0.01   | 0.01  | 0.01   | t | 112407 | YFCHQYL                     | Homo<br>sapiens     |
| 1 | 1.00 | 1 | 1 | 0.01  | 0.01  | 0.01   | 0.01  | 0.01   | t | 113467 | GQGQQPG<br>QLQQPAQ          | Homo<br>sapiens     |
| 1 | 1.00 | 1 | 1 | 0     | 0.003 | 0      | 0     | 0      | t | 38824  | LQDPRVR<br>GL               | Mus<br>musculu<br>s |
| 1 | 1.00 | 1 | 1 | -0.01 | -0.01 | -0.01  | -0.01 | -0.013 | t | 51827  | QPFPPQ<br>LPYPQPQ           | Mus<br>musculu<br>s |
| 1 | 1.00 | 1 | 1 | -0.01 | -0.01 | -0.018 | -0.01 | -0.008 | t | 46050  | NTAEYWG<br>FK               | Mus<br>musculu<br>s |
| 1 | 1.00 | 1 | 1 | 0.02  | 0.018 | 0.013  | 0.013 | 0.017  | t | 130816 | ESKAISDA<br>QITASSYFT<br>NM | Mus<br>musculu<br>s |
| 1 | 1.00 | 1 | 1 | 0     | 0     | -0.008 | 0     | 0      | t | 4220   | ARQKLKD<br>AER              | Mus<br>musculu<br>s |
| 1 | 1.00 | 1 | 1 | 0     | 0.003 | -0.008 | 0     | 0      | t | 4220   | ARQKLKD<br>AER              | Mus<br>musculu<br>s |

|   |      |   |   |       |        |        |        |        |   |        |                              |                |
|---|------|---|---|-------|--------|--------|--------|--------|---|--------|------------------------------|----------------|
| 1 | 1.00 | 1 | 1 | 0.02  | 0.024  | 0.02   | 0.021  | 0.02   | t | 58082  | SGIGPEKA                     | Homo sapiens   |
| 1 | 1.00 | 1 | 1 | 0.04  | 0.04   | 0.04   | 0.04   | 0.04   | t | 142427 | KA EKDAEA<br>AQ              | Homo sapiens   |
| 1 | 1.00 | 1 | 1 | 0.02  | 0.02   | 0.02   | 0.02   | 0.021  | t | 29285  | IVGGVYLL                     | Homo sapiens   |
| 1 | 1.00 | 1 | 1 | -0.04 | -0.038 | -0.049 | -0.037 | -0.038 | t | 63098  | TCRRMLAF<br>LKDKENR          | Homo sapiens   |
| 1 | 1.00 | 1 | 1 | 0     | 0      | 0      | 0.002  | 0      | t | 33365  | KSKFGYGA<br>KDVRNL           | Homo sapiens   |
| 1 | 1.00 | 1 | 1 | -0.02 | -0.02  | -0.02  | -0.018 | -0.02  | t | 136003 | TRKDINTV<br>TTVA             | Homo sapiens   |
| 1 | 1.00 | 1 | 1 | -0.03 | -0.03  | -0.046 | -0.03  | -0.03  | t | 16394  | FKKYNDKL<br>PLYISNPN<br>YKVN | Mus musculus   |
| 1 | 1.00 | 1 | 1 | -0.03 | -0.03  | -0.046 | -0.03  | -0.03  | t | 16394  | FKKYNDKL<br>PLYISNPN<br>YKVN | Mus musculus   |
| 1 | 1.00 | 1 | 1 | 0.05  | 0.054  | 0.05   | 0.053  | 0.051  | t | 117315 | KALSVETE<br>KLLKYLEAV        | Homo sapiens   |
| 1 | 1.00 | 1 | 1 | 0.02  | 0.02   | 0.02   | 0.02   | 0.02   | t | 78141  | EKAEEVEK                     | Homo sapiens   |
| 1 | 1.00 | 1 | 1 | 0     | 0      | 0      | 0      | 0      | t | 151019 | LCKLRGVA<br>PL               | Mus musculus   |
| 1 | 1.00 | 1 | 1 | 0     | 0      | -0.008 | -0.001 | 0      | t | 90217  | VNKIAEPE<br>ARLI             | Homo sapiens   |
| 1 | 1.00 | 1 | 1 | 0.01  | 0.009  | 0.015  | 0.011  | 0.01   | t | 819    | AEAEGGT<br>W                 | Homo sapiens   |
| 1 | 1.00 | 1 | 1 | 0     | 0      | 0      | 0      | 0      | t | 42755  | MTDVIRYR<br>YSNIYEAS<br>DK   | Aotus nancymae |
| 1 | 1.00 | 1 | 1 | -0.02 | -0.02  | -0.02  | -0.02  | -0.02  | t | 142381 | AAEFATEV<br>KKAT             | Homo sapiens   |
| 1 | 1.00 | 1 | 1 | 0.01  | 0.01   | 0.01   | 0.01   | 0.009  | t | 137733 | DTALTIQA<br>LKL V            | Mus musculus   |

|   |      |   |   |       |        |        |        |        |   |        |                              |                                  |
|---|------|---|---|-------|--------|--------|--------|--------|---|--------|------------------------------|----------------------------------|
| 1 | 1.00 | 1 | 1 | 0.02  | 0.02   | 0.02   | 0.02   | 0.02   | t | 117408 | YLQSASIFS<br>K               | Homo<br>sapiens                  |
| 1 | 1.00 | 1 | 1 | -0.02 | -0.022 | -0.02  | -0.023 | -0.019 | t | 72249  | WAP                          | Mus<br>musculu<br>s              |
| 1 | 1.00 | 1 | 1 | 0.04  | 0.04   | 0.04   | 0.04   | 0.04   | t | 114847 | GTNISKEH<br>DG               | Homo<br>sapiens                  |
| 1 | 1.00 | 1 | 1 | 0.02  | 0.02   | 0.02   | 0.02   | 0.02   | t | 72553  | WHTTIPPV<br>FDEP             | Rattus<br>norvegic<br>us         |
| 1 | 1.00 | 1 | 1 | 0.02  | 0.02   | 0.02   | 0.02   | 0.02   | t | 41329  | MEECASQ<br>LPYIEQGM<br>QLAEQ | Homo<br>sapiens                  |
| 1 | 1.00 | 1 | 1 | 0.03  | 0.027  | 0.034  | 0.03   | 0.028  | t | 95031  | NAYANEE<br>ATKL              | Oryctola<br>gus<br>cuniculu<br>s |
| 1 | 1.00 | 1 | 1 | -0.02 | -0.02  | -0.02  | -0.02  | -0.02  | t | 101079 | NKPVEPTY<br>EV               | Mus<br>musculu<br>s              |
| 1 | 1.00 | 1 | 1 | -0.01 | -0.006 | -0.01  | -0.009 | -0.01  | t | 137811 | AVSLGQN<br>V                 | Homo<br>sapiens                  |
| 1 | 1.00 | 1 | 1 | -0.02 | -0.018 | -0.037 | -0.019 | -0.016 | t | 20084  | GGVYLLPR<br>RGPRLGV          | Homo<br>sapiens                  |
| 1 | 1.00 | 1 | 1 | -0.04 | -0.038 | -0.023 | -0.039 | -0.049 | t | 134682 | GPSRRGPS<br>LGASSHQ          | Homo<br>sapiens                  |
| 1 | 1.00 | 1 | 1 | 0.02  | 0.02   | 0.018  | 0.017  | 0.018  | t | 139881 | RGDKSRPP<br>VWYVEGE          | Mus<br>musculu<br>s              |
| 1 | 1.00 | 1 | 1 | 0.01  | 0.013  | 0.009  | 0.01   | 0.01   | t | 97902  | ATYEAALK<br>QY               | Mus<br>musculu<br>s              |
| 1 | 1.00 | 1 | 1 | 0.05  | 0.052  | 0.045  | 0.051  | 0.052  | t | 15439  | FDPLVAEE<br>DEREIS           | Homo<br>sapiens                  |
| 1 | 1.00 | 1 | 1 | 0.03  | 0.034  | 0.03   | 0.037  | 0.032  | t | 117364 | RPDAEYW<br>NSQKDLLE<br>QRRAA | Homo<br>sapiens                  |
| 1 | 1.00 | 1 | 1 | -0.03 | -0.033 | -0.03  | -0.03  | -0.03  | t | 153415 | LPKFHKSP<br>HFYR             | Oryctola<br>gus<br>cuniculu<br>s |

|   |      |   |   |       |        |        |        |        |   |        |                     |                                  |
|---|------|---|---|-------|--------|--------|--------|--------|---|--------|---------------------|----------------------------------|
| 1 | 1.00 | 1 | 1 | -0.02 | -0.016 | -0.015 | -0.013 | -0.02  | t | 133900 | NEHPVFAY<br>LKDKLP  | Homo<br>sapiens                  |
| 1 | 1.00 | 1 | 1 | 0.03  | 0.033  | 0.036  | 0.031  | 0.031  | t | 105904 | KLVFFAED<br>V       | Mus<br>musculu<br>s              |
| 1 | 1.00 | 1 | 1 | 0.01  | 0.013  | 0.01   | 0.01   | 0.01   | t | 26046  | IFDT                | Mus<br>musculu<br>s              |
| 1 | 1.00 | 1 | 1 | 0.01  | 0.013  | 0.01   | 0.01   | 0.01   | t | 26046  | IFDT                | Mus<br>musculu<br>s              |
| 1 | 1.00 | 1 | 1 | 0.01  | 0.018  | 0.012  | 0.01   | 0.012  | t | 74045  | YGLLAVDP<br>LFKP    | Gallus<br>gallus                 |
| 1 | 1.00 | 1 | 1 | 0     | 0      | 0.001  | 0      | 0      | t | 29696  | IYSYFPSVI           | Mus<br>musculu<br>s              |
| 1 | 1.00 | 1 | 1 | 0.03  | 0.03   | 0.03   | 0.03   | 0.03   | t | 149087 | NPTQSPP             | Sus<br>scrofa                    |
| 1 | 1.00 | 1 | 1 | 0.03  | 0.03   | 0.03   | 0.03   | 0.03   | t | 114818 | FCNAVVES<br>NG      | Homo<br>sapiens                  |
| 1 | 1.00 | 1 | 1 | 0.01  | 0.01   | 0.01   | 0.01   | 0.011  | t | 43729  | NEREDERT            | Oryctola<br>gus<br>cuniculu<br>s |
| 1 | 1.00 | 1 | 1 | 0.01  | 0.01   | 0.01   | 0.01   | 0.01   | t | 119516 | RKLAHPGT<br>S       | Homo<br>sapiens                  |
| 1 | 1.00 | 1 | 1 | 0.01  | 0.01   | 0.01   | 0.01   | 0.01   | t | 111966 | YKSNNIAR<br>MRLYDPN | Oryctola<br>gus<br>cuniculu<br>s |
| 1 | 1.00 | 1 | 1 | 0.01  | 0.01   | 0.01   | 0.01   | 0.01   | t | 25452  | IATQEQPA<br>FD      | Mus<br>musculu<br>s              |
| 1 | 1.00 | 1 | 1 | -0.01 | -0.01  | -0.01  | -0.01  | -0.01  | t | 110585 | GAPGIAGA<br>PGFPGPR | Mus<br>musculu<br>s              |
| 1 | 1.00 | 1 | 1 | -0.01 | -0.007 | -0.021 | -0.01  | -0.008 | t | 111634 | PNNNKILV<br>PKVSGLQ | Mus<br>musculu<br>s              |
| 1 | 1.00 | 1 | 1 | 0.01  | 0.012  | 0.017  | 0.017  | 0.012  | t | 145235 | GTWICDFK<br>SCSW    | Homo<br>sapiens                  |

|   |      |   |   |       |        |        |        |        |   |        |                              |                                  |
|---|------|---|---|-------|--------|--------|--------|--------|---|--------|------------------------------|----------------------------------|
| 1 | 1.00 | 1 | 1 | 0.01  | 0.008  | 0.002  | 0.007  | 0.01   | t | 9039   | DLDA<br>SREAKKQ<br>LEAEHQK   | Mus<br>muscu<br>lus              |
| 1 | 1.00 | 1 | 1 | 0     | 0      | 0      | 0      | -0.001 | t | 28299  | IRGDTF<br>ATR                | Mus<br>muscu<br>lus              |
| 1 | 1.00 | 1 | 1 | 0     | 0      | 0      | 0      | -0.001 | t | 7492   | DAEFRH<br>DSGYEV<br>HHQKL    | Mus<br>muscu<br>lus              |
| 1 | 1.00 | 1 | 1 | -0.01 | -0.01  | -0.01  | -0.01  | -0.011 | t | 103830 | CHAVK<br>VGNPSC              | Orycto<br>lagus<br>cunicu<br>lus |
| 1 | 1.00 | 1 | 1 | 0     | 0.002  | 0.003  | 0.001  | 0      | t | 5344   | AVGGY<br>AISIS               | Homo<br>sapiens                  |
| 1 | 1.00 | 1 | 1 | -0.02 | -0.018 | -0.02  | -0.013 | -0.02  | t | 108141 | SPSDAK<br>SHVRVADLI          | Homo<br>sapiens                  |
| 1 | 1.00 | 1 | 1 | -0.02 | -0.016 | -0.02  | -0.017 | -0.02  | t | 19737  | GGGAG<br>AGAGAGG<br>GR       | Homo<br>sapiens                  |
| 1 | 1.00 | 1 | 1 | -0.01 | -0.006 | -0.015 | -0.01  | -0.01  | t | 3383   | ANPPDH<br>SAPLGVTRP<br>SAPPL | Cavia<br>porcellu<br>lus         |
| 1 | 1.00 | 1 | 1 | 0.01  | 0.014  | 0.019  | 0.017  | 0.01   | t | 112422 | YWASTRE                      | Homo<br>sapiens                  |
| 1 | 1.00 | 1 | 1 | 0     | 0      | 0.007  | 0.004  | 0      | t | 63096  | TCRNMW<br>SGT                | Homo<br>sapiens                  |
| 1 | 1.00 | 1 | 1 | 0.01  | 0.01   | 0.008  | 0.01   | 0.01   | t | 125051 | FQSKAN<br>CLNT               | Mus<br>muscu<br>lus              |
| 1 | 1.00 | 1 | 1 | 0     | 0.003  | 0      | 0      | 0      | t | 123063 | CPTMTR<br>VLQGVLPALP<br>Q    | Mus<br>muscu<br>lus              |
| 1 | 1.00 | 1 | 1 | 0     | 0      | 0      | 0      | 0      | t | 123063 | CPTMTR<br>VLQGVLPALP<br>Q    | Mus<br>muscu<br>lus              |
| 1 | 1.00 | 1 | 1 | 0     | -0.002 | 0.005  | -0.001 | -0.003 | t | 18363  | FWRGDL<br>VDFQV              | Mus<br>muscu<br>lus              |



|   |      |   |   |       |        |        |        |        |   |        |                            |                                  |
|---|------|---|---|-------|--------|--------|--------|--------|---|--------|----------------------------|----------------------------------|
| 1 | 1.00 | 1 | 1 | -0.03 | -0.026 | -0.031 | -0.029 | -0.032 | t | 147074 | KRKQNLV<br>QAWQAK          | Homo<br>sapiens                  |
| 1 | 1.00 | 1 | 1 | 0     | 0      | 0.005  | 0      | 0      | t | 124925 | YYVFEEQ<br>EDEIIGF         | Homo<br>sapiens                  |
| 1 | 1.00 | 1 | 1 | -0.02 | -0.018 | -0.02  | -0.019 | -0.02  | t | 117018 | KIVMFWH<br>EPVYA           | Homo<br>sapiens                  |
| 1 | 1.00 | 1 | 1 | 0.02  | 0.018  | 0.022  | 0.02   | 0.02   | t | 122895 | RWLPPVY<br>EDGFS           | Oryctola<br>gus<br>cuniculu<br>s |
| 1 | 1.00 | 1 | 1 | 0.01  | 0.008  | 0.008  | 0.009  | 0.011  | t | 103658 | TIYYQFKI<br>PQILK          | Mus<br>musculu<br>s              |
| 1 | 1.00 | 1 | 1 | -0.01 | -0.01  | -0.012 | -0.01  | -0.011 | t | 27961  | IPNKKPGK<br>KTTT           | Mus<br>musculu<br>s              |
| 1 | 1.00 | 1 | 1 | -0.02 | -0.02  | -0.02  | -0.02  | -0.019 | t | 115255 | FQINNKIW<br>CK             | Homo<br>sapiens                  |
| 1 | 1.00 | 1 | 1 | 0.02  | 0.023  | 0.01   | 0.023  | 0.02   | t | 74004  | YGGIPGGI<br>STPITQQS<br>EK | Equus<br>caballus                |
| 1 | 1.00 | 1 | 1 | -0.03 | -0.028 | -0.031 | -0.029 | -0.028 | t | 120810 | MVNKSR<br>MMPAV            | Homo<br>sapiens                  |
| 1 | 1.00 | 1 | 1 | 0.04  | 0.04   | 0.04   | 0.04   | 0.04   | t | 115839 | KYPVEPFT<br>ES             | Homo<br>sapiens                  |
| 1 | 1.00 | 1 | 1 | 0.04  | 0.04   | 0.04   | 0.04   | 0.04   | t | 112222 | LYSSDHK                    | Homo<br>sapiens                  |
| 1 | 1.00 | 1 | 1 | 0.02  | 0.02   | 0.02   | 0.02   | 0.02   | t | 123455 | LPNLPYYID                  | Ovis<br>aries                    |
| 1 | 1.00 | 1 | 1 | 0.02  | 0.02   | 0.02   | 0.02   | 0.02   | t | 114529 | QETTLVRS<br>SRSSER         | Homo<br>sapiens                  |
| 1 | 1.00 | 1 | 1 | 0.02  | 0.02   | 0.02   | 0.02   | 0.02   | t | 112402 | WNDNKFY                    | Homo<br>sapiens                  |
| 1 | 1.00 | 1 | 1 | -0.01 | -0.004 | -0.003 | -0.003 | -0.012 | t | 127729 | LRWAERQ<br>VGALGAES        | Homo<br>sapiens                  |
| 1 | 1.00 | 1 | 1 | 0     | 0      | 0      | 0      | 0      | t | 123858 | YDPKFEQL<br>K              | Ovis<br>aries                    |

|   |      |   |   |       |        |        |        |        |   |        |                              |                      |
|---|------|---|---|-------|--------|--------|--------|--------|---|--------|------------------------------|----------------------|
| 1 | 1.00 | 1 | 1 | 0     | 0      | 0      | 0      | 0      | t | 107026 | YQLPPKF<br>WFISP             | Mus<br>musculus      |
| 1 | 1.00 | 1 | 1 | -0.02 | -0.02  | -0.018 | -0.02  | -0.019 | t | 40563  | LVRMKRA                      | Mus<br>musculus      |
| 1 | 1.00 | 1 | 1 | -0.04 | -0.04  | -0.04  | -0.04  | -0.04  | t | 149431 | QPFPPQQ<br>PYP               | Homo<br>sapiens      |
| 1 | 1.00 | 1 | 1 | 0     | 0      | 0.002  | 0      | -0.001 | t | 6479   | CKGKIQAL<br>CENPEWA          | Mus<br>musculus      |
| 1 | 1.00 | 1 | 1 | 0.03  | 0.033  | 0.031  | 0.03   | 0.03   | t | 22894  | GTYETGNK                     | Mus<br>musculus      |
| 1 | 1.00 | 1 | 1 | 0     | 0.002  | 0      | -0.003 | 0      | t | 49078  | PQQPF                        | Homo<br>sapiens      |
| 1 | 1.00 | 1 | 1 | 0.03  | 0.028  | 0.028  | 0.033  | 0.033  | t | 105869 | IAGFKGEQ<br>GPK              | Mus<br>musculus      |
| 1 | 1.00 | 1 | 1 | -0.01 | -0.008 | -0.012 | -0.003 | -0.01  | t | 98784  | GAKGKAA<br>LLRELSDV<br>VPNLN | Homo<br>sapiens      |
| 1 | 1.00 | 1 | 1 | 0.01  | 0.01   | 0.017  | 0.01   | 0.007  | t | 140567 | KEAWLDS<br>TKAT              | Mus<br>musculus      |
| 1 | 1.00 | 1 | 1 | 0.02  | 0.02   | 0.02   | 0.02   | 0.019  | t | 59377  | SLNWSDR<br>TI                | Rattus<br>norvegicus |
| 1 | 1.00 | 1 | 1 | 0.01  | 0.008  | 0      | 0.013  | 0.012  | t | 8217   | DEYCSPDH<br>NCQSNCK<br>DSGEG | Mus<br>musculus      |
| 1 | 1.00 | 1 | 1 | -0.01 | -0.008 | -0.007 | -0.009 | -0.01  | t | 55680  | RRPQDVK<br>FPG               | Homo<br>sapiens      |
| 1 | 1.00 | 1 | 1 | 0     | 0      | 0      | 0      | -0.001 | t | 30093  | KCTSDQDE<br>QFIPKGCS<br>K    | Mus<br>musculus      |

|   |      |   |   |       |        |        |        |        |   |        |                             |                                  |
|---|------|---|---|-------|--------|--------|--------|--------|---|--------|-----------------------------|----------------------------------|
| 1 | 1.00 | 1 | 1 | -0.01 | -0.007 | -0.01  | -0.01  | -0.01  | t | 49656  | PTIAGA                      | Mus<br>musculu<br>s              |
| 1 | 1.00 | 1 | 1 | -0.01 | -0.007 | -0.01  | -0.01  | -0.01  | t | 49656  | PTIAGA                      | Mus<br>musculu<br>s              |
| 1 | 1.00 | 1 | 1 | 0.05  | 0.056  | 0.05   | 0.05   | 0.05   | t | 123705 | RIEDLPKIK                   | Ovis<br>aries                    |
| 1 | 1.00 | 1 | 1 | 0     | -0.004 | 0      | -0.003 | -0.003 | t | 138304 | ATVQLPQ                     | Oryctola<br>gus<br>cuniculu<br>s |
| 1 | 1.00 | 1 | 1 | 0     | -0.002 | 0      | -0.003 | -0.003 | t | 109917 | SHQESTRG<br>RSRGRSGR<br>SGS | Mus<br>musculu<br>s              |
| 1 | 1.00 | 1 | 1 | 0     | 0.004  | -0.003 | 0.001  | -0.001 | t | 103170 | FGDVDAH<br>GAMIRAQ<br>A     | Homo<br>sapiens                  |
| 1 | 1.00 | 1 | 1 | 0.01  | 0.01   | 0.01   | 0.01   | 0.01   | t | 36428  | LHSTSSEG<br>N               | Homo<br>sapiens                  |
| 1 | 1.00 | 1 | 1 | 0.03  | 0.03   | 0.028  | 0.03   | 0.029  | t | 153265 | ILETLPANP<br>PPASTN         | Mus<br>musculu<br>s              |
| 1 | 1.00 | 1 | 1 | 0     | 0      | 0      | 0      | -0.001 | t | 36956  | LKMADPN<br>RFRG             | Mus<br>musculu<br>s              |
| 1 | 1.00 | 1 | 1 | 0     | 0      | 0      | 0      | -0.001 | t | 36956  | LKMADPN<br>RFRG             | Mus<br>musculu<br>s              |
| 1 | 1.00 | 1 | 1 | 0.01  | 0.01   | 0.01   | 0.013  | 0.01   | t | 51145  | QIVGGV                      | Homo<br>sapiens                  |
| 1 | 1.00 | 1 | 1 | 0.01  | 0.01   | 0.01   | 0.01   | 0.011  | t | 119658 | TYGIVLLSG<br>V              | Homo<br>sapiens                  |
| 1 | 1.00 | 1 | 1 | 0.04  | 0.04   | 0.033  | 0.036  | 0.04   | t | 33842  | KTRNQMG<br>VSE              | Homo<br>sapiens                  |
| 1 | 1.00 | 1 | 1 | 0     | 0      | 0      | 0.004  | 0      | t | 136010 | VMIKSLPA<br>LNSPTVEE<br>C   | Homo<br>sapiens                  |
| 1 | 1.00 | 1 | 1 | -0.03 | -0.032 | -0.001 | -0.033 | -0.04  | t | 44174  | NHVRIPIG<br>YWAV            | Mus<br>musculu<br>s              |
| 1 | 1.00 | 1 | 1 | -0.02 | -0.02  | -0.02  | -0.02  | -0.022 | t | 118129 | SEEELKTHI<br>SKG            | Homo<br>sapiens                  |

|   |      |   |   |       |        |        |        |        |   |        |                     |                                  |
|---|------|---|---|-------|--------|--------|--------|--------|---|--------|---------------------|----------------------------------|
| 1 | 1.00 | 1 | 1 | 0.02  | 0.017  | 0.018  | 0.02   | 0.02   | t | 73450  | YASSGIGP<br>EK      | Oryctola<br>gus<br>cuniculu<br>s |
| 1 | 1.00 | 1 | 1 | 0.02  | 0.02   | 0.018  | 0.02   | 0.02   | t | 73450  | YASSGIGP<br>EK      | Oryctola<br>gus<br>cuniculu<br>s |
| 1 | 1.00 | 1 | 1 | 0     | 0      | 0      | 0      | -0.001 | t | 141559 | SDEALPLG<br>SPR     | Mus<br>musculu<br>s              |
| 1 | 1.00 | 1 | 1 | 0     | 0      | 0      | 0      | -0.001 | t | 118116 | RSGKPRGY<br>AF      | Homo<br>sapiens                  |
| 1 | 1.00 | 1 | 1 | -0.04 | -0.04  | -0.04  | -0.04  | -0.04  | t | 55185  | RPKHPIKH<br>QG      | Homo<br>sapiens                  |
| 1 | 1.00 | 1 | 1 | 0.02  | 0.025  | 0.03   | 0.022  | 0.017  | t | 157463 | KKETLICS            | Homo<br>sapiens                  |
| 1 | 1.00 | 1 | 1 | -0.01 | -0.01  | -0.005 | -0.011 | -0.01  | t | 54736  | RLRLVDAD            | Homo<br>sapiens                  |
| 1 | 1.00 | 1 | 1 | 0.06  | 0.064  | 0.061  | 0.061  | 0.061  | t | 59350  | SLNEEQ              | Homo<br>sapiens                  |
| 1 | 1.00 | 1 | 1 | 0     | -0.005 | 0.001  | 0      | 0      | t | 108632 | SKEENTPE<br>VKA     | Canis<br>lupus                   |
| 1 | 1.00 | 1 | 1 | 0     | 0      | 0.001  | 0      | 0      | t | 108632 | SKEENTPE<br>VKA     | Canis<br>lupus                   |
| 1 | 1.00 | 1 | 1 | 0.05  | 0.05   | 0.05   | 0.05   | 0.05   | t | 96209  | EDKDEDEE<br>DE      | Homo<br>sapiens                  |
| 1 | 1.00 | 1 | 1 | 0.01  | 0.01   | 0.01   | 0.01   | 0.008  | t | 10024  | DRNMYLN<br>T        | Mus<br>musculu<br>s              |
| 1 | 1.00 | 1 | 1 | 0.01  | 0.01   | 0.01   | 0.01   | 0.01   | t | 141754 | SSSKTWG<br>APLYY    | Mus<br>musculu<br>s              |
| 1 | 1.00 | 1 | 1 | -0.01 | -0.01  | -0.01  | -0.01  | -0.01  | t | 112389 | VPDRFTG             | Homo<br>sapiens                  |
| 1 | 1.00 | 1 | 1 | 0.01  | 0.01   | 0.01   | 0.01   | 0.009  | t | 130924 | KLFPEEDE<br>MRTETQR | Homo<br>sapiens                  |

|   |      |   |   |       |        |        |        |        |   |        |                     |                              |
|---|------|---|---|-------|--------|--------|--------|--------|---|--------|---------------------|------------------------------|
| 1 | 1.00 | 1 | 1 | 0.01  | 0.012  | 0.007  | 0.011  | 0.009  | t | 103493 | PPTPISVIF<br>RSDKSG | Homo<br>sapiens              |
| 1 | 1.00 | 1 | 1 | 0     | 0      | -0.007 | 0      | 0      | t | 95543  | LCPNNLCC<br>SQ      | Homo<br>sapiens              |
| 1 | 1.00 | 1 | 1 | 0.04  | 0.04   | 0.04   | 0.04   | 0.041  | t | 72548  | WHQTTPQ<br>PYLPG    | Rattus<br>norvegicus         |
| 1 | 1.00 | 1 | 1 | -0.01 | -0.01  | -0.01  | -0.01  | -0.01  | t | 129828 | RSGKG               | Homo<br>sapiens              |
| 1 | 1.00 | 1 | 1 | 0.02  | 0.02   | 0.02   | 0.02   | 0.02   | t | 137882 | GQNVLSA<br>D        | Homo<br>sapiens              |
| 1 | 1.00 | 1 | 1 | 0.06  | 0.06   | 0.069  | 0.06   | 0.058  | t | 79851  | GVINE               | Mus<br>musculus              |
| 1 | 1.00 | 1 | 1 | 0     | 0      | 0      | 0      | 0      | t | 51371  | QLINTNGS<br>WHIN    | Homo<br>sapiens              |
| 1 | 1.00 | 1 | 1 | -0.02 | -0.023 | -0.03  | -0.02  | -0.017 | t | 6762   | CPFIKPEVK<br>PGTPA  | Oryctola<br>gus<br>cuniculus |
| 1 | 1.00 | 1 | 1 | 0     | 0.002  | 0.004  | 0.003  | 0.002  | t | 18508  | GAAILTPT<br>PVNPSTA | Homo<br>sapiens              |
| 1 | 1.00 | 1 | 1 | 0.04  | 0.036  | 0.032  | 0.037  | 0.04   | t | 2816   | ALPKNTVG<br>GTIL    | Oryctola<br>gus<br>cuniculus |
| 1 | 1.00 | 1 | 1 | 0     | -0.002 | -0.001 | -0.003 | -0.002 | t | 122269 | ARQNLKD<br>AGE      | Mus<br>musculus              |
| 1 | 1.00 | 1 | 1 | -0.02 | -0.017 | -0.029 | -0.02  | -0.018 | t | 54749  | RLRVTHQT            | Mus<br>musculus              |
| 1 | 1.00 | 1 | 1 | -0.01 | -0.007 | -0.007 | -0.01  | -0.009 | t | 142291 | SHLQIYNL            | Sus<br>scrofa                |
| 1 | 1.00 | 1 | 1 | -0.02 | -0.02  | -0.02  | -0.02  | -0.02  | t | 103664 | TPPAPAPP<br>PFRLPLL | Homo<br>sapiens              |

|   |      |   |   |       |        |        |        |        |   |        |                            |                                     |
|---|------|---|---|-------|--------|--------|--------|--------|---|--------|----------------------------|-------------------------------------|
| 1 | 1.00 | 1 | 1 | 0.01  | 0.013  | 0.009  | 0.01   | 0.01   | t | 6456   | CITQYERES<br>QAYYQRG<br>S  | Mus<br>musculu<br>s                 |
| 1 | 1.00 | 1 | 1 | 0.03  | 0.028  | 0.033  | 0.033  | 0.03   | t | 14019  | ERLGDY                     | Mus<br>musculu<br>s                 |
| 1 | 1.00 | 1 | 1 | -0.01 | -0.011 | -0.02  | -0.007 | -0.01  | t | 32677  | KPDLTGTS<br>KSYVRSL        | Homo<br>sapiens                     |
| 1 | 1.00 | 1 | 1 | 0.01  | 0.006  | 0.003  | 0.009  | 0.01   | t | 61337  | SSSDSQIT<br>NPA            | Oryctola<br>gus<br>cuniculu<br>s    |
| 1 | 1.00 | 1 | 1 | -0.01 | -0.013 | -0.01  | -0.01  | -0.01  | t | 66629  | TTGYRFTN<br>F              | Oryctola<br>gus<br>cuniculu<br>s    |
| 1 | 1.00 | 1 | 1 | 0     | 0      | 0      | 0      | -0.001 | t | 104443 | DAEFRHDS<br>GYE            | Mus<br>musculu<br>s                 |
| 1 | 1.00 | 1 | 1 | 0     | 0      | 0      | 0      | -0.001 | t | 104443 | DAEFRHDS<br>GYE            | Mus<br>musculu<br>s                 |
| 1 | 1.00 | 1 | 1 | 0.02  | 0.02   | 0.024  | 0.026  | 0.021  | t | 108857 | DGQPGPA<br>G               | Rattus<br>norvegic<br>us            |
| 1 | 1.00 | 1 | 1 | -0.01 | -0.022 | -0.01  | -0.007 | -0.01  | t | 156911 | LGMSTNP<br>GPRIL           | Bos<br>taurus                       |
| 1 | 1.00 | 1 | 1 | 0.03  | 0.032  | 0.023  | 0.033  | 0.03   | t | 117015 | KEQFLDGD<br>GWTSRWI<br>ESK | Homo<br>sapiens                     |
| 1 | 1.00 | 1 | 1 | 0.01  | 0.01   | 0.01   | 0.01   | 0.01   | t | 130456 | CRPQVNN<br>PKEWSCA<br>AC   | Homo<br>sapiens                     |
| 1 | 1.00 | 1 | 1 | 0     | 0.002  | -0.013 | -0.003 | 0      | t | 115090 | NLLRFFVA<br>PFPE           | Homo<br>sapiens                     |
| 1 | 1.00 | 1 | 1 | 0.03  | 0.025  | 0.026  | 0.027  | 0.03   | t | 49790  | PTTNTGEG<br>TSSPVTPT<br>YT | Mesocric<br>etus<br>auratus         |
| 1 | 1.00 | 1 | 1 | 0.03  | 0.027  | 0.019  | 0.03   | 0.032  | t | 154    | AAGGSYSS<br>GDLGKKG        | Oncorhy<br>nchus<br>tshawyts<br>cha |
| 1 | 1.00 | 1 | 1 | 0.01  | 0.015  | 0.014  | 0.007  | 0.008  | t | 157230 | FDAEFLAD<br>AFNV           | Homo<br>sapiens                     |

|   |      |   |   |       |       |       |        |        |   |        |                              |                       |
|---|------|---|---|-------|-------|-------|--------|--------|---|--------|------------------------------|-----------------------|
| 1 | 1.00 | 1 | 1 | -0.01 | -0.01 | -0.01 | -0.01  | -0.008 | t | 131935 | KPFSNSKV                     | Homo sapiens          |
| 1 | 1.00 | 1 | 1 | 0.03  | 0.025 | 0.025 | 0.03   | 0.03   | t | 10144  | DSILFVPTT<br>VDPASFSD<br>DNS | Canis lupus           |
| 1 | 1.00 | 1 | 1 | -0.02 | -0.02 | -0.02 | -0.024 | -0.022 | t | 118681 | YAKDVKFG<br>ADARA            | Homo sapiens          |
| 1 | 1.00 | 1 | 1 | 0.01  | 0.01  | 0.011 | 0.013  | 0.011  | t | 66474  | TSTVQVFT<br>DSEYQLPY<br>VLGS | Homo sapiens          |
| 1 | 1.00 | 1 | 1 | 0.03  | 0.03  | 0.03  | 0.03   | 0.03   | t | 153351 | ACTYSPRD<br>MCGGGS           | Mus musculus          |
| 1 | 1.00 | 1 | 1 | 0.01  | 0.01  | 0.01  | 0.01   | 0.01   | t | 121736 | QCFLAITNI<br>QLILPY          | Mus musculus          |
| 1 | 1.00 | 1 | 1 | 0.01  | 0.01  | 0.01  | 0.01   | 0.01   | t | 121736 | QCFLAITNI<br>QLILPY          | Mus musculus          |
| 1 | 1.00 | 1 | 1 | 0.01  | 0.01  | 0.01  | 0.01   | 0.01   | t | 115895 | PPFLQPEV<br>MG               | Homo sapiens          |
| 1 | 1.00 | 1 | 1 | 0.01  | 0.01  | 0.01  | 0.01   | 0.01   | t | 79760  | ASSPDAHV<br>PFCF             | Mus musculus          |
| 1 | 1.00 | 1 | 1 | 0.01  | 0.01  | 0.01  | 0.01   | 0.01   | t | 79345  | QCDSFVIS<br>PPRTCG           | Mus musculus          |
| 1 | 1.00 | 1 | 1 | -0.01 | -0.01 | -0.01 | -0.01  | -0.01  | t | 138140 | ALLSKVTG<br>PPMPD            | Oryctolagus cuniculus |
| 1 | 1.00 | 1 | 1 | -0.03 | -0.03 | -0.03 | -0.03  | -0.03  | t | 80178  | ADAPQGF<br>YVL               | Homo sapiens          |
| 1 | 1.00 | 1 | 1 | 0.02  | 0.013 | 0.021 | 0.017  | 0.017  | t | 24084  | HIPYKISAS<br>TNCATVK         | Homo sapiens          |
| 1 | 1.00 | 1 | 1 | -0.01 | -0.01 | -0.01 | -0.01  | -0.011 | t | 16018  | FGNDYED<br>RYYR              | Mus musculus          |
| 1 | 1.00 | 1 | 1 | -0.01 | -0.01 | -0.01 | -0.01  | -0.01  | t | 122150 | MSKTLHA<br>QLGFKKT           | Oryctolagus cuniculus |

|   |      |   |   |       |        |        |        |        |   |        |                            |                                  |
|---|------|---|---|-------|--------|--------|--------|--------|---|--------|----------------------------|----------------------------------|
| 1 | 1.00 | 1 | 1 | -0.01 | -0.01  | -0.01  | -0.01  | -0.01  | t | 122150 | MSKTLHA<br>QLGFKKT         | Oryctola<br>gus<br>cuniculu<br>s |
| 1 | 1.00 | 1 | 1 | -0.02 | -0.022 | -0.021 | -0.017 | -0.018 | t | 24080  | HIPAYATH<br>V              | Mus<br>musculu<br>s              |
| 1 | 1.00 | 1 | 1 | 0.04  | 0.04   | 0.04   | 0.036  | 0.041  | t | 134216 | RNVELQ                     | Homo<br>sapiens                  |
| 1 | 1.00 | 1 | 1 | 0.05  | 0.054  | 0.043  | 0.051  | 0.054  | t | 137858 | FTPGTEYT                   | Homo<br>sapiens                  |
| 1 | 1.00 | 1 | 1 | 0.01  | 0.014  | 0.01   | 0.013  | 0.012  | t | 33858  | KTSERSQP<br>RGRRQPIP<br>KA | Homo<br>sapiens                  |
| 1 | 1.00 | 1 | 1 | -0.05 | -0.048 | -0.057 | -0.043 | -0.049 | t | 105887 | ISRCQVCM<br>KKRH           | Homo<br>sapiens                  |
| 1 | 1.00 | 1 | 1 | 0     | 0      | -0.005 | 0      | 0      | t | 44569  | NKPNNDF<br>HFEVF           | Mus<br>musculu<br>s              |
| 1 | 1.00 | 1 | 1 | 0     | 0      | -0.005 | 0      | 0      | t | 44569  | NKPNNDF<br>HFEVF           | Mus<br>musculu<br>s              |
| 1 | 1.00 | 1 | 1 | 0     | 0      | 0      | 0      | 0      | t | 57210  | SDGYPPNR<br>QDPRFTD        | Homo<br>sapiens                  |
| 1 | 1.00 | 1 | 1 | -0.05 | -0.046 | -0.05  | -0.05  | -0.051 | t | 122999 | AAMDLR<br>MGF              | Ovis<br>aries                    |
| 1 | 1.00 | 1 | 1 | 0.01  | 0.01   | 0.015  | 0.01   | 0.01   | t | 6020   | CAQQWPE<br>WYPC            | Mus<br>musculu<br>s              |
| 1 | 1.00 | 1 | 1 | 0.01  | 0.01   | 0.015  | 0.01   | 0.01   | t | 6020   | CAQQWPE<br>WYPC            | Mus<br>musculu<br>s              |
| 1 | 1.00 | 1 | 1 | 0.01  | 0.01   | 0.015  | 0.01   | 0.01   | t | 6020   | CAQQWPE<br>WYPC            | Mus<br>musculu<br>s              |
| 1 | 1.00 | 1 | 1 | -0.01 | -0.011 | -0.01  | -0.007 | -0.011 | t | 130469 | DQPPTSrv<br>PSLR           | Camelus<br>dromed<br>arius       |
| 1 | 1.00 | 1 | 1 | 0     | 0      | 0      | 0      | 0      | t | 122950 | YGHGSLEL<br>LADVQ          | Mus<br>musculu<br>s              |
| 1 | 1.00 | 1 | 1 | 0     | 0      | 0      | 0      | 0      | t | 110618 | GPVGPAG<br>GPGFP           | Mus<br>musculu<br>s              |



|   |      |   |   |       |        |        |        |        |   |        |                           |                       |
|---|------|---|---|-------|--------|--------|--------|--------|---|--------|---------------------------|-----------------------|
| 1 | 1.00 | 1 | 1 | 0     | 0      | 0      | 0      | 0      | t | 113778 | QQPGQ                     | Homo sapiens          |
| 1 | 1.00 | 1 | 1 | 0.01  | 0.007  | 0.01   | 0.01   | 0.01   | t | 741    | ADPNRFR<br>GKD            | Oryctolagus cuniculus |
| 1 | 1.00 | 1 | 1 | 0.01  | 0.007  | 0.01   | 0.01   | 0.01   | t | 741    | ADPNRFR<br>GKD            | Oryctolagus cuniculus |
| 1 | 1.00 | 1 | 1 | 0.01  | 0.01   | 0.01   | 0.01   | 0.01   | t | 741    | ADPNRFR<br>GKD            | Oryctolagus cuniculus |
| 1 | 1.00 | 1 | 1 | 0.04  | 0.044  | 0.035  | 0.04   | 0.04   | t | 94038  | TIYGNDGN<br>DR            | Ovis aries            |
| 1 | 1.00 | 1 | 1 | -0.03 | -0.03  | -0.023 | -0.03  | -0.03  | t | 119492 | LRKKGYDP<br>G             | Homo sapiens          |
| 1 | 1.00 | 1 | 1 | 0.02  | 0.02   | 0.019  | 0.02   | 0.02   | t | 70810  | VRRDSAW<br>DVRPLTET       | Homo sapiens          |
| 1 | 1.00 | 1 | 1 | 0.03  | 0.03   | 0.03   | 0.03   | 0.031  | t | 61800  | STNS                      | Mus musculus          |
| 1 | 1.00 | 1 | 1 | 0.04  | 0.04   | 0.04   | 0.04   | 0.041  | t | 115108 | SHGRTQD<br>ENP            | Mus musculus          |
| 1 | 1.00 | 1 | 1 | 0     | -0.002 | 0      | 0.003  | 0      | t | 146990 | GPGTIKKIS<br>F            | Mus musculus          |
| 1 | 1.00 | 1 | 1 | 0.01  | 0.006  | 0.013  | 0.009  | 0.01   | t | 80699  | CITTIYKTG                 | Oryctolagus cuniculus |
| 1 | 1.00 | 1 | 1 | 0.03  | 0.03   | 0.033  | 0.03   | 0.03   | t | 69699  | VLPPLLTD<br>DMIAAYT<br>AA | Homo sapiens          |
| 1 | 1.00 | 1 | 1 | -0.01 | -0.01  | -0.01  | -0.009 | -0.012 | t | 156664 | GGTHSQW<br>NKPSKPKT<br>NM | Mus musculus          |
| 1 | 1.00 | 1 | 1 | -0.01 | -0.012 | -0.006 | -0.007 | -0.007 | t | 141706 | MLEPFQIL                  | Mus musculus          |

|   |      |   |   |       |        |        |        |        |   |        |                              |                                  |
|---|------|---|---|-------|--------|--------|--------|--------|---|--------|------------------------------|----------------------------------|
| 1 | 1.00 | 1 | 1 | -0.02 | -0.018 | -0.021 | -0.023 | -0.023 | t | 113876 | SPQQSGQ<br>GQPGYYP           | Homo<br>sapiens                  |
| 1 | 1.00 | 1 | 1 | 0.04  | 0.04   | 0.04   | 0.04   | 0.04   | t | 127712 | KNWSTPF                      | Homo<br>sapiens                  |
| 1 | 1.00 | 1 | 1 | 0.04  | 0.04   | 0.04   | 0.04   | 0.04   | t | 114956 | SSYANTTS<br>ED               | Homo<br>sapiens                  |
| 1 | 1.00 | 1 | 1 | 0     | -0.002 | -0.008 | 0.003  | 0.002  | t | 111634 | PNNNKILV<br>PKVSGLQ          | Mus<br>musculu<br>s              |
| 1 | 1.00 | 1 | 1 | 0.02  | 0.02   | 0.02   | 0.02   | 0.02   | t | 151032 | LYQNADTY<br>VFVGSSR          | Homo<br>sapiens                  |
| 1 | 1.00 | 1 | 1 | 0.02  | 0.02   | 0.02   | 0.02   | 0.02   | t | 104176 | PKPQRKTK<br>RNTNRRP<br>QDVKF | Homo<br>sapiens                  |
| 1 | 1.00 | 1 | 1 | 0.02  | 0.02   | 0.02   | 0.02   | 0.02   | t | 92470  | DLTFEKVK<br>HN               | Ovis<br>aries                    |
| 1 | 1.00 | 1 | 1 | -0.03 | -0.03  | -0.032 | -0.03  | -0.03  | t | 97479  | LTAWNPSL                     | Mus<br>musculu<br>s              |
| 1 | 1.00 | 1 | 1 | -0.02 | -0.02  | -0.02  | -0.02  | -0.02  | t | 139895 | SLFASAQ                      | Ovis<br>aries                    |
| 1 | 1.00 | 1 | 1 | 0     | 0      | -0.01  | -0.006 | -0.002 | t | 60327  | SPVTKRAS<br>LKIDSKK          | Homo<br>sapiens                  |
| 1 | 1.00 | 1 | 1 | 0     | -0.003 | -0.012 | -0.001 | 0.001  | t | 10683  | DVNKSAQ<br>L                 | Oryctola<br>gus<br>cuniculu<br>s |
| 1 | 1.00 | 1 | 1 | 0     | 0      | 0.002  | 0      | 0      | t | 52600  | QTQQPQQ<br>PFP               | Mus<br>musculu<br>s              |
| 1 | 1.00 | 1 | 1 | 0     | 0      | 0      | 0      | -0.002 | t | 73660  | YEGFSWT<br>GVTQNKA<br>KGIT   | Mus<br>musculu<br>s              |
| 1 | 1.00 | 1 | 1 | 0.02  | 0.02   | 0.02   | 0.02   | 0.02   | t | 135445 | AKAAQFG                      | Oryctola<br>gus<br>cuniculu<br>s |
| 1 | 1.00 | 1 | 1 | 0.01  | 0.01   | 0.009  | 0.01   | 0.01   | t | 72503  | WGQGG                        | Mus<br>musculu<br>s              |
| 1 | 1.00 | 1 | 1 | 0.01  | 0.01   | 0.012  | 0.011  | 0.01   | t | 71437  | VTPDKEILY                    | Homo<br>sapiens                  |

|   |      |   |   |       |        |        |        |        |   |        |                     |                                  |
|---|------|---|---|-------|--------|--------|--------|--------|---|--------|---------------------|----------------------------------|
| 1 | 1.00 | 1 | 1 | 0.01  | 0.006  | 0.008  | 0.013  | 0.008  | t | 51327  | QLERANLR<br>PCEQHLM | Oryctola<br>gus<br>cuniculu<br>s |
| 1 | 1.00 | 1 | 1 | 0.01  | 0.012  | 0.01   | 0.007  | 0.01   | t | 8754   | DIPNPIGSE<br>N      | Homo<br>sapiens                  |
| 1 | 1.00 | 1 | 1 | 0.01  | 0.01   | 0.01   | 0.01   | 0.01   | t | 23191  | GVTYEIDL<br>TNKNAA  | Homo<br>sapiens                  |
| 1 | 1.00 | 1 | 1 | 0     | 0      | 0      | 0      | -0.001 | t | 48597  | PNANPN              | Mus<br>musculu<br>s              |
| 1 | 1.00 | 1 | 1 | -0.02 | -0.02  | -0.015 | -0.02  | -0.019 | t | 108382 | GGVVIA              | Mus<br>musculu<br>s              |
| 1 | 1.00 | 1 | 1 | -0.02 | -0.02  | -0.015 | -0.02  | -0.019 | t | 108382 | GGVVIA              | Mus<br>musculu<br>s              |
| 1 | 1.00 | 1 | 1 | -0.01 | -0.012 | -0.007 | -0.011 | -0.012 | t | 150982 | FEDINGIRR<br>P      | Mus<br>musculu<br>s              |
| 1 | 1.00 | 1 | 1 | 0     | 0      | 0      | 0      | -0.001 | t | 64638  | TKPSDGNC<br>T       | Oryctola<br>gus<br>cuniculu<br>s |
| 1 | 1.00 | 1 | 1 | 0     | 0      | 0      | 0      | -0.001 | t | 64638  | TKPSDGNC<br>T       | Oryctola<br>gus<br>cuniculu<br>s |
| 1 | 1.00 | 1 | 1 | 0.05  | 0.05   | 0.05   | 0.05   | 0.05   | t | 69235  | VKIDNASP<br>AS      | Mus<br>musculu<br>s              |
| 1 | 1.00 | 1 | 1 | 0.05  | 0.05   | 0.05   | 0.05   | 0.05   | t | 69235  | VKIDNASP<br>AS      | Homo<br>sapiens                  |
| 1 | 1.00 | 1 | 1 | 0.01  | 0.014  | 0.022  | 0.013  | 0.01   | t | 48663  | PNKPNND<br>FHFEV    | Homo<br>sapiens                  |
| 1 | 1.00 | 1 | 1 | 0.01  | 0.014  | 0.022  | 0.013  | 0.01   | t | 48663  | PNKPNND<br>FHFEV    | Homo<br>sapiens                  |
| 1 | 1.00 | 1 | 1 | 0.01  | 0.01   | 0.009  | 0.013  | 0.011  | t | 56501  | RYAHPS              | Homo<br>sapiens                  |
| 1 | 1.00 | 1 | 1 | -0.02 | -0.023 | -0.023 | -0.02  | -0.02  | t | 81798  | ERLRDLRR<br>KEKSE   | Oryctola<br>gus<br>cuniculu<br>s |

|   |      |   |   |       |        |        |        |        |   |        |                      |                                  |
|---|------|---|---|-------|--------|--------|--------|--------|---|--------|----------------------|----------------------------------|
| 1 | 1.00 | 1 | 1 | -0.02 | -0.024 | -0.023 | -0.02  | -0.02  | t | 81798  | ERLRDLRR<br>KEKSE    | Oryctola<br>gus<br>cuniculu<br>s |
| 1 | 1.00 | 1 | 1 | 0     | 0.003  | 0.002  | 0      | 0      | t | 119641 | SEHETRLV<br>AKLFKDYS | Mus<br>musculu<br>s              |
| 1 | 1.00 | 1 | 1 | 0     | -0.003 | 0.001  | 0      | 0      | t | 6478   | CKFTLVLT<br>KCGSQVL  | Oryctola<br>gus<br>cuniculu<br>s |
| 1 | 1.00 | 1 | 1 | -0.05 | -0.05  | -0.06  | -0.05  | -0.051 | t | 97117  | YIQMKRIA<br>VG       | Mus<br>musculu<br>s              |
| 1 | 1.00 | 1 | 1 | -0.01 | -0.011 | -0.021 | -0.01  | -0.008 | t | 49757  | PTPVSEII<br>TPTLQA   | Bos<br>taurus                    |
| 1 | 1.00 | 1 | 1 | -0.01 | -0.008 | -0.018 | -0.007 | -0.01  | t | 110841 | EVTPAIKSE<br>VSL     | Homo<br>sapiens                  |
| 1 | 1.00 | 1 | 1 | 0.05  | 0.046  | 0.05   | 0.043  | 0.05   | t | 131106 | TGLE                 | Oryctola<br>gus<br>cuniculu<br>s |
| 1 | 1.00 | 1 | 1 | 0.05  | 0.05   | 0.05   | 0.05   | 0.05   | t | 111161 | CNSSSMN<br>SC        | Homo<br>sapiens                  |
| 1 | 1.00 | 1 | 1 | 0.03  | 0.03   | 0.03   | 0.03   | 0.03   | t | 114859 | ICGTDGVT<br>YT       | Homo<br>sapiens                  |
| 1 | 1.00 | 1 | 1 | 0.03  | 0.03   | 0.03   | 0.03   | 0.03   | t | 79384  | SCNSFMIP<br>AQPST    | Mus<br>musculu<br>s              |
| 1 | 1.00 | 1 | 1 | 0.01  | 0.01   | 0.01   | 0.01   | 0.01   | t | 103260 | HRSDGSG<br>DTFLFTQY  | Homo<br>sapiens                  |
| 1 | 1.00 | 1 | 1 | 0.01  | 0.01   | 0.01   | 0.01   | 0.01   | t | 115980 | SPEVIESPP<br>E       | Homo<br>sapiens                  |
| 1 | 1.00 | 1 | 1 | 0.01  | 0.01   | 0.01   | 0.01   | 0.01   | t | 78226  | PFTNLAHV             | Homo<br>sapiens                  |
| 1 | 1.00 | 1 | 1 | -0.01 | -0.01  | -0.01  | -0.01  | -0.01  | t | 116978 | FPSHYWLY<br>PPPT     | Homo<br>sapiens                  |
| 1 | 1.00 | 1 | 1 | 0.01  | 0.012  | 0.01   | 0.017  | 0.01   | t | 104253 | SNVECDGL<br>NCDWII   | Homo<br>sapiens                  |
| 1 | 1.00 | 1 | 1 | 0.02  | 0.02   | 0.015  | 0.02   | 0.022  | t | 73636  | YEDRYyre             | Mus<br>musculu<br>s              |

|   |      |   |   |       |       |        |       |        |   |        |                              |                                  |
|---|------|---|---|-------|-------|--------|-------|--------|---|--------|------------------------------|----------------------------------|
| 1 | 1.00 | 1 | 1 | -0.01 | -0.01 | -0.01  | -0.01 | -0.011 | t | 116682 | CHGRGTC<br>NYYANAYS          | Oryctola<br>gus<br>cuniculu<br>s |
| 1 | 1.00 | 1 | 1 | 0.04  | 0.05  | 0.04   | 0.037 | 0.039  | t | 134149 | LRENQLLP<br>GFEL             | Rattus<br>rattus                 |
| 1 | 1.00 | 1 | 1 | 0.08  | 0.077 | 0.079  | 0.08  | 0.08   | t | 145119 | CLPKPLPK<br>GTEDNDQ<br>RAT   | Oryctola<br>gus<br>cuniculu<br>s |
| 1 | 1.00 | 1 | 1 | 0.03  | 0.028 | 0.035  | 0.029 | 0.03   | t | 61409  | SSTQVQHT<br>LLQT             | Mus<br>musculu<br>s              |
| 1 | 1.00 | 1 | 1 | 0.02  | 0.02  | 0.013  | 0.02  | 0.021  | t | 122719 | CGVDFEIK<br>AFATHSTD<br>VEED | Rattus<br>norvegic<br>us         |
| 1 | 1.00 | 1 | 1 | 0     | 0.004 | 0      | 0.001 | 0      | t | 37310  | LLGACSFs                     | Homo<br>sapiens                  |
| 1 | 1.00 | 1 | 1 | 0.06  | 0.064 | 0.069  | 0.063 | 0.06   | t | 50354  | QASDDGD<br>KGSDVES           | Homo<br>sapiens                  |
| 1 | 1.00 | 1 | 1 | -0.02 | -0.02 | -0.02  | -0.02 | -0.02  | t | 78562  | VYASPNTT<br>GLNDIL           | Mus<br>musculu<br>s              |
| 1 | 1.00 | 1 | 1 | 0     | 0     | -0.004 | 0     | 0.003  | t | 52082  | QQPFP                        | Mus<br>musculu<br>s              |
| 1 | 1.00 | 1 | 1 | -0.01 | -0.01 | -0.01  | -0.01 | -0.011 | t | 145776 | FDTGA FDP<br>DWPY            | Mus<br>musculu<br>s              |
| 1 | 1.00 | 1 | 1 | 0     | 0     | 0      | 0     | -0.002 | t | 104202 | QHGHLLTS<br>SQELERYT<br>FNP  | Oryctola<br>gus<br>cuniculu<br>s |
| 1 | 1.00 | 1 | 1 | 0.02  | 0.022 | 0.027  | 0.023 | 0.021  | t | 151609 | DETPMRG<br>ETRKV             | Homo<br>sapiens                  |
| 1 | 1.00 | 1 | 1 | 0.04  | 0.026 | 0.027  | 0.039 | 0.047  | t | 61502  | SSYTQMY<br>Q                 | Macaca<br>mulatta                |
| 1 | 1.00 | 1 | 1 | 0.02  | 0.018 | 0.02   | 0.019 | 0.022  | t | 146990 | GPGTIKKIS<br>F               | Mus<br>musculu<br>s              |
| 1 | 1.00 | 1 | 1 | 0.01  | 0.01  | 0.01   | 0.01  | 0.009  | t | 75847  | YSPELE                       | Mus<br>musculu<br>s              |

|   |      |   |   |       |        |        |        |        |   |        |                              |                                  |
|---|------|---|---|-------|--------|--------|--------|--------|---|--------|------------------------------|----------------------------------|
| 1 | 1.00 | 1 | 1 | 0.03  | 0.026  | 0.026  | 0.029  | 0.03   | t | 67972  | VDHFHLG<br>DDMDPEL           | Oryctola<br>gus<br>cuniculu<br>s |
| 1 | 1.00 | 1 | 1 | 0     | -0.002 | -0.007 | 0      | 0.001  | t | 75544  | YQRESQAY<br>YQRGA            | Oryctola<br>gus<br>cuniculu<br>s |
| 1 | 1.00 | 1 | 1 | 0.02  | 0.02   | 0.008  | 0.02   | 0.02   | t | 60592  | SQWGWG<br>GSTDEYCS<br>PDHNCQ | Mus<br>musculu<br>s              |
| 1 | 1.00 | 1 | 1 | 0.02  | 0.02   | 0.008  | 0.02   | 0.02   | t | 60592  | SQWGWG<br>GSTDEYCS<br>PDHNCQ | Mus<br>musculu<br>s              |
| 1 | 1.00 | 1 | 1 | 0     | -0.002 | -0.005 | -0.001 | 0      | t | 78752  | NKGKWKE<br>HIKEVTEKL<br>KKA  | Mus<br>musculu<br>s              |
| 1 | 1.00 | 1 | 1 | -0.01 | -0.012 | -0.015 | -0.007 | -0.009 | t | 51775  | QNTRNIVP<br>VSIVSR           | Mus<br>musculu<br>s              |
| 1 | 1.00 | 1 | 1 | -0.02 | -0.016 | -0.011 | -0.013 | -0.02  | t | 110852 | FFSARGHR<br>PLDKKREE<br>AP   | Homo<br>sapiens                  |
| 1 | 1.00 | 1 | 1 | -0.02 | -0.018 | -0.011 | -0.013 | -0.02  | t | 110854 | FFSARGHR<br>PLDKKREE<br>AP   | Homo<br>sapiens                  |
| 1 | 1.00 | 1 | 1 | 0.03  | 0.027  | 0.028  | 0.03   | 0.031  | t | 38408  | LPAMSTTD<br>LEAYFKDC         | Oryctola<br>gus<br>cuniculu<br>s |
| 1 | 1.00 | 1 | 1 | 0.01  | 0.006  | 0.01   | 0.013  | 0.01   | t | 111208 | DPDVNRFI<br>DKYGQ            | Oryctola<br>gus<br>cuniculu<br>s |
| 1 | 1.00 | 1 | 1 | 0.02  | 0.02   | 0.022  | 0.02   | 0.019  | t | 78923  | AFGANS                       | Mus<br>musculu<br>s              |
| 1 | 1.00 | 1 | 1 | 0     | -0.002 | 0.012  | -0.001 | -0.004 | t | 20089  | GGWNTG<br>GSR                | Mus<br>musculu<br>s              |
| 1 | 1.00 | 1 | 1 | -0.02 | -0.02  | -0.02  | -0.02  | -0.018 | t | 128088 | QVYYRPV                      | Ovis<br>aries                    |
| 1 | 1.00 | 1 | 1 | 0.02  | 0.022  | 0.017  | 0.021  | 0.02   | t | 21831  | GPVYCFTP<br>SPVVVGTT<br>DR   | Homo<br>sapiens                  |

|   |      |   |   |       |        |       |        |        |   |        |                            |                                  |
|---|------|---|---|-------|--------|-------|--------|--------|---|--------|----------------------------|----------------------------------|
| 1 | 1.00 | 1 | 1 | 0.04  | 0.04   | 0.04  | 0.04   | 0.04   | t | 92780  | GDDFIDG<br>GKG             | Ovis<br>aries                    |
| 1 | 1.00 | 1 | 1 | 0.02  | 0.02   | 0.02  | 0.02   | 0.02   | t | 135682 | GKVDAFC<br>G               | Homo<br>sapiens                  |
| 1 | 1.00 | 1 | 1 | 0.02  | 0.02   | 0.02  | 0.02   | 0.02   | t | 123425 | LGEEYEEH<br>L              | Ovis<br>aries                    |
| 1 | 1.00 | 1 | 1 | 0.02  | 0.02   | 0.02  | 0.02   | 0.02   | t | 103932 | GKLPPPI                    | Homo<br>sapiens                  |
| 1 | 1.00 | 1 | 1 | 0.02  | 0.02   | 0.02  | 0.02   | 0.02   | t | 70799  | VRPLTETR<br>GDLFSGD        | Homo<br>sapiens                  |
| 1 | 1.00 | 1 | 1 | -0.02 | -0.02  | -0.02 | -0.02  | -0.02  | t | 96476  | KLFPNSLD<br>QT             | Homo<br>sapiens                  |
| 1 | 1.00 | 1 | 1 | 0.01  | 0.01   | 0.01  | 0.01   | 0.01   | t | 3524   | APEARQ                     | Homo<br>sapiens                  |
| 1 | 1.00 | 1 | 1 | 0.03  | 0.033  | 0.024 | 0.031  | 0.032  | t | 41868  | MKNNPVY<br>SESL            | Equus<br>caballus                |
| 1 | 1.00 | 1 | 1 | 0     | 0.002  | 0     | -0.003 | -0.002 | t | 28075  | IPSTAFTDI<br>AWVRLPN<br>HY | Homo<br>sapiens                  |
| 1 | 1.00 | 1 | 1 | 0.01  | 0.01   | 0.009 | 0.01   | 0.01   | t | 73636  | YEDRYRE                    | Mus<br>musculu<br>s              |
| 1 | 1.00 | 1 | 1 | 0.03  | 0.035  | 0.039 | 0.03   | 0.03   | t | 65861  | TQGSNWI<br>Q               | Homo<br>sapiens                  |
| 1 | 1.00 | 1 | 1 | 0.03  | 0.03   | 0.039 | 0.03   | 0.03   | t | 65861  | TQGSNWI<br>Q               | Homo<br>sapiens                  |
| 1 | 1.00 | 1 | 1 | 0.02  | 0.008  | 0.02  | 0.023  | 0.02   | t | 156918 | MAITDHP<br>GSAMV           | Bos<br>taurus                    |
| 1 | 1.00 | 1 | 1 | 0.03  | 0.03   | 0.03  | 0.03   | 0.03   | t | 79672  | VNLEDPAS<br>RDL            | Homo<br>sapiens                  |
| 1 | 1.00 | 1 | 1 | 0.03  | 0.03   | 0.03  | 0.03   | 0.03   | t | 133535 | CKPGEVQ<br>QC              | Mus<br>musculu<br>s              |
| 1 | 1.00 | 1 | 1 | 0     | -0.003 | 0.005 | 0      | -0.001 | t | 146795 | CCELCCNP<br>QCAGCY         | Oryctola<br>gus<br>cuniculu<br>s |

|   |      |   |   |       |        |       |        |        |   |        |                              |                     |
|---|------|---|---|-------|--------|-------|--------|--------|---|--------|------------------------------|---------------------|
| 1 | 1.00 | 1 | 1 | -0.02 | -0.022 | -0.02 | -0.021 | -0.022 | t | 70472  | VPSDTVQT<br>RHVV             | Mus<br>musculu<br>s |
| 1 | 1.00 | 1 | 1 | -0.03 | -0.028 | -0.03 | -0.033 | -0.032 | t | 115887 | PHPHLSF<br>MAI               | Homo<br>sapiens     |
| 1 | 1.00 | 1 | 1 | 0.01  | 0.01   | 0.01  | 0.01   | 0.01   | t | 33888  | KTLLK                        | Homo<br>sapiens     |
| 1 | 1.00 | 1 | 1 | 0     | 0      | 0.011 | 0.007  | 0      | t | 102381 | EEIAQVATI<br>SANGDKDI<br>GNI | Mus<br>musculu<br>s |
| 1 | 1.00 | 1 | 1 | 0.01  | 0.01   | 0.01  | 0.01   | 0.01   | t | 94449  | CCNPA                        | Capra<br>hircus     |
| 1 | 1.00 | 1 | 1 | 0     | -0.002 | 0     | 0.003  | 0      | t | 27728  | INQQLNPK<br>TNKWEDK          | Mus<br>musculu<br>s |
| 1 | 1.00 | 1 | 1 | 0     | -0.002 | 0     | 0.003  | 0      | t | 27727  | INQQLNPK                     | Mus<br>musculu<br>s |
| 1 | 1.00 | 1 | 1 | 0.03  | 0.03   | 0.03  | 0.03   | 0.03   | t | 7532   | DAHHAAD                      | Mus<br>musculu<br>s |
| 1 | 1.00 | 1 | 1 | 0.03  | 0.03   | 0.03  | 0.03   | 0.03   | t | 7532   | DAHHAAD                      | Mus<br>musculu<br>s |
| 1 | 1.00 | 1 | 1 | -0.03 | -0.03  | -0.03 | -0.03  | -0.029 | t | 115297 | INYWLAHK<br>AL               | Homo<br>sapiens     |
| 1 | 1.00 | 1 | 1 | 0.03  | 0.027  | 0.033 | 0.036  | 0.027  | t | 73159  | WTTCQSIA<br>FPSKTSASI<br>GSL | Mus<br>musculu<br>s |
| 1 | 1.00 | 1 | 1 | 0.03  | 0.03   | 0.03  | 0.03   | 0.03   | t | 123875 | YMESEKFI<br>K                | Ovis<br>aries       |
| 1 | 1.00 | 1 | 1 | 0.03  | 0.03   | 0.03  | 0.03   | 0.03   | t | 123149 | ESEKFIKW<br>P                | Ovis<br>aries       |
| 1 | 1.00 | 1 | 1 | 0.03  | 0.03   | 0.03  | 0.03   | 0.03   | t | 84512  | KLQKNGA<br>DLA               | Homo<br>sapiens     |



|   |      |   |   |       |        |        |        |        |   |        |                              |                              |
|---|------|---|---|-------|--------|--------|--------|--------|---|--------|------------------------------|------------------------------|
| 1 | 1.00 | 1 | 1 | 0.01  | 0.01   | 0.01   | 0.01   | 0.01   | t | 121847 | SGVFLSVP<br>ESYFGSC          | Mus<br>musculus              |
| 1 | 1.00 | 1 | 1 | 0.01  | 0.01   | 0.01   | 0.01   | 0.01   | t | 121847 | SGVFLSVP<br>ESYFGSC          | Mus<br>musculus              |
| 1 | 1.00 | 1 | 1 | 0.01  | 0.01   | 0.01   | 0.01   | 0.01   | t | 103929 | GKLPIPY                      | Homo<br>sapiens              |
| 1 | 1.00 | 1 | 1 | -0.01 | -0.01  | -0.01  | -0.01  | -0.01  | t | 105850 | GTAPFEIH                     | Oryctola<br>gus<br>cuniculus |
| 1 | 1.00 | 1 | 1 | -0.03 | -0.03  | -0.03  | -0.03  | -0.03  | t | 123626 | PPYMPPPG                     | Oryctola<br>gus<br>cuniculus |
| 1 | 1.00 | 1 | 1 | -0.03 | -0.03  | -0.03  | -0.03  | -0.03  | t | 115824 | KIAKYIPIQ<br>Y               | Homo<br>sapiens              |
| 1 | 1.00 | 1 | 1 | 0.02  | 0.017  | 0.018  | 0.02   | 0.02   | t | 68858  | VHILCYCY<br>GLPDSEP          | Oryctola<br>gus<br>cuniculus |
| 1 | 1.00 | 1 | 1 | 0.02  | 0.023  | 0.018  | 0.02   | 0.02   | t | 68858  | VHILCYCY<br>GLPDSEP          | Equus<br>caballus            |
| 1 | 1.00 | 1 | 1 | 0.03  | 0.03   | 0.03   | 0.03   | 0.03   | t | 95119  | MKKPGENI<br>KPLSCKYSY<br>PKH | Rattus<br>norvegicus         |
| 1 | 1.00 | 1 | 1 | 0.03  | 0.03   | 0.03   | 0.03   | 0.03   | t | 142424 | GDEFDTYD<br>DIKKVT           | Homo<br>sapiens              |
| 1 | 1.00 | 1 | 1 | 0.03  | 0.032  | 0.021  | 0.031  | 0.03   | t | 60669  | SRGGSQAS<br>SRSSRSR          | Homo<br>sapiens              |
| 1 | 1.00 | 1 | 1 | 0.03  | 0.03   | 0.03   | 0.03   | 0.032  | t | 152053 | PYCLGSPS<br>QDGY             | Sus<br>scrofa                |
| 1 | 1.00 | 1 | 1 | -0.02 | -0.02  | -0.027 | -0.026 | -0.022 | t | 60082  | SPIAGKTS<br>VLRA             | Homo<br>sapiens              |
| 1 | 1.00 | 1 | 1 | -0.02 | -0.018 | -0.02  | -0.013 | -0.017 | t | 140546 | CNLWEVM<br>HGTC              | Homo<br>sapiens              |
| 1 | 1.00 | 1 | 1 | -0.03 | -0.032 | -0.022 | -0.027 | -0.031 | t | 27067  | ILGGKFL                      | Mus<br>musculus              |
| 1 | 1.00 | 1 | 1 | -0.02 | -0.022 | -0.02  | -0.027 | -0.022 | t | 135497 | RYPNQVYY<br>RPM              | Mus<br>musculus              |

|   |      |   |   |       |        |        |        |        |   |        |                             |                                  |
|---|------|---|---|-------|--------|--------|--------|--------|---|--------|-----------------------------|----------------------------------|
| 1 | 1.00 | 1 | 1 | 0     | -0.002 | 0      | -0.001 | 0      | t | 45695  | NRLGGLFN<br>FGPKQKI         | Mus<br>musculu<br>s              |
| 1 | 1.00 | 1 | 1 | 0.02  | 0.016  | 0.023  | 0.019  | 0.018  | t | 33090  | KQVTIRIG<br>CKTSSS          | Oryctola<br>gus<br>cuniculu<br>s |
| 1 | 1.00 | 1 | 1 | 0     | -0.004 | 0      | 0      | -0.001 | t | 124604 | QIERDTER<br>DRFLSAPE<br>AV  | Oryctola<br>gus<br>cuniculu<br>s |
| 1 | 1.00 | 1 | 1 | 0     | -0.002 | 0      | 0      | -0.001 | t | 3245   | ANDVDNS<br>NPVVQAE<br>QLNWL | Mus<br>musculu<br>s              |
| 1 | 1.00 | 1 | 1 | 0     | -0.003 | -0.003 | 0      | 0      | t | 21812  | GPTRTIGG<br>SQ              | Oryctola<br>gus<br>cuniculu<br>s |
| 1 | 1.00 | 1 | 1 | 0     | -0.002 | -0.007 | -0.001 | -0.002 | t | 20480  | GIVRTPLA<br>ELLDG           | Mus<br>musculu<br>s              |
| 1 | 1.00 | 1 | 1 | 0     | -0.004 | -0.012 | 0.003  | 0.003  | t | 106779 | RKPLSPG<br>MTGR             | Oryctola<br>gus<br>cuniculu<br>s |
| 1 | 1.00 | 1 | 1 | -0.01 | -0.01  | -0.01  | -0.01  | -0.011 | t | 133694 | SHMNALL<br>RQQAF            | Homo<br>sapiens                  |
| 1 | 1.00 | 1 | 1 | 0.07  | 0.07   | 0.068  | 0.067  | 0.068  | t | 60470  | SQKGKQQ<br>EEEENEGS         | Homo<br>sapiens                  |
| 1 | 1.00 | 1 | 1 | 0.02  | 0.02   | 0.014  | 0.02   | 0.02   | t | 64032  | THGQWN<br>KPSKPKTN<br>MK    | Oryctola<br>gus<br>cuniculu<br>s |
| 1 | 1.00 | 1 | 1 | 0.02  | 0.02   | 0.014  | 0.02   | 0.02   | t | 64032  | THGQWN<br>KPSKPKTN<br>MK    | Oryctola<br>gus<br>cuniculu<br>s |
| 1 | 1.00 | 1 | 1 | -0.03 | -0.03  | -0.047 | -0.03  | -0.026 | t | 145725 | CKQAGTC<br>PP               | Mus<br>musculu<br>s              |
| 1 | 1.00 | 1 | 1 | -0.04 | -0.04  | -0.04  | -0.04  | -0.04  | t | 111166 | CPVIKPC                     | Homo<br>sapiens                  |
| 1 | 1.00 | 1 | 1 | 0     | 0.002  | -0.004 | 0.001  | 0.001  | t | 19639  | GFTWTGV<br>TQNG             | Homo<br>sapiens                  |

|   |      |   |   |       |        |        |        |        |   |        |                              |                        |
|---|------|---|---|-------|--------|--------|--------|--------|---|--------|------------------------------|------------------------|
| 1 | 1.00 | 1 | 1 | 0.06  | 0.06   | 0.06   | 0.06   | 0.06   | t | 115730 | EPTSTPTTE<br>A               | Homo<br>sapiens        |
| 1 | 1.00 | 1 | 1 | 0.02  | 0.02   | 0.02   | 0.02   | 0.02   | t | 92809  | GGKGDDIL<br>DG               | Ovis<br>aries          |
| 1 | 1.00 | 1 | 1 | 0.02  | 0.02   | 0.02   | 0.02   | 0.02   | t | 95318  | DLQVLAQ<br>K                 | Bos<br>taurus          |
| 1 | 1.00 | 1 | 1 | 0.02  | 0.028  | 0.02   | 0.02   | 0.02   | t | 95318  | DLQVLAQ<br>K                 | Cavia<br>porcellu<br>s |
| 1 | 1.00 | 1 | 1 | 0     | 0      | 0      | 0      | 0      | t | 100352 | NQLKEHPT<br>DF               | Mus<br>musculu<br>s    |
| 1 | 1.00 | 1 | 1 | 0     | 0      | 0      | 0      | 0      | t | 79357  | RCDLRYDA<br>FVPWCP           | Mus<br>musculu<br>s    |
| 1 | 1.00 | 1 | 1 | 0     | 0.004  | 0      | 0      | 0      | t | 51123  | QIPYNLKIF<br>AIMLDTHK<br>MLV | Aotus<br>nancyma<br>ae |
| 1 | 1.00 | 1 | 1 | 0.02  | 0.018  | 0.028  | 0.021  | 0.02   | t | 86712  | NFKQGQG                      | Homo<br>sapiens        |
| 1 | 1.00 | 1 | 1 | 0.01  | 0.01   | 0.032  | 0.01   | 0.007  | t | 144622 | EDVGSNK                      | Mus<br>musculu<br>s    |
| 1 | 1.00 | 1 | 1 | -0.03 | -0.028 | -0.037 | -0.027 | -0.029 | t | 118348 | FHSGKHY<br>WEVDVTG<br>KE     | Homo<br>sapiens        |
| 1 | 1.00 | 1 | 1 | -0.01 | -0.007 | -0.008 | -0.01  | -0.01  | t | 19577  | GFLMHAP<br>AFETAGTY          | Mus<br>musculu<br>s    |
| 1 | 1.00 | 1 | 1 | 0     | 0      | -0.006 | 0      | 0.001  | t | 159172 | TTDSGKLV<br>TDWCCRS<br>C     | Mus<br>musculu<br>s    |
| 1 | 1.00 | 1 | 1 | -0.02 | -0.018 | -0.02  | -0.013 | -0.02  | t | 134274 | YKWTVTV<br>EDGPTKSD<br>PRCLT | Homo<br>sapiens        |
| 1 | 1.00 | 1 | 1 | 0     | 0.004  | 0      | 0.001  | 0.001  | t | 49505  | PSSKRFQP<br>FQQFGRD          | Homo<br>sapiens        |

|   |      |   |   |       |        |        |        |        |   |        |                             |                                  |
|---|------|---|---|-------|--------|--------|--------|--------|---|--------|-----------------------------|----------------------------------|
| 1 | 1.00 | 1 | 1 | 0.02  | 0.018  | 0.013  | 0.023  | 0.022  | t | 106550 | IWYINCFG<br>CETHAML         | Mus<br>musculu<br>s              |
| 1 | 1.00 | 1 | 1 | 0     | 0      | -0.01  | 0      | 0.001  | t | 44251  | NIISCNKN<br>DKNQ            | Oryctola<br>gus<br>cuniculu<br>s |
| 1 | 1.00 | 1 | 1 | 0.05  | 0.052  | 0.043  | 0.053  | 0.051  | t | 125357 | AEIETDKA<br>TIGFEVQE<br>EG  | Homo<br>sapiens                  |
| 1 | 1.00 | 1 | 1 | -0.01 | -0.01  | -0.01  | -0.01  | -0.01  | t | 137927 | LSADFTPG                    | Homo<br>sapiens                  |
| 1 | 1.00 | 1 | 1 | -0.03 | -0.028 | -0.034 | -0.029 | -0.03  | t | 138028 | SAGALQLL<br>VVG             | Homo<br>sapiens                  |
| 1 | 1.00 | 1 | 1 | 0.01  | 0.012  | 0.01   | 0.011  | 0.01   | t | 117111 | WPMNDD<br>STRPR             | Homo<br>sapiens                  |
| 1 | 1.00 | 1 | 1 | -0.01 | -0.008 | -0.013 | -0.003 | -0.01  | t | 120548 | GAGAPVYL<br>AAVLEYLT<br>AE  | Homo<br>sapiens                  |
| 1 | 1.00 | 1 | 1 | 0.02  | 0.017  | 0.017  | 0.02   | 0.02   | t | 13421  | EMVDVVT<br>G                | Oryctola<br>gus<br>cuniculu<br>s |
| 1 | 1.00 | 1 | 1 | -0.04 | -0.04  | -0.04  | -0.04  | -0.042 | t | 134670 | FIDEPRRR<br>PI              | Homo<br>sapiens                  |
| 1 | 1.00 | 1 | 1 | 0.03  | 0.03   | 0.03   | 0.03   | 0.03   | t | 109425 | KNQVSLT                     | Homo<br>sapiens                  |
| 1 | 1.00 | 1 | 1 | -0.02 | -0.018 | -0.024 | -0.012 | -0.02  | t | 55299  | RPQKRPS<br>IGCKGTHG<br>GTGA | Homo<br>sapiens                  |
| 1 | 1.00 | 1 | 1 | 0.04  | 0.043  | 0.04   | 0.04   | 0.04   | t | 105702 | CVYDQYG<br>TEFEDYSY<br>ES   | Mus<br>musculu<br>s              |
| 1 | 1.00 | 1 | 1 | 0     | 0      | 0      | 0      | -0.001 | t | 39183  | LRRDLAS<br>REAKKQVE<br>KALE | Homo<br>sapiens                  |
| 1 | 1.00 | 1 | 1 | -0.02 | -0.02  | -0.02  | -0.02  | -0.021 | t | 144647 | GDNGKGF<br>FELPMKD          | Oryctola<br>gus<br>cuniculu<br>s |

|   |      |   |   |       |        |        |        |        |   |        |                              |                                  |
|---|------|---|---|-------|--------|--------|--------|--------|---|--------|------------------------------|----------------------------------|
| 1 | 1.00 | 1 | 1 | 0.02  | 0.016  | 0.02   | 0.02   | 0.021  | t | 75950  | YTASARGD<br>LAHLTTT          | Mus<br>musculu<br>s              |
| 1 | 1.00 | 1 | 1 | 0.02  | 0.016  | 0.02   | 0.02   | 0.021  | t | 75950  | YTASARGD<br>LAHLTTT          | Mus<br>musculu<br>s              |
| 1 | 1.00 | 1 | 1 | -0.01 | -0.012 | -0.015 | -0.011 | -0.01  | t | 78735  | LRVKIERD<br>DLSRETIHQ<br>II  | Mus<br>musculu<br>s              |
| 1 | 1.00 | 1 | 1 | 0.01  | 0.007  | 0.014  | 0.01   | 0.01   | t | 99785  | YIVDDVN                      | Oryctola<br>gus<br>cuniculu<br>s |
| 1 | 1.00 | 1 | 1 | -0.03 | -0.032 | -0.03  | -0.03  | -0.03  | t | 111211 | DPVGPSD<br>PSIVSLVEE<br>TSF  | Oryctola<br>gus<br>cuniculu<br>s |
| 1 | 1.00 | 1 | 1 | -0.03 | -0.033 | -0.03  | -0.03  | -0.03  | t | 111211 | DPVGPSD<br>PSIVSLVEE<br>TSF  | Oryctola<br>gus<br>cuniculu<br>s |
| 1 | 1.00 | 1 | 1 | 0.05  | 0.052  | 0.047  | 0.051  | 0.05   | t | 46895  | PAPQAPY<br>QGYQEPP<br>APQAPY | Homo<br>sapiens                  |
| 1 | 1.00 | 1 | 1 | 0     | 0.004  | -0.003 | 0.001  | 0      | t | 752    | ADQAQYN<br>QMH               | Homo<br>sapiens                  |
| 1 | 1.00 | 1 | 1 | -0.01 | -0.01  | -0.01  | -0.01  | -0.012 | t | 113371 | EPARSRSR                     | Homo<br>sapiens                  |
| 1 | 1.00 | 1 | 1 | 0.04  | 0.04   | 0.041  | 0.043  | 0.042  | t | 11451  | EDTLNKVD                     | Homo<br>sapiens                  |
| 1 | 1.00 | 1 | 1 | 0.02  | 0.017  | 0.021  | 0.02   | 0.02   | t | 5771   | AYFLYQQ<br>QGRLDKL           | Oryctola<br>gus<br>cuniculu<br>s |
| 1 | 1.00 | 1 | 1 | 0.01  | 0.01   | 0.01   | 0.01   | 0.01   | t | 151110 | AEKA                         | Homo<br>sapiens                  |
| 1 | 1.00 | 1 | 1 | 0.03  | 0.03   | 0.03   | 0.03   | 0.03   | t | 158587 | EFGTFLW                      | Homo<br>sapiens                  |

|   |      |   |   |       |        |        |        |        |   |        |                              |                                  |
|---|------|---|---|-------|--------|--------|--------|--------|---|--------|------------------------------|----------------------------------|
| 1 | 1.00 | 1 | 1 | 0.03  | 0.03   | 0.03   | 0.03   | 0.03   | t | 138219 | PTPETGPL<br>QR               | Homo<br>sapiens                  |
| 1 | 1.00 | 1 | 1 | 0.03  | 0.03   | 0.03   | 0.03   | 0.03   | t | 123343 | KAYMESEK<br>F                | Ovis<br>aries                    |
| 1 | 1.00 | 1 | 1 | 0.01  | 0.01   | 0.01   | 0.01   | 0.01   | t | 132907 | TCYDDEM<br>KIGFPEDL          | Trichosu<br>rus<br>vulpecul<br>a |
| 1 | 1.00 | 1 | 1 | 0.01  | 0.01   | 0.01   | 0.01   | 0.01   | t | 114761 | DCSEYPKP<br>DC               | Homo<br>sapiens                  |
| 1 | 1.00 | 1 | 1 | 0.01  | 0.01   | 0.01   | 0.01   | 0.01   | t | 102091 | SSTWNTW<br>QYFPL             | Homo<br>sapiens                  |
| 1 | 1.00 | 1 | 1 | -0.01 | -0.01  | -0.01  | -0.01  | -0.01  | t | 100405 | PYYGPGV<br>DYKNNLD           | Oryctola<br>gus<br>cuniculu<br>s |
| 1 | 1.00 | 1 | 1 | -0.03 | -0.03  | -0.03  | -0.03  | -0.03  | t | 110585 | GAPGIAGA<br>PGFPGPR          | Mus<br>musculu<br>s              |
| 1 | 1.00 | 1 | 1 | -0.03 | -0.03  | -0.03  | -0.03  | -0.03  | t | 115259 | FYQKFPQY<br>LQYLYQGP<br>IVLN | Homo<br>sapiens                  |
| 1 | 1.00 | 1 | 1 | -0.03 | -0.03  | -0.03  | -0.03  | -0.03  | t | 111157 | CMPYGS<br>LAC                | Homo<br>sapiens                  |
| 1 | 1.00 | 1 | 1 | -0.03 | -0.03  | -0.03  | -0.03  | -0.03  | t | 81550  | EIKVQMSA<br>AY               | Homo<br>sapiens                  |
| 1 | 1.00 | 1 | 1 | -0.01 | -0.022 | -0.015 | -0.009 | -0.01  | t | 64050  | THLRALFG<br>YSEVRKVIL<br>TKR | Canis<br>lupus                   |
| 1 | 1.00 | 1 | 1 | -0.05 | -0.048 | -0.05  | -0.043 | -0.05  | t | 140648 | ALREYRKK<br>MDIPA            | Homo<br>sapiens                  |
| 1 | 1.00 | 1 | 1 | 0.01  | 0.01   | 0.01   | 0.01   | 0.012  | t | 132100 | TLPTPVVQ<br>L                | Homo<br>sapiens                  |
| 1 | 1.00 | 1 | 1 | -0.01 | -0.01  | -0.01  | -0.01  | -0.011 | t | 108860 | DGVNH                        | Mus<br>musculu<br>s              |
| 1 | 1.00 | 1 | 1 | 0.01  | 0.011  | 0.006  | 0.011  | 0.008  | t | 48395  | PLLGCIGST<br>CAEDGN          | Mus<br>musculu<br>s              |
| 1 | 1.00 | 1 | 1 | 0.01  | 0.007  | 0.01   | 0.01   | 0.012  | t | 135495 | RITLYL                       | Oryctola<br>gus<br>cuniculu<br>s |
| 1 | 1.00 | 1 | 1 | 0.03  | 0.03   | 0.03   | 0.034  | 0.03   | t | 117448 | CTLAEK                       | Homo<br>sapiens                  |

|   |      |   |   |       |        |        |        |        |   |        |                              |                                  |
|---|------|---|---|-------|--------|--------|--------|--------|---|--------|------------------------------|----------------------------------|
| 1 | 1.00 | 1 | 1 | 0     | -0.003 | 0.002  | 0      | -0.002 | t | 56610  | RYPGQGS<br>PGGNRYP<br>PQG    | Oryctola<br>gus<br>cuniculu<br>s |
| 1 | 1.00 | 1 | 1 | 0     | 0      | 0      | 0      | 0      | t | 44554  | NKND                         | Mus<br>musculu<br>s              |
| 1 | 1.00 | 1 | 1 | 0     | 0.003  | 0      | 0      | 0      | t | 44554  | NKND                         | Mus<br>musculu<br>s              |
| 1 | 1.00 | 1 | 1 | -0.02 | -0.02  | -0.021 | -0.023 | -0.018 | t | 48849  | PPPAPDPS<br>PT               | Homo<br>sapiens                  |
| 1 | 1.00 | 1 | 1 | 0     | 0      | 0      | 0.002  | 0      | t | 25009  | HTYSPHEL<br>SRVAAT           | Homo<br>sapiens                  |
| 1 | 1.00 | 1 | 1 | 0.02  | 0.022  | 0.014  | 0.021  | 0.022  | t | 58903  | SKNFNFEV                     | Homo<br>sapiens                  |
| 1 | 1.00 | 1 | 1 | -0.01 | -0.01  | -0.012 | -0.01  | -0.01  | t | 69833  | VLVLNPSV<br>AATLGFGA<br>YMSK | Mus<br>musculu<br>s              |
| 1 | 1.00 | 1 | 1 | -0.01 | -0.012 | -0.004 | -0.009 | -0.011 | t | 98804  | GLVWTSG<br>PAT               | Mus<br>musculu<br>s              |
| 1 | 1.00 | 1 | 1 | -0.03 | -0.03  | -0.03  | -0.027 | -0.028 | t | 70661  | VQVRI                        | Homo<br>sapiens                  |
| 1 | 1.00 | 1 | 1 | 0.03  | 0.026  | 0.03   | 0.024  | 0.031  | t | 142443 | LSTTEVAM                     | Oryctola<br>gus<br>cuniculu<br>s |
| 1 | 1.00 | 1 | 1 | 0.03  | 0.026  | 0.03   | 0.024  | 0.031  | t | 142443 | LSTTEVAM                     | Oryctola<br>gus<br>cuniculu<br>s |
| 1 | 1.00 | 1 | 1 | 0.02  | 0.02   | 0.02   | 0.02   | 0.02   | t | 108152 | TCPPCPAP<br>ELLGG            | Homo<br>sapiens                  |
| 1 | 1.00 | 1 | 1 | 0.02  | 0.02   | 0.02   | 0.02   | 0.02   | t | 106315 | CSGTKKLS<br>EE               | Homo<br>sapiens                  |
| 1 | 1.00 | 1 | 1 | 0     | -0.002 | 0.005  | -0.001 | 0.002  | t | 52332  | QSHFLLQG<br>T                | Mus<br>musculu<br>s              |
| 1 | 1.00 | 1 | 1 | 0.02  | 0.022  | 0      | 0.021  | 0.024  | t | 46479  | NVSINNN<br>NNNNNSN<br>T      | Homo<br>sapiens                  |

|   |      |   |   |       |        |        |        |        |   |        |                              |                                  |
|---|------|---|---|-------|--------|--------|--------|--------|---|--------|------------------------------|----------------------------------|
| 1 | 1.00 | 1 | 1 | 0.02  | 0.022  | 0.013  | 0.017  | 0.02   | t | 20548  | GKEKVNEL<br>SK               | Homo<br>sapiens                  |
| 1 | 1.00 | 1 | 1 | -0.08 | -0.083 | -0.072 | -0.08  | -0.082 | t | 58956  | SKVALAAL<br>PA               | Oryctola<br>gus<br>cuniculu<br>s |
| 1 | 1.00 | 1 | 1 | -0.03 | -0.032 | -0.027 | -0.031 | -0.032 | t | 19504  | GFCDGYCK<br>THLKASS          | Mus<br>musculu<br>s              |
| 1 | 1.00 | 1 | 1 | -0.03 | -0.032 | -0.027 | -0.031 | -0.032 | t | 19504  | GFCDGYCK<br>THLKASS          | Mus<br>musculu<br>s              |
| 1 | 1.00 | 1 | 1 | 0.01  | 0.01   | 0.008  | 0.014  | 0.012  | t | 134415 | IWRSTQG<br>V                 | Homo<br>sapiens                  |
| 1 | 1.00 | 1 | 1 | -0.03 | -0.03  | -0.03  | -0.03  | -0.03  | t | 142022 | SRIFRGDN                     | Mus<br>musculu<br>s              |
| 1 | 1.00 | 1 | 1 | -0.03 | -0.03  | -0.03  | -0.03  | -0.03  | t | 142022 | SRIFRGDN                     | Mus<br>musculu<br>s              |
| 1 | 1.00 | 1 | 1 | -0.03 | -0.03  | -0.03  | -0.03  | -0.03  | t | 142022 | SRIFRGDN                     | Sus<br>scrofa                    |
| 1 | 1.00 | 1 | 1 | -0.01 | -0.007 | -0.01  | -0.01  | -0.012 | t | 140853 | GEYVQILD<br>AHAAYLN<br>ATPAA | Mus<br>musculu<br>s              |
| 1 | 1.00 | 1 | 1 | 0.08  | 0.08   | 0.08   | 0.08   | 0.08   | t | 115884 | PGEIVESLS<br>S               | Homo<br>sapiens                  |
| 1 | 1.00 | 1 | 1 | 0.04  | 0.04   | 0.04   | 0.04   | 0.04   | t | 79478  | YFWNYSYE<br>VF               | Mus<br>musculu<br>s              |
| 1 | 1.00 | 1 | 1 | 0.02  | 0.012  | 0.02   | 0.02   | 0.02   | t | 144195 | AGGGSGS<br>ADDVVDA           | Bos<br>taurus                    |
| 1 | 1.00 | 1 | 1 | 0.02  | 0.02   | 0.02   | 0.02   | 0.02   | t | 144195 | AGGGSGS<br>ADDVVDA           | Bos<br>taurus                    |
| 1 | 1.00 | 1 | 1 | 0.02  | 0.02   | 0.02   | 0.02   | 0.02   | t | 99445  | LRAPQRCD<br>LDVESGG          | Homo<br>sapiens                  |
| 1 | 1.00 | 1 | 1 | 0.02  | 0.02   | 0.02   | 0.02   | 0.02   | t | 79142  | ACDPSTV<br>MVPWPCS           | Mus<br>musculu<br>s              |
| 1 | 1.00 | 1 | 1 | 0.02  | 0.02   | 0.02   | 0.02   | 0.02   | t | 93328  | LSKVVDNY<br>EL               | Ovis<br>aries                    |



|   |      |   |   |       |        |        |        |        |   |        |                           |                                  |
|---|------|---|---|-------|--------|--------|--------|--------|---|--------|---------------------------|----------------------------------|
| 1 | 1.00 | 1 | 1 | 0     | 0      | 0      | 0      | 0      | t | 151032 | LYQNADTY<br>VFVGSSR       | Homo<br>sapiens                  |
| 1 | 1.00 | 1 | 1 | 0     | 0      | 0      | 0      | 0      | t | 137734 | DTALTCAA<br>LKLK          | Mus<br>musculu<br>s              |
| 1 | 1.00 | 1 | 1 | 0     | 0      | 0      | 0      | 0      | t | 123653 | QCLEDFAK<br>L             | Ovis<br>aries                    |
| 1 | 1.00 | 1 | 1 | 0     | 0      | 0      | 0      | 0      | t | 118610 | SPGFNDG<br>GKNTAPLT<br>LC | Homo<br>sapiens                  |
| 1 | 1.00 | 1 | 1 | 0     | 0      | 0      | 0      | 0      | t | 123307 | IEALPSIA                  | Ovis<br>aries                    |
| 1 | 1.00 | 1 | 1 | 0     | 0      | 0      | 0      | 0      | t | 106921 | TPYTNNPD<br>LLFT          | Mus<br>musculu<br>s              |
| 1 | 1.00 | 1 | 1 | -0.02 | -0.02  | -0.02  | -0.02  | -0.02  | t | 107363 | FLFPPKP                   | Homo<br>sapiens                  |
| 1 | 1.00 | 1 | 1 | -0.04 | -0.04  | -0.04  | -0.04  | -0.04  | t | 142131 | DTPTLHEY<br>MLDL          | Homo<br>sapiens                  |
| 1 | 1.00 | 1 | 1 | 0.01  | 0.007  | 0.008  | 0.01   | 0.01   | t | 22884  | GTVVAVG<br>PGRWDED<br>GE  | Mus<br>musculu<br>s              |
| 1 | 1.00 | 1 | 1 | 0.01  | 0.012  | 0.012  | 0.007  | 0.008  | t | 44858  | NLRGDLQ<br>VLA            | Cavia<br>porcellu<br>s           |
| 1 | 1.00 | 1 | 1 | 0.01  | 0.012  | 0.012  | 0.007  | 0.008  | t | 44858  | NLRGDLQ<br>VLA            | Cavia<br>porcellu<br>s           |
| 1 | 1.00 | 1 | 1 | -0.01 | -0.012 | -0.016 | -0.013 | -0.01  | t | 54238  | RIRFKDDT<br>SF            | Mus<br>musculu<br>s              |
| 1 | 1.00 | 1 | 1 | 0.02  | 0.018  | 0.013  | 0.02   | 0.02   | t | 123016 | AIYENEIHA<br>LWADLP       | Trichosu<br>rus<br>vulpecul<br>a |
| 1 | 1.00 | 1 | 1 | -0.04 | -0.037 | -0.038 | -0.04  | -0.042 | t | 51833  | QPFRPQQ<br>PYP            | Mus<br>musculu<br>s              |
| 1 | 1.00 | 1 | 1 | 0.01  | 0.01   | 0.01   | 0.01   | 0.01   | t | 134781 | RGDGPFR<br>LGG            | Homo<br>sapiens                  |

|   |      |   |   |       |        |        |        |        |   |        |                            |                                  |
|---|------|---|---|-------|--------|--------|--------|--------|---|--------|----------------------------|----------------------------------|
| 1 | 1.00 | 1 | 1 | -0.06 | -0.058 | -0.067 | -0.061 | -0.061 | t | 107828 | ERGLKGHR<br>GFT            | Homo<br>sapiens                  |
| 1 | 1.00 | 1 | 1 | 0     | -0.003 | -0.011 | -0.001 | 0      | t | 138175 | GAPPNGA<br>PPPPVDP         | Oryctola<br>gus<br>cuniculu<br>s |
| 1 | 1.00 | 1 | 1 | 0.03  | 0.03   | 0.03   | 0.03   | 0.031  | t | 49533  | PSTPGDNP<br>LV             | Homo<br>sapiens                  |
| 1 | 1.00 | 1 | 1 | 0.05  | 0.054  | 0.012  | 0.051  | 0.059  | t | 133561 | ESTWYM<br>WQSRSE           | Homo<br>sapiens                  |
| 1 | 1.00 | 1 | 1 | 0.02  | 0.008  | 0.02   | 0.023  | 0.02   | t | 156872 | FSKSSSWE<br>SWLP           | Bos<br>taurus                    |
| 1 | 1.00 | 1 | 1 | 0.09  | 0.09   | 0.09   | 0.09   | 0.09   | t | 110460 | YEQLNDSS<br>EEEEIDG        | Homo<br>sapiens                  |
| 1 | 1.00 | 1 | 1 | -0.02 | -0.018 | -0.016 | -0.019 | -0.02  | t | 47726  | PGPSQKI                    | Homo<br>sapiens                  |
| 1 | 1.00 | 1 | 1 | -0.02 | -0.018 | -0.016 | -0.019 | -0.02  | t | 47726  | PGPSQKI                    | Homo<br>sapiens                  |
| 1 | 1.00 | 1 | 1 | 0.01  | 0.016  | 0.01   | 0.01   | 0.01   | t | 123133 | EKFNMGL<br>DL              | Ovis<br>aries                    |
| 1 | 1.00 | 1 | 1 | -0.02 | -0.02  | -0.018 | -0.02  | -0.019 | t | 153288 | SDPRKMCI<br>Y              | Mus<br>musculu<br>s              |
| 1 | 1.00 | 1 | 1 | 0.02  | 0.018  | 0.028  | 0.019  | 0.02   | t | 79040  | PGQNLCT<br>K               | Mus<br>musculu<br>s              |
| 1 | 1.00 | 1 | 1 | -0.02 | -0.021 | -0.018 | -0.023 | -0.022 | t | 3986   | AQKKIIAEK<br>TKI           | Homo<br>sapiens                  |
| 1 | 1.00 | 1 | 1 | 0     | 0      | 0      | 0      | -0.001 | t | 926    | AEGEFKTR<br>RNTNYQD<br>PAK | Homo<br>sapiens                  |
| 1 | 1.00 | 1 | 1 | 0.02  | 0.02   | 0.015  | 0.023  | 0.02   | t | 24286  | HLPYIEQG<br>MQLAEQ         | Homo<br>sapiens                  |
| 1 | 1.00 | 1 | 1 | 0.01  | 0.01   | 0.01   | 0.01   | 0.01   | t | 72503  | WGQGG                      | Mus<br>musculu<br>s              |
| 1 | 1.00 | 1 | 1 | 0.01  | 0.01   | 0.01   | 0.01   | 0.01   | t | 72503  | WGQGG                      | Mus<br>musculu<br>s              |
| 1 | 1.00 | 1 | 1 | 0.02  | 0.02   | 0.02   | 0.02   | 0.019  | t | 151792 | AINEGQNK<br>PEI            | Homo<br>sapiens                  |

|   |      |   |   |       |       |       |        |        |   |        |                            |                                  |
|---|------|---|---|-------|-------|-------|--------|--------|---|--------|----------------------------|----------------------------------|
| 1 | 1.00 | 1 | 1 | 0     | 0     | 0     | 0      | -0.001 | t | 130986 | NPIENMM<br>DRDSQ           | Homo<br>sapiens                  |
| 1 | 1.00 | 1 | 1 | -0.01 | -0.01 | -0.01 | -0.014 | -0.013 | t | 28911  | ITGHRMA<br>WMMMM<br>NWS    | Homo<br>sapiens                  |
| 1 | 1.00 | 1 | 1 | 0.05  | 0.052 | 0.043 | 0.047  | 0.052  | t | 14574  | ETTTASGL<br>VIPDTAK        | Homo<br>sapiens                  |
| 1 | 1.00 | 1 | 1 | 0.01  | 0.008 | 0     | 0.013  | 0.012  | t | 8475   | DGQPAGD<br>RADGQPA<br>GDRA | Mus<br>musculu<br>s              |
| 1 | 1.00 | 1 | 1 | 0     | 0.004 | 0.007 | -0.003 | -0.001 | t | 106411 | FALEAYAF<br>DI             | Homo<br>sapiens                  |
| 1 | 1.00 | 1 | 1 | 0.03  | 0.03  | 0.03  | 0.03   | 0.03   | t | 92809  | GGKGDDIL<br>DG             | Ovis<br>aries                    |
| 1 | 1.00 | 1 | 1 | 0.01  | 0.01  | 0.01  | 0.01   | 0.01   | t | 140605 | TLYDALGA<br>V              | Mus<br>musculu<br>s              |
| 1 | 1.00 | 1 | 1 | 0.01  | 0.01  | 0.01  | 0.01   | 0.01   | t | 140605 | TLYDALGA<br>V              | Mus<br>musculu<br>s              |
| 1 | 1.00 | 1 | 1 | 0.01  | 0.01  | 0.01  | 0.01   | 0.01   | t | 105697 | CCAVLNG<br>AY              | Mus<br>musculu<br>s              |
| 1 | 1.00 | 1 | 1 | 0.02  | 0.02  | 0.02  | 0.021  | 0.021  | t | 51306  | QLDPAFG                    | Mus<br>musculu<br>s              |
| 1 | 1.00 | 1 | 1 | -0.01 | -0.01 | -0.01 | -0.01  | -0.01  | t | 135698 | IYTKVSR                    | Homo<br>sapiens                  |
| 1 | 1.00 | 1 | 1 | -0.01 | -0.01 | -0.01 | -0.01  | -0.01  | t | 78299  | WHLAYSP                    | Homo<br>sapiens                  |
| 1 | 1.00 | 1 | 1 | 0.02  | 0.016 | 0.013 | 0.023  | 0.021  | t | 106418 | FIFPPSDE<br>QLKSGTAS<br>VV | Oryctola<br>gus<br>cuniculu<br>s |
| 1 | 1.00 | 1 | 1 | 0.01  | 0.01  | 0.011 | 0.01   | 0.01   | t | 60594  | SQWNKPS<br>K               | Mus<br>musculu<br>s              |
| 1 | 1.00 | 1 | 1 | 0.02  | 0.022 | 0.016 | 0.021  | 0.02   | t | 73068  | WSEVDAV<br>SSP             | Homo<br>sapiens                  |
| 1 | 1.00 | 1 | 1 | 0.03  | 0.034 | 0.03  | 0.03   | 0.028  | t | 79369  | RGDLRGDL<br>RGDL           | Cavia<br>porcellu<br>s           |

|   |      |   |   |       |        |        |        |        |   |        |                              |                                  |
|---|------|---|---|-------|--------|--------|--------|--------|---|--------|------------------------------|----------------------------------|
| 1 | 1.00 | 1 | 1 | 0.03  | 0.027  | 0.03   | 0.03   | 0.028  | t | 79369  | RGDLRGDL<br>RGDL             | Oryctola<br>gus<br>cuniculu<br>s |
| 1 | 1.00 | 1 | 1 | 0.01  | 0.01   | 0.009  | 0.007  | 0.011  | t | 22372  | GSIGAAS<br>MEF               | Homo<br>sapiens                  |
| 1 | 1.00 | 1 | 1 | 0     | 0      | 0      | 0      | 0      | t | 137451 | SHRLPVK                      | Mus<br>musculu<br>s              |
| 1 | 1.00 | 1 | 1 | -0.04 | -0.04  | -0.047 | -0.049 | -0.042 | t | 130922 | KGMLPDP<br>KNV               | Homo<br>sapiens                  |
| 1 | 1.00 | 1 | 1 | 0.02  | 0.016  | 0.003  | 0.013  | 0.021  | t | 115640 | QKSQRSQ<br>DEN               | Oryctola<br>gus<br>cuniculu<br>s |
| 1 | 1.00 | 1 | 1 | -0.01 | -0.007 | -0.01  | -0.01  | -0.007 | t | 108075 | PREPQVY                      | Mus<br>musculu<br>s              |
| 1 | 1.00 | 1 | 1 | -0.01 | -0.006 | -0.021 | -0.013 | -0.01  | t | 29897  | KANADAK<br>AAYEAAV<br>AANNA  | Homo<br>sapiens                  |
| 1 | 1.00 | 1 | 1 | -0.02 | -0.02  | -0.013 | -0.023 | -0.02  | t | 25296  | IAGMDWA<br>VK                | Homo<br>sapiens                  |
| 1 | 1.00 | 1 | 1 | -0.06 | -0.058 | -0.059 | -0.063 | -0.062 | t | 114997 | YTNDCLLC<br>AY               | Homo<br>sapiens                  |
| 1 | 1.00 | 1 | 1 | 0.03  | 0.03   | 0.018  | 0.03   | 0.03   | t | 42074  | MLTESTFK<br>NLSVTFKF<br>GEEF | Mus<br>musculu<br>s              |
| 1 | 1.00 | 1 | 1 | 0.03  | 0.03   | 0.018  | 0.03   | 0.03   | t | 42074  | MLTESTFK<br>NLSVTFKF<br>GEEF | Mus<br>musculu<br>s              |
| 1 | 1.00 | 1 | 1 | -0.01 | -0.01  | -0.013 | -0.01  | -0.01  | t | 45877  | NSKKIICTC<br>KEPTPNAY<br>YEG | Mus<br>musculu<br>s              |
| 1 | 1.00 | 1 | 1 | 0.03  | 0.028  | 0.03   | 0.029  | 0.03   | t | 116930 | AYKLPQTD<br>DST              | Mus<br>musculu<br>s              |
| 1 | 1.00 | 1 | 1 | 0.07  | 0.07   | 0.07   | 0.07   | 0.07   | t | 103792 | AGTELSAT<br>GNESGGG          | Oryctola<br>gus<br>cuniculu<br>s |

|   |      |   |   |       |        |        |        |        |   |        |                      |                                  |
|---|------|---|---|-------|--------|--------|--------|--------|---|--------|----------------------|----------------------------------|
| 1 | 1.00 | 1 | 1 | -0.01 | -0.01  | -0.008 | -0.01  | -0.011 | t | 60024  | SPDVDLG<br>DISGINAS  | Mus<br>musculu<br>s              |
| 1 | 1.00 | 1 | 1 | 0.03  | 0.028  | 0.033  | 0.033  | 0.031  | t | 33222  | KRTSIWGT             | Mus<br>musculu<br>s              |
| 1 | 1.00 | 1 | 1 | 0.01  | 0.01   | 0.005  | 0.01   | 0.012  | t | 145838 | IVSLVEETS<br>FIDAGAP | Mus<br>musculu<br>s              |
| 1 | 1.00 | 1 | 1 | -0.02 | -0.02  | -0.025 | -0.02  | -0.019 | t | 107219 | PAGGPGF<br>PG        | Rattus<br>norvegic<br>us         |
| 1 | 1.00 | 1 | 1 | 0.03  | 0.03   | 0.03   | 0.03   | 0.031  | t | 7673   | DAVTE                | Mus<br>musculu<br>s              |
| 1 | 1.00 | 1 | 1 | -0.01 | -0.013 | -0.002 | -0.01  | -0.013 | t | 42885  | MTTAQGT<br>SMYPSC    | Oryctola<br>gus<br>cuniculu<br>s |
| 1 | 1.00 | 1 | 1 | 0.02  | 0.02   | 0.02   | 0.02   | 0.02   | t | 73611  | YDYQHKE<br>G         | Oryctola<br>gus<br>cuniculu<br>s |
| 1 | 1.00 | 1 | 1 | 0.02  | 0.02   | 0.02   | 0.02   | 0.02   | t | 4770   | ASSGIGPE             | Oryctola<br>gus<br>cuniculu<br>s |
| 1 | 1.00 | 1 | 1 | -0.03 | -0.026 | -0.031 | -0.029 | -0.032 | t | 147064 | KHQGAQY<br>VWNRTA    | Homo<br>sapiens                  |
| 1 | 1.00 | 1 | 1 | 0.02  | 0.017  | 0.02   | 0.02   | 0.022  | t | 140889 | PAVLGHD<br>EAAYS     | Oryctola<br>gus<br>cuniculu<br>s |
| 1 | 1.00 | 1 | 1 | -0.04 | -0.036 | -0.053 | -0.043 | -0.04  | t | 18536  | GACAPYRR<br>LHLCD    | Homo<br>sapiens                  |
| 1 | 1.00 | 1 | 1 | 0.04  | 0.043  | 0.028  | 0.04   | 0.042  | t | 75418  | YPTFGEHK<br>QEKDLEY  | Mus<br>musculu<br>s              |
| 1 | 1.00 | 1 | 1 | -0.04 | -0.046 | -0.04  | -0.04  | -0.042 | t | 123030 | APPPAGAMIP           | Oryctola<br>gus<br>cuniculu<br>s |

|   |      |   |   |       |        |        |        |       |   |        |                            |                                  |
|---|------|---|---|-------|--------|--------|--------|-------|---|--------|----------------------------|----------------------------------|
| 1 | 1.00 | 1 | 1 | 0     | 0      | -0.004 | 0      | 0     | t | 71577  | VTYEIDLT<br>NKNAAKL<br>RGD | Homo<br>sapiens                  |
| 1 | 1.00 | 1 | 1 | 0.01  | 0.01   | 0.01   | 0.01   | 0.008 | t | 17366  | FPQPQQP<br>QQS             | Mus<br>musculu<br>s              |
| 1 | 1.00 | 1 | 1 | 0.06  | 0.06   | 0.06   | 0.06   | 0.06  | t | 135728 | NSTEAETI                   | Homo<br>sapiens                  |
| 1 | 1.00 | 1 | 1 | 0.04  | 0.04   | 0.04   | 0.04   | 0.04  | t | 135719 | MEEKCSFE                   | Homo<br>sapiens                  |
| 1 | 1.00 | 1 | 1 | 0.02  | 0.02   | 0.02   | 0.02   | 0.02  | t | 135995 | SIQSIVPAL<br>EIA           | Homo<br>sapiens                  |
| 1 | 1.00 | 1 | 1 | 0.02  | 0.02   | 0.02   | 0.02   | 0.02  | t | 144036 | PSIIGGSSV<br>DLV           | Homo<br>sapiens                  |
| 1 | 1.00 | 1 | 1 | 0.02  | 0.02   | 0.02   | 0.02   | 0.02  | t | 114772 | DGVITYTN<br>DCL            | Homo<br>sapiens                  |
| 1 | 1.00 | 1 | 1 | 0.02  | 0.02   | 0.02   | 0.02   | 0.02  | t | 103121 | DVGS LNG<br>TYVNREPV       | Homo<br>sapiens                  |
| 1 | 1.00 | 1 | 1 | 0     | 0.003  | 0      | 0      | 0     | t | 98330  | PGSDVYYA<br>GL             | Mus<br>musculu<br>s              |
| 1 | 1.00 | 1 | 1 | 0     | 0      | 0      | 0      | 0     | t | 97283  | ETINFADA<br>E              | Oryctola<br>gus<br>cuniculu<br>s |
| 1 | 1.00 | 1 | 1 | -0.01 | -0.01  | -0.009 | -0.013 | -0.01 | t | 42633  | MSPVNKS<br>FEIEVTCS        | Homo<br>sapiens                  |
| 1 | 1.00 | 1 | 1 | -0.01 | -0.004 | -0.01  | -0.009 | -0.01 | t | 44851  | NLQKDEP<br>NGRA            | Equus<br>caballus                |
| 1 | 1.00 | 1 | 1 | -0.01 | -0.01  | -0.01  | -0.01  | -0.01 | t | 63037  | TAVSPTTL<br>R              | Mus<br>musculu<br>s              |
| 1 | 1.00 | 1 | 1 | -0.01 | -0.01  | -0.01  | -0.01  | -0.01 | t | 27462  | IMDINKRK                   | Homo<br>sapiens                  |
| 1 | 1.00 | 1 | 1 | 0.01  | 0.013  | 0.012  | 0.01   | 0.011 | t | 62016  | STYQYIYNL<br>T             | Sus<br>scrofa                    |
| 1 | 1.00 | 1 | 1 | -0.01 | -0.01  | -0.01  | -0.008 | -0.01 | t | 70813  | VRRKDDR<br>RGALLSP         | Homo<br>sapiens                  |

|   |      |   |   |       |        |        |        |        |   |        |                 |                       |
|---|------|---|---|-------|--------|--------|--------|--------|---|--------|-----------------|-----------------------|
| 1 | 1.00 | 1 | 1 | 0     | 0      | -0.005 | 0      | 0.002  | t | 127725 | LPACNTPG        | Homo sapiens          |
| 1 | 1.00 | 1 | 1 | 0.01  | 0.01   | 0.003  | 0.007  | 0.01   | t | 54206  | RIPADVID AFHAAT | Homo sapiens          |
| 1 | 1.00 | 1 | 1 | 0.01  | 0.007  | -0.001 | 0.01   | 0.012  | t | 36043  | LGAALLQS AR     | Oryctolagus cuniculus |
| 1 | 1.00 | 1 | 1 | 0.02  | 0.02   | 0.024  | 0.02   | 0.02   | t | 157276 | FQSQPPP GVPQG   | Canis lupus           |
| 1 | 1.00 | 1 | 1 | 0     | -0.002 | -0.001 | -0.001 | 0      | t | 2609   | ALHQALQ DPRVRGL | Mus musculus          |
| 1 | 1.00 | 1 | 1 | 0     | -0.002 | -0.001 | -0.001 | 0      | t | 2609   | ALHQALQ DPRVRGL | Mus musculus          |
| 1 | 1.00 | 1 | 1 | 0.01  | 0.01   | 0.01   | 0.01   | 0.01   | t | 23190  | GVTYEIDL TNKNA  | Homo sapiens          |
| 1 | 1.00 | 1 | 1 | -0.01 | -0.012 | -0.01  | -0.007 | -0.01  | t | 95814  | SAQSGASA QSGA   | Mus musculus          |
| 1 | 1.00 | 1 | 1 | -0.01 | -0.007 | -0.011 | -0.01  | -0.011 | t | 60595  | SQWNKPS KPKT    | Mus musculus          |
| 1 | 1.00 | 1 | 1 | -0.01 | -0.01  | -0.01  | -0.01  | -0.01  | t | 69595  | VLLGACSF        | Oryctolagus cuniculus |
| 1 | 1.00 | 1 | 1 | -0.02 | -0.02  | -0.01  | -0.013 | -0.019 | t | 122136 | LGRGGSK         | Homo sapiens          |
| 1 | 1.00 | 1 | 1 | 0     | 0.002  | 0.004  | 0.003  | 0.002  | t | 136015 | YHVYEVNL VSEH   | Homo sapiens          |
| 1 | 1.00 | 1 | 1 | 0     | -0.003 | 0      | 0      | 0      | t | 50507  | QDPRVR          | Oryctolagus cuniculus |
| 1 | 1.00 | 1 | 1 | 0     | -0.003 | 0      | 0      | 0      | t | 50507  | QDPRVR          | Oryctolagus cuniculus |

|   |      |   |   |       |        |        |        |        |   |        |                             |                                  |
|---|------|---|---|-------|--------|--------|--------|--------|---|--------|-----------------------------|----------------------------------|
| 1 | 1.00 | 1 | 1 | -0.02 | -0.023 | -0.029 | -0.02  | -0.02  | t | 113862 | SITSGPMA<br>RP              | Oryctola<br>gus<br>cuniculu<br>s |
| 1 | 1.00 | 1 | 1 | -0.03 | -0.037 | -0.03  | -0.027 | -0.031 | t | 32145  | KLRRSTN<br>WG               | Homo<br>sapiens                  |
| 1 | 1.00 | 1 | 1 | -0.01 | -0.01  | -0.005 | -0.01  | -0.013 | t | 30290  | KEAFRLKN<br>GRQE            | Homo<br>sapiens                  |
| 1 | 1.00 | 1 | 1 | -0.06 | -0.056 | -0.056 | -0.06  | -0.06  | t | 123281 | GYWKLRG<br>LA               | Ovis<br>aries                    |
| 1 | 1.00 | 1 | 1 | -0.06 | -0.054 | -0.056 | -0.06  | -0.06  | t | 123281 | GYWKLRG<br>LA               | Ovis<br>aries                    |
| 1 | 1.00 | 1 | 1 | 0     | 0.002  | 0.006  | 0.003  | 0      | t | 65697  | TPPRCSDQ<br>MYCSLSR         | Homo<br>sapiens                  |
| 1 | 1.00 | 1 | 1 | 0     | 0.002  | 0.006  | 0.003  | 0      | t | 65697  | TPPRCSDQ<br>MYCSLSR         | Homo<br>sapiens                  |
| 1 | 1.00 | 1 | 1 | 0.02  | 0.017  | 0.018  | 0.02   | 0.021  | t | 126227 | HNNAHY<br>VFEEQED           | Oryctola<br>gus<br>cuniculu<br>s |
| 1 | 1.00 | 1 | 1 | 0.03  | 0.026  | 0.033  | 0.033  | 0.03   | t | 115265 | GKDITADN<br>K               | Oryctola<br>gus<br>cuniculu<br>s |
| 1 | 1.00 | 1 | 1 | 0.01  | 0.01   | -0.004 | 0.004  | 0.01   | t | 55889  | RSLPPIVKD<br>ASIQVVS<br>AIR | Homo<br>sapiens                  |
| 1 | 1.00 | 1 | 1 | 0.07  | 0.07   | 0.07   | 0.07   | 0.07   | t | 115906 | PVEPFTE<br>S<br>QS          | Homo<br>sapiens                  |
| 1 | 1.00 | 1 | 1 | 0.05  | 0.05   | 0.05   | 0.05   | 0.05   | t | 96208  | EDEEDEE<br>D<br>KE          | Homo<br>sapiens                  |
| 1 | 1.00 | 1 | 1 | 0.03  | 0.03   | 0.03   | 0.03   | 0.03   | t | 106850 | SLQQLYD<br>E<br>YGP         | Mus<br>musculu<br>s              |
| 1 | 1.00 | 1 | 1 | 0.03  | 0.03   | 0.03   | 0.03   | 0.03   | t | 103578 | SAAIGLS<br>M<br>AGSSAMI     | Homo<br>sapiens                  |
| 1 | 1.00 | 1 | 1 | 0.03  | 0.03   | 0.03   | 0.03   | 0.03   | t | 107765 | CESAQRPF<br>GCC             | Mus<br>musculu<br>s              |



|   |      |   |   |       |        |        |        |        |   |        |                       |                                  |
|---|------|---|---|-------|--------|--------|--------|--------|---|--------|-----------------------|----------------------------------|
| 1 | 1.00 | 1 | 1 | 0.03  | 0.03   | 0.03   | 0.03   | 0.03   | t | 107765 | CESAQRPF<br>GCC       | Mus<br>musculu<br>s              |
| 1 | 1.00 | 1 | 1 | 0.03  | 0.03   | 0.03   | 0.03   | 0.03   | t | 112398 | WFAYWG<br>Q           | Homo<br>sapiens                  |
| 1 | 1.00 | 1 | 1 | 0.01  | 0.013  | 0.005  | 0.002  | 0.008  | t | 144208 | AQAGGPD<br>GAAAGGG    | Capra<br>hircus                  |
| 1 | 1.00 | 1 | 1 | 0.01  | 0.005  | 0.005  | 0.002  | 0.008  | t | 144208 | AQAGGPD<br>GAAAGGG    | Bos<br>taurus                    |
| 1 | 1.00 | 1 | 1 | 0.01  | 0.01   | 0.01   | 0.01   | 0.01   | t | 137883 | GQNVLSA<br>DFTPG      | Homo<br>sapiens                  |
| 1 | 1.00 | 1 | 1 | 0.01  | 0.01   | 0.01   | 0.01   | 0.01   | t | 120920 | RLVEHLLD<br>PSRYNKLIR | Oryctola<br>gus<br>cuniculu<br>s |
| 1 | 1.00 | 1 | 1 | -0.01 | -0.01  | -0.01  | -0.01  | -0.01  | t | 115907 | PVVVPPFL<br>QP        | Homo<br>sapiens                  |
| 1 | 1.00 | 1 | 1 | 0.01  | 0.012  | 0.01   | 0.017  | 0.01   | t | 104155 | NPEDCFKT<br>GCNSPT    | Homo<br>sapiens                  |
| 1 | 1.00 | 1 | 1 | 0.01  | 0.008  | 0.009  | 0.007  | 0.01   | t | 33126  | KREMVITF<br>K         | Mus<br>musculu<br>s              |
| 1 | 1.00 | 1 | 1 | -0.02 | -0.027 | -0.017 | -0.019 | -0.02  | t | 968    | AEHQFKEK<br>V         | Homo<br>sapiens                  |
| 1 | 1.00 | 1 | 1 | 0     | 0      | -0.001 | 0      | -0.001 | t | 121474 | KKAPAKKG<br>EKVPKGK   | Homo<br>sapiens                  |
| 1 | 1.00 | 1 | 1 | -0.02 | -0.016 | -0.013 | -0.013 | -0.018 | t | 112860 | YAQPSEK               | Homo<br>sapiens                  |
| 1 | 1.00 | 1 | 1 | 0.02  | 0.009  | 0.016  | 0.02   | 0.02   | t | 147083 | LCSEYRNT<br>QIYTIN    | Oryctola<br>gus<br>cuniculu<br>s |
| 1 | 1.00 | 1 | 1 | 0.02  | 0.009  | 0.016  | 0.02   | 0.02   | t | 147083 | LCSEYRNT<br>QIYTIN    | Oryctola<br>gus<br>cuniculu<br>s |
| 1 | 1.00 | 1 | 1 | 0     | 0.003  | 0.008  | 0.001  | -0.002 | t | 16114  | FHISCLTFG<br>RET      | Mus<br>musculu<br>s              |

|   |      |   |   |       |        |        |        |        |   |        |                              |                     |
|---|------|---|---|-------|--------|--------|--------|--------|---|--------|------------------------------|---------------------|
| 1 | 1.00 | 1 | 1 | -0.01 | -0.01  | -0.012 | -0.01  | -0.01  | t | 8898   | DKILVQAG<br>EAETMTP          | Homo<br>sapiens     |
| 1 | 1.00 | 1 | 1 | -0.01 | -0.01  | -0.012 | -0.01  | -0.01  | t | 8898   | DKILVQAG<br>EAETMTP          | Homo<br>sapiens     |
| 1 | 1.00 | 1 | 1 | -0.02 | -0.02  | -0.03  | -0.02  | -0.02  | t | 140938 | YLNATPAA<br>KVLVEGNT<br>DERG | Mus<br>musculu<br>s |
| 1 | 1.00 | 1 | 1 | 0.03  | 0.03   | 0.03   | 0.032  | 0.03   | t | 22123  | GRLGTYRY<br>VSSGER           | Homo<br>sapiens     |
| 1 | 1.00 | 1 | 1 | 0.01  | 0.012  | 0.01   | 0.013  | 0.011  | t | 119837 | ELIPSTSSA<br>VPLIGK          | Homo<br>sapiens     |
| 1 | 1.00 | 1 | 1 | 0.05  | 0.048  | 0.057  | 0.051  | 0.049  | t | 103083 | CGGVYDD<br>KTGCA             | Mus<br>musculu<br>s |
| 1 | 1.00 | 1 | 1 | -0.03 | -0.028 | -0.03  | -0.023 | -0.028 | t | 107366 | FPPKPKD                      | Homo<br>sapiens     |
| 1 | 1.00 | 1 | 1 | -0.01 | -0.01  | 0.007  | -0.01  | -0.014 | t | 145921 | NPEIVYQY                     | Mus<br>musculu<br>s |
| 1 | 1.00 | 1 | 1 | 0     | 0.004  | 0.003  | 0.001  | 0      | t | 51374  | QLINTNGS<br>WHVN             | Homo<br>sapiens     |
| 1 | 1.00 | 1 | 1 | 0     | 0.004  | 0      | 0.001  | 0      | t | 75498  | YQHKEGRF                     | Homo<br>sapiens     |
| 1 | 1.00 | 1 | 1 | 0     | 0      | 0      | 0.003  | 0      | t | 42795  | MTEQQW<br>NFAGIEAA<br>AS     | Homo<br>sapiens     |
| 1 | 1.00 | 1 | 1 | 0     | 0.005  | 0      | 0.003  | 0      | t | 42795  | MTEQQW<br>NFAGIEAA<br>AS     | Homo<br>sapiens     |
| 1 | 1.00 | 1 | 1 | -0.01 | -0.012 | -0.01  | -0.011 | -0.01  | t | 151031 | LVKKGNSY<br>PKLSKSY          | Mus<br>musculu<br>s |
| 1 | 1.00 | 1 | 1 | -0.01 | -0.01  | -0.011 | -0.006 | -0.01  | t | 125029 | EIERDTER<br>DRFLSADE<br>AV   | Homo<br>sapiens     |

|   |      |   |   |       |        |        |        |        |   |        |                              |                                  |
|---|------|---|---|-------|--------|--------|--------|--------|---|--------|------------------------------|----------------------------------|
| 1 | 1.00 | 1 | 1 | 0     | -0.002 | 0      | 0.001  | 0      | t | 28911  | ITGHRMA<br>WMMMM<br>NWS      | Mus<br>musculu<br>s              |
| 1 | 1.00 | 1 | 1 | 0     | -0.002 | 0      | -0.001 | 0      | t | 4737   | ASREAK                       | Mus<br>musculu<br>s              |
| 1 | 1.00 | 1 | 1 | 0     | 0      | 0      | 0.002  | 0      | t | 65515  | TPCAAEEQ<br>KLPINA           | Homo<br>sapiens                  |
| 1 | 1.00 | 1 | 1 | -0.01 | -0.008 | -0.015 | -0.007 | -0.01  | t | 114941 | RQDENYEE<br>AIVHLKVA<br>ALGS | Homo<br>sapiens                  |
| 1 | 1.00 | 1 | 1 | 0.04  | 0.04   | 0.04   | 0.04   | 0.042  | t | 22783  | GTPLDIDT<br>ASESS            | Mus<br>musculu<br>s              |
| 1 | 1.00 | 1 | 1 | 0     | 0      | -0.006 | 0      | 0      | t | 91410  | GQVKRDN<br>LAPMSDG<br>A      | Oryctola<br>gus<br>cuniculu<br>s |
| 1 | 1.00 | 1 | 1 | -0.04 | -0.036 | -0.043 | -0.039 | -0.04  | t | 51758  | QNRLESIK<br>DS               | Homo<br>sapiens                  |
| 1 | 1.00 | 1 | 1 | 0.06  | 0.06   | 0.06   | 0.06   | 0.061  | t | 6816   | CPNSLTPA<br>DPTMDY           | Mus<br>musculu<br>s              |
| 1 | 1.00 | 1 | 1 | -0.01 | -0.01  | -0.01  | -0.01  | -0.011 | t | 131295 | ECQEATL<br>MVMVSK<br>DLFGTGK | Callithrix<br>pygmae<br>a        |
| 1 | 1.00 | 1 | 1 | -0.02 | -0.02  | -0.02  | -0.016 | -0.018 | t | 118575 | RATWKS<br>N<br>Y             | Homo<br>sapiens                  |
| 1 | 1.00 | 1 | 1 | 0     | 0      | 0      | 0      | 0      | t | 6540   | CLAVLLGA                     | Oryctola<br>gus<br>cuniculu<br>s |
| 1 | 1.00 | 1 | 1 | -0.05 | -0.05  | -0.05  | -0.05  | -0.05  | t | 145832 | IPLGTRPP                     | Mus<br>musculu<br>s              |
| 1 | 1.00 | 1 | 1 | -0.01 | -0.01  | -0.01  | -0.01  | -0.012 | t | 131913 | IGGGWGN<br>SDARYTPG          | Homo<br>sapiens                  |
| 1 | 1.00 | 1 | 1 | 0.05  | 0.052  | 0.05   | 0.051  | 0.049  | t | 151026 | LREQLSSV<br>SSFERFE          | Homo<br>sapiens                  |
| 1 | 1.00 | 1 | 1 | 0.02  | 0.016  | 0.02   | 0.023  | 0.02   | t | 76350  | YVLLSEKKI<br>S               | Oryctola<br>gus<br>cuniculu<br>s |

|   |      |   |   |       |       |       |       |        |   |        |                              |                                  |
|---|------|---|---|-------|-------|-------|-------|--------|---|--------|------------------------------|----------------------------------|
| 1 | 1.00 | 1 | 1 | -0.01 | -0.01 | -0.01 | -0.01 | -0.011 | t | 131130 | VIASLTGG<br>RRFEYDDP<br>RFLR | Homo<br>sapiens                  |
| 1 | 1.00 | 1 | 1 | 0.02  | 0.02  | 0.016 | 0.02  | 0.02   | t | 28413  | IRVEES                       | Homo<br>sapiens                  |
| 1 | 1.00 | 1 | 1 | 0.02  | 0.02  | 0.021 | 0.017 | 0.019  | t | 44227  | NIFSGFTPE<br>FLEQAF          | Homo<br>sapiens                  |
| 1 | 1.00 | 1 | 1 | 0.02  | 0.02  | 0.022 | 0.02  | 0.016  | t | 55924  | RSQDACIE<br>FVQQEVD          | Mus<br>musculu<br>s              |
| 1 | 1.00 | 1 | 1 | 0.03  | 0.03  | 0.024 | 0.03  | 0.03   | t | 75920  | YSVLYNST<br>FFSTFKCY<br>G    | Mus<br>musculu<br>s              |
| 1 | 1.00 | 1 | 1 | 0.03  | 0.027 | 0.024 | 0.03  | 0.03   | t | 75920  | YSVLYNST<br>FFSTFKCY<br>G    | Oryctola<br>gus<br>cuniculu<br>s |
| 1 | 1.00 | 1 | 1 | 0.03  | 0.03  | 0.024 | 0.03  | 0.03   | t | 75920  | YSVLYNST<br>FFSTFKCY<br>G    | Homo<br>sapiens                  |
| 1 | 1.00 | 1 | 1 | 0.04  | 0.04  | 0.04  | 0.04  | 0.04   | t | 99775  | WELQGDR<br>RCQSQLER          | Homo<br>sapiens                  |
| 1 | 1.00 | 1 | 1 | 0.04  | 0.04  | 0.04  | 0.04  | 0.04   | t | 78001  | SEGLKEET                     | Mus<br>musculu<br>s              |
| 1 | 1.00 | 1 | 1 | 0.02  | 0.02  | 0.02  | 0.02  | 0.02   | t | 149042 | FLHTRLLFR<br>IVSYSG          | Rattus<br>norvegic<br>us         |
| 1 | 1.00 | 1 | 1 | 0.02  | 0.02  | 0.02  | 0.02  | 0.02   | t | 120939 | SEQSKEVY<br>YE               | Mus<br>musculu<br>s              |
| 1 | 1.00 | 1 | 1 | 0     | 0     | 0     | 0     | 0      | t | 141581 | YVYRWVE<br>AECVA             | Mus<br>musculu<br>s              |
| 1 | 1.00 | 1 | 1 | 0     | 0     | 0     | 0     | 0      | t | 153423 | MPKDMLP<br>YANPNGG<br>GS     | Mus<br>musculu<br>s              |
| 1 | 1.00 | 1 | 1 | 0     | 0     | 0     | 0     | 0      | t | 119654 | TSGVHTFP                     | Homo<br>sapiens                  |
| 1 | 1.00 | 1 | 1 | 0     | 0     | 0     | 0     | 0      | t | 123075 | DFLGKNPY<br>L                | Ovis<br>aries                    |
| 1 | 1.00 | 1 | 1 | 0     | 0     | 0     | 0     | 0      | t | 108037 | MTQMPT<br>NHAMQLI<br>LE      | Homo<br>sapiens                  |

|   |      |   |   |       |        |        |        |        |   |        |                              |                                  |
|---|------|---|---|-------|--------|--------|--------|--------|---|--------|------------------------------|----------------------------------|
| 1 | 1.00 | 1 | 1 | -0.02 | -0.02  | -0.02  | -0.02  | -0.02  | t | 135900 | ATCRFYTL<br>DSIK             | Homo<br>sapiens                  |
| 1 | 1.00 | 1 | 1 | 0.01  | 0.012  | 0.004  | 0.007  | 0.009  | t | 95093  | HQQGGW<br>STLIEDNIP          | Homo<br>sapiens                  |
| 1 | 1.00 | 1 | 1 | 0.01  | 0.006  | 0.008  | 0.013  | 0.01   | t | 95728  | QPPVSQF<br>HIQQGQ            | Oryctola<br>gus<br>cuniculu<br>s |
| 1 | 1.00 | 1 | 1 | 0.03  | 0.03   | 0.03   | 0.03   | 0.031  | t | 61800  | STNS                         | Mus<br>musculu<br>s              |
| 1 | 1.00 | 1 | 1 | 0.01  | 0.01   | 0.01   | 0.01   | 0.007  | t | 151731 | SAQSQRA<br>PDR               | Mus<br>musculu<br>s              |
| 1 | 1.00 | 1 | 1 | 0     | 0      | -0.004 | 0.003  | 0      | t | 38764  | LPVWARP<br>D                 | Homo<br>sapiens                  |
| 1 | 1.00 | 1 | 1 | 0     | 0.003  | 0      | 0      | -0.001 | t | 135477 | LGAGLG                       | Mus<br>musculu<br>s              |
| 1 | 1.00 | 1 | 1 | 0.01  | 0.01   | 0.01   | 0.01   | 0.01   | t | 107034 | YTTRR                        | Homo<br>sapiens                  |
| 1 | 1.00 | 1 | 1 | 0.06  | 0.058  | 0.058  | 0.057  | 0.06   | t | 46849  | PALDKLKL<br>TGDEATG<br>A     | Mus<br>musculu<br>s              |
| 1 | 1.00 | 1 | 1 | 0.06  | 0.058  | 0.058  | 0.057  | 0.06   | t | 46849  | PALDKLKL<br>TGDEATG<br>A     | Mus<br>musculu<br>s              |
| 1 | 1.00 | 1 | 1 | -0.03 | -0.028 | -0.023 | -0.033 | -0.03  | t | 95898  | TDYKKY                       | Homo<br>sapiens                  |
| 1 | 1.00 | 1 | 1 | -0.04 | -0.04  | -0.04  | -0.04  | -0.042 | t | 2558   | ALGGWGL<br>HQPPPQIF<br>LKILP | Homo<br>sapiens                  |
| 1 | 1.00 | 1 | 1 | -0.01 | -0.012 | -0.012 | -0.011 | -0.01  | t | 17642  | FRRYQEER                     | Anas<br>platyrhy<br>nchos        |
| 1 | 1.00 | 1 | 1 | -0.01 | -0.01  | -0.02  | -0.01  | -0.008 | t | 104231 | SAADEKFI<br>KETEHAkd<br>YG   | Oryctola<br>gus<br>cuniculu<br>s |
| 1 | 1.00 | 1 | 1 | 0     | 0.004  | 0.006  | 0.001  | 0      | t | 28637  | ISNRDF                       | Homo<br>sapiens                  |

|   |      |   |   |       |        |        |        |        |   |        |                              |                                  |
|---|------|---|---|-------|--------|--------|--------|--------|---|--------|------------------------------|----------------------------------|
| 1 | 1.00 | 1 | 1 | -0.01 | -0.012 | -0.01  | -0.007 | -0.01  | t | 95827  | SGASAQS<br>GASAQ             | Mus<br>musculu<br>s              |
| 1 | 1.00 | 1 | 1 | 0.01  | 0.008  | 0.021  | 0.013  | 0.013  | t | 78194  | LITVNPI                      | Mus<br>musculu<br>s              |
| 1 | 1.00 | 1 | 1 | 0     | 0      | 0.011  | 0      | -0.002 | t | 47006  | PAYEKL                       | Mus<br>musculu<br>s              |
| 1 | 1.00 | 1 | 1 | 0.03  | 0.034  | 0.037  | 0.037  | 0.033  | t | 135546 | DWEYS                        | Homo<br>sapiens                  |
| 1 | 1.00 | 1 | 1 | 0     | -0.003 | 0      | -0.001 | -0.001 | t | 32889  | KPTDG                        | Oryctola<br>gus<br>cuniculu<br>s |
| 1 | 1.00 | 1 | 1 | 0.01  | 0.01   | 0.01   | 0.01   | 0.01   | t | 94442  | CCHPACG                      | Capra<br>hircus                  |
| 1 | 1.00 | 1 | 1 | 0     | 0.002  | 0      | -0.003 | -0.003 | t | 106317 | CSKIQSTIF<br>RGY             | Homo<br>sapiens                  |
| 1 | 1.00 | 1 | 1 | -0.01 | -0.008 | -0.005 | -0.007 | -0.01  | t | 12571  | EIRQVGDF<br>HYVTGM           | Homo<br>sapiens                  |
| 1 | 1.00 | 1 | 1 | -0.02 | -0.027 | -0.027 | -0.013 | -0.018 | t | 136137 | APDRKGFR<br>LLLASPRSC<br>YKL | Homo<br>sapiens                  |
| 1 | 1.00 | 1 | 1 | 0.02  | 0.018  | 0.013  | 0.017  | 0.018  | t | 29732  | IYYHGEPIP<br>VTVAVTNS<br>TEK | Mus<br>musculu<br>s              |
| 1 | 1.00 | 1 | 1 | -0.02 | -0.017 | -0.026 | -0.02  | -0.018 | t | 41126  | MASLIYRQ<br>LL               | Mus<br>musculu<br>s              |
| 1 | 1.00 | 1 | 1 | 0     | 0.002  | 0      | 0.003  | -0.002 | t | 121925 | TPFLPKIFIK<br>PNAQK          | Homo<br>sapiens                  |
| 1 | 1.00 | 1 | 1 | -0.02 | -0.017 | -0.031 | -0.02  | -0.018 | t | 111219 | DVNVYHIF<br>FQMSLWL<br>PSEAT | Mus<br>musculu<br>s              |
| 1 | 1.00 | 1 | 1 | 0.03  | 0.03   | 0.03   | 0.03   | 0.03   | t | 149073 | MTSSETQ                      | Sus<br>scrofa                    |
| 1 | 1.00 | 1 | 1 | 0.03  | 0.03   | 0.03   | 0.03   | 0.03   | t | 134788 | RRGPSLGA<br>SSHQHSR          | Homo<br>sapiens                  |

|   |      |   |   |       |        |       |       |       |   |        |                     |                       |
|---|------|---|---|-------|--------|-------|-------|-------|---|--------|---------------------|-----------------------|
| 1 | 1.00 | 1 | 1 | 0.03  | 0.03   | 0.03  | 0.03  | 0.03  | t | 132813 | FGENNNM             | Homo sapiens          |
| 1 | 1.00 | 1 | 1 | 0.03  | 0.03   | 0.03  | 0.03  | 0.03  | t | 108282 | AQAYDLSP<br>S       | Homo sapiens          |
| 1 | 1.00 | 1 | 1 | 0.03  | 0.03   | 0.03  | 0.03  | 0.03  | t | 115827 | KKNQDKT<br>EIP      | Homo sapiens          |
| 1 | 1.00 | 1 | 1 | 0.03  | 0.03   | 0.03  | 0.03  | 0.03  | t | 79889  | KQLTFEGK<br>PALE    | Mus musculus          |
| 1 | 1.00 | 1 | 1 | 0.03  | 0.03   | 0.03  | 0.03  | 0.03  | t | 79889  | KQLTFEGK<br>PALE    | Mus musculus          |
| 1 | 1.00 | 1 | 1 | 0.01  | 0.01   | 0.01  | 0.01  | 0.01  | t | 149512 | VLQESTYQ<br>LV      | Homo sapiens          |
| 1 | 1.00 | 1 | 1 | 0.01  | 0.01   | 0.01  | 0.01  | 0.01  | t | 149512 | VLQESTYQ<br>LV      | Mus musculus          |
| 1 | 1.00 | 1 | 1 | 0.01  | 0.01   | 0.01  | 0.01  | 0.01  | t | 117103 | TYQDFSTR<br>PRSF    | Homo sapiens          |
| 1 | 1.00 | 1 | 1 | 0.01  | 0.01   | 0.01  | 0.01  | 0.01  | t | 117103 | TYQDFSTR<br>PRSF    | Mus musculus          |
| 1 | 1.00 | 1 | 1 | 0.01  | 0.01   | 0.01  | 0.01  | 0.01  | t | 79638  | RLVTDEI             | Oryctolagus cuniculus |
| 1 | 1.00 | 1 | 1 | -0.01 | -0.01  | -0.01 | -0.01 | -0.01 | t | 151295 | LVLAKLGK<br>DAGQPK  | Mus musculus          |
| 1 | 1.00 | 1 | 1 | 0     | -0.001 | 0     | 0.003 | 0     | t | 130612 | SPNTAHIT<br>SKSL    | Camelus dromedarius   |
| 1 | 1.00 | 1 | 1 | 0     | -0.001 | 0     | 0.003 | 0     | t | 130612 | SPNTAHIT<br>SKSL    | Camelus dromedarius   |
| 1 | 1.00 | 1 | 1 | 0     | 0      | 0.002 | 0.004 | 0     | t | 75152  | YNGEEYLIL<br>SARDVL | Homo sapiens          |
| 1 | 1.00 | 1 | 1 | 0     | 0      | 0.002 | 0.004 | 0     | t | 67656  | VAKVNIKP<br>LEDKILV | Homo sapiens          |

|   |      |   |   |       |        |        |        |        |   |        |                             |                                  |
|---|------|---|---|-------|--------|--------|--------|--------|---|--------|-----------------------------|----------------------------------|
| 1 | 1.00 | 1 | 1 | 0     | 0      | 0.002  | 0.004  | 0      | t | 22882  | GTVVAVG<br>PGRWDED<br>G     | Homo<br>sapiens                  |
| 1 | 1.00 | 1 | 1 | 0     | 0      | 0.002  | 0.004  | 0      | t | 4132   | ARDVLAV<br>VSK              | Homo<br>sapiens                  |
| 1 | 1.00 | 1 | 1 | -0.01 | -0.015 | -0.019 | -0.012 | -0.009 | t | 51474  | QLPNVGIT<br>QGIV            | Bos<br>taurus                    |
| 1 | 1.00 | 1 | 1 | 0     | 0.002  | -0.008 | 0.001  | 0      | t | 23296  | GWVFGST<br>MNNKSQS<br>VII   | Homo<br>sapiens                  |
| 1 | 1.00 | 1 | 1 | 0     | -0.002 | -0.002 | -0.007 | 0      | t | 122295 | DDVWLP                      | Mus<br>musculu<br>s              |
| 1 | 1.00 | 1 | 1 | -0.02 | -0.018 | -0.015 | -0.013 | -0.022 | t | 131898 | GRPLSVQ<br>QQMMQQ<br>SR     | Homo<br>sapiens                  |
| 1 | 1.00 | 1 | 1 | 0     | -0.002 | -0.012 | -0.003 | 0.001  | t | 79867  | INNLIWELI<br>RGT            | Mus<br>musculu<br>s              |
| 1 | 1.00 | 1 | 1 | -0.01 | -0.015 | -0.014 | -0.007 | -0.008 | t | 157771 | QGDRYTG<br>EWYQGKK          | Canis<br>lupus                   |
| 1 | 1.00 | 1 | 1 | 0.03  | 0.027  | 0.027  | 0.03   | 0.029  | t | 55449  | RQLQNSM<br>SGASADST<br>QA   | Oryctola<br>gus<br>cuniculu<br>s |
| 1 | 1.00 | 1 | 1 | 0.03  | 0.03   | 0.025  | 0.03   | 0.031  | t | 29812  | KAGSTVYA<br>VTAVTSIFS<br>VG | Homo<br>sapiens                  |
| 1 | 1.00 | 1 | 1 | -0.05 | -0.053 | -0.065 | -0.05  | -0.05  | t | 97605  | RIVRGPAN<br>LRNLKEFK<br>E   | Oryctola<br>gus<br>cuniculu<br>s |
| 1 | 1.00 | 1 | 1 | -0.05 | -0.053 | -0.065 | -0.05  | -0.05  | t | 97605  | RIVRGPAN<br>LRNLKEFK<br>E   | Oryctola<br>gus<br>cuniculu<br>s |
| 1 | 1.00 | 1 | 1 | 0.02  | 0.024  | 0.02   | 0.021  | 0.02   | t | 58458  | SICGNNQL<br>CKSICKT         | Homo<br>sapiens                  |
| 1 | 1.00 | 1 | 1 | -0.02 | -0.022 | -0.02  | -0.019 | -0.02  | t | 149431 | QPFPPQQ<br>PYP              | Mus<br>musculu<br>s              |



|   |      |   |   |       |        |        |        |        |   |        |                         |                              |
|---|------|---|---|-------|--------|--------|--------|--------|---|--------|-------------------------|------------------------------|
| 1 | 1.00 | 1 | 1 | 0.01  | 0.01   | 0.005  | 0.01   | 0.01   | t | 44869  | NLSGKAIN<br>HIRS        | Homo<br>sapiens              |
| 1 | 1.00 | 1 | 1 | -0.01 | -0.01  | -0.01  | -0.01  | -0.01  | t | 156875 | GHTSLR                  | Gallus<br>gallus             |
| 1 | 1.00 | 1 | 1 | 0.03  | 0.028  | 0.027  | 0.033  | 0.032  | t | 32692  | KPEKEKAS<br>VPGGGD<br>M | Rattus<br>norvegicus         |
| 1 | 1.00 | 1 | 1 | -0.01 | -0.006 | 0.001  | -0.009 | -0.011 | t | 11029  | EAELTGYG                | Homo<br>sapiens              |
| 1 | 1.00 | 1 | 1 | -0.07 | -0.033 | -0.08  | -0.07  | -0.07  | t | 12792  | EKLCVWN<br>NKTPHAIA     | Oryctola<br>gus<br>cuniculus |
| 1 | 1.00 | 1 | 1 | -0.07 | -0.07  | -0.08  | -0.07  | -0.07  | t | 12792  | EKLCVWN<br>NKTPHAIA     | Oryctola<br>gus<br>cuniculus |
| 1 | 1.00 | 1 | 1 | -0.07 | -0.033 | -0.08  | -0.07  | -0.07  | t | 12792  | EKLCVWN<br>NKTPHAIA     | Oryctola<br>gus<br>cuniculus |
| 1 | 1.00 | 1 | 1 | 0.02  | 0.02   | 0.02   | 0.02   | 0.02   | t | 133795 | DFTYDQV<br>AFNGLPQF     | Homo<br>sapiens              |
| 1 | 1.00 | 1 | 1 | 0.02  | 0.02   | 0.02   | 0.02   | 0.02   | t | 133795 | DFTYDQV<br>AFNGLPQF     | Homo<br>sapiens              |
| 1 | 1.00 | 1 | 1 | 0.02  | 0.02   | 0.02   | 0.02   | 0.02   | t | 133795 | DFTYDQV<br>AFNGLPQF     | Homo<br>sapiens              |
| 1 | 1.00 | 1 | 1 | 0.02  | 0.02   | 0.02   | 0.02   | 0.02   | t | 114775 | DKEGKDVL<br>VC          | Homo<br>sapiens              |
| 1 | 1.00 | 1 | 1 | 0     | 0      | 0      | 0      | 0      | t | 78230  | PHMNNYH<br>L            | Homo<br>sapiens              |
| 1 | 1.00 | 1 | 1 | -0.02 | -0.02  | -0.02  | -0.02  | -0.02  | t | 151729 | RYSPSLNT<br>RL          | Mus<br>musculus              |
| 1 | 1.00 | 1 | 1 | -0.04 | -0.04  | -0.04  | -0.04  | -0.04  | t | 111157 | CMPYGSL<br>AC           | Homo<br>sapiens              |
| 1 | 1.00 | 1 | 1 | -0.02 | -0.018 | -0.019 | -0.018 | -0.02  | t | 41115  | MASCRPID<br>KFDQGW      | Homo<br>sapiens              |
| 1 | 1.00 | 1 | 1 | -0.05 | -0.049 | -0.055 | -0.05  | -0.053 | t | 56852  | SALEDKLA<br>DYKRRM      | Myodes<br>glareolus          |
| 1 | 1.00 | 1 | 1 | 0.05  | 0.048  | 0.057  | 0.047  | 0.048  | t | 142442 | LKGDDSA<br>GEQEL        | Mus<br>musculus              |

|   |      |   |   |       |        |        |        |        |   |        |                              |                                  |
|---|------|---|---|-------|--------|--------|--------|--------|---|--------|------------------------------|----------------------------------|
| 1 | 1.00 | 1 | 1 | -0.02 | -0.018 | -0.037 | -0.023 | -0.02  | t | 8127   | DEPTLLYVL<br>FEVFDV          | Homo sapiens                     |
| 1 | 1.00 | 1 | 1 | 0.01  | 0.012  | 0.015  | 0.013  | 0.01   | t | 5274   | AVASPPAT<br>ASVESSPL<br>PAAA | Homo sapiens                     |
| 1 | 1.00 | 1 | 1 | -0.01 | -0.006 | -0.01  | -0.009 | -0.01  | t | 43039  | MYASSGIG                     | Homo sapiens                     |
| 1 | 1.00 | 1 | 1 | 0.03  | 0.032  | 0.03   | 0.027  | 0.028  | t | 115869 | NKKIEKFQ<br>SE               | Homo sapiens                     |
| 1 | 1.00 | 1 | 1 | -0.04 | -0.043 | -0.035 | -0.037 | -0.042 | t | 134198 | PVGPAAG<br>MRPPMG<br>G       | Oryctola<br>gus<br>cuniculu<br>s |
| 1 | 1.00 | 1 | 1 | -0.01 | -0.006 | 0.001  | -0.003 | -0.009 | t | 122101 | GKGAGDL                      | Homo sapiens                     |
| 1 | 1.00 | 1 | 1 | 0.02  | 0.014  | 0.02   | 0.02   | 0.018  | t | 123323 | ILNKPLITV<br>SNSKIL          | Oryctola<br>gus<br>cuniculu<br>s |
| 1 | 1.00 | 1 | 1 | 0.02  | 0.02   | 0.02   | 0.02   | 0.021  | t | 107814 | EGLHNHY                      | Homo sapiens                     |
| 1 | 1.00 | 1 | 1 | 0.02  | 0.018  | 0.019  | 0.019  | 0.02   | t | 61573  | STEELFKEY                    | Mus<br>musculu<br>s              |
| 1 | 1.00 | 1 | 1 | 0.01  | 0.01   | -0.001 | 0.01   | 0.012  | t | 153469 | STETGNQ<br>HHYQTRV<br>VSNANK | Mus<br>musculu<br>s              |
| 1 | 1.00 | 1 | 1 | -0.03 | -0.03  | -0.021 | -0.023 | -0.03  | t | 136007 | VKEKGMA<br>ALPRL             | Homo sapiens                     |
| 1 | 1.00 | 1 | 1 | 0.01  | 0.011  | -0.009 | 0.003  | 0.012  | t | 120653 | KAAIPEDK<br>EYDVSGR          | Equus caballus                   |
| 1 | 1.00 | 1 | 1 | 0     | 0      | 0      | 0.004  | 0.001  | t | 11813  | EENVEENV                     | Homo sapiens                     |
| 1 | 1.00 | 1 | 1 | 0.03  | 0.032  | 0.023  | 0.021  | 0.028  | t | 115745 | FTESQSLTL<br>T               | Homo sapiens                     |
| 1 | 1.00 | 1 | 1 | -0.04 | -0.04  | -0.033 | -0.04  | -0.044 | t | 133554 | EGLYSPW<br>WPRSLPVL          | Mus<br>musculu<br>s              |

|   |      |   |   |       |        |        |        |        |   |        |                              |                                  |
|---|------|---|---|-------|--------|--------|--------|--------|---|--------|------------------------------|----------------------------------|
| 1 | 1.00 | 1 | 1 | 0.05  | 0.05   | 0.05   | 0.05   | 0.05   | t | 98883  | LNENKVLV<br>LD               | Homo<br>sapiens                  |
| 1 | 1.00 | 1 | 1 | 0     | -0.003 | 0      | 0      | 0.001  | t | 24009  | HHPSTDKE<br>QTNLY            | Oryctola<br>gus<br>cuniculu<br>s |
| 1 | 1.00 | 1 | 1 | 0.03  | 0.03   | 0.03   | 0.03   | 0.03   | t | 137816 | DAETLMD<br>AAVDV             | Oryctola<br>gus<br>cuniculu<br>s |
| 1 | 1.00 | 1 | 1 | 0.01  | 0.01   | 0.01   | 0.01   | 0.01   | t | 149062 | IPPNPSQ                      | Sus<br>scrofa                    |
| 1 | 1.00 | 1 | 1 | 0.01  | 0.01   | 0.01   | 0.01   | 0.01   | t | 119463 | HKKSLSSP<br>S                | Homo<br>sapiens                  |
| 1 | 1.00 | 1 | 1 | 0.01  | 0.01   | 0.01   | 0.01   | 0.01   | t | 121849 | SGVPLYSHI<br>SYVISC          | Mus<br>musculu<br>s              |
| 1 | 1.00 | 1 | 1 | 0.01  | 0.01   | 0.01   | 0.01   | 0.01   | t | 121849 | SGVPLYSHI<br>SYVISC          | Mus<br>musculu<br>s              |
| 1 | 1.00 | 1 | 1 | 0.01  | 0.01   | 0.01   | 0.01   | 0.01   | t | 122488 | MSAKAAL<br>EPRLAPG           | Mus<br>musculu<br>s              |
| 1 | 1.00 | 1 | 1 | -0.01 | -0.01  | -0.01  | -0.01  | -0.01  | t | 115258 | FYPELFRQ<br>FYQLDAYP<br>SGAW | Homo<br>sapiens                  |
| 1 | 1.00 | 1 | 1 | -0.01 | -0.01  | -0.01  | -0.01  | -0.01  | t | 77924  | IYTSPTFPP<br>TAH             | Mus<br>musculu<br>s              |
| 1 | 1.00 | 1 | 1 | -0.03 | -0.03  | -0.03  | -0.03  | -0.03  | t | 112853 | TPTFMYF                      | Homo<br>sapiens                  |
| 1 | 1.00 | 1 | 1 | -0.02 | -0.02  | -0.027 | -0.02  | -0.02  | t | 100032 | FEPNTVKA<br>HAAY             | Oryctola<br>gus<br>cuniculu<br>s |
| 1 | 1.00 | 1 | 1 | -0.03 | -0.028 | -0.039 | -0.033 | -0.031 | t | 45563  | NQGSCLKL<br>SFDEHLK          | Homo<br>sapiens                  |
| 1 | 1.00 | 1 | 1 | 0.03  | 0.028  | 0.031  | 0.023  | 0.03   | t | 134786 | RPVDQY                       | Mus<br>musculu<br>s              |
| 1 | 1.00 | 1 | 1 | 0.03  | 0.027  | 0.028  | 0.03   | 0.029  | t | 64085  | THTMIFDN<br>AFNCTFEYI        | Oryctola<br>gus<br>cuniculu<br>s |
| 1 | 1.00 | 1 | 1 | 0.03  | 0.026  | 0.028  | 0.029  | 0.03   | t | 78871  | VDVDPNK<br>GKWKEHI<br>KEVTE  | Oryctola<br>gus<br>cuniculu<br>s |

|   |      |   |   |       |        |        |        |       |   |        |                                 |                                  |
|---|------|---|---|-------|--------|--------|--------|-------|---|--------|---------------------------------|----------------------------------|
| 1 | 1.00 | 1 | 1 | 0.03  | 0.028  | 0.028  | 0.029  | 0.03  | t | 78871  | VDVDPNK<br>GKWKEHI<br>KEVTE     | Mus<br>musculu<br>s              |
| 1 | 1.00 | 1 | 1 | -0.05 | -0.05  | -0.052 | -0.054 | -0.05 | t | 69856  | VLWVVKS<br>TPA                  | Homo<br>sapiens                  |
| 1 | 1.00 | 1 | 1 | 0     | 0      | 0      | 0      | 0     | t | 5582   | AVTRGTIN<br>DPQRAKE             | Mus<br>musculu<br>s              |
| 1 | 1.00 | 1 | 1 | 0     | 0      | 0      | 0      | 0     | t | 5582   | AVTRGTIN<br>DPQRAKE             | Mus<br>musculu<br>s              |
| 1 | 1.00 | 1 | 1 | 0.03  | 0.03   | 0.024  | 0.03   | 0.028 | t | 15509  | FEDVKGTG<br>GESRDLP<br>S<br>GQG | Mus<br>musculu<br>s              |
| 1 | 1.00 | 1 | 1 | 0     | 0      | 0      | 0.006  | 0.002 | t | 27463  | IMDINKRK<br>YDSLK               | Homo<br>sapiens                  |
| 1 | 1.00 | 1 | 1 | 0     | 0      | -0.015 | 0      | 0.001 | t | 48618  | PNDPNRN<br>VD                   | Mus<br>musculu<br>s              |
| 1 | 1.00 | 1 | 1 | 0.01  | 0.008  | 0.01   | 0.009  | 0.01  | t | 65684  | TPPHSARS<br>KFGYGA              | Mus<br>musculu<br>s              |
| 1 | 1.00 | 1 | 1 | -0.02 | -0.024 | -0.02  | -0.017 | -0.02 | t | 19737  | GGGAGAG<br>GAGAGGG<br>GR        | Oryctola<br>gus<br>cuniculu<br>s |
| 1 | 1.00 | 1 | 1 | 0.02  | 0.016  | 0.017  | 0.019  | 0.02  | t | 127935 | ARLSAKPA<br>PPKPEPK             | Oryctola<br>gus<br>cuniculu<br>s |
| 1 | 1.00 | 1 | 1 | 0.01  | 0.012  | 0.009  | 0.007  | 0.012 | t | 8383   | DGFKVSNS<br>SA                  | Homo<br>sapiens                  |
| 1 | 1.00 | 1 | 1 | 0.01  | 0.009  | -0.006 | 0.009  | 0.012 | t | 10358  | DTIASGSQ<br>RSTNSAS             | Mus<br>musculu<br>s              |
| 1 | 1.00 | 1 | 1 | 0.03  | 0.03   | 0.019  | 0.03   | 0.03  | t | 31794  | KLDVVKLL<br>YNEQFAV<br>QGLLR    | Homo<br>sapiens                  |
| 1 | 1.00 | 1 | 1 | 0     | -0.003 | -0.003 | 0      | 0.002 | t | 12626  | EKAFRELA<br>DA                  | Oryctola<br>gus<br>cuniculu<br>s |

|   |      |   |   |       |        |        |        |        |   |        |                              |                                  |
|---|------|---|---|-------|--------|--------|--------|--------|---|--------|------------------------------|----------------------------------|
| 1 | 1.00 | 1 | 1 | 0     | 0      | 0      | 0.004  | -0.002 | t | 132027 | QCSTIGQ<br>MPNNQSI<br>N      | Homo<br>sapiens                  |
| 1 | 1.00 | 1 | 1 | 0     | 0      | 0      | -0.002 | 0      | t | 7061   | CSQHLPYI<br>E                | Homo<br>sapiens                  |
| 1 | 1.00 | 1 | 1 | -0.05 | -0.05  | -0.05  | -0.05  | -0.051 | t | 114223 | PFSRVVHL                     | Rattus<br>norvegic<br>us         |
| 1 | 1.00 | 1 | 1 | -0.02 | -0.02  | -0.02  | -0.02  | -0.02  | t | 95016  | IRLPSDDV<br>WLPDLVL          | Rattus<br>norvegic<br>us         |
| 1 | 1.00 | 1 | 1 | -0.02 | -0.02  | -0.02  | -0.02  | -0.02  | t | 24052  | HIHSVW                       | Homo<br>sapiens                  |
| 1 | 1.00 | 1 | 1 | -0.01 | -0.01  | -0.017 | -0.01  | -0.008 | t | 108998 | FVCGDRG<br>FYFNK             | Mus<br>musculu<br>s              |
| 1 | 1.00 | 1 | 1 | -0.01 | -0.01  | -0.01  | -0.01  | -0.011 | t | 118763 | CYGSFARP<br>MN               | Mus<br>musculu<br>s              |
| 1 | 1.00 | 1 | 1 | -0.06 | -0.06  | -0.065 | -0.06  | -0.063 | t | 131104 | TGALFKHS<br>ENYK             | Oryctola<br>gus<br>cuniculu<br>s |
| 1 | 1.00 | 1 | 1 | 0     | -0.002 | 0.003  | 0.003  | 0.001  | t | 52094  | QQPP                         | Mus<br>musculu<br>s              |
| 1 | 1.00 | 1 | 1 | 0     | 0      | -0.008 | -0.003 | 0.001  | t | 33538  | KSTWDLAL<br>NNM              | Homo<br>sapiens                  |
| 1 | 1.00 | 1 | 1 | 0.04  | 0.04   | 0.04   | 0.04   | 0.04   | t | 79413  | TCPLPDPD<br>SQYCE            | Mus<br>musculu<br>s              |
| 1 | 1.00 | 1 | 1 | -0.01 | -0.003 | -0.016 | -0.01  | -0.011 | t | 43547  | NDYDGFLE<br>NAHEHHG<br>VYNQG | Cavia<br>porcellu<br>s           |
| 1 | 1.00 | 1 | 1 | 0.01  | 0.01   | 0.01   | 0.007  | 0.01   | t | 33745  | KTKRNTN                      | Homo<br>sapiens                  |
| 1 | 1.00 | 1 | 1 | 0.02  | 0.02   | 0.014  | 0.02   | 0.021  | t | 76185  | YTTGGAQS<br>HTLR             | Mus<br>musculu<br>s              |
| 1 | 1.00 | 1 | 1 | -0.02 | -0.022 | -0.015 | -0.017 | -0.021 | t | 159085 | RYKYYPET<br>PQGLAKII         | Mus<br>musculu<br>s              |

|   |      |   |   |       |       |        |       |        |   |        |                              |                                  |
|---|------|---|---|-------|-------|--------|-------|--------|---|--------|------------------------------|----------------------------------|
| 1 | 1.00 | 1 | 1 | 0.01  | 0.01  | 0.01   | 0.01  | 0.008  | t | 144660 | GREGYPA<br>DGGASAS<br>ASAS   | Oryctola<br>gus<br>cuniculu<br>s |
| 1 | 1.00 | 1 | 1 | 0.04  | 0.04  | 0.04   | 0.04  | 0.04   | t | 145371 | NALTESKY<br>VKLL             | Homo<br>sapiens                  |
| 1 | 1.00 | 1 | 1 | 0.04  | 0.04  | 0.04   | 0.04  | 0.04   | t | 103000 | AAAGDLV<br>GPGCAEY<br>A      | Homo<br>sapiens                  |
| 1 | 1.00 | 1 | 1 | 0.02  | 0.02  | 0.02   | 0.02  | 0.02   | t | 143675 | DRVDLGLT<br>RGYY             | Mus<br>musculu<br>s              |
| 1 | 1.00 | 1 | 1 | 0.02  | 0.02  | 0.02   | 0.02  | 0.02   | t | 153337 | ACNVYEAY<br>WCGGGS           | Mus<br>musculu<br>s              |
| 1 | 1.00 | 1 | 1 | 0.02  | 0.02  | 0.02   | 0.02  | 0.02   | t | 135778 | VEGTSFLT                     | Homo<br>sapiens                  |
| 1 | 1.00 | 1 | 1 | 0.02  | 0.02  | 0.02   | 0.02  | 0.02   | t | 153339 | ACPPYET<br>WWCGGG<br>S       | Mus<br>musculu<br>s              |
| 1 | 1.00 | 1 | 1 | 0.02  | 0.02  | 0.02   | 0.02  | 0.02   | t | 115280 | HKEMPFP<br>KYPVEPFT<br>ESQSL | Homo<br>sapiens                  |
| 1 | 1.00 | 1 | 1 | 0.02  | 0.02  | 0.02   | 0.02  | 0.02   | t | 79640  | SASIRPQ                      | Oryctola<br>gus<br>cuniculu<br>s |
| 1 | 1.00 | 1 | 1 | 0.02  | 0.02  | 0.02   | 0.02  | 0.02   | t | 88060  | RMAFTEIK<br>VQ               | Homo<br>sapiens                  |
| 1 | 1.00 | 1 | 1 | 0.02  | 0.02  | 0.02   | 0.02  | 0.02   | t | 51830  | QPFPSQQ<br>PYL               | Mus<br>musculu<br>s              |
| 1 | 1.00 | 1 | 1 | 0     | 0     | 0      | 0     | 0      | t | 149059 | HLYNPTQ                      | Sus<br>scrofa                    |
| 1 | 1.00 | 1 | 1 | 0.07  | 0.072 | 0.065  | 0.071 | 0.069  | t | 23985  | HHFQSHG<br>QLSDHPH<br>ALSSSS | Homo<br>sapiens                  |
| 1 | 1.00 | 1 | 1 | -0.01 | -0.01 | -0.003 | -0.01 | -0.014 | t | 107380 | GEPGIAGF<br>KGDQGPK          | Mus<br>musculu<br>s              |
| 1 | 1.00 | 1 | 1 | 0.01  | 0.012 | 0.01   | 0.017 | 0.015  | t | 119673 | WNPDDYG<br>GVK               | Homo<br>sapiens                  |
| 1 | 1.00 | 1 | 1 | 0.03  | 0.03  | 0.028  | 0.03  | 0.029  | t | 51852  | QPHDLGK<br>VGEVIVTK<br>D     | Rattus<br>norvegic<br>us         |

|   |      |   |   |       |        |        |        |        |   |        |                             |                   |
|---|------|---|---|-------|--------|--------|--------|--------|---|--------|-----------------------------|-------------------|
| 1 | 1.00 | 1 | 1 | 0.02  | 0.02   | 0.02   | 0.02   | 0.02   | t | 136234 | FPGLITLTIS<br>LLDTSNLELP    | Homo sapiens      |
| 1 | 1.00 | 1 | 1 | 0.05  | 0.051  | 0.043  | 0.049  | 0.051  | t | 29278  | IVGAGDSS                    | Equus caballus    |
| 1 | 1.00 | 1 | 1 | -0.01 | -0.006 | -0.007 | -0.007 | -0.01  | t | 7063   | CSQHLPYI<br>EQGMQLA         | Homo sapiens      |
| 1 | 1.00 | 1 | 1 | -0.01 | -0.008 | -0.007 | -0.007 | -0.01  | t | 7063   | CSQHLPYI<br>EQGMQLA         | Homo sapiens      |
| 1 | 1.00 | 1 | 1 | -0.01 | -0.01  | -0.01  | -0.008 | -0.01  | t | 110879 | GYRGRSSI<br>RTGVKRPA<br>VSK | Homo sapiens      |
| 1 | 1.00 | 1 | 1 | 0.06  | 0.058  | 0.048  | 0.053  | 0.06   | t | 108170 | TTANPSCP<br>EGT             | Rattus norvegicus |
| 1 | 1.00 | 1 | 1 | -0.03 | -0.028 | -0.032 | -0.027 | -0.03  | t | 9586   | DPAFR                       | Homo sapiens      |
| 1 | 1.00 | 1 | 1 | 0.03  | 0.034  | 0.03   | 0.031  | 0.031  | t | 71848  | VVTGATVS                    | Homo sapiens      |
| 1 | 1.00 | 1 | 1 | 0     | -0.002 | 0      | -0.001 | 0      | t | 117103 | TYQDFSTR<br>PRSF            | Mus musculus      |
| 1 | 1.00 | 1 | 1 | -0.02 | -0.02  | -0.027 | -0.02  | -0.021 | t | 4681   | ASPTGYD<br>WRADW            | Mus musculus      |
| 1 | 1.00 | 1 | 1 | -0.05 | -0.048 | -0.041 | -0.05  | -0.052 | t | 100129 | HYKWLND<br>PLAAW            | Ovis aries        |
| 1 | 1.00 | 1 | 1 | -0.03 | -0.03  | -0.03  | -0.03  | -0.03  | t | 136415 | KFAGRNF<br>RNP<br>LAK       | Homo sapiens      |
| 1 | 1.00 | 1 | 1 | -0.03 | -0.03  | -0.03  | -0.03  | -0.03  | t | 136415 | KFAGRNF<br>RNP<br>LAK       | Homo sapiens      |
| 1 | 1.00 | 1 | 1 | -0.01 | -0.01  | -0.01  | -0.008 | -0.01  | t | 27554  | IMSGEKPS<br>MEDVVN          | Homo sapiens      |
| 1 | 1.00 | 1 | 1 | 0.02  | 0.023  | 0.022  | 0.02   | 0.02   | t | 5962   | CAALASLF<br>LSLGPQQK        | Mus musculus      |

|   |      |   |   |       |        |        |        |        |   |        |                             |                   |
|---|------|---|---|-------|--------|--------|--------|--------|---|--------|-----------------------------|-------------------|
| 1 | 1.00 | 1 | 1 | 0     | 0      | -0.004 | -0.006 | -0.002 | t | 106057 | REFSPRGQ<br>HGRRERA         | Homo sapiens      |
| 1 | 1.00 | 1 | 1 | 0.03  | 0.032  | 0.03   | 0.031  | 0.03   | t | 116930 | AYKLPQTD<br>DST             | Homo sapiens      |
| 1 | 1.00 | 1 | 1 | 0.02  | 0.028  | 0.019  | 0.02   | 0.018  | t | 4528   | ASLKDALL<br>KYIYDNRG<br>TLI | Gallus gallus     |
| 1 | 1.00 | 1 | 1 | 0.02  | 0.022  | 0.021  | 0.017  | 0.017  | t | 106539 | ILRWGNES<br>EI              | Homo sapiens      |
| 1 | 1.00 | 1 | 1 | 0.01  | 0.008  | 0.01   | 0.009  | 0.01   | t | 50609  | QEGVQQE<br>GA               | Mus musculus      |
| 1 | 1.00 | 1 | 1 | -0.04 | -0.041 | -0.039 | -0.039 | -0.04  | t | 54104  | RHVLGR                      | Homo sapiens      |
| 1 | 1.00 | 1 | 1 | -0.03 | -0.03  | -0.05  | -0.03  | -0.027 | t | 141737 | REAYYLWK<br>QYNPTGK<br>G    | Rattus norvegicus |
| 1 | 1.00 | 1 | 1 | 0.03  | 0.028  | 0.03   | 0.031  | 0.03   | t | 149428 | QLQLQNP<br>SQQ              | Mus musculus      |
| 1 | 1.00 | 1 | 1 | 0.02  | 0.024  | 0.024  | 0.027  | 0.022  | t | 122730 | DPAQPPR<br>D                | Homo sapiens      |
| 1 | 1.00 | 1 | 1 | 0     | 0.003  | 0.005  | 0      | 0.003  | t | 116284 | CAYSVAHL<br>C               | Mus musculus      |
| 1 | 1.00 | 1 | 1 | -0.03 | -0.026 | -0.03  | -0.03  | -0.031 | t | 146496 | PPGAQPP<br>TSRKEAM          | Homo sapiens      |
| 1 | 1.00 | 1 | 1 | 0.02  | 0.02   | 0.022  | 0.02   | 0.021  | t | 106965 | VKGEEKEP<br>SK              | Homo sapiens      |
| 1 | 1.00 | 1 | 1 | -0.01 | -0.002 | -0.006 | -0.01  | -0.012 | t | 58049  | SGGKLVGI<br>LTSRNET         | Gallus gallus     |
| 1 | 1.00 | 1 | 1 | -0.01 | -0.002 | -0.006 | -0.01  | -0.012 | t | 58049  | SGGKLVGI<br>LTSRNET         | Gallus gallus     |



|   |      |   |   |       |        |        |        |        |   |        |                              |                                  |
|---|------|---|---|-------|--------|--------|--------|--------|---|--------|------------------------------|----------------------------------|
| 1 | 1.00 | 1 | 1 | 0.01  | 0.01   | 0.01   | 0.01   | 0.01   | t | 151019 | LCKLRGVA<br>PL               | Mus<br>musculu<br>s              |
| 1 | 1.00 | 1 | 1 | 0     | 0      | -0.004 | 0      | 0.001  | t | 6139   | CDSSDRPR<br>VYTIT            | Mus<br>musculu<br>s              |
| 1 | 1.00 | 1 | 1 | 0.07  | 0.07   | 0.061  | 0.07   | 0.072  | t | 78573  | YTTEGGTK<br>SEVEDVIP<br>EG   | Oryctola<br>gus<br>cuniculu<br>s |
| 1 | 1.00 | 1 | 1 | -0.01 | -0.013 | -0.017 | -0.01  | -0.009 | t | 114149 | YGSLPQKA<br>QGHRPQD<br>E     | Oryctola<br>gus<br>cuniculu<br>s |
| 1 | 1.00 | 1 | 1 | 0.03  | 0.03   | 0.03   | 0.03   | 0.03   | t | 108579 | PPLLLTDV<br>T                | Homo<br>sapiens                  |
| 1 | 1.00 | 1 | 1 | 0.03  | 0.03   | 0.03   | 0.03   | 0.03   | t | 105023 | VIQGSQ                       | Homo<br>sapiens                  |
| 1 | 1.00 | 1 | 1 | 0.03  | 0.03   | 0.03   | 0.03   | 0.03   | t | 109854 | RQMVEKE<br>SLDQA             | Mus<br>musculu<br>s              |
| 1 | 1.00 | 1 | 1 | 0.03  | 0.03   | 0.03   | 0.03   | 0.03   | t | 93326  | LSFSDSNL<br>KD               | Ovis<br>aries                    |
| 1 | 1.00 | 1 | 1 | 0.01  | 0.01   | 0.01   | 0.01   | 0.01   | t | 124285 | HPLSPHPS<br>Y                | Homo<br>sapiens                  |
| 1 | 1.00 | 1 | 1 | 0.01  | 0.01   | 0.01   | 0.01   | 0.01   | t | 112149 | GVGWIRQ                      | Homo<br>sapiens                  |
| 1 | 1.00 | 1 | 1 | 0     | 0      | -0.002 | 0      | -0.001 | t | 50900  | QGLPQEV<br>LNE               | Homo<br>sapiens                  |
| 1 | 1.00 | 1 | 1 | 0     | 0.004  | 0      | 0.001  | 0      | t | 23068  | GVNLEDP<br>ASRDL             | Homo<br>sapiens                  |
| 1 | 1.00 | 1 | 1 | 0     | 0.004  | 0      | 0.001  | 0      | t | 23068  | GVNLEDP<br>ASRDL             | Homo<br>sapiens                  |
| 1 | 1.00 | 1 | 1 | 0     | 0      | -0.012 | -0.002 | 0      | t | 45464  | NPRENKLK<br>QPGDRAD<br>GQPAG | Homo<br>sapiens                  |
| 1 | 1.00 | 1 | 1 | 0     | 0      | -0.012 | -0.002 | 0      | t | 45464  | NPRENKLK<br>QPGDRAD<br>GQPAG | Homo<br>sapiens                  |
| 1 | 1.00 | 1 | 1 | 0     | 0      | -0.005 | -0.007 | 0      | t | 146248 | FLFCGSM<br>MATGKIL           | Homo<br>sapiens                  |

|   |      |   |   |       |        |        |        |        |   |        |                             |                          |
|---|------|---|---|-------|--------|--------|--------|--------|---|--------|-----------------------------|--------------------------|
| 1 | 1.00 | 1 | 1 | 0.02  | 0.02   | 0.018  | 0.02   | 0.02   | t | 110606 | GNPGTDGI<br>PGAAG           | Rattus<br>norvegicus     |
| 1 | 1.00 | 1 | 1 | 0     | -0.003 | 0      | 0      | 0      | t | 135472 | KDRHDF                      | Oryctolagus<br>cuniculus |
| 1 | 1.00 | 1 | 1 | 0     | 0      | 0      | 0      | 0      | t | 118374 | GKALCWV<br>CAQSRKH<br>RD    | Homo<br>sapiens          |
| 1 | 1.00 | 1 | 1 | 0     | 0      | 0      | 0      | 0      | t | 38272  | LNLTTWNP                    | Oryctolagus<br>cuniculus |
| 1 | 1.00 | 1 | 1 | 0.01  | 0.01   | 0.011  | 0.006  | 0.011  | t | 48129  | PKQGGLPN                    | Homo<br>sapiens          |
| 1 | 1.00 | 1 | 1 | -0.02 | -0.02  | -0.035 | -0.014 | -0.018 | t | 7705   | DCHLLGTE<br>ELSGIPPP<br>RGV | Homo<br>sapiens          |
| 1 | 1.00 | 1 | 1 | -0.01 | -0.01  | -0.003 | -0.003 | -0.01  | t | 119476 | KKKKYAEAV                   | Homo<br>sapiens          |
| 1 | 1.00 | 1 | 1 | 0.03  | 0.033  | 0.031  | 0.03   | 0.029  | t | 117530 | IEFRSDA<br>ESSDGEDF<br>IVEE | Mus<br>musculus          |
| 1 | 1.00 | 1 | 1 | 0.02  | 0.02   | 0.02   | 0.024  | 0.02   | t | 118645 | VAVSAAP<br>GSAAPAA<br>G     | Homo<br>sapiens          |
| 1 | 1.00 | 1 | 1 | 0.02  | 0.02   | 0.02   | 0.02   | 0.02   | t | 130581 | QAFDSH                      | Mus<br>musculus          |
| 1 | 1.00 | 1 | 1 | 0     | 0      | -0.005 | -0.004 | 0      | t | 133870 | LAKLAGGV<br>AVICAGA         | Homo<br>sapiens          |
| 1 | 1.00 | 1 | 1 | 0.02  | 0.02   | 0.02   | 0.024  | 0.021  | t | 118019 | MGRGAPP<br>PGMMG            | Homo<br>sapiens          |
| 1 | 1.00 | 1 | 1 | 0.02  | 0.02   | 0.015  | 0.02   | 0.02   | t | 136087 | VETDKATV<br>GF              | Oryctolagus<br>cuniculus |
| 1 | 1.00 | 1 | 1 | -0.01 | -0.008 | -0.011 | -0.009 | -0.01  | t | 40018  | LTLNLITEMG                  | Homo<br>sapiens          |
| 1 | 1.00 | 1 | 1 | 0     | 0      | -0.02  | -0.006 | 0      | t | 48319  | PLFDGIFCS<br>SSNFLGISF<br>L | Homo<br>sapiens          |
| 1 | 1.00 | 1 | 1 | 0.01  | 0.01   | 0.01   | 0.01   | 0.009  | t | 98955  | QFEDFFPA<br>SSRDQSS         | Homo<br>sapiens          |

|   |      |   |   |   |        |   |        |        |   |        |                            |                                  |
|---|------|---|---|---|--------|---|--------|--------|---|--------|----------------------------|----------------------------------|
| 1 | 1.00 | 1 | 1 | 0 | -0.004 | 0 | -0.003 | 0      | t | 117909 | HKGFKGV<br>D               | Oryctola<br>gus<br>cuniculu<br>s |
| 1 | 1.00 | 1 | 1 | 0 | 0      | 0 | 0      | 0      | t | 73449  | YASSGIGP                   | Oryctola<br>gus<br>cuniculu<br>s |
| 1 | 1.00 | 1 | 1 | 0 | 0      | 0 | 0      | 0      | t | 9755   | DPRVRGLY<br>FPA            | Mus<br>musculu<br>s              |
| 1 | 1.00 | 1 | 1 | 0 | 0      | 0 | 0      | -0.001 | t | 144385 | KPLEEVLN<br>L              | Mus<br>musculu<br>s              |
| 1 | 1.00 | 1 | 1 | 0 | 0      | 0 | 0      | -0.001 | t | 146625 | WNWFDIT<br>NW              | Homo<br>sapiens                  |
| 1 | 1.00 | 1 | 1 | 0 | 0      | 0 | 0      | -0.001 | t | 146624 | WNWFDIT<br>N               | Homo<br>sapiens                  |
| 1 | 1.00 | 1 | 1 | 0 | 0      | 0 | 0      | -0.001 | t | 134989 | GPPGARG<br>LTGRPGDA<br>GPP | Mus<br>musculu<br>s              |
| 1 | 1.00 | 1 | 1 | 0 | 0      | 0 | 0      | -0.001 | t | 103643 | TGALQERS<br>K              | Mus<br>musculu<br>s              |
| 1 | 1.00 | 1 | 1 | 0 | 0      | 0 | 0      | -0.001 | t | 69178  | VKAETRLN<br>PDLQPT         | Mus<br>musculu<br>s              |
| 1 | 1.00 | 1 | 1 | 0 | 0      | 0 | 0      | -0.001 | t | 69178  | VKAETRLN<br>PDLQPT         | Mus<br>musculu<br>s              |
| 1 | 1.00 | 1 | 1 | 0 | 0      | 0 | 0      | -0.001 | t | 51147  | QIVGGVYL<br>L              | Mus<br>musculu<br>s              |
| 1 | 1.00 | 1 | 1 | 0 | 0      | 0 | 0      | -0.001 | t | 51147  | QIVGGVYL<br>L              | Mus<br>musculu<br>s              |
| 1 | 1.00 | 1 | 1 | 0 | 0      | 0 | 0      | -0.001 | t | 23876  | HFVQQTP<br>KSQPTLV         | Mus<br>musculu<br>s              |
| 1 | 1.00 | 1 | 1 | 0 | 0      | 0 | 0      | -0.001 | t | 32990  | KQHTVTTT<br>TKGE           | Mus<br>musculu<br>s              |

|   |      |   |   |       |        |        |        |        |   |        |                           |                     |
|---|------|---|---|-------|--------|--------|--------|--------|---|--------|---------------------------|---------------------|
| 1 | 1.00 | 1 | 1 | 0     | 0      | 0      | 0      | -0.001 | t | 24591  | HQLDPAF<br>GANSTNP<br>D   | Mus<br>musculu<br>s |
| 1 | 1.00 | 1 | 1 | 0     | 0      | 0      | 0      | -0.001 | t | 10692  | DVPDYASL                  | Mus<br>musculu<br>s |
| 1 | 1.00 | 1 | 1 | 0.02  | 0.023  | 0.02   | 0.02   | 0.018  | t | 135465 | GSDYEDRY<br>YREN          | Mus<br>musculu<br>s |
| 1 | 1.00 | 1 | 1 | -0.04 | -0.038 | -0.05  | -0.039 | -0.036 | t | 55781  | RRYPF                     | Homo<br>sapiens     |
| 1 | 1.00 | 1 | 1 | 0     | 0      | -0.002 | 0      | -0.001 | t | 21469  | GNLLSCL                   | Mus<br>musculu<br>s |
| 1 | 1.00 | 1 | 1 | -0.02 | -0.02  | -0.021 | -0.02  | -0.02  | t | 108634 | SKVEQEET<br>NPEVLIKD<br>L | Canis<br>lupus      |
| 1 | 1.00 | 1 | 1 | 0     | 0      | 0      | 0      | 0      | t | 40076  | LTPCD                     | Homo<br>sapiens     |
| 1 | 1.00 | 1 | 1 | 0     | 0      | 0      | 0      | 0      | t | 40076  | LTPCD                     | Mus<br>musculu<br>s |
| 1 | 1.00 | 1 | 1 | 0     | 0      | -0.003 | 0.003  | 0      | t | 48414  | PLLVETWK                  | Homo<br>sapiens     |
| 1 | 1.00 | 1 | 1 | 0.04  | 0.04   | 0.04   | 0.04   | 0.041  | t | 115212 | DTQAIVQ<br>NND            | Homo<br>sapiens     |
| 1 | 1.00 | 1 | 1 | -0.04 | -0.038 | -0.035 | -0.037 | -0.04  | t | 33259  | KRYISWCL<br>WWLQYF        | Homo<br>sapiens     |
| 1 | 1.00 | 1 | 1 | -0.04 | -0.038 | -0.021 | -0.037 | -0.043 | t | 33448  | KSMRSAN<br>KP             | Homo<br>sapiens     |
| 1 | 1.00 | 1 | 1 | 0.04  | 0.038  | 0.033  | 0.037  | 0.039  | t | 56329  | RVKMEKLL<br>LKGTTYG<br>MC | Mus<br>musculu<br>s |
| 1 | 1.00 | 1 | 1 | 0.01  | 0.017  | 0.017  | 0.007  | 0.008  | t | 136728 | VNYNGKE<br>HLLIP          | Gallus<br>gallus    |
| 1 | 1.00 | 1 | 1 | 0.04  | 0.04   | 0.04   | 0.04   | 0.04   | t | 78295  | WADLYSP                   | Homo<br>sapiens     |

|   |      |   |   |       |        |        |        |        |   |        |                      |                       |
|---|------|---|---|-------|--------|--------|--------|--------|---|--------|----------------------|-----------------------|
| 1 | 1.00 | 1 | 1 | 0     | 0      | 0      | 0      | 0      | t | 144665 | GREGYPADGGITCFLTAA   | Oryctolagus cuniculus |
| 1 | 1.00 | 1 | 1 | 0     | 0      | 0      | 0      | 0      | t | 146920 | FGGYTLRGTSIFG        | Homo sapiens          |
| 1 | 1.00 | 1 | 1 | -0.01 | -0.006 | -0.014 | -0.01  | -0.01  | t | 21838  | GPWSPIDHHLS          | Mus musculus          |
| 1 | 1.00 | 1 | 1 | -0.01 | -0.01  | -0.014 | -0.01  | -0.01  | t | 21838  | GPWSPIDHHLS          | Canis lupus           |
| 1 | 1.00 | 1 | 1 | -0.01 | -0.01  | -0.014 | -0.01  | -0.01  | t | 21838  | GPWSPIDHHLS          | Canis lupus           |
| 1 | 1.00 | 1 | 1 | -0.03 | -0.03  | -0.03  | -0.03  | -0.03  | t | 123230 | GGPGIGRAA            | Oryctolagus cuniculus |
| 1 | 1.00 | 1 | 1 | 0.05  | 0.05   | 0.05   | 0.05   | 0.051  | t | 63236  | TDSPGG               | Oryctolagus cuniculus |
| 1 | 1.00 | 1 | 1 | -0.02 | -0.018 | -0.008 | -0.013 | -0.02  | t | 122564 | RTAGFDIKLIDT         | Homo sapiens          |
| 1 | 1.00 | 1 | 1 | 0     | -0.002 | 0      | -0.003 | -0.003 | t | 41870  | MKNYLSFGMFALL        | Mus musculus          |
| 1 | 1.00 | 1 | 1 | -0.01 | -0.012 | 0.005  | -0.007 | -0.01  | t | 48690  | PNPNDP               | Mus musculus          |
| 1 | 1.00 | 1 | 1 | 0     | 0      | -0.005 | 0      | -0.002 | t | 56583  | RYLQEKYNLYNSDVFDGKVQ | Oryctolagus cuniculus |
| 1 | 1.00 | 1 | 1 | -0.02 | -0.018 | -0.02  | -0.013 | -0.018 | t | 107364 | FNWYVDG              | Homo sapiens          |
| 1 | 1.00 | 1 | 1 | 0     | 0      | 0      | 0      | -0.001 | t | 151731 | SAQSQRA PDR          | Mus musculus          |

|   |      |   |   |       |        |        |        |        |   |        |                              |                       |
|---|------|---|---|-------|--------|--------|--------|--------|---|--------|------------------------------|-----------------------|
| 1 | 1.00 | 1 | 1 | 0     | 0      | 0      | 0      | -0.001 | t | 142007 | SDWRFLR<br>GYHQYA            | Homo sapiens          |
| 1 | 1.00 | 1 | 1 | 0.01  | 0.01   | 0.005  | 0.009  | 0.01   | t | 74162  | YIAGDPAL<br>AYGYAQD<br>QEPDA | Homo sapiens          |
| 1 | 1.00 | 1 | 1 | 0.01  | 0.008  | 0.018  | 0.013  | 0.01   | t | 137394 | EDHRQVV<br>E                 | Rattus norvegicus     |
| 1 | 1.00 | 1 | 1 | 0.02  | 0.019  | 0.018  | 0.021  | 0.02   | t | 48613  | PNDGEER<br>QSYWF             | Bos taurus            |
| 1 | 1.00 | 1 | 1 | 0.02  | 0.022  | 0.017  | 0.023  | 0.022  | t | 49954  | PVSATAM<br>APSVDPSA<br>EPTAP | Homo sapiens          |
| 1 | 1.00 | 1 | 1 | 0.01  | 0.012  | 0.01   | 0.011  | 0.01   | t | 150994 | GVTAACP<br>HAGAKSFY          | Homo sapiens          |
| 1 | 1.00 | 1 | 1 | 0.01  | 0.008  | 0.008  | 0.013  | 0.01   | t | 61686  | STKAAKPP<br>EAKREAI          | Mus musculus          |
| 1 | 1.00 | 1 | 1 | 0.03  | 0.026  | 0.029  | 0.03   | 0.031  | t | 123838 | VWQDE                        | Mus musculus          |
| 1 | 1.00 | 1 | 1 | 0.01  | 0.01   | 0.01   | 0.01   | 0.01   | t | 56364  | RVMYASS<br>G                 | Oryctolagus cuniculus |
| 1 | 1.00 | 1 | 1 | 0     | 0      | -0.01  | 0.006  | 0.002  | t | 50119  | PYKELRLE<br>VGKQRLKY<br>AQEE | Homo sapiens          |
| 1 | 1.00 | 1 | 1 | 0.05  | 0.05   | 0.041  | 0.05   | 0.05   | t | 139901 | SPFGEVPP<br>KLTSEEIAA<br>N   | Ovis aries            |
| 1 | 1.00 | 1 | 1 | -0.01 | -0.008 | -0.005 | -0.009 | -0.01  | t | 67450  | TYRGFTSL                     | Homo sapiens          |
| 1 | 1.00 | 1 | 1 | 0.01  | 0.01   | 0.01   | 0.01   | 0.01   | t | 141932 | KDKKDDKY<br>TKILAA           | Homo sapiens          |
| 1 | 1.00 | 1 | 1 | 0.01  | 0.01   | 0.01   | 0.01   | 0.01   | t | 77874  | FLPTSPTGL<br>RIE             | Mus musculus          |
| 1 | 1.00 | 1 | 1 | 0     | 0.002  | 0      | 0.007  | 0.003  | t | 11571  | EEEDDDM<br>GFGFLFD           | Homo sapiens          |

|   |      |   |   |       |        |        |        |        |   |        |                             |                       |
|---|------|---|---|-------|--------|--------|--------|--------|---|--------|-----------------------------|-----------------------|
| 1 | 1.00 | 1 | 1 | 0.01  | 0.01   | 0.003  | 0.01   | 0.008  | t | 128620 | FFQALGIT<br>TKISRGT         | Homo sapiens          |
| 1 | 1.00 | 1 | 1 | 0     | 0      | -0.005 | 0      | 0.002  | t | 123805 | TVGKSSK<br>MLQ              | Oryctolagus cuniculus |
| 1 | 1.00 | 1 | 1 | 0.01  | 0.01   | 0.01   | 0.01   | 0.008  | t | 145725 | CKQAGTC<br>PP               | Mus musculus          |
| 1 | 1.00 | 1 | 1 | 0.01  | 0.01   | 0.01   | 0.01   | 0.01   | t | 132928 | WGENFIQ<br>VPVSE            | Homo sapiens          |
| 1 | 1.00 | 1 | 1 | 0.01  | 0.01   | 0.01   | 0.01   | 0.01   | t | 107446 | IEKTISK                     | Homo sapiens          |
| 1 | 1.00 | 1 | 1 | 0.01  | 0.01   | 0.01   | 0.01   | 0.01   | t | 43237  | NANPDPN                     | Mus musculus          |
| 1 | 1.00 | 1 | 1 | -0.01 | -0.01  | -0.01  | -0.01  | -0.01  | t | 112196 | LAVYFCH                     | Homo sapiens          |
| 1 | 1.00 | 1 | 1 | -0.04 | -0.04  | -0.051 | -0.043 | -0.04  | t | 39136  | LRLKKYKV<br>PQ              | Homo sapiens          |
| 1 | 1.00 | 1 | 1 | -0.03 | -0.027 | -0.023 | -0.03  | -0.031 | t | 102860 | TPYTSLYT<br>W               | Mus musculus          |
| 1 | 1.00 | 1 | 1 | 0.03  | 0.03   | 0.037  | 0.03   | 0.027  | t | 79040  | PGQNLCYT<br>K               | Mus musculus          |
| 1 | 1.00 | 1 | 1 | 0.01  | 0.008  | 0.01   | 0.009  | 0.008  | t | 123346 | KDYYQKW<br>MEE              | Homo sapiens          |
| 1 | 1.00 | 1 | 1 | -0.03 | -0.026 | -0.024 | -0.029 | -0.03  | t | 35062  | LCKHSM                      | Homo sapiens          |
| 1 | 1.00 | 1 | 1 | 0     | -0.004 | 0      | -0.001 | -0.001 | t | 71353  | VTHESYQE<br>LVKKLEALE<br>DA | Oryctolagus cuniculus |
| 1 | 1.00 | 1 | 1 | 0     | 0.006  | 0      | -0.001 | -0.001 | t | 43242  | NANPNAN<br>PNANP            | Macaca fascicularis   |
| 1 | 1.00 | 1 | 1 | 0     | -0.002 | 0      | -0.001 | -0.001 | t | 7171   | CTKPTDG<br>NC               | Mus musculus          |
| 1 | 1.00 | 1 | 1 | 0     | -0.002 | 0      | -0.001 | -0.001 | t | 7171   | CTKPTDG<br>NC               | Mus musculus          |

|   |      |   |   |       |        |        |        |        |   |        |                              |                                  |
|---|------|---|---|-------|--------|--------|--------|--------|---|--------|------------------------------|----------------------------------|
| 1 | 1.00 | 1 | 1 | 0     | -0.007 | 0      | 0      | 0      | t | 112442 | ACQKH                        | Oryctola<br>gus<br>cuniculu<br>s |
| 1 | 1.00 | 1 | 1 | -0.04 | -0.04  | -0.036 | -0.034 | -0.039 | t | 138757 | AHWSGHC<br>CL                | Mus<br>musculu<br>s              |
| 1 | 1.00 | 1 | 1 | 0.01  | 0.01   | 0.014  | 0.014  | 0.009  | t | 134001 | AIQHESGIL<br>GPLLYGEV<br>GDT | Homo<br>sapiens                  |
| 1 | 1.00 | 1 | 1 | 0     | 0.002  | 0      | 0.001  | 0      | t | 75923  | YSWKTWG                      | Homo<br>sapiens                  |
| 1 | 1.00 | 1 | 1 | 0     | 0.002  | 0      | 0.001  | 0      | t | 39255  | LRYSWKT<br>WG                | Homo<br>sapiens                  |
| 1 | 1.00 | 1 | 1 | 0.01  | 0.014  | 0.012  | 0.011  | 0.007  | t | 17998  | FTKWTWE<br>TKGDL             | Homo<br>sapiens                  |
| 1 | 1.00 | 1 | 1 | 0.01  | 0.01   | 0.01   | 0.01   | 0.011  | t | 138255 | TTLTLRH                      | Homo<br>sapiens                  |
| 1 | 1.00 | 1 | 1 | 0.01  | 0.01   | 0.015  | 0.01   | 0.011  | t | 5232   | ATYTTGGA<br>QS               | Mus<br>musculu<br>s              |
| 1 | 1.00 | 1 | 1 | 0.02  | 0.02   | 0.018  | 0.02   | 0.018  | t | 95356  | ENGDTVFT<br>EVGY             | Homo<br>sapiens                  |
| 1 | 1.00 | 1 | 1 | 0     | 0.002  | 0.009  | -0.003 | -0.002 | t | 115349 | LKGYGGVS<br>LP               | Homo<br>sapiens                  |
| 1 | 1.00 | 1 | 1 | 0     | 0      | 0      | 0      | 0      | t | 153860 | NLQKRMQ<br>QLENDLD<br>Q      | Homo<br>sapiens                  |
| 1 | 1.00 | 1 | 1 | 0     | 0      | 0      | 0      | 0      | t | 6995   | CSFSSIPN                     | Oryctola<br>gus<br>cuniculu<br>s |
| 1 | 1.00 | 1 | 1 | 0.05  | 0.05   | 0.059  | 0.052  | 0.05   | t | 136004 | TPPEIAQ<br>VATI              | Homo<br>sapiens                  |
| 1 | 1.00 | 1 | 1 | 0.01  | 0.013  | 0.007  | 0.01   | 0.011  | t | 31580  | KKIQDCYV<br>ENGLIS           | Mus<br>musculu<br>s              |
| 1 | 1.00 | 1 | 1 | -0.03 | -0.032 | -0.036 | -0.031 | -0.03  | t | 82816  | GNVTPRVS<br>YAHG             | Mus<br>musculu<br>s              |



|   |      |   |   |       |        |        |        |        |   |        |                             |                                  |
|---|------|---|---|-------|--------|--------|--------|--------|---|--------|-----------------------------|----------------------------------|
| 1 | 1.00 | 1 | 1 | -0.03 | -0.03  | -0.036 | -0.031 | -0.03  | t | 82816  | GNVTPRVS<br>YAHG            | Homo<br>sapiens                  |
| 1 | 1.00 | 1 | 1 | -0.01 | -0.01  | -0.013 | -0.01  | -0.011 | t | 49950  | PVRVAWS<br>SPVQNCEP<br>WIPP | Mus<br>musculu<br>s              |
| 1 | 1.00 | 1 | 1 | 0.05  | 0.052  | 0.05   | 0.053  | 0.05   | t | 134015 | CDKNTGD<br>YYEDSYED         | Homo<br>sapiens                  |
| 1 | 1.00 | 1 | 1 | -0.02 | -0.022 | -0.025 | -0.021 | -0.02  | t | 78752  | NKGKWKE<br>HIKEVTEKL<br>KKA | Mus<br>musculu<br>s              |
| 1 | 1.00 | 1 | 1 | -0.02 | -0.024 | -0.025 | -0.021 | -0.02  | t | 78752  | NKGKWKE<br>HIKEVTEKL<br>KKA | Oryctola<br>gus<br>cuniculu<br>s |
| 1 | 1.00 | 1 | 1 | 0.01  | 0.01   | 0.01   | 0.007  | 0.01   | t | 10636  | DVKFPGG<br>GQI              | Homo<br>sapiens                  |
| 1 | 1.00 | 1 | 1 | -0.01 | -0.006 | -0.01  | -0.007 | -0.011 | t | 110766 | AIKSEVSLT<br>GAL            | Homo<br>sapiens                  |
| 1 | 1.00 | 1 | 1 | 0.03  | 0.03   | 0.03   | 0.03   | 0.031  | t | 108360 | FEDMAKS<br>DKARYDRE         | Homo<br>sapiens                  |
| 1 | 1.00 | 1 | 1 | 0.02  | 0.02   | 0.02   | 0.02   | 0.02   | t | 112769 | EPLYGPY                     | Homo<br>sapiens                  |
| 1 | 1.00 | 1 | 1 | 0     | 0      | 0      | 0      | 0      | t | 111725 | RHGEEYDL<br>QFIFQLC         | Mus<br>musculu<br>s              |
| 1 | 1.00 | 1 | 1 | 0     | 0      | 0      | 0      | 0      | t | 115474 | RVYVEELK<br>PTPEGDL<br>LLQ  | Homo<br>sapiens                  |
| 1 | 1.00 | 1 | 1 | 0     | 0      | -0.004 | -0.006 | 0      | t | 76352  | YVLMVPK<br>Q                | Homo<br>sapiens                  |
| 1 | 1.00 | 1 | 1 | 0     | 0      | -0.012 | 0      | 0      | t | 97605  | RIVRGPAN<br>LRNLKEFK<br>E   | Oryctola<br>gus<br>cuniculu<br>s |
| 1 | 1.00 | 1 | 1 | 0.03  | 0.028  | 0.037  | 0.029  | 0.03   | t | 20204  | GIADLNDA<br>S               | Rattus<br>norvegic<br>us         |

|   |      |   |   |       |        |        |        |        |   |        |                              |                                  |
|---|------|---|---|-------|--------|--------|--------|--------|---|--------|------------------------------|----------------------------------|
| 1 | 1.00 | 1 | 1 | 0     | 0.004  | 0.006  | 0.001  | 0      | t | 86748  | NHIENDPL<br>KI               | Homo<br>sapiens                  |
| 1 | 1.00 | 1 | 1 | 0.01  | 0.012  | 0.008  | 0.011  | 0.01   | t | 4132   | ARDVLAV<br>VSK               | Homo<br>sapiens                  |
| 1 | 1.00 | 1 | 1 | 0.03  | 0.024  | 0.03   | 0.03   | 0.027  | t | 123482 | MALLHQI<br>QGNELEPL          | Oryctola<br>gus<br>cuniculu<br>s |
| 1 | 1.00 | 1 | 1 | 0     | 0      | 0      | 0.007  | 0      | t | 67730  | VARALAH<br>GVRVLED<br>GVNFAT | Homo<br>sapiens                  |
| 1 | 1.00 | 1 | 1 | -0.02 | -0.018 | -0.011 | -0.013 | -0.02  | t | 38582  | LPLPLLQS<br>WM               | Homo<br>sapiens                  |
| 1 | 1.00 | 1 | 1 | 0.01  | 0.015  | 0.015  | 0.01   | 0.01   | t | 4754   | ASRQAEVI<br>A                | Homo<br>sapiens                  |
| 1 | 1.00 | 1 | 1 | 0     | 0      | 0      | 0      | -0.001 | t | 58405  | SHRLLQTY<br>WSSA             | Homo<br>sapiens                  |
| 1 | 1.00 | 1 | 1 | -0.01 | -0.01  | -0.01  | -0.008 | -0.01  | t | 3290   | ANGAGNQ<br>PGANGAG<br>NQPG   | Homo<br>sapiens                  |
| 1 | 1.00 | 1 | 1 | -0.03 | -0.032 | -0.028 | -0.031 | -0.029 | t | 16123  | FHLPYNHN<br>WFAL             | Mus<br>musculu<br>s              |
| 1 | 1.00 | 1 | 1 | 0     | -0.003 | -0.001 | 0      | 0      | t | 35628  | LENLMWK<br>QI                | Oryctola<br>gus<br>cuniculu<br>s |
| 1 | 1.00 | 1 | 1 | 0     | 0      | -0.005 | 0      | -0.002 | t | 32808  | KPNLSSKR<br>SELSQLSM<br>YRVF | Mus<br>musculu<br>s              |
| 1 | 1.00 | 1 | 1 | -0.01 | -0.014 | -0.015 | -0.011 | -0.01  | t | 97430  | KRLRLALA<br>S                | Oryctola<br>gus<br>cuniculu<br>s |
| 1 | 1.00 | 1 | 1 | -0.04 | -0.039 | -0.041 | -0.037 | -0.041 | t | 99380  | KIADDWD<br>NRHLPN<br>A       | Equus<br>caballus                |
| 1 | 1.00 | 1 | 1 | -0.06 | -0.059 | -0.061 | -0.057 | -0.061 | t | 99594  | QTYRQWII<br>EAMSEGI          | Equus<br>caballus                |

|   |      |   |   |   |        |   |   |        |   |        |                           |                                  |
|---|------|---|---|---|--------|---|---|--------|---|--------|---------------------------|----------------------------------|
| 1 | 1.00 | 1 | 1 | 0 | 0      | 0 | 0 | -0.001 | t | 150858 | ISSLYNLVK<br>SS           | Mus<br>musculu<br>s              |
| 1 | 1.00 | 1 | 1 | 0 | 0      | 0 | 0 | -0.001 | t | 142913 | MVLNEG<br>SGTA            | Oryctola<br>gus<br>cuniculu<br>s |
| 1 | 1.00 | 1 | 1 | 0 | 0      | 0 | 0 | -0.001 | t | 150883 | SDDEDLAT<br>S             | Mus<br>musculu<br>s              |
| 1 | 1.00 | 1 | 1 | 0 | 0      | 0 | 0 | -0.001 | t | 102004 | QPD                       | Mus<br>musculu<br>s              |
| 1 | 1.00 | 1 | 1 | 0 | 0      | 0 | 0 | -0.001 | t | 108482 | IINPSENG<br>DTSTNGIK<br>K | Mus<br>musculu<br>s              |
| 1 | 1.00 | 1 | 1 | 0 | 0      | 0 | 0 | -0.001 | t | 63038  | TAVSPTTL<br>RTEVVK        | Sus<br>scrofa                    |
| 1 | 1.00 | 1 | 1 | 0 | 0      | 0 | 0 | -0.001 | t | 97771  | WYGYHHS<br>N              | Mus<br>musculu<br>s              |
| 1 | 1.00 | 1 | 1 | 0 | 0      | 0 | 0 | -0.001 | t | 63122  | TDAYNQKL<br>SERRAN        | Mus<br>musculu<br>s              |
| 1 | 1.00 | 1 | 1 | 0 | 0      | 0 | 0 | -0.001 | t | 43317  | NATAEGR<br>AINRRVE        | Mus<br>musculu<br>s              |
| 1 | 1.00 | 1 | 1 | 0 | 0      | 0 | 0 | -0.001 | t | 59229  | SLKMADP<br>NRFRGKDL<br>P  | Mus<br>musculu<br>s              |
| 1 | 1.00 | 1 | 1 | 0 | -0.003 | 0 | 0 | -0.001 | t | 59229  | SLKMADP<br>NRFRGKDL<br>P  | Oryctola<br>gus<br>cuniculu<br>s |
| 1 | 1.00 | 1 | 1 | 0 | -0.003 | 0 | 0 | -0.001 | t | 53894  | RGKDLPVL<br>DQLTD         | Oryctola<br>gus<br>cuniculu<br>s |
| 1 | 1.00 | 1 | 1 | 0 | 0      | 0 | 0 | -0.001 | t | 59229  | SLKMADP<br>NRFRGKDL<br>P  | Mus<br>musculu<br>s              |
| 1 | 1.00 | 1 | 1 | 0 | 0      | 0 | 0 | -0.001 | t | 21059  | GLPDSVKI<br>WTSETNK       | Mus<br>musculu<br>s              |
| 1 | 1.00 | 1 | 1 | 0 | 0.004  | 0 | 0 | -0.001 | t | 22015  | GREGYP<br>DSKGCKIT        | Ovis<br>aries                    |

|   |      |   |   |       |        |        |       |        |   |        |                         |                                  |
|---|------|---|---|-------|--------|--------|-------|--------|---|--------|-------------------------|----------------------------------|
| 1 | 1.00 | 1 | 1 | 0     | 0      | 0      | 0     | -0.001 | t | 11463  | EDVNGIRK<br>PK          | Mus<br>musculu<br>s              |
| 1 | 1.00 | 1 | 1 | 0     | 0      | 0      | 0     | -0.001 | t | 11575  | EEEEEDG<br>FMGFGMF<br>D | Mus<br>musculu<br>s              |
| 1 | 1.00 | 1 | 1 | 0     | 0      | 0      | 0     | -0.001 | t | 22015  | GREGYP<br>A<br>DSKGCKIT | Mus<br>musculu<br>s              |
| 1 | 1.00 | 1 | 1 | 0     | -0.003 | 0      | 0     | -0.001 | t | 21059  | GLPDSVKI<br>WTSETNK     | Oryctola<br>gus<br>cuniculu<br>s |
| 1 | 1.00 | 1 | 1 | 0     | 0      | 0      | 0     | -0.001 | t | 7674   | DAVTELDK<br>N           | Mus<br>musculu<br>s              |
| 1 | 1.00 | 1 | 1 | 0.01  | 0.008  | 0.015  | 0.009 | 0.01   | t | 63885  | TGLPSSDR<br>AFLVSVS     | Mus<br>musculu<br>s              |
| 1 | 1.00 | 1 | 1 | 0.01  | 0.01   | 0.01   | 0.01  | 0.01   | t | 23192  | GVTYEIDL<br>TNKNAAK     | Homo<br>sapiens                  |
| 1 | 1.00 | 1 | 1 | -0.02 | -0.02  | -0.02  | -0.02 | -0.021 | t | 112323 | SLTTYGI                 | Homo<br>sapiens                  |
| 1 | 1.00 | 1 | 1 | 0.03  | 0.04   | 0.03   | 0.027 | 0.03   | t | 66044  | TRKTSERS<br>QP          | Pan<br>troglody<br>tes           |
| 1 | 1.00 | 1 | 1 | -0.06 | -0.06  | -0.06  | -0.06 | -0.064 | t | 138227 | QKRAA                   | Mus<br>musculu<br>s              |
| 1 | 1.00 | 1 | 1 | 0.01  | 0.01   | 0.01   | 0.01  | 0.01   | t | 67933  | VDENANA<br>N            | Oryctola<br>gus<br>cuniculu<br>s |
| 1 | 1.00 | 1 | 1 | 0     | -0.003 | -0.001 | 0     | -0.001 | t | 50218  | QAASAAL<br>GALGRFDE     | Oryctola<br>gus<br>cuniculu<br>s |
| 1 | 1.00 | 1 | 1 | -0.02 | -0.023 | -0.02  | -0.02 | -0.022 | t | 133467 | YYTYFGRN<br>AYNETKLK    | Oryctola<br>gus<br>cuniculu<br>s |
| 1 | 1.00 | 1 | 1 | 0.02  | 0.02   | 0.021  | 0.02  | 0.019  | t | 49998  | PVVEVNG<br>VTIQVGSR     | Mus<br>musculu<br>s              |
| 1 | 1.00 | 1 | 1 | 0.01  | 0.01   | 0.01   | 0.01  | 0.01   | t | 78225  | PFSNLDF<br>M            | Homo<br>sapiens                  |

|   |      |   |   |       |        |        |        |        |   |        |                          |                                  |
|---|------|---|---|-------|--------|--------|--------|--------|---|--------|--------------------------|----------------------------------|
| 1 | 1.00 | 1 | 1 | -0.01 | -0.01  | -0.01  | -0.01  | -0.01  | t | 158873 | KAFKVIDQ<br>DASGFIE      | Homo<br>sapiens                  |
| 1 | 1.00 | 1 | 1 | -0.02 | -0.018 | -0.001 | -0.019 | -0.023 | t | 57723  | SFAIKWEY<br>VL           | Homo<br>sapiens                  |
| 1 | 1.00 | 1 | 1 | 0.01  | 0.01   | 0.006  | 0.01   | 0.013  | t | 6093   | CDCDRTA<br>A             | Mus<br>musculu<br>s              |
| 1 | 1.00 | 1 | 1 | 0.01  | 0.01   | 0.006  | 0.01   | 0.013  | t | 6093   | CDCDRTA<br>A             | Mus<br>musculu<br>s              |
| 1 | 1.00 | 1 | 1 | 0.01  | 0.007  | 0.006  | 0.01   | 0.013  | t | 6093   | CDCDRTA<br>A             | Mus<br>musculu<br>s              |
| 1 | 1.00 | 1 | 1 | 0     | -0.001 | 0.006  | 0      | 0      | t | 18953  | GDDPLL<br>N              | Anas<br>platyrhy<br>nchos        |
| 1 | 1.00 | 1 | 1 | 0.01  | 0.012  | 0.01   | 0.01   | 0.01   | t | 117747 | AMKISFAK<br>K            | Homo<br>sapiens                  |
| 1 | 1.00 | 1 | 1 | -0.03 | -0.03  | -0.029 | -0.033 | -0.031 | t | 63082  | TCKKNM                   | Homo<br>sapiens                  |
| 1 | 1.00 | 1 | 1 | 0.02  | 0.018  | 0.013  | 0.02   | 0.02   | t | 38422  | LPAYQDYT<br>ARAQVSE      | Oryctola<br>gus<br>cuniculu<br>s |
| 1 | 1.00 | 1 | 1 | 0     | -0.004 | -0.007 | -0.001 | 0      | t | 2242   | AKLTLVLT<br>KCGSQIL      | Oryctola<br>gus<br>cuniculu<br>s |
| 1 | 1.00 | 1 | 1 | -0.03 | -0.03  | -0.032 | -0.03  | -0.03  | t | 119562 | DYTGKIM<br>WTPPAIFK<br>S | Mus<br>musculu<br>s              |
| 1 | 1.00 | 1 | 1 | -0.03 | -0.033 | -0.032 | -0.03  | -0.03  | t | 119562 | DYTGKIM<br>WTPPAIFK<br>S | Oryctola<br>gus<br>cuniculu<br>s |
| 1 | 1.00 | 1 | 1 | -0.03 | -0.03  | -0.032 | -0.03  | -0.03  | t | 119562 | DYTGKIM<br>WTPPAIFK<br>S | Mus<br>musculu<br>s              |
| 1 | 1.00 | 1 | 1 | -0.03 | -0.03  | -0.032 | -0.03  | -0.03  | t | 119562 | DYTGKIM<br>WTPPAIFK<br>S | Mus<br>musculu<br>s              |
| 1 | 1.00 | 1 | 1 | 0     | 0      | 0      | 0      | 0      | t | 117745 | ALLRNLGK<br>MTA          | Homo<br>sapiens                  |

|   |      |   |   |       |        |        |        |        |   |        |                        |                       |
|---|------|---|---|-------|--------|--------|--------|--------|---|--------|------------------------|-----------------------|
| 1 | 1.00 | 1 | 1 | -0.04 | -0.04  | -0.033 | -0.04  | -0.04  | t | 60758  | SRPIIHFGS              | Mus musculus          |
| 1 | 1.00 | 1 | 1 | -0.02 | -0.02  | -0.02  | -0.02  | -0.02  | t | 73594  | YDTRCF                 | Homo sapiens          |
| 1 | 1.00 | 1 | 1 | 0.02  | 0.02   | 0.019  | 0.017  | 0.02   | t | 79672  | VNLEDPAS RDL           | Homo sapiens          |
| 1 | 1.00 | 1 | 1 | 0.05  | 0.048  | 0.045  | 0.043  | 0.05   | t | 132269 | EPVDGVVL VDPE          | Mus musculus          |
| 1 | 1.00 | 1 | 1 | -0.02 | -0.018 | -0.02  | -0.019 | -0.02  | t | 116954 | DPTDYSTR PHMW          | Homo sapiens          |
| 1 | 1.00 | 1 | 1 | -0.02 | -0.02  | -0.027 | -0.017 | -0.02  | t | 125553 | RRPEMGD QAHMPYT TAVIHE | Homo sapiens          |
| 1 | 1.00 | 1 | 1 | 0     | 0      | 0      | 0      | 0      | t | 106256 | ANYGYTFG SGTRLTVV      | Oryctolagus cuniculus |
| 1 | 1.00 | 1 | 1 | 0     | 0      | 0      | 0      | 0      | t | 54430  | RKTKRNT                | Homo sapiens          |
| 1 | 1.00 | 1 | 1 | 0     | 0      | 0      | 0      | 0      | t | 48596  | PNANP                  | Mus musculus          |
| 1 | 1.00 | 1 | 1 | 0     | 0      | -0.003 | 0      | 0      | t | 50058  | PWYVWLGIAGLIAIV M      | Homo sapiens          |
| 1 | 1.00 | 1 | 1 | 0     | 0      | -0.003 | 0      | 0      | t | 50058  | PWYVWLGIAGLIAIV M      | Homo sapiens          |
| 1 | 1.00 | 1 | 1 | -0.04 | -0.04  | -0.04  | -0.04  | -0.04  | t | 156943 | QFTPDKH MLMLP          | Gallus gallus         |
| 1 | 1.00 | 1 | 1 | 0.01  | 0.01   | 0.01   | 0.01   | 0.009  | t | 108215 | WVAMHP QGDL            | Homo sapiens          |
| 1 | 1.00 | 1 | 1 | -0.03 | -0.026 | -0.032 | -0.023 | -0.026 | t | 116292 | DPVVHFFK NIVTP         | Homo sapiens          |
| 1 | 1.00 | 1 | 1 | -0.01 | -0.013 | -0.017 | -0.01  | -0.01  | t | 108164 | TLVCLATG FFPDHVEL      | Oryctolagus cuniculus |
| 1 | 1.00 | 1 | 1 | 0.03  | 0.026  | 0.023  | 0.033  | 0.032  | t | 106811 | SALTQPAS VSGSPGQS IT   | Oryctolagus cuniculus |

|   |      |   |   |      |        |       |       |       |   |        |                              |                                  |
|---|------|---|---|------|--------|-------|-------|-------|---|--------|------------------------------|----------------------------------|
| 1 | 1.00 | 1 | 1 | 0.03 | 0.027  | 0.026 | 0.03  | 0.028 | t | 7558   | DAKDGKEI<br>DTKHLPST<br>C    | Oryctola<br>gus<br>cuniculu<br>s |
| 1 | 1.00 | 1 | 1 | 0    | -0.002 | 0     | 0.001 | 0     | t | 73554  | YDKPYMYL<br>NLYDPNKY<br>VDV  | Mus<br>musculu<br>s              |
| 1 | 1.00 | 1 | 1 | 0    | -0.002 | 0     | 0.001 | 0     | t | 45824  | NSGILKDF<br>WGDYLQY<br>DKPY  | Mus<br>musculu<br>s              |
| 1 | 1.00 | 1 | 1 | 0    | -0.002 | 0     | 0.001 | 0     | t | 45824  | NSGILKDF<br>WGDYLQY<br>DKPY  | Mus<br>musculu<br>s              |
| 1 | 1.00 | 1 | 1 | 0    | -0.002 | 0     | 0.001 | 0     | t | 31365  | KINIGSKV<br>NFDPIDKN<br>QIQ  | Mus<br>musculu<br>s              |
| 1 | 1.00 | 1 | 1 | 0    | 0      | 0     | 0     | 0.001 | t | 115357 | LLQKWEN<br>GEC               | Homo<br>sapiens                  |
| 1 | 1.00 | 1 | 1 | 0.02 | 0.02   | 0.017 | 0.026 | 0.022 | t | 33493  | KSREQLSK<br>LHGVDTS          | Homo<br>sapiens                  |
| 1 | 1.00 | 1 | 1 | 0.01 | 0.01   | 0.003 | 0.01  | 0.011 | t | 141534 | DRMNLQT<br>LRGY              | Mus<br>musculu<br>s              |
| 1 | 1.00 | 1 | 1 | 0.05 | 0.05   | 0.047 | 0.05  | 0.05  | t | 35356  | LEALADQT<br>DALQSEEA<br>AVVK | Mus<br>musculu<br>s              |
| 1 | 1.00 | 1 | 1 | 0.02 | 0.02   | 0.02  | 0.02  | 0.02  | t | 39392  | LSGRPAIP<br>DREALYQE<br>FDE  | Homo<br>sapiens                  |
| 1 | 1.00 | 1 | 1 | 0    | 0      | 0     | 0     | 0     | t | 135950 | LLCLLLSS<br>RPG              | Homo<br>sapiens                  |
| 1 | 1.00 | 1 | 1 | 0    | 0      | 0     | 0     | 0     | t | 121843 | SGLGLFPY<br>SSFIWSC          | Mus<br>musculu<br>s              |
| 1 | 1.00 | 1 | 1 | 0    | 0      | 0     | 0     | 0     | t | 121843 | SGLGLFPY<br>SSFIWSC          | Mus<br>musculu<br>s              |
| 1 | 1.00 | 1 | 1 | 0    | 0      | 0     | 0     | 0     | t | 7238   | CTTSGFAS<br>LFRLGPSQ<br>K    | Mus<br>musculu<br>s              |

|   |      |   |   |       |        |        |        |        |   |        |                              |                                  |
|---|------|---|---|-------|--------|--------|--------|--------|---|--------|------------------------------|----------------------------------|
| 1 | 1.00 | 1 | 1 | 0.01  | 0.014  | 0.017  | 0.017  | 0.011  | t | 108126 | SIFFAVVLE<br>L               | Homo<br>sapiens                  |
| 1 | 1.00 | 1 | 1 | -0.02 | -0.016 | -0.025 | -0.02  | -0.02  | t | 15868  | FFPDHQLD<br>PAFRANT          | Mus<br>musculu<br>s              |
| 1 | 1.00 | 1 | 1 | 0.01  | 0.01   | 0.008  | 0.006  | 0.01   | t | 139570 | QEWGTPG<br>S                 | Homo<br>sapiens                  |
| 1 | 1.00 | 1 | 1 | 0.01  | 0.009  | 0.01   | 0.01   | 0.01   | t | 38428  | LPDDFFPKI<br>DDLVR           | Anas<br>platyrhy<br>nchos        |
| 1 | 1.00 | 1 | 1 | 0.06  | 0.06   | 0.06   | 0.056  | 0.06   | t | 117661 | TVTSAHPE<br>DSSFYICS         | Homo<br>sapiens                  |
| 1 | 1.00 | 1 | 1 | 0.02  | 0.023  | 0.02   | 0.02   | 0.02   | t | 135441 | AGLGAGIP                     | Mus<br>musculu<br>s              |
| 1 | 1.00 | 1 | 1 | 0     | -0.002 | -0.012 | -0.001 | 0      | t | 14280  | ESSVDRRP<br>METVSKD<br>S     | Mus<br>musculu<br>s              |
| 1 | 1.00 | 1 | 1 | 0.01  | 0.007  | 0.009  | 0.01   | 0.009  | t | 45667  | NRDQGRK<br>PTPPTPP           | Oryctola<br>gus<br>cuniculu<br>s |
| 1 | 1.00 | 1 | 1 | 0.01  | 0.01   | 0.006  | 0.016  | 0.012  | t | 55670  | RRPFFHPV<br>GEADYFEY<br>HQEG | Homo<br>sapiens                  |
| 1 | 1.00 | 1 | 1 | -0.03 | -0.032 | -0.037 | -0.027 | -0.029 | t | 106947 | VATWLNPNP<br>DPSQK           | Mus<br>musculu<br>s              |
| 1 | 1.00 | 1 | 1 | 0     | 0      | 0      | 0      | -0.001 | t | 106374 | EDHAGTY<br>GLGDRK            | Mus<br>musculu<br>s              |
| 1 | 1.00 | 1 | 1 | -0.02 | -0.022 | -0.02  | -0.017 | -0.021 | t | 52121  | QQQPFP<br>QQP                | Mus<br>musculu<br>s              |
| 1 | 1.00 | 1 | 1 | -0.02 | -0.017 | -0.013 | -0.02  | -0.02  | t | 106876 | STLFRHD                      | Mus<br>musculu<br>s              |
| 1 | 1.00 | 1 | 1 | 0.01  | 0.01   | 0.01   | 0.01   | 0.01   | t | 23190  | GVTYEIDL<br>TNKNA            | Homo<br>sapiens                  |



|   |      |   |   |       |        |        |        |        |   |        |                              |                                  |
|---|------|---|---|-------|--------|--------|--------|--------|---|--------|------------------------------|----------------------------------|
| 1 | 1.00 | 1 | 1 | -0.01 | -0.01  | -0.01  | -0.01  | -0.01  | t | 142381 | AAEFATEV<br>KKAT             | Homo<br>sapiens                  |
| 1 | 1.00 | 1 | 1 | -0.01 | -0.012 | -0.007 | -0.011 | -0.008 | t | 61636  | STGPCRTC<br>MT               | Mus<br>musculu<br>s              |
| 1 | 1.00 | 1 | 1 | -0.01 | -0.014 | -0.007 | -0.007 | -0.012 | t | 9819   | DPYSPSQD<br>PDRRDPY          | Oryctola<br>gus<br>cuniculu<br>s |
| 1 | 1.00 | 1 | 1 | 0     | 0      | 0      | 0      | 0      | t | 24651  | HQTLQDP<br>RVRG              | Mus<br>musculu<br>s              |
| 1 | 1.00 | 1 | 1 | 0.01  | 0.007  | 0.01   | 0.01   | 0.012  | t | 140916 | VSYGEEKP<br>AVLG             | Oryctola<br>gus<br>cuniculu<br>s |
| 1 | 1.00 | 1 | 1 | 0.02  | 0.024  | 0.022  | 0.027  | 0.023  | t | 120168 | RGWKHSV<br>TYSGGPD<br>PY     | Homo<br>sapiens                  |
| 1 | 1.00 | 1 | 1 | -0.05 | -0.052 | -0.051 | -0.053 | -0.052 | t | 139725 | EMRTRIRY<br>NRRS             | Mus<br>musculu<br>s              |
| 1 | 1.00 | 1 | 1 | -0.03 | -0.03  | -0.03  | -0.03  | -0.03  | t | 156936 | PMPRFF                       | Gallus<br>gallus                 |
| 1 | 1.00 | 1 | 1 | 0.02  | 0.008  | 0.02   | 0.02   | 0.019  | t | 61391  | SSTISSCT                     | Macaca<br>mulatta                |
| 1 | 1.00 | 1 | 1 | 0.03  | 0.03   | 0.03   | 0.03   | 0.03   | t | 149113 | STPNVTQ                      | Sus<br>scrofa                    |
| 1 | 1.00 | 1 | 1 | 0.03  | 0.03   | 0.03   | 0.03   | 0.03   | t | 93510  | NSLDKLISS<br>V               | Ovis<br>aries                    |
| 1 | 1.00 | 1 | 1 | -0.01 | -0.01  | -0.025 | -0.01  | -0.01  | t | 102810 | SLNGKIRA<br>VNVPKVTK<br>EKPT | Mus<br>musculu<br>s              |
| 1 | 1.00 | 1 | 1 | 0.01  | 0.01   | 0.01   | 0.01   | 0.01   | t | 138892 | REQAPNL<br>VY                | Mus<br>musculu<br>s              |
| 1 | 1.00 | 1 | 1 | 0.01  | 0.01   | 0.01   | 0.01   | 0.01   | t | 119625 | PENNYKTT                     | Homo<br>sapiens                  |
| 1 | 1.00 | 1 | 1 | 0.01  | 0.01   | 0.01   | 0.01   | 0.01   | t | 132035 | QSLTPSPG<br>WQSLGSS          | Homo<br>sapiens                  |

|   |      |   |   |       |        |        |        |        |   |        |                              |                              |
|---|------|---|---|-------|--------|--------|--------|--------|---|--------|------------------------------|------------------------------|
| 1 | 1.00 | 1 | 1 | -0.01 | -0.01  | -0.01  | -0.01  | -0.01  | t | 135833 | CDGWML<br>GECILV             | Mus<br>musculus              |
| 1 | 1.00 | 1 | 1 | -0.01 | -0.01  | -0.01  | -0.01  | -0.01  | t | 104747 | DCGDSFN<br>PLF               | Homo<br>sapiens              |
| 1 | 1.00 | 1 | 1 | -0.01 | -0.01  | -0.01  | -0.01  | -0.01  | t | 105280 | LDVTT                        | Oryctola<br>gus<br>cuniculus |
| 1 | 1.00 | 1 | 1 | -0.03 | -0.03  | -0.03  | -0.03  | -0.03  | t | 115189 | AWYYVPL<br>GTQYTDA<br>PSFSDI | Homo<br>sapiens              |
| 1 | 1.00 | 1 | 1 | -0.03 | -0.03  | -0.03  | -0.03  | -0.03  | t | 115874 | NQFLPYPY<br>YA               | Homo<br>sapiens              |
| 1 | 1.00 | 1 | 1 | -0.05 | -0.05  | -0.05  | -0.05  | -0.05  | t | 99008  | SMPVNTP<br>GQFEDFFP          | Homo<br>sapiens              |
| 1 | 1.00 | 1 | 1 | -0.01 | -0.014 | -0.008 | -0.013 | -0.012 | t | 78836  | SPKRIGTG<br>DR               | Oryctola<br>gus<br>cuniculus |
| 1 | 1.00 | 1 | 1 | 0     | 0      | -0.011 | 0      | 0      | t | 35982  | LFSLMPDV<br>AHSLA            | Homo<br>sapiens              |
| 1 | 1.00 | 1 | 1 | -0.04 | -0.04  | -0.048 | -0.04  | -0.038 | t | 20639  | GKMVQVV<br>YDY               | Oryctola<br>gus<br>cuniculus |
| 1 | 1.00 | 1 | 1 | -0.01 | -0.008 | -0.023 | -0.007 | -0.008 | t | 8356   | DGAVQPD<br>GGQPAVR<br>NERA   | Cavia<br>porcellus           |
| 1 | 1.00 | 1 | 1 | -0.01 | -0.014 | -0.023 | -0.007 | -0.008 | t | 8356   | DGAVQPD<br>GGQPAVR<br>NERA   | Oryctola<br>gus<br>cuniculus |
| 1 | 1.00 | 1 | 1 | -0.02 | -0.02  | -0.02  | -0.02  | -0.02  | t | 102005 | QPDQHHQ                      | Mus<br>musculus              |
| 1 | 1.00 | 1 | 1 | 0     | 0      | 0      | -0.003 | -0.002 | t | 71284  | VTEEI                        | Homo<br>sapiens              |
| 1 | 1.00 | 1 | 1 | 0.01  | 0.01   | 0.015  | 0.01   | 0.01   | t | 20657  | GKPALVPD<br>KE               | Homo<br>sapiens              |

|   |      |   |   |       |        |        |        |        |   |        |                             |                                  |
|---|------|---|---|-------|--------|--------|--------|--------|---|--------|-----------------------------|----------------------------------|
| 1 | 1.00 | 1 | 1 | 0     | 0.004  | 0      | 0.001  | 0      | t | 42932  | MVDVVTG<br>A                | Homo<br>sapiens                  |
| 1 | 1.00 | 1 | 1 | 0.01  | 0.013  | 0.022  | 0.01   | 0.01   | t | 79052  | QLDPAF                      | Mus<br>musculu<br>s              |
| 1 | 1.00 | 1 | 1 | -0.02 | -0.02  | -0.02  | -0.02  | -0.02  | t | 79475  | YDWLMF                      | Mus<br>musculu<br>s              |
| 1 | 1.00 | 1 | 1 | 0.01  | 0.012  | 0.006  | 0.007  | 0.008  | t | 6223   | CFEIKCTKP<br>EACSGEPV<br>VV | Homo<br>sapiens                  |
| 1 | 1.00 | 1 | 1 | -0.03 | -0.033 | -0.041 | -0.03  | -0.029 | t | 6541   | CLAVLLGA<br>CS              | Oryctola<br>gus<br>cuniculu<br>s |
| 1 | 1.00 | 1 | 1 | 0.01  | 0.008  | 0.007  | 0.009  | 0.01   | t | 28290  | IRFKDDSSY<br>EEVN           | Mus<br>musculu<br>s              |
| 1 | 1.00 | 1 | 1 | 0.01  | 0.01   | 0.003  | 0.01   | 0.011  | t | 102696 | NTKWDIY<br>GY               | Mus<br>musculu<br>s              |
| 1 | 1.00 | 1 | 1 | 0.01  | 0.01   | 0.012  | 0.01   | 0.011  | t | 153254 | ERHTKFPS<br>V               | Mus<br>musculu<br>s              |
| 1 | 1.00 | 1 | 1 | 0     | -0.002 | 0      | -0.001 | 0      | t | 56686  | RYYRE                       | Mus<br>musculu<br>s              |
| 1 | 1.00 | 1 | 1 | 0     | 0.002  | 0      | 0.001  | 0      | t | 68664  | VGGPLTNS<br>KGQNCGY<br>RRCR | Homo<br>sapiens                  |
| 1 | 1.00 | 1 | 1 | 0.02  | 0.024  | -0.001 | 0.017  | 0.022  | t | 153819 | DTLEQQN<br>KEANNRA<br>EKSE  | Homo<br>sapiens                  |
| 1 | 1.00 | 1 | 1 | -0.03 | -0.026 | -0.03  | -0.033 | -0.032 | t | 106311 | CLPFVQGK<br>EK              | Homo<br>sapiens                  |
| 1 | 1.00 | 1 | 1 | -0.01 | -0.01  | -0.01  | -0.01  | -0.011 | t | 9597   | DPAPPNA<br>NDPAPPN<br>AN    | Mus<br>musculu<br>s              |
| 1 | 1.00 | 1 | 1 | 0     | 0.003  | -0.006 | 0      | 0      | t | 98433  | RVQKANA<br>DAK              | Mus<br>musculu<br>s              |

|   |      |   |   |       |        |        |        |        |   |        |                              |                                  |
|---|------|---|---|-------|--------|--------|--------|--------|---|--------|------------------------------|----------------------------------|
| 1 | 1.00 | 1 | 1 | 0     | 0      | -0.006 | 0      | 0      | t | 98433  | RVQKANA<br>DAK               | Mus<br>musculu<br>s              |
| 1 | 1.00 | 1 | 1 | -0.03 | -0.028 | -0.035 | -0.029 | -0.028 | t | 54863  | RMAWDM<br>MMNW               | Homo<br>sapiens                  |
| 1 | 1.00 | 1 | 1 | 0.02  | 0.017  | 0.021  | 0.02   | 0.018  | t | 65996  | TRAPRREE<br>LEWDD<br>H       | Oryctola<br>gus<br>cuniculu<br>s |
| 1 | 1.00 | 1 | 1 | -0.02 | -0.018 | -0.003 | -0.013 | -0.023 | t | 113010 | GRVSTEVD<br>ARLSFDK          | Homo<br>sapiens                  |
| 1 | 1.00 | 1 | 1 | 0.02  | 0.018  | 0.008  | 0.019  | 0.02   | t | 112841 | SSKRGRQT<br>PVLAM<br>DH      | Rattus<br>norvegic<br>us         |
| 1 | 1.00 | 1 | 1 | -0.01 | -0.008 | -0.01  | -0.007 | -0.009 | t | 918    | AEGEFATA<br>PPSHYSW<br>DPAK  | Homo<br>sapiens                  |
| 1 | 1.00 | 1 | 1 | -0.08 | -0.08  | -0.08  | -0.08  | -0.08  | t | 115384 | MKPWIQP<br>KTKVIPY<br>RYL    | Homo<br>sapiens                  |
| 1 | 1.00 | 1 | 1 | -0.02 | -0.02  | -0.016 | -0.02  | -0.022 | t | 124061 | ELERIRRSIL<br>PYGD           | Homo<br>sapiens                  |
| 1 | 1.00 | 1 | 1 | -0.02 | -0.018 | -0.02  | -0.013 | -0.018 | t | 107533 | NWLDGKE                      | Homo<br>sapiens                  |
| 1 | 1.00 | 1 | 1 | -0.01 | -0.008 | -0.005 | -0.007 | -0.009 | t | 102563 | KKRPPKG                      | Homo<br>sapiens                  |
| 1 | 1.00 | 1 | 1 | 0.01  | 0.008  | 0.004  | 0.007  | 0.01   | t | 10824  | DWSERIRE<br>FM               | Mus<br>musculu<br>s              |
| 1 | 1.00 | 1 | 1 | 0.01  | 0.012  | 0.01   | 0.011  | 0.011  | t | 16123  | FHLPYNHN<br>WFAL             | Homo<br>sapiens                  |
| 1 | 1.00 | 1 | 1 | 0.01  | 0.014  | 0.01   | 0.017  | 0.011  | t | 122874 | PPARALKR<br>SLWVEVD<br>LLIGS | Homo<br>sapiens                  |
| 1 | 1.00 | 1 | 1 | 0.02  | 0.02   | 0.02   | 0.02   | 0.02   | t | 127619 | DEYKRFM<br>NYWTASN<br>E      | Homo<br>sapiens                  |
| 1 | 1.00 | 1 | 1 | 0.02  | 0.02   | 0.02   | 0.02   | 0.02   | t | 133956 | WIMSNF                       | Mus<br>musculu<br>s              |

|   |      |   |   |       |        |        |        |        |   |        |                              |                              |
|---|------|---|---|-------|--------|--------|--------|--------|---|--------|------------------------------|------------------------------|
| 1 | 1.00 | 1 | 1 | 0     | 0      | 0      | 0      | 0      | t | 135842 | NTYGDFM<br>VKSPN             | Mus<br>musculus              |
| 1 | 1.00 | 1 | 1 | 0     | 0      | 0      | 0      | 0      | t | 150970 | AVPADHG<br>AHLSLRGL<br>PVCAF | Mus<br>musculus              |
| 1 | 1.00 | 1 | 1 | 0     | 0      | 0      | 0      | 0      | t | 112074 | DGAWFAY                      | Homo<br>sapiens              |
| 1 | 1.00 | 1 | 1 | 0     | 0      | 0      | 0      | 0      | t | 115309 | KFPQYLQY<br>LYQGPIVL<br>NPWD | Homo<br>sapiens              |
| 1 | 1.00 | 1 | 1 | -0.02 | -0.02  | -0.01  | -0.02  | -0.02  | t | 45420  | NPNDPP                       | Mus<br>musculus              |
| 1 | 1.00 | 1 | 1 | -0.02 | -0.02  | -0.01  | -0.02  | -0.02  | t | 45420  | NPNDPP                       | Mus<br>musculus              |
| 1 | 1.00 | 1 | 1 | 0.05  | 0.05   | 0.045  | 0.047  | 0.05   | t | 49022  | PQLEIVPN<br>SA               | Homo<br>sapiens              |
| 1 | 1.00 | 1 | 1 | -0.02 | -0.02  | -0.02  | -0.02  | -0.02  | t | 115305 | KDERFFSD<br>KIAKYIPIQ<br>YVL | Homo<br>sapiens              |
| 1 | 1.00 | 1 | 1 | -0.02 | -0.02  | -0.02  | -0.02  | -0.02  | t | 79507  | AHIPWLL                      | Oryctola<br>gus<br>cuniculus |
| 1 | 1.00 | 1 | 1 | -0.02 | -0.02  | -0.02  | -0.02  | -0.02  | t | 17365  | FPQPQFPF<br>PQ               | Mus<br>musculus              |
| 1 | 1.00 | 1 | 1 | -0.02 | -0.02  | -0.02  | -0.02  | -0.02  | t | 17365  | FPQPQFPF<br>PQ               | Mus<br>musculus              |
| 1 | 1.00 | 1 | 1 | -0.01 | -0.01  | -0.01  | -0.012 | -0.01  | t | 98975  | QVEKLIKN<br>QKESHFV          | Homo<br>sapiens              |
| 1 | 1.00 | 1 | 1 | 0.01  | 0.01   | 0      | 0.01   | 0.01   | t | 50160  | PYQPVSNL<br>TATTQGQ          | Mus<br>musculus              |
| 1 | 1.00 | 1 | 1 | -0.03 | -0.042 | -0.03  | -0.027 | -0.03  | t | 156850 | APHNKWP<br>HLNPP             | Bos<br>taurus                |
| 1 | 1.00 | 1 | 1 | 0.03  | 0.03   | 0.032  | 0.03   | 0.032  | t | 52397  | QSPHLTYP<br>EPMS             | Mus<br>musculus              |
| 1 | 1.00 | 1 | 1 | -0.04 | -0.04  | -0.047 | -0.04  | -0.041 | t | 68019  | VDLPQPGL<br>RR               | Mus<br>musculus              |

|   |      |   |   |       |        |        |        |        |   |        |                      |                       |
|---|------|---|---|-------|--------|--------|--------|--------|---|--------|----------------------|-----------------------|
| 1 | 1.00 | 1 | 1 | -0.03 | -0.033 | -0.035 | -0.03  | -0.029 | t | 97478  | LTAGALWNA            | Oryctolagus cuniculus |
| 1 | 1.00 | 1 | 1 | -0.01 | -0.01  | -0.01  | -0.01  | -0.01  | t | 132816 | FGQNAPR              | Homo sapiens          |
| 1 | 1.00 | 1 | 1 | 0.01  | 0.012  | 0.003  | 0.007  | 0.012  | t | 78068  | VYDYNCHVDL           | Homo sapiens          |
| 1 | 1.00 | 1 | 1 | -0.01 | -0.01  | -0.022 | -0.017 | -0.01  | t | 96453  | KFKEAFLRSV           | Homo sapiens(human)   |
| 1 | 1.00 | 1 | 1 | -0.02 | -0.017 | -0.015 | -0.02  | -0.022 | t | 122083 | DPNIKLVLDDCWATS      | Mus musculus          |
| 1 | 1.00 | 1 | 1 | 0.03  | 0.028  | 0.025  | 0.031  | 0.03   | t | 135799 | YGKDVKDLFDYAE        | Mus musculus          |
| 1 | 1.00 | 1 | 1 | 0.07  | 0.072  | 0.078  | 0.067  | 0.071  | t | 18808  | GAVDSI               | Homo sapiens          |
| 1 | 1.00 | 1 | 1 | 0.04  | 0.04   | 0.042  | 0.049  | 0.039  | t | 102381 | EEIAQVATISANGDKDIGNI | Mus musculus          |
| 1 | 1.00 | 1 | 1 | 0.04  | 0.04   | 0.042  | 0.049  | 0.039  | t | 102381 | EEIAQVATISANGDKDIGNI | Mus musculus          |
| 1 | 1.00 | 1 | 1 | 0.01  | 0.01   | 0.01   | 0.01   | 0.01   | t | 43239  | NANPNAN              | Mus musculus          |
| 1 | 1.00 | 1 | 1 | 0     | 0      | -0.005 | 0      | 0      | t | 113400 | FKLGGRDSR            | Oryctolagus cuniculus |
| 1 | 1.00 | 1 | 1 | 0     | 0      | -0.005 | 0      | 0      | t | 113400 | FKLGGRDSR            | Homo sapiens          |
| 1 | 1.00 | 1 | 1 | 0     | 0      | -0.005 | 0      | 0      | t | 113400 | FKLGGRDSR            | Homo sapiens          |
| 1 | 1.00 | 1 | 1 | 0.03  | 0.032  | 0.024  | 0.033  | 0.03   | t | 10817  | DWLEDTLSEGIRQWWKLKPG | Homo sapiens          |

|   |      |   |   |       |        |        |        |        |   |        |                             |                                  |
|---|------|---|---|-------|--------|--------|--------|--------|---|--------|-----------------------------|----------------------------------|
| 1 | 1.00 | 1 | 1 | 0     | 0      | 0.007  | 0      | 0      | t | 119452 | FRKTSKGG<br>S               | Homo<br>sapiens                  |
| 1 | 1.00 | 1 | 1 | 0     | -0.002 | -0.005 | -0.001 | 0      | t | 53342  | RDFSIRES                    | Mus<br>musculu<br>s              |
| 1 | 1.00 | 1 | 1 | 0     | -0.004 | -0.005 | -0.007 | -0.002 | t | 130537 | LCENIANH<br>LK              | Oryctola<br>gus<br>cuniculu<br>s |
| 1 | 1.00 | 1 | 1 | 0.03  | 0.03   | 0.032  | 0.027  | 0.03   | t | 9118   | DLIAYKQ                     | Homo<br>sapiens                  |
| 1 | 1.00 | 1 | 1 | -0.01 | -0.01  | -0.01  | -0.01  | -0.01  | t | 118846 | ILKKVLEAL<br>KDLI           | Oryctola<br>gus<br>cuniculu<br>s |
| 1 | 1.00 | 1 | 1 | 0     | 0      | 0      | 0      | -0.001 | t | 135711 | LDETVKDK<br>LAKEQKSK<br>QNI | Homo<br>sapiens                  |
| 1 | 1.00 | 1 | 1 | 0     | 0      | 0      | 0      | -0.001 | t | 135837 | DMYGDIRL<br>TGLI            | Mus<br>musculu<br>s              |
| 1 | 1.00 | 1 | 1 | 0     | 0      | 0      | 0      | -0.001 | t | 144678 | GTQPTLEV<br>VPMGRGS         | Mus<br>musculu<br>s              |
| 1 | 1.00 | 1 | 1 | 0     | 0      | 0      | 0      | -0.001 | t | 141693 | KTWG                        | Mus<br>musculu<br>s              |
| 1 | 1.00 | 1 | 1 | 0     | 0      | 0      | 0      | -0.001 | t | 144820 | YLEDWIKY<br>NNQK            | Mus<br>musculu<br>s              |
| 1 | 1.00 | 1 | 1 | 0     | 0      | 0      | 0      | -0.001 | t | 153480 | TPSWRNP<br>FPTYGGG<br>S     | Mus<br>musculu<br>s              |
| 1 | 1.00 | 1 | 1 | 0     | 0      | 0      | 0      | -0.001 | t | 153333 | ACLDAKLQ<br>QCGGS           | Mus<br>musculu<br>s              |
| 1 | 1.00 | 1 | 1 | 0     | 0      | 0      | 0      | -0.001 | t | 153420 | MDWINPF<br>PNFNSGG<br>GS    | Mus<br>musculu<br>s              |
| 1 | 1.00 | 1 | 1 | 0     | 0      | 0      | 0      | -0.001 | t | 150883 | SDDEDLAT<br>S               | Mus<br>musculu<br>s              |
| 1 | 1.00 | 1 | 1 | 0     | 0      | 0      | 0      | -0.001 | t | 135660 | ECPEGYIL<br>DDGFICTD<br>IDE | Mus<br>musculu<br>s              |

|   |      |   |   |   |   |   |   |        |   |        |                           |                                  |
|---|------|---|---|---|---|---|---|--------|---|--------|---------------------------|----------------------------------|
| 1 | 1.00 | 1 | 1 | 0 | 0 | 0 | 0 | -0.001 | t | 135836 | DLFGNVLL<br>GQRLDQG       | Mus<br>musculu<br>s              |
| 1 | 1.00 | 1 | 1 | 0 | 0 | 0 | 0 | -0.001 | t | 144599 | CNGTHPSL<br>RLC           | Mus<br>musculu<br>s              |
| 1 | 1.00 | 1 | 1 | 0 | 0 | 0 | 0 | -0.001 | t | 138628 | SQKEVLER<br>TRAELDTV<br>C | Oryctola<br>gus<br>cuniculu<br>s |
| 1 | 1.00 | 1 | 1 | 0 | 0 | 0 | 0 | -0.001 | t | 143328 | DEGDTDLY<br>DYYPEE        | Mus<br>musculu<br>s              |
| 1 | 1.00 | 1 | 1 | 0 | 0 | 0 | 0 | -0.001 | t | 151101 | AAA                       | Homo<br>sapiens                  |
| 1 | 1.00 | 1 | 1 | 0 | 0 | 0 | 0 | -0.001 | t | 144779 | SGTHWFL<br>AGCIS          | Mus<br>musculu<br>s              |
| 1 | 1.00 | 1 | 1 | 0 | 0 | 0 | 0 | -0.001 | t | 136542 | PDGSESPT<br>DQET          | Mus<br>musculu<br>s              |
| 1 | 1.00 | 1 | 1 | 0 | 0 | 0 | 0 | -0.001 | t | 135841 | HVTDMM<br>ELYTLG          | Mus<br>musculu<br>s              |
| 1 | 1.00 | 1 | 1 | 0 | 0 | 0 | 0 | -0.001 | t | 136544 | PEEYVSPD<br>AEVIG         | Mus<br>musculu<br>s              |
| 1 | 1.00 | 1 | 1 | 0 | 0 | 0 | 0 | -0.001 | t | 134784 | RKRSQML<br>FRGRRASQ       | Mus<br>musculu<br>s              |
| 1 | 1.00 | 1 | 1 | 0 | 0 | 0 | 0 | -0.001 | t | 153341 | ACQVPHFF<br>GCGGGS        | Mus<br>musculu<br>s              |
| 1 | 1.00 | 1 | 1 | 0 | 0 | 0 | 0 | -0.001 | t | 138812 | SSVLYGGP<br>PSAA          | Mus<br>musculu<br>s              |
| 1 | 1.00 | 1 | 1 | 0 | 0 | 0 | 0 | -0.001 | t | 141559 | SDEALPLG<br>SPR           | Mus<br>musculu<br>s              |
| 1 | 1.00 | 1 | 1 | 0 | 0 | 0 | 0 | -0.001 | t | 139860 | PVQRGAW<br>RWPVVTN<br>E   | Mus<br>musculu<br>s              |
| 1 | 1.00 | 1 | 1 | 0 | 0 | 0 | 0 | -0.001 | t | 153362 | APWSLRD<br>HLAVTGG<br>GS  | Mus<br>musculu<br>s              |
| 1 | 1.00 | 1 | 1 | 0 | 0 | 0 | 0 | -0.001 | t | 135650 | DKVSFFCK<br>NKEKCC        | Homo<br>sapiens                  |



|   |      |   |   |   |   |   |   |        |   |        |                           |                                  |
|---|------|---|---|---|---|---|---|--------|---|--------|---------------------------|----------------------------------|
| 1 | 1.00 | 1 | 1 | 0 | 0 | 0 | 0 | -0.001 | t | 139846 | PEWWLEE<br>PPFISSGK       | Mus<br>musculu<br>s              |
| 1 | 1.00 | 1 | 1 | 0 | 0 | 0 | 0 | -0.001 | t | 137743 | DTPLTIAGL<br>KLV          | Mus<br>musculu<br>s              |
| 1 | 1.00 | 1 | 1 | 0 | 0 | 0 | 0 | -0.001 | t | 146813 | DAEFGHD<br>SGFEVRH<br>QK  | Mus<br>musculu<br>s              |
| 1 | 1.00 | 1 | 1 | 0 | 0 | 0 | 0 | -0.001 | t | 141560 | SDEALPPG<br>SPR           | Mus<br>musculu<br>s              |
| 1 | 1.00 | 1 | 1 | 0 | 0 | 0 | 0 | -0.001 | t | 153357 | ACWYSTR<br>DHC GGGS       | Mus<br>musculu<br>s              |
| 1 | 1.00 | 1 | 1 | 0 | 0 | 0 | 0 | -0.001 | t | 145144 | DPGQLRL<br>WRLAS          | Homo<br>sapiens                  |
| 1 | 1.00 | 1 | 1 | 0 | 0 | 0 | 0 | -0.001 | t | 135191 | NLKTPRV<br>GGC            | Homo<br>sapiens                  |
| 1 | 1.00 | 1 | 1 | 0 | 0 | 0 | 0 | -0.001 | t | 139602 | SDSMLSW                   | Oryctola<br>gus<br>cuniculu<br>s |
| 1 | 1.00 | 1 | 1 | 0 | 0 | 0 | 0 | -0.001 | t | 135841 | HVTDMM<br>ELYTLG          | Mus<br>musculu<br>s              |
| 1 | 1.00 | 1 | 1 | 0 | 0 | 0 | 0 | -0.001 | t | 137469 | YPPEETG<br>ERV            | Oryctola<br>gus<br>cuniculu<br>s |
| 1 | 1.00 | 1 | 1 | 0 | 0 | 0 | 0 | -0.001 | t | 135471 | KDKATFGC<br>HDGC          | Homo<br>sapiens                  |
| 1 | 1.00 | 1 | 1 | 0 | 0 | 0 | 0 | -0.001 | t | 144654 | GPHPTLEV<br>VPMGRGS       | Mus<br>musculu<br>s              |
| 1 | 1.00 | 1 | 1 | 0 | 0 | 0 | 0 | -0.001 | t | 135834 | CEFRDGA<br>GSICG          | Mus<br>musculu<br>s              |
| 1 | 1.00 | 1 | 1 | 0 | 0 | 0 | 0 | -0.001 | t | 134421 | KQIPECEN<br>VKTTQCVF      | Mus<br>musculu<br>s              |
| 1 | 1.00 | 1 | 1 | 0 | 0 | 0 | 0 | -0.001 | t | 134926 | ENPVVHFF<br>KNIVTPRT<br>P | Homo<br>sapiens                  |
| 1 | 1.00 | 1 | 1 | 0 | 0 | 0 | 0 | -0.001 | t | 145777 | FDTGA FDP<br>DWPYD        | Mus<br>musculu<br>s              |

|   |      |   |   |   |   |   |   |        |   |        |                              |                                  |
|---|------|---|---|---|---|---|---|--------|---|--------|------------------------------|----------------------------------|
| 1 | 1.00 | 1 | 1 | 0 | 0 | 0 | 0 | -0.001 | t | 140695 | KGRFTISR<br>DNAKSTLY<br>L    | Mus<br>musculu<br>s              |
| 1 | 1.00 | 1 | 1 | 0 | 0 | 0 | 0 | -0.001 | t | 144809 | VLAPGGT<br>HSRGLLE<br>M      | Mus<br>musculu<br>s              |
| 1 | 1.00 | 1 | 1 | 0 | 0 | 0 | 0 | -0.001 | t | 139305 | TAAQITQR<br>KWEAARE<br>AEQRR | Oryctola<br>gus<br>cuniculu<br>s |
| 1 | 1.00 | 1 | 1 | 0 | 0 | 0 | 0 | -0.001 | t | 138232 | RLTSSLRY<br>NP               | Oryctola<br>gus<br>cuniculu<br>s |
| 1 | 1.00 | 1 | 1 | 0 | 0 | 0 | 0 | -0.001 | t | 134702 | KEKKYS                       | Mus<br>musculu<br>s              |
| 1 | 1.00 | 1 | 1 | 0 | 0 | 0 | 0 | -0.001 | t | 137866 | GDTRPRFL                     | Oryctola<br>gus<br>cuniculu<br>s |
| 1 | 1.00 | 1 | 1 | 0 | 0 | 0 | 0 | -0.001 | t | 153334 | ACLEILSW<br>LCGGGS           | Mus<br>musculu<br>s              |
| 1 | 1.00 | 1 | 1 | 0 | 0 | 0 | 0 | -0.001 | t | 153331 | ACISPNQ<br>WLCGGGS           | Mus<br>musculu<br>s              |
| 1 | 1.00 | 1 | 1 | 0 | 0 | 0 | 0 | -0.001 | t | 138456 | KEQFEFAL<br>TAVAEV           | Oryctola<br>gus<br>cuniculu<br>s |
| 1 | 1.00 | 1 | 1 | 0 | 0 | 0 | 0 | -0.001 | t | 137944 | PGTEYT                       | Oryctola<br>gus<br>cuniculu<br>s |
| 1 | 1.00 | 1 | 1 | 0 | 0 | 0 | 0 | -0.001 | t | 153447 | QPAIWINP<br>FPAWGGG<br>S     | Mus<br>musculu<br>s              |
| 1 | 1.00 | 1 | 1 | 0 | 0 | 0 | 0 | -0.001 | t | 153346 | ACRDHYPL<br>SCGGGS           | Mus<br>musculu<br>s              |
| 1 | 1.00 | 1 | 1 | 0 | 0 | 0 | 0 | -0.001 | t | 135842 | NTYGDFM<br>VKSPN             | Mus<br>musculu<br>s              |
| 1 | 1.00 | 1 | 1 | 0 | 0 | 0 | 0 | -0.001 | t | 136061 | ETQAE                        | Mus<br>musculu<br>s              |
| 1 | 1.00 | 1 | 1 | 0 | 0 | 0 | 0 | -0.001 | t | 151609 | DETPMRG<br>ETRKV             | Homo<br>sapiens                  |

|   |      |   |   |   |   |   |   |        |   |        |                          |                                  |
|---|------|---|---|---|---|---|---|--------|---|--------|--------------------------|----------------------------------|
| 1 | 1.00 | 1 | 1 | 0 | 0 | 0 | 0 | -0.001 | t | 135842 | NTYGDFM<br>VKSPN         | Mus<br>musculu<br>s              |
| 1 | 1.00 | 1 | 1 | 0 | 0 | 0 | 0 | -0.001 | t | 145376 | NCWKPVQ<br>LHC           | Homo<br>sapiens                  |
| 1 | 1.00 | 1 | 1 | 0 | 0 | 0 | 0 | -0.001 | t | 139225 | REAEQRR                  | Oryctola<br>gus<br>cuniculu<br>s |
| 1 | 1.00 | 1 | 1 | 0 | 0 | 0 | 0 | -0.001 | t | 138198 | KPTSTLT                  | Mus<br>musculu<br>s              |
| 1 | 1.00 | 1 | 1 | 0 | 0 | 0 | 0 | -0.001 | t | 138189 | HILGSTA                  | Mus<br>musculu<br>s              |
| 1 | 1.00 | 1 | 1 | 0 | 0 | 0 | 0 | -0.001 | t | 135837 | DMYGDRL<br>TGLI          | Mus<br>musculu<br>s              |
| 1 | 1.00 | 1 | 1 | 0 | 0 | 0 | 0 | -0.001 | t | 135839 | DYMGNIQ<br>DFDT          | Mus<br>musculu<br>s              |
| 1 | 1.00 | 1 | 1 | 0 | 0 | 0 | 0 | -0.001 | t | 144777 | SGTHMNL<br>YLHDTAFA      | Mus<br>musculu<br>s              |
| 1 | 1.00 | 1 | 1 | 0 | 0 | 0 | 0 | -0.001 | t | 146189 | DIPEEIKQ                 | Mus<br>musculu<br>s              |
| 1 | 1.00 | 1 | 1 | 0 | 0 | 0 | 0 | -0.001 | t | 144656 | GPTHAMF<br>DSSGP         | Mus<br>musculu<br>s              |
| 1 | 1.00 | 1 | 1 | 0 | 0 | 0 | 0 | -0.001 | t | 142480 | VAAVTEKL<br>RAGT         | Mus<br>musculu<br>s              |
| 1 | 1.00 | 1 | 1 | 0 | 0 | 0 | 0 | -0.001 | t | 138192 | HQTPLST                  | Mus<br>musculu<br>s              |
| 1 | 1.00 | 1 | 1 | 0 | 0 | 0 | 0 | -0.001 | t | 139500 | FHTHISV                  | Oryctola<br>gus<br>cuniculu<br>s |
| 1 | 1.00 | 1 | 1 | 0 | 0 | 0 | 0 | -0.001 | t | 134422 | KRKRSQM<br>LFRGRRAS<br>Q | Mus<br>musculu<br>s              |
| 1 | 1.00 | 1 | 1 | 0 | 0 | 0 | 0 | -0.001 | t | 137136 | DQQTQIA<br>KDTAQT        | Mus<br>musculu<br>s              |

|   |      |   |   |   |   |   |   |        |   |        |                             |                       |
|---|------|---|---|---|---|---|---|--------|---|--------|-----------------------------|-----------------------|
| 1 | 1.00 | 1 | 1 | 0 | 0 | 0 | 0 | -0.001 | t | 151713 | RGEARK                      | Homo sapiens          |
| 1 | 1.00 | 1 | 1 | 0 | 0 | 0 | 0 | -0.001 | t | 144786 | SMNRGRG<br>THPSLIW<br>M     | Mus musculus          |
| 1 | 1.00 | 1 | 1 | 0 | 0 | 0 | 0 | -0.001 | t | 135642 | CKNKEKKC                    | Homo sapiens          |
| 1 | 1.00 | 1 | 1 | 0 | 0 | 0 | 0 | -0.001 | t | 140459 | EHWSHD<br>MFSPGD            | Mus musculus          |
| 1 | 1.00 | 1 | 1 | 0 | 0 | 0 | 0 | -0.001 | t | 135545 | DVFYPYPY<br>ASGS            | Mus musculus          |
| 1 | 1.00 | 1 | 1 | 0 | 0 | 0 | 0 | -0.001 | t | 153359 | ALLPFKDH<br>LPYPGGGS        | Mus musculus          |
| 1 | 1.00 | 1 | 1 | 0 | 0 | 0 | 0 | -0.001 | t | 138283 | AFSFEAQG<br>GLA             | Oryctolagus cuniculus |
| 1 | 1.00 | 1 | 1 | 0 | 0 | 0 | 0 | -0.001 | t | 134804 | TIFILCCSK<br>EKRRKKQA<br>AT | Mus musculus          |
| 1 | 1.00 | 1 | 1 | 0 | 0 | 0 | 0 | -0.001 | t | 134767 | QDPYVKE<br>AENLKKYF<br>NAG  | Mus musculus          |
| 1 | 1.00 | 1 | 1 | 0 | 0 | 0 | 0 | -0.001 | t | 138264 | YSNKTPHL<br>QWRL            | Homo sapiens          |
| 1 | 1.00 | 1 | 1 | 0 | 0 | 0 | 0 | -0.001 | t | 158947 | LDIDIDPKV<br>KVATLS         | Mus musculus          |
| 1 | 1.00 | 1 | 1 | 0 | 0 | 0 | 0 | -0.001 | t | 136419 | KIHAREIFD<br>SRGNPTVE       | Homo sapiens          |
| 1 | 1.00 | 1 | 1 | 0 | 0 | 0 | 0 | -0.001 | t | 144705 | KGTHSLYS<br>QIAG            | Mus musculus          |
| 1 | 1.00 | 1 | 1 | 0 | 0 | 0 | 0 | -0.001 | t | 136420 | KIHAREIFD<br>SRGNPTVE       | Homo sapiens          |
| 1 | 1.00 | 1 | 1 | 0 | 0 | 0 | 0 | -0.001 | t | 136418 | KIHAREIFD<br>SRGNPTVE       | Homo sapiens          |
| 1 | 1.00 | 1 | 1 | 0 | 0 | 0 | 0 | -0.001 | t | 153498 | WSPSKLYS<br>ARDHGGG<br>S    | Mus musculus          |

|   |      |   |   |   |   |   |   |        |   |        |                          |                                  |
|---|------|---|---|---|---|---|---|--------|---|--------|--------------------------|----------------------------------|
| 1 | 1.00 | 1 | 1 | 0 | 0 | 0 | 0 | -0.001 | t | 136353 | HGNAEVH<br>ASFFDIGG<br>S | Oryctola<br>gus<br>cuniculu<br>s |
| 1 | 1.00 | 1 | 1 | 0 | 0 | 0 | 0 | -0.001 | t | 135845 | WTEIHDW<br>EAAME         | Mus<br>musculu<br>s              |
| 1 | 1.00 | 1 | 1 | 0 | 0 | 0 | 0 | -0.001 | t | 140460 | EKLKHSM                  | Mus<br>musculu<br>s              |
| 1 | 1.00 | 1 | 1 | 0 | 0 | 0 | 0 | -0.001 | t | 138141 | ANKTSPFL<br>MWRL         | Homo<br>sapiens                  |
| 1 | 1.00 | 1 | 1 | 0 | 0 | 0 | 0 | -0.001 | t | 144673 | GTFCGGEE<br>CMRG         | Mus<br>musculu<br>s              |
| 1 | 1.00 | 1 | 1 | 0 | 0 | 0 | 0 | -0.001 | t | 153382 | FAENKKD<br>HFSPGGG<br>GS | Mus<br>musculu<br>s              |
| 1 | 1.00 | 1 | 1 | 0 | 0 | 0 | 0 | -0.001 | t | 144675 | GTHPFLSQ<br>W            | Mus<br>musculu<br>s              |
| 1 | 1.00 | 1 | 1 | 0 | 0 | 0 | 0 | -0.001 | t | 135845 | WTEIHDW<br>EAAME         | Mus<br>musculu<br>s              |
| 1 | 1.00 | 1 | 1 | 0 | 0 | 0 | 0 | -0.001 | t | 150200 | FGEHKQEK<br>DLEYGAC      | Mus<br>musculu<br>s              |
| 1 | 1.00 | 1 | 1 | 0 | 0 | 0 | 0 | -0.001 | t | 138255 | TTLTLRH                  | Homo<br>sapiens                  |
| 1 | 1.00 | 1 | 1 | 0 | 0 | 0 | 0 | -0.001 | t | 138238 | SMLDTPPT                 | Mus<br>musculu<br>s              |
| 1 | 1.00 | 1 | 1 | 0 | 0 | 0 | 0 | -0.001 | t | 144756 | QVGTHPG<br>LANDYEY       | Mus<br>musculu<br>s              |
| 1 | 1.00 | 1 | 1 | 0 | 0 | 0 | 0 | -0.001 | t | 153434 | NSPFMLH<br>SALSGGGS      | Mus<br>musculu<br>s              |
| 1 | 1.00 | 1 | 1 | 0 | 0 | 0 | 0 | -0.001 | t | 135839 | DYMGNIQ<br>DFDT          | Mus<br>musculu<br>s              |
| 1 | 1.00 | 1 | 1 | 0 | 0 | 0 | 0 | -0.001 | t | 142441 | LFSPWLRV<br>QNHF         | Mus<br>musculu<br>s              |
| 1 | 1.00 | 1 | 1 | 0 | 0 | 0 | 0 | -0.001 | t | 153481 | TPTWPLLT<br>IFPSGGGS     | Mus<br>musculu<br>s              |

|   |      |   |   |   |   |   |   |        |   |        |                              |                                  |
|---|------|---|---|---|---|---|---|--------|---|--------|------------------------------|----------------------------------|
| 1 | 1.00 | 1 | 1 | 0 | 0 | 0 | 0 | -0.001 | t | 141764 | TLNFNAEG<br>EPELLMLA<br>NWR  | Mus<br>musculu<br>s              |
| 1 | 1.00 | 1 | 1 | 0 | 0 | 0 | 0 | -0.001 | t | 138202 | LPTITNT                      | Mus<br>musculu<br>s              |
| 1 | 1.00 | 1 | 1 | 0 | 0 | 0 | 0 | -0.001 | t | 151023 | LCKLRGVA<br>PLHLGKC          | Mus<br>musculu<br>s              |
| 1 | 1.00 | 1 | 1 | 0 | 0 | 0 | 0 | -0.001 | t | 135350 | VGVTTETPL                    | Oryctola<br>gus<br>cuniculu<br>s |
| 1 | 1.00 | 1 | 1 | 0 | 0 | 0 | 0 | -0.001 | t | 137962 | RDSPEDFV                     | Oryctola<br>gus<br>cuniculu<br>s |
| 1 | 1.00 | 1 | 1 | 0 | 0 | 0 | 0 | -0.001 | t | 151763 | WYRATHQ<br>E                 | Mus<br>musculu<br>s              |
| 1 | 1.00 | 1 | 1 | 0 | 0 | 0 | 0 | -0.001 | t | 153396 | HSFEPWS<br>ARDMLGG<br>GS     | Mus<br>musculu<br>s              |
| 1 | 1.00 | 1 | 1 | 0 | 0 | 0 | 0 | -0.001 | t | 144623 | EEAEGTTD<br>AQIDANRK<br>RESE | Mus<br>musculu<br>s              |
| 1 | 1.00 | 1 | 1 | 0 | 0 | 0 | 0 | -0.001 | t | 137432 | NHNYPPLS<br>LLTF             | Mus<br>musculu<br>s              |
| 1 | 1.00 | 1 | 1 | 0 | 0 | 0 | 0 | -0.001 | t | 149867 | PESFDGDP<br>ASNTAPLQ<br>PE   | Homo<br>sapiens                  |
| 1 | 1.00 | 1 | 1 | 0 | 0 | 0 | 0 | -0.001 | t | 144701 | KFGNYNH<br>TQLLGQLQ<br>AV    | Oryctola<br>gus<br>cuniculu<br>s |
| 1 | 1.00 | 1 | 1 | 0 | 0 | 0 | 0 | -0.001 | t | 135799 | YGKDVKDL<br>FDYAEQ           | Mus<br>musculu<br>s              |
| 1 | 1.00 | 1 | 1 | 0 | 0 | 0 | 0 | -0.001 | t | 144598 | CFVGTHP<br>QLRC              | Mus<br>musculu<br>s              |
| 1 | 1.00 | 1 | 1 | 0 | 0 | 0 | 0 | -0.001 | t | 146337 | IPEEIKQL                     | Mus<br>musculu<br>s              |
| 1 | 1.00 | 1 | 1 | 0 | 0 | 0 | 0 | -0.001 | t | 135847 | YPAIVETGL                    | Mus<br>musculu<br>s              |
| 1 | 1.00 | 1 | 1 | 0 | 0 | 0 | 0 | -0.001 | t | 134492 | QIQRRPS<br>M                 | Mus<br>musculu<br>s              |

|   |      |   |   |   |   |   |   |        |   |        |                             |                                  |
|---|------|---|---|---|---|---|---|--------|---|--------|-----------------------------|----------------------------------|
| 1 | 1.00 | 1 | 1 | 0 | 0 | 0 | 0 | -0.001 | t | 144676 | GTHPSLQF<br>T               | Mus<br>musculu<br>s              |
| 1 | 1.00 | 1 | 1 | 0 | 0 | 0 | 0 | -0.001 | t | 135930 | GDKVSFFC<br>KNKEKKC         | Homo<br>sapiens                  |
| 1 | 1.00 | 1 | 1 | 0 | 0 | 0 | 0 | -0.001 | t | 135833 | CDGWML<br>GECILV            | Mus<br>musculu<br>s              |
| 1 | 1.00 | 1 | 1 | 0 | 0 | 0 | 0 | -0.001 | t | 142561 | CKVMVHD<br>PHSLA            | Mus<br>musculu<br>s              |
| 1 | 1.00 | 1 | 1 | 0 | 0 | 0 | 0 | -0.001 | t | 141683 | KDWG                        | Mus<br>musculu<br>s              |
| 1 | 1.00 | 1 | 1 | 0 | 0 | 0 | 0 | -0.001 | t | 149867 | PESFDGDP<br>ASNTAPLQ<br>PE  | Mus<br>musculu<br>s              |
| 1 | 1.00 | 1 | 1 | 0 | 0 | 0 | 0 | -0.001 | t | 141105 | WEISQASH<br>YFERHLE         | Oryctola<br>gus<br>cuniculu<br>s |
| 1 | 1.00 | 1 | 1 | 0 | 0 | 0 | 0 | -0.001 | t | 138608 | RVGAHDP                     | Homo<br>sapiens                  |
| 1 | 1.00 | 1 | 1 | 0 | 0 | 0 | 0 | -0.001 | t | 149684 | EPAGSNR                     | Mus<br>musculu<br>s              |
| 1 | 1.00 | 1 | 1 | 0 | 0 | 0 | 0 | -0.001 | t | 135449 | CATLRVYK<br>GG              | Homo<br>sapiens                  |
| 1 | 1.00 | 1 | 1 | 0 | 0 | 0 | 0 | -0.001 | t | 119025 | SWTDTDG<br>TN               | Mus<br>musculu<br>s              |
| 1 | 1.00 | 1 | 1 | 0 | 0 | 0 | 0 | -0.001 | t | 121112 | AACDPRH<br>GRYLTVA          | Homo<br>sapiens                  |
| 1 | 1.00 | 1 | 1 | 0 | 0 | 0 | 0 | -0.001 | t | 131406 | EGEGSGFI<br>REDPIGAG<br>A   | Oryctola<br>gus<br>cuniculu<br>s |
| 1 | 1.00 | 1 | 1 | 0 | 0 | 0 | 0 | -0.001 | t | 125209 | QFQIHGPR                    | Mus<br>musculu<br>s              |
| 1 | 1.00 | 1 | 1 | 0 | 0 | 0 | 0 | -0.001 | t | 122917 | TKVYSTDIF<br>FILEITDNP<br>Y | Mus<br>musculu<br>s              |
| 1 | 1.00 | 1 | 1 | 0 | 0 | 0 | 0 | -0.001 | t | 122375 | GLINRAKA<br>VKQFEESQ<br>G   | Mus<br>musculu<br>s              |

|   |      |   |   |   |   |   |   |        |   |        |                              |                                  |
|---|------|---|---|---|---|---|---|--------|---|--------|------------------------------|----------------------------------|
| 1 | 1.00 | 1 | 1 | 0 | 0 | 0 | 0 | -0.001 | t | 118810 | GHGKGVG<br>FGEGVGS<br>GK     | Mus<br>musculu<br>s              |
| 1 | 1.00 | 1 | 1 | 0 | 0 | 0 | 0 | -0.001 | t | 130925 | KLLPEDDE<br>SRTYHTV          | Homo<br>sapiens                  |
| 1 | 1.00 | 1 | 1 | 0 | 0 | 0 | 0 | -0.001 | t | 122895 | RWLPPVY<br>EDGFS             | Oryctola<br>gus<br>cuniculu<br>s |
| 1 | 1.00 | 1 | 1 | 0 | 0 | 0 | 0 | -0.001 | t | 133067 | EELSELREE                    | Mus<br>musculu<br>s              |
| 1 | 1.00 | 1 | 1 | 0 | 0 | 0 | 0 | -0.001 | t | 131576 | NSRQTDR<br>EDELI             | Rattus<br>norvegic<br>us         |
| 1 | 1.00 | 1 | 1 | 0 | 0 | 0 | 0 | -0.001 | t | 132727 | VTNEVHT<br>WTEQYKF<br>Q      | Mus<br>musculu<br>s              |
| 1 | 1.00 | 1 | 1 | 0 | 0 | 0 | 0 | -0.001 | t | 119823 | EDDDMGF<br>GLFD              | Homo<br>sapiens                  |
| 1 | 1.00 | 1 | 1 | 0 | 0 | 0 | 0 | -0.001 | t | 120769 | LLVDVEPK<br>VKSKKRE          | Mus<br>musculu<br>s              |
| 1 | 1.00 | 1 | 1 | 0 | 0 | 0 | 0 | -0.001 | t | 131101 | TDSEMDV<br>VRFDDDN<br>S      | Mus<br>musculu<br>s              |
| 1 | 1.00 | 1 | 1 | 0 | 0 | 0 | 0 | -0.001 | t | 122551 | RGQYLQL<br>QELECDW<br>EEVTTS | Homo<br>sapiens                  |
| 1 | 1.00 | 1 | 1 | 0 | 0 | 0 | 0 | -0.001 | t | 133622 | KPGDPSAL<br>HVVRCWI<br>C     | Mus<br>musculu<br>s              |
| 1 | 1.00 | 1 | 1 | 0 | 0 | 0 | 0 | -0.001 | t | 125015 | DNESSYSR<br>GFDMTYT<br>E     | Mus<br>musculu<br>s              |
| 1 | 1.00 | 1 | 1 | 0 | 0 | 0 | 0 | -0.001 | t | 122399 | HPQPEDP<br>DTAKE             | Mus<br>musculu<br>s              |
| 1 | 1.00 | 1 | 1 | 0 | 0 | 0 | 0 | -0.001 | t | 123193 | FQIHGPR                      | Mus<br>musculu<br>s              |
| 1 | 1.00 | 1 | 1 | 0 | 0 | 0 | 0 | -0.001 | t | 132754 | YER                          | Mus<br>musculu<br>s              |
| 1 | 1.00 | 1 | 1 | 0 | 0 | 0 | 0 | -0.001 | t | 122878 | PYEFSRKV<br>PTFATPW<br>PDFVP | Oryctola<br>gus<br>cuniculu<br>s |



|   |      |   |   |   |        |   |   |        |   |        |                           |                                  |
|---|------|---|---|---|--------|---|---|--------|---|--------|---------------------------|----------------------------------|
| 1 | 1.00 | 1 | 1 | 0 | 0      | 0 | 0 | -0.001 | t | 124925 | YYVFFEEQ<br>EDEIIGF       | Oryctola<br>gus<br>cuniculu<br>s |
| 1 | 1.00 | 1 | 1 | 0 | 0      | 0 | 0 | -0.001 | t | 123193 | FQIHGPR                   | Mus<br>musculu<br>s              |
| 1 | 1.00 | 1 | 1 | 0 | 0      | 0 | 0 | -0.001 | t | 118762 | CYGSFAKP<br>TN            | Mus<br>musculu<br>s              |
| 1 | 1.00 | 1 | 1 | 0 | -0.003 | 0 | 0 | -0.001 | t | 118877 | LDVEQLGI<br>PEQEYSC       | Oryctola<br>gus<br>cuniculu<br>s |
| 1 | 1.00 | 1 | 1 | 0 | 0      | 0 | 0 | -0.001 | t | 132890 | QSPWQT<br>WFTRAL          | Homo<br>sapiens                  |
| 1 | 1.00 | 1 | 1 | 0 | 0      | 0 | 0 | -0.001 | t | 120699 | KMFPEVKE<br>KGMAALP<br>RL | Oryctola<br>gus<br>cuniculu<br>s |
| 1 | 1.00 | 1 | 1 | 0 | 0      | 0 | 0 | -0.001 | t | 122875 | PRGWNPG<br>FLYNGFPL       | Oryctola<br>gus<br>cuniculu<br>s |
| 1 | 1.00 | 1 | 1 | 0 | 0      | 0 | 0 | -0.001 | t | 118877 | LDVEQLGI<br>PEQEYSC       | Oryctola<br>gus<br>cuniculu<br>s |
| 1 | 1.00 | 1 | 1 | 0 | 0      | 0 | 0 | -0.001 | t | 118383 | GLKKMLRT<br>CAVHITLD      | Homo<br>sapiens                  |
| 1 | 1.00 | 1 | 1 | 0 | 0      | 0 | 0 | -0.001 | t | 125415 | FSPDGKPC<br>TPPALNCY<br>W | Mus<br>musculu<br>s              |
| 1 | 1.00 | 1 | 1 | 0 | 0      | 0 | 0 | -0.001 | t | 125230 | RERRGIAL                  | Mus<br>musculu<br>s              |
| 1 | 1.00 | 1 | 1 | 0 | 0      | 0 | 0 | -0.001 | t | 130805 | ELNPEPDT<br>EVFPMTF       | Homo<br>sapiens                  |
| 1 | 1.00 | 1 | 1 | 0 | 0      | 0 | 0 | -0.001 | t | 130524 | KFHPKDIP<br>YQVW          | Mus<br>musculu<br>s              |
| 1 | 1.00 | 1 | 1 | 0 | 0      | 0 | 0 | -0.001 | t | 118036 | NIVTPRTP<br>PP            | Rattus<br>norvegic<br>us         |

|   |      |   |   |   |   |   |   |        |   |        |                              |                                  |
|---|------|---|---|---|---|---|---|--------|---|--------|------------------------------|----------------------------------|
| 1 | 1.00 | 1 | 1 | 0 | 0 | 0 | 0 | -0.001 | t | 122915 | THKANPSP<br>EPNMHEC          | Oryctola<br>gus<br>cuniculu<br>s |
| 1 | 1.00 | 1 | 1 | 0 | 0 | 0 | 0 | -0.001 | t | 130987 | NPVENM<br>MDRDSQ             | Homo<br>sapiens                  |
| 1 | 1.00 | 1 | 1 | 0 | 0 | 0 | 0 | -0.001 | t | 121154 | ASAARLT<br>MMW               | Homo<br>sapiens                  |
| 1 | 1.00 | 1 | 1 | 0 | 0 | 0 | 0 | -0.001 | t | 132948 | YNCEPANP<br>SEKNSPST<br>QYCY | Mus<br>musculu<br>s              |
| 1 | 1.00 | 1 | 1 | 0 | 0 | 0 | 0 | -0.001 | t | 132200 | CGNRGPSL<br>RTTTVTG          | Mus<br>musculu<br>s              |
| 1 | 1.00 | 1 | 1 | 0 | 0 | 0 | 0 | -0.001 | t | 119673 | WNPDDYG<br>GVK               | Rattus<br>norvegic<br>us         |
| 1 | 1.00 | 1 | 1 | 0 | 0 | 0 | 0 | -0.001 | t | 118581 | RDRDRDR<br>E                 | Mus<br>musculu<br>s              |
| 1 | 1.00 | 1 | 1 | 0 | 0 | 0 | 0 | -0.001 | t | 131658 | SGLRLLEKS<br>QH              | Oryctola<br>gus<br>cuniculu<br>s |
| 1 | 1.00 | 1 | 1 | 0 | 0 | 0 | 0 | -0.001 | t | 133623 | KPGEMR                       | Mus<br>musculu<br>s              |
| 1 | 1.00 | 1 | 1 | 0 | 0 | 0 | 0 | -0.001 | t | 125021 | DWC                          | Mus<br>musculu<br>s              |
| 1 | 1.00 | 1 | 1 | 0 | 0 | 0 | 0 | -0.001 | t | 122749 | EIIGFGQEL<br>KNPQEE          | Oryctola<br>gus<br>cuniculu<br>s |
| 1 | 1.00 | 1 | 1 | 0 | 0 | 0 | 0 | -0.001 | t | 122889 | RLDASFQE<br>HPDLPG           | Oryctola<br>gus<br>cuniculu<br>s |
| 1 | 1.00 | 1 | 1 | 0 | 0 | 0 | 0 | -0.001 | t | 117400 | VSKDDSIIS<br>SLDVTD          | Homo<br>sapiens                  |
| 1 | 1.00 | 1 | 1 | 0 | 0 | 0 | 0 | -0.001 | t | 130787 | EDFDIYDE<br>DE               | Mus<br>musculu<br>s              |
| 1 | 1.00 | 1 | 1 | 0 | 0 | 0 | 0 | -0.001 | t | 125384 | DSHYDYTI<br>CGDSEDM<br>VCTPK | Oryctola<br>gus<br>cuniculu<br>s |

|   |      |   |   |   |        |   |   |        |   |        |                              |                                  |
|---|------|---|---|---|--------|---|---|--------|---|--------|------------------------------|----------------------------------|
| 1 | 1.00 | 1 | 1 | 0 | 0      | 0 | 0 | -0.001 | t | 133536 | CKPVENRA<br>C                | Mus<br>musculu<br>s              |
| 1 | 1.00 | 1 | 1 | 0 | 0      | 0 | 0 | -0.001 | t | 132843 | ITPWPWH<br>LERSS             | Mus<br>musculu<br>s              |
| 1 | 1.00 | 1 | 1 | 0 | 0      | 0 | 0 | -0.001 | t | 118105 | RKGHFLLS<br>SKSGFWTI<br>WL   | Homo<br>sapiens                  |
| 1 | 1.00 | 1 | 1 | 0 | -0.003 | 0 | 0 | -0.001 | t | 120347 | YRGWKH<br>WVYYTCC<br>PDTPYLD | Oryctola<br>gus<br>cuniculu<br>s |
| 1 | 1.00 | 1 | 1 | 0 | 0      | 0 | 0 | -0.001 | t | 120347 | YRGWKH<br>WVYYTCC<br>PDTPYLD | Mus<br>musculu<br>s              |
| 1 | 1.00 | 1 | 1 | 0 | 0      | 0 | 0 | -0.001 | t | 122328 | EEYHLYKD<br>GHLPISEFA<br>LLV | Homo<br>sapiens                  |
| 1 | 1.00 | 1 | 1 | 0 | 0      | 0 | 0 | -0.001 | t | 118019 | MGRGAPP<br>PGMMG             | Homo<br>sapiens                  |
| 1 | 1.00 | 1 | 1 | 0 | 0      | 0 | 0 | -0.001 | t | 130808 | ENEPPVW<br>TTESKLQS          | Homo<br>sapiens                  |
| 1 | 1.00 | 1 | 1 | 0 | 0      | 0 | 0 | -0.001 | t | 120347 | YRGWKH<br>WVYYTCC<br>PDTPYLD | Mus<br>musculu<br>s              |
| 1 | 1.00 | 1 | 1 | 0 | 0      | 0 | 0 | -0.001 | t | 122861 | NALNSPLH<br>QEYEENL          | Oryctola<br>gus<br>cuniculu<br>s |
| 1 | 1.00 | 1 | 1 | 0 | 0      | 0 | 0 | -0.001 | t | 122327 | EEVTTSGP<br>CGEESVLL<br>DRKS | Homo<br>sapiens                  |
| 1 | 1.00 | 1 | 1 | 0 | 0      | 0 | 0 | -0.001 | t | 131075 | SQSYPEPA<br>RGSVPMP          | Homo<br>sapiens                  |
| 1 | 1.00 | 1 | 1 | 0 | 0      | 0 | 0 | -0.001 | t | 122508 | PCGEESVL<br>LDRKSGKQ<br>YSIE | Homo<br>sapiens                  |
| 1 | 1.00 | 1 | 1 | 0 | 0      | 0 | 0 | -0.001 | t | 119187 | GNAEVHA<br>SFFDIGG           | Oryctola<br>gus<br>cuniculu<br>s |
| 1 | 1.00 | 1 | 1 | 0 | 0      | 0 | 0 | -0.001 | t | 122775 | GIFNTGLK<br>MFPDLTK<br>VYST  | Mus<br>musculu<br>s              |

|   |      |   |   |   |   |   |   |        |   |        |                                 |                              |
|---|------|---|---|---|---|---|---|--------|---|--------|---------------------------------|------------------------------|
| 1 | 1.00 | 1 | 1 | 0 | 0 | 0 | 0 | -0.001 | t | 120109 | NIHPKAPI<br>WGIITSNF            | Rattus<br>norvegicus         |
| 1 | 1.00 | 1 | 1 | 0 | 0 | 0 | 0 | -0.001 | t | 125375 | DHTLFAAS<br>HNHR                | Sus<br>scrofa                |
| 1 | 1.00 | 1 | 1 | 0 | 0 | 0 | 0 | -0.001 | t | 125375 | DHTLFAAS<br>HNHR                | Mus<br>musculus              |
| 1 | 1.00 | 1 | 1 | 0 | 0 | 0 | 0 | -0.001 | t | 123734 | SFSKASNS<br>WFPVEGP<br>ADICQ    | marmos<br>ets                |
| 1 | 1.00 | 1 | 1 | 0 | 0 | 0 | 0 | -0.001 | t | 118763 | CYGSFARP<br>MN                  | Mus<br>musculus              |
| 1 | 1.00 | 1 | 1 | 0 | 0 | 0 | 0 | -0.001 | t | 122915 | THKANPSP<br>EPNMHEC             | Oryctola<br>gus<br>cuniculus |
| 1 | 1.00 | 1 | 1 | 0 | 0 | 0 | 0 | -0.001 | t | 129301 | LQELEKDE<br>REQ                 | Homo<br>sapiens              |
| 1 | 1.00 | 1 | 1 | 0 | 0 | 0 | 0 | -0.001 | t | 119499 | MTFSVPIS                        | Mus<br>musculus              |
| 1 | 1.00 | 1 | 1 | 0 | 0 | 0 | 0 | -0.001 | t | 118346 | FEYFPSHFF<br>VPELEV<br>TII<br>C | Mus<br>musculus              |
| 1 | 1.00 | 1 | 1 | 0 | 0 | 0 | 0 | -0.001 | t | 131701 | THHINNM<br>KPSFTREN<br>T        | Oryctola<br>gus<br>cuniculus |
| 1 | 1.00 | 1 | 1 | 0 | 0 | 0 | 0 | -0.001 | t | 131579 | PDIITGFSS                       | Oryctola<br>gus<br>cuniculus |
| 1 | 1.00 | 1 | 1 | 0 | 0 | 0 | 0 | -0.001 | t | 125229 | RDSEGLDV<br>AEKLGPI             | Homo<br>sapiens              |
| 1 | 1.00 | 1 | 1 | 0 | 0 | 0 | 0 | -0.001 | t | 125441 | HPLTCDDP<br>RFQ                 | Oryctola<br>gus<br>cuniculus |
| 1 | 1.00 | 1 | 1 | 0 | 0 | 0 | 0 | -0.001 | t | 118151 | SRFSWGA<br>E                    | Rattus<br>norvegicus         |
| 1 | 1.00 | 1 | 1 | 0 | 0 | 0 | 0 | -0.001 | t | 133542 | DGRRDVV<br>VRSATFYL             | Mus<br>musculus              |

|   |      |   |   |   |        |   |   |        |   |        |                              |                       |
|---|------|---|---|---|--------|---|---|--------|---|--------|------------------------------|-----------------------|
| 1 | 1.00 | 1 | 1 | 0 | 0      | 0 | 0 | -0.001 | t | 125236 | RIEKDTDR<br>DNFMSAE<br>EAQ   | Homo sapiens          |
| 1 | 1.00 | 1 | 1 | 0 | 0      | 0 | 0 | -0.001 | t | 133580 | GFLSSCNF<br>RFCELV           | Mus musculus          |
| 1 | 1.00 | 1 | 1 | 0 | 0      | 0 | 0 | -0.001 | t | 117598 | PEPAKSAP<br>APKKG            | Mus musculus          |
| 1 | 1.00 | 1 | 1 | 0 | 0      | 0 | 0 | -0.001 | t | 122430 | KGLRRDL<br>ASREAK            | Mus musculus          |
| 1 | 1.00 | 1 | 1 | 0 | 0      | 0 | 0 | -0.001 | t | 118060 | PPPGMRP<br>P                 | Mus musculus          |
| 1 | 1.00 | 1 | 1 | 0 | 0      | 0 | 0 | -0.001 | t | 120924 | RPEPKKP<br>WSGVWN<br>ASTY    | Mus musculus          |
| 1 | 1.00 | 1 | 1 | 0 | 0      | 0 | 0 | -0.001 | t | 130492 | FKEQFLDG<br>DGWTSR           | Oryctolagus cuniculus |
| 1 | 1.00 | 1 | 1 | 0 | 0      | 0 | 0 | -0.001 | t | 131657 | SGLQAEDE<br>ADYYCSSY         | Homo sapiens          |
| 1 | 1.00 | 1 | 1 | 0 | 0.002  | 0 | 0 | -0.001 | t | 123282 | HACQKKLL<br>KFEALQQE<br>EGEE | Rattus norvegicus     |
| 1 | 1.00 | 1 | 1 | 0 | 0      | 0 | 0 | -0.001 | t | 123282 | HACQKKLL<br>KFEALQQE<br>EGEE | Oryctolagus cuniculus |
| 1 | 1.00 | 1 | 1 | 0 | -0.003 | 0 | 0 | -0.001 | t | 117544 | KFRFLALKL<br>YFSFTRP         | Oryctolagus cuniculus |
| 1 | 1.00 | 1 | 1 | 0 | 0      | 0 | 0 | -0.001 | t | 131116 | TQSYPPPP<br>AWRAASR          | Homo sapiens          |
| 1 | 1.00 | 1 | 1 | 0 | 0      | 0 | 0 | -0.001 | t | 122892 | RSILPYGDS<br>MDRIE           | Homo sapiens          |
| 1 | 1.00 | 1 | 1 | 0 | 0      | 0 | 0 | -0.001 | t | 124588 | PQEETLQA<br>FDSHYDYT         | Homo sapiens          |

|   |      |   |   |   |   |   |   |        |   |        |                              |                                  |
|---|------|---|---|---|---|---|---|--------|---|--------|------------------------------|----------------------------------|
| 1 | 1.00 | 1 | 1 | 0 | 0 | 0 | 0 | -0.001 | t | 133705 | SSKTRSFG<br>VHLVGPY          | Mus<br>musculu<br>s              |
| 1 | 1.00 | 1 | 1 | 0 | 0 | 0 | 0 | -0.001 | t | 118374 | GKALCWV<br>CAQSRKH<br>RD     | Homo<br>sapiens                  |
| 1 | 1.00 | 1 | 1 | 0 | 0 | 0 | 0 | -0.001 | t | 123283 | HAEQKKLL<br>KFEALEQE<br>KGKE | Oryctola<br>gus<br>cuniculu<br>s |
| 1 | 1.00 | 1 | 1 | 0 | 0 | 0 | 0 | -0.001 | t | 118798 | GAGFGHG<br>SGYGVGH<br>GK     | Mus<br>musculu<br>s              |
| 1 | 1.00 | 1 | 1 | 0 | 0 | 0 | 0 | -0.001 | t | 117640 | SFEYFPSHF<br>FVPELEVTI<br>IC | Mus<br>musculu<br>s              |
| 1 | 1.00 | 1 | 1 | 0 | 0 | 0 | 0 | -0.001 | t | 119135 | EGVKYVLN<br>ETTNWLW<br>AFLAR | Mus<br>musculu<br>s              |
| 1 | 1.00 | 1 | 1 | 0 | 0 | 0 | 0 | -0.001 | t | 121542 | LFKPPKYH<br>PDVPYVKR         | Homo<br>sapiens                  |
| 1 | 1.00 | 1 | 1 | 0 | 0 | 0 | 0 | -0.001 | t | 119143 | EPTITFGTA<br>I               | Oryctola<br>gus<br>cuniculu<br>s |
| 1 | 1.00 | 1 | 1 | 0 | 0 | 0 | 0 | -0.001 | t | 125029 | EIERDTER<br>DRFLSADE<br>AV   | Homo<br>sapiens                  |
| 1 | 1.00 | 1 | 1 | 0 | 0 | 0 | 0 | -0.001 | t | 130729 | APHKHKAS<br>LSIY             | Homo<br>sapiens                  |
| 1 | 1.00 | 1 | 1 | 0 | 0 | 0 | 0 | -0.001 | t | 122538 | QELECDW<br>EEVTTSGP<br>CGEES | Homo<br>sapiens                  |
| 1 | 1.00 | 1 | 1 | 0 | 0 | 0 | 0 | -0.001 | t | 130815 | ESDPPVAS<br>YQWRLIN          | Homo<br>sapiens                  |
| 1 | 1.00 | 1 | 1 | 0 | 0 | 0 | 0 | -0.001 | t | 122445 | KQYSIEAA<br>LRCRRISKE<br>EYH | Homo<br>sapiens                  |
| 1 | 1.00 | 1 | 1 | 0 | 0 | 0 | 0 | -0.001 | t | 124008 | DGVVLVD                      | Mus<br>musculu<br>s              |
| 1 | 1.00 | 1 | 1 | 0 | 0 | 0 | 0 | -0.001 | t | 117495 | ERDRKREK<br>RKPKS            | Mus<br>musculu<br>s              |
| 1 | 1.00 | 1 | 1 | 0 | 0 | 0 | 0 | -0.001 | t | 117399 | VMIKSLPA<br>LNSPTVEE         | Oryctola<br>gus<br>cuniculu<br>s |

|   |      |   |   |   |        |   |   |        |   |        |                              |                       |
|---|------|---|---|---|--------|---|---|--------|---|--------|------------------------------|-----------------------|
| 1 | 1.00 | 1 | 1 | 0 | 0      | 0 | 0 | -0.001 | t | 130488 | FDIYDEDE                     | Mus musculus          |
| 1 | 1.00 | 1 | 1 | 0 | 0      | 0 | 0 | -0.001 | t | 127643 | ERPLELRV<br>RVLDI            | Homo sapiens          |
| 1 | 1.00 | 1 | 1 | 0 | 0      | 0 | 0 | -0.001 | t | 133372 | SPSPTPTP<br>GPSRRG           | Homo sapiens          |
| 1 | 1.00 | 1 | 1 | 0 | -0.003 | 0 | 0 | -0.001 | t | 121064 | WKHWVY<br>YTCCPDTP<br>YLDITY | Oryctolagus cuniculus |
| 1 | 1.00 | 1 | 1 | 0 | 0      | 0 | 0 | -0.001 | t | 133707 | STRKEEKQ<br>RNGT             | Mus musculus          |
| 1 | 1.00 | 1 | 1 | 0 | 0      | 0 | 0 | -0.001 | t | 133531 | CDTLKPGE<br>C                | Mus musculus          |
| 1 | 1.00 | 1 | 1 | 0 | 0      | 0 | 0 | -0.001 | t | 133630 | LPPGLHVF<br>PLASNRS          | Mus musculus          |
| 1 | 1.00 | 1 | 1 | 0 | 0      | 0 | 0 | -0.001 | t | 131303 | PVPSTPPT<br>PSPSTPPT<br>PSPS | Homo sapiens          |
| 1 | 1.00 | 1 | 1 | 0 | 0      | 0 | 0 | -0.001 | t | 117742 | AKAQTDR<br>EDLRTLRY          | Homo sapiens          |
| 1 | 1.00 | 1 | 1 | 0 | 0      | 0 | 0 | -0.001 | t | 117742 | AKAQTDR<br>EDLRTLRY          | Homo sapiens          |
| 1 | 1.00 | 1 | 1 | 0 | 0      | 0 | 0 | -0.001 | t | 130817 | ESVMQSY<br>PPHLQIPG          | Homo sapiens          |
| 1 | 1.00 | 1 | 1 | 0 | 0      | 0 | 0 | -0.001 | t | 131686 | SYLSLTP                      | Homo sapiens          |
| 1 | 1.00 | 1 | 1 | 0 | 0      | 0 | 0 | -0.001 | t | 118867 | KLSQTSNV<br>DKEEEAV          | Mus musculus          |
| 1 | 1.00 | 1 | 1 | 0 | 0      | 0 | 0 | -0.001 | t | 131438 | GAVTVAW                      | Homo sapiens          |
| 1 | 1.00 | 1 | 1 | 0 | 0      | 0 | 0 | -0.001 | t | 131374 | CKAKAQT<br>DREDLRTL<br>LRY   | Rattus norvegicus     |
| 1 | 1.00 | 1 | 1 | 0 | 0      | 0 | 0 | -0.001 | t | 122377 | GLPRLETP<br>ADLSTAIA<br>SRS  | Mus musculus          |

|   |      |   |   |   |        |   |   |        |   |        |                             |                                  |
|---|------|---|---|---|--------|---|---|--------|---|--------|-----------------------------|----------------------------------|
| 1 | 1.00 | 1 | 1 | 0 | 0      | 0 | 0 | -0.001 | t | 119048 | VSDYEMKL<br>MDLDVEQ         | Mus<br>musculu<br>s              |
| 1 | 1.00 | 1 | 1 | 0 | 0      | 0 | 0 | -0.001 | t | 122377 | GLPRLETP<br>ADLSTAIA<br>SRS | Mus<br>musculu<br>s              |
| 1 | 1.00 | 1 | 1 | 0 | 0      | 0 | 0 | -0.001 | t | 122377 | GLPRLETP<br>ADLSTAIA<br>SRS | Oryctola<br>gus<br>cuniculu<br>s |
| 1 | 1.00 | 1 | 1 | 0 | 0      | 0 | 0 | -0.001 | t | 118336 | ERADLIAYL<br>KKATNE         | Mus<br>musculu<br>s              |
| 1 | 1.00 | 1 | 1 | 0 | 0      | 0 | 0 | -0.001 | t | 119331 | RTVLVSM<br>NYR              | Oryctola<br>gus<br>cuniculu<br>s |
| 1 | 1.00 | 1 | 1 | 0 | 0      | 0 | 0 | -0.001 | t | 118764 | CYGSFARP<br>TN              | Mus<br>musculu<br>s              |
| 1 | 1.00 | 1 | 1 | 0 | 0      | 0 | 0 | -0.001 | t | 133900 | NEHPVFAY<br>LKDKLP          | Homo<br>sapiens                  |
| 1 | 1.00 | 1 | 1 | 0 | 0      | 0 | 0 | -0.001 | t | 118581 | RDRDRDR<br>E                | Mus<br>musculu<br>s              |
| 1 | 1.00 | 1 | 1 | 0 | 0      | 0 | 0 | -0.001 | t | 124604 | QIERDTER<br>DRFLSAPE<br>AV  | Homo<br>sapiens                  |
| 1 | 1.00 | 1 | 1 | 0 | -0.003 | 0 | 0 | -0.001 | t | 122377 | GLPRLETP<br>ADLSTAIA<br>SRS | Oryctola<br>gus<br>cuniculu<br>s |
| 1 | 1.00 | 1 | 1 | 0 | 0      | 0 | 0 | -0.001 | t | 122728 | DLSTAIASR<br>SVADKILD<br>LY | Oryctola<br>gus<br>cuniculu<br>s |
| 1 | 1.00 | 1 | 1 | 0 | 0      | 0 | 0 | -0.001 | t | 131040 | RLAPEPDD<br>PITPMTK         | Homo<br>sapiens                  |
| 1 | 1.00 | 1 | 1 | 0 | 0      | 0 | 0 | -0.001 | t | 132687 | STQTAGP<br>WHLGKLEL         | Mus<br>musculu<br>s              |
| 1 | 1.00 | 1 | 1 | 0 | 0      | 0 | 0 | -0.001 | t | 118060 | PPPGMRP<br>P                | Homo<br>sapiens                  |
| 1 | 1.00 | 1 | 1 | 0 | 0      | 0 | 0 | -0.001 | t | 120436 | DGTKVSIS                    | Rattus<br>norvegic<br>us         |



|   |      |   |   |   |   |   |   |        |   |        |                              |                          |
|---|------|---|---|---|---|---|---|--------|---|--------|------------------------------|--------------------------|
| 1 | 1.00 | 1 | 1 | 0 | 0 | 0 | 0 | -0.001 | t | 130837 | FTRHSQTT<br>ANPSCPE          | Rattus<br>norvegicus     |
| 1 | 1.00 | 1 | 1 | 0 | 0 | 0 | 0 | -0.001 | t | 122780 | GQELKNP<br>QEETLQAF<br>DSHYD | Oryctolagus<br>cuniculus |
| 1 | 1.00 | 1 | 1 | 0 | 0 | 0 | 0 | -0.001 | t | 132390 | ISNELNHIL<br>LENDMK          | Mus<br>musculus          |
| 1 | 1.00 | 1 | 1 | 0 | 0 | 0 | 0 | -0.001 | t | 130868 | GQSYPPRP<br>DTS LHVT         | Homo<br>sapiens          |
| 1 | 1.00 | 1 | 1 | 0 | 0 | 0 | 0 | -0.001 | t | 133665 | PVLLFCFLA<br>GRCVSV          | Mus<br>musculus          |
| 1 | 1.00 | 1 | 1 | 0 | 0 | 0 | 0 | -0.001 | t | 132397 | KEENLVKS<br>LVSAGSG          | Mus<br>musculus          |
| 1 | 1.00 | 1 | 1 | 0 | 0 | 0 | 0 | -0.001 | t | 131628 | RGYDSYA                      | Homo<br>sapiens          |
| 1 | 1.00 | 1 | 1 | 0 | 0 | 0 | 0 | -0.001 | t | 130844 | GDQSTDY<br>GIFQINSR          | Mus<br>musculus          |
| 1 | 1.00 | 1 | 1 | 0 | 0 | 0 | 0 | -0.001 | t | 121932 | TRGYLERR<br>L                | Mus<br>musculus          |
| 1 | 1.00 | 1 | 1 | 0 | 0 | 0 | 0 | -0.001 | t | 132365 | HKYSWKS<br>WGKAKIIG          | Mus<br>musculus          |
| 1 | 1.00 | 1 | 1 | 0 | 0 | 0 | 0 | -0.001 | t | 127185 | TCDDPRF<br>QDSS              | Oryctolagus<br>cuniculus |
| 1 | 1.00 | 1 | 1 | 0 | 0 | 0 | 0 | -0.001 | t | 119048 | VSDYEMKL<br>MDLDVEQ          | Mus<br>musculus          |
| 1 | 1.00 | 1 | 1 | 0 | 0 | 0 | 0 | -0.001 | t | 119052 | WNPADYG<br>GIK               | Rattus<br>norvegicus     |
| 1 | 1.00 | 1 | 1 | 0 | 0 | 0 | 0 | -0.001 | t | 122842 | LLDLPRDL<br>GGMGCS<br>PPCE   | Oryctolagus<br>cuniculus |
| 1 | 1.00 | 1 | 1 | 0 | 0 | 0 | 0 | -0.001 | t | 122746 | EEQEDEIIG<br>FGQELKN         | Oryctolagus<br>cuniculus |

|   |      |   |   |   |        |   |   |        |   |        |                            |                                  |
|---|------|---|---|---|--------|---|---|--------|---|--------|----------------------------|----------------------------------|
| 1 | 1.00 | 1 | 1 | 0 | 0      | 0 | 0 | -0.001 | t | 125403 | ETTKLQRF<br>QAML           | Mus<br>musculu<br>s              |
| 1 | 1.00 | 1 | 1 | 0 | -0.003 | 0 | 0 | -0.001 | t | 118060 | PPPGMRP<br>P               | Oryctola<br>gus<br>cuniculu<br>s |
| 1 | 1.00 | 1 | 1 | 0 | 0      | 0 | 0 | -0.001 | t | 119052 | WNPADYG<br>GIK             | Rattus<br>norvegic<br>us         |
| 1 | 1.00 | 1 | 1 | 0 | 0      | 0 | 0 | -0.001 | t | 119673 | WNPDDYG<br>GVK             | Rattus<br>norvegic<br>us         |
| 1 | 1.00 | 1 | 1 | 0 | 0      | 0 | 0 | -0.001 | t | 118766 | DGEGRGD<br>GGGEGHG<br>QG   | Mus<br>musculu<br>s              |
| 1 | 1.00 | 1 | 1 | 0 | 0      | 0 | 0 | -0.001 | t | 117773 | CNSRQTD<br>REDELI          | Homo<br>sapiens                  |
| 1 | 1.00 | 1 | 1 | 0 | 0      | 0 | 0 | -0.001 | t | 132504 | NNAIEPRS<br>FSQNPV         | Mus<br>musculu<br>s              |
| 1 | 1.00 | 1 | 1 | 0 | 0      | 0 | 0 | -0.001 | t | 120020 | LEDPASRD<br>LVVN           | Mus<br>musculu<br>s              |
| 1 | 1.00 | 1 | 1 | 0 | 0      | 0 | 0 | -0.001 | t | 118538 | NNGNLQL<br>RKEVTWE<br>VLEG | Mus<br>musculu<br>s              |
| 1 | 1.00 | 1 | 1 | 0 | 0      | 0 | 0 | -0.001 | t | 117773 | CNSRQTD<br>REDELI          | Homo<br>sapiens                  |
| 1 | 1.00 | 1 | 1 | 0 | 0      | 0 | 0 | -0.001 | t | 133535 | CKPGEVQ<br>QC              | Mus<br>musculu<br>s              |
| 1 | 1.00 | 1 | 1 | 0 | 0      | 0 | 0 | -0.001 | t | 119673 | WNPDDYG<br>GVK             | Rattus<br>norvegic<br>us         |
| 1 | 1.00 | 1 | 1 | 0 | 0      | 0 | 0 | -0.001 | t | 131717 | TTLVNPNK<br>KNSYPHY        | Oryctola<br>gus<br>cuniculu<br>s |
| 1 | 1.00 | 1 | 1 | 0 | 0      | 0 | 0 | -0.001 | t | 133776 | AGDLSKVD<br>AKQPGDY        | Homo<br>sapiens                  |
| 1 | 1.00 | 1 | 1 | 0 | 0      | 0 | 0 | -0.001 | t | 117558 | LDGPTYKR<br>RLDECEE        | Homo<br>sapiens                  |

|   |      |   |   |   |        |   |   |        |   |        |                              |                                  |
|---|------|---|---|---|--------|---|---|--------|---|--------|------------------------------|----------------------------------|
| 1 | 1.00 | 1 | 1 | 0 | 0      | 0 | 0 | -0.001 | t | 119599 | KAEYILKK<br>PRSELMFE<br>E    | Mus<br>musculu<br>s              |
| 1 | 1.00 | 1 | 1 | 0 | 0      | 0 | 0 | -0.001 | t | 119673 | WNPDDYG<br>GVK               | Rattus<br>norvegic<br>us         |
| 1 | 1.00 | 1 | 1 | 0 | 0      | 0 | 0 | -0.001 | t | 131365 | ATLVCLI                      | Homo<br>sapiens                  |
| 1 | 1.00 | 1 | 1 | 0 | 0      | 0 | 0 | -0.001 | t | 133528 | CADQKPG<br>EC                | Mus<br>musculu<br>s              |
| 1 | 1.00 | 1 | 1 | 0 | 0      | 0 | 0 | -0.001 | t | 122269 | ARQNLKD<br>AGE               | Mus<br>musculu<br>s              |
| 1 | 1.00 | 1 | 1 | 0 | 0      | 0 | 0 | -0.001 | t | 131338 | AASSYLSLT<br>PEQWKSH         | Homo<br>sapiens                  |
| 1 | 1.00 | 1 | 1 | 0 | 0      | 0 | 0 | -0.001 | t | 119601 | KGNNVHG<br>FQKQIIRSF<br>Y    | Rattus<br>norvegic<br>us         |
| 1 | 1.00 | 1 | 1 | 0 | 0      | 0 | 0 | -0.001 | t | 122262 | ALRCRRISK<br>EEYHLYKD<br>GHL | Homo<br>sapiens                  |
| 1 | 1.00 | 1 | 1 | 0 | 0      | 0 | 0 | -0.001 | t | 125127 | LDPENLTL                     | Mus<br>musculu<br>s              |
| 1 | 1.00 | 1 | 1 | 0 | 0      | 0 | 0 | -0.001 | t | 122468 | LLDRKSGK<br>QYSIEAAL<br>RCRR | Homo<br>sapiens                  |
| 1 | 1.00 | 1 | 1 | 0 | 0      | 0 | 0 | -0.001 | t | 122254 | AGETKPSS<br>SLSIGSIISK<br>SP | Homo<br>sapiens                  |
| 1 | 1.00 | 1 | 1 | 0 | 0      | 0 | 0 | -0.001 | t | 123849 | WQDE                         | Mus<br>musculu<br>s              |
| 1 | 1.00 | 1 | 1 | 0 | -0.003 | 0 | 0 | -0.001 | t | 122377 | GLPRLETP<br>ADLSTAIA<br>SRS  | Oryctola<br>gus<br>cuniculu<br>s |
| 1 | 1.00 | 1 | 1 | 0 | 0      | 0 | 0 | -0.001 | t | 118548 | PAPGMRP<br>P                 | Homo<br>sapiens                  |
| 1 | 1.00 | 1 | 1 | 0 | 0      | 0 | 0 | -0.001 | t | 118127 | SDDDMGF<br>GLFD              | Homo<br>sapiens                  |
| 1 | 1.00 | 1 | 1 | 0 | 0      | 0 | 0 | -0.001 | t | 131344 | AIGDRSKT<br>DRENSVSI<br>G    | Homo<br>sapiens                  |

|   |      |   |   |   |   |   |   |        |   |        |                        |                          |
|---|------|---|---|---|---|---|---|--------|---|--------|------------------------|--------------------------|
| 1 | 1.00 | 1 | 1 | 0 | 0 | 0 | 0 | -0.001 | t | 131652 | SFDSSNPE<br>YFDGYWGS   | Oryctolagus<br>cuniculus |
| 1 | 1.00 | 1 | 1 | 0 | 0 | 0 | 0 | -0.001 | t | 126201 | GYKEKSKF<br>QDTHNNA    | Oryctolagus<br>cuniculus |
| 1 | 1.00 | 1 | 1 | 0 | 0 | 0 | 0 | -0.001 | t | 125403 | ETTKLQRF<br>QAML       | Sus<br>scrofa            |
| 1 | 1.00 | 1 | 1 | 0 | 0 | 0 | 0 | -0.001 | t | 123838 | VWQDE                  | Mus<br>musculus          |
| 1 | 1.00 | 1 | 1 | 0 | 0 | 0 | 0 | -0.001 | t | 118127 | SDDDMGF<br>GLFD        | Homo<br>sapiens          |
| 1 | 1.00 | 1 | 1 | 0 | 0 | 0 | 0 | -0.001 | t | 133539 | CYKPGEW<br>AC          | Mus<br>musculus          |
| 1 | 1.00 | 1 | 1 | 0 | 0 | 0 | 0 | -0.001 | t | 131697 | TGTSSDVG<br>GYNYVSWY   | Homo<br>sapiens          |
| 1 | 1.00 | 1 | 1 | 0 | 0 | 0 | 0 | -0.001 | t | 117907 | HKAFKGSI               | Oryctolagus<br>cuniculus |
| 1 | 1.00 | 1 | 1 | 0 | 0 | 0 | 0 | -0.001 | t | 117907 | HKAFKGSI               | Homo<br>sapiens          |
| 1 | 1.00 | 1 | 1 | 0 | 0 | 0 | 0 | -0.001 | t | 117909 | HKGFKGV<br>D           | Oryctolagus<br>cuniculus |
| 1 | 1.00 | 1 | 1 | 0 | 0 | 0 | 0 | -0.001 | t | 118826 | GSGKGAGI<br>GLGVGGGVGA | Mus<br>musculus          |
| 1 | 1.00 | 1 | 1 | 0 | 0 | 0 | 0 | -0.001 | t | 124713 | SGEQPSDE<br>QPSGEHG    | Mus<br>musculus          |
| 1 | 1.00 | 1 | 1 | 0 | 0 | 0 | 0 | -0.001 | t | 118060 | PPPGMRP<br>P           | Homo<br>sapiens          |
| 1 | 1.00 | 1 | 1 | 0 | 0 | 0 | 0 | -0.001 | t | 133554 | EGLYSPW<br>WPRSLPVL    | Mus<br>musculus          |
| 1 | 1.00 | 1 | 1 | 0 | 0 | 0 | 0 | -0.001 | t | 118829 | GVLAGQA<br>SQLNA       | Mus<br>musculus          |

|   |      |   |   |   |   |   |   |        |   |        |                              |                                  |
|---|------|---|---|---|---|---|---|--------|---|--------|------------------------------|----------------------------------|
| 1 | 1.00 | 1 | 1 | 0 | 0 | 0 | 0 | -0.001 | t | 131020 | QLSPESDY<br>DDHGMRY          | Homo<br>sapiens                  |
| 1 | 1.00 | 1 | 1 | 0 | 0 | 0 | 0 | -0.001 | t | 119823 | EDDDMGF<br>GLFD              | Homo<br>sapiens                  |
| 1 | 1.00 | 1 | 1 | 0 | 0 | 0 | 0 | -0.001 | t | 133538 | CNKPGERT<br>C                | Mus<br>musculu<br>s              |
| 1 | 1.00 | 1 | 1 | 0 | 0 | 0 | 0 | -0.001 | t | 131504 | KATLVCLIS<br>DFYPGAV         | Homo<br>sapiens                  |
| 1 | 1.00 | 1 | 1 | 0 | 0 | 0 | 0 | -0.001 | t | 117614 | QGFPFYDK<br>PMRI             | Mus<br>musculu<br>s              |
| 1 | 1.00 | 1 | 1 | 0 | 0 | 0 | 0 | -0.001 | t | 120682 | KILPEVKEK<br>HEFLSRL         | Oryctola<br>gus<br>cuniculu<br>s |
| 1 | 1.00 | 1 | 1 | 0 | 0 | 0 | 0 | -0.001 | t | 122377 | GLPRLETP<br>ADLSTAIA<br>SRS  | Oryctola<br>gus<br>cuniculu<br>s |
| 1 | 1.00 | 1 | 1 | 0 | 0 | 0 | 0 | -0.001 | t | 122790 | HQEEDFR<br>VTCKDIQR          | Oryctola<br>gus<br>cuniculu<br>s |
| 1 | 1.00 | 1 | 1 | 0 | 0 | 0 | 0 | -0.001 | t | 108019 | LSQPKIVK<br>WDR              | Mus<br>musculu<br>s              |
| 1 | 1.00 | 1 | 1 | 0 | 0 | 0 | 0 | -0.001 | t | 112453 | ASQKRPSQ<br>R                | Mus<br>musculu<br>s              |
| 1 | 1.00 | 1 | 1 | 0 | 0 | 0 | 0 | -0.001 | t | 115268 | GLQYTPS<br>WLVG              | Mus<br>musculu<br>s              |
| 1 | 1.00 | 1 | 1 | 0 | 0 | 0 | 0 | -0.001 | t | 115096 | PPSLLFLP                     | Mus<br>musculu<br>s              |
| 1 | 1.00 | 1 | 1 | 0 | 0 | 0 | 0 | -0.001 | t | 112603 | MIAATYNF<br>AVLKLMG<br>RGTKF | Rattus<br>norvegic<br>us         |
| 1 | 1.00 | 1 | 1 | 0 | 0 | 0 | 0 | -0.001 | t | 101412 | WIRNNF                       | Mus<br>musculu<br>s              |
| 1 | 1.00 | 1 | 1 | 0 | 0 | 0 | 0 | -0.001 | t | 117383 | TLHKAFKG<br>SIFVVFDSI<br>ESA | Oryctola<br>gus<br>cuniculu<br>s |

|   |      |   |   |   |        |   |   |        |   |        |                              |                 |
|---|------|---|---|---|--------|---|---|--------|---|--------|------------------------------|-----------------|
| 1 | 1.00 | 1 | 1 | 0 | 0      | 0 | 0 | -0.001 | t | 108834 | CKPISGHN<br>SLFWYRQT         | Homo sapiens    |
| 1 | 1.00 | 1 | 1 | 0 | 0      | 0 | 0 | -0.001 | t | 102384 | EFRH                         | Cavia porcellus |
| 1 | 1.00 | 1 | 1 | 0 | 0      | 0 | 0 | -0.001 | t | 102384 | EFRH                         | Mus musculus    |
| 1 | 1.00 | 1 | 1 | 0 | 0      | 0 | 0 | -0.001 | t | 104226 | RPQDVKFP<br>GGGQIVG<br>GVYLL | Homo sapiens    |
| 1 | 1.00 | 1 | 1 | 0 | -0.004 | 0 | 0 | -0.001 | t | 102384 | EFRH                         | Mus musculus    |
| 1 | 1.00 | 1 | 1 | 0 | 0      | 0 | 0 | -0.001 | t | 102384 | EFRH                         | Mus musculus    |
| 1 | 1.00 | 1 | 1 | 0 | 0      | 0 | 0 | -0.001 | t | 99134  | DAEFRHDS<br>GYEVHHQ          | Mus musculus    |
| 1 | 1.00 | 1 | 1 | 0 | 0      | 0 | 0 | -0.001 | t | 112453 | ASQKRPSQ<br>R                | Mus musculus    |
| 1 | 1.00 | 1 | 1 | 0 | 0      | 0 | 0 | -0.001 | t | 105570 | VGGVVIA                      | Mus musculus    |
| 1 | 1.00 | 1 | 1 | 0 | 0      | 0 | 0 | -0.001 | t | 98822  | IEAGAIGFK<br>IHEDWG          | Mus musculus    |
| 1 | 1.00 | 1 | 1 | 0 | 0      | 0 | 0 | -0.001 | t | 108217 | WWNMFQ<br>MGVV               | Homo sapiens    |
| 1 | 1.00 | 1 | 1 | 0 | 0      | 0 | 0 | -0.001 | t | 108216 | WWATFFE<br>ATR               | Homo sapiens    |
| 1 | 1.00 | 1 | 1 | 0 | 0      | 0 | 0 | -0.001 | t | 102384 | EFRH                         | Mus musculus    |
| 1 | 1.00 | 1 | 1 | 0 | 0      | 0 | 0 | -0.001 | t | 108629 | SHQESTRG<br>RSRGRSGR<br>SGS  | Homo sapiens    |
| 1 | 1.00 | 1 | 1 | 0 | 0      | 0 | 0 | -0.001 | t | 112453 | ASQKRPSQ<br>R                | Mus musculus    |
| 1 | 1.00 | 1 | 1 | 0 | 0      | 0 | 0 | -0.001 | t | 107891 | HRLAFGQY<br>T                | Mus musculus    |
| 1 | 1.00 | 1 | 1 | 0 | 0      | 0 | 0 | -0.001 | t | 99040  | VLDTDYKK<br>YLLFCMEN<br>SAEP | Homo sapiens    |

|   |      |   |   |   |   |   |   |        |   |        |                            |                                  |
|---|------|---|---|---|---|---|---|--------|---|--------|----------------------------|----------------------------------|
| 1 | 1.00 | 1 | 1 | 0 | 0 | 0 | 0 | -0.001 | t | 100635 | VTNYLVDG<br>NG             | Mus<br>musculu<br>s              |
| 1 | 1.00 | 1 | 1 | 0 | 0 | 0 | 0 | -0.001 | t | 100635 | VTNYLVDG<br>NG             | Mus<br>musculu<br>s              |
| 1 | 1.00 | 1 | 1 | 0 | 0 | 0 | 0 | -0.001 | t | 104443 | DAEFRHDS<br>GYE            | Mus<br>musculu<br>s              |
| 1 | 1.00 | 1 | 1 | 0 | 0 | 0 | 0 | -0.001 | t | 105127 | DAEFRHD                    | Mus<br>musculu<br>s              |
| 1 | 1.00 | 1 | 1 | 0 | 0 | 0 | 0 | -0.001 | t | 115069 | KEVDRLM<br>S               | Mus<br>musculu<br>s              |
| 1 | 1.00 | 1 | 1 | 0 | 0 | 0 | 0 | -0.001 | t | 117015 | KEQFLDGD<br>GWTSRWI<br>ESK | Homo<br>sapiens                  |
| 1 | 1.00 | 1 | 1 | 0 | 0 | 0 | 0 | -0.001 | t | 105127 | DAEFRHD                    | Mus<br>musculu<br>s              |
| 1 | 1.00 | 1 | 1 | 0 | 0 | 0 | 0 | -0.001 | t | 107013 | YGASSRAT<br>GIPDR          | Oryctola<br>gus<br>cuniculu<br>s |
| 1 | 1.00 | 1 | 1 | 0 | 0 | 0 | 0 | -0.001 | t | 108599 | QGDAKKG<br>ANLFKTRC        | Homo<br>sapiens                  |
| 1 | 1.00 | 1 | 1 | 0 | 0 | 0 | 0 | -0.001 | t | 105127 | DAEFRHD                    | Mus<br>musculu<br>s              |
| 1 | 1.00 | 1 | 1 | 0 | 0 | 0 | 0 | -0.001 | t | 100070 | GLMVGGV<br>VIA             | Oryctola<br>gus<br>cuniculu<br>s |
| 1 | 1.00 | 1 | 1 | 0 | 0 | 0 | 0 | -0.001 | t | 100070 | GLMVGGV<br>VIA             | Oryctola<br>gus<br>cuniculu<br>s |
| 1 | 1.00 | 1 | 1 | 0 | 0 | 0 | 0 | -0.001 | t | 100070 | GLMVGGV<br>VIA             | Oryctola<br>gus<br>cuniculu<br>s |
| 1 | 1.00 | 1 | 1 | 0 | 0 | 0 | 0 | -0.001 | t | 99134  | DAEFRHDS<br>GYEVHHQ        | Mus<br>musculu<br>s              |
| 1 | 1.00 | 1 | 1 | 0 | 0 | 0 | 0 | -0.001 | t | 112149 | GVGWIRQ                    | Homo<br>sapiens                  |

|   |      |   |   |   |        |   |   |        |   |        |                    |                       |
|---|------|---|---|---|--------|---|---|--------|---|--------|--------------------|-----------------------|
| 1 | 1.00 | 1 | 1 | 0 | 0      | 0 | 0 | -0.001 | t | 107166 | GPPGPQG            | Mus musculus          |
| 1 | 1.00 | 1 | 1 | 0 | 0      | 0 | 0 | -0.001 | t | 108215 | WVAMHPQGD          | Homo sapiens          |
| 1 | 1.00 | 1 | 1 | 0 | 0      | 0 | 0 | -0.001 | t | 117140 | DWEYSVWLSN         | Mus musculus          |
| 1 | 1.00 | 1 | 1 | 0 | 0      | 0 | 0 | -0.001 | t | 117140 | DWEYSVWLSN         | Mus musculus          |
| 1 | 1.00 | 1 | 1 | 0 | 0      | 0 | 0 | -0.001 | t | 99134  | DAEFRHDSGYEVHHQ    | Mus musculus          |
| 1 | 1.00 | 1 | 1 | 0 | 0      | 0 | 0 | -0.001 | t | 100070 | GLMVGGVIA          | Oryctolagus cuniculus |
| 1 | 1.00 | 1 | 1 | 0 | 0      | 0 | 0 | -0.001 | t | 108052 | NWLSLITAR          | Homo sapiens          |
| 1 | 1.00 | 1 | 1 | 0 | 0      | 0 | 0 | -0.001 | t | 105127 | DAEFRHD            | Mus musculus          |
| 1 | 1.00 | 1 | 1 | 0 | 0      | 0 | 0 | -0.001 | t | 113879 | SQRSQDEN           | Rattus norvegicus     |
| 1 | 1.00 | 1 | 1 | 0 | 0      | 0 | 0 | -0.001 | t | 108213 | WQQGNVF            | Mus musculus          |
| 1 | 1.00 | 1 | 1 | 0 | 0      | 0 | 0 | -0.001 | t | 108064 | PGPPGPP            | Mus musculus          |
| 1 | 1.00 | 1 | 1 | 0 | -0.002 | 0 | 0 | -0.001 | t | 99921  | DAEFRHDS           | Mus musculus          |
| 1 | 1.00 | 1 | 1 | 0 | 0      | 0 | 0 | -0.001 | t | 107882 | HEHTFGRQW          | Mus musculus          |
| 1 | 1.00 | 1 | 1 | 0 | 0      | 0 | 0 | -0.001 | t | 117246 | VTWEVLEGEVEKEALKKI | Oryctolagus cuniculus |
| 1 | 1.00 | 1 | 1 | 0 | 0      | 0 | 0 | -0.001 | t | 104569 | MASPGSGFWSFGSE DGS | Mus musculus          |
| 1 | 1.00 | 1 | 1 | 0 | 0      | 0 | 0 | -0.001 | t | 112672 | TAEFQMTFHLFI       | Oryctolagus cuniculus |



|   |      |   |   |   |        |   |   |        |   |        |                              |                                  |
|---|------|---|---|---|--------|---|---|--------|---|--------|------------------------------|----------------------------------|
| 1 | 1.00 | 1 | 1 | 0 | 0      | 0 | 0 | -0.001 | t | 99134  | DAEFRHDS<br>GYEVHHQ          | Mus<br>musculu<br>s              |
| 1 | 1.00 | 1 | 1 | 0 | -0.003 | 0 | 0 | -0.001 | t | 111193 | DGPAGQA<br>EPDRAHY<br>NI     | Oryctola<br>gus<br>cuniculu<br>s |
| 1 | 1.00 | 1 | 1 | 0 | 0      | 0 | 0 | -0.001 | t | 99134  | DAEFRHDS<br>GYEVHHQ          | Mus<br>musculu<br>s              |
| 1 | 1.00 | 1 | 1 | 0 | 0      | 0 | 0 | -0.001 | t | 108345 | ENPKKIYP<br>GTK              | Homo<br>sapiens                  |
| 1 | 1.00 | 1 | 1 | 0 | 0      | 0 | 0 | -0.001 | t | 99134  | DAEFRHDS<br>GYEVHHQ          | Mus<br>musculu<br>s              |
| 1 | 1.00 | 1 | 1 | 0 | 0      | 0 | 0 | -0.001 | t | 104443 | DAEFRHDS<br>GYE              | Mus<br>musculu<br>s              |
| 1 | 1.00 | 1 | 1 | 0 | 0      | 0 | 0 | -0.001 | t | 110863 | GLKAKPKF<br>TLGKRKAT<br>PTTS | Homo<br>sapiens                  |
| 1 | 1.00 | 1 | 1 | 0 | 0      | 0 | 0 | -0.001 | t | 104443 | DAEFRHDS<br>GYE              | Mus<br>musculu<br>s              |
| 1 | 1.00 | 1 | 1 | 0 | 0      | 0 | 0 | -0.001 | t | 108212 | WPPSFWY<br>HPQ               | Homo<br>sapiens                  |
| 1 | 1.00 | 1 | 1 | 0 | 0      | 0 | 0 | -0.001 | t | 115047 | ELQFPFLQ<br>D                | Mus<br>musculu<br>s              |
| 1 | 1.00 | 1 | 1 | 0 | 0      | 0 | 0 | -0.001 | t | 106131 | TAIPSCPE<br>GTVPLYS          | Homo<br>sapiens                  |
| 1 | 1.00 | 1 | 1 | 0 | 0      | 0 | 0 | -0.001 | t | 108210 | WFTSWER<br>DWW               | Homo<br>sapiens                  |
| 1 | 1.00 | 1 | 1 | 0 | 0      | 0 | 0 | -0.001 | t | 109253 | GSLPQKSQ<br>RSQDENP<br>VVHF  | Rattus<br>norvegic<br>us         |
| 1 | 1.00 | 1 | 1 | 0 | 0      | 0 | 0 | -0.001 | t | 117345 | PRRRSRKP<br>EAPRRRS          | Homo<br>sapiens                  |
| 1 | 1.00 | 1 | 1 | 0 | -0.003 | 0 | 0 | -0.001 | t | 117260 | ANNGNLQ<br>LRNKEVT<br>WEVLEG | Oryctola<br>gus<br>cuniculu<br>s |
| 1 | 1.00 | 1 | 1 | 0 | 0      | 0 | 0 | -0.001 | t | 99134  | DAEFRHDS<br>GYEVHHQ          | Mus<br>musculu<br>s              |

|   |      |   |   |   |        |   |   |        |   |        |                             |                                  |
|---|------|---|---|---|--------|---|---|--------|---|--------|-----------------------------|----------------------------------|
| 1 | 1.00 | 1 | 1 | 0 | 0      | 0 | 0 | -0.001 | t | 103998 | IVKWDRD<br>M                | Mus<br>musculu<br>s              |
| 1 | 1.00 | 1 | 1 | 0 | 0      | 0 | 0 | -0.001 | t | 102435 | FPKLTLYS<br>W               | Mus<br>musculu<br>s              |
| 1 | 1.00 | 1 | 1 | 0 | -0.002 | 0 | 0 | -0.001 | t | 108295 | CKRDSTW<br>C                | Mus<br>musculu<br>s              |
| 1 | 1.00 | 1 | 1 | 0 | 0      | 0 | 0 | -0.001 | t | 112453 | ASQKRPSQ<br>R               | Mus<br>musculu<br>s              |
| 1 | 1.00 | 1 | 1 | 0 | -0.003 | 0 | 0 | -0.001 | t | 116677 | ASATQLYK<br>TCKQAGT<br>CPPD | Oryctola<br>gus<br>cuniculu<br>s |
| 1 | 1.00 | 1 | 1 | 0 | 0      | 0 | 0 | -0.001 | t | 111125 | ASQKRPSQ<br>R               | Mus<br>musculu<br>s              |
| 1 | 1.00 | 1 | 1 | 0 | 0      | 0 | 0 | -0.001 | t | 108074 | PQVYTL                      | Homo<br>sapiens                  |
| 1 | 1.00 | 1 | 1 | 0 | 0      | 0 | 0 | -0.001 | t | 114226 | QKSHGRT<br>QDENPVV<br>HF    | Mus<br>musculu<br>s              |
| 1 | 1.00 | 1 | 1 | 0 | 0      | 0 | 0 | -0.001 | t | 104443 | DAEFRHDS<br>GYE             | Mus<br>musculu<br>s              |
| 1 | 1.00 | 1 | 1 | 0 | 0      | 0 | 0 | -0.001 | t | 107814 | EGLHNHY                     | Mus<br>musculu<br>s              |
| 1 | 1.00 | 1 | 1 | 0 | 0      | 0 | 0 | -0.001 | t | 107814 | EGLHNHY                     | Homo<br>sapiens                  |
| 1 | 1.00 | 1 | 1 | 0 | -0.003 | 0 | 0 | -0.001 | t | 108522 | LHEYMLDL<br>QPETDL          | Oryctola<br>gus<br>cuniculu<br>s |
| 1 | 1.00 | 1 | 1 | 0 | 0      | 0 | 0 | -0.001 | t | 108382 | GGVVIA                      | Mus<br>musculu<br>s              |
| 1 | 1.00 | 1 | 1 | 0 | -0.003 | 0 | 0 | -0.001 | t | 108075 | PREPQVY                     | Oryctola<br>gus<br>cuniculu<br>s |
| 1 | 1.00 | 1 | 1 | 0 | 0      | 0 | 0 | -0.001 | t | 108075 | PREPQVY                     | Homo<br>sapiens                  |

|   |      |   |   |   |   |   |   |        |   |        |                              |                                  |
|---|------|---|---|---|---|---|---|--------|---|--------|------------------------------|----------------------------------|
| 1 | 1.00 | 1 | 1 | 0 | 0 | 0 | 0 | -0.001 | t | 108200 | VSLGKWL<br>GHPDKF            | Mus<br>musculu<br>s              |
| 1 | 1.00 | 1 | 1 | 0 | 0 | 0 | 0 | -0.001 | t | 108382 | GGVVIA                       | Mus<br>musculu<br>s              |
| 1 | 1.00 | 1 | 1 | 0 | 0 | 0 | 0 | -0.001 | t | 99922  | DAEFRHDS<br>GY               | Mus<br>musculu<br>s              |
| 1 | 1.00 | 1 | 1 | 0 | 0 | 0 | 0 | -0.001 | t | 104906 | MVGGVVI<br>A                 | Mus<br>musculu<br>s              |
| 1 | 1.00 | 1 | 1 | 0 | 0 | 0 | 0 | -0.001 | t | 99922  | DAEFRHDS<br>GY               | Mus<br>musculu<br>s              |
| 1 | 1.00 | 1 | 1 | 0 | 0 | 0 | 0 | -0.001 | t | 99922  | DAEFRHDS<br>GY               | Mus<br>musculu<br>s              |
| 1 | 1.00 | 1 | 1 | 0 | 0 | 0 | 0 | -0.001 | t | 100153 | INDQIKFII<br>N               | Mus<br>musculu<br>s              |
| 1 | 1.00 | 1 | 1 | 0 | 0 | 0 | 0 | -0.001 | t | 107949 | KSLSLSP                      | Oryctola<br>gus<br>cuniculu<br>s |
| 1 | 1.00 | 1 | 1 | 0 | 0 | 0 | 0 | -0.001 | t | 102860 | TPYTSLYT<br>W                | Mus<br>musculu<br>s              |
| 1 | 1.00 | 1 | 1 | 0 | 0 | 0 | 0 | -0.001 | t | 104906 | MVGGVVI<br>A                 | Mus<br>musculu<br>s              |
| 1 | 1.00 | 1 | 1 | 0 | 0 | 0 | 0 | -0.001 | t | 112453 | ASQKRPSQ<br>R                | Mus<br>musculu<br>s              |
| 1 | 1.00 | 1 | 1 | 0 | 0 | 0 | 0 | -0.001 | t | 110037 | VIASEGDS<br>VNITCST          | Rattus<br>norvegic<br>us         |
| 1 | 1.00 | 1 | 1 | 0 | 0 | 0 | 0 | -0.001 | t | 99134  | DAEFRHDS<br>GYEVHHQ          | Mus<br>musculu<br>s              |
| 1 | 1.00 | 1 | 1 | 0 | 0 | 0 | 0 | -0.001 | t | 106675 | NEEGFFSA<br>RGHRPLDK<br>K    | Homo<br>sapiens                  |
| 1 | 1.00 | 1 | 1 | 0 | 0 | 0 | 0 | -0.001 | t | 113013 | GSLPQKSQ<br>RSQDEN           | Rattus<br>norvegic<br>us         |
| 1 | 1.00 | 1 | 1 | 0 | 0 | 0 | 0 | -0.001 | t | 110385 | QLYKTCKQ<br>AGTCPPDII<br>PKV | Oryctola<br>gus<br>cuniculu<br>s |

|   |      |   |   |   |       |   |   |        |   |        |                              |                                  |
|---|------|---|---|---|-------|---|---|--------|---|--------|------------------------------|----------------------------------|
| 1 | 1.00 | 1 | 1 | 0 | 0     | 0 | 0 | -0.001 | t | 99134  | DAEFRHDS<br>GYEVHHQ          | Mus<br>musculu<br>s              |
| 1 | 1.00 | 1 | 1 | 0 | 0     | 0 | 0 | -0.001 | t | 114414 | IPKVPPGP<br>NITA             | Homo<br>sapiens                  |
| 1 | 1.00 | 1 | 1 | 0 | 0     | 0 | 0 | -0.001 | t | 107662 | VLTVLHQN<br>WL               | Oryctola<br>gus<br>cuniculu<br>s |
| 1 | 1.00 | 1 | 1 | 0 | 0     | 0 | 0 | -0.001 | t | 108088 | RAAPFGN<br>QW                | Mus<br>musculu<br>s              |
| 1 | 1.00 | 1 | 1 | 0 | 0     | 0 | 0 | -0.001 | t | 102880 | VDELD                        | Mus<br>musculu<br>s              |
| 1 | 1.00 | 1 | 1 | 0 | 0     | 0 | 0 | -0.001 | t | 113942 | TQDENPV<br>VHF               | Mus<br>musculu<br>s              |
| 1 | 1.00 | 1 | 1 | 0 | 0     | 0 | 0 | -0.001 | t | 113365 | EHPVTGC<br>GERTEGRC<br>LHYTV | Mus<br>musculu<br>s              |
| 1 | 1.00 | 1 | 1 | 0 | 0     | 0 | 0 | -0.001 | t | 108182 | VDLMTIRS<br>CR               | Homo<br>sapiens                  |
| 1 | 1.00 | 1 | 1 | 0 | 0     | 0 | 0 | -0.001 | t | 117383 | TLHKAFKG<br>SIFVVFSI<br>ESA  | Homo<br>sapiens                  |
| 1 | 1.00 | 1 | 1 | 0 | 0     | 0 | 0 | -0.001 | t | 105021 | VHHQKLV<br>FFAEDVGS<br>NK    | Oryctola<br>gus<br>cuniculu<br>s |
| 1 | 1.00 | 1 | 1 | 0 | 0     | 0 | 0 | -0.001 | t | 113942 | TQDENPV<br>VHF               | Mus<br>musculu<br>s              |
| 1 | 1.00 | 1 | 1 | 0 | 0     | 0 | 0 | -0.001 | t | 104443 | DAEFRHDS<br>GYE              | Mus<br>musculu<br>s              |
| 1 | 1.00 | 1 | 1 | 0 | 0.002 | 0 | 0 | -0.001 | t | 113879 | SQRSQDE<br>N                 | Rattus<br>norvegic<br>us         |
| 1 | 1.00 | 1 | 1 | 0 | 0     | 0 | 0 | -0.001 | t | 108104 | RRLPFGSQ<br>M                | Mus<br>musculu<br>s              |
| 1 | 1.00 | 1 | 1 | 0 | 0     | 0 | 0 | -0.001 | t | 108105 | RRLPFGSS<br>L                | Mus<br>musculu<br>s              |

|   |      |   |   |   |        |   |   |        |   |        |                              |                              |
|---|------|---|---|---|--------|---|---|--------|---|--------|------------------------------|------------------------------|
| 1 | 1.00 | 1 | 1 | 0 | 0      | 0 | 0 | -0.001 | t | 104850 | KEGILQYC<br>QEVYPELQ         | Mus<br>musculus              |
| 1 | 1.00 | 1 | 1 | 0 | 0      | 0 | 0 | -0.001 | t | 117260 | ANNGNLQ<br>LRNKEVT<br>WEVLEG | Homo<br>sapiens              |
| 1 | 1.00 | 1 | 1 | 0 | 0      | 0 | 0 | -0.001 | t | 109406 | KIQPSEPR<br>DSAVYFCA         | Homo<br>sapiens              |
| 1 | 1.00 | 1 | 1 | 0 | 0      | 0 | 0 | -0.001 | t | 102944 | YGCYCGP<br>GG                | Mus<br>musculus              |
| 1 | 1.00 | 1 | 1 | 0 | 0      | 0 | 0 | -0.001 | t | 108168 | TRSGIQA<br>T                 | Mus<br>musculus              |
| 1 | 1.00 | 1 | 1 | 0 | 0      | 0 | 0 | -0.001 | t | 115127 | WTQSLR                       | Mus<br>musculus              |
| 1 | 1.00 | 1 | 1 | 0 | 0      | 0 | 0 | -0.001 | t | 108167 | TRAFGNEA<br>T                | Mus<br>musculus              |
| 1 | 1.00 | 1 | 1 | 0 | 0      | 0 | 0 | -0.001 | t | 108525 | LKKPKDRN<br>DLI              | Homo<br>sapiens              |
| 1 | 1.00 | 1 | 1 | 0 | 0      | 0 | 0 | -0.001 | t | 104443 | DAEFRHDS<br>GYE              | Mus<br>musculus              |
| 1 | 1.00 | 1 | 1 | 0 | 0      | 0 | 0 | -0.001 | t | 117315 | KALSVETE<br>KLLKYLEAV        | Homo<br>sapiens              |
| 1 | 1.00 | 1 | 1 | 0 | 0      | 0 | 0 | -0.001 | t | 108107 | RYAFGSQI<br>A                | Mus<br>musculus              |
| 1 | 1.00 | 1 | 1 | 0 | 0      | 0 | 0 | -0.001 | t | 113365 | EHPVTGC<br>GERTEGRC<br>LHYTV | Mus<br>musculus              |
| 1 | 1.00 | 1 | 1 | 0 | 0      | 0 | 0 | -0.001 | t | 113365 | EHPVTGC<br>GERTEGRC<br>LHYTV | Mus<br>musculus              |
| 1 | 1.00 | 1 | 1 | 0 | 0      | 0 | 0 | -0.001 | t | 108666 | TRCAQCH<br>TLK               | Homo<br>sapiens              |
| 1 | 1.00 | 1 | 1 | 0 | 0      | 0 | 0 | -0.001 | t | 116745 | GSNKGAI<br>GLMVGGV<br>VIA    | Mus<br>musculus              |
| 1 | 1.00 | 1 | 1 | 0 | -0.003 | 0 | 0 | -0.001 | t | 111309 | GDTPTLHE<br>YMLDLQ           | Oryctola<br>gus<br>cuniculus |

|   |      |   |   |   |        |   |   |        |   |        |                             |                                  |
|---|------|---|---|---|--------|---|---|--------|---|--------|-----------------------------|----------------------------------|
| 1 | 1.00 | 1 | 1 | 0 | 0      | 0 | 0 | -0.001 | t | 107951 | KTTICGKG<br>LSATVT          | Mus<br>musculu<br>s              |
| 1 | 1.00 | 1 | 1 | 0 | 0      | 0 | 0 | -0.001 | t | 117074 | RSLLSGGL<br>P               | Mus<br>musculu<br>s              |
| 1 | 1.00 | 1 | 1 | 0 | 0      | 0 | 0 | -0.001 | t | 116677 | ASATQLYK<br>TCKQAGT<br>CPPD | Mus<br>musculu<br>s              |
| 1 | 1.00 | 1 | 1 | 0 | 0.002  | 0 | 0 | -0.001 | t | 116971 | FAVLKLM<br>GRGTKF           | Rattus<br>norvegic<br>us         |
| 1 | 1.00 | 1 | 1 | 0 | 0      | 0 | 0 | -0.001 | t | 104443 | DAEFRHDS<br>GYE             | Mus<br>musculu<br>s              |
| 1 | 1.00 | 1 | 1 | 0 | -0.003 | 0 | 0 | -0.001 | t | 107773 | CSVMHEG                     | Oryctola<br>gus<br>cuniculu<br>s |
| 1 | 1.00 | 1 | 1 | 0 | 0      | 0 | 0 | -0.001 | t | 107773 | CSVMHEG                     | Homo<br>sapiens                  |
| 1 | 1.00 | 1 | 1 | 0 | 0      | 0 | 0 | -0.001 | t | 117333 | MVTSTITE<br>KLLKNLVKI       | Homo<br>sapiens                  |
| 1 | 1.00 | 1 | 1 | 0 | 0      | 0 | 0 | -0.001 | t | 108156 | TDIPPCPH<br>GWISLWK         | Homo<br>sapiens                  |
| 1 | 1.00 | 1 | 1 | 0 | 0      | 0 | 0 | -0.001 | t | 106842 | SKDEIDSA<br>VKMLVSLK<br>MSY | Mus<br>musculu<br>s              |
| 1 | 1.00 | 1 | 1 | 0 | -0.002 | 0 | 0 | -0.001 | t | 108297 | CKYLWSKC                    | Mus<br>musculu<br>s              |
| 1 | 1.00 | 1 | 1 | 0 | 0      | 0 | 0 | -0.001 | t | 108019 | LSQPKIVK<br>WDR             | Mus<br>musculu<br>s              |
| 1 | 1.00 | 1 | 1 | 0 | 0      | 0 | 0 | -0.001 | t | 107768 | CIAPKRHN<br>SAC             | Mus<br>musculu<br>s              |
| 1 | 1.00 | 1 | 1 | 0 | 0      | 0 | 0 | -0.001 | t | 106036 | QFAGKDLE<br>SIK             | Mus<br>musculu<br>s              |
| 1 | 1.00 | 1 | 1 | 0 | 0      | 0 | 0 | -0.001 | t | 102563 | KKRPPKPG                    | Homo<br>sapiens                  |
| 1 | 1.00 | 1 | 1 | 0 | 0      | 0 | 0 | -0.001 | t | 108156 | TDIPPCPH<br>GWISLWK         | Homo<br>sapiens                  |

|   |      |   |   |   |        |   |   |        |   |        |                              |                                  |
|---|------|---|---|---|--------|---|---|--------|---|--------|------------------------------|----------------------------------|
| 1 | 1.00 | 1 | 1 | 0 | 0      | 0 | 0 | -0.001 | t | 112508 | FFKNIVTP<br>RTPPPSQQ<br>K    | Mus<br>musculu<br>s              |
| 1 | 1.00 | 1 | 1 | 0 | 0      | 0 | 0 | -0.001 | t | 108126 | SIFFAVVLE<br>L               | Homo<br>sapiens                  |
| 1 | 1.00 | 1 | 1 | 0 | 0      | 0 | 0 | -0.001 | t | 108628 | SHQESTRG<br>RSRGRSGR<br>SGS  | Homo<br>sapiens                  |
| 1 | 1.00 | 1 | 1 | 0 | -0.003 | 0 | 0 | -0.001 | t | 108019 | LSQPKIVK<br>WDR              | Oryctola<br>gus<br>cuniculu<br>s |
| 1 | 1.00 | 1 | 1 | 0 | 0      | 0 | 0 | -0.001 | t | 108378 | GFAGQAG<br>PAGATGA<br>PGRP   | Mus<br>musculu<br>s              |
| 1 | 1.00 | 1 | 1 | 0 | 0      | 0 | 0 | -0.001 | t | 102942 | YGCYCGK<br>GG                | Mus<br>musculu<br>s              |
| 1 | 1.00 | 1 | 1 | 0 | 0      | 0 | 0 | -0.001 | t | 99945  | DIRDSLSEE<br>E               | Mus<br>musculu<br>s              |
| 1 | 1.00 | 1 | 1 | 0 | 0      | 0 | 0 | -0.001 | t | 105127 | DAEFRHD                      | Mus<br>musculu<br>s              |
| 1 | 1.00 | 1 | 1 | 0 | 0      | 0 | 0 | -0.001 | t | 99975  | EEKELLKRI<br>Q               | Mus<br>musculu<br>s              |
| 1 | 1.00 | 1 | 1 | 0 | 0      | 0 | 0 | -0.001 | t | 99134  | DAEFRHDS<br>GYEVHHQ          | Mus<br>musculu<br>s              |
| 1 | 1.00 | 1 | 1 | 0 | 0      | 0 | 0 | -0.001 | t | 108152 | TCPPCPAP<br>ELLGG            | Homo<br>sapiens                  |
| 1 | 1.00 | 1 | 1 | 0 | 0      | 0 | 0 | -0.001 | t | 99975  | EEKELLKRI<br>Q               | Mus<br>musculu<br>s              |
| 1 | 1.00 | 1 | 1 | 0 | 0      | 0 | 0 | -0.001 | t | 115058 | GNAEVHA<br>SFFDIGGS          | Oryctola<br>gus<br>cuniculu<br>s |
| 1 | 1.00 | 1 | 1 | 0 | 0      | 0 | 0 | -0.001 | t | 117260 | ANNGNLQ<br>LRNKEVT<br>WEVLEG | Mus<br>musculu<br>s              |
| 1 | 1.00 | 1 | 1 | 0 | -0.003 | 0 | 0 | -0.001 | t | 108131 | SKDWSFY                      | Oryctola<br>gus<br>cuniculu<br>s |

|   |      |   |   |   |        |   |   |        |   |        |                    |                       |
|---|------|---|---|---|--------|---|---|--------|---|--------|--------------------|-----------------------|
| 1 | 1.00 | 1 | 1 | 0 | 0      | 0 | 0 | -0.001 | t | 107479 | KFNWYVD            | Homo sapiens          |
| 1 | 1.00 | 1 | 1 | 0 | -0.003 | 0 | 0 | -0.001 | t | 108131 | SKDWSFY            | Oryctolagus cuniculus |
| 1 | 1.00 | 1 | 1 | 0 | 0      | 0 | 0 | -0.001 | t | 106321 | DAEFRH             | Mus musculus          |
| 1 | 1.00 | 1 | 1 | 0 | 0      | 0 | 0 | -0.001 | t | 108131 | SKDWSFY            | Mus musculus          |
| 1 | 1.00 | 1 | 1 | 0 | 0      | 0 | 0 | -0.001 | t | 108131 | SKDWSFY            | Mus musculus          |
| 1 | 1.00 | 1 | 1 | 0 | 0      | 0 | 0 | -0.001 | t | 107758 | AWNCCVK QTP        | Homo sapiens          |
| 1 | 1.00 | 1 | 1 | 0 | 0      | 0 | 0 | -0.001 | t | 117300 | GSGKGKV QFQGKKT KF | Oryctolagus cuniculus |
| 1 | 1.00 | 1 | 1 | 0 | 0      | 0 | 0 | -0.001 | t | 112453 | ASQKRPSQ R         | Mus musculus          |
| 1 | 1.00 | 1 | 1 | 0 | 0      | 0 | 0 | -0.001 | t | 108007 | LLPWLDG HPM        | Homo sapiens          |
| 1 | 1.00 | 1 | 1 | 0 | 0      | 0 | 0 | -0.001 | t | 108134 | SLCINLRA AR        | Homo sapiens          |
| 1 | 1.00 | 1 | 1 | 0 | 0      | 0 | 0 | -0.001 | t | 107951 | KTTICGKG LSATVT    | Mus musculus          |
| 1 | 1.00 | 1 | 1 | 0 | 0      | 0 | 0 | -0.001 | t | 108135 | SLITAARG APS       | Homo sapiens          |
| 1 | 1.00 | 1 | 1 | 0 | -0.003 | 0 | 0 | -0.001 | t | 107479 | KFNWYVD            | Oryctolagus cuniculus |
| 1 | 1.00 | 1 | 1 | 0 | 0      | 0 | 0 | -0.001 | t | 107479 | KFNWYVD            | Oryctolagus cuniculus |
| 1 | 1.00 | 1 | 1 | 0 | 0      | 0 | 0 | -0.001 | t | 99134  | DAEFRHDS GYEVHHQ   | Mus musculus          |



|   |      |   |   |   |   |   |   |        |   |        |                              |                       |
|---|------|---|---|---|---|---|---|--------|---|--------|------------------------------|-----------------------|
| 1 | 1.00 | 1 | 1 | 0 | 0 | 0 | 0 | -0.001 | t | 107479 | KFNWYVD                      | Mus musculus          |
| 1 | 1.00 | 1 | 1 | 0 | 0 | 0 | 0 | -0.001 | t | 107242 | SQTTANPS<br>CPEGT            | Rattus norvegicus     |
| 1 | 1.00 | 1 | 1 | 0 | 0 | 0 | 0 | -0.001 | t | 78457  | LRLPPAP                      | Mus musculus          |
| 1 | 1.00 | 1 | 1 | 0 | 0 | 0 | 0 | -0.001 | t | 70391  | VPNLRGDL<br>QVLAQKV<br>ARTLP | Mus musculus          |
| 1 | 1.00 | 1 | 1 | 0 | 0 | 0 | 0 | -0.001 | t | 79535  | EDDDDDF<br>GMGALF            | Mus musculus          |
| 1 | 1.00 | 1 | 1 | 0 | 0 | 0 | 0 | -0.001 | t | 95163  | VLPGHQPS<br>NGNMIYS<br>YHTME | Rattus norvegicus     |
| 1 | 1.00 | 1 | 1 | 0 | 0 | 0 | 0 | -0.001 | t | 78536  | TPLCDYAA<br>ARVGACG          | Mus musculus          |
| 1 | 1.00 | 1 | 1 | 0 | 0 | 0 | 0 | -0.001 | t | 97020  | TVTRGTIS<br>DP               | Oryctolagus cuniculus |
| 1 | 1.00 | 1 | 1 | 0 | 0 | 0 | 0 | -0.001 | t | 64086  | THTPLPRG<br>IGY              | Mus musculus          |
| 1 | 1.00 | 1 | 1 | 0 | 0 | 0 | 0 | -0.001 | t | 96457  | KGTVNLT<br>WSR               | Mus musculus          |
| 1 | 1.00 | 1 | 1 | 0 | 0 | 0 | 0 | -0.001 | t | 79284  | LDAVPL                       | Mus musculus          |
| 1 | 1.00 | 1 | 1 | 0 | 0 | 0 | 0 | -0.001 | t | 62715  | SYSYNKDN<br>NELSHFA          | Mus musculus          |
| 1 | 1.00 | 1 | 1 | 0 | 0 | 0 | 0 | -0.001 | t | 64099  | THWQLGE<br>RPD               | Homo sapiens          |
| 1 | 1.00 | 1 | 1 | 0 | 0 | 0 | 0 | -0.001 | t | 62715  | SYSYNKDN<br>NELSHFA          | Mus musculus          |
| 1 | 1.00 | 1 | 1 | 0 | 0 | 0 | 0 | -0.001 | t | 65614  | TPIRHRS                      | Homo sapiens          |

|   |      |   |   |   |        |   |   |        |   |       |                    |                       |
|---|------|---|---|---|--------|---|---|--------|---|-------|--------------------|-----------------------|
| 1 | 1.00 | 1 | 1 | 0 | -0.003 | 0 | 0 | -0.001 | t | 95142 | RIKNTDGSIS         | Oryctolagus cuniculus |
| 1 | 1.00 | 1 | 1 | 0 | 0      | 0 | 0 | -0.001 | t | 77975 | QACQNNDTCPRL       | Mus musculus          |
| 1 | 1.00 | 1 | 1 | 0 | 0      | 0 | 0 | -0.001 | t | 96846 | RVFPRGTVENP        | Oryctolagus cuniculus |
| 1 | 1.00 | 1 | 1 | 0 | 0      | 0 | 0 | -0.001 | t | 70384 | VPNLQGVPEPFSRT     | Homo sapiens          |
| 1 | 1.00 | 1 | 1 | 0 | 0      | 0 | 0 | -0.001 | t | 69942 | VMENFVAF           | Homo sapiens          |
| 1 | 1.00 | 1 | 1 | 0 | 0      | 0 | 0 | -0.001 | t | 94483 | CYKKVWRDHRGTIIERGC | Mus musculus          |
| 1 | 1.00 | 1 | 1 | 0 | 0      | 0 | 0 | -0.001 | t | 72087 | VYLLPR             | Homo sapiens          |
| 1 | 1.00 | 1 | 1 | 0 | 0      | 0 | 0 | -0.001 | t | 79266 | KDAVPN             | Mus musculus          |
| 1 | 1.00 | 1 | 1 | 0 | 0      | 0 | 0 | -0.001 | t | 63391 | TEHRDYHPQQRG       | Mus musculus          |
| 1 | 1.00 | 1 | 1 | 0 | 0      | 0 | 0 | -0.001 | t | 75847 | YSPELE             | Mus musculus          |
| 1 | 1.00 | 1 | 1 | 0 | 0      | 0 | 0 | -0.001 | t | 63037 | TAVSPTTLR          | Oryctolagus cuniculus |
| 1 | 1.00 | 1 | 1 | 0 | 0      | 0 | 0 | -0.001 | t | 66749 | TTPAQGN SMFPSC     | Oryctolagus cuniculus |
| 1 | 1.00 | 1 | 1 | 0 | 0      | 0 | 0 | -0.001 | t | 70554 | VQESYYRYVAREQSCR   | Oryctolagus cuniculus |
| 1 | 1.00 | 1 | 1 | 0 | 0      | 0 | 0 | -0.001 | t | 67994 | VDKGHNYCGYPENLLI   | Homo sapiens          |

|   |      |   |   |   |        |   |   |        |   |       |                              |                                  |
|---|------|---|---|---|--------|---|---|--------|---|-------|------------------------------|----------------------------------|
| 1 | 1.00 | 1 | 1 | 0 | 0      | 0 | 0 | -0.001 | t | 63037 | TAVSP TTL<br>R               | Sus<br>scrofa                    |
| 1 | 1.00 | 1 | 1 | 0 | 0      | 0 | 0 | -0.001 | t | 62932 | TANGFYRL<br>PSG              | Mus<br>musculu<br>s              |
| 1 | 1.00 | 1 | 1 | 0 | 0      | 0 | 0 | -0.001 | t | 97023 | VATRSQTD<br>TSEKDC           | Oryctola<br>gus<br>cuniculu<br>s |
| 1 | 1.00 | 1 | 1 | 0 | 0      | 0 | 0 | -0.001 | t | 75849 | YSPEVR                       | Mus<br>musculu<br>s              |
| 1 | 1.00 | 1 | 1 | 0 | 0      | 0 | 0 | -0.001 | t | 71507 | VTSTLTSLF<br>RPGASQKI<br>QLV | Pan<br>troglody<br>tes           |
| 1 | 1.00 | 1 | 1 | 0 | 0      | 0 | 0 | -0.001 | t | 60751 | SRNWLPG<br>PCY               | Mus<br>musculu<br>s              |
| 1 | 1.00 | 1 | 1 | 0 | 0      | 0 | 0 | -0.001 | t | 62328 | SVSLPYAN<br>LATH             | Mus<br>musculu<br>s              |
| 1 | 1.00 | 1 | 1 | 0 | -0.002 | 0 | 0 | -0.001 | t | 76618 | YYTKDTNN<br>NLTLVPAV<br>VG   | Mus<br>musculu<br>s              |
| 1 | 1.00 | 1 | 1 | 0 | -0.003 | 0 | 0 | -0.001 | t | 66108 | TRTNPWP<br>ALAEGEF           | unidentif<br>ied                 |
| 1 | 1.00 | 1 | 1 | 0 | 0      | 0 | 0 | -0.001 | t | 62141 | SVGHMTG<br>RFTSLFSV<br>G     | Homo<br>sapiens                  |
| 1 | 1.00 | 1 | 1 | 0 | 0      | 0 | 0 | -0.001 | t | 74506 | YKSDNIR                      | Homo<br>sapiens                  |
| 1 | 1.00 | 1 | 1 | 0 | 0      | 0 | 0 | -0.001 | t | 72113 | VYNKTISG<br>SGP              | Oryctola<br>gus<br>cuniculu<br>s |
| 1 | 1.00 | 1 | 1 | 0 | 0      | 0 | 0 | -0.001 | t | 63098 | TCRRMLAF<br>LKDKENR          | Homo<br>sapiens                  |
| 1 | 1.00 | 1 | 1 | 0 | 0      | 0 | 0 | -0.001 | t | 72113 | VYNKTISG<br>SGP              | Mus<br>musculu<br>s              |
| 1 | 1.00 | 1 | 1 | 0 | 0      | 0 | 0 | -0.001 | t | 65820 | TQAHTTM<br>RLANLFTS<br>G     | Homo<br>sapiens                  |

|   |      |   |   |   |        |   |   |        |   |       |                              |                                  |
|---|------|---|---|---|--------|---|---|--------|---|-------|------------------------------|----------------------------------|
| 1 | 1.00 | 1 | 1 | 0 | 0      | 0 | 0 | -0.001 | t | 79535 | EDDDDDF<br>GMGALF            | Mus<br>musculu<br>s              |
| 1 | 1.00 | 1 | 1 | 0 | 0      | 0 | 0 | -0.001 | t | 79474 | YDAVPY                       | Mus<br>musculu<br>s              |
| 1 | 1.00 | 1 | 1 | 0 | 0      | 0 | 0 | -0.001 | t | 70391 | VPNLRGDL<br>QVLAQKV<br>ARTLP | Mus<br>musculu<br>s              |
| 1 | 1.00 | 1 | 1 | 0 | -0.002 | 0 | 0 | -0.001 | t | 66347 | TSNTHACR<br>TCSNPCR          | Mus<br>musculu<br>s              |
| 1 | 1.00 | 1 | 1 | 0 | 0      | 0 | 0 | -0.001 | t | 70817 | VRRRVNA<br>ANKKPEDL<br>TLNDL | Aotus<br>lemurinu<br>s           |
| 1 | 1.00 | 1 | 1 | 0 | 0      | 0 | 0 | -0.001 | t | 73081 | WSLFLNH<br>AE                | Mus<br>musculu<br>s              |
| 1 | 1.00 | 1 | 1 | 0 | 0      | 0 | 0 | -0.001 | t | 97348 | GLFGAIAG<br>FIEGGW           | Oryctola<br>gus<br>cuniculu<br>s |
| 1 | 1.00 | 1 | 1 | 0 | 0      | 0 | 0 | -0.001 | t | 77802 | TEYSASVK<br>GRFI             | Mus                              |
| 1 | 1.00 | 1 | 1 | 0 | 0      | 0 | 0 | -0.001 | t | 64045 | THKVGTSF<br>TFES             | Oryctola<br>gus<br>cuniculu<br>s |
| 1 | 1.00 | 1 | 1 | 0 | -0.003 | 0 | 0 | -0.001 | t | 72113 | VYNKTISG<br>SGP              | Oryctola<br>gus<br>cuniculu<br>s |
| 1 | 1.00 | 1 | 1 | 0 | 0      | 0 | 0 | -0.001 | t | 66751 | TTPAQGTS<br>M                | Mus<br>musculu<br>s              |
| 1 | 1.00 | 1 | 1 | 0 | 0      | 0 | 0 | -0.001 | t | 79389 | SDVAGLQ<br>NDPTT             | Mus<br>musculu<br>s              |
| 1 | 1.00 | 1 | 1 | 0 | 0      | 0 | 0 | -0.001 | t | 60722 | SRLGRSSA<br>WV               | Homo<br>sapiens                  |
| 1 | 1.00 | 1 | 1 | 0 | 0      | 0 | 0 | -0.001 | t | 65105 | TLTPENTL                     | Mus<br>musculu<br>s              |
| 1 | 1.00 | 1 | 1 | 0 | 0      | 0 | 0 | -0.001 | t | 97547 | PFVPRADE<br>PARKGKV<br>H     | Mus<br>musculu<br>s              |

|   |      |   |   |   |   |   |   |        |   |       |                               |                                  |
|---|------|---|---|---|---|---|---|--------|---|-------|-------------------------------|----------------------------------|
| 1 | 1.00 | 1 | 1 | 0 | 0 | 0 | 0 | -0.001 | t | 78176 | HLP                           | MD                               |
| 1 | 1.00 | 1 | 1 | 0 | 0 | 0 | 0 | -0.001 | t | 64411 | TIPAQGTS<br>M                 | Mus<br>musculu<br>s              |
| 1 | 1.00 | 1 | 1 | 0 | 0 | 0 | 0 | -0.001 | t | 69323 | VKTIGDKR<br>TLTLNTTA<br>NYT   | Mus<br>musculu<br>s              |
| 1 | 1.00 | 1 | 1 | 0 | 0 | 0 | 0 | -0.001 | t | 74036 | YGLFHKEK<br>MLL               | Mus<br>musculu<br>s              |
| 1 | 1.00 | 1 | 1 | 0 | 0 | 0 | 0 | -0.001 | t | 79153 | ALQREAAE<br>RSEDEIK           | Oryctola<br>gus<br>cuniculu<br>s |
| 1 | 1.00 | 1 | 1 | 0 | 0 | 0 | 0 | -0.001 | t | 73784 | YEVRAELP<br>GVDPPDKD<br>VDIMV | Mus<br>musculu<br>s              |
| 1 | 1.00 | 1 | 1 | 0 | 0 | 0 | 0 | -0.001 | t | 65678 | TPPAYR                        | Mus<br>musculu<br>s              |
| 1 | 1.00 | 1 | 1 | 0 | 0 | 0 | 0 | -0.001 | t | 66257 | TSHHDSH<br>GLHRV              | Mus<br>musculu<br>s              |
| 1 | 1.00 | 1 | 1 | 0 | 0 | 0 | 0 | -0.001 | t | 95119 | MKKPGENI<br>KPLSCKYSY<br>PKH  | Rattus<br>norvegic<br>us         |
| 1 | 1.00 | 1 | 1 | 0 | 0 | 0 | 0 | -0.001 | t | 72065 | VYKLDISEA                     | Mus<br>musculu<br>s              |
| 1 | 1.00 | 1 | 1 | 0 | 0 | 0 | 0 | -0.001 | t | 78424 | IPRSRQIDL<br>QIG              | Mus<br>musculu<br>s              |
| 1 | 1.00 | 1 | 1 | 0 | 0 | 0 | 0 | -0.001 | t | 62852 | TAGHGAY<br>GITSLFTRG          | Homo<br>sapiens                  |
| 1 | 1.00 | 1 | 1 | 0 | 0 | 0 | 0 | -0.001 | t | 97596 | QTPLTMA<br>ALELL              | Mus<br>musculu<br>s              |
| 1 | 1.00 | 1 | 1 | 0 | 0 | 0 | 0 | -0.001 | t | 66347 | TSNTHACR<br>TCSNPCR           | Mus<br>musculu<br>s              |
| 1 | 1.00 | 1 | 1 | 0 | 0 | 0 | 0 | -0.001 | t | 70460 | VPQYLRW<br>FEEWAED<br>FCRK    | Homo<br>sapiens                  |

|   |      |   |   |   |   |   |   |        |   |       |                              |                                  |
|---|------|---|---|---|---|---|---|--------|---|-------|------------------------------|----------------------------------|
| 1 | 1.00 | 1 | 1 | 0 | 0 | 0 | 0 | -0.001 | t | 71263 | VTCDPPT<br>Y                 | Oryctola<br>gus<br>cuniculu<br>s |
| 1 | 1.00 | 1 | 1 | 0 | 0 | 0 | 0 | -0.001 | t | 70391 | VPNLRGDL<br>QVLAQKV<br>ARTLP | Mus<br>musculu<br>s              |
| 1 | 1.00 | 1 | 1 | 0 | 0 | 0 | 0 | -0.001 | t | 80002 | RKADLEKA<br>LEGAM            | Oryctola<br>gus<br>cuniculu<br>s |
| 1 | 1.00 | 1 | 1 | 0 | 0 | 0 | 0 | -0.001 | t | 77810 | YSASVKGR<br>FIVS             | Mus                              |
| 1 | 1.00 | 1 | 1 | 0 | 0 | 0 | 0 | -0.001 | t | 97288 | ETQLTTAG<br>LRLL             | Mus<br>musculu<br>s              |
| 1 | 1.00 | 1 | 1 | 0 | 0 | 0 | 0 | -0.001 | t | 63736 | TFQVEVPG<br>SQHIDS           | Oryctola<br>gus<br>cuniculu<br>s |
| 1 | 1.00 | 1 | 1 | 0 | 0 | 0 | 0 | -0.001 | t | 79278 | KSAVGY                       | Mus<br>musculu<br>s              |
| 1 | 1.00 | 1 | 1 | 0 | 0 | 0 | 0 | -0.001 | t | 79867 | INNLI<br>VELI<br>RGT         | Mus<br>musculu<br>s              |
| 1 | 1.00 | 1 | 1 | 0 | 0 | 0 | 0 | -0.001 | t | 62932 | TANGFYRL<br>PSG              | Homo<br>sapiens                  |
| 1 | 1.00 | 1 | 1 | 0 | 0 | 0 | 0 | -0.001 | t | 79602 | LLPDSVI                      | Mus<br>musculu<br>s              |
| 1 | 1.00 | 1 | 1 | 0 | 0 | 0 | 0 | -0.001 | t | 70542 | VQDLMKS<br>SGV               | Homo<br>sapiens                  |
| 1 | 1.00 | 1 | 1 | 0 | 0 | 0 | 0 | -0.001 | t | 74462 | YKIGDNW                      | Homo<br>sapiens                  |
| 1 | 1.00 | 1 | 1 | 0 | 0 | 0 | 0 | -0.001 | t | 62345 | SVTCPQQ<br>V                 | Mus<br>musculu<br>s              |
| 1 | 1.00 | 1 | 1 | 0 | 0 | 0 | 0 | -0.001 | t | 78873 | VKFPGGG<br>QIVGGVYL<br>LPRRG | Homo<br>sapiens                  |

|   |      |   |   |   |        |   |   |        |   |       |                              |                                  |
|---|------|---|---|---|--------|---|---|--------|---|-------|------------------------------|----------------------------------|
| 1 | 1.00 | 1 | 1 | 0 | 0      | 0 | 0 | -0.001 | t | 74970 | YLVKYLCKI<br>ARSQDA          | Oryctola<br>gus<br>cuniculu<br>s |
| 1 | 1.00 | 1 | 1 | 0 | 0      | 0 | 0 | -0.001 | t | 72251 | WAPSV                        | Mus<br>musculu<br>s              |
| 1 | 1.00 | 1 | 1 | 0 | 0      | 0 | 0 | -0.001 | t | 70817 | VRRRVNA<br>ANKKPEDL<br>TLNDL | Homo<br>sapiens                  |
| 1 | 1.00 | 1 | 1 | 0 | 0      | 0 | 0 | -0.001 | t | 74821 | YLMEVQK                      | Homo<br>sapiens                  |
| 1 | 1.00 | 1 | 1 | 0 | 0      | 0 | 0 | -0.001 | t | 61612 | STFYGKPT<br>GAGPK            | Mus<br>musculu<br>s              |
| 1 | 1.00 | 1 | 1 | 0 | -0.003 | 0 | 0 | -0.001 | t | 72178 | VYVEELKP<br>TPEGDL<br>LQK    | Oryctola<br>gus<br>cuniculu<br>s |
| 1 | 1.00 | 1 | 1 | 0 | 0      | 0 | 0 | -0.001 | t | 72178 | VYVEELKP<br>TPEGDL<br>LQK    | Mus<br>musculu<br>s              |
| 1 | 1.00 | 1 | 1 | 0 | -0.002 | 0 | 0 | -0.001 | t | 72805 | WLTEKEGS<br>YP               | Mus<br>musculu<br>s              |
| 1 | 1.00 | 1 | 1 | 0 | 0      | 0 | 0 | -0.001 | t | 92900 | HEALREPR<br>KLERTISK         | Oryctola<br>gus<br>cuniculu<br>s |
| 1 | 1.00 | 1 | 1 | 0 | 0      | 0 | 0 | -0.001 | t | 78286 | TTAETLDA<br>TR               | Mus<br>musculu<br>s              |
| 1 | 1.00 | 1 | 1 | 0 | 0      | 0 | 0 | -0.001 | t | 78286 | TTAETLDA<br>TR               | Mus<br>musculu<br>s              |
| 1 | 1.00 | 1 | 1 | 0 | 0      | 0 | 0 | -0.001 | t | 60797 | SRSESRKN<br>RGGREEIL         | Homo<br>sapiens                  |
| 1 | 1.00 | 1 | 1 | 0 | 0      | 0 | 0 | -0.001 | t | 94380 | YVFLPPEE<br>EEKDKR           | Oryctola<br>gus<br>cuniculu<br>s |
| 1 | 1.00 | 1 | 1 | 0 | 0      | 0 | 0 | -0.001 | t | 74009 | YGGPANK<br>KNAG              | Mus<br>musculu<br>s              |
| 1 | 1.00 | 1 | 1 | 0 | 0      | 0 | 0 | -0.001 | t | 60526 | SQPNT EQS<br>PAIVLPF         | Mus<br>musculu<br>s              |

|   |      |   |   |   |   |   |   |        |   |       |                            |                                  |
|---|------|---|---|---|---|---|---|--------|---|-------|----------------------------|----------------------------------|
| 1 | 1.00 | 1 | 1 | 0 | 0 | 0 | 0 | -0.001 | t | 79806 | EKPAKTYD<br>DAAS           | Mus<br>musculu<br>s              |
| 1 | 1.00 | 1 | 1 | 0 | 0 | 0 | 0 | -0.001 | t | 67325 | TYEAALKQ<br>YEADL          | Mus<br>musculu<br>s              |
| 1 | 1.00 | 1 | 1 | 0 | 0 | 0 | 0 | -0.001 | t | 97595 | QTPLTMA<br>ALELF           | Mus<br>musculu<br>s              |
| 1 | 1.00 | 1 | 1 | 0 | 0 | 0 | 0 | -0.001 | t | 66304 | TSLNDRQ<br>GNATK           | Oryctola<br>gus<br>cuniculu<br>s |
| 1 | 1.00 | 1 | 1 | 0 | 0 | 0 | 0 | -0.001 | t | 67967 | VDGSDP                     | Mus<br>musculu<br>s              |
| 1 | 1.00 | 1 | 1 | 0 | 0 | 0 | 0 | -0.001 | t | 76618 | YYTKDTNN<br>NLTLVPAV<br>VG | Homo<br>sapiens                  |
| 1 | 1.00 | 1 | 1 | 0 | 0 | 0 | 0 | -0.001 | t | 94606 | LTGGFYEP<br>L              | Mus<br>musculu<br>s              |
| 1 | 1.00 | 1 | 1 | 0 | 0 | 0 | 0 | -0.001 | t | 79852 | HFFKNIVT<br>PRT            | Rattus<br>norvegic<br>us         |
| 1 | 1.00 | 1 | 1 | 0 | 0 | 0 | 0 | -0.001 | t | 68041 | VDPQ                       | Mus<br>musculu<br>s              |
| 1 | 1.00 | 1 | 1 | 0 | 0 | 0 | 0 | -0.001 | t | 65409 | TNRNPQ                     | Mus<br>musculu<br>s              |
| 1 | 1.00 | 1 | 1 | 0 | 0 | 0 | 0 | -0.001 | t | 74045 | YGLLAVDP<br>LFKP           | Gallus<br>gallus                 |
| 1 | 1.00 | 1 | 1 | 0 | 0 | 0 | 0 | -0.001 | t | 63122 | TDAYNQKL<br>SERRAN         | Mus<br>musculu<br>s              |
| 1 | 1.00 | 1 | 1 | 0 | 0 | 0 | 0 | -0.001 | t | 63122 | TDAYNQKL<br>SERRAN         | Mus<br>musculu<br>s              |
| 1 | 1.00 | 1 | 1 | 0 | 0 | 0 | 0 | -0.001 | t | 63758 | TFTNPVVS<br>TTQWSAP        | Oryctola<br>gus<br>cuniculu<br>s |



|   |      |   |   |   |   |   |   |        |   |       |                              |                                  |
|---|------|---|---|---|---|---|---|--------|---|-------|------------------------------|----------------------------------|
| 1 | 1.00 | 1 | 1 | 0 | 0 | 0 | 0 | -0.001 | t | 63122 | TDAYNQKL<br>SERRAN           | Mus<br>musculu<br>s              |
| 1 | 1.00 | 1 | 1 | 0 | 0 | 0 | 0 | -0.001 | t | 61708 | STLAKHAP<br>AGYR             | Oryctola<br>gus<br>cuniculu<br>s |
| 1 | 1.00 | 1 | 1 | 0 | 0 | 0 | 0 | -0.001 | t | 67325 | TYEAALKQ<br>YEADL            | Mus<br>musculu<br>s              |
| 1 | 1.00 | 1 | 1 | 0 | 0 | 0 | 0 | -0.001 | t | 67325 | TYEAALKQ<br>YEADL            | Mus<br>musculu<br>s              |
| 1 | 1.00 | 1 | 1 | 0 | 0 | 0 | 0 | -0.001 | t | 67325 | TYEAALKQ<br>YEADL            | Mus<br>musculu<br>s              |
| 1 | 1.00 | 1 | 1 | 0 | 0 | 0 | 0 | -0.001 | t | 74006 | YGGIYMN<br>G                 | Mus<br>musculu<br>s              |
| 1 | 1.00 | 1 | 1 | 0 | 0 | 0 | 0 | -0.001 | t | 79188 | DSAVGY                       | Mus<br>musculu<br>s              |
| 1 | 1.00 | 1 | 1 | 0 | 0 | 0 | 0 | -0.001 | t | 70391 | VPNLRGDL<br>QVLAQKV<br>ARTLP | Mus<br>musculu<br>s              |
| 1 | 1.00 | 1 | 1 | 0 | 0 | 0 | 0 | -0.001 | t | 74497 | YKQKIIAP                     | Mus<br>musculu<br>s              |
| 1 | 1.00 | 1 | 1 | 0 | 0 | 0 | 0 | -0.001 | t | 62489 | SWPLYDA<br>SGLG              | Mus<br>musculu<br>s              |
| 1 | 1.00 | 1 | 1 | 0 | 0 | 0 | 0 | -0.001 | t | 97256 | EGAKGEN<br>KRPNDKA<br>GEV    | Mus<br>musculu<br>s              |
| 1 | 1.00 | 1 | 1 | 0 | 0 | 0 | 0 | -0.001 | t | 69178 | VKAETRLN<br>PDLQPT           | Mus<br>musculu<br>s              |
| 1 | 1.00 | 1 | 1 | 0 | 0 | 0 | 0 | -0.001 | t | 96102 | APPLLPH                      | Homo<br>sapiens                  |
| 1 | 1.00 | 1 | 1 | 0 | 0 | 0 | 0 | -0.001 | t | 96085 | ALCSEKLD<br>QWLCEKL          | Homo<br>sapiens                  |

|   |      |   |   |   |   |   |   |        |   |       |                     |                                  |
|---|------|---|---|---|---|---|---|--------|---|-------|---------------------|----------------------------------|
| 1 | 1.00 | 1 | 1 | 0 | 0 | 0 | 0 | -0.001 | t | 74226 | YIIDHVDQ<br>HNATEIC | Oryctola<br>gus<br>cuniculu<br>s |
| 1 | 1.00 | 1 | 1 | 0 | 0 | 0 | 0 | -0.001 | t | 76290 | YVHDNC              | Mus<br>musculu<br>s              |
| 1 | 1.00 | 1 | 1 | 0 | 0 | 0 | 0 | -0.001 | t | 97252 | DTPLTTAA<br>LRLV    | Mus<br>musculu<br>s              |
| 1 | 1.00 | 1 | 1 | 0 | 0 | 0 | 0 | -0.001 | t | 60671 | SRGKGPG<br>KKNK     | Sus<br>scrofa                    |
| 1 | 1.00 | 1 | 1 | 0 | 0 | 0 | 0 | -0.001 | t | 60671 | SRGKGPG<br>KKNK     | Sus<br>scrofa                    |
| 1 | 1.00 | 1 | 1 | 0 | 0 | 0 | 0 | -0.001 | t | 69303 | VKQSRGE<br>A        | Mus<br>musculu<br>s              |
| 1 | 1.00 | 1 | 1 | 0 | 0 | 0 | 0 | -0.001 | t | 95051 | YSQFEKSY            | Oryctola<br>gus<br>cuniculu<br>s |
| 1 | 1.00 | 1 | 1 | 0 | 0 | 0 | 0 | -0.001 | t | 67076 | TVLRDPVF<br>YQ      | Homo<br>sapiens                  |
| 1 | 1.00 | 1 | 1 | 0 | 0 | 0 | 0 | -0.001 | t | 77955 | MCSPTALR<br>CQAH    | Mus<br>musculu<br>s              |
| 1 | 1.00 | 1 | 1 | 0 | 0 | 0 | 0 | -0.001 | t | 65050 | TLRVYK              | Mus<br>musculu<br>s              |
| 1 | 1.00 | 1 | 1 | 0 | 0 | 0 | 0 | -0.001 | t | 79176 | DAVPNM              | Mus<br>musculu<br>s              |
| 1 | 1.00 | 1 | 1 | 0 | 0 | 0 | 0 | -0.001 | t | 79176 | DAVPNM              | Mus<br>musculu<br>s              |
| 1 | 1.00 | 1 | 1 | 0 | 0 | 0 | 0 | -0.001 | t | 94513 | FHPDK               | Mus<br>musculu<br>s              |
| 1 | 1.00 | 1 | 1 | 0 | 0 | 0 | 0 | -0.001 | t | 61686 | STKAAKPP<br>EAKREAI | Mus<br>musculu<br>s              |
| 1 | 1.00 | 1 | 1 | 0 | 0 | 0 | 0 | -0.001 | t | 62885 | TAIHAVVW            | Homo<br>sapiens                  |

|   |      |   |   |   |        |   |   |        |   |       |                            |                                  |
|---|------|---|---|---|--------|---|---|--------|---|-------|----------------------------|----------------------------------|
| 1 | 1.00 | 1 | 1 | 0 | 0      | 0 | 0 | -0.001 | t | 95043 | SPHQVYN                    | Oryctola<br>gus<br>cuniculu<br>s |
| 1 | 1.00 | 1 | 1 | 0 | 0      | 0 | 0 | -0.001 | t | 72940 | WPKD TDT                   | Homo<br>sapiens                  |
| 1 | 1.00 | 1 | 1 | 0 | 0      | 0 | 0 | -0.001 | t | 53023 | QYPWRLA                    | Homo<br>sapiens                  |
| 1 | 1.00 | 1 | 1 | 0 | 0      | 0 | 0 | -0.001 | t | 41233 | MDIDPYKE<br>FGA            | Mus<br>musculu<br>s              |
| 1 | 1.00 | 1 | 1 | 0 | 0      | 0 | 0 | -0.001 | t | 41608 | MGP NLVL<br>PDQKPPS        | Mus<br>musculu<br>s              |
| 1 | 1.00 | 1 | 1 | 0 | 0      | 0 | 0 | -0.001 | t | 41571 | MGFGLFD                    | Homo<br>sapiens                  |
| 1 | 1.00 | 1 | 1 | 0 | 0      | 0 | 0 | -0.001 | t | 50502 | QDPDNTD<br>DNGPQDP<br>DNTD | Mus<br>musculu<br>s              |
| 1 | 1.00 | 1 | 1 | 0 | 0      | 0 | 0 | -0.001 | t | 58416 | SHSQLGPP<br>VGGPP          | Homo<br>sapiens                  |
| 1 | 1.00 | 1 | 1 | 0 | 0      | 0 | 0 | -0.001 | t | 39092 | LRGDLQVL<br>AQKVARTL       | Mus<br>musculu<br>s              |
| 1 | 1.00 | 1 | 1 | 0 | 0      | 0 | 0 | -0.001 | t | 56195 | RTTPDRQ<br>AA              | Oryctola<br>gus<br>cuniculu<br>s |
| 1 | 1.00 | 1 | 1 | 0 | -0.003 | 0 | 0 | -0.001 | t | 39092 | LRGDLQVL<br>AQKVARTL       | Oryctola<br>gus<br>cuniculu<br>s |
| 1 | 1.00 | 1 | 1 | 0 | 0      | 0 | 0 | -0.001 | t | 56807 | SAHGTSTG<br>VRGP           | Mus<br>musculu<br>s              |
| 1 | 1.00 | 1 | 1 | 0 | 0      | 0 | 0 | -0.001 | t | 38522 | LPHSNL                     | Homo<br>sapiens                  |
| 1 | 1.00 | 1 | 1 | 0 | 0      | 0 | 0 | -0.001 | t | 56734 | SADNNNS<br>EYSWT           | Mus<br>musculu<br>s              |

|   |      |   |   |   |        |   |   |        |   |       |                              |                       |
|---|------|---|---|---|--------|---|---|--------|---|-------|------------------------------|-----------------------|
| 1 | 1.00 | 1 | 1 | 0 | -0.003 | 0 | 0 | -0.001 | t | 40563 | LVRMKRA                      | Oryctolagus cuniculus |
| 1 | 1.00 | 1 | 1 | 0 | 0      | 0 | 0 | -0.001 | t | 43317 | NATAEGR<br>AINRRVE           | Mus musculus          |
| 1 | 1.00 | 1 | 1 | 0 | 0      | 0 | 0 | -0.001 | t | 49455 | PSPEAHVP<br>PPYVEPTT<br>TQCF | Homo sapiens          |
| 1 | 1.00 | 1 | 1 | 0 | 0      | 0 | 0 | -0.001 | t | 40563 | LVRMKRA                      | Mus musculus          |
| 1 | 1.00 | 1 | 1 | 0 | 0      | 0 | 0 | -0.001 | t | 56397 | RVRGLYLP<br>AGGS             | Mus musculus          |
| 1 | 1.00 | 1 | 1 | 0 | 0      | 0 | 0 | -0.001 | t | 39808 | LTANTKS<br>MALSG             | Oryctolagus cuniculus |
| 1 | 1.00 | 1 | 1 | 0 | 0      | 0 | 0 | -0.001 | t | 59387 | SLPGQTKIL<br>AKVfyGEN        | Homo sapiens          |
| 1 | 1.00 | 1 | 1 | 0 | 0      | 0 | 0 | -0.001 | t | 54393 | RKLWCHH<br>FC                | Capra hircus          |
| 1 | 1.00 | 1 | 1 | 0 | 0      | 0 | 0 | -0.001 | t | 56022 | RTCAHPGE<br>H                | Oryctolagus cuniculus |
| 1 | 1.00 | 1 | 1 | 0 | 0      | 0 | 0 | -0.001 | t | 57880 | SFRGSAQG<br>IEGS             | Homo sapiens          |
| 1 | 1.00 | 1 | 1 | 0 | 0      | 0 | 0 | -0.001 | t | 50930 | QGPgapQ<br>GPGAP             | Mus musculus          |
| 1 | 1.00 | 1 | 1 | 0 | 0      | 0 | 0 | -0.001 | t | 41232 | MDIDPYKE<br>FG               | Mus musculus          |
| 1 | 1.00 | 1 | 1 | 0 | 0      | 0 | 0 | -0.001 | t | 53195 | RARGRGR<br>GRGEKRP           | Homo sapiens          |

|   |      |   |   |   |        |   |   |        |   |       |                     |                       |
|---|------|---|---|---|--------|---|---|--------|---|-------|---------------------|-----------------------|
| 1 | 1.00 | 1 | 1 | 0 | 0      | 0 | 0 | -0.001 | t | 51258 | QKTAASY             | Homo sapiens          |
| 1 | 1.00 | 1 | 1 | 0 | 0      | 0 | 0 | -0.001 | t | 56022 | RTCAHPGEH           | Mus musculus          |
| 1 | 1.00 | 1 | 1 | 0 | 0      | 0 | 0 | -0.001 | t | 37372 | LLGTLL              | Mus musculus          |
| 1 | 1.00 | 1 | 1 | 0 | 0      | 0 | 0 | -0.001 | t | 58409 | SHSAFNMFDGVGPP      | Homo sapiens          |
| 1 | 1.00 | 1 | 1 | 0 | 0.004  | 0 | 0 | -0.001 | t | 49680 | PTKEFFREA           | Mus musculus          |
| 1 | 1.00 | 1 | 1 | 0 | 0      | 0 | 0 | -0.001 | t | 43160 | NAGVLTCSLSKR        | Mus musculus          |
| 1 | 1.00 | 1 | 1 | 0 | 0      | 0 | 0 | -0.001 | t | 55726 | RRRSQSPRRRR         | Mus musculus          |
| 1 | 1.00 | 1 | 1 | 0 | 0      | 0 | 0 | -0.001 | t | 43191 | NAKATYEAALKQYEADLAA | Mus musculus          |
| 1 | 1.00 | 1 | 1 | 0 | 0      | 0 | 0 | -0.001 | t | 48876 | PPPQAPYQGY          | Mus musculus          |
| 1 | 1.00 | 1 | 1 | 0 | -0.003 | 0 | 0 | -0.001 | t | 45990 | NSSFNTTQGWHHPSQRLLF | Oryctolagus cuniculus |
| 1 | 1.00 | 1 | 1 | 0 | 0      | 0 | 0 | -0.001 | t | 57557 | SEMPQLPSEMPQLP      | Mus musculus          |
| 1 | 1.00 | 1 | 1 | 0 | 0      | 0 | 0 | -0.001 | t | 38522 | LPHSNL              | Rattus norvegicus     |
| 1 | 1.00 | 1 | 1 | 0 | 0      | 0 | 0 | -0.001 | t | 56937 | SAPPTRVR            | Oryctolagus cuniculus |
| 1 | 1.00 | 1 | 1 | 0 | 0.002  | 0 | 0 | -0.001 | t | 38522 | LPHSNL              | Rattus norvegicus     |

|   |      |   |   |   |   |   |   |        |   |       |                              |                                  |
|---|------|---|---|---|---|---|---|--------|---|-------|------------------------------|----------------------------------|
| 1 | 1.00 | 1 | 1 | 0 | 0 | 0 | 0 | -0.001 | t | 50930 | QGP GAPQ<br>GPGAP            | Mus<br>musculu<br>s              |
| 1 | 1.00 | 1 | 1 | 0 | 0 | 0 | 0 | -0.001 | t | 45990 | NSSSFNTT<br>QGWHHPS<br>QRLLF | Mus<br>musculu<br>s              |
| 1 | 1.00 | 1 | 1 | 0 | 0 | 0 | 0 | -0.001 | t | 38522 | LPHSNL                       | Oryctola<br>gus<br>cuniculu<br>s |
| 1 | 1.00 | 1 | 1 | 0 | 0 | 0 | 0 | -0.001 | t | 45990 | NSSSFNTT<br>QGWHHPS<br>QRLLF | Oryctola<br>gus<br>cuniculu<br>s |
| 1 | 1.00 | 1 | 1 | 0 | 0 | 0 | 0 | -0.001 | t | 41571 | MGFGLFD                      | Homo<br>sapiens                  |
| 1 | 1.00 | 1 | 1 | 0 | 0 | 0 | 0 | -0.001 | t | 39788 | LTAELKIYS<br>VIQAEINK<br>HL  | Mus<br>musculu<br>s              |
| 1 | 1.00 | 1 | 1 | 0 | 0 | 0 | 0 | -0.001 | t | 57743 | SFDVPSKQ<br>PTIDIDL          | Oryctola<br>gus<br>cuniculu<br>s |
| 1 | 1.00 | 1 | 1 | 0 | 0 | 0 | 0 | -0.001 | t | 41571 | MGFGLFD                      | Homo<br>sapiens                  |
| 1 | 1.00 | 1 | 1 | 0 | 0 | 0 | 0 | -0.001 | t | 53166 | RANDKGS<br>VISLARLTE<br>ELKT | Mus<br>musculu<br>s              |
| 1 | 1.00 | 1 | 1 | 0 | 0 | 0 | 0 | -0.001 | t | 41169 | MAVPAFS<br>DIAKSAND<br>LLNKD | Oryctola<br>gus<br>cuniculu<br>s |
| 1 | 1.00 | 1 | 1 | 0 | 0 | 0 | 0 | -0.001 | t | 46317 | NTWTTCQ<br>SIAFPSK           | Mus<br>musculu<br>s              |
| 1 | 1.00 | 1 | 1 | 0 | 0 | 0 | 0 | -0.001 | t | 48732 | PPA                          | Mus<br>musculu<br>s              |
| 1 | 1.00 | 1 | 1 | 0 | 0 | 0 | 0 | -0.001 | t | 43317 | NATAEGR<br>AINRRVE           | Mus<br>musculu<br>s              |
| 1 | 1.00 | 1 | 1 | 0 | 0 | 0 | 0 | -0.001 | t | 53878 | RGGPDDL<br>TAL               | Homo<br>sapiens                  |
| 1 | 1.00 | 1 | 1 | 0 | 0 | 0 | 0 | -0.001 | t | 57299 | SDTRGDP<br>VFNLPFQ           | Mus<br>musculu<br>s              |

|   |      |   |   |   |   |   |   |        |   |       |                              |                                  |
|---|------|---|---|---|---|---|---|--------|---|-------|------------------------------|----------------------------------|
| 1 | 1.00 | 1 | 1 | 0 | 0 | 0 | 0 | -0.001 | t | 48933 | PPTAPPLL<br>PHSNL            | Homo<br>sapiens                  |
| 1 | 1.00 | 1 | 1 | 0 | 0 | 0 | 0 | -0.001 | t | 58422 | SHSVTKSL<br>RVFGGPP          | Homo<br>sapiens                  |
| 1 | 1.00 | 1 | 1 | 0 | 0 | 0 | 0 | -0.001 | t | 50929 | QGPGAP                       | Mus<br>musculu<br>s              |
| 1 | 1.00 | 1 | 1 | 0 | 0 | 0 | 0 | -0.001 | t | 43191 | NAKATYEA<br>ALKQYEAD<br>LAA  | Mus<br>musculu<br>s              |
| 1 | 1.00 | 1 | 1 | 0 | 0 | 0 | 0 | -0.001 | t | 37660 | LLPHSNLD<br>HILEPSIPW<br>KSK | Mus<br>musculu<br>s              |
| 1 | 1.00 | 1 | 1 | 0 | 0 | 0 | 0 | -0.001 | t | 52016 | QQEVDYII<br>DHVDQHN          | Oryctola<br>gus<br>cuniculu<br>s |
| 1 | 1.00 | 1 | 1 | 0 | 0 | 0 | 0 | -0.001 | t | 56719 | SAAYTAFG<br>IANLFRVG         | Homo<br>sapiens                  |
| 1 | 1.00 | 1 | 1 | 0 | 0 | 0 | 0 | -0.001 | t | 57654 | SETQKSQN<br>Y                | Mus<br>musculu<br>s              |
| 1 | 1.00 | 1 | 1 | 0 | 0 | 0 | 0 | -0.001 | t | 43246 | NANPNAN<br>PNANPNA<br>NP     | Mus<br>musculu<br>s              |
| 1 | 1.00 | 1 | 1 | 0 | 0 | 0 | 0 | -0.001 | t | 43246 | NANPNAN<br>PNANPNA<br>NP     | Mus<br>musculu<br>s              |
| 1 | 1.00 | 1 | 1 | 0 | 0 | 0 | 0 | -0.001 | t | 43246 | NANPNAN<br>PNANPNA<br>NP     | Mus<br>musculu<br>s              |
| 1 | 1.00 | 1 | 1 | 0 | 0 | 0 | 0 | -0.001 | t | 55073 | RNTNRRP<br>QDVKFPG<br>GGQIVG | Homo<br>sapiens                  |
| 1 | 1.00 | 1 | 1 | 0 | 0 | 0 | 0 | -0.001 | t | 58388 | SHLVEALY<br>LVCGERG          | Mus<br>musculu<br>s              |
| 1 | 1.00 | 1 | 1 | 0 | 0 | 0 | 0 | -0.001 | t | 58207 | SGQARVLY<br>SEFINAL          | Mus<br>musculu<br>s              |

|   |      |   |   |   |        |   |   |        |   |       |                              |                                  |
|---|------|---|---|---|--------|---|---|--------|---|-------|------------------------------|----------------------------------|
| 1 | 1.00 | 1 | 1 | 0 | 0      | 0 | 0 | -0.001 | t | 54786 | RLTENTEP<br>LL               | Homo<br>sapiens                  |
| 1 | 1.00 | 1 | 1 | 0 | 0      | 0 | 0 | -0.001 | t | 50929 | QGPGAP                       | Mus<br>musculu<br>s              |
| 1 | 1.00 | 1 | 1 | 0 | 0      | 0 | 0 | -0.001 | t | 55994 | RSVSKEEP<br>GM               | Homo<br>sapiens                  |
| 1 | 1.00 | 1 | 1 | 0 | 0      | 0 | 0 | -0.001 | t | 39024 | LQYTPSW<br>MLV               | Mus<br>musculu<br>s              |
| 1 | 1.00 | 1 | 1 | 0 | 0      | 0 | 0 | -0.001 | t | 55799 | RSAPRITF<br>G                | Homo<br>sapiens                  |
| 1 | 1.00 | 1 | 1 | 0 | 0      | 0 | 0 | -0.001 | t | 41183 | MCAVRDP<br>AFSRSRSL          | Mus<br>musculu<br>s              |
| 1 | 1.00 | 1 | 1 | 0 | 0      | 0 | 0 | -0.001 | t | 41537 | MFSGGGG<br>PLSPGGKS          | Mus<br>musculu<br>s              |
| 1 | 1.00 | 1 | 1 | 0 | 0      | 0 | 0 | -0.001 | t | 57542 | SELSQLS                      | Mus<br>musculu<br>s              |
| 1 | 1.00 | 1 | 1 | 0 | 0      | 0 | 0 | -0.001 | t | 57542 | SELSQLS                      | Mus<br>musculu<br>s              |
| 1 | 1.00 | 1 | 1 | 0 | 0      | 0 | 0 | -0.001 | t | 58931 | SKQPTIDID<br>LCDICT          | Oryctola<br>gus<br>cuniculu<br>s |
| 1 | 1.00 | 1 | 1 | 0 | 0      | 0 | 0 | -0.001 | t | 50930 | QGPGAPQ<br>GPGAP             | Mus<br>musculu<br>s              |
| 1 | 1.00 | 1 | 1 | 0 | 0      | 0 | 0 | -0.001 | t | 51775 | QNTRNIVP<br>VSIVSR           | Mus<br>musculu<br>s              |
| 1 | 1.00 | 1 | 1 | 0 | 0      | 0 | 0 | -0.001 | t | 56306 | RVHVSKEE<br>QYYDYED<br>ATFE  | Mus<br>musculu<br>s              |
| 1 | 1.00 | 1 | 1 | 0 | -0.003 | 0 | 0 | -0.001 | t | 56306 | RVHVSKEE<br>QYYDYED<br>ATFE  | Oryctola<br>gus<br>cuniculu<br>s |
| 1 | 1.00 | 1 | 1 | 0 | 0      | 0 | 0 | -0.001 | t | 45390 | NPLGLKRG<br>IEKAVEK          | Rattus<br>norvegic<br>us         |
| 1 | 1.00 | 1 | 1 | 0 | 0      | 0 | 0 | -0.001 | t | 47986 | PISLVNLST<br>ASSAPPTR<br>VRR | Mus<br>musculu<br>s              |



|   |      |   |   |   |        |   |   |        |   |       |                              |                                  |
|---|------|---|---|---|--------|---|---|--------|---|-------|------------------------------|----------------------------------|
| 1 | 1.00 | 1 | 1 | 0 | 0      | 0 | 0 | -0.001 | t | 45571 | NQITSALS<br>TQ               | Mus<br>musculu<br>s              |
| 1 | 1.00 | 1 | 1 | 0 | 0      | 0 | 0 | -0.001 | t | 46551 | NWNFDFG                      | Mus<br>musculu<br>s              |
| 1 | 1.00 | 1 | 1 | 0 | 0      | 0 | 0 | -0.001 | t | 53014 | QYNTGNF<br>SDGFYPFI<br>N     | Gallus<br>gallus                 |
| 1 | 1.00 | 1 | 1 | 0 | 0      | 0 | 0 | -0.001 | t | 49629 | PTGDRHK<br>QPLVAPAK<br>QLL   | Mus<br>musculu<br>s              |
| 1 | 1.00 | 1 | 1 | 0 | -0.003 | 0 | 0 | -0.001 | t | 47986 | PISLVNLST<br>ASSAPPTR<br>VRR | Oryctola<br>gus<br>cuniculu<br>s |
| 1 | 1.00 | 1 | 1 | 0 | 0      | 0 | 0 | -0.001 | t | 56699 | SAAFYYRV                     | Mus<br>musculu<br>s              |
| 1 | 1.00 | 1 | 1 | 0 | 0      | 0 | 0 | -0.001 | t | 43317 | NATAEGR<br>AINRRVE           | Mus<br>musculu<br>s              |
| 1 | 1.00 | 1 | 1 | 0 | 0      | 0 | 0 | -0.001 | t | 46550 | NWNFD                        | Mus<br>musculu<br>s              |
| 1 | 1.00 | 1 | 1 | 0 | 0      | 0 | 0 | -0.001 | t | 46795 | PAFLGCSS<br>RFSGSFSG<br>VEP  | Mus<br>musculu<br>s              |
| 1 | 1.00 | 1 | 1 | 0 | 0      | 0 | 0 | -0.001 | t | 45667 | NRDQGRK<br>PTPPTPP           | Oryctola<br>gus<br>cuniculu<br>s |
| 1 | 1.00 | 1 | 1 | 0 | 0      | 0 | 0 | -0.001 | t | 46792 | PAFGANS<br>NNPDWDF<br>NP     | Mus<br>musculu<br>s              |
| 1 | 1.00 | 1 | 1 | 0 | 0      | 0 | 0 | -0.001 | t | 46792 | PAFGANS<br>NNPDWDF<br>NP     | Homo<br>sapiens                  |
| 1 | 1.00 | 1 | 1 | 0 | 0      | 0 | 0 | -0.001 | t | 47984 | PISLLFNEK<br>EADDNDH<br>EPQI | Homo<br>sapiens                  |

|   |      |   |   |   |        |   |   |        |   |       |                              |                                  |
|---|------|---|---|---|--------|---|---|--------|---|-------|------------------------------|----------------------------------|
| 1 | 1.00 | 1 | 1 | 0 | 0      | 0 | 0 | -0.001 | t | 39070 | LREGVTLG<br>VGASFDT<br>QKL   | Oryctola<br>gus<br>cuniculu<br>s |
| 1 | 1.00 | 1 | 1 | 0 | 0      | 0 | 0 | -0.001 | t | 44616 | NKVIWDR<br>DWMYP             | Mus<br>musculu<br>s              |
| 1 | 1.00 | 1 | 1 | 0 | -0.003 | 0 | 0 | -0.001 | t | 53357 | RDGQSVIG<br>ACASPYEG<br>RYR  | Oryctola<br>gus<br>cuniculu<br>s |
| 1 | 1.00 | 1 | 1 | 0 | 0      | 0 | 0 | -0.001 | t | 54553 | RLGDTDLI<br>AEVEHDY          | Homo<br>sapiens                  |
| 1 | 1.00 | 1 | 1 | 0 | 0      | 0 | 0 | -0.001 | t | 53357 | RDGQSVIG<br>ACASPYEG<br>RYR  | Mus<br>musculu<br>s              |
| 1 | 1.00 | 1 | 1 | 0 | -0.004 | 0 | 0 | -0.001 | t | 51233 | QKPLK                        | Mus<br>musculu<br>s              |
| 1 | 1.00 | 1 | 1 | 0 | 0      | 0 | 0 | -0.001 | t | 41870 | MKNYLSF<br>GMFALL            | Mus<br>musculu<br>s              |
| 1 | 1.00 | 1 | 1 | 0 | 0.004  | 0 | 0 | -0.001 | t | 51233 | QKPLK                        | Mus<br>musculu<br>s              |
| 1 | 1.00 | 1 | 1 | 0 | 0      | 0 | 0 | -0.001 | t | 37660 | LLPHSNLD<br>HILEPSIPW<br>KSK | Homo<br>sapiens                  |
| 1 | 1.00 | 1 | 1 | 0 | 0      | 0 | 0 | -0.001 | t | 48598 | PNANPNA                      | Mus<br>musculu<br>s              |
| 1 | 1.00 | 1 | 1 | 0 | 0      | 0 | 0 | -0.001 | t | 42698 | MSTNPKP<br>QRKTKRNT<br>NRR   | Homo<br>sapiens                  |
| 1 | 1.00 | 1 | 1 | 0 | 0      | 0 | 0 | -0.001 | t | 59593 | SLYELTH                      | Homo<br>sapiens                  |
| 1 | 1.00 | 1 | 1 | 0 | 0      | 0 | 0 | -0.001 | t | 55260 | RPPNAP                       | Mus<br>musculu<br>s              |

|   |      |   |   |   |        |   |   |        |   |       |                             |                     |
|---|------|---|---|---|--------|---|---|--------|---|-------|-----------------------------|---------------------|
| 1 | 1.00 | 1 | 1 | 0 | 0      | 0 | 0 | -0.001 | t | 51847 | QPGVDIIE<br>GPVKNVA<br>VPLY | Homo<br>sapiens     |
| 1 | 1.00 | 1 | 1 | 0 | 0      | 0 | 0 | -0.001 | t | 39092 | LRGDLQVL<br>AQKVARTL        | Mus<br>musculu<br>s |
| 1 | 1.00 | 1 | 1 | 0 | 0      | 0 | 0 | -0.001 | t | 48331 | PLGFFPDH<br>QLDP            | Homo<br>sapiens     |
| 1 | 1.00 | 1 | 1 | 0 | 0      | 0 | 0 | -0.001 | t | 59982 | SPAPERRG<br>YSGYDVPD<br>Y   | Mus<br>musculu<br>s |
| 1 | 1.00 | 1 | 1 | 0 | 0      | 0 | 0 | -0.001 | t | 46443 | NVPEKQT                     | Mus<br>musculu<br>s |
| 1 | 1.00 | 1 | 1 | 0 | 0      | 0 | 0 | -0.001 | t | 38304 | LNPKTNK<br>WEDK             | Homo<br>sapiens     |
| 1 | 1.00 | 1 | 1 | 0 | 0      | 0 | 0 | -0.001 | t | 43481 | NDLALPW<br>KHEGAQN<br>WNNAR | Mus<br>musculu<br>s |
| 1 | 1.00 | 1 | 1 | 0 | 0      | 0 | 0 | -0.001 | t | 57062 | SAYTPAYY<br>TKDTNNN<br>LTL  | Homo<br>sapiens     |
| 1 | 1.00 | 1 | 1 | 0 | -0.002 | 0 | 0 | -0.001 | t | 57062 | SAYTPAYY<br>TKDTNNN<br>LTL  | Mus<br>musculu<br>s |
| 1 | 1.00 | 1 | 1 | 0 | 0      | 0 | 0 | -0.001 | t | 47289 | PEGRTWA<br>Q                | Homo<br>sapiens     |
| 1 | 1.00 | 1 | 1 | 0 | 0      | 0 | 0 | -0.001 | t | 50508 | QDPRVRG<br>LYFPAGG          | Mus<br>musculu<br>s |
| 1 | 1.00 | 1 | 1 | 0 | 0      | 0 | 0 | -0.001 | t | 43576 | NEDNEKLR<br>KPKHKCLK<br>QPG | Mus<br>musculu<br>s |
| 1 | 1.00 | 1 | 1 | 0 | 0      | 0 | 0 | -0.001 | t | 55671 | RRPFNIGI<br>NNQQ            | Homo<br>sapiens     |
| 1 | 1.00 | 1 | 1 | 0 | 0      | 0 | 0 | -0.001 | t | 56701 | SAAHTAFG<br>IANLFRMG        | Homo<br>sapiens     |

|   |      |   |   |   |        |   |   |        |   |       |                              |                                  |
|---|------|---|---|---|--------|---|---|--------|---|-------|------------------------------|----------------------------------|
| 1 | 1.00 | 1 | 1 | 0 | 0      | 0 | 0 | -0.001 | t | 50508 | QDPRVRG<br>LYFPAGG           | Mus<br>musculu<br>s              |
| 1 | 1.00 | 1 | 1 | 0 | 0      | 0 | 0 | -0.001 | t | 47565 | PFSPDGKP<br>CTPP             | Homo<br>sapiens                  |
| 1 | 1.00 | 1 | 1 | 0 | 0      | 0 | 0 | -0.001 | t | 52124 | QQQPP                        | Homo<br>sapiens                  |
| 1 | 1.00 | 1 | 1 | 0 | 0      | 0 | 0 | -0.001 | t | 38810 | LQAMRKY<br>SPFRNGY<br>MEPTLG | Homo<br>sapiens                  |
| 1 | 1.00 | 1 | 1 | 0 | 0      | 0 | 0 | -0.001 | t | 48993 | PQEQITQH<br>GSPYGRCA<br>NK   | Mus<br>musculu<br>s              |
| 1 | 1.00 | 1 | 1 | 0 | -0.003 | 0 | 0 | -0.001 | t | 48993 | PQEQITQH<br>GSPYGRCA<br>NK   | Oryctola<br>gus<br>cuniculu<br>s |
| 1 | 1.00 | 1 | 1 | 0 | 0      | 0 | 0 | -0.001 | t | 39169 | LRPTFDTR<br>LMRLEDE<br>MKEGR | Mus<br>musculu<br>s              |
| 1 | 1.00 | 1 | 1 | 0 | 0      | 0 | 0 | -0.001 | t | 37171 | LLDPSFDY<br>FQLYTT           | Mus<br>musculu<br>s              |
| 1 | 1.00 | 1 | 1 | 0 | 0      | 0 | 0 | -0.001 | t | 47201 | PDSDPQIP<br>PPYVEPTA<br>PQVL | Homo<br>sapiens                  |
| 1 | 1.00 | 1 | 1 | 0 | 0      | 0 | 0 | -0.001 | t | 38325 | LNRADIL                      | Homo<br>sapiens                  |
| 1 | 1.00 | 1 | 1 | 0 | 0      | 0 | 0 | -0.001 | t | 41375 | MEILGIAIN<br>RYNGLTLR<br>G   | Mus<br>musculu<br>s              |
| 1 | 1.00 | 1 | 1 | 0 | 0      | 0 | 0 | -0.001 | t | 54058 | RHKQKIVA<br>PVKQTL           | Ovis<br>aries                    |
| 1 | 1.00 | 1 | 1 | 0 | 0      | 0 | 0 | -0.001 | t | 41375 | MEILGIAIN<br>RYNGLTLR<br>G   | Mus<br>musculu<br>s              |

|   |      |   |   |   |        |   |   |        |   |       |                     |                          |
|---|------|---|---|---|--------|---|---|--------|---|-------|---------------------|--------------------------|
| 1 | 1.00 | 1 | 1 | 0 | 0      | 0 | 0 | -0.001 | t | 39167 | LRPTFDTRL<br>LM     | Mus<br>musculus          |
| 1 | 1.00 | 1 | 1 | 0 | -0.003 | 0 | 0 | -0.001 | t | 54058 | RHKQKIVAPVKQTL      | Oryctolagus<br>cuniculus |
| 1 | 1.00 | 1 | 1 | 0 | 0      | 0 | 0 | -0.001 | t | 55185 | RPKHPIKH<br>QG      | Homo<br>sapiens          |
| 1 | 1.00 | 1 | 1 | 0 | 0      | 0 | 0 | -0.001 | t | 51371 | QLINTNGSWHIN        | Rattus<br>norvegicus     |
| 1 | 1.00 | 1 | 1 | 0 | 0      | 0 | 0 | -0.001 | t | 51371 | QLINTNGSWHIN        | Mus<br>musculus          |
| 1 | 1.00 | 1 | 1 | 0 | 0      | 0 | 0 | -0.001 | t | 42475 | MRKTKLAPTVAHGV<br>F | Bos<br>taurus            |
| 1 | 1.00 | 1 | 1 | 0 | 0      | 0 | 0 | -0.001 | t | 52420 | QSRGEAR             | Mus<br>musculus          |
| 1 | 1.00 | 1 | 1 | 0 | 0      | 0 | 0 | -0.001 | t | 58944 | SKTDNLT             | Homo<br>sapiens          |
| 1 | 1.00 | 1 | 1 | 0 | 0      | 0 | 0 | -0.001 | t | 51371 | QLINTNGSWHIN        | Mus<br>musculus          |
| 1 | 1.00 | 1 | 1 | 0 | 0      | 0 | 0 | -0.001 | t | 42475 | MRKTKLAPTVAHGV<br>F | Mus<br>musculus          |
| 1 | 1.00 | 1 | 1 | 0 | 0      | 0 | 0 | -0.001 | t | 56185 | RTTADRQTA           | Oryctolagus<br>cuniculus |
| 1 | 1.00 | 1 | 1 | 0 | 0      | 0 | 0 | -0.001 | t | 38730 | LPTLARSFII<br>CIQMI | Homo<br>sapiens          |
| 1 | 1.00 | 1 | 1 | 0 | -0.003 | 0 | 0 | -0.001 | t | 46960 | PASTTNKDKL          | Oryctolagus<br>cuniculus |
| 1 | 1.00 | 1 | 1 | 0 | 0      | 0 | 0 | -0.001 | t | 36958 | LKMADPNRFRGKD       | Mus<br>musculus          |

|   |      |   |   |   |        |   |   |        |   |       |                              |                 |
|---|------|---|---|---|--------|---|---|--------|---|-------|------------------------------|-----------------|
| 1 | 1.00 | 1 | 1 | 0 | 0      | 0 | 0 | -0.001 | t | 46443 | NVPEKQT                      | Mus<br>musculus |
| 1 | 1.00 | 1 | 1 | 0 | 0      | 0 | 0 | -0.001 | t | 51371 | QLINTNGS<br>WHIN             | Mus<br>musculus |
| 1 | 1.00 | 1 | 1 | 0 | 0      | 0 | 0 | -0.001 | t | 36958 | LKMADPN<br>RFRGKD            | Mus<br>musculus |
| 1 | 1.00 | 1 | 1 | 0 | 0      | 0 | 0 | -0.001 | t | 39164 | LRPGPVSQ<br>PYHHWDT<br>DK    | Homo<br>sapiens |
| 1 | 1.00 | 1 | 1 | 0 | 0      | 0 | 0 | -0.001 | t | 58371 | SHITSYPAY<br>FW              | Mus<br>musculus |
| 1 | 1.00 | 1 | 1 | 0 | 0      | 0 | 0 | -0.001 | t | 48627 | PNEPDDAL<br>AMRIIRI          | Mus<br>musculus |
| 1 | 1.00 | 1 | 1 | 0 | 0      | 0 | 0 | -0.001 | t | 46894 | PAPQAPY<br>QGY               | Mus<br>musculus |
| 1 | 1.00 | 1 | 1 | 0 | 0      | 0 | 0 | -0.001 | t | 55174 | RPIDDFDQ<br>GWGPITY          | Homo<br>sapiens |
| 1 | 1.00 | 1 | 1 | 0 | 0      | 0 | 0 | -0.001 | t | 51371 | QLINTNGS<br>WHIN             | Mus<br>musculus |
| 1 | 1.00 | 1 | 1 | 0 | 0      | 0 | 0 | -0.001 | t | 53355 | RDGQLTIK<br>AERTEQKD<br>FDGR | Mus<br>musculus |
| 1 | 1.00 | 1 | 1 | 0 | 0      | 0 | 0 | -0.001 | t | 51371 | QLINTNGS<br>WHIN             | Mus<br>musculus |
| 1 | 1.00 | 1 | 1 | 0 | 0      | 0 | 0 | -0.001 | t | 42493 | MRQLDTN<br>VER               | Homo<br>sapiens |
| 1 | 1.00 | 1 | 1 | 0 | 0      | 0 | 0 | -0.001 | t | 50508 | QDPRVRG<br>LYFPAGG           | Mus<br>musculus |
| 1 | 1.00 | 1 | 1 | 0 | -0.002 | 0 | 0 | -0.001 | t | 45190 | NNNLTLVP<br>AVVGKPG<br>SDV   | Mus<br>musculus |
| 1 | 1.00 | 1 | 1 | 0 | 0      | 0 | 0 | -0.001 | t | 50508 | QDPRVRG<br>LYFPAGG           | Mus<br>musculus |
| 1 | 1.00 | 1 | 1 | 0 | 0      | 0 | 0 | -0.001 | t | 41204 | MCQCQVK<br>YGTEFCKK<br>RLA   | Mus<br>musculus |

|   |      |   |   |   |   |   |   |        |   |       |                    |                                  |
|---|------|---|---|---|---|---|---|--------|---|-------|--------------------|----------------------------------|
| 1 | 1.00 | 1 | 1 | 0 | 0 | 0 | 0 | -0.001 | t | 46859 | PALTAVET<br>GATNPL | Homo<br>sapiens                  |
| 1 | 1.00 | 1 | 1 | 0 | 0 | 0 | 0 | -0.001 | t | 50508 | QDPRVRG<br>LYFPAGG | Mus<br>musculu<br>s              |
| 1 | 1.00 | 1 | 1 | 0 | 0 | 0 | 0 | -0.001 | t | 50222 | QACKGKIQ<br>ALCEN  | Mus<br>musculu<br>s              |
| 1 | 1.00 | 1 | 1 | 0 | 0 | 0 | 0 | -0.001 | t | 37627 | LLNQTARA<br>FPDCA  | Oryctola<br>gus<br>cuniculu<br>s |
| 1 | 1.00 | 1 | 1 | 0 | 0 | 0 | 0 | -0.001 | t | 43242 | NANPNAN<br>PNANP   | Mus<br>musculu<br>s              |
| 1 | 1.00 | 1 | 1 | 0 | 0 | 0 | 0 | -0.001 | t | 43242 | NANPNAN<br>PNANP   | Mus<br>musculu<br>s              |
| 1 | 1.00 | 1 | 1 | 0 | 0 | 0 | 0 | -0.001 | t | 55641 | RRLGRQTY<br>DNES   | Mus<br>musculu<br>s              |
| 1 | 1.00 | 1 | 1 | 0 | 0 | 0 | 0 | -0.001 | t | 46443 | NVPEKQT            | Mus<br>musculu<br>s              |
| 1 | 1.00 | 1 | 1 | 0 | 0 | 0 | 0 | -0.001 | t | 43242 | NANPNAN<br>PNANP   | Mus<br>musculu<br>s              |
| 1 | 1.00 | 1 | 1 | 0 | 0 | 0 | 0 | -0.001 | t | 43242 | NANPNAN<br>PNANP   | Mus<br>musculu<br>s              |
| 1 | 1.00 | 1 | 1 | 0 | 0 | 0 | 0 | -0.001 | t | 43242 | NANPNAN<br>PNANP   | Mus<br>musculu<br>s              |
| 1 | 1.00 | 1 | 1 | 0 | 0 | 0 | 0 | -0.001 | t | 43242 | NANPNAN<br>PNANP   | Mus<br>musculu<br>s              |
| 1 | 1.00 | 1 | 1 | 0 | 0 | 0 | 0 | -0.001 | t | 43242 | NANPNAN<br>PNANP   | Oryctola<br>gus<br>cuniculu<br>s |
| 1 | 1.00 | 1 | 1 | 0 | 0 | 0 | 0 | -0.001 | t | 43242 | NANPNAN<br>PNANP   | Mus<br>musculu<br>s              |

|   |      |   |   |   |   |   |   |        |   |       |                             |                       |
|---|------|---|---|---|---|---|---|--------|---|-------|-----------------------------|-----------------------|
| 1 | 1.00 | 1 | 1 | 0 | 0 | 0 | 0 | -0.001 | t | 46443 | NVPEKQT                     | Mus musculus          |
| 1 | 1.00 | 1 | 1 | 0 | 0 | 0 | 0 | -0.001 | t | 47598 | PFWVRGT<br>TW               | Homo sapiens          |
| 1 | 1.00 | 1 | 1 | 0 | 0 | 0 | 0 | -0.001 | t | 52094 | QQPP                        | Mus musculus          |
| 1 | 1.00 | 1 | 1 | 0 | 0 | 0 | 0 | -0.001 | t | 45279 | NNVDQI                      | Homo sapiens          |
| 1 | 1.00 | 1 | 1 | 0 | 0 | 0 | 0 | -0.001 | t | 48906 | PPRRVS                      | Mus musculus          |
| 1 | 1.00 | 1 | 1 | 0 | 0 | 0 | 0 | -0.001 | t | 50930 | QGPGAPQ<br>GPGAP            | Mus musculus          |
| 1 | 1.00 | 1 | 1 | 0 | 0 | 0 | 0 | -0.001 | t | 49534 | PSTPGERV<br>RH              | Homo sapiens          |
| 1 | 1.00 | 1 | 1 | 0 | 0 | 0 | 0 | -0.001 | t | 42475 | MRKTKLA<br>PTVAHG<br>VF     | Bos taurus            |
| 1 | 1.00 | 1 | 1 | 0 | 0 | 0 | 0 | -0.001 | t | 43730 | NEREDERT<br>LTKEYEDIV<br>LK | Oryctolagus cuniculus |
| 1 | 1.00 | 1 | 1 | 0 | 0 | 0 | 0 | -0.001 | t | 58388 | SHLVEALY<br>LVCGERG         | Mus musculus          |
| 1 | 1.00 | 1 | 1 | 0 | 0 | 0 | 0 | -0.001 | t | 56718 | SAAYATSS<br>FSSLFTRG        | Homo sapiens          |
| 1 | 1.00 | 1 | 1 | 0 | 0 | 0 | 0 | -0.001 | t | 52082 | QQPFP                       | Mus musculus          |
| 1 | 1.00 | 1 | 1 | 0 | 0 | 0 | 0 | -0.001 | t | 49629 | PTGDRHK<br>QPLVAPAK<br>QLL  | Mus musculus          |
| 1 | 1.00 | 1 | 1 | 0 | 0 | 0 | 0 | -0.001 | t | 55389 | RQAESSEA<br>MAAWSER<br>AGEA | Mus musculus          |



|   |      |   |   |   |        |   |   |        |   |       |                      |                       |
|---|------|---|---|---|--------|---|---|--------|---|-------|----------------------|-----------------------|
| 1 | 1.00 | 1 | 1 | 0 | 0      | 0 | 0 | -0.001 | t | 21763 | GPRLQPY              | Mus musculus          |
| 1 | 1.00 | 1 | 1 | 0 | 0      | 0 | 0 | -0.001 | t | 21763 | GPRLQPY              | Mus musculus          |
| 1 | 1.00 | 1 | 1 | 0 | 0      | 0 | 0 | -0.001 | t | 11055 | EAGKHSG              | Homo sapiens          |
| 1 | 1.00 | 1 | 1 | 0 | 0      | 0 | 0 | -0.001 | t | 10908 | DYKDDDDK             | Mus musculus          |
| 1 | 1.00 | 1 | 1 | 0 | 0      | 0 | 0 | -0.001 | t | 15468 | FDTGAFDPDWPA         | Mus musculus          |
| 1 | 1.00 | 1 | 1 | 0 | 0.002  | 0 | 0 | -0.001 | t | 21815 | GPVEDAITAAIGRVA      | Rattus norvegicus     |
| 1 | 1.00 | 1 | 1 | 0 | 0      | 0 | 0 | -0.001 | t | 28351 | IRNW                 | Mus musculus          |
| 1 | 1.00 | 1 | 1 | 0 | 0      | 0 | 0 | -0.001 | t | 14000 | ERHLTFT              | Homo sapiens          |
| 1 | 1.00 | 1 | 1 | 0 | 0      | 0 | 0 | -0.001 | t | 13961 | ERAGAMERAN           | Homo sapiens          |
| 1 | 1.00 | 1 | 1 | 0 | 0      | 0 | 0 | -0.001 | t | 18363 | FWRGDLVFDFQV         | Homo sapiens          |
| 1 | 1.00 | 1 | 1 | 0 | 0      | 0 | 0 | -0.001 | t | 31383 | KIPDPPQPDFPQLNSDWVPS | Oryctolagus cuniculus |
| 1 | 1.00 | 1 | 1 | 0 | 0      | 0 | 0 | -0.001 | t | 11309 | EDENTLQHAYPID        | Mus musculus          |
| 1 | 1.00 | 1 | 1 | 0 | -0.003 | 0 | 0 | -0.001 | t | 31383 | KIPDPPQPDFPQLNSDWVPS | Oryctolagus cuniculus |
| 1 | 1.00 | 1 | 1 | 0 | 0      | 0 | 0 | -0.001 | t | 31885 | KLKGFGAARV           | Homo sapiens          |
| 1 | 1.00 | 1 | 1 | 0 | 0      | 0 | 0 | -0.001 | t | 25146 | HWYISKPQ             | Mus musculus          |

|   |      |   |   |   |       |   |   |        |   |       |                              |                                  |
|---|------|---|---|---|-------|---|---|--------|---|-------|------------------------------|----------------------------------|
| 1 | 1.00 | 1 | 1 | 0 | 0     | 0 | 0 | -0.001 | t | 31383 | KIPDPPQP<br>DFPQLNSD<br>WVPS | Mus<br>musculu<br>s              |
| 1 | 1.00 | 1 | 1 | 0 | 0     | 0 | 0 | -0.001 | t | 24037 | HIDSQKKA<br>IERMK            | Oryctola<br>gus<br>cuniculu<br>s |
| 1 | 1.00 | 1 | 1 | 0 | 0     | 0 | 0 | -0.001 | t | 23599 | HCLGKWL<br>GHPDKF            | Mus<br>musculu<br>s              |
| 1 | 1.00 | 1 | 1 | 0 | 0     | 0 | 0 | -0.001 | t | 20667 | GKQPASD                      | Homo<br>sapiens                  |
| 1 | 1.00 | 1 | 1 | 0 | 0     | 0 | 0 | -0.001 | t | 11208 | EAVEAERA<br>GRGTG            | Mus<br>musculu<br>s              |
| 1 | 1.00 | 1 | 1 | 0 | 0     | 0 | 0 | -0.001 | t | 30780 | KFLVNGR<br>WID               | Homo<br>sapiens                  |
| 1 | 1.00 | 1 | 1 | 0 | 0     | 0 | 0 | -0.001 | t | 11208 | EAVEAERA<br>GRGTG            | Mus<br>musculu<br>s              |
| 1 | 1.00 | 1 | 1 | 0 | 0.002 | 0 | 0 | -0.001 | t | 21816 | GPVEESVE<br>RAMVRVA          | Rattus<br>norvegic<br>us         |
| 1 | 1.00 | 1 | 1 | 0 | 0     | 0 | 0 | -0.001 | t | 13624 | EPDKSII                      | Homo<br>sapiens                  |
| 1 | 1.00 | 1 | 1 | 0 | 0     | 0 | 0 | -0.001 | t | 20064 | GGVATY                       | Macaca                           |
| 1 | 1.00 | 1 | 1 | 0 | 0     | 0 | 0 | -0.001 | t | 25140 | HWSYGLR<br>PG                | Rattus<br>norvegic<br>us         |
| 1 | 1.00 | 1 | 1 | 0 | 0     | 0 | 0 | -0.001 | t | 15430 | FDMATNP                      | Homo<br>sapiens                  |
| 1 | 1.00 | 1 | 1 | 0 | 0     | 0 | 0 | -0.001 | t | 29812 | KAGSTVYA<br>VTAVTSIFS<br>VG  | Homo<br>sapiens                  |
| 1 | 1.00 | 1 | 1 | 0 | 0     | 0 | 0 | -0.001 | t | 13623 | EPDKMTT                      | Homo<br>sapiens                  |
| 1 | 1.00 | 1 | 1 | 0 | 0     | 0 | 0 | -0.001 | t | 36931 | LKLAT                        | Mus<br>musculu<br>s              |

|   |      |   |   |   |   |   |   |        |   |       |                           |                              |
|---|------|---|---|---|---|---|---|--------|---|-------|---------------------------|------------------------------|
| 1 | 1.00 | 1 | 1 | 0 | 0 | 0 | 0 | -0.001 | t | 36729 | LITNTIAGV                 | Mus<br>musculus              |
| 1 | 1.00 | 1 | 1 | 0 | 0 | 0 | 0 | -0.001 | t | 32841 | KPPTPPPE<br>PET           | Mus<br>musculus              |
| 1 | 1.00 | 1 | 1 | 0 | 0 | 0 | 0 | -0.001 | t | 14844 | EVPLGVAA<br>DANK          | Oryctola<br>gus<br>cuniculus |
| 1 | 1.00 | 1 | 1 | 0 | 0 | 0 | 0 | -0.001 | t | 12345 | EHKYSWK<br>S              | Mus<br>musculus              |
| 1 | 1.00 | 1 | 1 | 0 | 0 | 0 | 0 | -0.001 | t | 21823 | GPVLR                     | Mus<br>musculus              |
| 1 | 1.00 | 1 | 1 | 0 | 0 | 0 | 0 | -0.001 | t | 12632 | EKASVPGG<br>GDMGGM<br>DF  | Mus<br>musculus              |
| 1 | 1.00 | 1 | 1 | 0 | 0 | 0 | 0 | -0.001 | t | 30093 | KCTSDQDE<br>QFIPKGCS<br>K | Mus<br>musculus              |
| 1 | 1.00 | 1 | 1 | 0 | 0 | 0 | 0 | -0.001 | t | 27910 | IPKVPPGP<br>NITA          | Homo<br>sapiens              |
| 1 | 1.00 | 1 | 1 | 0 | 0 | 0 | 0 | -0.001 | t | 30093 | KCTSDQDE<br>QFIPKGCS<br>K | Mus<br>musculus              |
| 1 | 1.00 | 1 | 1 | 0 | 0 | 0 | 0 | -0.001 | t | 15417 | FDKVK                     | Mus<br>musculus              |
| 1 | 1.00 | 1 | 1 | 0 | 0 | 0 | 0 | -0.001 | t | 23616 | HDEGRQII<br>QFEE          | Mus<br>musculus              |
| 1 | 1.00 | 1 | 1 | 0 | 0 | 0 | 0 | -0.001 | t | 16123 | FHLPYNHN<br>WFAL          | Mus<br>musculus              |
| 1 | 1.00 | 1 | 1 | 0 | 0 | 0 | 0 | -0.001 | t | 36931 | LKLAT                     | Mus<br>musculus              |
| 1 | 1.00 | 1 | 1 | 0 | 0 | 0 | 0 | -0.001 | t | 36931 | LKLAT                     | Mus<br>musculus              |
| 1 | 1.00 | 1 | 1 | 0 | 0 | 0 | 0 | -0.001 | t | 15417 | FDKVK                     | Mus<br>musculus              |

|   |      |   |   |   |        |   |   |        |   |       |                            |                                  |
|---|------|---|---|---|--------|---|---|--------|---|-------|----------------------------|----------------------------------|
| 1 | 1.00 | 1 | 1 | 0 | 0      | 0 | 0 | -0.001 | t | 11081 | EAIPALTA<br>VETGHTSQ<br>V  | Oryctola<br>gus<br>cuniculu<br>s |
| 1 | 1.00 | 1 | 1 | 0 | 0      | 0 | 0 | -0.001 | t | 36931 | LKLAT                      | Mus<br>musculu<br>s              |
| 1 | 1.00 | 1 | 1 | 0 | 0      | 0 | 0 | -0.001 | t | 34498 | KYLEEPV                    | Homo<br>sapiens                  |
| 1 | 1.00 | 1 | 1 | 0 | 0      | 0 | 0 | -0.001 | t | 28537 | ISIKYDPRK<br>DSEVFA        | Mus<br>musculu<br>s              |
| 1 | 1.00 | 1 | 1 | 0 | 0      | 0 | 0 | -0.001 | t | 28537 | ISIKYDPRK<br>DSEVFA        | Mus<br>musculu<br>s              |
| 1 | 1.00 | 1 | 1 | 0 | 0      | 0 | 0 | -0.001 | t | 28075 | IPSTAFTDI<br>AWVRLPN<br>HY | Homo<br>sapiens                  |
| 1 | 1.00 | 1 | 1 | 0 | 0      | 0 | 0 | -0.001 | t | 12307 | EGVQQEG<br>AQQPA           | Mus<br>musculu<br>s              |
| 1 | 1.00 | 1 | 1 | 0 | 0      | 0 | 0 | -0.001 | t | 18177 | FVGLFTP                    | Homo<br>sapiens                  |
| 1 | 1.00 | 1 | 1 | 0 | 0      | 0 | 0 | -0.001 | t | 12542 | EIPDPVEA<br>GEEV           | Mus<br>musculu<br>s              |
| 1 | 1.00 | 1 | 1 | 0 | 0      | 0 | 0 | -0.001 | t | 11744 | EELFKEYK                   | Mus<br>musculu<br>s              |
| 1 | 1.00 | 1 | 1 | 0 | 0      | 0 | 0 | -0.001 | t | 25587 | IDIDLCDIC<br>TNTMDV        | Oryctola<br>gus<br>cuniculu<br>s |
| 1 | 1.00 | 1 | 1 | 0 | -0.002 | 0 | 0 | -0.001 | t | 12375 | EHWSYGL<br>RPG             | Mus<br>musculu<br>s              |
| 1 | 1.00 | 1 | 1 | 0 | 0      | 0 | 0 | -0.001 | t | 35063 | LCKIARSQ<br>DACIEFV        | Oryctola<br>gus<br>cuniculu<br>s |
| 1 | 1.00 | 1 | 1 | 0 | 0      | 0 | 0 | -0.001 | t | 11081 | EAIPALTA<br>VETGHTSQ<br>V  | Oryctola<br>gus<br>cuniculu<br>s |
| 1 | 1.00 | 1 | 1 | 0 | 0      | 0 | 0 | -0.001 | t | 23068 | GVNLEDP<br>ASRDL           | Homo<br>sapiens                  |

|   |      |   |   |   |        |   |   |        |   |       |                              |                       |
|---|------|---|---|---|--------|---|---|--------|---|-------|------------------------------|-----------------------|
| 1 | 1.00 | 1 | 1 | 0 | 0      | 0 | 0 | -0.001 | t | 28804 | ITADMYT                      | Homo sapiens          |
| 1 | 1.00 | 1 | 1 | 0 | 0      | 0 | 0 | -0.001 | t | 21723 | GPPAAGP<br>PAAGPPA<br>A      | Homo sapiens          |
| 1 | 1.00 | 1 | 1 | 0 | 0      | 0 | 0 | -0.001 | t | 24168 | HKYSWK                       | Mus musculus          |
| 1 | 1.00 | 1 | 1 | 0 | -0.003 | 0 | 0 | -0.001 | t | 11815 | EENVEENV<br>EENVEENV         | Oryctolagus cuniculus |
| 1 | 1.00 | 1 | 1 | 0 | 0      | 0 | 0 | -0.001 | t | 16396 | FKLEKEVA<br>E                | Mus musculus          |
| 1 | 1.00 | 1 | 1 | 0 | 0      | 0 | 0 | -0.001 | t | 22230 | GRVCLR                       | Mus musculus          |
| 1 | 1.00 | 1 | 1 | 0 | -0.004 | 0 | 0 | -0.001 | t | 13095 | ELIHVLHG<br>LYGMQVS<br>S     | Oryctolagus cuniculus |
| 1 | 1.00 | 1 | 1 | 0 | 0      | 0 | 0 | -0.001 | t | 32769 | KPKHKKLK<br>QPGDGNP          | Mus musculus          |
| 1 | 1.00 | 1 | 1 | 0 | 0      | 0 | 0 | -0.001 | t | 13572 | ENPVVHFF<br>KNIVTPR          | Mus musculus          |
| 1 | 1.00 | 1 | 1 | 0 | 0      | 0 | 0 | -0.001 | t | 22312 | GSENKRTG<br>ALGNLKN          | Mus musculus          |
| 1 | 1.00 | 1 | 1 | 0 | -0.006 | 0 | 0 | -0.001 | t | 12375 | EHWSYGL<br>RPG               | Canis lupus           |
| 1 | 1.00 | 1 | 1 | 0 | -0.003 | 0 | 0 | -0.001 | t | 23975 | HHAEMQ<br>NPVYLIPET<br>VPYIK | Oryctolagus cuniculus |
| 1 | 1.00 | 1 | 1 | 0 | 0      | 0 | 0 | -0.001 | t | 16397 | FKLKAIE                      | Homo sapiens          |
| 1 | 1.00 | 1 | 1 | 0 | 0      | 0 | 0 | -0.001 | t | 20097 | GGYGDGG<br>AHGGGYG<br>G      | Homo sapiens          |
| 1 | 1.00 | 1 | 1 | 0 | 0      | 0 | 0 | -0.001 | t | 30200 | KDLLEQKR<br>AAVDTYC          | Oryctolagus cuniculus |

|   |      |   |   |   |   |   |   |        |   |       |                              |                       |
|---|------|---|---|---|---|---|---|--------|---|-------|------------------------------|-----------------------|
| 1 | 1.00 | 1 | 1 | 0 | 0 | 0 | 0 | -0.001 | t | 11377 | EDLDGA                       | Mus musculus          |
| 1 | 1.00 | 1 | 1 | 0 | 0 | 0 | 0 | -0.001 | t | 11571 | EEEDDDM<br>GFGLFD            | Mus musculus          |
| 1 | 1.00 | 1 | 1 | 0 | 0 | 0 | 0 | -0.001 | t | 11571 | EEEDDDM<br>GFGLFD            | Mus musculus          |
| 1 | 1.00 | 1 | 1 | 0 | 0 | 0 | 0 | -0.001 | t | 13481 | ENHSPVNI<br>AHKL             | Mus musculus          |
| 1 | 1.00 | 1 | 1 | 0 | 0 | 0 | 0 | -0.001 | t | 23975 | HHAEMQ<br>NPVYLIPET<br>VPYIK | Mus musculus          |
| 1 | 1.00 | 1 | 1 | 0 | 0 | 0 | 0 | -0.001 | t | 21293 | GMLATVA<br>FNTFTDNV<br>DQR   | Mus musculus          |
| 1 | 1.00 | 1 | 1 | 0 | 0 | 0 | 0 | -0.001 | t | 30093 | KCTSDQDE<br>QFIPKGC<br>S K   | Mus musculus          |
| 1 | 1.00 | 1 | 1 | 0 | 0 | 0 | 0 | -0.001 | t | 34645 | KYYGNGV<br>TC                | Oryctolagus cuniculus |
| 1 | 1.00 | 1 | 1 | 0 | 0 | 0 | 0 | -0.001 | t | 21254 | GMDGTQL<br>DRW               | Mus musculus          |
| 1 | 1.00 | 1 | 1 | 0 | 0 | 0 | 0 | -0.001 | t | 15981 | FGGETFTP<br>DWMMEV           | Mus musculus          |
| 1 | 1.00 | 1 | 1 | 0 | 0 | 0 | 0 | -0.001 | t | 11571 | EEEDDDM<br>GFGLFD            | Mus musculus          |
| 1 | 1.00 | 1 | 1 | 0 | 0 | 0 | 0 | -0.001 | t | 35484 | LEGGSRGA<br>PGGGFVP<br>NLQ   | Homo sapiens          |
| 1 | 1.00 | 1 | 1 | 0 | 0 | 0 | 0 | -0.001 | t | 11571 | EEEDDDM<br>GFGLFD            | Homo sapiens          |
| 1 | 1.00 | 1 | 1 | 0 | 0 | 0 | 0 | -0.001 | t | 11571 | EEEDDDM<br>GFGLFD            | Homo sapiens          |
| 1 | 1.00 | 1 | 1 | 0 | 0 | 0 | 0 | -0.001 | t | 23069 | GVNLEDP<br>ASRDLVVS          | Oryctolagus cuniculus |

|   |      |   |   |   |       |   |   |        |   |       |                            |                                  |
|---|------|---|---|---|-------|---|---|--------|---|-------|----------------------------|----------------------------------|
| 1 | 1.00 | 1 | 1 | 0 | 0     | 0 | 0 | -0.001 | t | 13743 | EPRCPYVG<br>ADHFDPCP       | Oryctola<br>gus<br>cuniculu<br>s |
| 1 | 1.00 | 1 | 1 | 0 | 0     | 0 | 0 | -0.001 | t | 11571 | EEEDDDM<br>GFGFLD          | Mus<br>musculu<br>s              |
| 1 | 1.00 | 1 | 1 | 0 | 0     | 0 | 0 | -0.001 | t | 11571 | EEEDDDM<br>GFGFLD          | Homo<br>sapiens                  |
| 1 | 1.00 | 1 | 1 | 0 | 0     | 0 | 0 | -0.001 | t | 11571 | EEEDDDM<br>GFGFLD          | Homo<br>sapiens                  |
| 1 | 1.00 | 1 | 1 | 0 | 0     | 0 | 0 | -0.001 | t | 23032 | GVLAKDV<br>RFSQV           | Homo<br>sapiens                  |
| 1 | 1.00 | 1 | 1 | 0 | 0     | 0 | 0 | -0.001 | t | 23685 | HEGKAYFP<br>REGV           | Homo<br>sapiens                  |
| 1 | 1.00 | 1 | 1 | 0 | 0     | 0 | 0 | -0.001 | t | 12982 | ELDGSKNE<br>WGWSKSK        | Mus<br>musculu<br>s              |
| 1 | 1.00 | 1 | 1 | 0 | 0     | 0 | 0 | -0.001 | t | 23694 | HEIAWFTE<br>RSDKSYEH<br>QT | Mus<br>musculu<br>s              |
| 1 | 1.00 | 1 | 1 | 0 | 0     | 0 | 0 | -0.001 | t | 33294 | KSDNNVT                    | Homo<br>sapiens                  |
| 1 | 1.00 | 1 | 1 | 0 | 0     | 0 | 0 | -0.001 | t | 11411 | EDPASR                     | Mus<br>musculu<br>s              |
| 1 | 1.00 | 1 | 1 | 0 | 0     | 0 | 0 | -0.001 | t | 21625 | GPFYTSAP<br>Q              | Oryctola<br>gus<br>cuniculu<br>s |
| 1 | 1.00 | 1 | 1 | 0 | 0     | 0 | 0 | -0.001 | t | 12856 | EKQT                       | Mus<br>musculu<br>s              |
| 1 | 1.00 | 1 | 1 | 0 | 0.002 | 0 | 0 | -0.001 | t | 21807 | GPTEESVE<br>RAMGRVA        | Rattus<br>norvegic<br>us         |
| 1 | 1.00 | 1 | 1 | 0 | 0     | 0 | 0 | -0.001 | t | 32159 | KLSEGDLL<br>AEIETDK        | Homo<br>sapiens                  |
| 1 | 1.00 | 1 | 1 | 0 | 0     | 0 | 0 | -0.001 | t | 19067 | GDPEDL                     | Mus<br>musculu<br>s              |

|   |      |   |   |   |       |   |   |        |   |       |                             |                                  |
|---|------|---|---|---|-------|---|---|--------|---|-------|-----------------------------|----------------------------------|
| 1 | 1.00 | 1 | 1 | 0 | 0     | 0 | 0 | -0.001 | t | 11872 | EESDDDM<br>GFGFLD           | Homo<br>sapiens                  |
| 1 | 1.00 | 1 | 1 | 0 | 0     | 0 | 0 | -0.001 | t | 34165 | KVPPWAR<br>TA               | Mus<br>musculu<br>s              |
| 1 | 1.00 | 1 | 1 | 0 | 0     | 0 | 0 | -0.001 | t | 11872 | EESDDDM<br>GFGFLD           | Homo<br>sapiens                  |
| 1 | 1.00 | 1 | 1 | 0 | 0     | 0 | 0 | -0.001 | t | 36940 | LKLKSIVS<br>WAKKVL          | Oryctola<br>gus<br>cuniculu<br>s |
| 1 | 1.00 | 1 | 1 | 0 | 0     | 0 | 0 | -0.001 | t | 24315 | HLVEKGY                     | Homo<br>sapiens                  |
| 1 | 1.00 | 1 | 1 | 0 | 0     | 0 | 0 | -0.001 | t | 11872 | EESDDDM<br>GFGFLD           | Homo<br>sapiens                  |
| 1 | 1.00 | 1 | 1 | 0 | 0     | 0 | 0 | -0.001 | t | 36353 | LGWLWG                      | Mus<br>musculu<br>s              |
| 1 | 1.00 | 1 | 1 | 0 | 0     | 0 | 0 | -0.001 | t | 14223 | ESNPVDG<br>AHLSL            | Mus<br>musculu<br>s              |
| 1 | 1.00 | 1 | 1 | 0 | 0     | 0 | 0 | -0.001 | t | 30262 | KDTNNN                      | Mus<br>musculu<br>s              |
| 1 | 1.00 | 1 | 1 | 0 | 0     | 0 | 0 | -0.001 | t | 16101 | FHENWPS                     | Mus<br>musculu<br>s              |
| 1 | 1.00 | 1 | 1 | 0 | 0     | 0 | 0 | -0.001 | t | 26844 | IKLPALF                     | Homo<br>sapiens                  |
| 1 | 1.00 | 1 | 1 | 0 | 0     | 0 | 0 | -0.001 | t | 11872 | EESDDDM<br>GFGFLD           | Homo<br>sapiens                  |
| 1 | 1.00 | 1 | 1 | 0 | 0.004 | 0 | 0 | -0.001 | t | 25807 | IEFQQKNN<br>RLLEITREF       | Mus<br>musculu<br>s              |
| 1 | 1.00 | 1 | 1 | 0 | 0     | 0 | 0 | -0.001 | t | 11872 | EESDDDM<br>GFGFLD           | Homo<br>sapiens                  |
| 1 | 1.00 | 1 | 1 | 0 | 0     | 0 | 0 | -0.001 | t | 15982 | FGGETFTP<br>DWMMEV<br>AIDNE | Mus<br>musculu<br>s              |
| 1 | 1.00 | 1 | 1 | 0 | 0     | 0 | 0 | -0.001 | t | 26829 | IKKMLAD<br>QTVEEHIG         | Oryctola<br>gus<br>cuniculu<br>s |



|   |      |   |   |   |   |   |   |        |   |       |                           |                       |
|---|------|---|---|---|---|---|---|--------|---|-------|---------------------------|-----------------------|
| 1 | 1.00 | 1 | 1 | 0 | 0 | 0 | 0 | -0.001 | t | 32548 | KNLEEPK                   | Homo sapiens          |
| 1 | 1.00 | 1 | 1 | 0 | 0 | 0 | 0 | -0.001 | t | 13524 | ENMTPQD                   | Mus musculus          |
| 1 | 1.00 | 1 | 1 | 0 | 0 | 0 | 0 | -0.001 | t | 28676 | ISQAVHAA<br>HAEINEAG<br>R | Mus musculus          |
| 1 | 1.00 | 1 | 1 | 0 | 0 | 0 | 0 | -0.001 | t | 25807 | IEFQQKNN<br>RLLEITREF     | Mus musculus          |
| 1 | 1.00 | 1 | 1 | 0 | 0 | 0 | 0 | -0.001 | t | 24445 | HPEYAVSV<br>LL            | Homo sapiens          |
| 1 | 1.00 | 1 | 1 | 0 | 0 | 0 | 0 | -0.001 | t | 14273 | ESSPNTQ<br>WELRAFM<br>A   | Mus musculus          |
| 1 | 1.00 | 1 | 1 | 0 | 0 | 0 | 0 | -0.001 | t | 15468 | FDTGAFDP<br>DWPA          | Mus musculus          |
| 1 | 1.00 | 1 | 1 | 0 | 0 | 0 | 0 | -0.001 | t | 18441 | FYNQKFKG<br>KATL          | Mus musculus          |
| 1 | 1.00 | 1 | 1 | 0 | 0 | 0 | 0 | -0.001 | t | 31002 | KGLNGLFD<br>LGPKQKI       | Mus musculus          |
| 1 | 1.00 | 1 | 1 | 0 | 0 | 0 | 0 | -0.001 | t | 30661 | KEVPALTA<br>VETGAT        | Oryctolagus cuniculus |
| 1 | 1.00 | 1 | 1 | 0 | 0 | 0 | 0 | -0.001 | t | 32159 | KLSEGDLL<br>AEIETDK       | Homo sapiens          |
| 1 | 1.00 | 1 | 1 | 0 | 0 | 0 | 0 | -0.001 | t | 34779 | LAGHGAF<br>QITSLFTRG      | Homo sapiens          |
| 1 | 1.00 | 1 | 1 | 0 | 0 | 0 | 0 | -0.001 | t | 26317 | IGRGNFGE<br>VFSG          | Mus musculus          |
| 1 | 1.00 | 1 | 1 | 0 | 0 | 0 | 0 | -0.001 | t | 30661 | KEVPALTA<br>VETGAT        | Oryctolagus cuniculus |
| 1 | 1.00 | 1 | 1 | 0 | 0 | 0 | 0 | -0.001 | t | 20586 | GKIGMYP                   | Homo sapiens          |

|   |      |   |   |   |   |   |   |        |   |       |                              |                        |
|---|------|---|---|---|---|---|---|--------|---|-------|------------------------------|------------------------|
| 1 | 1.00 | 1 | 1 | 0 | 0 | 0 | 0 | -0.001 | t | 22360 | GSGVRGD<br>FGSLAPRV<br>ARQL  | Cavia<br>porcellu<br>s |
| 1 | 1.00 | 1 | 1 | 0 | 0 | 0 | 0 | -0.001 | t | 22360 | GSGVRGD<br>FGSLAPRV<br>ARQL  | Cavia<br>porcellu<br>s |
| 1 | 1.00 | 1 | 1 | 0 | 0 | 0 | 0 | -0.001 | t | 33151 | KRHFLSQR<br>Q                | Mus<br>musculu<br>s    |
| 1 | 1.00 | 1 | 1 | 0 | 0 | 0 | 0 | -0.001 | t | 23947 | HGRVGIYF<br>GMK              | Mus<br>musculu<br>s    |
| 1 | 1.00 | 1 | 1 | 0 | 0 | 0 | 0 | -0.001 | t | 4331  | ASARGDLA<br>HLTTTHAR<br>HLP  | Mus<br>musculu<br>s    |
| 1 | 1.00 | 1 | 1 | 0 | 0 | 0 | 0 | -0.001 | t | 9044  | DLDGAA                       | Mus<br>musculu<br>s    |
| 1 | 1.00 | 1 | 1 | 0 | 0 | 0 | 0 | -0.001 | t | 7674  | DAVTELDK<br>N                | Mus<br>musculu<br>s    |
| 1 | 1.00 | 1 | 1 | 0 | 0 | 0 | 0 | -0.001 | t | 9722  | DPPPPNP<br>NDPPPPN<br>PN     | Mus<br>musculu<br>s    |
| 1 | 1.00 | 1 | 1 | 0 | 0 | 0 | 0 | -0.001 | t | 934   | AEGEFPPQ<br>DARFPGG<br>GDPAK | Homo<br>sapiens        |
| 1 | 1.00 | 1 | 1 | 0 | 0 | 0 | 0 | -0.001 | t | 1373  | AFPL                         | Mus<br>musculu<br>s    |
| 1 | 1.00 | 1 | 1 | 0 | 0 | 0 | 0 | -0.001 | t | 4330  | ASARGDLA<br>HLTTT            | Mus<br>musculu<br>s    |
| 1 | 1.00 | 1 | 1 | 0 | 0 | 0 | 0 | -0.001 | t | 9611  | DPDKDVDI<br>MV               | Mus<br>musculu<br>s    |
| 1 | 1.00 | 1 | 1 | 0 | 0 | 0 | 0 | -0.001 | t | 7756  | DDDMGFG<br>LFD               | Homo<br>sapiens        |
| 1 | 1.00 | 1 | 1 | 0 | 0 | 0 | 0 | -0.001 | t | 7673  | DAVTE                        | Mus<br>musculu<br>s    |

|   |      |   |   |   |   |   |   |        |   |      |                             |                                  |
|---|------|---|---|---|---|---|---|--------|---|------|-----------------------------|----------------------------------|
| 1 | 1.00 | 1 | 1 | 0 | 0 | 0 | 0 | -0.001 | t | 9722 | DPPPPNP<br>NDPPPPN<br>PN    | Mus<br>musculu<br>s              |
| 1 | 1.00 | 1 | 1 | 0 | 0 | 0 | 0 | -0.001 | t | 7209 | CTSRFASLF<br>NLGPQQQ        | Mus<br>musculu<br>s              |
| 1 | 1.00 | 1 | 1 | 0 | 0 | 0 | 0 | -0.001 | t | 6501 | CKLSQGAP<br>DSC             | Mus<br>musculu<br>s              |
| 1 | 1.00 | 1 | 1 | 0 | 0 | 0 | 0 | -0.001 | t | 1746 | AHAYSGY<br>DVPDY            | Mus<br>musculu<br>s              |
| 1 | 1.00 | 1 | 1 | 0 | 0 | 0 | 0 | -0.001 | t | 1022 | AEKQKAAE<br>ATKVAE          | Homo<br>sapiens                  |
| 1 | 1.00 | 1 | 1 | 0 | 0 | 0 | 0 | -0.001 | t | 4071 | AQSRNVR<br>TFTGLFTS<br>G    | Homo<br>sapiens                  |
| 1 | 1.00 | 1 | 1 | 0 | 0 | 0 | 0 | -0.001 | t | 6501 | CKLSQGAP<br>DSC             | Mus<br>musculu<br>s              |
| 1 | 1.00 | 1 | 1 | 0 | 0 | 0 | 0 | -0.001 | t | 921  | AEGEFCSP<br>PDSPGVC<br>GDPK | Mus<br>musculu<br>s              |
| 1 | 1.00 | 1 | 1 | 0 | 0 | 0 | 0 | -0.001 | t | 4331 | ASARGDLA<br>HLTTTHAR<br>HLP | Mus<br>musculu<br>s              |
| 1 | 1.00 | 1 | 1 | 0 | 0 | 0 | 0 | -0.001 | t | 9722 | DPPPPNP<br>NDPPPPN<br>PN    | Mus<br>musculu<br>s              |
| 1 | 1.00 | 1 | 1 | 0 | 0 | 0 | 0 | -0.001 | t | 6139 | CDSSDRPR<br>VYTIT           | Mus<br>musculu<br>s              |
| 1 | 1.00 | 1 | 1 | 0 | 0 | 0 | 0 | -0.001 | t | 9586 | DPAFR                       | Mus<br>musculu<br>s              |
| 1 | 1.00 | 1 | 1 | 0 | 0 | 0 | 0 | -0.001 | t | 247  | AAKGTPW                     | Homo<br>sapiens                  |
| 1 | 1.00 | 1 | 1 | 0 | 0 | 0 | 0 | -0.001 | t | 5994 | CAKSPRYT<br>LD              | Oryctola<br>gus<br>cuniculu<br>s |
| 1 | 1.00 | 1 | 1 | 0 | 0 | 0 | 0 | -0.001 | t | 7756 | DDDMGFG<br>LFD              | Homo<br>sapiens                  |
| 1 | 1.00 | 1 | 1 | 0 | 0 | 0 | 0 | -0.001 | t | 4149 | ARGSLAVT<br>I               | Mus<br>musculu<br>s              |

|   |      |   |   |   |        |   |   |        |   |      |                              |                              |
|---|------|---|---|---|--------|---|---|--------|---|------|------------------------------|------------------------------|
| 1 | 1.00 | 1 | 1 | 0 | 0      | 0 | 0 | -0.001 | t | 1254 | AFAQAPT<br>HQLSL             | Mus<br>musculus              |
| 1 | 1.00 | 1 | 1 | 0 | 0      | 0 | 0 | -0.001 | t | 5559 | AVTFSKG                      | Homo<br>sapiens              |
| 1 | 1.00 | 1 | 1 | 0 | 0      | 0 | 0 | -0.001 | t | 5563 | AVTKGTIN<br>DPQAAKE<br>ALDKY | Oryctola<br>gus<br>cuniculus |
| 1 | 1.00 | 1 | 1 | 0 | 0      | 0 | 0 | -0.001 | t | 6343 | CGRVCLRC                     | Mus<br>musculus              |
| 1 | 1.00 | 1 | 1 | 0 | 0      | 0 | 0 | -0.001 | t | 9524 | DNPASTT<br>NKDK              | Mus<br>musculus              |
| 1 | 1.00 | 1 | 1 | 0 | 0      | 0 | 0 | -0.001 | t | 939  | AEGEFRLG<br>VRALRKAP<br>DPAK | Homo<br>sapiens              |
| 1 | 1.00 | 1 | 1 | 0 | 0      | 0 | 0 | -0.001 | t | 2780 | ALNGNGD<br>PNNMDKA<br>VKLY   | Mus<br>musculus              |
| 1 | 1.00 | 1 | 1 | 0 | 0      | 0 | 0 | -0.001 | t | 918  | AEGEFATA<br>PPSHYSW<br>DPAK  | Homo<br>sapiens              |
| 1 | 1.00 | 1 | 1 | 0 | -0.003 | 0 | 0 | -0.001 | t | 7851 | DDPPATVY<br>RYDSRPPE<br>DV   | Oryctola<br>gus<br>cuniculus |
| 1 | 1.00 | 1 | 1 | 0 | 0      | 0 | 0 | -0.001 | t | 757  | ADQTVEE<br>HIGYLVKY          | Oryctola<br>gus<br>cuniculus |
| 1 | 1.00 | 1 | 1 | 0 | 0      | 0 | 0 | -0.001 | t | 7187 | CTNGLTAL<br>FTPGAKQ<br>N     | Mus<br>musculus              |
| 1 | 1.00 | 1 | 1 | 0 | 0      | 0 | 0 | -0.001 | t | 3933 | AQAANGG<br>ASGQVKV<br>TKVT   | Homo<br>sapiens              |
| 1 | 1.00 | 1 | 1 | 0 | 0      | 0 | 0 | -0.001 | t | 793  | ADVTITVN<br>GKVVAKP<br>C     | Oryctola<br>gus<br>cuniculus |
| 1 | 1.00 | 1 | 1 | 0 | 0      | 0 | 0 | -0.001 | t | 4941 | ATEKSNVV<br>RGWV             | Homo<br>sapiens              |
| 1 | 1.00 | 1 | 1 | 0 | 0      | 0 | 0 | -0.001 | t | 1406 | AFTPDWM<br>MEVAIDN<br>E      | Mus<br>musculus              |

|   |      |   |   |   |        |   |   |        |   |      |                              |                                  |
|---|------|---|---|---|--------|---|---|--------|---|------|------------------------------|----------------------------------|
| 1 | 1.00 | 1 | 1 | 0 | 0      | 0 | 0 | -0.001 | t | 6632 | CLTFGRET<br>VIEY             | Mus<br>musculu<br>s              |
| 1 | 1.00 | 1 | 1 | 0 | 0      | 0 | 0 | -0.001 | t | 8133 | DEQFIPK                      | Mus<br>musculu<br>s              |
| 1 | 1.00 | 1 | 1 | 0 | 0      | 0 | 0 | -0.001 | t | 9723 | DPPPPNP<br>NDPPPPN<br>PND    | Mus<br>musculu<br>s              |
| 1 | 1.00 | 1 | 1 | 0 | 0      | 0 | 0 | -0.001 | t | 9723 | DPPPPNP<br>NDPPPPN<br>PND    | Mus<br>musculu<br>s              |
| 1 | 1.00 | 1 | 1 | 0 | 0      | 0 | 0 | -0.001 | t | 7491 | DAEFRHDS<br>GYEVHHQ<br>K     | Mus<br>musculu<br>s              |
| 1 | 1.00 | 1 | 1 | 0 | 0      | 0 | 0 | -0.001 | t | 8756 | DIPNPIGSE<br>NSEKTTM<br>PLW  | Homo<br>sapiens                  |
| 1 | 1.00 | 1 | 1 | 0 | 0      | 0 | 0 | -0.001 | t | 7491 | DAEFRHDS<br>GYEVHHQ<br>K     | Mus<br>musculu<br>s              |
| 1 | 1.00 | 1 | 1 | 0 | 0      | 0 | 0 | -0.001 | t | 2273 | AKREAIVK<br>ADEDDNE<br>ET    | Mus<br>musculu<br>s              |
| 1 | 1.00 | 1 | 1 | 0 | -0.003 | 0 | 0 | -0.001 | t | 5967 | CADARMY<br>GVLPWNA<br>FPGKVC | Oryctola<br>gus<br>cuniculu<br>s |
| 1 | 1.00 | 1 | 1 | 0 | 0      | 0 | 0 | -0.001 | t | 5147 | ATSRSTM<br>QLASFFTP<br>G     | Homo<br>sapiens                  |
| 1 | 1.00 | 1 | 1 | 0 | 0      | 0 | 0 | -0.001 | t | 7491 | DAEFRHDS<br>GYEVHHQ<br>K     | Mus<br>musculu<br>s              |
| 1 | 1.00 | 1 | 1 | 0 | 0      | 0 | 0 | -0.001 | t | 7491 | DAEFRHDS<br>GYEVHHQ<br>K     | Mus<br>musculu<br>s              |
| 1 | 1.00 | 1 | 1 | 0 | 0      | 0 | 0 | -0.001 | t | 4710 | ASQKRPSQ<br>RHGSKY           | Rattus<br>norvegic<br>us         |
| 1 | 1.00 | 1 | 1 | 0 | 0      | 0 | 0 | -0.001 | t | 9134 | DLIQEGNI<br>GLMKAV           | Oryctola<br>gus<br>cuniculu<br>s |
| 1 | 1.00 | 1 | 1 | 0 | 0      | 0 | 0 | -0.001 | t | 7491 | DAEFRHDS<br>GYEVHHQ<br>K     | Mus<br>musculu<br>s              |

|   |      |   |   |   |        |   |   |        |   |       |                              |                                  |
|---|------|---|---|---|--------|---|---|--------|---|-------|------------------------------|----------------------------------|
| 1 | 1.00 | 1 | 1 | 0 | 0      | 0 | 0 | -0.001 | t | 7491  | DAEFRHDS<br>GYEVHHQ<br>K     | Homo<br>sapiens                  |
| 1 | 1.00 | 1 | 1 | 0 | 0      | 0 | 0 | -0.001 | t | 7756  | DDDMGFG<br>LFD               | Homo<br>sapiens                  |
| 1 | 1.00 | 1 | 1 | 0 | -0.004 | 0 | 0 | -0.001 | t | 9595  | DPALLM<br>HELIHVLH<br>GLYG   | Oryctola<br>gus<br>cuniculu<br>s |
| 1 | 1.00 | 1 | 1 | 0 | 0      | 0 | 0 | -0.001 | t | 610   | ACYLPFQL<br>SCGGKS           | Mus<br>musculu<br>s              |
| 1 | 1.00 | 1 | 1 | 0 | 0      | 0 | 0 | -0.001 | t | 6020  | CAQQWPE<br>WYPC              | Mus<br>musculu<br>s              |
| 1 | 1.00 | 1 | 1 | 0 | 0      | 0 | 0 | -0.001 | t | 10227 | DSSAHGTP<br>STPA             | Oryctola<br>gus<br>cuniculu<br>s |
| 1 | 1.00 | 1 | 1 | 0 | 0      | 0 | 0 | -0.001 | t | 6632  | CLTFGRET<br>VIEY             | Homo<br>sapiens                  |
| 1 | 1.00 | 1 | 1 | 0 | 0      | 0 | 0 | -0.001 | t | 9613  | DPDKDVDI<br>MVRDGQL<br>TIKAE | Mus<br>musculu<br>s              |
| 1 | 1.00 | 1 | 1 | 0 | 0      | 0 | 0 | -0.001 | t | 6210  | CEYNVFH<br>NKTFELPR<br>A     | Mus<br>musculu<br>s              |
| 1 | 1.00 | 1 | 1 | 0 | 0      | 0 | 0 | -0.001 | t | 6226  | CFGNSEY                      | Mus<br>musculu<br>s              |
| 1 | 1.00 | 1 | 1 | 0 | 0      | 0 | 0 | -0.001 | t | 3938  | AQAHTTR<br>GLTNLFSS<br>G     | Homo<br>sapiens                  |
| 1 | 1.00 | 1 | 1 | 0 | 0      | 0 | 0 | -0.001 | t | 9232  | DLPDYGDY<br>GEDLFDY          | Mus<br>musculu<br>s              |
| 1 | 1.00 | 1 | 1 | 0 | 0      | 0 | 0 | -0.001 | t | 1536  | AGGSGRP                      | Mus<br>musculu<br>s              |
| 1 | 1.00 | 1 | 1 | 0 | 0      | 0 | 0 | -0.001 | t | 3245  | ANDVDNS<br>NPVVQAE<br>QLNWL  | Homo<br>sapiens                  |

|   |      |   |   |   |        |   |   |        |   |      |                             |                                  |
|---|------|---|---|---|--------|---|---|--------|---|------|-----------------------------|----------------------------------|
| 1 | 1.00 | 1 | 1 | 0 | 0      | 0 | 0 | -0.001 | t | 6412 | CIEFVQQE<br>VDYIIDH         | Oryctola<br>gus<br>cuniculu<br>s |
| 1 | 1.00 | 1 | 1 | 0 | 0      | 0 | 0 | -0.001 | t | 7756 | DDDMGFG<br>LFD              | Homo<br>sapiens                  |
| 1 | 1.00 | 1 | 1 | 0 | 0      | 0 | 0 | -0.001 | t | 5558 | AVTFASFD<br>VPSKQPT         | Oryctola<br>gus<br>cuniculu<br>s |
| 1 | 1.00 | 1 | 1 | 0 | -0.003 | 0 | 0 | -0.001 | t | 7851 | DDPPATVY<br>RYDSRPPE<br>DV  | Oryctola<br>gus<br>cuniculu<br>s |
| 1 | 1.00 | 1 | 1 | 0 | 0      | 0 | 0 | -0.001 | t | 4429 | ASGQ                        | Mus<br>musculu<br>s              |
| 1 | 1.00 | 1 | 1 | 0 | 0      | 0 | 0 | -0.001 | t | 9278 | DLSLLGKA<br>RKVVVTKD        | Rattus<br>norvegic<br>us         |
| 1 | 1.00 | 1 | 1 | 0 | 0      | 0 | 0 | -0.001 | t | 8544 | DHILEPSIP<br>WKSLLTL<br>VQL | Homo<br>sapiens                  |
| 1 | 1.00 | 1 | 1 | 0 | 0      | 0 | 0 | -0.001 | t | 3517 | APDTRPAP                    | Mus<br>musculu<br>s              |
| 1 | 1.00 | 1 | 1 | 0 | 0      | 0 | 0 | -0.001 | t | 1157 | AESEE                       | Homo<br>sapiens                  |
| 1 | 1.00 | 1 | 1 | 0 | 0      | 0 | 0 | -0.001 | t | 6276 | CGAVIDDC                    | Mus<br>musculu<br>s              |
| 1 | 1.00 | 1 | 1 | 0 | 0      | 0 | 0 | -0.001 | t | 6883 | CQIYPPNA<br>NKIREALA<br>Q   | Oryctola<br>gus<br>cuniculu<br>s |
| 1 | 1.00 | 1 | 1 | 0 | 0      | 0 | 0 | -0.001 | t | 3516 | APDTRP                      | Mus<br>musculu<br>s              |
| 1 | 1.00 | 1 | 1 | 0 | 0      | 0 | 0 | -0.001 | t | 6249 | CFPYCYP<br>S<br>ESA         | Mus<br>musculu<br>s              |
| 1 | 1.00 | 1 | 1 | 0 | 0      | 0 | 0 | -0.001 | t | 8552 | DHLPSPW                     | Homo<br>sapiens                  |

|   |      |   |   |       |        |        |        |        |   |        |                              |                              |
|---|------|---|---|-------|--------|--------|--------|--------|---|--------|------------------------------|------------------------------|
| 1 | 1.00 | 1 | 1 | 0     | 0      | 0      | 0      | -0.001 | t | 6524   | CKTC                         | Mus<br>musculus              |
| 1 | 1.00 | 1 | 1 | 0     | 0      | 0      | 0      | -0.001 | t | 9524   | DNPASTT<br>NKDK              | Mus<br>musculus              |
| 1 | 1.00 | 1 | 1 | 0     | 0      | 0      | 0      | -0.001 | t | 868    | AEEAFDL<br>WNECAK<br>CV      | Homo<br>sapiens              |
| 1 | 1.00 | 1 | 1 | 0     | 0      | 0      | 0      | -0.001 | t | 1433   | AGAGGGA<br>GGAGAGG<br>GAGGAG | Oryctola<br>gus<br>cuniculus |
| 1 | 1.00 | 1 | 1 | 0     | 0      | 0      | 0      | -0.001 | t | 1497   | AGEPYVIE<br>QGMMDP<br>AK     | Homo<br>sapiens              |
| 1 | 1.00 | 1 | 1 | 0     | 0      | 0      | 0      | -0.001 | t | 3514   | APDTR                        | Mus<br>musculus              |
| 1 | 1.00 | 1 | 1 | 0.03  | 0.028  | 0.028  | 0.029  | 0.03   | t | 26317  | IGRGNFGE<br>VFSG             | Mus<br>musculus              |
| 1 | 1.00 | 1 | 1 | 0.03  | 0.027  | 0.03   | 0.03   | 0.03   | t | 133843 | GTKAVTKY<br>TSSK             | Oryctola<br>gus<br>cuniculus |
| 1 | 1.00 | 1 | 1 | 0.01  | 0.01   | 0.01   | 0.01   | 0.01   | t | 142413 | EIAAEVAK<br>AKVAK            | Homo<br>sapiens              |
| 1 | 1.00 | 1 | 1 | 0.02  | 0.02   | 0.02   | 0.02   | 0.019  | t | 108498 | KIHAREIFD<br>SRGNPTV         | Homo<br>sapiens              |
| 1 | 1.00 | 1 | 1 | 0.01  | 0.006  | 0.006  | 0.01   | 0.008  | t | 42583  | MSKKSGK<br>WWESDD<br>KFAKAVY | Oryctola<br>gus<br>cuniculus |
| 1 | 1.00 | 1 | 1 | 0.03  | 0.028  | 0.031  | 0.029  | 0.028  | t | 68053  | VDRAFSFE<br>GIYVYSS          | Mus<br>musculus              |
| 1 | 1.00 | 1 | 1 | -0.04 | -0.04  | -0.045 | -0.042 | -0.04  | t | 53067  | RAAIRAS                      | Homo<br>sapiens              |
| 1 | 1.00 | 1 | 1 | -0.03 | -0.029 | -0.027 | -0.029 | -0.03  | t | 50304  | QALGALK                      | Homo<br>sapiens              |



|   |      |   |   |       |        |        |        |        |   |        |                              |                          |
|---|------|---|---|-------|--------|--------|--------|--------|---|--------|------------------------------|--------------------------|
| 1 | 1.00 | 1 | 1 | 0.03  | 0.03   | 0.03   | 0.03   | 0.03   | t | 142436 | KVAATSLE<br>RWQQ             | Mus<br>musculu<br>s      |
| 1 | 1.00 | 1 | 1 | 0.03  | 0.03   | 0.03   | 0.03   | 0.03   | t | 142424 | GDEFDTYD<br>DIKKVT           | Homo<br>sapiens          |
| 1 | 1.00 | 1 | 1 | 0.03  | 0.03   | 0.03   | 0.03   | 0.03   | t | 158602 | PLELSVY                      | Homo<br>sapiens          |
| 1 | 1.00 | 1 | 1 | 0.01  | 0.01   | 0.01   | 0.01   | 0.01   | t | 149107 | SLAPRFPW<br>LNPLDGW          | Rattus<br>norvegic<br>us |
| 1 | 1.00 | 1 | 1 | 0.01  | 0.01   | 0.01   | 0.01   | 0.01   | t | 78298  | WHHMYV<br>P                  | Homo<br>sapiens          |
| 1 | 1.00 | 1 | 1 | 0.01  | 0.01   | 0.01   | 0.01   | 0.01   | t | 45434  | NPNPDPN                      | Mus<br>musculu<br>s      |
| 1 | 1.00 | 1 | 1 | -0.01 | -0.01  | -0.01  | -0.01  | -0.01  | t | 113774 | QQGQQP<br>GQGQPGY<br>Y       | Homo<br>sapiens          |
| 1 | 1.00 | 1 | 1 | -0.01 | -0.01  | -0.01  | -0.01  | -0.01  | t | 106026 | QARQLKN<br>NNPFKFFV          | Homo<br>sapiens          |
| 1 | 1.00 | 1 | 1 | -0.01 | -0.01  | -0.01  | -0.01  | -0.01  | t | 107650 | TYRVVSV                      | Homo<br>sapiens          |
| 1 | 1.00 | 1 | 1 | -0.01 | -0.01  | -0.01  | -0.01  | -0.01  | t | 79386  | SCSPTVYLT<br>STKCP           | Mus<br>musculu<br>s      |
| 1 | 1.00 | 1 | 1 | -0.01 | -0.01  | -0.01  | -0.01  | -0.01  | t | 79293  | LLDYGWL<br>WMW               | Mus<br>musculu<br>s      |
| 1 | 1.00 | 1 | 1 | 0.04  | 0.04   | 0.034  | 0.04   | 0.04   | t | 72816  | WLTYHGAI<br>KLDDKDP<br>QF    | Homo<br>sapiens          |
| 1 | 1.00 | 1 | 1 | 0.01  | 0.012  | -0.004 | 0.007  | 0.01   | t | 346    | AAPANDK<br>FTVFEEAF<br>NDAIK | Homo<br>sapiens          |
| 1 | 1.00 | 1 | 1 | -0.04 | -0.04  | -0.048 | -0.04  | -0.04  | t | 125454 | KDYKTMV<br>KFCN              | Mus<br>musculu<br>s      |
| 1 | 1.00 | 1 | 1 | 0     | 0      | 0.005  | 0      | 0      | t | 130474 | ECLLLSKYC<br>MPS             | Mus<br>musculu<br>s      |
| 1 | 1.00 | 1 | 1 | -0.04 | -0.042 | -0.05  | -0.039 | -0.039 | t | 42790  | MTDVSRI<br>RAWGRR<br>MIGTA   | Homo<br>sapiens          |

|   |      |   |   |       |        |        |        |        |   |        |                              |                                  |
|---|------|---|---|-------|--------|--------|--------|--------|---|--------|------------------------------|----------------------------------|
| 1 | 1.00 | 1 | 1 | -0.04 | -0.04  | -0.052 | -0.04  | -0.038 | t | 121023 | VATKGLNE<br>HG               | Mus<br>musculu<br>s              |
| 1 | 1.00 | 1 | 1 | 0     | 0.002  | 0.007  | 0.003  | 0      | t | 29752  | KAALIEEG<br>QRMAEM           | Homo<br>sapiens                  |
| 1 | 1.00 | 1 | 1 | 0     | 0.002  | 0.007  | 0.003  | 0      | t | 29752  | KAALIEEG<br>QRMAEM           | Homo<br>sapiens                  |
| 1 | 1.00 | 1 | 1 | 0.01  | 0.012  | 0.013  | 0.007  | 0.007  | t | 39985  | LTKFTTQK<br>QVSSLFQ          | Homo<br>sapiens                  |
| 1 | 1.00 | 1 | 1 | 0.03  | 0.028  | 0.006  | 0.033  | 0.037  | t | 20521  | GKAVTKE<br>QL                | Mus<br>musculu<br>s              |
| 1 | 1.00 | 1 | 1 | 0     | -0.001 | 0      | 0      | 0      | t | 41258  | MDPELRG<br>LAQ               | Mus<br>musculu<br>s              |
| 1 | 1.00 | 1 | 1 | 0.01  | 0.013  | 0.018  | 0.01   | 0.008  | t | 60013  | SPDDPAFR<br>FAPYFTP          | Mus<br>musculu<br>s              |
| 1 | 1.00 | 1 | 1 | -0.01 | 0.002  | -0.005 | -0.01  | -0.01  | t | 19491  | GFADLMG<br>YIP               | Pan<br>troglody<br>tes           |
| 1 | 1.00 | 1 | 1 | 0.02  | 0.018  | 0.02   | 0.019  | 0.02   | t | 110275 | GPVGPSD<br>PSIVSLVEE<br>TSFI | Mus<br>musculu<br>s              |
| 1 | 1.00 | 1 | 1 | -0.01 | -0.012 | -0.013 | -0.009 | -0.01  | t | 138935 | YDQREPQ<br>AWCRPNE<br>NQSWT  | Homo<br>sapiens                  |
| 1 | 1.00 | 1 | 1 | 0.02  | 0.02   | 0.02   | 0.02   | 0.02   | t | 105505 | SAE                          | Oryctola<br>gus<br>cuniculu<br>s |
| 1 | 1.00 | 1 | 1 | 0.02  | 0.02   | 0.02   | 0.02   | 0.02   | t | 105505 | SAE                          | Oryctola<br>gus<br>cuniculu<br>s |
| 1 | 1.00 | 1 | 1 | 0.02  | 0.02   | 0.02   | 0.02   | 0.02   | t | 105505 | SAE                          | Oryctola<br>gus<br>cuniculu<br>s |
| 1 | 1.00 | 1 | 1 | 0.02  | 0.02   | 0.02   | 0.02   | 0.02   | t | 105505 | SAE                          | Oryctola<br>gus<br>cuniculu<br>s |

|   |      |   |   |       |        |        |        |        |   |        |                              |                                  |
|---|------|---|---|-------|--------|--------|--------|--------|---|--------|------------------------------|----------------------------------|
| 1 | 1.00 | 1 | 1 | 0     | -0.003 | 0      | 0      | 0      | t | 48992  | PQEQITQH<br>GSPYGR           | Oryctola<br>gus<br>cuniculu<br>s |
| 1 | 1.00 | 1 | 1 | 0     | 0      | 0      | 0      | 0      | t | 48992  | PQEQITQH<br>GSPYGR           | Oryctola<br>gus<br>cuniculu<br>s |
| 1 | 1.00 | 1 | 1 | -0.05 | -0.047 | -0.046 | -0.05  | -0.051 | t | 22756  | GTLVRMA<br>PVIG              | Mus<br>musculu<br>s              |
| 1 | 1.00 | 1 | 1 | 0.04  | 0.038  | 0.047  | 0.043  | 0.04   | t | 106690 | NSDHFLQP<br>DPPL             | Mus<br>musculu<br>s              |
| 1 | 1.00 | 1 | 1 | -0.03 | -0.03  | -0.02  | -0.024 | -0.03  | t | 76368  | YVNTNMG<br>LKIRQ             | Homo<br>sapiens                  |
| 1 | 1.00 | 1 | 1 | 0     | -0.003 | -0.004 | 0      | 0.002  | t | 12626  | EKAFRELA<br>DA               | Oryctola<br>gus<br>cuniculu<br>s |
| 1 | 1.00 | 1 | 1 | 0.01  | 0.014  | 0.014  | 0.01   | 0.01   | t | 134335 | CTKPSDGN<br>CT               | Homo<br>sapiens                  |
| 1 | 1.00 | 1 | 1 | 0.01  | 0.014  | 0.014  | 0.01   | 0.01   | t | 134335 | CTKPSDGN<br>CT               | Homo<br>sapiens                  |
| 1 | 1.00 | 1 | 1 | 0.01  | 0.014  | 0.014  | 0.01   | 0.01   | t | 134335 | CTKPSDGN<br>CT               | Homo<br>sapiens                  |
| 1 | 1.00 | 1 | 1 | 0.01  | 0.01   | 0.009  | 0.013  | 0.01   | t | 71431  | VTNNTP                       | Homo<br>sapiens                  |
| 1 | 1.00 | 1 | 1 | 0.01  | 0.006  | 0.007  | 0.009  | 0.01   | t | 57257  | SDPDTSFL<br>EGLDLGVD<br>VRTY | Oryctola<br>gus<br>cuniculu<br>s |
| 1 | 1.00 | 1 | 1 | 0.02  | 0.02   | 0.015  | 0.02   | 0.02   | t | 136087 | VETDKATV<br>GF               | Oryctola<br>gus<br>cuniculu<br>s |
| 1 | 1.00 | 1 | 1 | 0.02  | 0.022  | 0.015  | 0.02   | 0.02   | t | 136087 | VETDKATV<br>GF               | Rattus<br>norvegic<br>us         |

|   |      |   |   |       |        |        |        |        |   |        |                              |                                  |
|---|------|---|---|-------|--------|--------|--------|--------|---|--------|------------------------------|----------------------------------|
| 1 | 1.00 | 1 | 1 | 0     | -0.003 | 0      | 0      | 0.002  | t | 140894 | QRRADAV<br>KGYLA             | Oryctola<br>gus<br>cuniculu<br>s |
| 1 | 1.00 | 1 | 1 | -0.01 | -0.01  | -0.005 | -0.01  | -0.01  | t | 66105  | TRTFTSL                      | Homo<br>sapiens                  |
| 1 | 1.00 | 1 | 1 | 0.01  | 0.01   | 0.014  | 0.01   | 0.01   | t | 37301  | LLFTGH                       | Homo<br>sapiens                  |
| 1 | 1.00 | 1 | 1 | 0.01  | 0.01   | 0.01   | 0.011  | 0.01   | t | 107008 | YEFRHSS                      | Mus<br>musculu<br>s              |
| 1 | 1.00 | 1 | 1 | 0     | 0      | 0      | 0      | 0.002  | t | 121713 | PLTALLRN                     | Homo<br>sapiens                  |
| 1 | 1.00 | 1 | 1 | 0.02  | 0.02   | 0.02   | 0.02   | 0.02   | t | 149061 | INPTQTT                      | Sus<br>scrofa                    |
| 1 | 1.00 | 1 | 1 | 0.02  | 0.02   | 0.02   | 0.02   | 0.02   | t | 135742 | QKSCEPAV                     | Homo<br>sapiens                  |
| 1 | 1.00 | 1 | 1 | 0.02  | 0.02   | 0.02   | 0.02   | 0.02   | t | 156339 | KDDPTNKF<br>YQSVIQ           | Homo<br>sapiens                  |
| 1 | 1.00 | 1 | 1 | 0.02  | 0.02   | 0.02   | 0.02   | 0.02   | t | 156958 | SLHSSVQ                      | Gallus<br>gallus                 |
| 1 | 1.00 | 1 | 1 | 0.02  | 0.02   | 0.02   | 0.02   | 0.02   | t | 132929 | WGNNY<br>M                   | Homo<br>sapiens                  |
| 1 | 1.00 | 1 | 1 | 0.02  | 0.02   | 0.02   | 0.02   | 0.02   | t | 127680 | HFHRPPT                      | Homo<br>sapiens                  |
| 1 | 1.00 | 1 | 1 | 0     | 0      | 0      | 0      | 0      | t | 133950 | WIFANF                       | Mus<br>musculu<br>s              |
| 1 | 1.00 | 1 | 1 | -0.02 | -0.02  | -0.02  | -0.02  | -0.02  | t | 89581  | TLVNADA<br>NYL               | Homo<br>sapiens                  |
| 1 | 1.00 | 1 | 1 | -0.04 | -0.04  | -0.04  | -0.04  | -0.04  | t | 135674 | FNDFTRVV                     | Homo<br>sapiens                  |
| 1 | 1.00 | 1 | 1 | -0.02 | -0.018 | -0.021 | -0.023 | -0.023 | t | 113876 | SPQQSGQ<br>GQPGYYP           | Homo<br>sapiens                  |
| 1 | 1.00 | 1 | 1 | 0.01  | 0.01   | 0.01   | 0.01   | 0.009  | t | 24870  | HSVRGFTS<br>LFS              | Homo<br>sapiens                  |
| 1 | 1.00 | 1 | 1 | 0.01  | 0.013  | 0.015  | 0.01   | 0.01   | t | 49967  | PVSLGGDV<br>PNS              | Sus<br>scrofa                    |
| 1 | 1.00 | 1 | 1 | 0     | 0      | -0.007 | 0      | 0.002  | t | 8469   | DGPQKSV<br>SQGGVSL<br>DLYSKL | Mus<br>musculu<br>s              |

|   |      |   |   |       |        |        |        |        |   |        |                              |                                  |
|---|------|---|---|-------|--------|--------|--------|--------|---|--------|------------------------------|----------------------------------|
| 1 | 1.00 | 1 | 1 | 0.01  | 0.012  | -0.002 | 0.011  | 0.012  | t | 141933 | KIENAAM<br>AIHLCFNN          | Homo<br>sapiens                  |
| 1 | 1.00 | 1 | 1 | 0.02  | 0.02   | 0.015  | 0.02   | 0.018  | t | 23985  | HHFQSHG<br>QLSDHPH<br>ALSSSS | Homo<br>sapiens                  |
| 1 | 1.00 | 1 | 1 | -0.02 | -0.02  | -0.022 | -0.02  | -0.02  | t | 97075  | VSCYGKTK<br>CTASNKNR         | Oryctola<br>gus<br>cuniculu<br>s |
| 1 | 1.00 | 1 | 1 | 0.02  | 0.022  | 0.02   | 0.023  | 0.02   | t | 104443 | DAEFRHDS<br>GYE              | Homo<br>sapiens                  |
| 1 | 1.00 | 1 | 1 | -0.01 | -0.008 | -0.005 | -0.007 | -0.012 | t | 25309  | IAHQFKEK<br>VLGLLQRA<br>TQQQ | Homo<br>sapiens                  |
| 1 | 1.00 | 1 | 1 | 0.01  | 0.013  | -0.007 | 0.01   | 0.012  | t | 7852   | DDPPKDG<br>NKDDLPE<br>EKKDD  | Mus<br>musculu<br>s              |
| 1 | 1.00 | 1 | 1 | -0.01 | -0.006 | 0.001  | -0.003 | -0.008 | t | 122071 | AALGSAI                      | Homo<br>sapiens                  |
| 1 | 1.00 | 1 | 1 | 0     | 0      | -0.002 | -0.006 | -0.002 | t | 13661  | EPIAPYHF<br>DLSGH            | Homo<br>sapiens                  |
| 1 | 1.00 | 1 | 1 | 0.02  | 0.018  | 0.02   | 0.013  | 0.02   | t | 117614 | QGFPFYDK<br>PMRI             | Mus<br>musculu<br>s              |
| 1 | 1.00 | 1 | 1 | 0.01  | 0.012  | 0.01   | 0.011  | 0.01   | t | 66240  | TSGTSGTS<br>GPSGPSG          | Homo<br>sapiens                  |
| 1 | 1.00 | 1 | 1 | -0.03 | -0.031 | -0.038 | -0.03  | -0.028 | t | 46801  | PAGAGRR<br>V                 | Anas<br>platyrhy<br>nchos        |
| 1 | 1.00 | 1 | 1 | -0.01 | -0.01  | -0.01  | -0.011 | -0.009 | t | 153288 | SDPRKMC<br>IY                | Mus<br>musculu<br>s              |
| 1 | 1.00 | 1 | 1 | 0.03  | 0.03   | 0.021  | 0.03   | 0.033  | t | 110733 | VGENVPD<br>DLYIKGSG          | Mus<br>musculu<br>s              |
| 1 | 1.00 | 1 | 1 | 0.01  | 0.014  | 0.016  | 0.011  | 0.01   | t | 12048  | EFLVNT                       | Homo<br>sapiens                  |

|   |      |   |   |       |        |        |        |       |   |        |                     |              |
|---|------|---|---|-------|--------|--------|--------|-------|---|--------|---------------------|--------------|
| 1 | 1.00 | 1 | 1 | 0.06  | 0.058  | 0.057  | 0.059  | 0.06  | t | 98093  | HGFTEQNSG           | Mus musculus |
| 1 | 1.00 | 1 | 1 | -0.01 | -0.01  | -0.01  | -0.007 | -0.01 | t | 49193  | PRGRRQPIPKARRPE     | Homo sapiens |
| 1 | 1.00 | 1 | 1 | 0     | 0.002  | 0.006  | 0.001  | 0     | t | 9951   | DRASLST             | Homo sapiens |
| 1 | 1.00 | 1 | 1 | 0     | 0.004  | 0.006  | 0.001  | 0     | t | 9951   | DRASLST             | Homo sapiens |
| 1 | 1.00 | 1 | 1 | 0.03  | 0.03   | 0.028  | 0.03   | 0.03  | t | 117605 | PNHPSSSGSFSDADLAD   | Mus musculus |
| 1 | 1.00 | 1 | 1 | 0.03  | 0.03   | 0.03   | 0.03   | 0.03  | t | 153336 | ACNQVLSWLCGGGS      | Mus musculus |
| 1 | 1.00 | 1 | 1 | 0.01  | 0.01   | 0.01   | 0.01   | 0.01  | t | 123405 | KWLGDKFN            | Ovis aries   |
| 1 | 1.00 | 1 | 1 | 0.01  | 0.01   | 0.01   | 0.01   | 0.01  | t | 124274 | HPLAPAGTF           | Homo sapiens |
| 1 | 1.00 | 1 | 1 | 0.01  | 0.01   | 0.01   | 0.01   | 0.01  | t | 117053 | PHPSTMFDRQED        | Homo sapiens |
| 1 | 1.00 | 1 | 1 | -0.01 | -0.01  | -0.01  | -0.01  | -0.01 | t | 110615 | GPRGPPGPQGATGPL     | Mus musculus |
| 1 | 1.00 | 1 | 1 | -0.03 | -0.03  | -0.03  | -0.03  | -0.03 | t | 92667  | FEKVKHNLVI          | Ovis aries   |
| 1 | 1.00 | 1 | 1 | 0     | 0      | -0.009 | 0      | 0     | t | 29965  | KATYEAAVAANNAKNAALT | Mus musculus |
| 1 | 1.00 | 1 | 1 | 0.01  | 0.008  | -0.004 | 0.009  | 0.01  | t | 4013   | AQNFRNIMHGSDSFYFTFS | Mus musculus |
| 1 | 1.00 | 1 | 1 | 0     | -0.006 | 0      | 0.003  | 0.001 | t | 6925   | CRGFTSFKKPPTPPPEPET | Papio        |

|   |      |   |   |       |        |        |        |        |   |        |                              |                                  |
|---|------|---|---|-------|--------|--------|--------|--------|---|--------|------------------------------|----------------------------------|
| 1 | 1.00 | 1 | 1 | -0.02 | -0.02  | -0.02  | -0.02  | -0.02  | t | 6712   | CNNPHRIL                     | Oryctola<br>gus<br>cuniculu<br>s |
| 1 | 1.00 | 1 | 1 | -0.03 | -0.034 | -0.038 | -0.031 | -0.029 | t | 66901  | TTVQQQF<br>ADAWKPS<br>PVMTVR | Oryctola<br>gus<br>cuniculu<br>s |
| 1 | 1.00 | 1 | 1 | 0.07  | 0.07   | 0.072  | 0.076  | 0.07   | t | 25497  | ICESAGVQ<br>EDAASL           | Homo<br>sapiens                  |
| 1 | 1.00 | 1 | 1 | 0.02  | 0.02   | 0.021  | 0.02   | 0.022  | t | 68041  | VDPQ                         | Mus<br>musculu<br>s              |
| 1 | 1.00 | 1 | 1 | -0.04 | -0.044 | -0.043 | -0.041 | -0.042 | t | 75659  | YRPLGPGT<br>PPMRARL<br>PA    | Oryctola<br>gus<br>cuniculu<br>s |
| 1 | 1.00 | 1 | 1 | 0.02  | 0.022  | 0.015  | 0.021  | 0.02   | t | 36264  | LGPLYLIQA<br>TITT            | Homo<br>sapiens                  |
| 1 | 1.00 | 1 | 1 | 0     | 0      | 0      | 0.002  | 0      | t | 119505 | NSTMGY                       | Homo<br>sapiens                  |
| 1 | 1.00 | 1 | 1 | 0     | 0      | 0      | 0.002  | 0      | t | 119546 | WTAN                         | Homo<br>sapiens                  |
| 1 | 1.00 | 1 | 1 | 0     | 0      | 0      | 0.002  | 0      | t | 119475 | KKIK                         | Homo<br>sapiens                  |
| 1 | 1.00 | 1 | 1 | 0     | 0      | 0      | 0.002  | 0      | t | 119473 | KILKVIRK                     | Homo<br>sapiens                  |
| 1 | 1.00 | 1 | 1 | 0     | 0      | 0      | 0.002  | 0      | t | 119478 | KNDK                         | Homo<br>sapiens                  |
| 1 | 1.00 | 1 | 1 | 0     | 0      | 0      | 0.002  | 0      | t | 119484 | LDKK                         | Homo<br>sapiens                  |
| 1 | 1.00 | 1 | 1 | 0     | 0      | 0      | 0.002  | 0      | t | 66312  | TSLNLQKD<br>EPNGRAS<br>DTAGQ | Equus<br>caballus                |
| 1 | 1.00 | 1 | 1 | 0     | 0.007  | 0      | 0.002  | 0      | t | 38273  | LNLTTWN<br>PTLLG             | Ovis<br>aries                    |
| 1 | 1.00 | 1 | 1 | 0     | 0.007  | 0      | 0.002  | 0      | t | 51474  | QLPNVGIT<br>QGIV             | Ovis<br>aries                    |
| 1 | 1.00 | 1 | 1 | 0.03  | 0.031  | 0.032  | 0.029  | 0.03   | t | 28548  | ISITTEVMP<br>VSMAKTS<br>V    | Oryctola<br>gus<br>cuniculu<br>s |
| 1 | 1.00 | 1 | 1 | -0.07 | -0.07  | -0.068 | -0.067 | -0.069 | t | 99009  | SNALSKRL                     | Homo<br>sapiens                  |

|   |      |   |   |       |        |        |        |        |   |        |                               |                                  |
|---|------|---|---|-------|--------|--------|--------|--------|---|--------|-------------------------------|----------------------------------|
| 1 | 1.00 | 1 | 1 | -0.01 | -0.008 | -0.002 | -0.003 | -0.012 | t | 113101 | NPVMERF<br>AAHAGDL<br>V       | Homo<br>sapiens                  |
| 1 | 1.00 | 1 | 1 | 0.02  | 0.02   | 0.02   | 0.017  | 0.022  | t | 60358  | SQAAPYIE<br>Q                 | Homo<br>sapiens                  |
| 1 | 1.00 | 1 | 1 | 0     | 0      | 0      | 0.002  | 0      | t | 10832  | DWVCSILT<br>DFKNWL            | Homo<br>sapiens                  |
| 1 | 1.00 | 1 | 1 | 0.04  | 0.037  | 0.038  | 0.04   | 0.04   | t | 35662  | LEQPVSND<br>LS                | Oryctola<br>gus<br>cuniculu<br>s |
| 1 | 1.00 | 1 | 1 | 0.04  | 0.037  | 0.038  | 0.04   | 0.04   | t | 35662  | LEQPVSND<br>LS                | Oryctola<br>gus<br>cuniculu<br>s |
| 1 | 1.00 | 1 | 1 | -0.03 | -0.03  | -0.035 | -0.024 | -0.03  | t | 11700  | EEITQVATI<br>SANS DHNI<br>GKL | Homo<br>sapiens                  |
| 1 | 1.00 | 1 | 1 | 0.01  | 0.01   | 0.009  | 0.01   | 0.01   | t | 73636  | YEDRYyre                      | Mus<br>musculu<br>s              |
| 1 | 1.00 | 1 | 1 | 0.03  | 0.026  | 0.032  | 0.03   | 0.029  | t | 94521  | GDLQVLA<br>QK                 | Oryctola<br>gus<br>cuniculu<br>s |
| 1 | 1.00 | 1 | 1 | -0.02 | -0.02  | -0.027 | -0.014 | -0.018 | t | 106990 | VYATRSSA<br>VRLRSSVP          | Homo<br>sapiens                  |
| 1 | 1.00 | 1 | 1 | 0     | 0      | 0      | 0      | 0      | t | 9982   | DRHFLN                        | Homo<br>sapiens                  |
| 1 | 1.00 | 1 | 1 | -0.02 | -0.02  | -0.02  | -0.02  | -0.02  | t | 132765 | YRAYA                         | Mus<br>musculu<br>s              |
| 1 | 1.00 | 1 | 1 | 0     | -0.001 | -0.003 | 0.001  | 0.002  | t | 12134  | EGCGWAG<br>WLL                | Homo<br>sapiens                  |
| 1 | 1.00 | 1 | 1 | 0     | 0      | -0.008 | 0      | 0.002  | t | 48672  | PNLSAYPK<br>SHGKTAK           | Oryctola<br>gus<br>cuniculu<br>s |
| 1 | 1.00 | 1 | 1 | 0.02  | 0.022  | 0.02   | 0.021  | 0.02   | t | 66241  | TSGTSGTS<br>GTSGTSG           | Homo<br>sapiens                  |
| 1 | 1.00 | 1 | 1 | 0.04  | 0.04   | 0.04   | 0.04   | 0.04   | t | 119506 | PIVET                         | Homo<br>sapiens                  |



|   |      |   |   |       |        |        |        |        |   |        |                              |                                  |
|---|------|---|---|-------|--------|--------|--------|--------|---|--------|------------------------------|----------------------------------|
| 1 | 1.00 | 1 | 1 | -0.02 | -0.022 | -0.02  | -0.021 | -0.021 | t | 70472  | VPSDTVQT<br>RHVV             | Mus<br>musculu<br>s              |
| 1 | 1.00 | 1 | 1 | -0.03 | -0.032 | -0.03  | -0.033 | -0.032 | t | 110385 | QLYKTCKQ<br>AGTCPPDII<br>PKV | Mus<br>musculu<br>s              |
| 1 | 1.00 | 1 | 1 | -0.03 | -0.028 | -0.029 | -0.033 | -0.03  | t | 70522  | VPYVKRVK<br>TW               | Homo<br>sapiens                  |
| 1 | 1.00 | 1 | 1 | 0     | -0.004 | -0.005 | -0.001 | 0      | t | 78657  | FVHAKKKE<br>EGEDDTA<br>RQEI  | Oryctola<br>gus<br>cuniculu<br>s |
| 1 | 1.00 | 1 | 1 | 0     | -0.002 | -0.005 | -0.001 | 0      | t | 78657  | FVHAKKKE<br>EGEDDTA<br>RQEI  | Mus<br>musculu<br>s              |
| 1 | 1.00 | 1 | 1 | 0     | 0.004  | 0      | 0.007  | 0      | t | 128016 | HLLTARAT<br>NSQLFRRA<br>VLMG | Homo<br>sapiens                  |
| 1 | 1.00 | 1 | 1 | 0.01  | 0.012  | 0.015  | 0.013  | 0.01   | t | 48555  | PMHECLS<br>APSVCAD<br>NY     | Homo<br>sapiens                  |
| 1 | 1.00 | 1 | 1 | -0.03 | -0.022 | -0.03  | -0.03  | -0.032 | t | 156850 | APHNKWP<br>HLNPP             | Gallus<br>gallus                 |
| 1 | 1.00 | 1 | 1 | 0.04  | 0.04   | 0.04   | 0.04   | 0.04   | t | 79462  | VTSTYH                       | Mus<br>musculu<br>s              |
| 1 | 1.00 | 1 | 1 | 0.02  | 0.02   | 0.02   | 0.02   | 0.02   | t | 149054 | GSPNFTQ                      | Sus<br>scrofa                    |
| 1 | 1.00 | 1 | 1 | 0.02  | 0.02   | 0.02   | 0.02   | 0.02   | t | 119602 | KGQPREP<br>Q                 | Homo<br>sapiens                  |
| 1 | 1.00 | 1 | 1 | 0.02  | 0.02   | 0.02   | 0.02   | 0.02   | t | 39391  | LSGQPAVI<br>PDREVLQ<br>QFDE  | Homo<br>sapiens                  |
| 1 | 1.00 | 1 | 1 | 0     | 0      | 0      | 0      | 0      | t | 134761 | PRRRSPSP<br>TPTPGPS          | Homo<br>sapiens                  |
| 1 | 1.00 | 1 | 1 | 0     | 0      | 0      | 0      | 0      | t | 153423 | MPKDMLP<br>YANPNGG<br>GS     | Mus<br>musculu<br>s              |
| 1 | 1.00 | 1 | 1 | 0     | 0      | 0      | 0      | 0      | t | 115904 | PTVMFPP<br>QSV               | Homo<br>sapiens                  |
| 1 | 1.00 | 1 | 1 | -0.02 | -0.02  | -0.02  | -0.02  | -0.02  | t | 114785 | ECLLCAHK<br>VE               | Homo<br>sapiens                  |

|   |      |   |   |       |        |        |        |        |   |        |                            |                                  |
|---|------|---|---|-------|--------|--------|--------|--------|---|--------|----------------------------|----------------------------------|
| 1 | 1.00 | 1 | 1 | 0.03  | 0.027  | 0.041  | 0.03   | 0.028  | t | 111927 | VSTAVDTG<br>VLGTSYP        | Oryctola<br>gus<br>cuniculu<br>s |
| 1 | 1.00 | 1 | 1 | -0.01 | -0.006 | -0.007 | -0.013 | -0.013 | t | 116695 | DRRDPYSP<br>SPYDRRG        | Homo<br>sapiens                  |
| 1 | 1.00 | 1 | 1 | 0.02  | 0.038  | 0.02   | 0.019  | 0.02   | t | 111238 | EGEAAQV<br>EEVRIY          | Oryctola<br>gus<br>cuniculu<br>s |
| 1 | 1.00 | 1 | 1 | 0.01  | 0.012  | 0.003  | 0.009  | 0.01   | t | 133787 | CQALVRM<br>LAKKPGW<br>K    | Homo<br>sapiens                  |
| 1 | 1.00 | 1 | 1 | 0.02  | 0.022  | 0.018  | 0.02   | 0.017  | t | 131990 | NSPLRIGG<br>GWGNSD<br>A    | Homo<br>sapiens                  |
| 1 | 1.00 | 1 | 1 | 0     | 0      | 0      | 0      | 0      | t | 86742  | NGVWVM<br>MDGNEQ<br>VEYPLK | Oryctola<br>gus<br>cuniculu<br>s |
| 1 | 1.00 | 1 | 1 | -0.02 | -0.02  | -0.022 | -0.02  | -0.022 | t | 608    | ACYCYGLP<br>NWKVW<br>D     | Mus<br>musculu<br>s              |
| 1 | 1.00 | 1 | 1 | -0.08 | -0.077 | -0.09  | -0.08  | -0.081 | t | 111232 | EDTYRFVT<br>SQAIACQ        | Mus<br>musculu<br>s              |
| 1 | 1.00 | 1 | 1 | -0.04 | -0.04  | -0.035 | -0.03  | -0.037 | t | 115784 | HRTFE                      | Homo<br>sapiens                  |
| 1 | 1.00 | 1 | 1 | 0     | 0      | 0.01   | 0      | -0.003 | t | 131836 | CAPGSCFP<br>GV             | Mus<br>musculu<br>s              |
| 1 | 1.00 | 1 | 1 | -0.01 | -0.006 | -0.011 | -0.009 | -0.01  | t | 6742   | CNYSKFW<br>YLEHAK          | Homo<br>sapiens                  |
| 1 | 1.00 | 1 | 1 | 0.02  | 0.017  | 0.02   | 0.02   | 0.02   | t | 53555  | RELADALL<br>EK             | Oryctola<br>gus<br>cuniculu<br>s |
| 1 | 1.00 | 1 | 1 | 0     | -0.004 | -0.005 | -0.007 | -0.002 | t | 130536 | LCENIAGH<br>LK             | Oryctola<br>gus<br>cuniculu<br>s |
| 1 | 1.00 | 1 | 1 | 0     | -0.002 | -0.005 | -0.007 | -0.002 | t | 130536 | LCENIAGH<br>LK             | Rattus<br>norvegic<br>us         |

|   |      |   |   |       |        |        |        |        |   |        |                              |                                  |
|---|------|---|---|-------|--------|--------|--------|--------|---|--------|------------------------------|----------------------------------|
| 1 | 1.00 | 1 | 1 | 0.03  | 0.028  | 0.025  | 0.027  | 0.03   | t | 32535  | KNKLEEKA<br>NKAMININ         | Mus<br>musculu<br>s              |
| 1 | 1.00 | 1 | 1 | -0.01 | -0.007 | -0.031 | -0.01  | -0.007 | t | 79775  | DDATVAIR<br>SAINNLIVE<br>LIR | Mus<br>musculu<br>s              |
| 1 | 1.00 | 1 | 1 | -0.03 | -0.03  | -0.03  | -0.03  | -0.03  | t | 117074 | RSLLSGGL<br>P                | Mus<br>musculu<br>s              |
| 1 | 1.00 | 1 | 1 | 0     | 0      | 0      | 0.001  | 0      | t | 10868  | DYEDRYR<br>E                 | Mus<br>musculu<br>s              |
| 1 | 1.00 | 1 | 1 | -0.02 | -0.022 | -0.02  | -0.019 | -0.021 | t | 72551  | WHRPPW<br>WPSSSL             | Oryctola<br>gus<br>cuniculu<br>s |
| 1 | 1.00 | 1 | 1 | 0     | 0.002  | -0.007 | 0.007  | 0      | t | 128144 | WGPVIDG<br>HFLREPPA<br>RALKR | Homo<br>sapiens                  |
| 1 | 1.00 | 1 | 1 | 0     | 0      | 0.007  | 0      | 0      | t | 119463 | HKKSLSSP<br>S                | Homo<br>sapiens                  |
| 1 | 1.00 | 1 | 1 | -0.03 | -0.032 | -0.033 | -0.033 | -0.03  | t | 75661  | YRPPNAPI<br>L                | Mus<br>musculu<br>s              |
| 1 | 1.00 | 1 | 1 | 0.01  | 0.017  | 0.012  | 0.01   | 0.011  | t | 95521  | KQTLPPSV                     | Cavia<br>porcellu<br>s           |
| 1 | 1.00 | 1 | 1 | -0.01 | -0.01  | -0.01  | -0.01  | -0.01  | t | 44095  | NGTYRATY                     | Oryctola<br>gus<br>cuniculu<br>s |
| 1 | 1.00 | 1 | 1 | 0.01  | 0.01   | 0.01   | 0.01   | 0.01   | t | 123522 | MTQAPRI<br>M                 | Oryctola<br>gus<br>cuniculu<br>s |
| 1 | 1.00 | 1 | 1 | 0.03  | 0.033  | 0.031  | 0.031  | 0.028  | t | 99416  | LFGILSVDC<br>TSEEMN          | Equus<br>caballus                |
| 1 | 1.00 | 1 | 1 | 0.01  | 0.01   | 0.01   | 0.01   | 0.01   | t | 151071 | YAADLKST<br>QNAIDEI          | Homo<br>sapiens                  |
| 1 | 1.00 | 1 | 1 | 0.01  | 0.01   | 0.01   | 0.01   | 0.01   | t | 133558 | EKVTSTWT<br>DWQY             | Homo<br>sapiens                  |
| 1 | 1.00 | 1 | 1 | 0.01  | 0.01   | 0.01   | 0.01   | 0.01   | t | 108297 | CKYLWSKC                     | Mus<br>musculu<br>s              |

|   |      |   |   |       |        |        |        |        |   |        |                          |                                  |
|---|------|---|---|-------|--------|--------|--------|--------|---|--------|--------------------------|----------------------------------|
| 1 | 1.00 | 1 | 1 | 0.01  | 0.01   | 0.01   | 0.01   | 0.01   | t | 104745 | CSTWDAN<br>KPY           | Homo<br>sapiens                  |
| 1 | 1.00 | 1 | 1 | 0.01  | 0.01   | 0.01   | 0.01   | 0.01   | t | 110586 | GAPGNRG<br>FPGQDGL<br>A  | Mus<br>musculu<br>s              |
| 1 | 1.00 | 1 | 1 | 0.01  | 0.01   | 0.01   | 0.01   | 0.01   | t | 108297 | CKYLWSKC                 | Homo<br>sapiens                  |
| 1 | 1.00 | 1 | 1 | 0.01  | 0.01   | 0.01   | 0.01   | 0.01   | t | 101921 | NGGCDAD<br>AT            | Homo<br>sapiens                  |
| 1 | 1.00 | 1 | 1 | -0.01 | -0.01  | -0.01  | -0.01  | -0.01  | t | 96566  | LKIVSPMV<br>VK           | Homo<br>sapiens(<br>human)       |
| 1 | 1.00 | 1 | 1 | 0     | 0.002  | -0.01  | -0.003 | -0.002 | t | 56675  | RYVKQEV<br>QRGGR         | Homo<br>sapiens                  |
| 1 | 1.00 | 1 | 1 | -0.01 | -0.012 | -0.004 | -0.004 | -0.009 | t | 27728  | INQQLNPK<br>TNKWEDK      | Mus<br>musculu<br>s              |
| 1 | 1.00 | 1 | 1 | -0.02 | -0.024 | -0.02  | -0.017 | -0.02  | t | 95354  | ELSEFIPGA<br>SLR         | Oryctola<br>gus<br>cuniculu<br>s |
| 1 | 1.00 | 1 | 1 | -0.01 | -0.01  | -0.005 | 0      | -0.007 | t | 116024 | VTLRI                    | Homo<br>sapiens                  |
| 1 | 1.00 | 1 | 1 | -0.02 | -0.023 | -0.019 | -0.02  | -0.021 | t | 10431  | DTNKDKPS<br>YQ           | Oryctola<br>gus<br>cuniculu<br>s |
| 1 | 1.00 | 1 | 1 | -0.02 | -0.02  | -0.02  | -0.02  | -0.02  | t | 117300 | GSGKGKV<br>QFQGKKT<br>KF | Homo<br>sapiens                  |
| 1 | 1.00 | 1 | 1 | -0.04 | -0.028 | -0.037 | -0.04  | -0.04  | t | 24696  | HRMAWN<br>MMMNW<br>SPT   | Pan<br>troglody<br>tes           |
| 1 | 1.00 | 1 | 1 | 0     | -0.003 | 0      | 0      | 0.001  | t | 135440 | AFPAVT                   | Oryctola<br>gus<br>cuniculu<br>s |
| 1 | 1.00 | 1 | 1 | -0.01 | -0.01  | -0.01  | -0.01  | -0.011 | t | 119382 | VISCAKDAI<br>EDEEGSC     | Oryctola<br>gus<br>cuniculu<br>s |

|   |      |   |   |       |        |        |        |       |   |        |                              |                                  |
|---|------|---|---|-------|--------|--------|--------|-------|---|--------|------------------------------|----------------------------------|
| 1 | 1.00 | 1 | 1 | 0.02  | 0.02   | 0.02   | 0.02   | 0.02  | t | 132400 | KGKAGKD<br>GGAGQ             | Mus<br>musculu<br>s              |
| 1 | 1.00 | 1 | 1 | 0     | 0      | 0      | 0      | 0     | t | 127989 | GGAGAGG<br>GAGAGG            | Homo<br>sapiens                  |
| 1 | 1.00 | 1 | 1 | 0.02  | 0.022  | 0.018  | 0.021  | 0.019 | t | 53923  | RGLTSLFS<br>AFSAQ            | Homo<br>sapiens                  |
| 1 | 1.00 | 1 | 1 | -0.01 | -0.01  | -0.005 | -0.007 | -0.01 | t | 65519  | TPCILSGSA<br>S               | Homo<br>sapiens                  |
| 1 | 1.00 | 1 | 1 | 0     | 0      | -0.002 | 0      | 0     | t | 70153  | VNPNNAA<br>AL                | Homo<br>sapiens                  |
| 1 | 1.00 | 1 | 1 | 0     | 0.002  | 0      | 0.001  | 0     | t | 22145  | GRLVLSGK<br>PAIIPDREV<br>LYR | Homo<br>sapiens                  |
| 1 | 1.00 | 1 | 1 | 0     | 0      | 0      | -0.001 | 0     | t | 106441 | GDLKRTT                      | Mus<br>musculu<br>s              |
| 1 | 1.00 | 1 | 1 | 0     | 0      | 0      | 0      | 0     | t | 50931  | QGPGAPQ<br>GPGAPQG<br>PGAP   | Mus<br>musculu<br>s              |
| 1 | 1.00 | 1 | 1 | 0     | 0      | 0      | 0      | 0     | t | 52814  | QVVYDYQ<br>H                 | Oryctola<br>gus<br>cuniculu<br>s |
| 1 | 1.00 | 1 | 1 | 0     | 0      | 0      | 0      | 0     | t | 36546  | LIHFGND                      | Mus<br>musculu<br>s              |
| 1 | 1.00 | 1 | 1 | 0.01  | 0.01   | 0.01   | 0.01   | 0.009 | t | 130924 | KLPPEEDE<br>MRTETQR          | Homo<br>sapiens                  |
| 1 | 1.00 | 1 | 1 | 0.01  | 0.01   | 0.005  | 0.01   | 0.01  | t | 44870  | NLSGKAV<br>NHIRS             | Homo<br>sapiens                  |
| 1 | 1.00 | 1 | 1 | 0     | -0.004 | 0      | -0.001 | 0     | t | 137964 | RFKEFGSV                     | Oryctola<br>gus<br>cuniculu<br>s |
| 1 | 1.00 | 1 | 1 | 0.01  | 0.012  | -0.004 | 0.011  | 0.01  | t | 44634  | NKYLKVQL<br>KKGETVEN<br>TNS  | Homo<br>sapiens                  |
| 1 | 1.00 | 1 | 1 | 0.01  | 0.01   | 0.01   | 0.007  | 0.01  | t | 21016  | GLLQRATQ<br>QQ               | Homo<br>sapiens                  |
| 1 | 1.00 | 1 | 1 | 0     | 0      | 0      | 0.004  | 0     | t | 115645 | RNGKDQD<br>GDQAP             | Homo<br>sapiens                  |

|   |      |   |   |       |        |        |       |        |   |        |                             |                                  |
|---|------|---|---|-------|--------|--------|-------|--------|---|--------|-----------------------------|----------------------------------|
| 1 | 1.00 | 1 | 1 | -0.01 | -0.01  | -0.01  | -0.01 | -0.01  | t | 75949  | YTASARGD<br>LAHL            | Mus<br>musculu<br>s              |
| 1 | 1.00 | 1 | 1 | -0.01 | -0.01  | -0.01  | -0.01 | -0.01  | t | 75949  | YTASARGD<br>LAHL            | Mus<br>musculu<br>s              |
| 1 | 1.00 | 1 | 1 | 0.04  | 0.04   | 0.04   | 0.04  | 0.04   | t | 135702 | KLTRAEAV                    | Homo<br>sapiens                  |
| 1 | 1.00 | 1 | 1 | 0.02  | 0.02   | 0.02   | 0.02  | 0.02   | t | 115626 | LKDAIGEG<br>KVTL            | Homo<br>sapiens                  |
| 1 | 1.00 | 1 | 1 | 0.02  | 0.02   | 0.02   | 0.02  | 0.02   | t | 103426 | MTLLELSD<br>FVKKFEE         | Homo<br>sapiens                  |
| 1 | 1.00 | 1 | 1 | 0.02  | 0.02   | 0.02   | 0.02  | 0.02   | t | 115626 | LKDAIGEG<br>KVTL            | Homo<br>sapiens                  |
| 1 | 1.00 | 1 | 1 | 0     | 0      | 0      | 0     | 0      | t | 142391 | DAANIAH<br>QKWLKAT          | Homo<br>sapiens                  |
| 1 | 1.00 | 1 | 1 | 0     | 0      | 0      | 0     | 0      | t | 138249 | TFRVVSV                     | Homo<br>sapiens                  |
| 1 | 1.00 | 1 | 1 | 0     | 0      | 0      | 0     | 0      | t | 140878 | LAGKGVD<br>AGKLG            | Oryctola<br>gus<br>cuniculu<br>s |
| 1 | 1.00 | 1 | 1 | 0     | 0      | 0      | 0     | 0      | t | 127738 | MHIPTPD                     | Homo<br>sapiens                  |
| 1 | 1.00 | 1 | 1 | 0     | 0      | 0      | 0     | 0      | t | 131823 | ALVRYSSK<br>EEVVKAQ         | Homo<br>sapiens                  |
| 1 | 1.00 | 1 | 1 | -0.02 | -0.02  | -0.02  | -0.02 | -0.02  | t | 99975  | EEKELLKRI<br>Q              | Mus<br>musculu<br>s              |
| 1 | 1.00 | 1 | 1 | -0.02 | -0.02  | -0.03  | -0.02 | -0.019 | t | 104165 | PAANTRK<br>GYHQTMN<br>NSYTE | Oryctola<br>gus<br>cuniculu<br>s |
| 1 | 1.00 | 1 | 1 | 0     | 0      | -0.006 | 0     | 0.001  | t | 158836 | IHNDVEA<br>WIDRYKYL<br>P    | Mus<br>musculu<br>s              |
| 1 | 1.00 | 1 | 1 | 0     | -0.003 | 0.003  | 0     | -0.003 | t | 111123 | ARTYNQN<br>LIRHVGGG         | Oryctola<br>gus<br>cuniculu<br>s |

|   |      |   |   |       |        |        |        |        |   |        |                            |                                  |
|---|------|---|---|-------|--------|--------|--------|--------|---|--------|----------------------------|----------------------------------|
| 1 | 1.00 | 1 | 1 | -0.02 | -0.016 | -0.023 | -0.019 | -0.021 | t | 103462 | PDRSAERC<br>GSPAIDL        | Homo<br>sapiens                  |
| 1 | 1.00 | 1 | 1 | -0.01 | -0.01  | -0.01  | -0.008 | -0.01  | t | 63540  | TESTLSTAL<br>AELAT         | Homo<br>sapiens                  |
| 1 | 1.00 | 1 | 1 | -0.01 | -0.01  | -0.01  | -0.008 | -0.01  | t | 62924  | TALVVAQL<br>LRIPQAI        | Homo<br>sapiens                  |
| 1 | 1.00 | 1 | 1 | -0.01 | -0.01  | -0.026 | -0.008 | -0.007 | t | 98807  | GSFRPSQQ<br>NPQA           | Homo<br>sapiens                  |
| 1 | 1.00 | 1 | 1 | 0.05  | 0.05   | 0.05   | 0.044  | 0.048  | t | 21102  | GLRGEEM<br>EEMVQS          | Homo<br>sapiens                  |
| 1 | 1.00 | 1 | 1 | -0.04 | -0.04  | -0.04  | -0.04  | -0.043 | t | 129296 | LPYGDSDM<br>DRIEKDRL<br>Q  | Homo<br>sapiens                  |
| 1 | 1.00 | 1 | 1 | -0.01 | -0.013 | -0.013 | -0.01  | -0.008 | t | 67168  | TVSSQSFR                   | Oryctola<br>gus<br>cuniculu<br>s |
| 1 | 1.00 | 1 | 1 | -0.01 | -0.01  | -0.01  | -0.01  | -0.01  | t | 72910  | WNSTTFH<br>QTL             | Mus<br>musculu<br>s              |
| 1 | 1.00 | 1 | 1 | -0.01 | -0.01  | -0.01  | -0.01  | -0.01  | t | 72910  | WNSTTFH<br>QTL             | Mus<br>musculu<br>s              |
| 1 | 1.00 | 1 | 1 | -0.01 | -0.01  | -0.01  | -0.01  | -0.01  | t | 72910  | WNSTTFH<br>QTL             | Mus<br>musculu<br>s              |
| 1 | 1.00 | 1 | 1 | -0.01 | -0.01  | -0.01  | -0.01  | -0.01  | t | 72910  | WNSTTFH<br>QTL             | Mus<br>musculu<br>s              |
| 1 | 1.00 | 1 | 1 | 0.02  | 0.022  | 0.02   | 0.023  | 0.019  | t | 108989 | FRCQVQFY<br>GLSENDE<br>W   | Homo<br>sapiens                  |
| 1 | 1.00 | 1 | 1 | -0.06 | -0.06  | -0.06  | -0.06  | -0.06  | t | 107124 | GAPGLRG<br>GAG             | Mus<br>musculu<br>s              |
| 1 | 1.00 | 1 | 1 | -0.03 | -0.03  | -0.038 | -0.031 | -0.03  | t | 87165  | NYKNGGF<br>FVQYG           | Homo<br>sapiens                  |
| 1 | 1.00 | 1 | 1 | 0.01  | 0.008  | 0.01   | 0.011  | 0.01   | t | 149425 | QGFFQPS<br>QQN             | Mus<br>musculu<br>s              |
| 1 | 1.00 | 1 | 1 | 0.02  | 0.02   | 0.025  | 0.02   | 0.018  | t | 50235  | QAELDDKY<br>AGKGYKLG<br>SK | Mus<br>musculu<br>s              |

|   |      |   |   |       |        |        |        |       |   |        |                              |                                  |
|---|------|---|---|-------|--------|--------|--------|-------|---|--------|------------------------------|----------------------------------|
| 1 | 1.00 | 1 | 1 | 0.04  | 0.026  | 0.039  | 0.04   | 0.04  | t | 63818  | TGFADPNT<br>TTG              | Oryctola<br>gus<br>cuniculu<br>s |
| 1 | 1.00 | 1 | 1 | 0     | -0.002 | -0.001 | -0.001 | 0     | t | 72251  | WAPSV                        | Mus<br>musculu<br>s              |
| 1 | 1.00 | 1 | 1 | 0     | 0      | 0      | 0      | 0     | t | 36278  | LGQGSFRP<br>SQQN             | Mus<br>musculu<br>s              |
| 1 | 1.00 | 1 | 1 | 0     | 0      | -0.005 | 0      | 0     | t | 19093  | GDRAAGQ<br>PAGDRAA<br>GQPA   | Mus<br>musculu<br>s              |
| 1 | 1.00 | 1 | 1 | 0     | 0      | -0.005 | 0      | 0     | t | 19093  | GDRAAGQ<br>PAGDRAA<br>GQPA   | Mus<br>musculu<br>s              |
| 1 | 1.00 | 1 | 1 | 0.03  | 0.03   | 0.03   | 0.03   | 0.03  | t | 103359 | LILTSYTS<br>EAMLDA           | Homo<br>sapiens                  |
| 1 | 1.00 | 1 | 1 | 0.05  | 0.05   | 0.057  | 0.05   | 0.05  | t | 63571  | TEVEDDRE<br>PSVPSEY          | Homo<br>sapiens                  |
| 1 | 1.00 | 1 | 1 | 0.01  | 0.01   | 0.01   | 0.01   | 0.01  | t | 149073 | MTSSETQ                      | Sus<br>scrofa                    |
| 1 | 1.00 | 1 | 1 | 0.01  | 0.01   | 0.01   | 0.01   | 0.01  | t | 137965 | RFLPKYEG<br>NIDI             | Homo<br>sapiens                  |
| 1 | 1.00 | 1 | 1 | 0.01  | 0.01   | 0.01   | 0.01   | 0.01  | t | 132170 | ASKAPAN<br>GGNIR             | Mus<br>musculu<br>s              |
| 1 | 1.00 | 1 | 1 | 0.01  | 0.01   | 0.01   | 0.01   | 0.01  | t | 118047 | PGIMAPPP<br>GM               | Mus<br>musculu<br>s              |
| 1 | 1.00 | 1 | 1 | 0.01  | 0.01   | 0.01   | 0.01   | 0.01  | t | 112395 | VYFCHQY                      | Homo<br>sapiens                  |
| 1 | 1.00 | 1 | 1 | 0.01  | 0.01   | 0.01   | 0.01   | 0.01  | t | 115907 | PVVVPPFL<br>QP               | Homo<br>sapiens                  |
| 1 | 1.00 | 1 | 1 | 0.01  | 0.01   | 0.01   | 0.01   | 0.01  | t | 112218 | LTCFSFG                      | Homo<br>sapiens                  |
| 1 | 1.00 | 1 | 1 | 0.01  | 0.01   | 0.01   | 0.01   | 0.01  | t | 114845 | GTDGVTYT<br>ND               | Homo<br>sapiens                  |
| 1 | 1.00 | 1 | 1 | 0.01  | 0.01   | 0.01   | 0.01   | 0.01  | t | 113193 | TGEIKALA<br>GCDFLT           | Homo<br>sapiens                  |
| 1 | 1.00 | 1 | 1 | 0.01  | 0.006  | 0.01   | 0.01   | 0.01  | t | 9478   | DNIHVKM<br>FKVIMNN<br>DKSELI | Aotus<br>sp.                     |
| 1 | 1.00 | 1 | 1 | -0.01 | -0.01  | -0.01  | -0.01  | -0.01 | t | 114784 | ECKETVP<br>MNC               | Homo<br>sapiens                  |



|   |      |   |   |       |       |        |       |        |   |        |                              |                          |
|---|------|---|---|-------|-------|--------|-------|--------|---|--------|------------------------------|--------------------------|
| 1 | 1.00 | 1 | 1 | -0.05 | -0.05 | -0.05  | -0.05 | -0.05  | t | 110795 | CDLIPNLKL<br>NNG             | Homo<br>sapiens          |
| 1 | 1.00 | 1 | 1 | 0     | 0.003 | 0      | 0     | 0      | t | 73606  | YDWRAD<br>W                  | Mus<br>musculu<br>s      |
| 1 | 1.00 | 1 | 1 | 0.02  | 0.02  | 0.012  | 0.02  | 0.02   | t | 88944  | SNSHNSQ<br>TEVAA             | Homo<br>sapiens          |
| 1 | 1.00 | 1 | 1 | 0.01  | 0.012 | 0.012  | 0.011 | 0.01   | t | 32971  | KQELDEIST<br>NIRQAG          | Homo<br>sapiens          |
| 1 | 1.00 | 1 | 1 | 0.02  | 0.008 | 0.02   | 0.02  | 0.02   | t | 108790 | AQGPRGE<br>P                 | Macaca<br>mulatta        |
| 1 | 1.00 | 1 | 1 | 0.09  | 0.092 | 0.091  | 0.088 | 0.088  | t | 106879 | STSTSSSSS<br>G               | Homo<br>sapiens          |
| 1 | 1.00 | 1 | 1 | -0.01 | -0.01 | -0.014 | -0.01 | -0.011 | t | 122659 | YTSLHGYF<br>VFGPTGC<br>NLEGF | Rattus<br>norvegic<br>us |
| 1 | 1.00 | 1 | 1 | 0     | 0.004 | 0      | 0.001 | 0      | t | 24712  | HRVMYAS<br>S                 | Homo<br>sapiens          |
| 1 | 1.00 | 1 | 1 | 0     | 0.004 | 0      | 0.001 | 0      | t | 35006  | LAVLLGAC                     | Homo<br>sapiens          |
| 1 | 1.00 | 1 | 1 | 0.06  | 0.06  | 0.058  | 0.06  | 0.058  | t | 95563  | LNTVNGTT<br>RTVN             | Homo<br>sapiens          |
| 1 | 1.00 | 1 | 1 | -0.03 | -0.03 | -0.023 | -0.03 | -0.03  | t | 119493 | LSRKKTLTT                    | Homo<br>sapiens          |
| 1 | 1.00 | 1 | 1 | 0.05  | 0.05  | 0.052  | 0.05  | 0.05   | t | 97650  | SLLTEVET                     | Mus<br>musculu<br>s      |
| 1 | 1.00 | 1 | 1 | 0     | 0     | 0      | 0     | 0      | t | 48463  | PLQKTYNY                     | Homo<br>sapiens          |
| 1 | 1.00 | 1 | 1 | -0.01 | -0.01 | -0.01  | -0.01 | -0.011 | t | 153378 | EIDLKLEPG<br>TRV             | Mus<br>musculu<br>s      |

|   |      |   |   |      |       |        |       |        |   |        |                              |                              |
|---|------|---|---|------|-------|--------|-------|--------|---|--------|------------------------------|------------------------------|
| 1 | 1.00 | 1 | 1 | 0    | 0.003 | -0.008 | 0     | -0.002 | t | 72485  | WGNGCGL<br>FGKGSIDT<br>CAKFA | Equus<br>caballus            |
| 1 | 1.00 | 1 | 1 | 0    | 0     | -0.006 | 0     | 0      | t | 55675  | RRPKHLYV<br>SMPTAQ           | Homo<br>sapiens              |
| 1 | 1.00 | 1 | 1 | 0    | 0.003 | 0      | 0     | -0.002 | t | 135458 | FGSDYEDR<br>YYR              | Mus<br>musculus              |
| 1 | 1.00 | 1 | 1 | 0.06 | 0.064 | 0.054  | 0.06  | 0.062  | t | 92285  | AFNGGGDG<br>VDT              | Ovis<br>aries                |
| 1 | 1.00 | 1 | 1 | 0.01 | 0.008 | 0.011  | 0.009 | 0.01   | t | 79166  | CEGNLACL<br>S                | Mus<br>musculus              |
| 1 | 1.00 | 1 | 1 | 0    | 0     | 0      | 0     | 0      | t | 70667  | VQWMNR<br>LIAFAFAG<br>NHVSP  | Homo<br>sapiens              |
| 1 | 1.00 | 1 | 1 | 0.01 | 0.012 | 0.012  | 0.011 | 0.009  | t | 61420  | SSTTSKVP<br>PSPGGE           | Homo<br>sapiens              |
| 1 | 1.00 | 1 | 1 | 0.03 | 0.026 | 0.038  | 0.03  | 0.028  | t | 140593 | PYQFFTAS<br>E                | Mus<br>musculus              |
| 1 | 1.00 | 1 | 1 | 0.03 | 0.033 | 0.03   | 0.03  | 0.029  | t | 133737 | VTPYFSYP<br>VA               | Mus<br>musculus              |
| 1 | 1.00 | 1 | 1 | 0.06 | 0.046 | 0.058  | 0.06  | 0.061  | t | 55924  | RSQDACIE<br>FVQQEVD          | Oryctola<br>gus<br>cuniculus |
| 1 | 1.00 | 1 | 1 | 0.02 | 0.02  | 0.02   | 0.02  | 0.02   | t | 133955 | WIMNNF                       | Mus<br>musculus              |
| 1 | 1.00 | 1 | 1 | 0.02 | 0.02  | 0.02   | 0.02  | 0.02   | t | 79409  | TCCLCSGK<br>LALACE           | Mus<br>musculus              |
| 1 | 1.00 | 1 | 1 | 0.02 | 0.02  | 0.02   | 0.02  | 0.02   | t | 95158  | TNVLVNSS<br>GHCQYLPP<br>GIFK | Rattus<br>norvegicus         |
| 1 | 1.00 | 1 | 1 | 0.02 | 0.02  | 0.02   | 0.02  | 0.02   | t | 22083  | GRIILSGKP<br>AVVPDRE<br>VLYQ | Homo<br>sapiens              |

|   |      |   |   |       |        |        |       |        |   |        |                              |                                  |
|---|------|---|---|-------|--------|--------|-------|--------|---|--------|------------------------------|----------------------------------|
| 1 | 1.00 | 1 | 1 | 0     | 0      | 0      | 0     | 0      | t | 123580 | PGMPPMT<br>Q                 | Oryctola<br>gus<br>cuniculu<br>s |
| 1 | 1.00 | 1 | 1 | 0     | 0      | 0      | 0     | 0      | t | 92808  | GGKGDDIF<br>VH               | Ovis<br>aries                    |
| 1 | 1.00 | 1 | 1 | -0.02 | -0.02  | -0.02  | -0.02 | -0.02  | t | 112165 | IGVGWIR                      | Homo<br>sapiens                  |
| 1 | 1.00 | 1 | 1 | -0.04 | -0.04  | -0.04  | -0.04 | -0.04  | t | 100174 | KDALLHEH<br>YV               | Mus<br>musculu<br>s              |
| 1 | 1.00 | 1 | 1 | -0.01 | -0.012 | -0.012 | -0.01 | -0.011 | t | 59353  | SLNFLGGT<br>TVCLGQN          | Oryctola<br>gus<br>cuniculu<br>s |
| 1 | 1.00 | 1 | 1 | -0.02 | -0.02  | -0.02  | -0.02 | -0.02  | t | 95119  | MKKPGENI<br>KPLSCKYSY<br>PKH | Rattus<br>norvegic<br>us         |
| 1 | 1.00 | 1 | 1 | 0.02  | 0.014  | 0.013  | 0.017 | 0.02   | t | 78213  | MVLVYYES<br>IAYSF            | Oryctola<br>gus<br>cuniculu<br>s |
| 1 | 1.00 | 1 | 1 | 0     | 0      | 0      | 0     | -0.001 | t | 135441 | AGLGAGIP                     | Mus<br>musculu<br>s              |
| 1 | 1.00 | 1 | 1 | 0     | 0      | 0      | 0     | -0.001 | t | 135477 | LGAGLG                       | Mus<br>musculu<br>s              |
| 1 | 1.00 | 1 | 1 | 0     | 0      | 0      | 0     | -0.001 | t | 158723 | DTGCAIDIS<br>RQELRCG         | Mus<br>musculu<br>s              |
| 1 | 1.00 | 1 | 1 | 0     | 0      | 0      | 0     | -0.001 | t | 158938 | KTQNQGP<br>WDEGRVE<br>ID     | Mus<br>musculu<br>s              |
| 1 | 1.00 | 1 | 1 | 0     | 0      | 0      | 0     | -0.001 | t | 139632 | VKPLPSPD<br>TD               | Mus<br>musculu<br>s              |
| 1 | 1.00 | 1 | 1 | 0     | 0      | 0      | 0     | -0.001 | t | 159043 | NTFVVDG<br>PETKECPT<br>Q     | Mus<br>musculu<br>s              |
| 1 | 1.00 | 1 | 1 | 0     | 0      | 0      | 0     | -0.001 | t | 149684 | EPAGSNR                      | Mus<br>musculu<br>s              |
| 1 | 1.00 | 1 | 1 | 0     | 0      | 0      | 0     | -0.001 | t | 159287 | KTQGHSY<br>HLRRKNG<br>VKHPVY | Aotus                            |
| 1 | 1.00 | 1 | 1 | 0     | 0      | 0      | 0     | -0.001 | t | 144678 | GTQPTLEV<br>VPMGRGS          | Mus<br>musculu<br>s              |

|   |      |   |   |   |        |   |   |        |   |        |                           |                                  |
|---|------|---|---|---|--------|---|---|--------|---|--------|---------------------------|----------------------------------|
| 1 | 1.00 | 1 | 1 | 0 | 0      | 0 | 0 | -0.001 | t | 141693 | KTWG                      | Mus<br>musculu<br>s              |
| 1 | 1.00 | 1 | 1 | 0 | 0      | 0 | 0 | -0.001 | t | 141955 | LTYLRGIST<br>KVTVGNI      | Mus<br>musculu<br>s              |
| 1 | 1.00 | 1 | 1 | 0 | 0      | 0 | 0 | -0.001 | t | 144656 | GPTHAMF<br>DSSGP          | Mus<br>musculu<br>s              |
| 1 | 1.00 | 1 | 1 | 0 | 0      | 0 | 0 | -0.001 | t | 138628 | SQKEVLER<br>TRAELDTV<br>C | Oryctola<br>gus<br>cuniculu<br>s |
| 1 | 1.00 | 1 | 1 | 0 | 0      | 0 | 0 | -0.001 | t | 144793 | SYGGRKGT<br>HPGLEMP       | Mus<br>musculu<br>s              |
| 1 | 1.00 | 1 | 1 | 0 | 0      | 0 | 0 | -0.001 | t | 148701 | PAELMRRF<br>ELYF          | Mus<br>musculu<br>s              |
| 1 | 1.00 | 1 | 1 | 0 | -0.003 | 0 | 0 | -0.001 | t | 142480 | VAAVTEKL<br>RAGT          | Oryctola<br>gus<br>cuniculu<br>s |
| 1 | 1.00 | 1 | 1 | 0 | 0      | 0 | 0 | -0.001 | t | 144654 | GPHPTLEV<br>VPMGRGS       | Mus<br>musculu<br>s              |
| 1 | 1.00 | 1 | 1 | 0 | 0      | 0 | 0 | -0.001 | t | 144675 | GTHPFLSQ<br>W             | Mus<br>musculu<br>s              |
| 1 | 1.00 | 1 | 1 | 0 | 0      | 0 | 0 | -0.001 | t | 139475 | ATPRAHEV<br>SE            | Mus<br>musculu<br>s              |
| 1 | 1.00 | 1 | 1 | 0 | 0      | 0 | 0 | -0.001 | t | 153379 | EQEFTNIT<br>DRV           | Mus<br>musculu<br>s              |
| 1 | 1.00 | 1 | 1 | 0 | 0      | 0 | 0 | -0.001 | t | 144673 | GTFCGGEE<br>CMRG          | Mus<br>musculu<br>s              |
| 1 | 1.00 | 1 | 1 | 0 | 0      | 0 | 0 | -0.001 | t | 144763 | RIEDPPFN<br>SLL           | Mus<br>musculu<br>s              |
| 1 | 1.00 | 1 | 1 | 0 | 0      | 0 | 0 | -0.001 | t | 144712 | KSLSSTEFI<br>PN           | Mus<br>musculu<br>s              |
| 1 | 1.00 | 1 | 1 | 0 | 0      | 0 | 0 | -0.001 | t | 159296 | SFSKPSNS<br>WFPVEGP       | Oryctola<br>gus<br>cuniculu<br>s |
| 1 | 1.00 | 1 | 1 | 0 | 0      | 0 | 0 | -0.001 | t | 153379 | EQEFTNIT<br>DRV           | Mus<br>musculu<br>s              |

|   |      |   |   |   |   |   |   |        |   |        |                              |                     |
|---|------|---|---|---|---|---|---|--------|---|--------|------------------------------|---------------------|
| 1 | 1.00 | 1 | 1 | 0 | 0 | 0 | 0 | -0.001 | t | 141786 | YGEESRR<br>GDLAALAR<br>RV    | Mus<br>musculu<br>s |
| 1 | 1.00 | 1 | 1 | 0 | 0 | 0 | 0 | -0.001 | t | 144598 | CFVGTHP<br>QLRC              | Mus<br>musculu<br>s |
| 1 | 1.00 | 1 | 1 | 0 | 0 | 0 | 0 | -0.001 | t | 158838 | IHNDVEA<br>WMDRYKY<br>YP     | Mus<br>musculu<br>s |
| 1 | 1.00 | 1 | 1 | 0 | 0 | 0 | 0 | -0.001 | t | 135414 | AAAYKAA                      | Mus<br>musculu<br>s |
| 1 | 1.00 | 1 | 1 | 0 | 0 | 0 | 0 | -0.001 | t | 144779 | SGTHWFL<br>AGCIS             | Mus<br>musculu<br>s |
| 1 | 1.00 | 1 | 1 | 0 | 0 | 0 | 0 | -0.001 | t | 159026 | NLAIHSDL<br>SYWIESRL         | Mus<br>musculu<br>s |
| 1 | 1.00 | 1 | 1 | 0 | 0 | 0 | 0 | -0.001 | t | 141963 | MVDRGW<br>G                  | Mus<br>musculu<br>s |
| 1 | 1.00 | 1 | 1 | 0 | 0 | 0 | 0 | -0.001 | t | 134411 | IPP                          | Mus<br>musculu<br>s |
| 1 | 1.00 | 1 | 1 | 0 | 0 | 0 | 0 | -0.001 | t | 138886 | NVGGDNV<br>DIHSIVPV<br>GQDPH | Mus<br>musculu<br>s |
| 1 | 1.00 | 1 | 1 | 0 | 0 | 0 | 0 | -0.001 | t | 144705 | KGTHSLYS<br>QIAG             | Mus<br>musculu<br>s |
| 1 | 1.00 | 1 | 1 | 0 | 0 | 0 | 0 | -0.001 | t | 144809 | VLAPGGT<br>HSRGLLE<br>M      | Mus<br>musculu<br>s |
| 1 | 1.00 | 1 | 1 | 0 | 0 | 0 | 0 | -0.001 | t | 144676 | GTHPSLQF<br>T                | Mus<br>musculu<br>s |
| 1 | 1.00 | 1 | 1 | 0 | 0 | 0 | 0 | -0.001 | t | 150204 | FHSVHTL<br>LEWLMEK<br>ELMV   | Mus<br>musculu<br>s |
| 1 | 1.00 | 1 | 1 | 0 | 0 | 0 | 0 | -0.001 | t | 159173 | TTESGKLIT<br>DWCCRSC         | Mus<br>musculu<br>s |
| 1 | 1.00 | 1 | 1 | 0 | 0 | 0 | 0 | -0.001 | t | 159288 | LLHYSTISQ<br>DNLDISFG<br>ELQ | Aotus               |

|   |      |   |   |   |        |   |   |        |   |        |                              |                                  |
|---|------|---|---|---|--------|---|---|--------|---|--------|------------------------------|----------------------------------|
| 1 | 1.00 | 1 | 1 | 0 | 0      | 0 | 0 | -0.001 | t | 144685 | HVGTHPM<br>LQPSF             | Mus<br>musculu<br>s              |
| 1 | 1.00 | 1 | 1 | 0 | 0      | 0 | 0 | -0.001 | t | 141683 | KDWG                         | Mus<br>musculu<br>s              |
| 1 | 1.00 | 1 | 1 | 0 | 0      | 0 | 0 | -0.001 | t | 148632 | IDSEELIN<br>KKR              | Mus<br>musculu<br>s              |
| 1 | 1.00 | 1 | 1 | 0 | 0      | 0 | 0 | -0.001 | t | 144873 | ATWVDLV<br>LEGDSCLTI         | Mus<br>musculu<br>s              |
| 1 | 1.00 | 1 | 1 | 0 | 0      | 0 | 0 | -0.001 | t | 135799 | YGKDVKDL<br>FDYAE            | Mus<br>musculu<br>s              |
| 1 | 1.00 | 1 | 1 | 0 | -0.003 | 0 | 0 | -0.001 | t | 142441 | LFSPWLRV<br>QNH              | Oryctola<br>gus<br>cuniculu<br>s |
| 1 | 1.00 | 1 | 1 | 0 | 0      | 0 | 0 | -0.001 | t | 144622 | EDVGSNK                      | Mus<br>musculu<br>s              |
| 1 | 1.00 | 1 | 1 | 0 | 0      | 0 | 0 | -0.001 | t | 159085 | RYKYYPET<br>PQGLAKII         | Mus<br>musculu<br>s              |
| 1 | 1.00 | 1 | 1 | 0 | 0      | 0 | 0 | -0.001 | t | 141523 | ALEPPHNL<br>PVP              | Mus<br>musculu<br>s              |
| 1 | 1.00 | 1 | 1 | 0 | 0      | 0 | 0 | -0.001 | t | 138765 | EEIKMDIS<br>KLNA             | Mus<br>musculu<br>s              |
| 1 | 1.00 | 1 | 1 | 0 | 0      | 0 | 0 | -0.001 | t | 159284 | FSLRLMEE<br>NWNAEKR<br>S     | Oryctola<br>gus<br>cuniculu<br>s |
| 1 | 1.00 | 1 | 1 | 0 | 0      | 0 | 0 | -0.001 | t | 138893 | RHDSGYEV<br>H                | Mus<br>musculu<br>s              |
| 1 | 1.00 | 1 | 1 | 0 | 0      | 0 | 0 | -0.001 | t | 156601 | ADEPNNL<br>NSK               | Oryctola<br>gus<br>cuniculu<br>s |
| 1 | 1.00 | 1 | 1 | 0 | 0      | 0 | 0 | -0.001 | t | 157189 | EFRHDSGY                     | Mus<br>musculu<br>s              |
| 1 | 1.00 | 1 | 1 | 0 | 0      | 0 | 0 | -0.001 | t | 139525 | ISSQTNDT<br>HKRDTYA<br>ATPRA | Mus<br>musculu<br>s              |

|   |      |   |   |   |   |   |   |        |   |        |                              |                       |
|---|------|---|---|---|---|---|---|--------|---|--------|------------------------------|-----------------------|
| 1 | 1.00 | 1 | 1 | 0 | 0 | 0 | 0 | -0.001 | t | 144799 | TLNLT                        | Mus musculus          |
| 1 | 1.00 | 1 | 1 | 0 | 0 | 0 | 0 | -0.001 | t | 144797 | TGGCTHG<br>CLAVP             | Mus musculus          |
| 1 | 1.00 | 1 | 1 | 0 | 0 | 0 | 0 | -0.001 | t | 144756 | QVGTHPG<br>LANDYEY           | Mus musculus          |
| 1 | 1.00 | 1 | 1 | 0 | 0 | 0 | 0 | -0.001 | t | 142435 | KTDGKGEE<br>SE               | Homo sapiens          |
| 1 | 1.00 | 1 | 1 | 0 | 0 | 0 | 0 | -0.001 | t | 134860 | AGPKAQV<br>EAIQKY            | Mus musculus          |
| 1 | 1.00 | 1 | 1 | 0 | 0 | 0 | 0 | -0.001 | t | 144601 | CSGTHPSIS<br>SC              | Mus musculus          |
| 1 | 1.00 | 1 | 1 | 0 | 0 | 0 | 0 | -0.001 | t | 159302 | YVLNSKLH<br>NSRSFDKF<br>KWIQ | Aotus                 |
| 1 | 1.00 | 1 | 1 | 0 | 0 | 0 | 0 | -0.001 | t | 139935 | VIAIALFGT<br>IATANAAD        | Homo sapiens          |
| 1 | 1.00 | 1 | 1 | 0 | 0 | 0 | 0 | -0.001 | t | 138527 | NYEVAYRG<br>ILQR             | Oryctolagus cuniculus |
| 1 | 1.00 | 1 | 1 | 0 | 0 | 0 | 0 | -0.001 | t | 150858 | ISSLYNLVK<br>SS              | Mus musculus          |
| 1 | 1.00 | 1 | 1 | 0 | 0 | 0 | 0 | -0.001 | t | 138194 | IIPKSSWS                     | Homo sapiens          |
| 1 | 1.00 | 1 | 1 | 0 | 0 | 0 | 0 | -0.001 | t | 122205 | VFTLPPPL<br>PETH             | Mus musculus          |
| 1 | 1.00 | 1 | 1 | 0 | 0 | 0 | 0 | -0.001 | t | 122293 | CTYVLDP<br>E NLTLKAPY<br>EA  | Oryctolagus cuniculus |
| 1 | 1.00 | 1 | 1 | 0 | 0 | 0 | 0 | -0.001 | t | 132849 | KKVLGEKT<br>ENPKKFK          | Oryctolagus cuniculus |
| 1 | 1.00 | 1 | 1 | 0 | 0 | 0 | 0 | -0.001 | t | 123849 | WQDE                         | Mus musculus          |

|   |      |   |   |   |   |   |   |        |   |        |                              |                                  |
|---|------|---|---|---|---|---|---|--------|---|--------|------------------------------|----------------------------------|
| 1 | 1.00 | 1 | 1 | 0 | 0 | 0 | 0 | -0.001 | t | 118877 | LDVEQLGI<br>PEQEYSC          | Oryctola<br>gus<br>cuniculu<br>s |
| 1 | 1.00 | 1 | 1 | 0 | 0 | 0 | 0 | -0.001 | t | 132200 | CGNRGPSL<br>RTTTVTG          | Mus<br>musculu<br>s              |
| 1 | 1.00 | 1 | 1 | 0 | 0 | 0 | 0 | -0.001 | t | 118362 | FTQLNPTD<br>GGSA             | Mus<br>musculu<br>s              |
| 1 | 1.00 | 1 | 1 | 0 | 0 | 0 | 0 | -0.001 | t | 123540 | NIFEYEVD<br>AEPLRPCE<br>LER  | Mus<br>musculu<br>s              |
| 1 | 1.00 | 1 | 1 | 0 | 0 | 0 | 0 | -0.001 | t | 117773 | CNSRQTD<br>REDELI            | Rattus<br>norvegic<br>us         |
| 1 | 1.00 | 1 | 1 | 0 | 0 | 0 | 0 | -0.001 | t | 123562 | NSSSSQFQ<br>IHGPR            | Mus<br>musculu<br>s              |
| 1 | 1.00 | 1 | 1 | 0 | 0 | 0 | 0 | -0.001 | t | 118391 | GVDQHND<br>GSRAR             | Mus<br>musculu<br>s              |
| 1 | 1.00 | 1 | 1 | 0 | 0 | 0 | 0 | -0.001 | t | 122167 | PPPITQGE<br>CKQL             | Mus<br>musculu<br>s              |
| 1 | 1.00 | 1 | 1 | 0 | 0 | 0 | 0 | -0.001 | t | 131297 | FSLRLMEE<br>NWNAEKR<br>SPTF  | Callithrix<br>pygmae<br>a        |
| 1 | 1.00 | 1 | 1 | 0 | 0 | 0 | 0 | -0.001 | t | 118740 | AKEASSYD<br>YILGWEFG<br>GG   | Mus<br>musculu<br>s              |
| 1 | 1.00 | 1 | 1 | 0 | 0 | 0 | 0 | -0.001 | t | 125400 | ELLKLLIEA                    | Mus<br>musculu<br>s              |
| 1 | 1.00 | 1 | 1 | 0 | 0 | 0 | 0 | -0.001 | t | 122406 | IEIGLEGKG<br>FEPTLEALF<br>GK | Homo<br>sapiens                  |
| 1 | 1.00 | 1 | 1 | 0 | 0 | 0 | 0 | -0.001 | t | 127643 | ERPLELRV<br>RVLDI            | Homo<br>sapiens                  |
| 1 | 1.00 | 1 | 1 | 0 | 0 | 0 | 0 | -0.001 | t | 123562 | NSSSSQFQ<br>IHGPR            | Mus<br>musculu<br>s              |
| 1 | 1.00 | 1 | 1 | 0 | 0 | 0 | 0 | -0.001 | t | 119383 | VISCAKDA<br>SGEEDEI          | Oryctola<br>gus<br>cuniculu<br>s |



|   |      |   |   |   |       |   |   |        |   |        |                            |                                  |
|---|------|---|---|---|-------|---|---|--------|---|--------|----------------------------|----------------------------------|
| 1 | 1.00 | 1 | 1 | 0 | 0     | 0 | 0 | -0.001 | t | 132660 | SKAVHAD<br>MGYWIES<br>E    | Mus<br>musculu<br>s              |
| 1 | 1.00 | 1 | 1 | 0 | 0     | 0 | 0 | -0.001 | t | 118141 | SKGRRFKG                   | Mus<br>musculu<br>s              |
| 1 | 1.00 | 1 | 1 | 0 | 0     | 0 | 0 | -0.001 | t | 125063 | GDRAVYE<br>NELVA           | Mus<br>musculu<br>s              |
| 1 | 1.00 | 1 | 1 | 0 | 0     | 0 | 0 | -0.001 | t | 131576 | NSRQTDR<br>EDELI           | Rattus<br>norvegic<br>us         |
| 1 | 1.00 | 1 | 1 | 0 | 0     | 0 | 0 | -0.001 | t | 131654 | SGFGVVKK<br>PNY            | Oryctola<br>gus<br>cuniculu<br>s |
| 1 | 1.00 | 1 | 1 | 0 | 0     | 0 | 0 | -0.001 | t | 118867 | KLSQTSNV<br>DKEEEAV        | Mus<br>musculu<br>s              |
| 1 | 1.00 | 1 | 1 | 0 | 0     | 0 | 0 | -0.001 | t | 124232 | GSITRDSIF<br>RLR           | Oryctola<br>gus<br>cuniculu<br>s |
| 1 | 1.00 | 1 | 1 | 0 | 0     | 0 | 0 | -0.001 | t | 122721 | CSNSSSSQ<br>FQIHGPR        | Mus<br>musculu<br>s              |
| 1 | 1.00 | 1 | 1 | 0 | 0     | 0 | 0 | -0.001 | t | 131500 | KAKAQTD<br>REDLRTL<br>LR   | Rattus<br>norvegic<br>us         |
| 1 | 1.00 | 1 | 1 | 0 | 0     | 0 | 0 | -0.001 | t | 125454 | KDYKTMV<br>KFCN            | Mus<br>musculu<br>s              |
| 1 | 1.00 | 1 | 1 | 0 | 0     | 0 | 0 | -0.001 | t | 125529 | PVEGPAVI<br>CRCC           | Oryctola<br>gus<br>cuniculu<br>s |
| 1 | 1.00 | 1 | 1 | 0 | 0.002 | 0 | 0 | -0.001 | t | 131576 | NSRQTDR<br>EDELI           | Rattus<br>norvegic<br>us         |
| 1 | 1.00 | 1 | 1 | 0 | 0     | 0 | 0 | -0.001 | t | 122083 | DPNIKLV<br>DDCWATS         | Oryctola<br>gus<br>cuniculu<br>s |
| 1 | 1.00 | 1 | 1 | 0 | 0     | 0 | 0 | -0.001 | t | 122291 | CTYILDPEK<br>LTLRATYD<br>N | Oryctola<br>gus<br>cuniculu<br>s |

|   |      |   |   |   |        |   |   |        |   |        |                            |                       |
|---|------|---|---|---|--------|---|---|--------|---|--------|----------------------------|-----------------------|
| 1 | 1.00 | 1 | 1 | 0 | 0      | 0 | 0 | -0.001 | t | 125870 | EEEEEEEEEE                 | Mus musculus          |
| 1 | 1.00 | 1 | 1 | 0 | 0      | 0 | 0 | -0.001 | t | 125367 | ASSAFKAP<br>RPGPETLQ<br>FT | Oryctolagus cuniculus |
| 1 | 1.00 | 1 | 1 | 0 | 0      | 0 | 0 | -0.001 | t | 118898 | LSHIGDAV<br>VISCAKD        | Oryctolagus cuniculus |
| 1 | 1.00 | 1 | 1 | 0 | 0      | 0 | 0 | -0.001 | t | 118678 | WPLHDGG<br>AVNRR           | Mus musculus          |
| 1 | 1.00 | 1 | 1 | 0 | 0      | 0 | 0 | -0.001 | t | 125870 | EEEEEEEEEE                 | Mus musculus          |
| 1 | 1.00 | 1 | 1 | 0 | 0      | 0 | 0 | -0.001 | t | 123809 | VAVESRN<br>GSRLHFNK        | Trichosurus vulpecula |
| 1 | 1.00 | 1 | 1 | 0 | 0      | 0 | 0 | -0.001 | t | 125608 | YYKKHIS                    | Mus musculus          |
| 1 | 1.00 | 1 | 1 | 0 | -0.008 | 0 | 0 | -0.001 | t | 125246 | RRQPHVM<br>S               | Mus musculus          |
| 1 | 1.00 | 1 | 1 | 0 | 0      | 0 | 0 | -0.001 | t | 125246 | RRQPHVM<br>S               | Mus musculus          |
| 1 | 1.00 | 1 | 1 | 0 | 0      | 0 | 0 | -0.001 | t | 123880 | YRVNLKFL<br>PNETTSN        | Trichosurus vulpecula |
| 1 | 1.00 | 1 | 1 | 0 | 0      | 0 | 0 | -0.001 | t | 125209 | QFQIHGPR                   | Mus musculus          |
| 1 | 1.00 | 1 | 1 | 0 | 0      | 0 | 0 | -0.001 | t | 118991 | RAEDNAD<br>TLALVFEA        | Oryctolagus cuniculus |
| 1 | 1.00 | 1 | 1 | 0 | 0      | 0 | 0 | -0.001 | t | 122375 | GLINRAKA<br>VKQFEESQ<br>G  | Mus musculus          |
| 1 | 1.00 | 1 | 1 | 0 | 0      | 0 | 0 | -0.001 | t | 122292 | CTYILDPEK<br>LTRVPYK<br>A  | Oryctolagus cuniculus |
| 1 | 1.00 | 1 | 1 | 0 | 0      | 0 | 0 | -0.001 | t | 122375 | GLINRAKA<br>VKQFEESQ<br>G  | Mus musculus          |

|   |      |   |   |   |   |   |   |        |   |        |                              |                       |
|---|------|---|---|---|---|---|---|--------|---|--------|------------------------------|-----------------------|
| 1 | 1.00 | 1 | 1 | 0 | 0 | 0 | 0 | -0.001 | t | 125246 | RRQPHVMS                     | Macaca fascicularis   |
| 1 | 1.00 | 1 | 1 | 0 | 0 | 0 | 0 | -0.001 | t | 125575 | THDALKAVKLIKT                | Mus musculus          |
| 1 | 1.00 | 1 | 1 | 0 | 0 | 0 | 0 | -0.001 | t | 132233 | DSGCVINWKGRELKC              | Mus musculus          |
| 1 | 1.00 | 1 | 1 | 0 | 0 | 0 | 0 | -0.001 | t | 122734 | DSVPKWDRLPC                  | Oryctolagus cuniculus |
| 1 | 1.00 | 1 | 1 | 0 | 0 | 0 | 0 | -0.001 | t | 122721 | CSNSSSQFQIHGPR               | Mus musculus          |
| 1 | 1.00 | 1 | 1 | 0 | 0 | 0 | 0 | -0.001 | t | 125414 | FSEELVFSLRLMEEN              | Oryctolagus cuniculus |
| 1 | 1.00 | 1 | 1 | 0 | 0 | 0 | 0 | -0.001 | t | 120598 | IARFKMFP<br>EVKEKGM<br>A     | Oryctolagus cuniculus |
| 1 | 1.00 | 1 | 1 | 0 | 0 | 0 | 0 | -0.001 | t | 125021 | DWC                          | Mus musculus          |
| 1 | 1.00 | 1 | 1 | 0 | 0 | 0 | 0 | -0.001 | t | 124069 | ELQIAKDE<br>RYGS             | Oryctolagus cuniculus |
| 1 | 1.00 | 1 | 1 | 0 | 0 | 0 | 0 | -0.001 | t | 122293 | CTYVLDPE<br>NLTLKAPY<br>EA   | Mus musculus          |
| 1 | 1.00 | 1 | 1 | 0 | 0 | 0 | 0 | -0.001 | t | 132390 | ISNELNHIL<br>LENDMK          | Mus musculus          |
| 1 | 1.00 | 1 | 1 | 0 | 0 | 0 | 0 | -0.001 | t | 131295 | ECQEATL<br>MVMVSK<br>DLFGTGK | Callithrix pygmaea    |
| 1 | 1.00 | 1 | 1 | 0 | 0 | 0 | 0 | -0.001 | t | 130524 | KFHPKDIP<br>YQVW             | Mus musculus          |
| 1 | 1.00 | 1 | 1 | 0 | 0 | 0 | 0 | -0.001 | t | 119048 | VSDYEMKL<br>MDLDVEQ          | Mus musculus          |
| 1 | 1.00 | 1 | 1 | 0 | 0 | 0 | 0 | -0.001 | t | 124713 | SGEQPSDE<br>QPSGEHG          | Mus musculus          |

|   |      |   |   |   |   |   |   |        |   |        |                              |                                  |
|---|------|---|---|---|---|---|---|--------|---|--------|------------------------------|----------------------------------|
| 1 | 1.00 | 1 | 1 | 0 | 0 | 0 | 0 | -0.001 | t | 121065 | WLKVKILP<br>EVKEKHEF         | Oryctola<br>gus<br>cuniculu<br>s |
| 1 | 1.00 | 1 | 1 | 0 | 0 | 0 | 0 | -0.001 | t | 132365 | HKYSWKS<br>WKGAKIIG          | Mus<br>musculu<br>s              |
| 1 | 1.00 | 1 | 1 | 0 | 0 | 0 | 0 | -0.001 | t | 119208 | IEDEEGSGI<br>PEQEYSC         | Oryctola<br>gus<br>cuniculu<br>s |
| 1 | 1.00 | 1 | 1 | 0 | 0 | 0 | 0 | -0.001 | t | 117569 | LKYYLAPKI<br>EDEEGS          | Oryctola<br>gus<br>cuniculu<br>s |
| 1 | 1.00 | 1 | 1 | 0 | 0 | 0 | 0 | -0.001 | t | 122202 | TSPPLLWD<br>SVHL             | Mus<br>musculu<br>s              |
| 1 | 1.00 | 1 | 1 | 0 | 0 | 0 | 0 | -0.001 | t | 132727 | VTNEVHT<br>WTEQYKF<br>Q      | Mus<br>musculu<br>s              |
| 1 | 1.00 | 1 | 1 | 0 | 0 | 0 | 0 | -0.001 | t | 118830 | GWEFGGG                      | Mus<br>musculu<br>s              |
| 1 | 1.00 | 1 | 1 | 0 | 0 | 0 | 0 | -0.001 | t | 123016 | AIYENEIHA<br>LWADLP          | Trichosu<br>rus<br>vulpecul<br>a |
| 1 | 1.00 | 1 | 1 | 0 | 0 | 0 | 0 | -0.001 | t | 118902 | LVFEAPNQ<br>EKVSDYE          | Oryctola<br>gus<br>cuniculu<br>s |
| 1 | 1.00 | 1 | 1 | 0 | 0 | 0 | 0 | -0.001 | t | 131374 | CKAKAQT<br>DREDLRTL<br>LRY   | Rattus<br>norvegic<br>us         |
| 1 | 1.00 | 1 | 1 | 0 | 0 | 0 | 0 | -0.001 | t | 122947 | WTQEPQP<br>LEEKWQH<br>RVVE   | Homo<br>sapiens                  |
| 1 | 1.00 | 1 | 1 | 0 | 0 | 0 | 0 | -0.001 | t | 131687 | SYPDNSYQ<br>QPYGE            | Oryctola<br>gus<br>cuniculu<br>s |
| 1 | 1.00 | 1 | 1 | 0 | 0 | 0 | 0 | -0.001 | t | 122452 | KTTKQSF<br>LSVKAQYK<br>KNKH  | Homo<br>sapiens                  |
| 1 | 1.00 | 1 | 1 | 0 | 0 | 0 | 0 | -0.001 | t | 123734 | SFSKASNS<br>WFPVEGP<br>ADICQ | marmos<br>ets                    |

|   |      |   |   |   |   |   |   |        |   |        |                      |                       |
|---|------|---|---|---|---|---|---|--------|---|--------|----------------------|-----------------------|
| 1 | 1.00 | 1 | 1 | 0 | 0 | 0 | 0 | -0.001 | t | 125263 | SSSSQFQIHG           | Mus musculus          |
| 1 | 1.00 | 1 | 1 | 0 | 0 | 0 | 0 | -0.001 | t | 125185 | NSSSSQFQIHG          | Mus musculus          |
| 1 | 1.00 | 1 | 1 | 0 | 0 | 0 | 0 | -0.001 | t | 130524 | KFHPKDIPYQVW         | Mus musculus          |
| 1 | 1.00 | 1 | 1 | 0 | 0 | 0 | 0 | -0.001 | t | 121529 | LDAPGGMELSDTNRALQL   | Mus musculus          |
| 1 | 1.00 | 1 | 1 | 0 | 0 | 0 | 0 | -0.001 | t | 122293 | CTYVLDPENLTLKAPYEA   | Oryctolagus cuniculus |
| 1 | 1.00 | 1 | 1 | 0 | 0 | 0 | 0 | -0.001 | t | 122293 | CTYVLDPENLTLKAPYEA   | Oryctolagus cuniculus |
| 1 | 1.00 | 1 | 1 | 0 | 0 | 0 | 0 | -0.001 | t | 102344 | DAEFR                | Mus musculus          |
| 1 | 1.00 | 1 | 1 | 0 | 0 | 0 | 0 | -0.001 | t | 102344 | DAEFR                | Mus musculus          |
| 1 | 1.00 | 1 | 1 | 0 | 0 | 0 | 0 | -0.001 | t | 112816 | PGKVCGSNLLSICKTAEF   | Mus musculus          |
| 1 | 1.00 | 1 | 1 | 0 | 0 | 0 | 0 | -0.001 | t | 101983 | PVYQQQP              | Mus musculus          |
| 1 | 1.00 | 1 | 1 | 0 | 0 | 0 | 0 | -0.001 | t | 102344 | DAEFR                | Mus musculus          |
| 1 | 1.00 | 1 | 1 | 0 | 0 | 0 | 0 | -0.001 | t | 102510 | HHQKLVEFAEDVGSNK     | Mus musculus          |
| 1 | 1.00 | 1 | 1 | 0 | 0 | 0 | 0 | -0.001 | t | 102344 | DAEFR                | Mus musculus          |
| 1 | 1.00 | 1 | 1 | 0 | 0 | 0 | 0 | -0.001 | t | 111915 | VHTGFGAMDFTTLQANKSEV | Cavia porcellus       |
| 1 | 1.00 | 1 | 1 | 0 | 0 | 0 | 0 | -0.001 | t | 110980 | QPLGVGISGHPLLNLKDDTE | Cavia porcellus       |
| 1 | 1.00 | 1 | 1 | 0 | 0 | 0 | 0 | -0.001 | t | 100437 | QPNNKRNQLWLRQLQTAGN  | Mus musculus          |

|   |      |   |   |   |   |   |   |        |   |        |                              |                                  |
|---|------|---|---|---|---|---|---|--------|---|--------|------------------------------|----------------------------------|
| 1 | 1.00 | 1 | 1 | 0 | 0 | 0 | 0 | -0.001 | t | 99134  | DAEFRHDS<br>GYEVHHQ          | Mus<br>musculu<br>s              |
| 1 | 1.00 | 1 | 1 | 0 | 0 | 0 | 0 | -0.001 | t | 99134  | DAEFRHDS<br>GYEVHHQ          | Mus<br>musculu<br>s              |
| 1 | 1.00 | 1 | 1 | 0 | 0 | 0 | 0 | -0.001 | t | 109277 | GVNH                         | Mus<br>musculu<br>s              |
| 1 | 1.00 | 1 | 1 | 0 | 0 | 0 | 0 | -0.001 | t | 105232 | GSNKGAI<br>GLM               | Mus<br>musculu<br>s              |
| 1 | 1.00 | 1 | 1 | 0 | 0 | 0 | 0 | -0.001 | t | 104851 | KGAIIGLM<br>VGGVVI           | Mus<br>musculu<br>s              |
| 1 | 1.00 | 1 | 1 | 0 | 0 | 0 | 0 | -0.001 | t | 105859 | HARGNYD<br>AAKR              | Mus<br>musculu<br>s              |
| 1 | 1.00 | 1 | 1 | 0 | 0 | 0 | 0 | -0.001 | t | 110920 | KPSPWAP<br>KKHRRLS           | Mus<br>musculu<br>s              |
| 1 | 1.00 | 1 | 1 | 0 | 0 | 0 | 0 | -0.001 | t | 108848 | DEIDGVN<br>H                 | Mus<br>musculu<br>s              |
| 1 | 1.00 | 1 | 1 | 0 | 0 | 0 | 0 | -0.001 | t | 99134  | DAEFRHDS<br>GYEVHHQ          | Mus<br>musculu<br>s              |
| 1 | 1.00 | 1 | 1 | 0 | 0 | 0 | 0 | -0.001 | t | 111051 | VGPLEVIP<br>EAVDPAG<br>SSIV  | Oryctola<br>gus<br>cuniculu<br>s |
| 1 | 1.00 | 1 | 1 | 0 | 0 | 0 | 0 | -0.001 | t | 112739 | YTTGAVR<br>QIFGDYKT<br>TICGK | Oryctola<br>gus<br>cuniculu<br>s |
| 1 | 1.00 | 1 | 1 | 0 | 0 | 0 | 0 | -0.001 | t | 102069 | SKSSITITN<br>KRLTRKC         | Mus<br>musculu<br>s              |
| 1 | 1.00 | 1 | 1 | 0 | 0 | 0 | 0 | -0.001 | t | 99134  | DAEFRHDS<br>GYEVHHQ          | Mus<br>musculu<br>s              |
| 1 | 1.00 | 1 | 1 | 0 | 0 | 0 | 0 | -0.001 | t | 101554 | DPLAQQS                      | Mus<br>musculu<br>s              |
| 1 | 1.00 | 1 | 1 | 0 | 0 | 0 | 0 | -0.001 | t | 106331 | DFMLTQP<br>HSVSESPG<br>KTVT  | Oryctola<br>gus<br>cuniculu<br>s |
| 1 | 1.00 | 1 | 1 | 0 | 0 | 0 | 0 | -0.001 | t | 101490 | ASGEVPVK<br>PSEG             | Mus<br>musculu<br>s              |

|   |      |   |   |   |        |   |   |        |   |        |                              |                                  |
|---|------|---|---|---|--------|---|---|--------|---|--------|------------------------------|----------------------------------|
| 1 | 1.00 | 1 | 1 | 0 | 0      | 0 | 0 | -0.001 | t | 105232 | GSNKGAIL<br>GLM              | Mus<br>musculu<br>s              |
| 1 | 1.00 | 1 | 1 | 0 | -0.003 | 0 | 0 | -0.001 | t | 103839 | DAEFRHDS<br>GYEVH            | Oryctola<br>gus<br>cuniculu<br>s |
| 1 | 1.00 | 1 | 1 | 0 | 0      | 0 | 0 | -0.001 | t | 99134  | DAEFRHDS<br>GYEVHHQ          | Mus<br>musculu<br>s              |
| 1 | 1.00 | 1 | 1 | 0 | 0      | 0 | 0 | -0.001 | t | 104443 | DAEFRHDS<br>GYE              | Mus<br>musculu<br>s              |
| 1 | 1.00 | 1 | 1 | 0 | 0      | 0 | 0 | -0.001 | t | 112603 | MIAATYNF<br>AVLKLMG<br>RGTKF | Oryctola<br>gus<br>cuniculu<br>s |
| 1 | 1.00 | 1 | 1 | 0 | 0      | 0 | 0 | -0.001 | t | 112352 | TGNKYPGY<br>P                | Mus<br>musculu<br>s              |
| 1 | 1.00 | 1 | 1 | 0 | 0      | 0 | 0 | -0.001 | t | 110652 | LCLIGCKPP<br>IGEHWGK<br>GSPC | Cavia<br>porcellu<br>s           |
| 1 | 1.00 | 1 | 1 | 0 | 0      | 0 | 0 | -0.001 | t | 105971 | MVGGVVI<br>AT                | Mus<br>musculu<br>s              |
| 1 | 1.00 | 1 | 1 | 0 | 0      | 0 | 0 | -0.001 | t | 109325 | IDGVNH                       | Mus<br>musculu<br>s              |
| 1 | 1.00 | 1 | 1 | 0 | 0      | 0 | 0 | -0.001 | t | 104443 | DAEFRHDS<br>GYE              | Mus<br>musculu<br>s              |
| 1 | 1.00 | 1 | 1 | 0 | 0      | 0 | 0 | -0.001 | t | 108382 | GGVVIA                       | Mus<br>musculu<br>s              |
| 1 | 1.00 | 1 | 1 | 0 | 0      | 0 | 0 | -0.001 | t | 99134  | DAEFRHDS<br>GYEVHHQ          | Mus<br>musculu<br>s              |
| 1 | 1.00 | 1 | 1 | 0 | 0      | 0 | 0 | -0.001 | t | 108382 | GGVVIA                       | Mus<br>musculu<br>s              |
| 1 | 1.00 | 1 | 1 | 0 | 0      | 0 | 0 | -0.001 | t | 108382 | GGVVIA                       | Mus<br>musculu<br>s              |
| 1 | 1.00 | 1 | 1 | 0 | 0      | 0 | 0 | -0.001 | t | 108378 | GFAGQAG<br>PAGATGA<br>PGRP   | Mus<br>musculu<br>s              |
| 1 | 1.00 | 1 | 1 | 0 | 0      | 0 | 0 | -0.001 | t | 99134  | DAEFRHDS<br>GYEVHHQ          | Mus<br>musculu<br>s              |

|   |      |   |   |   |   |   |   |        |   |        |                               |                                  |
|---|------|---|---|---|---|---|---|--------|---|--------|-------------------------------|----------------------------------|
| 1 | 1.00 | 1 | 1 | 0 | 0 | 0 | 0 | -0.001 | t | 103839 | DAEFRHDS<br>GYEVH             | Mus<br>musculu<br>s              |
| 1 | 1.00 | 1 | 1 | 0 | 0 | 0 | 0 | -0.001 | t | 113539 | IIPKVEGKT<br>IAEQILQY<br>GSM  | Cavia<br>porcellu<br>s           |
| 1 | 1.00 | 1 | 1 | 0 | 0 | 0 | 0 | -0.001 | t | 111050 | VGPLDIVP<br>EVADPGG<br>PTLV   | Oryctola<br>gus<br>cuniculu<br>s |
| 1 | 1.00 | 1 | 1 | 0 | 0 | 0 | 0 | -0.001 | t | 104443 | DAEFRHDS<br>GYE               | Mus<br>musculu<br>s              |
| 1 | 1.00 | 1 | 1 | 0 | 0 | 0 | 0 | -0.001 | t | 112625 | PSEATVYL<br>PPVPVSKV<br>VSTD  | Cavia<br>porcellu<br>s           |
| 1 | 1.00 | 1 | 1 | 0 | 0 | 0 | 0 | -0.001 | t | 108897 | EIDGPAGQ<br>AEP               | Mus<br>musculu<br>s              |
| 1 | 1.00 | 1 | 1 | 0 | 0 | 0 | 0 | -0.001 | t | 104906 | MVGGVVI<br>A                  | Mus<br>musculu<br>s              |
| 1 | 1.00 | 1 | 1 | 0 | 0 | 0 | 0 | -0.001 | t | 110126 | YIK                           | Mus<br>musculu<br>s              |
| 1 | 1.00 | 1 | 1 | 0 | 0 | 0 | 0 | -0.001 | t | 107107 | EAIQP                         | Rattus<br>norvegic<br>us         |
| 1 | 1.00 | 1 | 1 | 0 | 0 | 0 | 0 | -0.001 | t | 110855 | FNRA GTV<br>GENVPDD<br>LYIKGS | Cavia<br>porcellu<br>s           |
| 1 | 1.00 | 1 | 1 | 0 | 0 | 0 | 0 | -0.001 | t | 104906 | MVGGVVI<br>A                  | Mus<br>musculu<br>s              |
| 1 | 1.00 | 1 | 1 | 0 | 0 | 0 | 0 | -0.001 | t | 102093 | STGSSDV                       | Mus<br>musculu<br>s              |
| 1 | 1.00 | 1 | 1 | 0 | 0 | 0 | 0 | -0.001 | t | 108898 | EIDGPAGQ<br>AEPDRAH<br>YN     | Mus<br>musculu<br>s              |
| 1 | 1.00 | 1 | 1 | 0 | 0 | 0 | 0 | -0.001 | t | 105763 | EVHHQK                        | Mus<br>musculu<br>s              |
| 1 | 1.00 | 1 | 1 | 0 | 0 | 0 | 0 | -0.001 | t | 112316 | SIKNPTNA<br>K                 | Mus<br>musculu<br>s              |
| 1 | 1.00 | 1 | 1 | 0 | 0 | 0 | 0 | -0.001 | t | 108900 | EIPVDLL                       | Mus<br>musculu<br>s              |



|   |      |   |   |   |        |   |   |        |   |        |                              |                                  |
|---|------|---|---|---|--------|---|---|--------|---|--------|------------------------------|----------------------------------|
| 1 | 1.00 | 1 | 1 | 0 | 0      | 0 | 0 | -0.001 | t | 107852 | GEPQSSIIQ<br>Y               | Mus<br>musculu<br>s              |
| 1 | 1.00 | 1 | 1 | 0 | -0.003 | 0 | 0 | -0.001 | t | 105232 | GSNKGAI<br>GLM               | Oryctola<br>gus<br>cuniculu<br>s |
| 1 | 1.00 | 1 | 1 | 0 | 0      | 0 | 0 | -0.001 | t | 105497 | RHDSGYE                      | Mus<br>musculu<br>s              |
| 1 | 1.00 | 1 | 1 | 0 | 0      | 0 | 0 | -0.001 | t | 103998 | IVKWDRD<br>M                 | Mus<br>musculu<br>s              |
| 1 | 1.00 | 1 | 1 | 0 | 0      | 0 | 0 | -0.001 | t | 99922  | DAEFRHDS<br>GY               | Mus<br>musculu<br>s              |
| 1 | 1.00 | 1 | 1 | 0 | 0      | 0 | 0 | -0.001 | t | 112726 | YFPTPSGS<br>MVTSDAQ<br>IFNKP | Cavia<br>porcellu<br>s           |
| 1 | 1.00 | 1 | 1 | 0 | 0      | 0 | 0 | -0.001 | t | 99922  | DAEFRHDS<br>GY               | Mus<br>musculu<br>s              |
| 1 | 1.00 | 1 | 1 | 0 | 0      | 0 | 0 | -0.001 | t | 101716 | HQPTPAA                      | Mus<br>musculu<br>s              |
| 1 | 1.00 | 1 | 1 | 0 | -0.003 | 0 | 0 | -0.001 | t | 105232 | GSNKGAI<br>GLM               | Oryctola<br>gus<br>cuniculu<br>s |
| 1 | 1.00 | 1 | 1 | 0 | 0      | 0 | 0 | -0.001 | t | 102005 | QPDQHHQ                      | Mus<br>musculu<br>s              |
| 1 | 1.00 | 1 | 1 | 0 | 0      | 0 | 0 | -0.001 | t | 108860 | DGVNH                        | Mus<br>musculu<br>s              |
| 1 | 1.00 | 1 | 1 | 0 | 0      | 0 | 0 | -0.001 | t | 99922  | DAEFRHDS<br>GY               | Mus<br>musculu<br>s              |
| 1 | 1.00 | 1 | 1 | 0 | 0      | 0 | 0 | -0.001 | t | 109348 | IPVDL                        | Mus<br>musculu<br>s              |
| 1 | 1.00 | 1 | 1 | 0 | 0      | 0 | 0 | -0.001 | t | 100279 | LNP                          | Mus<br>musculu<br>s              |
| 1 | 1.00 | 1 | 1 | 0 | 0      | 0 | 0 | -0.001 | t | 114011 | VTTVTTHN<br>NPTFTDPS<br>VLQP | Cavia<br>porcellu<br>s           |
| 1 | 1.00 | 1 | 1 | 0 | 0      | 0 | 0 | -0.001 | t | 100655 | YHSRYFT                      | Mus<br>musculu<br>s              |

|   |      |   |   |   |   |   |   |        |   |        |                             |                                  |
|---|------|---|---|---|---|---|---|--------|---|--------|-----------------------------|----------------------------------|
| 1 | 1.00 | 1 | 1 | 0 | 0 | 0 | 0 | -0.001 | t | 99922  | DAEFRHDS<br>GY              | Mus<br>musculu<br>s              |
| 1 | 1.00 | 1 | 1 | 0 | 0 | 0 | 0 | -0.001 | t | 99134  | DAEFRHDS<br>GYEVHHQ         | Mus<br>musculu<br>s              |
| 1 | 1.00 | 1 | 1 | 0 | 0 | 0 | 0 | -0.001 | t | 109624 | NHQH                        | Mus<br>musculu<br>s              |
| 1 | 1.00 | 1 | 1 | 0 | 0 | 0 | 0 | -0.001 | t | 101962 | PEPVQEP                     | Mus<br>musculu<br>s              |
| 1 | 1.00 | 1 | 1 | 0 | 0 | 0 | 0 | -0.001 | t | 106341 | DIQMTQS<br>PSSLSASV<br>GDRV | Oryctola<br>gus<br>cuniculu<br>s |
| 1 | 1.00 | 1 | 1 | 0 | 0 | 0 | 0 | -0.001 | t | 104443 | DAEFRHDS<br>GYE             | Mus<br>musculu<br>s              |
| 1 | 1.00 | 1 | 1 | 0 | 0 | 0 | 0 | -0.001 | t | 107166 | GPPGPQG                     | Mus<br>musculu<br>s              |
| 1 | 1.00 | 1 | 1 | 0 | 0 | 0 | 0 | -0.001 | t | 104443 | DAEFRHDS<br>GYE             | Mus<br>musculu<br>s              |
| 1 | 1.00 | 1 | 1 | 0 | 0 | 0 | 0 | -0.001 | t | 104586 | NRVAPNV<br>RQ               | Homo<br>sapiens                  |
| 1 | 1.00 | 1 | 1 | 0 | 0 | 0 | 0 | -0.001 | t | 105127 | DAEFRHD                     | Mus<br>musculu<br>s              |
| 1 | 1.00 | 1 | 1 | 0 | 0 | 0 | 0 | -0.001 | t | 106321 | DAEFRH                      | Mus<br>musculu<br>s              |
| 1 | 1.00 | 1 | 1 | 0 | 0 | 0 | 0 | -0.001 | t | 107181 | IDVEF                       | Rattus<br>norvegic<br>us         |
| 1 | 1.00 | 1 | 1 | 0 | 0 | 0 | 0 | -0.001 | t | 101546 | DLNPLDPL<br>AQQS            | Mus<br>musculu<br>s              |
| 1 | 1.00 | 1 | 1 | 0 | 0 | 0 | 0 | -0.001 | t | 107269 | YKVIHAWL<br>I               | Mus<br>musculu<br>s              |
| 1 | 1.00 | 1 | 1 | 0 | 0 | 0 | 0 | -0.001 | t | 108861 | DGVNHQ                      | Mus<br>musculu<br>s              |
| 1 | 1.00 | 1 | 1 | 0 | 0 | 0 | 0 | -0.001 | t | 105207 | GAIIGLMV<br>GGVIA           | Mus<br>musculu<br>s              |
| 1 | 1.00 | 1 | 1 | 0 | 0 | 0 | 0 | -0.001 | t | 112702 | VHTGFGA<br>MDFTTLQ<br>A     | Cavia<br>porcellu<br>s           |

|   |      |   |   |   |        |   |   |        |   |        |                              |                       |
|---|------|---|---|---|--------|---|---|--------|---|--------|------------------------------|-----------------------|
| 1 | 1.00 | 1 | 1 | 0 | 0      | 0 | 0 | -0.001 | t | 105570 | VGGVVIA                      | Mus musculus          |
| 1 | 1.00 | 1 | 1 | 0 | 0      | 0 | 0 | -0.001 | t | 100070 | GLMVGGV<br>VIA               | Oryctolagus cuniculus |
| 1 | 1.00 | 1 | 1 | 0 | 0      | 0 | 0 | -0.001 | t | 108862 | DGVNHQHL                     | Mus musculus          |
| 1 | 1.00 | 1 | 1 | 0 | 0      | 0 | 0 | -0.001 | t | 105127 | DAEFRHD                      | Mus musculus          |
| 1 | 1.00 | 1 | 1 | 0 | 0      | 0 | 0 | -0.001 | t | 111585 | NKSEVPLD<br>ICTSICKYP<br>DYI | Cavia porcellus       |
| 1 | 1.00 | 1 | 1 | 0 | -0.003 | 0 | 0 | -0.001 | t | 111050 | VGPLDIVP<br>EVADPGG<br>PTLV  | Oryctolagus cuniculus |
| 1 | 1.00 | 1 | 1 | 0 | 0      | 0 | 0 | -0.001 | t | 110762 | AGSSIVPLE<br>EYPAEIP         | Oryctolagus cuniculus |
| 1 | 1.00 | 1 | 1 | 0 | 0      | 0 | 0 | -0.001 | t | 106321 | DAEFRH                       | Mus musculus          |
| 1 | 1.00 | 1 | 1 | 0 | 0      | 0 | 0 | -0.001 | t | 105127 | DAEFRHD                      | Mus musculus          |
| 1 | 1.00 | 1 | 1 | 0 | 0      | 0 | 0 | -0.001 | t | 109905 | SEEEND                       | Mus musculus          |
| 1 | 1.00 | 1 | 1 | 0 | 0      | 0 | 0 | -0.001 | t | 106321 | DAEFRH                       | Mus musculus          |
| 1 | 1.00 | 1 | 1 | 0 | 0      | 0 | 0 | -0.001 | t | 110862 | GGPTLVSL<br>HELPAETP         | Oryctolagus cuniculus |
| 1 | 1.00 | 1 | 1 | 0 | 0      | 0 | 0 | -0.001 | t | 104995 | SYSTTAVV<br>TN               | Oryctolagus cuniculus |
| 1 | 1.00 | 1 | 1 | 0 | 0      | 0 | 0 | -0.001 | t | 104443 | DAEFRHDS<br>GYE              | Mus musculus          |
| 1 | 1.00 | 1 | 1 | 0 | 0      | 0 | 0 | -0.001 | t | 107242 | SQTTANPS<br>CPEGT            | Rattus norvegicus     |

|   |      |   |   |   |   |   |   |        |   |        |                              |                                  |
|---|------|---|---|---|---|---|---|--------|---|--------|------------------------------|----------------------------------|
| 1 | 1.00 | 1 | 1 | 0 | 0 | 0 | 0 | -0.001 | t | 106322 | DAEFRHDS<br>G                | Mus<br>musculu<br>s              |
| 1 | 1.00 | 1 | 1 | 0 | 0 | 0 | 0 | -0.001 | t | 107242 | SQTTANPS<br>CPEGT            | Rattus<br>norvegic<br>us         |
| 1 | 1.00 | 1 | 1 | 0 | 0 | 0 | 0 | -0.001 | t | 65409  | TNRNPQ                       | Mus<br>musculu<br>s              |
| 1 | 1.00 | 1 | 1 | 0 | 0 | 0 | 0 | -0.001 | t | 79806  | EKPAKTYD<br>DAAS             | Mus<br>musculu<br>s              |
| 1 | 1.00 | 1 | 1 | 0 | 0 | 0 | 0 | -0.001 | t | 71285  | VTEEIVTEE<br>IVTEEI          | Mus<br>musculu<br>s              |
| 1 | 1.00 | 1 | 1 | 0 | 0 | 0 | 0 | -0.001 | t | 72006  | VYEAADMI<br>M                | Homo<br>sapiens                  |
| 1 | 1.00 | 1 | 1 | 0 | 0 | 0 | 0 | -0.001 | t | 72485  | WGNGCGL<br>FGKGSIDT<br>CAKFA | Equus<br>caballus                |
| 1 | 1.00 | 1 | 1 | 0 | 0 | 0 | 0 | -0.001 | t | 74488  | YKPLGALT<br>H                | Mus<br>musculu<br>s              |
| 1 | 1.00 | 1 | 1 | 0 | 0 | 0 | 0 | -0.001 | t | 71851  | VVTHEMA<br>HALG              | Oryctola<br>gus<br>cuniculu<br>s |
| 1 | 1.00 | 1 | 1 | 0 | 0 | 0 | 0 | -0.001 | t | 63756  | TFTNKLKE<br>KHTDLGK          | Mus<br>musculu<br>s              |
| 1 | 1.00 | 1 | 1 | 0 | 0 | 0 | 0 | -0.001 | t | 65409  | TNRNPQ                       | Mus<br>musculu<br>s              |
| 1 | 1.00 | 1 | 1 | 0 | 0 | 0 | 0 | -0.001 | t | 97177  | AELPF                        | Mus<br>musculu<br>s              |
| 1 | 1.00 | 1 | 1 | 0 | 0 | 0 | 0 | -0.001 | t | 67214  | TVWRNRE<br>TLMEFEET<br>HATKQ | Equus<br>caballus                |
| 1 | 1.00 | 1 | 1 | 0 | 0 | 0 | 0 | -0.001 | t | 63165  | TDHAGSN<br>DNIALLVQ          | Homo<br>sapiens                  |
| 1 | 1.00 | 1 | 1 | 0 | 0 | 0 | 0 | -0.001 | t | 79356  | RAVIWAW<br>MWE               | Mus<br>musculu<br>s              |
| 1 | 1.00 | 1 | 1 | 0 | 0 | 0 | 0 | -0.001 | t | 69244  | VKIPQHM<br>HPLPI             | Mus<br>musculu<br>s              |

|   |      |   |   |   |   |   |   |        |   |       |                             |                                  |
|---|------|---|---|---|---|---|---|--------|---|-------|-----------------------------|----------------------------------|
| 1 | 1.00 | 1 | 1 | 0 | 0 | 0 | 0 | -0.001 | t | 74037 | YGLFQKEK<br>MVL             | Mus<br>musculu<br>s              |
| 1 | 1.00 | 1 | 1 | 0 | 0 | 0 | 0 | -0.001 | t | 71284 | VTEEI                       | Homo<br>sapiens                  |
| 1 | 1.00 | 1 | 1 | 0 | 0 | 0 | 0 | -0.001 | t | 78627 | DPDPPDA<br>NDPAPPN<br>AN    | Mus<br>musculu<br>s              |
| 1 | 1.00 | 1 | 1 | 0 | 0 | 0 | 0 | -0.001 | t | 65409 | TNRNPQ                      | Oryctola<br>gus<br>cuniculu<br>s |
| 1 | 1.00 | 1 | 1 | 0 | 0 | 0 | 0 | -0.001 | t | 61124 | SSIVYEAA<br>DMIMHT          | Mus<br>musculu<br>s              |
| 1 | 1.00 | 1 | 1 | 0 | 0 | 0 | 0 | -0.001 | t | 60595 | SQWNKPS<br>KPKT             | Mus<br>musculu<br>s              |
| 1 | 1.00 | 1 | 1 | 0 | 0 | 0 | 0 | -0.001 | t | 62779 | TAADTPTA<br>TESISPSP        | Mus<br>musculu<br>s              |
| 1 | 1.00 | 1 | 1 | 0 | 0 | 0 | 0 | -0.001 | t | 72961 | WPQRVVT<br>KKGRTFL          | Mus<br>musculu<br>s              |
| 1 | 1.00 | 1 | 1 | 0 | 0 | 0 | 0 | -0.001 | t | 72039 | VYHGAGS<br>KTL              | Homo<br>sapiens                  |
| 1 | 1.00 | 1 | 1 | 0 | 0 | 0 | 0 | -0.001 | t | 65421 | TNSGINNS                    | Mus<br>musculu<br>s              |
| 1 | 1.00 | 1 | 1 | 0 | 0 | 0 | 0 | -0.001 | t | 71285 | VTEEIVTEE<br>IVTEEI         | Mus<br>musculu<br>s              |
| 1 | 1.00 | 1 | 1 | 0 | 0 | 0 | 0 | -0.001 | t | 65409 | TNRNPQ                      | Mus<br>musculu<br>s              |
| 1 | 1.00 | 1 | 1 | 0 | 0 | 0 | 0 | -0.001 | t | 78687 | IRVRKRKG<br>SNKKAEDT<br>LED | Mus<br>musculu<br>s              |
| 1 | 1.00 | 1 | 1 | 0 | 0 | 0 | 0 | -0.001 | t | 74036 | YGLFHKEK<br>MLL             | Mus<br>musculu<br>s              |
| 1 | 1.00 | 1 | 1 | 0 | 0 | 0 | 0 | -0.001 | t | 62779 | TAADTPTA<br>TESISPSP        | Mus<br>musculu<br>s              |

|   |      |   |   |   |        |   |   |        |   |       |                              |                                  |
|---|------|---|---|---|--------|---|---|--------|---|-------|------------------------------|----------------------------------|
| 1 | 1.00 | 1 | 1 | 0 | 0      | 0 | 0 | -0.001 | t | 71285 | VTEEIVTEE<br>IVTEEI          | Mus<br>musculu<br>s              |
| 1 | 1.00 | 1 | 1 | 0 | 0      | 0 | 0 | -0.001 | t | 65205 | TMGIYFAT<br>PEWVALN          | Mus<br>musculu<br>s              |
| 1 | 1.00 | 1 | 1 | 0 | 0      | 0 | 0 | -0.001 | t | 75441 | YPYDVPDY<br>A                | Mus<br>musculu<br>s              |
| 1 | 1.00 | 1 | 1 | 0 | 0      | 0 | 0 | -0.001 | t | 67875 | VCRQGVV<br>DRGWGN<br>GCGLFGK | Equus<br>caballus                |
| 1 | 1.00 | 1 | 1 | 0 | 0      | 0 | 0 | -0.001 | t | 60596 | SQWNKPS<br>KPKTN             | Oryctola<br>gus<br>cuniculu<br>s |
| 1 | 1.00 | 1 | 1 | 0 | 0      | 0 | 0 | -0.001 | t | 65409 | TNRNPQ                       | Mus<br>musculu<br>s              |
| 1 | 1.00 | 1 | 1 | 0 | 0      | 0 | 0 | -0.001 | t | 74009 | YGGPANK<br>KNAG              | Mus<br>musculu<br>s              |
| 1 | 1.00 | 1 | 1 | 0 | 0      | 0 | 0 | -0.001 | t | 71284 | VTEEI                        | Oryctola<br>gus<br>cuniculu<br>s |
| 1 | 1.00 | 1 | 1 | 0 | 0      | 0 | 0 | -0.001 | t | 65205 | TMGIYFAT<br>PEWVALN          | Mus<br>musculu<br>s              |
| 1 | 1.00 | 1 | 1 | 0 | 0      | 0 | 0 | -0.001 | t | 61256 | SSNYCCEL<br>CCNPACT<br>GCY   | Mus<br>musculu<br>s              |
| 1 | 1.00 | 1 | 1 | 0 | 0      | 0 | 0 | -0.001 | t | 71285 | VTEEIVTEE<br>IVTEEI          | Mus<br>musculu<br>s              |
| 1 | 1.00 | 1 | 1 | 0 | 0      | 0 | 0 | -0.001 | t | 62353 | SVTEEIAEE<br>DKSVTEEI<br>AV  | Homo<br>sapiens                  |
| 1 | 1.00 | 1 | 1 | 0 | 0      | 0 | 0 | -0.001 | t | 61800 | STNS                         | Mus<br>musculu<br>s              |
| 1 | 1.00 | 1 | 1 | 0 | 0      | 0 | 0 | -0.001 | t | 65000 | TLPERVRP<br>PDDWAT           | Mus<br>musculu<br>s              |
| 1 | 1.00 | 1 | 1 | 0 | -0.008 | 0 | 0 | -0.001 | t | 65205 | TMGIYFAT<br>PEWVALN          | Mus<br>musculu<br>s              |
| 1 | 1.00 | 1 | 1 | 0 | 0      | 0 | 0 | -0.001 | t | 71285 | VTEEIVTEE<br>IVTEEI          | Mus<br>musculu<br>s              |

|   |      |   |   |   |   |   |   |        |   |       |                              |                              |
|---|------|---|---|---|---|---|---|--------|---|-------|------------------------------|------------------------------|
| 1 | 1.00 | 1 | 1 | 0 | 0 | 0 | 0 | -0.001 | t | 63975 | TGTEKLIET<br>YFSKNYQD<br>YEY | Mus<br>musculus              |
| 1 | 1.00 | 1 | 1 | 0 | 0 | 0 | 0 | -0.001 | t | 66075 | TRPHGR                       | Mus<br>musculus              |
| 1 | 1.00 | 1 | 1 | 0 | 0 | 0 | 0 | -0.001 | t | 63077 | TCGVGVR<br>VRRRVNA<br>ANKKPE | Homo<br>sapiens              |
| 1 | 1.00 | 1 | 1 | 0 | 0 | 0 | 0 | -0.001 | t | 65050 | TLRVYK                       | Homo<br>sapiens              |
| 1 | 1.00 | 1 | 1 | 0 | 0 | 0 | 0 | -0.001 | t | 97484 | LVEETSFID<br>AGAP            | Oryctola<br>gus<br>cuniculus |
| 1 | 1.00 | 1 | 1 | 0 | 0 | 0 | 0 | -0.001 | t | 63077 | TCGVGVR<br>VRRRVNA<br>ANKKPE | Homo<br>sapiens              |
| 1 | 1.00 | 1 | 1 | 0 | 0 | 0 | 0 | -0.001 | t | 75371 | YPNQVYYR<br>PVDQYSN          | Mus<br>musculus              |
| 1 | 1.00 | 1 | 1 | 0 | 0 | 0 | 0 | -0.001 | t | 78635 | EKIERNNK<br>LKQPPPPP<br>NPN  | Mus<br>musculus              |
| 1 | 1.00 | 1 | 1 | 0 | 0 | 0 | 0 | -0.001 | t | 61801 | STNSGINN                     | Mus<br>musculus              |
| 1 | 1.00 | 1 | 1 | 0 | 0 | 0 | 0 | -0.001 | t | 69883 | VLYQEFDE                     | Mus<br>musculus              |
| 1 | 1.00 | 1 | 1 | 0 | 0 | 0 | 0 | -0.001 | t | 68969 | VIGHEITH<br>GFD              | Oryctola<br>gus<br>cuniculus |
| 1 | 1.00 | 1 | 1 | 0 | 0 | 0 | 0 | -0.001 | t | 71285 | VTEEIVTEE<br>IVTEEI          | Mus<br>musculus              |
| 1 | 1.00 | 1 | 1 | 0 | 0 | 0 | 0 | -0.001 | t | 62676 | SYPPP                        | Mus<br>musculus              |
| 1 | 1.00 | 1 | 1 | 0 | 0 | 0 | 0 | -0.001 | t | 62150 | SVIALGSQ<br>EGALHQAL<br>AGAI | Equus<br>caballus            |
| 1 | 1.00 | 1 | 1 | 0 | 0 | 0 | 0 | -0.001 | t | 75791 | YSLFQKEK<br>MVL              | Mus<br>musculus              |

|   |      |   |   |   |   |   |   |        |   |       |                              |                                  |
|---|------|---|---|---|---|---|---|--------|---|-------|------------------------------|----------------------------------|
| 1 | 1.00 | 1 | 1 | 0 | 0 | 0 | 0 | -0.001 | t | 71353 | VTHESYQE<br>LVKKLEALE<br>DA  | Oryctola<br>gus<br>cuniculu<br>s |
| 1 | 1.00 | 1 | 1 | 0 | 0 | 0 | 0 | -0.001 | t | 68042 | VDPTGLEP<br>DDHLK            | Mus<br>musculu<br>s              |
| 1 | 1.00 | 1 | 1 | 0 | 0 | 0 | 0 | -0.001 | t | 64074 | THSQWNK<br>PSKPKTN<br>MK     | Mus<br>musculu<br>s              |
| 1 | 1.00 | 1 | 1 | 0 | 0 | 0 | 0 | -0.001 | t | 72504 | WGQGGG<br>H                  | Mus<br>musculu<br>s              |
| 1 | 1.00 | 1 | 1 | 0 | 0 | 0 | 0 | -0.001 | t | 52825 | QVYYRPV<br>DQ                | Mus<br>musculu<br>s              |
| 1 | 1.00 | 1 | 1 | 0 | 0 | 0 | 0 | -0.001 | t | 49928 | PVPAPRRK<br>VGSDCGS          | Mus<br>musculu<br>s              |
| 1 | 1.00 | 1 | 1 | 0 | 0 | 0 | 0 | -0.001 | t | 41537 | MFSGGGG<br>PLSPGGKS          | Mus<br>musculu<br>s              |
| 1 | 1.00 | 1 | 1 | 0 | 0 | 0 | 0 | -0.001 | t | 40739 | LYDSYAYY<br>G                | Mus<br>musculu<br>s              |
| 1 | 1.00 | 1 | 1 | 0 | 0 | 0 | 0 | -0.001 | t | 40729 | LYDAAKAY<br>AEQLKEN<br>GVINY | Mus<br>musculu<br>s              |
| 1 | 1.00 | 1 | 1 | 0 | 0 | 0 | 0 | -0.001 | t | 43246 | NANPNAN<br>PNANPNA<br>NP     | Mus<br>musculu<br>s              |
| 1 | 1.00 | 1 | 1 | 0 | 0 | 0 | 0 | -0.001 | t | 43246 | NANPNAN<br>PNANPNA<br>NP     | Mus<br>musculu<br>s              |
| 1 | 1.00 | 1 | 1 | 0 | 0 | 0 | 0 | -0.001 | t | 43246 | NANPNAN<br>PNANPNA<br>NP     | Mus<br>musculu<br>s              |
| 1 | 1.00 | 1 | 1 | 0 | 0 | 0 | 0 | -0.001 | t | 56699 | SAAFYYRV                     | Mus<br>musculu<br>s              |
| 1 | 1.00 | 1 | 1 | 0 | 0 | 0 | 0 | -0.001 | t | 48933 | PPTAPPLL<br>PHSNL            | Homo<br>sapiens                  |



|   |      |   |   |   |        |   |   |        |   |       |                              |                     |
|---|------|---|---|---|--------|---|---|--------|---|-------|------------------------------|---------------------|
| 1 | 1.00 | 1 | 1 | 0 | 0      | 0 | 0 | -0.001 | t | 50637 | QELDCWH<br>YQHYCVTS<br>TKS   | MD                  |
| 1 | 1.00 | 1 | 1 | 0 | 0      | 0 | 0 | -0.001 | t | 58077 | SGHRMA<br>WDMMM<br>NW        | Mus<br>musculu<br>s |
| 1 | 1.00 | 1 | 1 | 0 | 0      | 0 | 0 | -0.001 | t | 46317 | NTWTTCQ<br>SIAFPSK           | Mus<br>musculu<br>s |
| 1 | 1.00 | 1 | 1 | 0 | 0      | 0 | 0 | -0.001 | t | 60024 | SPDVDLG<br>DISGINAS          | Mus<br>musculu<br>s |
| 1 | 1.00 | 1 | 1 | 0 | 0      | 0 | 0 | -0.001 | t | 45420 | NPNDPP                       | Mus<br>musculu<br>s |
| 1 | 1.00 | 1 | 1 | 0 | -0.008 | 0 | 0 | -0.001 | t | 47730 | PGQAEPP<br>QAFIDEV           | Mus<br>musculu<br>s |
| 1 | 1.00 | 1 | 1 | 0 | 0      | 0 | 0 | -0.001 | t | 57569 | SENHGNY<br>SAQVGAS<br>Q      | Mus<br>musculu<br>s |
| 1 | 1.00 | 1 | 1 | 0 | 0      | 0 | 0 | -0.001 | t | 57569 | SENHGNY<br>SAQVGAS<br>Q      | Mus<br>musculu<br>s |
| 1 | 1.00 | 1 | 1 | 0 | 0      | 0 | 0 | -0.001 | t | 45416 | NPNANPN<br>ANPNANP<br>NENPNA | Homo<br>sapiens     |
| 1 | 1.00 | 1 | 1 | 0 | 0      | 0 | 0 | -0.001 | t | 50502 | QDPDNTD<br>DNGPQDP<br>DNTD   | Mus<br>musculu<br>s |
| 1 | 1.00 | 1 | 1 | 0 | 0      | 0 | 0 | -0.001 | t | 48690 | PNPNDP                       | Mus<br>musculu<br>s |
| 1 | 1.00 | 1 | 1 | 0 | 0      | 0 | 0 | -0.001 | t | 47730 | PGQAEPP<br>QAFIDEV           | Mus<br>musculu<br>s |
| 1 | 1.00 | 1 | 1 | 0 | 0      | 0 | 0 | -0.001 | t | 40167 | LTSGHLKC<br>RVKMEKL<br>QLKGT | Equus<br>caballus   |
| 1 | 1.00 | 1 | 1 | 0 | 0      | 0 | 0 | -0.001 | t | 51233 | QKPLK                        | Mus<br>musculu<br>s |

|   |      |   |   |   |       |   |   |        |   |       |                              |                                  |
|---|------|---|---|---|-------|---|---|--------|---|-------|------------------------------|----------------------------------|
| 1 | 1.00 | 1 | 1 | 0 | 0.004 | 0 | 0 | -0.001 | t | 54393 | RKLWCHH<br>FC                | Mus<br>musculu<br>s              |
| 1 | 1.00 | 1 | 1 | 0 | 0     | 0 | 0 | -0.001 | t | 54393 | RKLWCHH<br>FC                | Mus<br>musculu<br>s              |
| 1 | 1.00 | 1 | 1 | 0 | 0     | 0 | 0 | -0.001 | t | 60024 | SPDVDLG<br>DISGINAS          | Mus<br>musculu<br>s              |
| 1 | 1.00 | 1 | 1 | 0 | 0     | 0 | 0 | -0.001 | t | 43248 | NANPNAN<br>PNANPNA<br>NPNANP | Mus<br>musculu<br>s              |
| 1 | 1.00 | 1 | 1 | 0 | 0     | 0 | 0 | -0.001 | t | 43248 | NANPNAN<br>PNANPNA<br>NPNANP | Mus<br>musculu<br>s              |
| 1 | 1.00 | 1 | 1 | 0 | 0     | 0 | 0 | -0.001 | t | 43248 | NANPNAN<br>PNANPNA<br>NPNANP | Mus<br>musculu<br>s              |
| 1 | 1.00 | 1 | 1 | 0 | 0     | 0 | 0 | -0.001 | t | 43248 | NANPNAN<br>PNANPNA<br>NPNANP | Mus<br>musculu<br>s              |
| 1 | 1.00 | 1 | 1 | 0 | 0     | 0 | 0 | -0.001 | t | 49795 | PTTRTDDK<br>LR               | Oryctola<br>gus<br>cuniculu<br>s |
| 1 | 1.00 | 1 | 1 | 0 | 0     | 0 | 0 | -0.001 | t | 49450 | PSNQDSF<br>QWQ               | Mus<br>musculu<br>s              |
| 1 | 1.00 | 1 | 1 | 0 | 0     | 0 | 0 | -0.001 | t | 41019 | MADPNRF<br>RG                | Mus<br>musculu<br>s              |
| 1 | 1.00 | 1 | 1 | 0 | 0     | 0 | 0 | -0.001 | t | 41019 | MADPNRF<br>RG                | Mus<br>musculu<br>s              |
| 1 | 1.00 | 1 | 1 | 0 | 0     | 0 | 0 | -0.001 | t | 58388 | SHLVEALY<br>LVCGERG          | Mus<br>musculu<br>s              |
| 1 | 1.00 | 1 | 1 | 0 | 0     | 0 | 0 | -0.001 | t | 51438 | QLLSSSKYT<br>IQRSTGDN<br>IDT | Mus<br>musculu<br>s              |
| 1 | 1.00 | 1 | 1 | 0 | 0     | 0 | 0 | -0.001 | t | 56610 | RYPGQGS<br>PGGNRYP<br>PQG    | Mus<br>musculu<br>s              |
| 1 | 1.00 | 1 | 1 | 0 | 0     | 0 | 0 | -0.001 | t | 58381 | SHLPYIEQ<br>GMQLAEQ<br>F     | Mus<br>musculu<br>s              |

|   |      |   |   |   |   |   |   |        |   |       |                              |                                  |
|---|------|---|---|---|---|---|---|--------|---|-------|------------------------------|----------------------------------|
| 1 | 1.00 | 1 | 1 | 0 | 0 | 0 | 0 | -0.001 | t | 51775 | QNTRNIVP<br>VSIVSR           | Oryctola<br>gus<br>cuniculu<br>s |
| 1 | 1.00 | 1 | 1 | 0 | 0 | 0 | 0 | -0.001 | t | 50171 | PYSPSQDP<br>YSPSPYD          | Homo<br>sapiens                  |
| 1 | 1.00 | 1 | 1 | 0 | 0 | 0 | 0 | -0.001 | t | 55799 | RSAPRITF<br>G                | Homo<br>sapiens                  |
| 1 | 1.00 | 1 | 1 | 0 | 0 | 0 | 0 | -0.001 | t | 55036 | RNNHPQN<br>TSDSQKEA<br>TD    | Oryctola<br>gus<br>cuniculu<br>s |
| 1 | 1.00 | 1 | 1 | 0 | 0 | 0 | 0 | -0.001 | t | 49878 | PVGTPE                       | Mus<br>musculu<br>s              |
| 1 | 1.00 | 1 | 1 | 0 | 0 | 0 | 0 | -0.001 | t | 59922 | SNTFINNA                     | Oryctola<br>gus<br>cuniculu<br>s |
| 1 | 1.00 | 1 | 1 | 0 | 0 | 0 | 0 | -0.001 | t | 45327 | NPDREYDF<br>RD               | Oryctola<br>gus<br>cuniculu<br>s |
| 1 | 1.00 | 1 | 1 | 0 | 0 | 0 | 0 | -0.001 | t | 37660 | LLPHSNLD<br>HILEPSIPW<br>KSK | Mus<br>musculu<br>s              |
| 1 | 1.00 | 1 | 1 | 0 | 0 | 0 | 0 | -0.001 | t | 40332 | LVFFAEDV                     | Mus<br>musculu<br>s              |
| 1 | 1.00 | 1 | 1 | 0 | 0 | 0 | 0 | -0.001 | t | 41826 | MKHM                         | Mus<br>musculu<br>s              |
| 1 | 1.00 | 1 | 1 | 0 | 0 | 0 | 0 | -0.001 | t | 37660 | LLPHSNLD<br>HILEPSIPW<br>KSK | Mus<br>musculu<br>s              |
| 1 | 1.00 | 1 | 1 | 0 | 0 | 0 | 0 | -0.001 | t | 55193 | RPKPG                        | Gallus<br>gallus                 |
| 1 | 1.00 | 1 | 1 | 0 | 0 | 0 | 0 | -0.001 | t | 47028 | PCKT                         | Mus<br>musculu<br>s              |
| 1 | 1.00 | 1 | 1 | 0 | 0 | 0 | 0 | -0.001 | t | 50932 | QGPGAPQ<br>GPGAPQG<br>PGAPQG | Mus<br>musculu<br>s              |

|   |      |   |   |   |        |   |   |        |   |       |                              |                                  |
|---|------|---|---|---|--------|---|---|--------|---|-------|------------------------------|----------------------------------|
| 1 | 1.00 | 1 | 1 | 0 | 0      | 0 | 0 | -0.001 | t | 43730 | NEREDERT<br>LTKEYEDIV<br>LK  | Oryctola<br>gus<br>cuniculu<br>s |
| 1 | 1.00 | 1 | 1 | 0 | -0.003 | 0 | 0 | -0.001 | t | 43730 | NEREDERT<br>LTKEYEDIV<br>LK  | Oryctola<br>gus<br>cuniculu<br>s |
| 1 | 1.00 | 1 | 1 | 0 | 0      | 0 | 0 | -0.001 | t | 50931 | QGPGAPQ<br>GPGAPQG<br>PGAP   | Mus<br>musculu<br>s              |
| 1 | 1.00 | 1 | 1 | 0 | 0      | 0 | 0 | -0.001 | t | 50931 | QGPGAPQ<br>GPGAPQG<br>PGAP   | Mus<br>musculu<br>s              |
| 1 | 1.00 | 1 | 1 | 0 | 0      | 0 | 0 | -0.001 | t | 48627 | PNEPDDAL<br>AMRIIRI          | Mus<br>musculu<br>s              |
| 1 | 1.00 | 1 | 1 | 0 | 0      | 0 | 0 | -0.001 | t | 50931 | QGPGAPQ<br>GPGAPQG<br>PGAP   | Mus<br>musculu<br>s              |
| 1 | 1.00 | 1 | 1 | 0 | -0.008 | 0 | 0 | -0.001 | t | 60117 | SPLLGCIGS<br>TCAEDGN         | Mus<br>musculu<br>s              |
| 1 | 1.00 | 1 | 1 | 0 | 0      | 0 | 0 | -0.001 | t | 43242 | NANPNAN<br>PNANP             | Mus<br>musculu<br>s              |
| 1 | 1.00 | 1 | 1 | 0 | 0      | 0 | 0 | -0.001 | t | 43242 | NANPNAN<br>PNANP             | Mus<br>musculu<br>s              |
| 1 | 1.00 | 1 | 1 | 0 | 0      | 0 | 0 | -0.001 | t | 52042 | QQINHHW<br>HKSGSSIG<br>KAFTT | Equus<br>caballus                |
| 1 | 1.00 | 1 | 1 | 0 | 0      | 0 | 0 | -0.001 | t | 50930 | QGPGAPQ<br>GPGAP             | Mus<br>musculu<br>s              |
| 1 | 1.00 | 1 | 1 | 0 | 0      | 0 | 0 | -0.001 | t | 50930 | QGPGAPQ<br>GPGAP             | Mus<br>musculu<br>s              |
| 1 | 1.00 | 1 | 1 | 0 | 0      | 0 | 0 | -0.001 | t | 50930 | QGPGAPQ<br>GPGAP             | Mus<br>musculu<br>s              |
| 1 | 1.00 | 1 | 1 | 0 | 0      | 0 | 0 | -0.001 | t | 46899 | PAPRRKFQ<br>QVKRL            | Mus<br>musculu<br>s              |
| 1 | 1.00 | 1 | 1 | 0 | 0      | 0 | 0 | -0.001 | t | 43242 | NANPNAN<br>PNANP             | Mus<br>musculu<br>s              |

|   |      |   |   |   |   |   |   |        |   |       |                             |                        |
|---|------|---|---|---|---|---|---|--------|---|-------|-----------------------------|------------------------|
| 1 | 1.00 | 1 | 1 | 0 | 0 | 0 | 0 | -0.001 | t | 53702 | RFFRDEKE<br>LQ              | Mus<br>musculu<br>s    |
| 1 | 1.00 | 1 | 1 | 0 | 0 | 0 | 0 | -0.001 | t | 50930 | QGPGAPQ<br>GPGAP            | Mus<br>musculu<br>s    |
| 1 | 1.00 | 1 | 1 | 0 | 0 | 0 | 0 | -0.001 | t | 41232 | MDIDPYKE<br>FG              | Mus<br>musculu<br>s    |
| 1 | 1.00 | 1 | 1 | 0 | 0 | 0 | 0 | -0.001 | t | 50930 | QGPGAPQ<br>GPGAP            | Mus<br>musculu<br>s    |
| 1 | 1.00 | 1 | 1 | 0 | 0 | 0 | 0 | -0.001 | t | 48620 | PNDPPP                      | Mus<br>musculu<br>s    |
| 1 | 1.00 | 1 | 1 | 0 | 0 | 0 | 0 | -0.001 | t | 45252 | NNSTNSGI                    | Mus<br>musculu<br>s    |
| 1 | 1.00 | 1 | 1 | 0 | 0 | 0 | 0 | -0.001 | t | 48382 | PLKPTKRS<br>FIEDLLF         | Homo<br>sapiens        |
| 1 | 1.00 | 1 | 1 | 0 | 0 | 0 | 0 | -0.001 | t | 57644 | SETFTNKL<br>KEKHTDLG<br>KEG | Mus<br>musculu<br>s    |
| 1 | 1.00 | 1 | 1 | 0 | 0 | 0 | 0 | -0.001 | t | 43242 | NANPNAN<br>PNANP            | Aotus<br>nancyma<br>ae |
| 1 | 1.00 | 1 | 1 | 0 | 0 | 0 | 0 | -0.001 | t | 43242 | NANPNAN<br>PNANP            | Mus<br>musculu<br>s    |
| 1 | 1.00 | 1 | 1 | 0 | 0 | 0 | 0 | -0.001 | t | 56502 | RYAPACKP<br>L               | Homo<br>sapiens        |
| 1 | 1.00 | 1 | 1 | 0 | 0 | 0 | 0 | -0.001 | t | 48858 | PPPPNPN<br>DPPPPNP<br>ND    | Mus<br>musculu<br>s    |
| 1 | 1.00 | 1 | 1 | 0 | 0 | 0 | 0 | -0.001 | t | 51483 | QLPQGTTL<br>PKGFYAE         | Homo<br>sapiens        |
| 1 | 1.00 | 1 | 1 | 0 | 0 | 0 | 0 | -0.001 | t | 50222 | QACKGKIQ<br>ALCEN           | Mus<br>musculu<br>s    |
| 1 | 1.00 | 1 | 1 | 0 | 0 | 0 | 0 | -0.001 | t | 43242 | NANPNAN<br>PNANP            | Mus<br>musculu<br>s    |

|   |      |   |   |   |   |   |   |        |   |       |                              |                                  |
|---|------|---|---|---|---|---|---|--------|---|-------|------------------------------|----------------------------------|
| 1 | 1.00 | 1 | 1 | 0 | 0 | 0 | 0 | -0.001 | t | 43242 | NANPNAN<br>PNANP             | Macaca<br>fascicula<br>ris       |
| 1 | 1.00 | 1 | 1 | 0 | 0 | 0 | 0 | -0.001 | t | 53681 | RFAKYQQ<br>QGRLEAR           | Oryctola<br>gus<br>cuniculu<br>s |
| 1 | 1.00 | 1 | 1 | 0 | 0 | 0 | 0 | -0.001 | t | 51775 | QNTRNIVP<br>VSIVSR           | Mus<br>musculu<br>s              |
| 1 | 1.00 | 1 | 1 | 0 | 0 | 0 | 0 | -0.001 | t | 43152 | NAGGNAG<br>GNAGGNA<br>GGNAGG | Mus<br>musculu<br>s              |
| 1 | 1.00 | 1 | 1 | 0 | 0 | 0 | 0 | -0.001 | t | 48618 | PNDPNRN<br>VD                | Mus<br>musculu<br>s              |
| 1 | 1.00 | 1 | 1 | 0 | 0 | 0 | 0 | -0.001 | t | 49961 | PVSGPFGP<br>LPSLAFSA<br>VPAD | Mus<br>musculu<br>s              |
| 1 | 1.00 | 1 | 1 | 0 | 0 | 0 | 0 | -0.001 | t | 43227 | NANDPP                       | Mus<br>musculu<br>s              |
| 1 | 1.00 | 1 | 1 | 0 | 0 | 0 | 0 | -0.001 | t | 51958 | QPRKTKPV<br>KSLPERK          | Mus<br>musculu<br>s              |
| 1 | 1.00 | 1 | 1 | 0 | 0 | 0 | 0 | -0.001 | t | 46026 | NSVGANA<br>PNADTIAS          | Mus<br>musculu<br>s              |
| 1 | 1.00 | 1 | 1 | 0 | 0 | 0 | 0 | -0.001 | t | 46026 | NSVGANA<br>PNADTIAS          | Mus<br>musculu<br>s              |
| 1 | 1.00 | 1 | 1 | 0 | 0 | 0 | 0 | -0.001 | t | 60024 | SPDVDLG<br>DISGINAS          | Mus<br>musculu<br>s              |
| 1 | 1.00 | 1 | 1 | 0 | 0 | 0 | 0 | -0.001 | t | 45202 | NNNSTNS<br>G                 | Mus<br>musculu<br>s              |
| 1 | 1.00 | 1 | 1 | 0 | 0 | 0 | 0 | -0.001 | t | 53009 | QYNLAFSD<br>RQSAQ            | Mus<br>musculu<br>s              |

|   |      |   |   |   |   |   |   |        |   |       |                              |                                  |
|---|------|---|---|---|---|---|---|--------|---|-------|------------------------------|----------------------------------|
| 1 | 1.00 | 1 | 1 | 0 | 0 | 0 | 0 | -0.001 | t | 43246 | NANPNAN<br>PNANPN<br>NP      | Mus<br>musculu<br>s              |
| 1 | 1.00 | 1 | 1 | 0 | 0 | 0 | 0 | -0.001 | t | 56599 | RYNLVFSG<br>DSDRICSN<br>RA   | Mus<br>musculu<br>s              |
| 1 | 1.00 | 1 | 1 | 0 | 0 | 0 | 0 | -0.001 | t | 10868 | DYEDRYR<br>E                 | Mus<br>musculu<br>s              |
| 1 | 1.00 | 1 | 1 | 0 | 0 | 0 | 0 | -0.001 | t | 10868 | DYEDRYR<br>E                 | Mus<br>musculu<br>s              |
| 1 | 1.00 | 1 | 1 | 0 | 0 | 0 | 0 | -0.001 | t | 10868 | DYEDRYR<br>E                 | Mus<br>musculu<br>s              |
| 1 | 1.00 | 1 | 1 | 0 | 0 | 0 | 0 | -0.001 | t | 26372 | IHFG                         | Mus<br>musculu<br>s              |
| 1 | 1.00 | 1 | 1 | 0 | 0 | 0 | 0 | -0.001 | t | 11819 | EENVEHD<br>A                 | Mus<br>musculu<br>s              |
| 1 | 1.00 | 1 | 1 | 0 | 0 | 0 | 0 | -0.001 | t | 23511 | GYYPSPDP<br>NTFYAPPY<br>S    | Mus<br>musculu<br>s              |
| 1 | 1.00 | 1 | 1 | 0 | 0 | 0 | 0 | -0.001 | t | 23511 | GYYPSPDP<br>NTFYAPPY<br>S    | Mus<br>musculu<br>s              |
| 1 | 1.00 | 1 | 1 | 0 | 0 | 0 | 0 | -0.001 | t | 32719 | KPGKIS                       | Homo<br>sapiens                  |
| 1 | 1.00 | 1 | 1 | 0 | 0 | 0 | 0 | -0.001 | t | 10801 | DWEDRYR<br>RE                | Oryctola<br>gus<br>cuniculu<br>s |
| 1 | 1.00 | 1 | 1 | 0 | 0 | 0 | 0 | -0.001 | t | 18766 | GASEDVRK<br>QP               | Oryctola<br>gus<br>cuniculu<br>s |
| 1 | 1.00 | 1 | 1 | 0 | 0 | 0 | 0 | -0.001 | t | 19096 | GDRADGQ<br>PA                | Aotus<br>griseime<br>mbra        |
| 1 | 1.00 | 1 | 1 | 0 | 0 | 0 | 0 | -0.001 | t | 10639 | DVKFPGG<br>GQIVGGV<br>YLLPRR | Mus<br>musculu<br>s              |
| 1 | 1.00 | 1 | 1 | 0 | 0 | 0 | 0 | -0.001 | t | 24369 | HNDKRAD<br>PAFVCRQ<br>GVVDRG | Equus<br>caballus                |

|   |      |   |   |   |   |   |   |        |   |       |                              |                                  |
|---|------|---|---|---|---|---|---|--------|---|-------|------------------------------|----------------------------------|
| 1 | 1.00 | 1 | 1 | 0 | 0 | 0 | 0 | -0.001 | t | 26375 | IHFGSDYE<br>DRYY             | Mus<br>musculu<br>s              |
| 1 | 1.00 | 1 | 1 | 0 | 0 | 0 | 0 | -0.001 | t | 10639 | DVKFPGG<br>GQIVGGV<br>YLLPRR | Mus<br>musculu<br>s              |
| 1 | 1.00 | 1 | 1 | 0 | 0 | 0 | 0 | -0.001 | t | 11815 | EENVEENV<br>EENVEENV         | Oryctola<br>gus<br>cuniculu<br>s |
| 1 | 1.00 | 1 | 1 | 0 | 0 | 0 | 0 | -0.001 | t | 32570 | KNNNSTN<br>S                 | Mus<br>musculu<br>s              |
| 1 | 1.00 | 1 | 1 | 0 | 0 | 0 | 0 | -0.001 | t | 11814 | EENVEENV<br>EENV             | Oryctola<br>gus<br>cuniculu<br>s |
| 1 | 1.00 | 1 | 1 | 0 | 0 | 0 | 0 | -0.001 | t | 32571 | KNNNSTN<br>SGI               | Mus<br>musculu<br>s              |
| 1 | 1.00 | 1 | 1 | 0 | 0 | 0 | 0 | -0.001 | t | 10496 | DTTIP                        | Mus<br>musculu<br>s              |
| 1 | 1.00 | 1 | 1 | 0 | 0 | 0 | 0 | -0.001 | t | 17524 | FQQFGRD<br>VSDFTDSV<br>RDPKT | Mus<br>musculu<br>s              |
| 1 | 1.00 | 1 | 1 | 0 | 0 | 0 | 0 | -0.001 | t | 11819 | EENVEHD<br>A                 | Mus<br>musculu<br>s              |
| 1 | 1.00 | 1 | 1 | 0 | 0 | 0 | 0 | -0.001 | t | 20051 | GGTHSQW<br>NKP               | Mus<br>musculu<br>s              |
| 1 | 1.00 | 1 | 1 | 0 | 0 | 0 | 0 | -0.001 | t | 17135 | FNCLGMS<br>NRDFLEGV<br>SGATW | Equus<br>caballus                |
| 1 | 1.00 | 1 | 1 | 0 | 0 | 0 | 0 | -0.001 | t | 18833 | GAVVGGL<br>GGYML             | Mus<br>musculu<br>s              |
| 1 | 1.00 | 1 | 1 | 0 | 0 | 0 | 0 | -0.001 | t | 14869 | EVSEKII                      | Oryctola<br>gus<br>cuniculu<br>s |
| 1 | 1.00 | 1 | 1 | 0 | 0 | 0 | 0 | -0.001 | t | 24500 | HPSDGKC                      | Mus<br>musculu<br>s              |



|   |      |   |   |   |        |   |   |        |   |       |                              |                                  |
|---|------|---|---|---|--------|---|---|--------|---|-------|------------------------------|----------------------------------|
| 1 | 1.00 | 1 | 1 | 0 | 0      | 0 | 0 | -0.001 | t | 19868 | GGGWGQ<br>PHGGGW<br>GQPH     | Mus<br>musculu<br>s              |
| 1 | 1.00 | 1 | 1 | 0 | 0      | 0 | 0 | -0.001 | t | 15205 | FAKY                         | Mus<br>musculu<br>s              |
| 1 | 1.00 | 1 | 1 | 0 | 0      | 0 | 0 | -0.001 | t | 19097 | GDRADGQ<br>PAGDRAA<br>GQPA   | Mus<br>musculu<br>s              |
| 1 | 1.00 | 1 | 1 | 0 | -0.003 | 0 | 0 | -0.001 | t | 11813 | EENVEENV                     | Oryctola<br>gus<br>cuniculu<br>s |
| 1 | 1.00 | 1 | 1 | 0 | -0.003 | 0 | 0 | -0.001 | t | 11813 | EENVEENV                     | Oryctola<br>gus<br>cuniculu<br>s |
| 1 | 1.00 | 1 | 1 | 0 | 0      | 0 | 0 | -0.001 | t | 32841 | KPPTPPPE<br>PET              | Mus<br>musculu<br>s              |
| 1 | 1.00 | 1 | 1 | 0 | 0      | 0 | 0 | -0.001 | t | 30180 | KDKDKDN<br>TDE               | Mus<br>musculu<br>s              |
| 1 | 1.00 | 1 | 1 | 0 | -0.003 | 0 | 0 | -0.001 | t | 11813 | EENVEENV                     | Oryctola<br>gus<br>cuniculu<br>s |
| 1 | 1.00 | 1 | 1 | 0 | 0      | 0 | 0 | -0.001 | t | 21867 | GQGGGTH<br>NQWNKP            | Oryctola<br>gus<br>cuniculu<br>s |
| 1 | 1.00 | 1 | 1 | 0 | 0      | 0 | 0 | -0.001 | t | 31046 | KGQKPNLL<br>DRLRHRK<br>NGYRH | Mus<br>musculu<br>s              |
| 1 | 1.00 | 1 | 1 | 0 | 0      | 0 | 0 | -0.001 | t | 16018 | FGNDYED<br>RYYR              | Mus<br>musculu<br>s              |
| 1 | 1.00 | 1 | 1 | 0 | 0      | 0 | 0 | -0.001 | t | 36166 | LGIMGEYR<br>GTPRNQD<br>LYDAA | Mus<br>musculu<br>s              |
| 1 | 1.00 | 1 | 1 | 0 | 0      | 0 | 0 | -0.001 | t | 30716 | KFDWNTPD                     | Mus<br>musculu<br>s              |

|   |      |   |   |   |        |   |   |        |   |       |                              |                       |
|---|------|---|---|---|--------|---|---|--------|---|-------|------------------------------|-----------------------|
| 1 | 1.00 | 1 | 1 | 0 | 0      | 0 | 0 | -0.001 | t | 11819 | EENVEHDA                     | Mus musculus          |
| 1 | 1.00 | 1 | 1 | 0 | 0      | 0 | 0 | -0.001 | t | 22305 | GSDYEDRY<br>YRENMHR<br>YPNQ  | Mus musculus          |
| 1 | 1.00 | 1 | 1 | 0 | 0      | 0 | 0 | -0.001 | t | 16101 | FHENWPS                      | Mus musculus          |
| 1 | 1.00 | 1 | 1 | 0 | 0      | 0 | 0 | -0.001 | t | 31018 | KGNCSGPT<br>TIR              | Oryctolagus cuniculus |
| 1 | 1.00 | 1 | 1 | 0 | -0.003 | 0 | 0 | -0.001 | t | 30716 | KFDWNTPD                     | Mus musculus          |
| 1 | 1.00 | 1 | 1 | 0 | -0.008 | 0 | 0 | -0.001 | t | 16551 | FLDLMRA<br>VA                | Mus musculus          |
| 1 | 1.00 | 1 | 1 | 0 | 0      | 0 | 0 | -0.001 | t | 11813 | EENVEENV                     | Homo sapiens          |
| 1 | 1.00 | 1 | 1 | 0 | 0      | 0 | 0 | -0.001 | t | 30716 | KFDWNTPD                     | Mus musculus          |
| 1 | 1.00 | 1 | 1 | 0 | 0      | 0 | 0 | -0.001 | t | 11819 | EENVEHDA                     | Oryctolagus cuniculus |
| 1 | 1.00 | 1 | 1 | 0 | 0      | 0 | 0 | -0.001 | t | 23599 | HCLGKWL<br>GHPDKF            | Mus musculus          |
| 1 | 1.00 | 1 | 1 | 0 | 0      | 0 | 0 | -0.001 | t | 27463 | IMDINKRK<br>YDSLK            | Homo sapiens          |
| 1 | 1.00 | 1 | 1 | 0 | 0      | 0 | 0 | -0.001 | t | 12982 | ELDGSKNE<br>WGWSKSK          | Mus musculus          |
| 1 | 1.00 | 1 | 1 | 0 | 0      | 0 | 0 | -0.001 | t | 30186 | KDKKKKTD<br>EAQPLPQR<br>QKKQ | Homo sapiens          |

|   |      |   |   |   |       |   |   |        |   |       |                            |                                  |
|---|------|---|---|---|-------|---|---|--------|---|-------|----------------------------|----------------------------------|
| 1 | 1.00 | 1 | 1 | 0 | 0     | 0 | 0 | -0.001 | t | 11241 | ECFPWDR<br>KL              | Mus<br>musculu<br>s              |
| 1 | 1.00 | 1 | 1 | 0 | 0.004 | 0 | 0 | -0.001 | t | 11241 | ECFPWDR<br>KL              | Mus<br>musculu<br>s              |
| 1 | 1.00 | 1 | 1 | 0 | 0     | 0 | 0 | -0.001 | t | 27675 | INKRKYDS<br>LKEKL          | Homo<br>sapiens                  |
| 1 | 1.00 | 1 | 1 | 0 | 0     | 0 | 0 | -0.001 | t | 14952 | EWSPCSVT<br>CGKGTRSR<br>KR | Oryctola<br>gus<br>cuniculu<br>s |
| 1 | 1.00 | 1 | 1 | 0 | 0     | 0 | 0 | -0.001 | t | 11819 | EENVEHD<br>A               | Mus<br>musculu<br>s              |
| 1 | 1.00 | 1 | 1 | 0 | 0     | 0 | 0 | -0.001 | t | 10358 | DTIASGSQ<br>RSTNSAS        | Mus<br>musculu<br>s              |
| 1 | 1.00 | 1 | 1 | 0 | 0     | 0 | 0 | -0.001 | t | 19097 | GDRADGQ<br>PAGDRAA<br>GQPA | Mus<br>musculu<br>s              |
| 1 | 1.00 | 1 | 1 | 0 | 0     | 0 | 0 | -0.001 | t | 19093 | GDRAAGQ<br>PAGDRAA<br>GQPA | Mus<br>musculu<br>s              |
| 1 | 1.00 | 1 | 1 | 0 | 0     | 0 | 0 | -0.001 | t | 26075 | IFGFNALV<br>DR             | Oryctola<br>gus<br>cuniculu<br>s |
| 1 | 1.00 | 1 | 1 | 0 | 0     | 0 | 0 | -0.001 | t | 13984 | ERESQAY                    | Mus<br>musculu<br>s              |
| 1 | 1.00 | 1 | 1 | 0 | 0     | 0 | 0 | -0.001 | t | 25149 | HYAPRPC<br>GI              | Homo<br>sapiens                  |
| 1 | 1.00 | 1 | 1 | 0 | 0     | 0 | 0 | -0.001 | t | 19093 | GDRAAGQ<br>PAGDRAA<br>GQPA | Mus<br>musculu<br>s              |
| 1 | 1.00 | 1 | 1 | 0 | 0     | 0 | 0 | -0.001 | t | 19093 | GDRAAGQ<br>PAGDRAA<br>GQPA | Mus<br>musculu<br>s              |
| 1 | 1.00 | 1 | 1 | 0 | 0     | 0 | 0 | -0.001 | t | 11819 | EENVEHD<br>A               | Mus<br>musculu<br>s              |

|   |      |   |   |   |   |   |   |        |   |       |                              |                     |
|---|------|---|---|---|---|---|---|--------|---|-------|------------------------------|---------------------|
| 1 | 1.00 | 1 | 1 | 0 | 0 | 0 | 0 | -0.001 | t | 19093 | GDRAAGQ<br>PAGDRAA<br>GQPA   | Mus<br>musculu<br>s |
| 1 | 1.00 | 1 | 1 | 0 | 0 | 0 | 0 | -0.001 | t | 21469 | GNLLLSCL                     | Mus<br>musculu<br>s |
| 1 | 1.00 | 1 | 1 | 0 | 0 | 0 | 0 | -0.001 | t | 10639 | DVKFPGG<br>GQIVGGV<br>YLLPRR | Mus<br>musculu<br>s |
| 1 | 1.00 | 1 | 1 | 0 | 0 | 0 | 0 | -0.001 | t | 21469 | GNLLLSCL                     | Mus<br>musculu<br>s |
| 1 | 1.00 | 1 | 1 | 0 | 0 | 0 | 0 | -0.001 | t | 33795 | KTNMKH<br>MAGA               | Mus<br>musculu<br>s |
| 1 | 1.00 | 1 | 1 | 0 | 0 | 0 | 0 | -0.001 | t | 4737  | ASREAK                       | Mus<br>musculu<br>s |
| 1 | 1.00 | 1 | 1 | 0 | 0 | 0 | 0 | -0.001 | t | 9723  | DPPPPNP<br>NDPPPPN<br>PND    | Mus<br>musculu<br>s |
| 1 | 1.00 | 1 | 1 | 0 | 0 | 0 | 0 | -0.001 | t | 4789  | ASTAAPPY<br>TNEQAYQ<br>MLLAL | Mus<br>musculu<br>s |
| 1 | 1.00 | 1 | 1 | 0 | 0 | 0 | 0 | -0.001 | t | 9610  | DPDIGQSK                     | Mus<br>musculu<br>s |
| 1 | 1.00 | 1 | 1 | 0 | 0 | 0 | 0 | -0.001 | t | 9609  | DPDI                         | Mus<br>musculu<br>s |
| 1 | 1.00 | 1 | 1 | 0 | 0 | 0 | 0 | -0.001 | t | 7491  | DAEFRHDS<br>GYEVHHQ<br>K     | Macaca<br>mulatta   |
| 1 | 1.00 | 1 | 1 | 0 | 0 | 0 | 0 | -0.001 | t | 3290  | ANGAGNQ<br>PGANGAG<br>NQPG   | Mus<br>musculu<br>s |
| 1 | 1.00 | 1 | 1 | 0 | 0 | 0 | 0 | -0.001 | t | 3290  | ANGAGNQ<br>PGANGAG<br>NQPG   | Mus<br>musculu<br>s |
| 1 | 1.00 | 1 | 1 | 0 | 0 | 0 | 0 | -0.001 | t | 9516  | DNNLVSG<br>P                 | Mus<br>musculu<br>s |
| 1 | 1.00 | 1 | 1 | 0 | 0 | 0 | 0 | -0.001 | t | 9516  | DNNLVSG<br>P                 | Mus<br>musculu<br>s |

|   |      |   |   |   |   |   |   |        |   |      |                             |                                  |
|---|------|---|---|---|---|---|---|--------|---|------|-----------------------------|----------------------------------|
| 1 | 1.00 | 1 | 1 | 0 | 0 | 0 | 0 | -0.001 | t | 9516 | DNNLVSG<br>P                | Mus<br>musculu<br>s              |
| 1 | 1.00 | 1 | 1 | 0 | 0 | 0 | 0 | -0.001 | t | 8916 | DKKTEETT<br>LLEDRL          | Mus<br>musculu<br>s              |
| 1 | 1.00 | 1 | 1 | 0 | 0 | 0 | 0 | -0.001 | t | 9524 | DNPASTT<br>NKDK             | Mus<br>musculu<br>s              |
| 1 | 1.00 | 1 | 1 | 0 | 0 | 0 | 0 | -0.001 | t | 9757 | DPRVRGLY<br>FPAGGSSS<br>GTV | Pan<br>troglody<br>tes           |
| 1 | 1.00 | 1 | 1 | 0 | 0 | 0 | 0 | -0.001 | t | 9694 | DPNANPN<br>VDPNANP<br>NV    | Mus<br>musculu<br>s              |
| 1 | 1.00 | 1 | 1 | 0 | 0 | 0 | 0 | -0.001 | t | 9694 | DPNANPN<br>VDPNANP<br>NV    | Mus<br>musculu<br>s              |
| 1 | 1.00 | 1 | 1 | 0 | 0 | 0 | 0 | -0.001 | t | 5771 | AYFLYQQ<br>QGRLDKL          | Oryctola<br>gus<br>cuniculu<br>s |
| 1 | 1.00 | 1 | 1 | 0 | 0 | 0 | 0 | -0.001 | t | 9694 | DPNANPN<br>VDPNANP<br>NV    | Mus<br>musculu<br>s              |
| 1 | 1.00 | 1 | 1 | 0 | 0 | 0 | 0 | -0.001 | t | 9524 | DNPASTT<br>NKDK             | Mus<br>musculu<br>s              |
| 1 | 1.00 | 1 | 1 | 0 | 0 | 0 | 0 | -0.001 | t | 7491 | DAEFRHDS<br>GYEVHHQ<br>K    | Mus<br>musculu<br>s              |
| 1 | 1.00 | 1 | 1 | 0 | 0 | 0 | 0 | -0.001 | t | 9694 | DPNANPN<br>VDPNANP<br>NV    | Mus<br>musculu<br>s              |
| 1 | 1.00 | 1 | 1 | 0 | 0 | 0 | 0 | -0.001 | t | 9621 | DPEDSALL                    | Mus<br>musculu<br>s              |
| 1 | 1.00 | 1 | 1 | 0 | 0 | 0 | 0 | -0.001 | t | 9722 | DPPPPNP<br>NDPPPPN<br>PN    | Mus<br>musculu<br>s              |
| 1 | 1.00 | 1 | 1 | 0 | 0 | 0 | 0 | -0.001 | t | 9694 | DPNANPN<br>VDPNANP<br>NV    | Mus<br>musculu<br>s              |

|   |      |   |   |   |   |   |   |        |   |      |                      |                       |
|---|------|---|---|---|---|---|---|--------|---|------|----------------------|-----------------------|
| 1 | 1.00 | 1 | 1 | 0 | 0 | 0 | 0 | -0.001 | t | 8226 | DEYSNQNFVHDC         | Mus musculus          |
| 1 | 1.00 | 1 | 1 | 0 | 0 | 0 | 0 | -0.001 | t | 5967 | CADARMYGVLPWNAFPGKVC | Oryctolagus cuniculus |
| 1 | 1.00 | 1 | 1 | 0 | 0 | 0 | 0 | -0.001 | t | 8748 | DIPFP                | Mus musculus          |
| 1 | 1.00 | 1 | 1 | 0 | 0 | 0 | 0 | -0.001 | t | 5352 | AVGPN                | Mus musculus          |
| 1 | 1.00 | 1 | 1 | 0 | 0 | 0 | 0 | -0.001 | t | 9722 | DPPPPNPNDPPPPNP      | Mus musculus          |
| 1 | 1.00 | 1 | 1 | 0 | 0 | 0 | 0 | -0.001 | t | 6455 | CITQYERESQAYY        | Mus musculus          |
| 1 | 1.00 | 1 | 1 | 0 | 0 | 0 | 0 | -0.001 | t | 4397 | ASFEAQGALANIAVDKA    | Mus musculus          |
| 1 | 1.00 | 1 | 1 | 0 | 0 | 0 | 0 | -0.001 | t | 2039 | AINPESDQPDLSNF       | Homo sapiens          |
| 1 | 1.00 | 1 | 1 | 0 | 0 | 0 | 0 | -0.001 | t | 2780 | ALNGNGDPNNMDKAVKLY   | Mus musculus          |
| 1 | 1.00 | 1 | 1 | 0 | 0 | 0 | 0 | -0.001 | t | 6402 | CHPSDGKCN            | Mus musculus          |
| 1 | 1.00 | 1 | 1 | 0 | 0 | 0 | 0 | -0.001 | t | 8076 | DEKDDQMEEED          | Mus musculus          |
| 1 | 1.00 | 1 | 1 | 0 | 0 | 0 | 0 | -0.001 | t | 9722 | DPPPPNPNDPPPPNP      | Mus musculus          |
| 1 | 1.00 | 1 | 1 | 0 | 0 | 0 | 0 | -0.001 | t | 8916 | DKKTEETTLLEDRL       | Mus musculus          |
| 1 | 1.00 | 1 | 1 | 0 | 0 | 0 | 0 | -0.001 | t | 5597 | AVVGGLGGY            | Mus musculus          |
| 1 | 1.00 | 1 | 1 | 0 | 0 | 0 | 0 | -0.001 | t | 8916 | DKKTEETTLLEDRL       | Mus musculus          |

|   |      |   |   |   |       |   |   |        |   |      |                              |                                  |
|---|------|---|---|---|-------|---|---|--------|---|------|------------------------------|----------------------------------|
| 1 | 1.00 | 1 | 1 | 0 | 0     | 0 | 0 | -0.001 | t | 8644 | DIFTNSRG<br>KRASKG           | Mus<br>musculu<br>s              |
| 1 | 1.00 | 1 | 1 | 0 | 0     | 0 | 0 | -0.001 | t | 709  | ADLIAAQK<br>LASKP            | Mus<br>musculu<br>s              |
| 1 | 1.00 | 1 | 1 | 0 | 0     | 0 | 0 | -0.001 | t | 3656 | APMSTPS<br>ATSVR             | Mus<br>musculu<br>s              |
| 1 | 1.00 | 1 | 1 | 0 | 0     | 0 | 0 | -0.001 | t | 7492 | DAEFRHDS<br>GYEVHHQ<br>KL    | Mus<br>musculu<br>s              |
| 1 | 1.00 | 1 | 1 | 0 | 0     | 0 | 0 | -0.001 | t | 4397 | ASFEAQG<br>ALANIAVD<br>KA    | Mus<br>musculu<br>s              |
| 1 | 1.00 | 1 | 1 | 0 | 0     | 0 | 0 | -0.001 | t | 9694 | DPNANPN<br>VDPNANP<br>NV     | Mus<br>musculu<br>s              |
| 1 | 1.00 | 1 | 1 | 0 | 0     | 0 | 0 | -0.001 | t | 9694 | DPNANPN<br>VDPNANP<br>NV     | Mus<br>musculu<br>s              |
| 1 | 1.00 | 1 | 1 | 0 | 0     | 0 | 0 | -0.001 | t | 7754 | DDDIPF                       | Mus<br>musculu<br>s              |
| 1 | 1.00 | 1 | 1 | 0 | 0     | 0 | 0 | -0.001 | t | 3242 | ANDPPP                       | Mus<br>musculu<br>s              |
| 1 | 1.00 | 1 | 1 | 0 | 0     | 0 | 0 | -0.001 | t | 9722 | DPPPPNP<br>NDPPPPN<br>PN     | Mus<br>musculu<br>s              |
| 1 | 1.00 | 1 | 1 | 0 | 0     | 0 | 0 | -0.001 | t | 6742 | CNYSKFW<br>YLEHAK            | Mus<br>musculu<br>s              |
| 1 | 1.00 | 1 | 1 | 0 | 0.012 | 0 | 0 | -0.001 | t | 6742 | CNYSKFW<br>YLEHAK            | Mus<br>musculu<br>s              |
| 1 | 1.00 | 1 | 1 | 0 | 0     | 0 | 0 | -0.001 | t | 9722 | DPPPPNP<br>NDPPPPN<br>PN     | Mus<br>musculu<br>s              |
| 1 | 1.00 | 1 | 1 | 0 | 0     | 0 | 0 | -0.001 | t | 1433 | AGAGGGA<br>GGAGAGG<br>GAGGAG | Oryctola<br>gus<br>cuniculu<br>s |

|   |      |   |   |       |        |        |        |        |   |        |                           |                                  |
|---|------|---|---|-------|--------|--------|--------|--------|---|--------|---------------------------|----------------------------------|
| 1 | 1.00 | 1 | 1 | 0     | 0      | 0      | 0      | -0.001 | t | 7318   | CVTQYQKE<br>SQAYYD        | Oryctola<br>gus<br>cuniculu<br>s |
| 1 | 1.00 | 1 | 1 | -0.01 | -0.006 | -0.01  | -0.009 | -0.01  | t | 47315  | PEKAFREL                  | Homo<br>sapiens                  |
| 1 | 1.00 | 1 | 1 | -0.01 | -0.012 | -0.015 | -0.011 | -0.011 | t | 73601  | YDVPDYAS                  | Mus<br>musculu<br>s              |
| 1 | 1.00 | 1 | 1 | 0.02  | 0.015  | 0.016  | 0.023  | 0.022  | t | 157341 | GQVEGRT<br>YDAAMVA        | Canis<br>lupus                   |
| 1 | 1.00 | 1 | 1 | -0.01 | -0.006 | -0.014 | -0.007 | -0.009 | t | 134002 | AKLVTILQ<br>AHPLQQS<br>YD | Homo<br>sapiens                  |
| 1 | 1.00 | 1 | 1 | -0.01 | -0.007 | -0.014 | -0.007 | -0.009 | t | 134002 | AKLVTILQ<br>AHPLQQS<br>YD | Mus<br>musculu<br>s              |
| 1 | 1.00 | 1 | 1 | 0     | 0      | 0      | 0.003  | 0.001  | t | 100508 | SGYEVHH<br>QKL            | Mus<br>musculu<br>s              |
| 1 | 1.00 | 1 | 1 | -0.01 | -0.01  | -0.01  | -0.01  | -0.01  | t | 33794  | KTNMKH<br>M               | Mus<br>musculu<br>s              |
| 1 | 1.00 | 1 | 1 | -0.01 | -0.01  | -0.01  | -0.01  | -0.01  | t | 33794  | KTNMKH<br>M               | Mus<br>musculu<br>s              |
| 1 | 1.00 | 1 | 1 | 0.01  | 0.01   | 0.01   | 0.007  | 0.01   | t | 43013  | MWLDVM<br>YLKGGG          | Homo<br>sapiens                  |
| 1 | 1.00 | 1 | 1 | -0.01 | -0.01  | -0.006 | -0.01  | -0.01  | t | 71855  | VVTLYL                    | Homo<br>sapiens                  |
| 1 | 1.00 | 1 | 1 | 0.01  | 0.01   | 0.01   | 0.01   | 0.01   | t | 45322  | NPDPN                     | Mus<br>musculu<br>s              |
| 1 | 1.00 | 1 | 1 | 0.04  | 0.04   | 0.04   | 0.04   | 0.04   | t | 108133 | SKTTTTPY<br>TPGPTAL       | Homo<br>sapiens                  |
| 1 | 1.00 | 1 | 1 | 0.03  | 0.03   | 0.03   | 0.03   | 0.03   | t | 133908 | PDTGISSK<br>AM            | Oryctola<br>gus<br>cuniculu<br>s |



|   |      |   |   |       |        |        |        |       |   |        |                            |                                  |
|---|------|---|---|-------|--------|--------|--------|-------|---|--------|----------------------------|----------------------------------|
| 1 | 1.00 | 1 | 1 | 0.03  | 0.027  | 0.03   | 0.03   | 0.03  | t | 133908 | PDTGISSK<br>AM             | Oryctola<br>gus<br>cuniculu<br>s |
| 1 | 1.00 | 1 | 1 | 0.03  | 0.03   | 0.03   | 0.03   | 0.03  | t | 133908 | PDTGISSK<br>AM             | Oryctola<br>gus<br>cuniculu<br>s |
| 1 | 1.00 | 1 | 1 | -0.07 | -0.068 | -0.07  | -0.063 | -0.07 | t | 121776 | RARARAR<br>A               | Homo<br>sapiens                  |
| 1 | 1.00 | 1 | 1 | 0.01  | 0.01   | 0.01   | 0.01   | 0.01  | t | 64985  | TLNPTI                     | Mus<br>musculu<br>s              |
| 1 | 1.00 | 1 | 1 | 0.01  | 0.013  | 0.01   | 0.01   | 0.01  | t | 64985  | TLNPTI                     | Mus<br>musculu<br>s              |
| 1 | 1.00 | 1 | 1 | 0.01  | 0.013  | 0.01   | 0.01   | 0.01  | t | 64985  | TLNPTI                     | Mus<br>musculu<br>s              |
| 1 | 1.00 | 1 | 1 | 0.01  | 0.013  | 0.01   | 0.01   | 0.01  | t | 64985  | TLNPTI                     | Mus<br>musculu<br>s              |
| 1 | 1.00 | 1 | 1 | 0.01  | 0.01   | 0.01   | 0.01   | 0.01  | t | 23193  | GVTYEIDL<br>TNKNAAKL       | Homo<br>sapiens                  |
| 1 | 1.00 | 1 | 1 | 0     | 0      | 0.002  | 0      | 0     | t | 62824  | TADWYTIG<br>VY             | Mus<br>musculu<br>s              |
| 1 | 1.00 | 1 | 1 | -0.01 | -0.01  | -0.016 | -0.013 | -0.01 | t | 18982  | GDGAAGQ<br>PAGDGAA<br>GQPA | Homo<br>sapiens                  |
| 1 | 1.00 | 1 | 1 | 0.01  | 0.01   | 0.015  | 0.01   | 0.01  | t | 44380  | NITRVESET<br>KVVVL         | Homo<br>sapiens                  |
| 1 | 1.00 | 1 | 1 | 0.03  | 0.03   | 0.03   | 0.03   | 0.03  | t | 115602 | EEAAMELK<br>VEDP           | Homo<br>sapiens                  |
| 1 | 1.00 | 1 | 1 | 0.01  | 0.01   | 0.01   | 0.01   | 0.01  | t | 145921 | NPEIVIQY                   | Mus<br>musculu<br>s              |
| 1 | 1.00 | 1 | 1 | 0.01  | 0.01   | 0.01   | 0.01   | 0.01  | t | 153463 | SLMHVYR<br>DHSTSGG<br>GS   | Mus<br>musculu<br>s              |

|   |      |   |   |       |       |        |        |        |   |        |                              |                                  |
|---|------|---|---|-------|-------|--------|--------|--------|---|--------|------------------------------|----------------------------------|
| 1 | 1.00 | 1 | 1 | 0.01  | 0.01  | 0.01   | 0.01   | 0.01   | t | 134798 | SPTPTPGP<br>SRRGPSL          | Homo<br>sapiens                  |
| 1 | 1.00 | 1 | 1 | 0.01  | 0.01  | 0.01   | 0.01   | 0.01   | t | 119535 | TQDLGYSR<br>V                | Homo<br>sapiens                  |
| 1 | 1.00 | 1 | 1 | 0.01  | 0.01  | 0.01   | 0.01   | 0.01   | t | 93854  | SDSNLKDL<br>TF               | Ovis<br>aries                    |
| 1 | 1.00 | 1 | 1 | 0.01  | 0.01  | 0.01   | 0.01   | 0.01   | t | 25095  | HVSPTHYV<br>PESDAAAK<br>VTAL | Homo<br>sapiens                  |
| 1 | 1.00 | 1 | 1 | -0.01 | -0.01 | -0.01  | -0.01  | -0.01  | t | 131888 | GISSPSPIN<br>AFLSVD          | Homo<br>sapiens                  |
| 1 | 1.00 | 1 | 1 | -0.01 | -0.01 | -0.01  | -0.01  | -0.01  | t | 99976  | EEKELLNRI<br>Q               | Mus<br>musculu<br>s              |
| 1 | 1.00 | 1 | 1 | 0.01  | 0.012 | -0.003 | 0.007  | 0.011  | t | 115068 | KEKVNELS<br>KDIG             | Homo<br>sapiens                  |
| 1 | 1.00 | 1 | 1 | -0.03 | -0.03 | -0.03  | -0.03  | -0.03  | t | 111156 | CMNKPAY<br>AC                | Homo<br>sapiens                  |
| 1 | 1.00 | 1 | 1 | -0.05 | -0.05 | -0.05  | -0.05  | -0.05  | t | 79512  | AIWYPHV                      | Oryctola<br>gus<br>cuniculu<br>s |
| 1 | 1.00 | 1 | 1 | 0.01  | 0.012 | 0.005  | 0.011  | 0.009  | t | 59375  | SLNTGWL<br>AGLFYQHK<br>FNS   | Homo<br>sapiens                  |
| 1 | 1.00 | 1 | 1 | 0     | 0.008 | -0.004 | 0.001  | 0      | t | 38199  | LNEEAER<br>WVRQNPP<br>GPN    | Capra<br>hircus                  |
| 1 | 1.00 | 1 | 1 | 0.02  | 0.022 | 0.018  | 0.023  | 0.02   | t | 118335 | EQLRILGEK<br>EAKLAQQS<br>QA  | Homo<br>sapiens                  |
| 1 | 1.00 | 1 | 1 | 0     | 0     | 0      | 0.009  | 0.003  | t | 131116 | TQSYPPPP<br>AWRAASR          | Homo<br>sapiens                  |
| 1 | 1.00 | 1 | 1 | -0.01 | -0.01 | -0.015 | -0.007 | -0.011 | t | 8360   | DGDGAAA<br>MRYTEAR<br>MTK    | Homo<br>sapiens                  |
| 1 | 1.00 | 1 | 1 | 0.01  | 0.012 | 0.014  | 0.011  | 0.009  | t | 25538  | IDANDCLV<br>TPSVK            | Homo<br>sapiens                  |
| 1 | 1.00 | 1 | 1 | 0.06  | 0.054 | 0.053  | 0.057  | 0.06   | t | 78318  | YDSRPPED<br>V                | Oryctola<br>gus<br>cuniculu<br>s |

|   |      |   |   |       |        |        |        |        |   |        |                             |                                  |
|---|------|---|---|-------|--------|--------|--------|--------|---|--------|-----------------------------|----------------------------------|
| 1 | 1.00 | 1 | 1 | 0     | 0      | -0.005 | 0      | 0      | t | 31894  | KLGVWKS<br>PTDMQS<br>WV     | Homo<br>sapiens                  |
| 1 | 1.00 | 1 | 1 | 0.01  | 0.01   | 0.017  | 0.014  | 0.01   | t | 118346 | FEYFPSHFF<br>VPELEVTT<br>C  | Homo<br>sapiens                  |
| 1 | 1.00 | 1 | 1 | 0     | 0      | 0      | 0      | 0      | t | 157429 | IQVYRSDV<br>PVN             | Canis<br>lupus                   |
| 1 | 1.00 | 1 | 1 | -0.01 | -0.008 | -0.01  | -0.007 | -0.011 | t | 110113 | WYRQTM<br>MRGLELLI<br>YF    | Homo<br>sapiens                  |
| 1 | 1.00 | 1 | 1 | -0.01 | -0.011 | -0.011 | -0.01  | -0.01  | t | 57941  | SFVTRRYLS<br>QLC            | Mus<br>musculu<br>s              |
| 1 | 1.00 | 1 | 1 | 0.03  | 0.033  | 0.034  | 0.03   | 0.031  | t | 122917 | TKVYSTDIF<br>FILEITDNP<br>Y | Mus<br>musculu<br>s              |
| 1 | 1.00 | 1 | 1 | 0.01  | 0.008  | 0.008  | 0.007  | 0.008  | t | 55936  | RSQSRESQ<br>CKLG            | Mus<br>musculu<br>s              |
| 1 | 1.00 | 1 | 1 | 0.02  | 0.016  | 0.02   | 0.019  | 0.018  | t | 64770  | TLEEWESG<br>KNPYEPRE        | Oryctola<br>gus<br>cuniculu<br>s |
| 1 | 1.00 | 1 | 1 | -0.01 | -0.01  | -0.007 | -0.013 | -0.012 | t | 51781  | QNVNRPS<br>RADVF            | Homo<br>sapiens                  |
| 1 | 1.00 | 1 | 1 | -0.02 | -0.02  | -0.02  | -0.02  | -0.019 | t | 115255 | FQINNKIW<br>CK              | Homo<br>sapiens                  |
| 1 | 1.00 | 1 | 1 | 0.04  | 0.04   | 0.04   | 0.04   | 0.04   | t | 123316 | IKAYMESN<br>R               | Ovis<br>aries                    |
| 1 | 1.00 | 1 | 1 | 0.02  | 0.02   | 0.02   | 0.02   | 0.02   | t | 151064 | TPKGAIN<br>SLPFQNI          | Homo<br>sapiens                  |
| 1 | 1.00 | 1 | 1 | 0.02  | 0.02   | 0.02   | 0.02   | 0.02   | t | 122544 | QVIKMDLP<br>QYEPRLA         | Mus<br>musculu<br>s              |
| 1 | 1.00 | 1 | 1 | -0.02 | -0.023 | -0.02  | -0.02  | -0.023 | t | 144818 | YCAWPAC<br>YGGGLPDS<br>VKI  | Oryctola<br>gus<br>cuniculu<br>s |
| 1 | 1.00 | 1 | 1 | 0     | 0      | 0      | 0      | 0      | t | 149048 | FSTQKSI                     | Sus<br>scrofa                    |
| 1 | 1.00 | 1 | 1 | 0     | 0      | 0      | 0      | 0      | t | 149087 | NPTQSPP                     | Sus<br>scrofa                    |

|   |      |   |   |       |        |        |        |        |   |        |                           |                                  |
|---|------|---|---|-------|--------|--------|--------|--------|---|--------|---------------------------|----------------------------------|
| 1 | 1.00 | 1 | 1 | 0     | 0      | 0      | 0      | 0      | t | 115680 | AKYIPIQYV<br>L            | Homo<br>sapiens                  |
| 1 | 1.00 | 1 | 1 | 0     | 0      | 0      | 0      | 0      | t | 79412  | TCLEVNW<br>LTRMACM        | Mus<br>musculu<br>s              |
| 1 | 1.00 | 1 | 1 | 0     | 0      | 0      | 0      | 0      | t | 47026  | PCKPLLRD<br>DITFMV        | Homo<br>sapiens                  |
| 1 | 1.00 | 1 | 1 | 0     | 0      | 0      | 0      | 0      | t | 47026  | PCKPLLRD<br>DITFMV        | Homo<br>sapiens                  |
| 1 | 1.00 | 1 | 1 | 0     | 0      | -0.004 | 0      | 0      | t | 49079  | PQQPFCQ<br>QPQ            | Mus<br>musculu<br>s              |
| 1 | 1.00 | 1 | 1 | -0.01 | -0.01  | -0.018 | -0.01  | -0.01  | t | 66337  | TSNFRVVP<br>SGDVVRFP<br>N | Homo<br>sapiens                  |
| 1 | 1.00 | 1 | 1 | 0     | 0      | 0      | 0      | -0.001 | t | 130815 | ESDPPVAS<br>YQWRLIN       | Homo<br>sapiens                  |
| 1 | 1.00 | 1 | 1 | 0.06  | 0.057  | 0.053  | 0.06   | 0.061  | t | 106494 | GYENPTYK<br>FFEQMQN       | Oryctola<br>gus<br>cuniculu<br>s |
| 1 | 1.00 | 1 | 1 | 0.01  | 0.008  | 0.011  | 0.002  | 0.01   | t | 55293  | RPQDVKEP                  | Mus<br>musculu<br>s              |
| 1 | 1.00 | 1 | 1 | -0.01 | -0.01  | -0.023 | -0.008 | -0.008 | t | 14426  | ETIGTLKKI<br>LDETVK       | Homo<br>sapiens                  |
| 1 | 1.00 | 1 | 1 | 0     | 0.002  | -0.007 | -0.003 | 0      | t | 118630 | TLNLEDVQ<br>PHDLG         | Homo<br>sapiens                  |
| 1 | 1.00 | 1 | 1 | 0.03  | 0.027  | 0.03   | 0.03   | 0.031  | t | 142480 | VAAVTEKL<br>RAGT          | Oryctola<br>gus<br>cuniculu<br>s |
| 1 | 1.00 | 1 | 1 | -0.01 | -0.01  | -0.01  | -0.01  | -0.01  | t | 48124  | PKPQRKTK<br>RNTNRRP       | Homo<br>sapiens                  |
| 1 | 1.00 | 1 | 1 | 0.01  | 0.012  | -0.011 | 0.011  | 0.02   | t | 14278  | ESSSSDKP                  | Homo<br>sapiens                  |
| 1 | 1.00 | 1 | 1 | -0.03 | -0.042 | -0.03  | -0.027 | -0.03  | t | 156850 | APHNKWP<br>HLNPP          | Bos<br>taurus                    |
| 1 | 1.00 | 1 | 1 | 0.01  | 0.012  | 0.007  | 0.01   | 0.012  | t | 66658  | TTIPPSSP                  | Anas<br>platyrhy<br>nchos        |

|   |      |   |   |       |        |        |        |        |   |        |                             |                                  |
|---|------|---|---|-------|--------|--------|--------|--------|---|--------|-----------------------------|----------------------------------|
| 1 | 1.00 | 1 | 1 | -0.02 | -0.014 | -0.02  | -0.021 | -0.019 | t | 131294 | DWGLPIPS<br>PSP             | Homo<br>sapiens                  |
| 1 | 1.00 | 1 | 1 | -0.01 | -0.006 | -0.01  | -0.009 | -0.01  | t | 137798 | AFRQQFQ<br>YAVEV            | Homo<br>sapiens                  |
| 1 | 1.00 | 1 | 1 | 0.01  | 0.01   | 0.01   | 0.01   | 0.01   | t | 106306 | CIVRATKGI<br>S              | Homo<br>sapiens                  |
| 1 | 1.00 | 1 | 1 | -0.02 | -0.023 | -0.027 | -0.02  | -0.02  | t | 79277  | KRDGYIV                     | Oryctola<br>gus<br>cuniculu<br>s |
| 1 | 1.00 | 1 | 1 | 0.01  | 0.005  | 0      | 0.012  | 0.013  | t | 157111 | ASDACDKI<br>RYQSLT          | Canis<br>lupus                   |
| 1 | 1.00 | 1 | 1 | 0.01  | 0.006  | 0.001  | 0.007  | 0.01   | t | 48610  | PNCRIHSD<br>NDCKFTL         | Oryctola<br>gus<br>cuniculu<br>s |
| 1 | 1.00 | 1 | 1 | 0.01  | 0.01   | 0.009  | 0.01   | 0.01   | t | 125423 | GKVLRFQK<br>AFLTQLDE<br>LTE | Homo<br>sapiens                  |
| 1 | 1.00 | 1 | 1 | 0.04  | 0.038  | 0.043  | 0.039  | 0.043  | t | 103117 | DTDY                        | Mus<br>musculu<br>s              |
| 1 | 1.00 | 1 | 1 | -0.01 | -0.01  | -0.003 | -0.01  | -0.011 | t | 121473 | KKAKAKAK                    | Homo<br>sapiens                  |
| 1 | 1.00 | 1 | 1 | 0     | 0      | 0      | 0.007  | 0.003  | t | 99134  | DAEFRHDS<br>GYEVHHQ         | Mus<br>musculu<br>s              |
| 1 | 1.00 | 1 | 1 | 0     | 0      | 0      | 0.007  | 0.003  | t | 99134  | DAEFRHDS<br>GYEVHHQ         | Mus<br>musculu<br>s              |
| 1 | 1.00 | 1 | 1 | 0     | -0.004 | -0.002 | 0      | 0      | t | 100566 | TMYVQFR<br>EFNLKDPP<br>LNP  | Sus<br>scrofa                    |
| 1 | 1.00 | 1 | 1 | 0.05  | 0.05   | 0.05   | 0.05   | 0.05   | t | 139518 | HDASASL                     | Oryctola<br>gus<br>cuniculu<br>s |
| 1 | 1.00 | 1 | 1 | 0.05  | 0.05   | 0.05   | 0.05   | 0.05   | t | 115842 | LEELNVP<br>G<br>EI          | Homo<br>sapiens                  |
| 1 | 1.00 | 1 | 1 | 0.03  | 0.03   | 0.03   | 0.03   | 0.03   | t | 133535 | CKPGEVQ<br>QC               | Mus<br>musculu<br>s              |

|   |      |   |   |       |        |        |        |        |   |        |                                  |                                  |
|---|------|---|---|-------|--------|--------|--------|--------|---|--------|----------------------------------|----------------------------------|
| 1 | 1.00 | 1 | 1 | 0.01  | 0.01   | 0.01   | 0.01   | 0.01   | t | 149064 | LAANLTQ                          | Sus<br>scrofa                    |
| 1 | 1.00 | 1 | 1 | 0.01  | 0.01   | 0.01   | 0.01   | 0.01   | t | 121676 | NVKVLLVA<br>SPLVDPF              | Mus<br>musculu<br>s              |
| 1 | 1.00 | 1 | 1 | 0.01  | 0.01   | 0.01   | 0.01   | 0.01   | t | 121676 | NVKVLLVA<br>SPLVDPF              | Mus<br>musculu<br>s              |
| 1 | 1.00 | 1 | 1 | 0.01  | 0.01   | 0.01   | 0.01   | 0.01   | t | 97691  | TKQPVLDF<br>S                    | Oryctola<br>gus<br>cuniculu<br>s |
| 1 | 1.00 | 1 | 1 | 0     | 0      | 0      | 0.004  | 0.001  | t | 117315 | KALSVETE<br>KLLKYLEAV            | Homo<br>sapiens                  |
| 1 | 1.00 | 1 | 1 | -0.01 | -0.01  | -0.01  | -0.01  | -0.01  | t | 115890 | PIQYVLSRY<br>P                   | Homo<br>sapiens                  |
| 1 | 1.00 | 1 | 1 | -0.02 | -0.018 | -0.02  | -0.017 | -0.02  | t | 131412 | ERGLRYL                          | Homo<br>sapiens                  |
| 1 | 1.00 | 1 | 1 | -0.02 | -0.022 | -0.018 | -0.017 | -0.018 | t | 105971 | MVGGVVI<br>AT                    | Mus<br>musculu<br>s              |
| 1 | 1.00 | 1 | 1 | 0     | 0.002  | 0      | 0.001  | -0.001 | t | 35398  | LEDPASRD<br>LVVSY                | Homo<br>sapiens                  |
| 1 | 1.00 | 1 | 1 | 0.01  | 0.008  | 0.017  | 0.013  | 0.01   | t | 97188  | AGVATAT<br>G                     | Mus<br>musculu<br>s              |
| 1 | 1.00 | 1 | 1 | -0.05 | -0.052 | -0.057 | -0.039 | -0.05  | t | 104113 | MHVDAA<br>WGGGLL<br>MSRKHKW<br>K | Mus<br>musculu<br>s              |
| 1 | 1.00 | 1 | 1 | 0     | -0.004 | 0.002  | -0.001 | -0.002 | t | 78638  | EKSLTSLSE<br>VVLQNRRLD           | Oryctola<br>gus<br>cuniculu<br>s |
| 1 | 1.00 | 1 | 1 | 0.01  | 0.007  | 0.01   | 0.01   | 0.009  | t | 58458  | SICGNNQL<br>CKSICKT              | Oryctola<br>gus<br>cuniculu<br>s |
| 1 | 1.00 | 1 | 1 | 0.01  | 0.01   | 0.01   | 0.01   | 0.009  | t | 58458  | SICGNNQL<br>CKSICKT              | Mus<br>musculu<br>s              |
| 1 | 1.00 | 1 | 1 | 0     | 0.004  | -0.001 | 0.007  | 0.002  | t | 122732 | DRKASPPS<br>GLWSPAY              | Homo<br>sapiens                  |

|   |      |   |   |       |        |        |        |        |   |        |                              |              |
|---|------|---|---|-------|--------|--------|--------|--------|---|--------|------------------------------|--------------|
| 1 | 1.00 | 1 | 1 | 0.01  | 0.012  | 0.01   | 0.011  | 0.011  | t | 21466  | GNLLFT                       | Homo sapiens |
| 1 | 1.00 | 1 | 1 | -0.02 | -0.016 | -0.02  | -0.019 | -0.02  | t | 141568 | VFPKDKEG<br>RALQKFLG<br>TIR  | Homo sapiens |
| 1 | 1.00 | 1 | 1 | -0.04 | -0.038 | -0.039 | -0.039 | -0.038 | t | 34896  | LAPEAR                       | Homo sapiens |
| 1 | 1.00 | 1 | 1 | -0.04 | -0.036 | -0.039 | -0.039 | -0.038 | t | 34896  | LAPEAR                       | Homo sapiens |
| 1 | 1.00 | 1 | 1 | 0.02  | 0.02   | 0.025  | 0.023  | 0.021  | t | 94646  | PPKVPPDL<br>MS               | Homo sapiens |
| 1 | 1.00 | 1 | 1 | 0.02  | 0.02   | 0.021  | 0.02   | 0.019  | t | 144807 | VFSYIPWS<br>EDKGEITA<br>CGIP | Mus musculus |
| 1 | 1.00 | 1 | 1 | -0.02 | -0.02  | -0.032 | -0.023 | -0.02  | t | 82909  | GTDSGWG<br>NRQSF             | Homo sapiens |
| 1 | 1.00 | 1 | 1 | -0.02 | -0.022 | -0.032 | -0.023 | -0.02  | t | 82909  | GTDSGWG<br>NRQSF             | Mus musculus |
| 1 | 1.00 | 1 | 1 | 0     | 0      | 0      | 0      | 0      | t | 56060  | RTGLDF                       | Homo sapiens |
| 1 | 1.00 | 1 | 1 | 0.02  | 0.022  | 0.012  | 0.02   | 0.02   | t | 100086 | GTGNLELV<br>AVRKEQQ<br>QRGR  | Homo sapiens |
| 1 | 1.00 | 1 | 1 | 0.02  | 0.02   | -0.001 | 0.02   | 0.023  | t | 26169  | IFSTYADN<br>QPGVHIQ          | Homo sapiens |
| 1 | 1.00 | 1 | 1 | -0.01 | -0.01  | -0.016 | -0.01  | -0.01  | t | 83789  | IPALTAAET<br>GHTSQV          | Homo sapiens |
| 1 | 1.00 | 1 | 1 | 0.06  | 0.06   | 0.06   | 0.06   | 0.06   | t | 115192 | CKEVVRN<br>ANEEYSI<br>GSSSE  | Homo sapiens |
| 1 | 1.00 | 1 | 1 | 0.04  | 0.04   | 0.04   | 0.04   | 0.04   | t | 127713 | KNWTTPL                      | Homo sapiens |
| 1 | 1.00 | 1 | 1 | 0.04  | 0.04   | 0.04   | 0.04   | 0.04   | t | 117096 | TLSQDQSE<br>TLNY             | Homo sapiens |
| 1 | 1.00 | 1 | 1 | 0.02  | 0.02   | 0.02   | 0.02   | 0.02   | t | 110620 | GQAGEPGI<br>AGFKGDQ          | Mus musculus |

|   |      |   |   |       |       |        |       |       |   |        |                             |                     |
|---|------|---|---|-------|-------|--------|-------|-------|---|--------|-----------------------------|---------------------|
| 1 | 1.00 | 1 | 1 | 0.02  | 0.02  | 0.02   | 0.02  | 0.02  | t | 117384 | TPRLNTAT<br>LWIT            | Homo<br>sapiens     |
| 1 | 1.00 | 1 | 1 | 0.02  | 0.02  | 0.02   | 0.02  | 0.02  | t | 75391  | YPQPQFPF<br>SQ              | Mus<br>musculu<br>s |
| 1 | 1.00 | 1 | 1 | 0.02  | 0.02  | 0.02   | 0.02  | 0.02  | t | 75391  | YPQPQFPF<br>SQ              | Mus<br>musculu<br>s |
| 1 | 1.00 | 1 | 1 | 0.02  | 0.02  | 0.02   | 0.02  | 0.02  | t | 75391  | YPQPQFPF<br>SQ              | Mus<br>musculu<br>s |
| 1 | 1.00 | 1 | 1 | 0     | 0     | 0      | 0     | 0     | t | 153355 | ACWLPLTR<br>LCGGGS          | Mus<br>musculu<br>s |
| 1 | 1.00 | 1 | 1 | 0     | 0     | 0      | 0     | 0     | t | 107679 | VVSVLTV                     | Homo<br>sapiens     |
| 1 | 1.00 | 1 | 1 | 0     | 0     | 0      | 0     | 0     | t | 99464  | LVALALFLL<br>AAHASA         | Homo<br>sapiens     |
| 1 | 1.00 | 1 | 1 | 0     | 0     | 0      | 0     | 0     | t | 102722 | PNKPVEPT<br>YEVIPTPT<br>DPV | Mus<br>musculu<br>s |
| 1 | 1.00 | 1 | 1 | -0.02 | -0.02 | -0.02  | -0.02 | -0.02 | t | 119450 | FRKADKFP<br>M               | Homo<br>sapiens     |
| 1 | 1.00 | 1 | 1 | -0.02 | -0.02 | -0.02  | -0.02 | -0.02 | t | 78305  | WHSMFAP                     | Homo<br>sapiens     |
| 1 | 1.00 | 1 | 1 | 0.01  | 0.01  | 0.01   | 0.008 | 0.01  | t | 98977  | RCLQSCQ<br>QEPDDLK<br>Q     | Homo<br>sapiens     |
| 1 | 1.00 | 1 | 1 | -0.04 | -0.04 | -0.04  | -0.04 | -0.04 | t | 77920  | IPPFLYKNF<br>WWP            | Mus<br>musculu<br>s |
| 1 | 1.00 | 1 | 1 | 0.04  | 0.042 | 0.019  | 0.041 | 0.05  | t | 14278  | ESSSSDKP                    | Homo<br>sapiens     |
| 1 | 1.00 | 1 | 1 | -0.03 | -0.03 | -0.035 | -0.03 | -0.03 | t | 159026 | NLAIHSDL<br>SYWIESRL        | Mus<br>musculu<br>s |
| 1 | 1.00 | 1 | 1 | 0     | 0.003 | -0.011 | 0     | 0.002 | t | 111286 | FPDTSFYN<br>PDTQRLV         | Mus<br>musculu<br>s |
| 1 | 1.00 | 1 | 1 | 0     | 0.003 | -0.011 | 0     | 0.002 | t | 111253 | ENDEIDGV<br>NHQHLP          | Mus<br>musculu<br>s |



|   |      |   |   |       |        |        |        |        |   |        |                             |                              |
|---|------|---|---|-------|--------|--------|--------|--------|---|--------|-----------------------------|------------------------------|
| 1 | 1.00 | 1 | 1 | 0.06  | 0.068  | 0.059  | 0.06   | 0.06   | t | 64573  | TKGENFTE<br>TD              | Gallus<br>gallus             |
| 1 | 1.00 | 1 | 1 | -0.01 | -0.01  | -0.016 | -0.016 | -0.012 | t | 68001  | VDKRHD                      | Homo<br>sapiens              |
| 1 | 1.00 | 1 | 1 | -0.04 | -0.036 | -0.04  | -0.033 | -0.04  | t | 134926 | ENPVVHFF<br>KNIVTPRT<br>P   | Homo<br>sapiens              |
| 1 | 1.00 | 1 | 1 | 0.04  | 0.04   | 0.054  | 0.04   | 0.037  | t | 303    | AALTKAIT<br>AMTQA           | Homo<br>sapiens              |
| 1 | 1.00 | 1 | 1 | -0.03 | -0.03  | -0.031 | -0.019 | -0.03  | t | 132092 | SVSGWGD<br>PKPALRW<br>G     | Homo<br>sapiens              |
| 1 | 1.00 | 1 | 1 | -0.02 | -0.019 | -0.021 | -0.017 | -0.021 | t | 99194  | EFVDRLLS<br>QIKSEGH         | Equus<br>caballus            |
| 1 | 1.00 | 1 | 1 | 0.02  | 0.017  | 0.024  | 0.02   | 0.02   | t | 61578  | STEGNVTG<br>MFA             | Homo<br>sapiens              |
| 1 | 1.00 | 1 | 1 | -0.03 | -0.032 | -0.03  | -0.031 | -0.032 | t | 66977  | TVDNSAST<br>KNKDKLFT<br>VWK | Rattus<br>norvegicus         |
| 1 | 1.00 | 1 | 1 | -0.02 | -0.018 | -0.011 | -0.013 | -0.018 | t | 108895 | EGNVFSC                     | Homo<br>sapiens              |
| 1 | 1.00 | 1 | 1 | 0.04  | 0.038  | 0.04   | 0.041  | 0.041  | t | 79056  | QSIGDLIAE<br>AMDKVG<br>EGV  | Rattus<br>norvegicus         |
| 1 | 1.00 | 1 | 1 | 0.03  | 0.03   | 0.03   | 0.03   | 0.03   | t | 105141 | DPT                         | Oryctola<br>gus<br>cuniculus |
| 1 | 1.00 | 1 | 1 | 0.03  | 0.03   | 0.03   | 0.03   | 0.03   | t | 105141 | DPT                         | Oryctola<br>gus<br>cuniculus |
| 1 | 1.00 | 1 | 1 | 0     | 0      | 0      | 0      | -0.001 | t | 138259 | WANKQPT<br>IIWRS            | Homo<br>sapiens              |
| 1 | 1.00 | 1 | 1 | 0.01  | 0.013  | 0.012  | 0.01   | 0.01   | t | 126341 | ITGHCQG<br>DGYRVGF<br>G     | Mus<br>musculus              |

|   |      |   |   |       |        |        |        |        |   |        |                              |                                  |
|---|------|---|---|-------|--------|--------|--------|--------|---|--------|------------------------------|----------------------------------|
| 1 | 1.00 | 1 | 1 | 0.01  | 0.01   | 0.01   | 0.017  | 0.013  | t | 122482 | LVDRKTGS<br>QYDIQDAI<br>DKGL | Homo<br>sapiens                  |
| 1 | 1.00 | 1 | 1 | -0.02 | -0.022 | -0.015 | -0.017 | -0.022 | t | 29378  | IVNTLNEIY<br>RYLYVR          | Mus<br>musculu<br>s              |
| 1 | 1.00 | 1 | 1 | -0.04 | -0.04  | -0.04  | -0.04  | -0.04  | t | 140859 | GQRRADA<br>VKGYL             | Oryctola<br>gus<br>cuniculu<br>s |
| 1 | 1.00 | 1 | 1 | -0.02 | -0.022 | -0.024 | -0.021 | -0.018 | t | 36890  | LKIKIASGF<br>GPLITH          | Mus<br>musculu<br>s              |
| 1 | 1.00 | 1 | 1 | 0     | 0      | 0      | 0      | 0      | t | 48685  | PNPLGFFP                     | Mus<br>musculu<br>s              |
| 1 | 1.00 | 1 | 1 | 0.04  | 0.048  | 0.045  | 0.033  | 0.038  | t | 136328 | GPYDTPM<br>FSLNM             | Gallus<br>gallus                 |
| 1 | 1.00 | 1 | 1 | -0.02 | -0.017 | -0.023 | -0.02  | -0.02  | t | 66841  | TTTCFRDT<br>DTGK             | Mus<br>musculu<br>s              |
| 1 | 1.00 | 1 | 1 | 0     | -0.002 | -0.008 | -0.003 | 0      | t | 57277  | SDSDNDG<br>VCDNVDK           | Mus<br>musculu<br>s              |
| 1 | 1.00 | 1 | 1 | 0.03  | 0.03   | 0.03   | 0.03   | 0.03   | t | 149424 | QESTYQLV<br>QQ               | Homo<br>sapiens                  |
| 1 | 1.00 | 1 | 1 | 0.03  | 0.03   | 0.03   | 0.03   | 0.03   | t | 149424 | QESTYQLV<br>QQ               | Mus<br>musculu<br>s              |
| 1 | 1.00 | 1 | 1 | 0.03  | 0.03   | 0.03   | 0.03   | 0.03   | t | 105282 | LENDP                        | Oryctola<br>gus<br>cuniculu<br>s |
| 1 | 1.00 | 1 | 1 | 0.01  | 0.008  | 0.023  | 0.009  | 0.008  | t | 138097 | YPYPLIS                      | Mus<br>musculu<br>s              |
| 1 | 1.00 | 1 | 1 | 0.01  | 0.01   | 0.01   | 0.01   | 0.01   | t | 153263 | HAGTFLQ<br>VA                | Mus<br>musculu<br>s              |
| 1 | 1.00 | 1 | 1 | 0.01  | 0.01   | 0.01   | 0.01   | 0.01   | t | 153274 | NLSTSNPL<br>GFFPDHQ          | Mus<br>musculu<br>s              |

|   |      |   |   |       |        |        |        |        |   |        |                              |                       |
|---|------|---|---|-------|--------|--------|--------|--------|---|--------|------------------------------|-----------------------|
| 1 | 1.00 | 1 | 1 | 0.01  | 0.01   | 0.01   | 0.01   | 0.01   | t | 128102 | SGEVSGN<br>WGLLDQV<br>AALTWV | Homo sapiens          |
| 1 | 1.00 | 1 | 1 | 0.01  | 0.01   | 0.01   | 0.01   | 0.01   | t | 117341 | PGSALLFDI<br>PEF             | Homo sapiens          |
| 1 | 1.00 | 1 | 1 | -0.01 | -0.01  | -0.01  | -0.01  | -0.01  | t | 135747 | RAEAVFPD                     | Homo sapiens          |
| 1 | 1.00 | 1 | 1 | -0.03 | -0.03  | -0.03  | -0.03  | -0.03  | t | 78279  | TKIPAVFKI<br>DALNENK<br>VLVL | Homo sapiens          |
| 1 | 1.00 | 1 | 1 | 0.04  | 0.042  | 0.04   | 0.047  | 0.042  | t | 141680 | ITKHNDDE<br>QYA              | Homo sapiens          |
| 1 | 1.00 | 1 | 1 | 0.01  | 0.01   | 0.01   | 0.01   | 0.012  | t | 131952 | LLPDPSAP<br>T                | Homo sapiens          |
| 1 | 1.00 | 1 | 1 | -0.02 | -0.023 | -0.014 | -0.02  | -0.021 | t | 72891  | WNKPS                        | Oryctolagus cuniculus |
| 1 | 1.00 | 1 | 1 | 0     | 0.003  | 0.005  | 0      | -0.002 | t | 9953   | DRCGEDD<br>HDELGFM<br>VP     | Sus scrofa            |
| 1 | 1.00 | 1 | 1 | -0.04 | -0.042 | -0.043 | -0.041 | -0.04  | t | 67297  | TWSGKFP<br>T                 | Anas platyrhynchos    |
| 1 | 1.00 | 1 | 1 | 0.01  | 0.012  | 0.01   | 0.009  | 0.01   | t | 149415 | PQQLPQFE<br>EI               | Homo sapiens          |
| 1 | 1.00 | 1 | 1 | 0     | 0      | 0      | 0.002  | 0      | t | 96209  | EDKDEDEE<br>DE               | Homo sapiens          |
| 1 | 1.00 | 1 | 1 | -0.06 | -0.057 | -0.048 | -0.06  | -0.065 | t | 137941 | PFRSYTK                      | Mus musculus          |
| 1 | 1.00 | 1 | 1 | -0.01 | -0.008 | -0.005 | -0.003 | -0.008 | t | 132268 | ENGYLME<br>AAP               | Homo sapiens          |
| 1 | 1.00 | 1 | 1 | 0.01  | 0.01   | 0.005  | 0.013  | 0.01   | t | 56209  | RTVLEPIR<br>DALNAMT          | Homo sapiens          |
| 1 | 1.00 | 1 | 1 | -0.02 | -0.025 | -0.024 | -0.017 | -0.018 | t | 42475  | MRKTKLA<br>PTVAHGV<br>F      | Bos taurus            |

|   |      |   |   |       |        |        |        |        |   |        |                               |                     |
|---|------|---|---|-------|--------|--------|--------|--------|---|--------|-------------------------------|---------------------|
| 1 | 1.00 | 1 | 1 | -0.02 | -0.025 | -0.024 | -0.017 | -0.018 | t | 42475  | MRKTKLA<br>PTVAHGV<br>F       | Bos<br>taurus       |
| 1 | 1.00 | 1 | 1 | 0.03  | 0.028  | 0.041  | 0.033  | 0.03   | t | 111486 | LIEESAIINA<br>GAP             | Mus<br>musculu<br>s |
| 1 | 1.00 | 1 | 1 | 0.03  | 0.028  | 0.041  | 0.033  | 0.03   | t | 111486 | LIEESAIINA<br>GAP             | Mus<br>musculu<br>s |
| 1 | 1.00 | 1 | 1 | 0.01  | 0.01   | 0.01   | 0.01   | 0.01   | t | 10801  | DWEDRY<br>RE                  | Mus<br>musculu<br>s |
| 1 | 1.00 | 1 | 1 | -0.01 | -0.01  | -0.01  | -0.01  | -0.009 | t | 140460 | EKLKHS<br>M                   | Mus<br>musculu<br>s |
| 1 | 1.00 | 1 | 1 | 0     | 0      | 0      | 0      | 0      | t | 70549  | VQEGVQQ<br>EGA                | Homo<br>sapiens     |
| 1 | 1.00 | 1 | 1 | 0     | 0      | 0      | 0      | 0      | t | 5582   | AVTRGTIN<br>DPQRAKE           | Mus<br>musculu<br>s |
| 1 | 1.00 | 1 | 1 | 0.01  | 0.01   | -0.001 | 0.013  | 0.012  | t | 49557  | PSVYAW<br>E<br>RKKISNCV<br>AD | Homo<br>sapiens     |
| 1 | 1.00 | 1 | 1 | 0.02  | 0.031  | 0.02   | 0.02   | 0.018  | t | 156889 | HNRKCDY<br>YIAECNVM<br>P      | Gallus<br>gallus    |
| 1 | 1.00 | 1 | 1 | -0.01 | -0.006 | -0.007 | -0.01  | -0.01  | t | 141070 | PSLRDIFA<br>W                 | Ovis<br>aries       |
| 1 | 1.00 | 1 | 1 | -0.02 | -0.018 | -0.017 | -0.019 | -0.02  | t | 20285  | GIGSAVVS<br>FAIKWE            | Homo<br>sapiens     |
| 1 | 1.00 | 1 | 1 | 0     | 0      | 0      | 0      | 0      | t | 21755  | GPRLGVRA                      | Homo<br>sapiens     |
| 1 | 1.00 | 1 | 1 | -0.05 | -0.05  | -0.054 | -0.05  | -0.05  | t | 9657   | DPKHVCV<br>DTRDIPKN<br>AGCFR  | Mus<br>musculu<br>s |
| 1 | 1.00 | 1 | 1 | 0.01  | 0.01   | 0.005  | 0.01   | 0.009  | t | 122173 | QSIQQSIE<br>RLWCRLW<br>PLPFP  | Homo<br>sapiens     |

|   |      |   |   |       |       |        |        |       |   |        |                              |                                  |
|---|------|---|---|-------|-------|--------|--------|-------|---|--------|------------------------------|----------------------------------|
| 1 | 1.00 | 1 | 1 | 0.03  | 0.034 | 0.037  | 0.031  | 0.027 | t | 50820  | QFVEFYEK<br>VTGTDLELI<br>QIL | Homo<br>sapiens                  |
| 1 | 1.00 | 1 | 1 | 0.01  | 0.013 | -0.002 | 0.01   | 0.012 | t | 33077  | KQSYAATV<br>ATAPAVKY<br>TVFE | Mus<br>musculu<br>s              |
| 1 | 1.00 | 1 | 1 | 0.01  | 0.012 | 0.012  | 0.009  | 0.008 | t | 8356   | DGAVQPD<br>GGQPAVR<br>NERA   | Cavia<br>porcellu<br>s           |
| 1 | 1.00 | 1 | 1 | 0.02  | 0.02  | 0.02   | 0.02   | 0.02  | t | 135908 | DINTVTTV<br>AQSR             | Homo<br>sapiens                  |
| 1 | 1.00 | 1 | 1 | 0.02  | 0.02  | 0.02   | 0.02   | 0.02  | t | 135769 | TQSTQSFN                     | Homo<br>sapiens                  |
| 1 | 1.00 | 1 | 1 | 0.02  | 0.02  | 0.02   | 0.02   | 0.02  | t | 123124 | EFKSRIEDL                    | Ovis<br>aries                    |
| 1 | 1.00 | 1 | 1 | 0.02  | 0.02  | 0.02   | 0.02   | 0.02  | t | 127956 | EELTAGSG<br>LREDLLSL<br>QEPG | Homo<br>sapiens                  |
| 1 | 1.00 | 1 | 1 | 0.02  | 0.02  | 0.02   | 0.02   | 0.02  | t | 111172 | CTHPEILFC                    | Homo<br>sapiens                  |
| 1 | 1.00 | 1 | 1 | 0     | 0     | 0      | 0      | 0     | t | 141546 | LKTRKLFW<br>KYKD             | Rattus                           |
| 1 | 1.00 | 1 | 1 | 0     | 0.003 | 0      | 0      | 0     | t | 120138 | PTPVLVWI<br>YG               | Mus<br>musculu<br>s              |
| 1 | 1.00 | 1 | 1 | 0     | 0     | 0      | 0      | 0     | t | 123240 | GLDLPNLP<br>Y                | Ovis<br>aries                    |
| 1 | 1.00 | 1 | 1 | -0.04 | -0.04 | -0.04  | -0.04  | -0.04 | t | 158600 | MFNWHP<br>F                  | Homo<br>sapiens                  |
| 1 | 1.00 | 1 | 1 | 0.01  | 0.01  | 0.01   | 0.01   | 0.011 | t | 11814  | EENVEENV<br>EENV             | Oryctola<br>gus<br>cuniculu<br>s |
| 1 | 1.00 | 1 | 1 | -0.01 | -0.01 | -0.009 | -0.014 | -0.01 | t | 36576  | LIKIFQDHP<br>L               | Homo<br>sapiens                  |
| 1 | 1.00 | 1 | 1 | 0     | 0     | 0      | 0      | 0     | t | 20051  | GGTHSQW<br>NKP               | Mus<br>musculu<br>s              |
| 1 | 1.00 | 1 | 1 | -0.02 | -0.02 | -0.02  | -0.02  | -0.02 | t | 70975  | VSHDRHFL<br>N                | Homo<br>sapiens                  |

|   |      |   |   |       |        |        |        |        |   |        |                             |                                  |
|---|------|---|---|-------|--------|--------|--------|--------|---|--------|-----------------------------|----------------------------------|
| 1 | 1.00 | 1 | 1 | 0.04  | 0.034  | 0.035  | 0.04   | 0.041  | t | 116468 | RPQDENP<br>VVH              | Oryctola<br>gus<br>cuniculu<br>s |
| 1 | 1.00 | 1 | 1 | 0.04  | 0.04   | 0.04   | 0.036  | 0.04   | t | 117662 | TVTSAQKN<br>PIAFYLCA        | Homo<br>sapiens                  |
| 1 | 1.00 | 1 | 1 | 0     | 0.002  | 0      | -0.001 | 0      | t | 149415 | PQQLPQFE<br>EI              | Homo<br>sapiens                  |
| 1 | 1.00 | 1 | 1 | 0.02  | 0.02   | 0.018  | 0.017  | 0.018  | t | 99008  | SMPVNTP<br>GQFEDFFP         | Homo<br>sapiens                  |
| 1 | 1.00 | 1 | 1 | -0.01 | -0.006 | -0.01  | -0.009 | -0.01  | t | 54545  | RLGAALLQ                    | Homo<br>sapiens                  |
| 1 | 1.00 | 1 | 1 | 0.01  | 0.01   | 0.017  | 0.01   | 0.007  | t | 130583 | QCQTFGK<br>TMLCT            | Mus<br>musculu<br>s              |
| 1 | 1.00 | 1 | 1 | 0.01  | 0.01   | 0.01   | 0.01   | 0.01   | t | 124023 | DPAQPPR<br>DLTE             | Homo<br>sapiens                  |
| 1 | 1.00 | 1 | 1 | -0.01 | -0.01  | -0.01  | -0.01  | -0.01  | t | 104205 | QHNPINA<br>GTELSATG         | Oryctola<br>gus<br>cuniculu<br>s |
| 1 | 1.00 | 1 | 1 | 0     | 0      | 0      | 0      | -0.001 | t | 46550  | NWNFD                       | Mus<br>musculu<br>s              |
| 1 | 1.00 | 1 | 1 | 0.05  | 0.05   | 0.055  | 0.047  | 0.05   | t | 59593  | SLYELTH                     | Homo<br>sapiens                  |
| 1 | 1.00 | 1 | 1 | 0.03  | 0.03   | 0.028  | 0.027  | 0.028  | t | 98808  | GTGNLELV<br>AV              | Homo<br>sapiens                  |
| 1 | 1.00 | 1 | 1 | -0.1  | -0.102 | -0.109 | -0.097 | -0.097 | t | 96141  | CGLRAPQ                     | Mus<br>musculu<br>s              |
| 1 | 1.00 | 1 | 1 | 0.02  | 0.02   | 0.022  | 0.021  | 0.02   | t | 153251 | AKAFSYW<br>TPFDGKSL<br>YSST | Mus<br>musculu<br>s              |
| 1 | 1.00 | 1 | 1 | 0.03  | 0.03   | 0.03   | 0.021  | 0.027  | t | 130814 | ERSDSM                      | Homo<br>sapiens                  |
| 1 | 1.00 | 1 | 1 | 0.01  | 0.008  | 0.015  | 0.01   | 0.01   | t | 107264 | VFGTGTKV<br>T               | Oryctola<br>gus<br>cuniculu<br>s |

|   |      |   |   |       |        |        |        |        |   |        |                             |                                  |
|---|------|---|---|-------|--------|--------|--------|--------|---|--------|-----------------------------|----------------------------------|
| 1 | 1.00 | 1 | 1 | 0.01  | 0.01   | 0.01   | 0.01   | 0.01   | t | 38304  | LNPKTNK<br>WEDK             | Homo<br>sapiens                  |
| 1 | 1.00 | 1 | 1 | -0.04 | -0.044 | -0.036 | -0.037 | -0.04  | t | 97322  | GASIGWK<br>AA               | Oryctola<br>gus<br>cuniculu<br>s |
| 1 | 1.00 | 1 | 1 | 0     | -0.002 | 0      | 0      | 0      | t | 48345  | PLGLRSEF<br>PI              | Mus<br>musculu<br>s              |
| 1 | 1.00 | 1 | 1 | -0.02 | -0.02  | -0.02  | -0.023 | -0.02  | t | 66932  | TVAEEHV                     | Homo<br>sapiens                  |
| 1 | 1.00 | 1 | 1 | 0.02  | 0.018  | 0.024  | 0.017  | 0.02   | t | 6068   | CCPDKNKS                    | Mus<br>musculu<br>s              |
| 1 | 1.00 | 1 | 1 | 0.02  | 0.02   | 0.015  | 0.02   | 0.02   | t | 51967  | QPSKPTTK<br>QRQN            | Mus<br>musculu<br>s              |
| 1 | 1.00 | 1 | 1 | -0.02 | -0.017 | -0.029 | -0.02  | -0.019 | t | 78635  | EKIERNNK<br>LKQPPPPP<br>NPN | Mus<br>musculu<br>s              |
| 1 | 1.00 | 1 | 1 | 0.03  | 0.03   | 0.03   | 0.03   | 0.029  | t | 133669 | QQQQQQ<br>QQQQQ             | Mus<br>musculu<br>s              |
| 1 | 1.00 | 1 | 1 | 0.05  | 0.05   | 0.05   | 0.05   | 0.05   | t | 151944 | KFPSESRP<br>NVVK            | Sus<br>scrofa                    |
| 1 | 1.00 | 1 | 1 | 0.03  | 0.03   | 0.03   | 0.03   | 0.03   | t | 123076 | DFMLYETL<br>D               | Ovis<br>aries                    |
| 1 | 1.00 | 1 | 1 | 0.03  | 0.03   | 0.03   | 0.03   | 0.03   | t | 112392 | VTMTCKS                     | Homo<br>sapiens                  |
| 1 | 1.00 | 1 | 1 | 0.03  | 0.03   | 0.03   | 0.03   | 0.03   | t | 98986  | RKIRPEGR<br>EGEQEWG         | Homo<br>sapiens                  |
| 1 | 1.00 | 1 | 1 | 0.01  | 0.01   | 0.01   | 0.01   | 0.01   | t | 148886 | QQSFPLQP<br>QQ              | Homo<br>sapiens                  |
| 1 | 1.00 | 1 | 1 | 0.01  | 0.01   | 0.01   | 0.01   | 0.01   | t | 138835 | CLNSFLRS<br>C               | Canis<br>lupus                   |
| 1 | 1.00 | 1 | 1 | 0.01  | 0.01   | 0.01   | 0.01   | 0.01   | t | 114901 | NCSSYANT<br>TS              | Homo<br>sapiens                  |
| 1 | 1.00 | 1 | 1 | -0.01 | -0.01  | -0.01  | -0.01  | -0.01  | t | 114917 | PMNCSSY<br>ANT              | Homo<br>sapiens                  |
| 1 | 1.00 | 1 | 1 | -0.01 | -0.01  | -0.01  | -0.01  | -0.01  | t | 110586 | GAPGNRG<br>FPGQDGL<br>A     | Mus<br>musculu<br>s              |

|   |      |   |   |       |        |        |        |        |   |        |                              |                                  |
|---|------|---|---|-------|--------|--------|--------|--------|---|--------|------------------------------|----------------------------------|
| 1 | 1.00 | 1 | 1 | -0.01 | -0.01  | -0.01  | -0.01  | -0.01  | t | 79570  | IHAHTTSD<br>PWHPPGP<br>LGLKF | Homo<br>sapiens                  |
| 1 | 1.00 | 1 | 1 | 0.01  | 0.012  | 0.013  | 0.017  | 0.01   | t | 125453 | KDRLQGM<br>APAAGAD           | Homo<br>sapiens                  |
| 1 | 1.00 | 1 | 1 | 0.02  | 0.018  | 0.025  | 0.02   | 0.018  | t | 118285 | DAYVLLSE<br>KKISSIQSIV       | Oryctola<br>gus<br>cuniculu<br>s |
| 1 | 1.00 | 1 | 1 | 0.01  | 0.008  | 0.003  | 0.009  | 0.01   | t | 9723   | DPPPPNP<br>NDPPPPN<br>PND    | Mus<br>musculu<br>s              |
| 1 | 1.00 | 1 | 1 | -0.01 | -0.006 | -0.013 | -0.003 | -0.008 | t | 124068 | ELMALHT<br>GQSLEQIE<br>R     | Homo<br>sapiens                  |
| 1 | 1.00 | 1 | 1 | 0.04  | 0.04   | 0.04   | 0.04   | 0.042  | t | 18494  | GAAAAGA<br>VVGGLG            | Oryctola<br>gus<br>cuniculu<br>s |
| 1 | 1.00 | 1 | 1 | 0.01  | 0.008  | 0.012  | 0.013  | 0.012  | t | 98980  | RELSA                        | Mus<br>musculu<br>s              |
| 1 | 1.00 | 1 | 1 | 0.01  | 0.01   | 0.01   | 0.009  | 0.01   | t | 82034  | FFVQYGG<br>AYKRH             | Homo<br>sapiens                  |
| 1 | 1.00 | 1 | 1 | -0.04 | -0.042 | -0.038 | -0.039 | -0.04  | t | 67305  | TWYFN                        | Mus<br>musculu<br>s              |
| 1 | 1.00 | 1 | 1 | 0.06  | 0.06   | 0.047  | 0.06   | 0.061  | t | 9789   | DPTSPDDI<br>ES               | Mus<br>musculu<br>s              |
| 1 | 1.00 | 1 | 1 | 0.01  | 0.01   | 0.002  | 0.013  | 0.012  | t | 70437  | VPPTQSKK<br>KNKNET           | Homo<br>sapiens                  |
| 1 | 1.00 | 1 | 1 | -0.04 | -0.04  | -0.038 | -0.04  | -0.04  | t | 125011 | DFHFEVFN<br>FVP              | Mus<br>musculu<br>s              |
| 1 | 1.00 | 1 | 1 | 0     | 0      | 0      | 0      | 0      | t | 132431 | LGFAE                        | Mus<br>musculu<br>s              |
| 1 | 1.00 | 1 | 1 | 0     | 0      | 0      | 0      | 0      | t | 38683  | LPRRGPRL<br>GV               | Homo<br>sapiens                  |
| 1 | 1.00 | 1 | 1 | -0.02 | -0.023 | -0.011 | -0.02  | -0.022 | t | 70729  | VRGLYFP                      | Mus<br>musculu<br>s              |



|   |      |   |   |       |        |       |        |        |   |        |                              |                                  |
|---|------|---|---|-------|--------|-------|--------|--------|---|--------|------------------------------|----------------------------------|
| 1 | 1.00 | 1 | 1 | -0.03 | -0.034 | -0.03 | -0.027 | -0.027 | t | 115559 | WLGHPDK<br>FVGITY            | Oryctola<br>gus<br>cuniculu<br>s |
| 1 | 1.00 | 1 | 1 | 0.04  | 0.04   | 0.044 | 0.04   | 0.04   | t | 63878  | TGLDFN                       | Homo<br>sapiens                  |
| 1 | 1.00 | 1 | 1 | 0     | 0      | 0     | 0      | 0      | t | 610    | ACYLPFQL<br>SCGGKS           | Mus<br>musculu<br>s              |
| 1 | 1.00 | 1 | 1 | 0.03  | 0.028  | 0.035 | 0.03   | 0.03   | t | 100426 | QKLVFFAE<br>DV               | Mus<br>musculu<br>s              |
| 1 | 1.00 | 1 | 1 | 0.02  | 0.025  | 0.022 | 0.02   | 0.02   | t | 3325   | ANKEGIV<br>WVATEGA<br>LN     | Homo<br>sapiens                  |
| 1 | 1.00 | 1 | 1 | 0.01  | 0.013  | 0.01  | 0.01   | 0.011  | t | 34351  | KYALADAS<br>LKMAD            | Mus<br>musculu<br>s              |
| 1 | 1.00 | 1 | 1 | 0.04  | 0.04   | 0.04  | 0.04   | 0.04   | t | 115408 | NVPGEIVE<br>SLSSESIT<br>RI   | Homo<br>sapiens                  |
| 1 | 1.00 | 1 | 1 | 0.02  | 0.032  | 0.014 | 0.02   | 0.02   | t | 31521  | KKEFLNSY<br>EDEFSS           | Mus<br>musculu<br>s              |
| 1 | 1.00 | 1 | 1 | 0.02  | 0.02   | 0.02  | 0.02   | 0.02   | t | 103693 | VFGGAAS<br>CAAPIQAD          | Homo<br>sapiens                  |
| 1 | 1.00 | 1 | 1 | 0.02  | 0.02   | 0.02  | 0.02   | 0.02   | t | 103931 | GKLPKMT                      | Homo<br>sapiens                  |
| 1 | 1.00 | 1 | 1 | 0.02  | 0.02   | 0.02  | 0.02   | 0.02   | t | 22237  | GRVILSGK<br>PATIPDRE<br>VLYQ | Homo<br>sapiens                  |
| 1 | 1.00 | 1 | 1 | 0     | 0      | 0     | 0      | 0      | t | 136568 | PYYRVFYK<br>YD               | Homo<br>sapiens                  |
| 1 | 1.00 | 1 | 1 | 0     | 0      | 0     | 0      | 0      | t | 101554 | DPLAQQS                      | Mus<br>musculu<br>s              |
| 1 | 1.00 | 1 | 1 | 0     | 0      | 0     | 0      | 0      | t | 101554 | DPLAQQS                      | Mus<br>musculu<br>s              |
| 1 | 1.00 | 1 | 1 | 0     | 0      | 0     | 0      | 0      | t | 105505 | SAE                          | Oryctola<br>gus<br>cuniculu<br>s |
| 1 | 1.00 | 1 | 1 | 0     | 0      | 0     | 0      | 0      | t | 99333  | IIEAMSEGI<br>KVMIGK          | Equus<br>caballus                |

|   |      |   |   |       |        |        |        |        |   |        |                               |                                  |
|---|------|---|---|-------|--------|--------|--------|--------|---|--------|-------------------------------|----------------------------------|
| 1 | 1.00 | 1 | 1 | 0     | 0      | 0      | 0      | 0      | t | 105505 | SAE                           | Oryctola<br>gus<br>cuniculu<br>s |
| 1 | 1.00 | 1 | 1 | 0     | 0      | 0      | 0      | 0      | t | 78064  | VPLSPTME<br>FMRK              | Mus<br>musculu<br>s              |
| 1 | 1.00 | 1 | 1 | 0     | 0      | 0      | 0      | 0      | t | 70667  | VQWMNR<br>LIAFAFAG<br>NHVSP   | Homo<br>sapiens                  |
| 1 | 1.00 | 1 | 1 | 0.01  | 0.007  | 0.021  | 0.01   | 0.008  | t | 111439 | KAGGIEQN<br>FGLFYPN           | Oryctola<br>gus<br>cuniculu<br>s |
| 1 | 1.00 | 1 | 1 | 0.01  | 0.007  | 0.021  | 0.01   | 0.008  | t | 111439 | KAGGIEQN<br>FGLFYPN           | Oryctola<br>gus<br>cuniculu<br>s |
| 1 | 1.00 | 1 | 1 | 0.01  | 0.01   | 0.01   | 0.01   | 0.01   | t | 27985  | IPPSSPPQ                      | Anas<br>platyrhy<br>nchos        |
| 1 | 1.00 | 1 | 1 | 0.01  | 0.013  | 0.01   | 0.01   | 0.008  | t | 140892 | QILDAHAA<br>YLNATPAA<br>KVLV  | Mus<br>musculu<br>s              |
| 1 | 1.00 | 1 | 1 | 0     | 0      | 0      | 0      | -0.001 | t | 137742 | DTPLTHAG<br>LKLK              | Mus<br>musculu<br>s              |
| 1 | 1.00 | 1 | 1 | -0.03 | -0.027 | -0.023 | -0.03  | -0.03  | t | 61971  | STVGMTPT<br>KYCGT             | Mus<br>musculu<br>s              |
| 1 | 1.00 | 1 | 1 | -0.03 | 0.009  | -0.023 | -0.03  | -0.03  | t | 61971  | STVGMTPT<br>KYCGT             | Mus<br>musculu<br>s              |
| 1 | 1.00 | 1 | 1 | 0.01  | 0.01   | 0.013  | 0.01   | 0.008  | t | 7375   | CYGLPDSV<br>KIWTSET           | Mus<br>musculu<br>s              |
| 1 | 1.00 | 1 | 1 | 0.01  | 0.013  | 0.013  | 0.01   | 0.008  | t | 7375   | CYGLPDSV<br>KIWTSET           | Equus<br>caballus                |
| 1 | 1.00 | 1 | 1 | -0.03 | -0.028 | -0.039 | -0.029 | -0.03  | t | 15959  | FGCTWMT<br>NSTGFTKV<br>CGAPPC | Homo<br>sapiens                  |
| 1 | 1.00 | 1 | 1 | -0.01 | -0.006 | -0.01  | -0.009 | -0.01  | t | 26293  | IGPEKAFT                      | Homo<br>sapiens                  |
| 1 | 1.00 | 1 | 1 | 0.04  | 0.04   | 0.026  | 0.04   | 0.041  | t | 47995  | PITEAAET<br>ATTEVPVE<br>KTEE  | Mus<br>musculu<br>s              |

|   |      |   |   |       |        |        |        |        |   |        |                              |                                  |
|---|------|---|---|-------|--------|--------|--------|--------|---|--------|------------------------------|----------------------------------|
| 1 | 1.00 | 1 | 1 | -0.02 | -0.02  | -0.028 | -0.02  | -0.02  | t | 106472 | GPSDPAH<br>KAR               | Homo<br>sapiens                  |
| 1 | 1.00 | 1 | 1 | 0.02  | 0.022  | 0.007  | 0.019  | 0.02   | t | 78944  | DADGDGH<br>GWKPGNA<br>PGIAGY | Homo<br>sapiens                  |
| 1 | 1.00 | 1 | 1 | 0.01  | 0.01   | 0.003  | 0.016  | 0.012  | t | 106990 | VYATRSSA<br>VRLRSSVP         | Homo<br>sapiens                  |
| 1 | 1.00 | 1 | 1 | -0.01 | -0.007 | -0.01  | -0.01  | -0.01  | t | 53634  | RESQAYYQ<br>R                | Mus<br>musculu<br>s              |
| 1 | 1.00 | 1 | 1 | -0.03 | -0.034 | -0.042 | -0.031 | -0.03  | t | 26294  | IGPEKAFR<br>EL               | Oryctola<br>gus<br>cuniculu<br>s |
| 1 | 1.00 | 1 | 1 | -0.04 | -0.04  | -0.039 | -0.04  | -0.04  | t | 68157  | VEEEIYQC<br>CNLEPE           | Homo<br>sapiens                  |
| 1 | 1.00 | 1 | 1 | -0.01 | -0.01  | -0.012 | -0.01  | -0.012 | t | 79928  | MDRPTSM<br>KALDH             | Mus<br>musculu<br>s              |
| 1 | 1.00 | 1 | 1 | 0     | 0.003  | 0      | 0      | 0.001  | t | 106342 | DIVMTQSP<br>DSLAVSL          | Mus<br>musculu<br>s              |
| 1 | 1.00 | 1 | 1 | 0.01  | 0.01   | 0.01   | 0.01   | 0.01   | t | 117112 | WPMNDD<br>STRR               | Mus<br>musculu<br>s              |
| 1 | 1.00 | 1 | 1 | 0.01  | 0.01   | 0.01   | 0.01   | 0.01   | t | 117112 | WPMNDD<br>STRR               | Homo<br>sapiens                  |
| 1 | 1.00 | 1 | 1 | -0.01 | -0.01  | -0.01  | -0.006 | -0.01  | t | 120423 | CDLPQTHS<br>LGSRR            | Homo<br>sapiens                  |
| 1 | 1.00 | 1 | 1 | -0.01 | -0.01  | -0.002 | -0.003 | -0.011 | t | 122512 | PEPAKSAP<br>APKKGSK          | Mus<br>musculu<br>s              |
| 1 | 1.00 | 1 | 1 | -0.01 | -0.014 | -0.014 | -0.007 | -0.008 | t | 1386   | AFRELADA<br>LL               | Oryctola<br>gus<br>cuniculu<br>s |

|   |      |   |   |       |        |        |        |        |   |        |                              |                            |
|---|------|---|---|-------|--------|--------|--------|--------|---|--------|------------------------------|----------------------------|
| 1 | 1.00 | 1 | 1 | 0.03  | 0.03   | 0.013  | 0.03   | 0.032  | t | 96098  | ANEEIRKR<br>NA               | Homo<br>sapiens(<br>human) |
| 1 | 1.00 | 1 | 1 | -0.05 | -0.046 | -0.063 | -0.049 | -0.05  | t | 12944  | ELAKLRAG<br>KASDSQTP<br>DT   | Homo<br>sapiens            |
| 1 | 1.00 | 1 | 1 | 0.01  | 0.01   | 0.01   | 0.01   | 0.01   | t | 23190  | GVTYEIDL<br>TNKNA            | Homo<br>sapiens            |
| 1 | 1.00 | 1 | 1 | -0.03 | -0.03  | -0.03  | -0.03  | -0.03  | t | 156929 | PGPRFF                       | Gallus<br>gallus           |
| 1 | 1.00 | 1 | 1 | -0.02 | -0.02  | -0.037 | -0.02  | -0.016 | t | 145726 | CKQAGTC<br>PPD               | Mus<br>musculu<br>s        |
| 1 | 1.00 | 1 | 1 | 0.07  | 0.07   | 0.07   | 0.07   | 0.07   | t | 127677 | GTNTAQK                      | Homo<br>sapiens            |
| 1 | 1.00 | 1 | 1 | 0.03  | 0.03   | 0.03   | 0.03   | 0.03   | t | 131683 | SVKVTCT                      | Mus<br>musculu<br>s        |
| 1 | 1.00 | 1 | 1 | 0.03  | 0.03   | 0.03   | 0.03   | 0.03   | t | 123077 | DFMVYEA<br>LD                | Ovis<br>aries              |
| 1 | 1.00 | 1 | 1 | 0.03  | 0.03   | 0.03   | 0.03   | 0.03   | t | 115847 | LLYQEPVL<br>GP               | Homo<br>sapiens            |
| 1 | 1.00 | 1 | 1 | 0.01  | 0.01   | 0.01   | 0.01   | 0.01   | t | 151056 | SQLKNN<br>KEIGNGCF           | Homo<br>sapiens            |
| 1 | 1.00 | 1 | 1 | 0.01  | 0.01   | 0.01   | 0.01   | 0.01   | t | 149064 | LAANLTQ                      | Sus<br>scrofa              |
| 1 | 1.00 | 1 | 1 | 0.01  | 0.01   | 0.01   | 0.01   | 0.01   | t | 133656 | NLGEKYNT<br>LSLL             | Homo<br>sapiens            |
| 1 | 1.00 | 1 | 1 | 0.01  | 0.01   | 0.01   | 0.01   | 0.01   | t | 127682 | HFHRPYH                      | Homo<br>sapiens            |
| 1 | 1.00 | 1 | 1 | 0.01  | 0.01   | 0.01   | 0.01   | 0.01   | t | 111563 | MPVNDTK                      | Homo<br>sapiens            |
| 1 | 1.00 | 1 | 1 | 0.01  | 0.01   | 0.01   | 0.01   | 0.01   | t | 78226  | PFTNLAHV                     | Homo<br>sapiens            |
| 1 | 1.00 | 1 | 1 | 0.01  | 0.01   | 0.01   | 0.01   | 0.01   | t | 77874  | FLPTSPTGL<br>RIE             | Mus<br>musculu<br>s        |
| 1 | 1.00 | 1 | 1 | 0     | 0      | -0.005 | 0      | 0.001  | t | 79622  | NYARTGG<br>QVTAG             | Mus<br>musculu<br>s        |
| 1 | 1.00 | 1 | 1 | -0.01 | -0.01  | -0.01  | -0.01  | -0.01  | t | 115309 | KFPQYLQY<br>LYQGPIVL<br>NPWD | Homo<br>sapiens            |

|   |      |   |   |       |        |        |        |        |   |        |                              |                                  |
|---|------|---|---|-------|--------|--------|--------|--------|---|--------|------------------------------|----------------------------------|
| 1 | 1.00 | 1 | 1 | -0.01 | 0.001  | -0.01  | -0.01  | -0.012 | t | 156887 | HKYLYCTG<br>KCNTKA           | Gallus<br>gallus                 |
| 1 | 1.00 | 1 | 1 | -0.01 | -0.01  | -0.021 | -0.01  | -0.01  | t | 79775  | DDATVAIR<br>SAINNLI<br>VIR   | Mus<br>musculu<br>s              |
| 1 | 1.00 | 1 | 1 | 0     | 0      | -0.019 | 0      | 0.004  | t | 20088  | GGWGQP<br>HGGGWG<br>QG       | Mus<br>musculu<br>s              |
| 1 | 1.00 | 1 | 1 | -0.01 | -0.007 | -0.006 | -0.01  | -0.01  | t | 122205 | VFTLPPPL<br>PETH             | Mus<br>musculu<br>s              |
| 1 | 1.00 | 1 | 1 | -0.02 | -0.017 | -0.016 | -0.02  | -0.023 | t | 153284 | PTPLSPPLR<br>NTHPQA          | Mus<br>musculu<br>s              |
| 1 | 1.00 | 1 | 1 | 0.02  | 0.02   | 0.02   | 0.02   | 0.021  | t | 104226 | RPQDVKEP<br>GGGQIVG<br>GVYLL | Homo<br>sapiens                  |
| 1 | 1.00 | 1 | 1 | 0.01  | 0.007  | 0.01   | 0.01   | 0.01   | t | 131579 | PDIITGFSS                    | Oryctola<br>gus<br>cuniculu<br>s |
| 1 | 1.00 | 1 | 1 | -0.04 | -0.042 | -0.045 | -0.043 | -0.04  | t | 133836 | GKKRKRSR<br>KE               | Mus<br>musculu<br>s              |
| 1 | 1.00 | 1 | 1 | -0.04 | -0.036 | -0.036 | -0.037 | -0.04  | t | 144614 | DMMYGG<br>MRGM               | Homo<br>sapiens                  |
| 1 | 1.00 | 1 | 1 | 0.04  | 0.038  | 0.032  | 0.039  | 0.04   | t | 73132  | WTGVTQN                      | Mus<br>musculu<br>s              |
| 1 | 1.00 | 1 | 1 | 0.04  | 0.038  | 0.032  | 0.039  | 0.04   | t | 73132  | WTGVTQN                      | Mus<br>musculu<br>s              |
| 1 | 1.00 | 1 | 1 | 0.01  | 0.012  | 0.01   | 0.011  | 0.007  | t | 146986 | GNGPGYA<br>LGGGSR            | Homo<br>sapiens                  |
| 1 | 1.00 | 1 | 1 | 0.01  | 0.01   | 0.01   | 0.01   | 0.01   | t | 105540 | TDNELA                       | Oryctola<br>gus<br>cuniculu<br>s |
| 1 | 1.00 | 1 | 1 | -0.01 | -0.01  | -0.01  | -0.01  | -0.009 | t | 15981  | FGGETFTP<br>DWMMEV           | Mus<br>musculu<br>s              |

|   |      |   |   |       |        |        |        |        |   |        |                              |                  |
|---|------|---|---|-------|--------|--------|--------|--------|---|--------|------------------------------|------------------|
| 1 | 1.00 | 1 | 1 | 0.03  | 0.034  | 0.029  | 0.027  | 0.028  | t | 98174  | KNETPEVT                     | Homo sapiens     |
| 1 | 1.00 | 1 | 1 | 0     | 0.002  | -0.002 | -0.001 | 0      | t | 130990 | NVLRGMG<br>GAF               | Homo sapiens     |
| 1 | 1.00 | 1 | 1 | -0.05 | -0.047 | -0.05  | -0.05  | -0.052 | t | 135497 | RYPNQVYY<br>RPM              | Mus musculus     |
| 1 | 1.00 | 1 | 1 | 0     | 0      | 0      | 0      | 0      | t | 45405  | NPNANP                       | Mus musculus     |
| 1 | 1.00 | 1 | 1 | 0     | 0      | 0      | 0      | 0      | t | 45405  | NPNANP                       | Mus musculus     |
| 1 | 1.00 | 1 | 1 | 0     | 0      | 0      | 0      | 0      | t | 70351  | VPKPQG<br>PLP                | Homo sapiens     |
| 1 | 1.00 | 1 | 1 | 0     | 0      | 0      | 0      | 0      | t | 70667  | VQWMNR<br>LIAFAFAG<br>NHVSP  | Homo sapiens     |
| 1 | 1.00 | 1 | 1 | 0     | 0.005  | 0.008  | 0.003  | 0.001  | t | 11775  | EELVEEVI                     | Homo sapiens     |
| 1 | 1.00 | 1 | 1 | 0.02  | 0.026  | 0.024  | 0.02   | 0.02   | t | 93854  | SDSNLKDL<br>TF               | Ovis aries       |
| 1 | 1.00 | 1 | 1 | -0.02 | -0.018 | -0.02  | -0.019 | -0.02  | t | 138083 | VYPSKTQP<br>LQHNNLL          | Homo sapiens     |
| 1 | 1.00 | 1 | 1 | -0.01 | -0.007 | -0.011 | -0.01  | -0.01  | t | 67932  | VDEKNM                       | Mus musculus     |
| 1 | 1.00 | 1 | 1 | 0.04  | 0.04   | 0.035  | 0.04   | 0.04   | t | 4455   | ASHLPYIE<br>QGVQLAE<br>QFKQK | Homo sapiens     |
| 1 | 1.00 | 1 | 1 | 0.04  | 0.04   | 0.04   | 0.04   | 0.04   | t | 141046 | KEVTVVTT<br>S                | Ovis aries       |
| 1 | 1.00 | 1 | 1 | -0.01 | -0.009 | -0.002 | -0.009 | -0.012 | t | 10377  | DTKCSSTG<br>LVAA             | Myodes glareolus |

|   |      |   |   |       |        |        |        |        |   |        |                              |                                  |
|---|------|---|---|-------|--------|--------|--------|--------|---|--------|------------------------------|----------------------------------|
| 1 | 1.00 | 1 | 1 | -0.01 | -0.009 | -0.002 | -0.009 | -0.012 | t | 10377  | DTKCSSTG<br>LVAA             | Myodes<br>glareolu<br>s          |
| 1 | 1.00 | 1 | 1 | 0.02  | 0.02   | 0.02   | 0.02   | 0.02   | t | 143673 | DRANLGT<br>L RGY             | Mus<br>musculu<br>s              |
| 1 | 1.00 | 1 | 1 | 0.02  | 0.02   | 0.02   | 0.02   | 0.02   | t | 103040 | ALTGLGDK<br>FGESIVN          | Homo<br>sapiens                  |
| 1 | 1.00 | 1 | 1 | 0.02  | 0.02   | 0.02   | 0.02   | 0.02   | t | 70427  | VPPRRKR<br>TIQLDG            | Homo<br>sapiens                  |
| 1 | 1.00 | 1 | 1 | 0.02  | 0.02   | 0.02   | 0.02   | 0.02   | t | 70427  | VPPRRKR<br>TIQLDG            | Homo<br>sapiens                  |
| 1 | 1.00 | 1 | 1 | 0     | 0      | 0      | 0      | 0      | t | 115938 | RDMPIQA<br>FLL               | Homo<br>sapiens                  |
| 1 | 1.00 | 1 | 1 | 0.05  | 0.052  | 0.043  | 0.051  | 0.05   | t | 42494  | MRQLDTN<br>VERRALGE<br>IQNV  | Homo<br>sapiens                  |
| 1 | 1.00 | 1 | 1 | 0.02  | 0.02   | 0.013  | 0.017  | 0.02   | t | 75881  | YSRPVSA<br>NGEPTVKL<br>YT    | Homo<br>sapiens                  |
| 1 | 1.00 | 1 | 1 | 0.02  | 0.02   | 0.019  | 0.02   | 0.02   | t | 35098  | LCSGGYTV<br>SKSK             | Mus<br>musculu<br>s              |
| 1 | 1.00 | 1 | 1 | 0.02  | 0.016  | 0.02   | 0.019  | 0.02   | t | 137923 | LMDAAVD<br>VFADG             | Oryctola<br>gus<br>cuniculu<br>s |
| 1 | 1.00 | 1 | 1 | 0.03  | 0.03   | 0.03   | 0.03   | 0.03   | t | 130924 | KLFPEEDE<br>MRTETQR          | Homo<br>sapiens                  |
| 1 | 1.00 | 1 | 1 | -0.01 | -0.008 | -0.02  | -0.009 | -0.008 | t | 58403  | SHRGIAD<br>NQAKWA<br>V       | Homo<br>sapiens                  |
| 1 | 1.00 | 1 | 1 | 0.03  | 0.033  | 0.031  | 0.03   | 0.03   | t | 22894  | GTYETGNK                     | Mus<br>musculu<br>s              |
| 1 | 1.00 | 1 | 1 | 0     | 0      | -0.005 | -0.002 | 0      | t | 78979  | GIPASWKT<br>IDADGDG<br>HGWKP | Homo<br>sapiens                  |
| 1 | 1.00 | 1 | 1 | -0.03 | -0.03  | -0.03  | -0.03  | -0.028 | t | 130356 | YCRSGK                       | Homo<br>sapiens                  |
| 1 | 1.00 | 1 | 1 | 0.03  | 0.034  | 0.03   | 0.031  | 0.03   | t | 118497 | LNGKNIED<br>VIAQGIG          | Homo<br>sapiens                  |

|   |      |   |   |      |       |       |       |        |   |        |                              |                                  |
|---|------|---|---|------|-------|-------|-------|--------|---|--------|------------------------------|----------------------------------|
| 1 | 1.00 | 1 | 1 | 0.03 | 0.028 | 0.023 | 0.023 | 0.031  | t | 108131 | SKDWSFY                      | Mus<br>musculu<br>s              |
| 1 | 1.00 | 1 | 1 | 0    | 0     | 0     | 0     | -0.001 | t | 57299  | SDTRGDP<br>VFNLPFQ           | Mus<br>musculu<br>s              |
| 1 | 1.00 | 1 | 1 | 0    | 0     | 0.007 | 0     | 0      | t | 119519 | RKVVQTSLE                    | Homo<br>sapiens                  |
| 1 | 1.00 | 1 | 1 | 0    | 0     | 0     | 0     | -0.001 | t | 159296 | SFSKPSNS<br>WFPVEGP          | Oryctola<br>gus<br>cuniculu<br>s |
| 1 | 1.00 | 1 | 1 | 0    | 0     | 0     | 0     | -0.001 | t | 159284 | FSLRLMEE<br>NWNAEKR<br>S     | Oryctola<br>gus<br>cuniculu<br>s |
| 1 | 1.00 | 1 | 1 | 0    | 0     | 0     | 0     | -0.001 | t | 148701 | PAELMRRF<br>ELYF             | Mus<br>musculu<br>s              |
| 1 | 1.00 | 1 | 1 | 0    | 0     | 0     | 0     | -0.001 | t | 141523 | ALEPPHNL<br>PVP              | Mus<br>musculu<br>s              |
| 1 | 1.00 | 1 | 1 | 0    | 0     | 0     | 0     | -0.001 | t | 141935 | KKPGGPG                      | Mus<br>musculu<br>s              |
| 1 | 1.00 | 1 | 1 | 0    | 0     | 0     | 0     | -0.001 | t | 148632 | IDSEEELIN<br>KKR             | Mus<br>musculu<br>s              |
| 1 | 1.00 | 1 | 1 | 0    | 0     | 0     | 0     | -0.001 | t | 138886 | NVGGDNV<br>DIHSIVPV<br>GQDPH | Mus<br>musculu<br>s              |
| 1 | 1.00 | 1 | 1 | 0    | 0     | 0     | 0     | -0.001 | t | 144742 | PFYGYRE                      | Mus<br>musculu<br>s              |
| 1 | 1.00 | 1 | 1 | 0    | 0     | 0     | 0     | -0.001 | t | 141693 | KTWG                         | Mus<br>musculu<br>s              |
| 1 | 1.00 | 1 | 1 | 0    | 0     | 0     | 0     | -0.001 | t | 142435 | KTDGKGEE<br>SE               | Homo<br>sapiens                  |
| 1 | 1.00 | 1 | 1 | 0    | 0     | 0     | 0     | -0.001 | t | 141683 | KDWG                         | Mus<br>musculu<br>s              |
| 1 | 1.00 | 1 | 1 | 0    | 0     | 0     | 0     | -0.001 | t | 144641 | FFENKD                       | Mus<br>musculu<br>s              |



|   |      |   |   |   |   |   |   |        |   |        |                              |                                  |
|---|------|---|---|---|---|---|---|--------|---|--------|------------------------------|----------------------------------|
| 1 | 1.00 | 1 | 1 | 0 | 0 | 0 | 0 | -0.001 | t | 150858 | ISSLYNLVK<br>SS              | Mus<br>musculu<br>s              |
| 1 | 1.00 | 1 | 1 | 0 | 0 | 0 | 0 | -0.001 | t | 141685 | KKTEETLL<br>EDR              | Mus<br>musculu<br>s              |
| 1 | 1.00 | 1 | 1 | 0 | 0 | 0 | 0 | -0.001 | t | 142913 | MVLNEG<br>SGTA               | Oryctola<br>gus<br>cuniculu<br>s |
| 1 | 1.00 | 1 | 1 | 0 | 0 | 0 | 0 | -0.001 | t | 141963 | MVDRGW<br>G                  | Mus<br>musculu<br>s              |
| 1 | 1.00 | 1 | 1 | 0 | 0 | 0 | 0 | -0.001 | t | 151493 | VVDGPETK<br>EC               | Mus<br>musculu<br>s              |
| 1 | 1.00 | 1 | 1 | 0 | 0 | 0 | 0 | -0.001 | t | 138194 | IIPKSSWS                     | Homo<br>sapiens                  |
| 1 | 1.00 | 1 | 1 | 0 | 0 | 0 | 0 | -0.001 | t | 150855 | HPGGSQP                      | Mus<br>musculu<br>s              |
| 1 | 1.00 | 1 | 1 | 0 | 0 | 0 | 0 | -0.001 | t | 136443 | KSMINAYL<br>DKHPLMT<br>VRKIH | Aotus                            |
| 1 | 1.00 | 1 | 1 | 0 | 0 | 0 | 0 | -0.001 | t | 144610 | DFFTYK                       | Mus<br>musculu<br>s              |
| 1 | 1.00 | 1 | 1 | 0 | 0 | 0 | 0 | -0.001 | t | 135569 | KTNMK                        | Mus<br>musculu<br>s              |
| 1 | 1.00 | 1 | 1 | 0 | 0 | 0 | 0 | -0.001 | t | 134860 | AGPKAQV<br>EAIQKY            | Mus<br>musculu<br>s              |
| 1 | 1.00 | 1 | 1 | 0 | 0 | 0 | 0 | -0.001 | t | 141777 | VVDSEDLP<br>LN               | Oryctola<br>gus<br>cuniculu<br>s |
| 1 | 1.00 | 1 | 1 | 0 | 0 | 0 | 0 | -0.001 | t | 136719 | VIKHMRF<br>HADYQAP<br>FLGGGY | Aotus                            |
| 1 | 1.00 | 1 | 1 | 0 | 0 | 0 | 0 | -0.001 | t | 150854 | HPGGQQP                      | Mus<br>musculu<br>s              |
| 1 | 1.00 | 1 | 1 | 0 | 0 | 0 | 0 | -0.001 | t | 135569 | KTNMK                        | Mus<br>musculu<br>s              |

|   |      |   |   |   |        |   |   |        |   |        |                              |                                  |
|---|------|---|---|---|--------|---|---|--------|---|--------|------------------------------|----------------------------------|
| 1 | 1.00 | 1 | 1 | 0 | 0      | 0 | 0 | -0.001 | t | 136720 | VIKHMRF<br>HVDYQIAF<br>LGGGY | Aotus                            |
| 1 | 1.00 | 1 | 1 | 0 | 0      | 0 | 0 | -0.001 | t | 144798 | TKYTM                        | Mus<br>musculu<br>s              |
| 1 | 1.00 | 1 | 1 | 0 | 0      | 0 | 0 | -0.001 | t | 156601 | ADEPNNL<br>NSK               | Oryctola<br>gus<br>cuniculu<br>s |
| 1 | 1.00 | 1 | 1 | 0 | 0      | 0 | 0 | -0.001 | t | 134795 | SFGAYGA<br>QEEAQC            | Oryctola<br>gus<br>cuniculu<br>s |
| 1 | 1.00 | 1 | 1 | 0 | 0      | 0 | 0 | -0.001 | t | 135569 | KTNMK                        | Mus<br>musculu<br>s              |
| 1 | 1.00 | 1 | 1 | 0 | 0      | 0 | 0 | -0.001 | t | 118141 | SKGRRFKG                     | Mus<br>musculu<br>s              |
| 1 | 1.00 | 1 | 1 | 0 | 0      | 0 | 0 | -0.001 | t | 117530 | IEFRSDA<br>ESSDGEDF<br>IVEE  | Mus<br>musculu<br>s              |
| 1 | 1.00 | 1 | 1 | 0 | 0      | 0 | 0 | -0.001 | t | 125238 | RLPLPPNQ<br>KR               | Mus<br>musculu<br>s              |
| 1 | 1.00 | 1 | 1 | 0 | -0.003 | 0 | 0 | -0.001 | t | 125246 | RRQPHVM<br>S                 | Oryctola<br>gus<br>cuniculu<br>s |
| 1 | 1.00 | 1 | 1 | 0 | 0      | 0 | 0 | -0.001 | t | 118431 | ISDAMKKV<br>GRKGVITV<br>KD   | Oryctola<br>gus<br>cuniculu<br>s |
| 1 | 1.00 | 1 | 1 | 0 | 0      | 0 | 0 | -0.001 | t | 118285 | DAYVLLSE<br>KKISSIQSIV       | Oryctola<br>gus<br>cuniculu<br>s |
| 1 | 1.00 | 1 | 1 | 0 | -0.011 | 0 | 0 | -0.001 | t | 125246 | RRQPHVM<br>S                 | Oryctola<br>gus<br>cuniculu<br>s |
| 1 | 1.00 | 1 | 1 | 0 | 0      | 0 | 0 | -0.001 | t | 125256 | SLRGRGNT<br>LGLD             | Mus<br>musculu<br>s              |
| 1 | 1.00 | 1 | 1 | 0 | 0      | 0 | 0 | -0.001 | t | 118435 | ISKGANPV<br>EIRRGVML<br>AV   | Oryctola<br>gus<br>cuniculu<br>s |

|   |      |   |   |   |   |   |   |        |   |        |                      |                                  |
|---|------|---|---|---|---|---|---|--------|---|--------|----------------------|----------------------------------|
| 1 | 1.00 | 1 | 1 | 0 | 0 | 0 | 0 | -0.001 | t | 120869 | PGYRSISG<br>PDPRIKRT | Mus<br>musculu<br>s              |
| 1 | 1.00 | 1 | 1 | 0 | 0 | 0 | 0 | -0.001 | t | 121773 | QYVAMVA<br>DRLFLY    | Rattus<br>norvegic<br>us         |
| 1 | 1.00 | 1 | 1 | 0 | 0 | 0 | 0 | -0.001 | t | 118867 | KLSQTSNV<br>DKEEEAV  | Mus<br>musculu<br>s              |
| 1 | 1.00 | 1 | 1 | 0 | 0 | 0 | 0 | -0.001 | t | 118678 | WPLHDGG<br>AVNRR     | Mus<br>musculu<br>s              |
| 1 | 1.00 | 1 | 1 | 0 | 0 | 0 | 0 | -0.001 | t | 129732 | RERRGIAL<br>DGKI     | Mus<br>musculu<br>s              |
| 1 | 1.00 | 1 | 1 | 0 | 0 | 0 | 0 | -0.001 | t | 121065 | WLKVKILP<br>EVKEKHEF | Oryctola<br>gus<br>cuniculu<br>s |
| 1 | 1.00 | 1 | 1 | 0 | 0 | 0 | 0 | -0.001 | t | 118633 | TNSFNDSG<br>SAPH     | Mus<br>musculu<br>s              |
| 1 | 1.00 | 1 | 1 | 0 | 0 | 0 | 0 | -0.001 | t | 118275 | ATVLARSI<br>AKEGF    | Oryctola<br>gus<br>cuniculu<br>s |
| 1 | 1.00 | 1 | 1 | 0 | 0 | 0 | 0 | -0.001 | t | 131671 | SPPPYVP              | Mus<br>musculu<br>s              |
| 1 | 1.00 | 1 | 1 | 0 | 0 | 0 | 0 | -0.001 | t | 125455 | KEGNLLIE             | Mus<br>musculu<br>s              |
| 1 | 1.00 | 1 | 1 | 0 | 0 | 0 | 0 | -0.001 | t | 118362 | FTQLNPTD<br>GGSA     | Mus<br>musculu<br>s              |
| 1 | 1.00 | 1 | 1 | 0 | 0 | 0 | 0 | -0.001 | t | 118451 | KGIIDPTKV<br>VRTA    | Oryctola<br>gus<br>cuniculu<br>s |
| 1 | 1.00 | 1 | 1 | 0 | 0 | 0 | 0 | -0.001 | t | 122205 | VFTLPPPL<br>PETH     | Mus<br>musculu<br>s              |
| 1 | 1.00 | 1 | 1 | 0 | 0 | 0 | 0 | -0.001 | t | 125476 | LFDYFIVG             | Mus<br>musculu<br>s              |
| 1 | 1.00 | 1 | 1 | 0 | 0 | 0 | 0 | -0.001 | t | 122202 | TSPPLLWD<br>SVHL     | Mus<br>musculu<br>s              |

|   |      |   |   |   |   |   |   |        |   |        |                              |                                  |
|---|------|---|---|---|---|---|---|--------|---|--------|------------------------------|----------------------------------|
| 1 | 1.00 | 1 | 1 | 0 | 0 | 0 | 0 | -0.001 | t | 117940 | KARIHPFHI<br>LIALETYKT<br>GH | Mus<br>musculu<br>s              |
| 1 | 1.00 | 1 | 1 | 0 | 0 | 0 | 0 | -0.001 | t | 132849 | KKVLGEKT<br>ENPKKFK          | Oryctola<br>gus<br>cuniculu<br>s |
| 1 | 1.00 | 1 | 1 | 0 | 0 | 0 | 0 | -0.001 | t | 122167 | PPITQGE<br>CKQL              | Mus<br>musculu<br>s              |
| 1 | 1.00 | 1 | 1 | 0 | 0 | 0 | 0 | -0.001 | t | 122083 | DPNIKLV<br>DDCWATS           | Mus<br>musculu<br>s              |
| 1 | 1.00 | 1 | 1 | 0 | 0 | 0 | 0 | -0.001 | t | 125052 | FSLRLMEE<br>NW               | Mus<br>musculu<br>s              |
| 1 | 1.00 | 1 | 1 | 0 | 0 | 0 | 0 | -0.001 | t | 118490 | LKDKYKNI<br>GAKLV            | Oryctola<br>gus<br>cuniculu<br>s |
| 1 | 1.00 | 1 | 1 | 0 | 0 | 0 | 0 | -0.001 | t | 118991 | RAEDNAD<br>TLALVFEA          | Oryctola<br>gus<br>cuniculu<br>s |
| 1 | 1.00 | 1 | 1 | 0 | 0 | 0 | 0 | -0.001 | t | 119048 | VSDYEMKL<br>MDLDVEQ          | Mus<br>musculu<br>s              |
| 1 | 1.00 | 1 | 1 | 0 | 0 | 0 | 0 | -0.001 | t | 131381 | CTYVLDPE<br>NL               | Mus<br>musculu<br>s              |
| 1 | 1.00 | 1 | 1 | 0 | 0 | 0 | 0 | -0.001 | t | 107852 | GEPQSSIIQ<br>Y               | Mus<br>musculu<br>s              |
| 1 | 1.00 | 1 | 1 | 0 | 0 | 0 | 0 | -0.001 | t | 113281 | ARTAHYGS<br>LPQKSHG          | Mus<br>musculu<br>s              |
| 1 | 1.00 | 1 | 1 | 0 | 0 | 0 | 0 | -0.001 | t | 98986  | RKIRPEGR<br>EGEQEWG          | Homo<br>sapiens                  |
| 1 | 1.00 | 1 | 1 | 0 | 0 | 0 | 0 | -0.001 | t | 99738  | TVRGGLRI<br>LSPDRKR          | Homo<br>sapiens                  |
| 1 | 1.00 | 1 | 1 | 0 | 0 | 0 | 0 | -0.001 | t | 98765  | EPDDLKQK<br>ACESRCT          | Homo<br>sapiens                  |
| 1 | 1.00 | 1 | 1 | 0 | 0 | 0 | 0 | -0.001 | t | 106322 | DAEFRHDS<br>G                | Mus<br>musculu<br>s              |

|   |      |   |   |   |        |   |   |        |   |        |                      |                       |
|---|------|---|---|---|--------|---|---|--------|---|--------|----------------------|-----------------------|
| 1 | 1.00 | 1 | 1 | 0 | 0      | 0 | 0 | -0.001 | t | 101716 | HQPTPAA              | Mus musculus          |
| 1 | 1.00 | 1 | 1 | 0 | 0      | 0 | 0 | -0.001 | t | 108897 | EIDGPAGQ<br>AEP      | Mus musculus          |
| 1 | 1.00 | 1 | 1 | 0 | 0      | 0 | 0 | -0.001 | t | 108382 | GGVVIA               | Mus musculus          |
| 1 | 1.00 | 1 | 1 | 0 | 0      | 0 | 0 | -0.001 | t | 110762 | AGSSIVPLE<br>EYPAEIP | Oryctolagus cuniculus |
| 1 | 1.00 | 1 | 1 | 0 | 0      | 0 | 0 | -0.001 | t | 108382 | GGVVIA               | Mus musculus          |
| 1 | 1.00 | 1 | 1 | 0 | 0      | 0 | 0 | -0.001 | t | 102093 | STGSSDV              | Mus musculus          |
| 1 | 1.00 | 1 | 1 | 0 | 0      | 0 | 0 | -0.001 | t | 115630 | NFDKLYIW<br>G        | Homo sapiens          |
| 1 | 1.00 | 1 | 1 | 0 | 0      | 0 | 0 | -0.001 | t | 113875 | SNRRPSTT             | Mus musculus          |
| 1 | 1.00 | 1 | 1 | 0 | 0      | 0 | 0 | -0.001 | t | 102005 | QPDQHHQ              | Mus musculus          |
| 1 | 1.00 | 1 | 1 | 0 | 0      | 0 | 0 | -0.001 | t | 99619  | RLVLRRNA<br>LRRPFYS  | Homo sapiens          |
| 1 | 1.00 | 1 | 1 | 0 | 0      | 0 | 0 | -0.001 | t | 98982  | REREREED<br>WRQPRED  | Homo sapiens          |
| 1 | 1.00 | 1 | 1 | 0 | 0      | 0 | 0 | -0.001 | t | 99775  | WELQGDR<br>RCQSQLER  | Homo sapiens          |
| 1 | 1.00 | 1 | 1 | 0 | 0      | 0 | 0 | -0.001 | t | 102423 | FEYQD                | Mus musculus          |
| 1 | 1.00 | 1 | 1 | 0 | -0.003 | 0 | 0 | -0.001 | t | 113742 | QDENPVV              | Oryctolagus cuniculus |
| 1 | 1.00 | 1 | 1 | 0 | 0      | 0 | 0 | -0.001 | t | 99097  | AGVALSRL<br>VLRRNAL  | Homo sapiens          |
| 1 | 1.00 | 1 | 1 | 0 | 0      | 0 | 0 | -0.001 | t | 99922  | DAEFRHDS<br>GY       | Oryctolagus cuniculus |

|   |      |   |   |   |   |   |   |        |   |        |                     |                                  |
|---|------|---|---|---|---|---|---|--------|---|--------|---------------------|----------------------------------|
| 1 | 1.00 | 1 | 1 | 0 | 0 | 0 | 0 | -0.001 | t | 113742 | QDENPVV             | Mus<br>musculu<br>s              |
| 1 | 1.00 | 1 | 1 | 0 | 0 | 0 | 0 | -0.001 | t | 116731 | GLGESRK             | Mus<br>musculu<br>s              |
| 1 | 1.00 | 1 | 1 | 0 | 0 | 0 | 0 | -0.001 | t | 99922  | DAEFRHDS<br>GY      | Oryctola<br>gus<br>cuniculu<br>s |
| 1 | 1.00 | 1 | 1 | 0 | 0 | 0 | 0 | -0.001 | t | 113517 | HLYADGLT<br>D       | Mus<br>musculu<br>s              |
| 1 | 1.00 | 1 | 1 | 0 | 0 | 0 | 0 | -0.001 | t | 115271 | GQKGRGS<br>RG       | Oryctola<br>gus<br>cuniculu<br>s |
| 1 | 1.00 | 1 | 1 | 0 | 0 | 0 | 0 | -0.001 | t | 101546 | DLNPLDPL<br>AQQS    | Mus<br>musculu<br>s              |
| 1 | 1.00 | 1 | 1 | 0 | 0 | 0 | 0 | -0.001 | t | 115652 | SSRISYWT<br>IVKP    | Homo<br>sapiens                  |
| 1 | 1.00 | 1 | 1 | 0 | 0 | 0 | 0 | -0.001 | t | 101962 | PEPVQEP             | Mus<br>musculu<br>s              |
| 1 | 1.00 | 1 | 1 | 0 | 0 | 0 | 0 | -0.001 | t | 104461 | EFRHDS              | Mus<br>musculu<br>s              |
| 1 | 1.00 | 1 | 1 | 0 | 0 | 0 | 0 | -0.001 | t | 103830 | CHAVKVG<br>NPSC     | Oryctola<br>gus<br>cuniculu<br>s |
| 1 | 1.00 | 1 | 1 | 0 | 0 | 0 | 0 | -0.001 | t | 99134  | DAEFRHDS<br>GYEVHHQ | Mus<br>musculu<br>s              |
| 1 | 1.00 | 1 | 1 | 0 | 0 | 0 | 0 | -0.001 | t | 116704 | ERIQWVG<br>DPHRK    | Mus<br>musculu<br>s              |
| 1 | 1.00 | 1 | 1 | 0 | 0 | 0 | 0 | -0.001 | t | 99134  | DAEFRHDS<br>GYEVHHQ | Mus<br>musculu<br>s              |
| 1 | 1.00 | 1 | 1 | 0 | 0 | 0 | 0 | -0.001 | t | 113679 | PEVPEVED<br>E       | Mus<br>musculu<br>s              |
| 1 | 1.00 | 1 | 1 | 0 | 0 | 0 | 0 | -0.001 | t | 113742 | QDENPVV             | Oryctola<br>gus<br>cuniculu<br>s |

|   |      |   |   |   |        |   |   |        |   |        |                      |                       |
|---|------|---|---|---|--------|---|---|--------|---|--------|----------------------|-----------------------|
| 1 | 1.00 | 1 | 1 | 0 | 0      | 0 | 0 | -0.001 | t | 101983 | PVYQQQP              | Mus musculus          |
| 1 | 1.00 | 1 | 1 | 0 | 0      | 0 | 0 | -0.001 | t | 110948 | MVTSDAQIFNKPYWL      | Mus musculus          |
| 1 | 1.00 | 1 | 1 | 0 | 0      | 0 | 0 | -0.001 | t | 114132 | KSHGRTQDENPVVHF      | Mus musculus          |
| 1 | 1.00 | 1 | 1 | 0 | 0      | 0 | 0 | -0.001 | t | 99008  | SMPVNTPGQFEDFFP      | Homo sapiens          |
| 1 | 1.00 | 1 | 1 | 0 | 0      | 0 | 0 | -0.001 | t | 101984 | PVYQQQP VQQPS        | Mus musculus          |
| 1 | 1.00 | 1 | 1 | 0 | 0      | 0 | 0 | -0.001 | t | 99451  | LRRNALRRPFYSNAP      | Homo sapiens          |
| 1 | 1.00 | 1 | 1 | 0 | 0      | 0 | 0 | -0.001 | t | 114126 | HYGSLPQKSQRSQDENPVV  | Oryctolagus cuniculus |
| 1 | 1.00 | 1 | 1 | 0 | 0      | 0 | 0 | -0.001 | t | 101558 | DQPDQHQ              | Mus musculus          |
| 1 | 1.00 | 1 | 1 | 0 | 0      | 0 | 0 | -0.001 | t | 108898 | EIDGPAGQAEPDRAHYN    | Mus musculus          |
| 1 | 1.00 | 1 | 1 | 0 | 0      | 0 | 0 | -0.001 | t | 106322 | DAEFRHDSG            | Mus musculus          |
| 1 | 1.00 | 1 | 1 | 0 | 0      | 0 | 0 | -0.001 | t | 110920 | KPSPWAPKKHRRLS       | Mus musculus          |
| 1 | 1.00 | 1 | 1 | 0 | -0.004 | 0 | 0 | -0.001 | t | 110980 | QPLGVGISGHPLLNLKDDTE | Mus musculus          |
| 1 | 1.00 | 1 | 1 | 0 | 0      | 0 | 0 | -0.001 | t | 101554 | DPLAQQS              | Mus musculus          |
| 1 | 1.00 | 1 | 1 | 0 | 0      | 0 | 0 | -0.001 | t | 111050 | VGPLDIVPEVADPGGPTLV  | Oryctolagus cuniculus |
| 1 | 1.00 | 1 | 1 | 0 | 0      | 0 | 0 | -0.001 | t | 99134  | DAEFRHDSGYEVHHQ      | Mus musculus          |
| 1 | 1.00 | 1 | 1 | 0 | 0      | 0 | 0 | -0.001 | t | 95014  | GRLIELSQEG           | Rattus norvegicus     |

|   |      |   |   |   |        |   |   |        |   |       |                              |                                  |
|---|------|---|---|---|--------|---|---|--------|---|-------|------------------------------|----------------------------------|
| 1 | 1.00 | 1 | 1 | 0 | 0      | 0 | 0 | -0.001 | t | 60595 | SQWNKPS<br>KPKT              | Mus<br>musculu<br>s              |
| 1 | 1.00 | 1 | 1 | 0 | 0      | 0 | 0 | -0.001 | t | 64682 | TKTDVALA                     | Mus<br>musculu<br>s              |
| 1 | 1.00 | 1 | 1 | 0 | 0      | 0 | 0 | -0.001 | t | 72503 | WGQGG                        | Mus<br>musculu<br>s              |
| 1 | 1.00 | 1 | 1 | 0 | 0      | 0 | 0 | -0.001 | t | 80063 | VDEDEDSD                     | Mus<br>musculu<br>s              |
| 1 | 1.00 | 1 | 1 | 0 | 0      | 0 | 0 | -0.001 | t | 97177 | AELPF                        | Mus<br>musculu<br>s              |
| 1 | 1.00 | 1 | 1 | 0 | 0      | 0 | 0 | -0.001 | t | 97231 | CNTKCQTP                     | Mus<br>musculu<br>s              |
| 1 | 1.00 | 1 | 1 | 0 | 0      | 0 | 0 | -0.001 | t | 74871 | YLPVGGLR<br>RIGG             | Mus<br>musculu<br>s              |
| 1 | 1.00 | 1 | 1 | 0 | 0      | 0 | 0 | -0.001 | t | 81130 | DLFHVNG<br>RDTMNIIV<br>DENKY | Aotus                            |
| 1 | 1.00 | 1 | 1 | 0 | 0      | 0 | 0 | -0.001 | t | 60596 | SQWNKPS<br>KPKTN             | Oryctola<br>gus<br>cuniculu<br>s |
| 1 | 1.00 | 1 | 1 | 0 | 0      | 0 | 0 | -0.001 | t | 63037 | TAVSPTTL<br>R                | Mus<br>musculu<br>s              |
| 1 | 1.00 | 1 | 1 | 0 | 0      | 0 | 0 | -0.001 | t | 61801 | STNSGINN                     | Mus<br>musculu<br>s              |
| 1 | 1.00 | 1 | 1 | 0 | 0      | 0 | 0 | -0.001 | t | 68969 | VIGHEITH<br>GFD              | Oryctola<br>gus<br>cuniculu<br>s |
| 1 | 1.00 | 1 | 1 | 0 | 0      | 0 | 0 | -0.001 | t | 65409 | TNRNPQ                       | Oryctola<br>gus<br>cuniculu<br>s |
| 1 | 1.00 | 1 | 1 | 0 | -0.003 | 0 | 0 | -0.001 | t | 65409 | TNRNPQ                       | Oryctola<br>gus<br>cuniculu<br>s |
| 1 | 1.00 | 1 | 1 | 0 | 0      | 0 | 0 | -0.001 | t | 72503 | WGQGG                        | Mus<br>musculu<br>s              |



|   |      |   |   |   |   |   |   |        |   |       |                              |                                  |
|---|------|---|---|---|---|---|---|--------|---|-------|------------------------------|----------------------------------|
| 1 | 1.00 | 1 | 1 | 0 | 0 | 0 | 0 | -0.001 | t | 72961 | WPQRVVT<br>KKGRTFL           | Mus<br>musculu<br>s              |
| 1 | 1.00 | 1 | 1 | 0 | 0 | 0 | 0 | -0.001 | t | 69462 | VLELAA                       | Mus<br>musculu<br>s              |
| 1 | 1.00 | 1 | 1 | 0 | 0 | 0 | 0 | -0.001 | t | 81131 | DLFHVNG<br>RDTMNNI<br>VDENKY | Aotus                            |
| 1 | 1.00 | 1 | 1 | 0 | 0 | 0 | 0 | -0.001 | t | 97484 | LVEETSFID<br>AGAP            | Oryctola<br>gus<br>cuniculu<br>s |
| 1 | 1.00 | 1 | 1 | 0 | 0 | 0 | 0 | -0.001 | t | 74488 | YKPLGALT<br>H                | Mus<br>musculu<br>s              |
| 1 | 1.00 | 1 | 1 | 0 | 0 | 0 | 0 | -0.001 | t | 61800 | STNS                         | Mus<br>musculu<br>s              |
| 1 | 1.00 | 1 | 1 | 0 | 0 | 0 | 0 | -0.001 | t | 97301 | FFWTILKP                     | Mus<br>musculu<br>s              |
| 1 | 1.00 | 1 | 1 | 0 | 0 | 0 | 0 | -0.001 | t | 68042 | VDPTGLEP<br>DDHLK            | Mus<br>musculu<br>s              |
| 1 | 1.00 | 1 | 1 | 0 | 0 | 0 | 0 | -0.001 | t | 65000 | TLPERVRP<br>PDDWAT           | Mus<br>musculu<br>s              |
| 1 | 1.00 | 1 | 1 | 0 | 0 | 0 | 0 | -0.001 | t | 65421 | TNSGINNS                     | Mus<br>musculu<br>s              |
| 1 | 1.00 | 1 | 1 | 0 | 0 | 0 | 0 | -0.001 | t | 79782 | DNDGPVA<br>AGEARPVP<br>EEYLQ | Mus<br>musculu<br>s              |
| 1 | 1.00 | 1 | 1 | 0 | 0 | 0 | 0 | -0.001 | t | 75441 | YPYDVDPDY<br>A               | Mus<br>musculu<br>s              |
| 1 | 1.00 | 1 | 1 | 0 | 0 | 0 | 0 | -0.001 | t | 80102 | YDDAASES<br>SDDDDIDA<br>LI   | Mus<br>musculu<br>s              |
| 1 | 1.00 | 1 | 1 | 0 | 0 | 0 | 0 | -0.001 | t | 39164 | LRPGPVSQ<br>PYHHWDT<br>DK    | Mus<br>musculu<br>s              |
| 1 | 1.00 | 1 | 1 | 0 | 0 | 0 | 0 | -0.001 | t | 49928 | PVPAPRRK<br>VGSDCGS          | Mus<br>musculu<br>s              |

|   |      |   |   |   |   |   |   |        |   |       |                              |                                  |
|---|------|---|---|---|---|---|---|--------|---|-------|------------------------------|----------------------------------|
| 1 | 1.00 | 1 | 1 | 0 | 0 | 0 | 0 | -0.001 | t | 40000 | LTKTDVAL<br>AD               | Mus<br>musculu<br>s              |
| 1 | 1.00 | 1 | 1 | 0 | 0 | 0 | 0 | -0.001 | t | 58916 | SKPKTNM<br>KHM               | Mus<br>musculu<br>s              |
| 1 | 1.00 | 1 | 1 | 0 | 0 | 0 | 0 | -0.001 | t | 40332 | LVFFAEDV                     | Mus<br>musculu<br>s              |
| 1 | 1.00 | 1 | 1 | 0 | 0 | 0 | 0 | -0.001 | t | 44227 | NIFSGFTPE<br>FLEQAF          | Homo<br>sapiens                  |
| 1 | 1.00 | 1 | 1 | 0 | 0 | 0 | 0 | -0.001 | t | 55115 | RPAPPKPT<br>PQP              | Mus<br>musculu<br>s              |
| 1 | 1.00 | 1 | 1 | 0 | 0 | 0 | 0 | -0.001 | t | 58038 | SGFTPEFLE<br>QAFQVD          | Homo<br>sapiens                  |
| 1 | 1.00 | 1 | 1 | 0 | 0 | 0 | 0 | -0.001 | t | 55193 | RPKPG                        | Gallus<br>gallus                 |
| 1 | 1.00 | 1 | 1 | 0 | 0 | 0 | 0 | -0.001 | t | 43227 | NANDPP                       | Mus<br>musculu<br>s              |
| 1 | 1.00 | 1 | 1 | 0 | 0 | 0 | 0 | -0.001 | t | 43993 | NGGVMKE<br>KD                | Oryctola<br>gus<br>cuniculu<br>s |
| 1 | 1.00 | 1 | 1 | 0 | 0 | 0 | 0 | -0.001 | t | 41826 | MKHM                         | Mus<br>musculu<br>s              |
| 1 | 1.00 | 1 | 1 | 0 | 0 | 0 | 0 | -0.001 | t | 40739 | LYDSYAYY<br>G                | Mus<br>musculu<br>s              |
| 1 | 1.00 | 1 | 1 | 0 | 0 | 0 | 0 | -0.001 | t | 55232 | RPMIHF                       | Mus<br>musculu<br>s              |
| 1 | 1.00 | 1 | 1 | 0 | 0 | 0 | 0 | -0.001 | t | 52825 | QVYYRPV<br>DQ                | Mus<br>musculu<br>s              |
| 1 | 1.00 | 1 | 1 | 0 | 0 | 0 | 0 | -0.001 | t | 52012 | QQEQQFK<br>RELRLNPQ          | Homo<br>sapiens                  |
| 1 | 1.00 | 1 | 1 | 0 | 0 | 0 | 0 | -0.001 | t | 56610 | RYPGQGS<br>PGGNRYP<br>PQG    | Mus<br>musculu<br>s              |
| 1 | 1.00 | 1 | 1 | 0 | 0 | 0 | 0 | -0.001 | t | 41430 | MERVVEQ<br>MCITQYQ<br>RESQAY | Mus<br>musculu<br>s              |

|   |      |   |   |   |   |   |   |        |   |       |                              |                                  |
|---|------|---|---|---|---|---|---|--------|---|-------|------------------------------|----------------------------------|
| 1 | 1.00 | 1 | 1 | 0 | 0 | 0 | 0 | -0.001 | t | 50637 | QELDCWH<br>YQHYCVTS<br>TKS   | MD                               |
| 1 | 1.00 | 1 | 1 | 0 | 0 | 0 | 0 | -0.001 | t | 55365 | RPVDQYS                      | Mus<br>musculu<br>s              |
| 1 | 1.00 | 1 | 1 | 0 | 0 | 0 | 0 | -0.001 | t | 41019 | MADPNRF<br>RG                | Mus<br>musculu<br>s              |
| 1 | 1.00 | 1 | 1 | 0 | 0 | 0 | 0 | -0.001 | t | 41019 | MADPNRF<br>RG                | Mus<br>musculu<br>s              |
| 1 | 1.00 | 1 | 1 | 0 | 0 | 0 | 0 | -0.001 | t | 45420 | NPNDPP                       | Mus<br>musculu<br>s              |
| 1 | 1.00 | 1 | 1 | 0 | 0 | 0 | 0 | -0.001 | t | 48690 | PNPNDP                       | Mus<br>musculu<br>s              |
| 1 | 1.00 | 1 | 1 | 0 | 0 | 0 | 0 | -0.001 | t | 44498 | NKGVNPD<br>E                 | Mus<br>musculu<br>s              |
| 1 | 1.00 | 1 | 1 | 0 | 0 | 0 | 0 | -0.001 | t | 37690 | LLPSRRGD<br>QLTL             | Oryctola<br>gus<br>cuniculu<br>s |
| 1 | 1.00 | 1 | 1 | 0 | 0 | 0 | 0 | -0.001 | t | 54393 | RKLWCHH<br>FC                | Mus<br>musculu<br>s              |
| 1 | 1.00 | 1 | 1 | 0 | 0 | 0 | 0 | -0.001 | t | 46899 | PAPRRKFQ<br>QVKRL            | Mus<br>musculu<br>s              |
| 1 | 1.00 | 1 | 1 | 0 | 0 | 0 | 0 | -0.001 | t | 53009 | QYNLAFSD<br>RQSAQ            | Mus<br>musculu<br>s              |
| 1 | 1.00 | 1 | 1 | 0 | 0 | 0 | 0 | -0.001 | t | 50846 | QGDRRCQ<br>SQLERANL          | Homo<br>sapiens                  |
| 1 | 1.00 | 1 | 1 | 0 | 0 | 0 | 0 | -0.001 | t | 55621 | RRKAHAG<br>NKKAEDLT<br>MDDLE | Oryctola<br>gus<br>cuniculu<br>s |
| 1 | 1.00 | 1 | 1 | 0 | 0 | 0 | 0 | -0.001 | t | 55621 | RRKAHAG<br>NKKAEDLT<br>MDDLE | Mus<br>musculu<br>s              |

|   |      |   |   |   |   |   |   |        |   |       |                              |                     |
|---|------|---|---|---|---|---|---|--------|---|-------|------------------------------|---------------------|
| 1 | 1.00 | 1 | 1 | 0 | 0 | 0 | 0 | -0.001 | t | 45252 | NNSTNSGI                     | Mus<br>musculu<br>s |
| 1 | 1.00 | 1 | 1 | 0 | 0 | 0 | 0 | -0.001 | t | 49967 | PVSLGGDV<br>PNS              | Mus<br>musculu<br>s |
| 1 | 1.00 | 1 | 1 | 0 | 0 | 0 | 0 | -0.001 | t | 57644 | SETFTNKL<br>KEKHTDLG<br>KEG  | Mus<br>musculu<br>s |
| 1 | 1.00 | 1 | 1 | 0 | 0 | 0 | 0 | -0.001 | t | 49961 | PVSGPFGP<br>LPSLAESA<br>VPAD | Mus<br>musculu<br>s |
| 1 | 1.00 | 1 | 1 | 0 | 0 | 0 | 0 | -0.001 | t | 53702 | RFFRDEKE<br>LQ               | Mus<br>musculu<br>s |
| 1 | 1.00 | 1 | 1 | 0 | 0 | 0 | 0 | -0.001 | t | 45202 | NNNSTNS<br>G                 | Mus<br>musculu<br>s |
| 1 | 1.00 | 1 | 1 | 0 | 0 | 0 | 0 | -0.001 | t | 43246 | NANPNAN<br>PNANPNA<br>NP     | Mus<br>musculu<br>s |
| 1 | 1.00 | 1 | 1 | 0 | 0 | 0 | 0 | -0.001 | t | 56599 | RYNLVFSG<br>DSDRICSN<br>RA   | Mus<br>musculu<br>s |
| 1 | 1.00 | 1 | 1 | 0 | 0 | 0 | 0 | -0.001 | t | 46026 | NSVGANA<br>PNADTIAS          | Mus<br>musculu<br>s |
| 1 | 1.00 | 1 | 1 | 0 | 0 | 0 | 0 | -0.001 | t | 20735 | GKYREDFQ<br>MDEGDPS          | Mus<br>musculu<br>s |
| 1 | 1.00 | 1 | 1 | 0 | 0 | 0 | 0 | -0.001 | t | 10801 | DWEDRYR<br>RE                | Mus<br>musculu<br>s |
| 1 | 1.00 | 1 | 1 | 0 | 0 | 0 | 0 | -0.001 | t | 18036 | FTPFYYQS<br>SRTR             | Mus<br>musculu<br>s |
| 1 | 1.00 | 1 | 1 | 0 | 0 | 0 | 0 | -0.001 | t | 13984 | ERESQAY                      | Mus<br>musculu<br>s |
| 1 | 1.00 | 1 | 1 | 0 | 0 | 0 | 0 | -0.001 | t | 31105 | KHFRETEV                     | Mus<br>musculu<br>s |

|   |      |   |   |   |   |   |   |        |   |       |                              |                                  |
|---|------|---|---|---|---|---|---|--------|---|-------|------------------------------|----------------------------------|
| 1 | 1.00 | 1 | 1 | 0 | 0 | 0 | 0 | -0.001 | t | 15529 | FEFPPPT<br>DE                | Oryctola<br>gus<br>cuniculu<br>s |
| 1 | 1.00 | 1 | 1 | 0 | 0 | 0 | 0 | -0.001 | t | 28085 | IPTGGIQR<br>GGRGPCQ<br>RQQRS | Capra<br>hircus                  |
| 1 | 1.00 | 1 | 1 | 0 | 0 | 0 | 0 | -0.001 | t | 20051 | GGTHSQW<br>NKP               | Mus<br>musculu<br>s              |
| 1 | 1.00 | 1 | 1 | 0 | 0 | 0 | 0 | -0.001 | t | 21867 | GQGGGTH<br>NQWNKP            | Oryctola<br>gus<br>cuniculu<br>s |
| 1 | 1.00 | 1 | 1 | 0 | 0 | 0 | 0 | -0.001 | t | 16043 | FGQIFRPD<br>NFVFGQS          | Mus<br>musculu<br>s              |
| 1 | 1.00 | 1 | 1 | 0 | 0 | 0 | 0 | -0.001 | t | 32865 | KPRPQPTP                     | Mus<br>musculu<br>s              |
| 1 | 1.00 | 1 | 1 | 0 | 0 | 0 | 0 | -0.001 | t | 14191 | ESKVQDII<br>DLIDH            | Mus<br>musculu<br>s              |
| 1 | 1.00 | 1 | 1 | 0 | 0 | 0 | 0 | -0.001 | t | 16551 | FLDLMRA<br>VA                | Mus<br>musculu<br>s              |
| 1 | 1.00 | 1 | 1 | 0 | 0 | 0 | 0 | -0.001 | t | 12632 | EKASVPGG<br>GDMGGM<br>DF     | Mus<br>musculu<br>s              |
| 1 | 1.00 | 1 | 1 | 0 | 0 | 0 | 0 | -0.001 | t | 10868 | DYEDRYR<br>E                 | Mus<br>musculu<br>s              |
| 1 | 1.00 | 1 | 1 | 0 | 0 | 0 | 0 | -0.001 | t | 10868 | DYEDRYR<br>E                 | Mus<br>musculu<br>s              |
| 1 | 1.00 | 1 | 1 | 0 | 0 | 0 | 0 | -0.001 | t | 22305 | GSDYEDRY<br>YRENMHR<br>YPNQ  | Mus<br>musculu<br>s              |
| 1 | 1.00 | 1 | 1 | 0 | 0 | 0 | 0 | -0.001 | t | 19722 | GGERRRPP<br>LGVREGR<br>GRT   | Oryctola<br>gus<br>cuniculu<br>s |
| 1 | 1.00 | 1 | 1 | 0 | 0 | 0 | 0 | -0.001 | t | 23465 | GYSLFQKE<br>MKTLNEG<br>TSGTA | Aotus<br>nancyma<br>ae           |
| 1 | 1.00 | 1 | 1 | 0 | 0 | 0 | 0 | -0.001 | t | 10868 | DYEDRYR<br>E                 | Mus<br>musculu<br>s              |

|   |      |   |   |   |        |   |   |        |   |       |                      |                       |
|---|------|---|---|---|--------|---|---|--------|---|-------|----------------------|-----------------------|
| 1 | 1.00 | 1 | 1 | 0 | 0      | 0 | 0 | -0.001 | t | 11819 | EENVEHDA             | Mus musculus          |
| 1 | 1.00 | 1 | 1 | 0 | 0      | 0 | 0 | -0.001 | t | 30716 | KFDWNTPD             | Mus musculus          |
| 1 | 1.00 | 1 | 1 | 0 | 0      | 0 | 0 | -0.001 | t | 11819 | EENVEHDA             | Mus musculus          |
| 1 | 1.00 | 1 | 1 | 0 | 0      | 0 | 0 | -0.001 | t | 14994 | EYEKWVKDPYQPTRAVSLD  | Mus musculus          |
| 1 | 1.00 | 1 | 1 | 0 | 0      | 0 | 0 | -0.001 | t | 10868 | DYEDRYRRE            | Mus musculus          |
| 1 | 1.00 | 1 | 1 | 0 | 0      | 0 | 0 | -0.001 | t | 35252 | LDPHAFHLL            | Mus musculus          |
| 1 | 1.00 | 1 | 1 | 0 | 0      | 0 | 0 | -0.001 | t | 22305 | GSDYEDRYRENMHRYPNQ   | Mus musculus          |
| 1 | 1.00 | 1 | 1 | 0 | 0      | 0 | 0 | -0.001 | t | 32848 | KPQGSPPASQKEAIRD     | Oryctolagus cuniculus |
| 1 | 1.00 | 1 | 1 | 0 | 0      | 0 | 0 | -0.001 | t | 11813 | EENVEENV             | Oryctolagus cuniculus |
| 1 | 1.00 | 1 | 1 | 0 | 0      | 0 | 0 | -0.001 | t | 20680 | GKSKRDAKNNAAKLAVDKLL | Mus musculus          |
| 1 | 1.00 | 1 | 1 | 0 | 0      | 0 | 0 | -0.001 | t | 10868 | DYEDRYRRE            | Mus musculus          |
| 1 | 1.00 | 1 | 1 | 0 | 0      | 0 | 0 | -0.001 | t | 11241 | ECFPWDRKL            | Mus musculus          |
| 1 | 1.00 | 1 | 1 | 0 | 0      | 0 | 0 | -0.001 | t | 21601 | GPEET                | Mus musculus          |
| 1 | 1.00 | 1 | 1 | 0 | -0.003 | 0 | 0 | -0.001 | t | 21602 | GPEETGPEETGPEET      | Oryctolagus cuniculus |

|   |      |   |   |   |   |   |   |        |   |       |                              |                                  |
|---|------|---|---|---|---|---|---|--------|---|-------|------------------------------|----------------------------------|
| 1 | 1.00 | 1 | 1 | 0 | 0 | 0 | 0 | -0.001 | t | 19868 | GGGWGQ<br>PHGGGW<br>GQPH     | Mus<br>musculu<br>s              |
| 1 | 1.00 | 1 | 1 | 0 | 0 | 0 | 0 | -0.001 | t | 33795 | KTNMKH<br>MAGA               | Mus<br>musculu<br>s              |
| 1 | 1.00 | 1 | 1 | 0 | 0 | 0 | 0 | -0.001 | t | 21602 | GPEETGPE<br>ETGPEET          | Oryctola<br>gus<br>cuniculu<br>s |
| 1 | 1.00 | 1 | 1 | 0 | 0 | 0 | 0 | -0.001 | t | 18833 | GAVVGGL<br>GGYML             | Mus<br>musculu<br>s              |
| 1 | 1.00 | 1 | 1 | 0 | 0 | 0 | 0 | -0.001 | t | 16387 | FKKDEIDM<br>SFETNKK          | Mus<br>musculu<br>s              |
| 1 | 1.00 | 1 | 1 | 0 | 0 | 0 | 0 | -0.001 | t | 11463 | EDVNGIRK<br>PK               | Mus<br>musculu<br>s              |
| 1 | 1.00 | 1 | 1 | 0 | 0 | 0 | 0 | -0.001 | t | 32657 | KPAPKPTP<br>PKPAPKPA<br>P    | Mus<br>musculu<br>s              |
| 1 | 1.00 | 1 | 1 | 0 | 0 | 0 | 0 | -0.001 | t | 33794 | KTNMKH<br>M                  | Mus<br>musculu<br>s              |
| 1 | 1.00 | 1 | 1 | 0 | 0 | 0 | 0 | -0.001 | t | 9524  | DNPASTT<br>NKDK              | Mus<br>musculu<br>s              |
| 1 | 1.00 | 1 | 1 | 0 | 0 | 0 | 0 | -0.001 | t | 5597  | AVVGGLG<br>GY                | Mus<br>musculu<br>s              |
| 1 | 1.00 | 1 | 1 | 0 | 0 | 0 | 0 | -0.001 | t | 6455  | CITQYERES<br>QAYY            | Mus<br>musculu<br>s              |
| 1 | 1.00 | 1 | 1 | 0 | 0 | 0 | 0 | -0.001 | t | 709   | ADLIAAQK<br>LASKP            | Mus<br>musculu<br>s              |
| 1 | 1.00 | 1 | 1 | 0 | 0 | 0 | 0 | -0.001 | t | 1433  | AGAGGGA<br>GGAGAGG<br>GAGGAG | Oryctola<br>gus<br>cuniculu<br>s |
| 1 | 1.00 | 1 | 1 | 0 | 0 | 0 | 0 | -0.001 | t | 9516  | DNNLVSG<br>P                 | Mus<br>musculu<br>s              |
| 1 | 1.00 | 1 | 1 | 0 | 0 | 0 | 0 | -0.001 | t | 8076  | DELKDQM<br>EED               | Mus<br>musculu<br>s              |
| 1 | 1.00 | 1 | 1 | 0 | 0 | 0 | 0 | -0.001 | t | 2894  | ALSRLVLR<br>RNALRRP          | Homo<br>sapiens                  |

|   |      |   |   |       |        |        |        |        |   |        |                              |                                  |
|---|------|---|---|-------|--------|--------|--------|--------|---|--------|------------------------------|----------------------------------|
| 1 | 1.00 | 1 | 1 | 0     | 0      | 0      | 0      | -0.001 | t | 9516   | DNNLVSG<br>P                 | Mus<br>musculu<br>s              |
| 1 | 1.00 | 1 | 1 | 0     | 0      | 0      | 0      | -0.001 | t | 8644   | DIFTNSRG<br>KRASKG           | Mus<br>musculu<br>s              |
| 1 | 1.00 | 1 | 1 | 0     | 0      | 0      | 0      | -0.001 | t | 5865   | AYLSPIDLN<br>QLAK            | Oryctola<br>gus<br>cuniculu<br>s |
| 1 | 1.00 | 1 | 1 | 0     | 0      | 0      | 0      | -0.001 | t | 7318   | CVTQYQKE<br>SQAYYD           | Oryctola<br>gus<br>cuniculu<br>s |
| 1 | 1.00 | 1 | 1 | 0     | 0      | 0      | 0      | -0.001 | t | 7491   | DAEFRHDS<br>GYEVHHQ<br>K     | Homo<br>sapiens                  |
| 1 | 1.00 | 1 | 1 | 0     | 0      | 0      | 0      | -0.001 | t | 6764   | CPFLPKPK<br>VASEAFM<br>STNKM | Mus<br>musculu<br>s              |
| 1 | 1.00 | 1 | 1 | 0     | 0      | 0      | 0      | -0.001 | t | 10227  | DSSAHGTP<br>STPA             | Mus<br>musculu<br>s              |
| 1 | 1.00 | 1 | 1 | 0     | 0      | -0.006 | 0      | 0.001  | t | 149681 | ELAEAKVL<br>ANRE             | Mus<br>musculu<br>s              |
| 1 | 1.00 | 1 | 1 | 0.02  | 0.022  | 0.02   | 0.017  | 0.017  | t | 106316 | CSGTTKLS<br>EEVK             | Homo<br>sapiens                  |
| 1 | 1.00 | 1 | 1 | -0.01 | -0.012 | -0.002 | -0.009 | -0.011 | t | 149299 | ELDKWKSL                     | Homo<br>sapiens                  |
| 1 | 1.00 | 1 | 1 | 0.05  | 0.05   | 0.039  | 0.047  | 0.05   | t | 42646  | MSRIAAG<br>DLESSVDD<br>PRSEE | Homo<br>sapiens                  |
| 1 | 1.00 | 1 | 1 | 0.01  | 0.01   | 0.01   | 0.01   | 0.01   | t | 122387 | GVGARLPE<br>QPPPFV           | Mus<br>musculu<br>s              |
| 1 | 1.00 | 1 | 1 | 0.03  | 0.033  | 0.029  | 0.03   | 0.03   | t | 133611 | IVSYLCDLA<br>PEAPPPTL<br>PP  | Mus<br>musculu<br>s              |
| 1 | 1.00 | 1 | 1 | -0.02 | -0.024 | -0.035 | -0.021 | -0.02  | t | 68813  | VGVIKSIAP<br>ASKNL           | Oryctola<br>gus<br>cuniculu<br>s |



|   |      |   |   |       |        |        |        |        |   |        |                              |                                  |
|---|------|---|---|-------|--------|--------|--------|--------|---|--------|------------------------------|----------------------------------|
| 1 | 1.00 | 1 | 1 | 0.01  | 0.01   | 0.01   | 0.01   | 0.008  | t | 135576 | LRYSTGTV<br>SG               | Oryctola<br>gus<br>cuniculu<br>s |
| 1 | 1.00 | 1 | 1 | 0.05  | 0.05   | 0.05   | 0.05   | 0.05   | t | 150998 | ILGNPECE<br>SLSTASS          | Homo<br>sapiens                  |
| 1 | 1.00 | 1 | 1 | 0.03  | 0.03   | 0.03   | 0.03   | 0.03   | t | 79254  | ICADDEE<br>WYSAMCA           | Mus<br>musculu<br>s              |
| 1 | 1.00 | 1 | 1 | 0.01  | 0.01   | 0.01   | 0.01   | 0.01   | t | 149088 | NQTQHSV                      | Sus<br>scrofa                    |
| 1 | 1.00 | 1 | 1 | 0.01  | 0.01   | 0.01   | 0.01   | 0.01   | t | 149078 | NITQEAF                      | Sus<br>scrofa                    |
| 1 | 1.00 | 1 | 1 | 0.01  | 0.01   | 0.01   | 0.01   | 0.01   | t | 140897 | RADAVKG<br>YLAGK             | Oryctola<br>gus<br>cuniculu<br>s |
| 1 | 1.00 | 1 | 1 | 0     | 0      | 0      | -0.003 | 0      | t | 24283  | HLPYIEQG<br>M                | Homo<br>sapiens                  |
| 1 | 1.00 | 1 | 1 | -0.01 | -0.01  | -0.01  | -0.01  | -0.01  | t | 115895 | PPFLQPEV<br>MG               | Homo<br>sapiens                  |
| 1 | 1.00 | 1 | 1 | -0.01 | -0.01  | -0.01  | -0.01  | -0.01  | t | 110584 | GAPGFPG<br>PRGPPGP<br>Q      | Mus<br>musculu<br>s              |
| 1 | 1.00 | 1 | 1 | -0.01 | -0.01  | -0.01  | -0.01  | -0.01  | t | 79674  | VPVRLAGV<br>GFESKIVD<br>GGCF | Homo<br>sapiens                  |
| 1 | 1.00 | 1 | 1 | -0.05 | -0.05  | -0.05  | -0.05  | -0.05  | t | 112142 | GQSPKLL                      | Homo<br>sapiens                  |
| 1 | 1.00 | 1 | 1 | -0.01 | -0.01  | -0.009 | -0.013 | -0.012 | t | 54079  | RHPHPHLS<br>FMAI             | Homo<br>sapiens                  |
| 1 | 1.00 | 1 | 1 | 0     | 0      | -0.017 | 0      | 0.003  | t | 56102  | RTLDQQYK<br>EVKRETDL<br>SHVQ | Mus<br>musculu<br>s              |
| 1 | 1.00 | 1 | 1 | 0.01  | 0.012  | -0.001 | 0.011  | 0.01   | t | 6777   | CPKDELRP<br>LEKVLESKT<br>RAI | Homo<br>sapiens                  |
| 1 | 1.00 | 1 | 1 | 0     | -0.004 | -0.001 | -0.001 | 0      | t | 1257   | AFASNRTF<br>DITVSGLG<br>TAPK | Oryctola<br>gus<br>cuniculu<br>s |
| 1 | 1.00 | 1 | 1 | 0     | 0      | 0      | 0      | 0      | t | 133531 | CDTLKPGE<br>C                | Mus<br>musculu<br>s              |
| 1 | 1.00 | 1 | 1 | -0.01 | -0.01  | -0.003 | -0.003 | -0.01  | t | 119477 | KKTKGLVT<br>T                | Homo<br>sapiens                  |

|   |      |   |   |       |        |        |        |        |   |        |                              |                                  |
|---|------|---|---|-------|--------|--------|--------|--------|---|--------|------------------------------|----------------------------------|
| 1 | 1.00 | 1 | 1 | -0.02 | -0.018 | -0.028 | -0.023 | -0.021 | t | 94573  | KRIPNKKP<br>GKKT             | Homo<br>sapiens                  |
| 1 | 1.00 | 1 | 1 | 0     | -0.004 | -0.007 | 0.003  | 0.002  | t | 98737  | DPIELINLC<br>TNALG           | Oryctola<br>gus<br>cuniculu<br>s |
| 1 | 1.00 | 1 | 1 | 0.04  | 0.04   | 0.042  | 0.04   | 0.041  | t | 95008  | EDVFQNG<br>FTAW              | Mus<br>musculu<br>s              |
| 1 | 1.00 | 1 | 1 | 0     | 0      | 0      | 0      | 0      | t | 132241 | DWRKNID                      | Mus<br>musculu<br>s              |
| 1 | 1.00 | 1 | 1 | 0     | 0.003  | 0      | 0      | 0      | t | 47689  | PGKKTTTK<br>PTKK             | Mus<br>musculu<br>s              |
| 1 | 1.00 | 1 | 1 | 0     | 0      | 0      | 0      | 0      | t | 36427  | LHSTSSDG<br>N                | Homo<br>sapiens                  |
| 1 | 1.00 | 1 | 1 | 0.01  | 0.004  | 0.01   | 0.01   | 0.01   | t | 123654 | QETPATKK                     | Oryctola<br>gus<br>cuniculu<br>s |
| 1 | 1.00 | 1 | 1 | 0.03  | 0.03   | 0.042  | 0.036  | 0.03   | t | 53145  | RALEDGIN<br>FA               | Homo<br>sapiens                  |
| 1 | 1.00 | 1 | 1 | 0     | 0      | 0      | 0      | 0      | t | 48596  | PNANP                        | Mus<br>musculu<br>s              |
| 1 | 1.00 | 1 | 1 | 0     | -0.003 | -0.001 | 0      | -0.001 | t | 9526   | DNPASTT<br>NKDKL             | Oryctola<br>gus<br>cuniculu<br>s |
| 1 | 1.00 | 1 | 1 | 0.01  | 0.012  | 0.008  | 0.011  | 0.01   | t | 53355  | RDGQLTIK<br>AERTEQKD<br>FDGR | Homo<br>sapiens                  |
| 1 | 1.00 | 1 | 1 | 0.01  | 0.014  | 0.008  | 0.011  | 0.01   | t | 53355  | RDGQLTIK<br>AERTEQKD<br>FDGR | Homo<br>sapiens                  |
| 1 | 1.00 | 1 | 1 | 0.01  | 0.008  | 0.002  | 0.009  | 0.01   | t | 12415  | EIDGPAGQ<br>AEPDRAH<br>YNIVT | Mus<br>musculu<br>s              |
| 1 | 1.00 | 1 | 1 | 0.02  | 0.02   | 0.02   | 0.02   | 0.02   | t | 142304 | SVTLVEAY<br>TDVFDDT<br>QVEMI | Felis<br>catus                   |

|   |      |   |   |       |       |        |        |        |   |        |                              |                                  |
|---|------|---|---|-------|-------|--------|--------|--------|---|--------|------------------------------|----------------------------------|
| 1 | 1.00 | 1 | 1 | 0.02  | 0.02  | 0.02   | 0.02   | 0.02   | t | 151058 | STASSWSY<br>IVETPSS          | Homo<br>sapiens                  |
| 1 | 1.00 | 1 | 1 | 0.02  | 0.02  | 0.02   | 0.02   | 0.02   | t | 118762 | CYGSFAKP<br>TN               | Mus<br>musculu<br>s              |
| 1 | 1.00 | 1 | 1 | 0.02  | 0.02  | 0.02   | 0.02   | 0.02   | t | 118762 | CYGSFAKP<br>TN               | Mus<br>musculu<br>s              |
| 1 | 1.00 | 1 | 1 | 0.02  | 0.02  | 0.02   | 0.02   | 0.02   | t | 118762 | CYGSFAKP<br>TN               | Mus<br>musculu<br>s              |
| 1 | 1.00 | 1 | 1 | 0.02  | 0.02  | 0.02   | 0.02   | 0.02   | t | 112387 | VLYSSDH                      | Homo<br>sapiens                  |
| 1 | 1.00 | 1 | 1 | 0.02  | 0.02  | 0.02   | 0.02   | 0.02   | t | 41332  | MEECGSH<br>LPYIEQGM<br>QLAEQ | Homo<br>sapiens                  |
| 1 | 1.00 | 1 | 1 | 0     | 0     | 0      | 0      | 0      | t | 144665 | GREGYP<br>A DGGITCFL<br>TAA  | Oryctola<br>gus<br>cuniculu<br>s |
| 1 | 1.00 | 1 | 1 | 0     | 0.002 | 0      | 0.003  | 0      | t | 32984  | KQGGENF<br>AYLTAYQA          | Homo<br>sapiens                  |
| 1 | 1.00 | 1 | 1 | 0     | 0     | 0      | 0      | -0.001 | t | 109348 | IPVDL                        | Mus<br>musculu<br>s              |
| 1 | 1.00 | 1 | 1 | 0     | 0     | -0.003 | -0.004 | 0      | t | 32809  | KPNNDFH<br>FEVFN             | Homo<br>sapiens                  |
| 1 | 1.00 | 1 | 1 | 0.02  | 0.02  | 0.02   | 0.02   | 0.02   | t | 135588 | QESYSSKK<br>LCT              | Oryctola<br>gus<br>cuniculu<br>s |
| 1 | 1.00 | 1 | 1 | -0.01 | -0.02 | -0.01  | -0.009 | -0.01  | t | 55666  | RRPEGRT<br>W                 | Homo<br>sapiens                  |
| 1 | 1.00 | 1 | 1 | 0     | 0     | 0      | 0      | -0.002 | t | 153379 | EQEIFTNIT<br>DRV             | Mus<br>musculu<br>s              |
| 1 | 1.00 | 1 | 1 | -0.01 | -0.01 | -0.02  | -0.01  | -0.01  | t | 50528  | QDVLDKN<br>HVADIDK           | Homo<br>sapiens                  |
| 1 | 1.00 | 1 | 1 | -0.01 | -0.01 | -0.01  | -0.01  | -0.01  | t | 30473  | KEKLQKTY                     | Homo<br>sapiens                  |

|   |      |   |   |       |        |        |        |        |   |        |                             |                          |
|---|------|---|---|-------|--------|--------|--------|--------|---|--------|-----------------------------|--------------------------|
| 1 | 1.00 | 1 | 1 | -0.01 | -0.008 | -0.01  | -0.009 | -0.012 | t | 75222  | YNSSRSYW<br>T               | Homo<br>sapiens          |
| 1 | 1.00 | 1 | 1 | 0.04  | 0.042  | 0.048  | 0.037  | 0.038  | t | 67323  | TYDNE                       | Homo<br>sapiens          |
| 1 | 1.00 | 1 | 1 | 0.01  | 0.01   | 0.003  | 0.01   | 0.011  | t | 73634  | YEDRY                       | Mus<br>musculu<br>s      |
| 1 | 1.00 | 1 | 1 | 0.01  | 0.013  | 0.01   | 0.01   | 0.008  | t | 156905 | KPGDPRQ                     | Mus<br>musculu<br>s      |
| 1 | 1.00 | 1 | 1 | 0.01  | 0.01   | 0.01   | 0.01   | 0.01   | t | 19275  | GEGAVQ<br>WMNRLIA<br>FASRGN | Homo<br>sapiens          |
| 1 | 1.00 | 1 | 1 | 0.01  | 0.012  | 0.008  | 0.013  | 0.012  | t | 55581  | RRGPRLGV<br>RATRKTS         | Homo<br>sapiens          |
| 1 | 1.00 | 1 | 1 | 0     | 0      | -0.005 | 0      | 0.002  | t | 26374  | IHFGSD                      | Mus<br>musculu<br>s      |
| 1 | 1.00 | 1 | 1 | 0.02  | 0.022  | 0.019  | 0.023  | 0.021  | t | 1497   | AGEPYVIE<br>QGMMDP<br>AK    | Homo<br>sapiens          |
| 1 | 1.00 | 1 | 1 | 0.03  | 0.032  | 0.03   | 0.037  | 0.032  | t | 107345 | EQRRAA                      | Homo<br>sapiens          |
| 1 | 1.00 | 1 | 1 | 0.02  | 0.02   | 0.02   | 0.024  | 0.02   | t | 135895 | ALLRCIPAL<br>DSLTPANE<br>DC | Homo<br>sapiens          |
| 1 | 1.00 | 1 | 1 | 0.02  | 0.024  | 0.013  | 0.027  | 0.021  | t | 139496 | ESSRDGSR<br>HPRSHD          | Homo<br>sapiens          |
| 1 | 1.00 | 1 | 1 | 0.03  | 0.03   | 0.03   | 0.03   | 0.03   | t | 111141 | CAKVVQA<br>DC               | Homo<br>sapiens          |
| 1 | 1.00 | 1 | 1 | 0.01  | 0.01   | 0.01   | 0.01   | 0.01   | t | 153352 | ACVLPWS<br>HVCGGGS          | Mus<br>musculu<br>s      |
| 1 | 1.00 | 1 | 1 | 0.01  | 0.01   | 0.01   | 0.01   | 0.01   | t | 149107 | SLAPRFPW<br>LNPLDGW         | Rattus<br>norvegic<br>us |
| 1 | 1.00 | 1 | 1 | 0.01  | 0.01   | 0.01   | 0.01   | 0.01   | t | 158290 | SQQAPAV<br>PPLPQ            | Canis<br>lupus           |

|   |      |   |   |       |       |       |       |        |   |        |                        |                                  |
|---|------|---|---|-------|-------|-------|-------|--------|---|--------|------------------------|----------------------------------|
| 1 | 1.00 | 1 | 1 | 0.01  | 0.01  | 0.01  | 0.01  | 0.01   | t | 120181 | RRATQLA<br>HLV         | Oryctola<br>gus<br>cuniculu<br>s |
| 1 | 1.00 | 1 | 1 | 0.01  | 0.01  | 0.01  | 0.01  | 0.01   | t | 120181 | RRATQLA<br>HLV         | Mus<br>musculu<br>s              |
| 1 | 1.00 | 1 | 1 | 0.01  | 0.013 | 0.01  | 0.01  | 0.01   | t | 120181 | RRATQLA<br>HLV         | Mus<br>musculu<br>s              |
| 1 | 1.00 | 1 | 1 | 0.01  | 0.007 | 0.01  | 0.01  | 0.01   | t | 120181 | RRATQLA<br>HLV         | Oryctola<br>gus<br>cuniculu<br>s |
| 1 | 1.00 | 1 | 1 | -0.01 | -0.01 | -0.01 | -0.01 | -0.01  | t | 157127 | CFNLFLNS<br>QEKHY      | Homo<br>sapiens                  |
| 1 | 1.00 | 1 | 1 | -0.01 | -0.01 | -0.01 | -0.01 | -0.01  | t | 113774 | QQGQQP<br>GQGQPGY<br>Y | Homo<br>sapiens                  |
| 1 | 1.00 | 1 | 1 | -0.01 | -0.01 | -0.01 | -0.01 | -0.01  | t | 112309 | SGFSLTT                | Homo<br>sapiens                  |
| 1 | 1.00 | 1 | 1 | -0.03 | -0.03 | -0.03 | -0.03 | -0.03  | t | 115442 | QKVAGTW<br>YSL         | Homo<br>sapiens                  |
| 1 | 1.00 | 1 | 1 | 0.01  | 0.01  | 0.01  | 0.01  | 0.009  | t | 133528 | CADQKPG<br>EC          | Mus<br>musculu<br>s              |
| 1 | 1.00 | 1 | 1 | 0     | 0     | 0     | 0     | -0.001 | t | 144820 | YLEDWIKY<br>NNQK       | Mus<br>musculu<br>s              |
| 1 | 1.00 | 1 | 1 | 0     | 0     | 0     | 0     | -0.001 | t | 105127 | DAEFRHD                | Mus<br>musculu<br>s              |
| 1 | 1.00 | 1 | 1 | 0     | 0     | 0     | 0     | -0.001 | t | 74036  | YGLFHKEK<br>MLL        | Mus<br>musculu<br>s              |
| 1 | 1.00 | 1 | 1 | 0     | 0     | 0     | 0     | -0.001 | t | 74009  | YGGPANK<br>KNAG        | Mus<br>musculu<br>s              |
| 1 | 1.00 | 1 | 1 | 0     | 0     | 0     | 0     | -0.001 | t | 75791  | YSLFQKEK<br>MVL        | Mus<br>musculu<br>s              |
| 1 | 1.00 | 1 | 1 | 0     | 0     | 0     | 0     | -0.001 | t | 75791  | YSLFQKEK<br>MVL        | Mus<br>musculu<br>s              |

|   |      |   |   |       |        |        |        |        |   |        |                              |                                  |
|---|------|---|---|-------|--------|--------|--------|--------|---|--------|------------------------------|----------------------------------|
| 1 | 1.00 | 1 | 1 | 0     | 0      | 0      | 0      | -0.001 | t | 14435  | ETIYNTTLK<br>Y               | Homo<br>sapiens                  |
| 1 | 1.00 | 1 | 1 | 0     | 0      | 0      | 0      | -0.001 | t | 10037  | DRPVPY                       | Mus<br>musculu<br>s              |
| 1 | 1.00 | 1 | 1 | 0     | 0      | 0      | 0      | -0.001 | t | 8133   | DEQFIPK                      | Mus<br>musculu<br>s              |
| 1 | 1.00 | 1 | 1 | 0.03  | 0.032  | 0.033  | 0.037  | 0.029  | t | 125607 | YVSIDVTL<br>QQLESHSF<br>YNLS | Homo<br>sapiens                  |
| 1 | 1.00 | 1 | 1 | -0.08 | -0.076 | -0.08  | -0.073 | -0.081 | t | 134147 | LPKGVKHL<br>KDFPILPGE<br>IFK | Homo<br>sapiens                  |
| 1 | 1.00 | 1 | 1 | -0.06 | -0.06  | -0.06  | -0.06  | -0.06  | t | 117752 | APPPGMR<br>PPM               | Mus<br>musculu<br>s              |
| 1 | 1.00 | 1 | 1 | 0.02  | 0.02   | 0.021  | 0.02   | 0.022  | t | 68041  | VDPQ                         | Mus<br>musculu<br>s              |
| 1 | 1.00 | 1 | 1 | -0.01 | -0.006 | -0.013 | -0.007 | -0.01  | t | 124068 | ELMALHT<br>GQSLEQIE<br>R     | Homo<br>sapiens                  |
| 1 | 1.00 | 1 | 1 | 0.07  | 0.067  | 0.066  | 0.07   | 0.071  | t | 58074  | SGHNYINE<br>IEATSSY          | Oryctola<br>gus<br>cuniculu<br>s |
| 1 | 1.00 | 1 | 1 | 0.01  | 0.012  | 0.01   | 0.013  | 0.011  | t | 131628 | RGYDSYA                      | Homo<br>sapiens                  |
| 1 | 1.00 | 1 | 1 | 0.02  | 0.02   | 0.02   | 0.02   | 0.02   | t | 109252 | GSLPQKSQ<br>RSQDENP<br>V     | Rattus<br>norvegic<br>us         |
| 1 | 1.00 | 1 | 1 | 0.02  | 0.022  | 0.02   | 0.017  | 0.018  | t | 115760 | GLNYYQQ<br>KPV               | Homo<br>sapiens                  |
| 1 | 1.00 | 1 | 1 | 0.02  | 0.024  | 0.027  | 0.021  | 0.02   | t | 50215  | QAAPYIEQ<br>A                | Homo<br>sapiens                  |
| 1 | 1.00 | 1 | 1 | 0     | 0.003  | 0      | 0      | 0      | t | 117240 | TLKNREP<br>VQLETLSI          | Mus<br>musculu<br>s              |

|   |      |   |   |       |        |        |        |        |   |        |                               |                                  |
|---|------|---|---|-------|--------|--------|--------|--------|---|--------|-------------------------------|----------------------------------|
| 1 | 1.00 | 1 | 1 | -0.01 | -0.022 | -0.006 | -0.01  | -0.01  | t | 110257 | GNPGADG<br>I                  | Macaca<br>mulatta                |
| 1 | 1.00 | 1 | 1 | 0     | 0      | 0      | 0.001  | 0      | t | 34243  | KVVQLPKI<br>SKNALKAN<br>G     | Homo<br>sapiens                  |
| 1 | 1.00 | 1 | 1 | 0.02  | 0.02   | 0.02   | 0.02   | 0.02   | t | 926    | AEGEFKTR<br>RNTNYQD<br>PAK    | Homo<br>sapiens                  |
| 1 | 1.00 | 1 | 1 | 0.02  | 0.02   | 0.02   | 0.02   | 0.02   | t | 926    | AEGEFKTR<br>RNTNYQD<br>PAK    | Homo<br>sapiens                  |
| 1 | 1.00 | 1 | 1 | 0     | 0      | 0      | 0      | 0      | t | 70521  | VPYVKRVK                      | Homo<br>sapiens                  |
| 1 | 1.00 | 1 | 1 | 0     | 0      | 0      | 0      | 0      | t | 94441  | CCHPAC                        | Capra<br>hircus                  |
| 1 | 1.00 | 1 | 1 | -0.04 | -0.038 | -0.04  | -0.039 | -0.04  | t | 43179  | NAIRMISD<br>QR                | Homo<br>sapiens                  |
| 1 | 1.00 | 1 | 1 | 0.02  | 0.02   | 0.03   | 0.02   | 0.018  | t | 66759  | TTPDRQA<br>AC                 | Oryctola<br>gus<br>cuniculu<br>s |
| 1 | 1.00 | 1 | 1 | 0.04  | 0.033  | 0.035  | 0.047  | 0.041  | t | 55187  | RPKHPIKH<br>QGLPQEV<br>L NENL | Homo<br>sapiens                  |
| 1 | 1.00 | 1 | 1 | -0.02 | -0.018 | -0.021 | -0.013 | -0.017 | t | 48751  | PPATVYRY<br>DSRPPE            | Homo<br>sapiens                  |
| 1 | 1.00 | 1 | 1 | 0.06  | 0.06   | 0.046  | 0.06   | 0.067  | t | 952    | AEGQLG                        | Mus<br>musculu<br>s              |
| 1 | 1.00 | 1 | 1 | 0.01  | 0.01   | 0.01   | 0.01   | 0.01   | t | 70389  | VPNLRGDL<br>QVLAQKV<br>A      | Cavia<br>porcellu<br>s           |
| 1 | 1.00 | 1 | 1 | 0.01  | 0.01   | 0.01   | 0.01   | 0.01   | t | 70389  | VPNLRGDL<br>QVLAQKV<br>A      | Cavia<br>porcellu<br>s           |
| 1 | 1.00 | 1 | 1 | -0.01 | -0.009 | -0.007 | -0.011 | -0.012 | t | 49393  | PSGYCGRE<br>CGIKKGS           | Equus<br>caballus                |
| 1 | 1.00 | 1 | 1 | 0.06  | 0.06   | 0.06   | 0.06   | 0.06   | t | 135786 | VNSTELET                      | Homo<br>sapiens                  |

|   |      |   |   |       |        |        |       |       |   |        |                              |                                  |
|---|------|---|---|-------|--------|--------|-------|-------|---|--------|------------------------------|----------------------------------|
| 1 | 1.00 | 1 | 1 | 0.04  | 0.04   | 0.04   | 0.04  | 0.04  | t | 139612 | SRGSESGIF<br>TNTKES          | Homo<br>sapiens                  |
| 1 | 1.00 | 1 | 1 | 0.04  | 0.04   | 0.04   | 0.04  | 0.04  | t | 115235 | EQQQTED<br>ELQDKIHP<br>FAQTQ | Homo<br>sapiens                  |
| 1 | 1.00 | 1 | 1 | 0     | -0.002 | 0      | 0     | 0     | t | 115611 | GSLPQKA<br>QRPQDEN           | Oryctola<br>gus<br>cuniculu<br>s |
| 1 | 1.00 | 1 | 1 | 0     | -0.002 | 0      | 0     | 0     | t | 115611 | GSLPQKA<br>QRPQDEN           | Oryctola<br>gus<br>cuniculu<br>s |
| 1 | 1.00 | 1 | 1 | 0     | -0.012 | 0      | 0     | 0     | t | 115611 | GSLPQKA<br>QRPQDEN           | Macaca<br>mulatta                |
| 1 | 1.00 | 1 | 1 | 0.02  | 0.02   | 0.02   | 0.02  | 0.02  | t | 156424 | QQEEGRQ<br>QEQQQG<br>QQ      | Homo<br>sapiens                  |
| 1 | 1.00 | 1 | 1 | 0.02  | 0.02   | 0.02   | 0.02  | 0.02  | t | 79545  | FGGDADR                      | Oryctola<br>gus<br>cuniculu<br>s |
| 1 | 1.00 | 1 | 1 | 0.02  | 0.02   | 0.02   | 0.02  | 0.02  | t | 86716  | NFNSNNY<br>TYD               | Homo<br>sapiens                  |
| 1 | 1.00 | 1 | 1 | 0     | 0.002  | 0.003  | 0.001 | 0.002 | t | 64697  | TKVTLDGR<br>PL               | Homo<br>sapiens                  |
| 1 | 1.00 | 1 | 1 | 0     | 0      | 0      | 0     | 0     | t | 137557 | QNFAVVK<br>RAREERFE          | Homo<br>sapiens                  |
| 1 | 1.00 | 1 | 1 | 0     | 0      | 0      | 0     | 0     | t | 6228   | CFIRPAGF<br>CDGYCKT          | Equus<br>caballus                |
| 1 | 1.00 | 1 | 1 | 0.02  | 0.02   | 0.02   | 0.02  | 0.022 | t | 4330   | ASARGDLA<br>HLTTT            | Mus<br>musculu<br>s              |
| 1 | 1.00 | 1 | 1 | -0.06 | -0.063 | -0.065 | -0.06 | -0.06 | t | 132846 | KAKRLHLS<br>PVRLAE           | Oryctola<br>gus<br>cuniculu<br>s |
| 1 | 1.00 | 1 | 1 | 0.02  | 0.018  | 0.015  | 0.017 | 0.019 | t | 134075 | GWGQGG<br>THSQWN             | Mus<br>musculu<br>s              |



|   |      |   |   |       |        |        |        |        |   |        |                      |                          |
|---|------|---|---|-------|--------|--------|--------|--------|---|--------|----------------------|--------------------------|
| 1 | 1.00 | 1 | 1 | 0     | 0.004  | -0.005 | 0      | 0      | t | 144364 | ITDAVITVP<br>AYFND   | Capra<br>hircus          |
| 1 | 1.00 | 1 | 1 | 0     | -0.004 | -0.005 | 0      | 0      | t | 144364 | ITDAVITVP<br>AYFND   | Bos<br>taurus            |
| 1 | 1.00 | 1 | 1 | -0.01 | -0.01  | -0.012 | -0.01  | -0.011 | t | 122733 | DSKPTIISR<br>AN      | Rattus<br>norvegicus     |
| 1 | 1.00 | 1 | 1 | 0.06  | 0.057  | 0.061  | 0.06   | 0.061  | t | 119220 | ISCAKDGG<br>IPEQEYSC | Oryctolagus<br>cuniculus |
| 1 | 1.00 | 1 | 1 | -0.03 | -0.03  | -0.03  | -0.03  | -0.03  | t | 22716  | GTIVIR               | Homo<br>sapiens          |
| 1 | 1.00 | 1 | 1 | 0.04  | 0.042  | 0.041  | 0.041  | 0.04   | t | 65428  | TNSKGQ               | Homo<br>sapiens          |
| 1 | 1.00 | 1 | 1 | -0.01 | -0.012 | -0.01  | -0.011 | -0.012 | t | 150978 | EKNVTVTH<br>SVNLLED  | Mus<br>musculus          |
| 1 | 1.00 | 1 | 1 | 0     | -0.002 | 0      | 0.001  | 0      | t | 50180  | PYVEPTAP<br>QVL      | Mus<br>musculus          |
| 1 | 1.00 | 1 | 1 | 0.01  | 0.013  | 0.009  | 0.01   | 0.012  | t | 141560 | SDEALPPG<br>SPR      | Mus<br>musculus          |
| 1 | 1.00 | 1 | 1 | -0.01 | -0.01  | -0.01  | -0.01  | -0.01  | t | 69175  | VKAETRLN             | Mus<br>musculus          |
| 1 | 1.00 | 1 | 1 | -0.05 | -0.048 | -0.05  | -0.043 | -0.048 | t | 145149 | DRQHLPLI<br>K        | Homo<br>sapiens          |
| 1 | 1.00 | 1 | 1 | 0     | -0.002 | 0      | -0.001 | -0.001 | t | 11872  | EESDDDM<br>GGLFD     | Mus<br>musculus          |
| 1 | 1.00 | 1 | 1 | -0.01 | -0.006 | -0.001 | -0.007 | -0.01  | t | 10149  | DSITWQL<br>QAAVLHV   | Homo<br>sapiens          |
| 1 | 1.00 | 1 | 1 | 0.07  | 0.07   | 0.07   | 0.07   | 0.07   | t | 79032  | NST                  | Mus<br>musculus          |
| 1 | 1.00 | 1 | 1 | -0.02 | -0.018 | -0.015 | -0.02  | -0.023 | t | 117591 | NTHLKAVK<br>MTLKN    | Homo<br>sapiens          |

|   |      |   |   |       |        |        |        |       |   |        |                              |                                  |
|---|------|---|---|-------|--------|--------|--------|-------|---|--------|------------------------------|----------------------------------|
| 1 | 1.00 | 1 | 1 | 0.01  | 0.01   | 0.01   | 0.01   | 0.01  | t | 153828 | ERAEERAE<br>TGESKI           | Homo<br>sapiens                  |
| 1 | 1.00 | 1 | 1 | 0.01  | 0.01   | 0.01   | 0.01   | 0.01  | t | 108860 | DGVNH                        | Mus<br>musculu<br>s              |
| 1 | 1.00 | 1 | 1 | 0.01  | 0.012  | 0.01   | 0.01   | 0.01  | t | 32115  | KLQPGDD<br>P                 | Anas<br>platyrhy<br>nchos        |
| 1 | 1.00 | 1 | 1 | -0.01 | -0.01  | -0.01  | -0.01  | -0.01 | t | 127818 | SDFGKFV                      | Homo<br>sapiens                  |
| 1 | 1.00 | 1 | 1 | -0.01 | -0.01  | -0.01  | -0.01  | -0.01 | t | 12625  | EKAFREL                      | Oryctola<br>gus<br>cuniculu<br>s |
| 1 | 1.00 | 1 | 1 | 0.01  | 0.013  | 0.005  | 0.01   | 0.01  | t | 134199 | PVQCSR<br>D<br>VVICPD<br>TS  | Mus<br>musculu<br>s              |
| 1 | 1.00 | 1 | 1 | 0.01  | 0.013  | 0.005  | 0.01   | 0.01  | t | 134199 | PVQCSR<br>D<br>VVICPD<br>TS  | Mus<br>musculu<br>s              |
| 1 | 1.00 | 1 | 1 | 0     | 0.003  | -0.007 | 0      | 0.002 | t | 51866  | QPKSAE                       | Mus<br>musculu<br>s              |
| 1 | 1.00 | 1 | 1 | 0.01  | 0.014  | 0.01   | 0.011  | 0.01  | t | 137967 | RLTLIANG<br>YRDV             | Homo<br>sapiens                  |
| 1 | 1.00 | 1 | 1 | 0.01  | 0.01   | 0.01   | 0.01   | 0.01  | t | 130780 | EAEDYDD<br>DLTDSE            | Homo<br>sapiens                  |
| 1 | 1.00 | 1 | 1 | -0.01 | -0.012 | -0.01  | -0.009 | -0.01 | t | 149442 | QQYPSGQ<br>GFF               | Mus<br>musculu<br>s              |
| 1 | 1.00 | 1 | 1 | 0.02  | 0.018  | 0.027  | 0.017  | 0.018 | t | 135939 | IPVLDENG<br>LFAP             | Mus<br>musculu<br>s              |
| 1 | 1.00 | 1 | 1 | 0.01  | 0.014  | 0.01   | 0.01   | 0.007 | t | 70385  | VPNLRGDI<br>QVLAQKV<br>ARTLP | Cavia<br>porcellu<br>s           |
| 1 | 1.00 | 1 | 1 | -0.03 | -0.03  | -0.03  | -0.03  | -0.03 | t | 156936 | PMPRFF                       | Gallus<br>gallus                 |
| 1 | 1.00 | 1 | 1 | 0.02  | 0.022  | 0.016  | 0.017  | 0.02  | t | 52106  | QQPQQSF<br>PQQ               | Homo<br>sapiens                  |

|   |      |   |   |       |        |        |        |        |   |        |                              |                       |
|---|------|---|---|-------|--------|--------|--------|--------|---|--------|------------------------------|-----------------------|
| 1 | 1.00 | 1 | 1 | -0.01 | -0.01  | -0.01  | -0.01  | -0.01  | t | 105651 | AEFRHDS                      | Mus musculus          |
| 1 | 1.00 | 1 | 1 | 0.01  | 0.006  | 0.005  | 0.011  | 0.011  | t | 133775 | AETNRAPFDLAEAE               | Oryctolagus cuniculus |
| 1 | 1.00 | 1 | 1 | 0     | 0.011  | 0      | 0      | -0.002 | t | 156896 | KHTSLAS                      | Gallus gallus         |
| 1 | 1.00 | 1 | 1 | 0.03  | 0.03   | 0.03   | 0.03   | 0.03   | t | 139809 | LPLTPRS                      | Ovis aries            |
| 1 | 1.00 | 1 | 1 | 0.03  | 0.03   | 0.03   | 0.03   | 0.03   | t | 122254 | AGETKPSSSLSIGSIISKSP         | Homo sapiens          |
| 1 | 1.00 | 1 | 1 | 0.03  | 0.03   | 0.03   | 0.03   | 0.03   | t | 122254 | AGETKPSSSLSIGSIISKSP         | Homo sapiens          |
| 1 | 1.00 | 1 | 1 | 0.03  | 0.03   | 0.03   | 0.03   | 0.03   | t | 131769 | YDSYAIA                      | Mus musculus          |
| 1 | 1.00 | 1 | 1 | 0.01  | 0.01   | 0.01   | 0.01   | 0.01   | t | 47120  | PDKEILYEA<br>FDEMEEC<br>ASKA | Homo sapiens          |
| 1 | 1.00 | 1 | 1 | -0.01 | -0.01  | -0.01  | -0.01  | -0.01  | t | 115177 | ALINNQFL<br>PYPYYAKP<br>AAVR | Homo sapiens          |
| 1 | 1.00 | 1 | 1 | -0.04 | -0.04  | -0.055 | -0.04  | -0.038 | t | 9657   | DPKHVCV<br>DTRDIPKN<br>AGCFR | Mus musculus          |
| 1 | 1.00 | 1 | 1 | 0     | 0      | 0      | 0.002  | 0      | t | 108125 | SHQESTRG<br>RSRGRSGR<br>SGS  | Homo sapiens          |
| 1 | 1.00 | 1 | 1 | 0     | 0      | 0      | 0.002  | 0      | t | 55671  | RRPFNIGI<br>NNQQ             | Homo sapiens          |
| 1 | 1.00 | 1 | 1 | 0     | 0      | 0      | 0      | 0      | t | 111831 | TISRTGI                      | Homo sapiens          |
| 1 | 1.00 | 1 | 1 | 0.03  | 0.026  | 0.042  | 0.03   | 0.028  | t | 18766  | GASEDVRK<br>QP               | Oryctolagus cuniculus |
| 1 | 1.00 | 1 | 1 | -0.04 | -0.044 | -0.049 | -0.043 | -0.04  | t | 113907 | TAPRPRVGLY                   | Oryctolagus cuniculus |
| 1 | 1.00 | 1 | 1 | 0.05  | 0.05   | 0.048  | 0.046  | 0.05   | t | 118563 | PVTTPEEIA<br>QVAT            | Homo sapiens          |

|   |      |   |   |       |        |       |        |        |   |        |                              |                                  |
|---|------|---|---|-------|--------|-------|--------|--------|---|--------|------------------------------|----------------------------------|
| 1 | 1.00 | 1 | 1 | -0.03 | -0.03  | -0.03 | -0.03  | -0.031 | t | 122471 | LLTEHRMT<br>WDPAQPP<br>RDL   | Homo<br>sapiens                  |
| 1 | 1.00 | 1 | 1 | -0.03 | -0.03  | -0.03 | -0.03  | -0.031 | t | 122471 | LLTEHRMT<br>WDPAQPP<br>RDL   | Homo<br>sapiens                  |
| 1 | 1.00 | 1 | 1 | 0.01  | 0.01   | 0.014 | 0.014  | 0.009  | t | 134140 | LLIIFKNQA<br>SRPYNIYP<br>HGI | Homo<br>sapiens                  |
| 1 | 1.00 | 1 | 1 | 0.01  | 0.012  | 0.014 | 0.014  | 0.009  | t | 134140 | LLIIFKNQA<br>SRPYNIYP<br>HGI | Homo<br>sapiens                  |
| 1 | 1.00 | 1 | 1 | -0.01 | -0.013 | -0.01 | -0.01  | -0.008 | t | 72484  | WGNCGCL<br>FG                | Mus<br>musculu<br>s              |
| 1 | 1.00 | 1 | 1 | 0.01  | 0.007  | 0.004 | 0.01   | 0.01   | t | 31773  | KLCKGTAP<br>FGVAFGNS         | Oryctola<br>gus<br>cuniculu<br>s |
| 1 | 1.00 | 1 | 1 | 0     | 0.002  | 0     | 0      | 0      | t | 48331  | PLGFFPDH<br>QLDP             | Homo<br>sapiens                  |
| 1 | 1.00 | 1 | 1 | -0.04 | -0.038 | -0.04 | -0.037 | -0.04  | t | 144619 | DYIWNTL<br>NSG               | Homo<br>sapiens                  |
| 1 | 1.00 | 1 | 1 | 0     | 0.002  | 0     | 0.001  | 0      | t | 9939   | DRAAGQP<br>AGDRADG<br>QPAGDR | Homo<br>sapiens                  |
| 1 | 1.00 | 1 | 1 | 0     | 0.002  | 0     | 0.001  | 0      | t | 9939   | DRAAGQP<br>AGDRADG<br>QPAGDR | Homo<br>sapiens                  |
| 1 | 1.00 | 1 | 1 | 0     | 0.002  | 0     | 0.001  | 0      | t | 9939   | DRAAGQP<br>AGDRADG<br>QPAGDR | Homo<br>sapiens                  |
| 1 | 1.00 | 1 | 1 | 0     | 0.002  | 0     | 0.001  | 0      | t | 9939   | DRAAGQP<br>AGDRADG<br>QPAGDR | Homo<br>sapiens                  |
| 1 | 1.00 | 1 | 1 | 0     | 0.002  | 0     | 0.001  | 0      | t | 9939   | DRAAGQP<br>AGDRADG<br>QPAGDR | Homo<br>sapiens                  |
| 1 | 1.00 | 1 | 1 | 0.02  | 0.02   | 0.02  | 0.02   | 0.02   | t | 58082  | SGIGPEKA                     | Oryctola<br>gus<br>cuniculu<br>s |
| 1 | 1.00 | 1 | 1 | -0.02 | -0.02  | -0.02 | -0.02  | -0.02  | t | 132481 | MMPVGP<br>APGM               | Homo<br>sapiens                  |

|   |      |   |   |       |        |        |        |        |   |        |                              |                                  |
|---|------|---|---|-------|--------|--------|--------|--------|---|--------|------------------------------|----------------------------------|
| 1 | 1.00 | 1 | 1 | -0.01 | -0.01  | -0.025 | -0.01  | -0.008 | t | 43226  | NANANPN                      | Mus<br>musculu<br>s              |
| 1 | 1.00 | 1 | 1 | -0.02 | -0.022 | -0.02  | -0.019 | -0.02  | t | 149434 | QPQPFLP<br>QQP               | Mus<br>musculu<br>s              |
| 1 | 1.00 | 1 | 1 | 0.01  | 0.011  | 0.01   | 0.007  | 0.01   | t | 28143  | IQDTYTQK<br>LS               | Homo<br>sapiens                  |
| 1 | 1.00 | 1 | 1 | 0.01  | 0.01   | 0.01   | 0.01   | 0.012  | t | 73432  | YARFMDT<br>DPD               | Mus<br>musculu<br>s              |
| 1 | 1.00 | 1 | 1 | 0.02  | 0.017  | 0.021  | 0.02   | 0.017  | t | 66759  | TTPDRQA<br>AC                | Oryctola<br>gus<br>cuniculu<br>s |
| 1 | 1.00 | 1 | 1 | 0.02  | 0.02   | 0.018  | 0.017  | 0.018  | t | 100479 | RNSWNCD<br>FSQTA             | Homo<br>sapiens                  |
| 1 | 1.00 | 1 | 1 | 0.02  | 0.024  | 0.018  | 0.017  | 0.018  | t | 100479 | RNSWNCD<br>FSQTA             | Homo<br>sapiens                  |
| 1 | 1.00 | 1 | 1 | 0     | -0.003 | 0.019  | 0      | -0.001 | t | 139029 | DLQVLT                       | Mus<br>musculu<br>s              |
| 1 | 1.00 | 1 | 1 | 0.02  | 0.02   | 0.024  | 0.02   | 0.02   | t | 94914  | RELADALL<br>E                | Homo<br>sapiens                  |
| 1 | 1.00 | 1 | 1 | 0.02  | 0.016  | 0.021  | 0.019  | 0.018  | t | 44871  | NLSGPAAV<br>TARIKE           | Oryctola<br>gus<br>cuniculu<br>s |
| 1 | 1.00 | 1 | 1 | 0.08  | 0.08   | 0.075  | 0.08   | 0.082  | t | 20174  | GHQVGDD<br>E                 | Homo<br>sapiens                  |
| 1 | 1.00 | 1 | 1 | 0.03  | 0.033  | 0.027  | 0.03   | 0.03   | t | 34290  | KWEDSTST<br>LTISADSKK<br>TKD | Mus<br>musculu<br>s              |
| 1 | 1.00 | 1 | 1 | 0.04  | 0.04   | 0.04   | 0.04   | 0.04   | t | 114814 | ESNGTLTL<br>SH               | Homo<br>sapiens                  |
| 1 | 1.00 | 1 | 1 | 0.02  | 0.02   | 0.02   | 0.02   | 0.02   | t | 153338 | ACPNFELH<br>WCGGGS           | Mus<br>musculu<br>s              |

|   |      |   |   |       |        |        |        |       |   |        |                              |                                  |
|---|------|---|---|-------|--------|--------|--------|-------|---|--------|------------------------------|----------------------------------|
| 1 | 1.00 | 1 | 1 | 0     | 0      | 0      | 0      | 0     | t | 142408 | DQVTKKEK<br>KTIKKA           | Homo<br>sapiens                  |
| 1 | 1.00 | 1 | 1 | 0     | 0      | 0      | 0      | 0     | t | 144706 | KITCFLTAG<br>GGLPDSVK<br>I   | Oryctola<br>gus<br>cuniculu<br>s |
| 1 | 1.00 | 1 | 1 | 0     | 0      | 0      | 0      | 0     | t | 98626  | YEAALKQY<br>EA               | Mus<br>musculu<br>s              |
| 1 | 1.00 | 1 | 1 | 0     | 0      | 0      | 0      | 0     | t | 98626  | YEAALKQY<br>EA               | Mus<br>musculu<br>s              |
| 1 | 1.00 | 1 | 1 | -0.02 | -0.02  | -0.02  | -0.02  | -0.02 | t | 105246 | ILDVTT                       | Oryctola<br>gus<br>cuniculu<br>s |
| 1 | 1.00 | 1 | 1 | 0.04  | 0.04   | 0.031  | 0.04   | 0.04  | t | 78573  | YTTEGGTK<br>SEVEDVIP<br>EG   | Oryctola<br>gus<br>cuniculu<br>s |
| 1 | 1.00 | 1 | 1 | 0.03  | 0.034  | 0.027  | 0.031  | 0.032 | t | 46127  | NTIMASKS<br>VGTAE            | Homo<br>sapiens                  |
| 1 | 1.00 | 1 | 1 | 0.02  | 0.018  | 0.028  | 0.023  | 0.02  | t | 45245  | NNSNDL                       | Mus<br>musculu<br>s              |
| 1 | 1.00 | 1 | 1 | 0.03  | 0.03   | 0.03   | 0.03   | 0.031 | t | 99839  | QSPF                         | Mus<br>musculu<br>s              |
| 1 | 1.00 | 1 | 1 | 0     | -0.006 | -0.007 | -0.003 | 0     | t | 78213  | MVLVYYES<br>IAYSF            | Oryctola<br>gus<br>cuniculu<br>s |
| 1 | 1.00 | 1 | 1 | 0.03  | 0.033  | 0.037  | 0.03   | 0.03  | t | 120020 | LEDPASRD<br>LVVN             | Mus<br>musculu<br>s              |
| 1 | 1.00 | 1 | 1 | 0.03  | 0.03   | 0.037  | 0.03   | 0.03  | t | 120020 | LEDPASRD<br>LVVN             | Mus<br>musculu<br>s              |
| 1 | 1.00 | 1 | 1 | 0.02  | 0.024  | 0.02   | 0.027  | 0.019 | t | 127956 | EELTAGSG<br>LREDLLSL<br>QEPG | Homo<br>sapiens                  |

|   |      |   |   |       |        |        |        |        |   |        |                              |                                  |
|---|------|---|---|-------|--------|--------|--------|--------|---|--------|------------------------------|----------------------------------|
| 1 | 1.00 | 1 | 1 | 0.02  | 0.022  | 0.02   | 0.027  | 0.019  | t | 127956 | EELTAGSG<br>LREDLLSL<br>QEPG | Homo<br>sapiens                  |
| 1 | 1.00 | 1 | 1 | -0.03 | -0.03  | -0.03  | -0.03  | -0.031 | t | 6782   | CPKNRKDS<br>C                | Mus<br>musculu<br>s              |
| 1 | 1.00 | 1 | 1 | -0.02 | -0.02  | -0.02  | -0.02  | -0.02  | t | 145422 | PPPGIR                       | Homo<br>sapiens                  |
| 1 | 1.00 | 1 | 1 | 0.01  | 0.01   | 0.01   | 0.01   | 0.01   | t | 138049 | TEYTVEVR                     | Oryctola<br>gus<br>cuniculu<br>s |
| 1 | 1.00 | 1 | 1 | -0.01 | -0.01  | -0.01  | -0.01  | -0.01  | t | 137811 | AVSLGQN<br>V                 | Oryctola<br>gus<br>cuniculu<br>s |
| 1 | 1.00 | 1 | 1 | -0.05 | -0.048 | -0.05  | -0.043 | -0.049 | t | 117229 | RHGFLPRH<br>RD               | Homo<br>sapiens                  |
| 1 | 1.00 | 1 | 1 | 0.02  | 0.02   | 0.022  | 0.02   | 0.022  | t | 95332  | EALEKF                       | Homo<br>sapiens                  |
| 1 | 1.00 | 1 | 1 | -0.01 | -0.014 | -0.015 | -0.011 | -0.01  | t | 97219  | AVLGAGN<br>MA                | Oryctola<br>gus<br>cuniculu<br>s |
| 1 | 1.00 | 1 | 1 | -0.01 | -0.01  | -0.01  | -0.01  | -0.01  | t | 156974 | WGTHTSY<br>PWRLS             | Gallus<br>gallus                 |
| 1 | 1.00 | 1 | 1 | 0.02  | 0.022  | 0.027  | 0.02   | 0.02   | t | 120679 | KIFADDID                     | Rattus<br>norvegic<br>us         |
| 1 | 1.00 | 1 | 1 | 0     | 0      | 0.002  | 0      | 0      | t | 50477  | QDIQPAV<br>QASWPKV           | Homo<br>sapiens                  |
| 1 | 1.00 | 1 | 1 | -0.03 | -0.03  | -0.016 | -0.023 | -0.03  | t | 104605 | PVIKARM<br>MEYGTTM<br>V      | Mus<br>musculu<br>s              |
| 1 | 1.00 | 1 | 1 | 0.01  | 0.007  | -0.002 | 0.01   | 0.01   | t | 41192  | MCITQYQ<br>RESQAYYQ<br>RG    | Oryctola<br>gus<br>cuniculu<br>s |
| 1 | 1.00 | 1 | 1 | -0.03 | -0.032 | -0.03  | -0.029 | -0.03  | t | 110468 | YYVLHLCL<br>AATKYPLL<br>KLLG | Homo<br>sapiens                  |
| 1 | 1.00 | 1 | 1 | -0.01 | -0.01  | -0.013 | -0.01  | -0.012 | t | 97370  | GTVLVTRK<br>AL               | Mus<br>musculu<br>s              |

|   |      |   |   |       |        |        |        |        |   |        |                              |                       |
|---|------|---|---|-------|--------|--------|--------|--------|---|--------|------------------------------|-----------------------|
| 1 | 1.00 | 1 | 1 | 0.03  | 0.03   | 0.03   | 0.03   | 0.03   | t | 111144 | CDATTLH                      | Homo sapiens          |
| 1 | 1.00 | 1 | 1 | -0.01 | -0.01  | -0.01  | -0.01  | -0.01  | t | 33732  | KTKIPAVFK<br>I               | Homo sapiens          |
| 1 | 1.00 | 1 | 1 | -0.01 | -0.012 | -0.01  | -0.009 | -0.01  | t | 148598 | FPPQLPYP<br>QP               | Mus musculus          |
| 1 | 1.00 | 1 | 1 | -0.02 | -0.016 | -0.013 | -0.013 | -0.019 | t | 135547 | DWEYSVW<br>SLN               | Homo sapiens          |
| 1 | 1.00 | 1 | 1 | 0     | 0      | 0.005  | 0.006  | 0.002  | t | 5380   | AVILLMCA<br>VHPTLV           | Homo sapiens          |
| 1 | 1.00 | 1 | 1 | 0.01  | 0.01   | 0.007  | 0.01   | 0.012  | t | 66659  | TTIPPSSPP                    | Oryctolagus cuniculus |
| 1 | 1.00 | 1 | 1 | 0.04  | 0.04   | 0.031  | 0.036  | 0.04   | t | 135958 | LTAVETGH<br>TSQV             | Homo sapiens          |
| 1 | 1.00 | 1 | 1 | 0.01  | 0.01   | 0.01   | 0.01   | 0.01   | t | 63135  | TDDNEEPI<br>APYHFDLS<br>G    | Homo sapiens          |
| 1 | 1.00 | 1 | 1 | -0.01 | -0.01  | -0.01  | -0.01  | -0.01  | t | 131581 | PDSRAVTC<br>GMASLSA<br>EKV   | Mus musculus          |
| 1 | 1.00 | 1 | 1 | -0.01 | -0.012 | -0.015 | -0.017 | -0.011 | t | 122442 | KPMSNFR<br>FGENHA            | Rattus norvegicus     |
| 1 | 1.00 | 1 | 1 | 0.01  | 0.012  | 0.01   | 0.013  | 0.01   | t | 56730  | SADGTTVT<br>SGSTKDT<br>LQ    | Homo sapiens          |
| 1 | 1.00 | 1 | 1 | 0.04  | 0.028  | 0.045  | 0.04   | 0.04   | t | 68020  | VDLQPSLI                     | Mus musculus          |
| 1 | 1.00 | 1 | 1 | -0.02 | -0.018 | -0.015 | -0.017 | -0.021 | t | 104586 | NRVAPNV<br>RQ                | Homo sapiens          |
| 1 | 1.00 | 1 | 1 | 0.03  | 0.03   | 0.03   | 0.03   | 0.03   | t | 95901  | TEKPLEPA<br>PVEPSYEA<br>EPTP | Mus musculus          |
| 1 | 1.00 | 1 | 1 | 0.03  | 0.03   | 0.03   | 0.03   | 0.03   | t | 97290  | EVELKLN<br>A                 | Oryctolagus cuniculus |
| 1 | 1.00 | 1 | 1 | 0.01  | 0.01   | 0.01   | 0.01   | 0.01   | t | 140916 | VSYGEEKP<br>AVLG             | Oryctolagus cuniculus |



|   |      |   |   |       |        |       |       |       |   |        |                      |                                  |
|---|------|---|---|-------|--------|-------|-------|-------|---|--------|----------------------|----------------------------------|
| 1 | 1.00 | 1 | 1 | 0.01  | 0.013  | 0.01  | 0.01  | 0.01  | t | 125600 | WESYPFRV<br>GTSL     | Mus<br>musculu<br>s              |
| 1 | 1.00 | 1 | 1 | 0.01  | 0.01   | 0.01  | 0.01  | 0.01  | t | 131005 | PPLKPVIDE            | Homo<br>sapiens                  |
| 1 | 1.00 | 1 | 1 | 0.01  | 0.01   | 0.01  | 0.01  | 0.01  | t | 99948  | DLISEVAQ<br>GALTLS   | Oryctola<br>gus<br>cuniculu<br>s |
| 1 | 1.00 | 1 | 1 | 0.01  | 0.01   | 0.01  | 0.01  | 0.01  | t | 110613 | GPPGPQG<br>ATGPLGPK  | Mus<br>musculu<br>s              |
| 1 | 1.00 | 1 | 1 | -0.01 | -0.008 | -0.01 | -0.01 | -0.01 | t | 141778 | VYVPPRRQ<br>QLCLYELF | Rattus<br>norvegic<br>us         |
| 1 | 1.00 | 1 | 1 | -0.01 | -0.01  | -0.01 | -0.01 | -0.01 | t | 141778 | VYVPPRRQ<br>QLCLYELF | Rattus<br>norvegic<br>us         |
| 1 | 1.00 | 1 | 1 | -0.01 | -0.01  | -0.01 | -0.01 | -0.01 | t | 149084 | NPTQHSY              | Sus<br>scrofa                    |
| 1 | 1.00 | 1 | 1 | -0.01 | -0.01  | -0.01 | -0.01 | -0.01 | t | 132931 | WGQNIKA              | Homo<br>sapiens                  |
| 1 | 1.00 | 1 | 1 | -0.01 | -0.01  | -0.01 | -0.01 | -0.01 | t | 115839 | KYPVEPFT<br>ES       | Homo<br>sapiens                  |
| 1 | 1.00 | 1 | 1 | -0.01 | -0.01  | -0.01 | -0.01 | -0.01 | t | 79383  | SCDVFLTM<br>FYPGCK   | Mus<br>musculu<br>s              |
| 1 | 1.00 | 1 | 1 | -0.01 | -0.01  | -0.01 | -0.01 | -0.01 | t | 79142  | ACDPSTV<br>MVPWPCS   | Mus<br>musculu<br>s              |
| 1 | 1.00 | 1 | 1 | -0.01 | -0.01  | -0.01 | -0.01 | -0.01 | t | 63896  | TGMSGFS<br>ETVTIVED  | Mus<br>musculu<br>s              |
| 1 | 1.00 | 1 | 1 | -0.03 | -0.03  | -0.03 | -0.03 | -0.03 | t | 81506  | EGKTYYPV<br>LV       | Homo<br>sapiens                  |
| 1 | 1.00 | 1 | 1 | -0.05 | -0.05  | -0.05 | -0.05 | -0.05 | t | 103004 | AAHKGLM<br>NIALAISA  | Homo<br>sapiens                  |
| 1 | 1.00 | 1 | 1 | -0.05 | -0.05  | -0.05 | -0.05 | -0.05 | t | 107585 | QVKFNWY              | Homo<br>sapiens                  |
| 1 | 1.00 | 1 | 1 | 0.02  | 0.022  | 0.035 | 0.021 | 0.02  | t | 8774   | DIRVEE               | Homo<br>sapiens                  |

|   |      |   |   |       |        |        |        |        |   |        |                           |                                  |
|---|------|---|---|-------|--------|--------|--------|--------|---|--------|---------------------------|----------------------------------|
| 1 | 1.00 | 1 | 1 | 0.01  | 0.012  | 0.015  | 0.017  | 0.013  | t | 108603 | QSPRLYPG<br>S             | Homo<br>sapiens                  |
| 1 | 1.00 | 1 | 1 | 0.08  | 0.084  | 0.082  | 0.081  | 0.08   | t | 50674  | QEQEEQEL<br>EEVEEQEQ<br>E | Homo<br>sapiens                  |
| 1 | 1.00 | 1 | 1 | -0.01 | -0.01  | -0.01  | -0.01  | -0.01  | t | 110922 | KQMDIKSI<br>NDLQ          | Homo<br>sapiens                  |
| 1 | 1.00 | 1 | 1 | 0     | 0      | 0.001  | 0      | -0.001 | t | 60596  | SQWNKPS<br>KPKTN          | Oryctola<br>gus<br>cuniculu<br>s |
| 1 | 1.00 | 1 | 1 | 0     | 0.008  | 0.001  | 0      | -0.001 | t | 56610  | RYPGQGS<br>PGGNRYP<br>PQG | Gallus<br>gallus                 |
| 1 | 1.00 | 1 | 1 | 0     | 0.008  | 0.001  | 0      | -0.001 | t | 19868  | GGGWGQ<br>PHGGGW<br>GQPH  | Gallus<br>gallus                 |
| 1 | 1.00 | 1 | 1 | -0.06 | -0.058 | -0.06  | -0.053 | -0.057 | t | 126137 | GLKKMLRT<br>CAVHITL       | Homo<br>sapiens                  |
| 1 | 1.00 | 1 | 1 | 0     | 0.002  | -0.015 | -0.003 | 0      | t | 48618  | PNDPNRN<br>VD             | Homo<br>sapiens                  |
| 1 | 1.00 | 1 | 1 | -0.01 | -0.01  | -0.012 | -0.01  | -0.01  | t | 67060  | TVLARSIAK<br>E            | Homo<br>sapiens                  |
| 1 | 1.00 | 1 | 1 | -0.02 | -0.02  | -0.022 | -0.02  | -0.02  | t | 110596 | GIAGFKGD<br>QGPKG         | Rattus<br>norvegic<br>us         |
| 1 | 1.00 | 1 | 1 | 0     | 0      | 0      | 0.002  | 0      | t | 148911 | QVSFQQP<br>QQQ            | Homo<br>sapiens                  |
| 1 | 1.00 | 1 | 1 | 0.03  | 0.03   | 0.032  | 0.03   | 0.031  | t | 153270 | LVAQINLE<br>M             | Mus<br>musculu<br>s              |
| 1 | 1.00 | 1 | 1 | 0.01  | 0.012  | 0.019  | 0.017  | 0.01   | t | 113912 | TCFFRDHS<br>YQEE          | Homo<br>sapiens                  |
| 1 | 1.00 | 1 | 1 | 0     | 0.002  | 0      | 0.001  | 0      | t | 32113  | KLQPAEIET<br>CMKTIT       | Homo<br>sapiens                  |
| 1 | 1.00 | 1 | 1 | 0     | 0.004  | 0      | -0.003 | 0      | t | 32901  | KPTKKPTF<br>KTTK          | Homo<br>sapiens                  |

|   |      |   |   |       |        |        |        |        |   |        |                               |                                  |
|---|------|---|---|-------|--------|--------|--------|--------|---|--------|-------------------------------|----------------------------------|
| 1 | 1.00 | 1 | 1 | 0.04  | 0.04   | 0.036  | 0.04   | 0.04   | t | 65042  | TLRITYLTE<br>T                | Mus<br>musculu<br>s              |
| 1 | 1.00 | 1 | 1 | 0.01  | 0.008  | 0.009  | 0.009  | 0.01   | t | 55683  | RRPQGLP<br>NNTASWF<br>T       | Mus<br>musculu<br>s              |
| 1 | 1.00 | 1 | 1 | -0.02 | -0.017 | -0.033 | -0.02  | -0.016 | t | 26075  | IFGFNALV<br>DR                | Oryctola<br>gus<br>cuniculu<br>s |
| 1 | 1.00 | 1 | 1 | -0.02 | -0.022 | -0.033 | -0.02  | -0.016 | t | 26075  | IFGFNALV<br>DR                | Oryctola<br>gus<br>cuniculu<br>s |
| 1 | 1.00 | 1 | 1 | 0.03  | 0.032  | 0.03   | 0.037  | 0.033  | t | 106223 | ADGGAQG<br>TA                 | Homo<br>sapiens                  |
| 1 | 1.00 | 1 | 1 | 0.01  | -0.001 | 0.012  | 0.01   | 0.01   | t | 40074  | LTPANLIR<br>GDNA              | Oryctola<br>gus<br>cuniculu<br>s |
| 1 | 1.00 | 1 | 1 | -0.01 | -0.012 | -0.009 | -0.013 | -0.01  | t | 6480   | CKGLNGLF<br>DLGPKQKI          | Mus<br>musculu<br>s              |
| 1 | 1.00 | 1 | 1 | 0     | 0      | 0      | 0      | 0      | t | 128685 | GAVAVSA<br>APGSAAP<br>A       | Homo<br>sapiens                  |
| 1 | 1.00 | 1 | 1 | -0.02 | -0.02  | -0.008 | -0.02  | -0.022 | t | 104461 | EFRHDS                        | Mus<br>musculu<br>s              |
| 1 | 1.00 | 1 | 1 | 0.01  | 0.014  | 0.019  | 0.011  | 0.008  | t | 32782  | KPLDERA                       | Homo<br>sapiens                  |
| 1 | 1.00 | 1 | 1 | -0.04 | -0.042 | -0.035 | -0.037 | -0.041 | t | 158838 | IHNDVEA<br>WMDRYKY<br>YP      | Mus<br>musculu<br>s              |
| 1 | 1.00 | 1 | 1 | 0.04  | 0.04   | 0.041  | 0.042  | 0.041  | t | 137909 | KPESDELT<br>AEK               | Homo<br>sapiens                  |
| 1 | 1.00 | 1 | 1 | 0.02  | 0.02   | 0.02   | 0.02   | 0.02   | t | 47175  | PDREALYQ<br>QFDEEMEE<br>CSASL | Homo<br>sapiens                  |
| 1 | 1.00 | 1 | 1 | 0.02  | 0.02   | 0.02   | 0.02   | 0.02   | t | 33142  | KRGPDGS                       | Mus<br>musculu<br>s              |
| 1 | 1.00 | 1 | 1 | 0     | 0      | 0      | 0      | 0      | t | 135979 | QMRPVSR<br>VLAPH              | Homo<br>sapiens                  |

|   |      |   |   |       |        |       |       |       |   |        |                             |                                  |
|---|------|---|---|-------|--------|-------|-------|-------|---|--------|-----------------------------|----------------------------------|
| 1 | 1.00 | 1 | 1 | 0     | 0      | 0     | 0     | 0     | t | 145511 | SCNYHHTY<br>LTCW            | Homo<br>sapiens                  |
| 1 | 1.00 | 1 | 1 | 0     | 0      | 0     | 0     | 0     | t | 115993 | TEIPTINTI<br>A              | Homo<br>sapiens                  |
| 1 | 1.00 | 1 | 1 | 0     | 0      | 0     | 0     | 0     | t | 109854 | RQMVEKE<br>SLDQA            | Mus<br>musculu<br>s              |
| 1 | 1.00 | 1 | 1 | 0     | 0      | 0     | 0     | 0     | t | 111934 | VVQDGRF<br>SYQNLFDA         | Oryctola<br>gus<br>cuniculu<br>s |
| 1 | 1.00 | 1 | 1 | 0     | 0      | 0     | 0     | 0     | t | 78647  | ETIIQIEYG<br>KKFNSSAG<br>D  | Oryctola<br>gus<br>cuniculu<br>s |
| 1 | 1.00 | 1 | 1 | 0     | 0.003  | 0     | 0     | 0     | t | 78701  | KKFNSSAG<br>DKQGNISI<br>EKL | Mus<br>musculu<br>s              |
| 1 | 1.00 | 1 | 1 | 0     | 0.003  | 0     | 0     | 0     | t | 78647  | ETIIQIEYG<br>KKFNSSAG<br>D  | Mus<br>musculu<br>s              |
| 1 | 1.00 | 1 | 1 | 0     | 0      | 0     | 0     | 0     | t | 78701  | KKFNSSAG<br>DKQGNISI<br>EKL | Mus<br>musculu<br>s              |
| 1 | 1.00 | 1 | 1 | 0     | 0      | 0     | 0     | 0     | t | 78701  | KKFNSSAG<br>DKQGNISI<br>EKL | Oryctola<br>gus<br>cuniculu<br>s |
| 1 | 1.00 | 1 | 1 | 0     | 0      | 0     | 0     | 0     | t | 61395  | SSTKNLIYN<br>LTLCELNV       | Sus<br>scrofa                    |
| 1 | 1.00 | 1 | 1 | -0.02 | -0.02  | -0.02 | -0.02 | -0.02 | t | 98529  | TLVPAVVG<br>KP              | Oryctola<br>gus<br>cuniculu<br>s |
| 1 | 1.00 | 1 | 1 | -0.02 | -0.017 | -0.02 | -0.02 | -0.02 | t | 98529  | TLVPAVVG<br>KP              | Mus<br>musculu<br>s              |
| 1 | 1.00 | 1 | 1 | -0.02 | -0.02  | -0.02 | -0.02 | -0.02 | t | 98529  | TLVPAVVG<br>KP              | Mus<br>musculu<br>s              |

|   |      |   |   |       |        |        |        |        |   |        |                              |                     |
|---|------|---|---|-------|--------|--------|--------|--------|---|--------|------------------------------|---------------------|
| 1 | 1.00 | 1 | 1 | 0.02  | 0.024  | 0.015  | 0.021  | 0.02   | t | 56017  | RTALNCN<br>DSLQTGFL<br>AALFY | Homo<br>sapiens     |
| 1 | 1.00 | 1 | 1 | 0     | 0.004  | 0.006  | 0.003  | -0.001 | t | 4912   | ATCMQVN<br>LEIMTST           | Homo<br>sapiens     |
| 1 | 1.00 | 1 | 1 | 0.01  | 0.01   | 0.015  | 0.01   | 0.011  | t | 5232   | ATYTTGGA<br>QS               | Mus<br>musculu<br>s |
| 1 | 1.00 | 1 | 1 | -0.02 | -0.02  | -0.02  | -0.02  | -0.02  | t | 117018 | KIVMFWH<br>EPVYA             | Mus<br>musculu<br>s |
| 1 | 1.00 | 1 | 1 | -0.02 | -0.02  | -0.02  | -0.02  | -0.02  | t | 117018 | KIVMFWH<br>EPVYA             | Homo<br>sapiens     |
| 1 | 1.00 | 1 | 1 | 0     | 0      | 0.009  | 0.002  | 0      | t | 65050  | TLRVYK                       | Homo<br>sapiens     |
| 1 | 1.00 | 1 | 1 | -0.04 | -0.04  | -0.048 | -0.04  | -0.04  | t | 43747  | NESKYSNT<br>FINNAYN<br>MSIR  | Mus<br>musculu<br>s |
| 1 | 1.00 | 1 | 1 | 0.01  | 0.014  | 0.01   | 0.011  | 0.01   | t | 1385   | AFRELADA                     | Homo<br>sapiens     |
| 1 | 1.00 | 1 | 1 | -0.01 | -0.006 | -0.01  | -0.009 | -0.01  | t | 17580  | FRELADAL                     | Homo<br>sapiens     |
| 1 | 1.00 | 1 | 1 | 0.04  | 0.042  | 0.045  | 0.037  | 0.037  | t | 113580 | KPQQQSP<br>QQQFPQQ<br>QIPQQQ | Homo<br>sapiens     |
| 1 | 1.00 | 1 | 1 | 0.06  | 0.062  | 0.052  | 0.06   | 0.061  | t | 125236 | RIEKDTDR<br>DNFMSAE<br>EAQ   | Homo<br>sapiens     |
| 1 | 1.00 | 1 | 1 | 0.02  | 0.022  | 0.023  | 0.023  | 0.021  | t | 56208  | RTVGSLSN<br>S                | Homo<br>sapiens     |
| 1 | 1.00 | 1 | 1 | 0     | 0.002  | 0.009  | 0.001  | 0      | t | 21431  | GNGCGL                       | Homo<br>sapiens     |
| 1 | 1.00 | 1 | 1 | -0.02 | -0.02  | -0.027 | -0.02  | -0.02  | t | 41661  | MHGSRNN<br>H                 | Mus<br>musculu<br>s |
| 1 | 1.00 | 1 | 1 | 0.02  | 0.02   | 0.013  | 0.016  | 0.02   | t | 33842  | KTRNQMG<br>VSE               | Homo<br>sapiens     |

|   |      |   |   |       |        |        |        |        |   |        |                              |                                  |
|---|------|---|---|-------|--------|--------|--------|--------|---|--------|------------------------------|----------------------------------|
| 1 | 1.00 | 1 | 1 | 0     | 0      | -0.007 | 0      | 0.002  | t | 141523 | ALEPPHNL<br>PVP              | Mus<br>musculu<br>s              |
| 1 | 1.00 | 1 | 1 | -0.02 | -0.02  | -0.02  | -0.02  | -0.02  | t | 140894 | QRRADAV<br>KGYLA             | Oryctola<br>gus<br>cuniculu<br>s |
| 1 | 1.00 | 1 | 1 | 0.02  | 0.017  | 0.02   | 0.02   | 0.021  | t | 11033  | EAESISSE<br>EIVPNSVE         | Oryctola<br>gus<br>cuniculu<br>s |
| 1 | 1.00 | 1 | 1 | 0.04  | 0.035  | 0.037  | 0.044  | 0.04   | t | 33223  | KRTITSKKS<br>KKAPSGAS<br>GVK | Canis<br>lupus                   |
| 1 | 1.00 | 1 | 1 | 0.01  | 0.01   | 0.01   | 0.01   | 0.01   | t | 103838 | DAEFRHDS<br>GYEV             | Mus<br>musculu<br>s              |
| 1 | 1.00 | 1 | 1 | 0.01  | 0.01   | 0.01   | 0.01   | 0.01   | t | 103838 | DAEFRHDS<br>GYEV             | Mus<br>musculu<br>s              |
| 1 | 1.00 | 1 | 1 | 0.01  | 0.01   | 0.01   | 0.01   | 0.01   | t | 18583  | GAGDVK                       | Mus<br>musculu<br>s              |
| 1 | 1.00 | 1 | 1 | -0.03 | -0.028 | -0.023 | -0.029 | -0.03  | t | 29269  | IVFPDL                       | Homo<br>sapiens                  |
| 1 | 1.00 | 1 | 1 | -0.03 | -0.031 | -0.023 | -0.029 | -0.03  | t | 29269  | IVFPDL                       | Homo<br>sapiens                  |
| 1 | 1.00 | 1 | 1 | -0.01 | -0.01  | -0.01  | -0.01  | -0.011 | t | 122725 | DLASINLQ<br>RGRDHG           | Oryctola<br>gus<br>cuniculu<br>s |
| 1 | 1.00 | 1 | 1 | 0.01  | 0.01   | 0.01   | 0.01   | 0.01   | t | 127695 | IISGKDS                      | Homo<br>sapiens                  |
| 1 | 1.00 | 1 | 1 | 0.01  | 0.01   | 0.01   | 0.01   | 0.01   | t | 107332 | EDPQVKF                      | Homo<br>sapiens                  |
| 1 | 1.00 | 1 | 1 | -0.01 | -0.01  | -0.01  | -0.01  | -0.01  | t | 106515 | HLPSFLRP<br>DPPL             | Mus<br>musculu<br>s              |
| 1 | 1.00 | 1 | 1 | -0.03 | -0.03  | -0.03  | -0.03  | -0.03  | t | 108555 | NKALTFFL<br>P                | Homo<br>sapiens                  |
| 1 | 1.00 | 1 | 1 | -0.01 | -0.008 | -0.01  | -0.003 | -0.01  | t | 132737 | WIRSTLRR<br>VEAKGRP          | Homo<br>sapiens                  |

|   |      |   |   |       |        |        |        |        |   |        |                              |                                  |
|---|------|---|---|-------|--------|--------|--------|--------|---|--------|------------------------------|----------------------------------|
| 1 | 1.00 | 1 | 1 | 0     | 0      | 0      | 0      | 0      | t | 149733 | GWHSPM<br>Y                  | Capra<br>hircus                  |
| 1 | 1.00 | 1 | 1 | 0     | 0      | 0      | 0      | 0      | t | 137415 | HAPRYHY                      | Mus<br>musculu<br>s              |
| 1 | 1.00 | 1 | 1 | 0.01  | 0.006  | 0.01   | 0.007  | 0.012  | t | 136071 | LLYGEVGD<br>TLLIIFK          | Oryctola<br>gus<br>cuniculu<br>s |
| 1 | 1.00 | 1 | 1 | 0     | 0      | 0      | 0      | 0      | t | 140837 | DEPPQSP<br>WDRVKDL<br>A      | Mus<br>musculu<br>s              |
| 1 | 1.00 | 1 | 1 | 0     | 0.002  | 0.001  | 0.003  | 0      | t | 79877  | KAKAQTD<br>R                 | Homo<br>sapiens                  |
| 1 | 1.00 | 1 | 1 | -0.01 | -0.01  | -0.01  | -0.01  | -0.011 | t | 152777 | LLNIDKDIR<br>K               | Homo<br>sapiens                  |
| 1 | 1.00 | 1 | 1 | -0.02 | -0.016 | -0.019 | -0.013 | -0.02  | t | 134682 | GPSRRGPS<br>LGASSHQ          | Homo<br>sapiens                  |
| 1 | 1.00 | 1 | 1 | -0.04 | -0.04  | -0.04  | -0.038 | -0.04  | t | 110293 | IPKPSPWA<br>PKKHRRLS<br>SDQD | Homo<br>sapiens                  |
| 1 | 1.00 | 1 | 1 | -0.01 | -0.014 | -0.01  | -0.011 | -0.01  | t | 66629  | TTGYRFTN<br>F                | Oryctola<br>gus<br>cuniculu<br>s |
| 1 | 1.00 | 1 | 1 | 0     | 0.002  | -0.015 | 0.001  | 0.002  | t | 45291  | NNYNNNA<br>KNVNDMY<br>RDGE   | Homo<br>sapiens                  |
| 1 | 1.00 | 1 | 1 | 0.09  | 0.094  | 0.09   | 0.091  | 0.091  | t | 119826 | EESDDDM<br>G                 | Homo<br>sapiens                  |
| 1 | 1.00 | 1 | 1 | 0.09  | 0.092  | 0.09   | 0.091  | 0.091  | t | 119826 | EESDDDM<br>G                 | Homo<br>sapiens                  |
| 1 | 1.00 | 1 | 1 | 0.09  | 0.092  | 0.09   | 0.091  | 0.091  | t | 119826 | EESDDDM<br>G                 | Homo<br>sapiens                  |
| 1 | 1.00 | 1 | 1 | 0.04  | 0.038  | 0.04   | 0.039  | 0.041  | t | 72548  | WHQTPQ<br>PYLPQ              | Rattus<br>norvegic<br>us         |
| 1 | 1.00 | 1 | 1 | -0.04 | -0.04  | -0.049 | -0.04  | -0.04  | t | 79280  | LAPISGTV<br>QSAHLIRF<br>D    | Mus<br>musculu<br>s              |

|   |      |   |   |       |        |        |        |        |   |        |                              |                                  |
|---|------|---|---|-------|--------|--------|--------|--------|---|--------|------------------------------|----------------------------------|
| 1 | 1.00 | 1 | 1 | 0.01  | 0.008  | 0.006  | 0.009  | 0.01   | t | 65698  | TPPRPAGD<br>NATVAAG<br>HAT   | Mus<br>musculu<br>s              |
| 1 | 1.00 | 1 | 1 | 0.01  | 0.008  | 0.006  | 0.009  | 0.01   | t | 65698  | TPPRPAGD<br>NATVAAG<br>HAT   | Mus<br>musculu<br>s              |
| 1 | 1.00 | 1 | 1 | 0.02  | 0.017  | 0.02   | 0.02   | 0.02   | t | 133860 | KKAVTKA<br>QKKD              | Oryctola<br>gus<br>cuniculu<br>s |
| 1 | 1.00 | 1 | 1 | 0     | 0      | 0      | 0      | 0      | t | 58663  | SIPNGTYR                     | Oryctola<br>gus<br>cuniculu<br>s |
| 1 | 1.00 | 1 | 1 | 0     | -0.004 | -0.007 | -0.007 | 0      | t | 135468 | GVGLAP                       | Oryctola<br>gus<br>cuniculu<br>s |
| 1 | 1.00 | 1 | 1 | -0.03 | -0.028 | -0.033 | -0.029 | -0.03  | t | 10774  | DVVLMKV<br>PTIPKFRDI<br>TQHF | Homo<br>sapiens                  |
| 1 | 1.00 | 1 | 1 | 0     | 0      | 0      | 0      | 0      | t | 94728  | VCNYGPG<br>GNDFNQP<br>IYERK  | Mus<br>musculu<br>s              |
| 1 | 1.00 | 1 | 1 | -0.03 | -0.028 | -0.035 | -0.029 | -0.03  | t | 50445  | QDCNCSIY<br>PGHASGH<br>RMAWD | Homo<br>sapiens                  |
| 1 | 1.00 | 1 | 1 | 0.03  | 0.028  | 0.037  | 0.033  | 0.028  | t | 77924  | IYTSPTFPP<br>TAH             | Mus<br>musculu<br>s              |
| 1 | 1.00 | 1 | 1 | -0.03 | -0.032 | -0.038 | -0.029 | -0.032 | t | 149498 | TLKRDNTI<br>RSNGKCL          | Mus<br>musculu<br>s              |
| 1 | 1.00 | 1 | 1 | 0     | 0      | 0      | 0.001  | 0      | t | 118380 | GKPIPNPL<br>LGLDST           | Mus<br>musculu<br>s              |
| 1 | 1.00 | 1 | 1 | 0     | 0      | 0      | 0.001  | 0      | t | 117331 | MKLVRFL<br>MKLSHETV<br>TIELK | Mus<br>musculu<br>s              |
| 1 | 1.00 | 1 | 1 | 0     | 0      | 0      | 0.001  | 0      | t | 66257  | TSHHDSH<br>GLHRV             | Mus<br>musculu<br>s              |
| 1 | 1.00 | 1 | 1 | 0     | 0      | 0      | 0.001  | 0      | t | 65678  | TPPAYR                       | Mus<br>musculu<br>s              |



|   |      |   |   |   |        |   |       |   |   |       |                              |                                  |
|---|------|---|---|---|--------|---|-------|---|---|-------|------------------------------|----------------------------------|
| 1 | 1.00 | 1 | 1 | 0 | 0      | 0 | 0.001 | 0 | t | 50508 | QDPRVRG<br>LYFPAGG           | Mus<br>musculu<br>s              |
| 1 | 1.00 | 1 | 1 | 0 | 0      | 0 | 0.001 | 0 | t | 50508 | QDPRVRG<br>LYFPAGG           | Mus<br>musculu<br>s              |
| 1 | 1.00 | 1 | 1 | 0 | -0.001 | 0 | 0.001 | 0 | t | 40167 | LTSGHLKC<br>RVKMEKL<br>QLKGT | Homo<br>sapiens                  |
| 1 | 1.00 | 1 | 1 | 0 | 0      | 0 | 0.001 | 0 | t | 41826 | MKHM                         | Mus<br>musculu<br>s              |
| 1 | 1.00 | 1 | 1 | 0 | 0      | 0 | 0.001 | 0 | t | 50508 | QDPRVRG<br>LYFPAGG           | Mus<br>musculu<br>s              |
| 1 | 1.00 | 1 | 1 | 0 | 0      | 0 | 0.001 | 0 | t | 53636 | RESQAYYQ<br>RGSS             | Oryctola<br>gus<br>cuniculu<br>s |
| 1 | 1.00 | 1 | 1 | 0 | 0      | 0 | 0.001 | 0 | t | 60116 | SPLLGCIGS<br>TCAE            | Mus<br>musculu<br>s              |
| 1 | 1.00 | 1 | 1 | 0 | 0      | 0 | 0.001 | 0 | t | 40110 | LTPLEELY                     | Mus<br>musculu<br>s              |
| 1 | 1.00 | 1 | 1 | 0 | 0      | 0 | 0.001 | 0 | t | 43233 | NANP                         | Mus<br>musculu<br>s              |
| 1 | 1.00 | 1 | 1 | 0 | 0      | 0 | 0.001 | 0 | t | 31794 | KLDVVKLL<br>YNEQFAV<br>QGLLR | Mus<br>musculu<br>s              |
| 1 | 1.00 | 1 | 1 | 0 | 0      | 0 | 0.001 | 0 | t | 17284 | FPFNASDS<br>VGQQIKVI<br>P    | Mus<br>musculu<br>s              |
| 1 | 1.00 | 1 | 1 | 0 | 0      | 0 | 0.001 | 0 | t | 13481 | ENHSPVNI<br>AHKL             | Mus<br>musculu<br>s              |
| 1 | 1.00 | 1 | 1 | 0 | 0      | 0 | 0.001 | 0 | t | 16101 | FHENWPS                      | Mus<br>musculu<br>s              |
| 1 | 1.00 | 1 | 1 | 0 | 0      | 0 | 0.001 | 0 | t | 10868 | DYEDRYYR<br>E                | Mus<br>musculu<br>s              |
| 1 | 1.00 | 1 | 1 | 0 | 0      | 0 | 0.001 | 0 | t | 24591 | HQLDPAF<br>GANSTNP<br>D      | Mus<br>musculu<br>s              |
| 1 | 1.00 | 1 | 1 | 0 | 0      | 0 | 0.001 | 0 | t | 10868 | DYEDRYYR<br>E                | Mus<br>musculu<br>s              |

|   |      |   |   |       |        |        |        |        |   |        |                              |                              |
|---|------|---|---|-------|--------|--------|--------|--------|---|--------|------------------------------|------------------------------|
| 1 | 1.00 | 1 | 1 | 0     | 0      | 0      | 0.001  | 0      | t | 7171   | CTKPTDGN<br>C                | Mus<br>musculus              |
| 1 | 1.00 | 1 | 1 | -0.05 | -0.053 | -0.053 | -0.05  | -0.052 | t | 111722 | RGLPRYFN<br>VTLRKRW<br>V     | Oryctola<br>gus<br>cuniculus |
| 1 | 1.00 | 1 | 1 | 0.06  | 0.06   | 0.06   | 0.06   | 0.06   | t | 150801 | EDDF                         | Homo<br>sapiens              |
| 1 | 1.00 | 1 | 1 | 0.06  | 0.06   | 0.06   | 0.06   | 0.06   | t | 150801 | EDDF                         | Homo<br>sapiens              |
| 1 | 1.00 | 1 | 1 | 0.02  | 0.02   | 0.02   | 0.02   | 0.02   | t | 144778 | SGTHPFLD<br>KSFS             | Mus<br>musculus              |
| 1 | 1.00 | 1 | 1 | 0.02  | 0.02   | 0.02   | 0.02   | 0.02   | t | 144778 | SGTHPFLD<br>KSFS             | Mus<br>musculus              |
| 1 | 1.00 | 1 | 1 | 0.02  | 0.02   | 0.02   | 0.02   | 0.02   | t | 137576 | SRQEWQQ<br>QDECQIDR          | Homo<br>sapiens              |
| 1 | 1.00 | 1 | 1 | 0.02  | 0.02   | 0.02   | 0.02   | 0.02   | t | 99290  | GNLELVAV<br>RKEQQQR          | Homo<br>sapiens              |
| 1 | 1.00 | 1 | 1 | 0.02  | 0.02   | 0.02   | 0.02   | 0.02   | t | 99296  | GREGEQE<br>WGTPGSH<br>V      | Homo<br>sapiens              |
| 1 | 1.00 | 1 | 1 | 0.02  | 0.02   | 0.02   | 0.02   | 0.02   | t | 46971  | PATIPDRE<br>AVLYQEFD<br>EMEE | Homo<br>sapiens              |
| 1 | 1.00 | 1 | 1 | -0.01 | -0.01  | -0.01  | -0.013 | -0.01  | t | 55577  | RRGPRLGV                     | Homo<br>sapiens              |
| 1 | 1.00 | 1 | 1 | -0.01 | -0.01  | -0.01  | -0.013 | -0.01  | t | 55577  | RRGPRLGV                     | Homo<br>sapiens              |
| 1 | 1.00 | 1 | 1 | -0.02 | -0.02  | -0.02  | -0.02  | -0.02  | t | 135770 | TRAEAVFP                     | Homo<br>sapiens              |
| 1 | 1.00 | 1 | 1 | -0.02 | -0.02  | -0.02  | -0.02  | -0.02  | t | 92470  | DLTFEKVK<br>HN               | Ovis<br>aries                |
| 1 | 1.00 | 1 | 1 | -0.01 | -0.012 | -0.004 | -0.011 | -0.011 | t | 30184  | KDKKADS<br>GYCYWVH<br>I      | Mus<br>musculus              |
| 1 | 1.00 | 1 | 1 | -0.05 | -0.052 | -0.05  | -0.05  | -0.05  | t | 119857 | FAQRLMR<br>YWA               | Oryctola<br>gus<br>cuniculus |

|   |      |   |   |       |        |        |        |        |   |        |                              |                                  |
|---|------|---|---|-------|--------|--------|--------|--------|---|--------|------------------------------|----------------------------------|
| 1 | 1.00 | 1 | 1 | -0.05 | -0.05  | -0.05  | -0.05  | -0.05  | t | 119857 | FAQRLMR<br>YWA               | Mus<br>musculu<br>s              |
| 1 | 1.00 | 1 | 1 | 0.01  | 0.007  | 0.016  | 0.01   | 0.01   | t | 100075 | GPGVDYK<br>NNLDPLS           | Oryctola<br>gus<br>cuniculu<br>s |
| 1 | 1.00 | 1 | 1 | 0.03  | 0.03   | 0.02   | 0.027  | 0.029  | t | 46806  | PAGGAYS<br>MYTNWE<br>QD      | Homo<br>sapiens                  |
| 1 | 1.00 | 1 | 1 | 0.02  | 0.02   | 0.02   | 0.02   | 0.02   | t | 145827 | IIPKVEGK                     | Mus<br>musculu<br>s              |
| 1 | 1.00 | 1 | 1 | 0.02  | 0.02   | 0.02   | 0.02   | 0.02   | t | 145827 | IIPKVEGK                     | Mus<br>musculu<br>s              |
| 1 | 1.00 | 1 | 1 | -0.01 | -0.004 | -0.01  | -0.013 | -0.01  | t | 6924   | CRGDDFP<br>AWYC              | Mus<br>musculu<br>s              |
| 1 | 1.00 | 1 | 1 | -0.02 | -0.023 | -0.027 | -0.021 | -0.021 | t | 78694  | KASAMYS<br>GKGPLNDL<br>RVKI  | Oryctola<br>gus<br>cuniculu<br>s |
| 1 | 1.00 | 1 | 1 | -0.02 | -0.02  | -0.02  | -0.02  | -0.022 | t | 63887  | TGLSTGTS<br>QNTRISLR<br>PGPV | Homo<br>sapiens                  |
| 1 | 1.00 | 1 | 1 | -0.01 | -0.01  | -0.018 | -0.01  | -0.01  | t | 82608  | GENKFVAT<br>AASV             | Homo<br>sapiens                  |
| 1 | 1.00 | 1 | 1 | 0     | -0.004 | -0.002 | 0      | 0      | t | 7761   | DDEADRYF<br>TYEE             | Bos<br>taurus                    |
| 1 | 1.00 | 1 | 1 | 0.01  | 0.011  | 0.003  | 0.007  | 0.013  | t | 130553 | MDPNCSC                      | Mus<br>musculu<br>s              |
| 1 | 1.00 | 1 | 1 | 0     | 0      | 0.002  | 0      | -0.001 | t | 23510  | GYYPSPDP<br>NTFFYAPP<br>YSA  | Sus<br>scrofa                    |
| 1 | 1.00 | 1 | 1 | -0.04 | -0.036 | -0.04  | -0.043 | -0.041 | t | 55185  | RPKHPIKH<br>QG               | Homo<br>sapiens                  |
| 1 | 1.00 | 1 | 1 | -0.01 | -0.01  | -0.01  | -0.01  | -0.01  | t | 102309 | ANQTEV                       | Mus<br>musculu<br>s              |
| 1 | 1.00 | 1 | 1 | -0.01 | -0.01  | -0.005 | -0.006 | -0.01  | t | 133798 | DKIRGEG<br>MRYIIILD          | Homo<br>sapiens                  |

|   |      |   |   |       |        |        |        |        |   |        |                   |                    |
|---|------|---|---|-------|--------|--------|--------|--------|---|--------|-------------------|--------------------|
| 1 | 1.00 | 1 | 1 | 0     | 0.003  | 0      | 0      | -0.001 | t | 135441 | AGLGAGIP          | Mus musculus       |
| 1 | 1.00 | 1 | 1 | 0     | 0.002  | 0.005  | -0.003 | 0      | t | 106326 | DCSKIQSTIF        | Homo sapiens       |
| 1 | 1.00 | 1 | 1 | 0     | -0.004 | -0.001 | 0      | 0      | t | 13064  | ELGAFFSILQDMR     | Mus                |
| 1 | 1.00 | 1 | 1 | 0.01  | 0.012  | 0.01   | 0.011  | 0.012  | t | 51849  | QPGYPWPL          | Homo sapiens       |
| 1 | 1.00 | 1 | 1 | 0.02  | 0.02   | 0.016  | 0.017  | 0.02   | t | 23422  | GYNVSSIVTMTSQGM   | Homo sapiens       |
| 1 | 1.00 | 1 | 1 | -0.04 | -0.04  | -0.033 | -0.04  | -0.04  | t | 119482 | KSVKPRQAT         | Homo sapiens       |
| 1 | 1.00 | 1 | 1 | -0.01 | -0.01  | -0.01  | -0.01  | -0.01  | t | 147232 | QPQQPF            | Homo sapiens       |
| 1 | 1.00 | 1 | 1 | -0.02 | -0.02  | -0.025 | -0.014 | -0.018 | t | 11699  | EEITQVATISANS DH  | Homo sapiens       |
| 1 | 1.00 | 1 | 1 | 0.03  | 0.03   | 0.023  | 0.026  | 0.03   | t | 124186 | GFTPGGGGS         | Homo sapiens       |
| 1 | 1.00 | 1 | 1 | 0     | 0.004  | -0.002 | 0.001  | 0.002  | t | 60614  | SRAATLT PAA       | Homo sapiens       |
| 1 | 1.00 | 1 | 1 | 0.03  | 0.03   | 0.03   | 0.03   | 0.03   | t | 131296 | EVGLHECGNSMQVTDAL | Callithrix pygmaea |
| 1 | 1.00 | 1 | 1 | 0.03  | 0.03   | 0.03   | 0.03   | 0.03   | t | 131296 | EVGLHECGNSMQVTDAL | Callithrix pygmaea |
| 1 | 1.00 | 1 | 1 | -0.01 | -0.011 | -0.009 | -0.01  | -0.01  | t | 54906  | RMIPKGTL          | Anas platyrhynchos |
| 1 | 1.00 | 1 | 1 | -0.05 | -0.047 | -0.055 | -0.05  | -0.05  | t | 48603  | PNAPWVFACA        | Mus musculus       |

|   |      |   |   |       |        |        |       |        |   |        |                              |                                  |
|---|------|---|---|-------|--------|--------|-------|--------|---|--------|------------------------------|----------------------------------|
| 1 | 1.00 | 1 | 1 | -0.05 | -0.047 | -0.055 | -0.05 | -0.05  | t | 48603  | PNAPWVF<br>ACA               | Mus<br>musculu<br>s              |
| 1 | 1.00 | 1 | 1 | 0.05  | 0.05   | 0.05   | 0.05  | 0.05   | t | 103348 | LGDVGEAF<br>VDSLTSQ          | Homo<br>sapiens                  |
| 1 | 1.00 | 1 | 1 | 0.03  | 0.03   | 0.03   | 0.03  | 0.03   | t | 127687 | HSSHRLS                      | Homo<br>sapiens                  |
| 1 | 1.00 | 1 | 1 | 0.01  | 0.01   | 0.01   | 0.01  | 0.01   | t | 125374 | DHTFMQR<br>YHTHQ             | Mus<br>musculu<br>s              |
| 1 | 1.00 | 1 | 1 | 0.01  | 0.01   | 0.01   | 0.01  | 0.01   | t | 125374 | DHTFMQR<br>YHTHQ             | Mus<br>musculu<br>s              |
| 1 | 1.00 | 1 | 1 | 0.01  | 0.01   | 0.01   | 0.01  | 0.01   | t | 113804 | RDTGILDSI<br>GRFFSGDR<br>GAP | Mus<br>musculu<br>s              |
| 1 | 1.00 | 1 | 1 | 0.01  | 0.01   | 0.01   | 0.01  | 0.01   | t | 115886 | PHLSFMAI<br>PP               | Homo<br>sapiens                  |
| 1 | 1.00 | 1 | 1 | 0.01  | 0.01   | 0.01   | 0.01  | 0.01   | t | 114775 | DKEGKDV<br>VC                | Homo<br>sapiens                  |
| 1 | 1.00 | 1 | 1 | 0.01  | 0.01   | 0.01   | 0.01  | 0.01   | t | 98436  | SAGTGGA<br>DLPTDLPP          | Sus<br>scrofa                    |
| 1 | 1.00 | 1 | 1 | 0.01  | 0.01   | 0.01   | 0.01  | 0.01   | t | 115807 | KEMPFKY<br>PV                | Homo<br>sapiens                  |
| 1 | 1.00 | 1 | 1 | 0.03  | 0.03   | 0.023  | 0.032 | 0.03   | t | 117015 | KEQFLDGD<br>GWTSRWI<br>ESK   | Homo<br>sapiens                  |
| 1 | 1.00 | 1 | 1 | -0.01 | -0.01  | -0.01  | -0.01 | -0.01  | t | 99252  | FNSKAMVI<br>VVVNKGT          | Homo<br>sapiens                  |
| 1 | 1.00 | 1 | 1 | -0.03 | -0.03  | -0.03  | -0.03 | -0.03  | t | 103004 | AAHKGLM<br>NIALAISA          | Homo<br>sapiens                  |
| 1 | 1.00 | 1 | 1 | -0.03 | -0.03  | -0.03  | -0.03 | -0.03  | t | 106783 | RLYHVPAV<br>GQ               | Homo<br>sapiens                  |
| 1 | 1.00 | 1 | 1 | -0.03 | -0.03  | -0.03  | -0.03 | -0.03  | t | 110584 | GAPGFPG<br>PRGPPGP<br>Q      | Mus<br>musculu<br>s              |
| 1 | 1.00 | 1 | 1 | 0     | 0.002  | 0.003  | 0     | -0.002 | t | 132886 | PVRLAELH<br>SDLKIQE          | Oryctola<br>gus<br>cuniculu<br>s |

|   |      |   |   |       |        |        |        |        |   |        |                        |                       |
|---|------|---|---|-------|--------|--------|--------|--------|---|--------|------------------------|-----------------------|
| 1 | 1.00 | 1 | 1 | -0.01 | -0.01  | -0.01  | -0.01  | -0.01  | t | 105279 | LDTTTL                 | Oryctolagus cuniculus |
| 1 | 1.00 | 1 | 1 | 0.05  | 0.05   | 0.05   | 0.046  | 0.048  | t | 96209  | EDKDEDEEDE             | Homo sapiens          |
| 1 | 1.00 | 1 | 1 | 0.04  | 0.04   | 0.04   | 0.04   | 0.041  | t | 95014  | GRLIELSQEG             | Rattus norvegicus     |
| 1 | 1.00 | 1 | 1 | 0.01  | 0.013  | 0.009  | 0.01   | 0.01   | t | 953    | AEGRAINRRVE            | Mus musculus          |
| 1 | 1.00 | 1 | 1 | 0     | 0      | 0      | 0      | 0.001  | t | 60116  | SPLLGCIGSTCAE          | Mus musculus          |
| 1 | 1.00 | 1 | 1 | 0.02  | 0.018  | 0.023  | 0.023  | 0.02   | t | 27681  | INLLDDSD F             | Sus scrofa            |
| 1 | 1.00 | 1 | 1 | 0.02  | 0.022  | 0.005  | 0.017  | 0.02   | t | 25997  | IETWNPNNQEFECAG        | Homo sapiens          |
| 1 | 1.00 | 1 | 1 | -0.02 | -0.018 | -0.014 | -0.023 | -0.022 | t | 44654  | NLARTTPD RQ            | Homo sapiens          |
| 1 | 1.00 | 1 | 1 | 0     | 0      | 0      | 0      | 0      | t | 135834 | CEFRDGA GSICG          | Mus musculus          |
| 1 | 1.00 | 1 | 1 | 0     | 0.003  | 0      | 0      | 0      | t | 58921  | SKPTTKQR QNKP          | Mus musculus          |
| 1 | 1.00 | 1 | 1 | 0.04  | 0.042  | 0.044  | 0.043  | 0.04   | t | 46800  | PAGAGAAI LTPTPVN       | Homo sapiens          |
| 1 | 1.00 | 1 | 1 | 0.05  | 0.05   | 0.043  | 0.05   | 0.054  | t | 137858 | FTPGTEYT               | Oryctolagus cuniculus |
| 1 | 1.00 | 1 | 1 | -0.01 | -0.012 | -0.01  | -0.009 | -0.011 | t | 45597  | NQNNFVH DCVNITIK QHTVT | Mus musculus          |
| 1 | 1.00 | 1 | 1 | -0.06 | -0.057 | -0.06  | -0.06  | -0.061 | t | 135569 | KTNMK                  | Mus musculus          |

|   |      |   |   |       |        |        |        |        |   |        |                             |                                  |
|---|------|---|---|-------|--------|--------|--------|--------|---|--------|-----------------------------|----------------------------------|
| 1 | 1.00 | 1 | 1 | -0.06 | -0.057 | -0.06  | -0.06  | -0.061 | t | 135569 | KTNMK                       | Mus<br>musculu<br>s              |
| 1 | 1.00 | 1 | 1 | 0.02  | 0.023  | 0.02   | 0.02   | 0.02   | t | 43222  | NANADPN                     | Mus<br>musculu<br>s              |
| 1 | 1.00 | 1 | 1 | -0.01 | -0.01  | -0.01  | -0.01  | -0.011 | t | 925    | AEGEFKTL<br>RNTNRLDP<br>AK  | Homo<br>sapiens                  |
| 1 | 1.00 | 1 | 1 | 0.04  | 0.037  | 0.046  | 0.04   | 0.041  | t | 12981  | ELDGDQM<br>I                | Oryctola<br>gus<br>cuniculu<br>s |
| 1 | 1.00 | 1 | 1 | 0     | -0.012 | 0      | 0      | 0      | t | 43233  | NANP                        | Macaca<br>mulatta                |
| 1 | 1.00 | 1 | 1 | 0     | 0      | 0      | 0      | 0      | t | 43233  | NANP                        | Mus<br>musculu<br>s              |
| 1 | 1.00 | 1 | 1 | 0.04  | 0.04   | 0.033  | 0.033  | 0.04   | t | 119502 | NNLGTI                      | Homo<br>sapiens                  |
| 1 | 1.00 | 1 | 1 | 0     | 0.002  | -0.007 | -0.009 | -0.002 | t | 115743 | FPPQSVLS<br>LS              | Homo<br>sapiens                  |
| 1 | 1.00 | 1 | 1 | 0.02  | 0.02   | 0.02   | 0.02   | 0.02   | t | 143675 | DRVDLGTL<br>RGYY            | Mus<br>musculu<br>s              |
| 1 | 1.00 | 1 | 1 | 0.02  | 0.02   | 0.02   | 0.02   | 0.02   | t | 72552  | WHRTPSTL<br>WGVI            | Mus<br>musculu<br>s              |
| 1 | 1.00 | 1 | 1 | 0     | 0      | 0      | 0      | 0      | t | 109845 | RPLGLQEE<br>SLDG            | Mus<br>musculu<br>s              |
| 1 | 1.00 | 1 | 1 | -0.02 | -0.02  | -0.02  | -0.02  | -0.02  | t | 135677 | FTRVVGGE                    | Homo<br>sapiens                  |
| 1 | 1.00 | 1 | 1 | -0.02 | -0.02  | -0.02  | -0.02  | -0.02  | t | 78303  | WHSIFAP                     | Homo<br>sapiens                  |
| 1 | 1.00 | 1 | 1 | 0     | 0      | -0.007 | 0      | 0.003  | t | 133664 | PPPPPPPP<br>PP              | Mus<br>musculu<br>s              |
| 1 | 1.00 | 1 | 1 | 0.02  | 0.02   | 0.022  | 0.02   | 0.02   | t | 95682  | PQYLQYLY<br>QG              | Homo<br>sapiens                  |
| 1 | 1.00 | 1 | 1 | 0.01  | 0      | -0.004 | 0.007  | 0.01   | t | 75561  | YQTELARV<br>QKANADA<br>KATY | Homo<br>sapiens                  |

|   |      |   |   |       |        |        |        |        |   |        |                              |                                  |
|---|------|---|---|-------|--------|--------|--------|--------|---|--------|------------------------------|----------------------------------|
| 1 | 1.00 | 1 | 1 | -0.02 | -0.02  | -0.018 | -0.02  | -0.02  | t | 95560  | LNFLKKISQ<br>R               | Homo<br>sapiens                  |
| 1 | 1.00 | 1 | 1 | 0     | 0      | 0      | 0.003  | 0      | t | 65390  | TNPMSTG<br>ALLRAS            | Homo<br>sapiens                  |
| 1 | 1.00 | 1 | 1 | 0.01  | 0.012  | 0.005  | 0.011  | 0.01   | t | 33107  | KRAASKVS<br>ARLLTV           | Homo<br>sapiens                  |
| 1 | 1.00 | 1 | 1 | -0.01 | -0.01  | -0.02  | -0.013 | -0.01  | t | 89062  | SRSESSVE<br>NFLCRSA          | Homo<br>sapiens                  |
| 1 | 1.00 | 1 | 1 | -0.02 | -0.018 | -0.013 | -0.021 | -0.02  | t | 34933  | LAQKVART<br>LP               | Cavia<br>porcellu<br>s           |
| 1 | 1.00 | 1 | 1 | -0.02 | -0.024 | -0.013 | -0.021 | -0.02  | t | 34933  | LAQKVART<br>LP               | Oryctola<br>gus<br>cuniculu<br>s |
| 1 | 1.00 | 1 | 1 | 0.01  | 0.01   | 0.01   | 0.019  | 0.009  | t | 131415 | ESKAISDA<br>QITASSYFT<br>NMF | Homo<br>sapiens                  |
| 1 | 1.00 | 1 | 1 | -0.01 | -0.01  | -0.01  | -0.01  | -0.01  | t | 156922 | NLHLGLA                      | Gallus<br>gallus                 |
| 1 | 1.00 | 1 | 1 | -0.02 | -0.02  | -0.02  | -0.02  | -0.02  | t | 14241  | ESQAYYDG<br>RRSS             | Mus<br>musculu<br>s              |
| 1 | 1.00 | 1 | 1 | 0     | 0      | 0      | 0      | -0.001 | t | 136353 | HGNAEVH<br>ASFFDIGG<br>S     | Oryctola<br>gus<br>cuniculu<br>s |
| 1 | 1.00 | 1 | 1 | 0     | 0      | 0      | 0      | -0.001 | t | 156904 | KPGDPRH                      | Mus<br>musculu<br>s              |
| 1 | 1.00 | 1 | 1 | 0     | 0      | 0      | 0      | -0.001 | t | 152917 | QLPELKQK<br>SSNSRKRR<br>STSA | Homo<br>sapiens                  |
| 1 | 1.00 | 1 | 1 | 0     | 0      | 0      | 0      | -0.001 | t | 156907 | KVGDPLW                      | Mus<br>musculu<br>s              |
| 1 | 1.00 | 1 | 1 | 0     | 0      | 0      | 0      | -0.001 | t | 156900 | KLGDPRIA<br>TTLF             | Mus<br>musculu<br>s              |
| 1 | 1.00 | 1 | 1 | 0     | -0.003 | 0      | 0      | -0.001 | t | 135799 | YGKDVKDL<br>FDYAE            | Oryctola<br>gus<br>cuniculu<br>s |



|   |      |   |   |   |        |   |   |        |   |        |                       |                 |
|---|------|---|---|---|--------|---|---|--------|---|--------|-----------------------|-----------------|
| 1 | 1.00 | 1 | 1 | 0 | 0      | 0 | 0 | -0.001 | t | 135799 | YGKDVKDL<br>FDYAE     | Mus<br>musculus |
| 1 | 1.00 | 1 | 1 | 0 | 0      | 0 | 0 | -0.001 | t | 135741 | QGETEEAL<br>IQKRSY    | Mus<br>musculus |
| 1 | 1.00 | 1 | 1 | 0 | 0      | 0 | 0 | -0.001 | t | 152777 | LLNIDKDIR<br>K        | Homo<br>sapiens |
| 1 | 1.00 | 1 | 1 | 0 | 0      | 0 | 0 | -0.001 | t | 150883 | SDDEDLAT<br>S         | Mus<br>musculus |
| 1 | 1.00 | 1 | 1 | 0 | 0      | 0 | 0 | -0.001 | t | 144699 | KASITEIKA<br>DKT      | Mus<br>musculus |
| 1 | 1.00 | 1 | 1 | 0 | 0      | 0 | 0 | -0.001 | t | 139935 | VIAIALFGT<br>IATANAAD | Homo<br>sapiens |
| 1 | 1.00 | 1 | 1 | 0 | 0      | 0 | 0 | -0.001 | t | 139830 | MKKISSVI<br>AIALFGTIA | Homo<br>sapiens |
| 1 | 1.00 | 1 | 1 | 0 | 0      | 0 | 0 | -0.001 | t | 150858 | ISSLYNLVK<br>SS       | Mus<br>musculus |
| 1 | 1.00 | 1 | 1 | 0 | 0      | 0 | 0 | -0.001 | t | 135736 | PRIGGQRE<br>LKKITE    | Mus<br>musculus |
| 1 | 1.00 | 1 | 1 | 0 | 0      | 0 | 0 | -0.001 | t | 149403 | PCKSNT                | Mus<br>musculus |
| 1 | 1.00 | 1 | 1 | 0 | 0      | 0 | 0 | -0.001 | t | 130636 | WPQIWFD<br>DEEDV      | Homo<br>sapiens |
| 1 | 1.00 | 1 | 1 | 0 | 0      | 0 | 0 | -0.001 | t | 130524 | KFHPKDIP<br>YQVW      | Mus<br>musculus |
| 1 | 1.00 | 1 | 1 | 0 | -0.002 | 0 | 0 | -0.001 | t | 130470 | DWPALIFD<br>QDML      | Mus<br>musculus |
| 1 | 1.00 | 1 | 1 | 0 | 0      | 0 | 0 | -0.001 | t | 130470 | DWPALIFD<br>QDML      | Homo<br>sapiens |
| 1 | 1.00 | 1 | 1 | 0 | 0      | 0 | 0 | -0.001 | t | 130470 | DWPALIFD<br>QDML      | Mus<br>musculus |
| 1 | 1.00 | 1 | 1 | 0 | 0      | 0 | 0 | -0.001 | t | 130524 | KFHPKDIP<br>YQVW      | Mus<br>musculus |
| 1 | 1.00 | 1 | 1 | 0 | 0      | 0 | 0 | -0.001 | t | 130598 | RQFECYTT<br>CVG       | Mus<br>musculus |

|   |      |   |   |   |        |   |   |        |   |        |                              |                          |
|---|------|---|---|---|--------|---|---|--------|---|--------|------------------------------|--------------------------|
| 1 | 1.00 | 1 | 1 | 0 | 0      | 0 | 0 | -0.001 | t | 133722 | TSKSKYPL<br>VV               | Mus<br>musculu<br>s      |
| 1 | 1.00 | 1 | 1 | 0 | 0      | 0 | 0 | -0.001 | t | 118963 | PNYKVVN<br>YAVTK             | Mus<br>musculu<br>s      |
| 1 | 1.00 | 1 | 1 | 0 | 0      | 0 | 0 | -0.001 | t | 119038 | TSTNGIKK<br>LIF              | Mus<br>musculu<br>s      |
| 1 | 1.00 | 1 | 1 | 0 | 0      | 0 | 0 | -0.001 | t | 130634 | WEWDWP<br>RIELNI             | Homo<br>sapiens          |
| 1 | 1.00 | 1 | 1 | 0 | -0.003 | 0 | 0 | -0.001 | t | 124603 | QHWSYPL<br>RPG               | Rattus<br>norvegic<br>us |
| 1 | 1.00 | 1 | 1 | 0 | 0      | 0 | 0 | -0.001 | t | 124603 | QHWSYPL<br>RPG               | Rattus<br>norvegic<br>us |
| 1 | 1.00 | 1 | 1 | 0 | 0      | 0 | 0 | -0.001 | t | 130643 | YSLLEPYT<br>FDP              | Homo<br>sapiens          |
| 1 | 1.00 | 1 | 1 | 0 | 0      | 0 | 0 | -0.001 | t | 130635 | WGPRVIFE<br>DVTV             | Homo<br>sapiens          |
| 1 | 1.00 | 1 | 1 | 0 | 0      | 0 | 0 | -0.001 | t | 130509 | HKKDFAR<br>GPGWS             | Mus<br>musculu<br>s      |
| 1 | 1.00 | 1 | 1 | 0 | 0      | 0 | 0 | -0.001 | t | 130471 | DWPAVIFE<br>DTRA             | Homo<br>sapiens          |
| 1 | 1.00 | 1 | 1 | 0 | 0      | 0 | 0 | -0.001 | t | 108482 | IINPSENG<br>DTSTNGIK<br>K    | Mus<br>musculu<br>s      |
| 1 | 1.00 | 1 | 1 | 0 | 0      | 0 | 0 | -0.001 | t | 108291 | AVGADES<br>VVKEAHRE<br>VINS  | Mus<br>musculu<br>s      |
| 1 | 1.00 | 1 | 1 | 0 | 0      | 0 | 0 | -0.001 | t | 72805  | WLTEKEGS<br>YP               | Mus<br>musculu<br>s      |
| 1 | 1.00 | 1 | 1 | 0 | 0      | 0 | 0 | -0.001 | t | 67875  | VCRQGVV<br>DRGWGN<br>GCGLFGK | Equus<br>caballus        |
| 1 | 1.00 | 1 | 1 | 0 | -0.003 | 0 | 0 | -0.001 | t | 66412  | TSSANGG<br>GIFNSVFG<br>GMKNN | Mus<br>musculu<br>s      |
| 1 | 1.00 | 1 | 1 | 0 | 0      | 0 | 0 | -0.001 | t | 97726  | VETPIRN                      | Mus<br>musculu<br>s      |
| 1 | 1.00 | 1 | 1 | 0 | 0      | 0 | 0 | -0.001 | t | 69183  | VKAVTTLL<br>KA               | Mus<br>musculu<br>s      |
| 1 | 1.00 | 1 | 1 | 0 | 0      | 0 | 0 | -0.001 | t | 63122  | TDAYNQKL<br>SERRAN           | Mus<br>musculu<br>s      |

|   |      |   |   |   |   |   |   |        |   |       |                              |                |
|---|------|---|---|---|---|---|---|--------|---|-------|------------------------------|----------------|
| 1 | 1.00 | 1 | 1 | 0 | 0 | 0 | 0 | -0.001 | t | 97650 | SLLTEVET                     | Mus musculus   |
| 1 | 1.00 | 1 | 1 | 0 | 0 | 0 | 0 | -0.001 | t | 79356 | RAVIWAW<br>MWE               | Mus musculus   |
| 1 | 1.00 | 1 | 1 | 0 | 0 | 0 | 0 | -0.001 | t | 63122 | TDAYNQKL<br>SERRAN           | Mus musculus   |
| 1 | 1.00 | 1 | 1 | 0 | 0 | 0 | 0 | -0.001 | t | 97547 | PFVPRADE<br>PARKGKV<br>H     | Mus musculus   |
| 1 | 1.00 | 1 | 1 | 0 | 0 | 0 | 0 | -0.001 | t | 64762 | TLDVRMIN<br>IE               | Mus musculus   |
| 1 | 1.00 | 1 | 1 | 0 | 0 | 0 | 0 | -0.001 | t | 61946 | STTNTPLV<br>SHLEHRS          | Mus musculus   |
| 1 | 1.00 | 1 | 1 | 0 | 0 | 0 | 0 | -0.001 | t | 61946 | STTNTPLV<br>SHLEHRS          | Mus musculus   |
| 1 | 1.00 | 1 | 1 | 0 | 0 | 0 | 0 | -0.001 | t | 63038 | TAVSPTTL<br>RTEVVK           | Sus scrofa     |
| 1 | 1.00 | 1 | 1 | 0 | 0 | 0 | 0 | -0.001 | t | 39183 | LRRDLAS<br>REAKKQVE<br>KALE  | Mus musculus   |
| 1 | 1.00 | 1 | 1 | 0 | 0 | 0 | 0 | -0.001 | t | 40167 | LTSGLKLC<br>RVKMEKL<br>QLKGT | Equus caballus |
| 1 | 1.00 | 1 | 1 | 0 | 0 | 0 | 0 | -0.001 | t | 57542 | SELSQLS                      | Mus musculus   |
| 1 | 1.00 | 1 | 1 | 0 | 0 | 0 | 0 | -0.001 | t | 43317 | NATAEGR<br>AINRRVE           | Mus musculus   |
| 1 | 1.00 | 1 | 1 | 0 | 0 | 0 | 0 | -0.001 | t | 48782 | PPFTSAVG<br>GVDHRS           | Mus musculus   |
| 1 | 1.00 | 1 | 1 | 0 | 0 | 0 | 0 | -0.001 | t | 48395 | PLLGICGST<br>CAEDGN          | Mus musculus   |
| 1 | 1.00 | 1 | 1 | 0 | 0 | 0 | 0 | -0.001 | t | 47108 | PDHVRTK<br>GPGRCH            | Mus musculus   |

|   |      |   |   |   |   |   |   |        |   |       |                             |                     |
|---|------|---|---|---|---|---|---|--------|---|-------|-----------------------------|---------------------|
| 1 | 1.00 | 1 | 1 | 0 | 0 | 0 | 0 | -0.001 | t | 41218 | MDDDTER<br>FPTHRSLP         | Mus<br>musculu<br>s |
| 1 | 1.00 | 1 | 1 | 0 | 0 | 0 | 0 | -0.001 | t | 46841 | PAKLLKER<br>GFFGAIAG<br>FLE | Mus<br>musculu<br>s |
| 1 | 1.00 | 1 | 1 | 0 | 0 | 0 | 0 | -0.001 | t | 49692 | PTLDVRMI<br>NI              | Mus<br>musculu<br>s |
| 1 | 1.00 | 1 | 1 | 0 | 0 | 0 | 0 | -0.001 | t | 40619 | LVTVNPV<br>SVATANS          | Mus<br>musculu<br>s |
| 1 | 1.00 | 1 | 1 | 0 | 0 | 0 | 0 | -0.001 | t | 41218 | MDDDTER<br>FPTHRSLP         | Mus<br>musculu<br>s |
| 1 | 1.00 | 1 | 1 | 0 | 0 | 0 | 0 | -0.001 | t | 49692 | PTLDVRMI<br>NI              | Mus<br>musculu<br>s |
| 1 | 1.00 | 1 | 1 | 0 | 0 | 0 | 0 | -0.001 | t | 44142 | NHGNYS<br>A<br>QVGASQ       | Mus<br>musculu<br>s |
| 1 | 1.00 | 1 | 1 | 0 | 0 | 0 | 0 | -0.001 | t | 44142 | NHGNYS<br>A<br>QVGASQ       | Mus<br>musculu<br>s |
| 1 | 1.00 | 1 | 1 | 0 | 0 | 0 | 0 | -0.001 | t | 59229 | SLKMADP<br>NRFRGKDL<br>P    | Mus<br>musculu<br>s |
| 1 | 1.00 | 1 | 1 | 0 | 0 | 0 | 0 | -0.001 | t | 56998 | SASRSCIG<br>S<br>QCSTTA     | Mus<br>musculu<br>s |
| 1 | 1.00 | 1 | 1 | 0 | 0 | 0 | 0 | -0.001 | t | 55825 | RSELSQLS                    | Mus<br>musculu<br>s |
| 1 | 1.00 | 1 | 1 | 0 | 0 | 0 | 0 | -0.001 | t | 37316 | LLGCIGSTC<br>A              | Mus<br>musculu<br>s |
| 1 | 1.00 | 1 | 1 | 0 | 0 | 0 | 0 | -0.001 | t | 56864 | SALLEDPV<br>G               | Mus<br>musculu<br>s |
| 1 | 1.00 | 1 | 1 | 0 | 0 | 0 | 0 | -0.001 | t | 39183 | LRRDLAS<br>REAKKQVE<br>KALE | Mus<br>musculu<br>s |

|   |      |   |   |   |        |   |   |        |   |       |                              |                     |
|---|------|---|---|---|--------|---|---|--------|---|-------|------------------------------|---------------------|
| 1 | 1.00 | 1 | 1 | 0 | 0      | 0 | 0 | -0.001 | t | 36958 | LKMADPN<br>RFRGKD            | Mus<br>musculu<br>s |
| 1 | 1.00 | 1 | 1 | 0 | 0      | 0 | 0 | -0.001 | t | 56998 | SASRSCIGS<br>QCSTTA          | Mus<br>musculu<br>s |
| 1 | 1.00 | 1 | 1 | 0 | 0      | 0 | 0 | -0.001 | t | 60116 | SPLLGIGS<br>TCAE             | Mus<br>musculu<br>s |
| 1 | 1.00 | 1 | 1 | 0 | 0      | 0 | 0 | -0.001 | t | 57542 | SELSQLS                      | Mus<br>musculu<br>s |
| 1 | 1.00 | 1 | 1 | 0 | 0      | 0 | 0 | -0.001 | t | 36958 | LKMADPN<br>RFRGKD            | Mus<br>musculu<br>s |
| 1 | 1.00 | 1 | 1 | 0 | 0      | 0 | 0 | -0.001 | t | 14457 | ETLGALAS<br>AIKETFEEG<br>TC  | Mus<br>musculu<br>s |
| 1 | 1.00 | 1 | 1 | 0 | -0.003 | 0 | 0 | -0.001 | t | 30247 | KDSPVGEI<br>LTRSKYNQ<br>NSKY | Mus<br>musculu<br>s |
| 1 | 1.00 | 1 | 1 | 0 | 0      | 0 | 0 | -0.001 | t | 31772 | KLCGVL                       | Homo<br>sapiens     |
| 1 | 1.00 | 1 | 1 | 0 | 0      | 0 | 0 | -0.001 | t | 18084 | FTTKVIGK<br>DSRDFDIS<br>PKV  | Mus<br>musculu<br>s |
| 1 | 1.00 | 1 | 1 | 0 | 0      | 0 | 0 | -0.001 | t | 18084 | FTTKVIGK<br>DSRDFDIS<br>PKV  | Mus<br>musculu<br>s |
| 1 | 1.00 | 1 | 1 | 0 | 0      | 0 | 0 | -0.001 | t | 27725 | INQDPDKI<br>LTY              | Mus<br>musculu<br>s |
| 1 | 1.00 | 1 | 1 | 0 | 0      | 0 | 0 | -0.001 | t | 21254 | GMDGTQL<br>DRW               | Mus<br>musculu<br>s |
| 1 | 1.00 | 1 | 1 | 0 | 0      | 0 | 0 | -0.001 | t | 27725 | INQDPDKI<br>LTY              | Mus<br>musculu<br>s |
| 1 | 1.00 | 1 | 1 | 0 | -0.003 | 0 | 0 | -0.001 | t | 31816 | KLEGGGK<br>DIREGGDG<br>DIDRT | Mus<br>musculu<br>s |
| 1 | 1.00 | 1 | 1 | 0 | 0      | 0 | 0 | -0.001 | t | 18084 | FTTKVIGK<br>DSRDFDIS<br>PKV  | Mus<br>musculu<br>s |
| 1 | 1.00 | 1 | 1 | 0 | 0      | 0 | 0 | -0.001 | t | 27725 | INQDPDKI<br>LTY              | Mus<br>musculu<br>s |

|   |      |   |   |   |   |   |   |        |   |       |                              |                     |
|---|------|---|---|---|---|---|---|--------|---|-------|------------------------------|---------------------|
| 1 | 1.00 | 1 | 1 | 0 | 0 | 0 | 0 | -0.001 | t | 21254 | GMDGTQL<br>DRW               | Mus<br>musculu<br>s |
| 1 | 1.00 | 1 | 1 | 0 | 0 | 0 | 0 | -0.001 | t | 17135 | FNCLGMS<br>NRDFLEGV<br>SGATW | Equus<br>caballus   |
| 1 | 1.00 | 1 | 1 | 0 | 0 | 0 | 0 | -0.001 | t | 14686 | EVETPIRN                     | Mus<br>musculu<br>s |
| 1 | 1.00 | 1 | 1 | 0 | 0 | 0 | 0 | -0.001 | t | 27725 | INQDPDKI<br>LTY              | Mus<br>musculu<br>s |
| 1 | 1.00 | 1 | 1 | 0 | 0 | 0 | 0 | -0.001 | t | 26849 | IKMVSSLK<br>TKIT             | Mus<br>musculu<br>s |
| 1 | 1.00 | 1 | 1 | 0 | 0 | 0 | 0 | -0.001 | t | 14686 | EVETPIRN                     | Mus<br>musculu<br>s |
| 1 | 1.00 | 1 | 1 | 0 | 0 | 0 | 0 | -0.001 | t | 26849 | IKMVSSLK<br>TKIT             | Mus<br>musculu<br>s |
| 1 | 1.00 | 1 | 1 | 0 | 0 | 0 | 0 | -0.001 | t | 12992 | ELDLQARR                     | Mus<br>musculu<br>s |
| 1 | 1.00 | 1 | 1 | 0 | 0 | 0 | 0 | -0.001 | t | 9463  | DNGKAIYE<br>RARERALQ<br>ELGP | Mus<br>musculu<br>s |
| 1 | 1.00 | 1 | 1 | 0 | 0 | 0 | 0 | -0.001 | t | 6925  | CRGFTSFK<br>KPPTPPPE<br>PET  | Mus<br>musculu<br>s |
| 1 | 1.00 | 1 | 1 | 0 | 0 | 0 | 0 | -0.001 | t | 7674  | DAVTELDK<br>N                | Mus<br>musculu<br>s |
| 1 | 1.00 | 1 | 1 | 0 | 0 | 0 | 0 | -0.001 | t | 4740  | ASREAKKQ<br>VEKALE           | Mus<br>musculu<br>s |
| 1 | 1.00 | 1 | 1 | 0 | 0 | 0 | 0 | -0.001 | t | 4740  | ASREAKKQ<br>VEKALE           | Mus<br>musculu<br>s |
| 1 | 1.00 | 1 | 1 | 0 | 0 | 0 | 0 | -0.001 | t | 4740  | ASREAKKQ<br>VEKALE           | Mus<br>musculu<br>s |
| 1 | 1.00 | 1 | 1 | 0 | 0 | 0 | 0 | -0.001 | t | 4740  | ASREAKKQ<br>VEKALE           | Mus<br>musculu<br>s |

|   |      |   |   |       |        |        |        |        |   |        |                              |                                  |
|---|------|---|---|-------|--------|--------|--------|--------|---|--------|------------------------------|----------------------------------|
| 1 | 1.00 | 1 | 1 | 0     | 0      | 0      | 0      | -0.001 | t | 9463   | DNGKAIYE<br>RARERALQ<br>ELGP | Mus<br>musculu<br>s              |
| 1 | 1.00 | 1 | 1 | 0     | 0      | 0      | 0      | -0.001 | t | 4740   | ASREAKKQ<br>VEKALE           | Mus<br>musculu<br>s              |
| 1 | 1.00 | 1 | 1 | 0     | 0      | 0      | 0      | -0.001 | t | 4740   | ASREAKKQ<br>VEKALE           | Mus<br>musculu<br>s              |
| 1 | 1.00 | 1 | 1 | 0.03  | 0.028  | 0.021  | 0.03   | 0.03   | t | 18787  | GATFQVE<br>VPGSQHID<br>SQKKA | Mus<br>musculu<br>s              |
| 1 | 1.00 | 1 | 1 | 0.03  | 0.027  | 0.025  | 0.03   | 0.031  | t | 80014  | RNYPTGAE<br>FLGEG            | Oryctola<br>gus<br>cuniculu<br>s |
| 1 | 1.00 | 1 | 1 | -0.01 | -0.01  | -0.01  | -0.01  | -0.01  | t | 69176  | VKAETRLN<br>P                | Mus<br>musculu<br>s              |
| 1 | 1.00 | 1 | 1 | -0.03 | -0.03  | -0.035 | -0.03  | -0.03  | t | 25252  | IAEAMRKV<br>KK               | Homo<br>sapiens                  |
| 1 | 1.00 | 1 | 1 | 0.03  | 0.032  | 0.037  | 0.027  | 0.03   | t | 7616   | DAPSFSDI<br>PN               | Homo<br>sapiens                  |
| 1 | 1.00 | 1 | 1 | 0.03  | 0.032  | 0.037  | 0.027  | 0.03   | t | 7616   | DAPSFSDI<br>PN               | Homo<br>sapiens                  |
| 1 | 1.00 | 1 | 1 | 0     | -0.003 | -0.008 | -0.001 | 0      | t | 65766  | TPSKYGLG<br>GDILFGWE<br>RTRE | Oryctola<br>gus<br>cuniculu<br>s |
| 1 | 1.00 | 1 | 1 | -0.02 | -0.016 | -0.013 | -0.013 | -0.021 | t | 108002 | LGWMRY<br>HPQA               | Homo<br>sapiens                  |
| 1 | 1.00 | 1 | 1 | -0.01 | -0.008 | -0.012 | -0.013 | -0.012 | t | 23372  | GYIWIQRN<br>TG               | Homo<br>sapiens                  |
| 1 | 1.00 | 1 | 1 | 0     | 0.003  | 0.001  | 0      | 0      | t | 87807  | RDATAYPS<br>AKTPSS           | Mus<br>musculu<br>s              |

|   |      |   |   |       |        |        |        |        |   |        |                              |                       |
|---|------|---|---|-------|--------|--------|--------|--------|---|--------|------------------------------|-----------------------|
| 1 | 1.00 | 1 | 1 | 0     | 0      | 0      | -0.003 | -0.001 | t | 49801  | PTVAEEH                      | Homo sapiens          |
| 1 | 1.00 | 1 | 1 | 0     | 0.002  | -0.009 | -0.003 | -0.002 | t | 105678 | ANSYGLPR<br>EQARQLK          | Homo sapiens          |
| 1 | 1.00 | 1 | 1 | 0.01  | 0.007  | 0.006  | 0.01   | 0.009  | t | 142292 | SHLQLIYNL<br>TLCELNGT<br>DW  | Oryctolagus cuniculus |
| 1 | 1.00 | 1 | 1 | 0.06  | 0.062  | 0.055  | 0.061  | 0.061  | t | 67257  | TWGENET<br>DVLLNNT<br>RPPQ   | Homo sapiens          |
| 1 | 1.00 | 1 | 1 | -0.02 | -0.02  | -0.02  | -0.02  | -0.017 | t | 39167  | LRPTFDTR<br>LM               | Mus musculus          |
| 1 | 1.00 | 1 | 1 | 0.01  | 0.01   | 0.01   | 0.01   | 0.01   | t | 94474  | CNPACGR                      | Capra hircus          |
| 1 | 1.00 | 1 | 1 | 0.01  | 0.003  | 0.01   | 0.01   | 0.01   | t | 94474  | CNPACGR                      | Oryctolagus cuniculus |
| 1 | 1.00 | 1 | 1 | 0.01  | 0.01   | 0.01   | 0.01   | 0.01   | t | 94474  | CNPACGR                      | Oryctolagus cuniculus |
| 1 | 1.00 | 1 | 1 | -0.08 | -0.076 | -0.087 | -0.079 | -0.08  | t | 66123  | TRVSRYSSTARHRLRRGA           | Homo sapiens          |
| 1 | 1.00 | 1 | 1 | -0.02 | -0.016 | -0.019 | -0.013 | -0.019 | t | 125413 | FRVTCKDI<br>QRIPSLPPS<br>TQT | Homo sapiens          |
| 1 | 1.00 | 1 | 1 | -0.01 | -0.01  | -0.012 | -0.013 | -0.009 | t | 44035  | NGNATPQLTKNA                 | Homo sapiens          |
| 1 | 1.00 | 1 | 1 | 0.03  | 0.03   | 0.03   | 0.03   | 0.03   | t | 121037 | VLEIYSELG<br>G               | Mus musculus          |
| 1 | 1.00 | 1 | 1 | 0.03  | 0.03   | 0.03   | 0.03   | 0.03   | t | 103283 | IRGSVTPA<br>VSQFNAR          | Homo sapiens          |
| 1 | 1.00 | 1 | 1 | 0.03  | 0.03   | 0.03   | 0.03   | 0.03   | t | 79346  | QCETESDL<br>LIPSCP           | Mus musculus          |



|   |      |   |   |       |       |       |       |       |   |        |                              |                     |
|---|------|---|---|-------|-------|-------|-------|-------|---|--------|------------------------------|---------------------|
| 1 | 1.00 | 1 | 1 | 0.01  | 0.01  | 0.01  | 0.01  | 0.01  | t | 137432 | NHNYPPLS<br>LLTF             | Mus<br>musculu<br>s |
| 1 | 1.00 | 1 | 1 | 0.01  | 0.01  | 0.01  | 0.01  | 0.01  | t | 151068 | VGSSRYSK<br>KFKPEIA          | Homo<br>sapiens     |
| 1 | 1.00 | 1 | 1 | 0.01  | 0.01  | 0.01  | 0.01  | 0.01  | t | 138257 | VLTVLHQ                      | Homo<br>sapiens     |
| 1 | 1.00 | 1 | 1 | 0.01  | 0.01  | 0.01  | 0.01  | 0.01  | t | 103042 | AMEDLVR<br>AYHAMSS<br>T      | Homo<br>sapiens     |
| 1 | 1.00 | 1 | 1 | 0.01  | 0.01  | 0.01  | 0.01  | 0.01  | t | 108413 | GWPVAPD<br>PA                | Homo<br>sapiens     |
| 1 | 1.00 | 1 | 1 | 0.01  | 0.01  | 0.01  | 0.01  | 0.01  | t | 47122  | PDKEVLYE<br>AFDEMEE<br>CASKA | Homo<br>sapiens     |
| 1 | 1.00 | 1 | 1 | 0.01  | 0.01  | 0.01  | 0.01  | 0.01  | t | 22236  | GRVILSGK<br>PAIIPDREV<br>LYR | Homo<br>sapiens     |
| 1 | 1.00 | 1 | 1 | -0.01 | -0.01 | -0.01 | -0.01 | -0.01 | t | 115674 | ADARM                        | Homo<br>sapiens     |
| 1 | 1.00 | 1 | 1 | -0.01 | -0.01 | -0.01 | -0.01 | -0.01 | t | 115674 | ADARM                        | Homo<br>sapiens     |
| 1 | 1.00 | 1 | 1 | -0.01 | -0.01 | -0.01 | -0.01 | -0.01 | t | 92780  | GDDFIDG<br>GKG               | Ovis<br>aries       |
| 1 | 1.00 | 1 | 1 | 0.01  | 0.014 | 0.006 | 0.011 | 0.012 | t | 46858  | PALTAET<br>G                 | Homo<br>sapiens     |
| 1 | 1.00 | 1 | 1 | -0.03 | -0.03 | -0.03 | -0.03 | -0.03 | t | 108555 | NKALTFFL<br>P                | Homo<br>sapiens     |
| 1 | 1.00 | 1 | 1 | -0.05 | -0.05 | -0.05 | -0.05 | -0.05 | t | 106929 | TSFPIHSSC<br>N               | Homo<br>sapiens     |
| 1 | 1.00 | 1 | 1 | 0.05  | 0.048 | 0.05  | 0.049 | 0.05  | t | 69235  | VKIDNASP<br>AS               | Mus<br>musculu<br>s |
| 1 | 1.00 | 1 | 1 | 0.01  | 0.008 | 0.008 | 0.007 | 0.01  | t | 57196  | SDFTDSVR<br>DPKTS            | Mus<br>musculu<br>s |
| 1 | 1.00 | 1 | 1 | 0     | 0     | 0.002 | 0.003 | 0     | t | 23430  | GYPPNRQ<br>DPRFTDTL          | Homo<br>sapiens     |
| 1 | 1.00 | 1 | 1 | 0.05  | 0.052 | 0.051 | 0.053 | 0.052 | t | 122406 | IEIGLEGKG<br>FEPTLEALF<br>GK | Homo<br>sapiens     |

|   |      |   |   |       |        |        |        |        |   |        |                           |                            |
|---|------|---|---|-------|--------|--------|--------|--------|---|--------|---------------------------|----------------------------|
| 1 | 1.00 | 1 | 1 | 0     | 0      | 0      | 0      | 0      | t | 137449 | SHRLPAK                   | Mus<br>musculus            |
| 1 | 1.00 | 1 | 1 | 0.01  | 0.01   | 0.012  | 0.01   | 0.01   | t | 97177  | AELPF                     | Mus<br>musculus            |
| 1 | 1.00 | 1 | 1 | 0.01  | 0.01   | 0.012  | 0.01   | 0.01   | t | 97177  | AELPF                     | Mus<br>musculus            |
| 1 | 1.00 | 1 | 1 | 0     | 0      | 0      | 0.003  | 0.001  | t | 117773 | CNSRQTD<br>REDELI         | Homo<br>sapiens            |
| 1 | 1.00 | 1 | 1 | 0     | 0      | 0      | 0.003  | 0.001  | t | 117742 | AKAQTD<br>EDLRTLLRY       | Homo<br>sapiens            |
| 1 | 1.00 | 1 | 1 | -0.05 | -0.051 | -0.045 | -0.053 | -0.05  | t | 50067  | PYCWHYAP                  | Homo<br>sapiens            |
| 1 | 1.00 | 1 | 1 | 0     | 0.004  | 0      | 0.001  | 0      | t | 71138  | VSSQSFR                   | Homo<br>sapiens            |
| 1 | 1.00 | 1 | 1 | 0     | 0.004  | 0      | 0.001  | 0      | t | 9978   | DRGWGN                    | Homo<br>sapiens            |
| 1 | 1.00 | 1 | 1 | 0     | 0      | -0.012 | -0.006 | 0      | t | 114430 | KDMTKEFF<br>KNKSETW       | Homo<br>sapiens            |
| 1 | 1.00 | 1 | 1 | 0.01  | 0.013  | 0.011  | 0.01   | 0.011  | t | 75371  | YPNQVYYR<br>PVDQYSN       | Mus<br>musculus            |
| 1 | 1.00 | 1 | 1 | 0     | 0      | 0      | 0      | 0      | t | 75481  | YQEPVLGP<br>VR            | Homo<br>sapiens            |
| 1 | 1.00 | 1 | 1 | -0.02 | 0.004  | -0.02  | -0.02  | -0.021 | t | 142844 | LDLGRFF<br>GSDRGAP        | Rattus                     |
| 1 | 1.00 | 1 | 1 | -0.01 | -0.008 | -0.01  | -0.009 | -0.011 | t | 96521  | KVTKEKPT<br>PP            | Homo<br>sapiens(<br>human) |
| 1 | 1.00 | 1 | 1 | 0     | 0      | 0      | 0      | 0      | t | 123063 | CPTMTRVL<br>QGVLPALP<br>Q | Mus<br>musculus            |

|   |      |   |   |       |        |        |        |        |   |        |                            |                                  |
|---|------|---|---|-------|--------|--------|--------|--------|---|--------|----------------------------|----------------------------------|
| 1 | 1.00 | 1 | 1 | 0     | 0.003  | 0      | 0      | 0      | t | 123063 | CPTMTRVL<br>QGVLPALP<br>Q  | Mus<br>musculu<br>s              |
| 1 | 1.00 | 1 | 1 | -0.05 | -0.054 | -0.047 | -0.051 | -0.052 | t | 52871  | QYAAQNR<br>RGLDLL          | Oryctola<br>gus<br>cuniculu<br>s |
| 1 | 1.00 | 1 | 1 | 0.02  | 0.022  | 0.02   | 0.021  | 0.02   | t | 150986 | GAIAGFIE<br>GGWTGM<br>V    | Homo<br>sapiens                  |
| 1 | 1.00 | 1 | 1 | -0.01 | -0.01  | -0.005 | -0.01  | -0.01  | t | 46319  | NTYFTAFL<br>DGPK           | Mus<br>musculu<br>s              |
| 1 | 1.00 | 1 | 1 | 0.04  | 0.04   | 0.04   | 0.04   | 0.04   | t | 110625 | HKHAIVTV<br>TYDSEEQ<br>RQQ | Homo<br>sapiens                  |
| 1 | 1.00 | 1 | 1 | 0     | 0.007  | 0      | 0      | 0      | t | 43246  | NANPNAN<br>PNANPNA<br>NP   | Cavia<br>porcellu<br>s           |
| 1 | 1.00 | 1 | 1 | 0     | 0      | 0      | 0      | 0      | t | 37310  | LLGACSF                    | Oryctola<br>gus<br>cuniculu<br>s |
| 1 | 1.00 | 1 | 1 | 0     | 0.004  | -0.012 | -0.003 | -0.002 | t | 21623  | GPFTVRYT<br>TEGGTKTE       | Homo<br>sapiens                  |
| 1 | 1.00 | 1 | 1 | 0     | 0.002  | -0.012 | -0.003 | -0.002 | t | 21623  | GPFTVRYT<br>TEGGTKTE       | Homo<br>sapiens                  |
| 1 | 1.00 | 1 | 1 | 0.01  | 0.012  | 0.01   | 0.013  | 0.011  | t | 61123  | SSIVYEAA<br>DAILHT         | Homo<br>sapiens                  |
| 1 | 1.00 | 1 | 1 | 0.02  | 0.02   | 0.013  | 0.02   | 0.02   | t | 118348 | FHSGKHY<br>WEVDVTG<br>KE   | Homo<br>sapiens                  |
| 1 | 1.00 | 1 | 1 | -0.05 | -0.05  | -0.054 | -0.051 | -0.05  | t | 20788  | GLCTLVA<br>ML              | Homo<br>sapiens                  |
| 1 | 1.00 | 1 | 1 | -0.01 | -0.008 | -0.012 | -0.007 | -0.009 | t | 119741 | AIFKSYGEII<br>VTHFPFD      | Homo<br>sapiens                  |
| 1 | 1.00 | 1 | 1 | -0.01 | -0.008 | -0.012 | -0.007 | -0.009 | t | 119741 | AIFKSYGEII<br>VTHFPFD      | Homo<br>sapiens                  |

|   |      |   |   |       |        |       |       |        |   |        |                        |                       |
|---|------|---|---|-------|--------|-------|-------|--------|---|--------|------------------------|-----------------------|
| 1 | 1.00 | 1 | 1 | 0     | 0.007  | 0     | 0     | 0      | t | 94441  | CCHPAC                 | Capra hircus          |
| 1 | 1.00 | 1 | 1 | 0     | -0.007 | 0     | 0     | 0      | t | 94441  | CCHPAC                 | Oryctolagus cuniculus |
| 1 | 1.00 | 1 | 1 | 0     | 0      | 0     | 0     | 0      | t | 94441  | CCHPAC                 | Capra hircus          |
| 1 | 1.00 | 1 | 1 | 0.03  | 0.03   | 0.032 | 0.03  | 0.03   | t | 6948   | CRTCTTPA QGTSMY        | Mus musculus          |
| 1 | 1.00 | 1 | 1 | 0     | -0.003 | 0     | 0     | -0.002 | t | 144736 | NTECTLKK GGGLPDS VKI   | Oryctolagus cuniculus |
| 1 | 1.00 | 1 | 1 | 0.01  | 0.006  | -0.01 | 0.003 | 0.01   | t | 141779 | WKQYNPT GKIGIDDA NK    | Oryctolagus cuniculus |
| 1 | 1.00 | 1 | 1 | 0.01  | 0.008  | -0.01 | 0.003 | 0.01   | t | 141779 | WKQYNPT GKIGIDDA NK    | Rattus norvegicus     |
| 1 | 1.00 | 1 | 1 | -0.01 | -0.018 | -0.01 | -0.01 | -0.011 | t | 19862  | GGGTHNQ WNKPSKP KTNLKH | Mus musculus          |
| 1 | 1.00 | 1 | 1 | 0     | 0      | 0     | 0     | 0.002  | t | 118258 | AKSPEKAK               | Homo sapiens          |
| 1 | 1.00 | 1 | 1 | 0.04  | 0.04   | 0.04  | 0.04  | 0.04   | t | 115929 | QSLTLTDV EN            | Homo sapiens          |
| 1 | 1.00 | 1 | 1 | 0.02  | 0.02   | 0.02  | 0.02  | 0.02   | t | 149081 | NPNQTRM                | Sus scrofa            |
| 1 | 1.00 | 1 | 1 | 0.02  | 0.02   | 0.02  | 0.02  | 0.02   | t | 137745 | DTPLTTAA LALV          | Mus musculus          |
| 1 | 1.00 | 1 | 1 | 0.02  | 0.02   | 0.02  | 0.02  | 0.02   | t | 99443  | LQSCQQE PDDLKQK A      | Homo sapiens          |
| 1 | 1.00 | 1 | 1 | 0.04  | 0.042  | 0.04  | 0.047 | 0.04   | t | 124341 | KAVRKERS KESDDNY DKTED | Homo sapiens          |
| 1 | 1.00 | 1 | 1 | 0     | 0      | 0     | 0     | 0      | t | 135959 | LTRAYAKD VKFG          | Homo sapiens          |
| 1 | 1.00 | 1 | 1 | 0     | 0      | 0     | 0     | 0      | t | 141006 | EYPSLRDIF              | Ovis aries            |
| 1 | 1.00 | 1 | 1 | 0     | 0      | 0     | 0     | 0      | t | 149079 | NLTQTQM                | Sus scrofa            |

|   |      |   |   |       |        |        |        |        |   |        |                           |                                  |
|---|------|---|---|-------|--------|--------|--------|--------|---|--------|---------------------------|----------------------------------|
| 1 | 1.00 | 1 | 1 | 0     | 0      | 0      | 0      | 0      | t | 132074 | SPINAFLSV<br>DHLGGG       | Homo<br>sapiens                  |
| 1 | 1.00 | 1 | 1 | 0     | 0      | 0      | 0      | 0      | t | 115733 | ERFFSDKIA<br>K            | Homo<br>sapiens                  |
| 1 | 1.00 | 1 | 1 | 0     | 0      | 0      | 0      | 0      | t | 108849 | DEIPEPAV<br>PCGG          | Mus<br>musculu<br>s              |
| 1 | 1.00 | 1 | 1 | 0     | 0      | 0      | 0      | 0      | t | 114870 | KELAAVSV<br>DC            | Homo<br>sapiens                  |
| 1 | 1.00 | 1 | 1 | 0     | 0      | 0      | 0      | 0      | t | 113468 | GQGQQPG<br>QWQQPG<br>Q    | Homo<br>sapiens                  |
| 1 | 1.00 | 1 | 1 | -0.02 | -0.02  | -0.02  | -0.02  | -0.02  | t | 78506  | RSDVVGL<br>QSLFCCEI       | Mus<br>musculu<br>s              |
| 1 | 1.00 | 1 | 1 | -0.02 | -0.023 | -0.02  | -0.02  | -0.02  | t | 17648  | FRTAISGTP<br>QFY          | Oryctola<br>gus<br>cuniculu<br>s |
| 1 | 1.00 | 1 | 1 | 0     | -0.008 | -0.007 | 0.003  | 0      | t | 123880 | YRVNLKFL<br>PNETTSN       | Trichosu<br>rus<br>vulpecul<br>a |
| 1 | 1.00 | 1 | 1 | -0.05 | -0.048 | -0.056 | -0.049 | -0.048 | t | 78370  | EFMKEAD<br>KEAY           | Homo<br>sapiens                  |
| 1 | 1.00 | 1 | 1 | 0.01  | 0.01   | 0.01   | 0.01   | 0.011  | t | 144803 | TSAHSLA<br>VAAL           | Mus<br>musculu<br>s              |
| 1 | 1.00 | 1 | 1 | 0.02  | 0.022  | 0.025  | 0.021  | 0.02   | t | 109865 | RSLDFQAT<br>TMF           | Homo<br>sapiens                  |
| 1 | 1.00 | 1 | 1 | 0.01  | 0.008  | 0.006  | 0.007  | 0.01   | t | 158947 | LDIDIDPKV<br>KVATLS       | Mus<br>musculu<br>s              |
| 1 | 1.00 | 1 | 1 | 0     | 0.002  | -0.008 | 0.001  | -0.001 | t | 141671 | IAESKQLT<br>VKQKTEQI<br>K | Homo<br>sapiens                  |
| 1 | 1.00 | 1 | 1 | 0.03  | 0.028  | 0.022  | 0.029  | 0.03   | t | 38387  | LPAADMD<br>DFSRQLQ<br>N   | Macaca<br>cyclopis               |
| 1 | 1.00 | 1 | 1 | -0.05 | -0.048 | -0.057 | -0.05  | -0.05  | t | 107193 | LADAVAVT<br>MGPKGRT       | Rattus<br>norvegic<br>us         |
| 1 | 1.00 | 1 | 1 | -0.03 | -0.03  | -0.03  | -0.03  | -0.032 | t | 95739  | QRYQKFAL<br>PQ            | Homo<br>sapiens                  |

|   |      |   |   |       |        |        |        |        |   |        |                        |                       |
|---|------|---|---|-------|--------|--------|--------|--------|---|--------|------------------------|-----------------------|
| 1 | 1.00 | 1 | 1 | 0.01  | 0.01   | 0.01   | 0.01   | 0.01   | t | 48595  | PNAN                   | Mus musculus          |
| 1 | 1.00 | 1 | 1 | -0.03 | -0.032 | -0.035 | -0.037 | -0.031 | t | 122500 | NKQFRNC MVTTL          | Rattus norvegicus     |
| 1 | 1.00 | 1 | 1 | 0.05  | 0.05   | 0.05   | 0.046  | 0.048  | t | 118533 | NEEAGDG TTTATV         | Homo sapiens          |
| 1 | 1.00 | 1 | 1 | -0.03 | -0.028 | -0.025 | -0.023 | -0.03  | t | 122028 | VYSKRSGK PRGY          | Homo sapiens          |
| 1 | 1.00 | 1 | 1 | 0     | -0.004 | 0      | 0.003  | 0.001  | t | 118490 | LKDKYKNI GAKLV         | Oryctolagus cuniculus |
| 1 | 1.00 | 1 | 1 | 0     | -0.004 | 0      | 0.003  | 0.001  | t | 118451 | KGIIDPTKV VRTA         | Oryctolagus cuniculus |
| 1 | 1.00 | 1 | 1 | 0     | -0.004 | 0      | 0.003  | 0.001  | t | 118487 | LEIANAHR KPLVI         | Oryctolagus cuniculus |
| 1 | 1.00 | 1 | 1 | -0.04 | -0.038 | -0.04  | -0.04  | -0.04  | t | 107346 | ERMFRK                 | Rattus norvegicus     |
| 1 | 1.00 | 1 | 1 | 0.03  | 0.03   | 0.03   | 0.03   | 0.03   | t | 136359 | HTQHSPM VSVEF          | Gallus gallus         |
| 1 | 1.00 | 1 | 1 | 0.01  | 0.01   | 0.01   | 0.01   | 0.01   | t | 135762 | SYVTPICI               | Homo sapiens          |
| 1 | 1.00 | 1 | 1 | 0.01  | 0.01   | 0.01   | 0.01   | 0.01   | t | 119625 | PENNYKTT               | Homo sapiens          |
| 1 | 1.00 | 1 | 1 | 0.01  | 0.01   | 0.01   | 0.01   | 0.01   | t | 108036 | MSVPQTT YSKITELI       | Homo sapiens          |
| 1 | 1.00 | 1 | 1 | 0.01  | 0.01   | 0.01   | 0.01   | 0.01   | t | 108508 | KSGPIDIIG              | Homo sapiens          |
| 1 | 1.00 | 1 | 1 | 0.01  | 0.01   | 0.01   | 0.01   | 0.01   | t | 77900  | HDSPTIRY VEAY          | Mus musculus          |
| 1 | 1.00 | 1 | 1 | 0.01  | 0.01   | 0.01   | 0.01   | 0.01   | t | 47120  | PDKEILYEA FDEMEEC ASKA | Homo sapiens          |
| 1 | 1.00 | 1 | 1 | 0.01  | 0.01   | 0.01   | 0.01   | 0.01   | t | 50106  | PYIEQGM QLAEQFK QKALGL | Homo sapiens          |
| 1 | 1.00 | 1 | 1 | 0.01  | 0.01   | 0.01   | 0.01   | 0.01   | t | 50914  | QGMQLAE QFKQKAL GLLQTA | Homo sapiens          |

|   |      |   |   |       |        |        |        |        |   |        |                              |                                  |
|---|------|---|---|-------|--------|--------|--------|--------|---|--------|------------------------------|----------------------------------|
| 1 | 1.00 | 1 | 1 | -0.01 | -0.01  | -0.01  | -0.01  | -0.01  | t | 128455 | DRATWKS<br>NYFLKIIQ          | Homo<br>sapiens                  |
| 1 | 1.00 | 1 | 1 | -0.01 | -0.01  | -0.01  | -0.01  | -0.01  | t | 110818 | DSTNNNK<br>YTVTL             | Homo<br>sapiens                  |
| 1 | 1.00 | 1 | 1 | -0.01 | -0.01  | -0.01  | -0.01  | -0.01  | t | 115793 | INNQFLPY<br>PY               | Homo<br>sapiens                  |
| 1 | 1.00 | 1 | 1 | -0.01 | -0.01  | -0.01  | -0.01  | -0.01  | t | 115319 | KKYLLFCM<br>ENSAEPEQ<br>SLAC | Homo<br>sapiens                  |
| 1 | 1.00 | 1 | 1 | -0.01 | -0.01  | -0.01  | -0.01  | -0.01  | t | 79357  | RCDLRYDA<br>FVPWCP           | Mus<br>musculu<br>s              |
| 1 | 1.00 | 1 | 1 | 0     | 0      | 0      | 0      | -0.001 | t | 55168  | RPGYEPPT<br>VLGCALPP<br>T    | Homo<br>sapiens                  |
| 1 | 1.00 | 1 | 1 | -0.01 | -0.01  | -0.014 | -0.01  | -0.007 | t | 106349 | DPLRPQRE<br>GC               | Oryctola<br>gus<br>cuniculu<br>s |
| 1 | 1.00 | 1 | 1 | 0.01  | 0.008  | 0.01   | 0.009  | 0.009  | t | 109325 | IDGVNH                       | Mus<br>musculu<br>s              |
| 1 | 1.00 | 1 | 1 | -0.01 | -0.008 | -0.019 | -0.014 | -0.012 | t | 13252  | ELRNLPPQ<br>CGLRAPQ          | Homo<br>sapiens                  |
| 1 | 1.00 | 1 | 1 | 0.03  | 0.028  | 0.024  | 0.027  | 0.028  | t | 46949  | PASQDMP<br>TNTTDITY<br>V     | Mus<br>musculu<br>s              |
| 1 | 1.00 | 1 | 1 | 0     | 0      | 0.002  | 0      | -0.001 | t | 58388  | SHLVEALY<br>LVCGERG          | Mus<br>musculu<br>s              |
| 1 | 1.00 | 1 | 1 | 0     | 0      | 0.002  | 0      | -0.001 | t | 58388  | SHLVEALY<br>LVCGERG          | Mus<br>musculu<br>s              |
| 1 | 1.00 | 1 | 1 | 0     | 0      | 0.002  | 0      | -0.001 | t | 58388  | SHLVEALY<br>LVCGERG          | Mus<br>musculu<br>s              |
| 1 | 1.00 | 1 | 1 | 0     | 0      | 0.002  | 0      | -0.001 | t | 58388  | SHLVEALY<br>LVCGERG          | Mus<br>musculu<br>s              |
| 1 | 1.00 | 1 | 1 | 0.06  | 0.06   | 0.055  | 0.06   | 0.062  | t | 127595 | ASNGIPSS<br>GMDTGRP<br>ALADT | Homo<br>sapiens                  |
| 1 | 1.00 | 1 | 1 | -0.02 | -0.023 | -0.022 | -0.02  | -0.019 | t | 123557 | NQFPGFKE                     | Oryctola<br>gus<br>cuniculu<br>s |

|   |      |   |   |       |        |        |        |        |   |        |                              |                                  |
|---|------|---|---|-------|--------|--------|--------|--------|---|--------|------------------------------|----------------------------------|
| 1 | 1.00 | 1 | 1 | -0.02 | -0.016 | -0.03  | -0.02  | -0.018 | t | 82816  | GNVTPRVS<br>YAHG             | Homo<br>sapiens                  |
| 1 | 1.00 | 1 | 1 | 0     | 0      | 0.011  | 0      | -0.002 | t | 54003  | RGTTTPAY<br>G                | Mus<br>musculu<br>s              |
| 1 | 1.00 | 1 | 1 | -0.01 | -0.01  | -0.01  | -0.01  | -0.01  | t | 133725 | TVCTYRDF<br>MY               | Mus<br>musculu<br>s              |
| 1 | 1.00 | 1 | 1 | -0.02 | -0.02  | -0.02  | -0.02  | -0.02  | t | 79213  | FGMLPVP<br>QQPMGP<br>Q       | Oryctola<br>gus<br>cuniculu<br>s |
| 1 | 1.00 | 1 | 1 | 0     | 0      | 0      | 0.002  | 0      | t | 135991 | SEKKISSIQ<br>SIV             | Homo<br>sapiens                  |
| 1 | 1.00 | 1 | 1 | 0.03  | 0.026  | 0.019  | 0.023  | 0.03   | t | 138140 | ALLSKVTG<br>PPMPD            | Oryctola<br>gus<br>cuniculu<br>s |
| 1 | 1.00 | 1 | 1 | -0.01 | -0.01  | -0.016 | -0.007 | -0.008 | t | 58366  | SHIECRKPY<br>KELRLEV<br>GKQR | Homo<br>sapiens                  |
| 1 | 1.00 | 1 | 1 | 0     | 0      | 0      | 0      | 0      | t | 72504  | WGQGG<br>SH                  | Mus<br>musculu<br>s              |
| 1 | 1.00 | 1 | 1 | 0.02  | 0.021  | 0.022  | 0.026  | 0.02   | t | 57506  | SEKSKCEE<br>NTMFQPY          | Equus<br>caballus                |
| 1 | 1.00 | 1 | 1 | 0     | 0.002  | -0.002 | 0.003  | 0.002  | t | 75937  | YTAADCP<br>GLLYLCP           | Homo<br>sapiens                  |
| 1 | 1.00 | 1 | 1 | 0     | 0      | -0.002 | 0      | 0      | t | 122183 | SGIPYIISYL<br>HPGNTILH<br>VD | Mus<br>musculu<br>s              |
| 1 | 1.00 | 1 | 1 | 0     | -0.002 | 0      | 0.001  | 0      | t | 149430 | QPFLPQQ<br>PYP               | Mus<br>musculu<br>s              |
| 1 | 1.00 | 1 | 1 | 0     | 0.003  | 0.003  | 0      | 0      | t | 14749  | EVKKKSDS                     | Mus<br>musculu<br>s              |
| 1 | 1.00 | 1 | 1 | 0     | -0.002 | -0.001 | 0.003  | 0      | t | 12185  | EGHTDSV<br>GTDAYNQ<br>K      | Mus<br>musculu<br>s              |



|   |      |   |   |       |        |        |        |        |   |        |                       |                       |
|---|------|---|---|-------|--------|--------|--------|--------|---|--------|-----------------------|-----------------------|
| 1 | 1.00 | 1 | 1 | -0.02 | -0.018 | -0.016 | -0.017 | -0.02  | t | 144697 | IYRNLYWEGS            | Homo sapiens          |
| 1 | 1.00 | 1 | 1 | -0.03 | -0.034 | -0.036 | -0.037 | -0.031 | t | 105884 | IMAKFTQF              | Oryctolagus cuniculus |
| 1 | 1.00 | 1 | 1 | 0.01  | 0.008  | 0.008  | 0.009  | 0.01   | t | 97494  | MGAKPTGS              | Mus musculus          |
| 1 | 1.00 | 1 | 1 | 0     | 0      | 0.002  | 0.001  | 0.002  | t | 65678  | TPPAYR                | Mus musculus          |
| 1 | 1.00 | 1 | 1 | 0.06  | 0.06   | 0.06   | 0.06   | 0.06   | t | 115428 | PTSTPTTEAVESTVATLED S | Homo sapiens          |
| 1 | 1.00 | 1 | 1 | 0.04  | 0.04   | 0.04   | 0.04   | 0.04   | t | 112146 | GSGTDFT               | Homo sapiens          |
| 1 | 1.00 | 1 | 1 | 0.04  | 0.04   | 0.04   | 0.04   | 0.04   | t | 96756  | PTKPTYETEK            | Homo sapiens(human)   |
| 1 | 1.00 | 1 | 1 | 0.02  | 0.02   | 0.02   | 0.02   | 0.02   | t | 100549 | TEEKEFLKKL            | Mus musculus          |
| 1 | 1.00 | 1 | 1 | 0.02  | 0.02   | 0.02   | 0.02   | 0.02   | t | 100549 | TEEKEFLKKL            | Mus musculus          |
| 1 | 1.00 | 1 | 1 | 0.02  | 0.02   | 0.02   | 0.02   | 0.02   | t | 97675  | TAVLNLT A             | Mus musculus          |
| 1 | 1.00 | 1 | 1 | 0.02  | 0.02   | 0.02   | 0.02   | 0.02   | t | 93898  | SKKEKVTIQN            | Ovis aries            |
| 1 | 1.00 | 1 | 1 | 0.02  | 0.02   | 0.02   | 0.02   | 0.02   | t | 52086  | QQPFPQQPQQ            | Mus musculus          |
| 1 | 1.00 | 1 | 1 | 0.02  | 0.02   | 0.02   | 0.02   | 0.02   | t | 45697  | NRLIAFASRGNHDSPTHYV   | Homo sapiens          |
| 1 | 1.00 | 1 | 1 | 0.02  | 0.02   | 0.02   | 0.02   | 0.02   | t | 52086  | QQPFPQQPQQ            | Mus musculus          |
| 1 | 1.00 | 1 | 1 | 0     | 0      | 0      | 0      | 0      | t | 144598 | CFVGTHPQLRC           | Mus musculus          |
| 1 | 1.00 | 1 | 1 | 0     | 0      | 0      | 0      | 0      | t | 144598 | CFVGTHPQLRC           | Mus musculus          |

|   |      |   |   |       |        |        |        |        |   |        |                     |                   |
|---|------|---|---|-------|--------|--------|--------|--------|---|--------|---------------------|-------------------|
| 1 | 1.00 | 1 | 1 | 0     | 0      | 0      | 0      | 0      | t | 123128 | EGAAMDLM            | Ovis aries        |
| 1 | 1.00 | 1 | 1 | 0     | 0      | 0      | 0      | 0      | t | 6365   | CGWAGWLLSPRG        | Homo sapiens      |
| 1 | 1.00 | 1 | 1 | -0.02 | -0.02  | -0.02  | -0.02  | -0.02  | t | 109854 | RQMVEKESLDQA        | Mus musculus      |
| 1 | 1.00 | 1 | 1 | 0.01  | 0.013  | 0.024  | 0.013  | 0.009  | t | 142159 | GAPTYSWGANDTDV      | Capra hircus      |
| 1 | 1.00 | 1 | 1 | 0     | 0      | -0.007 | -0.007 | 0      | t | 119508 | QFIGYPI             | Homo sapiens      |
| 1 | 1.00 | 1 | 1 | -0.03 | -0.028 | -0.034 | -0.023 | -0.029 | t | 144901 | GRGRGRGRGRGGGRG     | Homo sapiens      |
| 1 | 1.00 | 1 | 1 | 0.03  | 0.034  | 0.035  | 0.037  | 0.031  | t | 122145 | LTLFPSRDTPLSSQTD    | Homo sapiens      |
| 1 | 1.00 | 1 | 1 | 0     | 0.002  | 0      | 0.007  | 0      | t | 122885 | QVAALTWVQTHIRGGDPR  | Homo sapiens      |
| 1 | 1.00 | 1 | 1 | -0.01 | -0.008 | -0.01  | -0.01  | -0.01  | t | 141749 | SNLDHI              | Rattus norvegicus |
| 1 | 1.00 | 1 | 1 | -0.01 | -0.008 | -0.01  | -0.01  | -0.01  | t | 141749 | SNLDHI              | Rattus norvegicus |
| 1 | 1.00 | 1 | 1 | -0.01 | -0.01  | -0.01  | -0.001 | -0.008 | t | 130852 | GHFVKPEAFLPFSAGRACL | Homo sapiens      |
| 1 | 1.00 | 1 | 1 | 0.01  | 0.008  | 0.01   | 0.003  | 0.008  | t | 134006 | ALRMEVLGCEAQDLY     | Mus musculus      |
| 1 | 1.00 | 1 | 1 | -0.02 | -0.011 | -0.01  | -0.02  | -0.023 | t | 95144  | SCPYVTYGKFCIKPDG L  | Gallus gallus     |
| 1 | 1.00 | 1 | 1 | -0.02 | -0.018 | -0.025 | -0.023 | -0.02  | t | 158932 | KTALEARKAADTFNF     | Homo sapiens      |
| 1 | 1.00 | 1 | 1 | -0.02 | -0.018 | -0.008 | -0.019 | -0.018 | t | 36741  | LIVFPD              | Homo sapiens      |

|   |      |   |   |       |        |        |        |        |   |        |                              |                       |
|---|------|---|---|-------|--------|--------|--------|--------|---|--------|------------------------------|-----------------------|
| 1 | 1.00 | 1 | 1 | 0.01  | 0.012  | 0.011  | 0.013  | 0.013  | t | 51383  | QLITKPL                      | Homo sapiens          |
| 1 | 1.00 | 1 | 1 | -0.01 | -0.012 | -0.008 | -0.011 | -0.01  | t | 19577  | GFLMHAP<br>AFETAGTY          | Mus musculus          |
| 1 | 1.00 | 1 | 1 | 0     | 0      | 0      | 0      | 0.001  | t | 49505  | PSSKRFQP<br>FQQFGRD          | Oryctolagus cuniculus |
| 1 | 1.00 | 1 | 1 | -0.01 | -0.008 | -0.009 | -0.012 | -0.012 | t | 106517 | HRLYHVPA<br>VG               | Homo sapiens          |
| 1 | 1.00 | 1 | 1 | -0.04 | -0.04  | -0.045 | -0.036 | -0.04  | t | 127614 | CTNDSVLL<br>GPPGATN<br>ASNGI | Homo sapiens          |
| 1 | 1.00 | 1 | 1 | 0.01  | 0.01   | 0.01   | 0.01   | 0.01   | t | 111144 | CDATTLH                      | Homo sapiens          |
| 1 | 1.00 | 1 | 1 | 0.02  | 0.011  | 0.024  | 0.02   | 0.022  | t | 110232 | GADGIPG<br>A                 | Macaca mulatta        |
| 1 | 1.00 | 1 | 1 | -0.01 | -0.022 | -0.015 | -0.01  | -0.01  | t | 1437   | AGAGRRV<br>G                 | Anas platyrhynchos    |
| 1 | 1.00 | 1 | 1 | -0.01 | -0.014 | -0.01  | -0.011 | -0.01  | t | 137927 | LSADFTPG                     | Oryctolagus cuniculus |
| 1 | 1.00 | 1 | 1 | 0.01  | 0.008  | -0.006 | 0.009  | 0.011  | t | 149247 | AEQQWAL<br>YADGSIRP<br>Q     | Mus musculus          |
| 1 | 1.00 | 1 | 1 | -0.02 | -0.02  | -0.011 | -0.02  | -0.022 | t | 70729  | VRGLYFP                      | Mus musculus          |
| 1 | 1.00 | 1 | 1 | -0.02 | -0.017 | -0.011 | -0.02  | -0.022 | t | 70729  | VRGLYFP                      | Mus musculus          |
| 1 | 1.00 | 1 | 1 | 0.01  | 0.01   | 0.01   | 0.01   | 0.01   | t | 146019 | TCPDIIIP                     | Mus musculus          |
| 1 | 1.00 | 1 | 1 | 0     | 0      | -0.002 | 0      | 0      | t | 23685  | HEGKAYFP<br>REGV             | Homo sapiens          |
| 1 | 1.00 | 1 | 1 | -0.02 | -0.022 | -0.023 | -0.017 | -0.018 | t | 53449  | REAFRRYQ                     | Anas platyrhynchos    |

|   |      |   |   |       |        |        |        |        |   |        |                  |                       |
|---|------|---|---|-------|--------|--------|--------|--------|---|--------|------------------|-----------------------|
| 1 | 1.00 | 1 | 1 | 0.05  | 0.05   | 0.05   | 0.05   | 0.05   | t | 78455  | LPTNLTQ          | Mus musculus          |
| 1 | 1.00 | 1 | 1 | 0.01  | 0.01   | 0.01   | 0.01   | 0.01   | t | 153343 | ACRDHLYGSCGGGS   | Mus musculus          |
| 1 | 1.00 | 1 | 1 | 0.01  | 0.01   | 0.01   | 0.01   | 0.01   | t | 123405 | KWLGDKNM         | Ovis aries            |
| 1 | 1.00 | 1 | 1 | 0.01  | 0.01   | 0.01   | 0.01   | 0.01   | t | 132624 | RREKIERRQQ       | Homo sapiens          |
| 1 | 1.00 | 1 | 1 | -0.01 | -0.01  | -0.01  | -0.01  | -0.01  | t | 79507  | AHIPWLL          | Oryctolagus cuniculus |
| 1 | 1.00 | 1 | 1 | -0.01 | -0.01  | -0.014 | -0.01  | -0.01  | t | 51912  | QPQPFRPQQP       | Mus musculus          |
| 1 | 1.00 | 1 | 1 | 0.02  | 0.022  | 0.011  | 0.018  | 0.023  | t | 110733 | VGENVPDLYIKGSG   | Homo sapiens          |
| 1 | 1.00 | 1 | 1 | -0.06 | -0.062 | -0.055 | -0.06  | -0.062 | t | 125230 | RERRGIAL         | Mus musculus          |
| 1 | 1.00 | 1 | 1 | -0.02 | -0.018 | -0.025 | -0.019 | -0.018 | t | 38683  | LPRRGPRLV        | Homo sapiens          |
| 1 | 1.00 | 1 | 1 | 0.02  | 0.02   | 0.026  | 0.017  | 0.02   | t | 65949  | TQTFTSL          | Homo sapiens          |
| 1 | 1.00 | 1 | 1 | 0     | 0.003  | -0.003 | 0      | 0      | t | 752    | ADQAQYNQMH       | Mus musculus          |
| 1 | 1.00 | 1 | 1 | 0.02  | 0.016  | 0.021  | 0.019  | 0.02   | t | 5771   | AYFLYQQQGRDLKL   | Oryctolagus cuniculus |
| 1 | 1.00 | 1 | 1 | 0     | 0.004  | 0      | 0.001  | 0      | t | 29802  | KAFRELAD         | Homo sapiens          |
| 1 | 1.00 | 1 | 1 | 0.03  | 0.03   | 0.023  | 0.03   | 0.031  | t | 124588 | PQEETLQAFDSHYDYT | Homo sapiens          |
| 1 | 1.00 | 1 | 1 | 0.01  | 0.017  | 0.001  | 0.007  | 0.01   | t | 60117  | SPLLGCIGSTCAEDGN | Gallus gallus         |
| 1 | 1.00 | 1 | 1 | 0.03  | 0.03   | 0.03   | 0.03   | 0.032  | t | 95347  | EILLQK           | Homo sapiens          |

|   |      |   |   |       |        |        |        |        |   |        |                              |                       |
|---|------|---|---|-------|--------|--------|--------|--------|---|--------|------------------------------|-----------------------|
| 1 | 1.00 | 1 | 1 | -0.02 | -0.018 | -0.026 | -0.017 | -0.02  | t | 118809 | GGRPGAP<br>GGSGSGP<br>RHRDGV | Homo sapiens          |
| 1 | 1.00 | 1 | 1 | 0.02  | 0.023  | 0.015  | 0.02   | 0.021  | t | 156903 | KNRGIKTF<br>SN               | Mus musculus          |
| 1 | 1.00 | 1 | 1 | 0     | 0.002  | 0      | 0.007  | 0      | t | 134236 | SNIMHSIN<br>GYVFDLQ<br>LSVC  | Homo sapiens          |
| 1 | 1.00 | 1 | 1 | 0.01  | 0.01   | 0.005  | 0.003  | 0.008  | t | 140674 | ESQDPKP<br>DELHKS            | Mus musculus          |
| 1 | 1.00 | 1 | 1 | -0.02 | -0.02  | -0.02  | -0.02  | -0.02  | t | 10892  | DYHRVMY                      | Oryctolagus cuniculus |
| 1 | 1.00 | 1 | 1 | 0.01  | 0.013  | 0.01   | 0.007  | 0.01   | t | 7171   | CTKPTDGC<br>NC               | Capra hircus          |
| 1 | 1.00 | 1 | 1 | -0.07 | -0.072 | -0.072 | -0.067 | -0.069 | t | 99126  | CLAPDRRV                     | Mus musculus          |
| 1 | 1.00 | 1 | 1 | 0     | 0      | 0      | 0      | 0      | t | 42159  | MMNWSP<br>T                  | Homo sapiens          |
| 1 | 1.00 | 1 | 1 | -0.04 | -0.043 | -0.04  | -0.04  | -0.038 | t | 140897 | RADAVKGY<br>LAGK             | Oryctolagus cuniculus |
| 1 | 1.00 | 1 | 1 | -0.03 | -0.028 | -0.011 | -0.023 | -0.03  | t | 23028  | GVKYA                        | Homo sapiens          |
| 1 | 1.00 | 1 | 1 | 0     | -0.002 | 0      | 0      | 0      | t | 131373 | CIPTEYTM<br>HIERRECA<br>Y    | Oryctolagus cuniculus |
| 1 | 1.00 | 1 | 1 | 0     | -0.007 | 0      | 0      | 0      | t | 94468  | CNPAC                        | Oryctolagus cuniculus |
| 1 | 1.00 | 1 | 1 | 0     | 0.007  | 0      | 0      | 0      | t | 94468  | CNPAC                        | Capra hircus          |
| 1 | 1.00 | 1 | 1 | 0     | 0      | 0      | 0      | 0      | t | 94468  | CNPAC                        | Oryctolagus cuniculus |

|   |      |   |   |       |        |        |        |        |   |        |                     |                       |
|---|------|---|---|-------|--------|--------|--------|--------|---|--------|---------------------|-----------------------|
| 1 | 1.00 | 1 | 1 | 0     | 0      | 0      | 0      | 0      | t | 18953  | GDDPLLGN            | Anas platyrhynchos    |
| 1 | 1.00 | 1 | 1 | -0.02 | -0.02  | -0.02  | -0.02  | -0.02  | t | 156929 | PGPRFF              | Gallus gallus         |
| 1 | 1.00 | 1 | 1 | -0.03 | -0.03  | -0.03  | -0.027 | -0.028 | t | 70661  | VQVRI               | Homo sapiens          |
| 1 | 1.00 | 1 | 1 | -0.01 | -0.013 | -0.004 | -0.01  | -0.01  | t | 72484  | WGNGCGLFG           | Mus musculus          |
| 1 | 1.00 | 1 | 1 | 0.04  | 0.037  | 0.04   | 0.04   | 0.04   | t | 153398 | IDRTPTNFHTQR        | Oryctolagus cuniculus |
| 1 | 1.00 | 1 | 1 | 0.04  | 0.04   | 0.04   | 0.04   | 0.04   | t | 121293 | FDQQNC              | Oryctolagus cuniculus |
| 1 | 1.00 | 1 | 1 | 0.04  | 0.04   | 0.04   | 0.04   | 0.04   | t | 115388 | NDSTEYGLFQ          | Homo sapiens          |
| 1 | 1.00 | 1 | 1 | 0.02  | 0.02   | 0.02   | 0.02   | 0.02   | t | 156415 | QGRQQEQEQERQQQ      | Homo sapiens          |
| 1 | 1.00 | 1 | 1 | 0.02  | 0.02   | 0.02   | 0.02   | 0.02   | t | 47175  | PDREALYQQFDEMEECASL | Homo sapiens          |
| 1 | 1.00 | 1 | 1 | 0.02  | 0.02   | 0.02   | 0.02   | 0.02   | t | 27422  | ILYEFDEMEECASKAALIE | Homo sapiens          |
| 1 | 1.00 | 1 | 1 | 0     | 0      | 0      | 0      | 0      | t | 137743 | DTPLTIAGLKL         | Mus musculus          |
| 1 | 1.00 | 1 | 1 | 0     | 0      | 0      | 0      | 0      | t | 137743 | DTPLTIAGLKL         | Mus musculus          |
| 1 | 1.00 | 1 | 1 | 0     | 0      | 0      | 0      | 0      | t | 149254 | ALDKWAS             | Homo sapiens          |
| 1 | 1.00 | 1 | 1 | 0     | 0      | 0      | 0      | 0      | t | 132931 | WGQNIKA             | Homo sapiens          |
| 1 | 1.00 | 1 | 1 | 0     | 0      | 0      | 0      | 0      | t | 99896  | ALTLSLPKQQDSLP      | Oryctolagus cuniculus |
| 1 | 1.00 | 1 | 1 | 0     | 0      | 0      | 0      | 0      | t | 115917 | QKPVALIN            | Homo sapiens          |

|   |      |   |   |       |        |        |        |        |   |        |                            |                                  |
|---|------|---|---|-------|--------|--------|--------|--------|---|--------|----------------------------|----------------------------------|
| 1 | 1.00 | 1 | 1 | -0.02 | -0.02  | -0.02  | -0.02  | -0.02  | t | 148655 | LALQTLPA<br>MC             | Homo<br>sapiens                  |
| 1 | 1.00 | 1 | 1 | -0.04 | -0.04  | -0.04  | -0.04  | -0.04  | t | 140479 | KHGLLSM                    | Mus<br>musculu<br>s              |
| 1 | 1.00 | 1 | 1 | -0.04 | -0.04  | -0.04  | -0.04  | -0.04  | t | 140488 | MSLLGHK                    | Mus<br>musculu<br>s              |
| 1 | 1.00 | 1 | 1 | -0.04 | -0.04  | -0.04  | -0.04  | -0.04  | t | 140479 | KHGLLSM                    | Mus<br>musculu<br>s              |
| 1 | 1.00 | 1 | 1 | -0.04 | -0.04  | -0.04  | -0.04  | -0.04  | t | 140488 | MSLLGHK                    | Mus<br>musculu<br>s              |
| 1 | 1.00 | 1 | 1 | -0.01 | -0.008 | -0.01  | -0.003 | -0.007 | t | 111027 | SRALAREV<br>DLKDYED<br>QQK | Homo<br>sapiens                  |
| 1 | 1.00 | 1 | 1 | 0.04  | 0.04   | 0.04   | 0.04   | 0.04   | t | 156927 | NTFQAFY                    | Gallus<br>gallus                 |
| 1 | 1.00 | 1 | 1 | 0.03  | 0.03   | 0.03   | 0.03   | 0.03   | t | 132260 | EKIERRQQ<br>EV             | Homo<br>sapiens                  |
| 1 | 1.00 | 1 | 1 | 0.01  | 0.014  | 0.01   | 0.013  | 0.01   | t | 111010 | RLGSEHVD<br>RPLTTP         | Homo<br>sapiens                  |
| 1 | 1.00 | 1 | 1 | 0.01  | 0.012  | 0.01   | 0.013  | 0.01   | t | 111010 | RLGSEHVD<br>RPLTTP         | Homo<br>sapiens                  |
| 1 | 1.00 | 1 | 1 | 0.02  | 0.016  | 0.008  | 0.013  | 0.022  | t | 30299  | KEALDKYE<br>LENHD          | Oryctola<br>gus<br>cuniculu<br>s |
| 1 | 1.00 | 1 | 1 | -0.01 | -0.01  | -0.017 | -0.01  | -0.01  | t | 95874  | SQWGWGC<br>GSTD            | Homo<br>sapiens                  |
| 1 | 1.00 | 1 | 1 | 0     | -0.003 | -0.011 | -0.001 | 0      | t | 138174 | GAPGTPA<br>APGAPAA         | Oryctola<br>gus<br>cuniculu<br>s |
| 1 | 1.00 | 1 | 1 | 0.01  | 0.01   | 0.01   | 0.01   | 0.011  | t | 153481 | TPTWPLLT<br>IFPSGGGS       | Mus<br>musculu<br>s              |
| 1 | 1.00 | 1 | 1 | 0.01  | 0.01   | 0.011  | 0.01   | 0.01   | t | 158910 | KNLDIDPK<br>LQEYLGK        | Mus<br>musculu<br>s              |

|   |      |   |   |       |        |        |        |        |   |        |                              |                                  |
|---|------|---|---|-------|--------|--------|--------|--------|---|--------|------------------------------|----------------------------------|
| 1 | 1.00 | 1 | 1 | 0     | -0.002 | 0.004  | 0.003  | -0.002 | t | 51816  | QPFPLQP<br>QQP               | Mus<br>musculu<br>s              |
| 1 | 1.00 | 1 | 1 | -0.01 | -0.008 | -0.005 | -0.003 | -0.01  | t | 133117 | GPSRRGPS<br>LGASSHQ<br>H     | Homo<br>sapiens                  |
| 1 | 1.00 | 1 | 1 | 0.03  | 0.03   | 0.03   | 0.03   | 0.03   | t | 78951  | DPA                          | Mus<br>musculu<br>s              |
| 1 | 1.00 | 1 | 1 | -0.01 | -0.01  | -0.01  | -0.01  | -0.01  | t | 75949  | YTASARGD<br>LAHL             | Mus<br>musculu<br>s              |
| 1 | 1.00 | 1 | 1 | -0.05 | -0.05  | -0.052 | -0.05  | -0.052 | t | 95216  | AEGLYSML<br>VERD             | Homo<br>sapiens                  |
| 1 | 1.00 | 1 | 1 | 0     | 0      | 0      | -0.001 | -0.003 | t | 106533 | IEFRHGLN<br>RTNA             | Mus<br>musculu<br>s              |
| 1 | 1.00 | 1 | 1 | 0     | 0.002  | -0.01  | 0.007  | 0.002  | t | 138886 | NVGGDNV<br>DIHSIVPV<br>GQDPH | Homo<br>sapiens                  |
| 1 | 1.00 | 1 | 1 | 0     | 0.002  | 0.005  | 0.001  | 0      | t | 56216  | RTWAQPG<br>Y                 | Homo<br>sapiens                  |
| 1 | 1.00 | 1 | 1 | 0.01  | 0.01   | 0.01   | 0.01   | 0.01   | t | 3985   | AQKKIIAEK<br>T               | Homo<br>sapiens                  |
| 1 | 1.00 | 1 | 1 | -0.01 | -0.01  | -0.01  | -0.01  | -0.01  | t | 79960  | PFCFGKDL<br>KRPG             | Mus<br>musculu<br>s              |
| 1 | 1.00 | 1 | 1 | -0.01 | -0.01  | -0.01  | -0.01  | -0.01  | t | 74135  | YHRVMYA<br>S                 | Oryctola<br>gus<br>cuniculu<br>s |
| 1 | 1.00 | 1 | 1 | -0.01 | -0.01  | -0.01  | -0.01  | -0.01  | t | 32649  | KPAIIPDRE<br>VLYREFDE<br>M   | Homo<br>sapiens                  |
| 1 | 1.00 | 1 | 1 | 0.02  | 0.02   | 0.012  | 0.02   | 0.021  | t | 20838  | GLFGAIAG<br>FIE              | Homo<br>sapiens                  |
| 1 | 1.00 | 1 | 1 | -0.05 | -0.046 | -0.057 | -0.043 | -0.05  | t | 139597 | RGHAKSRP<br>VRGIHTS          | Homo<br>sapiens                  |
| 1 | 1.00 | 1 | 1 | 0.02  | 0.02   | 0.013  | 0.019  | 0.018  | t | 138162 | EKKYSPCA<br>WEVVRAE          | Mus<br>musculu<br>s              |



|   |      |   |   |       |        |        |        |        |   |        |                             |                         |
|---|------|---|---|-------|--------|--------|--------|--------|---|--------|-----------------------------|-------------------------|
| 1 | 1.00 | 1 | 1 | -0.02 | -0.018 | -0.021 | -0.017 | -0.02  | t | 65953  | TQTPVNG<br>NSPWAPT<br>A     | Homo<br>sapiens         |
| 1 | 1.00 | 1 | 1 | -0.05 | -0.05  | -0.05  | -0.046 | -0.05  | t | 115607 | GPRHPIRA<br>LVGD            | Homo<br>sapiens         |
| 1 | 1.00 | 1 | 1 | -0.02 | -0.016 | -0.021 | -0.019 | -0.022 | t | 75439  | YPWQTAG<br>CFVEK            | Myodes<br>glareolu<br>s |
| 1 | 1.00 | 1 | 1 | -0.02 | -0.019 | -0.021 | -0.019 | -0.022 | t | 75439  | YPWQTAG<br>CFVEK            | Myodes<br>glareolu<br>s |
| 1 | 1.00 | 1 | 1 | 0.01  | 0.01   | 0.01   | 0.01   | 0.01   | t | 119584 | GQPENNY<br>K                | Homo<br>sapiens         |
| 1 | 1.00 | 1 | 1 | 0.01  | 0.01   | 0.01   | 0.01   | 0.01   | t | 110611 | GPKGQAG<br>EPGIAGFK         | Mus<br>musculu<br>s     |
| 1 | 1.00 | 1 | 1 | 0.01  | 0.01   | 0.01   | 0.01   | 0.01   | t | 79344  | QCDAFAV<br>PVEGACM          | Mus<br>musculu<br>s     |
| 1 | 1.00 | 1 | 1 | 0.01  | 0.01   | 0.01   | 0.01   | 0.01   | t | 91344  | FYETVLFK<br>GFESI           | Equus<br>caballus       |
| 1 | 1.00 | 1 | 1 | 0.01  | 0.01   | 0.01   | 0.01   | 0.01   | t | 39373  | LSGKPAIP<br>DREVLQFE<br>FDE | Homo<br>sapiens         |
| 1 | 1.00 | 1 | 1 | 0.01  | 0.01   | 0.01   | 0.01   | 0.01   | t | 29943  | KASFDVTG<br>AFKAPRYK<br>S   | Aotus<br>nancyma<br>ae  |
| 1 | 1.00 | 1 | 1 | -0.01 | -0.01  | -0.01  | -0.01  | -0.01  | t | 135757 | SFNDFTRV                    | Homo<br>sapiens         |
| 1 | 1.00 | 1 | 1 | -0.01 | -0.01  | -0.01  | -0.01  | -0.01  | t | 123842 | WFSKKFEL<br>G               | Ovis<br>aries           |
| 1 | 1.00 | 1 | 1 | -0.01 | -0.01  | -0.01  | -0.01  | -0.01  | t | 119607 | KTHTCPPC                    | Homo<br>sapiens         |
| 1 | 1.00 | 1 | 1 | -0.01 | -0.01  | -0.01  | -0.01  | -0.01  | t | 115603 | ELKVEDPF<br>YWVS            | Homo<br>sapiens         |
| 1 | 1.00 | 1 | 1 | -0.01 | -0.01  | -0.01  | -0.01  | -0.01  | t | 115742 | FPKYPVEP<br>FT              | Homo<br>sapiens         |
| 1 | 1.00 | 1 | 1 | -0.01 | -0.01  | -0.01  | -0.01  | -0.01  | t | 115603 | ELKVEDPF<br>YWVS            | Homo<br>sapiens         |
| 1 | 1.00 | 1 | 1 | -0.01 | -0.01  | -0.01  | -0.01  | -0.01  | t | 92684  | FIDGGKGN<br>DL              | Ovis<br>aries           |
| 1 | 1.00 | 1 | 1 | -0.03 | -0.03  | -0.03  | -0.03  | -0.03  | t | 137418 | HHILPPKA<br>LLFG            | Mus<br>musculu<br>s     |
| 1 | 1.00 | 1 | 1 | -0.07 | -0.07  | -0.07  | -0.07  | -0.07  | t | 115923 | QPLPPTV<br>MFP              | Homo<br>sapiens         |

|   |      |   |   |       |        |        |        |        |   |        |                              |                                  |
|---|------|---|---|-------|--------|--------|--------|--------|---|--------|------------------------------|----------------------------------|
| 1 | 1.00 | 1 | 1 | -0.04 | -0.04  | -0.04  | -0.034 | -0.04  | t | 118443 | KAPGFGD<br>NRKNQL            | Homo<br>sapiens                  |
| 1 | 1.00 | 1 | 1 | 0.03  | 0.027  | 0.03   | 0.03   | 0.028  | t | 7558   | DAKDGKEI<br>DTKHLPS<br>T C   | Oryctola<br>gus<br>cuniculu<br>s |
| 1 | 1.00 | 1 | 1 | -0.05 | -0.05  | -0.057 | -0.05  | -0.053 | t | 133527 | AYIGLKDR<br>KRPSELRR<br>I AS | Mus<br>musculu<br>s              |
| 1 | 1.00 | 1 | 1 | -0.01 | -0.01  | -0.022 | -0.01  | -0.008 | t | 153370 | DKEGIPPD<br>QQRLIFA          | Mus<br>musculu<br>s              |
| 1 | 1.00 | 1 | 1 | 0     | 0.004  | 0      | 0.001  | 0      | t | 22898  | GTyrATYQ                     | Homo<br>sapiens                  |
| 1 | 1.00 | 1 | 1 | 0.01  | -0.004 | 0.015  | 0.01   | 0.012  | t | 21990  | GRAIN                        | Mus<br>musculu<br>s              |
| 1 | 1.00 | 1 | 1 | -0.06 | -0.062 | -0.06  | -0.067 | -0.062 | t | 135484 | MSRPLIHF<br>GN               | Mus<br>musculu<br>s              |
| 1 | 1.00 | 1 | 1 | -0.01 | -0.01  | -0.017 | -0.013 | -0.008 | t | 49246  | PRRRAGRC                     | Homo<br>sapiens                  |
| 1 | 1.00 | 1 | 1 | 0.02  | 0.024  | 0.019  | 0.02   | 0.018  | t | 97484  | LVEETSFID<br>AGAP            | Homo<br>sapiens                  |
| 1 | 1.00 | 1 | 1 | 0.03  | 0.03   | 0.019  | 0.027  | 0.031  | t | 156260 | DSQPQQF<br>QQQQQQ<br>QQ      | Homo<br>sapiens                  |
| 1 | 1.00 | 1 | 1 | 0.01  | 0.007  | 0.013  | 0.01   | 0.009  | t | 66203  | TSFPPSP<br>GPSCPT            | Oryctola<br>gus<br>cuniculu<br>s |
| 1 | 1.00 | 1 | 1 | 0     | 0      | 0      | 0      | 0      | t | 78468  | NAKATYEA<br>AL               | Mus<br>musculu<br>s              |
| 1 | 1.00 | 1 | 1 | 0     | 0      | 0      | 0      | 0      | t | 20051  | GGTHSQW<br>NKP               | Mus<br>musculu<br>s              |
| 1 | 1.00 | 1 | 1 | 0.01  | 0.01   | 0.007  | 0.01   | 0.01   | t | 97717  | TYNYFKDE<br>L                | Mus<br>musculu<br>s              |

|   |      |   |   |       |        |        |        |        |   |        |                              |                                  |
|---|------|---|---|-------|--------|--------|--------|--------|---|--------|------------------------------|----------------------------------|
| 1 | 1.00 | 1 | 1 | 0.01  | 0.01   | 0.007  | 0.01   | 0.01   | t | 97717  | TYNYFKDE<br>L                | Mus<br>musculu<br>s              |
| 1 | 1.00 | 1 | 1 | -0.05 | -0.056 | -0.05  | -0.05  | -0.05  | t | 123665 | QIPPGAM<br>P                 | Oryctola<br>gus<br>cuniculu<br>s |
| 1 | 1.00 | 1 | 1 | -0.01 | -0.01  | -0.021 | -0.014 | -0.01  | t | 29897  | KANADAK<br>AA YEAAV<br>AANNA | Homo<br>sapiens                  |
| 1 | 1.00 | 1 | 1 | 0.02  | 0.016  | 0.013  | 0.013  | 0.017  | t | 122122 | KHSVTYSC<br>CPDTPYL          | Oryctola<br>gus<br>cuniculu<br>s |
| 1 | 1.00 | 1 | 1 | 0     | 0      | 0      | 0      | -0.003 | t | 106118 | SPRGQHG<br>RRERAGQ<br>E      | Homo<br>sapiens                  |
| 1 | 1.00 | 1 | 1 | 0     | 0      | 0      | 0.001  | 0      | t | 28911  | ITGHRMA<br>WDMMM<br>NWS      | Homo<br>sapiens                  |
| 1 | 1.00 | 1 | 1 | -0.01 | -0.01  | -0.01  | -0.01  | -0.011 | t | 60796  | SRSERRKD<br>RGGREDIL         | Homo<br>sapiens                  |
| 1 | 1.00 | 1 | 1 | 0     | -0.002 | 0      | -0.001 | 0      | t | 23390  | GYKVLVLN<br>PSVAAT           | Mus<br>musculu<br>s              |
| 1 | 1.00 | 1 | 1 | -0.03 | -0.03  | -0.025 | -0.023 | -0.028 | t | 140672 | EQIYRVDL<br>RTLRL            | Rattus<br>norvegic<br>us         |
| 1 | 1.00 | 1 | 1 | 0     | 0      | 0.005  | 0      | -0.002 | t | 156900 | KLGDPRIA<br>TTLF             | Mus<br>musculu<br>s              |
| 1 | 1.00 | 1 | 1 | 0.03  | 0.03   | 0.03   | 0.03   | 0.03   | t | 156858 | DMSYYYAL<br>PTYT             | Gallus<br>gallus                 |
| 1 | 1.00 | 1 | 1 | 0.02  | 0.02   | 0.02   | 0.02   | 0.02   | t | 934    | AEGEFPQ<br>DARFPGG<br>GDPK   | Homo<br>sapiens                  |
| 1 | 1.00 | 1 | 1 | 0.02  | 0.02   | 0.02   | 0.02   | 0.02   | t | 934    | AEGEFPQ<br>DARFPGG<br>GDPK   | Homo<br>sapiens                  |
| 1 | 1.00 | 1 | 1 | 0     | 0      | 0      | 0      | 0      | t | 45405  | NPNANP                       | Mus<br>musculu<br>s              |
| 1 | 1.00 | 1 | 1 | 0.01  | 0.013  | 0.005  | 0.01   | 0.012  | t | 37656  | LLPHSNLD                     | Mus<br>musculu<br>s              |

|   |      |   |   |       |       |        |        |       |   |        |                              |                                  |
|---|------|---|---|-------|-------|--------|--------|-------|---|--------|------------------------------|----------------------------------|
| 1 | 1.00 | 1 | 1 | 0.01  | 0.006 | 0.003  | 0.003  | 0.009 | t | 135467 | GVGGLGG                      | Oryctola<br>gus<br>cuniculu<br>s |
| 1 | 1.00 | 1 | 1 | 0.04  | 0.04  | 0.04   | 0.04   | 0.04  | t | 96756  | PTKPTYET<br>EK               | Homo<br>sapiens(<br>human)       |
| 1 | 1.00 | 1 | 1 | 0.02  | 0.02  | 0.02   | 0.02   | 0.02  | t | 151067 | VDDGFLDI<br>WTYNAEL          | Homo<br>sapiens                  |
| 1 | 1.00 | 1 | 1 | 0.02  | 0.02  | 0.02   | 0.02   | 0.02  | t | 106306 | CIVRATKGI<br>S               | Homo<br>sapiens                  |
| 1 | 1.00 | 1 | 1 | 0.02  | 0.02  | 0.02   | 0.02   | 0.02  | t | 80008  | RMFLGPK<br>QLTFE             | Mus<br>musculu<br>s              |
| 1 | 1.00 | 1 | 1 | 0.02  | 0.02  | 0.02   | 0.02   | 0.02  | t | 80008  | RMFLGPK<br>QLTFE             | Mus<br>musculu<br>s              |
| 1 | 1.00 | 1 | 1 | -0.01 | -0.01 | -0.018 | -0.012 | -0.01 | t | 48554  | PMGTQTH<br>TMIFDNAF<br>NC    | Homo<br>sapiens                  |
| 1 | 1.00 | 1 | 1 | 0     | 0     | 0      | 0      | 0     | t | 156846 | AKLITCSKT<br>CSKWQ           | Gallus<br>gallus                 |
| 1 | 1.00 | 1 | 1 | 0     | 0     | 0      | 0      | 0     | t | 128476 | DVQLIKTG<br>DKVGASE          | Homo<br>sapiens                  |
| 1 | 1.00 | 1 | 1 | 0     | 0     | 0      | 0      | 0     | t | 121676 | NVKVLLVA<br>SPLVDPF          | Mus<br>musculu<br>s              |
| 1 | 1.00 | 1 | 1 | 0     | 0     | 0      | 0      | 0     | t | 132415 | KSRANGG<br>AGSIA             | Mus<br>musculu<br>s              |
| 1 | 1.00 | 1 | 1 | 0     | 0     | 0      | 0      | 0     | t | 123037 | AQPVRLFL<br>E                | Ovis<br>aries                    |
| 1 | 1.00 | 1 | 1 | 0     | 0     | 0      | 0      | 0     | t | 123610 | PPGAMPP<br>Q                 | Oryctola<br>gus<br>cuniculu<br>s |
| 1 | 1.00 | 1 | 1 | 0     | 0     | 0      | 0      | 0     | t | 115325 | KPVALINN<br>QFLPYPPY<br>AKPA | Homo<br>sapiens                  |
| 1 | 1.00 | 1 | 1 | 0     | 0     | 0      | 0      | 0     | t | 110863 | GLKAKPKF<br>TLGKRKAT<br>PTTS | Homo<br>sapiens                  |
| 1 | 1.00 | 1 | 1 | 0     | 0     | 0      | 0      | 0     | t | 103301 | KAMLFDG<br>RSGEPFPY          | Homo<br>sapiens                  |

|   |      |   |   |       |        |        |        |        |   |        |                              |                                  |
|---|------|---|---|-------|--------|--------|--------|--------|---|--------|------------------------------|----------------------------------|
| 1 | 1.00 | 1 | 1 | 0     | 0      | 0      | 0      | 0      | t | 105851 | GTAPFEIH<br>ANRIVGFF<br>SKII | Oryctola<br>gus<br>cuniculu<br>s |
| 1 | 1.00 | 1 | 1 | 0     | 0      | 0      | 0      | 0      | t | 105851 | GTAPFEIH<br>ANRIVGFF<br>SKII | Homo<br>sapiens                  |
| 1 | 1.00 | 1 | 1 | 0     | 0      | 0      | 0      | 0      | t | 49081  | PQQPFPL<br>QPQ               | Mus<br>musculu<br>s              |
| 1 | 1.00 | 1 | 1 | 0     | 0      | 0      | 0      | 0      | t | 49081  | PQQPFPL<br>QPQ               | Mus<br>musculu<br>s              |
| 1 | 1.00 | 1 | 1 | -0.02 | -0.02  | -0.02  | -0.02  | -0.02  | t | 114948 | SIEFGTNIS<br>K               | Homo<br>sapiens                  |
| 1 | 1.00 | 1 | 1 | -0.02 | -0.023 | -0.007 | -0.02  | -0.023 | t | 41131  | MASRPAA<br>SSPVE             | Oryctola<br>gus<br>cuniculu<br>s |
| 1 | 1.00 | 1 | 1 | -0.01 | -0.01  | -0.01  | -0.01  | -0.012 | t | 131928 | KEPQSRLR<br>KWTTVDS          | Homo<br>sapiens                  |
| 1 | 1.00 | 1 | 1 | -0.04 | -0.036 | -0.039 | -0.033 | -0.039 | t | 105640 | AAGAVMR<br>GFVFT             | Homo<br>sapiens                  |
| 1 | 1.00 | 1 | 1 | 0     | 0      | 0      | 0      | 0      | t | 135496 | RYPNQVY                      | Mus<br>musculu<br>s              |
| 1 | 1.00 | 1 | 1 | -0.02 | -0.016 | -0.022 | -0.017 | -0.018 | t | 136703 | VDLFTSKG<br>LFRAAVPS<br>G    | Homo<br>sapiens                  |
| 1 | 1.00 | 1 | 1 | 0     | -0.002 | 0      | 0      | 0      | t | 137401 | FEDVW                        | Mus<br>musculu<br>s              |
| 1 | 1.00 | 1 | 1 | 0     | 0      | 0      | 0      | -0.001 | t | 63756  | TFTNKLKE<br>KHTDLGK          | Mus<br>musculu<br>s              |
| 1 | 1.00 | 1 | 1 | -0.01 | -0.012 | -0.004 | -0.007 | -0.01  | t | 28898  | ITFKSGATF<br>Q               | Mus<br>musculu<br>s              |
| 1 | 1.00 | 1 | 1 | 0     | 0      | -0.001 | 0      | 0.001  | t | 63972  | TGTAYPVP<br>LELTPENA         | Mus<br>musculu<br>s              |
| 1 | 1.00 | 1 | 1 | -0.01 | -0.01  | -0.01  | -0.01  | -0.01  | t | 33182  | KRLHQWI<br>NED               | Homo<br>sapiens                  |
| 1 | 1.00 | 1 | 1 | -0.01 | -0.01  | -0.018 | -0.01  | -0.01  | t | 89660  | TQKIPKAN<br>AADADTD<br>TT    | Mus<br>musculu<br>s              |

|   |      |   |   |       |        |        |        |        |   |        |                         |                                  |
|---|------|---|---|-------|--------|--------|--------|--------|---|--------|-------------------------|----------------------------------|
| 1 | 1.00 | 1 | 1 | 0.04  | 0.034  | 0.04   | 0.04   | 0.04   | t | 123591 | PKSQETPA                | Oryctola<br>gus<br>cuniculu<br>s |
| 1 | 1.00 | 1 | 1 | -0.01 | -0.01  | -0.01  | -0.01  | -0.01  | t | 66061  | TRLNPDQL                | Mus<br>musculu<br>s              |
| 1 | 1.00 | 1 | 1 | -0.03 | -0.03  | -0.026 | -0.027 | -0.03  | t | 53331  | RDDITFMV<br>GLHSYT      | Homo<br>sapiens                  |
| 1 | 1.00 | 1 | 1 | 0     | 0      | 0.005  | 0.003  | 0      | t | 73230  | WVTPVIGS                | Homo<br>sapiens                  |
| 1 | 1.00 | 1 | 1 | -0.03 | -0.028 | -0.03  | -0.029 | -0.03  | t | 116954 | DPTDYSTR<br>PHMW        | Homo<br>sapiens                  |
| 1 | 1.00 | 1 | 1 | 0.03  | 0.03   | 0.03   | 0.03   | 0.03   | t | 141893 | FEEETESSA<br>SSES       | Mus<br>musculu<br>s              |
| 1 | 1.00 | 1 | 1 | -0.06 | -0.063 | -0.066 | -0.06  | -0.06  | t | 105795 | FTQFAGKD                | Oryctola<br>gus<br>cuniculu<br>s |
| 1 | 1.00 | 1 | 1 | 0.02  | 0.02   | 0.011  | 0.023  | 0.02   | t | 2610   | ALHQSMML<br>NSQAIDNL    | Homo<br>sapiens                  |
| 1 | 1.00 | 1 | 1 | 0.04  | 0.04   | 0.039  | 0.04   | 0.042  | t | 132644 | SAKEK                   | Mus<br>musculu<br>s              |
| 1 | 1.00 | 1 | 1 | 0.08  | 0.084  | 0.075  | 0.081  | 0.082  | t | 20174  | GHQVGDDG<br>E           | Homo<br>sapiens                  |
| 1 | 1.00 | 1 | 1 | -0.02 | -0.018 | -0.013 | -0.023 | -0.021 | t | 47450  | PEVFGKEK<br>VN          | Homo<br>sapiens                  |
| 1 | 1.00 | 1 | 1 | 0.03  | 0.03   | 0.03   | 0.03   | 0.03   | t | 127681 | HFHRPTQ                 | Homo<br>sapiens                  |
| 1 | 1.00 | 1 | 1 | 0.03  | 0.03   | 0.03   | 0.03   | 0.03   | t | 103479 | PGYPVAG<br>QVWEATA<br>T | Homo<br>sapiens                  |
| 1 | 1.00 | 1 | 1 | 0.03  | 0.03   | 0.03   | 0.03   | 0.03   | t | 13902  | EQPYIEN                 | Oryctola<br>gus<br>cuniculu<br>s |
| 1 | 1.00 | 1 | 1 | 0.01  | 0.01   | 0.01   | 0.01   | 0.01   | t | 140583 | PWDKFVH<br>EQ           | Mus<br>musculu<br>s              |
| 1 | 1.00 | 1 | 1 | 0.01  | 0.01   | 0.01   | 0.01   | 0.01   | t | 140583 | PWDKFVH<br>EQ           | Mus<br>musculu<br>s              |

|   |      |   |   |       |       |       |        |       |   |        |                              |                     |
|---|------|---|---|-------|-------|-------|--------|-------|---|--------|------------------------------|---------------------|
| 1 | 1.00 | 1 | 1 | 0.01  | 0.01  | 0.01  | 0.01   | 0.01  | t | 156339 | KDDPTNKF<br>YQSVIQ           | Homo<br>sapiens     |
| 1 | 1.00 | 1 | 1 | 0.01  | 0.01  | 0.01  | 0.01   | 0.01  | t | 123452 | LPKIKAYM<br>E                | Ovis<br>aries       |
| 1 | 1.00 | 1 | 1 | 0.01  | 0.01  | 0.01  | 0.01   | 0.01  | t | 22104  | GRIVLSGK<br>PAIIPDREV<br>LYR | Homo<br>sapiens     |
| 1 | 1.00 | 1 | 1 | 0.01  | 0.01  | 0.01  | 0.01   | 0.01  | t | 22075  | GRIILSGKP<br>AIIPDREVL<br>YQ | Homo<br>sapiens     |
| 1 | 1.00 | 1 | 1 | 0.01  | 0.01  | 0.01  | 0.01   | 0.01  | t | 22083  | GRIILSGKP<br>AVVPDRE<br>VLYQ | Homo<br>sapiens     |
| 1 | 1.00 | 1 | 1 | 0.01  | 0.01  | 0.01  | 0.01   | 0.01  | t | 7434   | CYRGARV<br>DGLMC             | Homo<br>sapiens     |
| 1 | 1.00 | 1 | 1 | -0.01 | -0.01 | -0.01 | -0.01  | -0.01 | t | 81704  | ENATKVED<br>IK               | Homo<br>sapiens     |
| 1 | 1.00 | 1 | 1 | -0.01 | -0.01 | -0.01 | -0.01  | -0.01 | t | 78925  | AGTYDFAI<br>AAPQANA<br>KIWIA | Homo<br>sapiens     |
| 1 | 1.00 | 1 | 1 | -0.03 | -0.03 | -0.03 | -0.03  | -0.03 | t | 93328  | LSKVVDNY<br>EL               | Ovis<br>aries       |
| 1 | 1.00 | 1 | 1 | -0.05 | -0.05 | -0.05 | -0.05  | -0.05 | t | 115807 | KEMPFPKY<br>PV               | Homo<br>sapiens     |
| 1 | 1.00 | 1 | 1 | 0     | 0.002 | -0.01 | -0.003 | 0     | t | 96779  | QKVAGTW<br>YSLAMAAS          | Homo<br>sapiens     |
| 1 | 1.00 | 1 | 1 | 0.02  | 0.024 | 0.008 | 0.02   | 0.023 | t | 7765   | DDEHVEEP<br>TVA              | Homo<br>sapiens     |
| 1 | 1.00 | 1 | 1 | 0.06  | 0.062 | 0.055 | 0.061  | 0.062 | t | 19723  | GGESSEEL<br>SESSFFNLI<br>T   | Homo<br>sapiens     |
| 1 | 1.00 | 1 | 1 | 0.01  | 0.008 | 0.017 | 0.013  | 0.01  | t | 97565  | PTGSAAA<br>N                 | Mus<br>musculu<br>s |
| 1 | 1.00 | 1 | 1 | 0.01  | 0.008 | 0.017 | 0.013  | 0.01  | t | 97565  | PTGSAAA<br>N                 | Mus<br>musculu<br>s |

|   |      |   |   |       |        |        |        |        |   |        |                             |                                  |
|---|------|---|---|-------|--------|--------|--------|--------|---|--------|-----------------------------|----------------------------------|
| 1 | 1.00 | 1 | 1 | 0     | 0      | 0      | 0      | 0      | t | 105893 | KCNTATCA<br>TQR             | Mus<br>musculus                  |
| 1 | 1.00 | 1 | 1 | -0.05 | -0.045 | -0.059 | -0.05  | -0.05  | t | 59856  | SNKSASQ<br>NVR              | Homo<br>sapiens                  |
| 1 | 1.00 | 1 | 1 | 0     | 0      | -0.007 | 0      | 0      | t | 96017  | YHLYNSQD<br>HG              | Homo<br>sapiens                  |
| 1 | 1.00 | 1 | 1 | 0     | 0      | 0.001  | 0      | 0      | t | 134679 | GGSGPQR<br>RGG              | Homo<br>sapiens                  |
| 1 | 1.00 | 1 | 1 | 0.02  | 0.02   | 0.016  | 0.02   | 0.023  | t | 106690 | NSDHFLQP<br>DPPL            | Mus<br>musculus                  |
| 1 | 1.00 | 1 | 1 | 0     | 0.002  | 0      | 0.001  | 0      | t | 56201  | RTTTASGK<br>L               | Homo<br>sapiens                  |
| 1 | 1.00 | 1 | 1 | -0.01 | -0.012 | -0.01  | -0.01  | -0.012 | t | 114126 | HYGSLPQK<br>SQRSQDE<br>NPVV | Oryctola<br>gus<br>cuniculu<br>s |
| 1 | 1.00 | 1 | 1 | 0     | 0.003  | -0.005 | 0      | 0      | t | 113220 | YAPWKPT<br>VNGTVVA<br>V     | Mus<br>musculus                  |
| 1 | 1.00 | 1 | 1 | 0     | -0.002 | 0      | 0.001  | 0      | t | 46275  | NTTASDQL<br>LVENAAG<br>HRV  | Homo<br>sapiens                  |
| 1 | 1.00 | 1 | 1 | 0     | 0.003  | 0      | 0      | 0      | t | 23588  | HCDGFQN<br>EKWDL            | Mus<br>musculus                  |
| 1 | 1.00 | 1 | 1 | -0.03 | -0.032 | -0.026 | -0.027 | -0.032 | t | 52148  | QQSFPQQ<br>PQR              | Mus<br>musculus                  |
| 1 | 1.00 | 1 | 1 | 0.02  | 0.02   | 0.015  | 0.014  | 0.017  | t | 116021 | VPQKAVP<br>YPQ              | Homo<br>sapiens                  |
| 1 | 1.00 | 1 | 1 | 0.02  | 0.02   | 0.02   | 0.02   | 0.02   | t | 126328 | ISHG                        | Mus<br>musculus                  |
| 1 | 1.00 | 1 | 1 | -0.01 | -0.01  | -0.01  | -0.01  | -0.011 | t | 153419 | LTPPPWQ<br>NPFPFGG<br>GS    | Mus<br>musculus                  |
| 1 | 1.00 | 1 | 1 | -0.01 | -0.01  | -0.011 | -0.012 | -0.01  | t | 60433  | SQERNFV<br>DSIGQSFG         | Homo<br>sapiens                  |



|   |      |   |   |       |        |        |        |        |   |        |                             |                                  |
|---|------|---|---|-------|--------|--------|--------|--------|---|--------|-----------------------------|----------------------------------|
| 1 | 1.00 | 1 | 1 | 0     | -0.002 | 0.008  | 0.001  | -0.001 | t | 149300 | ELDKWNS<br>L                | Homo<br>sapiens                  |
| 1 | 1.00 | 1 | 1 | -0.02 | -0.018 | -0.031 | -0.023 | -0.019 | t | 37165  | LLDKIYTSP<br>LC             | Homo<br>sapiens                  |
| 1 | 1.00 | 1 | 1 | 0     | 0      | 0      | 0      | 0      | t | 94450  | CCNPAC                      | Capra<br>hircus                  |
| 1 | 1.00 | 1 | 1 | 0     | 0      | 0      | 0      | 0      | t | 94450  | CCNPAC                      | Oryctola<br>gus<br>cuniculu<br>s |
| 1 | 1.00 | 1 | 1 | 0     | -0.007 | 0      | 0      | 0      | t | 94450  | CCNPAC                      | Oryctola<br>gus<br>cuniculu<br>s |
| 1 | 1.00 | 1 | 1 | 0.02  | 0.016  | 0.015  | 0.02   | 0.021  | t | 49680  | PTKEFFRE<br>A               | Bos<br>taurus                    |
| 1 | 1.00 | 1 | 1 | -0.05 | -0.05  | -0.043 | -0.05  | -0.05  | t | 113989 | VFILGPLRL<br>LG             | Rattus<br>norvegic<br>us         |
| 1 | 1.00 | 1 | 1 | -0.01 | -0.01  | -0.012 | -0.01  | -0.011 | t | 79928  | MDRPTSM<br>KALDH            | Mus<br>musculu<br>s              |
| 1 | 1.00 | 1 | 1 | 0.04  | 0.04   | 0.04   | 0.04   | 0.04   | t | 137555 | QEWQQQ<br>DECQIDRL<br>D     | Homo<br>sapiens                  |
| 1 | 1.00 | 1 | 1 | 0.02  | 0.02   | 0.02   | 0.02   | 0.02   | t | 121847 | SGVFLSVP<br>ESYFGSC         | Mus<br>musculu<br>s              |
| 1 | 1.00 | 1 | 1 | 0.02  | 0.02   | 0.02   | 0.02   | 0.02   | t | 113466 | GQGQQPG<br>QGQQGQ<br>Q      | Homo<br>sapiens                  |
| 1 | 1.00 | 1 | 1 | 0.02  | 0.02   | 0.02   | 0.02   | 0.02   | t | 115795 | IPTINTIAS<br>G              | Homo<br>sapiens                  |
| 1 | 1.00 | 1 | 1 | 0     | 0      | 0      | 0      | 0      | t | 131954 | LNPLFGPQ<br>QVAMLNQ         | Homo<br>sapiens                  |
| 1 | 1.00 | 1 | 1 | 0     | 0      | 0      | 0      | 0      | t | 100407 | QDLLFTNQ<br>LK              | Mus<br>musculu<br>s              |
| 1 | 1.00 | 1 | 1 | 0     | 0      | 0      | 0      | 0      | t | 106343 | DIVMTQSP<br>LSLPVTPG<br>EPA | Oryctola<br>gus<br>cuniculu<br>s |

|   |      |   |   |       |        |        |        |       |   |        |                              |                                  |
|---|------|---|---|-------|--------|--------|--------|-------|---|--------|------------------------------|----------------------------------|
| 1 | 1.00 | 1 | 1 | -0.02 | -0.02  | -0.02  | -0.02  | -0.02 | t | 149439 | QQQPLSQ<br>VSF               | Mus<br>musculu<br>s              |
| 1 | 1.00 | 1 | 1 | -0.02 | -0.02  | -0.02  | -0.02  | -0.02 | t | 149108 | SLPNLTQ                      | Sus<br>scrofa                    |
| 1 | 1.00 | 1 | 1 | -0.02 | -0.02  | -0.02  | -0.02  | -0.02 | t | 149439 | QQQPLSQ<br>VSF               | Homo<br>sapiens                  |
| 1 | 1.00 | 1 | 1 | -0.02 | -0.02  | -0.02  | -0.02  | -0.02 | t | 97920  | AYTPAYYT<br>KN               | Mus<br>musculu<br>s              |
| 1 | 1.00 | 1 | 1 | -0.02 | -0.017 | -0.02  | -0.02  | -0.02 | t | 97920  | AYTPAYYT<br>KN               | Mus<br>musculu<br>s              |
| 1 | 1.00 | 1 | 1 | -0.02 | -0.02  | -0.02  | -0.02  | -0.02 | t | 97920  | AYTPAYYT<br>KN               | Oryctola<br>gus<br>cuniculu<br>s |
| 1 | 1.00 | 1 | 1 | -0.02 | -0.023 | -0.02  | -0.02  | -0.02 | t | 97920  | AYTPAYYT<br>KN               | Oryctola<br>gus<br>cuniculu<br>s |
| 1 | 1.00 | 1 | 1 | -0.02 | -0.017 | -0.028 | -0.02  | -0.02 | t | 675    | ADHPSYTA<br>AKDEVLSH<br>FSV  | Mus<br>musculu<br>s              |
| 1 | 1.00 | 1 | 1 | 0     | 0      | 0      | 0.009  | 0.003 | t | 131116 | TQSYPPPP<br>AWRAASR          | Homo<br>sapiens                  |
| 1 | 1.00 | 1 | 1 | 0     | 0      | 0      | 0      | 0.002 | t | 36760  | LIVTQTMK                     | Homo<br>sapiens                  |
| 1 | 1.00 | 1 | 1 | 0.02  | 0.022  | 0.021  | 0.021  | 0.019 | t | 46982  | PATVPDRE<br>VLYQEFDE<br>MEEC | Homo<br>sapiens                  |
| 1 | 1.00 | 1 | 1 | 0.06  | 0.057  | 0.061  | 0.06   | 0.061 | t | 119220 | ISCAKDGG<br>IPEQEYSC         | Oryctola<br>gus<br>cuniculu<br>s |
| 1 | 1.00 | 1 | 1 | -0.01 | -0.008 | -0.017 | -0.009 | -0.01 | t | 18700  | GANIPAEF<br>LENFVRSS<br>NLKF | Homo<br>sapiens                  |
| 1 | 1.00 | 1 | 1 | 0     | 0      | -0.005 | 0      | 0.002 | t | 79622  | NYARTGG<br>QVTAG             | Mus<br>musculu<br>s              |

|   |      |   |   |       |        |        |        |        |   |        |                            |                       |
|---|------|---|---|-------|--------|--------|--------|--------|---|--------|----------------------------|-----------------------|
| 1 | 1.00 | 1 | 1 | -0.01 | -0.006 | -0.01  | -0.009 | -0.01  | t | 12258  | EGRFKSQD                   | Homo sapiens          |
| 1 | 1.00 | 1 | 1 | 0     | 0      | -0.011 | 0      | 0.002  | t | 111177 | CVQSTHV<br>DIRTLEDLL       | Oryctolagus cuniculus |
| 1 | 1.00 | 1 | 1 | -0.01 | -0.01  | -0.02  | -0.008 | -0.008 | t | 37335  | LLGILESRG<br>IKARIT        | Homo sapiens          |
| 1 | 1.00 | 1 | 1 | -0.01 | -0.008 | -0.012 | -0.01  | -0.01  | t | 46792  | PAFGANS<br>NNPDWDF<br>NP   | Homo sapiens          |
| 1 | 1.00 | 1 | 1 | -0.01 | -0.008 | -0.012 | -0.01  | -0.01  | t | 46792  | PAFGANS<br>NNPDWDF<br>NP   | Homo sapiens          |
| 1 | 1.00 | 1 | 1 | 0     | -0.004 | -0.005 | 0      | 0      | t | 123841 | WEGVGVV<br>PDVAVP          | Rattus norvegicus     |
| 1 | 1.00 | 1 | 1 | -0.03 | -0.03  | -0.031 | -0.03  | -0.03  | t | 127960 | EKVPKGKK<br>GKADAGK        | Homo sapiens          |
| 1 | 1.00 | 1 | 1 | -0.01 | -0.01  | -0.017 | -0.01  | -0.012 | t | 122471 | LLTEHRMT<br>WDPAQPP<br>RDL | Homo sapiens          |
| 1 | 1.00 | 1 | 1 | -0.01 | -0.01  | -0.003 | -0.01  | -0.009 | t | 122127 | KRSRLDV                    | Homo sapiens          |
| 1 | 1.00 | 1 | 1 | 0.01  | 0.012  | 0.01   | 0.011  | 0.01   | t | 116957 | DSMNTDD<br>STRPR           | Homo sapiens          |
| 1 | 1.00 | 1 | 1 | -0.01 | -0.01  | -0.01  | -0.01  | -0.01  | t | 156911 | LGMSTNP<br>GPRIL           | Gallus gallus         |
| 1 | 1.00 | 1 | 1 | -0.01 | -0.01  | -0.01  | -0.01  | -0.01  | t | 102310 | ANQTEVE<br>M               | Mus musculus          |
| 1 | 1.00 | 1 | 1 | 0.05  | 0.05   | 0.043  | 0.04   | 0.048  | t | 106624 | LSEEVKTTE<br>Q             | Homo sapiens          |
| 1 | 1.00 | 1 | 1 | -0.01 | -0.01  | -0.006 | -0.01  | -0.012 | t | 78629  | DQKPPSR<br>QSQIESR         | Oryctolagus cuniculus |
| 1 | 1.00 | 1 | 1 | -0.01 | -0.013 | -0.006 | -0.01  | -0.012 | t | 78629  | DQKPPSR<br>QSQIESR         | Oryctolagus cuniculus |

|   |      |   |   |       |        |        |        |        |   |        |                      |                       |
|---|------|---|---|-------|--------|--------|--------|--------|---|--------|----------------------|-----------------------|
| 1 | 1.00 | 1 | 1 | -0.04 | -0.042 | -0.027 | -0.041 | -0.044 | t | 145923 | NPPIPVGEL            | Mus musculus          |
| 1 | 1.00 | 1 | 1 | 0     | 0.002  | 0      | 0.003  | 0.001  | t | 3289   | ANGAGNQPGANGAGGQAA   | Homo sapiens          |
| 1 | 1.00 | 1 | 1 | 0     | 0      | -0.009 | -0.004 | 0      | t | 135973 | PSKFTEPVKDVM         | Homo sapiens          |
| 1 | 1.00 | 1 | 1 | 0     | -0.002 | 0.005  | -0.001 | 0      | t | 40960  | LYSLNWQDL            | Rattus norvegicus     |
| 1 | 1.00 | 1 | 1 | 0     | 0      | 0.006  | 0      | 0      | t | 28637  | ISNRDF               | Homo sapiens          |
| 1 | 1.00 | 1 | 1 | 0     | 0      | -0.002 | 0      | 0      | t | 125320 | YDGPR                | Homo sapiens          |
| 1 | 1.00 | 1 | 1 | 0.05  | 0.05   | 0.05   | 0.05   | 0.05   | t | 114901 | NCSSYANTTS           | Homo sapiens          |
| 1 | 1.00 | 1 | 1 | 0.03  | 0.03   | 0.03   | 0.03   | 0.03   | t | 132820 | FGSNDPY              | Homo sapiens          |
| 1 | 1.00 | 1 | 1 | 0.01  | 0.01   | 0.001  | 0.007  | 0.01   | t | 97572  | QEHKPKKDDFRNEFDH     | Homo sapiens          |
| 1 | 1.00 | 1 | 1 | -0.06 | -0.056 | -0.058 | -0.053 | -0.062 | t | 121715 | PNKQTPSGKKCIAAK      | Homo sapiens          |
| 1 | 1.00 | 1 | 1 | 0.01  | 0.01   | 0.01   | 0.01   | 0.01   | t | 140856 | GKGVDAGKLGTV         | Oryctolagus cuniculus |
| 1 | 1.00 | 1 | 1 | 0.01  | 0.01   | 0.01   | 0.01   | 0.01   | t | 135329 | TQNKVFDFIVIFEKI      | Sus scrofa            |
| 1 | 1.00 | 1 | 1 | 0.01  | 0.01   | 0.01   | 0.01   | 0.01   | t | 115462 | QYLQYLYQGPIVLNPWDQVK | Homo sapiens          |
| 1 | 1.00 | 1 | 1 | 0.01  | 0.01   | 0.01   | 0.01   | 0.01   | t | 47122  | PDKEVLYEAFDEMEECASKA | Homo sapiens          |
| 1 | 1.00 | 1 | 1 | 0.01  | 0.01   | 0.01   | 0.01   | 0.01   | t | 7205   | CTSGFTGLFSSGAKQT     | Mus musculus          |

|   |      |   |   |       |        |        |        |        |   |        |                              |                                  |
|---|------|---|---|-------|--------|--------|--------|--------|---|--------|------------------------------|----------------------------------|
| 1 | 1.00 | 1 | 1 | -0.01 | -0.01  | -0.01  | -0.01  | -0.01  | t | 149439 | QQQPLSQ<br>VSF               | Mus<br>musculu<br>s              |
| 1 | 1.00 | 1 | 1 | -0.01 | -0.01  | -0.01  | -0.01  | -0.01  | t | 149439 | QQQPLSQ<br>VSF               | Homo<br>sapiens                  |
| 1 | 1.00 | 1 | 1 | -0.01 | -0.01  | -0.01  | -0.01  | -0.01  | t | 103297 | IWKLIKDM<br>LILPYLD          | Homo<br>sapiens                  |
| 1 | 1.00 | 1 | 1 | -0.01 | -0.01  | -0.01  | -0.01  | -0.01  | t | 112278 | QSVLYSS                      | Homo<br>sapiens                  |
| 1 | 1.00 | 1 | 1 | -0.01 | -0.006 | -0.01  | -0.003 | -0.01  | t | 132010 | PPGLTGQK<br>PPLSTWD          | Homo<br>sapiens                  |
| 1 | 1.00 | 1 | 1 | 0.01  | 0.012  | 0.01   | 0.014  | 0.013  | t | 111027 | SRALAREV<br>DLKDYED<br>QQK   | Homo<br>sapiens                  |
| 1 | 1.00 | 1 | 1 | 0.01  | 0.012  | 0.01   | 0.014  | 0.013  | t | 111028 | SRALAREV<br>DLKDYED<br>QQK   | Homo<br>sapiens                  |
| 1 | 1.00 | 1 | 1 | 0     | 0      | 0      | 0      | 0.001  | t | 153837 | HGRLVTLK<br>DIVLDLQP         | Cavia<br>porcellu<br>s           |
| 1 | 1.00 | 1 | 1 | 0     | -0.004 | 0.006  | 0      | -0.004 | t | 92794  | GENKRPN<br>DKAGEV            | Mus<br>musculu<br>s              |
| 1 | 1.00 | 1 | 1 | 0     | 0.002  | 0.002  | -0.003 | -0.004 | t | 17536  | FQSRDEKE<br>RERF             | Homo<br>sapiens                  |
| 1 | 1.00 | 1 | 1 | 0.01  | 0.007  | 0.01   | 0.01   | 0.01   | t | 135478 | LGGLGVG                      | Oryctola<br>gus<br>cuniculu<br>s |
| 1 | 1.00 | 1 | 1 | -0.01 | -0.01  | -0.005 | -0.01  | -0.012 | t | 23372  | GYIWIQRN<br>TG               | Homo<br>sapiens                  |
| 1 | 1.00 | 1 | 1 | 0     | 0      | -0.007 | 0      | -0.002 | t | 67045  | TVKKIKVLV<br>EQVTNVVL<br>YSS | Mus<br>musculu<br>s              |
| 1 | 1.00 | 1 | 1 | 0     | 0.004  | 0      | 0.001  | 0      | t | 5437   | AVLLGACS                     | Homo<br>sapiens                  |

|   |      |   |   |       |        |        |        |        |   |        |                              |                                  |
|---|------|---|---|-------|--------|--------|--------|--------|---|--------|------------------------------|----------------------------------|
| 1 | 1.00 | 1 | 1 | 0.02  | 0.02   | 0.021  | 0.022  | 0.02   | t | 52184  | QRAKEALD<br>KYELENH          | Homo<br>sapiens                  |
| 1 | 1.00 | 1 | 1 | -0.02 | -0.02  | -0.02  | -0.02  | -0.018 | t | 129817 | RRMELK                       | Homo<br>sapiens                  |
| 1 | 1.00 | 1 | 1 | -0.02 | -0.016 | -0.02  | -0.019 | -0.018 | t | 71192  | VSVK                         | Homo<br>sapiens                  |
| 1 | 1.00 | 1 | 1 | 0     | -0.002 | 0.007  | -0.001 | -0.002 | t | 71212  | VSVTDHKK<br>WQFNSPF<br>VP    | Mus<br>musculu<br>s              |
| 1 | 1.00 | 1 | 1 | 0     | 0      | 0      | 0.006  | 0.002  | t | 868    | AEEAFDL<br>WNECAKA<br>CV     | Homo<br>sapiens                  |
| 1 | 1.00 | 1 | 1 | 0.02  | 0.018  | 0.022  | 0.021  | 0.021  | t | 78853  | TKDTNNN<br>LCGN              | Mus<br>musculu<br>s              |
| 1 | 1.00 | 1 | 1 | 0     | -0.002 | 0.008  | 0.001  | -0.001 | t | 149301 | ELEKWAS                      | Homo<br>sapiens                  |
| 1 | 1.00 | 1 | 1 | 0     | 0      | 0      | 0      | 0      | t | 55678  | RRPQDVK<br>F                 | Homo<br>sapiens                  |
| 1 | 1.00 | 1 | 1 | 0.05  | 0.052  | 0.047  | 0.053  | 0.052  | t | 46895  | PAPQAPY<br>QGYQEPP<br>APQAPY | Homo<br>sapiens                  |
| 1 | 1.00 | 1 | 1 | 0.04  | 0.04   | 0.039  | 0.04   | 0.043  | t | 111308 | GDTGPR                       | Oryctola<br>gus<br>cuniculu<br>s |
| 1 | 1.00 | 1 | 1 | -0.02 | -0.02  | -0.02  | -0.02  | -0.02  | t | 128455 | DRATWKS<br>NYFLKIIQ          | Homo<br>sapiens                  |
| 1 | 1.00 | 1 | 1 | 0     | 0.005  | 0.008  | 0.003  | 0.001  | t | 11777  | EELVEEVV                     | Homo<br>sapiens                  |
| 1 | 1.00 | 1 | 1 | 0     | -0.003 | 0      | 0      | -0.002 | t | 144706 | KITCFLTAG<br>GGLPDSVK<br>I   | Oryctola<br>gus<br>cuniculu<br>s |
| 1 | 1.00 | 1 | 1 | -0.03 | -0.03  | -0.038 | -0.03  | -0.029 | t | 35484  | LEGGSRGA<br>PGGGFVP<br>NLQ   | Homo<br>sapiens                  |

|   |      |   |   |      |      |      |      |        |   |        |                              |                                  |
|---|------|---|---|------|------|------|------|--------|---|--------|------------------------------|----------------------------------|
| 1 | 1.00 | 1 | 1 | 0.04 | 0.04 | 0.04 | 0.04 | 0.04   | t | 99381  | KIQRDEDS<br>YERDPYS          | Homo<br>sapiens                  |
| 1 | 1.00 | 1 | 1 | 0.02 | 0.02 | 0.02 | 0.02 | 0.02   | t | 153252 | DHQLDPA<br>FRANTAN<br>P      | Mus<br>musculu<br>s              |
| 1 | 1.00 | 1 | 1 | 0.02 | 0.02 | 0.02 | 0.02 | 0.02   | t | 131897 | GQMPNN<br>QSINSKVS<br>G      | Homo<br>sapiens                  |
| 1 | 1.00 | 1 | 1 | 0.02 | 0.02 | 0.02 | 0.02 | 0.02   | t | 97330  | GFIVLEIQG                    | Oryctola<br>gus<br>cuniculu<br>s |
| 1 | 1.00 | 1 | 1 | 0    | 0    | 0    | 0    | 0      | t | 78518  | SHLVGGFL<br>NDASWSF          | Mus<br>musculu<br>s              |
| 1 | 1.00 | 1 | 1 | 0    | 0    | 0    | 0    | -0.001 | t | 141693 | KTWG                         | Mus<br>musculu<br>s              |
| 1 | 1.00 | 1 | 1 | 0    | 0    | 0    | 0    | -0.001 | t | 144311 | GNLTAG                       | Homo<br>sapiens                  |
| 1 | 1.00 | 1 | 1 | 0    | 0    | 0    | 0    | -0.001 | t | 144325 | GVTTV                        | Homo<br>sapiens                  |
| 1 | 1.00 | 1 | 1 | 0    | 0    | 0    | 0    | -0.001 | t | 144320 | GSEN                         | Homo<br>sapiens                  |
| 1 | 1.00 | 1 | 1 | 0    | 0    | 0    | 0    | -0.001 | t | 119382 | VISCAKDAI<br>EDEEGSC         | Oryctola<br>gus<br>cuniculu<br>s |
| 1 | 1.00 | 1 | 1 | 0    | 0    | 0    | 0    | -0.001 | t | 127643 | ERPLELRV<br>RVLDI            | Homo<br>sapiens                  |
| 1 | 1.00 | 1 | 1 | 0    | 0    | 0    | 0    | -0.001 | t | 120629 | IMIKAEYYI<br>LKKPRSEL<br>MFE | Rattus<br>norvegic<br>us         |
| 1 | 1.00 | 1 | 1 | 0    | 0    | 0    | 0    | -0.001 | t | 117506 | GGAHFSVS<br>SLAEG            | Mus<br>musculu<br>s              |
| 1 | 1.00 | 1 | 1 | 0    | 0    | 0    | 0    | -0.001 | t | 118898 | LSHIGDAV<br>VISCAKD          | Oryctola<br>gus<br>cuniculu<br>s |
| 1 | 1.00 | 1 | 1 | 0    | 0    | 0    | 0    | -0.001 | t | 117520 | GSFSDADL<br>AD               | Mus<br>musculu<br>s              |

|   |      |   |   |   |   |   |   |        |   |        |                              |                                  |
|---|------|---|---|---|---|---|---|--------|---|--------|------------------------------|----------------------------------|
| 1 | 1.00 | 1 | 1 | 0 | 0 | 0 | 0 | -0.001 | t | 118902 | LVFEAPNQ<br>EKVSDYE          | Oryctola<br>gus<br>cuniculu<br>s |
| 1 | 1.00 | 1 | 1 | 0 | 0 | 0 | 0 | -0.001 | t | 122947 | WTQEPQP<br>LEEKWQH<br>RVVE   | Homo<br>sapiens                  |
| 1 | 1.00 | 1 | 1 | 0 | 0 | 0 | 0 | -0.001 | t | 118877 | LDVEQLGI<br>PEQEYSC          | Oryctola<br>gus<br>cuniculu<br>s |
| 1 | 1.00 | 1 | 1 | 0 | 0 | 0 | 0 | -0.001 | t | 120498 | ELMFEEQK<br>DRHGLKR<br>VНКMT | Rattus<br>norvegic<br>us         |
| 1 | 1.00 | 1 | 1 | 0 | 0 | 0 | 0 | -0.001 | t | 119048 | VSDYEMKL<br>MDLDVEQ          | Mus<br>musculu<br>s              |
| 1 | 1.00 | 1 | 1 | 0 | 0 | 0 | 0 | -0.001 | t | 105763 | EVHHQK                       | Mus<br>musculu<br>s              |
| 1 | 1.00 | 1 | 1 | 0 | 0 | 0 | 0 | -0.001 | t | 106322 | DAEFRHDS<br>G                | Mus<br>musculu<br>s              |
| 1 | 1.00 | 1 | 1 | 0 | 0 | 0 | 0 | -0.001 | t | 108848 | DEIDGVN<br>H                 | Mus<br>musculu<br>s              |
| 1 | 1.00 | 1 | 1 | 0 | 0 | 0 | 0 | -0.001 | t | 106322 | DAEFRHDS<br>G                | Mus<br>musculu<br>s              |
| 1 | 1.00 | 1 | 1 | 0 | 0 | 0 | 0 | -0.001 | t | 109905 | SEEEND                       | Mus<br>musculu<br>s              |
| 1 | 1.00 | 1 | 1 | 0 | 0 | 0 | 0 | -0.001 | t | 100378 | PGSGFWS<br>FGSEDGSG<br>DSEN  | Mus<br>musculu<br>s              |
| 1 | 1.00 | 1 | 1 | 0 | 0 | 0 | 0 | -0.001 | t | 94836  | GSSK                         | Oryctola<br>gus<br>cuniculu<br>s |
| 1 | 1.00 | 1 | 1 | 0 | 0 | 0 | 0 | -0.001 | t | 68524  | VFMVPQY<br>GYL               | Mus<br>musculu<br>s              |
| 1 | 1.00 | 1 | 1 | 0 | 0 | 0 | 0 | -0.001 | t | 61124  | SSIVYEA<br>DMIMHT            | Mus<br>musculu<br>s              |
| 1 | 1.00 | 1 | 1 | 0 | 0 | 0 | 0 | -0.001 | t | 69462  | VLELAA                       | Mus<br>musculu<br>s              |



|   |      |   |   |   |   |   |   |        |   |       |                              |                                  |
|---|------|---|---|---|---|---|---|--------|---|-------|------------------------------|----------------------------------|
| 1 | 1.00 | 1 | 1 | 0 | 0 | 0 | 0 | -0.001 | t | 41537 | MFSGGGG<br>PLSPGGKS          | Mus<br>musculu<br>s              |
| 1 | 1.00 | 1 | 1 | 0 | 0 | 0 | 0 | -0.001 | t | 41826 | MKHM                         | Mus<br>musculu<br>s              |
| 1 | 1.00 | 1 | 1 | 0 | 0 | 0 | 0 | -0.001 | t | 58077 | SGHRMA<br>WDMMM<br>NW        | Mus<br>musculu<br>s              |
| 1 | 1.00 | 1 | 1 | 0 | 0 | 0 | 0 | -0.001 | t | 37660 | LLPHSNLD<br>HILEPSIPW<br>KSK | Mus<br>musculu<br>s              |
| 1 | 1.00 | 1 | 1 | 0 | 0 | 0 | 0 | -0.001 | t | 42274 | MPGGMP<br>GGMPGG<br>MPGG     | Oryctola<br>gus<br>cuniculu<br>s |
| 1 | 1.00 | 1 | 1 | 0 | 0 | 0 | 0 | -0.001 | t | 56599 | RYNLVFSG<br>DSDRICSN<br>RA   | Mus<br>musculu<br>s              |
| 1 | 1.00 | 1 | 1 | 0 | 0 | 0 | 0 | -0.001 | t | 36434 | LHTISRYSS<br>EYPHGDK         | Oryctola<br>gus<br>cuniculu<br>s |
| 1 | 1.00 | 1 | 1 | 0 | 0 | 0 | 0 | -0.001 | t | 16018 | FGNDYED<br>RYYR              | Mus<br>musculu<br>s              |
| 1 | 1.00 | 1 | 1 | 0 | 0 | 0 | 0 | -0.001 | t | 11813 | EENVEENV                     | Oryctola<br>gus<br>cuniculu<br>s |
| 1 | 1.00 | 1 | 1 | 0 | 0 | 0 | 0 | -0.001 | t | 11813 | EENVEENV                     | Oryctola<br>gus<br>cuniculu<br>s |
| 1 | 1.00 | 1 | 1 | 0 | 0 | 0 | 0 | -0.001 | t | 10801 | DWEDRYR<br>RE                | Oryctola<br>gus<br>cuniculu<br>s |
| 1 | 1.00 | 1 | 1 | 0 | 0 | 0 | 0 | -0.001 | t | 11819 | EENVEHD<br>A                 | Oryctola<br>gus<br>cuniculu<br>s |
| 1 | 1.00 | 1 | 1 | 0 | 0 | 0 | 0 | -0.001 | t | 4397  | ASFEAQG<br>ALANIAVD<br>KA    | Mus<br>musculu<br>s              |
| 1 | 1.00 | 1 | 1 | 0 | 0 | 0 | 0 | -0.001 | t | 7491  | DAEFRHDS<br>GYEVHHQ<br>K     | Mus<br>musculu<br>s              |

|   |      |   |   |       |        |        |        |        |   |        |                             |                                  |
|---|------|---|---|-------|--------|--------|--------|--------|---|--------|-----------------------------|----------------------------------|
| 1 | 1.00 | 1 | 1 | 0     | 0      | 0      | 0      | -0.001 | t | 4397   | ASFEAQQ<br>ALANIAVD<br>KA   | Mus<br>musculu<br>s              |
| 1 | 1.00 | 1 | 1 | 0     | 0      | 0      | 0      | -0.001 | t | 6675   | CMYSNNN<br>VEDMYSN<br>NNVED | Oryctola<br>gus<br>cuniculu<br>s |
| 1 | 1.00 | 1 | 1 | 0     | 0      | 0      | 0      | -0.001 | t | 5771   | AYFLYQQ<br>QGRLDKL          | Oryctola<br>gus<br>cuniculu<br>s |
| 1 | 1.00 | 1 | 1 | 0     | 0.002  | 0      | 0.003  | 0      | t | 51372  | QLINTNGS<br>WHINSTA         | Homo<br>sapiens                  |
| 1 | 1.00 | 1 | 1 | 0     | 0.002  | 0      | 0.003  | 0      | t | 51372  | QLINTNGS<br>WHINSTA         | Homo<br>sapiens                  |
| 1 | 1.00 | 1 | 1 | 0     | 0.002  | 0      | 0.003  | 0      | t | 51372  | QLINTNGS<br>WHINSTA         | Homo<br>sapiens                  |
| 1 | 1.00 | 1 | 1 | 0     | 0.002  | 0      | 0.003  | 0      | t | 51372  | QLINTNGS<br>WHINSTA         | Homo<br>sapiens                  |
| 1 | 1.00 | 1 | 1 | 0     | 0.002  | 0      | 0.003  | 0      | t | 51372  | QLINTNGS<br>WHINSTA         | Homo<br>sapiens                  |
| 1 | 1.00 | 1 | 1 | 0.02  | 0.022  | 0.02   | 0.019  | 0.02   | t | 151998 | LTRYLRHP<br>QS              | Homo<br>sapiens                  |
| 1 | 1.00 | 1 | 1 | -0.01 | -0.014 | -0.012 | -0.007 | -0.01  | t | 95749  | QVYNKLG<br>MYPPN            | Oryctola<br>gus<br>cuniculu<br>s |
| 1 | 1.00 | 1 | 1 | 0     | 0      | -0.004 | -0.003 | 0      | t | 86972  | NPITESAH<br>LN              | Homo<br>sapiens                  |
| 1 | 1.00 | 1 | 1 | 0     | 0.004  | 0      | 0.007  | 0.001  | t | 107773 | CSVMHEG                     | Homo<br>sapiens                  |
| 1 | 1.00 | 1 | 1 | -0.03 | -0.03  | -0.03  | -0.03  | -0.03  | t | 94741  | WEQWW                       | Mus<br>musculu<br>s              |
| 1 | 1.00 | 1 | 1 | -0.03 | -0.03  | -0.03  | -0.03  | -0.03  | t | 94741  | WEQWW                       | Mus<br>musculu<br>s              |
| 1 | 1.00 | 1 | 1 | 0.01  | 0.01   | 0.01   | 0.01   | 0.011  | t | 79188  | DSAVGY                      | Mus<br>musculu<br>s              |

|   |      |   |   |       |        |        |        |        |   |        |                             |                       |
|---|------|---|---|-------|--------|--------|--------|--------|---|--------|-----------------------------|-----------------------|
| 1 | 1.00 | 1 | 1 | 0.01  | 0.01   | 0.01   | 0.01   | 0.011  | t | 79188  | DSAVGY                      | Mus musculus          |
| 1 | 1.00 | 1 | 1 | 0.02  | 0.02   | 0.02   | 0.02   | 0.02   | t | 106571 | KLVSEVPK<br>HCGI            | Homo sapiens          |
| 1 | 1.00 | 1 | 1 | -0.02 | -0.02  | -0.025 | -0.02  | -0.018 | t | 133667 | QDVCTYR<br>DFMYK            | Mus musculus          |
| 1 | 1.00 | 1 | 1 | 0     | 0      | 0      | 0      | 0      | t | 111856 | TTHYGSLP<br>QK              | Oryctolagus cuniculus |
| 1 | 1.00 | 1 | 1 | 0     | 0      | 0      | 0      | 0      | t | 113966 | TTHYGSLP<br>QKAQGHR<br>PQDE | Oryctolagus cuniculus |
| 1 | 1.00 | 1 | 1 | 0     | -0.002 | 0      | 0      | 0      | t | 113966 | TTHYGSLP<br>QKAQGHR<br>PQDE | Oryctolagus cuniculus |
| 1 | 1.00 | 1 | 1 | 0.06  | 0.06   | 0.053  | 0.051  | 0.06   | t | 119524 | SKEQV                       | Homo sapiens          |
| 1 | 1.00 | 1 | 1 | -0.01 | -0.01  | -0.015 | -0.01  | -0.011 | t | 103367 | LNDESLIL<br>ENLTK           | Mus musculus          |
| 1 | 1.00 | 1 | 1 | -0.02 | -0.022 | -0.027 | -0.021 | -0.018 | t | 23240  | GWAGYW<br>RGSNHS            | Mus musculus          |
| 1 | 1.00 | 1 | 1 | 0     | 0      | 0      | 0      | -0.001 | t | 100508 | SGYEVHH<br>QKL              | Mus musculus          |
| 1 | 1.00 | 1 | 1 | -0.02 | -0.02  | -0.022 | -0.013 | -0.019 | t | 11872  | EESDDDM<br>GFGFLD           | Homo sapiens          |
| 1 | 1.00 | 1 | 1 | 0.04  | 0.04   | 0.04   | 0.04   | 0.038  | t | 140462 | FNTKHDM<br>QGDS             | Mus musculus          |
| 1 | 1.00 | 1 | 1 | -0.03 | -0.026 | -0.019 | -0.023 | -0.029 | t | 122206 | VISRSRV                     | Homo sapiens          |
| 1 | 1.00 | 1 | 1 | 0.01  | 0      | 0.01   | 0.011  | 0.01   | t | 29931  | KARQPEG<br>RAWAQ            | Homo sapiens          |
| 1 | 1.00 | 1 | 1 | 0.01  | 0.01   | 0.005  | 0.008  | 0.01   | t | 96352  | GVTKAAEK<br>QM              | Homo sapiens          |

|   |      |   |   |       |        |        |        |        |   |        |                               |                                  |
|---|------|---|---|-------|--------|--------|--------|--------|---|--------|-------------------------------|----------------------------------|
| 1 | 1.00 | 1 | 1 | -0.01 | -0.01  | -0.01  | -0.01  | -0.01  | t | 43039  | MYASSGIG                      | Oryctola<br>gus<br>cuniculu<br>s |
| 1 | 1.00 | 1 | 1 | -0.01 | -0.008 | -0.007 | -0.009 | -0.009 | t | 36542  | LIGVII                        | Homo<br>sapiens                  |
| 1 | 1.00 | 1 | 1 | 0.05  | 0.05   | 0.066  | 0.044  | 0.044  | t | 136061 | ETQAE                         | Mus<br>musculu<br>s              |
| 1 | 1.00 | 1 | 1 | 0     | 0      | 0      | 0.003  | 0.001  | t | 123016 | AIYENEIHA<br>LWADLP           | Trichosu<br>rus<br>vulpecul<br>a |
| 1 | 1.00 | 1 | 1 | 0     | 0      | 0      | 0.003  | 0.001  | t | 123809 | VAVESRN<br>GSRLHFNK           | Trichosu<br>rus<br>vulpecul<br>a |
| 1 | 1.00 | 1 | 1 | 0     | 0      | 0      | 0.003  | 0.001  | t | 123880 | YRVNLKFL<br>PNETTSN           | Trichosu<br>rus<br>vulpecul<br>a |
| 1 | 1.00 | 1 | 1 | 0     | -0.002 | 0      | 0.003  | 0.001  | t | 110652 | LCLIGCKPP<br>IGEHWGK<br>GSPC  | Homo<br>sapiens                  |
| 1 | 1.00 | 1 | 1 | 0     | -0.002 | 0      | 0.003  | 0.001  | t | 111585 | NKSEVPLD<br>ICTSICKYP<br>DYI  | Homo<br>sapiens                  |
| 1 | 1.00 | 1 | 1 | 0     | -0.002 | 0      | 0.003  | 0.001  | t | 111450 | KGSPCTNV<br>AVNPGDC<br>PPLEL  | Homo<br>sapiens                  |
| 1 | 1.00 | 1 | 1 | 0     | 0      | 0      | 0.003  | 0.001  | t | 99922  | DAEFRHDS<br>GY                | Mus<br>musculu<br>s              |
| 1 | 1.00 | 1 | 1 | 0.04  | 0.043  | 0.045  | 0.04   | 0.038  | t | 134654 | DQQNQFQ<br>KAET               | Mus<br>musculu<br>s              |
| 1 | 1.00 | 1 | 1 | 0.04  | 0.038  | 0.038  | 0.037  | 0.04   | t | 142125 | DLIDASREA<br>KKQLEAEQ<br>QKLE | Homo<br>sapiens                  |
| 1 | 1.00 | 1 | 1 | 0.02  | 0.017  | 0.017  | 0.02   | 0.02   | t | 42933  | MVDVVTG<br>ATV                | Oryctola<br>gus<br>cuniculu<br>s |
| 1 | 1.00 | 1 | 1 | 0.03  | 0.032  | 0.03   | 0.03   | 0.03   | t | 136075 | PGSSYP                        | Rattus<br>norvegic<br>us         |

|   |      |   |   |       |        |        |        |        |   |        |                              |                       |
|---|------|---|---|-------|--------|--------|--------|--------|---|--------|------------------------------|-----------------------|
| 1 | 1.00 | 1 | 1 | 0.01  | 0.01   | 0.01   | 0.01   | 0.01   | t | 156934 | PLHTSL                       | Gallus gallus         |
| 1 | 1.00 | 1 | 1 | -0.01 | -0.01  | -0.014 | -0.01  | -0.01  | t | 73021  | WRCVVYP<br>GNGFVSAS<br>IFGFQ | Oryctolagus cuniculus |
| 1 | 1.00 | 1 | 1 | -0.04 | -0.038 | -0.03  | -0.037 | -0.04  | t | 77929  | KFHRVIKDF                    | Homo sapiens          |
| 1 | 1.00 | 1 | 1 | 0     | -0.002 | 0.004  | -0.001 | 0.001  | t | 34912  | LAPRVAR                      | Mus musculus          |
| 1 | 1.00 | 1 | 1 | 0.07  | 0.07   | 0.07   | 0.07   | 0.07   | t | 135728 | NSTEAEIT                     | Homo sapiens          |
| 1 | 1.00 | 1 | 1 | 0.05  | 0.05   | 0.05   | 0.05   | 0.05   | t | 106569 | KLSEEVKT<br>TEQK             | Homo sapiens          |
| 1 | 1.00 | 1 | 1 | 0.03  | 0.03   | 0.03   | 0.03   | 0.03   | t | 123693 | REKWLGD<br>KF                | Ovis aries            |
| 1 | 1.00 | 1 | 1 | 0     | -0.007 | 0.012  | 0      | -0.007 | t | 137108 | ARAAVDT<br>YCRHNYGV          | Oryctolagus cuniculus |
| 1 | 1.00 | 1 | 1 | 0.01  | 0.01   | 0.01   | 0.01   | 0.01   | t | 147546 | CFGSLPWM<br>C                | Homo sapiens          |
| 1 | 1.00 | 1 | 1 | 0.01  | 0.01   | 0.01   | 0.01   | 0.01   | t | 123401 | KTLKMWS<br>DF                | Ovis aries            |
| 1 | 1.00 | 1 | 1 | 0.01  | 0.01   | 0.01   | 0.01   | 0.01   | t | 124283 | HPLLPGTAS                    | Homo sapiens          |
| 1 | 1.00 | 1 | 1 | 0.01  | 0.01   | 0.01   | 0.01   | 0.01   | t | 99934  | DFLSTEEKE<br>F               | Mus musculus          |
| 1 | 1.00 | 1 | 1 | -0.01 | -0.01  | -0.01  | -0.01  | -0.01  | t | 123723 | RVCYNPKFE                    | Ovis aries            |
| 1 | 1.00 | 1 | 1 | -0.01 | -0.01  | -0.01  | -0.01  | -0.01  | t | 78231  | PHMQLHH<br>L                 | Homo sapiens          |
| 1 | 1.00 | 1 | 1 | -0.03 | -0.03  | -0.03  | -0.03  | -0.03  | t | 114980 | VTYTNDCL<br>LC               | Homo sapiens          |
| 1 | 1.00 | 1 | 1 | 0     | 0.002  | 0      | 0.003  | 0      | t | 115109 | SKIFKLGGR<br>DSRSGSP<br>MARR | Homo sapiens          |
| 1 | 1.00 | 1 | 1 | -0.03 | -0.03  | -0.032 | -0.03  | -0.03  | t | 73301  | WYWGPSLY<br>SI               | Mus musculus          |

|   |      |   |   |       |        |        |       |        |   |        |                              |                                  |
|---|------|---|---|-------|--------|--------|-------|--------|---|--------|------------------------------|----------------------------------|
| 1 | 1.00 | 1 | 1 | -0.02 | -0.024 | 0      | -0.02 | -0.022 | t | 100070 | GLMVGGV<br>VIA               | Chloroce<br>bus<br>aethiops      |
| 1 | 1.00 | 1 | 1 | 0     | -0.002 | 0      | 0.003 | 0.001  | t | 11813  | EENVEENV                     | Mus<br>musculu<br>s              |
| 1 | 1.00 | 1 | 1 | -0.01 | -0.01  | -0.013 | -0.01 | -0.01  | t | 48071  | PKGRNVVL<br>EK               | Homo<br>sapiens                  |
| 1 | 1.00 | 1 | 1 | 0.02  | 0.018  | 0.025  | 0.023 | 0.02   | t | 65974  | TQYERE                       | Mus<br>musculu<br>s              |
| 1 | 1.00 | 1 | 1 | 0.03  | 0.03   | 0.033  | 0.036 | 0.032  | t | 111585 | NKSEVPLD<br>ICTSICKYP<br>DYI | Homo<br>sapiens                  |
| 1 | 1.00 | 1 | 1 | 0     | 0.004  | 0      | 0.001 | 0      | t | 52321  | QSFRRLGA                     | Homo<br>sapiens                  |
| 1 | 1.00 | 1 | 1 | 0.03  | 0.026  | 0.03   | 0.029 | 0.03   | t | 137816 | DAETLMD<br>AAVDV             | Oryctola<br>gus<br>cuniculu<br>s |
| 1 | 1.00 | 1 | 1 | 0.01  | 0.011  | 0.01   | 0.009 | 0.01   | t | 147530 | ATNFGDIG<br>V                | Oryctola<br>gus<br>cuniculu<br>s |
| 1 | 1.00 | 1 | 1 | 0.02  | 0.013  | 0.015  | 0.021 | 0.019  | t | 34115  | KVLSPLQD<br>NNDSGH           | Homo<br>sapiens                  |
| 1 | 1.00 | 1 | 1 | 0     | -0.003 | 0      | 0     | -0.002 | t | 38825  | LQDPRVR<br>GLYFPAGG          | Oryctola<br>gus<br>cuniculu<br>s |
| 1 | 1.00 | 1 | 1 | 0     | 0      | 0      | 0     | -0.001 | t | 136074 | LVKK                         | Mus<br>musculu<br>s              |
| 1 | 1.00 | 1 | 1 | 0     | 0      | 0      | 0     | -0.001 | t | 126201 | GYKEKSKF<br>QDTHNNA          | Oryctola<br>gus<br>cuniculu<br>s |
| 1 | 1.00 | 1 | 1 | 0     | 0      | 0      | 0     | -0.001 | t | 124588 | PQEETLQA<br>FDSHYDYT         | Oryctola<br>gus<br>cuniculu<br>s |
| 1 | 1.00 | 1 | 1 | 0     | 0      | 0      | 0     | -0.001 | t | 122790 | HQEEDFR<br>VTCKDIQR          | Oryctola<br>gus<br>cuniculu<br>s |

|   |      |   |   |   |   |   |   |        |   |        |                              |                                  |
|---|------|---|---|---|---|---|---|--------|---|--------|------------------------------|----------------------------------|
| 1 | 1.00 | 1 | 1 | 0 | 0 | 0 | 0 | -0.001 | t | 122857 | MGCSSPP<br>CECHQEE           | Mus<br>musculu<br>s              |
| 1 | 1.00 | 1 | 1 | 0 | 0 | 0 | 0 | -0.001 | t | 127898 | YEENLGDS<br>IV               | Oryctola<br>gus<br>cuniculu<br>s |
| 1 | 1.00 | 1 | 1 | 0 | 0 | 0 | 0 | -0.001 | t | 125250 | SDEFNPCE<br>DIMGYK           | Mus<br>musculu<br>s              |
| 1 | 1.00 | 1 | 1 | 0 | 0 | 0 | 0 | -0.001 | t | 122842 | LLDLPRDL<br>GGMGCSS<br>PPCE  | Oryctola<br>gus<br>cuniculu<br>s |
| 1 | 1.00 | 1 | 1 | 0 | 0 | 0 | 0 | -0.001 | t | 132848 | KKEDFDIY<br>DEDENQS<br>PR    | Mus<br>musculu<br>s              |
| 1 | 1.00 | 1 | 1 | 0 | 0 | 0 | 0 | -0.001 | t | 122746 | EEQEDEIIG<br>FGQELKN         | Oryctola<br>gus<br>cuniculu<br>s |
| 1 | 1.00 | 1 | 1 | 0 | 0 | 0 | 0 | -0.001 | t | 106322 | DAEFRHDS<br>G                | Mus<br>musculu<br>s              |
| 1 | 1.00 | 1 | 1 | 0 | 0 | 0 | 0 | -0.001 | t | 102384 | EFRH                         | Mus<br>musculu<br>s              |
| 1 | 1.00 | 1 | 1 | 0 | 0 | 0 | 0 | -0.001 | t | 100777 | DIDFLIEIE<br>RLGQDL          | Oryctola<br>gus<br>cuniculu<br>s |
| 1 | 1.00 | 1 | 1 | 0 | 0 | 0 | 0 | -0.001 | t | 102384 | EFRH                         | Mus<br>musculu<br>s              |
| 1 | 1.00 | 1 | 1 | 0 | 0 | 0 | 0 | -0.001 | t | 95137  | RGLSLGM<br>RLEN              | Mus<br>musculu<br>s              |
| 1 | 1.00 | 1 | 1 | 0 | 0 | 0 | 0 | -0.001 | t | 69178  | VKAETRLN<br>PDLQPTE          | Oryctola<br>gus<br>cuniculu<br>s |
| 1 | 1.00 | 1 | 1 | 0 | 0 | 0 | 0 | -0.001 | t | 65684  | TPPHSARS<br>KFGYGA           | Mus<br>musculu<br>s              |
| 1 | 1.00 | 1 | 1 | 0 | 0 | 0 | 0 | -0.001 | t | 73889  | YFRTLEDA<br>AH               | Mus<br>musculu<br>s              |
| 1 | 1.00 | 1 | 1 | 0 | 0 | 0 | 0 | -0.001 | t | 75203  | YNPLYGSR<br>LGVPDTLG<br>GDPK | Homo<br>sapiens                  |

|   |      |   |   |   |        |   |   |        |   |       |                              |                                  |
|---|------|---|---|---|--------|---|---|--------|---|-------|------------------------------|----------------------------------|
| 1 | 1.00 | 1 | 1 | 0 | 0      | 0 | 0 | -0.001 | t | 97282 | ESNNL                        | Oryctola<br>gus<br>cuniculu<br>s |
| 1 | 1.00 | 1 | 1 | 0 | 0      | 0 | 0 | -0.001 | t | 61944 | STTNK                        | Mus<br>musculu<br>s              |
| 1 | 1.00 | 1 | 1 | 0 | 0      | 0 | 0 | -0.001 | t | 68524 | VFMVPQY<br>GYL               | Mus<br>musculu<br>s              |
| 1 | 1.00 | 1 | 1 | 0 | 0      | 0 | 0 | -0.001 | t | 73636 | YEDRYRE                      | Mus<br>musculu<br>s              |
| 1 | 1.00 | 1 | 1 | 0 | 0      | 0 | 0 | -0.001 | t | 97348 | GLFGAIAG<br>FIEGGW           | Oryctola<br>gus<br>cuniculu<br>s |
| 1 | 1.00 | 1 | 1 | 0 | 0      | 0 | 0 | -0.001 | t | 73433 | YARFMDT<br>DPDRYGIL<br>PSNF  | Mus<br>musculu<br>s              |
| 1 | 1.00 | 1 | 1 | 0 | 0      | 0 | 0 | -0.001 | t | 70391 | VPNLRGDL<br>QVLAQKV<br>ARTLP | Oryctola<br>gus<br>cuniculu<br>s |
| 1 | 1.00 | 1 | 1 | 0 | 0      | 0 | 0 | -0.001 | t | 72065 | VYKLDISEA                    | Mus<br>musculu<br>s              |
| 1 | 1.00 | 1 | 1 | 0 | 0      | 0 | 0 | -0.001 | t | 80049 | TGELTMY<br>YVW               | Mus<br>musculu<br>s              |
| 1 | 1.00 | 1 | 1 | 0 | 0      | 0 | 0 | -0.001 | t | 73889 | YFRTLEDA<br>AH               | Mus<br>musculu<br>s              |
| 1 | 1.00 | 1 | 1 | 0 | 0      | 0 | 0 | -0.001 | t | 69175 | VKAETRLN                     | Mus<br>musculu<br>s              |
| 1 | 1.00 | 1 | 1 | 0 | 0      | 0 | 0 | -0.001 | t | 73433 | YARFMDT<br>DPDRYGIL<br>PSNF  | Mus<br>musculu<br>s              |
| 1 | 1.00 | 1 | 1 | 0 | -0.007 | 0 | 0 | -0.001 | t | 61589 | STEQNVP<br>DPQVG             | Oryctola<br>gus<br>cuniculu<br>s |
| 1 | 1.00 | 1 | 1 | 0 | 0      | 0 | 0 | -0.001 | t | 69178 | VKAETRLN<br>PDLQPT           | Oryctola<br>gus<br>cuniculu<br>s |



|   |      |   |   |   |   |   |   |        |   |       |                              |                              |
|---|------|---|---|---|---|---|---|--------|---|-------|------------------------------|------------------------------|
| 1 | 1.00 | 1 | 1 | 0 | 0 | 0 | 0 | -0.001 | t | 95058 | AGLQND                       | Mus<br>musculus              |
| 1 | 1.00 | 1 | 1 | 0 | 0 | 0 | 0 | -0.001 | t | 66060 | TRLNPD                       | Mus<br>musculus              |
| 1 | 1.00 | 1 | 1 | 0 | 0 | 0 | 0 | -0.001 | t | 71350 | VTGTDLELI<br>QILK            | Homo<br>sapiens              |
| 1 | 1.00 | 1 | 1 | 0 | 0 | 0 | 0 | -0.001 | t | 95524 | KRQIYTDIE<br>MNRLGK          | Oryctola<br>gus<br>cuniculus |
| 1 | 1.00 | 1 | 1 | 0 | 0 | 0 | 0 | -0.001 | t | 75278 | YPEKAVLD<br>EYDYRYNR<br>PK   | Mus<br>musculus              |
| 1 | 1.00 | 1 | 1 | 0 | 0 | 0 | 0 | -0.001 | t | 39164 | LRPGPVSQ<br>PYHHWDT<br>DK    | Homo<br>sapiens              |
| 1 | 1.00 | 1 | 1 | 0 | 0 | 0 | 0 | -0.001 | t | 53122 | RAISSWKQ<br>RNRWEW<br>RPD    | Felis<br>catus               |
| 1 | 1.00 | 1 | 1 | 0 | 0 | 0 | 0 | -0.001 | t | 48912 | PPSDIKGK<br>YVKEVEVK         | Oryctola<br>gus<br>cuniculus |
| 1 | 1.00 | 1 | 1 | 0 | 0 | 0 | 0 | -0.001 | t | 49450 | PSNQDSF<br>QWQ               | Mus<br>musculus              |
| 1 | 1.00 | 1 | 1 | 0 | 0 | 0 | 0 | -0.001 | t | 55951 | RSRSES                       | Oryctola<br>gus<br>cuniculus |
| 1 | 1.00 | 1 | 1 | 0 | 0 | 0 | 0 | -0.001 | t | 37660 | LLPHSNLD<br>HILEPSIPW<br>KSK | Mus<br>musculus              |
| 1 | 1.00 | 1 | 1 | 0 | 0 | 0 | 0 | -0.001 | t | 59229 | SLKMADP<br>NRFRGKDL<br>P     | Mus<br>musculus              |
| 1 | 1.00 | 1 | 1 | 0 | 0 | 0 | 0 | -0.001 | t | 49450 | PSNQDSF<br>QWQ               | Mus<br>musculus              |
| 1 | 1.00 | 1 | 1 | 0 | 0 | 0 | 0 | -0.001 | t | 57320 | SDYEDRY<br>REN               | Mus<br>musculus              |

|   |      |   |   |   |        |   |   |        |   |       |                              |                                  |
|---|------|---|---|---|--------|---|---|--------|---|-------|------------------------------|----------------------------------|
| 1 | 1.00 | 1 | 1 | 0 | 0      | 0 | 0 | -0.001 | t | 42748 | MTDSPGG<br>VAP               | Mus<br>musculu<br>s              |
| 1 | 1.00 | 1 | 1 | 0 | 0      | 0 | 0 | -0.001 | t | 56734 | SADNNNS<br>EYSWT             | Mus<br>musculu<br>s              |
| 1 | 1.00 | 1 | 1 | 0 | 0      | 0 | 0 | -0.001 | t | 51393 | QLKLNWF<br>KKGSS             | Oryctola<br>gus<br>cuniculu<br>s |
| 1 | 1.00 | 1 | 1 | 0 | 0      | 0 | 0 | -0.001 | t | 54058 | RHKQKIVA<br>PVKQTL           | Oryctola<br>gus<br>cuniculu<br>s |
| 1 | 1.00 | 1 | 1 | 0 | 0      | 0 | 0 | -0.001 | t | 55951 | RSRSES                       | Oryctola<br>gus<br>cuniculu<br>s |
| 1 | 1.00 | 1 | 1 | 0 | -0.003 | 0 | 0 | -0.001 | t | 51393 | QLKLNWF<br>KKGSS             | Oryctola<br>gus<br>cuniculu<br>s |
| 1 | 1.00 | 1 | 1 | 0 | 0      | 0 | 0 | -0.001 | t | 37698 | LLQAHRQL<br>EER              | Mus<br>musculu<br>s              |
| 1 | 1.00 | 1 | 1 | 0 | 0      | 0 | 0 | -0.001 | t | 56599 | RYNLVFSG<br>DSDRICSN<br>RA   | Mus<br>musculu<br>s              |
| 1 | 1.00 | 1 | 1 | 0 | 0      | 0 | 0 | -0.001 | t | 38918 | LQND                         | Mus<br>musculu<br>s              |
| 1 | 1.00 | 1 | 1 | 0 | 0      | 0 | 0 | -0.001 | t | 37660 | LLPHSNLD<br>HILEPSIPW<br>KSK | Mus<br>musculu<br>s              |
| 1 | 1.00 | 1 | 1 | 0 | 0      | 0 | 0 | -0.001 | t | 10801 | DWEDRYR<br>RE                | Oryctola<br>gus<br>cuniculu<br>s |
| 1 | 1.00 | 1 | 1 | 0 | 0      | 0 | 0 | -0.001 | t | 11819 | EENVEHD<br>A                 | Oryctola<br>gus<br>cuniculu<br>s |
| 1 | 1.00 | 1 | 1 | 0 | 0      | 0 | 0 | -0.001 | t | 17470 | FQEPFWLE<br>DG               | Mus<br>musculu<br>s              |

|   |      |   |   |   |   |   |   |        |   |       |                              |                                  |
|---|------|---|---|---|---|---|---|--------|---|-------|------------------------------|----------------------------------|
| 1 | 1.00 | 1 | 1 | 0 | 0 | 0 | 0 | -0.001 | t | 14435 | ETIYNTTLK<br>Y               | Homo<br>sapiens                  |
| 1 | 1.00 | 1 | 1 | 0 | 0 | 0 | 0 | -0.001 | t | 11813 | EENVEENV                     | Oryctola<br>gus<br>cuniculu<br>s |
| 1 | 1.00 | 1 | 1 | 0 | 0 | 0 | 0 | -0.001 | t | 14435 | ETIYNTTLK<br>Y               | Homo<br>sapiens                  |
| 1 | 1.00 | 1 | 1 | 0 | 0 | 0 | 0 | -0.001 | t | 11148 | EANNREG<br>VEG               | Mus<br>musculu<br>s              |
| 1 | 1.00 | 1 | 1 | 0 | 0 | 0 | 0 | -0.001 | t | 17470 | FQEPFWLE<br>DG               | Mus<br>musculu<br>s              |
| 1 | 1.00 | 1 | 1 | 0 | 0 | 0 | 0 | -0.001 | t | 11148 | EANNREG<br>VEG               | Mus<br>musculu<br>s              |
| 1 | 1.00 | 1 | 1 | 0 | 0 | 0 | 0 | -0.001 | t | 23973 | HGYEKPEE<br>LWTAKSR<br>VHPL  | Homo<br>sapiens                  |
| 1 | 1.00 | 1 | 1 | 0 | 0 | 0 | 0 | -0.001 | t | 31075 | KGTMDSG<br>QTKR              | Mus<br>musculu<br>s              |
| 1 | 1.00 | 1 | 1 | 0 | 0 | 0 | 0 | -0.001 | t | 36413 | LHQPPPQI<br>FLKILPQSG<br>PIG | Homo<br>sapiens                  |
| 1 | 1.00 | 1 | 1 | 0 | 0 | 0 | 0 | -0.001 | t | 12248 | EGQKSAVT<br>EY               | Oryctola<br>gus<br>cuniculu<br>s |
| 1 | 1.00 | 1 | 1 | 0 | 0 | 0 | 0 | -0.001 | t | 9526  | DNPASTT<br>NKDKL             | Mus<br>musculu<br>s              |
| 1 | 1.00 | 1 | 1 | 0 | 0 | 0 | 0 | -0.001 | t | 7717  | DCNFCRQ<br>MTGASLK<br>KGSYPL | Mus<br>musculu<br>s              |
| 1 | 1.00 | 1 | 1 | 0 | 0 | 0 | 0 | -0.001 | t | 7491  | DAEFRHDS<br>GYEVHHQ<br>K     | Mus<br>musculu<br>s              |
| 1 | 1.00 | 1 | 1 | 0 | 0 | 0 | 0 | -0.001 | t | 7491  | DAEFRHDS<br>GYEVHHQ<br>K     | Mus<br>musculu<br>s              |
| 1 | 1.00 | 1 | 1 | 0 | 0 | 0 | 0 | -0.001 | t | 7491  | DAEFRHDS<br>GYEVHHQ<br>K     | Oryctola<br>gus<br>cuniculu<br>s |
| 1 | 1.00 | 1 | 1 | 0 | 0 | 0 | 0 | -0.001 | t | 7491  | DAEFRHDS<br>GYEVHHQ<br>K     | Mus<br>musculu<br>s              |

|   |      |   |   |       |        |        |        |        |   |        |                           |                                  |
|---|------|---|---|-------|--------|--------|--------|--------|---|--------|---------------------------|----------------------------------|
| 1 | 1.00 | 1 | 1 | 0     | 0      | 0      | 0      | -0.001 | t | 7491   | DAEFRHDS<br>GYEVHHQ<br>K  | Mus<br>musculu<br>s              |
| 1 | 1.00 | 1 | 1 | 0     | 0      | 0      | 0      | -0.001 | t | 9524   | DNPASTT<br>NKDK           | Mus<br>musculu<br>s              |
| 1 | 1.00 | 1 | 1 | 0     | -0.003 | 0.005  | 0      | -0.002 | t | 78115  | DDPPATVY<br>RYDSRPP       | Oryctola<br>gus<br>cuniculu<br>s |
| 1 | 1.00 | 1 | 1 | -0.01 | -0.012 | -0.002 | -0.011 | -0.012 | t | 38009  | LMDPVFG<br>FDRRVPFV       | Mus<br>musculu<br>s              |
| 1 | 1.00 | 1 | 1 | 0.02  | 0.023  | 0.02   | 0.017  | 0.021  | t | 135569 | KTNMK                     | Mus<br>musculu<br>s              |
| 1 | 1.00 | 1 | 1 | 0     | 0      | 0      | 0      | 0      | t | 106705 | PFVQGKEK<br>EP            | Homo<br>sapiens                  |
| 1 | 1.00 | 1 | 1 | -0.01 | -0.01  | -0.01  | -0.01  | -0.011 | t | 114192 | AEYWNSQ<br>PEILERTRA<br>E | Mus<br>musculu<br>s              |
| 1 | 1.00 | 1 | 1 | 0     | 0      | 0      | 0      | 0      | t | 107218 | PAGGPGF<br>P              | Rattus<br>norvegic<br>us         |
| 1 | 1.00 | 1 | 1 | 0     | 0      | 0      | 0      | 0      | t | 45016  | NMPNDP<br>NR              | Oryctola<br>gus<br>cuniculu<br>s |
| 1 | 1.00 | 1 | 1 | -0.02 | -0.018 | -0.023 | -0.019 | -0.02  | t | 15389  | FDGGKMV<br>Q              | Homo<br>sapiens                  |
| 1 | 1.00 | 1 | 1 | 0.02  | 0.02   | 0.033  | 0.021  | 0.02   | t | 3919   | APYIEQAQ<br>V             | Homo<br>sapiens                  |
| 1 | 1.00 | 1 | 1 | -0.02 | -0.017 | -0.022 | -0.02  | -0.018 | t | 6670   | CMTTAQG<br>TSMYPSC        | Mus<br>musculu<br>s              |
| 1 | 1.00 | 1 | 1 | -0.02 | -0.017 | -0.022 | -0.02  | -0.018 | t | 6670   | CMTTAQG<br>TSMYPSC        | Mus<br>musculu<br>s              |
| 1 | 1.00 | 1 | 1 | 0.02  | 0.02   | 0.02   | 0.02   | 0.02   | t | 138219 | PTPETGPL<br>QR            | Mus<br>musculu<br>s              |
| 1 | 1.00 | 1 | 1 | 0.02  | 0.02   | 0.02   | 0.02   | 0.02   | t | 139861 | PWYLSSL                   | Ovis<br>aries                    |

|   |      |   |   |       |       |       |       |        |   |        |                              |                                  |
|---|------|---|---|-------|-------|-------|-------|--------|---|--------|------------------------------|----------------------------------|
| 1 | 1.00 | 1 | 1 | 0.02  | 0.02  | 0.02  | 0.02  | 0.02   | t | 130925 | KLLPEDDE<br>SRTYHTV          | Homo<br>sapiens                  |
| 1 | 1.00 | 1 | 1 | 0.02  | 0.02  | 0.02  | 0.02  | 0.02   | t | 130925 | KLLPEDDE<br>SRTYHTV          | Homo<br>sapiens                  |
| 1 | 1.00 | 1 | 1 | 0.02  | 0.02  | 0.02  | 0.02  | 0.02   | t | 130925 | KLLPEDDE<br>SRTYHTV          | Homo<br>sapiens                  |
| 1 | 1.00 | 1 | 1 | 0.02  | 0.02  | 0.02  | 0.02  | 0.02   | t | 47184  | PDREVLQY<br>EFDEMEEC<br>ASQL | Homo<br>sapiens                  |
| 1 | 1.00 | 1 | 1 | 0     | 0     | 0     | 0     | 0      | t | 115124 | VTLRIRNV<br>RFSDEGGF<br>TCFF | Mus<br>musculu<br>s              |
| 1 | 1.00 | 1 | 1 | 0     | 0     | 0     | 0     | 0      | t | 102721 | PNKPTPPT<br>YETEKPLEP<br>APV | Mus<br>musculu<br>s              |
| 1 | 1.00 | 1 | 1 | -0.02 | -0.02 | -0.02 | -0.02 | -0.02  | t | 107495 | KTISKAK                      | Homo<br>sapiens                  |
| 1 | 1.00 | 1 | 1 | -0.04 | -0.04 | -0.04 | -0.04 | -0.04  | t | 89854  | VAKLTVM<br>VYN               | Homo<br>sapiens                  |
| 1 | 1.00 | 1 | 1 | 0.01  | 0.01  | 0.007 | 0.01  | 0.01   | t | 61078  | SSIAADQL                     | Oryctola<br>gus<br>cuniculu<br>s |
| 1 | 1.00 | 1 | 1 | 0.01  | 0.01  | 0.007 | 0.01  | 0.01   | t | 19657  | GFYTTTGI<br>GYQPYRV<br>VV    | Homo<br>sapiens                  |
| 1 | 1.00 | 1 | 1 | 0.01  | 0.01  | 0.01  | 0.01  | 0.01   | t | 111218 | DTTRSTN<br>MSLCAAIS          | Mus<br>musculu<br>s              |
| 1 | 1.00 | 1 | 1 | 0.02  | 0.02  | 0.02  | 0.02  | 0.02   | t | 106302 | CDIKTTLPP<br>ITA             | Homo<br>sapiens                  |
| 1 | 1.00 | 1 | 1 | 0.04  | 0.04  | 0.033 | 0.04  | 0.043  | t | 130567 | NPCEDI                       | Mus<br>musculu<br>s              |
| 1 | 1.00 | 1 | 1 | 0.03  | 0.032 | 0.023 | 0.037 | 0.031  | t | 103993 | IPPSLRLE<br>DNEERMS          | Homo<br>sapiens                  |
| 1 | 1.00 | 1 | 1 | 0.02  | 0.014 | 0.006 | 0.013 | 0.02   | t | 132888 | QAYVVDSF<br>GNEIFRC          | Trichosu<br>rus<br>vulpecul<br>a |
| 1 | 1.00 | 1 | 1 | 0     | 0     | 0     | 0     | -0.001 | t | 136719 | VIKHMRF<br>HADYQAP<br>FLGGGY | Aotus                            |

|   |      |   |   |       |        |        |        |        |   |        |                         |                                  |
|---|------|---|---|-------|--------|--------|--------|--------|---|--------|-------------------------|----------------------------------|
| 1 | 1.00 | 1 | 1 | 0     | 0      | 0      | 0      | -0.001 | t | 63391  | TEHRDYHP<br>QQRG        | Mus<br>musculu<br>s              |
| 1 | 1.00 | 1 | 1 | 0.03  | 0.026  | 0.029  | 0.027  | 0.03   | t | 68904  | VIAHELAH<br>QWF         | Oryctola<br>gus<br>cuniculu<br>s |
| 1 | 1.00 | 1 | 1 | 0.01  | 0.01   | 0.003  | 0.01   | 0.011  | t | 46313  | NTWEGQA<br>ASAALGAL     | Mus<br>musculu<br>s              |
| 1 | 1.00 | 1 | 1 | -0.02 | -0.02  | -0.029 | -0.024 | -0.02  | t | 135923 | FRIPVTINA<br>PLQ        | Homo<br>sapiens                  |
| 1 | 1.00 | 1 | 1 | 0.03  | 0.03   | 0.03   | 0.03   | 0.031  | t | 61800  | STNS                    | Mus<br>musculu<br>s              |
| 1 | 1.00 | 1 | 1 | -0.03 | -0.03  | -0.037 | -0.03  | -0.03  | t | 25140  | HWSYGLR<br>PG           | Mus<br>musculu<br>s              |
| 1 | 1.00 | 1 | 1 | 0.03  | 0.03   | 0.03   | 0.03   | 0.03   | t | 116930 | AYKLPQTD<br>DST         | Homo<br>sapiens                  |
| 1 | 1.00 | 1 | 1 | 0.01  | 0.01   | 0.01   | 0.01   | 0.01   | t | 94622  | NPACGR                  | Oryctola<br>gus<br>cuniculu<br>s |
| 1 | 1.00 | 1 | 1 | 0.01  | 0.01   | 0.01   | 0.01   | 0.01   | t | 94622  | NPACGR                  | Capra<br>hircus                  |
| 1 | 1.00 | 1 | 1 | 0.01  | 0.003  | 0.01   | 0.01   | 0.01   | t | 94622  | NPACGR                  | Oryctola<br>gus<br>cuniculu<br>s |
| 1 | 1.00 | 1 | 1 | 0.01  | 0.017  | 0.01   | 0.01   | 0.01   | t | 94622  | NPACGR                  | Capra<br>hircus                  |
| 1 | 1.00 | 1 | 1 | -0.04 | -0.047 | -0.047 | -0.033 | -0.038 | t | 156956 | SGIGTLDG<br>FRHRHPD     | Homo<br>sapiens                  |
| 1 | 1.00 | 1 | 1 | -0.03 | -0.028 | -0.03  | -0.029 | -0.03  | t | 137868 | GFYPGSIE<br>VRWFLNG     | Homo<br>sapiens                  |
| 1 | 1.00 | 1 | 1 | -0.03 | -0.04  | -0.03  | -0.029 | -0.03  | t | 137868 | GFYPGSIE<br>VRWFLNG     | Homo<br>sapiens                  |
| 1 | 1.00 | 1 | 1 | 0.03  | 0.03   | 0.03   | 0.03   | 0.03   | t | 115788 | IESPPEINT<br>V          | Homo<br>sapiens                  |
| 1 | 1.00 | 1 | 1 | 0.01  | 0.01   | 0.01   | 0.01   | 0.01   | t | 99392  | KPDKKNP<br>QLQDLDM<br>M | Homo<br>sapiens                  |

|   |      |   |   |       |        |        |        |        |   |        |                              |                                  |
|---|------|---|---|-------|--------|--------|--------|--------|---|--------|------------------------------|----------------------------------|
| 1 | 1.00 | 1 | 1 | 0.01  | 0.01   | 0.01   | 0.01   | 0.01   | t | 69861  | VLVEAFDE<br>MEECASK<br>ATLIE | Homo<br>sapiens                  |
| 1 | 1.00 | 1 | 1 | 0.01  | 0.01   | 0.01   | 0.01   | 0.01   | t | 69861  | VLVEAFDE<br>MEECASK<br>ATLIE | Homo<br>sapiens                  |
| 1 | 1.00 | 1 | 1 | -0.01 | -0.01  | -0.01  | -0.01  | -0.01  | t | 158585 | APPHVMP                      | Homo<br>sapiens                  |
| 1 | 1.00 | 1 | 1 | -0.01 | -0.01  | -0.01  | -0.01  | -0.01  | t | 79245  | HCDSFWIP<br>PPPVCK           | Mus<br>musculu<br>s              |
| 1 | 1.00 | 1 | 1 | -0.01 | -0.01  | -0.021 | -0.01  | -0.01  | t | 49005  | PQGPGAP<br>QGPGAPQ<br>GPGAP  | Oryctola<br>gus<br>cuniculu<br>s |
| 1 | 1.00 | 1 | 1 | -0.01 | -0.007 | -0.021 | -0.01  | -0.01  | t | 49005  | PQGPGAP<br>QGPGAPQ<br>GPGAP  | Mus<br>musculu<br>s              |
| 1 | 1.00 | 1 | 1 | -0.03 | -0.03  | -0.03  | -0.03  | -0.03  | t | 115233 | EPMIGVN<br>QELAYFYP<br>ELFRQ | Homo<br>sapiens                  |
| 1 | 1.00 | 1 | 1 | -0.03 | -0.03  | -0.03  | -0.03  | -0.03  | t | 98845  | KFDKALKA<br>LP               | Homo<br>sapiens                  |
| 1 | 1.00 | 1 | 1 | -0.03 | -0.03  | -0.03  | -0.03  | -0.03  | t | 115433 | QDKIHFA<br>QTQSLVYP<br>FPGP  | Homo<br>sapiens                  |
| 1 | 1.00 | 1 | 1 | -0.03 | -0.03  | -0.03  | -0.03  | -0.03  | t | 78298  | WHHMYV<br>P                  | Homo<br>sapiens                  |
| 1 | 1.00 | 1 | 1 | -0.01 | -0.01  | -0.008 | -0.01  | -0.01  | t | 96020  | YLKTVYQH<br>QK               | Homo<br>sapiens                  |
| 1 | 1.00 | 1 | 1 | -0.01 | -0.012 | -0.027 | -0.017 | -0.009 | t | 109940 | SQDENPV<br>VHF               | Rattus<br>norvegic<br>us         |
| 1 | 1.00 | 1 | 1 | -0.01 | -0.012 | -0.027 | -0.017 | -0.009 | t | 109940 | SQDENPV<br>VHF               | Mus<br>musculu<br>s              |
| 1 | 1.00 | 1 | 1 | -0.01 | -0.012 | -0.01  | -0.013 | -0.009 | t | 72251  | WAPSV                        | Mus<br>musculu<br>s              |
| 1 | 1.00 | 1 | 1 | 0     | 0      | 0      | -0.001 | -0.001 | t | 104443 | DAEFRHDS<br>GYE              | Mus<br>musculu<br>s              |
| 1 | 1.00 | 1 | 1 | 0     | 0      | 0      | -0.001 | -0.001 | t | 104443 | DAEFRHDS<br>GYE              | Mus<br>musculu<br>s              |
| 1 | 1.00 | 1 | 1 | -0.04 | -0.04  | -0.052 | -0.047 | -0.04  | t | 96320  | GKKPNIW<br>YSL               | Homo<br>sapiens(<br>human)       |

|   |      |   |   |       |        |        |        |        |   |        |                             |                                  |
|---|------|---|---|-------|--------|--------|--------|--------|---|--------|-----------------------------|----------------------------------|
| 1 | 1.00 | 1 | 1 | 0.01  | 0.01   | 0.01   | 0.01   | 0.01   | t | 38304  | LNPKTNK<br>WEDK             | Homo<br>sapiens                  |
| 1 | 1.00 | 1 | 1 | -0.06 | -0.064 | -0.062 | -0.061 | -0.061 | t | 49350  | PSDVSGLL<br>LRPPPAP         | Oryctola<br>gus<br>cuniculu<br>s |
| 1 | 1.00 | 1 | 1 | 0.03  | 0.03   | 0.042  | 0.03   | 0.026  | t | 133531 | CDTLKPGE<br>C               | Mus<br>musculu<br>s              |
| 1 | 1.00 | 1 | 1 | 0     | 0      | -0.003 | 0      | 0      | t | 111051 | VGPLEVIP<br>EAVDPAG<br>SSIV | Oryctola<br>gus<br>cuniculu<br>s |
| 1 | 1.00 | 1 | 1 | 0.02  | 0.022  | 0.019  | 0.017  | 0.018  | t | 50833  | QGASVDK<br>R                | Homo<br>sapiens                  |
| 1 | 1.00 | 1 | 1 | 0     | 0.003  | 0      | 0      | 0      | t | 23068  | GVNLEDP<br>ASRDL            | Mus<br>musculu<br>s              |
| 1 | 1.00 | 1 | 1 | -0.02 | -0.017 | -0.02  | -0.02  | -0.02  | t | 106321 | DAEFRH                      | Mus<br>musculu<br>s              |
| 1 | 1.00 | 1 | 1 | 0.01  | 0.01   | 0.007  | 0.01   | 0.01   | t | 23171  | GVTLLQAA<br>PT              | Homo<br>sapiens                  |
| 1 | 1.00 | 1 | 1 | 0.03  | 0.028  | 0.03   | 0.023  | 0.03   | t | 134237 | SQWN                        | Mus<br>musculu<br>s              |
| 1 | 1.00 | 1 | 1 | 0.01  | 0.006  | 0.009  | 0.007  | 0.008  | t | 67564  | VAEFIEKVS<br>RR             | Oryctola<br>gus<br>cuniculu<br>s |
| 1 | 1.00 | 1 | 1 | -0.01 | -0.01  | -0.01  | -0.01  | -0.011 | t | 97348  | GLFGAIAG<br>FIEGGW          | Oryctola<br>gus<br>cuniculu<br>s |
| 1 | 1.00 | 1 | 1 | 0     | -0.006 | 0      | -0.001 | 0      | t | 38272  | LNLTTWN<br>P                | Oryctola<br>gus<br>cuniculu<br>s |
| 1 | 1.00 | 1 | 1 | 0.02  | 0.02   | 0.02   | 0.02   | 0.02   | t | 79413  | TCPLPDPD<br>SQYCE           | Mus<br>musculu<br>s              |
| 1 | 1.00 | 1 | 1 | 0     | 0      | 0      | 0      | 0      | t | 10538  | DVAGLEK<br>DPVA             | Mus<br>musculu<br>s              |



|   |      |   |   |       |       |        |        |       |   |        |                              |                     |
|---|------|---|---|-------|-------|--------|--------|-------|---|--------|------------------------------|---------------------|
| 1 | 1.00 | 1 | 1 | 0.04  | 0.04  | 0.04   | 0.04   | 0.04  | t | 99173  | EDEDEEEE<br>GSNREVR          | Homo<br>sapiens     |
| 1 | 1.00 | 1 | 1 | 0.04  | 0.04  | 0.04   | 0.04   | 0.04  | t | 115193 | CMENSAE<br>PEQSLACQ<br>CLVRT | Homo<br>sapiens     |
| 1 | 1.00 | 1 | 1 | 0.02  | 0.02  | 0.02   | 0.02   | 0.02  | t | 120472 | EFPEKDNE<br>IF               | Mus<br>musculu<br>s |
| 1 | 1.00 | 1 | 1 | 0.02  | 0.02  | 0.02   | 0.02   | 0.02  | t | 130583 | QCQTFGK<br>TMLCT             | Mus<br>musculu<br>s |
| 1 | 1.00 | 1 | 1 | 0.02  | 0.02  | 0.02   | 0.02   | 0.02  | t | 60675  | SRGNHVA<br>PTHYVTES<br>DASQR | Homo<br>sapiens     |
| 1 | 1.00 | 1 | 1 | 0.02  | 0.02  | 0.02   | 0.02   | 0.02  | t | 63917  | TGPCKTCT<br>TTAQ             | Mus<br>musculu<br>s |
| 1 | 1.00 | 1 | 1 | 0.02  | 0.02  | 0.02   | 0.02   | 0.02  | t | 47184  | PDREVLQY<br>EFDEMEEC<br>ASQL | Homo<br>sapiens     |
| 1 | 1.00 | 1 | 1 | 0     | 0     | 0      | 0      | 0     | t | 120180 | RQWKAEF<br>HRW               | Mus<br>musculu<br>s |
| 1 | 1.00 | 1 | 1 | 0     | 0     | 0      | 0      | 0     | t | 122197 | TDVVFNSK<br>GIGN             | Mus<br>musculu<br>s |
| 1 | 1.00 | 1 | 1 | 0     | 0.003 | 0      | 0      | 0     | t | 120180 | RQWKAEF<br>HRW               | Mus<br>musculu<br>s |
| 1 | 1.00 | 1 | 1 | 0     | 0     | 0      | 0      | 0     | t | 21459  | GNKTLAGP<br>KGPVTQ           | Homo<br>sapiens     |
| 1 | 1.00 | 1 | 1 | 0.03  | 0.03  | 0.031  | 0.03   | 0.03  | t | 31555  | KKGSSGYS                     | Mus<br>musculu<br>s |
| 1 | 1.00 | 1 | 1 | -0.02 | -0.02 | -0.02  | -0.02  | -0.02 | t | 149519 | VRVPVPQL<br>QL               | Mus<br>musculu<br>s |
| 1 | 1.00 | 1 | 1 | -0.02 | -0.02 | -0.02  | -0.02  | -0.02 | t | 149519 | VRVPVPQL<br>QL               | Homo<br>sapiens     |
| 1 | 1.00 | 1 | 1 | 0     | 0.002 | -0.013 | -0.003 | 0.001 | t | 115081 | LLRFFVAPF<br>PEV             | Homo<br>sapiens     |
| 1 | 1.00 | 1 | 1 | -0.05 | -0.05 | -0.043 | -0.044 | -0.05 | t | 48681  | PNNDFHF<br>EVFNF             | Homo<br>sapiens     |

|   |      |   |   |       |        |        |        |        |   |        |                     |                     |
|---|------|---|---|-------|--------|--------|--------|--------|---|--------|---------------------|---------------------|
| 1 | 1.00 | 1 | 1 | 0.01  | 0.01   | 0.01   | 0.01   | 0.009  | t | 24872  | HSVRGLTS<br>LFS     | Homo<br>sapiens     |
| 1 | 1.00 | 1 | 1 | 0.04  | 0.04   | 0.035  | 0.043  | 0.043  | t | 20108  | GGYYSASY<br>SDPCSLK | Homo<br>sapiens     |
| 1 | 1.00 | 1 | 1 | 0     | 0      | -0.003 | 0      | 0      | t | 70153  | VNPNNAA<br>AL       | Homo<br>sapiens     |
| 1 | 1.00 | 1 | 1 | 0.05  | 0.048  | 0.05   | 0.043  | 0.05   | t | 134669 | FGFPQE              | Mus<br>musculu<br>s |
| 1 | 1.00 | 1 | 1 | 0     | 0      | -0.004 | 0      | 0      | t | 4149   | ARGSLAVT<br>I       | Mus<br>musculu<br>s |
| 1 | 1.00 | 1 | 1 | 0.01  | 0.01   | 0.01   | 0.01   | 0.01   | t | 3514   | APDTR               | Mus<br>musculu<br>s |
| 1 | 1.00 | 1 | 1 | -0.01 | -0.01  | -0.01  | -0.01  | -0.01  | t | 21927  | GQPAVRN<br>ERA      | Mus<br>musculu<br>s |
| 1 | 1.00 | 1 | 1 | -0.01 | -0.007 | -0.01  | -0.01  | -0.01  | t | 21927  | GQPAVRN<br>ERA      | Mus<br>musculu<br>s |
| 1 | 1.00 | 1 | 1 | -0.03 | -0.03  | -0.03  | -0.03  | -0.03  | t | 142056 | VKHVEKKL<br>DMLDR   | Mus<br>musculu<br>s |
| 1 | 1.00 | 1 | 1 | -0.04 | -0.04  | -0.04  | -0.04  | -0.039 | t | 101716 | HQPTPAA             | Mus<br>musculu<br>s |
| 1 | 1.00 | 1 | 1 | -0.02 | -0.022 | -0.02  | -0.02  | -0.02  | t | 123675 | QPLWLLQ<br>G        | marmos<br>ets       |
| 1 | 1.00 | 1 | 1 | 0.04  | 0.045  | 0.048  | 0.037  | 0.038  | t | 157230 | FDAEFLAD<br>AFNV    | Homo<br>sapiens     |
| 1 | 1.00 | 1 | 1 | -0.01 | -0.01  | -0.011 | -0.007 | -0.01  | t | 7055   | CSPHHTAL<br>RQ      | Homo<br>sapiens     |
| 1 | 1.00 | 1 | 1 | 0     | 0      | 0      | 0      | -0.001 | t | 150854 | HPGGQQP             | Mus<br>musculu<br>s |
| 1 | 1.00 | 1 | 1 | 0     | -0.002 | 0      | 0      | -0.001 | t | 108299 | CKYWLSRC            | Mus<br>musculu<br>s |
| 1 | 1.00 | 1 | 1 | 0.02  | 0.019  | 0.018  | 0.02   | 0.02   | t | 48613  | PNDGEER<br>QSYWF    | Bos<br>taurus       |

|   |      |   |   |       |        |        |       |        |   |        |                             |                                  |
|---|------|---|---|-------|--------|--------|-------|--------|---|--------|-----------------------------|----------------------------------|
| 1 | 1.00 | 1 | 1 | 0.01  | 0.01   | 0.01   | 0.008 | 0.01   | t | 382    | AAPYIEQA<br>Q               | Homo<br>sapiens                  |
| 1 | 1.00 | 1 | 1 | -0.03 | -0.033 | -0.018 | -0.03 | -0.033 | t | 47453  | PEVIRMQ<br>DNNP             | Oryctola<br>gus<br>cuniculu<br>s |
| 1 | 1.00 | 1 | 1 | 0.01  | 0.008  | 0.001  | 0.013 | 0.012  | t | 11148  | EANNREG<br>VEG              | Mus<br>musculu<br>s              |
| 1 | 1.00 | 1 | 1 | 0.01  | 0.008  | 0.001  | 0.013 | 0.012  | t | 11148  | EANNREG<br>VEG              | Mus<br>musculu<br>s              |
| 1 | 1.00 | 1 | 1 | 0.01  | 0.008  | 0.006  | 0.009 | 0.01   | t | 66382  | TSQDGNN<br>HQFT             | Mus<br>musculu<br>s              |
| 1 | 1.00 | 1 | 1 | 0     | 0      | -0.008 | 0     | 0.001  | t | 39070  | LREGVTLG<br>VGASFDT<br>QKL  | Oryctola<br>gus<br>cuniculu<br>s |
| 1 | 1.00 | 1 | 1 | 0.05  | 0.05   | 0.05   | 0.05  | 0.05   | t | 115506 | TEDQAME<br>DIKQMEA<br>ESISS | Homo<br>sapiens                  |
| 1 | 1.00 | 1 | 1 | 0     | 0.002  | 0.007  | 0.007 | 0.001  | t | 74871  | YLPVGGLR<br>RIGG            | Homo<br>sapiens                  |
| 1 | 1.00 | 1 | 1 | 0.03  | 0.03   | 0.03   | 0.03  | 0.03   | t | 140861 | GTVSYGEE<br>KPAV            | Oryctola<br>gus<br>cuniculu<br>s |
| 1 | 1.00 | 1 | 1 | 0.03  | 0.03   | 0.03   | 0.03  | 0.03   | t | 149048 | FSTQKSI                     | Sus<br>scrofa                    |
| 1 | 1.00 | 1 | 1 | 0.03  | 0.03   | 0.03   | 0.03  | 0.03   | t | 99013  | SPSSPEKES<br>PEKEDQ         | Homo<br>sapiens                  |
| 1 | 1.00 | 1 | 1 | 0.01  | 0.01   | 0.01   | 0.01  | 0.01   | t | 150994 | GVTAACP<br>HAGAKSFY         | Homo<br>sapiens                  |
| 1 | 1.00 | 1 | 1 | 0.01  | 0.01   | 0.01   | 0.01  | 0.01   | t | 127739 | MHLNTAS                     | Homo<br>sapiens                  |
| 1 | 1.00 | 1 | 1 | 0.01  | 0.01   | 0.01   | 0.01  | 0.01   | t | 113565 | KGNQYWR<br>FEDGVLD<br>DYPRN | Mus<br>musculu<br>s              |
| 1 | 1.00 | 1 | 1 | 0.01  | 0.01   | 0.01   | 0.01  | 0.01   | t | 113565 | KGNQYWR<br>FEDGVLD<br>DYPRN | Mus<br>musculu<br>s              |
| 1 | 1.00 | 1 | 1 | 0.01  | 0.01   | 0.01   | 0.01  | 0.01   | t | 113564 | KGNQYWR<br>FEDGVLD<br>DYPRN | Mus<br>musculu<br>s              |
| 1 | 1.00 | 1 | 1 | 0.01  | 0.01   | 0.01   | 0.01  | 0.01   | t | 113565 | KGNQYWR<br>FEDGVLD<br>DYPRN | Mus<br>musculu<br>s              |

|   |      |   |   |       |        |        |        |        |   |        |                              |                                  |
|---|------|---|---|-------|--------|--------|--------|--------|---|--------|------------------------------|----------------------------------|
| 1 | 1.00 | 1 | 1 | 0.01  | 0.01   | 0.01   | 0.01   | 0.01   | t | 65638  | TPLGPPDA<br>EYW              | Homo<br>sapiens                  |
| 1 | 1.00 | 1 | 1 | 0.01  | 0.01   | 0.01   | 0.01   | 0.01   | t | 34754  | LAEQFKQK<br>ALGLLQTS<br>TKQA | Homo<br>sapiens                  |
| 1 | 1.00 | 1 | 1 | 0.01  | 0.01   | 0.01   | 0.01   | 0.01   | t | 20143  | GHIELGGK<br>PAIVPDKE<br>VLYQ | Homo<br>sapiens                  |
| 1 | 1.00 | 1 | 1 | 0.01  | 0.01   | 0.01   | 0.01   | 0.01   | t | 20144  | GHIELGGK<br>PALVPDKE<br>VLYQ | Homo<br>sapiens                  |
| 1 | 1.00 | 1 | 1 | -0.01 | -0.01  | -0.01  | -0.01  | -0.01  | t | 103511 | QAQYVAQ<br>LHVWARR<br>E      | Homo<br>sapiens                  |
| 1 | 1.00 | 1 | 1 | -0.01 | -0.01  | -0.01  | -0.01  | -0.01  | t | 105545 | TKSSDF                       | Oryctola<br>gus<br>cuniculu<br>s |
| 1 | 1.00 | 1 | 1 | -0.01 | -0.01  | -0.01  | -0.01  | -0.01  | t | 115850 | LPVPQKAV<br>PY               | Homo<br>sapiens                  |
| 1 | 1.00 | 1 | 1 | 0.01  | 0.007  | 0.004  | 0.01   | 0.012  | t | 133618 | KKLLVRGL<br>YRISFTTYK        | Oryctola<br>gus<br>cuniculu<br>s |
| 1 | 1.00 | 1 | 1 | -0.02 | -0.022 | -0.02  | -0.017 | -0.02  | t | 148678 | LQQQLIPC<br>RD               | Mus<br>musculu<br>s              |
| 1 | 1.00 | 1 | 1 | -0.01 | -0.006 | -0.015 | -0.013 | -0.01  | t | 95201  | AASAYCST<br>WD               | Homo<br>sapiens                  |
| 1 | 1.00 | 1 | 1 | 0.03  | 0.03   | 0.03   | 0.03   | 0.03   | t | 120649 | ITVGLQLIQ<br>LISVDEVN<br>QIV | Mus<br>musculu<br>s              |
| 1 | 1.00 | 1 | 1 | 0     | 0.004  | 0      | 0.001  | 0      | t | 21606  | GPEKAFRE                     | Homo<br>sapiens                  |
| 1 | 1.00 | 1 | 1 | -0.01 | -0.01  | -0.027 | -0.01  | -0.009 | t | 133926 | RSSYWVYS<br>PWRFISR          | Mus<br>musculu<br>s              |
| 1 | 1.00 | 1 | 1 | 0.02  | 0.02   | 0.02   | 0.022  | 0.02   | t | 5368   | AVIEPIVAT<br>NWQKL           | Homo<br>sapiens                  |
| 1 | 1.00 | 1 | 1 | 0.04  | 0.043  | 0.043  | 0.04   | 0.04   | t | 97197  | ALSTTDSF                     | Mus<br>musculu<br>s              |

|   |      |   |   |       |        |       |        |       |   |        |                              |                                  |
|---|------|---|---|-------|--------|-------|--------|-------|---|--------|------------------------------|----------------------------------|
| 1 | 1.00 | 1 | 1 | -0.01 | -0.014 | -0.01 | -0.007 | -0.01 | t | 106313 | CQQYGSS<br>PQTFG             | Oryctola<br>gus<br>cuniculu<br>s |
| 1 | 1.00 | 1 | 1 | 0.02  | 0.018  | 0.02  | 0.023  | 0.02  | t | 103887 | EQWSLPW                      | Mus<br>musculu<br>s              |
| 1 | 1.00 | 1 | 1 | 0.01  | 0.01   | 0.007 | 0.016  | 0.012 | t | 17531  | FQSFPSGE<br>PSNSKLSG<br>FFQS | Homo<br>sapiens                  |
| 1 | 1.00 | 1 | 1 | 0.01  | 0.014  | 0.01  | 0.013  | 0.009 | t | 122874 | PPARALKR<br>SLWVEVD<br>LLIGS | Homo<br>sapiens                  |
| 1 | 1.00 | 1 | 1 | 0.03  | 0.03   | 0.03  | 0.03   | 0.032 | t | 99839  | QSPF                         | Mus<br>musculu<br>s              |
| 1 | 1.00 | 1 | 1 | 0     | 0.002  | 0     | 0.003  | 0     | t | 4420   | ASGKEAKV<br>CTISPIMG<br>YSTP | Homo<br>sapiens                  |
| 1 | 1.00 | 1 | 1 | 0.02  | 0.02   | 0.02  | 0.02   | 0.02  | t | 108861 | DGVNHQ                       | Mus<br>musculu<br>s              |
| 1 | 1.00 | 1 | 1 | 0     | 0      | 0     | 0      | 0     | t | 75923  | YSWKTWG                      | Mus<br>musculu<br>s              |
| 1 | 1.00 | 1 | 1 | 0     | 0      | 0     | 0      | 0     | t | 75923  | YSWKTWG                      | Homo<br>sapiens                  |
| 1 | 1.00 | 1 | 1 | 0     | 0      | 0     | 0      | 0     | t | 75923  | YSWKTWG                      | Mus<br>musculu<br>s              |
| 1 | 1.00 | 1 | 1 | 0     | 0      | 0     | 0      | 0     | t | 60549  | SQSFRRLG                     | Oryctola<br>gus<br>cuniculu<br>s |
| 1 | 1.00 | 1 | 1 | 0     | 0      | 0     | 0      | 0     | t | 39255  | LRYSWKT<br>WG                | Mus<br>musculu<br>s              |
| 1 | 1.00 | 1 | 1 | 0     | 0      | 0     | 0      | 0     | t | 39255  | LRYSWKT<br>WG                | Mus<br>musculu<br>s              |
| 1 | 1.00 | 1 | 1 | -0.02 | -0.022 | -0.02 | -0.019 | -0.02 | t | 149427 | QLPQFEEI<br>RN               | Mus<br>musculu<br>s              |
| 1 | 1.00 | 1 | 1 | 0.03  | 0.03   | 0.023 | 0.021  | 0.03  | t | 119508 | QFIGYPI                      | Homo<br>sapiens                  |
| 1 | 1.00 | 1 | 1 | -0.02 | -0.02  | -0.02 | -0.016 | -0.02 | t | 135897 | APKRPGPA<br>GELL             | Homo<br>sapiens                  |

|   |      |   |   |       |        |        |        |        |   |        |                              |                                  |
|---|------|---|---|-------|--------|--------|--------|--------|---|--------|------------------------------|----------------------------------|
| 1 | 1.00 | 1 | 1 | 0.04  | 0.04   | 0.04   | 0.04   | 0.04   | t | 115631 | NVRFSDEG<br>GFTC             | Homo<br>sapiens                  |
| 1 | 1.00 | 1 | 1 | 0.04  | 0.04   | 0.04   | 0.04   | 0.04   | t | 115631 | NVRFSDEG<br>GFTC             | Homo<br>sapiens                  |
| 1 | 1.00 | 1 | 1 | 0.02  | 0.02   | 0.02   | 0.02   | 0.02   | t | 153351 | ACTYSPRD<br>MCGGGS           | Mus<br>musculu<br>s              |
| 1 | 1.00 | 1 | 1 | 0.02  | 0.02   | 0.02   | 0.02   | 0.02   | t | 153380 | ETELTIAAL<br>KYV             | Mus<br>musculu<br>s              |
| 1 | 1.00 | 1 | 1 | 0.02  | 0.02   | 0.02   | 0.02   | 0.02   | t | 150978 | EKNVTVTH<br>SVNLLED          | Homo<br>sapiens                  |
| 1 | 1.00 | 1 | 1 | 0.02  | 0.02   | 0.02   | 0.02   | 0.02   | t | 131988 | NQSLGWG<br>DSSKPVSS          | Homo<br>sapiens                  |
| 1 | 1.00 | 1 | 1 | 0.02  | 0.02   | 0.02   | 0.02   | 0.02   | t | 112069 | CSFSGFS                      | Homo<br>sapiens                  |
| 1 | 1.00 | 1 | 1 | 0.02  | 0.02   | 0.02   | 0.02   | 0.02   | t | 42802  | MTFEGAIG<br>IDLGTTYSC<br>VGV | Homo<br>sapiens                  |
| 1 | 1.00 | 1 | 1 | 0.02  | 0.015  | 0.02   | 0.02   | 0.02   | t | 42802  | MTFEGAIG<br>IDLGTTYSC<br>VGV | Canis<br>lupus                   |
| 1 | 1.00 | 1 | 1 | -0.01 | -0.013 | -0.005 | -0.01  | -0.01  | t | 49706  | PTLPGTNI<br>VLGALPE          | Oryctola<br>gus<br>cuniculu<br>s |
| 1 | 1.00 | 1 | 1 | 0     | 0      | 0      | 0      | 0      | t | 78163  | GERLFT                       | Equus<br>caballus                |
| 1 | 1.00 | 1 | 1 | 0     | 0      | 0      | 0      | 0      | t | 79977  | PTRMLVC<br>GIAAK             | Mus<br>musculu<br>s              |
| 1 | 1.00 | 1 | 1 | -0.02 | -0.02  | -0.02  | -0.02  | -0.02  | t | 158670 | ADTFNFKT<br>FFHTIGF          | Homo<br>sapiens                  |
| 1 | 1.00 | 1 | 1 | -0.01 | -0.006 | 0.002  | -0.009 | -0.011 | t | 23160  | GVSWTM                       | Homo<br>sapiens                  |
| 1 | 1.00 | 1 | 1 | 0.03  | 0.03   | 0.026  | 0.03   | 0.032  | t | 49107  | PQQQFPQ<br>TQQ               | Mus<br>musculu<br>s              |
| 1 | 1.00 | 1 | 1 | 0.02  | 0.017  | 0.015  | 0.02   | 0.022  | t | 68052  | VDQYSNQ<br>NNF               | Oryctola<br>gus<br>cuniculu<br>s |

|   |      |   |   |       |        |        |        |        |   |        |                              |                             |
|---|------|---|---|-------|--------|--------|--------|--------|---|--------|------------------------------|-----------------------------|
| 1 | 1.00 | 1 | 1 | 0.02  | 0.014  | 0.008  | 0.02   | 0.022  | t | 68790  | VGSDQHP<br>DIHAPDGA          | Oncorhynchus<br>tshawytscha |
| 1 | 1.00 | 1 | 1 | 0     | 0      | 0      | -0.001 | -0.001 | t | 99921  | DAEFRHDS                     | Mus<br>musculus             |
| 1 | 1.00 | 1 | 1 | 0     | 0      | 0      | -0.001 | -0.001 | t | 102384 | EFRH                         | Mus<br>musculus             |
| 1 | 1.00 | 1 | 1 | 0     | 0      | 0      | -0.001 | -0.001 | t | 104443 | DAEFRHDS<br>GYE              | Mus<br>musculus             |
| 1 | 1.00 | 1 | 1 | 0.06  | 0.056  | 0.06   | 0.061  | 0.062  | t | 130792 | EDVPLLED                     | Oryctolagus<br>cuniculus    |
| 1 | 1.00 | 1 | 1 | 0     | 0      | 0      | 0      | 0      | t | 144720 | LMKFVDSK<br>SG               | Homo<br>sapiens             |
| 1 | 1.00 | 1 | 1 | -0.02 | -0.019 | -0.021 | -0.017 | -0.021 | t | 99380  | KIADDWD<br>NRHPLPNA          | Equus<br>caballus           |
| 1 | 1.00 | 1 | 1 | -0.03 | -0.032 | -0.03  | -0.03  | -0.03  | t | 117885 | GMRPPM<br>GPPI               | Mus<br>musculus             |
| 1 | 1.00 | 1 | 1 | -0.02 | -0.022 | -0.02  | -0.027 | -0.022 | t | 135497 | RYPNQVYY<br>RPM              | Mus<br>musculus             |
| 1 | 1.00 | 1 | 1 | 0     | 0.002  | 0.005  | -0.001 | 0      | t | 135785 | VNEKWIVT                     | Homo<br>sapiens             |
| 1 | 1.00 | 1 | 1 | 0     | 0      | 0.002  | 0      | 0      | t | 65745  | TPRPTQY<br>WLHL              | Mus<br>musculus             |
| 1 | 1.00 | 1 | 1 | 0.01  | 0.01   | 0.01   | 0.01   | 0.01   | t | 12306  | EGVQQEG<br>AQQ               | Mus<br>musculus             |
| 1 | 1.00 | 1 | 1 | 0.01  | 0.01   | 0.005  | 0.01   | 0.01   | t | 34776  | LAGGAAT<br>AGAFSRPG<br>LPVEY | Homo<br>sapiens             |
| 1 | 1.00 | 1 | 1 | 0.01  | 0.008  | 0.011  | 0.013  | 0.012  | t | 759    | ADREYCKY<br>TVCTYPG          | Mus<br>musculus             |
| 1 | 1.00 | 1 | 1 | 0     | 0      | -0.003 | -0.007 | -0.003 | t | 115652 | SSRISYWT<br>IVKP             | Homo<br>sapiens             |
| 1 | 1.00 | 1 | 1 | -0.03 | -0.027 | -0.03  | -0.03  | -0.03  | t | 119955 | IRLPSDDV<br>WLPDLVLY         | Mus<br>musculus             |

|   |      |   |   |       |        |       |       |        |   |        |                              |                              |
|---|------|---|---|-------|--------|-------|-------|--------|---|--------|------------------------------|------------------------------|
| 1 | 1.00 | 1 | 1 | 0     | -0.002 | 0.007 | 0.003 | -0.002 | t | 77920  | IPPFYKNF<br>WWP              | Mus<br>musculus              |
| 1 | 1.00 | 1 | 1 | 0.03  | 0.03   | 0.03  | 0.03  | 0.03   | t | 149516 | VPVPQLQL<br>QN               | Homo<br>sapiens              |
| 1 | 1.00 | 1 | 1 | 0.03  | 0.03   | 0.03  | 0.03  | 0.03   | t | 149516 | VPVPQLQL<br>QN               | Mus<br>musculus              |
| 1 | 1.00 | 1 | 1 | 0.03  | 0.032  | 0.03  | 0.03  | 0.03   | t | 136076 | PGSSYP                       | Rattus<br>norvegicus         |
| 1 | 1.00 | 1 | 1 | 0.01  | 0.01   | 0.01  | 0.01  | 0.01   | t | 135965 | NIISDAMK<br>KVGR             | Homo<br>sapiens              |
| 1 | 1.00 | 1 | 1 | 0.01  | 0.01   | 0.01  | 0.01  | 0.01   | t | 124277 | HPLAPSPA<br>V                | Homo<br>sapiens              |
| 1 | 1.00 | 1 | 1 | 0.01  | 0.01   | 0.01  | 0.01  | 0.01   | t | 98972  | QSAPLRVY<br>VE               | Homo<br>sapiens              |
| 1 | 1.00 | 1 | 1 | 0.01  | 0.01   | 0.01  | 0.01  | 0.01   | t | 98972  | QSAPLRVY<br>VE               | Homo<br>sapiens              |
| 1 | 1.00 | 1 | 1 | 0.01  | 0.007  | 0.01  | 0.01  | 0.01   | t | 73131  | WTGVAQ<br>D                  | Oryctola<br>gus<br>cuniculus |
| 1 | 1.00 | 1 | 1 | 0.01  | 0.01   | 0.01  | 0.01  | 0.01   | t | 39377  | LSGKPATIP<br>DREAVLYQ<br>EFD | Homo<br>sapiens              |
| 1 | 1.00 | 1 | 1 | 0.01  | 0.01   | 0.01  | 0.01  | 0.01   | t | 36124  | LGGKPAIV<br>PDKEVLYQ<br>QYDE | Homo<br>sapiens              |
| 1 | 1.00 | 1 | 1 | -0.01 | -0.01  | -0.01 | -0.01 | -0.01  | t | 158612 | SHRPTTQ                      | Homo<br>sapiens              |
| 1 | 1.00 | 1 | 1 | -0.01 | -0.01  | -0.01 | -0.01 | -0.01  | t | 120475 | EGEIGKIPL<br>K               | Mus<br>musculus              |
| 1 | 1.00 | 1 | 1 | -0.01 | -0.01  | -0.01 | -0.01 | -0.01  | t | 128094 | RQGLKKA<br>DCSFWSKY<br>ISSLK | Homo<br>sapiens              |
| 1 | 1.00 | 1 | 1 | -0.01 | -0.01  | -0.01 | -0.01 | -0.01  | t | 101719 | HSHQVFN<br>LLSLL             | Homo<br>sapiens              |
| 1 | 1.00 | 1 | 1 | -0.01 | -0.01  | -0.01 | -0.01 | -0.01  | t | 103738 | WSFAVGK<br>QLNMAQII          | Homo<br>sapiens              |



|   |      |   |   |       |        |        |        |        |   |        |                             |                                  |
|---|------|---|---|-------|--------|--------|--------|--------|---|--------|-----------------------------|----------------------------------|
| 1 | 1.00 | 1 | 1 | -0.01 | -0.01  | -0.01  | -0.01  | -0.01  | t | 103340 | LCKTTSNFI<br>WGQLLL         | Homo<br>sapiens                  |
| 1 | 1.00 | 1 | 1 | -0.02 | -0.023 | -0.035 | -0.02  | -0.018 | t | 43224  | NANANNA<br>VK               | Oryctola<br>gus<br>cuniculu<br>s |
| 1 | 1.00 | 1 | 1 | -0.01 | -0.008 | -0.007 | -0.013 | -0.012 | t | 39631  | LSRISSKKS                   | Homo<br>sapiens                  |
| 1 | 1.00 | 1 | 1 | 0     | 0      | -0.007 | 0      | 0.001  | t | 122430 | KGLRRDL<br>ASREAK           | Mus<br>musculu<br>s              |
| 1 | 1.00 | 1 | 1 | 0.06  | 0.06   | 0.066  | 0.06   | 0.06   | t | 57001  | SASTKNKD                    | Mus<br>musculu<br>s              |
| 1 | 1.00 | 1 | 1 | -0.06 | -0.056 | -0.06  | -0.053 | -0.06  | t | 134792 | RSPSPTPT<br>PGPSRRG         | Homo<br>sapiens                  |
| 1 | 1.00 | 1 | 1 | -0.01 | -0.008 | -0.005 | -0.003 | -0.01  | t | 134194 | PTKSDPRC<br>LTRYSSFV<br>NME | Homo<br>sapiens                  |
| 1 | 1.00 | 1 | 1 | -0.04 | -0.042 | -0.038 | -0.037 | -0.038 | t | 24841  | HSQWNKP<br>SKP              | Mus<br>musculu<br>s              |
| 1 | 1.00 | 1 | 1 | 0.01  | 0.008  | 0.005  | 0.009  | 0.01   | t | 109479 | LGPKGQT<br>G                | Rattus<br>norvegic<br>us         |
| 1 | 1.00 | 1 | 1 | 0.01  | 0.006  | 0.003  | 0.003  | 0.009  | t | 131016 | QESLDMN<br>SARDF            | Oryctola<br>gus<br>cuniculu<br>s |
| 1 | 1.00 | 1 | 1 | 0     | 0      | 0      | 0      | 0      | t | 18705  | GANSNNP<br>DW               | Mus<br>musculu<br>s              |
| 1 | 1.00 | 1 | 1 | 0.02  | 0.02   | 0.013  | 0.011  | 0.017  | t | 130816 | ESKAISDA<br>QITASSYFT<br>NM | Homo<br>sapiens                  |
| 1 | 1.00 | 1 | 1 | 0     | 0      | 0.002  | 0      | 0.001  | t | 65678  | TPPAYR                      | Mus<br>musculu<br>s              |
| 1 | 1.00 | 1 | 1 | 0.02  | 0.024  | 0.02   | 0.021  | 0.02   | t | 137834 | EDSRVTEN<br>TNGL            | Homo<br>sapiens                  |

|   |      |   |   |       |        |        |       |        |   |        |                              |                                  |
|---|------|---|---|-------|--------|--------|-------|--------|---|--------|------------------------------|----------------------------------|
| 1 | 1.00 | 1 | 1 | 0     | 0.005  | 0      | 0.001 | 0      | t | 148575 | DVKDNKP<br>SDVKLPVI<br>KAE   | Homo<br>sapiens                  |
| 1 | 1.00 | 1 | 1 | 0     | 0.002  | 0      | 0.001 | 0      | t | 68674  | VGGVYLLP<br>RRGPRLGV<br>RAIR | Homo<br>sapiens                  |
| 1 | 1.00 | 1 | 1 | -0.01 | -0.01  | -0.01  | -0.01 | -0.009 | t | 131100 | TDSEMDV<br>VRFD              | Mus<br>musculu<br>s              |
| 1 | 1.00 | 1 | 1 | -0.05 | -0.05  | -0.047 | -0.05 | -0.049 | t | 105966 | MKKRH                        | Homo<br>sapiens                  |
| 1 | 1.00 | 1 | 1 | -0.01 | -0.007 | -0.002 | -0.01 | -0.01  | t | 6329   | CGPFFLAA<br>SVC              | Mus<br>musculu<br>s              |
| 1 | 1.00 | 1 | 1 | 0     | 0      | 0      | 0     | 0      | t | 52006  | QQDAKLT<br>WR                | Mus<br>musculu<br>s              |
| 1 | 1.00 | 1 | 1 | 0.02  | 0.02   | 0.02   | 0.016 | 0.02   | t | 156603 | AEVLRDG<br>DCP               | Homo<br>sapiens                  |
| 1 | 1.00 | 1 | 1 | 0     | -0.003 | -0.015 | 0     | 0.002  | t | 48618  | PNDPNRN<br>VD                | Oryctola<br>gus<br>cuniculu<br>s |
| 1 | 1.00 | 1 | 1 | 0.02  | 0.02   | 0.016  | 0.023 | 0.022  | t | 68896  | VHTWTEQ<br>YK                | Homo<br>sapiens                  |
| 1 | 1.00 | 1 | 1 | 0.02  | 0.02   | 0.02   | 0.02  | 0.02   | t | 121848 | SGVPLCPL<br>ESNVISC          | Mus<br>musculu<br>s              |
| 1 | 1.00 | 1 | 1 | 0.02  | 0.02   | 0.02   | 0.02  | 0.02   | t | 121848 | SGVPLCPL<br>ESNVISC          | Mus<br>musculu<br>s              |
| 1 | 1.00 | 1 | 1 | 0     | 0      | 0      | 0     | 0      | t | 149114 | STPRLPD                      | Sus<br>scrofa                    |
| 1 | 1.00 | 1 | 1 | 0     | 0      | 0      | 0     | 0      | t | 121684 | NVTCLMV<br>ALPLVDSF          | Mus<br>musculu<br>s              |
| 1 | 1.00 | 1 | 1 | 0     | 0      | 0      | 0     | 0      | t | 115916 | QEQUIRCE<br>KD               | Homo<br>sapiens                  |
| 1 | 1.00 | 1 | 1 | 0     | 0      | 0      | 0     | 0      | t | 77970  | PQTQQFIP                     | Mus<br>musculu<br>s              |

|   |      |   |   |       |        |        |        |       |   |        |                       |                       |
|---|------|---|---|-------|--------|--------|--------|-------|---|--------|-----------------------|-----------------------|
| 1 | 1.00 | 1 | 1 | 0     | 0      | 0      | 0      | 0     | t | 77970  | PQTQQFIP              | Mus musculus          |
| 1 | 1.00 | 1 | 1 | 0     | 0      | 0      | 0      | 0     | t | 78305  | WHSMFAP               | Homo sapiens          |
| 1 | 1.00 | 1 | 1 | -0.02 | -0.02  | -0.02  | -0.02  | -0.02 | t | 116954 | DPTDYSTRPHMW          | Homo sapiens          |
| 1 | 1.00 | 1 | 1 | 0     | 0.003  | 0      | 0      | 0.002 | t | 32901  | KPTKKPTFKTTK          | Mus musculus          |
| 1 | 1.00 | 1 | 1 | 0.02  | 0.018  | 0.02   | 0.02   | 0.019 | t | 137393 | EDFESCDSITGMNLEA      | Oryctolagus cuniculus |
| 1 | 1.00 | 1 | 1 | 0.02  | 0.016  | 0.013  | 0.013  | 0.02  | t | 135448 | AKYGAA                | Oryctolagus cuniculus |
| 1 | 1.00 | 1 | 1 | -0.05 | -0.048 | -0.051 | -0.049 | -0.05 | t | 74503  | YKRRMADAVSRKKM        | Homo sapiens          |
| 1 | 1.00 | 1 | 1 | 0     | 0.003  | 0      | 0      | 0     | t | 135414 | AAAYKAA               | Mus musculus          |
| 1 | 1.00 | 1 | 1 | 0     | 0      | 0      | 0      | 0     | t | 142407 | DKTIAAAKAKKARE        | Homo sapiens          |
| 1 | 1.00 | 1 | 1 | 0     | 0      | -0.001 | 0      | 0     | t | 56610  | RYPGQGS<br>PGGNRYPPQG | Oryctolagus cuniculus |
| 1 | 1.00 | 1 | 1 | 0     | 0.011  | -0.001 | 0      | 0     | t | 56610  | RYPGQGS<br>PGGNRYPPQG | Gallus gallus         |
| 1 | 1.00 | 1 | 1 | -0.02 | -0.018 | -0.017 | -0.019 | -0.02 | t | 23337  | GYFGHQVG              | Homo sapiens          |
| 1 | 1.00 | 1 | 1 | 0     | 0.003  | 0      | 0      | 0.002 | t | 38313  | LNPTIA                | Mus musculus          |
| 1 | 1.00 | 1 | 1 | 0     | 0.003  | 0      | 0      | 0.002 | t | 38313  | LNPTIA                | Mus musculus          |

|   |      |   |   |       |        |        |        |        |   |        |                            |                                  |
|---|------|---|---|-------|--------|--------|--------|--------|---|--------|----------------------------|----------------------------------|
| 1 | 1.00 | 1 | 1 | 0     | 0.003  | 0      | 0      | 0.002  | t | 38313  | LNPTIA                     | Mus<br>musculu<br>s              |
| 1 | 1.00 | 1 | 1 | 0     | 0.003  | 0      | 0      | 0.002  | t | 38313  | LNPTIA                     | Mus<br>musculu<br>s              |
| 1 | 1.00 | 1 | 1 | 0     | 0.003  | 0      | 0      | 0.002  | t | 38313  | LNPTIA                     | Mus<br>musculu<br>s              |
| 1 | 1.00 | 1 | 1 | 0.01  | 0.007  | 0.01   | 0.01   | 0.012  | t | 135495 | RITLYL                     | Oryctola<br>gus<br>cuniculu<br>s |
| 1 | 1.00 | 1 | 1 | -0.06 | -0.058 | -0.067 | -0.053 | -0.059 | t | 107859 | GHRPLDKK<br>REEAPSLR<br>PA | Homo<br>sapiens                  |
| 1 | 1.00 | 1 | 1 | 0     | 0.002  | -0.01  | -0.003 | -0.001 | t | 56675  | RYVKQEV<br>QRGGR           | Homo<br>sapiens                  |
| 1 | 1.00 | 1 | 1 | -0.06 | -0.066 | -0.06  | -0.06  | -0.06  | t | 123244 | GMIPPPGL                   | Oryctola<br>gus<br>cuniculu<br>s |
| 1 | 1.00 | 1 | 1 | 0.02  | 0.024  | 0.023  | 0.02   | 0.02   | t | 141006 | EYPSLRDIF                  | Ovis<br>aries                    |
| 1 | 1.00 | 1 | 1 | -0.02 | -0.018 | -0.016 | -0.02  | -0.02  | t | 50193  | PYWKSDSI<br>KKHVLI         | Anas<br>platyrhy<br>nchos        |
| 1 | 1.00 | 1 | 1 | -0.02 | -0.018 | -0.016 | -0.02  | -0.02  | t | 50193  | PYWKSDSI<br>KKHVLI         | Anas<br>platyrhy<br>nchos        |
| 1 | 1.00 | 1 | 1 | 0     | 0.002  | -0.001 | 0.001  | 0      | t | 40018  | LTLNLITE<br>MG             | Homo<br>sapiens                  |
| 1 | 1.00 | 1 | 1 | -0.01 | -0.008 | -0.01  | -0.009 | -0.01  | t | 116981 | FSTDWSTR<br>PRLV           | Homo<br>sapiens                  |
| 1 | 1.00 | 1 | 1 | -0.01 | -0.01  | -0.01  | -0.01  | -0.01  | t | 133231 | MGPRRRS<br>RKP             | Homo<br>sapiens                  |
| 1 | 1.00 | 1 | 1 | -0.01 | -0.01  | -0.01  | -0.01  | -0.01  | t | 99833  | PPFSQQ                     | Mus<br>musculu<br>s              |

|   |      |   |   |       |        |        |       |        |   |        |                             |                              |
|---|------|---|---|-------|--------|--------|-------|--------|---|--------|-----------------------------|------------------------------|
| 1 | 1.00 | 1 | 1 | -0.01 | -0.01  | -0.01  | -0.01 | -0.01  | t | 99833  | PPFSQQ                      | Mus<br>musculus              |
| 1 | 1.00 | 1 | 1 | -0.01 | -0.01  | -0.01  | -0.01 | -0.01  | t | 99833  | PPFSQQ                      | Mus<br>musculus              |
| 1 | 1.00 | 1 | 1 | -0.03 | -0.026 | -0.03  | -0.03 | -0.031 | t | 146494 | PHQIINLRT<br>NNSAT          | Homo<br>sapiens              |
| 1 | 1.00 | 1 | 1 | -0.01 | -0.013 | -0.017 | -0.01 | -0.009 | t | 114149 | YGSLPQKA<br>QGHRPQD<br>E    | Oryctola<br>gus<br>cuniculus |
| 1 | 1.00 | 1 | 1 | 0     | -0.004 | 0      | 0.003 | 0.001  | t | 43730  | NEREDERT<br>LTKEYEDIV<br>LK | Oryctola<br>gus<br>cuniculus |
| 1 | 1.00 | 1 | 1 | 0     | -0.002 | 0      | 0.003 | 0.001  | t | 43191  | NAKATYEA<br>ALKQYEAD<br>LAA | Mus<br>musculus              |
| 1 | 1.00 | 1 | 1 | 0.01  | 0.01   | 0.01   | 0.01  | 0.01   | t | 45065  | NNEDNEK<br>L                | Oryctola<br>gus<br>cuniculus |
| 1 | 1.00 | 1 | 1 | 0     | 0.002  | 0.001  | 0     | 0      | t | 80395  | ALYASVAV<br>QQQD            | Homo<br>sapiens              |
| 1 | 1.00 | 1 | 1 | 0     | 0.003  | 0.002  | 0     | 0      | t | 60535  | SQQPQQP<br>FPQ              | Mus<br>musculus              |
| 1 | 1.00 | 1 | 1 | 0.02  | 0.02   | 0.018  | 0.017 | 0.018  | t | 12264  | EGRSVFDD<br>NVQR            | Homo<br>sapiens              |
| 1 | 1.00 | 1 | 1 | 0.05  | 0.05   | 0.05   | 0.05  | 0.05   | t | 115980 | SPEVIESPP<br>E              | Homo<br>sapiens              |
| 1 | 1.00 | 1 | 1 | 0.03  | 0.03   | 0.03   | 0.03  | 0.03   | t | 133598 | HLNSLYYD<br>WTEP            | Homo<br>sapiens              |
| 1 | 1.00 | 1 | 1 | 0.03  | 0.03   | 0.03   | 0.03  | 0.03   | t | 115985 | STVATLED<br>SP              | Homo<br>sapiens              |
| 1 | 1.00 | 1 | 1 | 0.03  | 0.03   | 0.03   | 0.03  | 0.03   | t | 103661 | TNDGVIFF<br>FNPGEEL         | Homo<br>sapiens              |
| 1 | 1.00 | 1 | 1 | 0.01  | 0.01   | 0.01   | 0.01  | 0.01   | t | 132940 | WGSNVT                      | Homo<br>sapiens              |

|   |      |   |   |       |        |        |        |        |   |        |                              |                                  |
|---|------|---|---|-------|--------|--------|--------|--------|---|--------|------------------------------|----------------------------------|
| 1 | 1.00 | 1 | 1 | 0.01  | 0.01   | 0.01   | 0.01   | 0.01   | t | 114903 | NGTLTSLH<br>FG               | Homo<br>sapiens                  |
| 1 | 1.00 | 1 | 1 | 0.01  | 0.014  | 0.01   | 0.01   | 0.01   | t | 100504 | SEVAQGAL<br>TSLPK            | Homo<br>sapiens                  |
| 1 | 1.00 | 1 | 1 | 0.01  | 0.01   | 0.01   | 0.01   | 0.01   | t | 100504 | SEVAQGAL<br>TSLPK            | Oryctola<br>gus<br>cuniculu<br>s |
| 1 | 1.00 | 1 | 1 | 0.01  | 0.01   | 0.01   | 0.01   | 0.01   | t | 108297 | CKYLWSKC                     | Homo<br>sapiens                  |
| 1 | 1.00 | 1 | 1 | 0.01  | 0.01   | 0.01   | 0.01   | 0.01   | t | 112403 | WWNDNK<br>F                  | Homo<br>sapiens                  |
| 1 | 1.00 | 1 | 1 | 0.01  | 0.01   | 0.01   | 0.01   | 0.01   | t | 46990  | PAVIPDRE<br>VLYQAFDE<br>MEEC | Homo<br>sapiens                  |
| 1 | 1.00 | 1 | 1 | 0.01  | 0.01   | 0.01   | 0.01   | 0.01   | t | 22126  | GRLHLND<br>QVVVTPD<br>KEILYE | Homo<br>sapiens                  |
| 1 | 1.00 | 1 | 1 | -0.01 | -0.01  | -0.01  | -0.01  | -0.01  | t | 135779 | VETGVKIT                     | Homo<br>sapiens                  |
| 1 | 1.00 | 1 | 1 | -0.01 | -0.01  | -0.01  | -0.01  | -0.01  | t | 151035 | NGTYDYPK<br>YSEEAKL          | Homo<br>sapiens                  |
| 1 | 1.00 | 1 | 1 | -0.01 | -0.01  | -0.01  | -0.01  | -0.01  | t | 156370 | LRGMAKD<br>GKFAVKD           | Homo<br>sapiens                  |
| 1 | 1.00 | 1 | 1 | -0.01 | -0.01  | -0.01  | -0.01  | -0.01  | t | 137737 | DTALTYAG<br>LKLK             | Mus<br>musculu<br>s              |
| 1 | 1.00 | 1 | 1 | -0.01 | -0.01  | -0.01  | -0.01  | -0.01  | t | 131304 | PVVWKN                       | Homo<br>sapiens                  |
| 1 | 1.00 | 1 | 1 | -0.01 | -0.01  | -0.01  | -0.01  | -0.01  | t | 131304 | PVVWKN                       | Homo<br>sapiens                  |
| 1 | 1.00 | 1 | 1 | -0.01 | -0.01  | -0.01  | -0.01  | -0.01  | t | 110608 | GPAGGPG<br>FPGAPGA<br>K      | Mus<br>musculu<br>s              |
| 1 | 1.00 | 1 | 1 | -0.01 | -0.01  | -0.01  | -0.01  | -0.01  | t | 79384  | SCNSFMIP<br>AQPST            | Mus<br>musculu<br>s              |
| 1 | 1.00 | 1 | 1 | -0.01 | -0.012 | -0.018 | -0.011 | -0.009 | t | 37698  | LLQAHRQL<br>EER              | Mus<br>musculu<br>s              |
| 1 | 1.00 | 1 | 1 | -0.03 | -0.03  | -0.03  | -0.03  | -0.03  | t | 120813 | NEAVKYTG<br>YT               | Mus<br>musculu<br>s              |

|   |      |   |   |       |        |        |        |        |   |        |                            |                                  |
|---|------|---|---|-------|--------|--------|--------|--------|---|--------|----------------------------|----------------------------------|
| 1 | 1.00 | 1 | 1 | -0.03 | -0.03  | -0.03  | -0.03  | -0.03  | t | 98985  | RIPSGFISYI<br>LNRHD        | Homo<br>sapiens                  |
| 1 | 1.00 | 1 | 1 | -0.03 | -0.03  | -0.03  | -0.03  | -0.03  | t | 97683  | TFSMGAK<br>P               | Mus<br>musculu<br>s              |
| 1 | 1.00 | 1 | 1 | -0.05 | -0.05  | -0.05  | -0.05  | -0.05  | t | 115824 | KIAKYIPIQ<br>Y             | Homo<br>sapiens                  |
| 1 | 1.00 | 1 | 1 | 0     | -0.003 | -0.004 | 0      | 0.001  | t | 153286 | QKLVFFAE<br>DVGSNKG<br>A   | Oryctola<br>gus<br>cuniculu<br>s |
| 1 | 1.00 | 1 | 1 | -0.04 | -0.04  | -0.04  | -0.04  | -0.04  | t | 130860 | GLPGARGL<br>TGRP           | Mus<br>musculu<br>s              |
| 1 | 1.00 | 1 | 1 | 0     | -0.002 | -0.008 | -0.001 | 0.002  | t | 48774  | PPFFLVQE<br>KGI            | Mus<br>musculu<br>s              |
| 1 | 1.00 | 1 | 1 | -0.03 | -0.026 | -0.035 | -0.027 | -0.028 | t | 134076 | GWLGFNK<br>ERGHQ           | Homo<br>sapiens                  |
| 1 | 1.00 | 1 | 1 | 0.03  | 0.03   | 0.025  | 0.026  | 0.029  | t | 124604 | QIERDTER<br>DRFLSAPE<br>AV | Homo<br>sapiens                  |
| 1 | 1.00 | 1 | 1 | 0     | 0      | 0      | 0      | -0.001 | t | 72954  | WPMVIPA<br>SISTM           | Mus<br>musculu<br>s              |
| 1 | 1.00 | 1 | 1 | 0.03  | 0.032  | 0.028  | 0.027  | 0.028  | t | 60178  | SPPEINTV<br>QV             | Homo<br>sapiens                  |
| 1 | 1.00 | 1 | 1 | 0.02  | 0.018  | 0.015  | 0.021  | 0.02   | t | 135653 | DSRGNPT<br>VEVDFTT         | Mus<br>musculu<br>s              |
| 1 | 1.00 | 1 | 1 | -0.03 | -0.028 | -0.04  | -0.029 | -0.026 | t | 55782  | RRYPFVKF<br>T              | Homo<br>sapiens                  |
| 1 | 1.00 | 1 | 1 | -0.01 | -0.012 | -0.003 | -0.013 | -0.014 | t | 135912 | EALVLDTN<br>GLMS           | Mus<br>musculu<br>s              |
| 1 | 1.00 | 1 | 1 | 0     | 0      | -0.002 | 0      | 0      | t | 150855 | HPGGSQP                    | Mus<br>musculu<br>s              |
| 1 | 1.00 | 1 | 1 | 0     | 0      | 0      | 0      | 0      | t | 111856 | TTHYGSLP<br>QK             | Oryctola<br>gus<br>cuniculu<br>s |

|   |      |   |   |       |       |        |        |        |   |        |                              |                                  |
|---|------|---|---|-------|-------|--------|--------|--------|---|--------|------------------------------|----------------------------------|
| 1 | 1.00 | 1 | 1 | 0     | 0.011 | 0      | 0      | 0      | t | 111856 | TTHYGSLP<br>QK               | Gallus<br>gallus                 |
| 1 | 1.00 | 1 | 1 | 0     | 0     | 0      | 0      | 0      | t | 111856 | TTHYGSLP<br>QK               | Oryctola<br>gus<br>cuniculu<br>s |
| 1 | 1.00 | 1 | 1 | 0     | 0     | -0.005 | -0.006 | -0.003 | t | 115672 | AAVRSPA<br>QIL               | Homo<br>sapiens                  |
| 1 | 1.00 | 1 | 1 | 0     | 0.002 | 0      | 0.001  | 0      | t | 39385  | LSGKPAVV<br>PDREVLYQ<br>EFDE | Homo<br>sapiens                  |
| 1 | 1.00 | 1 | 1 | 0     | 0.012 | 0      | -0.003 | 0      | t | 156859 | DPHVFKS                      | Gallus<br>gallus                 |
| 1 | 1.00 | 1 | 1 | 0     | 0     | 0      | 0      | 0      | t | 42932  | MVDVVTG<br>A                 | Oryctola<br>gus<br>cuniculu<br>s |
| 1 | 1.00 | 1 | 1 | 0     | 0.004 | 0      | 0      | 0      | t | 48107  | PKNTLTPL<br>EELYPT           | Aotus<br>nancyma<br>ae           |
| 1 | 1.00 | 1 | 1 | 0     | 0     | -0.002 | 0      | 0.002  | t | 118554 | PPGIRGP                      | Homo<br>sapiens                  |
| 1 | 1.00 | 1 | 1 | 0.01  | 0.013 | 0.016  | 0.01   | 0.01   | t | 21269  | GMFTGLF<br>NQGAQQK<br>L      | Mus<br>musculu<br>s              |
| 1 | 1.00 | 1 | 1 | 0.05  | 0.036 | 0.05   | 0.05   | 0.051  | t | 134148 | LQSDQEEI<br>DY               | Oryctola<br>gus<br>cuniculu<br>s |
| 1 | 1.00 | 1 | 1 | 0.04  | 0.04  | 0.043  | 0.04   | 0.041  | t | 125250 | SDEFNPCE<br>DIMGYK           | Mus<br>musculu<br>s              |
| 1 | 1.00 | 1 | 1 | 0.03  | 0.03  | 0.033  | 0.03   | 0.03   | t | 78759  | PGLRPQNL<br>YTLWGGS<br>VVCMY | Homo<br>sapiens                  |
| 1 | 1.00 | 1 | 1 | -0.03 | -0.03 | -0.035 | -0.03  | -0.028 | t | 54863  | RMAWDM<br>MMNW               | Mus<br>musculu<br>s              |
| 1 | 1.00 | 1 | 1 | 0.02  | 0.02  | 0.02   | 0.02   | 0.02   | t | 136612 | RRQKRF                       | Gallus<br>gallus                 |



|   |      |   |   |       |        |        |       |       |   |        |                      |                       |
|---|------|---|---|-------|--------|--------|-------|-------|---|--------|----------------------|-----------------------|
| 1 | 1.00 | 1 | 1 | 0.02  | 0.012  | 0.02   | 0.02  | 0.02  | t | 136612 | RRQKRF               | Mus musculus          |
| 1 | 1.00 | 1 | 1 | 0.02  | 0.02   | 0.02   | 0.02  | 0.02  | t | 108283 | AQSAITACW            | Homo sapiens          |
| 1 | 1.00 | 1 | 1 | 0.02  | 0.02   | 0.02   | 0.02  | 0.02  | t | 99690  | SSYLQGFSRNTLEAA      | Homo sapiens          |
| 1 | 1.00 | 1 | 1 | 0.02  | 0.02   | 0.02   | 0.02  | 0.02  | t | 114882 | LAAVSVDCSE           | Homo sapiens          |
| 1 | 1.00 | 1 | 1 | 0     | 0      | 0      | 0     | 0     | t | 121685 | NVVPLIVASPYVDAF      | Mus musculus          |
| 1 | 1.00 | 1 | 1 | 0     | 0      | 0      | 0     | 0     | t | 121685 | NVVPLIVASPYVDAF      | Mus musculus          |
| 1 | 1.00 | 1 | 1 | 0     | 0      | 0      | 0     | 0     | t | 111160 | CNKLSRPVC            | Homo sapiens          |
| 1 | 1.00 | 1 | 1 | 0     | 0      | 0      | 0     | 0     | t | 11150  | EANSKLAALEKLNKELEESK | Mus musculus          |
| 1 | 1.00 | 1 | 1 | -0.02 | -0.02  | -0.02  | -0.02 | -0.02 | t | 115393 | NIPPLTQTPVVPPFLQPEV  | Homo sapiens          |
| 1 | 1.00 | 1 | 1 | -0.02 | -0.02  | -0.02  | -0.02 | -0.02 | t | 79507  | AHIPWLL              | Oryctolagus cuniculus |
| 1 | 1.00 | 1 | 1 | 0.03  | 0.03   | 0.03   | 0.034 | 0.032 | t | 118536 | NITDHGSLIYFSECAF     | Homo sapiens          |
| 1 | 1.00 | 1 | 1 | 0     | 0      | 0.002  | 0     | 0.002 | t | 79428  | TKLKGESGY            | Oryctolagus cuniculus |
| 1 | 1.00 | 1 | 1 | -0.01 | -0.01  | -0.012 | -0.01 | -0.01 | t | 18999  | GDHCEGLGVL           | Mus musculus          |
| 1 | 1.00 | 1 | 1 | 0.05  | 0.052  | 0.05   | 0.051 | 0.051 | t | 69235  | VKIDNASPAS           | Homo sapiens          |
| 1 | 1.00 | 1 | 1 | -0.06 | -0.058 | -0.062 | -0.06 | -0.06 | t | 9949   | DRARRLLWWHYNC L      | Anas platyrhynchos    |
| 1 | 1.00 | 1 | 1 | -0.06 | -0.061 | -0.062 | -0.06 | -0.06 | t | 9949   | DRARRLLWWHYNC L      | Anas platyrhynchos    |

|   |      |   |   |       |        |        |        |        |   |        |                           |                                  |
|---|------|---|---|-------|--------|--------|--------|--------|---|--------|---------------------------|----------------------------------|
| 1 | 1.00 | 1 | 1 | 0     | 0      | 0      | 0      | 0      | t | 122589 | SRLDPDPR<br>LFLRMSTN      | Mus<br>musculu<br>s              |
| 1 | 1.00 | 1 | 1 | -0.01 | -0.01  | -0.02  | -0.01  | -0.008 | t | 140725 | PDELHK                    | Mus<br>musculu<br>s              |
| 1 | 1.00 | 1 | 1 | -0.01 | -0.016 | -0.01  | -0.01  | -0.009 | t | 17132  | FNATKFPS<br>VYAWERK<br>KI | Oryctola<br>gus<br>cuniculu<br>s |
| 1 | 1.00 | 1 | 1 | 0.03  | 0.027  | 0.03   | 0.03   | 0.028  | t | 79369  | RGDLRGDL<br>RGDL          | Oryctola<br>gus<br>cuniculu<br>s |
| 1 | 1.00 | 1 | 1 | 0.03  | 0.034  | 0.03   | 0.03   | 0.028  | t | 79369  | RGDLRGDL<br>RGDL          | Cavia<br>porcellu<br>s           |
| 1 | 1.00 | 1 | 1 | 0.01  | 0.01   | 0.01   | 0.01   | 0.011  | t | 16123  | FHLPYNHN<br>WFAL          | Mus<br>musculu<br>s              |
| 1 | 1.00 | 1 | 1 | -0.02 | -0.02  | -0.003 | -0.02  | -0.024 | t | 97252  | DTPLTTAA<br>LRLV          | Mus<br>musculu<br>s              |
| 1 | 1.00 | 1 | 1 | 0     | 0      | 0      | 0      | 0      | t | 142426 | KAAYGLLK<br>TKNQYVL       | Homo<br>sapiens                  |
| 1 | 1.00 | 1 | 1 | 0     | 0.004  | 0      | -0.003 | -0.001 | t | 118568 | QKIGIEIKR<br>TLK          | Homo<br>sapiens                  |
| 1 | 1.00 | 1 | 1 | 0.01  | 0.014  | 0.01   | 0.013  | 0.01   | t | 122892 | RSILPYGDS<br>MDRIE        | Homo<br>sapiens                  |
| 1 | 1.00 | 1 | 1 | -0.01 | -0.007 | -0.01  | -0.01  | -0.01  | t | 141074 | RHLEFEAR<br>TLSP          | Mus<br>musculu<br>s              |
| 1 | 1.00 | 1 | 1 | -0.04 | -0.04  | -0.039 | -0.04  | -0.04  | t | 68157  | VEEEIYQC<br>CNLEPE        | Homo<br>sapiens                  |
| 1 | 1.00 | 1 | 1 | 0     | -0.003 | -0.003 | 0      | 0      | t | 97478  | LTAGALW<br>NA             | Oryctola<br>gus<br>cuniculu<br>s |
| 1 | 1.00 | 1 | 1 | -0.06 | -0.06  | -0.065 | -0.057 | -0.06  | t | 10983  | EAAAPVVE<br>SKWRAL        | Homo<br>sapiens                  |

|   |      |   |   |       |        |       |       |        |   |        |                              |                                  |
|---|------|---|---|-------|--------|-------|-------|--------|---|--------|------------------------------|----------------------------------|
| 1 | 1.00 | 1 | 1 | 0.03  | 0.032  | 0.03  | 0.031 | 0.03   | t | 89474  | TIKAGVET<br>SRSV             | Homo<br>sapiens                  |
| 1 | 1.00 | 1 | 1 | 0.03  | 0.03   | 0.03  | 0.031 | 0.03   | t | 89474  | TIKAGVET<br>SRSV             | Homo<br>sapiens                  |
| 1 | 1.00 | 1 | 1 | 0.07  | 0.07   | 0.07  | 0.07  | 0.07   | t | 103792 | AGTELSAT<br>GNESGGG          | Oryctola<br>gus<br>cuniculu<br>s |
| 1 | 1.00 | 1 | 1 | -0.01 | -0.01  | -0.01 | -0.01 | -0.01  | t | 53869  | RGFTSLFS<br>AGS              | Homo<br>sapiens                  |
| 1 | 1.00 | 1 | 1 | 0.02  | 0.024  | 0.021 | 0.021 | 0.022  | t | 40070  | LTNSKG                       | Homo<br>sapiens                  |
| 1 | 1.00 | 1 | 1 | -0.03 | -0.033 | -0.03 | -0.03 | -0.028 | t | 140840 | EAAYSKNR<br>RAVL             | Oryctola<br>gus<br>cuniculu<br>s |
| 1 | 1.00 | 1 | 1 | 0.03  | 0.026  | 0.024 | 0.029 | 0.03   | t | 12459  | EIIQLDVT<br>T                | Oryctola<br>gus<br>cuniculu<br>s |
| 1 | 1.00 | 1 | 1 | 0.07  | 0.07   | 0.078 | 0.066 | 0.071  | t | 18808  | GAVDSI                       | Homo<br>sapiens                  |
| 1 | 1.00 | 1 | 1 | 0     | 0      | 0     | 0     | 0      | t | 66976  | TVDNPAST<br>TNKDKLFA<br>VWK  | Rattus<br>norvegic<br>us         |
| 1 | 1.00 | 1 | 1 | 0     | 0      | 0     | 0     | 0      | t | 44474  | NKDKLFAV<br>WK               | Rattus<br>norvegic<br>us         |
| 1 | 1.00 | 1 | 1 | 0.03  | 0.027  | 0.03  | 0.03  | 0.03   | t | 6458   | CITQYQRE<br>SQAYYQR<br>GASVI | Oryctola<br>gus<br>cuniculu<br>s |
| 1 | 1.00 | 1 | 1 | 0     | 0      | 0     | 0.001 | 0      | t | 117211 | GYWSWI<br>RQPPGKG<br>EEWIG   | Mus<br>musculu<br>s              |
| 1 | 1.00 | 1 | 1 | 0.05  | 0.05   | 0.05  | 0.05  | 0.05   | t | 119646 | SNGQPEN<br>N                 | Homo<br>sapiens                  |
| 1 | 1.00 | 1 | 1 | 0.03  | 0.03   | 0.03  | 0.03  | 0.03   | t | 156341 | KDGKFAVK<br>DGEKEK           | Homo<br>sapiens                  |
| 1 | 1.00 | 1 | 1 | 0.03  | 0.03   | 0.03  | 0.03  | 0.03   | t | 141931 | ITKLTPEEL<br>ENLAK           | Homo<br>sapiens                  |

|   |      |   |   |       |        |       |        |        |   |        |                             |                                  |
|---|------|---|---|-------|--------|-------|--------|--------|---|--------|-----------------------------|----------------------------------|
| 1 | 1.00 | 1 | 1 | 0.03  | 0.03   | 0.03  | 0.03   | 0.03   | t | 149073 | MTSSETQ                     | Sus<br>scrofa                    |
| 1 | 1.00 | 1 | 1 | 0.03  | 0.03   | 0.03  | 0.03   | 0.03   | t | 100352 | NQLKEHPT<br>DF              | Mus<br>musculu<br>s              |
| 1 | 1.00 | 1 | 1 | 0.03  | 0.03   | 0.03  | 0.03   | 0.03   | t | 94481  | CSNNPTC<br>WAICK            | Homo<br>sapiens                  |
| 1 | 1.00 | 1 | 1 | 0.01  | 0.01   | 0.01  | 0.01   | 0.01   | t | 131299 | ISPNTTYP<br>SL              | Homo<br>sapiens                  |
| 1 | 1.00 | 1 | 1 | 0.01  | 0.01   | 0.01  | 0.01   | 0.01   | t | 103716 | VRERMTT<br>QDVEAITP         | Homo<br>sapiens                  |
| 1 | 1.00 | 1 | 1 | 0.01  | 0.01   | 0.01  | 0.01   | 0.01   | t | 115492 | SLTLTDVE<br>NLHLPLPL<br>QSW | Homo<br>sapiens                  |
| 1 | 1.00 | 1 | 1 | 0.01  | 0.01   | 0.01  | 0.01   | 0.01   | t | 112368 | TTYGIGV                     | Homo<br>sapiens                  |
| 1 | 1.00 | 1 | 1 | 0.01  | 0.007  | 0.01  | 0.01   | 0.01   | t | 45367  | NPIDATAR<br>S               | Oryctola<br>gus<br>cuniculu<br>s |
| 1 | 1.00 | 1 | 1 | 0.01  | 0.01   | 0.01  | 0.01   | 0.01   | t | 45367  | NPIDATAR<br>S               | Oryctola<br>gus<br>cuniculu<br>s |
| 1 | 1.00 | 1 | 1 | 0.01  | 0.01   | 0.01  | 0.01   | 0.01   | t | 45367  | NPIDATAR<br>S               | Mus<br>musculu<br>s              |
| 1 | 1.00 | 1 | 1 | -0.01 | -0.01  | -0.01 | -0.01  | -0.01  | t | 124277 | HPLAPSPA<br>V               | Homo<br>sapiens                  |
| 1 | 1.00 | 1 | 1 | -0.01 | -0.01  | -0.01 | -0.01  | -0.01  | t | 115684 | ALINNQFL<br>PY              | Homo<br>sapiens                  |
| 1 | 1.00 | 1 | 1 | -0.01 | -0.01  | -0.01 | -0.01  | -0.01  | t | 106730 | QHFTKNP<br>ALLMA            | Mus<br>musculu<br>s              |
| 1 | 1.00 | 1 | 1 | -0.01 | -0.023 | -0.01 | -0.01  | -0.01  | t | 33512  | KSSLEDQKI<br>KEKLQP         | Aotus<br>trivirgat<br>us         |
| 1 | 1.00 | 1 | 1 | 0     | -0.002 | 0     | -0.001 | -0.001 | t | 153480 | TPSWRNP<br>FPTFYGGG<br>S    | Mus<br>musculu<br>s              |
| 1 | 1.00 | 1 | 1 | 0     | -0.002 | 0     | -0.001 | -0.001 | t | 153420 | MDWINPF<br>PNFNSSGG<br>GS   | Mus<br>musculu<br>s              |
| 1 | 1.00 | 1 | 1 | 0     | -0.002 | 0     | -0.001 | -0.001 | t | 153359 | ALLPFKDH<br>LPYPGGGS        | Mus<br>musculu<br>s              |

|   |      |   |   |   |        |   |        |        |   |        |                            |                                  |
|---|------|---|---|---|--------|---|--------|--------|---|--------|----------------------------|----------------------------------|
| 1 | 1.00 | 1 | 1 | 0 | -0.002 | 0 | -0.001 | -0.001 | t | 153362 | APWSLRD<br>HLAVTGG<br>GS   | Mus<br>musculu<br>s              |
| 1 | 1.00 | 1 | 1 | 0 | -0.002 | 0 | -0.001 | -0.001 | t | 153396 | HSFEPWS<br>ARDMLGG<br>GS   | Mus<br>musculu<br>s              |
| 1 | 1.00 | 1 | 1 | 0 | -0.002 | 0 | -0.001 | -0.001 | t | 153382 | FAENKKD<br>HFSPGGG<br>GS   | Mus<br>musculu<br>s              |
| 1 | 1.00 | 1 | 1 | 0 | -0.004 | 0 | -0.001 | -0.001 | t | 116757 | KFDVPCG<br>GRDCSGG<br>CQCY | Oryctola<br>gus<br>cuniculu<br>s |
| 1 | 1.00 | 1 | 1 | 0 | -0.002 | 0 | -0.001 | -0.001 | t | 79535  | EDDDDDF<br>GMGALF          | Mus<br>musculu<br>s              |
| 1 | 1.00 | 1 | 1 | 0 | -0.004 | 0 | -0.001 | -0.001 | t | 96103  | APPLLPHS<br>NLDHI          | Oryctola<br>gus<br>cuniculu<br>s |
| 1 | 1.00 | 1 | 1 | 0 | -0.002 | 0 | -0.001 | -0.001 | t | 67170  | TVSTEQNV<br>PDPQVGI        | Mus<br>musculu<br>s              |
| 1 | 1.00 | 1 | 1 | 0 | -0.002 | 0 | -0.001 | -0.001 | t | 62932  | TANGFYRL<br>PSG            | Mus<br>musculu<br>s              |
| 1 | 1.00 | 1 | 1 | 0 | -0.002 | 0 | -0.001 | -0.001 | t | 96103  | APPLLPHS<br>NLDHI          | Rattus<br>norvegic<br>us         |
| 1 | 1.00 | 1 | 1 | 0 | -0.002 | 0 | -0.001 | -0.001 | t | 58582  | SIKEDVQF                   | Mus<br>musculu<br>s              |
| 1 | 1.00 | 1 | 1 | 0 | -0.002 | 0 | -0.001 | -0.001 | t | 58409  | SHSAFNM<br>FDFGVGPP        | Mus<br>musculu<br>s              |
| 1 | 1.00 | 1 | 1 | 0 | -0.004 | 0 | -0.001 | -0.001 | t | 60170  | SPNVSVPS<br>SSSTPLLY       | Oryctola<br>gus<br>cuniculu<br>s |
| 1 | 1.00 | 1 | 1 | 0 | -0.002 | 0 | -0.001 | -0.001 | t | 40922  | LYREFD                     | Mus<br>musculu<br>s              |
| 1 | 1.00 | 1 | 1 | 0 | -0.002 | 0 | -0.001 | -0.001 | t | 58422  | SHSVTKSL<br>RVFGGPP        | Mus<br>musculu<br>s              |

|   |      |   |   |       |        |       |        |        |   |        |                             |                                  |
|---|------|---|---|-------|--------|-------|--------|--------|---|--------|-----------------------------|----------------------------------|
| 1 | 1.00 | 1 | 1 | 0     | -0.002 | 0     | -0.001 | -0.001 | t | 47565  | PFSPDGKP<br>CTPP            | Mus<br>musculu<br>s              |
| 1 | 1.00 | 1 | 1 | 0     | -0.004 | 0     | -0.001 | -0.001 | t | 46859  | PALTAVET<br>GATNPL          | Oryctola<br>gus<br>cuniculu<br>s |
| 1 | 1.00 | 1 | 1 | 0     | -0.004 | 0     | -0.001 | -0.001 | t | 60170  | SPNVSVPS<br>SSSTPLLY        | Oryctola<br>gus<br>cuniculu<br>s |
| 1 | 1.00 | 1 | 1 | 0     | 0.004  | 0     | -0.001 | -0.001 | t | 51233  | QKPLK                       | Mus<br>musculu<br>s              |
| 1 | 1.00 | 1 | 1 | 0     | -0.002 | 0     | -0.001 | -0.001 | t | 46242  | NTRNIDAT<br>STGN            | Mus<br>musculu<br>s              |
| 1 | 1.00 | 1 | 1 | 0     | -0.002 | 0     | -0.001 | -0.001 | t | 42493  | MRQLDTN<br>VER              | Mus<br>musculu<br>s              |
| 1 | 1.00 | 1 | 1 | 0     | -0.002 | 0     | -0.001 | -0.001 | t | 58418  | SHSSESHR<br>VKSAGPP         | Mus<br>musculu<br>s              |
| 1 | 1.00 | 1 | 1 | 0     | -0.002 | 0     | -0.001 | -0.001 | t | 12307  | EGVQQEG<br>AQQPA            | Mus<br>musculu<br>s              |
| 1 | 1.00 | 1 | 1 | 0     | -0.002 | 0     | -0.001 | -0.001 | t | 18363  | FWRGDLV<br>FDFQV            | Mus<br>musculu<br>s              |
| 1 | 1.00 | 1 | 1 | 0     | -0.002 | 0     | -0.001 | -0.001 | t | 23068  | GVNLEDP<br>ASRDL            | Mus<br>musculu<br>s              |
| 1 | 1.00 | 1 | 1 | 0     | -0.004 | 0     | -0.001 | -0.001 | t | 8544   | DHILEPSIP<br>WKSLLTL<br>VQL | Oryctola<br>gus<br>cuniculu<br>s |
| 1 | 1.00 | 1 | 1 | 0     | -0.002 | 0     | -0.001 | -0.001 | t | 7756   | DDDMGFG<br>LFD              | Mus<br>musculu<br>s              |
| 1 | 1.00 | 1 | 1 | -0.01 | -0.01  | -0.01 | -0.014 | -0.012 | t | 28911  | ITGHRMA<br>WDMMM<br>NWS     | Homo<br>sapiens                  |
| 1 | 1.00 | 1 | 1 | 0.02  | 0.02   | 0.02  | 0.02   | 0.021  | t | 135837 | DMYGDIRL<br>TGLI            | Mus<br>musculu<br>s              |

|   |      |   |   |       |        |        |        |        |   |        |                            |                                  |
|---|------|---|---|-------|--------|--------|--------|--------|---|--------|----------------------------|----------------------------------|
| 1 | 1.00 | 1 | 1 | -0.02 | -0.017 | -0.015 | -0.02  | -0.02  | t | 78568  | YATNPQT<br>QLS             | Mus<br>musculu<br>s              |
| 1 | 1.00 | 1 | 1 | -0.02 | -0.017 | -0.015 | -0.02  | -0.02  | t | 78568  | YATNPQT<br>QLS             | Mus<br>musculu<br>s              |
| 1 | 1.00 | 1 | 1 | -0.03 | -0.029 | -0.027 | -0.03  | -0.03  | t | 50304  | QALGALK                    | Homo<br>sapiens                  |
| 1 | 1.00 | 1 | 1 | -0.03 | -0.03  | -0.027 | -0.03  | -0.03  | t | 50304  | QALGALK                    | Homo<br>sapiens                  |
| 1 | 1.00 | 1 | 1 | -0.01 | -0.007 | -0.015 | -0.01  | -0.01  | t | 42923  | MVDHFHL<br>GDD             | Mus<br>musculu<br>s              |
| 1 | 1.00 | 1 | 1 | 0.01  | 0.012  | 0.012  | 0.013  | 0.01   | t | 8356   | DGAVQPD<br>GGQPAVR<br>NERA | Cavia<br>porcellu<br>s           |
| 1 | 1.00 | 1 | 1 | -0.04 | -0.036 | -0.044 | -0.039 | -0.04  | t | 15770  | FEWYYQS<br>GLSVVMP<br>V    | Homo<br>sapiens                  |
| 1 | 1.00 | 1 | 1 | 0.01  | 0.007  | 0.011  | 0.01   | 0.011  | t | 61426  | SSTYQYIY<br>NLTICELN<br>G  | Sus<br>scrofa                    |
| 1 | 1.00 | 1 | 1 | 0.01  | 0.01   | 0.012  | 0.01   | 0.011  | t | 153267 | IWENAGR<br>MV              | Mus<br>musculu<br>s              |
| 1 | 1.00 | 1 | 1 | -0.01 | -0.009 | -0.016 | -0.01  | -0.01  | t | 66194  | TSFEDINGI<br>RRPKH         | Myodes<br>glareolu<br>s          |
| 1 | 1.00 | 1 | 1 | -0.06 | -0.06  | -0.058 | -0.06  | -0.061 | t | 120184 | RRRATQLA<br>HL             | Oryctola<br>gus<br>cuniculu<br>s |
| 1 | 1.00 | 1 | 1 | -0.06 | -0.06  | -0.058 | -0.06  | -0.061 | t | 120184 | RRRATQLA<br>HL             | Mus<br>musculu<br>s              |
| 1 | 1.00 | 1 | 1 | -0.06 | -0.057 | -0.058 | -0.06  | -0.061 | t | 120184 | RRRATQLA<br>HL             | Mus<br>musculu<br>s              |

|   |      |   |   |       |        |        |        |        |   |        |                              |                      |
|---|------|---|---|-------|--------|--------|--------|--------|---|--------|------------------------------|----------------------|
| 1 | 1.00 | 1 | 1 | 0     | 0      | -0.002 | 0      | -0.002 | t | 95354  | ELSEFIPGA<br>SLR             | Homo<br>sapiens      |
| 1 | 1.00 | 1 | 1 | -0.03 | -0.028 | -0.04  | -0.029 | -0.03  | t | 21322  | GMPGGM<br>PGGMPGG<br>MPG     | Homo<br>sapiens      |
| 1 | 1.00 | 1 | 1 | 0.02  | 0.02   | 0.02   | 0.02   | 0.019  | t | 124016 | DKTEDVDI<br>EEMALKLD<br>NVLL | Homo<br>sapiens      |
| 1 | 1.00 | 1 | 1 | 0.01  | 0.012  | 0.013  | 0.007  | 0.01   | t | 39631  | LSRISSKKS                    | Homo<br>sapiens      |
| 1 | 1.00 | 1 | 1 | -0.02 | -0.018 | -0.02  | -0.02  | -0.02  | t | 122886 | RGTDIFY<br>RKPP              | Rattus<br>norvegicus |
| 1 | 1.00 | 1 | 1 | -0.02 | -0.022 | -0.02  | -0.019 | -0.02  | t | 149315 | FLPQQPYP<br>QP               | Mus<br>musculus      |
| 1 | 1.00 | 1 | 1 | 0.01  | 0.008  | 0.018  | 0.009  | 0.008  | t | 60013  | SPDDPAFR<br>FAPYFTP          | Mus<br>musculus      |
| 1 | 1.00 | 1 | 1 | 0     | 0.003  | -0.01  | 0      | 0.001  | t | 139404 | YIDINKTIA<br>DMLEQYN<br>PNYT | Felis<br>catus       |
| 1 | 1.00 | 1 | 1 | 0.02  | 0.02   | 0.02   | 0.02   | 0.02   | t | 142023 | SRKKKAAA<br>AIEEEDI          | Mus<br>musculus      |
| 1 | 1.00 | 1 | 1 | 0.02  | 0.02   | 0.018  | 0.017  | 0.018  | t | 99909  | ATPTPTPK<br>AAGS             | Homo<br>sapiens      |
| 1 | 1.00 | 1 | 1 | 0     | 0.003  | 0      | 0      | 0      | t | 155333 | PADS                         | Mus<br>musculus      |
| 1 | 1.00 | 1 | 1 | 0     | 0      | 0      | 0      | 0      | t | 78852  | TKDTNNN<br>LCG               | Mus<br>musculus      |
| 1 | 1.00 | 1 | 1 | -0.03 | -0.028 | -0.031 | -0.027 | -0.03  | t | 144759 | RAALPSHV<br>VT               | Homo<br>sapiens      |
| 1 | 1.00 | 1 | 1 | 0     | 0      | 0.005  | 0      | 0      | t | 56900  | SAMSTTDL<br>EAYFKDC          | Homo<br>sapiens      |
| 1 | 1.00 | 1 | 1 | 0.05  | 0.05   | 0.045  | 0.047  | 0.048  | t | 98836  | ISLLDAQS<br>AP               | Homo<br>sapiens      |



|   |      |   |   |       |       |       |       |       |   |        |                              |                                  |
|---|------|---|---|-------|-------|-------|-------|-------|---|--------|------------------------------|----------------------------------|
| 1 | 1.00 | 1 | 1 | 0.06  | 0.06  | 0.06  | 0.06  | 0.06  | t | 115730 | EPTSTPTTE<br>A               | Homo<br>sapiens                  |
| 1 | 1.00 | 1 | 1 | 0.04  | 0.04  | 0.04  | 0.04  | 0.04  | t | 103547 | RGLGEAQL<br>GNSSGNF          | Homo<br>sapiens                  |
| 1 | 1.00 | 1 | 1 | 0.04  | 0.04  | 0.04  | 0.04  | 0.04  | t | 114901 | NCSSYANT<br>TS               | Homo<br>sapiens                  |
| 1 | 1.00 | 1 | 1 | 0.04  | 0.04  | 0.04  | 0.04  | 0.04  | t | 96003  | WGWCGS<br>TDEY               | Homo<br>sapiens                  |
| 1 | 1.00 | 1 | 1 | 0.02  | 0.02  | 0.02  | 0.02  | 0.02  | t | 132834 | GTRAKFEG<br>GQAIYEN          | Trichosu<br>rus<br>vulpecul<br>a |
| 1 | 1.00 | 1 | 1 | 0.02  | 0.02  | 0.02  | 0.02  | 0.02  | t | 79226  | GCEMSCEI<br>ALVVCH           | Mus<br>musculu<br>s              |
| 1 | 1.00 | 1 | 1 | 0.02  | 0.02  | 0.02  | 0.02  | 0.02  | t | 77900  | HDSPTIRY<br>VEAY             | Mus<br>musculu<br>s              |
| 1 | 1.00 | 1 | 1 | 0.02  | 0.02  | 0.02  | 0.02  | 0.02  | t | 7058   | CSQAAPYI<br>E                | Homo<br>sapiens                  |
| 1 | 1.00 | 1 | 1 | 0     | 0     | 0     | 0     | 0     | t | 115536 | VEELKPTP<br>EGDLEILLQ<br>KWE | Homo<br>sapiens                  |
| 1 | 1.00 | 1 | 1 | 0     | 0     | 0     | 0     | 0     | t | 115460 | QTPVVVPP<br>FLQPEVM<br>GVSKV | Homo<br>sapiens                  |
| 1 | 1.00 | 1 | 1 | 0     | 0     | 0     | 0     | 0     | t | 61397  | SSTKNLIYT<br>STLCELNV        | Sus<br>scrofa                    |
| 1 | 1.00 | 1 | 1 | 0     | 0     | 0     | 0     | 0     | t | 79565  | HFTTRL                       | Oryctola<br>gus<br>cuniculu<br>s |
| 1 | 1.00 | 1 | 1 | -0.02 | -0.02 | -0.02 | -0.02 | -0.02 | t | 99464  | LVALALFLL<br>AAHASA          | Homo<br>sapiens                  |
| 1 | 1.00 | 1 | 1 | -0.04 | -0.04 | -0.04 | -0.04 | -0.04 | t | 7822   | DDLPTTM<br>FQPVRAPC<br>IQTAW | Homo<br>sapiens                  |
| 1 | 1.00 | 1 | 1 | -0.06 | -0.06 | -0.06 | -0.06 | -0.06 | t | 95237  | ALPQYLKT<br>VY               | Homo<br>sapiens                  |

|   |      |   |   |       |        |        |        |        |   |        |                            |                                  |
|---|------|---|---|-------|--------|--------|--------|--------|---|--------|----------------------------|----------------------------------|
| 1 | 1.00 | 1 | 1 | -0.01 | -0.01  | -0.013 | -0.01  | -0.011 | t | 94580  | LDNKYAGK<br>GY             | Mus<br>musculu<br>s              |
| 1 | 1.00 | 1 | 1 | -0.03 | -0.03  | -0.025 | -0.028 | -0.03  | t | 79013  | LGIASFTR<br>GPKQNI         | Homo<br>sapiens                  |
| 1 | 1.00 | 1 | 1 | 0.02  | 0.016  | 0.029  | 0.023  | 0.02   | t | 111684 | QPETTDLY<br>CYEQLSD        | Oryctola<br>gus<br>cuniculu<br>s |
| 1 | 1.00 | 1 | 1 | -0.03 | -0.028 | -0.033 | -0.029 | -0.03  | t | 7193   | CTPPALNC<br>YWPLNDY<br>GF  | Homo<br>sapiens                  |
| 1 | 1.00 | 1 | 1 | 0.03  | 0.032  | 0.032  | 0.031  | 0.032  | t | 38970  | LQRATQQ<br>QA              | Homo<br>sapiens                  |
| 1 | 1.00 | 1 | 1 | -0.04 | -0.036 | -0.049 | -0.043 | -0.04  | t | 14826  | EVMKLT                     | Homo<br>sapiens                  |
| 1 | 1.00 | 1 | 1 | 0.03  | 0.038  | 0.03   | 0.033  | 0.03   | t | 110926 | KSEKDSTN<br>NNK            | Homo<br>sapiens                  |
| 1 | 1.00 | 1 | 1 | 0.01  | 0.008  | 0.015  | 0.009  | 0.01   | t | 49967  | PVSLGGDV<br>PNS            | Mus<br>musculu<br>s              |
| 1 | 1.00 | 1 | 1 | 0     | -0.015 | 0      | -0.001 | -0.001 | t | 67615  | VAGRKKLE<br>ELERDLRK<br>TK | Marmot<br>a monax                |
| 1 | 1.00 | 1 | 1 | 0     | 0      | 0      | -0.001 | -0.001 | t | 63217  | TDQMEVD<br>SGPRKRPL<br>RGG | Homo<br>sapiens                  |
| 1 | 1.00 | 1 | 1 | 0     | -0.015 | 0      | -0.001 | -0.001 | t | 63217  | TDQMEVD<br>SGPRKRPL<br>RGG | Marmot<br>a monax                |
| 1 | 1.00 | 1 | 1 | 0     | 0      | 0      | -0.001 | -0.001 | t | 67615  | VAGRKKLE<br>ELERDLRK<br>TK | Homo<br>sapiens                  |
| 1 | 1.00 | 1 | 1 | 0     | 0      | 0      | -0.001 | -0.001 | t | 19269  | GEGAPPA<br>KRARTDQ<br>ME   | Homo<br>sapiens                  |
| 1 | 1.00 | 1 | 1 | 0     | -0.015 | 0      | -0.001 | -0.001 | t | 29852  | KALENKKK<br>QLSAGGK<br>NLS | Marmot<br>a monax                |
| 1 | 1.00 | 1 | 1 | 0     | -0.015 | 0      | -0.001 | -0.001 | t | 19269  | GEGAPPA<br>KRARTDQ<br>ME   | Marmot<br>a monax                |

|   |      |   |   |       |        |        |        |        |   |        |                              |                                  |
|---|------|---|---|-------|--------|--------|--------|--------|---|--------|------------------------------|----------------------------------|
| 1 | 1.00 | 1 | 1 | 0     | 0      | 0      | -0.001 | -0.001 | t | 29852  | KALENKKK<br>QLSAGGK<br>NLS   | Homo<br>sapiens                  |
| 1 | 1.00 | 1 | 1 | 0.05  | 0.05   | 0.052  | 0.05   | 0.05   | t | 46982  | PATVPDRE<br>VLYQEFD<br>MEEC  | Homo<br>sapiens                  |
| 1 | 1.00 | 1 | 1 | 0.04  | 0.034  | 0.04   | 0.04   | 0.04   | t | 123374 | KKAVQGG<br>G                 | Oryctola<br>gus<br>cuniculu<br>s |
| 1 | 1.00 | 1 | 1 | -0.01 | -0.01  | -0.01  | -0.01  | -0.01  | t | 116721 | FSWGGRD<br>SRSGSPM<br>ARR    | Mus<br>musculu<br>s              |
| 1 | 1.00 | 1 | 1 | 0.01  | 0.008  | -0.003 | 0.003  | 0.01   | t | 134678 | GEWNLPD<br>NCRGGVS           | Mus<br>musculu<br>s              |
| 1 | 1.00 | 1 | 1 | -0.05 | -0.048 | -0.049 | -0.052 | -0.052 | t | 106591 | LARHAKA<br>HIL               | Homo<br>sapiens                  |
| 1 | 1.00 | 1 | 1 | 0.02  | 0.018  | 0.018  | 0.023  | 0.021  | t | 99569  | QGLSERRA                     | Mus<br>musculu<br>s              |
| 1 | 1.00 | 1 | 1 | 0.01  | 0.012  | 0.01   | 0.011  | 0.01   | t | 142200 | KGLRRDL<br>ASREAKKQ<br>LEAE  | Homo<br>sapiens                  |
| 1 | 1.00 | 1 | 1 | 0.01  | 0.013  | 0.01   | 0.01   | 0.01   | t | 64541  | TKDTNNN<br>L                 | Mus<br>musculu<br>s              |
| 1 | 1.00 | 1 | 1 | -0.01 | -0.01  | -0.01  | -0.01  | -0.01  | t | 71297  | VTFDGGK<br>M                 | Oryctola<br>gus<br>cuniculu<br>s |
| 1 | 1.00 | 1 | 1 | -0.01 | -0.01  | -0.01  | -0.01  | -0.01  | t | 47160  | PDPPQPD<br>FPQLN             | Oryctola<br>gus<br>cuniculu<br>s |
| 1 | 1.00 | 1 | 1 | -0.01 | -0.012 | -0.01  | -0.009 | -0.01  | t | 149440 | QQQQQPL<br>SQV               | Mus<br>musculu<br>s              |
| 1 | 1.00 | 1 | 1 | 0     | 0      | 0      | 0      | -0.001 | t | 145775 | FDTGAFDP<br>DWPA             | Mus<br>musculu<br>s              |
| 1 | 1.00 | 1 | 1 | 0.03  | 0.03   | 0.031  | 0.03   | 0.029  | t | 144785 | SKSIGWAD<br>EEGRTKRY<br>ALVI | Mus<br>musculu<br>s              |

|   |      |   |   |       |        |        |        |        |   |        |                              |                                  |
|---|------|---|---|-------|--------|--------|--------|--------|---|--------|------------------------------|----------------------------------|
| 1 | 1.00 | 1 | 1 | -0.01 | -0.012 | -0.01  | -0.009 | -0.012 | t | 151944 | KFPSESRP<br>NVVK             | Sus<br>scrofa                    |
| 1 | 1.00 | 1 | 1 | -0.02 | -0.024 | -0.017 | -0.017 | -0.02  | t | 115406 | NRKVKPTT<br>EGGVETE          | Oryctola<br>gus<br>cuniculu<br>s |
| 1 | 1.00 | 1 | 1 | 0.01  | 0.01   | 0.01   | 0.01   | 0.01   | t | 1258   | AFASRGN<br>HDSPTHYV<br>PESD  | Homo<br>sapiens                  |
| 1 | 1.00 | 1 | 1 | 0.03  | 0.019  | 0.03   | 0.03   | 0.032  | t | 156894 | KAGDPRT                      | Oryctola<br>gus<br>cuniculu<br>s |
| 1 | 1.00 | 1 | 1 | 0.03  | 0.03   | 0.03   | 0.03   | 0.03   | t | 127899 | YFKEQFLD<br>GD               | Homo<br>sapiens                  |
| 1 | 1.00 | 1 | 1 | 0.03  | 0.03   | 0.03   | 0.03   | 0.03   | t | 115745 | FTESQSLTL<br>T               | Homo<br>sapiens                  |
| 1 | 1.00 | 1 | 1 | 0.01  | 0.01   | 0.01   | 0.01   | 0.01   | t | 141719 | NTEEYIDG                     | Homo<br>sapiens                  |
| 1 | 1.00 | 1 | 1 | 0.01  | 0.01   | 0.01   | 0.01   | 0.01   | t | 141719 | NTEEYIDG                     | Homo<br>sapiens                  |
| 1 | 1.00 | 1 | 1 | 0.01  | 0.01   | 0.01   | 0.01   | 0.01   | t | 149055 | GSSLHDI                      | Sus<br>scrofa                    |
| 1 | 1.00 | 1 | 1 | 0.01  | 0.01   | 0.01   | 0.01   | 0.01   | t | 123484 | MDLRIGFG<br>L                | Ovis<br>aries                    |
| 1 | 1.00 | 1 | 1 | 0.01  | 0.01   | 0.01   | 0.01   | 0.01   | t | 123723 | RVCYNPKF<br>E                | Ovis<br>aries                    |
| 1 | 1.00 | 1 | 1 | 0.01  | 0.01   | 0.01   | 0.01   | 0.01   | t | 121734 | QCCLADD<br>ECLLSLPY          | Mus<br>musculu<br>s              |
| 1 | 1.00 | 1 | 1 | 0.01  | 0.01   | 0.01   | 0.01   | 0.01   | t | 121734 | QCCLADD<br>ECLLSLPY          | Mus<br>musculu<br>s              |
| 1 | 1.00 | 1 | 1 | 0.01  | 0.01   | 0.01   | 0.01   | 0.01   | t | 100035 | FFPASSRD<br>QSSYLQGF<br>SRNT | Homo<br>sapiens                  |
| 1 | 1.00 | 1 | 1 | 0.01  | 0.01   | 0.01   | 0.01   | 0.01   | t | 102723 | PPTPTPDQ<br>PEPNKPVE<br>PTYE | Mus<br>musculu<br>s              |
| 1 | 1.00 | 1 | 1 | 0.01  | 0.01   | 0.01   | 0.01   | 0.01   | t | 108088 | RAAPFGN<br>QW                | Mus<br>musculu<br>s              |
| 1 | 1.00 | 1 | 1 | 0.01  | 0.01   | 0.01   | 0.01   | 0.01   | t | 66240  | TSGTSGTS<br>GPSGPSG          | Homo<br>sapiens                  |
| 1 | 1.00 | 1 | 1 | 0.01  | 0.01   | 0.01   | 0.01   | 0.01   | t | 50913  | QGMQLAE<br>QFKQKAL<br>GLLQQA | Homo<br>sapiens                  |

|   |      |   |   |       |        |        |        |        |   |        |                              |                       |
|---|------|---|---|-------|--------|--------|--------|--------|---|--------|------------------------------|-----------------------|
| 1 | 1.00 | 1 | 1 | 0.01  | 0.01   | 0.01   | 0.01   | 0.01   | t | 43222  | NANADPN                      | Mus musculus          |
| 1 | 1.00 | 1 | 1 | 0.01  | 0.01   | 0.01   | 0.01   | 0.01   | t | 22075  | GRIILSGKP<br>AIIPDREVL<br>YQ | Homo sapiens          |
| 1 | 1.00 | 1 | 1 | 0.01  | 0.01   | 0.01   | 0.01   | 0.01   | t | 22074  | GRIILSGKP<br>AIIPDREAL<br>YQ | Homo sapiens          |
| 1 | 1.00 | 1 | 1 | 0.01  | 0.01   | 0.01   | 0.01   | 0.01   | t | 22074  | GRIILSGKP<br>AIIPDREAL<br>YQ | Homo sapiens          |
| 1 | 1.00 | 1 | 1 | -0.01 | -0.01  | -0.01  | -0.01  | -0.01  | t | 135779 | VETGVKIT                     | Homo sapiens          |
| 1 | 1.00 | 1 | 1 | -0.01 | -0.01  | -0.01  | -0.01  | -0.01  | t | 128101 | SFSRALEN<br>ATRDYFIC<br>PII  | Homo sapiens          |
| 1 | 1.00 | 1 | 1 | -0.01 | -0.01  | -0.01  | -0.01  | -0.01  | t | 115205 | DELQDKIH<br>PFAQTQSL<br>VYPF | Homo sapiens          |
| 1 | 1.00 | 1 | 1 | -0.03 | -0.03  | -0.03  | -0.03  | -0.03  | t | 135586 | PFMLAQF<br>DG                | Oryctolagus cuniculus |
| 1 | 1.00 | 1 | 1 | 0.03  | 0.028  | 0.03   | 0.023  | 0.027  | t | 140014 | DSDVGE                       | Mus musculus          |
| 1 | 1.00 | 1 | 1 | -0.02 | -0.02  | -0.013 | -0.02  | -0.02  | t | 151650 | GWWPYA<br>ALRALS             | Mus musculus          |
| 1 | 1.00 | 1 | 1 | -0.03 | -0.026 | -0.02  | -0.027 | -0.031 | t | 76368  | YVNTNMG<br>LKIRQ             | Homo sapiens          |
| 1 | 1.00 | 1 | 1 | 0     | 0      | 0.006  | 0      | 0      | t | 9951   | DRASLST                      | Homo sapiens          |
| 1 | 1.00 | 1 | 1 | 0.04  | 0.04   | 0.04   | 0.04   | 0.041  | t | 75847  | YSPELE                       | Mus musculus          |
| 1 | 1.00 | 1 | 1 | 0.01  | 0.012  | 0.005  | 0.011  | 0.011  | t | 19091  | GDRAAGQ<br>AAGDRAA<br>GQAA   | Homo sapiens          |
| 1 | 1.00 | 1 | 1 | 0     | -0.006 | 0      | 0      | -0.002 | t | 123760 | SSYAKVSIC<br>LPMDTETP<br>LAL | Oryctolagus cuniculus |

|   |      |   |   |       |        |        |        |        |   |        |                   |                                  |
|---|------|---|---|-------|--------|--------|--------|--------|---|--------|-------------------|----------------------------------|
| 1 | 1.00 | 1 | 1 | 0.01  | 0.009  | 0.008  | 0.007  | 0.01   | t | 66870  | TTTQTQPS<br>KPTT  | Homo<br>sapiens                  |
| 1 | 1.00 | 1 | 1 | 0.02  | 0.018  | 0.017  | 0.023  | 0.023  | t | 66751  | TTPAQGTS<br>M     | Mus<br>musculu<br>s              |
| 1 | 1.00 | 1 | 1 | -0.04 | -0.038 | -0.045 | -0.04  | -0.04  | t | 116971 | FAVLKLM<br>GRGTKF | Rattus<br>norvegic<br>us         |
| 1 | 1.00 | 1 | 1 | -0.01 | -0.007 | -0.01  | -0.011 | -0.01  | t | 53634  | RESQAYYQ<br>R     | Mus<br>musculu<br>s              |
| 1 | 1.00 | 1 | 1 | 0.03  | 0.033  | 0.033  | 0.03   | 0.03   | t | 12542  | EIPDPVEA<br>GEEV  | Mus<br>musculu<br>s              |
| 1 | 1.00 | 1 | 1 | 0.05  | 0.052  | 0.045  | 0.047  | 0.048  | t | 98919  | NSAEPEQS<br>LA    | Homo<br>sapiens                  |
| 1 | 1.00 | 1 | 1 | 0.03  | 0.028  | 0.027  | 0.029  | 0.03   | t | 26942  | IKYNGEEYL<br>I    | Mus<br>musculu<br>s              |
| 1 | 1.00 | 1 | 1 | 0     | -0.002 | -0.009 | -0.007 | -0.001 | t | 109277 | GVNH              | Mus<br>musculu<br>s              |
| 1 | 1.00 | 1 | 1 | 0     | 0      | 0      | 0      | 0      | t | 79352  | QPMEPQP<br>LPMGPQ | Oryctola<br>gus<br>cuniculu<br>s |
| 1 | 1.00 | 1 | 1 | 0     | 0      | 0      | 0      | 0      | t | 33232  | KRVKTWR<br>M      | Homo<br>sapiens                  |
| 1 | 1.00 | 1 | 1 | 0     | 0      | 0      | 0      | 0      | t | 8560   | DHPLQKTY          | Homo<br>sapiens                  |
| 1 | 1.00 | 1 | 1 | 0     | -0.002 | 0      | 0.001  | 0      | t | 148742 | PQQPYYPQ<br>PQP   | Mus<br>musculu<br>s              |
| 1 | 1.00 | 1 | 1 | 0     | -0.002 | 0      | 0.001  | 0      | t | 149411 | PQFEEIRN<br>LA    | Mus<br>musculu<br>s              |
| 1 | 1.00 | 1 | 1 | 0     | -0.002 | 0      | 0.001  | 0      | t | 149440 | QQQQQPL<br>SQV    | Mus<br>musculu<br>s              |

|   |      |   |   |   |        |   |       |   |   |        |                            |                                  |
|---|------|---|---|---|--------|---|-------|---|---|--------|----------------------------|----------------------------------|
| 1 | 1.00 | 1 | 1 | 0 | -0.002 | 0 | 0.001 | 0 | t | 148821 | QPYPQPQ<br>PFP             | Mus<br>musculu<br>s              |
| 1 | 1.00 | 1 | 1 | 0 | -0.002 | 0 | 0.001 | 0 | t | 136567 | PYWKWQ<br>YKYD             | Mus<br>musculu<br>s              |
| 1 | 1.00 | 1 | 1 | 0 | -0.002 | 0 | 0.001 | 0 | t | 149514 | VPQLQLQ<br>NPS             | Mus<br>musculu<br>s              |
| 1 | 1.00 | 1 | 1 | 0 | -0.002 | 0 | 0.001 | 0 | t | 149373 | LSQVSFQQ<br>PQ             | Mus<br>musculu<br>s              |
| 1 | 1.00 | 1 | 1 | 0 | -0.002 | 0 | 0.001 | 0 | t | 149479 | STTIAPFGI<br>F             | Mus<br>musculu<br>s              |
| 1 | 1.00 | 1 | 1 | 0 | -0.002 | 0 | 0.001 | 0 | t | 148949 | SQQPYLQL<br>QP             | Mus<br>musculu<br>s              |
| 1 | 1.00 | 1 | 1 | 0 | -0.002 | 0 | 0.001 | 0 | t | 149439 | QQQPLSQ<br>VSF             | Mus<br>musculu<br>s              |
| 1 | 1.00 | 1 | 1 | 0 | -0.002 | 0 | 0.001 | 0 | t | 149423 | QEQVPLV<br>QEQ             | Mus<br>musculu<br>s              |
| 1 | 1.00 | 1 | 1 | 0 | -0.002 | 0 | 0.001 | 0 | t | 149335 | IAPFGIFGT<br>N             | Mus<br>musculu<br>s              |
| 1 | 1.00 | 1 | 1 | 0 | -0.004 | 0 | 0.001 | 0 | t | 134115 | KENVKDYY<br>QKWMEE<br>QAQS | Oryctola<br>gus<br>cuniculu<br>s |
| 1 | 1.00 | 1 | 1 | 0 | -0.002 | 0 | 0.001 | 0 | t | 148820 | QPYLQLQP<br>FP             | Mus<br>musculu<br>s              |
| 1 | 1.00 | 1 | 1 | 0 | -0.002 | 0 | 0.001 | 0 | t | 149434 | QPQPFLP<br>QQP             | Mus<br>musculu<br>s              |
| 1 | 1.00 | 1 | 1 | 0 | -0.002 | 0 | 0.001 | 0 | t | 149516 | VPVPQLQL<br>QN             | Mus<br>musculu<br>s              |

|   |      |   |   |   |        |   |       |   |   |        |                    |                     |
|---|------|---|---|---|--------|---|-------|---|---|--------|--------------------|---------------------|
| 1 | 1.00 | 1 | 1 | 0 | -0.002 | 0 | 0.001 | 0 | t | 149449 | QYSQPQQ<br>PIS     | Mus<br>musculu<br>s |
| 1 | 1.00 | 1 | 1 | 0 | -0.002 | 0 | 0.001 | 0 | t | 149537 | YPSGQGFF<br>QP     | Mus<br>musculu<br>s |
| 1 | 1.00 | 1 | 1 | 0 | -0.002 | 0 | 0.001 | 0 | t | 149428 | QLQLQNP<br>SQQ     | Mus<br>musculu<br>s |
| 1 | 1.00 | 1 | 1 | 0 | -0.002 | 0 | 0.001 | 0 | t | 148872 | QQQQQIL<br>QQI     | Mus<br>musculu<br>s |
| 1 | 1.00 | 1 | 1 | 0 | -0.002 | 0 | 0.001 | 0 | t | 136596 | RHYQYNF<br>QHF     | Mus<br>musculu<br>s |
| 1 | 1.00 | 1 | 1 | 0 | -0.002 | 0 | 0.001 | 0 | t | 149496 | TIAPFGIFG<br>T     | Mus<br>musculu<br>s |
| 1 | 1.00 | 1 | 1 | 0 | -0.002 | 0 | 0.001 | 0 | t | 136219 | FEEYGKIDT<br>IEIIT | Mus<br>musculu<br>s |
| 1 | 1.00 | 1 | 1 | 0 | -0.002 | 0 | 0.001 | 0 | t | 149436 | QQHHHH<br>QEQK     | Mus<br>musculu<br>s |
| 1 | 1.00 | 1 | 1 | 0 | -0.002 | 0 | 0.001 | 0 | t | 149416 | PQQPISQ<br>QQQ     | Mus<br>musculu<br>s |
| 1 | 1.00 | 1 | 1 | 0 | -0.002 | 0 | 0.001 | 0 | t | 148771 | QKQQQLQQ<br>QQQ    | Mus<br>musculu<br>s |
| 1 | 1.00 | 1 | 1 | 0 | -0.002 | 0 | 0.001 | 0 | t | 136593 | RHYKQYQ<br>FHF     | Mus<br>musculu<br>s |
| 1 | 1.00 | 1 | 1 | 0 | -0.002 | 0 | 0.001 | 0 | t | 149441 | QQQQQQQ<br>QPLS    | Mus<br>musculu<br>s |
| 1 | 1.00 | 1 | 1 | 0 | -0.002 | 0 | 0.001 | 0 | t | 149519 | VRVPVPQL<br>QL     | Mus<br>musculu<br>s |



|   |      |   |   |   |        |   |       |   |   |        |                  |                     |
|---|------|---|---|---|--------|---|-------|---|---|--------|------------------|---------------------|
| 1 | 1.00 | 1 | 1 | 0 | -0.002 | 0 | 0.001 | 0 | t | 149435 | QPQYSQP<br>QQP   | Mus<br>musculu<br>s |
| 1 | 1.00 | 1 | 1 | 0 | -0.002 | 0 | 0.001 | 0 | t | 148780 | QLQPFQP<br>PQP   | Mus<br>musculu<br>s |
| 1 | 1.00 | 1 | 1 | 0 | -0.002 | 0 | 0.001 | 0 | t | 149317 | FQPQQLP<br>QFE   | Mus<br>musculu<br>s |
| 1 | 1.00 | 1 | 1 | 0 | -0.002 | 0 | 0.001 | 0 | t | 149535 | YPQPQPFL<br>PQ   | Mus<br>musculu<br>s |
| 1 | 1.00 | 1 | 1 | 0 | -0.002 | 0 | 0.001 | 0 | t | 149312 | FEEIRNLAL<br>Q   | Mus<br>musculu<br>s |
| 1 | 1.00 | 1 | 1 | 0 | -0.002 | 0 | 0.001 | 0 | t | 149425 | QGFFQPS<br>QQN   | Mus<br>musculu<br>s |
| 1 | 1.00 | 1 | 1 | 0 | -0.002 | 0 | 0.001 | 0 | t | 149315 | FLPQQPYP<br>QP   | Mus<br>musculu<br>s |
| 1 | 1.00 | 1 | 1 | 0 | -0.002 | 0 | 0.001 | 0 | t | 148599 | FPPQQPYP<br>QP   | Mus<br>musculu<br>s |
| 1 | 1.00 | 1 | 1 | 0 | -0.002 | 0 | 0.001 | 0 | t | 136303 | GARGLTG<br>RPGDA | Mus<br>musculu<br>s |
| 1 | 1.00 | 1 | 1 | 0 | -0.002 | 0 | 0.001 | 0 | t | 148680 | LQQQQQ<br>QQQQ   | Mus<br>musculu<br>s |
| 1 | 1.00 | 1 | 1 | 0 | -0.002 | 0 | 0.001 | 0 | t | 148875 | QQQQQQ<br>LQQQ   | Mus<br>musculu<br>s |
| 1 | 1.00 | 1 | 1 | 0 | -0.002 | 0 | 0.001 | 0 | t | 149328 | GSFQPQQ<br>LPQ   | Mus<br>musculu<br>s |
| 1 | 1.00 | 1 | 1 | 0 | -0.002 | 0 | 0.001 | 0 | t | 149512 | VLQESTYQ<br>LV   | Mus<br>musculu<br>s |

|   |      |   |   |   |        |   |       |   |   |        |                              |                                  |
|---|------|---|---|---|--------|---|-------|---|---|--------|------------------------------|----------------------------------|
| 1 | 1.00 | 1 | 1 | 0 | -0.002 | 0 | 0.001 | 0 | t | 149442 | QQYPSGQ<br>GFF               | Mus<br>musculu<br>s              |
| 1 | 1.00 | 1 | 1 | 0 | -0.002 | 0 | 0.001 | 0 | t | 148911 | QVSFQQP<br>QQQ               | Mus<br>musculu<br>s              |
| 1 | 1.00 | 1 | 1 | 0 | -0.002 | 0 | 0.001 | 0 | t | 149527 | WQIPEQS<br>RCQ               | Mus<br>musculu<br>s              |
| 1 | 1.00 | 1 | 1 | 0 | -0.002 | 0 | 0.001 | 0 | t | 149433 | QPLSQVSF<br>QQ               | Mus<br>musculu<br>s              |
| 1 | 1.00 | 1 | 1 | 0 | -0.002 | 0 | 0.001 | 0 | t | 149465 | SGQGFFQ<br>PSQ               | Mus<br>musculu<br>s              |
| 1 | 1.00 | 1 | 1 | 0 | -0.002 | 0 | 0.001 | 0 | t | 149473 | SQPQQPIS<br>QQ               | Mus<br>musculu<br>s              |
| 1 | 1.00 | 1 | 1 | 0 | -0.002 | 0 | 0.001 | 0 | t | 148917 | RDVVLQQ<br>HNI               | Mus<br>musculu<br>s              |
| 1 | 1.00 | 1 | 1 | 0 | -0.002 | 0 | 0.001 | 0 | t | 131101 | TDSEMDV<br>VRFDDDN<br>S      | Mus<br>musculu<br>s              |
| 1 | 1.00 | 1 | 1 | 0 | -0.004 | 0 | 0.001 | 0 | t | 131303 | PVPSTPPT<br>PSPSTPPT<br>PSPS | Oryctola<br>gus<br>cuniculu<br>s |
| 1 | 1.00 | 1 | 1 | 0 | -0.002 | 0 | 0.001 | 0 | t | 130816 | ESKAISDA<br>QITASSYFT<br>NM  | Mus<br>musculu<br>s              |
| 1 | 1.00 | 1 | 1 | 0 | -0.002 | 0 | 0.001 | 0 | t | 130885 | HQIALRME<br>VLGCEAQ<br>D     | Mus<br>musculu<br>s              |
| 1 | 1.00 | 1 | 1 | 0 | -0.002 | 0 | 0.001 | 0 | t | 132504 | NNAIEPRS<br>FSQNPPV          | Mus<br>musculu<br>s              |
| 1 | 1.00 | 1 | 1 | 0 | -0.002 | 0 | 0.001 | 0 | t | 107087 | ARGLTGRP<br>GDA              | Mus<br>musculu<br>s              |
| 1 | 1.00 | 1 | 1 | 0 | -0.002 | 0 | 0.001 | 0 | t | 100426 | QKLVFFAE<br>DV               | Mus<br>musculu<br>s              |

|   |      |   |   |   |        |   |       |   |   |        |                             |                      |
|---|------|---|---|---|--------|---|-------|---|---|--------|-----------------------------|----------------------|
| 1 | 1.00 | 1 | 1 | 0 | -0.002 | 0 | 0.001 | 0 | t | 107087 | ARGLTGRP<br>GDA             | Rattus<br>norvegicus |
| 1 | 1.00 | 1 | 1 | 0 | -0.002 | 0 | 0.001 | 0 | t | 99922  | DAEFRHDS<br>GY              | Mus<br>musculus      |
| 1 | 1.00 | 1 | 1 | 0 | -0.002 | 0 | 0.001 | 0 | t | 99922  | DAEFRHDS<br>GY              | Mus<br>musculus      |
| 1 | 1.00 | 1 | 1 | 0 | -0.002 | 0 | 0.001 | 0 | t | 64525  | TKAIINYQY<br>NQYTEEEK<br>NN | Mus<br>musculus      |
| 1 | 1.00 | 1 | 1 | 0 | -0.002 | 0 | 0.001 | 0 | t | 73893  | YFSIFNTEL<br>SQSNIEER<br>YK | Mus<br>musculus      |
| 1 | 1.00 | 1 | 1 | 0 | -0.002 | 0 | 0.001 | 0 | t | 73554  | YDKPYMYL<br>NLYDPNKY<br>VDV | Mus<br>musculus      |
| 1 | 1.00 | 1 | 1 | 0 | -0.002 | 0 | 0.001 | 0 | t | 73554  | YDKPYMYL<br>NLYDPNKY<br>VDV | Mus<br>musculus      |
| 1 | 1.00 | 1 | 1 | 0 | -0.002 | 0 | 0.001 | 0 | t | 74737  | YLKGPRGS<br>VMTTNIYL<br>NSS | Mus<br>musculus      |
| 1 | 1.00 | 1 | 1 | 0 | -0.002 | 0 | 0.001 | 0 | t | 64525  | TKAIINYQY<br>NQYTEEEK<br>NN | Mus<br>musculus      |
| 1 | 1.00 | 1 | 1 | 0 | -0.002 | 0 | 0.001 | 0 | t | 74737  | YLKGPRGS<br>VMTTNIYL<br>NSS | Mus<br>musculus      |
| 1 | 1.00 | 1 | 1 | 0 | -0.002 | 0 | 0.001 | 0 | t | 64525  | TKAIINYQY<br>NQYTEEEK<br>NN | Mus<br>musculus      |
| 1 | 1.00 | 1 | 1 | 0 | -0.002 | 0 | 0.001 | 0 | t | 74279  | YIKNIINTSI<br>LNLRYESN<br>H | Mus<br>musculus      |
| 1 | 1.00 | 1 | 1 | 0 | -0.002 | 0 | 0.001 | 0 | t | 73763  | YESNHLIDL<br>SRYASKINI<br>G | Mus<br>musculus      |

|   |      |   |   |   |        |   |       |   |   |       |                              |                     |
|---|------|---|---|---|--------|---|-------|---|---|-------|------------------------------|---------------------|
| 1 | 1.00 | 1 | 1 | 0 | -0.002 | 0 | 0.001 | 0 | t | 65481 | TNWLAKV<br>NTQIDLIRK<br>KMK  | Mus<br>musculu<br>s |
| 1 | 1.00 | 1 | 1 | 0 | -0.002 | 0 | 0.001 | 0 | t | 75391 | YPQPQFPF<br>SQ               | Mus<br>musculu<br>s |
| 1 | 1.00 | 1 | 1 | 0 | -0.002 | 0 | 0.001 | 0 | t | 65481 | TNWLAKV<br>NTQIDLIRK<br>KMK  | Mus<br>musculu<br>s |
| 1 | 1.00 | 1 | 1 | 0 | -0.002 | 0 | 0.001 | 0 | t | 73763 | YESNHLIDL<br>SRYASKINI<br>G  | Mus<br>musculu<br>s |
| 1 | 1.00 | 1 | 1 | 0 | -0.002 | 0 | 0.001 | 0 | t | 75691 | YRYNIYSEK<br>EKSININIDF<br>N | Mus<br>musculu<br>s |
| 1 | 1.00 | 1 | 1 | 0 | -0.002 | 0 | 0.001 | 0 | t | 75391 | YPQPQFPF<br>SQ               | Mus<br>musculu<br>s |
| 1 | 1.00 | 1 | 1 | 0 | -0.002 | 0 | 0.001 | 0 | t | 73763 | YESNHLIDL<br>SRYASKINI<br>G  | Mus<br>musculu<br>s |
| 1 | 1.00 | 1 | 1 | 0 | -0.002 | 0 | 0.001 | 0 | t | 74279 | YIKNIINTSI<br>LNLRYESN<br>H  | Mus<br>musculu<br>s |
| 1 | 1.00 | 1 | 1 | 0 | -0.002 | 0 | 0.001 | 0 | t | 64525 | TKAIINYQY<br>NQYTEEEK<br>NN  | Mus<br>musculu<br>s |
| 1 | 1.00 | 1 | 1 | 0 | -0.002 | 0 | 0.001 | 0 | t | 74279 | YIKNIINTSI<br>LNLRYESN<br>H  | Mus<br>musculu<br>s |
| 1 | 1.00 | 1 | 1 | 0 | -0.002 | 0 | 0.001 | 0 | t | 73763 | YESNHLIDL<br>SRYASKINI<br>G  | Mus<br>musculu<br>s |
| 1 | 1.00 | 1 | 1 | 0 | -0.002 | 0 | 0.001 | 0 | t | 64843 | TLIDINGKT<br>KSVFFEYNI<br>R  | Mus<br>musculu<br>s |

|   |      |   |   |   |        |   |       |   |   |       |                             |                                  |
|---|------|---|---|---|--------|---|-------|---|---|-------|-----------------------------|----------------------------------|
| 1 | 1.00 | 1 | 1 | 0 | -0.002 | 0 | 0.001 | 0 | t | 74849 | YLNSSLRY<br>GTKFIIKKY<br>AS | Mus<br>musculu<br>s              |
| 1 | 1.00 | 1 | 1 | 0 | -0.002 | 0 | 0.001 | 0 | t | 50945 | QGQQQPF<br>PPQ              | Mus<br>musculu<br>s              |
| 1 | 1.00 | 1 | 1 | 0 | -0.002 | 0 | 0.001 | 0 | t | 45124 | NNIILNLR<br>KDNNLIDL<br>SG  | Mus<br>musculu<br>s              |
| 1 | 1.00 | 1 | 1 | 0 | -0.002 | 0 | 0.001 | 0 | t | 50945 | QGQQQPF<br>PPQ              | Mus<br>musculu<br>s              |
| 1 | 1.00 | 1 | 1 | 0 | -0.002 | 0 | 0.001 | 0 | t | 56557 | RYIWIKYF<br>NLFDKELN<br>EKE | Mus<br>musculu<br>s              |
| 1 | 1.00 | 1 | 1 | 0 | -0.002 | 0 | 0.001 | 0 | t | 45130 | NNIMFKLD<br>GCRDTHR<br>YIWI | Mus<br>musculu<br>s              |
| 1 | 1.00 | 1 | 1 | 0 | -0.002 | 0 | 0.001 | 0 | t | 45130 | NNIMFKLD<br>GCRDTHR<br>YIWI | Mus<br>musculu<br>s              |
| 1 | 1.00 | 1 | 1 | 0 | -0.002 | 0 | 0.001 | 0 | t | 45130 | NNIMFKLD<br>GCRDTHR<br>YIWI | Mus<br>musculu<br>s              |
| 1 | 1.00 | 1 | 1 | 0 | 0.001  | 0 | 0.001 | 0 | t | 38273 | LNLTTWN<br>PTLLG            | Oryctola<br>gus<br>cuniculu<br>s |
| 1 | 1.00 | 1 | 1 | 0 | -0.002 | 0 | 0.001 | 0 | t | 43826 | NFENAFEI<br>AGASILLEF<br>IP | Mus<br>musculu<br>s              |
| 1 | 1.00 | 1 | 1 | 0 | -0.002 | 0 | 0.001 | 0 | t | 51908 | QPQPFP<br>QQP               | Mus<br>musculu<br>s              |
| 1 | 1.00 | 1 | 1 | 0 | -0.002 | 0 | 0.001 | 0 | t | 57874 | SFQQPQQ<br>QYP              | Mus<br>musculu<br>s              |

|   |      |   |   |   |        |   |       |   |   |       |                                 |                     |
|---|------|---|---|---|--------|---|-------|---|---|-------|---------------------------------|---------------------|
| 1 | 1.00 | 1 | 1 | 0 | 0.004  | 0 | 0.001 | 0 | t | 56657 | RYSRNAV<br>NV                   | Mus<br>musculu<br>s |
| 1 | 1.00 | 1 | 1 | 0 | 0.004  | 0 | 0.001 | 0 | t | 56657 | RYSRNAV<br>NV                   | Mus<br>musculu<br>s |
| 1 | 1.00 | 1 | 1 | 0 | -0.002 | 0 | 0.001 | 0 | t | 51908 | QPQPFPS<br>QQP                  | Mus<br>musculu<br>s |
| 1 | 1.00 | 1 | 1 | 0 | -0.002 | 0 | 0.001 | 0 | t | 44468 | NKCKMNL<br>QDNNGN<br>DIGFIG     | Mus<br>musculu<br>s |
| 1 | 1.00 | 1 | 1 | 0 | -0.002 | 0 | 0.001 | 0 | t | 44468 | NKCKMNL<br>QDNNGN<br>DIGFIG     | Mus<br>musculu<br>s |
| 1 | 1.00 | 1 | 1 | 0 | -0.002 | 0 | 0.001 | 0 | t | 53998 | RGTLLIGQV<br>DRLKDKV<br>NNTL    | Mus<br>musculu<br>s |
| 1 | 1.00 | 1 | 1 | 0 | -0.002 | 0 | 0.001 | 0 | t | 53998 | RGTLLIGQV<br>DRLKDKV<br>NNTL    | Mus<br>musculu<br>s |
| 1 | 1.00 | 1 | 1 | 0 | -0.002 | 0 | 0.001 | 0 | t | 53998 | RGTLLIGQV<br>DRLKDKV<br>NNTL    | Mus<br>musculu<br>s |
| 1 | 1.00 | 1 | 1 | 0 | -0.002 | 0 | 0.001 | 0 | t | 51997 | QPYPQPQ<br>PQY                  | Mus<br>musculu<br>s |
| 1 | 1.00 | 1 | 1 | 0 | -0.002 | 0 | 0.001 | 0 | t | 58886 | SKLNE<br>SINK<br>AMININKF<br>LN | Mus<br>musculu<br>s |
| 1 | 1.00 | 1 | 1 | 0 | -0.002 | 0 | 0.001 | 0 | t | 58886 | SKLNE<br>SINK<br>AMININKF<br>LN | Mus<br>musculu<br>s |
| 1 | 1.00 | 1 | 1 | 0 | -0.002 | 0 | 0.001 | 0 | t | 43525 | NDRVYINV<br>VVKNKEYR<br>LAT     | Mus<br>musculu<br>s |

|   |      |   |   |   |        |   |       |   |   |       |                             |                                  |
|---|------|---|---|---|--------|---|-------|---|---|-------|-----------------------------|----------------------------------|
| 1 | 1.00 | 1 | 1 | 0 | -0.002 | 0 | 0.001 | 0 | t | 43525 | NDRVYINV<br>VVKNKEYR<br>LAT | Mus<br>musculu<br>s              |
| 1 | 1.00 | 1 | 1 | 0 | -0.002 | 0 | 0.001 | 0 | t | 43525 | NDRVYINV<br>VVKNKEYR<br>LAT | Mus<br>musculu<br>s              |
| 1 | 1.00 | 1 | 1 | 0 | -0.002 | 0 | 0.001 | 0 | t | 43525 | NDRVYINV<br>VVKNKEYR<br>LAT | Mus<br>musculu<br>s              |
| 1 | 1.00 | 1 | 1 | 0 | -0.002 | 0 | 0.001 | 0 | t | 51830 | QPFPSQQ<br>PYL              | Mus<br>musculu<br>s              |
| 1 | 1.00 | 1 | 1 | 0 | -0.002 | 0 | 0.001 | 0 | t | 50814 | QFQGQQ<br>QFPF              | Mus<br>musculu<br>s              |
| 1 | 1.00 | 1 | 1 | 0 | -0.002 | 0 | 0.001 | 0 | t | 44491 | NKFLNQCS<br>VSYLMNS<br>MIPY | Mus<br>musculu<br>s              |
| 1 | 1.00 | 1 | 1 | 0 | -0.002 | 0 | 0.001 | 0 | t | 44491 | NKFLNQCS<br>VSYLMNS<br>MIPY | Mus<br>musculu<br>s              |
| 1 | 1.00 | 1 | 1 | 0 | -0.002 | 0 | 0.001 | 0 | t | 44491 | NKFLNQCS<br>VSYLMNS<br>MIPY | Mus<br>musculu<br>s              |
| 1 | 1.00 | 1 | 1 | 0 | -0.002 | 0 | 0.001 | 0 | t | 51906 | QPQPFPF<br>QLP              | Mus<br>musculu<br>s              |
| 1 | 1.00 | 1 | 1 | 0 | 0.001  | 0 | 0.001 | 0 | t | 51474 | QLPNVGIT<br>QGIV            | Oryctola<br>gus<br>cuniculu<br>s |
| 1 | 1.00 | 1 | 1 | 0 | -0.002 | 0 | 0.001 | 0 | t | 43438 | NDFPINELI<br>LDTDLISKI<br>E | Mus<br>musculu<br>s              |
| 1 | 1.00 | 1 | 1 | 0 | -0.002 | 0 | 0.001 | 0 | t | 45824 | NSGILKDF<br>WGDYLQY<br>DKPY | Mus<br>musculu<br>s              |

|   |      |   |   |   |        |   |       |   |   |       |                             |                     |
|---|------|---|---|---|--------|---|-------|---|---|-------|-----------------------------|---------------------|
| 1 | 1.00 | 1 | 1 | 0 | -0.002 | 0 | 0.001 | 0 | t | 45824 | NSGILKDF<br>WGDYLQY<br>DKPY | Mus<br>musculu<br>s |
| 1 | 1.00 | 1 | 1 | 0 | -0.002 | 0 | 0.001 | 0 | t | 51906 | QPQPFPP<br>QLP              | Mus<br>musculu<br>s |
| 1 | 1.00 | 1 | 1 | 0 | -0.002 | 0 | 0.001 | 0 | t | 57874 | SFQQPQQ<br>QYP              | Mus<br>musculu<br>s |
| 1 | 1.00 | 1 | 1 | 0 | -0.002 | 0 | 0.001 | 0 | t | 19297 | GEIIWTLQ<br>DTQEIKQR<br>VVF | Mus<br>musculu<br>s |
| 1 | 1.00 | 1 | 1 | 0 | -0.002 | 0 | 0.001 | 0 | t | 32595 | KNQIQLFN<br>LESSKIEVIL<br>K | Mus<br>musculu<br>s |
| 1 | 1.00 | 1 | 1 | 0 | -0.002 | 0 | 0.001 | 0 | t | 32595 | KNQIQLFN<br>LESSKIEVIL<br>K | Mus<br>musculu<br>s |
| 1 | 1.00 | 1 | 1 | 0 | -0.002 | 0 | 0.001 | 0 | t | 14730 | EVILKNAIV<br>YNSMYEN<br>FST | Mus<br>musculu<br>s |
| 1 | 1.00 | 1 | 1 | 0 | -0.002 | 0 | 0.001 | 0 | t | 32595 | KNQIQLFN<br>LESSKIEVIL<br>K | Mus<br>musculu<br>s |
| 1 | 1.00 | 1 | 1 | 0 | -0.002 | 0 | 0.001 | 0 | t | 14730 | EVILKNAIV<br>YNSMYEN<br>FST | Mus<br>musculu<br>s |
| 1 | 1.00 | 1 | 1 | 0 | -0.002 | 0 | 0.001 | 0 | t | 34621 | KYVDNQR<br>LLSTFTEYI<br>KNI | Mus<br>musculu<br>s |
| 1 | 1.00 | 1 | 1 | 0 | -0.002 | 0 | 0.001 | 0 | t | 19297 | GEIIWTLQ<br>DTQEIKQR<br>VVF | Mus<br>musculu<br>s |
| 1 | 1.00 | 1 | 1 | 0 | -0.002 | 0 | 0.001 | 0 | t | 33198 | KRNEKWD<br>EVYKYIVT<br>NWLA | Mus<br>musculu<br>s |



|   |      |   |   |   |        |   |       |   |   |       |                              |                     |
|---|------|---|---|---|--------|---|-------|---|---|-------|------------------------------|---------------------|
| 1 | 1.00 | 1 | 1 | 0 | -0.002 | 0 | 0.001 | 0 | t | 33198 | KRNEKWD<br>EVYKYIVT<br>NWL A | Mus<br>musculu<br>s |
| 1 | 1.00 | 1 | 1 | 0 | -0.002 | 0 | 0.001 | 0 | t | 17365 | FPQPQFP<br>PQ                | Mus<br>musculu<br>s |
| 1 | 1.00 | 1 | 1 | 0 | -0.002 | 0 | 0.001 | 0 | t | 27308 | ILSALEIPD<br>VGNLSQV<br>VVM  | Mus<br>musculu<br>s |
| 1 | 1.00 | 1 | 1 | 0 | -0.002 | 0 | 0.001 | 0 | t | 19297 | GEIIWTLQ<br>DTQEIKQR<br>VVF  | Mus<br>musculu<br>s |
| 1 | 1.00 | 1 | 1 | 0 | -0.002 | 0 | 0.001 | 0 | t | 13471 | ENFSTSFW<br>IRIPKYFNSI<br>S  | Mus<br>musculu<br>s |
| 1 | 1.00 | 1 | 1 | 0 | -0.002 | 0 | 0.001 | 0 | t | 27100 | ILIEMFNKY<br>NSEILNNII<br>L  | Mus<br>musculu<br>s |
| 1 | 1.00 | 1 | 1 | 0 | -0.002 | 0 | 0.001 | 0 | t | 27308 | ILSALEIPD<br>VGNLSQV<br>VVM  | Mus<br>musculu<br>s |
| 1 | 1.00 | 1 | 1 | 0 | -0.002 | 0 | 0.001 | 0 | t | 34612 | KYTMFHYL<br>RAQFEH<br>GKSR   | Mus<br>musculu<br>s |
| 1 | 1.00 | 1 | 1 | 0 | -0.002 | 0 | 0.001 | 0 | t | 28322 | IRIPKYKND<br>GIQNYIHN<br>EY  | Mus<br>musculu<br>s |
| 1 | 1.00 | 1 | 1 | 0 | -0.002 | 0 | 0.001 | 0 | t | 19297 | GEIIWTLQ<br>DTQEIKQR<br>VVF  | Mus<br>musculu<br>s |
| 1 | 1.00 | 1 | 1 | 0 | -0.002 | 0 | 0.001 | 0 | t | 31365 | KINIGSKV<br>NFDPIDKN<br>QIQ  | Mus<br>musculu<br>s |
| 1 | 1.00 | 1 | 1 | 0 | -0.002 | 0 | 0.001 | 0 | t | 17410 | FPSQQPYL<br>QL               | Mus<br>musculu<br>s |

|   |      |   |   |   |        |   |       |   |   |       |                              |                     |
|---|------|---|---|---|--------|---|-------|---|---|-------|------------------------------|---------------------|
| 1 | 1.00 | 1 | 1 | 0 | -0.002 | 0 | 0.001 | 0 | t | 32595 | KNQIQLFN<br>LESSKIEVIL<br>K  | Mus<br>musculu<br>s |
| 1 | 1.00 | 1 | 1 | 0 | -0.002 | 0 | 0.001 | 0 | t | 34612 | KYTMFHYL<br>RAQEFEH<br>GKSR  | Mus<br>musculu<br>s |
| 1 | 1.00 | 1 | 1 | 0 | -0.002 | 0 | 0.001 | 0 | t | 33198 | KRNEKWD<br>EVYKYIVT<br>NWL A | Mus<br>musculu<br>s |
| 1 | 1.00 | 1 | 1 | 0 | -0.002 | 0 | 0.001 | 0 | t | 28911 | ITGHRMA<br>WMMMM<br>NWS      | Mus<br>musculu<br>s |
| 1 | 1.00 | 1 | 1 | 0 | -0.002 | 0 | 0.001 | 0 | t | 34622 | KYVDVNN<br>VGIRGYM<br>YLKGP  | Mus<br>musculu<br>s |
| 1 | 1.00 | 1 | 1 | 0 | -0.002 | 0 | 0.001 | 0 | t | 34622 | KYVDVNN<br>VGIRGYM<br>YLKGP  | Mus<br>musculu<br>s |
| 1 | 1.00 | 1 | 1 | 0 | -0.002 | 0 | 0.001 | 0 | t | 11800 | EENISLDLI<br>QQYYLT FN<br>FD | Mus<br>musculu<br>s |
| 1 | 1.00 | 1 | 1 | 0 | -0.002 | 0 | 0.001 | 0 | t | 34622 | KYVDVNN<br>VGIRGYM<br>YLKGP  | Mus<br>musculu<br>s |
| 1 | 1.00 | 1 | 1 | 0 | -0.002 | 0 | 0.001 | 0 | t | 17365 | FPQPQPFP<br>PQ               | Mus<br>musculu<br>s |
| 1 | 1.00 | 1 | 1 | 0 | -0.002 | 0 | 0.001 | 0 | t | 34621 | KYVDNQR<br>LLSTFTEYI<br>KNI  | Mus<br>musculu<br>s |
| 1 | 1.00 | 1 | 1 | 0 | -0.002 | 0 | 0.001 | 0 | t | 11870 | EERYKIQSY<br>SEYLKDFW<br>GN  | Mus<br>musculu<br>s |
| 1 | 1.00 | 1 | 1 | 0 | -0.002 | 0 | 0.001 | 0 | t | 34622 | KYVDVNN<br>VGIRGYM<br>YLKGP  | Mus<br>musculu<br>s |
| 1 | 1.00 | 1 | 1 | 0 | -0.002 | 0 | 0.001 | 0 | t | 13471 | ENFSTSFW<br>IRIPKYFNSI<br>S  | Mus<br>musculu<br>s |

|   |      |   |   |   |        |   |       |   |   |       |                             |                     |
|---|------|---|---|---|--------|---|-------|---|---|-------|-----------------------------|---------------------|
| 1 | 1.00 | 1 | 1 | 0 | -0.002 | 0 | 0.001 | 0 | t | 17234 | FNSISLNN<br>EYTIINCM<br>ENN | Mus<br>musculu<br>s |
| 1 | 1.00 | 1 | 1 | 0 | -0.002 | 0 | 0.001 | 0 | t | 17234 | FNSISLNN<br>EYTIINCM<br>ENN | Mus<br>musculu<br>s |
| 1 | 1.00 | 1 | 1 | 0 | -0.002 | 0 | 0.001 | 0 | t | 17234 | FNSISLNN<br>EYTIINCM<br>ENN | Mus<br>musculu<br>s |
| 1 | 1.00 | 1 | 1 | 0 | -0.002 | 0 | 0.001 | 0 | t | 31365 | KINIGSKV<br>NFDPIDKN<br>QIQ | Mus<br>musculu<br>s |
| 1 | 1.00 | 1 | 1 | 0 | -0.014 | 0 | 0.001 | 0 | t | 7491  | DAEFRHDS<br>GYEVHHQ<br>K    | Macaca<br>mulatta   |
| 1 | 1.00 | 1 | 1 | 0 | -0.002 | 0 | 0.001 | 0 | t | 2720  | ALLNPSRV<br>YTFFSSDY<br>VKK | Mus<br>musculu<br>s |
| 1 | 1.00 | 1 | 1 | 0 | -0.002 | 0 | 0.001 | 0 | t | 2772  | ALNDLCIK<br>VNNWDLF<br>FSPS | Mus<br>musculu<br>s |
| 1 | 1.00 | 1 | 1 | 0 | -0.002 | 0 | 0.001 | 0 | t | 6650  | CMENNSG<br>WKVSLNY<br>GEIIW | Mus<br>musculu<br>s |
| 1 | 1.00 | 1 | 1 | 0 | -0.002 | 0 | 0.001 | 0 | t | 6650  | CMENNSG<br>WKVSLNY<br>GEIIW | Mus<br>musculu<br>s |
| 1 | 1.00 | 1 | 1 | 0 | -0.002 | 0 | 0.001 | 0 | t | 9863  | DQKPISNL<br>GNIHASN<br>NIMF | Mus<br>musculu<br>s |
| 1 | 1.00 | 1 | 1 | 0 | -0.002 | 0 | 0.001 | 0 | t | 2772  | ALNDLCIK<br>VNNWDLF<br>FSPS | Mus<br>musculu<br>s |
| 1 | 1.00 | 1 | 1 | 0 | -0.002 | 0 | 0.001 | 0 | t | 8770  | DIREVIAN<br>GEIIFKLDG<br>DI | Mus<br>musculu<br>s |
| 1 | 1.00 | 1 | 1 | 0 | -0.002 | 0 | 0.001 | 0 | t | 6650  | CMENNSG<br>WKVSLNY<br>GEIIW | Mus<br>musculu<br>s |

|   |      |   |   |       |        |        |       |        |   |        |                             |                        |
|---|------|---|---|-------|--------|--------|-------|--------|---|--------|-----------------------------|------------------------|
| 1 | 1.00 | 1 | 1 | 0     | -0.002 | 0      | 0.001 | 0      | t | 4528   | ASLKDALL<br>KYIYDNRG<br>TLI | Mus<br>musculu<br>s    |
| 1 | 1.00 | 1 | 1 | 0     | -0.002 | 0      | 0.001 | 0      | t | 4528   | ASLKDALL<br>KYIYDNRG<br>TLI | Mus<br>musculu<br>s    |
| 1 | 1.00 | 1 | 1 | -0.04 | -0.037 | -0.034 | -0.04 | -0.042 | t | 133539 | CYKPGEW<br>AC               | Mus<br>musculu<br>s    |
| 1 | 1.00 | 1 | 1 | -0.06 | -0.057 | -0.06  | -0.06 | -0.062 | t | 139725 | EMRTRIRY<br>NRRS            | Mus<br>musculu<br>s    |
| 1 | 1.00 | 1 | 1 | 0     | 0.009  | -0.003 | 0     | 0.002  | t | 12134  | EGCGWAG<br>WLL              | Pan<br>troglody<br>tes |
| 1 | 1.00 | 1 | 1 | 0.01  | 0.01   | 0.01   | 0.01  | 0.008  | t | 136301 | GALHQEPS<br>SNLF            | Gallus<br>gallus       |
| 1 | 1.00 | 1 | 1 | 0.04  | 0.04   | 0.04   | 0.04  | 0.04   | t | 135771 | TRVVGGE<br>D                | Homo<br>sapiens        |
| 1 | 1.00 | 1 | 1 | 0.04  | 0.04   | 0.04   | 0.04  | 0.04   | t | 115847 | LLYQEPVL<br>GP              | Homo<br>sapiens        |
| 1 | 1.00 | 1 | 1 | 0.02  | 0.02   | 0.02   | 0.02  | 0.02   | t | 135969 | PPEPRPRD<br>RSGL            | Homo<br>sapiens        |
| 1 | 1.00 | 1 | 1 | 0.02  | 0.02   | 0.02   | 0.02  | 0.02   | t | 121671 | NVKELLVA<br>SPLVDPF         | Mus<br>musculu<br>s    |
| 1 | 1.00 | 1 | 1 | 0.02  | 0.02   | 0.02   | 0.02  | 0.02   | t | 66241  | TSGTSGTS<br>GTSGTSG         | Homo<br>sapiens        |
| 1 | 1.00 | 1 | 1 | 0.02  | 0.02   | 0.02   | 0.02  | 0.02   | t | 66241  | TSGTSGTS<br>GTSGTSG         | Mus<br>musculu<br>s    |
| 1 | 1.00 | 1 | 1 | 0.02  | 0.02   | 0.02   | 0.02  | 0.02   | t | 11264  | ECSQAAPY<br>I               | Homo<br>sapiens        |
| 1 | 1.00 | 1 | 1 | 0     | 0      | 0      | 0     | 0      | t | 149079 | NLTQTQM                     | Sus<br>scrofa          |
| 1 | 1.00 | 1 | 1 | 0     | 0      | 0      | 0     | 0      | t | 135702 | KLTRAEAV                    | Homo<br>sapiens        |
| 1 | 1.00 | 1 | 1 | 0     | 0      | 0      | 0     | 0      | t | 103718 | VSVAVSEG<br>KPTEKHI         | Homo<br>sapiens        |
| 1 | 1.00 | 1 | 1 | 0     | 0      | 0      | 0     | 0      | t | 108557 | NLFTQTGT<br>P               | Homo<br>sapiens        |

|   |      |   |   |       |        |        |        |        |   |        |                              |                            |
|---|------|---|---|-------|--------|--------|--------|--------|---|--------|------------------------------|----------------------------|
| 1 | 1.00 | 1 | 1 | -0.02 | -0.02  | -0.02  | -0.02  | -0.02  | t | 149091 | NSTQMRI                      | Sus<br>scrofa              |
| 1 | 1.00 | 1 | 1 | -0.02 | -0.02  | -0.02  | -0.02  | -0.02  | t | 140590 | PYHLALAG<br>V                | Mus<br>musculu<br>s        |
| 1 | 1.00 | 1 | 1 | -0.02 | -0.02  | -0.02  | -0.02  | -0.02  | t | 119583 | GNVFSCSV                     | Homo<br>sapiens            |
| 1 | 1.00 | 1 | 1 | -0.02 | -0.02  | -0.02  | -0.02  | -0.02  | t | 119450 | FRKADKFP<br>M                | Homo<br>sapiens            |
| 1 | 1.00 | 1 | 1 | -0.02 | -0.02  | -0.02  | -0.02  | -0.02  | t | 42818  | MTKDCHL<br>LGTFDLSGI<br>PPAP | Canis<br>lupus             |
| 1 | 1.00 | 1 | 1 | 0     | 0      | 0.002  | 0      | 0      | t | 95750  | QYLYQGPI<br>VL               | Homo<br>sapiens            |
| 1 | 1.00 | 1 | 1 | -0.02 | -0.018 | -0.015 | -0.013 | -0.019 | t | 140648 | ALREYRKK<br>MDIPA            | Homo<br>sapiens            |
| 1 | 1.00 | 1 | 1 | 0.02  | 0.02   | 0.025  | 0.023  | 0.022  | t | 41052  | MAILGD                       | Homo<br>sapiens            |
| 1 | 1.00 | 1 | 1 | -0.01 | -0.01  | -0.017 | -0.01  | -0.009 | t | 105696 | CAPLKPAK<br>SA               | Mus<br>musculu<br>s        |
| 1 | 1.00 | 1 | 1 | -0.04 | -0.038 | -0.048 | -0.039 | -0.041 | t | 146178 | AYAPPGA<br>QPPTSrk           | Homo<br>sapiens            |
| 1 | 1.00 | 1 | 1 | -0.03 | -0.03  | -0.029 | -0.034 | -0.03  | t | 70522  | VPYVKRVK<br>TW               | Homo<br>sapiens            |
| 1 | 1.00 | 1 | 1 | -0.05 | -0.05  | -0.05  | -0.049 | -0.05  | t | 39132  | LRKYCI                       | Homo<br>sapiens            |
| 1 | 1.00 | 1 | 1 | 0.03  | 0.032  | 0.03   | 0.031  | 0.03   | t | 133661 | NYSPLHNS<br>DITV             | Homo<br>sapiens            |
| 1 | 1.00 | 1 | 1 | 0.03  | 0.035  | 0.023  | 0.031  | 0.03   | t | 36999  | LKQKALGL<br>LQTATKQA<br>EAAA | Homo<br>sapiens            |
| 1 | 1.00 | 1 | 1 | 0.02  | 0.02   | 0.02   | 0.022  | 0.02   | t | 32635  | KNVVTGE<br>VQVLYTA           | Homo<br>sapiens            |
| 1 | 1.00 | 1 | 1 | 0     | -0.001 | 0      | 0.003  | 0      | t | 130612 | SPNTAHIT<br>SKSL             | Camelus<br>dromed<br>arius |
| 1 | 1.00 | 1 | 1 | -0.01 | -0.01  | -0.01  | -0.01  | -0.01  | t | 106824 | SEFRHGL                      | Mus<br>musculu<br>s        |
| 1 | 1.00 | 1 | 1 | 0.01  | 0.01   | 0.01   | 0.01   | 0.009  | t | 24871  | HSVRGFTS<br>LFSA             | Homo<br>sapiens            |

|   |      |   |   |       |        |        |        |        |   |        |                              |                              |
|---|------|---|---|-------|--------|--------|--------|--------|---|--------|------------------------------|------------------------------|
| 1 | 1.00 | 1 | 1 | 0.02  | 0.023  | 0.02   | 0.02   | 0.022  | t | 111742 | RRETQ                        | Mus<br>musculus              |
| 1 | 1.00 | 1 | 1 | 0     | -0.004 | 0.001  | -0.003 | -0.002 | t | 32902  | KPTKKPTF<br>KTTKKDLK<br>PQ   | Oryctola<br>gus<br>cuniculus |
| 1 | 1.00 | 1 | 1 | 0.03  | 0.03   | 0.03   | 0.03   | 0.031  | t | 98986  | RKIRPEGR<br>EGEQEWG          | Homo<br>sapiens              |
| 1 | 1.00 | 1 | 1 | 0     | 0.004  | -0.005 | -0.003 | 0.002  | t | 60966  | SSEEIVPNS<br>V               | Homo<br>sapiens              |
| 1 | 1.00 | 1 | 1 | 0.02  | 0.018  | 0.02   | 0.019  | 0.02   | t | 39391  | LSGQPAVI<br>PDREVLYQ<br>QFDE | Mus<br>musculus              |
| 1 | 1.00 | 1 | 1 | -0.01 | -0.008 | -0.011 | -0.013 | -0.01  | t | 32708  | KPFQCAG<br>VALSRCTL          | Homo<br>sapiens              |
| 1 | 1.00 | 1 | 1 | 0.02  | 0.02   | 0.02   | 0.02   | 0.022  | t | 144676 | GTHPSLQF<br>T                | Mus<br>musculus              |
| 1 | 1.00 | 1 | 1 | 0.03  | 0.027  | 0.039  | 0.03   | 0.03   | t | 7998   | DEGKQSLT<br>K                | Oryctola<br>gus<br>cuniculus |
| 1 | 1.00 | 1 | 1 | 0.05  | 0.05   | 0.05   | 0.045  | 0.05   | t | 116085 | EPANPSEK                     | Mus<br>musculus              |
| 1 | 1.00 | 1 | 1 | 0     | -0.003 | 0      | 0      | -0.001 | t | 69178  | VKAETRLN<br>PDLQPT           | Oryctola<br>gus<br>cuniculus |
| 1 | 1.00 | 1 | 1 | 0     | -0.003 | 0      | 0      | -0.001 | t | 7491   | DAEFRHDS<br>GYEVHHQ<br>K     | Oryctola<br>gus<br>cuniculus |
| 1 | 1.00 | 1 | 1 | 0.02  | 0.018  | 0.013  | 0.017  | 0.017  | t | 138162 | EKKYSPCA<br>WEVVRAE          | Mus<br>musculus              |
| 1 | 1.00 | 1 | 1 | -0.01 | -0.006 | -0.01  | -0.009 | -0.01  | t | 17997  | FTKVCGAP<br>PCVIGGAG<br>NNTL | Homo<br>sapiens              |
| 1 | 1.00 | 1 | 1 | -0.01 | -0.01  | -0.011 | -0.01  | -0.01  | t | 6742   | CNYSKFW<br>YLEHAK            | Cavia<br>porcellus           |

|   |      |   |   |       |        |        |        |        |   |        |                     |                                  |
|---|------|---|---|-------|--------|--------|--------|--------|---|--------|---------------------|----------------------------------|
| 1 | 1.00 | 1 | 1 | -0.01 | -0.003 | -0.011 | -0.01  | -0.01  | t | 6742   | CNYSKFW<br>YLEHAK   | Cavia<br>porcellu<br>s           |
| 1 | 1.00 | 1 | 1 | -0.01 | -0.007 | -0.01  | -0.01  | -0.012 | t | 135458 | FGSDYEDR<br>YYR     | Mus<br>musculu<br>s              |
| 1 | 1.00 | 1 | 1 | -0.04 | -0.037 | -0.033 | -0.041 | -0.04  | t | 106882 | SWHHTVY             | Mus<br>musculu<br>s              |
| 1 | 1.00 | 1 | 1 | 0.01  | 0.01   | 0.01   | 0.01   | 0.01   | t | 146624 | WNWFDIT<br>N        | Homo<br>sapiens                  |
| 1 | 1.00 | 1 | 1 | 0.01  | 0.01   | 0.01   | 0.01   | 0.01   | t | 146624 | WNWFDIT<br>N        | Homo<br>sapiens                  |
| 1 | 1.00 | 1 | 1 | 0.05  | 0.05   | 0.05   | 0.05   | 0.05   | t | 119366 | TQGEAVLP<br>EEQDPNY | Homo<br>sapiens                  |
| 1 | 1.00 | 1 | 1 | 0.05  | 0.05   | 0.05   | 0.05   | 0.05   | t | 115920 | QNQECP<br>RCE       | Homo<br>sapiens                  |
| 1 | 1.00 | 1 | 1 | 0.03  | 0.03   | 0.03   | 0.03   | 0.03   | t | 106238 | AHILRWG<br>NES      | Homo<br>sapiens                  |
| 1 | 1.00 | 1 | 1 | 0.01  | 0.01   | 0.01   | 0.01   | 0.01   | t | 136566 | PYKYTFYK<br>YD      | Homo<br>sapiens                  |
| 1 | 1.00 | 1 | 1 | 0.01  | 0.01   | 0.01   | 0.01   | 0.01   | t | 137928 | LSADFTPG<br>TEYT    | Oryctola<br>gus<br>cuniculu<br>s |
| 1 | 1.00 | 1 | 1 | 0.01  | 0.01   | 0.01   | 0.01   | 0.01   | t | 123453 | LPKIKEYM<br>K       | Ovis<br>aries                    |
| 1 | 1.00 | 1 | 1 | 0.01  | 0.01   | 0.01   | 0.01   | 0.01   | t | 111567 | MRLETSK             | Homo<br>sapiens                  |
| 1 | 1.00 | 1 | 1 | 0.01  | 0.01   | 0.01   | 0.01   | 0.01   | t | 79565  | HFTTRLL             | Oryctola<br>gus<br>cuniculu<br>s |
| 1 | 1.00 | 1 | 1 | 0.01  | 0.01   | 0.01   | 0.01   | 0.01   | t | 78163  | GERLFT              | Equus<br>caballus                |

|   |      |   |   |       |        |        |        |        |   |        |                  |              |
|---|------|---|---|-------|--------|--------|--------|--------|---|--------|------------------|--------------|
| 1 | 1.00 | 1 | 1 | 0.01  | 0.01   | 0.01   | 0.01   | 0.01   | t | 45320  | NPDPDPN          | Mus musculus |
| 1 | 1.00 | 1 | 1 | -0.01 | -0.01  | -0.01  | -0.01  | -0.01  | t | 135643 | CPFGFEGK         | Homo sapiens |
| 1 | 1.00 | 1 | 1 | -0.01 | -0.01  | -0.01  | -0.01  | -0.01  | t | 114785 | ECLLCAHKVE       | Homo sapiens |
| 1 | 1.00 | 1 | 1 | -0.03 | -0.03  | -0.03  | -0.03  | -0.03  | t | 1698   | AGTK             | Mus musculus |
| 1 | 1.00 | 1 | 1 | -0.03 | -0.03  | -0.03  | -0.03  | -0.03  | t | 1698   | AGTK             | Mus musculus |
| 1 | 1.00 | 1 | 1 | -0.05 | -0.05  | -0.05  | -0.05  | -0.05  | t | 137546 | LSVCFLILFHGCLAS  | Homo sapiens |
| 1 | 1.00 | 1 | 1 | -0.02 | -0.02  | -0.02  | -0.02  | -0.02  | t | 105918 | LAPRVARQL        | Bos taurus   |
| 1 | 1.00 | 1 | 1 | 0     | 0      | 0      | 0      | 0.003  | t | 107479 | KFNWYVD          | Mus musculus |
| 1 | 1.00 | 1 | 1 | 0.01  | 0.012  | 0.01   | 0.013  | 0.012  | t | 96455  | KGKNVLINKD       | Homo sapiens |
| 1 | 1.00 | 1 | 1 | 0.02  | 0.018  | 0.032  | 0.023  | 0.019  | t | 78379  | FEPSKSISGVSHYLL  | Mus musculus |
| 1 | 1.00 | 1 | 1 | 0.01  | 0.008  | 0.01   | 0.007  | 0.01   | t | 74488  | YKPLGALTH        | Mus musculus |
| 1 | 1.00 | 1 | 1 | 0     | 0.004  | -0.002 | 0.003  | 0      | t | 135917 | EIRRGVMLAVDA     | Homo sapiens |
| 1 | 1.00 | 1 | 1 | 0.02  | 0.022  | 0.03   | 0.023  | 0.018  | t | 28377  | IRQLLWFHISCL     | Homo sapiens |
| 1 | 1.00 | 1 | 1 | -0.01 | -0.006 | -0.016 | -0.007 | -0.008 | t | 8930   | DKLKQQRDTLSTQKET | Homo sapiens |
| 1 | 1.00 | 1 | 1 | 0.06  | 0.058  | 0.053  | 0.053  | 0.06   | t | 121812 | RRATQLAH         | Mus musculus |



|   |      |   |   |       |        |        |        |        |   |        |                              |                                  |
|---|------|---|---|-------|--------|--------|--------|--------|---|--------|------------------------------|----------------------------------|
| 1 | 1.00 | 1 | 1 | 0.01  | 0.01   | 0.01   | 0.006  | 0.012  | t | 132112 | VLLPAVDF<br>SL               | Homo<br>sapiens                  |
| 1 | 1.00 | 1 | 1 | 0     | 0      | 0.005  | 0      | 0      | t | 56     | AAARTTS                      | Homo<br>sapiens                  |
| 1 | 1.00 | 1 | 1 | 0.04  | 0.026  | 0.055  | 0.04   | 0.038  | t | 61549  | STDEPAGE<br>SA               | Oryctola<br>gus<br>cuniculu<br>s |
| 1 | 1.00 | 1 | 1 | 0.04  | 0.026  | 0.055  | 0.04   | 0.038  | t | 61549  | STDEPAGE<br>SA               | Oryctola<br>gus<br>cuniculu<br>s |
| 1 | 1.00 | 1 | 1 | 0.04  | 0.036  | 0.055  | 0.04   | 0.038  | t | 61549  | STDEPAGE<br>SA               | Oryctola<br>gus<br>cuniculu<br>s |
| 1 | 1.00 | 1 | 1 | -0.02 | -0.018 | -0.003 | -0.013 | -0.023 | t | 113010 | GRVSTEVD<br>ARLSFDK          | Homo<br>sapiens                  |
| 1 | 1.00 | 1 | 1 | 0     | 0      | 0      | -0.002 | -0.002 | t | 24694  | HRMAWD<br>MMM                | Homo<br>sapiens                  |
| 1 | 1.00 | 1 | 1 | -0.04 | -0.038 | -0.04  | -0.033 | -0.038 | t | 108152 | TCPPCPAP<br>ELLGG            | Homo<br>sapiens                  |
| 1 | 1.00 | 1 | 1 | 0     | 0.002  | 0      | 0      | 0      | t | 118060 | PPPGMRP<br>P                 | Homo<br>sapiens                  |
| 1 | 1.00 | 1 | 1 | 0     | -0.004 | -0.006 | 0      | 0      | t | 20046  | GGTEESVV<br>TASRS            | Bos<br>taurus                    |
| 1 | 1.00 | 1 | 1 | 0     | -0.004 | -0.006 | 0      | 0      | t | 20046  | GGTEESVV<br>TASRS            | Bos<br>taurus                    |
| 1 | 1.00 | 1 | 1 | 0.03  | 0.033  | 0.032  | 0.03   | 0.03   | t | 107307 | DAEFGHD<br>SGF               | Mus<br>musculu<br>s              |
| 1 | 1.00 | 1 | 1 | 0     | 0      | 0      | 0      | 0      | t | 43548  | NDYEDRYY<br>RE               | Mus<br>musculu<br>s              |
| 1 | 1.00 | 1 | 1 | 0     | 0      | 0      | 0      | 0      | t | 37171  | LLDPSFDY<br>FQLYTT           | Mus<br>musculu<br>s              |
| 1 | 1.00 | 1 | 1 | 0.01  | 0.01   | -0.001 | 0.01   | 0.012  | t | 153469 | STETGNQ<br>HHYQTRV<br>VSNANK | Mus<br>musculu<br>s              |

|   |      |   |   |       |       |       |        |       |   |        |                     |                                  |
|---|------|---|---|-------|-------|-------|--------|-------|---|--------|---------------------|----------------------------------|
| 1 | 1.00 | 1 | 1 | -0.01 | -0.01 | -0.01 | -0.011 | -0.01 | t | 72320  | WDMMM<br>NW         | Homo<br>sapiens                  |
| 1 | 1.00 | 1 | 1 | 0.04  | 0.04  | 0.04  | 0.04   | 0.04  | t | 130761 | CSRTSSRT<br>C       | Homo<br>sapiens                  |
| 1 | 1.00 | 1 | 1 | 0.04  | 0.04  | 0.04  | 0.04   | 0.04  | t | 113978 | TVTTVTTH<br>NN      | Oryctola<br>gus<br>cuniculu<br>s |
| 1 | 1.00 | 1 | 1 | 0.04  | 0.04  | 0.04  | 0.04   | 0.04  | t | 115882 | PFAQTQSL<br>VY      | Homo<br>sapiens                  |
| 1 | 1.00 | 1 | 1 | 0.04  | 0.04  | 0.04  | 0.04   | 0.04  | t | 117386 | TRPINTAQ<br>CGDC    | Homo<br>sapiens                  |
| 1 | 1.00 | 1 | 1 | 0.05  | 0.044 | 0.043 | 0.043  | 0.052 | t | 127864 | TLGPSACA<br>PVPA    | Trichosu<br>rus<br>vulpecul<br>a |
| 1 | 1.00 | 1 | 1 | 0.02  | 0.02  | 0.02  | 0.02   | 0.02  | t | 98710  | CLVRTPEV<br>DD      | Homo<br>sapiens                  |
| 1 | 1.00 | 1 | 1 | 0.02  | 0.02  | 0.02  | 0.02   | 0.02  | t | 115606 | GEGKVTLR<br>IRNV    | Homo<br>sapiens                  |
| 1 | 1.00 | 1 | 1 | 0.02  | 0.02  | 0.02  | 0.02   | 0.02  | t | 99580  | QPRQEERE<br>FSPRGQH | Homo<br>sapiens                  |
| 1 | 1.00 | 1 | 1 | 0     | 0     | 0     | 0      | 0     | t | 137448 | SHKLHKV             | Mus<br>musculu<br>s              |
| 1 | 1.00 | 1 | 1 | 0     | 0     | 0     | 0      | 0     | t | 136138 | APYDTPW<br>PSPSL    | Gallus<br>gallus                 |
| 1 | 1.00 | 1 | 1 | 0     | 0     | 0     | 0      | 0     | t | 134789 | RRQGWLK<br>EIRKLQKS | Homo<br>sapiens                  |
| 1 | 1.00 | 1 | 1 | 0     | 0     | 0     | 0      | 0     | t | 149094 | QPPNITQ             | Sus<br>scrofa                    |
| 1 | 1.00 | 1 | 1 | 0     | 0     | 0     | 0      | 0     | t | 149087 | NPTQSPP             | Sus<br>scrofa                    |
| 1 | 1.00 | 1 | 1 | 0     | 0     | 0     | 0      | 0     | t | 121968 | VFTPRPPD<br>NYKVIPS | Mus<br>musculu<br>s              |
| 1 | 1.00 | 1 | 1 | 0     | 0     | 0     | 0      | 0     | t | 121968 | VFTPRPPD<br>NYKVIPS | Mus<br>musculu<br>s              |
| 1 | 1.00 | 1 | 1 | 0     | 0     | 0     | 0      | 0     | t | 123043 | ASFGAGD<br>AP       | Ovis<br>aries                    |
| 1 | 1.00 | 1 | 1 | 0     | 0     | 0     | 0      | 0     | t | 103291 | ITSAGRHP<br>DSDIFLD | Homo<br>sapiens                  |
| 1 | 1.00 | 1 | 1 | 0     | 0     | 0     | 0      | 0     | t | 78161  | GDDRFLF             | Equus<br>caballus                |

|   |      |   |   |       |        |        |        |       |   |        |                              |                                  |
|---|------|---|---|-------|--------|--------|--------|-------|---|--------|------------------------------|----------------------------------|
| 1 | 1.00 | 1 | 1 | 0     | 0      | 0      | 0      | 0     | t | 51672  | QNAPQVE<br>NAPQAQ            | Bos<br>taurus                    |
| 1 | 1.00 | 1 | 1 | 0     | 0      | 0      | 0      | 0     | t | 51670  | QNAPQAQ<br>NAPQVE            | Bos<br>taurus                    |
| 1 | 1.00 | 1 | 1 | -0.02 | -0.02  | -0.02  | -0.02  | -0.02 | t | 158620 | VLNWHPF                      | Homo<br>sapiens                  |
| 1 | 1.00 | 1 | 1 | -0.02 | -0.02  | -0.02  | -0.02  | -0.02 | t | 158620 | VLNWHPF                      | Homo<br>sapiens                  |
| 1 | 1.00 | 1 | 1 | -0.02 | -0.02  | -0.02  | -0.02  | -0.02 | t | 107587 | QYNSTYR                      | Homo<br>sapiens                  |
| 1 | 1.00 | 1 | 1 | 0.05  | 0.052  | 0.05   | 0.057  | 0.052 | t | 139612 | SRGSESGIF<br>TNTKES          | Homo<br>sapiens                  |
| 1 | 1.00 | 1 | 1 | 0.04  | 0.04   | 0.039  | 0.043  | 0.038 | t | 47304  | PEHRGGP<br>EEFEGAGD<br>GEPPE | Homo<br>sapiens                  |
| 1 | 1.00 | 1 | 1 | 0.03  | 0.03   | 0.023  | 0.03   | 0.03  | t | 119449 | ETPGQKYK<br>ETDLLILFK<br>DDY | Homo<br>sapiens                  |
| 1 | 1.00 | 1 | 1 | -0.01 | -0.006 | -0.012 | -0.003 | -0.01 | t | 49763  | PTRAETRE<br>ERMERKR<br>REKIE | Homo<br>sapiens                  |
| 1 | 1.00 | 1 | 1 | 0     | 0.004  | 0      | 0.001  | 0.001 | t | 51391  | QLKLNW                       | Homo<br>sapiens                  |
| 1 | 1.00 | 1 | 1 | 0.02  | 0.022  | 0.025  | 0.021  | 0.02  | t | 65482  | TNWQKLE                      | Homo<br>sapiens                  |
| 1 | 1.00 | 1 | 1 | 0.03  | 0.028  | 0.027  | 0.033  | 0.032 | t | 76395  | YVRFDLEL<br>TFVITST          | Mus<br>musculu<br>s              |
| 1 | 1.00 | 1 | 1 | 0     | 0      | -0.001 | 0      | 0     | t | 137944 | PGTEYT                       | Oryctola<br>gus<br>cuniculu<br>s |
| 1 | 1.00 | 1 | 1 | 0     | 0      | -0.001 | 0      | 0     | t | 137944 | PGTEYT                       | Oryctola<br>gus<br>cuniculu<br>s |
| 1 | 1.00 | 1 | 1 | 0.02  | 0.022  | 0.009  | 0.017  | 0.021 | t | 1577   | AGKLGTVS<br>YGEEKPA          | Homo<br>sapiens                  |

|   |      |   |   |       |        |        |        |        |   |        |                              |                                  |
|---|------|---|---|-------|--------|--------|--------|--------|---|--------|------------------------------|----------------------------------|
| 1 | 1.00 | 1 | 1 | -0.02 | -0.017 | -0.021 | -0.02  | -0.022 | t | 94743  | YGTDEWE<br>QWW               | Mus<br>musculu<br>s              |
| 1 | 1.00 | 1 | 1 | 0     | 0.002  | 0.005  | 0.003  | 0      | t | 52594  | QTPPCPIE<br>HCPSFYQ          | Homo<br>sapiens                  |
| 1 | 1.00 | 1 | 1 | -0.01 | 0.002  | -0.01  | -0.013 | -0.01  | t | 156909 | LAHPFTP                      | Gallus<br>gallus                 |
| 1 | 1.00 | 1 | 1 | -0.01 | -0.01  | -0.01  | -0.01  | -0.01  | t | 156861 | DSQKPCKC<br>HCTMTQ           | Gallus<br>gallus                 |
| 1 | 1.00 | 1 | 1 | -0.01 | -0.009 | -0.009 | -0.009 | -0.01  | t | 55001  | RNIGLSGN<br>PF               | Homo<br>sapiens                  |
| 1 | 1.00 | 1 | 1 | 0.01  | 0.01   | 0.01   | 0.01   | 0.01   | t | 119579 | FKDYSSVV<br>RPVEDHR<br>Q     | Homo<br>sapiens                  |
| 1 | 1.00 | 1 | 1 | 0.03  | 0.028  | 0.023  | 0.023  | 0.03   | t | 108202 | VVSHFND                      | Mus<br>musculu<br>s              |
| 1 | 1.00 | 1 | 1 | -0.02 | -0.024 | -0.029 | -0.027 | -0.022 | t | 117399 | VMIKSLPA<br>LNSPTVEE         | Oryctola<br>gus<br>cuniculu<br>s |
| 1 | 1.00 | 1 | 1 | -0.04 | -0.038 | -0.039 | -0.041 | -0.04  | t | 60544  | SQRTRDIYI<br>SR              | Cavia<br>porcellu<br>s           |
| 1 | 1.00 | 1 | 1 | -0.04 | -0.044 | -0.039 | -0.041 | -0.04  | t | 60544  | SQRTRDIYI<br>SR              | Oryctola<br>gus<br>cuniculu<br>s |
| 1 | 1.00 | 1 | 1 | -0.02 | -0.023 | -0.012 | -0.02  | -0.019 | t | 62147  | SVGPPH                       | Mus<br>musculu<br>s              |
| 1 | 1.00 | 1 | 1 | -0.02 | -0.018 | -0.021 | -0.02  | -0.018 | t | 50836  | QGAWPA<br>GA                 | Anas<br>platyrhy<br>nchos        |
| 1 | 1.00 | 1 | 1 | 0.05  | 0.05   | 0.05   | 0.05   | 0.05   | t | 123161 | EYLGEEYE<br>E                | Ovis<br>aries                    |
| 1 | 1.00 | 1 | 1 | 0.05  | 0.05   | 0.05   | 0.05   | 0.05   | t | 115544 | VNELSKDI<br>GSESTEDQ<br>AMED | Homo<br>sapiens                  |
| 1 | 1.00 | 1 | 1 | 0.03  | 0.03   | 0.03   | 0.03   | 0.03   | t | 127729 | LRWAERQ<br>VGALGAES          | Homo<br>sapiens                  |
| 1 | 1.00 | 1 | 1 | 0.01  | 0.01   | 0.01   | 0.01   | 0.01   | t | 139939 | VLPWPWE                      | Ovis<br>aries                    |

|   |      |   |   |       |        |       |        |        |   |        |                              |                       |
|---|------|---|---|-------|--------|-------|--------|--------|---|--------|------------------------------|-----------------------|
| 1 | 1.00 | 1 | 1 | 0.01  | 0.01   | 0.01  | 0.01   | 0.01   | t | 119625 | PENNYKTT                     | Homo sapiens          |
| 1 | 1.00 | 1 | 1 | 0.01  | 0.01   | 0.01  | 0.01   | 0.01   | t | 129173 | KVEAKEES<br>EESDEDM          | Homo sapiens          |
| 1 | 1.00 | 1 | 1 | 0.01  | 0.01   | 0.01  | 0.01   | 0.01   | t | 102245 | YNMPALL                      | Homo sapiens          |
| 1 | 1.00 | 1 | 1 | 0.01  | 0.01   | 0.01  | 0.01   | 0.01   | t | 101932 | NNGGCDA<br>DA                | Homo sapiens          |
| 1 | 1.00 | 1 | 1 | 0.01  | 0.01   | 0.01  | 0.01   | 0.01   | t | 45434  | NPNPDPN                      | Mus musculus          |
| 1 | 1.00 | 1 | 1 | 0.01  | 0.01   | 0.01  | 0.01   | 0.01   | t | 41333  | MEECPSHL<br>PYIEQGM<br>QLAEQ | Homo sapiens          |
| 1 | 1.00 | 1 | 1 | 0.01  | 0.007  | 0.01  | 0.01   | 0.01   | t | 35234  | LDNIKDNV<br>GKMEDIYK<br>KNKT | Oryctolagus cuniculus |
| 1 | 1.00 | 1 | 1 | 0.01  | 0.01   | 0.01  | 0.01   | 0.01   | t | 35234  | LDNIKDNV<br>GKMEDIYK<br>KNKT | Mus musculus          |
| 1 | 1.00 | 1 | 1 | 0.01  | 0.01   | 0.01  | 0.01   | 0.01   | t | 35234  | LDNIKDNV<br>GKMEDIYK<br>KNKT | Mus musculus          |
| 1 | 1.00 | 1 | 1 | 0.01  | 0.01   | 0.01  | 0.01   | 0.01   | t | 35234  | LDNIKDNV<br>GKMEDIYK<br>KNKT | Oryctolagus cuniculus |
| 1 | 1.00 | 1 | 1 | 0     | -0.002 | 0     | -0.007 | -0.003 | t | 122775 | GIFNTGLK<br>MFPDLTK<br>VYST  | Mus musculus          |
| 1 | 1.00 | 1 | 1 | -0.01 | -0.01  | -0.01 | -0.01  | -0.01  | t | 114886 | LCGSDNKT<br>YG               | Homo sapiens          |
| 1 | 1.00 | 1 | 1 | -0.01 | -0.01  | -0.01 | -0.01  | -0.01  | t | 93039  | ITSKQVDD<br>LI               | Ovis aries            |
| 1 | 1.00 | 1 | 1 | 0.03  | 0.03   | 0.04  | 0.029  | 0.027  | t | 68052  | VDQYSNQ<br>NNF               | Oryctolagus cuniculus |
| 1 | 1.00 | 1 | 1 | 0     | 0.004  | 0     | 0.001  | 0      | t | 137919 | LGQNVLSA                     | Homo sapiens          |

|   |      |   |   |       |        |        |       |       |   |        |                     |                                  |
|---|------|---|---|-------|--------|--------|-------|-------|---|--------|---------------------|----------------------------------|
| 1 | 1.00 | 1 | 1 | 0.02  | 0.02   | 0.016  | 0.02  | 0.022 | t | 17368  | FPQPQQT<br>FPQ      | Mus<br>musculu<br>s              |
| 1 | 1.00 | 1 | 1 | 0.01  | 0.01   | 0.014  | 0.01  | 0.008 | t | 68969  | VIGHEITH<br>GFD     | Oryctola<br>gus<br>cuniculu<br>s |
| 1 | 1.00 | 1 | 1 | 0.03  | 0.028  | 0.037  | 0.027 | 0.03  | t | 11692  | EEINTLQN            | Anas<br>platyrhy<br>nchos        |
| 1 | 1.00 | 1 | 1 | 0     | 0      | 0      | 0     | 0     | t | 21352  | GMTFRAQ<br>EGA      | Homo<br>sapiens                  |
| 1 | 1.00 | 1 | 1 | -0.01 | -0.013 | -0.01  | -0.01 | -0.01 | t | 40152  | LTRILTIPQ<br>SLDSW  | Oryctola<br>gus<br>cuniculu<br>s |
| 1 | 1.00 | 1 | 1 | 0     | 0      | 0      | 0     | 0     | t | 130437 | AFRGHIAR<br>EE      | Macaca                           |
| 1 | 1.00 | 1 | 1 | 0     | -0.001 | 0      | 0     | 0     | t | 130437 | AFRGHIAR<br>EE      | Macaca                           |
| 1 | 1.00 | 1 | 1 | 0     | 0      | 0      | 0     | 0     | t | 130437 | AFRGHIAR<br>EE      | Papio                            |
| 1 | 1.00 | 1 | 1 | -0.01 | -0.013 | -0.013 | -0.01 | -0.01 | t | 97166  | AAIVVGSA<br>A       | Oryctola<br>gus<br>cuniculu<br>s |
| 1 | 1.00 | 1 | 1 | 0.01  | 0.01   | 0.012  | 0.01  | 0.01  | t | 32971  | KQELDEIST<br>NIRQAG | Mus<br>musculu<br>s              |
| 1 | 1.00 | 1 | 1 | 0.02  | 0.02   | 0.02   | 0.02  | 0.02  | t | 105152 | DVT                 | Oryctola<br>gus<br>cuniculu<br>s |
| 1 | 1.00 | 1 | 1 | 0     | 0      | 0      | 0     | 0     | t | 35006  | LAVLLGAC            | Oryctola<br>gus<br>cuniculu<br>s |
| 1 | 1.00 | 1 | 1 | 0.03  | 0.03   | 0.032  | 0.033 | 0.03  | t | 40619  | LVTVNPV<br>SVATANS  | Homo<br>sapiens                  |
| 1 | 1.00 | 1 | 1 | 0.03  | 0.03   | 0.032  | 0.033 | 0.03  | t | 40619  | LVTVNPV<br>SVATANS  | Homo<br>sapiens                  |
| 1 | 1.00 | 1 | 1 | 0     | 0      | -0.007 | 0     | 0.001 | t | 124601 | QGPGLTD<br>WLFPRR   | Mus<br>musculu<br>s              |

|   |      |   |   |       |        |        |       |       |   |        |                             |                                  |
|---|------|---|---|-------|--------|--------|-------|-------|---|--------|-----------------------------|----------------------------------|
| 1 | 1.00 | 1 | 1 | -0.01 | -0.008 | -0.012 | -0.01 | -0.01 | t | 118579 | RDMLLAN<br>KVPAAR<br>A      | Homo<br>sapiens                  |
| 1 | 1.00 | 1 | 1 | 0.01  | 0.01   | 0.01   | 0.01  | 0.011 | t | 153838 | HQKRTAM<br>FQDPQER          | Cavia<br>porcellu<br>s           |
| 1 | 1.00 | 1 | 1 | 0.01  | 0.008  | -0.008 | 0.013 | 0.015 | t | 46444  | NVPEKQT<br>RGIFGAIA<br>GFIE | Mus<br>musculu<br>s              |
| 1 | 1.00 | 1 | 1 | 0     | 0      | 0      | 0     | 0     | t | 94637  | PACGRHYS<br>C               | Oryctola<br>gus<br>cuniculu<br>s |
| 1 | 1.00 | 1 | 1 | 0     | 0      | 0      | 0     | 0     | t | 94637  | PACGRHYS<br>C               | Capra<br>hircus                  |
| 1 | 1.00 | 1 | 1 | 0.01  | 0.01   | 0.01   | 0.01  | 0.012 | t | 10486  | DTSNKFAD                    | Oryctola<br>gus<br>cuniculu<br>s |
| 1 | 1.00 | 1 | 1 | 0     | 0      | 0.002  | 0     | 0     | t | 95713  | QKIVAPVK                    | Bos<br>taurus                    |
| 1 | 1.00 | 1 | 1 | 0     | 0      | 0.002  | 0     | 0     | t | 95713  | QKIVAPVK                    | Cavia<br>porcellu<br>s           |
| 1 | 1.00 | 1 | 1 | 0     | -0.008 | 0.002  | 0     | 0     | t | 95713  | QKIVAPVK                    | Bos<br>taurus                    |
| 1 | 1.00 | 1 | 1 | 0.04  | 0.04   | 0.04   | 0.04  | 0.04  | t | 150980 | ETPSSDNG<br>TCYPGDF         | Homo<br>sapiens                  |
| 1 | 1.00 | 1 | 1 | 0.04  | 0.04   | 0.04   | 0.04  | 0.04  | t | 118567 | QIEKRIQEII<br>EQL           | Homo<br>sapiens                  |
| 1 | 1.00 | 1 | 1 | 0.04  | 0.04   | 0.04   | 0.04  | 0.04  | t | 40019  | LTLNMDS<br>GQ               | Rattus<br>norvegic<br>us         |
| 1 | 1.00 | 1 | 1 | 0.02  | 0.02   | 0.02   | 0.02  | 0.02  | t | 121671 | NVKELLVA<br>SPLVDPF         | Mus<br>musculu<br>s              |
| 1 | 1.00 | 1 | 1 | 0.02  | 0.02   | 0.02   | 0.02  | 0.02  | t | 115883 | PFPGPIN<br>SL               | Homo<br>sapiens                  |

|   |      |   |   |       |        |       |        |        |   |        |                              |                                  |
|---|------|---|---|-------|--------|-------|--------|--------|---|--------|------------------------------|----------------------------------|
| 1 | 1.00 | 1 | 1 | 0.02  | 0.02   | 0.02  | 0.02   | 0.02   | t | 91742  | NCIIIEYGK<br>QNPDSKL         | Oryctola<br>gus<br>cuniculu<br>s |
| 1 | 1.00 | 1 | 1 | 0.02  | 0.02   | 0.02  | 0.02   | 0.02   | t | 17589  | FRGETKTF<br>NPEEVSS          | Homo<br>sapiens                  |
| 1 | 1.00 | 1 | 1 | 0.02  | 0.02   | 0.02  | 0.02   | 0.02   | t | 17589  | FRGETKTF<br>NPEEVSS          | Homo<br>sapiens                  |
| 1 | 1.00 | 1 | 1 | 0     | 0      | 0     | 0      | 0      | t | 133950 | WIFANF                       | Mus<br>musculu<br>s              |
| 1 | 1.00 | 1 | 1 | 0     | 0      | 0     | 0      | 0      | t | 106438 | GDFKRTT                      | Mus<br>musculu<br>s              |
| 1 | 1.00 | 1 | 1 | 0     | 0      | 0     | 0      | 0      | t | 101937 | NPNPTCN<br>EN                | Homo<br>sapiens                  |
| 1 | 1.00 | 1 | 1 | 0     | 0      | 0     | 0      | 0      | t | 110604 | GLTGRPG<br>DAGPQGK<br>V      | Mus<br>musculu<br>s              |
| 1 | 1.00 | 1 | 1 | -0.02 | -0.02  | -0.02 | -0.02  | -0.02  | t | 78283  | TLSNLTHV                     | Homo<br>sapiens                  |
| 1 | 1.00 | 1 | 1 | -0.04 | -0.04  | -0.04 | -0.04  | -0.04  | t | 115938 | RDMPIQA<br>FLL               | Homo<br>sapiens                  |
| 1 | 1.00 | 1 | 1 | 0.02  | 0.02   | 0.02  | 0.02   | 0.019  | t | 153379 | EQEIFTNIT<br>DRV             | Mus<br>musculu<br>s              |
| 1 | 1.00 | 1 | 1 | 0.02  | 0.02   | 0.02  | 0.02   | 0.019  | t | 153379 | EQEIFTNIT<br>DRV             | Mus<br>musculu<br>s              |
| 1 | 1.00 | 1 | 1 | -0.01 | -0.014 | -0.01 | -0.013 | -0.012 | t | 117735 | AEGLMVT<br>GGR               | Oryctola<br>gus<br>cuniculu<br>s |
| 1 | 1.00 | 1 | 1 | 0.04  | 0.04   | 0.04  | 0.04   | 0.04   | t | 156927 | NTFQAFY                      | Gallus<br>gallus                 |
| 1 | 1.00 | 1 | 1 | 0.01  | 0.01   | 0.001 | 0.011  | 0.01   | t | 65797  | TPVGLAVD<br>TPWVEKES<br>ALSI | Homo<br>sapiens                  |
| 1 | 1.00 | 1 | 1 | 0.02  | 0.023  | 0.01  | 0.023  | 0.02   | t | 74005  | YGGIPGGI<br>STPITQQS<br>EKSK | Equus<br>caballus                |
| 1 | 1.00 | 1 | 1 | 0     | -0.002 | 0     | -0.003 | -0.002 | t | 98822  | IEAGAIGFK<br>IHEDWG          | Mus<br>musculu<br>s              |



|   |      |   |   |       |        |        |        |        |   |        |                     |                          |
|---|------|---|---|-------|--------|--------|--------|--------|---|--------|---------------------|--------------------------|
| 1 | 1.00 | 1 | 1 | 0     | -0.002 | 0      | -0.003 | -0.002 | t | 40619  | LVTVNP<br>FVSVATANS | Mus<br>musculus          |
| 1 | 1.00 | 1 | 1 | 0     | 0      | -0.006 | -0.007 | -0.002 | t | 12142  | EGDDPAK<br>AAFDLSQA | Mus<br>musculus          |
| 1 | 1.00 | 1 | 1 | 0.06  | 0.056  | 0.058  | 0.059  | 0.061  | t | 55924  | RSQDACIE<br>FVQQEVD | Oryctola<br>guscuniculus |
| 1 | 1.00 | 1 | 1 | 0.01  | 0.014  | 0.01   | 0.011  | 0.01   | t | 63792  | TGATVSSQ            | Homo<br>sapiens          |
| 1 | 1.00 | 1 | 1 | 0.04  | 0.04   | 0.028  | 0.032  | 0.04   | t | 117773 | CNSRQTD<br>REDELI   | Homo<br>sapiens          |
| 1 | 1.00 | 1 | 1 | 0.02  | 0.02   | 0.02   | 0.016  | 0.019  | t | 118196 | VEPTGKRF<br>L       | Homo<br>sapiens          |
| 1 | 1.00 | 1 | 1 | 0.01  | 0.012  | 0.01   | 0.013  | 0.011  | t | 51145  | QIVGGV              | Homo<br>sapiens          |
| 1 | 1.00 | 1 | 1 | 0     | 0      | 0      | 0      | 0      | t | 104905 | MVGGV               | Mus<br>musculus          |
| 1 | 1.00 | 1 | 1 | 0     | 0      | 0.002  | 0      | -0.001 | t | 108382 | GGVVIA              | Mus<br>musculus          |
| 1 | 1.00 | 1 | 1 | 0.06  | 0.06   | 0.064  | 0.053  | 0.059  | t | 144885 | EPGQLKLN<br>WFKKGSS | Homo<br>sapiens          |
| 1 | 1.00 | 1 | 1 | -0.01 | -0.006 | -0.01  | -0.007 | -0.01  | t | 118487 | LEIANAHR<br>KPLVI   | Homo<br>sapiens          |
| 1 | 1.00 | 1 | 1 | 0     | 0.003  | 0      | 0      | -0.001 | t | 135441 | AGLGAGIP            | Mus<br>musculus          |
| 1 | 1.00 | 1 | 1 | 0     | -0.002 | 0      | -0.001 | -0.001 | t | 144712 | KSLSTEFI<br>PN      | Mus<br>musculus          |
| 1 | 1.00 | 1 | 1 | 0     | -0.002 | 0      | -0.001 | -0.001 | t | 144799 | TLNLT               | Mus<br>musculus          |

|   |      |   |   |   |        |   |        |        |   |        |                              |                              |
|---|------|---|---|---|--------|---|--------|--------|---|--------|------------------------------|------------------------------|
| 1 | 1.00 | 1 | 1 | 0 | -0.002 | 0 | -0.001 | -0.001 | t | 117773 | CNSRQTD<br>REDELI            | Rattus<br>norvegicus         |
| 1 | 1.00 | 1 | 1 | 0 | -0.002 | 0 | -0.001 | -0.001 | t | 107852 | GEPQSSIIQ<br>Y               | Mus<br>musculus              |
| 1 | 1.00 | 1 | 1 | 0 | -0.002 | 0 | -0.001 | -0.001 | t | 102069 | SKSSITITN<br>KRLTRKC         | Mus<br>musculus              |
| 1 | 1.00 | 1 | 1 | 0 | -0.002 | 0 | -0.001 | -0.001 | t | 110920 | KPSPWAP<br>KKHRRLS           | Mus<br>musculus              |
| 1 | 1.00 | 1 | 1 | 0 | -0.002 | 0 | -0.001 | -0.001 | t | 69235  | VKIDNASP<br>AS               | Mus<br>musculus              |
| 1 | 1.00 | 1 | 1 | 0 | -0.002 | 0 | -0.001 | -0.001 | t | 61124  | SSIVYEAA<br>DMIMHT           | Mus<br>musculus              |
| 1 | 1.00 | 1 | 1 | 0 | -0.002 | 0 | -0.001 | -0.001 | t | 69244  | VKIPQHM<br>HPLPI             | Mus<br>musculus              |
| 1 | 1.00 | 1 | 1 | 0 | -0.002 | 0 | -0.001 | -0.001 | t | 39164  | LRPGPVSQ<br>PYHHWDT<br>DK    | Mus<br>musculus              |
| 1 | 1.00 | 1 | 1 | 0 | -0.002 | 0 | -0.001 | -0.001 | t | 23511  | GYYPSPDP<br>NTFYAPPY<br>S    | Mus<br>musculus              |
| 1 | 1.00 | 1 | 1 | 0 | -0.004 | 0 | -0.001 | -0.001 | t | 11813  | EENVEENV                     | Oryctola<br>gus<br>cuniculus |
| 1 | 1.00 | 1 | 1 | 0 | -0.002 | 0 | -0.001 | -0.001 | t | 35252  | LDPHAFHL<br>LL               | Mus<br>musculus              |
| 1 | 1.00 | 1 | 1 | 0 | -0.002 | 0 | -0.001 | -0.001 | t | 21469  | GNLLLSCL                     | Mus<br>musculus              |
| 1 | 1.00 | 1 | 1 | 0 | -0.004 | 0 | -0.001 | -0.001 | t | 1433   | AGAGGGA<br>GGAGAGG<br>GAGGAG | Oryctola<br>gus<br>cuniculus |
| 1 | 1.00 | 1 | 1 | 0 | -0.002 | 0 | -0.001 | -0.001 | t | 3656   | APMSTPS<br>ATSVR             | Mus<br>musculus              |
| 1 | 1.00 | 1 | 1 | 0 | -0.002 | 0 | -0.001 | -0.001 | t | 10227  | DSSAHGTP<br>STPA             | Mus<br>musculus              |

|   |      |   |   |       |        |        |        |        |   |        |                             |                                  |
|---|------|---|---|-------|--------|--------|--------|--------|---|--------|-----------------------------|----------------------------------|
| 1 | 1.00 | 1 | 1 | 0     | -0.002 | 0      | -0.001 | -0.001 | t | 6742   | CNYSKFW<br>YLEHAK           | Mus<br>musculu<br>s              |
| 1 | 1.00 | 1 | 1 | -0.01 | -0.01  | -0.01  | -0.01  | -0.01  | t | 72249  | WAP                         | Mus<br>musculu<br>s              |
| 1 | 1.00 | 1 | 1 | -0.01 | -0.01  | -0.01  | -0.01  | -0.01  | t | 25852  | IEKKIAKM<br>EKASSVFN<br>VV  | Homo<br>sapiens                  |
| 1 | 1.00 | 1 | 1 | -0.01 | -0.01  | -0.01  | -0.01  | -0.01  | t | 31253  | KIFQDHPL                    | Homo<br>sapiens                  |
| 1 | 1.00 | 1 | 1 | 0.02  | 0.024  | 0.011  | 0.02   | 0.022  | t | 139880 | RDEYDHVL<br>SAKLAEQY<br>DT  | Ovis<br>aries                    |
| 1 | 1.00 | 1 | 1 | -0.01 | -0.013 | -0.01  | -0.009 | -0.011 | t | 105485 | QKLVFFAE<br>DVGSNK          | Oryctola<br>gus<br>cuniculu<br>s |
| 1 | 1.00 | 1 | 1 | -0.01 | -0.01  | -0.006 | -0.007 | -0.01  | t | 82914  | GTGALASS<br>APST            | Homo<br>sapiens                  |
| 1 | 1.00 | 1 | 1 | -0.04 | -0.037 | -0.039 | -0.04  | -0.04  | t | 125321 | YFLHWWY<br>DKK              | Mus<br>musculu<br>s              |
| 1 | 1.00 | 1 | 1 | -0.01 | -0.008 | -0.01  | -0.007 | -0.01  | t | 42684  | MSTNPKP<br>QKKNKRN<br>TNRR  | Homo<br>sapiens                  |
| 1 | 1.00 | 1 | 1 | 0     | 0      | 0      | 0.004  | 0.002  | t | 131010 | PSTRWTEL<br>DDVKRLK<br>GSRs | Homo<br>sapiens                  |
| 1 | 1.00 | 1 | 1 | 0     | 0      | 0      | 0.004  | 0.002  | t | 133263 | NSSPEYPR<br>KEFASST<br>RGRs | Homo<br>sapiens                  |
| 1 | 1.00 | 1 | 1 | -0.02 | -0.02  | -0.021 | -0.02  | -0.021 | t | 16043  | FGQIFRPD<br>NFVFGQS         | Mus<br>musculu<br>s              |
| 1 | 1.00 | 1 | 1 | -0.03 | -0.03  | -0.035 | -0.03  | -0.031 | t | 140657 | ATRLNNEV<br>L               | Mus<br>musculu<br>s              |
| 1 | 1.00 | 1 | 1 | 0.02  | 0.013  | 0.024  | 0.017  | 0.018  | t | 23494  | GYVRSGG<br>AVPPACC<br>N     | Homo<br>sapiens                  |
| 1 | 1.00 | 1 | 1 | 0.01  | 0.008  | 0.01   | 0.007  | 0.01   | t | 43013  | MWLDVM<br>YLKGGG            | Mus<br>musculu<br>s              |

|   |      |   |   |      |       |      |      |      |   |        |                              |                                  |
|---|------|---|---|------|-------|------|------|------|---|--------|------------------------------|----------------------------------|
| 1 | 1.00 | 1 | 1 | 0.05 | 0.05  | 0.05 | 0.05 | 0.05 | t | 123169 | FGGGDAP<br>PA                | Ovis<br>aries                    |
| 1 | 1.00 | 1 | 1 | 0.05 | 0.05  | 0.05 | 0.05 | 0.05 | t | 114552 | QRQGQG<br>QSQRSEQ<br>DR      | Homo<br>sapiens                  |
| 1 | 1.00 | 1 | 1 | 0.03 | 0.03  | 0.03 | 0.03 | 0.03 | t | 119585 | GQPREPQ<br>V                 | Homo<br>sapiens                  |
| 1 | 1.00 | 1 | 1 | 0.03 | 0.03  | 0.03 | 0.03 | 0.03 | t | 106345 | DKANVLFR<br>CD               | Homo<br>sapiens                  |
| 1 | 1.00 | 1 | 1 | 0.03 | 0.03  | 0.03 | 0.03 | 0.03 | t | 115512 | TKKTKLTEE<br>EKNRLNFL<br>KKI | Homo<br>sapiens                  |
| 1 | 1.00 | 1 | 1 | 0.03 | 0.03  | 0.03 | 0.03 | 0.03 | t | 57530  | SELPQLS                      | Mus<br>musculu<br>s              |
| 1 | 1.00 | 1 | 1 | 0.01 | 0.01  | 0.01 | 0.01 | 0.01 | t | 135075 | KNDVVNS<br>QDKTEKTE          | Sus<br>scrofa                    |
| 1 | 1.00 | 1 | 1 | 0.01 | 0.01  | 0.01 | 0.01 | 0.01 | t | 123130 | EHLYGRDD<br>R                | Ovis<br>aries                    |
| 1 | 1.00 | 1 | 1 | 0.01 | 0.01  | 0.01 | 0.01 | 0.01 | t | 131347 | AKAQTDR<br>EDL               | Oryctola<br>gus<br>cuniculu<br>s |
| 1 | 1.00 | 1 | 1 | 0.01 | 0.01  | 0.01 | 0.01 | 0.01 | t | 107489 | KPREQQY                      | Homo<br>sapiens                  |
| 1 | 1.00 | 1 | 1 | 0.01 | 0.01  | 0.01 | 0.01 | 0.01 | t | 98647  | YTKDTNN<br>NLT               | Mus<br>musculu<br>s              |
| 1 | 1.00 | 1 | 1 | 0.01 | 0.01  | 0.01 | 0.01 | 0.01 | t | 98647  | YTKDTNN<br>NLT               | Oryctola<br>gus<br>cuniculu<br>s |
| 1 | 1.00 | 1 | 1 | 0.01 | 0.007 | 0.01 | 0.01 | 0.01 | t | 98647  | YTKDTNN<br>NLT               | Oryctola<br>gus<br>cuniculu<br>s |
| 1 | 1.00 | 1 | 1 | 0.01 | 0.01  | 0.01 | 0.01 | 0.01 | t | 114946 | SEYPKPDC<br>TA               | Homo<br>sapiens                  |
| 1 | 1.00 | 1 | 1 | 0.01 | 0.01  | 0.01 | 0.01 | 0.01 | t | 100585 | TWQTSSN<br>PSIFYTY           | Homo<br>sapiens                  |

|   |      |   |   |       |       |       |       |       |   |        |                                |                                  |
|---|------|---|---|-------|-------|-------|-------|-------|---|--------|--------------------------------|----------------------------------|
| 1 | 1.00 | 1 | 1 | 0.01  | 0.013 | 0.01  | 0.01  | 0.01  | t | 98647  | YTKDTNN<br>NLT                 | Mus<br>musculu<br>s              |
| 1 | 1.00 | 1 | 1 | 0.01  | 0.01  | 0.01  | 0.01  | 0.01  | t | 97921  | AYYTKDTN<br>NN                 | Oryctola<br>gus<br>cuniculu<br>s |
| 1 | 1.00 | 1 | 1 | 0.01  | 0.007 | 0.01  | 0.01  | 0.01  | t | 97921  | AYYTKDTN<br>NN                 | Oryctola<br>gus<br>cuniculu<br>s |
| 1 | 1.00 | 1 | 1 | 0.01  | 0.01  | 0.01  | 0.01  | 0.01  | t | 97921  | AYYTKDTN<br>NN                 | Mus<br>musculu<br>s              |
| 1 | 1.00 | 1 | 1 | 0.01  | 0.01  | 0.01  | 0.01  | 0.01  | t | 46992  | PAVIPDRE<br>VLYQGFDE<br>MEEC   | Homo<br>sapiens                  |
| 1 | 1.00 | 1 | 1 | 0.01  | 0.01  | 0.01  | 0.01  | 0.01  | t | 46824  | PAIIPDREA<br>LYQQFDE<br>MEEC   | Homo<br>sapiens                  |
| 1 | 1.00 | 1 | 1 | -0.01 | -0.01 | -0.01 | -0.01 | -0.01 | t | 134884 | DFIVIFEKII<br>REFVP            | Sus<br>scrofa                    |
| 1 | 1.00 | 1 | 1 | -0.01 | -0.01 | -0.01 | -0.01 | -0.01 | t | 153355 | ACWLPLTR<br>LCGGGS             | Mus<br>musculu<br>s              |
| 1 | 1.00 | 1 | 1 | -0.01 | -0.01 | -0.01 | -0.01 | -0.01 | t | 149048 | FSTQKSI                        | Sus<br>scrofa                    |
| 1 | 1.00 | 1 | 1 | -0.01 | -0.01 | -0.01 | -0.01 | -0.01 | t | 151005 | KEVLVLW<br>GIHPSTS             | Homo<br>sapiens                  |
| 1 | 1.00 | 1 | 1 | -0.01 | -0.01 | -0.01 | -0.01 | -0.01 | t | 144668 | GREGYP<br>A<br>DGGPACY<br>CYGL | Oryctola<br>gus<br>cuniculu<br>s |
| 1 | 1.00 | 1 | 1 | -0.03 | -0.03 | -0.03 | -0.03 | -0.03 | t | 149069 | LPSYLQE                        | Sus<br>scrofa                    |
| 1 | 1.00 | 1 | 1 | -0.03 | -0.03 | -0.03 | -0.03 | -0.03 | t | 99368  | KDLAFPGS<br>GEQVEKL            | Homo<br>sapiens                  |
| 1 | 1.00 | 1 | 1 | -0.05 | -0.05 | -0.05 | -0.05 | -0.05 | t | 120442 | DLFALAPS<br>LT                 | Mus<br>musculu<br>s              |
| 1 | 1.00 | 1 | 1 | 0.03  | 0.033 | 0.032 | 0.03  | 0.029 | t | 132200 | CGNRGPSL<br>RTTTVTG            | Mus<br>musculu<br>s              |

|   |      |   |   |       |       |        |        |        |   |        |                              |                                  |
|---|------|---|---|-------|-------|--------|--------|--------|---|--------|------------------------------|----------------------------------|
| 1 | 1.00 | 1 | 1 | -0.02 | -0.02 | -0.02  | -0.024 | -0.022 | t | 118313 | EALSTLVL<br>NRLKV            | Homo<br>sapiens                  |
| 1 | 1.00 | 1 | 1 | -0.01 | -0.01 | -0.016 | -0.01  | -0.009 | t | 159083 | RYKYPET<br>PKQLAKVV          | Mus<br>musculu<br>s              |
| 1 | 1.00 | 1 | 1 | 0.03  | 0.027 | 0.025  | 0.03   | 0.031  | t | 4938   | ATEINDNS<br>WKDTLS           | Oryctola<br>gus<br>cuniculu<br>s |
| 1 | 1.00 | 1 | 1 | 0.01  | 0.006 | 0.012  | 0.009  | 0.01   | t | 32889  | KPTDG                        | Oryctola<br>gus<br>cuniculu<br>s |
| 1 | 1.00 | 1 | 1 | -0.01 | -0.01 | -0.008 | -0.01  | -0.011 | t | 127204 | TGHCQGD<br>GYRVGFG<br>Q      | Mus<br>musculu<br>s              |
| 1 | 1.00 | 1 | 1 | 0     | 0.003 | 0.01   | 0      | 0      | t | 100279 | LNP                          | Mus<br>musculu<br>s              |
| 1 | 1.00 | 1 | 1 | -0.03 | -0.03 | -0.03  | -0.03  | -0.031 | t | 122471 | LLTEHRMT<br>WDPAQPP<br>RDL   | Homo<br>sapiens                  |
| 1 | 1.00 | 1 | 1 | 0.01  | 0.016 | 0      | 0.01   | 0.01   | t | 139074 | HELQQYID<br>NLNKTLDV<br>LDWL | Felis<br>catus                   |
| 1 | 1.00 | 1 | 1 | 0     | 0     | -0.003 | 0      | 0.001  | t | 41232  | MDIDPYKE<br>FG               | Mus<br>musculu<br>s              |
| 1 | 1.00 | 1 | 1 | 0.07  | 0.07  | 0.07   | 0.07   | 0.072  | t | 11570  | EEEDDD                       | Mus<br>musculu<br>s              |
| 1 | 1.00 | 1 | 1 | 0.04  | 0.04  | 0.04   | 0.04   | 0.04   | t | 32596  | KNQLAGK<br>DEYEAKQK<br>EAE   | Homo<br>sapiens                  |
| 1 | 1.00 | 1 | 1 | 0.01  | 0.01  | 0.008  | 0.01   | 0.011  | t | 65974  | TQYERE                       | Mus<br>musculu<br>s              |
| 1 | 1.00 | 1 | 1 | 0     | 0     | 0      | 0.001  | 0      | t | 85221  | LGSKIGFK<br>GQED             | Homo<br>sapiens                  |
| 1 | 1.00 | 1 | 1 | 0     | 0.002 | 0      | 0.001  | 0      | t | 9943   | DRADGQP<br>AGDRAAG<br>QPAGDR | Homo<br>sapiens                  |

|   |      |   |   |       |        |        |        |        |   |        |                              |                                  |
|---|------|---|---|-------|--------|--------|--------|--------|---|--------|------------------------------|----------------------------------|
| 1 | 1.00 | 1 | 1 | 0     | 0.002  | 0      | 0.001  | 0      | t | 9943   | DRADGQP<br>AGDRAAG<br>QPAGDR | Homo<br>sapiens                  |
| 1 | 1.00 | 1 | 1 | 0     | 0.002  | 0      | 0.001  | 0      | t | 9943   | DRADGQP<br>AGDRAAG<br>QPAGDR | Homo<br>sapiens                  |
| 1 | 1.00 | 1 | 1 | -0.02 | -0.02  | -0.02  | -0.02  | -0.02  | t | 106574 | KREACKCI<br>VR               | Homo<br>sapiens                  |
| 1 | 1.00 | 1 | 1 | 0.01  | 0.01   | -0.001 | 0.01   | 0.013  | t | 144701 | KFGNYNH<br>TQLGQLQ<br>AV     | Oryctola<br>gus<br>cuniculu<br>s |
| 1 | 1.00 | 1 | 1 | 0     | -0.002 | -0.004 | -0.003 | -0.002 | t | 25279  | IAGALEVH<br>AVKPA            | Homo<br>sapiens                  |
| 1 | 1.00 | 1 | 1 | 0     | 0.002  | 0      | 0      | 0      | t | 119995 | KNEELRLY<br>HHLFNNY          | Rattus<br>norvegic<br>us         |
| 1 | 1.00 | 1 | 1 | 0     | 0      | 0      | 0      | 0      | t | 119995 | KNEELRLY<br>HHLFNNY          | Rattus<br>norvegic<br>us         |
| 1 | 1.00 | 1 | 1 | 0     | 0      | 0      | 0      | 0      | t | 23195  | GVTYEIDL<br>TNKNAAKL<br>RG   | Homo<br>sapiens                  |
| 1 | 1.00 | 1 | 1 | -0.02 | -0.02  | -0.02  | -0.02  | -0.02  | t | 105510 | SDSKL                        | Oryctola<br>gus<br>cuniculu<br>s |
| 1 | 1.00 | 1 | 1 | 0.03  | 0.034  | 0.022  | 0.03   | 0.032  | t | 140604 | TDQPLSAD                     | Cavia<br>porcellu<br>s           |
| 1 | 1.00 | 1 | 1 | 0.02  | 0.02   | 0.037  | 0.02   | 0.018  | t | 48999  | PQGG                         | Mus<br>musculu<br>s              |
| 1 | 1.00 | 1 | 1 | -0.02 | -0.02  | -0.02  | -0.02  | -0.018 | t | 128276 | ALLRNLGK                     | Homo<br>sapiens                  |
| 1 | 1.00 | 1 | 1 | 0.08  | 0.08   | 0.08   | 0.08   | 0.08   | t | 98902  | MENSAEP<br>EQS               | Homo<br>sapiens                  |
| 1 | 1.00 | 1 | 1 | 0.04  | 0.04   | 0.04   | 0.04   | 0.04   | t | 104824 | GWCGSTD<br>EYC               | Homo<br>sapiens                  |
| 1 | 1.00 | 1 | 1 | 0     | -0.002 | -0.005 | -0.001 | 0      | t | 31894  | KLGVWKS<br>PTDMQS<br>WV      | Mus<br>musculu<br>s              |

|   |      |   |   |       |       |       |       |       |   |        |                          |                                  |
|---|------|---|---|-------|-------|-------|-------|-------|---|--------|--------------------------|----------------------------------|
| 1 | 1.00 | 1 | 1 | 0.02  | 0.02  | 0.02  | 0.02  | 0.02  | t | 153397 | HTKIHNHP<br>RLPT         | Mus<br>musculu<br>s              |
| 1 | 1.00 | 1 | 1 | 0.02  | 0.02  | 0.02  | 0.02  | 0.02  | t | 153835 | HGDTPTLH<br>EYMLDLQ<br>P | Cavia<br>porcellu<br>s           |
| 1 | 1.00 | 1 | 1 | 0.02  | 0.02  | 0.02  | 0.02  | 0.02  | t | 135756 | SCKDDINS                 | Homo<br>sapiens                  |
| 1 | 1.00 | 1 | 1 | 0.02  | 0.02  | 0.02  | 0.02  | 0.02  | t | 149726 | GSEKEAPT<br>TDFYLKN      | Oryctola<br>gus<br>cuniculu<br>s |
| 1 | 1.00 | 1 | 1 | 0.02  | 0.02  | 0.02  | 0.02  | 0.02  | t | 149424 | QESTYQLV<br>QQ           | Homo<br>sapiens                  |
| 1 | 1.00 | 1 | 1 | 0.02  | 0.02  | 0.02  | 0.02  | 0.02  | t | 149726 | GSEKEAPT<br>TDFYLKN      | Oryctola<br>gus<br>cuniculu<br>s |
| 1 | 1.00 | 1 | 1 | 0.02  | 0.02  | 0.02  | 0.02  | 0.02  | t | 153835 | HGDTPTLH<br>EYMLDLQ<br>P | Cavia<br>porcellu<br>s           |
| 1 | 1.00 | 1 | 1 | 0.02  | 0.02  | 0.02  | 0.02  | 0.02  | t | 103266 | IADIEAYP<br>QWISEYK      | Homo<br>sapiens                  |
| 1 | 1.00 | 1 | 1 | 0.02  | 0.02  | 0.02  | 0.02  | 0.02  | t | 113749 | QGQQGQ<br>QLGQQGQ<br>G   | Homo<br>sapiens                  |
| 1 | 1.00 | 1 | 1 | 0     | 0     | 0     | 0     | 0     | t | 142390 | CGRLIRSEL<br>PRL         | Mus<br>musculu<br>s              |
| 1 | 1.00 | 1 | 1 | 0     | 0     | 0     | 0     | 0     | t | 153284 | PTPLSPPLR<br>NTHPQA      | Mus<br>musculu<br>s              |
| 1 | 1.00 | 1 | 1 | 0     | 0     | 0     | 0     | 0     | t | 123860 | YEEHLYGR<br>D            | Ovis<br>aries                    |
| 1 | 1.00 | 1 | 1 | 0     | 0     | 0     | 0     | 0     | t | 115845 | LHLPLPLL<br>QS           | Homo<br>sapiens                  |
| 1 | 1.00 | 1 | 1 | 0     | 0     | 0     | 0     | 0     | t | 70426  | VPPPRKKR<br>TVVLTE       | Homo<br>sapiens                  |
| 1 | 1.00 | 1 | 1 | 0     | 0     | 0     | 0     | 0     | t | 15352  | FCVDPTKG<br>GKKAAR       | Homo<br>sapiens                  |
| 1 | 1.00 | 1 | 1 | -0.02 | -0.02 | -0.02 | -0.02 | -0.02 | t | 99451  | LRRNALRR<br>PFYSNAP      | Homo<br>sapiens                  |



|   |      |   |   |       |        |        |        |        |   |        |                              |                                  |
|---|------|---|---|-------|--------|--------|--------|--------|---|--------|------------------------------|----------------------------------|
| 1 | 1.00 | 1 | 1 | -0.02 | -0.02  | -0.02  | -0.02  | -0.02  | t | 100262 | LIKKV TNYL<br>V              | Mus<br>musculu<br>s              |
| 1 | 1.00 | 1 | 1 | 0.03  | 0.03   | 0.02   | 0.03   | 0.03   | t | 29248  | IVEEDAPA<br>TEEIDEIE         | Oryctola<br>gus<br>cuniculu<br>s |
| 1 | 1.00 | 1 | 1 | -0.04 | -0.04  | -0.04  | -0.04  | -0.04  | t | 115982 | SRYP SYGL<br>NY              | Homo<br>sapiens                  |
| 1 | 1.00 | 1 | 1 | -0.02 | -0.02  | -0.025 | -0.023 | -0.02  | t | 49454  | PSPAPSRP<br>FSVLRAND<br>V    | Homo<br>sapiens                  |
| 1 | 1.00 | 1 | 1 | -0.01 | -0.007 | -0.005 | -0.01  | -0.009 | t | 97127  | YSPSPYD                      | Mus<br>musculu<br>s              |
| 1 | 1.00 | 1 | 1 | 0     | 0.011  | -0.001 | 0      | 0      | t | 41430  | MERVVEQ<br>MCITQYQ<br>RESQAY | Gallus<br>gallus                 |
| 1 | 1.00 | 1 | 1 | 0.01  | 0.008  | 0.01   | 0.013  | 0.012  | t | 3900   | APVTVTRF<br>VNAS             | Mus<br>musculu<br>s              |
| 1 | 1.00 | 1 | 1 | 0.01  | 0.006  | 0.01   | 0.013  | 0.012  | t | 3900   | APVTVTRF<br>VNAS             | Oryctola<br>gus<br>cuniculu<br>s |
| 1 | 1.00 | 1 | 1 | 0.02  | 0.023  | 0.026  | 0.02   | 0.017  | t | 58990  | SLAELLNA<br>GLGGS            | Mus<br>musculu<br>s              |
| 1 | 1.00 | 1 | 1 | 0     | 0.003  | 0.004  | 0      | 0      | t | 19641  | GFVDGLR<br>DLTTTER           | Mus<br>musculu<br>s              |
| 1 | 1.00 | 1 | 1 | 0.02  | 0.022  | 0.02   | 0.021  | 0.021  | t | 133553 | EDMSYWH<br>EWNP              | Homo<br>sapiens                  |
| 1 | 1.00 | 1 | 1 | -0.01 | -0.006 | -0.01  | -0.009 | -0.01  | t | 19900  | GGK MVQ<br>VV                | Homo<br>sapiens                  |
| 1 | 1.00 | 1 | 1 | -0.01 | -0.007 | -0.01  | -0.01  | -0.01  | t | 141072 | QVVHVET<br>HRCNI             | Mus<br>musculu<br>s              |
| 1 | 1.00 | 1 | 1 | 0     | -0.002 | -0.008 | 0.001  | 0.002  | t | 33669  | KTFPPTep<br>KKDKKKK          | Homo<br>sapiens                  |

|   |      |   |   |       |        |        |        |       |   |        |                              |                                  |
|---|------|---|---|-------|--------|--------|--------|-------|---|--------|------------------------------|----------------------------------|
| 1 | 1.00 | 1 | 1 | -0.02 | -0.022 | -0.024 | -0.021 | -0.02 | t | 145951 | PVGPSDPS<br>IVSLVEE          | Mus<br>musculu<br>s              |
| 1 | 1.00 | 1 | 1 | -0.02 | -0.017 | -0.022 | -0.02  | -0.02 | t | 18054  | FTQEVSRL<br>NINLHFSK         | Mus<br>musculu<br>s              |
| 1 | 1.00 | 1 | 1 | -0.02 | -0.017 | -0.022 | -0.02  | -0.02 | t | 18054  | FTQEVSRL<br>NINLHFSK         | Mus<br>musculu<br>s              |
| 1 | 1.00 | 1 | 1 | 0     | 0      | 0      | 0      | 0     | t | 10852  | DYAWDDF<br>YAMGD             | Mus<br>musculu<br>s              |
| 1 | 1.00 | 1 | 1 | -0.01 | -0.008 | -0.01  | -0.009 | -0.01 | t | 22882  | GTVVAVG<br>PGRWDED<br>G      | Homo<br>sapiens                  |
| 1 | 1.00 | 1 | 1 | 0.03  | 0.027  | 0.03   | 0.03   | 0.029 | t | 107521 | LVFFAEDV<br>GSNKGAI          | Oryctola<br>gus<br>cuniculu<br>s |
| 1 | 1.00 | 1 | 1 | 0     | 0      | 0      | 0.001  | 0     | t | 71568  | VTVVTTS<br>GS                | Homo<br>sapiens                  |
| 1 | 1.00 | 1 | 1 | 0     | 0      | 0      | 0.001  | 0     | t | 71568  | VTVVTTS<br>GS                | Homo<br>sapiens                  |
| 1 | 1.00 | 1 | 1 | 0     | 0      | 0      | 0.001  | 0     | t | 78850  | TGAPSLGD<br>YVRPAYIV<br>TPYW | Homo<br>sapiens                  |
| 1 | 1.00 | 1 | 1 | 0     | 0      | 0      | 0.001  | 0     | t | 78863  | TPSMDALS<br>AQLYSSL<br>SLDSP | Homo<br>sapiens                  |
| 1 | 1.00 | 1 | 1 | 0     | 0      | 0      | 0.001  | 0     | t | 38810  | LQAMRKY<br>SPFRNGY<br>MEPTLG | Homo<br>sapiens                  |
| 1 | 1.00 | 1 | 1 | 0     | 0      | 0      | 0.001  | 0     | t | 53800  | RFVKTPSK<br>KKTKSR           | Homo<br>sapiens                  |

|   |      |   |   |      |       |       |       |       |   |        |                              |                        |
|---|------|---|---|------|-------|-------|-------|-------|---|--------|------------------------------|------------------------|
| 1 | 1.00 | 1 | 1 | 0    | 0     | 0     | 0.001 | 0     | t | 56918  | SANNDAEI<br>GNLI             | Homo<br>sapiens        |
| 1 | 1.00 | 1 | 1 | 0    | 0     | 0     | 0.001 | 0     | t | 47984  | PISLLFNEK<br>EADDNDH<br>EPQI | Homo<br>sapiens        |
| 1 | 1.00 | 1 | 1 | 0    | 0     | 0     | 0.001 | 0     | t | 53800  | RFVKTPSK<br>KKTCSR           | Homo<br>sapiens        |
| 1 | 1.00 | 1 | 1 | 0    | 0     | 0     | 0.001 | 0     | t | 60062  | SPGGLEPP<br>SEKHFRET<br>EV   | Homo<br>sapiens        |
| 1 | 1.00 | 1 | 1 | 0    | 0     | 0     | 0.001 | 0     | t | 20046  | GGTEESVV<br>TASRS            | Homo<br>sapiens        |
| 1 | 1.00 | 1 | 1 | 0    | 0     | 0     | 0.001 | 0     | t | 20046  | GGTEESVV<br>TASRS            | Homo<br>sapiens        |
| 1 | 1.00 | 1 | 1 | 0    | 0     | 0     | 0.001 | 0     | t | 3245   | ANDVDNS<br>NPVVQAE<br>QLNWL  | Homo<br>sapiens        |
| 1 | 1.00 | 1 | 1 | 0.04 | 0.038 | 0.032 | 0.033 | 0.039 | t | 122167 | PPPITQGE<br>CKQL             | Mus<br>musculu<br>s    |
| 1 | 1.00 | 1 | 1 | 0.03 | 0.032 | 0.03  | 0.031 | 0.03  | t | 117065 | QFTGSTRQ<br>HAG              | Homo<br>sapiens        |
| 1 | 1.00 | 1 | 1 | 0.03 | 0.037 | 0.024 | 0.03  | 0.03  | t | 69178  | VKAETRLN<br>PDLQPTE          | Cavia<br>porcellu<br>s |
| 1 | 1.00 | 1 | 1 | 0.03 | 0.037 | 0.024 | 0.03  | 0.03  | t | 69178  | VKAETRLN<br>PDLQPTE          | Cavia<br>porcellu<br>s |
| 1 | 1.00 | 1 | 1 | 0.01 | 0.01  | 0.01  | 0.01  | 0.01  | t | 79963  | PGSSPME<br>VMLRA             | Mus<br>musculu<br>s    |
| 1 | 1.00 | 1 | 1 | 0.01 | 0.01  | 0.01  | 0.01  | 0.01  | t | 79963  | PGSSPME<br>VMLRA             | Mus<br>musculu<br>s    |
| 1 | 1.00 | 1 | 1 | 0.03 | 0.03  | 0.03  | 0.03  | 0.03  | t | 142424 | GDEFDTYD<br>DIKKVT           | Homo<br>sapiens        |

|   |      |   |   |       |       |        |       |       |   |        |                              |                       |
|---|------|---|---|-------|-------|--------|-------|-------|---|--------|------------------------------|-----------------------|
| 1 | 1.00 | 1 | 1 | 0.01  | 0.01  | 0.01   | 0.01  | 0.01  | t | 11775  | EELVEEVI                     | Homo sapiens          |
| 1 | 1.00 | 1 | 1 | -0.01 | -0.01 | -0.022 | -0.01 | -0.01 | t | 45632  | NQTEPSQT<br>HNRLYQER<br>QRL  | Mus musculus          |
| 1 | 1.00 | 1 | 1 | 0.03  | 0.034 | 0.03   | 0.037 | 0.03  | t | 120210 | SQKDLLEQ<br>RRAAVDTY         | Homo sapiens          |
| 1 | 1.00 | 1 | 1 | 0.02  | 0.023 | 0.014  | 0.02  | 0.02  | t | 7124   | CTDGNKE<br>N                 | Mus musculus          |
| 1 | 1.00 | 1 | 1 | 0.05  | 0.05  | 0.05   | 0.05  | 0.05  | t | 103510 | QAQLISSQ<br>AQGGGQ<br>Q      | Homo sapiens          |
| 1 | 1.00 | 1 | 1 | 0.03  | 0.03  | 0.03   | 0.03  | 0.03  | t | 112368 | TTYGIGV                      | Homo sapiens          |
| 1 | 1.00 | 1 | 1 | 0.03  | 0.03  | 0.03   | 0.03  | 0.03  | t | 103751 | YNANGSG<br>AGVTQFL<br>N      | Homo sapiens          |
| 1 | 1.00 | 1 | 1 | 0.03  | 0.03  | 0.03   | 0.03  | 0.03  | t | 78680  | HPPSSRPC<br>ANTPPSE<br>MDTWN | Homo sapiens          |
| 1 | 1.00 | 1 | 1 | 0.01  | 0.01  | 0.01   | 0.01  | 0.01  | t | 149427 | QLPQFEEI<br>RN               | Mus musculus          |
| 1 | 1.00 | 1 | 1 | 0.01  | 0.01  | 0.01   | 0.01  | 0.01  | t | 153353 | ACWALRD<br>PLCGGGS           | Mus musculus          |
| 1 | 1.00 | 1 | 1 | 0.01  | 0.01  | 0.01   | 0.01  | 0.01  | t | 140876 | KPAVLGH<br>DEAAY             | Oryctolagus cuniculus |
| 1 | 1.00 | 1 | 1 | 0.01  | 0.01  | 0.01   | 0.01  | 0.01  | t | 123860 | YEEHLYGR<br>D                | Ovis aries            |
| 1 | 1.00 | 1 | 1 | 0.01  | 0.01  | 0.01   | 0.01  | 0.01  | t | 132690 | TCSADGGT<br>LFYNLCL          | Mus musculus          |
| 1 | 1.00 | 1 | 1 | 0.01  | 0.01  | 0.01   | 0.01  | 0.01  | t | 132690 | TCSADGGT<br>LFYNLCL          | Mus musculus          |

|   |      |   |   |       |       |       |       |       |   |        |                              |                                  |
|---|------|---|---|-------|-------|-------|-------|-------|---|--------|------------------------------|----------------------------------|
| 1 | 1.00 | 1 | 1 | 0.01  | 0.01  | 0.01  | 0.01  | 0.01  | t | 108082 | QKTTTRPY<br>PNLQIDP          | Homo<br>sapiens                  |
| 1 | 1.00 | 1 | 1 | 0.01  | 0.01  | 0.01  | 0.01  | 0.01  | t | 98320  | PAYYTKDT<br>NN               | Mus<br>musculu<br>s              |
| 1 | 1.00 | 1 | 1 | 0.01  | 0.007 | 0.01  | 0.01  | 0.01  | t | 98320  | PAYYTKDT<br>NN               | Oryctola<br>gus<br>cuniculu<br>s |
| 1 | 1.00 | 1 | 1 | 0.01  | 0.01  | 0.01  | 0.01  | 0.01  | t | 115436 | QEVLNENL<br>LRFFVAPF<br>PEVF | Homo<br>sapiens                  |
| 1 | 1.00 | 1 | 1 | 0.01  | 0.01  | 0.01  | 0.01  | 0.01  | t | 78227  | PHAMVDH<br>L                 | Homo<br>sapiens                  |
| 1 | 1.00 | 1 | 1 | 0.01  | 0.01  | 0.01  | 0.01  | 0.01  | t | 97919  | AYTPAYYT<br>KD               | Mus<br>musculu<br>s              |
| 1 | 1.00 | 1 | 1 | 0.01  | 0.013 | 0.01  | 0.01  | 0.01  | t | 97919  | AYTPAYYT<br>KD               | Mus<br>musculu<br>s              |
| 1 | 1.00 | 1 | 1 | 0.01  | 0.01  | 0.01  | 0.01  | 0.01  | t | 97919  | AYTPAYYT<br>KD               | Oryctola<br>gus<br>cuniculu<br>s |
| 1 | 1.00 | 1 | 1 | 0.01  | 0.01  | 0.01  | 0.01  | 0.01  | t | 60677  | SRGNHVS<br>PAHYVPES<br>DAAAR | Homo<br>sapiens                  |
| 1 | 1.00 | 1 | 1 | 0.01  | 0.007 | 0.01  | 0.01  | 0.01  | t | 97919  | AYTPAYYT<br>KD               | Oryctola<br>gus<br>cuniculu<br>s |
| 1 | 1.00 | 1 | 1 | 0.01  | 0.01  | 0.01  | 0.01  | 0.01  | t | 50235  | QAELDDKY<br>AGKG YKLG<br>SK  | Mus<br>musculu<br>s              |
| 1 | 1.00 | 1 | 1 | 0.01  | 0.01  | 0.01  | 0.01  | 0.01  | t | 53768  | RFRGKDLP                     | Oryctola<br>gus<br>cuniculu<br>s |
| 1 | 1.00 | 1 | 1 | 0.01  | 0.01  | 0.01  | 0.01  | 0.01  | t | 22075  | GRIILSGKP<br>AIIPDREVL<br>YQ | Homo<br>sapiens                  |
| 1 | 1.00 | 1 | 1 | -0.01 | -0.01 | -0.01 | -0.01 | -0.01 | t | 137798 | AFRQQFQ<br>YAVEV             | Homo<br>sapiens                  |
| 1 | 1.00 | 1 | 1 | -0.01 | -0.01 | -0.01 | -0.01 | -0.01 | t | 119592 | HTFPAVLQ                     | Homo<br>sapiens                  |

|   |      |   |   |       |        |        |        |        |   |        |                              |                                  |
|---|------|---|---|-------|--------|--------|--------|--------|---|--------|------------------------------|----------------------------------|
| 1 | 1.00 | 1 | 1 | -0.01 | -0.01  | -0.01  | -0.01  | -0.01  | t | 93028  | ISSVSAFTS<br>S               | Ovis<br>aries                    |
| 1 | 1.00 | 1 | 1 | -0.03 | -0.03  | -0.03  | -0.03  | -0.03  | t | 100354 | NRGIFNEF<br>KK               | Mus<br>musculu<br>s              |
| 1 | 1.00 | 1 | 1 | -0.03 | -0.03  | -0.03  | -0.03  | -0.03  | t | 97751  | VRKFFKIIS                    | Oryctola<br>gus<br>cuniculu<br>s |
| 1 | 1.00 | 1 | 1 | 0.02  | 0.019  | 0.027  | 0.022  | 0.019  | t | 78171  | GLPLK                        | Equus<br>caballus                |
| 1 | 1.00 | 1 | 1 | 0.04  | 0.018  | 0.036  | 0.037  | 0.038  | t | 114910 | NTTSEDGK<br>VM               | Homo<br>sapiens                  |
| 1 | 1.00 | 1 | 1 | -0.02 | -0.021 | -0.014 | -0.02  | -0.018 | t | 19475  | GEVWVTP<br>V                 | Homo<br>sapiens                  |
| 1 | 1.00 | 1 | 1 | 0.01  | 0.014  | 0.007  | 0.01   | 0.009  | t | 110762 | AGSSIVPLE<br>EYPAEIP         | Oryctola<br>gus<br>cuniculu<br>s |
| 1 | 1.00 | 1 | 1 | -0.01 | -0.01  | -0.005 | -0.01  | -0.012 | t | 1465   | AGDGEPP<br>EDDDSAT<br>GLAFRT | Homo<br>sapiens                  |
| 1 | 1.00 | 1 | 1 | -0.01 | -0.008 | -0.02  | -0.013 | -0.01  | t | 55478  | RQQWELQ<br>GDRRCQS<br>QL     | Homo<br>sapiens                  |
| 1 | 1.00 | 1 | 1 | -0.01 | -0.008 | -0.011 | -0.009 | -0.011 | t | 63973  | TGTDLELI<br>QILKDHYN<br>ISLD | Homo<br>sapiens                  |
| 1 | 1.00 | 1 | 1 | -0.02 | -0.018 | -0.013 | -0.023 | -0.02  | t | 95357  | ENKVLV                       | Homo<br>sapiens                  |
| 1 | 1.00 | 1 | 1 | 0.02  | 0.016  | 0.014  | 0.017  | 0.02   | t | 57505  | SEKSEEINE<br>KDLRKKSE<br>LQG | Oryctola<br>gus<br>cuniculu<br>s |
| 1 | 1.00 | 1 | 1 | 0     | 0.002  | 0.001  | 0      | -0.002 | t | 97575  | QGRTSP<br>GQ                 | Rattus<br>norvegic<br>us         |
| 1 | 1.00 | 1 | 1 | 0     | 0.003  | 0.001  | 0      | -0.002 | t | 97575  | QGRTSP<br>GQ                 | Mus<br>musculu<br>s              |

|   |      |   |   |       |        |        |        |        |   |        |                              |                       |
|---|------|---|---|-------|--------|--------|--------|--------|---|--------|------------------------------|-----------------------|
| 1 | 1.00 | 1 | 1 | -0.02 | -0.018 | -0.011 | -0.013 | -0.019 | t | 119297 | NTFCDSCI<br>PKTFWN           | Homo sapiens          |
| 1 | 1.00 | 1 | 1 | 0.01  | 0.008  | 0.003  | 0.007  | 0.01   | t | 132903 | SQSSWKS<br>VGSQW             | Mus musculus          |
| 1 | 1.00 | 1 | 1 | 0.03  | 0.033  | 0.03   | 0.03   | 0.029  | t | 142436 | KVAATSLE<br>RWQQ             | Mus musculus          |
| 1 | 1.00 | 1 | 1 | 0     | 0      | 0      | 0      | 0      | t | 52358  | QSKVLPVP<br>QK               | Homo sapiens          |
| 1 | 1.00 | 1 | 1 | 0.06  | 0.058  | 0.048  | 0.053  | 0.06   | t | 121774 | RALVGDEA<br>ELPCRISPG<br>K   | Rattus norvegicus     |
| 1 | 1.00 | 1 | 1 | 0.03  | 0.03   | 0.03   | 0.03   | 0.029  | t | 122327 | EEVTTSGP<br>CGEESVLL<br>DRKS | Homo sapiens          |
| 1 | 1.00 | 1 | 1 | 0     | -0.002 | 0.002  | -0.003 | -0.002 | t | 117745 | ALLRNLGK<br>MTA              | Mus musculus          |
| 1 | 1.00 | 1 | 1 | -0.05 | -0.05  | -0.052 | -0.053 | -0.052 | t | 19424  | GERTRGR<br>QPG               | Homo sapiens          |
| 1 | 1.00 | 1 | 1 | 0.03  | 0.03   | 0.025  | 0.028  | 0.03   | t | 79039  | PGNAPGIA<br>GYNSNGC<br>VYSES | Homo sapiens          |
| 1 | 1.00 | 1 | 1 | 0     | 0      | 0      | 0      | 0      | t | 56905  | SANGEPTV<br>KLYTSVEN<br>AQ   | Homo sapiens          |
| 1 | 1.00 | 1 | 1 | 0     | 0      | 0      | 0      | 0      | t | 45817  | NSGCFRHL<br>DEREECKC<br>LL   | Homo sapiens          |
| 1 | 1.00 | 1 | 1 | -0.02 | -0.02  | -0.02  | -0.02  | -0.02  | t | 141568 | VFPKDKEG<br>RALQKFLG<br>TIR  | Oryctolagus cuniculus |
| 1 | 1.00 | 1 | 1 | -0.01 | -0.014 | -0.01  | -0.007 | -0.009 | t | 118451 | KGIIDPTKV<br>VRTA            | Oryctolagus cuniculus |
| 1 | 1.00 | 1 | 1 | 0.03  | 0.03   | 0.03   | 0.03   | 0.032  | t | 9585   | DPAF                         | Mus musculus          |
| 1 | 1.00 | 1 | 1 | 0.03  | 0.028  | 0.033  | 0.033  | 0.031  | t | 33222  | KRTISIWG<br>T                | Mus musculus          |

|   |      |   |   |       |        |        |        |        |   |        |                       |                       |
|---|------|---|---|-------|--------|--------|--------|--------|---|--------|-----------------------|-----------------------|
| 1 | 1.00 | 1 | 1 | -0.06 | -0.057 | -0.065 | -0.06  | -0.06  | t | 118141 | SKGRRFKG              | Mus musculus          |
| 1 | 1.00 | 1 | 1 | -0.01 | -0.012 | -0.013 | -0.007 | -0.008 | t | 45556  | NQGAWPAG              | Anas platyrhynchos    |
| 1 | 1.00 | 1 | 1 | -0.02 | -0.02  | -0.022 | -0.02  | -0.02  | t | 95987  | VTFTEVGYTRAE          | Homo sapiens          |
| 1 | 1.00 | 1 | 1 | -0.05 | -0.053 | -0.06  | -0.05  | -0.048 | t | 140939 | YNIALGQRADA           | Oryctolagus cuniculus |
| 1 | 1.00 | 1 | 1 | 0.02  | 0.02   | 0.02   | 0.02   | 0.02   | t | 141072 | QVVHVETHRCNI          | Mus musculus          |
| 1 | 1.00 | 1 | 1 | 0.02  | 0.02   | 0.02   | 0.02   | 0.02   | t | 121735 | QCCLAIPH TENS LPY     | Mus musculus          |
| 1 | 1.00 | 1 | 1 | 0.02  | 0.02   | 0.02   | 0.02   | 0.02   | t | 121735 | QCCLAIPH TENS LPY     | Mus musculus          |
| 1 | 1.00 | 1 | 1 | 0.02  | 0.02   | 0.02   | 0.02   | 0.02   | t | 115825 | KIEKFQSEEQ            | Homo sapiens          |
| 1 | 1.00 | 1 | 1 | 0.02  | 0.02   | 0.02   | 0.02   | 0.02   | t | 93522  | NVTNSLDKLI            | Ovis aries            |
| 1 | 1.00 | 1 | 1 | 0.02  | 0.02   | 0.02   | 0.02   | 0.02   | t | 47175  | PDREALYQ QFDEMEECSASL | Homo sapiens          |
| 1 | 1.00 | 1 | 1 | 0     | 0      | 0      | 0      | 0      | t | 151060 | SVIEKMNTQFTAVGK       | Homo sapiens          |
| 1 | 1.00 | 1 | 1 | 0     | 0      | 0      | 0      | 0      | t | 144659 | GREGYPADGGAAGYCNTE    | Oryctolagus cuniculus |
| 1 | 1.00 | 1 | 1 | 0     | 0      | 0      | 0      | 0      | t | 131990 | NSPLRIGGWGNSDA        | Homo sapiens          |
| 1 | 1.00 | 1 | 1 | 0     | 0      | 0      | 0      | 0      | t | 119591 | HTCPPCPA              | Homo sapiens          |
| 1 | 1.00 | 1 | 1 | 0     | 0      | 0      | 0      | 0      | t | 113756 | QGQQSGQGQQGYYS        | Homo sapiens          |
| 1 | 1.00 | 1 | 1 | 0     | 0      | 0      | 0      | 0      | t | 114905 | NKCNFCNAV             | Homo sapiens          |



|   |      |   |   |       |        |        |        |        |   |        |                               |                          |
|---|------|---|---|-------|--------|--------|--------|--------|---|--------|-------------------------------|--------------------------|
| 1 | 1.00 | 1 | 1 | 0     | 0      | 0      | 0      | 0      | t | 115969 | SLPQNIPPL<br>T                | Homo<br>sapiens          |
| 1 | 1.00 | 1 | 1 | 0     | 0      | 0      | 0      | 0      | t | 79144  | ACPSFIQA<br>LTPECM            | Mus<br>musculu<br>s      |
| 1 | 1.00 | 1 | 1 | 0     | 0      | 0      | 0      | 0      | t | 92714  | FNDAFNG<br>GDG                | Ovis<br>aries            |
| 1 | 1.00 | 1 | 1 | 0     | 0      | 0      | 0      | 0      | t | 79255  | ICTSHQHIL<br>KPMCE            | Mus<br>musculu<br>s      |
| 1 | 1.00 | 1 | 1 | 0     | 0      | 0      | 0      | 0      | t | 45696  | NRLIAFAF<br>AGNHVSP<br>THYVP  | Homo<br>sapiens          |
| 1 | 1.00 | 1 | 1 | -0.02 | -0.02  | -0.02  | -0.02  | -0.02  | t | 131199 | DHSPFYLS<br>TAHY              | Homo<br>sapiens          |
| 1 | 1.00 | 1 | 1 | -0.03 | -0.035 | -0.03  | -0.03  | -0.029 | t | 37038  | LKTNSSLL                      | Bos<br>taurus            |
| 1 | 1.00 | 1 | 1 | 0     | -0.007 | 0      | 0.003  | 0.002  | t | 136341 | GTTMPLH<br>AAPHS              | Homo<br>sapiens          |
| 1 | 1.00 | 1 | 1 | 0.01  | 0.014  | 0.01   | 0.011  | 0.01   | t | 61026  | SSGIGPEK                      | Homo<br>sapiens          |
| 1 | 1.00 | 1 | 1 | 0     | -0.002 | -0.003 | 0.003  | 0.002  | t | 63022  | TATRLLSST<br>NSRLC            | Mus<br>musculu<br>s      |
| 1 | 1.00 | 1 | 1 | 0.02  | 0.022  | 0.02   | 0.02   | 0.019  | t | 131651 | SEGTGQAL<br>ASPGSCLE          | Rattus<br>norvegic<br>us |
| 1 | 1.00 | 1 | 1 | 0.01  | 0.01   | 0.017  | 0.01   | 0.01   | t | 106561 | KHYAAFPE<br>NLLI              | Mus<br>musculu<br>s      |
| 1 | 1.00 | 1 | 1 | -0.04 | -0.042 | -0.035 | -0.041 | -0.046 | t | 21325  | GMQAFFR<br>PRCAKTL<br>S<br>CA | Mus<br>musculu<br>s      |
| 1 | 1.00 | 1 | 1 | -0.03 | -0.032 | -0.031 | -0.031 | -0.03  | t | 51958  | QPRKTKPV<br>KSLPERK           | Sus<br>scrofa            |
| 1 | 1.00 | 1 | 1 | -0.03 | -0.032 | -0.031 | -0.031 | -0.03  | t | 51958  | QPRKTKPV<br>KSLPERK           | Mus<br>musculu<br>s      |

|   |      |   |   |       |        |        |        |        |   |        |                              |                       |
|---|------|---|---|-------|--------|--------|--------|--------|---|--------|------------------------------|-----------------------|
| 1 | 1.00 | 1 | 1 | 0.01  | 0.01   | 0.01   | 0.01   | 0.008  | t | 134757 | PEAPRRRS<br>PSPTPTP          | Homo sapiens          |
| 1 | 1.00 | 1 | 1 | 0     | 0      | 0      | -0.006 | -0.004 | t | 142810 | KEWEQIYR                     | Rattus norvegicus     |
| 1 | 1.00 | 1 | 1 | -0.01 | -0.01  | -0.01  | -0.01  | -0.01  | t | 67449  | TYRFVSL                      | Homo sapiens          |
| 1 | 1.00 | 1 | 1 | 0.02  | 0.02   | 0.02   | 0.016  | 0.019  | t | 122406 | IEIGLEGKG<br>FEPTLEALF<br>GK | Homo sapiens          |
| 1 | 1.00 | 1 | 1 | -0.02 | -0.021 | -0.029 | -0.021 | -0.018 | t | 52891  | QYDSNGT<br>KLE               | Mus musculus          |
| 1 | 1.00 | 1 | 1 | 0.04  | 0.041  | 0.04   | 0.039  | 0.038  | t | 36807  | LKASSGYC<br>AWPACYC          | Equus caballus        |
| 1 | 1.00 | 1 | 1 | 0.01  | 0.008  | -0.006 | 0.009  | 0.011  | t | 149247 | AEQQWAL<br>YADGSIRP<br>Q     | Mus musculus          |
| 1 | 1.00 | 1 | 1 | 0.03  | 0.03   | 0.03   | 0.03   | 0.03   | t | 115787 | IASGEPTST<br>P               | Homo sapiens          |
| 1 | 1.00 | 1 | 1 | 0.01  | 0.01   | 0.01   | 0.01   | 0.01   | t | 150971 | CDNTCME<br>SVKNGTYD          | Homo sapiens          |
| 1 | 1.00 | 1 | 1 | 0.01  | 0.01   | 0.01   | 0.01   | 0.01   | t | 123798 | TTLKMWS<br>DF                | Ovis aries            |
| 1 | 1.00 | 1 | 1 | 0.01  | 0.01   | 0.01   | 0.01   | 0.01   | t | 123437 | LKMWSDF<br>LG                | Ovis aries            |
| 1 | 1.00 | 1 | 1 | 0.01  | 0.01   | 0.01   | 0.01   | 0.01   | t | 112801 | LATPNPS                      | Homo sapiens          |
| 1 | 1.00 | 1 | 1 | 0.01  | 0.01   | 0.01   | 0.01   | 0.01   | t | 115514 | TLEDSPEVI<br>ESPPEINTV<br>QV | Homo sapiens          |
| 1 | 1.00 | 1 | 1 | 0.01  | 0.01   | 0.01   | 0.01   | 0.01   | t | 115718 | EAVESTVA<br>TL               | Homo sapiens          |
| 1 | 1.00 | 1 | 1 | 0.01  | 0.007  | 0.01   | 0.01   | 0.01   | t | 98649  | YTPAYYTK<br>DT               | Oryctolagus cuniculus |
| 1 | 1.00 | 1 | 1 | 0.01  | 0.01   | 0.01   | 0.01   | 0.01   | t | 103195 | GASVTVTG<br>QGNSLKV          | Homo sapiens          |
| 1 | 1.00 | 1 | 1 | 0.01  | 0.01   | 0.01   | 0.01   | 0.01   | t | 109237 | GRPGEAG<br>L                 | Rattus norvegicus     |

|   |      |   |   |       |        |        |        |        |   |        |                              |                                  |
|---|------|---|---|-------|--------|--------|--------|--------|---|--------|------------------------------|----------------------------------|
| 1 | 1.00 | 1 | 1 | 0.01  | 0.013  | 0.01   | 0.01   | 0.01   | t | 98649  | YTPAYYTK<br>DT               | Mus<br>musculu<br>s              |
| 1 | 1.00 | 1 | 1 | -0.01 | -0.01  | -0.01  | -0.01  | -0.01  | t | 115690 | AQTQSLVY<br>PF               | Homo<br>sapiens                  |
| 1 | 1.00 | 1 | 1 | -0.03 | -0.03  | -0.03  | -0.03  | -0.03  | t | 141892 | FEEDKKML<br>ELFVQKL          | Mus<br>musculu<br>s              |
| 1 | 1.00 | 1 | 1 | 0.01  | 0.01   | 0.011  | 0.01   | 0.01   | t | 125428 | GSDDYVW<br>LSRLDLAP<br>NYRQ  | Homo<br>sapiens                  |
| 1 | 1.00 | 1 | 1 | 0.01  | 0.012  | 0.01   | 0.013  | 0.01   | t | 42023  | MLNSQAI<br>DNLRASLE          | Homo<br>sapiens                  |
| 1 | 1.00 | 1 | 1 | -0.05 | -0.05  | -0.052 | -0.05  | -0.052 | t | 120319 | WTPPAIFK<br>SYCEIIVTH<br>FPF | Mus<br>musculu<br>s              |
| 1 | 1.00 | 1 | 1 | 0     | -0.004 | -0.006 | -0.001 | 0      | t | 50299  | QALCENPE<br>CVPLKDN          | Oryctola<br>gus<br>cuniculu<br>s |
| 1 | 1.00 | 1 | 1 | 0.03  | 0.027  | 0.03   | 0.03   | 0.03   | t | 105747 | EEVVRVPT<br>TAASTPDA         | Oryctola<br>gus<br>cuniculu<br>s |
| 1 | 1.00 | 1 | 1 | 0.01  | 0.013  | 0.01   | 0.01   | 0.011  | t | 144705 | KGTHSLYS<br>QIAG             | Mus<br>musculu<br>s              |
| 1 | 1.00 | 1 | 1 | 0     | 0      | -0.007 | -0.006 | -0.002 | t | 33488  | KSQQARQ<br>VKNNNPF<br>S      | Homo<br>sapiens                  |
| 1 | 1.00 | 1 | 1 | 0     | -0.002 | 0.005  | -0.001 | -0.002 | t | 9953   | DRCGEDD<br>HDELGFM<br>VP     | Sus<br>scrofa                    |
| 1 | 1.00 | 1 | 1 | 0.04  | 0.038  | 0.037  | 0.043  | 0.04   | t | 69308  | VKRGLTVA<br>VAGAAILV<br>AGLS | Mus<br>musculu<br>s              |
| 1 | 1.00 | 1 | 1 | 0.02  | 0.016  | 0.013  | 0.017  | 0.021  | t | 133862 | KLKKIIDL<br>DAKEN            | Oryctola<br>gus<br>cuniculu<br>s |
| 1 | 1.00 | 1 | 1 | 0     | 0      | 0      | 0      | 0      | t | 66060  | TRLNPD                       | Mus<br>musculu<br>s              |

|   |      |   |   |       |        |        |        |       |   |        |                      |                       |
|---|------|---|---|-------|--------|--------|--------|-------|---|--------|----------------------|-----------------------|
| 1 | 1.00 | 1 | 1 | -0.02 | -0.02  | -0.02  | -0.02  | -0.02 | t | 55639  | RRLGAALL             | Oryctolagus cuniculus |
| 1 | 1.00 | 1 | 1 | 0.01  | 0.01   | 0.022  | 0.017  | 0.01  | t | 96503  | KSGTIFDNFL           | Homo sapiens          |
| 1 | 1.00 | 1 | 1 | 0     | -0.002 | 0      | 0      | 0     | t | 115609 | GSLPQKAQGHRPQDE      | Oryctolagus cuniculus |
| 1 | 1.00 | 1 | 1 | 0     | 0      | 0      | 0      | 0     | t | 115609 | GSLPQKAQGHRPQDE      | Oryctolagus cuniculus |
| 1 | 1.00 | 1 | 1 | 0     | 0      | 0      | 0      | 0     | t | 115609 | GSLPQKAQGHRPQDE      | Oryctolagus cuniculus |
| 1 | 1.00 | 1 | 1 | 0     | -0.002 | 0      | 0      | 0     | t | 115609 | GSLPQKAQGHRPQDE      | Oryctolagus cuniculus |
| 1 | 1.00 | 1 | 1 | 0     | 0      | 0      | 0      | 0     | t | 115609 | GSLPQKAQGHRPQDE      | Macaca mulatta        |
| 1 | 1.00 | 1 | 1 | 0     | -0.002 | 0      | -0.001 | 0     | t | 70549  | VQEGVQQEGA           | Mus musculus          |
| 1 | 1.00 | 1 | 1 | 0     | -0.002 | 0      | -0.001 | 0     | t | 70549  | VQEGVQQEGA           | Mus musculus          |
| 1 | 1.00 | 1 | 1 | 0     | -0.002 | -0.005 | -0.001 | 0     | t | 36205  | LGLKRGIEKAVE         | Mus musculus          |
| 1 | 1.00 | 1 | 1 | 0.01  | 0.006  | -0.001 | 0.013  | 0.012 | t | 49557  | PSVYAWERKKISNCVAD    | Oryctolagus cuniculus |
| 1 | 1.00 | 1 | 1 | 0.02  | 0.018  | 0.027  | 0.021  | 0.019 | t | 130599 | RQGEEVYMWRDSMPA      | Mus musculus          |
| 1 | 1.00 | 1 | 1 | 0     | 0.002  | 0      | 0.001  | 0     | t | 117122 | YTYTDYSTRPHY         | Homo sapiens          |
| 1 | 1.00 | 1 | 1 | 0.01  | 0.014  | 0.005  | 0.01   | 0.01  | t | 2052   | AIPTDPRNVGGDLDPSSIPD | Homo sapiens          |

|   |      |   |   |       |        |        |        |        |   |        |                              |                                  |
|---|------|---|---|-------|--------|--------|--------|--------|---|--------|------------------------------|----------------------------------|
| 1 | 1.00 | 1 | 1 | 0.02  | 0.02   | 0.02   | 0.02   | 0.02   | t | 106514 | HKMTNFP<br>DSLLT             | Mus<br>musculu<br>s              |
| 1 | 1.00 | 1 | 1 | 0     | 0      | 0      | 0      | 0      | t | 133956 | WIMSNF                       | Mus<br>musculu<br>s              |
| 1 | 1.00 | 1 | 1 | 0     | 0      | 0      | 0      | 0      | t | 115484 | SFSDIPNPI<br>GSENSEKT<br>TMP | Homo<br>sapiens                  |
| 1 | 1.00 | 1 | 1 | 0     | 0      | 0      | 0      | 0      | t | 115905 | PVALINNQ<br>FL               | Homo<br>sapiens                  |
| 1 | 1.00 | 1 | 1 | 0     | 0      | 0      | 0      | 0      | t | 111157 | CMPLYGSL<br>AC               | Homo<br>sapiens                  |
| 1 | 1.00 | 1 | 1 | 0     | 0      | 0      | 0      | 0      | t | 38693  | LPRSNTSS<br>GAIPPAD          | Homo<br>sapiens                  |
| 1 | 1.00 | 1 | 1 | 0     | 0      | 0      | 0      | 0      | t | 22360  | GSGVRGD<br>FGSLAPRV<br>ARQL  | Cavia<br>porcellu<br>s           |
| 1 | 1.00 | 1 | 1 | 0     | 0      | 0      | 0      | 0      | t | 29936  | KARRPEGR<br>TWAQ             | Homo<br>sapiens                  |
| 1 | 1.00 | 1 | 1 | -0.02 | -0.02  | -0.02  | -0.02  | -0.02  | t | 115462 | QYLQYLYQ<br>GPIVLNP<br>WDQVK | Homo<br>sapiens                  |
| 1 | 1.00 | 1 | 1 | -0.02 | -0.02  | -0.02  | -0.02  | -0.02  | t | 78305  | WHSMFAP                      | Homo<br>sapiens                  |
| 1 | 1.00 | 1 | 1 | -0.02 | -0.02  | -0.02  | -0.02  | -0.02  | t | 97324  | GDSQATY<br>NY                | Oryctola<br>gus<br>cuniculu<br>s |
| 1 | 1.00 | 1 | 1 | -0.02 | -0.02  | -0.02  | -0.02  | -0.02  | t | 86870  | NLFGATLV<br>NA               | Homo<br>sapiens                  |
| 1 | 1.00 | 1 | 1 | -0.01 | -0.012 | -0.004 | -0.011 | -0.01  | t | 64648  | TKPTKKPT<br>FKTT             | Mus<br>musculu<br>s              |
| 1 | 1.00 | 1 | 1 | -0.01 | -0.01  | -0.009 | -0.01  | -0.01  | t | 55581  | RRGPRLGV<br>RATRKTS          | Homo<br>sapiens                  |
| 1 | 1.00 | 1 | 1 | 0.03  | 0.03   | 0.026  | 0.03   | 0.032  | t | 49112  | PQQSFPQ<br>QQQ               | Mus<br>musculu<br>s              |
| 1 | 1.00 | 1 | 1 | -0.01 | -0.012 | -0.006 | -0.01  | -0.008 | t | 58371  | SHITSYPAY<br>FW              | Mus<br>musculu<br>s              |

|   |      |   |   |       |        |        |        |        |   |        |                              |                              |
|---|------|---|---|-------|--------|--------|--------|--------|---|--------|------------------------------|------------------------------|
| 1 | 1.00 | 1 | 1 | 0     | 0.002  | -0.011 | -0.003 | 0      | t | 33149  | KRHDGGC<br>RKELAAV           | Homo<br>sapiens              |
| 1 | 1.00 | 1 | 1 | 0.02  | 0.022  | 0.015  | 0.02   | 0.02   | t | 107246 | TEIPKEEKD<br>PGMGAM          | Rattus<br>norvegicus         |
| 1 | 1.00 | 1 | 1 | 0     | 0      | 0      | -0.006 | -0.004 | t | 138758 | AMVYLGA<br>KDSTRQI           | Mus<br>musculus              |
| 1 | 1.00 | 1 | 1 | 0.04  | 0.042  | 0.04   | 0.043  | 0.042  | t | 117948 | KFVETPGQ<br>KYKETDL          | Homo<br>sapiens              |
| 1 | 1.00 | 1 | 1 | -0.01 | -0.006 | -0.003 | -0.009 | -0.01  | t | 46857  | PALSTGLI                     | Homo<br>sapiens              |
| 1 | 1.00 | 1 | 1 | 0.03  | 0.036  | 0.03   | 0.03   | 0.03   | t | 123227 | GGGDAPP<br>SH                | Ovis<br>aries                |
| 1 | 1.00 | 1 | 1 | -0.01 | -0.01  | -0.01  | -0.01  | -0.01  | t | 133722 | TSKSKYPL<br>VV               | Mus<br>musculus              |
| 1 | 1.00 | 1 | 1 | -0.02 | -0.024 | -0.026 | -0.021 | -0.02  | t | 70370  | VPLYNRFS<br>YIPNGALK<br>FVD  | Oryctola<br>gus<br>cuniculus |
| 1 | 1.00 | 1 | 1 | 0     | 0      | -0.009 | 0      | -0.001 | t | 102928 | VYYSGEIIR<br>AATTSPAR<br>ENY | Mus<br>musculus              |
| 1 | 1.00 | 1 | 1 | 0     | 0.002  | -0.011 | 0.001  | 0.002  | t | 57296  | SDSVGQQI<br>KVIPVDPY<br>FFQM | Homo<br>sapiens              |
| 1 | 1.00 | 1 | 1 | -0.05 | -0.043 | -0.046 | -0.047 | -0.05  | t | 24842  | HSQWNKP<br>SKPKTNM<br>K      | Gallus<br>gallus             |
| 1 | 1.00 | 1 | 1 | -0.05 | -0.054 | -0.046 | -0.047 | -0.05  | t | 24842  | HSQWNKP<br>SKPKTNM<br>K      | Oryctola<br>gus<br>cuniculus |
| 1 | 1.00 | 1 | 1 | 0     | 0      | 0      | 0      | 0      | t | 137743 | DTPLTIAGL<br>KLV             | Mus<br>musculus              |
| 1 | 1.00 | 1 | 1 | 0.01  | 0.01   | 0.015  | 0.01   | 0.01   | t | 9629   | DPESPEKK<br>KLS              | Mus<br>musculus              |

|   |      |   |   |       |        |       |       |        |   |        |                              |                                  |
|---|------|---|---|-------|--------|-------|-------|--------|---|--------|------------------------------|----------------------------------|
| 1 | 1.00 | 1 | 1 | 0.01  | 0.01   | 0.01  | 0.01  | 0.01   | t | 53729  | RFKSQDA<br>D                 | Oryctola<br>gus<br>cuniculu<br>s |
| 1 | 1.00 | 1 | 1 | -0.01 | -0.01  | -0.01 | -0.01 | -0.01  | t | 54545  | RLGAALLQ                     | Oryctola<br>gus<br>cuniculu<br>s |
| 1 | 1.00 | 1 | 1 | -0.02 | -0.02  | -0.02 | -0.02 | -0.021 | t | 44616  | NKVIWDR<br>DWMYP             | Mus<br>musculu<br>s              |
| 1 | 1.00 | 1 | 1 | -0.02 | -0.02  | -0.02 | -0.02 | -0.021 | t | 44616  | NKVIWDR<br>DWMYP             | Mus<br>musculu<br>s              |
| 1 | 1.00 | 1 | 1 | 0.01  | 0.008  | 0.005 | 0.011 | 0.009  | t | 135736 | PRIGGQRE<br>LKKITE           | Mus<br>musculu<br>s              |
| 1 | 1.00 | 1 | 1 | 0.01  | 0.01   | 0.01  | 0.01  | 0.01   | t | 45697  | NRLIAFAS<br>RGNHDSP<br>THYV  | Homo<br>sapiens                  |
| 1 | 1.00 | 1 | 1 | 0     | -0.003 | 0     | 0     | 0      | t | 122083 | DPNIKLV<br>DDCWATS           | Oryctola<br>gus<br>cuniculu<br>s |
| 1 | 1.00 | 1 | 1 | 0     | -0.003 | 0     | 0     | 0      | t | 110385 | QLYKTCKQ<br>AGTCPPDII<br>PKV | Oryctola<br>gus<br>cuniculu<br>s |
| 1 | 1.00 | 1 | 1 | 0     | -0.003 | 0     | 0     | 0      | t | 110385 | QLYKTCKQ<br>AGTCPPDII<br>PKV | Oryctola<br>gus<br>cuniculu<br>s |
| 1 | 1.00 | 1 | 1 | 0     | -0.003 | 0     | 0     | 0      | t | 106322 | DAEFRHDS<br>G                | Oryctola<br>gus<br>cuniculu<br>s |
| 1 | 1.00 | 1 | 1 | 0     | 0.003  | 0     | 0     | 0      | t | 104327 | VEQHNPIN<br>AGTELSAT         | Sus<br>scrofa                    |
| 1 | 1.00 | 1 | 1 | 0     | 0.003  | 0     | 0     | 0      | t | 63038  | TAVSPTTL<br>RTEVVK           | Sus<br>scrofa                    |
| 1 | 1.00 | 1 | 1 | 0     | -0.007 | 0     | 0     | 0      | t | 79444  | VARGDLA<br>ARGDLAA<br>RGDLA  | Oryctola<br>gus<br>cuniculu<br>s |

|   |      |   |   |   |        |   |   |   |   |       |                              |                                  |
|---|------|---|---|---|--------|---|---|---|---|-------|------------------------------|----------------------------------|
| 1 | 1.00 | 1 | 1 | 0 | -0.003 | 0 | 0 | 0 | t | 95524 | KRQIYTDIE<br>MNRLGK          | Oryctola<br>gus<br>cuniculu<br>s |
| 1 | 1.00 | 1 | 1 | 0 | 0.002  | 0 | 0 | 0 | t | 66976 | TVDNPAST<br>TNKDKLFA<br>VWK  | Rattus<br>norvegic<br>us         |
| 1 | 1.00 | 1 | 1 | 0 | -0.007 | 0 | 0 | 0 | t | 79368 | RGDLARG<br>DLARGDL           | Oryctola<br>gus<br>cuniculu<br>s |
| 1 | 1.00 | 1 | 1 | 0 | -0.003 | 0 | 0 | 0 | t | 97484 | LVEETSFID<br>AGAP            | Oryctola<br>gus<br>cuniculu<br>s |
| 1 | 1.00 | 1 | 1 | 0 | -0.003 | 0 | 0 | 0 | t | 63037 | TAVSPTTL<br>R                | Oryctola<br>gus<br>cuniculu<br>s |
| 1 | 1.00 | 1 | 1 | 0 | 0.002  | 0 | 0 | 0 | t | 70656 | VQTRHVV<br>QHRSRSES<br>SIESF | Rattus<br>norvegic<br>us         |
| 1 | 1.00 | 1 | 1 | 0 | -0.004 | 0 | 0 | 0 | t | 53839 | RGDLQVL<br>AQK               | Mus<br>musculu<br>s              |
| 1 | 1.00 | 1 | 1 | 0 | -0.003 | 0 | 0 | 0 | t | 43242 | NANPNAN<br>PNANP             | Oryctola<br>gus<br>cuniculu<br>s |
| 1 | 1.00 | 1 | 1 | 0 | -0.008 | 0 | 0 | 0 | t | 41126 | MASLIYRQ<br>LL               | Mus<br>musculu<br>s              |
| 1 | 1.00 | 1 | 1 | 0 | -0.003 | 0 | 0 | 0 | t | 59229 | SLKMADP<br>NRFRGKDL<br>P     | Oryctola<br>gus<br>cuniculu<br>s |
| 1 | 1.00 | 1 | 1 | 0 | 0.002  | 0 | 0 | 0 | t | 44474 | NKDKLFAV<br>WK               | Rattus<br>norvegic<br>us         |
| 1 | 1.00 | 1 | 1 | 0 | -0.003 | 0 | 0 | 0 | t | 58582 | SIKEDVQF                     | Oryctola<br>gus<br>cuniculu<br>s |



|   |      |   |   |       |        |        |       |       |   |        |                              |                                  |
|---|------|---|---|-------|--------|--------|-------|-------|---|--------|------------------------------|----------------------------------|
| 1 | 1.00 | 1 | 1 | 0     | -0.003 | 0      | 0     | 0     | t | 37657  | LLPHSNLD<br>HI               | Oryctola<br>gus<br>cuniculu<br>s |
| 1 | 1.00 | 1 | 1 | 0     | -0.003 | 0      | 0     | 0     | t | 59967  | SNYYSDNE<br>IEQHTAKQ<br>PKL  | Oryctola<br>gus<br>cuniculu<br>s |
| 1 | 1.00 | 1 | 1 | 0     | -0.004 | 0      | 0     | 0     | t | 53839  | RGDLQVL<br>AQK               | Mus<br>musculu<br>s              |
| 1 | 1.00 | 1 | 1 | 0     | -0.003 | 0      | 0     | 0     | t | 11815  | EENVEENV<br>EENVEENV         | Oryctola<br>gus<br>cuniculu<br>s |
| 1 | 1.00 | 1 | 1 | 0     | -0.003 | 0      | 0     | 0     | t | 9516   | DNNLVSG<br>P                 | Oryctola<br>gus<br>cuniculu<br>s |
| 1 | 1.00 | 1 | 1 | 0     | 0.002  | 0      | 0     | 0     | t | 279    | AALGDSLY<br>GAASLNDF<br>GILA | Rattus<br>norvegic<br>us         |
| 1 | 1.00 | 1 | 1 | 0     | -0.003 | 0      | 0     | 0     | t | 9520   | DNNQTSP                      | Oryctola<br>gus<br>cuniculu<br>s |
| 1 | 1.00 | 1 | 1 | 0     | -0.003 | 0      | 0     | 0     | t | 9516   | DNNLVSG<br>P                 | Oryctola<br>gus<br>cuniculu<br>s |
| 1 | 1.00 | 1 | 1 | 0.03  | 0.03   | 0.031  | 0.03  | 0.03  | t | 38816  | LQDGQVKI                     | Mus<br>musculu<br>s              |
| 1 | 1.00 | 1 | 1 | -0.02 | -0.023 | -0.024 | -0.02 | -0.02 | t | 17640  | FRRLGAAL<br>LQ               | Oryctola<br>gus<br>cuniculu<br>s |
| 1 | 1.00 | 1 | 1 | 0.04  | 0.04   | 0.04   | 0.04  | 0.041 | t | 89783  | TVEVEMT<br>ASTAVWD<br>EWSP   | Aotus                            |
| 1 | 1.00 | 1 | 1 | 0.01  | 0.01   | 0.01   | 0.01  | 0.01  | t | 149079 | NLTQTQM                      | Sus<br>scrofa                    |
| 1 | 1.00 | 1 | 1 | 0.01  | 0.01   | 0.01   | 0.01  | 0.01  | t | 121685 | NVVPLIVA<br>SPYVDAF          | Mus<br>musculu<br>s              |

|   |      |   |   |       |        |        |       |       |   |        |                              |                                  |
|---|------|---|---|-------|--------|--------|-------|-------|---|--------|------------------------------|----------------------------------|
| 1 | 1.00 | 1 | 1 | 0.01  | 0.01   | 0.01   | 0.01  | 0.01  | t | 128069 | PFYPAYEG<br>QFSLEEKSL<br>SLK | Homo<br>sapiens                  |
| 1 | 1.00 | 1 | 1 | 0.01  | 0.01   | 0.01   | 0.01  | 0.01  | t | 121685 | NVVPLIVA<br>SPYVDAF          | Mus<br>musculu<br>s              |
| 1 | 1.00 | 1 | 1 | 0.01  | 0.01   | 0.01   | 0.01  | 0.01  | t | 123124 | EFKSRIEDL                    | Ovis<br>aries                    |
| 1 | 1.00 | 1 | 1 | 0.01  | 0.01   | 0.01   | 0.01  | 0.01  | t | 99283  | GKLFEVKP<br>DKKNPQL          | Homo<br>sapiens                  |
| 1 | 1.00 | 1 | 1 | 0.01  | 0.01   | 0.01   | 0.01  | 0.01  | t | 106881 | SVMTSNP<br>DRTFI             | Mus<br>musculu<br>s              |
| 1 | 1.00 | 1 | 1 | 0.01  | 0.01   | 0.01   | 0.01  | 0.01  | t | 100573 | TRAQKLFA<br>MWRITY           | Homo<br>sapiens                  |
| 1 | 1.00 | 1 | 1 | 0.01  | 0.01   | 0.01   | 0.01  | 0.01  | t | 78161  | GDDRLF                       | Equus<br>caballus                |
| 1 | 1.00 | 1 | 1 | 0.01  | 0.01   | 0.01   | 0.01  | 0.01  | t | 41320  | MEECASH<br>LPYFEQG<br>MQLAEQ | Homo<br>sapiens                  |
| 1 | 1.00 | 1 | 1 | 0.01  | 0.01   | 0.01   | 0.01  | 0.01  | t | 12958  | ELAWGIAS<br>DGGALKH<br>GFKTT | Oryctola<br>gus<br>cuniculu<br>s |
| 1 | 1.00 | 1 | 1 | -0.01 | -0.01  | -0.01  | -0.01 | -0.01 | t | 137737 | DTALTYAG<br>LKLV             | Mus<br>musculu<br>s              |
| 1 | 1.00 | 1 | 1 | -0.01 | -0.01  | -0.01  | -0.01 | -0.01 | t | 107020 | YMTPSKHL<br>YWLP             | Mus<br>musculu<br>s              |
| 1 | 1.00 | 1 | 1 | -0.01 | -0.01  | -0.01  | -0.01 | -0.01 | t | 99582  | QQFKREL<br>RLPQQCG           | Homo<br>sapiens                  |
| 1 | 1.00 | 1 | 1 | 0     | -0.003 | 0.006  | 0     | 0     | t | 100075 | GPGVDYK<br>NNLDPLS           | Oryctola<br>gus<br>cuniculu<br>s |
| 1 | 1.00 | 1 | 1 | -0.02 | -0.02  | -0.01  | -0.02 | -0.02 | t | 45420  | NPNDPP                       | Mus<br>musculu<br>s              |
| 1 | 1.00 | 1 | 1 | -0.02 | -0.02  | -0.01  | -0.02 | -0.02 | t | 45420  | NPNDPP                       | Mus<br>musculu<br>s              |
| 1 | 1.00 | 1 | 1 | 0     | 0.002  | -0.002 | 0.001 | 0     | t | 21469  | GNLLSCL                      | Homo<br>sapiens                  |

|   |      |   |   |       |        |        |        |        |   |        |                               |                                  |
|---|------|---|---|-------|--------|--------|--------|--------|---|--------|-------------------------------|----------------------------------|
| 1 | 1.00 | 1 | 1 | -0.01 | -0.012 | -0.005 | -0.01  | -0.011 | t | 122519 | PIECRYPR<br>QGNVSS            | Oryctola<br>gus<br>cuniculu<br>s |
| 1 | 1.00 | 1 | 1 | 0.03  | 0.028  | 0.031  | 0.023  | 0.03   | t | 134786 | RPVDQY                        | Mus<br>musculu<br>s              |
| 1 | 1.00 | 1 | 1 | 0.02  | 0.022  | 0.02   | 0.023  | 0.02   | t | 110303 | KHRRLLSSD<br>QDQSQTP<br>ETPAT | Homo<br>sapiens                  |
| 1 | 1.00 | 1 | 1 | 0.01  | 0.012  | 0.01   | 0.009  | 0.01   | t | 149512 | VLQESTYQ<br>LV                | Homo<br>sapiens                  |
| 1 | 1.00 | 1 | 1 | 0.02  | 0.016  | 0.031  | 0.019  | 0.018  | t | 111445 | KEIEAYIFE<br>MFNENQ           | Oryctola<br>gus<br>cuniculu<br>s |
| 1 | 1.00 | 1 | 1 | 0.01  | 0.006  | -0.001 | 0.007  | 0.011  | t | 4923   | ATDKEGK<br>DVLVCNK            | Oryctola<br>gus<br>cuniculu<br>s |
| 1 | 1.00 | 1 | 1 | -0.01 | -0.006 | -0.01  | -0.009 | -0.009 | t | 51392  | QLKLNWF                       | Homo<br>sapiens                  |
| 1 | 1.00 | 1 | 1 | 0     | 0.002  | -0.003 | 0.007  | 0.002  | t | 125118 | KVAAEQSL<br>ITVEGDK           | Homo<br>sapiens                  |
| 1 | 1.00 | 1 | 1 | -0.01 | -0.012 | -0.017 | -0.01  | -0.01  | t | 121065 | WLKVKILP<br>EVKEKHEF          | Oryctola<br>gus<br>cuniculu<br>s |
| 1 | 1.00 | 1 | 1 | 0.04  | 0.04   | 0.039  | 0.034  | 0.04   | t | 45279  | NNVDQI                        | Homo<br>sapiens                  |
| 1 | 1.00 | 1 | 1 | 0     | 0      | 0      | 0      | 0      | t | 135587 | QESYSSKK<br>L                 | Oryctola<br>gus<br>cuniculu<br>s |
| 1 | 1.00 | 1 | 1 | 0     | 0.002  | 0      | 0      | -0.001 | t | 119439 | DGDFAIVH<br>MTKLLEDY<br>TGKI  | Rattus<br>norvegic<br>us         |
| 1 | 1.00 | 1 | 1 | -0.01 | -0.017 | -0.015 | -0.009 | -0.01  | t | 147074 | KRKQNLV<br>QAWQAK             | Homo<br>sapiens                  |
| 1 | 1.00 | 1 | 1 | 0     | -0.002 | 0.003  | -0.001 | 0.002  | t | 52330  | QSGRQPT<br>PISP               | Mus<br>musculu<br>s              |

|   |      |   |   |       |        |        |        |        |   |        |                           |                                  |
|---|------|---|---|-------|--------|--------|--------|--------|---|--------|---------------------------|----------------------------------|
| 1 | 1.00 | 1 | 1 | -0.04 | -0.044 | -0.038 | -0.037 | -0.038 | t | 6712   | CNNPHRIL                  | Oryctola<br>gus<br>cuniculu<br>s |
| 1 | 1.00 | 1 | 1 | 0.04  | 0.04   | 0.033  | 0.033  | 0.04   | t | 119502 | NNLGTI                    | Homo<br>sapiens                  |
| 1 | 1.00 | 1 | 1 | 0.06  | 0.06   | 0.06   | 0.06   | 0.06   | t | 115736 | EVIESPPEI<br>N            | Homo<br>sapiens                  |
| 1 | 1.00 | 1 | 1 | 0.04  | 0.04   | 0.04   | 0.04   | 0.04   | t | 150998 | ILGNPECE<br>SLSTASS       | Homo<br>sapiens                  |
| 1 | 1.00 | 1 | 1 | 0.04  | 0.04   | 0.04   | 0.04   | 0.04   | t | 111158 | CNASTSM<br>QC             | Homo<br>sapiens                  |
| 1 | 1.00 | 1 | 1 | 0.02  | 0.02   | 0.02   | 0.02   | 0.02   | t | 139920 | TGSWFRP                   | Ovis<br>aries                    |
| 1 | 1.00 | 1 | 1 | 0.02  | 0.02   | 0.02   | 0.02   | 0.02   | t | 106881 | SVMTSNP<br>DRTFI          | Mus<br>musculu<br>s              |
| 1 | 1.00 | 1 | 1 | 0     | 0      | 0      | 0      | 0      | t | 131077 | SQTTAAPS<br>CPEGT         | Rattus<br>norvegic<br>us         |
| 1 | 1.00 | 1 | 1 | 0     | 0      | 0      | 0      | 0      | t | 98683  | AGGAGE                    | Gallus<br>gallus                 |
| 1 | 1.00 | 1 | 1 | 0     | 0      | 0      | 0      | 0      | t | 80899  | DANYLTGS<br>LT            | Homo<br>sapiens                  |
| 1 | 1.00 | 1 | 1 | -0.02 | -0.02  | -0.02  | -0.02  | -0.02  | t | 149431 | QPFPPQQ<br>PYP            | Homo<br>sapiens                  |
| 1 | 1.00 | 1 | 1 | -0.02 | -0.02  | -0.02  | -0.02  | -0.02  | t | 149431 | QPFPPQQ<br>PYP            | Mus<br>musculu<br>s              |
| 1 | 1.00 | 1 | 1 | -0.02 | -0.02  | -0.02  | -0.02  | -0.02  | t | 112054 | AVYFCHQ                   | Homo<br>sapiens                  |
| 1 | 1.00 | 1 | 1 | -0.02 | -0.02  | -0.02  | -0.02  | -0.02  | t | 103255 | HGTCANQ<br>CPIVDAGD       | Homo<br>sapiens                  |
| 1 | 1.00 | 1 | 1 | 0.03  | 0.026  | 0.02   | 0.03   | 0.03   | t | 21715  | GPNNSEAI<br>PALTAAE       | Oryctola<br>gus<br>cuniculu<br>s |
| 1 | 1.00 | 1 | 1 | 0.02  | 0.02   | 0.018  | 0.017  | 0.02   | t | 47823  | PHGVVFLH<br>VTYVPSQE<br>R | Homo<br>sapiens                  |

|   |      |   |   |       |        |        |        |        |   |        |                              |                       |
|---|------|---|---|-------|--------|--------|--------|--------|---|--------|------------------------------|-----------------------|
| 1 | 1.00 | 1 | 1 | 0.03  | 0.032  | 0.028  | 0.031  | 0.03   | t | 26506  | IIGRLHLND                    | Homo sapiens          |
| 1 | 1.00 | 1 | 1 | 0     | 0      | 0.005  | 0.01   | 0.003  | t | 115677 | AHRET                        | Homo sapiens          |
| 1 | 1.00 | 1 | 1 | -0.01 | -0.012 | 0.006  | -0.003 | -0.01  | t | 112725 | WHTSDPL<br>PPAQP             | Homo sapiens          |
| 1 | 1.00 | 1 | 1 | 0.01  | 0.014  | 0.009  | 0.011  | 0.009  | t | 32070  | KLPDDFM<br>GCVLAWN<br>TRN    | Homo sapiens          |
| 1 | 1.00 | 1 | 1 | 0.03  | 0.03   | 0.032  | 0.03   | 0.03   | t | 49749  | PTPSDNPF<br>SKLYKETIE<br>TFD | Homo sapiens          |
| 1 | 1.00 | 1 | 1 | 0.02  | 0.018  | 0.025  | 0.017  | 0.018  | t | 96874  | SIAPDLSLD<br>FEKLVN          | Mus musculus          |
| 1 | 1.00 | 1 | 1 | 0     | 0      | 0      | 0      | 0.002  | t | 15930  | FFVAPFPE<br>VF               | Homo sapiens          |
| 1 | 1.00 | 1 | 1 | 0.02  | 0.022  | 0.016  | 0.02   | 0.02   | t | 56846  | SAKREMA<br>QKLAIDQ<br>LT     | Equus caballus        |
| 1 | 1.00 | 1 | 1 | 0.01  | 0.006  | 0.005  | 0.009  | 0.01   | t | 12843  | EKPNLSSK<br>RSE              | Oryctolagus cuniculus |
| 1 | 1.00 | 1 | 1 | -0.01 | -0.012 | -0.008 | -0.007 | -0.008 | t | 98794  | GERQH                        | Mus musculus          |
| 1 | 1.00 | 1 | 1 | -0.02 | -0.02  | -0.02  | -0.022 | -0.02  | t | 148679 | LQQQLVP<br>QLQ               | Homo sapiens          |
| 1 | 1.00 | 1 | 1 | 0.04  | 0.038  | 0.04   | 0.037  | 0.041  | t | 115108 | SHGRTQD<br>ENP               | Mus musculus          |
| 1 | 1.00 | 1 | 1 | 0.01  | 0.01   | 0.01   | 0.01   | 0.01   | t | 25622  | IDLTKNA<br>A                 | Homo sapiens          |
| 1 | 1.00 | 1 | 1 | -0.01 | -0.01  | -0.01  | -0.01  | -0.01  | t | 26293  | IGPEKAFR                     | Oryctolagus cuniculus |
| 1 | 1.00 | 1 | 1 | 0     | 0      | -0.005 | 0      | 0.001  | t | 10868  | DYEDRYR<br>E                 | Mus musculus          |

|   |      |   |   |       |        |       |        |        |   |        |                      |              |
|---|------|---|---|-------|--------|-------|--------|--------|---|--------|----------------------|--------------|
| 1 | 1.00 | 1 | 1 | 0.01  | 0.014  | 0.01  | 0.013  | 0.013  | t | 62347  | SVTEEIAEEDK          | Homo sapiens |
| 1 | 1.00 | 1 | 1 | 0     | 0      | 0     | 0      | -0.001 | t | 111304 | GAVGENVPDDLVIKG      | Mus musculus |
| 1 | 1.00 | 1 | 1 | 0.02  | 0.019  | 0.019 | 0.021  | 0.02   | t | 10340  | DTGCAIDITRKEMRC      | Homo sapiens |
| 1 | 1.00 | 1 | 1 | -0.09 | -0.09  | -0.09 | -0.09  | -0.091 | t | 98746  | EDWRRPSHQQ           | Homo sapiens |
| 1 | 1.00 | 1 | 1 | 0.04  | 0.038  | 0.038 | 0.037  | 0.04   | t | 20455  | GITGETTTT EYSNARYV   | Mus musculus |
| 1 | 1.00 | 1 | 1 | 0.04  | 0.04   | 0.038 | 0.037  | 0.04   | t | 20455  | GITGETTTT EYSNARYV   | Homo sapiens |
| 1 | 1.00 | 1 | 1 | -0.03 | -0.032 | -0.03 | -0.027 | -0.031 | t | 74801  | YLLQKLRLN            | Mus musculus |
| 1 | 1.00 | 1 | 1 | -0.03 | -0.032 | -0.03 | -0.027 | -0.031 | t | 74801  | YLLQKLRLN            | Mus musculus |
| 1 | 1.00 | 1 | 1 | 0.05  | 0.05   | 0.05  | 0.05   | 0.05   | t | 115877 | NVPGEIVSL            | Homo sapiens |
| 1 | 1.00 | 1 | 1 | 0.03  | 0.03   | 0.03  | 0.03   | 0.03   | t | 123588 | PKFEQLKEG            | Ovis aries   |
| 1 | 1.00 | 1 | 1 | 0.03  | 0.03   | 0.03  | 0.03   | 0.03   | t | 11576  | EEEEEEEGAGDGE        | Homo sapiens |
| 1 | 1.00 | 1 | 1 | 0.01  | 0.01   | 0.01  | 0.01   | 0.01   | t | 100201 | KKFIDIFKEE           | Mus musculus |
| 1 | 1.00 | 1 | 1 | 0.01  | 0.01   | 0.01  | 0.01   | 0.01   | t | 93510  | NSLDKLISSV           | Ovis aries   |
| 1 | 1.00 | 1 | 1 | 0.01  | 0.01   | 0.01  | 0.01   | 0.01   | t | 93058  | KATKDEKIEE           | Ovis aries   |
| 1 | 1.00 | 1 | 1 | 0.01  | 0.01   | 0.01  | 0.01   | 0.01   | t | 47184  | PDREVLYQEFDEMEECASQL | Homo sapiens |

|   |      |   |   |       |        |        |       |       |   |        |                              |                                  |
|---|------|---|---|-------|--------|--------|-------|-------|---|--------|------------------------------|----------------------------------|
| 1 | 1.00 | 1 | 1 | 0.01  | 0.01   | 0.01   | 0.01  | 0.01  | t | 46833  | PAIVPDKE<br>VLYQQYDE<br>MEEC | Homo<br>sapiens                  |
| 1 | 1.00 | 1 | 1 | 0.01  | 0.007  | 0.01   | 0.01  | 0.01  | t | 46756  | PACYCYGL<br>PDSVKIW          | Mus<br>musculu<br>s              |
| 1 | 1.00 | 1 | 1 | 0.01  | 0.01   | 0.01   | 0.01  | 0.01  | t | 46823  | PAIIPDREA<br>LYQEFDE<br>MEEC | Homo<br>sapiens                  |
| 1 | 1.00 | 1 | 1 | -0.01 | -0.01  | -0.01  | -0.01 | -0.01 | t | 156871 | FQNIASM<br>PHLYV             | Mus<br>musculu<br>s              |
| 1 | 1.00 | 1 | 1 | -0.01 | -0.01  | -0.01  | -0.01 | -0.01 | t | 156871 | FQNIASM<br>PHLYV             | Gallus<br>gallus                 |
| 1 | 1.00 | 1 | 1 | -0.01 | -0.01  | -0.01  | -0.01 | -0.01 | t | 156871 | FQNIASM<br>PHLYV             | Bos<br>taurus                    |
| 1 | 1.00 | 1 | 1 | -0.01 | -0.01  | -0.01  | -0.01 | -0.01 | t | 116037 | YIPIQYVLS<br>R               | Homo<br>sapiens                  |
| 1 | 1.00 | 1 | 1 | -0.01 | -0.01  | -0.01  | -0.01 | -0.01 | t | 104747 | DCGDSFN<br>PLF               | Homo<br>sapiens                  |
| 1 | 1.00 | 1 | 1 | -0.01 | -0.01  | -0.01  | -0.01 | -0.01 | t | 78400  | GLLNDY                       | Mus<br>musculu<br>s              |
| 1 | 1.00 | 1 | 1 | -0.03 | -0.03  | -0.03  | -0.03 | -0.03 | t | 115205 | DELQDKIH<br>PFAQTQSL<br>VYPF | Homo<br>sapiens                  |
| 1 | 1.00 | 1 | 1 | -0.07 | -0.07  | -0.07  | -0.07 | -0.07 | t | 135804 | YTNIFLKF                     | Homo<br>sapiens                  |
| 1 | 1.00 | 1 | 1 | 0.01  | 0.008  | 0.01   | 0.009 | 0.01  | t | 117112 | WPMNDD<br>STRR               | Mus<br>musculu<br>s              |
| 1 | 1.00 | 1 | 1 | -0.02 | -0.02  | -0.023 | -0.02 | -0.02 | t | 69865  | VLYENQK<br>QIANQFN<br>KAI    | Homo<br>sapiens                  |
| 1 | 1.00 | 1 | 1 | -0.05 | -0.047 | -0.063 | -0.05 | -0.05 | t | 12944  | ELAKLRAG<br>KASDSQTP<br>DT   | Mus<br>musculu<br>s              |
| 1 | 1.00 | 1 | 1 | 0.04  | 0.042  | 0.054  | 0.041 | 0.04  | t | 60589  | SQVYTTSE<br>YPSQ             | Homo<br>sapiens                  |
| 1 | 1.00 | 1 | 1 | 0.02  | 0.02   | 0.021  | 0.02  | 0.02  | t | 68034  | VDPDDVN<br>KNTLQAR           | Homo<br>sapiens                  |
| 1 | 1.00 | 1 | 1 | 0.03  | 0.03   | 0.03   | 0.03  | 0.03  | t | 141620 | DNPRPND<br>KTGS              | Oryctola<br>gus<br>cuniculu<br>s |

|   |      |   |   |       |        |        |        |        |   |        |                            |                                  |
|---|------|---|---|-------|--------|--------|--------|--------|---|--------|----------------------------|----------------------------------|
| 1 | 1.00 | 1 | 1 | 0.03  | 0.03   | 0.03   | 0.03   | 0.03   | t | 141620 | DNPRPND<br>KTGS            | Oryctola<br>gus<br>cuniculu<br>s |
| 1 | 1.00 | 1 | 1 | -0.03 | -0.03  | -0.03  | -0.03  | -0.03  | t | 145423 | PPPGMR                     | Homo<br>sapiens                  |
| 1 | 1.00 | 1 | 1 | -0.01 | -0.012 | -0.015 | -0.011 | -0.01  | t | 109870 | RTGPAGA<br>A               | Rattus<br>norvegic<br>us         |
| 1 | 1.00 | 1 | 1 | 0.03  | 0.03   | 0.037  | 0.03   | 0.03   | t | 131304 | PVVWKN                     | Homo<br>sapiens                  |
| 1 | 1.00 | 1 | 1 | -0.01 | -0.008 | -0.014 | -0.013 | -0.011 | t | 105490 | QSRATLGI                   | Homo<br>sapiens                  |
| 1 | 1.00 | 1 | 1 | 0     | 0.001  | -0.013 | 0      | 0.001  | t | 31920  | KLIPNASLI<br>ENCTKAEL      | Canis<br>familiari<br>s          |
| 1 | 1.00 | 1 | 1 | -0.01 | -0.008 | -0.012 | -0.013 | -0.01  | t | 32825  | KPPKYHPD                   | Homo<br>sapiens                  |
| 1 | 1.00 | 1 | 1 | -0.03 | -0.026 | -0.03  | -0.03  | -0.031 | t | 138191 | HPTWSSL                    | MD                               |
| 1 | 1.00 | 1 | 1 | 0.01  | 0.01   | 0.009  | 0.004  | 0.007  | t | 114442 | LATAFQIP<br>REDARRL        | Homo<br>sapiens                  |
| 1 | 1.00 | 1 | 1 | 0.01  | 0.013  | 0.012  | 0.01   | 0.009  | t | 122721 | CSNSSSSQ<br>FQIHGPR        | Mus<br>musculu<br>s              |
| 1 | 1.00 | 1 | 1 | -0.02 | -0.023 | -0.027 | -0.02  | -0.019 | t | 114149 | YGSLPQKA<br>QGHRPQD<br>E   | Oryctola<br>gus<br>cuniculu<br>s |
| 1 | 1.00 | 1 | 1 | 0.01  | 0.01   | 0.015  | 0.01   | 0.01   | t | 153434 | NSPFMLH<br>SALSGGGS        | Mus<br>musculu<br>s              |
| 1 | 1.00 | 1 | 1 | 0.04  | 0.04   | 0.04   | 0.04   | 0.04   | t | 110625 | HKHAIVTV<br>TYDSEEQR<br>QQ | Homo<br>sapiens                  |
| 1 | 1.00 | 1 | 1 | 0     | -0.004 | -0.013 | 0      | 0      | t | 140026 | FVFNLKD<br>MFSRANR<br>KRKA | Oryctola<br>gus<br>cuniculu<br>s |
| 1 | 1.00 | 1 | 1 | 0     | -0.004 | -0.013 | 0      | 0      | t | 140026 | FVFNLKD<br>MFSRANR<br>KRKA | Oryctola<br>gus<br>cuniculu<br>s |



|   |      |   |   |       |        |        |        |        |   |        |                              |                     |
|---|------|---|---|-------|--------|--------|--------|--------|---|--------|------------------------------|---------------------|
| 1 | 1.00 | 1 | 1 | -0.02 | -0.018 | -0.023 | -0.023 | -0.019 | t | 138884 | NKLLIAFGL<br>VILLVTLP<br>CAS | Homo<br>sapiens     |
| 1 | 1.00 | 1 | 1 | 0     | 0      | 0      | 0      | 0.002  | t | 46025  | NSVGANA<br>P                 | Mus<br>musculu<br>s |
| 1 | 1.00 | 1 | 1 | 0.01  | 0.01   | 0.009  | 0.013  | 0.01   | t | 44684  | NLEDPASR<br>DL               | Homo<br>sapiens     |
| 1 | 1.00 | 1 | 1 | -0.02 | -0.02  | -0.021 | -0.02  | -0.019 | t | 122156 | NLHIDPTLI                    | Mus<br>musculu<br>s |
| 1 | 1.00 | 1 | 1 | 0.03  | 0.029  | 0.031  | 0.03   | 0.03   | t | 140761 | TYRVDVD<br>GYRND             | Bos<br>taurus       |
| 1 | 1.00 | 1 | 1 | 0.03  | 0.029  | 0.031  | 0.03   | 0.03   | t | 140761 | TYRVDVD<br>GYRND             | Bos<br>taurus       |
| 1 | 1.00 | 1 | 1 | -0.03 | -0.028 | -0.023 | -0.031 | -0.032 | t | 136217 | FAYRTFYK<br>YD               | Homo<br>sapiens     |
| 1 | 1.00 | 1 | 1 | 0.03  | 0.03   | 0.03   | 0.03   | 0.031  | t | 89784  | TVEVEMT<br>ASTGVWN<br>MWSP   | Aotus               |
| 1 | 1.00 | 1 | 1 | 0.02  | 0.02   | 0.02   | 0.02   | 0.02   | t | 158596 | KFGTALW                      | Homo<br>sapiens     |
| 1 | 1.00 | 1 | 1 | 0.02  | 0.02   | 0.02   | 0.02   | 0.02   | t | 132091 | STLNSASN<br>HGAWPVL          | Homo<br>sapiens     |
| 1 | 1.00 | 1 | 1 | 0.02  | 0.02   | 0.02   | 0.02   | 0.02   | t | 128476 | DVQLIKTG<br>DKVGASE          | Homo<br>sapiens     |
| 1 | 1.00 | 1 | 1 | 0     | 0      | 0      | 0      | 0      | t | 150971 | CDNTCME<br>SVKNGTYD          | Homo<br>sapiens     |
| 1 | 1.00 | 1 | 1 | 0     | 0      | 0      | 0      | 0      | t | 118341 | EVPTVSPIS<br>RFTYHM          | Homo<br>sapiens     |
| 1 | 1.00 | 1 | 1 | 0     | 0      | 0      | 0      | 0      | t | 123712 | RLFLEYLGE                    | Ovis<br>aries       |
| 1 | 1.00 | 1 | 1 | 0     | 0      | 0      | 0      | 0      | t | 113139 | QSYKFIPAL<br>E               | Mus<br>musculu<br>s |
| 1 | 1.00 | 1 | 1 | 0     | 0      | 0      | 0      | 0      | t | 114871 | KETVPMN<br>CSS               | Homo<br>sapiens     |

|   |      |   |   |       |        |        |        |        |   |        |                              |                              |
|---|------|---|---|-------|--------|--------|--------|--------|---|--------|------------------------------|------------------------------|
| 1 | 1.00 | 1 | 1 | 0     | 0      | 0      | 0      | 0      | t | 51671  | QNAPQVE<br>NAPQAE            | Bos<br>taurus                |
| 1 | 1.00 | 1 | 1 | 0     | 0      | 0      | 0      | 0      | t | 14202  | ESLNTGW<br>LAGLF             | Rattus<br>norvegicus         |
| 1 | 1.00 | 1 | 1 | 0     | 0      | 0      | 0      | 0      | t | 22080  | GRIILSGKP<br>AVIPDRELL<br>YR | Homo<br>sapiens              |
| 1 | 1.00 | 1 | 1 | -0.02 | -0.02  | -0.02  | -0.02  | -0.02  | t | 8836   | DKAFAVSK<br>DLADKLAA<br>K    | Equus<br>caballus            |
| 1 | 1.00 | 1 | 1 | -0.02 | -0.024 | -0.02  | -0.017 | -0.02  | t | 32621  | KNTTPTW<br>LTQNPQL<br>G      | Oryctola<br>gus<br>cuniculus |
| 1 | 1.00 | 1 | 1 | 0     | -0.004 | -0.009 | 0.003  | 0.002  | t | 33483  | KSQGERS<br>WTWRKEA<br>H      | Oryctola<br>gus<br>cuniculus |
| 1 | 1.00 | 1 | 1 | -0.02 | -0.02  | -0.02  | -0.02  | -0.018 | t | 143959 | KFPHLAVG<br>F                | Oryctola<br>gus<br>cuniculus |
| 1 | 1.00 | 1 | 1 | 0.04  | 0.04   | 0.04   | 0.04   | 0.04   | t | 79358  | RCEQSM<br>WTQRLPC<br>L       | Mus<br>musculus              |
| 1 | 1.00 | 1 | 1 | -0.04 | -0.038 | -0.046 | -0.043 | -0.04  | t | 102271 | YYNSLGFN<br>IK               | Homo<br>sapiens              |
| 1 | 1.00 | 1 | 1 | -0.02 | -0.02  | -0.019 | -0.023 | -0.02  | t | 72326  | WDQMW<br>KCLI                | Homo<br>sapiens              |
| 1 | 1.00 | 1 | 1 | -0.03 | -0.033 | -0.018 | -0.03  | -0.032 | t | 47453  | PEVIRMQ<br>DNNP              | Oryctola<br>gus<br>cuniculus |
| 1 | 1.00 | 1 | 1 | -0.03 | -0.028 | -0.037 | -0.033 | -0.03  | t | 106848 | SKIQTIFR<br>G                | Homo<br>sapiens              |
| 1 | 1.00 | 1 | 1 | 0.02  | 0.022  | 0.02   | 0.019  | 0.02   | t | 51830  | QPFPSQQ<br>PYL               | Homo<br>sapiens              |
| 1 | 1.00 | 1 | 1 | 0     | 0.002  | -0.004 | -0.001 | 0      | t | 51908  | QPQPFPS<br>QQP               | Homo<br>sapiens              |

|   |      |   |   |       |        |        |        |        |   |        |                             |                                  |
|---|------|---|---|-------|--------|--------|--------|--------|---|--------|-----------------------------|----------------------------------|
| 1 | 1.00 | 1 | 1 | -0.03 | -0.026 | -0.026 | -0.027 | -0.03  | t | 144772 | SAHTSHLV<br>GS              | Homo<br>sapiens                  |
| 1 | 1.00 | 1 | 1 | -0.02 | -0.021 | -0.011 | -0.023 | -0.02  | t | 42965  | MVLLQM                      | Homo<br>sapiens                  |
| 1 | 1.00 | 1 | 1 | -0.01 | -0.01  | -0.01  | -0.008 | -0.01  | t | 20654  | GKPAIIPDR<br>E              | Homo<br>sapiens                  |
| 1 | 1.00 | 1 | 1 | -0.01 | -0.004 | -0.01  | -0.01  | -0.01  | t | 123640 | PVRLLELYL                   | Ovis<br>aries                    |
| 1 | 1.00 | 1 | 1 | 0.02  | 0.018  | 0.02   | 0.017  | 0.02   | t | 122129 | KTVTVKED<br>QVMQQN<br>PPKF  | Mus<br>musculu<br>s              |
| 1 | 1.00 | 1 | 1 | -0.01 | -0.012 | -0.01  | -0.009 | -0.01  | t | 149447 | QVPLVQE<br>QQF              | Mus<br>musculu<br>s              |
| 1 | 1.00 | 1 | 1 | -0.03 | -0.028 | -0.03  | -0.023 | -0.03  | t | 139630 | VDIDIKIRS<br>CRGSCS         | Homo<br>sapiens                  |
| 1 | 1.00 | 1 | 1 | -0.01 | -0.01  | -0.02  | -0.01  | -0.008 | t | 58403  | SHRGVIAD<br>NQAKWA<br>V     | Mus<br>musculu<br>s              |
| 1 | 1.00 | 1 | 1 | 0.03  | 0.028  | 0.031  | 0.029  | 0.03   | t | 22894  | GTYETGNK                    | Mus<br>musculu<br>s              |
| 1 | 1.00 | 1 | 1 | -0.02 | -0.023 | -0.022 | -0.02  | -0.02  | t | 26294  | IGPEKAFR<br>EL              | Oryctola<br>gus<br>cuniculu<br>s |
| 1 | 1.00 | 1 | 1 | 0.02  | 0.022  | 0.019  | 0.019  | 0.018  | t | 4528   | ASLKDALL<br>KYIYDNRG<br>TLI | Homo<br>sapiens                  |
| 1 | 1.00 | 1 | 1 | 0     | 0      | -0.005 | 0      | 0.001  | t | 67039  | TVIYSKYG<br>GT              | Mus<br>musculu<br>s              |
| 1 | 1.00 | 1 | 1 | 0.01  | 0.01   | 0.01   | 0.01   | 0.011  | t | 11814  | EENVEENV<br>EENV            | Oryctola<br>gus<br>cuniculu<br>s |
| 1 | 1.00 | 1 | 1 | 0.01  | 0.01   | 0.01   | 0.01   | 0.01   | t | 135443 | AGLGGV                      | Oryctola<br>gus<br>cuniculu<br>s |

|   |      |   |   |       |        |       |       |        |   |        |                              |                |
|---|------|---|---|-------|--------|-------|-------|--------|---|--------|------------------------------|----------------|
| 1 | 1.00 | 1 | 1 | -0.03 | -0.03  | -0.03 | -0.03 | -0.03  | t | 132430 | LGFA                         | Mus musculus   |
| 1 | 1.00 | 1 | 1 | -0.01 | -0.022 | 0.001 | -0.01 | -0.011 | t | 31525  | KKELSQKT                     | Macaca mulatta |
| 1 | 1.00 | 1 | 1 | 0.02  | 0.02   | 0.02  | 0.024 | 0.02   | t | 135895 | ALLRCIPAL<br>DSLTPANE<br>DC  | Homo sapiens   |
| 1 | 1.00 | 1 | 1 | 0     | 0      | 0     | 0     | -0.002 | t | 142439 | LARLARLG<br>EACG             | Mus musculus   |
| 1 | 1.00 | 1 | 1 | 0.03  | 0.03   | 0.03  | 0.03  | 0.03   | t | 149428 | QLQLQNP<br>SQQ               | Mus musculus   |
| 1 | 1.00 | 1 | 1 | 0.03  | 0.03   | 0.03  | 0.03  | 0.03   | t | 111140 | CAEPNNLL<br>C                | Homo sapiens   |
| 1 | 1.00 | 1 | 1 | 0.03  | 0.03   | 0.03  | 0.03  | 0.03   | t | 115922 | QPIRCEKD<br>ER               | Homo sapiens   |
| 1 | 1.00 | 1 | 1 | 0.01  | 0.01   | 0.01  | 0.01  | 0.01   | t | 135747 | RAEAVFPD                     | Homo sapiens   |
| 1 | 1.00 | 1 | 1 | 0.01  | 0.01   | 0.01  | 0.01  | 0.01   | t | 123858 | YDPKFEQL<br>K                | Ovis aries     |
| 1 | 1.00 | 1 | 1 | 0.01  | 0.01   | 0.01  | 0.01  | 0.01   | t | 111141 | CAKVVQA<br>DC                | Homo sapiens   |
| 1 | 1.00 | 1 | 1 | 0.01  | 0.01   | 0.01  | 0.01  | 0.01   | t | 79992  | QRPLRMFL<br>GPKQ             | Mus musculus   |
| 1 | 1.00 | 1 | 1 | 0.01  | 0.01   | 0.01  | 0.01  | 0.01   | t | 70270  | VPDKEVLY<br>QQYDEM           | Homo sapiens   |
| 1 | 1.00 | 1 | 1 | 0.01  | 0.01   | 0.01  | 0.01  | 0.01   | t | 79992  | QRPLRMFL<br>GPKQ             | Mus musculus   |
| 1 | 1.00 | 1 | 1 | 0.01  | 0.01   | 0.01  | 0.01  | 0.01   | t | 41334  | MEECSASL<br>PYMDETR<br>AIAGQ | Homo sapiens   |
| 1 | 1.00 | 1 | 1 | 0.01  | 0.01   | 0.01  | 0.01  | 0.01   | t | 49651  | PTHYISTSL                    | Homo sapiens   |
| 1 | 1.00 | 1 | 1 | 0.01  | 0.01   | 0.01  | 0.01  | 0.01   | t | 22074  | GRIILSGKP<br>AIIPDREAL<br>YQ | Homo sapiens   |
| 1 | 1.00 | 1 | 1 | -0.01 | -0.01  | -0.01 | -0.01 | -0.01  | t | 158695 | ASKSADDV<br>KKAFAKVI         | Homo sapiens   |
| 1 | 1.00 | 1 | 1 | -0.01 | -0.01  | -0.01 | -0.01 | -0.01  | t | 158695 | ASKSADDV<br>KKAFAKVI         | Homo sapiens   |
| 1 | 1.00 | 1 | 1 | -0.01 | -0.01  | -0.01 | -0.01 | -0.01  | t | 156919 | MLHTSM                       | Gallus gallus  |

|   |      |   |   |       |        |        |        |        |   |        |                                      |                                  |
|---|------|---|---|-------|--------|--------|--------|--------|---|--------|--------------------------------------|----------------------------------|
| 1 | 1.00 | 1 | 1 | -0.01 | -0.01  | -0.01  | -0.01  | -0.01  | t | 67931  | VDEKKM                               | Mus<br>musculu<br>s              |
| 1 | 1.00 | 1 | 1 | -0.01 | -0.01  | -0.01  | -0.01  | -0.01  | t | 67931  | VDEKKM                               | Mus<br>musculu<br>s              |
| 1 | 1.00 | 1 | 1 | -0.01 | -0.01  | -0.01  | -0.01  | -0.01  | t | 67931  | VDEKKM                               | Mus<br>musculu<br>s              |
| 1 | 1.00 | 1 | 1 | 0.02  | 0.018  | 0.027  | 0.023  | 0.02   | t | 70320  | VPGSQHY<br>DS                        | Mus<br>musculu<br>s              |
| 1 | 1.00 | 1 | 1 | 0     | 0.002  | 0.001  | 0.007  | 0.001  | t | 122655 | YKRGII<br>DR<br>GQYLQL<br>Q<br>ELECD | Homo<br>sapiens                  |
| 1 | 1.00 | 1 | 1 | -0.05 | -0.046 | -0.062 | -0.05  | -0.05  | t | 79026  | MSDGAV<br>Q<br>PDGGQP<br>A<br>V      | MD                               |
| 1 | 1.00 | 1 | 1 | -0.05 | -0.053 | -0.062 | -0.05  | -0.05  | t | 79026  | MSDGAV<br>Q<br>PDGGQP<br>A<br>V      | Oryctola<br>gus<br>cuniculu<br>s |
| 1 | 1.00 | 1 | 1 | 0.03  | 0.025  | 0.028  | 0.033  | 0.03   | t | 10067  | DRYFTY<br>EE<br>PNDG                 | Bos<br>taurus                    |
| 1 | 1.00 | 1 | 1 | -0.01 | -0.01  | -0.01  | -0.01  | -0.011 | t | 138627 | SQKEVLE<br>G<br>ARASVDR<br>VC        | Oryctola<br>gus<br>cuniculu<br>s |
| 1 | 1.00 | 1 | 1 | -0.05 | -0.05  | -0.05  | -0.05  | -0.05  | t | 105510 | SDSKL                                | Oryctola<br>gus<br>cuniculu<br>s |
| 1 | 1.00 | 1 | 1 | 0.01  | 0.012  | -0.001 | 0.011  | 0.01   | t | 23797  | HFLCTFT<br>F<br>NSNNKEY<br>T<br>FPIT | Homo<br>sapiens                  |
| 1 | 1.00 | 1 | 1 | 0     | -0.002 | 0.01   | 0.003  | -0.002 | t | 38628  | LPPTAP<br>PLL                        | Mus<br>musculu<br>s              |
| 1 | 1.00 | 1 | 1 | -0.01 | -0.008 | -0.011 | -0.009 | -0.01  | t | 47823  | PHGVVFL<br>H<br>VTYVPSQ<br>E<br>R    | Homo<br>sapiens                  |

|   |      |   |   |       |        |        |        |        |   |        |                              |                       |
|---|------|---|---|-------|--------|--------|--------|--------|---|--------|------------------------------|-----------------------|
| 1 | 1.00 | 1 | 1 | -0.01 | -0.008 | -0.011 | -0.009 | -0.01  | t | 47823  | PHGVVFLH<br>VTYVPSQER        | Homo sapiens          |
| 1 | 1.00 | 1 | 1 | -0.02 | -0.016 | -0.02  | -0.013 | -0.019 | t | 117568 | LKYLEAVE<br>KVKRTKDE<br>LEVI | Homo sapiens          |
| 1 | 1.00 | 1 | 1 | 0.05  | 0.05   | 0.055  | 0.044  | 0.044  | t | 115612 | GSLPQKA<br>QRPQDEN<br>G      | Rattus norvegicus     |
| 1 | 1.00 | 1 | 1 | -0.02 | -0.02  | -0.022 | -0.017 | -0.02  | t | 4849   | ASYKVM<br>RSSHQSLV           | Homo sapiens          |
| 1 | 1.00 | 1 | 1 | 0     | 0.002  | 0      | 0.001  | 0      | t | 76584  | YYQSGLSI<br>VMPVGG<br>QSSFYS | Homo sapiens          |
| 1 | 1.00 | 1 | 1 | 0     | 0.004  | 0      | 0.001  | 0      | t | 49421  | PSLIGLAM<br>GDAGGYK<br>AADMW | Homo sapiens          |
| 1 | 1.00 | 1 | 1 | 0     | 0.004  | 0      | 0.001  | 0      | t | 43332  | NAVFNFPP<br>NGTHSWE<br>YWGAQ | Homo sapiens          |
| 1 | 1.00 | 1 | 1 | 0     | 0.004  | 0      | 0.001  | 0      | t | 56895  | SAMILAAY<br>HPQQFIYA<br>GSLS | Homo sapiens          |
| 1 | 1.00 | 1 | 1 | 0     | 0.004  | 0      | 0.001  | 0      | t | 1545   | AGGYKAA<br>DMWGPSS<br>DPAWER | Homo sapiens          |
| 1 | 1.00 | 1 | 1 | 0     | 0.004  | 0      | 0.001  | 0      | t | 2695   | ALLDPSQG<br>MGPSLIGL<br>AMGD | Homo sapiens          |
| 1 | 1.00 | 1 | 1 | -0.02 | -0.024 | -0.033 | -0.021 | -0.021 | t | 71851  | VVTHEMA<br>HALG              | Oryctolagus cuniculus |
| 1 | 1.00 | 1 | 1 | 0     | 0      | 0.002  | 0.004  | 0      | t | 118566 | QDFSQYRS<br>LKFRPKG          | Homo sapiens          |
| 1 | 1.00 | 1 | 1 | 0.03  | 0.03   | 0.03   | 0.03   | 0.03   | t | 106522 | HVTPISKL<br>MWFN             | Mus musculus          |

|   |      |   |   |       |        |        |        |        |   |        |                              |                       |
|---|------|---|---|-------|--------|--------|--------|--------|---|--------|------------------------------|-----------------------|
| 1 | 1.00 | 1 | 1 | 0.01  | 0.01   | 0.01   | 0.007  | 0.009  | t | 49801  | PTVAEEH                      | Homo sapiens          |
| 1 | 1.00 | 1 | 1 | 0     | -0.002 | -0.002 | -0.001 | -0.001 | t | 86999  | NQKNVRT<br>LEEWE             | Mus musculus          |
| 1 | 1.00 | 1 | 1 | -0.01 | -0.01  | -0.011 | -0.004 | -0.01  | t | 52749  | QVMSRSA<br>NEGYD             | Homo sapiens          |
| 1 | 1.00 | 1 | 1 | 0.01  | 0.007  | 0.01   | 0.01   | 0.009  | t | 107229 | RHEVTEM<br>GQEV              | Oryctolagus cuniculus |
| 1 | 1.00 | 1 | 1 | 0     | -0.002 | 0      | 0      | 0      | t | 28075  | IPSTAFTDI<br>AWVRLPN<br>HY   | Oryctolagus cuniculus |
| 1 | 1.00 | 1 | 1 | -0.01 | -0.006 | 0.002  | -0.009 | -0.016 | t | 4498   | ASKAALIEE<br>GQRMAE<br>MLKSK | Homo sapiens          |
| 1 | 1.00 | 1 | 1 | 0.01  | 0.006  | 0.015  | 0.013  | 0.01   | t | 141750 | SNLDHILE<br>PSI              | Oryctolagus cuniculus |
| 1 | 1.00 | 1 | 1 | 0.02  | 0.02   | 0.02   | 0.02   | 0.02   | t | 141566 | SSIVIPAAV<br>GIKLNVT<br>DA   | Homo sapiens          |
| 1 | 1.00 | 1 | 1 | 0.02  | 0.02   | 0.02   | 0.02   | 0.02   | t | 140862 | GTVSYGEE<br>KPAVLGH<br>DEAAY | Oryctolagus cuniculus |
| 1 | 1.00 | 1 | 1 | 0.02  | 0.02   | 0.02   | 0.02   | 0.02   | t | 134217 | RNVILFSVF<br>DENRSWY<br>LTEN | Homo sapiens          |
| 1 | 1.00 | 1 | 1 | 0.02  | 0.02   | 0.02   | 0.02   | 0.02   | t | 112421 | YSSDHKN                      | Homo sapiens          |
| 1 | 1.00 | 1 | 1 | 0.02  | 0.02   | 0.02   | 0.02   | 0.02   | t | 110597 | GIAGFKGD<br>QGPKGET          | Mus musculus          |
| 1 | 1.00 | 1 | 1 | 0.02  | 0.02   | 0.02   | 0.02   | 0.02   | t | 77802  | TEYSASVK<br>GRFI             | Mus                   |
| 1 | 1.00 | 1 | 1 | 0.02  | 0.02   | 0.02   | 0.02   | 0.02   | t | 77802  | TEYSASVK<br>GRFI             | Mus                   |

|   |      |   |   |       |       |       |       |       |   |        |                              |                                  |
|---|------|---|---|-------|-------|-------|-------|-------|---|--------|------------------------------|----------------------------------|
| 1 | 1.00 | 1 | 1 | 0     | 0     | 0     | 0     | 0     | t | 143677 | DRVNLRKL<br>RGYY             | Mus<br>musculu<br>s              |
| 1 | 1.00 | 1 | 1 | 0     | 0     | 0     | 0     | 0     | t | 113782 | QQPGQLQ<br>QPAQGQQ           | Homo<br>sapiens                  |
| 1 | 1.00 | 1 | 1 | 0     | 0     | 0     | 0     | 0     | t | 110833 | EQFNWVS<br>RLANLTQG<br>EDQYY | Mus<br>musculu<br>s              |
| 1 | 1.00 | 1 | 1 | 0     | 0     | 0     | 0     | 0     | t | 115904 | PTVMFPP<br>QSV               | Homo<br>sapiens                  |
| 1 | 1.00 | 1 | 1 | 0     | 0     | 0     | 0     | 0     | t | 110833 | EQFNWVS<br>RLANLTQG<br>EDQYY | Mus<br>musculu<br>s              |
| 1 | 1.00 | 1 | 1 | 0     | 0     | 0     | 0     | 0     | t | 107753 | ATNMKMS<br>NMHTLIG<br>A      | Homo<br>sapiens                  |
| 1 | 1.00 | 1 | 1 | 0     | 0     | 0     | 0     | 0     | t | 77841  | AYDFLYNY<br>L                | Homo<br>sapiens                  |
| 1 | 1.00 | 1 | 1 | 0     | 0     | 0     | 0     | 0     | t | 77841  | AYDFLYNY<br>L                | Homo<br>sapiens                  |
| 1 | 1.00 | 1 | 1 | 0     | 0     | 0     | 0     | 0     | t | 49651  | PTHYISTSL                    | Homo<br>sapiens                  |
| 1 | 1.00 | 1 | 1 | -0.02 | -0.02 | -0.02 | -0.02 | -0.02 | t | 133950 | WIFANF                       | Mus<br>musculu<br>s              |
| 1 | 1.00 | 1 | 1 | -0.02 | -0.02 | -0.02 | -0.02 | -0.02 | t | 108030 | MAYVPPY<br>EMIVRELK          | Homo<br>sapiens                  |
| 1 | 1.00 | 1 | 1 | -0.04 | -0.04 | -0.04 | -0.04 | -0.04 | t | 77920  | IPPFYKNF<br>WWP              | Mus<br>musculu<br>s              |
| 1 | 1.00 | 1 | 1 | 0.01  | 0.012 | 0.015 | 0.017 | 0.011 | t | 122655 | YKRGIDR<br>GQYLQLQ<br>ELECD  | Homo<br>sapiens                  |
| 1 | 1.00 | 1 | 1 | 0.06  | 0.062 | 0.053 | 0.057 | 0.061 | t | 13834  | EQGSENEE<br>IFVEEVSA         | Homo<br>sapiens                  |
| 1 | 1.00 | 1 | 1 | 0     | 0     | 0.001 | 0     | 0     | t | 127771 | PRHGHSQ<br>GPWKPWS<br>A      | Homo<br>sapiens                  |
| 1 | 1.00 | 1 | 1 | 0.01  | 0.008 | 0.012 | 0.01  | 0.01  | t | 122730 | DPAQPPR<br>D                 | Oryctola<br>gus<br>cuniculu<br>s |
| 1 | 1.00 | 1 | 1 | 0.04  | 0.034 | 0.035 | 0.04  | 0.041 | t | 116468 | RPQDENP<br>VVH               | Oryctola<br>gus<br>cuniculu<br>s |



|   |      |   |   |       |        |        |        |        |   |        |                              |                                  |
|---|------|---|---|-------|--------|--------|--------|--------|---|--------|------------------------------|----------------------------------|
| 1 | 1.00 | 1 | 1 | 0     | 0      | 0      | 0      | 0      | t | 142426 | KAAYGLLK<br>TKNQYVL          | Homo<br>sapiens                  |
| 1 | 1.00 | 1 | 1 | 0.01  | 0.013  | 0.008  | 0.01   | 0.01   | t | 53355  | RDGQLTIK<br>AERTEQKD<br>FDGR | Mus<br>musculu<br>s              |
| 1 | 1.00 | 1 | 1 | -0.02 | -0.02  | -0.023 | -0.02  | -0.02  | t | 34833  | LAKLAGGV<br>AV               | Homo<br>sapiens                  |
| 1 | 1.00 | 1 | 1 | -0.02 | -0.02  | -0.023 | -0.02  | -0.02  | t | 34833  | LAKLAGGV<br>AV               | Homo<br>sapiens                  |
| 1 | 1.00 | 1 | 1 | -0.02 | -0.022 | -0.024 | -0.017 | -0.018 | t | 30422  | KEGYLVDK<br>NTGCKY           | Mus<br>musculu<br>s              |
| 1 | 1.00 | 1 | 1 | -0.06 | -0.065 | -0.064 | -0.057 | -0.058 | t | 157951 | SKRYAKA<br>MAKMGLK           | Canis<br>lupus                   |
| 1 | 1.00 | 1 | 1 | -0.01 | -0.012 | -0.01  | -0.007 | -0.01  | t | 70541  | VQDKYGR<br>VCYGD             | Mus<br>musculu<br>s              |
| 1 | 1.00 | 1 | 1 | 0     | 0      | -0.005 | -0.001 | 0.001  | t | 10868  | DYEDRYR<br>E                 | Mus<br>musculu<br>s              |
| 1 | 1.00 | 1 | 1 | 0     | 0      | -0.005 | -0.001 | 0.001  | t | 10868  | DYEDRYR<br>E                 | Mus<br>musculu<br>s              |
| 1 | 1.00 | 1 | 1 | 0.03  | 0.03   | 0.03   | 0.03   | 0.03   | t | 135559 | GSDPQHY<br>EG                | Oryctola<br>gus<br>cuniculu<br>s |
| 1 | 1.00 | 1 | 1 | 0.01  | 0.013  | 0.01   | 0.01   | 0.01   | t | 32570  | KNNNSTN<br>S                 | Mus<br>musculu<br>s              |
| 1 | 1.00 | 1 | 1 | -0.01 | -0.01  | -0.01  | -0.01  | -0.01  | t | 26622  | IIPDREVL<br>YREFDEMEE<br>C   | Homo<br>sapiens                  |
| 1 | 1.00 | 1 | 1 | -0.02 | -0.02  | -0.02  | -0.02  | -0.021 | t | 114280 | CKWSVAH<br>LC                | Mus<br>musculu<br>s              |
| 1 | 1.00 | 1 | 1 | -0.02 | -0.02  | -0.02  | -0.02  | -0.021 | t | 114280 | CKWSVAH<br>LC                | Mus<br>musculu<br>s              |
| 1 | 1.00 | 1 | 1 | 0.01  | 0.012  | 0.009  | 0.009  | 0.01   | t | 35076  | LCLILFATS<br>VLAQE           | Ovis<br>aries                    |

|   |      |   |   |       |       |        |       |        |   |        |                              |                                  |
|---|------|---|---|-------|-------|--------|-------|--------|---|--------|------------------------------|----------------------------------|
| 1 | 1.00 | 1 | 1 | 0.01  | 0.01  | 0.01   | 0.01  | 0.01   | t | 42294  | MPNDPNR<br>N                 | Oryctola<br>gus<br>cuniculu<br>s |
| 1 | 1.00 | 1 | 1 | -0.01 | -0.01 | -0.01  | -0.01 | -0.01  | t | 99759  | VKDGIV                       | Oryctola<br>gus<br>cuniculu<br>s |
| 1 | 1.00 | 1 | 1 | -0.02 | -0.02 | -0.025 | -0.02 | -0.018 | t | 44025  | NGLEYIVG<br>RV               | Homo<br>sapiens                  |
| 1 | 1.00 | 1 | 1 | 0.02  | 0.02  | 0.023  | 0.02  | 0.02   | t | 78762  | PLLPHVIFC<br>HPGQLGA<br>FLTN | Homo<br>sapiens                  |
| 1 | 1.00 | 1 | 1 | 0.03  | 0.03  | 0.03   | 0.03  | 0.03   | t | 158597 | KWPIIDT                      | Homo<br>sapiens                  |
| 1 | 1.00 | 1 | 1 | 0.03  | 0.03  | 0.03   | 0.03  | 0.03   | t | 131814 | AFLSVDHL<br>GGGGESM          | Homo<br>sapiens                  |
| 1 | 1.00 | 1 | 1 | 0.03  | 0.03  | 0.03   | 0.03  | 0.03   | t | 116681 | CFEGQEKA<br>HNQDLGL          | Oryctola<br>gus<br>cuniculu<br>s |
| 1 | 1.00 | 1 | 1 | 0.03  | 0.03  | 0.03   | 0.03  | 0.03   | t | 115653 | SSYAGQFR<br>VIGP             | Homo<br>sapiens                  |
| 1 | 1.00 | 1 | 1 | 0.03  | 0.03  | 0.03   | 0.03  | 0.03   | t | 116681 | CFEGQEKA<br>HNQDLGL          | Homo<br>sapiens                  |
| 1 | 1.00 | 1 | 1 | 0.03  | 0.03  | 0.03   | 0.03  | 0.03   | t | 115386 | NANEEYS<br>IGSSSEESA<br>EVA  | Homo<br>sapiens                  |
| 1 | 1.00 | 1 | 1 | 0.03  | 0.03  | 0.03   | 0.03  | 0.03   | t | 79474  | YDAVPY                       | Mus<br>musculu<br>s              |
| 1 | 1.00 | 1 | 1 | 0.01  | 0.01  | 0.01   | 0.01  | 0.01   | t | 46835  | PAIVPDRE<br>VLYQDFDE<br>MEEC | Homo<br>sapiens                  |
| 1 | 1.00 | 1 | 1 | 0.01  | 0.01  | 0.01   | 0.01  | 0.01   | t | 41340  | MEECSQA<br>GPYIEQAQ<br>VIAHQ | Homo<br>sapiens                  |
| 1 | 1.00 | 1 | 1 | 0.01  | 0.012 | -0.003 | 0.011 | 0.012  | t | 138094 | YGYATLSY<br>ADYW             | Homo<br>sapiens                  |
| 1 | 1.00 | 1 | 1 | -0.01 | -0.01 | -0.01  | -0.01 | -0.01  | t | 137551 | PEEVLANA<br>FQISRED          | Homo<br>sapiens                  |

|   |      |   |   |       |        |        |        |        |   |        |                            |                                  |
|---|------|---|---|-------|--------|--------|--------|--------|---|--------|----------------------------|----------------------------------|
| 1 | 1.00 | 1 | 1 | -0.01 | -0.01  | -0.01  | -0.01  | -0.01  | t | 132087 | SSVNWPP<br>EFRPGEP<br>W    | Homo<br>sapiens                  |
| 1 | 1.00 | 1 | 1 | -0.01 | -0.01  | -0.01  | -0.01  | -0.01  | t | 99273  | GFSEVI                     | Oryctola<br>gus<br>cuniculu<br>s |
| 1 | 1.00 | 1 | 1 | -0.03 | -0.03  | -0.03  | -0.03  | -0.03  | t | 135677 | FTRVVGGE                   | Homo<br>sapiens                  |
| 1 | 1.00 | 1 | 1 | -0.03 | -0.03  | -0.03  | -0.03  | -0.03  | t | 131833 | AWINPFV<br>KQFSNISF        | Homo<br>sapiens                  |
| 1 | 1.00 | 1 | 1 | -0.03 | -0.03  | -0.03  | -0.03  | -0.03  | t | 101925 | NISQHQC<br>V<br>K          | Homo<br>sapiens                  |
| 1 | 1.00 | 1 | 1 | -0.03 | -0.03  | -0.03  | -0.03  | -0.03  | t | 92667  | FEKVKHNL<br>VI             | Ovis<br>aries                    |
| 1 | 1.00 | 1 | 1 | -0.02 | -0.016 | -0.02  | -0.019 | -0.02  | t | 137811 | AVSLGQN<br>V               | Homo<br>sapiens                  |
| 1 | 1.00 | 1 | 1 | -0.01 | -0.012 | -0.01  | -0.011 | -0.01  | t | 49321  | PSDKHIEQ<br>YLKKIKNSI<br>S | Mus<br>musculu<br>s              |
| 1 | 1.00 | 1 | 1 | -0.01 | -0.009 | -0.01  | -0.01  | -0.012 | t | 75222  | YNSSRSYW<br>T              | Mus<br>musculu<br>s              |
| 1 | 1.00 | 1 | 1 | 0     | -0.002 | -0.003 | -0.001 | -0.002 | t | 72153  | VYRYDSRP                   | Mus<br>musculu<br>s              |
| 1 | 1.00 | 1 | 1 | -0.05 | -0.048 | -0.049 | -0.047 | -0.049 | t | 121527 | LCNEKLLK<br>KARIHPFH       | Homo<br>sapiens                  |
| 1 | 1.00 | 1 | 1 | 0     | -0.004 | -0.007 | 0.003  | 0      | t | 5558   | AVTFASFD<br>VPSKQPT        | Oryctola<br>gus<br>cuniculu<br>s |
| 1 | 1.00 | 1 | 1 | 0     | -0.002 | -0.007 | 0.003  | 0      | t | 5558   | AVTFASFD<br>VPSKQPT        | Mus<br>musculu<br>s              |
| 1 | 1.00 | 1 | 1 | 0     | 0.002  | 0.005  | 0.003  | 0.002  | t | 138198 | KPTSTLT                    | Homo<br>sapiens                  |

|   |      |   |   |       |        |        |        |        |   |        |                              |                                  |
|---|------|---|---|-------|--------|--------|--------|--------|---|--------|------------------------------|----------------------------------|
| 1 | 1.00 | 1 | 1 | -0.01 | -0.01  | -0.01  | -0.01  | -0.01  | t | 106457 | GIVDSKLP<br>PIDV             | Homo<br>sapiens                  |
| 1 | 1.00 | 1 | 1 | 0     | -0.003 | -0.013 | 0      | 0.002  | t | 110248 | GGLGIGTG<br>SGTGGRT<br>GYIPL | Oryctola<br>gus<br>cuniculu<br>s |
| 1 | 1.00 | 1 | 1 | 0     | -0.01  | 0      | 0.001  | 0      | t | 4021   | AQPGYPW<br>P                 | Homo<br>sapiens                  |
| 1 | 1.00 | 1 | 1 | -0.01 | -0.012 | -0.022 | -0.017 | -0.009 | t | 122430 | KGLRRDLD<br>ASREAK           | Mus<br>musculu<br>s              |
| 1 | 1.00 | 1 | 1 | -0.01 | -0.01  | -0.009 | -0.01  | -0.01  | t | 65948  | TQTFLGTT<br>VGGVIW           | Homo<br>sapiens                  |
| 1 | 1.00 | 1 | 1 | -0.02 | -0.017 | -0.018 | -0.019 | -0.02  | t | 10109  | DSESGGHI<br>TH               | Mus<br>musculu<br>s              |
| 1 | 1.00 | 1 | 1 | -0.01 | -0.01  | 0.001  | -0.003 | -0.013 | t | 30302  | KEALISLT<br>RGKLYTQ<br>Q     | Homo<br>sapiens                  |
| 1 | 1.00 | 1 | 1 | 0     | -0.002 | 0.009  | 0.003  | 0.002  | t | 105825 | GGFRIFGIV                    | Mus<br>musculu<br>s              |
| 1 | 1.00 | 1 | 1 | -0.02 | -0.02  | -0.022 | -0.02  | -0.022 | t | 95728  | QPPVSQF<br>HIQGQ             | Homo<br>sapiens                  |
| 1 | 1.00 | 1 | 1 | 0.04  | 0.04   | 0.04   | 0.04   | 0.041  | t | 7013   | CSYGSTIA<br>GS               | Mus<br>musculu<br>s              |
| 1 | 1.00 | 1 | 1 | 0     | 0.002  | 0      | 0.001  | 0      | t | 39394  | LSGRPAIIP<br>DREVLYQE<br>FDE | Homo<br>sapiens                  |
| 1 | 1.00 | 1 | 1 | 0     | 0.002  | 0      | 0.001  | 0      | t | 39396  | LSGRPAIV<br>PDRELLYQ<br>EFDE | Homo<br>sapiens                  |
| 1 | 1.00 | 1 | 1 | 0     | 0.002  | 0      | 0.001  | 0      | t | 39396  | LSGRPAIV<br>PDRELLYQ<br>EFDE | Homo<br>sapiens                  |
| 1 | 1.00 | 1 | 1 | 0     | 0.002  | 0      | 0.001  | 0      | t | 26865  | IKPGSADK<br>PKDQLDYE<br>NDIE | Homo<br>sapiens                  |
| 1 | 1.00 | 1 | 1 | -0.01 | -0.01  | -0.01  | -0.01  | -0.01  | t | 72910  | WNSTTFH<br>QTL               | Mus<br>musculu<br>s              |

|   |      |   |   |       |        |        |        |        |   |        |                            |                                  |
|---|------|---|---|-------|--------|--------|--------|--------|---|--------|----------------------------|----------------------------------|
| 1 | 1.00 | 1 | 1 | -0.01 | -0.01  | -0.01  | -0.01  | -0.011 | t | 107882 | HEHTFGR<br>QW              | Mus<br>musculu<br>s              |
| 1 | 1.00 | 1 | 1 | 0.04  | 0.04   | 0.043  | 0.04   | 0.04   | t | 68092  | VDVVTGA<br>T               | Homo<br>sapiens                  |
| 1 | 1.00 | 1 | 1 | -0.01 | -0.01  | 0      | -0.01  | -0.012 | t | 23125  | GVRLLSGV<br>FSDPAFA        | Mus<br>musculu<br>s              |
| 1 | 1.00 | 1 | 1 | 0.02  | 0.017  | 0.02   | 0.02   | 0.019  | t | 144597 | CFLTAAGY<br>GGGLPDS<br>VKI | Oryctola<br>gus<br>cuniculu<br>s |
| 1 | 1.00 | 1 | 1 | 0.02  | 0.015  | 0.025  | 0.02   | 0.022  | t | 40938  | LYRPSDSSL<br>AGP           | Bos<br>taurus                    |
| 1 | 1.00 | 1 | 1 | 0     | -0.004 | -0.007 | -0.007 | 0      | t | 135470 | KAAQFG                     | Oryctola<br>gus<br>cuniculu<br>s |
| 1 | 1.00 | 1 | 1 | -0.02 | -0.02  | -0.026 | -0.02  | -0.018 | t | 28691  | ISQHQCVK                   | Mus<br>musculu<br>s              |
| 1 | 1.00 | 1 | 1 | 0     | 0      | 0      | 0      | 0      | t | 61291  | SSPSSTKSS<br>PSNVKSAS      | Oryctola<br>gus<br>cuniculu<br>s |
| 1 | 1.00 | 1 | 1 | 0     | 0.003  | 0      | 0      | 0      | t | 61291  | SSPSSTKSS<br>PSNVKSAS      | Mus<br>musculu<br>s              |
| 1 | 1.00 | 1 | 1 | 0     | 0      | 0      | 0      | 0      | t | 48999  | PQGG                       | Mus<br>musculu<br>s              |
| 1 | 1.00 | 1 | 1 | 0     | 0      | 0      | 0      | 0      | t | 23194  | GVTYEIDL<br>TNKNAAKL<br>R  | Homo<br>sapiens                  |
| 1 | 1.00 | 1 | 1 | -0.01 | -0.01  | -0.009 | -0.01  | -0.012 | t | 132641 | RVDKVIDE                   | Mus<br>musculu<br>s              |
| 1 | 1.00 | 1 | 1 | -0.03 | -0.03  | -0.037 | -0.033 | -0.032 | t | 30198  | KDLKGYG<br>GVS             | Homo<br>sapiens                  |
| 1 | 1.00 | 1 | 1 | 0.02  | 0.02   | 0.02   | 0.02   | 0.02   | t | 79409  | TCCLCSGK<br>LALACE         | Mus<br>musculu<br>s              |
| 1 | 1.00 | 1 | 1 | 0     | 0      | 0      | 0      | 0      | t | 124281 | HPLATGPH<br>L              | Homo<br>sapiens                  |

|   |      |   |   |       |       |        |       |       |   |        |                           |                            |
|---|------|---|---|-------|-------|--------|-------|-------|---|--------|---------------------------|----------------------------|
| 1 | 1.00 | 1 | 1 | 0     | 0     | 0      | 0     | 0     | t | 131079 | SQTTANPA<br>CPEGT         | Rattus<br>norvegicus       |
| 1 | 1.00 | 1 | 1 | 0     | 0     | 0      | 0     | 0     | t | 132932 | WGQNNW<br>T               | Homo<br>sapiens            |
| 1 | 1.00 | 1 | 1 | 0     | 0     | 0      | 0     | 0     | t | 114761 | DCSEYKPK<br>DC            | Homo<br>sapiens            |
| 1 | 1.00 | 1 | 1 | 0     | 0     | 0      | 0     | 0     | t | 77872  | FGTSPTGL<br>KLAP          | Mus<br>musculus            |
| 1 | 1.00 | 1 | 1 | 0     | 0     | 0      | 0     | 0     | t | 65637  | TPLGPPAA<br>EYW           | Homo<br>sapiens            |
| 1 | 1.00 | 1 | 1 | 0     | 0     | 0      | 0     | 0     | t | 92463  | DKLISSVSA<br>F            | Ovis<br>aries              |
| 1 | 1.00 | 1 | 1 | 0     | 0     | 0      | 0     | 0     | t | 77923  | ISPTQLYA<br>QVRA          | Mus<br>musculus            |
| 1 | 1.00 | 1 | 1 | 0     | 0     | 0      | 0     | 0     | t | 63915  | TGPCKTCT<br>IPAQ          | Mus<br>musculus            |
| 1 | 1.00 | 1 | 1 | 0     | 0     | 0      | 0     | 0     | t | 97049  | VKPTAPTK<br>PT            | Homo<br>sapiens(<br>human) |
| 1 | 1.00 | 1 | 1 | 0     | 0     | 0      | 0     | 0     | t | 63923  | TGPCRTCT<br>TLAQ          | Mus<br>musculus            |
| 1 | 1.00 | 1 | 1 | 0     | 0     | 0      | 0     | 0     | t | 34243  | KVVQLPKI<br>SKNALKAN<br>G | Homo<br>sapiens            |
| 1 | 1.00 | 1 | 1 | 0     | 0     | 0      | 0     | 0     | t | 34243  | KVVQLPKI<br>SKNALKAN<br>G | Homo<br>sapiens            |
| 1 | 1.00 | 1 | 1 | -0.01 | -0.01 | -0.01  | -0.01 | -0.01 | t | 99833  | PPFSQQ                    | Mus<br>musculus            |
| 1 | 1.00 | 1 | 1 | -0.04 | -0.04 | -0.04  | -0.04 | -0.04 | t | 149067 | LNFDPPS                   | Sus<br>scrofa              |
| 1 | 1.00 | 1 | 1 | -0.04 | -0.04 | -0.04  | -0.04 | -0.04 | t | 115823 | KHKEMPF<br>PKY            | Homo<br>sapiens            |
| 1 | 1.00 | 1 | 1 | -0.01 | -0.01 | -0.004 | -0.01 | -0.01 | t | 73421  | YAPSSLLP<br>HSVD          | Mus<br>musculus            |
| 1 | 1.00 | 1 | 1 | 0.02  | 0.022 | 0.018  | 0.02  | 0.017 | t | 131992 | NTVREVD<br>HLDRNS<br>G    | Homo<br>sapiens            |

|   |      |   |   |       |        |        |        |        |   |        |                              |                       |
|---|------|---|---|-------|--------|--------|--------|--------|---|--------|------------------------------|-----------------------|
| 1 | 1.00 | 1 | 1 | 0.03  | 0.032  | 0.011  | 0.027  | 0.034  | t | 97244  | DLNILERF<br>NYEEAQLT         | Homo sapiens          |
| 1 | 1.00 | 1 | 1 | 0.01  | 0.011  | 0.009  | 0.01   | 0.01   | t | 61778  | STNDNIKD<br>LLD              | Oryctolagus cuniculus |
| 1 | 1.00 | 1 | 1 | -0.03 | -0.03  | -0.03  | -0.03  | -0.03  | t | 115068 | KEKVNELS<br>KDIG             | Homo sapiens          |
| 1 | 1.00 | 1 | 1 | 0.01  | 0.01   | 0      | 0.009  | 0.01   | t | 64698  | TKWCPPG<br>QLVNLHDF<br>RSDEI | Homo sapiens          |
| 1 | 1.00 | 1 | 1 | -0.01 | -0.012 | -0.011 | -0.007 | -0.008 | t | 106831 | SFPEFRH                      | Mus musculus          |
| 1 | 1.00 | 1 | 1 | 0.04  | 0.034  | 0.04   | 0.04   | 0.04   | t | 123591 | PKSQETPA                     | Oryctolagus cuniculus |
| 1 | 1.00 | 1 | 1 | -0.03 | -0.032 | -0.03  | -0.03  | -0.03  | t | 117876 | GIMAPPP<br>GMR               | Mus musculus          |
| 1 | 1.00 | 1 | 1 | 0.01  | 0.008  | 0.017  | 0.013  | 0.008  | t | 38142  | LMTPLDVS<br>FVVITPF          | Mus musculus          |
| 1 | 1.00 | 1 | 1 | 0     | 0      | 0.003  | 0.003  | 0      | t | 60680  | SRGNHVS<br>PTHYVPES<br>DAAAR | Homo sapiens          |
| 1 | 1.00 | 1 | 1 | 0.01  | 0.01   | 0.01   | 0.01   | 0.01   | t | 94449  | CCNPA                        | Capra hircus          |
| 1 | 1.00 | 1 | 1 | 0.01  | 0.017  | 0.01   | 0.01   | 0.01   | t | 94449  | CCNPA                        | Capra hircus          |
| 1 | 1.00 | 1 | 1 | 0.03  | 0.03   | 0.025  | 0.03   | 0.03   | t | 4453   | ASHLPYIE<br>QGMQLAE<br>QFKQK | Homo sapiens          |
| 1 | 1.00 | 1 | 1 | 0.03  | 0.03   | 0.03   | 0.03   | 0.03   | t | 158753 | FIEVEELKL<br>FLQNFC          | Homo sapiens          |
| 1 | 1.00 | 1 | 1 | 0.03  | 0.03   | 0.03   | 0.03   | 0.03   | t | 158753 | FIEVEELKL<br>FLQNFC          | Homo sapiens          |
| 1 | 1.00 | 1 | 1 | 0.03  | 0.03   | 0.03   | 0.03   | 0.03   | t | 114870 | KELAAVSV<br>DC               | Homo sapiens          |
| 1 | 1.00 | 1 | 1 | 0.01  | 0.01   | 0.01   | 0.01   | 0.01   | t | 142483 | WRMAGQ<br>KRTSGG             | Mus musculus          |

|   |      |   |   |       |        |        |        |        |   |        |                              |                     |
|---|------|---|---|-------|--------|--------|--------|--------|---|--------|------------------------------|---------------------|
| 1 | 1.00 | 1 | 1 | 0.01  | 0.01   | 0.01   | 0.01   | 0.01   | t | 137967 | RLTLIANG<br>YRDV             | Homo<br>sapiens     |
| 1 | 1.00 | 1 | 1 | 0.01  | 0.01   | 0.01   | 0.01   | 0.01   | t | 134757 | PEAPRRRS<br>PSPTPTP          | Homo<br>sapiens     |
| 1 | 1.00 | 1 | 1 | 0.01  | 0.01   | 0.01   | 0.01   | 0.01   | t | 98760  | ELKPTPEG<br>DL               | Homo<br>sapiens     |
| 1 | 1.00 | 1 | 1 | 0.01  | 0.01   | 0.01   | 0.01   | 0.01   | t | 95689  | PTPTPDQP<br>EPNKPVEP<br>TYEV | Mus<br>musculu<br>s |
| 1 | 1.00 | 1 | 1 | 0.01  | 0.01   | 0.01   | 0.01   | 0.01   | t | 30476  | KEKMILNE<br>EEITTKG          | Homo<br>sapiens     |
| 1 | 1.00 | 1 | 1 | -0.01 | -0.01  | -0.01  | -0.01  | -0.01  | t | 156922 | NLHLGLA                      | Gallus<br>gallus    |
| 1 | 1.00 | 1 | 1 | -0.01 | -0.01  | -0.01  | -0.01  | -0.01  | t | 119554 | CNVNHKP<br>S                 | Homo<br>sapiens     |
| 1 | 1.00 | 1 | 1 | -0.01 | -0.01  | -0.01  | -0.01  | -0.01  | t | 127770 | PRAPPARA<br>SYRRFRT          | Homo<br>sapiens     |
| 1 | 1.00 | 1 | 1 | -0.01 | -0.01  | -0.01  | -0.01  | -0.01  | t | 101252 | SNYWLRS                      | Homo<br>sapiens     |
| 1 | 1.00 | 1 | 1 | -0.03 | -0.03  | -0.03  | -0.03  | -0.03  | t | 142429 | KAYAVEAH<br>LAKTKN           | Homo<br>sapiens     |
| 1 | 1.00 | 1 | 1 | -0.03 | -0.03  | -0.03  | -0.03  | -0.03  | t | 135997 | SLEKKMSN<br>YIQF             | Homo<br>sapiens     |
| 1 | 1.00 | 1 | 1 | -0.03 | -0.03  | -0.03  | -0.03  | -0.03  | t | 149133 | YLPNVTQ                      | Sus<br>scrofa       |
| 1 | 1.00 | 1 | 1 | 0     | 0      | 0      | -0.003 | -0.002 | t | 72087  | VYLLPR                       | Homo<br>sapiens     |
| 1 | 1.00 | 1 | 1 | 0.02  | 0.023  | 0.01   | 0.02   | 0.019  | t | 74004  | YGGIPGGI<br>STPITQQS<br>EK   | Equus<br>caballus   |
| 1 | 1.00 | 1 | 1 | 0     | 0      | -0.004 | 0.003  | -0.002 | t | 36413  | LHQPPPQI<br>FLKILPQSG<br>PIG | Homo<br>sapiens     |
| 1 | 1.00 | 1 | 1 | -0.01 | -0.011 | -0.003 | -0.01  | -0.011 | t | 43470  | NDKLYRM<br>EYWKTIKK<br>DVW   | Aotus<br>sp.        |
| 1 | 1.00 | 1 | 1 | 0.06  | 0.062  | 0.055  | 0.061  | 0.062  | t | 19723  | GGESSEEL<br>SESSFFNLI<br>T   | Homo<br>sapiens     |



|   |      |   |   |       |        |        |        |        |   |        |                             |                                  |
|---|------|---|---|-------|--------|--------|--------|--------|---|--------|-----------------------------|----------------------------------|
| 1 | 1.00 | 1 | 1 | 0.01  | 0.014  | 0.016  | 0.017  | 0.01   | t | 106131 | TAIPSCPE<br>GTVPLYS         | Homo<br>sapiens                  |
| 1 | 1.00 | 1 | 1 | -0.01 | -0.013 | -0.012 | -0.01  | -0.01  | t | 78811  | RKRNGVD<br>VDPNKGK<br>WKEHI | Oryctola<br>gus<br>cuniculu<br>s |
| 1 | 1.00 | 1 | 1 | -0.01 | -0.012 | -0.01  | -0.013 | -0.009 | t | 46894  | PAPQAPY<br>QGY              | Mus<br>musculu<br>s              |
| 1 | 1.00 | 1 | 1 | 0.03  | 0.032  | 0.025  | 0.033  | 0.034  | t | 141604 | APPDDGP<br>P                | Homo<br>sapiens                  |
| 1 | 1.00 | 1 | 1 | 0.04  | 0.042  | 0.035  | 0.041  | 0.042  | t | 21699  | GPLTNS                      | Homo<br>sapiens                  |
| 1 | 1.00 | 1 | 1 | -0.01 | -0.01  | -0.016 | -0.014 | -0.01  | t | 23136  | GVSELLIST<br>A              | Homo<br>sapiens                  |
| 1 | 1.00 | 1 | 1 | -0.04 | -0.04  | -0.045 | -0.041 | -0.038 | t | 51799  | QPDLIPL                     | Mus<br>musculu<br>s              |
| 1 | 1.00 | 1 | 1 | -0.02 | -0.024 | -0.029 | -0.023 | -0.02  | t | 73612  | YDYQHKE<br>GRF              | Oryctola<br>gus<br>cuniculu<br>s |
| 1 | 1.00 | 1 | 1 | 0.01  | 0.007  | 0.01   | 0.01   | 0.012  | t | 493    | AAVLNLTT                    | Oryctola<br>gus<br>cuniculu<br>s |
| 1 | 1.00 | 1 | 1 | -0.01 | -0.01  | -0.01  | -0.01  | -0.01  | t | 109427 | KPISGHNS<br>LF              | Homo<br>sapiens                  |
| 1 | 1.00 | 1 | 1 | 0     | 0      | -0.007 | 0      | 0      | t | 55106  | RPADKTRH<br>KFPTNINK<br>Q   | Mus<br>musculu<br>s              |
| 1 | 1.00 | 1 | 1 | 0     | 0.003  | -0.007 | 0      | 0      | t | 55106  | RPADKTRH<br>KFPTNINK<br>Q   | Equus<br>caballus                |
| 1 | 1.00 | 1 | 1 | 0     | 0      | 0      | 0      | 0      | t | 134411 | IPP                         | Mus<br>musculu<br>s              |
| 1 | 1.00 | 1 | 1 | 0     | 0      | 0      | 0      | 0      | t | 134411 | IPP                         | Mus<br>musculu<br>s              |

|   |      |   |   |       |        |        |        |        |   |        |                              |                          |
|---|------|---|---|-------|--------|--------|--------|--------|---|--------|------------------------------|--------------------------|
| 1 | 1.00 | 1 | 1 | 0.02  | 0.023  | 0.019  | 0.02   | 0.018  | t | 22280  | GSAMSRPI<br>IHFGSDYE<br>DRYY | Mus<br>musculu<br>s      |
| 1 | 1.00 | 1 | 1 | -0.03 | -0.03  | -0.035 | -0.03  | -0.029 | t | 122896 | RWNPADY<br>GGIK              | Rattus<br>norvegic<br>us |
| 1 | 1.00 | 1 | 1 | -0.01 | -0.01  | -0.01  | -0.01  | -0.009 | t | 107773 | CSVMHEG                      | Homo<br>sapiens          |
| 1 | 1.00 | 1 | 1 | 0.02  | 0.02   | 0.016  | 0.02   | 0.02   | t | 18994  | GDGRQTIT<br>NPAYDE           | Mus<br>musculu<br>s      |
| 1 | 1.00 | 1 | 1 | 0     | 0      | 0      | 0      | 0      | t | 94467  | CNPA                         | Capra<br>hircus          |
| 1 | 1.00 | 1 | 1 | 0     | 0.007  | 0      | 0      | 0      | t | 94467  | CNPA                         | Capra<br>hircus          |
| 1 | 1.00 | 1 | 1 | 0.01  | 0.01   | 0.017  | 0.01   | 0.011  | t | 78436  | KTAISPT                      | Mus<br>musculu<br>s      |
| 1 | 1.00 | 1 | 1 | 0.01  | 0.01   | 0.017  | 0.01   | 0.011  | t | 78436  | KTAISPT                      | Mus<br>musculu<br>s      |
| 1 | 1.00 | 1 | 1 | -0.02 | -0.02  | -0.011 | -0.02  | -0.022 | t | 134492 | QIQRRPS<br>M                 | Mus<br>musculu<br>s      |
| 1 | 1.00 | 1 | 1 | -0.02 | -0.016 | -0.013 | -0.013 | -0.02  | t | 108210 | WFTSWER<br>DWW               | Homo<br>sapiens          |
| 1 | 1.00 | 1 | 1 | 0.02  | 0.023  | 0.012  | 0.02   | 0.02   | t | 31116  | KHIDAYKT<br>FPPTPKK<br>DKKK  | Macaca<br>cyclopi<br>s   |
| 1 | 1.00 | 1 | 1 | 0.01  | 0.01   | -0.008 | 0.01   | 0.013  | t | 34537  | KYNDDDT<br>FTVKVGD           | Mus<br>musculu<br>s      |
| 1 | 1.00 | 1 | 1 | 0     | 0      | 0.005  | 0      | -0.002 | t | 22305  | GSDYEDRY<br>YRENMHR<br>YPNQ  | Mus<br>musculu<br>s      |
| 1 | 1.00 | 1 | 1 | 0.02  | 0.02   | 0.02   | 0.02   | 0.02   | t | 149030 | DFRFESSLS<br>INDHA           | Rattus<br>norvegic<br>us |

|   |      |   |   |       |        |       |       |       |   |        |                             |                                  |
|---|------|---|---|-------|--------|-------|-------|-------|---|--------|-----------------------------|----------------------------------|
| 1 | 1.00 | 1 | 1 | 0.02  | 0.024  | 0.025 | 0.023 | 0.017 | t | 134020 | CPEPQLR<br>MKNNEEA<br>EDYDD | Homo<br>sapiens                  |
| 1 | 1.00 | 1 | 1 | 0     | 0      | 0     | 0     | 0     | t | 37315  | LLGCIGSTC                   | Mus<br>musculu<br>s              |
| 1 | 1.00 | 1 | 1 | 0     | 0      | 0     | 0     | 0     | t | 38312  | LNPTI                       | Mus<br>musculu<br>s              |
| 1 | 1.00 | 1 | 1 | 0     | 0      | 0     | 0     | 0     | t | 38312  | LNPTI                       | Oryctola<br>gus<br>cuniculu<br>s |
| 1 | 1.00 | 1 | 1 | -0.02 | -0.02  | -0.02 | -0.02 | -0.02 | t | 135488 | PIFPGG                      | Oryctola<br>gus<br>cuniculu<br>s |
| 1 | 1.00 | 1 | 1 | 0.01  | 0.01   | 0.01  | 0.01  | 0.01  | t | 106938 | TTVQLYST<br>YPAP            | Mus<br>musculu<br>s              |
| 1 | 1.00 | 1 | 1 | 0.01  | 0.012  | 0.01  | 0.007 | 0.007 | t | 106766 | RATKGISGI<br>KNE            | Homo<br>sapiens                  |
| 1 | 1.00 | 1 | 1 | 0.02  | 0.018  | 0.015 | 0.013 | 0.017 | t | 108607 | RGAQGPP<br>GATGF            | Mus<br>musculu<br>s              |
| 1 | 1.00 | 1 | 1 | 0.04  | 0.04   | 0.04  | 0.04  | 0.04  | t | 40019  | LTLNMDS<br>GQ               | Rattus<br>norvegic<br>us         |
| 1 | 1.00 | 1 | 1 | 0.02  | 0.02   | 0.02  | 0.02  | 0.02  | t | 137576 | SRQEWQQ<br>QDECQIDR         | Homo<br>sapiens                  |
| 1 | 1.00 | 1 | 1 | 0.02  | 0.02   | 0.02  | 0.02  | 0.02  | t | 121346 | GPGHPIRA<br>LVGDEAEL<br>PC  | Rattus<br>norvegic<br>us         |
| 1 | 1.00 | 1 | 1 | 0.02  | 0.02   | 0.02  | 0.02  | 0.02  | t | 100585 | TWQTSSN<br>PSIFYTY          | Homo<br>sapiens                  |
| 1 | 1.00 | 1 | 1 | 0.02  | 0.02   | 0.02  | 0.02  | 0.02  | t | 93679  | READFAKE<br>VP              | Ovis<br>aries                    |
| 1 | 1.00 | 1 | 1 | 0     | -0.002 | 0     | 0     | 0     | t | 119992 | KLGTWTY<br>DGSVVAIN<br>P    | Oryctola<br>gus<br>cuniculu<br>s |

|   |      |   |   |       |        |        |       |        |   |        |                              |                                  |
|---|------|---|---|-------|--------|--------|-------|--------|---|--------|------------------------------|----------------------------------|
| 1 | 1.00 | 1 | 1 | 0     | 0.003  | 0      | 0     | 0      | t | 119992 | KLGTWTY<br>DGSVVAIN<br>P     | Mus<br>musculu<br>s              |
| 1 | 1.00 | 1 | 1 | 0     | 0      | 0      | 0     | 0      | t | 119992 | KLGTWTY<br>DGSVVAIN<br>P     | Mus<br>musculu<br>s              |
| 1 | 1.00 | 1 | 1 | 0     | 0      | 0      | 0     | 0      | t | 133951 | WIFNNF                       | Mus<br>musculu<br>s              |
| 1 | 1.00 | 1 | 1 | 0     | 0      | 0      | 0     | 0      | t | 103928 | GKLPIAM                      | Homo<br>sapiens                  |
| 1 | 1.00 | 1 | 1 | 0     | 0      | 0      | 0     | 0      | t | 78746  | MDTWNP<br>PLGSTSQP<br>CLFQTP | Homo<br>sapiens                  |
| 1 | 1.00 | 1 | 1 | 0     | 0      | 0      | 0     | 0      | t | 50105  | PYIEQGM<br>QLAAEFKQ<br>KALGL | Homo<br>sapiens                  |
| 1 | 1.00 | 1 | 1 | 0     | 0      | 0      | 0     | 0      | t | 11565  | EEDTEKDK<br>PK               | Oryctola<br>gus<br>cuniculu<br>s |
| 1 | 1.00 | 1 | 1 | 0     | 0      | 0      | 0     | 0      | t | 9939   | DRAAGQP<br>AGDRADG<br>QPAGDR | Mus<br>musculu<br>s              |
| 1 | 1.00 | 1 | 1 | 0     | 0      | 0      | 0     | 0      | t | 9939   | DRAAGQP<br>AGDRADG<br>QPAGDR | Mus<br>musculu<br>s              |
| 1 | 1.00 | 1 | 1 | -0.02 | -0.02  | -0.02  | -0.02 | -0.02  | t | 86551  | MTAEPKTI<br>VL               | Homo<br>sapiens                  |
| 1 | 1.00 | 1 | 1 | 0.01  | 0.01   | 0.016  | 0.01  | 0.01   | t | 52594  | QTPPCPIE<br>HCPSFYQ          | Homo<br>sapiens                  |
| 1 | 1.00 | 1 | 1 | -0.04 | -0.04  | -0.04  | -0.04 | -0.04  | t | 115742 | FPKYPVEP<br>FT               | Homo<br>sapiens                  |
| 1 | 1.00 | 1 | 1 | -0.05 | -0.047 | -0.045 | -0.05 | -0.052 | t | 97301  | FFWTILKP                     | Mus<br>musculu<br>s              |
| 1 | 1.00 | 1 | 1 | 0.01  | 0.013  | 0.01   | 0.01  | 0.011  | t | 24591  | HQLDPAF<br>GANSTNP<br>D      | Mus<br>musculu<br>s              |

|   |      |   |   |       |        |        |        |        |   |        |                        |                       |
|---|------|---|---|-------|--------|--------|--------|--------|---|--------|------------------------|-----------------------|
| 1 | 1.00 | 1 | 1 | -0.02 | -0.019 | -0.008 | -0.014 | -0.017 | t | 78266  | RYNPPD                 | Equus caballus        |
| 1 | 1.00 | 1 | 1 | 0     | -0.003 | 0      | 0      | 0      | t | 113942 | TQDENPV VHF            | Oryctolagus cuniculus |
| 1 | 1.00 | 1 | 1 | 0     | -0.003 | 0      | 0      | 0      | t | 113942 | TQDENPV VHF            | Oryctolagus cuniculus |
| 1 | 1.00 | 1 | 1 | 0     | 0.002  | 0      | 0      | 0      | t | 113966 | TTHYGSLP QKAQGHR PQDE  | Rattus norvegicus     |
| 1 | 1.00 | 1 | 1 | 0     | -0.011 | 0      | 0      | 0      | t | 116164 | RTPPPSG                | Oryctolagus cuniculus |
| 1 | 1.00 | 1 | 1 | 0     | 0.006  | 0      | 0      | 0      | t | 116001 | TQDQDPV VHF            | Ovis aries            |
| 1 | 1.00 | 1 | 1 | 0     | 0.002  | 0      | 0      | 0      | t | 114042 | YGSLPQKA QRPQDENG      | Rattus norvegicus     |
| 1 | 1.00 | 1 | 1 | 0     | 0.002  | 0      | 0      | 0      | t | 113966 | TTHYGSLP QKAQGHR PQDE  | Rattus norvegicus     |
| 1 | 1.00 | 1 | 1 | 0     | 0.001  | 0      | 0      | 0      | t | 95042  | SPESDRPD LST           | Oryctolagus cuniculus |
| 1 | 1.00 | 1 | 1 | 0     | 0      | 0      | 0      | 0      | t | 70304  | VPGIDPNA CHYMKC        | Homo sapiens          |
| 1 | 1.00 | 1 | 1 | 0     | -0.002 | 0      | 0      | 0      | t | 73554  | YDKPYMYML NLYDPNKY VDV | Mus musculus          |
| 1 | 1.00 | 1 | 1 | 0     | -0.003 | 0      | 0      | 0      | t | 45824  | NSGILKDF WGDYLQY DKPY  | Mus musculus          |

|   |      |   |   |       |        |        |        |        |   |        |                             |                                  |
|---|------|---|---|-------|--------|--------|--------|--------|---|--------|-----------------------------|----------------------------------|
| 1 | 1.00 | 1 | 1 | 0     | -0.003 | 0      | 0      | 0      | t | 45824  | NSGILKDF<br>WGDYLQY<br>DKPY | Mus<br>musculu<br>s              |
| 1 | 1.00 | 1 | 1 | 0     | -0.008 | 0      | 0      | 0      | t | 31365  | KINIGSKV<br>NFDPIDKN<br>QIQ | Mus<br>musculu<br>s              |
| 1 | 1.00 | 1 | 1 | 0     | -0.003 | 0      | 0      | 0      | t | 31365  | KINIGSKV<br>NFDPIDKN<br>QIQ | Mus<br>musculu<br>s              |
| 1 | 1.00 | 1 | 1 | 0     | -0.003 | 0      | 0      | 0      | t | 7171   | CTKPTDG<br>NC               | Oryctola<br>gus<br>cuniculu<br>s |
| 1 | 1.00 | 1 | 1 | 0.02  | 0.02   | 0.02   | 0.02   | 0.02   | t | 135439 | ADAAAAY                     | Oryctola<br>gus<br>cuniculu<br>s |
| 1 | 1.00 | 1 | 1 | 0.02  | 0.016  | 0.024  | 0.019  | 0.02   | t | 94914  | RELADALL<br>E               | Oryctola<br>gus<br>cuniculu<br>s |
| 1 | 1.00 | 1 | 1 | -0.07 | -0.056 | -0.076 | -0.07  | -0.071 | t | 60642  | SREAKKQV<br>EKAL            | Mus<br>musculu<br>s              |
| 1 | 1.00 | 1 | 1 | 0.01  | 0.011  | 0.017  | 0.013  | 0.01   | t | 24201  | HLFEAP                      | Equus<br>caballus                |
| 1 | 1.00 | 1 | 1 | -0.01 | -0.007 | -0.01  | -0.01  | -0.009 | t | 105228 | GLMVGGV<br>V                | Mus<br>musculu<br>s              |
| 1 | 1.00 | 1 | 1 | 0.01  | 0.013  | 0.008  | 0.01   | 0.012  | t | 95132  | PYVTYG                      | Mus<br>musculu<br>s              |
| 1 | 1.00 | 1 | 1 | 0.03  | 0.03   | 0.03   | 0.03   | 0.031  | t | 75848  | YSPEVG                      | Mus<br>musculu<br>s              |
| 1 | 1.00 | 1 | 1 | -0.02 | -0.016 | -0.026 | -0.021 | -0.021 | t | 32887  | KPSTLYKM<br>TVEAVK          | Ovis<br>aries                    |
| 1 | 1.00 | 1 | 1 | -0.01 | -0.01  | -0.01  | -0.01  | -0.01  | t | 55781  | RRYPF                       | Homo<br>sapiens                  |

|   |      |   |   |       |        |        |        |        |   |        |                             |                                  |
|---|------|---|---|-------|--------|--------|--------|--------|---|--------|-----------------------------|----------------------------------|
| 1 | 1.00 | 1 | 1 | 0     | 0.003  | -0.003 | 0      | 0      | t | 125238 | RLPLPPNQ<br>KR              | Mus<br>musculu<br>s              |
| 1 | 1.00 | 1 | 1 | 0.03  | 0.019  | 0.036  | 0.03   | 0.03   | t | 63215  | TDPTGIEP<br>DDHLKE          | Myodes<br>glareolu<br>s          |
| 1 | 1.00 | 1 | 1 | 0     | 0      | -0.002 | -0.004 | 0      | t | 118582 | RGYISPYFI<br>NTSK           | Homo<br>sapiens                  |
| 1 | 1.00 | 1 | 1 | 0.03  | 0.03   | 0.03   | 0.03   | 0.03   | t | 142427 | KAEKDAEA<br>AQ              | Homo<br>sapiens                  |
| 1 | 1.00 | 1 | 1 | -0.01 | -0.008 | -0.01  | -0.009 | -0.01  | t | 56956  | SAQSGPSG<br>TSAPSGS         | Homo<br>sapiens                  |
| 1 | 1.00 | 1 | 1 | 0.02  | 0.024  | 0.025  | 0.021  | 0.02   | t | 138456 | KEQFEFAL<br>TAVAEV          | Homo<br>sapiens                  |
| 1 | 1.00 | 1 | 1 | -0.01 | -0.01  | -0.01  | -0.01  | -0.01  | t | 106301 | CDIKTTLPP<br>I              | Homo<br>sapiens                  |
| 1 | 1.00 | 1 | 1 | -0.01 | -0.01  | -0.003 | -0.007 | -0.011 | t | 70816  | VRRRGDS<br>RGSLLSP          | Homo<br>sapiens                  |
| 1 | 1.00 | 1 | 1 | 0.04  | 0.04   | 0.039  | 0.04   | 0.04   | t | 42603  | MSLSLLDL<br>YLGRGYN         | Homo<br>sapiens                  |
| 1 | 1.00 | 1 | 1 | 0     | 0.002  | -0.006 | 0      | 0      | t | 20046  | GGTEESVV<br>TASRS           | Homo<br>sapiens                  |
| 1 | 1.00 | 1 | 1 | 0     | 0      | 0.002  | 0.001  | 0.002  | t | 65678  | TPPAYR                      | Mus<br>musculu<br>s              |
| 1 | 1.00 | 1 | 1 | 0.05  | 0.046  | 0.05   | 0.043  | 0.05   | t | 131944 | LDEDGEK                     | Oryctola<br>gus<br>cuniculu<br>s |
| 1 | 1.00 | 1 | 1 | 0.01  | 0.01   | 0.01   | 0.01   | 0.01   | t | 69899  | VLYREFDE                    | Homo<br>sapiens                  |
| 1 | 1.00 | 1 | 1 | 0.01  | 0.01   | 0.01   | 0.01   | 0.01   | t | 45697  | NRLIAFAS<br>RGNHDSP<br>THYV | Homo<br>sapiens                  |
| 1 | 1.00 | 1 | 1 | -0.04 | -0.04  | -0.04  | -0.04  | -0.041 | t | 133701 | SRNKHKR                     | Mus<br>musculu<br>s              |

|   |      |   |   |      |       |       |       |       |   |        |                              |                          |
|---|------|---|---|------|-------|-------|-------|-------|---|--------|------------------------------|--------------------------|
| 1 | 1.00 | 1 | 1 | 0.02 | 0.018 | 0.02  | 0.019 | 0.022 | t | 149316 | FMAYTDE<br>TFK               | Homo<br>sapiens          |
| 1 | 1.00 | 1 | 1 | 0.03 | 0.034 | 0.03  | 0.03  | 0.033 | t | 62942  | TAPGPGEV                     | Homo<br>sapiens          |
| 1 | 1.00 | 1 | 1 | 0.02 | 0.018 | 0.027 | 0.019 | 0.02  | t | 120679 | KIFADDID                     | Rattus<br>norvegicus     |
| 1 | 1.00 | 1 | 1 | 0.01 | 0.006 | 0.009 | 0.007 | 0.01  | t | 139730 | EQLAGNLR<br>ENIE             | Oryctolagus<br>cuniculus |
| 1 | 1.00 | 1 | 1 | 0.03 | 0.03  | 0.03  | 0.03  | 0.03  | t | 102076 | SNPIELL                      | Homo<br>sapiens          |
| 1 | 1.00 | 1 | 1 | 0.01 | 0.01  | 0.01  | 0.01  | 0.01  | t | 157218 | EQHRRQQ<br>QHQQR             | Homo<br>sapiens          |
| 1 | 1.00 | 1 | 1 | 0.01 | 0.01  | 0.01  | 0.01  | 0.01  | t | 131038 | RKIAKDEG<br>AK               | Homo<br>sapiens          |
| 1 | 1.00 | 1 | 1 | 0.01 | 0.01  | 0.01  | 0.01  | 0.01  | t | 108259 | AAFSELPL<br>G                | Homo<br>sapiens          |
| 1 | 1.00 | 1 | 1 | 0.01 | 0.01  | 0.01  | 0.01  | 0.01  | t | 103266 | IADIEAYP<br>QWISEYK          | Homo<br>sapiens          |
| 1 | 1.00 | 1 | 1 | 0.01 | 0.01  | 0.01  | 0.01  | 0.01  | t | 103255 | HGTCANQ<br>CPIVDAGD          | Homo<br>sapiens          |
| 1 | 1.00 | 1 | 1 | 0.01 | 0.01  | 0.01  | 0.01  | 0.01  | t | 103195 | GASVTVTG<br>QGNSLKV          | Homo<br>sapiens          |
| 1 | 1.00 | 1 | 1 | 0.01 | 0.01  | 0.01  | 0.01  | 0.01  | t | 108272 | ALARLMP<br>GS                | Homo<br>sapiens          |
| 1 | 1.00 | 1 | 1 | 0.01 | 0.01  | 0.01  | 0.01  | 0.01  | t | 78227  | PHAMVDH<br>L                 | Homo<br>sapiens          |
| 1 | 1.00 | 1 | 1 | 0.01 | 0.01  | 0.01  | 0.01  | 0.01  | t | 46993  | PAVIPDRE<br>VLYQQFDE<br>MEEC | Homo<br>sapiens          |
| 1 | 1.00 | 1 | 1 | 0.01 | 0.01  | 0.01  | 0.01  | 0.01  | t | 39400  | LSGRPAVI<br>PDREVLYQ<br>EFDE | Homo<br>sapiens          |
| 1 | 1.00 | 1 | 1 | 0.01 | 0.01  | 0.01  | 0.01  | 0.01  | t | 46834  | PAIVPDRE<br>LLYQEFDE<br>MEEC | Homo<br>sapiens          |



|   |      |   |   |       |        |        |        |        |   |        |                              |                                  |
|---|------|---|---|-------|--------|--------|--------|--------|---|--------|------------------------------|----------------------------------|
| 1 | 1.00 | 1 | 1 | 0.01  | 0.01   | 0.01   | 0.01   | 0.01   | t | 11967  | EFDEMEEC<br>ASHLPYIE<br>QGMQ | Homo<br>sapiens                  |
| 1 | 1.00 | 1 | 1 | 0.01  | 0.01   | 0.01   | 0.01   | 0.01   | t | 20141  | GHIELEGK<br>PALVPDKE<br>VLYQ | Homo<br>sapiens                  |
| 1 | 1.00 | 1 | 1 | -0.01 | -0.01  | -0.01  | -0.01  | -0.01  | t | 149425 | QGFFQPS<br>QQN               | Homo<br>sapiens                  |
| 1 | 1.00 | 1 | 1 | -0.03 | -0.03  | -0.03  | -0.03  | -0.03  | t | 149099 | RVLTSMD                      | Sus<br>scrofa                    |
| 1 | 1.00 | 1 | 1 | -0.01 | -0.007 | -0.021 | -0.01  | -0.008 | t | 29897  | KANADAK<br>AAYEAAV<br>AANNA  | Mus<br>musculu<br>s              |
| 1 | 1.00 | 1 | 1 | 0     | 0.004  | 0.005  | 0      | 0      | t | 47638  | PGEVWVT<br>P                 | Homo<br>sapiens                  |
| 1 | 1.00 | 1 | 1 | 0.01  | 0.01   | 0.01   | 0.01   | 0.01   | t | 45699  | NRLIAFAS<br>RGNHVAP<br>THYVV | Homo<br>sapiens                  |
| 1 | 1.00 | 1 | 1 | 0     | 0.002  | 0      | 0.001  | 0      | t | 58405  | SHRLLQTY<br>WSSA             | Homo<br>sapiens                  |
| 1 | 1.00 | 1 | 1 | -0.01 | -0.01  | -0.013 | -0.01  | -0.012 | t | 52089  | QQPFPQS<br>QQP               | Mus<br>musculu<br>s              |
| 1 | 1.00 | 1 | 1 | 0.02  | 0.018  | 0.022  | 0.023  | 0.022  | t | 118428 | IRYFILPDSL<br>PLDTL          | Mus<br>musculu<br>s              |
| 1 | 1.00 | 1 | 1 | -0.02 | -0.016 | -0.016 | -0.019 | -0.02  | t | 56061  | RTGLDFN                      | Homo<br>sapiens                  |
| 1 | 1.00 | 1 | 1 | 0.03  | 0.03   | 0.032  | 0.03   | 0.032  | t | 95545  | LDTDYK                       | Homo<br>sapiens                  |
| 1 | 1.00 | 1 | 1 | -0.04 | -0.036 | -0.029 | -0.033 | -0.04  | t | 138141 | ANKTSPFL<br>MWRL             | Homo<br>sapiens                  |
| 1 | 1.00 | 1 | 1 | 0.01  | 0.008  | 0      | 0.013  | 0.01   | t | 9352   | DMANPM<br>SPVNSFEI<br>EVTCS  | Mus<br>musculu<br>s              |
| 1 | 1.00 | 1 | 1 | -0.04 | -0.04  | -0.04  | -0.04  | -0.04  | t | 136068 | KATV                         | Oryctola<br>gus<br>cuniculu<br>s |

|   |      |   |   |       |        |        |        |        |   |        |                            |                                  |
|---|------|---|---|-------|--------|--------|--------|--------|---|--------|----------------------------|----------------------------------|
| 1 | 1.00 | 1 | 1 | -0.06 | -0.06  | -0.06  | -0.06  | -0.06  | t | 108870 | DLLMGTL<br>GIVCPICSQ<br>KP | Gallus<br>gallus                 |
| 1 | 1.00 | 1 | 1 | 0     | -0.002 | 0      | -0.001 | 0      | t | 30596  | KERSSLRY<br>GN             | Mus<br>musculu<br>s              |
| 1 | 1.00 | 1 | 1 | 0     | -0.002 | -0.005 | 0.001  | -0.001 | t | 135741 | QGETEEAL<br>IQKRSY         | Mus<br>musculu<br>s              |
| 1 | 1.00 | 1 | 1 | 0.01  | 0.01   | 0.015  | 0.01   | 0.008  | t | 50236  | QAELDNKY<br>AGKGYKLG<br>SK | Mus<br>musculu<br>s              |
| 1 | 1.00 | 1 | 1 | 0     | -0.003 | 0.002  | 0      | -0.002 | t | 52156  | QQTAPKA<br>PTE             | Oryctola<br>gus<br>cuniculu<br>s |
| 1 | 1.00 | 1 | 1 | 0     | 0      | 0      | 0      | 0      | t | 131023 | QTTANPSC<br>PE             | Rattus<br>norvegic<br>us         |
| 1 | 1.00 | 1 | 1 | 0     | -0.003 | 0      | 0      | 0      | t | 76616  | YYTKDTNN<br>NL             | Oryctola<br>gus<br>cuniculu<br>s |
| 1 | 1.00 | 1 | 1 | 0     | 0      | 0      | 0      | 0      | t | 76616  | YYTKDTNN<br>NL             | Mus<br>musculu<br>s              |
| 1 | 1.00 | 1 | 1 | 0     | 0      | 0      | 0      | 0      | t | 47012  | PAYYTKDT<br>NNNL           | Mus<br>musculu<br>s              |
| 1 | 1.00 | 1 | 1 | -0.03 | -0.028 | -0.023 | -0.033 | -0.032 | t | 95501  | KKISQRYQ<br>KF             | Homo<br>sapiens                  |
| 1 | 1.00 | 1 | 1 | 0.02  | 0.02   | 0.02   | 0.02   | 0.02   | t | 98945  | PSSQVSFQ<br>QPLQ           | Homo<br>sapiens                  |
| 1 | 1.00 | 1 | 1 | 0.02  | 0.02   | 0.02   | 0.02   | 0.02   | t | 47546  | PFPQPQQ<br>QLP             | Mus<br>musculu<br>s              |
| 1 | 1.00 | 1 | 1 | 0.02  | 0.02   | 0.02   | 0.02   | 0.02   | t | 30477  | KEKMLLNE<br>EEITTKG        | Homo<br>sapiens                  |
| 1 | 1.00 | 1 | 1 | 0.02  | 0.02   | 0.02   | 0.02   | 0.02   | t | 30476  | KEKMILNE<br>EEITTKG        | Homo<br>sapiens                  |

|   |      |   |   |       |       |       |       |       |   |        |                              |                                  |
|---|------|---|---|-------|-------|-------|-------|-------|---|--------|------------------------------|----------------------------------|
| 1 | 1.00 | 1 | 1 | 0     | 0     | 0     | 0     | 0     | t | 149435 | QPQYSQP<br>QQP               | Homo<br>sapiens                  |
| 1 | 1.00 | 1 | 1 | 0     | 0     | 0     | 0     | 0     | t | 149435 | QPQYSQP<br>QQP               | Mus<br>musculu<br>s              |
| 1 | 1.00 | 1 | 1 | 0     | 0     | 0     | 0     | 0     | t | 127722 | LGRNSTV                      | Homo<br>sapiens                  |
| 1 | 1.00 | 1 | 1 | 0     | 0     | 0     | 0     | 0     | t | 115436 | QEVLNENL<br>LRFFVAPF<br>PEVF | Homo<br>sapiens                  |
| 1 | 1.00 | 1 | 1 | 0     | 0     | 0     | 0     | 0     | t | 98781  | FPSQQPYL<br>QLQP             | Homo<br>sapiens                  |
| 1 | 1.00 | 1 | 1 | 0     | 0     | 0     | 0     | 0     | t | 78227  | PHAMVDH<br>L                 | Homo<br>sapiens                  |
| 1 | 1.00 | 1 | 1 | 0     | 0     | 0     | 0     | 0     | t | 97304  | FKIISDGTQ                    | Oryctola<br>gus<br>cuniculu<br>s |
| 1 | 1.00 | 1 | 1 | 0     | 0     | 0     | 0     | 0     | t | 45696  | NRLIAFAF<br>AGNHVSP<br>THYVP | Homo<br>sapiens                  |
| 1 | 1.00 | 1 | 1 | 0     | 0     | 0     | 0     | 0     | t | 47119  | PDKEILYEA                    | Homo<br>sapiens                  |
| 1 | 1.00 | 1 | 1 | 0     | 0     | 0     | 0     | 0     | t | 56275  | RVEHAVVY<br>YVYSPSR          | Homo<br>sapiens                  |
| 1 | 1.00 | 1 | 1 | 0     | 0     | 0     | 0     | 0     | t | 22082  | GRIILSGKP<br>AVIPDREV<br>LYR | Homo<br>sapiens                  |
| 1 | 1.00 | 1 | 1 | 0     | 0     | 0     | 0     | 0     | t | 22104  | GRIVLSGK<br>PAIIPDREV<br>LYR | Homo<br>sapiens                  |
| 1 | 1.00 | 1 | 1 | -0.02 | -0.02 | -0.02 | -0.02 | -0.02 | t | 135754 | RYVNWIKE                     | Homo<br>sapiens                  |
| 1 | 1.00 | 1 | 1 | -0.02 | -0.02 | -0.02 | -0.02 | -0.02 | t | 81550  | EIKVQMSA<br>AY               | Homo<br>sapiens                  |
| 1 | 1.00 | 1 | 1 | 0.01  | 0.01  | 0.01  | 0.014 | 0.012 | t | 118441 | IWLWNKQ<br>KYEAGTYP<br>QT    | Homo<br>sapiens                  |
| 1 | 1.00 | 1 | 1 | 0.03  | 0.03  | 0.026 | 0.03  | 0.032 | t | 60535  | SQQPQQP<br>FPQ               | Mus<br>musculu<br>s              |

|   |      |   |   |       |        |        |        |        |   |        |                     |                          |
|---|------|---|---|-------|--------|--------|--------|--------|---|--------|---------------------|--------------------------|
| 1 | 1.00 | 1 | 1 | 0     | -0.005 | -0.01  | 0.002  | 0.003  | t | 157429 | IQVYRSDV<br>PVN     | Canis<br>lupus           |
| 1 | 1.00 | 1 | 1 | -0.01 | -0.008 | -0.01  | -0.003 | -0.007 | t | 130737 | ASAVISAR            | Homo<br>sapiens          |
| 1 | 1.00 | 1 | 1 | 0     | 0.001  | 0.012  | 0.006  | 0.003  | t | 78266  | RYNPPD              | Equus<br>caballus        |
| 1 | 1.00 | 1 | 1 | -0.02 | -0.022 | -0.025 | -0.027 | -0.021 | t | 122642 | VTVQHKKL<br>RTPLNYI | Rattus<br>norvegicus     |
| 1 | 1.00 | 1 | 1 | -0.04 | -0.037 | -0.051 | -0.04  | -0.038 | t | 111924 | VSGLQYRV<br>FRIHLPD | Mus<br>musculus          |
| 1 | 1.00 | 1 | 1 | -0.02 | -0.018 | -0.02  | -0.021 | -0.02  | t | 17365  | FPQPQFP<br>PQ       | Homo<br>sapiens          |
| 1 | 1.00 | 1 | 1 | -0.02 | -0.016 | -0.018 | -0.023 | -0.02  | t | 65837  | TQEIFSFLIS          | Homo<br>sapiens          |
| 1 | 1.00 | 1 | 1 | 0     | 0.003  | 0.005  | -0.001 | 0      | t | 25512  | ICLTRTDR<br>GWFC    | Mus<br>musculus          |
| 1 | 1.00 | 1 | 1 | 0.01  | 0.008  | 0.01   | 0.007  | 0.01   | t | 56864  | SALLEDPV<br>G       | Mus<br>musculus          |
| 1 | 1.00 | 1 | 1 | -0.02 | -0.024 | -0.015 | -0.017 | -0.02  | t | 78107  | ATYQSEYL<br>AHRIPP  | Oryctolagus<br>cuniculus |
| 1 | 1.00 | 1 | 1 | -0.01 | -0.01  | -0.01  | -0.01  | -0.01  | t | 48002  | PITNDQKK<br>LMSNN   | Mus<br>musculus          |
| 1 | 1.00 | 1 | 1 | -0.01 | -0.007 | -0.01  | -0.01  | -0.01  | t | 48002  | PITNDQKK<br>LMSNN   | Mus<br>musculus          |
| 1 | 1.00 | 1 | 1 | -0.06 | -0.066 | -0.06  | -0.06  | -0.06  | t | 123244 | GMIPPPGL            | Oryctolagus<br>cuniculus |
| 1 | 1.00 | 1 | 1 | -0.01 | -0.012 | -0.005 | -0.011 | -0.01  | t | 39160  | LRPFHQILY<br>GMS    | Mus<br>musculus          |

|   |      |   |   |       |        |        |        |        |   |        |                              |                                  |
|---|------|---|---|-------|--------|--------|--------|--------|---|--------|------------------------------|----------------------------------|
| 1 | 1.00 | 1 | 1 | 0.02  | 0.02   | 0.029  | 0.027  | 0.02   | t | 135933 | GVELRQLT<br>PEQL             | Homo<br>sapiens                  |
| 1 | 1.00 | 1 | 1 | 0.05  | 0.05   | 0.05   | 0.05   | 0.05   | t | 105505 | SAE                          | Oryctola<br>gus<br>cuniculu<br>s |
| 1 | 1.00 | 1 | 1 | 0.05  | 0.05   | 0.05   | 0.05   | 0.05   | t | 105505 | SAE                          | Oryctola<br>gus<br>cuniculu<br>s |
| 1 | 1.00 | 1 | 1 | 0.05  | 0.05   | 0.05   | 0.05   | 0.05   | t | 105505 | SAE                          | Oryctola<br>gus<br>cuniculu<br>s |
| 1 | 1.00 | 1 | 1 | 0.01  | 0.01   | 0.01   | 0.01   | 0.01   | t | 1385   | AFRELADA                     | Oryctola<br>gus<br>cuniculu<br>s |
| 1 | 1.00 | 1 | 1 | -0.01 | -0.01  | -0.01  | -0.01  | -0.01  | t | 40578  | LVSFGVWI<br>RTPPAYRP         | Mus<br>musculu<br>s              |
| 1 | 1.00 | 1 | 1 | -0.01 | -0.01  | -0.01  | -0.01  | -0.01  | t | 17580  | FRELADAL                     | Oryctola<br>gus<br>cuniculu<br>s |
| 1 | 1.00 | 1 | 1 | 0     | 0      | 0      | 0      | -0.004 | t | 127852 | TCTIKVVG<br>GYQVNIRV<br>GDTT | Mus<br>musculu<br>s              |
| 1 | 1.00 | 1 | 1 | -0.02 | -0.022 | -0.027 | -0.021 | -0.02  | t | 41661  | MHGSRNN<br>H                 | Mus<br>musculu<br>s              |
| 1 | 1.00 | 1 | 1 | 0     | 0.004  | 0.002  | -0.003 | 0      | t | 96021  | YLQYLYQG<br>PI               | Homo<br>sapiens                  |
| 1 | 1.00 | 1 | 1 | 0.05  | 0.049  | 0.055  | 0.048  | 0.048  | t | 52893  | QYECETAK<br>ELES             | Myodes<br>glareolu<br>s          |
| 1 | 1.00 | 1 | 1 | 0     | -0.003 | -0.005 | 0      | 0.002  | t | 61818  | STPGIVI                      | Oryctola<br>gus<br>cuniculu<br>s |
| 1 | 1.00 | 1 | 1 | 0.01  | 0.01   | 0.01   | 0.01   | 0.01   | t | 138144 | APGAPAP<br>GQAPAVE           | Oryctola<br>gus<br>cuniculu<br>s |

|   |      |   |   |       |       |       |       |       |   |        |                              |                     |
|---|------|---|---|-------|-------|-------|-------|-------|---|--------|------------------------------|---------------------|
| 1 | 1.00 | 1 | 1 | 0.01  | 0.01  | 0.01  | 0.01  | 0.01  | t | 148854 | QQQFPEQ<br>SQQ               | Homo<br>sapiens     |
| 1 | 1.00 | 1 | 1 | 0.01  | 0.01  | 0.01  | 0.01  | 0.01  | t | 122998 | AAMDRLRI<br>GF               | Ovis<br>aries       |
| 1 | 1.00 | 1 | 1 | 0.01  | 0.01  | 0.01  | 0.01  | 0.01  | t | 101921 | NGGCDAD<br>AT                | Homo<br>sapiens     |
| 1 | 1.00 | 1 | 1 | 0.01  | 0.01  | 0.01  | 0.01  | 0.01  | t | 114937 | RFPNATDK<br>EG               | Homo<br>sapiens     |
| 1 | 1.00 | 1 | 1 | 0.01  | 0.01  | 0.01  | 0.01  | 0.01  | t | 63916  | TGPCKTCT<br>TPAQ             | Mus<br>musculu<br>s |
| 1 | 1.00 | 1 | 1 | 0.01  | 0.01  | 0.01  | 0.01  | 0.01  | t | 46970  | PATIPDRE<br>ALYREFDE<br>MEEC | Homo<br>sapiens     |
| 1 | 1.00 | 1 | 1 | 0.01  | 0.01  | 0.01  | 0.01  | 0.01  | t | 22086  | GRIILSGRP<br>AIIPDREVL<br>YQ | Homo<br>sapiens     |
| 1 | 1.00 | 1 | 1 | 0.01  | 0.01  | 0.01  | 0.01  | 0.01  | t | 22074  | GRIILSGKP<br>AIIPDREAL<br>YQ | Homo<br>sapiens     |
| 1 | 1.00 | 1 | 1 | 0.01  | 0.01  | 0.01  | 0.01  | 0.01  | t | 22074  | GRIILSGKP<br>AIIPDREAL<br>YQ | Homo<br>sapiens     |
| 1 | 1.00 | 1 | 1 | 0.01  | 0.01  | 0.01  | 0.01  | 0.01  | t | 22088  | GRIILSGRP<br>AIVPDRELL<br>YQ | Homo<br>sapiens     |
| 1 | 1.00 | 1 | 1 | 0.01  | 0.01  | 0.01  | 0.01  | 0.01  | t | 22089  | GRIILSGRP<br>AVIPDREV<br>LYQ | Homo<br>sapiens     |
| 1 | 1.00 | 1 | 1 | -0.01 | -0.01 | -0.01 | -0.01 | -0.01 | t | 158583 | APPHLPP                      | Homo<br>sapiens     |
| 1 | 1.00 | 1 | 1 | -0.01 | -0.01 | -0.01 | -0.01 | -0.01 | t | 136392 | IPKSRKRRI<br>PQR             | Mus<br>musculu<br>s |
| 1 | 1.00 | 1 | 1 | -0.01 | -0.01 | -0.01 | -0.01 | -0.01 | t | 151067 | VDDGFLDI<br>WTYNAEL          | Homo<br>sapiens     |
| 1 | 1.00 | 1 | 1 | -0.01 | -0.01 | -0.01 | -0.01 | -0.01 | t | 136392 | IPKSRKRRI<br>PQR             | Mus<br>musculu<br>s |
| 1 | 1.00 | 1 | 1 | -0.01 | -0.01 | -0.01 | -0.01 | -0.01 | t | 149108 | SLPNLTQ                      | Sus<br>scrofa       |
| 1 | 1.00 | 1 | 1 | -0.03 | -0.03 | -0.03 | -0.03 | -0.03 | t | 115453 | QQKEPMI<br>GVNQELA<br>YFYPEL | Homo<br>sapiens     |

|   |      |   |   |       |        |        |        |        |   |        |                              |                                  |
|---|------|---|---|-------|--------|--------|--------|--------|---|--------|------------------------------|----------------------------------|
| 1 | 1.00 | 1 | 1 | -0.03 | -0.03  | -0.03  | -0.03  | -0.03  | t | 115853 | LSFMAIPP<br>KK               | Homo<br>sapiens                  |
| 1 | 1.00 | 1 | 1 | 0     | 0      | 0      | -0.001 | -0.001 | t | 105164 | EFRHDSG                      | Mus<br>musculu<br>s              |
| 1 | 1.00 | 1 | 1 | -0.05 | -0.05  | -0.05  | -0.05  | -0.05  | t | 79219  | FWLAVR                       | Mus<br>musculu<br>s              |
| 1 | 1.00 | 1 | 1 | 0.01  | 0.008  | 0.011  | 0.007  | 0.009  | t | 10815  | DWIWNQ<br>MHIDEEK<br>NE      | Rattus<br>norvegic<br>us         |
| 1 | 1.00 | 1 | 1 | -0.02 | -0.02  | -0.02  | -0.02  | -0.02  | t | 70951  | VSGGSW                       | Homo<br>sapiens                  |
| 1 | 1.00 | 1 | 1 | 0.03  | 0.033  | 0.03   | 0.03   | 0.031  | t | 130871 | GSESGIFT<br>NTK              | Mus<br>musculu<br>s              |
| 1 | 1.00 | 1 | 1 | 0.03  | 0.03   | 0.023  | 0.03   | 0.029  | t | 119495 | MAENGD<br>NEKMAAL<br>EAKICHQ | Homo<br>sapiens                  |
| 1 | 1.00 | 1 | 1 | -0.01 | -0.006 | -0.01  | -0.013 | -0.011 | t | 118430 | ISDAMKKV<br>GRKGV            | Homo<br>sapiens                  |
| 1 | 1.00 | 1 | 1 | 0     | 0      | -0.002 | -0.001 | 0      | t | 153249 | AFRANTA<br>NPDWDFN<br>P      | Mus<br>musculu<br>s              |
| 1 | 1.00 | 1 | 1 | 0     | 0      | -0.003 | 0      | 0.001  | t | 41232  | MDIDPYKE<br>FG               | Mus<br>musculu<br>s              |
| 1 | 1.00 | 1 | 1 | 0.01  | 0.01   | 0.01   | 0.01   | 0.01   | t | 27421  | ILYEFDE<br>M                 | Homo<br>sapiens                  |
| 1 | 1.00 | 1 | 1 | 0     | 0.002  | 0      | 0.001  | 0      | t | 51146  | QIVGGVYL                     | Homo<br>sapiens                  |
| 1 | 1.00 | 1 | 1 | 0     | 0.002  | 0      | 0.001  | 0      | t | 6938   | CRQLGKQ<br>RC                | Homo<br>sapiens                  |
| 1 | 1.00 | 1 | 1 | 0.01  | 0.004  | 0.01   | 0.01   | 0.01   | t | 123053 | AVQGPVP<br>G                 | Oryctola<br>gus<br>cuniculu<br>s |
| 1 | 1.00 | 1 | 1 | -0.01 | -0.012 | -0.002 | -0.011 | -0.012 | t | 38010  | LMDPVFG<br>FDRRVPVV          | Mus<br>musculu<br>s              |
| 1 | 1.00 | 1 | 1 | 0.04  | 0.04   | 0.04   | 0.04   | 0.042  | t | 136069 | KEADIS                       | Oryctola<br>gus<br>cuniculu<br>s |

|   |      |   |   |       |        |        |        |        |   |        |                           |                    |
|---|------|---|---|-------|--------|--------|--------|--------|---|--------|---------------------------|--------------------|
| 1 | 1.00 | 1 | 1 | -0.01 | -0.01  | -0.001 | -0.003 | -0.01  | t | 135956 | LRQLTPEQ<br>LSTL          | Homo sapiens       |
| 1 | 1.00 | 1 | 1 | 0     | 0      | 0      | 0      | 0.002  | t | 24749  | HSYHYHKF                  | Mus musculus       |
| 1 | 1.00 | 1 | 1 | 0.01  | 0.008  | 0.01   | 0.01   | 0.009  | t | 108295 | CKRDSTW<br>C              | Mus musculus       |
| 1 | 1.00 | 1 | 1 | -0.03 | -0.03  | -0.037 | -0.03  | -0.031 | t | 105748 | EFRHDSGY<br>EVHHQK        | Mus musculus       |
| 1 | 1.00 | 1 | 1 | 0     | 0      | 0      | 0.004  | 0.002  | t | 96211  | EDKKRKEE<br>EE            | Homo sapiens       |
| 1 | 1.00 | 1 | 1 | 0     | 0.003  | 0      | 0      | -0.002 | t | 135501 | SQWNKP                    | Mus musculus       |
| 1 | 1.00 | 1 | 1 | -0.01 | -0.012 | -0.021 | -0.011 | -0.01  | t | 26306  | IGQLVIEHY<br>ADT          | Mus musculus       |
| 1 | 1.00 | 1 | 1 | 0     | -0.012 | 0      | 0      | 0      | t | 115611 | GSLPQKA<br>QRPQDEN        | Macaca mulatta     |
| 1 | 1.00 | 1 | 1 | 0     | 0      | 0      | 0      | 0      | t | 62858  | TAGLVGLL<br>TPG           | Rattus norvegicus  |
| 1 | 1.00 | 1 | 1 | 0     | 0      | 0      | 0      | 0      | t | 62858  | TAGLVGLL<br>TPG           | Rattus norvegicus  |
| 1 | 1.00 | 1 | 1 | 0     | 0      | 0      | 0      | 0      | t | 24870  | HSVRGFTS<br>LFS           | Homo sapiens       |
| 1 | 1.00 | 1 | 1 | 0.06  | 0.064  | 0.06   | 0.067  | 0.063  | t | 119908 | GNIGIDVE<br>DEDSDEDE<br>F | Homo sapiens       |
| 1 | 1.00 | 1 | 1 | 0.06  | 0.062  | 0.06   | 0.067  | 0.063  | t | 119908 | GNIGIDVE<br>DEDSDEDE<br>F | Homo sapiens       |
| 1 | 1.00 | 1 | 1 | 0.01  | 0.01   | 0.001  | 0.008  | 0.009  | t | 151076 | YPGDFIDY<br>EELREQL       | Homo sapiens       |
| 1 | 1.00 | 1 | 1 | 0.01  | 0.012  | 0.01   | 0.01   | 0.011  | t | 41609  | MGQHPAK<br>S              | Anas platyrhynchos |
| 1 | 1.00 | 1 | 1 | -0.01 | -0.008 | -0.006 | -0.01  | -0.011 | t | 134333 | CIPIPSSW<br>AFARFLW       | Homo sapiens       |



|   |      |   |   |      |       |       |       |       |   |        |                              |                                  |
|---|------|---|---|------|-------|-------|-------|-------|---|--------|------------------------------|----------------------------------|
| 1 | 1.00 | 1 | 1 | 0.01 | 0.006 | 0.003 | 0.003 | 0.009 | t | 131016 | QESLDMN<br>SARDF             | Oryctola<br>gus<br>cuniculu<br>s |
| 1 | 1.00 | 1 | 1 | 0.02 | 0.02  | 0.02  | 0.02  | 0.02  | t | 118752 | AVGADES<br>VVKEA             | Homo<br>sapiens                  |
| 1 | 1.00 | 1 | 1 | 0.02 | 0.02  | 0.02  | 0.02  | 0.02  | t | 127772 | PRHRHPQ<br>DPRSPGPA          | Homo<br>sapiens                  |
| 1 | 1.00 | 1 | 1 | 0    | 0     | 0.004 | 0     | 0     | t | 124986 | ANCLNTCK<br>NK               | Mus<br>musculu<br>s              |
| 1 | 1.00 | 1 | 1 | 0    | 0.003 | 0.004 | 0     | 0     | t | 124986 | ANCLNTCK<br>NK               | Mus<br>musculu<br>s              |
| 1 | 1.00 | 1 | 1 | 0    | 0     | 0     | 0     | 0     | t | 138241 | SQPEILED<br>ARASVDTY         | Mus<br>musculu<br>s              |
| 1 | 1.00 | 1 | 1 | 0    | 0     | 0     | 0     | 0     | t | 138241 | SQPEILED<br>ARASVDTY         | Mus<br>musculu<br>s              |
| 1 | 1.00 | 1 | 1 | 0    | 0     | 0     | 0     | 0     | t | 132078 | SQGWGDP<br>PKSNQSLG          | Homo<br>sapiens                  |
| 1 | 1.00 | 1 | 1 | 0    | 0     | 0     | 0     | 0     | t | 131079 | SQTTANPA<br>CPEGT            | Rattus<br>norvegic<br>us         |
| 1 | 1.00 | 1 | 1 | 0    | 0     | 0     | 0     | 0     | t | 101921 | NGGCDAD<br>AT                | Homo<br>sapiens                  |
| 1 | 1.00 | 1 | 1 | 0    | 0     | 0     | 0     | 0     | t | 79249  | HFQYRM                       | Mus<br>musculu<br>s              |
| 1 | 1.00 | 1 | 1 | 0    | 0     | 0     | 0     | 0     | t | 92451  | DFAKEVPN<br>YK               | Ovis<br>aries                    |
| 1 | 1.00 | 1 | 1 | 0    | 0     | 0     | 0     | 0     | t | 48685  | PNPLGFFP                     | Mus<br>musculu<br>s              |
| 1 | 1.00 | 1 | 1 | 0    | 0     | 0     | 0     | 0     | t | 47179  | PDRELLYR<br>EFDEMEEC<br>PSHL | Homo<br>sapiens                  |
| 1 | 1.00 | 1 | 1 | 0    | 0     | 0     | 0     | 0     | t | 58768  | SIYPGTITG<br>HRMAW           | Homo<br>sapiens                  |
| 1 | 1.00 | 1 | 1 | 0    | 0     | 0     | 0     | 0     | t | 21815  | GPVEDAIT<br>AAIGRVA          | Rattus<br>norvegic<br>us         |

|   |      |   |   |       |        |        |        |       |   |        |                              |                              |
|---|------|---|---|-------|--------|--------|--------|-------|---|--------|------------------------------|------------------------------|
| 1 | 1.00 | 1 | 1 | 0     | 0      | 0      | 0      | 0     | t | 21815  | GPVEDAIT<br>AAIGRVA          | Rattus<br>norvegicus         |
| 1 | 1.00 | 1 | 1 | 0     | 0      | 0      | 0      | 0     | t | 36425  | LHSTSPEG<br>N                | Homo<br>sapiens              |
| 1 | 1.00 | 1 | 1 | 0     | 0      | 0      | 0      | 0     | t | 4451   | ASHLPYIE<br>QGMHLAE<br>QFKQK | Homo<br>sapiens              |
| 1 | 1.00 | 1 | 1 | -0.02 | -0.02  | -0.02  | -0.02  | -0.02 | t | 103347 | LFSRVEDV<br>LGLPQNT          | Homo<br>sapiens              |
| 1 | 1.00 | 1 | 1 | -0.02 | -0.02  | -0.02  | -0.02  | -0.02 | t | 115730 | EPTSTPTTE<br>A               | Homo<br>sapiens              |
| 1 | 1.00 | 1 | 1 | 0.05  | 0.05   | 0.038  | 0.051  | 0.052 | t | 53702  | RFFRDEKE<br>LQ               | Mus<br>musculus              |
| 1 | 1.00 | 1 | 1 | 0     | 0.002  | 0.009  | 0.002  | 0     | t | 65050  | TLRVYK                       | Homo<br>sapiens              |
| 1 | 1.00 | 1 | 1 | 0     | 0      | -0.004 | 0      | 0.001 | t | 106057 | REFSPRGQ<br>HGRRERA          | Homo<br>sapiens              |
| 1 | 1.00 | 1 | 1 | 0.02  | 0.016  | 0.008  | 0.023  | 0.022 | t | 58938  | SKSIGGTP<br>ALDRRVQ<br>DVNDT | Oryctola<br>gus<br>cuniculus |
| 1 | 1.00 | 1 | 1 | 0.03  | 0.03   | 0.029  | 0.027  | 0.03  | t | 22405  | GSLFESTCT<br>W               | Homo<br>sapiens              |
| 1 | 1.00 | 1 | 1 | -0.03 | -0.03  | -0.033 | -0.03  | -0.03 | t | 10774  | DVVLMKV<br>PTIPKFRDI<br>TQHF | Homo<br>sapiens              |
| 1 | 1.00 | 1 | 1 | 0.02  | 0.02   | 0.013  | 0.011  | 0.017 | t | 130816 | ESKAISDA<br>QITASSYFT<br>NM  | Homo<br>sapiens              |
| 1 | 1.00 | 1 | 1 | -0.03 | -0.03  | -0.035 | -0.03  | -0.03 | t | 50445  | QDCNCSIY<br>PGHASGH<br>RMAWD | Mus<br>musculus              |
| 1 | 1.00 | 1 | 1 | -0.02 | -0.02  | -0.024 | -0.023 | -0.02 | t | 89403  | TFNGAYTP<br>AN               | Homo<br>sapiens              |
| 1 | 1.00 | 1 | 1 | 0     | -0.002 | 0      | 0.001  | 0     | t | 65051  | TLRWFFNL<br>FQLYRG           | Mus<br>musculus              |
| 1 | 1.00 | 1 | 1 | 0     | -0.004 | 0      | 0.001  | 0     | t | 68054  | VDREGRD<br>NVRSKGV           | Oryctola<br>gus<br>cuniculus |

|   |      |   |   |       |        |        |        |        |   |        |                              |                                  |
|---|------|---|---|-------|--------|--------|--------|--------|---|--------|------------------------------|----------------------------------|
| 1 | 1.00 | 1 | 1 | 0     | -0.002 | 0      | 0.001  | 0      | t | 51806  | QPELAPED<br>PED              | Mus<br>musculu<br>s              |
| 1 | 1.00 | 1 | 1 | 0     | -0.002 | 0      | 0.001  | 0      | t | 50180  | PYVEPTAP<br>QVL              | Mus<br>musculu<br>s              |
| 1 | 1.00 | 1 | 1 | 0     | -0.002 | 0      | 0.001  | 0      | t | 17128  | FNASDSVG<br>QQIKVIP          | Mus<br>musculu<br>s              |
| 1 | 1.00 | 1 | 1 | 0     | -0.002 | 0      | 0.001  | 0      | t | 17284  | FPFNASDS<br>VGQQIKVI<br>P    | Mus<br>musculu<br>s              |
| 1 | 1.00 | 1 | 1 | 0     | -0.002 | 0      | 0.001  | 0      | t | 31794  | KLDVVKLL<br>YNEQFAV<br>QGLLR | Mus<br>musculu<br>s              |
| 1 | 1.00 | 1 | 1 | -0.03 | -0.03  | -0.037 | -0.039 | -0.032 | t | 130800 | EGAKAFFK<br>GA               | Homo<br>sapiens                  |
| 1 | 1.00 | 1 | 1 | 0     | -0.003 | -0.001 | 0      | 0      | t | 14905  | EVWREEA<br>YHAADIKD          | Oryctola<br>gus<br>cuniculu<br>s |
| 1 | 1.00 | 1 | 1 | 0     | 0      | -0.001 | 0      | 0      | t | 14905  | EVWREEA<br>YHAADIKD          | Homo<br>sapiens                  |
| 1 | 1.00 | 1 | 1 | 0.03  | 0.028  | 0.028  | 0.027  | 0.032  | t | 120610 | IFADDID                      | Rattus<br>norvegic<br>us         |
| 1 | 1.00 | 1 | 1 | 0     | 0.002  | -0.005 | 0.001  | 0.001  | t | 19093  | GDRAAGQ<br>PAGDRAA<br>GQPA   | Homo<br>sapiens                  |
| 1 | 1.00 | 1 | 1 | 0     | -0.004 | 0      | 0.003  | 0.001  | t | 68473  | VFGKEKVN<br>ELSKDIGSE<br>STE | Oryctola<br>gus<br>cuniculu<br>s |
| 1 | 1.00 | 1 | 1 | 0     | -0.004 | 0      | 0.003  | 0.001  | t | 76384  | YVPLGTQY<br>TDAPSFSD<br>IPN  | Oryctola<br>gus<br>cuniculu<br>s |
| 1 | 1.00 | 1 | 1 | 0     | -0.004 | 0      | 0.003  | 0.001  | t | 68322  | VEQKHIQK<br>EDVPSEY<br>LGYL  | Oryctola<br>gus<br>cuniculu<br>s |
| 1 | 1.00 | 1 | 1 | 0     | -0.004 | 0      | 0.003  | 0.001  | t | 74689  | YLGYLEQL<br>LRLKKYKV<br>PQLE | Oryctola<br>gus<br>cuniculu<br>s |

|   |      |   |   |       |        |        |        |        |   |        |                              |                                  |
|---|------|---|---|-------|--------|--------|--------|--------|---|--------|------------------------------|----------------------------------|
| 1 | 1.00 | 1 | 1 | 0     | -0.002 | 0      | 0.003  | 0.001  | t | 52082  | QQPFP                        | Mus<br>musculu<br>s              |
| 1 | 1.00 | 1 | 1 | 0     | -0.004 | 0      | 0.003  | 0.001  | t | 55186  | RPKHPIKH<br>QGLPQEV<br>LNE   | Oryctola<br>gus<br>cuniculu<br>s |
| 1 | 1.00 | 1 | 1 | 0     | -0.004 | 0      | 0.003  | 0.001  | t | 38207  | LNENLLRF<br>FVAPFPEV<br>FGKE | Oryctola<br>gus<br>cuniculu<br>s |
| 1 | 1.00 | 1 | 1 | 0     | -0.004 | 0      | 0.003  | 0.001  | t | 57630  | SESTEDQA<br>MEDIKQM<br>EAE   | Oryctola<br>gus<br>cuniculu<br>s |
| 1 | 1.00 | 1 | 1 | 0     | -0.004 | 0      | 0.003  | 0.001  | t | 26341  | IGVNQELA<br>YFYPELFR<br>QFYQ | Oryctola<br>gus<br>cuniculu<br>s |
| 1 | 1.00 | 1 | 1 | 0     | -0.004 | 0      | 0.003  | 0.001  | t | 8756   | DIPNPIGSE<br>NSEKTTM<br>PLW  | Oryctola<br>gus<br>cuniculu<br>s |
| 1 | 1.00 | 1 | 1 | -0.01 | -0.01  | -0.01  | -0.008 | -0.01  | t | 56714  | SAASANG<br>PLWFFIF           | Homo<br>sapiens                  |
| 1 | 1.00 | 1 | 1 | -0.02 | -0.016 | -0.013 | -0.023 | -0.023 | t | 106492 | GWVDHFA<br>DGY               | Homo<br>sapiens                  |
| 1 | 1.00 | 1 | 1 | -0.02 | -0.018 | -0.011 | -0.017 | -0.02  | t | 14263  | ESSCTFMP<br>EGTVCSQ          | Homo<br>sapiens                  |
| 1 | 1.00 | 1 | 1 | 0.02  | 0.022  | 0.02   | 0.017  | 0.02   | t | 11033  | EAESISSE<br>EIVPNSVE         | Homo<br>sapiens                  |
| 1 | 1.00 | 1 | 1 | -0.05 | -0.048 | -0.038 | -0.043 | -0.05  | t | 102833 | TARAWCQ<br>VAQKF             | Homo<br>sapiens                  |
| 1 | 1.00 | 1 | 1 | 0.03  | 0.032  | 0.042  | 0.037  | 0.03   | t | 106628 | LSSREPQA<br>R                | Homo<br>sapiens                  |
| 1 | 1.00 | 1 | 1 | 0.01  | 0.01   | 0.01   | 0.01   | 0.013  | t | 132029 | QLGPTCLS<br>SL               | Homo<br>sapiens                  |
| 1 | 1.00 | 1 | 1 | -0.01 | -0.01  | -0.018 | -0.011 | -0.01  | t | 82608  | GENKFVAT<br>AASV             | Homo<br>sapiens                  |

|   |      |   |   |       |        |        |        |        |   |        |                              |                       |
|---|------|---|---|-------|--------|--------|--------|--------|---|--------|------------------------------|-----------------------|
| 1 | 1.00 | 1 | 1 | -0.01 | -0.008 | -0.01  | -0.009 | -0.01  | t | 66240  | TSGTSGTS<br>GPSGPSG          | Homo sapiens          |
| 1 | 1.00 | 1 | 1 | 0     | 0      | 0      | 0      | 0.001  | t | 48598  | PNANPNA                      | Mus musculus          |
| 1 | 1.00 | 1 | 1 | 0.01  | 0.01   | 0.018  | 0.01   | 0.008  | t | 98116  | IKYNGEEYL                    | Oryctolagus cuniculus |
| 1 | 1.00 | 1 | 1 | 0.01  | 0.014  | 0.008  | 0.011  | 0.01   | t | 39011  | LQVPSPS<br>MGRDIKV<br>QFQSGG | Homo sapiens          |
| 1 | 1.00 | 1 | 1 | 0.03  | 0.03   | 0.037  | 0.03   | 0.028  | t | 35763  | LEYDPRLV<br>YD               | Homo sapiens          |
| 1 | 1.00 | 1 | 1 | 0.03  | 0.028  | 0.027  | 0.023  | 0.03   | t | 122167 | PPPITQGE<br>CKQL             | Mus musculus          |
| 1 | 1.00 | 1 | 1 | -0.01 | -0.017 | -0.017 | -0.009 | -0.011 | t | 71216  | VSWFAST<br>GGRDSKID<br>VWSLV | Homo sapiens          |
| 1 | 1.00 | 1 | 1 | -0.02 | -0.018 | -0.025 | -0.023 | -0.02  | t | 158933 | KTFFHTIGF<br>ASKSADDV<br>K   | Homo sapiens          |
| 1 | 1.00 | 1 | 1 | 0.01  | 0.01   | 0.01   | 0.01   | 0.01   | t | 1258   | AFASRGN<br>HDSPTHYV<br>PESD  | Homo sapiens          |
| 1 | 1.00 | 1 | 1 | 0.01  | 0.01   | 0.01   | 0.01   | 0.01   | t | 1258   | AFASRGN<br>HDSPTHYV<br>PESD  | Homo sapiens          |
| 1 | 1.00 | 1 | 1 | 0     | 0.003  | 0.002  | 0      | 0.002  | t | 18879  | GCIGSYCV                     | Mus musculus          |
| 1 | 1.00 | 1 | 1 | 0.02  | 0.018  | 0.016  | 0.017  | 0.02   | t | 23422  | GYNVSSIV<br>TMTSQGM          | Mus musculus          |
| 1 | 1.00 | 1 | 1 | 0     | -0.003 | -0.002 | 0      | 0.001  | t | 135835 | CWAFSGV<br>AATESAY           | Oryctolagus cuniculus |
| 1 | 1.00 | 1 | 1 | 0.04  | 0.04   | 0.036  | 0.043  | 0.04   | t | 6926   | CRGGEPPS<br>PKTCGSYT<br>YTYQ | Homo sapiens          |
| 1 | 1.00 | 1 | 1 | 0.03  | 0.03   | 0.03   | 0.03   | 0.03   | t | 100501 | SEEEKELLN<br>R               | Mus musculus          |

|   |      |   |   |       |        |        |       |       |   |        |                              |                                  |
|---|------|---|---|-------|--------|--------|-------|-------|---|--------|------------------------------|----------------------------------|
| 1 | 1.00 | 1 | 1 | 0.03  | 0.03   | 0.03   | 0.03  | 0.03  | t | 103476 | PGQGAYA<br>AANSWVD<br>V      | Homo<br>sapiens                  |
| 1 | 1.00 | 1 | 1 | 0.03  | 0.03   | 0.03   | 0.03  | 0.03  | t | 79957  | PALELIRM<br>VECS             | Mus<br>musculu<br>s              |
| 1 | 1.00 | 1 | 1 | 0.01  | 0.01   | 0.01   | 0.01  | 0.01  | t | 123127 | EGAAMD<br>LRI                | Ovis<br>aries                    |
| 1 | 1.00 | 1 | 1 | 0.01  | 0.01   | 0.01   | 0.01  | 0.01  | t | 133555 | EGPEYWD<br>RET               | Mus<br>musculu<br>s              |
| 1 | 1.00 | 1 | 1 | 0.01  | 0.01   | 0.01   | 0.01  | 0.01  | t | 113762 | QPAQGQQ<br>GQQPGQA           | Homo<br>sapiens                  |
| 1 | 1.00 | 1 | 1 | 0.01  | 0.01   | 0.01   | 0.01  | 0.01  | t | 63917  | TGPCKTCT<br>TTAQ             | Mus<br>musculu<br>s              |
| 1 | 1.00 | 1 | 1 | 0.01  | 0.01   | 0.01   | 0.01  | 0.01  | t | 77905  | HLSPTMLR<br>WEQF             | Mus<br>musculu<br>s              |
| 1 | 1.00 | 1 | 1 | 0.01  | 0.01   | 0.01   | 0.01  | 0.01  | t | 78297  | WHELYSP                      | Homo<br>sapiens                  |
| 1 | 1.00 | 1 | 1 | 0.01  | 0.01   | 0.01   | 0.01  | 0.01  | t | 41338  | MEECSQA<br>APYIEQAQ<br>AIAHQ | Homo<br>sapiens                  |
| 1 | 1.00 | 1 | 1 | 0.01  | 0.01   | 0.01   | 0.01  | 0.01  | t | 34353  | KYALADAS<br>LKMADPN<br>R     | Oryctola<br>gus<br>cuniculu<br>s |
| 1 | 1.00 | 1 | 1 | 0.01  | 0.01   | 0.01   | 0.01  | 0.01  | t | 34353  | KYALADAS<br>LKMADPN<br>R     | Oryctola<br>gus<br>cuniculu<br>s |
| 1 | 1.00 | 1 | 1 | 0.01  | 0.01   | 0.01   | 0.01  | 0.01  | t | 11589  | EEEITTKGA<br>SAQGSS          | Homo<br>sapiens                  |
| 1 | 1.00 | 1 | 1 | 0.01  | 0.01   | 0.01   | 0.01  | 0.01  | t | 5683   | AWPACYC<br>YGLPDSVK          | Equus<br>caballus                |
| 1 | 1.00 | 1 | 1 | 0     | 0.002  | -0.005 | 0.001 | 0     | t | 65516  | TPCAAEE<br>S<br>KLPINA       | Homo<br>sapiens                  |
| 1 | 1.00 | 1 | 1 | -0.01 | -0.013 | 0.002  | -0.01 | -0.01 | t | 49289  | PSACLSPQ<br>AY               | Oryctola<br>gus<br>cuniculu<br>s |

|   |      |   |   |       |        |        |        |        |   |        |                              |                                  |
|---|------|---|---|-------|--------|--------|--------|--------|---|--------|------------------------------|----------------------------------|
| 1 | 1.00 | 1 | 1 | -0.01 | -0.01  | -0.01  | -0.01  | -0.01  | t | 103694 | VGNVGLST<br>IAGRLLG          | Homo<br>sapiens                  |
| 1 | 1.00 | 1 | 1 | -0.01 | -0.01  | -0.01  | -0.01  | -0.01  | t | 114786 | EDGKVMV<br>LCN               | Homo<br>sapiens                  |
| 1 | 1.00 | 1 | 1 | -0.01 | -0.01  | -0.01  | -0.01  | -0.01  | t | 5333   | AVFVTLYM<br>PQLSY            | Mus<br>musculu<br>s              |
| 1 | 1.00 | 1 | 1 | 0.01  | 0.01   | 0.01   | 0.006  | 0.008  | t | 107856 | GGQGSRH<br>QQAR              | Homo<br>sapiens                  |
| 1 | 1.00 | 1 | 1 | -0.05 | -0.05  | -0.05  | -0.05  | -0.05  | t | 79586  | KIPIALS                      | Oryctola<br>gus<br>cuniculu<br>s |
| 1 | 1.00 | 1 | 1 | 0     | 0      | -0.007 | -0.003 | 0      | t | 21722  | GPPAAEY<br>WNSQ              | Homo<br>sapiens                  |
| 1 | 1.00 | 1 | 1 | 0.01  | 0.012  | 0.014  | 0.013  | 0.01   | t | 21664  | GPIRPTLP<br>GILGPLAP<br>NTP  | Homo<br>sapiens                  |
| 1 | 1.00 | 1 | 1 | 0.01  | 0.013  | 0.01   | 0.01   | 0.012  | t | 144705 | KGTHSLYS<br>QIAG             | Mus<br>musculu<br>s              |
| 1 | 1.00 | 1 | 1 | 0.01  | 0.012  | 0.011  | 0.011  | 0.009  | t | 46973  | PATIPDRE<br>VLYREFDE<br>MEEC | Homo<br>sapiens                  |
| 1 | 1.00 | 1 | 1 | 0.01  | 0.008  | 0.01   | 0.009  | 0.01   | t | 51147  | QIVGGVYL<br>L                | Mus<br>musculu<br>s              |
| 1 | 1.00 | 1 | 1 | 0     | 0      | -0.003 | 0      | 0.001  | t | 42487  | MRNVPEK<br>QT                | Mus<br>musculu<br>s              |
| 1 | 1.00 | 1 | 1 | 0     | 0      | -0.003 | 0      | 0.001  | t | 42487  | MRNVPEK<br>QT                | Mus<br>musculu<br>s              |
| 1 | 1.00 | 1 | 1 | -0.01 | -0.008 | -0.007 | -0.003 | -0.009 | t | 119608 | LGTWTYD<br>GSVVAINP<br>ES    | Homo<br>sapiens                  |
| 1 | 1.00 | 1 | 1 | 0     | 0      | 0      | 0      | 0.001  | t | 153359 | ALLPFKDH<br>LPYPGGGS         | Mus<br>musculu<br>s              |
| 1 | 1.00 | 1 | 1 | 0     | 0.004  | 0      | 0      | 0.001  | t | 110767 | AKEEISFVA<br>TFS             | Oryctola<br>gus<br>cuniculu<br>s |

|   |      |   |   |       |        |        |        |        |   |        |                             |                                  |
|---|------|---|---|-------|--------|--------|--------|--------|---|--------|-----------------------------|----------------------------------|
| 1 | 1.00 | 1 | 1 | 0.02  | 0.023  | 0.018  | 0.02   | 0.02   | t | 102130 | TKLYQNPT<br>TYISVGT         | Mus<br>musculu<br>s              |
| 1 | 1.00 | 1 | 1 | 0.01  | 0.01   | 0.01   | 0.01   | 0.01   | t | 43237  | NANPDPN                     | Mus<br>musculu<br>s              |
| 1 | 1.00 | 1 | 1 | -0.02 | -0.022 | -0.015 | -0.021 | -0.02  | t | 131343 | AIAWHQQ                     | Mus<br>musculu<br>s              |
| 1 | 1.00 | 1 | 1 | -0.02 | -0.022 | -0.015 | -0.021 | -0.02  | t | 131343 | AIAWHQQ                     | Mus<br>musculu<br>s              |
| 1 | 1.00 | 1 | 1 | 0.03  | 0.027  | 0.023  | 0.03   | 0.028  | t | 104305 | THQDIDFLI<br>EEIERLGQ       | Oryctola<br>gus<br>cuniculu<br>s |
| 1 | 1.00 | 1 | 1 | -0.02 | -0.016 | -0.01  | -0.02  | -0.022 | t | 52600  | QTQQPQQ<br>PFP              | Mus<br>musculu<br>s              |
| 1 | 1.00 | 1 | 1 | 0.01  | 0.007  | 0.015  | 0.01   | 0.01   | t | 70249  | VPANIKSM<br>ALSG            | Oryctola<br>gus<br>cuniculu<br>s |
| 1 | 1.00 | 1 | 1 | 0.01  | 0.012  | 0.013  | 0.017  | 0.011  | t | 125453 | KDRLQGM<br>APAAGAD          | Homo<br>sapiens                  |
| 1 | 1.00 | 1 | 1 | 0.03  | 0.028  | 0.03   | 0.033  | 0.03   | t | 56479  | RWGSYAI<br>GGSASPW<br>LTQTN | Mus<br>musculu<br>s              |
| 1 | 1.00 | 1 | 1 | 0     | -0.002 | 0      | 0.003  | 0.001  | t | 58921  | SKPTTKQR<br>QNKP            | Mus<br>musculu<br>s              |
| 1 | 1.00 | 1 | 1 | 0.01  | 0.015  | 0.012  | 0.01   | 0.009  | t | 48131  | PKQRRPQ<br>GLPNNTAS<br>WFT  | Homo<br>sapiens                  |
| 1 | 1.00 | 1 | 1 | 0     | 0      | -0.006 | 0      | 0      | t | 55675  | RRPKHLYV<br>SMPTAQ          | Homo<br>sapiens                  |
| 1 | 1.00 | 1 | 1 | -0.02 | -0.02  | -0.023 | -0.02  | -0.02  | t | 133737 | VTPYFSYP<br>VA              | Mus<br>musculu<br>s              |
| 1 | 1.00 | 1 | 1 | -0.03 | -0.03  | -0.032 | -0.03  | -0.029 | t | 97479  | LTAWNPSL                    | Mus<br>musculu<br>s              |



|   |      |   |   |      |        |       |       |      |   |        |                              |                                  |
|---|------|---|---|------|--------|-------|-------|------|---|--------|------------------------------|----------------------------------|
| 1 | 1.00 | 1 | 1 | 0.02 | 0.029  | 0.014 | 0.02  | 0.02 | t | 52749  | QVMSRSA<br>NEGYD             | Oryctola<br>gus<br>cuniculu<br>s |
| 1 | 1.00 | 1 | 1 | 0    | 0.005  | 0     | 0.001 | 0    | t | 148567 | DKSKLQDV<br>KDNKPSD<br>VKL   | Homo<br>sapiens                  |
| 1 | 1.00 | 1 | 1 | 0    | 0.005  | 0     | 0.001 | 0    | t | 148576 | DVKDNKS<br>TDVKLPVV<br>KAE   | Homo<br>sapiens                  |
| 1 | 1.00 | 1 | 1 | 0    | 0.005  | 0     | 0.001 | 0    | t | 148575 | DVKDNKP<br>SDVKLPVI<br>KAE   | Homo<br>sapiens                  |
| 1 | 1.00 | 1 | 1 | 0    | 0      | 0     | 0.001 | 0    | t | 144791 | STIDYFQP<br>NNKR             | Sus<br>scrofa                    |
| 1 | 1.00 | 1 | 1 | 0    | -0.007 | 0     | 0.001 | 0    | t | 148521 | CNTKCQTP<br>MGAINSS          | Homo<br>sapiens                  |
| 1 | 1.00 | 1 | 1 | 0    | -0.007 | 0     | 0.001 | 0    | t | 148529 | KLRPFERDI<br>SNV             | Homo<br>sapiens                  |
| 1 | 1.00 | 1 | 1 | 0    | 0.005  | 0     | 0.001 | 0    | t | 148569 | DKSKLRDV<br>KDNKSTD<br>VKL   | Homo<br>sapiens                  |
| 1 | 1.00 | 1 | 1 | 0    | 0      | 0     | 0.001 | 0    | t | 116563 | TGKIPWILL<br>PGR             | Ovis<br>aries                    |
| 1 | 1.00 | 1 | 1 | 0    | 0      | 0     | 0.001 | 0    | t | 116505 | SGKVPWL<br>KPGR              | Ovis<br>aries                    |
| 1 | 1.00 | 1 | 1 | 0    | -0.002 | 0     | 0.001 | 0    | t | 110685 | PMDTFIVS<br>TNPNTVTS<br>STPI | Homo<br>sapiens                  |
| 1 | 1.00 | 1 | 1 | 0    | -0.002 | 0     | 0.001 | 0    | t | 110652 | LCLIGCKPP<br>IGEHWGK<br>GSPC | Homo<br>sapiens                  |
| 1 | 1.00 | 1 | 1 | 0    | -0.002 | 0     | 0.001 | 0    | t | 111088 | ACQKHTP<br>PAPKEDDP<br>LKKYT | Homo<br>sapiens                  |
| 1 | 1.00 | 1 | 1 | 0    | -0.002 | 0     | 0.001 | 0    | t | 111450 | KGSPCTNV<br>AVNPGDC<br>PPLEL | Homo<br>sapiens                  |
| 1 | 1.00 | 1 | 1 | 0    | -0.002 | 0     | 0.001 | 0    | t | 111583 | NKFGFPDT<br>SFYNPDTQ<br>RLVW | Homo<br>sapiens                  |

|   |      |   |   |   |        |   |       |   |   |        |                              |                |
|---|------|---|---|---|--------|---|-------|---|---|--------|------------------------------|----------------|
| 1 | 1.00 | 1 | 1 | 0 | -0.003 | 0 | 0.001 | 0 | t | 108551 | NDSLNTGF<br>LAFLFYTKK        | Homo sapiens   |
| 1 | 1.00 | 1 | 1 | 0 | -0.003 | 0 | 0.001 | 0 | t | 108600 | QLINTNGS                     | Homo sapiens   |
| 1 | 1.00 | 1 | 1 | 0 | 0      | 0 | 0.001 | 0 | t | 60684  | SRGTSMD<br>DEADR             | Bos taurus     |
| 1 | 1.00 | 1 | 1 | 0 | -0.002 | 0 | 0.001 | 0 | t | 66480  | TSVENAQ<br>QDKGIAIP<br>HDIDL | Homo sapiens   |
| 1 | 1.00 | 1 | 1 | 0 | -0.007 | 0 | 0.001 | 0 | t | 97231  | CNTKCQTP                     | Homo sapiens   |
| 1 | 1.00 | 1 | 1 | 0 | 0      | 0 | 0.001 | 0 | t | 63611  | TFASRGTS<br>MDDE             | Bos taurus     |
| 1 | 1.00 | 1 | 1 | 0 | 0      | 0 | 0.001 | 0 | t | 94762  | AAPAKKA<br>APAKKAA<br>A      | Homo sapiens   |
| 1 | 1.00 | 1 | 1 | 0 | 0      | 0 | 0.001 | 0 | t | 66312  | TSLNLQKD<br>EPNGRAS<br>DTAGQ | Equus caballus |
| 1 | 1.00 | 1 | 1 | 0 | 0      | 0 | 0.001 | 0 | t | 94763  | AAPAKKA<br>APAKKAA<br>A      | Homo sapiens   |
| 1 | 1.00 | 1 | 1 | 0 | 0      | 0 | 0.001 | 0 | t | 91218  | DVLEATYA<br>MVQHVAK          | Capra hircus   |
| 1 | 1.00 | 1 | 1 | 0 | 0      | 0 | 0.001 | 0 | t | 73920  | YFTYEPPN<br>DGEE             | Bos taurus     |
| 1 | 1.00 | 1 | 1 | 0 | 0      | 0 | 0.001 | 0 | t | 70661  | VQVRI                        | Homo sapiens   |
| 1 | 1.00 | 1 | 1 | 0 | 0      | 0 | 0.001 | 0 | t | 70651  | VQTGGTS<br>RTVTMRYL<br>AS    | Homo sapiens   |
| 1 | 1.00 | 1 | 1 | 0 | 0      | 0 | 0.001 | 0 | t | 63805  | TGDLRAY                      | Homo sapiens   |

|   |      |   |   |   |        |   |       |   |   |       |                              |              |
|---|------|---|---|---|--------|---|-------|---|---|-------|------------------------------|--------------|
| 1 | 1.00 | 1 | 1 | 0 | 0      | 0 | 0.001 | 0 | t | 69124 | VITGSI                       | Homo sapiens |
| 1 | 1.00 | 1 | 1 | 0 | 0      | 0 | 0.001 | 0 | t | 66330 | TSMDEA<br>DRYFT              | Bos taurus   |
| 1 | 1.00 | 1 | 1 | 0 | 0      | 0 | 0.001 | 0 | t | 82608 | GENKFVAT<br>AASV             | Homo sapiens |
| 1 | 1.00 | 1 | 1 | 0 | 0      | 0 | 0.001 | 0 | t | 70817 | VRRRVNA<br>ANKKPEDL<br>TLNDL | Homo sapiens |
| 1 | 1.00 | 1 | 1 | 0 | 0      | 0 | 0.001 | 0 | t | 71568 | VTVVTTSG<br>S                | Bos taurus   |
| 1 | 1.00 | 1 | 1 | 0 | 0      | 0 | 0.001 | 0 | t | 66509 | TSYVG                        | Homo sapiens |
| 1 | 1.00 | 1 | 1 | 0 | 0      | 0 | 0.001 | 0 | t | 94762 | AAPAKKA<br>APAKKAA<br>A      | Homo sapiens |
| 1 | 1.00 | 1 | 1 | 0 | 0      | 0 | 0.001 | 0 | t | 94847 | IELPKKAAP<br>AKKAAP          | Homo sapiens |
| 1 | 1.00 | 1 | 1 | 0 | 0      | 0 | 0.001 | 0 | t | 82078 | FHQNGQV<br>TEVTT             | Homo sapiens |
| 1 | 1.00 | 1 | 1 | 0 | 0      | 0 | 0.001 | 0 | t | 71568 | VTVVTTSG<br>S                | Bos taurus   |
| 1 | 1.00 | 1 | 1 | 0 | 0      | 0 | 0.001 | 0 | t | 73649 | YEEPNDGE<br>ERQS             | Bos taurus   |
| 1 | 1.00 | 1 | 1 | 0 | 0      | 0 | 0.001 | 0 | t | 60914 | SSATK                        | Homo sapiens |
| 1 | 1.00 | 1 | 1 | 0 | -0.002 | 0 | 0.001 | 0 | t | 60710 | SRKAYDH<br>NSPYIWPR<br>NDYDG | Homo sapiens |
| 1 | 1.00 | 1 | 1 | 0 | 0      | 0 | 0.001 | 0 | t | 70817 | VRRRVNA<br>ANKKPEDL<br>TLNDL | Homo sapiens |

|   |      |   |   |   |        |   |       |   |   |       |                              |                |
|---|------|---|---|---|--------|---|-------|---|---|-------|------------------------------|----------------|
| 1 | 1.00 | 1 | 1 | 0 | -0.002 | 0 | 0.001 | 0 | t | 73744 | YEPYYHSD<br>HAESSWV<br>NRGES | Homo sapiens   |
| 1 | 1.00 | 1 | 1 | 0 | 0      | 0 | 0.001 | 0 | t | 91222 | EAITDRIM<br>LYQE             | Capra hircus   |
| 1 | 1.00 | 1 | 1 | 0 | 0      | 0 | 0.001 | 0 | t | 39254 | LRILA                        | Homo sapiens   |
| 1 | 1.00 | 1 | 1 | 0 | 0      | 0 | 0.001 | 0 | t | 50304 | QALGALK                      | Homo sapiens   |
| 1 | 1.00 | 1 | 1 | 0 | 0.005  | 0 | 0.001 | 0 | t | 53800 | RFVKTPSK<br>KKTCSR           | Homo sapiens   |
| 1 | 1.00 | 1 | 1 | 0 | 0      | 0 | 0.001 | 0 | t | 41866 | MKNNPIYS<br>EGSL             | Equus caballus |
| 1 | 1.00 | 1 | 1 | 0 | 0      | 0 | 0.001 | 0 | t | 50636 | QELDCWH<br>YHQYCITS          | Capra hircus   |
| 1 | 1.00 | 1 | 1 | 0 | 0.006  | 0 | 0.001 | 0 | t | 38273 | LNLTTWN<br>PTLLG             | Ovis aries     |
| 1 | 1.00 | 1 | 1 | 0 | 0.002  | 0 | 0.001 | 0 | t | 54237 | RIRFKDDT<br>SF               | Homo sapiens   |
| 1 | 1.00 | 1 | 1 | 0 | 0.006  | 0 | 0.001 | 0 | t | 51474 | QLPNVGIT<br>QGIV             | Ovis aries     |
| 1 | 1.00 | 1 | 1 | 0 | 0      | 0 | 0.001 | 0 | t | 59640 | SMDDEAD<br>RYFTY             | Bos taurus     |
| 1 | 1.00 | 1 | 1 | 0 | -0.002 | 0 | 0.001 | 0 | t | 46276 | NTTASDQL<br>LVENAAG<br>HRVA  | Homo sapiens   |
| 1 | 1.00 | 1 | 1 | 0 | 0      | 0 | 0.001 | 0 | t | 41866 | MKNNPIYS<br>EGSL             | Equus caballus |
| 1 | 1.00 | 1 | 1 | 0 | 0      | 0 | 0.001 | 0 | t | 56534 | RYFTYEED<br>NDGE             | Bos taurus     |
| 1 | 1.00 | 1 | 1 | 0 | 0      | 0 | 0.001 | 0 | t | 48613 | PNDGEER<br>QSYWF             | Bos taurus     |

|   |      |   |   |   |        |   |       |   |   |       |                              |                   |
|---|------|---|---|---|--------|---|-------|---|---|-------|------------------------------|-------------------|
| 1 | 1.00 | 1 | 1 | 0 | 0      | 0 | 0.001 | 0 | t | 50636 | QELDCWH<br>YHQYCITS          | Capra<br>hircus   |
| 1 | 1.00 | 1 | 1 | 0 | 0      | 0 | 0.001 | 0 | t | 48331 | PLGFFPDH<br>QLDP             | Homo<br>sapiens   |
| 1 | 1.00 | 1 | 1 | 0 | 0      | 0 | 0.001 | 0 | t | 41219 | MDDEADR<br>YFTYE             | Bos<br>taurus     |
| 1 | 1.00 | 1 | 1 | 0 | 0.001  | 0 | 0.001 | 0 | t | 47077 | PDDVNKN<br>TLQ               | Homo<br>sapiens   |
| 1 | 1.00 | 1 | 1 | 0 | 0      | 0 | 0.001 | 0 | t | 46792 | PAFGANS<br>NNPDWDF<br>NP     | Homo<br>sapiens   |
| 1 | 1.00 | 1 | 1 | 0 | 0      | 0 | 0.001 | 0 | t | 51233 | QKPLK                        | Bos<br>taurus     |
| 1 | 1.00 | 1 | 1 | 0 | 0      | 0 | 0.001 | 0 | t | 41866 | MKNNPIYS<br>EGSL             | Equus<br>caballus |
| 1 | 1.00 | 1 | 1 | 0 | 0      | 0 | 0.001 | 0 | t | 46371 | NVESQPG<br>GQPNT             | Bos<br>taurus     |
| 1 | 1.00 | 1 | 1 | 0 | -0.007 | 0 | 0.001 | 0 | t | 41660 | MHGDTPT<br>LHEYMLDL<br>QPETT | Homo<br>sapiens   |
| 1 | 1.00 | 1 | 1 | 0 | 0      | 0 | 0.001 | 0 | t | 22835 | GTSMDDE<br>ADRYF             | Bos<br>taurus     |
| 1 | 1.00 | 1 | 1 | 0 | 0      | 0 | 0.001 | 0 | t | 31932 | KLKECPQ                      | Homo<br>sapiens   |
| 1 | 1.00 | 1 | 1 | 0 | 0      | 0 | 0.001 | 0 | t | 11013 | EADRYFTY<br>EEPN             | Bos<br>taurus     |
| 1 | 1.00 | 1 | 1 | 0 | 0      | 0 | 0.001 | 0 | t | 19251 | GEERQSY<br>WFENR             | Bos<br>taurus     |
| 1 | 1.00 | 1 | 1 | 0 | 0      | 0 | 0.001 | 0 | t | 34243 | KVVQLPKI<br>SKNALKAN<br>G    | Homo<br>sapiens   |

|   |      |   |   |   |        |   |       |   |   |       |                           |              |
|---|------|---|---|---|--------|---|-------|---|---|-------|---------------------------|--------------|
| 1 | 1.00 | 1 | 1 | 0 | -0.003 | 0 | 0.001 | 0 | t | 11815 | EENVEENV<br>EENVEENV      | Homo sapiens |
| 1 | 1.00 | 1 | 1 | 0 | 0.005  | 0 | 0.001 | 0 | t | 20046 | GGTEESVV<br>TASRS         | Homo sapiens |
| 1 | 1.00 | 1 | 1 | 0 | -0.003 | 0 | 0.001 | 0 | t | 19520 | GFFGAIAG<br>FIE           | Homo sapiens |
| 1 | 1.00 | 1 | 1 | 0 | 0      | 0 | 0.001 | 0 | t | 30661 | KEVPALTA<br>VETGAT        | Homo sapiens |
| 1 | 1.00 | 1 | 1 | 0 | -0.003 | 0 | 0.001 | 0 | t | 11815 | EENVEENV<br>EENVEENV      | Homo sapiens |
| 1 | 1.00 | 1 | 1 | 0 | 0      | 0 | 0.001 | 0 | t | 34244 | KVVQLPKI<br>SKNALRND<br>G | Homo sapiens |
| 1 | 1.00 | 1 | 1 | 0 | 0.002  | 0 | 0.001 | 0 | t | 29067 | ITRHEQQLI<br>V            | Homo sapiens |
| 1 | 1.00 | 1 | 1 | 0 | 0      | 0 | 0.001 | 0 | t | 15281 | FASRGTS<br>MDDEA          | Bos taurus   |
| 1 | 1.00 | 1 | 1 | 0 | -0.003 | 0 | 0.001 | 0 | t | 20838 | GLFGAIAG<br>FIE           | Homo sapiens |
| 1 | 1.00 | 1 | 1 | 0 | 0      | 0 | 0.001 | 0 | t | 22217 | GRTPFII                   | Homo sapiens |
| 1 | 1.00 | 1 | 1 | 0 | 0      | 0 | 0.001 | 0 | t | 25541 | IDAVNKRG<br>RKQNKRG       | Homo sapiens |
| 1 | 1.00 | 1 | 1 | 0 | -0.003 | 0 | 0.001 | 0 | t | 20838 | GLFGAIAG<br>FIE           | Homo sapiens |
| 1 | 1.00 | 1 | 1 | 0 | 0.002  | 0 | 0.001 | 0 | t | 32616 | KNTLQAR<br>QQT            | Homo sapiens |
| 1 | 1.00 | 1 | 1 | 0 | -0.003 | 0 | 0.001 | 0 | t | 11819 | EENVEHD<br>A              | Homo sapiens |

|   |      |   |   |   |        |   |       |   |   |       |                              |                 |
|---|------|---|---|---|--------|---|-------|---|---|-------|------------------------------|-----------------|
| 1 | 1.00 | 1 | 1 | 0 | -0.003 | 0 | 0.001 | 0 | t | 11819 | EENVEHD<br>A                 | Homo<br>sapiens |
| 1 | 1.00 | 1 | 1 | 0 | 0      | 0 | 0.001 | 0 | t | 32418 | KMVYATN                      | Homo<br>sapiens |
| 1 | 1.00 | 1 | 1 | 0 | 0      | 0 | 0.001 | 0 | t | 22986 | GVGSSAVI<br>LDDNFVT          | Sus<br>scrofa   |
| 1 | 1.00 | 1 | 1 | 0 | 0      | 0 | 0.001 | 0 | t | 29126 | ITTYV                        | Homo<br>sapiens |
| 1 | 1.00 | 1 | 1 | 0 | -0.002 | 0 | 0.001 | 0 | t | 24730 | HSDHAESS<br>WVNRGES<br>SRKAY | Homo<br>sapiens |
| 1 | 1.00 | 1 | 1 | 0 | 0.014  | 0 | 0.001 | 0 | t | 19096 | GDRADGQ<br>PA                | Homo<br>sapiens |
| 1 | 1.00 | 1 | 1 | 0 | 0      | 0 | 0.001 | 0 | t | 10067 | DRYFTYEE<br>PNDG             | Bos<br>taurus   |
| 1 | 1.00 | 1 | 1 | 0 | 0      | 0 | 0.001 | 0 | t | 766   | ADRYFTYE<br>EPND             | Bos<br>taurus   |
| 1 | 1.00 | 1 | 1 | 0 | 0      | 0 | 0.001 | 0 | t | 7761  | DDEADRYF<br>TYEE             | Bos<br>taurus   |
| 1 | 1.00 | 1 | 1 | 0 | 0      | 0 | 0.001 | 0 | t | 4856  | ASYVKKPK<br>EDVD             | Homo<br>sapiens |
| 1 | 1.00 | 1 | 1 | 0 | 0      | 0 | 0.001 | 0 | t | 2198  | AKGVEFR                      | Homo<br>sapiens |
| 1 | 1.00 | 1 | 1 | 0 | -0.002 | 0 | 0.001 | 0 | t | 6742  | CNYSKFW<br>YLEHAK            | Homo<br>sapiens |
| 1 | 1.00 | 1 | 1 | 0 | -0.002 | 0 | 0.001 | 0 | t | 7771  | DDFHTDE<br>DKLDTNSV<br>YEPYY | Homo<br>sapiens |

|   |      |   |   |       |        |        |        |        |   |        |                      |                       |
|---|------|---|---|-------|--------|--------|--------|--------|---|--------|----------------------|-----------------------|
| 1 | 1.00 | 1 | 1 | 0     | -0.002 | 0      | 0.001  | 0      | t | 7171   | CTKPTDGN<br>NC       | Homo sapiens          |
| 1 | 1.00 | 1 | 1 | 0     | 0      | 0      | 0.001  | 0      | t | 7901   | DEADRYFT<br>YEEP     | Bos taurus            |
| 1 | 1.00 | 1 | 1 | 0     | 0      | 0      | 0.001  | 0      | t | 7171   | CTKPTDGN<br>NC       | Homo sapiens          |
| 1 | 1.00 | 1 | 1 | 0     | 0      | 0      | 0.001  | 0      | t | 4749   | ASRGTSMD<br>DEAD     | Bos taurus            |
| 1 | 1.00 | 1 | 1 | 0     | 0.006  | 0      | 0.001  | 0      | t | 4885   | ATALDTSN<br>KFADFLQI | Ovis aries            |
| 1 | 1.00 | 1 | 1 | -0.04 | -0.038 | -0.023 | -0.033 | -0.043 | t | 113008 | GRILDWH<br>VANTDKKS  | Homo sapiens          |
| 1 | 1.00 | 1 | 1 | -0.02 | -0.02  | -0.02  | -0.02  | -0.02  | t | 105650 | AEFRH                | Mus musculus          |
| 1 | 1.00 | 1 | 1 | -0.01 | -0.007 | -0.01  | -0.01  | -0.007 | t | 46894  | PAPQAPY<br>QGY       | Mus musculus          |
| 1 | 1.00 | 1 | 1 | -0.02 | -0.026 | -0.023 | -0.027 | -0.02  | t | 127759 | PDSLIYSTV<br>LHY     | Trichosurus vulpecula |
| 1 | 1.00 | 1 | 1 | 0.02  | 0.02   | 0.02   | 0.02   | 0.02   | t | 94615  | NPA                  | Capra hircus          |
| 1 | 1.00 | 1 | 1 | 0.02  | 0.027  | 0.02   | 0.02   | 0.02   | t | 94615  | NPA                  | Capra hircus          |
| 1 | 1.00 | 1 | 1 | 0     | 0      | 0      | 0      | 0      | t | 132667 | SNYRAY               | Mus musculus          |
| 1 | 1.00 | 1 | 1 | 0.03  | 0.032  | 0.031  | 0.031  | 0.029  | t | 9929   | DQYCADV<br>AAEELMNA  | Homo sapiens          |
| 1 | 1.00 | 1 | 1 | 0.06  | 0.06   | 0.06   | 0.06   | 0.06   | t | 79603  | LLTTDEL              | Oryctolagus cuniculus |



|   |      |   |   |       |        |        |        |       |   |        |                              |                                  |
|---|------|---|---|-------|--------|--------|--------|-------|---|--------|------------------------------|----------------------------------|
| 1 | 1.00 | 1 | 1 | 0.04  | 0.04   | 0.04   | 0.04   | 0.04  | t | 153398 | IDRTPTNF<br>HTQR             | Oryctola<br>gus<br>cuniculu<br>s |
| 1 | 1.00 | 1 | 1 | 0.04  | 0.04   | 0.04   | 0.04   | 0.04  | t | 95163  | VLPGHQPS<br>NGNMIYS<br>YHTME | Rattus<br>norvegic<br>us         |
| 1 | 1.00 | 1 | 1 | 0.02  | 0.02   | 0.02   | 0.02   | 0.02  | t | 45878  | NSKNPVP<br>VKKEAKLS<br>EAEL  | Mus<br>musculu<br>s              |
| 1 | 1.00 | 1 | 1 | 0     | 0      | 0      | 0      | 0     | t | 135945 | KFGADAR<br>ALMLQ             | Homo<br>sapiens                  |
| 1 | 1.00 | 1 | 1 | 0     | 0      | 0      | 0      | 0     | t | 153353 | ACWALRD<br>PLCGGGS           | Mus<br>musculu<br>s              |
| 1 | 1.00 | 1 | 1 | 0     | 0      | 0      | 0      | 0     | t | 135905 | CLFDRRLC<br>SHLE             | Homo<br>sapiens                  |
| 1 | 1.00 | 1 | 1 | 0     | 0      | 0      | 0      | 0     | t | 114939 | RPICGTDG<br>VT               | Homo<br>sapiens                  |
| 1 | 1.00 | 1 | 1 | 0     | 0      | 0      | 0      | 0     | t | 117384 | TPRLNTAT<br>LWIT             | Homo<br>sapiens                  |
| 1 | 1.00 | 1 | 1 | 0     | 0      | 0      | 0      | 0     | t | 115420 | PLTQTPVV<br>VPPFLQPE<br>VMGV | Homo<br>sapiens                  |
| 1 | 1.00 | 1 | 1 | 0     | 0      | 0      | 0      | 0     | t | 4452   | ASHLPYIE<br>QGMLQAA<br>EFKQK | Homo<br>sapiens                  |
| 1 | 1.00 | 1 | 1 | 0.01  | 0.01   | 0.015  | 0.013  | 0.012 | t | 98801  | GILLEN                       | Homo<br>sapiens                  |
| 1 | 1.00 | 1 | 1 | -0.01 | -0.011 | -0.003 | -0.008 | -0.01 | t | 130513 | IGYQPSMP<br>LDMP             | Camelus<br>dromed<br>arius       |
| 1 | 1.00 | 1 | 1 | 0.03  | 0.028  | 0.022  | 0.033  | 0.032 | t | 72466  | WGENDTD<br>VFVLNNTR          | Mus<br>musculu<br>s              |
| 1 | 1.00 | 1 | 1 | 0.02  | 0.022  | 0.015  | 0.021  | 0.02  | t | 60721  | SRKSYKKM<br>LKEMGEV<br>APEYR | Homo<br>sapiens                  |
| 1 | 1.00 | 1 | 1 | -0.01 | -0.013 | -0.012 | -0.01  | -0.01 | t | 116035 | YGSLPQKS<br>GHRTQD           | Oryctola<br>gus<br>cuniculu<br>s |
| 1 | 1.00 | 1 | 1 | 0.04  | 0.038  | 0.04   | 0.041  | 0.042 | t | 131058 | SATTANPS<br>CPEGT            | Rattus<br>norvegic<br>us         |

|   |      |   |   |       |        |        |       |        |   |        |                             |                   |
|---|------|---|---|-------|--------|--------|-------|--------|---|--------|-----------------------------|-------------------|
| 1 | 1.00 | 1 | 1 | 0     | -0.008 | 0      | 0     | 0.002  | t | 156907 | KVGDPLW                     | Mus<br>musculus   |
| 1 | 1.00 | 1 | 1 | 0.02  | 0.017  | 0.023  | 0.02  | 0.019  | t | 75443  | YPYDVDPY<br>ASL             | Mus<br>musculus   |
| 1 | 1.00 | 1 | 1 | 0.02  | 0.02   | 0.023  | 0.02  | 0.019  | t | 75443  | YPYDVDPY<br>ASL             | Mus<br>musculus   |
| 1 | 1.00 | 1 | 1 | 0.01  | 0.01   | -0.004 | 0.006 | 0.01   | t | 75561  | YQTELARV<br>QKANADA<br>KATY | Homo<br>sapiens   |
| 1 | 1.00 | 1 | 1 | 0.01  | 0.014  | 0.017  | 0.017 | 0.011  | t | 108126 | SIFFAVVLE<br>L              | Homo<br>sapiens   |
| 1 | 1.00 | 1 | 1 | 0.01  | 0.017  | 0.018  | 0.01  | 0.008  | t | 64049  | THLKASSG<br>YCAWPAC         | Equus<br>caballus |
| 1 | 1.00 | 1 | 1 | 0.01  | 0.014  | 0.018  | 0.01  | 0.008  | t | 64049  | THLKASSG<br>YCAWPAC         | Mus<br>musculus   |
| 1 | 1.00 | 1 | 1 | -0.01 | -0.007 | -0.01  | -0.01 | -0.01  | t | 61289  | SSPSNVKS<br>ASPHGES         | Mus<br>musculus   |
| 1 | 1.00 | 1 | 1 | -0.01 | -0.01  | -0.01  | -0.01 | -0.01  | t | 43233  | NANP                        | Mus<br>musculus   |
| 1 | 1.00 | 1 | 1 | -0.01 | -0.022 | -0.01  | -0.01 | -0.01  | t | 43233  | NANP                        | Macaca<br>mulatta |
| 1 | 1.00 | 1 | 1 | 0     | 0.003  | 0.002  | 0     | -0.001 | t | 135834 | CEFRDGA<br>GSICG            | Mus<br>musculus   |
| 1 | 1.00 | 1 | 1 | 0     | 0.003  | 0.002  | 0     | -0.001 | t | 135834 | CEFRDGA<br>GSICG            | Mus<br>musculus   |

|   |      |   |   |       |        |        |        |        |   |        |                              |                                  |
|---|------|---|---|-------|--------|--------|--------|--------|---|--------|------------------------------|----------------------------------|
| 1 | 1.00 | 1 | 1 | 0     | 0      | 0.005  | 0.003  | 0      | t | 27716  | INPPNSDV<br>VFPGGSPV<br>AQYC | Homo<br>sapiens                  |
| 1 | 1.00 | 1 | 1 | 0.01  | 0.01   | 0.01   | 0.01   | 0.01   | t | 135477 | LGAGLG                       | Mus<br>musculu<br>s              |
| 1 | 1.00 | 1 | 1 | 0.03  | 0.028  | 0.027  | 0.033  | 0.032  | t | 76395  | YVRFDLEL<br>TFVITST          | Mus<br>musculu<br>s              |
| 1 | 1.00 | 1 | 1 | 0     | -0.002 | 0      | -0.001 | -0.001 | t | 60642  | SREAKKQV<br>EKAL             | Mus<br>musculu<br>s              |
| 1 | 1.00 | 1 | 1 | 0     | 0      | -0.002 | 0      | 0.002  | t | 49271  | PRVRGLYF                     | Mus<br>musculu<br>s              |
| 1 | 1.00 | 1 | 1 | 0     | 0.003  | -0.002 | 0      | 0.002  | t | 49271  | PRVRGLYF                     | Mus<br>musculu<br>s              |
| 1 | 1.00 | 1 | 1 | -0.01 | -0.012 | -0.01  | -0.017 | -0.012 | t | 131656 | SGKLEEFV<br>Q                | Mus<br>musculu<br>s              |
| 1 | 1.00 | 1 | 1 | -0.05 | -0.051 | -0.044 | -0.049 | -0.049 | t | 69515  | VLGRLI                       | Homo<br>sapiens                  |
| 1 | 1.00 | 1 | 1 | 0.05  | 0.05   | 0.05   | 0.05   | 0.05   | t | 115842 | LEELNVPG<br>EI               | Homo<br>sapiens                  |
| 1 | 1.00 | 1 | 1 | 0.03  | 0.03   | 0.03   | 0.03   | 0.03   | t | 142384 | AGVLRQE<br>QANSV             | Mus<br>musculu<br>s              |
| 1 | 1.00 | 1 | 1 | 0.03  | 0.03   | 0.03   | 0.03   | 0.03   | t | 149113 | STPNVTQ                      | Sus<br>scrofa                    |
| 1 | 1.00 | 1 | 1 | 0.01  | 0.01   | 0.01   | 0.01   | 0.01   | t | 149054 | GSPNFTQ                      | Sus<br>scrofa                    |
| 1 | 1.00 | 1 | 1 | 0.01  | 0.01   | 0.01   | 0.01   | 0.01   | t | 138212 | PAAPPAAP<br>GGPGAP           | Oryctola<br>gus<br>cuniculu<br>s |
| 1 | 1.00 | 1 | 1 | 0.01  | 0.01   | 0.01   | 0.01   | 0.01   | t | 104732 | ASAYCST<br>WDA               | Homo<br>sapiens                  |
| 1 | 1.00 | 1 | 1 | 0.01  | 0.01   | 0.01   | 0.01   | 0.01   | t | 116820 | RDEDSYGR<br>DPYSPSQ          | Homo<br>sapiens                  |
| 1 | 1.00 | 1 | 1 | 0.01  | 0.01   | 0.01   | 0.01   | 0.01   | t | 115799 | IRCEKDER<br>FF               | Homo<br>sapiens                  |
| 1 | 1.00 | 1 | 1 | 0.01  | 0.01   | 0.01   | 0.01   | 0.01   | t | 104889 | LPGERQI                      | Homo<br>sapiens                  |

|   |      |   |   |       |        |        |       |       |   |        |                              |                     |
|---|------|---|---|-------|--------|--------|-------|-------|---|--------|------------------------------|---------------------|
| 1 | 1.00 | 1 | 1 | 0.01  | 0.01   | 0.01   | 0.01  | 0.01  | t | 110610 | GPKGAPG<br>ERGPSGLA          | Mus<br>musculu<br>s |
| 1 | 1.00 | 1 | 1 | 0.01  | 0.01   | 0.01   | 0.01  | 0.01  | t | 79358  | RCEQSM<br>WTQRLPC<br>L       | Mus<br>musculu<br>s |
| 1 | 1.00 | 1 | 1 | 0.01  | 0.01   | 0.01   | 0.01  | 0.01  | t | 41329  | MEECASQ<br>LPYIEQGM<br>QLAEQ | Homo<br>sapiens     |
| 1 | 1.00 | 1 | 1 | 0.01  | 0.01   | 0.01   | 0.01  | 0.01  | t | 41332  | MEECGSH<br>LPYIEQGM<br>QLAEQ | Homo<br>sapiens     |
| 1 | 1.00 | 1 | 1 | 0.01  | 0.01   | 0.01   | 0.01  | 0.01  | t | 47184  | PDREVLQ<br>EFDEMEEC<br>ASQL  | Homo<br>sapiens     |
| 1 | 1.00 | 1 | 1 | 0.01  | 0.01   | 0.01   | 0.01  | 0.01  | t | 14887  | EVTQHGSF<br>SYVTGL           | Homo<br>sapiens     |
| 1 | 1.00 | 1 | 1 | 0.01  | 0.01   | 0.01   | 0.01  | 0.01  | t | 4259   | ARSLATLFS<br>PGARQQ          | Mus<br>musculu<br>s |
| 1 | 1.00 | 1 | 1 | -0.01 | -0.01  | -0.01  | -0.01 | -0.01 | t | 132935 | WGSNAEH                      | Homo<br>sapiens     |
| 1 | 1.00 | 1 | 1 | -0.01 | -0.01  | -0.01  | -0.01 | -0.01 | t | 115477 | SAEVATEE<br>VKITVDDK<br>HYQK | Homo<br>sapiens     |
| 1 | 1.00 | 1 | 1 | -0.01 | -0.01  | -0.01  | -0.01 | -0.01 | t | 79385  | SCRLSTFS<br>MRMVCN           | Mus<br>musculu<br>s |
| 1 | 1.00 | 1 | 1 | -0.01 | -0.01  | -0.01  | -0.01 | -0.01 | t | 77842  | AYIDFEMK<br>I                | Homo<br>sapiens     |
| 1 | 1.00 | 1 | 1 | -0.01 | -0.01  | -0.01  | -0.01 | -0.01 | t | 77842  | AYIDFEMK<br>I                | Homo<br>sapiens     |
| 1 | 1.00 | 1 | 1 | -0.01 | -0.01  | -0.01  | -0.01 | -0.01 | t | 41343  | MEECSQH<br>LPYIEQGM<br>MLAEQ | Homo<br>sapiens     |
| 1 | 1.00 | 1 | 1 | -0.01 | -0.007 | -0.01  | -0.01 | -0.01 | t | 21617  | GPFFLSPTS                    | Mus<br>musculu<br>s |
| 1 | 1.00 | 1 | 1 | -0.03 | -0.03  | -0.03  | -0.03 | -0.03 | t | 132000 | PGEPWKG<br>YPNIDPET          | Homo<br>sapiens     |
| 1 | 1.00 | 1 | 1 | 0.03  | 0.03   | 0.024  | 0.03  | 0.03  | t | 20722  | GKVTNGS                      | Homo<br>sapiens     |
| 1 | 1.00 | 1 | 1 | -0.02 | -0.02  | -0.023 | -0.02 | -0.02 | t | 98729  | DIQKVAGT<br>WY               | Homo<br>sapiens     |

|   |      |   |   |       |        |        |        |        |   |        |                              |                                  |
|---|------|---|---|-------|--------|--------|--------|--------|---|--------|------------------------------|----------------------------------|
| 1 | 1.00 | 1 | 1 | -0.01 | -0.013 | -0.012 | -0.01  | -0.01  | t | 122897 | RYSDLLMA<br>WGQYIDH<br>DIA   | Oryctola<br>gus<br>cuniculu<br>s |
| 1 | 1.00 | 1 | 1 | 0.01  | 0.013  | 0.01   | 0.01   | 0.008  | t | 140892 | QILDAHAA<br>YLNATPAA<br>KVLV | Mus<br>musculu<br>s              |
| 1 | 1.00 | 1 | 1 | -0.02 | -0.018 | -0.03  | -0.023 | -0.02  | t | 1740   | AHAAYLN<br>ATPAAKVL          | Homo<br>sapiens                  |
| 1 | 1.00 | 1 | 1 | 0     | 0.004  | 0      | 0.001  | 0      | t | 57885  | SFRRLGAA                     | Homo<br>sapiens                  |
| 1 | 1.00 | 1 | 1 | -0.01 | -0.006 | -0.003 | -0.003 | -0.007 | t | 122116 | IPDSRLK                      | Homo<br>sapiens                  |
| 1 | 1.00 | 1 | 1 | 0     | 0      | 0      | 0.006  | 0.003  | t | 51252  | QKSKQNIG<br>ALKQEL           | Homo<br>sapiens                  |
| 1 | 1.00 | 1 | 1 | -0.03 | -0.03  | -0.035 | -0.03  | -0.03  | t | 132861 | LKRGIEKA<br>V                | Mus<br>musculu<br>s              |
| 1 | 1.00 | 1 | 1 | -0.02 | -0.02  | -0.02  | -0.02  | -0.022 | t | 139841 | PAGRQAR<br>RPATVPEG          | Mus<br>musculu<br>s              |
| 1 | 1.00 | 1 | 1 | 0.02  | 0.02   | 0.013  | 0.02   | 0.019  | t | 108050 | NRDNTYN<br>RVSEDLRS<br>RI    | Homo<br>sapiens                  |
| 1 | 1.00 | 1 | 1 | -0.05 | -0.052 | -0.049 | -0.05  | -0.048 | t | 94979  | YNKRFPGF<br>VSP              | Oryctola<br>gus<br>cuniculu<br>s |
| 1 | 1.00 | 1 | 1 | 0.04  | 0.036  | 0.028  | 0.039  | 0.041  | t | 68473  | VFGKEKVN<br>ELSKDIGSE<br>STE | Oryctola<br>gus<br>cuniculu<br>s |
| 1 | 1.00 | 1 | 1 | 0     | -0.003 | 0      | 0      | 0      | t | 99761  | VKVGDK                       | Oryctola<br>gus<br>cuniculu<br>s |
| 1 | 1.00 | 1 | 1 | 0     | 0      | 0      | 0      | 0      | t | 38823  | LQDPRVR                      | Mus<br>musculu<br>s              |
| 1 | 1.00 | 1 | 1 | 0     | -0.002 | 0.005  | -0.001 | 0      | t | 66462  | TSTGPCKT<br>CTTPAQ           | Mus<br>musculu<br>s              |

|   |      |   |   |       |        |        |        |        |   |        |                              |                              |
|---|------|---|---|-------|--------|--------|--------|--------|---|--------|------------------------------|------------------------------|
| 1 | 1.00 | 1 | 1 | -0.02 | -0.02  | -0.02  | -0.02  | -0.022 | t | 151842 | EHSGQAA<br>WKQVV             | Sus<br>scrofa                |
| 1 | 1.00 | 1 | 1 | 0     | 0      | 0      | 0      | 0      | t | 99838  | QQRPF                        | Mus<br>musculus              |
| 1 | 1.00 | 1 | 1 | 0     | 0      | 0      | 0      | 0      | t | 70671  | VQWMNR<br>LIAFASRG<br>NHVSP  | Homo<br>sapiens              |
| 1 | 1.00 | 1 | 1 | -0.01 | -0.006 | 0.002  | -0.009 | -0.016 | t | 4499   | ASKATLIEE<br>GQRIAEM<br>LKSK | Homo<br>sapiens              |
| 1 | 1.00 | 1 | 1 | -0.02 | -0.016 | -0.029 | -0.02  | -0.019 | t | 66194  | TSFEDINGI<br>RRPKH           | Myodes<br>glareolus          |
| 1 | 1.00 | 1 | 1 | 0.04  | 0.04   | 0.04   | 0.04   | 0.04   | t | 135703 | KNGRCEQ<br>F                 | Homo<br>sapiens              |
| 1 | 1.00 | 1 | 1 | 0.04  | 0.04   | 0.04   | 0.04   | 0.04   | t | 158617 | TVQPQFH                      | Homo<br>sapiens              |
| 1 | 1.00 | 1 | 1 | 0.04  | 0.04   | 0.04   | 0.04   | 0.04   | t | 92556  | EIIGQNGE<br>RI               | Ovis<br>aries                |
| 1 | 1.00 | 1 | 1 | 0.02  | 0.02   | 0.02   | 0.02   | 0.02   | t | 133954 | WIKENF                       | Mus<br>musculus              |
| 1 | 1.00 | 1 | 1 | 0.02  | 0.02   | 0.02   | 0.02   | 0.02   | t | 131771 | YLSLTPE                      | Mus<br>musculus              |
| 1 | 1.00 | 1 | 1 | 0.02  | 0.02   | 0.02   | 0.02   | 0.02   | t | 6501   | CKLSQGAP<br>DSC              | Mus<br>musculus              |
| 1 | 1.00 | 1 | 1 | 0     | 0      | -0.002 | 0      | 0      | t | 114293 | DDNGLEET<br>ICTLR            | Homo<br>sapiens              |
| 1 | 1.00 | 1 | 1 | 0     | 0      | 0      | 0      | 0      | t | 135896 | APHLTRAY<br>AKDV             | Homo<br>sapiens              |
| 1 | 1.00 | 1 | 1 | 0     | 0      | 0      | 0      | 0      | t | 139902 | SPFNPRV                      | Ovis<br>aries                |
| 1 | 1.00 | 1 | 1 | 0     | 0      | 0      | 0      | 0      | t | 104926 | PDGSRLV                      | Homo<br>sapiens              |
| 1 | 1.00 | 1 | 1 | 0     | 0      | 0      | 0      | 0      | t | 105069 | AEFDLDIL<br>AGTEAA           | Oryctola<br>gus<br>cuniculus |

|   |      |   |   |       |        |        |        |        |   |        |                              |                       |
|---|------|---|---|-------|--------|--------|--------|--------|---|--------|------------------------------|-----------------------|
| 1 | 1.00 | 1 | 1 | 0     | 0      | 0      | 0      | 0      | t | 104926 | PDGSRLV                      | Homo sapiens          |
| 1 | 1.00 | 1 | 1 | -0.02 | -0.02  | -0.02  | -0.02  | -0.02  | t | 108856 | DGIPGAKG                     | Rattus norvegicus     |
| 1 | 1.00 | 1 | 1 | -0.02 | -0.02  | -0.02  | -0.02  | -0.02  | t | 115474 | RVYVEELK<br>PTPEGDLEI<br>LLQ | Homo sapiens          |
| 1 | 1.00 | 1 | 1 | 0     | -0.01  | 0      | 0.003  | 0      | t | 42683  | MSTNPKP<br>QKKNKRN<br>T      | Homo sapiens          |
| 1 | 1.00 | 1 | 1 | 0.01  | 0.01   | 0.006  | 0.01   | 0.012  | t | 49108  | PQQQPFPP<br>QPQ              | Mus musculus          |
| 1 | 1.00 | 1 | 1 | 0     | 0      | -0.009 | 0      | 0.003  | t | 64534  | TKDASIDY<br>HE               | Mus musculus          |
| 1 | 1.00 | 1 | 1 | -0.01 | -0.01  | -0.009 | -0.01  | -0.01  | t | 21928  | GQPAVRN<br>ERATGS            | Mus musculus          |
| 1 | 1.00 | 1 | 1 | -0.06 | -0.06  | -0.047 | -0.06  | -0.063 | t | 110332 | LYRWR                        | Mus musculus          |
| 1 | 1.00 | 1 | 1 | 0     | 0.003  | 0      | 0      | -0.002 | t | 140835 | DAVKGYLA<br>GKGVDAG<br>KLGTV | Mus musculus          |
| 1 | 1.00 | 1 | 1 | -0.02 | -0.02  | -0.02  | -0.02  | -0.02  | t | 135484 | MSRPLIHF<br>GN               | Mus musculus          |
| 1 | 1.00 | 1 | 1 | 0.02  | 0.02   | 0.022  | 0.02   | 0.022  | t | 95547  | LEKFDK                       | Homo sapiens          |
| 1 | 1.00 | 1 | 1 | 0     | 0.002  | 0      | -0.003 | 0      | t | 66682  | TTKPTKKP<br>TFKT             | Homo sapiens          |
| 1 | 1.00 | 1 | 1 | -0.02 | -0.018 | -0.028 | -0.017 | -0.018 | t | 111450 | KGSPCTNV<br>AVNPGDC<br>PPLEL | Cavia porcellus       |
| 1 | 1.00 | 1 | 1 | -0.01 | -0.01  | -0.01  | -0.01  | -0.008 | t | 64685  | TKTQYSKF<br>NT               | Oryctolagus cuniculus |
| 1 | 1.00 | 1 | 1 | 0     | -0.002 | 0.007  | -0.001 | -0.002 | t | 21704  | GPLYHTP                      | Mus musculus          |

|   |      |   |   |       |        |        |       |        |   |        |                             |                                  |
|---|------|---|---|-------|--------|--------|-------|--------|---|--------|-----------------------------|----------------------------------|
| 1 | 1.00 | 1 | 1 | -0.01 | -0.01  | -0.01  | -0.01 | -0.01  | t | 94620  | NPACGPK<br>Y                | Capra<br>hircus                  |
| 1 | 1.00 | 1 | 1 | 0     | 0      | -0.008 | 0     | -0.001 | t | 141671 | IAESKQLT<br>VKQKTEQI<br>K   | Mus<br>musculu<br>s              |
| 1 | 1.00 | 1 | 1 | 0.01  | 0.01   | 0.01   | 0.01  | 0.01   | t | 94618  | NPACGP                      | Capra<br>hircus                  |
| 1 | 1.00 | 1 | 1 | -0.01 | -0.01  | -0.01  | -0.01 | -0.01  | t | 64113  | TIAGAG                      | Mus<br>musculu<br>s              |
| 1 | 1.00 | 1 | 1 | -0.01 | -0.013 | -0.01  | -0.01 | -0.01  | t | 64113  | TIAGAG                      | Oryctola<br>gus<br>cuniculu<br>s |
| 1 | 1.00 | 1 | 1 | 0     | 0      | 0.002  | 0     | 0      | t | 122597 | SVDDARK<br>AWIHDFPL         | Mus<br>musculu<br>s              |
| 1 | 1.00 | 1 | 1 | -0.02 | -0.02  | -0.014 | -0.02 | -0.021 | t | 34341  | KWYISKPQ                    | Mus<br>musculu<br>s              |
| 1 | 1.00 | 1 | 1 | -0.02 | -0.017 | -0.031 | -0.02 | -0.018 | t | 111929 | VTFCKCD<br>STLRLCVQ<br>STHV | Mus<br>musculu<br>s              |
| 1 | 1.00 | 1 | 1 | 0.03  | 0.03   | 0.03   | 0.03  | 0.03   | t | 120070 | LLDQRLAL<br>QW              | Mus<br>musculu<br>s              |
| 1 | 1.00 | 1 | 1 | 0.03  | 0.033  | 0.03   | 0.03  | 0.03   | t | 120070 | LLDQRLAL<br>QW              | Mus<br>musculu<br>s              |
| 1 | 1.00 | 1 | 1 | 0.03  | 0.033  | 0.03   | 0.03  | 0.03   | t | 120070 | LLDQRLAL<br>QW              | Mus<br>musculu<br>s              |
| 1 | 1.00 | 1 | 1 | 0.03  | 0.03   | 0.03   | 0.03  | 0.03   | t | 120070 | LLDQRLAL<br>QW              | Mus<br>musculu<br>s              |
| 1 | 1.00 | 1 | 1 | 0.01  | 0.01   | 0.01   | 0.01  | 0.01   | t | 135572 | LLCEDGCL<br>AL              | Oryctola<br>gus<br>cuniculu<br>s |
| 1 | 1.00 | 1 | 1 | 0.01  | 0.01   | 0.01   | 0.01  | 0.01   | t | 149425 | QGFFQPS<br>QQN              | Mus<br>musculu<br>s              |
| 1 | 1.00 | 1 | 1 | 0.01  | 0.01   | 0.01   | 0.01  | 0.01   | t | 134773 | QKSTHLLIR<br>KLPSFR         | Homo<br>sapiens                  |



|   |      |   |   |      |      |      |      |      |   |        |                              |                     |
|---|------|---|---|------|------|------|------|------|---|--------|------------------------------|---------------------|
| 1 | 1.00 | 1 | 1 | 0.01 | 0.01 | 0.01 | 0.01 | 0.01 | t | 150999 | IPSIQSRGL<br>FGAIAG          | Homo<br>sapiens     |
| 1 | 1.00 | 1 | 1 | 0.01 | 0.01 | 0.01 | 0.01 | 0.01 | t | 132372 | IARGGFER<br>ALDD             | Mus<br>musculu<br>s |
| 1 | 1.00 | 1 | 1 | 0.01 | 0.01 | 0.01 | 0.01 | 0.01 | t | 115571 | YQLDAYPS<br>GAWYYVP<br>LGTQY | Homo<br>sapiens     |
| 1 | 1.00 | 1 | 1 | 0.01 | 0.01 | 0.01 | 0.01 | 0.01 | t | 103532 | QSSFYSD<br>WYSPACG<br>K      | Homo<br>sapiens     |
| 1 | 1.00 | 1 | 1 | 0.01 | 0.01 | 0.01 | 0.01 | 0.01 | t | 114799 | ENPVVHFF<br>ENIVTPRT<br>P    | Mus<br>musculu<br>s |
| 1 | 1.00 | 1 | 1 | 0.01 | 0.01 | 0.01 | 0.01 | 0.01 | t | 47183  | PDREVLQ<br>EFDEMEEC<br>ASHL  | Homo<br>sapiens     |
| 1 | 1.00 | 1 | 1 | 0.01 | 0.01 | 0.01 | 0.01 | 0.01 | t | 47174  | PDREALYQ<br>EFDEMEEC<br>ASHL | Homo<br>sapiens     |
| 1 | 1.00 | 1 | 1 | 0.01 | 0.01 | 0.01 | 0.01 | 0.01 | t | 46972  | PATIPDRE<br>VLYQEFDE<br>MEEC | Homo<br>sapiens     |
| 1 | 1.00 | 1 | 1 | 0.01 | 0.01 | 0.01 | 0.01 | 0.01 | t | 39402  | LSGRPAVV<br>PDREVLQ<br>EFDE  | Homo<br>sapiens     |
| 1 | 1.00 | 1 | 1 | 0.01 | 0.01 | 0.01 | 0.01 | 0.01 | t | 39398  | LSGRPAIV<br>PDREVLQ<br>EFDE  | Homo<br>sapiens     |
| 1 | 1.00 | 1 | 1 | 0.01 | 0.01 | 0.01 | 0.01 | 0.01 | t | 46999  | PAVVPDRE<br>VLYQEFDE<br>MEEC | Homo<br>sapiens     |
| 1 | 1.00 | 1 | 1 | 0.01 | 0.01 | 0.01 | 0.01 | 0.01 | t | 52151  | QQSPEQQ                      | Homo<br>sapiens     |
| 1 | 1.00 | 1 | 1 | 0.01 | 0.01 | 0.01 | 0.01 | 0.01 | t | 39400  | LSGRPAVI<br>PDREVLQ<br>EFDE  | Homo<br>sapiens     |
| 1 | 1.00 | 1 | 1 | 0.01 | 0.01 | 0.01 | 0.01 | 0.01 | t | 39394  | LSGRPAIP<br>DREVLQ<br>FDE    | Homo<br>sapiens     |
| 1 | 1.00 | 1 | 1 | 0.01 | 0.01 | 0.01 | 0.01 | 0.01 | t | 39373  | LSGKPAIP<br>DREVLQ<br>FDE    | Homo<br>sapiens     |
| 1 | 1.00 | 1 | 1 | 0.01 | 0.01 | 0.01 | 0.01 | 0.01 | t | 46991  | PAVIPDRE<br>VLYQEFDE<br>MEEC | Homo<br>sapiens     |

|   |      |   |   |       |        |        |        |        |   |        |                              |                                  |
|---|------|---|---|-------|--------|--------|--------|--------|---|--------|------------------------------|----------------------------------|
| 1 | 1.00 | 1 | 1 | -0.01 | -0.01  | -0.01  | -0.01  | -0.01  | t | 151031 | LVKKGNSY<br>PKLSKSY          | Homo<br>sapiens                  |
| 1 | 1.00 | 1 | 1 | -0.01 | -0.01  | -0.01  | -0.01  | -0.01  | t | 119528 | SRKKTFTG<br>A                | Homo<br>sapiens                  |
| 1 | 1.00 | 1 | 1 | -0.01 | -0.01  | -0.01  | -0.01  | -0.01  | t | 103176 | FLGGFAGL<br>PSLGFGN          | Homo<br>sapiens                  |
| 1 | 1.00 | 1 | 1 | 0.01  | 0.02   | 0.01   | 0.009  | 0.01   | t | 22222  | GRTWAQP<br>GYP               | Pan<br>troglody<br>tes           |
| 1 | 1.00 | 1 | 1 | 0.02  | 0.02   | 0.014  | 0.02   | 0.02   | t | 16417  | FKNKDGFL<br>YVYKGYP<br>I     | Homo<br>sapiens                  |
| 1 | 1.00 | 1 | 1 | -0.01 | -0.012 | -0.015 | -0.007 | -0.009 | t | 95084  | GEFQRKLY<br>KELLKNYN<br>PLER | Rattus<br>norvegic<br>us         |
| 1 | 1.00 | 1 | 1 | 0     | 0      | 0.005  | 0      | -0.002 | t | 67170  | TVSTEQNV<br>PDPQVGI          | Mus<br>musculu<br>s              |
| 1 | 1.00 | 1 | 1 | 0     | 0.007  | 0.005  | 0      | -0.002 | t | 61589  | STEQNVP<br>DPQVG             | Cavia<br>porcellu<br>s           |
| 1 | 1.00 | 1 | 1 | -0.01 | -0.008 | -0.01  | -0.007 | -0.008 | t | 40578  | LVSFGVWI<br>RTPPAYRP         | Homo<br>sapiens                  |
| 1 | 1.00 | 1 | 1 | 0.01  | 0.01   | 0.01   | 0.01   | 0.009  | t | 111193 | DGPAGQA<br>EPDRAHY<br>NI     | Mus<br>musculu<br>s              |
| 1 | 1.00 | 1 | 1 | 0.03  | 0.03   | 0.031  | 0.03   | 0.03   | t | 127961 | ELLADVQF<br>ALGLPFYP<br>AYEG | Homo<br>sapiens                  |
| 1 | 1.00 | 1 | 1 | 0.01  | 0.012  | 0.01   | 0.009  | 0.008  | t | 73787  | YEVNRVSG<br>IYHVTNDC<br>SNS  | MD                               |
| 1 | 1.00 | 1 | 1 | 0.01  | 0.006  | 0.01   | 0.013  | 0.013  | t | 56185  | RTTADRQT<br>A                | Oryctola<br>gus<br>cuniculu<br>s |
| 1 | 1.00 | 1 | 1 | 0.02  | 0.02   | 0.027  | 0.026  | 0.02   | t | 115750 | GFYTTGAV<br>RQIFGDY          | Mus<br>musculu<br>s              |
| 1 | 1.00 | 1 | 1 | 0     | 0.005  | 0      | 0.001  | 0      | t | 148567 | DKSKLQDV<br>KDNKPSD<br>VKL   | Homo<br>sapiens                  |
| 1 | 1.00 | 1 | 1 | -0.01 | -0.01  | -0.01  | -0.01  | -0.011 | t | 114281 | CNYKTHS<br>WC                | Mus<br>musculu<br>s              |

|   |      |   |   |       |        |        |        |        |   |        |                             |                                  |
|---|------|---|---|-------|--------|--------|--------|--------|---|--------|-----------------------------|----------------------------------|
| 1 | 1.00 | 1 | 1 | -0.01 | -0.01  | -0.01  | -0.01  | -0.011 | t | 114281 | CNYKTHS<br>WC               | Mus<br>musculu<br>s              |
| 1 | 1.00 | 1 | 1 | 0.01  | 0.012  | 0.005  | 0.01   | 0.009  | t | 95030  | KRASKEKQ<br>ENKIFADDI       | Rattus<br>norvegic<br>us         |
| 1 | 1.00 | 1 | 1 | -0.03 | -0.033 | -0.026 | -0.03  | -0.03  | t | 78628  | DQKPPSR                     | Oryctola<br>gus<br>cuniculu<br>s |
| 1 | 1.00 | 1 | 1 | 0.02  | 0.02   | 0.02   | 0.02   | 0.02   | t | 156934 | PLHTSL                      | Gallus<br>gallus                 |
| 1 | 1.00 | 1 | 1 | 0.04  | 0.04   | 0.035  | 0.03   | 0.04   | t | 115107 | SENSEKTT<br>MPLW            | Homo<br>sapiens                  |
| 1 | 1.00 | 1 | 1 | 0.03  | 0.034  | 0.024  | 0.03   | 0.034  | t | 92786  | GDGNDIIT<br>DS              | Ovis<br>aries                    |
| 1 | 1.00 | 1 | 1 | -0.02 | -0.022 | -0.041 | -0.023 | -0.018 | t | 43747  | NESKYSNT<br>FINNAYN<br>MSIR | Mus<br>musculu<br>s              |
| 1 | 1.00 | 1 | 1 | -0.01 | -0.009 | -0.01  | -0.011 | -0.012 | t | 12315  | EGYPADSK<br>GCKITCF         | Equus<br>caballus                |
| 1 | 1.00 | 1 | 1 | -0.01 | -0.014 | -0.01  | -0.011 | -0.012 | t | 12315  | EGYPADSK<br>GCKITCF         | Oryctola<br>gus<br>cuniculu<br>s |
| 1 | 1.00 | 1 | 1 | -0.01 | -0.012 | -0.01  | -0.011 | -0.012 | t | 12315  | EGYPADSK<br>GCKITCF         | Mus<br>musculu<br>s              |
| 1 | 1.00 | 1 | 1 | 0.04  | 0.04   | 0.04   | 0.04   | 0.04   | t | 108281 | APSSLAGN<br>G               | Homo<br>sapiens                  |
| 1 | 1.00 | 1 | 1 | -0.02 | -0.02  | -0.027 | -0.02  | -0.02  | t | 78694  | KASAMYS<br>GKGPLNDL<br>RVKI | Mus<br>musculu<br>s              |
| 1 | 1.00 | 1 | 1 | -0.02 | -0.023 | -0.027 | -0.02  | -0.02  | t | 78694  | KASAMYS<br>GKGPLNDL<br>RVKI | Oryctola<br>gus<br>cuniculu<br>s |
| 1 | 1.00 | 1 | 1 | 0.02  | 0.02   | 0.02   | 0.02   | 0.02   | t | 145388 | NNLTQSKF<br>LRLQ            | Homo<br>sapiens                  |
| 1 | 1.00 | 1 | 1 | 0.02  | 0.02   | 0.02   | 0.02   | 0.02   | t | 123171 | FGRVCYNP<br>K               | Ovis<br>aries                    |
| 1 | 1.00 | 1 | 1 | 0.02  | 0.02   | 0.02   | 0.02   | 0.02   | t | 131437 | GASVKVT                     | Homo<br>sapiens                  |

|   |      |   |   |       |       |       |       |       |   |        |                              |                       |
|---|------|---|---|-------|-------|-------|-------|-------|---|--------|------------------------------|-----------------------|
| 1 | 1.00 | 1 | 1 | 0.02  | 0.02  | 0.02  | 0.02  | 0.02  | t | 131437 | GASVKVT                      | Homo sapiens          |
| 1 | 1.00 | 1 | 1 | 0     | 0     | 0     | 0     | 0     | t | 137579 | VFQQQQQ<br>HQSRGRN<br>L      | Homo sapiens          |
| 1 | 1.00 | 1 | 1 | 0     | 0     | 0     | 0     | 0     | t | 123453 | LPKIKEYM<br>K                | Ovis aries            |
| 1 | 1.00 | 1 | 1 | 0     | 0     | 0     | 0     | 0     | t | 111171 | CSSGPIAP<br>C                | Homo sapiens          |
| 1 | 1.00 | 1 | 1 | 0     | 0     | 0     | 0     | 0     | t | 99936  | DFSVEFLE<br>QN               | Mus musculus          |
| 1 | 1.00 | 1 | 1 | 0     | 0     | 0     | 0     | 0     | t | 111551 | MKVSNHK<br>DIPPL             | Homo sapiens          |
| 1 | 1.00 | 1 | 1 | 0     | 0     | 0     | 0     | 0     | t | 111120 | ARMRLYD<br>PNQAALQ<br>A      | Oryctolagus cuniculus |
| 1 | 1.00 | 1 | 1 | 0     | 0     | 0     | 0     | 0     | t | 81130  | DLFHVNG<br>RDTMNIIV<br>DENKY | Aotus                 |
| 1 | 1.00 | 1 | 1 | 0     | 0     | 0     | 0     | 0     | t | 81130  | DLFHVNG<br>RDTMNIIV<br>DENKY | Aotus                 |
| 1 | 1.00 | 1 | 1 | 0     | 0     | 0     | 0     | 0     | t | 69884  | VLYQEFDE<br>MEECASH<br>LPYFE | Homo sapiens          |
| 1 | 1.00 | 1 | 1 | 0     | 0     | 0     | 0     | 0     | t | 39375  | LSGKPAIIP<br>DREVLRYE<br>FDE | Homo sapiens          |
| 1 | 1.00 | 1 | 1 | 0     | 0     | 0     | 0     | 0     | t | 39375  | LSGKPAIIP<br>DREVLRYE<br>FDE | Homo sapiens          |
| 1 | 1.00 | 1 | 1 | 0     | 0     | 0     | 0     | 0     | t | 6127   | CDPPIDLD<br>C                | Mus musculus          |
| 1 | 1.00 | 1 | 1 | 0     | 0     | 0     | 0     | 0     | t | 4450   | ASHLPYFE<br>QGMQLAE<br>QFKQK | Homo sapiens          |
| 1 | 1.00 | 1 | 1 | -0.02 | -0.02 | -0.02 | -0.02 | -0.02 | t | 132006 | PLSSSQPN<br>LRAQVPP          | Homo sapiens          |
| 1 | 1.00 | 1 | 1 | -0.02 | -0.02 | -0.02 | -0.02 | -0.02 | t | 123512 | MPPPGMI<br>P                 | Oryctolagus cuniculus |
| 1 | 1.00 | 1 | 1 | -0.02 | -0.02 | -0.02 | -0.02 | -0.02 | t | 107531 | NKALPAP                      | Homo sapiens          |

|   |      |   |   |       |        |        |        |       |   |        |                              |                                  |
|---|------|---|---|-------|--------|--------|--------|-------|---|--------|------------------------------|----------------------------------|
| 1 | 1.00 | 1 | 1 | -0.02 | -0.02  | -0.02  | -0.02  | -0.02 | t | 91854  | QQMSINV<br>DNQFNYV<br>P      | Oryctola<br>gus<br>cuniculu<br>s |
| 1 | 1.00 | 1 | 1 | -0.06 | -0.06  | -0.06  | -0.06  | -0.06 | t | 156423 | QNQLDQV<br>PRRFYLAG          | Homo<br>sapiens                  |
| 1 | 1.00 | 1 | 1 | 0.01  | 0.01   | 0.01   | 0.01   | 0.013 | t | 141534 | DRMNLQT<br>LRGY              | Mus<br>musculu<br>s              |
| 1 | 1.00 | 1 | 1 | 0.05  | 0.05   | 0.05   | 0.05   | 0.051 | t | 131968 | LSELQVEQ<br>TSLEP            | Oryctola<br>gus<br>cuniculu<br>s |
| 1 | 1.00 | 1 | 1 | 0.01  | 0.006  | 0.01   | 0.013  | 0.01  | t | 96012  | YERGHITV<br>NY               | Oryctola<br>gus<br>cuniculu<br>s |
| 1 | 1.00 | 1 | 1 | 0.02  | 0.02   | 0.023  | 0.02   | 0.02  | t | 57686  | SEYIENWN<br>LQNRRQR          | Mus<br>musculu<br>s              |
| 1 | 1.00 | 1 | 1 | 0.02  | 0.018  | 0.023  | 0.02   | 0.02  | t | 57686  | SEYIENWN<br>LQNRRQR          | Mus<br>musculu<br>s              |
| 1 | 1.00 | 1 | 1 | 0.03  | 0.028  | 0.021  | 0.03   | 0.03  | t | 21715  | GPNNSEAI<br>PALTAAE          | Rattus<br>norvegic<br>us         |
| 1 | 1.00 | 1 | 1 | 0.02  | 0.02   | 0.024  | 0.026  | 0.022 | t | 106084 | RPRSPSSQ<br>SSSSGSP<br>RRP   | Homo<br>sapiens                  |
| 1 | 1.00 | 1 | 1 | 0     | 0      | 0      | 0      | 0     | t | 103965 | GYKYLPGP<br>NSLDQGE<br>PT    | Oryctola<br>gus<br>cuniculu<br>s |
| 1 | 1.00 | 1 | 1 | 0     | -0.002 | 0      | 0.001  | 0     | t | 99921  | DAEFRHDS                     | Mus<br>musculu<br>s              |
| 1 | 1.00 | 1 | 1 | 0.02  | 0.022  | 0.014  | 0.021  | 0.02  | t | 63166  | TDHEEDN<br>N                 | Homo<br>sapiens                  |
| 1 | 1.00 | 1 | 1 | -0.03 | -0.032 | -0.037 | -0.031 | -0.03 | t | 71863  | VVTVRAER<br>PGVDPDR<br>EMLAA | Mus<br>musculu<br>s              |
| 1 | 1.00 | 1 | 1 | 0.04  | 0.04   | 0.046  | 0.036  | 0.04  | t | 48733  | PPAAEYPP<br>AAEY             | Homo<br>sapiens                  |
| 1 | 1.00 | 1 | 1 | 0.02  | 0.02   | 0.02   | 0.02   | 0.02  | t | 145803 | GPVGPSD<br>PSIVS             | Mus<br>musculu<br>s              |

|   |      |   |   |       |        |        |       |       |   |        |                     |                                  |
|---|------|---|---|-------|--------|--------|-------|-------|---|--------|---------------------|----------------------------------|
| 1 | 1.00 | 1 | 1 | -0.01 | -0.007 | -0.003 | -0.01 | -0.01 | t | 78695  | KDTNNNL<br>YNGK     | Mus<br>musculu<br>s              |
| 1 | 1.00 | 1 | 1 | 0.04  | 0.04   | 0.049  | 0.04  | 0.04  | t | 55508  | RQWFLD              | Homo<br>sapiens                  |
| 1 | 1.00 | 1 | 1 | -0.01 | -0.01  | -0.01  | -0.01 | -0.01 | t | 54860  | RMAWDM<br>M         | Homo<br>sapiens                  |
| 1 | 1.00 | 1 | 1 | 0.03  | 0.032  | 0.038  | 0.027 | 0.028 | t | 98821  | IDQIEKQA<br>KD      | Homo<br>sapiens                  |
| 1 | 1.00 | 1 | 1 | 0.06  | 0.061  | 0.06   | 0.063 | 0.062 | t | 78296  | WESETT              | Equus<br>caballus                |
| 1 | 1.00 | 1 | 1 | 0.01  | 0.01   | 0.01   | 0.01  | 0.008 | t | 70332  | VPHYTLNA<br>NSIIYAL | Homo<br>sapiens                  |
| 1 | 1.00 | 1 | 1 | 0.01  | 0.01   | 0.01   | 0.01  | 0.01  | t | 3514   | APDTR               | Mus<br>musculu<br>s              |
| 1 | 1.00 | 1 | 1 | 0.01  | 0.01   | 0.01   | 0.01  | 0.01  | t | 3514   | APDTR               | Mus<br>musculu<br>s              |
| 1 | 1.00 | 1 | 1 | 0.02  | 0.016  | 0.018  | 0.019 | 0.02  | t | 122153 | NASGLSRP<br>SPSAH   | Oryctola<br>gus<br>cuniculu<br>s |
| 1 | 1.00 | 1 | 1 | 0.01  | 0.013  | 0.01   | 0.01  | 0.012 | t | 21407  | GNDYEDR<br>YYREN    | Mus<br>musculu<br>s              |
| 1 | 1.00 | 1 | 1 | 0.03  | 0.03   | 0.03   | 0.03  | 0.03  | t | 137284 | RTNTTQG<br>KVPSQ    | Sus<br>scrofa                    |
| 1 | 1.00 | 1 | 1 | 0.03  | 0.03   | 0.03   | 0.03  | 0.03  | t | 137284 | RTNTTQG<br>KVPSQ    | Sus<br>scrofa                    |
| 1 | 1.00 | 1 | 1 | 0.01  | 0.01   | 0.01   | 0.01  | 0.01  | t | 137741 | DTPLTHAA<br>LTLV    | Mus<br>musculu<br>s              |
| 1 | 1.00 | 1 | 1 | 0.01  | 0.01   | 0.01   | 0.01  | 0.01  | t | 140863 | GVDAGKL<br>GTVSY    | Oryctola<br>gus<br>cuniculu<br>s |
| 1 | 1.00 | 1 | 1 | 0.01  | 0.01   | 0.01   | 0.01  | 0.01  | t | 123452 | LPKIKAYM<br>E       | Ovis<br>aries                    |
| 1 | 1.00 | 1 | 1 | 0.01  | 0.01   | 0.01   | 0.01  | 0.01  | t | 117633 | RGRGRGR<br>GRGRGG   | Homo<br>sapiens                  |
| 1 | 1.00 | 1 | 1 | 0.01  | 0.01   | 0.01   | 0.01  | 0.01  | t | 105030 | VPQQSIP             | Homo<br>sapiens                  |

|   |      |   |   |       |        |        |        |       |   |        |                              |                                  |
|---|------|---|---|-------|--------|--------|--------|-------|---|--------|------------------------------|----------------------------------|
| 1 | 1.00 | 1 | 1 | 0.01  | 0.01   | 0.01   | 0.01   | 0.01  | t | 60675  | SRGNHVA<br>PTHYVTES<br>DASQR | Homo<br>sapiens                  |
| 1 | 1.00 | 1 | 1 | 0.01  | 0.01   | 0.01   | 0.01   | 0.01  | t | 22081  | GRIILSGKP<br>AVIPDREV<br>LYQ | Homo<br>sapiens                  |
| 1 | 1.00 | 1 | 1 | 0.01  | 0.013  | 0.01   | 0.01   | 0.01  | t | 11820  | EENVEHD<br>AEENVEEN<br>V     | Mus<br>musculu<br>s              |
| 1 | 1.00 | 1 | 1 | 0.01  | 0.01   | 0.01   | 0.01   | 0.01  | t | 22089  | GRIILSGRP<br>AVIPDREV<br>LYQ | Homo<br>sapiens                  |
| 1 | 1.00 | 1 | 1 | 0.01  | 0.01   | 0.01   | 0.01   | 0.01  | t | 30479  | KEKMVLN<br>EEEITTKG          | Homo<br>sapiens                  |
| 1 | 1.00 | 1 | 1 | 0.01  | 0.01   | 0.01   | 0.01   | 0.01  | t | 22091  | GRIILSGRP<br>AVVPDRE<br>VLYQ | Homo<br>sapiens                  |
| 1 | 1.00 | 1 | 1 | 0.01  | 0.01   | 0.01   | 0.01   | 0.01  | t | 11970  | EFDEMEEC<br>GSHLPYIE<br>QGMQ | Homo<br>sapiens                  |
| 1 | 1.00 | 1 | 1 | -0.01 | -0.01  | -0.01  | -0.01  | -0.01 | t | 140458 | EHNDFPM<br>YTWRP             | Mus<br>musculu<br>s              |
| 1 | 1.00 | 1 | 1 | -0.03 | -0.03  | -0.03  | -0.03  | -0.03 | t | 79507  | AHIPWLL                      | Oryctola<br>gus<br>cuniculu<br>s |
| 1 | 1.00 | 1 | 1 | -0.03 | -0.027 | -0.031 | -0.03  | -0.03 | t | 94513  | FHPDK                        | Mus<br>musculu<br>s              |
| 1 | 1.00 | 1 | 1 | 0     | -0.002 | -0.006 | -0.008 | 0     | t | 6479   | CKGKIQAL<br>CENPEWA          | Mus<br>musculu<br>s              |
| 1 | 1.00 | 1 | 1 | 0.02  | 0.02   | 0.029  | 0.026  | 0.019 | t | 2009   | AILTPTPV<br>NPSTAPA          | Homo<br>sapiens                  |
| 1 | 1.00 | 1 | 1 | 0.01  | 0.006  | -0.001 | 0.007  | 0.01  | t | 86822  | NKGKDKD<br>VNAGTSG<br>THT    | Oryctola<br>gus<br>cuniculu<br>s |
| 1 | 1.00 | 1 | 1 | 0.01  | 0.012  | 0.014  | 0.01   | 0.01  | t | 137827 | DVKSIAIEG                    | Rattus<br>norvegic<br>us         |

|   |      |   |   |       |        |        |        |        |   |        |                              |                     |
|---|------|---|---|-------|--------|--------|--------|--------|---|--------|------------------------------|---------------------|
| 1 | 1.00 | 1 | 1 | -0.03 | -0.03  | -0.025 | -0.03  | -0.032 | t | 22687  | GTHNQW<br>NKPSKPKT<br>NLK    | Mus<br>musculu<br>s |
| 1 | 1.00 | 1 | 1 | 0.04  | 0.04   | 0.037  | 0.034  | 0.04   | t | 76634  | YYVPLGTQ<br>YT               | Homo<br>sapiens     |
| 1 | 1.00 | 1 | 1 | 0.01  | 0.014  | 0.01   | 0.009  | 0.01   | t | 34169  | KVPTL                        | Mus<br>musculu<br>s |
| 1 | 1.00 | 1 | 1 | 0.01  | 0.012  | 0.015  | 0.017  | 0.01   | t | 134001 | AIQHESGIL<br>GPLLYGEV<br>GDT | Homo<br>sapiens     |
| 1 | 1.00 | 1 | 1 | -0.03 | -0.032 | -0.03  | -0.031 | -0.031 | t | 133693 | SGRHSRL                      | Mus<br>musculu<br>s |
| 1 | 1.00 | 1 | 1 | 0     | 0.002  | 0.002  | 0.003  | 0      | t | 6623   | CLSATCDC<br>TLCGP            | Homo<br>sapiens     |
| 1 | 1.00 | 1 | 1 | 0.03  | 0.03   | 0.026  | 0.03   | 0.032  | t | 74937  | YLTETKIDK<br>L               | Mus<br>musculu<br>s |
| 1 | 1.00 | 1 | 1 | 0.01  | 0.011  | 0.015  | 0.009  | 0.01   | t | 54629  | RLKSSR                       | Equus<br>caballus   |
| 1 | 1.00 | 1 | 1 | 0     | -0.001 | 0      | 0      | 0      | t | 11353  | EDINGIRR<br>PK               | Mus<br>musculu<br>s |
| 1 | 1.00 | 1 | 1 | 0.04  | 0.042  | 0.06   | 0.047  | 0.04   | t | 141777 | VVDSLDLP<br>LN               | Homo<br>sapiens     |
| 1 | 1.00 | 1 | 1 | 0.04  | 0.04   | 0.032  | 0.037  | 0.04   | t | 2809   | ALPDYASQ<br>PGKPPR           | Homo<br>sapiens     |
| 1 | 1.00 | 1 | 1 | 0     | 0      | 0      | 0      | 0      | t | 158932 | KTALEARK<br>AADTFNF          | Homo<br>sapiens     |
| 1 | 1.00 | 1 | 1 | 0     | 0.002  | 0      | 0      | 0      | t | 117750 | APGMRPP                      | Homo<br>sapiens     |
| 1 | 1.00 | 1 | 1 | 0     | 0      | 0      | 0      | 0      | t | 117750 | APGMRPP                      | Mus<br>musculu<br>s |
| 1 | 1.00 | 1 | 1 | 0.01  | 0.012  | 0.008  | 0.011  | 0.01   | t | 96367  | HSNLDHI                      | Homo<br>sapiens     |



|   |      |   |   |       |        |        |       |        |   |        |                             |                                  |
|---|------|---|---|-------|--------|--------|-------|--------|---|--------|-----------------------------|----------------------------------|
| 1 | 1.00 | 1 | 1 | 0     | 0.002  | 0      | 0.001 | 0      | t | 117093 | TDSDYSTR<br>PSRG            | Homo<br>sapiens                  |
| 1 | 1.00 | 1 | 1 | 0     | 0.004  | 0      | 0     | 0      | t | 70387  | VPNLRGDL<br>QV              | Cavia<br>porcellu<br>s           |
| 1 | 1.00 | 1 | 1 | 0     | 0      | 0      | 0     | 0      | t | 29802  | KAFRELAD                    | Oryctola<br>gus<br>cuniculu<br>s |
| 1 | 1.00 | 1 | 1 | -0.04 | -0.037 | -0.038 | -0.04 | -0.042 | t | 28277  | IRECTGLA<br>WEWWRT<br>V     | Mus<br>musculu<br>s              |
| 1 | 1.00 | 1 | 1 | -0.04 | -0.04  | -0.038 | -0.04 | -0.042 | t | 28277  | IRECTGLA<br>WEWWRT<br>V     | Mus<br>musculu<br>s              |
| 1 | 1.00 | 1 | 1 | -0.01 | -0.01  | -0.003 | -0.01 | -0.01  | t | 67835  | VCEKMA                      | Homo<br>sapiens                  |
| 1 | 1.00 | 1 | 1 | -0.01 | -0.007 | -0.012 | -0.01 | -0.009 | t | 108323 | DTPPPCPR<br>CP              | Mus<br>musculu<br>s              |
| 1 | 1.00 | 1 | 1 | 0.06  | 0.056  | 0.053  | 0.063 | 0.063  | t | 97023  | VATRSQTD<br>TSEKDC          | Oryctola<br>gus<br>cuniculu<br>s |
| 1 | 1.00 | 1 | 1 | 0     | 0      | 0      | 0     | 0      | t | 1259   | AFASRGN<br>HVAPTHY<br>VTESD | Homo<br>sapiens                  |
| 1 | 1.00 | 1 | 1 | 0.02  | 0.022  | 0.032  | 0.027 | 0.022  | t | 134673 | FVAQNKID<br>SLNLD           | Homo<br>sapiens                  |
| 1 | 1.00 | 1 | 1 | 0.02  | 0.02   | 0.02   | 0.02  | 0.02   | t | 135839 | DYMGNIQ<br>DFDT             | Mus<br>musculu<br>s              |
| 1 | 1.00 | 1 | 1 | 0.02  | 0.02   | 0.02   | 0.02  | 0.02   | t | 135839 | DYMGNIQ<br>DFDT             | Mus<br>musculu<br>s              |
| 1 | 1.00 | 1 | 1 | 0.02  | 0.02   | 0.02   | 0.02  | 0.02   | t | 135839 | DYMGNIQ<br>DFDT             | Mus<br>musculu<br>s              |
| 1 | 1.00 | 1 | 1 | 0.02  | 0.02   | 0.02   | 0.02  | 0.02   | t | 112054 | AVYFCHQ                     | Homo<br>sapiens                  |

|   |      |   |   |       |       |       |       |       |   |        |                              |                                  |
|---|------|---|---|-------|-------|-------|-------|-------|---|--------|------------------------------|----------------------------------|
| 1 | 1.00 | 1 | 1 | 0.02  | 0.02  | 0.02  | 0.02  | 0.02  | t | 115719 | EDSPEVIES<br>P               | Homo<br>sapiens                  |
| 1 | 1.00 | 1 | 1 | 0.02  | 0.02  | 0.02  | 0.02  | 0.02  | t | 112115 | FSLTTYG                      | Homo<br>sapiens                  |
| 1 | 1.00 | 1 | 1 | 0.02  | 0.02  | 0.02  | 0.02  | 0.02  | t | 45624  | NQSFEEDT<br>EE               | Oryctola<br>gus<br>cuniculu<br>s |
| 1 | 1.00 | 1 | 1 | 0     | 0     | 0     | 0     | 0     | t | 151046 | RDQEGRM<br>NYYWTLV<br>E      | Homo<br>sapiens                  |
| 1 | 1.00 | 1 | 1 | 0     | 0     | 0     | 0     | 0     | t | 135468 | GVGLAP                       | Oryctola<br>gus<br>cuniculu<br>s |
| 1 | 1.00 | 1 | 1 | 0     | 0     | 0     | 0     | 0     | t | 121719 | PSGKKCIA<br>AKKIKQS          | Homo<br>sapiens                  |
| 1 | 1.00 | 1 | 1 | 0     | 0     | 0     | 0     | 0     | t | 98780  | FPQPQLPY<br>SQPQ             | Homo<br>sapiens                  |
| 1 | 1.00 | 1 | 1 | 0     | 0     | 0     | 0     | 0     | t | 115312 | KHYQKAL<br>NEINQFYQ<br>KFPQY | Homo<br>sapiens                  |
| 1 | 1.00 | 1 | 1 | 0     | 0     | 0     | 0     | 0     | t | 95847  | SGTSGTSG<br>PSGP             | Homo<br>sapiens                  |
| 1 | 1.00 | 1 | 1 | 0     | 0     | 0     | 0     | 0     | t | 95847  | SGTSGTSG<br>PSGP             | Homo<br>sapiens                  |
| 1 | 1.00 | 1 | 1 | 0     | 0     | 0     | 0     | 0     | t | 95847  | SGTSGTSG<br>PSGP             | Homo<br>sapiens                  |
| 1 | 1.00 | 1 | 1 | 0     | 0     | 0     | 0     | 0     | t | 39377  | LSGKPATIP<br>DREAVLYQ<br>EFD | Homo<br>sapiens                  |
| 1 | 1.00 | 1 | 1 | 0     | 0     | 0     | 0     | 0     | t | 6330   | CGPFFLSP<br>TSC              | Homo<br>sapiens                  |
| 1 | 1.00 | 1 | 1 | -0.02 | -0.02 | -0.02 | -0.02 | -0.02 | t | 102245 | YNMPALL                      | Homo<br>sapiens                  |
| 1 | 1.00 | 1 | 1 | -0.02 | -0.02 | -0.02 | -0.02 | -0.02 | t | 117384 | TPRLNTAT<br>LWIT             | Homo<br>sapiens                  |
| 1 | 1.00 | 1 | 1 | -0.02 | -0.02 | -0.02 | -0.02 | -0.02 | t | 103700 | VHNVAAL<br>PGAAYCE<br>M      | Homo<br>sapiens                  |

|   |      |   |   |       |        |        |        |        |   |        |                              |                                  |
|---|------|---|---|-------|--------|--------|--------|--------|---|--------|------------------------------|----------------------------------|
| 1 | 1.00 | 1 | 1 | -0.04 | -0.04  | -0.04  | -0.04  | -0.04  | t | 149099 | RVLTSMD                      | Sus<br>scrofa                    |
| 1 | 1.00 | 1 | 1 | -0.06 | -0.06  | -0.06  | -0.06  | -0.06  | t | 115973 | SLVYPFPG<br>PI               | Homo<br>sapiens                  |
| 1 | 1.00 | 1 | 1 | 0.03  | 0.032  | 0.03   | 0.033  | 0.032  | t | 62993  | TASITSPLT<br>TQNTL           | Homo<br>sapiens                  |
| 1 | 1.00 | 1 | 1 | 0     | 0      | -0.006 | 0      | 0      | t | 18952  | GDDPAKA<br>AFDSLQAS          | Mus<br>musculu<br>s              |
| 1 | 1.00 | 1 | 1 | 0.02  | 0.02   | 0.02   | 0.02   | 0.02   | t | 99836  | QFPQPQ                       | Mus<br>musculu<br>s              |
| 1 | 1.00 | 1 | 1 | 0.02  | 0.02   | 0.02   | 0.02   | 0.02   | t | 99836  | QFPQPQ                       | Mus<br>musculu<br>s              |
| 1 | 1.00 | 1 | 1 | -0.03 | -0.03  | -0.03  | -0.039 | -0.033 | t | 130810 | EPWWSM<br>H                  | Homo<br>sapiens                  |
| 1 | 1.00 | 1 | 1 | -0.02 | -0.018 | -0.02  | -0.017 | -0.02  | t | 22491  | GSRTLGA<br>KHPALQ            | Homo<br>sapiens                  |
| 1 | 1.00 | 1 | 1 | 0.02  | 0.02   | 0.02   | 0.02   | 0.02   | t | 156846 | AKLITCSKT<br>CSKWQ           | Gallus<br>gallus                 |
| 1 | 1.00 | 1 | 1 | -0.01 | -0.006 | -0.01  | -0.009 | -0.01  | t | 48648  | PNGTYRAT                     | Homo<br>sapiens                  |
| 1 | 1.00 | 1 | 1 | -0.02 | -0.024 | -0.022 | -0.017 | -0.022 | t | 64876  | TLKKGSSG<br>YCAWPAC          | Oryctola<br>gus<br>cuniculu<br>s |
| 1 | 1.00 | 1 | 1 | -0.02 | -0.018 | -0.022 | -0.017 | -0.022 | t | 64876  | TLKKGSSG<br>YCAWPAC          | Ovis<br>aries                    |
| 1 | 1.00 | 1 | 1 | -0.02 | -0.019 | -0.022 | -0.017 | -0.022 | t | 64876  | TLKKGSSG<br>YCAWPAC          | Equus<br>caballus                |
| 1 | 1.00 | 1 | 1 | 0.02  | 0.02   | 0.02   | 0.02   | 0.022  | t | 45538  | NQELAYFY<br>PE               | Homo<br>sapiens                  |
| 1 | 1.00 | 1 | 1 | 0     | 0.003  | 0.002  | 0      | -0.001 | t | 122721 | CSNSSSQ<br>FQIHGPR           | Mus<br>musculu<br>s              |
| 1 | 1.00 | 1 | 1 | -0.02 | -0.02  | -0.02  | -0.02  | -0.023 | t | 132063 | SKPTPSQG<br>WGDPPKS          | Homo<br>sapiens                  |
| 1 | 1.00 | 1 | 1 | 0     | 0.002  | 0      | 0.001  | -0.002 | t | 56712  | SAARIHDF<br>RYSQLAKL<br>GINP | Homo<br>sapiens                  |

|   |      |   |   |       |        |        |        |        |   |        |                              |                                  |
|---|------|---|---|-------|--------|--------|--------|--------|---|--------|------------------------------|----------------------------------|
| 1 | 1.00 | 1 | 1 | -0.01 | -0.012 | -0.021 | -0.007 | -0.007 | t | 43317  | NATAEGR<br>AINRRVE           | Mus<br>musculu<br>s              |
| 1 | 1.00 | 1 | 1 | 0.01  | 0.01   | 0.01   | 0.01   | 0.01   | t | 32477  | KNESKYSN                     | Mus<br>musculu<br>s              |
| 1 | 1.00 | 1 | 1 | 0.02  | 0.014  | 0.02   | 0.02   | 0.02   | t | 123184 | FLTNLPEE                     | Oryctola<br>gus<br>cuniculu<br>s |
| 1 | 1.00 | 1 | 1 | -0.04 | -0.042 | -0.036 | -0.037 | -0.042 | t | 52148  | QQSFPQQ<br>PQR               | Mus<br>musculu<br>s              |
| 1 | 1.00 | 1 | 1 | 0     | 0.002  | 0.009  | 0.001  | 0      | t | 12210  | EGLDIR                       | Homo<br>sapiens                  |
| 1 | 1.00 | 1 | 1 | -0.02 | -0.02  | -0.02  | -0.02  | -0.019 | t | 97020  | TVTRGTIS<br>DP               | Oryctola<br>gus<br>cuniculu<br>s |
| 1 | 1.00 | 1 | 1 | 0     | 0.004  | -0.003 | 0      | 0      | t | 7244   | CTWQQW<br>ERELQGYD           | Capra<br>hircus                  |
| 1 | 1.00 | 1 | 1 | 0     | -0.002 | 0.001  | -0.001 | 0      | t | 6106   | CDICTNTM<br>DVIKKML          | Mus<br>musculu<br>s              |
| 1 | 1.00 | 1 | 1 | -0.02 | -0.018 | -0.018 | -0.019 | -0.02  | t | 20084  | GGVYLLPR<br>RGPRLGV          | Homo<br>sapiens                  |
| 1 | 1.00 | 1 | 1 | 0.01  | 0.013  | 0.01   | 0.01   | 0.013  | t | 134702 | KEKKYS                       | Mus<br>musculu<br>s              |
| 1 | 1.00 | 1 | 1 | -0.01 | -0.01  | -0.01  | -0.01  | -0.008 | t | 129198 | LACKYNGK                     | Homo<br>sapiens                  |
| 1 | 1.00 | 1 | 1 | 0     | 0      | 0.003  | 0      | -0.002 | t | 97231  | CNTKCQTP                     | Mus<br>musculu<br>s              |
| 1 | 1.00 | 1 | 1 | 0.07  | 0.07   | 0.07   | 0.07   | 0.07   | t | 115884 | PGEIVESLS<br>S               | Homo<br>sapiens                  |
| 1 | 1.00 | 1 | 1 | 0.03  | 0.03   | 0.03   | 0.03   | 0.03   | t | 115459 | QTEDELQ<br>DKIHPFAQ<br>TQSLV | Homo<br>sapiens                  |
| 1 | 1.00 | 1 | 1 | 0.01  | 0.01   | 0.01   | 0.01   | 0.01   | t | 153835 | HGDTPTLH<br>EYMLDLQ<br>P     | Cavia<br>porcellu<br>s           |
| 1 | 1.00 | 1 | 1 | 0.01  | 0.01   | 0.01   | 0.01   | 0.01   | t | 145422 | PPPGIR                       | Homo<br>sapiens                  |

|   |      |   |   |       |        |        |        |        |   |        |                              |                                  |
|---|------|---|---|-------|--------|--------|--------|--------|---|--------|------------------------------|----------------------------------|
| 1 | 1.00 | 1 | 1 | 0.01  | 0.01   | 0.01   | 0.01   | 0.01   | t | 153835 | HGDTPTLH<br>EYMLDLQ<br>P     | Cavia<br>porcellu<br>s           |
| 1 | 1.00 | 1 | 1 | 0.01  | 0.01   | 0.01   | 0.01   | 0.01   | t | 132814 | FGENRPA                      | Homo<br>sapiens                  |
| 1 | 1.00 | 1 | 1 | 0.01  | 0.01   | 0.01   | 0.01   | 0.01   | t | 131976 | MEIDKHSL<br>NIGDYNR          | Homo<br>sapiens                  |
| 1 | 1.00 | 1 | 1 | 0.01  | 0.01   | 0.01   | 0.01   | 0.01   | t | 99671  | SLNEHFRPI<br>KQF             | Oryctola<br>gus<br>cuniculu<br>s |
| 1 | 1.00 | 1 | 1 | 0.01  | 0.01   | 0.01   | 0.01   | 0.01   | t | 88462  | SEDRETRP<br>HGRNNEN<br>FVYNR | Aotus                            |
| 1 | 1.00 | 1 | 1 | 0.01  | 0.01   | 0.01   | 0.01   | 0.01   | t | 58196  | SGPSGTPS<br>GTSGPSG          | Homo<br>sapiens                  |
| 1 | 1.00 | 1 | 1 | -0.01 | -0.01  | -0.01  | -0.01  | -0.01  | t | 103469 | PFNVNLKL<br>QLHDAF           | Homo<br>sapiens                  |
| 1 | 1.00 | 1 | 1 | -0.01 | -0.01  | -0.01  | -0.01  | -0.01  | t | 79903  | LELIRMVE<br>CSGK             | Mus<br>musculu<br>s              |
| 1 | 1.00 | 1 | 1 | -0.01 | -0.01  | -0.01  | -0.01  | -0.01  | t | 79903  | LELIRMVE<br>CSGK             | Mus<br>musculu<br>s              |
| 1 | 1.00 | 1 | 1 | -0.01 | -0.01  | -0.01  | -0.01  | -0.01  | t | 78944  | DADGDGH<br>GWKPGNA<br>PGIAGY | Homo<br>sapiens                  |
| 1 | 1.00 | 1 | 1 | -0.03 | -0.03  | -0.03  | -0.03  | -0.03  | t | 99292  | GNQNGRI<br>RVLQRFD<br>Q      | Homo<br>sapiens                  |
| 1 | 1.00 | 1 | 1 | -0.01 | -0.005 | -0.002 | -0.007 | -0.009 | t | 11776  | EELVEEVIP                    | Homo<br>sapiens                  |
| 1 | 1.00 | 1 | 1 | -0.05 | -0.05  | -0.05  | -0.05  | -0.05  | t | 115543 | VLSRYPSY<br>GLNYYQQ<br>KPVAL | Homo<br>sapiens                  |
| 1 | 1.00 | 1 | 1 | 0.01  | 0.01   | 0.01   | 0.01   | 0.008  | t | 129022 | KAAGVNV<br>EPFWPGLF          | Homo<br>sapiens                  |
| 1 | 1.00 | 1 | 1 | 0.01  | 0.01   | 0.01   | 0.01   | 0.01   | t | 141977 | PKDSQHG<br>REYQEFSA<br>NRH   | Mus<br>musculu<br>s              |

|   |      |   |   |       |        |        |        |        |   |        |                           |                                  |
|---|------|---|---|-------|--------|--------|--------|--------|---|--------|---------------------------|----------------------------------|
| 1 | 1.00 | 1 | 1 | 0.01  | 0.01   | 0.01   | 0.01   | 0.01   | t | 141977 | PKDSQHG<br>REYQEFS<br>NRH | Mus<br>musculu<br>s              |
| 1 | 1.00 | 1 | 1 | 0.02  | 0.023  | 0.012  | 0.019  | 0.021  | t | 20838  | GLFGAIA<br>G FIE          | Capra<br>hircus                  |
| 1 | 1.00 | 1 | 1 | 0     | 0      | 0.005  | 0      | 0      | t | 130568 | NQYCIYA<br>G RYC          | Mus<br>musculu<br>s              |
| 1 | 1.00 | 1 | 1 | 0     | 0      | 0      | 0      | 0      | t | 132935 | WGSNAEH                   | Homo<br>sapiens                  |
| 1 | 1.00 | 1 | 1 | -0.01 | -0.014 | -0.001 | -0.011 | -0.01  | t | 30691  | KFADFLQI                  | Oryctola<br>gus<br>cuniculu<br>s |
| 1 | 1.00 | 1 | 1 | -0.02 | -0.024 | -0.024 | -0.02  | -0.019 | t | 21037  | GLMKAV                    | Oryctola<br>gus<br>cuniculu<br>s |
| 1 | 1.00 | 1 | 1 | 0.03  | 0.03   | 0.03   | 0.03   | 0.032  | t | 7673   | DAVTE                     | Mus<br>musculu<br>s              |
| 1 | 1.00 | 1 | 1 | 0     | -0.002 | 0      | -0.001 | -0.001 | t | 108023 | LVGPRGER<br>GFP           | Rattus<br>norvegic<br>us         |
| 1 | 1.00 | 1 | 1 | -0.03 | -0.028 | -0.03  | -0.029 | -0.03  | t | 63831  | TGGAAAR                   | Homo<br>sapiens                  |
| 1 | 1.00 | 1 | 1 | -0.04 | -0.04  | -0.04  | -0.04  | -0.042 | t | 23605  | HDAAFRV<br>VHSSEWSF       | Mus<br>musculu<br>s              |
| 1 | 1.00 | 1 | 1 | 0.01  | 0.016  | 0.017  | 0.013  | 0.012  | t | 78101  | AKINAS                    | Equus<br>caballus                |
| 1 | 1.00 | 1 | 1 | -0.02 | -0.016 | -0.016 | -0.017 | -0.02  | t | 144644 | FRQQHKG<br>K TVV          | Homo<br>sapiens                  |
| 1 | 1.00 | 1 | 1 | 0.04  | 0.042  | 0.043  | 0.04   | 0.039  | t | 58914  | SKPFATDS<br>GA            | Homo<br>sapiens                  |
| 1 | 1.00 | 1 | 1 | 0.02  | 0.018  | 0.025  | 0.023  | 0.02   | t | 159043 | NTFVVDG<br>PETKECPT<br>Q  | Mus<br>musculu<br>s              |
| 1 | 1.00 | 1 | 1 | 0     | -0.002 | 0.013  | 0.003  | 0      | t | 105682 | ARSLFGVD                  | Mus<br>musculu<br>s              |
| 1 | 1.00 | 1 | 1 | -0.01 | -0.018 | -0.016 | -0.009 | -0.011 | t | 24454  | HPHDLDD<br>ARRDGRA<br>P   | Mus<br>musculu<br>s              |

|   |      |   |   |       |        |        |       |        |   |        |                              |                                  |
|---|------|---|---|-------|--------|--------|-------|--------|---|--------|------------------------------|----------------------------------|
| 1 | 1.00 | 1 | 1 | 0     | 0      | 0      | 0     | 0      | t | 142391 | DAANIAH<br>QKWLKAT           | Homo<br>sapiens                  |
| 1 | 1.00 | 1 | 1 | 0     | 0      | 0      | 0     | 0      | t | 70728  | VRGLYF                       | Mus<br>musculu<br>s              |
| 1 | 1.00 | 1 | 1 | -0.02 | -0.023 | -0.027 | -0.02 | -0.018 | t | 49855  | PVEIRRGV<br>ML               | Oryctola<br>gus<br>cuniculu<br>s |
| 1 | 1.00 | 1 | 1 | 0.04  | 0.04   | 0.04   | 0.04  | 0.04   | t | 114904 | NISKEHDG<br>EC               | Homo<br>sapiens                  |
| 1 | 1.00 | 1 | 1 | 0.04  | 0.04   | 0.04   | 0.04  | 0.04   | t | 78301  | WHQQMS<br>P                  | Homo<br>sapiens                  |
| 1 | 1.00 | 1 | 1 | 0.02  | 0.02   | 0.02   | 0.02  | 0.02   | t | 140310 | PGSHFCG<br>G                 | Homo<br>sapiens                  |
| 1 | 1.00 | 1 | 1 | 0.02  | 0.02   | 0.02   | 0.02  | 0.02   | t | 156340 | KDDQIAAA<br>IALRGM           | Homo<br>sapiens                  |
| 1 | 1.00 | 1 | 1 | 0.02  | 0.02   | 0.02   | 0.02  | 0.02   | t | 153351 | ACTYSPRD<br>MCGGGS           | Mus<br>musculu<br>s              |
| 1 | 1.00 | 1 | 1 | 0.02  | 0.02   | 0.02   | 0.02  | 0.02   | t | 151058 | STASSWSY<br>IVETPSS          | Homo<br>sapiens                  |
| 1 | 1.00 | 1 | 1 | 0.02  | 0.02   | 0.02   | 0.02  | 0.02   | t | 103249 | HDHKLEGT<br>E                | Mus<br>musculu<br>s              |
| 1 | 1.00 | 1 | 1 | 0.02  | 0.02   | 0.02   | 0.02  | 0.02   | t | 79358  | RCEQSM<br>WTQRLPC<br>L       | Mus<br>musculu<br>s              |
| 1 | 1.00 | 1 | 1 | 0.02  | 0.02   | 0.02   | 0.02  | 0.02   | t | 79542  | EQTINQW                      | Oryctola<br>gus<br>cuniculu<br>s |
| 1 | 1.00 | 1 | 1 | 0.02  | 0.02   | 0.02   | 0.02  | 0.02   | t | 11564  | EEDTEEDK<br>PK               | Oryctola<br>gus<br>cuniculu<br>s |
| 1 | 1.00 | 1 | 1 | 0.02  | 0.02   | 0.02   | 0.02  | 0.02   | t | 4028   | AQPHEPG<br>SYTNVFDH<br>LDWIQ | Oryctola<br>gus<br>cuniculu<br>s |
| 1 | 1.00 | 1 | 1 | 0     | 0      | 0      | 0     | 0      | t | 124276 | HPLAPPH<br>S                 | Homo<br>sapiens                  |
| 1 | 1.00 | 1 | 1 | 0     | 0      | 0      | 0     | 0      | t | 119451 | FRKTSISGA                    | Homo<br>sapiens                  |
| 1 | 1.00 | 1 | 1 | 0     | 0      | 0      | 0     | 0      | t | 106647 | MHLTTNI                      | Homo<br>sapiens                  |

|   |      |   |   |       |        |        |        |        |   |        |                              |                                  |
|---|------|---|---|-------|--------|--------|--------|--------|---|--------|------------------------------|----------------------------------|
| 1 | 1.00 | 1 | 1 | 0     | 0      | 0      | 0      | 0      | t | 110581 | GAKGSAG<br>APGIAGAP          | Mus<br>musculu<br>s              |
| 1 | 1.00 | 1 | 1 | 0     | 0      | 0      | 0      | 0      | t | 106647 | MHLTTNI                      | Homo<br>sapiens                  |
| 1 | 1.00 | 1 | 1 | 0     | 0      | 0      | 0      | 0      | t | 112186 | KNYLAWY                      | Homo<br>sapiens                  |
| 1 | 1.00 | 1 | 1 | 0     | 0      | 0      | 0      | 0      | t | 115568 | YPYYAKPA<br>AVRSPAQI<br>LQWQ | Homo<br>sapiens                  |
| 1 | 1.00 | 1 | 1 | 0     | 0      | 0      | 0      | 0      | t | 9238   | DLPQLG                       | Homo<br>sapiens                  |
| 1 | 1.00 | 1 | 1 | -0.02 | -0.018 | -0.025 | -0.017 | -0.02  | t | 118377 | GKEAWDL<br>GVCRDSV<br>RRKG   | Homo<br>sapiens                  |
| 1 | 1.00 | 1 | 1 | -0.01 | -0.01  | -0.01  | -0.01  | -0.01  | t | 105651 | AEFRHDS                      | Mus<br>musculu<br>s              |
| 1 | 1.00 | 1 | 1 | 0.04  | 0.04   | 0.04   | 0.036  | 0.04   | t | 115671 | AAMEL                        | Homo<br>sapiens                  |
| 1 | 1.00 | 1 | 1 | 0.01  | 0.01   | 0.017  | 0.01   | 0.009  | t | 158910 | KNLDIDPK<br>LQEYLGK          | Mus<br>musculu<br>s              |
| 1 | 1.00 | 1 | 1 | -0.02 | -0.023 | -0.019 | -0.02  | -0.022 | t | 30260  | KDTRLRIAYL<br>TEAKVEKL       | Oryctola<br>gus<br>cuniculu<br>s |
| 1 | 1.00 | 1 | 1 | -0.03 | -0.028 | -0.03  | -0.027 | -0.03  | t | 119580 | FMESGEW<br>VIKESRGW<br>KH    | Homo<br>sapiens                  |
| 1 | 1.00 | 1 | 1 | 0.04  | 0.036  | 0.043  | 0.043  | 0.04   | t | 115272 | GREAADA<br>FSPE              | Oryctola<br>gus<br>cuniculu<br>s |
| 1 | 1.00 | 1 | 1 | 0     | 0      | 0.005  | 0      | 0      | t | 107214 | MVGGVV                       | Mus<br>musculu<br>s              |
| 1 | 1.00 | 1 | 1 | -0.03 | -0.027 | -0.021 | -0.03  | -0.031 | t | 67192  | TVVAVGP<br>GRW               | Mus<br>musculu<br>s              |
| 1 | 1.00 | 1 | 1 | 0.04  | 0.04   | 0.031  | 0.04   | 0.042  | t | 22691  | GTHPSSSA<br>GLKNDLLE<br>N    | Mus<br>musculu<br>s              |
| 1 | 1.00 | 1 | 1 | -0.01 | -0.01  | -0.01  | -0.01  | -0.01  | t | 67266  | TWIGMN                       | Homo<br>sapiens                  |
| 1 | 1.00 | 1 | 1 | 0.03  | 0.032  | 0.03   | 0.037  | 0.03   | t | 104756 | DTTFEYQD<br>LC               | Homo<br>sapiens                  |



|   |      |   |   |       |        |        |       |        |   |        |                         |                       |
|---|------|---|---|-------|--------|--------|-------|--------|---|--------|-------------------------|-----------------------|
| 1 | 1.00 | 1 | 1 | 0     | -0.003 | 0.005  | 0     | -0.001 | t | 29218  | IVCIDRASLST             | Oryctolagus cuniculus |
| 1 | 1.00 | 1 | 1 | -0.01 | -0.017 | -0.008 | -0.01 | -0.012 | t | 56529  | RYETSNDNSLI             | Oryctolagus cuniculus |
| 1 | 1.00 | 1 | 1 | -0.01 | -0.006 | -0.008 | -0.01 | -0.012 | t | 56529  | RYETSNDNSLI             | Mus musculus          |
| 1 | 1.00 | 1 | 1 | -0.03 | -0.03  | -0.021 | -0.03 | -0.03  | t | 32587  | KNPHAK                  | Homo sapiens          |
| 1 | 1.00 | 1 | 1 | 0     | 0      | 0      | 0.004 | 0      | t | 132099 | TLNELPNRT               | Homo sapiens          |
| 1 | 1.00 | 1 | 1 | -0.01 | -0.013 | -0.008 | -0.01 | -0.012 | t | 52156  | QQTAPKAPTE              | Oryctolagus cuniculus |
| 1 | 1.00 | 1 | 1 | 0.01  | 0.01   | 0.01   | 0.01  | 0.01   | t | 45697  | NRLIAFASRGNHDSP<br>THYV | Homo sapiens          |
| 1 | 1.00 | 1 | 1 | 0.03  | 0.033  | 0.019  | 0.029 | 0.03   | t | 5032   | ATLEPKTG<br>PRDGGTV     | Capra hircus          |
| 1 | 1.00 | 1 | 1 | 0.01  | 0.013  | 0.01   | 0.01  | 0.012  | t | 144601 | CSGTHPSIS<br>SC         | Mus musculus          |
| 1 | 1.00 | 1 | 1 | 0.05  | 0.05   | 0.05   | 0.05  | 0.05   | t | 119584 | GQPENNY<br>K            | Homo sapiens          |
| 1 | 1.00 | 1 | 1 | 0.01  | 0.01   | 0.01   | 0.01  | 0.01   | t | 135678 | GEDAKPG<br>Q            | Homo sapiens          |
| 1 | 1.00 | 1 | 1 | 0.01  | 0.01   | 0.01   | 0.01  | 0.01   | t | 131079 | SQTTANPA<br>CPEGT       | Rattus norvegicus     |
| 1 | 1.00 | 1 | 1 | 0.01  | 0.01   | 0.01   | 0.01  | 0.01   | t | 115795 | IPTINTIAS<br>G          | Homo sapiens          |
| 1 | 1.00 | 1 | 1 | 0.01  | 0.01   | 0.01   | 0.01  | 0.01   | t | 114772 | DGVTYTN<br>DCL          | Homo sapiens          |
| 1 | 1.00 | 1 | 1 | 0.01  | 0.01   | 0.01   | 0.01  | 0.01   | t | 108136 | SLNTADSK<br>TTTFPAR     | Homo sapiens          |
| 1 | 1.00 | 1 | 1 | 0.01  | 0.01   | 0.01   | 0.01  | 0.01   | t | 51908  | QPQPFPSP<br>QQP         | Mus musculus          |

|   |      |   |   |       |        |       |       |       |   |        |                              |                                  |
|---|------|---|---|-------|--------|-------|-------|-------|---|--------|------------------------------|----------------------------------|
| 1 | 1.00 | 1 | 1 | 0.01  | 0.01   | 0.01  | 0.01  | 0.01  | t | 51908  | QPQFPFS<br>QQP               | Mus<br>musculu<br>s              |
| 1 | 1.00 | 1 | 1 | 0.01  | 0.01   | 0.01  | 0.01  | 0.01  | t | 32686  | KPEASSSD                     | Homo<br>sapiens                  |
| 1 | 1.00 | 1 | 1 | 0.01  | 0.01   | 0.01  | 0.01  | 0.01  | t | 11968  | EFDEMEEC<br>ASHLPYIE<br>QGVQ | Homo<br>sapiens                  |
| 1 | 1.00 | 1 | 1 | 0.01  | 0.01   | 0.01  | 0.01  | 0.01  | t | 22126  | GRLHLND<br>QVVVTPD<br>KEILYE | Homo<br>sapiens                  |
| 1 | 1.00 | 1 | 1 | 0.01  | 0.01   | 0.01  | 0.01  | 0.01  | t | 11195  | EASSSDKP                     | Homo<br>sapiens                  |
| 1 | 1.00 | 1 | 1 | 0.01  | 0.01   | 0.01  | 0.01  | 0.01  | t | 23463  | GYSLFQKE<br>MKTDNEG<br>TSGTA | Aotus<br>nancyma<br>ae           |
| 1 | 1.00 | 1 | 1 | 0.01  | 0.01   | 0.01  | 0.01  | 0.01  | t | 3654   | APMFITGR<br>EMLASIDT<br>LK   | Homo<br>sapiens                  |
| 1 | 1.00 | 1 | 1 | -0.01 | -0.01  | -0.01 | -0.01 | -0.01 | t | 151070 | WTLVEPG<br>DKITFEAT          | Homo<br>sapiens                  |
| 1 | 1.00 | 1 | 1 | -0.01 | -0.01  | -0.01 | -0.01 | -0.01 | t | 114981 | VVESNGTL<br>TL               | Homo<br>sapiens                  |
| 1 | 1.00 | 1 | 1 | -0.01 | -0.01  | -0.01 | -0.01 | -0.01 | t | 111572 | MSPRFPQ                      | Homo<br>sapiens                  |
| 1 | 1.00 | 1 | 1 | -0.01 | -0.01  | -0.01 | -0.01 | -0.01 | t | 102722 | PNKPVEPT<br>YEVIPTPPT<br>DPV | Mus<br>musculu<br>s              |
| 1 | 1.00 | 1 | 1 | -0.01 | -0.01  | -0.01 | -0.01 | -0.01 | t | 112129 | GIGVGWI                      | Homo<br>sapiens                  |
| 1 | 1.00 | 1 | 1 | -0.01 | -0.01  | -0.01 | -0.01 | -0.01 | t | 62097  | SVEFTKDT<br>QTGMSGF          | Mus<br>musculu<br>s              |
| 1 | 1.00 | 1 | 1 | -0.01 | -0.016 | -0.01 | -0.01 | -0.01 | t | 769    | ADSGYCY<br>WVHILCYC          | Oryctola<br>gus<br>cuniculu<br>s |
| 1 | 1.00 | 1 | 1 | -0.03 | -0.03  | -0.03 | -0.03 | -0.03 | t | 116954 | DPTDYSTR<br>PHMW             | Homo<br>sapiens                  |
| 1 | 1.00 | 1 | 1 | -0.03 | -0.03  | -0.03 | -0.03 | -0.03 | t | 116954 | DPTDYSTR<br>PHMW             | Mus<br>musculu<br>s              |

|   |      |   |   |       |        |        |       |        |   |        |                              |                                  |
|---|------|---|---|-------|--------|--------|-------|--------|---|--------|------------------------------|----------------------------------|
| 1 | 1.00 | 1 | 1 | -0.03 | -0.03  | -0.03  | -0.03 | -0.03  | t | 80178  | ADAPQGF<br>YVL               | Homo<br>sapiens                  |
| 1 | 1.00 | 1 | 1 | -0.05 | -0.05  | -0.05  | -0.05 | -0.05  | t | 98681  | AEKTKIPA<br>VF               | Homo<br>sapiens                  |
| 1 | 1.00 | 1 | 1 | -0.01 | -0.01  | -0.005 | -0.01 | -0.01  | t | 102563 | KKRPKPG                      | Homo<br>sapiens                  |
| 1 | 1.00 | 1 | 1 | 0     | 0      | 0.002  | 0     | -0.001 | t | 118581 | RDRDRDR<br>E                 | Mus<br>musculu<br>s              |
| 1 | 1.00 | 1 | 1 | 0     | 0      | 0.002  | 0     | -0.001 | t | 25140  | HWSYGLR<br>PG                | Mus<br>musculu<br>s              |
| 1 | 1.00 | 1 | 1 | 0.05  | 0.05   | 0.05   | 0.046 | 0.05   | t | 135981 | QYVISQE<br>MERIP             | Homo<br>sapiens                  |
| 1 | 1.00 | 1 | 1 | 0.01  | 0.01   | 0.01   | 0.01  | 0.01   | t | 45701  | NRLIAFAS<br>RGNHVSP<br>AHYVP | Homo<br>sapiens                  |
| 1 | 1.00 | 1 | 1 | 0.01  | 0.01   | 0.022  | 0.013 | 0.01   | t | 80335  | ALASSAPS<br>TAVA             | Homo<br>sapiens                  |
| 1 | 1.00 | 1 | 1 | 0     | 0      | 0      | 0     | 0      | t | 111452 | KHARTSE                      | Homo<br>sapiens                  |
| 1 | 1.00 | 1 | 1 | -0.04 | -0.04  | -0.04  | -0.04 | -0.04  | t | 149961 | SWKHWYSY                     | Capra<br>hircus                  |
| 1 | 1.00 | 1 | 1 | 0     | -0.003 | 0      | 0     | 0.002  | t | 7849   | DDPPATVY<br>RYD              | Oryctola<br>gus<br>cuniculu<br>s |
| 1 | 1.00 | 1 | 1 | 0     | 0      | 0      | 0     | 0.001  | t | 130805 | ELNPEPDT<br>EVFPMTF          | Homo<br>sapiens                  |
| 1 | 1.00 | 1 | 1 | 0.03  | 0.03   | 0.018  | 0.03  | 0.033  | t | 75418  | YPTFGEHK<br>QEKDLEY          | Mus<br>musculu<br>s              |
| 1 | 1.00 | 1 | 1 | 0.03  | 0.032  | 0.03   | 0.029 | 0.03   | t | 149424 | QESTYQLV<br>QQ               | Homo<br>sapiens                  |
| 1 | 1.00 | 1 | 1 | 0.01  | 0.012  | 0.005  | 0.007 | 0.01   | t | 159048 | PKARELTD<br>AETKAFL          | Homo<br>sapiens                  |
| 1 | 1.00 | 1 | 1 | 0     | -0.003 | 0.003  | 0     | -0.002 | t | 111120 | ARMRLYD<br>PNQAALQ<br>A      | Oryctola<br>gus<br>cuniculu<br>s |

|   |      |   |   |       |        |        |        |        |   |        |                            |                                  |
|---|------|---|---|-------|--------|--------|--------|--------|---|--------|----------------------------|----------------------------------|
| 1 | 1.00 | 1 | 1 | 0.01  | 0.007  | 0.01   | 0.01   | 0.01   | t | 37311  | LLGACSFSS<br>I             | Oryctola<br>gus<br>cuniculu<br>s |
| 1 | 1.00 | 1 | 1 | 0.01  | 0.007  | 0.01   | 0.01   | 0.01   | t | 37311  | LLGACSFSS<br>I             | Oryctola<br>gus<br>cuniculu<br>s |
| 1 | 1.00 | 1 | 1 | -0.04 | -0.037 | -0.045 | -0.04  | -0.041 | t | 117380 | TKPAIRRL<br>ARRGGVK<br>RIS | Mus<br>musculu<br>s              |
| 1 | 1.00 | 1 | 1 | -0.05 | -0.046 | -0.059 | -0.051 | -0.05  | t | 59856  | SNKSASQ<br>NVR             | Mus<br>musculu<br>s              |
| 1 | 1.00 | 1 | 1 | -0.01 | -0.007 | -0.01  | -0.01  | -0.011 | t | 135441 | AGLGAGIP                   | Mus<br>musculu<br>s              |
| 1 | 1.00 | 1 | 1 | 0     | 0.005  | 0      | 0.001  | 0      | t | 148565 | DKNKLQD<br>VKDNKPS<br>DVKL | Homo<br>sapiens                  |
| 1 | 1.00 | 1 | 1 | 0     | 0      | 0      | 0      | 0      | t | 65860  | TQGSNW                     | Homo<br>sapiens                  |
| 1 | 1.00 | 1 | 1 | 0     | 0      | 0      | 0      | 0      | t | 50480  | QDKGIAIP<br>HDIDLGES<br>RV | Homo<br>sapiens                  |
| 1 | 1.00 | 1 | 1 | 0     | 0      | 0      | 0      | 0      | t | 56201  | RTTTASGK<br>L              | Mus<br>musculu<br>s              |
| 1 | 1.00 | 1 | 1 | -0.02 | -0.02  | -0.02  | -0.02  | -0.02  | t | 2724   | ALLQSARR                   | Oryctola<br>gus<br>cuniculu<br>s |
| 1 | 1.00 | 1 | 1 | -0.01 | -0.01  | -0.009 | -0.01  | -0.01  | t | 48839  | PPNKPNN<br>DFHFE           | Homo<br>sapiens                  |
| 1 | 1.00 | 1 | 1 | 0     | 0      | 0.003  | 0      | -0.001 | t | 122876 | PSPDSKPT                   | Rattus<br>norvegic<br>us         |
| 1 | 1.00 | 1 | 1 | 0     | 0.003  | 0      | 0      | 0      | t | 125870 | EEEEEEEEEE                 | Mus<br>musculu<br>s              |
| 1 | 1.00 | 1 | 1 | 0     | 0      | 0      | 0      | 0      | t | 125870 | EEEEEEEEEE                 | Mus<br>musculu<br>s              |
| 1 | 1.00 | 1 | 1 | 0     | 0      | 0      | 0      | 0      | t | 125870 | EEEEEEEEEE                 | Mus<br>musculu<br>s              |

|   |      |   |   |       |        |        |        |        |   |        |                              |                                  |
|---|------|---|---|-------|--------|--------|--------|--------|---|--------|------------------------------|----------------------------------|
| 1 | 1.00 | 1 | 1 | 0     | 0.003  | 0      | 0      | 0      | t | 125870 | EEEEEEEEEE                   | Mus<br>musculu<br>s              |
| 1 | 1.00 | 1 | 1 | 0     | 0      | 0      | 0      | 0      | t | 46275  | NTTASDQL<br>LVENAAG<br>HRV   | Homo<br>sapiens                  |
| 1 | 1.00 | 1 | 1 | 0     | 0.003  | 0      | 0      | 0      | t | 9106   | DLGSIA                       | Mus<br>musculu<br>s              |
| 1 | 1.00 | 1 | 1 | 0     | 0.003  | 0      | 0      | 0      | t | 9106   | DLGSIA                       | Mus<br>musculu<br>s              |
| 1 | 1.00 | 1 | 1 | -0.02 | -0.018 | -0.018 | -0.019 | -0.02  | t | 66341  | TSNLGKAH<br>TQKL             | Homo<br>sapiens                  |
| 1 | 1.00 | 1 | 1 | 0.02  | 0.02   | 0.024  | 0.02   | 0.021  | t | 56587  | RYLSQLCS<br>GGYT             | Mus<br>musculu<br>s              |
| 1 | 1.00 | 1 | 1 | -0.03 | -0.034 | -0.05  | -0.037 | -0.03  | t | 141610 | CEEEKGPL<br>DLMNEVL<br>N     | Oryctola<br>gus<br>cuniculu<br>s |
| 1 | 1.00 | 1 | 1 | 0     | -0.002 | 0      | -0.003 | -0.002 | t | 102564 | KKRPPKPGG<br>GWNT            | Mus<br>musculu<br>s              |
| 1 | 1.00 | 1 | 1 | 0     | -0.003 | -0.012 | 0      | 0.002  | t | 30604  | KESHDQFL<br>QHTILFKG<br>FFTD | Oryctola<br>gus<br>cuniculu<br>s |
| 1 | 1.00 | 1 | 1 | 0     | 0      | 0      | 0      | 0.002  | t | 128601 | EYRKKMDI                     | Homo<br>sapiens                  |
| 1 | 1.00 | 1 | 1 | -0.02 | -0.02  | -0.02  | -0.02  | -0.018 | t | 128280 | ALREYRKK                     | Homo<br>sapiens                  |
| 1 | 1.00 | 1 | 1 | 0.04  | 0.04   | 0.04   | 0.04   | 0.04   | t | 115939 | RELEELNV<br>PG               | Homo<br>sapiens                  |
| 1 | 1.00 | 1 | 1 | 0.02  | 0.02   | 0.02   | 0.02   | 0.02   | t | 137812 | AVSLGQN<br>VLSAD             | Oryctola<br>gus<br>cuniculu<br>s |
| 1 | 1.00 | 1 | 1 | 0.02  | 0.02   | 0.02   | 0.02   | 0.02   | t | 105540 | TDNELA                       | Oryctola<br>gus<br>cuniculu<br>s |

|   |      |   |   |       |        |        |        |        |   |        |                              |                                  |
|---|------|---|---|-------|--------|--------|--------|--------|---|--------|------------------------------|----------------------------------|
| 1 | 1.00 | 1 | 1 | 0.02  | 0.02   | 0.02   | 0.02   | 0.02   | t | 103534 | QSVCPILA<br>EPGGSFN          | Homo<br>sapiens                  |
| 1 | 1.00 | 1 | 1 | 0.02  | 0.02   | 0.02   | 0.02   | 0.02   | t | 115899 | PQNIPPLT<br>QT               | Homo<br>sapiens                  |
| 1 | 1.00 | 1 | 1 | 0     | 0      | 0      | 0      | 0      | t | 123123 | EFKSRIEAL                    | Ovis<br>aries                    |
| 1 | 1.00 | 1 | 1 | 0     | 0      | 0      | 0      | 0      | t | 111156 | CMNKPAY<br>AC                | Homo<br>sapiens                  |
| 1 | 1.00 | 1 | 1 | 0     | 0      | 0      | 0      | 0      | t | 106300 | CALEGWG<br>GHW               | Homo<br>sapiens                  |
| 1 | 1.00 | 1 | 1 | 0     | 0      | 0      | 0      | 0      | t | 115865 | MPFPKYP<br>VEP               | Homo<br>sapiens                  |
| 1 | 1.00 | 1 | 1 | 0     | 0      | 0      | 0      | 0      | t | 41320  | MEECASH<br>LPYFEQG<br>MQLAEQ | Homo<br>sapiens                  |
| 1 | 1.00 | 1 | 1 | 0     | 0      | 0      | 0      | 0      | t | 41323  | MEECASH<br>LPYIEQGM<br>QLAAE | Homo<br>sapiens                  |
| 1 | 1.00 | 1 | 1 | -0.02 | -0.02  | -0.02  | -0.02  | -0.02  | t | 127782 | QAAELTLG<br>PSAC             | Trichosu<br>rus<br>vulpecul<br>a |
| 1 | 1.00 | 1 | 1 | -0.04 | -0.04  | -0.04  | -0.04  | -0.04  | t | 135955 | LRLLLCLLL<br>LSS             | Homo<br>sapiens                  |
| 1 | 1.00 | 1 | 1 | -0.04 | -0.042 | -0.045 | -0.037 | -0.038 | t | 14636  | EVCVRQLK<br>AIANK            | Mus<br>musculu<br>s              |
| 1 | 1.00 | 1 | 1 | -0.04 | -0.042 | -0.045 | -0.037 | -0.038 | t | 14636  | EVCVRQLK<br>AIANK            | Mus<br>musculu<br>s              |
| 1 | 1.00 | 1 | 1 | -0.01 | -0.01  | -0.01  | -0.007 | -0.009 | t | 61791  | STNPKPQR<br>KTKRNTNR<br>RPQ  | Homo<br>sapiens                  |
| 1 | 1.00 | 1 | 1 | 0.04  | 0.04   | 0.044  | 0.04   | 0.04   | t | 102711 | PDETDLS<br>KLSKDVVQ<br>YEQE  | Mus<br>musculu<br>s              |
| 1 | 1.00 | 1 | 1 | 0     | 0      | 0      | 0      | 0      | t | 51123  | QIPYNLKIF<br>AIMLDTHK<br>MLV | Aotus<br>nancyma<br>ae           |
| 1 | 1.00 | 1 | 1 | 0.03  | 0.03   | 0.037  | 0.023  | 0.03   | t | 104065 | LWDDFW                       | Mus<br>musculu<br>s              |
| 1 | 1.00 | 1 | 1 | -0.03 | -0.03  | -0.03  | -0.03  | -0.03  | t | 156942 | PWSKMHI                      | Gallus<br>gallus                 |

|   |      |   |   |       |        |        |        |        |   |        |                             |                                  |
|---|------|---|---|-------|--------|--------|--------|--------|---|--------|-----------------------------|----------------------------------|
| 1 | 1.00 | 1 | 1 | 0.01  | 0.008  | 0.011  | 0.011  | 0.008  | t | 70946  | VSGDPRG<br>RYEDI            | Mus<br>musculu<br>s              |
| 1 | 1.00 | 1 | 1 | 0.04  | 0.04   | 0.04   | 0.04   | 0.04   | t | 156347 | KNLEFSDKI<br>NTLLSET        | Platyrrhi<br>ni                  |
| 1 | 1.00 | 1 | 1 | 0.03  | 0.028  | 0.025  | 0.031  | 0.03   | t | 135787 | VPLDGKTI<br>TNNQRI          | Mus<br>musculu<br>s              |
| 1 | 1.00 | 1 | 1 | -0.02 | -0.022 | -0.028 | -0.021 | -0.02  | t | 675    | ADHPSYTA<br>AKDEVLSH<br>FSV | Mus<br>musculu<br>s              |
| 1 | 1.00 | 1 | 1 | -0.01 | -0.01  | -0.01  | -0.008 | -0.01  | t | 48520  | PLVESWKR<br>PDYQPA          | Homo<br>sapiens                  |
| 1 | 1.00 | 1 | 1 | -0.03 | -0.032 | -0.035 | -0.029 | -0.03  | t | 58742  | SIVTAPFQ<br>VK              | Homo<br>sapiens                  |
| 1 | 1.00 | 1 | 1 | 0.01  | 0.011  | 0.016  | 0.009  | 0.008  | t | 21059  | GLPDSVKI<br>WTSETNK         | Equus<br>caballus                |
| 1 | 1.00 | 1 | 1 | -0.01 | -0.01  | -0.01  | -0.01  | -0.01  | t | 12258  | EGRFKSQD                    | Oryctola<br>gus<br>cuniculu<br>s |
| 1 | 1.00 | 1 | 1 | -0.03 | -0.025 | -0.038 | -0.029 | -0.03  | t | 34914  | LAPSTLRSL<br>RKRRLLSSP      | Homo<br>sapiens                  |
| 1 | 1.00 | 1 | 1 | 0.04  | 0.04   | 0.038  | 0.037  | 0.038  | t | 37300  | LLFSLGLS<br>SSSSIS          | Homo<br>sapiens                  |
| 1 | 1.00 | 1 | 1 | -0.01 | -0.007 | -0.003 | -0.011 | -0.009 | t | 33222  | KRTISIWG<br>T               | Mus<br>musculu<br>s              |
| 1 | 1.00 | 1 | 1 | -0.01 | -0.013 | -0.01  | -0.01  | -0.008 | t | 140823 | AGKGVDA<br>GKLGT            | Oryctola<br>gus<br>cuniculu<br>s |
| 1 | 1.00 | 1 | 1 | 0.01  | 0.01   | 0.01   | 0.01   | 0.01   | t | 6204   | CETEFSL                     | Mus<br>musculu<br>s              |
| 1 | 1.00 | 1 | 1 | -0.01 | -0.01  | -0.01  | -0.01  | -0.01  | t | 79839  | GKDLKRP<br>GSSPM            | Mus<br>musculu<br>s              |

|   |      |   |   |       |        |        |        |        |   |        |                          |                       |
|---|------|---|---|-------|--------|--------|--------|--------|---|--------|--------------------------|-----------------------|
| 1 | 1.00 | 1 | 1 | -0.01 | -0.01  | -0.01  | -0.01  | -0.01  | t | 49802  | PTVAEEHV                 | Homo sapiens          |
| 1 | 1.00 | 1 | 1 | 0     | -0.003 | 0      | -0.001 | 0      | t | 50507  | QDPRVR                   | Oryctolagus cuniculus |
| 1 | 1.00 | 1 | 1 | -0.02 | -0.018 | -0.015 | -0.013 | -0.02  | t | 118032 | NEKLLKKA<br>RIHPFH       | Homo sapiens          |
| 1 | 1.00 | 1 | 1 | 0     | 0.003  | -0.009 | 0      | 0.002  | t | 78627  | DPDPPDA<br>NDPAPPN<br>AN | Mus musculus          |
| 1 | 1.00 | 1 | 1 | -0.02 | -0.022 | -0.029 | -0.017 | -0.017 | t | 68299  | VENGLISR<br>VLDGLV       | Mus musculus          |
| 1 | 1.00 | 1 | 1 | 0     | -0.002 | -0.001 | -0.003 | 0      | t | 72251  | WAPSV                    | Mus musculus          |
| 1 | 1.00 | 1 | 1 | 0.03  | 0.03   | 0.028  | 0.03   | 0.029  | t | 8226   | DEYSNQN<br>NFVHDC        | Mus musculus          |
| 1 | 1.00 | 1 | 1 | 0.03  | 0.03   | 0.03   | 0.03   | 0.03   | t | 92845  | GNGKITQ<br>DEL           | Ovis aries            |
| 1 | 1.00 | 1 | 1 | -0.01 | -0.012 | 0      | -0.011 | -0.01  | t | 30821  | KFPTLDHV                 | Anas platyrhynchos    |
| 1 | 1.00 | 1 | 1 | 0.01  | 0.01   | 0.01   | 0.01   | 0.01   | t | 141667 | HEIGSLAG<br>LAMR         | Mus musculus          |
| 1 | 1.00 | 1 | 1 | 0.01  | 0.013  | 0.01   | 0.01   | 0.01   | t | 156905 | KPGDPRQ                  | Mus musculus          |
| 1 | 1.00 | 1 | 1 | 0.01  | 0.01   | 0.01   | 0.01   | 0.01   | t | 127737 | MHETTKA                  | Homo sapiens          |
| 1 | 1.00 | 1 | 1 | 0.01  | 0.01   | 0.01   | 0.01   | 0.01   | t | 123677 | QQFMSRIE<br>A            | Ovis aries            |
| 1 | 1.00 | 1 | 1 | 0.01  | 0.01   | 0.01   | 0.01   | 0.01   | t | 116957 | DSMNTDD<br>STRPR         | Homo sapiens          |
| 1 | 1.00 | 1 | 1 | 0.01  | 0.01   | 0.01   | 0.01   | 0.01   | t | 77793  | PKSKLSVK<br>KC           | Homo sapiens          |



|   |      |   |   |       |        |        |        |        |   |        |                              |                                  |
|---|------|---|---|-------|--------|--------|--------|--------|---|--------|------------------------------|----------------------------------|
| 1 | 1.00 | 1 | 1 | 0.01  | 0.01   | 0.01   | 0.01   | 0.01   | t | 41332  | MEECGSH<br>LPYIEQGM<br>QLAEQ | Homo<br>sapiens                  |
| 1 | 1.00 | 1 | 1 | -0.01 | -0.01  | -0.01  | -0.01  | -0.01  | t | 149318 | FYYGKGLI<br>NVQAAAQ          | Cavia<br>porcellu<br>s           |
| 1 | 1.00 | 1 | 1 | -0.01 | -0.01  | -0.01  | -0.01  | -0.01  | t | 115399 | NMAINPS<br>KENLCSTF<br>CKEVV | Homo<br>sapiens                  |
| 1 | 1.00 | 1 | 1 | -0.01 | -0.01  | -0.01  | -0.01  | -0.01  | t | 103137 | EGWGKSP<br>GFGTTVDF          | Homo<br>sapiens                  |
| 1 | 1.00 | 1 | 1 | -0.01 | -0.01  | -0.01  | -0.01  | -0.01  | t | 103472 | PGGTTTLV<br>EHMVGIL          | Homo<br>sapiens                  |
| 1 | 1.00 | 1 | 1 | -0.01 | -0.01  | -0.01  | -0.01  | -0.01  | t | 10781  | DVVS KLPL<br>AVMG            | Homo<br>sapiens                  |
| 1 | 1.00 | 1 | 1 | -0.03 | -0.03  | -0.03  | -0.03  | -0.03  | t | 97171  | ADVVISPN<br>D                | Oryctola<br>gus<br>cuniculu<br>s |
| 1 | 1.00 | 1 | 1 | 0.02  | 0.023  | 0.018  | 0.02   | 0.021  | t | 48877  | PPPQCSKA<br>WPCPPTH          | Mus<br>musculu<br>s              |
| 1 | 1.00 | 1 | 1 | 0.05  | 0.05   | 0.05   | 0.05   | 0.05   | t | 153364 | CDLEDRDR<br>SELSP            | Mus<br>musculu<br>s              |
| 1 | 1.00 | 1 | 1 | 0.03  | 0.028  | 0.025  | 0.029  | 0.032  | t | 22562  | GSVNSFFS<br>R                | Mus<br>musculu<br>s              |
| 1 | 1.00 | 1 | 1 | -0.03 | -0.034 | -0.029 | -0.027 | -0.031 | t | 57736  | SFDADTIRI<br>A               | Oryctola<br>gus<br>cuniculu<br>s |
| 1 | 1.00 | 1 | 1 | -0.01 | -0.01  | -0.008 | -0.013 | -0.01  | t | 125791 | CSFWSKYI<br>QTLK             | Mus<br>musculu<br>s              |
| 1 | 1.00 | 1 | 1 | 0     | 0      | 0      | 0      | 0      | t | 138194 | IIPKSSWS                     | Homo<br>sapiens                  |
| 1 | 1.00 | 1 | 1 | 0     | 0      | 0      | 0      | 0      | t | 6479   | CKGKIQAL<br>CENPEWA          | Mus<br>musculu<br>s              |
| 1 | 1.00 | 1 | 1 | 0.02  | 0.02   | 0.015  | 0.02   | 0.02   | t | 47136  | PDLERYAG                     | Mus<br>musculu<br>s              |

|   |      |   |   |       |       |       |        |        |   |        |                     |                                  |
|---|------|---|---|-------|-------|-------|--------|--------|---|--------|---------------------|----------------------------------|
| 1 | 1.00 | 1 | 1 | 0.02  | 0.023 | 0.015 | 0.02   | 0.02   | t | 47136  | PDLERYAG            | Mus<br>musculu<br>s              |
| 1 | 1.00 | 1 | 1 | 0.02  | 0.02  | 0.02  | 0.02   | 0.02   | t | 130808 | ENEPPVW<br>TTESKLQS | Homo<br>sapiens                  |
| 1 | 1.00 | 1 | 1 | -0.02 | -0.02 | -0.02 | -0.02  | -0.02  | t | 68094  | VDWLR               | Homo<br>sapiens                  |
| 1 | 1.00 | 1 | 1 | 0.03  | 0.03  | 0.03  | 0.03   | 0.032  | t | 7673   | DAVTE               | Mus<br>musculu<br>s              |
| 1 | 1.00 | 1 | 1 | 0     | 0.002 | 0.006 | -0.003 | -0.002 | t | 72270  | WAVKDSK<br>SR       | Homo<br>sapiens                  |
| 1 | 1.00 | 1 | 1 | 0.01  | 0.01  | 0.01  | 0.01   | 0.01   | t | 24243  | HLKYATYP<br>PYPQ    | Mus<br>musculu<br>s              |
| 1 | 1.00 | 1 | 1 | 0     | 0.004 | 0     | 0.001  | 0      | t | 138063 | VDTVGTG<br>YHSRF    | Homo<br>sapiens                  |
| 1 | 1.00 | 1 | 1 | 0.02  | 0.02  | 0.018 | 0.023  | 0.02   | t | 34143  | KVNSRCEQ            | Homo<br>sapiens                  |
| 1 | 1.00 | 1 | 1 | 0     | 0     | 0     | 0      | 0      | t | 67444  | TYRATYQD            | Oryctola<br>gus<br>cuniculu<br>s |
| 1 | 1.00 | 1 | 1 | 0     | 0.001 | 0     | 0      | 0      | t | 56564  | RYKQKIIAP<br>AKQ    | Oryctola<br>gus<br>cuniculu<br>s |
| 1 | 1.00 | 1 | 1 | 0     | 0.001 | 0     | 0      | 0      | t | 56564  | RYKQKIIAP<br>AKQ    | Oryctola<br>gus<br>cuniculu<br>s |
| 1 | 1.00 | 1 | 1 | 0     | 0     | 0     | 0      | 0      | t | 3516   | APDTRP              | Mus<br>musculu<br>s              |
| 1 | 1.00 | 1 | 1 | -0.02 | -0.02 | -0.02 | -0.02  | -0.02  | t | 60445  | SQHI                | Oryctola<br>gus<br>cuniculu<br>s |

|   |      |   |   |       |        |        |        |       |   |        |                              |                                  |
|---|------|---|---|-------|--------|--------|--------|-------|---|--------|------------------------------|----------------------------------|
| 1 | 1.00 | 1 | 1 | -0.02 | -0.018 | -0.02  | -0.013 | -0.02 | t | 139631 | VIQNRQD<br>GSVDFGRK          | Homo<br>sapiens                  |
| 1 | 1.00 | 1 | 1 | -0.01 | -0.012 | -0.02  | -0.011 | -0.01 | t | 76076  | YTINDKILS<br>Y               | Mus<br>musculu<br>s              |
| 1 | 1.00 | 1 | 1 | 0.01  | 0.006  | 0.013  | 0.013  | 0.01  | t | 115488 | SKDNGWE<br>KDDNVSKS          | Oryctola<br>gus<br>cuniculu<br>s |
| 1 | 1.00 | 1 | 1 | 0     | -0.004 | -0.005 | -0.007 | 0.001 | t | 134221 | RQIFGDYK<br>T                | Oryctola<br>gus<br>cuniculu<br>s |
| 1 | 1.00 | 1 | 1 | 0.01  | 0.013  | -0.004 | 0.01   | 0.013 | t | 57726  | SFANTNTN<br>TNSK             | Mus<br>musculu<br>s              |
| 1 | 1.00 | 1 | 1 | 0.02  | 0.02   | 0.02   | 0.02   | 0.02  | t | 135747 | RAEAVFPD                     | Homo<br>sapiens                  |
| 1 | 1.00 | 1 | 1 | 0.02  | 0.02   | 0.02   | 0.02   | 0.02  | t | 140861 | GTVSYGEE<br>KPAV             | Oryctola<br>gus<br>cuniculu<br>s |
| 1 | 1.00 | 1 | 1 | 0.02  | 0.02   | 0.02   | 0.02   | 0.02  | t | 130150 | TTAAPAAA<br>AAPAKVE          | Homo<br>sapiens                  |
| 1 | 1.00 | 1 | 1 | 0.02  | 0.02   | 0.02   | 0.02   | 0.02  | t | 7375   | CYGLPDSV<br>KIWTSET          | Mus<br>musculu<br>s              |
| 1 | 1.00 | 1 | 1 | 0.02  | 0.023  | 0.02   | 0.02   | 0.02  | t | 7375   | CYGLPDSV<br>KIWTSET          | Equus<br>caballus                |
| 1 | 1.00 | 1 | 1 | 0.02  | 0.023  | 0.02   | 0.02   | 0.02  | t | 7375   | CYGLPDSV<br>KIWTSET          | Equus<br>caballus                |
| 1 | 1.00 | 1 | 1 | 0     | 0      | 0      | 0      | 0     | t | 156877 | GLHSGIQ                      | Gallus<br>gallus                 |
| 1 | 1.00 | 1 | 1 | 0     | 0      | 0      | 0      | 0     | t | 121675 | NVKKLLVA<br>NPLVDSF          | Mus<br>musculu<br>s              |
| 1 | 1.00 | 1 | 1 | 0     | 0      | 0      | 0      | 0     | t | 121675 | NVKKLLVA<br>NPLVDSF          | Mus<br>musculu<br>s              |
| 1 | 1.00 | 1 | 1 | 0     | 0      | 0      | 0      | 0     | t | 115998 | TLEDSPEVI<br>E               | Homo<br>sapiens                  |
| 1 | 1.00 | 1 | 1 | 0     | 0      | 0      | 0      | 0     | t | 115205 | DELQDKIH<br>PFAQTQSL<br>VYPF | Homo<br>sapiens                  |
| 1 | 1.00 | 1 | 1 | 0     | 0      | 0      | 0      | 0     | t | 75875  | YSREQLNK<br>LFGIEVM          | Homo<br>sapiens                  |

|   |      |   |   |       |        |        |        |        |   |        |                              |                                  |
|---|------|---|---|-------|--------|--------|--------|--------|---|--------|------------------------------|----------------------------------|
| 1 | 1.00 | 1 | 1 | 0     | 0      | 0      | 0      | 0      | t | 77800  | RGCTFYGC<br>WK               | Homo<br>sapiens                  |
| 1 | 1.00 | 1 | 1 | 0     | 0      | 0      | 0      | 0      | t | 22082  | GRIILSGKP<br>AVIPDREV<br>LYR | Homo<br>sapiens                  |
| 1 | 1.00 | 1 | 1 | 0     | 0      | 0      | 0      | 0      | t | 22075  | GRIILSGKP<br>AIIPDREVL<br>YQ | Homo<br>sapiens                  |
| 1 | 1.00 | 1 | 1 | 0     | 0      | 0      | 0      | 0      | t | 22128  | GRLHLND<br>RVVVAPD<br>KEILYE | Homo<br>sapiens                  |
| 1 | 1.00 | 1 | 1 | 0.04  | 0.038  | 0.047  | 0.049  | 0.042  | t | 115750 | GFYTTGAV<br>RQIFGDY          | Mus<br>musculu<br>s              |
| 1 | 1.00 | 1 | 1 | 0.04  | 0.037  | 0.04   | 0.039  | 0.042  | t | 156601 | ADEPNNL<br>NSK               | Oryctola<br>gus<br>cuniculu<br>s |
| 1 | 1.00 | 1 | 1 | 0     | -0.003 | -0.001 | 0.001  | -0.001 | t | 68142  | VEDIVRCS<br>TAYTEYAR<br>KKTV | Canis<br>lupus                   |
| 1 | 1.00 | 1 | 1 | 0.05  | 0.048  | 0.057  | 0.043  | 0.048  | t | 156756 | SGPSYTT                      | Mus<br>musculu<br>s              |
| 1 | 1.00 | 1 | 1 | 0     | 0.004  | 0.009  | 0.003  | 0.002  | t | 71636  | VVDLPQ                       | Homo<br>sapiens                  |
| 1 | 1.00 | 1 | 1 | 0.03  | 0.03   | 0.035  | 0.029  | 0.03   | t | 100426 | QKLVFFAE<br>DV               | Homo<br>sapiens(<br>human)       |
| 1 | 1.00 | 1 | 1 | -0.02 | -0.018 | -0.011 | -0.013 | -0.019 | t | 119297 | NTFCDSCI<br>PKTFWN           | Homo<br>sapiens                  |
| 1 | 1.00 | 1 | 1 | -0.03 | -0.028 | -0.032 | -0.033 | -0.031 | t | 106089 | RRHQSQR<br>PPRRFQG<br>Q      | Homo<br>sapiens                  |
| 1 | 1.00 | 1 | 1 | 0.03  | 0.03   | 0.027  | 0.03   | 0.03   | t | 133584 | GKCNTDYS<br>D                | Mus<br>musculu<br>s              |
| 1 | 1.00 | 1 | 1 | 0     | 0      | 0      | 0      | 0.002  | t | 101983 | PVYQQQP                      | Mus<br>musculu<br>s              |
| 1 | 1.00 | 1 | 1 | -0.01 | -0.01  | -0.01  | -0.01  | -0.01  | t | 133536 | CKPVENRA<br>C                | Mus<br>musculu<br>s              |

|   |      |   |   |       |        |        |        |        |   |        |                               |                                  |
|---|------|---|---|-------|--------|--------|--------|--------|---|--------|-------------------------------|----------------------------------|
| 1 | 1.00 | 1 | 1 | -0.01 | -0.01  | 0      | -0.012 | -0.013 | t | 22932  | GVDAYVID<br>TGANVKH<br>VDFE   | Homo<br>sapiens                  |
| 1 | 1.00 | 1 | 1 | -0.02 | -0.02  | -0.013 | -0.011 | -0.018 | t | 130815 | ESDPPVAS<br>YQWRLIN           | Homo<br>sapiens                  |
| 1 | 1.00 | 1 | 1 | 0.01  | 0.01   | 0.008  | 0.01   | 0.009  | t | 153249 | AFRANTA<br>NPDWDFN<br>P       | Mus<br>musculu<br>s              |
| 1 | 1.00 | 1 | 1 | 0     | -0.004 | -0.009 | -0.003 | 0.001  | t | 132984 | AIQNIRLR<br>HENKDL            | Oryctola<br>gus<br>cuniculu<br>s |
| 1 | 1.00 | 1 | 1 | 0.01  | 0.008  | 0.01   | 0.009  | 0.011  | t | 38434  | LPDKFNAY<br>LANKWV            | Mus<br>musculu<br>s              |
| 1 | 1.00 | 1 | 1 | 0.01  | 0.01   | 0.013  | 0.009  | 0.01   | t | 648    | ADDPLLRT                      | Homo<br>sapiens                  |
| 1 | 1.00 | 1 | 1 | -0.03 | -0.034 | -0.027 | -0.031 | -0.032 | t | 73515  | YCYWVHIL<br>CYCYGLP           | Oryctola<br>gus<br>cuniculu<br>s |
| 1 | 1.00 | 1 | 1 | 0     | 0      | -0.005 | 0      | 0.001  | t | 132687 | STQTAGP<br>WHLGKLEL           | Mus<br>musculu<br>s              |
| 1 | 1.00 | 1 | 1 | -0.03 | -0.03  | -0.03  | -0.03  | -0.03  | t | 142428 | KAQKEATA<br>AKLKA             | Homo<br>sapiens                  |
| 1 | 1.00 | 1 | 1 | 0.03  | 0.03   | 0.03   | 0.03   | 0.03   | t | 115787 | IASGEPTST<br>P                | Homo<br>sapiens                  |
| 1 | 1.00 | 1 | 1 | 0.03  | 0.03   | 0.03   | 0.03   | 0.03   | t | 78241  | PIQIGA                        | Equus<br>caballus                |
| 1 | 1.00 | 1 | 1 | 0.01  | 0.01   | 0.01   | 0.01   | 0.01   | t | 138231 | RDGQRLTS<br>SKTMLPY           | Homo<br>sapiens                  |
| 1 | 1.00 | 1 | 1 | 0.01  | 0.01   | 0.01   | 0.01   | 0.01   | t | 144679 | GYCNTECT<br>GGGLPDS<br>VKI    | Oryctola<br>gus<br>cuniculu<br>s |
| 1 | 1.00 | 1 | 1 | 0.01  | 0.01   | 0.01   | 0.01   | 0.01   | t | 114776 | DLRPICGT<br>DG                | Homo<br>sapiens                  |
| 1 | 1.00 | 1 | 1 | 0.01  | 0.01   | 0.01   | 0.01   | 0.01   | t | 78927  | ALLEETITA<br>KGVRSPEA<br>IRG  | Homo<br>sapiens                  |
| 1 | 1.00 | 1 | 1 | 0.01  | 0.01   | 0.01   | 0.01   | 0.01   | t | 47185  | PDREVLQYQ<br>EFDEMEEC<br>GSHL | Homo<br>sapiens                  |

|   |      |   |   |       |       |       |       |       |   |        |                              |                                  |
|---|------|---|---|-------|-------|-------|-------|-------|---|--------|------------------------------|----------------------------------|
| 1 | 1.00 | 1 | 1 | 0.01  | 0.01  | 0.01  | 0.01  | 0.01  | t | 50744  | QFDEMEE<br>CSASLPYM<br>DETRA | Homo<br>sapiens                  |
| 1 | 1.00 | 1 | 1 | 0.01  | 0.01  | 0.01  | 0.01  | 0.01  | t | 39371  | LSGKPAIIP<br>DREALYQ<br>QFDE | Homo<br>sapiens                  |
| 1 | 1.00 | 1 | 1 | 0.01  | 0.01  | 0.01  | 0.01  | 0.01  | t | 47174  | PDREALYQ<br>EFDEMEEC<br>ASHL | Homo<br>sapiens                  |
| 1 | 1.00 | 1 | 1 | 0.01  | 0.01  | 0.01  | 0.01  | 0.01  | t | 10783  | DVVSTLPQ<br>AVMG             | Homo<br>sapiens                  |
| 1 | 1.00 | 1 | 1 | -0.01 | -0.01 | -0.01 | -0.01 | -0.01 | t | 148707 | PELQQPIP<br>QQ               | Homo<br>sapiens                  |
| 1 | 1.00 | 1 | 1 | -0.01 | -0.01 | -0.01 | -0.01 | -0.01 | t | 115207 | DISLLDAQ<br>SAPLRVYV<br>EELK | Homo<br>sapiens                  |
| 1 | 1.00 | 1 | 1 | -0.01 | -0.01 | -0.01 | -0.01 | -0.01 | t | 97456  | LKRTDLNIL<br>ERFNYEE         | Homo<br>sapiens                  |
| 1 | 1.00 | 1 | 1 | -0.01 | -0.01 | -0.01 | -0.01 | -0.01 | t | 94037  | TIQNWFR<br>EAD               | Ovis<br>aries                    |
| 1 | 1.00 | 1 | 1 | -0.03 | -0.03 | -0.03 | -0.03 | -0.03 | t | 114903 | NGTLTLSH<br>FG               | Homo<br>sapiens                  |
| 1 | 1.00 | 1 | 1 | -0.05 | -0.05 | -0.05 | -0.05 | -0.05 | t | 99653  | RYTARLKE<br>GDVFIMP          | Homo<br>sapiens                  |
| 1 | 1.00 | 1 | 1 | 0.01  | 0.01  | 0.01  | 0.01  | 0.012 | t | 50929  | QGPGAP                       | Mus<br>musculu<br>s              |
| 1 | 1.00 | 1 | 1 | 0.01  | 0.01  | 0.01  | 0.01  | 0.012 | t | 50929  | QGPGAP                       | Mus<br>musculu<br>s              |
| 1 | 1.00 | 1 | 1 | 0     | 0     | 0     | 0     | 0.001 | t | 139090 | IKRSNSTA                     | Oryctola<br>gus<br>cuniculu<br>s |
| 1 | 1.00 | 1 | 1 | 0.01  | 0.017 | 0.012 | 0.01  | 0.012 | t | 95521  | KQTLPPSV                     | Cavia<br>porcellu<br>s           |
| 1 | 1.00 | 1 | 1 | 0.01  | 0.009 | 0.012 | 0.01  | 0.012 | t | 95521  | KQTLPPSV                     | Bos<br>taurus                    |
| 1 | 1.00 | 1 | 1 | 0.01  | 0.009 | 0.004 | 0.011 | 0.01  | t | 42614  | MSNFKVR<br>DPVIQERL<br>DHDYA | Homo<br>sapiens                  |

|   |      |   |   |       |        |        |        |        |   |        |                              |                       |
|---|------|---|---|-------|--------|--------|--------|--------|---|--------|------------------------------|-----------------------|
| 1 | 1.00 | 1 | 1 | 0.01  | 0.01   | 0.01   | 0.01   | 0.01   | t | 107892 | HSASQDGGSS<br>QDTIRGHP       | Homo sapiens          |
| 1 | 1.00 | 1 | 1 | 0.01  | 0.01   | 0.01   | 0.01   | 0.01   | t | 107892 | HSASQDGGSS<br>QDTIRGHP       | Homo sapiens          |
| 1 | 1.00 | 1 | 1 | -0.01 | -0.01  | -0.01  | -0.01  | -0.01  | t | 159294 | QPLWLL                       | Oryctolagus cuniculus |
| 1 | 1.00 | 1 | 1 | -0.04 | -0.042 | -0.047 | -0.037 | -0.037 | t | 113570 | KKAVTKA<br>QKKDGKS<br>AAHRKE | Mus musculus          |
| 1 | 1.00 | 1 | 1 | 0.02  | 0.02   | 0.02   | 0.02   | 0.021  | t | 122458 | LEPETGKDMSPYEAYK<br>RGII     | Homo sapiens          |
| 1 | 1.00 | 1 | 1 | -0.03 | -0.033 | -0.037 | -0.03  | -0.03  | t | 6517   | CKRGPDS<br>GFFSRLN<br>WLY    | Oryctolagus cuniculus |
| 1 | 1.00 | 1 | 1 | -0.03 | -0.028 | -0.03  | -0.031 | -0.03  | t | 149371 | LPYPQPQP<br>FL               | Homo sapiens          |
| 1 | 1.00 | 1 | 1 | -0.01 | -0.008 | -0.004 | -0.003 | -0.009 | t | 145144 | DPGQLRL<br>WRLAS             | Homo sapiens          |
| 1 | 1.00 | 1 | 1 | 0.01  | 0.012  | 0.008  | 0.006  | 0.01   | t | 117329 | MAVPETR<br>PNHT              | Homo sapiens          |
| 1 | 1.00 | 1 | 1 | 0     | -0.002 | -0.004 | 0      | 0      | t | 138065 | VEVRFKEF<br>GSRV             | Oryctolagus cuniculus |
| 1 | 1.00 | 1 | 1 | 0     | -0.001 | 0.006  | 0      | 0      | t | 18954  | GDDPLLGNQ                    | Anas platyrhynchos    |
| 1 | 1.00 | 1 | 1 | 0.05  | 0.05   | 0.05   | 0.048  | 0.05   | t | 96210  | EDKEEDEE<br>ED               | Homo sapiens          |
| 1 | 1.00 | 1 | 1 | 0.05  | 0.05   | 0.05   | 0.048  | 0.05   | t | 96213  | EEDEEDKE<br>ED               | Homo sapiens          |
| 1 | 1.00 | 1 | 1 | 0.02  | 0.032  | 0.02   | 0.017  | 0.02   | t | 156961 | SLLASTT                      | Gallus gallus         |
| 1 | 1.00 | 1 | 1 | -0.01 | -0.007 | -0.003 | -0.01  | -0.009 | t | 139202 | QIWYERTLPFTF                 | Mus musculus          |
| 1 | 1.00 | 1 | 1 | -0.01 | -0.01  | -0.003 | -0.01  | -0.009 | t | 139202 | QIWYERTLPFTF                 | Mus musculus          |

|   |      |   |   |       |        |        |        |        |   |        |                              |                                  |
|---|------|---|---|-------|--------|--------|--------|--------|---|--------|------------------------------|----------------------------------|
| 1 | 1.00 | 1 | 1 | -0.03 | -0.028 | -0.03  | -0.033 | -0.032 | t | 75410  | YPSGAWY<br>YVPLGTQ           | Homo<br>sapiens                  |
| 1 | 1.00 | 1 | 1 | -0.02 | -0.02  | -0.02  | -0.024 | -0.02  | t | 30473  | KEKLQKTY                     | Homo<br>sapiens                  |
| 1 | 1.00 | 1 | 1 | -0.02 | -0.02  | -0.019 | -0.02  | -0.022 | t | 119649 | SYCEIIVTH<br>FPFDQQN<br>CT   | Mus<br>musculu<br>s              |
| 1 | 1.00 | 1 | 1 | 0     | 0.003  | 0      | 0      | 0.002  | t | 72504  | WGQGGH                       | Mus<br>musculu<br>s              |
| 1 | 1.00 | 1 | 1 | 0.03  | 0.034  | 0.03   | 0.037  | 0.03   | t | 117508 | GKMTANS<br>DVEPGNSE<br>VSLVC | Homo<br>sapiens                  |
| 1 | 1.00 | 1 | 1 | 0.03  | 0.032  | 0.03   | 0.037  | 0.03   | t | 117508 | GKMTANS<br>DVEPGNSE<br>VSLVC | Homo<br>sapiens                  |
| 1 | 1.00 | 1 | 1 | -0.03 | -0.03  | -0.03  | -0.03  | -0.03  | t | 9794   | DPVAALFF<br>F                | Mus<br>musculu<br>s              |
| 1 | 1.00 | 1 | 1 | -0.03 | -0.032 | -0.041 | -0.031 | -0.03  | t | 47491  | PFFRKYFG<br>NDTA             | Mus<br>musculu<br>s              |
| 1 | 1.00 | 1 | 1 | 0.02  | 0.017  | 0.02   | 0.02   | 0.02   | t | 97369  | GTVALTAG<br>A                | Oryctola<br>gus<br>cuniculu<br>s |
| 1 | 1.00 | 1 | 1 | 0     | 0      | 0      | 0      | 0      | t | 110651 | LCLIGCKPP<br>IGEHWGK<br>GSP  | Homo<br>sapiens                  |
| 1 | 1.00 | 1 | 1 | 0     | 0      | 0      | 0      | 0      | t | 20851  | GLFGKGGI<br>VTCAMFT          | Mus<br>musculu<br>s              |
| 1 | 1.00 | 1 | 1 | -0.01 | -0.01  | -0.01  | -0.01  | -0.011 | t | 135710 | LAKEQKSK<br>QNIGALKQ<br>ELAK | Homo<br>sapiens                  |
| 1 | 1.00 | 1 | 1 | 0.01  | 0.012  | 0.016  | 0.011  | 0.01   | t | 23511  | GYYYPSDP<br>NTFYAPPY<br>S    | Homo<br>sapiens                  |
| 1 | 1.00 | 1 | 1 | 0.01  | 0.014  | 0.016  | 0.011  | 0.01   | t | 23511  | GYYYPSDP<br>NTFYAPPY<br>S    | Homo<br>sapiens                  |



|   |      |   |   |       |       |       |       |       |   |        |                              |                                  |
|---|------|---|---|-------|-------|-------|-------|-------|---|--------|------------------------------|----------------------------------|
| 1 | 1.00 | 1 | 1 | 0.07  | 0.07  | 0.071 | 0.067 | 0.07  | t | 7778   | DDGDKGS<br>DVESYSSM<br>PPLE  | Homo<br>sapiens                  |
| 1 | 1.00 | 1 | 1 | 0.04  | 0.04  | 0.04  | 0.04  | 0.04  | t | 140589 | PYHELEQV<br>P                | Mus<br>musculu<br>s              |
| 1 | 1.00 | 1 | 1 | 0.04  | 0.04  | 0.04  | 0.04  | 0.04  | t | 140589 | PYHELEQV<br>P                | Mus<br>musculu<br>s              |
| 1 | 1.00 | 1 | 1 | 0.02  | 0.02  | 0.02  | 0.02  | 0.02  | t | 121368 | HDDPQLG<br>AEAQAFTF          | Mus<br>musculu<br>s              |
| 1 | 1.00 | 1 | 1 | 0.02  | 0.02  | 0.02  | 0.02  | 0.02  | t | 131847 | DPPKSNQS<br>LGWGDSS          | Homo<br>sapiens                  |
| 1 | 1.00 | 1 | 1 | 0.02  | 0.02  | 0.02  | 0.02  | 0.02  | t | 132008 | PNNGGLN<br>PLFGPQQ<br>V      | Homo<br>sapiens                  |
| 1 | 1.00 | 1 | 1 | 0.02  | 0.02  | 0.02  | 0.02  | 0.02  | t | 79644  | SHLSTMV                      | Oryctola<br>gus<br>cuniculu<br>s |
| 1 | 1.00 | 1 | 1 | 0     | 0     | 0     | 0     | 0     | t | 135841 | HVTDMM<br>ELYTLG             | Mus<br>musculu<br>s              |
| 1 | 1.00 | 1 | 1 | 0     | 0     | 0     | 0     | 0     | t | 135841 | HVTDMM<br>ELYTLG             | Mus<br>musculu<br>s              |
| 1 | 1.00 | 1 | 1 | 0     | 0     | 0     | 0     | 0     | t | 135841 | HVTDMM<br>ELYTLG             | Mus<br>musculu<br>s              |
| 1 | 1.00 | 1 | 1 | 0     | 0     | 0     | 0     | 0     | t | 153348 | ACTALQQ<br>WLCGGGS           | Mus<br>musculu<br>s              |
| 1 | 1.00 | 1 | 1 | 0     | 0     | 0     | 0     | 0     | t | 119503 | NRKLKSN<br>MM                | Homo<br>sapiens                  |
| 1 | 1.00 | 1 | 1 | 0     | 0     | 0     | 0     | 0     | t | 118325 | EKEKLNER<br>LAKLS            | Homo<br>sapiens                  |
| 1 | 1.00 | 1 | 1 | 0     | 0     | 0     | 0     | 0     | t | 114870 | KELAAVSV<br>DC               | Homo<br>sapiens                  |
| 1 | 1.00 | 1 | 1 | 0     | 0     | 0     | 0     | 0     | t | 47191  | PDREVLJR<br>EFDEMEEC<br>AAHI | Homo<br>sapiens                  |
| 1 | 1.00 | 1 | 1 | 0     | 0     | 0     | 0     | 0     | t | 27998  | IPQQPQQ<br>PFP               | Mus<br>musculu<br>s              |
| 1 | 1.00 | 1 | 1 | -0.02 | -0.02 | -0.02 | -0.02 | -0.02 | t | 115434 | QEKNMAI<br>NPSKENLC<br>STFCK | Homo<br>sapiens                  |

|   |      |   |   |       |        |        |        |        |   |        |                             |                                  |
|---|------|---|---|-------|--------|--------|--------|--------|---|--------|-----------------------------|----------------------------------|
| 1 | 1.00 | 1 | 1 | -0.02 | -0.02  | -0.022 | -0.023 | -0.022 | t | 44809  | NLNAHSAL<br>YVTR            | Homo<br>sapiens                  |
| 1 | 1.00 | 1 | 1 | 0.04  | 0.037  | 0.04   | 0.04   | 0.04   | t | 104132 | MSENVEQ<br>HNPINAGT         | Oryctola<br>gus<br>cuniculu<br>s |
| 1 | 1.00 | 1 | 1 | -0.05 | -0.052 | -0.053 | -0.049 | -0.05  | t | 28401  | IRSMLVK                     | Mus<br>musculu<br>s              |
| 1 | 1.00 | 1 | 1 | 0     | 0.002  | -0.006 | 0.003  | 0      | t | 31071  | KGTHGGT<br>GAGAGAG<br>GAGAG | Homo<br>sapiens                  |
| 1 | 1.00 | 1 | 1 | -0.02 | -0.023 | -0.023 | -0.02  | -0.02  | t | 15389  | FDGGKMOV<br>Q               | Oryctola<br>gus<br>cuniculu<br>s |
| 1 | 1.00 | 1 | 1 | 0.04  | 0.043  | 0.04   | 0.04   | 0.039  | t | 132848 | KKEDFDIY<br>DEDENQS<br>PR   | Mus<br>musculu<br>s              |
| 1 | 1.00 | 1 | 1 | 0     | 0      | 0      | 0      | 0.003  | t | 78558  | VSIFPPA                     | Mus<br>musculu<br>s              |
| 1 | 1.00 | 1 | 1 | -0.01 | -0.008 | -0.011 | -0.013 | -0.013 | t | 56186  | RTTADRQT<br>ACNCLKN         | Homo<br>sapiens                  |
| 1 | 1.00 | 1 | 1 | -0.01 | -0.006 | -0.003 | -0.007 | -0.008 | t | 139202 | QIWYERTL<br>PFTF            | Homo<br>sapiens                  |
| 1 | 1.00 | 1 | 1 | -0.01 | -0.01  | -0.002 | -0.01  | -0.01  | t | 90911  | YPTVV                       | Homo<br>sapiens                  |
| 1 | 1.00 | 1 | 1 | 0.02  | 0.02   | 0.021  | 0.019  | 0.015  | t | 37638  | LLNYIDEN<br>KLYLIGSAE<br>YE | Homo<br>sapiens                  |
| 1 | 1.00 | 1 | 1 | 0.01  | 0.008  | 0.01   | 0.011  | 0.01   | t | 149433 | QPLSQVSF<br>QQ              | Mus<br>musculu<br>s              |
| 1 | 1.00 | 1 | 1 | 0.01  | 0.011  | 0.014  | 0.007  | 0.008  | t | 8803   | DITPQEFS<br>KKYLQAP         | Homo<br>sapiens                  |
| 1 | 1.00 | 1 | 1 | 0.02  | 0.02   | 0.02   | 0.02   | 0.021  | t | 109252 | GSLPQKSQ<br>RSQDENP<br>V    | Rattus<br>norvegic<br>us         |

|   |      |   |   |       |       |        |       |        |   |        |                              |                        |
|---|------|---|---|-------|-------|--------|-------|--------|---|--------|------------------------------|------------------------|
| 1 | 1.00 | 1 | 1 | -0.01 | -0.01 | -0.013 | -0.01 | -0.011 | t | 94580  | LDNKYAGK<br>GY               | Mus<br>musculu<br>s    |
| 1 | 1.00 | 1 | 1 | 0.04  | 0.048 | 0.045  | 0.033 | 0.038  | t | 136322 | GLFTPKDS<br>PAKT             | Gallus<br>gallus       |
| 1 | 1.00 | 1 | 1 | 0.03  | 0.03  | 0.03   | 0.03  | 0.03   | t | 99368  | KDLAFPGS<br>GEQVEKL          | Homo<br>sapiens        |
| 1 | 1.00 | 1 | 1 | 0.03  | 0.03  | 0.03   | 0.03  | 0.03   | t | 80205  | AENQEAA<br>GLI               | Homo<br>sapiens        |
| 1 | 1.00 | 1 | 1 | 0.03  | 0.03  | 0.03   | 0.03  | 0.03   | t | 78235  | PHSNSYHT                     | Homo<br>sapiens        |
| 1 | 1.00 | 1 | 1 | 0.01  | 0.01  | 0.01   | 0.01  | 0.01   | t | 131858 | EKDGLRNS<br>TGLGSQN          | Homo<br>sapiens        |
| 1 | 1.00 | 1 | 1 | 0.01  | 0.01  | 0.01   | 0.01  | 0.01   | t | 103338 | LAPDTVPL<br>AGVVLG           | Homo<br>sapiens        |
| 1 | 1.00 | 1 | 1 | 0.01  | 0.01  | 0.01   | 0.01  | 0.01   | t | 79409  | TCCLCSGK<br>LALACE           | Mus<br>musculu<br>s    |
| 1 | 1.00 | 1 | 1 | 0.01  | 0.01  | 0.01   | 0.01  | 0.01   | t | 47185  | PDREVLQ<br>EFDEMEEC<br>GSHL  | Homo<br>sapiens        |
| 1 | 1.00 | 1 | 1 | 0.01  | 0.01  | 0.01   | 0.01  | 0.01   | t | 23462  | GYSLFQKE<br>METLNEG<br>TSGTA | Aotus<br>nancyma<br>ae |
| 1 | 1.00 | 1 | 1 | -0.01 | -0.01 | -0.01  | -0.01 | -0.01  | t | 156957 | SLHSHLS                      | Gallus<br>gallus       |
| 1 | 1.00 | 1 | 1 | -0.01 | -0.01 | -0.01  | -0.01 | -0.01  | t | 127680 | HFHRPPT                      | Homo<br>sapiens        |
| 1 | 1.00 | 1 | 1 | -0.01 | -0.01 | -0.01  | -0.01 | -0.01  | t | 109232 | GRGGAIW<br>DRPEF             | Mus<br>musculu<br>s    |
| 1 | 1.00 | 1 | 1 | -0.01 | -0.01 | -0.01  | -0.01 | -0.01  | t | 103525 | QNAGGTH<br>PTTTYKAF          | Homo<br>sapiens        |
| 1 | 1.00 | 1 | 1 | -0.01 | -0.01 | -0.01  | -0.01 | -0.01  | t | 103747 | YIGISFLDQ<br>ASQRGL          | Homo<br>sapiens        |
| 1 | 1.00 | 1 | 1 | -0.01 | -0.01 | -0.01  | -0.01 | -0.01  | t | 107532 | NSTYRVV                      | Homo<br>sapiens        |

|   |      |   |   |       |        |        |        |        |   |        |                              |                       |
|---|------|---|---|-------|--------|--------|--------|--------|---|--------|------------------------------|-----------------------|
| 1 | 1.00 | 1 | 1 | -0.01 | -0.01  | -0.01  | -0.01  | -0.01  | t | 103344 | LEAAGDKK<br>IGVIKVV          | Homo sapiens          |
| 1 | 1.00 | 1 | 1 | -0.01 | -0.01  | -0.01  | -0.01  | -0.01  | t | 79669  | VKFHTETR<br>TVWQLSV<br>AGVSC | Homo sapiens          |
| 1 | 1.00 | 1 | 1 | -0.01 | -0.003 | -0.01  | -0.01  | -0.01  | t | 94493  | ECCHPAC<br>GKH               | Capra hircus          |
| 1 | 1.00 | 1 | 1 | -0.03 | -0.03  | -0.03  | -0.03  | -0.03  | t | 149479 | STTIAPFGI<br>F               | Mus musculus          |
| 1 | 1.00 | 1 | 1 | -0.03 | -0.03  | -0.03  | -0.03  | -0.03  | t | 78503  | RFPYWFL<br>PPIATVD           | Mus musculus          |
| 1 | 1.00 | 1 | 1 | 0.04  | 0.026  | 0.034  | 0.034  | 0.04   | t | 55765  | RRVNAAN<br>KKPEDLTL<br>NDLET | Aotus griseimembra    |
| 1 | 1.00 | 1 | 1 | -0.02 | -0.018 | -0.013 | -0.013 | -0.019 | t | 108212 | WPPSFWY<br>HPQ               | Homo sapiens          |
| 1 | 1.00 | 1 | 1 | 0.02  | 0.018  | 0.02   | 0.023  | 0.02   | t | 148835 | QQLQQQ<br>QQQQ               | Mus musculus          |
| 1 | 1.00 | 1 | 1 | 0     | 0      | 0.003  | 0      | 0      | t | 46489  | NVSVPSST<br>STPLLY           | Homo sapiens          |
| 1 | 1.00 | 1 | 1 | -0.01 | -0.01  | -0.017 | -0.01  | -0.009 | t | 106375 | EDHAGTY<br>GLGDRK            | Mus musculus          |
| 1 | 1.00 | 1 | 1 | 0.01  | 0.012  | 0.021  | 0.011  | 0.01   | t | 52439  | QSSWPKLE<br>Q                | Homo sapiens          |
| 1 | 1.00 | 1 | 1 | 0.01  | 0.01   | 0.01   | 0.01   | 0.01   | t | 127646 | EYNIMFGP<br>DI               | Homo sapiens          |
| 1 | 1.00 | 1 | 1 | -0.03 | -0.028 | -0.037 | -0.027 | -0.028 | t | 118348 | FHSGKHY<br>WEVDVTG<br>KE     | Homo sapiens          |
| 1 | 1.00 | 1 | 1 | -0.05 | -0.05  | -0.045 | -0.047 | -0.05  | t | 75885  | YRSWLM<br>KAHGLELG           | Homo sapiens          |
| 1 | 1.00 | 1 | 1 | -0.01 | -0.01  | -0.01  | -0.01  | -0.011 | t | 119382 | VISCAKDAI<br>EDEEGSC         | Oryctolagus cuniculus |

|   |      |   |   |       |        |        |        |        |   |        |                              |                                  |
|---|------|---|---|-------|--------|--------|--------|--------|---|--------|------------------------------|----------------------------------|
| 1 | 1.00 | 1 | 1 | -0.02 | -0.02  | -0.019 | -0.02  | -0.02  | t | 105081 | AFNKFTDN<br>VDQR             | Homo<br>sapiens                  |
| 1 | 1.00 | 1 | 1 | 0     | -0.004 | 0      | -0.007 | -0.001 | t | 123822 | VPGMPP<br>MT                 | Oryctola<br>gus<br>cuniculu<br>s |
| 1 | 1.00 | 1 | 1 | 0.04  | 0.042  | 0.045  | 0.041  | 0.037  | t | 47126  | PDKEVLYQ<br>QYDEMEE<br>CSQAA | Homo<br>sapiens                  |
| 1 | 1.00 | 1 | 1 | 0.04  | 0.042  | 0.045  | 0.041  | 0.037  | t | 47128  | PDKEVLYQ<br>QYDEMEE<br>CSQAR | Homo<br>sapiens                  |
| 1 | 1.00 | 1 | 1 | -0.04 | -0.04  | -0.035 | -0.037 | -0.041 | t | 105207 | GAIIGLMV<br>GGVVIA           | Mus<br>musculu<br>s              |
| 1 | 1.00 | 1 | 1 | -0.02 | -0.018 | -0.015 | -0.017 | -0.022 | t | 134029 | DEDENQS<br>PRSFQKKT<br>R     | Homo<br>sapiens                  |
| 1 | 1.00 | 1 | 1 | 0.04  | 0.04   | 0.04   | 0.04   | 0.04   | t | 135559 | GSDPQHY<br>EG                | Oryctola<br>gus<br>cuniculu<br>s |
| 1 | 1.00 | 1 | 1 | 0.07  | 0.07   | 0.061  | 0.07   | 0.073  | t | 133698 | SLLTEVETP<br>IRNEWG          | Mus<br>musculu<br>s              |
| 1 | 1.00 | 1 | 1 | 0     | 0      | 0      | 0      | 0      | t | 156851 | AQMIIRLS<br>SPGN             | Gallus<br>gallus                 |
| 1 | 1.00 | 1 | 1 | 0     | 0      | 0      | 0      | 0      | t | 153281 | PLRNTHPQ<br>AMQWNS<br>T      | Mus<br>musculu<br>s              |
| 1 | 1.00 | 1 | 1 | 0.01  | 0.006  | 0.008  | 0.009  | 0.008  | t | 53636  | RESQAYYQ<br>RGSS             | Oryctola<br>gus<br>cuniculu<br>s |
| 1 | 1.00 | 1 | 1 | 0     | 0      | 0      | 0      | 0      | t | 78939  | CINHRGY<br>WVC               | Oryctola<br>gus<br>cuniculu<br>s |
| 1 | 1.00 | 1 | 1 | 0     | 0      | 0      | 0      | 0      | t | 78939  | CINHRGY<br>WVC               | Mus<br>musculu<br>s              |
| 1 | 1.00 | 1 | 1 | 0     | 0      | 0      | 0      | 0      | t | 78939  | CINHRGY<br>WVC               | Mus<br>musculu<br>s              |
| 1 | 1.00 | 1 | 1 | 0.02  | 0.02   | 0.023  | 0.02   | 0.02   | t | 2380   | ALAELATR<br>SFGSSS           | Homo<br>sapiens                  |
| 1 | 1.00 | 1 | 1 | 0.02  | 0.02   | 0.02   | 0.02   | 0.02   | t | 129909 | SHPTYS                       | Homo<br>sapiens                  |

|   |      |   |   |      |       |       |       |       |   |        |                               |                                  |
|---|------|---|---|------|-------|-------|-------|-------|---|--------|-------------------------------|----------------------------------|
| 1 | 1.00 | 1 | 1 | 0.02 | 0.02  | 0.02  | 0.02  | 0.02  | t | 49107  | PQQQFPQ<br>TQQ                | Mus<br>musculu<br>s              |
| 1 | 1.00 | 1 | 1 | 0.02 | 0.02  | 0.02  | 0.02  | 0.02  | t | 47186  | PDREVLQYQ<br>EFDEMEEC<br>SQHL | Homo<br>sapiens                  |
| 1 | 1.00 | 1 | 1 | 0.02 | 0.02  | 0.02  | 0.02  | 0.02  | t | 49107  | PQQQFPQ<br>TQQ                | Mus<br>musculu<br>s              |
| 1 | 1.00 | 1 | 1 | 0.03 | 0.032 | 0.036 | 0.031 | 0.029 | t | 13641  | EPEQVELQ<br>PPPQGG            | Homo<br>sapiens                  |
| 1 | 1.00 | 1 | 1 | 0    | 0     | 0     | 0     | 0     | t | 142201 | KGLRRDLQ<br>ASREAKKQ<br>VEKA  | Mus<br>musculu<br>s              |
| 1 | 1.00 | 1 | 1 | 0    | 0     | 0     | 0     | 0     | t | 135716 | LRSTKFTI                      | Homo<br>sapiens                  |
| 1 | 1.00 | 1 | 1 | 0    | 0     | 0     | 0     | 0     | t | 151063 | TFEATGNL<br>VVPRIYAF          | Homo<br>sapiens                  |
| 1 | 1.00 | 1 | 1 | 0    | 0     | 0     | 0     | 0     | t | 114936 | RAFNPVC<br>GTD                | Homo<br>sapiens                  |
| 1 | 1.00 | 1 | 1 | 0    | 0     | 0     | 0     | 0     | t | 99718  | TLNDFFHN<br>PPHP              | Oryctola<br>gus<br>cuniculu<br>s |
| 1 | 1.00 | 1 | 1 | 0    | 0     | 0     | 0     | 0     | t | 98078  | GSDVYYA<br>GLN                | Oryctola<br>gus<br>cuniculu<br>s |
| 1 | 1.00 | 1 | 1 | 0    | 0     | 0     | 0     | 0     | t | 112538 | HLVMAPS<br>VARGL              | Homo<br>sapiens                  |
| 1 | 1.00 | 1 | 1 | 0    | 0     | 0     | 0     | 0     | t | 98787  | GDALAGG<br>AVP                | Mus<br>musculu<br>s              |
| 1 | 1.00 | 1 | 1 | 0    | 0.003 | 0     | 0     | 0     | t | 98078  | GSDVYYA<br>GLN                | Mus<br>musculu<br>s              |
| 1 | 1.00 | 1 | 1 | 0    | 0     | 0     | 0     | 0     | t | 86944  | NNLPNDV<br>FREAG              | Homo<br>sapiens                  |
| 1 | 1.00 | 1 | 1 | 0    | 0     | 0     | 0     | 0     | t | 63924  | TGPCRTCT<br>TPAQ              | Mus<br>musculu<br>s              |

|   |      |   |   |       |        |        |        |        |   |        |                               |                       |
|---|------|---|---|-------|--------|--------|--------|--------|---|--------|-------------------------------|-----------------------|
| 1 | 1.00 | 1 | 1 | 0     | 0      | 0      | 0      | 0      | t | 39377  | LSGKPATIP<br>DREAVLYQ<br>EFD  | Homo sapiens          |
| 1 | 1.00 | 1 | 1 | 0     | 0      | 0      | 0      | 0      | t | 38009  | LMDPVFG<br>FDRRVPFV           | Mus musculus          |
| 1 | 1.00 | 1 | 1 | 0     | 0      | 0      | 0      | 0      | t | 47182  | PDREVLQYQ<br>DFDEMEE<br>CASHL | Homo sapiens          |
| 1 | 1.00 | 1 | 1 | 0     | 0      | 0      | 0      | 0      | t | 22121  | GRLGIYRY<br>VSTGER            | Homo sapiens          |
| 1 | 1.00 | 1 | 1 | 0     | 0      | 0      | 0      | 0      | t | 16961  | FLVNTWK<br>SKKCP              | Homo sapiens          |
| 1 | 1.00 | 1 | 1 | -0.04 | -0.04  | -0.04  | -0.04  | -0.04  | t | 79537  | EHPWPLL                       | Oryctolagus cuniculus |
| 1 | 1.00 | 1 | 1 | -0.01 | -0.012 | -0.021 | -0.011 | -0.009 | t | 4225   | ARQPYGFF<br>LETEEVYQ<br>PG    | Mus musculus          |
| 1 | 1.00 | 1 | 1 | 0     | 0.001  | 0.004  | -0.001 | -0.001 | t | 50636  | QEIDCWH<br>YHQYCITS           | Capra hircus          |
| 1 | 1.00 | 1 | 1 | -0.01 | -0.012 | -0.008 | -0.011 | -0.012 | t | 48947  | PPWDFDA<br>GEGIH              | Mus musculus          |
| 1 | 1.00 | 1 | 1 | -0.04 | -0.04  | -0.039 | -0.041 | -0.042 | t | 28475  | ISEKYYVLK<br>KGEKPYDP<br>FDR  | Homo sapiens          |
| 1 | 1.00 | 1 | 1 | 0.02  | 0.02   | 0.031  | 0.023  | 0.02   | t | 43693  | NEMVLL                        | Homo sapiens          |
| 1 | 1.00 | 1 | 1 | 0.03  | 0.033  | 0.029  | 0.03   | 0.03   | t | 98237  | LTAYQTEL<br>AR                | Mus musculus          |
| 1 | 1.00 | 1 | 1 | 0.02  | 0.018  | 0.026  | 0.023  | 0.022  | t | 21763  | GPRLQPY                       | Mus musculus          |
| 1 | 1.00 | 1 | 1 | 0.03  | 0.029  | 0.023  | 0.03   | 0.03   | t | 48396  | PLLGNQSL                      | Anas platyrhynchos    |
| 1 | 1.00 | 1 | 1 | -0.04 | -0.036 | -0.04  | -0.033 | -0.04  | t | 127962 | ENYKEFSE<br>LLPNRQGL<br>KKAD  | Homo sapiens          |

|   |      |   |   |       |        |        |        |        |   |        |                              |                       |
|---|------|---|---|-------|--------|--------|--------|--------|---|--------|------------------------------|-----------------------|
| 1 | 1.00 | 1 | 1 | 0.02  | 0.018  | 0.02   | 0.019  | 0.022  | t | 149507 | VFDSLQL                      | Homo sapiens          |
| 1 | 1.00 | 1 | 1 | 0.05  | 0.05   | 0.049  | 0.05   | 0.056  | t | 18594  | GAGICASY                     | Homo sapiens          |
| 1 | 1.00 | 1 | 1 | -0.01 | -0.004 | -0.01  | -0.01  | -0.01  | t | 123653 | QCLEDFPK<br>L                | Ovis aries            |
| 1 | 1.00 | 1 | 1 | -0.01 | -0.014 | -0.011 | -0.007 | -0.007 | t | 114962 | THYGSL                       | Oryctolagus cuniculus |
| 1 | 1.00 | 1 | 1 | -0.01 | -0.014 | -0.011 | -0.011 | -0.01  | t | 1257   | AFASNRTF<br>DITVSGLG<br>TAPK | Oryctolagus cuniculus |
| 1 | 1.00 | 1 | 1 | -0.02 | -0.019 | -0.021 | -0.017 | -0.021 | t | 99487  | NANEECR<br>NAMRHLR<br>P      | Equus caballus        |
| 1 | 1.00 | 1 | 1 | -0.01 | -0.01  | -0.018 | -0.01  | -0.01  | t | 33358  | KSIVAYTM<br>SLGADSS<br>A     | Homo sapiens          |
| 1 | 1.00 | 1 | 1 | -0.01 | -0.008 | -0.005 | -0.007 | -0.01  | t | 72684  | WKKPDYE<br>P                 | Homo sapiens          |
| 1 | 1.00 | 1 | 1 | 0.04  | 0.034  | 0.04   | 0.04   | 0.04   | t | 123752 | SQETPATK                     | Oryctolagus cuniculus |
| 1 | 1.00 | 1 | 1 | 0.05  | 0.053  | 0.053  | 0.05   | 0.05   | t | 139732 | ERETQKAK<br>G                | Mus musculus          |
| 1 | 1.00 | 1 | 1 | 0.03  | 0.026  | 0.024  | 0.027  | 0.03   | t | 63856  | TGIEPDDH<br>LKERSS           | Oryctolagus cuniculus |
| 1 | 1.00 | 1 | 1 | 0     | 0      | 0.002  | 0      | -0.001 | t | 108607 | RGAQGPP<br>GATGF             | Mus musculus          |
| 1 | 1.00 | 1 | 1 | -0.01 | -0.012 | -0.015 | -0.017 | -0.012 | t | 131164 | YRLWHYP<br>CT                | Mus musculus          |
| 1 | 1.00 | 1 | 1 | -0.04 | -0.04  | -0.04  | -0.038 | -0.04  | t | 135940 | ISQEMERI<br>PRLR             | Homo sapiens          |



|   |      |   |   |      |        |       |        |       |   |        |                              |                                  |
|---|------|---|---|------|--------|-------|--------|-------|---|--------|------------------------------|----------------------------------|
| 1 | 1.00 | 1 | 1 | 0.03 | 0.03   | 0.03  | 0.03   | 0.03  | t | 135570 | LFDASDSS<br>S                | Oryctola<br>gus<br>cuniculu<br>s |
| 1 | 1.00 | 1 | 1 | 0.03 | 0.03   | 0.03  | 0.03   | 0.03  | t | 135570 | LFDASDSS<br>S                | Oryctola<br>gus<br>cuniculu<br>s |
| 1 | 1.00 | 1 | 1 | 0.01 | 0.01   | 0.01  | 0.01   | 0.01  | t | 148127 | QEQQNLR<br>QCQEYIK           | Homo<br>sapiens                  |
| 1 | 1.00 | 1 | 1 | 0.01 | 0.01   | 0.01  | 0.01   | 0.01  | t | 148127 | QEQQNLR<br>QCQEYIK           | Homo<br>sapiens                  |
| 1 | 1.00 | 1 | 1 | 0.01 | 0.01   | 0.01  | 0.01   | 0.01  | t | 56181  | RTSP                         | MD                               |
| 1 | 1.00 | 1 | 1 | 0.01 | 0.012  | 0.01  | 0.007  | 0.008 | t | 51935  | QPQQSFP<br>QQQ               | Homo<br>sapiens                  |
| 1 | 1.00 | 1 | 1 | 0.01 | 0.01   | 0.01  | 0.01   | 0.012 | t | 128512 | EGPPPKDT                     | Homo<br>sapiens                  |
| 1 | 1.00 | 1 | 1 | 0    | -0.002 | 0.007 | 0.001  | 0     | t | 133786 | CMTSPWR<br>C                 | Mus<br>musculu<br>s              |
| 1 | 1.00 | 1 | 1 | 0    | 0.004  | 0.002 | -0.003 | 0     | t | 96023  | YQKFPQYL<br>QY               | Homo<br>sapiens                  |
| 1 | 1.00 | 1 | 1 | 0.03 | 0.03   | 0.025 | 0.03   | 0.03  | t | 4454   | ASHLPYIE<br>QGMQLAE<br>QLKQK | Homo<br>sapiens                  |
| 1 | 1.00 | 1 | 1 | 0.03 | 0.03   | 0.03  | 0.03   | 0.03  | t | 93094  | KFKVQGE<br>AVSNIQEN          | Mus<br>musculu<br>s              |
| 1 | 1.00 | 1 | 1 | 0.01 | 0.01   | 0.01  | 0.01   | 0.01  | t | 138189 | HILGSTA                      | Homo<br>sapiens                  |
| 1 | 1.00 | 1 | 1 | 0.01 | 0.01   | 0.01  | 0.01   | 0.01  | t | 135714 | LNGKVDA<br>F                 | Homo<br>sapiens                  |
| 1 | 1.00 | 1 | 1 | 0.01 | 0.01   | 0.01  | 0.01   | 0.01  | t | 118532 | NATRAAV<br>EEGIVL            | Homo<br>sapiens                  |
| 1 | 1.00 | 1 | 1 | 0.01 | 0.01   | 0.01  | 0.01   | 0.01  | t | 106646 | MHLTQSP                      | Homo<br>sapiens                  |
| 1 | 1.00 | 1 | 1 | 0.01 | 0.01   | 0.01  | 0.01   | 0.01  | t | 113763 | QPAQQQQ<br>PGQQQQG           | Homo<br>sapiens                  |
| 1 | 1.00 | 1 | 1 | 0.01 | 0.01   | 0.01  | 0.01   | 0.01  | t | 99545  | PSHQQPR<br>KIRPEGRE          | Homo<br>sapiens                  |

|   |      |   |   |       |        |       |       |        |   |        |                              |                                  |
|---|------|---|---|-------|--------|-------|-------|--------|---|--------|------------------------------|----------------------------------|
| 1 | 1.00 | 1 | 1 | 0.01  | 0.01   | 0.01  | 0.01  | 0.01   | t | 78656  | FSDTQSTC<br>LETVYKAT<br>GAPS | Homo<br>sapiens                  |
| 1 | 1.00 | 1 | 1 | -0.01 | -0.01  | -0.01 | -0.01 | -0.01  | t | 144666 | GREGYP<br>DGGKGSS<br>GYCA    | Oryctola<br>gus<br>cuniculu<br>s |
| 1 | 1.00 | 1 | 1 | -0.01 | -0.01  | -0.01 | -0.01 | -0.01  | t | 103830 | CHAVKVG<br>NPSC              | Homo<br>sapiens                  |
| 1 | 1.00 | 1 | 1 | -0.01 | -0.01  | -0.01 | -0.01 | -0.01  | t | 115893 | PNSLPQNI<br>PP               | Homo<br>sapiens                  |
| 1 | 1.00 | 1 | 1 | -0.01 | -0.01  | -0.01 | -0.01 | -0.01  | t | 79410  | TCKELQW<br>LPLRLCL           | Mus<br>musculu<br>s              |
| 1 | 1.00 | 1 | 1 | -0.01 | -0.01  | -0.01 | -0.01 | -0.01  | t | 94943  | TKVSNGAF<br>VPNM             | Oryctola<br>gus<br>cuniculu<br>s |
| 1 | 1.00 | 1 | 1 | -0.01 | -0.01  | -0.01 | -0.01 | -0.01  | t | 6329   | CGPFFLAA<br>SVC              | Homo<br>sapiens                  |
| 1 | 1.00 | 1 | 1 | -0.03 | -0.033 | -0.03 | -0.03 | -0.028 | t | 135464 | GLAPGV                       | Oryctola<br>gus<br>cuniculu<br>s |
| 1 | 1.00 | 1 | 1 | 0.02  | 0.022  | 0.027 | 0.017 | 0.018  | t | 68358  | VESTVATL<br>ED               | Homo<br>sapiens                  |
| 1 | 1.00 | 1 | 1 | 0.01  | 0.01   | 0.01  | 0.006 | 0.01   | t | 118284 | DAYVLLSE<br>KKISS            | Homo<br>sapiens                  |
| 1 | 1.00 | 1 | 1 | 0     | 0      | 0.002 | 0     | 0      | t | 55157  | RPGLDELS<br>FTLT             | Homo<br>sapiens                  |
| 1 | 1.00 | 1 | 1 | 0.02  | 0.026  | 0.02  | 0.02  | 0.02   | t | 123043 | ASFGAGD<br>AP                | Ovis<br>aries                    |
| 1 | 1.00 | 1 | 1 | 0.03  | 0.03   | 0.024 | 0.032 | 0.031  | t | 67572  | VAESDGV<br>DEDRAAL           | Homo<br>sapiens                  |
| 1 | 1.00 | 1 | 1 | -0.08 | -0.075 | -0.07 | -0.08 | -0.082 | t | 49273  | PRVRSKPV<br>V                | Homo<br>sapiens                  |
| 1 | 1.00 | 1 | 1 | 0.01  | 0.01   | 0.014 | 0.01  | 0.01   | t | 78623  | DMDDFSR<br>QLQ               | Mus<br>musculu<br>s              |

|   |      |   |   |       |        |        |        |        |   |        |                             |                       |
|---|------|---|---|-------|--------|--------|--------|--------|---|--------|-----------------------------|-----------------------|
| 1 | 1.00 | 1 | 1 | 0.02  | 0.02   | 0.02   | 0.02   | 0.024  | t | 60472  | SQKIQLI                     | Homo sapiens          |
| 1 | 1.00 | 1 | 1 | 0     | 0      | 0.008  | 0      | 0      | t | 90911  | YPTVV                       | Homo sapiens          |
| 1 | 1.00 | 1 | 1 | -0.06 | -0.06  | -0.059 | -0.056 | -0.06  | t | 99823  | IPPNWHIP<br>SIQ             | Homo sapiens          |
| 1 | 1.00 | 1 | 1 | 0     | 0.002  | 0      | 0.001  | 0      | t | 51574  | QLVNSNG<br>SWHIN            | Homo sapiens          |
| 1 | 1.00 | 1 | 1 | 0     | 0.002  | 0      | 0.001  | 0      | t | 51370  | QLINSNGS<br>WHIN            | Homo sapiens          |
| 1 | 1.00 | 1 | 1 | 0     | 0      | -0.009 | 0      | 0.003  | t | 95109  | KNVRFPD<br>GLIWKPD<br>LLYNS | Rattus norvegicus     |
| 1 | 1.00 | 1 | 1 | -0.02 | -0.018 | -0.02  | -0.019 | -0.02  | t | 66237  | TSGTSGPS<br>GPSGTSP         | Homo sapiens          |
| 1 | 1.00 | 1 | 1 | 0     | -0.003 | 0.01   | 0      | -0.002 | t | 52194  | QRDEDSY<br>GRDPYSPS         | Oryctolagus cuniculus |
| 1 | 1.00 | 1 | 1 | 0     | -0.003 | 0.01   | 0      | -0.002 | t | 52194  | QRDEDSY<br>GRDPYSPS         | Oryctolagus cuniculus |
| 1 | 1.00 | 1 | 1 | 0     | 0      | 0      | 0      | 0      | t | 21606  | GPEKAFRE                    | Oryctolagus cuniculus |
| 1 | 1.00 | 1 | 1 | 0     | 0      | 0      | 0      | 0      | t | 7109   | CTARVAGL<br>FSPGSQQR        | Mus musculus          |
| 1 | 1.00 | 1 | 1 | -0.03 | -0.032 | -0.04  | -0.031 | -0.03  | t | 41043  | MAGKRE<br>MVII              | Mus musculus          |
| 1 | 1.00 | 1 | 1 | 0     | 0.006  | 0.005  | 0      | -0.003 | t | 6104   | CDGYCKT<br>HLKASSGY         | Equus caballus        |
| 1 | 1.00 | 1 | 1 | 0     | 0.002  | 0      | 0.001  | 0      | t | 117111 | WPMNDD<br>STRPR             | Homo sapiens          |

|   |      |   |   |      |       |      |      |       |   |        |                              |                          |
|---|------|---|---|------|-------|------|------|-------|---|--------|------------------------------|--------------------------|
| 1 | 1.00 | 1 | 1 | 0.01 | 0.01  | 0.01 | 0.01 | 0.01  | t | 48595  | PNAN                         | Mus<br>musculu<br>s      |
| 1 | 1.00 | 1 | 1 | 0    | 0     | 0    | 0    | 0     | t | 1263   | AFASRGN<br>HVSPRHYV<br>PESE  | Homo<br>sapiens          |
| 1 | 1.00 | 1 | 1 | 0    | 0     | 0    | 0    | 0     | t | 1259   | AFASRGN<br>HVAPTHY<br>VTESD  | Homo<br>sapiens          |
| 1 | 1.00 | 1 | 1 | 0    | 0     | 0    | 0    | 0     | t | 1263   | AFASRGN<br>HVSPRHYV<br>PESE  | Homo<br>sapiens          |
| 1 | 1.00 | 1 | 1 | 0.04 | 0.04  | 0.04 | 0.04 | 0.04  | t | 111098 | AGTVGEN<br>VPDDLVIK<br>GSGST | Mus<br>musculu<br>s      |
| 1 | 1.00 | 1 | 1 | 0.02 | 0.016 | 0.02 | 0.02 | 0.02  | t | 136647 | SNNADYK<br>QSLLL             | Bos<br>taurus            |
| 1 | 1.00 | 1 | 1 | 0.02 | 0.028 | 0.02 | 0.02 | 0.02  | t | 136647 | SNNADYK<br>QSLLL             | Gallus<br>gallus         |
| 1 | 1.00 | 1 | 1 | 0.02 | 0.02  | 0.02 | 0.02 | 0.02  | t | 136647 | SNNADYK<br>QSLLL             | Bos<br>taurus            |
| 1 | 1.00 | 1 | 1 | 0.02 | 0.02  | 0.02 | 0.02 | 0.02  | t | 104520 | IAKEQENK<br>ETIGTLKKI<br>LDE | Rattus<br>norvegic<br>us |
| 1 | 1.00 | 1 | 1 | 0.02 | 0.02  | 0.02 | 0.02 | 0.02  | t | 115192 | CKEVVRN<br>ANESEYSI<br>GSSSE | Homo<br>sapiens          |
| 1 | 1.00 | 1 | 1 | 0.02 | 0.02  | 0.02 | 0.02 | 0.02  | t | 56718  | SAAYATSS<br>FSLFTRG          | Homo<br>sapiens          |
| 1 | 1.00 | 1 | 1 | 0.02 | 0.02  | 0.02 | 0.02 | 0.02  | t | 56718  | SAAYATSS<br>FSLFTRG          | Homo<br>sapiens          |
| 1 | 1.00 | 1 | 1 | 0.01 | 0.01  | 0.01 | 0.01 | 0.011 | t | 72503  | WGQGG                        | Mus<br>musculu<br>s      |
| 1 | 1.00 | 1 | 1 | 0    | 0     | 0    | 0    | 0     | t | 148820 | QPYLQLQP<br>FP               | Homo<br>sapiens          |
| 1 | 1.00 | 1 | 1 | 0    | 0     | 0    | 0    | 0     | t | 131989 | NRTLDPR<br>VLSNSGW           | Homo<br>sapiens          |
| 1 | 1.00 | 1 | 1 | 0    | 0     | 0    | 0    | 0     | t | 132142 | AGPCILLA<br>PDRCPG           | Homo<br>sapiens          |

|   |      |   |   |       |       |       |       |       |   |        |                              |                                  |
|---|------|---|---|-------|-------|-------|-------|-------|---|--------|------------------------------|----------------------------------|
| 1 | 1.00 | 1 | 1 | 0     | 0     | 0     | 0     | 0     | t | 121741 | QCVLAIFN<br>DVYWLPLY         | Mus<br>musculu<br>s              |
| 1 | 1.00 | 1 | 1 | 0     | 0     | 0     | 0     | 0     | t | 127712 | KNWSTPF                      | Homo<br>sapiens                  |
| 1 | 1.00 | 1 | 1 | 0     | 0     | 0     | 0     | 0     | t | 98453  | SGFSGSVQ<br>FV               | Mus<br>musculu<br>s              |
| 1 | 1.00 | 1 | 1 | 0     | 0     | 0     | 0     | 0     | t | 100412 | QEVFAKAF<br>AY               | Mus<br>musculu<br>s              |
| 1 | 1.00 | 1 | 1 | 0     | 0     | 0     | 0     | 0     | t | 98453  | SGFSGSVQ<br>FV               | Oryctola<br>gus<br>cuniculu<br>s |
| 1 | 1.00 | 1 | 1 | 0     | 0.002 | 0     | 0     | 0     | t | 87580  | QIHRLVSG<br>YDND             | Homo<br>sapiens                  |
| 1 | 1.00 | 1 | 1 | 0     | 0     | 0     | 0     | 0     | t | 87580  | QIHRLVSG<br>YDND             | Mus<br>musculu<br>s              |
| 1 | 1.00 | 1 | 1 | 0     | 0     | 0     | 0     | 0     | t | 70609  | VQMAFM<br>KLAALTGT           | Homo<br>sapiens                  |
| 1 | 1.00 | 1 | 1 | 0     | 0     | 0     | 0     | 0     | t | 40034  | LTLWTTTPA<br>PSPNCRL         | Oryctola<br>gus<br>cuniculu<br>s |
| 1 | 1.00 | 1 | 1 | 0     | 0     | 0     | 0     | 0     | t | 46990  | PAVIPDRE<br>VLYQAFDE<br>MEEC | Homo<br>sapiens                  |
| 1 | 1.00 | 1 | 1 | 0     | 0     | 0     | 0     | 0     | t | 47000  | PAVVPDRE<br>VLYREFDE<br>MEAC | Homo<br>sapiens                  |
| 1 | 1.00 | 1 | 1 | -0.02 | -0.02 | -0.02 | -0.02 | -0.02 | t | 123244 | GMIPPPGL                     | Oryctola<br>gus<br>cuniculu<br>s |
| 1 | 1.00 | 1 | 1 | -0.02 | -0.02 | -0.02 | -0.02 | -0.02 | t | 123244 | GMIPPPGL                     | Homo<br>sapiens                  |
| 1 | 1.00 | 1 | 1 | -0.02 | -0.02 | -0.02 | -0.02 | -0.02 | t | 100634 | VTNSKKFI<br>DI               | Mus<br>musculu<br>s              |
| 1 | 1.00 | 1 | 1 | -0.02 | -0.02 | -0.02 | -0.02 | -0.02 | t | 115283 | HPLVRYP<br>WHYH              | Mus<br>musculu<br>s              |

|   |      |   |   |       |        |        |        |        |   |        |                              |                                  |
|---|------|---|---|-------|--------|--------|--------|--------|---|--------|------------------------------|----------------------------------|
| 1 | 1.00 | 1 | 1 | -0.06 | -0.063 | -0.06  | -0.06  | -0.06  | t | 136058 | DKATV                        | Oryctola<br>gus<br>cuniculu<br>s |
| 1 | 1.00 | 1 | 1 | 0     | -0.002 | 0      | -0.001 | 0      | t | 75923  | YSWKTWG                      | Mus<br>musculu<br>s              |
| 1 | 1.00 | 1 | 1 | 0.03  | 0.026  | 0.025  | 0.03   | 0.03   | t | 70444  | VPQLEIVP<br>NSAEERLH<br>SMKE | Mus<br>musculu<br>s              |
| 1 | 1.00 | 1 | 1 | -0.01 | -0.01  | -0.009 | -0.011 | -0.012 | t | 25084  | HVRVRPYK<br>EKPIQNQA<br>KSVD | Homo<br>sapiens                  |
| 1 | 1.00 | 1 | 1 | 0.01  | 0.012  | 0.003  | 0.011  | 0.012  | t | 56796  | SAGGQLFY<br>SRPVVSAN<br>GE   | Homo<br>sapiens                  |
| 1 | 1.00 | 1 | 1 | 0.03  | 0.03   | 0.026  | 0.03   | 0.03   | t | 52034  | QQGVTVD<br>SIGM              | Mus<br>musculu<br>s              |
| 1 | 1.00 | 1 | 1 | -0.01 | -0.008 | -0.01  | -0.015 | -0.014 | t | 118464 | KLSDGVAV<br>LKVGG            | Homo<br>sapiens                  |
| 1 | 1.00 | 1 | 1 | 0     | 0      | -0.007 | 0      | -0.002 | t | 124730 | SMDRIEKD<br>RLQGMAP<br>AA    | Homo<br>sapiens                  |
| 1 | 1.00 | 1 | 1 | 0     | 0      | 0      | 0      | 0      | t | 117172 | TSSEVATE<br>VPFRLMH<br>PQPED | Rattus<br>norvegic<br>us         |
| 1 | 1.00 | 1 | 1 | 0     | -0.002 | 0      | 0      | 0      | t | 113966 | TTHYGSLP<br>QKAQGHR<br>PQDE  | Oryctola<br>gus<br>cuniculu<br>s |
| 1 | 1.00 | 1 | 1 | 0     | 0      | 0.005  | 0.006  | 0.003  | t | 116024 | VTLRI                        | Homo<br>sapiens                  |
| 1 | 1.00 | 1 | 1 | -0.03 | -0.028 | -0.03  | -0.029 | -0.028 | t | 48005  | PIVATNW<br>QK                | Homo<br>sapiens                  |
| 1 | 1.00 | 1 | 1 | 0.01  | 0.01   | 0.01   | 0.01   | 0.008  | t | 54566  | RLGVPDTL<br>GGDPKFRS<br>LTHE | Homo<br>sapiens                  |
| 1 | 1.00 | 1 | 1 | -0.01 | -0.013 | -0.009 | -0.01  | -0.01  | t | 159024 | NKGAIIGL<br>MVGGVVI<br>A     | Oryctola<br>gus<br>cuniculu<br>s |
| 1 | 1.00 | 1 | 1 | 0.01  | 0.012  | 0.01   | 0.017  | 0.01   | t | 107774 | DAGPQGK<br>VGPS              | Homo<br>sapiens                  |

|   |      |   |   |       |        |        |        |        |   |        |                              |                                  |
|---|------|---|---|-------|--------|--------|--------|--------|---|--------|------------------------------|----------------------------------|
| 1 | 1.00 | 1 | 1 | 0.01  | 0.014  | 0.01   | 0.017  | 0.01   | t | 107774 | DAGPQGK<br>VGPS              | Homo<br>sapiens                  |
| 1 | 1.00 | 1 | 1 | 0.02  | 0.023  | 0.015  | 0.02   | 0.02   | t | 89851  | VAGTWYS<br>LAMAASDI          | Mus<br>musculu<br>s              |
| 1 | 1.00 | 1 | 1 | 0.01  | 0.01   | 0.01   | 0.01   | 0.01   | t | 132860 | LKKLKPG<br>L EKDF            | Rattus<br>norvegic<br>us         |
| 1 | 1.00 | 1 | 1 | 0     | 0      | 0.005  | 0      | 0      | t | 73521  | YDASVHG<br>QIGAALL           | Homo<br>sapiens                  |
| 1 | 1.00 | 1 | 1 | 0     | 0      | 0.003  | 0.003  | 0      | t | 79570  | IHAHTTSD<br>PWHPPGP<br>LGLKF | Homo<br>sapiens                  |
| 1 | 1.00 | 1 | 1 | 0     | 0.003  | -0.002 | 0      | -0.002 | t | 52692  | QVETEDTK<br>EPGVLMG          | Mus<br>musculu<br>s              |
| 1 | 1.00 | 1 | 1 | 0     | 0      | 0.006  | 0      | 0      | t | 67732  | VARDDKG<br>RRYYLT            | Homo<br>sapiens                  |
| 1 | 1.00 | 1 | 1 | 0     | 0      | 0.006  | 0      | 0      | t | 67732  | VARDDKG<br>RRYYLT            | Homo<br>sapiens                  |
| 1 | 1.00 | 1 | 1 | 0.05  | 0.048  | 0.043  | 0.051  | 0.053  | t | 131128 | VEMKKED<br>FDIYDEDE          | Mus<br>musculu<br>s              |
| 1 | 1.00 | 1 | 1 | 0.01  | 0.008  | 0.005  | 0.009  | 0.01   | t | 59499  | SLTDLGGE<br>LC               | Mus<br>musculu<br>s              |
| 1 | 1.00 | 1 | 1 | 0.01  | 0.01   | 0.01   | 0.01   | 0.01   | t | 151715 | RIMNVIGE<br>PIDERGPIK<br>T   | Mus<br>musculu<br>s              |
| 1 | 1.00 | 1 | 1 | -0.01 | -0.01  | -0.01  | -0.01  | -0.01  | t | 35473  | LEGAAR                       | Mus<br>musculu<br>s              |
| 1 | 1.00 | 1 | 1 | 0.01  | 0.012  | 0.01   | 0.007  | 0.008  | t | 51935  | QPQQSFP<br>QQQ               | Homo<br>sapiens                  |
| 1 | 1.00 | 1 | 1 | 0     | 0      | 0      | 0      | 0      | t | 130590 | RCKTFGKT<br>TLCS             | Mus<br>musculu<br>s              |
| 1 | 1.00 | 1 | 1 | -0.01 | -0.013 | -0.01  | -0.009 | -0.01  | t | 72551  | WHRPPW<br>WPSSSL             | Oryctola<br>gus<br>cuniculu<br>s |

|   |      |   |   |       |        |       |        |        |   |        |                              |                                  |
|---|------|---|---|-------|--------|-------|--------|--------|---|--------|------------------------------|----------------------------------|
| 1 | 1.00 | 1 | 1 | -0.02 | -0.02  | -0.02 | -0.02  | -0.02  | t | 104153 | NMPQQN<br>R                  | Homo<br>sapiens                  |
| 1 | 1.00 | 1 | 1 | -0.03 | -0.032 | -0.05 | -0.037 | -0.027 | t | 44556  | NKNDNKN<br>DNKND             | Mus<br>musculu<br>s              |
| 1 | 1.00 | 1 | 1 | -0.03 | -0.032 | -0.05 | -0.037 | -0.027 | t | 44556  | NKNDNKN<br>DNKND             | Mus<br>musculu<br>s              |
| 1 | 1.00 | 1 | 1 | 0.03  | 0.028  | 0.026 | 0.023  | 0.03   | t | 14009  | ERKIKV                       | Mus<br>musculu<br>s              |
| 1 | 1.00 | 1 | 1 | 0.05  | 0.05   | 0.05  | 0.05   | 0.05   | t | 115881 | PEINTVQV<br>TS               | Homo<br>sapiens                  |
| 1 | 1.00 | 1 | 1 | 0.03  | 0.03   | 0.03  | 0.03   | 0.03   | t | 109855 | RQTEVDS<br>GRDLE             | Mus<br>musculu<br>s              |
| 1 | 1.00 | 1 | 1 | 0.03  | 0.03   | 0.03  | 0.03   | 0.03   | t | 112303 | SAGEKVT                      | Homo<br>sapiens                  |
| 1 | 1.00 | 1 | 1 | 0.01  | 0.01   | 0.01  | 0.01   | 0.01   | t | 128685 | GAVAVSA<br>APGSAAP<br>A      | Homo<br>sapiens                  |
| 1 | 1.00 | 1 | 1 | 0.01  | 0.01   | 0.01  | 0.01   | 0.01   | t | 78299  | WHLAYSP                      | Homo<br>sapiens                  |
| 1 | 1.00 | 1 | 1 | 0.01  | 0.01   | 0.01  | 0.01   | 0.01   | t | 97295  | FADAEVEL<br>K                | Oryctola<br>gus<br>cuniculu<br>s |
| 1 | 1.00 | 1 | 1 | 0.01  | 0.01   | 0.01  | 0.01   | 0.01   | t | 39400  | LSGRPAVI<br>PDREVLYQ<br>EFDE | Homo<br>sapiens                  |
| 1 | 1.00 | 1 | 1 | 0.01  | 0.01   | 0.01  | 0.01   | 0.01   | t | 26924  | IKVELTGN<br>STLSSDYA<br>QARA | Oryctola<br>gus<br>cuniculu<br>s |
| 1 | 1.00 | 1 | 1 | 0.01  | 0.01   | 0.01  | 0.01   | 0.01   | t | 25496  | ICESAGTQ<br>EDAASL           | Homo<br>sapiens                  |
| 1 | 1.00 | 1 | 1 | 0     | 0      | 0     | -0.003 | 0      | t | 33746  | KTKRNTNR                     | Homo<br>sapiens                  |
| 1 | 1.00 | 1 | 1 | -0.01 | -0.01  | -0.01 | -0.01  | -0.01  | t | 149442 | QQYPSGQ<br>GFF               | Mus<br>musculu<br>s              |
| 1 | 1.00 | 1 | 1 | -0.01 | -0.01  | -0.01 | -0.01  | -0.01  | t | 149442 | QQYPSGQ<br>GFF               | Homo<br>sapiens                  |
| 1 | 1.00 | 1 | 1 | -0.01 | -0.01  | -0.01 | -0.01  | -0.01  | t | 132933 | WGQNSFP                      | Homo<br>sapiens                  |



|   |      |   |   |       |        |        |        |        |   |        |                              |                                  |
|---|------|---|---|-------|--------|--------|--------|--------|---|--------|------------------------------|----------------------------------|
| 1 | 1.00 | 1 | 1 | -0.01 | -0.01  | -0.01  | -0.01  | -0.01  | t | 114936 | RAFNPVC<br>GTD               | Homo<br>sapiens                  |
| 1 | 1.00 | 1 | 1 | -0.01 | -0.01  | -0.01  | -0.01  | -0.01  | t | 110613 | GPPGPQG<br>ATGPLGPK          | Mus<br>musculu<br>s              |
| 1 | 1.00 | 1 | 1 | -0.01 | -0.01  | -0.01  | -0.01  | -0.01  | t | 112184 | KLLIYWA                      | Homo<br>sapiens                  |
| 1 | 1.00 | 1 | 1 | -0.01 | -0.01  | -0.01  | -0.01  | -0.01  | t | 78207  | MLPLKS                       | Equus<br>caballus                |
| 1 | 1.00 | 1 | 1 | 0.01  | 0.01   | 0.005  | 0.013  | 0.011  | t | 55073  | RNTNRRP<br>QDVKFP<br>GGQIVG  | Homo<br>sapiens                  |
| 1 | 1.00 | 1 | 1 | -0.03 | -0.03  | -0.03  | -0.03  | -0.03  | t | 115658 | VGWYRPP<br>FSRVV             | Homo<br>sapiens                  |
| 1 | 1.00 | 1 | 1 | -0.03 | -0.03  | -0.03  | -0.03  | -0.03  | t | 107585 | QVKFNWY                      | Homo<br>sapiens                  |
| 1 | 1.00 | 1 | 1 | -0.03 | -0.03  | -0.03  | -0.03  | -0.03  | t | 115492 | SLTLTDVE<br>NLHLPLPL<br>QSW  | Homo<br>sapiens                  |
| 1 | 1.00 | 1 | 1 | -0.03 | -0.03  | -0.03  | -0.03  | -0.03  | t | 115658 | VGWYRPP<br>FSRVV             | Homo<br>sapiens                  |
| 1 | 1.00 | 1 | 1 | 0     | -0.002 | 0.002  | -0.001 | 0      | t | 65745  | TPRPTQY<br>WLHL              | Mus<br>musculu<br>s              |
| 1 | 1.00 | 1 | 1 | -0.06 | -0.06  | -0.063 | -0.06  | -0.06  | t | 98923  | PAVFKIDA<br>LN               | Homo<br>sapiens                  |
| 1 | 1.00 | 1 | 1 | 0.01  | 0.01   | 0.01   | 0.01   | 0.01   | t | 45698  | NRLIAFAS<br>RGNHVAP<br>THYVT | Homo<br>sapiens                  |
| 1 | 1.00 | 1 | 1 | 0.02  | 0.02   | 0.02   | 0.02   | 0.021  | t | 100153 | INDQIKFII<br>N               | Mus<br>musculu<br>s              |
| 1 | 1.00 | 1 | 1 | 0     | 0.002  | -0.011 | 0.003  | 0      | t | 58366  | SHIECRKPY<br>KELRLEVG<br>KQR | Homo<br>sapiens                  |
| 1 | 1.00 | 1 | 1 | 0.04  | 0.044  | 0.049  | 0.043  | 0.04   | t | 50354  | QASDDGD<br>KGSDVES           | Homo<br>sapiens                  |
| 1 | 1.00 | 1 | 1 | -0.02 | -0.014 | -0.02  | -0.02  | -0.02  | t | 123638 | PVRLFLEYL                    | Ovis<br>aries                    |
| 1 | 1.00 | 1 | 1 | -0.01 | -0.01  | -0.01  | -0.01  | -0.009 | t | 63037  | TAVSPTTL<br>R                | Mus<br>musculu<br>s              |
| 1 | 1.00 | 1 | 1 | 0.01  | 0.007  | 0.007  | 0.01   | 0.01   | t | 97310  | FNVKAEIQ<br>G                | Oryctola<br>gus<br>cuniculu<br>s |

|   |      |   |   |       |        |        |        |        |   |        |                              |                                  |
|---|------|---|---|-------|--------|--------|--------|--------|---|--------|------------------------------|----------------------------------|
| 1 | 1.00 | 1 | 1 | 0.01  | 0.007  | 0.007  | 0.01   | 0.01   | t | 97310  | FNVKAEIQ<br>G                | Oryctola<br>gus<br>cuniculu<br>s |
| 1 | 1.00 | 1 | 1 | -0.03 | -0.03  | -0.028 | -0.03  | -0.03  | t | 67272  | TWKSCK                       | Homo<br>sapiens                  |
| 1 | 1.00 | 1 | 1 | -0.04 | -0.043 | -0.051 | -0.04  | -0.04  | t | 79743  | AALAARKA<br>DLEKALEG<br>AM   | Oryctola<br>gus<br>cuniculu<br>s |
| 1 | 1.00 | 1 | 1 | 0.01  | 0.012  | 0.012  | 0.013  | 0.008  | t | 40921  | LYREALESP<br>EHC             | Homo<br>sapiens                  |
| 1 | 1.00 | 1 | 1 | -0.01 | -0.012 | -0.002 | -0.011 | -0.01  | t | 52371  | QSLNWPR<br>DV                | Rattus<br>norvegic<br>us         |
| 1 | 1.00 | 1 | 1 | 0     | 0      | 0      | 0      | 0      | t | 135442 | AGLGGL                       | Oryctola<br>gus<br>cuniculu<br>s |
| 1 | 1.00 | 1 | 1 | -0.03 | -0.032 | -0.03  | -0.037 | -0.031 | t | 139618 | TGQLVHRF                     | Mus<br>musculu<br>s              |
| 1 | 1.00 | 1 | 1 | -0.01 | -0.01  | -0.01  | -0.01  | -0.011 | t | 141104 | VVHVETH<br>RCNISWEI<br>S     | Oryctola<br>gus<br>cuniculu<br>s |
| 1 | 1.00 | 1 | 1 | 0     | 0      | 0      | 0      | 0      | t | 10841  | DWYSPAC<br>GKAGCQT<br>YKWETF | Homo<br>sapiens                  |
| 1 | 1.00 | 1 | 1 | 0     | -0.003 | 0      | 0      | -0.002 | t | 144672 | GREGYPA<br>DGGYCYG<br>LPDS   | Oryctola<br>gus<br>cuniculu<br>s |
| 1 | 1.00 | 1 | 1 | -0.02 | -0.02  | -0.011 | -0.02  | -0.022 | t | 70729  | VRGLYFP                      | Mus<br>musculu<br>s              |
| 1 | 1.00 | 1 | 1 | -0.02 | -0.017 | -0.011 | -0.02  | -0.022 | t | 70729  | VRGLYFP                      | Mus<br>musculu<br>s              |
| 1 | 1.00 | 1 | 1 | 0.05  | 0.05   | 0.049  | 0.05   | 0.053  | t | 102208 | VQYEGDG<br>SPCKI             | Mus<br>musculu<br>s              |
| 1 | 1.00 | 1 | 1 | 0.02  | 0.02   | 0.02   | 0.02   | 0.02   | t | 137834 | EDSRVTEN<br>TNGL             | Homo<br>sapiens                  |

|   |      |   |   |      |      |      |      |      |   |        |                            |                                  |
|---|------|---|---|------|------|------|------|------|---|--------|----------------------------|----------------------------------|
| 1 | 1.00 | 1 | 1 | 0.02 | 0.02 | 0.02 | 0.02 | 0.02 | t | 137834 | EDSRVTEN<br>TNGL           | Oryctola<br>gus<br>cuniculu<br>s |
| 1 | 1.00 | 1 | 1 | 0.02 | 0.02 | 0.02 | 0.02 | 0.02 | t | 149076 | NATQAST                    | Sus<br>scrofa                    |
| 1 | 1.00 | 1 | 1 | 0.02 | 0.02 | 0.02 | 0.02 | 0.02 | t | 104124 | MNKTFVD                    | Homo<br>sapiens                  |
| 1 | 1.00 | 1 | 1 | 0    | 0    | 0    | 0    | 0    | t | 141684 | KKACCAIR<br>GSFYDLED       | Oryctola<br>gus<br>cuniculu<br>s |
| 1 | 1.00 | 1 | 1 | 0    | 0    | 0    | 0    | 0    | t | 147284 | SIFGLAPSK<br>ALDS          | Homo<br>sapiens                  |
| 1 | 1.00 | 1 | 1 | 0    | 0    | 0    | 0    | 0    | t | 148575 | DVKDNKP<br>SDVKLPVI<br>KAE | Homo<br>sapiens                  |
| 1 | 1.00 | 1 | 1 | 0    | 0    | 0    | 0    | 0    | t | 147225 | QLQPFP                     | Homo<br>sapiens                  |
| 1 | 1.00 | 1 | 1 | 0    | 0    | 0    | 0    | 0    | t | 148575 | DVKDNKP<br>SDVKLPVI<br>KAE | Canis<br>lupus                   |
| 1 | 1.00 | 1 | 1 | 0    | 0    | 0    | 0    | 0    | t | 135734 | PGQFPWQ<br>V               | Homo<br>sapiens                  |
| 1 | 1.00 | 1 | 1 | 0    | 0    | 0    | 0    | 0    | t | 157770 | QEYEQHR<br>RQQQH           | Homo<br>sapiens                  |
| 1 | 1.00 | 1 | 1 | 0    | 0    | 0    | 0    | 0    | t | 149296 | ELDKWAG                    | Homo<br>sapiens                  |
| 1 | 1.00 | 1 | 1 | 0    | 0    | 0    | 0    | 0    | t | 119518 | RKTALGTR<br>Q              | Homo<br>sapiens                  |
| 1 | 1.00 | 1 | 1 | 0    | 0    | 0    | 0    | 0    | t | 131076 | SQTAANPS<br>CPEGT          | Rattus<br>norvegic<br>us         |
| 1 | 1.00 | 1 | 1 | 0    | 0    | 0    | 0    | 0    | t | 115877 | NVPGEIVE<br>SL             | Homo<br>sapiens                  |
| 1 | 1.00 | 1 | 1 | 0    | 0    | 0    | 0    | 0    | t | 98964  | QLQPQNP<br>SQQQP           | Homo<br>sapiens                  |
| 1 | 1.00 | 1 | 1 | 0    | 0    | 0    | 0    | 0    | t | 97049  | VKPTAPTK<br>PT             | Homo<br>sapiens(<br>human)       |

|   |      |   |   |       |        |        |        |        |   |        |                              |                       |
|---|------|---|---|-------|--------|--------|--------|--------|---|--------|------------------------------|-----------------------|
| 1 | 1.00 | 1 | 1 | 0     | 0      | 0      | 0      | 0      | t | 50103  | PYIEQGM<br>MLAEQFK<br>QKALGL | Homo sapiens          |
| 1 | 1.00 | 1 | 1 | 0     | 0      | 0      | 0      | 0      | t | 22094  | GRIILTGKP<br>AVIPDREV<br>LYQ | Homo sapiens          |
| 1 | 1.00 | 1 | 1 | 0     | 0      | 0      | 0      | 0      | t | 10753  | DVTRIESD<br>SKVIVL           | Homo sapiens          |
| 1 | 1.00 | 1 | 1 | 0     | 0      | 0      | 0      | 0      | t | 10753  | DVTRIESD<br>SKVIVL           | Homo sapiens          |
| 1 | 1.00 | 1 | 1 | -0.02 | -0.02  | -0.02  | -0.02  | -0.02  | t | 135953 | LLQYVVK<br>S FDRS            | Homo sapiens          |
| 1 | 1.00 | 1 | 1 | -0.02 | -0.02  | -0.02  | -0.02  | -0.02  | t | 149434 | QPQPFLP<br>QQP               | Mus musculus          |
| 1 | 1.00 | 1 | 1 | -0.02 | -0.02  | -0.02  | -0.02  | -0.02  | t | 135922 | FFRMVISN<br>PAAT             | Homo sapiens          |
| 1 | 1.00 | 1 | 1 | -0.02 | -0.02  | -0.02  | -0.02  | -0.02  | t | 132102 | TNTSLAHE<br>LWKVPLP          | Homo sapiens          |
| 1 | 1.00 | 1 | 1 | -0.02 | -0.02  | -0.02  | -0.02  | -0.02  | t | 110585 | GAPGIAGA<br>PGFPGPR          | Mus musculus          |
| 1 | 1.00 | 1 | 1 | -0.02 | -0.032 | -0.02  | -0.02  | -0.019 | t | 9756   | DPRVRGLY<br>FPAGG            | Mus musculus          |
| 1 | 1.00 | 1 | 1 | 0.03  | 0.03   | 0.025  | 0.032  | 0.03   | t | 66219  | TSGITGDN<br>TTTSSE           | Homo sapiens          |
| 1 | 1.00 | 1 | 1 | 0.01  | 0.006  | 0.005  | 0.007  | 0.012  | t | 134087 | IGTLCAD<br>AR                | Oryctolagus cuniculus |
| 1 | 1.00 | 1 | 1 | 0.02  | 0.02   | 0.023  | 0.027  | 0.022  | t | 115626 | LKDAIGEG<br>KVTL             | Homo sapiens          |
| 1 | 1.00 | 1 | 1 | -0.02 | -0.018 | -0.027 | -0.024 | -0.02  | t | 138807 | RLQGISP<br>KI                | Homo sapiens          |
| 1 | 1.00 | 1 | 1 | -0.06 | -0.056 | -0.06  | -0.053 | -0.058 | t | 122748 | EHRMTW<br>DPAQPPR            | Homo sapiens          |
| 1 | 1.00 | 1 | 1 | 0.01  | 0.013  | 0.011  | 0.01   | 0.01   | t | 64759  | TLDTAH                       | Equus caballus        |

|   |      |   |   |       |        |        |       |        |   |        |                            |                                  |
|---|------|---|---|-------|--------|--------|-------|--------|---|--------|----------------------------|----------------------------------|
| 1 | 1.00 | 1 | 1 | 0.04  | 0.042  | 0.04   | 0.041 | 0.04   | t | 48566  | PMKTDLEL<br>DFSLP          | Homo<br>sapiens                  |
| 1 | 1.00 | 1 | 1 | 0.01  | 0.007  | 0.007  | 0.01  | 0.01   | t | 6562   | CLGDINAR<br>DLICAQKF<br>N  | Oryctola<br>gus<br>cuniculu<br>s |
| 1 | 1.00 | 1 | 1 | 0.01  | 0.008  | 0.01   | 0.011 | 0.01   | t | 149438 | QQPQQQY<br>PSG             | Mus<br>musculu<br>s              |
| 1 | 1.00 | 1 | 1 | 0.01  | 0.01   | 0      | 0.01  | 0.01   | t | 54848  | RMADAVS<br>RKKMDTK         | Homo<br>sapiens                  |
| 1 | 1.00 | 1 | 1 | -0.01 | -0.007 | -0.01  | -0.01 | -0.008 | t | 48911  | PPSDIKGK                   | Mus<br>musculu<br>s              |
| 1 | 1.00 | 1 | 1 | 0     | 0      | 0      | 0     | 0.001  | t | 133623 | KPGEMR                     | Mus<br>musculu<br>s              |
| 1 | 1.00 | 1 | 1 | -0.01 | -0.01  | -0.016 | -0.01 | -0.008 | t | 28691  | ISQHQCVK                   | Mus<br>musculu<br>s              |
| 1 | 1.00 | 1 | 1 | 0.01  | 0.007  | 0.01   | 0.01  | 0.01   | t | 135478 | LGGLGVG                    | Oryctola<br>gus<br>cuniculu<br>s |
| 1 | 1.00 | 1 | 1 | -0.01 | -0.01  | -0.01  | -0.01 | -0.01  | t | 149030 | DFRFESSLS<br>INDHA         | Rattus<br>norvegic<br>us         |
| 1 | 1.00 | 1 | 1 | -0.01 | -0.01  | -0.01  | -0.01 | -0.01  | t | 16018  | FGNDYED<br>RYYR            | Mus<br>musculu<br>s              |
| 1 | 1.00 | 1 | 1 | -0.01 | -0.01  | -0.01  | -0.01 | -0.01  | t | 16018  | FGNDYED<br>RYYR            | Mus<br>musculu<br>s              |
| 1 | 1.00 | 1 | 1 | 0.03  | 0.03   | 0.03   | 0.03  | 0.032  | t | 78609  | ANPSPHQ<br>VYN             | Oryctola<br>gus<br>cuniculu<br>s |
| 1 | 1.00 | 1 | 1 | 0.02  | 0.021  | 0.019  | 0.02  | 0.02   | t | 55751  | RRTQSMG<br>IQL             | Mus<br>musculu<br>s              |
| 1 | 1.00 | 1 | 1 | 0.01  | 0.007  | 0.01   | 0.01  | 0.008  | t | 144671 | GREGYPA<br>DGGYCNT<br>ECTL | Oryctola<br>gus<br>cuniculu<br>s |

|   |      |   |   |       |        |        |        |        |   |        |                              |                                  |
|---|------|---|---|-------|--------|--------|--------|--------|---|--------|------------------------------|----------------------------------|
| 1 | 1.00 | 1 | 1 | 0     | 0.004  | 0      | 0      | -0.001 | t | 9845   | DQGNSDT<br>SWNFAAK<br>YLLETI | Aotus<br>nancyma<br>ae           |
| 1 | 1.00 | 1 | 1 | 0.01  | 0.01   | 0.005  | 0.007  | 0.01   | t | 17838  | FSRPGLPV<br>EYLQVPSP<br>SMGR | Homo<br>sapiens                  |
| 1 | 1.00 | 1 | 1 | -0.01 | -0.012 | -0.027 | -0.017 | -0.009 | t | 109940 | SQDENPV<br>VHF               | Rattus<br>norvegic<br>us         |
| 1 | 1.00 | 1 | 1 | 0.03  | 0.03   | 0.03   | 0.03   | 0.03   | t | 121682 | NVSDLTVA<br>GPLVDLF          | Mus<br>musculu<br>s              |
| 1 | 1.00 | 1 | 1 | 0.03  | 0.03   | 0.03   | 0.03   | 0.03   | t | 121682 | NVSDLTVA<br>GPLVDLF          | Mus<br>musculu<br>s              |
| 1 | 1.00 | 1 | 1 | 0.01  | 0.01   | 0.01   | 0.01   | 0.01   | t | 137740 | DTPLTAQA<br>LKLK             | Mus<br>musculu<br>s              |
| 1 | 1.00 | 1 | 1 | 0.01  | 0.01   | 0.01   | 0.01   | 0.01   | t | 140825 | AGKLGTVS<br>YGEEKPAV<br>LGHD | Oryctola<br>gus<br>cuniculu<br>s |
| 1 | 1.00 | 1 | 1 | 0.01  | 0.01   | 0.01   | 0.01   | 0.01   | t | 119629 | QPENNYK<br>T                 | Homo<br>sapiens                  |
| 1 | 1.00 | 1 | 1 | 0.01  | 0.01   | 0.01   | 0.01   | 0.01   | t | 118471 | KNAGVEG<br>SLIVEK            | Homo<br>sapiens                  |
| 1 | 1.00 | 1 | 1 | 0.01  | 0.01   | 0.01   | 0.01   | 0.01   | t | 121183 | CVRGEYST<br>CSAFRVF          | Mus<br>musculu<br>s              |
| 1 | 1.00 | 1 | 1 | 0.01  | 0.01   | 0.01   | 0.01   | 0.01   | t | 49085  | PQQPFPQ<br>QPE               | Mus<br>musculu<br>s              |
| 1 | 1.00 | 1 | 1 | 0.01  | 0.01   | 0.01   | 0.01   | 0.01   | t | 46998  | PAVVPDRE<br>ILYQQFDE<br>MEEC | Homo<br>sapiens                  |
| 1 | 1.00 | 1 | 1 | 0.01  | 0.01   | 0.01   | 0.01   | 0.01   | t | 49085  | PQQPFPQ<br>QPE               | Mus<br>musculu<br>s              |
| 1 | 1.00 | 1 | 1 | 0.01  | 0.01   | 0.01   | 0.01   | 0.01   | t | 39392  | LSGRPAIIP<br>DREALYQE<br>FDE | Homo<br>sapiens                  |
| 1 | 1.00 | 1 | 1 | 0.01  | 0.01   | 0.01   | 0.01   | 0.01   | t | 22089  | GRIILSGRP<br>AVIPDREV<br>LYQ | Homo<br>sapiens                  |
| 1 | 1.00 | 1 | 1 | 0.01  | 0.01   | 0.01   | 0.01   | 0.01   | t | 13623  | EPDKMTT                      | Homo<br>sapiens                  |
| 1 | 1.00 | 1 | 1 | 0.01  | 0.01   | 0.01   | 0.01   | 0.01   | t | 17769  | FSLGAKQ                      | Homo<br>sapiens                  |

|   |      |   |   |       |       |       |       |       |   |        |                              |                     |
|---|------|---|---|-------|-------|-------|-------|-------|---|--------|------------------------------|---------------------|
| 1 | 1.00 | 1 | 1 | 0.01  | 0.01  | 0.01  | 0.01  | 0.01  | t | 22084  | GRIILSGRP<br>AIIPDREAL<br>YQ | Homo<br>sapiens     |
| 1 | 1.00 | 1 | 1 | 0.01  | 0.01  | 0.01  | 0.01  | 0.01  | t | 4911   | ATCMQAD<br>LEVMTST           | Homo<br>sapiens     |
| 1 | 1.00 | 1 | 1 | 0.01  | 0.01  | 0.01  | 0.01  | 0.01  | t | 4911   | ATCMQAD<br>LEVMTST           | Homo<br>sapiens     |
| 1 | 1.00 | 1 | 1 | -0.01 | -0.01 | -0.01 | -0.01 | -0.01 | t | 146952 | GAQYVW<br>NRTALLQ            | Homo<br>sapiens     |
| 1 | 1.00 | 1 | 1 | -0.01 | -0.01 | -0.01 | -0.01 | -0.01 | t | 116981 | FSTDWSTR<br>PRLV             | Mus<br>musculu<br>s |
| 1 | 1.00 | 1 | 1 | -0.01 | -0.01 | -0.01 | -0.01 | -0.01 | t | 113001 | GIRKFAAD<br>AVKLERM          | Homo<br>sapiens     |
| 1 | 1.00 | 1 | 1 | -0.01 | -0.01 | -0.01 | -0.01 | -0.01 | t | 108031 | MGTVLLP<br>NGEFSIEN          | Homo<br>sapiens     |
| 1 | 1.00 | 1 | 1 | -0.01 | -0.01 | -0.01 | -0.01 | -0.01 | t | 95844  | SGTSGPSG<br>PSGT             | Homo<br>sapiens     |
| 1 | 1.00 | 1 | 1 | -0.01 | -0.01 | -0.01 | -0.01 | -0.01 | t | 95845  | SGTSGPSG<br>TSGP             | Homo<br>sapiens     |
| 1 | 1.00 | 1 | 1 | -0.01 | -0.01 | -0.01 | -0.01 | -0.01 | t | 95844  | SGTSGPSG<br>PSGT             | Homo<br>sapiens     |
| 1 | 1.00 | 1 | 1 | -0.01 | -0.01 | -0.01 | -0.01 | -0.01 | t | 78367  | EAGVLND<br>GPRFTDAF          | Mus<br>musculu<br>s |
| 1 | 1.00 | 1 | 1 | -0.01 | -0.01 | -0.01 | -0.01 | -0.01 | t | 95847  | SGTSGTSG<br>PSGP             | Homo<br>sapiens     |
| 1 | 1.00 | 1 | 1 | -0.01 | -0.01 | -0.01 | -0.01 | -0.01 | t | 95845  | SGTSGPSG<br>TSGP             | Homo<br>sapiens     |
| 1 | 1.00 | 1 | 1 | -0.01 | -0.01 | -0.01 | -0.01 | -0.01 | t | 95844  | SGTSGPSG<br>PSGT             | Homo<br>sapiens     |
| 1 | 1.00 | 1 | 1 | -0.01 | -0.01 | -0.01 | -0.01 | -0.01 | t | 95847  | SGTSGTSG<br>PSGP             | Homo<br>sapiens     |

|   |      |   |   |       |        |        |       |        |   |        |                              |                                  |
|---|------|---|---|-------|--------|--------|-------|--------|---|--------|------------------------------|----------------------------------|
| 1 | 1.00 | 1 | 1 | -0.03 | -0.03  | -0.03  | -0.03 | -0.03  | t | 115882 | PFAQTQSL<br>VY               | Homo<br>sapiens                  |
| 1 | 1.00 | 1 | 1 | -0.03 | -0.03  | -0.03  | -0.03 | -0.03  | t | 99266  | GDLIAVPT<br>GVAFWLY          | Homo<br>sapiens                  |
| 1 | 1.00 | 1 | 1 | -0.03 | -0.03  | -0.032 | -0.03 | -0.028 | t | 118585 | RNPLIAGK                     | Homo<br>sapiens                  |
| 1 | 1.00 | 1 | 1 | -0.04 | -0.043 | -0.038 | -0.04 | -0.04  | t | 120598 | IARFKMFP<br>EVKEKGM<br>A     | Oryctola<br>gus<br>cuniculu<br>s |
| 1 | 1.00 | 1 | 1 | 0.02  | 0.022  | 0.02   | 0.023 | 0.021  | t | 104443 | DAEFRHDS<br>GYE              | Homo<br>sapiens                  |
| 1 | 1.00 | 1 | 1 | -0.04 | -0.037 | -0.038 | -0.04 | -0.04  | t | 10510  | DTVIYSKY<br>GG               | Mus<br>musculu<br>s              |
| 1 | 1.00 | 1 | 1 | 0.05  | 0.05   | 0.045  | 0.05  | 0.049  | t | 125015 | DNESSYSR<br>GFDMTYT<br>E     | Mus<br>musculu<br>s              |
| 1 | 1.00 | 1 | 1 | 0.01  | 0.012  | 0.01   | 0.01  | 0.012  | t | 41609  | MGQHPAK<br>S                 | Anas<br>platyrhy<br>nchos        |
| 1 | 1.00 | 1 | 1 | 0     | 0      | -0.007 | 0     | 0.002  | t | 41421  | MEQFIRAF<br>IEIDKDN<br>ELID  | Mus<br>musculu<br>s              |
| 1 | 1.00 | 1 | 1 | 0     | 0.003  | -0.007 | 0     | 0.002  | t | 41421  | MEQFIRAF<br>IEIDKDN<br>ELID  | Mus<br>musculu<br>s              |
| 1 | 1.00 | 1 | 1 | 0     | 0.003  | -0.007 | 0     | 0.002  | t | 41421  | MEQFIRAF<br>IEIDKDN<br>ELID  | Mus<br>musculu<br>s              |
| 1 | 1.00 | 1 | 1 | 0     | 0      | -0.007 | 0     | 0.002  | t | 41421  | MEQFIRAF<br>IEIDKDN<br>ELID  | Mus<br>musculu<br>s              |
| 1 | 1.00 | 1 | 1 | 0.07  | 0.068  | 0.07   | 0.069 | 0.07   | t | 111515 | LQPETTDL<br>YCYEQLND<br>SSEE | Mus<br>musculu<br>s              |
| 1 | 1.00 | 1 | 1 | 0.07  | 0.068  | 0.07   | 0.069 | 0.07   | t | 111515 | LQPETTDL<br>YCYEQLND<br>SSEE | Mus<br>musculu<br>s              |
| 1 | 1.00 | 1 | 1 | 0.01  | 0.01   | 0.01   | 0.01  | 0.011  | t | 133624 | KPGEMRG<br>AA                | Mus<br>musculu<br>s              |



|   |      |   |   |       |        |       |        |       |   |        |                     |                       |
|---|------|---|---|-------|--------|-------|--------|-------|---|--------|---------------------|-----------------------|
| 1 | 1.00 | 1 | 1 | -0.05 | -0.046 | -0.05 | -0.043 | -0.05 | t | 132058 | SEVSGTQK<br>VSFSGQP | Homo sapiens          |
| 1 | 1.00 | 1 | 1 | 0     | -0.003 | 0     | 0      | 0     | t | 105127 | DAEFRHD             | Oryctolagus cuniculus |
| 1 | 1.00 | 1 | 1 | 0     | 0      | 0     | 0      | 0     | t | 75950  | YTASARGD<br>LAHLTTT | Mus musculus          |
| 1 | 1.00 | 1 | 1 | 0     | 0      | 0     | 0      | 0     | t | 75950  | YTASARGD<br>LAHLTTT | Sus scrofa            |
| 1 | 1.00 | 1 | 1 | 0     | 0      | 0     | 0      | 0     | t | 75950  | YTASARGD<br>LAHLTTT | Mus musculus          |
| 1 | 1.00 | 1 | 1 | 0     | 0      | 0     | 0      | 0     | t | 75950  | YTASARGD<br>LAHLTTT | Mus musculus          |
| 1 | 1.00 | 1 | 1 | 0     | 0      | 0     | 0      | 0     | t | 75950  | YTASARGD<br>LAHLTTT | Sus scrofa            |
| 1 | 1.00 | 1 | 1 | 0     | 0      | 0     | 0      | 0     | t | 36958  | LKMADPN<br>RFRGKD   | Mus musculus          |
| 1 | 1.00 | 1 | 1 | 0     | -0.003 | 0     | 0      | 0     | t | 43242  | NANPNAN<br>PNANP    | Oryctolagus cuniculus |
| 1 | 1.00 | 1 | 1 | 0     | 0      | 0     | 0      | 0     | t | 51371  | QLINTNGS<br>WHIN    | Rattus norvegicus     |
| 1 | 1.00 | 1 | 1 | 0     | -0.003 | 0     | 0      | 0     | t | 43242  | NANPNAN<br>PNANP    | Oryctolagus cuniculus |
| 1 | 1.00 | 1 | 1 | 0.03  | 0.03   | 0.03  | 0.03   | 0.032 | t | 61800  | STNS                | Mus musculus          |

|   |      |   |   |       |        |        |        |        |   |        |                           |                                  |
|---|------|---|---|-------|--------|--------|--------|--------|---|--------|---------------------------|----------------------------------|
| 1 | 1.00 | 1 | 1 | 0     | 0      | 0      | 0      | -0.002 | t | 131862 | ELPSSNTG<br>AWRVSTM       | Homo<br>sapiens                  |
| 1 | 1.00 | 1 | 1 | 0.01  | 0.007  | 0.013  | 0.01   | 0.009  | t | 66203  | TSFPPSP<br>GPSCPT         | Oryctola<br>gus<br>cuniculu<br>s |
| 1 | 1.00 | 1 | 1 | 0     | 0.003  | 0      | -0.001 | 0.001  | t | 79111  | VNKGYTG<br>Y              | Mus<br>musculu<br>s              |
| 1 | 1.00 | 1 | 1 | -0.04 | -0.04  | -0.026 | -0.034 | -0.042 | t | 52403  | QSPRRRRS<br>QSRE          | Homo<br>sapiens                  |
| 1 | 1.00 | 1 | 1 | -0.02 | -0.024 | -0.02  | -0.017 | -0.021 | t | 31205  | KIDSWEEE<br>GWPAASG<br>TH | Oryctola<br>gus<br>cuniculu<br>s |
| 1 | 1.00 | 1 | 1 | -0.03 | -0.036 | -0.03  | -0.03  | -0.03  | t | 123643 | PYMPPPG<br>M              | Oryctola<br>gus<br>cuniculu<br>s |
| 1 | 1.00 | 1 | 1 | 0     | -0.002 | 0.003  | -0.001 | 0      | t | 647    | ADDPLLR                   | Mus<br>musculu<br>s              |
| 1 | 1.00 | 1 | 1 | -0.03 | -0.03  | -0.03  | -0.03  | -0.031 | t | 108134 | SLCINLRA<br>AR            | Homo<br>sapiens                  |
| 1 | 1.00 | 1 | 1 | 0     | 0      | 0.003  | 0      | 0.002  | t | 74144  | YHTLTATII<br>R            | Mus<br>musculu<br>s              |
| 1 | 1.00 | 1 | 1 | -0.04 | -0.042 | -0.048 | -0.041 | -0.04  | t | 89533  | TLAYRFGN<br>VTPR          | Mus<br>musculu<br>s              |
| 1 | 1.00 | 1 | 1 | 0     | 0.004  | 0      | 0.001  | 0      | t | 1790   | AHKWYSQ<br>WLPHR          | Homo<br>sapiens                  |
| 1 | 1.00 | 1 | 1 | 0.02  | 0.016  | 0.019  | 0.02   | 0.021  | t | 123838 | VWQDE                     | Mus<br>musculu<br>s              |
| 1 | 1.00 | 1 | 1 | 0     | 0.002  | -0.008 | 0.001  | -0.001 | t | 39023  | LQYGSFCT<br>QLNRALSG<br>I | Homo<br>sapiens                  |
| 1 | 1.00 | 1 | 1 | 0     | 0.003  | 0.001  | -0.001 | 0.001  | t | 6139   | CDSSDRPR<br>VYTIT         | Mus<br>musculu<br>s              |

|   |      |   |   |      |        |       |      |       |   |        |                              |                     |
|---|------|---|---|------|--------|-------|------|-------|---|--------|------------------------------|---------------------|
| 1 | 1.00 | 1 | 1 | 0.03 | 0.033  | 0.03  | 0.03 | 0.028 | t | 135465 | GSDYEDRY<br>YREN             | Mus<br>musculu<br>s |
| 1 | 1.00 | 1 | 1 | 0    | 0      | 0     | 0    | 0     | t | 145934 | PDIIPK                       | Mus<br>musculu<br>s |
| 1 | 1.00 | 1 | 1 | 0    | -0.012 | 0     | 0    | 0     | t | 71506  | VTSTLTSLF<br>RPGASQKI<br>QL  | Mus<br>musculu<br>s |
| 1 | 1.00 | 1 | 1 | 0    | 0      | 0     | 0    | 0     | t | 21408  | GNDYEDR<br>YYREMY<br>RYPNQ   | Mus<br>musculu<br>s |
| 1 | 1.00 | 1 | 1 | 0    | 0.008  | 0     | 0    | 0     | t | 21408  | GNDYEDR<br>YYREMY<br>RYPNQ   | Gallus<br>gallus    |
| 1 | 1.00 | 1 | 1 | 0    | 0      | 0     | 0    | 0     | t | 9538   | DNPSSVPK<br>KAAELYDK<br>IK   | Mus<br>musculu<br>s |
| 1 | 1.00 | 1 | 1 | 0    | 0      | 0     | 0    | 0     | t | 9538   | DNPSSVPK<br>KAAELYDK<br>IK   | Mus<br>musculu<br>s |
| 1 | 1.00 | 1 | 1 | 0.02 | 0.02   | 0.026 | 0.02 | 0.022 | t | 46443  | NVPEKQT                      | Mus<br>musculu<br>s |
| 1 | 1.00 | 1 | 1 | 0.02 | 0.02   | 0.026 | 0.02 | 0.022 | t | 46443  | NVPEKQT                      | Mus<br>musculu<br>s |
| 1 | 1.00 | 1 | 1 | 0.04 | 0.04   | 0.04  | 0.04 | 0.04  | t | 110679 | PETTDLYC<br>YEQLNDSS<br>EEED | Homo<br>sapiens     |
| 1 | 1.00 | 1 | 1 | 0.04 | 0.04   | 0.04  | 0.04 | 0.04  | t | 111169 | CQLDSQKI<br>C                | Homo<br>sapiens     |
| 1 | 1.00 | 1 | 1 | 0.02 | 0.02   | 0.02  | 0.02 | 0.02  | t | 121670 | NVFQLEVA<br>MALVDGL          | Mus<br>musculu<br>s |
| 1 | 1.00 | 1 | 1 | 0.02 | 0.02   | 0.02  | 0.02 | 0.02  | t | 96788  | QQEQQFK                      | Mus<br>musculu<br>s |
| 1 | 1.00 | 1 | 1 | 0.02 | 0.02   | 0.02  | 0.02 | 0.02  | t | 79044  | PNPNPNP<br>NPGTTTSL<br>ESFEN | Homo<br>sapiens     |
| 1 | 1.00 | 1 | 1 | 0.02 | 0.02   | 0.02  | 0.02 | 0.02  | t | 17197  | FNLVYT                       | Mus<br>musculu<br>s |
| 1 | 1.00 | 1 | 1 | 0    | 0      | 0     | 0    | 0     | t | 137448 | SHKLHKV                      | Mus<br>musculu<br>s |

|   |      |   |   |       |        |        |        |       |   |        |                              |                                  |
|---|------|---|---|-------|--------|--------|--------|-------|---|--------|------------------------------|----------------------------------|
| 1 | 1.00 | 1 | 1 | 0     | 0      | 0      | 0      | 0     | t | 140612 | VPVCDWE<br>LNC               | Mus<br>musculu<br>s              |
| 1 | 1.00 | 1 | 1 | 0     | 0      | 0      | 0      | 0     | t | 156945 | QLHTSI                       | Gallus<br>gallus                 |
| 1 | 1.00 | 1 | 1 | 0     | 0      | 0      | 0      | 0     | t | 119492 | LRKKGYDP<br>G                | Homo<br>sapiens                  |
| 1 | 1.00 | 1 | 1 | 0     | 0      | 0      | 0      | 0     | t | 119581 | FSCSVMH<br>E                 | Homo<br>sapiens                  |
| 1 | 1.00 | 1 | 1 | 0     | 0      | 0      | 0      | 0     | t | 98168  | KKHEDAG<br>ADKAVHL<br>R      | Sus<br>scrofa                    |
| 1 | 1.00 | 1 | 1 | 0     | 0      | 0      | 0      | 0     | t | 115789 | IHPFAQTQ<br>SL               | Homo<br>sapiens                  |
| 1 | 1.00 | 1 | 1 | 0     | 0      | 0      | 0      | 0     | t | 115731 | EPVLGPVR<br>GP               | Homo<br>sapiens                  |
| 1 | 1.00 | 1 | 1 | 0     | 0      | 0      | 0      | 0     | t | 110607 | GNRGFPG<br>QDGLAGP<br>K      | Mus<br>musculu<br>s              |
| 1 | 1.00 | 1 | 1 | 0     | 0.011  | 0      | 0      | 0     | t | 64056  | THNQWN<br>KPSKPKTN<br>FK     | Gallus<br>gallus                 |
| 1 | 1.00 | 1 | 1 | 0     | 0      | 0      | 0      | 0     | t | 39375  | LSGKPAIIP<br>DREVLyre<br>FDE | Homo<br>sapiens                  |
| 1 | 1.00 | 1 | 1 | 0     | 0      | 0      | 0      | 0     | t | 11967  | EFDEMEEC<br>ASHLPYIE<br>QGMQ | Homo<br>sapiens                  |
| 1 | 1.00 | 1 | 1 | 0     | 0      | 0      | 0      | 0     | t | 15913  | FFTELDGV<br>RLHRFA           | Homo<br>sapiens                  |
| 1 | 1.00 | 1 | 1 | 0     | 0      | 0      | 0      | 0     | t | 36769  | LIYDAAVE<br>GDLLFKL          | Homo<br>sapiens                  |
| 1 | 1.00 | 1 | 1 | 0     | 0      | 0      | 0      | 0     | t | 4451   | ASHLPYIE<br>QGMHLAE<br>QFKQK | Homo<br>sapiens                  |
| 1 | 1.00 | 1 | 1 | -0.03 | -0.032 | -0.031 | -0.033 | -0.03 | t | 48869  | PPPPRVQP<br>RKTKSV           | Sus<br>scrofa                    |
| 1 | 1.00 | 1 | 1 | 0     | 0.005  | 0.005  | 0      | 0     | t | 55877  | RSKYGFGA<br>KEVRSL           | Homo<br>sapiens                  |
| 1 | 1.00 | 1 | 1 | 0.04  | 0.038  | 0.036  | 0.04   | 0.04  | t | 137918 | LGEKVLSK<br>QETE             | Oryctola<br>gus<br>cuniculu<br>s |

|   |      |   |   |       |        |        |        |        |   |        |                           |                           |
|---|------|---|---|-------|--------|--------|--------|--------|---|--------|---------------------------|---------------------------|
| 1 | 1.00 | 1 | 1 | 0.01  | 0.01   | 0.005  | 0.009  | 0.012  | t | 122399 | HPQPEDP<br>DTAKE          | Mus<br>musculu<br>s       |
| 1 | 1.00 | 1 | 1 | -0.03 | -0.03  | -0.023 | -0.03  | -0.029 | t | 95899  | TDYKKYLLF<br>CME          | Homo<br>sapiens           |
| 1 | 1.00 | 1 | 1 | 0.01  | 0.012  | 0.01   | 0.016  | 0.011  | t | 119892 | GGDRGAP<br>KRGSGKDS<br>HH | Rattus<br>norvegic<br>us  |
| 1 | 1.00 | 1 | 1 | 0.01  | 0.01   | 0.01   | 0.016  | 0.011  | t | 119892 | GGDRGAP<br>KRGSGKDS<br>HH | Rattus<br>norvegic<br>us  |
| 1 | 1.00 | 1 | 1 | 0.02  | 0.022  | 0.026  | 0.02   | 0.022  | t | 25816  | IEGGEILL                  | Anas<br>platyrhy<br>nchos |
| 1 | 1.00 | 1 | 1 | 0     | 0.002  | 0      | 0.002  | 0      | t | 5214   | ATWSRPIY<br>FDIT          | Homo<br>sapiens           |
| 1 | 1.00 | 1 | 1 | -0.03 | -0.028 | -0.028 | -0.029 | -0.031 | t | 103365 | LMILIATNL<br>LGQNTP       | Homo<br>sapiens           |
| 1 | 1.00 | 1 | 1 | -0.02 | -0.019 | -0.015 | -0.02  | -0.021 | t | 56622  | RYPNQVYY<br>RPV           | Mus<br>musculu<br>s       |
| 1 | 1.00 | 1 | 1 | -0.01 | -0.006 | -0.01  | -0.01  | -0.011 | t | 139952 | WYSFSAV                   | Ovis<br>aries             |
| 1 | 1.00 | 1 | 1 | -0.01 | -0.006 | -0.01  | -0.009 | -0.01  | t | 22031  | GRFKSQD<br>A              | Homo<br>sapiens           |
| 1 | 1.00 | 1 | 1 | 0.04  | 0.04   | 0.04   | 0.039  | 0.041  | t | 72805  | WLTEKEGS<br>YP            | Homo<br>sapiens           |
| 1 | 1.00 | 1 | 1 | 0.05  | 0.05   | 0.05   | 0.05   | 0.051  | t | 69235  | VKIDNASP<br>AS            | Mus<br>musculu<br>s       |
| 1 | 1.00 | 1 | 1 | -0.01 | -0.008 | -0.007 | -0.009 | -0.008 | t | 2046   | AIPLEVIK                  | Homo<br>sapiens           |
| 1 | 1.00 | 1 | 1 | -0.01 | -0.006 | -0.007 | -0.009 | -0.008 | t | 2046   | AIPLEVIK                  | Homo<br>sapiens           |
| 1 | 1.00 | 1 | 1 | 0.01  | 0.01   | 0.009  | 0.013  | 0.012  | t | 56501  | RYAHPS                    | Homo<br>sapiens           |

|   |      |   |   |       |        |       |        |        |   |        |                                 |                                  |
|---|------|---|---|-------|--------|-------|--------|--------|---|--------|---------------------------------|----------------------------------|
| 1 | 1.00 | 1 | 1 | 0     | 0      | 0     | 0      | 0      | t | 69271  | VKMAETC<br>PIFYDVF              | Homo<br>sapiens                  |
| 1 | 1.00 | 1 | 1 | 0     | 0      | 0     | 0      | 0      | t | 63655  | TFGAASNK<br>AFAEALST<br>EPKG    | Homo<br>sapiens                  |
| 1 | 1.00 | 1 | 1 | 0     | 0      | 0     | 0      | 0      | t | 62912  | TALKKAITA<br>MSQAQKA<br>AKPA    | Homo<br>sapiens                  |
| 1 | 1.00 | 1 | 1 | 0     | 0      | 0     | 0      | 0      | t | 31580  | KKIQDCYV<br>ENGLIS              | Homo<br>sapiens                  |
| 1 | 1.00 | 1 | 1 | 0     | 0      | 0     | 0      | 0      | t | 12408  | EICPAVKR<br>DVDLFLTG            | Homo<br>sapiens                  |
| 1 | 1.00 | 1 | 1 | 0     | 0      | 0     | 0      | 0      | t | 13644  | EPERTAM<br>KKIQDCY              | Homo<br>sapiens                  |
| 1 | 1.00 | 1 | 1 | 0     | 0      | 0     | 0      | 0      | t | 751    | ADPVTTEG<br>DYVVKISEF<br>YGR    | Homo<br>sapiens                  |
| 1 | 1.00 | 1 | 1 | 0     | 0      | 0     | 0      | 0      | t | 5781   | AYFYPELF<br>RQFYQLD<br>AYP      | Homo<br>sapiens                  |
| 1 | 1.00 | 1 | 1 | 0     | 0      | 0     | 0      | 0      | t | 10040  | DRRCQSQ<br>LER                  | Homo<br>sapiens                  |
| 1 | 1.00 | 1 | 1 | 0.01  | 0.014  | 0.021 | 0.013  | 0.008  | t | 60396  | SQCKLGSV<br>DLN                 | Homo<br>sapiens                  |
| 1 | 1.00 | 1 | 1 | -0.06 | -0.062 | -0.06 | -0.067 | -0.062 | t | 135484 | MSRPLIHF<br>GN                  | Mus<br>musculu<br>s              |
| 1 | 1.00 | 1 | 1 | 0.03  | 0.024  | 0.02  | 0.033  | 0.032  | t | 15509  | FEDVKGTG<br>GESRDLP<br>S<br>GQG | Papio                            |
| 1 | 1.00 | 1 | 1 | 0.01  | 0.008  | 0.016 | 0.007  | 0.01   | t | 31069  | KGTFDPLQ<br>EPRT                | Mus<br>musculu<br>s              |
| 1 | 1.00 | 1 | 1 | 0.01  | 0.008  | 0.016 | 0.007  | 0.01   | t | 31069  | KGTFDPLQ<br>EPRT                | Mus<br>musculu<br>s              |
| 1 | 1.00 | 1 | 1 | 0     | 0      | 0     | 0      | 0      | t | 53009  | QYNLAFSD<br>RQSAQ               | Mus<br>musculu<br>s              |
| 1 | 1.00 | 1 | 1 | -0.05 | -0.05  | -0.05 | -0.05  | -0.05  | t | 136067 | KATI                            | Oryctola<br>gus<br>cuniculu<br>s |

|   |      |   |   |       |       |       |       |       |   |        |                              |                     |
|---|------|---|---|-------|-------|-------|-------|-------|---|--------|------------------------------|---------------------|
| 1 | 1.00 | 1 | 1 | 0.02  | 0.02  | 0.026 | 0.02  | 0.02  | t | 18037  | FTPGAKQ<br>NIQLINT           | Homo<br>sapiens     |
| 1 | 1.00 | 1 | 1 | 0.03  | 0.032 | 0.03  | 0.031 | 0.032 | t | 123635 | PTTMKM<br>WSD                | Ovis<br>aries       |
| 1 | 1.00 | 1 | 1 | 0     | 0     | 0     | 0     | 0     | t | 156874 | GHFPPTPI<br>KTLA             | Gallus<br>gallus    |
| 1 | 1.00 | 1 | 1 | 0.05  | 0.05  | 0.05  | 0.05  | 0.05  | t | 150964 | AIDEITNKV<br>NSVIEK          | Homo<br>sapiens     |
| 1 | 1.00 | 1 | 1 | 0.03  | 0.03  | 0.03  | 0.03  | 0.03  | t | 115877 | NVPGEIVE<br>SL               | Homo<br>sapiens     |
| 1 | 1.00 | 1 | 1 | 0.03  | 0.03  | 0.03  | 0.03  | 0.03  | t | 102247 | YNNPGLL                      | Homo<br>sapiens     |
| 1 | 1.00 | 1 | 1 | 0.03  | 0.033 | 0.03  | 0.03  | 0.03  | t | 72919  | WNYDNAY<br>CDKLCKDK          | Equus<br>caballus   |
| 1 | 1.00 | 1 | 1 | 0.03  | 0.03  | 0.03  | 0.03  | 0.03  | t | 72919  | WNYDNAY<br>CDKLCKDK          | Mus<br>musculu<br>s |
| 1 | 1.00 | 1 | 1 | 0.03  | 0.03  | 0.03  | 0.03  | 0.03  | t | 72919  | WNYDNAY<br>CDKLCKDK          | Mus<br>musculu<br>s |
| 1 | 1.00 | 1 | 1 | 0.01  | 0.013 | 0.005 | 0.01  | 0.012 | t | 37656  | LLPHSNLD                     | Mus<br>musculu<br>s |
| 1 | 1.00 | 1 | 1 | 0.01  | 0.01  | 0.01  | 0.01  | 0.01  | t | 137746 | DTPLTVQG<br>LKLK             | Mus<br>musculu<br>s |
| 1 | 1.00 | 1 | 1 | 0.01  | 0.01  | 0.01  | 0.01  | 0.01  | t | 121739 | QCSLAIRIP<br>YQKLPY          | Mus<br>musculu<br>s |
| 1 | 1.00 | 1 | 1 | 0.01  | 0.01  | 0.01  | 0.01  | 0.01  | t | 46824  | PAIIPDREA<br>LYQQFDE<br>MEEC | Homo<br>sapiens     |
| 1 | 1.00 | 1 | 1 | 0.01  | 0.01  | 0.01  | 0.01  | 0.01  | t | 11970  | EFDEMEEC<br>GSHLPYIE<br>QGMQ | Homo<br>sapiens     |
| 1 | 1.00 | 1 | 1 | 0.01  | 0.007 | 0.01  | 0.01  | 0.01  | t | 7348   | CYCYGLPD<br>SVKIWTS          | Mus<br>musculu<br>s |
| 1 | 1.00 | 1 | 1 | -0.01 | -0.01 | -0.01 | -0.01 | -0.01 | t | 135716 | LRSTKFTI                     | Homo<br>sapiens     |
| 1 | 1.00 | 1 | 1 | -0.01 | -0.01 | -0.01 | -0.01 | -0.01 | t | 133601 | HPMYPTW<br>YSWQP             | Homo<br>sapiens     |

|   |      |   |   |       |        |        |        |        |   |        |                              |                                  |
|---|------|---|---|-------|--------|--------|--------|--------|---|--------|------------------------------|----------------------------------|
| 1 | 1.00 | 1 | 1 | -0.01 | -0.01  | -0.01  | -0.01  | -0.01  | t | 61557  | STDNNNT<br>KTISTDNN<br>NTKTI | Pan<br>troglody<br>tes           |
| 1 | 1.00 | 1 | 1 | -0.01 | -0.02  | -0.01  | -0.01  | -0.01  | t | 61557  | STDNNNT<br>KTISTDNN<br>NTKTI | Aotus<br>lemurinu<br>s           |
| 1 | 1.00 | 1 | 1 | -0.01 | -0.01  | -0.01  | -0.01  | -0.01  | t | 28693  | ISQQPFPL<br>QP               | Mus<br>musculu<br>s              |
| 1 | 1.00 | 1 | 1 | -0.01 | -0.01  | -0.01  | -0.01  | -0.01  | t | 28693  | ISQQPFPL<br>QP               | Mus<br>musculu<br>s              |
| 1 | 1.00 | 1 | 1 | 0.02  | 0.02   | 0.017  | 0.02   | 0.02   | t | 99028  | TPEGDLLEIL<br>L              | Homo<br>sapiens                  |
| 1 | 1.00 | 1 | 1 | 0.04  | 0.035  | 0.037  | 0.044  | 0.04   | t | 33223  | KRTITSKKS<br>KKAPSGAS<br>GVK | Canis<br>lupus                   |
| 1 | 1.00 | 1 | 1 | -0.02 | -0.02  | -0.024 | -0.02  | -0.02  | t | 152057 | QAARQRL<br>EPGRN             | Sus<br>scrofa                    |
| 1 | 1.00 | 1 | 1 | 0     | 0      | 0.007  | 0      | 0      | t | 151630 | FSTNWM<br>NQHRPS             | Mus<br>musculu<br>s              |
| 1 | 1.00 | 1 | 1 | -0.02 | -0.016 | -0.02  | -0.019 | -0.02  | t | 52292  | QSARRGEK                     | Homo<br>sapiens                  |
| 1 | 1.00 | 1 | 1 | 0.01  | 0.008  | 0.01   | 0.009  | 0.01   | t | 45367  | NPIDATAR<br>S                | Mus<br>musculu<br>s              |
| 1 | 1.00 | 1 | 1 | 0.01  | 0.006  | 0.01   | 0.009  | 0.01   | t | 45367  | NPIDATAR<br>S                | Oryctola<br>gus<br>cuniculu<br>s |
| 1 | 1.00 | 1 | 1 | 0     | 0      | -0.008 | -0.001 | 0.001  | t | 3933   | AQAANGG<br>ASGQVKV<br>TKVT   | Homo<br>sapiens                  |
| 1 | 1.00 | 1 | 1 | -0.01 | -0.01  | -0.015 | -0.01  | -0.008 | t | 58417  | SHSQWNK<br>PSKPKTN<br>MK     | Mus<br>musculu<br>s              |
| 1 | 1.00 | 1 | 1 | -0.01 | -0.013 | -0.015 | -0.01  | -0.008 | t | 58417  | SHSQWNK<br>PSKPKTN<br>MK     | Oryctola<br>gus<br>cuniculu<br>s |



|   |      |   |   |       |        |        |        |        |   |        |                              |                                  |
|---|------|---|---|-------|--------|--------|--------|--------|---|--------|------------------------------|----------------------------------|
| 1 | 1.00 | 1 | 1 | -0.02 | -0.02  | -0.027 | -0.02  | -0.02  | t | 94962  | VPTIAHGD<br>GRRPSKQR<br>TFI  | Homo<br>sapiens                  |
| 1 | 1.00 | 1 | 1 | 0.02  | 0.02   | 0.008  | 0.02   | 0.021  | t | 60592  | SQWGWC<br>GSTDEYCS<br>PDHNCQ | Mus<br>musculu<br>s              |
| 1 | 1.00 | 1 | 1 | -0.01 | -0.012 | -0.015 | -0.007 | -0.008 | t | 51775  | QNTRNIVP<br>VSIVSR           | Mus<br>musculu<br>s              |
| 1 | 1.00 | 1 | 1 | -0.01 | -0.014 | -0.002 | -0.007 | -0.008 | t | 137391 | DTHKRDTY                     | Oryctola<br>gus<br>cuniculu<br>s |
| 1 | 1.00 | 1 | 1 | 0.03  | 0.03   | 0.036  | 0.026  | 0.03   | t | 48733  | PPAAEYPP<br>AAEY             | Homo<br>sapiens                  |
| 1 | 1.00 | 1 | 1 | 0.02  | 0.022  | 0.026  | 0.021  | 0.02   | t | 54601  | RLITVN                       | Homo<br>sapiens                  |
| 1 | 1.00 | 1 | 1 | -0.03 | -0.03  | -0.027 | -0.031 | -0.03  | t | 50304  | QALGALK                      | Homo<br>sapiens                  |
| 1 | 1.00 | 1 | 1 | -0.02 | -0.016 | -0.015 | -0.013 | -0.019 | t | 133900 | NEHPVFAY<br>LKDKLP           | Homo<br>sapiens                  |
| 1 | 1.00 | 1 | 1 | -0.02 | -0.016 | -0.015 | -0.013 | -0.019 | t | 133900 | NEHPVFAY<br>LKDKLP           | Homo<br>sapiens                  |
| 1 | 1.00 | 1 | 1 | -0.03 | -0.028 | -0.035 | -0.029 | -0.03  | t | 74798  | YLLPRRGP<br>RL               | Homo<br>sapiens                  |
| 1 | 1.00 | 1 | 1 | 0.01  | 0.006  | 0.006  | 0.013  | 0.012  | t | 105684 | ASFDKVKG<br>DPVGILYA<br>VFKA | Oryctola<br>gus<br>cuniculu<br>s |
| 1 | 1.00 | 1 | 1 | -0.02 | -0.017 | -0.008 | -0.017 | -0.02  | t | 51027  | QHRLCVPS                     | Capra<br>hircus                  |
| 1 | 1.00 | 1 | 1 | 0.01  | 0.018  | 0.012  | 0.01   | 0.013  | t | 74045  | YGLLAVDP<br>LFKP             | Gallus<br>gallus                 |
| 1 | 1.00 | 1 | 1 | 0.01  | 0.015  | 0.012  | 0.01   | 0.013  | t | 74045  | YGLLAVDP<br>LFKP             | Gallus<br>gallus                 |

|   |      |   |   |      |       |      |      |      |   |        |                              |                                  |
|---|------|---|---|------|-------|------|------|------|---|--------|------------------------------|----------------------------------|
| 1 | 1.00 | 1 | 1 | 0    | 0     | 0    | 0    | 0    | t | 20267  | GIGAVLKV<br>LTTGLPALI<br>SW  | Mus<br>musculu<br>s              |
| 1 | 1.00 | 1 | 1 | 0.04 | 0.04  | 0.04 | 0.04 | 0.04 | t | 115602 | EAAAMELK<br>VEDP             | Homo<br>sapiens                  |
| 1 | 1.00 | 1 | 1 | 0.04 | 0.04  | 0.04 | 0.04 | 0.04 | t | 115602 | EAAAMELK<br>VEDP             | Homo<br>sapiens                  |
| 1 | 1.00 | 1 | 1 | 0.04 | 0.04  | 0.04 | 0.04 | 0.04 | t | 114987 | YANTTSED<br>GK               | Homo<br>sapiens                  |
| 1 | 1.00 | 1 | 1 | 0.02 | 0.02  | 0.02 | 0.02 | 0.02 | t | 149423 | QEQVPLV<br>QEQ               | Mus<br>musculu<br>s              |
| 1 | 1.00 | 1 | 1 | 0.02 | 0.02  | 0.02 | 0.02 | 0.02 | t | 140905 | TPAAKVLV<br>EGNTDER<br>GTPEY | Mus<br>musculu<br>s              |
| 1 | 1.00 | 1 | 1 | 0.02 | 0.02  | 0.02 | 0.02 | 0.02 | t | 149423 | QEQVPLV<br>QEQ               | Homo<br>sapiens                  |
| 1 | 1.00 | 1 | 1 | 0.02 | 0.02  | 0.02 | 0.02 | 0.02 | t | 140905 | TPAAKVLV<br>EGNTDER<br>GTPEY | Oryctola<br>gus<br>cuniculu<br>s |
| 1 | 1.00 | 1 | 1 | 0.02 | 0.02  | 0.02 | 0.02 | 0.02 | t | 108350 | EQEETNPE<br>VLIKDLQD         | Canis<br>lupus                   |
| 1 | 1.00 | 1 | 1 | 0.02 | 0.025 | 0.02 | 0.02 | 0.02 | t | 108350 | EQEETNPE<br>VLIKDLQD         | Homo<br>sapiens                  |
| 1 | 1.00 | 1 | 1 | 0.02 | 0.02  | 0.02 | 0.02 | 0.02 | t | 108350 | EQEETNPE<br>VLIKDLQD         | Homo<br>sapiens                  |
| 1 | 1.00 | 1 | 1 | 0.02 | 0.02  | 0.02 | 0.02 | 0.02 | t | 103910 | FWDDFW                       | Mus<br>musculu<br>s              |
| 1 | 1.00 | 1 | 1 | 0.02 | 0.02  | 0.02 | 0.02 | 0.02 | t | 115399 | NMAINPS<br>KENLCSTF<br>CKEVV | Homo<br>sapiens                  |
| 1 | 1.00 | 1 | 1 | 0    | 0     | 0    | 0    | 0    | t | 135714 | LNGKVDA<br>F                 | Homo<br>sapiens                  |
| 1 | 1.00 | 1 | 1 | 0    | 0     | 0    | 0    | 0    | t | 149647 | CPPLELKN<br>KHIEDGD          | Oryctola<br>gus<br>cuniculu<br>s |
| 1 | 1.00 | 1 | 1 | 0    | 0     | 0    | 0    | 0    | t | 132925 | WGANSPL                      | Homo<br>sapiens                  |

|   |      |   |   |       |       |       |       |       |   |        |                              |                                  |
|---|------|---|---|-------|-------|-------|-------|-------|---|--------|------------------------------|----------------------------------|
| 1 | 1.00 | 1 | 1 | 0     | 0     | 0     | 0     | 0     | t | 123209 | GATPVVG<br>A                 | Oryctola<br>gus<br>cuniculu<br>s |
| 1 | 1.00 | 1 | 1 | 0     | 0     | 0     | 0     | 0     | t | 98239  | LTLVPAVV<br>GK               | Mus<br>musculu<br>s              |
| 1 | 1.00 | 1 | 1 | 0     | 0.003 | 0     | 0     | 0     | t | 98239  | LTLVPAVV<br>GK               | Mus<br>musculu<br>s              |
| 1 | 1.00 | 1 | 1 | 0     | 0     | 0     | 0     | 0     | t | 98239  | LTLVPAVV<br>GK               | Oryctola<br>gus<br>cuniculu<br>s |
| 1 | 1.00 | 1 | 1 | 0     | 0     | 0     | 0     | 0     | t | 103532 | QSSFYSD<br>WYSPACG<br>K      | Homo<br>sapiens                  |
| 1 | 1.00 | 1 | 1 | 0     | 0     | 0     | 0     | 0     | t | 61395  | SSTKNLIYN<br>LTLCELNV        | Sus<br>scrofa                    |
| 1 | 1.00 | 1 | 1 | 0     | 0     | 0     | 0     | 0     | t | 47591  | PFVQWFM<br>GL                | Homo<br>sapiens                  |
| 1 | 1.00 | 1 | 1 | 0     | 0     | 0     | 0     | 0     | t | 57705  | SEYPSQPL<br>S                | Homo<br>sapiens                  |
| 1 | 1.00 | 1 | 1 | 0     | 0     | 0     | 0     | 0     | t | 42656  | MSRTFLM<br>KAHGIES<br>W      | Homo<br>sapiens                  |
| 1 | 1.00 | 1 | 1 | 0     | 0     | 0     | 0     | 0     | t | 4452   | ASHLPYIE<br>QGMQLAA<br>EFKQK | Homo<br>sapiens                  |
| 1 | 1.00 | 1 | 1 | -0.02 | -0.02 | -0.02 | -0.02 | -0.02 | t | 115987 | SVLSLSQS<br>KV               | Homo<br>sapiens                  |
| 1 | 1.00 | 1 | 1 | -0.02 | -0.02 | -0.02 | -0.02 | -0.02 | t | 100288 | LSKINQPY<br>QK               | Mus<br>musculu<br>s              |
| 1 | 1.00 | 1 | 1 | -0.04 | -0.04 | -0.04 | -0.04 | -0.04 | t | 115425 | PSGAWYY<br>VPLGTQYT<br>DAPSF | Homo<br>sapiens                  |
| 1 | 1.00 | 1 | 1 | 0.01  | 0.014 | 0.01  | 0.01  | 0.012 | t | 7771   | DDFHTDE<br>DKLDTNSV<br>YEPYY | Cavia<br>porcellu<br>s           |

|   |      |   |   |       |        |        |        |        |   |        |                              |                      |
|---|------|---|---|-------|--------|--------|--------|--------|---|--------|------------------------------|----------------------|
| 1 | 1.00 | 1 | 1 | 0     | 0.002  | 0.006  | 0      | 0      | t | 28076  | IPSTAFTDI<br>AWVRLPN<br>HYG  | Rattus<br>norvegicus |
| 1 | 1.00 | 1 | 1 | -0.02 | -0.02  | -0.02  | -0.02  | -0.02  | t | 149481 | SVCLHEVA<br>YW               | Homo<br>sapiens      |
| 1 | 1.00 | 1 | 1 | -0.03 | -0.03  | -0.031 | -0.028 | -0.03  | t | 144759 | RAALPSHV<br>VT               | Homo<br>sapiens      |
| 1 | 1.00 | 1 | 1 | 0     | 0      | 0      | 0.004  | 0.002  | t | 59922  | SNTFINNA                     | Homo<br>sapiens      |
| 1 | 1.00 | 1 | 1 | 0     | 0      | 0      | 0.004  | 0.002  | t | 59922  | SNTFINNA                     | Homo<br>sapiens      |
| 1 | 1.00 | 1 | 1 | -0.03 | -0.03  | -0.03  | -0.03  | -0.03  | t | 132927 | WGANVPS                      | Homo<br>sapiens      |
| 1 | 1.00 | 1 | 1 | 0.02  | 0.022  | 0.008  | 0.02   | 0.023  | t | 7765   | DDEHVEEP<br>TVA              | Homo<br>sapiens      |
| 1 | 1.00 | 1 | 1 | 0     | 0      | 0      | 0      | -0.001 | t | 266    | AALANSLS<br>LG PQQKV         | Mus<br>musculus      |
| 1 | 1.00 | 1 | 1 | 0     | 0      | 0      | 0      | 0      | t | 159077 | RSKHNRRE<br>GYKTQNG          | Mus<br>musculus      |
| 1 | 1.00 | 1 | 1 | -0.03 | -0.032 | -0.039 | -0.027 | -0.03  | t | 115351 | LKQKSSNS<br>RKKRSTS          | Mus<br>musculus      |
| 1 | 1.00 | 1 | 1 | -0.02 | -0.022 | -0.022 | -0.023 | -0.02  | t | 53173  | RANPNPYT<br>SRRSV            | Mus<br>musculus      |
| 1 | 1.00 | 1 | 1 | -0.06 | -0.06  | -0.06  | -0.053 | -0.059 | t | 118119 | RSLKMRG<br>QAF               | Homo<br>sapiens      |
| 1 | 1.00 | 1 | 1 | 0     | -0.002 | -0.002 | 0.001  | 0      | t | 49872  | PVGGQSSF<br>YSDWYSP<br>ACGKA | Homo<br>sapiens      |
| 1 | 1.00 | 1 | 1 | 0.01  | 0.01   | 0.008  | 0.007  | 0.011  | t | 48751  | PPATVYRY<br>DSRPPE           | Homo<br>sapiens      |

|   |      |   |   |       |        |        |        |        |   |        |                              |                                  |
|---|------|---|---|-------|--------|--------|--------|--------|---|--------|------------------------------|----------------------------------|
| 1 | 1.00 | 1 | 1 | 0.03  | 0.033  | 0.023  | 0.03   | 0.03   | t | 8567   | DHSDLVAE<br>KQRLEDLG<br>QKFE | Mus<br>musculu<br>s              |
| 1 | 1.00 | 1 | 1 | -0.02 | -0.02  | -0.02  | -0.02  | -0.02  | t | 132067 | SLVLTNLNL                    | Homo<br>sapiens                  |
| 1 | 1.00 | 1 | 1 | 0.04  | 0.036  | 0.045  | 0.04   | 0.04   | t | 146230 | FDIPEEIK                     | Oryctola<br>gus<br>cuniculu<br>s |
| 1 | 1.00 | 1 | 1 | -0.02 | -0.02  | -0.034 | -0.024 | -0.02  | t | 4266   | ARTEGIIGK<br>EWYKMFV<br>NDFD | Homo<br>sapiens                  |
| 1 | 1.00 | 1 | 1 | -0.02 | -0.023 | -0.023 | -0.02  | -0.02  | t | 97203  | ANQAFKLT<br>S                | Oryctola<br>gus<br>cuniculu<br>s |
| 1 | 1.00 | 1 | 1 | -0.02 | -0.023 | -0.023 | -0.02  | -0.02  | t | 97203  | ANQAFKLT<br>S                | Oryctola<br>gus<br>cuniculu<br>s |
| 1 | 1.00 | 1 | 1 | 0     | 0      | 0.009  | 0      | -0.003 | t | 48085  | PKINRSAS<br>EPSL             | Oryctola<br>gus<br>cuniculu<br>s |
| 1 | 1.00 | 1 | 1 | 0     | 0      | 0.002  | 0.001  | 0      | t | 153251 | AKAFSYW<br>TPFDGKSL<br>YSST  | Mus<br>musculu<br>s              |
| 1 | 1.00 | 1 | 1 | 0.01  | 0.012  | 0.01   | 0.011  | 0.01   | t | 142166 | GLRRDLDA<br>SREAKKQL<br>EAEQ | Homo<br>sapiens                  |
| 1 | 1.00 | 1 | 1 | -0.02 | -0.022 | -0.013 | -0.026 | -0.026 | t | 122626 | VDVPNGR<br>GDSLAYGL<br>RS    | Oryctola<br>gus<br>cuniculu<br>s |
| 1 | 1.00 | 1 | 1 | 0     | 0.003  | 0      | 0      | 0.001  | t | 41019  | MADPNRF<br>RG                | Mus<br>musculu<br>s              |
| 1 | 1.00 | 1 | 1 | -0.03 | -0.033 | -0.033 | -0.03  | -0.03  | t | 7193   | CTPPALNC<br>YWPLNDY<br>GF    | Oryctola<br>gus<br>cuniculu<br>s |
| 1 | 1.00 | 1 | 1 | 0     | 0      | 0      | 0      | 0      | t | 120155 | QPSPYNG<br>WRMEI             | Rattus<br>norvegic<br>us         |
| 1 | 1.00 | 1 | 1 | 0     | 0      | 0      | 0      | 0      | t | 108832 | CGDRGFYF<br>NKPTG            | Mus<br>musculu<br>s              |

|   |      |   |   |       |        |        |        |        |   |        |                             |                                  |
|---|------|---|---|-------|--------|--------|--------|--------|---|--------|-----------------------------|----------------------------------|
| 1 | 1.00 | 1 | 1 | 0     | 0      | 0      | 0      | 0      | t | 100378 | PGSGFWS<br>FGSEDGSG<br>DSEN | Mus<br>musculu<br>s              |
| 1 | 1.00 | 1 | 1 | 0     | 0      | 0      | 0      | 0      | t | 43242  | NANPNAN<br>PNANP            | Mus<br>musculu<br>s              |
| 1 | 1.00 | 1 | 1 | 0.03  | 0.028  | 0.03   | 0.031  | 0.032  | t | 52120  | QQQP                        | Mus<br>musculu<br>s              |
| 1 | 1.00 | 1 | 1 | 0.01  | 0.012  | 0.01   | 0.011  | 0.01   | t | 116943 | DFRDYSTR<br>PFAL            | Homo<br>sapiens                  |
| 1 | 1.00 | 1 | 1 | 0     | -0.004 | 0      | -0.001 | -0.001 | t | 61589  | STEQNVP<br>DPQVG            | Oryctola<br>gus<br>cuniculu<br>s |
| 1 | 1.00 | 1 | 1 | 0     | -0.004 | 0      | -0.001 | -0.001 | t | 29852  | KALENKKK<br>QLSAGGK<br>NLS  | Oryctola<br>gus<br>cuniculu<br>s |
| 1 | 1.00 | 1 | 1 | 0     | 0      | 0      | -0.001 | -0.001 | t | 16101  | FHENWPS                     | Rattus<br>norvegic<br>us         |
| 1 | 1.00 | 1 | 1 | -0.01 | -0.01  | -0.01  | -0.01  | -0.01  | t | 94472  | CNPACGP<br>KY               | Capra<br>hircus                  |
| 1 | 1.00 | 1 | 1 | -0.01 | -0.017 | -0.01  | -0.01  | -0.01  | t | 94472  | CNPACGP<br>KY               | Oryctola<br>gus<br>cuniculu<br>s |
| 1 | 1.00 | 1 | 1 | -0.01 | -0.01  | -0.01  | -0.01  | -0.01  | t | 94635  | PACGRHY                     | Oryctola<br>gus<br>cuniculu<br>s |
| 1 | 1.00 | 1 | 1 | -0.01 | -0.003 | -0.01  | -0.01  | -0.01  | t | 94472  | CNPACGP<br>KY               | Capra<br>hircus                  |
| 1 | 1.00 | 1 | 1 | 0.03  | 0.03   | 0.04   | 0.03   | 0.028  | t | 76310  | YVKGGGA<br>VP               | Homo<br>sapiens                  |
| 1 | 1.00 | 1 | 1 | -0.03 | -0.027 | -0.024 | -0.03  | -0.032 | t | 60541  | SQRPQQP<br>FPL              | Mus<br>musculu<br>s              |
| 1 | 1.00 | 1 | 1 | -0.03 | -0.03  | -0.024 | -0.03  | -0.032 | t | 60541  | SQRPQQP<br>FPL              | Mus<br>musculu<br>s              |

|   |      |   |   |       |       |       |       |       |   |        |                              |                      |
|---|------|---|---|-------|-------|-------|-------|-------|---|--------|------------------------------|----------------------|
| 1 | 1.00 | 1 | 1 | 0.03  | 0.03  | 0.03  | 0.03  | 0.03  | t | 149033 | EDFRFESSL<br>SINDHA          | Rattus<br>norvegicus |
| 1 | 1.00 | 1 | 1 | 0.03  | 0.03  | 0.03  | 0.03  | 0.03  | t | 103531 | QSG LGDN<br>GYIPDE           | Homo<br>sapiens      |
| 1 | 1.00 | 1 | 1 | 0.01  | 0.01  | 0.01  | 0.01  | 0.01  | t | 153836 | HGPKATL<br>QDIVLHLE<br>P     | Cavia<br>porcellus   |
| 1 | 1.00 | 1 | 1 | 0.01  | 0.01  | 0.01  | 0.01  | 0.01  | t | 142200 | KGLRRDL<br>ASREAKKQ<br>LEAE  | Homo<br>sapiens      |
| 1 | 1.00 | 1 | 1 | 0.01  | 0.01  | 0.01  | 0.01  | 0.01  | t | 142200 | KGLRRDL<br>ASREAKKQ<br>LEAE  | Mus<br>musculus      |
| 1 | 1.00 | 1 | 1 | 0.01  | 0.01  | 0.01  | 0.01  | 0.01  | t | 142200 | KGLRRDL<br>ASREAKKQ<br>LEAE  | Homo<br>sapiens      |
| 1 | 1.00 | 1 | 1 | 0.01  | 0.01  | 0.01  | 0.01  | 0.01  | t | 153836 | HGPKATL<br>QDIVLHLE<br>P     | Cavia<br>porcellus   |
| 1 | 1.00 | 1 | 1 | 0.01  | 0.01  | 0.01  | 0.01  | 0.01  | t | 121677 | NVLALCVH<br>SYLVDGA          | Mus<br>musculus      |
| 1 | 1.00 | 1 | 1 | 0.01  | 0.01  | 0.01  | 0.01  | 0.01  | t | 41329  | MEECASQ<br>LPYIEQGM<br>QLAEQ | Homo<br>sapiens      |
| 1 | 1.00 | 1 | 1 | 0.01  | 0.01  | 0.01  | 0.01  | 0.01  | t | 11969  | EFDEMEEC<br>ASQLPYIE<br>QGMQ | Homo<br>sapiens      |
| 1 | 1.00 | 1 | 1 | -0.01 | -0.01 | -0.01 | -0.01 | -0.01 | t | 157811 | QRQCQQR<br>CER               | Homo<br>sapiens      |
| 1 | 1.00 | 1 | 1 | -0.01 | -0.01 | -0.01 | -0.01 | -0.01 | t | 110581 | GAKGSAG<br>APGIAGAP          | Mus<br>musculus      |
| 1 | 1.00 | 1 | 1 | -0.01 | -0.01 | -0.01 | -0.01 | -0.01 | t | 92684  | FIDGGKGN<br>DL               | Ovis<br>aries        |
| 1 | 1.00 | 1 | 1 | -0.01 | -0.01 | -0.01 | -0.01 | -0.01 | t | 63915  | TGPCKTCT<br>IPAQ             | Mus<br>musculus      |
| 1 | 1.00 | 1 | 1 | -0.01 | -0.01 | -0.01 | -0.01 | -0.01 | t | 57705  | SEYPSQPL<br>S                | Homo<br>sapiens      |
| 1 | 1.00 | 1 | 1 | -0.03 | -0.03 | -0.03 | -0.03 | -0.03 | t | 139892 | SKLPLAL                      | Ovis<br>aries        |

|   |      |   |   |       |       |        |        |       |   |        |                              |                                  |
|---|------|---|---|-------|-------|--------|--------|-------|---|--------|------------------------------|----------------------------------|
| 1 | 1.00 | 1 | 1 | 0.03  | 0.026 | 0.023  | 0.023  | 0.03  | t | 135443 | AGLGGV                       | Oryctola<br>gus<br>cuniculu<br>s |
| 1 | 1.00 | 1 | 1 | 0.01  | 0.01  | 0.01   | 0.01   | 0.01  | t | 133843 | GTKAVTKY<br>TSSK             | Oryctola<br>gus<br>cuniculu<br>s |
| 1 | 1.00 | 1 | 1 | 0     | 0     | -0.011 | 0      | 0     | t | 56366  | RVNAANK<br>KPEDLTN<br>DLETD  | Homo<br>sapiens                  |
| 1 | 1.00 | 1 | 1 | -0.03 | -0.03 | -0.037 | -0.03  | -0.03 | t | 159131 | SRLEHQM<br>WEAVKDE<br>LN     | Mus<br>musculu<br>s              |
| 1 | 1.00 | 1 | 1 | 0     | 0.004 | 0      | 0.001  | 0     | t | 8391   | DGGKMV<br>QV                 | Homo<br>sapiens                  |
| 1 | 1.00 | 1 | 1 | 0.01  | 0.01  | 0.012  | 0.013  | 0.01  | t | 1878   | AIDNLRAS<br>LETTNQA          | Homo<br>sapiens                  |
| 1 | 1.00 | 1 | 1 | -0.06 | -0.06 | -0.063 | -0.06  | -0.06 | t | 110390 | QWGRL                        | Mus<br>musculu<br>s              |
| 1 | 1.00 | 1 | 1 | -0.02 | -0.02 | -0.025 | -0.023 | -0.02 | t | 27703  | INNVLNLY<br>VFSKIFGKS<br>PVF | Homo<br>sapiens                  |
| 1 | 1.00 | 1 | 1 | 0     | 0.002 | -0.008 | 0.003  | 0.001 | t | 110957 | PAAVTLAE<br>ADRT             | Homo<br>sapiens                  |
| 1 | 1.00 | 1 | 1 | 0.03  | 0.03  | 0.03   | 0.026  | 0.028 | t | 118582 | RGYISPYFI<br>NTSK            | Homo<br>sapiens                  |
| 1 | 1.00 | 1 | 1 | 0.04  | 0.04  | 0.035  | 0.04   | 0.04  | t | 115035 | ASSDSSNT<br>E                | Rattus<br>norvegic<br>us         |
| 1 | 1.00 | 1 | 1 | 0.01  | 0.014 | 0.01   | 0.007  | 0.01  | t | 111589 | NLIRHVGG<br>GTPR             | Homo<br>sapiens                  |
| 1 | 1.00 | 1 | 1 | -0.01 | -0.01 | -0.01  | -0.01  | -0.01 | t | 126918 | RDYIPRILG<br>PEAFQQY<br>VGP  | Oryctola<br>gus<br>cuniculu<br>s |
| 1 | 1.00 | 1 | 1 | -0.02 | -0.02 | -0.02  | -0.023 | -0.02 | t | 4023   | AQPGYPW<br>PLY               | Homo<br>sapiens                  |



|   |      |   |   |       |        |        |        |        |   |        |                              |                       |
|---|------|---|---|-------|--------|--------|--------|--------|---|--------|------------------------------|-----------------------|
| 1 | 1.00 | 1 | 1 | 0.04  | 0.042  | 0.045  | 0.041  | 0.037  | t | 47127  | PDKEVLYQ<br>QYDEMEE<br>CSQAG | Homo sapiens          |
| 1 | 1.00 | 1 | 1 | -0.01 | -0.013 | -0.013 | -0.01  | -0.01  | t | 97531  | NQTIQRDK<br>V                | Oryctolagus cuniculus |
| 1 | 1.00 | 1 | 1 | -0.01 | -0.013 | -0.013 | -0.01  | -0.01  | t | 97531  | NQTIQRDK<br>V                | Oryctolagus cuniculus |
| 1 | 1.00 | 1 | 1 | -0.05 | -0.05  | -0.05  | -0.046 | -0.048 | t | 107895 | HSTKRGH<br>AKSRPVRG          | Homo sapiens          |
| 1 | 1.00 | 1 | 1 | 0     | 0.002  | 0.014  | 0.001  | 0      | t | 48511  | PLTNSK                       | Homo sapiens          |
| 1 | 1.00 | 1 | 1 | 0.01  | 0.008  | 0.01   | 0.003  | 0.011  | t | 136740 | WDETLLD<br>KF                | Mus musculus          |
| 1 | 1.00 | 1 | 1 | 0.05  | 0.048  | 0.043  | 0.047  | 0.049  | t | 65343  | TNINSDSQ<br>GRQQMT           | Mus musculus          |
| 1 | 1.00 | 1 | 1 | 0     | -0.003 | 0      | 0      | 0      | t | 135415 | AAKAAA                       | Oryctolagus cuniculus |
| 1 | 1.00 | 1 | 1 | -0.01 | -0.014 | -0.01  | -0.01  | -0.011 | t | 110766 | AIKSEVSLT<br>GAL             | Macaca                |
| 1 | 1.00 | 1 | 1 | 0.07  | 0.07   | 0.081  | 0.07   | 0.069  | t | 117235 | SS                           | Mus musculus          |
| 1 | 1.00 | 1 | 1 | 0.03  | 0.034  | 0.03   | 0.027  | 0.027  | t | 115379 | MAIPPKKN<br>QDKTEIPTI<br>NTI | Homo sapiens          |
| 1 | 1.00 | 1 | 1 | 0     | 0      | 0      | 0      | 0      | t | 145831 | IPLGTRP                      | Mus musculus          |
| 1 | 1.00 | 1 | 1 | 0     | -0.003 | 0      | 0      | 0      | t | 58922  | SKPTTKQR<br>QNKPPSK          | Oryctolagus cuniculus |
| 1 | 1.00 | 1 | 1 | -0.02 | -0.02  | -0.02  | -0.02  | -0.02  | t | 79445  | VCAKGPP<br>QLPRCP            | Mus musculus          |

|   |      |   |   |       |        |       |       |        |   |        |                              |                              |
|---|------|---|---|-------|--------|-------|-------|--------|---|--------|------------------------------|------------------------------|
| 1 | 1.00 | 1 | 1 | -0.02 | -0.02  | -0.02 | -0.02 | -0.02  | t | 79445  | VCAKGPP<br>QLPRCP            | Mus<br>musculus              |
| 1 | 1.00 | 1 | 1 | -0.01 | -0.01  | -0.01 | -0.01 | -0.01  | t | 91100  | AFQTPVHS                     | Mus<br>musculus              |
| 1 | 1.00 | 1 | 1 | 0     | 0      | 0     | 0     | 0      | t | 151731 | SAQSQRA<br>PDR               | Mus<br>musculus              |
| 1 | 1.00 | 1 | 1 | 0     | 0      | 0.008 | 0     | 0.001  | t | 31118  | KHIHKDIG<br>HC               | Oryctola<br>gus<br>cuniculus |
| 1 | 1.00 | 1 | 1 | 0.05  | 0.05   | 0.045 | 0.047 | 0.048  | t | 98919  | NSAEPEQS<br>LA               | Homo<br>sapiens              |
| 1 | 1.00 | 1 | 1 | -0.01 | -0.01  | -0.01 | -0.01 | -0.011 | t | 45597  | NQNNFVH<br>DCVNITIK<br>QHTVT | Mus<br>musculus              |
| 1 | 1.00 | 1 | 1 | -0.01 | -0.013 | -0.01 | -0.01 | -0.011 | t | 45597  | NQNNFVH<br>DCVNITIK<br>QHTVT | Mus<br>musculus              |
| 1 | 1.00 | 1 | 1 | 0.08  | 0.08   | 0.08  | 0.08  | 0.08   | t | 115732 | EQQQTED<br>ELQ               | Homo<br>sapiens              |
| 1 | 1.00 | 1 | 1 | 0.02  | 0.02   | 0.02  | 0.02  | 0.02   | t | 122593 | SSSLWAVP<br>SADPRFD          | Mus<br>musculus              |
| 1 | 1.00 | 1 | 1 | 0.02  | 0.02   | 0.02  | 0.02  | 0.02   | t | 132907 | TCYDDEM<br>KIGFPEDL          | Trichosu<br>rus<br>vulpecula |
| 1 | 1.00 | 1 | 1 | 0.02  | 0.02   | 0.02  | 0.02  | 0.02   | t | 123368 | KIKAYMES<br>E                | Ovis<br>aries                |
| 1 | 1.00 | 1 | 1 | 0.02  | 0.02   | 0.02  | 0.02  | 0.02   | t | 115933 | QWQVLSN<br>TVP               | Homo<br>sapiens              |
| 1 | 1.00 | 1 | 1 | 0.02  | 0.02   | 0.02  | 0.02  | 0.02   | t | 58228  | SGSGANN<br>SSSSGSGSI<br>YN   | Sus<br>scrofa                |
| 1 | 1.00 | 1 | 1 | 0     | 0      | 0     | 0     | 0      | t | 147546 | CFGSLPW<br>MC                | Homo<br>sapiens              |
| 1 | 1.00 | 1 | 1 | 0     | 0      | 0     | 0     | 0      | t | 141559 | SDEALPLG<br>SPR              | Mus<br>musculus              |
| 1 | 1.00 | 1 | 1 | 0     | 0      | 0     | 0     | 0      | t | 141559 | SDEALPLG<br>SPR              | Mus<br>musculus              |

|   |      |   |   |       |       |       |       |       |   |        |                          |                          |
|---|------|---|---|-------|-------|-------|-------|-------|---|--------|--------------------------|--------------------------|
| 1 | 1.00 | 1 | 1 | 0     | 0     | 0     | 0     | 0     | t | 144666 | GREGYPADGGKGS<br>GYCA    | Oryctolagus<br>cuniculus |
| 1 | 1.00 | 1 | 1 | 0     | 0     | 0     | 0     | 0     | t | 153343 | ACRDHLYGSCGGGS           | Mus<br>musculus          |
| 1 | 1.00 | 1 | 1 | 0     | 0     | 0     | 0     | 0     | t | 132121 | WGDSSKPVSPDWN<br>K       | Homo<br>sapiens          |
| 1 | 1.00 | 1 | 1 | 0     | 0     | 0     | 0     | 0     | t | 119476 | KKKKYAEAV                | Homo<br>sapiens          |
| 1 | 1.00 | 1 | 1 | 0     | 0     | 0     | 0     | 0     | t | 119628 | QGNVFSCS                 | Homo<br>sapiens          |
| 1 | 1.00 | 1 | 1 | 0     | 0     | 0     | 0     | 0     | t | 114759 | CRKELAAVSV               | Homo<br>sapiens          |
| 1 | 1.00 | 1 | 1 | 0     | 0     | 0     | 0     | 0     | t | 69885  | VLYQEFDEMEECASH<br>LPYIE | Homo<br>sapiens          |
| 1 | 1.00 | 1 | 1 | 0     | 0     | 0     | 0     | 0     | t | 46990  | PAVIPDREVLYQAFDE<br>MEEC | Homo<br>sapiens          |
| 1 | 1.00 | 1 | 1 | 0     | 0     | 0     | 0     | 0     | t | 49086  | PQQPFPQQPG               | Mus<br>musculus          |
| 1 | 1.00 | 1 | 1 | 0     | 0     | 0     | 0     | 0     | t | 49086  | PQQPFPQQPG               | Mus<br>musculus          |
| 1 | 1.00 | 1 | 1 | 0     | 0     | 0     | 0     | 0     | t | 47177  | PDREILYQQFDEMEE<br>CSRHI | Homo<br>sapiens          |
| 1 | 1.00 | 1 | 1 | 0     | 0     | 0     | 0     | 0     | t | 50914  | QGMQLAEQFKQKAL<br>GLLQTA | Homo<br>sapiens          |
| 1 | 1.00 | 1 | 1 | -0.02 | -0.02 | -0.02 | -0.02 | -0.02 | t | 96240  | EKQMKDKQDE               | Homo<br>sapiens          |
| 1 | 1.00 | 1 | 1 | -0.02 | -0.02 | -0.02 | -0.02 | -0.02 | t | 78315  | WQTFYSP                  | Homo<br>sapiens          |
| 1 | 1.00 | 1 | 1 | -0.02 | -0.02 | -0.02 | -0.02 | -0.02 | t | 97966  | DYQAKLTAYQ               | Mus<br>musculus          |
| 1 | 1.00 | 1 | 1 | -0.02 | -0.02 | -0.02 | -0.02 | -0.02 | t | 79960  | PFCFGKDLKRP              | Mus<br>musculus          |
| 1 | 1.00 | 1 | 1 | 0.01  | 0.007 | 0.021 | 0.01  | 0.008 | t | 111437 | IYNALSSAGLQNIQIK         | Oryctolagus<br>cuniculus |

|   |      |   |   |       |        |        |        |        |   |        |                              |                            |
|---|------|---|---|-------|--------|--------|--------|--------|---|--------|------------------------------|----------------------------|
| 1 | 1.00 | 1 | 1 | -0.04 | -0.04  | -0.04  | -0.04  | -0.039 | t | 55185  | RPKHPIKH<br>QG               | Homo<br>sapiens            |
| 1 | 1.00 | 1 | 1 | 0.06  | 0.06   | 0.06   | 0.057  | 0.06   | t | 78872  | VIPDREVL<br>YQEFDEM<br>EECAS | Homo<br>sapiens            |
| 1 | 1.00 | 1 | 1 | -0.04 | -0.04  | -0.028 | -0.034 | -0.04  | t | 51841  | QPGLRR                       | Homo<br>sapiens            |
| 1 | 1.00 | 1 | 1 | -0.03 | -0.026 | -0.023 | -0.029 | -0.03  | t | 10518  | DTVTP                        | Homo<br>sapiens            |
| 1 | 1.00 | 1 | 1 | -0.07 | -0.066 | -0.068 | -0.063 | -0.07  | t | 121267 | ERMERKR<br>REK               | Homo<br>sapiens            |
| 1 | 1.00 | 1 | 1 | 0.02  | 0.022  | 0.023  | 0.021  | 0.02   | t | 23349  | GYGTVT                       | Homo<br>sapiens            |
| 1 | 1.00 | 1 | 1 | 0     | 0      | 0      | 0      | 0      | t | 156852 | AYQLGYSP<br>PPLPNPH          | Gallus<br>gallus           |
| 1 | 1.00 | 1 | 1 | 0.01  | 0.013  | 0.007  | 0.01   | 0.01   | t | 52910  | QYGLEKRD<br>NGHQGE           | Mus<br>musculu<br>s        |
| 1 | 1.00 | 1 | 1 | 0.01  | 0.013  | 0.007  | 0.01   | 0.01   | t | 52910  | QYGLEKRD<br>NGHQGE           | Mus<br>musculu<br>s        |
| 1 | 1.00 | 1 | 1 | -0.02 | -0.02  | -0.018 | -0.02  | -0.02  | t | 96771  | QFFRRMD<br>Y                 | Mus<br>musculu<br>s        |
| 1 | 1.00 | 1 | 1 | 0.02  | 0.02   | 0.02   | 0.02   | 0.02   | t | 156889 | HNRKCDY<br>YIAECNVM<br>P     | Gallus<br>gallus           |
| 1 | 1.00 | 1 | 1 | 0.02  | 0.022  | 0.015  | 0.021  | 0.019  | t | 19511  | GFDEMEE<br>CASHLPYIE<br>QGMQ | Homo<br>sapiens            |
| 1 | 1.00 | 1 | 1 | 0.02  | 0.018  | 0.02   | 0.019  | 0.02   | t | 66241  | TSGTSGTS<br>GTSGTSG          | Mus<br>musculu<br>s        |
| 1 | 1.00 | 1 | 1 | 0.01  | 0.01   | 0.01   | 0.01   | 0.01   | t | 130924 | KLFPEEDE<br>MRTETQR          | Homo<br>sapiens            |
| 1 | 1.00 | 1 | 1 | -0.01 | -0.008 | -0.01  | -0.007 | -0.009 | t | 96521  | KVTKEKPT<br>PP               | Homo<br>sapiens(<br>human) |

|   |      |   |   |       |        |        |       |        |   |        |                              |                                  |
|---|------|---|---|-------|--------|--------|-------|--------|---|--------|------------------------------|----------------------------------|
| 1 | 1.00 | 1 | 1 | 0.02  | 0.018  | 0.012  | 0.013 | 0.019  | t | 122205 | VFTLPPPL<br>PETH             | Mus<br>musculu<br>s              |
| 1 | 1.00 | 1 | 1 | 0.03  | 0.03   | 0.03   | 0.03  | 0.03   | t | 135502 | SSSQHL                       | Oryctola<br>gus<br>cuniculu<br>s |
| 1 | 1.00 | 1 | 1 | -0.01 | -0.01  | -0.01  | -0.01 | -0.01  | t | 137375 | AHHFSE                       | Oryctola<br>gus<br>cuniculu<br>s |
| 1 | 1.00 | 1 | 1 | 0.06  | 0.06   | 0.069  | 0.06  | 0.059  | t | 79851  | GVINE                        | Mus<br>musculu<br>s              |
| 1 | 1.00 | 1 | 1 | 0.01  | 0.006  | 0.005  | 0.009 | 0.009  | t | 58809  | SKEKATAA<br>SLTIPRNSK<br>KSQ | Oryctola<br>gus<br>cuniculu<br>s |
| 1 | 1.00 | 1 | 1 | 0     | -0.012 | -0.002 | 0     | 0      | t | 68019  | VDLPQPGL<br>RR               | Mus<br>musculu<br>s              |
| 1 | 1.00 | 1 | 1 | 0     | -0.012 | 0      | 0     | 0.001  | t | 51371  | QLINTNGS<br>WHIN             | Mus<br>musculu<br>s              |
| 1 | 1.00 | 1 | 1 | 0     | -0.012 | 0      | 0     | 0.001  | t | 51371  | QLINTNGS<br>WHIN             | Mus<br>musculu<br>s              |
| 1 | 1.00 | 1 | 1 | 0.02  | 0.024  | 0.014  | 0.017 | 0.02   | t | 158746 | ETKAFLKA<br>GDADGDG          | Homo<br>sapiens                  |
| 1 | 1.00 | 1 | 1 | -0.01 | -0.01  | -0.01  | -0.01 | -0.01  | t | 108860 | DGVNH                        | Mus<br>musculu<br>s              |
| 1 | 1.00 | 1 | 1 | -0.01 | -0.01  | -0.01  | -0.01 | -0.01  | t | 108860 | DGVNH                        | Mus<br>musculu<br>s              |
| 1 | 1.00 | 1 | 1 | -0.01 | -0.01  | -0.01  | -0.01 | -0.01  | t | 52138  | QQQTAPK<br>APT               | Oryctola<br>gus<br>cuniculu<br>s |
| 1 | 1.00 | 1 | 1 | 0.02  | 0.018  | 0.019  | 0.023 | 0.022  | t | 55783  | RRYQEERP                     | Anas<br>platyrhy<br>nchos        |
| 1 | 1.00 | 1 | 1 | -0.05 | -0.047 | -0.059 | -0.05 | -0.052 | t | 78635  | EKIERNNK<br>LKQPPPPP<br>NPN  | Mus<br>musculu<br>s              |
| 1 | 1.00 | 1 | 1 | -0.06 | -0.06  | -0.067 | -0.06 | -0.057 | t | 105696 | CAPLKPAK<br>SA               | Mus<br>musculu<br>s              |

|   |      |   |   |      |       |      |      |      |   |        |                              |                                  |
|---|------|---|---|------|-------|------|------|------|---|--------|------------------------------|----------------------------------|
| 1 | 1.00 | 1 | 1 | 0.03 | 0.03  | 0.03 | 0.03 | 0.03 | t | 123169 | FGGGDAP<br>PA                | Ovis<br>aries                    |
| 1 | 1.00 | 1 | 1 | 0.03 | 0.03  | 0.03 | 0.03 | 0.03 | t | 115464 | QYTDAPSF<br>SDIPNPIGS<br>ENS | Homo<br>sapiens                  |
| 1 | 1.00 | 1 | 1 | 0.01 | 0.01  | 0.01 | 0.01 | 0.01 | t | 137935 | NFNTVRY<br>DYYGD             | Homo<br>sapiens                  |
| 1 | 1.00 | 1 | 1 | 0.01 | 0.01  | 0.01 | 0.01 | 0.01 | t | 153499 | WSWQPPL<br>FPTDS             | Mus<br>musculu<br>s              |
| 1 | 1.00 | 1 | 1 | 0.01 | 0.01  | 0.01 | 0.01 | 0.01 | t | 119733 | AAQGARV<br>YAY               | Mus<br>musculu<br>s              |
| 1 | 1.00 | 1 | 1 | 0.01 | 0.007 | 0.01 | 0.01 | 0.01 | t | 119733 | AAQGARV<br>YAY               | Oryctola<br>gus<br>cuniculu<br>s |
| 1 | 1.00 | 1 | 1 | 0.01 | 0.01  | 0.01 | 0.01 | 0.01 | t | 119733 | AAQGARV<br>YAY               | Oryctola<br>gus<br>cuniculu<br>s |
| 1 | 1.00 | 1 | 1 | 0.01 | 0.01  | 0.01 | 0.01 | 0.01 | t | 119733 | AAQGARV<br>YAY               | Mus<br>musculu<br>s              |
| 1 | 1.00 | 1 | 1 | 0.01 | 0.01  | 0.01 | 0.01 | 0.01 | t | 122597 | SVDDARK<br>AWIHDFPL          | Mus<br>musculu<br>s              |
| 1 | 1.00 | 1 | 1 | 0.01 | 0.013 | 0.01 | 0.01 | 0.01 | t | 119733 | AAQGARV<br>YAY               | Mus<br>musculu<br>s              |
| 1 | 1.00 | 1 | 1 | 0.01 | 0.01  | 0.01 | 0.01 | 0.01 | t | 98954  | QEQVPLV<br>QQQQF             | Homo<br>sapiens                  |
| 1 | 1.00 | 1 | 1 | 0.01 | 0.01  | 0.01 | 0.01 | 0.01 | t | 98955  | QFEDFFPA<br>SSRDQSS          | Homo<br>sapiens                  |
| 1 | 1.00 | 1 | 1 | 0.01 | 0.01  | 0.01 | 0.01 | 0.01 | t | 39371  | LSGKPAIIP<br>DREALYQ<br>QFDE | Homo<br>sapiens                  |
| 1 | 1.00 | 1 | 1 | 0.01 | 0.01  | 0.01 | 0.01 | 0.01 | t | 47186  | PDREVLYQ<br>EFDEMEEC<br>SQHL | Homo<br>sapiens                  |
| 1 | 1.00 | 1 | 1 | 0.01 | 0.01  | 0.01 | 0.01 | 0.01 | t | 48735  | PPAAGPP<br>AAGPPAA<br>GPPAAG | Homo<br>sapiens                  |

|   |      |   |   |       |        |        |        |        |   |        |                              |                                  |
|---|------|---|---|-------|--------|--------|--------|--------|---|--------|------------------------------|----------------------------------|
| 1 | 1.00 | 1 | 1 | 0.01  | 0.01   | 0.01   | 0.01   | 0.01   | t | 22101  | GRITLTGK<br>PAVVPDRE<br>ILYQ | Homo<br>sapiens                  |
| 1 | 1.00 | 1 | 1 | 0.01  | 0.01   | 0.01   | 0.01   | 0.01   | t | 7003   | CSGLSSLFT<br>PGPKQQI         | Mus<br>musculu<br>s              |
| 1 | 1.00 | 1 | 1 | -0.01 | -0.01  | -0.01  | -0.01  | -0.01  | t | 99067  | YLQLQFPF<br>QPQL             | Homo<br>sapiens                  |
| 1 | 1.00 | 1 | 1 | -0.01 | -0.01  | -0.01  | -0.01  | -0.01  | t | 111559 | MPLVSQK                      | Homo<br>sapiens                  |
| 1 | 1.00 | 1 | 1 | -0.01 | -0.01  | -0.01  | -0.01  | -0.01  | t | 63922  | TGPCRTCT<br>IPAQ             | Mus<br>musculu<br>s              |
| 1 | 1.00 | 1 | 1 | -0.01 | -0.01  | -0.01  | -0.01  | -0.01  | t | 73185  | WVDWV                        | Equus<br>caballus                |
| 1 | 1.00 | 1 | 1 | -0.01 | -0.01  | -0.01  | -0.01  | -0.01  | t | 95817  | SAQSGTSG<br>PSGP             | Homo<br>sapiens                  |
| 1 | 1.00 | 1 | 1 | -0.01 | -0.01  | -0.01  | -0.01  | -0.01  | t | 53868  | RGFTSLFS<br>AFSAQ            | Homo<br>sapiens                  |
| 1 | 1.00 | 1 | 1 | -0.03 | -0.022 | -0.03  | -0.03  | -0.03  | t | 136364 | IDPLMFKY<br>WYNM             | Gallus<br>gallus                 |
| 1 | 1.00 | 1 | 1 | -0.03 | -0.034 | -0.03  | -0.03  | -0.03  | t | 136364 | IDPLMFKY<br>WYNM             | Bos<br>taurus                    |
| 1 | 1.00 | 1 | 1 | -0.03 | -0.03  | -0.03  | -0.03  | -0.03  | t | 118324 | EIKRTLKIP<br>AMT             | Homo<br>sapiens                  |
| 1 | 1.00 | 1 | 1 | -0.03 | -0.03  | -0.03  | -0.03  | -0.03  | t | 111560 | MPMTPAK                      | Homo<br>sapiens                  |
| 1 | 1.00 | 1 | 1 | -0.01 | -0.015 | -0.003 | -0.01  | -0.012 | t | 31916  | KLILAYTPP<br>GARGPQD         | Oryctola<br>gus<br>cuniculu<br>s |
| 1 | 1.00 | 1 | 1 | 0     | -0.003 | 0.002  | 0      | -0.001 | t | 56610  | RYPGQGS<br>PGGNRYP<br>PQG    | Oryctola<br>gus<br>cuniculu<br>s |
| 1 | 1.00 | 1 | 1 | -0.02 | -0.02  | -0.02  | -0.016 | -0.018 | t | 134219 | RPYNIYPH<br>GITDVRPL<br>YSRR | Homo<br>sapiens                  |
| 1 | 1.00 | 1 | 1 | 0.02  | 0.023  | 0.017  | 0.02   | 0.022  | t | 66751  | TTPAQGTS<br>M                | Mus<br>musculu<br>s              |
| 1 | 1.00 | 1 | 1 | 0.02  | 0.024  | 0.011  | 0.02   | 0.022  | t | 139880 | RDEYDHVL<br>SAKLAEQY<br>DT   | Ovis<br>aries                    |

|   |      |   |   |       |        |        |        |        |   |        |                              |                                  |
|---|------|---|---|-------|--------|--------|--------|--------|---|--------|------------------------------|----------------------------------|
| 1 | 1.00 | 1 | 1 | 0.03  | 0.03   | 0.03   | 0.03   | 0.03   | t | 134710 | KNWKEES<br>DRKIMQS           | Oryctola<br>gus<br>cuniculu<br>s |
| 1 | 1.00 | 1 | 1 | 0     | 0      | -0.006 | 0      | 0      | t | 25004  | HTYARFGI<br>EIQVQINP<br>TPFQ | Homo<br>sapiens                  |
| 1 | 1.00 | 1 | 1 | 0.01  | 0.01   | 0.003  | 0.01   | 0.012  | t | 19637  | GFTTNEPR<br>YNVFAE           | Mus<br>musculu<br>s              |
| 1 | 1.00 | 1 | 1 | 0.01  | 0.01   | 0.003  | 0.01   | 0.012  | t | 19637  | GFTTNEPR<br>YNVFAE           | Mus<br>musculu<br>s              |
| 1 | 1.00 | 1 | 1 | 0.01  | 0.01   | 0.01   | 0.004  | 0.009  | t | 3274   | ANETIYNT<br>TLKYGDV          | Homo<br>sapiens                  |
| 1 | 1.00 | 1 | 1 | -0.01 | -0.006 | -0.02  | -0.009 | -0.008 | t | 31502  | KKDGKKAE<br>PKNPRENK<br>LDQP | Homo<br>sapiens                  |
| 1 | 1.00 | 1 | 1 | 0.03  | 0.03   | 0.03   | 0.03   | 0.03   | t | 134176 | NSSYFPGK<br>L                | Homo<br>sapiens                  |
| 1 | 1.00 | 1 | 1 | -0.03 | -0.034 | -0.035 | -0.033 | -0.028 | t | 12115  | EGAARQP                      | Oryctola<br>gus<br>cuniculu<br>s |
| 1 | 1.00 | 1 | 1 | -0.03 | -0.032 | -0.035 | -0.033 | -0.028 | t | 12115  | EGAARQP                      | Mus<br>musculu<br>s              |
| 1 | 1.00 | 1 | 1 | 0.01  | 0.006  | 0.01   | 0.009  | 0.01   | t | 137928 | LSADFTPG<br>TEYT             | Oryctola<br>gus<br>cuniculu<br>s |
| 1 | 1.00 | 1 | 1 | -0.03 | -0.026 | -0.029 | -0.033 | -0.032 | t | 74358  | YIQQGNGI<br>FGMIFPG          | Homo<br>sapiens                  |
| 1 | 1.00 | 1 | 1 | 0     | -0.002 | 0      | -0.003 | -0.002 | t | 58381  | SHLPYIEQ<br>GMQLAEQ<br>F     | Mus<br>musculu<br>s              |
| 1 | 1.00 | 1 | 1 | -0.01 | -0.01  | -0.01  | -0.01  | -0.009 | t | 122875 | PRGWNPG<br>FLYNGFPL          | Oryctola<br>gus<br>cuniculu<br>s |
| 1 | 1.00 | 1 | 1 | 0.02  | 0.016  | 0.008  | 0.019  | 0.02   | t | 71849  | VVTGATVS<br>SQ               | Oryctola<br>gus<br>cuniculu<br>s |



|   |      |   |   |       |        |        |        |        |   |        |                              |                                  |
|---|------|---|---|-------|--------|--------|--------|--------|---|--------|------------------------------|----------------------------------|
| 1 | 1.00 | 1 | 1 | 0.01  | 0.005  | 0      | 0.007  | 0.01   | t | 42657  | MSRTKETA<br>RAKRTITSK<br>KSK | Canis<br>lupus                   |
| 1 | 1.00 | 1 | 1 | 0     | -0.004 | 0      | 0.003  | 0.001  | t | 118431 | ISDAMKKV<br>GRKGVITV<br>KD   | Oryctola<br>gus<br>cuniculu<br>s |
| 1 | 1.00 | 1 | 1 | 0     | 0      | -0.007 | 0      | 0      | t | 78392  | GDLRAYK<br>MVYATNP<br>QTQLSN | Mus<br>musculu<br>s              |
| 1 | 1.00 | 1 | 1 | 0.02  | 0.02   | 0.02   | 0.02   | 0.02   | t | 98365  | QGGLCKAL<br>QEQCRF           | Homo<br>sapiens                  |
| 1 | 1.00 | 1 | 1 | 0     | 0.002  | 0      | 0.001  | 0      | t | 117110 | WNTDFST<br>RAAHT             | Homo<br>sapiens                  |
| 1 | 1.00 | 1 | 1 | 0     | 0.002  | 0.005  | 0.001  | 0      | t | 5270   | AVARSAQ<br>SLTSLFVSG         | Homo<br>sapiens                  |
| 1 | 1.00 | 1 | 1 | 0.05  | 0.036  | 0.05   | 0.05   | 0.051  | t | 134148 | LQSDQEEI<br>DY               | Oryctola<br>gus<br>cuniculu<br>s |
| 1 | 1.00 | 1 | 1 | 0.01  | 0.01   | 0.005  | 0.008  | 0.01   | t | 96352  | GVTKAAEK<br>QM               | Homo<br>sapiens                  |
| 1 | 1.00 | 1 | 1 | 0.02  | 0.024  | 0.02   | 0.02   | 0.021  | t | 96220  | EENV                         | Homo<br>sapiens                  |
| 1 | 1.00 | 1 | 1 | 0     | 0      | 0      | 0      | 0      | t | 76396  | YVRGGGA<br>VP                | Homo<br>sapiens                  |
| 1 | 1.00 | 1 | 1 | 0     | 0      | 0      | 0      | 0      | t | 70536  | VQDGSVT<br>EQIIEELF          | Homo<br>sapiens                  |
| 1 | 1.00 | 1 | 1 | -0.09 | -0.087 | -0.1   | -0.09  | -0.091 | t | 111231 | EDLLMGTL<br>GIVCPICSQ<br>KP  | Mus<br>musculu<br>s              |
| 1 | 1.00 | 1 | 1 | -0.03 | -0.03  | -0.025 | -0.023 | -0.031 | t | 140718 | NKWERAR<br>YAER              | Rattus<br>norvegic<br>us         |

|   |      |   |   |       |        |        |        |        |   |        |                            |                                  |
|---|------|---|---|-------|--------|--------|--------|--------|---|--------|----------------------------|----------------------------------|
| 1 | 1.00 | 1 | 1 | 0     | -0.004 | 0      | -0.003 | -0.002 | t | 118374 | GKALCWV<br>CAQSRKH<br>RD   | Oryctola<br>gus<br>cuniculu<br>s |
| 1 | 1.00 | 1 | 1 | 0     | -0.002 | 0      | -0.003 | -0.002 | t | 117509 | GQIPPGA<br>M               | Mus<br>musculu<br>s              |
| 1 | 1.00 | 1 | 1 | 0     | -0.004 | 0      | -0.003 | -0.002 | t | 118383 | GLKKMLRT<br>CAVHITLD       | Oryctola<br>gus<br>cuniculu<br>s |
| 1 | 1.00 | 1 | 1 | 0     | -0.004 | 0      | -0.003 | -0.002 | t | 118105 | RKGHFLLS<br>SKSGFWTI<br>WL | Oryctola<br>gus<br>cuniculu<br>s |
| 1 | 1.00 | 1 | 1 | 0     | -0.004 | 0      | -0.003 | -0.002 | t | 117348 | PTRAPSGP<br>RPP            | Oryctola<br>gus<br>cuniculu<br>s |
| 1 | 1.00 | 1 | 1 | 0.01  | 0.008  | 0.01   | 0.009  | 0.008  | t | 51390  | QLKLDWF<br>KKGSS           | Mus<br>musculu<br>s              |
| 1 | 1.00 | 1 | 1 | -0.04 | -0.041 | -0.031 | -0.037 | -0.04  | t | 56841  | SAKIMPAL<br>PGLPFI         | Homo<br>sapiens                  |
| 1 | 1.00 | 1 | 1 | -0.01 | -0.002 | -0.01  | -0.01  | -0.012 | t | 136361 | HVRIPPTM<br>PEAW           | Gallus<br>gallus                 |
| 1 | 1.00 | 1 | 1 | -0.07 | -0.072 | -0.058 | -0.067 | -0.07  | t | 10090  | DSDFP IQN<br>LP            | Mus<br>musculu<br>s              |
| 1 | 1.00 | 1 | 1 | 0.02  | 0.02   | 0.02   | 0.02   | 0.02   | t | 153350 | ACTSPNQ<br>WLCGGGS         | Mus<br>musculu<br>s              |
| 1 | 1.00 | 1 | 1 | 0.02  | 0.02   | 0.02   | 0.02   | 0.02   | t | 137539 | KVKDDEL R<br>VIRPSRS       | Homo<br>sapiens                  |
| 1 | 1.00 | 1 | 1 | 0.02  | 0.02   | 0.02   | 0.02   | 0.02   | t | 133954 | WIKENF                     | Mus<br>musculu<br>s              |
| 1 | 1.00 | 1 | 1 | 0.02  | 0.02   | 0.02   | 0.02   | 0.02   | t | 118323 | EIGNIISDA<br>MKKV          | Homo<br>sapiens                  |
| 1 | 1.00 | 1 | 1 | 0     | 0      | 0      | 0      | 0      | t | 156928 | PAPRFF                     | Gallus<br>gallus                 |
| 1 | 1.00 | 1 | 1 | 0     | 0      | 0      | 0      | 0      | t | 156937 | PMSKSHL                    | Gallus<br>gallus                 |
| 1 | 1.00 | 1 | 1 | 0     | 0      | 0      | 0      | 0      | t | 149080 | NMTQAA<br>Q                | Sus<br>scrofa                    |

|   |      |   |   |   |   |   |   |   |   |        |                               |                                  |
|---|------|---|---|---|---|---|---|---|---|--------|-------------------------------|----------------------------------|
| 1 | 1.00 | 1 | 1 | 0 | 0 | 0 | 0 | 0 | t | 131911 | HSLNIGDY<br>NRTVGKG           | Homo<br>sapiens                  |
| 1 | 1.00 | 1 | 1 | 0 | 0 | 0 | 0 | 0 | t | 123167 | FGAGDAP<br>PS                 | Ovis<br>aries                    |
| 1 | 1.00 | 1 | 1 | 0 | 0 | 0 | 0 | 0 | t | 107674 | VSVLTVL                       | Homo<br>sapiens                  |
| 1 | 1.00 | 1 | 1 | 0 | 0 | 0 | 0 | 0 | t | 108582 | PSFPALR<br>L                  | Homo<br>sapiens                  |
| 1 | 1.00 | 1 | 1 | 0 | 0 | 0 | 0 | 0 | t | 105177 | FARANRGL                      | Homo<br>sapiens                  |
| 1 | 1.00 | 1 | 1 | 0 | 0 | 0 | 0 | 0 | t | 68018  | VDLPQLGL<br>RR                | Mus<br>musculu<br>s              |
| 1 | 1.00 | 1 | 1 | 0 | 0 | 0 | 0 | 0 | t | 79643  | SHLSTML                       | Oryctola<br>gus<br>cuniculu<br>s |
| 1 | 1.00 | 1 | 1 | 0 | 0 | 0 | 0 | 0 | t | 79971  | PLRMFLGP<br>KQLT              | Mus<br>musculu<br>s              |
| 1 | 1.00 | 1 | 1 | 0 | 0 | 0 | 0 | 0 | t | 78396  | GLANDV                        | Mus<br>musculu<br>s              |
| 1 | 1.00 | 1 | 1 | 0 | 0 | 0 | 0 | 0 | t | 79971  | PLRMFLGP<br>KQLT              | Mus<br>musculu<br>s              |
| 1 | 1.00 | 1 | 1 | 0 | 0 | 0 | 0 | 0 | t | 63923  | TGPCRTCT<br>TLAQ              | Mus<br>musculu<br>s              |
| 1 | 1.00 | 1 | 1 | 0 | 0 | 0 | 0 | 0 | t | 60679  | SRGNHVS<br>PTHYVPES<br>DAAAK  | Homo<br>sapiens                  |
| 1 | 1.00 | 1 | 1 | 0 | 0 | 0 | 0 | 0 | t | 47191  | PDREVLRYR<br>EFDEMEEC<br>AAHI | Homo<br>sapiens                  |
| 1 | 1.00 | 1 | 1 | 0 | 0 | 0 | 0 | 0 | t | 55645  | RRLHQWI<br>NEDYPSP            | Homo<br>sapiens                  |
| 1 | 1.00 | 1 | 1 | 0 | 0 | 0 | 0 | 0 | t | 47192  | PDREVLRYR<br>EFDEMEEC<br>ASHL | Homo<br>sapiens                  |
| 1 | 1.00 | 1 | 1 | 0 | 0 | 0 | 0 | 0 | t | 4453   | ASHLPYIE<br>QGMQLAE<br>QFKQK  | Homo<br>sapiens                  |
| 1 | 1.00 | 1 | 1 | 0 | 0 | 0 | 0 | 0 | t | 6079   | CCRHKQKI<br>VDPVKQTL<br>PPS   | Ovis<br>aries                    |

|   |      |   |   |       |        |        |        |        |   |        |                              |                       |
|---|------|---|---|-------|--------|--------|--------|--------|---|--------|------------------------------|-----------------------|
| 1 | 1.00 | 1 | 1 | 0     | 0      | 0      | 0      | 0      | t | 4450   | ASHLPYFE<br>QGMQLAE<br>QFKQK | Homo sapiens          |
| 1 | 1.00 | 1 | 1 | 0     | 0      | 0      | 0.007  | 0      | t | 12143  | EGDEATG<br>ANIVKVAL<br>EA    | Mus musculus          |
| 1 | 1.00 | 1 | 1 | 0.01  | 0.012  | 0.005  | 0.007  | 0.011  | t | 115122 | VPSEYLG<br>YLEQLRLK<br>K     | Homo sapiens          |
| 1 | 1.00 | 1 | 1 | -0.01 | -0.01  | -0.01  | -0.001 | -0.008 | t | 130808 | ENEPPVW<br>TTESKLQS          | Homo sapiens          |
| 1 | 1.00 | 1 | 1 | -0.02 | -0.018 | -0.016 | -0.019 | -0.019 | t | 47726  | PGPSQKI                      | Homo sapiens          |
| 1 | 1.00 | 1 | 1 | 0.01  | 0.008  | 0.001  | 0.007  | 0.01   | t | 89     | AADKPTLD<br>IRMMNIE<br>A     | Mus musculus          |
| 1 | 1.00 | 1 | 1 | 0.01  | 0.008  | 0.001  | 0.007  | 0.01   | t | 89     | AADKPTLD<br>IRMMNIE<br>A     | Mus musculus          |
| 1 | 1.00 | 1 | 1 | 0     | 0      | -0.007 | 0      | 0      | t | 46859  | PALTAVET<br>GATNPL           | Homo sapiens          |
| 1 | 1.00 | 1 | 1 | -0.01 | -0.01  | -0.015 | -0.01  | -0.009 | t | 54975  | RNCKKLGP<br>RENV A           | Oryctolagus cuniculus |
| 1 | 1.00 | 1 | 1 | 0.08  | 0.082  | 0.081  | 0.078  | 0.078  | t | 106878 | STSSSSSGS<br>G               | Homo sapiens          |
| 1 | 1.00 | 1 | 1 | 0.01  | 0.01   | 0.01   | 0.01   | 0.011  | t | 73081  | WSLFLNH<br>AE                | Mus musculus          |
| 1 | 1.00 | 1 | 1 | 0     | 0      | 0      | 0      | 0      | t | 123373 | KITQNNA<br>MKI               | Oryctolagus cuniculus |
| 1 | 1.00 | 1 | 1 | 0     | 0.003  | -0.001 | 0      | 0      | t | 9524   | DNPASTT<br>NKDK              | Mus musculus          |
| 1 | 1.00 | 1 | 1 | 0.05  | 0.048  | 0.05   | 0.047  | 0.048  | t | 7782   | DDGKGDR<br>SHKNEDES<br>ALASK | Mus musculus          |
| 1 | 1.00 | 1 | 1 | 0     | 0.003  | 0      | 0      | 0.001  | t | 106342 | DIVMTQSP<br>DSLAVSL          | Mus musculus          |

|   |      |   |   |      |       |       |       |      |   |        |                          |                                  |
|---|------|---|---|------|-------|-------|-------|------|---|--------|--------------------------|----------------------------------|
| 1 | 1.00 | 1 | 1 | 0.04 | 0.041 | 0.045 | 0.039 | 0.04 | t | 14849  | EVPTTKPT<br>EEPTINT      | Oryctola<br>gus<br>cuniculu<br>s |
| 1 | 1.00 | 1 | 1 | 0    | 0     | 0     | 0     | 0    | t | 151813 | CGADSYE<br>MEEDGVR<br>KC | Mus<br>musculu<br>s              |
| 1 | 1.00 | 1 | 1 | 0    | 0     | 0     | 0     | 0    | t | 141693 | KTWG                     | Mus<br>musculu<br>s              |
| 1 | 1.00 | 1 | 1 | 0    | 0     | 0     | 0     | 0    | t | 125250 | SDEFNPCE<br>DIMGYK       | Mus<br>musculu<br>s              |
| 1 | 1.00 | 1 | 1 | 0    | 0.006 | 0     | 0     | 0    | t | 124588 | PQEETLQA<br>FDSHYDYT     | Ovis<br>aries                    |
| 1 | 1.00 | 1 | 1 | 0    | 0     | 0     | 0     | 0    | t | 133775 | AETNRAPF<br>DLAEAE       | Oryctola<br>gus<br>cuniculu<br>s |
| 1 | 1.00 | 1 | 1 | 0    | 0     | 0     | 0     | 0    | t | 119048 | VSDYEMKL<br>MDLDVEQ      | Mus<br>musculu<br>s              |
| 1 | 1.00 | 1 | 1 | 0    | 0     | 0     | 0     | 0    | t | 122857 | MGCSSPP<br>CECHQEE       | Mus<br>musculu<br>s              |
| 1 | 1.00 | 1 | 1 | 0    | 0     | 0     | 0     | 0    | t | 103499 | PSRTWSPP<br>FESEDSQK     | Oryctola<br>gus<br>cuniculu<br>s |
| 1 | 1.00 | 1 | 1 | 0    | 0     | 0     | 0     | 0    | t | 99836  | QFPQPQ                   | Mus<br>musculu<br>s              |
| 1 | 1.00 | 1 | 1 | 0    | 0     | 0     | 0     | 0    | t | 99834  | QGGQGGY<br>P             | Mus<br>musculu<br>s              |
| 1 | 1.00 | 1 | 1 | 0    | 0     | 0     | 0     | 0    | t | 99833  | PPFSQQ                   | Mus<br>musculu<br>s              |
| 1 | 1.00 | 1 | 1 | 0    | 0     | 0     | 0     | 0    | t | 106327 | DDDKLEQI<br>RRDYTSGA     | Mus<br>musculu<br>s              |
| 1 | 1.00 | 1 | 1 | 0    | 0     | 0     | 0     | 0    | t | 99842  | RPQQPYP                  | Mus<br>musculu<br>s              |

|   |      |   |   |   |        |   |   |   |   |        |                              |                                  |
|---|------|---|---|---|--------|---|---|---|---|--------|------------------------------|----------------------------------|
| 1 | 1.00 | 1 | 1 | 0 | 0      | 0 | 0 | 0 | t | 104171 | PGSGFWS<br>FGSEDGSG<br>DPE   | Oryctola<br>gus<br>cuniculu<br>s |
| 1 | 1.00 | 1 | 1 | 0 | -0.003 | 0 | 0 | 0 | t | 103309 | KKNGRILT<br>LPRSNPS          | Oryctola<br>gus<br>cuniculu<br>s |
| 1 | 1.00 | 1 | 1 | 0 | 0      | 0 | 0 | 0 | t | 80049  | TGELTMY<br>WV                | Mus<br>musculu<br>s              |
| 1 | 1.00 | 1 | 1 | 0 | 0      | 0 | 0 | 0 | t | 79891  | KSADVESD<br>V                | Mus<br>musculu<br>s              |
| 1 | 1.00 | 1 | 1 | 0 | 0      | 0 | 0 | 0 | t | 97348  | GLFGAIA<br>G<br>FIEGGW       | Oryctola<br>gus<br>cuniculu<br>s |
| 1 | 1.00 | 1 | 1 | 0 | 0      | 0 | 0 | 0 | t | 70391  | VPNLRGDL<br>QVLAQKV<br>ARTLP | Oryctola<br>gus<br>cuniculu<br>s |
| 1 | 1.00 | 1 | 1 | 0 | 0      | 0 | 0 | 0 | t | 75286  | YPFMWG<br>GAYCF              | Mus<br>musculu<br>s              |
| 1 | 1.00 | 1 | 1 | 0 | 0      | 0 | 0 | 0 | t | 70472  | VPSDTVQT<br>RHVV             | Mus<br>musculu<br>s              |
| 1 | 1.00 | 1 | 1 | 0 | 0      | 0 | 0 | 0 | t | 65974  | TQYERE                       | Mus<br>musculu<br>s              |
| 1 | 1.00 | 1 | 1 | 0 | 0      | 0 | 0 | 0 | t | 73430  | YAQYMSR<br>AYAEFLGE<br>DPGSG | Mus<br>musculu<br>s              |
| 1 | 1.00 | 1 | 1 | 0 | 0      | 0 | 0 | 0 | t | 95050  | YCEIIVTHF<br>PFDQQNC<br>T    | Rattus<br>norvegic<br>us         |
| 1 | 1.00 | 1 | 1 | 0 | 0      | 0 | 0 | 0 | t | 73889  | YFRTLEDA<br>AH               | Mus<br>musculu<br>s              |
| 1 | 1.00 | 1 | 1 | 0 | 0      | 0 | 0 | 0 | t | 79624  | PEEQVPQL<br>IPPIIPRA<br>G    | Mus<br>musculu<br>s              |
| 1 | 1.00 | 1 | 1 | 0 | 0      | 0 | 0 | 0 | t | 73636  | YEDRYYRE                     | Mus<br>musculu<br>s              |
| 1 | 1.00 | 1 | 1 | 0 | 0      | 0 | 0 | 0 | t | 69462  | VLELAA                       | Mus<br>musculu<br>s              |

|   |      |   |   |   |   |   |   |   |   |       |                    |                       |
|---|------|---|---|---|---|---|---|---|---|-------|--------------------|-----------------------|
| 1 | 1.00 | 1 | 1 | 0 | 0 | 0 | 0 | 0 | t | 73328 | YAAQNRRLDLLFWEQGLC | Oryctolagus cuniculus |
| 1 | 1.00 | 1 | 1 | 0 | 0 | 0 | 0 | 0 | t | 95058 | AGLQND             | Mus musculus          |
| 1 | 1.00 | 1 | 1 | 0 | 0 | 0 | 0 | 0 | t | 74068 | YGPQVDY            | Mus musculus          |
| 1 | 1.00 | 1 | 1 | 0 | 0 | 0 | 0 | 0 | t | 71143 | VSSYHSPKCNPAQPV    | Oryctolagus cuniculus |
| 1 | 1.00 | 1 | 1 | 0 | 0 | 0 | 0 | 0 | t | 73636 | YEDRYRE            | Mus musculus          |
| 1 | 1.00 | 1 | 1 | 0 | 0 | 0 | 0 | 0 | t | 61944 | STTNK              | Mus musculus          |
| 1 | 1.00 | 1 | 1 | 0 | 0 | 0 | 0 | 0 | t | 94979 | YNKRFPGFVSP        | Oryctolagus cuniculus |
| 1 | 1.00 | 1 | 1 | 0 | 0 | 0 | 0 | 0 | t | 78937 | AYSDDFFVGRV        | Mus musculus          |
| 1 | 1.00 | 1 | 1 | 0 | 0 | 0 | 0 | 0 | t | 94838 | GTSSCRLVP          | Oryctolagus cuniculus |
| 1 | 1.00 | 1 | 1 | 0 | 0 | 0 | 0 | 0 | t | 64086 | THTPLPRGIGY        | Mus musculus          |
| 1 | 1.00 | 1 | 1 | 0 | 0 | 0 | 0 | 0 | t | 48279 | PLATQPPVLAL        | Mus musculus          |
| 1 | 1.00 | 1 | 1 | 0 | 0 | 0 | 0 | 0 | t | 47453 | PEVIRMQDNNP        | Oryctolagus cuniculus |
| 1 | 1.00 | 1 | 1 | 0 | 0 | 0 | 0 | 0 | t | 53484 | REEEDDDDEDGEDA     | Mus musculus          |

|   |      |   |   |   |   |   |   |   |   |       |                              |                                  |
|---|------|---|---|---|---|---|---|---|---|-------|------------------------------|----------------------------------|
| 1 | 1.00 | 1 | 1 | 0 | 0 | 0 | 0 | 0 | t | 37660 | LLPHSNLD<br>HILEPSIPW<br>KSK | Oryctola<br>gus<br>cuniculu<br>s |
| 1 | 1.00 | 1 | 1 | 0 | 0 | 0 | 0 | 0 | t | 44409 | NIYFNIY                      | Mus<br>musculu<br>s              |
| 1 | 1.00 | 1 | 1 | 0 | 0 | 0 | 0 | 0 | t | 48084 | PKINRSAP<br>EPSL             | Oryctola<br>gus<br>cuniculu<br>s |
| 1 | 1.00 | 1 | 1 | 0 | 0 | 0 | 0 | 0 | t | 38422 | LPAYQDYT<br>ARAQVSE          | Oryctola<br>gus<br>cuniculu<br>s |
| 1 | 1.00 | 1 | 1 | 0 | 0 | 0 | 0 | 0 | t | 57320 | SDYEDRYY<br>REN              | Mus<br>musculu<br>s              |
| 1 | 1.00 | 1 | 1 | 0 | 0 | 0 | 0 | 0 | t | 59229 | SLKMADP<br>NRFRGKDL<br>P     | Mus<br>musculu<br>s              |
| 1 | 1.00 | 1 | 1 | 0 | 0 | 0 | 0 | 0 | t | 59229 | SLKMADP<br>NRFRGKDL<br>P     | Mus<br>musculu<br>s              |
| 1 | 1.00 | 1 | 1 | 0 | 0 | 0 | 0 | 0 | t | 40332 | LVFFAEDV                     | Mus<br>musculu<br>s              |
| 1 | 1.00 | 1 | 1 | 0 | 0 | 0 | 0 | 0 | t | 56614 | RYPHYSLIK<br>PESSL           | Oryctola<br>gus<br>cuniculu<br>s |
| 1 | 1.00 | 1 | 1 | 0 | 0 | 0 | 0 | 0 | t | 48912 | PPSDIKGK<br>YVKEVEVK         | Oryctola<br>gus<br>cuniculu<br>s |
| 1 | 1.00 | 1 | 1 | 0 | 0 | 0 | 0 | 0 | t | 48912 | PPSDIKGK<br>YVKEVEVK         | Oryctola<br>gus<br>cuniculu<br>s |
| 1 | 1.00 | 1 | 1 | 0 | 0 | 0 | 0 | 0 | t | 48779 | PPFSLSPV<br>PTLGSRSR<br>R    | Oryctola<br>gus<br>cuniculu<br>s |
| 1 | 1.00 | 1 | 1 | 0 | 0 | 0 | 0 | 0 | t | 38918 | LQND                         | Mus<br>musculu<br>s              |



|   |      |   |   |   |   |   |   |   |   |       |                    |                                  |
|---|------|---|---|---|---|---|---|---|---|-------|--------------------|----------------------------------|
| 1 | 1.00 | 1 | 1 | 0 | 0 | 0 | 0 | 0 | t | 41610 | MGQHPAK<br>SMDVRR  | Oryctola<br>gus<br>cuniculu<br>s |
| 1 | 1.00 | 1 | 1 | 0 | 0 | 0 | 0 | 0 | t | 41103 | MAPEVIR<br>MQDDNP  | Oryctola<br>gus<br>cuniculu<br>s |
| 1 | 1.00 | 1 | 1 | 0 | 0 | 0 | 0 | 0 | t | 38345 | LNTEPSQL<br>PPTAPP | Oryctola<br>gus<br>cuniculu<br>s |
| 1 | 1.00 | 1 | 1 | 0 | 0 | 0 | 0 | 0 | t | 41826 | MKHM               | Mus<br>musculu<br>s              |
| 1 | 1.00 | 1 | 1 | 0 | 0 | 0 | 0 | 0 | t | 47925 | PILQERPPL<br>ENR   | Oryctola<br>gus<br>cuniculu<br>s |
| 1 | 1.00 | 1 | 1 | 0 | 0 | 0 | 0 | 0 | t | 55996 | RSVYS              | Mus<br>musculu<br>s              |
| 1 | 1.00 | 1 | 1 | 0 | 0 | 0 | 0 | 0 | t | 39423 | LSHNPGAS<br>ALL    | Mus<br>musculu<br>s              |
| 1 | 1.00 | 1 | 1 | 0 | 0 | 0 | 0 | 0 | t | 48906 | PPRRVS             | Mus<br>musculu<br>s              |
| 1 | 1.00 | 1 | 1 | 0 | 0 | 0 | 0 | 0 | t | 46786 | PAEVTQLK<br>GLS    | Mus<br>musculu<br>s              |
| 1 | 1.00 | 1 | 1 | 0 | 0 | 0 | 0 | 0 | t | 10801 | DWEDRYR<br>E       | Oryctola<br>gus<br>cuniculu<br>s |
| 1 | 1.00 | 1 | 1 | 0 | 0 | 0 | 0 | 0 | t | 30661 | KEVPALTA<br>VETGAT | Oryctola<br>gus<br>cuniculu<br>s |
| 1 | 1.00 | 1 | 1 | 0 | 0 | 0 | 0 | 0 | t | 31414 | KIRPRGQR<br>DSSY   | Oryctola<br>gus<br>cuniculu<br>s |
| 1 | 1.00 | 1 | 1 | 0 | 0 | 0 | 0 | 0 | t | 17470 | FQEPPWLE<br>DG     | Mus<br>musculu<br>s              |
| 1 | 1.00 | 1 | 1 | 0 | 0 | 0 | 0 | 0 | t | 14435 | ETIYNTTLK<br>Y     | Homo<br>sapiens                  |

|   |      |   |   |       |       |        |        |       |   |        |                              |                       |
|---|------|---|---|-------|-------|--------|--------|-------|---|--------|------------------------------|-----------------------|
| 1 | 1.00 | 1 | 1 | 0     | 0     | 0      | 0      | 0     | t | 10529  | DTYRYI                       | Mus musculus          |
| 1 | 1.00 | 1 | 1 | 0     | 0     | 0      | 0      | 0     | t | 30661  | KEVPALTA<br>VETGAT           | Oryctolagus cuniculus |
| 1 | 1.00 | 1 | 1 | 0     | 0     | 0      | 0      | 0     | t | 11819  | EENVEHDA                     | Oryctolagus cuniculus |
| 1 | 1.00 | 1 | 1 | 0     | 0     | 0      | 0      | 0     | t | 11813  | EENVEENV                     | Oryctolagus cuniculus |
| 1 | 1.00 | 1 | 1 | 0     | 0     | 0      | 0      | 0     | t | 11148  | EANNREG<br>VEG               | Mus musculus          |
| 1 | 1.00 | 1 | 1 | 0     | 0     | 0      | 0      | 0     | t | 6918   | CRFPNITN<br>SHVPILQE         | Oryctolagus cuniculus |
| 1 | 1.00 | 1 | 1 | 0     | 0     | 0      | 0      | 0     | t | 1807   | AHPLHPA<br>NLVANTV<br>NAMFH  | Mus musculus          |
| 1 | 1.00 | 1 | 1 | 0     | 0     | 0      | 0      | 0     | t | 1450   | AGAPSAE<br>QREER             | Mus musculus          |
| 1 | 1.00 | 1 | 1 | 0.02  | 0.027 | 0.034  | 0.02   | 0.02  | t | 149642 | AVFYTTN                      | Capra hircus          |
| 1 | 1.00 | 1 | 1 | -0.01 | -0.01 | -0.012 | -0.003 | -0.01 | t | 49763  | PTRAETRE<br>ERMERKR<br>REKIE | Homo sapiens          |
| 1 | 1.00 | 1 | 1 | 0.01  | 0.01  | 0.015  | 0.01   | 0.011 | t | 6020   | CAQQWPE<br>WYPC              | Mus musculus          |
| 1 | 1.00 | 1 | 1 | -0.01 | -0.01 | -0.01  | -0.01  | -0.01 | t | 132631 | RRSS                         | Mus musculus          |
| 1 | 1.00 | 1 | 1 | 0.04  | 0.038 | 0.047  | 0.043  | 0.038 | t | 77923  | ISPTQLYA<br>QVRA             | Mus musculus          |
| 1 | 1.00 | 1 | 1 | 0     | 0.002 | 0.005  | 0.007  | 0.002 | t | 133672 | RGGMR                        | Homo sapiens          |

|   |      |   |   |       |        |        |        |        |   |        |                              |                                  |
|---|------|---|---|-------|--------|--------|--------|--------|---|--------|------------------------------|----------------------------------|
| 1 | 1.00 | 1 | 1 | 0     | 0      | -0.017 | 0      | 0.004  | t | 145726 | CKQAGTC<br>PPD               | Mus<br>musculu<br>s              |
| 1 | 1.00 | 1 | 1 | -0.04 | -0.04  | -0.035 | -0.04  | -0.041 | t | 94570  | KPHFLLAT<br>EDDVRHH<br>FTP   | Mus<br>musculu<br>s              |
| 1 | 1.00 | 1 | 1 | -0.01 | -0.01  | -0.015 | -0.012 | -0.012 | t | 146852 | DVAVFAR<br>GPQ AHL           | Homo<br>sapiens                  |
| 1 | 1.00 | 1 | 1 | 0     | -0.003 | -0.01  | 0.001  | 0      | t | 44018  | NGKQVES<br>PAPSGHT<br>HLKKPA | Canis<br>lupus                   |
| 1 | 1.00 | 1 | 1 | 0     | 0.002  | -0.01  | 0.001  | 0      | t | 44018  | NGKQVES<br>PAPSGHT<br>HLKKPA | Homo<br>sapiens                  |
| 1 | 1.00 | 1 | 1 | 0.03  | 0.03   | 0.03   | 0.03   | 0.03   | t | 107194 | LEQTELSV<br>TRET             | Oryctola<br>gus<br>cuniculu<br>s |
| 1 | 1.00 | 1 | 1 | 0.03  | 0.03   | 0.03   | 0.03   | 0.03   | t | 110951 | NDGYFWE<br>DGTNG             | Homo<br>sapiens                  |
| 1 | 1.00 | 1 | 1 | 0.03  | 0.03   | 0.03   | 0.03   | 0.03   | t | 107194 | LEQTELSV<br>TRET             | Oryctola<br>gus<br>cuniculu<br>s |
| 1 | 1.00 | 1 | 1 | 0.03  | 0.03   | 0.03   | 0.03   | 0.03   | t | 104124 | MNKTFVD                      | Homo<br>sapiens                  |
| 1 | 1.00 | 1 | 1 | 0.03  | 0.03   | 0.03   | 0.03   | 0.03   | t | 79346  | QCETESDL<br>LIPSCP           | Mus<br>musculu<br>s              |
| 1 | 1.00 | 1 | 1 | 0.03  | 0.03   | 0.03   | 0.03   | 0.03   | t | 95830  | SGASAQS<br>GTSGT             | Homo<br>sapiens                  |
| 1 | 1.00 | 1 | 1 | 0.03  | 0.03   | 0.03   | 0.03   | 0.03   | t | 95830  | SGASAQS<br>GTSGT             | Homo<br>sapiens                  |
| 1 | 1.00 | 1 | 1 | 0.03  | 0.03   | 0.03   | 0.03   | 0.03   | t | 95830  | SGASAQS<br>GTSGT             | Homo<br>sapiens                  |
| 1 | 1.00 | 1 | 1 | 0.01  | 0.01   | 0.01   | 0.01   | 0.01   | t | 131130 | VIASLTCG<br>RRFEYDDP<br>RFLR | Homo<br>sapiens                  |

|   |      |   |   |       |        |       |       |       |   |        |                              |                                  |
|---|------|---|---|-------|--------|-------|-------|-------|---|--------|------------------------------|----------------------------------|
| 1 | 1.00 | 1 | 1 | 0.01  | 0.01   | 0.01  | 0.01  | 0.01  | t | 113751 | QGGQQGQ<br>QPGQGQ<br>QG      | Homo<br>sapiens                  |
| 1 | 1.00 | 1 | 1 | 0.01  | 0.01   | 0.01  | 0.01  | 0.01  | t | 113475 | GQQGQQ<br>VGQGQQA<br>Q       | Homo<br>sapiens                  |
| 1 | 1.00 | 1 | 1 | 0.01  | 0.01   | 0.01  | 0.01  | 0.01  | t | 113773 | QGGQQLG<br>QGGQQG<br>Q       | Homo<br>sapiens                  |
| 1 | 1.00 | 1 | 1 | 0.01  | 0.01   | 0.01  | 0.01  | 0.01  | t | 93073  | KDEKIEEI<br>G                | Ovis<br>aries                    |
| 1 | 1.00 | 1 | 1 | 0.01  | 0.01   | 0.01  | 0.01  | 0.01  | t | 47186  | PDREVLQ<br>EFDEMEEC<br>SQL   | Homo<br>sapiens                  |
| 1 | 1.00 | 1 | 1 | 0.01  | 0.01   | 0.01  | 0.01  | 0.01  | t | 54799  | RLVDADD<br>P                 | Homo<br>sapiens                  |
| 1 | 1.00 | 1 | 1 | 0.01  | 0.01   | 0.01  | 0.01  | 0.01  | t | 42344  | MPVHWA<br>PAPAQPP<br>ADIYFPV | Oryctola<br>gus<br>cuniculu<br>s |
| 1 | 1.00 | 1 | 1 | 0.01  | 0.01   | 0.01  | 0.01  | 0.01  | t | 6060   | CCDLAPEA<br>RQAIKS           | Homo<br>sapiens                  |
| 1 | 1.00 | 1 | 1 | 0.01  | 0.01   | 0.01  | 0.01  | 0.01  | t | 6060   | CCDLAPEA<br>RQAIKS           | Homo<br>sapiens                  |
| 1 | 1.00 | 1 | 1 | -0.01 | -0.01  | -0.01 | -0.01 | -0.01 | t | 139630 | VDIDIKIRS<br>CRGSCS          | Homo<br>sapiens                  |
| 1 | 1.00 | 1 | 1 | -0.01 | -0.01  | -0.01 | -0.01 | -0.01 | t | 123486 | MDLRMGF<br>VR                | Ovis<br>aries                    |
| 1 | 1.00 | 1 | 1 | -0.01 | -0.007 | -0.01 | -0.01 | -0.01 | t | 98294  | NNLTLVPA<br>VV               | Mus<br>musculu<br>s              |
| 1 | 1.00 | 1 | 1 | -0.01 | -0.01  | -0.01 | -0.01 | -0.01 | t | 115718 | EAVESTVA<br>TL               | Homo<br>sapiens                  |
| 1 | 1.00 | 1 | 1 | -0.01 | -0.01  | -0.01 | -0.01 | -0.01 | t | 98294  | NNLTLVPA<br>VV               | Oryctola<br>gus<br>cuniculu<br>s |
| 1 | 1.00 | 1 | 1 | -0.01 | -0.01  | -0.01 | -0.01 | -0.01 | t | 55305  | RPQQPFPL<br>QP               | Mus<br>musculu<br>s              |
| 1 | 1.00 | 1 | 1 | -0.01 | -0.01  | -0.01 | -0.01 | -0.01 | t | 55305  | RPQQPFPL<br>QP               | Mus<br>musculu<br>s              |

|   |      |   |   |       |        |        |        |        |   |        |                             |                                  |
|---|------|---|---|-------|--------|--------|--------|--------|---|--------|-----------------------------|----------------------------------|
| 1 | 1.00 | 1 | 1 | -0.01 | -0.01  | -0.01  | -0.01  | -0.01  | t | 21737  | GPPVAPTS<br>A               | Oryctola<br>gus<br>cuniculu<br>s |
| 1 | 1.00 | 1 | 1 | -0.03 | -0.03  | -0.03  | -0.03  | -0.03  | t | 92973  | IFKGSKFN<br>DA              | Ovis<br>aries                    |
| 1 | 1.00 | 1 | 1 | 0     | 0.008  | 0.001  | 0      | 0      | t | 6139   | CDSSDRPR<br>VYTIT           | Gallus<br>gallus                 |
| 1 | 1.00 | 1 | 1 | -0.01 | -0.01  | -0.013 | -0.01  | -0.01  | t | 49950  | PVRVAWS<br>SPVQNCEP<br>WIPP | Mus<br>musculu<br>s              |
| 1 | 1.00 | 1 | 1 | -0.01 | -0.01  | -0.013 | -0.01  | -0.01  | t | 49950  | PVRVAWS<br>SPVQNCEP<br>WIPP | Mus<br>musculu<br>s              |
| 1 | 1.00 | 1 | 1 | -0.01 | -0.01  | -0.01  | -0.01  | -0.01  | t | 149299 | ELDKWKSL                    | Homo<br>sapiens                  |
| 1 | 1.00 | 1 | 1 | 0.03  | 0.028  | 0.03   | 0.029  | 0.03   | t | 54008  | RGVGSTV<br>VILDANFV         | Sus<br>scrofa                    |
| 1 | 1.00 | 1 | 1 | -0.03 | -0.03  | -0.034 | -0.033 | -0.03  | t | 88259  | RTLVMMA<br>NTG              | Homo<br>sapiens                  |
| 1 | 1.00 | 1 | 1 | 0.01  | 0.012  | 0.01   | 0.009  | 0.01   | t | 96455  | KGKNVLIN<br>KD              | Homo<br>sapiens                  |
| 1 | 1.00 | 1 | 1 | -0.01 | -0.01  | -0.01  | -0.01  | -0.01  | t | 134704 | KFFNSNKK<br>KRDDFEKL        | Oryctola<br>gus<br>cuniculu<br>s |
| 1 | 1.00 | 1 | 1 | -0.01 | -0.012 | -0.011 | -0.011 | -0.009 | t | 18036  | FTPFIYQS<br>SRTR            | Mus<br>musculu<br>s              |
| 1 | 1.00 | 1 | 1 | 0     | 0.004  | 0      | 0.001  | 0      | t | 60400  | SQDADYH<br>R                | Homo<br>sapiens                  |
| 1 | 1.00 | 1 | 1 | -0.02 | -0.016 | -0.02  | -0.019 | -0.02  | t | 37716  | LLQSARRG                    | Homo<br>sapiens                  |

|   |      |   |   |       |        |        |        |        |   |        |                              |                     |
|---|------|---|---|-------|--------|--------|--------|--------|---|--------|------------------------------|---------------------|
| 1 | 1.00 | 1 | 1 | 0.02  | 0.022  | 0.013  | 0.023  | 0.022  | t | 130448 | AYAKDVKF<br>GADA             | Homo<br>sapiens     |
| 1 | 1.00 | 1 | 1 | -0.02 | -0.018 | -0.02  | -0.013 | -0.021 | t | 136731 | VRVFQATR<br>GKLSSKCS<br>VVLG | Homo<br>sapiens     |
| 1 | 1.00 | 1 | 1 | 0.02  | 0.02   | 0.02   | 0.02   | 0.02   | t | 99836  | QFPQPQ                       | Mus<br>musculu<br>s |
| 1 | 1.00 | 1 | 1 | 0.02  | 0.022  | 0.021  | 0.018  | 0.018  | t | 106520 | HTHEGGQ<br>LHC               | Homo<br>sapiens     |
| 1 | 1.00 | 1 | 1 | -0.02 | -0.02  | -0.02  | -0.02  | -0.019 | t | 24590  | HQLDPAF<br>GAN               | Mus<br>musculu<br>s |
| 1 | 1.00 | 1 | 1 | 0.02  | 0.02   | 0.02   | 0.02   | 0.02   | t | 56175  | RTS                          | MD                  |
| 1 | 1.00 | 1 | 1 | -0.02 | -0.022 | -0.02  | -0.021 | -0.02  | t | 6028   | CARSLVNL<br>FTPGARQ<br>N     | Mus<br>musculu<br>s |
| 1 | 1.00 | 1 | 1 | 0.01  | 0.01   | 0.008  | 0.01   | 0.012  | t | 118528 | MSLLNKPK<br>SEMT             | Homo<br>sapiens     |
| 1 | 1.00 | 1 | 1 | 0     | 0      | 0      | 0      | 0      | t | 48597  | PNANPN                       | Mus<br>musculu<br>s |
| 1 | 1.00 | 1 | 1 | -0.01 | -0.01  | -0.01  | -0.01  | -0.011 | t | 117227 | RGNNIRYF<br>ILPDSLP          | Mus<br>musculu<br>s |
| 1 | 1.00 | 1 | 1 | -0.02 | -0.02  | -0.026 | -0.02  | -0.017 | t | 48996  | PQFKPQ                       | Mus<br>musculu<br>s |
| 1 | 1.00 | 1 | 1 | 0     | 0.002  | 0.002  | -0.003 | 0      | t | 159063 | RKAADTFN<br>FKTFFHT          | Homo<br>sapiens     |
| 1 | 1.00 | 1 | 1 | 0.03  | 0.03   | 0.03   | 0.03   | 0.03   | t | 141943 | LEKKETLG<br>CDESECV          | Mus<br>musculu<br>s |
| 1 | 1.00 | 1 | 1 | -0.01 | -0.01  | -0.01  | -0.01  | -0.009 | t | 27462  | IMDINKRK                     | Homo<br>sapiens     |
| 1 | 1.00 | 1 | 1 | 0.01  | 0.008  | 0.003  | 0.003  | 0.009  | t | 108213 | WQQGNV<br>F                  | Mus<br>musculu<br>s |

|   |      |   |   |      |       |       |        |       |   |        |                         |                                  |
|---|------|---|---|------|-------|-------|--------|-------|---|--------|-------------------------|----------------------------------|
| 1 | 1.00 | 1 | 1 | 0.04 | 0.04  | 0.04  | 0.04   | 0.04  | t | 123169 | FGGGDAP<br>PA           | Ovis<br>aries                    |
| 1 | 1.00 | 1 | 1 | 0.02 | 0.018 | 0.024 | 0.024  | 0.022 | t | 8218   | DEYDDAA<br>DAAGDRA<br>P | Mus<br>musculu<br>s              |
| 1 | 1.00 | 1 | 1 | 0.02 | 0.02  | 0.02  | 0.02   | 0.02  | t | 147563 | CYGTEPW<br>MC           | Homo<br>sapiens                  |
| 1 | 1.00 | 1 | 1 | 0.02 | 0.02  | 0.02  | 0.02   | 0.02  | t | 92841  | GNDGNDR<br>LFG          | Ovis<br>aries                    |
| 1 | 1.00 | 1 | 1 | 0    | 0.01  | 0     | -0.003 | 0     | t | 68023  | VDMIAGA<br>HWG          | Pan<br>troglody<br>tes           |
| 1 | 1.00 | 1 | 1 | 0    | 0     | 0     | 0      | 0     | t | 149430 | QPFLPQQ<br>PYP          | Homo<br>sapiens                  |
| 1 | 1.00 | 1 | 1 | 0    | 0     | 0     | 0      | 0     | t | 149430 | QPFLPQQ<br>PYP          | Mus<br>musculu<br>s              |
| 1 | 1.00 | 1 | 1 | 0    | 0     | 0     | 0      | 0     | t | 137444 | SDEALPLG<br>SPRCD       | Mus<br>musculu<br>s              |
| 1 | 1.00 | 1 | 1 | 0    | 0     | 0     | 0      | 0     | t | 140874 | KGYLAGKG<br>VDAG        | Oryctola<br>gus<br>cuniculu<br>s |
| 1 | 1.00 | 1 | 1 | 0    | 0     | 0     | 0      | 0     | t | 117516 | GRGRGRG<br>RGRGRGG<br>P | Homo<br>sapiens                  |
| 1 | 1.00 | 1 | 1 | 0    | 0     | 0     | 0      | 0     | t | 119533 | TKLSNTPS<br>P           | Homo<br>sapiens                  |
| 1 | 1.00 | 1 | 1 | 0    | 0     | 0     | 0      | 0     | t | 103338 | LAPDTVPL<br>AGVVLG      | Homo<br>sapiens                  |
| 1 | 1.00 | 1 | 1 | 0    | 0     | 0     | 0      | 0     | t | 115932 | QVLSNTVP<br>AK          | Homo<br>sapiens                  |
| 1 | 1.00 | 1 | 1 | 0    | 0     | 0     | 0      | 0     | t | 113749 | QGQQGQ<br>QLGQQGQ<br>G  | Homo<br>sapiens                  |
| 1 | 1.00 | 1 | 1 | 0    | 0     | 0     | 0      | 0     | t | 114406 | IGGRVHFF<br>KDISPIS     | Homo<br>sapiens                  |
| 1 | 1.00 | 1 | 1 | 0    | 0     | 0     | 0      | 0     | t | 103928 | GKLPIAM                 | Homo<br>sapiens                  |

|   |      |   |   |       |        |        |       |        |   |        |                               |                                  |
|---|------|---|---|-------|--------|--------|-------|--------|---|--------|-------------------------------|----------------------------------|
| 1 | 1.00 | 1 | 1 | 0     | 0      | 0      | 0     | 0      | t | 103327 | KTINLCAP<br>DDPICTG           | Homo<br>sapiens                  |
| 1 | 1.00 | 1 | 1 | 0     | 0      | 0      | 0     | 0      | t | 79515  | ALSIIGK                       | Oryctola<br>gus<br>cuniculu<br>s |
| 1 | 1.00 | 1 | 1 | 0     | 0      | 0      | 0     | 0      | t | 72561  | WHWTWL<br>SDYPPP              | Oryctola<br>gus<br>cuniculu<br>s |
| 1 | 1.00 | 1 | 1 | 0     | 0      | 0      | 0     | 0      | t | 69884  | VLYQEFDE<br>MEECASH<br>LPYFE  | Homo<br>sapiens                  |
| 1 | 1.00 | 1 | 1 | 0     | 0      | 0      | 0     | 0      | t | 47182  | PDREVLQYQ<br>DFDEMEE<br>CASHL | Homo<br>sapiens                  |
| 1 | 1.00 | 1 | 1 | 0     | 0      | 0      | 0     | 0      | t | 55643  | RRLHAWIT<br>EDCPVP            | Homo<br>sapiens                  |
| 1 | 1.00 | 1 | 1 | 0     | 0      | 0      | 0     | 0      | t | 50744  | QFDEMEE<br>CSASLPYM<br>DETRA  | Homo<br>sapiens                  |
| 1 | 1.00 | 1 | 1 | 0     | 0      | 0      | 0     | 0      | t | 10833  | DWVCSVL<br>ADFKAWL            | Homo<br>sapiens                  |
| 1 | 1.00 | 1 | 1 | 0     | 0      | 0      | 0     | 0      | t | 10833  | DWVCSVL<br>ADFKAWL            | Homo<br>sapiens                  |
| 1 | 1.00 | 1 | 1 | 0     | -0.001 | 0.003  | 0.001 | 0      | t | 11974  | EFDEMEEC<br>SQHLPYIE<br>QGMM  | Homo<br>sapiens                  |
| 1 | 1.00 | 1 | 1 | -0.02 | -0.02  | -0.003 | -0.02 | -0.024 | t | 145923 | NPPIPVGEL                     | Mus<br>musculu<br>s              |
| 1 | 1.00 | 1 | 1 | 0     | 0      | 0.001  | 0     | 0      | t | 120959 | SPLNVLM                       | Homo<br>sapiens                  |
| 1 | 1.00 | 1 | 1 | 0.01  | 0.009  | 0.015  | 0.013 | 0.01   | t | 46459  | NVQLINTN<br>GSWHLNS<br>TAL    | Homo<br>sapiens                  |
| 1 | 1.00 | 1 | 1 | -0.01 | -0.007 | -0.011 | -0.01 | -0.01  | t | 60595  | SQWNKPS<br>KPKT               | Mus<br>musculu<br>s              |
| 1 | 1.00 | 1 | 1 | -0.01 | -0.007 | -0.011 | -0.01 | -0.01  | t | 60595  | SQWNKPS<br>KPKT               | Mus<br>musculu<br>s              |



|   |      |   |   |       |        |        |        |        |   |        |                         |                                  |
|---|------|---|---|-------|--------|--------|--------|--------|---|--------|-------------------------|----------------------------------|
| 1 | 1.00 | 1 | 1 | -0.03 | -0.03  | -0.032 | -0.03  | -0.031 | t | 6386   | CHGSEPCII<br>HRGKPF     | Mus<br>musculu<br>s              |
| 1 | 1.00 | 1 | 1 | -0.02 | -0.032 | -0.02  | -0.017 | -0.02  | t | 156860 | DRWNSM<br>WKESLL        | Bos<br>taurus                    |
| 1 | 1.00 | 1 | 1 | -0.03 | -0.034 | -0.03  | -0.037 | -0.03  | t | 131316 | TLMVMVS<br>K            | Oryctola<br>gus<br>cuniculu<br>s |
| 1 | 1.00 | 1 | 1 | -0.01 | -0.01  | -0.01  | -0.01  | -0.01  | t | 116682 | CHGRGTC<br>NYANAYS      | Homo<br>sapiens                  |
| 1 | 1.00 | 1 | 1 | -0.03 | -0.032 | -0.036 | -0.032 | -0.032 | t | 24454  | HPHDLDD<br>ARRDGRA<br>P | Mus<br>musculu<br>s              |
| 1 | 1.00 | 1 | 1 | -0.02 | -0.022 | -0.018 | -0.017 | -0.017 | t | 105696 | CAPLKPAK<br>SA          | Mus<br>musculu<br>s              |
| 1 | 1.00 | 1 | 1 | -0.04 | -0.037 | -0.042 | -0.04  | -0.042 | t | 6500   | CKLSCFIRP<br>SGYCGR     | Equus<br>caballus                |
| 1 | 1.00 | 1 | 1 | -0.04 | -0.037 | -0.042 | -0.04  | -0.042 | t | 6500   | CKLSCFIRP<br>SGYCGR     | Equus<br>caballus                |
| 1 | 1.00 | 1 | 1 | 0.01  | 0.012  | 0.01   | 0.011  | 0.01   | t | 116951 | DLNTNRT<br>QMV LH       | Homo<br>sapiens                  |
| 1 | 1.00 | 1 | 1 | -0.03 | -0.027 | -0.027 | -0.029 | -0.032 | t | 37316  | LLGCIGSTC<br>A          | Mus<br>musculu<br>s              |
| 1 | 1.00 | 1 | 1 | 0.01  | 0.01   | 0.01   | 0.01   | 0.01   | t | 63792  | TGATVSSQ                | Oryctola<br>gus<br>cuniculu<br>s |
| 1 | 1.00 | 1 | 1 | -0.01 | -0.01  | -0.01  | -0.01  | -0.01  | t | 151020 | LCKLRGVA<br>PLH         | Mus<br>musculu<br>s              |
| 1 | 1.00 | 1 | 1 | 0     | 0      | 0      | 0      | 0      | t | 9753   | DPRVRGLY                | Mus<br>musculu<br>s              |
| 1 | 1.00 | 1 | 1 | 0     | 0      | 0      | 0      | -0.001 | t | 108210 | WFTSWER<br>DWW          | Homo<br>sapiens                  |
| 1 | 1.00 | 1 | 1 | -0.01 | -0.01  | -0.01  | -0.01  | -0.01  | t | 145776 | FDTGA FDP<br>DWPY       | Mus<br>musculu<br>s              |

|   |      |   |   |       |       |       |       |       |   |        |                            |                                  |
|---|------|---|---|-------|-------|-------|-------|-------|---|--------|----------------------------|----------------------------------|
| 1 | 1.00 | 1 | 1 | -0.01 | -0.01 | -0.01 | -0.01 | -0.01 | t | 145776 | FDTGA FDP<br>DWPY          | Mus<br>musculu<br>s              |
| 1 | 1.00 | 1 | 1 | -0.01 | -0.01 | -0.01 | -0.01 | -0.01 | t | 145776 | FDTGA FDP<br>DWPY          | Mus<br>musculu<br>s              |
| 1 | 1.00 | 1 | 1 | 0.01  | 0.011 | 0.02  | 0.011 | 0.01  | t | 11362  | EDKAWL                     | Homo<br>sapiens                  |
| 1 | 1.00 | 1 | 1 | 0.06  | 0.058 | 0.064 | 0.053 | 0.059 | t | 144885 | EPGQLKLN<br>WFKKGSS        | Mus<br>musculu<br>s              |
| 1 | 1.00 | 1 | 1 | 0.05  | 0.05  | 0.05  | 0.05  | 0.05  | t | 97746  | VNLTLTGD<br>V              | Oryctola<br>gus<br>cuniculu<br>s |
| 1 | 1.00 | 1 | 1 | 0.03  | 0.03  | 0.03  | 0.03  | 0.03  | t | 144659 | GREGYPA<br>DGGAAGY<br>CNTE | Oryctola<br>gus<br>cuniculu<br>s |
| 1 | 1.00 | 1 | 1 | 0.03  | 0.03  | 0.03  | 0.03  | 0.03  | t | 98944  | PSQQQPQ<br>EQVPL           | Homo<br>sapiens                  |
| 1 | 1.00 | 1 | 1 | 0.01  | 0.01  | 0.01  | 0.01  | 0.01  | t | 151064 | TPKGAIN T<br>SLPFQNI       | Homo<br>sapiens                  |
| 1 | 1.00 | 1 | 1 | 0.01  | 0.01  | 0.01  | 0.01  | 0.01  | t | 153336 | ACNQVLS<br>WLCGGGS         | Mus<br>musculu<br>s              |
| 1 | 1.00 | 1 | 1 | 0.01  | 0.01  | 0.01  | 0.01  | 0.01  | t | 103534 | QSVCPILA<br>EPGGSFN        | Homo<br>sapiens                  |
| 1 | 1.00 | 1 | 1 | 0.01  | 0.01  | 0.01  | 0.01  | 0.01  | t | 114784 | ECKETVP<br>MNC             | Homo<br>sapiens                  |
| 1 | 1.00 | 1 | 1 | 0.01  | 0.01  | 0.01  | 0.01  | 0.01  | t | 75847  | YSPELE                     | Mus<br>musculu<br>s              |
| 1 | 1.00 | 1 | 1 | 0.01  | 0.007 | 0.01  | 0.01  | 0.01  | t | 63344  | TEEIDEIES<br>VTEEVVE       | Oryctola<br>gus<br>cuniculu<br>s |
| 1 | 1.00 | 1 | 1 | 0.01  | 0.01  | 0.01  | 0.01  | 0.01  | t | 63344  | TEEIDEIES<br>VTEEVVE       | Homo<br>sapiens                  |
| 1 | 1.00 | 1 | 1 | 0.01  | 0.01  | 0.01  | 0.01  | 0.01  | t | 63344  | TEEIDEIES<br>VTEEVVE       | Mus<br>musculu<br>s              |

|   |      |   |   |       |       |       |       |       |   |        |                              |                       |
|---|------|---|---|-------|-------|-------|-------|-------|---|--------|------------------------------|-----------------------|
| 1 | 1.00 | 1 | 1 | 0.01  | 0.01  | 0.01  | 0.01  | 0.01  | t | 63344  | TEEIDEIES<br>VTEEVVE         | Homo sapiens          |
| 1 | 1.00 | 1 | 1 | 0.01  | 0.01  | 0.01  | 0.01  | 0.01  | t | 79466  | YCDAFLIE<br>QANHWCW          | Mus musculus          |
| 1 | 1.00 | 1 | 1 | 0.01  | 0.01  | 0.01  | 0.01  | 0.01  | t | 63344  | TEEIDEIES<br>VTEEVVE         | Homo sapiens          |
| 1 | 1.00 | 1 | 1 | 0.01  | 0.01  | 0.01  | 0.01  | 0.01  | t | 78759  | PGLRPQNL<br>YTLWGGS<br>VVCMY | Homo sapiens          |
| 1 | 1.00 | 1 | 1 | 0.01  | 0.01  | 0.01  | 0.01  | 0.01  | t | 46823  | PAIIPDREA<br>LYQEFDE<br>MEEC | Homo sapiens          |
| 1 | 1.00 | 1 | 1 | -0.01 | -0.01 | -0.01 | -0.01 | -0.01 | t | 149299 | ELDKWKSL                     | Homo sapiens          |
| 1 | 1.00 | 1 | 1 | -0.01 | -0.01 | -0.01 | -0.01 | -0.01 | t | 140586 | PWQLPLN<br>FQ                | Mus musculus          |
| 1 | 1.00 | 1 | 1 | -0.01 | -0.01 | -0.01 | -0.01 | -0.01 | t | 132077 | SPNGSSSV<br>NWPPEFR          | Homo sapiens          |
| 1 | 1.00 | 1 | 1 | -0.01 | -0.01 | -0.01 | -0.01 | -0.01 | t | 93496  | NLKDLTFE<br>KV               | Ovis aries            |
| 1 | 1.00 | 1 | 1 | -0.01 | -0.01 | -0.01 | -0.01 | -0.01 | t | 52821  | QVYLHGD<br>KTKPMILT          | Oryctolagus cuniculus |
| 1 | 1.00 | 1 | 1 | -0.01 | -0.01 | -0.01 | -0.01 | -0.01 | t | 55305  | RPQQPFPL<br>QP               | Mus musculus          |
| 1 | 1.00 | 1 | 1 | -0.01 | -0.01 | -0.01 | -0.01 | -0.01 | t | 55305  | RPQQPFPL<br>QP               | Mus musculus          |
| 1 | 1.00 | 1 | 1 | -0.03 | -0.03 | -0.03 | -0.03 | -0.03 | t | 115460 | QTPVVVPP<br>FLQPEVM<br>GVSKV | Homo sapiens          |
| 1 | 1.00 | 1 | 1 | 0.01  | 0.014 | 0.01  | 0.011 | 0.012 | t | 61326  | SSSAKPES                     | Homo sapiens          |

|   |      |   |   |       |        |        |       |        |   |        |                              |                       |
|---|------|---|---|-------|--------|--------|-------|--------|---|--------|------------------------------|-----------------------|
| 1 | 1.00 | 1 | 1 | 0.01  | 0.01   | 0.003  | 0.01  | 0.013  | t | 130581 | QAFDSH                       | Mus musculus          |
| 1 | 1.00 | 1 | 1 | -0.01 | -0.01  | -0.01  | -0.01 | -0.01  | t | 131295 | ECQEATL<br>MVMVSK<br>DLFGTGK | Callithrix pygmaea    |
| 1 | 1.00 | 1 | 1 | 0     | 0      | 0      | 0     | 0      | t | 144820 | YLEDWIKY<br>NNQK             | Mus musculus          |
| 1 | 1.00 | 1 | 1 | 0     | 0      | 0      | 0     | 0      | t | 105127 | DAEFRHD                      | Mus musculus          |
| 1 | 1.00 | 1 | 1 | 0     | 0      | 0      | 0     | 0      | t | 105127 | DAEFRHD                      | Mus musculus          |
| 1 | 1.00 | 1 | 1 | 0     | 0      | 0      | 0     | 0      | t | 105127 | DAEFRHD                      | Mus musculus          |
| 1 | 1.00 | 1 | 1 | 0     | 0      | 0      | 0     | 0      | t | 74036  | YGLFHKEK<br>MLL              | Mus musculus          |
| 1 | 1.00 | 1 | 1 | 0     | 0      | 0      | 0     | 0      | t | 74035  | YGLFHKEK<br>MIL              | Mus musculus          |
| 1 | 1.00 | 1 | 1 | 0     | 0      | 0      | 0     | 0      | t | 8133   | DEQFIPK                      | Mus musculus          |
| 1 | 1.00 | 1 | 1 | 0     | 0      | 0      | 0     | 0      | t | 9684   | DPMFTPK                      | Mus musculus          |
| 1 | 1.00 | 1 | 1 | 0     | 0      | 0.008  | 0     | 0      | t | 90911  | YPTVV                        | Homo sapiens          |
| 1 | 1.00 | 1 | 1 | 0     | -0.003 | 0.005  | 0     | 0      | t | 146795 | CCELCCNP<br>QCAGCY           | Oryctolagus cuniculus |
| 1 | 1.00 | 1 | 1 | -0.06 | -0.058 | -0.057 | -0.06 | -0.059 | t | 132835 | HFRWG                        | Oryctolagus cuniculus |
| 1 | 1.00 | 1 | 1 | 0.04  | 0.042  | 0.04   | 0.047 | 0.042  | t | 135486 | PELEETLTH<br>TITKLNAE<br>NNA | Homo sapiens          |

|   |      |   |   |       |        |        |        |        |   |        |                             |                       |
|---|------|---|---|-------|--------|--------|--------|--------|---|--------|-----------------------------|-----------------------|
| 1 | 1.00 | 1 | 1 | 0     | 0.003  | 0      | 0      | 0      | t | 135477 | LGAGLG                      | Mus musculus          |
| 1 | 1.00 | 1 | 1 | 0     | 0      | 0      | 0      | 0      | t | 45406  | NPNANPN                     | Mus musculus          |
| 1 | 1.00 | 1 | 1 | 0     | 0      | 0      | 0      | 0      | t | 1259   | AFASRGN<br>HVAPTHY<br>VTESD | Homo sapiens          |
| 1 | 1.00 | 1 | 1 | 0.03  | 0.03   | 0.035  | 0.033  | 0.03   | t | 55641  | RRLGRQTY<br>DNES            | Homo sapiens          |
| 1 | 1.00 | 1 | 1 | -0.02 | -0.018 | -0.006 | -0.013 | -0.022 | t | 120952 | SLGSRRTL<br>MLLAQM          | Homo sapiens          |
| 1 | 1.00 | 1 | 1 | 0.05  | 0.046  | 0.043  | 0.053  | 0.052  | t | 106343 | DIVMTQSP<br>LSLPVTPG<br>EPA | Oryctolagus cuniculus |
| 1 | 1.00 | 1 | 1 | 0.06  | 0.06   | 0.06   | 0.06   | 0.06   | t | 115906 | PVEPFTES<br>QS              | Homo sapiens          |
| 1 | 1.00 | 1 | 1 | 0.04  | 0.04   | 0.04   | 0.04   | 0.04   | t | 108580 | PQSPGSSF<br>P               | Homo sapiens          |
| 1 | 1.00 | 1 | 1 | 0.02  | 0.018  | 0.02   | 0.02   | 0.02   | t | 141617 | DLEDIIKG<br>NDLVHDE<br>Y    | Oryctolagus cuniculus |
| 1 | 1.00 | 1 | 1 | 0.02  | 0.02   | 0.02   | 0.02   | 0.02   | t | 141617 | DLEDIIKG<br>NDLVHDE<br>Y    | Oryctolagus cuniculus |
| 1 | 1.00 | 1 | 1 | 0.02  | 0.02   | 0.02   | 0.02   | 0.02   | t | 153348 | ACTALQQ<br>WLCGGGS          | Mus musculus          |
| 1 | 1.00 | 1 | 1 | 0.02  | 0.022  | 0.02   | 0.02   | 0.02   | t | 141617 | DLEDIIKG<br>NDLVHDE<br>Y    | Rattus norvegicus     |
| 1 | 1.00 | 1 | 1 | 0.02  | 0.02   | 0.02   | 0.02   | 0.02   | t | 106836 | SGMARAP<br>ESLQV            | Mus musculus          |
| 1 | 1.00 | 1 | 1 | 0     | 0      | 0      | 0      | 0      | t | 147545 | CFGHKPW<br>MC               | Homo sapiens          |
| 1 | 1.00 | 1 | 1 | 0     | 0      | 0      | 0      | 0      | t | 137450 | SHRLPLK                     | Mus musculus          |
| 1 | 1.00 | 1 | 1 | 0     | 0      | 0      | 0      | 0      | t | 149110 | SRAPRFP<br>WLNPLDG<br>W     | Rattus norvegicus     |

|   |      |   |   |       |        |       |       |       |   |        |                              |                    |
|---|------|---|---|-------|--------|-------|-------|-------|---|--------|------------------------------|--------------------|
| 1 | 1.00 | 1 | 1 | 0     | 0      | 0     | 0     | 0     | t | 153342 | ACRDHFST<br>HCGGGS           | Mus<br>musculus    |
| 1 | 1.00 | 1 | 1 | 0     | 0      | 0     | 0     | 0     | t | 149062 | IPPNPSQ                      | Sus<br>scrofa      |
| 1 | 1.00 | 1 | 1 | 0     | 0      | 0     | 0     | 0     | t | 141576 | WKLRKWF<br>FKDGG             | Rattus             |
| 1 | 1.00 | 1 | 1 | 0     | 0      | 0     | 0     | 0     | t | 113479 | GQQPGQA<br>QQGQQP<br>G       | Homo<br>sapiens    |
| 1 | 1.00 | 1 | 1 | 0     | 0      | 0     | 0     | 0     | t | 111808 | STHNYEEI<br>PMDTFIVS<br>T    | Homo<br>sapiens    |
| 1 | 1.00 | 1 | 1 | 0     | -0.008 | 0     | 0     | 0     | t | 95446  | HKQKIIAP                     | Bos<br>taurus      |
| 1 | 1.00 | 1 | 1 | 0     | 0      | 0     | 0     | 0     | t | 95446  | HKQKIIAP                     | Cavia<br>porcellus |
| 1 | 1.00 | 1 | 1 | 0     | 0      | 0     | 0     | 0     | t | 96021  | YLQYLYQG<br>PI               | Homo<br>sapiens    |
| 1 | 1.00 | 1 | 1 | 0     | 0      | 0     | 0     | 0     | t | 9943   | DRADGQP<br>AGDRAAG<br>QPAGDR | Mus<br>musculus    |
| 1 | 1.00 | 1 | 1 | 0     | 0      | 0     | 0     | 0     | t | 1261   | AFASRGN<br>HVAPTHY<br>VVESDA | Homo<br>sapiens    |
| 1 | 1.00 | 1 | 1 | -0.02 | -0.02  | -0.02 | -0.02 | -0.02 | t | 131928 | KEPQSRLR<br>KWTTVDS          | Homo<br>sapiens    |
| 1 | 1.00 | 1 | 1 | -0.06 | -0.06  | -0.06 | -0.06 | -0.06 | t | 115923 | QPLPPTV<br>MFP               | Homo<br>sapiens    |
| 1 | 1.00 | 1 | 1 | 0.07  | 0.046  | 0.063 | 0.07  | 0.07  | t | 113302 | CDDDDDN<br>DGVPSDR<br>DNCRLV | Mus<br>musculus    |
| 1 | 1.00 | 1 | 1 | 0     | 0      | 0     | 0     | 0     | t | 64541  | TKDTNNN<br>L                 | Mus<br>musculus    |
| 1 | 1.00 | 1 | 1 | 0.02  | 0.023  | 0.02  | 0.02  | 0.022 | t | 38918  | LQND                         | Mus<br>musculus    |

|   |      |   |   |       |        |        |        |        |   |        |                              |                                  |
|---|------|---|---|-------|--------|--------|--------|--------|---|--------|------------------------------|----------------------------------|
| 1 | 1.00 | 1 | 1 | 0     | -0.002 | 0      | 0.003  | 0.001  | t | 38304  | LNPKTNK<br>WEDK              | Mus<br>musculu<br>s              |
| 1 | 1.00 | 1 | 1 | -0.02 | -0.02  | -0.02  | -0.02  | -0.018 | t | 132124 | YLNRIHELL                    | Homo<br>sapiens                  |
| 1 | 1.00 | 1 | 1 | 0.01  | 0.006  | 0.011  | 0.01   | 0.01   | t | 21625  | GPFYTSAP<br>Q                | Oryctola<br>gus<br>cuniculu<br>s |
| 1 | 1.00 | 1 | 1 | 0.01  | 0.008  | 0.011  | 0.01   | 0.01   | t | 21625  | GPFYTSAP<br>Q                | Mus<br>musculu<br>s              |
| 1 | 1.00 | 1 | 1 | 0.01  | 0.006  | -0.007 | 0.003  | 0.013  | t | 117451 | DDGFFYIP<br>KD               | Oryctola<br>gus<br>cuniculu<br>s |
| 1 | 1.00 | 1 | 1 | 0.02  | 0.02   | 0.02   | 0.02   | 0.02   | t | 79360  | RCPYYTRH<br>PSMRCN           | Mus<br>musculu<br>s              |
| 1 | 1.00 | 1 | 1 | 0     | 0      | 0      | 0      | 0      | t | 51122  | QIPYNLKIF<br>AIMLDTHK<br>MLT | Aotus<br>nancyma<br>ae           |
| 1 | 1.00 | 1 | 1 | 0.05  | 0.047  | 0.051  | 0.05   | 0.05   | t | 24013  | HHPVDLA<br>DWELIESP<br>ED    | Sus<br>scrofa                    |
| 1 | 1.00 | 1 | 1 | -0.01 | -0.008 | -0.017 | -0.009 | -0.011 | t | 125401 | ELLTEHRM<br>TWDPAQP<br>PRDLT | Homo<br>sapiens                  |
| 1 | 1.00 | 1 | 1 | -0.01 | -0.006 | -0.01  | -0.009 | -0.01  | t | 27959  | IPNGTYRA                     | Homo<br>sapiens                  |
| 1 | 1.00 | 1 | 1 | 0.03  | 0.03   | 0.021  | 0.023  | 0.03   | t | 135980 | QSRRRGD<br>MSTLN             | Homo<br>sapiens                  |
| 1 | 1.00 | 1 | 1 | 0     | -0.003 | 0      | -0.001 | -0.001 | t | 45327  | NPDREYDF<br>RD               | Oryctola<br>gus<br>cuniculu<br>s |
| 1 | 1.00 | 1 | 1 | 0.02  | 0.02   | 0.014  | 0.02   | 0.02   | t | 58143  | SGNCDVVI<br>GIINNTVY<br>D    | Homo<br>sapiens                  |
| 1 | 1.00 | 1 | 1 | 0     | 0.003  | -0.006 | 0      | 0      | t | 45303  | NPASTTNK<br>DK               | Mus<br>musculu<br>s              |
| 1 | 1.00 | 1 | 1 | -0.01 | -0.01  | -0.01  | -0.01  | -0.01  | t | 19900  | GGKMVQ<br>VV                 | Oryctola<br>gus<br>cuniculu<br>s |

|   |      |   |   |       |        |        |        |        |   |        |                            |                                  |
|---|------|---|---|-------|--------|--------|--------|--------|---|--------|----------------------------|----------------------------------|
| 1 | 1.00 | 1 | 1 | -0.02 | -0.022 | -0.022 | -0.021 | -0.019 | t | 51775  | QNTRNIVP<br>VSIVSR         | Mus<br>musculu<br>s              |
| 1 | 1.00 | 1 | 1 | -0.02 | -0.02  | -0.02  | -0.019 | -0.02  | t | 98396  | QQQQFLG<br>QQQPFPP<br>QQPY | Homo<br>sapiens(<br>human)       |
| 1 | 1.00 | 1 | 1 | 0.03  | 0.03   | 0.021  | 0.03   | 0.03   | t | 139806 | LLSPVRRD<br>QPLFTFRQ<br>VG | Ovis<br>aries                    |
| 1 | 1.00 | 1 | 1 | 0.04  | 0.04   | 0.04   | 0.04   | 0.042  | t | 27494  | IMGGECPT<br>AEDMVN         | Homo<br>sapiens                  |
| 1 | 1.00 | 1 | 1 | 0     | -0.003 | 0      | 0      | 0      | t | 141935 | KKPGGPG                    | Mus<br>musculu<br>s              |
| 1 | 1.00 | 1 | 1 | 0     | -0.004 | 0      | 0      | 0      | t | 124604 | QIERDTER<br>DRFLSAPE<br>AV | Oryctola<br>gus<br>cuniculu<br>s |
| 1 | 1.00 | 1 | 1 | 0     | -0.003 | 0      | 0      | 0      | t | 70735  | VRGTLGDI                   | Rattus<br>norvegic<br>us         |
| 1 | 1.00 | 1 | 1 | 0     | -0.006 | 0      | 0      | 0      | t | 62813  | TADEWDII                   | Oryctola<br>gus<br>cuniculu<br>s |
| 1 | 1.00 | 1 | 1 | 0     | -0.003 | 0      | 0      | 0      | t | 62813  | TADEWDII                   | Rattus<br>norvegic<br>us         |
| 1 | 1.00 | 1 | 1 | 0     | -0.006 | 0      | 0      | 0      | t | 62971  | TAQRCDH<br>S               | Oryctola<br>gus<br>cuniculu<br>s |
| 1 | 1.00 | 1 | 1 | 0     | -0.003 | 0      | 0      | 0      | t | 62971  | TAQRCDH<br>S               | Rattus<br>norvegic<br>us         |
| 1 | 1.00 | 1 | 1 | 0     | -0.006 | 0      | 0      | 0      | t | 70735  | VRGTLGDI                   | Oryctola<br>gus<br>cuniculu<br>s |
| 1 | 1.00 | 1 | 1 | 0     | -0.003 | 0      | 0      | 0      | t | 41449  | METMKL<br>MMEKVD           | Rattus<br>norvegic<br>us         |
| 1 | 1.00 | 1 | 1 | 0     | -0.006 | 0      | 0      | 0      | t | 41449  | METMKL<br>MMEKVD           | Oryctola<br>gus<br>cuniculu<br>s |
| 1 | 1.00 | 1 | 1 | 0     | -0.003 | 0      | 0      | 0      | t | 43215  | NALTQPV<br>DQLLK           | Rattus<br>norvegic<br>us         |



|   |      |   |   |       |        |        |       |        |   |        |                     |                                  |
|---|------|---|---|-------|--------|--------|-------|--------|---|--------|---------------------|----------------------------------|
| 1 | 1.00 | 1 | 1 | 0     | -0.004 | 0      | 0     | 0      | t | 48733  | PPAAEYPP<br>AAEY    | Oryctola<br>gus<br>cuniculu<br>s |
| 1 | 1.00 | 1 | 1 | 0     | -0.006 | 0      | 0     | 0      | t | 48568  | PMLPSHP<br>A        | Oryctola<br>gus<br>cuniculu<br>s |
| 1 | 1.00 | 1 | 1 | 0     | -0.003 | 0      | 0     | 0      | t | 43215  | NALTQPV<br>DQLLK    | Mus<br>musculu<br>s              |
| 1 | 1.00 | 1 | 1 | 0     | -0.003 | 0      | 0     | 0      | t | 49510  | PSSLVDSL            | Rattus<br>norvegic<br>us         |
| 1 | 1.00 | 1 | 1 | 0     | -0.004 | 0      | 0     | 0      | t | 56918  | SANNDAEI<br>GNLI    | Oryctola<br>gus<br>cuniculu<br>s |
| 1 | 1.00 | 1 | 1 | 0     | -0.006 | 0      | 0     | 0      | t | 43215  | NALTQPV<br>DQLLK    | Oryctola<br>gus<br>cuniculu<br>s |
| 1 | 1.00 | 1 | 1 | 0.04  | 0.04   | 0.045  | 0.04  | 0.041  | t | 140665 | DTAAQI              | Mus<br>musculu<br>s              |
| 1 | 1.00 | 1 | 1 | -0.04 | -0.043 | -0.028 | -0.04 | -0.042 | t | 69183  | VKAVTTLL<br>KA      | Oryctola<br>gus<br>cuniculu<br>s |
| 1 | 1.00 | 1 | 1 | 0.03  | 0.03   | 0.03   | 0.03  | 0.03   | t | 149046 | FQINPTQ             | Sus<br>scrofa                    |
| 1 | 1.00 | 1 | 1 | 0.03  | 0.03   | 0.03   | 0.03  | 0.03   | t | 149094 | QPPNITQ             | Sus<br>scrofa                    |
| 1 | 1.00 | 1 | 1 | 0.03  | 0.03   | 0.03   | 0.03  | 0.03   | t | 117065 | QFTGSTRQ<br>HAG     | Mus<br>musculu<br>s              |
| 1 | 1.00 | 1 | 1 | 0.01  | 0.01   | 0.01   | 0.01  | 0.01   | t | 149026 | ANITQSS             | Sus<br>scrofa                    |
| 1 | 1.00 | 1 | 1 | 0.01  | 0.01   | 0.01   | 0.01  | 0.01   | t | 142636 | EQIYRVDL<br>RTLRYG  | Rattus<br>norvegic<br>us         |
| 1 | 1.00 | 1 | 1 | 0.01  | 0.01   | 0.01   | 0.01  | 0.01   | t | 149725 | GSEKEAPS<br>KDFYLKN | Oryctola<br>gus<br>cuniculu<br>s |
| 1 | 1.00 | 1 | 1 | 0.01  | 0.01   | 0.01   | 0.01  | 0.01   | t | 123554 | NPKFEEVK<br>E       | Ovis<br>aries                    |

|   |      |   |   |       |       |       |       |       |   |        |                              |                       |
|---|------|---|---|-------|-------|-------|-------|-------|---|--------|------------------------------|-----------------------|
| 1 | 1.00 | 1 | 1 | 0.01  | 0.01  | 0.01  | 0.01  | 0.01  | t | 113751 | QGGQGG<br>QPGQGG<br>QG       | Homo sapiens          |
| 1 | 1.00 | 1 | 1 | 0.01  | 0.01  | 0.01  | 0.01  | 0.01  | t | 88462  | SEDRETRP<br>HGRNNEN<br>FVYNR | Aotus                 |
| 1 | 1.00 | 1 | 1 | 0.01  | 0.01  | 0.01  | 0.01  | 0.01  | t | 46774  | PAEEEEK                      | Mus musculus          |
| 1 | 1.00 | 1 | 1 | 0.01  | 0.01  | 0.01  | 0.01  | 0.01  | t | 48735  | PPAAGPP<br>AAGPPAA<br>GPPAAG | Homo sapiens          |
| 1 | 1.00 | 1 | 1 | 0.01  | 0.01  | 0.01  | 0.01  | 0.01  | t | 46774  | PAEEEEK                      | Mus musculus          |
| 1 | 1.00 | 1 | 1 | 0.01  | 0.01  | 0.01  | 0.01  | 0.01  | t | 29402  | IVPNSAEE<br>RL               | Homo sapiens          |
| 1 | 1.00 | 1 | 1 | -0.01 | -0.01 | -0.01 | -0.01 | -0.01 | t | 156938 | PPEKIHV                      | Gallus gallus         |
| 1 | 1.00 | 1 | 1 | -0.01 | -0.01 | -0.01 | -0.01 | -0.01 | t | 149059 | HLYNPTQ                      | Sus scrofa            |
| 1 | 1.00 | 1 | 1 | -0.01 | -0.01 | -0.01 | -0.01 | -0.01 | t | 115309 | KFPQYLQY<br>LYQGPIVL<br>NPWD | Homo sapiens          |
| 1 | 1.00 | 1 | 1 | -0.01 | -0.01 | -0.01 | -0.01 | -0.01 | t | 103385 | LRPASCRF<br>VPTCSQY          | Homo sapiens          |
| 1 | 1.00 | 1 | 1 | -0.01 | -0.01 | -0.01 | -0.01 | -0.01 | t | 93039  | ITSKQVDD<br>LI               | Ovis aries            |
| 1 | 1.00 | 1 | 1 | -0.01 | -0.01 | -0.01 | -0.01 | -0.01 | t | 79636  | QVARTSF                      | Oryctolagus cuniculus |
| 1 | 1.00 | 1 | 1 | 0     | 0     | 0     | 0.001 | 0.001 | t | 51306  | QLDPAFG                      | Mus musculus          |
| 1 | 1.00 | 1 | 1 | -0.03 | -0.03 | -0.03 | -0.03 | -0.03 | t | 115201 | DDIMCVK<br>KIL               | Homo sapiens          |
| 1 | 1.00 | 1 | 1 | -0.03 | -0.03 | -0.03 | -0.03 | -0.03 | t | 110619 | GPVGPAG<br>GPGFPGA<br>P      | Mus musculus          |
| 1 | 1.00 | 1 | 1 | 0.02  | 0.02  | 0.02  | 0.016 | 0.02  | t | 117671 | VCEHCD                       | Homo sapiens          |
| 1 | 1.00 | 1 | 1 | 0     | 0     | 0.003 | 0.007 | 0.001 | t | 115628 | LPCRISPGK<br>NAT             | Homo sapiens          |

|   |      |   |   |       |        |        |        |        |   |        |                              |                       |
|---|------|---|---|-------|--------|--------|--------|--------|---|--------|------------------------------|-----------------------|
| 1 | 1.00 | 1 | 1 | -0.08 | -0.078 | -0.086 | -0.083 | -0.078 | t | 58206  | SGPWSW                       | Homo sapiens          |
| 1 | 1.00 | 1 | 1 | 0.05  | 0.05   | 0.05   | 0.046  | 0.05   | t | 118806 | GPGDGE<br>DVPPGAIE<br>QGPAD  | Homo sapiens          |
| 1 | 1.00 | 1 | 1 | -0.01 | -0.014 | -0.013 | -0.011 | -0.011 | t | 43840  | NFGDQDLI<br>RQGTDYK<br>HWPQI | Oryctolagus cuniculus |
| 1 | 1.00 | 1 | 1 | -0.04 | -0.042 | -0.04  | -0.039 | -0.038 | t | 134162 | MKHMAG<br>A                  | Mus musculus          |
| 1 | 1.00 | 1 | 1 | 0.02  | 0.017  | 0.024  | 0.02   | 0.022  | t | 56587  | RYLSQLCS<br>GGYT             | Oryctolagus cuniculus |
| 1 | 1.00 | 1 | 1 | 0.02  | 0.02   | 0.024  | 0.02   | 0.022  | t | 56587  | RYLSQLCS<br>GGYT             | Mus musculus          |
| 1 | 1.00 | 1 | 1 | -0.01 | -0.003 | -0.01  | -0.01  | -0.01  | t | 153837 | HGRLVTLK<br>DIVLDLQP         | Cavia porcellus       |
| 1 | 1.00 | 1 | 1 | 0.02  | 0.02   | 0.025  | 0.02   | 0.02   | t | 122730 | DPAQPP<br>D                  | Homo sapiens          |
| 1 | 1.00 | 1 | 1 | -0.04 | -0.04  | -0.047 | -0.04  | -0.04  | t | 131305 | RARAKW                       | Homo sapiens          |
| 1 | 1.00 | 1 | 1 | -0.03 | -0.03  | -0.037 | -0.03  | -0.031 | t | 130802 | EHRMTW<br>DPAQPP<br>DLTEAFL  | Homo sapiens          |
| 1 | 1.00 | 1 | 1 | 0.03  | 0.03   | 0.017  | 0.028  | 0.034  | t | 12931  | ELADALLE                     | Homo sapiens          |
| 1 | 1.00 | 1 | 1 | 0.01  | 0.007  | 0.007  | 0.01   | 0.01   | t | 97523  | NGRGEGT<br>VL                | Oryctolagus cuniculus |
| 1 | 1.00 | 1 | 1 | -0.03 | -0.027 | -0.031 | -0.031 | -0.029 | t | 45531  | NQDPDKIL<br>TYIAADH          | Mus musculus          |
| 1 | 1.00 | 1 | 1 | -0.03 | -0.032 | -0.031 | -0.031 | -0.029 | t | 45531  | NQDPDKIL<br>TYIAADH          | Mus musculus          |

|   |      |   |   |       |        |        |        |        |   |        |                              |                                  |
|---|------|---|---|-------|--------|--------|--------|--------|---|--------|------------------------------|----------------------------------|
| 1 | 1.00 | 1 | 1 | -0.03 | -0.027 | -0.031 | -0.031 | -0.029 | t | 45531  | NQDPDKIL<br>TYIAADH          | Mus<br>musculu<br>s              |
| 1 | 1.00 | 1 | 1 | -0.03 | -0.032 | -0.031 | -0.031 | -0.029 | t | 45531  | NQDPDKIL<br>TYIAADH          | Mus<br>musculu<br>s              |
| 1 | 1.00 | 1 | 1 | -0.03 | -0.032 | -0.031 | -0.031 | -0.029 | t | 45531  | NQDPDKIL<br>TYIAADH          | Mus<br>musculu<br>s              |
| 1 | 1.00 | 1 | 1 | 0.01  | 0.007  | 0.009  | 0.01   | 0.01   | t | 149729 | GTVTGHPT<br>FNALLDA          | Oryctola<br>gus<br>cuniculu<br>s |
| 1 | 1.00 | 1 | 1 | 0     | -0.004 | -0.008 | -0.001 | -0.002 | t | 10277  | DSYGRDPY<br>SPSQDPY          | Oryctola<br>gus<br>cuniculu<br>s |
| 1 | 1.00 | 1 | 1 | -0.02 | -0.016 | -0.02  | -0.019 | -0.02  | t | 137896 | IANGYRDV<br>VADV             | Homo<br>sapiens                  |
| 1 | 1.00 | 1 | 1 | 0.01  | 0.008  | 0.017  | 0.013  | 0.009  | t | 65982  | TQYQKES<br>QAYY              | Mus<br>musculu<br>s              |
| 1 | 1.00 | 1 | 1 | 0.01  | 0.014  | 0.004  | 0.011  | 0.012  | t | 55838  | RSFQNKKS<br>LVAFKIMP<br>LEDM | Homo<br>sapiens                  |
| 1 | 1.00 | 1 | 1 | -0.01 | -0.01  | -0.003 | -0.008 | -0.01  | t | 117010 | IRTDESTKR<br>LPP             | Homo<br>sapiens                  |
| 1 | 1.00 | 1 | 1 | 0.01  | 0.01   | 0.005  | 0.01   | 0.009  | t | 122173 | QSIQQSIE<br>RLWCRLW<br>PLPFP | Homo<br>sapiens                  |
| 1 | 1.00 | 1 | 1 | -0.03 | -0.027 | -0.03  | -0.03  | -0.032 | t | 133676 | RIYMRMK<br>HVR               | Mus<br>musculu<br>s              |
| 1 | 1.00 | 1 | 1 | 0.04  | 0.036  | 0.04   | 0.033  | 0.04   | t | 127964 | EQLIEKLIE<br>DDE             | Oryctola<br>gus<br>cuniculu<br>s |
| 1 | 1.00 | 1 | 1 | -0.01 | -0.006 | -0.016 | -0.009 | -0.008 | t | 44870  | NLSGKAV<br>NHIRS             | Homo<br>sapiens                  |

|   |      |   |   |       |        |        |        |        |   |        |                     |                                  |
|---|------|---|---|-------|--------|--------|--------|--------|---|--------|---------------------|----------------------------------|
| 1 | 1.00 | 1 | 1 | 0     | 0      | 0      | 0      | 0      | t | 151020 | LCKLRGVA<br>PLH     | Mus<br>musculu<br>s              |
| 1 | 1.00 | 1 | 1 | 0     | 0      | 0      | 0      | 0      | t | 94636  | PACGRHYS            | Oryctola<br>gus<br>cuniculu<br>s |
| 1 | 1.00 | 1 | 1 | 0     | -0.007 | 0      | 0      | 0      | t | 94636  | PACGRHYS            | Oryctola<br>gus<br>cuniculu<br>s |
| 1 | 1.00 | 1 | 1 | 0     | 0      | 0      | 0      | 0      | t | 52929  | QYIKANSK<br>FIGITE  | Mus<br>musculu<br>s              |
| 1 | 1.00 | 1 | 1 | 0     | 0      | 0      | 0      | 0      | t | 23191  | GVTYEIDL<br>TNKNAA  | Homo<br>sapiens                  |
| 1 | 1.00 | 1 | 1 | -0.01 | -0.008 | -0.007 | -0.007 | -0.008 | t | 151713 | RGEARK              | Homo<br>sapiens                  |
| 1 | 1.00 | 1 | 1 | 0     | -0.002 | 0      | -0.003 | 0      | t | 42276  | MPHGFIN<br>WHGAF    | Mus<br>musculu<br>s              |
| 1 | 1.00 | 1 | 1 | 0.02  | 0.02   | 0.02   | 0.02   | 0.02   | t | 149054 | GSPNFTQ             | Sus<br>scrofa                    |
| 1 | 1.00 | 1 | 1 | 0.02  | 0.02   | 0.02   | 0.02   | 0.02   | t | 135790 | VVGGEDA<br>K        | Homo<br>sapiens                  |
| 1 | 1.00 | 1 | 1 | 0.02  | 0.02   | 0.02   | 0.02   | 0.02   | t | 149076 | NATQAST             | Sus<br>scrofa                    |
| 1 | 1.00 | 1 | 1 | 0.02  | 0.02   | 0.02   | 0.02   | 0.02   | t | 113189 | TDKKSYPE<br>LEDPGVK | Homo<br>sapiens                  |
| 1 | 1.00 | 1 | 1 | 0.02  | 0.02   | 0.02   | 0.02   | 0.02   | t | 57531  | SELPQWD             | Mus<br>musculu<br>s              |
| 1 | 1.00 | 1 | 1 | 0.02  | 0.02   | 0.02   | 0.02   | 0.02   | t | 57531  | SELPQWD             | Mus<br>musculu<br>s              |
| 1 | 1.00 | 1 | 1 | 0     | 0      | 0      | 0      | 0      | t | 149535 | YPQPQPFL<br>PQ      | Mus<br>musculu<br>s              |
| 1 | 1.00 | 1 | 1 | 0     | 0      | 0      | 0      | 0      | t | 140256 | KYEQGGNI<br>ID      | Mus<br>musculu<br>s              |
| 1 | 1.00 | 1 | 1 | 0     | 0      | 0      | 0      | 0      | t | 140256 | KYEQGGNI<br>ID      | Mus<br>musculu<br>s              |

|   |      |   |   |       |       |       |       |       |   |        |                              |                                  |
|---|------|---|---|-------|-------|-------|-------|-------|---|--------|------------------------------|----------------------------------|
| 1 | 1.00 | 1 | 1 | 0     | 0     | 0     | 0     | 0     | t | 148761 | QFPGQQQ<br>QFP               | Homo<br>sapiens                  |
| 1 | 1.00 | 1 | 1 | 0     | 0     | 0     | 0     | 0     | t | 140256 | KYEQGGNI<br>ID               | Mus<br>musculu<br>s              |
| 1 | 1.00 | 1 | 1 | 0     | 0     | 0     | 0     | 0     | t | 149535 | YPQPQPFL<br>PQ               | Homo<br>sapiens                  |
| 1 | 1.00 | 1 | 1 | 0     | 0     | 0     | 0     | 0     | t | 117514 | GRGRGRG<br>RGRGGPR<br>R      | Homo<br>sapiens                  |
| 1 | 1.00 | 1 | 1 | 0     | 0     | 0     | 0     | 0     | t | 123553 | NPKFEELK<br>G                | Ovis<br>aries                    |
| 1 | 1.00 | 1 | 1 | 0     | 0     | 0     | 0     | 0     | t | 119665 | VLHQDWL<br>N                 | Homo<br>sapiens                  |
| 1 | 1.00 | 1 | 1 | 0     | 0     | 0     | 0     | 0     | t | 123173 | FIKWPLNG<br>W                | Ovis<br>aries                    |
| 1 | 1.00 | 1 | 1 | 0     | 0     | 0     | 0     | 0     | t | 114975 | VLCNRAFN<br>PV               | Homo<br>sapiens                  |
| 1 | 1.00 | 1 | 1 | 0     | 0     | 0     | 0     | 0     | t | 114406 | IGGRVHFF<br>KDISPIS          | Homo<br>sapiens                  |
| 1 | 1.00 | 1 | 1 | 0     | 0     | 0     | 0     | 0     | t | 107815 | EIDGYNN<br>QFKKSPLP          | Homo<br>sapiens                  |
| 1 | 1.00 | 1 | 1 | 0     | 0     | 0     | 0     | 0     | t | 113762 | QPAQGQQ<br>GQQPGQA           | Homo<br>sapiens                  |
| 1 | 1.00 | 1 | 1 | 0     | 0     | 0     | 0     | 0     | t | 78227  | PHAMVDH<br>L                 | Homo<br>sapiens                  |
| 1 | 1.00 | 1 | 1 | 0     | 0     | 0     | 0     | 0     | t | 79933  | MLRAVFM<br>QQRPL             | Mus<br>musculu<br>s              |
| 1 | 1.00 | 1 | 1 | 0     | 0     | 0     | 0     | 0     | t | 50099  | PYIEQAQV<br>IAHQFKEKI<br>LGL | Homo<br>sapiens                  |
| 1 | 1.00 | 1 | 1 | 0     | 0     | 0     | 0     | 0     | t | 57708  | SEYPSQPS<br>S                | Homo<br>sapiens                  |
| 1 | 1.00 | 1 | 1 | -0.02 | -0.02 | -0.02 | -0.02 | -0.02 | t | 144647 | GDNGKGF<br>FELPMKD           | Oryctola<br>gus<br>cuniculu<br>s |

|   |      |   |   |       |        |        |        |        |   |        |                              |                                  |
|---|------|---|---|-------|--------|--------|--------|--------|---|--------|------------------------------|----------------------------------|
| 1 | 1.00 | 1 | 1 | 0     | 0.004  | 0      | 0.003  | 0.001  | t | 23973  | HGYEKPEE<br>LWTAKSR<br>VHPL  | Homo<br>sapiens                  |
| 1 | 1.00 | 1 | 1 | 0     | 0      | -0.004 | -0.003 | 0      | t | 82532  | GADLAGA<br>DLA               | Homo<br>sapiens                  |
| 1 | 1.00 | 1 | 1 | 0.03  | 0.03   | 0.036  | 0.03   | 0.03   | t | 27421  | ILYEAFFE<br>M                | Homo<br>sapiens                  |
| 1 | 1.00 | 1 | 1 | -0.02 | -0.018 | -0.02  | -0.013 | -0.02  | t | 112911 | ASDLEKIHL<br>DEKSFR          | Homo<br>sapiens                  |
| 1 | 1.00 | 1 | 1 | 0.01  | 0.008  | 0.009  | 0.013  | 0.012  | t | 106380 | EFFRHNS                      | Mus<br>musculu<br>s              |
| 1 | 1.00 | 1 | 1 | -0.02 | -0.018 | -0.023 | -0.013 | -0.019 | t | 120711 | KQLATKAA<br>RKSAPAT          | Homo<br>sapiens                  |
| 1 | 1.00 | 1 | 1 | -0.04 | -0.04  | -0.048 | -0.04  | -0.039 | t | 125454 | KDYKTMV<br>KFCN              | Mus<br>musculu<br>s              |
| 1 | 1.00 | 1 | 1 | 0.03  | 0.03   | 0.03   | 0.026  | 0.03   | t | 131697 | TGTSSDVG<br>GYNYVSW<br>Y     | Homo<br>sapiens                  |
| 1 | 1.00 | 1 | 1 | -0.01 | -0.01  | -0.009 | -0.007 | -0.01  | t | 30102  | KCYTTGTII<br>NQDPDK          | Homo<br>sapiens                  |
| 1 | 1.00 | 1 | 1 | -0.03 | -0.028 | -0.026 | -0.03  | -0.032 | t | 44476  | NKDKLFTV<br>WK               | Rattus<br>norvegic<br>us         |
| 1 | 1.00 | 1 | 1 | -0.03 | -0.03  | -0.026 | -0.03  | -0.032 | t | 44476  | NKDKLFTV<br>WK               | Oryctola<br>gus<br>cuniculu<br>s |
| 1 | 1.00 | 1 | 1 | -0.01 | -0.008 | -0.011 | -0.007 | -0.01  | t | 52597  | QTPVNGN<br>SPWAPTA<br>PLPGDM | Homo<br>sapiens                  |
| 1 | 1.00 | 1 | 1 | 0.02  | 0.016  | 0.009  | 0.013  | 0.018  | t | 122210 | VRVIDPSL<br>GDRKDE           | Oryctola<br>gus<br>cuniculu<br>s |
| 1 | 1.00 | 1 | 1 | -0.05 | -0.053 | -0.048 | -0.05  | -0.05  | t | 127963 | EPKPKKAP<br>AKKGKGV          | Oryctola<br>gus<br>cuniculu<br>s |

|   |      |   |   |       |        |        |        |        |   |        |                              |                                  |
|---|------|---|---|-------|--------|--------|--------|--------|---|--------|------------------------------|----------------------------------|
| 1 | 1.00 | 1 | 1 | 0.01  | 0.01   | 0.01   | 0.01   | 0.01   | t | 61026  | SSGIGPEK                     | Oryctola<br>gus<br>cuniculu<br>s |
| 1 | 1.00 | 1 | 1 | -0.02 | -0.024 | -0.025 | -0.017 | -0.019 | t | 117403 | YALKRQGR<br>TLYG             | Oryctola<br>gus<br>cuniculu<br>s |
| 1 | 1.00 | 1 | 1 | 0.01  | 0.013  | 0.009  | 0.01   | 0.012  | t | 24841  | HSQWNKP<br>SKP               | Mus<br>musculu<br>s              |
| 1 | 1.00 | 1 | 1 | 0.01  | 0.01   | 0.011  | 0.013  | 0.01   | t | 79674  | VPVRLAGV<br>GFESKIVD<br>GGCF | Homo<br>sapiens                  |
| 1 | 1.00 | 1 | 1 | 0.01  | 0.01   | 0.01   | 0.01   | 0.01   | t | 29463  | IVTCAM                       | Homo<br>sapiens                  |
| 1 | 1.00 | 1 | 1 | -0.05 | -0.05  | -0.05  | -0.05  | -0.048 | t | 118372 | GIARVPLA                     | Homo<br>sapiens                  |
| 1 | 1.00 | 1 | 1 | 0.02  | 0.02   | 0.02   | 0.02   | 0.021  | t | 108152 | TCPPCPAP<br>ELLGG            | Homo<br>sapiens                  |
| 1 | 1.00 | 1 | 1 | 0.05  | 0.05   | 0.05   | 0.05   | 0.05   | t | 91860  | QSEGATNF<br>GDIGVQQ          | Oryctola<br>gus<br>cuniculu<br>s |
| 1 | 1.00 | 1 | 1 | 0.03  | 0.03   | 0.03   | 0.03   | 0.03   | t | 111149 | CIPASGQT<br>C                | Homo<br>sapiens                  |
| 1 | 1.00 | 1 | 1 | 0.01  | 0.01   | 0.01   | 0.01   | 0.01   | t | 148963 | TPQQQFP<br>EQS               | Homo<br>sapiens                  |
| 1 | 1.00 | 1 | 1 | 0.01  | 0.01   | 0.01   | 0.01   | 0.01   | t | 132926 | WGANTNL                      | Homo<br>sapiens                  |
| 1 | 1.00 | 1 | 1 | 0.01  | 0.01   | 0.01   | 0.01   | 0.01   | t | 127663 | GGYVKLFP<br>NS               | Homo<br>sapiens                  |
| 1 | 1.00 | 1 | 1 | 0.01  | 0.01   | 0.01   | 0.01   | 0.01   | t | 110582 | GANGDPG<br>RPGEPLP           | Mus<br>musculu<br>s              |
| 1 | 1.00 | 1 | 1 | 0.01  | 0.01   | 0.01   | 0.01   | 0.01   | t | 115310 | KHIQKEDV<br>PSERYLGY<br>LEQL | Homo<br>sapiens                  |
| 1 | 1.00 | 1 | 1 | 0.01  | 0.01   | 0.01   | 0.01   | 0.01   | t | 95828  | SGASAQs<br>GTSAQ             | Homo<br>sapiens                  |
| 1 | 1.00 | 1 | 1 | 0.01  | 0.01   | 0.01   | 0.01   | 0.01   | t | 97311  | FPLPTDAG                     | Mus<br>musculu<br>s              |



|   |      |   |   |       |        |        |        |        |   |        |                              |                                  |
|---|------|---|---|-------|--------|--------|--------|--------|---|--------|------------------------------|----------------------------------|
| 1 | 1.00 | 1 | 1 | 0.01  | 0.01   | 0.01   | 0.01   | 0.01   | t | 95828  | SGASAQS<br>GTSAQ             | Homo<br>sapiens                  |
| 1 | 1.00 | 1 | 1 | 0.01  | 0.01   | 0.01   | 0.01   | 0.01   | t | 95828  | SGASAQS<br>GTSAQ             | Homo<br>sapiens                  |
| 1 | 1.00 | 1 | 1 | 0.01  | 0.01   | 0.01   | 0.01   | 0.01   | t | 95828  | SGASAQS<br>GTSAQ             | Mus<br>musculu<br>s              |
| 1 | 1.00 | 1 | 1 | 0.01  | 0.01   | 0.01   | 0.01   | 0.01   | t | 95828  | SGASAQS<br>GTSAQ             | Homo<br>sapiens                  |
| 1 | 1.00 | 1 | 1 | 0.01  | 0.01   | 0.01   | 0.01   | 0.01   | t | 97311  | FPLPTDAG                     | Mus<br>musculu<br>s              |
| 1 | 1.00 | 1 | 1 | 0.01  | 0.01   | 0.01   | 0.01   | 0.01   | t | 39370  | LSGKPAIIP<br>DREALYQE<br>FDE | Homo<br>sapiens                  |
| 1 | 1.00 | 1 | 1 | -0.01 | -0.01  | -0.01  | -0.01  | -0.01  | t | 149961 | SWKHWSY                      | Capra<br>hircus                  |
| 1 | 1.00 | 1 | 1 | -0.01 | -0.01  | -0.01  | -0.01  | -0.01  | t | 104232 | SAMWDF                       | Mus<br>musculu<br>s              |
| 1 | 1.00 | 1 | 1 | -0.01 | -0.01  | -0.01  | -0.01  | -0.01  | t | 78077  | YPYSMWK<br>NLWPS             | Mus<br>musculu<br>s              |
| 1 | 1.00 | 1 | 1 | -0.01 | -0.01  | -0.01  | -0.01  | -0.01  | t | 79655  | TASFHRN                      | Oryctola<br>gus<br>cuniculu<br>s |
| 1 | 1.00 | 1 | 1 | -0.01 | -0.01  | -0.01  | -0.01  | -0.01  | t | 90912  | YPVLVNFN<br>SN               | Homo<br>sapiens                  |
| 1 | 1.00 | 1 | 1 | -0.01 | -0.01  | -0.01  | -0.01  | -0.01  | t | 57706  | SEYPSQPP<br>S                | Homo<br>sapiens                  |
| 1 | 1.00 | 1 | 1 | -0.01 | -0.01  | -0.01  | -0.01  | -0.01  | t | 27598  | INCYTEGP<br>CVPKPP           | Homo<br>sapiens                  |
| 1 | 1.00 | 1 | 1 | -0.02 | -0.018 | -0.011 | -0.019 | -0.022 | t | 133695 | SHNQLLRI<br>QALD             | Homo<br>sapiens                  |
| 1 | 1.00 | 1 | 1 | 0     | 0      | 0      | 0      | 0.002  | t | 135483 | MDRHDFG<br>F                 | Mus<br>musculu<br>s              |

|   |      |   |   |       |        |        |        |        |   |        |                              |                                  |
|---|------|---|---|-------|--------|--------|--------|--------|---|--------|------------------------------|----------------------------------|
| 1 | 1.00 | 1 | 1 | -0.01 | -0.01  | -0.013 | -0.01  | -0.01  | t | 30553  | KENYIYGT<br>CYYTASDR<br>TAFP | Oryctola<br>gus<br>cuniculu<br>s |
| 1 | 1.00 | 1 | 1 | 0     | 0.001  | 0.008  | 0.001  | -0.002 | t | 47067  | PDCPGVG<br>TGCTA             | Myodes<br>glareolu<br>s          |
| 1 | 1.00 | 1 | 1 | 0     | 0      | 0.001  | 0      | 0      | t | 73636  | YEDRYRE                      | Mus<br>musculu<br>s              |
| 1 | 1.00 | 1 | 1 | 0     | 0      | -0.001 | 0.003  | 0      | t | 71431  | VTNNTP                       | Homo<br>sapiens                  |
| 1 | 1.00 | 1 | 1 | 0.05  | 0.05   | 0.037  | 0.05   | 0.05   | t | 110308 | KTCKQAGT<br>CPPDIIPKV<br>EG  | Mus<br>musculu<br>s              |
| 1 | 1.00 | 1 | 1 | 0     | 0      | 0      | -0.004 | -0.002 | t | 134029 | DEDENQS<br>PRSFQKKT<br>R     | Homo<br>sapiens                  |
| 1 | 1.00 | 1 | 1 | 0.05  | 0.05   | 0.049  | 0.05   | 0.05   | t | 157171 | DQRSQEE<br>RER               | Homo<br>sapiens                  |
| 1 | 1.00 | 1 | 1 | -0.02 | -0.02  | -0.02  | -0.02  | -0.02  | t | 134516 | RSGTVG                       | Mus<br>musculu<br>s              |
| 1 | 1.00 | 1 | 1 | -0.02 | -0.02  | -0.02  | -0.02  | -0.02  | t | 134516 | RSGTVG                       | Mus<br>musculu<br>s              |
| 1 | 1.00 | 1 | 1 | -0.03 | -0.03  | -0.03  | -0.03  | -0.031 | t | 107156 | GLAGAPGL<br>R                | Mus<br>musculu<br>s              |
| 1 | 1.00 | 1 | 1 | 0     | 0.003  | 0.008  | 0.001  | 0.001  | t | 50180  | PYVEPTAP<br>QVL              | Mus<br>musculu<br>s              |
| 1 | 1.00 | 1 | 1 | -0.01 | -0.01  | -0.021 | -0.01  | -0.007 | t | 30052  | KCEVFREL<br>KDLKGY           | Homo<br>sapiens                  |
| 1 | 1.00 | 1 | 1 | -0.02 | -0.016 | -0.015 | -0.013 | -0.017 | t | 120590 | HWYRATH<br>QEAINCYA<br>N     | Homo<br>sapiens                  |
| 1 | 1.00 | 1 | 1 | -0.02 | -0.022 | -0.018 | -0.021 | -0.02  | t | 22881  | GTVVAVG<br>PGR               | Mus<br>musculu<br>s              |
| 1 | 1.00 | 1 | 1 | -0.04 | -0.038 | -0.04  | -0.034 | -0.04  | t | 138232 | RLTSSLRY<br>NP               | Homo<br>sapiens                  |

|   |      |   |   |       |        |        |        |        |   |        |                            |                                  |
|---|------|---|---|-------|--------|--------|--------|--------|---|--------|----------------------------|----------------------------------|
| 1 | 1.00 | 1 | 1 | -0.01 | -0.012 | -0.006 | -0.011 | -0.012 | t | 22871  | GTVAPQIP<br>PNWHIPSI<br>QD | Mus<br>musculu<br>s              |
| 1 | 1.00 | 1 | 1 | 0.03  | 0.027  | 0.028  | 0.03   | 0.03   | t | 131035 | RHQREITR<br>TTLQSDQ        | Oryctola<br>gus<br>cuniculu<br>s |
| 1 | 1.00 | 1 | 1 | 0.02  | 0.021  | 0.018  | 0.016  | 0.02   | t | 43215  | NALTQPV<br>DQLLK           | Equus<br>caballus                |
| 1 | 1.00 | 1 | 1 | 0     | 0.002  | 0      | 0.001  | 0      | t | 150977 | EEAKLNRE<br>EIDGVKL        | Homo<br>sapiens                  |
| 1 | 1.00 | 1 | 1 | -0.02 | -0.022 | -0.015 | -0.017 | -0.02  | t | 159085 | RYKYYPET<br>PQGLAKII       | Mus<br>musculu<br>s              |
| 1 | 1.00 | 1 | 1 | -0.01 | -0.008 | -0.01  | -0.009 | -0.011 | t | 117069 | QRYYSTRP<br>RAL            | Homo<br>sapiens                  |
| 1 | 1.00 | 1 | 1 | 0     | 0      | 0      | 0      | 0      | t | 156675 | GPRVVER<br>HQSACKD<br>S    | Homo<br>sapiens                  |
| 1 | 1.00 | 1 | 1 | 0.02  | 0.024  | 0.02   | 0.023  | 0.02   | t | 117888 | GQILDILVS<br>RSLK          | Homo<br>sapiens                  |
| 1 | 1.00 | 1 | 1 | 0     | 0      | 0      | 0      | 0      | t | 926    | AEGEFKTR<br>RNTNYQD<br>PAK | Homo<br>sapiens                  |
| 1 | 1.00 | 1 | 1 | 0     | 0      | 0      | 0      | 0      | t | 926    | AEGEFKTR<br>RNTNYQD<br>PAK | Homo<br>sapiens                  |
| 1 | 1.00 | 1 | 1 | -0.02 | -0.02  | -0.02  | -0.02  | -0.02  | t | 79445  | VCAKGPP<br>QLPRCP          | Mus<br>musculu<br>s              |
| 1 | 1.00 | 1 | 1 | 0.02  | 0.018  | 0.024  | 0.017  | 0.019  | t | 66833  | TTSTGPCK<br>TCTTPAQ        | Mus<br>musculu<br>s              |
| 1 | 1.00 | 1 | 1 | -0.01 | -0.01  | -0.01  | -0.01  | -0.012 | t | 137735 | DTALTREA<br>LRLV           | Mus<br>musculu<br>s              |
| 1 | 1.00 | 1 | 1 | 0.04  | 0.04   | 0.04   | 0.04   | 0.04   | t | 141687 | KLQKKETE<br>CEEEKGPL       | Oryctola<br>gus<br>cuniculu<br>s |
| 1 | 1.00 | 1 | 1 | 0.04  | 0.042  | 0.04   | 0.04   | 0.04   | t | 141687 | KLQKKETE<br>CEEEKGPL       | Rattus<br>norvegic<br>us         |

|   |      |   |   |      |      |      |      |      |   |        |                              |                     |
|---|------|---|---|------|------|------|------|------|---|--------|------------------------------|---------------------|
| 1 | 1.00 | 1 | 1 | 0.02 | 0.02 | 0.02 | 0.02 | 0.02 | t | 117661 | TVTSAHPE<br>DSSFYICS         | Homo<br>sapiens     |
| 1 | 1.00 | 1 | 1 | 0.02 | 0.02 | 0.02 | 0.02 | 0.02 | t | 111110 | ANKSEVPL<br>DICTSIC          | Mus<br>musculu<br>s |
| 1 | 1.00 | 1 | 1 | 0.02 | 0.02 | 0.02 | 0.02 | 0.02 | t | 115194 | CNISCDKF<br>LD               | Homo<br>sapiens     |
| 1 | 1.00 | 1 | 1 | 0.02 | 0.02 | 0.02 | 0.02 | 0.02 | t | 78216  | NKLSAA                       | Equus<br>caballus   |
| 1 | 1.00 | 1 | 1 | 0    | 0    | 0    | 0    | 0    | t | 137738 | DTELTQQA<br>LKL V            | Mus<br>musculu<br>s |
| 1 | 1.00 | 1 | 1 | 0    | 0    | 0    | 0    | 0    | t | 123455 | LPNLPYYID                    | Ovis<br>aries       |
| 1 | 1.00 | 1 | 1 | 0    | 0    | 0    | 0    | 0    | t | 112940 | DQMAVEK<br>LSDGIRKF          | Homo<br>sapiens     |
| 1 | 1.00 | 1 | 1 | 0    | 0    | 0    | 0    | 0    | t | 103116 | DSIYYVDA<br>NASIQEM          | Homo<br>sapiens     |
| 1 | 1.00 | 1 | 1 | 0    | 0    | 0    | 0    | 0    | t | 101862 | LLNYKQEG<br>D                | Homo<br>sapiens     |
| 1 | 1.00 | 1 | 1 | 0    | 0    | 0    | 0    | 0    | t | 70670  | VQWMNR<br>LIAFASRG<br>NHVAPT | Homo<br>sapiens     |
| 1 | 1.00 | 1 | 1 | 0    | 0    | 0    | 0    | 0    | t | 78169  | GKHGKEIKI<br>T               | Mus<br>musculu<br>s |
| 1 | 1.00 | 1 | 1 | 0    | 0    | 0    | 0    | 0    | t | 50106  | PYIEQGM<br>QLAEQFK<br>QKALGL | Homo<br>sapiens     |
| 1 | 1.00 | 1 | 1 | 0    | 0    | 0    | 0    | 0    | t | 39917  | LTGKPAVI<br>PDREILYQ<br>QFDE | Homo<br>sapiens     |
| 1 | 1.00 | 1 | 1 | 0    | 0    | 0    | 0    | 0    | t | 47176  | PDREALYR<br>EFDEMEEC<br>ASHL | Homo<br>sapiens     |
| 1 | 1.00 | 1 | 1 | 0    | 0    | 0    | 0    | 0    | t | 46992  | PAVIPDRE<br>VLYQGFE<br>MEEC  | Homo<br>sapiens     |
| 1 | 1.00 | 1 | 1 | 0    | 0    | 0    | 0    | 0    | t | 44869  | NLSGKAIN<br>HIRS             | Homo<br>sapiens     |
| 1 | 1.00 | 1 | 1 | 0    | 0    | 0    | 0    | 0    | t | 41324  | MEECASH<br>LPYIEQGM<br>QLAEQ | Homo<br>sapiens     |

|   |      |   |   |       |       |        |        |        |   |        |                              |                        |
|---|------|---|---|-------|-------|--------|--------|--------|---|--------|------------------------------|------------------------|
| 1 | 1.00 | 1 | 1 | 0     | 0     | 0      | 0      | 0      | t | 46998  | PAVVPDRE<br>ILYQQFDE<br>MEEC | Homo<br>sapiens        |
| 1 | 1.00 | 1 | 1 | 0     | 0     | 0      | 0      | 0      | t | 35235  | LDNIKGNV<br>GKMEDIYK<br>KNNK | Mus<br>musculu<br>s    |
| 1 | 1.00 | 1 | 1 | 0     | 0     | 0      | 0      | 0      | t | 35235  | LDNIKGNV<br>GKMEDIYK<br>KNNK | Mus<br>musculu<br>s    |
| 1 | 1.00 | 1 | 1 | 0     | 0     | 0      | 0      | 0      | t | 35235  | LDNIKGNV<br>GKMEDIYK<br>KNNK | Mus<br>musculu<br>s    |
| 1 | 1.00 | 1 | 1 | 0     | 0     | 0      | 0      | 0      | t | 32484  | KNESKYSN<br>TFQMNAY<br>NMSIR | Aotus<br>nancyma<br>ae |
| 1 | 1.00 | 1 | 1 | 0     | 0     | 0      | 0      | 0      | t | 11968  | EFDEMEEC<br>ASHLPYIE<br>QGVQ | Homo<br>sapiens        |
| 1 | 1.00 | 1 | 1 | 0     | 0     | 0      | 0      | 0      | t | 30636  | KETNNAIS<br>FMSNAGS<br>LEKK  | Aotus<br>nancyma<br>ae |
| 1 | 1.00 | 1 | 1 | 0     | 0     | 0      | 0      | 0      | t | 7000   | CSGFVGLF<br>SPGPSQRI         | Mus<br>musculu<br>s    |
| 1 | 1.00 | 1 | 1 | -0.02 | -0.02 | -0.02  | -0.02  | -0.02  | t | 119515 | RKKKPPGL<br>A                | Homo<br>sapiens        |
| 1 | 1.00 | 1 | 1 | -0.02 | -0.02 | -0.02  | -0.02  | -0.02  | t | 131896 | GQKPPLST<br>WDNSPLR          | Homo<br>sapiens        |
| 1 | 1.00 | 1 | 1 | -0.02 | -0.02 | -0.02  | -0.02  | -0.02  | t | 110954 | NNKYTVTL<br>KATP             | Homo<br>sapiens        |
| 1 | 1.00 | 1 | 1 | -0.02 | -0.02 | -0.02  | -0.02  | -0.02  | t | 115850 | LPVPQKAV<br>PY               | Homo<br>sapiens        |
| 1 | 1.00 | 1 | 1 | -0.02 | -0.02 | -0.02  | -0.02  | -0.02  | t | 115396 | NLLRFFVA<br>PFPEVFGK<br>EKNV | Homo<br>sapiens        |
| 1 | 1.00 | 1 | 1 | -0.02 | -0.02 | -0.02  | -0.02  | -0.02  | t | 92780  | GDDFIDG<br>GKG               | Ovis<br>aries          |
| 1 | 1.00 | 1 | 1 | -0.02 | -0.02 | -0.015 | -0.014 | -0.021 | t | 115109 | SKIFKLGGR<br>DSRSGSP<br>MARR | Homo<br>sapiens        |
| 1 | 1.00 | 1 | 1 | 0     | 0     | 0.002  | -0.002 | -0.001 | t | 56200  | RTTSGLT                      | Homo<br>sapiens        |

|   |      |   |   |       |        |        |        |        |   |        |                              |                                  |
|---|------|---|---|-------|--------|--------|--------|--------|---|--------|------------------------------|----------------------------------|
| 1 | 1.00 | 1 | 1 | -0.01 | -0.003 | -0.003 | -0.013 | -0.012 | t | 136394 | IPYTHAHA<br>DHTL             | Gallus<br>gallus                 |
| 1 | 1.00 | 1 | 1 | 0     | 0.003  | -0.006 | 0      | 0.001  | t | 19266  | GEFPRHVK<br>LKNEIENLL<br>DQV | Mus<br>musculu<br>s              |
| 1 | 1.00 | 1 | 1 | -0.01 | -0.01  | -0.01  | -0.01  | -0.01  | t | 132525 | PGPSPLPH<br>RD               | Homo<br>sapiens                  |
| 1 | 1.00 | 1 | 1 | 0     | 0      | 0      | 0      | 0      | t | 117122 | YTYTDYST<br>RPHY             | Mus<br>musculu<br>s              |
| 1 | 1.00 | 1 | 1 | 0     | 0      | 0      | 0      | 0      | t | 117122 | YTYTDYST<br>RPHY             | Mus<br>musculu<br>s              |
| 1 | 1.00 | 1 | 1 | -0.01 | -0.006 | -0.01  | -0.009 | -0.01  | t | 7488   | DADYHRV<br>M                 | Homo<br>sapiens                  |
| 1 | 1.00 | 1 | 1 | 0.01  | 0.01   | 0.005  | 0.009  | 0.01   | t | 2052   | AIPTDPRN<br>VGGDLDP<br>SSIPD | Homo<br>sapiens                  |
| 1 | 1.00 | 1 | 1 | -0.01 | -0.008 | -0.01  | -0.003 | -0.007 | t | 110785 | ARGHRPL<br>DKKREEAP<br>SLRPA | Homo<br>sapiens                  |
| 1 | 1.00 | 1 | 1 | -0.01 | -0.008 | -0.01  | -0.003 | -0.007 | t | 110784 | ARGHRPL<br>DKKREEAP<br>SLRPA | Homo<br>sapiens                  |
| 1 | 1.00 | 1 | 1 | -0.01 | -0.008 | -0.01  | -0.003 | -0.007 | t | 110783 | ARGHRPL<br>DKKREEAP<br>SLRPA | Homo<br>sapiens                  |
| 1 | 1.00 | 1 | 1 | -0.02 | -0.023 | -0.02  | -0.019 | -0.021 | t | 17553  | FQWSWYT<br>PPRPS             | Oryctola<br>gus<br>cuniculu<br>s |
| 1 | 1.00 | 1 | 1 | -0.03 | -0.03  | -0.023 | -0.03  | -0.029 | t | 122228 | YLGRGDK                      | Homo<br>sapiens                  |
| 1 | 1.00 | 1 | 1 | 0.01  | 0.01   | 0.01   | 0.01   | 0.01   | t | 50429  | QDADYHR<br>V                 | Oryctola<br>gus<br>cuniculu<br>s |
| 1 | 1.00 | 1 | 1 | 0.04  | 0.037  | 0.04   | 0.04   | 0.042  | t | 135472 | KDRHDF                       | Oryctola<br>gus<br>cuniculu<br>s |
| 1 | 1.00 | 1 | 1 | -0.02 | -0.02  | -0.02  | -0.02  | -0.021 | t | 108105 | RRLPFGSS<br>L                | Mus<br>musculu<br>s              |

|   |      |   |   |       |        |        |        |        |   |        |                              |                                  |
|---|------|---|---|-------|--------|--------|--------|--------|---|--------|------------------------------|----------------------------------|
| 1 | 1.00 | 1 | 1 | -0.04 | -0.042 | -0.046 | -0.037 | -0.037 | t | 31388  | KIPKTITVS<br>T               | Mus<br>musculu<br>s              |
| 1 | 1.00 | 1 | 1 | -0.01 | -0.01  | -0.01  | -0.01  | -0.01  | t | 145947 | PPDIIPK                      | Mus<br>musculu<br>s              |
| 1 | 1.00 | 1 | 1 | -0.01 | -0.01  | -0.01  | -0.01  | -0.01  | t | 94476  | CNPACGR<br>HY                | Capra<br>hircus                  |
| 1 | 1.00 | 1 | 1 | -0.01 | -0.003 | -0.01  | -0.01  | -0.01  | t | 94476  | CNPACGR<br>HY                | Capra<br>hircus                  |
| 1 | 1.00 | 1 | 1 | -0.01 | -0.017 | -0.01  | -0.01  | -0.01  | t | 94476  | CNPACGR<br>HY                | Oryctola<br>gus<br>cuniculu<br>s |
| 1 | 1.00 | 1 | 1 | -0.02 | -0.023 | -0.019 | -0.02  | -0.021 | t | 123837 | VVGAVQG<br>P                 | Oryctola<br>gus<br>cuniculu<br>s |
| 1 | 1.00 | 1 | 1 | -0.02 | -0.027 | -0.027 | -0.013 | -0.018 | t | 136634 | SINASPGV<br>VVDIAHSP<br>PAKK | Homo<br>sapiens                  |
| 1 | 1.00 | 1 | 1 | -0.03 | -0.03  | -0.03  | -0.03  | -0.028 | t | 118394 | GVPAGVPI                     | Homo<br>sapiens                  |
| 1 | 1.00 | 1 | 1 | 0.03  | 0.03   | 0.03   | 0.03   | 0.03   | t | 135931 | GDVEEAIE<br>RAVV             | Homo<br>sapiens                  |
| 1 | 1.00 | 1 | 1 | 0.01  | 0.01   | 0.01   | 0.01   | 0.01   | t | 151071 | YAADLKST<br>QNAIDEI          | Homo<br>sapiens                  |
| 1 | 1.00 | 1 | 1 | 0.01  | 0.01   | 0.01   | 0.01   | 0.01   | t | 127680 | HFHRPPT                      | Homo<br>sapiens                  |
| 1 | 1.00 | 1 | 1 | 0.01  | 0.01   | 0.01   | 0.01   | 0.01   | t | 121816 | RRSHRSER                     | Homo<br>sapiens                  |
| 1 | 1.00 | 1 | 1 | 0.01  | 0.01   | 0.01   | 0.01   | 0.01   | t | 115496 | SSEEIVPNS<br>VEQKHIQK<br>EDV | Homo<br>sapiens                  |
| 1 | 1.00 | 1 | 1 | 0.01  | 0.01   | 0.01   | 0.01   | 0.01   | t | 112935 | DFLTISPKL<br>LGELLQ          | Oryctola<br>gus<br>cuniculu<br>s |
| 1 | 1.00 | 1 | 1 | 0.01  | 0.01   | 0.01   | 0.01   | 0.01   | t | 115437 | QKALNEIN<br>QFYQKFP<br>QYLQY | Homo<br>sapiens                  |
| 1 | 1.00 | 1 | 1 | 0.01  | 0.01   | 0.01   | 0.01   | 0.01   | t | 97166  | AAIVVGSA<br>A                | Oryctola<br>gus<br>cuniculu<br>s |

|   |      |   |   |       |        |        |        |        |   |        |                      |                       |
|---|------|---|---|-------|--------|--------|--------|--------|---|--------|----------------------|-----------------------|
| 1 | 1.00 | 1 | 1 | 0.01  | 0.01   | 0.01   | 0.01   | 0.01   | t | 97290  | EVELKLNLA            | Oryctolagus cuniculus |
| 1 | 1.00 | 1 | 1 | 0.01  | 0.01   | 0.01   | 0.01   | 0.01   | t | 78228  | PHANMTHI             | Homo sapiens          |
| 1 | 1.00 | 1 | 1 | 0.01  | 0.01   | 0.01   | 0.01   | 0.01   | t | 97188  | AGVATATG             | Mus musculus          |
| 1 | 1.00 | 1 | 1 | 0.01  | 0.01   | 0.01   | 0.01   | 0.01   | t | 95846  | SGTSGTSAQSGT         | Homo sapiens          |
| 1 | 1.00 | 1 | 1 | 0.01  | 0.01   | 0.01   | 0.01   | 0.01   | t | 95846  | SGTSGTSAQSGT         | Homo sapiens          |
| 1 | 1.00 | 1 | 1 | 0.01  | 0.01   | 0.01   | 0.01   | 0.01   | t | 88461  | SEDRETRPHGRNNENFPYNR | Aotus                 |
| 1 | 1.00 | 1 | 1 | 0.01  | 0.01   | 0.01   | 0.01   | 0.01   | t | 10812  | DWICEVLSDFKTWL       | Homo sapiens          |
| 1 | 1.00 | 1 | 1 | 0.01  | 0.01   | 0.01   | 0.01   | 0.01   | t | 10812  | DWICEVLSDFKTWL       | Homo sapiens          |
| 1 | 1.00 | 1 | 1 | -0.01 | -0.01  | -0.01  | -0.01  | -0.01  | t | 151672 | KLYTLVLTPDAPSRK      | Mus musculus          |
| 1 | 1.00 | 1 | 1 | -0.01 | -0.01  | -0.01  | -0.01  | -0.01  | t | 149132 | YLENATQ              | Sus scrofa            |
| 1 | 1.00 | 1 | 1 | -0.01 | -0.01  | -0.01  | -0.01  | -0.01  | t | 119516 | RKLAHPGTS            | Homo sapiens          |
| 1 | 1.00 | 1 | 1 | -0.01 | -0.01  | -0.01  | -0.01  | -0.01  | t | 100586 | TYGAAPARISVPYV       | Homo sapiens          |
| 1 | 1.00 | 1 | 1 | -0.01 | -0.01  | -0.01  | -0.01  | -0.01  | t | 115931 | QTPVVVPPFL           | Homo sapiens          |
| 1 | 1.00 | 1 | 1 | -0.01 | -0.006 | -0.004 | -0.009 | -0.01  | t | 89623  | TNNPENPITE           | Homo sapiens          |
| 1 | 1.00 | 1 | 1 | 0     | -0.002 | 0      | -0.001 | -0.002 | t | 51390  | QLKLDWFKKGSS         | Mus musculus          |
| 1 | 1.00 | 1 | 1 | -0.03 | -0.03  | -0.03  | -0.034 | -0.033 | t | 117695 | YITTIAGVM            | Homo sapiens          |
| 1 | 1.00 | 1 | 1 | -0.01 | -0.01  | 0.001  | -0.01  | -0.01  | t | 153464 | SMHTFQRSPGLT         | Mus musculus          |



|   |      |   |   |       |        |        |        |        |   |        |                     |                                  |
|---|------|---|---|-------|--------|--------|--------|--------|---|--------|---------------------|----------------------------------|
| 1 | 1.00 | 1 | 1 | 0     | -0.002 | 0      | -0.001 | 0      | t | 139324 | TRLIDERA<br>AH      | Mus<br>musculu<br>s              |
| 1 | 1.00 | 1 | 1 | 0     | -0.002 | 0      | -0.001 | 0      | t | 64534  | TKDASIDY<br>HE      | Mus<br>musculu<br>s              |
| 1 | 1.00 | 1 | 1 | 0     | 0.004  | 0      | -0.001 | 0      | t | 32691  | KPEENK              | Mus<br>musculu<br>s              |
| 1 | 1.00 | 1 | 1 | 0     | -0.004 | 0      | -0.001 | 0      | t | 20179  | GHRMAW<br>DMM       | Oryctola<br>gus<br>cuniculu<br>s |
| 1 | 1.00 | 1 | 1 | -0.01 | -0.006 | 0.019  | -0.01  | -0.016 | t | 31772  | KLCGVL              | Homo<br>sapiens                  |
| 1 | 1.00 | 1 | 1 | -0.03 | -0.03  | -0.03  | -0.03  | -0.03  | t | 105137 | DLQN                | Oryctola<br>gus<br>cuniculu<br>s |
| 1 | 1.00 | 1 | 1 | -0.02 | -0.022 | -0.016 | -0.017 | -0.02  | t | 158738 | EIVDLDPKL<br>KQINLI | Mus<br>musculu<br>s              |
| 1 | 1.00 | 1 | 1 | 0.03  | 0.03   | 0.038  | 0.031  | 0.03   | t | 87178  | NYTYDSNY<br>TP      | Homo<br>sapiens                  |
| 1 | 1.00 | 1 | 1 | 0     | 0      | 0      | 0      | 0      | t | 104461 | EFRHDS              | Mus<br>musculu<br>s              |
| 1 | 1.00 | 1 | 1 | -0.05 | -0.052 | -0.059 | -0.057 | -0.051 | t | 112352 | TGNKYPGY<br>P       | Mus<br>musculu<br>s              |
| 1 | 1.00 | 1 | 1 | 0     | 0      | -0.002 | 0      | 0      | t | 21469  | GNLLLSCL            | Mus<br>musculu<br>s              |
| 1 | 1.00 | 1 | 1 | 0     | 0      | -0.002 | 0      | 0      | t | 21469  | GNLLLSCL            | Mus<br>musculu<br>s              |
| 1 | 1.00 | 1 | 1 | 0     | 0      | -0.002 | 0      | 0      | t | 3656   | APMSTPS<br>ATSVR    | Mus<br>musculu<br>s              |
| 1 | 1.00 | 1 | 1 | 0     | 0      | -0.002 | 0      | 0      | t | 3656   | APMSTPS<br>ATSVR    | Mus<br>musculu<br>s              |

|   |      |   |   |       |        |        |        |        |   |        |                             |                                  |
|---|------|---|---|-------|--------|--------|--------|--------|---|--------|-----------------------------|----------------------------------|
| 1 | 1.00 | 1 | 1 | 0.02  | 0.022  | 0.021  | 0.021  | 0.022  | t | 7778   | DDGDKGS<br>DVESYSSM<br>PPLE | Homo<br>sapiens                  |
| 1 | 1.00 | 1 | 1 | 0     | -0.004 | -0.004 | -0.001 | 0      | t | 48377  | PLKDNRI<br>SYGVLSV          | Oryctola<br>gus<br>cuniculu<br>s |
| 1 | 1.00 | 1 | 1 | 0     | 0      | 0      | 0      | -0.002 | t | 51896  | QPQLPFP<br>QQP              | Mus<br>musculu<br>s              |
| 1 | 1.00 | 1 | 1 | 0     | 0      | 0      | 0.001  | 0      | t | 69124  | VITGSI                      | Homo<br>sapiens                  |
| 1 | 1.00 | 1 | 1 | 0     | 0      | 0      | -0.004 | 0      | t | 32108  | KLQKTYSQ                    | Homo<br>sapiens                  |
| 1 | 1.00 | 1 | 1 | 0     | 0.004  | 0.001  | 0.001  | 0      | t | 98736  | DNRAG                       | Homo<br>sapiens                  |
| 1 | 1.00 | 1 | 1 | 0     | 0.002  | 0      | 0      | 0      | t | 66658  | TTIPPSSP                    | Anas<br>platyrhy<br>nchos        |
| 1 | 1.00 | 1 | 1 | 0.01  | 0.012  | 0.01   | 0.011  | 0.012  | t | 43176  | NAINPRLT                    | Homo<br>sapiens                  |
| 1 | 1.00 | 1 | 1 | 0     | -0.001 | -0.01  | -0.003 | 0.002  | t | 23398  | GYLEQLLR<br>LKQYKVPQ        | Homo<br>sapiens                  |
| 1 | 1.00 | 1 | 1 | -0.02 | -0.022 | -0.019 | -0.017 | -0.018 | t | 41810  | MKDTLRIT<br>YL              | Mus<br>musculu<br>s              |
| 1 | 1.00 | 1 | 1 | -0.01 | -0.01  | -0.01  | -0.004 | -0.01  | t | 159002 | MACAHL<br>KEADIKTA<br>LEA   | Homo<br>sapiens                  |
| 1 | 1.00 | 1 | 1 | 0.02  | 0.02   | 0.02   | 0.02   | 0.02   | t | 115206 | DIGSESTE<br>DQAMED<br>KQMEA | Homo<br>sapiens                  |
| 1 | 1.00 | 1 | 1 | 0.02  | 0.02   | 0.02   | 0.02   | 0.02   | t | 110581 | GAKGSAG<br>APGIAGAP         | Mus<br>musculu<br>s              |
| 1 | 1.00 | 1 | 1 | 0.02  | 0.02   | 0.02   | 0.02   | 0.02   | t | 115920 | QNQEPI<br>RCE               | Homo<br>sapiens                  |

|   |      |   |   |   |        |   |   |   |   |        |                              |                                  |
|---|------|---|---|---|--------|---|---|---|---|--------|------------------------------|----------------------------------|
| 1 | 1.00 | 1 | 1 | 0 | 0      | 0 | 0 | 0 | t | 135060 | KKDVVNS<br>QNKTDKT<br>E      | Sus<br>scrofa                    |
| 1 | 1.00 | 1 | 1 | 0 | 0      | 0 | 0 | 0 | t | 138240 | SQPEFLEQ<br>KRAELDTV         | Mus<br>musculu<br>s              |
| 1 | 1.00 | 1 | 1 | 0 | 0      | 0 | 0 | 0 | t | 138240 | SQPEFLEQ<br>KRAELDTV         | Mus<br>musculu<br>s              |
| 1 | 1.00 | 1 | 1 | 0 | 0      | 0 | 0 | 0 | t | 149077 | NATQERY                      | Sus<br>scrofa                    |
| 1 | 1.00 | 1 | 1 | 0 | 0      | 0 | 0 | 0 | t | 123832 | VSHVDFM<br>LY                | Ovis<br>aries                    |
| 1 | 1.00 | 1 | 1 | 0 | 0      | 0 | 0 | 0 | t | 131083 | SQTTANPS<br>CPEAT            | Rattus<br>norvegic<br>us         |
| 1 | 1.00 | 1 | 1 | 0 | 0      | 0 | 0 | 0 | t | 111084 | AAPDDVLP<br>NPAR             | Homo<br>sapiens                  |
| 1 | 1.00 | 1 | 1 | 0 | 0      | 0 | 0 | 0 | t | 78107  | ATYQSEYL<br>AHRRIPP          | Oryctola<br>gus<br>cuniculu<br>s |
| 1 | 1.00 | 1 | 1 | 0 | 0      | 0 | 0 | 0 | t | 90912  | YPVLVNFN<br>SN               | Homo<br>sapiens                  |
| 1 | 1.00 | 1 | 1 | 0 | 0      | 0 | 0 | 0 | t | 66976  | TVDNPAST<br>TNKDKLFA<br>VWK  | Oryctola<br>gus<br>cuniculu<br>s |
| 1 | 1.00 | 1 | 1 | 0 | 0      | 0 | 0 | 0 | t | 39372  | LSGKPAIIP<br>DREVLYQA<br>FDE | Homo<br>sapiens                  |
| 1 | 1.00 | 1 | 1 | 0 | -0.002 | 0 | 0 | 0 | t | 44474  | NKDKLFAV<br>WK               | Oryctola<br>gus<br>cuniculu<br>s |
| 1 | 1.00 | 1 | 1 | 0 | 0      | 0 | 0 | 0 | t | 52878  | QYDEMEE<br>CSQAAPYI<br>EQAQA | Homo<br>sapiens                  |
| 1 | 1.00 | 1 | 1 | 0 | 0      | 0 | 0 | 0 | t | 47185  | PDREVLYQ<br>EFDEMEEC<br>GSHL | Homo<br>sapiens                  |
| 1 | 1.00 | 1 | 1 | 0 | 0      | 0 | 0 | 0 | t | 47191  | PDREVLRY<br>EFDEMEEC<br>AAHI | Homo<br>sapiens                  |

|   |      |   |   |       |        |        |        |        |   |        |                              |                       |
|---|------|---|---|-------|--------|--------|--------|--------|---|--------|------------------------------|-----------------------|
| 1 | 1.00 | 1 | 1 | 0     | 0      | 0      | 0      | 0      | t | 39372  | LSGKPAIIP<br>DREVLVQA<br>FDE | Homo sapiens          |
| 1 | 1.00 | 1 | 1 | 0     | 0      | 0      | 0      | 0      | t | 44474  | NKDKLFAV<br>WK               | Oryctolagus cuniculus |
| 1 | 1.00 | 1 | 1 | 0     | 0      | 0      | 0      | 0      | t | 45699  | NRLIAFAS<br>RGNHVAP<br>THYVV | Homo sapiens          |
| 1 | 1.00 | 1 | 1 | 0     | 0      | 0      | 0      | 0      | t | 11967  | EFDEMEEC<br>ASHLPYIE<br>QGMQ | Homo sapiens          |
| 1 | 1.00 | 1 | 1 | 0     | 0      | 0      | 0      | 0      | t | 7396   | CYKKVWR<br>DHAGTI            | Mus musculus          |
| 1 | 1.00 | 1 | 1 | 0     | 0      | 0      | 0      | 0      | t | 7394   | CYKKVWA<br>DHRGTI            | Mus musculus          |
| 1 | 1.00 | 1 | 1 | 0     | 0      | 0      | 0      | 0      | t | 1261   | AFASRGN<br>HVAPTHY<br>VVESDA | Homo sapiens          |
| 1 | 1.00 | 1 | 1 | 0     | 0      | 0      | 0      | 0      | t | 1261   | AFASRGN<br>HVAPTHY<br>VVESDA | Homo sapiens          |
| 1 | 1.00 | 1 | 1 | 0     | 0      | 0      | 0      | 0      | t | 7396   | CYKKVWR<br>DHAGTI            | Mus musculus          |
| 1 | 1.00 | 1 | 1 | -0.02 | -0.02  | -0.02  | -0.02  | -0.02  | t | 147225 | QLQPFP                       | Homo sapiens          |
| 1 | 1.00 | 1 | 1 | -0.02 | -0.02  | -0.02  | -0.02  | -0.02  | t | 115329 | KTVYQHQ<br>KAMKPWI<br>QPKTKV | Homo sapiens          |
| 1 | 1.00 | 1 | 1 | -0.02 | -0.02  | -0.02  | -0.02  | -0.02  | t | 79305  | MCEYSHW<br>SGFAFCK           | Mus musculus          |
| 1 | 1.00 | 1 | 1 | -0.03 | -0.03  | -0.03  | -0.027 | -0.03  | t | 134198 | PVGPAPG<br>MRPPMG<br>G       | Oryctolagus cuniculus |
| 1 | 1.00 | 1 | 1 | -0.01 | -0.015 | -0.021 | -0.007 | -0.008 | t | 20519  | GKATVLLG<br>MVLSLMA<br>LVVVW | Canis lupus           |
| 1 | 1.00 | 1 | 1 | -0.02 | -0.023 | -0.029 | -0.02  | -0.019 | t | 124998 | CLQMNNK<br>DMVAIKH<br>LLSE   | Oryctolagus cuniculus |

|   |      |   |   |       |        |        |        |        |   |        |                              |                                  |
|---|------|---|---|-------|--------|--------|--------|--------|---|--------|------------------------------|----------------------------------|
| 1 | 1.00 | 1 | 1 | -0.01 | -0.012 | -0.015 | -0.009 | -0.009 | t | 29938  | KARRSEGR<br>SWAQ             | Homo<br>sapiens                  |
| 1 | 1.00 | 1 | 1 | 0.04  | 0.038  | 0.045  | 0.043  | 0.041  | t | 105164 | EFRHDSG                      | Mus<br>musculu<br>s              |
| 1 | 1.00 | 1 | 1 | -0.04 | -0.044 | -0.04  | -0.043 | -0.04  | t | 143962 | KIWKAPH<br>VAKYFDD<br>Q      | Oryctola<br>gus<br>cuniculu<br>s |
| 1 | 1.00 | 1 | 1 | 0.01  | 0.01   | 0.003  | 0.01   | 0.01   | t | 119464 | HPMLPNY<br>KNFKGTIQ<br>ELGQN | Homo<br>sapiens                  |
| 1 | 1.00 | 1 | 1 | -0.01 | -0.008 | -0.011 | -0.011 | -0.01  | t | 7771   | DDFHTDE<br>DKLDTNSV<br>YEPYY | Cavia<br>porcellu<br>s           |
| 1 | 1.00 | 1 | 1 | -0.07 | -0.072 | -0.077 | -0.071 | -0.07  | t | 1165   | AESPKKP                      | Homo<br>sapiens                  |
| 1 | 1.00 | 1 | 1 | 0.01  | 0.014  | 0.011  | 0.017  | 0.011  | t | 125524 | PSTQTLKLI<br>ETHLRTIPS<br>HA | Homo<br>sapiens                  |
| 1 | 1.00 | 1 | 1 | 0.01  | 0.01   | 0.009  | 0.01   | 0.009  | t | 32070  | KLPDDFM<br>GCVLAWN<br>TRN    | Oryctola<br>gus<br>cuniculu<br>s |
| 1 | 1.00 | 1 | 1 | 0.01  | 0.014  | 0.013  | 0.011  | 0.01   | t | 65474  | TNVDQDL<br>VGWPAPQ           | Homo<br>sapiens                  |
| 1 | 1.00 | 1 | 1 | 0.02  | 0.022  | 0.02   | 0.017  | 0.02   | t | 43159  | NAGVLTCS<br>LSK              | Homo<br>sapiens                  |
| 1 | 1.00 | 1 | 1 | -0.03 | -0.03  | -0.03  | -0.03  | -0.028 | t | 129293 | LPPARGTP                     | Homo<br>sapiens                  |
| 1 | 1.00 | 1 | 1 | -0.05 | -0.05  | -0.05  | -0.05  | -0.05  | t | 119596 | IHIPSEKIW<br>RPDLVLY         | Mus<br>musculu<br>s              |
| 1 | 1.00 | 1 | 1 | -0.05 | -0.05  | -0.05  | -0.05  | -0.05  | t | 119596 | IHIPSEKIW<br>RPDLVLY         | Homo<br>sapiens                  |
| 1 | 1.00 | 1 | 1 | 0.05  | 0.05   | 0.05   | 0.05   | 0.05   | t | 107501 | LDGKEYK                      | Homo<br>sapiens                  |
| 1 | 1.00 | 1 | 1 | 0.01  | 0.01   | 0.01   | 0.01   | 0.01   | t | 156980 | YTLGHFHG<br>QPQL             | Bos<br>taurus                    |
| 1 | 1.00 | 1 | 1 | 0.01  | 0.01   | 0.01   | 0.01   | 0.01   | t | 156980 | YTLGHFHG<br>QPQL             | Gallus<br>gallus                 |

|   |      |   |   |       |       |       |       |       |   |        |                               |                                  |
|---|------|---|---|-------|-------|-------|-------|-------|---|--------|-------------------------------|----------------------------------|
| 1 | 1.00 | 1 | 1 | 0.01  | 0.01  | 0.01  | 0.01  | 0.01  | t | 132939 | WGSNPPS<br>ATAPP              | Homo<br>sapiens                  |
| 1 | 1.00 | 1 | 1 | 0.01  | 0.01  | 0.01  | 0.01  | 0.01  | t | 121673 | NVKKLCVA<br>KPLVDSF           | Mus<br>musculu<br>s              |
| 1 | 1.00 | 1 | 1 | 0.01  | 0.01  | 0.01  | 0.01  | 0.01  | t | 114903 | NGTLTSLH<br>FG                | Homo<br>sapiens                  |
| 1 | 1.00 | 1 | 1 | 0.01  | 0.01  | 0.01  | 0.01  | 0.01  | t | 115700 | CEKDERFF<br>SD                | Homo<br>sapiens                  |
| 1 | 1.00 | 1 | 1 | 0.01  | 0.01  | 0.01  | 0.01  | 0.01  | t | 52157  | QQTFPQP<br>QQT                | Mus<br>musculu<br>s              |
| 1 | 1.00 | 1 | 1 | 0.01  | 0.01  | 0.01  | 0.01  | 0.01  | t | 39378  | LSGKPATIP<br>DREVLYQE<br>FDE  | Homo<br>sapiens                  |
| 1 | 1.00 | 1 | 1 | 0.01  | 0.01  | 0.01  | 0.01  | 0.01  | t | 47188  | PDREVLYQ<br>QFDEEMEE<br>CSKHL | Homo<br>sapiens                  |
| 1 | 1.00 | 1 | 1 | 0.01  | 0.01  | 0.01  | 0.01  | 0.01  | t | 52157  | QQTFPQP<br>QQT                | Mus<br>musculu<br>s              |
| 1 | 1.00 | 1 | 1 | -0.01 | -0.01 | -0.01 | -0.01 | -0.01 | t | 158592 | GPVNMNL                       | Homo<br>sapiens                  |
| 1 | 1.00 | 1 | 1 | -0.01 | -0.01 | -0.01 | -0.01 | -0.01 | t | 128051 | LLSYEASVP<br>SVPISTHG<br>RLL  | Homo<br>sapiens                  |
| 1 | 1.00 | 1 | 1 | -0.01 | -0.01 | -0.01 | -0.01 | -0.01 | t | 128099 | SEGWPAI<br>DGSFLAAV<br>GNLIV  | Homo<br>sapiens                  |
| 1 | 1.00 | 1 | 1 | -0.01 | -0.01 | -0.01 | -0.01 | -0.01 | t | 115728 | EPFTESQS<br>LT                | Homo<br>sapiens                  |
| 1 | 1.00 | 1 | 1 | -0.01 | -0.01 | -0.01 | -0.01 | -0.01 | t | 114280 | CKWSVAH<br>LC                 | Mus<br>musculu<br>s              |
| 1 | 1.00 | 1 | 1 | -0.01 | -0.01 | -0.01 | -0.01 | -0.01 | t | 105896 | KFTQFAGK                      | Oryctola<br>gus<br>cuniculu<br>s |
| 1 | 1.00 | 1 | 1 | -0.01 | -0.01 | -0.01 | -0.01 | -0.01 | t | 79592  | KSFNSPH                       | Oryctola<br>gus<br>cuniculu<br>s |
| 1 | 1.00 | 1 | 1 | -0.01 | -0.01 | -0.01 | -0.01 | -0.01 | t | 47190  | PDREVLYR<br>EFDEMEA<br>CAPHL  | Homo<br>sapiens                  |
| 1 | 1.00 | 1 | 1 | -0.03 | -0.03 | -0.03 | -0.03 | -0.03 | t | 141608 | CCAIRGSF<br>YDLEDIIK          | Oryctola<br>gus<br>cuniculu<br>s |

|   |      |   |   |       |        |        |        |        |   |        |                              |                                  |
|---|------|---|---|-------|--------|--------|--------|--------|---|--------|------------------------------|----------------------------------|
| 1 | 1.00 | 1 | 1 | -0.03 | -0.032 | -0.03  | -0.03  | -0.03  | t | 141608 | CCAIRGSF<br>YDLEDIK          | Oryctola<br>gus<br>cuniculu<br>s |
| 1 | 1.00 | 1 | 1 | -0.03 | -0.03  | -0.03  | -0.03  | -0.03  | t | 115979 | SPAQILQ<br>WQV               | Homo<br>sapiens                  |
| 1 | 1.00 | 1 | 1 | -0.03 | -0.03  | -0.03  | -0.03  | -0.03  | t | 115402 | NNQFLPYP<br>YYAKPAAV<br>RSPA | Homo<br>sapiens                  |
| 1 | 1.00 | 1 | 1 | -0.03 | -0.03  | -0.03  | -0.03  | -0.03  | t | 106991 | WASDLM<br>HRLY               | Homo<br>sapiens                  |
| 1 | 1.00 | 1 | 1 | -0.03 | -0.03  | -0.03  | -0.03  | -0.03  | t | 114790 | EGKDVLC<br>NK                | Homo<br>sapiens                  |
| 1 | 1.00 | 1 | 1 | 0.02  | 0.023  | 0.022  | 0.02   | 0.02   | t | 120168 | RGWKHSV<br>TYSGGPDT<br>PY    | Mus<br>musculu<br>s              |
| 1 | 1.00 | 1 | 1 | 0     | 0      | 0.008  | 0      | 0.001  | t | 115127 | WTQSLR                       | Mus<br>musculu<br>s              |
| 1 | 1.00 | 1 | 1 | 0     | -0.002 | -0.007 | -0.003 | 0      | t | 147559 | CTVRGLG                      | Rattus<br>norvegic<br>us         |
| 1 | 1.00 | 1 | 1 | 0     | 0      | -0.002 | -0.006 | -0.003 | t | 55787  | RRYTARLK<br>EG               | Homo<br>sapiens                  |
| 1 | 1.00 | 1 | 1 | -0.03 | -0.03  | -0.03  | -0.027 | -0.028 | t | 71637  | VVDLPQLG<br>PR               | Homo<br>sapiens                  |
| 1 | 1.00 | 1 | 1 | 0.03  | 0.03   | 0.03   | 0.03   | 0.03   | t | 79361  | RCQALSRL<br>FREKCT           | Mus<br>musculu<br>s              |
| 1 | 1.00 | 1 | 1 | 0.01  | 0.01   | 0.01   | 0.01   | 0.01   | t | 130452 | CGVKSLLT<br>SMYCAAC          | Homo<br>sapiens                  |
| 1 | 1.00 | 1 | 1 | 0.04  | 0.043  | 0.04   | 0.04   | 0.04   | t | 132848 | KKEDFDIY<br>DEDENQS<br>PR    | Mus<br>musculu<br>s              |
| 1 | 1.00 | 1 | 1 | 0     | -0.004 | -0.007 | -0.001 | -0.001 | t | 144125 | WPSVNSA<br>LLRSPIQRK<br>NA   | Oryctola<br>gus<br>cuniculu<br>s |
| 1 | 1.00 | 1 | 1 | -0.01 | -0.008 | -0.01  | -0.011 | -0.01  | t | 51906  | QPQPFPP<br>QLP               | Homo<br>sapiens                  |

|   |      |   |   |       |        |        |        |        |   |        |                             |                                  |
|---|------|---|---|-------|--------|--------|--------|--------|---|--------|-----------------------------|----------------------------------|
| 1 | 1.00 | 1 | 1 | -0.01 | -0.008 | -0.01  | -0.011 | -0.01  | t | 51906  | QPQPFPP<br>QLP              | Homo<br>sapiens                  |
| 1 | 1.00 | 1 | 1 | 0     | -0.002 | -0.007 | -0.007 | 0.001  | t | 108131 | SKDWSFY                     | Mus<br>musculu<br>s              |
| 1 | 1.00 | 1 | 1 | 0.04  | 0.042  | 0.041  | 0.041  | 0.04   | t | 58294  | SGVLTTSM<br>GNTITC          | Homo<br>sapiens                  |
| 1 | 1.00 | 1 | 1 | 0.01  | 0.008  | -0.002 | 0.003  | 0.009  | t | 130864 | GPKGQAG<br>EPGIAGFK<br>GDQ  | Mus<br>musculu<br>s              |
| 1 | 1.00 | 1 | 1 | 0     | 0.006  | 0      | 0      | 0      | t | 123486 | MDLRMGF<br>VR               | Ovis<br>aries                    |
| 1 | 1.00 | 1 | 1 | 0.04  | 0.039  | 0.033  | 0.041  | 0.04   | t | 54747  | RLRSSVPG<br>VRLQDSV<br>DFSL | Homo<br>sapiens                  |
| 1 | 1.00 | 1 | 1 | -0.01 | -0.01  | -0.01  | -0.006 | -0.008 | t | 58859  | SKIYQDAA<br>GAAGGMP<br>G    | Homo<br>sapiens                  |
| 1 | 1.00 | 1 | 1 | 0.01  | 0.01   | 0.022  | 0.01   | 0.008  | t | 140620 | YSLYQALT<br>A               | Mus<br>musculu<br>s              |
| 1 | 1.00 | 1 | 1 | 0.06  | 0.06   | 0.06   | 0.056  | 0.058  | t | 107892 | HSASQDG<br>QDTIRGHP<br>GSS  | Homo<br>sapiens                  |
| 1 | 1.00 | 1 | 1 | -0.01 | -0.01  | 0.001  | -0.01  | -0.013 | t | 111050 | VGPLDIVP<br>EVADPGG<br>PTLV | Oryctola<br>gus<br>cuniculu<br>s |
| 1 | 1.00 | 1 | 1 | -0.01 | -0.007 | 0.001  | -0.01  | -0.013 | t | 111050 | VGPLDIVP<br>EVADPGG<br>PTLV | Mus<br>musculu<br>s              |
| 1 | 1.00 | 1 | 1 | 0     | 0      | 0      | 0      | 0      | t | 102309 | ANQTEV                      | Mus<br>musculu<br>s              |
| 1 | 1.00 | 1 | 1 | 0     | -0.002 | 0      | 0.001  | 0      | t | 149514 | VPQLQLQ<br>NPS              | Mus<br>musculu<br>s              |
| 1 | 1.00 | 1 | 1 | 0.02  | 0.022  | 0.03   | 0.021  | 0.02   | t | 65853  | TQGLASL                     | Homo<br>sapiens                  |



|   |      |   |   |       |       |        |        |        |   |        |                              |                                  |
|---|------|---|---|-------|-------|--------|--------|--------|---|--------|------------------------------|----------------------------------|
| 1 | 1.00 | 1 | 1 | 0.03  | 0.026 | 0.03   | 0.029  | 0.03   | t | 56123  | RTLTKYEY                     | Oryctola<br>gus<br>cuniculu<br>s |
| 1 | 1.00 | 1 | 1 | 0     | 0     | 0      | 0      | 0      | t | 7001   | CSGFVSL<br>APGAKQN           | Mus<br>musculu<br>s              |
| 1 | 1.00 | 1 | 1 | -0.02 | -0.02 | -0.02  | -0.02  | -0.02  | t | 116685 | CPAGWISL<br>WKGFS            | Homo<br>sapiens                  |
| 1 | 1.00 | 1 | 1 | 0.02  | 0.02  | 0.02   | 0.02   | 0.023  | t | 133371 | SPSPTPT<br>GP                | Homo<br>sapiens                  |
| 1 | 1.00 | 1 | 1 | -0.01 | -0.01 | -0.008 | -0.01  | -0.012 | t | 151672 | KLYTLVLT<br>DAPSRK           | Mus<br>musculu<br>s              |
| 1 | 1.00 | 1 | 1 | 0.07  | 0.07  | 0.067  | 0.07   | 0.07   | t | 53933  | RGPEQTQ<br>GNFGDQD<br>LIR    | Homo<br>sapiens                  |
| 1 | 1.00 | 1 | 1 | 0     | 0.001 | -0.013 | -0.001 | 0.001  | t | 31920  | KLIPNASLI<br>ENCTKAEL        | Canis<br>familiari<br>s          |
| 1 | 1.00 | 1 | 1 | 0.01  | 0.01  | 0.01   | 0.01   | 0.011  | t | 151022 | LCKLRGVA<br>PLHLG            | Mus<br>musculu<br>s              |
| 1 | 1.00 | 1 | 1 | 0.04  | 0.04  | 0.04   | 0.04   | 0.04   | t | 103751 | YNANGSG<br>AGVTQFL<br>N      | Homo<br>sapiens                  |
| 1 | 1.00 | 1 | 1 | 0.02  | 0.02  | 0.02   | 0.02   | 0.02   | t | 78054  | VAETTNV<br>QGWWCLF<br>QITHGK | Mus<br>musculu<br>s              |
| 1 | 1.00 | 1 | 1 | 0.02  | 0.02  | 0.02   | 0.02   | 0.02   | t | 40195  | LTTDHSTT<br>VING             | Oryctola<br>gus<br>cuniculu<br>s |
| 1 | 1.00 | 1 | 1 | 0     | 0     | 0      | 0      | 0      | t | 140589 | PYHELEQV<br>P                | Mus<br>musculu<br>s              |
| 1 | 1.00 | 1 | 1 | 0     | 0     | 0      | 0      | 0      | t | 144099 | TLQQNMPL<br>LALVW            | Homo<br>sapiens                  |
| 1 | 1.00 | 1 | 1 | 0     | 0     | 0      | 0      | 0      | t | 140589 | PYHELEQV<br>P                | Mus<br>musculu<br>s              |
| 1 | 1.00 | 1 | 1 | 0     | 0     | 0      | 0      | 0      | t | 158584 | APPHQMP                      | Homo<br>sapiens                  |
| 1 | 1.00 | 1 | 1 | 0     | 0     | 0      | 0      | 0      | t | 121679 | NVQVLCV<br>ASPLVDVF          | Mus<br>musculu<br>s              |

|   |      |   |   |       |       |       |       |       |   |        |                              |                    |
|---|------|---|---|-------|-------|-------|-------|-------|---|--------|------------------------------|--------------------|
| 1 | 1.00 | 1 | 1 | 0     | 0     | 0     | 0     | 0     | t | 121679 | NVQVLCV<br>ASPLVDVF          | Mus<br>musculus    |
| 1 | 1.00 | 1 | 1 | 0     | 0     | 0     | 0     | 0     | t | 118432 | ISIGYHYPP<br>ICLGRA          | Homo<br>sapiens    |
| 1 | 1.00 | 1 | 1 | 0     | 0     | 0     | 0     | 0     | t | 109713 | PPSRDEL                      | Homo<br>sapiens    |
| 1 | 1.00 | 1 | 1 | 0     | 0     | 0     | 0     | 0     | t | 111851 | TSHPIEEIP<br>LDTFVI          | Homo<br>sapiens    |
| 1 | 1.00 | 1 | 1 | 0     | 0     | 0     | 0     | 0     | t | 115807 | KEMPFPKY<br>PV               | Homo<br>sapiens    |
| 1 | 1.00 | 1 | 1 | 0     | 0.004 | 0     | 0     | 0     | t | 111088 | ACQKHTP<br>PAPKEDDP<br>LKKYT | Cavia<br>porcellus |
| 1 | 1.00 | 1 | 1 | 0     | 0     | 0     | 0     | 0     | t | 82528  | GAATPYSG<br>EDSPFDM<br>TLGEE | Aotus              |
| 1 | 1.00 | 1 | 1 | 0     | 0     | 0     | 0     | 0     | t | 78858  | TNEAFYAD                     | Mus<br>musculus    |
| 1 | 1.00 | 1 | 1 | 0     | 0     | 0     | 0     | 0     | t | 42284  | MPIRRKRK<br>NIRTIIS          | Homo<br>sapiens    |
| 1 | 1.00 | 1 | 1 | 0     | 0     | 0     | 0     | 0     | t | 59619  | SLYPGHLS<br>GHRMAW           | Homo<br>sapiens    |
| 1 | 1.00 | 1 | 1 | 0     | 0     | 0     | 0     | 0     | t | 47182  | PDREVLYQ<br>DFDEMEE<br>CASHL | Homo<br>sapiens    |
| 1 | 1.00 | 1 | 1 | 0     | 0     | 0     | 0     | 0     | t | 55266  | RPPRFQLS<br>S                | Mus<br>musculus    |
| 1 | 1.00 | 1 | 1 | 0     | 0     | 0     | 0     | 0     | t | 30477  | KEKMLLNE<br>EEITTKG          | Homo<br>sapiens    |
| 1 | 1.00 | 1 | 1 | 0     | 0     | 0     | 0     | 0     | t | 16958  | FLVNAWK<br>SKKNP             | Homo<br>sapiens    |
| 1 | 1.00 | 1 | 1 | 0     | 0     | 0     | 0     | 0     | t | 4498   | ASKAALIEE<br>GQRMAE<br>MLKSK | Homo<br>sapiens    |
| 1 | 1.00 | 1 | 1 | -0.02 | -0.02 | -0.02 | -0.02 | -0.02 | t | 139565 | PEWKALT<br>DMPQMR<br>ME      | Homo<br>sapiens    |
| 1 | 1.00 | 1 | 1 | -0.02 | -0.02 | -0.02 | -0.02 | -0.02 | t | 98975  | QVEKLIKN<br>QKESHFV          | Homo<br>sapiens    |

|   |      |   |   |       |        |        |        |        |   |        |                             |                                   |
|---|------|---|---|-------|--------|--------|--------|--------|---|--------|-----------------------------|-----------------------------------|
| 1 | 1.00 | 1 | 1 | -0.04 | -0.04  | -0.04  | -0.04  | -0.04  | t | 157762 | PQNFAVV<br>KRARD            | Homo<br>sapiens                   |
| 1 | 1.00 | 1 | 1 | -0.04 | -0.04  | -0.04  | -0.04  | -0.04  | t | 158590 | FHLPWM<br>Q                 | Homo<br>sapiens                   |
| 1 | 1.00 | 1 | 1 | -0.04 | -0.04  | -0.04  | -0.04  | -0.04  | t | 106568 | KLPPIDVN<br>MDCK            | Homo<br>sapiens                   |
| 1 | 1.00 | 1 | 1 | -0.04 | -0.04  | -0.04  | -0.04  | -0.04  | t | 96808  | QVKSQTIF<br>DN              | Homo<br>sapiens                   |
| 1 | 1.00 | 1 | 1 | 0     | 0.002  | 0.007  | 0.007  | 0.001  | t | 119465 | HRKSTVAG<br>S               | Homo<br>sapiens                   |
| 1 | 1.00 | 1 | 1 | -0.01 | -0.008 | -0.026 | -0.016 | -0.01  | t | 142288 | SEASRKGL<br>RRDLASR<br>EAKK | Homo<br>sapiens                   |
| 1 | 1.00 | 1 | 1 | 0.02  | 0.02   | 0.037  | 0.02   | 0.018  | t | 49000  | PQGGG                       | Mus<br>musculu<br>s               |
| 1 | 1.00 | 1 | 1 | 0.03  | 0.019  | 0.03   | 0.03   | 0.03   | t | 125610 | YYVFEEQ<br>EDEIIGFG<br>QELK | Cricetulu<br>s<br>migrator<br>ius |
| 1 | 1.00 | 1 | 1 | -0.02 | -0.024 | -0.011 | -0.02  | -0.019 | t | 7214   | CTTAVPW<br>N                | Macaca                            |
| 1 | 1.00 | 1 | 1 | 0.01  | 0.014  | 0.02   | 0.011  | 0.01   | t | 21919  | GQNCGY                      | Homo<br>sapiens                   |
| 1 | 1.00 | 1 | 1 | 0.01  | 0.008  | 0.011  | 0.007  | 0.009  | t | 151679 | LAALTRTP<br>VVSP            | Mus<br>musculu<br>s               |
| 1 | 1.00 | 1 | 1 | 0.02  | 0.017  | 0.022  | 0.02   | 0.021  | t | 120346 | YQVLNKW<br>TLGQVTC<br>DL    | Oryctola<br>gus<br>cuniculu<br>s  |
| 1 | 1.00 | 1 | 1 | 0.02  | 0.017  | 0.022  | 0.02   | 0.021  | t | 120346 | YQVLNKW<br>TLGQVTC<br>DL    | Oryctola<br>gus<br>cuniculu<br>s  |
| 1 | 1.00 | 1 | 1 | 0.02  | 0.02   | 0.022  | 0.02   | 0.021  | t | 120346 | YQVLNKW<br>TLGQVTC<br>DL    | Oryctola<br>gus<br>cuniculu<br>s  |
| 1 | 1.00 | 1 | 1 | 0.04  | 0.04   | 0.04   | 0.04   | 0.04   | t | 79123  | YEVNRVSG<br>VYHTND<br>CS    | Homo<br>sapiens                   |

|   |      |   |   |       |        |        |        |        |   |        |                              |                                  |
|---|------|---|---|-------|--------|--------|--------|--------|---|--------|------------------------------|----------------------------------|
| 1 | 1.00 | 1 | 1 | -0.04 | -0.04  | -0.04  | -0.04  | -0.04  | t | 110468 | YYVLHLCL<br>AATKYPLL<br>KLLG | Homo<br>sapiens                  |
| 1 | 1.00 | 1 | 1 | -0.01 | -0.014 | -0.01  | -0.01  | -0.011 | t | 110949 | NAEKVLEK<br>LGYA             | Macaca                           |
| 1 | 1.00 | 1 | 1 | 0.02  | 0.02   | 0.02   | 0.02   | 0.022  | t | 19912  | GGLLGEKT<br>RN               | Homo<br>sapiens                  |
| 1 | 1.00 | 1 | 1 | 0.03  | 0.032  | 0.05   | 0.037  | 0.03   | t | 141673 | IDEYCVQQ<br>LK               | Homo<br>sapiens                  |
| 1 | 1.00 | 1 | 1 | 0.02  | 0.02   | 0.02   | 0.02   | 0.022  | t | 14099  | ERYLGYLE<br>QL               | Homo<br>sapiens                  |
| 1 | 1.00 | 1 | 1 | 0.01  | 0.008  | 0.013  | 0.017  | 0.013  | t | 103477 | PGSGFWS<br>FGSEDGS           | Mus<br>musculu<br>s              |
| 1 | 1.00 | 1 | 1 | 0.03  | 0.034  | 0.033  | 0.037  | 0.029  | t | 124703 | SDDNYDK<br>TEDVDIEE<br>MALKL | Homo<br>sapiens                  |
| 1 | 1.00 | 1 | 1 | 0     | -0.003 | -0.018 | 0      | 0.004  | t | 59972  | SPAFTKGE<br>KVDLN            | Oryctola<br>gus<br>cuniculu<br>s |
| 1 | 1.00 | 1 | 1 | 0     | -0.002 | -0.002 | -0.007 | 0.001  | t | 122295 | DDVWLP                       | Mus<br>musculu<br>s              |
| 1 | 1.00 | 1 | 1 | 0.04  | 0.044  | 0.041  | 0.037  | 0.037  | t | 114961 | TDGVTYD<br>NEC               | Homo<br>sapiens                  |
| 1 | 1.00 | 1 | 1 | 0.04  | 0.032  | 0.045  | 0.04   | 0.041  | t | 125063 | GDRAYVE<br>NELVA             | Mus<br>musculu<br>s              |
| 1 | 1.00 | 1 | 1 | 0     | 0      | -0.005 | 0      | 0      | t | 63525  | TESGLIIGK<br>RVQGEV          | Mus<br>musculu<br>s              |
| 1 | 1.00 | 1 | 1 | -0.01 | -0.008 | -0.01  | -0.009 | -0.01  | t | 39395  | LSGRPAIIP<br>DREVLRYE<br>FDE | Homo<br>sapiens                  |
| 1 | 1.00 | 1 | 1 | -0.01 | -0.008 | -0.01  | -0.009 | -0.01  | t | 39395  | LSGRPAIIP<br>DREVLRYE<br>FDE | Homo<br>sapiens                  |
| 1 | 1.00 | 1 | 1 | 0     | 0.002  | 0.005  | -0.001 | 0      | t | 135732 | PCLNGGSC                     | Homo<br>sapiens                  |

|   |      |   |   |       |        |        |        |        |   |        |                              |                                  |
|---|------|---|---|-------|--------|--------|--------|--------|---|--------|------------------------------|----------------------------------|
| 1 | 1.00 | 1 | 1 | -0.01 | -0.007 | -0.01  | -0.011 | -0.01  | t | 53634  | RESQAYYQ<br>R                | Mus<br>musculu<br>s              |
| 1 | 1.00 | 1 | 1 | 0.02  | 0.018  | 0.013  | 0.023  | 0.02   | t | 95472  | IPTPPTDP<br>VYQDLPTP<br>PSIP | Mus<br>musculu<br>s              |
| 1 | 1.00 | 1 | 1 | 0     | 0      | -0.001 | 0      | 0      | t | 105340 | MPRCRHG<br>Y                 | Homo<br>sapiens                  |
| 1 | 1.00 | 1 | 1 | 0     | 0.003  | 0.016  | 0      | -0.003 | t | 66894  | TTVNAHQI<br>LPKV             | Mus<br>musculu<br>s              |
| 1 | 1.00 | 1 | 1 | 0     | -0.003 | 0      | 0      | 0      | t | 43247  | NANPNAN<br>PNANPNA<br>NPNA   | Oryctola<br>gus<br>cuniculu<br>s |
| 1 | 1.00 | 1 | 1 | 0.02  | 0.02   | 0.013  | 0.02   | 0.02   | t | 136474 | LLDTSNLEL<br>PEAVVFQ<br>DSVV | Homo<br>sapiens                  |
| 1 | 1.00 | 1 | 1 | 0.04  | 0.04   | 0.04   | 0.04   | 0.041  | t | 122108 | GVGVELE<br>NSMGGLN<br>F      | Oryctola<br>gus<br>cuniculu<br>s |
| 1 | 1.00 | 1 | 1 | 0.02  | 0.02   | 0.02   | 0.02   | 0.02   | t | 156872 | FSKSSSWE<br>SWLP             | Gallus<br>gallus                 |
| 1 | 1.00 | 1 | 1 | 0     | 0      | 0      | 0      | 0      | t | 29937  | KARRPEGR<br>TWAQPGY          | Homo<br>sapiens                  |
| 1 | 1.00 | 1 | 1 | -0.02 | -0.012 | -0.02  | -0.02  | -0.022 | t | 136727 | VNWNSW<br>HKTNLS             | Gallus<br>gallus                 |
| 1 | 1.00 | 1 | 1 | 0.03  | 0.03   | 0.03   | 0.03   | 0.03   | t | 103141 | EKVAKEAA<br>DEAKAKL          | Homo<br>sapiens                  |
| 1 | 1.00 | 1 | 1 | 0.03  | 0.03   | 0.03   | 0.03   | 0.03   | t | 79603  | LLTTDEL                      | Oryctola<br>gus<br>cuniculu<br>s |
| 1 | 1.00 | 1 | 1 | 0.03  | 0.03   | 0.03   | 0.03   | 0.03   | t | 13902  | EQPYIEN                      | Oryctola<br>gus<br>cuniculu<br>s |
| 1 | 1.00 | 1 | 1 | 0.01  | 0.01   | 0.01   | 0.01   | 0.01   | t | 149102 | SGPNATQ                      | Sus<br>scrofa                    |
| 1 | 1.00 | 1 | 1 | 0.01  | 0.01   | 0.01   | 0.01   | 0.01   | t | 137738 | DTELTQQA<br>LKLK             | Mus<br>musculu<br>s              |

|   |      |   |   |       |        |       |       |       |   |        |                              |                                  |
|---|------|---|---|-------|--------|-------|-------|-------|---|--------|------------------------------|----------------------------------|
| 1 | 1.00 | 1 | 1 | 0.01  | 0.01   | 0.01  | 0.01  | 0.01  | t | 107019 | YLTDESHL<br>HWFG             | Mus<br>musculu<br>s              |
| 1 | 1.00 | 1 | 1 | 0.01  | 0.01   | 0.01  | 0.01  | 0.01  | t | 94480  | CSICSNNP<br>TCWA             | Homo<br>sapiens                  |
| 1 | 1.00 | 1 | 1 | 0.01  | 0.01   | 0.01  | 0.01  | 0.01  | t | 47187  | PDREVLYQ<br>GFDEMEE<br>CASHL | Homo<br>sapiens                  |
| 1 | 1.00 | 1 | 1 | 0.01  | 0.01   | 0.01  | 0.01  | 0.01  | t | 49319  | PSDKHIEQ<br>YLKKIENSI<br>S   | Mus<br>musculu<br>s              |
| 1 | 1.00 | 1 | 1 | 0.01  | 0.01   | 0.01  | 0.01  | 0.01  | t | 49319  | PSDKHIEQ<br>YLKKIENSI<br>S   | Mus<br>musculu<br>s              |
| 1 | 1.00 | 1 | 1 | 0.01  | 0.01   | 0.01  | 0.01  | 0.01  | t | 49319  | PSDKHIEQ<br>YLKKIENSI<br>S   | Mus<br>musculu<br>s              |
| 1 | 1.00 | 1 | 1 | -0.01 | -0.01  | -0.01 | -0.01 | -0.01 | t | 153410 | LIPFHKHP<br>HHRG             | Oryctola<br>gus<br>cuniculu<br>s |
| 1 | 1.00 | 1 | 1 | -0.01 | -0.007 | -0.01 | -0.01 | -0.01 | t | 153410 | LIPFHKHP<br>HHRG             | Mus<br>musculu<br>s              |
| 1 | 1.00 | 1 | 1 | -0.01 | -0.01  | -0.01 | -0.01 | -0.01 | t | 132925 | WGANSPL                      | Homo<br>sapiens                  |
| 1 | 1.00 | 1 | 1 | -0.01 | -0.01  | -0.01 | -0.01 | -0.01 | t | 99392  | KPDKKNP<br>QLQLDLM<br>M      | Homo<br>sapiens                  |
| 1 | 1.00 | 1 | 1 | -0.01 | -0.01  | -0.01 | -0.01 | -0.01 | t | 102721 | PNKPTPPT<br>YETEKPLEP<br>APV | Mus<br>musculu<br>s              |
| 1 | 1.00 | 1 | 1 | -0.01 | -0.01  | -0.01 | -0.01 | -0.01 | t | 103038 | ALMSGNF<br>SNGILWR<br>G      | Homo<br>sapiens                  |
| 1 | 1.00 | 1 | 1 | -0.01 | -0.01  | -0.01 | -0.01 | -0.01 | t | 77781  | GLVGRPKS<br>KL               | Homo<br>sapiens                  |
| 1 | 1.00 | 1 | 1 | -0.01 | -0.01  | -0.01 | -0.01 | -0.01 | t | 55390  | RQAEVIAP<br>A                | Homo<br>sapiens                  |
| 1 | 1.00 | 1 | 1 | -0.03 | -0.03  | -0.03 | -0.03 | -0.03 | t | 156950 | RGPMFF                       | Gallus<br>gallus                 |
| 1 | 1.00 | 1 | 1 | -0.03 | -0.03  | -0.03 | -0.03 | -0.03 | t | 115133 | YRLRGKLR<br>AEIENLHR<br>TFDP | Mus<br>musculu<br>s              |

|   |      |   |   |       |        |        |        |        |   |        |                              |                                  |
|---|------|---|---|-------|--------|--------|--------|--------|---|--------|------------------------------|----------------------------------|
| 1 | 1.00 | 1 | 1 | -0.03 | -0.03  | -0.03  | -0.03  | -0.03  | t | 79511  | AIWSTRT                      | Oryctola<br>gus<br>cuniculu<br>s |
| 1 | 1.00 | 1 | 1 | -0.05 | -0.05  | -0.05  | -0.05  | -0.05  | t | 116002 | TQSLVYPF<br>PG               | Homo<br>sapiens                  |
| 1 | 1.00 | 1 | 1 | -0.05 | -0.05  | -0.05  | -0.05  | -0.05  | t | 107566 | PQVKFNW                      | Homo<br>sapiens                  |
| 1 | 1.00 | 1 | 1 | 0     | -0.003 | 0      | 0      | -0.001 | t | 135566 | KCSRLYTA<br>CVY              | Oryctola<br>gus<br>cuniculu<br>s |
| 1 | 1.00 | 1 | 1 | -0.01 | -0.01  | -0.013 | -0.01  | -0.01  | t | 157443 | KAKDAEKK<br>KAKTD            | Canis<br>lupus                   |
| 1 | 1.00 | 1 | 1 | -0.01 | -0.011 | -0.011 | -0.011 | -0.01  | t | 9472   | DNIDSPNA<br>PWVFAC           | Myodes<br>glareolu<br>s          |
| 1 | 1.00 | 1 | 1 | 0.02  | 0.025  | 0.02   | 0.023  | 0.02   | t | 46500  | NVTSIHSL<br>DEGKQSL          | Homo<br>sapiens                  |
| 1 | 1.00 | 1 | 1 | 0     | 0.002  | -0.007 | -0.003 | 0      | t | 106513 | HKARLERP<br>QI               | Homo<br>sapiens                  |
| 1 | 1.00 | 1 | 1 | 0     | 0      | 0.004  | -0.003 | 0      | t | 74056  | YGMEIRPL<br>K                | Homo<br>sapiens                  |
| 1 | 1.00 | 1 | 1 | 0     | -0.008 | -0.007 | 0      | -0.001 | t | 123880 | YRVNLKFL<br>PNETTSN          | Trichosu<br>rus<br>vulpecul<br>a |
| 1 | 1.00 | 1 | 1 | 0     | -0.003 | 0      | 0      | 0.001  | t | 108302 | CNFASRN<br>DYSYWLST<br>PEPMP | Oryctola<br>gus<br>cuniculu<br>s |
| 1 | 1.00 | 1 | 1 | -0.03 | -0.032 | -0.028 | -0.031 | -0.032 | t | 28337  | IRMARPT                      | Mus<br>musculu<br>s              |
| 1 | 1.00 | 1 | 1 | -0.01 | -0.012 | -0.01  | -0.011 | -0.01  | t | 151041 | PFQNIHPIT<br>IGKCPK          | Mus<br>musculu<br>s              |
| 1 | 1.00 | 1 | 1 | 0.02  | 0.018  | 0.001  | 0.013  | 0.02   | t | 104581 | NKISEASR<br>KGLRRDL<br>ASRE  | Rattus<br>norvegic<br>us         |

|   |      |   |   |       |        |        |        |        |   |        |                             |                                  |
|---|------|---|---|-------|--------|--------|--------|--------|---|--------|-----------------------------|----------------------------------|
| 1 | 1.00 | 1 | 1 | 0.05  | 0.048  | 0.05   | 0.043  | 0.049  | t | 117520 | GSFSDADL<br>AD              | Mus<br>musculu<br>s              |
| 1 | 1.00 | 1 | 1 | -0.03 | -0.027 | -0.02  | -0.031 | -0.031 | t | 41290  | MDWNM<br>HAA                | Mus<br>musculu<br>s              |
| 1 | 1.00 | 1 | 1 | -0.01 | -0.01  | -0.008 | -0.01  | -0.009 | t | 153267 | IWENAGR<br>MV               | Mus<br>musculu<br>s              |
| 1 | 1.00 | 1 | 1 | 0     | -0.003 | -0.012 | 0      | 0.001  | t | 78362  | DNEEPIAP<br>YHFDLSGH<br>AFG | Oryctola<br>gus<br>cuniculu<br>s |
| 1 | 1.00 | 1 | 1 | 0     | 0      | 0      | 0      | 0      | t | 156851 | AQMIIRLS<br>SPGN            | Gallus<br>gallus                 |
| 1 | 1.00 | 1 | 1 | -0.06 | -0.06  | -0.065 | -0.066 | -0.063 | t | 115910 | PYPYYAKP<br>AA              | Homo<br>sapiens                  |
| 1 | 1.00 | 1 | 1 | 0.01  | 0.01   | 0.015  | 0.01   | 0.01   | t | 44570  | NKPNWD<br>GYA               | Mus<br>musculu<br>s              |
| 1 | 1.00 | 1 | 1 | 0.01  | 0.01   | 0.015  | 0.01   | 0.01   | t | 44570  | NKPNWD<br>GYA               | Mus<br>musculu<br>s              |
| 1 | 1.00 | 1 | 1 | -0.01 | -0.01  | -0.01  | -0.01  | -0.011 | t | 153358 | AHPPWPL<br>QYVFRGG<br>GS    | Mus<br>musculu<br>s              |
| 1 | 1.00 | 1 | 1 | -0.02 | -0.022 | -0.025 | -0.019 | -0.021 | t | 135736 | PRIGGQRE<br>LKKITE          | Mus<br>musculu<br>s              |
| 1 | 1.00 | 1 | 1 | 0     | -0.002 | 0      | 0.004  | 0.001  | t | 135660 | ECPEGYIL<br>DDGFICTD<br>IDE | Mus<br>musculu<br>s              |
| 1 | 1.00 | 1 | 1 | 0     | 0.002  | 0.001  | 0.001  | 0.002  | t | 9951   | DRASLST                     | Homo<br>sapiens                  |
| 1 | 1.00 | 1 | 1 | 0.01  | 0.003  | 0.011  | 0.009  | 0.009  | t | 50627  | QEKISFGK<br>SSQCREAV        | Oryctola<br>gus<br>cuniculu<br>s |
| 1 | 1.00 | 1 | 1 | 0.02  | 0.02   | 0.02   | 0.02   | 0.02   | t | 44232  | NIGGEGN<br>HNESPL           | Homo<br>sapiens                  |
| 1 | 1.00 | 1 | 1 | 0     | 0      | 0      | 0      | 0      | t | 94442  | CCHPACG                     | Capra<br>hircus                  |



|   |      |   |   |       |        |        |        |        |   |        |                        |                       |
|---|------|---|---|-------|--------|--------|--------|--------|---|--------|------------------------|-----------------------|
| 1 | 1.00 | 1 | 1 | 0     | -0.007 | 0      | 0      | 0      | t | 94442  | CCHPACG                | Oryctolagus cuniculus |
| 1 | 1.00 | 1 | 1 | 0.05  | 0.052  | 0.05   | 0.051  | 0.051  | t | 23986  | HHFSSDPR PDLH          | Homo sapiens          |
| 1 | 1.00 | 1 | 1 | 0     | 0      | 0      | 0      | 0      | t | 76584  | YYQSGLSI VMPVGG QSSFYS | Homo sapiens          |
| 1 | 1.00 | 1 | 1 | 0     | 0      | 0      | 0      | 0      | t | 56895  | SAMILAAY HPQQFIYA GSLS | Homo sapiens          |
| 1 | 1.00 | 1 | 1 | 0     | 0      | 0      | 0      | 0      | t | 12632  | EKASVPGG GDMGGM DF     | Mus musculus          |
| 1 | 1.00 | 1 | 1 | 0     | 0      | 0      | 0      | 0      | t | 12632  | EKASVPGG GDMGGM DF     | Mus musculus          |
| 1 | 1.00 | 1 | 1 | -0.02 | -0.018 | -0.032 | -0.019 | -0.018 | t | 6246   | CFNPAHTL TLSQP         | Homo sapiens          |
| 1 | 1.00 | 1 | 1 | 0.02  | 0.022  | 0.015  | 0.021  | 0.022  | t | 52389  | QSNQRSA PRITFGGP TDS   | Homo sapiens          |
| 1 | 1.00 | 1 | 1 | 0.04  | 0.04   | 0.04   | 0.04   | 0.04   | t | 127715 | KQDPPSL                | Homo sapiens          |
| 1 | 1.00 | 1 | 1 | 0.04  | 0.04   | 0.04   | 0.04   | 0.04   | t | 103262 | HVIAGQAS PSRIDGT       | Homo sapiens          |
| 1 | 1.00 | 1 | 1 | 0.02  | 0.02   | 0.02   | 0.02   | 0.02   | t | 141879 | EKSKKEIED QKNTK        | Homo sapiens          |
| 1 | 1.00 | 1 | 1 | 0.02  | 0.02   | 0.02   | 0.02   | 0.02   | t | 98977  | RCLQSCQ QEPDDLK Q      | Homo sapiens          |
| 1 | 1.00 | 1 | 1 | 0.02  | 0.02   | 0.02   | 0.02   | 0.02   | t | 111150 | CKEGKKSP C             | Homo sapiens          |
| 1 | 1.00 | 1 | 1 | 0.02  | 0.02   | 0.02   | 0.02   | 0.02   | t | 79031  | NSNGCVYS ESFGLGGI GVLT | Homo sapiens          |
| 1 | 1.00 | 1 | 1 | 0     | 0      | 0      | 0      | 0      | t | 148557 | DDSKLPIV KVEDKSKL QD   | Canis lupus           |

|   |      |   |   |   |        |   |   |   |   |        |                              |                                  |
|---|------|---|---|---|--------|---|---|---|---|--------|------------------------------|----------------------------------|
| 1 | 1.00 | 1 | 1 | 0 | 0      | 0 | 0 | 0 | t | 148559 | DDSKLPVI<br>KVEDKSKL<br>QD   | Canis<br>lupus                   |
| 1 | 1.00 | 1 | 1 | 0 | 0      | 0 | 0 | 0 | t | 107537 | PAPIEKT                      | Homo<br>sapiens                  |
| 1 | 1.00 | 1 | 1 | 0 | 0      | 0 | 0 | 0 | t | 117363 | RPDAEYW<br>NSQKDLLE<br>QKRGR | Homo<br>sapiens                  |
| 1 | 1.00 | 1 | 1 | 0 | 0      | 0 | 0 | 0 | t | 70670  | VQWMNR<br>LIAFASRG<br>NHVAPT | Homo<br>sapiens                  |
| 1 | 1.00 | 1 | 1 | 0 | 0      | 0 | 0 | 0 | t | 79447  | VCEHPENK<br>APPCCP           | Mus<br>musculu<br>s              |
| 1 | 1.00 | 1 | 1 | 0 | 0      | 0 | 0 | 0 | t | 46990  | PAVIPDRE<br>VLYQAFDE<br>MEEC | Homo<br>sapiens                  |
| 1 | 1.00 | 1 | 1 | 0 | 0      | 0 | 0 | 0 | t | 47183  | PDREVLQ<br>EFDEMEEC<br>ASHL  | Homo<br>sapiens                  |
| 1 | 1.00 | 1 | 1 | 0 | 0      | 0 | 0 | 0 | t | 47123  | PDKEVLYE<br>AFDEMEE<br>CASRA | Homo<br>sapiens                  |
| 1 | 1.00 | 1 | 1 | 0 | 0      | 0 | 0 | 0 | t | 47179  | PDRELLYR<br>EFDEMEEC<br>PSHL | Homo<br>sapiens                  |
| 1 | 1.00 | 1 | 1 | 0 | 0      | 0 | 0 | 0 | t | 39378  | LSGKPATIP<br>DREVLQ<br>FDE   | Homo<br>sapiens                  |
| 1 | 1.00 | 1 | 1 | 0 | -0.006 | 0 | 0 | 0 | t | 58314  | SGYCAWP<br>ACYCYGLP          | Oryctola<br>gus<br>cuniculu<br>s |
| 1 | 1.00 | 1 | 1 | 0 | 0      | 0 | 0 | 0 | t | 50100  | PYIEQAQV<br>IAHQFKEK<br>VLGL | Homo<br>sapiens                  |
| 1 | 1.00 | 1 | 1 | 0 | 0      | 0 | 0 | 0 | t | 47126  | PDKEVLQ<br>QYDEMEE<br>CSQAA  | Homo<br>sapiens                  |
| 1 | 1.00 | 1 | 1 | 0 | 0      | 0 | 0 | 0 | t | 47192  | PDREVLQ<br>EFDEMEEC<br>ASHL  | Homo<br>sapiens                  |
| 1 | 1.00 | 1 | 1 | 0 | 0      | 0 | 0 | 0 | t | 11967  | EFDEMEEC<br>ASHLPYIE<br>QGMQ | Homo<br>sapiens                  |
| 1 | 1.00 | 1 | 1 | 0 | 0      | 0 | 0 | 0 | t | 3507   | APDKEILYE<br>AFDEM           | Homo<br>sapiens                  |
| 1 | 1.00 | 1 | 1 | 0 | 0      | 0 | 0 | 0 | t | 6374   | CHARKAV<br>AHINS             | Homo<br>sapiens                  |
| 1 | 1.00 | 1 | 1 | 0 | 0      | 0 | 0 | 0 | t | 3507   | APDKEILYE<br>AFDEM           | Homo<br>sapiens                  |

|   |      |   |   |       |        |        |        |        |   |        |                            |                                  |
|---|------|---|---|-------|--------|--------|--------|--------|---|--------|----------------------------|----------------------------------|
| 1 | 1.00 | 1 | 1 | -0.02 | -0.02  | -0.02  | -0.02  | -0.02  | t | 138083 | VYPSKTQP<br>LQHNNLL        | Mus<br>musculu<br>s              |
| 1 | 1.00 | 1 | 1 | -0.02 | -0.02  | -0.02  | -0.02  | -0.02  | t | 115601 | DPFYWVS<br>PGVLV           | Homo<br>sapiens                  |
| 1 | 1.00 | 1 | 1 | -0.02 | -0.02  | -0.02  | -0.02  | -0.02  | t | 102247 | YNNPGLL                    | Homo<br>sapiens                  |
| 1 | 1.00 | 1 | 1 | -0.02 | -0.02  | -0.02  | -0.02  | -0.02  | t | 115601 | DPFYWVS<br>PGVLV           | Homo<br>sapiens                  |
| 1 | 1.00 | 1 | 1 | -0.02 | -0.02  | -0.02  | -0.02  | -0.02  | t | 78314  | WQIDYAM                    | Homo<br>sapiens                  |
| 1 | 1.00 | 1 | 1 | 0.01  | 0.01   | 0.006  | 0.01   | 0.012  | t | 51922  | QPQQPFP<br>QPQ             | Mus<br>musculu<br>s              |
| 1 | 1.00 | 1 | 1 | 0     | -0.007 | -0.008 | 0      | 0      | t | 110957 | PAAVTLAE<br>ADRT           | Macaca                           |
| 1 | 1.00 | 1 | 1 | 0     | 0      | 0      | 0      | 0      | t | 58041  | SGFVGLFS<br>PGPSQRI        | Mus<br>musculu<br>s              |
| 1 | 1.00 | 1 | 1 | -0.02 | -0.018 | -0.02  | -0.021 | -0.02  | t | 149519 | VRVPVPQL<br>QL             | Homo<br>sapiens                  |
| 1 | 1.00 | 1 | 1 | -0.03 | -0.026 | -0.018 | -0.03  | -0.03  | t | 108300 | CKYWWSK<br>C               | Homo<br>sapiens                  |
| 1 | 1.00 | 1 | 1 | 0.02  | 0.016  | 0.02   | 0.019  | 0.02   | t | 141566 | SSIVIPAAV<br>GIKLNVT<br>DA | Oryctola<br>gus<br>cuniculu<br>s |
| 1 | 1.00 | 1 | 1 | 0.03  | 0.03   | 0.037  | 0.03   | 0.03   | t | 41057  | MAKNEV                     | Homo<br>sapiens                  |
| 1 | 1.00 | 1 | 1 | -0.04 | -0.036 | -0.033 | -0.033 | -0.039 | t | 132143 | AGPCILLA<br>RDRCPG         | Homo<br>sapiens                  |
| 1 | 1.00 | 1 | 1 | 0     | 0      | 0      | 0      | -0.001 | t | 114132 | KSHGRTQ<br>DENPVVH<br>F    | Mus<br>musculu<br>s              |
| 1 | 1.00 | 1 | 1 | 0     | 0      | -0.005 | 0      | -0.001 | t | 116111 | KGQGQKA<br>KMRCIPEK<br>GH  | Mus<br>musculu<br>s              |
| 1 | 1.00 | 1 | 1 | -0.01 | -0.006 | -0.016 | -0.007 | -0.008 | t | 8930   | DKLKQQR<br>DTLSTQKE<br>T   | Homo<br>sapiens                  |

|   |      |   |   |       |        |        |        |        |   |        |                           |                                  |
|---|------|---|---|-------|--------|--------|--------|--------|---|--------|---------------------------|----------------------------------|
| 1 | 1.00 | 1 | 1 | 0.03  | 0.027  | 0.028  | 0.03   | 0.03   | t | 64085  | THTMIFDN<br>AFNCTFEYI     | Oryctola<br>gus<br>cuniculu<br>s |
| 1 | 1.00 | 1 | 1 | 0.04  | 0.034  | 0.035  | 0.039  | 0.041  | t | 116468 | RPQDENP<br>VVH            | Oryctola<br>gus<br>cuniculu<br>s |
| 1 | 1.00 | 1 | 1 | 0.03  | 0.03   | 0.034  | 0.03   | 0.03   | t | 20906  | GLIAGAVG<br>GSLLAAL       | Homo<br>sapiens                  |
| 1 | 1.00 | 1 | 1 | 0.04  | 0.042  | 0.04   | 0.039  | 0.04   | t | 134166 | MPKFYCD<br>YCDTYLTH<br>DS | Homo<br>sapiens                  |
| 1 | 1.00 | 1 | 1 | -0.04 | -0.038 | -0.027 | -0.039 | -0.043 | t | 4427   | ASGLVSMF<br>SV            | Homo<br>sapiens                  |
| 1 | 1.00 | 1 | 1 | -0.03 | -0.03  | -0.03  | -0.03  | -0.03  | t | 55396  | RQAIKS                    | Homo<br>sapiens                  |
| 1 | 1.00 | 1 | 1 | 0     | 0.002  | 0.007  | 0.001  | 0      | t | 49764  | PTRTIGGS<br>QA            | Homo<br>sapiens                  |
| 1 | 1.00 | 1 | 1 | -0.02 | -0.018 | -0.023 | -0.019 | -0.022 | t | 103371 | LPADTAA<br>QLTSAGRE       | Homo<br>sapiens                  |
| 1 | 1.00 | 1 | 1 | -0.02 | -0.016 | -0.017 | -0.02  | -0.02  | t | 141070 | PSLRDIFA<br>W             | Ovis<br>aries                    |
| 1 | 1.00 | 1 | 1 | -0.01 | -0.01  | -0.01  | -0.01  | -0.009 | t | 119573 | EWEDTYGI<br>VL            | Homo<br>sapiens                  |
| 1 | 1.00 | 1 | 1 | 0.02  | 0.018  | 0.02   | 0.021  | 0.019  | t | 151948 | KLGKAEVD<br>GNLV          | Sus<br>crofa                     |
| 1 | 1.00 | 1 | 1 | 0.01  | 0.012  | 0.005  | 0.007  | 0.008  | t | 17690  | FSDIPNPIG<br>SENSE        | Homo<br>sapiens                  |
| 1 | 1.00 | 1 | 1 | -0.03 | -0.03  | -0.029 | -0.03  | -0.03  | t | 128073 | PKKSAKKT<br>PKKAKKP       | Oryctola<br>gus<br>cuniculu<br>s |
| 1 | 1.00 | 1 | 1 | -0.03 | -0.03  | -0.029 | -0.03  | -0.03  | t | 128073 | PKKSAKKT<br>PKKAKKP       | Homo<br>sapiens                  |
| 1 | 1.00 | 1 | 1 | 0.01  | 0.014  | 0.01   | 0.007  | 0.01   | t | 10040  | DRRCQSQ<br>LER            | Homo<br>sapiens                  |

|   |      |   |   |       |        |        |        |       |   |        |                     |                                  |
|---|------|---|---|-------|--------|--------|--------|-------|---|--------|---------------------|----------------------------------|
| 1 | 1.00 | 1 | 1 | 0.05  | 0.048  | 0.05   | 0.051  | 0.05  | t | 149474 | SQVLQEST<br>YQ      | Mus<br>musculu<br>s              |
| 1 | 1.00 | 1 | 1 | 0.01  | 0.01   | 0.01   | 0.01   | 0.01  | t | 94617  | NPACG               | Capra<br>hircus                  |
| 1 | 1.00 | 1 | 1 | 0.03  | 0.032  | 0.035  | 0.031  | 0.03  | t | 118139 | SIPWKS<br>LTLV      | Homo<br>sapiens                  |
| 1 | 1.00 | 1 | 1 | 0.01  | 0.01   | 0.01   | 0.01   | 0.011 | t | 138892 | REQAPNL<br>VY       | Mus<br>musculu<br>s              |
| 1 | 1.00 | 1 | 1 | 0     | -0.011 | 0.001  | 0      | 0     | t | 111856 | TTHYGSLP<br>QK      | Oryctola<br>gus<br>cuniculu<br>s |
| 1 | 1.00 | 1 | 1 | 0     | 0      | 0.001  | 0      | 0     | t | 111856 | TTHYGSLP<br>QK      | Oryctola<br>gus<br>cuniculu<br>s |
| 1 | 1.00 | 1 | 1 | 0.01  | 0.01   | 0.01   | 0.01   | 0.01  | t | 149298 | ELDKWAS             | Homo<br>sapiens                  |
| 1 | 1.00 | 1 | 1 | 0.01  | 0.01   | 0.01   | 0.01   | 0.01  | t | 51391  | QLKLNW              | Homo<br>sapiens                  |
| 1 | 1.00 | 1 | 1 | -0.01 | -0.011 | -0.014 | -0.007 | -0.01 | t | 12440  | EIEMLRN<br>KIYFMQ   | Myodes<br>glareolu<br>s          |
| 1 | 1.00 | 1 | 1 | -0.01 | -0.013 | -0.01  | -0.01  | -0.01 | t | 48617  | PNDPNRN<br>V        | Oryctola<br>gus<br>cuniculu<br>s |
| 1 | 1.00 | 1 | 1 | -0.01 | -0.01  | -0.01  | -0.01  | -0.01 | t | 19210  | GEASGLCC<br>RWSLRVV | Mus<br>musculu<br>s              |
| 1 | 1.00 | 1 | 1 | 0.03  | 0.033  | 0.032  | 0.03   | 0.03  | t | 107307 | DAEFGHD<br>SGF      | Mus<br>musculu<br>s              |
| 1 | 1.00 | 1 | 1 | 0.01  | 0.008  | -0.001 | 0.003  | 0.009 | t | 119655 | TTEAVVAD<br>KPEKEKA | Rattus<br>norvegic<br>us         |

|   |      |   |   |      |       |       |        |        |   |        |                              |                                  |
|---|------|---|---|------|-------|-------|--------|--------|---|--------|------------------------------|----------------------------------|
| 1 | 1.00 | 1 | 1 | 0.01 | 0.014 | 0.005 | 0.011  | 0.012  | t | 66107  | TRTIGGSQ<br>AQ               | Homo<br>sapiens                  |
| 1 | 1.00 | 1 | 1 | 0    | 0     | 0     | -0.003 | -0.001 | t | 71284  | VTEEI                        | Homo<br>sapiens                  |
| 1 | 1.00 | 1 | 1 | 0    | 0     | 0     | -0.003 | -0.001 | t | 73327  | YAAQNRR<br>GLDLLFWE<br>QGGL  | Homo<br>sapiens                  |
| 1 | 1.00 | 1 | 1 | 0    | 0     | 0     | -0.003 | -0.001 | t | 66933  | TVAEEHVE<br>EPTVAEE          | Homo<br>sapiens                  |
| 1 | 1.00 | 1 | 1 | 0    | 0     | 0     | -0.003 | -0.001 | t | 66933  | TVAEEHVE<br>EPTVAEE          | Homo<br>sapiens                  |
| 1 | 1.00 | 1 | 1 | 0    | 0     | 0     | -0.003 | -0.001 | t | 38345  | LNTEPSQL<br>PPTAPP           | Homo<br>sapiens                  |
| 1 | 1.00 | 1 | 1 | 0    | 0     | 0     | -0.003 | -0.001 | t | 48779  | PPFSLSPV<br>PTLGSRSR<br>R    | Homo<br>sapiens                  |
| 1 | 1.00 | 1 | 1 | 0    | 0     | 0     | -0.003 | -0.001 | t | 37660  | LLPHSNLD<br>HILEPSIPW<br>KSK | Homo<br>sapiens                  |
| 1 | 1.00 | 1 | 1 | 0    | 0     | 0     | -0.003 | -0.001 | t | 38482  | LPFNWTH<br>CFDPQ             | Homo<br>sapiens                  |
| 1 | 1.00 | 1 | 1 | 0.02 | 0.02  | 0.013 | 0.02   | 0.021  | t | 105835 | GLKGEQG<br>EPGA              | Mus<br>musculu<br>s              |
| 1 | 1.00 | 1 | 1 | 0.01 | 0.01  | 0.01  | 0.01   | 0.01   | t | 140872 | KGVDAGK<br>LGTVS             | Oryctola<br>gus<br>cuniculu<br>s |
| 1 | 1.00 | 1 | 1 | 0.01 | 0.01  | 0.01  | 0.01   | 0.01   | t | 136363 | IDPLMFKY<br>WSNM             | Gallus<br>gallus                 |

|   |      |   |   |       |       |       |       |       |   |        |                                |                                  |
|---|------|---|---|-------|-------|-------|-------|-------|---|--------|--------------------------------|----------------------------------|
| 1 | 1.00 | 1 | 1 | 0.01  | 0.01  | 0.01  | 0.01  | 0.01  | t | 142282 | RRDLASR<br>EAKKQLEA<br>EQQK    | Homo<br>sapiens                  |
| 1 | 1.00 | 1 | 1 | 0.01  | 0.01  | 0.01  | 0.01  | 0.01  | t | 142282 | RRDLASR<br>EAKKQLEA<br>EQQK    | Homo<br>sapiens                  |
| 1 | 1.00 | 1 | 1 | 0.01  | 0.002 | 0.01  | 0.01  | 0.01  | t | 136363 | IDPLMFKY<br>WSNM               | Mus<br>musculu<br>s              |
| 1 | 1.00 | 1 | 1 | 0.01  | 0.01  | 0.01  | 0.01  | 0.01  | t | 149061 | INPTQTT                        | Sus<br>scrofa                    |
| 1 | 1.00 | 1 | 1 | 0.01  | 0.01  | 0.01  | 0.01  | 0.01  | t | 121672 | NVKHLSVA<br>YPLVDPF            | Mus<br>musculu<br>s              |
| 1 | 1.00 | 1 | 1 | 0.01  | 0.01  | 0.01  | 0.01  | 0.01  | t | 121672 | NVKHLSVA<br>YPLVDPF            | Mus<br>musculu<br>s              |
| 1 | 1.00 | 1 | 1 | 0.01  | 0.01  | 0.01  | 0.01  | 0.01  | t | 39380  | LSGKPATV<br>PDREVLYQ<br>EFDE   | Homo<br>sapiens                  |
| 1 | 1.00 | 1 | 1 | -0.01 | -0.01 | -0.01 | -0.01 | -0.01 | t | 144667 | GREGYP<br>A<br>DGGKIWT<br>SETN | Oryctola<br>gus<br>cuniculu<br>s |
| 1 | 1.00 | 1 | 1 | -0.01 | -0.01 | -0.01 | -0.01 | -0.01 | t | 156938 | PPEKIHV                        | Mus<br>musculu<br>s              |
| 1 | 1.00 | 1 | 1 | -0.01 | -0.01 | -0.01 | -0.01 | -0.01 | t | 118763 | CYGSFARP<br>MN                 | Mus<br>musculu<br>s              |
| 1 | 1.00 | 1 | 1 | -0.01 | -0.01 | -0.01 | -0.01 | -0.01 | t | 118763 | CYGSFARP<br>MN                 | Mus<br>musculu<br>s              |
| 1 | 1.00 | 1 | 1 | -0.01 | -0.01 | -0.01 | -0.01 | -0.01 | t | 118763 | CYGSFARP<br>MN                 | Mus<br>musculu<br>s              |
| 1 | 1.00 | 1 | 1 | -0.01 | -0.01 | -0.01 | -0.01 | -0.01 | t | 115437 | QKALNEIN<br>QFYQKFP<br>QYLQY   | Homo<br>sapiens                  |
| 1 | 1.00 | 1 | 1 | -0.01 | -0.01 | -0.01 | -0.01 | -0.01 | t | 115313 | KIIAEKTKIP<br>AVFKIDAL<br>NE   | Homo<br>sapiens                  |
| 1 | 1.00 | 1 | 1 | -0.01 | -0.01 | -0.01 | -0.01 | -0.01 | t | 111170 | CSPLTHAIC                      | Homo<br>sapiens                  |
| 1 | 1.00 | 1 | 1 | -0.01 | -0.01 | -0.01 | -0.01 | -0.01 | t | 71323  | VTGHRMA<br>WDMMM<br>NWS        | Homo<br>sapiens                  |
| 1 | 1.00 | 1 | 1 | -0.01 | -0.01 | -0.01 | -0.01 | -0.01 | t | 78164  | GERLIV                         | Equus<br>caballus                |

|   |      |   |   |       |        |        |        |       |   |        |                             |                                  |
|---|------|---|---|-------|--------|--------|--------|-------|---|--------|-----------------------------|----------------------------------|
| 1 | 1.00 | 1 | 1 | -0.01 | -0.01  | -0.01  | -0.01  | -0.01 | t | 47544  | PFPQPQQ<br>PFC              | Mus<br>musculu<br>s              |
| 1 | 1.00 | 1 | 1 | -0.01 | -0.01  | -0.01  | -0.01  | -0.01 | t | 47544  | PFPQPQQ<br>PFC              | Mus<br>musculu<br>s              |
| 1 | 1.00 | 1 | 1 | -0.01 | -0.01  | -0.01  | -0.01  | -0.01 | t | 36425  | LHSTSPEG<br>N               | Homo<br>sapiens                  |
| 1 | 1.00 | 1 | 1 | 0.01  | 0.012  | -0.003 | 0.007  | 0.01  | t | 105942 | LSADQIST<br>VQASFDK<br>VKGD | Homo<br>sapiens                  |
| 1 | 1.00 | 1 | 1 | -0.02 | -0.02  | -0.02  | -0.02  | -0.02 | t | 54401  | RKPARL                      | Homo<br>sapiens                  |
| 1 | 1.00 | 1 | 1 | -0.01 | -0.016 | -0.014 | -0.01  | -0.01 | t | 93874  | SFDADTIRI<br>AQP            | Oryctola<br>gus<br>cuniculu<br>s |
| 1 | 1.00 | 1 | 1 | 0     | 0.004  | -0.005 | -0.003 | 0.002 | t | 30198  | KDLKGYG<br>GVS              | Homo<br>sapiens                  |
| 1 | 1.00 | 1 | 1 | 0.01  | 0.01   | 0.019  | 0.01   | 0.01  | t | 139761 | GLGGTAQ                     | Ovis<br>aries                    |
| 1 | 1.00 | 1 | 1 | 0.02  | 0.016  | 0.015  | 0.02   | 0.02  | t | 24596  | HQNITNIN<br>SDSQGRQ         | Mus<br>musculu<br>s              |
| 1 | 1.00 | 1 | 1 | 0.05  | 0.048  | 0.05   | 0.043  | 0.05  | t | 139632 | VKPLPSPD<br>TD              | Mus<br>musculu<br>s              |
| 1 | 1.00 | 1 | 1 | -0.03 | -0.03  | -0.035 | -0.03  | -0.03 | t | 52000  | QQACKGKI<br>QALCENP         | Homo<br>sapiens                  |
| 1 | 1.00 | 1 | 1 | 0.06  | 0.065  | 0.07   | 0.057  | 0.06  | t | 10990  | EAAKQGE                     | Homo<br>sapiens                  |
| 1 | 1.00 | 1 | 1 | 0     | 0      | 0      | 0      | 0     | t | 1186   | AETHL                       | Mus<br>musculu<br>s              |
| 1 | 1.00 | 1 | 1 | 0.01  | 0.014  | 0.013  | 0.01   | 0.01  | t | 141046 | KEVTVVTT<br>S               | Ovis<br>aries                    |
| 1 | 1.00 | 1 | 1 | -0.06 | -0.06  | -0.053 | -0.051 | -0.06 | t | 119522 | RSLKTKLPS                   | Homo<br>sapiens                  |



|   |      |   |   |       |        |        |        |        |   |        |                              |                                  |
|---|------|---|---|-------|--------|--------|--------|--------|---|--------|------------------------------|----------------------------------|
| 1 | 1.00 | 1 | 1 | 0     | 0.002  | -0.003 | 0.001  | 0.001  | t | 48554  | PMGTQTH<br>TMIFDNAF<br>NC    | Homo<br>sapiens                  |
| 1 | 1.00 | 1 | 1 | 0.01  | 0.009  | 0.012  | 0.011  | 0.01   | t | 24362  | HNASGKE<br>AKVCTISPI<br>MGYS | Homo<br>sapiens                  |
| 1 | 1.00 | 1 | 1 | 0     | 0      | 0      | -0.003 | 0      | t | 42694  | MSTNPKP<br>QRKTK             | Homo<br>sapiens                  |
| 1 | 1.00 | 1 | 1 | 0     | 0      | 0      | 0      | 0      | t | 4021   | AQPGYPW<br>P                 | Homo<br>sapiens                  |
| 1 | 1.00 | 1 | 1 | 0     | 0      | 0.001  | 0      | 0.002  | t | 20420  | GIREVWP<br>AG                | Homo<br>sapiens                  |
| 1 | 1.00 | 1 | 1 | -0.06 | -0.06  | -0.06  | -0.06  | -0.06  | t | 115382 | MHIRLSFN<br>PTQLEEQC<br>HI   | Homo<br>sapiens                  |
| 1 | 1.00 | 1 | 1 | 0     | 0.007  | 0.002  | 0      | 0      | t | 65205  | TMGIYFAT<br>PEWVALN          | Gallus<br>gallus                 |
| 1 | 1.00 | 1 | 1 | 0     | 0.015  | 0      | 0.007  | 0.004  | t | 125478 | LHQEYEEN<br>LGDSIVGY<br>KEKS | Homo<br>sapiens                  |
| 1 | 1.00 | 1 | 1 | 0     | 0      | 0.01   | 0      | -0.003 | t | 119573 | EWEDTYGI<br>VL               | Homo<br>sapiens                  |
| 1 | 1.00 | 1 | 1 | 0     | 0      | 0      | 0      | 0      | t | 136088 | VPPTPQ                       | Oryctola<br>gus<br>cuniculu<br>s |
| 1 | 1.00 | 1 | 1 | 0     | 0      | 0      | 0      | 0      | t | 69175  | VKAETRLN                     | Mus<br>musculu<br>s              |
| 1 | 1.00 | 1 | 1 | 0     | 0      | 0      | 0      | 0      | t | 47013  | PAYYTKDT<br>NNNLT            | Mus<br>musculu<br>s              |
| 1 | 1.00 | 1 | 1 | 0     | 0      | 0      | 0      | 0      | t | 47013  | PAYYTKDT<br>NNNLT            | Mus<br>musculu<br>s              |
| 1 | 1.00 | 1 | 1 | -0.01 | -0.012 | -0.004 | -0.013 | -0.012 | t | 21683  | GPLDRAFS<br>WRLNPRV          | Mus<br>musculu<br>s              |
| 1 | 1.00 | 1 | 1 | 0.01  | 0.014  | 0.005  | 0.007  | 0.012  | t | 47450  | PEVFGKEK<br>VN               | Homo<br>sapiens                  |

|   |      |   |   |      |       |       |       |      |   |        |                               |                       |
|---|------|---|---|------|-------|-------|-------|------|---|--------|-------------------------------|-----------------------|
| 1 | 1.00 | 1 | 1 | 0.04 | 0.04  | 0.04  | 0.04  | 0.04 | t | 150996 | HPSTSADQ<br>QSLYQNA           | Homo sapiens          |
| 1 | 1.00 | 1 | 1 | 0.02 | 0.02  | 0.02  | 0.02  | 0.02 | t | 99036  | VEELKPTP<br>EG                | Homo sapiens          |
| 1 | 1.00 | 1 | 1 | 0.02 | 0.02  | 0.02  | 0.02  | 0.02 | t | 115173 | AEKTKIPA<br>VFKIDALN<br>ENKV  | Homo sapiens          |
| 1 | 1.00 | 1 | 1 | 0.02 | 0.02  | 0.02  | 0.02  | 0.02 | t | 99136  | DDDTFT                        | Oryctolagus cuniculus |
| 1 | 1.00 | 1 | 1 | 0.06 | 0.063 | 0.063 | 0.063 | 0.06 | t | 53859  | RGETPGQL<br>LPEIMQ            | Capra hircus          |
| 1 | 1.00 | 1 | 1 | 0    | 0     | 0     | 0     | 0    | t | 140857 | GKLGTVSY<br>GEEK              | Oryctolagus cuniculus |
| 1 | 1.00 | 1 | 1 | 0    | 0     | 0     | 0     | 0    | t | 134051 | FPFSGETV<br>FMSMENP<br>GLWIL  | Homo sapiens          |
| 1 | 1.00 | 1 | 1 | 0    | 0     | 0     | 0     | 0    | t | 104472 | ELLEKTVK<br>DKIAKEQE<br>NKET  | Rattus norvegicus     |
| 1 | 1.00 | 1 | 1 | 0    | 0     | 0     | 0     | 0    | t | 90527  | VWDEWS<br>PVSTAVA<br>MGTRSRK  | Aotus                 |
| 1 | 1.00 | 1 | 1 | 0    | 0     | 0     | 0     | 0    | t | 71533  | VTTSTPGS<br>GGSVASG           | Homo sapiens          |
| 1 | 1.00 | 1 | 1 | 0    | 0     | 0     | 0     | 0    | t | 39396  | LSGRPAIV<br>PDRELLYQ<br>EFDE  | Homo sapiens          |
| 1 | 1.00 | 1 | 1 | 0    | 0     | 0     | 0     | 0    | t | 46972  | PATIPDRE<br>VLYQEFDE<br>MEEC  | Homo sapiens          |
| 1 | 1.00 | 1 | 1 | 0    | 0     | 0     | 0     | 0    | t | 50099  | PYIEQAQV<br>IAHQFKEKI<br>LGL  | Homo sapiens          |
| 1 | 1.00 | 1 | 1 | 0    | 0     | 0     | 0     | 0    | t | 39381  | LSGKPAVI<br>PDRELLYR<br>EFDE  | Homo sapiens          |
| 1 | 1.00 | 1 | 1 | 0    | 0     | 0     | 0     | 0    | t | 39398  | LSGRPAIV<br>PDREVLVYQ<br>EFDE | Homo sapiens          |

|   |      |   |   |       |       |       |       |       |   |        |                              |                        |
|---|------|---|---|-------|-------|-------|-------|-------|---|--------|------------------------------|------------------------|
| 1 | 1.00 | 1 | 1 | 0     | 0     | 0     | 0     | 0     | t | 39917  | LTGKPAVI<br>PDREILYQ<br>QFDE | Homo<br>sapiens        |
| 1 | 1.00 | 1 | 1 | 0     | 0     | 0     | 0     | 0     | t | 46833  | PAIVPDKE<br>VLYQQYDE<br>MEEC | Homo<br>sapiens        |
| 1 | 1.00 | 1 | 1 | 0     | 0     | 0     | 0     | 0     | t | 47120  | PDKEILYEA<br>FDEMEEC<br>ASKA | Homo<br>sapiens        |
| 1 | 1.00 | 1 | 1 | 0     | 0     | 0     | 0     | 0     | t | 39399  | LSGRPAIV<br>PDREVLRY<br>EFDE | Homo<br>sapiens        |
| 1 | 1.00 | 1 | 1 | 0     | 0     | 0     | 0     | 0     | t | 39401  | LSGRPAVI<br>PDREVLRY<br>EFDE | Homo<br>sapiens        |
| 1 | 1.00 | 1 | 1 | 0     | 0     | 0     | 0     | 0     | t | 22077  | GRIILSGKP<br>ATIPDREA<br>VLY | Homo<br>sapiens        |
| 1 | 1.00 | 1 | 1 | 0     | 0     | 0     | 0     | 0     | t | 22087  | GRIILSGRP<br>AIIPDREVL<br>YR | Homo<br>sapiens        |
| 1 | 1.00 | 1 | 1 | 0     | 0     | 0     | 0     | 0     | t | 22086  | GRIILSGRP<br>AIIPDREVL<br>YQ | Homo<br>sapiens        |
| 1 | 1.00 | 1 | 1 | 0     | 0     | 0     | 0     | 0     | t | 22088  | GRIILSGRP<br>AIVPDRELL<br>YQ | Homo<br>sapiens        |
| 1 | 1.00 | 1 | 1 | 0     | 0     | 0     | 0     | 0     | t | 22081  | GRIILSGKP<br>AVIPDREV<br>LYQ | Homo<br>sapiens        |
| 1 | 1.00 | 1 | 1 | 0     | 0     | 0     | 0     | 0     | t | 22089  | GRIILSGRP<br>AVIPDREV<br>LYQ | Homo<br>sapiens        |
| 1 | 1.00 | 1 | 1 | 0     | 0     | 0     | 0     | 0     | t | 22080  | GRIILSGKP<br>AVIPDRELL<br>YR | Homo<br>sapiens        |
| 1 | 1.00 | 1 | 1 | 0     | 0     | 0     | 0     | 0     | t | 22090  | GRIILSGRP<br>AVIPDREV<br>LYR | Homo<br>sapiens        |
| 1 | 1.00 | 1 | 1 | 0     | 0     | 0     | 0     | 0     | t | 32370  | KMNMHLE<br>NVPWIMN<br>KQNLFK | Aotus<br>nancyma<br>ae |
| 1 | 1.00 | 1 | 1 | 0     | 0     | 0     | 0     | 0     | t | 25308  | IAHQFKEKI<br>LGLLQRAT<br>QQQ | Homo<br>sapiens        |
| 1 | 1.00 | 1 | 1 | -0.02 | -0.02 | -0.02 | -0.02 | -0.02 | t | 149427 | QLPQFEEI<br>RN               | Mus<br>musculu<br>s    |

|   |      |   |   |       |        |        |        |        |   |        |                              |                                  |
|---|------|---|---|-------|--------|--------|--------|--------|---|--------|------------------------------|----------------------------------|
| 1 | 1.00 | 1 | 1 | -0.02 | -0.02  | -0.02  | -0.02  | -0.02  | t | 149427 | QLPQFEEI<br>RN               | Homo<br>sapiens                  |
| 1 | 1.00 | 1 | 1 | -0.02 | -0.02  | -0.02  | -0.02  | -0.02  | t | 149390 | NIYPHGIT<br>DVRPLY           | Homo<br>sapiens                  |
| 1 | 1.00 | 1 | 1 | -0.02 | -0.02  | -0.02  | -0.02  | -0.02  | t | 148886 | QQSFPLQP<br>QQ               | Homo<br>sapiens                  |
| 1 | 1.00 | 1 | 1 | -0.02 | -0.02  | -0.02  | -0.02  | -0.02  | t | 79360  | RCPYYTRH<br>PSMRCN           | Mus<br>musculu<br>s              |
| 1 | 1.00 | 1 | 1 | -0.02 | -0.02  | -0.02  | -0.02  | -0.02  | t | 96235  | EKDKGLQT<br>SQ               | Homo<br>sapiens                  |
| 1 | 1.00 | 1 | 1 | -0.02 | -0.02  | -0.02  | -0.02  | -0.02  | t | 95835  | SGPSNIPP<br>EI               | Mus<br>musculu<br>s              |
| 1 | 1.00 | 1 | 1 | -0.02 | -0.02  | -0.02  | -0.02  | -0.02  | t | 18442  | FYPELFRQ<br>FY               | Homo<br>sapiens                  |
| 1 | 1.00 | 1 | 1 | -0.01 | -0.01  | -0.008 | -0.007 | -0.008 | t | 67191  | TVVAPDKE<br>VLYEAFDE<br>MEEC | Homo<br>sapiens                  |
| 1 | 1.00 | 1 | 1 | 0.04  | 0.036  | 0.043  | 0.039  | 0.04   | t | 68092  | VDVVTGA<br>T                 | Oryctola<br>gus<br>cuniculu<br>s |
| 1 | 1.00 | 1 | 1 | 0.03  | 0.03   | 0.029  | 0.03   | 0.03   | t | 98237  | LTAYQTEL<br>AR               | Mus<br>musculu<br>s              |
| 1 | 1.00 | 1 | 1 | 0.02  | 0.018  | 0.025  | 0.019  | 0.022  | t | 40938  | LYRPSDSSL<br>AGP             | Mus<br>musculu<br>s              |
| 1 | 1.00 | 1 | 1 | -0.02 | -0.016 | -0.018 | -0.023 | -0.022 | t | 50752  | QFEEQQR<br>FRNCQ             | Homo<br>sapiens                  |
| 1 | 1.00 | 1 | 1 | 0.02  | 0.02   | 0.013  | 0.02   | 0.02   | t | 47679  | PGIKADSL<br>DIDIERNV<br>VTVR | Mus<br>musculu<br>s              |
| 1 | 1.00 | 1 | 1 | -0.01 | -0.006 | -0.01  | -0.009 | -0.01  | t | 127984 | FTNLKFKV<br>RKITSSHR<br>GN   | Homo<br>sapiens                  |
| 1 | 1.00 | 1 | 1 | 0     | 0      | 0      | -0.001 | 0      | t | 34243  | KVVQLPKI<br>SKNALKAN<br>G    | Homo<br>sapiens                  |

|   |      |   |   |       |        |        |        |        |   |        |                              |                              |
|---|------|---|---|-------|--------|--------|--------|--------|---|--------|------------------------------|------------------------------|
| 1 | 1.00 | 1 | 1 | 0.03  | 0.036  | 0.03   | 0.03   | 0.03   | t | 123240 | GLDLPNLP<br>Y                | Ovis<br>aries                |
| 1 | 1.00 | 1 | 1 | 0     | 0.002  | -0.012 | -0.003 | 0.003  | t | 69942  | VMENFVA<br>F                 | Homo<br>sapiens              |
| 1 | 1.00 | 1 | 1 | -0.04 | -0.038 | -0.046 | -0.043 | -0.04  | t | 102271 | YYNSLGFN<br>IK               | Homo<br>sapiens              |
| 1 | 1.00 | 1 | 1 | 0     | 0.004  | 0      | 0.001  | 0.001  | t | 23068  | GVNLEDP<br>ASRDL             | Homo<br>sapiens              |
| 1 | 1.00 | 1 | 1 | -0.02 | -0.018 | -0.022 | -0.02  | -0.019 | t | 122896 | RWNPADY<br>GGIK              | Rattus<br>norvegicus         |
| 1 | 1.00 | 1 | 1 | -0.04 | -0.038 | -0.049 | -0.043 | -0.042 | t | 106118 | SPRGQHG<br>RRERAGQ<br>E      | Homo<br>sapiens              |
| 1 | 1.00 | 1 | 1 | -0.07 | -0.07  | -0.07  | -0.07  | -0.07  | t | 129293 | LPPARGTP                     | Homo<br>sapiens              |
| 1 | 1.00 | 1 | 1 | -0.01 | -0.01  | -0.007 | -0.01  | -0.009 | t | 41012  | MACMSA<br>DLEVVTST           | Homo<br>sapiens              |
| 1 | 1.00 | 1 | 1 | 0.01  | 0.012  | 0.004  | 0.013  | 0.01   | t | 10080  | DSAVAEFF<br>QSFPSGEP<br>SNSK | Homo<br>sapiens              |
| 1 | 1.00 | 1 | 1 | 0     | 0      | 0      | 0      | 0.001  | t | 118374 | GKALCWV<br>CAQSRKH<br>RD     | Homo<br>sapiens              |
| 1 | 1.00 | 1 | 1 | -0.01 | -0.01  | -0.01  | -0.01  | -0.01  | t | 68873  | VHNLQKR<br>MQQLEN            | Homo<br>sapiens              |
| 1 | 1.00 | 1 | 1 | -0.01 | -0.01  | -0.01  | -0.01  | -0.01  | t | 54078  | RHPHPHLS<br>FM               | Homo<br>sapiens              |
| 1 | 1.00 | 1 | 1 | -0.01 | -0.01  | -0.01  | -0.01  | -0.01  | t | 38982  | LQSARRGE                     | Oryctola<br>gus<br>cuniculus |
| 1 | 1.00 | 1 | 1 | 0     | 0.002  | 0.01   | -0.003 | -0.001 | t | 30243  | KDSKSRGA<br>T                | Homo<br>sapiens              |

|   |      |   |   |       |        |        |        |        |   |        |                              |                                  |
|---|------|---|---|-------|--------|--------|--------|--------|---|--------|------------------------------|----------------------------------|
| 1 | 1.00 | 1 | 1 | 0.02  | 0.02   | 0.021  | 0.02   | 0.02   | t | 159166 | TRLEHQM<br>WESVRDE<br>LN     | Mus<br>musculu<br>s              |
| 1 | 1.00 | 1 | 1 | -0.01 | -0.037 | -0.01  | -0.01  | -0.01  | t | 113592 | KWGS LGV<br>FFG              | Oryctola<br>gus<br>cuniculu<br>s |
| 1 | 1.00 | 1 | 1 | 0.03  | 0.03   | 0.034  | 0.03   | 0.03   | t | 22837  | GTSNGSN<br>PST               | Mus<br>musculu<br>s              |
| 1 | 1.00 | 1 | 1 | -0.06 | -0.057 | -0.047 | -0.06  | -0.065 | t | 137941 | PFRSYTK                      | Mus<br>musculu<br>s              |
| 1 | 1.00 | 1 | 1 | -0.04 | -0.04  | -0.048 | -0.04  | -0.039 | t | 125454 | KDYKTMV<br>KFCN              | Mus<br>musculu<br>s              |
| 1 | 1.00 | 1 | 1 | 0.01  | 0.01   | 0.009  | 0.01   | 0.01   | t | 113095 | MSSSPVKR<br>QRMESAL          | Homo<br>sapiens                  |
| 1 | 1.00 | 1 | 1 | 0     | 0.004  | 0      | 0.007  | 0.001  | t | 107434 | GVQVHNA                      | Homo<br>sapiens                  |
| 1 | 1.00 | 1 | 1 | 0     | -0.004 | 0      | -0.003 | 0.001  | t | 117909 | HKGFKGV<br>D                 | Oryctola<br>gus<br>cuniculu<br>s |
| 1 | 1.00 | 1 | 1 | 0.05  | 0.05   | 0.05   | 0.05   | 0.05   | t | 115466 | RELEELNV<br>PGEIVESLS<br>SSE | Homo<br>sapiens                  |
| 1 | 1.00 | 1 | 1 | 0.03  | 0.03   | 0.03   | 0.03   | 0.03   | t | 123167 | FGAGDAP<br>PS                | Ovis<br>aries                    |
| 1 | 1.00 | 1 | 1 | 0.03  | 0.03   | 0.03   | 0.03   | 0.03   | t | 99250  | FNAEFNEI<br>RRVLEE           | Homo<br>sapiens                  |
| 1 | 1.00 | 1 | 1 | 0.01  | 0.01   | 0.01   | 0.01   | 0.01   | t | 111149 | CIPASGQT<br>C                | Homo<br>sapiens                  |
| 1 | 1.00 | 1 | 1 | 0.01  | 0.01   | 0.01   | 0.01   | 0.01   | t | 73659  | YEGFSTGV<br>TQKAKGIT         | Mus<br>musculu<br>s              |
| 1 | 1.00 | 1 | 1 | 0.01  | 0.01   | 0.01   | 0.01   | 0.01   | t | 95545  | LDTDYK                       | Homo<br>sapiens                  |
| 1 | 1.00 | 1 | 1 | 0.01  | 0.01   | 0.01   | 0.01   | 0.01   | t | 79313  | NCGSRTQ<br>YCKSRCT           | Mus<br>musculu<br>s              |

|   |      |   |   |       |        |        |        |        |   |        |                              |                     |
|---|------|---|---|-------|--------|--------|--------|--------|---|--------|------------------------------|---------------------|
| 1 | 1.00 | 1 | 1 | 0.01  | 0.01   | 0.01   | 0.01   | 0.01   | t | 22079  | GRIILSGKP<br>ATVPDREV<br>LYQ | Homo<br>sapiens     |
| 1 | 1.00 | 1 | 1 | 0.01  | 0.01   | 0.01   | 0.01   | 0.01   | t | 6075   | CCRHKQK<br>DVGPVKQ<br>TLPPS  | Ovis<br>aries       |
| 1 | 1.00 | 1 | 1 | 0.01  | 0.01   | 0.01   | 0.01   | 0.01   | t | 7920   | DECHAQD<br>ATSILGI           | Homo<br>sapiens     |
| 1 | 1.00 | 1 | 1 | 0     | 0      | 0      | 0      | 0      | t | 132062 | SKDERRF                      | Homo<br>sapiens     |
| 1 | 1.00 | 1 | 1 | 0     | 0      | 0      | 0      | 0      | t | 131818 | AKEERRY                      | Homo<br>sapiens     |
| 1 | 1.00 | 1 | 1 | 0     | 0      | 0      | 0      | 0      | t | 132042 | RFEQPRV                      | Homo<br>sapiens     |
| 1 | 1.00 | 1 | 1 | 0     | 0      | 0      | 0      | 0      | t | 1433   | AGAGGGA<br>GGAGAGG<br>GAGGAG | Homo<br>sapiens     |
| 1 | 1.00 | 1 | 1 | -0.01 | -0.01  | -0.01  | -0.01  | -0.01  | t | 103532 | QSSFYSD<br>WYSPACG<br>K      | Homo<br>sapiens     |
| 1 | 1.00 | 1 | 1 | -0.01 | -0.01  | -0.01  | -0.01  | -0.01  | t | 110591 | GDPGRPG<br>EPGLPGAR          | Mus<br>musculu<br>s |
| 1 | 1.00 | 1 | 1 | -0.01 | -0.01  | -0.01  | -0.01  | -0.01  | t | 75875  | YSREQLNK<br>LFGIEVM          | Homo<br>sapiens     |
| 1 | 1.00 | 1 | 1 | -0.01 | -0.01  | -0.01  | -0.01  | -0.01  | t | 79360  | RCPYYTRH<br>PSMRCN           | Mus<br>musculu<br>s |
| 1 | 1.00 | 1 | 1 | -0.01 | -0.01  | -0.01  | -0.01  | -0.01  | t | 39914  | LTGHRMA<br>WDMMM<br>NWS      | Homo<br>sapiens     |
| 1 | 1.00 | 1 | 1 | -0.03 | -0.03  | -0.03  | -0.03  | -0.03  | t | 79475  | YDWLMF                       | Mus<br>musculu<br>s |
| 1 | 1.00 | 1 | 1 | 0.03  | 0.03   | 0.021  | 0.029  | 0.03   | t | 31320  | KILGCDWY<br>FVPTDEG<br>WTND  | Homo<br>sapiens     |
| 1 | 1.00 | 1 | 1 | 0.02  | 0.02   | 0.02   | 0.02   | 0.02   | t | 132937 | WGSNNQ<br>N                  | Homo<br>sapiens     |
| 1 | 1.00 | 1 | 1 | -0.05 | -0.05  | -0.049 | -0.053 | -0.052 | t | 44083  | NGTLTSLH<br>FGKC             | Homo<br>sapiens     |
| 1 | 1.00 | 1 | 1 | 0.03  | 0.032  | 0.03   | 0.029  | 0.03   | t | 149516 | VPVPQLQL<br>QN               | Homo<br>sapiens     |
| 1 | 1.00 | 1 | 1 | 0     | -0.002 | 0      | -0.003 | -0.002 | t | 98822  | IEAGAIGFK<br>IHEDWG          | Mus<br>musculu<br>s |

|   |      |   |   |       |        |        |        |        |   |       |                              |                                  |
|---|------|---|---|-------|--------|--------|--------|--------|---|-------|------------------------------|----------------------------------|
| 1 | 1.00 | 1 | 1 | 0     | -0.007 | 0      | -0.003 | -0.002 | t | 53859 | RGETPGQL<br>LPEIMQ           | Oryctola<br>gus<br>cuniculu<br>s |
| 1 | 1.00 | 1 | 1 | 0     | -0.004 | 0      | -0.003 | -0.002 | t | 46895 | PAPQAPY<br>QGYQEPP<br>APQAPY | Oryctola<br>gus<br>cuniculu<br>s |
| 1 | 1.00 | 1 | 1 | 0     | -0.004 | 0      | -0.003 | -0.002 | t | 19737 | GGGAGAG<br>GAGAGGG<br>GR     | Oryctola<br>gus<br>cuniculu<br>s |
| 1 | 1.00 | 1 | 1 | 0     | -0.002 | 0      | -0.003 | -0.002 | t | 1477  | AGDR                         | Mus<br>musculu<br>s              |
| 1 | 1.00 | 1 | 1 | -0.07 | -0.055 | -0.076 | -0.069 | -0.07  | t | 60642 | SREAKKQV<br>EKAL             | Homo<br>sapiens                  |
| 1 | 1.00 | 1 | 1 | -0.03 | -0.032 | -0.037 | -0.031 | -0.03  | t | 3900  | APVTVTRF<br>VNAS             | Mus<br>musculu<br>s              |
| 1 | 1.00 | 1 | 1 | -0.03 | -0.027 | -0.025 | -0.031 | -0.03  | t | 58041 | SGFVGLFS<br>PGPSQRI          | Mus<br>musculu<br>s              |
| 1 | 1.00 | 1 | 1 | -0.05 | -0.053 | -0.053 | -0.05  | -0.05  | t | 97616 | RPFTGLLV<br>N                | Oryctola<br>gus<br>cuniculu<br>s |
| 1 | 1.00 | 1 | 1 | -0.05 | -0.053 | -0.053 | -0.05  | -0.05  | t | 97616 | RPFTGLLV<br>N                | Oryctola<br>gus<br>cuniculu<br>s |
| 1 | 1.00 | 1 | 1 | 0.04  | 0.038  | 0.049  | 0.039  | 0.039  | t | 28733 | ISSTNEI                      | Sus<br>scrofa                    |
| 1 | 1.00 | 1 | 1 | -0.02 | -0.018 | -0.02  | -0.019 | -0.02  | t | 66238 | TSGTSGPS<br>GTSPSSR          | Homo<br>sapiens                  |
| 1 | 1.00 | 1 | 1 | 0     | 0      | 0      | 0      | 0      | t | 94453 | CCNPACG<br>R                 | Oryctola<br>gus<br>cuniculu<br>s |
| 1 | 1.00 | 1 | 1 | 0     | -0.007 | 0      | 0      | 0      | t | 94453 | CCNPACG<br>R                 | Oryctola<br>gus<br>cuniculu<br>s |



|   |      |   |   |       |        |        |       |        |   |        |                      |                       |
|---|------|---|---|-------|--------|--------|-------|--------|---|--------|----------------------|-----------------------|
| 1 | 1.00 | 1 | 1 | 0     | 0.007  | 0      | 0     | 0      | t | 94453  | CCNPACGR             | Capra hircus          |
| 1 | 1.00 | 1 | 1 | -0.02 | -0.02  | -0.02  | -0.02 | -0.02  | t | 106710 | PKHCGIVDSK           | Homo sapiens          |
| 1 | 1.00 | 1 | 1 | 0.01  | 0.013  | 0.014  | 0.01  | 0.011  | t | 68811  | VGVAPG               | Mus musculus          |
| 1 | 1.00 | 1 | 1 | 0.01  | 0.01   | 0.01   | 0.01  | 0.01   | t | 137418 | HHILPPKALLFG         | Mus musculus          |
| 1 | 1.00 | 1 | 1 | -0.01 | -0.01  | -0.012 | -0.01 | -0.01  | t | 47620  | PGATARA PAI          | Homo sapiens          |
| 1 | 1.00 | 1 | 1 | 0     | 0      | 0      | 0     | 0      | t | 136075 | PGSSYP               | Rattus norvegicus     |
| 1 | 1.00 | 1 | 1 | 0     | 0      | 0      | 0     | 0      | t | 24917  | HTHADGE VH           | Mus musculus          |
| 1 | 1.00 | 1 | 1 | 0     | -0.004 | -0.012 | 0.003 | 0.003  | t | 106398 | EQLAEVAVSAKR         | Oryctolagus cuniculus |
| 1 | 1.00 | 1 | 1 | 0.01  | 0.01   | 0.009  | 0.011 | 0.012  | t | 39918  | LTGKPAVIPDREVLYQEFDE | Homo sapiens          |
| 1 | 1.00 | 1 | 1 | -0.04 | -0.043 | -0.04  | -0.04 | -0.038 | t | 105    | AAEFTINKPK           | Oryctolagus cuniculus |
| 1 | 1.00 | 1 | 1 | 0     | 0.002  | 0      | 0.001 | 0      | t | 117110 | WNTDFSTRAAHT         | Homo sapiens          |
| 1 | 1.00 | 1 | 1 | 0.04  | 0.04   | 0.04   | 0.04  | 0.04   | t | 108269 | AKYSNQR AQ           | Homo sapiens          |
| 1 | 1.00 | 1 | 1 | 0.04  | 0.04   | 0.04   | 0.04  | 0.04   | t | 115955 | SGEPTSTPTT           | Homo sapiens          |
| 1 | 1.00 | 1 | 1 | 0.02  | 0.02   | 0.02   | 0.02  | 0.02   | t | 141021 | GHKEVTVT             | Ovis aries            |
| 1 | 1.00 | 1 | 1 | 0.02  | 0.02   | 0.02   | 0.02  | 0.02   | t | 151034 | NERTLDYHDSNVKNL      | Homo sapiens          |
| 1 | 1.00 | 1 | 1 | 0.02  | 0.02   | 0.02   | 0.02  | 0.02   | t | 117386 | TRPINTAQCGDC         | Homo sapiens          |
| 1 | 1.00 | 1 | 1 | 0.02  | 0.02   | 0.02   | 0.02  | 0.02   | t | 115395 | NLCSTFCKEVVRNANEEEYS | Homo sapiens          |

|   |      |   |   |      |      |      |      |      |   |        |                              |                                  |
|---|------|---|---|------|------|------|------|------|---|--------|------------------------------|----------------------------------|
| 1 | 1.00 | 1 | 1 | 0.02 | 0.02 | 0.02 | 0.02 | 0.02 | t | 115184 | APLRVYVE<br>ELKPTPEG<br>DLEI | Homo<br>sapiens                  |
| 1 | 1.00 | 1 | 1 | 0.02 | 0.02 | 0.02 | 0.02 | 0.02 | t | 77910  | HTSPTGLR<br>FQVQ             | Mus<br>musculu<br>s              |
| 1 | 1.00 | 1 | 1 | 0    | 0    | 0    | 0    | 0    | t | 140583 | PWDKFBVH<br>EQ               | Mus<br>musculu<br>s              |
| 1 | 1.00 | 1 | 1 | 0    | 0    | 0    | 0    | 0    | t | 149786 | KVTAQTTD<br>DRKQTGL          | Oryctola<br>gus<br>cuniculu<br>s |
| 1 | 1.00 | 1 | 1 | 0    | 0    | 0    | 0    | 0    | t | 140583 | PWDKFBVH<br>EQ               | Mus<br>musculu<br>s              |
| 1 | 1.00 | 1 | 1 | 0    | 0    | 0    | 0    | 0    | t | 117629 | RGRGMGR<br>GNIFQKRR          | Homo<br>sapiens                  |
| 1 | 1.00 | 1 | 1 | 0    | 0    | 0    | 0    | 0    | t | 131080 | SQTTANPS<br>APEGT            | Rattus<br>norvegic<br>us         |
| 1 | 1.00 | 1 | 1 | 0    | 0    | 0    | 0    | 0    | t | 98798  | GGFGPGG<br>FGP               | Mus<br>musculu<br>s              |
| 1 | 1.00 | 1 | 1 | 0    | 0    | 0    | 0    | 0    | t | 115251 | FLLYQEPV<br>LGPVRGPF<br>PIIV | Homo<br>sapiens                  |
| 1 | 1.00 | 1 | 1 | 0    | 0    | 0    | 0    | 0    | t | 99241  | FEDFFPAS<br>SRDQSSY          | Homo<br>sapiens                  |
| 1 | 1.00 | 1 | 1 | 0    | 0    | 0    | 0    | 0    | t | 111140 | CAEPNNLL<br>C                | Homo<br>sapiens                  |
| 1 | 1.00 | 1 | 1 | 0    | 0    | 0    | 0    | 0    | t | 60677  | SRGNHVS<br>PAHYVPES<br>DAAAR | Homo<br>sapiens                  |
| 1 | 1.00 | 1 | 1 | 0    | 0    | 0    | 0    | 0    | t | 70672  | VQWMNR<br>LIAFASRG<br>NHVSPA | Homo<br>sapiens                  |
| 1 | 1.00 | 1 | 1 | 0    | 0    | 0    | 0    | 0    | t | 63384  | TEGRTAN<br>AFASLLSP<br>G     | Homo<br>sapiens                  |
| 1 | 1.00 | 1 | 1 | 0    | 0    | 0    | 0    | 0    | t | 46970  | PATIPDRE<br>ALYREFDE<br>MEEC | Homo<br>sapiens                  |
| 1 | 1.00 | 1 | 1 | 0    | 0    | 0    | 0    | 0    | t | 45701  | NRLIAFAS<br>RGNHVSP<br>AHYVP | Homo<br>sapiens                  |

|   |      |   |   |       |        |        |        |        |   |        |                              |              |
|---|------|---|---|-------|--------|--------|--------|--------|---|--------|------------------------------|--------------|
| 1 | 1.00 | 1 | 1 | 0     | 0      | 0      | 0      | 0      | t | 42683  | MSTNPKP<br>QKKNKRNT          | Homo sapiens |
| 1 | 1.00 | 1 | 1 | 0     | 0      | 0      | 0      | 0      | t | 48736  | PPAAGPP<br>AAGPPAA<br>GPRILA | Homo sapiens |
| 1 | 1.00 | 1 | 1 | 0     | 0      | 0      | 0      | 0      | t | 1262   | AFASRGN<br>HVSPAHYV<br>PESDA | Homo sapiens |
| 1 | 1.00 | 1 | 1 | 0     | 0      | 0      | 0      | 0      | t | 1262   | AFASRGN<br>HVSPAHYV<br>PESDA | Homo sapiens |
| 1 | 1.00 | 1 | 1 | -0.02 | -0.02  | -0.02  | -0.02  | -0.02  | t | 103180 | FPSFAGLR<br>PTFDTRL          | Homo sapiens |
| 1 | 1.00 | 1 | 1 | -0.04 | -0.036 | -0.04  | -0.04  | -0.04  | t | 100586 | TYGAAPAR<br>ISVPYV           | Homo sapiens |
| 1 | 1.00 | 1 | 1 | -0.04 | -0.04  | -0.04  | -0.04  | -0.04  | t | 100331 | NGRFVFTD<br>IT               | Mus musculus |
| 1 | 1.00 | 1 | 1 | -0.01 | -0.007 | -0.005 | -0.01  | -0.012 | t | 35060  | LCKDKKAD<br>SGYCYWV          | Mus musculus |
| 1 | 1.00 | 1 | 1 | -0.04 | -0.04  | -0.046 | -0.043 | -0.039 | t | 27553  | IMSALAM<br>VYLGAK            | Homo sapiens |
| 1 | 1.00 | 1 | 1 | 0.04  | 0.042  | 0.038  | 0.04   | 0.04   | t | 136407 | KAASGSTG<br>DQKVQISY<br>YGPK | Homo sapiens |
| 1 | 1.00 | 1 | 1 | 0     | 0.004  | -0.002 | -0.003 | 0      | t | 5990   | CAISGGYP<br>VC               | Homo sapiens |
| 1 | 1.00 | 1 | 1 | 0.03  | 0.03   | 0.034  | 0.03   | 0.031  | t | 123838 | VWQDE                        | Mus musculus |
| 1 | 1.00 | 1 | 1 | 0.02  | 0.023  | 0.02   | 0.02   | 0.018  | t | 140935 | YGEEKPAV<br>LGHDEAAY<br>SKNR | Mus musculus |
| 1 | 1.00 | 1 | 1 | 0.02  | 0.017  | 0.017  | 0.02   | 0.023  | t | 62830  | TAEGRAIN                     | Mus musculus |
| 1 | 1.00 | 1 | 1 | -0.03 | -0.03  | -0.028 | -0.028 | -0.03  | t | 54065  | RHLLCLLL<br>LTVGG            | Homo sapiens |

|   |      |   |   |       |        |        |        |        |   |        |                              |                                  |
|---|------|---|---|-------|--------|--------|--------|--------|---|--------|------------------------------|----------------------------------|
| 1 | 1.00 | 1 | 1 | 0     | -0.003 | -0.003 | 0      | 0      | t | 18051  | FTPSPVVV<br>GTTDRSGV<br>PTYR | Oryctola<br>gus<br>cuniculu<br>s |
| 1 | 1.00 | 1 | 1 | 0     | -0.003 | -0.003 | 0      | 0      | t | 18051  | FTPSPVVV<br>GTTDRSGV<br>PTYR | Oryctola<br>gus<br>cuniculu<br>s |
| 1 | 1.00 | 1 | 1 | -0.01 | -0.012 | -0.012 | -0.011 | -0.01  | t | 125462 | KLPLSLSFL<br>HLTRADLS<br>YPS | Mus<br>musculu<br>s              |
| 1 | 1.00 | 1 | 1 | -0.03 | -0.027 | -0.023 | -0.03  | -0.03  | t | 102860 | TPYTSLYT<br>W                | Mus<br>musculu<br>s              |
| 1 | 1.00 | 1 | 1 | 0.01  | 0.015  | 0.018  | 0.01   | 0.01   | t | 41048  | MAHFPGF<br>GQSLLYGY<br>PVYVF | Homo<br>sapiens                  |
| 1 | 1.00 | 1 | 1 | 0     | 0.004  | 0      | -0.003 | -0.001 | t | 118434 | ISKGANPV<br>EIRRG            | Homo<br>sapiens                  |
| 1 | 1.00 | 1 | 1 | 0.05  | 0.05   | 0.041  | 0.043  | 0.05   | t | 135990 | SASVPALT<br>AVET             | Homo<br>sapiens                  |
| 1 | 1.00 | 1 | 1 | -0.04 | -0.038 | -0.035 | -0.037 | -0.04  | t | 135650 | DKVSFFCK<br>NKEKCC           | Homo<br>sapiens                  |
| 1 | 1.00 | 1 | 1 | -0.01 | -0.008 | -0.012 | -0.013 | -0.013 | t | 105700 | CPSTYEPP<br>AQQGRRH          | Homo<br>sapiens                  |
| 1 | 1.00 | 1 | 1 | -0.03 | -0.032 | -0.036 | -0.031 | -0.027 | t | 2040   | AINRRVE                      | Mus<br>musculu<br>s              |
| 1 | 1.00 | 1 | 1 | 0     | 0.003  | 0.009  | 0      | -0.002 | t | 139227 | RGDLQVLT<br>PK               | Sus<br>scrofa                    |
| 1 | 1.00 | 1 | 1 | 0     | -0.004 | 0      | -0.001 | 0      | t | 48927  | PPSSPTHDP<br>PPSDP           | Oryctola<br>gus<br>cuniculu<br>s |

|   |      |   |   |       |        |        |        |        |   |        |                              |                                  |
|---|------|---|---|-------|--------|--------|--------|--------|---|--------|------------------------------|----------------------------------|
| 1 | 1.00 | 1 | 1 | 0     | -0.002 | 0      | -0.001 | 0      | t | 43242  | NANPNAN<br>PNANP             | Mus<br>musculu<br>s              |
| 1 | 1.00 | 1 | 1 | 0.01  | 0.013  | 0.013  | 0.01   | 0.011  | t | 7210   | CTSSLTSIF<br>TQGAKQN         | Mus<br>musculu<br>s              |
| 1 | 1.00 | 1 | 1 | -0.02 | -0.02  | -0.013 | -0.02  | -0.02  | t | 132794 | DRLYAQYP<br>VPTP             | Mus<br>musculu<br>s              |
| 1 | 1.00 | 1 | 1 | 0.01  | 0.01   | 0.01   | 0.01   | 0.01   | t | 153357 | ACWYSTR<br>DHCGGS            | Mus<br>musculu<br>s              |
| 1 | 1.00 | 1 | 1 | -0.03 | -0.032 | -0.03  | -0.029 | -0.03  | t | 149414 | PQLPYQP<br>QP                | Mus<br>musculu<br>s              |
| 1 | 1.00 | 1 | 1 | 0.03  | 0.045  | 0.036  | 0.029  | 0.03   | t | 63215  | TDPTGIEP<br>DDHLKE           | Myodes<br>glareolu<br>s          |
| 1 | 1.00 | 1 | 1 | 0.01  | 0.01   | -0.004 | 0.01   | 0.01   | t | 60592  | SQWGWC<br>GSTDEYCS<br>PDHNCQ | Mus<br>musculu<br>s              |
| 1 | 1.00 | 1 | 1 | -0.01 | -0.01  | -0.015 | -0.01  | -0.01  | t | 136066 | IETDKTSV<br>QV               | Oryctola<br>gus<br>cuniculu<br>s |
| 1 | 1.00 | 1 | 1 | -0.02 | -0.02  | -0.015 | -0.02  | -0.021 | t | 133664 | PPPPPPPP<br>PP               | Mus<br>musculu<br>s              |
| 1 | 1.00 | 1 | 1 | 0.01  | 0.01   | 0.01   | 0.01   | 0.011  | t | 10801  | DWEDRY<br>RE                 | Mus<br>musculu<br>s              |
| 1 | 1.00 | 1 | 1 | -0.01 | -0.01  | -0.01  | -0.01  | -0.01  | t | 70317  | VPGSQHID                     | Mus<br>musculu<br>s              |
| 1 | 1.00 | 1 | 1 | -0.02 | -0.028 | -0.015 | -0.019 | -0.02  | t | 75059  | YMIDSVL<br>M                 | Bos<br>taurus                    |
| 1 | 1.00 | 1 | 1 | 0.03  | 0.03   | 0.03   | 0.03   | 0.03   | t | 114900 | NAVVESN<br>GTL               | Homo<br>sapiens                  |
| 1 | 1.00 | 1 | 1 | 0.03  | 0.03   | 0.03   | 0.03   | 0.03   | t | 79555  | GHQVSRL                      | Oryctola<br>gus<br>cuniculu<br>s |
| 1 | 1.00 | 1 | 1 | -0.01 | -0.01  | -0.01  | -0.01  | -0.01  | t | 149046 | FQINPTQ                      | Sus<br>scrofa                    |
| 1 | 1.00 | 1 | 1 | -0.01 | -0.01  | -0.01  | -0.01  | -0.01  | t | 115374 | LTDDIMCV<br>KK               | Homo<br>sapiens                  |

|   |      |   |   |       |        |        |        |        |   |        |                              |                     |
|---|------|---|---|-------|--------|--------|--------|--------|---|--------|------------------------------|---------------------|
| 1 | 1.00 | 1 | 1 | -0.01 | -0.01  | -0.01  | -0.01  | -0.01  | t | 99119  | ATHAKSSP<br>YQKKTEN          | Homo<br>sapiens     |
| 1 | 1.00 | 1 | 1 | -0.01 | -0.01  | -0.01  | -0.01  | -0.01  | t | 89403  | TFNGAYTP<br>AN               | Homo<br>sapiens     |
| 1 | 1.00 | 1 | 1 | -0.01 | -0.01  | -0.01  | -0.01  | -0.01  | t | 56956  | SAQSGPSG<br>TSAPSGS          | Homo<br>sapiens     |
| 1 | 1.00 | 1 | 1 | -0.01 | -0.01  | -0.01  | -0.01  | -0.01  | t | 12136  | EGCKFSCFI<br>RPAGFC          | Equus<br>caballus   |
| 1 | 1.00 | 1 | 1 | -0.01 | -0.01  | -0.01  | -0.01  | -0.01  | t | 24676  | HRGRAA                       | Equus<br>caballus   |
| 1 | 1.00 | 1 | 1 | 0.02  | 0.023  | 0.025  | 0.02   | 0.02   | t | 138456 | KEQFEFAL<br>TAVAEV           | Mus<br>musculu<br>s |
| 1 | 1.00 | 1 | 1 | -0.03 | -0.03  | -0.03  | -0.03  | -0.03  | t | 103550 | RIFYKDAF<br>AKHQELF          | Homo<br>sapiens     |
| 1 | 1.00 | 1 | 1 | -0.03 | -0.03  | -0.03  | -0.03  | -0.03  | t | 112371 | TYYCARM                      | Homo<br>sapiens     |
| 1 | 1.00 | 1 | 1 | -0.01 | -0.012 | -0.015 | -0.011 | -0.01  | t | 10510  | DTVIYSKY<br>GG               | Mus<br>musculu<br>s |
| 1 | 1.00 | 1 | 1 | -0.01 | -0.01  | -0.003 | -0.008 | -0.011 | t | 70816  | VRRRGDS<br>RGSLLSP           | Homo<br>sapiens     |
| 1 | 1.00 | 1 | 1 | -0.04 | -0.038 | -0.04  | -0.043 | -0.04  | t | 75409  | YPSGAWY<br>YVP               | Homo<br>sapiens     |
| 1 | 1.00 | 1 | 1 | 0.01  | 0.008  | 0.01   | 0.009  | 0.01   | t | 69899  | VLYREFDE                     | Mus<br>musculu<br>s |
| 1 | 1.00 | 1 | 1 | 0.01  | 0.01   | 0.01   | 0.01   | 0.01   | t | 156857 | DKSKKCEK<br>NCAPMV           | Gallus<br>gallus    |
| 1 | 1.00 | 1 | 1 | -0.01 | -0.01  | -0.01  | -0.01  | -0.01  | t | 153282 | PLRNTHPQ<br>AMQWNS<br>TTF    | Mus<br>musculu<br>s |
| 1 | 1.00 | 1 | 1 | 0.03  | 0.03   | 0.028  | 0.03   | 0.029  | t | 22280  | GSAMSRPI<br>IHFGSDYE<br>DRYY | Mus<br>musculu<br>s |
| 1 | 1.00 | 1 | 1 | -0.01 | -0.015 | -0.008 | -0.007 | -0.008 | t | 99675  | SNKGAIIGL<br>MVGGVVI<br>A    | Canis<br>lupus      |

|   |      |   |   |       |        |        |        |       |   |        |                         |                          |
|---|------|---|---|-------|--------|--------|--------|-------|---|--------|-------------------------|--------------------------|
| 1 | 1.00 | 1 | 1 | 0.05  | 0.05   | 0.055  | 0.044  | 0.044 | t | 115612 | GSLPQKA<br>QRPQDEN<br>G | Rattus<br>norvegicus     |
| 1 | 1.00 | 1 | 1 | 0.01  | 0.007  | 0.01   | 0.01   | 0.012 | t | 11814  | EENVEENV<br>EENV        | Oryctolagus<br>cuniculus |
| 1 | 1.00 | 1 | 1 | 0.04  | 0.043  | 0.043  | 0.04   | 0.04  | t | 97428  | KPTGSAAA                | Mus<br>musculus          |
| 1 | 1.00 | 1 | 1 | 0.03  | 0.032  | 0.03   | 0.027  | 0.03  | t | 51837  | QPGHLA                  | Cavia<br>porcellus       |
| 1 | 1.00 | 1 | 1 | -0.02 | -0.017 | -0.017 | -0.02  | -0.02 | t | 97157  | AAANYTTA                | Mus<br>musculus          |
| 1 | 1.00 | 1 | 1 | -0.02 | -0.017 | -0.017 | -0.02  | -0.02 | t | 97157  | AAANYTTA                | Mus<br>musculus          |
| 1 | 1.00 | 1 | 1 | 0     | 0      | 0      | 0      | 0.001 | t | 20051  | GGTHSQW<br>NKP          | Mus<br>musculus          |
| 1 | 1.00 | 1 | 1 | 0     | 0      | 0      | 0      | 0     | t | 58405  | SHRLLQTY<br>WSSA        | Homo<br>sapiens          |
| 1 | 1.00 | 1 | 1 | -0.02 | -0.016 | -0.009 | -0.013 | -0.02 | t | 138225 | QH NKSPN<br>LYWRS       | Homo<br>sapiens          |
| 1 | 1.00 | 1 | 1 | 0.01  | 0.01   | -0.002 | 0.01   | 0.011 | t | 51286  | QLAKDKV<br>NE           | Mus<br>musculus          |
| 1 | 1.00 | 1 | 1 | 0.02  | 0.02   | 0.018  | 0.017  | 0.019 | t | 99008  | SMPVNTP<br>GQFEDFFP     | Homo<br>sapiens          |
| 1 | 1.00 | 1 | 1 | -0.02 | -0.02  | -0.016 | -0.02  | -0.02 | t | 56061  | RTGLDFN                 | Homo<br>sapiens          |
| 1 | 1.00 | 1 | 1 | -0.01 | -0.008 | -0.005 | -0.011 | -0.01 | t | 135739 | QFCKNSA<br>D            | Homo<br>sapiens          |
| 1 | 1.00 | 1 | 1 | 0     | 0.004  | 0      | -0.003 | 0     | t | 118284 | DAYVLLSE<br>KKISS       | Homo<br>sapiens          |

|   |      |   |   |       |        |        |        |        |   |        |                              |                                  |
|---|------|---|---|-------|--------|--------|--------|--------|---|--------|------------------------------|----------------------------------|
| 1 | 1.00 | 1 | 1 | 0     | -0.003 | -0.003 | 0      | -0.002 | t | 120519 | FAGRLIELS<br>QEG             | Oryctola<br>gus<br>cuniculu<br>s |
| 1 | 1.00 | 1 | 1 | -0.06 | -0.06  | -0.069 | -0.058 | -0.06  | t | 36319  | LGSINQA<br>MVTRCEP<br>VVCYLY | Homo<br>sapiens                  |
| 1 | 1.00 | 1 | 1 | 0.03  | 0.03   | 0.033  | 0.03   | 0.03   | t | 98927  | PEKESPEK<br>ED               | Homo<br>sapiens                  |
| 1 | 1.00 | 1 | 1 | 0.01  | 0.009  | 0.008  | 0.011  | 0.011  | t | 40165  | LTSELPQW<br>LSANRAVK<br>PTGS | Homo<br>sapiens                  |
| 1 | 1.00 | 1 | 1 | 0.02  | 0.02   | 0.02   | 0.02   | 0.02   | t | 148885 | QQSEQIIP<br>QQ               | Homo<br>sapiens                  |
| 1 | 1.00 | 1 | 1 | 0.02  | 0.02   | 0.02   | 0.02   | 0.02   | t | 148854 | QQQFPEQ<br>SQQ               | Homo<br>sapiens                  |
| 1 | 1.00 | 1 | 1 | 0.02  | 0.02   | 0.02   | 0.02   | 0.02   | t | 124280 | HPLASSVS<br>A                | Homo<br>sapiens                  |
| 1 | 1.00 | 1 | 1 | 0.02  | 0.02   | 0.02   | 0.02   | 0.02   | t | 132934 | WGQNTS<br>M                  | Homo<br>sapiens                  |
| 1 | 1.00 | 1 | 1 | 0     | 0      | 0      | 0      | 0      | t | 147217 | QGFFQP                       | Homo<br>sapiens                  |
| 1 | 1.00 | 1 | 1 | 0     | 0      | 0      | 0      | 0      | t | 118490 | LKDKYKNI<br>GAKLV            | Homo<br>sapiens                  |
| 1 | 1.00 | 1 | 1 | 0     | 0      | 0      | 0      | 0      | t | 118490 | LKDKYKNI<br>GAKLV            | Homo<br>sapiens                  |
| 1 | 1.00 | 1 | 1 | 0     | 0      | 0      | 0      | 0      | t | 131078 | SQTTANAS<br>CPEGT            | Rattus<br>norvegic<br>us         |
| 1 | 1.00 | 1 | 1 | 0     | 0      | 0      | 0      | 0      | t | 108557 | NLFTQTGT<br>P                | Homo<br>sapiens                  |
| 1 | 1.00 | 1 | 1 | 0     | 0      | 0      | 0      | 0      | t | 113750 | QGQQGQ<br>QPGQGQP<br>G       | Homo<br>sapiens                  |
| 1 | 1.00 | 1 | 1 | 0     | 0      | 0      | 0      | 0      | t | 57704  | SEYPPQPS<br>S                | Homo<br>sapiens                  |
| 1 | 1.00 | 1 | 1 | 0     | 0      | 0      | 0      | 0      | t | 50476  | QDIQPAIQ<br>SSWPKL           | Homo<br>sapiens                  |
| 1 | 1.00 | 1 | 1 | 0     | 0      | 0      | 0      | 0      | t | 50913  | QGMQLAE<br>QFKQKAL<br>GLLQQA | Homo<br>sapiens                  |



|   |      |   |   |       |        |       |       |       |   |        |                              |                                  |
|---|------|---|---|-------|--------|-------|-------|-------|---|--------|------------------------------|----------------------------------|
| 1 | 1.00 | 1 | 1 | 0     | 0      | 0     | 0     | 0     | t | 49297  | PSAPPLPH<br>VVDLPQLG<br>PRR  | Cavia<br>porcellu<br>s           |
| 1 | 1.00 | 1 | 1 | 0     | 0      | 0     | 0     | 0     | t | 39381  | LSGKPAVI<br>PDRELLYR<br>EFDE | Homo<br>sapiens                  |
| 1 | 1.00 | 1 | 1 | 0     | 0      | 0     | 0     | 0     | t | 46833  | PAIVPDKE<br>VLYQQYDE<br>MEEC | Homo<br>sapiens                  |
| 1 | 1.00 | 1 | 1 | 0     | 0      | 0     | 0     | 0     | t | 39383  | LSGKPAVI<br>PDREVLQY<br>GFDE | Homo<br>sapiens                  |
| 1 | 1.00 | 1 | 1 | 0     | 0      | 0     | 0     | 0     | t | 32371  | KMNMHM<br>ENVAWIM<br>KNQNLFK | Aotus<br>nancyma<br>ae           |
| 1 | 1.00 | 1 | 1 | 0     | 0      | 0     | 0     | 0     | t | 34752  | LAEQFKQK<br>ALGLLQTA<br>TRQA | Homo<br>sapiens                  |
| 1 | 1.00 | 1 | 1 | 0     | 0      | 0     | 0     | 0     | t | 32370  | KMNMHLE<br>NVPWIMN<br>KQNLFK | Aotus<br>nancyma<br>ae           |
| 1 | 1.00 | 1 | 1 | -0.02 | -0.02  | -0.02 | -0.02 | -0.02 | t | 120691 | KLATNLIKS<br>G               | Mus<br>musculu<br>s              |
| 1 | 1.00 | 1 | 1 | -0.02 | -0.02  | -0.02 | -0.02 | -0.02 | t | 103007 | AAQAVQT<br>AAQNGVR<br>A      | Homo<br>sapiens                  |
| 1 | 1.00 | 1 | 1 | -0.02 | -0.02  | -0.02 | -0.02 | -0.02 | t | 66213  | TSGFASLF<br>KFGPSQK          | Mus<br>musculu<br>s              |
| 1 | 1.00 | 1 | 1 | -0.02 | -0.02  | -0.02 | -0.02 | -0.02 | t | 79888  | KPYEVTPT<br>RMLV             | Mus<br>musculu<br>s              |
| 1 | 1.00 | 1 | 1 | -0.02 | -0.02  | -0.02 | -0.02 | -0.02 | t | 79888  | KPYEVTPT<br>RMLV             | Mus<br>musculu<br>s              |
| 1 | 1.00 | 1 | 1 | -0.02 | -0.023 | -0.02 | -0.02 | -0.02 | t | 79888  | KPYEVTPT<br>RMLV             | Oryctola<br>gus<br>cuniculu<br>s |
| 1 | 1.00 | 1 | 1 | 0     | 0      | 0.004 | 0     | 0     | t | 9979   | DRGWGN<br>GC                 | Oryctola<br>gus<br>cuniculu<br>s |

|   |      |   |   |       |        |        |        |        |   |        |                              |                       |
|---|------|---|---|-------|--------|--------|--------|--------|---|--------|------------------------------|-----------------------|
| 1 | 1.00 | 1 | 1 | 0     | 0.004  | 0      | 0.007  | -0.001 | t | 131114 | TQLDELLT<br>EHRMTW<br>DPAQPP | Homo sapiens          |
| 1 | 1.00 | 1 | 1 | 0     | 0      | 0      | 0      | 0      | t | 7000   | CSGFVGLF<br>SPGPSQRI         | Mus musculus          |
| 1 | 1.00 | 1 | 1 | 0.01  | 0.01   | 0.01   | 0.014  | 0.012  | t | 118131 | SEESDDD<br>MGFGLFD           | Homo sapiens          |
| 1 | 1.00 | 1 | 1 | 0.04  | 0.044  | 0.039  | 0.041  | 0.04   | t | 32273  | KLYTSVEN<br>AQQDKGI<br>AIPHD | Homo sapiens          |
| 1 | 1.00 | 1 | 1 | 0.04  | 0.042  | 0.039  | 0.041  | 0.04   | t | 32273  | KLYTSVEN<br>AQQDKGI<br>AIPHD | Homo sapiens          |
| 1 | 1.00 | 1 | 1 | 0.02  | 0.02   | 0.02   | 0.016  | 0.02   | t | 135647 | DAKPGQF<br>P                 | Homo sapiens          |
| 1 | 1.00 | 1 | 1 | -0.04 | -0.038 | -0.049 | -0.043 | -0.04  | t | 105700 | CPSTYEPP<br>AQQGRRH          | Homo sapiens          |
| 1 | 1.00 | 1 | 1 | 0.07  | 0.07   | 0.063  | 0.07   | 0.07   | t | 119432 | AREETDKE<br>EPASKQQK<br>TENG | Homo sapiens          |
| 1 | 1.00 | 1 | 1 | -0.01 | -0.005 | 0      | -0.007 | -0.01  | t | 42656  | MSRTFLM<br>KAHGIES<br>W      | Homo sapiens          |
| 1 | 1.00 | 1 | 1 | 0.03  | 0.034  | 0.035  | 0.033  | 0.03   | t | 122145 | LTLFPSRDT<br>PLSSQTD         | Homo sapiens          |
| 1 | 1.00 | 1 | 1 | 0.02  | 0.02   | 0.025  | 0.026  | 0.023  | t | 115832 | KTGQFL                       | Homo sapiens          |
| 1 | 1.00 | 1 | 1 | 0.02  | 0.018  | 0.025  | 0.02   | 0.019  | t | 118285 | DAYVLLSE<br>KKISSIQSIV       | Oryctolagus cuniculus |
| 1 | 1.00 | 1 | 1 | -0.01 | -0.008 | -0.01  | -0.009 | -0.01  | t | 9935   | DRAAGQP<br>AGDRAAG<br>QPAGDR | Homo sapiens          |
| 1 | 1.00 | 1 | 1 | -0.01 | -0.008 | -0.01  | -0.009 | -0.01  | t | 9935   | DRAAGQP<br>AGDRAAG<br>QPAGDR | Homo sapiens          |
| 1 | 1.00 | 1 | 1 | 0     | -0.004 | -0.004 | -0.001 | 0      | t | 58273  | SGTVQSA<br>HLIIRFDE          | Oryctolagus cuniculus |

|   |      |   |   |       |        |        |        |       |   |        |                              |                                  |
|---|------|---|---|-------|--------|--------|--------|-------|---|--------|------------------------------|----------------------------------|
| 1 | 1.00 | 1 | 1 | -0.05 | -0.048 | -0.045 | -0.047 | -0.05 | t | 652    | ADDVILHT<br>PGCVPC           | Homo<br>sapiens                  |
| 1 | 1.00 | 1 | 1 | -0.01 | -0.01  | -0.01  | -0.01  | -0.01 | t | 151021 | LCKLRGVA<br>PLHL             | Mus<br>musculu<br>s              |
| 1 | 1.00 | 1 | 1 | 0.04  | 0.04   | 0.033  | 0.034  | 0.038 | t | 50011  | PVVVHITD<br>DNE              | Homo<br>sapiens                  |
| 1 | 1.00 | 1 | 1 | 0     | 0      | 0      | 0      | 0     | t | 122406 | IEIGLEGKG<br>FEPTLEALF<br>GK | Homo<br>sapiens                  |
| 1 | 1.00 | 1 | 1 | 0     | 0      | 0      | 0      | 0     | t | 104443 | DAEFRHDS<br>GYE              | Mus<br>musculu<br>s              |
| 1 | 1.00 | 1 | 1 | 0     | 0      | 0      | 0      | 0     | t | 107428 | GRGDSVV<br>YGLR              | Mus<br>musculu<br>s              |
| 1 | 1.00 | 1 | 1 | 0     | 0      | 0      | 0      | 0     | t | 102384 | EFRH                         | Mus<br>musculu<br>s              |
| 1 | 1.00 | 1 | 1 | 0     | 0      | 0      | 0      | 0     | t | 104443 | DAEFRHDS<br>GYE              | Mus<br>musculu<br>s              |
| 1 | 1.00 | 1 | 1 | 0     | 0      | 0      | 0      | 0     | t | 104443 | DAEFRHDS<br>GYE              | Mus<br>musculu<br>s              |
| 1 | 1.00 | 1 | 1 | 0     | 0      | 0      | 0      | 0     | t | 59024  | SLAYGLR                      | Oryctola<br>gus<br>cuniculu<br>s |
| 1 | 1.00 | 1 | 1 | 0     | 0      | 0      | 0      | 0     | t | 7491   | DAEFRHDS<br>GYEVHHQ<br>K     | Mus<br>musculu<br>s              |
| 1 | 1.00 | 1 | 1 | 0     | 0      | 0      | 0      | 0     | t | 7491   | DAEFRHDS<br>GYEVHHQ<br>K     | Mus<br>musculu<br>s              |
| 1 | 1.00 | 1 | 1 | 0     | 0.002  | -0.005 | 0.001  | 0     | t | 53073  | RAAVCTR<br>GVAKAVD<br>FIPVEN | Homo<br>sapiens                  |
| 1 | 1.00 | 1 | 1 | -0.03 | -0.028 | -0.033 | -0.027 | -0.03 | t | 44571  | NKPPNKP<br>NNDFH             | Homo<br>sapiens                  |
| 1 | 1.00 | 1 | 1 | 0.01  | 0.012  | 0.006  | 0.011  | 0.012 | t | 137824 | DQAVSLG<br>Q                 | Homo<br>sapiens                  |
| 1 | 1.00 | 1 | 1 | 0.03  | 0.03   | 0.03   | 0.03   | 0.03  | t | 135914 | EEIAQVATI<br>SAN             | Homo<br>sapiens                  |

|   |      |   |   |       |       |       |       |       |   |        |                     |                       |
|---|------|---|---|-------|-------|-------|-------|-------|---|--------|---------------------|-----------------------|
| 1 | 1.00 | 1 | 1 | 0.03  | 0.03  | 0.03  | 0.03  | 0.03  | t | 135681 | GKNCELDV            | Homo sapiens          |
| 1 | 1.00 | 1 | 1 | 0.03  | 0.03  | 0.03  | 0.03  | 0.03  | t | 135633 | ADNKVVCS            | Homo sapiens          |
| 1 | 1.00 | 1 | 1 | 0.03  | 0.03  | 0.03  | 0.03  | 0.03  | t | 12537  | EINTLQNNQ           | Anas platyrhynchos    |
| 1 | 1.00 | 1 | 1 | 0.01  | 0.01  | 0.01  | 0.01  | 0.01  | t | 141575 | WKAQKRFMKKSG        | Rattus                |
| 1 | 1.00 | 1 | 1 | 0.01  | 0.01  | 0.01  | 0.01  | 0.01  | t | 137748 | DTQLTLEALKLV        | Mus musculus          |
| 1 | 1.00 | 1 | 1 | 0.01  | 0.01  | 0.01  | 0.01  | 0.01  | t | 123280 | GYWKIRGLQ           | Ovis aries            |
| 1 | 1.00 | 1 | 1 | 0.01  | 0.01  | 0.01  | 0.01  | 0.01  | t | 115992 | TEDELQDKIH          | Homo sapiens          |
| 1 | 1.00 | 1 | 1 | 0.01  | 0.01  | 0.01  | 0.01  | 0.01  | t | 108215 | WVAMHPQGD           | Homo sapiens          |
| 1 | 1.00 | 1 | 1 | 0.01  | 0.01  | 0.01  | 0.01  | 0.01  | t | 103716 | VRERMTTQDVEAITP     | Homo sapiens          |
| 1 | 1.00 | 1 | 1 | 0.01  | 0.01  | 0.01  | 0.01  | 0.01  | t | 89783  | TVEVEMTASTAVWDEWSP  | Aotus                 |
| 1 | 1.00 | 1 | 1 | 0.01  | 0.01  | 0.01  | 0.01  | 0.01  | t | 41331  | MEECASRAALLEEGQRIEM | Homo sapiens          |
| 1 | 1.00 | 1 | 1 | -0.01 | -0.01 | -0.01 | -0.01 | -0.01 | t | 158596 | KFGTALW             | Homo sapiens          |
| 1 | 1.00 | 1 | 1 | -0.01 | -0.01 | -0.01 | -0.01 | -0.01 | t | 152777 | LLNIDKDIRK          | Homo sapiens          |
| 1 | 1.00 | 1 | 1 | -0.01 | -0.01 | -0.01 | -0.01 | -0.01 | t | 99975  | EEKELLKRIQ          | Mus musculus          |
| 1 | 1.00 | 1 | 1 | -0.01 | -0.01 | -0.01 | -0.01 | -0.01 | t | 99975  | EEKELLKRIQ          | Mus musculus          |
| 1 | 1.00 | 1 | 1 | -0.01 | -0.01 | -0.01 | -0.01 | -0.01 | t | 93679  | READFAKEVP          | Ovis aries            |
| 1 | 1.00 | 1 | 1 | -0.01 | -0.01 | -0.01 | -0.01 | -0.01 | t | 79566  | HGLHLPV             | Oryctolagus cuniculus |

|   |      |   |   |       |        |        |        |        |   |        |                              |                                  |
|---|------|---|---|-------|--------|--------|--------|--------|---|--------|------------------------------|----------------------------------|
| 1 | 1.00 | 1 | 1 | -0.01 | -0.01  | -0.01  | -0.01  | -0.01  | t | 91002  | YTPANYAN<br>VP               | Homo<br>sapiens                  |
| 1 | 1.00 | 1 | 1 | -0.01 | -0.01  | -0.01  | -0.01  | -0.01  | t | 92810  | GGKGNDL<br>LHG               | Ovis<br>aries                    |
| 1 | 1.00 | 1 | 1 | -0.01 | -0.01  | -0.01  | -0.01  | -0.01  | t | 57704  | SEYPPQPS<br>S                | Homo<br>sapiens                  |
| 1 | 1.00 | 1 | 1 | -0.01 | -0.01  | -0.01  | -0.01  | -0.01  | t | 30478  | KEKMVLK<br>DGANTQV<br>V      | Homo<br>sapiens                  |
| 1 | 1.00 | 1 | 1 | -0.03 | -0.03  | -0.03  | -0.03  | -0.03  | t | 118449 | KFGADAR<br>ALMLQG            | Homo<br>sapiens                  |
| 1 | 1.00 | 1 | 1 | -0.01 | -0.006 | -0.014 | -0.01  | -0.008 | t | 13438  | ENANANN<br>AV                | Mus<br>musculu<br>s              |
| 1 | 1.00 | 1 | 1 | 0.03  | 0.032  | 0.031  | 0.031  | 0.031  | t | 20069  | GGVFTS                       | Homo<br>sapiens                  |
| 1 | 1.00 | 1 | 1 | -0.01 | -0.01  | -0.01  | -0.01  | -0.011 | t | 119382 | VISCAKDAI<br>EDEEGSC         | Oryctola<br>gus<br>cuniculu<br>s |
| 1 | 1.00 | 1 | 1 | 0.01  | 0.009  | 0.011  | 0.007  | 0.01   | t | 99484  | NALRRPFY<br>SNAPQEI          | Homo<br>sapiens                  |
| 1 | 1.00 | 1 | 1 | 0.01  | 0.01   | 0.011  | 0.011  | 0.01   | t | 8218   | DEYDDAA<br>DAAGDRA<br>P      | Mus<br>musculu<br>s              |
| 1 | 1.00 | 1 | 1 | -0.03 | -0.031 | -0.03  | -0.026 | -0.03  | t | 72515  | WGRRLMI<br>GTAAAVVL<br>PGLVG | Homo<br>sapiens                  |
| 1 | 1.00 | 1 | 1 | 0.03  | 0.03   | 0.023  | 0.03   | 0.031  | t | 131652 | SFDSSNPE<br>YFDGYWG<br>YS    | Oryctola<br>gus<br>cuniculu<br>s |
| 1 | 1.00 | 1 | 1 | 0     | 0      | 0      | 0      | 0.001  | t | 101554 | DPLAQQS                      | Mus<br>musculu<br>s              |
| 1 | 1.00 | 1 | 1 | 0.02  | 0.02   | 0.009  | 0.016  | 0.02   | t | 75152  | YNGEEYLIL<br>SARDVL          | Homo<br>sapiens                  |

|   |      |   |   |       |        |        |        |        |   |        |                              |                                  |
|---|------|---|---|-------|--------|--------|--------|--------|---|--------|------------------------------|----------------------------------|
| 1 | 1.00 | 1 | 1 | 0.01  | 0.011  | 0.01   | 0.009  | 0.01   | t | 147995 | NFGDIGV<br>QQ                | Oryctola<br>gus<br>cuniculu<br>s |
| 1 | 1.00 | 1 | 1 | 0     | 0      | 0      | 0      | 0      | t | 22220  | GRTWAQP<br>G                 | Homo<br>sapiens                  |
| 1 | 1.00 | 1 | 1 | 0.01  | 0.01   | 0.01   | 0.014  | 0.012  | t | 118281 | CPLNIGSQ<br>GSTDY            | Homo<br>sapiens                  |
| 1 | 1.00 | 1 | 1 | 0     | 0      | 0      | 0      | 0.001  | t | 50931  | QGP GAPQ<br>GPGAPQG<br>PGAP  | Mus<br>musculu<br>s              |
| 1 | 1.00 | 1 | 1 | 0.04  | 0.04   | 0.047  | 0.043  | 0.04   | t | 55174  | RPIDDFDQ<br>GWGPITY          | Homo<br>sapiens                  |
| 1 | 1.00 | 1 | 1 | 0.04  | 0.04   | 0.047  | 0.043  | 0.04   | t | 55174  | RPIDDFDQ<br>GWGPITY          | Homo<br>sapiens                  |
| 1 | 1.00 | 1 | 1 | 0     | 0      | 0.002  | 0      | -0.001 | t | 55255  | RPPKWVS<br>AQ                | Mus<br>musculu<br>s              |
| 1 | 1.00 | 1 | 1 | -0.01 | -0.008 | -0.016 | -0.013 | -0.01  | t | 102265 | YSCGENSF<br>MD               | Homo<br>sapiens                  |
| 1 | 1.00 | 1 | 1 | 0     | -0.001 | 0      | 0.001  | 0.001  | t | 40167  | LTSGHLKC<br>RVKMEKL<br>QLKGT | Homo<br>sapiens                  |
| 1 | 1.00 | 1 | 1 | 0     | 0      | 0      | 0.001  | 0.001  | t | 60116  | SPLLGCIGS<br>TCAE            | Mus<br>musculu<br>s              |
| 1 | 1.00 | 1 | 1 | 0.02  | 0.022  | 0.013  | 0.021  | 0.02   | t | 78500  | RASLSTW<br>HVLSPNV<br>SVPSS  | Homo<br>sapiens                  |
| 1 | 1.00 | 1 | 1 | -0.02 | -0.016 | -0.02  | -0.019 | -0.02  | t | 6355   | CGSVFLVG<br>QLFTFSPR<br>RHWT | Homo<br>sapiens                  |
| 1 | 1.00 | 1 | 1 | 0.01  | 0.007  | 0.009  | 0.01   | 0.01   | t | 45667  | NRDQGRK<br>PTPPTPP           | Oryctola<br>gus<br>cuniculu<br>s |
| 1 | 1.00 | 1 | 1 | -0.02 | -0.02  | -0.02  | -0.02  | -0.02  | t | 144677 | GTHPTLVV<br>HSREL            | Mus<br>musculu<br>s              |
| 1 | 1.00 | 1 | 1 | -0.02 | -0.02  | -0.02  | -0.02  | -0.02  | t | 144677 | GTHPTLVV<br>HSREL            | Mus<br>musculu<br>s              |
| 1 | 1.00 | 1 | 1 | -0.02 | -0.02  | -0.02  | -0.02  | -0.02  | t | 144677 | GTHPTLVV<br>HSREL            | Mus<br>musculu<br>s              |

|   |      |   |   |       |        |        |        |        |   |        |                              |                           |
|---|------|---|---|-------|--------|--------|--------|--------|---|--------|------------------------------|---------------------------|
| 1 | 1.00 | 1 | 1 | 0     | 0      | -0.003 | 0.001  | 0      | t | 65635  | TPLFKIIGD<br>EVGLRT          | Homo<br>sapiens           |
| 1 | 1.00 | 1 | 1 | 0     | -0.001 | -0.005 | -0.001 | 0      | t | 67297  | TWSGKFP<br>T                 | Anas<br>platyrhy<br>nchos |
| 1 | 1.00 | 1 | 1 | -0.04 | -0.038 | -0.041 | -0.033 | -0.04  | t | 134783 | RKLQKSTH<br>LLIRKLP          | Homo<br>sapiens           |
| 1 | 1.00 | 1 | 1 | -0.02 | -0.02  | -0.02  | -0.02  | -0.02  | t | 20656  | GKPALVPD<br>K                | Homo<br>sapiens           |
| 1 | 1.00 | 1 | 1 | 0.02  | 0.02   | 0.024  | 0.02   | 0.02   | t | 83234  | HSKEIPALT<br>AVETGA          | Homo<br>sapiens           |
| 1 | 1.00 | 1 | 1 | 0.02  | 0.018  | 0.02   | 0.019  | 0.02   | t | 27698  | INNLNKLN<br>EEKAN            | Mus<br>musculu<br>s       |
| 1 | 1.00 | 1 | 1 | -0.01 | -0.012 | -0.015 | -0.011 | -0.01  | t | 3562   | APGEKDG<br>KIVPA             | Mus<br>musculu<br>s       |
| 1 | 1.00 | 1 | 1 | -0.02 | -0.006 | -0.026 | -0.02  | -0.022 | t | 19266  | GEFPRHVK<br>LKNEIENLL<br>DQV | Mus<br>musculu<br>s       |
| 1 | 1.00 | 1 | 1 | -0.02 | -0.022 | -0.02  | -0.017 | -0.02  | t | 52121  | QQQPFP<br>QQP                | Mus<br>musculu<br>s       |
| 1 | 1.00 | 1 | 1 | 0     | 0.003  | 0.01   | 0      | 0.001  | t | 66766  | TTPGPWF                      | Mus<br>musculu<br>s       |
| 1 | 1.00 | 1 | 1 | -0.01 | -0.008 | -0.012 | -0.013 | -0.01  | t | 32826  | KPPKYHPD<br>VP               | Homo<br>sapiens           |
| 1 | 1.00 | 1 | 1 | 0.06  | 0.06   | 0.06   | 0.06   | 0.06   | t | 99945  | DIRDSLSEE<br>E               | Mus<br>musculu<br>s       |
| 1 | 1.00 | 1 | 1 | 0.04  | 0.04   | 0.04   | 0.04   | 0.04   | t | 157158 | DDQCQRQ<br>LQR               | Homo<br>sapiens           |
| 1 | 1.00 | 1 | 1 | 0.02  | 0.02   | 0.02   | 0.02   | 0.02   | t | 105836 | GLRPGEG<br>AY                | Mus<br>musculu<br>s       |
| 1 | 1.00 | 1 | 1 | 0     | 0      | 0      | 0      | 0      | t | 123182 | FLGDRQYL<br>I                | Ovis<br>aries             |
| 1 | 1.00 | 1 | 1 | 0     | 0      | 0      | 0      | 0      | t | 123076 | DFMLYETL<br>D                | Ovis<br>aries             |

|   |      |   |   |       |       |       |       |       |   |        |                              |                        |
|---|------|---|---|-------|-------|-------|-------|-------|---|--------|------------------------------|------------------------|
| 1 | 1.00 | 1 | 1 | 0     | 0     | 0     | 0     | 0     | t | 121684 | NVTCLMV<br>ALPLVDSF          | Mus<br>musculu<br>s    |
| 1 | 1.00 | 1 | 1 | 0     | 0     | 0     | 0     | 0     | t | 121684 | NVTCLMV<br>ALPLVDSF          | Mus<br>musculu<br>s    |
| 1 | 1.00 | 1 | 1 | 0     | 0.003 | 0     | 0     | 0     | t | 119857 | FAQRLMR<br>YWA               | Mus<br>musculu<br>s    |
| 1 | 1.00 | 1 | 1 | 0     | 0     | 0     | 0     | 0     | t | 110583 | GAPGERG<br>PSGLAGPK          | Mus<br>musculu<br>s    |
| 1 | 1.00 | 1 | 1 | 0     | 0     | 0     | 0     | 0     | t | 70397  | VPNLRGD<br>RQVLAQK<br>VARTLP | Cavia<br>porcellu<br>s |
| 1 | 1.00 | 1 | 1 | 0     | 0     | 0     | 0     | 0     | t | 51939  | QPQQTFP<br>QPQ               | Mus<br>musculu<br>s    |
| 1 | 1.00 | 1 | 1 | 0     | 0     | 0     | 0     | 0     | t | 51939  | QPQQTFP<br>QPQ               | Mus<br>musculu<br>s    |
| 1 | 1.00 | 1 | 1 | 0     | 0     | 0     | 0     | 0     | t | 53336  | RDEVDFCV<br>GLNSFV           | Homo<br>sapiens        |
| 1 | 1.00 | 1 | 1 | 0     | 0     | 0     | 0     | 0     | t | 55306  | RPQQPFP<br>QPQ               | Mus<br>musculu<br>s    |
| 1 | 1.00 | 1 | 1 | 0     | 0     | 0     | 0     | 0     | t | 55271  | RPPRYLSQ<br>L                | Mus<br>musculu<br>s    |
| 1 | 1.00 | 1 | 1 | 0     | 0     | 0     | 0     | 0     | t | 4451   | ASHLPYIE<br>QGMHLAE<br>QFKQK | Homo<br>sapiens        |
| 1 | 1.00 | 1 | 1 | -0.02 | -0.02 | -0.02 | -0.02 | -0.02 | t | 149315 | FLPQQPYP<br>QP               | Mus<br>musculu<br>s    |
| 1 | 1.00 | 1 | 1 | -0.02 | -0.02 | -0.02 | -0.02 | -0.02 | t | 132936 | WGSNHA<br>Q                  | Homo<br>sapiens        |
| 1 | 1.00 | 1 | 1 | -0.02 | -0.02 | -0.02 | -0.02 | -0.02 | t | 115856 | LSQSKVLP<br>VP               | Homo<br>sapiens        |
| 1 | 1.00 | 1 | 1 | -0.02 | -0.02 | -0.02 | -0.02 | -0.02 | t | 78267  | RYPSYGLN<br>YYQQKPV<br>ALINN | Homo<br>sapiens        |
| 1 | 1.00 | 1 | 1 | -0.02 | -0.02 | -0.02 | -0.02 | -0.02 | t | 93947  | SRNVLVAP<br>TS               | Ovis<br>aries          |



|   |      |   |   |       |        |        |        |        |   |        |                              |                                  |
|---|------|---|---|-------|--------|--------|--------|--------|---|--------|------------------------------|----------------------------------|
| 1 | 1.00 | 1 | 1 | -0.02 | -0.02  | -0.02  | -0.02  | -0.02  | t | 10781  | DVVSKLPL<br>AVMG             | Homo<br>sapiens                  |
| 1 | 1.00 | 1 | 1 | 0.02  | 0.03   | 0.02   | 0.019  | 0.02   | t | 37831  | LLSTTQW<br>QVLPC             | Pan<br>troglody<br>tes           |
| 1 | 1.00 | 1 | 1 | 0.04  | 0.04   | 0.04   | 0.04   | 0.038  | t | 118546 | PAGGAVA<br>VSAAPGSA          | Homo<br>sapiens                  |
| 1 | 1.00 | 1 | 1 | -0.02 | -0.016 | -0.02  | -0.019 | -0.021 | t | 67697  | VANNTRL<br>WVYCGNG<br>TPNELG | Homo<br>sapiens                  |
| 1 | 1.00 | 1 | 1 | 0.01  | 0.01   | 0.01   | 0.01   | 0.012  | t | 99209  | ELFTNR                       | Oryctola<br>gus<br>cuniculu<br>s |
| 1 | 1.00 | 1 | 1 | -0.02 | -0.02  | -0.015 | -0.02  | -0.02  | t | 62997  | TASNKNR<br>GIIKTFS           | Mus<br>musculu<br>s              |
| 1 | 1.00 | 1 | 1 | 0     | 0      | 0      | 0      | 0      | t | 149300 | ELDKWNS<br>L                 | Homo<br>sapiens                  |
| 1 | 1.00 | 1 | 1 | 0.04  | 0.04   | 0.038  | 0.04   | 0.04   | t | 66751  | TTPAQGTS<br>M                | Mus<br>musculu<br>s              |
| 1 | 1.00 | 1 | 1 | 0.04  | 0.036  | 0.038  | 0.037  | 0.04   | t | 62448  | SWGGDPC<br>AQPHEPG<br>SYTNV  | Oryctola<br>gus<br>cuniculu<br>s |
| 1 | 1.00 | 1 | 1 | 0.06  | 0.06   | 0.06   | 0.067  | 0.063  | t | 119908 | GNIGIDVE<br>DEDSDEDE<br>F    | Homo<br>sapiens                  |
| 1 | 1.00 | 1 | 1 | -0.02 | -0.021 | -0.026 | -0.021 | -0.02  | t | 26227  | IGFTLPIILK<br>ALYM           | Myodes<br>glareolu<br>s          |
| 1 | 1.00 | 1 | 1 | 0.05  | 0.05   | 0.048  | 0.053  | 0.05   | t | 58196  | SGPSGTSP<br>GTSGPSG          | Homo<br>sapiens                  |
| 1 | 1.00 | 1 | 1 | -0.01 | -0.01  | -0.01  | -0.01  | -0.009 | t | 135833 | CDGWML<br>GECILV             | Mus<br>musculu<br>s              |
| 1 | 1.00 | 1 | 1 | -0.01 | -0.01  | -0.01  | -0.01  | -0.009 | t | 135833 | CDGWML<br>GECILV             | Mus<br>musculu<br>s              |

|   |      |   |   |       |        |        |        |        |   |        |                              |                                  |
|---|------|---|---|-------|--------|--------|--------|--------|---|--------|------------------------------|----------------------------------|
| 1 | 1.00 | 1 | 1 | 0     | 0.002  | 0      | -0.001 | 0      | t | 149317 | FQPQQLP<br>QFE               | Homo<br>sapiens                  |
| 1 | 1.00 | 1 | 1 | 0.02  | 0.018  | 0.02   | 0.019  | 0.02   | t | 48001  | PITNDQKK                     | Mus<br>musculu<br>s              |
| 1 | 1.00 | 1 | 1 | -0.03 | -0.027 | -0.03  | -0.03  | -0.03  | t | 141073 | REGVRWR<br>VMAIQ             | Mus<br>musculu<br>s              |
| 1 | 1.00 | 1 | 1 | 0.01  | 0.01   | 0.003  | 0.01   | 0.013  | t | 130585 | QKKIRGILE                    | Mus<br>musculu<br>s              |
| 1 | 1.00 | 1 | 1 | -0.01 | -0.008 | -0.012 | -0.007 | -0.008 | t | 48351  | PLGVTR                       | Homo<br>sapiens                  |
| 1 | 1.00 | 1 | 1 | 0     | 0.002  | -0.011 | 0.001  | -0.001 | t | 58366  | SHIECRKPY<br>KELRLEVG<br>KQR | Homo<br>sapiens                  |
| 1 | 1.00 | 1 | 1 | -0.02 | -0.02  | -0.02  | -0.02  | -0.019 | t | 118127 | SDDDMGF<br>GLFD              | Homo<br>sapiens                  |
| 1 | 1.00 | 1 | 1 | 0.01  | 0.012  | 0.013  | 0.011  | 0.01   | t | 16060  | FGSLGG                       | Homo<br>sapiens                  |
| 1 | 1.00 | 1 | 1 | 0.03  | 0.03   | 0.03   | 0.03   | 0.03   | t | 92761  | FTSSNDSR<br>NV               | Ovis<br>aries                    |
| 1 | 1.00 | 1 | 1 | 0.01  | 0.01   | 0.01   | 0.01   | 0.01   | t | 149416 | PQQPISQ<br>QQQ               | Homo<br>sapiens                  |
| 1 | 1.00 | 1 | 1 | 0.01  | 0.01   | 0.01   | 0.01   | 0.01   | t | 149101 | SFTRVVTD<br>VYRPRLS          | Rattus<br>norvegic<br>us         |
| 1 | 1.00 | 1 | 1 | 0.01  | 0.01   | 0.01   | 0.01   | 0.01   | t | 138210 | PAAPAPN<br>DPNAAPP           | Oryctola<br>gus<br>cuniculu<br>s |
| 1 | 1.00 | 1 | 1 | 0.01  | 0.01   | 0.01   | 0.01   | 0.01   | t | 107687 | WYVDGV<br>Q                  | Homo<br>sapiens                  |
| 1 | 1.00 | 1 | 1 | 0.01  | 0.01   | 0.01   | 0.01   | 0.01   | t | 101932 | NNGGCDA<br>DA                | Homo<br>sapiens                  |
| 1 | 1.00 | 1 | 1 | 0.01  | 0.01   | 0.01   | 0.01   | 0.01   | t | 78228  | PHANMTH<br>I                 | Homo<br>sapiens                  |

|   |      |   |   |       |        |        |        |        |   |        |                              |                                  |
|---|------|---|---|-------|--------|--------|--------|--------|---|--------|------------------------------|----------------------------------|
| 1 | 1.00 | 1 | 1 | 0.01  | 0.01   | 0.01   | 0.01   | 0.01   | t | 49106  | PQQQFPQ<br>PQQ               | Mus<br>musculu<br>s              |
| 1 | 1.00 | 1 | 1 | 0.01  | 0.014  | 0.01   | 0.01   | 0.01   | t | 9477   | DNIHVKM<br>FKVIENND<br>KSELI | Aotus<br>nancyma<br>ae           |
| 1 | 1.00 | 1 | 1 | -0.01 | -0.012 | -0.01  | -0.01  | -0.01  | t | 141779 | WKQYNPT<br>GKGIDDA<br>NK     | Oryctola<br>gus<br>cuniculu<br>s |
| 1 | 1.00 | 1 | 1 | -0.01 | -0.01  | -0.01  | -0.01  | -0.01  | t | 149440 | QQQQQPL<br>SQV               | Homo<br>sapiens                  |
| 1 | 1.00 | 1 | 1 | -0.01 | -0.01  | -0.01  | -0.01  | -0.01  | t | 149440 | QQQQQPL<br>SQV               | Mus<br>musculu<br>s              |
| 1 | 1.00 | 1 | 1 | -0.01 | -0.01  | -0.01  | -0.01  | -0.01  | t | 123861 | YEEHLYGR<br>N                | Ovis<br>aries                    |
| 1 | 1.00 | 1 | 1 | -0.01 | -0.01  | -0.01  | -0.01  | -0.01  | t | 124276 | HPLAPPHP<br>S                | Homo<br>sapiens                  |
| 1 | 1.00 | 1 | 1 | -0.01 | -0.01  | -0.01  | -0.01  | -0.01  | t | 106883 | SWTPYPDL<br>LSPR             | Mus<br>musculu<br>s              |
| 1 | 1.00 | 1 | 1 | -0.01 | -0.01  | -0.01  | -0.01  | -0.01  | t | 115281 | HPHLSFM<br>AIPPKKNQ<br>DKTEI | Homo<br>sapiens                  |
| 1 | 1.00 | 1 | 1 | -0.01 | -0.01  | -0.01  | -0.01  | -0.01  | t | 79361  | RCQALSRL<br>FREKCT           | Mus<br>musculu<br>s              |
| 1 | 1.00 | 1 | 1 | 0.01  | 0.01   | 0.01   | 0.01   | 0.009  | t | 133538 | CNKPGERT<br>C                | Mus<br>musculu<br>s              |
| 1 | 1.00 | 1 | 1 | -0.01 | -0.008 | -0.005 | -0.007 | -0.008 | t | 102563 | KKRPPKG                      | Homo<br>sapiens                  |
| 1 | 1.00 | 1 | 1 | -0.02 | -0.018 | -0.022 | -0.017 | -0.02  | t | 61792  | STNPKPQR<br>KTKRNTNR<br>RPQD | Homo<br>sapiens                  |
| 1 | 1.00 | 1 | 1 | -0.02 | -0.02  | -0.008 | -0.02  | -0.021 | t | 104461 | EFRHDS                       | Mus<br>musculu<br>s              |
| 1 | 1.00 | 1 | 1 | 0     | 0      | 0      | 0      | 0      | t | 118535 | NGNLQLR<br>NKEVT             | Homo<br>sapiens                  |

|   |      |   |   |       |        |        |        |        |   |        |                              |                                  |
|---|------|---|---|-------|--------|--------|--------|--------|---|--------|------------------------------|----------------------------------|
| 1 | 1.00 | 1 | 1 | -0.04 | -0.044 | -0.04  | -0.037 | -0.037 | t | 115529 | TYNFAVLK<br>LMGRGTK<br>F     | Oryctola<br>gus<br>cuniculu<br>s |
| 1 | 1.00 | 1 | 1 | 0.01  | 0.006  | 0.001  | 0.009  | 0.01   | t | 63038  | TAVSPTTL<br>RTEVVK           | Oryctola<br>gus<br>cuniculu<br>s |
| 1 | 1.00 | 1 | 1 | 0     | 0      | 0      | 0      | 0.001  | t | 135842 | NTYGDFM<br>VKSPN             | Mus<br>musculu<br>s              |
| 1 | 1.00 | 1 | 1 | 0     | 0      | 0      | 0      | 0.001  | t | 135842 | NTYGDFM<br>VKSPN             | Mus<br>musculu<br>s              |
| 1 | 1.00 | 1 | 1 | -0.01 | -0.008 | -0.01  | -0.009 | -0.01  | t | 70683  | VQYRGEEK<br>TFTPEEISS<br>MVL | Homo<br>sapiens                  |
| 1 | 1.00 | 1 | 1 | 0.03  | 0.03   | 0.03   | 0.03   | 0.03   | t | 110974 | QDIVLHLE<br>PQNEIPVD<br>LL   | Mus<br>musculu<br>s              |
| 1 | 1.00 | 1 | 1 | 0     | -0.002 | -0.003 | -0.001 | 0.001  | t | 42487  | MRNVPEK<br>QT                | Mus<br>musculu<br>s              |
| 1 | 1.00 | 1 | 1 | 0.03  | 0.028  | 0.025  | 0.031  | 0.031  | t | 135799 | YGKDVKDL<br>FDYAE            | Mus<br>musculu<br>s              |
| 1 | 1.00 | 1 | 1 | 0     | 0      | 0      | -0.003 | -0.001 | t | 11819  | EENVEHD<br>A                 | Homo<br>sapiens                  |
| 1 | 1.00 | 1 | 1 | -0.03 | -0.03  | -0.03  | -0.03  | -0.032 | t | 79239  | GRNAYCN                      | Oryctola<br>gus<br>cuniculu<br>s |
| 1 | 1.00 | 1 | 1 | 0     | 0      | 0      | 0      | 0      | t | 46054  | NTANPDW                      | Mus<br>musculu<br>s              |
| 1 | 1.00 | 1 | 1 | 0.06  | 0.062  | 0.047  | 0.063  | 0.063  | t | 110388 | QSQTPEP<br>ATPLSCCT<br>ETQW  | Homo<br>sapiens                  |
| 1 | 1.00 | 1 | 1 | -0.02 | -0.016 | -0.008 | -0.019 | -0.021 | t | 24872  | HSVRGLTS<br>LFS              | Homo<br>sapiens                  |
| 1 | 1.00 | 1 | 1 | 0.01  | 0.01   | 0.01   | 0.01   | 0.01   | t | 98765  | EPDDLKQK<br>ACESRCT          | Homo<br>sapiens                  |

|   |      |   |   |      |        |       |       |       |   |        |                              |                                  |
|---|------|---|---|------|--------|-------|-------|-------|---|--------|------------------------------|----------------------------------|
| 1 | 1.00 | 1 | 1 | 0.04 | 0.036  | 0.034 | 0.039 | 0.04  | t | 68987  | VIIEQSWG<br>SP               | Oryctola<br>gus<br>cuniculu<br>s |
| 1 | 1.00 | 1 | 1 | 0    | 0      | 0     | 0     | 0     | t | 132979 | AFHYESQ                      | Homo<br>sapiens                  |
| 1 | 1.00 | 1 | 1 | 0    | 0.003  | 0     | 0     | 0     | t | 72889  | WNK                          | Mus<br>musculu<br>s              |
| 1 | 1.00 | 1 | 1 | 0    | 0      | 0     | 0     | 0     | t | 24693  | HRMAWD<br>MM                 | Homo<br>sapiens                  |
| 1 | 1.00 | 1 | 1 | 0    | 0      | 0     | 0     | 0     | t | 25622  | IDLTNKNA<br>A                | Homo<br>sapiens                  |
| 1 | 1.00 | 1 | 1 | 0.04 | 0.038  | 0.02  | 0.033 | 0.042 | t | 128133 | TSEPLNSES<br>EVTDGMIE<br>VQS | Mus<br>musculu<br>s              |
| 1 | 1.00 | 1 | 1 | 0.02 | 0.02   | 0.02  | 0.02  | 0.02  | t | 111559 | MPLVSQK                      | Homo<br>sapiens                  |
| 1 | 1.00 | 1 | 1 | 0.02 | 0.02   | 0.02  | 0.02  | 0.02  | t | 115916 | QEQPIRCE<br>KD               | Homo<br>sapiens                  |
| 1 | 1.00 | 1 | 1 | 0    | 0.002  | 0     | 0     | 0     | t | 141610 | CEEEKGPL<br>DLMNEVL<br>N     | Rattus<br>norvegic<br>us         |
| 1 | 1.00 | 1 | 1 | 0    | -0.003 | 0     | 0     | 0     | t | 137165 | GDTRPRFL<br>WQPKREC          | Oryctola<br>gus<br>cuniculu<br>s |
| 1 | 1.00 | 1 | 1 | 0    | 0      | 0     | 0     | 0     | t | 134494 | QLYKTCKQ<br>AGTCPPD          | Mus<br>musculu<br>s              |
| 1 | 1.00 | 1 | 1 | 0    | 0      | 0     | 0     | 0     | t | 141948 | LKPREEYQ<br>PS               | Sus<br>scrofa                    |
| 1 | 1.00 | 1 | 1 | 0    | -0.007 | 0     | 0     | 0     | t | 153827 | EQQYNKPL<br>CDL              | Oryctola<br>gus<br>cuniculu<br>s |
| 1 | 1.00 | 1 | 1 | 0    | 0      | 0     | 0     | 0     | t | 143362 | ETPLMKE                      | Mus<br>musculu<br>s              |
| 1 | 1.00 | 1 | 1 | 0    | -0.008 | 0     | 0     | 0     | t | 136685 | TLFTPKDS<br>PAKT             | Mus<br>musculu<br>s              |
| 1 | 1.00 | 1 | 1 | 0    | 0      | 0     | 0     | 0     | t | 134988 | GPPGARG<br>LTGRPGDA<br>GPP   | Mus<br>musculu<br>s              |

|   |      |   |   |   |        |   |   |   |   |        |                            |                                  |
|---|------|---|---|---|--------|---|---|---|---|--------|----------------------------|----------------------------------|
| 1 | 1.00 | 1 | 1 | 0 | -0.002 | 0 | 0 | 0 | t | 150032 | VSDYYKNL<br>INNA           | Mus<br>musculu<br>s              |
| 1 | 1.00 | 1 | 1 | 0 | 0      | 0 | 0 | 0 | t | 149729 | GTVTGHPT<br>FNALLDA        | Oryctola<br>gus<br>cuniculu<br>s |
| 1 | 1.00 | 1 | 1 | 0 | 0      | 0 | 0 | 0 | t | 134987 | GPPGARG<br>LTGRPGDA<br>GPP | Mus<br>musculu<br>s              |
| 1 | 1.00 | 1 | 1 | 0 | 0      | 0 | 0 | 0 | t | 135834 | CEFRDGA<br>GSICG           | Mus<br>musculu<br>s              |
| 1 | 1.00 | 1 | 1 | 0 | 0.014  | 0 | 0 | 0 | t | 137165 | GDTRPRFL<br>WQPKREC        | Pan<br>troglody<br>tes           |
| 1 | 1.00 | 1 | 1 | 0 | 0.002  | 0 | 0 | 0 | t | 141681 | KAKEELLET<br>LQIVAER       | Rattus<br>norvegic<br>us         |
| 1 | 1.00 | 1 | 1 | 0 | 0      | 0 | 0 | 0 | t | 136686 | TLHDMGIF<br>SITSSDS        | Mus<br>musculu<br>s              |
| 1 | 1.00 | 1 | 1 | 0 | 0      | 0 | 0 | 0 | t | 136686 | TLHDMGIF<br>SITSSDS        | Mus<br>musculu<br>s              |
| 1 | 1.00 | 1 | 1 | 0 | 0.002  | 0 | 0 | 0 | t | 141617 | DLEDIIKG<br>NDLVHDE<br>Y   | Rattus<br>norvegic<br>us         |
| 1 | 1.00 | 1 | 1 | 0 | 0      | 0 | 0 | 0 | t | 145272 | KDLLPSRD<br>RQHLPLI        | Homo<br>sapiens                  |
| 1 | 1.00 | 1 | 1 | 0 | 0      | 0 | 0 | 0 | t | 149782 | KQTGLDA<br>KQQQILL         | Oryctola<br>gus<br>cuniculu<br>s |
| 1 | 1.00 | 1 | 1 | 0 | 0      | 0 | 0 | 0 | t | 136612 | RRQKRF                     | Gallus<br>gallus                 |
| 1 | 1.00 | 1 | 1 | 0 | -0.003 | 0 | 0 | 0 | t | 137298 | TELGRPDA<br>EYWNSQK        | Oryctola<br>gus<br>cuniculu<br>s |
| 1 | 1.00 | 1 | 1 | 0 | 0      | 0 | 0 | 0 | t | 142050 | VDMRGDC<br>WSIEY           | Sus<br>scrofa                    |
| 1 | 1.00 | 1 | 1 | 0 | 0.004  | 0 | 0 | 0 | t | 136635 | SIPTYTPDK<br>VTY           | Mus<br>musculu<br>s              |

|   |      |   |   |   |        |   |   |   |   |        |                            |                                  |
|---|------|---|---|---|--------|---|---|---|---|--------|----------------------------|----------------------------------|
| 1 | 1.00 | 1 | 1 | 0 | -0.003 | 0 | 0 | 0 | t | 146338 | IP EEIKQLQ<br>QFQKEDA<br>A | Oryctola<br>gus<br>cuniculu<br>s |
| 1 | 1.00 | 1 | 1 | 0 | 0      | 0 | 0 | 0 | t | 145136 | DLLPSRDR                   | Homo<br>sapiens                  |
| 1 | 1.00 | 1 | 1 | 0 | 0      | 0 | 0 | 0 | t | 139732 | ERETQKAK<br>G              | Mus<br>musculu<br>s              |
| 1 | 1.00 | 1 | 1 | 0 | -0.003 | 0 | 0 | 0 | t | 156907 | KVGDPLW                    | Oryctola<br>gus<br>cuniculu<br>s |
| 1 | 1.00 | 1 | 1 | 0 | 0.014  | 0 | 0 | 0 | t | 137298 | TELGRPDA<br>EYWNSQK        | Pan<br>troglody<br>tes           |
| 1 | 1.00 | 1 | 1 | 0 | 0.006  | 0 | 0 | 0 | t | 139806 | LLSPVRRD<br>QLFTFRQ<br>VG  | Ovis<br>aries                    |
| 1 | 1.00 | 1 | 1 | 0 | 0      | 0 | 0 | 0 | t | 140761 | TYRVDVD<br>GYRND           | Bos<br>taurus                    |
| 1 | 1.00 | 1 | 1 | 0 | -0.003 | 0 | 0 | 0 | t | 139730 | EQLAGNLR<br>ENIE           | Oryctola<br>gus<br>cuniculu<br>s |
| 1 | 1.00 | 1 | 1 | 0 | 0      | 0 | 0 | 0 | t | 134058 | GDKVSFF                    | Homo<br>sapiens                  |
| 1 | 1.00 | 1 | 1 | 0 | -0.003 | 0 | 0 | 0 | t | 150108 | AGGTGTE<br>DSHPYKQ         | Oryctola<br>gus<br>cuniculu<br>s |
| 1 | 1.00 | 1 | 1 | 0 | 0      | 0 | 0 | 0 | t | 135002 | HWDPFSL<br>SAYFP           | Homo<br>sapiens                  |
| 1 | 1.00 | 1 | 1 | 0 | -0.003 | 0 | 0 | 0 | t | 156900 | KLGDPRIA<br>TTLF           | Oryctola<br>gus<br>cuniculu<br>s |
| 1 | 1.00 | 1 | 1 | 0 | 0.002  | 0 | 0 | 0 | t | 141618 | DLMNEVL<br>NKMDKKY<br>SA   | Rattus<br>norvegic<br>us         |
| 1 | 1.00 | 1 | 1 | 0 | 0      | 0 | 0 | 0 | t | 140080 | YEKEPTPP<br>TRTPDQ         | Rattus<br>norvegic<br>us         |

|   |      |   |   |   |        |   |   |   |   |        |                            |                                  |
|---|------|---|---|---|--------|---|---|---|---|--------|----------------------------|----------------------------------|
| 1 | 1.00 | 1 | 1 | 0 | 0.008  | 0 | 0 | 0 | t | 140845 | ELHEKVSS<br>HPIFKQ         | Capra<br>hircus                  |
| 1 | 1.00 | 1 | 1 | 0 | 0.012  | 0 | 0 | 0 | t | 138083 | VYPSKTQP<br>LQHNNLL        | Pan<br>troglody<br>tes           |
| 1 | 1.00 | 1 | 1 | 0 | 0      | 0 | 0 | 0 | t | 135836 | DLFGNVLL<br>GQRLDQG        | Mus<br>musculu<br>s              |
| 1 | 1.00 | 1 | 1 | 0 | -0.003 | 0 | 0 | 0 | t | 144664 | GREGYP<br>DGGGLPD<br>SVKI  | Oryctola<br>gus<br>cuniculu<br>s |
| 1 | 1.00 | 1 | 1 | 0 | 0      | 0 | 0 | 0 | t | 142447 | NKYRGTA<br>GNALMDG<br>ASQL | Homo<br>sapiens                  |
| 1 | 1.00 | 1 | 1 | 0 | 0      | 0 | 0 | 0 | t | 141928 | IRHQRSQT<br>ECG            | Sus<br>scrofa                    |
| 1 | 1.00 | 1 | 1 | 0 | 0      | 0 | 0 | 0 | t | 135837 | DMYGD<br>IRLTGLI           | Mus<br>musculu<br>s              |
| 1 | 1.00 | 1 | 1 | 0 | 0.002  | 0 | 0 | 0 | t | 141687 | KLQKKETE<br>CEEKGPL        | Rattus<br>norvegic<br>us         |
| 1 | 1.00 | 1 | 1 | 0 | -0.008 | 0 | 0 | 0 | t | 136612 | RRQKRF                     | Mus<br>musculu<br>s              |
| 1 | 1.00 | 1 | 1 | 0 | 0      | 0 | 0 | 0 | t | 142023 | SRKKKAAA<br>AIEEEDI        | Sus<br>scrofa                    |
| 1 | 1.00 | 1 | 1 | 0 | 0      | 0 | 0 | 0 | t | 143214 | WDGQWD<br>TLNW             | Mus<br>musculu<br>s              |
| 1 | 1.00 | 1 | 1 | 0 | 0.012  | 0 | 0 | 0 | t | 137869 | GGVSTGLI<br>QDDWTFQ        | Pan<br>troglody<br>tes           |
| 1 | 1.00 | 1 | 1 | 0 | 0.002  | 0 | 0 | 0 | t | 141779 | WKQYNPT<br>GKGIDDA<br>NK   | Rattus<br>norvegic<br>us         |
| 1 | 1.00 | 1 | 1 | 0 | -0.003 | 0 | 0 | 0 | t | 146421 | LKDRMNF<br>DIPEEIKQL       | Oryctola<br>gus<br>cuniculu<br>s |



|   |      |   |   |   |        |   |   |   |   |        |                              |                                  |
|---|------|---|---|---|--------|---|---|---|---|--------|------------------------------|----------------------------------|
| 1 | 1.00 | 1 | 1 | 0 | 0      | 0 | 0 | 0 | t | 140258 | KYEQGGNI<br>VD               | Mus<br>musculu<br>s              |
| 1 | 1.00 | 1 | 1 | 0 | -0.007 | 0 | 0 | 0 | t | 153815 | CYEQLNDS<br>SEEDEI           | Oryctola<br>gus<br>cuniculu<br>s |
| 1 | 1.00 | 1 | 1 | 0 | 0      | 0 | 0 | 0 | t | 140258 | KYEQGGNI<br>VD               | Mus<br>musculu<br>s              |
| 1 | 1.00 | 1 | 1 | 0 | 0.012  | 0 | 0 | 0 | t | 138041 | SPLTVEWR<br>ARSESAQS<br>KM   | Pan<br>troglody<br>tes           |
| 1 | 1.00 | 1 | 1 | 0 | 0      | 0 | 0 | 0 | t | 136303 | GARGLTG<br>RPGDA             | Homo<br>sapiens                  |
| 1 | 1.00 | 1 | 1 | 0 | 0      | 0 | 0 | 0 | t | 138791 | MKGLRGH<br>GGLQGMP<br>GPNGPS | Homo<br>sapiens                  |
| 1 | 1.00 | 1 | 1 | 0 | 0      | 0 | 0 | 0 | t | 138791 | MKGLRGH<br>GGLQGMP<br>GPNGPS | Homo<br>sapiens                  |
| 1 | 1.00 | 1 | 1 | 0 | 0.008  | 0 | 0 | 0 | t | 144364 | ITDAVITVP<br>AYFND           | Capra<br>hircus                  |
| 1 | 1.00 | 1 | 1 | 0 | 0      | 0 | 0 | 0 | t | 142545 | AVILNDNF<br>VTKATAL          | Sus<br>scrofa                    |
| 1 | 1.00 | 1 | 1 | 0 | 0      | 0 | 0 | 0 | t | 135839 | DYMGNIQ<br>DFDT              | Mus<br>musculu<br>s              |
| 1 | 1.00 | 1 | 1 | 0 | 0      | 0 | 0 | 0 | t | 138792 | MKGLRGH<br>PGLQGMP<br>GPNGPS | Homo<br>sapiens                  |
| 1 | 1.00 | 1 | 1 | 0 | -0.004 | 0 | 0 | 0 | t | 144364 | ITDAVITVP<br>AYFND           | Mus<br>musculu<br>s              |
| 1 | 1.00 | 1 | 1 | 0 | 0      | 0 | 0 | 0 | t | 142022 | SRIFRGDN                     | Sus<br>scrofa                    |
| 1 | 1.00 | 1 | 1 | 0 | 0.004  | 0 | 0 | 0 | t | 136162 | DAWKMR<br>L<br>SQMYD         | Mus<br>musculu<br>s              |
| 1 | 1.00 | 1 | 1 | 0 | 0.014  | 0 | 0 | 0 | t | 137185 | HNYGVVE<br>SFTVQRRV          | Pan<br>troglody<br>tes           |

|   |      |   |   |   |        |   |   |   |   |        |                             |                                  |
|---|------|---|---|---|--------|---|---|---|---|--------|-----------------------------|----------------------------------|
| 1 | 1.00 | 1 | 1 | 0 | 0.012  | 0 | 0 | 0 | t | 137185 | HNYGVVE<br>SFTVQRRV         | Pan<br>troglody<br>tes           |
| 1 | 1.00 | 1 | 1 | 0 | 0      | 0 | 0 | 0 | t | 137768 | SHQESTKG<br>KSKGKSGK<br>SGS | Mus<br>musculu<br>s              |
| 1 | 1.00 | 1 | 1 | 0 | 0      | 0 | 0 | 0 | t | 141971 | NKPVTDN<br>PVTDL            | Sus<br>scrofa                    |
| 1 | 1.00 | 1 | 1 | 0 | 0      | 0 | 0 | 0 | t | 135546 | DWEYS                       | Mus<br>musculu<br>s              |
| 1 | 1.00 | 1 | 1 | 0 | 0      | 0 | 0 | 0 | t | 136303 | GARGLTG<br>RPGDA            | Homo<br>sapiens                  |
| 1 | 1.00 | 1 | 1 | 0 | 0      | 0 | 0 | 0 | t | 134123 | KVSFFCKN<br>KEKKCSY         | Homo<br>sapiens                  |
| 1 | 1.00 | 1 | 1 | 0 | 0.002  | 0 | 0 | 0 | t | 141663 | GRSLEGVY<br>VPPRRQQ<br>L    | Rattus<br>norvegic<br>us         |
| 1 | 1.00 | 1 | 1 | 0 | 0      | 0 | 0 | 0 | t | 147353 | VALRVVSR<br>NPRGF           | Homo<br>sapiens                  |
| 1 | 1.00 | 1 | 1 | 0 | 0      | 0 | 0 | 0 | t | 135833 | CDGWML<br>GECILV            | Mus<br>musculu<br>s              |
| 1 | 1.00 | 1 | 1 | 0 | 0.002  | 0 | 0 | 0 | t | 141613 | DANKKAC<br>CAIRGSFY<br>D    | Rattus<br>norvegic<br>us         |
| 1 | 1.00 | 1 | 1 | 0 | -0.008 | 0 | 0 | 0 | t | 136612 | RRQKRF                      | Mus<br>musculu<br>s              |
| 1 | 1.00 | 1 | 1 | 0 | 0.002  | 0 | 0 | 0 | t | 141625 | DTKRARTD<br>WWENETI<br>T    | Rattus<br>norvegic<br>us         |
| 1 | 1.00 | 1 | 1 | 0 | -0.003 | 0 | 0 | 0 | t | 153410 | LIPFHKHP<br>HHRG            | Oryctola<br>gus<br>cuniculu<br>s |
| 1 | 1.00 | 1 | 1 | 0 | 0      | 0 | 0 | 0 | t | 149764 | IQLPDPNQ<br>FALPDRT         | Oryctola<br>gus<br>cuniculu<br>s |
| 1 | 1.00 | 1 | 1 | 0 | -0.003 | 0 | 0 | 0 | t | 137185 | HNYGVVE<br>SFTVQRRV         | Oryctola<br>gus<br>cuniculu<br>s |

|   |      |   |   |   |        |   |   |   |   |        |                            |                          |
|---|------|---|---|---|--------|---|---|---|---|--------|----------------------------|--------------------------|
| 1 | 1.00 | 1 | 1 | 0 | 0.002  | 0 | 0 | 0 | t | 141676 | IKKLENGR<br>SLEGVYVP       | Rattus<br>norvegicus     |
| 1 | 1.00 | 1 | 1 | 0 | 0.004  | 0 | 0 | 0 | t | 136648 | SPLNNFYK<br>TQLR           | Mus<br>musculus          |
| 1 | 1.00 | 1 | 1 | 0 | 0      | 0 | 0 | 0 | t | 135845 | WTEIHDW<br>EAAME           | Mus<br>musculus          |
| 1 | 1.00 | 1 | 1 | 0 | 0      | 0 | 0 | 0 | t | 151101 | AAA                        | Homo<br>sapiens          |
| 1 | 1.00 | 1 | 1 | 0 | 0      | 0 | 0 | 0 | t | 136315 | GGGTGPA<br>DGTNATTI        | Mus<br>musculus          |
| 1 | 1.00 | 1 | 1 | 0 | 0      | 0 | 0 | 0 | t | 136315 | GGGTGPA<br>DGTNATTI        | Mus<br>musculus          |
| 1 | 1.00 | 1 | 1 | 0 | 0      | 0 | 0 | 0 | t | 143959 | KFPHLAVG<br>F              | Oryctolagus<br>cuniculus |
| 1 | 1.00 | 1 | 1 | 0 | -0.008 | 0 | 0 | 0 | t | 136364 | IDPLMFKY<br>WYNM           | Mus<br>musculus          |
| 1 | 1.00 | 1 | 1 | 0 | 0      | 0 | 0 | 0 | t | 134987 | GPPGARG<br>LTGRPGDA<br>GPP | Mus<br>musculus          |
| 1 | 1.00 | 1 | 1 | 0 | 0.012  | 0 | 0 | 0 | t | 137165 | GDTRPRFL<br>WQPKREC        | Pan<br>troglodytes       |
| 1 | 1.00 | 1 | 1 | 0 | 0      | 0 | 0 | 0 | t | 140479 | KHGLLSM                    | Mus<br>musculus          |
| 1 | 1.00 | 1 | 1 | 0 | 0      | 0 | 0 | 0 | t | 140479 | KHGLLSM                    | Mus<br>musculus          |
| 1 | 1.00 | 1 | 1 | 0 | -0.002 | 0 | 0 | 0 | t | 134141 | LLMPPKYH<br>PKEPYVTR       | Mus<br>musculus          |
| 1 | 1.00 | 1 | 1 | 0 | 0.006  | 0 | 0 | 0 | t | 139684 | AMRVMEP<br>KPSPFAEA<br>VCP | Ovis<br>aries            |
| 1 | 1.00 | 1 | 1 | 0 | 0      | 0 | 0 | 0 | t | 135847 | YPAIVETGL                  | Mus<br>musculus          |
| 1 | 1.00 | 1 | 1 | 0 | 0.012  | 0 | 0 | 0 | t | 137893 | HHNLLVGS<br>VSGFYPG        | Pan<br>troglodytes       |

|   |      |   |   |   |        |   |   |   |   |        |                              |                                  |
|---|------|---|---|---|--------|---|---|---|---|--------|------------------------------|----------------------------------|
| 1 | 1.00 | 1 | 1 | 0 | 0      | 0 | 0 | 0 | t | 141978 | PKGQTRTL<br>GSNRERER<br>I    | Sus<br>scrofa                    |
| 1 | 1.00 | 1 | 1 | 0 | 0      | 0 | 0 | 0 | t | 141896 | FRKRKNST<br>SLQSHIPS<br>DEQL | Sus<br>scrofa                    |
| 1 | 1.00 | 1 | 1 | 0 | 0      | 0 | 0 | 0 | t | 148557 | DDSKLPIV<br>KVEDKSKL<br>QD   | Canis<br>lupus                   |
| 1 | 1.00 | 1 | 1 | 0 | -0.003 | 0 | 0 | 0 | t | 139398 | YGCDVGP<br>DGRLLRGH<br>DQYAY | Oryctola<br>gus<br>cuniculu<br>s |
| 1 | 1.00 | 1 | 1 | 0 | 0.012  | 0 | 0 | 0 | t | 136647 | SNNADYK<br>QSLLL             | Gallus<br>gallus                 |
| 1 | 1.00 | 1 | 1 | 0 | 0.002  | 0 | 0 | 0 | t | 141660 | GMEKAKE<br>ELLETLQIV         | Rattus<br>norvegic<br>us         |
| 1 | 1.00 | 1 | 1 | 0 | -0.008 | 0 | 0 | 0 | t | 136647 | SNNADYK<br>QSLLL             | Mus<br>musculu<br>s              |
| 1 | 1.00 | 1 | 1 | 0 | 0.002  | 0 | 0 | 0 | t | 136066 | IETDKTSV<br>QV               | Rattus<br>norvegic<br>us         |
| 1 | 1.00 | 1 | 1 | 0 | 0      | 0 | 0 | 0 | t | 145150 | DSSTYQYIY<br>NLT             | Sus<br>scrofa                    |
| 1 | 1.00 | 1 | 1 | 0 | -0.003 | 0 | 0 | 0 | t | 139203 | QIYKAQA<br>QTDRESLR<br>NLR   | Oryctola<br>gus<br>cuniculu<br>s |
| 1 | 1.00 | 1 | 1 | 0 | -0.003 | 0 | 0 | 0 | t | 139305 | TAAQITQR<br>KWEAARE<br>AEQRR | Oryctola<br>gus<br>cuniculu<br>s |
| 1 | 1.00 | 1 | 1 | 0 | 0.004  | 0 | 0 | 0 | t | 136364 | IDPLMFKY<br>WYNM             | Mus<br>musculu<br>s              |
| 1 | 1.00 | 1 | 1 | 0 | 0.012  | 0 | 0 | 0 | t | 138059 | TSQVEHPS<br>VTSPLTV          | Pan<br>troglody<br>tes           |
| 1 | 1.00 | 1 | 1 | 0 | 0.012  | 0 | 0 | 0 | t | 136364 | IDPLMFKY<br>WYNM             | Gallus<br>gallus                 |
| 1 | 1.00 | 1 | 1 | 0 | 0      | 0 | 0 | 0 | t | 135569 | KTNMK                        | Mus<br>musculu<br>s              |
| 1 | 1.00 | 1 | 1 | 0 | 0      | 0 | 0 | 0 | t | 135569 | KTNMK                        | Mus<br>musculu<br>s              |

|   |      |   |   |   |        |   |   |   |   |        |                           |                                  |
|---|------|---|---|---|--------|---|---|---|---|--------|---------------------------|----------------------------------|
| 1 | 1.00 | 1 | 1 | 0 | 0      | 0 | 0 | 0 | t | 136749 | WMLRAAE<br>EYSMNLG<br>F   | Mus<br>musculu<br>s              |
| 1 | 1.00 | 1 | 1 | 0 | 0      | 0 | 0 | 0 | t | 136749 | WMLRAAE<br>EYSMNLG<br>F   | Mus<br>musculu<br>s              |
| 1 | 1.00 | 1 | 1 | 0 | 0      | 0 | 0 | 0 | t | 134867 | APVCVWE<br>RLSPYRER<br>CV | Homo<br>sapiens                  |
| 1 | 1.00 | 1 | 1 | 0 | 0      | 0 | 0 | 0 | t | 142576 | DGASYSW<br>MYEA           | Mus<br>musculu<br>s              |
| 1 | 1.00 | 1 | 1 | 0 | -0.003 | 0 | 0 | 0 | t | 150616 | TEDSHPPY<br>KQTQPGA       | Oryctola<br>gus<br>cuniculu<br>s |
| 1 | 1.00 | 1 | 1 | 0 | -0.003 | 0 | 0 | 0 | t | 144449 | QRDFDLA<br>DALDDP         | Oryctola<br>gus<br>cuniculu<br>s |
| 1 | 1.00 | 1 | 1 | 0 | 0      | 0 | 0 | 0 | t | 136420 | KIHAREIFD<br>SRGNPTVE     | Homo<br>sapiens                  |
| 1 | 1.00 | 1 | 1 | 0 | -0.003 | 0 | 0 | 0 | t | 148058 | PDGGQPA<br>VR             | Oryctola<br>gus<br>cuniculu<br>s |
| 1 | 1.00 | 1 | 1 | 0 | 0      | 0 | 0 | 0 | t | 136420 | KIHAREIFD<br>SRGNPTVE     | Homo<br>sapiens                  |
| 1 | 1.00 | 1 | 1 | 0 | 0.004  | 0 | 0 | 0 | t | 136727 | VNWNSW<br>HKTNLS          | Mus<br>musculu<br>s              |
| 1 | 1.00 | 1 | 1 | 0 | 0      | 0 | 0 | 0 | t | 142576 | DGASYSW<br>MYEA           | Mus<br>musculu<br>s              |
| 1 | 1.00 | 1 | 1 | 0 | 0.012  | 0 | 0 | 0 | t | 137829 | DWTFQTL<br>VMLETVP<br>R   | Pan<br>troglody<br>tes           |
| 1 | 1.00 | 1 | 1 | 0 | -0.003 | 0 | 0 | 0 | t | 156905 | KPGDPRQ                   | Oryctola<br>gus<br>cuniculu<br>s |
| 1 | 1.00 | 1 | 1 | 0 | 0      | 0 | 0 | 0 | t | 148880 | QQQQQQ<br>QQLQ            | Homo<br>sapiens                  |
| 1 | 1.00 | 1 | 1 | 0 | -0.003 | 0 | 0 | 0 | t | 141748 | SLLTEVETP                 | Oryctola<br>gus<br>cuniculu<br>s |

|   |      |   |   |   |        |   |   |   |   |        |                            |                                  |
|---|------|---|---|---|--------|---|---|---|---|--------|----------------------------|----------------------------------|
| 1 | 1.00 | 1 | 1 | 0 | -0.003 | 0 | 0 | 0 | t | 137256 | PKRECHFF<br>NGTERVR        | Oryctola<br>gus<br>cuniculu<br>s |
| 1 | 1.00 | 1 | 1 | 0 | -0.003 | 0 | 0 | 0 | t | 135799 | YGKDVKDL<br>FDYAQE         | Oryctola<br>gus<br>cuniculu<br>s |
| 1 | 1.00 | 1 | 1 | 0 | 0.008  | 0 | 0 | 0 | t | 144538 | VVDAEVV<br>DDDRESK         | Capra<br>hircus                  |
| 1 | 1.00 | 1 | 1 | 0 | 0      | 0 | 0 | 0 | t | 136419 | KIHAREIFD<br>SRGNPTVE      | Homo<br>sapiens                  |
| 1 | 1.00 | 1 | 1 | 0 | 0.002  | 0 | 0 | 0 | t | 141704 | LQIVAERE<br>AYYLWKQ<br>Y   | Rattus<br>norvegic<br>us         |
| 1 | 1.00 | 1 | 1 | 0 | 0.003  | 0 | 0 | 0 | t | 156977 | YGAPEITK<br>DGYKVIKSI<br>K | Mus<br>musculu<br>s              |
| 1 | 1.00 | 1 | 1 | 0 | -0.003 | 0 | 0 | 0 | t | 141105 | WEISQASH<br>YFERHLE        | Oryctola<br>gus<br>cuniculu<br>s |
| 1 | 1.00 | 1 | 1 | 0 | 0.014  | 0 | 0 | 0 | t | 137108 | ARAAVDT<br>YCRHNYG<br>V    | Pan<br>troglody<br>tes           |
| 1 | 1.00 | 1 | 1 | 0 | 0.002  | 0 | 0 | 0 | t | 141771 | VAEREAYY<br>LWKQYNP        | Rattus<br>norvegic<br>us         |
| 1 | 1.00 | 1 | 1 | 0 | -0.003 | 0 | 0 | 0 | t | 137759 | NQEDAEAI<br>THLF           | Oryctola<br>gus<br>cuniculu<br>s |
| 1 | 1.00 | 1 | 1 | 0 | 0      | 0 | 0 | 0 | t | 153379 | EQEIFTNIT<br>DRV           | Mus<br>musculu<br>s              |
| 1 | 1.00 | 1 | 1 | 0 | 0      | 0 | 0 | 0 | t | 142447 | NKYRGTA<br>GNALMDG<br>ASQL | Homo<br>sapiens                  |
| 1 | 1.00 | 1 | 1 | 0 | 0      | 0 | 0 | 0 | t | 149980 | TLKIPSVHF<br>GSPSGS        | Oryctola<br>gus<br>cuniculu<br>s |
| 1 | 1.00 | 1 | 1 | 0 | 0      | 0 | 0 | 0 | t | 134770 | QIFNLFSTK<br>DSSAA         | Mus<br>musculu<br>s              |

|   |      |   |   |   |        |   |   |   |   |        |                            |                          |
|---|------|---|---|---|--------|---|---|---|---|--------|----------------------------|--------------------------|
| 1 | 1.00 | 1 | 1 | 0 | 0.002  | 0 | 0 | 0 | t | 136087 | VETDKATV<br>GF             | Rattus<br>norvegicus     |
| 1 | 1.00 | 1 | 1 | 0 | 0.004  | 0 | 0 | 0 | t | 136647 | SNNADYK<br>QSLLL           | Mus<br>musculus          |
| 1 | 1.00 | 1 | 1 | 0 | 0.002  | 0 | 0 | 0 | t | 141699 | LETQIVAE<br>REAYYLW        | Rattus<br>norvegicus     |
| 1 | 1.00 | 1 | 1 | 0 | 0.002  | 0 | 0 | 0 | t | 141689 | KMDKKYS<br>AHKMKCT<br>EV   | Rattus<br>norvegicus     |
| 1 | 1.00 | 1 | 1 | 0 | 0.004  | 0 | 0 | 0 | t | 134702 | KEKKYS                     | Ovis<br>aries            |
| 1 | 1.00 | 1 | 1 | 0 | 0      | 0 | 0 | 0 | t | 141924 | IKKQIPRCK<br>DAFNKIES      | Sus<br>scrofa            |
| 1 | 1.00 | 1 | 1 | 0 | 0.002  | 0 | 0 | 0 | t | 141763 | TGKGIDDA<br>NKKACCAI       | Rattus<br>norvegicus     |
| 1 | 1.00 | 1 | 1 | 0 | 0      | 0 | 0 | 0 | t | 134200 | PVVNSLDP<br>PLLTRY         | Oryctolagus<br>cuniculus |
| 1 | 1.00 | 1 | 1 | 0 | 0.008  | 0 | 0 | 0 | t | 144195 | AGGGSGS<br>ADDVVDA         | Capra<br>hircus          |
| 1 | 1.00 | 1 | 1 | 0 | 0.002  | 0 | 0 | 0 | t | 141789 | YNPTGKGI<br>DDANKKAC       | Rattus<br>norvegicus     |
| 1 | 1.00 | 1 | 1 | 0 | -0.007 | 0 | 0 | 0 | t | 153818 | DSTLRLCV<br>QSTHVDIR       | Oryctolagus<br>cuniculus |
| 1 | 1.00 | 1 | 1 | 0 | 0      | 0 | 0 | 0 | t | 122375 | GLINRAKA<br>VKQFEESQ<br>G  | Rattus<br>norvegicus     |
| 1 | 1.00 | 1 | 1 | 0 | 0      | 0 | 0 | 0 | t | 122293 | CTYVLDPE<br>NLTLKAPY<br>EA | Oryctolagus<br>cuniculus |
| 1 | 1.00 | 1 | 1 | 0 | 0      | 0 | 0 | 0 | t | 122375 | GLINRAKA<br>VKQFEESQ<br>G  | Mus<br>musculus          |

|   |      |   |   |   |        |   |   |   |   |        |                             |                          |
|---|------|---|---|---|--------|---|---|---|---|--------|-----------------------------|--------------------------|
| 1 | 1.00 | 1 | 1 | 0 | 0.002  | 0 | 0 | 0 | t | 120108 | NFMESGE<br>WVIKESRG<br>W    | Rattus<br>norvegicus     |
| 1 | 1.00 | 1 | 1 | 0 | 0      | 0 | 0 | 0 | t | 122375 | GLINRAKA<br>VKQFEESQ<br>G   | Mus<br>musculus          |
| 1 | 1.00 | 1 | 1 | 0 | 0      | 0 | 0 | 0 | t | 122375 | GLINRAKA<br>VKQFEESQ<br>G   | Rattus<br>norvegicus     |
| 1 | 1.00 | 1 | 1 | 0 | 0      | 0 | 0 | 0 | t | 120084 | LRQQWID<br>VRLRWNP<br>AD    | Mus<br>musculus          |
| 1 | 1.00 | 1 | 1 | 0 | 0      | 0 | 0 | 0 | t | 123562 | NSSSSQFQ<br>IHGPR           | Mus<br>musculus          |
| 1 | 1.00 | 1 | 1 | 0 | -0.003 | 0 | 0 | 0 | t | 119930 | HRWSSYM<br>VHW              | Oryctolagus<br>cuniculus |
| 1 | 1.00 | 1 | 1 | 0 | 0      | 0 | 0 | 0 | t | 120849 | NSQPEILE<br>RTRAELD         | Mus<br>musculus          |
| 1 | 1.00 | 1 | 1 | 0 | -0.003 | 0 | 0 | 0 | t | 120197 | SEHETRLV<br>ANLLENYN        | Oryctolagus<br>cuniculus |
| 1 | 1.00 | 1 | 1 | 0 | -0.003 | 0 | 0 | 0 | t | 119930 | HRWSSYM<br>VHW              | Oryctolagus<br>cuniculus |
| 1 | 1.00 | 1 | 1 | 0 | -0.003 | 0 | 0 | 0 | t | 119856 | FAIVHMTK<br>LLDYGTK         | Oryctolagus<br>cuniculus |
| 1 | 1.00 | 1 | 1 | 0 | 0.002  | 0 | 0 | 0 | t | 123221 | GENHAKS<br>KAVPYSE<br>MYAN  | Rattus<br>norvegicus     |
| 1 | 1.00 | 1 | 1 | 0 | -0.003 | 0 | 0 | 0 | t | 122377 | GLPRLETP<br>ADLSTAIA<br>SRS | Oryctolagus<br>cuniculus |
| 1 | 1.00 | 1 | 1 | 0 | -0.002 | 0 | 0 | 0 | t | 118550 | PEPAKSAP<br>APKKGSKK<br>AV  | Mus<br>musculus          |
| 1 | 1.00 | 1 | 1 | 0 | -0.003 | 0 | 0 | 0 | t | 122377 | GLPRLETP<br>ADLSTAIA<br>SRS | Oryctolagus<br>cuniculus |



|   |      |   |   |   |        |   |   |   |   |        |                              |                          |
|---|------|---|---|---|--------|---|---|---|---|--------|------------------------------|--------------------------|
| 1 | 1.00 | 1 | 1 | 0 | 0.002  | 0 | 0 | 0 | t | 117773 | CNSRQTD<br>REDELI            | Rattus<br>norvegicus     |
| 1 | 1.00 | 1 | 1 | 0 | -0.003 | 0 | 0 | 0 | t | 122377 | GLPRLETP<br>ADLSTAIA<br>SRS  | Oryctolagus<br>cuniculus |
| 1 | 1.00 | 1 | 1 | 0 | 0.002  | 0 | 0 | 0 | t | 119845 | ESDQPDLS<br>NFMESGE<br>W     | Rattus<br>norvegicus     |
| 1 | 1.00 | 1 | 1 | 0 | -0.003 | 0 | 0 | 0 | t | 119856 | FAIVHMTK<br>LLLDYTGK         | Oryctolagus<br>cuniculus |
| 1 | 1.00 | 1 | 1 | 0 | -0.003 | 0 | 0 | 0 | t | 119856 | FAIVHMTK<br>LLLDYTGK         | Oryctolagus<br>cuniculus |
| 1 | 1.00 | 1 | 1 | 0 | 0      | 0 | 0 | 0 | t | 125403 | ETTKLQRF<br>QAML             | Sus<br>scrofa            |
| 1 | 1.00 | 1 | 1 | 0 | -0.003 | 0 | 0 | 0 | t | 131128 | VEMKKED<br>FDIYDEDE          | Oryctolagus<br>cuniculus |
| 1 | 1.00 | 1 | 1 | 0 | 0      | 0 | 0 | 0 | t | 120067 | LKWNPD<br>YGGVKKIH<br>I      | Rattus<br>norvegicus     |
| 1 | 1.00 | 1 | 1 | 0 | -0.003 | 0 | 0 | 0 | t | 122377 | GLPRLETP<br>ADLSTAIA<br>SRS  | Oryctolagus<br>cuniculus |
| 1 | 1.00 | 1 | 1 | 0 | 0.002  | 0 | 0 | 0 | t | 123058 | CEDFTKKIE<br>AFYRASPH<br>AAR | Rattus<br>norvegicus     |
| 1 | 1.00 | 1 | 1 | 0 | 0      | 0 | 0 | 0 | t | 130475 | EDSDARIL<br>AAAVWYY<br>SL    | Mus<br>musculus          |
| 1 | 1.00 | 1 | 1 | 0 | 0      | 0 | 0 | 0 | t | 119962 | ISPESDRP<br>DLSTFMES<br>G    | Mus<br>musculus          |
| 1 | 1.00 | 1 | 1 | 0 | 0      | 0 | 0 | 0 | t | 120247 | TPEDPTDP<br>TDPQDPSS         | Mus<br>musculus          |
| 1 | 1.00 | 1 | 1 | 0 | 0      | 0 | 0 | 0 | t | 122377 | GLPRLETP<br>ADLSTAIA<br>SRS  | Mus<br>musculus          |

|   |      |   |   |   |        |   |   |   |   |        |                              |                                  |
|---|------|---|---|---|--------|---|---|---|---|--------|------------------------------|----------------------------------|
| 1 | 1.00 | 1 | 1 | 0 | 0      | 0 | 0 | 0 | t | 125492 | LSYPSHCC<br>AFKNQKKI<br>RGIL | Mus<br>musculu<br>s              |
| 1 | 1.00 | 1 | 1 | 0 | 0      | 0 | 0 | 0 | t | 119930 | HRWSSYM<br>VHW               | Mus<br>musculu<br>s              |
| 1 | 1.00 | 1 | 1 | 0 | 0      | 0 | 0 | 0 | t | 120084 | LRQQWID<br>VRLRWNP<br>AD     | Mus<br>musculu<br>s              |
| 1 | 1.00 | 1 | 1 | 0 | 0.002  | 0 | 0 | 0 | t | 131576 | NSRQTDR<br>EDELI             | Rattus<br>norvegic<br>us         |
| 1 | 1.00 | 1 | 1 | 0 | -0.003 | 0 | 0 | 0 | t | 132293 | FGFPEHLL<br>VDFLQSLs         | Oryctola<br>gus<br>cuniculu<br>s |
| 1 | 1.00 | 1 | 1 | 0 | -0.003 | 0 | 0 | 0 | t | 120084 | LRQQWID<br>VRLRWNP<br>AD     | Oryctola<br>gus<br>cuniculu<br>s |
| 1 | 1.00 | 1 | 1 | 0 | 0.001  | 0 | 0 | 0 | t | 130438 | AFRGHIAR<br>EEAKK            | Papio                            |
| 1 | 1.00 | 1 | 1 | 0 | 0      | 0 | 0 | 0 | t | 119745 | AKLFKDYS<br>SVVRPVED         | Rattus<br>norvegic<br>us         |
| 1 | 1.00 | 1 | 1 | 0 | -0.003 | 0 | 0 | 0 | t | 117544 | KFRFLALKL<br>YFSFTRP         | Oryctola<br>gus<br>cuniculu<br>s |
| 1 | 1.00 | 1 | 1 | 0 | -0.002 | 0 | 0 | 0 | t | 117750 | APGMRPP                      | Mus<br>musculu<br>s              |
| 1 | 1.00 | 1 | 1 | 0 | -0.003 | 0 | 0 | 0 | t | 128766 | GPLTLELQI                    | Papio                            |
| 1 | 1.00 | 1 | 1 | 0 | 0      | 0 | 0 | 0 | t | 119856 | FAIVHMTK<br>LLLDYTGK         | Mus<br>musculu<br>s              |
| 1 | 1.00 | 1 | 1 | 0 | 0      | 0 | 0 | 0 | t | 131087 | SSPPCE                       | Mus<br>musculu<br>s              |
| 1 | 1.00 | 1 | 1 | 0 | 0      | 0 | 0 | 0 | t | 131087 | SSPPCE                       | Mus<br>musculu<br>s              |

|   |      |   |   |   |        |   |   |   |   |        |                              |                                  |
|---|------|---|---|---|--------|---|---|---|---|--------|------------------------------|----------------------------------|
| 1 | 1.00 | 1 | 1 | 0 | -0.003 | 0 | 0 | 0 | t | 119857 | FAQRLMR<br>YWA               | Oryctola<br>gus<br>cuniculu<br>s |
| 1 | 1.00 | 1 | 1 | 0 | -0.003 | 0 | 0 | 0 | t | 119745 | AKLFKDYS<br>SVVRPVED         | Oryctola<br>gus<br>cuniculu<br>s |
| 1 | 1.00 | 1 | 1 | 0 | 0      | 0 | 0 | 0 | t | 117602 | PKVKSKKR<br>EAVAGRG          | Homo<br>sapiens                  |
| 1 | 1.00 | 1 | 1 | 0 | -0.003 | 0 | 0 | 0 | t | 119979 | KAEFHRW<br>SSY               | Oryctola<br>gus<br>cuniculu<br>s |
| 1 | 1.00 | 1 | 1 | 0 | -0.003 | 0 | 0 | 0 | t | 127986 | FVGVGAD<br>YRHASCPI<br>DYIIA | Oryctola<br>gus<br>cuniculu<br>s |
| 1 | 1.00 | 1 | 1 | 0 | 0      | 0 | 0 | 0 | t | 123562 | NSSSSQFQ<br>IHGPR            | Mus<br>musculu<br>s              |
| 1 | 1.00 | 1 | 1 | 0 | -0.003 | 0 | 0 | 0 | t | 118970 | PPPGRRP                      | Oryctola<br>gus<br>cuniculu<br>s |
| 1 | 1.00 | 1 | 1 | 0 | -0.003 | 0 | 0 | 0 | t | 125386 | DVSQTSVT<br>ALPSKGLE<br>HLKE | Oryctola<br>gus<br>cuniculu<br>s |
| 1 | 1.00 | 1 | 1 | 0 | -0.002 | 0 | 0 | 0 | t | 130482 | EIYPWYP<br>MAERS             | Mus<br>musculu<br>s              |
| 1 | 1.00 | 1 | 1 | 0 | 0.002  | 0 | 0 | 0 | t | 123221 | GENHAKS<br>KAVPYSE<br>MYAN   | Rattus<br>norvegic<br>us         |
| 1 | 1.00 | 1 | 1 | 0 | -0.003 | 0 | 0 | 0 | t | 119992 | KLGTWTY<br>DGSVVAIN<br>P     | Oryctola<br>gus<br>cuniculu<br>s |
| 1 | 1.00 | 1 | 1 | 0 | -0.003 | 0 | 0 | 0 | t | 127919 | AFSLPDRS<br>LSAIPFDV<br>SFE  | Oryctola<br>gus<br>cuniculu<br>s |
| 1 | 1.00 | 1 | 1 | 0 | 0      | 0 | 0 | 0 | t | 129776 | RLDRCLKA<br>VRKERSKE<br>SDDN | Mus<br>musculu<br>s              |
| 1 | 1.00 | 1 | 1 | 0 | -0.003 | 0 | 0 | 0 | t | 120084 | LRQQWID<br>VRLRWNP<br>AD     | Oryctola<br>gus<br>cuniculu<br>s |

|   |      |   |   |   |        |   |   |   |   |        |                              |                                  |
|---|------|---|---|---|--------|---|---|---|---|--------|------------------------------|----------------------------------|
| 1 | 1.00 | 1 | 1 | 0 | 0      | 0 | 0 | 0 | t | 125384 | DSHYDYTI<br>CGDSEDM<br>VCTPK | Mus<br>musculu<br>s              |
| 1 | 1.00 | 1 | 1 | 0 | 0      | 0 | 0 | 0 | t | 120849 | NSQPEILE<br>RTRAELD          | Mus<br>musculu<br>s              |
| 1 | 1.00 | 1 | 1 | 0 | -0.003 | 0 | 0 | 0 | t | 120184 | RRRATQLA<br>HL               | Oryctola<br>gus<br>cuniculu<br>s |
| 1 | 1.00 | 1 | 1 | 0 | -0.003 | 0 | 0 | 0 | t | 125384 | DSHYDYTI<br>CGDSEDM<br>VCTPK | Oryctola<br>gus<br>cuniculu<br>s |
| 1 | 1.00 | 1 | 1 | 0 | -0.003 | 0 | 0 | 0 | t | 125384 | DSHYDYTI<br>CGDSEDM<br>VCTPK | Oryctola<br>gus<br>cuniculu<br>s |
| 1 | 1.00 | 1 | 1 | 0 | -0.003 | 0 | 0 | 0 | t | 120249 | TPVLVWIY<br>GG               | Oryctola<br>gus<br>cuniculu<br>s |
| 1 | 1.00 | 1 | 1 | 0 | 0      | 0 | 0 | 0 | t | 120108 | NFMESGE<br>WVIKESRG<br>W     | Rattus<br>norvegic<br>us         |
| 1 | 1.00 | 1 | 1 | 0 | 0      | 0 | 0 | 0 | t | 125377 | DKDAFGG<br>VYSGPSLL<br>DVSQT | Mus<br>musculu<br>s              |
| 1 | 1.00 | 1 | 1 | 0 | -0.003 | 0 | 0 | 0 | t | 125377 | DKDAFGG<br>VYSGPSLL<br>DVSQT | Oryctola<br>gus<br>cuniculu<br>s |
| 1 | 1.00 | 1 | 1 | 0 | -0.003 | 0 | 0 | 0 | t | 119411 | YKYFPEVK<br>TKGMA            | Oryctola<br>gus<br>cuniculu<br>s |
| 1 | 1.00 | 1 | 1 | 0 | -0.003 | 0 | 0 | 0 | t | 125377 | DKDAFGG<br>VYSGPSLL<br>DVSQT | Oryctola<br>gus<br>cuniculu<br>s |
| 1 | 1.00 | 1 | 1 | 0 | 0      | 0 | 0 | 0 | t | 133590 | GMVDGW<br>YG                 | Mus<br>musculu<br>s              |
| 1 | 1.00 | 1 | 1 | 0 | -0.003 | 0 | 0 | 0 | t | 125602 | WMSYPDR<br>TLRTS             | Oryctola<br>gus<br>cuniculu<br>s |
| 1 | 1.00 | 1 | 1 | 0 | -0.003 | 0 | 0 | 0 | t | 119861 | FHRWSSY<br>MVH               | Oryctola<br>gus<br>cuniculu<br>s |

|   |      |   |   |   |        |   |   |   |   |        |                              |                          |
|---|------|---|---|---|--------|---|---|---|---|--------|------------------------------|--------------------------|
| 1 | 1.00 | 1 | 1 | 0 | 0      | 0 | 0 | 0 | t | 119673 | WNPDDYG<br>GVK               | Rattus<br>norvegicus     |
| 1 | 1.00 | 1 | 1 | 0 | 0      | 0 | 0 | 0 | t | 119979 | KAEFHRW<br>SSY               | Mus<br>musculus          |
| 1 | 1.00 | 1 | 1 | 0 | 0      | 0 | 0 | 0 | t | 120084 | LRQQWID<br>VRLRWNP<br>AD     | Mus<br>musculus          |
| 1 | 1.00 | 1 | 1 | 0 | -0.003 | 0 | 0 | 0 | t | 119955 | IRLPSTDDV<br>WLPDLVLY        | Oryctolagus<br>cuniculus |
| 1 | 1.00 | 1 | 1 | 0 | 0      | 0 | 0 | 0 | t | 131073 | SQATANPS<br>CPEGT            | Rattus<br>norvegicus     |
| 1 | 1.00 | 1 | 1 | 0 | 0      | 0 | 0 | 0 | t | 119998 | KQQWVDY<br>NLKWNPD<br>DY     | Rattus<br>norvegicus     |
| 1 | 1.00 | 1 | 1 | 0 | 0      | 0 | 0 | 0 | t | 125375 | DHTLFAAS<br>HNHR             | Sus<br>scrofa            |
| 1 | 1.00 | 1 | 1 | 0 | 0.002  | 0 | 0 | 0 | t | 120067 | LKWNPD<br>YGGVKKIH<br>I      | Rattus<br>norvegicus     |
| 1 | 1.00 | 1 | 1 | 0 | -0.003 | 0 | 0 | 0 | t | 130485 | EVVTGSPR<br>GDSQSS           | Oryctolagus<br>cuniculus |
| 1 | 1.00 | 1 | 1 | 0 | 0.002  | 0 | 0 | 0 | t | 131500 | KAKAQTD<br>REDLRTLL<br>R     | Rattus<br>norvegicus     |
| 1 | 1.00 | 1 | 1 | 0 | 0      | 0 | 0 | 0 | t | 132350 | GPNICTTR<br>GVSSC            | Oryctolagus<br>cuniculus |
| 1 | 1.00 | 1 | 1 | 0 | 0.011  | 0 | 0 | 0 | t | 125540 | QSLRQRKS<br>VNALNSPL<br>HQEY | Oryctolagus<br>cuniculus |
| 1 | 1.00 | 1 | 1 | 0 | -0.003 | 0 | 0 | 0 | t | 119827 | EFHRWSSY<br>MV               | Oryctolagus<br>cuniculus |
| 1 | 1.00 | 1 | 1 | 0 | -0.002 | 0 | 0 | 0 | t | 117948 | KFVETPGQ<br>KYKETDL          | Mus<br>musculus          |

|   |      |   |   |   |        |   |   |   |   |        |                              |                                  |
|---|------|---|---|---|--------|---|---|---|---|--------|------------------------------|----------------------------------|
| 1 | 1.00 | 1 | 1 | 0 | -0.003 | 0 | 0 | 0 | t | 118877 | LDVEQLGI<br>PEQEYSC          | Oryctola<br>gus<br>cuniculu<br>s |
| 1 | 1.00 | 1 | 1 | 0 | -0.003 | 0 | 0 | 0 | t | 127944 | DLVNCNL<br>NTNCVAV<br>AFSLPD | Oryctola<br>gus<br>cuniculu<br>s |
| 1 | 1.00 | 1 | 1 | 0 | 0      | 0 | 0 | 0 | t | 119861 | FHRWSSY<br>MVH               | Mus<br>musculu<br>s              |
| 1 | 1.00 | 1 | 1 | 0 | 0.002  | 0 | 0 | 0 | t | 121010 | TPLIKNPD<br>VK               | Rattus<br>norvegic<br>us         |
| 1 | 1.00 | 1 | 1 | 0 | -0.003 | 0 | 0 | 0 | t | 119758 | ARVYAYVF<br>EH               | Oryctola<br>gus<br>cuniculu<br>s |
| 1 | 1.00 | 1 | 1 | 0 | 0      | 0 | 0 | 0 | t | 134015 | CDKNTGD<br>YYEDSYED          | Oryctola<br>gus<br>cuniculu<br>s |
| 1 | 1.00 | 1 | 1 | 0 | 0      | 0 | 0 | 0 | t | 124008 | DGVVLVD                      | Rattus<br>norvegic<br>us         |
| 1 | 1.00 | 1 | 1 | 0 | -0.003 | 0 | 0 | 0 | t | 125605 | YKEKSKFQ<br>DTHNNAH<br>YYVFF | Oryctola<br>gus<br>cuniculu<br>s |
| 1 | 1.00 | 1 | 1 | 0 | 0      | 0 | 0 | 0 | t | 120109 | NIHPKAPI<br>WGIITSNF         | Rattus<br>norvegic<br>us         |
| 1 | 1.00 | 1 | 1 | 0 | 0.014  | 0 | 0 | 0 | t | 125605 | YKEKSKFQ<br>DTHNNAH<br>YYVFF | Mus<br>musculu<br>s              |
| 1 | 1.00 | 1 | 1 | 0 | 0      | 0 | 0 | 0 | t | 118060 | PPPGMRP<br>P                 | Oryctola<br>gus<br>cuniculu<br>s |
| 1 | 1.00 | 1 | 1 | 0 | 0      | 0 | 0 | 0 | t | 120849 | NSQPEILE<br>RTRAELD          | Mus<br>musculu<br>s              |
| 1 | 1.00 | 1 | 1 | 0 | 0      | 0 | 0 | 0 | t | 119741 | AIFKSYGEII<br>VTHFPFD        | Mus<br>musculu<br>s              |

|   |      |   |   |   |        |   |   |   |   |        |                             |                                  |
|---|------|---|---|---|--------|---|---|---|---|--------|-----------------------------|----------------------------------|
| 1 | 1.00 | 1 | 1 | 0 | -0.003 | 0 | 0 | 0 | t | 120270 | VFRFSFVP<br>VV              | Oryctola<br>gus<br>cuniculu<br>s |
| 1 | 1.00 | 1 | 1 | 0 | 0      | 0 | 0 | 0 | t | 119955 | IRLPSTDDV<br>WLPDLVLY       | Mus<br>musculu<br>s              |
| 1 | 1.00 | 1 | 1 | 0 | -0.002 | 0 | 0 | 0 | t | 122452 | KTTKQSF<br>LSVKAQYK<br>KNKH | Mus<br>musculu<br>s              |
| 1 | 1.00 | 1 | 1 | 0 | -0.003 | 0 | 0 | 0 | t | 119955 | IRLPSTDDV<br>WLPDLVLY       | Oryctola<br>gus<br>cuniculu<br>s |
| 1 | 1.00 | 1 | 1 | 0 | 0      | 0 | 0 | 0 | t | 119828 | EHHTHFV<br>DITVGLQLI        | Mus<br>musculu<br>s              |
| 1 | 1.00 | 1 | 1 | 0 | -0.007 | 0 | 0 | 0 | t | 125327 | YRYDSRPP<br>EDV             | Oryctola<br>gus<br>cuniculu<br>s |
| 1 | 1.00 | 1 | 1 | 0 | 0      | 0 | 0 | 0 | t | 125327 | YRYDSRPP<br>EDV             | Oryctola<br>gus<br>cuniculu<br>s |
| 1 | 1.00 | 1 | 1 | 0 | -0.007 | 0 | 0 | 0 | t | 125327 | YRYDSRPP<br>EDV             | Oryctola<br>gus<br>cuniculu<br>s |
| 1 | 1.00 | 1 | 1 | 0 | -0.002 | 0 | 0 | 0 | t | 117736 | AEMKSLEE<br>KIGCLLK         | Mus<br>musculu<br>s              |
| 1 | 1.00 | 1 | 1 | 0 | 0      | 0 | 0 | 0 | t | 119926 | HFPDQ<br>NCTMKLGI<br>WT     | Mus<br>musculu<br>s              |
| 1 | 1.00 | 1 | 1 | 0 | 0      | 0 | 0 | 0 | t | 119926 | HFPDQ<br>NCTMKLGI<br>WT     | Mus<br>musculu<br>s              |
| 1 | 1.00 | 1 | 1 | 0 | -0.003 | 0 | 0 | 0 | t | 119939 | IFAQRLMR<br>YW              | Oryctola<br>gus<br>cuniculu<br>s |
| 1 | 1.00 | 1 | 1 | 0 | 0      | 0 | 0 | 0 | t | 119562 | DYTGKIM<br>WTPPAIFK<br>S    | Mus<br>musculu<br>s              |

|   |      |   |   |   |        |   |   |   |   |        |                           |                                  |
|---|------|---|---|---|--------|---|---|---|---|--------|---------------------------|----------------------------------|
| 1 | 1.00 | 1 | 1 | 0 | 0      | 0 | 0 | 0 | t | 119488 | LGIWTYDG<br>TKVSISPES     | Mus<br>musculu<br>s              |
| 1 | 1.00 | 1 | 1 | 0 | 0      | 0 | 0 | 0 | t | 119562 | DYTGKIM<br>WTPPAIFK<br>S  | Mus<br>musculu<br>s              |
| 1 | 1.00 | 1 | 1 | 0 | -0.003 | 0 | 0 | 0 | t | 119562 | DYTGKIM<br>WTPPAIFK<br>S  | Oryctola<br>gus<br>cuniculu<br>s |
| 1 | 1.00 | 1 | 1 | 0 | 0      | 0 | 0 | 0 | t | 119867 | FMESGEW<br>VMKDYRG<br>WKH | Mus<br>musculu<br>s              |
| 1 | 1.00 | 1 | 1 | 0 | -0.003 | 0 | 0 | 0 | t | 120229 | SVFRFSFV<br>PV            | Oryctola<br>gus<br>cuniculu<br>s |
| 1 | 1.00 | 1 | 1 | 0 | 0.001  | 0 | 0 | 0 | t | 130437 | AFRGHIAR<br>EE            | Papio                            |
| 1 | 1.00 | 1 | 1 | 0 | -0.003 | 0 | 0 | 0 | t | 125871 | EEEEEEEE<br>E             | Oryctola<br>gus<br>cuniculu<br>s |
| 1 | 1.00 | 1 | 1 | 0 | -0.003 | 0 | 0 | 0 | t | 119562 | DYTGKIM<br>WTPPAIFK<br>S  | Oryctola<br>gus<br>cuniculu<br>s |
| 1 | 1.00 | 1 | 1 | 0 | 0      | 0 | 0 | 0 | t | 119926 | HFPFDQQ<br>NCTMKLGI<br>WT | Mus<br>musculu<br>s              |
| 1 | 1.00 | 1 | 1 | 0 | 0      | 0 | 0 | 0 | t | 119562 | DYTGKIM<br>WTPPAIFK<br>S  | Mus<br>musculu<br>s              |
| 1 | 1.00 | 1 | 1 | 0 | 0      | 0 | 0 | 0 | t | 119048 | VSDYEMKL<br>MDLDVEQ       | Mus<br>musculu<br>s              |
| 1 | 1.00 | 1 | 1 | 0 | -0.003 | 0 | 0 | 0 | t | 119827 | EFHRWSSY<br>MV            | Oryctola<br>gus<br>cuniculu<br>s |
| 1 | 1.00 | 1 | 1 | 0 | 0      | 0 | 0 | 0 | t | 119867 | FMESGEW<br>VMKDYRG<br>WKH | Mus<br>musculu<br>s              |



|   |      |   |   |   |        |   |   |   |   |        |                            |                                  |
|---|------|---|---|---|--------|---|---|---|---|--------|----------------------------|----------------------------------|
| 1 | 1.00 | 1 | 1 | 0 | -0.003 | 0 | 0 | 0 | t | 120156 | QRLMRYW<br>ANF             | Oryctola<br>gus<br>cuniculu<br>s |
| 1 | 1.00 | 1 | 1 | 0 | 0      | 0 | 0 | 0 | t | 119867 | FMESGEW<br>VMKDYRG<br>WKH  | Mus<br>musculu<br>s              |
| 1 | 1.00 | 1 | 1 | 0 | 0      | 0 | 0 | 0 | t | 122950 | YGHGSLEL<br>LADVQ          | Mus<br>musculu<br>s              |
| 1 | 1.00 | 1 | 1 | 0 | 0      | 0 | 0 | 0 | t | 119867 | FMESGEW<br>VMKDYRG<br>WKH  | Mus<br>musculu<br>s              |
| 1 | 1.00 | 1 | 1 | 0 | -0.003 | 0 | 0 | 0 | t | 120189 | RVYAYVFE<br>HR             | Oryctola<br>gus<br>cuniculu<br>s |
| 1 | 1.00 | 1 | 1 | 0 | 0      | 0 | 0 | 0 | t | 119867 | FMESGEW<br>VMKDYRG<br>WKH  | Mus<br>musculu<br>s              |
| 1 | 1.00 | 1 | 1 | 0 | 0      | 0 | 0 | 0 | t | 119867 | FMESGEW<br>VMKDYRG<br>WKH  | Mus<br>musculu<br>s              |
| 1 | 1.00 | 1 | 1 | 0 | 0      | 0 | 0 | 0 | t | 120180 | RQWKAEF<br>HRW             | Mus<br>musculu<br>s              |
| 1 | 1.00 | 1 | 1 | 0 | -0.003 | 0 | 0 | 0 | t | 119980 | KAPQWPP<br>YTA             | Oryctola<br>gus<br>cuniculu<br>s |
| 1 | 1.00 | 1 | 1 | 0 | -0.003 | 0 | 0 | 0 | t | 119926 | HFPFDQQ<br>NCTMKLGI<br>WT  | Oryctola<br>gus<br>cuniculu<br>s |
| 1 | 1.00 | 1 | 1 | 0 | 0      | 0 | 0 | 0 | t | 119867 | FMESGEW<br>VMKDYRG<br>WKH  | Mus<br>musculu<br>s              |
| 1 | 1.00 | 1 | 1 | 0 | 0      | 0 | 0 | 0 | t | 122471 | LLTEHRMT<br>WDPAQPP<br>RDL | Homo<br>sapiens                  |
| 1 | 1.00 | 1 | 1 | 0 | 0      | 0 | 0 | 0 | t | 123377 | KLGYWKIR<br>G              | Ovis<br>aries                    |
| 1 | 1.00 | 1 | 1 | 0 | 0      | 0 | 0 | 0 | t | 125250 | SDEFNPCE<br>DIMGYK         | Mus<br>musculu<br>s              |

|   |      |   |   |   |        |   |   |   |   |        |                              |                                  |
|---|------|---|---|---|--------|---|---|---|---|--------|------------------------------|----------------------------------|
| 1 | 1.00 | 1 | 1 | 0 | -0.003 | 0 | 0 | 0 | t | 119998 | KQQWVDY<br>NLKWNPD<br>DY     | Oryctola<br>gus<br>cuniculu<br>s |
| 1 | 1.00 | 1 | 1 | 0 | 0      | 0 | 0 | 0 | t | 118060 | PPPGMRP<br>P                 | Homo<br>sapiens                  |
| 1 | 1.00 | 1 | 1 | 0 | -0.003 | 0 | 0 | 0 | t | 120180 | RQWKAEF<br>HRW               | Oryctola<br>gus<br>cuniculu<br>s |
| 1 | 1.00 | 1 | 1 | 0 | 0      | 0 | 0 | 0 | t | 119851 | EVNQIVET<br>NVRLRQQ<br>W     | Mus<br>musculu<br>s              |
| 1 | 1.00 | 1 | 1 | 0 | 0      | 0 | 0 | 0 | t | 120316 | WNPADYG<br>GIKKIRLPS         | Mus<br>musculu<br>s              |
| 1 | 1.00 | 1 | 1 | 0 | 0      | 0 | 0 | 0 | t | 119926 | HFPFDQQ<br>NCTMKLGI<br>WT    | Mus<br>musculu<br>s              |
| 1 | 1.00 | 1 | 1 | 0 | 0      | 0 | 0 | 0 | t | 119867 | FMESGEW<br>VMKDYRG<br>WKH    | Mus<br>musculu<br>s              |
| 1 | 1.00 | 1 | 1 | 0 | -0.003 | 0 | 0 | 0 | t | 119867 | FMESGEW<br>VMKDYRG<br>WKH    | Oryctola<br>gus<br>cuniculu<br>s |
| 1 | 1.00 | 1 | 1 | 0 | -0.003 | 0 | 0 | 0 | t | 119851 | EVNQIVET<br>NVRLRQQ<br>W     | Oryctola<br>gus<br>cuniculu<br>s |
| 1 | 1.00 | 1 | 1 | 0 | -0.003 | 0 | 0 | 0 | t | 125498 | MGCSSPP<br>CECHQEE<br>DFRVTC | Oryctola<br>gus<br>cuniculu<br>s |
| 1 | 1.00 | 1 | 1 | 0 | -0.003 | 0 | 0 | 0 | t | 120022 | LENYNKVI<br>RPVEHHT<br>H     | Oryctola<br>gus<br>cuniculu<br>s |
| 1 | 1.00 | 1 | 1 | 0 | -0.008 | 0 | 0 | 0 | t | 125246 | RRQPHVM<br>S                 | Mus<br>musculu<br>s              |
| 1 | 1.00 | 1 | 1 | 0 | -0.008 | 0 | 0 | 0 | t | 125246 | RRQPHVM<br>S                 | Mus<br>musculu<br>s              |

|   |      |   |   |   |        |   |   |   |   |        |                              |                          |
|---|------|---|---|---|--------|---|---|---|---|--------|------------------------------|--------------------------|
| 1 | 1.00 | 1 | 1 | 0 | 0.002  | 0 | 0 | 0 | t | 119998 | KQQWVDY<br>NLKWNP<br>DY      | Rattus<br>norvegicus     |
| 1 | 1.00 | 1 | 1 | 0 | -0.003 | 0 | 0 | 0 | t | 125498 | MGCSSPP<br>CECHQEE<br>DFRVTC | Oryctolagus<br>cuniculus |
| 1 | 1.00 | 1 | 1 | 0 | 0      | 0 | 0 | 0 | t | 130524 | KFHPKDIP<br>YQVW             | Mus<br>musculus          |
| 1 | 1.00 | 1 | 1 | 0 | 0      | 0 | 0 | 0 | t | 130524 | KFHPKDIP<br>YQVW             | Mus<br>musculus          |
| 1 | 1.00 | 1 | 1 | 0 | 0      | 0 | 0 | 0 | t | 120316 | WNPADYG<br>GIKKIRLPS         | Mus<br>musculus          |
| 1 | 1.00 | 1 | 1 | 0 | 0      | 0 | 0 | 0 | t | 120316 | WNPADYG<br>GIKKIRLPS         | Mus<br>musculus          |
| 1 | 1.00 | 1 | 1 | 0 | -0.003 | 0 | 0 | 0 | t | 118060 | PPPGMRP<br>P                 | Oryctolagus<br>cuniculus |
| 1 | 1.00 | 1 | 1 | 0 | 0      | 0 | 0 | 0 | t | 120316 | WNPADYG<br>GIKKIRLPS         | Mus<br>musculus          |
| 1 | 1.00 | 1 | 1 | 0 | -0.003 | 0 | 0 | 0 | t | 119753 | AQGARVY<br>AYV               | Oryctolagus<br>cuniculus |
| 1 | 1.00 | 1 | 1 | 0 | 0      | 0 | 0 | 0 | t | 120316 | WNPADYG<br>GIKKIRLPS         | Mus<br>musculus          |
| 1 | 1.00 | 1 | 1 | 0 | -0.003 | 0 | 0 | 0 | t | 119926 | HFPFDQQ<br>NCTMKLGI<br>WT    | Oryctolagus<br>cuniculus |
| 1 | 1.00 | 1 | 1 | 0 | -0.003 | 0 | 0 | 0 | t | 122932 | VCTPKSDE<br>FNPCEDIM<br>GYK  | Oryctolagus<br>cuniculus |
| 1 | 1.00 | 1 | 1 | 0 | 0      | 0 | 0 | 0 | t | 119926 | HFPFDQQ<br>NCTMKLGI<br>WT    | Mus<br>musculus          |

|   |      |   |   |   |        |   |   |   |   |        |                              |                                  |
|---|------|---|---|---|--------|---|---|---|---|--------|------------------------------|----------------------------------|
| 1 | 1.00 | 1 | 1 | 0 | -0.003 | 0 | 0 | 0 | t | 122932 | VCTPKSDE<br>FNPCEDIM<br>GYK  | Oryctola<br>gus<br>cuniculu<br>s |
| 1 | 1.00 | 1 | 1 | 0 | -0.003 | 0 | 0 | 0 | t | 119926 | HFPFDQQ<br>NCTMKLGI<br>WT    | Oryctola<br>gus<br>cuniculu<br>s |
| 1 | 1.00 | 1 | 1 | 0 | 0      | 0 | 0 | 0 | t | 120316 | WNPADYG<br>GIKKIRLPS         | Mus<br>musculu<br>s              |
| 1 | 1.00 | 1 | 1 | 0 | -0.003 | 0 | 0 | 0 | t | 119867 | FMESGEW<br>VMKDYRG<br>WKH    | Oryctola<br>gus<br>cuniculu<br>s |
| 1 | 1.00 | 1 | 1 | 0 | -0.003 | 0 | 0 | 0 | t | 119851 | EVNQIVET<br>NVRLRQQ<br>W     | Oryctola<br>gus<br>cuniculu<br>s |
| 1 | 1.00 | 1 | 1 | 0 | 0      | 0 | 0 | 0 | t | 120316 | WNPADYG<br>GIKKIRLPS         | Mus<br>musculu<br>s              |
| 1 | 1.00 | 1 | 1 | 0 | 0      | 0 | 0 | 0 | t | 120316 | WNPADYG<br>GIKKIRLPS         | Mus<br>musculu<br>s              |
| 1 | 1.00 | 1 | 1 | 0 | 0      | 0 | 0 | 0 | t | 117683 | VKSKKREA<br>VAGRGRG          | Homo<br>sapiens                  |
| 1 | 1.00 | 1 | 1 | 0 | -0.003 | 0 | 0 | 0 | t | 120316 | WNPADYG<br>GIKKIRLPS         | Oryctola<br>gus<br>cuniculu<br>s |
| 1 | 1.00 | 1 | 1 | 0 | -0.003 | 0 | 0 | 0 | t | 120316 | WNPADYG<br>GIKKIRLPS         | Oryctola<br>gus<br>cuniculu<br>s |
| 1 | 1.00 | 1 | 1 | 0 | -0.003 | 0 | 0 | 0 | t | 120180 | RQWKAEF<br>HRW               | Oryctola<br>gus<br>cuniculu<br>s |
| 1 | 1.00 | 1 | 1 | 0 | 0      | 0 | 0 | 0 | t | 117676 | VEPKVKSK<br>KREAVAG          | Homo<br>sapiens                  |
| 1 | 1.00 | 1 | 1 | 0 | -0.003 | 0 | 0 | 0 | t | 125478 | LHQEYEEN<br>LGDSIVGY<br>KEKS | Oryctola<br>gus<br>cuniculu<br>s |

|   |      |   |   |   |        |   |   |   |   |        |                              |                                  |
|---|------|---|---|---|--------|---|---|---|---|--------|------------------------------|----------------------------------|
| 1 | 1.00 | 1 | 1 | 0 | 0      | 0 | 0 | 0 | t | 120123 | PDTPYLDIT<br>YHFIMQRI        | Mus<br>musculu<br>s              |
| 1 | 1.00 | 1 | 1 | 0 | 0      | 0 | 0 | 0 | t | 120022 | LENYNKVI<br>RPVEHHT<br>H     | Mus<br>musculu<br>s              |
| 1 | 1.00 | 1 | 1 | 0 | 0      | 0 | 0 | 0 | t | 119962 | ISPESDRP<br>DLSTFMES<br>G    | Mus<br>musculu<br>s              |
| 1 | 1.00 | 1 | 1 | 0 | 0      | 0 | 0 | 0 | t | 120123 | PDTPYLDIT<br>YHFIMQRI        | Mus<br>musculu<br>s              |
| 1 | 1.00 | 1 | 1 | 0 | 0      | 0 | 0 | 0 | t | 125498 | MGCSSPP<br>CECHQEE<br>DFRVTC | Mus<br>musculu<br>s              |
| 1 | 1.00 | 1 | 1 | 0 | -0.003 | 0 | 0 | 0 | t | 120123 | PDTPYLDIT<br>YHFIMQRI        | Oryctola<br>gus<br>cuniculu<br>s |
| 1 | 1.00 | 1 | 1 | 0 | -0.003 | 0 | 0 | 0 | t | 128004 | GMIEVQS<br>NYGFVWD<br>VSLKKV | Oryctola<br>gus<br>cuniculu<br>s |
| 1 | 1.00 | 1 | 1 | 0 | 0      | 0 | 0 | 0 | t | 119514 | RGWKHW<br>VYYTCCPD<br>TPY    | Mus<br>musculu<br>s              |
| 1 | 1.00 | 1 | 1 | 0 | 0.002  | 0 | 0 | 0 | t | 130536 | LCENIAGH<br>LK               | Rattus<br>norvegic<br>us         |
| 1 | 1.00 | 1 | 1 | 0 | 0.002  | 0 | 0 | 0 | t | 130537 | LCENIANH<br>LK               | Rattus<br>norvegic<br>us         |
| 1 | 1.00 | 1 | 1 | 0 | 0      | 0 | 0 | 0 | t | 122915 | THKANPSP<br>EPNMHEC          | Oryctola<br>gus<br>cuniculu<br>s |
| 1 | 1.00 | 1 | 1 | 0 | 0      | 0 | 0 | 0 | t | 125498 | MGCSSPP<br>CECHQEE<br>DFRVTC | Mus<br>musculu<br>s              |
| 1 | 1.00 | 1 | 1 | 0 | 0      | 0 | 0 | 0 | t | 119851 | EVNQIVET<br>NVRLRQQ<br>W     | Mus<br>musculu<br>s              |

|   |      |   |   |   |        |   |   |   |   |        |                              |                                  |
|---|------|---|---|---|--------|---|---|---|---|--------|------------------------------|----------------------------------|
| 1 | 1.00 | 1 | 1 | 0 | 0      | 0 | 0 | 0 | t | 120084 | LRQQWID<br>VRLRWNP<br>AD     | Mus<br>musculu<br>s              |
| 1 | 1.00 | 1 | 1 | 0 | -0.003 | 0 | 0 | 0 | t | 120084 | LRQQWID<br>VRLRWNP<br>AD     | Oryctola<br>gus<br>cuniculu<br>s |
| 1 | 1.00 | 1 | 1 | 0 | -0.003 | 0 | 0 | 0 | t | 119488 | LGIWTYDG<br>TKVSISPES        | Oryctola<br>gus<br>cuniculu<br>s |
| 1 | 1.00 | 1 | 1 | 0 | 0      | 0 | 0 | 0 | t | 125209 | QFQIHGPR                     | Mus<br>musculu<br>s              |
| 1 | 1.00 | 1 | 1 | 0 | 0.002  | 0 | 0 | 0 | t | 119745 | AKLFKDYS<br>SVVRPVED         | Rattus<br>norvegic<br>us         |
| 1 | 1.00 | 1 | 1 | 0 | -0.002 | 0 | 0 | 0 | t | 130470 | DWPALIFD<br>QDML             | Mus<br>musculu<br>s              |
| 1 | 1.00 | 1 | 1 | 0 | 0      | 0 | 0 | 0 | t | 120022 | LENYNKVI<br>RPVEHHT<br>H     | Mus<br>musculu<br>s              |
| 1 | 1.00 | 1 | 1 | 0 | -0.003 | 0 | 0 | 0 | t | 119488 | LGIWTYDG<br>TKVSISPES        | Oryctola<br>gus<br>cuniculu<br>s |
| 1 | 1.00 | 1 | 1 | 0 | 0      | 0 | 0 | 0 | t | 119514 | RGWKHW<br>VYYTCCPD<br>TPY    | Mus<br>musculu<br>s              |
| 1 | 1.00 | 1 | 1 | 0 | -0.003 | 0 | 0 | 0 | t | 119733 | AAQGARY<br>YAY               | Oryctola<br>gus<br>cuniculu<br>s |
| 1 | 1.00 | 1 | 1 | 0 | 0      | 0 | 0 | 0 | t | 119981 | KDEGSYFL<br>VY               | Mus<br>musculu<br>s              |
| 1 | 1.00 | 1 | 1 | 0 | -0.003 | 0 | 0 | 0 | t | 120197 | SEHETRLV<br>ANLLENYN         | Oryctola<br>gus<br>cuniculu<br>s |
| 1 | 1.00 | 1 | 1 | 0 | 0.014  | 0 | 0 | 0 | t | 125610 | YYVFFEEQ<br>EDEIIGFG<br>QELK | Mus<br>musculu<br>s              |

|   |      |   |   |   |        |   |   |   |   |        |                              |                                  |
|---|------|---|---|---|--------|---|---|---|---|--------|------------------------------|----------------------------------|
| 1 | 1.00 | 1 | 1 | 0 | -0.003 | 0 | 0 | 0 | t | 119851 | EVNQIVET<br>NVRLRQQ<br>W     | Oryctola<br>gus<br>cuniculu<br>s |
| 1 | 1.00 | 1 | 1 | 0 | 0      | 0 | 0 | 0 | t | 117431 | AARGRGR<br>GMGRGNI<br>F      | Homo<br>sapiens                  |
| 1 | 1.00 | 1 | 1 | 0 | -0.002 | 0 | 0 | 0 | t | 134002 | AKLVTILQ<br>AHPLQQS<br>YD    | Mus<br>musculu<br>s              |
| 1 | 1.00 | 1 | 1 | 0 | -0.003 | 0 | 0 | 0 | t | 119888 | GARVYAY<br>VFE               | Oryctola<br>gus<br>cuniculu<br>s |
| 1 | 1.00 | 1 | 1 | 0 | 0      | 0 | 0 | 0 | t | 120022 | LENYNKVI<br>RPVEHHT<br>H     | Mus<br>musculu<br>s              |
| 1 | 1.00 | 1 | 1 | 0 | -0.003 | 0 | 0 | 0 | t | 120197 | SEHETRLV<br>ANLLENYN         | Oryctola<br>gus<br>cuniculu<br>s |
| 1 | 1.00 | 1 | 1 | 0 | -0.003 | 0 | 0 | 0 | t | 119988 | KIFAQRLM<br>RY               | Oryctola<br>gus<br>cuniculu<br>s |
| 1 | 1.00 | 1 | 1 | 0 | 0.014  | 0 | 0 | 0 | t | 125610 | YYVFFEEQ<br>EDEIIGFG<br>QELK | Mus<br>musculu<br>s              |
| 1 | 1.00 | 1 | 1 | 0 | 0      | 0 | 0 | 0 | t | 125610 | YYVFFEEQ<br>EDEIIGFG<br>QELK | Mus<br>musculu<br>s              |
| 1 | 1.00 | 1 | 1 | 0 | -0.003 | 0 | 0 | 0 | t | 133909 | PEPAKKVP<br>APK              | Oryctola<br>gus<br>cuniculu<br>s |
| 1 | 1.00 | 1 | 1 | 0 | 0.014  | 0 | 0 | 0 | t | 125610 | YYVFFEEQ<br>EDEIIGFG<br>QELK | Mus<br>musculu<br>s              |
| 1 | 1.00 | 1 | 1 | 0 | 0.002  | 0 | 0 | 0 | t | 123282 | HACQKKLL<br>KFEALQQE<br>EGEE | Rattus<br>norvegic<br>us         |
| 1 | 1.00 | 1 | 1 | 0 | -0.003 | 0 | 0 | 0 | t | 130872 | GSFLTKEP<br>SKLNDRA          | Oryctola<br>gus<br>cuniculu<br>s |

|   |      |   |   |   |        |   |   |   |   |        |                              |                                  |
|---|------|---|---|---|--------|---|---|---|---|--------|------------------------------|----------------------------------|
| 1 | 1.00 | 1 | 1 | 0 | -0.003 | 0 | 0 | 0 | t | 119914 | GSVVAINP<br>ESDQPDLS         | Oryctola<br>gus<br>cuniculu<br>s |
| 1 | 1.00 | 1 | 1 | 0 | -0.003 | 0 | 0 | 0 | t | 130872 | GSFLTKEP<br>SKLNDRA          | Oryctola<br>gus<br>cuniculu<br>s |
| 1 | 1.00 | 1 | 1 | 0 | 0      | 0 | 0 | 0 | t | 119851 | EVNQIVET<br>NVRLRQQ<br>W     | Mus<br>musculu<br>s              |
| 1 | 1.00 | 1 | 1 | 0 | 0      | 0 | 0 | 0 | t | 119488 | LGIWYTDG<br>TKVSISPES        | Mus<br>musculu<br>s              |
| 1 | 1.00 | 1 | 1 | 0 | -0.003 | 0 | 0 | 0 | t | 121437 | IVQQFGAP<br>GGLGETLQ<br>QKLL | Oryctola<br>gus<br>cuniculu<br>s |
| 1 | 1.00 | 1 | 1 | 0 | 0      | 0 | 0 | 0 | t | 118549 | PEPAKSAP<br>APKKGSKK<br>AV   | Homo<br>sapiens                  |
| 1 | 1.00 | 1 | 1 | 0 | 0.002  | 0 | 0 | 0 | t | 118549 | PEPAKSAP<br>APKKGSKK<br>AV   | Homo<br>sapiens                  |
| 1 | 1.00 | 1 | 1 | 0 | 0      | 0 | 0 | 0 | t | 120343 | YNLKWNP<br>DDYGGVK<br>KIHI   | Rattus<br>norvegic<br>us         |
| 1 | 1.00 | 1 | 1 | 0 | 0.002  | 0 | 0 | 0 | t | 119914 | GSVVAINP<br>ESDQPDLS         | Rattus<br>norvegic<br>us         |
| 1 | 1.00 | 1 | 1 | 0 | 0      | 0 | 0 | 0 | t | 119851 | EVNQIVET<br>NVRLRQQ<br>W     | Mus<br>musculu<br>s              |
| 1 | 1.00 | 1 | 1 | 0 | 0      | 0 | 0 | 0 | t | 119914 | GSVVAINP<br>ESDQPDLS         | Rattus<br>norvegic<br>us         |
| 1 | 1.00 | 1 | 1 | 0 | -0.003 | 0 | 0 | 0 | t | 123282 | HACQKKLL<br>KFEALQQE<br>EGEE | Oryctola<br>gus<br>cuniculu<br>s |
| 1 | 1.00 | 1 | 1 | 0 | 0      | 0 | 0 | 0 | t | 125498 | MGCSSPP<br>CECHQEE<br>DFRVTC | Mus<br>musculu<br>s              |
| 1 | 1.00 | 1 | 1 | 0 | -0.002 | 0 | 0 | 0 | t | 118058 | PPPGIRGP                     | Mus<br>musculu<br>s              |



|   |      |   |   |   |        |   |   |   |   |        |                            |                                  |
|---|------|---|---|---|--------|---|---|---|---|--------|----------------------------|----------------------------------|
| 1 | 1.00 | 1 | 1 | 0 | 0      | 0 | 0 | 0 | t | 118549 | PEPAKSAP<br>APKKGSKK<br>AV | Mus<br>musculu<br>s              |
| 1 | 1.00 | 1 | 1 | 0 | 0      | 0 | 0 | 0 | t | 119488 | LGIWTYDG<br>TKVSISPES      | Mus<br>musculu<br>s              |
| 1 | 1.00 | 1 | 1 | 0 | 0      | 0 | 0 | 0 | t | 120197 | SEHETRLV<br>ANLLENYN       | Mus<br>musculu<br>s              |
| 1 | 1.00 | 1 | 1 | 0 | -0.003 | 0 | 0 | 0 | t | 120022 | LENYNKVI<br>RPVEHHT<br>H   | Oryctola<br>gus<br>cuniculu<br>s |
| 1 | 1.00 | 1 | 1 | 0 | -0.003 | 0 | 0 | 0 | t | 119331 | RTVLVSM<br>NYR             | Oryctola<br>gus<br>cuniculu<br>s |
| 1 | 1.00 | 1 | 1 | 0 | -0.002 | 0 | 0 | 0 | t | 118963 | PNYKVVV<br>YAVTK           | Mus<br>musculu<br>s              |
| 1 | 1.00 | 1 | 1 | 0 | 0      | 0 | 0 | 0 | t | 119378 | VDYNLKW<br>NPDDYGG<br>VK   | Rattus<br>norvegic<br>us         |
| 1 | 1.00 | 1 | 1 | 0 | -0.002 | 0 | 0 | 0 | t | 130470 | DWPALIFD<br>QDML           | Mus<br>musculu<br>s              |
| 1 | 1.00 | 1 | 1 | 0 | -0.002 | 0 | 0 | 0 | t | 121219 | DVEPKVKS<br>KKREAVAG       | Mus<br>musculu<br>s              |
| 1 | 1.00 | 1 | 1 | 0 | 0      | 0 | 0 | 0 | t | 122721 | CSNSSSSQ<br>FQIHGPR        | Mus<br>musculu<br>s              |
| 1 | 1.00 | 1 | 1 | 0 | 0      | 0 | 0 | 0 | t | 119488 | LGIWTYDG<br>TKVSISPES      | Mus<br>musculu<br>s              |
| 1 | 1.00 | 1 | 1 | 0 | 0      | 0 | 0 | 0 | t | 119828 | EHHTHFV<br>DITVGLQLI       | Mus<br>musculu<br>s              |
| 1 | 1.00 | 1 | 1 | 0 | 0      | 0 | 0 | 0 | t | 119851 | EVNQIVET<br>NVRLRQQ<br>W   | Mus<br>musculu<br>s              |
| 1 | 1.00 | 1 | 1 | 0 | 0      | 0 | 0 | 0 | t | 118549 | PEPAKSAP<br>APKKGSKK<br>AV | Mus<br>musculu<br>s              |

|   |      |   |   |   |        |   |   |   |   |        |                            |                                  |
|---|------|---|---|---|--------|---|---|---|---|--------|----------------------------|----------------------------------|
| 1 | 1.00 | 1 | 1 | 0 | -0.003 | 0 | 0 | 0 | t | 119845 | ESDQPDLS<br>NFMESGE<br>W   | Oryctola<br>gus<br>cuniculu<br>s |
| 1 | 1.00 | 1 | 1 | 0 | -0.003 | 0 | 0 | 0 | t | 119410 | YKMFPEVK<br>EKGMA          | Oryctola<br>gus<br>cuniculu<br>s |
| 1 | 1.00 | 1 | 1 | 0 | -0.003 | 0 | 0 | 0 | t | 127958 | EHP                        | Oryctola<br>gus<br>cuniculu<br>s |
| 1 | 1.00 | 1 | 1 | 0 | 0      | 0 | 0 | 0 | t | 119828 | EHHTHFV<br>DITVGLQLI       | Mus<br>musculu<br>s              |
| 1 | 1.00 | 1 | 1 | 0 | 0      | 0 | 0 | 0 | t | 120197 | SEHETRLV<br>ANLLENYN       | Mus<br>musculu<br>s              |
| 1 | 1.00 | 1 | 1 | 0 | -0.003 | 0 | 0 | 0 | t | 119514 | RGWKHW<br>VYYTCCPD<br>TPY  | Oryctola<br>gus<br>cuniculu<br>s |
| 1 | 1.00 | 1 | 1 | 0 | 0      | 0 | 0 | 0 | t | 119828 | EHHTHFV<br>DITVGLQLI       | Mus<br>musculu<br>s              |
| 1 | 1.00 | 1 | 1 | 0 | -0.003 | 0 | 0 | 0 | t | 122293 | CTYVLDPE<br>NLTLKAPY<br>EA | Oryctola<br>gus<br>cuniculu<br>s |
| 1 | 1.00 | 1 | 1 | 0 | 0      | 0 | 0 | 0 | t | 120197 | SEHETRLV<br>ANLLENYN       | Mus<br>musculu<br>s              |
| 1 | 1.00 | 1 | 1 | 0 | -0.003 | 0 | 0 | 0 | t | 120197 | SEHETRLV<br>ANLLENYN       | Oryctola<br>gus<br>cuniculu<br>s |
| 1 | 1.00 | 1 | 1 | 0 | -0.002 | 0 | 0 | 0 | t | 121542 | LFKPPKYH<br>PDVPYVKR       | Mus<br>musculu<br>s              |
| 1 | 1.00 | 1 | 1 | 0 | 0      | 0 | 0 | 0 | t | 119488 | LGIWTYDG<br>TKVSISPES      | Mus<br>musculu<br>s              |
| 1 | 1.00 | 1 | 1 | 0 | 0      | 0 | 0 | 0 | t | 119488 | LGIWTYDG<br>TKVSISPES      | Mus<br>musculu<br>s              |

|   |      |   |   |   |        |   |   |   |   |        |                              |                                  |
|---|------|---|---|---|--------|---|---|---|---|--------|------------------------------|----------------------------------|
| 1 | 1.00 | 1 | 1 | 0 | 0      | 0 | 0 | 0 | t | 119488 | LGIWTYDG<br>TKVSISPES        | Mus<br>musculu<br>s              |
| 1 | 1.00 | 1 | 1 | 0 | -0.003 | 0 | 0 | 0 | t | 120129 | PKAPQWP<br>PYT               | Oryctola<br>gus<br>cuniculu<br>s |
| 1 | 1.00 | 1 | 1 | 0 | -0.003 | 0 | 0 | 0 | t | 119803 | DLVLYNNA<br>DGDFAI VH        | Oryctola<br>gus<br>cuniculu<br>s |
| 1 | 1.00 | 1 | 1 | 0 | 0      | 0 | 0 | 0 | t | 120084 | LRQQWID<br>VRLRWNP<br>AD     | Mus<br>musculu<br>s              |
| 1 | 1.00 | 1 | 1 | 0 | 0.002  | 0 | 0 | 0 | t | 124998 | CLQMNNKK<br>DMVAIKH<br>LLSE  | Rattus<br>norvegic<br>us         |
| 1 | 1.00 | 1 | 1 | 0 | 0      | 0 | 0 | 0 | t | 119488 | LGIWTYDG<br>TKVSISPES        | Mus<br>musculu<br>s              |
| 1 | 1.00 | 1 | 1 | 0 | 0.002  | 0 | 0 | 0 | t | 119895 | GGVKKIHI<br>PSEKIWRP         | Rattus<br>norvegic<br>us         |
| 1 | 1.00 | 1 | 1 | 0 | -0.003 | 0 | 0 | 0 | t | 120067 | LKWNPDD<br>YGGVKKIHI<br>I    | Oryctola<br>gus<br>cuniculu<br>s |
| 1 | 1.00 | 1 | 1 | 0 | 0      | 0 | 0 | 0 | t | 120070 | LLDQRLAL<br>QW               | Mus<br>musculu<br>s              |
| 1 | 1.00 | 1 | 1 | 0 | 0.002  | 0 | 0 | 0 | t | 120503 | ENKIFADDI<br>DIS             | Rattus<br>norvegic<br>us         |
| 1 | 1.00 | 1 | 1 | 0 | 0      | 0 | 0 | 0 | t | 120084 | LRQQWID<br>VRLRWNP<br>AD     | Mus<br>musculu<br>s              |
| 1 | 1.00 | 1 | 1 | 0 | 0      | 0 | 0 | 0 | t | 123511 | MPPMTQ<br>AP                 | Oryctola<br>gus<br>cuniculu<br>s |
| 1 | 1.00 | 1 | 1 | 0 | 0.005  | 0 | 0 | 0 | t | 119597 | INEPVQVD<br>IPNNPVRE<br>GRNV | Homo<br>sapiens                  |

|   |      |   |   |   |        |   |   |   |   |        |                              |                                  |
|---|------|---|---|---|--------|---|---|---|---|--------|------------------------------|----------------------------------|
| 1 | 1.00 | 1 | 1 | 0 | 0      | 0 | 0 | 0 | t | 122885 | QVAALTW<br>VQTHIRGF<br>GGDPR | Mus<br>musculu<br>s              |
| 1 | 1.00 | 1 | 1 | 0 | 0      | 0 | 0 | 0 | t | 121845 | SGRALLEF<br>SCFKGSC          | Mus<br>musculu<br>s              |
| 1 | 1.00 | 1 | 1 | 0 | -0.003 | 0 | 0 | 0 | t | 119187 | GNAEVHA<br>SFFDIGG           | Oryctola<br>gus<br>cuniculu<br>s |
| 1 | 1.00 | 1 | 1 | 0 | -0.003 | 0 | 0 | 0 | t | 120084 | LRQQWID<br>VRLRWNP<br>AD     | Oryctola<br>gus<br>cuniculu<br>s |
| 1 | 1.00 | 1 | 1 | 0 | 0      | 0 | 0 | 0 | t | 120084 | LRQQWID<br>VRLRWNP<br>AD     | Mus<br>musculu<br>s              |
| 1 | 1.00 | 1 | 1 | 0 | 0      | 0 | 0 | 0 | t | 118480 | KWNPDDY<br>GGVK              | Rattus<br>norvegic<br>us         |
| 1 | 1.00 | 1 | 1 | 0 | -0.003 | 0 | 0 | 0 | t | 119828 | EHHTHFV<br>DITVGLQLI         | Oryctola<br>gus<br>cuniculu<br>s |
| 1 | 1.00 | 1 | 1 | 0 | 0      | 0 | 0 | 0 | t | 118336 | ERADLIAYL<br>KKATNE          | Mus<br>musculu<br>s              |
| 1 | 1.00 | 1 | 1 | 0 | 0      | 0 | 0 | 0 | t | 120197 | SEHETRLV<br>ANLLENYN         | Mus<br>musculu<br>s              |
| 1 | 1.00 | 1 | 1 | 0 | 0      | 0 | 0 | 0 | t | 119828 | EHHTHFV<br>DITVGLQLI         | Mus<br>musculu<br>s              |
| 1 | 1.00 | 1 | 1 | 0 | 0      | 0 | 0 | 0 | t | 119851 | EVNQIVET<br>NVRLRQQ<br>W     | Mus<br>musculu<br>s              |
| 1 | 1.00 | 1 | 1 | 0 | 0      | 0 | 0 | 0 | t | 119962 | ISPESDRP<br>DLSTFMES<br>G    | Mus<br>musculu<br>s              |
| 1 | 1.00 | 1 | 1 | 0 | -0.003 | 0 | 0 | 0 | t | 119488 | LGIWTYDG<br>TKVSISPES        | Oryctola<br>gus<br>cuniculu<br>s |

|   |      |   |   |   |        |   |   |   |   |        |                             |                                  |
|---|------|---|---|---|--------|---|---|---|---|--------|-----------------------------|----------------------------------|
| 1 | 1.00 | 1 | 1 | 0 | 0      | 0 | 0 | 0 | t | 119514 | RGWKHW<br>VYYTCCPD<br>TPY   | Mus<br>musculu<br>s              |
| 1 | 1.00 | 1 | 1 | 0 | 0      | 0 | 0 | 0 | t | 119514 | RGWKHW<br>VYYTCCPD<br>TPY   | Mus<br>musculu<br>s              |
| 1 | 1.00 | 1 | 1 | 0 | -0.003 | 0 | 0 | 0 | t | 119187 | GNAEVHA<br>SFFDIGG          | Oryctola<br>gus<br>cuniculu<br>s |
| 1 | 1.00 | 1 | 1 | 0 | 0      | 0 | 0 | 0 | t | 118428 | IRYFILPDSL<br>PLDTL         | Mus<br>musculu<br>s              |
| 1 | 1.00 | 1 | 1 | 0 | 0      | 0 | 0 | 0 | t | 119828 | EHHTHFV<br>DITVGLQLI        | Mus<br>musculu<br>s              |
| 1 | 1.00 | 1 | 1 | 0 | -0.003 | 0 | 0 | 0 | t | 119488 | LGIWTYDG<br>TKVSISPES       | Oryctola<br>gus<br>cuniculu<br>s |
| 1 | 1.00 | 1 | 1 | 0 | 0      | 0 | 0 | 0 | t | 119987 | KIDIDTEAY<br>TENGEW         | Rattus<br>norvegic<br>us         |
| 1 | 1.00 | 1 | 1 | 0 | -0.003 | 0 | 0 | 0 | t | 119962 | ISPESDRP<br>DLSTFMES<br>G   | Oryctola<br>gus<br>cuniculu<br>s |
| 1 | 1.00 | 1 | 1 | 0 | -0.003 | 0 | 0 | 0 | t | 119962 | ISPESDRP<br>DLSTFMES<br>G   | Oryctola<br>gus<br>cuniculu<br>s |
| 1 | 1.00 | 1 | 1 | 0 | -0.003 | 0 | 0 | 0 | t | 122293 | CTYVLDPE<br>NLTLKAPY<br>EA  | Oryctola<br>gus<br>cuniculu<br>s |
| 1 | 1.00 | 1 | 1 | 0 | -0.003 | 0 | 0 | 0 | t | 120173 | RLMRYWA<br>NFA              | Oryctola<br>gus<br>cuniculu<br>s |
| 1 | 1.00 | 1 | 1 | 0 | 0      | 0 | 0 | 0 | t | 119488 | LGIWTYDG<br>TKVSISPES       | Mus<br>musculu<br>s              |
| 1 | 1.00 | 1 | 1 | 0 | 0.005  | 0 | 0 | 0 | t | 119553 | ASVSEGDA<br>VVNAVSQ<br>ETPA | Homo<br>sapiens                  |

|   |      |   |   |   |        |   |   |   |   |        |                              |                                  |
|---|------|---|---|---|--------|---|---|---|---|--------|------------------------------|----------------------------------|
| 1 | 1.00 | 1 | 1 | 0 | 0      | 0 | 0 | 0 | t | 119551 | AIFKSYCEII<br>VTHFPFD        | Mus<br>musculu<br>s              |
| 1 | 1.00 | 1 | 1 | 0 | 0.014  | 0 | 0 | 0 | t | 122780 | GQELKNP<br>QEETLQAF<br>DSHYD | Mus<br>musculu<br>s              |
| 1 | 1.00 | 1 | 1 | 0 | -0.002 | 0 | 0 | 0 | t | 130643 | YSLLEPYT<br>FDP              | Mus<br>musculu<br>s              |
| 1 | 1.00 | 1 | 1 | 0 | 0      | 0 | 0 | 0 | t | 117513 | GRGRGRG<br>RGRGGPR<br>R      | Homo<br>sapiens                  |
| 1 | 1.00 | 1 | 1 | 0 | -0.003 | 0 | 0 | 0 | t | 120516 | EWGWS                        | Oryctola<br>gus<br>cuniculu<br>s |
| 1 | 1.00 | 1 | 1 | 0 | -0.002 | 0 | 0 | 0 | t | 130636 | WPQIWFD<br>DEEDV             | Mus<br>musculu<br>s              |
| 1 | 1.00 | 1 | 1 | 0 | 0      | 0 | 0 | 0 | t | 119851 | EVNQIVET<br>NVRLRQQ<br>W     | Mus<br>musculu<br>s              |
| 1 | 1.00 | 1 | 1 | 0 | -0.003 | 0 | 0 | 0 | t | 120347 | YRGWKH<br>WVYYTCC<br>PDTPYLD | Oryctola<br>gus<br>cuniculu<br>s |
| 1 | 1.00 | 1 | 1 | 0 | 0      | 0 | 0 | 0 | t | 120347 | YRGWKH<br>WVYYTCC<br>PDTPYLD | Mus<br>musculu<br>s              |
| 1 | 1.00 | 1 | 1 | 0 | -0.003 | 0 | 0 | 0 | t | 120347 | YRGWKH<br>WVYYTCC<br>PDTPYLD | Oryctola<br>gus<br>cuniculu<br>s |
| 1 | 1.00 | 1 | 1 | 0 | 0      | 0 | 0 | 0 | t | 122293 | CTYVLDPE<br>NLTLKAPY<br>EA   | Oryctola<br>gus<br>cuniculu<br>s |
| 1 | 1.00 | 1 | 1 | 0 | -0.003 | 0 | 0 | 0 | t | 119851 | EVNQIVET<br>NVRLRQQ<br>W     | Oryctola<br>gus<br>cuniculu<br>s |
| 1 | 1.00 | 1 | 1 | 0 | 0      | 0 | 0 | 0 | t | 121845 | SGRALLEF<br>SCFKGSC          | Mus<br>musculu<br>s              |

|   |      |   |   |   |        |   |   |   |   |        |                          |                                  |
|---|------|---|---|---|--------|---|---|---|---|--------|--------------------------|----------------------------------|
| 1 | 1.00 | 1 | 1 | 0 | -0.003 | 0 | 0 | 0 | t | 119735 | AEFHRWS<br>SYM           | Oryctola<br>gus<br>cuniculu<br>s |
| 1 | 1.00 | 1 | 1 | 0 | 0      | 0 | 0 | 0 | t | 119904 | GLQLIQLIS<br>VDEVNQI     | Mus<br>musculu<br>s              |
| 1 | 1.00 | 1 | 1 | 0 | 0      | 0 | 0 | 0 | t | 119904 | GLQLIQLIS<br>VDEVNQI     | Mus<br>musculu<br>s              |
| 1 | 1.00 | 1 | 1 | 0 | 0      | 0 | 0 | 0 | t | 119904 | GLQLIQLIS<br>VDEVNQI     | Mus<br>musculu<br>s              |
| 1 | 1.00 | 1 | 1 | 0 | 0      | 0 | 0 | 0 | t | 123193 | FQIHGPR                  | Mus<br>musculu<br>s              |
| 1 | 1.00 | 1 | 1 | 0 | 0      | 0 | 0 | 0 | t | 119904 | GLQLIQLIS<br>VDEVNQI     | Mus<br>musculu<br>s              |
| 1 | 1.00 | 1 | 1 | 0 | -0.003 | 0 | 0 | 0 | t | 119904 | GLQLIQLIS<br>VDEVNQI     | Oryctola<br>gus<br>cuniculu<br>s |
| 1 | 1.00 | 1 | 1 | 0 | -0.008 | 0 | 0 | 0 | t | 133802 | DSPAPIIKL<br>GG          | Mus<br>musculu<br>s              |
| 1 | 1.00 | 1 | 1 | 0 | -0.002 | 0 | 0 | 0 | t | 130635 | WGPRVIFE<br>DVTV         | Mus<br>musculu<br>s              |
| 1 | 1.00 | 1 | 1 | 0 | 0      | 0 | 0 | 0 | t | 119855 | FAESRIRRE<br>TIAAED      | Homo<br>sapiens                  |
| 1 | 1.00 | 1 | 1 | 0 | 0      | 0 | 0 | 0 | t | 119378 | VDYNLKW<br>NPDDYGG<br>VK | Rattus<br>norvegic<br>us         |
| 1 | 1.00 | 1 | 1 | 0 | -0.002 | 0 | 0 | 0 | t | 130634 | WEWDWP<br>RIELNI         | Mus<br>musculu<br>s              |
| 1 | 1.00 | 1 | 1 | 0 | 0      | 0 | 0 | 0 | t | 119904 | GLQLIQLIS<br>VDEVNQI     | Mus<br>musculu<br>s              |
| 1 | 1.00 | 1 | 1 | 0 | 0      | 0 | 0 | 0 | t | 133908 | PDTGISSK<br>AM           | Oryctola<br>gus<br>cuniculu<br>s |

|   |      |   |   |   |        |   |   |   |   |        |                             |                                  |
|---|------|---|---|---|--------|---|---|---|---|--------|-----------------------------|----------------------------------|
| 1 | 1.00 | 1 | 1 | 0 | -0.003 | 0 | 0 | 0 | t | 125472 | LDVYLNK<br>NKYLTVID<br>KDAF | Oryctola<br>gus<br>cuniculu<br>s |
| 1 | 1.00 | 1 | 1 | 0 | 0      | 0 | 0 | 0 | t | 119663 | VIVELIPST<br>SSAV           | Mus<br>musculu<br>s              |
| 1 | 1.00 | 1 | 1 | 0 | 0      | 0 | 0 | 0 | t | 119673 | WNPDDYG<br>GVK              | Rattus<br>norvegic<br>us         |
| 1 | 1.00 | 1 | 1 | 0 | -0.003 | 0 | 0 | 0 | t | 119910 | GQYFAKPR<br>NQGG            | Oryctola<br>gus<br>cuniculu<br>s |
| 1 | 1.00 | 1 | 1 | 0 | -0.003 | 0 | 0 | 0 | t | 119904 | GLQLIQLIS<br>VDEVNQI        | Oryctola<br>gus<br>cuniculu<br>s |
| 1 | 1.00 | 1 | 1 | 0 | 0      | 0 | 0 | 0 | t | 119962 | ISPESDRP<br>DLSTFMES<br>G   | Mus<br>musculu<br>s              |
| 1 | 1.00 | 1 | 1 | 0 | -0.003 | 0 | 0 | 0 | t | 120403 | AMGSKGN<br>RTDSC            | Oryctola<br>gus<br>cuniculu<br>s |
| 1 | 1.00 | 1 | 1 | 0 | -0.003 | 0 | 0 | 0 | t | 119735 | AEFHRWS<br>SYM              | Oryctola<br>gus<br>cuniculu<br>s |
| 1 | 1.00 | 1 | 1 | 0 | -0.003 | 0 | 0 | 0 | t | 119904 | GLQLIQLIS<br>VDEVNQI        | Oryctola<br>gus<br>cuniculu<br>s |
| 1 | 1.00 | 1 | 1 | 0 | 0      | 0 | 0 | 0 | t | 130632 | VWYYSLEH<br>STDDYAS         | Mus<br>musculu<br>s              |
| 1 | 1.00 | 1 | 1 | 0 | 0      | 0 | 0 | 0 | t | 131344 | AIGDRSKT<br>DRENSVSI<br>G   | Homo<br>sapiens                  |
| 1 | 1.00 | 1 | 1 | 0 | 0      | 0 | 0 | 0 | t | 125870 | EEEEEEEE                    | Mus<br>musculu<br>s              |
| 1 | 1.00 | 1 | 1 | 0 | 0      | 0 | 0 | 0 | t | 119514 | RGWKHW<br>VYYTCCPD<br>TPY   | Mus<br>musculu<br>s              |
| 1 | 1.00 | 1 | 1 | 0 | -0.003 | 0 | 0 | 0 | t | 119551 | AIFKSYCEII<br>VTHFPFD       | Oryctola<br>gus<br>cuniculu<br>s |



|   |      |   |   |   |        |   |   |   |   |        |                            |                                  |
|---|------|---|---|---|--------|---|---|---|---|--------|----------------------------|----------------------------------|
| 1 | 1.00 | 1 | 1 | 0 | 0      | 0 | 0 | 0 | t | 119551 | AIFKSYCEII<br>VTHFPFD      | Mus<br>musculu<br>s              |
| 1 | 1.00 | 1 | 1 | 0 | 0      | 0 | 0 | 0 | t | 119735 | AEFHRWS<br>SYM             | Mus<br>musculu<br>s              |
| 1 | 1.00 | 1 | 1 | 0 | -0.003 | 0 | 0 | 0 | t | 119551 | AIFKSYCEII<br>VTHFPFD      | Oryctola<br>gus<br>cuniculu<br>s |
| 1 | 1.00 | 1 | 1 | 0 | 0      | 0 | 0 | 0 | t | 119962 | ISPESDRP<br>DLSTFMES<br>G  | Mus<br>musculu<br>s              |
| 1 | 1.00 | 1 | 1 | 0 | 0      | 0 | 0 | 0 | t | 119551 | AIFKSYCEII<br>VTHFPFD      | Mus<br>musculu<br>s              |
| 1 | 1.00 | 1 | 1 | 0 | -0.003 | 0 | 0 | 0 | t | 124603 | QHWSYPL<br>RPG             | Rattus<br>norvegic<br>us         |
| 1 | 1.00 | 1 | 1 | 0 | 0.002  | 0 | 0 | 0 | t | 130621 | TFYTK                      | Rattus<br>norvegic<br>us         |
| 1 | 1.00 | 1 | 1 | 0 | -0.003 | 0 | 0 | 0 | t | 125551 | RNLTYIDP<br>DALKEPL<br>KFL | Oryctola<br>gus<br>cuniculu<br>s |
| 1 | 1.00 | 1 | 1 | 0 | 0      | 0 | 0 | 0 | t | 119551 | AIFKSYCEII<br>VTHFPFD      | Mus<br>musculu<br>s              |
| 1 | 1.00 | 1 | 1 | 0 | -0.003 | 0 | 0 | 0 | t | 119551 | AIFKSYCEII<br>VTHFPFD      | Oryctola<br>gus<br>cuniculu<br>s |
| 1 | 1.00 | 1 | 1 | 0 | 0      | 0 | 0 | 0 | t | 119845 | ESDQPDLS<br>NFMESGE<br>W   | Rattus<br>norvegic<br>us         |
| 1 | 1.00 | 1 | 1 | 0 | 0.002  | 0 | 0 | 0 | t | 130620 | TFYLK                      | Rattus<br>norvegic<br>us         |
| 1 | 1.00 | 1 | 1 | 0 | -0.003 | 0 | 0 | 0 | t | 119551 | AIFKSYCEII<br>VTHFPFD      | Oryctola<br>gus<br>cuniculu<br>s |

|   |      |   |   |   |        |   |   |   |   |        |                              |                       |
|---|------|---|---|---|--------|---|---|---|---|--------|------------------------------|-----------------------|
| 1 | 1.00 | 1 | 1 | 0 | 0      | 0 | 0 | 0 | t | 125870 | EEEEEEEEEE                   | Mus musculus          |
| 1 | 1.00 | 1 | 1 | 0 | 0      | 0 | 0 | 0 | t | 124029 | DQSIGDLI<br>AEAMDKV          | Homo sapiens          |
| 1 | 1.00 | 1 | 1 | 0 | 0.002  | 0 | 0 | 0 | t | 121054 | VTGEVIFQ<br>TPL              | Rattus norvegicus     |
| 1 | 1.00 | 1 | 1 | 0 | -0.003 | 0 | 0 | 0 | t | 123064 | CPTMTRVL<br>QGVLPALP<br>QVVC | Oryctolagus cuniculus |
| 1 | 1.00 | 1 | 1 | 0 | -0.003 | 0 | 0 | 0 | t | 119962 | ISPESDRP<br>DLSTFMES<br>G    | Oryctolagus cuniculus |
| 1 | 1.00 | 1 | 1 | 0 | 0      | 0 | 0 | 0 | t | 123567 | PAKLGYW<br>KI                | Ovis aries            |
| 1 | 1.00 | 1 | 1 | 0 | 0      | 0 | 0 | 0 | t | 122857 | MGCSSPP<br>CECHQEE           | Mus musculus          |
| 1 | 1.00 | 1 | 1 | 0 | 0      | 0 | 0 | 0 | t | 121348 | GQFRVIGP<br>GHPIRALV<br>GD   | Rattus norvegicus     |
| 1 | 1.00 | 1 | 1 | 0 | -0.003 | 0 | 0 | 0 | t | 120181 | RRATQLA<br>HLV               | Oryctolagus cuniculus |
| 1 | 1.00 | 1 | 1 | 0 | 0      | 0 | 0 | 0 | t | 105127 | DAEFRHD                      | Mus musculus          |
| 1 | 1.00 | 1 | 1 | 0 | -0.003 | 0 | 0 | 0 | t | 98183  | KSAYTPAY<br>YT               | Oryctolagus cuniculus |
| 1 | 1.00 | 1 | 1 | 0 | 0      | 0 | 0 | 0 | t | 113534 | IDVDVSKP<br>DLTAALRD<br>VRQQ | Mus musculus          |
| 1 | 1.00 | 1 | 1 | 0 | -0.003 | 0 | 0 | 0 | t | 110284 | HKSAIVTLT<br>YDSEWQR<br>DQ   | Oryctolagus cuniculus |
| 1 | 1.00 | 1 | 1 | 0 | 0      | 0 | 0 | 0 | t | 105127 | DAEFRHD                      | Mus musculus          |

|   |      |   |   |   |        |   |   |   |   |        |                              |                                  |
|---|------|---|---|---|--------|---|---|---|---|--------|------------------------------|----------------------------------|
| 1 | 1.00 | 1 | 1 | 0 | 0      | 0 | 0 | 0 | t | 106482 | GSRSRTPS<br>LPTPTRE          | Mus<br>musculu<br>s              |
| 1 | 1.00 | 1 | 1 | 0 | 0      | 0 | 0 | 0 | t | 111515 | LQPETTDL<br>YCYEQLND<br>SSEE | Mus<br>musculu<br>s              |
| 1 | 1.00 | 1 | 1 | 0 | 0      | 0 | 0 | 0 | t | 104443 | DAEFRHDS<br>GYE              | Mus<br>musculu<br>s              |
| 1 | 1.00 | 1 | 1 | 0 | 0      | 0 | 0 | 0 | t | 100070 | GLMVGGV<br>VIA               | Oryctola<br>gus<br>cuniculu<br>s |
| 1 | 1.00 | 1 | 1 | 0 | 0      | 0 | 0 | 0 | t | 100070 | GLMVGGV<br>VIA               | Oryctola<br>gus<br>cuniculu<br>s |
| 1 | 1.00 | 1 | 1 | 0 | 0      | 0 | 0 | 0 | t | 110284 | HKSAIVTLT<br>YDSEWQR<br>DQ   | Homo<br>sapiens                  |
| 1 | 1.00 | 1 | 1 | 0 | 0      | 0 | 0 | 0 | t | 106322 | DAEFRHDS<br>G                | Mus<br>musculu<br>s              |
| 1 | 1.00 | 1 | 1 | 0 | 0      | 0 | 0 | 0 | t | 108796 | ARGLTGRP<br>GDA              | Mus<br>musculu<br>s              |
| 1 | 1.00 | 1 | 1 | 0 | 0.002  | 0 | 0 | 0 | t | 114149 | YGSLPQKA<br>QGHRPQD<br>E     | Rattus<br>norvegic<br>us         |
| 1 | 1.00 | 1 | 1 | 0 | 0      | 0 | 0 | 0 | t | 110847 | FFSARGHR<br>PLDKKREE<br>AP   | Homo<br>sapiens                  |
| 1 | 1.00 | 1 | 1 | 0 | -0.003 | 0 | 0 | 0 | t | 98453  | SGFSGSVQ<br>FV               | Oryctola<br>gus<br>cuniculu<br>s |
| 1 | 1.00 | 1 | 1 | 0 | 0      | 0 | 0 | 0 | t | 107345 | EQRRAA                       | Homo<br>sapiens                  |
| 1 | 1.00 | 1 | 1 | 0 | 0.009  | 0 | 0 | 0 | t | 113879 | SQRSQDE<br>N                 | Oryctola<br>gus<br>cuniculu<br>s |
| 1 | 1.00 | 1 | 1 | 0 | 0.012  | 0 | 0 | 0 | t | 113879 | SQRSQDE<br>N                 | Rattus<br>norvegic<br>us         |
| 1 | 1.00 | 1 | 1 | 0 | 0      | 0 | 0 | 0 | t | 105127 | DAEFRHD                      | Mus<br>musculu<br>s              |

|   |      |   |   |   |        |   |   |   |   |        |                              |                       |
|---|------|---|---|---|--------|---|---|---|---|--------|------------------------------|-----------------------|
| 1 | 1.00 | 1 | 1 | 0 | -0.002 | 0 | 0 | 0 | t | 117344 | PPGMRPP                      | Mus musculus          |
| 1 | 1.00 | 1 | 1 | 0 | 0      | 0 | 0 | 0 | t | 110993 | RARPAKA<br>AATQKKVE<br>RKA   | Homo sapiens          |
| 1 | 1.00 | 1 | 1 | 0 | -0.004 | 0 | 0 | 0 | t | 100101 | HFYDGF<br>VPLKTD             | Oryctolagus cuniculus |
| 1 | 1.00 | 1 | 1 | 0 | -0.003 | 0 | 0 | 0 | t | 98647  | YTKDTNN<br>NLT               | Oryctolagus cuniculus |
| 1 | 1.00 | 1 | 1 | 0 | 0      | 0 | 0 | 0 | t | 113570 | KKAVTKA<br>QKKDGKS<br>AAHRKE | Mus musculus          |
| 1 | 1.00 | 1 | 1 | 0 | -0.003 | 0 | 0 | 0 | t | 98648  | YTKNTNN<br>NLT               | Oryctolagus cuniculus |
| 1 | 1.00 | 1 | 1 | 0 | -0.003 | 0 | 0 | 0 | t | 98649  | YTPAYYTK<br>DT               | Oryctolagus cuniculus |
| 1 | 1.00 | 1 | 1 | 0 | -0.004 | 0 | 0 | 0 | t | 110980 | QPLGVGIS<br>GHPLLNL<br>DDTE  | Mus musculus          |
| 1 | 1.00 | 1 | 1 | 0 | 0.002  | 0 | 0 | 0 | t | 112673 | TGGQKGR<br>GSRGQHQ<br>AHSLER | Rattus norvegicus     |
| 1 | 1.00 | 1 | 1 | 0 | 0.004  | 0 | 0 | 0 | t | 100992 | KSLSRHDH<br>IHHD             | Ovis aries            |
| 1 | 1.00 | 1 | 1 | 0 | 0.004  | 0 | 0 | 0 | t | 100992 | KSLSRHDH<br>IHHD             | Ovis aries            |
| 1 | 1.00 | 1 | 1 | 0 | 0      | 0 | 0 | 0 | t | 108019 | LSQPKIVK<br>WDR              | Mus musculus          |
| 1 | 1.00 | 1 | 1 | 0 | 0      | 0 | 0 | 0 | t | 110993 | RARPAKA<br>AATQKKVE<br>RKA   | Homo sapiens          |
| 1 | 1.00 | 1 | 1 | 0 | 0      | 0 | 0 | 0 | t | 110993 | RARPAKA<br>AATQKKVE<br>RKA   | Homo sapiens          |
| 1 | 1.00 | 1 | 1 | 0 | 0      | 0 | 0 | 0 | t | 106227 | AEIVYKSP<br>VVSQDTSP<br>RHL  | Mus musculus          |

|   |      |   |   |   |        |   |   |   |   |        |                              |                                  |
|---|------|---|---|---|--------|---|---|---|---|--------|------------------------------|----------------------------------|
| 1 | 1.00 | 1 | 1 | 0 | 0      | 0 | 0 | 0 | t | 113518 | HNKIQAE<br>LEDLLRYSK<br>LYR  | Mus<br>musculu<br>s              |
| 1 | 1.00 | 1 | 1 | 0 | 0      | 0 | 0 | 0 | t | 111062 | YEQLNDSS<br>EEEDEIDG<br>PAG  | Mus<br>musculu<br>s              |
| 1 | 1.00 | 1 | 1 | 0 | -0.003 | 0 | 0 | 0 | t | 108019 | LSQPKIVK<br>WDR              | Oryctola<br>gus<br>cuniculu<br>s |
| 1 | 1.00 | 1 | 1 | 0 | -0.003 | 0 | 0 | 0 | t | 111486 | LIEESAIINA<br>GAP            | Oryctola<br>gus<br>cuniculu<br>s |
| 1 | 1.00 | 1 | 1 | 0 | 0      | 0 | 0 | 0 | t | 100549 | TEEKEFLKK<br>L               | Mus<br>musculu<br>s              |
| 1 | 1.00 | 1 | 1 | 0 | -0.003 | 0 | 0 | 0 | t | 111486 | LIEESAIINA<br>GAP            | Oryctola<br>gus<br>cuniculu<br>s |
| 1 | 1.00 | 1 | 1 | 0 | 0      | 0 | 0 | 0 | t | 115056 | GLSLSRFS<br>WGAEGQR<br>PGFG  | Homo<br>sapiens                  |
| 1 | 1.00 | 1 | 1 | 0 | 0      | 0 | 0 | 0 | t | 110770 | ARGHRPL<br>DKKREEAP<br>SLRPA | Homo<br>sapiens                  |
| 1 | 1.00 | 1 | 1 | 0 | 0      | 0 | 0 | 0 | t | 108019 | LSQPKIVK<br>WDR              | Oryctola<br>gus<br>cuniculu<br>s |
| 1 | 1.00 | 1 | 1 | 0 | 0      | 0 | 0 | 0 | t | 104780 | FRHDSGY                      | Rattus<br>norvegic<br>us         |
| 1 | 1.00 | 1 | 1 | 0 | 0      | 0 | 0 | 0 | t | 111845 | TPTLHEYM<br>LDLQPETT<br>DLYC | Mus<br>musculu<br>s              |
| 1 | 1.00 | 1 | 1 | 0 | -0.003 | 0 | 0 | 0 | t | 111486 | LIEESAIINA<br>GAP            | Oryctola<br>gus<br>cuniculu<br>s |
| 1 | 1.00 | 1 | 1 | 0 | -0.007 | 0 | 0 | 0 | t | 112655 | SADLDQFP<br>LGRKFLL          | Oryctola<br>gus<br>cuniculu<br>s |
| 1 | 1.00 | 1 | 1 | 0 | -0.003 | 0 | 0 | 0 | t | 108019 | LSQPKIVK<br>WDR              | Oryctola<br>gus<br>cuniculu<br>s |

|   |      |   |   |   |        |   |   |   |   |        |                              |                                  |
|---|------|---|---|---|--------|---|---|---|---|--------|------------------------------|----------------------------------|
| 1 | 1.00 | 1 | 1 | 0 | -0.003 | 0 | 0 | 0 | t | 108019 | LSQPKIVK<br>WDR              | Oryctola<br>gus<br>cuniculu<br>s |
| 1 | 1.00 | 1 | 1 | 0 | 0      | 0 | 0 | 0 | t | 111486 | LIEESAIINA<br>GAP            | Oryctola<br>gus<br>cuniculu<br>s |
| 1 | 1.00 | 1 | 1 | 0 | -0.003 | 0 | 0 | 0 | t | 111486 | LIEESAIINA<br>GAP            | Oryctola<br>gus<br>cuniculu<br>s |
| 1 | 1.00 | 1 | 1 | 0 | -0.003 | 0 | 0 | 0 | t | 111486 | LIEESAIINA<br>GAP            | Oryctola<br>gus<br>cuniculu<br>s |
| 1 | 1.00 | 1 | 1 | 0 | 0.002  | 0 | 0 | 0 | t | 104780 | FRHDSGY                      | Rattus<br>norvegic<br>us         |
| 1 | 1.00 | 1 | 1 | 0 | -0.003 | 0 | 0 | 0 | t | 98434  | RYMDQPS<br>RD                | Oryctola<br>gus<br>cuniculu<br>s |
| 1 | 1.00 | 1 | 1 | 0 | 0      | 0 | 0 | 0 | t | 111486 | LIEESAIINA<br>GAP            | Oryctola<br>gus<br>cuniculu<br>s |
| 1 | 1.00 | 1 | 1 | 0 | 0      | 0 | 0 | 0 | t | 111486 | LIEESAIINA<br>GAP            | Mus<br>musculu<br>s              |
| 1 | 1.00 | 1 | 1 | 0 | 0      | 0 | 0 | 0 | t | 104780 | FRHDSGY                      | Mus<br>musculu<br>s              |
| 1 | 1.00 | 1 | 1 | 0 | -0.003 | 0 | 0 | 0 | t | 98455  | SGSVQFVP<br>IQ               | Oryctola<br>gus<br>cuniculu<br>s |
| 1 | 1.00 | 1 | 1 | 0 | 0      | 0 | 0 | 0 | t | 110866 | GNVSPGT<br>RREYHTEK<br>LVT   | Homo<br>sapiens                  |
| 1 | 1.00 | 1 | 1 | 0 | 0      | 0 | 0 | 0 | t | 111845 | TPTLHEYM<br>LDLQPETT<br>DLYC | Rattus<br>norvegic<br>us         |
| 1 | 1.00 | 1 | 1 | 0 | 0      | 0 | 0 | 0 | t | 117301 | GSGKGKV<br>QFQGKKT<br>KFASDD | Homo<br>sapiens                  |
| 1 | 1.00 | 1 | 1 | 0 | 0      | 0 | 0 | 0 | t | 110866 | GNVSPGT<br>RREYHTEK<br>LVT   | Homo<br>sapiens                  |

|   |      |   |   |   |        |   |   |   |   |        |                              |                                  |
|---|------|---|---|---|--------|---|---|---|---|--------|------------------------------|----------------------------------|
| 1 | 1.00 | 1 | 1 | 0 | 0      | 0 | 0 | 0 | t | 106481 | GSRSRTPS<br>LPTPTRE          | Mus<br>musculu<br>s              |
| 1 | 1.00 | 1 | 1 | 0 | -0.003 | 0 | 0 | 0 | t | 98093  | HGFTEQN<br>SG                | Oryctola<br>gus<br>cuniculu<br>s |
| 1 | 1.00 | 1 | 1 | 0 | 0.009  | 0 | 0 | 0 | t | 114142 | PQKSQRS<br>QDEN              | Oryctola<br>gus<br>cuniculu<br>s |
| 1 | 1.00 | 1 | 1 | 0 | 0      | 0 | 0 | 0 | t | 110867 | GNVSPGT<br>RREYHTEK<br>LVT   | Homo<br>sapiens                  |
| 1 | 1.00 | 1 | 1 | 0 | 0      | 0 | 0 | 0 | t | 111845 | TPTLHEYM<br>LDLQPETT<br>DLYC | Rattus<br>norvegic<br>us         |
| 1 | 1.00 | 1 | 1 | 0 | 0      | 0 | 0 | 0 | t | 106322 | DAEFRHDS<br>G                | Mus<br>musculu<br>s              |
| 1 | 1.00 | 1 | 1 | 0 | -0.003 | 0 | 0 | 0 | t | 108382 | GGVVIA                       | Oryctola<br>gus<br>cuniculu<br>s |
| 1 | 1.00 | 1 | 1 | 0 | 0      | 0 | 0 | 0 | t | 110994 | RARPAKA<br>AATQKKVE<br>RKA   | Homo<br>sapiens                  |
| 1 | 1.00 | 1 | 1 | 0 | -0.003 | 0 | 0 | 0 | t | 108074 | PQVYTLP                      | Oryctola<br>gus<br>cuniculu<br>s |
| 1 | 1.00 | 1 | 1 | 0 | 0      | 0 | 0 | 0 | t | 110770 | ARGHRPL<br>DKKREEAP<br>SLRPA | Homo<br>sapiens                  |
| 1 | 1.00 | 1 | 1 | 0 | -0.003 | 0 | 0 | 0 | t | 98061  | GFSGSVQF<br>VP               | Oryctola<br>gus<br>cuniculu<br>s |
| 1 | 1.00 | 1 | 1 | 0 | 0      | 0 | 0 | 0 | t | 115053 | GGSYFMIS<br>R                | Mus<br>musculu<br>s              |
| 1 | 1.00 | 1 | 1 | 0 | 0      | 0 | 0 | 0 | t | 110770 | ARGHRPL<br>DKKREEAP<br>SLRPA | Homo<br>sapiens                  |
| 1 | 1.00 | 1 | 1 | 0 | 0      | 0 | 0 | 0 | t | 110847 | FFSARGHR<br>PLDKKREE<br>AP   | Homo<br>sapiens                  |
| 1 | 1.00 | 1 | 1 | 0 | 0      | 0 | 0 | 0 | t | 105148 | DVAGL                        | Oryctola<br>gus<br>cuniculu<br>s |

|   |      |   |   |   |       |   |   |   |   |        |                              |                                  |
|---|------|---|---|---|-------|---|---|---|---|--------|------------------------------|----------------------------------|
| 1 | 1.00 | 1 | 1 | 0 | 0     | 0 | 0 | 0 | t | 115609 | GSLPQKA<br>QGHRPQD<br>E      | Oryctola<br>gus<br>cuniculu<br>s |
| 1 | 1.00 | 1 | 1 | 0 | 0.009 | 0 | 0 | 0 | t | 115609 | GSLPQKA<br>QGHRPQD<br>E      | Oryctola<br>gus<br>cuniculu<br>s |
| 1 | 1.00 | 1 | 1 | 0 | 0     | 0 | 0 | 0 | t | 104443 | DAEFRHDS<br>GYE              | Mus<br>musculu<br>s              |
| 1 | 1.00 | 1 | 1 | 0 | 0     | 0 | 0 | 0 | t | 105148 | DVAGL                        | Oryctola<br>gus<br>cuniculu<br>s |
| 1 | 1.00 | 1 | 1 | 0 | 0     | 0 | 0 | 0 | t | 105148 | DVAGL                        | Oryctola<br>gus<br>cuniculu<br>s |
| 1 | 1.00 | 1 | 1 | 0 | 0.002 | 0 | 0 | 0 | t | 113495 | GSLPQKSQ<br>RSQ              | Rattus<br>norvegic<br>us         |
| 1 | 1.00 | 1 | 1 | 0 | 0.006 | 0 | 0 | 0 | t | 116035 | YGSLPQKS<br>GHRTQD           | Ovis<br>aries                    |
| 1 | 1.00 | 1 | 1 | 0 | 0.009 | 0 | 0 | 0 | t | 115594 | AQRPQDE<br>N                 | Oryctola<br>gus<br>cuniculu<br>s |
| 1 | 1.00 | 1 | 1 | 0 | 0     | 0 | 0 | 0 | t | 106634 | LVGPRGER<br>GFP              | Rattus<br>norvegic<br>us         |
| 1 | 1.00 | 1 | 1 | 0 | 0     | 0 | 0 | 0 | t | 110994 | RARPAKA<br>AATQKKVE<br>RKA   | Homo<br>sapiens                  |
| 1 | 1.00 | 1 | 1 | 0 | 0     | 0 | 0 | 0 | t | 113564 | KGNQYWR<br>FEDGVLDP<br>DYPRN | Mus<br>musculu<br>s              |
| 1 | 1.00 | 1 | 1 | 0 | 0     | 0 | 0 | 0 | t | 110991 | RARPAKA<br>AATQKKVE<br>RKA   | Homo<br>sapiens                  |
| 1 | 1.00 | 1 | 1 | 0 | 0     | 0 | 0 | 0 | t | 113564 | KGNQYWR<br>FEDGVLDP<br>DYPRN | Mus<br>musculu<br>s              |
| 1 | 1.00 | 1 | 1 | 0 | 0     | 0 | 0 | 0 | t | 105148 | DVAGL                        | Oryctola<br>gus<br>cuniculu<br>s |



|   |      |   |   |   |        |   |   |   |   |        |                             |                                  |
|---|------|---|---|---|--------|---|---|---|---|--------|-----------------------------|----------------------------------|
| 1 | 1.00 | 1 | 1 | 0 | 0      | 0 | 0 | 0 | t | 116080 | ATGGTLQ<br>QLFYSTITV<br>GQV | Mus<br>musculu<br>s              |
| 1 | 1.00 | 1 | 1 | 0 | -0.003 | 0 | 0 | 0 | t | 98378  | QNSKSAYT<br>PA              | Oryctola<br>gus<br>cuniculu<br>s |
| 1 | 1.00 | 1 | 1 | 0 | 0.005  | 0 | 0 | 0 | t | 108353 | ETNPEVLIK<br>DLQDVAS        | Homo<br>sapiens                  |
| 1 | 1.00 | 1 | 1 | 0 | -0.003 | 0 | 0 | 0 | t | 98461  | SKSAYTPA<br>YY              | Oryctola<br>gus<br>cuniculu<br>s |
| 1 | 1.00 | 1 | 1 | 0 | 0.002  | 0 | 0 | 0 | t | 115610 | GSLPQKA<br>QGHRPQD<br>EN    | Rattus<br>norvegic<br>us         |
| 1 | 1.00 | 1 | 1 | 0 | 0.012  | 0 | 0 | 0 | t | 115610 | GSLPQKA<br>QGHRPQD<br>EN    | Rattus<br>norvegic<br>us         |
| 1 | 1.00 | 1 | 1 | 0 | 0      | 0 | 0 | 0 | t | 115610 | GSLPQKA<br>QGHRPQD<br>EN    | Oryctola<br>gus<br>cuniculu<br>s |
| 1 | 1.00 | 1 | 1 | 0 | -0.003 | 0 | 0 | 0 | t | 107784 | DGSFFLY                     | Oryctola<br>gus<br>cuniculu<br>s |
| 1 | 1.00 | 1 | 1 | 0 | -0.003 | 0 | 0 | 0 | t | 108075 | PREPQVY                     | Oryctola<br>gus<br>cuniculu<br>s |
| 1 | 1.00 | 1 | 1 | 0 | 0      | 0 | 0 | 0 | t | 110848 | FFSARGHR<br>PLDKKREE<br>AP  | Homo<br>sapiens                  |
| 1 | 1.00 | 1 | 1 | 0 | 0      | 0 | 0 | 0 | t | 107455 | KAKGQPR                     | Mus<br>musculu<br>s              |
| 1 | 1.00 | 1 | 1 | 0 | 0.009  | 0 | 0 | 0 | t | 115610 | GSLPQKA<br>QGHRPQD<br>EN    | Oryctola<br>gus<br>cuniculu<br>s |
| 1 | 1.00 | 1 | 1 | 0 | -0.003 | 0 | 0 | 0 | t | 98122  | IQNSKSAY<br>TP              | Oryctola<br>gus<br>cuniculu<br>s |

|   |      |   |   |   |        |   |   |   |   |        |                              |                                  |
|---|------|---|---|---|--------|---|---|---|---|--------|------------------------------|----------------------------------|
| 1 | 1.00 | 1 | 1 | 0 | 0.009  | 0 | 0 | 0 | t | 115610 | GSLPQKA<br>QGHRPQD<br>EN     | Oryctola<br>gus<br>cuniculu<br>s |
| 1 | 1.00 | 1 | 1 | 0 | 0      | 0 | 0 | 0 | t | 105148 | DVAGL                        | Oryctola<br>gus<br>cuniculu<br>s |
| 1 | 1.00 | 1 | 1 | 0 | 0.002  | 0 | 0 | 0 | t | 115610 | GSLPQKA<br>QGHRPQD<br>EN     | Rattus<br>norvegic<br>us         |
| 1 | 1.00 | 1 | 1 | 0 | -0.007 | 0 | 0 | 0 | t | 112486 | DTYRF                        | Oryctola<br>gus<br>cuniculu<br>s |
| 1 | 1.00 | 1 | 1 | 0 | 0      | 0 | 0 | 0 | t | 108382 | GGVVIA                       | Mus<br>musculu<br>s              |
| 1 | 1.00 | 1 | 1 | 0 | 0      | 0 | 0 | 0 | t | 106480 | GSRSRTPS<br>LTPPTRE          | Mus<br>musculu<br>s              |
| 1 | 1.00 | 1 | 1 | 0 | 0      | 0 | 0 | 0 | t | 111440 | KCDSTLRL<br>CVQSTHV<br>DIRTL | Mus<br>musculu<br>s              |
| 1 | 1.00 | 1 | 1 | 0 | 0      | 0 | 0 | 0 | t | 112472 | DEGGYTCTF<br>FRDHSYQ         | Mus<br>musculu<br>s              |
| 1 | 1.00 | 1 | 1 | 0 | -0.003 | 0 | 0 | 0 | t | 98653  | YYTKNTNN<br>NL               | Oryctola<br>gus<br>cuniculu<br>s |
| 1 | 1.00 | 1 | 1 | 0 | 0      | 0 | 0 | 0 | t | 110852 | FFSARGHR<br>PLDKKREE<br>AP   | Homo<br>sapiens                  |
| 1 | 1.00 | 1 | 1 | 0 | 0.006  | 0 | 0 | 0 | t | 115829 | KRGSGKDS<br>HHPARTAHY        | Ovis<br>aries                    |
| 1 | 1.00 | 1 | 1 | 0 | 0      | 0 | 0 | 0 | t | 110770 | ARGHRPL<br>DKKREEAP<br>SLRPA | Homo<br>sapiens                  |
| 1 | 1.00 | 1 | 1 | 0 | -0.004 | 0 | 0 | 0 | t | 100482 | RPPRAVPY<br>YGPQVD           | Oryctola<br>gus<br>cuniculu<br>s |
| 1 | 1.00 | 1 | 1 | 0 | 0.005  | 0 | 0 | 0 | t | 108634 | SKVEQEET<br>NPEVLIKDL        | Homo<br>sapiens                  |

|   |      |   |   |   |        |   |   |   |   |        |                              |                                  |
|---|------|---|---|---|--------|---|---|---|---|--------|------------------------------|----------------------------------|
| 1 | 1.00 | 1 | 1 | 0 | 0      | 0 | 0 | 0 | t | 110771 | ARGHRPL<br>DKKREEAP<br>SLRPA | Homo<br>sapiens                  |
| 1 | 1.00 | 1 | 1 | 0 | 0      | 0 | 0 | 0 | t | 113601 | LEQLYME<br>HNNVYTV<br>PDSYFR | Mus<br>musculu<br>s              |
| 1 | 1.00 | 1 | 1 | 0 | 0      | 0 | 0 | 0 | t | 110991 | RARPAKA<br>AATQKKVE<br>RKA   | Homo<br>sapiens                  |
| 1 | 1.00 | 1 | 1 | 0 | 0.012  | 0 | 0 | 0 | t | 115593 | AQGHRPQ<br>DEN               | Rattus<br>norvegic<br>us         |
| 1 | 1.00 | 1 | 1 | 0 | 0.006  | 0 | 0 | 0 | t | 115831 | KSGHRTQ<br>DENP              | Ovis<br>aries                    |
| 1 | 1.00 | 1 | 1 | 0 | 0      | 0 | 0 | 0 | t | 110771 | ARGHRPL<br>DKKREEAP<br>SLRPA | Homo<br>sapiens                  |
| 1 | 1.00 | 1 | 1 | 0 | -0.003 | 0 | 0 | 0 | t | 116677 | ASATQLYK<br>TCKQAGT<br>CPPD  | Oryctola<br>gus<br>cuniculu<br>s |
| 1 | 1.00 | 1 | 1 | 0 | 0      | 0 | 0 | 0 | t | 98822  | IEAGAIGFK<br>IHEDWG          | Mus<br>musculu<br>s              |
| 1 | 1.00 | 1 | 1 | 0 | -0.007 | 0 | 0 | 0 | t | 111585 | NKSEVPLD<br>ICTSICKYP<br>DYI | Oryctola<br>gus<br>cuniculu<br>s |
| 1 | 1.00 | 1 | 1 | 0 | 0      | 0 | 0 | 0 | t | 110824 | EDEIDGPA<br>GQAEPDR<br>AHYNI | Mus<br>musculu<br>s              |
| 1 | 1.00 | 1 | 1 | 0 | 0      | 0 | 0 | 0 | t | 110771 | ARGHRPL<br>DKKREEAP<br>SLRPA | Homo<br>sapiens                  |
| 1 | 1.00 | 1 | 1 | 0 | 0      | 0 | 0 | 0 | t | 110824 | EDEIDGPA<br>GQAEPDR<br>AHYNI | Rattus<br>norvegic<br>us         |
| 1 | 1.00 | 1 | 1 | 0 | 0.009  | 0 | 0 | 0 | t | 115611 | GSLPQKA<br>QRPQDEN           | Oryctola<br>gus<br>cuniculu<br>s |
| 1 | 1.00 | 1 | 1 | 0 | 0      | 0 | 0 | 0 | t | 110772 | ARGHRPL<br>DKKREEAP<br>SLRPA | Homo<br>sapiens                  |
| 1 | 1.00 | 1 | 1 | 0 | 0      | 0 | 0 | 0 | t | 110824 | EDEIDGPA<br>GQAEPDR<br>AHYNI | Mus<br>musculu<br>s              |

|   |      |   |   |   |        |   |   |   |   |        |                              |                                  |
|---|------|---|---|---|--------|---|---|---|---|--------|------------------------------|----------------------------------|
| 1 | 1.00 | 1 | 1 | 0 | 0      | 0 | 0 | 0 | t | 113564 | KGNQYWR<br>FEDGVLPD<br>DYPRN | Mus<br>musculu<br>s              |
| 1 | 1.00 | 1 | 1 | 0 | 0      | 0 | 0 | 0 | t | 110824 | EDEIDGPA<br>GQAEPDR<br>AHYNI | Mus<br>musculu<br>s              |
| 1 | 1.00 | 1 | 1 | 0 | 0.005  | 0 | 0 | 0 | t | 108349 | EQEETNPE<br>VLIK             | Homo<br>sapiens                  |
| 1 | 1.00 | 1 | 1 | 0 | -0.003 | 0 | 0 | 0 | t | 105232 | GSNKGAI<br>GLM               | Oryctola<br>gus<br>cuniculu<br>s |
| 1 | 1.00 | 1 | 1 | 0 | 0      | 0 | 0 | 0 | t | 111819 | TDLYCYEQ<br>LNDSEEE<br>DEID  | Mus<br>musculu<br>s              |
| 1 | 1.00 | 1 | 1 | 0 | 0.009  | 0 | 0 | 0 | t | 115593 | AQGHRPQ<br>DEN               | Oryctola<br>gus<br>cuniculu<br>s |
| 1 | 1.00 | 1 | 1 | 0 | 0.002  | 0 | 0 | 0 | t | 112739 | YTTGAVR<br>QIFGDYKT<br>TICGK | Rattus<br>norvegic<br>us         |
| 1 | 1.00 | 1 | 1 | 0 | 0      | 0 | 0 | 0 | t | 110824 | EDEIDGPA<br>GQAEPDR<br>AHYNI | Mus<br>musculu<br>s              |
| 1 | 1.00 | 1 | 1 | 0 | 0      | 0 | 0 | 0 | t | 110824 | EDEIDGPA<br>GQAEPDR<br>AHYNI | Rattus<br>norvegic<br>us         |
| 1 | 1.00 | 1 | 1 | 0 | 0      | 0 | 0 | 0 | t | 104443 | DAEFRHDS<br>GYE              | Mus<br>musculu<br>s              |
| 1 | 1.00 | 1 | 1 | 0 | -0.003 | 0 | 0 | 0 | t | 98321  | PAYYTKNT<br>NN               | Oryctola<br>gus<br>cuniculu<br>s |
| 1 | 1.00 | 1 | 1 | 0 | 0      | 0 | 0 | 0 | t | 104443 | DAEFRHDS<br>GYE              | Mus<br>musculu<br>s              |
| 1 | 1.00 | 1 | 1 | 0 | 0      | 0 | 0 | 0 | t | 111819 | TDLYCYEQ<br>LNDSEEE<br>DEID  | Rattus<br>norvegic<br>us         |
| 1 | 1.00 | 1 | 1 | 0 | 0      | 0 | 0 | 0 | t | 110772 | ARGHRPL<br>DKKREEAP<br>SLRPA | Homo<br>sapiens                  |
| 1 | 1.00 | 1 | 1 | 0 | -0.004 | 0 | 0 | 0 | t | 99886  | AHSKEVPA<br>LTAVET           | Oryctola<br>gus<br>cuniculu<br>s |

|   |      |   |   |   |        |   |   |   |   |        |                              |                                  |
|---|------|---|---|---|--------|---|---|---|---|--------|------------------------------|----------------------------------|
| 1 | 1.00 | 1 | 1 | 0 | -0.003 | 0 | 0 | 0 | t | 117260 | ANNGNLQ<br>LRNKEVT<br>WEVLEG | Oryctola<br>gus<br>cuniculu<br>s |
| 1 | 1.00 | 1 | 1 | 0 | 0      | 0 | 0 | 0 | t | 111819 | TDLYCYEQ<br>LNDSEEE<br>DEID  | Rattus<br>norvegic<br>us         |
| 1 | 1.00 | 1 | 1 | 0 | 0      | 0 | 0 | 0 | t | 105650 | AEFRH                        | Mus<br>musculu<br>s              |
| 1 | 1.00 | 1 | 1 | 0 | -0.003 | 0 | 0 | 0 | t | 111050 | VGPLDIVP<br>EVADPGG<br>PTLV  | Oryctola<br>gus<br>cuniculu<br>s |
| 1 | 1.00 | 1 | 1 | 0 | 0      | 0 | 0 | 0 | t | 110772 | ARGHRPL<br>DKKREEAP<br>SLRPA | Homo<br>sapiens                  |
| 1 | 1.00 | 1 | 1 | 0 | 0      | 0 | 0 | 0 | t | 110824 | EDEIDGPA<br>GQAEPDR<br>AHYNI | Mus<br>musculu<br>s              |
| 1 | 1.00 | 1 | 1 | 0 | 0      | 0 | 0 | 0 | t | 110887 | HSTKRGH<br>AKSRPVRG          | Homo<br>sapiens                  |
| 1 | 1.00 | 1 | 1 | 0 | 0      | 0 | 0 | 0 | t | 110887 | HSTKRGH<br>AKSRPVRG          | Homo<br>sapiens                  |
| 1 | 1.00 | 1 | 1 | 0 | 0      | 0 | 0 | 0 | t | 110772 | ARGHRPL<br>DKKREEAP<br>SLRPA | Homo<br>sapiens                  |
| 1 | 1.00 | 1 | 1 | 0 | 0      | 0 | 0 | 0 | t | 99134  | DAEFRHDS<br>GYEVHHQ          | Mus<br>musculu<br>s              |
| 1 | 1.00 | 1 | 1 | 0 | 0      | 0 | 0 | 0 | t | 110887 | HSTKRGH<br>AKSRPVRG          | Homo<br>sapiens                  |
| 1 | 1.00 | 1 | 1 | 0 | 0      | 0 | 0 | 0 | t | 110888 | HSTKRGH<br>AKSRPVRG          | Homo<br>sapiens                  |
| 1 | 1.00 | 1 | 1 | 0 | 0      | 0 | 0 | 0 | t | 110888 | HSTKRGH<br>AKSRPVRG          | Homo<br>sapiens                  |
| 1 | 1.00 | 1 | 1 | 0 | 0      | 0 | 0 | 0 | t | 110888 | HSTKRGH<br>AKSRPVRG          | Homo<br>sapiens                  |
| 1 | 1.00 | 1 | 1 | 0 | 0      | 0 | 0 | 0 | t | 110773 | ARGHRPL<br>DKKREEAP<br>SLRPA | Homo<br>sapiens                  |
| 1 | 1.00 | 1 | 1 | 0 | -0.003 | 0 | 0 | 0 | t | 113942 | TQDENPV<br>VHF               | Oryctola<br>gus<br>cuniculu<br>s |

|   |      |   |   |   |        |   |   |   |   |        |                              |                                  |
|---|------|---|---|---|--------|---|---|---|---|--------|------------------------------|----------------------------------|
| 1 | 1.00 | 1 | 1 | 0 | 0      | 0 | 0 | 0 | t | 110889 | HSTKRGH<br>AKSRPVRG          | Homo<br>sapiens                  |
| 1 | 1.00 | 1 | 1 | 0 | 0      | 0 | 0 | 0 | t | 113942 | TQDENPV<br>VHF               | Mus<br>musculu<br>s              |
| 1 | 1.00 | 1 | 1 | 0 | -0.003 | 0 | 0 | 0 | t | 117260 | ANNGNLQ<br>LRNKEVT<br>WEVLEG | Oryctola<br>gus<br>cuniculu<br>s |
| 1 | 1.00 | 1 | 1 | 0 | -0.003 | 0 | 0 | 0 | t | 110248 | GGLGIGTG<br>SGTGGRT<br>GYIPL | Oryctola<br>gus<br>cuniculu<br>s |
| 1 | 1.00 | 1 | 1 | 0 | 0      | 0 | 0 | 0 | t | 108860 | DGVNH                        | Mus<br>musculu<br>s              |
| 1 | 1.00 | 1 | 1 | 0 | 0      | 0 | 0 | 0 | t | 110889 | HSTKRGH<br>AKSRPVRG          | Homo<br>sapiens                  |
| 1 | 1.00 | 1 | 1 | 0 | 0      | 0 | 0 | 0 | t | 113302 | CDDDDDN<br>DGVPSDR<br>DNCRLV | Mus<br>musculu<br>s              |
| 1 | 1.00 | 1 | 1 | 0 | -0.003 | 0 | 0 | 0 | t | 110248 | GGLGIGTG<br>SGTGGRT<br>GYIPL | Oryctola<br>gus<br>cuniculu<br>s |
| 1 | 1.00 | 1 | 1 | 0 | 0      | 0 | 0 | 0 | t | 102384 | EFRH                         | Mus<br>musculu<br>s              |
| 1 | 1.00 | 1 | 1 | 0 | 0      | 0 | 0 | 0 | t | 110890 | HSTKRGH<br>AKSRPVRG          | Homo<br>sapiens                  |
| 1 | 1.00 | 1 | 1 | 0 | -0.004 | 0 | 0 | 0 | t | 102384 | EFRH                         | Mus<br>musculu<br>s              |
| 1 | 1.00 | 1 | 1 | 0 | 0      | 0 | 0 | 0 | t | 110890 | HSTKRGH<br>AKSRPVRG          | Homo<br>sapiens                  |
| 1 | 1.00 | 1 | 1 | 0 | 0      | 0 | 0 | 0 | t | 108623 | SHQESTRG<br>RSRGRSGR<br>SGS  | Homo<br>sapiens                  |
| 1 | 1.00 | 1 | 1 | 0 | 0      | 0 | 0 | 0 | t | 99134  | DAEFRHDS<br>GYEVHHQ          | Mus<br>musculu<br>s              |
| 1 | 1.00 | 1 | 1 | 0 | -0.004 | 0 | 0 | 0 | t | 102384 | EFRH                         | Mus<br>musculu<br>s              |
| 1 | 1.00 | 1 | 1 | 0 | 0      | 0 | 0 | 0 | t | 110892 | HSTKRGH<br>AKSRPVRG          | Homo<br>sapiens                  |

|   |      |   |   |   |        |   |   |   |   |        |                            |                                  |
|---|------|---|---|---|--------|---|---|---|---|--------|----------------------------|----------------------------------|
| 1 | 1.00 | 1 | 1 | 0 | 0      | 0 | 0 | 0 | t | 106564 | KKVAVVRT<br>PPKSPSSA<br>K  | Mus<br>musculu<br>s              |
| 1 | 1.00 | 1 | 1 | 0 | 0      | 0 | 0 | 0 | t | 99134  | DAEFRHDS<br>GYEVHHQ        | Mus<br>musculu<br>s              |
| 1 | 1.00 | 1 | 1 | 0 | 0      | 0 | 0 | 0 | t | 112453 | ASQKRPSQ<br>R              | Mus<br>musculu<br>s              |
| 1 | 1.00 | 1 | 1 | 0 | 0      | 0 | 0 | 0 | t | 110899 | IAKDLLPSR<br>DRQHLPLI<br>K | Homo<br>sapiens                  |
| 1 | 1.00 | 1 | 1 | 0 | 0      | 0 | 0 | 0 | t | 112453 | ASQKRPSQ<br>R              | Mus<br>musculu<br>s              |
| 1 | 1.00 | 1 | 1 | 0 | 0      | 0 | 0 | 0 | t | 110899 | IAKDLLPSR<br>DRQHLPLI<br>K | Homo<br>sapiens                  |
| 1 | 1.00 | 1 | 1 | 0 | 0      | 0 | 0 | 0 | t | 110899 | IAKDLLPSR<br>DRQHLPLI<br>K | Homo<br>sapiens                  |
| 1 | 1.00 | 1 | 1 | 0 | 0      | 0 | 0 | 0 | t | 112453 | ASQKRPSQ<br>R              | Mus<br>musculu<br>s              |
| 1 | 1.00 | 1 | 1 | 0 | 0      | 0 | 0 | 0 | t | 105505 | SAE                        | Oryctola<br>gus<br>cuniculu<br>s |
| 1 | 1.00 | 1 | 1 | 0 | 0      | 0 | 0 | 0 | t | 105505 | SAE                        | Oryctola<br>gus<br>cuniculu<br>s |
| 1 | 1.00 | 1 | 1 | 0 | -0.003 | 0 | 0 | 0 | t | 106322 | DAEFRHDS<br>G              | Oryctola<br>gus<br>cuniculu<br>s |
| 1 | 1.00 | 1 | 1 | 0 | 0      | 0 | 0 | 0 | t | 113463 | GQGQQG<br>QQPGQG<br>QQ     | Homo<br>sapiens                  |
| 1 | 1.00 | 1 | 1 | 0 | 0      | 0 | 0 | 0 | t | 105505 | SAE                        | Oryctola<br>gus<br>cuniculu<br>s |
| 1 | 1.00 | 1 | 1 | 0 | 0      | 0 | 0 | 0 | t | 102384 | EFRH                       | Mus<br>musculu<br>s              |
| 1 | 1.00 | 1 | 1 | 0 | 0      | 0 | 0 | 0 | t | 102384 | EFRH                       | Mus<br>musculu<br>s              |

|   |      |   |   |   |        |   |   |   |   |        |                              |                                  |
|---|------|---|---|---|--------|---|---|---|---|--------|------------------------------|----------------------------------|
| 1 | 1.00 | 1 | 1 | 0 | 0      | 0 | 0 | 0 | t | 110991 | RARPAKA<br>AATQKKVE<br>RKA   | Homo<br>sapiens                  |
| 1 | 1.00 | 1 | 1 | 0 | 0      | 0 | 0 | 0 | t | 110847 | FFSARGHR<br>PLDKKREE<br>AP   | Homo<br>sapiens                  |
| 1 | 1.00 | 1 | 1 | 0 | 0      | 0 | 0 | 0 | t | 110900 | IAKDLLPSR<br>DRQHLPLI<br>K   | Homo<br>sapiens                  |
| 1 | 1.00 | 1 | 1 | 0 | 0      | 0 | 0 | 0 | t | 110901 | IAKDLLPSR<br>DRQHLPLI<br>K   | Homo<br>sapiens                  |
| 1 | 1.00 | 1 | 1 | 0 | 0      | 0 | 0 | 0 | t | 98626  | YEAALKQY<br>EA               | Mus<br>musculu<br>s              |
| 1 | 1.00 | 1 | 1 | 0 | 0.003  | 0 | 0 | 0 | t | 105561 | VAVVRTPP<br>KSPSSAK          | Mus<br>musculu<br>s              |
| 1 | 1.00 | 1 | 1 | 0 | 0      | 0 | 0 | 0 | t | 104785 | GAEIVYKS<br>PVVSGD           | Mus<br>musculu<br>s              |
| 1 | 1.00 | 1 | 1 | 0 | -0.003 | 0 | 0 | 0 | t | 98320  | PAYYTKDT<br>NN               | Oryctola<br>gus<br>cuniculu<br>s |
| 1 | 1.00 | 1 | 1 | 0 | 0      | 0 | 0 | 0 | t | 105650 | AEFRH                        | Mus<br>musculu<br>s              |
| 1 | 1.00 | 1 | 1 | 0 | 0      | 0 | 0 | 0 | t | 104785 | GAEIVYKS<br>PVVSGD           | Mus<br>musculu<br>s              |
| 1 | 1.00 | 1 | 1 | 0 | -0.003 | 0 | 0 | 0 | t | 98319  | PAVVGKP<br>GSD               | Oryctola<br>gus<br>cuniculu<br>s |
| 1 | 1.00 | 1 | 1 | 0 | 0      | 0 | 0 | 0 | t | 105650 | AEFRH                        | Mus<br>musculu<br>s              |
| 1 | 1.00 | 1 | 1 | 0 | 0      | 0 | 0 | 0 | t | 99134  | DAEFRHDS<br>GYEVHHQ          | Mus<br>musculu<br>s              |
| 1 | 1.00 | 1 | 1 | 0 | 0      | 0 | 0 | 0 | t | 110820 | DVRQQYE<br>SVAAKNL<br>QEAEW  | Mus<br>musculu<br>s              |
| 1 | 1.00 | 1 | 1 | 0 | 0      | 0 | 0 | 0 | t | 111091 | AEPDRAH<br>YNIVTFCC<br>KCDST | Rattus<br>norvegic<br>us         |
| 1 | 1.00 | 1 | 1 | 0 | 0      | 0 | 0 | 0 | t | 109940 | SQDENPV<br>VHF               | Rattus<br>norvegic<br>us         |



|   |      |   |   |   |        |   |   |   |   |        |                              |                                  |
|---|------|---|---|---|--------|---|---|---|---|--------|------------------------------|----------------------------------|
| 1 | 1.00 | 1 | 1 | 0 | 0      | 0 | 0 | 0 | t | 99134  | DAEFRHDS<br>GYEVHHQ          | Mus<br>musculu<br>s              |
| 1 | 1.00 | 1 | 1 | 0 | -0.007 | 0 | 0 | 0 | t | 114011 | VTTVTTHN<br>NPTFTDPS<br>VLQP | Oryctola<br>gus<br>cuniculu<br>s |
| 1 | 1.00 | 1 | 1 | 0 | 0      | 0 | 0 | 0 | t | 108624 | SHQESTRG<br>RSRGRSGR<br>SGS  | Homo<br>sapiens                  |
| 1 | 1.00 | 1 | 1 | 0 | -0.003 | 0 | 0 | 0 | t | 117300 | GSGKGKV<br>QFQGKKT<br>KF     | Oryctola<br>gus<br>cuniculu<br>s |
| 1 | 1.00 | 1 | 1 | 0 | 0      | 0 | 0 | 0 | t | 105505 | SAE                          | Oryctola<br>gus<br>cuniculu<br>s |
| 1 | 1.00 | 1 | 1 | 0 | -0.003 | 0 | 0 | 0 | t | 108131 | SKDWSFY                      | Oryctola<br>gus<br>cuniculu<br>s |
| 1 | 1.00 | 1 | 1 | 0 | -0.003 | 0 | 0 | 0 | t | 108131 | SKDWSFY                      | Oryctola<br>gus<br>cuniculu<br>s |
| 1 | 1.00 | 1 | 1 | 0 | 0      | 0 | 0 | 0 | t | 108131 | SKDWSFY                      | Oryctola<br>gus<br>cuniculu<br>s |
| 1 | 1.00 | 1 | 1 | 0 | 0      | 0 | 0 | 0 | t | 106480 | GSRSRTPS<br>LTPPTRE          | Mus<br>musculu<br>s              |
| 1 | 1.00 | 1 | 1 | 0 | 0      | 0 | 0 | 0 | t | 110248 | GGLGIGTG<br>SGTGGRT<br>GYIPL | Oryctola<br>gus<br>cuniculu<br>s |
| 1 | 1.00 | 1 | 1 | 0 | 0      | 0 | 0 | 0 | t | 99975  | EEKELLKRI<br>Q               | Mus<br>musculu<br>s              |
| 1 | 1.00 | 1 | 1 | 0 | 0      | 0 | 0 | 0 | t | 113564 | KGNQYWR<br>FEDGVLDP<br>DYPRN | Mus<br>musculu<br>s              |
| 1 | 1.00 | 1 | 1 | 0 | -0.004 | 0 | 0 | 0 | t | 102384 | EFRH                         | Mus<br>musculu<br>s              |
| 1 | 1.00 | 1 | 1 | 0 | 0      | 0 | 0 | 0 | t | 99134  | DAEFRHDS<br>GYEVHHQ          | Mus<br>musculu<br>s              |

|   |      |   |   |   |        |   |   |   |   |        |                              |                                  |
|---|------|---|---|---|--------|---|---|---|---|--------|------------------------------|----------------------------------|
| 1 | 1.00 | 1 | 1 | 0 | 0      | 0 | 0 | 0 | t | 100224 | KQISSQLTE<br>EWS             | Mus<br>musculu<br>s              |
| 1 | 1.00 | 1 | 1 | 0 | 0.003  | 0 | 0 | 0 | t | 99134  | DAEFRHDS<br>GYEVHHQ          | Mus<br>musculu<br>s              |
| 1 | 1.00 | 1 | 1 | 0 | 0      | 0 | 0 | 0 | t | 102384 | EFRH                         | Mus<br>musculu<br>s              |
| 1 | 1.00 | 1 | 1 | 0 | -0.003 | 0 | 0 | 0 | t | 111380 | GTGSGTG<br>GRTGYIPL          | Oryctola<br>gus<br>cuniculu<br>s |
| 1 | 1.00 | 1 | 1 | 0 | -0.003 | 0 | 0 | 0 | t | 98439  | SAYTPAYY<br>TK               | Oryctola<br>gus<br>cuniculu<br>s |
| 1 | 1.00 | 1 | 1 | 0 | 0      | 0 | 0 | 0 | t | 115612 | GSLPQKA<br>QRPQDEN<br>G      | Rattus<br>norvegic<br>us         |
| 1 | 1.00 | 1 | 1 | 0 | -0.003 | 0 | 0 | 0 | t | 110248 | GGLGIGTG<br>SGTGGRT<br>GYIPL | Oryctola<br>gus<br>cuniculu<br>s |
| 1 | 1.00 | 1 | 1 | 0 | -0.011 | 0 | 0 | 0 | t | 111856 | TTHYGSLP<br>QK               | Oryctola<br>gus<br>cuniculu<br>s |
| 1 | 1.00 | 1 | 1 | 0 | 0      | 0 | 0 | 0 | t | 99134  | DAEFRHDS<br>GYEVHHQ          | Mus<br>musculu<br>s              |
| 1 | 1.00 | 1 | 1 | 0 | -0.002 | 0 | 0 | 0 | t | 117300 | GSGKGKV<br>QFQGKKT<br>KF     | Mus<br>musculu<br>s              |
| 1 | 1.00 | 1 | 1 | 0 | 0      | 0 | 0 | 0 | t | 110849 | FFSARGHR<br>PLDKKREE<br>AP   | Homo<br>sapiens                  |
| 1 | 1.00 | 1 | 1 | 0 | -0.003 | 0 | 0 | 0 | t | 107479 | KFNWYVD                      | Oryctola<br>gus<br>cuniculu<br>s |
| 1 | 1.00 | 1 | 1 | 0 | -0.003 | 0 | 0 | 0 | t | 107479 | KFNWYVD                      | Oryctola<br>gus<br>cuniculu<br>s |
| 1 | 1.00 | 1 | 1 | 0 | 0      | 0 | 0 | 0 | t | 110850 | FFSARGHR<br>PLDKKREE<br>AP   | Homo<br>sapiens                  |

|   |      |   |   |   |        |   |   |   |   |        |                              |                                  |
|---|------|---|---|---|--------|---|---|---|---|--------|------------------------------|----------------------------------|
| 1 | 1.00 | 1 | 1 | 0 | -0.003 | 0 | 0 | 0 | t | 110424 | SGTGGRT<br>GYIPLGTR<br>PPT   | Oryctola<br>gus<br>cuniculu<br>s |
| 1 | 1.00 | 1 | 1 | 0 | -0.003 | 0 | 0 | 0 | t | 110855 | FNRAGTV<br>GENVPDD<br>LYIKGS | Oryctola<br>gus<br>cuniculu<br>s |
| 1 | 1.00 | 1 | 1 | 0 | 0      | 0 | 0 | 0 | t | 99134  | DAEFRHDS<br>GYEVHHQ          | Mus<br>musculu<br>s              |
| 1 | 1.00 | 1 | 1 | 0 | -0.003 | 0 | 0 | 0 | t | 110424 | SGTGGRT<br>GYIPLGTR<br>PPT   | Oryctola<br>gus<br>cuniculu<br>s |
| 1 | 1.00 | 1 | 1 | 0 | 0      | 0 | 0 | 0 | t | 110850 | FFSARGHR<br>PLDKKREE<br>AP   | Homo<br>sapiens                  |
| 1 | 1.00 | 1 | 1 | 0 | 0      | 0 | 0 | 0 | t | 110773 | ARGHRPL<br>DKKREEAP<br>SLRPA | Homo<br>sapiens                  |
| 1 | 1.00 | 1 | 1 | 0 | 0      | 0 | 0 | 0 | t | 115135 | YSYDVNST<br>EKG              | Oryctola<br>gus<br>cuniculu<br>s |
| 1 | 1.00 | 1 | 1 | 0 | 0      | 0 | 0 | 0 | t | 113625 | LQVVRLD<br>GNEIKRSA<br>MPADA | Mus<br>musculu<br>s              |
| 1 | 1.00 | 1 | 1 | 0 | 0      | 0 | 0 | 0 | t | 107951 | KTTICGKG<br>LSATVT           | Mus<br>musculu<br>s              |
| 1 | 1.00 | 1 | 1 | 0 | -0.003 | 0 | 0 | 0 | t | 98334  | PIQNSKSA<br>YT               | Oryctola<br>gus<br>cuniculu<br>s |
| 1 | 1.00 | 1 | 1 | 0 | -0.003 | 0 | 0 | 0 | t | 98240  | LVPAVVGK<br>PG               | Oryctola<br>gus<br>cuniculu<br>s |
| 1 | 1.00 | 1 | 1 | 0 | 0      | 0 | 0 | 0 | t | 110773 | ARGHRPL<br>DKKREEAP<br>SLRPA | Homo<br>sapiens                  |
| 1 | 1.00 | 1 | 1 | 0 | 0      | 0 | 0 | 0 | t | 107242 | SQTTANPS<br>CPEGT            | Rattus<br>norvegic<br>us         |
| 1 | 1.00 | 1 | 1 | 0 | 0      | 0 | 0 | 0 | t | 108626 | SHQESTRG<br>RSRGRSGR<br>SGS  | Homo<br>sapiens                  |

|   |      |   |   |   |        |   |   |   |   |        |                               |                                  |
|---|------|---|---|---|--------|---|---|---|---|--------|-------------------------------|----------------------------------|
| 1 | 1.00 | 1 | 1 | 0 | -0.007 | 0 | 0 | 0 | t | 113438 | GGTLEDTY<br>RFVTQAIA<br>CQKH  | Oryctola<br>gus<br>cuniculu<br>s |
| 1 | 1.00 | 1 | 1 | 0 | 0      | 0 | 0 | 0 | t | 111359 | GPAGQAE<br>PDRAHYNI<br>VTFCC  | Rattus<br>norvegic<br>us         |
| 1 | 1.00 | 1 | 1 | 0 | 0      | 0 | 0 | 0 | t | 107242 | SQTTANPS<br>CPEGT             | Rattus<br>norvegic<br>us         |
| 1 | 1.00 | 1 | 1 | 0 | 0      | 0 | 0 | 0 | t | 108626 | SHQESTRG<br>RSRGRSGR<br>SGS   | Homo<br>sapiens                  |
| 1 | 1.00 | 1 | 1 | 0 | 0      | 0 | 0 | 0 | t | 113540 | IIPRHLQLA<br>IRNDEELN<br>KLL  | Mus<br>musculu<br>s              |
| 1 | 1.00 | 1 | 1 | 0 | 0      | 0 | 0 | 0 | t | 111359 | GPAGQAE<br>PDRAHYNI<br>VTFCC  | Mus<br>musculu<br>s              |
| 1 | 1.00 | 1 | 1 | 0 | 0      | 0 | 0 | 0 | t | 107110 | EKERRPSPI<br>GTATLL           | Homo<br>sapiens                  |
| 1 | 1.00 | 1 | 1 | 0 | 0      | 0 | 0 | 0 | t | 111359 | GPAGQAE<br>PDRAHYNI<br>VTFCC  | Rattus<br>norvegic<br>us         |
| 1 | 1.00 | 1 | 1 | 0 | 0      | 0 | 0 | 0 | t | 111359 | GPAGQAE<br>PDRAHYNI<br>VTFCC  | Rattus<br>norvegic<br>us         |
| 1 | 1.00 | 1 | 1 | 0 | 0      | 0 | 0 | 0 | t | 111216 | DSSEEEDEI<br>DGPAGQA<br>EPDR  | Mus<br>musculu<br>s              |
| 1 | 1.00 | 1 | 1 | 0 | -0.003 | 0 | 0 | 0 | t | 98307  | NTNNNLTL<br>VP                | Oryctola<br>gus<br>cuniculu<br>s |
| 1 | 1.00 | 1 | 1 | 0 | 0      | 0 | 0 | 0 | t | 106481 | GSRSRTPS<br>LTPPTRE           | Mus<br>musculu<br>s              |
| 1 | 1.00 | 1 | 1 | 0 | 0      | 0 | 0 | 0 | t | 111216 | DSSEEEDEI<br>DGPAGQA<br>EPDR  | Rattus<br>norvegic<br>us         |
| 1 | 1.00 | 1 | 1 | 0 | 0      | 0 | 0 | 0 | t | 104785 | GAEIVYKS<br>PVVSGD            | Mus<br>musculu<br>s              |
| 1 | 1.00 | 1 | 1 | 0 | -0.004 | 0 | 0 | 0 | t | 110855 | FNRAAGTV<br>GENVPDD<br>LYIKGS | Mus<br>musculu<br>s              |
| 1 | 1.00 | 1 | 1 | 0 | 0      | 0 | 0 | 0 | t | 106321 | DAEFRH                        | Mus<br>musculu<br>s              |

|   |      |   |   |   |        |   |   |   |   |        |                              |                                  |
|---|------|---|---|---|--------|---|---|---|---|--------|------------------------------|----------------------------------|
| 1 | 1.00 | 1 | 1 | 0 | -0.003 | 0 | 0 | 0 | t | 98607  | VVGKPGS<br>DVY               | Oryctola<br>gus<br>cuniculu<br>s |
| 1 | 1.00 | 1 | 1 | 0 | 0.002  | 0 | 0 | 0 | t | 113628 | LRLIHYSYD<br>VN              | Rattus<br>norvegic<br>us         |
| 1 | 1.00 | 1 | 1 | 0 | 0.002  | 0 | 0 | 0 | t | 113628 | LRLIHYSYD<br>VN              | Rattus<br>norvegic<br>us         |
| 1 | 1.00 | 1 | 1 | 0 | -0.003 | 0 | 0 | 0 | t | 98048  | FVPIQNSK<br>SA               | Oryctola<br>gus<br>cuniculu<br>s |
| 1 | 1.00 | 1 | 1 | 0 | -0.003 | 0 | 0 | 0 | t | 106374 | EDHAGTY<br>GLGDRK            | Oryctola<br>gus<br>cuniculu<br>s |
| 1 | 1.00 | 1 | 1 | 0 | 0      | 0 | 0 | 0 | t | 105207 | GAIIGLMV<br>GGVVIA           | Mus<br>musculu<br>s              |
| 1 | 1.00 | 1 | 1 | 0 | 0      | 0 | 0 | 0 | t | 111216 | DSSEEEDEI<br>DGPAGQA<br>EPDR | Mus<br>musculu<br>s              |
| 1 | 1.00 | 1 | 1 | 0 | 0      | 0 | 0 | 0 | t | 115268 | GLQYTPS<br>WLVG              | Mus<br>musculu<br>s              |
| 1 | 1.00 | 1 | 1 | 0 | 0      | 0 | 0 | 0 | t | 111216 | DSSEEEDEI<br>DGPAGQA<br>EPDR | Rattus<br>norvegic<br>us         |
| 1 | 1.00 | 1 | 1 | 0 | 0      | 0 | 0 | 0 | t | 99134  | DAEFRHDS<br>GYEVHHQ          | Mus<br>musculu<br>s              |
| 1 | 1.00 | 1 | 1 | 0 | -0.009 | 0 | 0 | 0 | t | 116164 | RTPPPSG                      | Rattus<br>norvegic<br>us         |
| 1 | 1.00 | 1 | 1 | 0 | -0.003 | 0 | 0 | 0 | t | 105021 | VHHQKLV<br>FFAEDVGS<br>NK    | Oryctola<br>gus<br>cuniculu<br>s |
| 1 | 1.00 | 1 | 1 | 0 | -0.007 | 0 | 0 | 0 | t | 113993 | VHTGFGA<br>MDF TTLQ          | Oryctola<br>gus<br>cuniculu<br>s |
| 1 | 1.00 | 1 | 1 | 0 | 0      | 0 | 0 | 0 | t | 105228 | GLMVGGV<br>V                 | Mus<br>musculu<br>s              |

|   |      |   |   |   |        |   |   |   |   |        |                             |                                  |
|---|------|---|---|---|--------|---|---|---|---|--------|-----------------------------|----------------------------------|
| 1 | 1.00 | 1 | 1 | 0 | 0      | 0 | 0 | 0 | t | 110990 | RARPAKA<br>AATQKKVE<br>RKA  | Homo<br>sapiens                  |
| 1 | 1.00 | 1 | 1 | 0 | 0      | 0 | 0 | 0 | t | 104443 | DAEFRHDS<br>GYE             | Mus<br>musculu<br>s              |
| 1 | 1.00 | 1 | 1 | 0 | -0.011 | 0 | 0 | 0 | t | 116164 | RTPPPSG                     | Oryctola<br>gus<br>cuniculu<br>s |
| 1 | 1.00 | 1 | 1 | 0 | 0      | 0 | 0 | 0 | t | 98264  | NAANEAD<br>YQA              | Mus<br>musculu<br>s              |
| 1 | 1.00 | 1 | 1 | 0 | 0      | 0 | 0 | 0 | t | 108627 | SHQESTRG<br>RSRGRSGR<br>SGS | Homo<br>sapiens                  |
| 1 | 1.00 | 1 | 1 | 0 | 0      | 0 | 0 | 0 | t | 108156 | TDIPPCPH<br>GWISLWK         | Homo<br>sapiens                  |
| 1 | 1.00 | 1 | 1 | 0 | -0.003 | 0 | 0 | 0 | t | 103839 | DAEFRHDS<br>GYEVH           | Oryctola<br>gus<br>cuniculu<br>s |
| 1 | 1.00 | 1 | 1 | 0 | 0      | 0 | 0 | 0 | t | 104443 | DAEFRHDS<br>GYE             | Mus<br>musculu<br>s              |
| 1 | 1.00 | 1 | 1 | 0 | -0.003 | 0 | 0 | 0 | t | 98599  | VQFVPIQN<br>SK              | Oryctola<br>gus<br>cuniculu<br>s |
| 1 | 1.00 | 1 | 1 | 0 | -0.003 | 0 | 0 | 0 | t | 98529  | TLVPAVVG<br>KP              | Oryctola<br>gus<br>cuniculu<br>s |
| 1 | 1.00 | 1 | 1 | 0 | -0.003 | 0 | 0 | 0 | t | 103309 | KKNGRILT<br>LPRSNPS         | Oryctola<br>gus<br>cuniculu<br>s |
| 1 | 1.00 | 1 | 1 | 0 | 0.002  | 0 | 0 | 0 | t | 115593 | AQGHRPQ<br>DEN              | Rattus<br>norvegic<br>us         |
| 1 | 1.00 | 1 | 1 | 0 | 0      | 0 | 0 | 0 | t | 104443 | DAEFRHDS<br>GYE             | Mus<br>musculu<br>s              |
| 1 | 1.00 | 1 | 1 | 0 | -0.003 | 0 | 0 | 0 | t | 117220 | LYKTCKQA<br>GTCPPD          | Oryctola<br>gus<br>cuniculu<br>s |
| 1 | 1.00 | 1 | 1 | 0 | 0      | 0 | 0 | 0 | t | 109599 | MPGERGA<br>AGIAGPK          | Mus<br>musculu<br>s              |

|   |      |   |   |   |        |   |   |   |   |        |                              |                          |
|---|------|---|---|---|--------|---|---|---|---|--------|------------------------------|--------------------------|
| 1 | 1.00 | 1 | 1 | 0 | 0.002  | 0 | 0 | 0 | t | 102510 | HHQKLVFF<br>AEDVGSN<br>K     | Rattus<br>norvegicus     |
| 1 | 1.00 | 1 | 1 | 0 | 0      | 0 | 0 | 0 | t | 99134  | DAEFRHDS<br>GYEVHHQ          | Mus<br>musculus          |
| 1 | 1.00 | 1 | 1 | 0 | 0      | 0 | 0 | 0 | t | 110849 | FFSARGHR<br>PLDKKREE<br>AP   | Homo<br>sapiens          |
| 1 | 1.00 | 1 | 1 | 0 | -0.003 | 0 | 0 | 0 | t | 98081  | GSVQFVPI<br>QN               | Oryctolagus<br>cuniculus |
| 1 | 1.00 | 1 | 1 | 0 | 0      | 0 | 0 | 0 | t | 104356 | YGSHSNI                      | Mus<br>musculus          |
| 1 | 1.00 | 1 | 1 | 0 | 0      | 0 | 0 | 0 | t | 110773 | ARGHRPL<br>DKKREEAP<br>SLRPA | Homo<br>sapiens          |
| 1 | 1.00 | 1 | 1 | 0 | 0      | 0 | 0 | 0 | t | 110851 | FFSARGHR<br>PLDKKREE<br>AP   | Homo<br>sapiens          |
| 1 | 1.00 | 1 | 1 | 0 | -0.003 | 0 | 0 | 0 | t | 107662 | VLTVLHQN<br>WL               | Oryctolagus<br>cuniculus |
| 1 | 1.00 | 1 | 1 | 0 | 0      | 0 | 0 | 0 | t | 105201 | FVNQHLCY                     | Oryctolagus<br>cuniculus |
| 1 | 1.00 | 1 | 1 | 0 | -0.004 | 0 | 0 | 0 | t | 111811 | STILEDWN<br>FGLQPPPG<br>GTLE | Mus<br>musculus          |
| 1 | 1.00 | 1 | 1 | 0 | 0      | 0 | 0 | 0 | t | 104443 | DAEFRHDS<br>GYE              | Mus<br>musculus          |
| 1 | 1.00 | 1 | 1 | 0 | 0      | 0 | 0 | 0 | t | 110990 | RARPAKA<br>AATQKKVE<br>RKA   | Homo<br>sapiens          |
| 1 | 1.00 | 1 | 1 | 0 | -0.004 | 0 | 0 | 0 | t | 100504 | SEVAQGAL<br>TSLPK            | Oryctolagus<br>cuniculus |
| 1 | 1.00 | 1 | 1 | 0 | 0      | 0 | 0 | 0 | t | 104816 | GREKFTIR<br>PHYGKEI          | Mus<br>musculus          |
| 1 | 1.00 | 1 | 1 | 0 | -0.007 | 0 | 0 | 0 | t | 105201 | FVNQHLCY                     | Oryctolagus<br>cuniculus |

|   |      |   |   |   |        |   |   |   |   |        |                              |                          |
|---|------|---|---|---|--------|---|---|---|---|--------|------------------------------|--------------------------|
| 1 | 1.00 | 1 | 1 | 0 | 0.002  | 0 | 0 | 0 | t | 114042 | YGSLPQKA<br>QRPQDEN<br>G     | Rattus<br>norvegicus     |
| 1 | 1.00 | 1 | 1 | 0 | 0      | 0 | 0 | 0 | t | 110848 | FFSARGHR<br>PLDKKREE<br>AP   | Homo<br>sapiens          |
| 1 | 1.00 | 1 | 1 | 0 | 0      | 0 | 0 | 0 | t | 114042 | YGSLPQKA<br>QRPQDEN<br>G     | Rattus<br>norvegicus     |
| 1 | 1.00 | 1 | 1 | 0 | 0      | 0 | 0 | 0 | t | 111091 | AEPDRAH<br>YNIVTFCC<br>KCDST | Mus<br>musculus          |
| 1 | 1.00 | 1 | 1 | 0 | 0      | 0 | 0 | 0 | t | 110774 | ARGHRPL<br>DKKREEAP<br>SLRPA | Homo<br>sapiens          |
| 1 | 1.00 | 1 | 1 | 0 | 0      | 0 | 0 | 0 | t | 110774 | ARGHRPL<br>DKKREEAP<br>SLRPA | Homo<br>sapiens          |
| 1 | 1.00 | 1 | 1 | 0 | 0      | 0 | 0 | 0 | t | 110775 | ARGHRPL<br>DKKREEAP<br>SLRPA | Homo<br>sapiens          |
| 1 | 1.00 | 1 | 1 | 0 | -0.003 | 0 | 0 | 0 | t | 107949 | KSLSLSP                      | Oryctolagus<br>cuniculus |
| 1 | 1.00 | 1 | 1 | 0 | 0.002  | 0 | 0 | 0 | t | 114042 | YGSLPQKA<br>QRPQDEN<br>G     | Rattus<br>norvegicus     |
| 1 | 1.00 | 1 | 1 | 0 | 0      | 0 | 0 | 0 | t | 110775 | ARGHRPL<br>DKKREEAP<br>SLRPA | Homo<br>sapiens          |
| 1 | 1.00 | 1 | 1 | 0 | 0      | 0 | 0 | 0 | t | 110775 | ARGHRPL<br>DKKREEAP<br>SLRPA | Homo<br>sapiens          |
| 1 | 1.00 | 1 | 1 | 0 | 0      | 0 | 0 | 0 | t | 110775 | ARGHRPL<br>DKKREEAP<br>SLRPA | Homo<br>sapiens          |
| 1 | 1.00 | 1 | 1 | 0 | 0      | 0 | 0 | 0 | t | 114042 | YGSLPQKA<br>QRPQDEN<br>G     | Rattus<br>norvegicus     |
| 1 | 1.00 | 1 | 1 | 0 | 0      | 0 | 0 | 0 | t | 111027 | SRALAREV<br>DLKDYED<br>QQK   | Homo<br>sapiens          |
| 1 | 1.00 | 1 | 1 | 0 | 0      | 0 | 0 | 0 | t | 113957 | TSSKAKEL<br>KDRHRDF<br>PDVIS | Mus<br>musculus          |
| 1 | 1.00 | 1 | 1 | 0 | 0      | 0 | 0 | 0 | t | 110941 | MHGDTPT<br>LHEYMLDL<br>QPE   | Mus<br>musculus          |



|   |      |   |   |   |        |   |   |   |   |        |                              |                                  |
|---|------|---|---|---|--------|---|---|---|---|--------|------------------------------|----------------------------------|
| 1 | 1.00 | 1 | 1 | 0 | -0.003 | 0 | 0 | 0 | t | 98804  | GLVWTS<br>GPAT               | Oryctola<br>gus<br>cuniculu<br>s |
| 1 | 1.00 | 1 | 1 | 0 | -0.003 | 0 | 0 | 0 | t | 98593  | VPIQNSK<br>SAY               | Oryctola<br>gus<br>cuniculu<br>s |
| 1 | 1.00 | 1 | 1 | 0 | 0      | 0 | 0 | 0 | t | 110776 | ARGHRPL<br>DKKREEAP<br>SLRPA | Homo<br>sapiens                  |
| 1 | 1.00 | 1 | 1 | 0 | 0      | 0 | 0 | 0 | t | 104443 | DAEFRHDS<br>GYE              | Mus<br>musculu<br>s              |
| 1 | 1.00 | 1 | 1 | 0 | 0      | 0 | 0 | 0 | t | 111026 | SRALAREV<br>DLKDYED<br>QQK   | Homo<br>sapiens                  |
| 1 | 1.00 | 1 | 1 | 0 | 0      | 0 | 0 | 0 | t | 104443 | DAEFRHDS<br>GYE              | Mus<br>musculu<br>s              |
| 1 | 1.00 | 1 | 1 | 0 | 0      | 0 | 0 | 0 | t | 117288 | FGDFNLPR<br>DKFLKEQI<br>KLDE | Mus<br>musculu<br>s              |
| 1 | 1.00 | 1 | 1 | 0 | 0      | 0 | 0 | 0 | t | 111026 | SRALAREV<br>DLKDYED<br>QQK   | Homo<br>sapiens                  |
| 1 | 1.00 | 1 | 1 | 0 | 0.003  | 0 | 0 | 0 | t | 104327 | VEQHNPIN<br>AGTELSAT         | Sus<br>scrofa                    |
| 1 | 1.00 | 1 | 1 | 0 | 0      | 0 | 0 | 0 | t | 111231 | EDLLMGTL<br>GIVCPICSQ<br>KP  | Mus<br>musculu<br>s              |
| 1 | 1.00 | 1 | 1 | 0 | -0.003 | 0 | 0 | 0 | t | 98176  | KNTNNNL<br>TLV               | Oryctola<br>gus<br>cuniculu<br>s |
| 1 | 1.00 | 1 | 1 | 0 | -0.003 | 0 | 0 | 0 | t | 98589  | VPAVVGK<br>PGS               | Oryctola<br>gus<br>cuniculu<br>s |
| 1 | 1.00 | 1 | 1 | 0 | 0.003  | 0 | 0 | 0 | t | 99134  | DAEFRHDS<br>GYEVHHQ          | Mus<br>musculu<br>s              |
| 1 | 1.00 | 1 | 1 | 0 | -0.003 | 0 | 0 | 0 | t | 98489  | SVQFVPIQ<br>NS               | Oryctola<br>gus<br>cuniculu<br>s |

|   |      |   |   |   |        |   |   |   |   |        |                              |                                  |
|---|------|---|---|---|--------|---|---|---|---|--------|------------------------------|----------------------------------|
| 1 | 1.00 | 1 | 1 | 0 | 0.006  | 0 | 0 | 0 | t | 116001 | TQDQDPV<br>VHF               | Ovis<br>aries                    |
| 1 | 1.00 | 1 | 1 | 0 | 0      | 0 | 0 | 0 | t | 108628 | SHQESTRG<br>RSRGRSGR<br>SGS  | Homo<br>sapiens                  |
| 1 | 1.00 | 1 | 1 | 0 | 0      | 0 | 0 | 0 | t | 107149 | GIAGFKGE<br>QGPKGET          | Mus<br>musculu<br>s              |
| 1 | 1.00 | 1 | 1 | 0 | -0.003 | 0 | 0 | 0 | t | 98532  | TNNNLTLV<br>PA               | Oryctola<br>gus<br>cuniculu<br>s |
| 1 | 1.00 | 1 | 1 | 0 | 0      | 0 | 0 | 0 | t | 110851 | FFSARGHR<br>PLDKKREE<br>AP   | Homo<br>sapiens                  |
| 1 | 1.00 | 1 | 1 | 0 | 0      | 0 | 0 | 0 | t | 110946 | MSTRSVSS<br>SSYRRMFG<br>GPGT | Mus<br>musculu<br>s              |
| 1 | 1.00 | 1 | 1 | 0 | 0      | 0 | 0 | 0 | t | 110946 | MSTRSVSS<br>SSYRRMFG<br>GPGT | Mus<br>musculu<br>s              |
| 1 | 1.00 | 1 | 1 | 0 | 0      | 0 | 0 | 0 | t | 98534  | TPAYYTKD<br>TN               | Oryctola<br>gus<br>cuniculu<br>s |
| 1 | 1.00 | 1 | 1 | 0 | 0      | 0 | 0 | 0 | t | 111856 | TTHYGSLP<br>QK               | Oryctola<br>gus<br>cuniculu<br>s |
| 1 | 1.00 | 1 | 1 | 0 | 0      | 0 | 0 | 0 | t | 105898 | KGEQG                        | Mus<br>musculu<br>s              |
| 1 | 1.00 | 1 | 1 | 0 | 0      | 0 | 0 | 0 | t | 99134  | DAEFRHDS<br>GYEVHHQ          | Mus<br>musculu<br>s              |
| 1 | 1.00 | 1 | 1 | 0 | -0.003 | 0 | 0 | 0 | t | 107814 | EGLHNHY                      | Oryctola<br>gus<br>cuniculu<br>s |
| 1 | 1.00 | 1 | 1 | 0 | 0      | 0 | 0 | 0 | t | 113014 | GSLPQKSQ<br>RSQDENG          | Rattus<br>norvegic<br>us         |
| 1 | 1.00 | 1 | 1 | 0 | 0      | 0 | 0 | 0 | t | 99134  | DAEFRHDS<br>GYEVHHQ          | Mus<br>musculu<br>s              |
| 1 | 1.00 | 1 | 1 | 0 | 0      | 0 | 0 | 0 | t | 99134  | DAEFRHDS<br>GYEVHHQ          | Mus<br>musculu<br>s              |

|   |      |   |   |   |        |   |   |   |   |        |                              |                                  |
|---|------|---|---|---|--------|---|---|---|---|--------|------------------------------|----------------------------------|
| 1 | 1.00 | 1 | 1 | 0 | 0      | 0 | 0 | 0 | t | 113365 | EHPVTGC<br>GERTEGRC<br>LHYTV | Mus<br>musculu<br>s              |
| 1 | 1.00 | 1 | 1 | 0 | 0      | 0 | 0 | 0 | t | 108629 | SHQESTRG<br>RSRGRSGR<br>SGS  | Homo<br>sapiens                  |
| 1 | 1.00 | 1 | 1 | 0 | 0      | 0 | 0 | 0 | t | 98534  | TPAYYTKD<br>TN               | Mus<br>musculu<br>s              |
| 1 | 1.00 | 1 | 1 | 0 | 0.002  | 0 | 0 | 0 | t | 112603 | MIAATYNF<br>AVLKLMG<br>RGTKF | Rattus<br>norvegic<br>us         |
| 1 | 1.00 | 1 | 1 | 0 | 0      | 0 | 0 | 0 | t | 113551 | IRDVWGIE<br>GPIDAAFT<br>RINC | Mus<br>musculu<br>s              |
| 1 | 1.00 | 1 | 1 | 0 | 0      | 0 | 0 | 0 | t | 113738 | PVEVSRKN<br>PKFMETV<br>AEKAL | Mus<br>musculu<br>s              |
| 1 | 1.00 | 1 | 1 | 0 | 0      | 0 | 0 | 0 | t | 102439 | FQLKTADL<br>PAGRDETT<br>SFVL | Mus<br>musculu<br>s              |
| 1 | 1.00 | 1 | 1 | 0 | 0      | 0 | 0 | 0 | t | 113365 | EHPVTGC<br>GERTEGRC<br>LHYTV | Mus<br>musculu<br>s              |
| 1 | 1.00 | 1 | 1 | 0 | 0      | 0 | 0 | 0 | t | 113365 | EHPVTGC<br>GERTEGRC<br>LHYTV | Mus<br>musculu<br>s              |
| 1 | 1.00 | 1 | 1 | 0 | 0      | 0 | 0 | 0 | t | 110776 | ARGHRPL<br>DKKREEAP<br>SLRPA | Homo<br>sapiens                  |
| 1 | 1.00 | 1 | 1 | 0 | 0.003  | 0 | 0 | 0 | t | 98534  | TPAYYTKD<br>TN               | Mus<br>musculu<br>s              |
| 1 | 1.00 | 1 | 1 | 0 | 0.002  | 0 | 0 | 0 | t | 113966 | TTHYGSLP<br>QKAQGHR<br>PQDE  | Rattus<br>norvegic<br>us         |
| 1 | 1.00 | 1 | 1 | 0 | -0.007 | 0 | 0 | 0 | t | 105202 | FVNQHLYK                     | Oryctola<br>gus<br>cuniculu<br>s |
| 1 | 1.00 | 1 | 1 | 0 | -0.003 | 0 | 0 | 0 | t | 98364  | QFVPIQNS<br>KS               | Oryctola<br>gus<br>cuniculu<br>s |

|   |      |   |   |   |        |   |   |   |   |        |                              |                                  |
|---|------|---|---|---|--------|---|---|---|---|--------|------------------------------|----------------------------------|
| 1 | 1.00 | 1 | 1 | 0 | -0.003 | 0 | 0 | 0 | t | 107018 | YKTTICGK<br>GLSATV           | Oryctola<br>gus<br>cuniculu<br>s |
| 1 | 1.00 | 1 | 1 | 0 | 0.006  | 0 | 0 | 0 | t | 116001 | TQDQDPV<br>VHF               | Ovis<br>aries                    |
| 1 | 1.00 | 1 | 1 | 0 | 0      | 0 | 0 | 0 | t | 111020 | SGIGTLDG<br>FRHRHPDE<br>AA   | Homo<br>sapiens                  |
| 1 | 1.00 | 1 | 1 | 0 | 0      | 0 | 0 | 0 | t | 116001 | TQDQDPV<br>VHF               | Oryctola<br>gus<br>cuniculu<br>s |
| 1 | 1.00 | 1 | 1 | 0 | 0.006  | 0 | 0 | 0 | t | 116001 | TQDQDPV<br>VHF               | Ovis<br>aries                    |
| 1 | 1.00 | 1 | 1 | 0 | 0      | 0 | 0 | 0 | t | 100635 | VTNYLVDG<br>NG               | Mus<br>musculu<br>s              |
| 1 | 1.00 | 1 | 1 | 0 | 0      | 0 | 0 | 0 | t | 111264 | EYMLDLQ<br>PETTDLYC<br>YEQLN | Rattus<br>norvegic<br>us         |
| 1 | 1.00 | 1 | 1 | 0 | 0      | 0 | 0 | 0 | t | 111264 | EYMLDLQ<br>PETTDLYC<br>YEQLN | Mus<br>musculu<br>s              |
| 1 | 1.00 | 1 | 1 | 0 | -0.003 | 0 | 0 | 0 | t | 98534  | TPAYYTKD<br>TN               | Oryctola<br>gus<br>cuniculu<br>s |
| 1 | 1.00 | 1 | 1 | 0 | -0.003 | 0 | 0 | 0 | t | 98177  | KPGSDVYY<br>AG               | Oryctola<br>gus<br>cuniculu<br>s |
| 1 | 1.00 | 1 | 1 | 0 | 0.002  | 0 | 0 | 0 | t | 113966 | TTHYGSLP<br>QKAQGHR<br>PQDE  | Rattus<br>norvegic<br>us         |
| 1 | 1.00 | 1 | 1 | 0 | 0      | 0 | 0 | 0 | t | 108652 | TGPSTRGR<br>QGSRHEQ<br>AQ    | Homo<br>sapiens                  |
| 1 | 1.00 | 1 | 1 | 0 | -0.003 | 0 | 0 | 0 | t | 98295  | NNNLTLP<br>AV                | Oryctola<br>gus<br>cuniculu<br>s |
| 1 | 1.00 | 1 | 1 | 0 | 0      | 0 | 0 | 0 | t | 99134  | DAEFRHDS<br>GYEVHHQ          | Mus<br>musculu<br>s              |

|   |      |   |   |   |        |   |   |   |   |        |                              |                          |
|---|------|---|---|---|--------|---|---|---|---|--------|------------------------------|--------------------------|
| 1 | 1.00 | 1 | 1 | 0 | 0.002  | 0 | 0 | 0 | t | 113966 | TTHYGSLP<br>QKAQGHR<br>PQDE  | Rattus<br>norvegicus     |
| 1 | 1.00 | 1 | 1 | 0 | 0      | 0 | 0 | 0 | t | 108630 | SHQESTRG<br>RSRGRSGR<br>SGS  | Mus<br>musculus          |
| 1 | 1.00 | 1 | 1 | 0 | 0      | 0 | 0 | 0 | t | 113667 | NNPDWG<br>TFEEVSGN<br>VSPGTR | Mus<br>musculus          |
| 1 | 1.00 | 1 | 1 | 0 | 0.003  | 0 | 0 | 0 | t | 104327 | VEQHNPIN<br>AGTELSAT         | Sus<br>scrofa            |
| 1 | 1.00 | 1 | 1 | 0 | 0      | 0 | 0 | 0 | t | 102335 | CKMWAD<br>AFTSSRGK<br>VVEC   | Mus<br>musculus          |
| 1 | 1.00 | 1 | 1 | 0 | 0      | 0 | 0 | 0 | t | 99922  | DAEFRHDS<br>GY               | Mus<br>musculus          |
| 1 | 1.00 | 1 | 1 | 0 | -0.003 | 0 | 0 | 0 | t | 102335 | CKMWAD<br>AFTSSRGK<br>VVEC   | Oryctolagus<br>cuniculus |
| 1 | 1.00 | 1 | 1 | 0 | 0      | 0 | 0 | 0 | t | 99922  | DAEFRHDS<br>GY               | Mus<br>musculus          |
| 1 | 1.00 | 1 | 1 | 0 | 0      | 0 | 0 | 0 | t | 99922  | DAEFRHDS<br>GY               | Mus<br>musculus          |
| 1 | 1.00 | 1 | 1 | 0 | 0      | 0 | 0 | 0 | t | 99922  | DAEFRHDS<br>GY               | Mus<br>musculus          |
| 1 | 1.00 | 1 | 1 | 0 | 0      | 0 | 0 | 0 | t | 102335 | CKMWAD<br>AFTSSRGK<br>VVEC   | Mus<br>musculus          |
| 1 | 1.00 | 1 | 1 | 0 | 0      | 0 | 0 | 0 | t | 99922  | DAEFRHDS<br>GY               | Mus<br>musculus          |
| 1 | 1.00 | 1 | 1 | 0 | -0.003 | 0 | 0 | 0 | t | 102335 | CKMWAD<br>AFTSSRGK<br>VVEC   | Oryctolagus<br>cuniculus |
| 1 | 1.00 | 1 | 1 | 0 | 0      | 0 | 0 | 0 | t | 102335 | CKMWAD<br>AFTSSRGK<br>VVEC   | Mus<br>musculus          |

|   |      |   |   |   |        |   |   |   |   |        |                               |                                  |
|---|------|---|---|---|--------|---|---|---|---|--------|-------------------------------|----------------------------------|
| 1 | 1.00 | 1 | 1 | 0 | 0      | 0 | 0 | 0 | t | 114740 | AQGHRPQ<br>DE                 | Oryctola<br>gus<br>cuniculu<br>s |
| 1 | 1.00 | 1 | 1 | 0 | -0.003 | 0 | 0 | 0 | t | 102335 | CKMWAD<br>AFTSSRGK<br>VVEC    | Oryctola<br>gus<br>cuniculu<br>s |
| 1 | 1.00 | 1 | 1 | 0 | 0      | 0 | 0 | 0 | t | 113350 | EAE EWYKS<br>KFADLSEA<br>ANRN | Mus<br>musculu<br>s              |
| 1 | 1.00 | 1 | 1 | 0 | 0      | 0 | 0 | 0 | t | 110783 | ARGHRPL<br>DKKREEAP<br>SLRPA  | Homo<br>sapiens                  |
| 1 | 1.00 | 1 | 1 | 0 | 0.009  | 0 | 0 | 0 | t | 114740 | AQGHRPQ<br>DE                 | Oryctola<br>gus<br>cuniculu<br>s |
| 1 | 1.00 | 1 | 1 | 0 | 0.009  | 0 | 0 | 0 | t | 114740 | AQGHRPQ<br>DE                 | Oryctola<br>gus<br>cuniculu<br>s |
| 1 | 1.00 | 1 | 1 | 0 | 0      | 0 | 0 | 0 | t | 110783 | ARGHRPL<br>DKKREEAP<br>SLRPA  | Homo<br>sapiens                  |
| 1 | 1.00 | 1 | 1 | 0 | 0      | 0 | 0 | 0 | t | 106322 | DAEFRHDS<br>G                 | Mus<br>musculu<br>s              |
| 1 | 1.00 | 1 | 1 | 0 | 0      | 0 | 0 | 0 | t | 110782 | ARGHRPL<br>DKKREEAP<br>SLRPA  | Homo<br>sapiens                  |
| 1 | 1.00 | 1 | 1 | 0 | 0      | 0 | 0 | 0 | t | 113349 | EAE EWYKS<br>KFADLSEA<br>ANRN | Mus<br>musculu<br>s              |
| 1 | 1.00 | 1 | 1 | 0 | 0      | 0 | 0 | 0 | t | 110848 | FFSARGHR<br>PLDKKREE<br>AP    | Homo<br>sapiens                  |
| 1 | 1.00 | 1 | 1 | 0 | 0      | 0 | 0 | 0 | t | 113349 | EAE EWYKS<br>KFADLSEA<br>ANRN | Mus<br>musculu<br>s              |
| 1 | 1.00 | 1 | 1 | 0 | 0      | 0 | 0 | 0 | t | 110782 | ARGHRPL<br>DKKREEAP<br>SLRPA  | Homo<br>sapiens                  |
| 1 | 1.00 | 1 | 1 | 0 | 0      | 0 | 0 | 0 | t | 110781 | ARGHRPL<br>DKKREEAP<br>SLRPA  | Homo<br>sapiens                  |
| 1 | 1.00 | 1 | 1 | 0 | 0      | 0 | 0 | 0 | t | 110781 | ARGHRPL<br>DKKREEAP<br>SLRPA  | Homo<br>sapiens                  |

|   |      |   |   |   |        |   |   |   |   |        |                               |                                  |
|---|------|---|---|---|--------|---|---|---|---|--------|-------------------------------|----------------------------------|
| 1 | 1.00 | 1 | 1 | 0 | 0.003  | 0 | 0 | 0 | t | 104327 | VEQHNPIN<br>AGTELSAT          | Sus<br>scrofa                    |
| 1 | 1.00 | 1 | 1 | 0 | 0      | 0 | 0 | 0 | t | 113349 | EAE EWYKS<br>KFADLSEA<br>ANRN | Mus<br>musculu<br>s              |
| 1 | 1.00 | 1 | 1 | 0 | 0      | 0 | 0 | 0 | t | 113349 | EAE EWYKS<br>KFADLSEA<br>ANRN | Mus<br>musculu<br>s              |
| 1 | 1.00 | 1 | 1 | 0 | 0      | 0 | 0 | 0 | t | 110780 | ARGHRPL<br>DKKREEAP<br>SLRPA  | Homo<br>sapiens                  |
| 1 | 1.00 | 1 | 1 | 0 | -0.003 | 0 | 0 | 0 | t | 98078  | GSDVYYA<br>GLN                | Oryctola<br>gus<br>cuniculu<br>s |
| 1 | 1.00 | 1 | 1 | 0 | 0      | 0 | 0 | 0 | t | 99134  | DAEFRHDS<br>GYEVHHQ           | Mus<br>musculu<br>s              |
| 1 | 1.00 | 1 | 1 | 0 | 0      | 0 | 0 | 0 | t | 110780 | ARGHRPL<br>DKKREEAP<br>SLRPA  | Homo<br>sapiens                  |
| 1 | 1.00 | 1 | 1 | 0 | 0      | 0 | 0 | 0 | t | 110376 | QAEPD                         | Mus<br>musculu<br>s              |
| 1 | 1.00 | 1 | 1 | 0 | 0      | 0 | 0 | 0 | t | 110376 | QAEPD                         | Mus<br>musculu<br>s              |
| 1 | 1.00 | 1 | 1 | 0 | 0      | 0 | 0 | 0 | t | 110376 | QAEPD                         | Mus<br>musculu<br>s              |
| 1 | 1.00 | 1 | 1 | 0 | 0      | 0 | 0 | 0 | t | 110376 | QAEPD                         | Mus<br>musculu<br>s              |
| 1 | 1.00 | 1 | 1 | 0 | 0      | 0 | 0 | 0 | t | 113159 | SDEGGYTC<br>FFRDHSYQ<br>EE    | Rattus<br>norvegic<br>us         |
| 1 | 1.00 | 1 | 1 | 0 | -0.003 | 0 | 0 | 0 | t | 110198 | CPPDIIPKV<br>EGKTIA           | Oryctola<br>gus<br>cuniculu<br>s |
| 1 | 1.00 | 1 | 1 | 0 | 0      | 0 | 0 | 0 | t | 113159 | SDEGGYTC<br>FFRDHSYQ<br>EE    | Rattus<br>norvegic<br>us         |
| 1 | 1.00 | 1 | 1 | 0 | 0      | 0 | 0 | 0 | t | 110853 | FFSARGHR<br>PLDKKREE<br>AP    | Homo<br>sapiens                  |

|   |      |   |   |   |        |   |   |   |   |        |                              |                                  |
|---|------|---|---|---|--------|---|---|---|---|--------|------------------------------|----------------------------------|
| 1 | 1.00 | 1 | 1 | 0 | -0.003 | 0 | 0 | 0 | t | 110198 | CPPDIIPKV<br>EGKTIA          | Oryctola<br>gus<br>cuniculu<br>s |
| 1 | 1.00 | 1 | 1 | 0 | 0      | 0 | 0 | 0 | t | 110376 | QAEPD                        | Mus<br>musculu<br>s              |
| 1 | 1.00 | 1 | 1 | 0 | 0      | 0 | 0 | 0 | t | 110776 | ARGHRPL<br>DKKREEAP<br>SLRPA | Homo<br>sapiens                  |
| 1 | 1.00 | 1 | 1 | 0 | 0      | 0 | 0 | 0 | t | 110780 | ARGHRPL<br>DKKREEAP<br>SLRPA | Homo<br>sapiens                  |
| 1 | 1.00 | 1 | 1 | 0 | 0.006  | 0 | 0 | 0 | t | 113670 | NPVVHFFK<br>NIVTP            | Ovis<br>aries                    |
| 1 | 1.00 | 1 | 1 | 0 | 0      | 0 | 0 | 0 | t | 117140 | DWEYSVW<br>LSN               | Mus<br>musculu<br>s              |
| 1 | 1.00 | 1 | 1 | 0 | 0      | 0 | 0 | 0 | t | 110851 | FFSARGHR<br>PLDKKREE<br>AP   | Homo<br>sapiens                  |
| 1 | 1.00 | 1 | 1 | 0 | 0      | 0 | 0 | 0 | t | 110900 | IAKDLLPSR<br>DRQHLPLI<br>K   | Homo<br>sapiens                  |
| 1 | 1.00 | 1 | 1 | 0 | 0      | 0 | 0 | 0 | t | 99134  | DAEFRHDS<br>GYEVHHQ          | Mus<br>musculu<br>s              |
| 1 | 1.00 | 1 | 1 | 0 | 0      | 0 | 0 | 0 | t | 102344 | DAEFR                        | Mus<br>musculu<br>s              |
| 1 | 1.00 | 1 | 1 | 0 | 0      | 0 | 0 | 0 | t | 110779 | ARGHRPL<br>DKKREEAP<br>SLRPA | Homo<br>sapiens                  |
| 1 | 1.00 | 1 | 1 | 0 | 0      | 0 | 0 | 0 | t | 110778 | ARGHRPL<br>DKKREEAP<br>SLRPA | Homo<br>sapiens                  |
| 1 | 1.00 | 1 | 1 | 0 | -0.003 | 0 | 0 | 0 | t | 98290  | NLTLVPAV<br>VG               | Oryctola<br>gus<br>cuniculu<br>s |
| 1 | 1.00 | 1 | 1 | 0 | 0      | 0 | 0 | 0 | t | 110778 | ARGHRPL<br>DKKREEAP<br>SLRPA | Homo<br>sapiens                  |
| 1 | 1.00 | 1 | 1 | 0 | 0      | 0 | 0 | 0 | t | 105505 | SAE                          | Oryctola<br>gus<br>cuniculu<br>s |



|   |      |   |   |   |        |   |   |   |   |        |                              |                                  |
|---|------|---|---|---|--------|---|---|---|---|--------|------------------------------|----------------------------------|
| 1 | 1.00 | 1 | 1 | 0 | 0.009  | 0 | 0 | 0 | t | 115640 | QKSQRSQ<br>DEN               | Oryctola<br>gus<br>cuniculu<br>s |
| 1 | 1.00 | 1 | 1 | 0 | -0.003 | 0 | 0 | 0 | t | 103104 | DFLIEEIERL<br>GQDL           | Oryctola<br>gus<br>cuniculu<br>s |
| 1 | 1.00 | 1 | 1 | 0 | 0      | 0 | 0 | 0 | t | 104443 | DAEFRHDS<br>GYE              | Mus<br>musculu<br>s              |
| 1 | 1.00 | 1 | 1 | 0 | 0      | 0 | 0 | 0 | t | 104443 | DAEFRHDS<br>GYE              | Mus<br>musculu<br>s              |
| 1 | 1.00 | 1 | 1 | 0 | 0      | 0 | 0 | 0 | t | 110778 | ARGHRPL<br>DKKREEAP<br>SLRPA | Homo<br>sapiens                  |
| 1 | 1.00 | 1 | 1 | 0 | 0      | 0 | 0 | 0 | t | 110778 | ARGHRPL<br>DKKREEAP<br>SLRPA | Homo<br>sapiens                  |
| 1 | 1.00 | 1 | 1 | 0 | -0.003 | 0 | 0 | 0 | t | 114226 | QKSHGRT<br>QDENPVV<br>HF     | Oryctola<br>gus<br>cuniculu<br>s |
| 1 | 1.00 | 1 | 1 | 0 | -0.003 | 0 | 0 | 0 | t | 113742 | QDENPVV                      | Oryctola<br>gus<br>cuniculu<br>s |
| 1 | 1.00 | 1 | 1 | 0 | 0      | 0 | 0 | 0 | t | 110777 | ARGHRPL<br>DKKREEAP<br>SLRPA | Homo<br>sapiens                  |
| 1 | 1.00 | 1 | 1 | 0 | -0.003 | 0 | 0 | 0 | t | 113742 | QDENPVV                      | Oryctola<br>gus<br>cuniculu<br>s |
| 1 | 1.00 | 1 | 1 | 0 | 0      | 0 | 0 | 0 | t | 110777 | ARGHRPL<br>DKKREEAP<br>SLRPA | Homo<br>sapiens                  |
| 1 | 1.00 | 1 | 1 | 0 | 0      | 0 | 0 | 0 | t | 110777 | ARGHRPL<br>DKKREEAP<br>SLRPA | Homo<br>sapiens                  |
| 1 | 1.00 | 1 | 1 | 0 | 0      | 0 | 0 | 0 | t | 110777 | ARGHRPL<br>DKKREEAP<br>SLRPA | Homo<br>sapiens                  |
| 1 | 1.00 | 1 | 1 | 0 | 0      | 0 | 0 | 0 | t | 102344 | DAEFR                        | Mus<br>musculu<br>s              |
| 1 | 1.00 | 1 | 1 | 0 | 0      | 0 | 0 | 0 | t | 110990 | RARPAKA<br>AATQKKVE<br>RKA   | Homo<br>sapiens                  |

|   |      |   |   |   |        |   |   |   |   |       |                              |                                  |
|---|------|---|---|---|--------|---|---|---|---|-------|------------------------------|----------------------------------|
| 1 | 1.00 | 1 | 1 | 0 | 0      | 0 | 0 | 0 | t | 65615 | TPISPPLRD<br>SHP             | Mus<br>musculu<br>s              |
| 1 | 1.00 | 1 | 1 | 0 | -0.004 | 0 | 0 | 0 | t | 73744 | YEPYYHSD<br>HAESSWV<br>NRGES | Mus<br>musculu<br>s              |
| 1 | 1.00 | 1 | 1 | 0 | 0      | 0 | 0 | 0 | t | 64057 | THNQWN<br>KPSKPKTN<br>LK     | Oryctola<br>gus<br>cuniculu<br>s |
| 1 | 1.00 | 1 | 1 | 0 | -0.007 | 0 | 0 | 0 | t | 94441 | CCHPAC                       | Oryctola<br>gus<br>cuniculu<br>s |
| 1 | 1.00 | 1 | 1 | 0 | 0      | 0 | 0 | 0 | t | 64057 | THNQWN<br>KPSKPKTN<br>LK     | Oryctola<br>gus<br>cuniculu<br>s |
| 1 | 1.00 | 1 | 1 | 0 | -0.003 | 0 | 0 | 0 | t | 63832 | TGGAGYFY                     | Mus<br>musculu<br>s              |
| 1 | 1.00 | 1 | 1 | 0 | -0.007 | 0 | 0 | 0 | t | 94447 | CCHPACG<br>KNY               | Oryctola<br>gus<br>cuniculu<br>s |
| 1 | 1.00 | 1 | 1 | 0 | 0      | 0 | 0 | 0 | t | 71523 | VTTLNP                       | Mus<br>musculu<br>s              |
| 1 | 1.00 | 1 | 1 | 0 | -0.003 | 0 | 0 | 0 | t | 71523 | VTTLNP                       | Oryctola<br>gus<br>cuniculu<br>s |
| 1 | 1.00 | 1 | 1 | 0 | 0.002  | 0 | 0 | 0 | t | 70735 | VRGTLGDI                     | Rattus<br>norvegic<br>us         |
| 1 | 1.00 | 1 | 1 | 0 | -0.003 | 0 | 0 | 0 | t | 71523 | VTTLNP                       | Oryctola<br>gus<br>cuniculu<br>s |
| 1 | 1.00 | 1 | 1 | 0 | -0.003 | 0 | 0 | 0 | t | 76275 | YVFYSGNG<br>PKASGGD<br>YCIQS | Oryctola<br>gus<br>cuniculu<br>s |
| 1 | 1.00 | 1 | 1 | 0 | 0      | 0 | 0 | 0 | t | 63037 | TAVSPTTL<br>R                | Mus<br>musculu<br>s              |

|   |      |   |   |   |        |   |   |   |   |       |                              |                                  |
|---|------|---|---|---|--------|---|---|---|---|-------|------------------------------|----------------------------------|
| 1 | 1.00 | 1 | 1 | 0 | 0.003  | 0 | 0 | 0 | t | 63037 | TAVSP TTL<br>R               | Sus<br>scrofa                    |
| 1 | 1.00 | 1 | 1 | 0 | -0.007 | 0 | 0 | 0 | t | 94451 | CCNPACG                      | Oryctola<br>gus<br>cuniculu<br>s |
| 1 | 1.00 | 1 | 1 | 0 | -0.007 | 0 | 0 | 0 | t | 94452 | CCNPACG<br>PKY               | Oryctola<br>gus<br>cuniculu<br>s |
| 1 | 1.00 | 1 | 1 | 0 | -0.007 | 0 | 0 | 0 | t | 94453 | CCNPACG<br>R                 | Oryctola<br>gus<br>cuniculu<br>s |
| 1 | 1.00 | 1 | 1 | 0 | -0.003 | 0 | 0 | 0 | t | 64049 | THLKASSG<br>YCAWPAC          | Mus<br>musculu<br>s              |
| 1 | 1.00 | 1 | 1 | 0 | -0.007 | 0 | 0 | 0 | t | 94454 | CCNPACG<br>RHY               | Oryctola<br>gus<br>cuniculu<br>s |
| 1 | 1.00 | 1 | 1 | 0 | -0.003 | 0 | 0 | 0 | t | 65664 | TPNATQPE<br>LAPEDPE          | Oryctola<br>gus<br>cuniculu<br>s |
| 1 | 1.00 | 1 | 1 | 0 | 0.003  | 0 | 0 | 0 | t | 76239 | YVATRSET<br>DYYAGNSP<br>PQ   | Sus<br>scrofa                    |
| 1 | 1.00 | 1 | 1 | 0 | -0.006 | 0 | 0 | 0 | t | 88388 | SAWNSDS<br>EKPFDDHL          | Oryctola<br>gus<br>cuniculu<br>s |
| 1 | 1.00 | 1 | 1 | 0 | 0.008  | 0 | 0 | 0 | t | 73649 | YEEPNDGE<br>ERQS             | Capra<br>hircus                  |
| 1 | 1.00 | 1 | 1 | 0 | 0      | 0 | 0 | 0 | t | 72571 | WIARFDT<br>DKDGKVSL<br>EEFCR | Mus<br>musculu<br>s              |
| 1 | 1.00 | 1 | 1 | 0 | 0      | 0 | 0 | 0 | t | 72571 | WIARFDT<br>DKDGKVSL<br>EEFCR | Mus<br>musculu<br>s              |
| 1 | 1.00 | 1 | 1 | 0 | -0.002 | 0 | 0 | 0 | t | 89533 | TLAYRFGN<br>VTPR             | Mus<br>musculu<br>s              |

|   |      |   |   |   |   |   |   |   |   |       |                          |                 |
|---|------|---|---|---|---|---|---|---|---|-------|--------------------------|-----------------|
| 1 | 1.00 | 1 | 1 | 0 | 0 | 0 | 0 | 0 | t | 72571 | WIARFDT<br>DKDGKVSLEEFGR | Mus<br>musculus |
| 1 | 1.00 | 1 | 1 | 0 | 0 | 0 | 0 | 0 | t | 73640 | YEDVNGIR<br>RP           | Mus<br>musculus |
| 1 | 1.00 | 1 | 1 | 0 | 0 | 0 | 0 | 0 | t | 74279 | YIKNIINTSI<br>LNLRYESNH  | Mus<br>musculus |
| 1 | 1.00 | 1 | 1 | 0 | 0 | 0 | 0 | 0 | t | 74279 | YIKNIINTSI<br>LNLRYESNH  | Mus<br>musculus |
| 1 | 1.00 | 1 | 1 | 0 | 0 | 0 | 0 | 0 | t | 78286 | TTAETLDA<br>TR           | Mus<br>musculus |
| 1 | 1.00 | 1 | 1 | 0 | 0 | 0 | 0 | 0 | t | 78286 | TTAETLDA<br>TR           | Mus<br>musculus |
| 1 | 1.00 | 1 | 1 | 0 | 0 | 0 | 0 | 0 | t | 78286 | TTAETLDA<br>TR           | Mus<br>musculus |
| 1 | 1.00 | 1 | 1 | 0 | 0 | 0 | 0 | 0 | t | 78286 | TTAETLDA<br>TR           | Mus<br>musculus |
| 1 | 1.00 | 1 | 1 | 0 | 0 | 0 | 0 | 0 | t | 78286 | TTAETLDA<br>TR           | Mus<br>musculus |
| 1 | 1.00 | 1 | 1 | 0 | 0 | 0 | 0 | 0 | t | 78286 | TTAETLDA<br>TR           | Mus<br>musculus |
| 1 | 1.00 | 1 | 1 | 0 | 0 | 0 | 0 | 0 | t | 78286 | TTAETLDA<br>TR           | Mus<br>musculus |
| 1 | 1.00 | 1 | 1 | 0 | 0 | 0 | 0 | 0 | t | 74279 | YIKNIINTSI<br>LNLRYESNH  | Mus<br>musculus |
| 1 | 1.00 | 1 | 1 | 0 | 0 | 0 | 0 | 0 | t | 74279 | YIKNIINTSI<br>LNLRYESNH  | Mus<br>musculus |

|   |      |   |   |   |        |   |   |   |   |       |                             |                                  |
|---|------|---|---|---|--------|---|---|---|---|-------|-----------------------------|----------------------------------|
| 1 | 1.00 | 1 | 1 | 0 | -0.003 | 0 | 0 | 0 | t | 76208 | YTVSKSKT<br>NIFW            | Oryctola<br>gus<br>cuniculu<br>s |
| 1 | 1.00 | 1 | 1 | 0 | 0      | 0 | 0 | 0 | t | 74279 | YIKNIINTSI<br>LNLRYESN<br>H | Mus<br>musculu<br>s              |
| 1 | 1.00 | 1 | 1 | 0 | 0      | 0 | 0 | 0 | t | 73763 | YESNHLIDL<br>SRYASKINI<br>G | Mus<br>musculu<br>s              |
| 1 | 1.00 | 1 | 1 | 0 | -0.008 | 0 | 0 | 0 | t | 73763 | YESNHLIDL<br>SRYASKINI<br>G | Mus<br>musculu<br>s              |
| 1 | 1.00 | 1 | 1 | 0 | 0      | 0 | 0 | 0 | t | 74279 | YIKNIINTSI<br>LNLRYESN<br>H | Mus<br>musculu<br>s              |
| 1 | 1.00 | 1 | 1 | 0 | 0      | 0 | 0 | 0 | t | 73763 | YESNHLIDL<br>SRYASKINI<br>G | Mus<br>musculu<br>s              |
| 1 | 1.00 | 1 | 1 | 0 | 0.005  | 0 | 0 | 0 | t | 73763 | YESNHLIDL<br>SRYASKINI<br>G | Gallus<br>gallus                 |
| 1 | 1.00 | 1 | 1 | 0 | -0.003 | 0 | 0 | 0 | t | 73763 | YESNHLIDL<br>SRYASKINI<br>G | Mus<br>musculu<br>s              |
| 1 | 1.00 | 1 | 1 | 0 | 0      | 0 | 0 | 0 | t | 74279 | YIKNIINTSI<br>LNLRYESN<br>H | Mus<br>musculu<br>s              |
| 1 | 1.00 | 1 | 1 | 0 | -0.008 | 0 | 0 | 0 | t | 60978 | SSEVAVLY<br>QDVNCTD<br>V    | Mus<br>musculu<br>s              |
| 1 | 1.00 | 1 | 1 | 0 | -0.008 | 0 | 0 | 0 | t | 74279 | YIKNIINTSI<br>LNLRYESN<br>H | Mus<br>musculu<br>s              |
| 1 | 1.00 | 1 | 1 | 0 | -0.003 | 0 | 0 | 0 | t | 73763 | YESNHLIDL<br>SRYASKINI<br>G | Mus<br>musculu<br>s              |
| 1 | 1.00 | 1 | 1 | 0 | 0      | 0 | 0 | 0 | t | 74279 | YIKNIINTSI<br>LNLRYESN<br>H | Mus<br>musculu<br>s              |

|   |      |   |   |   |        |   |   |   |   |       |                             |                     |
|---|------|---|---|---|--------|---|---|---|---|-------|-----------------------------|---------------------|
| 1 | 1.00 | 1 | 1 | 0 | 0      | 0 | 0 | 0 | t | 74279 | YIKNIINTSI<br>LNLRYESN<br>H | Mus<br>musculu<br>s |
| 1 | 1.00 | 1 | 1 | 0 | 0      | 0 | 0 | 0 | t | 76195 | YTTSTRGD<br>LAHVTAT         | Mus<br>musculu<br>s |
| 1 | 1.00 | 1 | 1 | 0 | 0      | 0 | 0 | 0 | t | 65698 | TPPRPAGD<br>NATVAAG<br>HAT  | Mus<br>musculu<br>s |
| 1 | 1.00 | 1 | 1 | 0 | -0.008 | 0 | 0 | 0 | t | 73763 | YESNHLIDL<br>SRYASKINI<br>G | Mus<br>musculu<br>s |
| 1 | 1.00 | 1 | 1 | 0 | 0      | 0 | 0 | 0 | t | 73763 | YESNHLIDL<br>SRYASKINI<br>G | Mus<br>musculu<br>s |
| 1 | 1.00 | 1 | 1 | 0 | 0      | 0 | 0 | 0 | t | 73763 | YESNHLIDL<br>SRYASKINI<br>G | Mus<br>musculu<br>s |
| 1 | 1.00 | 1 | 1 | 0 | 0      | 0 | 0 | 0 | t | 73763 | YESNHLIDL<br>SRYASKINI<br>G | Mus<br>musculu<br>s |
| 1 | 1.00 | 1 | 1 | 0 | 0      | 0 | 0 | 0 | t | 73763 | YESNHLIDL<br>SRYASKINI<br>G | Mus<br>musculu<br>s |
| 1 | 1.00 | 1 | 1 | 0 | -0.002 | 0 | 0 | 0 | t | 74279 | YIKNIINTSI<br>LNLRYESN<br>H | Mus<br>musculu<br>s |
| 1 | 1.00 | 1 | 1 | 0 | -0.008 | 0 | 0 | 0 | t | 74279 | YIKNIINTSI<br>LNLRYESN<br>H | Mus<br>musculu<br>s |
| 1 | 1.00 | 1 | 1 | 0 | 0      | 0 | 0 | 0 | t | 73763 | YESNHLIDL<br>SRYASKINI<br>G | Mus<br>musculu<br>s |
| 1 | 1.00 | 1 | 1 | 0 | 0      | 0 | 0 | 0 | t | 73763 | YESNHLIDL<br>SRYASKINI<br>G | Mus<br>musculu<br>s |

|   |      |   |   |   |        |   |   |   |   |       |                             |                                  |
|---|------|---|---|---|--------|---|---|---|---|-------|-----------------------------|----------------------------------|
| 1 | 1.00 | 1 | 1 | 0 | 0      | 0 | 0 | 0 | t | 73763 | YESNHLIDL<br>SRYASKINI<br>G | Mus<br>musculu<br>s              |
| 1 | 1.00 | 1 | 1 | 0 | 0      | 0 | 0 | 0 | t | 71422 | VTMTDLV<br>PGILEKQR         | Bos<br>taurus                    |
| 1 | 1.00 | 1 | 1 | 0 | -0.007 | 0 | 0 | 0 | t | 74279 | YIKNIINTSI<br>LNLRYESN<br>H | Homo<br>sapiens                  |
| 1 | 1.00 | 1 | 1 | 0 | 0      | 0 | 0 | 0 | t | 71421 | VTMRPTSL<br>AQRNEMF<br>F    | Mus<br>musculu<br>s              |
| 1 | 1.00 | 1 | 1 | 0 | -0.002 | 0 | 0 | 0 | t | 74279 | YIKNIINTSI<br>LNLRYESN<br>H | Mus<br>musculu<br>s              |
| 1 | 1.00 | 1 | 1 | 0 | -0.008 | 0 | 0 | 0 | t | 73763 | YESNHLIDL<br>SRYASKINI<br>G | Mus<br>musculu<br>s              |
| 1 | 1.00 | 1 | 1 | 0 | 0      | 0 | 0 | 0 | t | 73763 | YESNHLIDL<br>SRYASKINI<br>G | Mus<br>musculu<br>s              |
| 1 | 1.00 | 1 | 1 | 0 | 0      | 0 | 0 | 0 | t | 73763 | YESNHLIDL<br>SRYASKINI<br>G | Mus<br>musculu<br>s              |
| 1 | 1.00 | 1 | 1 | 0 | 0      | 0 | 0 | 0 | t | 74279 | YIKNIINTSI<br>LNLRYESN<br>H | Mus<br>musculu<br>s              |
| 1 | 1.00 | 1 | 1 | 0 | -0.003 | 0 | 0 | 0 | t | 97960 | DTNNNLTL<br>VP              | Oryctola<br>gus<br>cuniculu<br>s |
| 1 | 1.00 | 1 | 1 | 0 | 0      | 0 | 0 | 0 | t | 89768 | TTTLNP                      | Mus<br>musculu<br>s              |
| 1 | 1.00 | 1 | 1 | 0 | 0      | 0 | 0 | 0 | t | 74279 | YIKNIINTSI<br>LNLRYESN<br>H | Mus<br>musculu<br>s              |

|   |      |   |   |   |        |   |   |   |   |       |                             |                                  |
|---|------|---|---|---|--------|---|---|---|---|-------|-----------------------------|----------------------------------|
| 1 | 1.00 | 1 | 1 | 0 | -0.002 | 0 | 0 | 0 | t | 74279 | YIKNIINTSI<br>LNLRYESN<br>H | Mus<br>musculu<br>s              |
| 1 | 1.00 | 1 | 1 | 0 | 0      | 0 | 0 | 0 | t | 73636 | YEDRRYRE                    | Mus<br>musculu<br>s              |
| 1 | 1.00 | 1 | 1 | 0 | 0      | 0 | 0 | 0 | t | 97205 | ANYTTAV<br>D                | Mus<br>musculu<br>s              |
| 1 | 1.00 | 1 | 1 | 0 | 0      | 0 | 0 | 0 | t | 71568 | VTVVTTSG<br>S               | Bos<br>taurus                    |
| 1 | 1.00 | 1 | 1 | 0 | 0.005  | 0 | 0 | 0 | t | 71568 | VTVVTTSG<br>S               | Homo<br>sapiens                  |
| 1 | 1.00 | 1 | 1 | 0 | 0      | 0 | 0 | 0 | t | 71568 | VTVVTTSG<br>S               | Homo<br>sapiens                  |
| 1 | 1.00 | 1 | 1 | 0 | -0.007 | 0 | 0 | 0 | t | 94467 | CNPA                        | Oryctola<br>gus<br>cuniculu<br>s |
| 1 | 1.00 | 1 | 1 | 0 | 0      | 0 | 0 | 0 | t | 64032 | THGQWN<br>KPSKPKTN<br>MK    | Oryctola<br>gus<br>cuniculu<br>s |
| 1 | 1.00 | 1 | 1 | 0 | -0.007 | 0 | 0 | 0 | t | 94468 | CNPAC                       | Oryctola<br>gus<br>cuniculu<br>s |
| 1 | 1.00 | 1 | 1 | 0 | 0      | 0 | 0 | 0 | t | 61574 | STEELFKEY<br>KLTRPYMA<br>RC | Mus<br>musculu<br>s              |
| 1 | 1.00 | 1 | 1 | 0 | -0.002 | 0 | 0 | 0 | t | 87595 | QKASIAGT<br>DSGW            | Mus<br>musculu<br>s              |
| 1 | 1.00 | 1 | 1 | 0 | -0.003 | 0 | 0 | 0 | t | 61574 | STEELFKEY<br>KLTRPYMA<br>RC | Mus<br>musculu<br>s              |
| 1 | 1.00 | 1 | 1 | 0 | 0      | 0 | 0 | 0 | t | 63038 | TAVSPTTL<br>RTEVVK          | Sus<br>scrofa                    |
| 1 | 1.00 | 1 | 1 | 0 | -0.003 | 0 | 0 | 0 | t | 63022 | TATRLLSST<br>NSRLC          | Oryctola<br>gus<br>cuniculu<br>s |



|   |      |   |   |   |        |   |   |   |   |       |                             |                                  |
|---|------|---|---|---|--------|---|---|---|---|-------|-----------------------------|----------------------------------|
| 1 | 1.00 | 1 | 1 | 0 | -0.007 | 0 | 0 | 0 | t | 94469 | CNPACG                      | Oryctola<br>gus<br>cuniculu<br>s |
| 1 | 1.00 | 1 | 1 | 0 | -0.011 | 0 | 0 | 0 | t | 67187 | TVTTTTKG<br>ENFTETDI<br>KI  | Oryctola<br>gus<br>cuniculu<br>s |
| 1 | 1.00 | 1 | 1 | 0 | -0.002 | 0 | 0 | 0 | t | 87580 | QIHRLVSG<br>YDND            | Mus<br>musculu<br>s              |
| 1 | 1.00 | 1 | 1 | 0 | -0.003 | 0 | 0 | 0 | t | 67187 | TVTTTTKG<br>ENFTETDI<br>KI  | Oryctola<br>gus<br>cuniculu<br>s |
| 1 | 1.00 | 1 | 1 | 0 | -0.002 | 0 | 0 | 0 | t | 66884 | TTTTTKTT<br>TT              | Mus<br>musculu<br>s              |
| 1 | 1.00 | 1 | 1 | 0 | -0.007 | 0 | 0 | 0 | t | 94470 | CNPACGP                     | Oryctola<br>gus<br>cuniculu<br>s |
| 1 | 1.00 | 1 | 1 | 0 | 0.003  | 0 | 0 | 0 | t | 63038 | TAVSP TTL<br>RTEVVK         | Sus<br>scrofa                    |
| 1 | 1.00 | 1 | 1 | 0 | -0.003 | 0 | 0 | 0 | t | 61574 | STEELFKEY<br>KLTRPYMA<br>RC | Mus<br>musculu<br>s              |
| 1 | 1.00 | 1 | 1 | 0 | -0.006 | 0 | 0 | 0 | t | 68858 | VHILCYCY<br>GLPDSEP         | Oryctola<br>gus<br>cuniculu<br>s |
| 1 | 1.00 | 1 | 1 | 0 | -0.007 | 0 | 0 | 0 | t | 94471 | CNPACGP<br>K                | Oryctola<br>gus<br>cuniculu<br>s |
| 1 | 1.00 | 1 | 1 | 0 | -0.007 | 0 | 0 | 0 | t | 94472 | CNPACGP<br>KY               | Oryctola<br>gus<br>cuniculu<br>s |
| 1 | 1.00 | 1 | 1 | 0 | 0      | 0 | 0 | 0 | t | 89329 | TAIFDT                      | Mus<br>musculu<br>s              |
| 1 | 1.00 | 1 | 1 | 0 | -0.002 | 0 | 0 | 0 | t | 66347 | TSNTHACR<br>TCSNPCR         | Mus<br>musculu<br>s              |

|   |      |   |   |   |        |   |   |   |   |       |                     |                                  |
|---|------|---|---|---|--------|---|---|---|---|-------|---------------------|----------------------------------|
| 1 | 1.00 | 1 | 1 | 0 | -0.003 | 0 | 0 | 0 | t | 73607 | YDWRAD<br>WVKGFP    | Oryctola<br>gus<br>cuniculu<br>s |
| 1 | 1.00 | 1 | 1 | 0 | -0.003 | 0 | 0 | 0 | t | 95524 | KRQIYTDIE<br>MNRLGK | Oryctola<br>gus<br>cuniculu<br>s |
| 1 | 1.00 | 1 | 1 | 0 | -0.007 | 0 | 0 | 0 | t | 94473 | CNPACGP<br>KYS      | Oryctola<br>gus<br>cuniculu<br>s |
| 1 | 1.00 | 1 | 1 | 0 | -0.007 | 0 | 0 | 0 | t | 94474 | CNPACGR             | Oryctola<br>gus<br>cuniculu<br>s |
| 1 | 1.00 | 1 | 1 | 0 | -0.002 | 0 | 0 | 0 | t | 87232 | PEFAGLSG<br>SVQY    | Mus<br>musculu<br>s              |
| 1 | 1.00 | 1 | 1 | 0 | -0.007 | 0 | 0 | 0 | t | 94475 | CNPACGR<br>H        | Oryctola<br>gus<br>cuniculu<br>s |
| 1 | 1.00 | 1 | 1 | 0 | 0      | 0 | 0 | 0 | t | 64010 | TGYRYDSR<br>TGFFATN | Mus<br>musculu<br>s              |
| 1 | 1.00 | 1 | 1 | 0 | 0      | 0 | 0 | 0 | t | 64010 | TGYRYDSR<br>TGFFATN | Mus<br>musculu<br>s              |
| 1 | 1.00 | 1 | 1 | 0 | -0.007 | 0 | 0 | 0 | t | 94477 | CNPACGR<br>HYS      | Oryctola<br>gus<br>cuniculu<br>s |
| 1 | 1.00 | 1 | 1 | 0 | 0      | 0 | 0 | 0 | t | 64010 | TGYRYDSR<br>TGFFATN | Mus<br>musculu<br>s              |
| 1 | 1.00 | 1 | 1 | 0 | -0.003 | 0 | 0 | 0 | t | 74374 | YISPYFINT<br>S      | Oryctola<br>gus<br>cuniculu<br>s |
| 1 | 1.00 | 1 | 1 | 0 | -0.006 | 0 | 0 | 0 | t | 62788 | TAAGYCNT<br>ECLKKG  | Oryctola<br>gus<br>cuniculu<br>s |

|   |      |   |   |   |        |   |   |   |   |       |                              |                                  |
|---|------|---|---|---|--------|---|---|---|---|-------|------------------------------|----------------------------------|
| 1 | 1.00 | 1 | 1 | 0 | -0.002 | 0 | 0 | 0 | t | 66347 | TSNTHACR<br>TCSNPCR          | Mus<br>musculu<br>s              |
| 1 | 1.00 | 1 | 1 | 0 | 0      | 0 | 0 | 0 | t | 62779 | TAADTPTA<br>TESISPSP         | Mus<br>musculu<br>s              |
| 1 | 1.00 | 1 | 1 | 0 | -0.007 | 0 | 0 | 0 | t | 70682 | VQYNLSHS<br>YAGDA            | Oryctola<br>gus<br>cuniculu<br>s |
| 1 | 1.00 | 1 | 1 | 0 | 0.002  | 0 | 0 | 0 | t | 96103 | APPLLPHS<br>NLDHI            | Rattus<br>norvegic<br>us         |
| 1 | 1.00 | 1 | 1 | 0 | -0.003 | 0 | 0 | 0 | t | 66841 | TTTCFRDT<br>DTGK             | Oryctola<br>gus<br>cuniculu<br>s |
| 1 | 1.00 | 1 | 1 | 0 | 0.003  | 0 | 0 | 0 | t | 66841 | TTTCFRDT<br>DTGK             | Sus<br>scrofa                    |
| 1 | 1.00 | 1 | 1 | 0 | 0      | 0 | 0 | 0 | t | 74416 | YIWPRND<br>YDGFLENA<br>HEHHG | Mus<br>musculu<br>s              |
| 1 | 1.00 | 1 | 1 | 0 | 0      | 0 | 0 | 0 | t | 73563 | YDNAYCD<br>KLCKDKKA          | Mus<br>musculu<br>s              |
| 1 | 1.00 | 1 | 1 | 0 | -0.003 | 0 | 0 | 0 | t | 73563 | YDNAYCD<br>KLCKDKKA          | Mus<br>musculu<br>s              |
| 1 | 1.00 | 1 | 1 | 0 | -0.007 | 0 | 0 | 0 | t | 94494 | ECCNPAC<br>GRH               | Oryctola<br>gus<br>cuniculu<br>s |
| 1 | 1.00 | 1 | 1 | 0 | -0.006 | 0 | 0 | 0 | t | 73563 | YDNAYCD<br>KLCKDKKA          | Oryctola<br>gus<br>cuniculu<br>s |
| 1 | 1.00 | 1 | 1 | 0 | -0.003 | 0 | 0 | 0 | t | 73563 | YDNAYCD<br>KLCKDKKA          | Mus<br>musculu<br>s              |
| 1 | 1.00 | 1 | 1 | 0 | -0.003 | 0 | 0 | 0 | t | 73563 | YDNAYCD<br>KLCKDKKA          | Oryctola<br>gus<br>cuniculu<br>s |
| 1 | 1.00 | 1 | 1 | 0 | -0.002 | 0 | 0 | 0 | t | 97484 | LVEETSFID<br>AGAP            | Mus<br>musculu<br>s              |

|   |      |   |   |   |        |   |   |   |   |       |                              |                                  |
|---|------|---|---|---|--------|---|---|---|---|-------|------------------------------|----------------------------------|
| 1 | 1.00 | 1 | 1 | 0 | -0.003 | 0 | 0 | 0 | t | 71368 | VTIPGEGC<br>NGDG             | Oryctola<br>gus<br>cuniculu<br>s |
| 1 | 1.00 | 1 | 1 | 0 | 0      | 0 | 0 | 0 | t | 97484 | LVEETSFID<br>AGAP            | Mus<br>musculu<br>s              |
| 1 | 1.00 | 1 | 1 | 0 | -0.003 | 0 | 0 | 0 | t | 90069 | VKASAE                       | Oryctola<br>gus<br>cuniculu<br>s |
| 1 | 1.00 | 1 | 1 | 0 | -0.002 | 0 | 0 | 0 | t | 97484 | LVEETSFID<br>AGAP            | Mus<br>musculu<br>s              |
| 1 | 1.00 | 1 | 1 | 0 | -0.003 | 0 | 0 | 0 | t | 97484 | LVEETSFID<br>AGAP            | Oryctola<br>gus<br>cuniculu<br>s |
| 1 | 1.00 | 1 | 1 | 0 | 0      | 0 | 0 | 0 | t | 71693 | VVIANNV<br>DKFVSWG<br>TDFEM  | Rattus<br>norvegic<br>us         |
| 1 | 1.00 | 1 | 1 | 0 | 0      | 0 | 0 | 0 | t | 62912 | TALKKAITA<br>MSQAQKA<br>AKPA | Mus<br>musculu<br>s              |
| 1 | 1.00 | 1 | 1 | 0 | -0.008 | 0 | 0 | 0 | t | 85636 | LNPTIAG                      | Mus<br>musculu<br>s              |
| 1 | 1.00 | 1 | 1 | 0 | -0.002 | 0 | 0 | 0 | t | 85615 | LNIEKYQIH<br>RLV             | Mus<br>musculu<br>s              |
| 1 | 1.00 | 1 | 1 | 0 | 0      | 0 | 0 | 0 | t | 67253 | TWEVLH                       | Mus<br>musculu<br>s              |
| 1 | 1.00 | 1 | 1 | 0 | 0      | 0 | 0 | 0 | t | 67253 | TWEVLH                       | Mus<br>musculu<br>s              |
| 1 | 1.00 | 1 | 1 | 0 | -0.002 | 0 | 0 | 0 | t | 97484 | LVEETSFID<br>AGAP            | Mus<br>musculu<br>s              |
| 1 | 1.00 | 1 | 1 | 0 | 0      | 0 | 0 | 0 | t | 68370 | VETEDTKE<br>PGVLMGG<br>Q     | Mus<br>musculu<br>s              |
| 1 | 1.00 | 1 | 1 | 0 | 0.008  | 0 | 0 | 0 | t | 95521 | KQTLPPSV                     | Cavia<br>porcellu<br>s           |

|   |      |   |   |   |        |   |   |   |   |       |                              |                                  |
|---|------|---|---|---|--------|---|---|---|---|-------|------------------------------|----------------------------------|
| 1 | 1.00 | 1 | 1 | 0 | 0      | 0 | 0 | 0 | t | 78417 | HVWSSPQ<br>ALQRFLHD<br>PTLTW | Mus<br>musculu<br>s              |
| 1 | 1.00 | 1 | 1 | 0 | 0      | 0 | 0 | 0 | t | 78419 | IGHGLLPW<br>NNLVTHP<br>VLGKV | Mus<br>musculu<br>s              |
| 1 | 1.00 | 1 | 1 | 0 | 0.002  | 0 | 0 | 0 | t | 70656 | VQTRHVV<br>QHRSRSES<br>SIESF | Rattus<br>norvegic<br>us         |
| 1 | 1.00 | 1 | 1 | 0 | 0.002  | 0 | 0 | 0 | t | 70656 | VQTRHVV<br>QHRSRSES<br>SIESF | Rattus<br>norvegic<br>us         |
| 1 | 1.00 | 1 | 1 | 0 | 0.002  | 0 | 0 | 0 | t | 70656 | VQTRHVV<br>QHRSRSES<br>SIESF | Rattus<br>norvegic<br>us         |
| 1 | 1.00 | 1 | 1 | 0 | 0      | 0 | 0 | 0 | t | 75954 | YTASTRGD<br>LAHLTAT          | Mus<br>musculu<br>s              |
| 1 | 1.00 | 1 | 1 | 0 | 0      | 0 | 0 | 0 | t | 60840 | SRYD                         | Oryctola<br>gus<br>cuniculu<br>s |
| 1 | 1.00 | 1 | 1 | 0 | 0.002  | 0 | 0 | 0 | t | 74436 | YKDGTLP<br>LSTKDLTTY         | Rattus<br>norvegic<br>us         |
| 1 | 1.00 | 1 | 1 | 0 | 0.002  | 0 | 0 | 0 | t | 74436 | YKDGTLP<br>LSTKDLTTY         | Rattus<br>norvegic<br>us         |
| 1 | 1.00 | 1 | 1 | 0 | 0      | 0 | 0 | 0 | t | 62912 | TALKKAITA<br>MSQAQKA<br>AKPA | Mus<br>musculu<br>s              |
| 1 | 1.00 | 1 | 1 | 0 | 0      | 0 | 0 | 0 | t | 73554 | YDKPYMML<br>NLYDPNKY<br>VDV  | Mus<br>musculu<br>s              |
| 1 | 1.00 | 1 | 1 | 0 | 0      | 0 | 0 | 0 | t | 73554 | YDKPYMML<br>NLYDPNKY<br>VDV  | Mus<br>musculu<br>s              |
| 1 | 1.00 | 1 | 1 | 0 | -0.002 | 0 | 0 | 0 | t | 73554 | YDKPYMML<br>NLYDPNKY<br>VDV  | Mus<br>musculu<br>s              |

|   |      |   |   |   |        |   |   |   |   |       |                              |                           |
|---|------|---|---|---|--------|---|---|---|---|-------|------------------------------|---------------------------|
| 1 | 1.00 | 1 | 1 | 0 | 0      | 0 | 0 | 0 | t | 73554 | YDKPYMYL<br>NLYDPNKY<br>VDV  | Mus<br>musculu<br>s       |
| 1 | 1.00 | 1 | 1 | 0 | 0      | 0 | 0 | 0 | t | 62912 | TALKKAITA<br>MSQAQKA<br>AKPA | Mus<br>musculu<br>s       |
| 1 | 1.00 | 1 | 1 | 0 | -0.002 | 0 | 0 | 0 | t | 73554 | YDKPYMYL<br>NLYDPNKY<br>VDV  | Mus<br>musculu<br>s       |
| 1 | 1.00 | 1 | 1 | 0 | 0      | 0 | 0 | 0 | t | 61394 | SSTKNLIY                     | Sus<br>scrofa             |
| 1 | 1.00 | 1 | 1 | 0 | 0      | 0 | 0 | 0 | t | 61394 | SSTKNLIY                     | Mus<br>musculu<br>s       |
| 1 | 1.00 | 1 | 1 | 0 | 0      | 0 | 0 | 0 | t | 61946 | STTNTPLV<br>SHLEHRS          | Mus<br>musculu<br>s       |
| 1 | 1.00 | 1 | 1 | 0 | 0      | 0 | 0 | 0 | t | 73554 | YDKPYMYL<br>NLYDPNKY<br>VDV  | Mus<br>musculu<br>s       |
| 1 | 1.00 | 1 | 1 | 0 | -0.037 | 0 | 0 | 0 | t | 61977 | STVKEQLIE<br>KLIEDDEN<br>SQC | Papio<br>cynocep<br>halus |
| 1 | 1.00 | 1 | 1 | 0 | 0      | 0 | 0 | 0 | t | 60818 | SRTLGCWS<br>EFIPVDDG<br>WGE  | Mus<br>musculu<br>s       |
| 1 | 1.00 | 1 | 1 | 0 | 0      | 0 | 0 | 0 | t | 73554 | YDKPYMYL<br>NLYDPNKY<br>VDV  | Mus<br>musculu<br>s       |
| 1 | 1.00 | 1 | 1 | 0 | 0      | 0 | 0 | 0 | t | 73554 | YDKPYMYL<br>NLYDPNKY<br>VDV  | Mus<br>musculu<br>s       |
| 1 | 1.00 | 1 | 1 | 0 | 0      | 0 | 0 | 0 | t | 78437 | KVTNGSKS<br>YTLRYLAS<br>YVK  | Mus<br>musculu<br>s       |

|   |      |   |   |   |        |   |   |   |   |       |                              |                                  |
|---|------|---|---|---|--------|---|---|---|---|-------|------------------------------|----------------------------------|
| 1 | 1.00 | 1 | 1 | 0 | 0      | 0 | 0 | 0 | t | 73554 | YDKPYMYL<br>NLYDPNKY<br>VDV  | Mus<br>musculu<br>s              |
| 1 | 1.00 | 1 | 1 | 0 | 0      | 0 | 0 | 0 | t | 69862 | VLYEAFDE<br>MEECASR<br>AALIE | Homo<br>sapiens                  |
| 1 | 1.00 | 1 | 1 | 0 | 0      | 0 | 0 | 0 | t | 75287 | YPFRLPIKG<br>VPIELQ          | Mus<br>musculu<br>s              |
| 1 | 1.00 | 1 | 1 | 0 | 0      | 0 | 0 | 0 | t | 73554 | YDKPYMYL<br>NLYDPNKY<br>VDV  | Mus<br>musculu<br>s              |
| 1 | 1.00 | 1 | 1 | 0 | -0.003 | 0 | 0 | 0 | t | 63282 | TEAAILTQ<br>QAAQFDQ          | Oryctola<br>gus<br>cuniculu<br>s |
| 1 | 1.00 | 1 | 1 | 0 | 0      | 0 | 0 | 0 | t | 70851 | VRVRSRV<br>NAANKKP<br>ED     | Saimiri<br>sciureus              |
| 1 | 1.00 | 1 | 1 | 0 | 0      | 0 | 0 | 0 | t | 75950 | YTASARGD<br>LAHLTTT          | Mus<br>musculu<br>s              |
| 1 | 1.00 | 1 | 1 | 0 | 0      | 0 | 0 | 0 | t | 75950 | YTASARGD<br>LAHLTTT          | Mus<br>musculu<br>s              |
| 1 | 1.00 | 1 | 1 | 0 | -0.003 | 0 | 0 | 0 | t | 64628 | TKNTNNN<br>LTL               | Oryctola<br>gus<br>cuniculu<br>s |
| 1 | 1.00 | 1 | 1 | 0 | 0      | 0 | 0 | 0 | t | 84184 | KASAEG                       | Mus<br>musculu<br>s              |
| 1 | 1.00 | 1 | 1 | 0 | 0      | 0 | 0 | 0 | t | 75950 | YTASARGD<br>LAHLTTT          | Sus<br>scrofa                    |
| 1 | 1.00 | 1 | 1 | 0 | -0.002 | 0 | 0 | 0 | t | 71346 | VTGSVVCT<br>TAAGNVNI<br>AIGG | Mus<br>musculu<br>s              |

|   |      |   |   |   |        |   |   |   |   |       |                              |                                  |
|---|------|---|---|---|--------|---|---|---|---|-------|------------------------------|----------------------------------|
| 1 | 1.00 | 1 | 1 | 0 | -0.003 | 0 | 0 | 0 | t | 63065 | TCFLTAAG<br>YCNECT           | Oryctola<br>gus<br>cuniculu<br>s |
| 1 | 1.00 | 1 | 1 | 0 | 0      | 0 | 0 | 0 | t | 71346 | VTGSVVCT<br>TAAGNVNI<br>AIGG | Mus<br>musculu<br>s              |
| 1 | 1.00 | 1 | 1 | 0 | 0.008  | 0 | 0 | 0 | t | 95518 | KQKIVAPV                     | Cavia<br>porcellu<br>s           |
| 1 | 1.00 | 1 | 1 | 0 | 0      | 0 | 0 | 0 | t | 97686 | TGSAAAN<br>Y                 | Mus<br>musculu<br>s              |
| 1 | 1.00 | 1 | 1 | 0 | 0      | 0 | 0 | 0 | t | 79524 | CHTTATIPS<br>SAVTC           | Mus<br>musculu<br>s              |
| 1 | 1.00 | 1 | 1 | 0 | -0.003 | 0 | 0 | 0 | t | 79524 | CHTTATIPS<br>SAVTC           | Oryctola<br>gus<br>cuniculu<br>s |
| 1 | 1.00 | 1 | 1 | 0 | -0.003 | 0 | 0 | 0 | t | 75222 | YNSSRSYW<br>T                | Oryctola<br>gus<br>cuniculu<br>s |
| 1 | 1.00 | 1 | 1 | 0 | -0.002 | 0 | 0 | 0 | t | 83781 | INPWDSKS<br>DYLK             | Mus<br>musculu<br>s              |
| 1 | 1.00 | 1 | 1 | 0 | 0      | 0 | 0 | 0 | t | 62912 | TALKKAITA<br>MSQAQKA<br>AKPA | Mus<br>musculu<br>s              |
| 1 | 1.00 | 1 | 1 | 0 | 0      | 0 | 0 | 0 | t | 63979 | TGTIINQD<br>PDKILTY          | Mus<br>musculu<br>s              |
| 1 | 1.00 | 1 | 1 | 0 | 0      | 0 | 0 | 0 | t | 63979 | TGTIINQD<br>PDKILTY          | Mus<br>musculu<br>s              |
| 1 | 1.00 | 1 | 1 | 0 | 0      | 0 | 0 | 0 | t | 63979 | TGTIINQD<br>PDKILTY          | Mus<br>musculu<br>s              |
| 1 | 1.00 | 1 | 1 | 0 | -0.003 | 0 | 0 | 0 | t | 69183 | VKAVTTLL<br>KA               | Oryctola<br>gus<br>cuniculu<br>s |



|   |      |   |   |   |        |   |   |   |   |       |                              |                                  |
|---|------|---|---|---|--------|---|---|---|---|-------|------------------------------|----------------------------------|
| 1 | 1.00 | 1 | 1 | 0 | 0.008  | 0 | 0 | 0 | t | 95517 | KQKIIAPA                     | Cavia porcellu<br>s              |
| 1 | 1.00 | 1 | 1 | 0 | -0.003 | 0 | 0 | 0 | t | 79524 | CHTTATIPS<br>SAVTC           | Oryctola<br>gus<br>cuniculu<br>s |
| 1 | 1.00 | 1 | 1 | 0 | -0.006 | 0 | 0 | 0 | t | 63065 | TCFLTAAG<br>YCNECT           | Oryctola<br>gus<br>cuniculu<br>s |
| 1 | 1.00 | 1 | 1 | 0 | -0.003 | 0 | 0 | 0 | t | 61291 | SSPSSTKSS<br>PSNVKSAS        | Oryctola<br>gus<br>cuniculu<br>s |
| 1 | 1.00 | 1 | 1 | 0 | -0.003 | 0 | 0 | 0 | t | 63065 | TCFLTAAG<br>YCNECT           | Mus<br>musculu<br>s              |
| 1 | 1.00 | 1 | 1 | 0 | 0      | 0 | 0 | 0 | t | 78468 | NAKATYEA<br>AL               | Mus<br>musculu<br>s              |
| 1 | 1.00 | 1 | 1 | 0 | -0.003 | 0 | 0 | 0 | t | 96067 | AETIFD                       | Oryctola<br>gus<br>cuniculu<br>s |
| 1 | 1.00 | 1 | 1 | 0 | -0.003 | 0 | 0 | 0 | t | 96067 | AETIFD                       | Oryctola<br>gus<br>cuniculu<br>s |
| 1 | 1.00 | 1 | 1 | 0 | 0      | 0 | 0 | 0 | t | 96067 | AETIFD                       | Mus<br>musculu<br>s              |
| 1 | 1.00 | 1 | 1 | 0 | 0.005  | 0 | 0 | 0 | t | 64428 | TIPTKKSQI<br>FSTYADNQ<br>PGV | Homo<br>sapiens                  |
| 1 | 1.00 | 1 | 1 | 0 | 0      | 0 | 0 | 0 | t | 65000 | TLPERVRP<br>PDDWAT           | Sus<br>scrofa                    |
| 1 | 1.00 | 1 | 1 | 0 | 0      | 0 | 0 | 0 | t | 62909 | TALGNLKQ<br>IYYNEKA<br>KTEN  | Oryctola<br>gus<br>cuniculu<br>s |
| 1 | 1.00 | 1 | 1 | 0 | 0.005  | 0 | 0 | 0 | t | 65863 | TQGVVKE<br>RRWTLVN<br>ENRPIW | Homo<br>sapiens                  |

|   |      |   |   |   |        |   |   |   |   |       |                           |                                  |
|---|------|---|---|---|--------|---|---|---|---|-------|---------------------------|----------------------------------|
| 1 | 1.00 | 1 | 1 | 0 | 0.008  | 0 | 0 | 0 | t | 60684 | SRGTSMD<br>DEADR          | Capra<br>hircus                  |
| 1 | 1.00 | 1 | 1 | 0 | 0      | 0 | 0 | 0 | t | 96268 | ETIFDV                    | Mus<br>musculu<br>s              |
| 1 | 1.00 | 1 | 1 | 0 | 0      | 0 | 0 | 0 | t | 79524 | CHTTATIPS<br>SAVTC        | Mus<br>musculu<br>s              |
| 1 | 1.00 | 1 | 1 | 0 | 0.008  | 0 | 0 | 0 | t | 61720 | STLGNDL<br>RTYNDKDL<br>L  | Cavia<br>porcellu<br>s           |
| 1 | 1.00 | 1 | 1 | 0 | -0.003 | 0 | 0 | 0 | t | 96268 | ETIFDV                    | Oryctola<br>gus<br>cuniculu<br>s |
| 1 | 1.00 | 1 | 1 | 0 | -0.002 | 0 | 0 | 0 | t | 68833 | VHASFFDI<br>G             | Mus<br>musculu<br>s              |
| 1 | 1.00 | 1 | 1 | 0 | -0.002 | 0 | 0 | 0 | t | 82909 | GTDSGWG<br>NRQSF          | Mus<br>musculu<br>s              |
| 1 | 1.00 | 1 | 1 | 0 | 0      | 0 | 0 | 0 | t | 68401 | VEVPGSQ<br>HIDSQKKA       | Oryctola<br>gus<br>cuniculu<br>s |
| 1 | 1.00 | 1 | 1 | 0 | 0      | 0 | 0 | 0 | t | 78478 | PDSDPQI                   | Homo<br>sapiens                  |
| 1 | 1.00 | 1 | 1 | 0 | 0      | 0 | 0 | 0 | t | 75923 | YSWKTWG                   | Mus<br>musculu<br>s              |
| 1 | 1.00 | 1 | 1 | 0 | -0.003 | 0 | 0 | 0 | t | 71844 | VVSWKNK<br>EL             | Oryctola<br>gus<br>cuniculu<br>s |
| 1 | 1.00 | 1 | 1 | 0 | -0.002 | 0 | 0 | 0 | t | 82850 | GRHNSESY<br>HAGF          | Mus<br>musculu<br>s              |
| 1 | 1.00 | 1 | 1 | 0 | -0.003 | 0 | 0 | 0 | t | 75920 | YSVLYNST<br>FFSTFKCY<br>G | Oryctola<br>gus<br>cuniculu<br>s |

|   |      |   |   |   |        |   |   |   |   |       |                             |                       |
|---|------|---|---|---|--------|---|---|---|---|-------|-----------------------------|-----------------------|
| 1 | 1.00 | 1 | 1 | 0 | 0.002  | 0 | 0 | 0 | t | 62813 | TADEWDII                    | Rattus norvegicus     |
| 1 | 1.00 | 1 | 1 | 0 | -0.003 | 0 | 0 | 0 | t | 73513 | YCYGLPN<br>WVKVWD<br>RA     | Mus musculus          |
| 1 | 1.00 | 1 | 1 | 0 | 0      | 0 | 0 | 0 | t | 68200 | VEGMQFD<br>RGYLSPYF         | Mus musculus          |
| 1 | 1.00 | 1 | 1 | 0 | -0.002 | 0 | 0 | 0 | t | 82816 | GNVTPRVS<br>YAHG            | Mus musculus          |
| 1 | 1.00 | 1 | 1 | 0 | -0.007 | 0 | 0 | 0 | t | 60801 | SRSGLGS<br>IAARVATQ<br>LP   | Oryctolagus cuniculus |
| 1 | 1.00 | 1 | 1 | 0 | 0      | 0 | 0 | 0 | t | 60671 | SRGKGPG<br>KKNK             | Sus scrofa            |
| 1 | 1.00 | 1 | 1 | 0 | -0.006 | 0 | 0 | 0 | t | 73503 | YCNTCTL<br>KKGSSGY          | Oryctolagus cuniculus |
| 1 | 1.00 | 1 | 1 | 0 | 0.006  | 0 | 0 | 0 | t | 73503 | YCNTCTL<br>KKGSSGY          | Ovis aries            |
| 1 | 1.00 | 1 | 1 | 0 | 0.001  | 0 | 0 | 0 | t | 73503 | YCNTCTL<br>KKGSSGY          | Ovis aries            |
| 1 | 1.00 | 1 | 1 | 0 | 0      | 0 | 0 | 0 | t | 64628 | TKNTNNN<br>LTL              | Mus musculus          |
| 1 | 1.00 | 1 | 1 | 0 | 0      | 0 | 0 | 0 | t | 64525 | TKAIINYQY<br>NQYTEEEK<br>NN | Mus musculus          |
| 1 | 1.00 | 1 | 1 | 0 | -0.003 | 0 | 0 | 0 | t | 75913 | YSVDDGET<br>W               | Oryctolagus cuniculus |
| 1 | 1.00 | 1 | 1 | 0 | -0.002 | 0 | 0 | 0 | t | 64525 | TKAIINYQY<br>NQYTEEEK<br>NN | Mus musculus          |

|   |      |   |   |   |        |   |   |   |   |       |                             |                                  |
|---|------|---|---|---|--------|---|---|---|---|-------|-----------------------------|----------------------------------|
| 1 | 1.00 | 1 | 1 | 0 | -0.003 | 0 | 0 | 0 | t | 65910 | TQPELVPE<br>DPED            | Oryctola<br>gus<br>cuniculu<br>s |
| 1 | 1.00 | 1 | 1 | 0 | 0      | 0 | 0 | 0 | t | 64985 | TLNPTI                      | Mus<br>musculu<br>s              |
| 1 | 1.00 | 1 | 1 | 0 | 0      | 0 | 0 | 0 | t | 64985 | TLNPTI                      | Mus<br>musculu<br>s              |
| 1 | 1.00 | 1 | 1 | 0 | 0      | 0 | 0 | 0 | t | 64985 | TLNPTI                      | Mus<br>musculu<br>s              |
| 1 | 1.00 | 1 | 1 | 0 | 0.005  | 0 | 0 | 0 | t | 64525 | TKAIINYQY<br>NQYTEEEK<br>NN | Gallus<br>gallus                 |
| 1 | 1.00 | 1 | 1 | 0 | 0      | 0 | 0 | 0 | t | 63967 | TGSQDFFV<br>RSIG            | Mus<br>musculu<br>s              |
| 1 | 1.00 | 1 | 1 | 0 | -0.002 | 0 | 0 | 0 | t | 64525 | TKAIINYQY<br>NQYTEEEK<br>NN | Mus<br>musculu<br>s              |
| 1 | 1.00 | 1 | 1 | 0 | -0.003 | 0 | 0 | 0 | t | 63715 | TFNFDNEP<br>ENISIENLS<br>SD | Mus<br>musculu<br>s              |
| 1 | 1.00 | 1 | 1 | 0 | 0      | 0 | 0 | 0 | t | 63967 | TGSQDFFV<br>RSIG            | Mus<br>musculu<br>s              |
| 1 | 1.00 | 1 | 1 | 0 | -0.002 | 0 | 0 | 0 | t | 69178 | VKAETRLN<br>PDLQPT          | Homo<br>sapiens                  |
| 1 | 1.00 | 1 | 1 | 0 | -0.006 | 0 | 0 | 0 | t | 73485 | YCAWPAC<br>YCYGLPDS         | Oryctola<br>gus<br>cuniculu<br>s |
| 1 | 1.00 | 1 | 1 | 0 | -0.002 | 0 | 0 | 0 | t | 82573 | GAYKRHH<br>QVQEG            | Mus<br>musculu<br>s              |
| 1 | 1.00 | 1 | 1 | 0 | -0.007 | 0 | 0 | 0 | t | 64525 | TKAIINYQY<br>NQYTEEEK<br>NN | Homo<br>sapiens                  |

|   |      |   |   |   |        |   |   |   |   |       |                             |                                  |
|---|------|---|---|---|--------|---|---|---|---|-------|-----------------------------|----------------------------------|
| 1 | 1.00 | 1 | 1 | 0 | -0.003 | 0 | 0 | 0 | t | 69178 | VKAETRLN<br>PDLQPTE         | Oryctola<br>gus<br>cuniculu<br>s |
| 1 | 1.00 | 1 | 1 | 0 | -0.002 | 0 | 0 | 0 | t | 69178 | VKAETRLN<br>PDLQPTE         | Mus<br>musculu<br>s              |
| 1 | 1.00 | 1 | 1 | 0 | 0      | 0 | 0 | 0 | t | 64985 | TLNPTI                      | Mus<br>musculu<br>s              |
| 1 | 1.00 | 1 | 1 | 0 | 0      | 0 | 0 | 0 | t | 63344 | TEEIDEIES<br>VTEEVVE        | Homo<br>sapiens                  |
| 1 | 1.00 | 1 | 1 | 0 | 0      | 0 | 0 | 0 | t | 97539 | NYTTAVDR                    | Mus<br>musculu<br>s              |
| 1 | 1.00 | 1 | 1 | 0 | 0      | 0 | 0 | 0 | t | 69178 | VKAETRLN<br>PDLQPTE         | Mus<br>musculu<br>s              |
| 1 | 1.00 | 1 | 1 | 0 | 0      | 0 | 0 | 0 | t | 69178 | VKAETRLN<br>PDLQPTE         | Oryctola<br>gus<br>cuniculu<br>s |
| 1 | 1.00 | 1 | 1 | 0 | -0.007 | 0 | 0 | 0 | t | 79444 | VARGDLA<br>ARGDLAA<br>RGDLA | Oryctola<br>gus<br>cuniculu<br>s |
| 1 | 1.00 | 1 | 1 | 0 | -0.003 | 0 | 0 | 0 | t | 63967 | TGSQDFFV<br>RSIG            | Oryctola<br>gus<br>cuniculu<br>s |
| 1 | 1.00 | 1 | 1 | 0 | -0.007 | 0 | 0 | 0 | t | 79444 | VARGDLA<br>ARGDLAA<br>RGDLA | Oryctola<br>gus<br>cuniculu<br>s |
| 1 | 1.00 | 1 | 1 | 0 | 0      | 0 | 0 | 0 | t | 64985 | TLNPTI                      | Mus<br>musculu<br>s              |
| 1 | 1.00 | 1 | 1 | 0 | -0.003 | 0 | 0 | 0 | t | 69178 | VKAETRLN<br>PDLQPTE         | Oryctola<br>gus<br>cuniculu<br>s |
| 1 | 1.00 | 1 | 1 | 0 | 0      | 0 | 0 | 0 | t | 78547 | TYEAALKQ<br>YEADLAA         | Mus<br>musculu<br>s              |

|   |      |   |   |   |        |   |   |   |   |       |                             |                                  |
|---|------|---|---|---|--------|---|---|---|---|-------|-----------------------------|----------------------------------|
| 1 | 1.00 | 1 | 1 | 0 | 0      | 0 | 0 | 0 | t | 63967 | TGSQDFFV<br>RSIG            | Mus<br>musculu<br>s              |
| 1 | 1.00 | 1 | 1 | 0 | -0.003 | 0 | 0 | 0 | t | 63967 | TGSQDFFV<br>RSIG            | Oryctola<br>gus<br>cuniculu<br>s |
| 1 | 1.00 | 1 | 1 | 0 | -0.003 | 0 | 0 | 0 | t | 63967 | TGSQDFFV<br>RSIG            | Oryctola<br>gus<br>cuniculu<br>s |
| 1 | 1.00 | 1 | 1 | 0 | -0.003 | 0 | 0 | 0 | t | 96286 | FDVTTL                      | Oryctola<br>gus<br>cuniculu<br>s |
| 1 | 1.00 | 1 | 1 | 0 | -0.004 | 0 | 0 | 0 | t | 69178 | VKAETRLN<br>PDLQPT          | Mus<br>musculu<br>s              |
| 1 | 1.00 | 1 | 1 | 0 | -0.003 | 0 | 0 | 0 | t | 66743 | TTNRFAKY                    | Mus<br>musculu<br>s              |
| 1 | 1.00 | 1 | 1 | 0 | 0      | 0 | 0 | 0 | t | 73483 | YCADVAA<br>EELMNAL<br>V     | Mus<br>musculu<br>s              |
| 1 | 1.00 | 1 | 1 | 0 | -0.001 | 0 | 0 | 0 | t | 64525 | TKAIINYQY<br>NQYTEEEK<br>NN | Homo<br>sapiens                  |
| 1 | 1.00 | 1 | 1 | 0 | -0.003 | 0 | 0 | 0 | t | 64985 | TLNPTI                      | Oryctola<br>gus<br>cuniculu<br>s |
| 1 | 1.00 | 1 | 1 | 0 | 0      | 0 | 0 | 0 | t | 96286 | FDVTTL                      | Mus<br>musculu<br>s              |
| 1 | 1.00 | 1 | 1 | 0 | 0      | 0 | 0 | 0 | t | 64985 | TLNPTI                      | Mus<br>musculu<br>s              |
| 1 | 1.00 | 1 | 1 | 0 | 0      | 0 | 0 | 0 | t | 65205 | TMGIYFAT<br>PEWVALN         | Mus<br>musculu<br>s              |
| 1 | 1.00 | 1 | 1 | 0 | -0.003 | 0 | 0 | 0 | t | 63967 | TGSQDFFV<br>RSIG            | Oryctola<br>gus<br>cuniculu<br>s |

|   |      |   |   |   |        |   |   |   |   |       |                              |                                  |
|---|------|---|---|---|--------|---|---|---|---|-------|------------------------------|----------------------------------|
| 1 | 1.00 | 1 | 1 | 0 | 0      | 0 | 0 | 0 | t | 75863 | YSPSRFSY<br>FYPFRL           | Mus<br>musculu<br>s              |
| 1 | 1.00 | 1 | 1 | 0 | 0      | 0 | 0 | 0 | t | 63967 | TGSQDFFV<br>RSIG             | Mus<br>musculu<br>s              |
| 1 | 1.00 | 1 | 1 | 0 | -0.003 | 0 | 0 | 0 | t | 64985 | TLNPTI                       | Oryctola<br>gus<br>cuniculu<br>s |
| 1 | 1.00 | 1 | 1 | 0 | 0      | 0 | 0 | 0 | t | 63077 | TCGVGVR<br>VRRRVNA<br>ANKKPE | Homo<br>sapiens                  |
| 1 | 1.00 | 1 | 1 | 0 | -0.008 | 0 | 0 | 0 | t | 65205 | TMGIYFAT<br>PEWVALN          | Mus<br>musculu<br>s              |
| 1 | 1.00 | 1 | 1 | 0 | 0      | 0 | 0 | 0 | t | 63077 | TCGVGVR<br>VRRRVNA<br>ANKKPE | Mus<br>musculu<br>s              |
| 1 | 1.00 | 1 | 1 | 0 | 0      | 0 | 0 | 0 | t | 96849 | SAETIF                       | Mus<br>musculu<br>s              |
| 1 | 1.00 | 1 | 1 | 0 | -0.008 | 0 | 0 | 0 | t | 65205 | TMGIYFAT<br>PEWVALN          | Mus<br>musculu<br>s              |
| 1 | 1.00 | 1 | 1 | 0 | -0.007 | 0 | 0 | 0 | t | 65535 | TPDNNQT<br>SPARR             | Oryctola<br>gus<br>cuniculu<br>s |
| 1 | 1.00 | 1 | 1 | 0 | 0      | 0 | 0 | 0 | t | 63077 | TCGVGVR<br>VRRRVNA<br>ANKKPE | Mus<br>musculu<br>s              |
| 1 | 1.00 | 1 | 1 | 0 | -0.003 | 0 | 0 | 0 | t | 96849 | SAETIF                       | Oryctola<br>gus<br>cuniculu<br>s |
| 1 | 1.00 | 1 | 1 | 0 | 0.002  | 0 | 0 | 0 | t | 65535 | TPDNNQT<br>SPARR             | Rattus<br>norvegic<br>us         |
| 1 | 1.00 | 1 | 1 | 0 | -0.003 | 0 | 0 | 0 | t | 96849 | SAETIF                       | Oryctola<br>gus<br>cuniculu<br>s |
| 1 | 1.00 | 1 | 1 | 0 | -0.004 | 0 | 0 | 0 | t | 65535 | TPDNNQT<br>SPARR             | Rattus<br>norvegic<br>us         |

|   |      |   |   |   |        |   |   |   |   |       |                              |                                  |
|---|------|---|---|---|--------|---|---|---|---|-------|------------------------------|----------------------------------|
| 1 | 1.00 | 1 | 1 | 0 | -0.003 | 0 | 0 | 0 | t | 73466 | YAVRNSNS<br>LIYY             | Oryctola<br>gus<br>cuniculu<br>s |
| 1 | 1.00 | 1 | 1 | 0 | 0      | 0 | 0 | 0 | t | 70038 | VMYASSG                      | Oryctola<br>gus<br>cuniculu<br>s |
| 1 | 1.00 | 1 | 1 | 0 | 0      | 0 | 0 | 0 | t | 64985 | TLNPTI                       | Mus<br>musculu<br>s              |
| 1 | 1.00 | 1 | 1 | 0 | 0      | 0 | 0 | 0 | t | 97363 | GSAAANY<br>T                 | Mus<br>musculu<br>s              |
| 1 | 1.00 | 1 | 1 | 0 | 0      | 0 | 0 | 0 | t | 63077 | TCGVGVR<br>VRRRVNA<br>ANKKPE | Mus<br>musculu<br>s              |
| 1 | 1.00 | 1 | 1 | 0 | 0      | 0 | 0 | 0 | t | 78568 | YATNPQT<br>QLS               | Mus<br>musculu<br>s              |
| 1 | 1.00 | 1 | 1 | 0 | -0.003 | 0 | 0 | 0 | t | 64985 | TLNPTI                       | Oryctola<br>gus<br>cuniculu<br>s |
| 1 | 1.00 | 1 | 1 | 0 | -0.007 | 0 | 0 | 0 | t | 94616 | NPAC                         | Oryctola<br>gus<br>cuniculu<br>s |
| 1 | 1.00 | 1 | 1 | 0 | 0      | 0 | 0 | 0 | t | 64985 | TLNPTI                       | Mus<br>musculu<br>s              |
| 1 | 1.00 | 1 | 1 | 0 | -0.002 | 0 | 0 | 0 | t | 82078 | FHQNGQV<br>TEVTT             | Mus<br>musculu<br>s              |
| 1 | 1.00 | 1 | 1 | 0 | 0.008  | 0 | 0 | 0 | t | 95695 | PVKQTLPP                     | Cavia<br>porcellu<br>s           |
| 1 | 1.00 | 1 | 1 | 0 | 0      | 0 | 0 | 0 | t | 64985 | TLNPTI                       | Mus<br>musculu<br>s              |
| 1 | 1.00 | 1 | 1 | 0 | -0.003 | 0 | 0 | 0 | t | 78624 | DMNEKQK<br>PYFEFEYD<br>DFKP  | Oryctola<br>gus<br>cuniculu<br>s |



|   |      |   |   |   |        |   |   |   |   |       |                             |                                  |
|---|------|---|---|---|--------|---|---|---|---|-------|-----------------------------|----------------------------------|
| 1 | 1.00 | 1 | 1 | 0 | 0      | 0 | 0 | 0 | t | 71312 | VTGATVS                     | Oryctola<br>gus<br>cuniculu<br>s |
| 1 | 1.00 | 1 | 1 | 0 | -0.006 | 0 | 0 | 0 | t | 78624 | DMNEKQK<br>PYFEFEYD<br>DFKP | Oryctola<br>gus<br>cuniculu<br>s |
| 1 | 1.00 | 1 | 1 | 0 | -0.003 | 0 | 0 | 0 | t | 78624 | DMNEKQK<br>PYFEFEYD<br>DFKP | Mus<br>musculu<br>s              |
| 1 | 1.00 | 1 | 1 | 0 | -0.002 | 0 | 0 | 0 | t | 82034 | FFVQYGG<br>AYKRH            | Mus<br>musculu<br>s              |
| 1 | 1.00 | 1 | 1 | 0 | 0      | 0 | 0 | 0 | t | 79528 | CPSKKPYE<br>EVTC            | Mus<br>musculu<br>s              |
| 1 | 1.00 | 1 | 1 | 0 | -0.003 | 0 | 0 | 0 | t | 68182 | VEFPLDITA<br>G              | Oryctola<br>gus<br>cuniculu<br>s |
| 1 | 1.00 | 1 | 1 | 0 | 0      | 0 | 0 | 0 | t | 73433 | YARFMDT<br>DPDRYGIL<br>PSNF | Mus<br>musculu<br>s              |
| 1 | 1.00 | 1 | 1 | 0 | 0      | 0 | 0 | 0 | t | 64985 | TLNPTI                      | Mus<br>musculu<br>s              |
| 1 | 1.00 | 1 | 1 | 0 | -0.008 | 0 | 0 | 0 | t | 64525 | TKAIINYQY<br>NQYTEEEK<br>NN | Mus<br>musculu<br>s              |
| 1 | 1.00 | 1 | 1 | 0 | 0      | 0 | 0 | 0 | t | 64985 | TLNPTI                      | Mus<br>musculu<br>s              |
| 1 | 1.00 | 1 | 1 | 0 | -0.003 | 0 | 0 | 0 | t | 78630 | DYGEILTEK<br>VEDLYKGV<br>LL | Oryctola<br>gus<br>cuniculu<br>s |
| 1 | 1.00 | 1 | 1 | 0 | 0.004  | 0 | 0 | 0 | t | 91165 | CCELCCNP<br>ACAGCY          | Sus<br>scrofa                    |
| 1 | 1.00 | 1 | 1 | 0 | 0.004  | 0 | 0 | 0 | t | 91165 | CCELCCNP<br>ACAGCY          | Sus<br>scrofa                    |

|   |      |   |   |   |        |   |   |   |   |       |                             |                                  |
|---|------|---|---|---|--------|---|---|---|---|-------|-----------------------------|----------------------------------|
| 1 | 1.00 | 1 | 1 | 0 | 0      | 0 | 0 | 0 | t | 64525 | TKAIINYQY<br>NQYTEEEK<br>NN | Mus<br>musculu<br>s              |
| 1 | 1.00 | 1 | 1 | 0 | -0.003 | 0 | 0 | 0 | t | 79528 | CPSKKPYE<br>EVTC            | Oryctola<br>gus<br>cuniculu<br>s |
| 1 | 1.00 | 1 | 1 | 0 | -0.002 | 0 | 0 | 0 | t | 64525 | TKAIINYQY<br>NQYTEEEK<br>NN | Mus<br>musculu<br>s              |
| 1 | 1.00 | 1 | 1 | 0 | -0.003 | 0 | 0 | 0 | t | 64525 | TKAIINYQY<br>NQYTEEEK<br>NN | Mus<br>musculu<br>s              |
| 1 | 1.00 | 1 | 1 | 0 | 0      | 0 | 0 | 0 | t | 97311 | FPLPTDAG                    | Mus<br>musculu<br>s              |
| 1 | 1.00 | 1 | 1 | 0 | 0      | 0 | 0 | 0 | t | 79528 | CPSKKPYE<br>EVTC            | Mus<br>musculu<br>s              |
| 1 | 1.00 | 1 | 1 | 0 | 0.008  | 0 | 0 | 0 | t | 66330 | TSMDDEA<br>DRYFT            | Capra<br>hircus                  |
| 1 | 1.00 | 1 | 1 | 0 | -0.003 | 0 | 0 | 0 | t | 79528 | CPSKKPYE<br>EVTC            | Oryctola<br>gus<br>cuniculu<br>s |
| 1 | 1.00 | 1 | 1 | 0 | -0.003 | 0 | 0 | 0 | t | 74497 | YKQKIIAP                    | Oryctola<br>gus<br>cuniculu<br>s |
| 1 | 1.00 | 1 | 1 | 0 | -0.008 | 0 | 0 | 0 | t | 69129 | VITPGTNA<br>SSEVAVLY        | Mus<br>musculu<br>s              |
| 1 | 1.00 | 1 | 1 | 0 | -0.007 | 0 | 0 | 0 | t | 94623 | NPACGRH                     | Oryctola<br>gus<br>cuniculu<br>s |
| 1 | 1.00 | 1 | 1 | 0 | -0.003 | 0 | 0 | 0 | t | 78657 | FVHAKKKE<br>EGEDDTA<br>RQEI | Oryctola<br>gus<br>cuniculu<br>s |

|   |      |   |   |   |        |   |   |   |   |       |                              |                                  |
|---|------|---|---|---|--------|---|---|---|---|-------|------------------------------|----------------------------------|
| 1 | 1.00 | 1 | 1 | 0 | -0.007 | 0 | 0 | 0 | t | 61589 | STEQNVP<br>DPQVG             | Oryctola<br>gus<br>cuniculu<br>s |
| 1 | 1.00 | 1 | 1 | 0 | 0      | 0 | 0 | 0 | t | 62359 | SVTFKFGE<br>EFDEKTSD<br>GRSV | Mus<br>musculu<br>s              |
| 1 | 1.00 | 1 | 1 | 0 | 0      | 0 | 0 | 0 | t | 62359 | SVTFKFGE<br>EFDEKTSD<br>GRSV | Mus<br>musculu<br>s              |
| 1 | 1.00 | 1 | 1 | 0 | 0      | 0 | 0 | 0 | t | 62359 | SVTFKFGE<br>EFDEKTSD<br>GRSV | Mus<br>musculu<br>s              |
| 1 | 1.00 | 1 | 1 | 0 | -0.007 | 0 | 0 | 0 | t | 94624 | NPACGRH<br>Y                 | Oryctola<br>gus<br>cuniculu<br>s |
| 1 | 1.00 | 1 | 1 | 0 | 0      | 0 | 0 | 0 | t | 79535 | EDDDDDF<br>GMGALF            | Mus<br>musculu<br>s              |
| 1 | 1.00 | 1 | 1 | 0 | -0.007 | 0 | 0 | 0 | t | 61589 | STEQNVP<br>DPQVG             | Oryctola<br>gus<br>cuniculu<br>s |
| 1 | 1.00 | 1 | 1 | 0 | -0.007 | 0 | 0 | 0 | t | 60544 | SQRTRDIYI<br>SR              | Oryctola<br>gus<br>cuniculu<br>s |
| 1 | 1.00 | 1 | 1 | 0 | 0.008  | 0 | 0 | 0 | t | 95712 | QKIIAPAK                     | Cavia<br>porcellu<br>s           |
| 1 | 1.00 | 1 | 1 | 0 | 0.008  | 0 | 0 | 0 | t | 95713 | QKIVAPVK                     | Cavia<br>porcellu<br>s           |
| 1 | 1.00 | 1 | 1 | 0 | -0.003 | 0 | 0 | 0 | t | 61589 | STEQNVP<br>DPQVG             | Oryctola<br>gus<br>cuniculu<br>s |
| 1 | 1.00 | 1 | 1 | 0 | 0      | 0 | 0 | 0 | t | 95849 | SGTSGTSG<br>TSAQ             | Homo<br>sapiens                  |

|   |      |   |   |   |        |   |   |   |   |       |                          |                       |
|---|------|---|---|---|--------|---|---|---|---|-------|--------------------------|-----------------------|
| 1 | 1.00 | 1 | 1 | 0 | -0.003 | 0 | 0 | 0 | t | 78701 | KKFNSSAG<br>DKQGNISIEKL  | Oryctolagus cuniculus |
| 1 | 1.00 | 1 | 1 | 0 | -0.003 | 0 | 0 | 0 | t | 78702 | KKKEEGED<br>DTARQEIRKAW  | Oryctolagus cuniculus |
| 1 | 1.00 | 1 | 1 | 0 | 0      | 0 | 0 | 0 | t | 73385 | YALADASL<br>KMADPNRFRGKD | Oryctolagus cuniculus |
| 1 | 1.00 | 1 | 1 | 0 | -0.003 | 0 | 0 | 0 | t | 78708 | KLVEYCDF<br>LTTFVHAKKKE  | Oryctolagus cuniculus |
| 1 | 1.00 | 1 | 1 | 0 | 0.008  | 0 | 0 | 0 | t | 95715 | QKVARTPC                 | Cavia porcellus       |
| 1 | 1.00 | 1 | 1 | 0 | 0      | 0 | 0 | 0 | t | 60596 | SQWNKPS<br>KPKTN         | Oryctolagus cuniculus |
| 1 | 1.00 | 1 | 1 | 0 | 0      | 0 | 0 | 0 | t | 97776 | YKGVAFPL                 | Mus musculus          |
| 1 | 1.00 | 1 | 1 | 0 | 0      | 0 | 0 | 0 | t | 64411 | TIPAQGTS<br>M            | Mus musculus          |
| 1 | 1.00 | 1 | 1 | 0 | -0.003 | 0 | 0 | 0 | t | 61589 | STEQNVP<br>DPQVG         | Oryctolagus cuniculus |
| 1 | 1.00 | 1 | 1 | 0 | -0.003 | 0 | 0 | 0 | t | 78735 | LRVKIERD<br>DLSRETIQII   | Oryctolagus cuniculus |
| 1 | 1.00 | 1 | 1 | 0 | -0.003 | 0 | 0 | 0 | t | 76471 | YWPPPQG<br>RRRF          | Oryctolagus cuniculus |
| 1 | 1.00 | 1 | 1 | 0 | -0.003 | 0 | 0 | 0 | t | 72113 | VYNKTISG<br>SGP          | Oryctolagus cuniculus |
| 1 | 1.00 | 1 | 1 | 0 | -0.003 | 0 | 0 | 0 | t | 72113 | VYNKTISG<br>SGP          | Oryctolagus cuniculus |

|   |      |   |   |   |        |   |   |   |   |       |                             |                              |
|---|------|---|---|---|--------|---|---|---|---|-------|-----------------------------|------------------------------|
| 1 | 1.00 | 1 | 1 | 0 | 0      | 0 | 0 | 0 | t | 66707 | TTLPKGIFY<br>AEGSRGG        | Mus<br>musculus              |
| 1 | 1.00 | 1 | 1 | 0 | -0.004 | 0 | 0 | 0 | t | 61833 | STPPVPPP<br>SVSRRKP         | Sus<br>scrofa                |
| 1 | 1.00 | 1 | 1 | 0 | -0.003 | 0 | 0 | 0 | t | 66025 | TRFVNASP<br>TGYD            | Oryctola<br>gus<br>cuniculus |
| 1 | 1.00 | 1 | 1 | 0 | -0.003 | 0 | 0 | 0 | t | 78752 | NKGKWKE<br>HIKEVTEKL<br>KKA | Oryctola<br>gus<br>cuniculus |
| 1 | 1.00 | 1 | 1 | 0 | 0      | 0 | 0 | 0 | t | 75791 | YSLFQKEK<br>MVL             | Mus<br>musculus              |
| 1 | 1.00 | 1 | 1 | 0 | 0      | 0 | 0 | 0 | t | 75791 | YSLFQKEK<br>MVL             | Mus<br>musculus              |
| 1 | 1.00 | 1 | 1 | 0 | -0.003 | 0 | 0 | 0 | t | 64113 | TIAGAG                      | Oryctola<br>gus<br>cuniculus |
| 1 | 1.00 | 1 | 1 | 0 | 0      | 0 | 0 | 0 | t | 80508 | ATAIFD                      | Mus<br>musculus              |
| 1 | 1.00 | 1 | 1 | 0 | 0      | 0 | 0 | 0 | t | 70783 | VRLIRVTAS<br>PSA            | Mus<br>musculus              |
| 1 | 1.00 | 1 | 1 | 0 | -0.003 | 0 | 0 | 0 | t | 75791 | YSLFQKEK<br>MVL             | Oryctola<br>gus<br>cuniculus |
| 1 | 1.00 | 1 | 1 | 0 | -0.004 | 0 | 0 | 0 | t | 75791 | YSLFQKEK<br>MVL             | Mus<br>musculus              |
| 1 | 1.00 | 1 | 1 | 0 | 0      | 0 | 0 | 0 | t | 64113 | TIAGAG                      | Mus<br>musculus              |
| 1 | 1.00 | 1 | 1 | 0 | -0.003 | 0 | 0 | 0 | t | 64113 | TIAGAG                      | Oryctola<br>gus<br>cuniculus |

|   |      |   |   |   |        |   |   |   |   |       |                             |                                  |
|---|------|---|---|---|--------|---|---|---|---|-------|-----------------------------|----------------------------------|
| 1 | 1.00 | 1 | 1 | 0 | -0.003 | 0 | 0 | 0 | t | 61560 | STDPAATD                    | Oryctola<br>gus<br>cuniculu<br>s |
| 1 | 1.00 | 1 | 1 | 0 | 0      | 0 | 0 | 0 | t | 72507 | WGQGGT<br>HGQWNK<br>PSK     | Oryctola<br>gus<br>cuniculu<br>s |
| 1 | 1.00 | 1 | 1 | 0 | -0.003 | 0 | 0 | 0 | t | 78816 | RQEIRKA<br>WVKGMP<br>YMDFSK | Oryctola<br>gus<br>cuniculu<br>s |
| 1 | 1.00 | 1 | 1 | 0 | 0      | 0 | 0 | 0 | t | 67931 | VDEKKM                      | Mus<br>musculu<br>s              |
| 1 | 1.00 | 1 | 1 | 0 | 0      | 0 | 0 | 0 | t | 67931 | VDEKKM                      | Mus<br>musculu<br>s              |
| 1 | 1.00 | 1 | 1 | 0 | -0.003 | 0 | 0 | 0 | t | 66703 | TTLNPT                      | Oryctola<br>gus<br>cuniculu<br>s |
| 1 | 1.00 | 1 | 1 | 0 | 0      | 0 | 0 | 0 | t | 67325 | TYEAALKQ<br>YEADL           | Mus<br>musculu<br>s              |
| 1 | 1.00 | 1 | 1 | 0 | 0      | 0 | 0 | 0 | t | 66933 | TVAEEHVE<br>EPTVAEE         | Homo<br>sapiens                  |
| 1 | 1.00 | 1 | 1 | 0 | -0.003 | 0 | 0 | 0 | t | 70537 | VQDGSVT<br>EQIIEELFP        | Oryctola<br>gus<br>cuniculu<br>s |
| 1 | 1.00 | 1 | 1 | 0 | 0.008  | 0 | 0 | 0 | t | 95744 | QTLPPSVP                    | Cavia<br>porcellu<br>s           |
| 1 | 1.00 | 1 | 1 | 0 | 0      | 0 | 0 | 0 | t | 66050 | TRLENLM<br>WK               | Mus<br>musculu<br>s              |
| 1 | 1.00 | 1 | 1 | 0 | 0      | 0 | 0 | 0 | t | 63458 | TELRYSWK<br>T               | Mus<br>musculu<br>s              |
| 1 | 1.00 | 1 | 1 | 0 | 0.003  | 0 | 0 | 0 | t | 66050 | TRLENLM<br>WK               | Mus<br>musculu<br>s              |
| 1 | 1.00 | 1 | 1 | 0 | 0      | 0 | 0 | 0 | t | 66050 | TRLENLM<br>WK               | Mus<br>musculu<br>s              |

|   |      |   |   |   |        |   |   |   |   |       |                             |                                  |
|---|------|---|---|---|--------|---|---|---|---|-------|-----------------------------|----------------------------------|
| 1 | 1.00 | 1 | 1 | 0 | 0      | 0 | 0 | 0 | t | 61833 | STPPVPPP<br>SVSRRKP         | Sus<br>scrofa                    |
| 1 | 1.00 | 1 | 1 | 0 | -0.004 | 0 | 0 | 0 | t | 61833 | STPPVPPP<br>SVSRRKP         | Mus<br>musculu<br>s              |
| 1 | 1.00 | 1 | 1 | 0 | -0.007 | 0 | 0 | 0 | t | 79369 | RGDLRGDL<br>RGDL            | Oryctola<br>gus<br>cuniculu<br>s |
| 1 | 1.00 | 1 | 1 | 0 | -0.007 | 0 | 0 | 0 | t | 79369 | RGDLRGDL<br>RGDL            | Oryctola<br>gus<br>cuniculu<br>s |
| 1 | 1.00 | 1 | 1 | 0 | 0.007  | 0 | 0 | 0 | t | 78843 | TAAQITAG<br>IALHQSNL<br>N   | Cavia<br>porcellu<br>s           |
| 1 | 1.00 | 1 | 1 | 0 | 0      | 0 | 0 | 0 | t | 63458 | TELRYSWK<br>T               | Mus<br>musculu<br>s              |
| 1 | 1.00 | 1 | 1 | 0 | 0      | 0 | 0 | 0 | t | 73889 | YFRTLEDA<br>AH              | Mus<br>musculu<br>s              |
| 1 | 1.00 | 1 | 1 | 0 | 0      | 0 | 0 | 0 | t | 73889 | YFRTLEDA<br>AH              | Mus<br>musculu<br>s              |
| 1 | 1.00 | 1 | 1 | 0 | -0.007 | 0 | 0 | 0 | t | 94637 | PACGRHYS<br>C               | Oryctola<br>gus<br>cuniculu<br>s |
| 1 | 1.00 | 1 | 1 | 0 | -0.003 | 0 | 0 | 0 | t | 66051 | TRLENLM<br>WK               | Oryctola<br>gus<br>cuniculu<br>s |
| 1 | 1.00 | 1 | 1 | 0 | -0.003 | 0 | 0 | 0 | t | 66051 | TRLENLM<br>WK               | Oryctola<br>gus<br>cuniculu<br>s |
| 1 | 1.00 | 1 | 1 | 0 | 0      | 0 | 0 | 0 | t | 66051 | TRLENLM<br>WK               | Mus<br>musculu<br>s              |
| 1 | 1.00 | 1 | 1 | 0 | 0.008  | 0 | 0 | 0 | t | 95747 | QVLAQKV<br>A                | Cavia<br>porcellu<br>s           |
| 1 | 1.00 | 1 | 1 | 0 | -0.001 | 0 | 0 | 0 | t | 70203 | VNTQFYTI<br>KEGMYKA<br>LNYQ | Homo<br>sapiens                  |

|   |      |   |   |   |        |   |   |   |   |       |                               |                          |
|---|------|---|---|---|--------|---|---|---|---|-------|-------------------------------|--------------------------|
| 1 | 1.00 | 1 | 1 | 0 | 0      | 0 | 0 | 0 | t | 70489 | VPSYSFIRA<br>HDSEVQD<br>LIA   | Rattus<br>norvegicus     |
| 1 | 1.00 | 1 | 1 | 0 | 0      | 0 | 0 | 0 | t | 70489 | VPSYSFIRA<br>HDSEVQD<br>LIA   | Rattus<br>norvegicus     |
| 1 | 1.00 | 1 | 1 | 0 | 0      | 0 | 0 | 0 | t | 80272 | AIFDTT                        | Mus<br>musculus          |
| 1 | 1.00 | 1 | 1 | 0 | -0.003 | 0 | 0 | 0 | t | 67373 | TYKADGET<br>ATEKT             | Oryctolagus<br>cuniculus |
| 1 | 1.00 | 1 | 1 | 0 | 0      | 0 | 0 | 0 | t | 97565 | PTGSAAAN                      | Mus<br>musculus          |
| 1 | 1.00 | 1 | 1 | 0 | -0.003 | 0 | 0 | 0 | t | 72178 | VYVEELKP<br>TPEGDLLEIL<br>LQK | Oryctolagus<br>cuniculus |
| 1 | 1.00 | 1 | 1 | 0 | 0      | 0 | 0 | 0 | t | 70070 | VNGENLV<br>GDDVVLA<br>T       | Mus<br>musculus          |
| 1 | 1.00 | 1 | 1 | 0 | 0      | 0 | 0 | 0 | t | 79446 | VCDQVQ<br>WMTRLAC<br>Q        | Mus<br>musculus          |
| 1 | 1.00 | 1 | 1 | 0 | 0.001  | 0 | 0 | 0 | t | 64876 | TLKKGSSG<br>YCAWPAC           | Ovis<br>aries            |
| 1 | 1.00 | 1 | 1 | 0 | -0.011 | 0 | 0 | 0 | t | 67908 | VDASSGSN<br>RFAALPAF          | Oryctolagus<br>cuniculus |
| 1 | 1.00 | 1 | 1 | 0 | 0      | 0 | 0 | 0 | t | 70070 | VNGENLV<br>GDDVVLA<br>T       | Mus<br>musculus          |
| 1 | 1.00 | 1 | 1 | 0 | -0.003 | 0 | 0 | 0 | t | 78875 | VLHSDYCI<br>VPNKGGSIGS        | Oryctolagus<br>cuniculus |
| 1 | 1.00 | 1 | 1 | 0 | -0.002 | 0 | 0 | 0 | t | 65481 | TNWLAKV<br>NTQIDLIRK<br>KMK   | Mus<br>musculus          |
| 1 | 1.00 | 1 | 1 | 0 | -0.002 | 0 | 0 | 0 | t | 65481 | TNWLAKV<br>NTQIDLIRK<br>KMK   | Mus<br>musculus          |



|   |      |   |   |   |        |   |   |   |   |       |                             |                                  |
|---|------|---|---|---|--------|---|---|---|---|-------|-----------------------------|----------------------------------|
| 1 | 1.00 | 1 | 1 | 0 | -0.003 | 0 | 0 | 0 | t | 78876 | VLLGRKW<br>EDEVDDE<br>SYF   | Oryctola<br>gus<br>cuniculu<br>s |
| 1 | 1.00 | 1 | 1 | 0 | -0.007 | 0 | 0 | 0 | t | 65481 | TNWLAKV<br>NTQIDLIRK<br>KMK | Homo<br>sapiens                  |
| 1 | 1.00 | 1 | 1 | 0 | -0.008 | 0 | 0 | 0 | t | 65481 | TNWLAKV<br>NTQIDLIRK<br>KMK | Mus<br>musculu<br>s              |
| 1 | 1.00 | 1 | 1 | 0 | 0      | 0 | 0 | 0 | t | 65481 | TNWLAKV<br>NTQIDLIRK<br>KMK | Mus<br>musculu<br>s              |
| 1 | 1.00 | 1 | 1 | 0 | 0.005  | 0 | 0 | 0 | t | 65481 | TNWLAKV<br>NTQIDLIRK<br>KMK | Gallus<br>gallus                 |
| 1 | 1.00 | 1 | 1 | 0 | -0.003 | 0 | 0 | 0 | t | 76485 | YYALDVYA<br>YDVT            | Oryctola<br>gus<br>cuniculu<br>s |
| 1 | 1.00 | 1 | 1 | 0 | 0.006  | 0 | 0 | 0 | t | 75245 | YPADSKGC<br>KITCFLT         | Ovis<br>aries                    |
| 1 | 1.00 | 1 | 1 | 0 | -0.007 | 0 | 0 | 0 | t | 79368 | RGDLARG<br>DLARGDL          | Oryctola<br>gus<br>cuniculu<br>s |
| 1 | 1.00 | 1 | 1 | 0 | 0.006  | 0 | 0 | 0 | t | 64876 | TLKKGSSG<br>YCAWPAC         | Ovis<br>aries                    |
| 1 | 1.00 | 1 | 1 | 0 | -0.003 | 0 | 0 | 0 | t | 75245 | YPADSKGC<br>KITCFLT         | Oryctola<br>gus<br>cuniculu<br>s |
| 1 | 1.00 | 1 | 1 | 0 | 0      | 0 | 0 | 0 | t | 64541 | TKDTNNN<br>L                | Mus<br>musculu<br>s              |
| 1 | 1.00 | 1 | 1 | 0 | 0      | 0 | 0 | 0 | t | 71285 | VTEEIVTEE<br>IVTEEI         | Mus<br>musculu<br>s              |
| 1 | 1.00 | 1 | 1 | 0 | 0      | 0 | 0 | 0 | t | 64541 | TKDTNNN<br>L                | Mus<br>musculu<br>s              |

|   |      |   |   |   |        |   |   |   |   |       |                             |                                  |
|---|------|---|---|---|--------|---|---|---|---|-------|-----------------------------|----------------------------------|
| 1 | 1.00 | 1 | 1 | 0 | 0      | 0 | 0 | 0 | t | 71285 | VTEEIVTEE<br>IVTEEI         | Mus<br>musculu<br>s              |
| 1 | 1.00 | 1 | 1 | 0 | 0      | 0 | 0 | 0 | t | 61523 | STANAKVL<br>VEIE            | Mus<br>musculu<br>s              |
| 1 | 1.00 | 1 | 1 | 0 | 0      | 0 | 0 | 0 | t | 61523 | STANAKVL<br>VEIE            | Mus<br>musculu<br>s              |
| 1 | 1.00 | 1 | 1 | 0 | -0.003 | 0 | 0 | 0 | t | 62715 | SYSYNKDN<br>NELSHFA         | Oryctola<br>gus<br>cuniculu<br>s |
| 1 | 1.00 | 1 | 1 | 0 | 0      | 0 | 0 | 0 | t | 71285 | VTEEIVTEE<br>IVTEEI         | Mus<br>musculu<br>s              |
| 1 | 1.00 | 1 | 1 | 0 | -0.003 | 0 | 0 | 0 | t | 73893 | YFSIFNTEL<br>SQSNIEER<br>YK | Mus<br>musculu<br>s              |
| 1 | 1.00 | 1 | 1 | 0 | -0.001 | 0 | 0 | 0 | t | 73893 | YFSIFNTEL<br>SQSNIEER<br>YK | Homo<br>sapiens                  |
| 1 | 1.00 | 1 | 1 | 0 | -0.002 | 0 | 0 | 0 | t | 73893 | YFSIFNTEL<br>SQSNIEER<br>YK | Mus<br>musculu<br>s              |
| 1 | 1.00 | 1 | 1 | 0 | -0.003 | 0 | 0 | 0 | t | 62354 | SVTEEVVE<br>EEGPVDEE        | Oryctola<br>gus<br>cuniculu<br>s |
| 1 | 1.00 | 1 | 1 | 0 | 0      | 0 | 0 | 0 | t | 71285 | VTEEIVTEE<br>IVTEEI         | Mus<br>musculu<br>s              |
| 1 | 1.00 | 1 | 1 | 0 | -0.003 | 0 | 0 | 0 | t | 67903 | VDAGSVD<br>QTVQLG           | Oryctola<br>gus<br>cuniculu<br>s |
| 1 | 1.00 | 1 | 1 | 0 | 0      | 0 | 0 | 0 | t | 71285 | VTEEIVTEE<br>IVTEEI         | Mus<br>musculu<br>s              |
| 1 | 1.00 | 1 | 1 | 0 | 0      | 0 | 0 | 0 | t | 71285 | VTEEIVTEE<br>IVTEEI         | Mus<br>musculu<br>s              |
| 1 | 1.00 | 1 | 1 | 0 | 0      | 0 | 0 | 0 | t | 71285 | VTEEIVTEE<br>IVTEEI         | Mus<br>musculu<br>s              |

|   |      |   |   |   |        |   |   |   |   |       |                         |                                  |
|---|------|---|---|---|--------|---|---|---|---|-------|-------------------------|----------------------------------|
| 1 | 1.00 | 1 | 1 | 0 | -0.003 | 0 | 0 | 0 | t | 95058 | AGLQND                  | Oryctola<br>gus<br>cuniculu<br>s |
| 1 | 1.00 | 1 | 1 | 0 | 0.008  | 0 | 0 | 0 | t | 70457 | VPQVRKET<br>RASSR       | Cavia<br>porcellu<br>s           |
| 1 | 1.00 | 1 | 1 | 0 | 0      | 0 | 0 | 0 | t | 71285 | VTEEIVTEE<br>IVTEEI     | Mus<br>musculu<br>s              |
| 1 | 1.00 | 1 | 1 | 0 | 0      | 0 | 0 | 0 | t | 71285 | VTEEIVTEE<br>IVTEEI     | Mus<br>musculu<br>s              |
| 1 | 1.00 | 1 | 1 | 0 | 0      | 0 | 0 | 0 | t | 70070 | VNGENLV<br>GDDVVLA<br>T | Mus<br>musculu<br>s              |
| 1 | 1.00 | 1 | 1 | 0 | 0      | 0 | 0 | 0 | t | 71285 | VTEEIVTEE<br>IVTEEI     | Mus<br>musculu<br>s              |
| 1 | 1.00 | 1 | 1 | 0 | 0      | 0 | 0 | 0 | t | 70070 | VNGENLV<br>GDDVVLA<br>T | Mus<br>musculu<br>s              |
| 1 | 1.00 | 1 | 1 | 0 | -0.003 | 0 | 0 | 0 | t | 70070 | VNGENLV<br>GDDVVLA<br>T | Oryctola<br>gus<br>cuniculu<br>s |
| 1 | 1.00 | 1 | 1 | 0 | -0.003 | 0 | 0 | 0 | t | 70070 | VNGENLV<br>GDDVVLA<br>T | Oryctola<br>gus<br>cuniculu<br>s |
| 1 | 1.00 | 1 | 1 | 0 | 0      | 0 | 0 | 0 | t | 95058 | AGLQND                  | Mus<br>musculu<br>s              |
| 1 | 1.00 | 1 | 1 | 0 | 0      | 0 | 0 | 0 | t | 71285 | VTEEIVTEE<br>IVTEEI     | Mus<br>musculu<br>s              |
| 1 | 1.00 | 1 | 1 | 0 | 0      | 0 | 0 | 0 | t | 71285 | VTEEIVTEE<br>IVTEEI     | Mus<br>musculu<br>s              |
| 1 | 1.00 | 1 | 1 | 0 | 0      | 0 | 0 | 0 | t | 71285 | VTEEIVTEE<br>IVTEEI     | Mus<br>musculu<br>s              |
| 1 | 1.00 | 1 | 1 | 0 | 0      | 0 | 0 | 0 | t | 62354 | SVTEEVEE<br>EEGPVDEE    | Homo<br>sapiens                  |
| 1 | 1.00 | 1 | 1 | 0 | 0      | 0 | 0 | 0 | t | 71285 | VTEEIVTEE<br>IVTEEI     | Mus<br>musculu<br>s              |

|   |      |   |   |   |        |   |   |   |   |       |                     |                       |
|---|------|---|---|---|--------|---|---|---|---|-------|---------------------|-----------------------|
| 1 | 1.00 | 1 | 1 | 0 | 0      | 0 | 0 | 0 | t | 97575 | QGRTSPPGQ           | Rattus norvegicus     |
| 1 | 1.00 | 1 | 1 | 0 | 0      | 0 | 0 | 0 | t | 63604 | TEYYLNHGKWPEN       | Oryctolagus cuniculus |
| 1 | 1.00 | 1 | 1 | 0 | -0.003 | 0 | 0 | 0 | t | 80105 | YEVTPTRMLVCG        | Oryctolagus cuniculus |
| 1 | 1.00 | 1 | 1 | 0 | 0      | 0 | 0 | 0 | t | 80105 | YEVTPTRMLVCG        | Mus musculus          |
| 1 | 1.00 | 1 | 1 | 0 | 0      | 0 | 0 | 0 | t | 71285 | VTEEIVTEEIVTEEI     | Mus musculus          |
| 1 | 1.00 | 1 | 1 | 0 | 0      | 0 | 0 | 0 | t | 71285 | VTEEIVTEEIVTEEI     | Mus musculus          |
| 1 | 1.00 | 1 | 1 | 0 | 0      | 0 | 0 | 0 | t | 71285 | VTEEIVTEEIVTEEI     | Mus musculus          |
| 1 | 1.00 | 1 | 1 | 0 | 0      | 0 | 0 | 0 | t | 95771 | RNVPEKQT            | Mus musculus          |
| 1 | 1.00 | 1 | 1 | 0 | -0.002 | 0 | 0 | 0 | t | 75691 | YRYNIYSEKEKSNINIDFN | Mus musculus          |
| 1 | 1.00 | 1 | 1 | 0 | 0      | 0 | 0 | 0 | t | 64640 | TKPTDGN             | Oryctolagus cuniculus |
| 1 | 1.00 | 1 | 1 | 0 | -0.001 | 0 | 0 | 0 | t | 75691 | YRYNIYSEKEKSNINIDFN | Homo sapiens          |
| 1 | 1.00 | 1 | 1 | 0 | -0.003 | 0 | 0 | 0 | t | 75691 | YRYNIYSEKEKSNINIDFN | Mus musculus          |
| 1 | 1.00 | 1 | 1 | 0 | -0.002 | 0 | 0 | 0 | t | 64843 | TLIDINGKTKSVFFEYNI  | Mus musculus          |
| 1 | 1.00 | 1 | 1 | 0 | -0.003 | 0 | 0 | 0 | t | 62991 | TASGQKAEQDT         | Oryctolagus cuniculus |

|   |      |   |   |   |        |   |   |   |   |       |                              |                                  |
|---|------|---|---|---|--------|---|---|---|---|-------|------------------------------|----------------------------------|
| 1 | 1.00 | 1 | 1 | 0 | 0      | 0 | 0 | 0 | t | 70304 | VPGIDPNA<br>CHYMKC           | Homo<br>sapiens                  |
| 1 | 1.00 | 1 | 1 | 0 | 0      | 0 | 0 | 0 | t | 80090 | VTSVAMK<br>PYEVT             | Mus<br>musculu<br>s              |
| 1 | 1.00 | 1 | 1 | 0 | -0.003 | 0 | 0 | 0 | t | 64843 | TLIDINGKT<br>KSVFFEYNI<br>R  | Mus<br>musculu<br>s              |
| 1 | 1.00 | 1 | 1 | 0 | -0.004 | 0 | 0 | 0 | t | 60710 | SRKAYDH<br>NSPYIWPR<br>NDYDG | Mus<br>musculu<br>s              |
| 1 | 1.00 | 1 | 1 | 0 | -0.003 | 0 | 0 | 0 | t | 75686 | YRYDSRPP                     | Oryctola<br>gus<br>cuniculu<br>s |
| 1 | 1.00 | 1 | 1 | 0 | 0.004  | 0 | 0 | 0 | t | 69383 | VLAQKVA<br>RTLP              | Mus<br>musculu<br>s              |
| 1 | 1.00 | 1 | 1 | 0 | -0.003 | 0 | 0 | 0 | t | 70070 | VNGENLV<br>GDDVVLA<br>T      | Oryctola<br>gus<br>cuniculu<br>s |
| 1 | 1.00 | 1 | 1 | 0 | -0.003 | 0 | 0 | 0 | t | 70070 | VNGENLV<br>GDDVVLA<br>T      | Oryctola<br>gus<br>cuniculu<br>s |
| 1 | 1.00 | 1 | 1 | 0 | -0.015 | 0 | 0 | 0 | t | 60663 | SRGAPGG<br>GFVPSLQG<br>VP    | Marmot<br>a monax                |
| 1 | 1.00 | 1 | 1 | 0 | 0.014  | 0 | 0 | 0 | t | 60663 | SRGAPGG<br>GFVPSLQG<br>VP    | Pan<br>troglody<br>tes           |
| 1 | 1.00 | 1 | 1 | 0 | 0      | 0 | 0 | 0 | t | 77968 | PPPYAPNP<br>GPPPPYTG<br>A    | Sus<br>scrofa                    |
| 1 | 1.00 | 1 | 1 | 0 | 0      | 0 | 0 | 0 | t | 94762 | AAPAKKA<br>APAKKAA<br>A      | Homo<br>sapiens                  |
| 1 | 1.00 | 1 | 1 | 0 | 0      | 0 | 0 | 0 | t | 80041 | SVAMKPY<br>EVTPT             | Mus<br>musculu<br>s              |

|   |      |   |   |   |        |   |   |   |   |       |                              |                                  |
|---|------|---|---|---|--------|---|---|---|---|-------|------------------------------|----------------------------------|
| 1 | 1.00 | 1 | 1 | 0 | 0      | 0 | 0 | 0 | t | 80035 | SSPMEVM<br>LRAVF             | Mus<br>musculu<br>s              |
| 1 | 1.00 | 1 | 1 | 0 | 0.001  | 0 | 0 | 0 | t | 75245 | YPADSKGC<br>KITCFLT          | Ovis<br>aries                    |
| 1 | 1.00 | 1 | 1 | 0 | -0.003 | 0 | 0 | 0 | t | 64542 | TKDTNNN<br>LTL               | Oryctola<br>gus<br>cuniculu<br>s |
| 1 | 1.00 | 1 | 1 | 0 | -0.008 | 0 | 0 | 0 | t | 74737 | YKLGPRGS<br>VMTTNIYL<br>NSS  | Mus<br>musculu<br>s              |
| 1 | 1.00 | 1 | 1 | 0 | 0      | 0 | 0 | 0 | t | 63754 | TFTMDGD<br>TMTMLTE<br>STFKNL | Mus<br>musculu<br>s              |
| 1 | 1.00 | 1 | 1 | 0 | -0.003 | 0 | 0 | 0 | t | 97922 | AYYTKNTN<br>NN               | Oryctola<br>gus<br>cuniculu<br>s |
| 1 | 1.00 | 1 | 1 | 0 | 0      | 0 | 0 | 0 | t | 74737 | YKLGPRGS<br>VMTTNIYL<br>NSS  | Mus<br>musculu<br>s              |
| 1 | 1.00 | 1 | 1 | 0 | 0      | 0 | 0 | 0 | t | 74737 | YKLGPRGS<br>VMTTNIYL<br>NSS  | Mus<br>musculu<br>s              |
| 1 | 1.00 | 1 | 1 | 0 | -0.003 | 0 | 0 | 0 | t | 64296 | TIFDVT                       | Oryctola<br>gus<br>cuniculu<br>s |
| 1 | 1.00 | 1 | 1 | 0 | 0      | 0 | 0 | 0 | t | 65473 | TNVDQDL<br>VGWPAPP           | Homo<br>sapiens                  |
| 1 | 1.00 | 1 | 1 | 0 | 0      | 0 | 0 | 0 | t | 65473 | TNVDQDL<br>VGWPAPP           | Homo<br>sapiens                  |
| 1 | 1.00 | 1 | 1 | 0 | -0.003 | 0 | 0 | 0 | t | 74737 | YKLGPRGS<br>VMTTNIYL<br>NSS  | Mus<br>musculu<br>s              |
| 1 | 1.00 | 1 | 1 | 0 | 0      | 0 | 0 | 0 | t | 74737 | YKLGPRGS<br>VMTTNIYL<br>NSS  | Mus<br>musculu<br>s              |
| 1 | 1.00 | 1 | 1 | 0 | 0      | 0 | 0 | 0 | t | 73132 | WTGVTQN                      | Mus<br>musculu<br>s              |

|   |      |   |   |   |        |   |   |   |   |       |                            |              |
|---|------|---|---|---|--------|---|---|---|---|-------|----------------------------|--------------|
| 1 | 1.00 | 1 | 1 | 0 | 0      | 0 | 0 | 0 | t | 73132 | WTGVTQN                    | Mus musculus |
| 1 | 1.00 | 1 | 1 | 0 | 0      | 0 | 0 | 0 | t | 74737 | YLGPRGS<br>VMTTNIYL<br>NSS | Mus musculus |
| 1 | 1.00 | 1 | 1 | 0 | 0      | 0 | 0 | 0 | t | 63345 | TEEIIQGES<br>KVEEVVE       | Homo sapiens |
| 1 | 1.00 | 1 | 1 | 0 | -0.007 | 0 | 0 | 0 | t | 74737 | YLGPRGS<br>VMTTNIYL<br>NSS | Homo sapiens |
| 1 | 1.00 | 1 | 1 | 0 | 0      | 0 | 0 | 0 | t | 73132 | WTGVTQN                    | Mus musculus |
| 1 | 1.00 | 1 | 1 | 0 | 0      | 0 | 0 | 0 | t | 80011 | RMVECSG<br>KQDCP           | Mus musculus |
| 1 | 1.00 | 1 | 1 | 0 | 0      | 0 | 0 | 0 | t | 74737 | YLGPRGS<br>VMTTNIYL<br>NSS | Mus musculus |
| 1 | 1.00 | 1 | 1 | 0 | -0.002 | 0 | 0 | 0 | t | 74737 | YLGPRGS<br>VMTTNIYL<br>NSS | Mus musculus |
| 1 | 1.00 | 1 | 1 | 0 | -0.002 | 0 | 0 | 0 | t | 74737 | YLGPRGS<br>VMTTNIYL<br>NSS | Mus musculus |
| 1 | 1.00 | 1 | 1 | 0 | 0      | 0 | 0 | 0 | t | 66935 | TVAFNQF<br>GPNAGQ          | Homo sapiens |
| 1 | 1.00 | 1 | 1 | 0 | 0      | 0 | 0 | 0 | t | 74737 | YLGPRGS<br>VMTTNIYL<br>NSS | Mus musculus |
| 1 | 1.00 | 1 | 1 | 0 | 0      | 0 | 0 | 0 | t | 66935 | TVAFNQF<br>GPNAGQ          | Homo sapiens |
| 1 | 1.00 | 1 | 1 | 0 | -0.003 | 0 | 0 | 0 | t | 66108 | TRTNPWP<br>ALAEGEF         | unidentified |
| 1 | 1.00 | 1 | 1 | 0 | 0.008  | 0 | 0 | 0 | t | 73920 | YFTYEEPN<br>DGEE           | Capra hircus |

|   |      |   |   |   |        |   |   |   |   |       |                             |                                  |
|---|------|---|---|---|--------|---|---|---|---|-------|-----------------------------|----------------------------------|
| 1 | 1.00 | 1 | 1 | 0 | -0.002 | 0 | 0 | 0 | t | 75629 | YRLATNAS<br>QAGVEKIL<br>SAL | Mus<br>musculu<br>s              |
| 1 | 1.00 | 1 | 1 | 0 | -0.003 | 0 | 0 | 0 | t | 75629 | YRLATNAS<br>QAGVEKIL<br>SAL | Mus<br>musculu<br>s              |
| 1 | 1.00 | 1 | 1 | 0 | 0      | 0 | 0 | 0 | t | 75629 | YRLATNAS<br>QAGVEKIL<br>SAL | Mus<br>musculu<br>s              |
| 1 | 1.00 | 1 | 1 | 0 | -0.003 | 0 | 0 | 0 | t | 75629 | YRLATNAS<br>QAGVEKIL<br>SAL | Mus<br>musculu<br>s              |
| 1 | 1.00 | 1 | 1 | 0 | 0      | 0 | 0 | 0 | t | 95814 | SAQSGASA<br>QSGA            | Homo<br>sapiens                  |
| 1 | 1.00 | 1 | 1 | 0 | 0      | 0 | 0 | 0 | t | 64396 | TINKPKGY<br>VGKE            | Mus<br>musculu<br>s              |
| 1 | 1.00 | 1 | 1 | 0 | 0      | 0 | 0 | 0 | t | 64296 | TIFDVT                      | Mus<br>musculu<br>s              |
| 1 | 1.00 | 1 | 1 | 0 | 0      | 0 | 0 | 0 | t | 64296 | TIFDVT                      | Mus<br>musculu<br>s              |
| 1 | 1.00 | 1 | 1 | 0 | 0      | 0 | 0 | 0 | t | 66935 | TVAFNQF<br>GPNAGQ           | Homo<br>sapiens                  |
| 1 | 1.00 | 1 | 1 | 0 | -0.003 | 0 | 0 | 0 | t | 64296 | TIFDVT                      | Oryctola<br>gus<br>cuniculu<br>s |
| 1 | 1.00 | 1 | 1 | 0 | 0      | 0 | 0 | 0 | t | 75629 | YRLATNAS<br>QAGVEKIL<br>SAL | Mus<br>musculu<br>s              |
| 1 | 1.00 | 1 | 1 | 0 | 0      | 0 | 0 | 0 | t | 75629 | YRLATNAS<br>QAGVEKIL<br>SAL | Mus<br>musculu<br>s              |
| 1 | 1.00 | 1 | 1 | 0 | 0.008  | 0 | 0 | 0 | t | 95966 | VKQTLPPS                    | Cavia<br>porcellu<br>s           |



|   |      |   |   |   |        |   |   |   |   |       |                              |                                  |
|---|------|---|---|---|--------|---|---|---|---|-------|------------------------------|----------------------------------|
| 1 | 1.00 | 1 | 1 | 0 | -0.002 | 0 | 0 | 0 | t | 75629 | YRLATNAS<br>QAGVEKIL<br>SAL  | Mus<br>musculu<br>s              |
| 1 | 1.00 | 1 | 1 | 0 | 0      | 0 | 0 | 0 | t | 95815 | SAQSGASA<br>QSGT             | Homo<br>sapiens                  |
| 1 | 1.00 | 1 | 1 | 0 | 0      | 0 | 0 | 0 | t | 95815 | SAQSGASA<br>QSGT             | Homo<br>sapiens                  |
| 1 | 1.00 | 1 | 1 | 0 | -0.003 | 0 | 0 | 0 | t | 66649 | TTIHELLVR<br>MKRAELYC<br>PRP | Oryctola<br>gus<br>cuniculu<br>s |
| 1 | 1.00 | 1 | 1 | 0 | 0      | 0 | 0 | 0 | t | 65430 | TNSNSNLS<br>DGLYVIDK<br>GDGG | Oryctola<br>gus<br>cuniculu<br>s |
| 1 | 1.00 | 1 | 1 | 0 | -0.006 | 0 | 0 | 0 | t | 79026 | MSDGAVQ<br>PDGGQPA<br>V      | Oryctola<br>gus<br>cuniculu<br>s |
| 1 | 1.00 | 1 | 1 | 0 | 0      | 0 | 0 | 0 | t | 74737 | YLKGRGS<br>VMTTNIYL<br>NSS   | Mus<br>musculu<br>s              |
| 1 | 1.00 | 1 | 1 | 0 | -0.004 | 0 | 0 | 0 | t | 66649 | TTIHELLVR<br>MKRAELYC<br>PRP | Mus<br>musculu<br>s              |
| 1 | 1.00 | 1 | 1 | 0 | -0.003 | 0 | 0 | 0 | t | 75245 | YPADSKGC<br>KITCFLT          | Mus<br>musculu<br>s              |
| 1 | 1.00 | 1 | 1 | 0 | -0.007 | 0 | 0 | 0 | t | 66649 | TTIHELLVR<br>MKRAELYC<br>PRP | Oryctola<br>gus<br>cuniculu<br>s |
| 1 | 1.00 | 1 | 1 | 0 | 0      | 0 | 0 | 0 | t | 74737 | YLKGRGS<br>VMTTNIYL<br>NSS   | Mus<br>musculu<br>s              |
| 1 | 1.00 | 1 | 1 | 0 | 0      | 0 | 0 | 0 | t | 97420 | KGVAFPLP                     | Mus<br>musculu<br>s              |

|   |      |   |   |   |        |   |   |   |   |       |                              |                                  |
|---|------|---|---|---|--------|---|---|---|---|-------|------------------------------|----------------------------------|
| 1 | 1.00 | 1 | 1 | 0 | 0      | 0 | 0 | 0 | t | 64312 | TIGTLKKIL<br>DETVKDKI<br>A   | Mus<br>musculu<br>s              |
| 1 | 1.00 | 1 | 1 | 0 | 0      | 0 | 0 | 0 | t | 95815 | SAQSGASA<br>QSGT             | Homo<br>sapiens                  |
| 1 | 1.00 | 1 | 1 | 0 | 0      | 0 | 0 | 0 | t | 74737 | YLGPRGS<br>VMTTNIYL<br>NSS   | Mus<br>musculu<br>s              |
| 1 | 1.00 | 1 | 1 | 0 | 0      | 0 | 0 | 0 | t | 74737 | YLGPRGS<br>VMTTNIYL<br>NSS   | Mus<br>musculu<br>s              |
| 1 | 1.00 | 1 | 1 | 0 | 0      | 0 | 0 | 0 | t | 79992 | QRPLRMFL<br>GPKQ             | Mus<br>musculu<br>s              |
| 1 | 1.00 | 1 | 1 | 0 | 0      | 0 | 0 | 0 | t | 62863 | TAGPNEYV<br>YYKVYATY<br>RKYQ | Oryctola<br>gus<br>cuniculu<br>s |
| 1 | 1.00 | 1 | 1 | 0 | 0      | 0 | 0 | 0 | t | 64783 | TLEVHGVK<br>PAAEEVKA<br>TPAG | Mus<br>musculu<br>s              |
| 1 | 1.00 | 1 | 1 | 0 | 0      | 0 | 0 | 0 | t | 95816 | SAQSGTSA<br>QSGT             | Homo<br>sapiens                  |
| 1 | 1.00 | 1 | 1 | 0 | -0.003 | 0 | 0 | 0 | t | 73089 | WSPCSVT<br>CG                | Oryctola<br>gus<br>cuniculu<br>s |
| 1 | 1.00 | 1 | 1 | 0 | 0      | 0 | 0 | 0 | t | 95816 | SAQSGTSA<br>QSGT             | Homo<br>sapiens                  |
| 1 | 1.00 | 1 | 1 | 0 | -0.003 | 0 | 0 | 0 | t | 95051 | YSQFEKSY                     | Oryctola<br>gus<br>cuniculu<br>s |
| 1 | 1.00 | 1 | 1 | 0 | -0.002 | 0 | 0 | 0 | t | 89258 | SVRYDSPE<br>FAGL             | Mus<br>musculu<br>s              |
| 1 | 1.00 | 1 | 1 | 0 | -0.003 | 0 | 0 | 0 | t | 75604 | YRFTNFEP<br>F                | Oryctola<br>gus<br>cuniculu<br>s |

|   |      |   |   |   |        |   |   |   |   |       |                             |                       |
|---|------|---|---|---|--------|---|---|---|---|-------|-----------------------------|-----------------------|
| 1 | 1.00 | 1 | 1 | 0 | 0      | 0 | 0 | 0 | t | 75370 | YPNQV                       | Mus musculus          |
| 1 | 1.00 | 1 | 1 | 0 | 0      | 0 | 0 | 0 | t | 79971 | PLRMFLGPKQLT                | Mus musculus          |
| 1 | 1.00 | 1 | 1 | 0 | -0.003 | 0 | 0 | 0 | t | 73973 | YFYVGLDY                    | Mus musculus          |
| 1 | 1.00 | 1 | 1 | 0 | 0      | 0 | 0 | 0 | t | 73747 | YEQLNDSS<br>EEDEIDG<br>PAGQ | Rattus norvegicus     |
| 1 | 1.00 | 1 | 1 | 0 | 0      | 0 | 0 | 0 | t | 95048 | VIFQTPLIK<br>NPDVKSAL<br>EG | Rattus norvegicus     |
| 1 | 1.00 | 1 | 1 | 0 | 0.008  | 0 | 0 | 0 | t | 95446 | HKQKIIAP                    | Cavia porcellus       |
| 1 | 1.00 | 1 | 1 | 0 | 0      | 0 | 0 | 0 | t | 95818 | SAQSGTSG<br>TSAQ            | Homo sapiens          |
| 1 | 1.00 | 1 | 1 | 0 | 0      | 0 | 0 | 0 | t | 60722 | SRLGRSSA<br>WV              | Mus musculus          |
| 1 | 1.00 | 1 | 1 | 0 | 0      | 0 | 0 | 0 | t | 97734 | VIDPAKVT<br>RV              | Homo sapiens          |
| 1 | 1.00 | 1 | 1 | 0 | 0      | 0 | 0 | 0 | t | 95819 | SAQSGTSG<br>TSGT            | Homo sapiens          |
| 1 | 1.00 | 1 | 1 | 0 | -0.006 | 0 | 0 | 0 | t | 75245 | YPADSKGC<br>KITCFLT         | Oryctolagus cuniculus |
| 1 | 1.00 | 1 | 1 | 0 | 0.004  | 0 | 0 | 0 | t | 66648 | TTIHELLVR<br>MKRAELYC<br>PR | Mus musculus          |

|   |      |   |   |   |        |   |   |   |   |       |                              |                                  |
|---|------|---|---|---|--------|---|---|---|---|-------|------------------------------|----------------------------------|
| 1 | 1.00 | 1 | 1 | 0 | -0.004 | 0 | 0 | 0 | t | 73067 | WSERIREF<br>MEKECP           | Oryctola<br>gus<br>cuniculu<br>s |
| 1 | 1.00 | 1 | 1 | 0 | 0      | 0 | 0 | 0 | t | 70391 | VPNLRGDL<br>QVLAQKV<br>ARTLP | Cavia<br>porcellu<br>s           |
| 1 | 1.00 | 1 | 1 | 0 | 0      | 0 | 0 | 0 | t | 70391 | VPNLRGDL<br>QVLAQKV<br>ARTLP | Cavia<br>porcellu<br>s           |
| 1 | 1.00 | 1 | 1 | 0 | 0      | 0 | 0 | 0 | t | 70391 | VPNLRGDL<br>QVLAQKV<br>ARTLP | Cavia<br>porcellu<br>s           |
| 1 | 1.00 | 1 | 1 | 0 | 0      | 0 | 0 | 0 | t | 73051 | WRSTRDA<br>FINGAY            | Homo<br>sapiens                  |
| 1 | 1.00 | 1 | 1 | 0 | 0      | 0 | 0 | 0 | t | 73051 | WRSTRDA<br>FINGAY            | Homo<br>sapiens                  |
| 1 | 1.00 | 1 | 1 | 0 | -0.002 | 0 | 0 | 0 | t | 72320 | WDMMM<br>NW                  | Mus<br>musculu<br>s              |
| 1 | 1.00 | 1 | 1 | 0 | -0.003 | 0 | 0 | 0 | t | 70391 | VPNLRGDL<br>QVLAQKV<br>ARTLP | Oryctola<br>gus<br>cuniculu<br>s |
| 1 | 1.00 | 1 | 1 | 0 | -0.017 | 0 | 0 | 0 | t | 75571 | YQWLTRV<br>GKYRPQD<br>KPNT   | Oryctola<br>gus<br>cuniculu<br>s |
| 1 | 1.00 | 1 | 1 | 0 | 0      | 0 | 0 | 0 | t | 70391 | VPNLRGDL<br>QVLAQKV<br>ARTLP | Cavia<br>porcellu<br>s           |
| 1 | 1.00 | 1 | 1 | 0 | 0      | 0 | 0 | 0 | t | 70391 | VPNLRGDL<br>QVLAQKV<br>ARTLP | Cavia<br>porcellu<br>s           |
| 1 | 1.00 | 1 | 1 | 0 | 0      | 0 | 0 | 0 | t | 70391 | VPNLRGDL<br>QVLAQKV<br>ARTLP | Cavia<br>porcellu<br>s           |

|   |      |   |   |   |        |   |   |   |   |       |                              |                                  |
|---|------|---|---|---|--------|---|---|---|---|-------|------------------------------|----------------------------------|
| 1 | 1.00 | 1 | 1 | 0 | 0      | 0 | 0 | 0 | t | 70391 | VPNLRGDL<br>QVLAQKV<br>ARTLP | Mus<br>musculu<br>s              |
| 1 | 1.00 | 1 | 1 | 0 | 0      | 0 | 0 | 0 | t | 70391 | VPNLRGDL<br>QVLAQKV<br>ARTLP | Cavia<br>porcellu<br>s           |
| 1 | 1.00 | 1 | 1 | 0 | 0      | 0 | 0 | 0 | t | 70391 | VPNLRGDL<br>QVLAQKV<br>ARTLP | Mus<br>musculu<br>s              |
| 1 | 1.00 | 1 | 1 | 0 | 0      | 0 | 0 | 0 | t | 70391 | VPNLRGDL<br>QVLAQKV<br>ARTLP | Mus<br>musculu<br>s              |
| 1 | 1.00 | 1 | 1 | 0 | -0.003 | 0 | 0 | 0 | t | 60543 | SQRSTNSA<br>ST               | Oryctola<br>gus<br>cuniculu<br>s |
| 1 | 1.00 | 1 | 1 | 0 | 0      | 0 | 0 | 0 | t | 70391 | VPNLRGDL<br>QVLAQKV<br>ARTLP | Oryctola<br>gus<br>cuniculu<br>s |
| 1 | 1.00 | 1 | 1 | 0 | 0      | 0 | 0 | 0 | t | 70391 | VPNLRGDL<br>QVLAQKV<br>ARTLP | Mus<br>musculu<br>s              |
| 1 | 1.00 | 1 | 1 | 0 | -0.003 | 0 | 0 | 0 | t | 64698 | TKWCPPG<br>QLVNLHDF<br>RSDEI | Oryctola<br>gus<br>cuniculu<br>s |
| 1 | 1.00 | 1 | 1 | 0 | -0.003 | 0 | 0 | 0 | t | 65409 | TNRNPQ                       | Oryctola<br>gus<br>cuniculu<br>s |
| 1 | 1.00 | 1 | 1 | 0 | 0      | 0 | 0 | 0 | t | 65409 | TNRNPQ                       | Mus<br>musculu<br>s              |
| 1 | 1.00 | 1 | 1 | 0 | 0.01   | 0 | 0 | 0 | t | 61557 | STDNNNT<br>KTISTDNN<br>NTKTI | Pan<br>troglody<br>tes           |

|   |      |   |   |   |        |   |   |   |   |       |                              |                                  |
|---|------|---|---|---|--------|---|---|---|---|-------|------------------------------|----------------------------------|
| 1 | 1.00 | 1 | 1 | 0 | 0      | 0 | 0 | 0 | t | 79908 | LIRMVECS<br>GKQD             | Mus<br>musculu<br>s              |
| 1 | 1.00 | 1 | 1 | 0 | 0      | 0 | 0 | 0 | t | 65409 | TNRNPQ                       | Mus<br>musculu<br>s              |
| 1 | 1.00 | 1 | 1 | 0 | -0.003 | 0 | 0 | 0 | t | 65409 | TNRNPQ                       | Oryctola<br>gus<br>cuniculu<br>s |
| 1 | 1.00 | 1 | 1 | 0 | 0      | 0 | 0 | 0 | t | 95827 | SGASAQS<br>GASAQ             | Homo<br>sapiens                  |
| 1 | 1.00 | 1 | 1 | 0 | 0      | 0 | 0 | 0 | t | 70391 | VPNLRGDL<br>QVLAQKV<br>ARTLP | Mus<br>musculu<br>s              |
| 1 | 1.00 | 1 | 1 | 0 | 0      | 0 | 0 | 0 | t | 70391 | VPNLRGDL<br>QVLAQKV<br>ARTLP | Cavia<br>porcellu<br>s           |
| 1 | 1.00 | 1 | 1 | 0 | 0      | 0 | 0 | 0 | t | 70391 | VPNLRGDL<br>QVLAQKV<br>ARTLP | Cavia<br>porcellu<br>s           |
| 1 | 1.00 | 1 | 1 | 0 | 0      | 0 | 0 | 0 | t | 96386 | IFDVTT                       | Mus<br>musculu<br>s              |
| 1 | 1.00 | 1 | 1 | 0 | -0.003 | 0 | 0 | 0 | t | 96386 | IFDVTT                       | Oryctola<br>gus<br>cuniculu<br>s |
| 1 | 1.00 | 1 | 1 | 0 | 0      | 0 | 0 | 0 | t | 95828 | SGASAQS<br>GTSAQ             | Homo<br>sapiens                  |
| 1 | 1.00 | 1 | 1 | 0 | 0      | 0 | 0 | 0 | t | 79903 | LELIRMVE<br>CSGK             | Mus<br>musculu<br>s              |
| 1 | 1.00 | 1 | 1 | 0 | 0.004  | 0 | 0 | 0 | t | 72324 | WDQKLW<br>CRHFCVLA<br>D      | Mus<br>musculu<br>s              |

|   |      |   |   |   |        |   |   |   |   |       |                              |                                  |
|---|------|---|---|---|--------|---|---|---|---|-------|------------------------------|----------------------------------|
| 1 | 1.00 | 1 | 1 | 0 | -0.002 | 0 | 0 | 0 | t | 74849 | YLNSSLYR<br>GTKFIIKKY<br>AS  | Mus<br>musculu<br>s              |
| 1 | 1.00 | 1 | 1 | 0 | -0.001 | 0 | 0 | 0 | t | 74849 | YLNSSLYR<br>GTKFIIKKY<br>AS  | Homo<br>sapiens                  |
| 1 | 1.00 | 1 | 1 | 0 | 0      | 0 | 0 | 0 | t | 95047 | VEVPGSQ<br>HIDSQ             | Oryctola<br>gus<br>cuniculu<br>s |
| 1 | 1.00 | 1 | 1 | 0 | -0.003 | 0 | 0 | 0 | t | 74048 | YGLPNWV<br>KVWDRAT<br>N      | Mus<br>musculu<br>s              |
| 1 | 1.00 | 1 | 1 | 0 | 0      | 0 | 0 | 0 | t | 74849 | YLNSSLYR<br>GTKFIIKKY<br>AS  | Mus<br>musculu<br>s              |
| 1 | 1.00 | 1 | 1 | 0 | 0.005  | 0 | 0 | 0 | t | 74849 | YLNSSLYR<br>GTKFIIKKY<br>AS  | Gallus<br>gallus                 |
| 1 | 1.00 | 1 | 1 | 0 | -0.003 | 0 | 0 | 0 | t | 71189 | VSVITPGT<br>NASSEVAV<br>L    | Oryctola<br>gus<br>cuniculu<br>s |
| 1 | 1.00 | 1 | 1 | 0 | -0.002 | 0 | 0 | 0 | t | 74849 | YLNSSLYR<br>GTKFIIKKY<br>AS  | Mus<br>musculu<br>s              |
| 1 | 1.00 | 1 | 1 | 0 | -0.008 | 0 | 0 | 0 | t | 74849 | YLNSSLYR<br>GTKFIIKKY<br>AS  | Mus<br>musculu<br>s              |
| 1 | 1.00 | 1 | 1 | 0 | 0      | 0 | 0 | 0 | t | 70391 | VPNLRGDL<br>QVLAQKV<br>ARTLP | Mus<br>musculu<br>s              |
| 1 | 1.00 | 1 | 1 | 0 | 0      | 0 | 0 | 0 | t | 70391 | VPNLRGDL<br>QVLAQKV<br>ARTLP | Cavia<br>porcellu<br>s           |
| 1 | 1.00 | 1 | 1 | 0 | 0      | 0 | 0 | 0 | t | 70391 | VPNLRGDL<br>QVLAQKV<br>ARTLP | Mus<br>musculu<br>s              |

|   |      |   |   |   |        |   |   |   |   |       |                              |                                     |
|---|------|---|---|---|--------|---|---|---|---|-------|------------------------------|-------------------------------------|
| 1 | 1.00 | 1 | 1 | 0 | 0      | 0 | 0 | 0 | t | 70391 | VPNLRGDL<br>QVLAQKV<br>ARTLP | Mus<br>musculu<br>s                 |
| 1 | 1.00 | 1 | 1 | 0 | 0      | 0 | 0 | 0 | t | 79890 | KRPGSSP<br>MEVML             | Mus<br>musculu<br>s                 |
| 1 | 1.00 | 1 | 1 | 0 | 0      | 0 | 0 | 0 | t | 74849 | YLNSSLYR<br>GTKFIIKKY<br>AS  | Mus<br>musculu<br>s                 |
| 1 | 1.00 | 1 | 1 | 0 | -0.01  | 0 | 0 | 0 | t | 71182 | VSVAFGNP<br>GDPVTG           | Oncorhy<br>nchus<br>tshawyts<br>cha |
| 1 | 1.00 | 1 | 1 | 0 | -0.007 | 0 | 0 | 0 | t | 74849 | YLNSSLYR<br>GTKFIIKKY<br>AS  | Homo<br>sapiens                     |
| 1 | 1.00 | 1 | 1 | 0 | -0.003 | 0 | 0 | 0 | t | 75372 | YPNQVYYR<br>PVDRYSN<br>QNNFV | Oryctola<br>gus<br>cuniculu<br>s    |
| 1 | 1.00 | 1 | 1 | 0 | 0      | 0 | 0 | 0 | t | 95829 | SGASAQs<br>GTSGP             | Homo<br>sapiens                     |
| 1 | 1.00 | 1 | 1 | 0 | 0      | 0 | 0 | 0 | t | 70391 | VPNLRGDL<br>QVLAQKV<br>ARTLP | Mus<br>musculu<br>s                 |
| 1 | 1.00 | 1 | 1 | 0 | 0      | 0 | 0 | 0 | t | 79889 | KQLTFEGK<br>PALE             | Mus<br>musculu<br>s                 |
| 1 | 1.00 | 1 | 1 | 0 | 0      | 0 | 0 | 0 | t | 95830 | SGASAQs<br>GTSGT             | Homo<br>sapiens                     |
| 1 | 1.00 | 1 | 1 | 0 | 0      | 0 | 0 | 0 | t | 79158 | ASPYGNA                      | Oryctola<br>gus<br>cuniculu<br>s    |
| 1 | 1.00 | 1 | 1 | 0 | -0.004 | 0 | 0 | 0 | t | 61945 | STTNKDK                      | Mus<br>musculu<br>s                 |



|   |      |   |   |   |        |   |   |   |   |       |                              |                                  |
|---|------|---|---|---|--------|---|---|---|---|-------|------------------------------|----------------------------------|
| 1 | 1.00 | 1 | 1 | 0 | -0.003 | 0 | 0 | 0 | t | 79888 | KPYEVTPT<br>RMLV             | Oryctola<br>gus<br>cuniculu<br>s |
| 1 | 1.00 | 1 | 1 | 0 | 0      | 0 | 0 | 0 | t | 70391 | VPNLRGDL<br>QVLAQKV<br>ARTLP | Mus<br>musculu<br>s              |
| 1 | 1.00 | 1 | 1 | 0 | -0.003 | 0 | 0 | 0 | t | 76586 | YYR                          | Oryctola<br>gus<br>cuniculu<br>s |
| 1 | 1.00 | 1 | 1 | 0 | -0.003 | 0 | 0 | 0 | t | 72998 | WQPIYGST<br>PVTPTGS          | Oryctola<br>gus<br>cuniculu<br>s |
| 1 | 1.00 | 1 | 1 | 0 | 0      | 0 | 0 | 0 | t | 70391 | VPNLRGDL<br>QVLAQKV<br>ARTLP | Mus<br>musculu<br>s              |
| 1 | 1.00 | 1 | 1 | 0 | 0      | 0 | 0 | 0 | t | 70391 | VPNLRGDL<br>QVLAQKV<br>ARTLP | Mus<br>musculu<br>s              |
| 1 | 1.00 | 1 | 1 | 0 | 0      | 0 | 0 | 0 | t | 61945 | STTNKDK                      | Oryctola<br>gus<br>cuniculu<br>s |
| 1 | 1.00 | 1 | 1 | 0 | 0      | 0 | 0 | 0 | t | 70391 | VPNLRGDL<br>QVLAQKV<br>ARTLP | Mus<br>musculu<br>s              |
| 1 | 1.00 | 1 | 1 | 0 | 0      | 0 | 0 | 0 | t | 70391 | VPNLRGDL<br>QVLAQKV<br>ARTLP | Mus<br>musculu<br>s              |
| 1 | 1.00 | 1 | 1 | 0 | 0      | 0 | 0 | 0 | t | 63122 | TDAYNQKL<br>SERRAN           | Mus<br>musculu<br>s              |
| 1 | 1.00 | 1 | 1 | 0 | 0      | 0 | 0 | 0 | t | 63122 | TDAYNQKL<br>SERRAN           | Mus<br>musculu<br>s              |

|   |      |   |   |   |        |   |   |   |   |       |                              |                          |
|---|------|---|---|---|--------|---|---|---|---|-------|------------------------------|--------------------------|
| 1 | 1.00 | 1 | 1 | 0 | 0      | 0 | 0 | 0 | t | 63122 | TDAYNQKL<br>SERRAN           | Rattus<br>norvegicus     |
| 1 | 1.00 | 1 | 1 | 0 | -0.004 | 0 | 0 | 0 | t | 63856 | TGIEPDDH<br>LKERSS           | Oryctolagus<br>cuniculus |
| 1 | 1.00 | 1 | 1 | 0 | 0      | 0 | 0 | 0 | t | 70391 | VPNLRGDL<br>QVLAQKV<br>ARTLP | Mus<br>musculus          |
| 1 | 1.00 | 1 | 1 | 0 | 0      | 0 | 0 | 0 | t | 70391 | VPNLRGDL<br>QVLAQKV<br>ARTLP | Mus<br>musculus          |
| 1 | 1.00 | 1 | 1 | 0 | 0      | 0 | 0 | 0 | t | 79843 | GPKQLTFE<br>GKPA             | Mus<br>musculus          |
| 1 | 1.00 | 1 | 1 | 0 | 0      | 0 | 0 | 0 | t | 95832 | SGPSGPSG<br>PSGP             | Homo<br>sapiens          |
| 1 | 1.00 | 1 | 1 | 0 | 0      | 0 | 0 | 0 | t | 63122 | TDAYNQKL<br>SERRAN           | Mus<br>musculus          |
| 1 | 1.00 | 1 | 1 | 0 | 0      | 0 | 0 | 0 | t | 63122 | TDAYNQKL<br>SERRAN           | Mus<br>musculus          |
| 1 | 1.00 | 1 | 1 | 0 | 0      | 0 | 0 | 0 | t | 70391 | VPNLRGDL<br>QVLAQKV<br>ARTLP | Mus<br>musculus          |
| 1 | 1.00 | 1 | 1 | 0 | 0      | 0 | 0 | 0 | t | 63122 | TDAYNQKL<br>SERRAN           | Rattus<br>norvegicus     |
| 1 | 1.00 | 1 | 1 | 0 | 0      | 0 | 0 | 0 | t | 95833 | SGPSGPSG<br>PSGT             | Homo<br>sapiens          |
| 1 | 1.00 | 1 | 1 | 0 | -0.002 | 0 | 0 | 0 | t | 64328 | TIIPYIGPA<br>LNIGNMLY<br>K   | Mus<br>musculus          |

|   |      |   |   |   |       |   |   |   |   |       |                              |                      |
|---|------|---|---|---|-------|---|---|---|---|-------|------------------------------|----------------------|
| 1 | 1.00 | 1 | 1 | 0 | 0     | 0 | 0 | 0 | t | 66539 | TTASGKLIT                    | Mus<br>musculus      |
| 1 | 1.00 | 1 | 1 | 0 | 0     | 0 | 0 | 0 | t | 70391 | VPNLRGDL<br>QVLAQKV<br>ARTLP | Mus<br>musculus      |
| 1 | 1.00 | 1 | 1 | 0 | 0     | 0 | 0 | 0 | t | 70391 | VPNLRGDL<br>QVLAQKV<br>ARTLP | Mus<br>musculus      |
| 1 | 1.00 | 1 | 1 | 0 | 0     | 0 | 0 | 0 | t | 70391 | VPNLRGDL<br>QVLAQKV<br>ARTLP | Mus<br>musculus      |
| 1 | 1.00 | 1 | 1 | 0 | 0     | 0 | 0 | 0 | t | 70391 | VPNLRGDL<br>QVLAQKV<br>ARTLP | Mus<br>musculus      |
| 1 | 1.00 | 1 | 1 | 0 | 0     | 0 | 0 | 0 | t | 70391 | VPNLRGDL<br>QVLAQKV<br>ARTLP | Mus<br>musculus      |
| 1 | 1.00 | 1 | 1 | 0 | 0     | 0 | 0 | 0 | t | 70391 | VPNLRGDL<br>QVLAQKV<br>ARTLP | Mus<br>musculus      |
| 1 | 1.00 | 1 | 1 | 0 | 0.002 | 0 | 0 | 0 | t | 66976 | TVDNPAST<br>TNKDKLFA<br>VWK  | Rattus<br>norvegicus |
| 1 | 1.00 | 1 | 1 | 0 | 0     | 0 | 0 | 0 | t | 70391 | VPNLRGDL<br>QVLAQKV<br>ARTLP | Mus<br>musculus      |
| 1 | 1.00 | 1 | 1 | 0 | 0.004 | 0 | 0 | 0 | t | 62730 | SYTVTNLV<br>QTQSQVQ          | Mus<br>musculus      |
| 1 | 1.00 | 1 | 1 | 0 | 0     | 0 | 0 | 0 | t | 70391 | VPNLRGDL<br>QVLAQKV<br>ARTLP | Cavia<br>porcellus   |
| 1 | 1.00 | 1 | 1 | 0 | 0     | 0 | 0 | 0 | t | 70391 | VPNLRGDL<br>QVLAQKV<br>ARTLP | Mus<br>musculus      |

|   |      |   |   |   |        |   |   |   |   |       |                              |                      |
|---|------|---|---|---|--------|---|---|---|---|-------|------------------------------|----------------------|
| 1 | 1.00 | 1 | 1 | 0 | 0.002  | 0 | 0 | 0 | t | 62971 | TAQRCDH<br>S                 | Rattus<br>norvegicus |
| 1 | 1.00 | 1 | 1 | 0 | 0      | 0 | 0 | 0 | t | 70391 | VPNLRGDL<br>QVLAQKV<br>ARTLP | Cavia<br>porcellus   |
| 1 | 1.00 | 1 | 1 | 0 | 0      | 0 | 0 | 0 | t | 70391 | VPNLRGDL<br>QVLAQKV<br>ARTLP | Mus<br>musculus      |
| 1 | 1.00 | 1 | 1 | 0 | 0      | 0 | 0 | 0 | t | 61945 | STTNKDK                      | Rattus<br>norvegicus |
| 1 | 1.00 | 1 | 1 | 0 | 0      | 0 | 0 | 0 | t | 79176 | DAVPNM                       | Mus<br>musculus      |
| 1 | 1.00 | 1 | 1 | 0 | -0.003 | 0 | 0 | 0 | t | 64328 | TIIPYIGPA<br>LNIGNMLY<br>K   | Mus<br>musculus      |
| 1 | 1.00 | 1 | 1 | 0 | 0      | 0 | 0 | 0 | t | 97377 | GYKGVAFP                     | Mus<br>musculus      |
| 1 | 1.00 | 1 | 1 | 0 | -0.003 | 0 | 0 | 0 | t | 64328 | TIIPYIGPA<br>LNIGNMLY<br>K   | Mus<br>musculus      |
| 1 | 1.00 | 1 | 1 | 0 | 0.005  | 0 | 0 | 0 | t | 64328 | TIIPYIGPA<br>LNIGNMLY<br>K   | Gallus<br>gallus     |
| 1 | 1.00 | 1 | 1 | 0 | -0.008 | 0 | 0 | 0 | t | 64328 | TIIPYIGPA<br>LNIGNMLY<br>K   | Mus<br>musculus      |
| 1 | 1.00 | 1 | 1 | 0 | -0.008 | 0 | 0 | 0 | t | 64328 | TIIPYIGPA<br>LNIGNMLY<br>K   | Mus<br>musculus      |
| 1 | 1.00 | 1 | 1 | 0 | 0      | 0 | 0 | 0 | t | 70391 | VPNLRGDL<br>QVLAQKV<br>ARTLP | Mus<br>musculus      |

|   |      |   |   |   |        |   |   |   |   |       |                              |                       |
|---|------|---|---|---|--------|---|---|---|---|-------|------------------------------|-----------------------|
| 1 | 1.00 | 1 | 1 | 0 | 0      | 0 | 0 | 0 | t | 79177 | DAVPYL                       | Mus musculus          |
| 1 | 1.00 | 1 | 1 | 0 | 0      | 0 | 0 | 0 | t | 70391 | VPNLRGDL<br>QVLAQKV<br>ARTLP | Mus musculus          |
| 1 | 1.00 | 1 | 1 | 0 | 0      | 0 | 0 | 0 | t | 70391 | VPNLRGDL<br>QVLAQKV<br>ARTLP | Cavia porcellus       |
| 1 | 1.00 | 1 | 1 | 0 | -0.001 | 0 | 0 | 0 | t | 64328 | TIIPYIGPA<br>LNIGNMLY<br>K   | Homo sapiens          |
| 1 | 1.00 | 1 | 1 | 0 | -0.007 | 0 | 0 | 0 | t | 61945 | STTNKDK                      | Oryctolagus cuniculus |
| 1 | 1.00 | 1 | 1 | 0 | -0.007 | 0 | 0 | 0 | t | 68927 | VIDLMQT<br>HQHGLVG<br>ALLRAA | Oryctolagus cuniculus |
| 1 | 1.00 | 1 | 1 | 0 | -0.002 | 0 | 0 | 0 | t | 89292 | SYHAGFNY<br>KNGG             | Mus musculus          |
| 1 | 1.00 | 1 | 1 | 0 | -0.003 | 0 | 0 | 0 | t | 79821 | FEGKPALE<br>LIRM             | Oryctolagus cuniculus |
| 1 | 1.00 | 1 | 1 | 0 | -0.003 | 0 | 0 | 0 | t | 64663 | TKRRITPK<br>D                | Oryctolagus cuniculus |
| 1 | 1.00 | 1 | 1 | 0 | 0      | 0 | 0 | 0 | t | 62859 | TAGLVGLL<br>TPGA             | Rattus norvegicus     |
| 1 | 1.00 | 1 | 1 | 0 | -0.001 | 0 | 0 | 0 | t | 74009 | YGGPANK<br>KNAG              | Aotus nancymae        |
| 1 | 1.00 | 1 | 1 | 0 | -0.007 | 0 | 0 | 0 | t | 74009 | YGGPANK<br>KNAG              | Oryctolagus cuniculus |

|   |      |   |   |   |        |   |   |   |   |       |                              |                              |
|---|------|---|---|---|--------|---|---|---|---|-------|------------------------------|------------------------------|
| 1 | 1.00 | 1 | 1 | 0 | 0      | 0 | 0 | 0 | t | 79189 | DSAVPN                       | Mus<br>musculus              |
| 1 | 1.00 | 1 | 1 | 0 | -0.006 | 0 | 0 | 0 | t | 74009 | YGGPANK<br>KNAG              | Oryctola<br>gus<br>cuniculus |
| 1 | 1.00 | 1 | 1 | 0 | 0      | 0 | 0 | 0 | t | 97628 | SAAANYTT                     | Mus<br>musculus              |
| 1 | 1.00 | 1 | 1 | 0 | 0      | 0 | 0 | 0 | t | 64662 | TKRNTNRR<br>PQDVKFP<br>GGGQI | Mus<br>musculus              |
| 1 | 1.00 | 1 | 1 | 0 | 0      | 0 | 0 | 0 | t | 95848 | SGTSGTSG<br>PSGT             | Homo<br>sapiens              |
| 1 | 1.00 | 1 | 1 | 0 | 0      | 0 | 0 | 0 | t | 64662 | TKRNTNRR<br>PQDVKFP<br>GGGQI | Mus<br>musculus              |
| 1 | 1.00 | 1 | 1 | 0 | 0      | 0 | 0 | 0 | t | 64662 | TKRNTNRR<br>PQDVKFP<br>GGGQI | Mus<br>musculus              |
| 1 | 1.00 | 1 | 1 | 0 | -0.003 | 0 | 0 | 0 | t | 95043 | SPHQVYN                      | Oryctola<br>gus<br>cuniculus |
| 1 | 1.00 | 1 | 1 | 0 | 0      | 0 | 0 | 0 | t | 97157 | AAANYTTA                     | Mus<br>musculus              |
| 1 | 1.00 | 1 | 1 | 0 | -0.003 | 0 | 0 | 0 | t | 72919 | WNYDNAY<br>CDKLCKDK          | Oryctola<br>gus<br>cuniculus |
| 1 | 1.00 | 1 | 1 | 0 | -0.006 | 0 | 0 | 0 | t | 72919 | WNYDNAY<br>CDKLCKDK          | Oryctola<br>gus<br>cuniculus |
| 1 | 1.00 | 1 | 1 | 0 | -0.003 | 0 | 0 | 0 | t | 72919 | WNYDNAY<br>CDKLCKDK          | Oryctola<br>gus<br>cuniculus |
| 1 | 1.00 | 1 | 1 | 0 | 0      | 0 | 0 | 0 | t | 64328 | TIIPYIGPA<br>LNIGNMLY<br>K   | Mus<br>musculus              |
| 1 | 1.00 | 1 | 1 | 0 | -0.003 | 0 | 0 | 0 | t | 72919 | WNYDNAY<br>CDKLCKDK          | Mus<br>musculus              |

|   |      |   |   |   |        |   |   |   |   |       |                            |                                  |
|---|------|---|---|---|--------|---|---|---|---|-------|----------------------------|----------------------------------|
| 1 | 1.00 | 1 | 1 | 0 | 0      | 0 | 0 | 0 | t | 72919 | WNYDNAY<br>CDKLCKDK        | Mus<br>musculu<br>s              |
| 1 | 1.00 | 1 | 1 | 0 | 0      | 0 | 0 | 0 | t | 94954 | TTAETLDA<br>TC             | Mus<br>musculu<br>s              |
| 1 | 1.00 | 1 | 1 | 0 | 0      | 0 | 0 | 0 | t | 70390 | VPNLRGDL<br>QVLAQKV<br>ART | Ovis<br>aries                    |
| 1 | 1.00 | 1 | 1 | 0 | 0      | 0 | 0 | 0 | t | 70390 | VPNLRGDL<br>QVLAQKV<br>ART | Cavia<br>porcellu<br>s           |
| 1 | 1.00 | 1 | 1 | 0 | 0      | 0 | 0 | 0 | t | 97181 | AFPLPTDA                   | Mus<br>musculu<br>s              |
| 1 | 1.00 | 1 | 1 | 0 | -0.004 | 0 | 0 | 0 | t | 63215 | TDPTGIEP<br>DDHLKE         | Oryctola<br>gus<br>cuniculu<br>s |
| 1 | 1.00 | 1 | 1 | 0 | 0      | 0 | 0 | 0 | t | 70390 | VPNLRGDL<br>QVLAQKV<br>ART | Bos<br>taurus                    |
| 1 | 1.00 | 1 | 1 | 0 | 0.008  | 0 | 0 | 0 | t | 70390 | VPNLRGDL<br>QVLAQKV<br>ART | Cavia<br>porcellu<br>s           |
| 1 | 1.00 | 1 | 1 | 0 | 0      | 0 | 0 | 0 | t | 95841 | SGTSAQSG<br>TSAQ           | Homo<br>sapiens                  |
| 1 | 1.00 | 1 | 1 | 0 | 0      | 0 | 0 | 0 | t | 65331 | TNGTSGRT<br>PVL            | Mus<br>musculu<br>s              |
| 1 | 1.00 | 1 | 1 | 0 | -0.003 | 0 | 0 | 0 | t | 65331 | TNGTSGRT<br>PVL            | Oryctola<br>gus<br>cuniculu<br>s |
| 1 | 1.00 | 1 | 1 | 0 | 0      | 0 | 0 | 0 | t | 70389 | VPNLRGDL<br>QVLAQKV<br>A   | Cavia<br>porcellu<br>s           |

|   |      |   |   |   |        |   |   |   |   |       |                              |                                  |
|---|------|---|---|---|--------|---|---|---|---|-------|------------------------------|----------------------------------|
| 1 | 1.00 | 1 | 1 | 0 | -0.003 | 0 | 0 | 0 | t | 65331 | TNGTSGRT<br>PVL              | Oryctola<br>gus<br>cuniculu<br>s |
| 1 | 1.00 | 1 | 1 | 0 | 0      | 0 | 0 | 0 | t | 66382 | TSQDGNN<br>HQFT              | Mus<br>musculu<br>s              |
| 1 | 1.00 | 1 | 1 | 0 | -0.008 | 0 | 0 | 0 | t | 61516 | STAIHADQ<br>LTPAWRIY         | Mus<br>musculu<br>s              |
| 1 | 1.00 | 1 | 1 | 0 | 0      | 0 | 0 | 0 | t | 72913 | WNTGGSR<br>YPGQGSP<br>GGNRYP | Mus<br>musculu<br>s              |
| 1 | 1.00 | 1 | 1 | 0 | 0      | 0 | 0 | 0 | t | 95004 | DEESSNAA<br>EEWKYVA<br>MVIDH | Rattus<br>norvegic<br>us         |
| 1 | 1.00 | 1 | 1 | 0 | 0      | 0 | 0 | 0 | t | 95842 | SGTSAQSG<br>TSGT             | Homo<br>sapiens                  |
| 1 | 1.00 | 1 | 1 | 0 | 0      | 0 | 0 | 0 | t | 79235 | GRDGYIV                      | Oryctola<br>gus<br>cuniculu<br>s |
| 1 | 1.00 | 1 | 1 | 0 | 0      | 0 | 0 | 0 | t | 72911 | WNSTTFH<br>QTLQDP            | Mus<br>musculu<br>s              |
| 1 | 1.00 | 1 | 1 | 0 | -0.004 | 0 | 0 | 0 | t | 75791 | YSLFQKEK<br>MVL              | Mus<br>musculu<br>s              |
| 1 | 1.00 | 1 | 1 | 0 | 0      | 0 | 0 | 0 | t | 95843 | SGTSGPSG<br>PSGP             | Homo<br>sapiens                  |
| 1 | 1.00 | 1 | 1 | 0 | -0.007 | 0 | 0 | 0 | t | 61945 | STTNKDK                      | Oryctola<br>gus<br>cuniculu<br>s |
| 1 | 1.00 | 1 | 1 | 0 | 0      | 0 | 0 | 0 | t | 97167 | AANYTTAV                     | Mus<br>musculu<br>s              |
| 1 | 1.00 | 1 | 1 | 0 | 0      | 0 | 0 | 0 | t | 95844 | SGTSGPSG<br>PSGT             | Homo<br>sapiens                  |



|   |      |   |   |   |        |   |   |   |   |       |                              |                                  |
|---|------|---|---|---|--------|---|---|---|---|-------|------------------------------|----------------------------------|
| 1 | 1.00 | 1 | 1 | 0 | 0      | 0 | 0 | 0 | t | 79760 | ASSPDAHV<br>PFCF             | Mus<br>musculu<br>s              |
| 1 | 1.00 | 1 | 1 | 0 | 0      | 0 | 0 | 0 | t | 95844 | SGTSGPSG<br>PSGT             | Homo<br>sapiens                  |
| 1 | 1.00 | 1 | 1 | 0 | -0.003 | 0 | 0 | 0 | t | 97920 | AYTPAYYT<br>KN               | Oryctola<br>gus<br>cuniculu<br>s |
| 1 | 1.00 | 1 | 1 | 0 | 0      | 0 | 0 | 0 | t | 63808 | TGDPKPKK<br>NKKPKNPT<br>PPRP | Mus<br>musculu<br>s              |
| 1 | 1.00 | 1 | 1 | 0 | 0      | 0 | 0 | 0 | t | 64587 | TKINADNP<br>VPILELE          | Mus<br>musculu<br>s              |
| 1 | 1.00 | 1 | 1 | 0 | -0.003 | 0 | 0 | 0 | t | 75445 | YPYLKDGK                     | Mus<br>musculu<br>s              |
| 1 | 1.00 | 1 | 1 | 0 | 0      | 0 | 0 | 0 | t | 64587 | TKINADNP<br>VPILELE          | Mus<br>musculu<br>s              |
| 1 | 1.00 | 1 | 1 | 0 | -0.003 | 0 | 0 | 0 | t | 66382 | TSQDGNN<br>HQFT              | Oryctola<br>gus<br>cuniculu<br>s |
| 1 | 1.00 | 1 | 1 | 0 | -0.003 | 0 | 0 | 0 | t | 66382 | TSQDGNN<br>HQFT              | Oryctola<br>gus<br>cuniculu<br>s |
| 1 | 1.00 | 1 | 1 | 0 | 0      | 0 | 0 | 0 | t | 95845 | SGTSGPSG<br>TSGP             | Homo<br>sapiens                  |
| 1 | 1.00 | 1 | 1 | 0 | 0      | 0 | 0 | 0 | t | 79751 | AKLGAAAS<br>SPDA             | Mus<br>musculu<br>s              |
| 1 | 1.00 | 1 | 1 | 0 | 0      | 0 | 0 | 0 | t | 66382 | TSQDGNN<br>HQFT              | Mus<br>musculu<br>s              |

[illegible]

|   |      |   |   |   |        |   |   |   |   |       |                               |                                  |
|---|------|---|---|---|--------|---|---|---|---|-------|-------------------------------|----------------------------------|
| 1 | 1.00 | 1 | 1 | 0 | 0      | 0 | 0 | 0 | t | 64587 | TKINADNP<br>VPILELE           | Mus<br>musculu<br>s              |
| 1 | 1.00 | 1 | 1 | 0 | 0      | 0 | 0 | 0 | t | 66382 | TSQDGNN<br>HQFT               | Mus<br>musculu<br>s              |
| 1 | 1.00 | 1 | 1 | 0 | 0      | 0 | 0 | 0 | t | 79277 | KRDGYIV                       | Oryctola<br>gus<br>cuniculu<br>s |
| 1 | 1.00 | 1 | 1 | 0 | -0.003 | 0 | 0 | 0 | t | 97919 | AYTPAYYT<br>KD                | Oryctola<br>gus<br>cuniculu<br>s |
| 1 | 1.00 | 1 | 1 | 0 | 0      | 0 | 0 | 0 | t | 75128 | YNAVLDP<br>LITALLGT<br>FDTR   | Oryctola<br>gus<br>cuniculu<br>s |
| 1 | 1.00 | 1 | 1 | 0 | 0.002  | 0 | 0 | 0 | t | 66977 | TVDNSAST<br>KNKDKLFT<br>VWK   | Rattus<br>norvegic<br>us         |
| 1 | 1.00 | 1 | 1 | 0 | -0.003 | 0 | 0 | 0 | t | 95034 | PKPAKSP                       | Oryctola<br>gus<br>cuniculu<br>s |
| 1 | 1.00 | 1 | 1 | 0 | 0      | 0 | 0 | 0 | t | 95847 | SGTSGTSG<br>PSGP              | Homo<br>sapiens                  |
| 1 | 1.00 | 1 | 1 | 0 | 0      | 0 | 0 | 0 | t | 95036 | RTCMTTA<br>QGTSMP<br>YSC      | Mus<br>musculu<br>s              |
| 1 | 1.00 | 1 | 1 | 0 | -0.001 | 0 | 0 | 0 | t | 70140 | VNNTLSTD<br>IPFQLSKY<br>VDN   | Homo<br>sapiens                  |
| 1 | 1.00 | 1 | 1 | 0 | 0      | 0 | 0 | 0 | t | 97170 | ADQELGD<br>APFLDRL<br>RDRDQKS | Homo<br>sapiens                  |
| 1 | 1.00 | 1 | 1 | 0 | -0.003 | 0 | 0 | 0 | t | 97671 | SWGPFPP<br>GGGSC              | Oryctola<br>gus<br>cuniculu<br>s |
| 1 | 1.00 | 1 | 1 | 0 | -0.003 | 0 | 0 | 0 | t | 97916 | AVVGKPG<br>SDV                | Oryctola<br>gus<br>cuniculu<br>s |

|   |      |   |   |   |        |   |   |   |   |       |                |                       |
|---|------|---|---|---|--------|---|---|---|---|-------|----------------|-----------------------|
| 1 | 1.00 | 1 | 1 | 0 | -0.003 | 0 | 0 | 0 | t | 75425 | YPVDRSTFW      | Oryctolagus cuniculus |
| 1 | 1.00 | 1 | 1 | 0 | 0      | 0 | 0 | 0 | t | 63132 | TDDKTLDEAEKSPL | Bos taurus            |
| 1 | 1.00 | 1 | 1 | 0 | -0.003 | 0 | 0 | 0 | t | 76616 | YYTKDTNNNL     | Oryctolagus cuniculus |
| 1 | 1.00 | 1 | 1 | 0 | -0.003 | 0 | 0 | 0 | t | 79619 | NHPPKRQPG      | Oryctolagus cuniculus |
| 1 | 1.00 | 1 | 1 | 0 | 0      | 0 | 0 | 0 | t | 79619 | NHPPKRQPG      | Mus musculus          |
| 1 | 1.00 | 1 | 1 | 0 | -0.003 | 0 | 0 | 0 | t | 79619 | NHPPKRQPG      | Oryctolagus cuniculus |
| 1 | 1.00 | 1 | 1 | 0 | -0.003 | 0 | 0 | 0 | t | 79619 | NHPPKRQPG      | Oryctolagus cuniculus |
| 1 | 1.00 | 1 | 1 | 0 | 0      | 0 | 0 | 0 | t | 79619 | NHPPKRQPG      | Mus musculus          |
| 1 | 1.00 | 1 | 1 | 0 | 0      | 0 | 0 | 0 | t | 95041 | SLAGKREMA      | Oryctolagus cuniculus |
| 1 | 1.00 | 1 | 1 | 0 | 0.001  | 0 | 0 | 0 | t | 95042 | SPESDRPD LST   | Oryctolagus cuniculus |
| 1 | 1.00 | 1 | 1 | 0 | 0.003  | 0 | 0 | 0 | t | 95042 | SPESDRPD LST   | Rattus norvegicus     |
| 1 | 1.00 | 1 | 1 | 0 | 0.004  | 0 | 0 | 0 | t | 72805 | WLTEKEGSYP     | Ovis aries            |

|   |      |   |   |   |        |   |   |   |   |       |                              |                          |
|---|------|---|---|---|--------|---|---|---|---|-------|------------------------------|--------------------------|
| 1 | 1.00 | 1 | 1 | 0 | 0.002  | 0 | 0 | 0 | t | 95042 | SPESDRPD<br>LST              | Rattus<br>norvegicus     |
| 1 | 1.00 | 1 | 1 | 0 | 0      | 0 | 0 | 0 | t | 72503 | WGQGG                        | Mus<br>musculus          |
| 1 | 1.00 | 1 | 1 | 0 | -0.004 | 0 | 0 | 0 | t | 64645 | TKPTDPTG<br>IEPDDH           | Oryctolagus<br>cuniculus |
| 1 | 1.00 | 1 | 1 | 0 | -0.015 | 0 | 0 | 0 | t | 67615 | VAGRKKLE<br>ELERDLRK<br>TK   | Marmota<br>monax         |
| 1 | 1.00 | 1 | 1 | 0 | 0      | 0 | 0 | 0 | t | 68801 | VGTEWTP<br>CSVTCGVG<br>VRVRR | Mus<br>musculus          |
| 1 | 1.00 | 1 | 1 | 0 | -0.003 | 0 | 0 | 0 | t | 66382 | TSQDGNN<br>HQFT              | Oryctolagus<br>cuniculus |
| 1 | 1.00 | 1 | 1 | 0 | 0      | 0 | 0 | 0 | t | 79329 | PDHVRTK                      | Oryctolagus<br>cuniculus |
| 1 | 1.00 | 1 | 1 | 0 | 0      | 0 | 0 | 0 | t | 66382 | TSQDGNN<br>HQFT              | Mus<br>musculus          |
| 1 | 1.00 | 1 | 1 | 0 | 0      | 0 | 0 | 0 | t | 61549 | STDEPAGE<br>SA               | Oryctolagus<br>cuniculus |
| 1 | 1.00 | 1 | 1 | 0 | 0      | 0 | 0 | 0 | t | 66382 | TSQDGNN<br>HQFT              | Mus<br>musculus          |
| 1 | 1.00 | 1 | 1 | 0 | 0      | 0 | 0 | 0 | t | 66382 | TSQDGNN<br>HQFT              | Mus<br>musculus          |
| 1 | 1.00 | 1 | 1 | 0 | -0.003 | 0 | 0 | 0 | t | 66382 | TSQDGNN<br>HQFT              | Oryctolagus<br>cuniculus |
| 1 | 1.00 | 1 | 1 | 0 | 0      | 0 | 0 | 0 | t | 66382 | TSQDGNN<br>HQFT              | Mus<br>musculus          |
| 1 | 1.00 | 1 | 1 | 0 | -0.002 | 0 | 0 | 0 | t | 76618 | YYTKDTNN<br>NLTLVPAV<br>VG   | Mus<br>musculus          |

|   |      |   |   |   |        |   |   |   |   |       |                               |                          |
|---|------|---|---|---|--------|---|---|---|---|-------|-------------------------------|--------------------------|
| 1 | 1.00 | 1 | 1 | 0 | 0      | 0 | 0 | 0 | t | 66382 | TSQDGNH<br>HQFT               | Mus<br>musculus          |
| 1 | 1.00 | 1 | 1 | 0 | 0      | 0 | 0 | 0 | t | 39398 | LSGRPAIV<br>PDREVLVYQ<br>EFDE | Mus<br>musculus          |
| 1 | 1.00 | 1 | 1 | 0 | 0      | 0 | 0 | 0 | t | 39398 | LSGRPAIV<br>PDREVLVYQ<br>EFDE | Mus<br>musculus          |
| 1 | 1.00 | 1 | 1 | 0 | 0      | 0 | 0 | 0 | t | 38313 | LNPTIA                        | Mus<br>musculus          |
| 1 | 1.00 | 1 | 1 | 0 | 0      | 0 | 0 | 0 | t | 38313 | LNPTIA                        | Mus<br>musculus          |
| 1 | 1.00 | 1 | 1 | 0 | -0.003 | 0 | 0 | 0 | t | 38313 | LNPTIA                        | Oryctolagus<br>cuniculus |
| 1 | 1.00 | 1 | 1 | 0 | 0      | 0 | 0 | 0 | t | 43242 | NANPNAN<br>PNANP              | Homo<br>sapiens          |
| 1 | 1.00 | 1 | 1 | 0 | 0      | 0 | 0 | 0 | t | 53998 | RGTLLIGQV<br>DRLKDKV<br>NNTL  | Mus<br>musculus          |
| 1 | 1.00 | 1 | 1 | 0 | 0.002  | 0 | 0 | 0 | t | 59797 | SNAYSHFY<br>DGFSKVPL<br>KDQS  | Rattus<br>norvegicus     |
| 1 | 1.00 | 1 | 1 | 0 | 0      | 0 | 0 | 0 | t | 43242 | NANPNAN<br>PNANP              | Mus<br>musculus          |
| 1 | 1.00 | 1 | 1 | 0 | 0      | 0 | 0 | 0 | t | 38313 | LNPTIA                        | Mus<br>musculus          |
| 1 | 1.00 | 1 | 1 | 0 | 0      | 0 | 0 | 0 | t | 38313 | LNPTIA                        | Mus<br>musculus          |
| 1 | 1.00 | 1 | 1 | 0 | -0.003 | 0 | 0 | 0 | t | 38313 | LNPTIA                        | Oryctolagus<br>cuniculus |

|   |      |   |   |   |        |   |   |   |   |       |                              |                                  |
|---|------|---|---|---|--------|---|---|---|---|-------|------------------------------|----------------------------------|
| 1 | 1.00 | 1 | 1 | 0 | 0      | 0 | 0 | 0 | t | 38313 | LNPTIA                       | Mus<br>musculu<br>s              |
| 1 | 1.00 | 1 | 1 | 0 | 0      | 0 | 0 | 0 | t | 43242 | NANPNAN<br>PNANP             | Mus<br>musculu<br>s              |
| 1 | 1.00 | 1 | 1 | 0 | 0.002  | 0 | 0 | 0 | t | 59797 | SNAYSHFY<br>DGFSKVPL<br>KDQS | Rattus<br>norvegic<br>us         |
| 1 | 1.00 | 1 | 1 | 0 | 0      | 0 | 0 | 0 | t | 39399 | LSGRPAIV<br>PDREVLRY<br>EFDE | Homo<br>sapiens                  |
| 1 | 1.00 | 1 | 1 | 0 | 0      | 0 | 0 | 0 | t | 43242 | NANPNAN<br>PNANP             | Mus<br>musculu<br>s              |
| 1 | 1.00 | 1 | 1 | 0 | 0      | 0 | 0 | 0 | t | 43242 | NANPNAN<br>PNANP             | Mus<br>musculu<br>s              |
| 1 | 1.00 | 1 | 1 | 0 | 0      | 0 | 0 | 0 | t | 49450 | PSNQDSF<br>QWQ               | Mus<br>musculu<br>s              |
| 1 | 1.00 | 1 | 1 | 0 | 0      | 0 | 0 | 0 | t | 43242 | NANPNAN<br>PNANP             | Mus<br>musculu<br>s              |
| 1 | 1.00 | 1 | 1 | 0 | 0      | 0 | 0 | 0 | t | 49450 | PSNQDSF<br>QWQ               | Mus<br>musculu<br>s              |
| 1 | 1.00 | 1 | 1 | 0 | -0.002 | 0 | 0 | 0 | t | 53998 | RGTIGQV<br>DRLKDKV<br>NNTL   | Mus<br>musculu<br>s              |
| 1 | 1.00 | 1 | 1 | 0 | 0      | 0 | 0 | 0 | t | 43242 | NANPNAN<br>PNANP             | Mus<br>musculu<br>s              |
| 1 | 1.00 | 1 | 1 | 0 | 0      | 0 | 0 | 0 | t | 43242 | NANPNAN<br>PNANP             | Mus<br>musculu<br>s              |
| 1 | 1.00 | 1 | 1 | 0 | -0.003 | 0 | 0 | 0 | t | 51799 | QPDLIPL                      | Oryctola<br>gus<br>cuniculu<br>s |

|   |      |   |   |   |        |   |   |   |   |       |                             |                                  |
|---|------|---|---|---|--------|---|---|---|---|-------|-----------------------------|----------------------------------|
| 1 | 1.00 | 1 | 1 | 0 | -0.002 | 0 | 0 | 0 | t | 53998 | RGTLLGQV<br>DRLKDKV<br>NNTL | Mus<br>musculu<br>s              |
| 1 | 1.00 | 1 | 1 | 0 | 0      | 0 | 0 | 0 | t | 43242 | NANPNAN<br>PNANP            | Mus<br>musculu<br>s              |
| 1 | 1.00 | 1 | 1 | 0 | 0      | 0 | 0 | 0 | t | 43242 | NANPNAN<br>PNANP            | Mus<br>musculu<br>s              |
| 1 | 1.00 | 1 | 1 | 0 | 0      | 0 | 0 | 0 | t | 53998 | RGTLLGQV<br>DRLKDKV<br>NNTL | Mus<br>musculu<br>s              |
| 1 | 1.00 | 1 | 1 | 0 | 0      | 0 | 0 | 0 | t | 54103 | RHVKNYH<br>SRSESTIE         | Mus<br>musculu<br>s              |
| 1 | 1.00 | 1 | 1 | 0 | 0      | 0 | 0 | 0 | t | 47839 | PHKAAVD<br>VGPLSVGP<br>QS   | Mus<br>musculu<br>s              |
| 1 | 1.00 | 1 | 1 | 0 | 0      | 0 | 0 | 0 | t | 43242 | NANPNAN<br>PNANP            | Mus<br>musculu<br>s              |
| 1 | 1.00 | 1 | 1 | 0 | 0      | 0 | 0 | 0 | t | 43242 | NANPNAN<br>PNANP            | Mus<br>musculu<br>s              |
| 1 | 1.00 | 1 | 1 | 0 | 0      | 0 | 0 | 0 | t | 43242 | NANPNAN<br>PNANP            | Mus<br>musculu<br>s              |
| 1 | 1.00 | 1 | 1 | 0 | -0.003 | 0 | 0 | 0 | t | 42251 | MNYLLFCL<br>FFAF            | Oryctola<br>gus<br>cuniculu<br>s |
| 1 | 1.00 | 1 | 1 | 0 | -0.003 | 0 | 0 | 0 | t | 53342 | RDFSIRES                    | Mus<br>musculu<br>s              |
| 1 | 1.00 | 1 | 1 | 0 | 0.011  | 0 | 0 | 0 | t | 45316 | NPKD                        | Oryctola<br>gus<br>cuniculu<br>s |



|   |      |   |   |   |        |   |   |   |   |       |                              |                                  |
|---|------|---|---|---|--------|---|---|---|---|-------|------------------------------|----------------------------------|
| 1 | 1.00 | 1 | 1 | 0 | 0      | 0 | 0 | 0 | t | 43242 | NANPNAN<br>PNANP             | Mus<br>musculu<br>s              |
| 1 | 1.00 | 1 | 1 | 0 | 0      | 0 | 0 | 0 | t | 43242 | NANPNAN<br>PNANP             | Mus<br>musculu<br>s              |
| 1 | 1.00 | 1 | 1 | 0 | 0      | 0 | 0 | 0 | t | 43242 | NANPNAN<br>PNANP             | Mus<br>musculu<br>s              |
| 1 | 1.00 | 1 | 1 | 0 | 0.005  | 0 | 0 | 0 | t | 42227 | MNPHNTV<br>FDAKRLIG<br>RKFND | Homo<br>sapiens                  |
| 1 | 1.00 | 1 | 1 | 0 | 0      | 0 | 0 | 0 | t | 43242 | NANPNAN<br>PNANP             | Mus<br>musculu<br>s              |
| 1 | 1.00 | 1 | 1 | 0 | -0.003 | 0 | 0 | 0 | t | 47257 | PEDPEDSA<br>LLEDVPG          | Oryctola<br>gus<br>cuniculu<br>s |
| 1 | 1.00 | 1 | 1 | 0 | 0      | 0 | 0 | 0 | t | 43242 | NANPNAN<br>PNANP             | Mus<br>musculu<br>s              |
| 1 | 1.00 | 1 | 1 | 0 | 0      | 0 | 0 | 0 | t | 43242 | NANPNAN<br>PNANP             | Mus<br>musculu<br>s              |
| 1 | 1.00 | 1 | 1 | 0 | -0.004 | 0 | 0 | 0 | t | 56949 | SAQEDLG<br>DDTGIHVI<br>PTLNG | Mus<br>musculu<br>s              |
| 1 | 1.00 | 1 | 1 | 0 | 0      | 0 | 0 | 0 | t | 42196 | MNDIQIKT<br>ITIYI            | Homo<br>sapiens                  |
| 1 | 1.00 | 1 | 1 | 0 | 0      | 0 | 0 | 0 | t | 39329 | LSEIKGVIV<br>HRLEGV          | Mus<br>musculu<br>s              |
| 1 | 1.00 | 1 | 1 | 0 | -0.006 | 0 | 0 | 0 | t | 46081 | NTECTLKK<br>GSSGYCA          | Oryctola<br>gus<br>cuniculu<br>s |
| 1 | 1.00 | 1 | 1 | 0 | 0.006  | 0 | 0 | 0 | t | 46081 | NTECTLKK<br>GSSGYCA          | Ovis<br>aries                    |

|   |      |   |   |   |        |   |   |   |   |       |                              |                                  |
|---|------|---|---|---|--------|---|---|---|---|-------|------------------------------|----------------------------------|
| 1 | 1.00 | 1 | 1 | 0 | 0      | 0 | 0 | 0 | t | 54058 | RHKQKIVA<br>PVKQTL           | Cavia<br>porcellu<br>s           |
| 1 | 1.00 | 1 | 1 | 0 | -0.003 | 0 | 0 | 0 | t | 56022 | RTCAHPGE<br>H                | Oryctola<br>gus<br>cuniculu<br>s |
| 1 | 1.00 | 1 | 1 | 0 | -0.002 | 0 | 0 | 0 | t | 45130 | NNIMFKLD<br>GCRDTHR<br>YIWI  | Mus<br>musculu<br>s              |
| 1 | 1.00 | 1 | 1 | 0 | 0.008  | 0 | 0 | 0 | t | 47233 | PEADTDPL                     | Cavia<br>porcellu<br>s           |
| 1 | 1.00 | 1 | 1 | 0 | 0      | 0 | 0 | 0 | t | 43242 | NANPNAN<br>PNANP             | Mus<br>musculu<br>s              |
| 1 | 1.00 | 1 | 1 | 0 | 0      | 0 | 0 | 0 | t | 43242 | NANPNAN<br>PNANP             | Mus<br>musculu<br>s              |
| 1 | 1.00 | 1 | 1 | 0 | 0      | 0 | 0 | 0 | t | 45130 | NNIMFKLD<br>GCRDTHR<br>YIWI  | Mus<br>musculu<br>s              |
| 1 | 1.00 | 1 | 1 | 0 | 0      | 0 | 0 | 0 | t | 45130 | NNIMFKLD<br>GCRDTHR<br>YIWI  | Mus<br>musculu<br>s              |
| 1 | 1.00 | 1 | 1 | 0 | 0      | 0 | 0 | 0 | t | 45130 | NNIMFKLD<br>GCRDTHR<br>YIWI  | Mus<br>musculu<br>s              |
| 1 | 1.00 | 1 | 1 | 0 | 0      | 0 | 0 | 0 | t | 43242 | NANPNAN<br>PNANP             | Oryctola<br>gus<br>cuniculu<br>s |
| 1 | 1.00 | 1 | 1 | 0 | -0.003 | 0 | 0 | 0 | t | 56962 | SARDGIRD<br>AMIGLREE<br>MIEK | Oryctola<br>gus<br>cuniculu<br>s |
| 1 | 1.00 | 1 | 1 | 0 | 0      | 0 | 0 | 0 | t | 43242 | NANPNAN<br>PNANP             | Mus<br>musculu<br>s              |

|   |      |   |   |   |       |   |   |   |   |       |                              |                     |
|---|------|---|---|---|-------|---|---|---|---|-------|------------------------------|---------------------|
| 1 | 1.00 | 1 | 1 | 0 | 0     | 0 | 0 | 0 | t | 43242 | NANPNAN<br>PNANP             | Mus<br>musculu<br>s |
| 1 | 1.00 | 1 | 1 | 0 | 0     | 0 | 0 | 0 | t | 43242 | NANPNAN<br>PNANP             | Mus<br>musculu<br>s |
| 1 | 1.00 | 1 | 1 | 0 | 0     | 0 | 0 | 0 | t | 43242 | NANPNAN<br>PNANP             | Mus<br>musculu<br>s |
| 1 | 1.00 | 1 | 1 | 0 | 0     | 0 | 0 | 0 | t | 50508 | QDPRVRG<br>LYFPAGG           | Mus<br>musculu<br>s |
| 1 | 1.00 | 1 | 1 | 0 | 0     | 0 | 0 | 0 | t | 42074 | MLTESTFK<br>NLSVTFKF<br>GEEF | Mus<br>musculu<br>s |
| 1 | 1.00 | 1 | 1 | 0 | 0     | 0 | 0 | 0 | t | 42074 | MLTESTFK<br>NLSVTFKF<br>GEEF | Mus<br>musculu<br>s |
| 1 | 1.00 | 1 | 1 | 0 | 0     | 0 | 0 | 0 | t | 43242 | NANPNAN<br>PNANP             | Mus<br>musculu<br>s |
| 1 | 1.00 | 1 | 1 | 0 | 0     | 0 | 0 | 0 | t | 50508 | QDPRVRG<br>LYFPAGG           | Mus<br>musculu<br>s |
| 1 | 1.00 | 1 | 1 | 0 | 0     | 0 | 0 | 0 | t | 42074 | MLTESTFK<br>NLSVTFKF<br>GEEF | Mus<br>musculu<br>s |
| 1 | 1.00 | 1 | 1 | 0 | 0     | 0 | 0 | 0 | t | 43242 | NANPNAN<br>PNANP             | Mus<br>musculu<br>s |
| 1 | 1.00 | 1 | 1 | 0 | 0     | 0 | 0 | 0 | t | 43242 | NANPNAN<br>PNANP             | Mus<br>musculu<br>s |
| 1 | 1.00 | 1 | 1 | 0 | 0.004 | 0 | 0 | 0 | t | 42475 | MRKTKLA<br>PTVAHG<br>V F     | Mus<br>musculu<br>s |
| 1 | 1.00 | 1 | 1 | 0 | 0     | 0 | 0 | 0 | t | 43242 | NANPNAN<br>PNANP             | Mus<br>musculu<br>s |

|   |      |   |   |   |        |   |   |   |   |       |                             |                       |
|---|------|---|---|---|--------|---|---|---|---|-------|-----------------------------|-----------------------|
| 1 | 1.00 | 1 | 1 | 0 | 0      | 0 | 0 | 0 | t | 47229 | PDYASLR                     | Mus musculus          |
| 1 | 1.00 | 1 | 1 | 0 | 0      | 0 | 0 | 0 | t | 47229 | PDYASLR                     | Mus musculus          |
| 1 | 1.00 | 1 | 1 | 0 | 0      | 0 | 0 | 0 | t | 47229 | PDYASLR                     | Mus musculus          |
| 1 | 1.00 | 1 | 1 | 0 | 0.004  | 0 | 0 | 0 | t | 42475 | MRKTKLA<br>PTVAHGV<br>F     | Mus musculus          |
| 1 | 1.00 | 1 | 1 | 0 | -0.003 | 0 | 0 | 0 | t | 51775 | QNTRNIVP<br>VSIVSR          | Oryctolagus cuniculus |
| 1 | 1.00 | 1 | 1 | 0 | -0.003 | 0 | 0 | 0 | t | 51775 | QNTRNIVP<br>VSIVSR          | Oryctolagus cuniculus |
| 1 | 1.00 | 1 | 1 | 0 | -0.003 | 0 | 0 | 0 | t | 51775 | QNTRNIVP<br>VSIVSR          | Oryctolagus cuniculus |
| 1 | 1.00 | 1 | 1 | 0 | 0      | 0 | 0 | 0 | t | 43242 | NANPNAN<br>PNANP            | Homo sapiens          |
| 1 | 1.00 | 1 | 1 | 0 | 0      | 0 | 0 | 0 | t | 45130 | NNIMFKLD<br>GCRDTHR<br>YIWI | Mus musculus          |
| 1 | 1.00 | 1 | 1 | 0 | 0      | 0 | 0 | 0 | t | 48819 | PPLGNWF<br>G                | Rattus norvegicus     |
| 1 | 1.00 | 1 | 1 | 0 | 0      | 0 | 0 | 0 | t | 43242 | NANPNAN<br>PNANP            | Homo sapiens          |
| 1 | 1.00 | 1 | 1 | 0 | -0.002 | 0 | 0 | 0 | t | 43242 | NANPNAN<br>PNANP            | Homo sapiens          |
| 1 | 1.00 | 1 | 1 | 0 | 0      | 0 | 0 | 0 | t | 43242 | NANPNAN<br>PNANP            | Homo sapiens          |

|   |      |   |   |   |        |   |   |   |   |       |                             |                                  |
|---|------|---|---|---|--------|---|---|---|---|-------|-----------------------------|----------------------------------|
| 1 | 1.00 | 1 | 1 | 0 | 0      | 0 | 0 | 0 | t | 53998 | RGTLLGQV<br>DRLKDKV<br>NNTL | Mus<br>musculu<br>s              |
| 1 | 1.00 | 1 | 1 | 0 | 0      | 0 | 0 | 0 | t | 50508 | QDPRVRG<br>LYFPAGG          | Mus<br>musculu<br>s              |
| 1 | 1.00 | 1 | 1 | 0 | 0      | 0 | 0 | 0 | t | 39329 | LSEIKGVIV<br>HRLEGV         | Mus<br>musculu<br>s              |
| 1 | 1.00 | 1 | 1 | 0 | 0      | 0 | 0 | 0 | t | 46094 | NTFYCCEL<br>CCNPACA<br>GCY  | Oryctola<br>gus<br>cuniculu<br>s |
| 1 | 1.00 | 1 | 1 | 0 | 0      | 0 | 0 | 0 | t | 43242 | NANPNAN<br>PNANP            | Mus<br>musculu<br>s              |
| 1 | 1.00 | 1 | 1 | 0 | 0      | 0 | 0 | 0 | t | 43242 | NANPNAN<br>PNANP            | Mus<br>musculu<br>s              |
| 1 | 1.00 | 1 | 1 | 0 | 0      | 0 | 0 | 0 | t | 43242 | NANPNAN<br>PNANP            | Mus<br>musculu<br>s              |
| 1 | 1.00 | 1 | 1 | 0 | 0      | 0 | 0 | 0 | t | 42008 | MLMRTDP<br>FRELDRA<br>EQVLG | Mus<br>musculu<br>s              |
| 1 | 1.00 | 1 | 1 | 0 | 0      | 0 | 0 | 0 | t | 42008 | MLMRTDP<br>FRELDRA<br>EQVLG | Mus<br>musculu<br>s              |
| 1 | 1.00 | 1 | 1 | 0 | 0      | 0 | 0 | 0 | t | 42008 | MLMRTDP<br>FRELDRA<br>EQVLG | Mus<br>musculu<br>s              |
| 1 | 1.00 | 1 | 1 | 0 | 0      | 0 | 0 | 0 | t | 43242 | NANPNAN<br>PNANP            | Mus<br>musculu<br>s              |
| 1 | 1.00 | 1 | 1 | 0 | -0.002 | 0 | 0 | 0 | t | 43242 | NANPNAN<br>PNANP            | Homo<br>sapiens                  |
| 1 | 1.00 | 1 | 1 | 0 | 0      | 0 | 0 | 0 | t | 60024 | SPDVDLG<br>DISGINAS         | Mus<br>musculu<br>s              |
| 1 | 1.00 | 1 | 1 | 0 | 0      | 0 | 0 | 0 | t | 60024 | SPDVDLG<br>DISGINAS         | Mus<br>musculu<br>s              |

|   |      |   |   |   |        |   |   |   |   |       |                             |                                  |
|---|------|---|---|---|--------|---|---|---|---|-------|-----------------------------|----------------------------------|
| 1 | 1.00 | 1 | 1 | 0 | 0      | 0 | 0 | 0 | t | 45130 | NNIMFKLD<br>GCRDTHR<br>YIWI | Mus<br>musculu<br>s              |
| 1 | 1.00 | 1 | 1 | 0 | 0      | 0 | 0 | 0 | t | 50508 | QDPRVRG<br>LYFPAGG          | Mus<br>musculu<br>s              |
| 1 | 1.00 | 1 | 1 | 0 | 0      | 0 | 0 | 0 | t | 45130 | NNIMFKLD<br>GCRDTHR<br>YIWI | Mus<br>musculu<br>s              |
| 1 | 1.00 | 1 | 1 | 0 | 0      | 0 | 0 | 0 | t | 43242 | NANPNAN<br>PNANP            | Mus<br>musculu<br>s              |
| 1 | 1.00 | 1 | 1 | 0 | 0      | 0 | 0 | 0 | t | 43242 | NANPNAN<br>PNANP            | Mus<br>musculu<br>s              |
| 1 | 1.00 | 1 | 1 | 0 | 0      | 0 | 0 | 0 | t | 52274 | QRVVFKYS<br>QMINSIDY<br>INR | Mus<br>musculu<br>s              |
| 1 | 1.00 | 1 | 1 | 0 | 0      | 0 | 0 | 0 | t | 52274 | QRVVFKYS<br>QMINSIDY<br>INR | Mus<br>musculu<br>s              |
| 1 | 1.00 | 1 | 1 | 0 | 0      | 0 | 0 | 0 | t | 51772 | QNTEEME<br>NLSDRVAS         | Mus<br>musculu<br>s              |
| 1 | 1.00 | 1 | 1 | 0 | 0      | 0 | 0 | 0 | t | 45130 | NNIMFKLD<br>GCRDTHR<br>YIWI | Mus<br>musculu<br>s              |
| 1 | 1.00 | 1 | 1 | 0 | 0      | 0 | 0 | 0 | t | 45130 | NNIMFKLD<br>GCRDTHR<br>YIWI | Mus<br>musculu<br>s              |
| 1 | 1.00 | 1 | 1 | 0 | 0      | 0 | 0 | 0 | t | 46094 | NTFYCCCL<br>CCNPACA<br>GCY  | Oryctola<br>gus<br>cuniculu<br>s |
| 1 | 1.00 | 1 | 1 | 0 | -0.008 | 0 | 0 | 0 | t | 52274 | QRVVFKYS<br>QMINSIDY<br>INR | Mus<br>musculu<br>s              |

|   |      |   |   |   |        |   |   |   |   |       |                             |                                  |
|---|------|---|---|---|--------|---|---|---|---|-------|-----------------------------|----------------------------------|
| 1 | 1.00 | 1 | 1 | 0 | -0.003 | 0 | 0 | 0 | t | 52274 | QRVVFKYS<br>QMINISDY<br>INR | Mus<br>musculu<br>s              |
| 1 | 1.00 | 1 | 1 | 0 | -0.002 | 0 | 0 | 0 | t | 52274 | QRVVFKYS<br>QMINISDY<br>INR | Mus<br>musculu<br>s              |
| 1 | 1.00 | 1 | 1 | 0 | 0      | 0 | 0 | 0 | t | 52274 | QRVVFKYS<br>QMINISDY<br>INR | Mus<br>musculu<br>s              |
| 1 | 1.00 | 1 | 1 | 0 | -0.003 | 0 | 0 | 0 | t | 58582 | SIKEDVQF                    | Oryctola<br>gus<br>cuniculu<br>s |
| 1 | 1.00 | 1 | 1 | 0 | -0.003 | 0 | 0 | 0 | t | 58582 | SIKEDVQF                    | Oryctola<br>gus<br>cuniculu<br>s |
| 1 | 1.00 | 1 | 1 | 0 | 0      | 0 | 0 | 0 | t | 52274 | QRVVFKYS<br>QMINISDY<br>INR | Mus<br>musculu<br>s              |
| 1 | 1.00 | 1 | 1 | 0 | 0      | 0 | 0 | 0 | t | 52274 | QRVVFKYS<br>QMINISDY<br>INR | Mus<br>musculu<br>s              |
| 1 | 1.00 | 1 | 1 | 0 | 0      | 0 | 0 | 0 | t | 52274 | QRVVFKYS<br>QMINISDY<br>INR | Mus<br>musculu<br>s              |
| 1 | 1.00 | 1 | 1 | 0 | 0      | 0 | 0 | 0 | t | 52274 | QRVVFKYS<br>QMINISDY<br>INR | Mus<br>musculu<br>s              |
| 1 | 1.00 | 1 | 1 | 0 | -0.002 | 0 | 0 | 0 | t | 52274 | QRVVFKYS<br>QMINISDY<br>INR | Mus<br>musculu<br>s              |
| 1 | 1.00 | 1 | 1 | 0 | 0      | 0 | 0 | 0 | t | 52274 | QRVVFKYS<br>QMINISDY<br>INR | Mus<br>musculu<br>s              |
| 1 | 1.00 | 1 | 1 | 0 | 0      | 0 | 0 | 0 | t | 52274 | QRVVFKYS<br>QMINISDY<br>INR | Mus<br>musculu<br>s              |

|   |      |   |   |   |        |   |   |   |   |       |                              |                     |
|---|------|---|---|---|--------|---|---|---|---|-------|------------------------------|---------------------|
| 1 | 1.00 | 1 | 1 | 0 | 0      | 0 | 0 | 0 | t | 51771 | QNTEEME<br>NLSDRV            | Mus<br>musculu<br>s |
| 1 | 1.00 | 1 | 1 | 0 | 0      | 0 | 0 | 0 | t | 51771 | QNTEEME<br>NLSDRV            | Mus<br>musculu<br>s |
| 1 | 1.00 | 1 | 1 | 0 | 0      | 0 | 0 | 0 | t | 51771 | QNTEEME<br>NLSDRV            | Mus<br>musculu<br>s |
| 1 | 1.00 | 1 | 1 | 0 | -0.007 | 0 | 0 | 0 | t | 45130 | NNIMFKLD<br>GCRDTHR<br>YIWI  | Homo<br>sapiens     |
| 1 | 1.00 | 1 | 1 | 0 | 0.004  | 0 | 0 | 0 | t | 47890 | PIELQVECF<br>TWDQKL          | Mus<br>musculu<br>s |
| 1 | 1.00 | 1 | 1 | 0 | 0      | 0 | 0 | 0 | t | 52274 | QRVVFKEYS<br>QMINISDY<br>INR | Mus<br>musculu<br>s |
| 1 | 1.00 | 1 | 1 | 0 | 0      | 0 | 0 | 0 | t | 52274 | QRVVFKEYS<br>QMINISDY<br>INR | Mus<br>musculu<br>s |
| 1 | 1.00 | 1 | 1 | 0 | 0.005  | 0 | 0 | 0 | t | 52274 | QRVVFKEYS<br>QMINISDY<br>INR | Gallus<br>gallus    |
| 1 | 1.00 | 1 | 1 | 0 | 0      | 0 | 0 | 0 | t | 45130 | NNIMFKLD<br>GCRDTHR<br>YIWI  | Mus<br>musculu<br>s |
| 1 | 1.00 | 1 | 1 | 0 | 0      | 0 | 0 | 0 | t | 45130 | NNIMFKLD<br>GCRDTHR<br>YIWI  | Mus<br>musculu<br>s |
| 1 | 1.00 | 1 | 1 | 0 | 0      | 0 | 0 | 0 | t | 39329 | LSEIKGVIV<br>HRLEGV          | Mus<br>musculu<br>s |
| 1 | 1.00 | 1 | 1 | 0 | 0      | 0 | 0 | 0 | t | 58560 | SIINFEKL                     | Mus<br>musculu<br>s |



|   |      |   |   |   |        |   |   |   |   |       |                              |                                  |
|---|------|---|---|---|--------|---|---|---|---|-------|------------------------------|----------------------------------|
| 1 | 1.00 | 1 | 1 | 0 | 0      | 0 | 0 | 0 | t | 41869 | MKNQTFH<br>LQGFVDGL          | Mus<br>musculu<br>s              |
| 1 | 1.00 | 1 | 1 | 0 | -0.001 | 0 | 0 | 0 | t | 45130 | NNIMFKLD<br>GCRDTHR<br>YIWI  | Homo<br>sapiens                  |
| 1 | 1.00 | 1 | 1 | 0 | 0.003  | 0 | 0 | 0 | t | 46094 | NTFYCCEL<br>CCNPACA<br>GCY   | Sus<br>scrofa                    |
| 1 | 1.00 | 1 | 1 | 0 | -0.005 | 0 | 0 | 0 | t | 46094 | NTFYCCEL<br>CCNPACA<br>GCY   | Bos<br>taurus                    |
| 1 | 1.00 | 1 | 1 | 0 | 0      | 0 | 0 | 0 | t | 50929 | QGPGAP                       | Mus<br>musculu<br>s              |
| 1 | 1.00 | 1 | 1 | 0 | 0      | 0 | 0 | 0 | t | 38314 | LNPTIAGA<br>GDV              | Oryctola<br>gus<br>cuniculu<br>s |
| 1 | 1.00 | 1 | 1 | 0 | -0.002 | 0 | 0 | 0 | t | 52274 | QRVVFKEYS<br>QMINISDY<br>INR | Mus<br>musculu<br>s              |
| 1 | 1.00 | 1 | 1 | 0 | 0      | 0 | 0 | 0 | t | 52274 | QRVVFKEYS<br>QMINISDY<br>INR | Mus<br>musculu<br>s              |
| 1 | 1.00 | 1 | 1 | 0 | 0      | 0 | 0 | 0 | t | 50929 | QGPGAP                       | Mus<br>musculu<br>s              |
| 1 | 1.00 | 1 | 1 | 0 | 0      | 0 | 0 | 0 | t | 52274 | QRVVFKEYS<br>QMINISDY<br>INR | Mus<br>musculu<br>s              |
| 1 | 1.00 | 1 | 1 | 0 | -0.002 | 0 | 0 | 0 | t | 57062 | SAYTPAYY<br>TKDTNNN<br>LTL   | Mus<br>musculu<br>s              |
| 1 | 1.00 | 1 | 1 | 0 | -0.001 | 0 | 0 | 0 | t | 52274 | QRVVFKEYS<br>QMINISDY<br>INR | Homo<br>sapiens                  |
| 1 | 1.00 | 1 | 1 | 0 | -0.007 | 0 | 0 | 0 | t | 52274 | QRVVFKEYS<br>QMINISDY<br>INR | Homo<br>sapiens                  |

|   |      |   |   |   |        |   |   |   |   |       |                              |                                  |
|---|------|---|---|---|--------|---|---|---|---|-------|------------------------------|----------------------------------|
| 1 | 1.00 | 1 | 1 | 0 | -0.008 | 0 | 0 | 0 | t | 52274 | QRVVFKEYS<br>QMINISDY<br>INR | Mus<br>musculu<br>s              |
| 1 | 1.00 | 1 | 1 | 0 | 0      | 0 | 0 | 0 | t | 43242 | NANPNAN<br>PNANP             | Mus<br>musculu<br>s              |
| 1 | 1.00 | 1 | 1 | 0 | 0      | 0 | 0 | 0 | t | 43242 | NANPNAN<br>PNANP             | Mus<br>musculu<br>s              |
| 1 | 1.00 | 1 | 1 | 0 | 0      | 0 | 0 | 0 | t | 43242 | NANPNAN<br>PNANP             | Mus<br>musculu<br>s              |
| 1 | 1.00 | 1 | 1 | 0 | 0      | 0 | 0 | 0 | t | 43242 | NANPNAN<br>PNANP             | Mus<br>musculu<br>s              |
| 1 | 1.00 | 1 | 1 | 0 | 0      | 0 | 0 | 0 | t | 41866 | MKNNPIYS<br>EGSL             | Equus<br>caballus                |
| 1 | 1.00 | 1 | 1 | 0 | 0      | 0 | 0 | 0 | t | 41866 | MKNNPIYS<br>EGSL             | Equus<br>caballus                |
| 1 | 1.00 | 1 | 1 | 0 | -0.003 | 0 | 0 | 0 | t | 37760 | LLRTQFF                      | Oryctola<br>gus<br>cuniculu<br>s |
| 1 | 1.00 | 1 | 1 | 0 | 0.001  | 0 | 0 | 0 | t | 46094 | NTFYCCEL<br>CCNPACA<br>GCY   | Oryctola<br>gus<br>cuniculu<br>s |
| 1 | 1.00 | 1 | 1 | 0 | 0.003  | 0 | 0 | 0 | t | 46094 | NTFYCCEL<br>CCNPACA<br>GCY   | Sus<br>scrofa                    |
| 1 | 1.00 | 1 | 1 | 0 | 0.005  | 0 | 0 | 0 | t | 55987 | RSVHDVVL<br>VGGSTRIP<br>KVQS | Homo<br>sapiens                  |
| 1 | 1.00 | 1 | 1 | 0 | 0      | 0 | 0 | 0 | t | 45130 | NNIMFKLD<br>GCRDTHR<br>YIWI  | Mus<br>musculu<br>s              |
| 1 | 1.00 | 1 | 1 | 0 | 0      | 0 | 0 | 0 | t | 43242 | NANPNAN<br>PNANP             | Mus<br>musculu<br>s              |

|   |      |   |   |   |        |   |   |   |   |       |                             |                                  |
|---|------|---|---|---|--------|---|---|---|---|-------|-----------------------------|----------------------------------|
| 1 | 1.00 | 1 | 1 | 0 | 0      | 0 | 0 | 0 | t | 43242 | NANPNAN<br>PNANP            | Mus<br>musculu<br>s              |
| 1 | 1.00 | 1 | 1 | 0 | 0.005  | 0 | 0 | 0 | t | 45130 | NNIMFKLD<br>GCRDTHR<br>YIWI | Gallus<br>gallus                 |
| 1 | 1.00 | 1 | 1 | 0 | 0      | 0 | 0 | 0 | t | 45130 | NNIMFKLD<br>GCRDTHR<br>YIWI | Mus<br>musculu<br>s              |
| 1 | 1.00 | 1 | 1 | 0 | 0      | 0 | 0 | 0 | t | 39597 | LSQDEIDR<br>MVNDAEK<br>Y    | Mus<br>musculu<br>s              |
| 1 | 1.00 | 1 | 1 | 0 | -0.003 | 0 | 0 | 0 | t | 47358 | PELVPEDP<br>EDSALL          | Oryctola<br>gus<br>cuniculu<br>s |
| 1 | 1.00 | 1 | 1 | 0 | -0.003 | 0 | 0 | 0 | t | 57120 | SCNATQY<br>NQLST            | Oryctola<br>gus<br>cuniculu<br>s |
| 1 | 1.00 | 1 | 1 | 0 | 0      | 0 | 0 | 0 | t | 43242 | NANPNAN<br>PNANP            | Mus<br>musculu<br>s              |
| 1 | 1.00 | 1 | 1 | 0 | 0      | 0 | 0 | 0 | t | 43242 | NANPNAN<br>PNANP            | Mus<br>musculu<br>s              |
| 1 | 1.00 | 1 | 1 | 0 | 0      | 0 | 0 | 0 | t | 47212 | PDTRPA                      | Mus<br>musculu<br>s              |
| 1 | 1.00 | 1 | 1 | 0 | 0      | 0 | 0 | 0 | t | 43242 | NANPNAN<br>PNANP            | Mus<br>musculu<br>s              |
| 1 | 1.00 | 1 | 1 | 0 | 0      | 0 | 0 | 0 | t | 43242 | NANPNAN<br>PNANP            | Mus<br>musculu<br>s              |
| 1 | 1.00 | 1 | 1 | 0 | -0.007 | 0 | 0 | 0 | t | 60415 | SQDRHKQ<br>KIIAPAKQL<br>L   | Oryctola<br>gus<br>cuniculu<br>s |

|   |      |   |   |   |        |   |   |   |   |       |                             |                                |
|---|------|---|---|---|--------|---|---|---|---|-------|-----------------------------|--------------------------------|
| 1 | 1.00 | 1 | 1 | 0 | -0.003 | 0 | 0 | 0 | t | 39597 | LSQDEIDR<br>MVNDAEK<br>Y    | Saimiri<br>sciureus            |
| 1 | 1.00 | 1 | 1 | 0 | -0.003 | 0 | 0 | 0 | t | 39597 | LSQDEIDR<br>MVNDAEK<br>Y    | Saimiri<br>sciureus            |
| 1 | 1.00 | 1 | 1 | 0 | 0      | 0 | 0 | 0 | t | 50202 | QAAAAVP<br>ATKWKA<br>YCGYY  | Oryctola<br>gus<br>cunicu<br>s |
| 1 | 1.00 | 1 | 1 | 0 | 0      | 0 | 0 | 0 | t | 48912 | PPSDIKGK<br>YVKEVEVK        | Oryctola<br>gus<br>cunicu<br>s |
| 1 | 1.00 | 1 | 1 | 0 | -0.003 | 0 | 0 | 0 | t | 58522 | SIGMLPRFI<br>PENQRTV<br>A   | Oryctola<br>gus<br>cunicu<br>s |
| 1 | 1.00 | 1 | 1 | 0 | -0.002 | 0 | 0 | 0 | t | 45124 | NNIILNLR<br>YKDNLLID<br>LSG | Mus<br>musculu<br>s            |
| 1 | 1.00 | 1 | 1 | 0 | -0.003 | 0 | 0 | 0 | t | 49968 | PVSMAKT<br>SVDCNMYI<br>CGDS | Oryctola<br>gus<br>cunicu<br>s |
| 1 | 1.00 | 1 | 1 | 0 | 0      | 0 | 0 | 0 | t | 43242 | NANPNAN<br>PNANP            | Mus<br>musculu<br>s            |
| 1 | 1.00 | 1 | 1 | 0 | 0      | 0 | 0 | 0 | t | 60024 | SPDVDLG<br>DISGINAS         | Mus<br>musculu<br>s            |
| 1 | 1.00 | 1 | 1 | 0 | 0      | 0 | 0 | 0 | t | 50930 | QGPGAPQ<br>GPGAP            | Mus<br>musculu<br>s            |
| 1 | 1.00 | 1 | 1 | 0 | 0      | 0 | 0 | 0 | t | 43242 | NANPNAN<br>PNANP            | Mus<br>musculu<br>s            |
| 1 | 1.00 | 1 | 1 | 0 | 0      | 0 | 0 | 0 | t | 60024 | SPDVDLG<br>DISGINAS         | Mus<br>musculu<br>s            |
| 1 | 1.00 | 1 | 1 | 0 | 0      | 0 | 0 | 0 | t | 50930 | QGPGAPQ<br>GPGAP            | Mus<br>musculu<br>s            |

|   |      |   |   |   |        |   |   |   |   |       |                               |                                  |
|---|------|---|---|---|--------|---|---|---|---|-------|-------------------------------|----------------------------------|
| 1 | 1.00 | 1 | 1 | 0 | 0      | 0 | 0 | 0 | t | 43242 | NANPNAN<br>PNANP              | Mus<br>musculu<br>s              |
| 1 | 1.00 | 1 | 1 | 0 | -0.003 | 0 | 0 | 0 | t | 38330 | LNRSGGN<br>YTKTDDEA           | Oryctola<br>gus<br>cuniculu<br>s |
| 1 | 1.00 | 1 | 1 | 0 | 0      | 0 | 0 | 0 | t | 50930 | QGP GAPQ<br>GPGAP             | Mus<br>musculu<br>s              |
| 1 | 1.00 | 1 | 1 | 0 | 0      | 0 | 0 | 0 | t | 43242 | NANPNAN<br>PNANP              | Mus<br>musculu<br>s              |
| 1 | 1.00 | 1 | 1 | 0 | 0      | 0 | 0 | 0 | t | 50930 | QGP GAPQ<br>GPGAP             | Mus<br>musculu<br>s              |
| 1 | 1.00 | 1 | 1 | 0 | 0      | 0 | 0 | 0 | t | 50930 | QGP GAPQ<br>GPGAP             | Mus<br>musculu<br>s              |
| 1 | 1.00 | 1 | 1 | 0 | 0      | 0 | 0 | 0 | t | 43242 | NANPNAN<br>PNANP              | Mus<br>musculu<br>s              |
| 1 | 1.00 | 1 | 1 | 0 | 0.005  | 0 | 0 | 0 | t | 57166 | SDARQRV<br>ADRK RKEK<br>YDSFF | Homo<br>sapiens                  |
| 1 | 1.00 | 1 | 1 | 0 | 0      | 0 | 0 | 0 | t | 50930 | QGP GAPQ<br>GPGAP             | Mus<br>musculu<br>s              |
| 1 | 1.00 | 1 | 1 | 0 | 0      | 0 | 0 | 0 | t | 50930 | QGP GAPQ<br>GPGAP             | Mus<br>musculu<br>s              |
| 1 | 1.00 | 1 | 1 | 0 | 0      | 0 | 0 | 0 | t | 50930 | QGP GAPQ<br>GPGAP             | Mus<br>musculu<br>s              |
| 1 | 1.00 | 1 | 1 | 0 | 0      | 0 | 0 | 0 | t | 43242 | NANPNAN<br>PNANP              | Mus<br>musculu<br>s              |
| 1 | 1.00 | 1 | 1 | 0 | 0      | 0 | 0 | 0 | t | 43242 | NANPNAN<br>PNANP              | Mus<br>musculu<br>s              |
| 1 | 1.00 | 1 | 1 | 0 | 0      | 0 | 0 | 0 | t | 50930 | QGP GAPQ<br>GPGAP             | Mus<br>musculu<br>s              |

|   |      |   |   |   |        |   |   |   |   |       |                         |                                  |
|---|------|---|---|---|--------|---|---|---|---|-------|-------------------------|----------------------------------|
| 1 | 1.00 | 1 | 1 | 0 | 0      | 0 | 0 | 0 | t | 43242 | NANPNAN<br>PNANP        | Mus<br>musculu<br>s              |
| 1 | 1.00 | 1 | 1 | 0 | 0      | 0 | 0 | 0 | t | 43242 | NANPNAN<br>PNANP        | Mus<br>musculu<br>s              |
| 1 | 1.00 | 1 | 1 | 0 | -0.006 | 0 | 0 | 0 | t | 47205 | PDSVKIWT<br>SETNKC      | Oryctola<br>gus<br>cuniculu<br>s |
| 1 | 1.00 | 1 | 1 | 0 | 0      | 0 | 0 | 0 | t | 50930 | QGPGAPQ<br>GPGAP        | Mus<br>musculu<br>s              |
| 1 | 1.00 | 1 | 1 | 0 | 0      | 0 | 0 | 0 | t | 43242 | NANPNAN<br>PNANP        | Mus<br>musculu<br>s              |
| 1 | 1.00 | 1 | 1 | 0 | 0.004  | 0 | 0 | 0 | t | 42475 | MRKTKLA<br>PTVAHGV<br>F | Mus<br>musculu<br>s              |
| 1 | 1.00 | 1 | 1 | 0 | 0      | 0 | 0 | 0 | t | 43242 | NANPNAN<br>PNANP        | Mus<br>musculu<br>s              |
| 1 | 1.00 | 1 | 1 | 0 | 0      | 0 | 0 | 0 | t | 43242 | NANPNAN<br>PNANP        | Mus<br>musculu<br>s              |
| 1 | 1.00 | 1 | 1 | 0 | 0      | 0 | 0 | 0 | t | 48912 | PPSDIKGK<br>YVKEVEVK    | Oryctola<br>gus<br>cuniculu<br>s |
| 1 | 1.00 | 1 | 1 | 0 | 0      | 0 | 0 | 0 | t | 50930 | QGPGAPQ<br>GPGAP        | Mus<br>musculu<br>s              |
| 1 | 1.00 | 1 | 1 | 0 | 0      | 0 | 0 | 0 | t | 43242 | NANPNAN<br>PNANP        | Mus<br>musculu<br>s              |
| 1 | 1.00 | 1 | 1 | 0 | 0      | 0 | 0 | 0 | t | 43242 | NANPNAN<br>PNANP        | Mus<br>musculu<br>s              |
| 1 | 1.00 | 1 | 1 | 0 | 0      | 0 | 0 | 0 | t | 43242 | NANPNAN<br>PNANP        | Mus<br>musculu<br>s              |

|   |      |   |   |   |        |   |   |   |   |       |                              |                                  |
|---|------|---|---|---|--------|---|---|---|---|-------|------------------------------|----------------------------------|
| 1 | 1.00 | 1 | 1 | 0 | 0      | 0 | 0 | 0 | t | 50930 | QGP GAPQ<br>GPGAP            | Mus<br>musculu<br>s              |
| 1 | 1.00 | 1 | 1 | 0 | 0      | 0 | 0 | 0 | t | 50930 | QGP GAPQ<br>GPGAP            | Mus<br>musculu<br>s              |
| 1 | 1.00 | 1 | 1 | 0 | 0      | 0 | 0 | 0 | t | 50930 | QGP GAPQ<br>GPGAP            | Mus<br>musculu<br>s              |
| 1 | 1.00 | 1 | 1 | 0 | 0      | 0 | 0 | 0 | t | 50930 | QGP GAPQ<br>GPGAP            | Mus<br>musculu<br>s              |
| 1 | 1.00 | 1 | 1 | 0 | 0      | 0 | 0 | 0 | t | 50930 | QGP GAPQ<br>GPGAP            | Mus<br>musculu<br>s              |
| 1 | 1.00 | 1 | 1 | 0 | 0      | 0 | 0 | 0 | t | 43242 | NANPNAN<br>PNANP             | Mus<br>musculu<br>s              |
| 1 | 1.00 | 1 | 1 | 0 | 0      | 0 | 0 | 0 | t | 43242 | NANPNAN<br>PNANP             | Mus<br>musculu<br>s              |
| 1 | 1.00 | 1 | 1 | 0 | 0      | 0 | 0 | 0 | t | 58783 | SKAFSNCY<br>PYDVPDYA<br>SL   | Mus<br>musculu<br>s              |
| 1 | 1.00 | 1 | 1 | 0 | 0      | 0 | 0 | 0 | t | 43242 | NANPNAN<br>PNANP             | Mus<br>musculu<br>s              |
| 1 | 1.00 | 1 | 1 | 0 | -0.003 | 0 | 0 | 0 | t | 47986 | PISLVNLST<br>ASSAPPTR<br>VRR | Oryctola<br>gus<br>cuniculu<br>s |
| 1 | 1.00 | 1 | 1 | 0 | 0      | 0 | 0 | 0 | t | 43242 | NANPNAN<br>PNANP             | Mus<br>musculu<br>s              |
| 1 | 1.00 | 1 | 1 | 0 | 0      | 0 | 0 | 0 | t | 42475 | MRKTKLA<br>PTVAHG<br>V F     | Bos<br>taurus                    |
| 1 | 1.00 | 1 | 1 | 0 | -0.008 | 0 | 0 | 0 | t | 41660 | MHGDTPT<br>LHEYMLDL<br>QPETT | Mus<br>musculu<br>s              |
| 1 | 1.00 | 1 | 1 | 0 | 0      | 0 | 0 | 0 | t | 41660 | MHGDTPT<br>LHEYMLDL<br>QPETT | Mus<br>musculu<br>s              |

|   |      |   |   |   |        |   |   |   |   |       |                               |                          |
|---|------|---|---|---|--------|---|---|---|---|-------|-------------------------------|--------------------------|
| 1 | 1.00 | 1 | 1 | 0 | 0      | 0 | 0 | 0 | t | 41660 | MHGDTPT<br>LHEYMLDL<br>QPETT  | Rattus<br>norvegicus     |
| 1 | 1.00 | 1 | 1 | 0 | 0      | 0 | 0 | 0 | t | 41660 | MHGDTPT<br>LHEYMLDL<br>QPETT  | Mus<br>musculus          |
| 1 | 1.00 | 1 | 1 | 0 | -0.003 | 0 | 0 | 0 | t | 47202 | PDSEPTKT<br>NGKCKSG           | Mus<br>musculus          |
| 1 | 1.00 | 1 | 1 | 0 | 0      | 0 | 0 | 0 | t | 58783 | SKAFSNCY<br>PYDVPDYA<br>SL    | Mus<br>musculus          |
| 1 | 1.00 | 1 | 1 | 0 | -0.003 | 0 | 0 | 0 | t | 41660 | MHGDTPT<br>LHEYMLDL<br>QPETT  | Oryctolagus<br>cuniculus |
| 1 | 1.00 | 1 | 1 | 0 | -0.003 | 0 | 0 | 0 | t | 53247 | RAYALWS<br>ARQQFKTT           | Oryctolagus<br>cuniculus |
| 1 | 1.00 | 1 | 1 | 0 | -0.003 | 0 | 0 | 0 | t | 47202 | PDSEPTKT<br>NGKCKSG           | Mus<br>musculus          |
| 1 | 1.00 | 1 | 1 | 0 | 0      | 0 | 0 | 0 | t | 41660 | MHGDTPT<br>LHEYMLDL<br>QPETT  | Mus<br>musculus          |
| 1 | 1.00 | 1 | 1 | 0 | -0.008 | 0 | 0 | 0 | t | 41660 | MHGDTPT<br>LHEYMLDL<br>QPETT  | Mus<br>musculus          |
| 1 | 1.00 | 1 | 1 | 0 | 0      | 0 | 0 | 0 | t | 39398 | LSGRPAIV<br>PDREVLQYQ<br>EFDE | Homo<br>sapiens          |
| 1 | 1.00 | 1 | 1 | 0 | -0.003 | 0 | 0 | 0 | t | 41660 | MHGDTPT<br>LHEYMLDL<br>QPETT  | Oryctolagus<br>cuniculus |
| 1 | 1.00 | 1 | 1 | 0 | 0      | 0 | 0 | 0 | t | 53247 | RAYALWS<br>ARQQFKTT           | Mus<br>musculus          |
| 1 | 1.00 | 1 | 1 | 0 | -0.003 | 0 | 0 | 0 | t | 53247 | RAYALWS<br>ARQQFKTT           | Oryctolagus<br>cuniculus |
| 1 | 1.00 | 1 | 1 | 0 | 0      | 0 | 0 | 0 | t | 47202 | PDSEPTKT<br>NGKCKSG           | Mus<br>musculus          |
| 1 | 1.00 | 1 | 1 | 0 | 0      | 0 | 0 | 0 | t | 41660 | MHGDTPT<br>LHEYMLDL<br>QPETT  | Mus<br>musculus          |



|   |      |   |   |   |        |   |   |   |   |       |                              |                          |
|---|------|---|---|---|--------|---|---|---|---|-------|------------------------------|--------------------------|
| 1 | 1.00 | 1 | 1 | 0 | 0.002  | 0 | 0 | 0 | t | 41660 | MHGDTPT<br>LHEYMLDL<br>QPETT | Rattus<br>norvegicus     |
| 1 | 1.00 | 1 | 1 | 0 | -0.001 | 0 | 0 | 0 | t | 57250 | SDMYGLIV<br>AQWLSTV<br>NTQF  | Homo<br>sapiens          |
| 1 | 1.00 | 1 | 1 | 0 | 0.002  | 0 | 0 | 0 | t | 58511 | SIFYTYGTA<br>PARISVPY<br>VGI | Rattus<br>norvegicus     |
| 1 | 1.00 | 1 | 1 | 0 | 0.002  | 0 | 0 | 0 | t | 58511 | SIFYTYGTA<br>PARISVPY<br>VGI | Rattus<br>norvegicus     |
| 1 | 1.00 | 1 | 1 | 0 | -0.008 | 0 | 0 | 0 | t | 41660 | MHGDTPT<br>LHEYMLDL<br>QPETT | Mus<br>musculus          |
| 1 | 1.00 | 1 | 1 | 0 | 0.002  | 0 | 0 | 0 | t | 58511 | SIFYTYGTA<br>PARISVPY<br>VGI | Rattus<br>norvegicus     |
| 1 | 1.00 | 1 | 1 | 0 | 0      | 0 | 0 | 0 | t | 48782 | PPFTSAVG<br>GVDHRS           | Mus<br>musculus          |
| 1 | 1.00 | 1 | 1 | 0 | -0.003 | 0 | 0 | 0 | t | 46179 | NTMDVIK<br>KMLADQT<br>V      | Oryctolagus<br>cuniculus |
| 1 | 1.00 | 1 | 1 | 0 | -0.004 | 0 | 0 | 0 | t | 54233 | RIREFMEK<br>ECPFIK           | Oryctolagus<br>cuniculus |
| 1 | 1.00 | 1 | 1 | 0 | -0.003 | 0 | 0 | 0 | t | 45006 | NMMRFTE<br>LSTPS             | Oryctolagus<br>cuniculus |
| 1 | 1.00 | 1 | 1 | 0 | -0.003 | 0 | 0 | 0 | t | 55952 | RSRSESSIE<br>SF              | Oryctolagus<br>cuniculus |
| 1 | 1.00 | 1 | 1 | 0 | -0.003 | 0 | 0 | 0 | t | 55952 | RSRSESSIE<br>SF              | Oryctolagus<br>cuniculus |
| 1 | 1.00 | 1 | 1 | 0 | 0      | 0 | 0 | 0 | t | 58783 | SKAFSNCY<br>PYDVPDYA<br>SL   | Mus<br>musculus          |

|   |      |   |   |   |        |   |   |   |   |       |                             |                                  |
|---|------|---|---|---|--------|---|---|---|---|-------|-----------------------------|----------------------------------|
| 1 | 1.00 | 1 | 1 | 0 | -0.003 | 0 | 0 | 0 | t | 58783 | SKAFSNCY<br>PYDVDPDYA<br>SL | Oryctola<br>gus<br>cuniculu<br>s |
| 1 | 1.00 | 1 | 1 | 0 | -0.002 | 0 | 0 | 0 | t | 55952 | RSRSESSIE<br>SF             | Mus<br>musculu<br>s              |
| 1 | 1.00 | 1 | 1 | 0 | 0      | 0 | 0 | 0 | t | 55952 | RSRSESSIE<br>SF             | Mus<br>musculu<br>s              |
| 1 | 1.00 | 1 | 1 | 0 | -0.003 | 0 | 0 | 0 | t | 48006 | PIVKNQSC<br>SISNIETV        | Oryctola<br>gus<br>cuniculu<br>s |
| 1 | 1.00 | 1 | 1 | 0 | 0      | 0 | 0 | 0 | t | 55952 | RSRSESSIE<br>SF             | Mus<br>musculu<br>s              |
| 1 | 1.00 | 1 | 1 | 0 | -0.002 | 0 | 0 | 0 | t | 55952 | RSRSESSIE<br>SF             | Mus<br>musculu<br>s              |
| 1 | 1.00 | 1 | 1 | 0 | 0      | 0 | 0 | 0 | t | 43242 | NANPNAN<br>PNANP            | Mus<br>musculu<br>s              |
| 1 | 1.00 | 1 | 1 | 0 | 0      | 0 | 0 | 0 | t | 50931 | QGPGAPQ<br>GPGAPQG<br>PGAP  | Mus<br>musculu<br>s              |
| 1 | 1.00 | 1 | 1 | 0 | 0      | 0 | 0 | 0 | t | 43242 | NANPNAN<br>PNANP            | Mus<br>musculu<br>s              |
| 1 | 1.00 | 1 | 1 | 0 | 0      | 0 | 0 | 0 | t | 50931 | QGPGAPQ<br>GPGAPQG<br>PGAP  | Mus<br>musculu<br>s              |
| 1 | 1.00 | 1 | 1 | 0 | 0      | 0 | 0 | 0 | t | 50931 | QGPGAPQ<br>GPGAPQG<br>PGAP  | Mus<br>musculu<br>s              |
| 1 | 1.00 | 1 | 1 | 0 | -0.003 | 0 | 0 | 0 | t | 58783 | SKAFSNCY<br>PYDVDPDYA<br>SL | Oryctola<br>gus<br>cuniculu<br>s |
| 1 | 1.00 | 1 | 1 | 0 | 0      | 0 | 0 | 0 | t | 43242 | NANPNAN<br>PNANP            | Mus<br>musculu<br>s              |
| 1 | 1.00 | 1 | 1 | 0 | 0      | 0 | 0 | 0 | t | 43242 | NANPNAN<br>PNANP            | Mus<br>musculu<br>s              |

|   |      |   |   |   |        |   |   |   |   |       |                             |                                  |
|---|------|---|---|---|--------|---|---|---|---|-------|-----------------------------|----------------------------------|
| 1 | 1.00 | 1 | 1 | 0 | 0      | 0 | 0 | 0 | t | 50931 | QGPGAPQ<br>GPGAPQG<br>PGAP  | Mus<br>musculu<br>s              |
| 1 | 1.00 | 1 | 1 | 0 | 0      | 0 | 0 | 0 | t | 50931 | QGPGAPQ<br>GPGAPQG<br>PGAP  | Mus<br>musculu<br>s              |
| 1 | 1.00 | 1 | 1 | 0 | 0      | 0 | 0 | 0 | t | 48017 | PIYGKTIST<br>PSDYM          | Mus<br>musculu<br>s              |
| 1 | 1.00 | 1 | 1 | 0 | -0.003 | 0 | 0 | 0 | t | 53357 | RDGQSVIG<br>ACASPYEG<br>RYS | Oryctola<br>gus<br>cuniculu<br>s |
| 1 | 1.00 | 1 | 1 | 0 | 0      | 0 | 0 | 0 | t | 50931 | QGPGAPQ<br>GPGAPQG<br>PGAP  | Mus<br>musculu<br>s              |
| 1 | 1.00 | 1 | 1 | 0 | 0      | 0 | 0 | 0 | t | 43242 | NANPNAN<br>PNANP            | Mus<br>musculu<br>s              |
| 1 | 1.00 | 1 | 1 | 0 | 0      | 0 | 0 | 0 | t | 50931 | QGPGAPQ<br>GPGAPQG<br>PGAP  | Mus<br>musculu<br>s              |
| 1 | 1.00 | 1 | 1 | 0 | 0      | 0 | 0 | 0 | t | 43242 | NANPNAN<br>PNANP            | Mus<br>musculu<br>s              |
| 1 | 1.00 | 1 | 1 | 0 | 0      | 0 | 0 | 0 | t | 43242 | NANPNAN<br>PNANP            | Mus<br>musculu<br>s              |
| 1 | 1.00 | 1 | 1 | 0 | 0      | 0 | 0 | 0 | t | 43242 | NANPNAN<br>PNANP            | Mus<br>musculu<br>s              |
| 1 | 1.00 | 1 | 1 | 0 | 0      | 0 | 0 | 0 | t | 56899 | SAMSRPM<br>IHFGNDW<br>EDRYR | Mus<br>musculu<br>s              |
| 1 | 1.00 | 1 | 1 | 0 | -0.003 | 0 | 0 | 0 | t | 45367 | NPIDATAR<br>S               | Oryctola<br>gus<br>cuniculu<br>s |
| 1 | 1.00 | 1 | 1 | 0 | -0.003 | 0 | 0 | 0 | t | 45004 | NMMKYIS<br>PPIFL            | Oryctola<br>gus<br>cuniculu<br>s |

|   |      |   |   |   |        |   |   |   |   |       |                             |                                  |
|---|------|---|---|---|--------|---|---|---|---|-------|-----------------------------|----------------------------------|
| 1 | 1.00 | 1 | 1 | 0 | -0.008 | 0 | 0 | 0 | t | 45003 | NMLYKDD<br>FVGALIFS<br>GAVI | Mus<br>musculu<br>s              |
| 1 | 1.00 | 1 | 1 | 0 | -0.004 | 0 | 0 | 0 | t | 56173 | RTRVHGD<br>KATAHGR<br>K     | Sus<br>scrofa                    |
| 1 | 1.00 | 1 | 1 | 0 | 0      | 0 | 0 | 0 | t | 42475 | MRKTKLA<br>PTVAHGV<br>F     | Bos<br>taurus                    |
| 1 | 1.00 | 1 | 1 | 0 | 0      | 0 | 0 | 0 | t | 50814 | QFQGQQ<br>QPFP              | Mus<br>musculu<br>s              |
| 1 | 1.00 | 1 | 1 | 0 | 0      | 0 | 0 | 0 | t | 45003 | NMLYKDD<br>FVGALIFS<br>GAVI | Mus<br>musculu<br>s              |
| 1 | 1.00 | 1 | 1 | 0 | -0.003 | 0 | 0 | 0 | t | 45368 | NPIDHSAR<br>S               | Oryctola<br>gus<br>cuniculu<br>s |
| 1 | 1.00 | 1 | 1 | 0 | 0      | 0 | 0 | 0 | t | 58466 | SICSNNPT<br>CWAISK          | Mus<br>musculu<br>s              |
| 1 | 1.00 | 1 | 1 | 0 | -0.003 | 0 | 0 | 0 | t | 60424 | SQEIVQNE<br>SGTEEILE        | Oryctola<br>gus<br>cuniculu<br>s |
| 1 | 1.00 | 1 | 1 | 0 | 0      | 0 | 0 | 0 | t | 60424 | SQEIVQNE<br>SGTEEILE        | Homo<br>sapiens                  |
| 1 | 1.00 | 1 | 1 | 0 | 0      | 0 | 0 | 0 | t | 39329 | LSEIKGVIV<br>HRLEGV         | Mus<br>musculu<br>s              |
| 1 | 1.00 | 1 | 1 | 0 | 0      | 0 | 0 | 0 | t | 51670 | QNAPQAQ<br>NAPQVE           | Bos<br>taurus                    |
| 1 | 1.00 | 1 | 1 | 0 | 0      | 0 | 0 | 0 | t | 58466 | SICSNNPT<br>CWAISK          | Mus<br>musculu<br>s              |
| 1 | 1.00 | 1 | 1 | 0 | -0.003 | 0 | 0 | 0 | t | 58465 | SICSNNPT<br>CWAICKR         | Oryctola<br>gus<br>cuniculu<br>s |

|   |      |   |   |   |        |   |   |   |   |       |                             |                                  |
|---|------|---|---|---|--------|---|---|---|---|-------|-----------------------------|----------------------------------|
| 1 | 1.00 | 1 | 1 | 0 | -0.003 | 0 | 0 | 0 | t | 58465 | SICSNNPT<br>CWAICKR         | Oryctola<br>gus<br>cuniculu<br>s |
| 1 | 1.00 | 1 | 1 | 0 | 0      | 0 | 0 | 0 | t | 48017 | PIYGKTIST<br>PSDYM          | Mus<br>musculu<br>s              |
| 1 | 1.00 | 1 | 1 | 0 | 0.012  | 0 | 0 | 0 | t | 43233 | NANP                        | Mus<br>musculu<br>s              |
| 1 | 1.00 | 1 | 1 | 0 | -0.003 | 0 | 0 | 0 | t | 43233 | NANP                        | Oryctola<br>gus<br>cuniculu<br>s |
| 1 | 1.00 | 1 | 1 | 0 | 0      | 0 | 0 | 0 | t | 38956 | LQQATRQ<br>AQ               | Homo<br>sapiens                  |
| 1 | 1.00 | 1 | 1 | 0 | 0      | 0 | 0 | 0 | t | 45003 | NMLYKDD<br>FVGALIFS<br>GAVI | Mus<br>musculu<br>s              |
| 1 | 1.00 | 1 | 1 | 0 | 0      | 0 | 0 | 0 | t | 39329 | LSEIKGVIV<br>HRLEGV         | Mus<br>musculu<br>s              |
| 1 | 1.00 | 1 | 1 | 0 | 0      | 0 | 0 | 0 | t | 45003 | NMLYKDD<br>FVGALIFS<br>GAVI | Mus<br>musculu<br>s              |
| 1 | 1.00 | 1 | 1 | 0 | -0.003 | 0 | 0 | 0 | t | 38313 | LNPTIA                      | Oryctola<br>gus<br>cuniculu<br>s |
| 1 | 1.00 | 1 | 1 | 0 | 0      | 0 | 0 | 0 | t | 45003 | NMLYKDD<br>FVGALIFS<br>GAVI | Mus<br>musculu<br>s              |
| 1 | 1.00 | 1 | 1 | 0 | 0      | 0 | 0 | 0 | t | 42487 | MRNVPEK<br>QT               | Mus<br>musculu<br>s              |
| 1 | 1.00 | 1 | 1 | 0 | 0      | 0 | 0 | 0 | t | 45003 | NMLYKDD<br>FVGALIFS<br>GAVI | Mus<br>musculu<br>s              |
| 1 | 1.00 | 1 | 1 | 0 | 0      | 0 | 0 | 0 | t | 45003 | NMLYKDD<br>FVGALIFS<br>GAVI | Mus<br>musculu<br>s              |

|   |      |   |   |   |        |   |   |   |   |       |                               |                                  |
|---|------|---|---|---|--------|---|---|---|---|-------|-------------------------------|----------------------------------|
| 1 | 1.00 | 1 | 1 | 0 | 0      | 0 | 0 | 0 | t | 58465 | SICSNNPT<br>CWAICKR           | Mus<br>musculu<br>s              |
| 1 | 1.00 | 1 | 1 | 0 | 0      | 0 | 0 | 0 | t | 39329 | LSEIKGVIV<br>HRLEGV           | Mus<br>musculu<br>s              |
| 1 | 1.00 | 1 | 1 | 0 | 0      | 0 | 0 | 0 | t | 39329 | LSEIKGVIV<br>HRLEGV           | Mus<br>musculu<br>s              |
| 1 | 1.00 | 1 | 1 | 0 | 0      | 0 | 0 | 0 | t | 39398 | LSGRPAIV<br>PDREVLVYQ<br>EFDE | Mus<br>musculu<br>s              |
| 1 | 1.00 | 1 | 1 | 0 | -0.003 | 0 | 0 | 0 | t | 55951 | RSRSES                        | Oryctola<br>gus<br>cuniculu<br>s |
| 1 | 1.00 | 1 | 1 | 0 | -0.007 | 0 | 0 | 0 | t | 55951 | RSRSES                        | Oryctola<br>gus<br>cuniculu<br>s |
| 1 | 1.00 | 1 | 1 | 0 | 0      | 0 | 0 | 0 | t | 41571 | MGFGLFD                       | Homo<br>sapiens                  |
| 1 | 1.00 | 1 | 1 | 0 | 0      | 0 | 0 | 0 | t | 39329 | LSEIKGVIV<br>HRLEGV           | Mus<br>musculu<br>s              |
| 1 | 1.00 | 1 | 1 | 0 | 0.002  | 0 | 0 | 0 | t | 55951 | RSRSES                        | Rattus<br>norvegic<br>us         |
| 1 | 1.00 | 1 | 1 | 0 | 0      | 0 | 0 | 0 | t | 44978 | NMGLIAG<br>AVG                | Oryctola<br>gus<br>cuniculu<br>s |
| 1 | 1.00 | 1 | 1 | 0 | 0      | 0 | 0 | 0 | t | 55951 | RSRSES                        | Oryctola<br>gus<br>cuniculu<br>s |
| 1 | 1.00 | 1 | 1 | 0 | 0      | 0 | 0 | 0 | t | 43242 | NANPNAN<br>PNANP              | Mus<br>musculu<br>s              |
| 1 | 1.00 | 1 | 1 | 0 | 0      | 0 | 0 | 0 | t | 39329 | LSEIKGVIV<br>HRLEGV           | Mus<br>musculu<br>s              |
| 1 | 1.00 | 1 | 1 | 0 | 0.008  | 0 | 0 | 0 | t | 59640 | SMDDEAD<br>RYFTY              | Capra<br>hircus                  |

|   |      |   |   |   |        |   |   |   |   |       |                              |                                  |
|---|------|---|---|---|--------|---|---|---|---|-------|------------------------------|----------------------------------|
| 1 | 1.00 | 1 | 1 | 0 | -0.003 | 0 | 0 | 0 | t | 50934 | QGPHVISR<br>IYQTAT           | Oryctola<br>gus<br>cuniculu<br>s |
| 1 | 1.00 | 1 | 1 | 0 | 0      | 0 | 0 | 0 | t | 60374 | SQAQKAA<br>KPAAAAT<br>GTATAA | Mus<br>musculu<br>s              |
| 1 | 1.00 | 1 | 1 | 0 | -0.003 | 0 | 0 | 0 | t | 57306 | SDVEGLQ<br>NDP               | Oryctola<br>gus<br>cuniculu<br>s |
| 1 | 1.00 | 1 | 1 | 0 | 0.002  | 0 | 0 | 0 | t | 57306 | SDVEGLQ<br>NDP               | Rattus<br>norvegic<br>us         |
| 1 | 1.00 | 1 | 1 | 0 | 0      | 0 | 0 | 0 | t | 57306 | SDVEGLQ<br>NDP               | Rattus<br>norvegic<br>us         |
| 1 | 1.00 | 1 | 1 | 0 | 0      | 0 | 0 | 0 | t | 43242 | NANPNAN<br>PNANP             | Mus<br>musculu<br>s              |
| 1 | 1.00 | 1 | 1 | 0 | 0      | 0 | 0 | 0 | t | 43242 | NANPNAN<br>PNANP             | Mus<br>musculu<br>s              |
| 1 | 1.00 | 1 | 1 | 0 | 0      | 0 | 0 | 0 | t | 39329 | LSEIKGVIV<br>HRLEGV          | Mus<br>musculu<br>s              |
| 1 | 1.00 | 1 | 1 | 0 | 0      | 0 | 0 | 0 | t | 39329 | LSEIKGVIV<br>HRLEGV          | Mus<br>musculu<br>s              |
| 1 | 1.00 | 1 | 1 | 0 | 0      | 0 | 0 | 0 | t | 43242 | NANPNAN<br>PNANP             | Mus<br>musculu<br>s              |
| 1 | 1.00 | 1 | 1 | 0 | 0      | 0 | 0 | 0 | t | 60374 | SQAQKAA<br>KPAAAAT<br>GTATAA | Mus<br>musculu<br>s              |
| 1 | 1.00 | 1 | 1 | 0 | 0      | 0 | 0 | 0 | t | 43242 | NANPNAN<br>PNANP             | Mus<br>musculu<br>s              |
| 1 | 1.00 | 1 | 1 | 0 | 0      | 0 | 0 | 0 | t | 60374 | SQAQKAA<br>KPAAAAT<br>GTATAA | Mus<br>musculu<br>s              |
| 1 | 1.00 | 1 | 1 | 0 | 0      | 0 | 0 | 0 | t | 39329 | LSEIKGVIV<br>HRLEGV          | Mus<br>musculu<br>s              |

|   |      |   |   |   |        |   |   |   |   |       |                              |                                  |
|---|------|---|---|---|--------|---|---|---|---|-------|------------------------------|----------------------------------|
| 1 | 1.00 | 1 | 1 | 0 | 0      | 0 | 0 | 0 | t | 39324 | LSEALRIIA<br>GTLEVHGV<br>KPA | Mus<br>musculu<br>s              |
| 1 | 1.00 | 1 | 1 | 0 | 0      | 0 | 0 | 0 | t | 60374 | SQAQKAA<br>KPAAAAT<br>GTATAA | Mus<br>musculu<br>s              |
| 1 | 1.00 | 1 | 1 | 0 | 0      | 0 | 0 | 0 | t | 53916 | RGLIVFHT<br>STEPSVNY<br>DLFG | Oryctola<br>gus<br>cuniculu<br>s |
| 1 | 1.00 | 1 | 1 | 0 | -0.003 | 0 | 0 | 0 | t | 58458 | SICGNNQL<br>CKSICKT          | Oryctola<br>gus<br>cuniculu<br>s |
| 1 | 1.00 | 1 | 1 | 0 | 0      | 0 | 0 | 0 | t | 60374 | SQAQKAA<br>KPAAAAT<br>GTATAA | Mus<br>musculu<br>s              |
| 1 | 1.00 | 1 | 1 | 0 | 0      | 0 | 0 | 0 | t | 46258 | NTSDSQKE                     | Mus<br>musculu<br>s              |
| 1 | 1.00 | 1 | 1 | 0 | 0      | 0 | 0 | 0 | t | 39788 | LTAELKIYS<br>VIQAEINK<br>HL  | Mus<br>musculu<br>s              |
| 1 | 1.00 | 1 | 1 | 0 | -0.003 | 0 | 0 | 0 | t | 39788 | LTAELKIYS<br>VIQAEINK<br>HL  | Oryctola<br>gus<br>cuniculu<br>s |
| 1 | 1.00 | 1 | 1 | 0 | -0.003 | 0 | 0 | 0 | t | 44904 | NLTQHPSA<br>PTMP             | Oryctola<br>gus<br>cuniculu<br>s |
| 1 | 1.00 | 1 | 1 | 0 | 0      | 0 | 0 | 0 | t | 60374 | SQAQKAA<br>KPAAAAT<br>GTATAA | Mus<br>musculu<br>s              |
| 1 | 1.00 | 1 | 1 | 0 | 0      | 0 | 0 | 0 | t | 44880 | NLSSDIIGQ<br>LELMPNIE<br>RF  | Mus<br>musculu<br>s              |
| 1 | 1.00 | 1 | 1 | 0 | -0.002 | 0 | 0 | 0 | t | 44880 | NLSSDIIGQ<br>LELMPNIE<br>RF  | Mus<br>musculu<br>s              |
| 1 | 1.00 | 1 | 1 | 0 | -0.001 | 0 | 0 | 0 | t | 44880 | NLSSDIIGQ<br>LELMPNIE<br>RF  | Homo<br>sapiens                  |
| 1 | 1.00 | 1 | 1 | 0 | 0.005  | 0 | 0 | 0 | t | 44880 | NLSSDIIGQ<br>LELMPNIE<br>RF  | Gallus<br>gallus                 |



|   |      |   |   |   |        |   |   |   |   |       |                             |                                  |
|---|------|---|---|---|--------|---|---|---|---|-------|-----------------------------|----------------------------------|
| 1 | 1.00 | 1 | 1 | 0 | 0      | 0 | 0 | 0 | t | 44880 | NLSSDIIGQ<br>LELMPNIE<br>RF | Mus<br>musculu<br>s              |
| 1 | 1.00 | 1 | 1 | 0 | -0.004 | 0 | 0 | 0 | t | 41480 | MFDFASG<br>L                | Mus<br>musculu<br>s              |
| 1 | 1.00 | 1 | 1 | 0 | 0      | 0 | 0 | 0 | t | 44880 | NLSSDIIGQ<br>LELMPNIE<br>RF | Mus<br>musculu<br>s              |
| 1 | 1.00 | 1 | 1 | 0 | 0      | 0 | 0 | 0 | t | 44880 | NLSSDIIGQ<br>LELMPNIE<br>RF | Mus<br>musculu<br>s              |
| 1 | 1.00 | 1 | 1 | 0 | 0      | 0 | 0 | 0 | t | 49629 | PTGDRHK<br>QPLVAPAK<br>QLL  | Mus<br>musculu<br>s              |
| 1 | 1.00 | 1 | 1 | 0 | 0      | 0 | 0 | 0 | t | 49629 | PTGDRHK<br>QPLVAPAK<br>QLL  | Mus<br>musculu<br>s              |
| 1 | 1.00 | 1 | 1 | 0 | -0.003 | 0 | 0 | 0 | t | 50795 | QFKTTDVL<br>WFNFTTG         | Oryctola<br>gus<br>cuniculu<br>s |
| 1 | 1.00 | 1 | 1 | 0 | -0.003 | 0 | 0 | 0 | t | 47341 | PELDSFKE<br>ELDKYFKN<br>H   | Oryctola<br>gus<br>cuniculu<br>s |
| 1 | 1.00 | 1 | 1 | 0 | 0      | 0 | 0 | 0 | t | 52121 | QQQPFP<br>QQP               | Mus<br>musculu<br>s              |
| 1 | 1.00 | 1 | 1 | 0 | -0.002 | 0 | 0 | 0 | t | 44880 | NLSSDIIGQ<br>LELMPNIE<br>RF | Mus<br>musculu<br>s              |
| 1 | 1.00 | 1 | 1 | 0 | 0      | 0 | 0 | 0 | t | 47730 | PGQAEP<br>QAFIDEV           | Mus<br>musculu<br>s              |
| 1 | 1.00 | 1 | 1 | 0 | -0.008 | 0 | 0 | 0 | t | 44880 | NLSSDIIGQ<br>LELMPNIE<br>RF | Mus<br>musculu<br>s              |

|   |      |   |   |   |        |   |   |   |   |       |                              |                                  |
|---|------|---|---|---|--------|---|---|---|---|-------|------------------------------|----------------------------------|
| 1 | 1.00 | 1 | 1 | 0 | -0.003 | 0 | 0 | 0 | t | 57386 | SEEGKQET                     | Oryctola<br>gus<br>cuniculu<br>s |
| 1 | 1.00 | 1 | 1 | 0 | -0.002 | 0 | 0 | 0 | t | 44880 | NLSSDIIGQ<br>LELMPNIE<br>RF  | Mus<br>musculu<br>s              |
| 1 | 1.00 | 1 | 1 | 0 | 0      | 0 | 0 | 0 | t | 44880 | NLSSDIIGQ<br>LELMPNIE<br>RF  | Mus<br>musculu<br>s              |
| 1 | 1.00 | 1 | 1 | 0 | 0      | 0 | 0 | 0 | t | 57389 | SEEKFVTM<br>TDLVPGI          | Bos<br>taurus                    |
| 1 | 1.00 | 1 | 1 | 0 | -0.008 | 0 | 0 | 0 | t | 44880 | NLSSDIIGQ<br>LELMPNIE<br>RF  | Mus<br>musculu<br>s              |
| 1 | 1.00 | 1 | 1 | 0 | 0.002  | 0 | 0 | 0 | t | 41449 | METMKL<br>MMEKVD             | Rattus<br>norvegic<br>us         |
| 1 | 1.00 | 1 | 1 | 0 | 0      | 0 | 0 | 0 | t | 43242 | NANPNAN<br>PNANP             | Mus<br>musculu<br>s              |
| 1 | 1.00 | 1 | 1 | 0 | 0      | 0 | 0 | 0 | t | 51602 | QMCVTQY<br>QKESQAYY<br>DGRRS | Mus<br>musculu<br>s              |
| 1 | 1.00 | 1 | 1 | 0 | 0      | 0 | 0 | 0 | t | 51602 | QMCVTQY<br>QKESQAYY<br>DGRRS | Mus<br>musculu<br>s              |
| 1 | 1.00 | 1 | 1 | 0 | -0.003 | 0 | 0 | 0 | t | 45834 | NSHCHTH<br>ADGEV             | Oryctola<br>gus<br>cuniculu<br>s |
| 1 | 1.00 | 1 | 1 | 0 | 0      | 0 | 0 | 0 | t | 60374 | SQAQKAA<br>KPAAAAT<br>GTATAA | Mus<br>musculu<br>s              |
| 1 | 1.00 | 1 | 1 | 0 | 0      | 0 | 0 | 0 | t | 44880 | NLSSDIIGQ<br>LELMPNIE<br>RF  | Mus<br>musculu<br>s              |
| 1 | 1.00 | 1 | 1 | 0 | 0      | 0 | 0 | 0 | t | 48093 | PKKPENENK<br>LKQPNE          | Oryctola<br>gus<br>cuniculu<br>s |

|   |      |   |   |   |        |   |   |   |   |       |                              |                                  |
|---|------|---|---|---|--------|---|---|---|---|-------|------------------------------|----------------------------------|
| 1 | 1.00 | 1 | 1 | 0 | -0.003 | 0 | 0 | 0 | t | 48093 | PKKPNENK<br>LKQPNE           | Oryctola<br>gus<br>cuniculu<br>s |
| 1 | 1.00 | 1 | 1 | 0 | -0.003 | 0 | 0 | 0 | t | 44880 | NLSSDIIGQ<br>LELMPNIE<br>RF  | Mus<br>musculu<br>s              |
| 1 | 1.00 | 1 | 1 | 0 | -0.003 | 0 | 0 | 0 | t | 44880 | NLSSDIIGQ<br>LELMPNIE<br>RF  | Mus<br>musculu<br>s              |
| 1 | 1.00 | 1 | 1 | 0 | 0      | 0 | 0 | 0 | t | 42308 | MPPYPTG<br>GPPPV             | Sus<br>scrofa                    |
| 1 | 1.00 | 1 | 1 | 0 | 0      | 0 | 0 | 0 | t | 44880 | NLSSDIIGQ<br>LELMPNIE<br>RF  | Mus<br>musculu<br>s              |
| 1 | 1.00 | 1 | 1 | 0 | 0      | 0 | 0 | 0 | t | 43242 | NANPNAN<br>PNANP             | Mus<br>musculu<br>s              |
| 1 | 1.00 | 1 | 1 | 0 | 0      | 0 | 0 | 0 | t | 43242 | NANPNAN<br>PNANP             | Mus<br>musculu<br>s              |
| 1 | 1.00 | 1 | 1 | 0 | -0.002 | 0 | 0 | 0 | t | 44880 | NLSSDIIGQ<br>LELMPNIE<br>RF  | Mus<br>musculu<br>s              |
| 1 | 1.00 | 1 | 1 | 0 | 0      | 0 | 0 | 0 | t | 43242 | NANPNAN<br>PNANP             | Mus<br>musculu<br>s              |
| 1 | 1.00 | 1 | 1 | 0 | -0.003 | 0 | 0 | 0 | t | 60433 | SQERNFV<br>DSIGQSFSQ         | Oryctola<br>gus<br>cuniculu<br>s |
| 1 | 1.00 | 1 | 1 | 0 | 0      | 0 | 0 | 0 | t | 51574 | QLVNSNG<br>SWHIN             | Rattus<br>norvegic<br>us         |
| 1 | 1.00 | 1 | 1 | 0 | 0      | 0 | 0 | 0 | t | 60374 | SQAQKAA<br>KPAAAAT<br>GTATAA | Mus<br>musculu<br>s              |
| 1 | 1.00 | 1 | 1 | 0 | 0      | 0 | 0 | 0 | t | 47420 | PESDQPD                      | Oryctola<br>gus<br>cuniculu<br>s |

|   |      |   |   |   |        |   |   |   |   |       |                              |                                  |
|---|------|---|---|---|--------|---|---|---|---|-------|------------------------------|----------------------------------|
| 1 | 1.00 | 1 | 1 | 0 | 0      | 0 | 0 | 0 | t | 45422 | NPNEPSN<br>PNEPSNP<br>NEPS   | Mus<br>musculu<br>s              |
| 1 | 1.00 | 1 | 1 | 0 | -0.003 | 0 | 0 | 0 | t | 56751 | SAEGQL                       | Oryctola<br>gus<br>cuniculu<br>s |
| 1 | 1.00 | 1 | 1 | 0 | -0.003 | 0 | 0 | 0 | t | 56751 | SAEGQL                       | Oryctola<br>gus<br>cuniculu<br>s |
| 1 | 1.00 | 1 | 1 | 0 | 0      | 0 | 0 | 0 | t | 45422 | NPNEPSN<br>PNEPSNP<br>NEPS   | Mus<br>musculu<br>s              |
| 1 | 1.00 | 1 | 1 | 0 | 0      | 0 | 0 | 0 | t | 58417 | SHSQWNK<br>PSKPKTN<br>MK     | Oryctola<br>gus<br>cuniculu<br>s |
| 1 | 1.00 | 1 | 1 | 0 | 0      | 0 | 0 | 0 | t | 56751 | SAEGQL                       | Mus<br>musculu<br>s              |
| 1 | 1.00 | 1 | 1 | 0 | -0.003 | 0 | 0 | 0 | t | 41430 | MERVVEQ<br>MCITQYQ<br>RESQAY | Oryctola<br>gus<br>cuniculu<br>s |
| 1 | 1.00 | 1 | 1 | 0 | 0      | 0 | 0 | 0 | t | 54058 | RHKQKIVA<br>PVKQTL           | Bos<br>taurus                    |
| 1 | 1.00 | 1 | 1 | 0 | 0      | 0 | 0 | 0 | t | 45422 | NPNEPSN<br>PNEPSNP<br>NEPS   | Mus<br>musculu<br>s              |
| 1 | 1.00 | 1 | 1 | 0 | 0      | 0 | 0 | 0 | t | 45422 | NPNEPSN<br>PNEPSNP<br>NEPS   | Mus<br>musculu<br>s              |
| 1 | 1.00 | 1 | 1 | 0 | 0      | 0 | 0 | 0 | t | 45422 | NPNEPSN<br>PNEPSNP<br>NEPS   | Mus<br>musculu<br>s              |
| 1 | 1.00 | 1 | 1 | 0 | -0.003 | 0 | 0 | 0 | t | 58417 | SHSQWNK<br>PSKPKTN<br>MK     | Oryctola<br>gus<br>cuniculu<br>s |
| 1 | 1.00 | 1 | 1 | 0 | 0      | 0 | 0 | 0 | t | 58417 | SHSQWNK<br>PSKPKTN<br>MK     | Oryctola<br>gus<br>cuniculu<br>s |
| 1 | 1.00 | 1 | 1 | 0 | 0      | 0 | 0 | 0 | t | 45422 | NPNEPSN<br>PNEPSNP<br>NEPS   | Mus<br>musculu<br>s              |

|   |      |   |   |   |        |   |   |   |   |       |                              |                                  |
|---|------|---|---|---|--------|---|---|---|---|-------|------------------------------|----------------------------------|
| 1 | 1.00 | 1 | 1 | 0 | 0      | 0 | 0 | 0 | t | 45824 | NSGILKDF<br>WGDYLQY<br>DKPY  | Mus<br>musculu<br>s              |
| 1 | 1.00 | 1 | 1 | 0 | -0.011 | 0 | 0 | 0 | t | 41430 | MERVVEQ<br>MCITQYQ<br>RESQAY | Oryctola<br>gus<br>cuniculu<br>s |
| 1 | 1.00 | 1 | 1 | 0 | -0.008 | 0 | 0 | 0 | t | 41430 | MERVVEQ<br>MCITQYQ<br>RESQAY | Mus<br>musculu<br>s              |
| 1 | 1.00 | 1 | 1 | 0 | -0.003 | 0 | 0 | 0 | t | 41430 | MERVVEQ<br>MCITQYQ<br>RESQAY | Oryctola<br>gus<br>cuniculu<br>s |
| 1 | 1.00 | 1 | 1 | 0 | 0      | 0 | 0 | 0 | t | 45824 | NSGILKDF<br>WGDYLQY<br>DKPY  | Mus<br>musculu<br>s              |
| 1 | 1.00 | 1 | 1 | 0 | 0      | 0 | 0 | 0 | t | 50525 | QDVKFPG<br>GGQIVGG<br>V      | Homo<br>sapiens                  |
| 1 | 1.00 | 1 | 1 | 0 | -0.007 | 0 | 0 | 0 | t | 44865 | NLSDAHKK<br>NLYDHAL          | Oryctola<br>gus<br>cuniculu<br>s |
| 1 | 1.00 | 1 | 1 | 0 | 0.014  | 0 | 0 | 0 | t | 50977 | QGVPESPF<br>SRTGEGLD         | Pan<br>troglody<br>tes           |
| 1 | 1.00 | 1 | 1 | 0 | -0.015 | 0 | 0 | 0 | t | 50977 | QGVPESPF<br>SRTGEGLD         | Marmot<br>a monax                |
| 1 | 1.00 | 1 | 1 | 0 | 0      | 0 | 0 | 0 | t | 45824 | NSGILKDF<br>WGDYLQY<br>DKPY  | Mus<br>musculu<br>s              |
| 1 | 1.00 | 1 | 1 | 0 | -0.003 | 0 | 0 | 0 | t | 55924 | RSQDACIE<br>FVQQEVD          | Oryctola<br>gus<br>cuniculu<br>s |
| 1 | 1.00 | 1 | 1 | 0 | -0.003 | 0 | 0 | 0 | t | 58834 | SKGCKITCF<br>LTAAGY          | Oryctola<br>gus<br>cuniculu<br>s |
| 1 | 1.00 | 1 | 1 | 0 | -0.006 | 0 | 0 | 0 | t | 58834 | SKGCKITCF<br>LTAAGY          | Oryctola<br>gus<br>cuniculu<br>s |

|   |      |   |   |   |        |   |   |   |   |       |                              |                                  |
|---|------|---|---|---|--------|---|---|---|---|-------|------------------------------|----------------------------------|
| 1 | 1.00 | 1 | 1 | 0 | 0      | 0 | 0 | 0 | t | 43242 | NANPNAN<br>PNANP             | Mus<br>musculu<br>s              |
| 1 | 1.00 | 1 | 1 | 0 | 0      | 0 | 0 | 0 | t | 53998 | RGTLLIGQV<br>DRLKDKV<br>NNTL | Mus<br>musculu<br>s              |
| 1 | 1.00 | 1 | 1 | 0 | -0.004 | 0 | 0 | 0 | t | 48107 | PKNTLTPL<br>EELYPT           | Mus<br>musculu<br>s              |
| 1 | 1.00 | 1 | 1 | 0 | 0.004  | 0 | 0 | 0 | t | 54393 | RKLWCHH<br>FC                | Mus<br>musculu<br>s              |
| 1 | 1.00 | 1 | 1 | 0 | 0.004  | 0 | 0 | 0 | t | 58834 | SKGCKITCF<br>LTAAGY          | Ovis<br>aries                    |
| 1 | 1.00 | 1 | 1 | 0 | 0      | 0 | 0 | 0 | t | 41421 | MEQFIRAF<br>IEIDKDN<br>ELID  | Mus<br>musculu<br>s              |
| 1 | 1.00 | 1 | 1 | 0 | 0      | 0 | 0 | 0 | t | 46293 | NTTVIVREI<br>VGDTMKT<br>TVTV | Mus<br>musculu<br>s              |
| 1 | 1.00 | 1 | 1 | 0 | 0      | 0 | 0 | 0 | t | 44858 | NLRGDLQ<br>VLA               | Cavia<br>porcellu<br>s           |
| 1 | 1.00 | 1 | 1 | 0 | -0.003 | 0 | 0 | 0 | t | 58834 | SKGCKITCF<br>LTAAGY          | Mus<br>musculu<br>s              |
| 1 | 1.00 | 1 | 1 | 0 | 0      | 0 | 0 | 0 | t | 43242 | NANPNAN<br>PNANP             | Mus<br>musculu<br>s              |
| 1 | 1.00 | 1 | 1 | 0 | 0      | 0 | 0 | 0 | t | 43242 | NANPNAN<br>PNANP             | Mus<br>musculu<br>s              |
| 1 | 1.00 | 1 | 1 | 0 | 0      | 0 | 0 | 0 | t | 41375 | MEILGIAIN<br>RYNGLTLR<br>G   | Mus<br>musculu<br>s              |
| 1 | 1.00 | 1 | 1 | 0 | -0.003 | 0 | 0 | 0 | t | 46313 | NTWEGQA<br>ASAALGAL          | Oryctola<br>gus<br>cuniculu<br>s |

|   |      |   |   |   |        |   |   |   |   |       |                              |                                  |
|---|------|---|---|---|--------|---|---|---|---|-------|------------------------------|----------------------------------|
| 1 | 1.00 | 1 | 1 | 0 | -0.003 | 0 | 0 | 0 | t | 38229 | LNHLKSEM<br>EQRLRERD<br>EELE | Oryctola<br>gus<br>cuniculu<br>s |
| 1 | 1.00 | 1 | 1 | 0 | -0.003 | 0 | 0 | 0 | t | 58404 | SHRLHNT<br>MPSES             | Oryctola<br>gus<br>cuniculu<br>s |
| 1 | 1.00 | 1 | 1 | 0 | 0      | 0 | 0 | 0 | t | 58404 | SHRLHNT<br>MPSES             | Mus<br>musculu<br>s              |
| 1 | 1.00 | 1 | 1 | 0 | 0.002  | 0 | 0 | 0 | t | 43215 | NALTQPV<br>DQLLK             | Rattus<br>norvegic<br>us         |
| 1 | 1.00 | 1 | 1 | 0 | 0      | 0 | 0 | 0 | t | 45824 | NSGILKDF<br>WGDYLQY<br>DKPY  | Mus<br>musculu<br>s              |
| 1 | 1.00 | 1 | 1 | 0 | 0      | 0 | 0 | 0 | t | 38229 | LNHLKSEM<br>EQRLRERD<br>EELE | Mus<br>musculu<br>s              |
| 1 | 1.00 | 1 | 1 | 0 | -0.003 | 0 | 0 | 0 | t | 39230 | LRTQFFI                      | Oryctola<br>gus<br>cuniculu<br>s |
| 1 | 1.00 | 1 | 1 | 0 | 0      | 0 | 0 | 0 | t | 45824 | NSGILKDF<br>WGDYLQY<br>DKPY  | Mus<br>musculu<br>s              |
| 1 | 1.00 | 1 | 1 | 0 | 0      | 0 | 0 | 0 | t | 45824 | NSGILKDF<br>WGDYLQY<br>DKPY  | Mus<br>musculu<br>s              |
| 1 | 1.00 | 1 | 1 | 0 | -0.003 | 0 | 0 | 0 | t | 38229 | LNHLKSEM<br>EQRLRERD<br>EELE | Oryctola<br>gus<br>cuniculu<br>s |
| 1 | 1.00 | 1 | 1 | 0 | -0.003 | 0 | 0 | 0 | t | 37924 | LLVRMKR<br>AELYCPRP          | Oryctola<br>gus<br>cuniculu<br>s |
| 1 | 1.00 | 1 | 1 | 0 | -0.003 | 0 | 0 | 0 | t | 38215 | LNFKGRW<br>LRDRL             | Oryctola<br>gus<br>cuniculu<br>s |

|   |      |   |   |   |        |   |   |   |   |       |                               |                                  |
|---|------|---|---|---|--------|---|---|---|---|-------|-------------------------------|----------------------------------|
| 1 | 1.00 | 1 | 1 | 0 | 0      | 0 | 0 | 0 | t | 45824 | NSGILKDF<br>WGDYLQY<br>DKPY   | Mus<br>musculu<br>s              |
| 1 | 1.00 | 1 | 1 | 0 | 0.012  | 0 | 0 | 0 | t | 58402 | SHRELWA<br>K                  | Mus<br>musculu<br>s              |
| 1 | 1.00 | 1 | 1 | 0 | -0.003 | 0 | 0 | 0 | t | 43215 | NALTQPV<br>DQLLK              | Oryctola<br>gus<br>cuniculu<br>s |
| 1 | 1.00 | 1 | 1 | 0 | -0.003 | 0 | 0 | 0 | t | 58397 | SHQHTDS<br>NPSAT              | Oryctola<br>gus<br>cuniculu<br>s |
| 1 | 1.00 | 1 | 1 | 0 | 0      | 0 | 0 | 0 | t | 45824 | NSGILKDF<br>WGDYLQY<br>DKPY   | Mus<br>musculu<br>s              |
| 1 | 1.00 | 1 | 1 | 0 | 0      | 0 | 0 | 0 | t | 45824 | NSGILKDF<br>WGDYLQY<br>DKPY   | Mus<br>musculu<br>s              |
| 1 | 1.00 | 1 | 1 | 0 | 0      | 0 | 0 | 0 | t | 45824 | NSGILKDF<br>WGDYLQY<br>DKPY   | Mus<br>musculu<br>s              |
| 1 | 1.00 | 1 | 1 | 0 | 0      | 0 | 0 | 0 | t | 47126 | PDKEVLYQ<br>QYDEEMEE<br>CSQAA | Homo<br>sapiens                  |
| 1 | 1.00 | 1 | 1 | 0 | 0      | 0 | 0 | 0 | t | 43242 | NANPNAN<br>PNANP              | Mus<br>musculu<br>s              |
| 1 | 1.00 | 1 | 1 | 0 | -0.003 | 0 | 0 | 0 | t | 37056 | LKVIRKNIV<br>KKMIE            | Oryctola<br>gus<br>cuniculu<br>s |
| 1 | 1.00 | 1 | 1 | 0 | 0      | 0 | 0 | 0 | t | 51001 | QHGHMH<br>GS                  | Mus<br>musculu<br>s              |
| 1 | 1.00 | 1 | 1 | 0 | 0      | 0 | 0 | 0 | t | 58388 | SHLVEALY<br>LVCGERG           | Mus<br>musculu<br>s              |
| 1 | 1.00 | 1 | 1 | 0 | 0      | 0 | 0 | 0 | t | 58388 | SHLVEALY<br>LVCGERG           | Mus<br>musculu<br>s              |
| 1 | 1.00 | 1 | 1 | 0 | 0      | 0 | 0 | 0 | t | 58388 | SHLVEALY<br>LVCGERG           | Mus<br>musculu<br>s              |



|   |      |   |   |   |        |   |   |   |   |       |                             |                          |
|---|------|---|---|---|--------|---|---|---|---|-------|-----------------------------|--------------------------|
| 1 | 1.00 | 1 | 1 | 0 | -0.002 | 0 | 0 | 0 | t | 44619 | NKVLTVQT<br>IDNALSKR<br>NEK | Mus<br>musculu<br>s      |
| 1 | 1.00 | 1 | 1 | 0 | -0.001 | 0 | 0 | 0 | t | 44619 | NKVLTVQT<br>IDNALSKR<br>NEK | Homo<br>sapiens          |
| 1 | 1.00 | 1 | 1 | 0 | 0      | 0 | 0 | 0 | t | 45824 | NSGILKDF<br>WGDYLQY<br>DKPY | Mus<br>musculu<br>s      |
| 1 | 1.00 | 1 | 1 | 0 | -0.003 | 0 | 0 | 0 | t | 44619 | NKVLTVQT<br>IDNALSKR<br>NEK | Mus<br>musculu<br>s      |
| 1 | 1.00 | 1 | 1 | 0 | 0      | 0 | 0 | 0 | t | 43215 | NALTQPV<br>DQLLK            | Rattus<br>norvegic<br>us |
| 1 | 1.00 | 1 | 1 | 0 | 0      | 0 | 0 | 0 | t | 56275 | RVEHAVVY<br>YVYSPSR         | Mus<br>musculu<br>s      |
| 1 | 1.00 | 1 | 1 | 0 | 0      | 0 | 0 | 0 | t | 43246 | NANPNAN<br>PNANPNA<br>NP    | Mus<br>musculu<br>s      |
| 1 | 1.00 | 1 | 1 | 0 | 0.005  | 0 | 0 | 0 | t | 45824 | NSGILKDF<br>WGDYLQY<br>DKPY | Gallus<br>gallus         |
| 1 | 1.00 | 1 | 1 | 0 | 0      | 0 | 0 | 0 | t | 43246 | NANPNAN<br>PNANPNA<br>NP    | Mus<br>musculu<br>s      |
| 1 | 1.00 | 1 | 1 | 0 | 0      | 0 | 0 | 0 | t | 43246 | NANPNAN<br>PNANPNA<br>NP    | Mus<br>musculu<br>s      |
| 1 | 1.00 | 1 | 1 | 0 | 0      | 0 | 0 | 0 | t | 53998 | RGTLIGQV<br>DRLKDKV<br>NNTL | Mus<br>musculu<br>s      |
| 1 | 1.00 | 1 | 1 | 0 | 0      | 0 | 0 | 0 | t | 44616 | NKVIWDR<br>DWMYP            | Mus<br>musculu<br>s      |
| 1 | 1.00 | 1 | 1 | 0 | 0      | 0 | 0 | 0 | t | 45824 | NSGILKDF<br>WGDYLQY<br>DKPY | Mus<br>musculu<br>s      |

|   |      |   |   |   |        |   |   |   |   |       |                              |                                  |
|---|------|---|---|---|--------|---|---|---|---|-------|------------------------------|----------------------------------|
| 1 | 1.00 | 1 | 1 | 0 | -0.003 | 0 | 0 | 0 | t | 50767 | QFGRDVS<br>DFTDSVRD<br>PK    | Oryctola<br>gus<br>cuniculu<br>s |
| 1 | 1.00 | 1 | 1 | 0 | 0.004  | 0 | 0 | 0 | t | 46371 | NVESQPG<br>GQPNT             | Mus<br>musculu<br>s              |
| 1 | 1.00 | 1 | 1 | 0 | 0      | 0 | 0 | 0 | t | 45824 | NSGILKDF<br>WGDYLQY<br>DKPY  | Mus<br>musculu<br>s              |
| 1 | 1.00 | 1 | 1 | 0 | 0      | 0 | 0 | 0 | t | 45824 | NSGILKDF<br>WGDYLQY<br>DKPY  | Mus<br>musculu<br>s              |
| 1 | 1.00 | 1 | 1 | 0 | 0      | 0 | 0 | 0 | t | 49928 | PVPAPRRK<br>VGSDCGS          | Sus<br>scrofa                    |
| 1 | 1.00 | 1 | 1 | 0 | 0      | 0 | 0 | 0 | t | 49319 | PSDKHIEQ<br>YLKKIENSI<br>S   | Mus<br>musculu<br>s              |
| 1 | 1.00 | 1 | 1 | 0 | 0      | 0 | 0 | 0 | t | 52441 | QSTHVDIR<br>TLEDLLMG<br>TLGI | Mus<br>musculu<br>s              |
| 1 | 1.00 | 1 | 1 | 0 | 0      | 0 | 0 | 0 | t | 43246 | NANPNAN<br>PNANPNA<br>NP     | Mus<br>musculu<br>s              |
| 1 | 1.00 | 1 | 1 | 0 | 0      | 0 | 0 | 0 | t | 48136 | PKSAET                       | Mus<br>musculu<br>s              |
| 1 | 1.00 | 1 | 1 | 0 | 0      | 0 | 0 | 0 | t | 39183 | LRRDLAS<br>REAKKQVE<br>KALE  | Homo<br>sapiens                  |
| 1 | 1.00 | 1 | 1 | 0 | 0      | 0 | 0 | 0 | t | 39917 | LTGKPAVI<br>PDREILYQ<br>QFDE | Mus<br>musculu<br>s              |
| 1 | 1.00 | 1 | 1 | 0 | 0      | 0 | 0 | 0 | t | 43246 | NANPNAN<br>PNANPNA<br>NP     | Mus<br>musculu<br>s              |
| 1 | 1.00 | 1 | 1 | 0 | 0      | 0 | 0 | 0 | t | 39183 | LRRDLAS<br>REAKKQVE<br>KALE  | Rattus<br>norvegic<br>us         |
| 1 | 1.00 | 1 | 1 | 0 | 0      | 0 | 0 | 0 | t | 39917 | LTGKPAVI<br>PDREILYQ<br>QFDE | Mus<br>musculu<br>s              |

|   |      |   |   |   |        |   |   |   |   |       |                              |                                  |
|---|------|---|---|---|--------|---|---|---|---|-------|------------------------------|----------------------------------|
| 1 | 1.00 | 1 | 1 | 0 | 0      | 0 | 0 | 0 | t | 43246 | NANPNAN<br>PNANPNA<br>NP     | Mus<br>musculu<br>s              |
| 1 | 1.00 | 1 | 1 | 0 | 0      | 0 | 0 | 0 | t | 50761 | QFGPNAG<br>QRMPRA            | Homo<br>sapiens                  |
| 1 | 1.00 | 1 | 1 | 0 | 0      | 0 | 0 | 0 | t | 50761 | QFGPNAG<br>QRMPRA            | Homo<br>sapiens                  |
| 1 | 1.00 | 1 | 1 | 0 | 0      | 0 | 0 | 0 | t | 43242 | NANPNAN<br>PNANP             | Homo<br>sapiens                  |
| 1 | 1.00 | 1 | 1 | 0 | 0      | 0 | 0 | 0 | t | 47679 | PGIKADSL<br>DIDIERNV<br>VTVR | Mus<br>musculu<br>s              |
| 1 | 1.00 | 1 | 1 | 0 | 0      | 0 | 0 | 0 | t | 50761 | QFGPNAG<br>QRMPRA            | Homo<br>sapiens                  |
| 1 | 1.00 | 1 | 1 | 0 | 0      | 0 | 0 | 0 | t | 49319 | PSDKHIEQ<br>YLKKIENSI<br>S   | Mus<br>musculu<br>s              |
| 1 | 1.00 | 1 | 1 | 0 | 0      | 0 | 0 | 0 | t | 43246 | NANPNAN<br>PNANPNA<br>NP     | Mus<br>musculu<br>s              |
| 1 | 1.00 | 1 | 1 | 0 | 0      | 0 | 0 | 0 | t | 58383 | SHLQLIYNL<br>T               | Sus<br>scrofa                    |
| 1 | 1.00 | 1 | 1 | 0 | 0      | 0 | 0 | 0 | t | 43242 | NANPNAN<br>PNANP             | Homo<br>sapiens                  |
| 1 | 1.00 | 1 | 1 | 0 | 0      | 0 | 0 | 0 | t | 49319 | PSDKHIEQ<br>YLKKIENSI<br>S   | Mus<br>musculu<br>s              |
| 1 | 1.00 | 1 | 1 | 0 | -0.003 | 0 | 0 | 0 | t | 38919 | LQNDPTT<br>NVA               | Oryctola<br>gus<br>cuniculu<br>s |
| 1 | 1.00 | 1 | 1 | 0 | 0      | 0 | 0 | 0 | t | 43246 | NANPNAN<br>PNANPNA<br>NP     | Mus<br>musculu<br>s              |
| 1 | 1.00 | 1 | 1 | 0 | 0      | 0 | 0 | 0 | t | 43242 | NANPNAN<br>PNANP             | Mus<br>musculu<br>s              |

[illegible]

|   |      |   |   |   |        |   |   |   |   |       |                             |                                  |
|---|------|---|---|---|--------|---|---|---|---|-------|-----------------------------|----------------------------------|
| 1 | 1.00 | 1 | 1 | 0 | 0      | 0 | 0 | 0 | t | 43246 | NANPNAN<br>PNANPNA<br>NP    | Mus<br>musculu<br>s              |
| 1 | 1.00 | 1 | 1 | 0 | 0      | 0 | 0 | 0 | t | 43246 | NANPNAN<br>PNANPNA<br>NP    | Mus<br>musculu<br>s              |
| 1 | 1.00 | 1 | 1 | 0 | -0.004 | 0 | 0 | 0 | t | 43246 | NANPNAN<br>PNANPNA<br>NP    | Mus<br>musculu<br>s              |
| 1 | 1.00 | 1 | 1 | 0 | 0      | 0 | 0 | 0 | t | 43246 | NANPNAN<br>PNANPNA<br>NP    | Mus<br>musculu<br>s              |
| 1 | 1.00 | 1 | 1 | 0 | 0      | 0 | 0 | 0 | t | 39183 | LRRDLAS<br>REAKKQVE<br>KALE | Homo<br>sapiens                  |
| 1 | 1.00 | 1 | 1 | 0 | -0.003 | 0 | 0 | 0 | t | 43246 | NANPNAN<br>PNANPNA<br>NP    | Oryctola<br>gus<br>cuniculu<br>s |
| 1 | 1.00 | 1 | 1 | 0 | -0.004 | 0 | 0 | 0 | t | 43246 | NANPNAN<br>PNANPNA<br>NP    | Mus<br>musculu<br>s              |
| 1 | 1.00 | 1 | 1 | 0 | 0      | 0 | 0 | 0 | t | 39183 | LRRDLAS<br>REAKKQVE<br>KALE | Mus<br>musculu<br>s              |
| 1 | 1.00 | 1 | 1 | 0 | 0      | 0 | 0 | 0 | t | 39183 | LRRDLAS<br>REAKKQVE<br>KALE | Mus<br>musculu<br>s              |
| 1 | 1.00 | 1 | 1 | 0 | 0      | 0 | 0 | 0 | t | 39183 | LRRDLAS<br>REAKKQVE<br>KALE | Mus<br>musculu<br>s              |
| 1 | 1.00 | 1 | 1 | 0 | 0      | 0 | 0 | 0 | t | 51906 | QPQPFPP<br>QLP              | Mus<br>musculu<br>s              |
| 1 | 1.00 | 1 | 1 | 0 | 0      | 0 | 0 | 0 | t | 44556 | NKNDNKN<br>DNKND            | Mus<br>musculu<br>s              |

|   |      |   |   |   |        |   |   |   |   |       |                              |                                  |
|---|------|---|---|---|--------|---|---|---|---|-------|------------------------------|----------------------------------|
| 1 | 1.00 | 1 | 1 | 0 | -0.004 | 0 | 0 | 0 | t | 46417 | NVLDVNAI<br>DIEEPS           | Oryctola<br>gus<br>cuniculu<br>s |
| 1 | 1.00 | 1 | 1 | 0 | -0.003 | 0 | 0 | 0 | t | 44555 | NKNDNKN<br>D                 | Oryctola<br>gus<br>cuniculu<br>s |
| 1 | 1.00 | 1 | 1 | 0 | 0      | 0 | 0 | 0 | t | 43248 | NANPNAN<br>PNANPNA<br>NPNANP | Homo<br>sapiens                  |
| 1 | 1.00 | 1 | 1 | 0 | -0.003 | 0 | 0 | 0 | t | 54688 | RLNNSKIYI<br>NGRLIDQK<br>PI  | Mus<br>musculu<br>s              |
| 1 | 1.00 | 1 | 1 | 0 | 0      | 0 | 0 | 0 | t | 43242 | NANPNAN<br>PNANP             | Mus<br>musculu<br>s              |
| 1 | 1.00 | 1 | 1 | 0 | -0.003 | 0 | 0 | 0 | t | 56290 | RVFPRGTV<br>ENPDKARE<br>LLNK | Oryctola<br>gus<br>cuniculu<br>s |
| 1 | 1.00 | 1 | 1 | 0 | 0      | 0 | 0 | 0 | t | 48670 | PNLRGDL<br>QVLAQKV<br>ARTLP  | Mus<br>musculu<br>s              |
| 1 | 1.00 | 1 | 1 | 0 | -0.004 | 0 | 0 | 0 | t | 48670 | PNLRGDL<br>QVLAQKV<br>ARTLP  | Mus<br>musculu<br>s              |
| 1 | 1.00 | 1 | 1 | 0 | 0      | 0 | 0 | 0 | t | 43248 | NANPNAN<br>PNANPNA<br>NPNANP | Mus<br>musculu<br>s              |
| 1 | 1.00 | 1 | 1 | 0 | 0      | 0 | 0 | 0 | t | 52085 | QQPFPQP<br>QQQ               | Mus<br>musculu<br>s              |
| 1 | 1.00 | 1 | 1 | 0 | 0      | 0 | 0 | 0 | t | 52085 | QQPFPQP<br>QQQ               | Mus<br>musculu<br>s              |
| 1 | 1.00 | 1 | 1 | 0 | 0      | 0 | 0 | 0 | t | 57569 | SENHGNY<br>SAQVGAS<br>Q      | Mus<br>musculu<br>s              |

|   |      |   |   |   |        |   |   |   |   |       |                              |                                  |
|---|------|---|---|---|--------|---|---|---|---|-------|------------------------------|----------------------------------|
| 1 | 1.00 | 1 | 1 | 0 | 0      | 0 | 0 | 0 | t | 43248 | NANPNAN<br>PNANPNA<br>NPNANP | Mus<br>musculu<br>s              |
| 1 | 1.00 | 1 | 1 | 0 | 0      | 0 | 0 | 0 | t | 43248 | NANPNAN<br>PNANPNA<br>NPNANP | Mus<br>musculu<br>s              |
| 1 | 1.00 | 1 | 1 | 0 | 0      | 0 | 0 | 0 | t | 44491 | NKFLNQCS<br>VSYLEMNS<br>MIPY | Mus<br>musculu<br>s              |
| 1 | 1.00 | 1 | 1 | 0 | 0.006  | 0 | 0 | 0 | t | 47063 | PDCAICWE<br>PSPWPAP<br>E     | Ovis<br>aries                    |
| 1 | 1.00 | 1 | 1 | 0 | 0      | 0 | 0 | 0 | t | 59192 | SLINTNGS<br>WHIN             | Rattus<br>norvegic<br>us         |
| 1 | 1.00 | 1 | 1 | 0 | 0      | 0 | 0 | 0 | t | 44491 | NKFLNQCS<br>VSYLEMNS<br>MIPY | Mus<br>musculu<br>s              |
| 1 | 1.00 | 1 | 1 | 0 | 0      | 0 | 0 | 0 | t | 39998 | LTKSGSTY<br>PVLNVT           | Mus<br>musculu<br>s              |
| 1 | 1.00 | 1 | 1 | 0 | 0      | 0 | 0 | 0 | t | 44491 | NKFLNQCS<br>VSYLEMNS<br>MIPY | Mus<br>musculu<br>s              |
| 1 | 1.00 | 1 | 1 | 0 | -0.004 | 0 | 0 | 0 | t | 48669 | PNLRGDL<br>QVLA              | Sus<br>scrofa                    |
| 1 | 1.00 | 1 | 1 | 0 | 0      | 0 | 0 | 0 | t | 43190 | NAKATYEA<br>ALKQYEAD<br>L    | Mus<br>musculu<br>s              |
| 1 | 1.00 | 1 | 1 | 0 | -0.003 | 0 | 0 | 0 | t | 52494 | QTDEIKND<br>NIQTDEIK<br>NDNI | Oryctola<br>gus<br>cuniculu<br>s |
| 1 | 1.00 | 1 | 1 | 0 | 0      | 0 | 0 | 0 | t | 55818 | RSDYKFYE<br>DANGTRD<br>HKKG  | Chinchill<br>a<br>lanigera       |
| 1 | 1.00 | 1 | 1 | 0 | 0      | 0 | 0 | 0 | t | 51826 | QPFPQPQ<br>LPYPQPQ           | Mus<br>musculu<br>s              |

|   |      |   |   |   |        |   |   |   |   |       |                              |                                  |
|---|------|---|---|---|--------|---|---|---|---|-------|------------------------------|----------------------------------|
| 1 | 1.00 | 1 | 1 | 0 | -0.003 | 0 | 0 | 0 | t | 45817 | NSGCFRHL<br>DEREECKC<br>LL   | Oryctola<br>gus<br>cuniculu<br>s |
| 1 | 1.00 | 1 | 1 | 0 | 0      | 0 | 0 | 0 | t | 57575 | SENMHIDI<br>YLYTS            | Oryctola<br>gus<br>cuniculu<br>s |
| 1 | 1.00 | 1 | 1 | 0 | 0      | 0 | 0 | 0 | t | 48668 | PNLRGDL<br>QVL               | Cavia<br>porcellu<br>s           |
| 1 | 1.00 | 1 | 1 | 0 | 0      | 0 | 0 | 0 | t | 46443 | NVPEKQT                      | Mus<br>musculu<br>s              |
| 1 | 1.00 | 1 | 1 | 0 | 0      | 0 | 0 | 0 | t | 45464 | NPRENKLK<br>QPGDRAD<br>GQPAG | Homo<br>sapiens                  |
| 1 | 1.00 | 1 | 1 | 0 | 0      | 0 | 0 | 0 | t | 46443 | NVPEKQT                      | Mus<br>musculu<br>s              |
| 1 | 1.00 | 1 | 1 | 0 | 0      | 0 | 0 | 0 | t | 46443 | NVPEKQT                      | Mus<br>musculu<br>s              |
| 1 | 1.00 | 1 | 1 | 0 | 0.005  | 0 | 0 | 0 | t | 48168 | PKVQSLVS<br>DFFGGKEL<br>NKSI | Homo<br>sapiens                  |
| 1 | 1.00 | 1 | 1 | 0 | -0.008 | 0 | 0 | 0 | t | 58886 | SKLNESINK<br>AMININKF<br>LN  | Mus<br>musculu<br>s              |
| 1 | 1.00 | 1 | 1 | 0 | 0      | 0 | 0 | 0 | t | 51908 | QPQPFPS<br>QQP               | Mus<br>musculu<br>s              |
| 1 | 1.00 | 1 | 1 | 0 | -0.003 | 0 | 0 | 0 | t | 56306 | RVHVSKEE<br>QYYDYED<br>ATFE  | Oryctola<br>gus<br>cuniculu<br>s |
| 1 | 1.00 | 1 | 1 | 0 | 0      | 0 | 0 | 0 | t | 41320 | MEECASH<br>LPYFEQG<br>MQLAEQ | Homo<br>sapiens                  |
| 1 | 1.00 | 1 | 1 | 0 | 0      | 0 | 0 | 0 | t | 49319 | PSDKHIEQ<br>YLKKIENSI<br>S   | Mus<br>musculu<br>s              |



|   |      |   |   |   |        |   |   |   |   |       |                              |                                  |
|---|------|---|---|---|--------|---|---|---|---|-------|------------------------------|----------------------------------|
| 1 | 1.00 | 1 | 1 | 0 | -0.002 | 0 | 0 | 0 | t | 58886 | SKLNESINK<br>AMININKF<br>LN  | Mus<br>musculu<br>s              |
| 1 | 1.00 | 1 | 1 | 0 | 0      | 0 | 0 | 0 | t | 49319 | PSDKHIEQ<br>YLKKIENSI<br>S   | Mus<br>musculu<br>s              |
| 1 | 1.00 | 1 | 1 | 0 | -0.001 | 0 | 0 | 0 | t | 58886 | SKLNESINK<br>AMININKF<br>LN  | Homo<br>sapiens                  |
| 1 | 1.00 | 1 | 1 | 0 | 0      | 0 | 0 | 0 | t | 44491 | NKFLNQCS<br>VSYLMNS<br>MIPY  | Mus<br>musculu<br>s              |
| 1 | 1.00 | 1 | 1 | 0 | 0      | 0 | 0 | 0 | t | 44491 | NKFLNQCS<br>VSYLMNS<br>MIPY  | Mus<br>musculu<br>s              |
| 1 | 1.00 | 1 | 1 | 0 | 0      | 0 | 0 | 0 | t | 48664 | PNKTACM<br>YGGVTLH<br>DNNRLT | Oryctola<br>gus<br>cuniculu<br>s |
| 1 | 1.00 | 1 | 1 | 0 | 0.005  | 0 | 0 | 0 | t | 58886 | SKLNESINK<br>AMININKF<br>LN  | Gallus<br>gallus                 |
| 1 | 1.00 | 1 | 1 | 0 | 0      | 0 | 0 | 0 | t | 49319 | PSDKHIEQ<br>YLKKIENSI<br>S   | Mus<br>musculu<br>s              |
| 1 | 1.00 | 1 | 1 | 0 | 0      | 0 | 0 | 0 | t | 47045 | PCSICSNN<br>PTCWAICK         | Mus<br>musculu<br>s              |
| 1 | 1.00 | 1 | 1 | 0 | 0      | 0 | 0 | 0 | t | 49319 | PSDKHIEQ<br>YLKKIENSI<br>S   | Mus<br>musculu<br>s              |
| 1 | 1.00 | 1 | 1 | 0 | 0      | 0 | 0 | 0 | t | 49319 | PSDKHIEQ<br>YLKKIENSI<br>S   | Mus<br>musculu<br>s              |
| 1 | 1.00 | 1 | 1 | 0 | 0      | 0 | 0 | 0 | t | 44491 | NKFLNQCS<br>VSYLMNS<br>MIPY  | Mus<br>musculu<br>s              |
| 1 | 1.00 | 1 | 1 | 0 | -0.002 | 0 | 0 | 0 | t | 58886 | SKLNESINK<br>AMININKF<br>LN  | Mus<br>musculu<br>s              |

|   |      |   |   |   |        |   |   |   |   |       |                              |                                  |
|---|------|---|---|---|--------|---|---|---|---|-------|------------------------------|----------------------------------|
| 1 | 1.00 | 1 | 1 | 0 | -0.003 | 0 | 0 | 0 | t | 58886 | SKLNESINK<br>AMININKF<br>LN  | Mus<br>musculu<br>s              |
| 1 | 1.00 | 1 | 1 | 0 | 0      | 0 | 0 | 0 | t | 43317 | NATAEGR<br>AINRRVE           | Mus<br>musculu<br>s              |
| 1 | 1.00 | 1 | 1 | 0 | 0      | 0 | 0 | 0 | t | 51072 | QIGNTVTP<br>TVTFTMD<br>GDTMT | Mus<br>musculu<br>s              |
| 1 | 1.00 | 1 | 1 | 0 | 0      | 0 | 0 | 0 | t | 51072 | QIGNTVTP<br>TVTFTMD<br>GDTMT | Mus<br>musculu<br>s              |
| 1 | 1.00 | 1 | 1 | 0 | 0      | 0 | 0 | 0 | t | 44491 | NKFLNQCS<br>VSYLEMNS<br>MIPY | Mus<br>musculu<br>s              |
| 1 | 1.00 | 1 | 1 | 0 | -0.002 | 0 | 0 | 0 | t | 44491 | NKFLNQCS<br>VSYLEMNS<br>MIPY | Mus<br>musculu<br>s              |
| 1 | 1.00 | 1 | 1 | 0 | 0      | 0 | 0 | 0 | t | 44491 | NKFLNQCS<br>VSYLEMNS<br>MIPY | Mus<br>musculu<br>s              |
| 1 | 1.00 | 1 | 1 | 0 | -0.002 | 0 | 0 | 0 | t | 44491 | NKFLNQCS<br>VSYLEMNS<br>MIPY | Mus<br>musculu<br>s              |
| 1 | 1.00 | 1 | 1 | 0 | 0      | 0 | 0 | 0 | t | 44491 | NKFLNQCS<br>VSYLEMNS<br>MIPY | Mus<br>musculu<br>s              |
| 1 | 1.00 | 1 | 1 | 0 | 0      | 0 | 0 | 0 | t | 44491 | NKFLNQCS<br>VSYLEMNS<br>MIPY | Mus<br>musculu<br>s              |
| 1 | 1.00 | 1 | 1 | 0 | 0      | 0 | 0 | 0 | t | 38918 | LQND                         | Mus<br>musculu<br>s              |
| 1 | 1.00 | 1 | 1 | 0 | -0.003 | 0 | 0 | 0 | t | 45491 | NPTI                         | Oryctola<br>gus<br>cuniculu<br>s |

|   |      |   |   |   |        |   |   |   |   |       |                              |                                  |
|---|------|---|---|---|--------|---|---|---|---|-------|------------------------------|----------------------------------|
| 1 | 1.00 | 1 | 1 | 0 | 0      | 0 | 0 | 0 | t | 57620 | SESHNFDA<br>VMSKLGV<br>SWATR | Mus<br>musculu<br>s              |
| 1 | 1.00 | 1 | 1 | 0 | 0      | 0 | 0 | 0 | t | 57620 | SESHNFDA<br>VMSKLGV<br>SWATR | Mus<br>musculu<br>s              |
| 1 | 1.00 | 1 | 1 | 0 | 0      | 0 | 0 | 0 | t | 44491 | NKFLNQCS<br>VSYLMNS<br>MIPY  | Mus<br>musculu<br>s              |
| 1 | 1.00 | 1 | 1 | 0 | 0      | 0 | 0 | 0 | t | 43317 | NATAEGR<br>AINRRVE           | Mus<br>musculu<br>s              |
| 1 | 1.00 | 1 | 1 | 0 | 0      | 0 | 0 | 0 | t | 43317 | NATAEGR<br>AINRRVE           | Mus<br>musculu<br>s              |
| 1 | 1.00 | 1 | 1 | 0 | -0.008 | 0 | 0 | 0 | t | 44491 | NKFLNQCS<br>VSYLMNS<br>MIPY  | Mus<br>musculu<br>s              |
| 1 | 1.00 | 1 | 1 | 0 | 0      | 0 | 0 | 0 | t | 43317 | NATAEGR<br>AINRRVE           | Mus<br>musculu<br>s              |
| 1 | 1.00 | 1 | 1 | 0 | 0      | 0 | 0 | 0 | t | 43317 | NATAEGR<br>AINRRVE           | Mus<br>musculu<br>s              |
| 1 | 1.00 | 1 | 1 | 0 | 0      | 0 | 0 | 0 | t | 43317 | NATAEGR<br>AINRRVE           | Mus<br>musculu<br>s              |
| 1 | 1.00 | 1 | 1 | 0 | 0      | 0 | 0 | 0 | t | 43317 | NATAEGR<br>AINRRVE           | Mus<br>musculu<br>s              |
| 1 | 1.00 | 1 | 1 | 0 | -0.003 | 0 | 0 | 0 | t | 51393 | QLKLNWF<br>KKGSS             | Oryctola<br>gus<br>cuniculu<br>s |
| 1 | 1.00 | 1 | 1 | 0 | -0.003 | 0 | 0 | 0 | t | 51393 | QLKLNWF<br>KKGSS             | Oryctola<br>gus<br>cuniculu<br>s |
| 1 | 1.00 | 1 | 1 | 0 | 0      | 0 | 0 | 0 | t | 60292 | SPTRAVNE<br>LFGM             | Mus<br>musculu<br>s              |

|   |      |   |   |   |        |   |   |   |   |       |                             |                                  |
|---|------|---|---|---|--------|---|---|---|---|-------|-----------------------------|----------------------------------|
| 1 | 1.00 | 1 | 1 | 0 | -0.003 | 0 | 0 | 0 | t | 40110 | LTPLEELY                    | Oryctola<br>gus<br>cuniculu<br>s |
| 1 | 1.00 | 1 | 1 | 0 | -0.003 | 0 | 0 | 0 | t | 55733 | RRRTQKAP<br>KRIRLPH         | Oryctola<br>gus<br>cuniculu<br>s |
| 1 | 1.00 | 1 | 1 | 0 | 0      | 0 | 0 | 0 | t | 56885 | SAL TSAIA<br>GFVFSC         | Ovis<br>aries                    |
| 1 | 1.00 | 1 | 1 | 0 | 0.002  | 0 | 0 | 0 | t | 44476 | NKDKLFTV<br>WK              | Rattus<br>norvegic<br>us         |
| 1 | 1.00 | 1 | 1 | 0 | 0      | 0 | 0 | 0 | t | 45491 | NPTI                        | Oryctola<br>gus<br>cuniculu<br>s |
| 1 | 1.00 | 1 | 1 | 0 | -0.003 | 0 | 0 | 0 | t | 48993 | PQE QITQH<br>GSPYGRCA<br>NK | Oryctola<br>gus<br>cuniculu<br>s |
| 1 | 1.00 | 1 | 1 | 0 | 0.002  | 0 | 0 | 0 | t | 38522 | LPHSNL                      | Rattus<br>norvegic<br>us         |
| 1 | 1.00 | 1 | 1 | 0 | 0      | 0 | 0 | 0 | t | 38522 | LPHSNL                      | Rattus<br>norvegic<br>us         |
| 1 | 1.00 | 1 | 1 | 0 | 0      | 0 | 0 | 0 | t | 45491 | NPTI                        | Oryctola<br>gus<br>cuniculu<br>s |
| 1 | 1.00 | 1 | 1 | 0 | 0.002  | 0 | 0 | 0 | t | 38522 | LPHSNL                      | Rattus<br>norvegic<br>us         |
| 1 | 1.00 | 1 | 1 | 0 | 0      | 0 | 0 | 0 | t | 43116 | NAAGNAA<br>GNAAGNA<br>AG    | Mus<br>musculu<br>s              |
| 1 | 1.00 | 1 | 1 | 0 | 0      | 0 | 0 | 0 | t | 45491 | NPTI                        | Oryctola<br>gus<br>cuniculu<br>s |

|   |      |   |   |   |        |   |   |   |   |       |                              |                          |
|---|------|---|---|---|--------|---|---|---|---|-------|------------------------------|--------------------------|
| 1 | 1.00 | 1 | 1 | 0 | 0.002  | 0 | 0 | 0 | t | 44474 | NKDKLFAV<br>WK               | Rattus<br>norvegicus     |
| 1 | 1.00 | 1 | 1 | 0 | 0      | 0 | 0 | 0 | t | 45491 | NPTI                         | Oryctolagus<br>cuniculus |
| 1 | 1.00 | 1 | 1 | 0 | 0      | 0 | 0 | 0 | t | 37660 | LLPHSNLD<br>HILEPSIPW<br>KSK | Mus<br>musculus          |
| 1 | 1.00 | 1 | 1 | 0 | 0      | 0 | 0 | 0 | t | 37660 | LLPHSNLD<br>HILEPSIPW<br>KSK | Mus<br>musculus          |
| 1 | 1.00 | 1 | 1 | 0 | 0.002  | 0 | 0 | 0 | t | 44474 | NKDKLFAV<br>WK               | Rattus<br>norvegicus     |
| 1 | 1.00 | 1 | 1 | 0 | -0.004 | 0 | 0 | 0 | t | 49772 | PTSGDKID<br>MTPRAGV<br>LMLE  | Mus<br>musculus          |
| 1 | 1.00 | 1 | 1 | 0 | 0      | 0 | 0 | 0 | t | 58293 | SGVLTTC<br>GNTLTC            | Homo<br>sapiens          |
| 1 | 1.00 | 1 | 1 | 0 | -0.003 | 0 | 0 | 0 | t | 43348 | NAYCDKLC<br>KDKKADS          | Mus<br>musculus          |
| 1 | 1.00 | 1 | 1 | 0 | -0.006 | 0 | 0 | 0 | t | 43348 | NAYCDKLC<br>KDKKADS          | Oryctolagus<br>cuniculus |
| 1 | 1.00 | 1 | 1 | 0 | 0      | 0 | 0 | 0 | t | 37660 | LLPHSNLD<br>HILEPSIPW<br>KSK | Mus<br>musculus          |
| 1 | 1.00 | 1 | 1 | 0 | 0      | 0 | 0 | 0 | t | 45491 | NPTI                         | Oryctolagus<br>cuniculus |
| 1 | 1.00 | 1 | 1 | 0 | 0      | 0 | 0 | 0 | t | 37660 | LLPHSNLD<br>HILEPSIPW<br>KSK | Mus<br>musculus          |

|   |      |   |   |   |        |   |   |   |   |       |                             |                                  |
|---|------|---|---|---|--------|---|---|---|---|-------|-----------------------------|----------------------------------|
| 1 | 1.00 | 1 | 1 | 0 | 0      | 0 | 0 | 0 | t | 45491 | NPTI                        | Oryctola<br>gus<br>cuniculu<br>s |
| 1 | 1.00 | 1 | 1 | 0 | -0.007 | 0 | 0 | 0 | t | 53998 | RGTIGQV<br>DRLDKV<br>NNTL   | Homo<br>sapiens                  |
| 1 | 1.00 | 1 | 1 | 0 | 0      | 0 | 0 | 0 | t | 45491 | NPTI                        | Oryctola<br>gus<br>cuniculu<br>s |
| 1 | 1.00 | 1 | 1 | 0 | 0.004  | 0 | 0 | 0 | t | 53839 | RGDLQVL<br>AQK              | Mus<br>musculu<br>s              |
| 1 | 1.00 | 1 | 1 | 0 | -0.003 | 0 | 0 | 0 | t | 38312 | LNPTI                       | Oryctola<br>gus<br>cuniculu<br>s |
| 1 | 1.00 | 1 | 1 | 0 | 0      | 0 | 0 | 0 | t | 38031 | LMGYIPLV<br>GA              | Homo<br>sapiens                  |
| 1 | 1.00 | 1 | 1 | 0 | 0      | 0 | 0 | 0 | t | 53839 | RGDLQVL<br>AQK              | Cavia<br>porcellu<br>s           |
| 1 | 1.00 | 1 | 1 | 0 | 0      | 0 | 0 | 0 | t | 43411 | NDDASVD<br>FVAEPVK          | Mus<br>musculu<br>s              |
| 1 | 1.00 | 1 | 1 | 0 | 0      | 0 | 0 | 0 | t | 39391 | LSGQPAVI<br>PDREVLQ<br>QFDE | Mus<br>musculu<br>s              |
| 1 | 1.00 | 1 | 1 | 0 | 0      | 0 | 0 | 0 | t | 43411 | NDDASVD<br>FVAEPVK          | Mus<br>musculu<br>s              |
| 1 | 1.00 | 1 | 1 | 0 | 0      | 0 | 0 | 0 | t | 39391 | LSGQPAVI<br>PDREVLQ<br>QFDE | Homo<br>sapiens                  |
| 1 | 1.00 | 1 | 1 | 0 | 0      | 0 | 0 | 0 | t | 56366 | RVNAANK<br>KPEDLTN<br>DLET  | Homo<br>sapiens                  |

|   |      |   |   |   |        |   |   |   |   |       |                              |                                  |
|---|------|---|---|---|--------|---|---|---|---|-------|------------------------------|----------------------------------|
| 1 | 1.00 | 1 | 1 | 0 | 0      | 0 | 0 | 0 | t | 37660 | LLPHSNLD<br>HILEPSIPW<br>KSK | Mus<br>musculu<br>s              |
| 1 | 1.00 | 1 | 1 | 0 | 0      | 0 | 0 | 0 | t | 47669 | PGGPDRFT<br>LLTPGSH          | Mus<br>musculu<br>s              |
| 1 | 1.00 | 1 | 1 | 0 | -0.003 | 0 | 0 | 0 | t | 58252 | SGTENKPA<br>TG               | Oryctola<br>gus<br>cuniculu<br>s |
| 1 | 1.00 | 1 | 1 | 0 | 0      | 0 | 0 | 0 | t | 46993 | PAVIPDRE<br>VLYQQFDE<br>MEEC | Homo<br>sapiens                  |
| 1 | 1.00 | 1 | 1 | 0 | 0      | 0 | 0 | 0 | t | 43411 | NDDASVD<br>FVAEPVK           | Mus<br>musculu<br>s              |
| 1 | 1.00 | 1 | 1 | 0 | -0.003 | 0 | 0 | 0 | t | 47669 | PGGPDRFT<br>LLTPGSH          | Oryctola<br>gus<br>cuniculu<br>s |
| 1 | 1.00 | 1 | 1 | 0 | -0.003 | 0 | 0 | 0 | t | 47669 | PGGPDRFT<br>LLTPGSH          | Oryctola<br>gus<br>cuniculu<br>s |
| 1 | 1.00 | 1 | 1 | 0 | 0      | 0 | 0 | 0 | t | 45491 | NPTI                         | Oryctola<br>gus<br>cuniculu<br>s |
| 1 | 1.00 | 1 | 1 | 0 | 0      | 0 | 0 | 0 | t | 51374 | QLINTNGS<br>WHVN             | Rattus<br>norvegic<br>us         |
| 1 | 1.00 | 1 | 1 | 0 | 0      | 0 | 0 | 0 | t | 51374 | QLINTNGS<br>WHVN             | Rattus<br>norvegic<br>us         |
| 1 | 1.00 | 1 | 1 | 0 | 0      | 0 | 0 | 0 | t | 45768 | NSARARA<br>DSCRI             | Homo<br>sapiens                  |
| 1 | 1.00 | 1 | 1 | 0 | 0      | 0 | 0 | 0 | t | 58251 | SGTEEILEK<br>VSASQEI         | Homo<br>sapiens                  |
| 1 | 1.00 | 1 | 1 | 0 | -0.003 | 0 | 0 | 0 | t | 58251 | SGTEEILEK<br>VSASQEI         | Oryctola<br>gus<br>cuniculu<br>s |

|   |      |   |   |   |        |   |   |   |   |       |                             |                                  |
|---|------|---|---|---|--------|---|---|---|---|-------|-----------------------------|----------------------------------|
| 1 | 1.00 | 1 | 1 | 0 | 0      | 0 | 0 | 0 | t | 43242 | NANPNAN<br>PNANP            | Mus<br>musculu<br>s              |
| 1 | 1.00 | 1 | 1 | 0 | 0      | 0 | 0 | 0 | t | 44468 | NKCKMNL<br>QDNNGN<br>DIGFIG | Mus<br>musculu<br>s              |
| 1 | 1.00 | 1 | 1 | 0 | 0      | 0 | 0 | 0 | t | 45491 | NPTI                        | Oryctola<br>gus<br>cuniculu<br>s |
| 1 | 1.00 | 1 | 1 | 0 | -0.003 | 0 | 0 | 0 | t | 45491 | NPTI                        | Oryctola<br>gus<br>cuniculu<br>s |
| 1 | 1.00 | 1 | 1 | 0 | 0      | 0 | 0 | 0 | t | 45491 | NPTI                        | Oryctola<br>gus<br>cuniculu<br>s |
| 1 | 1.00 | 1 | 1 | 0 | 0      | 0 | 0 | 0 | t | 45491 | NPTI                        | Oryctola<br>gus<br>cuniculu<br>s |
| 1 | 1.00 | 1 | 1 | 0 | 0.006  | 0 | 0 | 0 | t | 53018 | QYPALT                      | Ovis<br>aries                    |
| 1 | 1.00 | 1 | 1 | 0 | 0      | 0 | 0 | 0 | t | 45491 | NPTI                        | Oryctola<br>gus<br>cuniculu<br>s |
| 1 | 1.00 | 1 | 1 | 0 | -0.003 | 0 | 0 | 0 | t | 45492 | NPTIAG                      | Oryctola<br>gus<br>cuniculu<br>s |
| 1 | 1.00 | 1 | 1 | 0 | 0      | 0 | 0 | 0 | t | 40281 | LVASNWy<br>NRQIERSS<br>RTLg | Mus<br>musculu<br>s              |
| 1 | 1.00 | 1 | 1 | 0 | 0      | 0 | 0 | 0 | t | 51372 | QLINTNGS<br>WHINSTA         | Homo<br>sapiens                  |
| 1 | 1.00 | 1 | 1 | 0 | -0.002 | 0 | 0 | 0 | t | 40281 | LVASNWy<br>NRQIERSS<br>RTLg | Mus<br>musculu<br>s              |



|   |      |   |   |   |        |   |   |   |   |       |                              |                                  |
|---|------|---|---|---|--------|---|---|---|---|-------|------------------------------|----------------------------------|
| 1 | 1.00 | 1 | 1 | 0 | -0.003 | 0 | 0 | 0 | t | 40281 | LVASNWY<br>NRQIERSS<br>RTLQ  | Mus<br>musculu<br>s              |
| 1 | 1.00 | 1 | 1 | 0 | -0.003 | 0 | 0 | 0 | t | 45492 | NPTIAG                       | Oryctola<br>gus<br>cuniculu<br>s |
| 1 | 1.00 | 1 | 1 | 0 | -0.002 | 0 | 0 | 0 | t | 44468 | NKCKMNL<br>QDNNGN<br>DIGFIG  | Mus<br>musculu<br>s              |
| 1 | 1.00 | 1 | 1 | 0 | -0.001 | 0 | 0 | 0 | t | 40281 | LVASNWY<br>NRQIERSS<br>RTLQ  | Homo<br>sapiens                  |
| 1 | 1.00 | 1 | 1 | 0 | 0      | 0 | 0 | 0 | t | 50180 | PYVEPTAP<br>QVL              | Oryctola<br>gus<br>cuniculu<br>s |
| 1 | 1.00 | 1 | 1 | 0 | 0      | 0 | 0 | 0 | t | 37660 | LLPHSNLD<br>HILEPSIPW<br>KSK | Mus<br>musculu<br>s              |
| 1 | 1.00 | 1 | 1 | 0 | 0      | 0 | 0 | 0 | t | 41218 | MDDDTERR<br>FPTHRSLP         | Mus<br>musculu<br>s              |
| 1 | 1.00 | 1 | 1 | 0 | 0.002  | 0 | 0 | 0 | t | 53326 | RDALPNTE<br>ASGPTHSE<br>E    | Rattus<br>norvegic<br>us         |
| 1 | 1.00 | 1 | 1 | 0 | 0      | 0 | 0 | 0 | t | 45492 | NPTIAG                       | Mus<br>musculu<br>s              |
| 1 | 1.00 | 1 | 1 | 0 | 0      | 0 | 0 | 0 | t | 37660 | LLPHSNLD<br>HILEPSIPW<br>KSK | Mus<br>musculu<br>s              |
| 1 | 1.00 | 1 | 1 | 0 | -0.002 | 0 | 0 | 0 | t | 57692 | SEYLAHRRR<br>PPENIRRV<br>TRV | Mus<br>musculu<br>s              |
| 1 | 1.00 | 1 | 1 | 0 | -0.003 | 0 | 0 | 0 | t | 40281 | LVASNWY<br>NRQIERSS<br>RTLQ  | Mus<br>musculu<br>s              |

|   |      |   |   |   |        |   |   |   |   |       |                              |                                  |
|---|------|---|---|---|--------|---|---|---|---|-------|------------------------------|----------------------------------|
| 1 | 1.00 | 1 | 1 | 0 | -0.002 | 0 | 0 | 0 | t | 44468 | NKCKMNL<br>QDNNGN<br>DIGFIG  | Mus<br>musculu<br>s              |
| 1 | 1.00 | 1 | 1 | 0 | -0.003 | 0 | 0 | 0 | t | 45492 | NPTIAG                       | Oryctola<br>gus<br>cuniculu<br>s |
| 1 | 1.00 | 1 | 1 | 0 | 0      | 0 | 0 | 0 | t | 40281 | LVASNWW<br>NRQIERSS<br>RTLK  | Mus<br>musculu<br>s              |
| 1 | 1.00 | 1 | 1 | 0 | 0      | 0 | 0 | 0 | t | 43013 | MWLDVM<br>YLKGGG             | Mus<br>musculu<br>s              |
| 1 | 1.00 | 1 | 1 | 0 | 0      | 0 | 0 | 0 | t | 44468 | NKCKMNL<br>QDNNGN<br>DIGFIG  | Mus<br>musculu<br>s              |
| 1 | 1.00 | 1 | 1 | 0 | 0      | 0 | 0 | 0 | t | 37315 | LLGCIGSTC                    | Mus<br>musculu<br>s              |
| 1 | 1.00 | 1 | 1 | 0 | 0.002  | 0 | 0 | 0 | t | 53326 | RDALPNTE<br>ASGPTHSK<br>E    | Rattus<br>norvegic<br>us         |
| 1 | 1.00 | 1 | 1 | 0 | 0.004  | 0 | 0 | 0 | t | 56657 | RYSRNAV<br>P<br>NV           | Mus<br>musculu<br>s              |
| 1 | 1.00 | 1 | 1 | 0 | 0.004  | 0 | 0 | 0 | t | 56657 | RYSRNAV<br>P<br>NV           | Mus<br>musculu<br>s              |
| 1 | 1.00 | 1 | 1 | 0 | -0.002 | 0 | 0 | 0 | t | 40281 | LVASNWW<br>NRQIERSS<br>RTLK  | Mus<br>musculu<br>s              |
| 1 | 1.00 | 1 | 1 | 0 | -0.002 | 0 | 0 | 0 | t | 40281 | LVASNWW<br>NRQIERSS<br>RTLK  | Mus<br>musculu<br>s              |
| 1 | 1.00 | 1 | 1 | 0 | -0.004 | 0 | 0 | 0 | t | 51125 | QIPYNLKIR<br>AGGLDGG<br>KKLV | Aotus<br>sp.                     |
| 1 | 1.00 | 1 | 1 | 0 | -0.002 | 0 | 0 | 0 | t | 43438 | NDFPINELI<br>LDTDLISKI<br>E  | Mus<br>musculu<br>s              |

|   |      |   |   |   |        |   |   |   |   |       |                            |                     |
|---|------|---|---|---|--------|---|---|---|---|-------|----------------------------|---------------------|
| 1 | 1.00 | 1 | 1 | 0 | 0      | 0 | 0 | 0 | t | 56657 | RYSRNAV<br>NV              | Bos<br>taurus       |
| 1 | 1.00 | 1 | 1 | 0 | -0.008 | 0 | 0 | 0 | t | 40281 | LVASNWY<br>NRQIERSS<br>RTL | Mus<br>musculu<br>s |
| 1 | 1.00 | 1 | 1 | 0 | 0      | 0 | 0 | 0 | t | 40281 | LVASNWY<br>NRQIERSS<br>RTL | Mus<br>musculu<br>s |
| 1 | 1.00 | 1 | 1 | 0 | -0.002 | 0 | 0 | 0 | t | 40281 | LVASNWY<br>NRQIERSS<br>RTL | Mus<br>musculu<br>s |
| 1 | 1.00 | 1 | 1 | 0 | 0      | 0 | 0 | 0 | t | 56657 | RYSRNAV<br>NV              | Bos<br>taurus       |
| 1 | 1.00 | 1 | 1 | 0 | 0.004  | 0 | 0 | 0 | t | 59873 | SNNVQIV<br>RQQSY           | Mus<br>musculu<br>s |
| 1 | 1.00 | 1 | 1 | 0 | -0.008 | 0 | 0 | 0 | t | 40281 | LVASNWY<br>NRQIERSS<br>RTL | Mus<br>musculu<br>s |
| 1 | 1.00 | 1 | 1 | 0 | 0      | 0 | 0 | 0 | t | 44468 | NKCKMNL<br>QDNNGN<br>DIGFI | Mus<br>musculu<br>s |
| 1 | 1.00 | 1 | 1 | 0 | -0.002 | 0 | 0 | 0 | t | 44468 | NKCKMNL<br>QDNNGN<br>DIGFI | Mus<br>musculu<br>s |
| 1 | 1.00 | 1 | 1 | 0 | 0      | 0 | 0 | 0 | t | 56657 | RYSRNAV<br>NV              | Mus<br>musculu<br>s |
| 1 | 1.00 | 1 | 1 | 0 | 0      | 0 | 0 | 0 | t | 45492 | NPTIAG                     | Mus<br>musculu<br>s |
| 1 | 1.00 | 1 | 1 | 0 | 0      | 0 | 0 | 0 | t | 45492 | NPTIAG                     | Mus<br>musculu<br>s |

|   |      |   |   |   |   |   |   |   |   |       |                  |                          |
|---|------|---|---|---|---|---|---|---|---|-------|------------------|--------------------------|
| 1 | 1.00 | 1 | 1 | 0 | 0 | 0 | 0 | 0 | t | 51371 | QLINTNGS<br>WHIN | Mus<br>musculu<br>s      |
| 1 | 1.00 | 1 | 1 | 0 | 0 | 0 | 0 | 0 | t | 51371 | QLINTNGS<br>WHIN | Mus<br>musculu<br>s      |
| 1 | 1.00 | 1 | 1 | 0 | 0 | 0 | 0 | 0 | t | 51371 | QLINTNGS<br>WHIN | Mus<br>musculu<br>s      |
| 1 | 1.00 | 1 | 1 | 0 | 0 | 0 | 0 | 0 | t | 51371 | QLINTNGS<br>WHIN | Mus<br>musculu<br>s      |
| 1 | 1.00 | 1 | 1 | 0 | 0 | 0 | 0 | 0 | t | 51371 | QLINTNGS<br>WHIN | Mus<br>musculu<br>s      |
| 1 | 1.00 | 1 | 1 | 0 | 0 | 0 | 0 | 0 | t | 51371 | QLINTNGS<br>WHIN | Mus<br>musculu<br>s      |
| 1 | 1.00 | 1 | 1 | 0 | 0 | 0 | 0 | 0 | t | 51371 | QLINTNGS<br>WHIN | Mus<br>musculu<br>s      |
| 1 | 1.00 | 1 | 1 | 0 | 0 | 0 | 0 | 0 | t | 51371 | QLINTNGS<br>WHIN | Mus<br>musculu<br>s      |
| 1 | 1.00 | 1 | 1 | 0 | 0 | 0 | 0 | 0 | t | 51371 | QLINTNGS<br>WHIN | Mus<br>musculu<br>s      |
| 1 | 1.00 | 1 | 1 | 0 | 0 | 0 | 0 | 0 | t | 51371 | QLINTNGS<br>WHIN | Mus<br>musculu<br>s      |
| 1 | 1.00 | 1 | 1 | 0 | 0 | 0 | 0 | 0 | t | 51371 | QLINTNGS<br>WHIN | Mus<br>musculu<br>s      |
| 1 | 1.00 | 1 | 1 | 0 | 0 | 0 | 0 | 0 | t | 51371 | QLINTNGS<br>WHIN | Mus<br>musculu<br>s      |
| 1 | 1.00 | 1 | 1 | 0 | 0 | 0 | 0 | 0 | t | 51371 | QLINTNGS<br>WHIN | Mus<br>musculu<br>s      |
| 1 | 1.00 | 1 | 1 | 0 | 0 | 0 | 0 | 0 | t | 51371 | QLINTNGS<br>WHIN | Rattus<br>norvegic<br>us |
| 1 | 1.00 | 1 | 1 | 0 | 0 | 0 | 0 | 0 | t | 51371 | QLINTNGS<br>WHIN | Mus<br>musculu<br>s      |
| 1 | 1.00 | 1 | 1 | 0 | 0 | 0 | 0 | 0 | t | 51371 | QLINTNGS<br>WHIN | Mus<br>musculu<br>s      |
| 1 | 1.00 | 1 | 1 | 0 | 0 | 0 | 0 | 0 | t | 51371 | QLINTNGS<br>WHIN | Mus<br>musculu<br>s      |
| 1 | 1.00 | 1 | 1 | 0 | 0 | 0 | 0 | 0 | t | 51371 | QLINTNGS<br>WHIN | Mus<br>musculu<br>s      |

|   |      |   |   |   |        |   |   |   |   |       |                              |                                  |
|---|------|---|---|---|--------|---|---|---|---|-------|------------------------------|----------------------------------|
| 1 | 1.00 | 1 | 1 | 0 | 0      | 0 | 0 | 0 | t | 45531 | NQDPDKIL<br>TYIAADH          | Mus<br>musculu<br>s              |
| 1 | 1.00 | 1 | 1 | 0 | -0.003 | 0 | 0 | 0 | t | 48618 | PNDPNRN<br>VD                | Oryctola<br>gus<br>cuniculu<br>s |
| 1 | 1.00 | 1 | 1 | 0 | 0      | 0 | 0 | 0 | t | 45531 | NQDPDKIL<br>TYIAADH          | Mus<br>musculu<br>s              |
| 1 | 1.00 | 1 | 1 | 0 | 0      | 0 | 0 | 0 | t | 45531 | NQDPDKIL<br>TYIAADH          | Mus<br>musculu<br>s              |
| 1 | 1.00 | 1 | 1 | 0 | 0      | 0 | 0 | 0 | t | 56432 | RVTTTSQA<br>QDAAGLK<br>EKAD  | Mus<br>musculu<br>s              |
| 1 | 1.00 | 1 | 1 | 0 | 0      | 0 | 0 | 0 | t | 56432 | RVTTTSQA<br>QDAAGLK<br>EKAD  | Mus<br>musculu<br>s              |
| 1 | 1.00 | 1 | 1 | 0 | 0      | 0 | 0 | 0 | t | 42416 | MQTLWDE<br>IMDINKRK          | Homo<br>sapiens                  |
| 1 | 1.00 | 1 | 1 | 0 | 0      | 0 | 0 | 0 | t | 59229 | SLKMADP<br>NRFRGKDL<br>P     | Mus<br>musculu<br>s              |
| 1 | 1.00 | 1 | 1 | 0 | 0.008  | 0 | 0 | 0 | t | 48613 | PNDGEER<br>QSYWF             | Capra<br>hircus                  |
| 1 | 1.00 | 1 | 1 | 0 | 0      | 0 | 0 | 0 | t | 43242 | NANPNAN<br>PNANP             | Mus<br>musculu<br>s              |
| 1 | 1.00 | 1 | 1 | 0 | -0.003 | 0 | 0 | 0 | t | 55621 | RRKAHAG<br>NKKAEDLT<br>MDDLE | Oryctola<br>gus<br>cuniculu<br>s |
| 1 | 1.00 | 1 | 1 | 0 | -0.003 | 0 | 0 | 0 | t | 59229 | SLKMADP<br>NRFRGKDL<br>P     | Oryctola<br>gus<br>cuniculu<br>s |
| 1 | 1.00 | 1 | 1 | 0 | -0.003 | 0 | 0 | 0 | t | 59229 | SLKMADP<br>NRFRGKDL<br>P     | Oryctola<br>gus<br>cuniculu<br>s |

|   |      |   |   |   |        |   |   |   |   |       |                              |                                  |
|---|------|---|---|---|--------|---|---|---|---|-------|------------------------------|----------------------------------|
| 1 | 1.00 | 1 | 1 | 0 | 0      | 0 | 0 | 0 | t | 55621 | RRKAHAG<br>NKKAEDLT<br>MDDLE | Oryctola<br>gus<br>cuniculu<br>s |
| 1 | 1.00 | 1 | 1 | 0 | 0      | 0 | 0 | 0 | t | 59229 | SLKMADP<br>NRFRGKDL<br>P     | Oryctola<br>gus<br>cuniculu<br>s |
| 1 | 1.00 | 1 | 1 | 0 | 0      | 0 | 0 | 0 | t | 43242 | NANPNAN<br>PNANP             | Mus<br>musculu<br>s              |
| 1 | 1.00 | 1 | 1 | 0 | 0      | 0 | 0 | 0 | t | 49015 | PQIPPNW<br>HIP               | Oryctola<br>gus<br>cuniculu<br>s |
| 1 | 1.00 | 1 | 1 | 0 | 0      | 0 | 0 | 0 | t | 51370 | QLINSNGS<br>WHIN             | Rattus<br>norvegic<br>us         |
| 1 | 1.00 | 1 | 1 | 0 | -0.003 | 0 | 0 | 0 | t | 59229 | SLKMADP<br>NRFRGKDL<br>P     | Oryctola<br>gus<br>cuniculu<br>s |
| 1 | 1.00 | 1 | 1 | 0 | 0      | 0 | 0 | 0 | t | 48606 | PNATQPEL                     | Oryctola<br>gus<br>cuniculu<br>s |
| 1 | 1.00 | 1 | 1 | 0 | 0.005  | 0 | 0 | 0 | t | 45532 | NQEAAKE<br>EYEHKQKE<br>LESVC | Homo<br>sapiens                  |
| 1 | 1.00 | 1 | 1 | 0 | 0      | 0 | 0 | 0 | t | 38523 | LPHSNLDH<br>ILEPSIPWK<br>SK  | Mus<br>musculu<br>s              |
| 1 | 1.00 | 1 | 1 | 0 | 0      | 0 | 0 | 0 | t | 55621 | RRKAHAG<br>NKKAEDLT<br>MDDLE | Oryctola<br>gus<br>cuniculu<br>s |
| 1 | 1.00 | 1 | 1 | 0 | -0.005 | 0 | 0 | 0 | t | 58975 | SKYSNTFNI<br>NAYNMVI<br>RRSM | Aotus<br>sp.                     |
| 1 | 1.00 | 1 | 1 | 0 | -0.003 | 0 | 0 | 0 | t | 55621 | RRKAHAG<br>NKKAEDLT<br>MDDLE | Oryctola<br>gus<br>cuniculu<br>s |

|   |      |   |   |   |        |   |   |   |   |       |                              |                                  |
|---|------|---|---|---|--------|---|---|---|---|-------|------------------------------|----------------------------------|
| 1 | 1.00 | 1 | 1 | 0 | 0      | 0 | 0 | 0 | t | 56469 | RWAPTGA<br>PADVTDQ<br>L      | Mus<br>musculu<br>s              |
| 1 | 1.00 | 1 | 1 | 0 | 0      | 0 | 0 | 0 | t | 49950 | PVRVAWS<br>SPVQNCEP<br>WIPP  | Mus<br>musculu<br>s              |
| 1 | 1.00 | 1 | 1 | 0 | 0      | 0 | 0 | 0 | t | 46551 | NWNFDFG                      | Mus<br>musculu<br>s              |
| 1 | 1.00 | 1 | 1 | 0 | 0      | 0 | 0 | 0 | t | 42667 | MSSFLGK<br>WKLSESH<br>NFDAVM | Mus<br>musculu<br>s              |
| 1 | 1.00 | 1 | 1 | 0 | 0      | 0 | 0 | 0 | t | 42667 | MSSFLGK<br>WKLSESH<br>NFDAVM | Mus<br>musculu<br>s              |
| 1 | 1.00 | 1 | 1 | 0 | 0      | 0 | 0 | 0 | t | 48858 | PPPPNPN<br>DPPPPNP<br>ND     | Mus<br>musculu<br>s              |
| 1 | 1.00 | 1 | 1 | 0 | 0      | 0 | 0 | 0 | t | 51147 | QIVGGVYL<br>L                | Mus<br>musculu<br>s              |
| 1 | 1.00 | 1 | 1 | 0 | -0.003 | 0 | 0 | 0 | t | 54989 | RNFTTAPA<br>ICHEGKAY<br>F    | Oryctola<br>gus<br>cuniculu<br>s |
| 1 | 1.00 | 1 | 1 | 0 | 0      | 0 | 0 | 0 | t | 52967 | QYIYNLTIC                    | Sus<br>scrofa                    |
| 1 | 1.00 | 1 | 1 | 0 | 0      | 0 | 0 | 0 | t | 52930 | QYIKANSK<br>FIGITEL          | Mus<br>musculu<br>s              |
| 1 | 1.00 | 1 | 1 | 0 | -0.003 | 0 | 0 | 0 | t | 52930 | QYIKANSK<br>FIGITEL          | Oryctola<br>gus<br>cuniculu<br>s |
| 1 | 1.00 | 1 | 1 | 0 | -0.001 | 0 | 0 | 0 | t | 58975 | SKYSNTFNI<br>NAYNMVI<br>RRSM | Aotus<br>nancyma<br>ae           |
| 1 | 1.00 | 1 | 1 | 0 | 0.005  | 0 | 0 | 0 | t | 43515 | NDQGNRT<br>TPSYVAFT<br>DSERL | Homo<br>sapiens                  |
| 1 | 1.00 | 1 | 1 | 0 | 0      | 0 | 0 | 0 | t | 40332 | LVFFAEDV                     | Mus<br>musculu<br>s              |

|   |      |   |   |   |        |   |   |   |   |       |                              |                                  |
|---|------|---|---|---|--------|---|---|---|---|-------|------------------------------|----------------------------------|
| 1 | 1.00 | 1 | 1 | 0 | -0.003 | 0 | 0 | 0 | t | 52016 | QQEVDYII<br>DHVDQHN          | Oryctola<br>gus<br>cuniculu<br>s |
| 1 | 1.00 | 1 | 1 | 0 | 0      | 0 | 0 | 0 | t | 52016 | QQEVDYII<br>DHVDQHN          | Mus<br>musculu<br>s              |
| 1 | 1.00 | 1 | 1 | 0 | -0.001 | 0 | 0 | 0 | t | 58975 | SKYSNTFNI<br>NAYNMVI<br>RRSM | Aotus<br>nancyma<br>ae           |
| 1 | 1.00 | 1 | 1 | 0 | 0      | 0 | 0 | 0 | t | 48858 | PPPPNPN<br>DPPPPNP<br>ND     | Mus<br>musculu<br>s              |
| 1 | 1.00 | 1 | 1 | 0 | 0.004  | 0 | 0 | 0 | t | 44221 | NIETVIEFQ<br>QKNNRLL         | Mus<br>musculu<br>s              |
| 1 | 1.00 | 1 | 1 | 0 | 0      | 0 | 0 | 0 | t | 52693 | QVETEDTK<br>EPGVLMG<br>G     | Mus<br>musculu<br>s              |
| 1 | 1.00 | 1 | 1 | 0 | 0.005  | 0 | 0 | 0 | t | 42818 | MTKDCHL<br>LGTFDLSGI<br>PPAP | Homo<br>sapiens                  |
| 1 | 1.00 | 1 | 1 | 0 | 0.005  | 0 | 0 | 0 | t | 42802 | MTFEGAIG<br>IDLGTTYSC<br>VGV | Homo<br>sapiens                  |
| 1 | 1.00 | 1 | 1 | 0 | 0      | 0 | 0 | 0 | t | 43525 | NDRVYINV<br>VVKNKEYR<br>LAT  | Mus<br>musculu<br>s              |
| 1 | 1.00 | 1 | 1 | 0 | 0      | 0 | 0 | 0 | t | 43525 | NDRVYINV<br>VVKNKEYR<br>LAT  | Mus<br>musculu<br>s              |
| 1 | 1.00 | 1 | 1 | 0 | 0      | 0 | 0 | 0 | t | 43525 | NDRVYINV<br>VVKNKEYR<br>LAT  | Mus<br>musculu<br>s              |
| 1 | 1.00 | 1 | 1 | 0 | 0      | 0 | 0 | 0 | t | 42441 | MQWNST<br>TFHQTLQ            | Mus<br>musculu<br>s              |
| 1 | 1.00 | 1 | 1 | 0 | 0      | 0 | 0 | 0 | t | 53545 | REKEELKR<br>DKEGKVST<br>LPLD | Mus<br>musculu<br>s              |
| 1 | 1.00 | 1 | 1 | 0 | 0      | 0 | 0 | 0 | t | 53545 | REKEELKR<br>DKEGKVST<br>LPLD | Mus<br>musculu<br>s              |



|   |      |   |   |   |        |   |   |   |   |       |                             |                                  |
|---|------|---|---|---|--------|---|---|---|---|-------|-----------------------------|----------------------------------|
| 1 | 1.00 | 1 | 1 | 0 | -0.007 | 0 | 0 | 0 | t | 43525 | NDRVYINV<br>VVKNKEYR<br>LAT | Homo<br>sapiens                  |
| 1 | 1.00 | 1 | 1 | 0 | 0      | 0 | 0 | 0 | t | 43525 | NDRVYINV<br>VVKNKEYR<br>LAT | Mus<br>musculu<br>s              |
| 1 | 1.00 | 1 | 1 | 0 | 0      | 0 | 0 | 0 | t | 43525 | NDRVYINV<br>VVKNKEYR<br>LAT | Mus<br>musculu<br>s              |
| 1 | 1.00 | 1 | 1 | 0 | 0      | 0 | 0 | 0 | t | 43525 | NDRVYINV<br>VVKNKEYR<br>LAT | Mus<br>musculu<br>s              |
| 1 | 1.00 | 1 | 1 | 0 | 0      | 0 | 0 | 0 | t | 38609 | LPNWVKV<br>WDRATNK<br>C     | Mus<br>musculu<br>s              |
| 1 | 1.00 | 1 | 1 | 0 | 0      | 0 | 0 | 0 | t | 53800 | RFVKTPSK<br>KKTCSR          | Bos<br>taurus                    |
| 1 | 1.00 | 1 | 1 | 0 | 0      | 0 | 0 | 0 | t | 59922 | SNTFINNA                    | Homo<br>sapiens                  |
| 1 | 1.00 | 1 | 1 | 0 | -0.003 | 0 | 0 | 0 | t | 38609 | LPNWVKV<br>WDRATNK<br>C     | Mus<br>musculu<br>s              |
| 1 | 1.00 | 1 | 1 | 0 | -0.008 | 0 | 0 | 0 | t | 43525 | NDRVYINV<br>VVKNKEYR<br>LAT | Mus<br>musculu<br>s              |
| 1 | 1.00 | 1 | 1 | 0 | 0      | 0 | 0 | 0 | t | 52910 | QYGLEKRD<br>NGHQGE          | Mus<br>musculu<br>s              |
| 1 | 1.00 | 1 | 1 | 0 | 0      | 0 | 0 | 0 | t | 44218 | NIERFPNG<br>KKYELDKY<br>TMF | Mus<br>musculu<br>s              |
| 1 | 1.00 | 1 | 1 | 0 | -0.003 | 0 | 0 | 0 | t | 57743 | SFDVPSKQ<br>PTIDIDL         | Oryctola<br>gus<br>cuniculu<br>s |
| 1 | 1.00 | 1 | 1 | 0 | 0      | 0 | 0 | 0 | t | 43525 | NDRVYINV<br>VVKNKEYR<br>LAT | Mus<br>musculu<br>s              |

|   |      |   |   |   |        |   |   |   |   |       |                              |                                  |
|---|------|---|---|---|--------|---|---|---|---|-------|------------------------------|----------------------------------|
| 1 | 1.00 | 1 | 1 | 0 | -0.007 | 0 | 0 | 0 | t | 44218 | NIERFPNG<br>KKYELDKY<br>TMF  | Homo<br>sapiens                  |
| 1 | 1.00 | 1 | 1 | 0 | 0      | 0 | 0 | 0 | t | 41157 | MATTEYRL<br>SLMEQFIR<br>AFIE | Mus<br>musculu<br>s              |
| 1 | 1.00 | 1 | 1 | 0 | 0      | 0 | 0 | 0 | t | 41157 | MATTEYRL<br>SLMEQFIR<br>AFIE | Mus<br>musculu<br>s              |
| 1 | 1.00 | 1 | 1 | 0 | -0.003 | 0 | 0 | 0 | t | 59922 | SNTFINNA                     | Oryctola<br>gus<br>cuniculu<br>s |
| 1 | 1.00 | 1 | 1 | 0 | 0      | 0 | 0 | 0 | t | 44218 | NIERFPNG<br>KKYELDKY<br>TMF  | Mus<br>musculu<br>s              |
| 1 | 1.00 | 1 | 1 | 0 | 0      | 0 | 0 | 0 | t | 53800 | RFVKTPSK<br>KKTKSR           | Homo<br>sapiens                  |
| 1 | 1.00 | 1 | 1 | 0 | 0      | 0 | 0 | 0 | t | 43525 | NDRVYINV<br>VVKNKEYR<br>LAT  | Mus<br>musculu<br>s              |
| 1 | 1.00 | 1 | 1 | 0 | 0      | 0 | 0 | 0 | t | 44218 | NIERFPNG<br>KKYELDKY<br>TMF  | Mus<br>musculu<br>s              |
| 1 | 1.00 | 1 | 1 | 0 | -0.003 | 0 | 0 | 0 | t | 44218 | NIERFPNG<br>KKYELDKY<br>TMF  | Mus<br>musculu<br>s              |
| 1 | 1.00 | 1 | 1 | 0 | 0      | 0 | 0 | 0 | t | 43525 | NDRVYINV<br>VVKNKEYR<br>LAT  | Mus<br>musculu<br>s              |
| 1 | 1.00 | 1 | 1 | 0 | 0      | 0 | 0 | 0 | t | 44218 | NIERFPNG<br>KKYELDKY<br>TMF  | Mus<br>musculu<br>s              |
| 1 | 1.00 | 1 | 1 | 0 | -0.008 | 0 | 0 | 0 | t | 43525 | NDRVYINV<br>VVKNKEYR<br>LAT  | Mus<br>musculu<br>s              |
| 1 | 1.00 | 1 | 1 | 0 | 0      | 0 | 0 | 0 | t | 43525 | NDRVYINV<br>VVKNKEYR<br>LAT  | Mus<br>musculu<br>s              |

|   |      |   |   |   |        |   |   |   |   |       |                             |                                  |
|---|------|---|---|---|--------|---|---|---|---|-------|-----------------------------|----------------------------------|
| 1 | 1.00 | 1 | 1 | 0 | -0.008 | 0 | 0 | 0 | t | 44218 | NIERFPNG<br>KKYELDKY<br>TMF | Mus<br>musculu<br>s              |
| 1 | 1.00 | 1 | 1 | 0 | 0.005  | 0 | 0 | 0 | t | 44218 | NIERFPNG<br>KKYELDKY<br>TMF | Gallus<br>gallus                 |
| 1 | 1.00 | 1 | 1 | 0 | -0.002 | 0 | 0 | 0 | t | 44218 | NIERFPNG<br>KKYELDKY<br>TMF | Mus<br>musculu<br>s              |
| 1 | 1.00 | 1 | 1 | 0 | -0.003 | 0 | 0 | 0 | t | 44218 | NIERFPNG<br>KKYELDKY<br>TMF | Mus<br>musculu<br>s              |
| 1 | 1.00 | 1 | 1 | 0 | 0      | 0 | 0 | 0 | t | 57751 | SFERFEIFP<br>KE             | Oryctola<br>gus<br>cuniculu<br>s |
| 1 | 1.00 | 1 | 1 | 0 | 0      | 0 | 0 | 0 | t | 57751 | SFERFEIFP<br>KE             | Oryctola<br>gus<br>cuniculu<br>s |
| 1 | 1.00 | 1 | 1 | 0 | 0      | 0 | 0 | 0 | t | 57751 | SFERFEIFP<br>KE             | Oryctola<br>gus<br>cuniculu<br>s |
| 1 | 1.00 | 1 | 1 | 0 | 0      | 0 | 0 | 0 | t | 57751 | SFERFEIFP<br>KE             | Oryctola<br>gus<br>cuniculu<br>s |
| 1 | 1.00 | 1 | 1 | 0 | 0      | 0 | 0 | 0 | t | 43525 | NDRVYINV<br>VVKNKEYR<br>LAT | Mus<br>musculu<br>s              |
| 1 | 1.00 | 1 | 1 | 0 | -0.002 | 0 | 0 | 0 | t | 43525 | NDRVYINV<br>VVKNKEYR<br>LAT | Mus<br>musculu<br>s              |
| 1 | 1.00 | 1 | 1 | 0 | 0      | 0 | 0 | 0 | t | 55581 | RRGPRLGV<br>RATRKTS         | Homo<br>sapiens                  |
| 1 | 1.00 | 1 | 1 | 0 | 0      | 0 | 0 | 0 | t | 46899 | PAPRRKFQ<br>QVKRL           | Sus<br>scrofa                    |
| 1 | 1.00 | 1 | 1 | 0 | 0      | 0 | 0 | 0 | t | 59922 | SNTFINNA                    | Mus<br>musculu<br>s              |

|   |      |   |   |   |        |   |   |   |   |       |                             |                                  |
|---|------|---|---|---|--------|---|---|---|---|-------|-----------------------------|----------------------------------|
| 1 | 1.00 | 1 | 1 | 0 | -0.002 | 0 | 0 | 0 | t | 44218 | NIERFPNG<br>KKYELDKY<br>TMF | Mus<br>musculu<br>s              |
| 1 | 1.00 | 1 | 1 | 0 | 0      | 0 | 0 | 0 | t | 44218 | NIERFPNG<br>KKYELDKY<br>TMF | Mus<br>musculu<br>s              |
| 1 | 1.00 | 1 | 1 | 0 | -0.006 | 0 | 0 | 0 | t | 57766 | SFFSYGEI                    | Oryctola<br>gus<br>cuniculu<br>s |
| 1 | 1.00 | 1 | 1 | 0 | 0.002  | 0 | 0 | 0 | t | 49510 | PSSLVDSL                    | Rattus<br>norvegic<br>us         |
| 1 | 1.00 | 1 | 1 | 0 | -0.002 | 0 | 0 | 0 | t | 59881 | SNPTQGH                     | Sus<br>scrofa                    |
| 1 | 1.00 | 1 | 1 | 0 | -0.001 | 0 | 0 | 0 | t | 44218 | NIERFPNG<br>KKYELDKY<br>TMF | Homo<br>sapiens                  |
| 1 | 1.00 | 1 | 1 | 0 | -0.003 | 0 | 0 | 0 | t | 40563 | LVRMKRA                     | Oryctola<br>gus<br>cuniculu<br>s |
| 1 | 1.00 | 1 | 1 | 0 | 0      | 0 | 0 | 0 | t | 44218 | NIERFPNG<br>KKYELDKY<br>TMF | Mus<br>musculu<br>s              |
| 1 | 1.00 | 1 | 1 | 0 | 0      | 0 | 0 | 0 | t | 59922 | SNTFINNA                    | Mus<br>musculu<br>s              |
| 1 | 1.00 | 1 | 1 | 0 | 0      | 0 | 0 | 0 | t | 48858 | PPPPNPN<br>DPPPPNP<br>ND    | Mus<br>musculu<br>s              |
| 1 | 1.00 | 1 | 1 | 0 | 0      | 0 | 0 | 0 | t | 44218 | NIERFPNG<br>KKYELDKY<br>TMF | Mus<br>musculu<br>s              |
| 1 | 1.00 | 1 | 1 | 0 | 0.015  | 0 | 0 | 0 | t | 45221 | NNRAVPD<br>KIDWRESG<br>YVTE | Rattus<br>rattus                 |
| 1 | 1.00 | 1 | 1 | 0 | -0.008 | 0 | 0 | 0 | t | 44218 | NIERFPNG<br>KKYELDKY<br>TMF | Mus<br>musculu<br>s              |

|   |      |   |   |   |        |   |   |   |   |       |                              |                                  |
|---|------|---|---|---|--------|---|---|---|---|-------|------------------------------|----------------------------------|
| 1 | 1.00 | 1 | 1 | 0 | 0      | 0 | 0 | 0 | t | 43525 | NDRVYINV<br>VVKNKEYR<br>LAT  | Mus<br>musculu<br>s              |
| 1 | 1.00 | 1 | 1 | 0 | 0      | 0 | 0 | 0 | t | 43525 | NDRVYINV<br>VVKNKEYR<br>LAT  | Mus<br>musculu<br>s              |
| 1 | 1.00 | 1 | 1 | 0 | 0.005  | 0 | 0 | 0 | t | 45225 | NNRNRLT<br>KLFYKSSR<br>SESE  | Homo<br>sapiens                  |
| 1 | 1.00 | 1 | 1 | 0 | -0.002 | 0 | 0 | 0 | t | 44218 | NIERFPNG<br>KKYELDKY<br>TMF  | Mus<br>musculu<br>s              |
| 1 | 1.00 | 1 | 1 | 0 | -0.003 | 0 | 0 | 0 | t | 54057 | RHKQKIVA<br>PVK              | Oryctola<br>gus<br>cuniculu<br>s |
| 1 | 1.00 | 1 | 1 | 0 | -0.008 | 0 | 0 | 0 | t | 44218 | NIERFPNG<br>KKYELDKY<br>TMF  | Mus<br>musculu<br>s              |
| 1 | 1.00 | 1 | 1 | 0 | -0.008 | 0 | 0 | 0 | t | 41126 | MASLIYRQ<br>LL               | Mus<br>musculu<br>s              |
| 1 | 1.00 | 1 | 1 | 0 | -0.008 | 0 | 0 | 0 | t | 41126 | MASLIYRQ<br>LL               | Mus<br>musculu<br>s              |
| 1 | 1.00 | 1 | 1 | 0 | 0      | 0 | 0 | 0 | t | 44218 | NIERFPNG<br>KKYELDKY<br>TMF  | Mus<br>musculu<br>s              |
| 1 | 1.00 | 1 | 1 | 0 | 0      | 0 | 0 | 0 | t | 37377 | LLGYKKGE<br>GNTCVEN<br>NNPTC | Mus<br>musculu<br>s              |
| 1 | 1.00 | 1 | 1 | 0 | -0.003 | 0 | 0 | 0 | t | 40575 | LVSEEIVTE<br>EGSVAQE         | Oryctola<br>gus<br>cuniculu<br>s |
| 1 | 1.00 | 1 | 1 | 0 | 0      | 0 | 0 | 0 | t | 59922 | SNTFINNA                     | Mus<br>musculu<br>s              |
| 1 | 1.00 | 1 | 1 | 0 | 0      | 0 | 0 | 0 | t | 59922 | SNTFINNA                     | Mus<br>musculu<br>s              |

|   |      |   |   |   |        |   |   |   |   |       |                              |                                  |
|---|------|---|---|---|--------|---|---|---|---|-------|------------------------------|----------------------------------|
| 1 | 1.00 | 1 | 1 | 0 | -0.003 | 0 | 0 | 0 | t | 40575 | LVSEEVTE<br>EGSVAQE          | Oryctola<br>gus<br>cuniculu<br>s |
| 1 | 1.00 | 1 | 1 | 0 | 0      | 0 | 0 | 0 | t | 40575 | LVSEEVTE<br>EGSVAQE          | Homo<br>sapiens                  |
| 1 | 1.00 | 1 | 1 | 0 | -0.003 | 0 | 0 | 0 | t | 59922 | SNTFINNA                     | Oryctola<br>gus<br>cuniculu<br>s |
| 1 | 1.00 | 1 | 1 | 0 | 0      | 0 | 0 | 0 | t | 57784 | SFGVWIRT<br>PPAYRPPN<br>APIL | Homo<br>sapiens                  |
| 1 | 1.00 | 1 | 1 | 0 | 0      | 0 | 0 | 0 | t | 49656 | PTIAGA                       | Mus<br>musculu<br>s              |
| 1 | 1.00 | 1 | 1 | 0 | 0      | 0 | 0 | 0 | t | 40575 | LVSEEVTE<br>EGSVAQE          | Mus<br>musculu<br>s              |
| 1 | 1.00 | 1 | 1 | 0 | 0      | 0 | 0 | 0 | t | 51958 | QPRKTKPV<br>KSLPERK          | Sus<br>scrofa                    |
| 1 | 1.00 | 1 | 1 | 0 | 0      | 0 | 0 | 0 | t | 59403 | SLPRVYVEI<br>FGA             | Mus<br>musculu<br>s              |
| 1 | 1.00 | 1 | 1 | 0 | 0      | 0 | 0 | 0 | t | 43578 | NEDQKIGI<br>EIIKRALKI        | Mus<br>musculu<br>s              |
| 1 | 1.00 | 1 | 1 | 0 | 0      | 0 | 0 | 0 | t | 56519 | RYDSRPPE<br>DVF              | Mus<br>musculu<br>s              |
| 1 | 1.00 | 1 | 1 | 0 | 0      | 0 | 0 | 0 | t | 43578 | NEDQKIGI<br>EIIKRALKI        | Mus<br>musculu<br>s              |
| 1 | 1.00 | 1 | 1 | 0 | 0      | 0 | 0 | 0 | t | 42780 | MTDVNRY<br>RYSNNYEE<br>QPHIS | Aotus<br>nancyma<br>ae           |
| 1 | 1.00 | 1 | 1 | 0 | -0.003 | 0 | 0 | 0 | t | 58931 | SKQPTIDID<br>LCDICT          | Oryctola<br>gus<br>cuniculu<br>s |
| 1 | 1.00 | 1 | 1 | 0 | 0      | 0 | 0 | 0 | t | 36958 | LKMADPN<br>RFRGKD            | Mus<br>musculu<br>s              |

|   |      |   |   |   |        |   |   |   |   |       |                              |                                  |
|---|------|---|---|---|--------|---|---|---|---|-------|------------------------------|----------------------------------|
| 1 | 1.00 | 1 | 1 | 0 | -0.003 | 0 | 0 | 0 | t | 56529 | RYETSNDN<br>SLI              | Oryctola<br>gus<br>cuniculu<br>s |
| 1 | 1.00 | 1 | 1 | 0 | 0      | 0 | 0 | 0 | t | 44142 | NHGNYS<br>A QVGASQ           | Mus<br>musculu<br>s              |
| 1 | 1.00 | 1 | 1 | 0 | -0.003 | 0 | 0 | 0 | t | 37393 | LLHRFWHL<br>KSIG             | Oryctola<br>gus<br>cuniculu<br>s |
| 1 | 1.00 | 1 | 1 | 0 | 0      | 0 | 0 | 0 | t | 60211 | SPQYWTG<br>PA                | Mus<br>musculu<br>s              |
| 1 | 1.00 | 1 | 1 | 0 | -0.003 | 0 | 0 | 0 | t | 59231 | SLKMADP<br>NRFRGKNL<br>P     | Oryctola<br>gus<br>cuniculu<br>s |
| 1 | 1.00 | 1 | 1 | 0 | 0.008  | 0 | 0 | 0 | t | 56534 | RYFTYE<br>EP NDGE            | Capra<br>hircus                  |
| 1 | 1.00 | 1 | 1 | 0 | -0.003 | 0 | 0 | 0 | t | 55460 | RQPD<br>LIP                  | Oryctola<br>gus<br>cuniculu<br>s |
| 1 | 1.00 | 1 | 1 | 0 | 0      | 0 | 0 | 0 | t | 36958 | LKMADP<br>NRFRGKD            | Mus<br>musculu<br>s              |
| 1 | 1.00 | 1 | 1 | 0 | 0      | 0 | 0 | 0 | t | 59231 | SLKMADP<br>NRFRGKNL<br>P     | Oryctola<br>gus<br>cuniculu<br>s |
| 1 | 1.00 | 1 | 1 | 0 | -0.003 | 0 | 0 | 0 | t | 55106 | RPADKTRH<br>KFPTNINK<br>Q    | Oryctola<br>gus<br>cuniculu<br>s |
| 1 | 1.00 | 1 | 1 | 0 | -0.003 | 0 | 0 | 0 | t | 43730 | NEREDERT<br>LTKEYEDIV<br>LK  | Oryctola<br>gus<br>cuniculu<br>s |
| 1 | 1.00 | 1 | 1 | 0 | 0      | 0 | 0 | 0 | t | 59922 | SNTFINNA                     | Mus<br>musculu<br>s              |
| 1 | 1.00 | 1 | 1 | 0 | -0.004 | 0 | 0 | 0 | t | 42761 | MTDVIRYR<br>YSNNYEAS<br>DHIS | Aotus<br>sp.                     |

|   |      |   |   |   |        |   |   |   |   |       |                              |                                  |
|---|------|---|---|---|--------|---|---|---|---|-------|------------------------------|----------------------------------|
| 1 | 1.00 | 1 | 1 | 0 | 0      | 0 | 0 | 0 | t | 42429 | MQWNST<br>AFHQTQ             | Mus<br>musculu<br>s              |
| 1 | 1.00 | 1 | 1 | 0 | -0.003 | 0 | 0 | 0 | t | 50660 | QENSTYAV<br>RNSN             | Oryctola<br>gus<br>cuniculu<br>s |
| 1 | 1.00 | 1 | 1 | 0 | -0.003 | 0 | 0 | 0 | t | 59231 | SLKMADP<br>NRFRGKNL<br>P     | Oryctola<br>gus<br>cuniculu<br>s |
| 1 | 1.00 | 1 | 1 | 0 | -0.006 | 0 | 0 | 0 | t | 55106 | RPADKTRH<br>KFPTNINK<br>Q    | Oryctola<br>gus<br>cuniculu<br>s |
| 1 | 1.00 | 1 | 1 | 0 | -0.011 | 0 | 0 | 0 | t | 56610 | RYPGQGS<br>PGGNRYP<br>PQG    | Oryctola<br>gus<br>cuniculu<br>s |
| 1 | 1.00 | 1 | 1 | 0 | -0.003 | 0 | 0 | 0 | t | 55106 | RPADKTRH<br>KFPTNINK<br>Q    | Mus<br>musculu<br>s              |
| 1 | 1.00 | 1 | 1 | 0 | -0.003 | 0 | 0 | 0 | t | 52870 | QY                           | Oryctola<br>gus<br>cuniculu<br>s |
| 1 | 1.00 | 1 | 1 | 0 | -0.006 | 0 | 0 | 0 | t | 44117 | NGWGAPT<br>KEESTYN<br>WLP    | Oryctola<br>gus<br>cuniculu<br>s |
| 1 | 1.00 | 1 | 1 | 0 | 0      | 0 | 0 | 0 | t | 58052 | SGGNTNQ<br>QR                | Mus<br>musculu<br>s              |
| 1 | 1.00 | 1 | 1 | 0 | 0      | 0 | 0 | 0 | t | 48550 | PMERQKP<br>LKVKAKA           | Bos<br>taurus                    |
| 1 | 1.00 | 1 | 1 | 0 | -0.003 | 0 | 0 | 0 | t | 56610 | RYPGQGS<br>PGGNRYP<br>PQG    | Oryctola<br>gus<br>cuniculu<br>s |
| 1 | 1.00 | 1 | 1 | 0 | -0.003 | 0 | 0 | 0 | t | 59300 | SLLRRRRN<br>GEDVSV           | Oryctola<br>gus<br>cuniculu<br>s |
| 1 | 1.00 | 1 | 1 | 0 | 0      | 0 | 0 | 0 | t | 45588 | NQMDMK<br>QIDPWIAR<br>FDTDKD | Mus<br>musculu<br>s              |



|   |      |   |   |   |        |   |   |   |   |       |                              |                                  |
|---|------|---|---|---|--------|---|---|---|---|-------|------------------------------|----------------------------------|
| 1 | 1.00 | 1 | 1 | 0 | 0      | 0 | 0 | 0 | t | 45588 | NQMDMK<br>QIDPWIAR<br>FDTDKD | Mus<br>musculu<br>s              |
| 1 | 1.00 | 1 | 1 | 0 | 0.001  | 0 | 0 | 0 | t | 46756 | PACYCYGL<br>PDSVKIW          | Ovis<br>aries                    |
| 1 | 1.00 | 1 | 1 | 0 | -0.003 | 0 | 0 | 0 | t | 39110 | LRHGKLRP<br>FERDISNV<br>P    | Oryctola<br>gus<br>cuniculu<br>s |
| 1 | 1.00 | 1 | 1 | 0 | -0.003 | 0 | 0 | 0 | t | 53766 | RFQPFQQ<br>FGRDVSD<br>FDT    | Oryctola<br>gus<br>cuniculu<br>s |
| 1 | 1.00 | 1 | 1 | 0 | -0.003 | 0 | 0 | 0 | t | 46756 | PACYCYGL<br>PDSVKIW          | Oryctola<br>gus<br>cuniculu<br>s |
| 1 | 1.00 | 1 | 1 | 0 | -0.003 | 0 | 0 | 0 | t | 48409 | PLLRTQF                      | Oryctola<br>gus<br>cuniculu<br>s |
| 1 | 1.00 | 1 | 1 | 0 | 0      | 0 | 0 | 0 | t | 42429 | MQWNST<br>AFHQTLQ            | Mus<br>musculu<br>s              |
| 1 | 1.00 | 1 | 1 | 0 | -0.003 | 0 | 0 | 0 | t | 38203 | LNEKEIKDL<br>YDNQSNS<br>GIL  | Mus<br>musculu<br>s              |
| 1 | 1.00 | 1 | 1 | 0 | -0.003 | 0 | 0 | 0 | t | 38203 | LNEKEIKDL<br>YDNQSNS<br>GIL  | Mus<br>musculu<br>s              |
| 1 | 1.00 | 1 | 1 | 0 | 0      | 0 | 0 | 0 | t | 51204 | QKKNKRN<br>TNRRPQD<br>V      | Homo<br>sapiens                  |
| 1 | 1.00 | 1 | 1 | 0 | 0      | 0 | 0 | 0 | t | 57864 | SFPMNEES<br>PLGFSPE          | Mus<br>musculu<br>s              |
| 1 | 1.00 | 1 | 1 | 0 | 0      | 0 | 0 | 0 | t | 57864 | SFPMNEES<br>PLGFSPE          | Mus<br>musculu<br>s              |
| 1 | 1.00 | 1 | 1 | 0 | 0      | 0 | 0 | 0 | t | 43242 | NANPNAN<br>PNANP             | Mus<br>musculu<br>s              |
| 1 | 1.00 | 1 | 1 | 0 | 0      | 0 | 0 | 0 | t | 43796 | NEYGVEG<br>GRVNAV<br>G       | Mus<br>musculu<br>s              |

|   |      |   |   |   |        |   |   |   |   |       |                              |                     |
|---|------|---|---|---|--------|---|---|---|---|-------|------------------------------|---------------------|
| 1 | 1.00 | 1 | 1 | 0 | 0      | 0 | 0 | 0 | t | 46849 | PALDKLKL<br>TGDEATG<br>A     | Mus<br>musculu<br>s |
| 1 | 1.00 | 1 | 1 | 0 | 0.004  | 0 | 0 | 0 | t | 46756 | PACYCYGL<br>PDSVKIW          | Ovis<br>aries       |
| 1 | 1.00 | 1 | 1 | 0 | 0.006  | 0 | 0 | 0 | t | 46756 | PACYCYGL<br>PDSVKIW          | Ovis<br>aries       |
| 1 | 1.00 | 1 | 1 | 0 | 0      | 0 | 0 | 0 | t | 40579 | LVSFGVWI<br>RTPPAYRP<br>PN   | Mus<br>musculu<br>s |
| 1 | 1.00 | 1 | 1 | 0 | 0      | 0 | 0 | 0 | t | 43798 | NEYIEKANI<br>TTDDK           | Bos<br>taurus       |
| 1 | 1.00 | 1 | 1 | 0 | 0      | 0 | 0 | 0 | t | 36957 | LKMADPN<br>RFRGK             | Mus<br>musculu<br>s |
| 1 | 1.00 | 1 | 1 | 0 | 0.005  | 0 | 0 | 0 | t | 58044 | SGGAGPA<br>GGASSGPK<br>VEEVD | Homo<br>sapiens     |
| 1 | 1.00 | 1 | 1 | 0 | 0      | 0 | 0 | 0 | t | 38203 | LNEKEIKDL<br>YDNQSNS<br>GIL  | Mus<br>musculu<br>s |
| 1 | 1.00 | 1 | 1 | 0 | 0      | 0 | 0 | 0 | t | 53998 | RGTIGQV<br>DRLKDKV<br>NNTL   | Mus<br>musculu<br>s |
| 1 | 1.00 | 1 | 1 | 0 | 0      | 0 | 0 | 0 | t | 42429 | MQWNST<br>AFHQTLQ            | Mus<br>musculu<br>s |
| 1 | 1.00 | 1 | 1 | 0 | 0      | 0 | 0 | 0 | t | 55148 | RPFERDIS<br>NV               | Mus<br>musculu<br>s |
| 1 | 1.00 | 1 | 1 | 0 | -0.002 | 0 | 0 | 0 | t | 59896 | SNRTQGE                      | Sus<br>scrofa       |
| 1 | 1.00 | 1 | 1 | 0 | 0      | 0 | 0 | 0 | t | 59326 | SLLTYMK<br>M                 | Mus<br>musculu<br>s |
| 1 | 1.00 | 1 | 1 | 0 | -0.002 | 0 | 0 | 0 | t | 43826 | NFENAFEI<br>AGASILFE<br>IP   | Mus<br>musculu<br>s |

|   |      |   |   |   |        |   |   |   |   |       |                              |                                  |
|---|------|---|---|---|--------|---|---|---|---|-------|------------------------------|----------------------------------|
| 1 | 1.00 | 1 | 1 | 0 | -0.003 | 0 | 0 | 0 | t | 41019 | MADPNRF<br>RG                | Oryctola<br>gus<br>cuniculu<br>s |
| 1 | 1.00 | 1 | 1 | 0 | 0      | 0 | 0 | 0 | t | 41019 | MADPNRF<br>RG                | Mus<br>musculu<br>s              |
| 1 | 1.00 | 1 | 1 | 0 | -0.003 | 0 | 0 | 0 | t | 41019 | MADPNRF<br>RG                | Oryctola<br>gus<br>cuniculu<br>s |
| 1 | 1.00 | 1 | 1 | 0 | -0.003 | 0 | 0 | 0 | t | 45598 | NQNSKYIN<br>YRDLYIGE<br>KFI  | Mus<br>musculu<br>s              |
| 1 | 1.00 | 1 | 1 | 0 | -0.004 | 0 | 0 | 0 | t | 49223 | PRNNNRT<br>RVHGDKA<br>T      | Sus<br>scrofa                    |
| 1 | 1.00 | 1 | 1 | 0 | 0      | 0 | 0 | 0 | t | 37056 | LKVIRKNIV<br>KKMIE           | Oryctola<br>gus<br>cuniculu<br>s |
| 1 | 1.00 | 1 | 1 | 0 | -0.001 | 0 | 0 | 0 | t | 45598 | NQNSKYIN<br>YRDLYIGE<br>KFI  | Homo<br>sapiens                  |
| 1 | 1.00 | 1 | 1 | 0 | -0.003 | 0 | 0 | 0 | t | 59907 | SNSLIYYAL<br>DVY             | Oryctola<br>gus<br>cuniculu<br>s |
| 1 | 1.00 | 1 | 1 | 0 | -0.003 | 0 | 0 | 0 | t | 45990 | NSSSFNTT<br>QGWHHPS<br>QRLLF | Oryctola<br>gus<br>cuniculu<br>s |
| 1 | 1.00 | 1 | 1 | 0 | 0      | 0 | 0 | 0 | t | 50636 | QELDCWH<br>YHQYCITS          | Capra<br>hircus                  |
| 1 | 1.00 | 1 | 1 | 0 | -0.003 | 0 | 0 | 0 | t | 58733 | SIVDKLNR<br>SGGNYTK          | Oryctola<br>gus<br>cuniculu<br>s |
| 1 | 1.00 | 1 | 1 | 0 | 0      | 0 | 0 | 0 | t | 56862 | SALLED                       | Mus<br>musculu<br>s              |
| 1 | 1.00 | 1 | 1 | 0 | -0.003 | 0 | 0 | 0 | t | 58957 | SKVEEVVE<br>EQGSENEE         | Oryctola<br>gus<br>cuniculu<br>s |

|   |      |   |   |   |        |   |   |   |   |       |                               |                                  |
|---|------|---|---|---|--------|---|---|---|---|-------|-------------------------------|----------------------------------|
| 1 | 1.00 | 1 | 1 | 0 | 0.005  | 0 | 0 | 0 | t | 44018 | NGKQVES<br>PAPSGHT<br>HLKKPA  | Homo<br>sapiens                  |
| 1 | 1.00 | 1 | 1 | 0 | 0      | 0 | 0 | 0 | t | 51974 | QPTELRYS<br>W                 | Mus<br>musculu<br>s              |
| 1 | 1.00 | 1 | 1 | 0 | 0      | 0 | 0 | 0 | t | 58957 | SKVEEVVE<br>EQGSENEE          | Homo<br>sapiens                  |
| 1 | 1.00 | 1 | 1 | 0 | 0      | 0 | 0 | 0 | t | 46828 | PAIIPDREV<br>LYQEFDE<br>MEEC  | Homo<br>sapiens                  |
| 1 | 1.00 | 1 | 1 | 0 | 0      | 0 | 0 | 0 | t | 42699 | MSTNPKP<br>QRKTKRNT<br>NRRPQ  | Homo<br>sapiens                  |
| 1 | 1.00 | 1 | 1 | 0 | 0      | 0 | 0 | 0 | t | 40636 | LVVNRLRG<br>SL                | Homo<br>sapiens                  |
| 1 | 1.00 | 1 | 1 | 0 | -0.003 | 0 | 0 | 0 | t | 53633 | RESNGETK                      | Mus<br>musculu<br>s              |
| 1 | 1.00 | 1 | 1 | 0 | 0      | 0 | 0 | 0 | t | 60450 | SQHLPYIE<br>QGMMMLA<br>EQFKQK | Homo<br>sapiens                  |
| 1 | 1.00 | 1 | 1 | 0 | 0      | 0 | 0 | 0 | t | 59374 | SLNTGWL<br>AGLFY              | Mus<br>musculu<br>s              |
| 1 | 1.00 | 1 | 1 | 0 | -0.003 | 0 | 0 | 0 | t | 39092 | LRGDLQVL<br>AQKVARTL          | Oryctola<br>gus<br>cuniculu<br>s |
| 1 | 1.00 | 1 | 1 | 0 | 0      | 0 | 0 | 0 | t | 39092 | LRGDLQVL<br>AQKVARTL          | Mus<br>musculu<br>s              |
| 1 | 1.00 | 1 | 1 | 0 | 0      | 0 | 0 | 0 | t | 55335 | RPSAPP                        | Homo<br>sapiens                  |
| 1 | 1.00 | 1 | 1 | 0 | 0.008  | 0 | 0 | 0 | t | 54002 | RGTSMD<br>EADRY               | Capra<br>hircus                  |
| 1 | 1.00 | 1 | 1 | 0 | 0      | 0 | 0 | 0 | t | 41012 | MACMSA<br>DLEVVTST            | Homo<br>sapiens                  |

|   |      |   |   |   |        |   |   |   |   |       |                              |                                  |
|---|------|---|---|---|--------|---|---|---|---|-------|------------------------------|----------------------------------|
| 1 | 1.00 | 1 | 1 | 0 | -0.003 | 0 | 0 | 0 | t | 60170 | SPNVSVPS<br>SSSTPLLY         | Oryctola<br>gus<br>cuniculu<br>s |
| 1 | 1.00 | 1 | 1 | 0 | -0.004 | 0 | 0 | 0 | t | 51979 | QPTQMSA<br>QEDLGDD<br>TGIHVI | Mus<br>musculu<br>s              |
| 1 | 1.00 | 1 | 1 | 0 | 0      | 0 | 0 | 0 | t | 60170 | SPNVSVPS<br>SSSTPLLY         | Oryctola<br>gus<br>cuniculu<br>s |
| 1 | 1.00 | 1 | 1 | 0 | -0.014 | 0 | 0 | 0 | t | 60170 | SPNVSVPS<br>SSSTPLLY         | Macaca<br>mulatta                |
| 1 | 1.00 | 1 | 1 | 0 | -0.003 | 0 | 0 | 0 | t | 60170 | SPNVSVPS<br>SSSTPLLY         | Oryctola<br>gus<br>cuniculu<br>s |
| 1 | 1.00 | 1 | 1 | 0 | -0.003 | 0 | 0 | 0 | t | 39092 | LRGDLQVL<br>AQKVARTL         | Oryctola<br>gus<br>cuniculu<br>s |
| 1 | 1.00 | 1 | 1 | 0 | -0.003 | 0 | 0 | 0 | t | 43893 | NFNGLTGT<br>GVLT PSSK<br>R   | Oryctola<br>gus<br>cuniculu<br>s |
| 1 | 1.00 | 1 | 1 | 0 | 0      | 0 | 0 | 0 | t | 39092 | LRGDLQVL<br>AQKVARTL         | Oryctola<br>gus<br>cuniculu<br>s |
| 1 | 1.00 | 1 | 1 | 0 | -0.003 | 0 | 0 | 0 | t | 48479 | PLSLRSK                      | Oryctola<br>gus<br>cuniculu<br>s |
| 1 | 1.00 | 1 | 1 | 0 | 0.004  | 0 | 0 | 0 | t | 51233 | QKPLK                        | Ovis<br>aries                    |
| 1 | 1.00 | 1 | 1 | 0 | 0      | 0 | 0 | 0 | t | 56583 | RYLQEKYN<br>LYNSDVFD<br>GKVQ | Oryctola<br>gus<br>cuniculu<br>s |
| 1 | 1.00 | 1 | 1 | 0 | 0      | 0 | 0 | 0 | t | 52196 | QRDTLSTQ<br>KETLEREV<br>QN   | Mus<br>musculu<br>s              |

|   |      |   |   |   |        |   |   |   |   |       |                              |                          |
|---|------|---|---|---|--------|---|---|---|---|-------|------------------------------|--------------------------|
| 1 | 1.00 | 1 | 1 | 0 | -0.004 | 0 | 0 | 0 | t | 56602 | RYNRNAV<br>PNLRGDL<br>QVLAQK | Sus<br>scrofa            |
| 1 | 1.00 | 1 | 1 | 0 | -0.004 | 0 | 0 | 0 | t | 56602 | RYNRNAV<br>PNLRGDL<br>QVLAQK | Sus<br>scrofa            |
| 1 | 1.00 | 1 | 1 | 0 | -0.001 | 0 | 0 | 0 | t | 51233 | QKPLK                        | Ovis<br>aries            |
| 1 | 1.00 | 1 | 1 | 0 | 0      | 0 | 0 | 0 | t | 44747 | NLINTNGS<br>WHIN             | Rattus<br>norvegicus     |
| 1 | 1.00 | 1 | 1 | 0 | -0.004 | 0 | 0 | 0 | t | 51233 | QKPLK                        | Mus<br>musculus          |
| 1 | 1.00 | 1 | 1 | 0 | 0      | 0 | 0 | 0 | t | 51233 | QKPLK                        | Sus<br>scrofa            |
| 1 | 1.00 | 1 | 1 | 0 | 0.008  | 0 | 0 | 0 | t | 51233 | QKPLK                        | Capra<br>hircus          |
| 1 | 1.00 | 1 | 1 | 0 | 0.004  | 0 | 0 | 0 | t | 51233 | QKPLK                        | Mus<br>musculus          |
| 1 | 1.00 | 1 | 1 | 0 | -0.003 | 0 | 0 | 0 | t | 39092 | LRGDLQVL<br>AQKVARTL         | Oryctolagus<br>cuniculus |
| 1 | 1.00 | 1 | 1 | 0 | -0.002 | 0 | 0 | 0 | t | 46792 | PAFGANS<br>NNPDWDF<br>NP     | Mus<br>musculus          |
| 1 | 1.00 | 1 | 1 | 0 | 0      | 0 | 0 | 0 | t | 56862 | SALLED                       | Mus<br>musculus          |

|   |      |   |   |   |        |   |   |   |   |       |                               |                                  |
|---|------|---|---|---|--------|---|---|---|---|-------|-------------------------------|----------------------------------|
| 1 | 1.00 | 1 | 1 | 0 | -0.003 | 0 | 0 | 0 | t | 58950 | SKTNIFWA<br>GDLL              | Oryctola<br>gus<br>cuniculu<br>s |
| 1 | 1.00 | 1 | 1 | 0 | 0      | 0 | 0 | 0 | t | 49893 | PVKKPVAL<br>KVKAKN            | Bos<br>taurus                    |
| 1 | 1.00 | 1 | 1 | 0 | -0.007 | 0 | 0 | 0 | t | 39090 | LRGDLQVL                      | Oryctola<br>gus<br>cuniculu<br>s |
| 1 | 1.00 | 1 | 1 | 0 | -0.003 | 0 | 0 | 0 | t | 56587 | RYLSQLCS<br>GGYT              | Oryctola<br>gus<br>cuniculu<br>s |
| 1 | 1.00 | 1 | 1 | 0 | 0      | 0 | 0 | 0 | t | 50070 | PYCWHYP<br>PKPCGIVP<br>A      | Homo<br>sapiens                  |
| 1 | 1.00 | 1 | 1 | 0 | 0      | 0 | 0 | 0 | t | 46804 | PAGFCDG<br>YCKTHLKA           | Mus<br>musculu<br>s              |
| 1 | 1.00 | 1 | 1 | 0 | 0      | 0 | 0 | 0 | t | 55304 | RPQPTEL<br>RY                 | Mus<br>musculu<br>s              |
| 1 | 1.00 | 1 | 1 | 0 | -0.002 | 0 | 0 | 0 | t | 55952 | RSRSESS<br>IE SF              | Mus<br>musculu<br>s              |
| 1 | 1.00 | 1 | 1 | 0 | -0.001 | 0 | 0 | 0 | t | 13471 | ENFSTSF<br>WIRIPKYF<br>NSIS   | Homo<br>sapiens                  |
| 1 | 1.00 | 1 | 1 | 0 | 0      | 0 | 0 | 0 | t | 11208 | EAVEAER<br>A GRGTG            | Mus<br>musculu<br>s              |
| 1 | 1.00 | 1 | 1 | 0 | 0      | 0 | 0 | 0 | t | 32595 | KNQIQL<br>FN LESSK<br>IEVIL K | Mus<br>musculu<br>s              |
| 1 | 1.00 | 1 | 1 | 0 | -0.002 | 0 | 0 | 0 | t | 33198 | KRNEKW<br>D EVYKY<br>IVT NWLA | Mus<br>musculu<br>s              |
| 1 | 1.00 | 1 | 1 | 0 | 0      | 0 | 0 | 0 | t | 30716 | KFDWNT<br>PD                  | Mus<br>musculu<br>s              |

|   |      |   |   |   |        |   |   |   |   |       |                             |                                  |
|---|------|---|---|---|--------|---|---|---|---|-------|-----------------------------|----------------------------------|
| 1 | 1.00 | 1 | 1 | 0 | -0.003 | 0 | 0 | 0 | t | 26178 | IFVEEVSAS<br>QEIVQNE        | Oryctola<br>gus<br>cuniculu<br>s |
| 1 | 1.00 | 1 | 1 | 0 | 0      | 0 | 0 | 0 | t | 24012 | HH PSTNQ<br>EQTSLYVQ<br>AS  | Mus<br>musculu<br>s              |
| 1 | 1.00 | 1 | 1 | 0 | 0      | 0 | 0 | 0 | t | 26178 | IFVEEVSAS<br>QEIVQNE        | Homo<br>sapiens                  |
| 1 | 1.00 | 1 | 1 | 0 | -0.003 | 0 | 0 | 0 | t | 13471 | ENFSTSF<br>WIRIPKYF<br>NSIS | Mus<br>musculu<br>s              |
| 1 | 1.00 | 1 | 1 | 0 | -0.002 | 0 | 0 | 0 | t | 13471 | ENFSTSF<br>WIRIPKYF<br>NSIS | Mus<br>musculu<br>s              |
| 1 | 1.00 | 1 | 1 | 0 | 0      | 0 | 0 | 0 | t | 13471 | ENFSTSF<br>WIRIPKYF<br>NSIS | Mus<br>musculu<br>s              |
| 1 | 1.00 | 1 | 1 | 0 | -0.002 | 0 | 0 | 0 | t | 13471 | ENFSTSF<br>WIRIPKYF<br>NSIS | Mus<br>musculu<br>s              |
| 1 | 1.00 | 1 | 1 | 0 | 0.005  | 0 | 0 | 0 | t | 13471 | ENFSTSF<br>WIRIPKYF<br>NSIS | Gallus<br>gallus                 |
| 1 | 1.00 | 1 | 1 | 0 | 0      | 0 | 0 | 0 | t | 32783 | KPLDKFG<br>NIYDYHYE<br>H    | Mus<br>musculu<br>s              |
| 1 | 1.00 | 1 | 1 | 0 | -0.003 | 0 | 0 | 0 | t | 32783 | KPLDKFG<br>NIYDYHYE<br>H    | Oryctola<br>gus<br>cuniculu<br>s |
| 1 | 1.00 | 1 | 1 | 0 | -0.003 | 0 | 0 | 0 | t | 32783 | KPLDKFG<br>NIYDYHYE<br>H    | Oryctola<br>gus<br>cuniculu<br>s |
| 1 | 1.00 | 1 | 1 | 0 | 0      | 0 | 0 | 0 | t | 32783 | KPLDKFG<br>NIYDYHYE<br>H    | Mus<br>musculu<br>s              |
| 1 | 1.00 | 1 | 1 | 0 | 0      | 0 | 0 | 0 | t | 32783 | KPLDKFG<br>NIYDYHYE<br>H    | Mus<br>musculu<br>s              |



|   |      |   |   |   |        |   |   |   |   |       |                             |              |
|---|------|---|---|---|--------|---|---|---|---|-------|-----------------------------|--------------|
| 1 | 1.00 | 1 | 1 | 0 | -0.003 | 0 | 0 | 0 | t | 30716 | KFDWNTPD                    | Mus musculus |
| 1 | 1.00 | 1 | 1 | 0 | -0.007 | 0 | 0 | 0 | t | 13471 | ENFSTSFWIRIPKYFNIS          | Homo sapiens |
| 1 | 1.00 | 1 | 1 | 0 | 0      | 0 | 0 | 0 | t | 33198 | KRNEKWD<br>EVYKYIVT<br>NWLA | Mus musculus |
| 1 | 1.00 | 1 | 1 | 0 | -0.003 | 0 | 0 | 0 | t | 31439 | KITCFLTAAGYCNETE            | Mus musculus |
| 1 | 1.00 | 1 | 1 | 0 | 0      | 0 | 0 | 0 | t | 13471 | ENFSTSFWIRIPKYFNIS          | Mus musculus |
| 1 | 1.00 | 1 | 1 | 0 | 0      | 0 | 0 | 0 | t | 13471 | ENFSTSFWIRIPKYFNIS          | Mus musculus |
| 1 | 1.00 | 1 | 1 | 0 | 0      | 0 | 0 | 0 | t | 32159 | KLSEGDLLAEIETDK             | Homo sapiens |
| 1 | 1.00 | 1 | 1 | 0 | 0      | 0 | 0 | 0 | t | 19006 | GDINKVLE<br>KLGYSGGD<br>LLG | Mus musculus |
| 1 | 1.00 | 1 | 1 | 0 | 0      | 0 | 0 | 0 | t | 32159 | KLSEGDLLAEIETDK             | Homo sapiens |
| 1 | 1.00 | 1 | 1 | 0 | -0.001 | 0 | 0 | 0 | t | 33198 | KRNEKWD<br>EVYKYIVT<br>NWLA | Homo sapiens |
| 1 | 1.00 | 1 | 1 | 0 | 0      | 0 | 0 | 0 | t | 19006 | GDINKVLE<br>KLGYSGGD<br>LLG | Mus musculus |
| 1 | 1.00 | 1 | 1 | 0 | 0      | 0 | 0 | 0 | t | 13471 | ENFSTSFWIRIPKYFNIS          | Mus musculus |
| 1 | 1.00 | 1 | 1 | 0 | -0.008 | 0 | 0 | 0 | t | 13471 | ENFSTSFWIRIPKYFNIS          | Mus musculus |
| 1 | 1.00 | 1 | 1 | 0 | 0      | 0 | 0 | 0 | t | 13471 | ENFSTSFWIRIPKYFNIS          | Mus musculus |

|   |      |   |   |   |        |   |   |   |   |       |                               |                                  |
|---|------|---|---|---|--------|---|---|---|---|-------|-------------------------------|----------------------------------|
| 1 | 1.00 | 1 | 1 | 0 | -0.003 | 0 | 0 | 0 | t | 13438 | ENANANN<br>AV                 | Oryctola<br>gus<br>cuniculu<br>s |
| 1 | 1.00 | 1 | 1 | 0 | 0      | 0 | 0 | 0 | t | 13471 | ENFSTSF<br>WIRIPKYF<br>NSIS   | Mus<br>musculu<br>s              |
| 1 | 1.00 | 1 | 1 | 0 | -0.008 | 0 | 0 | 0 | t | 13471 | ENFSTSF<br>WIRIPKYF<br>NSIS   | Mus<br>musculu<br>s              |
| 1 | 1.00 | 1 | 1 | 0 | 0      | 0 | 0 | 0 | t | 19006 | GDINKVLE<br>KLGYSGG<br>DLLG   | Mus<br>musculu<br>s              |
| 1 | 1.00 | 1 | 1 | 0 | -0.003 | 0 | 0 | 0 | t | 16058 | FGSKSPFF<br>RKYF              | Oryctola<br>gus<br>cuniculu<br>s |
| 1 | 1.00 | 1 | 1 | 0 | 0      | 0 | 0 | 0 | t | 29757 | KAAPKRAA<br>PKRAAPKK<br>AAPK  | Homo<br>sapiens                  |
| 1 | 1.00 | 1 | 1 | 0 | 0      | 0 | 0 | 0 | t | 14953 | EWSPCSVT<br>CGNGIQV<br>RIK    | Mus<br>musculu<br>s              |
| 1 | 1.00 | 1 | 1 | 0 | 0      | 0 | 0 | 0 | t | 29758 | KAAQIYSE<br>P                 | Mus<br>musculu<br>s              |
| 1 | 1.00 | 1 | 1 | 0 | 0      | 0 | 0 | 0 | t | 34621 | KYVDNQR<br>LLSTFTEYI<br>KNI   | Mus<br>musculu<br>s              |
| 1 | 1.00 | 1 | 1 | 0 | -0.008 | 0 | 0 | 0 | t | 14730 | EVILKNAIV<br>YNSMYEN<br>FST   | Mus<br>musculu<br>s              |
| 1 | 1.00 | 1 | 1 | 0 | 0      | 0 | 0 | 0 | t | 22074 | GRIILSGKP<br>AIIPDREAL<br>YQ  | Homo<br>sapiens                  |
| 1 | 1.00 | 1 | 1 | 0 | 0      | 0 | 0 | 0 | t | 31116 | KHIDAYKT<br>FPPTPEPKK<br>DKKK | Mus<br>musculu<br>s              |
| 1 | 1.00 | 1 | 1 | 0 | -0.008 | 0 | 0 | 0 | t | 21408 | GNDYEDR<br>YYRENMY<br>RYPNQ   | Mus<br>musculu<br>s              |
| 1 | 1.00 | 1 | 1 | 0 | 0      | 0 | 0 | 0 | t | 19928 | GGMPGG<br>MPGGMP<br>GGMNF     | Mus<br>musculu<br>s              |

|   |      |   |   |   |        |   |   |   |   |       |                             |                                  |
|---|------|---|---|---|--------|---|---|---|---|-------|-----------------------------|----------------------------------|
| 1 | 1.00 | 1 | 1 | 0 | 0      | 0 | 0 | 0 | t | 19928 | GGMPGG<br>MPGGMP<br>GGMNFP  | Mus<br>musculu<br>s              |
| 1 | 1.00 | 1 | 1 | 0 | 0      | 0 | 0 | 0 | t | 19928 | GGMPGG<br>MPGGMP<br>GGMNFP  | Mus<br>musculu<br>s              |
| 1 | 1.00 | 1 | 1 | 0 | -0.002 | 0 | 0 | 0 | t | 11208 | EAVEAERA<br>GRGTG           | Mus<br>musculu<br>s              |
| 1 | 1.00 | 1 | 1 | 0 | 0      | 0 | 0 | 0 | t | 34621 | KYVDNQR<br>LLSTFTEYI<br>KNI | Mus<br>musculu<br>s              |
| 1 | 1.00 | 1 | 1 | 0 | 0.001  | 0 | 0 | 0 | t | 12315 | EGYPADSK<br>GCKITCF         | Ovis<br>aries                    |
| 1 | 1.00 | 1 | 1 | 0 | 0.006  | 0 | 0 | 0 | t | 12315 | EGYPADSK<br>GCKITCF         | Ovis<br>aries                    |
| 1 | 1.00 | 1 | 1 | 0 | -0.003 | 0 | 0 | 0 | t | 34621 | KYVDNQR<br>LLSTFTEYI<br>KNI | Mus<br>musculu<br>s              |
| 1 | 1.00 | 1 | 1 | 0 | -0.003 | 0 | 0 | 0 | t | 12315 | EGYPADSK<br>GCKITCF         | Oryctola<br>gus<br>cuniculu<br>s |
| 1 | 1.00 | 1 | 1 | 0 | -0.003 | 0 | 0 | 0 | t | 12315 | EGYPADSK<br>GCKITCF         | Mus<br>musculu<br>s              |
| 1 | 1.00 | 1 | 1 | 0 | 0.004  | 0 | 0 | 0 | t | 12315 | EGYPADSK<br>GCKITCF         | Ovis<br>aries                    |
| 1 | 1.00 | 1 | 1 | 0 | -0.006 | 0 | 0 | 0 | t | 12315 | EGYPADSK<br>GCKITCF         | Oryctola<br>gus<br>cuniculu<br>s |
| 1 | 1.00 | 1 | 1 | 0 | 0      | 0 | 0 | 0 | t | 23269 | GWLAGLF<br>YQHKF            | Rattus<br>norvegic<br>us         |
| 1 | 1.00 | 1 | 1 | 0 | -0.003 | 0 | 0 | 0 | t | 21408 | GNDYEDR<br>YYRENMY<br>RYPNQ | Oryctola<br>gus<br>cuniculu<br>s |

|   |      |   |   |   |        |   |   |   |   |       |                              |                     |
|---|------|---|---|---|--------|---|---|---|---|-------|------------------------------|---------------------|
| 1 | 1.00 | 1 | 1 | 0 | 0      | 0 | 0 | 0 | t | 20719 | GKVSLEEF<br>CRGFGLKV<br>WEVR | Mus<br>musculu<br>s |
| 1 | 1.00 | 1 | 1 | 0 | 0      | 0 | 0 | 0 | t | 32159 | KLSEGDLL<br>AEIETDK          | Homo<br>sapiens     |
| 1 | 1.00 | 1 | 1 | 0 | 0      | 0 | 0 | 0 | t | 20719 | GKVSLEEF<br>CRGFGLKV<br>WEVR | Mus<br>musculu<br>s |
| 1 | 1.00 | 1 | 1 | 0 | 0      | 0 | 0 | 0 | t | 36781 | LIYNLTLC                     | Sus<br>scrofa       |
| 1 | 1.00 | 1 | 1 | 0 | 0      | 0 | 0 | 0 | t | 19928 | GGMPGG<br>MPGGMP<br>GGMNFP   | Mus<br>musculu<br>s |
| 1 | 1.00 | 1 | 1 | 0 | 0.005  | 0 | 0 | 0 | t | 26220 | IGFIGFHQ<br>FNNIAKLV<br>ASN  | Gallus<br>gallus    |
| 1 | 1.00 | 1 | 1 | 0 | -0.003 | 0 | 0 | 0 | t | 26220 | IGFIGFHQ<br>FNNIAKLV<br>ASN  | Mus<br>musculu<br>s |
| 1 | 1.00 | 1 | 1 | 0 | -0.007 | 0 | 0 | 0 | t | 26220 | IGFIGFHQ<br>FNNIAKLV<br>ASN  | Homo<br>sapiens     |
| 1 | 1.00 | 1 | 1 | 0 | -0.002 | 0 | 0 | 0 | t | 26220 | IGFIGFHQ<br>FNNIAKLV<br>ASN  | Mus<br>musculu<br>s |
| 1 | 1.00 | 1 | 1 | 0 | -0.008 | 0 | 0 | 0 | t | 26220 | IGFIGFHQ<br>FNNIAKLV<br>ASN  | Mus<br>musculu<br>s |
| 1 | 1.00 | 1 | 1 | 0 | -0.001 | 0 | 0 | 0 | t | 26220 | IGFIGFHQ<br>FNNIAKLV<br>ASN  | Homo<br>sapiens     |
| 1 | 1.00 | 1 | 1 | 0 | 0      | 0 | 0 | 0 | t | 13471 | ENFSTSF<br>WIRIPKYF<br>NSIS  | Mus<br>musculu<br>s |
| 1 | 1.00 | 1 | 1 | 0 | 0      | 0 | 0 | 0 | t | 13471 | ENFSTSF<br>WIRIPKYF<br>NSIS  | Mus<br>musculu<br>s |

|   |      |   |   |   |        |   |   |   |   |       |                              |                                  |
|---|------|---|---|---|--------|---|---|---|---|-------|------------------------------|----------------------------------|
| 1 | 1.00 | 1 | 1 | 0 | -0.011 | 0 | 0 | 0 | t | 21408 | GNDYEDR<br>YYRENMY<br>RYPNQ  | Oryctola<br>gus<br>cuniculu<br>s |
| 1 | 1.00 | 1 | 1 | 0 | 0      | 0 | 0 | 0 | t | 14730 | EVILKNAIV<br>YNSMYEN<br>FST  | Mus<br>musculu<br>s              |
| 1 | 1.00 | 1 | 1 | 0 | -0.002 | 0 | 0 | 0 | t | 13471 | ENFSTSFW<br>IRIPKYFNSI<br>S  | Mus<br>musculu<br>s              |
| 1 | 1.00 | 1 | 1 | 0 | 0      | 0 | 0 | 0 | t | 25181 | HYMKCPL<br>VKGQQYD           | Homo<br>sapiens                  |
| 1 | 1.00 | 1 | 1 | 0 | -0.003 | 0 | 0 | 0 | t | 35234 | LDNIKDNV<br>GKMEDIYK<br>KNKT | Oryctola<br>gus<br>cuniculu<br>s |
| 1 | 1.00 | 1 | 1 | 0 | 0      | 0 | 0 | 0 | t | 28165 | IQIIAATMS<br>KAKQYNIC<br>CKF | Mus<br>musculu<br>s              |
| 1 | 1.00 | 1 | 1 | 0 | 0      | 0 | 0 | 0 | t | 19928 | GGMPGG<br>MPGGMP<br>GGMNFP   | Mus<br>musculu<br>s              |
| 1 | 1.00 | 1 | 1 | 0 | -0.003 | 0 | 0 | 0 | t | 20726 | GKVYLVG<br>GPELGGW<br>K      | Oryctola<br>gus<br>cuniculu<br>s |
| 1 | 1.00 | 1 | 1 | 0 | -0.003 | 0 | 0 | 0 | t | 20726 | GKVYLVG<br>GPELGGW<br>K      | Oryctola<br>gus<br>cuniculu<br>s |
| 1 | 1.00 | 1 | 1 | 0 | 0      | 0 | 0 | 0 | t | 20726 | GKVYLVG<br>GPELGGW<br>K      | Mus<br>musculu<br>s              |
| 1 | 1.00 | 1 | 1 | 0 | 0      | 0 | 0 | 0 | t | 19928 | GGMPGG<br>MPGGMP<br>GGMNFP   | Mus<br>musculu<br>s              |
| 1 | 1.00 | 1 | 1 | 0 | 0      | 0 | 0 | 0 | t | 19928 | GGMPGG<br>MPGGMP<br>GGMNFP   | Mus<br>musculu<br>s              |

|   |      |   |   |   |        |   |   |   |   |       |                                  |                                  |
|---|------|---|---|---|--------|---|---|---|---|-------|----------------------------------|----------------------------------|
| 1 | 1.00 | 1 | 1 | 0 | 0      | 0 | 0 | 0 | t | 19928 | GGMPGG<br>MPGGMP<br>GGMNFP       | Mus<br>musculu<br>s              |
| 1 | 1.00 | 1 | 1 | 0 | 0      | 0 | 0 | 0 | t | 19928 | GGMPGG<br>MPGGMP<br>GGMNFP       | Mus<br>musculu<br>s              |
| 1 | 1.00 | 1 | 1 | 0 | -0.003 | 0 | 0 | 0 | t | 34621 | KYVDNQR<br>LLSTFTEYI<br>KNI      | Mus<br>musculu<br>s              |
| 1 | 1.00 | 1 | 1 | 0 | -0.006 | 0 | 0 | 0 | t | 31439 | KITCFLTAA<br>GYCNTE              | Oryctola<br>gus<br>cuniculu<br>s |
| 1 | 1.00 | 1 | 1 | 0 | 0      | 0 | 0 | 0 | t | 23269 | GWLAGLF<br>YQHKF                 | Rattus<br>norvegic<br>us         |
| 1 | 1.00 | 1 | 1 | 0 | -0.003 | 0 | 0 | 0 | t | 34986 | LATRLMKK<br>FKAEIRDFF            | Oryctola<br>gus<br>cuniculu<br>s |
| 1 | 1.00 | 1 | 1 | 0 | -0.003 | 0 | 0 | 0 | t | 32769 | KPKHKKLK<br>QPGDGNP              | Oryctola<br>gus<br>cuniculu<br>s |
| 1 | 1.00 | 1 | 1 | 0 | 0      | 0 | 0 | 0 | t | 14695 | EVFLISED<br>L<br>KTPINITNS<br>NS | Oryctola<br>gus<br>cuniculu<br>s |
| 1 | 1.00 | 1 | 1 | 0 | 0      | 0 | 0 | 0 | t | 15056 | EYLNKIQN<br>SLSTEWSP<br>CSV      | Mus<br>musculu<br>s              |
| 1 | 1.00 | 1 | 1 | 0 | 0      | 0 | 0 | 0 | t | 19006 | GDINKVLE<br>KLGYSGGD<br>LLG      | Mus<br>musculu<br>s              |
| 1 | 1.00 | 1 | 1 | 0 | -0.003 | 0 | 0 | 0 | t | 31439 | KITCFLTAA<br>GYCNTE              | Oryctola<br>gus<br>cuniculu<br>s |
| 1 | 1.00 | 1 | 1 | 0 | -0.003 | 0 | 0 | 0 | t | 22028 | GRFDEAM<br>QDQIRQLE              | Oryctola<br>gus<br>cuniculu<br>s |
| 1 | 1.00 | 1 | 1 | 0 | -0.003 | 0 | 0 | 0 | t | 18524 | GAARQPD                          | Oryctola<br>gus<br>cuniculu<br>s |

|   |      |   |   |   |        |   |   |   |   |       |                             |                                  |
|---|------|---|---|---|--------|---|---|---|---|-------|-----------------------------|----------------------------------|
| 1 | 1.00 | 1 | 1 | 0 | 0      | 0 | 0 | 0 | t | 19928 | GGMPGG<br>MPGGMP<br>GGMNFP  | Mus<br>musculu<br>s              |
| 1 | 1.00 | 1 | 1 | 0 | 0      | 0 | 0 | 0 | t | 19928 | GGMPGG<br>MPGGMP<br>GGMNFP  | Mus<br>musculu<br>s              |
| 1 | 1.00 | 1 | 1 | 0 | 0      | 0 | 0 | 0 | t | 19928 | GGMPGG<br>MPGGMP<br>GGMNFP  | Mus<br>musculu<br>s              |
| 1 | 1.00 | 1 | 1 | 0 | 0.004  | 0 | 0 | 0 | t | 31439 | KITCFLTA<br>A<br>GYCNTE     | Ovis<br>aries                    |
| 1 | 1.00 | 1 | 1 | 0 | 0      | 0 | 0 | 0 | t | 19928 | GGMPGG<br>MPGGMP<br>GGMNFP  | Mus<br>musculu<br>s              |
| 1 | 1.00 | 1 | 1 | 0 | 0      | 0 | 0 | 0 | t | 32769 | KPKHKKLK<br>QPGDGNP         | Mus<br>musculu<br>s              |
| 1 | 1.00 | 1 | 1 | 0 | -0.003 | 0 | 0 | 0 | t | 32769 | KPKHKKLK<br>QPGDGNP         | Oryctola<br>gus<br>cuniculu<br>s |
| 1 | 1.00 | 1 | 1 | 0 | 0      | 0 | 0 | 0 | t | 19928 | GGMPGG<br>MPGGMP<br>GGMNFP  | Mus<br>musculu<br>s              |
| 1 | 1.00 | 1 | 1 | 0 | -0.003 | 0 | 0 | 0 | t | 36659 | LIPLLR                      | Oryctola<br>gus<br>cuniculu<br>s |
| 1 | 1.00 | 1 | 1 | 0 | 0      | 0 | 0 | 0 | t | 32595 | KNQIQLFN<br>LESSKIEVIL<br>K | Mus<br>musculu<br>s              |
| 1 | 1.00 | 1 | 1 | 0 | 0      | 0 | 0 | 0 | t | 14730 | EVILKNAIV<br>YNSMYEN<br>FST | Mus<br>musculu<br>s              |
| 1 | 1.00 | 1 | 1 | 0 | 0      | 0 | 0 | 0 | t | 19928 | GGMPGG<br>MPGGMP<br>GGMNFP  | Mus<br>musculu<br>s              |
| 1 | 1.00 | 1 | 1 | 0 | -0.002 | 0 | 0 | 0 | t | 14730 | EVILKNAIV<br>YNSMYEN<br>FST | Mus<br>musculu<br>s              |

|   |      |   |   |   |        |   |   |   |   |       |                             |                                  |
|---|------|---|---|---|--------|---|---|---|---|-------|-----------------------------|----------------------------------|
| 1 | 1.00 | 1 | 1 | 0 | 0      | 0 | 0 | 0 | t | 19928 | GGMPGG<br>MPGGMP<br>GGMNFP  | Mus<br>musculu<br>s              |
| 1 | 1.00 | 1 | 1 | 0 | 0      | 0 | 0 | 0 | t | 19928 | GGMPGG<br>MPGGMP<br>GGMNFP  | Mus<br>musculu<br>s              |
| 1 | 1.00 | 1 | 1 | 0 | 0      | 0 | 0 | 0 | t | 19928 | GGMPGG<br>MPGGMP<br>GGMNFP  | Mus<br>musculu<br>s              |
| 1 | 1.00 | 1 | 1 | 0 | 0.004  | 0 | 0 | 0 | t | 22015 | GREGYPA<br>DSKGCKIT         | Ovis<br>aries                    |
| 1 | 1.00 | 1 | 1 | 0 | -0.006 | 0 | 0 | 0 | t | 22015 | GREGYPA<br>DSKGCKIT         | Oryctola<br>gus<br>cuniculu<br>s |
| 1 | 1.00 | 1 | 1 | 0 | 0      | 0 | 0 | 0 | t | 34621 | KYVDNQR<br>LLSTFTEYI<br>KNI | Mus<br>musculu<br>s              |
| 1 | 1.00 | 1 | 1 | 0 | -0.003 | 0 | 0 | 0 | t | 22015 | GREGYPA<br>DSKGCKIT         | Oryctola<br>gus<br>cuniculu<br>s |
| 1 | 1.00 | 1 | 1 | 0 | -0.003 | 0 | 0 | 0 | t | 11740 | EELDKYFK<br>NHTSPDV<br>DL   | Oryctola<br>gus<br>cuniculu<br>s |
| 1 | 1.00 | 1 | 1 | 0 | 0.004  | 0 | 0 | 0 | t | 22015 | GREGYPA<br>DSKGCKIT         | Ovis<br>aries                    |
| 1 | 1.00 | 1 | 1 | 0 | -0.003 | 0 | 0 | 0 | t | 22015 | GREGYPA<br>DSKGCKIT         | Oryctola<br>gus<br>cuniculu<br>s |
| 1 | 1.00 | 1 | 1 | 0 | 0      | 0 | 0 | 0 | t | 19928 | GGMPGG<br>MPGGMP<br>GGMNFP  | Mus<br>musculu<br>s              |
| 1 | 1.00 | 1 | 1 | 0 | 0      | 0 | 0 | 0 | t | 22015 | GREGYPA<br>DSKGCKIT         | Mus<br>musculu<br>s              |
| 1 | 1.00 | 1 | 1 | 0 | 0.006  | 0 | 0 | 0 | t | 22015 | GREGYPA<br>DSKGCKIT         | Ovis<br>aries                    |



|   |      |   |   |   |        |   |   |   |   |       |                     |                       |
|---|------|---|---|---|--------|---|---|---|---|-------|---------------------|-----------------------|
| 1 | 1.00 | 1 | 1 | 0 | -0.003 | 0 | 0 | 0 | t | 22015 | GREGYPADSKGCKIT     | Mus musculus          |
| 1 | 1.00 | 1 | 1 | 0 | 0      | 0 | 0 | 0 | t | 19928 | GGMPGGMPGGMPGGMNF   | Mus musculus          |
| 1 | 1.00 | 1 | 1 | 0 | -0.008 | 0 | 0 | 0 | t | 14730 | EVILKNAIVYNSMYENFST | Mus musculus          |
| 1 | 1.00 | 1 | 1 | 0 | -0.008 | 0 | 0 | 0 | t | 32595 | KNQIQLFNLESSKIEVILK | Mus musculus          |
| 1 | 1.00 | 1 | 1 | 0 | 0      | 0 | 0 | 0 | t | 19928 | GGMPGGMPGGMPGGMNF   | Mus musculus          |
| 1 | 1.00 | 1 | 1 | 0 | 0      | 0 | 0 | 0 | t | 34621 | KYVDNQRLLSTFTEYIKNI | Mus musculus          |
| 1 | 1.00 | 1 | 1 | 0 | 0      | 0 | 0 | 0 | t | 32595 | KNQIQLFNLESSKIEVILK | Mus musculus          |
| 1 | 1.00 | 1 | 1 | 0 | -0.003 | 0 | 0 | 0 | t | 10801 | DWEDRYRE            | Oryctolagus cuniculus |
| 1 | 1.00 | 1 | 1 | 0 | -0.003 | 0 | 0 | 0 | t | 32571 | KNNNSTNSGI          | Oryctolagus cuniculus |
| 1 | 1.00 | 1 | 1 | 0 | -0.003 | 0 | 0 | 0 | t | 32738 | KPIVQYDNF           | Oryctolagus cuniculus |
| 1 | 1.00 | 1 | 1 | 0 | 0      | 0 | 0 | 0 | t | 14686 | EVETPIRN            | Mus musculus          |
| 1 | 1.00 | 1 | 1 | 0 | -0.003 | 0 | 0 | 0 | t | 34621 | KYVDNQRLLSTFTEYIKNI | Mus musculus          |
| 1 | 1.00 | 1 | 1 | 0 | 0      | 0 | 0 | 0 | t | 14686 | EVETPIRN            | Mus musculus          |

|   |      |   |   |   |        |   |   |   |   |       |                              |                       |
|---|------|---|---|---|--------|---|---|---|---|-------|------------------------------|-----------------------|
| 1 | 1.00 | 1 | 1 | 0 | 0      | 0 | 0 | 0 | t | 14686 | EVETPIRN                     | Mus musculus          |
| 1 | 1.00 | 1 | 1 | 0 | 0      | 0 | 0 | 0 | t | 24878 | HSWYNDL<br>LVDFDSKD<br>IVDKY | Oryctolagus cuniculus |
| 1 | 1.00 | 1 | 1 | 0 | -0.002 | 0 | 0 | 0 | t | 33198 | KRNEKWD<br>EVYKYIVT<br>NWLA  | Mus musculus          |
| 1 | 1.00 | 1 | 1 | 0 | -0.002 | 0 | 0 | 0 | t | 32595 | KNQIQLFN<br>LESSKIEVIL<br>K  | Mus musculus          |
| 1 | 1.00 | 1 | 1 | 0 | -0.003 | 0 | 0 | 0 | t | 12345 | EHKYSWK<br>S                 | Oryctolagus cuniculus |
| 1 | 1.00 | 1 | 1 | 0 | 0      | 0 | 0 | 0 | t | 34621 | KYVDNQR<br>LLSTFTEYI<br>KNI  | Mus musculus          |
| 1 | 1.00 | 1 | 1 | 0 | -0.003 | 0 | 0 | 0 | t | 27932 | IPLLRTQ                      | Oryctolagus cuniculus |
| 1 | 1.00 | 1 | 1 | 0 | -0.003 | 0 | 0 | 0 | t | 26244 | IGILGGK                      | Oryctolagus cuniculus |
| 1 | 1.00 | 1 | 1 | 0 | 0      | 0 | 0 | 0 | t | 34621 | KYVDNQR<br>LLSTFTEYI<br>KNI  | Mus musculus          |
| 1 | 1.00 | 1 | 1 | 0 | -0.008 | 0 | 0 | 0 | t | 32595 | KNQIQLFN<br>LESSKIEVIL<br>K  | Mus musculus          |
| 1 | 1.00 | 1 | 1 | 0 | 0      | 0 | 0 | 0 | t | 26046 | IFDT                         | Mus musculus          |
| 1 | 1.00 | 1 | 1 | 0 | 0      | 0 | 0 | 0 | t | 15056 | EYLNKIQN<br>SLSTEWSP<br>CSV  | Mus musculus          |
| 1 | 1.00 | 1 | 1 | 0 | 0      | 0 | 0 | 0 | t | 22305 | GSDYEDRY<br>YRENMHR<br>YPNQ  | Mus musculus          |

|   |      |   |   |   |        |   |   |   |   |       |                              |                                  |
|---|------|---|---|---|--------|---|---|---|---|-------|------------------------------|----------------------------------|
| 1 | 1.00 | 1 | 1 | 0 | 0.005  | 0 | 0 | 0 | t | 34391 | KYEEDDKA<br>QRDRVEA<br>KNGLE | Homo<br>sapiens                  |
| 1 | 1.00 | 1 | 1 | 0 | -0.003 | 0 | 0 | 0 | t | 21972 | GQVSIGDE<br>NSA              | Oryctola<br>gus<br>cuniculu<br>s |
| 1 | 1.00 | 1 | 1 | 0 | 0      | 0 | 0 | 0 | t | 27997 | IPQPQWT<br>P                 | Mus<br>musculu<br>s              |
| 1 | 1.00 | 1 | 1 | 0 | 0      | 0 | 0 | 0 | t | 15056 | EYLNKIQN<br>SLSTEWSP<br>CSV  | Mus<br>musculu<br>s              |
| 1 | 1.00 | 1 | 1 | 0 | 0      | 0 | 0 | 0 | t | 26167 | IFSQNMNI<br>KLKMP            | Homo<br>sapiens                  |
| 1 | 1.00 | 1 | 1 | 0 | -0.003 | 0 | 0 | 0 | t | 21956 | GQSFQNT<br>WEGQAAS<br>A      | Oryctola<br>gus<br>cuniculu<br>s |
| 1 | 1.00 | 1 | 1 | 0 | -0.003 | 0 | 0 | 0 | t | 31695 | KKSDFFSF<br>EDSD             | Oryctola<br>gus<br>cuniculu<br>s |
| 1 | 1.00 | 1 | 1 | 0 | -0.003 | 0 | 0 | 0 | t | 14670 | EVDNEQP<br>TTRAQKLF<br>A     | Oryctola<br>gus<br>cuniculu<br>s |
| 1 | 1.00 | 1 | 1 | 0 | -0.004 | 0 | 0 | 0 | t | 14670 | EVDNEQP<br>TTRAQKLF<br>A     | Mus<br>musculu<br>s              |
| 1 | 1.00 | 1 | 1 | 0 | 0.001  | 0 | 0 | 0 | t | 27997 | IPQPQWT<br>P                 | Mus<br>musculu<br>s              |
| 1 | 1.00 | 1 | 1 | 0 | 0      | 0 | 0 | 0 | t | 14670 | EVDNEQP<br>TTRAQKLF<br>A     | Mus<br>musculu<br>s              |
| 1 | 1.00 | 1 | 1 | 0 | -0.003 | 0 | 0 | 0 | t | 14670 | EVDNEQP<br>TTRAQKLF<br>A     | Oryctola<br>gus<br>cuniculu<br>s |
| 1 | 1.00 | 1 | 1 | 0 | -0.003 | 0 | 0 | 0 | t | 14670 | EVDNEQP<br>TTRAQKLF<br>A     | Oryctola<br>gus<br>cuniculu<br>s |
| 1 | 1.00 | 1 | 1 | 0 | 0      | 0 | 0 | 0 | t | 15056 | EYLNKIQN<br>SLSTEWSP<br>CSV  | Mus<br>musculu<br>s              |

|   |      |   |   |   |        |   |   |   |   |       |                             |                                  |
|---|------|---|---|---|--------|---|---|---|---|-------|-----------------------------|----------------------------------|
| 1 | 1.00 | 1 | 1 | 0 | 0      | 0 | 0 | 0 | t | 32844 | KPQEEKEK<br>ITKEILNGK       | Mus<br>musculu<br>s              |
| 1 | 1.00 | 1 | 1 | 0 | 0      | 0 | 0 | 0 | t | 32316 | KMGDYGE<br>VTVECEPR<br>SGLN | Mus<br>musculu<br>s              |
| 1 | 1.00 | 1 | 1 | 0 | -0.004 | 0 | 0 | 0 | t | 14670 | EVDNEQP<br>TTRAQKLF<br>A    | Mus<br>musculu<br>s              |
| 1 | 1.00 | 1 | 1 | 0 | -0.007 | 0 | 0 | 0 | t | 14670 | EVDNEQP<br>TTRAQKLF<br>A    | Oryctola<br>gus<br>cuniculu<br>s |
| 1 | 1.00 | 1 | 1 | 0 | 0      | 0 | 0 | 0 | t | 32316 | KMGDYGE<br>VTVECEPR<br>SGLN | Mus<br>musculu<br>s              |
| 1 | 1.00 | 1 | 1 | 0 | 0      | 0 | 0 | 0 | t | 32316 | KMGDYGE<br>VTVECEPR<br>SGLN | Mus<br>musculu<br>s              |
| 1 | 1.00 | 1 | 1 | 0 | 0      | 0 | 0 | 0 | t | 32316 | KMGDYGE<br>VTVECEPR<br>SGLN | Mus<br>musculu<br>s              |
| 1 | 1.00 | 1 | 1 | 0 | 0      | 0 | 0 | 0 | t | 32844 | KPQEEKEK<br>ITKEILNGK       | Mus<br>musculu<br>s              |
| 1 | 1.00 | 1 | 1 | 0 | 0.008  | 0 | 0 | 0 | t | 18105 | FTYEPPND<br>GEER            | Capra<br>hircus                  |
| 1 | 1.00 | 1 | 1 | 0 | 0      | 0 | 0 | 0 | t | 32316 | KMGDYGE<br>VTVECEPR<br>SGLN | Mus<br>musculu<br>s              |
| 1 | 1.00 | 1 | 1 | 0 | 0      | 0 | 0 | 0 | t | 27308 | ILSALEIPD<br>VGNLSQV<br>VVM | Mus<br>musculu<br>s              |
| 1 | 1.00 | 1 | 1 | 0 | 0      | 0 | 0 | 0 | t | 32844 | KPQEEKEK<br>ITKEILNGK       | Mus<br>musculu<br>s              |
| 1 | 1.00 | 1 | 1 | 0 | -0.003 | 0 | 0 | 0 | t | 27308 | ILSALEIPD<br>VGNLSQV<br>VVM | Mus<br>musculu<br>s              |
| 1 | 1.00 | 1 | 1 | 0 | 0      | 0 | 0 | 0 | t | 32844 | KPQEEKEK<br>ITKEILNGK       | Mus<br>musculu<br>s              |

|   |      |   |   |   |        |   |   |   |   |       |                              |                          |
|---|------|---|---|---|--------|---|---|---|---|-------|------------------------------|--------------------------|
| 1 | 1.00 | 1 | 1 | 0 | 0.002  | 0 | 0 | 0 | t | 32844 | KPQEEKEK<br>ITKEILNGK        | Rattus<br>norvegicus     |
| 1 | 1.00 | 1 | 1 | 0 | 0      | 0 | 0 | 0 | t | 30677 | KEYLDKVR<br>ATVGTEW<br>TPCSV | Homo<br>sapiens          |
| 1 | 1.00 | 1 | 1 | 0 | -0.003 | 0 | 0 | 0 | t | 32844 | KPQEEKEK<br>ITKEILNGK        | Oryctolagus<br>cuniculus |
| 1 | 1.00 | 1 | 1 | 0 | -0.003 | 0 | 0 | 0 | t | 20562 | GKFLEGA                      | Oryctolagus<br>cuniculus |
| 1 | 1.00 | 1 | 1 | 0 | 0      | 0 | 0 | 0 | t | 15056 | EYLNKIQN<br>SLSTEWSP<br>CSV  | Mus<br>musculus          |
| 1 | 1.00 | 1 | 1 | 0 | -0.003 | 0 | 0 | 0 | t | 27308 | ILSALEIPD<br>VGNLSQV<br>VVM  | Mus<br>musculus          |
| 1 | 1.00 | 1 | 1 | 0 | -0.003 | 0 | 0 | 0 | t | 11438 | EDSGSNG<br>KKITCECTK<br>PDS  | Oryctolagus<br>cuniculus |
| 1 | 1.00 | 1 | 1 | 0 | 0      | 0 | 0 | 0 | t | 15056 | EYLNKIQN<br>SLSTEWSP<br>CSV  | Mus<br>musculus          |
| 1 | 1.00 | 1 | 1 | 0 | -0.002 | 0 | 0 | 0 | t | 18527 | GAASSYFE<br>YVDTYG           | Mus<br>musculus          |
| 1 | 1.00 | 1 | 1 | 0 | 0      | 0 | 0 | 0 | t | 15056 | EYLNKIQN<br>SLSTEWSP<br>CSV  | Mus<br>musculus          |
| 1 | 1.00 | 1 | 1 | 0 | 0      | 0 | 0 | 0 | t | 15056 | EYLNKIQN<br>SLSTEWSP<br>CSV  | Mus<br>musculus          |
| 1 | 1.00 | 1 | 1 | 0 | 0      | 0 | 0 | 0 | t | 12208 | EGKVSTLP<br>LDIQIIAAT<br>MSK | Mus<br>musculus          |
| 1 | 1.00 | 1 | 1 | 0 | 0      | 0 | 0 | 0 | t | 30476 | KEKMILNE<br>EEITTKG          | Homo<br>sapiens          |

|   |      |   |   |   |        |   |   |   |   |       |                              |                                  |
|---|------|---|---|---|--------|---|---|---|---|-------|------------------------------|----------------------------------|
| 1 | 1.00 | 1 | 1 | 0 | 0      | 0 | 0 | 0 | t | 12208 | EGKVSTLP<br>LDIQIAAT<br>MSK  | Mus<br>musculu<br>s              |
| 1 | 1.00 | 1 | 1 | 0 | -0.003 | 0 | 0 | 0 | t | 21928 | GQPAVRN<br>ERATGS            | Oryctola<br>gus<br>cuniculu<br>s |
| 1 | 1.00 | 1 | 1 | 0 | -0.003 | 0 | 0 | 0 | t | 14636 | EVCVRQLK<br>AIANK            | Oryctola<br>gus<br>cuniculu<br>s |
| 1 | 1.00 | 1 | 1 | 0 | 0      | 0 | 0 | 0 | t | 19006 | GDINKVLE<br>KLGYSGGD<br>LLG  | Mus<br>musculu<br>s              |
| 1 | 1.00 | 1 | 1 | 0 | 0      | 0 | 0 | 0 | t | 13471 | ENFSTSF<br>WIRIPKYFNSI<br>S  | Mus<br>musculu<br>s              |
| 1 | 1.00 | 1 | 1 | 0 | -0.003 | 0 | 0 | 0 | t | 23051 | GVLTPSSK<br>RFQPFQQ<br>FG    | Oryctola<br>gus<br>cuniculu<br>s |
| 1 | 1.00 | 1 | 1 | 0 | 0      | 0 | 0 | 0 | t | 26046 | IFDT                         | Mus<br>musculu<br>s              |
| 1 | 1.00 | 1 | 1 | 0 | -0.011 | 0 | 0 | 0 | t | 24842 | HSQWNKP<br>SKPKTNM<br>K      | Oryctola<br>gus<br>cuniculu<br>s |
| 1 | 1.00 | 1 | 1 | 0 | -0.003 | 0 | 0 | 0 | t | 14636 | EVCVRQLK<br>AIANK            | Oryctola<br>gus<br>cuniculu<br>s |
| 1 | 1.00 | 1 | 1 | 0 | 0      | 0 | 0 | 0 | t | 18084 | FTTKVIGK<br>DSRDFDIS<br>PKV  | Mus<br>musculu<br>s              |
| 1 | 1.00 | 1 | 1 | 0 | -0.003 | 0 | 0 | 0 | t | 31383 | KIPDPPQP<br>DFPQLNSD<br>WVPS | Oryctola<br>gus<br>cuniculu<br>s |
| 1 | 1.00 | 1 | 1 | 0 | 0      | 0 | 0 | 0 | t | 18084 | FTTKVIGK<br>DSRDFDIS<br>PKV  | Mus<br>musculu<br>s              |
| 1 | 1.00 | 1 | 1 | 0 | 0      | 0 | 0 | 0 | t | 18084 | FTTKVIGK<br>DSRDFDIS<br>PKV  | Mus<br>musculu<br>s              |
| 1 | 1.00 | 1 | 1 | 0 | 0      | 0 | 0 | 0 | t | 23051 | GVLTPSSK<br>RFQPFQQ<br>FG    | Mus<br>musculu<br>s              |

|   |      |   |   |   |        |   |   |   |   |       |                              |                                  |
|---|------|---|---|---|--------|---|---|---|---|-------|------------------------------|----------------------------------|
| 1 | 1.00 | 1 | 1 | 0 | 0      | 0 | 0 | 0 | t | 18084 | FTTKVIGK<br>DSRDFDIS<br>PKV  | Mus<br>musculu<br>s              |
| 1 | 1.00 | 1 | 1 | 0 | 0      | 0 | 0 | 0 | t | 26167 | IFSQNMNI<br>KLKMP            | Homo<br>sapiens                  |
| 1 | 1.00 | 1 | 1 | 0 | -0.003 | 0 | 0 | 0 | t | 23051 | GVLTPSSK<br>RFQPFQQ<br>FG    | Oryctola<br>gus<br>cuniculu<br>s |
| 1 | 1.00 | 1 | 1 | 0 | 0      | 0 | 0 | 0 | t | 14636 | EVCVRQLK<br>AIANK            | Mus<br>musculu<br>s              |
| 1 | 1.00 | 1 | 1 | 0 | 0      | 0 | 0 | 0 | t | 14636 | EVCVRQLK<br>AIANK            | Mus<br>musculu<br>s              |
| 1 | 1.00 | 1 | 1 | 0 | 0      | 0 | 0 | 0 | t | 14636 | EVCVRQLK<br>AIANK            | Mus<br>musculu<br>s              |
| 1 | 1.00 | 1 | 1 | 0 | 0      | 0 | 0 | 0 | t | 19093 | GDRAAGQ<br>PAGDRAA<br>GQPA   | Mus<br>musculu<br>s              |
| 1 | 1.00 | 1 | 1 | 0 | 0.001  | 0 | 0 | 0 | t | 31439 | KITCFLTAA<br>GYCNTE          | Ovis<br>aries                    |
| 1 | 1.00 | 1 | 1 | 0 | 0      | 0 | 0 | 0 | t | 15056 | EYLNKIQN<br>SLSTEWSP<br>CSVV | Mus<br>musculu<br>s              |
| 1 | 1.00 | 1 | 1 | 0 | 0      | 0 | 0 | 0 | t | 19093 | GDRAAGQ<br>PAGDRAA<br>GQPA   | Mus<br>musculu<br>s              |
| 1 | 1.00 | 1 | 1 | 0 | 0      | 0 | 0 | 0 | t | 15056 | EYLNKIQN<br>SLSTEWSP<br>CSVV | Mus<br>musculu<br>s              |
| 1 | 1.00 | 1 | 1 | 0 | 0      | 0 | 0 | 0 | t | 18084 | FTTKVIGK<br>DSRDFDIS<br>PKV  | Mus<br>musculu<br>s              |
| 1 | 1.00 | 1 | 1 | 0 | 0      | 0 | 0 | 0 | t | 18084 | FTTKVIGK<br>DSRDFDIS<br>PKV  | Mus<br>musculu<br>s              |
| 1 | 1.00 | 1 | 1 | 0 | 0      | 0 | 0 | 0 | t | 19093 | GDRAAGQ<br>PAGDRAA<br>GQPA   | Mus<br>musculu<br>s              |
| 1 | 1.00 | 1 | 1 | 0 | 0      | 0 | 0 | 0 | t | 19093 | GDRAAGQ<br>PAGDRAA<br>GQPA   | Mus<br>musculu<br>s              |

|   |      |   |   |   |        |   |   |   |   |       |                             |                                  |
|---|------|---|---|---|--------|---|---|---|---|-------|-----------------------------|----------------------------------|
| 1 | 1.00 | 1 | 1 | 0 | 0      | 0 | 0 | 0 | t | 11448 | EDTKEPGV<br>LMGGQSE<br>S    | Mus<br>musculu<br>s              |
| 1 | 1.00 | 1 | 1 | 0 | 0      | 0 | 0 | 0 | t | 18084 | FTTKVIGK<br>DSRDFDIS<br>PKV | Mus<br>musculu<br>s              |
| 1 | 1.00 | 1 | 1 | 0 | -0.003 | 0 | 0 | 0 | t | 32844 | KPQEEKEK<br>ITKEILNGK       | Oryctola<br>gus<br>cuniculu<br>s |
| 1 | 1.00 | 1 | 1 | 0 | -0.003 | 0 | 0 | 0 | t | 23090 | GVPDHIKV<br>WDYATNK         | Mus<br>musculu<br>s              |
| 1 | 1.00 | 1 | 1 | 0 | 0      | 0 | 0 | 0 | t | 19006 | GDINKVLE<br>KLGYSGGD<br>LLG | Mus<br>musculu<br>s              |
| 1 | 1.00 | 1 | 1 | 0 | 0      | 0 | 0 | 0 | t | 19093 | GDRAAGQ<br>PAGDRAA<br>GQPA  | Mus<br>musculu<br>s              |
| 1 | 1.00 | 1 | 1 | 0 | 0      | 0 | 0 | 0 | t | 19093 | GDRAAGQ<br>PAGDRAA<br>GQPA  | Mus<br>musculu<br>s              |
| 1 | 1.00 | 1 | 1 | 0 | 0      | 0 | 0 | 0 | t | 30661 | KEVPALTA<br>VETGAT          | Oryctola<br>gus<br>cuniculu<br>s |
| 1 | 1.00 | 1 | 1 | 0 | 0      | 0 | 0 | 0 | t | 30661 | KEVPALTA<br>VETGAT          | Oryctola<br>gus<br>cuniculu<br>s |
| 1 | 1.00 | 1 | 1 | 0 | 0      | 0 | 0 | 0 | t | 30661 | KEVPALTA<br>VETGAT          | Homo<br>sapiens                  |
| 1 | 1.00 | 1 | 1 | 0 | 0      | 0 | 0 | 0 | t | 35402 | LEDPVG                      | Mus<br>musculu<br>s              |
| 1 | 1.00 | 1 | 1 | 0 | 0.019  | 0 | 0 | 0 | t | 34335 | KWVNGRE<br>I                | Macaca<br>fuscata                |
| 1 | 1.00 | 1 | 1 | 0 | 0      | 0 | 0 | 0 | t | 18084 | FTTKVIGK<br>DSRDFDIS<br>PKV | Mus<br>musculu<br>s              |
| 1 | 1.00 | 1 | 1 | 0 | 0      | 0 | 0 | 0 | t | 20838 | GLFGAIAG<br>FIE             | Mus<br>musculu<br>s              |
| 1 | 1.00 | 1 | 1 | 0 | -0.003 | 0 | 0 | 0 | t | 36045 | LGAARGYT<br>FGAC            | Oryctola<br>gus<br>cuniculu<br>s |



|   |      |   |   |   |        |   |   |   |   |       |                             |                                  |
|---|------|---|---|---|--------|---|---|---|---|-------|-----------------------------|----------------------------------|
| 1 | 1.00 | 1 | 1 | 0 | 0      | 0 | 0 | 0 | t | 34335 | KWVNGRE<br>I                | Mus<br>musculu<br>s              |
| 1 | 1.00 | 1 | 1 | 0 | 0      | 0 | 0 | 0 | t | 15056 | EYLNKIQN<br>SLSTEWSP<br>CSV | Mus<br>musculu<br>s              |
| 1 | 1.00 | 1 | 1 | 0 | -0.007 | 0 | 0 | 0 | t | 14730 | EVILKNAIV<br>YNSMYEN<br>FST | Homo<br>sapiens                  |
| 1 | 1.00 | 1 | 1 | 0 | 0      | 0 | 0 | 0 | t | 19006 | GDINKVLE<br>KLGYSGGD<br>LLG | Mus<br>musculu<br>s              |
| 1 | 1.00 | 1 | 1 | 0 | -0.003 | 0 | 0 | 0 | t | 30093 | KCTSDQDE<br>QFIPKGCS<br>K   | Oryctola<br>gus<br>cuniculu<br>s |
| 1 | 1.00 | 1 | 1 | 0 | 0      | 0 | 0 | 0 | t | 13425 | EMVIITFKS<br>G              | Mus<br>musculu<br>s              |
| 1 | 1.00 | 1 | 1 | 0 | -0.003 | 0 | 0 | 0 | t | 30093 | KCTSDQDE<br>QFIPKGCS<br>K   | Oryctola<br>gus<br>cuniculu<br>s |
| 1 | 1.00 | 1 | 1 | 0 | 0      | 0 | 0 | 0 | t | 36931 | LKLAT                       | Mus<br>musculu<br>s              |
| 1 | 1.00 | 1 | 1 | 0 | 0      | 0 | 0 | 0 | t | 25140 | HWSYGLR<br>PG               | Rattus<br>norvegic<br>us         |
| 1 | 1.00 | 1 | 1 | 0 | -0.003 | 0 | 0 | 0 | t | 30093 | KCTSDQDE<br>QFIPKGCS<br>K   | Oryctola<br>gus<br>cuniculu<br>s |
| 1 | 1.00 | 1 | 1 | 0 | 0      | 0 | 0 | 0 | t | 30093 | KCTSDQDE<br>QFIPKGCS<br>K   | Mus<br>musculu<br>s              |
| 1 | 1.00 | 1 | 1 | 0 | 0      | 0 | 0 | 0 | t | 30093 | KCTSDQDE<br>QFIPKGCS<br>K   | Mus<br>musculu<br>s              |
| 1 | 1.00 | 1 | 1 | 0 | 0      | 0 | 0 | 0 | t | 19504 | GFCDGYCK<br>THLKASS         | Mus<br>musculu<br>s              |
| 1 | 1.00 | 1 | 1 | 0 | -0.004 | 0 | 0 | 0 | t | 20838 | GLFGAIAG<br>FIE             | Mus<br>musculu<br>s              |

|   |      |   |   |   |        |   |   |   |   |       |                               |                                  |
|---|------|---|---|---|--------|---|---|---|---|-------|-------------------------------|----------------------------------|
| 1 | 1.00 | 1 | 1 | 0 | 0      | 0 | 0 | 0 | t | 20838 | GLFGAIAG<br>FIE               | Homo<br>sapiens                  |
| 1 | 1.00 | 1 | 1 | 0 | 0      | 0 | 0 | 0 | t | 20838 | GLFGAIAG<br>FIE               | Mus<br>musculu<br>s              |
| 1 | 1.00 | 1 | 1 | 0 | 0      | 0 | 0 | 0 | t | 28537 | ISIKYDPRK<br>DSEVFA           | Mus<br>musculu<br>s              |
| 1 | 1.00 | 1 | 1 | 0 | -0.003 | 0 | 0 | 0 | t | 28537 | ISIKYDPRK<br>DSEVFA           | Oryctola<br>gus<br>cuniculu<br>s |
| 1 | 1.00 | 1 | 1 | 0 | 0      | 0 | 0 | 0 | t | 15056 | EYLNKIQN<br>SLSTEWSP<br>CSV T | Mus<br>musculu<br>s              |
| 1 | 1.00 | 1 | 1 | 0 | 0      | 0 | 0 | 0 | t | 29936 | KARRPEGR<br>TWAQ              | Homo<br>sapiens                  |
| 1 | 1.00 | 1 | 1 | 0 | 0      | 0 | 0 | 0 | t | 15056 | EYLNKIQN<br>SLSTEWSP<br>CSV T | Mus<br>musculu<br>s              |
| 1 | 1.00 | 1 | 1 | 0 | -0.003 | 0 | 0 | 0 | t | 21881 | GQHGGM<br>HG                  | Oryctola<br>gus<br>cuniculu<br>s |
| 1 | 1.00 | 1 | 1 | 0 | 0      | 0 | 0 | 0 | t | 15056 | EYLNKIQN<br>SLSTEWSP<br>CSV T | Mus<br>musculu<br>s              |
| 1 | 1.00 | 1 | 1 | 0 | 0      | 0 | 0 | 0 | t | 15056 | EYLNKIQN<br>SLSTEWSP<br>CSV T | Mus<br>musculu<br>s              |
| 1 | 1.00 | 1 | 1 | 0 | 0      | 0 | 0 | 0 | t | 18084 | FTTKVIGK<br>DSRDFDIS<br>PKV   | Mus<br>musculu<br>s              |
| 1 | 1.00 | 1 | 1 | 0 | -0.003 | 0 | 0 | 0 | t | 34897 | LAPEDPED<br>SALLEDPV<br>GTVA  | Oryctola<br>gus<br>cuniculu<br>s |
| 1 | 1.00 | 1 | 1 | 0 | -0.002 | 0 | 0 | 0 | t | 14730 | EVILKNAIV<br>YNSMYEN<br>FST   | Mus<br>musculu<br>s              |
| 1 | 1.00 | 1 | 1 | 0 | 0      | 0 | 0 | 0 | t | 13527 | ENMYRYP<br>NQVYYRP<br>VDQYSN  | Mus<br>musculu<br>s              |

|   |      |   |   |   |        |   |   |   |   |       |                             |                              |
|---|------|---|---|---|--------|---|---|---|---|-------|-----------------------------|------------------------------|
| 1 | 1.00 | 1 | 1 | 0 | 0      | 0 | 0 | 0 | t | 17539 | FQTAAQR                     | Mus<br>musculus              |
| 1 | 1.00 | 1 | 1 | 0 | 0      | 0 | 0 | 0 | t | 33859 | KTSESRQPRGRRQPIPKARR        | Homo<br>sapiens              |
| 1 | 1.00 | 1 | 1 | 0 | -0.008 | 0 | 0 | 0 | t | 33198 | KRNEKWD<br>EVYKYIVT<br>NWLA | Mus<br>musculus              |
| 1 | 1.00 | 1 | 1 | 0 | 0      | 0 | 0 | 0 | t | 32595 | KNQIQLFN<br>LESSKIEVIL<br>K | Mus<br>musculus              |
| 1 | 1.00 | 1 | 1 | 0 | 0      | 0 | 0 | 0 | t | 15056 | EYLNKIQN<br>SLSTEWSP<br>CSV | Mus<br>musculus              |
| 1 | 1.00 | 1 | 1 | 0 | 0      | 0 | 0 | 0 | t | 24786 | HSLGKWL<br>GHPDKF           | Mus<br>musculus              |
| 1 | 1.00 | 1 | 1 | 0 | -0.003 | 0 | 0 | 0 | t | 10757 | DVTTLN                      | Oryctola<br>gus<br>cuniculus |
| 1 | 1.00 | 1 | 1 | 0 | 0      | 0 | 0 | 0 | t | 24786 | HSLGKWL<br>GHPDKF           | Mus<br>musculus              |
| 1 | 1.00 | 1 | 1 | 0 | 0      | 0 | 0 | 0 | t | 32595 | KNQIQLFN<br>LESSKIEVIL<br>K | Mus<br>musculus              |
| 1 | 1.00 | 1 | 1 | 0 | -0.003 | 0 | 0 | 0 | t | 10757 | DVTTLN                      | Oryctola<br>gus<br>cuniculus |
| 1 | 1.00 | 1 | 1 | 0 | 0      | 0 | 0 | 0 | t | 27725 | INQDPDKI<br>LTY             | Mus<br>musculus              |
| 1 | 1.00 | 1 | 1 | 0 | 0      | 0 | 0 | 0 | t | 27725 | INQDPDKI<br>LTY             | Mus<br>musculus              |
| 1 | 1.00 | 1 | 1 | 0 | 0      | 0 | 0 | 0 | t | 27725 | INQDPDKI<br>LTY             | Mus<br>musculus              |
| 1 | 1.00 | 1 | 1 | 0 | 0      | 0 | 0 | 0 | t | 27725 | INQDPDKI<br>LTY             | Mus<br>musculus              |
| 1 | 1.00 | 1 | 1 | 0 | 0      | 0 | 0 | 0 | t | 27725 | INQDPDKI<br>LTY             | Mus<br>musculus              |

|   |      |   |   |   |        |   |   |   |   |       |                              |                                  |
|---|------|---|---|---|--------|---|---|---|---|-------|------------------------------|----------------------------------|
| 1 | 1.00 | 1 | 1 | 0 | 0      | 0 | 0 | 0 | t | 27725 | INQDPDKI<br>LTY              | Mus<br>musculu<br>s              |
| 1 | 1.00 | 1 | 1 | 0 | 0      | 0 | 0 | 0 | t | 27725 | INQDPDKI<br>LTY              | Mus<br>musculu<br>s              |
| 1 | 1.00 | 1 | 1 | 0 | 0      | 0 | 0 | 0 | t | 27725 | INQDPDKI<br>LTY              | Mus<br>musculu<br>s              |
| 1 | 1.00 | 1 | 1 | 0 | -0.003 | 0 | 0 | 0 | t | 23315 | GYCKTHLK<br>ASSGYCA          | Mus<br>musculu<br>s              |
| 1 | 1.00 | 1 | 1 | 0 | -0.003 | 0 | 0 | 0 | t | 10757 | DVTTLN                       | Oryctola<br>gus<br>cuniculu<br>s |
| 1 | 1.00 | 1 | 1 | 0 | 0      | 0 | 0 | 0 | t | 33450 | KSNAATSY<br>INAIINSKS<br>VSD | Rattus<br>norvegic<br>us         |
| 1 | 1.00 | 1 | 1 | 0 | -0.003 | 0 | 0 | 0 | t | 10757 | DVTTLN                       | Oryctola<br>gus<br>cuniculu<br>s |
| 1 | 1.00 | 1 | 1 | 0 | 0      | 0 | 0 | 0 | t | 15056 | EYLNKIQN<br>SLSTEWSP<br>CSV  | Mus<br>musculu<br>s              |
| 1 | 1.00 | 1 | 1 | 0 | -0.003 | 0 | 0 | 0 | t | 23169 | GVTHDQL<br>NNFR              | Oryctola<br>gus<br>cuniculu<br>s |
| 1 | 1.00 | 1 | 1 | 0 | 0      | 0 | 0 | 0 | t | 22312 | GSENKRTG<br>ALGNLKN          | Mus<br>musculu<br>s              |
| 1 | 1.00 | 1 | 1 | 0 | 0      | 0 | 0 | 0 | t | 15056 | EYLNKIQN<br>SLSTEWSP<br>CSV  | Mus<br>musculu<br>s              |
| 1 | 1.00 | 1 | 1 | 0 | 0      | 0 | 0 | 0 | t | 15056 | EYLNKIQN<br>SLSTEWSP<br>CSV  | Mus<br>musculu<br>s              |
| 1 | 1.00 | 1 | 1 | 0 | 0      | 0 | 0 | 0 | t | 18054 | FTQEVSR<br>NINLHFSK          | Mus<br>musculu<br>s              |
| 1 | 1.00 | 1 | 1 | 0 | 0      | 0 | 0 | 0 | t | 13243 | ELQVIDKV<br>DAAFKVA<br>ATAAN | Mus<br>musculu<br>s              |

|   |      |   |   |   |        |   |   |   |   |       |                              |                                  |
|---|------|---|---|---|--------|---|---|---|---|-------|------------------------------|----------------------------------|
| 1 | 1.00 | 1 | 1 | 0 | 0      | 0 | 0 | 0 | t | 34621 | KYVDNQR<br>LLSTFTEYI<br>KNI  | Mus<br>musculu<br>s              |
| 1 | 1.00 | 1 | 1 | 0 | 0      | 0 | 0 | 0 | t | 23511 | GYYYPSDP<br>NTFYAPPY<br>S    | Sus<br>scrofa                    |
| 1 | 1.00 | 1 | 1 | 0 | -0.003 | 0 | 0 | 0 | t | 32716 | KPGGGW<br>NTGGSRYP<br>GQGS   | Oryctola<br>gus<br>cuniculu<br>s |
| 1 | 1.00 | 1 | 1 | 0 | 0      | 0 | 0 | 0 | t | 34621 | KYVDNQR<br>LLSTFTEYI<br>KNI  | Mus<br>musculu<br>s              |
| 1 | 1.00 | 1 | 1 | 0 | -0.004 | 0 | 0 | 0 | t | 36072 | LGDDTGIH<br>VIPTLNGD<br>DRHK | Mus<br>musculu<br>s              |
| 1 | 1.00 | 1 | 1 | 0 | -0.003 | 0 | 0 | 0 | t | 12138 | EGCNGDG<br>TSYKK             | Oryctola<br>gus<br>cuniculu<br>s |
| 1 | 1.00 | 1 | 1 | 0 | 0      | 0 | 0 | 0 | t | 33198 | KRNEKWD<br>EVYKYIVT<br>NWLA  | Mus<br>musculu<br>s              |
| 1 | 1.00 | 1 | 1 | 0 | -0.003 | 0 | 0 | 0 | t | 34897 | LAPEDPED<br>SALLEDPV<br>GTVA | Oryctola<br>gus<br>cuniculu<br>s |
| 1 | 1.00 | 1 | 1 | 0 | 0      | 0 | 0 | 0 | t | 23511 | GYYYPSDP<br>NTFYAPPY<br>S    | Sus<br>scrofa                    |
| 1 | 1.00 | 1 | 1 | 0 | -0.004 | 0 | 0 | 0 | t | 18951 | GDDMDPE<br>LRGLAQA           | Oryctola<br>gus<br>cuniculu<br>s |
| 1 | 1.00 | 1 | 1 | 0 | 0      | 0 | 0 | 0 | t | 15056 | EYLNKIQN<br>SLSTEWSP<br>CSV  | Mus<br>musculu<br>s              |
| 1 | 1.00 | 1 | 1 | 0 | 0      | 0 | 0 | 0 | t | 33198 | KRNEKWD<br>EVYKYIVT<br>NWLA  | Mus<br>musculu<br>s              |
| 1 | 1.00 | 1 | 1 | 0 | -0.003 | 0 | 0 | 0 | t | 16769 | FLMHAPA<br>FETAGTYL          | Oryctola<br>gus<br>cuniculu<br>s |

|   |      |   |   |   |        |   |   |   |   |       |                              |                                  |
|---|------|---|---|---|--------|---|---|---|---|-------|------------------------------|----------------------------------|
| 1 | 1.00 | 1 | 1 | 0 | 0.001  | 0 | 0 | 0 | t | 18885 | GCKITCFLT<br>AAGYCN          | Ovis<br>aries                    |
| 1 | 1.00 | 1 | 1 | 0 | -0.003 | 0 | 0 | 0 | t | 23520 | HADQLTP<br>AWRIYSTG<br>NN    | Oryctola<br>gus<br>cuniculu<br>s |
| 1 | 1.00 | 1 | 1 | 0 | 0.013  | 0 | 0 | 0 | t | 19096 | GDRADGQ<br>PA                | Mus<br>musculu<br>s              |
| 1 | 1.00 | 1 | 1 | 0 | 0      | 0 | 0 | 0 | t | 19005 | GDINKVLE<br>KLGYS            | Mus<br>musculu<br>s              |
| 1 | 1.00 | 1 | 1 | 0 | 0      | 0 | 0 | 0 | t | 14730 | EVILKNAIV<br>YNSMYEN<br>FST  | Mus<br>musculu<br>s              |
| 1 | 1.00 | 1 | 1 | 0 | -0.002 | 0 | 0 | 0 | t | 33198 | KRNEKWD<br>EVYKYIVT<br>NWL A | Mus<br>musculu<br>s              |
| 1 | 1.00 | 1 | 1 | 0 | -0.003 | 0 | 0 | 0 | t | 31566 | KKICKMEK<br>CSSVFNV          | Oryctola<br>gus<br>cuniculu<br>s |
| 1 | 1.00 | 1 | 1 | 0 | -0.003 | 0 | 0 | 0 | t | 18885 | GCKITCFLT<br>AAGYCN          | Mus<br>musculu<br>s              |
| 1 | 1.00 | 1 | 1 | 0 | -0.004 | 0 | 0 | 0 | t | 24730 | HSDHAESS<br>WVNRGES<br>SRKAY | Mus<br>musculu<br>s              |
| 1 | 1.00 | 1 | 1 | 0 | 0      | 0 | 0 | 0 | t | 35036 | LCAEYHNT<br>QIHTL            | Oryctola<br>gus<br>cuniculu<br>s |
| 1 | 1.00 | 1 | 1 | 0 | -0.003 | 0 | 0 | 0 | t | 18885 | GCKITCFLT<br>AAGYCN          | Oryctola<br>gus<br>cuniculu<br>s |
| 1 | 1.00 | 1 | 1 | 0 | 0.019  | 0 | 0 | 0 | t | 21851 | GQCKWV<br>NGREICND<br>RDRPTA | Macaca<br>fuscata                |
| 1 | 1.00 | 1 | 1 | 0 | 0.004  | 0 | 0 | 0 | t | 18885 | GCKITCFLT<br>AAGYCN          | Ovis<br>aries                    |
| 1 | 1.00 | 1 | 1 | 0 | 0      | 0 | 0 | 0 | t | 26382 | IHIGPGRA<br>FYTT             | Mus<br>musculu<br>s              |

|   |      |   |   |   |        |   |   |   |   |       |                              |                                  |
|---|------|---|---|---|--------|---|---|---|---|-------|------------------------------|----------------------------------|
| 1 | 1.00 | 1 | 1 | 0 | 0      | 0 | 0 | 0 | t | 26382 | IHIGPGRA<br>FYTT             | Mus<br>musculu<br>s              |
| 1 | 1.00 | 1 | 1 | 0 | 0      | 0 | 0 | 0 | t | 16832 | FLPSDFFPS<br>I               | Mus<br>musculu<br>s              |
| 1 | 1.00 | 1 | 1 | 0 | -0.008 | 0 | 0 | 0 | t | 10975 | DYVKKVN<br>KATEAAM<br>FLGWV  | Mus<br>musculu<br>s              |
| 1 | 1.00 | 1 | 1 | 0 | 0      | 0 | 0 | 0 | t | 19097 | GDRADGQ<br>PAGDRAA<br>GQPA   | Mus<br>musculu<br>s              |
| 1 | 1.00 | 1 | 1 | 0 | 0      | 0 | 0 | 0 | t | 21841 | GPYAGPM<br>ERQKPLK           | Bos<br>taurus                    |
| 1 | 1.00 | 1 | 1 | 0 | 0      | 0 | 0 | 0 | t | 34295 | KWFKTNA<br>PNGVDEKI<br>RI    | Mus<br>musculu<br>s              |
| 1 | 1.00 | 1 | 1 | 0 | 0      | 0 | 0 | 0 | t | 34295 | KWFKTNA<br>PNGVDEKI<br>RI    | Mus<br>musculu<br>s              |
| 1 | 1.00 | 1 | 1 | 0 | 0      | 0 | 0 | 0 | t | 19097 | GDRADGQ<br>PAGDRAA<br>GQPA   | Mus<br>musculu<br>s              |
| 1 | 1.00 | 1 | 1 | 0 | 0      | 0 | 0 | 0 | t | 20674 | GKREMVII<br>TF               | Mus<br>musculu<br>s              |
| 1 | 1.00 | 1 | 1 | 0 | 0      | 0 | 0 | 0 | t | 19005 | GDINKVLE<br>KLGYS            | Mus<br>musculu<br>s              |
| 1 | 1.00 | 1 | 1 | 0 | -0.003 | 0 | 0 | 0 | t | 34295 | KWFKTNA<br>PNGVDEKI<br>RI    | Oryctola<br>gus<br>cuniculu<br>s |
| 1 | 1.00 | 1 | 1 | 0 | 0      | 0 | 0 | 0 | t | 34897 | LAPEDPED<br>SALLEDPV<br>GTVA | Oryctola<br>gus<br>cuniculu<br>s |
| 1 | 1.00 | 1 | 1 | 0 | 0      | 0 | 0 | 0 | t | 21840 | GPYAGPLE<br>RQKPLK           | Bos<br>taurus                    |

|   |      |   |   |   |        |   |   |   |   |       |                              |                                  |
|---|------|---|---|---|--------|---|---|---|---|-------|------------------------------|----------------------------------|
| 1 | 1.00 | 1 | 1 | 0 | 0      | 0 | 0 | 0 | t | 13243 | ELQVIDKV<br>DAAFKVA<br>ATAAN | Mus<br>musculu<br>s              |
| 1 | 1.00 | 1 | 1 | 0 | 0      | 0 | 0 | 0 | t | 20046 | GGTEESVV<br>TASRS            | Homo<br>sapiens                  |
| 1 | 1.00 | 1 | 1 | 0 | 0      | 0 | 0 | 0 | t | 34612 | KYTMFHYL<br>RAQFEFH<br>GKSR  | Mus<br>musculu<br>s              |
| 1 | 1.00 | 1 | 1 | 0 | -0.003 | 0 | 0 | 0 | t | 12115 | EGAARQP                      | Oryctola<br>gus<br>cuniculu<br>s |
| 1 | 1.00 | 1 | 1 | 0 | -0.002 | 0 | 0 | 0 | t | 10975 | DYVKKVN<br>KATEAAM<br>FLGWV  | Mus<br>musculu<br>s              |
| 1 | 1.00 | 1 | 1 | 0 | -0.003 | 0 | 0 | 0 | t | 10975 | DYVKKVN<br>KATEAAM<br>FLGWV  | Mus<br>musculu<br>s              |
| 1 | 1.00 | 1 | 1 | 0 | 0      | 0 | 0 | 0 | t | 19097 | GDRADGQ<br>PAGDRAA<br>GQPA   | Mus<br>musculu<br>s              |
| 1 | 1.00 | 1 | 1 | 0 | 0.001  | 0 | 0 | 0 | t | 31554 | KKGSSGYC<br>AWPACYC          | Ovis<br>aries                    |
| 1 | 1.00 | 1 | 1 | 0 | -0.003 | 0 | 0 | 0 | t | 30767 | KFLEGAA                      | Oryctola<br>gus<br>cuniculu<br>s |
| 1 | 1.00 | 1 | 1 | 0 | 0      | 0 | 0 | 0 | t | 36931 | LKLAT                        | Mus<br>musculu<br>s              |
| 1 | 1.00 | 1 | 1 | 0 | 0.006  | 0 | 0 | 0 | t | 31554 | KKGSSGYC<br>AWPACYC          | Ovis<br>aries                    |
| 1 | 1.00 | 1 | 1 | 0 | -0.001 | 0 | 0 | 0 | t | 10975 | DYVKKVN<br>KATEAAM<br>FLGWV  | Homo<br>sapiens                  |
| 1 | 1.00 | 1 | 1 | 0 | 0      | 0 | 0 | 0 | t | 33562 | KSVVTKDS<br>ESKITQTQ<br>KDSK | Mus<br>musculu<br>s              |
| 1 | 1.00 | 1 | 1 | 0 | -0.003 | 0 | 0 | 0 | t | 34295 | KWFKTNA<br>PNGVDEKI<br>RI    | Oryctola<br>gus<br>cuniculu<br>s |



|   |      |   |   |   |        |   |   |   |   |       |                              |                                  |
|---|------|---|---|---|--------|---|---|---|---|-------|------------------------------|----------------------------------|
| 1 | 1.00 | 1 | 1 | 0 | -0.008 | 0 | 0 | 0 | t | 19833 | GGGGWG<br>QGGSHSQ<br>WNK     | Mus<br>musculu<br>s              |
| 1 | 1.00 | 1 | 1 | 0 | -0.011 | 0 | 0 | 0 | t | 19833 | GGGGWG<br>QGGSHSQ<br>WNK     | Oryctola<br>gus<br>cuniculu<br>s |
| 1 | 1.00 | 1 | 1 | 0 | 0      | 0 | 0 | 0 | t | 36931 | LKLAT                        | Mus<br>musculu<br>s              |
| 1 | 1.00 | 1 | 1 | 0 | 0.005  | 0 | 0 | 0 | t | 33198 | KRNEKWD<br>EVYKYIVT<br>NWL A | Gallus<br>gallus                 |
| 1 | 1.00 | 1 | 1 | 0 | 0.003  | 0 | 0 | 0 | t | 21838 | GPWSPIDI<br>HHLS             | Mus<br>musculu<br>s              |
| 1 | 1.00 | 1 | 1 | 0 | 0      | 0 | 0 | 0 | t | 34295 | KWFKTNA<br>PNGVDEKI<br>RI    | Mus<br>musculu<br>s              |
| 1 | 1.00 | 1 | 1 | 0 | 0      | 0 | 0 | 0 | t | 14730 | EVILKNAIV<br>YNSMYEN<br>FST  | Mus<br>musculu<br>s              |
| 1 | 1.00 | 1 | 1 | 0 | -0.003 | 0 | 0 | 0 | t | 34295 | KWFKTNA<br>PNGVDEKI<br>RI    | Oryctola<br>gus<br>cuniculu<br>s |
| 1 | 1.00 | 1 | 1 | 0 | 0      | 0 | 0 | 0 | t | 19097 | GDRADGQ<br>PAGDRAA<br>GQPA   | Mus<br>musculu<br>s              |
| 1 | 1.00 | 1 | 1 | 0 | 0      | 0 | 0 | 0 | t | 19097 | GDRADGQ<br>PAGDRAA<br>GQPA   | Mus<br>musculu<br>s              |
| 1 | 1.00 | 1 | 1 | 0 | 0      | 0 | 0 | 0 | t | 19005 | GDINKVLE<br>KLGYS            | Mus<br>musculu<br>s              |
| 1 | 1.00 | 1 | 1 | 0 | 0      | 0 | 0 | 0 | t | 19097 | GDRADGQ<br>PAGDRAA<br>GQPA   | Mus<br>musculu<br>s              |
| 1 | 1.00 | 1 | 1 | 0 | -0.003 | 0 | 0 | 0 | t | 32037 | KLNDLCFS<br>NVYADSFV<br>V    | Oryctola<br>gus<br>cuniculu<br>s |
| 1 | 1.00 | 1 | 1 | 0 | -0.003 | 0 | 0 | 0 | t | 24706 | HRRTKAP<br>KRIRLPHIR         | Oryctola<br>gus<br>cuniculu<br>s |

|   |      |   |   |   |        |   |   |   |   |       |                              |                                  |
|---|------|---|---|---|--------|---|---|---|---|-------|------------------------------|----------------------------------|
| 1 | 1.00 | 1 | 1 | 0 | -0.003 | 0 | 0 | 0 | t | 23594 | HCHTHAD<br>GEVHC             | Oryctola<br>gus<br>cuniculu<br>s |
| 1 | 1.00 | 1 | 1 | 0 | 0      | 0 | 0 | 0 | t | 19005 | GDINKVLE<br>KLGYS            | Mus<br>musculu<br>s              |
| 1 | 1.00 | 1 | 1 | 0 | 0      | 0 | 0 | 0 | t | 19005 | GDINKVLE<br>KLGYS            | Mus<br>musculu<br>s              |
| 1 | 1.00 | 1 | 1 | 0 | 0      | 0 | 0 | 0 | t | 35235 | LDNIKGNV<br>GKMEDYIK<br>KNNK | Mus<br>musculu<br>s              |
| 1 | 1.00 | 1 | 1 | 0 | 0      | 0 | 0 | 0 | t | 23599 | HCLGKWL<br>GHPDKF            | Mus<br>musculu<br>s              |
| 1 | 1.00 | 1 | 1 | 0 | 0      | 0 | 0 | 0 | t | 13243 | ELQVIDKV<br>DAAFKVA<br>ATAAN | Mus<br>musculu<br>s              |
| 1 | 1.00 | 1 | 1 | 0 | -0.003 | 0 | 0 | 0 | t | 35341 | LDYSPAFS                     | Mus<br>musculu<br>s              |
| 1 | 1.00 | 1 | 1 | 0 | 0      | 0 | 0 | 0 | t | 19005 | GDINKVLE<br>KLGYS            | Mus<br>musculu<br>s              |
| 1 | 1.00 | 1 | 1 | 0 | 0      | 0 | 0 | 0 | t | 22357 | GSGVRGD<br>FG                | Cavia<br>porcellu<br>s           |
| 1 | 1.00 | 1 | 1 | 0 | 0      | 0 | 0 | 0 | t | 20143 | GHIELGGK<br>PAIVPDKE<br>VLYQ | Homo<br>sapiens                  |
| 1 | 1.00 | 1 | 1 | 0 | 0      | 0 | 0 | 0 | t | 12208 | EGKVSTLP<br>LDIQIIAAT<br>MSK | Mus<br>musculu<br>s              |
| 1 | 1.00 | 1 | 1 | 0 | 0      | 0 | 0 | 0 | t | 11150 | EANSKLAA<br>LEKLNKELE<br>ESK | Rattus<br>norvegic<br>us         |
| 1 | 1.00 | 1 | 1 | 0 | 0      | 0 | 0 | 0 | t | 17470 | FQEPFWLE<br>DG               | Mus<br>musculu<br>s              |
| 1 | 1.00 | 1 | 1 | 0 | -0.006 | 0 | 0 | 0 | t | 16907 | FLTAAGYC<br>NTECTLK          | Oryctola<br>gus<br>cuniculu<br>s |

|   |      |   |   |   |        |   |   |   |   |       |                             |                                  |
|---|------|---|---|---|--------|---|---|---|---|-------|-----------------------------|----------------------------------|
| 1 | 1.00 | 1 | 1 | 0 | 0      | 0 | 0 | 0 | t | 29756 | KAANYQY<br>NYLRDGE<br>QVTA  | Mus<br>musculu<br>s              |
| 1 | 1.00 | 1 | 1 | 0 | 0      | 0 | 0 | 0 | t | 11813 | EENVEENV                    | Oryctola<br>gus<br>cuniculu<br>s |
| 1 | 1.00 | 1 | 1 | 0 | 0      | 0 | 0 | 0 | t | 29138 | ITVNPIVTE<br>KDSPVNIE       | Mus<br>musculu<br>s              |
| 1 | 1.00 | 1 | 1 | 0 | 0.001  | 0 | 0 | 0 | t | 11273 | ECTLKKG<br>SGYCAWP          | Ovis<br>aries                    |
| 1 | 1.00 | 1 | 1 | 0 | 0      | 0 | 0 | 0 | t | 35050 | LCENPEW<br>APLKDNRI         | Mus<br>musculu<br>s              |
| 1 | 1.00 | 1 | 1 | 0 | 0.006  | 0 | 0 | 0 | t | 11273 | ECTLKKG<br>SGYCAWP          | Ovis<br>aries                    |
| 1 | 1.00 | 1 | 1 | 0 | 0      | 0 | 0 | 0 | t | 17470 | FQEPFWLE<br>DG              | Mus<br>musculu<br>s              |
| 1 | 1.00 | 1 | 1 | 0 | -0.003 | 0 | 0 | 0 | t | 26444 | IICDLSFVT<br>RRY            | Oryctola<br>gus<br>cuniculu<br>s |
| 1 | 1.00 | 1 | 1 | 0 | 0      | 0 | 0 | 0 | t | 14730 | EVILKNAIV<br>YNSMYEN<br>FST | Mus<br>musculu<br>s              |
| 1 | 1.00 | 1 | 1 | 0 | 0      | 0 | 0 | 0 | t | 22359 | GSGVRGD<br>FGSLAPRV<br>ARQL | Sus<br>scrofa                    |
| 1 | 1.00 | 1 | 1 | 0 | 0      | 0 | 0 | 0 | t | 11543 | EEDEREISV<br>PAEIL          | Homo<br>sapiens                  |
| 1 | 1.00 | 1 | 1 | 0 | 0.002  | 0 | 0 | 0 | t | 35329 | LDVTTLNP<br>TI              | Rattus<br>norvegic<br>us         |
| 1 | 1.00 | 1 | 1 | 0 | 0      | 0 | 0 | 0 | t | 14730 | EVILKNAIV<br>YNSMYEN<br>FST | Mus<br>musculu<br>s              |
| 1 | 1.00 | 1 | 1 | 0 | -0.003 | 0 | 0 | 0 | t | 14447 | ETKRKGDG                    | Mus<br>musculu<br>s              |

|   |      |   |   |   |        |   |   |   |   |       |                             |                                  |
|---|------|---|---|---|--------|---|---|---|---|-------|-----------------------------|----------------------------------|
| 1 | 1.00 | 1 | 1 | 0 | 0      | 0 | 0 | 0 | t | 19098 | GDRADGQ<br>PAGDRAD<br>GQPA  | Mus<br>musculu<br>s              |
| 1 | 1.00 | 1 | 1 | 0 | 0      | 0 | 0 | 0 | t | 11813 | EENVEENV                    | Mus<br>musculu<br>s              |
| 1 | 1.00 | 1 | 1 | 0 | -0.003 | 0 | 0 | 0 | t | 35329 | LDVTTLNP<br>TI              | Oryctola<br>gus<br>cuniculu<br>s |
| 1 | 1.00 | 1 | 1 | 0 | 0      | 0 | 0 | 0 | t | 11815 | EENVEENV<br>EENVEENV        | Homo<br>sapiens                  |
| 1 | 1.00 | 1 | 1 | 0 | 0      | 0 | 0 | 0 | t | 11815 | EENVEENV<br>EENVEENV        | Homo<br>sapiens                  |
| 1 | 1.00 | 1 | 1 | 0 | -0.001 | 0 | 0 | 0 | t | 22949 | GVELNDK<br>NQFKLTSS<br>ANSK | Homo<br>sapiens                  |
| 1 | 1.00 | 1 | 1 | 0 | 0      | 0 | 0 | 0 | t | 11815 | EENVEENV<br>EENVEENV        | Homo<br>sapiens                  |
| 1 | 1.00 | 1 | 1 | 0 | 0      | 0 | 0 | 0 | t | 29160 | ITYGACPR<br>YVK             | Mus<br>musculu<br>s              |
| 1 | 1.00 | 1 | 1 | 0 | 0      | 0 | 0 | 0 | t | 29160 | ITYGACPR<br>YVK             | Mus<br>musculu<br>s              |
| 1 | 1.00 | 1 | 1 | 0 | 0      | 0 | 0 | 0 | t | 29160 | ITYGACPR<br>YVK             | Mus<br>musculu<br>s              |
| 1 | 1.00 | 1 | 1 | 0 | -0.003 | 0 | 0 | 0 | t | 11815 | EENVEENV<br>EENVEENV        | Oryctola<br>gus<br>cuniculu<br>s |
| 1 | 1.00 | 1 | 1 | 0 | 0      | 0 | 0 | 0 | t | 11815 | EENVEENV<br>EENVEENV        | Homo<br>sapiens                  |
| 1 | 1.00 | 1 | 1 | 0 | 0      | 0 | 0 | 0 | t | 22360 | GSGVRGD<br>FGSLAPRV<br>ARQL | Cavia<br>porcellu<br>s           |

|   |      |   |   |   |        |   |   |   |   |       |                              |                        |
|---|------|---|---|---|--------|---|---|---|---|-------|------------------------------|------------------------|
| 1 | 1.00 | 1 | 1 | 0 | 0      | 0 | 0 | 0 | t | 34612 | KYTMFHYL<br>RAQFEH<br>GKSR   | Mus<br>musculu<br>s    |
| 1 | 1.00 | 1 | 1 | 0 | -0.002 | 0 | 0 | 0 | t | 32454 | KNAETNPK<br>GKGEVQ           | Mus<br>musculu<br>s    |
| 1 | 1.00 | 1 | 1 | 0 | -0.003 | 0 | 0 | 0 | t | 14436 | ETKAVYPY                     | Mus<br>musculu<br>s    |
| 1 | 1.00 | 1 | 1 | 0 | 0      | 0 | 0 | 0 | t | 22360 | GSGVRGD<br>FGSLAPRV<br>ARQL  | Cavia<br>porcellu<br>s |
| 1 | 1.00 | 1 | 1 | 0 | 0      | 0 | 0 | 0 | t | 19005 | GDINKVLE<br>KLGYS            | Mus<br>musculu<br>s    |
| 1 | 1.00 | 1 | 1 | 0 | 0      | 0 | 0 | 0 | t | 11815 | EENVEENV<br>EENVEENV         | Homo<br>sapiens        |
| 1 | 1.00 | 1 | 1 | 0 | -0.008 | 0 | 0 | 0 | t | 17524 | FQQFGRD<br>VSDFTDSV<br>RDPKT | Mus<br>musculu<br>s    |
| 1 | 1.00 | 1 | 1 | 0 | -0.004 | 0 | 0 | 0 | t | 22360 | GSGVRGD<br>FGSLAPRV<br>ARQL  | Mus<br>musculu<br>s    |
| 1 | 1.00 | 1 | 1 | 0 | -0.004 | 0 | 0 | 0 | t | 22360 | GSGVRGD<br>FGSLAPRV<br>ARQL  | Mus<br>musculu<br>s    |
| 1 | 1.00 | 1 | 1 | 0 | 0      | 0 | 0 | 0 | t | 24651 | HQTLQDP<br>RVRG              | Mus<br>musculu<br>s    |
| 1 | 1.00 | 1 | 1 | 0 | 0      | 0 | 0 | 0 | t | 11815 | EENVEENV<br>EENVEENV         | Homo<br>sapiens        |
| 1 | 1.00 | 1 | 1 | 0 | 0.008  | 0 | 0 | 0 | t | 15281 | FASRGTS<br>MDDEA             | Capra<br>hircus        |

|   |      |   |   |   |        |   |   |   |   |       |                              |                                  |
|---|------|---|---|---|--------|---|---|---|---|-------|------------------------------|----------------------------------|
| 1 | 1.00 | 1 | 1 | 0 | -0.008 | 0 | 0 | 0 | t | 34622 | KYVDVNN<br>VGIRGYM<br>YLKGP  | Mus<br>musculu<br>s              |
| 1 | 1.00 | 1 | 1 | 0 | 0      | 0 | 0 | 0 | t | 21763 | GPRLQPY                      | Mus<br>musculu<br>s              |
| 1 | 1.00 | 1 | 1 | 0 | 0      | 0 | 0 | 0 | t | 21763 | GPRLQPY                      | Mus<br>musculu<br>s              |
| 1 | 1.00 | 1 | 1 | 0 | 0      | 0 | 0 | 0 | t | 33440 | KSMKVTV<br>AFNQFG            | Homo<br>sapiens                  |
| 1 | 1.00 | 1 | 1 | 0 | 0      | 0 | 0 | 0 | t | 21760 | GPRLGVRA<br>TRKTSERS<br>QPRG | Homo<br>sapiens                  |
| 1 | 1.00 | 1 | 1 | 0 | 0      | 0 | 0 | 0 | t | 13688 | EPLEPFPT<br>QIHKDYK          | Homo<br>sapiens                  |
| 1 | 1.00 | 1 | 1 | 0 | -0.003 | 0 | 0 | 0 | t | 27100 | ILIEMFNKY<br>NSEILNNII<br>L  | Mus<br>musculu<br>s              |
| 1 | 1.00 | 1 | 1 | 0 | 0      | 0 | 0 | 0 | t | 11815 | EENVEENV<br>EENVEENV         | Homo<br>sapiens                  |
| 1 | 1.00 | 1 | 1 | 0 | 0      | 0 | 0 | 0 | t | 34622 | KYVDVNN<br>VGIRGYM<br>YLKGP  | Mus<br>musculu<br>s              |
| 1 | 1.00 | 1 | 1 | 0 | 0      | 0 | 0 | 0 | t | 34622 | KYVDVNN<br>VGIRGYM<br>YLKGP  | Mus<br>musculu<br>s              |
| 1 | 1.00 | 1 | 1 | 0 | 0      | 0 | 0 | 0 | t | 33126 | KREMVITF<br>K                | Mus<br>musculu<br>s              |
| 1 | 1.00 | 1 | 1 | 0 | 0      | 0 | 0 | 0 | t | 13243 | ELQVIDKV<br>DAAFKVA<br>ATAAN | Mus<br>musculu<br>s              |
| 1 | 1.00 | 1 | 1 | 0 | 0.005  | 0 | 0 | 0 | t | 34622 | KYVDVNN<br>VGIRGYM<br>YLKGP  | Gallus<br>gallus                 |
| 1 | 1.00 | 1 | 1 | 0 | -0.003 | 0 | 0 | 0 | t | 28278 | IREDDQPS<br>SHQPLFY          | Oryctola<br>gus<br>cuniculu<br>s |

|   |      |   |   |   |        |   |   |   |   |       |                              |                                  |
|---|------|---|---|---|--------|---|---|---|---|-------|------------------------------|----------------------------------|
| 1 | 1.00 | 1 | 1 | 0 | 0      | 0 | 0 | 0 | t | 14808 | EVLYLKPLA<br>GVYRSLKK<br>QLE | Mus<br>musculu<br>s              |
| 1 | 1.00 | 1 | 1 | 0 | 0      | 0 | 0 | 0 | t | 10902 | DYINRWIF<br>VTITNNRL<br>NNS  | Mus<br>musculu<br>s              |
| 1 | 1.00 | 1 | 1 | 0 | 0      | 0 | 0 | 0 | t | 14808 | EVLYLKPLA<br>GVYRSLKK<br>QLE | Mus<br>musculu<br>s              |
| 1 | 1.00 | 1 | 1 | 0 | 0      | 0 | 0 | 0 | t | 14808 | EVLYLKPLA<br>GVYRSLKK<br>QLE | Mus<br>musculu<br>s              |
| 1 | 1.00 | 1 | 1 | 0 | 0      | 0 | 0 | 0 | t | 13391 | EMLAAER<br>PRGVFNR<br>QLVLGE | Mus<br>musculu<br>s              |
| 1 | 1.00 | 1 | 1 | 0 | 0      | 0 | 0 | 0 | t | 11148 | EANNREG<br>VEG               | Mus<br>musculu<br>s              |
| 1 | 1.00 | 1 | 1 | 0 | 0.008  | 0 | 0 | 0 | t | 13719 | EPNDGEER<br>QSYW             | Capra<br>hircus                  |
| 1 | 1.00 | 1 | 1 | 0 | -0.003 | 0 | 0 | 0 | t | 11216 | EAVRRHA<br>RAYNATVI          | Oryctola<br>gus<br>cuniculu<br>s |
| 1 | 1.00 | 1 | 1 | 0 | 0      | 0 | 0 | 0 | t | 33198 | KRNEKWD<br>EVYKYIVT<br>NWLA  | Mus<br>musculu<br>s              |
| 1 | 1.00 | 1 | 1 | 0 | 0      | 0 | 0 | 0 | t | 24592 | HQLDPAF<br>GANSTNP<br>DWDFNP | Mus<br>musculu<br>s              |
| 1 | 1.00 | 1 | 1 | 0 | 0      | 0 | 0 | 0 | t | 24592 | HQLDPAF<br>GANSTNP<br>DWDFNP | Mus<br>musculu<br>s              |
| 1 | 1.00 | 1 | 1 | 0 | -0.003 | 0 | 0 | 0 | t | 21750 | GPRFLAAS<br>V                | Oryctola<br>gus<br>cuniculu<br>s |
| 1 | 1.00 | 1 | 1 | 0 | 0      | 0 | 0 | 0 | t | 11148 | EANNREG<br>VEG               | Mus<br>musculu<br>s              |
| 1 | 1.00 | 1 | 1 | 0 | 0      | 0 | 0 | 0 | t | 14730 | EVILKNAIV<br>YNSMYEN<br>FST  | Mus<br>musculu<br>s              |

|   |      |   |   |   |        |   |   |   |   |       |                              |                              |
|---|------|---|---|---|--------|---|---|---|---|-------|------------------------------|------------------------------|
| 1 | 1.00 | 1 | 1 | 0 | 0      | 0 | 0 | 0 | t | 10381 | DTKEPGVL<br>MGGQSESV         | Mus<br>musculus              |
| 1 | 1.00 | 1 | 1 | 0 | 0      | 0 | 0 | 0 | t | 24592 | HQLDPAF<br>GANSTNP<br>DWDFNP | Mus<br>musculus              |
| 1 | 1.00 | 1 | 1 | 0 | 0      | 0 | 0 | 0 | t | 24592 | HQLDPAF<br>GANSTNP<br>DWDFNP | Mus<br>musculus              |
| 1 | 1.00 | 1 | 1 | 0 | -0.003 | 0 | 0 | 0 | t | 24592 | HQLDPAF<br>GANSTNP<br>DWDFNP | Oryctola<br>gus<br>cuniculus |
| 1 | 1.00 | 1 | 1 | 0 | -0.008 | 0 | 0 | 0 | t | 17524 | FQQFGRD<br>VSDFTDSV<br>RDPKT | Mus<br>musculus              |
| 1 | 1.00 | 1 | 1 | 0 | -0.003 | 0 | 0 | 0 | t | 21373 | GNAEKYD<br>KMDEPQH<br>YGKS   | Oryctola<br>gus<br>cuniculus |
| 1 | 1.00 | 1 | 1 | 0 | -0.003 | 0 | 0 | 0 | t | 31373 | KINSLS                       | Oryctola<br>gus<br>cuniculus |
| 1 | 1.00 | 1 | 1 | 0 | -0.003 | 0 | 0 | 0 | t | 36940 | LKLKSIVS<br>WAKKVL           | Oryctola<br>gus<br>cuniculus |
| 1 | 1.00 | 1 | 1 | 0 | 0      | 0 | 0 | 0 | t | 24592 | HQLDPAF<br>GANSTNP<br>DWDFNP | Mus<br>musculus              |
| 1 | 1.00 | 1 | 1 | 0 | -0.002 | 0 | 0 | 0 | t | 25315 | IAIGGAAT<br>GIAAVLTD<br>GNPP | Mus<br>musculus              |
| 1 | 1.00 | 1 | 1 | 0 | 0      | 0 | 0 | 0 | t | 24592 | HQLDPAF<br>GANSTNP<br>DWDFNP | Mus<br>musculus              |
| 1 | 1.00 | 1 | 1 | 0 | 0      | 0 | 0 | 0 | t | 21014 | GLLQQATR<br>Q                | Homo<br>sapiens              |
| 1 | 1.00 | 1 | 1 | 0 | 0      | 0 | 0 | 0 | t | 20012 | GGSGGSV<br>ASGGSVAS          | Homo<br>sapiens              |
| 1 | 1.00 | 1 | 1 | 0 | 0      | 0 | 0 | 0 | t | 13243 | ELQVIDKV<br>DAAFKVA<br>ATAAN | Mus<br>musculus              |



|   |      |   |   |   |        |   |   |   |   |       |                              |                                  |
|---|------|---|---|---|--------|---|---|---|---|-------|------------------------------|----------------------------------|
| 1 | 1.00 | 1 | 1 | 0 | 0      | 0 | 0 | 0 | t | 21373 | GNAEKYD<br>KMDEPQH<br>YGKS   | Mus<br>musculu<br>s              |
| 1 | 1.00 | 1 | 1 | 0 | 0      | 0 | 0 | 0 | t | 24592 | HQLDPAF<br>GANSTNP<br>DWDFNP | Mus<br>musculu<br>s              |
| 1 | 1.00 | 1 | 1 | 0 | 0      | 0 | 0 | 0 | t | 17524 | FQQFGRD<br>VSDFTDSV<br>RDPKT | Mus<br>musculu<br>s              |
| 1 | 1.00 | 1 | 1 | 0 | -0.007 | 0 | 0 | 0 | t | 34622 | KYVDVNN<br>VGIRGYM<br>YLKGP  | Homo<br>sapiens                  |
| 1 | 1.00 | 1 | 1 | 0 | 0      | 0 | 0 | 0 | t | 23178 | GVTAPDT<br>RPAPGSTA          | Mus<br>musculu<br>s              |
| 1 | 1.00 | 1 | 1 | 0 | -0.008 | 0 | 0 | 0 | t | 34622 | KYVDVNN<br>VGIRGYM<br>YLKGP  | Mus<br>musculu<br>s              |
| 1 | 1.00 | 1 | 1 | 0 | -0.008 | 0 | 0 | 0 | t | 10902 | DYINRWIF<br>VTITNNRL<br>NNS  | Mus<br>musculu<br>s              |
| 1 | 1.00 | 1 | 1 | 0 | 0      | 0 | 0 | 0 | t | 24592 | HQLDPAF<br>GANSTNP<br>DWDFNP | Mus<br>musculu<br>s              |
| 1 | 1.00 | 1 | 1 | 0 | 0      | 0 | 0 | 0 | t | 34612 | KYTMFHYL<br>RAQFEH<br>GKSR   | Mus<br>musculu<br>s              |
| 1 | 1.00 | 1 | 1 | 0 | 0      | 0 | 0 | 0 | t | 34622 | KYVDVNN<br>VGIRGYM<br>YLKGP  | Mus<br>musculu<br>s              |
| 1 | 1.00 | 1 | 1 | 0 | 0      | 0 | 0 | 0 | t | 24592 | HQLDPAF<br>GANSTNP<br>DWDFNP | Mus<br>musculu<br>s              |
| 1 | 1.00 | 1 | 1 | 0 | -0.003 | 0 | 0 | 0 | t | 13975 | EREDERTL<br>TKEYEDIVL<br>K   | Oryctola<br>gus<br>cuniculu<br>s |
| 1 | 1.00 | 1 | 1 | 0 | 0      | 0 | 0 | 0 | t | 24592 | HQLDPAF<br>GANSTNP<br>DWDFNP | Mus<br>musculu<br>s              |
| 1 | 1.00 | 1 | 1 | 0 | -0.002 | 0 | 0 | 0 | t | 14730 | EVILKNAIV<br>YNSMYEN<br>FST  | Mus<br>musculu<br>s              |

|   |      |   |   |   |        |   |   |   |   |       |                              |                                  |
|---|------|---|---|---|--------|---|---|---|---|-------|------------------------------|----------------------------------|
| 1 | 1.00 | 1 | 1 | 0 | -0.003 | 0 | 0 | 0 | t | 14905 | EVWREEA<br>YHAADIKD          | Oryctola<br>gus<br>cuniculu<br>s |
| 1 | 1.00 | 1 | 1 | 0 | 0      | 0 | 0 | 0 | t | 17136 | FNCLGMS<br>SRDFIEGA          | Mus<br>musculu<br>s              |
| 1 | 1.00 | 1 | 1 | 0 | 0      | 0 | 0 | 0 | t | 24592 | HQLDPAF<br>GANSTNP<br>DWDFNP | Mus<br>musculu<br>s              |
| 1 | 1.00 | 1 | 1 | 0 | -0.001 | 0 | 0 | 0 | t | 34612 | KYTMFHYL<br>RAQEFEH<br>GKSR  | Homo<br>sapiens                  |
| 1 | 1.00 | 1 | 1 | 0 | -0.002 | 0 | 0 | 0 | t | 32595 | KNQIQLFN<br>LESSKIEVIL<br>K  | Mus<br>musculu<br>s              |
| 1 | 1.00 | 1 | 1 | 0 | -0.003 | 0 | 0 | 0 | t | 22870 | GTVAPQIP<br>PNWHIPSI<br>QD   | Oryctola<br>gus<br>cuniculu<br>s |
| 1 | 1.00 | 1 | 1 | 0 | 0.005  | 0 | 0 | 0 | t | 17140 | FNDSQRQ<br>ATKDAGTI<br>AGLEV | Homo<br>sapiens                  |
| 1 | 1.00 | 1 | 1 | 0 | 0      | 0 | 0 | 0 | t | 32480 | KNESKYSN<br>TFINNAYN<br>MSIR | Aotus<br>sp.                     |
| 1 | 1.00 | 1 | 1 | 0 | -0.003 | 0 | 0 | 0 | t | 24592 | HQLDPAF<br>GANSTNP<br>DWDFNP | Oryctola<br>gus<br>cuniculu<br>s |
| 1 | 1.00 | 1 | 1 | 0 | -0.003 | 0 | 0 | 0 | t | 24592 | HQLDPAF<br>GANSTNP<br>DWDFNP | Oryctola<br>gus<br>cuniculu<br>s |
| 1 | 1.00 | 1 | 1 | 0 | 0      | 0 | 0 | 0 | t | 13471 | ENFSTSFW<br>IRIPKYFNSI<br>S  | Mus<br>musculu<br>s              |
| 1 | 1.00 | 1 | 1 | 0 | 0      | 0 | 0 | 0 | t | 28749 | ISTLIKQKL<br>DGLKNE          | Homo<br>sapiens                  |
| 1 | 1.00 | 1 | 1 | 0 | -0.003 | 0 | 0 | 0 | t | 15334 | FCLFFAFSV<br>AAP             | Oryctola<br>gus<br>cuniculu<br>s |

|   |      |   |   |   |        |   |   |   |   |       |                              |                                  |
|---|------|---|---|---|--------|---|---|---|---|-------|------------------------------|----------------------------------|
| 1 | 1.00 | 1 | 1 | 0 | -0.003 | 0 | 0 | 0 | t | 36579 | LIKNQCVN<br>FNFNGLTG<br>T    | Oryctola<br>gus<br>cuniculu<br>s |
| 1 | 1.00 | 1 | 1 | 0 | -0.003 | 0 | 0 | 0 | t | 34622 | KYVDVNN<br>VGIRGYM<br>YLKGP  | Mus<br>musculu<br>s              |
| 1 | 1.00 | 1 | 1 | 0 | -0.003 | 0 | 0 | 0 | t | 36940 | LKLKSIVS<br>WAKKVL           | Oryctola<br>gus<br>cuniculu<br>s |
| 1 | 1.00 | 1 | 1 | 0 | 0.002  | 0 | 0 | 0 | t | 21715 | GPNNSEAI<br>PALTAAE          | Rattus<br>norvegic<br>us         |
| 1 | 1.00 | 1 | 1 | 0 | 0      | 0 | 0 | 0 | t | 10639 | DVKFPGG<br>GQIVGGV<br>YLLPRR | Mus<br>musculu<br>s              |
| 1 | 1.00 | 1 | 1 | 0 | 0      | 0 | 0 | 0 | t | 10639 | DVKFPGG<br>GQIVGGV<br>YLLPRR | Mus<br>musculu<br>s              |
| 1 | 1.00 | 1 | 1 | 0 | 0      | 0 | 0 | 0 | t | 11927 | EEVVGE EK<br>LVSEEIVT        | Homo<br>sapiens                  |
| 1 | 1.00 | 1 | 1 | 0 | -0.003 | 0 | 0 | 0 | t | 11927 | EEVVGE EK<br>LVSEEIVT        | Oryctola<br>gus<br>cuniculu<br>s |
| 1 | 1.00 | 1 | 1 | 0 | -0.008 | 0 | 0 | 0 | t | 10902 | DYINRWIF<br>VTITNNRL<br>NNS  | Mus<br>musculu<br>s              |
| 1 | 1.00 | 1 | 1 | 0 | 0      | 0 | 0 | 0 | t | 11571 | EEEDDDM<br>GFGFLD            | Homo<br>sapiens                  |
| 1 | 1.00 | 1 | 1 | 0 | 0      | 0 | 0 | 0 | t | 11571 | EEEDDDM<br>GFGFLD            | Homo<br>sapiens                  |
| 1 | 1.00 | 1 | 1 | 0 | 0      | 0 | 0 | 0 | t | 36940 | LKLKSIVS<br>WAKKVL           | Mus<br>musculu<br>s              |
| 1 | 1.00 | 1 | 1 | 0 | 0      | 0 | 0 | 0 | t | 11571 | EEEDDDM<br>GFGFLD            | Mus<br>musculu<br>s              |
| 1 | 1.00 | 1 | 1 | 0 | 0      | 0 | 0 | 0 | t | 11571 | EEEDDDM<br>GFGFLD            | Mus<br>musculu<br>s              |

|   |      |   |   |   |        |   |   |   |   |       |                              |                                  |
|---|------|---|---|---|--------|---|---|---|---|-------|------------------------------|----------------------------------|
| 1 | 1.00 | 1 | 1 | 0 | -0.007 | 0 | 0 | 0 | t | 32595 | KNQIQLFN<br>LESSKIEVIL<br>K  | Homo<br>sapiens                  |
| 1 | 1.00 | 1 | 1 | 0 | 0      | 0 | 0 | 0 | t | 11571 | EEEDDDM<br>GFGFLD            | Mus<br>musculu<br>s              |
| 1 | 1.00 | 1 | 1 | 0 | 0      | 0 | 0 | 0 | t | 10639 | DVKFPGG<br>GQIVGGV<br>YLLPRR | Mus<br>musculu<br>s              |
| 1 | 1.00 | 1 | 1 | 0 | 0      | 0 | 0 | 0 | t | 10639 | DVKFPGG<br>GQIVGGV<br>YLLPRR | Mus<br>musculu<br>s              |
| 1 | 1.00 | 1 | 1 | 0 | 0.008  | 0 | 0 | 0 | t | 22835 | GTSMDDE<br>ADRYF             | Capra<br>hircus                  |
| 1 | 1.00 | 1 | 1 | 0 | -0.002 | 0 | 0 | 0 | t | 34612 | KYTMFHYL<br>RAQFEH<br>GKSR   | Mus<br>musculu<br>s              |
| 1 | 1.00 | 1 | 1 | 0 | -0.003 | 0 | 0 | 0 | t | 35310 | LDTNGGT<br>GTAIV             | Oryctola<br>gus<br>cuniculu<br>s |
| 1 | 1.00 | 1 | 1 | 0 | 0      | 0 | 0 | 0 | t | 14084 | ERTLPGQK<br>ACDDVN           | Bos<br>taurus                    |
| 1 | 1.00 | 1 | 1 | 0 | 0.004  | 0 | 0 | 0 | t | 11241 | ECFPWDR<br>KL                | Mus<br>musculu<br>s              |
| 1 | 1.00 | 1 | 1 | 0 | 0      | 0 | 0 | 0 | t | 29248 | IVEEDAPA<br>TEEIDEIE         | Homo<br>sapiens                  |
| 1 | 1.00 | 1 | 1 | 0 | 0      | 0 | 0 | 0 | t | 29875 | KALRENP                      | Mus<br>musculu<br>s              |
| 1 | 1.00 | 1 | 1 | 0 | 0      | 0 | 0 | 0 | t | 14409 | ETHVTGGS                     | Rattus<br>norvegic<br>us         |
| 1 | 1.00 | 1 | 1 | 0 | 0.002  | 0 | 0 | 0 | t | 34965 | LASLRKAF<br>ADTVVPRP<br>PSNY | Rattus<br>norvegic<br>us         |
| 1 | 1.00 | 1 | 1 | 0 | 0      | 0 | 0 | 0 | t | 12514 | EILVEFEEP<br>HATKQS          | Mus<br>musculu<br>s              |

|   |      |   |   |   |        |   |   |   |   |       |                              |                                  |
|---|------|---|---|---|--------|---|---|---|---|-------|------------------------------|----------------------------------|
| 1 | 1.00 | 1 | 1 | 0 | -0.003 | 0 | 0 | 0 | t | 34217 | KVTLADAG<br>FMKQYGE<br>CL    | Oryctola<br>gus<br>cuniculu<br>s |
| 1 | 1.00 | 1 | 1 | 0 | 0      | 0 | 0 | 0 | t | 31365 | KINIGSKV<br>NFDPIDKN<br>QIQ  | Mus<br>musculu<br>s              |
| 1 | 1.00 | 1 | 1 | 0 | 0      | 0 | 0 | 0 | t | 31365 | KINIGSKV<br>NFDPIDKN<br>QIQ  | Mus<br>musculu<br>s              |
| 1 | 1.00 | 1 | 1 | 0 | 0      | 0 | 0 | 0 | t | 14899 | EVVLQNR<br>RGLDLL            | Oryctola<br>gus<br>cuniculu<br>s |
| 1 | 1.00 | 1 | 1 | 0 | -0.001 | 0 | 0 | 0 | t | 32595 | KNQIQLFN<br>LESSKIEVIL<br>K  | Homo<br>sapiens                  |
| 1 | 1.00 | 1 | 1 | 0 | -0.008 | 0 | 0 | 0 | t | 10902 | DYINRWIF<br>VTITNNRL<br>NNS  | Mus<br>musculu<br>s              |
| 1 | 1.00 | 1 | 1 | 0 | 0      | 0 | 0 | 0 | t | 10868 | DYEDRYR<br>E                 | Mus<br>musculu<br>s              |
| 1 | 1.00 | 1 | 1 | 0 | 0      | 0 | 0 | 0 | t | 13775 | EPTPNAYY<br>EGVFCSSS<br>S    | Mus<br>musculu<br>s              |
| 1 | 1.00 | 1 | 1 | 0 | 0.005  | 0 | 0 | 0 | t | 32502 | KNGLENYA<br>YSMKNTLS<br>DSNV | Homo<br>sapiens                  |
| 1 | 1.00 | 1 | 1 | 0 | 0      | 0 | 0 | 0 | t | 13775 | EPTPNAYY<br>EGVFCSSS<br>S    | Mus<br>musculu<br>s              |
| 1 | 1.00 | 1 | 1 | 0 | 0      | 0 | 0 | 0 | t | 13775 | EPTPNAYY<br>EGVFCSSS<br>S    | Mus<br>musculu<br>s              |
| 1 | 1.00 | 1 | 1 | 0 | 0      | 0 | 0 | 0 | t | 10868 | DYEDRYR<br>E                 | Mus<br>musculu<br>s              |
| 1 | 1.00 | 1 | 1 | 0 | 0      | 0 | 0 | 0 | t | 10868 | DYEDRYR<br>E                 | Mus<br>musculu<br>s              |
| 1 | 1.00 | 1 | 1 | 0 | 0      | 0 | 0 | 0 | t | 13775 | EPTPNAYY<br>EGVFCSSS<br>S    | Mus<br>musculu<br>s              |

|   |      |   |   |   |        |   |   |   |   |       |                              |                                  |
|---|------|---|---|---|--------|---|---|---|---|-------|------------------------------|----------------------------------|
| 1 | 1.00 | 1 | 1 | 0 | 0      | 0 | 0 | 0 | t | 20046 | GGTEESVV<br>TASRS            | Bos<br>taurus                    |
| 1 | 1.00 | 1 | 1 | 0 | 0      | 0 | 0 | 0 | t | 18970 | GDEVRLA<br>NDLKAFD<br>SEYG   | Mus<br>musculu<br>s              |
| 1 | 1.00 | 1 | 1 | 0 | -0.003 | 0 | 0 | 0 | t | 24037 | HIDSQKKA<br>IERMK            | Oryctola<br>gus<br>cuniculu<br>s |
| 1 | 1.00 | 1 | 1 | 0 | -0.003 | 0 | 0 | 0 | t | 21625 | GPFYTSAP<br>Q                | Oryctola<br>gus<br>cuniculu<br>s |
| 1 | 1.00 | 1 | 1 | 0 | 0      | 0 | 0 | 0 | t | 13775 | EPTPNAYY<br>EGVFCSS<br>S     | Mus<br>musculu<br>s              |
| 1 | 1.00 | 1 | 1 | 0 | 0      | 0 | 0 | 0 | t | 25595 | IDKDNNEL<br>IDKQELTK<br>YCQQ | Mus<br>musculu<br>s              |
| 1 | 1.00 | 1 | 1 | 0 | 0      | 0 | 0 | 0 | t | 25595 | IDKDNNEL<br>IDKQELTK<br>YCQQ | Mus<br>musculu<br>s              |
| 1 | 1.00 | 1 | 1 | 0 | 0      | 0 | 0 | 0 | t | 15356 | FCVQPEKG<br>GRKPAR           | Homo<br>sapiens                  |
| 1 | 1.00 | 1 | 1 | 0 | -0.003 | 0 | 0 | 0 | t | 21617 | GPFFLSPTS                    | Oryctola<br>gus<br>cuniculu<br>s |
| 1 | 1.00 | 1 | 1 | 0 | 0      | 0 | 0 | 0 | t | 12792 | EKLCVWN<br>NKTPHAIA          | Oryctola<br>gus<br>cuniculu<br>s |
| 1 | 1.00 | 1 | 1 | 0 | 0.005  | 0 | 0 | 0 | t | 31365 | KINIGSKV<br>NFDPIDKN<br>QIQ  | Gallus<br>gallus                 |
| 1 | 1.00 | 1 | 1 | 0 | 0.002  | 0 | 0 | 0 | t | 28075 | IPSTAFTDI<br>AWVRLPN<br>HY   | Rattus<br>norvegic<br>us         |
| 1 | 1.00 | 1 | 1 | 0 | 0      | 0 | 0 | 0 | t | 17234 | FNSISLNN<br>EYTIINCM<br>ENN  | Mus<br>musculu<br>s              |

|   |      |   |   |   |        |   |   |   |   |       |                             |                                  |
|---|------|---|---|---|--------|---|---|---|---|-------|-----------------------------|----------------------------------|
| 1 | 1.00 | 1 | 1 | 0 | 0      | 0 | 0 | 0 | t | 17234 | FNSISLNN<br>EYTIINCM<br>ENN | Mus<br>musculu<br>s              |
| 1 | 1.00 | 1 | 1 | 0 | -0.002 | 0 | 0 | 0 | t | 20455 | GITGETTTT<br>EYSNARYV       | Mus<br>musculu<br>s              |
| 1 | 1.00 | 1 | 1 | 0 | -0.003 | 0 | 0 | 0 | t | 25421 | IASGLSQE<br>RNFVDSI         | Oryctola<br>gus<br>cuniculu<br>s |
| 1 | 1.00 | 1 | 1 | 0 | -0.008 | 0 | 0 | 0 | t | 31365 | KINIGSKV<br>NFPIDKN<br>QIQ  | Mus<br>musculu<br>s              |
| 1 | 1.00 | 1 | 1 | 0 | -0.003 | 0 | 0 | 0 | t | 11729 | EEKNNINF<br>NIDDLSSKL<br>NE | Mus<br>musculu<br>s              |
| 1 | 1.00 | 1 | 1 | 0 | -0.003 | 0 | 0 | 0 | t | 29278 | IVGAGDSS                    | Mus<br>musculu<br>s              |
| 1 | 1.00 | 1 | 1 | 0 | -0.003 | 0 | 0 | 0 | t | 19520 | GFFGAIAG<br>FIE             | Oryctola<br>gus<br>cuniculu<br>s |
| 1 | 1.00 | 1 | 1 | 0 | -0.002 | 0 | 0 | 0 | t | 28105 | IPVLGTFAL<br>VSYIANKV<br>LT | Mus<br>musculu<br>s              |
| 1 | 1.00 | 1 | 1 | 0 | 0      | 0 | 0 | 0 | t | 11872 | EESDDDM<br>GFGFLFD          | Mus<br>musculu<br>s              |
| 1 | 1.00 | 1 | 1 | 0 | -0.003 | 0 | 0 | 0 | t | 21057 | GLPDSEPT<br>KTNGKCK         | Oryctola<br>gus<br>cuniculu<br>s |
| 1 | 1.00 | 1 | 1 | 0 | -0.004 | 0 | 0 | 0 | t | 19520 | GFFGAIAG<br>FIE             | Mus<br>musculu<br>s              |
| 1 | 1.00 | 1 | 1 | 0 | -0.006 | 0 | 0 | 0 | t | 21057 | GLPDSEPT<br>KTNGKCK         | Oryctola<br>gus<br>cuniculu<br>s |
| 1 | 1.00 | 1 | 1 | 0 | -0.037 | 0 | 0 | 0 | t | 12794 | EKLIEDDE<br>NSQC            | Papio<br>cynocep<br>halus        |

|   |      |   |   |   |        |   |   |   |   |       |                             |                                  |
|---|------|---|---|---|--------|---|---|---|---|-------|-----------------------------|----------------------------------|
| 1 | 1.00 | 1 | 1 | 0 | 0      | 0 | 0 | 0 | t | 21057 | GLPDSEPT<br>KTNGKCK         | Mus<br>musculu<br>s              |
| 1 | 1.00 | 1 | 1 | 0 | -0.003 | 0 | 0 | 0 | t | 21057 | GLPDSEPT<br>KTNGKCK         | Mus<br>musculu<br>s              |
| 1 | 1.00 | 1 | 1 | 0 | 0      | 0 | 0 | 0 | t | 11872 | EESDDDM<br>GFGLFD           | Homo<br>sapiens                  |
| 1 | 1.00 | 1 | 1 | 0 | -0.003 | 0 | 0 | 0 | t | 21059 | GLPDSVKI<br>WTSETNK         | Oryctola<br>gus<br>cuniculu<br>s |
| 1 | 1.00 | 1 | 1 | 0 | -0.006 | 0 | 0 | 0 | t | 21059 | GLPDSVKI<br>WTSETNK         | Oryctola<br>gus<br>cuniculu<br>s |
| 1 | 1.00 | 1 | 1 | 0 | 0.004  | 0 | 0 | 0 | t | 21059 | GLPDSVKI<br>WTSETNK         | Ovis<br>aries                    |
| 1 | 1.00 | 1 | 1 | 0 | 0      | 0 | 0 | 0 | t | 19639 | GFTWTGV<br>TQNG             | Mus<br>musculu<br>s              |
| 1 | 1.00 | 1 | 1 | 0 | -0.006 | 0 | 0 | 0 | t | 31504 | KKDGYPVE<br>YDNCAIYI        | Oryctola<br>gus<br>cuniculu<br>s |
| 1 | 1.00 | 1 | 1 | 0 | -0.003 | 0 | 0 | 0 | t | 21059 | GLPDSVKI<br>WTSETNK         | Oryctola<br>gus<br>cuniculu<br>s |
| 1 | 1.00 | 1 | 1 | 0 | -0.003 | 0 | 0 | 0 | t | 21059 | GLPDSVKI<br>WTSETNK         | Mus<br>musculu<br>s              |
| 1 | 1.00 | 1 | 1 | 0 | -0.003 | 0 | 0 | 0 | t | 21059 | GLPDSVKI<br>WTSETNK         | Mus<br>musculu<br>s              |
| 1 | 1.00 | 1 | 1 | 0 | 0      | 0 | 0 | 0 | t | 12794 | EKLIEDDE<br>NSQC            | Oryctola<br>gus<br>cuniculu<br>s |
| 1 | 1.00 | 1 | 1 | 0 | 0      | 0 | 0 | 0 | t | 21059 | GLPDSVKI<br>WTSETNK         | Mus<br>musculu<br>s              |
| 1 | 1.00 | 1 | 1 | 0 | 0.006  | 0 | 0 | 0 | t | 21059 | GLPDSVKI<br>WTSETNK         | Ovis<br>aries                    |
| 1 | 1.00 | 1 | 1 | 0 | -0.002 | 0 | 0 | 0 | t | 28105 | IPVLGTFAL<br>VSYIANKV<br>LT | Mus<br>musculu<br>s              |



|   |      |   |   |   |        |   |   |   |   |       |                      |                       |
|---|------|---|---|---|--------|---|---|---|---|-------|----------------------|-----------------------|
| 1 | 1.00 | 1 | 1 | 0 | 0      | 0 | 0 | 0 | t | 21469 | GNLLLSC              | Mus musculus          |
| 1 | 1.00 | 1 | 1 | 0 | -0.003 | 0 | 0 | 0 | t | 28375 | IRQLESIVDKLNRSG      | Oryctolagus cuniculus |
| 1 | 1.00 | 1 | 1 | 0 | 0      | 0 | 0 | 0 | t | 28105 | IPVLGTFALVSYIANKVLT  | Mus musculus          |
| 1 | 1.00 | 1 | 1 | 0 | 0      | 0 | 0 | 0 | t | 31502 | KKDGKKAEKPNPRENKLDQP | Homo sapiens          |
| 1 | 1.00 | 1 | 1 | 0 | -0.004 | 0 | 0 | 0 | t | 15383 | FDFASGLD             | Mus musculus          |
| 1 | 1.00 | 1 | 1 | 0 | -0.007 | 0 | 0 | 0 | t | 19520 | GFFGAIAGFIE          | Oryctolagus cuniculus |
| 1 | 1.00 | 1 | 1 | 0 | -0.003 | 0 | 0 | 0 | t | 21602 | GPEETGPEETGPEET      | Oryctolagus cuniculus |
| 1 | 1.00 | 1 | 1 | 0 | -0.037 | 0 | 0 | 0 | t | 12794 | EKLIEDDENSC          | Papio cynocephalus    |
| 1 | 1.00 | 1 | 1 | 0 | 0.003  | 0 | 0 | 0 | t | 12375 | EHWSYGLRPG           | Rattus norvegicus     |
| 1 | 1.00 | 1 | 1 | 0 | -0.005 | 0 | 0 | 0 | t | 26076 | IFGVDANTGNVL         | unidentified          |
| 1 | 1.00 | 1 | 1 | 0 | -0.003 | 0 | 0 | 0 | t | 25587 | IDIDLCDICTNTMDV      | Oryctolagus cuniculus |
| 1 | 1.00 | 1 | 1 | 0 | 0      | 0 | 0 | 0 | t | 15417 | FDKVK                | Mus musculus          |
| 1 | 1.00 | 1 | 1 | 0 | -0.008 | 0 | 0 | 0 | t | 28105 | IPVLGTFALVSYIANKVLT  | Mus musculus          |
| 1 | 1.00 | 1 | 1 | 0 | 0      | 0 | 0 | 0 | t | 11081 | EAIPALTA VETGHTSQV   | Oryctolagus cuniculus |

|   |      |   |   |   |        |   |   |   |   |       |                              |                                  |
|---|------|---|---|---|--------|---|---|---|---|-------|------------------------------|----------------------------------|
| 1 | 1.00 | 1 | 1 | 0 | -0.002 | 0 | 0 | 0 | t | 22756 | GTLVRMA<br>PVIG              | Mus<br>musculu<br>s              |
| 1 | 1.00 | 1 | 1 | 0 | 0      | 0 | 0 | 0 | t | 22755 | GTLVKTIT<br>DDQIEV           | Mus<br>musculu<br>s              |
| 1 | 1.00 | 1 | 1 | 0 | 0      | 0 | 0 | 0 | t | 30036 | KAYSNCYP<br>YDVPDY           | Oryctola<br>gus<br>cuniculu<br>s |
| 1 | 1.00 | 1 | 1 | 0 | 0      | 0 | 0 | 0 | t | 28719 | ISSIFSR                      | Mus<br>musculu<br>s              |
| 1 | 1.00 | 1 | 1 | 0 | -0.003 | 0 | 0 | 0 | t | 31383 | KIPDPPQP<br>DFPQLNSD<br>WVPS | Oryctola<br>gus<br>cuniculu<br>s |
| 1 | 1.00 | 1 | 1 | 0 | 0      | 0 | 0 | 0 | t | 28105 | IPVLGTFAL<br>VSYIANKV<br>LT  | Mus<br>musculu<br>s              |
| 1 | 1.00 | 1 | 1 | 0 | 0      | 0 | 0 | 0 | t | 19637 | GFTTNEPR<br>YNVFAE           | Mus<br>musculu<br>s              |
| 1 | 1.00 | 1 | 1 | 0 | -0.008 | 0 | 0 | 0 | t | 28105 | IPVLGTFAL<br>VSYIANKV<br>LT  | Mus<br>musculu<br>s              |
| 1 | 1.00 | 1 | 1 | 0 | 0      | 0 | 0 | 0 | t | 34612 | KYTMFHYL<br>RAQEFEH<br>GKSR  | Mus<br>musculu<br>s              |
| 1 | 1.00 | 1 | 1 | 0 | -0.003 | 0 | 0 | 0 | t | 32662 | KPATGEAP<br>SQ               | Oryctola<br>gus<br>cuniculu<br>s |
| 1 | 1.00 | 1 | 1 | 0 | -0.002 | 0 | 0 | 0 | t | 11870 | EERYKIQSY<br>SEYLKDFW<br>GN  | Mus<br>musculu<br>s              |
| 1 | 1.00 | 1 | 1 | 0 | -0.008 | 0 | 0 | 0 | t | 31365 | KINIGSKV<br>NFDPIDKN<br>QIQ  | Mus<br>musculu<br>s              |
| 1 | 1.00 | 1 | 1 | 0 | 0.014  | 0 | 0 | 0 | t | 29852 | KALENKKK<br>QLSAGGK<br>NLS   | Pan<br>troglody<br>tes           |

|   |      |   |   |   |        |   |   |   |   |       |                              |                                  |
|---|------|---|---|---|--------|---|---|---|---|-------|------------------------------|----------------------------------|
| 1 | 1.00 | 1 | 1 | 0 | -0.015 | 0 | 0 | 0 | t | 29852 | KALENKKK<br>QLSAGGK<br>NLS   | Marmot<br>a monax                |
| 1 | 1.00 | 1 | 1 | 0 | 0      | 0 | 0 | 0 | t | 13834 | EQGSENEE<br>IFVEEVSA         | Homo<br>sapiens                  |
| 1 | 1.00 | 1 | 1 | 0 | -0.003 | 0 | 0 | 0 | t | 13834 | EQGSENEE<br>IFVEEVSA         | Oryctola<br>gus<br>cuniculu<br>s |
| 1 | 1.00 | 1 | 1 | 0 | 0      | 0 | 0 | 0 | t | 22562 | GSVNSFFS<br>R                | Mus<br>musculu<br>s              |
| 1 | 1.00 | 1 | 1 | 0 | -0.003 | 0 | 0 | 0 | t | 31365 | KINIGSKV<br>NFDPIDKN<br>QIQ  | Mus<br>musculu<br>s              |
| 1 | 1.00 | 1 | 1 | 0 | -0.008 | 0 | 0 | 0 | t | 10902 | DYINRWIF<br>VTITNNRL<br>NNS  | Mus<br>musculu<br>s              |
| 1 | 1.00 | 1 | 1 | 0 | 0      | 0 | 0 | 0 | t | 12375 | EHWSYGL<br>RPG               | Rattus<br>norvegic<br>us         |
| 1 | 1.00 | 1 | 1 | 0 | 0      | 0 | 0 | 0 | t | 34197 | KVSASQEI<br>VQDGSVT<br>E     | Homo<br>sapiens                  |
| 1 | 1.00 | 1 | 1 | 0 | 0      | 0 | 0 | 0 | t | 22562 | GSVNSFFS<br>R                | Mus<br>musculu<br>s              |
| 1 | 1.00 | 1 | 1 | 0 | 0      | 0 | 0 | 0 | t | 35235 | LDNIKGNV<br>GKMEDIYK<br>KNNK | Mus<br>musculu<br>s              |
| 1 | 1.00 | 1 | 1 | 0 | 0      | 0 | 0 | 0 | t | 19275 | GEGAVQ<br>WMNRLIA<br>FASRGN  | Homo<br>sapiens                  |
| 1 | 1.00 | 1 | 1 | 0 | -0.007 | 0 | 0 | 0 | t | 21553 | GNVNYKY<br>RYLRHGKL<br>RPFER | Oryctola<br>gus<br>cuniculu<br>s |
| 1 | 1.00 | 1 | 1 | 0 | -0.004 | 0 | 0 | 0 | t | 21553 | GNVNYKY<br>RYLRHGKL<br>RPFER | Mus<br>musculu<br>s              |
| 1 | 1.00 | 1 | 1 | 0 | -0.003 | 0 | 0 | 0 | t | 21553 | GNVNYKY<br>RYLRHGKL<br>RPFER | Oryctola<br>gus<br>cuniculu<br>s |

|   |      |   |   |   |        |   |   |   |   |       |                              |                                  |
|---|------|---|---|---|--------|---|---|---|---|-------|------------------------------|----------------------------------|
| 1 | 1.00 | 1 | 1 | 0 | 0      | 0 | 0 | 0 | t | 35235 | LDNIKGNV<br>GKMEDIYK<br>KNNK | Mus<br>musculu<br>s              |
| 1 | 1.00 | 1 | 1 | 0 | 0.006  | 0 | 0 | 0 | t | 10551 | DVDGINY<br>WTKAITG<br>GGEFTD | Ovis<br>aries                    |
| 1 | 1.00 | 1 | 1 | 0 | 0      | 0 | 0 | 0 | t | 10902 | DYINRWIF<br>VTITNNRL<br>NNS  | Mus<br>musculu<br>s              |
| 1 | 1.00 | 1 | 1 | 0 | 0      | 0 | 0 | 0 | t | 14261 | ESRRAL                       | Homo<br>sapiens                  |
| 1 | 1.00 | 1 | 1 | 0 | -0.003 | 0 | 0 | 0 | t | 26829 | IKKMLAD<br>QTVEEHIG          | Oryctola<br>gus<br>cuniculu<br>s |
| 1 | 1.00 | 1 | 1 | 0 | 0      | 0 | 0 | 0 | t | 23919 | HGKSRIAL<br>TNSVNEAL<br>LNP  | Mus<br>musculu<br>s              |
| 1 | 1.00 | 1 | 1 | 0 | 0      | 0 | 0 | 0 | t | 34612 | KYTMFHYL<br>RAQFEH<br>GKSR   | Mus<br>musculu<br>s              |
| 1 | 1.00 | 1 | 1 | 0 | -0.007 | 0 | 0 | 0 | t | 28105 | IPVLGTFAL<br>VSYIANKV<br>LT  | Homo<br>sapiens                  |
| 1 | 1.00 | 1 | 1 | 0 | -0.001 | 0 | 0 | 0 | t | 23919 | HGKSRIAL<br>TNSVNEAL<br>LNP  | Homo<br>sapiens                  |
| 1 | 1.00 | 1 | 1 | 0 | -0.002 | 0 | 0 | 0 | t | 23919 | HGKSRIAL<br>TNSVNEAL<br>LNP  | Mus<br>musculu<br>s              |
| 1 | 1.00 | 1 | 1 | 0 | 0      | 0 | 0 | 0 | t | 34612 | KYTMFHYL<br>RAQFEH<br>GKSR   | Mus<br>musculu<br>s              |
| 1 | 1.00 | 1 | 1 | 0 | -0.003 | 0 | 0 | 0 | t | 31330 | KILPEVKEK<br>HEF             | Oryctola<br>gus<br>cuniculu<br>s |
| 1 | 1.00 | 1 | 1 | 0 | 0      | 0 | 0 | 0 | t | 23919 | HGKSRIAL<br>TNSVNEAL<br>LNP  | Mus<br>musculu<br>s              |

|   |      |   |   |   |        |   |   |   |   |       |                              |                                  |
|---|------|---|---|---|--------|---|---|---|---|-------|------------------------------|----------------------------------|
| 1 | 1.00 | 1 | 1 | 0 | 0      | 0 | 0 | 0 | t | 34612 | KYTMFHYL<br>RAQFEH<br>GKSR   | Mus<br>musculu<br>s              |
| 1 | 1.00 | 1 | 1 | 0 | 0      | 0 | 0 | 0 | t | 33440 | KSMKVTV<br>AFNQFG            | Homo<br>sapiens                  |
| 1 | 1.00 | 1 | 1 | 0 | 0      | 0 | 0 | 0 | t | 23919 | HGKSRIAL<br>TNSVNEAL<br>LNP  | Mus<br>musculu<br>s              |
| 1 | 1.00 | 1 | 1 | 0 | 0      | 0 | 0 | 0 | t | 23919 | HGKSRIAL<br>TNSVNEAL<br>LNP  | Mus<br>musculu<br>s              |
| 1 | 1.00 | 1 | 1 | 0 | 0      | 0 | 0 | 0 | t | 19636 | GFTTNEER<br>YNVFAE           | Mus<br>musculu<br>s              |
| 1 | 1.00 | 1 | 1 | 0 | -0.003 | 0 | 0 | 0 | t | 17308 | FPIDSSCN<br>ATQY             | Oryctola<br>gus<br>cuniculu<br>s |
| 1 | 1.00 | 1 | 1 | 0 | 0      | 0 | 0 | 0 | t | 19636 | GFTTNEER<br>YNVFAE           | Mus<br>musculu<br>s              |
| 1 | 1.00 | 1 | 1 | 0 | 0      | 0 | 0 | 0 | t | 11821 | EENVEHD<br>AEENVEH<br>DA     | Mus<br>musculu<br>s              |
| 1 | 1.00 | 1 | 1 | 0 | 0      | 0 | 0 | 0 | t | 11821 | EENVEHD<br>AEENVEH<br>DA     | Mus<br>musculu<br>s              |
| 1 | 1.00 | 1 | 1 | 0 | 0      | 0 | 0 | 0 | t | 23919 | HGKSRIAL<br>TNSVNEAL<br>LNP  | Mus<br>musculu<br>s              |
| 1 | 1.00 | 1 | 1 | 0 | 0      | 0 | 0 | 0 | t | 11821 | EENVEHD<br>AEENVEH<br>DA     | Mus<br>musculu<br>s              |
| 1 | 1.00 | 1 | 1 | 0 | -0.003 | 0 | 0 | 0 | t | 11821 | EENVEHD<br>AEENVEH<br>DA     | Oryctola<br>gus<br>cuniculu<br>s |
| 1 | 1.00 | 1 | 1 | 0 | -0.003 | 0 | 0 | 0 | t | 35235 | LDNIKGNV<br>GKMEDIYK<br>KNNK | Oryctola<br>gus<br>cuniculu<br>s |

|   |      |   |   |   |        |   |   |   |   |       |                             |                                  |
|---|------|---|---|---|--------|---|---|---|---|-------|-----------------------------|----------------------------------|
| 1 | 1.00 | 1 | 1 | 0 | 0      | 0 | 0 | 0 | t | 34612 | KYTMFHYL<br>RAQEFEH<br>GKSR | Mus<br>musculu<br>s              |
| 1 | 1.00 | 1 | 1 | 0 | 0      | 0 | 0 | 0 | t | 19636 | GFTTNEER<br>YNVFAE          | Mus<br>musculu<br>s              |
| 1 | 1.00 | 1 | 1 | 0 | -0.007 | 0 | 0 | 0 | t | 34612 | KYTMFHYL<br>RAQEFEH<br>GKSR | Homo<br>sapiens                  |
| 1 | 1.00 | 1 | 1 | 0 | -0.002 | 0 | 0 | 0 | t | 28322 | IRIPKYKND<br>GIQNYIHN<br>EY | Mus<br>musculu<br>s              |
| 1 | 1.00 | 1 | 1 | 0 | -0.002 | 0 | 0 | 0 | t | 23919 | HGKSRIAL<br>TNSVNEAL<br>LNP | Mus<br>musculu<br>s              |
| 1 | 1.00 | 1 | 1 | 0 | 0      | 0 | 0 | 0 | t | 11821 | EENVEHD<br>AEENVEH<br>DA    | Homo<br>sapiens                  |
| 1 | 1.00 | 1 | 1 | 0 | -0.003 | 0 | 0 | 0 | t | 23919 | HGKSRIAL<br>TNSVNEAL<br>LNP | Mus<br>musculu<br>s              |
| 1 | 1.00 | 1 | 1 | 0 | 0      | 0 | 0 | 0 | t | 11821 | EENVEHD<br>AEENVEH<br>DA    | Mus<br>musculu<br>s              |
| 1 | 1.00 | 1 | 1 | 0 | 0      | 0 | 0 | 0 | t | 11821 | EENVEHD<br>AEENVEH<br>DA    | Mus<br>musculu<br>s              |
| 1 | 1.00 | 1 | 1 | 0 | 0      | 0 | 0 | 0 | t | 11652 | EEGPVDEE<br>IVQEEGTV        | Homo<br>sapiens                  |
| 1 | 1.00 | 1 | 1 | 0 | 0      | 0 | 0 | 0 | t | 30036 | KAYSNCYP<br>YDVPDY          | Oryctola<br>gus<br>cuniculu<br>s |
| 1 | 1.00 | 1 | 1 | 0 | -0.008 | 0 | 0 | 0 | t | 23919 | HGKSRIAL<br>TNSVNEAL<br>LNP | Mus<br>musculu<br>s              |

|   |      |   |   |   |        |   |   |   |   |       |                             |                                  |
|---|------|---|---|---|--------|---|---|---|---|-------|-----------------------------|----------------------------------|
| 1 | 1.00 | 1 | 1 | 0 | -0.003 | 0 | 0 | 0 | t | 26849 | IKMVSSLK<br>TKIT            | Oryctola<br>gus<br>cuniculu<br>s |
| 1 | 1.00 | 1 | 1 | 0 | -0.002 | 0 | 0 | 0 | t | 23919 | HGKSRIAL<br>TNSVNEAL<br>LNP | Mus<br>musculu<br>s              |
| 1 | 1.00 | 1 | 1 | 0 | -0.008 | 0 | 0 | 0 | t | 23919 | HGKSRIAL<br>TNSVNEAL<br>LNP | Mus<br>musculu<br>s              |
| 1 | 1.00 | 1 | 1 | 0 | 0.005  | 0 | 0 | 0 | t | 23919 | HGKSRIAL<br>TNSVNEAL<br>LNP | Gallus<br>gallus                 |
| 1 | 1.00 | 1 | 1 | 0 | 0      | 0 | 0 | 0 | t | 26849 | IKMVSSLK<br>TKIT            | Mus<br>musculu<br>s              |
| 1 | 1.00 | 1 | 1 | 0 | -0.003 | 0 | 0 | 0 | t | 29409 | IVQEEGTV<br>TEEIIQGE        | Oryctola<br>gus<br>cuniculu<br>s |
| 1 | 1.00 | 1 | 1 | 0 | -0.003 | 0 | 0 | 0 | t | 29409 | IVQEEGTV<br>TEEIIQGE        | Oryctola<br>gus<br>cuniculu<br>s |
| 1 | 1.00 | 1 | 1 | 0 | 0      | 0 | 0 | 0 | t | 29409 | IVQEEGTV<br>TEEIIQGE        | Mus<br>musculu<br>s              |
| 1 | 1.00 | 1 | 1 | 0 | 0      | 0 | 0 | 0 | t | 29409 | IVQEEGTV<br>TEEIIQGE        | Homo<br>sapiens                  |
| 1 | 1.00 | 1 | 1 | 0 | -0.007 | 0 | 0 | 0 | t | 23919 | HGKSRIAL<br>TNSVNEAL<br>LNP | Homo<br>sapiens                  |
| 1 | 1.00 | 1 | 1 | 0 | -0.003 | 0 | 0 | 0 | t | 23919 | HGKSRIAL<br>TNSVNEAL<br>LNP | Mus<br>musculu<br>s              |
| 1 | 1.00 | 1 | 1 | 0 | 0      | 0 | 0 | 0 | t | 14261 | ESRRAL                      | Homo<br>sapiens                  |
| 1 | 1.00 | 1 | 1 | 0 | 0      | 0 | 0 | 0 | t | 14261 | ESRRAL                      | Homo<br>sapiens                  |

|   |      |   |   |   |        |   |   |   |   |       |                               |                                  |
|---|------|---|---|---|--------|---|---|---|---|-------|-------------------------------|----------------------------------|
| 1 | 1.00 | 1 | 1 | 0 | -0.003 | 0 | 0 | 0 | t | 23920 | HGKVVD<br>VDRAKEA<br>AK       | Oryctola<br>gus<br>cuniculu<br>s |
| 1 | 1.00 | 1 | 1 | 0 | -0.037 | 0 | 0 | 0 | t | 13871 | EQLIEK<br>LIEDDKNSQ           | Papio<br>cynocep<br>halus        |
| 1 | 1.00 | 1 | 1 | 0 | -0.002 | 0 | 0 | 0 | t | 28105 | IPVLGT<br>FALVSYIANKV<br>LT   | Mus<br>musculu<br>s              |
| 1 | 1.00 | 1 | 1 | 0 | 0      | 0 | 0 | 0 | t | 35235 | LDNIKGNV<br>GKMEDIYIK<br>KNNK | Mus<br>musculu<br>s              |
| 1 | 1.00 | 1 | 1 | 0 | -0.003 | 0 | 0 | 0 | t | 33267 | KSAETI                        | Oryctola<br>gus<br>cuniculu<br>s |
| 1 | 1.00 | 1 | 1 | 0 | 0      | 0 | 0 | 0 | t | 17326 | FPLDIT                        | Mus<br>musculu<br>s              |
| 1 | 1.00 | 1 | 1 | 0 | -0.003 | 0 | 0 | 0 | t | 28322 | IRIPKYKND<br>GIQNYIHN<br>EY   | Mus<br>musculu<br>s              |
| 1 | 1.00 | 1 | 1 | 0 | -0.003 | 0 | 0 | 0 | t | 33267 | KSAETI                        | Oryctola<br>gus<br>cuniculu<br>s |
| 1 | 1.00 | 1 | 1 | 0 | -0.001 | 0 | 0 | 0 | t | 28322 | IRIPKYKND<br>GIQNYIHN<br>EY   | Homo<br>sapiens                  |
| 1 | 1.00 | 1 | 1 | 0 | 0      | 0 | 0 | 0 | t | 13267 | ELRYSWKT<br>WGKAKML<br>STELH  | Mus<br>musculu<br>s              |
| 1 | 1.00 | 1 | 1 | 0 | 0      | 0 | 0 | 0 | t | 15468 | FDTGAFDP<br>DWPA              | Mus<br>musculu<br>s              |
| 1 | 1.00 | 1 | 1 | 0 | -0.003 | 0 | 0 | 0 | t | 33166 | KRIRLPHIR<br>EDDQPS           | Oryctola<br>gus<br>cuniculu<br>s |
| 1 | 1.00 | 1 | 1 | 0 | -0.008 | 0 | 0 | 0 | t | 34612 | KYTMFH<br>YLRAQEF<br>EHGKSR   | Mus<br>musculu<br>s              |



|   |      |   |   |   |        |   |   |   |   |       |                             |                                  |
|---|------|---|---|---|--------|---|---|---|---|-------|-----------------------------|----------------------------------|
| 1 | 1.00 | 1 | 1 | 0 | 0      | 0 | 0 | 0 | t | 34612 | KYTMFHYL<br>RAQEFEH<br>GKSR | Mus<br>musculu<br>s              |
| 1 | 1.00 | 1 | 1 | 0 | 0      | 0 | 0 | 0 | t | 15468 | FDTGAFDP<br>DWPA            | Mus<br>musculu<br>s              |
| 1 | 1.00 | 1 | 1 | 0 | -0.003 | 0 | 0 | 0 | t | 11661 | EEGSVAQE<br>IVEEDAPA        | Oryctola<br>gus<br>cuniculu<br>s |
| 1 | 1.00 | 1 | 1 | 0 | -0.003 | 0 | 0 | 0 | t | 11661 | EEGSVAQE<br>IVEEDAPA        | Oryctola<br>gus<br>cuniculu<br>s |
| 1 | 1.00 | 1 | 1 | 0 | 0      | 0 | 0 | 0 | t | 34612 | KYTMFHYL<br>RAQEFEH<br>GKSR | Mus<br>musculu<br>s              |
| 1 | 1.00 | 1 | 1 | 0 | 0.002  | 0 | 0 | 0 | t | 17629 | FRPSQQN                     | Rattus<br>norvegic<br>us         |
| 1 | 1.00 | 1 | 1 | 0 | 0      | 0 | 0 | 0 | t | 19297 | GEIIWTLQ<br>DTQEIKQR<br>VVF | Mus<br>musculu<br>s              |
| 1 | 1.00 | 1 | 1 | 0 | -0.008 | 0 | 0 | 0 | t | 19297 | GEIIWTLQ<br>DTQEIKQR<br>VVF | Mus<br>musculu<br>s              |
| 1 | 1.00 | 1 | 1 | 0 | -0.003 | 0 | 0 | 0 | t | 30150 | KDGDTTN<br>R                | Mus<br>musculu<br>s              |
| 1 | 1.00 | 1 | 1 | 0 | 0      | 0 | 0 | 0 | t | 34612 | KYTMFHYL<br>RAQEFEH<br>GKSR | Mus<br>musculu<br>s              |
| 1 | 1.00 | 1 | 1 | 0 | -0.007 | 0 | 0 | 0 | t | 13899 | EQPTTRA<br>Q                | Oryctola<br>gus<br>cuniculu<br>s |
| 1 | 1.00 | 1 | 1 | 0 | -0.003 | 0 | 0 | 0 | t | 28353 | IRPAGFCD<br>GYCKTHL         | Mus<br>musculu<br>s              |
| 1 | 1.00 | 1 | 1 | 0 | -0.002 | 0 | 0 | 0 | t | 34612 | KYTMFHYL<br>RAQEFEH<br>GKSR | Mus<br>musculu<br>s              |

|   |      |   |   |   |        |   |   |   |   |       |                               |                                  |
|---|------|---|---|---|--------|---|---|---|---|-------|-------------------------------|----------------------------------|
| 1 | 1.00 | 1 | 1 | 0 | 0      | 0 | 0 | 0 | t | 31813 | KLEEQNKI<br>SEASRKGL<br>RR    | Mus<br>musculu<br>s              |
| 1 | 1.00 | 1 | 1 | 0 | -0.007 | 0 | 0 | 0 | t | 13900 | EQPTTRA<br>QKLFAMW<br>RI      | Oryctola<br>gus<br>cuniculu<br>s |
| 1 | 1.00 | 1 | 1 | 0 | 0      | 0 | 0 | 0 | t | 27416 | ILYAVFK                       | Mus<br>musculu<br>s              |
| 1 | 1.00 | 1 | 1 | 0 | 0      | 0 | 0 | 0 | t | 24249 | HLLRLSEI                      | Mus<br>musculu<br>s              |
| 1 | 1.00 | 1 | 1 | 0 | 0      | 0 | 0 | 0 | t | 28353 | IRPAGFCD<br>GYCKTHL           | Mus<br>musculu<br>s              |
| 1 | 1.00 | 1 | 1 | 0 | -0.002 | 0 | 0 | 0 | t | 26870 | IKPGSANK<br>PKDEL DYE<br>NDIE | Mus<br>musculu<br>s              |
| 1 | 1.00 | 1 | 1 | 0 | -0.004 | 0 | 0 | 0 | t | 26870 | IKPGSANK<br>PKDEL DYE<br>NDIE | Saimiri<br>sciureus              |
| 1 | 1.00 | 1 | 1 | 0 | -0.008 | 0 | 0 | 0 | t | 13901 | EQPTTRV<br>Q                  | Mus<br>musculu<br>s              |
| 1 | 1.00 | 1 | 1 | 0 | -0.003 | 0 | 0 | 0 | t | 26870 | IKPGSANK<br>PKDEL DYE<br>NDIE | Saimiri<br>sciureus              |
| 1 | 1.00 | 1 | 1 | 0 | -0.011 | 0 | 0 | 0 | t | 13901 | EQPTTRV<br>Q                  | Oryctola<br>gus<br>cuniculu<br>s |
| 1 | 1.00 | 1 | 1 | 0 | -0.008 | 0 | 0 | 0 | t | 11800 | EENISLDLI<br>QQYYLT FN<br>FD  | Mus<br>musculu<br>s              |
| 1 | 1.00 | 1 | 1 | 0 | -0.003 | 0 | 0 | 0 | t | 25527 | ICWNYDN<br>AYCDKLCK           | Mus<br>musculu<br>s              |
| 1 | 1.00 | 1 | 1 | 0 | 0      | 0 | 0 | 0 | t | 19297 | GEIIWTLQ<br>DTQEIKQR<br>VVF   | Mus<br>musculu<br>s              |
| 1 | 1.00 | 1 | 1 | 0 | 0      | 0 | 0 | 0 | t | 19297 | GEIIWTLQ<br>DTQEIKQR<br>VVF   | Mus<br>musculu<br>s              |

|   |      |   |   |   |        |   |   |   |   |       |                             |                                  |
|---|------|---|---|---|--------|---|---|---|---|-------|-----------------------------|----------------------------------|
| 1 | 1.00 | 1 | 1 | 0 | 0      | 0 | 0 | 0 | t | 19297 | GEIIWTLQ<br>DTQEIKQR<br>VVF | Mus<br>musculu<br>s              |
| 1 | 1.00 | 1 | 1 | 0 | -0.003 | 0 | 0 | 0 | t | 13901 | EQPTTRV<br>Q                | Oryctola<br>gus<br>cuniculu<br>s |
| 1 | 1.00 | 1 | 1 | 0 | -0.002 | 0 | 0 | 0 | t | 19297 | GEIIWTLQ<br>DTQEIKQR<br>VVF | Mus<br>musculu<br>s              |
| 1 | 1.00 | 1 | 1 | 0 | 0      | 0 | 0 | 0 | t | 30386 | KEFSEVEG<br>RIQDLEKY<br>V   | Mus<br>musculu<br>s              |
| 1 | 1.00 | 1 | 1 | 0 | 0.005  | 0 | 0 | 0 | t | 19297 | GEIIWTLQ<br>DTQEIKQR<br>VVF | Gallus<br>gallus                 |
| 1 | 1.00 | 1 | 1 | 0 | 0      | 0 | 0 | 0 | t | 15511 | FEDVNGIR<br>RP              | Mus<br>musculu<br>s              |
| 1 | 1.00 | 1 | 1 | 0 | -0.002 | 0 | 0 | 0 | t | 32595 | KNQIQLFN<br>LESSKIEVIL<br>K | Mus<br>musculu<br>s              |
| 1 | 1.00 | 1 | 1 | 0 | 0      | 0 | 0 | 0 | t | 19297 | GEIIWTLQ<br>DTQEIKQR<br>VVF | Mus<br>musculu<br>s              |
| 1 | 1.00 | 1 | 1 | 0 | -0.003 | 0 | 0 | 0 | t | 19297 | GEIIWTLQ<br>DTQEIKQR<br>VVF | Mus<br>musculu<br>s              |
| 1 | 1.00 | 1 | 1 | 0 | -0.002 | 0 | 0 | 0 | t | 19297 | GEIIWTLQ<br>DTQEIKQR<br>VVF | Mus<br>musculu<br>s              |
| 1 | 1.00 | 1 | 1 | 0 | 0      | 0 | 0 | 0 | t | 19297 | GEIIWTLQ<br>DTQEIKQR<br>VVF | Mus<br>musculu<br>s              |
| 1 | 1.00 | 1 | 1 | 0 | 0      | 0 | 0 | 0 | t | 20451 | GISYYEVL<br>AKYKDDLE        | Mus<br>musculu<br>s              |
| 1 | 1.00 | 1 | 1 | 0 | -0.003 | 0 | 0 | 0 | t | 27395 | ILVEGSVTE<br>EVVGEEK        | Oryctola<br>gus<br>cuniculu<br>s |

|   |      |   |   |   |        |   |   |   |   |       |                               |                                  |
|---|------|---|---|---|--------|---|---|---|---|-------|-------------------------------|----------------------------------|
| 1 | 1.00 | 1 | 1 | 0 | -0.003 | 0 | 0 | 0 | t | 20451 | GISYYEKVL<br>AKYKDDLE         | Oryctola<br>gus<br>cuniculu<br>s |
| 1 | 1.00 | 1 | 1 | 0 | -0.003 | 0 | 0 | 0 | t | 20451 | GISYYEKVL<br>AKYKDDLE         | Oryctola<br>gus<br>cuniculu<br>s |
| 1 | 1.00 | 1 | 1 | 0 | 0.003  | 0 | 0 | 0 | t | 12375 | EHWSYGL<br>RPG                | Mus<br>musculu<br>s              |
| 1 | 1.00 | 1 | 1 | 0 | 0      | 0 | 0 | 0 | t | 35235 | LDNIKGNV<br>GKMEDIYIK<br>KNNK | Mus<br>musculu<br>s              |
| 1 | 1.00 | 1 | 1 | 0 | -0.002 | 0 | 0 | 0 | t | 11800 | EENISLDLI<br>QQYYLTFFN<br>FD  | Mus<br>musculu<br>s              |
| 1 | 1.00 | 1 | 1 | 0 | 0      | 0 | 0 | 0 | t | 35235 | LDNIKGNV<br>GKMEDIYIK<br>KNNK | Mus<br>musculu<br>s              |
| 1 | 1.00 | 1 | 1 | 0 | -0.007 | 0 | 0 | 0 | t | 10975 | DYVKKVN<br>KATEAAM<br>FLGWV   | Homo<br>sapiens                  |
| 1 | 1.00 | 1 | 1 | 0 | 0      | 0 | 0 | 0 | t | 34612 | KYTMFHYL<br>RAQFEFH<br>GKSR   | Mus<br>musculu<br>s              |
| 1 | 1.00 | 1 | 1 | 0 | -0.001 | 0 | 0 | 0 | t | 11800 | EENISLDLI<br>QQYYLTFFN<br>FD  | Homo<br>sapiens                  |
| 1 | 1.00 | 1 | 1 | 0 | 0      | 0 | 0 | 0 | t | 21254 | GMDGTQL<br>DRW                | Mus<br>musculu<br>s              |
| 1 | 1.00 | 1 | 1 | 0 | 0.004  | 0 | 0 | 0 | t | 25807 | IEFQQKNN<br>RLLEITREF         | Mus<br>musculu<br>s              |
| 1 | 1.00 | 1 | 1 | 0 | 0      | 0 | 0 | 0 | t | 21254 | GMDGTQL<br>DRW                | Mus<br>musculu<br>s              |
| 1 | 1.00 | 1 | 1 | 0 | 0      | 0 | 0 | 0 | t | 21254 | GMDGTQL<br>DRW                | Mus<br>musculu<br>s              |
| 1 | 1.00 | 1 | 1 | 0 | -0.003 | 0 | 0 | 0 | t | 25527 | ICWNYDN<br>AYCDKLCK           | Oryctola<br>gus<br>cuniculu<br>s |

|   |      |   |   |   |        |   |   |   |   |       |                              |                                  |
|---|------|---|---|---|--------|---|---|---|---|-------|------------------------------|----------------------------------|
| 1 | 1.00 | 1 | 1 | 0 | 0      | 0 | 0 | 0 | t | 35235 | LDNIKGNV<br>GKMEDYIK<br>KNNK | Mus<br>musculu<br>s              |
| 1 | 1.00 | 1 | 1 | 0 | 0      | 0 | 0 | 0 | t | 10902 | DYINRWIF<br>VTITNNRL<br>NNS  | Mus<br>musculu<br>s              |
| 1 | 1.00 | 1 | 1 | 0 | 0      | 0 | 0 | 0 | t | 11819 | EENVEHD<br>A                 | Mus<br>musculu<br>s              |
| 1 | 1.00 | 1 | 1 | 0 | 0      | 0 | 0 | 0 | t | 11819 | EENVEHD<br>A                 | Mus<br>musculu<br>s              |
| 1 | 1.00 | 1 | 1 | 0 | -0.003 | 0 | 0 | 0 | t | 35235 | LDNIKGNV<br>GKMEDYIK<br>KNNK | Oryctola<br>gus<br>cuniculu<br>s |
| 1 | 1.00 | 1 | 1 | 0 | -0.002 | 0 | 0 | 0 | t | 19318 | GEKFIIRRK<br>SNSQSIND<br>DI  | Mus<br>musculu<br>s              |
| 1 | 1.00 | 1 | 1 | 0 | -0.003 | 0 | 0 | 0 | t | 28676 | ISQAVHAA<br>HAEINEAG<br>R    | Oryctola<br>gus<br>cuniculu<br>s |
| 1 | 1.00 | 1 | 1 | 0 | 0      | 0 | 0 | 0 | t | 11819 | EENVEHD<br>A                 | Mus<br>musculu<br>s              |
| 1 | 1.00 | 1 | 1 | 0 | 0      | 0 | 0 | 0 | t | 31069 | KGTFDPLQ<br>EPRT             | Mus<br>musculu<br>s              |
| 1 | 1.00 | 1 | 1 | 0 | 0      | 0 | 0 | 0 | t | 35235 | LDNIKGNV<br>GKMEDYIK<br>KNNK | Mus<br>musculu<br>s              |
| 1 | 1.00 | 1 | 1 | 0 | 0      | 0 | 0 | 0 | t | 25093 | HVSPRHYV<br>PESEPAAR<br>VTQI | Homo<br>sapiens                  |
| 1 | 1.00 | 1 | 1 | 0 | -0.006 | 0 | 0 | 0 | t | 25527 | ICWNYDN<br>AYCDKLCK          | Oryctola<br>gus<br>cuniculu<br>s |
| 1 | 1.00 | 1 | 1 | 0 | 0      | 0 | 0 | 0 | t | 35235 | LDNIKGNV<br>GKMEDYIK<br>KNNK | Mus<br>musculu<br>s              |

|   |      |   |   |   |        |   |   |   |   |       |                              |                                  |
|---|------|---|---|---|--------|---|---|---|---|-------|------------------------------|----------------------------------|
| 1 | 1.00 | 1 | 1 | 0 | 0      | 0 | 0 | 0 | t | 11819 | EENVEHD<br>A                 | Mus<br>musculu<br>s              |
| 1 | 1.00 | 1 | 1 | 0 | 0      | 0 | 0 | 0 | t | 19533 | GFGLKVV<br>EVRREKEE<br>LKRDK | Mus<br>musculu<br>s              |
| 1 | 1.00 | 1 | 1 | 0 | 0      | 0 | 0 | 0 | t | 19533 | GFGLKVV<br>EVRREKEE<br>LKRDK | Mus<br>musculu<br>s              |
| 1 | 1.00 | 1 | 1 | 0 | 0      | 0 | 0 | 0 | t | 11819 | EENVEHD<br>A                 | Mus<br>musculu<br>s              |
| 1 | 1.00 | 1 | 1 | 0 | -0.004 | 0 | 0 | 0 | t | 10436 | DTNSVYEP<br>YYHSDHAE<br>SSWV | Mus<br>musculu<br>s              |
| 1 | 1.00 | 1 | 1 | 0 | 0      | 0 | 0 | 0 | t | 35235 | LDNIKGNV<br>GKMEDIYK<br>KNNK | Mus<br>musculu<br>s              |
| 1 | 1.00 | 1 | 1 | 0 | -0.003 | 0 | 0 | 0 | t | 25527 | ICWNYDN<br>AYCDKLCK          | Oryctola<br>gus<br>cuniculu<br>s |
| 1 | 1.00 | 1 | 1 | 0 | 0      | 0 | 0 | 0 | t | 11819 | EENVEHD<br>A                 | Oryctola<br>gus<br>cuniculu<br>s |
| 1 | 1.00 | 1 | 1 | 0 | -0.003 | 0 | 0 | 0 | t | 30062 | KCKNDGW<br>AGYWR             | Oryctola<br>gus<br>cuniculu<br>s |
| 1 | 1.00 | 1 | 1 | 0 | 0      | 0 | 0 | 0 | t | 11819 | EENVEHD<br>A                 | Homo<br>sapiens                  |
| 1 | 1.00 | 1 | 1 | 0 | 0      | 0 | 0 | 0 | t | 11819 | EENVEHD<br>A                 | Oryctola<br>gus<br>cuniculu<br>s |
| 1 | 1.00 | 1 | 1 | 0 | 0      | 0 | 0 | 0 | t | 11819 | EENVEHD<br>A                 | Mus<br>musculu<br>s              |
| 1 | 1.00 | 1 | 1 | 0 | -0.003 | 0 | 0 | 0 | t | 11800 | EENISLDLI<br>QQYYLTFN<br>FD  | Mus<br>musculu<br>s              |

|   |      |   |   |   |        |   |   |   |   |       |                              |                          |
|---|------|---|---|---|--------|---|---|---|---|-------|------------------------------|--------------------------|
| 1 | 1.00 | 1 | 1 | 0 | 0.002  | 0 | 0 | 0 | t | 26909 | IKSTIRIYFK<br>PKHVK          | Rattus<br>norvegicus     |
| 1 | 1.00 | 1 | 1 | 0 | 0      | 0 | 0 | 0 | t | 35235 | LDNIKGNV<br>GKMEDIYK<br>KNNK | Mus<br>musculus          |
| 1 | 1.00 | 1 | 1 | 0 | 0      | 0 | 0 | 0 | t | 30504 | KELLDKTS<br>RTGDEVR<br>ALAND | Mus<br>musculus          |
| 1 | 1.00 | 1 | 1 | 0 | 0      | 0 | 0 | 0 | t | 35235 | LDNIKGNV<br>GKMEDIYK<br>KNNK | Mus<br>musculus          |
| 1 | 1.00 | 1 | 1 | 0 | -0.003 | 0 | 0 | 0 | t | 25527 | ICWNYDN<br>AYCDKLCK          | Mus<br>musculus          |
| 1 | 1.00 | 1 | 1 | 0 | -0.003 | 0 | 0 | 0 | t | 23975 | HHAEMQ<br>NPVYLIPET<br>VPYIK | Oryctolagus<br>cuniculus |
| 1 | 1.00 | 1 | 1 | 0 | 0.005  | 0 | 0 | 0 | t | 34612 | KYTMFHYL<br>RAQFEH<br>GKSR   | Gallus<br>gallus         |
| 1 | 1.00 | 1 | 1 | 0 | 0      | 0 | 0 | 0 | t | 35235 | LDNIKGNV<br>GKMEDIYK<br>KNNK | Mus<br>musculus          |
| 1 | 1.00 | 1 | 1 | 0 | -0.003 | 0 | 0 | 0 | t | 23975 | HHAEMQ<br>NPVYLIPET<br>VPYIK | Oryctolagus<br>cuniculus |
| 1 | 1.00 | 1 | 1 | 0 | 0      | 0 | 0 | 0 | t | 35235 | LDNIKGNV<br>GKMEDIYK<br>KNNK | Mus<br>musculus          |
| 1 | 1.00 | 1 | 1 | 0 | -0.003 | 0 | 0 | 0 | t | 35235 | LDNIKGNV<br>GKMEDIYK<br>KNNK | Oryctolagus<br>cuniculus |
| 1 | 1.00 | 1 | 1 | 0 | -0.003 | 0 | 0 | 0 | t | 13913 | EQQSDLE<br>QERLAKEK<br>LQ    | Oryctolagus<br>cuniculus |
| 1 | 1.00 | 1 | 1 | 0 | -0.002 | 0 | 0 | 0 | t | 32886 | KPSTGAG                      | Mus<br>musculus          |

|   |      |   |   |   |        |   |   |   |   |       |                               |                                  |
|---|------|---|---|---|--------|---|---|---|---|-------|-------------------------------|----------------------------------|
| 1 | 1.00 | 1 | 1 | 0 | 0      | 0 | 0 | 0 | t | 31451 | KITQTQKD<br>SKNTTVIV<br>REIV  | Mus<br>musculu<br>s              |
| 1 | 1.00 | 1 | 1 | 0 | 0      | 0 | 0 | 0 | t | 30419 | KEGYAMD<br>HEGCKFSC           | Equus<br>caballus                |
| 1 | 1.00 | 1 | 1 | 0 | 0      | 0 | 0 | 0 | t | 11723 | EEKKVPINL<br>WLDGKQN<br>TVPL  | Oryctola<br>gus<br>cuniculu<br>s |
| 1 | 1.00 | 1 | 1 | 0 | 0      | 0 | 0 | 0 | t | 35235 | LDNIKGNV<br>GKMEDIYIK<br>KNNK | Mus<br>musculu<br>s              |
| 1 | 1.00 | 1 | 1 | 0 | 0      | 0 | 0 | 0 | t | 31451 | KITQTQKD<br>SKNTTVIV<br>REIV  | Mus<br>musculu<br>s              |
| 1 | 1.00 | 1 | 1 | 0 | 0      | 0 | 0 | 0 | t | 31451 | KITQTQKD<br>SKNTTVIV<br>REIV  | Mus<br>musculu<br>s              |
| 1 | 1.00 | 1 | 1 | 0 | 0      | 0 | 0 | 0 | t | 35235 | LDNIKGNV<br>GKMEDIYIK<br>KNNK | Mus<br>musculu<br>s              |
| 1 | 1.00 | 1 | 1 | 0 | 0.001  | 0 | 0 | 0 | t | 17642 | FRRYQEER                      | Mus<br>musculu<br>s              |
| 1 | 1.00 | 1 | 1 | 0 | -0.001 | 0 | 0 | 0 | t | 7097  | CSVSYLMK<br>KMIPLAVE<br>KLL   | Homo<br>sapiens                  |
| 1 | 1.00 | 1 | 1 | 0 | -0.002 | 0 | 0 | 0 | t | 9694  | DPNANPN<br>VDPNANP<br>NV      | Mus<br>musculu<br>s              |
| 1 | 1.00 | 1 | 1 | 0 | -0.003 | 0 | 0 | 0 | t | 8448  | DGNCEDIP<br>HVNEFSAI<br>DL    | Oryctola<br>gus<br>cuniculu<br>s |
| 1 | 1.00 | 1 | 1 | 0 | -0.003 | 0 | 0 | 0 | t | 9516  | DNNLVSG<br>P                  | Oryctola<br>gus<br>cuniculu<br>s |
| 1 | 1.00 | 1 | 1 | 0 | -0.003 | 0 | 0 | 0 | t | 8448  | DGNCEDIP<br>HVNEFSAI<br>DL    | Oryctola<br>gus<br>cuniculu<br>s |



|   |      |   |   |   |   |   |   |   |   |      |                              |                     |
|---|------|---|---|---|---|---|---|---|---|------|------------------------------|---------------------|
| 1 | 1.00 | 1 | 1 | 0 | 0 | 0 | 0 | 0 | t | 9516 | DNNLVSG<br>P                 | Mus<br>musculu<br>s |
| 1 | 1.00 | 1 | 1 | 0 | 0 | 0 | 0 | 0 | t | 8448 | DGNCEDIP<br>HVNEFSAI<br>DL   | Mus<br>musculu<br>s |
| 1 | 1.00 | 1 | 1 | 0 | 0 | 0 | 0 | 0 | t | 3221 | ANAANEAA<br>DYQAKLTA<br>YQTE | Mus<br>musculu<br>s |
| 1 | 1.00 | 1 | 1 | 0 | 0 | 0 | 0 | 0 | t | 9216 | DLNF                         | Mus<br>musculu<br>s |
| 1 | 1.00 | 1 | 1 | 0 | 0 | 0 | 0 | 0 | t | 3236 | ANCASILC<br>KCYTTGT          | Mus<br>musculu<br>s |
| 1 | 1.00 | 1 | 1 | 0 | 0 | 0 | 0 | 0 | t | 8448 | DGNCEDIP<br>HVNEFSAI<br>DL   | Homo<br>sapiens     |
| 1 | 1.00 | 1 | 1 | 0 | 0 | 0 | 0 | 0 | t | 9755 | DPRVRGLY<br>FPA              | Mus<br>musculu<br>s |
| 1 | 1.00 | 1 | 1 | 0 | 0 | 0 | 0 | 0 | t | 3221 | ANAANEAA<br>DYQAKLTA<br>YQTE | Mus<br>musculu<br>s |
| 1 | 1.00 | 1 | 1 | 0 | 0 | 0 | 0 | 0 | t | 3236 | ANCASILC<br>KCYTTGT          | Mus<br>musculu<br>s |
| 1 | 1.00 | 1 | 1 | 0 | 0 | 0 | 0 | 0 | t | 4331 | ASARGDLA<br>HLTTTHAR<br>HLP  | Mus<br>musculu<br>s |
| 1 | 1.00 | 1 | 1 | 0 | 0 | 0 | 0 | 0 | t | 9723 | DPPPPNP<br>NDPPPPNP<br>PND   | Mus<br>musculu<br>s |
| 1 | 1.00 | 1 | 1 | 0 | 0 | 0 | 0 | 0 | t | 895  | AEEVKATP<br>AGELQVID<br>KVDA | Mus<br>musculu<br>s |
| 1 | 1.00 | 1 | 1 | 0 | 0 | 0 | 0 | 0 | t | 9694 | DPNANPN<br>VDPNANPN<br>NV    | Mus<br>musculu<br>s |
| 1 | 1.00 | 1 | 1 | 0 | 0 | 0 | 0 | 0 | t | 3236 | ANCASILC<br>KCYTTGT          | Mus<br>musculu<br>s |

|   |      |   |   |   |        |   |   |   |   |      |                              |                                  |
|---|------|---|---|---|--------|---|---|---|---|------|------------------------------|----------------------------------|
| 1 | 1.00 | 1 | 1 | 0 | 0      | 0 | 0 | 0 | t | 9694 | DPNANPN<br>VDPNANP<br>NV     | Mus<br>musculu<br>s              |
| 1 | 1.00 | 1 | 1 | 0 | 0.002  | 0 | 0 | 0 | t | 279  | AALGDSLY<br>GAASLNDF<br>GILA | Rattus<br>norvegic<br>us         |
| 1 | 1.00 | 1 | 1 | 0 | 0      | 0 | 0 | 0 | t | 9723 | DPPPPNP<br>NDPPPPN<br>PND    | Mus<br>musculu<br>s              |
| 1 | 1.00 | 1 | 1 | 0 | 0      | 0 | 0 | 0 | t | 7394 | CYKKVWA<br>DHRGTI            | Mus<br>musculu<br>s              |
| 1 | 1.00 | 1 | 1 | 0 | 0      | 0 | 0 | 0 | t | 9694 | DPNANPN<br>VDPNANP<br>NV     | Mus<br>musculu<br>s              |
| 1 | 1.00 | 1 | 1 | 0 | 0      | 0 | 0 | 0 | t | 3245 | ANDVDNS<br>NPVVQAE<br>QLNWL  | Rattus<br>norvegic<br>us         |
| 1 | 1.00 | 1 | 1 | 0 | 0      | 0 | 0 | 0 | t | 4331 | ASARGDLA<br>HLTTTHAR<br>HLP  | Mus<br>musculu<br>s              |
| 1 | 1.00 | 1 | 1 | 0 | 0      | 0 | 0 | 0 | t | 3221 | ANAANEAE<br>DYQAKLTA<br>YQTE | Mus<br>musculu<br>s              |
| 1 | 1.00 | 1 | 1 | 0 | 0      | 0 | 0 | 0 | t | 3619 | APKKAVKK<br>AVKAACK<br>AVKKA | Homo<br>sapiens                  |
| 1 | 1.00 | 1 | 1 | 0 | 0      | 0 | 0 | 0 | t | 4740 | ASREAKKQ<br>VEKALE           | Mus<br>musculu<br>s              |
| 1 | 1.00 | 1 | 1 | 0 | 0      | 0 | 0 | 0 | t | 4528 | ASLKDALL<br>KYIYDNRG<br>TLI  | Mus<br>musculu<br>s              |
| 1 | 1.00 | 1 | 1 | 0 | 0      | 0 | 0 | 0 | t | 7812 | DDKLRME<br>TCFQQAC<br>K      | Mus<br>musculu<br>s              |
| 1 | 1.00 | 1 | 1 | 0 | 0      | 0 | 0 | 0 | t | 4397 | ASFEAQG<br>ALANIAVD<br>KA    | Mus<br>musculu<br>s              |
| 1 | 1.00 | 1 | 1 | 0 | -0.003 | 0 | 0 | 0 | t | 8439 | DGLRAQD<br>DYNGWDI<br>NTPAF  | Oryctola<br>gus<br>cuniculu<br>s |

|   |      |   |   |   |        |   |   |   |   |      |                              |                                  |
|---|------|---|---|---|--------|---|---|---|---|------|------------------------------|----------------------------------|
| 1 | 1.00 | 1 | 1 | 0 | -0.003 | 0 | 0 | 0 | t | 1402 | AFSVAAPV<br>TVTR             | Oryctola<br>gus<br>cuniculu<br>s |
| 1 | 1.00 | 1 | 1 | 0 | 0      | 0 | 0 | 0 | t | 9694 | DPNANPN<br>VDPNANP<br>NV     | Mus<br>musculu<br>s              |
| 1 | 1.00 | 1 | 1 | 0 | -0.003 | 0 | 0 | 0 | t | 7381 | CYGVDPHI<br>KVWDYAT          | Mus<br>musculu<br>s              |
| 1 | 1.00 | 1 | 1 | 0 | 0      | 0 | 0 | 0 | t | 7381 | CYGVDPHI<br>KVWDYAT          | Mus<br>musculu<br>s              |
| 1 | 1.00 | 1 | 1 | 0 | -0.003 | 0 | 0 | 0 | t | 9106 | DLGSIA                       | Oryctola<br>gus<br>cuniculu<br>s |
| 1 | 1.00 | 1 | 1 | 0 | -0.003 | 0 | 0 | 0 | t | 5683 | AWPACYC<br>YGLPDSVK          | Oryctola<br>gus<br>cuniculu<br>s |
| 1 | 1.00 | 1 | 1 | 0 | 0      | 0 | 0 | 0 | t | 9694 | DPNANPN<br>VDPNANP<br>NV     | Mus<br>musculu<br>s              |
| 1 | 1.00 | 1 | 1 | 0 | 0      | 0 | 0 | 0 | t | 9694 | DPNANPN<br>VDPNANP<br>NV     | Mus<br>musculu<br>s              |
| 1 | 1.00 | 1 | 1 | 0 | -0.003 | 0 | 0 | 0 | t | 2053 | AIPTNFSISI<br>TTEVMPV        | Oryctola<br>gus<br>cuniculu<br>s |
| 1 | 1.00 | 1 | 1 | 0 | 0      | 0 | 0 | 0 | t | 9694 | DPNANPN<br>VDPNANP<br>NV     | Mus<br>musculu<br>s              |
| 1 | 1.00 | 1 | 1 | 0 | -0.003 | 0 | 0 | 0 | t | 8355 | DGAVQPD<br>GG                | Oryctola<br>gus<br>cuniculu<br>s |
| 1 | 1.00 | 1 | 1 | 0 | 0      | 0 | 0 | 0 | t | 895  | AEEVKATP<br>AGELQVID<br>KVDA | Mus<br>musculu<br>s              |
| 1 | 1.00 | 1 | 1 | 0 | 0      | 0 | 0 | 0 | t | 9516 | DNNLVSG<br>P                 | Mus<br>musculu<br>s              |

|   |      |   |   |   |        |   |   |   |   |      |                            |                                  |
|---|------|---|---|---|--------|---|---|---|---|------|----------------------------|----------------------------------|
| 1 | 1.00 | 1 | 1 | 0 | 0      | 0 | 0 | 0 | t | 7100 | CSVTCGVG<br>VRVRSRV<br>NA  | Saimiri<br>sciureus              |
| 1 | 1.00 | 1 | 1 | 0 | -0.007 | 0 | 0 | 0 | t | 8356 | DGAVQPD<br>GGQPAVR<br>NERA | Oryctola<br>gus<br>cuniculu<br>s |
| 1 | 1.00 | 1 | 1 | 0 | 0      | 0 | 0 | 0 | t | 7491 | DAEFRHDS<br>GYEVHHQ<br>K   | Mus<br>musculu<br>s              |
| 1 | 1.00 | 1 | 1 | 0 | 0      | 0 | 0 | 0 | t | 7491 | DAEFRHDS<br>GYEVHHQ<br>K   | Mus<br>musculu<br>s              |
| 1 | 1.00 | 1 | 1 | 0 | -0.007 | 0 | 0 | 0 | t | 8356 | DGAVQPD<br>GGQPAVR<br>NERA | Oryctola<br>gus<br>cuniculu<br>s |
| 1 | 1.00 | 1 | 1 | 0 | 0      | 0 | 0 | 0 | t | 7491 | DAEFRHDS<br>GYEVHHQ<br>K   | Mus<br>musculu<br>s              |
| 1 | 1.00 | 1 | 1 | 0 | 0      | 0 | 0 | 0 | t | 9516 | DNNLVSG<br>P               | Mus<br>musculu<br>s              |
| 1 | 1.00 | 1 | 1 | 0 | 0      | 0 | 0 | 0 | t | 7491 | DAEFRHDS<br>GYEVHHQ<br>K   | Mus<br>musculu<br>s              |
| 1 | 1.00 | 1 | 1 | 0 | -0.006 | 0 | 0 | 0 | t | 7375 | CYGLPDSV<br>KIWTSET        | Oryctola<br>gus<br>cuniculu<br>s |
| 1 | 1.00 | 1 | 1 | 0 | 0.006  | 0 | 0 | 0 | t | 7375 | CYGLPDSV<br>KIWTSET        | Ovis<br>aries                    |
| 1 | 1.00 | 1 | 1 | 0 | -0.003 | 0 | 0 | 0 | t | 7375 | CYGLPDSV<br>KIWTSET        | Oryctola<br>gus<br>cuniculu<br>s |
| 1 | 1.00 | 1 | 1 | 0 | 0.001  | 0 | 0 | 0 | t | 7375 | CYGLPDSV<br>KIWTSET        | Ovis<br>aries                    |
| 1 | 1.00 | 1 | 1 | 0 | 0      | 0 | 0 | 0 | t | 7374 | CYGLPDSE<br>PTKTNGK        | Mus<br>musculu<br>s              |
| 1 | 1.00 | 1 | 1 | 0 | -0.003 | 0 | 0 | 0 | t | 7374 | CYGLPDSE<br>PTKTNGK        | Mus<br>musculu<br>s              |

|   |      |   |   |   |        |   |   |   |   |      |                              |                     |
|---|------|---|---|---|--------|---|---|---|---|------|------------------------------|---------------------|
| 1 | 1.00 | 1 | 1 | 0 | -0.003 | 0 | 0 | 0 | t | 7374 | CYGLPDSE<br>PTKTNGK          | Mus<br>musculu<br>s |
| 1 | 1.00 | 1 | 1 | 0 | 0      | 0 | 0 | 0 | t | 9694 | DPNANPN<br>VDPNANP<br>NV     | Mus<br>musculu<br>s |
| 1 | 1.00 | 1 | 1 | 0 | 0      | 0 | 0 | 0 | t | 7491 | DAEFRHDS<br>GYEVHHQ<br>K     | Mus<br>musculu<br>s |
| 1 | 1.00 | 1 | 1 | 0 | 0      | 0 | 0 | 0 | t | 9694 | DPNANPN<br>VDPNANP<br>NV     | Mus<br>musculu<br>s |
| 1 | 1.00 | 1 | 1 | 0 | 0      | 0 | 0 | 0 | t | 9694 | DPNANPN<br>VDPNANP<br>NV     | Mus<br>musculu<br>s |
| 1 | 1.00 | 1 | 1 | 0 | -0.002 | 0 | 0 | 0 | t | 9694 | DPNANPN<br>VDPNANP<br>NV     | Mus<br>musculu<br>s |
| 1 | 1.00 | 1 | 1 | 0 | 0      | 0 | 0 | 0 | t | 6139 | CDSSDRPR<br>VYTIT            | Mus<br>musculu<br>s |
| 1 | 1.00 | 1 | 1 | 0 | 0      | 0 | 0 | 0 | t | 7491 | DAEFRHDS<br>GYEVHHQ<br>K     | Mus<br>musculu<br>s |
| 1 | 1.00 | 1 | 1 | 0 | -0.008 | 0 | 0 | 0 | t | 2772 | ALNDLCIK<br>VNNWDLF<br>FSPS  | Mus<br>musculu<br>s |
| 1 | 1.00 | 1 | 1 | 0 | 0      | 0 | 0 | 0 | t | 7491 | DAEFRHDS<br>GYEVHHQ<br>K     | Mus<br>musculu<br>s |
| 1 | 1.00 | 1 | 1 | 0 | 0      | 0 | 0 | 0 | t | 9754 | DPRVRGLY<br>F                | Mus<br>musculu<br>s |
| 1 | 1.00 | 1 | 1 | 0 | -0.008 | 0 | 0 | 0 | t | 6139 | CDSSDRPR<br>VYTIT            | Mus<br>musculu<br>s |
| 1 | 1.00 | 1 | 1 | 0 | 0      | 0 | 0 | 0 | t | 9944 | DRADGQP<br>AGDRADG<br>QPAGDR | Mus<br>musculu<br>s |
| 1 | 1.00 | 1 | 1 | 0 | 0      | 0 | 0 | 0 | t | 9944 | DRADGQP<br>AGDRADG<br>QPAGDR | Mus<br>musculu<br>s |
| 1 | 1.00 | 1 | 1 | 0 | -0.002 | 0 | 0 | 0 | t | 2772 | ALNDLCIK<br>VNNWDLF<br>FSPS  | Mus<br>musculu<br>s |

|   |      |   |   |   |        |   |   |   |   |      |                              |                     |
|---|------|---|---|---|--------|---|---|---|---|------|------------------------------|---------------------|
| 1 | 1.00 | 1 | 1 | 0 | 0      | 0 | 0 | 0 | t | 2772 | ALNDLCIK<br>VNNWDLF<br>FSPS  | Mus<br>musculu<br>s |
| 1 | 1.00 | 1 | 1 | 0 | -0.008 | 0 | 0 | 0 | t | 2772 | ALNDLCIK<br>VNNWDLF<br>FSPS  | Mus<br>musculu<br>s |
| 1 | 1.00 | 1 | 1 | 0 | -0.003 | 0 | 0 | 0 | t | 5683 | AWPACYC<br>YGLPDSVK          | Mus<br>musculu<br>s |
| 1 | 1.00 | 1 | 1 | 0 | 0      | 0 | 0 | 0 | t | 7491 | DAEFRHDS<br>GYEVHHQ<br>K     | Mus<br>musculu<br>s |
| 1 | 1.00 | 1 | 1 | 0 | 0      | 0 | 0 | 0 | t | 7491 | DAEFRHDS<br>GYEVHHQ<br>K     | Mus<br>musculu<br>s |
| 1 | 1.00 | 1 | 1 | 0 | 0      | 0 | 0 | 0 | t | 7491 | DAEFRHDS<br>GYEVHHQ<br>K     | Mus<br>musculu<br>s |
| 1 | 1.00 | 1 | 1 | 0 | 0.001  | 0 | 0 | 0 | t | 5683 | AWPACYC<br>YGLPDSVK          | Ovis<br>aries       |
| 1 | 1.00 | 1 | 1 | 0 | 0.005  | 0 | 0 | 0 | t | 9863 | DQKPISNL<br>GNIHASN<br>NIMF  | Gallus<br>gallus    |
| 1 | 1.00 | 1 | 1 | 0 | 0      | 0 | 0 | 0 | t | 895  | AEEVKATP<br>AGELQVID<br>KVDA | Mus<br>musculu<br>s |
| 1 | 1.00 | 1 | 1 | 0 | 0      | 0 | 0 | 0 | t | 895  | AEEVKATP<br>AGELQVID<br>KVDA | Mus<br>musculu<br>s |
| 1 | 1.00 | 1 | 1 | 0 | -0.008 | 0 | 0 | 0 | t | 9863 | DQKPISNL<br>GNIHASN<br>NIMF  | Mus<br>musculu<br>s |
| 1 | 1.00 | 1 | 1 | 0 | 0      | 0 | 0 | 0 | t | 7491 | DAEFRHDS<br>GYEVHHQ<br>K     | Mus<br>musculu<br>s |
| 1 | 1.00 | 1 | 1 | 0 | 0      | 0 | 0 | 0 | t | 7491 | DAEFRHDS<br>GYEVHHQ<br>K     | Mus<br>musculu<br>s |
| 1 | 1.00 | 1 | 1 | 0 | 0      | 0 | 0 | 0 | t | 2772 | ALNDLCIK<br>VNNWDLF<br>FSPS  | Mus<br>musculu<br>s |
| 1 | 1.00 | 1 | 1 | 0 | 0      | 0 | 0 | 0 | t | 4528 | ASLKDALL<br>KYIYDNRG<br>TLI  | Mus<br>musculu<br>s |

|   |      |   |   |   |        |   |   |   |   |      |                              |                                  |
|---|------|---|---|---|--------|---|---|---|---|------|------------------------------|----------------------------------|
| 1 | 1.00 | 1 | 1 | 0 | 0      | 0 | 0 | 0 | t | 7491 | DAEFRHDS<br>GYEVHHQ<br>K     | Mus<br>musculu<br>s              |
| 1 | 1.00 | 1 | 1 | 0 | -0.003 | 0 | 0 | 0 | t | 9863 | DQKPISNL<br>GNIHASN<br>NIMF  | Mus<br>musculu<br>s              |
| 1 | 1.00 | 1 | 1 | 0 | 0      | 0 | 0 | 0 | t | 7491 | DAEFRHDS<br>GYEVHHQ<br>K     | Mus<br>musculu<br>s              |
| 1 | 1.00 | 1 | 1 | 0 | -0.003 | 0 | 0 | 0 | t | 7064 | CSQNPLAE<br>LKCSVKSE         | Oryctola<br>gus<br>cuniculu<br>s |
| 1 | 1.00 | 1 | 1 | 0 | 0      | 0 | 0 | 0 | t | 895  | AEEVKATP<br>AGELQVID<br>KVDA | Mus<br>musculu<br>s              |
| 1 | 1.00 | 1 | 1 | 0 | 0      | 0 | 0 | 0 | t | 895  | AEEVKATP<br>AGELQVID<br>KVDA | Mus<br>musculu<br>s              |
| 1 | 1.00 | 1 | 1 | 0 | -0.002 | 0 | 0 | 0 | t | 2772 | ALNDLCIK<br>VNNWDLF<br>FSPS  | Mus<br>musculu<br>s              |
| 1 | 1.00 | 1 | 1 | 0 | 0      | 0 | 0 | 0 | t | 895  | AEEVKATP<br>AGELQVID<br>KVDA | Mus<br>musculu<br>s              |
| 1 | 1.00 | 1 | 1 | 0 | -0.003 | 0 | 0 | 0 | t | 7348 | CYCYGLPD<br>SVKIWTS          | Oryctola<br>gus<br>cuniculu<br>s |
| 1 | 1.00 | 1 | 1 | 0 | -0.003 | 0 | 0 | 0 | t | 7348 | CYCYGLPD<br>SVKIWTS          | Mus<br>musculu<br>s              |
| 1 | 1.00 | 1 | 1 | 0 | 0.004  | 0 | 0 | 0 | t | 7348 | CYCYGLPD<br>SVKIWTS          | Ovis<br>aries                    |
| 1 | 1.00 | 1 | 1 | 0 | 0.006  | 0 | 0 | 0 | t | 7348 | CYCYGLPD<br>SVKIWTS          | Ovis<br>aries                    |
| 1 | 1.00 | 1 | 1 | 0 | -0.006 | 0 | 0 | 0 | t | 7348 | CYCYGLPD<br>SVKIWTS          | Oryctola<br>gus<br>cuniculu<br>s |
| 1 | 1.00 | 1 | 1 | 0 | -0.003 | 0 | 0 | 0 | t | 7347 | CYCYGLPD<br>SEPTKTN          | Mus<br>musculu<br>s              |

|   |      |   |   |   |        |   |   |   |   |      |                              |                                  |
|---|------|---|---|---|--------|---|---|---|---|------|------------------------------|----------------------------------|
| 1 | 1.00 | 1 | 1 | 0 | -0.006 | 0 | 0 | 0 | t | 7347 | CYCYGLPD<br>SEPTKTN          | Oryctola<br>gus<br>cuniculu<br>s |
| 1 | 1.00 | 1 | 1 | 0 | 0      | 0 | 0 | 0 | t | 9694 | DPNANPN<br>VDPNANP<br>NV     | Mus<br>musculu<br>s              |
| 1 | 1.00 | 1 | 1 | 0 | 0      | 0 | 0 | 0 | t | 9524 | DNPASTT<br>NKDK              | Oryctola<br>gus<br>cuniculu<br>s |
| 1 | 1.00 | 1 | 1 | 0 | 0      | 0 | 0 | 0 | t | 3221 | ANAANEAA<br>DYQAKLTA<br>YQTE | Mus<br>musculu<br>s              |
| 1 | 1.00 | 1 | 1 | 0 | 0      | 0 | 0 | 0 | t | 895  | AEEVKATP<br>AGELQVID<br>KVDA | Mus<br>musculu<br>s              |
| 1 | 1.00 | 1 | 1 | 0 | 0      | 0 | 0 | 0 | t | 346  | AAPANDK<br>FTVFEEAF<br>NDAIK | Mus<br>musculu<br>s              |
| 1 | 1.00 | 1 | 1 | 0 | 0      | 0 | 0 | 0 | t | 895  | AEEVKATP<br>AGELQVID<br>KVDA | Mus<br>musculu<br>s              |
| 1 | 1.00 | 1 | 1 | 0 | 0      | 0 | 0 | 0 | t | 4331 | ASARGDLA<br>HLTTTHAR<br>HLP  | Mus<br>musculu<br>s              |
| 1 | 1.00 | 1 | 1 | 0 | 0      | 0 | 0 | 0 | t | 9694 | DPNANPN<br>VDPNANP<br>NV     | Mus<br>musculu<br>s              |
| 1 | 1.00 | 1 | 1 | 0 | 0      | 0 | 0 | 0 | t | 9944 | DRADGQP<br>AGDRADG<br>QPAGDR | Mus<br>musculu<br>s              |
| 1 | 1.00 | 1 | 1 | 0 | -0.002 | 0 | 0 | 0 | t | 8464 | DGNPPEV<br>KSVGLGN<br>VNGVTL | Mus<br>musculu<br>s              |
| 1 | 1.00 | 1 | 1 | 0 | 0      | 0 | 0 | 0 | t | 3493 | APAVKYTV<br>FETALKKAI<br>TAM | Mus<br>musculu<br>s              |
| 1 | 1.00 | 1 | 1 | 0 | 0      | 0 | 0 | 0 | t | 9694 | DPNANPN<br>VDPNANP<br>NV     | Mus<br>musculu<br>s              |
| 1 | 1.00 | 1 | 1 | 0 | 0      | 0 | 0 | 0 | t | 9944 | DRADGQP<br>AGDRADG<br>QPAGDR | Mus<br>musculu<br>s              |



|   |      |   |   |   |        |   |   |   |   |      |                              |                                  |
|---|------|---|---|---|--------|---|---|---|---|------|------------------------------|----------------------------------|
| 1 | 1.00 | 1 | 1 | 0 | 0      | 0 | 0 | 0 | t | 4528 | ASLKDALL<br>KYIYDNRG<br>TLI  | Mus<br>musculu<br>s              |
| 1 | 1.00 | 1 | 1 | 0 | 0      | 0 | 0 | 0 | t | 9759 | DPRVRGLY<br>LPA              | Mus<br>musculu<br>s              |
| 1 | 1.00 | 1 | 1 | 0 | 0      | 0 | 0 | 0 | t | 9944 | DRADGQP<br>AGDRADG<br>QPAGDR | Homo<br>sapiens                  |
| 1 | 1.00 | 1 | 1 | 0 | 0      | 0 | 0 | 0 | t | 2772 | ALNDLCIK<br>VNNWDLF<br>FSPS  | Mus<br>musculu<br>s              |
| 1 | 1.00 | 1 | 1 | 0 | -0.007 | 0 | 0 | 0 | t | 2772 | ALNDLCIK<br>VNNWDLF<br>FSPS  | Homo<br>sapiens                  |
| 1 | 1.00 | 1 | 1 | 0 | 0      | 0 | 0 | 0 | t | 9759 | DPRVRGLY<br>LPA              | Mus<br>musculu<br>s              |
| 1 | 1.00 | 1 | 1 | 0 | 0      | 0 | 0 | 0 | t | 9944 | DRADGQP<br>AGDRADG<br>QPAGDR | Mus<br>musculu<br>s              |
| 1 | 1.00 | 1 | 1 | 0 | 0      | 0 | 0 | 0 | t | 9694 | DPNANPN<br>VDPNANP<br>NV     | Mus<br>musculu<br>s              |
| 1 | 1.00 | 1 | 1 | 0 | 0      | 0 | 0 | 0 | t | 7849 | DDPPATVY<br>RYD              | Oryctola<br>gus<br>cuniculu<br>s |
| 1 | 1.00 | 1 | 1 | 0 | -0.002 | 0 | 0 | 0 | t | 2772 | ALNDLCIK<br>VNNWDLF<br>FSPS  | Mus<br>musculu<br>s              |
| 1 | 1.00 | 1 | 1 | 0 | 0.004  | 0 | 0 | 0 | t | 5683 | AWPACYC<br>YGLPDSVK          | Ovis<br>aries                    |
| 1 | 1.00 | 1 | 1 | 0 | -0.003 | 0 | 0 | 0 | t | 4528 | ASLKDALL<br>KYIYDNRG<br>TLI  | Mus<br>musculu<br>s              |
| 1 | 1.00 | 1 | 1 | 0 | -0.002 | 0 | 0 | 0 | t | 4528 | ASLKDALL<br>KYIYDNRG<br>TLI  | Mus<br>musculu<br>s              |
| 1 | 1.00 | 1 | 1 | 0 | 0      | 0 | 0 | 0 | t | 9723 | DPPPPNP<br>NDPPPPN<br>PND    | Mus<br>musculu<br>s              |

|   |      |   |   |   |        |   |   |   |   |      |                              |                                  |
|---|------|---|---|---|--------|---|---|---|---|------|------------------------------|----------------------------------|
| 1 | 1.00 | 1 | 1 | 0 | 0      | 0 | 0 | 0 | t | 570  | ACKRGP GS<br>GFFSRLN         | Mus<br>musculu<br>s              |
| 1 | 1.00 | 1 | 1 | 0 | -0.003 | 0 | 0 | 0 | t | 952  | AEGQLG                       | Oryctola<br>gus<br>cuniculu<br>s |
| 1 | 1.00 | 1 | 1 | 0 | 0      | 0 | 0 | 0 | t | 9759 | DPRVRGLY<br>LPA              | Mus<br>musculu<br>s              |
| 1 | 1.00 | 1 | 1 | 0 | 0.005  | 0 | 0 | 0 | t | 4528 | ASLKDALL<br>KYIYDNRG<br>TLI  | Gallus<br>gallus                 |
| 1 | 1.00 | 1 | 1 | 0 | 0      | 0 | 0 | 0 | t | 7629 | DARSVNG<br>EFPRHVKL<br>KNEIE | Mus<br>musculu<br>s              |
| 1 | 1.00 | 1 | 1 | 0 | 0      | 0 | 0 | 0 | t | 3221 | ANAANE A<br>DYQAKLTA<br>YQTE | Mus<br>musculu<br>s              |
| 1 | 1.00 | 1 | 1 | 0 | 0      | 0 | 0 | 0 | t | 6670 | CMTTAQG<br>TSMYPSC           | Mus<br>musculu<br>s              |
| 1 | 1.00 | 1 | 1 | 0 | 0      | 0 | 0 | 0 | t | 346  | AAPANDK<br>FTVFEEAF<br>NDAIK | Mus<br>musculu<br>s              |
| 1 | 1.00 | 1 | 1 | 0 | 0      | 0 | 0 | 0 | t | 6020 | CAQQWPE<br>WYPC              | Mus<br>musculu<br>s              |
| 1 | 1.00 | 1 | 1 | 0 | 0      | 0 | 0 | 0 | t | 6343 | CGRVCLRC                     | Mus<br>musculu<br>s              |
| 1 | 1.00 | 1 | 1 | 0 | 0      | 0 | 0 | 0 | t | 874  | AEEDRKRR<br>EEADVRN<br>QAE   | Mus<br>musculu<br>s              |
| 1 | 1.00 | 1 | 1 | 0 | -0.003 | 0 | 0 | 0 | t | 7851 | DDPPATVY<br>RYDSRPPE<br>DV   | Oryctola<br>gus<br>cuniculu<br>s |
| 1 | 1.00 | 1 | 1 | 0 | -0.004 | 0 | 0 | 0 | t | 6742 | CNYSKFW<br>YLEHAK            | Mus<br>musculu<br>s              |
| 1 | 1.00 | 1 | 1 | 0 | -0.016 | 0 | 0 | 0 | t | 6742 | CNYSKFW<br>YLEHAK            | Macaca<br>mulatta                |

|   |      |   |   |   |        |   |   |   |   |      |                              |                                  |
|---|------|---|---|---|--------|---|---|---|---|------|------------------------------|----------------------------------|
| 1 | 1.00 | 1 | 1 | 0 | 0      | 0 | 0 | 0 | t | 2271 | AKQYNICC<br>KFKELLD          | Mus<br>musculu<br>s              |
| 1 | 1.00 | 1 | 1 | 0 | -0.011 | 0 | 0 | 0 | t | 3528 | APEDQSPE<br>TRRLDRL<br>SR    | Oryctola<br>gus<br>cuniculu<br>s |
| 1 | 1.00 | 1 | 1 | 0 | 0      | 0 | 0 | 0 | t | 3221 | ANAANE<br>DYQAKLTA<br>YQTE   | Mus<br>musculu<br>s              |
| 1 | 1.00 | 1 | 1 | 0 | -0.003 | 0 | 0 | 0 | t | 874  | AEEDRKRR<br>EEADVRN<br>QAE   | Oryctola<br>gus<br>cuniculu<br>s |
| 1 | 1.00 | 1 | 1 | 0 | 0      | 0 | 0 | 0 | t | 3656 | APMSTPS<br>ATSVR             | Mus<br>musculu<br>s              |
| 1 | 1.00 | 1 | 1 | 0 | -0.008 | 0 | 0 | 0 | t | 3528 | APEDQSPE<br>TRRLDRL<br>SR    | Sus<br>scrofa                    |
| 1 | 1.00 | 1 | 1 | 0 | -0.003 | 0 | 0 | 0 | t | 1330 | AFKGGNG<br>AKKG              | Oryctola<br>gus<br>cuniculu<br>s |
| 1 | 1.00 | 1 | 1 | 0 | 0      | 0 | 0 | 0 | t | 5853 | AYKSAEGA<br>TPEAKYDD<br>YVAT | Mus<br>musculu<br>s              |
| 1 | 1.00 | 1 | 1 | 0 | -0.003 | 0 | 0 | 0 | t | 960  | AEHARDH<br>TLRFG             | Oryctola<br>gus<br>cuniculu<br>s |
| 1 | 1.00 | 1 | 1 | 0 | 0      | 0 | 0 | 0 | t | 9943 | DRADGQP<br>AGDRAAG<br>QPAGDR | Homo<br>sapiens                  |
| 1 | 1.00 | 1 | 1 | 0 | 0.012  | 0 | 0 | 0 | t | 6742 | CNYSKFW<br>YLEHAK            | Mus<br>musculu<br>s              |
| 1 | 1.00 | 1 | 1 | 0 | 0      | 0 | 0 | 0 | t | 9943 | DRADGQP<br>AGDRAAG<br>QPAGDR | Mus<br>musculu<br>s              |
| 1 | 1.00 | 1 | 1 | 0 | 0      | 0 | 0 | 0 | t | 9943 | DRADGQP<br>AGDRAAG<br>QPAGDR | Mus<br>musculu<br>s              |
| 1 | 1.00 | 1 | 1 | 0 | -0.003 | 0 | 0 | 0 | t | 7461 | DAADL                        | Oryctola<br>gus<br>cuniculu<br>s |

|   |      |   |   |   |        |   |   |   |   |      |                              |                                  |
|---|------|---|---|---|--------|---|---|---|---|------|------------------------------|----------------------------------|
| 1 | 1.00 | 1 | 1 | 0 | 0      | 0 | 0 | 0 | t | 89   | AADKPTLD<br>IRMMNIE<br>A     | Mus<br>musculu<br>s              |
| 1 | 1.00 | 1 | 1 | 0 | 0      | 0 | 0 | 0 | t | 89   | AADKPTLD<br>IRMMNIE<br>A     | Mus<br>musculu<br>s              |
| 1 | 1.00 | 1 | 1 | 0 | 0      | 0 | 0 | 0 | t | 9943 | DRADGQP<br>AGDRAAG<br>QPAGDR | Mus<br>musculu<br>s              |
| 1 | 1.00 | 1 | 1 | 0 | 0      | 0 | 0 | 0 | t | 89   | AADKPTLD<br>IRMMNIE<br>A     | Mus<br>musculu<br>s              |
| 1 | 1.00 | 1 | 1 | 0 | -0.008 | 0 | 0 | 0 | t | 4528 | ASLKDALL<br>KYIYDNRG<br>TLI  | Mus<br>musculu<br>s              |
| 1 | 1.00 | 1 | 1 | 0 | 0      | 0 | 0 | 0 | t | 7134 | CTEKFTFSK<br>NPADTG          | Mus<br>musculu<br>s              |
| 1 | 1.00 | 1 | 1 | 0 | 0      | 0 | 0 | 0 | t | 1523 | AGGGQGP<br>QNEGANA<br>PNEDSV | Homo<br>sapiens                  |
| 1 | 1.00 | 1 | 1 | 0 | 0      | 0 | 0 | 0 | t | 7134 | CTEKFTFSK<br>NPADTG          | Mus<br>musculu<br>s              |
| 1 | 1.00 | 1 | 1 | 0 | 0      | 0 | 0 | 0 | t | 7134 | CTEKFTFSK<br>NPADTG          | Mus<br>musculu<br>s              |
| 1 | 1.00 | 1 | 1 | 0 | 0      | 0 | 0 | 0 | t | 3289 | ANGAGNQ<br>PGANGAG<br>GQAA   | Homo<br>sapiens                  |
| 1 | 1.00 | 1 | 1 | 0 | 0      | 0 | 0 | 0 | t | 3289 | ANGAGNQ<br>PGANGAG<br>GQAA   | Homo<br>sapiens                  |
| 1 | 1.00 | 1 | 1 | 0 | -0.003 | 0 | 0 | 0 | t | 6249 | CFPYCYP<br>ESA               | Oryctola<br>gus<br>cuniculu<br>s |
| 1 | 1.00 | 1 | 1 | 0 | 0      | 0 | 0 | 0 | t | 9759 | DPRVRGL<br>LPA               | Mus<br>musculu<br>s              |
| 1 | 1.00 | 1 | 1 | 0 | -0.008 | 0 | 0 | 0 | t | 8130 | DEQDYQIR                     | Mus<br>musculu<br>s              |
| 1 | 1.00 | 1 | 1 | 0 | -0.003 | 0 | 0 | 0 | t | 6332 | CGPKLST<br>LIKNQCV<br>NF     | Oryctola<br>gus<br>cuniculu<br>s |

|   |      |   |   |   |        |   |   |   |   |      |                              |                                  |
|---|------|---|---|---|--------|---|---|---|---|------|------------------------------|----------------------------------|
| 1 | 1.00 | 1 | 1 | 0 | -0.007 | 0 | 0 | 0 | t | 6650 | CMENNSG<br>WKVSLNY<br>GEIIW  | Homo<br>sapiens                  |
| 1 | 1.00 | 1 | 1 | 0 | -0.003 | 0 | 0 | 0 | t | 7768 | DDEIYGND<br>GHP              | Oryctola<br>gus<br>cuniculu<br>s |
| 1 | 1.00 | 1 | 1 | 0 | 0      | 0 | 0 | 0 | t | 6650 | CMENNSG<br>WKVSLNY<br>GEIIW  | Mus<br>musculu<br>s              |
| 1 | 1.00 | 1 | 1 | 0 | 0      | 0 | 0 | 0 | t | 7682 | DAWREGE<br>EFVVEFDL<br>PGIKA | Mus<br>musculu<br>s              |
| 1 | 1.00 | 1 | 1 | 0 | 0      | 0 | 0 | 0 | t | 8273 | DFGSLAPR<br>VA               | Cavia<br>porcellu<br>s           |
| 1 | 1.00 | 1 | 1 | 0 | 0      | 0 | 0 | 0 | t | 6650 | CMENNSG<br>WKVSLNY<br>GEIIW  | Mus<br>musculu<br>s              |
| 1 | 1.00 | 1 | 1 | 0 | 0      | 0 | 0 | 0 | t | 3221 | ANAANE<br>DYQAKLTA<br>YQTE   | Mus<br>musculu<br>s              |
| 1 | 1.00 | 1 | 1 | 0 | -0.003 | 0 | 0 | 0 | t | 874  | AEEDRKRR<br>EEADVRN<br>QAE   | Oryctola<br>gus<br>cuniculu<br>s |
| 1 | 1.00 | 1 | 1 | 0 | -0.003 | 0 | 0 | 0 | t | 6106 | CDICTNTM<br>DVIKKML          | Oryctola<br>gus<br>cuniculu<br>s |
| 1 | 1.00 | 1 | 1 | 0 | 0      | 0 | 0 | 0 | t | 5925 | AYSNCYPY<br>DVPDYASL<br>R    | Mus<br>musculu<br>s              |
| 1 | 1.00 | 1 | 1 | 0 | 0      | 0 | 0 | 0 | t | 1265 | AFASRGN<br>HVSPTHYV<br>PESDA | Homo<br>sapiens                  |
| 1 | 1.00 | 1 | 1 | 0 | 0.002  | 0 | 0 | 0 | t | 7313 | CVTIMTVD<br>NPASTTNK<br>DK   | Rattus<br>norvegic<br>us         |
| 1 | 1.00 | 1 | 1 | 0 | 0      | 0 | 0 | 0 | t | 5925 | AYSNCYPY<br>DVPDYASL<br>R    | Mus<br>musculu<br>s              |

|   |      |   |   |   |        |   |   |   |   |      |                              |                                  |
|---|------|---|---|---|--------|---|---|---|---|------|------------------------------|----------------------------------|
| 1 | 1.00 | 1 | 1 | 0 | 0      | 0 | 0 | 0 | t | 6650 | CMENNSG<br>WKVSLNY<br>GEIHW  | Mus<br>musculu<br>s              |
| 1 | 1.00 | 1 | 1 | 0 | 0      | 0 | 0 | 0 | t | 6650 | CMENNSG<br>WKVSLNY<br>GEIHW  | Mus<br>musculu<br>s              |
| 1 | 1.00 | 1 | 1 | 0 | 0      | 0 | 0 | 0 | t | 6650 | CMENNSG<br>WKVSLNY<br>GEIHW  | Mus<br>musculu<br>s              |
| 1 | 1.00 | 1 | 1 | 0 | 0      | 0 | 0 | 0 | t | 1453 | AGARRGD<br>LAHLAAAH<br>ARHLP | Bos<br>taurus                    |
| 1 | 1.00 | 1 | 1 | 0 | 0.006  | 0 | 0 | 0 | t | 1731 | AGYCNTEC<br>TLKKGSS          | Ovis<br>aries                    |
| 1 | 1.00 | 1 | 1 | 0 | -0.006 | 0 | 0 | 0 | t | 1731 | AGYCNTEC<br>TLKKGSS          | Oryctola<br>gus<br>cuniculu<br>s |
| 1 | 1.00 | 1 | 1 | 0 | 0      | 0 | 0 | 0 | t | 1453 | AGARRGD<br>LAHLAAAH<br>ARHLP | Bos<br>taurus                    |
| 1 | 1.00 | 1 | 1 | 0 | -0.002 | 0 | 0 | 0 | t | 6650 | CMENNSG<br>WKVSLNY<br>GEIHW  | Mus<br>musculu<br>s              |
| 1 | 1.00 | 1 | 1 | 0 | -0.003 | 0 | 0 | 0 | t | 6015 | CAPESIEFP<br>VSEARVLE<br>D   | Oryctola<br>gus<br>cuniculu<br>s |
| 1 | 1.00 | 1 | 1 | 0 | -0.003 | 0 | 0 | 0 | t | 3959 | AQFDQIAS<br>GLSQERN          | Oryctola<br>gus<br>cuniculu<br>s |
| 1 | 1.00 | 1 | 1 | 0 | 0      | 0 | 0 | 0 | t | 7851 | DDPPATVY<br>RYDSRPPE<br>DV   | Oryctola<br>gus<br>cuniculu<br>s |
| 1 | 1.00 | 1 | 1 | 0 | 0.008  | 0 | 0 | 0 | t | 4749 | ASRGTSMD<br>DEAD             | Capra<br>hircus                  |

|   |      |   |   |   |        |   |   |   |   |      |                              |                  |
|---|------|---|---|---|--------|---|---|---|---|------|------------------------------|------------------|
| 1 | 1.00 | 1 | 1 | 0 | -0.003 | 0 | 0 | 0 | t | 6104 | CDGYCKT<br>HLKASSGY          | Mus<br>musculus  |
| 1 | 1.00 | 1 | 1 | 0 | -0.002 | 0 | 0 | 0 | t | 6650 | CMENNSG<br>WKVSLNY<br>GEIIW  | Mus<br>musculus  |
| 1 | 1.00 | 1 | 1 | 0 | 0      | 0 | 0 | 0 | t | 9940 | DRAAGQP<br>AGNGAGG<br>QAAGGN | Homo<br>sapiens  |
| 1 | 1.00 | 1 | 1 | 0 | 0      | 0 | 0 | 0 | t | 6104 | CDGYCKT<br>HLKASSGY          | Mus<br>musculus  |
| 1 | 1.00 | 1 | 1 | 0 | 0      | 0 | 0 | 0 | t | 7492 | DAEFRHDS<br>GYEVHHQ<br>KL    | Mus<br>musculus  |
| 1 | 1.00 | 1 | 1 | 0 | 0      | 0 | 0 | 0 | t | 9940 | DRAAGQP<br>AGNGAGG<br>QAAGGN | Mus<br>musculus  |
| 1 | 1.00 | 1 | 1 | 0 | 0      | 0 | 0 | 0 | t | 9940 | DRAAGQP<br>AGNGAGG<br>QAAGGN | Mus<br>musculus  |
| 1 | 1.00 | 1 | 1 | 0 | -0.003 | 0 | 0 | 0 | t | 2720 | ALLNPSRV<br>YTFFSSDY<br>VKK  | Mus<br>musculus  |
| 1 | 1.00 | 1 | 1 | 0 | 0.005  | 0 | 0 | 0 | t | 2720 | ALLNPSRV<br>YTFFSSDY<br>VKK  | Gallus<br>gallus |
| 1 | 1.00 | 1 | 1 | 0 | -0.007 | 0 | 0 | 0 | t | 2720 | ALLNPSRV<br>YTFFSSDY<br>VKK  | Homo<br>sapiens  |
| 1 | 1.00 | 1 | 1 | 0 | 0      | 0 | 0 | 0 | t | 9940 | DRAAGQP<br>AGNGAGG<br>QAAGGN | Mus<br>musculus  |
| 1 | 1.00 | 1 | 1 | 0 | 0      | 0 | 0 | 0 | t | 9940 | DRAAGQP<br>AGNGAGG<br>QAAGGN | Mus<br>musculus  |
| 1 | 1.00 | 1 | 1 | 0 | 0      | 0 | 0 | 0 | t | 9940 | DRAAGQP<br>AGNGAGG<br>QAAGGN | Mus<br>musculus  |

|   |      |   |   |   |        |   |   |   |   |      |                              |                     |
|---|------|---|---|---|--------|---|---|---|---|------|------------------------------|---------------------|
| 1 | 1.00 | 1 | 1 | 0 | 0      | 0 | 0 | 0 | t | 7850 | DDPPATVY<br>RYDSRPPE<br>D    | Mus<br>musculu<br>s |
| 1 | 1.00 | 1 | 1 | 0 | 0      | 0 | 0 | 0 | t | 6650 | CMENNSG<br>WKVSLNY<br>GEIIW  | Mus<br>musculu<br>s |
| 1 | 1.00 | 1 | 1 | 0 | 0      | 0 | 0 | 0 | t | 6650 | CMENNSG<br>WKVSLNY<br>GEIIW  | Mus<br>musculu<br>s |
| 1 | 1.00 | 1 | 1 | 0 | 0      | 0 | 0 | 0 | t | 7492 | DAEFRHDS<br>GYEVHHQ<br>KL    | Mus<br>musculu<br>s |
| 1 | 1.00 | 1 | 1 | 0 | 0      | 0 | 0 | 0 | t | 2720 | ALLNPSRV<br>YTFFSSDY<br>VKK  | Mus<br>musculu<br>s |
| 1 | 1.00 | 1 | 1 | 0 | 0      | 0 | 0 | 0 | t | 6487 | CKIPFEIM<br>DLEKRHVL<br>GRL  | Mus<br>musculu<br>s |
| 1 | 1.00 | 1 | 1 | 0 | -0.008 | 0 | 0 | 0 | t | 2720 | ALLNPSRV<br>YTFFSSDY<br>VKK  | Mus<br>musculu<br>s |
| 1 | 1.00 | 1 | 1 | 0 | 0      | 0 | 0 | 0 | t | 6650 | CMENNSG<br>WKVSLNY<br>GEIIW  | Mus<br>musculu<br>s |
| 1 | 1.00 | 1 | 1 | 0 | -0.002 | 0 | 0 | 0 | t | 6650 | CMENNSG<br>WKVSLNY<br>GEIIW  | Mus<br>musculu<br>s |
| 1 | 1.00 | 1 | 1 | 0 | 0      | 0 | 0 | 0 | t | 6650 | CMENNSG<br>WKVSLNY<br>GEIIW  | Mus<br>musculu<br>s |
| 1 | 1.00 | 1 | 1 | 0 | 0      | 0 | 0 | 0 | t | 8637 | DIETPRAG<br>KKESTVMT<br>SGSA | Ovis<br>aries       |
| 1 | 1.00 | 1 | 1 | 0 | 0      | 0 | 0 | 0 | t | 9722 | DPPPPNP<br>NDPPPPN<br>PN     | Mus<br>musculu<br>s |
| 1 | 1.00 | 1 | 1 | 0 | -0.002 | 0 | 0 | 0 | t | 2720 | ALLNPSRV<br>YTFFSSDY<br>VKK  | Mus<br>musculu<br>s |



|   |      |   |   |   |        |   |   |   |   |       |                              |                                  |
|---|------|---|---|---|--------|---|---|---|---|-------|------------------------------|----------------------------------|
| 1 | 1.00 | 1 | 1 | 0 | -0.001 | 0 | 0 | 0 | t | 2720  | ALLNPSRV<br>YTFFSSDY<br>VKK  | Homo<br>sapiens                  |
| 1 | 1.00 | 1 | 1 | 0 | -0.008 | 0 | 0 | 0 | t | 2720  | ALLNPSRV<br>YTFFSSDY<br>VKK  | Mus<br>musculu<br>s              |
| 1 | 1.00 | 1 | 1 | 0 | -0.002 | 0 | 0 | 0 | t | 2720  | ALLNPSRV<br>YTFFSSDY<br>VKK  | Mus<br>musculu<br>s              |
| 1 | 1.00 | 1 | 1 | 0 | -0.008 | 0 | 0 | 0 | t | 6650  | CMENNSG<br>WKVSLNY<br>GEIIW  | Mus<br>musculu<br>s              |
| 1 | 1.00 | 1 | 1 | 0 | 0      | 0 | 0 | 0 | t | 6650  | CMENNSG<br>WKVSLNY<br>GEIIW  | Mus<br>musculu<br>s              |
| 1 | 1.00 | 1 | 1 | 0 | -0.007 | 0 | 0 | 0 | t | 9557  | DNTVRET                      | Oryctola<br>gus<br>cuniculu<br>s |
| 1 | 1.00 | 1 | 1 | 0 | 0      | 0 | 0 | 0 | t | 9557  | DNTVRET                      | Oryctola<br>gus<br>cuniculu<br>s |
| 1 | 1.00 | 1 | 1 | 0 | 0      | 0 | 0 | 0 | t | 9722  | DPPPPNP<br>NDPPPPN<br>PN     | Mus<br>musculu<br>s              |
| 1 | 1.00 | 1 | 1 | 0 | 0      | 0 | 0 | 0 | t | 9463  | DNGKAIYE<br>RARERALQ<br>ELGP | Mus<br>musculu<br>s              |
| 1 | 1.00 | 1 | 1 | 0 | 0.008  | 0 | 0 | 0 | t | 10067 | DRYFTYEE<br>PNDG             | Capra<br>hircus                  |
| 1 | 1.00 | 1 | 1 | 0 | 0      | 0 | 0 | 0 | t | 6496  | CKKNMEG<br>KVLLENL<br>EYTIV  | Mus<br>musculu<br>s              |
| 1 | 1.00 | 1 | 1 | 0 | 0      | 0 | 0 | 0 | t | 1261  | AFASRGN<br>HVAPTHY<br>VVESDA | Homo<br>sapiens                  |
| 1 | 1.00 | 1 | 1 | 0 | 0      | 0 | 0 | 0 | t | 6650  | CMENNSG<br>WKVSLNY<br>GEIIW  | Mus<br>musculu<br>s              |

|   |      |   |   |   |        |   |   |   |   |      |                      |                       |
|---|------|---|---|---|--------|---|---|---|---|------|----------------------|-----------------------|
| 1 | 1.00 | 1 | 1 | 0 | -0.003 | 0 | 0 | 0 | t | 4224 | ARQPDLI              | Oryctolagus cuniculus |
| 1 | 1.00 | 1 | 1 | 0 | 0      | 0 | 0 | 0 | t | 9722 | DPPPPNPNDPPPPNP      | Mus musculus          |
| 1 | 1.00 | 1 | 1 | 0 | 0      | 0 | 0 | 0 | t | 9463 | DNGKAIYERARERALQELGP | Mus musculus          |
| 1 | 1.00 | 1 | 1 | 0 | -0.003 | 0 | 0 | 0 | t | 307  | AALVSGTAGWTFGAG      | Oryctolagus cuniculus |
| 1 | 1.00 | 1 | 1 | 0 | 0      | 0 | 0 | 0 | t | 9722 | DPPPPNPNDPPPPNP      | Mus musculus          |
| 1 | 1.00 | 1 | 1 | 0 | 0      | 0 | 0 | 0 | t | 9759 | DPRVRGLYLPA          | Mus musculus          |
| 1 | 1.00 | 1 | 1 | 0 | 0      | 0 | 0 | 0 | t | 4528 | ASLKDALLKYIYDNRGTLI  | Mus musculus          |
| 1 | 1.00 | 1 | 1 | 0 | 0      | 0 | 0 | 0 | t | 9759 | DPRVRGLYLPA          | Mus musculus          |
| 1 | 1.00 | 1 | 1 | 0 | 0      | 0 | 0 | 0 | t | 8887 | DKIDWRESGYVTELKDQGNC | Homo sapiens          |
| 1 | 1.00 | 1 | 1 | 0 | 0      | 0 | 0 | 0 | t | 895  | AEEVKATPAGELQVIDKVDA | Mus musculus          |
| 1 | 1.00 | 1 | 1 | 0 | 0      | 0 | 0 | 0 | t | 8050 | DEKTSDGRSVKSVVTKDSES | Mus musculus          |
| 1 | 1.00 | 1 | 1 | 0 | 0      | 0 | 0 | 0 | t | 9722 | DPPPPNPNDPPPPNP      | Mus musculus          |
| 1 | 1.00 | 1 | 1 | 0 | 0      | 0 | 0 | 0 | t | 4733 | ASRAALIEEGQRIAEMLKSK | Homo sapiens          |
| 1 | 1.00 | 1 | 1 | 0 | 0      | 0 | 0 | 0 | t | 8076 | DEKLDQMEED           | Sus scrofa            |
| 1 | 1.00 | 1 | 1 | 0 | 0      | 0 | 0 | 0 | t | 3221 | ANAANEADYQAKLTAYQTE  | Mus musculus          |

|   |      |   |   |   |        |   |   |   |   |      |                              |                          |
|---|------|---|---|---|--------|---|---|---|---|------|------------------------------|--------------------------|
| 1 | 1.00 | 1 | 1 | 0 | -0.001 | 0 | 0 | 0 | t | 8265 | DDFNLNQE<br>WRVYTYK<br>YFKK  | Homo<br>sapiens          |
| 1 | 1.00 | 1 | 1 | 0 | 0.002  | 0 | 0 | 0 | t | 9557 | DNTVRET                      | Rattus<br>norvegicus     |
| 1 | 1.00 | 1 | 1 | 0 | 0      | 0 | 0 | 0 | t | 6329 | CGPFFLAA<br>SVC              | Mus<br>musculus          |
| 1 | 1.00 | 1 | 1 | 0 | 0      | 0 | 0 | 0 | t | 9722 | DPPPPNP<br>NDPPPPN<br>PN     | Mus<br>musculus          |
| 1 | 1.00 | 1 | 1 | 0 | 0      | 0 | 0 | 0 | t | 9722 | DPPPPNP<br>NDPPPPN<br>PN     | Mus<br>musculus          |
| 1 | 1.00 | 1 | 1 | 0 | 0      | 0 | 0 | 0 | t | 9939 | DRAAGQP<br>AGDRADG<br>QPAGDR | Mus<br>musculus          |
| 1 | 1.00 | 1 | 1 | 0 | 0      | 0 | 0 | 0 | t | 1433 | AGAGGGA<br>GGAGAGG<br>GAGGAG | Homo<br>sapiens          |
| 1 | 1.00 | 1 | 1 | 0 | 0      | 0 | 0 | 0 | t | 9939 | DRAAGQP<br>AGDRADG<br>QPAGDR | Mus<br>musculus          |
| 1 | 1.00 | 1 | 1 | 0 | 0.001  | 0 | 0 | 0 | t | 770  | ADSKGCKI<br>TCFLTAA          | Ovis<br>aries            |
| 1 | 1.00 | 1 | 1 | 0 | 0      | 0 | 0 | 0 | t | 8916 | DKKTEETT<br>LLEDRL           | Mus<br>musculus          |
| 1 | 1.00 | 1 | 1 | 0 | 0.006  | 0 | 0 | 0 | t | 770  | ADSKGCKI<br>TCFLTAA          | Ovis<br>aries            |
| 1 | 1.00 | 1 | 1 | 0 | 0      | 0 | 0 | 0 | t | 9939 | DRAAGQP<br>AGDRADG<br>QPAGDR | Mus<br>musculus          |
| 1 | 1.00 | 1 | 1 | 0 | 0      | 0 | 0 | 0 | t | 9939 | DRAAGQP<br>AGDRADG<br>QPAGDR | Homo<br>sapiens          |
| 1 | 1.00 | 1 | 1 | 0 | -0.003 | 0 | 0 | 0 | t | 8505 | DGTSYKKS<br>DFSS             | Oryctolagus<br>cuniculus |
| 1 | 1.00 | 1 | 1 | 0 | 0      | 0 | 0 | 0 | t | 9722 | DPPPPNP<br>NDPPPPN<br>PN     | Mus<br>musculus          |

|   |      |   |   |   |        |   |   |   |   |      |                              |                                  |
|---|------|---|---|---|--------|---|---|---|---|------|------------------------------|----------------------------------|
| 1 | 1.00 | 1 | 1 | 0 | 0      | 0 | 0 | 0 | t | 4740 | ASREAKKQ<br>VEKALE           | Mus<br>musculu<br>s              |
| 1 | 1.00 | 1 | 1 | 0 | 0      | 0 | 0 | 0 | t | 9598 | DPAPPNA<br>NDPAPPN<br>AND    | Mus<br>musculu<br>s              |
| 1 | 1.00 | 1 | 1 | 0 | 0      | 0 | 0 | 0 | t | 3290 | ANGAGNQ<br>PGANGAG<br>NQPG   | Mus<br>musculu<br>s              |
| 1 | 1.00 | 1 | 1 | 0 | 0.002  | 0 | 0 | 0 | t | 6832 | CPRPPRAV<br>AYYGPGV<br>DYK   | Rattus<br>norvegic<br>us         |
| 1 | 1.00 | 1 | 1 | 0 | 0      | 0 | 0 | 0 | t | 6501 | CKLSQGAP<br>DSC              | Mus<br>musculu<br>s              |
| 1 | 1.00 | 1 | 1 | 0 | 0      | 0 | 0 | 0 | t | 3290 | ANGAGNQ<br>PGANGAG<br>NQPG   | Mus<br>musculu<br>s              |
| 1 | 1.00 | 1 | 1 | 0 | 0      | 0 | 0 | 0 | t | 3290 | ANGAGNQ<br>PGANGAG<br>NQPG   | Mus<br>musculu<br>s              |
| 1 | 1.00 | 1 | 1 | 0 | 0      | 0 | 0 | 0 | t | 3290 | ANGAGNQ<br>PGANGAG<br>NQPG   | Mus<br>musculu<br>s              |
| 1 | 1.00 | 1 | 1 | 0 | 0      | 0 | 0 | 0 | t | 3290 | ANGAGNQ<br>PGANGAG<br>NQPG   | Mus<br>musculu<br>s              |
| 1 | 1.00 | 1 | 1 | 0 | 0      | 0 | 0 | 0 | t | 3290 | ANGAGNQ<br>PGANGAG<br>NQPG   | Mus<br>musculu<br>s              |
| 1 | 1.00 | 1 | 1 | 0 | 0      | 0 | 0 | 0 | t | 8132 | DEQFIPK                      | Mus<br>musculu<br>s              |
| 1 | 1.00 | 1 | 1 | 0 | 0      | 0 | 0 | 0 | t | 481  | AAVDSSKA<br>ALTSKLDA<br>AYKL | Mus<br>musculu<br>s              |
| 1 | 1.00 | 1 | 1 | 0 | -0.003 | 0 | 0 | 0 | t | 4681 | ASPTGYD<br>WRADW             | Oryctola<br>gus<br>cuniculu<br>s |
| 1 | 1.00 | 1 | 1 | 0 | 0      | 0 | 0 | 0 | t | 9722 | DPPPPNP<br>NDPPPPN<br>PN     | Mus<br>musculu<br>s              |
| 1 | 1.00 | 1 | 1 | 0 | 0      | 0 | 0 | 0 | t | 3290 | ANGAGNQ<br>PGANGAG<br>NQPG   | Mus<br>musculu<br>s              |
| 1 | 1.00 | 1 | 1 | 0 | 0      | 0 | 0 | 0 | t | 3290 | ANGAGNQ<br>PGANGAG<br>NQPG   | Mus<br>musculu<br>s              |

|   |      |   |   |   |        |   |   |   |   |      |                              |                                  |
|---|------|---|---|---|--------|---|---|---|---|------|------------------------------|----------------------------------|
| 1 | 1.00 | 1 | 1 | 0 | -0.003 | 0 | 0 | 0 | t | 2609 | ALHQUALQ<br>DPRVRGL          | Oryctola<br>gus<br>cuniculu<br>s |
| 1 | 1.00 | 1 | 1 | 0 | -0.003 | 0 | 0 | 0 | t | 9886 | DQPKQYE<br>QHLDYKE<br>IKEG   | Oryctola<br>gus<br>cuniculu<br>s |
| 1 | 1.00 | 1 | 1 | 0 | 0.008  | 0 | 0 | 0 | t | 766  | ADRYFTYE<br>EPND             | Capra<br>hircus                  |
| 1 | 1.00 | 1 | 1 | 0 | 0      | 0 | 0 | 0 | t | 3290 | ANGAGNQ<br>PGANGAG<br>NQPG   | Mus<br>musculu<br>s              |
| 1 | 1.00 | 1 | 1 | 0 | 0      | 0 | 0 | 0 | t | 2609 | ALHQUALQ<br>DPRVRGL          | Mus<br>musculu<br>s              |
| 1 | 1.00 | 1 | 1 | 0 | -0.003 | 0 | 0 | 0 | t | 2609 | ALHQUALQ<br>DPRVRGL          | Oryctola<br>gus<br>cuniculu<br>s |
| 1 | 1.00 | 1 | 1 | 0 | -0.003 | 0 | 0 | 0 | t | 2609 | ALHQUALQ<br>DPRVRGL          | Oryctola<br>gus<br>cuniculu<br>s |
| 1 | 1.00 | 1 | 1 | 0 | 0      | 0 | 0 | 0 | t | 9722 | DPPPPNP<br>NDPPPPN<br>PN     | Mus<br>musculu<br>s              |
| 1 | 1.00 | 1 | 1 | 0 | 0      | 0 | 0 | 0 | t | 2609 | ALHQUALQ<br>DPRVRGL          | Mus<br>musculu<br>s              |
| 1 | 1.00 | 1 | 1 | 0 | 0.005  | 0 | 0 | 0 | t | 4774 | ASSHRALA<br>RLRTACER<br>AKRT | Homo<br>sapiens                  |
| 1 | 1.00 | 1 | 1 | 0 | 0      | 0 | 0 | 0 | t | 1656 | AGQRMPR<br>ARYGLV            | Homo<br>sapiens                  |
| 1 | 1.00 | 1 | 1 | 0 | -0.003 | 0 | 0 | 0 | t | 7249 | CVCRCRST<br>MSLQKTV<br>EKLFD | Oryctola<br>gus<br>cuniculu<br>s |
| 1 | 1.00 | 1 | 1 | 0 | 0.003  | 0 | 0 | 0 | t | 3528 | APEDQSPE<br>TRRLDLRL<br>SR   | Sus<br>scrofa                    |
| 1 | 1.00 | 1 | 1 | 0 | 0      | 0 | 0 | 0 | t | 1656 | AGQRMPR<br>ARYGLV            | Homo<br>sapiens                  |
| 1 | 1.00 | 1 | 1 | 0 | 0      | 0 | 0 | 0 | t | 3290 | ANGAGNQ<br>PGANGAG<br>NQPG   | Mus<br>musculu<br>s              |

|   |      |   |   |   |        |   |   |   |   |      |                              |                                  |
|---|------|---|---|---|--------|---|---|---|---|------|------------------------------|----------------------------------|
| 1 | 1.00 | 1 | 1 | 0 | 0      | 0 | 0 | 0 | t | 3290 | ANGAGNQ<br>PGANGAG<br>NQPG   | Mus<br>musculu<br>s              |
| 1 | 1.00 | 1 | 1 | 0 | 0.008  | 0 | 0 | 0 | t | 7901 | DEADRYFT<br>YEEP             | Capra<br>hircus                  |
| 1 | 1.00 | 1 | 1 | 0 | 0      | 0 | 0 | 0 | t | 9722 | DPPPPNP<br>NDPPPPN<br>PN     | Mus<br>musculu<br>s              |
| 1 | 1.00 | 1 | 1 | 0 | 0      | 0 | 0 | 0 | t | 3221 | ANAANE<br>DYQAKLT<br>AQTE    | Mus<br>musculu<br>s              |
| 1 | 1.00 | 1 | 1 | 0 | 0      | 0 | 0 | 0 | t | 6210 | CEYNVFH<br>NKTFELP<br>RA     | Mus<br>musculu<br>s              |
| 1 | 1.00 | 1 | 1 | 0 | -0.002 | 0 | 0 | 0 | t | 7850 | DDPPATVY<br>RYDSRPE<br>D     | Mus<br>musculu<br>s              |
| 1 | 1.00 | 1 | 1 | 0 | -0.007 | 0 | 0 | 0 | t | 8066 | DELEAETQ<br>NVYAA            | Oryctola<br>gus<br>cuniculu<br>s |
| 1 | 1.00 | 1 | 1 | 0 | -0.002 | 0 | 0 | 0 | t | 3379 | ANPNENP<br>NANPNAN<br>PNANPN | Mus<br>musculu<br>s              |
| 1 | 1.00 | 1 | 1 | 0 | 0      | 0 | 0 | 0 | t | 3290 | ANGAGNQ<br>PGANGAG<br>NQPG   | Mus<br>musculu<br>s              |
| 1 | 1.00 | 1 | 1 | 0 | 0      | 0 | 0 | 0 | t | 6276 | CGAVIDDC                     | Mus<br>musculu<br>s              |
| 1 | 1.00 | 1 | 1 | 0 | 0.002  | 0 | 0 | 0 | t | 9524 | DNPASTT<br>NKDK              | Rattus<br>norvegic<br>us         |
| 1 | 1.00 | 1 | 1 | 0 | 0      | 0 | 0 | 0 | t | 7789 | DDGSIYKL<br>TGIWLSKT<br>SADS | Oryctola<br>gus<br>cuniculu<br>s |
| 1 | 1.00 | 1 | 1 | 0 | 0      | 0 | 0 | 0 | t | 9753 | DPRVRGLY                     | Mus<br>musculu<br>s              |
| 1 | 1.00 | 1 | 1 | 0 | 0      | 0 | 0 | 0 | t | 9753 | DPRVRGLY                     | Mus<br>musculu<br>s              |

|   |      |   |   |   |        |   |   |   |   |      |                              |                                  |
|---|------|---|---|---|--------|---|---|---|---|------|------------------------------|----------------------------------|
| 1 | 1.00 | 1 | 1 | 0 | 0      | 0 | 0 | 0 | t | 4331 | ASARGDLA<br>HLTTTHAR<br>HLP  | Sus<br>scrofa                    |
| 1 | 1.00 | 1 | 1 | 0 | 0      | 0 | 0 | 0 | t | 4528 | ASLKDALL<br>KYIYDNRG<br>TLI  | Mus<br>musculu<br>s              |
| 1 | 1.00 | 1 | 1 | 0 | -0.003 | 0 | 0 | 0 | t | 7171 | CTKPTDG<br>NC                | Homo<br>sapiens                  |
| 1 | 1.00 | 1 | 1 | 0 | 0      | 0 | 0 | 0 | t | 7171 | CTKPTDG<br>NC                | Oryctola<br>gus<br>cuniculu<br>s |
| 1 | 1.00 | 1 | 1 | 0 | -0.003 | 0 | 0 | 0 | t | 757  | ADQTVEE<br>HIGYLVKY          | Oryctola<br>gus<br>cuniculu<br>s |
| 1 | 1.00 | 1 | 1 | 0 | 0.003  | 0 | 0 | 0 | t | 7171 | CTKPTDG<br>NC                | Sus<br>scrofa                    |
| 1 | 1.00 | 1 | 1 | 0 | 0      | 0 | 0 | 0 | t | 741  | ADPNRFR<br>GKD               | Oryctola<br>gus<br>cuniculu<br>s |
| 1 | 1.00 | 1 | 1 | 0 | 0      | 0 | 0 | 0 | t | 4740 | ASREAKKQ<br>VEKALE           | Mus<br>musculu<br>s              |
| 1 | 1.00 | 1 | 1 | 0 | -0.002 | 0 | 0 | 0 | t | 4528 | ASLKDALL<br>KYIYDNRG<br>TLI  | Mus<br>musculu<br>s              |
| 1 | 1.00 | 1 | 1 | 0 | 0.003  | 0 | 0 | 0 | t | 7171 | CTKPTDG<br>NC                | Sus<br>scrofa                    |
| 1 | 1.00 | 1 | 1 | 0 | 0      | 0 | 0 | 0 | t | 9753 | DPRVRGLY                     | Mus<br>musculu<br>s              |
| 1 | 1.00 | 1 | 1 | 0 | -0.002 | 0 | 0 | 0 | t | 7171 | CTKPTDG<br>NC                | Homo<br>sapiens                  |
| 1 | 1.00 | 1 | 1 | 0 | 0      | 0 | 0 | 0 | t | 1433 | AGAGGGA<br>GGAGAGG<br>GAGGAG | Homo<br>sapiens                  |
| 1 | 1.00 | 1 | 1 | 0 | 0      | 0 | 0 | 0 | t | 4792 | ASTGGAY<br>QSYKFIPAL<br>EAAV | Mus<br>musculu<br>s              |

|   |      |   |   |   |        |   |   |   |   |      |                              |                                  |
|---|------|---|---|---|--------|---|---|---|---|------|------------------------------|----------------------------------|
| 1 | 1.00 | 1 | 1 | 0 | -0.003 | 0 | 0 | 0 | t | 2550 | ALGALGRF<br>DEAMQD<br>Q      | Oryctola<br>gus<br>cuniculu<br>s |
| 1 | 1.00 | 1 | 1 | 0 | 0      | 0 | 0 | 0 | t | 3862 | APTHYVTE<br>SDASQR           | Homo<br>sapiens                  |
| 1 | 1.00 | 1 | 1 | 0 | 0      | 0 | 0 | 0 | t | 9258 | DLQVLAQ<br>KVA               | Cavia<br>porcellu<br>s           |
| 1 | 1.00 | 1 | 1 | 0 | 0      | 0 | 0 | 0 | t | 7171 | CTKPTDG<br>NC                | Mus<br>musculu<br>s              |
| 1 | 1.00 | 1 | 1 | 0 | 0      | 0 | 0 | 0 | t | 4528 | ASLKDALL<br>KYIYDNRG<br>TLI  | Mus<br>musculu<br>s              |
| 1 | 1.00 | 1 | 1 | 0 | 0      | 0 | 0 | 0 | t | 9722 | DPPPPNP<br>NDPPPPN<br>PN     | Mus<br>musculu<br>s              |
| 1 | 1.00 | 1 | 1 | 0 | -0.003 | 0 | 0 | 0 | t | 6530 | CKTHLKAS<br>SGYCAWP          | Mus<br>musculu<br>s              |
| 1 | 1.00 | 1 | 1 | 0 | 0      | 0 | 0 | 0 | t | 9722 | DPPPPNP<br>NDPPPPN<br>PN     | Mus<br>musculu<br>s              |
| 1 | 1.00 | 1 | 1 | 0 | 0      | 0 | 0 | 0 | t | 7171 | CTKPTDG<br>NC                | Cavia<br>porcellu<br>s           |
| 1 | 1.00 | 1 | 1 | 0 | 0      | 0 | 0 | 0 | t | 4740 | ASREAKKQ<br>VEKALE           | Mus<br>musculu<br>s              |
| 1 | 1.00 | 1 | 1 | 0 | 0      | 0 | 0 | 0 | t | 9722 | DPPPPNP<br>NDPPPPN<br>PN     | Mus<br>musculu<br>s              |
| 1 | 1.00 | 1 | 1 | 0 | 0      | 0 | 0 | 0 | t | 7836 | DDNGTEE<br>WRCLLG<br>YKKGE   | Mus<br>musculu<br>s              |
| 1 | 1.00 | 1 | 1 | 0 | 0      | 0 | 0 | 0 | t | 1433 | AGAGGGA<br>GGAGAGG<br>GAGGAG | Homo<br>sapiens                  |
| 1 | 1.00 | 1 | 1 | 0 | 0      | 0 | 0 | 0 | t | 9722 | DPPPPNP<br>NDPPPPN<br>PN     | Mus<br>musculu<br>s              |
| 1 | 1.00 | 1 | 1 | 0 | -0.003 | 0 | 0 | 0 | t | 8424 | DGKSVKLE                     | Mus<br>musculu<br>s              |



|   |      |   |   |   |        |   |   |   |   |      |                              |                                  |
|---|------|---|---|---|--------|---|---|---|---|------|------------------------------|----------------------------------|
| 1 | 1.00 | 1 | 1 | 0 | 0      | 0 | 0 | 0 | t | 9756 | DPRVRGLY<br>FPAGG            | Mus<br>musculu<br>s              |
| 1 | 1.00 | 1 | 1 | 0 | -0.004 | 0 | 0 | 0 | t | 7771 | DDFHTDE<br>DKLDTNSV<br>YEPYY | Mus<br>musculu<br>s              |
| 1 | 1.00 | 1 | 1 | 0 | 0      | 0 | 0 | 0 | t | 8773 | DIRTLEDLL<br>MGTLGIVC<br>PIC | Mus<br>musculu<br>s              |
| 1 | 1.00 | 1 | 1 | 0 | 0.008  | 0 | 0 | 0 | t | 7761 | DDEADRYF<br>TYEE             | Capra<br>hircus                  |
| 1 | 1.00 | 1 | 1 | 0 | 0      | 0 | 0 | 0 | t | 9722 | DPPPPNP<br>NDPPPPN<br>PN     | Mus<br>musculu<br>s              |
| 1 | 1.00 | 1 | 1 | 0 | -0.003 | 0 | 0 | 0 | t | 8575 | DHTLRFGS<br>KSPF             | Oryctola<br>gus<br>cuniculu<br>s |
| 1 | 1.00 | 1 | 1 | 0 | 0      | 0 | 0 | 0 | t | 895  | AEEVKATP<br>AGELQVID<br>KVDA | Mus<br>musculu<br>s              |
| 1 | 1.00 | 1 | 1 | 0 | 0      | 0 | 0 | 0 | t | 895  | AEEVKATP<br>AGELQVID<br>KVDA | Mus<br>musculu<br>s              |
| 1 | 1.00 | 1 | 1 | 0 | 0      | 0 | 0 | 0 | t | 4740 | ASREAKKQ<br>VEKALE           | Mus<br>musculu<br>s              |
| 1 | 1.00 | 1 | 1 | 0 | 0      | 0 | 0 | 0 | t | 3221 | ANAANEAA<br>DYQAKLTA<br>YQTE | Mus<br>musculu<br>s              |
| 1 | 1.00 | 1 | 1 | 0 | -0.004 | 0 | 0 | 0 | t | 9524 | DNPASTT<br>NKDK              | Mus<br>musculu<br>s              |
| 1 | 1.00 | 1 | 1 | 0 | -0.006 | 0 | 0 | 0 | t | 8066 | DELEAETQ<br>NVYAA            | Oryctola<br>gus<br>cuniculu<br>s |
| 1 | 1.00 | 1 | 1 | 0 | 0      | 0 | 0 | 0 | t | 8832 | DKAAAICF<br>RNSMDT           | Mus<br>musculu<br>s              |
| 1 | 1.00 | 1 | 1 | 0 | -0.001 | 0 | 0 | 0 | t | 8066 | DELEAETQ<br>NVYAA            | Aotus<br>nancyma<br>ae           |
| 1 | 1.00 | 1 | 1 | 0 | 0      | 0 | 0 | 0 | t | 9722 | DPPPPNP<br>NDPPPPN<br>PN     | Rattus<br>norvegic<br>us         |

|   |      |   |   |   |        |   |   |   |   |      |                              |                                  |
|---|------|---|---|---|--------|---|---|---|---|------|------------------------------|----------------------------------|
| 1 | 1.00 | 1 | 1 | 0 | 0      | 0 | 0 | 0 | t | 4740 | ASREAKKQ<br>VEKALE           | Mus<br>musculu<br>s              |
| 1 | 1.00 | 1 | 1 | 0 | 0      | 0 | 0 | 0 | t | 9524 | DNPASTT<br>NKDK              | Mus<br>musculu<br>s              |
| 1 | 1.00 | 1 | 1 | 0 | -0.003 | 0 | 0 | 0 | t | 9956 | DRCTTFDD<br>VQAPNYT<br>QH    | Oryctola<br>gus<br>cuniculu<br>s |
| 1 | 1.00 | 1 | 1 | 0 | -0.003 | 0 | 0 | 0 | t | 6412 | CIEFVQQE<br>VDYIIDH          | Oryctola<br>gus<br>cuniculu<br>s |
| 1 | 1.00 | 1 | 1 | 0 | 0      | 0 | 0 | 0 | t | 7756 | DDDMGFG<br>LFD               | Homo<br>sapiens                  |
| 1 | 1.00 | 1 | 1 | 0 | 0      | 0 | 0 | 0 | t | 3221 | ANAANEAA<br>DYQAKLTA<br>YQTE | Mus<br>musculu<br>s              |
| 1 | 1.00 | 1 | 1 | 0 | 0      | 0 | 0 | 0 | t | 7756 | DDDMGFG<br>LFD               | Mus<br>musculu<br>s              |
| 1 | 1.00 | 1 | 1 | 0 | -0.003 | 0 | 0 | 0 | t | 416  | AARQPDL                      | Oryctola<br>gus<br>cuniculu<br>s |
| 1 | 1.00 | 1 | 1 | 0 | -0.003 | 0 | 0 | 0 | t | 5609 | AVVYNNE<br>GTNVELG           | Oryctola<br>gus<br>cuniculu<br>s |
| 1 | 1.00 | 1 | 1 | 0 | 0      | 0 | 0 | 0 | t | 4792 | ASTGGAY<br>QSYKFIPAL<br>EAAV | Mus<br>musculu<br>s              |
| 1 | 1.00 | 1 | 1 | 0 | 0      | 0 | 0 | 0 | t | 346  | AAPANDK<br>FTVFEEAF<br>NDAIK | Mus<br>musculu<br>s              |
| 1 | 1.00 | 1 | 1 | 0 | -0.003 | 0 | 0 | 0 | t | 3900 | APVTVTRF<br>VNAS             | Oryctola<br>gus<br>cuniculu<br>s |
| 1 | 1.00 | 1 | 1 | 0 | 0      | 0 | 0 | 0 | t | 4331 | ASARGDLA<br>HLTTTHAR<br>HLP  | Mus<br>musculu<br>s              |
| 1 | 1.00 | 1 | 1 | 0 | -0.003 | 0 | 0 | 0 | t | 751  | ADPVTTEG<br>DYVVKISEF<br>YGR | Oryctola<br>gus<br>cuniculu<br>s |

|   |      |   |   |       |        |       |       |       |   |        |                              |                                  |
|---|------|---|---|-------|--------|-------|-------|-------|---|--------|------------------------------|----------------------------------|
| 1 | 1.00 | 1 | 1 | 0     | -0.003 | 0     | 0     | 0     | t | 5582   | AVTRGTIN<br>DPQRAKE          | Oryctola<br>gus<br>cuniculu<br>s |
| 1 | 1.00 | 1 | 1 | 0     | -0.003 | 0     | 0     | 0     | t | 5582   | AVTRGTIN<br>DPQRAKE          | Oryctola<br>gus<br>cuniculu<br>s |
| 1 | 1.00 | 1 | 1 | 0     | -0.003 | 0     | 0     | 0     | t | 742    | ADPNRFR<br>GKNLP             | Oryctola<br>gus<br>cuniculu<br>s |
| 1 | 1.00 | 1 | 1 | 0     | 0      | 0     | 0     | 0     | t | 4740   | ASREAKKQ<br>VEKALE           | Mus<br>musculu<br>s              |
| 1 | 1.00 | 1 | 1 | 0     | 0      | 0     | 0     | 0     | t | 9722   | DPPPPNP<br>NDPPPPN<br>PN     | Mus<br>musculu<br>s              |
| 1 | 1.00 | 1 | 1 | 0     | 0      | 0     | 0     | 0     | t | 8888   | DKIDWRES<br>GYVTEVKD<br>QGNC | Homo<br>sapiens                  |
| 1 | 1.00 | 1 | 1 | 0     | -0.003 | 0     | 0     | 0     | t | 9524   | DNPASTT<br>NKDK              | Oryctola<br>gus<br>cuniculu<br>s |
| 1 | 1.00 | 1 | 1 | 0     | 0      | 0     | 0     | 0     | t | 7745   | DDASVDF<br>VAEPVKLP          | Mus<br>musculu<br>s              |
| 1 | 1.00 | 1 | 1 | 0     | 0      | 0     | 0     | 0     | t | 9524   | DNPASTT<br>NKDK              | Mus<br>musculu<br>s              |
| 1 | 1.00 | 1 | 1 | 0     | 0      | 0     | 0     | 0     | t | 7756   | DDDMGFG<br>LFD               | Homo<br>sapiens                  |
| 1 | 1.00 | 1 | 1 | 0     | 0      | 0     | 0     | 0     | t | 9722   | DPPPPNP<br>NDPPPPN<br>PN     | Mus<br>musculu<br>s              |
| 1 | 1.00 | 1 | 1 | 0     | 0      | 0     | 0     | 0     | t | 9694   | DPNANPN<br>VDPNANP<br>NV     | Mus<br>musculu<br>s              |
| 1 | 1.00 | 1 | 1 | -0.02 | -0.02  | -0.02 | -0.02 | -0.02 | t | 114869 | KDVLVCNK<br>DL               | Homo<br>sapiens                  |
| 1 | 1.00 | 1 | 1 | -0.02 | -0.02  | -0.02 | -0.02 | -0.02 | t | 103143 | EMIEAVGY<br>RSWPRYF          | Homo<br>sapiens                  |

|   |      |   |   |       |        |        |        |        |   |        |                              |                                  |
|---|------|---|---|-------|--------|--------|--------|--------|---|--------|------------------------------|----------------------------------|
| 1 | 1.00 | 1 | 1 | -0.04 | -0.04  | -0.04  | -0.04  | -0.04  | t | 115275 | GTWYSLA<br>MAA               | Homo<br>sapiens                  |
| 1 | 1.00 | 1 | 1 | 0.03  | 0.028  | 0.028  | 0.029  | 0.031  | t | 26317  | IGRGNFGE<br>VFSG             | Mus<br>musculu<br>s              |
| 1 | 1.00 | 1 | 1 | 0.01  | 0.01   | 0.006  | 0.01   | 0.012  | t | 52157  | QQTFPQP<br>QQT               | Mus<br>musculu<br>s              |
| 1 | 1.00 | 1 | 1 | 0.01  | 0.012  | 0.005  | 0.009  | 0.011  | t | 79123  | YEVNRVSG<br>VYHVTND<br>CS    | Homo<br>sapiens                  |
| 1 | 1.00 | 1 | 1 | -0.01 | -0.01  | -0.009 | -0.011 | -0.012 | t | 25084  | HVRVRPYK<br>EKPIQNQA<br>KSVD | Homo<br>sapiens                  |
| 1 | 1.00 | 1 | 1 | 0.02  | 0.022  | 0.024  | 0.023  | 0.02   | t | 68987  | VIIEQSWG<br>SP               | Homo<br>sapiens                  |
| 1 | 1.00 | 1 | 1 | 0.01  | 0.014  | 0.021  | 0.013  | 0.008  | t | 60396  | SQCKLGSV<br>DLN              | Homo<br>sapiens                  |
| 1 | 1.00 | 1 | 1 | -0.01 | -0.003 | -0.012 | -0.01  | -0.011 | t | 139686 | ANIREEMR<br>RLQRRKQL<br>CF   | Ovis<br>aries                    |
| 1 | 1.00 | 1 | 1 | 0.02  | 0.02   | 0.013  | 0.02   | 0.023  | t | 7005   | CSGPPTIR<br>GQFS             | Mus<br>musculu<br>s              |
| 1 | 1.00 | 1 | 1 | 0.04  | 0.04   | 0.04   | 0.038  | 0.04   | t | 119506 | PIVET                        | Homo<br>sapiens                  |
| 1 | 1.00 | 1 | 1 | -0.02 | -0.024 | -0.02  | -0.021 | -0.02  | t | 111164 | CPPDVIPK<br>VEGTTIA          | Oryctola<br>gus<br>cuniculu<br>s |
| 1 | 1.00 | 1 | 1 | 0.05  | 0.05   | 0.041  | 0.043  | 0.05   | t | 136006 | VETGHTSQ<br>VTPS             | Homo<br>sapiens                  |
| 1 | 1.00 | 1 | 1 | 0     | -0.012 | 0      | 0      | 0      | t | 71506  | VTSTLTSLF<br>RPGASQKI<br>QL  | Mus<br>musculu<br>s              |
| 1 | 1.00 | 1 | 1 | 0     | 0      | 0.005  | 0      | 0.001  | t | 130474 | ECLLLSKYC<br>MPS             | Mus<br>musculu<br>s              |
| 1 | 1.00 | 1 | 1 | 0     | 0      | 0.005  | 0      | 0.001  | t | 130474 | ECLLLSKYC<br>MPS             | Mus<br>musculu<br>s              |
| 1 | 1.00 | 1 | 1 | 0.03  | 0.032  | 0.033  | 0.033  | 0.031  | t | 111585 | NKSEVPLD<br>ICTSICKYP<br>DYI | Cavia<br>porcellu<br>s           |

|   |      |   |   |       |        |        |        |        |   |        |                              |                                  |
|---|------|---|---|-------|--------|--------|--------|--------|---|--------|------------------------------|----------------------------------|
| 1 | 1.00 | 1 | 1 | 0.02  | 0.014  | 0.02   | 0.02   | 0.02   | t | 123392 | KRKPKSQE                     | Oryctola<br>gus<br>cuniculu<br>s |
| 1 | 1.00 | 1 | 1 | 0     | 0      | -0.016 | 0      | 0.002  | t | 20451  | GISYYEKVL<br>AKYKDDLE        | Mus<br>musculu<br>s              |
| 1 | 1.00 | 1 | 1 | 0     | -0.003 | -0.016 | 0      | 0.002  | t | 20451  | GISYYEKVL<br>AKYKDDLE        | Oryctola<br>gus<br>cuniculu<br>s |
| 1 | 1.00 | 1 | 1 | 0     | 0      | -0.016 | 0      | 0.002  | t | 20451  | GISYYEKVL<br>AKYKDDLE        | Mus<br>musculu<br>s              |
| 1 | 1.00 | 1 | 1 | -0.01 | 0.004  | -0.01  | -0.01  | -0.01  | t | 134197 | PVFPTAEQ<br>FRRM             | Rattus<br>rattus                 |
| 1 | 1.00 | 1 | 1 | 0.01  | 0.013  | 0.018  | 0.009  | 0.008  | t | 64049  | THLKASSG<br>YCAWPAC          | Mus<br>musculu<br>s              |
| 1 | 1.00 | 1 | 1 | 0     | 0      | 0.002  | 0      | 0      | t | 21893  | GQIVGGV<br>Y                 | Homo<br>sapiens                  |
| 1 | 1.00 | 1 | 1 | 0     | -0.004 | -0.004 | -0.001 | 0      | t | 59761  | SMT PQAV<br>LAFVALIPP<br>T   | Oryctola<br>gus<br>cuniculu<br>s |
| 1 | 1.00 | 1 | 1 | 0.03  | 0.03   | 0.03   | 0.03   | 0.03   | t | 79641  | SGIAVNP                      | Oryctola<br>gus<br>cuniculu<br>s |
| 1 | 1.00 | 1 | 1 | -0.02 | -0.019 | -0.012 | -0.019 | -0.022 | t | 47773  | PGVGTGC<br>TACGV             | Myodes<br>glareolu<br>s          |
| 1 | 1.00 | 1 | 1 | 0.01  | 0.01   | 0.01   | 0.01   | 0.01   | t | 135714 | LNGKVDA<br>F                 | Homo<br>sapiens                  |
| 1 | 1.00 | 1 | 1 | 0.01  | 0.01   | 0.01   | 0.01   | 0.01   | t | 127718 | KSTPQFT                      | Homo<br>sapiens                  |
| 1 | 1.00 | 1 | 1 | 0.01  | 0.01   | 0.01   | 0.01   | 0.01   | t | 116005 | TTEAVEST<br>VA               | Homo<br>sapiens                  |
| 1 | 1.00 | 1 | 1 | 0.01  | 0.01   | 0.01   | 0.01   | 0.01   | t | 73614  | YEAADAIL<br>HTP              | Homo<br>sapiens                  |
| 1 | 1.00 | 1 | 1 | 0.01  | 0.01   | 0.01   | 0.01   | 0.01   | t | 60675  | SRGNHVA<br>PTHYVTES<br>DASQR | Homo<br>sapiens                  |
| 1 | 1.00 | 1 | 1 | 0.01  | 0.01   | 0.01   | 0.01   | 0.01   | t | 12925  | ELAAKLSG<br>LGLNAV           | Homo<br>sapiens                  |

|   |      |   |   |       |        |        |        |        |   |        |                              |                     |
|---|------|---|---|-------|--------|--------|--------|--------|---|--------|------------------------------|---------------------|
| 1 | 1.00 | 1 | 1 | -0.01 | -0.01  | -0.01  | -0.01  | -0.01  | t | 149059 | HLYNPTQ                      | Sus<br>scrofa       |
| 1 | 1.00 | 1 | 1 | -0.01 | -0.01  | -0.01  | -0.01  | -0.01  | t | 123553 | NPKFEELK<br>G                | Ovis<br>aries       |
| 1 | 1.00 | 1 | 1 | -0.01 | -0.01  | -0.01  | -0.01  | -0.01  | t | 98941  | PQYSQPQ<br>QPISQ             | Homo<br>sapiens     |
| 1 | 1.00 | 1 | 1 | -0.01 | -0.01  | -0.01  | -0.01  | -0.01  | t | 103031 | AIANAYW<br>SPQARRRF          | Homo<br>sapiens     |
| 1 | 1.00 | 1 | 1 | -0.01 | -0.01  | -0.01  | -0.01  | -0.01  | t | 115474 | RVYVEELK<br>PTPEGDLEI<br>LLQ | Homo<br>sapiens     |
| 1 | 1.00 | 1 | 1 | -0.01 | -0.01  | -0.01  | -0.01  | -0.01  | t | 111946 | WGNQLFV<br>TVVDTTRS          | Mus<br>musculu<br>s |
| 1 | 1.00 | 1 | 1 | -0.01 | -0.01  | -0.01  | -0.01  | -0.01  | t | 52084  | QQPFPQP<br>QQP               | Mus<br>musculu<br>s |
| 1 | 1.00 | 1 | 1 | -0.01 | -0.01  | -0.01  | -0.01  | -0.01  | t | 52084  | QQPFPQP<br>QQP               | Mus<br>musculu<br>s |
| 1 | 1.00 | 1 | 1 | -0.01 | -0.01  | -0.01  | -0.01  | -0.01  | t | 5147   | ATSRSTM<br>QLASFFTP<br>G     | Homo<br>sapiens     |
| 1 | 1.00 | 1 | 1 | 0     | 0      | -0.001 | -0.002 | 0      | t | 7064   | CSQNPLAE<br>LKCSVKSFE        | Homo<br>sapiens     |
| 1 | 1.00 | 1 | 1 | 0.07  | 0.07   | 0.07   | 0.07   | 0.068  | t | 128212 | AEEKKVEA<br>KKEESEE          | Homo<br>sapiens     |
| 1 | 1.00 | 1 | 1 | 0.06  | 0.062  | 0.08   | 0.067  | 0.06   | t | 141611 | CETNTGEV                     | Homo<br>sapiens     |
| 1 | 1.00 | 1 | 1 | -0.01 | -0.008 | -0.015 | -0.009 | -0.011 | t | 43264  | NAPATVC<br>GPKLSTDLI<br>K    | Homo<br>sapiens     |
| 1 | 1.00 | 1 | 1 | 0.01  | 0.01   | 0.01   | 0.01   | 0.01   | t | 117408 | YLQSASIFS<br>K               | Homo<br>sapiens     |
| 1 | 1.00 | 1 | 1 | -0.01 | -0.01  | -0.006 | -0.01  | -0.01  | t | 102709 | PCKKMCT<br>VSDYISELY<br>NKPL | Mus<br>musculu<br>s |
| 1 | 1.00 | 1 | 1 | -0.02 | -0.022 | -0.015 | -0.023 | -0.022 | t | 21101  | GLRFRER                      | Mus<br>musculu<br>s |

|   |      |   |   |       |        |        |        |        |   |        |                              |                                  |
|---|------|---|---|-------|--------|--------|--------|--------|---|--------|------------------------------|----------------------------------|
| 1 | 1.00 | 1 | 1 | 0.01  | 0.01   | 0.006  | 0.01   | 0.01   | t | 72908  | WNSQKDI<br>LEQARA            | Mus<br>musculu<br>s              |
| 1 | 1.00 | 1 | 1 | 0     | 0      | 0.003  | 0      | 0.003  | t | 94566  | KKTTTKPT<br>K                | Mus<br>musculu<br>s              |
| 1 | 1.00 | 1 | 1 | 0.06  | 0.062  | 0.056  | 0.059  | 0.059  | t | 2677   | ALKTELED<br>TLDSTATQ<br>QELR | Homo<br>sapiens                  |
| 1 | 1.00 | 1 | 1 | 0.04  | 0.04   | 0.035  | 0.04   | 0.042  | t | 63997  | TGVYEDLL<br>AAGVA            | Mus<br>musculu<br>s              |
| 1 | 1.00 | 1 | 1 | 0.02  | 0.018  | 0.025  | 0.017  | 0.018  | t | 96874  | SIAPDLSLD<br>FEKLVN          | Mus<br>musculu<br>s              |
| 1 | 1.00 | 1 | 1 | 0.03  | 0.027  | 0.03   | 0.03   | 0.032  | t | 135478 | LGGLGVG                      | Oryctola<br>gus<br>cuniculu<br>s |
| 1 | 1.00 | 1 | 1 | 0.03  | 0.03   | 0.03   | 0.03   | 0.03   | t | 14279  | ESSTVKA<br>ESSTVKAES<br>STIS | Mus<br>musculu<br>s              |
| 1 | 1.00 | 1 | 1 | 0.03  | 0.03   | 0.03   | 0.03   | 0.03   | t | 14279  | ESSTVKA<br>ESSTVKAES<br>STIS | Mus<br>musculu<br>s              |
| 1 | 1.00 | 1 | 1 | 0.04  | 0.04   | 0.048  | 0.04   | 0.04   | t | 106466 | GNESEIYR<br>KY               | Homo<br>sapiens                  |
| 1 | 1.00 | 1 | 1 | -0.01 | -0.01  | -0.005 | -0.003 | -0.01  | t | 146298 | GVYATR<br>SSAVRLRSSV         | Homo<br>sapiens                  |
| 1 | 1.00 | 1 | 1 | 0     | 0      | 0      | 0      | 0      | t | 94470  | CNPACGP                      | Oryctola<br>gus<br>cuniculu<br>s |
| 1 | 1.00 | 1 | 1 | 0     | 0      | 0      | 0      | 0      | t | 70669  | VQWMNR<br>LIAFASRG<br>NHDSP  | Homo<br>sapiens                  |
| 1 | 1.00 | 1 | 1 | 0     | 0.007  | 0      | 0      | 0      | t | 94470  | CNPACGP                      | Capra<br>hircus                  |
| 1 | 1.00 | 1 | 1 | -0.02 | -0.023 | -0.024 | -0.02  | -0.019 | t | 122734 | DSVPKWD<br>RLPC              | Oryctola<br>gus<br>cuniculu<br>s |

|   |      |   |   |       |        |        |       |        |   |        |                              |                                  |
|---|------|---|---|-------|--------|--------|-------|--------|---|--------|------------------------------|----------------------------------|
| 1 | 1.00 | 1 | 1 | 0.02  | 0.018  | 0.02   | 0.013 | 0.021  | t | 117614 | QGFPFYDK<br>PMRI             | Mus<br>musculu<br>s              |
| 1 | 1.00 | 1 | 1 | -0.02 | -0.017 | -0.022 | -0.02 | -0.017 | t | 6670   | CMTTAQG<br>TSMYPSC           | Mus<br>musculu<br>s              |
| 1 | 1.00 | 1 | 1 | 0.02  | 0.02   | 0.02   | 0.02  | 0.02   | t | 117339 | PGALLRQD<br>NAPN             | Homo<br>sapiens                  |
| 1 | 1.00 | 1 | 1 | 0.02  | 0.02   | 0.02   | 0.02  | 0.02   | t | 78260  | RIVSIT                       | Equus<br>caballus                |
| 1 | 1.00 | 1 | 1 | 0     | 0      | 0      | 0     | 0      | t | 131078 | SQTTANAS<br>CPEGT            | Rattus<br>norvegic<br>us         |
| 1 | 1.00 | 1 | 1 | 0     | 0      | 0      | 0     | 0      | t | 122022 | VVFPVPPP<br>NYINIPS          | Mus<br>musculu<br>s              |
| 1 | 1.00 | 1 | 1 | 0     | 0      | 0      | 0     | 0      | t | 118591 | RSIAKEGFE<br>KISK            | Homo<br>sapiens                  |
| 1 | 1.00 | 1 | 1 | 0     | 0      | 0      | 0     | 0      | t | 123225 | GGATPVV<br>G                 | Oryctola<br>gus<br>cuniculu<br>s |
| 1 | 1.00 | 1 | 1 | 0     | 0      | 0      | 0     | 0      | t | 122022 | VVFPVPPP<br>NYINIPS          | Mus<br>musculu<br>s              |
| 1 | 1.00 | 1 | 1 | 0     | 0      | 0      | 0     | 0      | t | 109638 | NVFSCSV                      | Homo<br>sapiens                  |
| 1 | 1.00 | 1 | 1 | 0     | 0      | 0      | 0     | 0      | t | 99688  | SSELHLLGF<br>GINAEN          | Homo<br>sapiens                  |
| 1 | 1.00 | 1 | 1 | 0     | 0      | 0      | 0     | 0      | t | 107687 | WYVDGV<br>Q                  | Homo<br>sapiens                  |
| 1 | 1.00 | 1 | 1 | 0     | 0      | 0      | 0     | 0      | t | 107684 | WLDGKEY                      | Homo<br>sapiens                  |
| 1 | 1.00 | 1 | 1 | 0     | 0      | 0      | 0     | 0      | t | 51925  | QPQQPFP<br>QSQ               | Mus<br>musculu<br>s              |
| 1 | 1.00 | 1 | 1 | 0     | 0      | 0      | 0     | 0      | t | 7502   | DAEVAGT<br>QWFTPSG<br>KTPVFG | Aotus<br>nancyma<br>ae           |
| 1 | 1.00 | 1 | 1 | -0.02 | -0.02  | -0.02  | -0.02 | -0.02  | t | 22815  | GTSGPSGT<br>GPSGTSP          | Homo<br>sapiens                  |
| 1 | 1.00 | 1 | 1 | 0     | 0      | 0.002  | 0     | 0      | t | 48155  | PKTSEILDI<br>SPCAFGGV        | Homo<br>sapiens                  |



|   |      |   |   |       |        |        |        |        |   |        |                         |                          |
|---|------|---|---|-------|--------|--------|--------|--------|---|--------|-------------------------|--------------------------|
| 1 | 1.00 | 1 | 1 | -0.04 | -0.04  | -0.046 | -0.043 | -0.039 | t | 27553  | IMSALAM<br>VYLGAK       | Homo<br>sapiens          |
| 1 | 1.00 | 1 | 1 | -0.03 | -0.03  | -0.021 | -0.023 | -0.03  | t | 135930 | GDKVSFFC<br>KNKEKKC     | Homo<br>sapiens          |
| 1 | 1.00 | 1 | 1 | 0     | 0.002  | 0.002  | 0.003  | 0.003  | t | 119641 | SEHETRLV<br>AKLFKDYS    | Homo<br>sapiens          |
| 1 | 1.00 | 1 | 1 | 0.03  | 0.03   | 0.035  | 0.028  | 0.03   | t | 2979   | ALVPDKEV<br>L           | Homo<br>sapiens          |
| 1 | 1.00 | 1 | 1 | -0.03 | -0.03  | -0.023 | -0.03  | -0.03  | t | 151650 | GWWPYA<br>ALRALS        | Mus<br>musculu<br>s      |
| 1 | 1.00 | 1 | 1 | -0.01 | -0.008 | -0.017 | -0.007 | -0.008 | t | 135935 | IEQGWGS<br>PKVTK        | Homo<br>sapiens          |
| 1 | 1.00 | 1 | 1 | 0.01  | 0.012  | 0.015  | 0.011  | 0.01   | t | 49150  | PQVVMG                  | Homo<br>sapiens          |
| 1 | 1.00 | 1 | 1 | 0     | 0.002  | 0.002  | 0.001  | 0      | t | 73483  | YCADVAA<br>EELMNAL<br>V | Homo<br>sapiens          |
| 1 | 1.00 | 1 | 1 | 0     | 0.002  | 0.002  | 0.001  | 0      | t | 72324  | WDQKLW<br>CRHFCVLA<br>D | Homo<br>sapiens          |
| 1 | 1.00 | 1 | 1 | 0     | 0.005  | 0.002  | 0.001  | 0      | t | 72324  | WDQKLW<br>CRHFCVLA<br>D | Homo<br>sapiens          |
| 1 | 1.00 | 1 | 1 | 0     | 0.002  | 0.002  | 0.001  | 0      | t | 47890  | PIELQVECF<br>TWDQKL     | Homo<br>sapiens          |
| 1 | 1.00 | 1 | 1 | 0     | 0.005  | 0.002  | 0.001  | 0      | t | 47890  | PIELQVECF<br>TWDQKL     | Homo<br>sapiens          |
| 1 | 1.00 | 1 | 1 | 0     | 0.002  | 0.002  | 0.001  | 0      | t | 9319   | DLVKFISD<br>KIKFLNP     | Homo<br>sapiens          |
| 1 | 1.00 | 1 | 1 | 0     | 0      | 0      | 0.003  | 0      | t | 42683  | MSTNPKP<br>QKKNKRN<br>T | Homo<br>sapiens          |
| 1 | 1.00 | 1 | 1 | -0.02 | -0.01  | -0.017 | -0.021 | -0.017 | t | 61635  | STGPCR                  | Pan<br>troglody<br>tes   |
| 1 | 1.00 | 1 | 1 | -0.03 | -0.03  | -0.013 | -0.03  | -0.035 | t | 114120 | GILDSIGRF<br>FGGDRG     | Rattus<br>norvegic<br>us |

|   |      |   |   |       |        |        |        |        |   |        |                             |                     |
|---|------|---|---|-------|--------|--------|--------|--------|---|--------|-----------------------------|---------------------|
| 1 | 1.00 | 1 | 1 | -0.01 | -0.004 | -0.01  | -0.01  | -0.01  | t | 123639 | PVRLLEY<br>G                | Ovis<br>aries       |
| 1 | 1.00 | 1 | 1 | -0.01 | -0.012 | -0.008 | -0.009 | -0.01  | t | 51755  | QNQRPTL                     | Mus<br>musculu<br>s |
| 1 | 1.00 | 1 | 1 | 0.02  | 0.02   | 0.013  | 0.014  | 0.018  | t | 70236  | VPAAKIPT<br>GELQI           | Homo<br>sapiens     |
| 1 | 1.00 | 1 | 1 | -0.01 | -0.012 | -0.004 | -0.011 | -0.014 | t | 54229  | RIQRGSGR<br>AFVTIGK         | Mus<br>musculu<br>s |
| 1 | 1.00 | 1 | 1 | 0.02  | 0.02   | 0.021  | 0.02   | 0.023  | t | 68041  | VDPQ                        | Mus<br>musculu<br>s |
| 1 | 1.00 | 1 | 1 | 0.04  | 0.04   | 0.04   | 0.04   | 0.04   | t | 145841 | KEDFRYAIS<br>STNEIGLLG<br>A | Sus<br>scrofa       |
| 1 | 1.00 | 1 | 1 | 0.02  | 0.013  | 0.016  | 0.021  | 0.022  | t | 148521 | CNTKCQTP<br>MGAINSS         | Homo<br>sapiens     |
| 1 | 1.00 | 1 | 1 | 0.03  | 0.03   | 0.03   | 0.03   | 0.03   | t | 136134 | ANGWGV<br>MVSHRSG<br>ETEDT  | Homo<br>sapiens     |
| 1 | 1.00 | 1 | 1 | 0     | 0      | 0.002  | 0      | -0.002 | t | 151676 | KVDFPQD<br>QLATLTGR<br>I    | Mus<br>musculu<br>s |
| 1 | 1.00 | 1 | 1 | -0.01 | -0.01  | -0.011 | -0.01  | -0.01  | t | 127770 | PRAPPARA<br>SYRRFRT         | Homo<br>sapiens     |
| 1 | 1.00 | 1 | 1 | -0.03 | -0.026 | -0.024 | -0.029 | -0.03  | t | 80414  | ANGGTIHP<br>TI              | Homo<br>sapiens     |
| 1 | 1.00 | 1 | 1 | 0.03  | 0.03   | 0.03   | 0.03   | 0.03   | t | 78272  | STLSKS                      | Equus<br>caballus   |
| 1 | 1.00 | 1 | 1 | 0.01  | 0.01   | 0.01   | 0.01   | 0.01   | t | 123171 | FGRVCYNP<br>K               | Ovis<br>aries       |
| 1 | 1.00 | 1 | 1 | 0.01  | 0.01   | 0.01   | 0.01   | 0.01   | t | 111170 | CSPLTHAIC                   | Homo<br>sapiens     |
| 1 | 1.00 | 1 | 1 | 0.01  | 0.01   | 0.01   | 0.01   | 0.01   | t | 114784 | ECKETVP<br>MNC              | Homo<br>sapiens     |
| 1 | 1.00 | 1 | 1 | 0.01  | 0.01   | 0.01   | 0.01   | 0.01   | t | 111151 | CLEASYFR<br>C               | Homo<br>sapiens     |
| 1 | 1.00 | 1 | 1 | -0.01 | -0.01  | -0.01  | -0.01  | -0.01  | t | 121474 | KKAPAKKG<br>EKVPKGK         | Homo<br>sapiens     |

|   |      |   |   |       |        |        |        |        |   |        |                               |                                  |
|---|------|---|---|-------|--------|--------|--------|--------|---|--------|-------------------------------|----------------------------------|
| 1 | 1.00 | 1 | 1 | -0.01 | -0.01  | -0.01  | -0.01  | -0.01  | t | 107695 | YKCKVSN                       | Homo sapiens                     |
| 1 | 1.00 | 1 | 1 | -0.01 | -0.01  | -0.01  | -0.01  | -0.01  | t | 96012  | YERGHITV<br>NY                | Oryctola<br>gus<br>cuniculu<br>s |
| 1 | 1.00 | 1 | 1 | -0.01 | -0.01  | -0.01  | -0.01  | -0.01  | t | 78356  | DFLIRYLN<br>DSTPPFP           | Mus<br>musculu<br>s              |
| 1 | 1.00 | 1 | 1 | -0.01 | -0.01  | -0.01  | -0.01  | -0.01  | t | 97199  | ALWNASY<br>TA                 | Oryctola<br>gus<br>cuniculu<br>s |
| 1 | 1.00 | 1 | 1 | -0.01 | -0.01  | -0.01  | -0.01  | -0.01  | t | 61124  | SSIVYEAA<br>DMIMHT            | Homo sapiens                     |
| 1 | 1.00 | 1 | 1 | -0.03 | -0.03  | -0.03  | -0.03  | -0.03  | t | 115482 | SERYLGYLE<br>QLRLKKY<br>KVP   | Homo sapiens                     |
| 1 | 1.00 | 1 | 1 | 0.04  | 0.033  | 0.035  | 0.047  | 0.042  | t | 55187  | RPKHPIKH<br>QGLPQEV<br>L NENL | Homo sapiens                     |
| 1 | 1.00 | 1 | 1 | 0     | 0.004  | 0      | 0.001  | 0.001  | t | 46198  | NTNSGPD<br>DQIGYYRR<br>ATR    | Homo sapiens                     |
| 1 | 1.00 | 1 | 1 | -0.01 | -0.012 | -0.019 | -0.01  | -0.01  | t | 100063 | GHALRIPS<br>GFISYILNR<br>HDN  | Homo sapiens                     |
| 1 | 1.00 | 1 | 1 | 0.04  | 0.04   | 0.028  | 0.037  | 0.04   | t | 68473  | VFGKEKVN<br>ELSKDIGSE<br>STE  | Homo sapiens                     |
| 1 | 1.00 | 1 | 1 | -0.01 | -0.008 | -0.01  | -0.009 | -0.01  | t | 110938 | LYIKGSGST<br>ANLASSNY<br>FPT  | Homo sapiens                     |
| 1 | 1.00 | 1 | 1 | -0.01 | -0.008 | -0.01  | -0.009 | -0.01  | t | 110938 | LYIKGSGST<br>ANLASSNY<br>FPT  | Homo sapiens                     |
| 1 | 1.00 | 1 | 1 | -0.03 | -0.028 | -0.029 | -0.027 | -0.03  | t | 47838  | PHIVTPPS<br>ARPRIMAP<br>PVVR  | Homo sapiens                     |
| 1 | 1.00 | 1 | 1 | -0.03 | -0.028 | -0.029 | -0.027 | -0.03  | t | 47838  | PHIVTPPS<br>ARPRIMAP<br>PVVR  | Homo sapiens                     |
| 1 | 1.00 | 1 | 1 | -0.04 | -0.045 | -0.044 | -0.037 | -0.038 | t | 158493 | WNNNIFY<br>DGPVGAF            | Canis lupus                      |
| 1 | 1.00 | 1 | 1 | 0.01  | 0.008  | 0.01   | 0.009  | 0.01   | t | 39398  | LSGRPAIV<br>PDREVLYQ<br>EFDE  | Mus<br>musculu<br>s              |

|   |      |   |   |       |        |        |        |        |   |        |                               |                                  |
|---|------|---|---|-------|--------|--------|--------|--------|---|--------|-------------------------------|----------------------------------|
| 1 | 1.00 | 1 | 1 | 0.01  | 0.008  | 0.01   | 0.009  | 0.01   | t | 39398  | LSGRPAIV<br>PDREVLVYQ<br>EFDE | Mus<br>musculu<br>s              |
| 1 | 1.00 | 1 | 1 | 0.01  | 0.008  | 0.01   | 0.009  | 0.01   | t | 39398  | LSGRPAIV<br>PDREVLVYQ<br>EFDE | Mus<br>musculu<br>s              |
| 1 | 1.00 | 1 | 1 | 0.01  | 0.008  | 0.01   | 0.009  | 0.01   | t | 39398  | LSGRPAIV<br>PDREVLVYQ<br>EFDE | Mus<br>musculu<br>s              |
| 1 | 1.00 | 1 | 1 | -0.01 | -0.012 | -0.01  | -0.011 | -0.01  | t | 151031 | LVKKGNSY<br>PKLSKSY           | Mus<br>musculu<br>s              |
| 1 | 1.00 | 1 | 1 | 0.06  | 0.06   | 0.053  | 0.06   | 0.06   | t | 119432 | AREETDKE<br>EPASKQQK<br>TENG  | Homo<br>sapiens                  |
| 1 | 1.00 | 1 | 1 | -0.03 | -0.028 | -0.037 | -0.033 | -0.03  | t | 106848 | SKIQSTIFR<br>G                | Homo<br>sapiens                  |
| 1 | 1.00 | 1 | 1 | -0.04 | -0.04  | -0.04  | -0.04  | -0.04  | t | 135942 | KDVKFGA<br>DARAL              | Homo<br>sapiens                  |
| 1 | 1.00 | 1 | 1 | -0.04 | -0.04  | -0.04  | -0.04  | -0.04  | t | 135942 | KDVKFGA<br>DARAL              | Homo<br>sapiens                  |
| 1 | 1.00 | 1 | 1 | -0.03 | -0.032 | -0.025 | -0.031 | -0.03  | t | 58042  | SGFVSLLA<br>PGAKQN            | Mus<br>musculu<br>s              |
| 1 | 1.00 | 1 | 1 | -0.03 | -0.027 | -0.025 | -0.031 | -0.03  | t | 58042  | SGFVSLLA<br>PGAKQN            | Mus<br>musculu<br>s              |
| 1 | 1.00 | 1 | 1 | -0.02 | -0.018 | -0.016 | -0.017 | -0.019 | t | 144697 | IYRNLYWE<br>GS                | Homo<br>sapiens                  |
| 1 | 1.00 | 1 | 1 | 0.01  | 0.006  | 0.005  | 0.01   | 0.01   | t | 123841 | WEGVGVV<br>PDVAVP             | Rattus<br>norvegic<br>us         |
| 1 | 1.00 | 1 | 1 | 0     | -0.003 | -0.008 | 0      | 0      | t | 6562   | CLGDINAR<br>DLICAQKF<br>N     | Oryctola<br>gus<br>cuniculu<br>s |
| 1 | 1.00 | 1 | 1 | 0.02  | 0.022  | 0.02   | 0.027  | 0.022  | t | 108844 | DAGVIQSP<br>RHEVTEM<br>G      | Homo<br>sapiens                  |
| 1 | 1.00 | 1 | 1 | 0.01  | 0.014  | 0.013  | 0.011  | 0.01   | t | 5437   | AVLLGACS                      | Homo<br>sapiens                  |

|   |      |   |   |       |        |        |        |        |   |        |                                |                                  |
|---|------|---|---|-------|--------|--------|--------|--------|---|--------|--------------------------------|----------------------------------|
| 1 | 1.00 | 1 | 1 | 0     | -0.002 | 0.005  | -0.001 | -0.002 | t | 21026  | GLLRYHTY<br>ARFG               | Mus<br>musculu<br>s              |
| 1 | 1.00 | 1 | 1 | 0     | -0.002 | 0.005  | -0.001 | -0.002 | t | 18363  | FWRGDLV<br>FDFQV               | Mus<br>musculu<br>s              |
| 1 | 1.00 | 1 | 1 | 0     | 0.002  | 0      | 0      | 0      | t | 130536 | LCENIAGH<br>LK                 | Rattus<br>norvegic<br>us         |
| 1 | 1.00 | 1 | 1 | 0     | -0.002 | 0      | 0      | 0      | t | 130536 | LCENIAGH<br>LK                 | Oryctola<br>gus<br>cuniculu<br>s |
| 1 | 1.00 | 1 | 1 | 0     | 0      | 0      | 0      | 0      | t | 130536 | LCENIAGH<br>LK                 | Oryctola<br>gus<br>cuniculu<br>s |
| 1 | 1.00 | 1 | 1 | 0.02  | 0.019  | 0.011  | 0.021  | 0.022  | t | 48477  | PLSLPNPY<br>QLDAAF             | Bos<br>taurus                    |
| 1 | 1.00 | 1 | 1 | -0.01 | -0.008 | -0.022 | -0.013 | -0.009 | t | 78381  | FKDGRGC<br>GSCFEIKCT<br>KP     | Homo<br>sapiens                  |
| 1 | 1.00 | 1 | 1 | 0.01  | 0.013  | 0.012  | 0.01   | 0.012  | t | 118429 | IRYFILPDSL<br>PLDTL            | Mus<br>musculu<br>s              |
| 1 | 1.00 | 1 | 1 | 0.04  | 0.04   | 0.04   | 0.04   | 0.04   | t | 115725 | ELNVPGEI<br>VE                 | Homo<br>sapiens                  |
| 1 | 1.00 | 1 | 1 | 0.02  | 0.02   | 0.02   | 0.02   | 0.02   | t | 119629 | QPENNYK<br>T                   | Homo<br>sapiens                  |
| 1 | 1.00 | 1 | 1 | 0.02  | 0.02   | 0.02   | 0.02   | 0.02   | t | 114910 | NTTSEDGK<br>VM                 | Homo<br>sapiens                  |
| 1 | 1.00 | 1 | 1 | 0.02  | 0.02   | 0.02   | 0.02   | 0.02   | t | 108033 | MQTPPGN<br>LENAVETL            | Homo<br>sapiens                  |
| 1 | 1.00 | 1 | 1 | 0.02  | 0.02   | 0.02   | 0.02   | 0.02   | t | 96823  | RKEEEAE<br>DK                  | Homo<br>sapiens                  |
| 1 | 1.00 | 1 | 1 | 0     | 0      | 0      | 0      | 0      | t | 148567 | DKSKLQDV<br>KDNKPSD<br>VKL     | Canis<br>lupus                   |
| 1 | 1.00 | 1 | 1 | 0     | 0      | 0      | 0      | 0      | t | 144666 | GREGYP<br>A<br>DGGKGSS<br>GYCA | Oryctola<br>gus<br>cuniculu<br>s |

|   |      |   |   |   |   |   |   |   |   |        |                              |                            |
|---|------|---|---|---|---|---|---|---|---|--------|------------------------------|----------------------------|
| 1 | 1.00 | 1 | 1 | 0 | 0 | 0 | 0 | 0 | t | 148567 | DKSKLQDV<br>KDNKPSD<br>VKL   | Homo<br>sapiens            |
| 1 | 1.00 | 1 | 1 | 0 | 0 | 0 | 0 | 0 | t | 127866 | TLRPAATA<br>RRKRRWA          | Homo<br>sapiens            |
| 1 | 1.00 | 1 | 1 | 0 | 0 | 0 | 0 | 0 | t | 129575 | PGRGTPPP                     | Homo<br>sapiens            |
| 1 | 1.00 | 1 | 1 | 0 | 0 | 0 | 0 | 0 | t | 121672 | NVKHLSVA<br>YPLVDPF          | Mus<br>musculu<br>s        |
| 1 | 1.00 | 1 | 1 | 0 | 0 | 0 | 0 | 0 | t | 121672 | NVKHLSVA<br>YPLVDPF          | Mus<br>musculu<br>s        |
| 1 | 1.00 | 1 | 1 | 0 | 0 | 0 | 0 | 0 | t | 109845 | RPLGLQEE<br>SLDG             | Mus<br>musculu<br>s        |
| 1 | 1.00 | 1 | 1 | 0 | 0 | 0 | 0 | 0 | t | 103245 | GVYKVCK<br>GLEKIPLL          | Homo<br>sapiens            |
| 1 | 1.00 | 1 | 1 | 0 | 0 | 0 | 0 | 0 | t | 116979 | FQTD MST<br>RPRGA            | Homo<br>sapiens            |
| 1 | 1.00 | 1 | 1 | 0 | 0 | 0 | 0 | 0 | t | 114407 | IGGRVHFF<br>RDISPIG          | Homo<br>sapiens            |
| 1 | 1.00 | 1 | 1 | 0 | 0 | 0 | 0 | 0 | t | 113754 | QGQQPG<br>QGQQGQ<br>QP       | Homo<br>sapiens            |
| 1 | 1.00 | 1 | 1 | 0 | 0 | 0 | 0 | 0 | t | 79755  | AMKPYEY<br>TPTRM             | Mus<br>musculu<br>s        |
| 1 | 1.00 | 1 | 1 | 0 | 0 | 0 | 0 | 0 | t | 88461  | SEDRETRP<br>HGRNNEN<br>FPYNR | Aotus                      |
| 1 | 1.00 | 1 | 1 | 0 | 0 | 0 | 0 | 0 | t | 96760  | PTPPVKPT<br>AP               | Homo<br>sapiens(<br>human) |
| 1 | 1.00 | 1 | 1 | 0 | 0 | 0 | 0 | 0 | t | 45698  | NRLIAFAS<br>RGNHVAP<br>THYVT | Homo<br>sapiens            |
| 1 | 1.00 | 1 | 1 | 0 | 0 | 0 | 0 | 0 | t | 42766  | MTDVIRYR<br>YSNNYESE<br>SHIS | Aotus<br>nancyma<br>ae     |
| 1 | 1.00 | 1 | 1 | 0 | 0 | 0 | 0 | 0 | t | 49068  | PQPQQPF<br>CQQ               | Mus<br>musculu<br>s        |

|   |      |   |   |       |        |        |        |        |   |        |                              |                                  |
|---|------|---|---|-------|--------|--------|--------|--------|---|--------|------------------------------|----------------------------------|
| 1 | 1.00 | 1 | 1 | 0     | 0      | 0      | 0      | 0      | t | 11968  | EFDEMEEC<br>ASHLPYIE<br>QGVQ | Homo<br>sapiens                  |
| 1 | 1.00 | 1 | 1 | -0.02 | -0.02  | -0.02  | -0.02  | -0.02  | t | 140546 | CNLWEVM<br>HGTC              | Mus<br>musculu<br>s              |
| 1 | 1.00 | 1 | 1 | -0.02 | -0.02  | -0.02  | -0.02  | -0.02  | t | 140546 | CNLWEVM<br>HGTC              | Mus<br>musculu<br>s              |
| 1 | 1.00 | 1 | 1 | -0.02 | -0.02  | -0.02  | -0.02  | -0.02  | t | 140546 | CNLWEVM<br>HGTC              | Homo<br>sapiens                  |
| 1 | 1.00 | 1 | 1 | -0.02 | -0.02  | -0.02  | -0.02  | -0.02  | t | 118275 | ATVLARSI<br>AKEGF            | Homo<br>sapiens                  |
| 1 | 1.00 | 1 | 1 | -0.02 | -0.02  | -0.02  | -0.02  | -0.02  | t | 105891 | KADPSIMA                     | Oryctola<br>gus<br>cuniculu<br>s |
| 1 | 1.00 | 1 | 1 | -0.04 | -0.04  | -0.04  | -0.04  | -0.04  | t | 135661 | EDAKPGQ<br>F                 | Homo<br>sapiens                  |
| 1 | 1.00 | 1 | 1 | 0     | 0.003  | -0.004 | 0      | 0      | t | 33051  | KQPQPRLR<br>VKTPPPVT<br>VP   | Equus<br>caballus                |
| 1 | 1.00 | 1 | 1 | -0.01 | -0.015 | -0.022 | -0.014 | -0.01  | t | 44602  | NKSTLQNR<br>RAAVS            | Mus                              |
| 1 | 1.00 | 1 | 1 | -0.03 | -0.031 | -0.019 | -0.027 | -0.03  | t | 52657  | QTVKFAP                      | Sus<br>scrofa                    |
| 1 | 1.00 | 1 | 1 | 0.01  | 0.006  | 0.01   | 0.013  | 0.012  | t | 106313 | CQQYGSS<br>PQTFG             | Oryctola<br>gus<br>cuniculu<br>s |
| 1 | 1.00 | 1 | 1 | 0     | 0      | 0.007  | 0.004  | 0      | t | 134112 | KDKATF                       | Homo<br>sapiens                  |
| 1 | 1.00 | 1 | 1 | -0.02 | -0.024 | -0.015 | -0.017 | -0.017 | t | 141715 | NLDHI                        | Oryctola<br>gus<br>cuniculu<br>s |
| 1 | 1.00 | 1 | 1 | 0.02  | 0.02   | 0.014  | 0.021  | 0.02   | t | 37758  | LLRSTSQK<br>SIVAYTMS<br>L    | Homo<br>sapiens                  |
| 1 | 1.00 | 1 | 1 | 0.02  | 0.02   | 0.023  | 0.02   | 0.02   | t | 69171  | VIYSKYGG<br>TE               | Mus<br>musculu<br>s              |
| 1 | 1.00 | 1 | 1 | 0.01  | 0.012  | 0.002  | 0.011  | 0.015  | t | 15972  | FGEVFNAT                     | Homo<br>sapiens                  |

|   |      |   |   |       |        |        |       |        |   |        |                              |                                  |
|---|------|---|---|-------|--------|--------|-------|--------|---|--------|------------------------------|----------------------------------|
| 1 | 1.00 | 1 | 1 | 0     | 0      | 0      | 0     | 0      | t | 36956  | LKMADPN<br>RFRG              | Mus<br>musculu<br>s              |
| 1 | 1.00 | 1 | 1 | 0     | 0      | 0      | 0     | 0      | t | 36956  | LKMADPN<br>RFRG              | Mus<br>musculu<br>s              |
| 1 | 1.00 | 1 | 1 | -0.03 | -0.03  | -0.042 | -0.03 | -0.026 | t | 133533 | CKCGKCNT                     | Mus<br>musculu<br>s              |
| 1 | 1.00 | 1 | 1 | 0.02  | 0.02   | 0.02   | 0.02  | 0.022  | t | 39638  | LSRNSQGF<br>MMTE             | Mus<br>musculu<br>s              |
| 1 | 1.00 | 1 | 1 | -0.01 | -0.008 | -0.005 | -0.01 | -0.012 | t | 117594 | NWHQLH<br>GKKEAY             | Homo<br>sapiens                  |
| 1 | 1.00 | 1 | 1 | 0.01  | 0.01   | 0.01   | 0.01  | 0.01   | t | 94618  | NPACGP                       | Capra<br>hircus                  |
| 1 | 1.00 | 1 | 1 | 0.06  | 0.062  | 0.055  | 0.061 | 0.061  | t | 67257  | TWGENET<br>DVLLNNT<br>RPPQ   | Homo<br>sapiens                  |
| 1 | 1.00 | 1 | 1 | 0.01  | 0.01   | 0.008  | 0.006 | 0.01   | t | 65837  | TQEIFSFLIS                   | Homo<br>sapiens                  |
| 1 | 1.00 | 1 | 1 | -0.01 | -0.01  | -0.01  | -0.01 | -0.01  | t | 130620 | TFYLK                        | Oryctola<br>gus<br>cuniculu<br>s |
| 1 | 1.00 | 1 | 1 | -0.01 | -0.01  | -0.01  | -0.01 | -0.01  | t | 130620 | TFYLK                        | Rattus<br>norvegic<br>us         |
| 1 | 1.00 | 1 | 1 | 0.01  | 0.006  | 0.013  | 0.013 | 0.01   | t | 111639 | PPPSEVVS<br>LYKSNNI          | Oryctola<br>gus<br>cuniculu<br>s |
| 1 | 1.00 | 1 | 1 | -0.01 | -0.01  | -0.01  | -0.01 | -0.01  | t | 58382  | SHLQLIYNL                    | Sus<br>scrofa                    |
| 1 | 1.00 | 1 | 1 | 0.03  | 0.03   | 0.023  | 0.03  | 0.031  | t | 131652 | SFDSSNPE<br>YFDGYWG<br>YS    | Oryctola<br>gus<br>cuniculu<br>s |
| 1 | 1.00 | 1 | 1 | 0.02  | 0.017  | 0.02   | 0.02  | 0.022  | t | 140852 | GEEKPAVL<br>GHDE             | Oryctola<br>gus<br>cuniculu<br>s |
| 1 | 1.00 | 1 | 1 | 0     | -0.007 | 0      | 0.001 | 0      | t | 50273  | QAGRTAH<br>AVTNIFSV<br>G     | Homo<br>sapiens                  |
| 1 | 1.00 | 1 | 1 | 0.02  | 0.02   | 0.02   | 0.017 | 0.02   | t | 111030 | SRGSEGFF<br>SPMLGEFV<br>SETE | Mus<br>musculu<br>s              |



|   |      |   |   |       |       |        |       |        |   |        |                              |                                  |
|---|------|---|---|-------|-------|--------|-------|--------|---|--------|------------------------------|----------------------------------|
| 1 | 1.00 | 1 | 1 | 0.03  | 0.03  | 0.03   | 0.03  | 0.03   | t | 135927 | GAKLVQD<br>VANNT             | Homo<br>sapiens                  |
| 1 | 1.00 | 1 | 1 | 0.03  | 0.03  | 0.03   | 0.03  | 0.03   | t | 134798 | SPTPTPGP<br>SRRGPSL          | Homo<br>sapiens                  |
| 1 | 1.00 | 1 | 1 | 0.03  | 0.03  | 0.03   | 0.03  | 0.03   | t | 102265 | YSCGENSF<br>MD               | Homo<br>sapiens                  |
| 1 | 1.00 | 1 | 1 | 0.01  | 0.01  | 0.01   | 0.01  | 0.01   | t | 130924 | KLFPEEDE<br>MRTETQR          | Homo<br>sapiens                  |
| 1 | 1.00 | 1 | 1 | 0.01  | 0.01  | 0.01   | 0.01  | 0.01   | t | 130924 | KLFPEEDE<br>MRTETQR          | Homo<br>sapiens                  |
| 1 | 1.00 | 1 | 1 | 0.01  | 0.01  | 0.01   | 0.01  | 0.01   | t | 97534  | NVLSNGV                      | Mus<br>musculu<br>s              |
| 1 | 1.00 | 1 | 1 | 0.01  | 0.01  | 0.01   | 0.01  | 0.01   | t | 12284  | EGSYPKLK<br>NSYENK           | Mus<br>musculu<br>s              |
| 1 | 1.00 | 1 | 1 | -0.01 | -0.01 | -0.01  | -0.01 | -0.01  | t | 150975 | DTLCIGYH<br>ANNSTDT          | Homo<br>sapiens                  |
| 1 | 1.00 | 1 | 1 | -0.01 | -0.01 | -0.01  | -0.01 | -0.01  | t | 144668 | GREGYPA<br>DGGPACY<br>CYGL   | Oryctola<br>gus<br>cuniculu<br>s |
| 1 | 1.00 | 1 | 1 | -0.01 | -0.01 | -0.01  | -0.01 | -0.01  | t | 119628 | QGNVFSCS                     | Homo<br>sapiens                  |
| 1 | 1.00 | 1 | 1 | -0.01 | -0.01 | -0.01  | -0.01 | -0.01  | t | 103352 | LGGGVGA<br>FLNALFAG          | Homo<br>sapiens                  |
| 1 | 1.00 | 1 | 1 | -0.01 | -0.01 | -0.01  | -0.01 | -0.01  | t | 100545 | TAVETGAT<br>NPLAPS           | Oryctola<br>gus<br>cuniculu<br>s |
| 1 | 1.00 | 1 | 1 | -0.01 | -0.01 | -0.01  | -0.01 | -0.01  | t | 115990 | SYGLNYYQ<br>QK               | Homo<br>sapiens                  |
| 1 | 1.00 | 1 | 1 | -0.01 | -0.01 | -0.01  | -0.01 | -0.01  | t | 22104  | GRIVLSGK<br>PAIIPDREV<br>LYR | Homo<br>sapiens                  |
| 1 | 1.00 | 1 | 1 | -0.03 | -0.03 | -0.03  | -0.03 | -0.03  | t | 157808 | QQDRHQK<br>IRHFR             | Homo<br>sapiens                  |
| 1 | 1.00 | 1 | 1 | -0.05 | -0.05 | -0.05  | -0.05 | -0.05  | t | 150965 | AKSFYKNLI<br>WLVKKG          | Homo<br>sapiens                  |
| 1 | 1.00 | 1 | 1 | -0.01 | -0.01 | -0.015 | -0.01 | -0.008 | t | 45478  | NPSPKTVY<br>VKEAIDRR<br>LHFK | Homo<br>sapiens                  |

|   |      |   |   |       |        |        |        |       |   |        |                              |                     |
|---|------|---|---|-------|--------|--------|--------|-------|---|--------|------------------------------|---------------------|
| 1 | 1.00 | 1 | 1 | -0.04 | -0.045 | -0.045 | -0.04  | -0.04 | t | 4444   | ASHAHKS<br>HRKPKRS<br>WNVYVG | Canis<br>lupus      |
| 1 | 1.00 | 1 | 1 | 0.02  | 0.018  | 0.013  | 0.013  | 0.019 | t | 107986 | LAGQRGIV                     | Mus<br>musculu<br>s |
| 1 | 1.00 | 1 | 1 | 0.03  | 0.03   | 0.03   | 0.026  | 0.03  | t | 118824 | GRRPFFHP<br>VGEADYFE<br>YHQE | Homo<br>sapiens     |
| 1 | 1.00 | 1 | 1 | 0     | -0.001 | 0.004  | 0.001  | 0     | t | 25653  | IDQKVKEIS<br>NQEPL           | Homo<br>sapiens     |
| 1 | 1.00 | 1 | 1 | 0.03  | 0.03   | 0.03   | 0.03   | 0.03  | t | 108523 | LKAGEGNK<br>IGPE             | Homo<br>sapiens     |
| 1 | 1.00 | 1 | 1 | 0.03  | 0.03   | 0.03   | 0.03   | 0.03  | t | 108523 | LKAGEGNK<br>IGPE             | Homo<br>sapiens     |
| 1 | 1.00 | 1 | 1 | 0.03  | 0.03   | 0.034  | 0.03   | 0.03  | t | 158466 | VTKEYEVQ<br>NK               | Canis<br>lupus      |
| 1 | 1.00 | 1 | 1 | 0.02  | 0.022  | 0.015  | 0.017  | 0.02  | t | 141603 | AINASSDL<br>NLIGFGI          | Homo<br>sapiens     |
| 1 | 1.00 | 1 | 1 | 0.05  | 0.05   | 0.05   | 0.059  | 0.053 | t | 130808 | ENEPPVW<br>TTESKLQS          | Homo<br>sapiens     |
| 1 | 1.00 | 1 | 1 | -0.03 | -0.016 | -0.026 | -0.027 | -0.03 | t | 49023  | PQLGPR                       | Homo<br>sapiens     |
| 1 | 1.00 | 1 | 1 | -0.02 | -0.02  | -0.024 | -0.02  | -0.02 | t | 138758 | AMVYLGA<br>KDSTRQI           | Mus<br>musculu<br>s |
| 1 | 1.00 | 1 | 1 | -0.01 | -0.012 | -0.005 | -0.011 | -0.01 | t | 48332  | PLGFFPDH<br>QLDPAFG          | Mus<br>musculu<br>s |
| 1 | 1.00 | 1 | 1 | 0.05  | 0.05   | 0.05   | 0.05   | 0.05  | t | 104850 | KEGILQYC<br>QEVYPELQ         | Mus<br>musculu<br>s |
| 1 | 1.00 | 1 | 1 | 0.02  | 0.02   | 0.02   | 0.02   | 0.022 | t | 117631 | RGRGRGM<br>GRGNIFQK          | Homo<br>sapiens     |
| 1 | 1.00 | 1 | 1 | 0.01  | 0.013  | 0.012  | 0.01   | 0.01  | t | 122945 | WELTE LDS<br>VGTHLPQE<br>RC  | Mus<br>musculu<br>s |

|   |      |   |   |       |        |        |        |        |   |        |                            |                       |
|---|------|---|---|-------|--------|--------|--------|--------|---|--------|----------------------------|-----------------------|
| 1 | 1.00 | 1 | 1 | -0.02 | -0.022 | -0.02  | -0.027 | -0.02  | t | 122138 | LKKDV                      | Mus musculus          |
| 1 | 1.00 | 1 | 1 | 0     | -0.003 | 0.003  | 0      | -0.002 | t | 111123 | ARTYNQN<br>LIRHVGGG        | Oryctolagus cuniculus |
| 1 | 1.00 | 1 | 1 | 0.01  | 0.007  | 0.015  | 0.01   | 0.01   | t | 6385   | CHGIFTLT<br>WEIWGY         | Oryctolagus cuniculus |
| 1 | 1.00 | 1 | 1 | -0.05 | -0.05  | -0.055 | -0.044 | -0.05  | t | 32540  | KNKRNTN<br>RRPQDVK<br>F    | Homo sapiens          |
| 1 | 1.00 | 1 | 1 | 0.02  | 0.022  | 0.02   | 0.021  | 0.02   | t | 117097 | TLSTDQST<br>TRNW           | Homo sapiens          |
| 1 | 1.00 | 1 | 1 | 0     | -0.002 | 0      | -0.001 | 0      | t | 11353  | EDINGIRR<br>PK             | Mus musculus          |
| 1 | 1.00 | 1 | 1 | 0.05  | 0.051  | 0.05   | 0.053  | 0.052  | t | 78296  | WESETT                     | Equus caballus        |
| 1 | 1.00 | 1 | 1 | 0.01  | 0.008  | 0.01   | 0.01   | 0.011  | t | 62349  | SVTEEIAEE<br>DKSVTEE       | Mus musculus          |
| 1 | 1.00 | 1 | 1 | 0.04  | 0.041  | 0.035  | 0.043  | 0.04   | t | 36343  | LGVLEDNK<br>GVVRGDY<br>TAC | Equus caballus        |
| 1 | 1.00 | 1 | 1 | -0.02 | -0.02  | -0.02  | -0.02  | -0.02  | t | 20653  | GKPAIIPDR                  | Homo sapiens          |
| 1 | 1.00 | 1 | 1 | -0.03 | -0.028 | -0.038 | -0.029 | -0.03  | t | 39141  | LRMAGHS<br>LGRCDIKD<br>LPK | Homo sapiens          |
| 1 | 1.00 | 1 | 1 | 0.02  | 0.02   | 0.02   | 0.02   | 0.02   | t | 121680 | NVQVLSV<br>ARPLVDYF        | Mus musculus          |
| 1 | 1.00 | 1 | 1 | 0.02  | 0.02   | 0.02   | 0.02   | 0.02   | t | 108215 | WVAMHP<br>QGDL             | Homo sapiens          |
| 1 | 1.00 | 1 | 1 | 0.02  | 0.02   | 0.02   | 0.02   | 0.02   | t | 107698 | YNSTYRV                    | Homo sapiens          |
| 1 | 1.00 | 1 | 1 | 0.02  | 0.02   | 0.02   | 0.02   | 0.02   | t | 99121  | CCNELNEF<br>ENNQRCM        | Homo sapiens          |
| 1 | 1.00 | 1 | 1 | 0.02  | 0.02   | 0.02   | 0.02   | 0.02   | t | 108215 | WVAMHP<br>QGDL             | Homo sapiens          |
| 1 | 1.00 | 1 | 1 | 0.02  | 0.02   | 0.02   | 0.02   | 0.02   | t | 95842  | SGTSAQSG<br>TSGT           | Homo sapiens          |

|   |      |   |   |      |       |      |      |      |   |        |                              |                                  |
|---|------|---|---|------|-------|------|------|------|---|--------|------------------------------|----------------------------------|
| 1 | 1.00 | 1 | 1 | 0.02 | 0.02  | 0.02 | 0.02 | 0.02 | t | 95842  | SGTSAQSG<br>TSGT             | Homo<br>sapiens                  |
| 1 | 1.00 | 1 | 1 | 0.02 | 0.02  | 0.02 | 0.02 | 0.02 | t | 95842  | SGTSAQSG<br>TSGT             | Homo<br>sapiens                  |
| 1 | 1.00 | 1 | 1 | 0.02 | 0.02  | 0.02 | 0.02 | 0.02 | t | 7347   | CYCYGLPD<br>SEPTKTN          | Oryctola<br>gus<br>cuniculu<br>s |
| 1 | 1.00 | 1 | 1 | 0.02 | 0.023 | 0.02 | 0.02 | 0.02 | t | 7347   | CYCYGLPD<br>SEPTKTN          | Equus<br>caballus                |
| 1 | 1.00 | 1 | 1 | 0.02 | 0.016 | 0.02 | 0.02 | 0.02 | t | 7347   | CYCYGLPD<br>SEPTKTN          | Mus<br>musculu<br>s              |
| 1 | 1.00 | 1 | 1 | 0.02 | 0.014 | 0.02 | 0.02 | 0.02 | t | 7347   | CYCYGLPD<br>SEPTKTN          | Oryctola<br>gus<br>cuniculu<br>s |
| 1 | 1.00 | 1 | 1 | 0    | 0     | 0    | 0    | 0    | t | 149065 | LGPNHTQ                      | Sus<br>scrofa                    |
| 1 | 1.00 | 1 | 1 | 0    | 0     | 0    | 0    | 0    | t | 133601 | HPMYPTW<br>YSWQP             | Homo<br>sapiens                  |
| 1 | 1.00 | 1 | 1 | 0    | 0     | 0    | 0    | 0    | t | 117093 | TDSDYSTR<br>PSRG             | Mus<br>musculu<br>s              |
| 1 | 1.00 | 1 | 1 | 0    | 0     | 0    | 0    | 0    | t | 117093 | TDSDYSTR<br>PSRG             | Homo<br>sapiens                  |
| 1 | 1.00 | 1 | 1 | 0    | 0     | 0    | 0    | 0    | t | 75723  | YSEMKRAS<br>LTPVLKEK<br>PYY  | Aotus<br>nancyma<br>ae           |
| 1 | 1.00 | 1 | 1 | 0    | 0     | 0    | 0    | 0    | t | 92451  | DFAKEVPN<br>YK               | Ovis<br>aries                    |
| 1 | 1.00 | 1 | 1 | 0    | 0     | 0    | 0    | 0    | t | 75875  | YSREQLNK<br>LFGIEVM          | Homo<br>sapiens                  |
| 1 | 1.00 | 1 | 1 | 0    | 0     | 0    | 0    | 0    | t | 39391  | LSGQPAVI<br>PDREVLYQ<br>QFDE | Homo<br>sapiens                  |
| 1 | 1.00 | 1 | 1 | 0    | 0     | 0    | 0    | 0    | t | 39381  | LSGKPAVI<br>PDRELLYR<br>EFDE | Homo<br>sapiens                  |
| 1 | 1.00 | 1 | 1 | 0    | 0     | 0    | 0    | 0    | t | 39391  | LSGQPAVI<br>PDREVLYQ<br>QFDE | Homo<br>sapiens                  |

|   |      |   |   |       |       |        |       |        |   |        |                              |                                  |
|---|------|---|---|-------|-------|--------|-------|--------|---|--------|------------------------------|----------------------------------|
| 1 | 1.00 | 1 | 1 | 0     | 0     | 0      | 0     | 0      | t | 23462  | GYSLFQKE<br>METLNEG<br>TSGTA | Aotus<br>nancyma<br>ae           |
| 1 | 1.00 | 1 | 1 | 0     | 0     | 0      | 0     | 0      | t | 33847  | KTRRNTNY<br>Q                | Homo<br>sapiens                  |
| 1 | 1.00 | 1 | 1 | 0     | 0     | 0      | 0     | 0      | t | 33847  | KTRRNTNY<br>Q                | Homo<br>sapiens                  |
| 1 | 1.00 | 1 | 1 | -0.02 | -0.02 | -0.02  | -0.02 | -0.02  | t | 150987 | GKCPKYVK<br>STKLRLA          | Homo<br>sapiens                  |
| 1 | 1.00 | 1 | 1 | -0.02 | -0.02 | -0.02  | -0.02 | -0.02  | t | 115439 | QKAVPYP<br>QRDMPIQ<br>AFLLYQ | Homo<br>sapiens                  |
| 1 | 1.00 | 1 | 1 | 0.05  | 0.046 | 0.052  | 0.053 | 0.05   | t | 97025  | VDDALIDS<br>TKIYSYFPS<br>V   | Oryctola<br>gus<br>cuniculu<br>s |
| 1 | 1.00 | 1 | 1 | 0     | 0     | 0.002  | 0     | 0.002  | t | 65678  | TPPAYR                       | Mus<br>musculu<br>s              |
| 1 | 1.00 | 1 | 1 | 0.01  | 0.01  | 0.01   | 0.01  | 0.01   | t | 132937 | WGSNNQ<br>N                  | Homo<br>sapiens                  |
| 1 | 1.00 | 1 | 1 | 0.02  | 0.022 | 0.02   | 0.019 | 0.02   | t | 149424 | QESTYQLV<br>QQ               | Homo<br>sapiens                  |
| 1 | 1.00 | 1 | 1 | -0.02 | -0.02 | -0.02  | -0.02 | -0.018 | t | 17689  | FSDIPNPIG<br>S               | Homo<br>sapiens                  |
| 1 | 1.00 | 1 | 1 | 0     | 0     | -0.002 | 0     | 0      | t | 119851 | EVNQIVET<br>NVRLRQQ<br>W     | Mus<br>musculu<br>s              |
| 1 | 1.00 | 1 | 1 | 0     | 0     | -0.002 | 0     | 0      | t | 119851 | EVNQIVET<br>NVRLRQQ<br>W     | Mus<br>musculu<br>s              |
| 1 | 1.00 | 1 | 1 | 0     | 0     | -0.002 | 0     | 0      | t | 119851 | EVNQIVET<br>NVRLRQQ<br>W     | Mus<br>musculu<br>s              |
| 1 | 1.00 | 1 | 1 | 0     | 0     | 0.001  | 0     | 0      | t | 72503  | WGQGG                        | Mus<br>musculu<br>s              |
| 1 | 1.00 | 1 | 1 | 0     | 0     | 0.001  | 0     | 0      | t | 73636  | YEDRYyre                     | Mus<br>musculu<br>s              |
| 1 | 1.00 | 1 | 1 | 0     | 0     | 0.001  | 0     | 0      | t | 60596  | SQWNKPS<br>KPKTN             | Oryctola<br>gus<br>cuniculu<br>s |
| 1 | 1.00 | 1 | 1 | 0     | 0     | 0.001  | 0     | 0      | t | 60596  | SQWNKPS<br>KPKTN             | Oryctola<br>gus<br>cuniculu<br>s |

|   |      |   |   |       |        |        |        |        |   |        |                    |                       |
|---|------|---|---|-------|--------|--------|--------|--------|---|--------|--------------------|-----------------------|
| 1 | 1.00 | 1 | 1 | 0     | 0      | 0.001  | 0      | 0      | t | 72503  | WGQGG              | Mus musculus          |
| 1 | 1.00 | 1 | 1 | 0     | 0      | 0.001  | 0      | 0      | t | 73636  | YEDRYRE            | Mus musculus          |
| 1 | 1.00 | 1 | 1 | 0     | 0      | 0.001  | 0      | 0      | t | 60596  | SQWNKPSKPTN        | Oryctolagus cuniculus |
| 1 | 1.00 | 1 | 1 | 0     | 0      | 0.001  | 0      | 0      | t | 25002  | HTVTTTTK           | Mus musculus          |
| 1 | 1.00 | 1 | 1 | 0     | -0.003 | 0.001  | 0      | 0      | t | 19868  | GGGWGQPHGGWGQPH    | Oryctolagus cuniculus |
| 1 | 1.00 | 1 | 1 | 0.01  | 0.01   | 0.01   | 0.01   | 0.01   | t | 53580  | REM                | Oryctolagus cuniculus |
| 1 | 1.00 | 1 | 1 | -0.01 | -0.008 | -0.017 | -0.013 | -0.01  | t | 106973 | VPKHCIVDSKL        | Homo sapiens          |
| 1 | 1.00 | 1 | 1 | 0     | 0      | 0      | 0.003  | 0.002  | t | 144467 | RPWLVPVHRHRY       | Sus scrofa            |
| 1 | 1.00 | 1 | 1 | 0     | 0      | 0      | 0.003  | 0.002  | t | 47333  | PEKPHFPLAAEDDIRHH  | Sus scrofa            |
| 1 | 1.00 | 1 | 1 | -0.02 | -0.02  | -0.023 | -0.022 | -0.02  | t | 65832  | TQDLFLPFYSNVTGFHT  | Homo sapiens          |
| 1 | 1.00 | 1 | 1 | 0     | -0.003 | 0.012  | 0      | -0.002 | t | 53093  | RAEVSYPVHVNGAKF    | Oryctolagus cuniculus |
| 1 | 1.00 | 1 | 1 | 0.03  | 0.03   | 0.03   | 0.03   | 0.032  | t | 132069 | SNSKVE             | Homo sapiens          |
| 1 | 1.00 | 1 | 1 | -0.02 | -0.017 | -0.029 | -0.02  | -0.018 | t | 78635  | EKIERNKLLKQPPPPNPN | Mus musculus          |
| 1 | 1.00 | 1 | 1 | -0.03 | -0.033 | -0.037 | -0.03  | -0.029 | t | 41610  | MGQHPAKSMDVRR      | Oryctolagus cuniculus |
| 1 | 1.00 | 1 | 1 | -0.02 | -0.02  | -0.02  | -0.019 | -0.021 | t | 62484  | SWNSVDIWHMSS       | Mus musculus          |

|   |      |   |   |       |        |        |        |        |   |        |                              |                                  |
|---|------|---|---|-------|--------|--------|--------|--------|---|--------|------------------------------|----------------------------------|
| 1 | 1.00 | 1 | 1 | -0.01 | -0.01  | -0.01  | -0.01  | -0.01  | t | 129933 | SKQMQQI<br>RMSLRGK<br>A      | Homo<br>sapiens                  |
| 1 | 1.00 | 1 | 1 | 0     | 0      | 0      | 0      | -0.002 | t | 56712  | SAARIHDF<br>RYSQLAKL<br>GINP | Homo<br>sapiens                  |
| 1 | 1.00 | 1 | 1 | -0.02 | -0.02  | -0.015 | -0.015 | -0.019 | t | 144423 | NPATAKEII<br>NVGHSF          | Homo<br>sapiens                  |
| 1 | 1.00 | 1 | 1 | -0.01 | -0.01  | -0.007 | -0.01  | -0.012 | t | 5865   | AYLSPIDLN<br>QLAK            | Oryctola<br>gus<br>cuniculu<br>s |
| 1 | 1.00 | 1 | 1 | 0.05  | 0.05   | 0.05   | 0.05   | 0.05   | t | 149125 | TTL DANQ                     | Sus<br>scrofa                    |
| 1 | 1.00 | 1 | 1 | 0.03  | 0.03   | 0.03   | 0.03   | 0.03   | t | 135644 | CQGDSGG<br>P                 | Homo<br>sapiens                  |
| 1 | 1.00 | 1 | 1 | 0.03  | 0.03   | 0.03   | 0.03   | 0.03   | t | 108683 | VPVDAGT<br>AK                | Homo<br>sapiens                  |
| 1 | 1.00 | 1 | 1 | 0.03  | 0.03   | 0.03   | 0.03   | 0.03   | t | 97897  | ASEQETAD                     | Oryctola<br>gus<br>cuniculu<br>s |
| 1 | 1.00 | 1 | 1 | 0.01  | 0.01   | 0.01   | 0.01   | 0.01   | t | 140585 | PWNTFAT<br>NA                | Mus<br>musculu<br>s              |
| 1 | 1.00 | 1 | 1 | 0.01  | 0.01   | 0.01   | 0.01   | 0.01   | t | 140882 | LGHDEAAY<br>SKNR             | Oryctola<br>gus<br>cuniculu<br>s |
| 1 | 1.00 | 1 | 1 | 0.01  | 0.01   | 0.01   | 0.01   | 0.01   | t | 140585 | PWNTFAT<br>NA                | Mus<br>musculu<br>s              |
| 1 | 1.00 | 1 | 1 | 0.01  | 0.01   | 0.01   | 0.01   | 0.01   | t | 107364 | FNWYVDG                      | Homo<br>sapiens                  |
| 1 | 1.00 | 1 | 1 | 0.01  | 0.01   | 0.01   | 0.01   | 0.01   | t | 27595  | INAYTTGP<br>CTPSA            | Homo<br>sapiens                  |
| 1 | 1.00 | 1 | 1 | -0.01 | -0.01  | -0.01  | -0.01  | -0.01  | t | 135717 | LTGIISWG                     | Homo<br>sapiens                  |
| 1 | 1.00 | 1 | 1 | -0.01 | -0.004 | -0.01  | -0.01  | -0.01  | t | 139854 | PPSMVKH<br>PEKALFTF<br>KQV   | Ovis<br>aries                    |
| 1 | 1.00 | 1 | 1 | -0.01 | -0.01  | -0.01  | -0.01  | -0.01  | t | 151816 | CLTSQAAK<br>QRLE             | Sus<br>scrofa                    |
| 1 | 1.00 | 1 | 1 | -0.01 | -0.01  | -0.01  | -0.01  | -0.01  | t | 148867 | QQQQFPP<br>QQP               | Homo<br>sapiens                  |

|   |      |   |   |       |        |        |        |        |   |        |                              |                              |
|---|------|---|---|-------|--------|--------|--------|--------|---|--------|------------------------------|------------------------------|
| 1 | 1.00 | 1 | 1 | -0.01 | -0.01  | -0.01  | -0.01  | -0.01  | t | 122035 | WNPADYG<br>GIKWNP<br>ADYGGIK | Rattus<br>norvegicus         |
| 1 | 1.00 | 1 | 1 | -0.01 | -0.01  | -0.01  | -0.01  | -0.01  | t | 119433 | ARKVKGA<br>AG                | Homo<br>sapiens              |
| 1 | 1.00 | 1 | 1 | -0.01 | -0.01  | -0.01  | -0.01  | -0.01  | t | 99192  | EFNEIRRV<br>LEENAG           | Homo<br>sapiens              |
| 1 | 1.00 | 1 | 1 | -0.01 | -0.01  | -0.01  | -0.01  | -0.01  | t | 111158 | CNASTSM<br>QC                | Homo<br>sapiens              |
| 1 | 1.00 | 1 | 1 | -0.01 | -0.01  | -0.01  | -0.01  | -0.01  | t | 103693 | VFGGAAS<br>CAAPIQAD          | Homo<br>sapiens              |
| 1 | 1.00 | 1 | 1 | -0.01 | -0.01  | -0.01  | -0.01  | -0.01  | t | 41336  | MEECSKHL<br>PLVEHGLQ<br>LAEQ | Homo<br>sapiens              |
| 1 | 1.00 | 1 | 1 | -0.03 | -0.03  | -0.03  | -0.03  | -0.03  | t | 112209 | LLIYWAS                      | Homo<br>sapiens              |
| 1 | 1.00 | 1 | 1 | 0.01  | 0.01   | 0.017  | 0.01   | 0.01   | t | 103996 | ITMWDF                       | Mus<br>musculus              |
| 1 | 1.00 | 1 | 1 | -0.02 | -0.018 | -0.02  | -0.017 | -0.02  | t | 151609 | DETPMRG<br>ETRKV             | Homo<br>sapiens              |
| 1 | 1.00 | 1 | 1 | -0.01 | -0.013 | -0.01  | -0.01  | -0.008 | t | 135461 | GGLGVS                       | Oryctola<br>gus<br>cuniculus |
| 1 | 1.00 | 1 | 1 | -0.04 | -0.04  | -0.033 | -0.04  | -0.042 | t | 133665 | PVLLFCFLA<br>GRCVSV          | Mus<br>musculus              |
| 1 | 1.00 | 1 | 1 | -0.02 | -0.02  | -0.008 | -0.02  | -0.021 | t | 104461 | EFRHDS                       | Mus<br>musculus              |
| 1 | 1.00 | 1 | 1 | 0     | 0      | 0      | -0.007 | -0.002 | t | 119910 | GQYFAKPR<br>NQGG             | Homo<br>sapiens              |
| 1 | 1.00 | 1 | 1 | 0.01  | 0.012  | 0.01   | 0.009  | 0.01   | t | 149427 | QLPQFEEI<br>RN               | Homo<br>sapiens              |
| 1 | 1.00 | 1 | 1 | 0.03  | 0.039  | 0.021  | 0.027  | 0.031  | t | 156415 | QGRQQEQ<br>EQERQQQ<br>Q      | Homo<br>sapiens              |
| 1 | 1.00 | 1 | 1 | 0     | 0.002  | 0.002  | 0.001  | 0      | t | 78643  | EQGMQLA<br>EQFKQKAL<br>GL    | Homo<br>sapiens              |



|   |      |   |   |       |        |        |       |        |   |        |                              |                                  |
|---|------|---|---|-------|--------|--------|-------|--------|---|--------|------------------------------|----------------------------------|
| 1 | 1.00 | 1 | 1 | 0     | 0.004  | 0.002  | 0.001 | 0      | t | 78643  | EQGMQLA<br>EQFKQKAL<br>GL    | Homo<br>sapiens                  |
| 1 | 1.00 | 1 | 1 | 0.02  | 0.023  | 0.02   | 0.02  | 0.02   | t | 26071  | IFFYDPITG<br>GGS             | Mus<br>musculu<br>s              |
| 1 | 1.00 | 1 | 1 | 0.01  | 0.01   | 0.003  | 0.011 | 0.01   | t | 44917  | NLVLNRDV<br>SFQDL            | Homo<br>sapiens                  |
| 1 | 1.00 | 1 | 1 | 0     | 0      | 0.005  | 0     | -0.001 | t | 156900 | KLGDPRIA<br>TTLF             | Mus<br>musculu<br>s              |
| 1 | 1.00 | 1 | 1 | 0.01  | 0.01   | 0.01   | 0.014 | 0.012  | t | 118565 | QALGITTKI<br>SRGT            | Homo<br>sapiens                  |
| 1 | 1.00 | 1 | 1 | 0.02  | 0.023  | 0.025  | 0.02  | 0.02   | t | 44570  | NKPNWD<br>GYA                | Mus<br>musculu<br>s              |
| 1 | 1.00 | 1 | 1 | 0.03  | 0.025  | 0.025  | 0.028 | 0.03   | t | 10144  | DSILFVPTT<br>VDPASFSD<br>DNS | Canis<br>lupus                   |
| 1 | 1.00 | 1 | 1 | -0.03 | -0.033 | -0.033 | -0.03 | -0.03  | t | 97768  | WLSNGFW<br>RR                | Oryctola<br>gus<br>cuniculu<br>s |
| 1 | 1.00 | 1 | 1 | -0.03 | -0.033 | -0.033 | -0.03 | -0.03  | t | 97768  | WLSNGFW<br>RR                | Oryctola<br>gus<br>cuniculu<br>s |
| 1 | 1.00 | 1 | 1 | 0.02  | 0.02   | 0.02   | 0.02  | 0.02   | t | 23184  | GVTTSLS                      | Homo<br>sapiens                  |
| 1 | 1.00 | 1 | 1 | -0.02 | -0.02  | -0.02  | -0.02 | -0.02  | t | 17639  | FRRLGAAL                     | Oryctola<br>gus<br>cuniculu<br>s |
| 1 | 1.00 | 1 | 1 | 0.06  | 0.062  | 0.052  | 0.06  | 0.062  | t | 125236 | RIEKDTDR<br>DNFMSAE<br>EAQ   | Homo<br>sapiens                  |
| 1 | 1.00 | 1 | 1 | -0.01 | -0.01  | -0.01  | -0.01 | -0.011 | t | 112151 | GWIRQRS                      | Homo<br>sapiens                  |
| 1 | 1.00 | 1 | 1 | 0     | 0      | 0      | 0     | 0      | t | 149482 | SVFDENRS<br>W                | Homo<br>sapiens                  |

|   |      |   |   |       |        |        |        |        |   |        |                        |                       |
|---|------|---|---|-------|--------|--------|--------|--------|---|--------|------------------------|-----------------------|
| 1 | 1.00 | 1 | 1 | -0.01 | -0.006 | -0.01  | -0.009 | -0.008 | t | 65407  | TNRFTSL                | Homo sapiens          |
| 1 | 1.00 | 1 | 1 | -0.02 | -0.02  | -0.022 | -0.023 | -0.022 | t | 99884  | AGRNSWN<br>CDFSQ       | Homo sapiens          |
| 1 | 1.00 | 1 | 1 | -0.02 | -0.016 | -0.022 | -0.023 | -0.022 | t | 99884  | AGRNSWN<br>CDFSQ       | Homo sapiens          |
| 1 | 1.00 | 1 | 1 | 0.01  | 0.006  | 0.013  | 0.016  | 0.011  | t | 123562 | NSSSSQFQ<br>IHGPR      | Mus musculus          |
| 1 | 1.00 | 1 | 1 | -0.01 | -0.01  | -0.01  | -0.01  | -0.008 | t | 8566   | DHSDLVAE<br>KQRL       | Mus musculus          |
| 1 | 1.00 | 1 | 1 | 0.02  | 0.02   | 0.02   | 0.02   | 0.02   | t | 121734 | QCCLADD<br>ECLLSLPY    | Mus musculus          |
| 1 | 1.00 | 1 | 1 | 0.02  | 0.02   | 0.02   | 0.02   | 0.02   | t | 121734 | QCCLADD<br>ECLLSLPY    | Mus musculus          |
| 1 | 1.00 | 1 | 1 | 0.02  | 0.02   | 0.02   | 0.02   | 0.02   | t | 112392 | VTMTCKS                | Homo sapiens          |
| 1 | 1.00 | 1 | 1 | 0.02  | 0.02   | 0.02   | 0.02   | 0.02   | t | 113466 | GQGQQPG<br>QGQQGQ<br>Q | Homo sapiens          |
| 1 | 1.00 | 1 | 1 | 0.02  | 0.02   | 0.02   | 0.02   | 0.02   | t | 79638  | RLVTDEI                | Oryctolagus cuniculus |
| 1 | 1.00 | 1 | 1 | 0     | 0      | 0      | 0      | 0      | t | 121986 | VLCFWGP<br>VNYEASPS    | Mus musculus          |
| 1 | 1.00 | 1 | 1 | 0     | 0      | 0      | 0      | 0      | t | 121986 | VLCFWGP<br>VNYEASPS    | Mus musculus          |
| 1 | 1.00 | 1 | 1 | 0     | 0      | 0      | 0      | 0      | t | 123207 | GAMPPQ<br>QL           | Oryctolagus cuniculus |
| 1 | 1.00 | 1 | 1 | 0     | 0.003  | 0      | 0      | 0      | t | 98319  | PAVVGKP<br>GSD         | Mus musculus          |

|   |      |   |   |       |       |       |       |       |   |        |                       |                       |
|---|------|---|---|-------|-------|-------|-------|-------|---|--------|-----------------------|-----------------------|
| 1 | 1.00 | 1 | 1 | 0     | 0     | 0     | 0     | 0     | t | 98319  | PAVVGKPGSD            | Mus musculus          |
| 1 | 1.00 | 1 | 1 | 0     | 0     | 0     | 0     | 0     | t | 98319  | PAVVGKPGSD            | Oryctolagus cuniculus |
| 1 | 1.00 | 1 | 1 | 0     | 0     | 0     | 0     | 0     | t | 73485  | YCAWPACYCYGLPDS       | Equus caballus        |
| 1 | 1.00 | 1 | 1 | 0     | 0     | 0     | 0     | 0     | t | 56959  | SAQSGTSGTSAQSGTSGT    | Mus musculus          |
| 1 | 1.00 | 1 | 1 | 0     | 0     | 0     | 0     | 0     | t | 46991  | PAVIPDREVLVYQEFDEMEEC | Homo sapiens          |
| 1 | 1.00 | 1 | 1 | 0     | 0     | 0     | 0     | 0     | t | 58285  | SGVFTTSMGNTMTC        | Homo sapiens          |
| 1 | 1.00 | 1 | 1 | 0     | 0     | 0     | 0     | 0     | t | 46828  | PAIIPDREVLVYQEFDEMEEC | Homo sapiens          |
| 1 | 1.00 | 1 | 1 | 0     | 0     | 0     | 0     | 0     | t | 41338  | MEECSQAAPYIEQAQAIAHQ  | Homo sapiens          |
| 1 | 1.00 | 1 | 1 | 0     | 0     | 0     | 0     | 0     | t | 39370  | LSGKPAIIPDREALYQEFDE  | Homo sapiens          |
| 1 | 1.00 | 1 | 1 | 0     | 0     | 0     | 0     | 0     | t | 39918  | LTGKPAVIPDREVLVYQEFDE | Homo sapiens          |
| 1 | 1.00 | 1 | 1 | 0     | 0     | 0     | 0     | 0     | t | 22129  | GRLHVNERAVVAPDKEVLYE  | Homo sapiens          |
| 1 | 1.00 | 1 | 1 | 0     | 0     | 0     | 0     | 0     | t | 32372  | KMNMHMENVPWIVKNQNLFK  | Aotus nancymaiae      |
| 1 | 1.00 | 1 | 1 | -0.02 | -0.02 | -0.02 | -0.02 | -0.02 | t | 114788 | EFGTNISKEH            | Homo sapiens          |
| 1 | 1.00 | 1 | 1 | -0.02 | -0.02 | -0.02 | -0.02 | -0.02 | t | 101252 | SNYWLRS               | Homo sapiens          |
| 1 | 1.00 | 1 | 1 | -0.02 | -0.02 | -0.02 | -0.02 | -0.02 | t | 109855 | RQTEVDSGRDLE          | Mus musculus          |
| 1 | 1.00 | 1 | 1 | -0.04 | -0.04 | -0.04 | -0.04 | -0.04 | t | 115251 | FLLYQEPVLGPVRGPFPIIV  | Homo sapiens          |

|   |      |   |   |       |        |        |        |        |   |        |                              |                                  |
|---|------|---|---|-------|--------|--------|--------|--------|---|--------|------------------------------|----------------------------------|
| 1 | 1.00 | 1 | 1 | 0     | -0.004 | -0.006 | -0.001 | 0      | t | 86742  | NGVWVM<br>MDGNEQ<br>VEYPLK   | Oryctola<br>gus<br>cuniculu<br>s |
| 1 | 1.00 | 1 | 1 | -0.04 | -0.04  | -0.034 | -0.036 | -0.04  | t | 48459  | PLPWLP                       | Homo<br>sapiens                  |
| 1 | 1.00 | 1 | 1 | 0.04  | 0.04   | 0.04   | 0.04   | 0.041  | t | 108133 | SKTTTMPY<br>TPGPTAL          | Homo<br>sapiens                  |
| 1 | 1.00 | 1 | 1 | -0.02 | -0.023 | -0.009 | -0.02  | -0.021 | t | 4224   | ARQPDLI                      | Oryctola<br>gus<br>cuniculu<br>s |
| 1 | 1.00 | 1 | 1 | -0.02 | -0.02  | -0.009 | -0.02  | -0.021 | t | 4224   | ARQPDLI                      | Mus<br>musculu<br>s              |
| 1 | 1.00 | 1 | 1 | 0     | 0.005  | 0.002  | 0.001  | 0      | t | 44915  | NLVILPGQ<br>DLQYVLA          | Homo<br>sapiens                  |
| 1 | 1.00 | 1 | 1 | -0.01 | -0.008 | -0.001 | -0.003 | -0.01  | t | 8508   | DGVAVLK<br>VGG               | Homo<br>sapiens                  |
| 1 | 1.00 | 1 | 1 | -0.02 | -0.018 | -0.013 | -0.019 | -0.022 | t | 51063  | QIFLKILPQ<br>SGPIGGIKS<br>MG | Homo<br>sapiens                  |
| 1 | 1.00 | 1 | 1 | 0     | -0.002 | 0      | -0.007 | -0.004 | t | 125478 | LHQEYEEN<br>LGDSIVGY<br>KEKS | Mus<br>musculu<br>s              |
| 1 | 1.00 | 1 | 1 | 0     | -0.004 | 0      | -0.007 | -0.004 | t | 122749 | EIIGFGQEL<br>KNPQEE          | Oryctola<br>gus<br>cuniculu<br>s |
| 1 | 1.00 | 1 | 1 | 0     | -0.004 | 0      | -0.007 | -0.004 | t | 122746 | EEQEDEIIG<br>FGQELKN         | Oryctola<br>gus<br>cuniculu<br>s |
| 1 | 1.00 | 1 | 1 | -0.01 | -0.01  | -0.005 | -0.01  | -0.01  | t | 42592  | MSLLDGR<br>GPVRFVLA          | Homo<br>sapiens                  |
| 1 | 1.00 | 1 | 1 | -0.04 | -0.038 | -0.041 | -0.039 | -0.04  | t | 66051  | TRLENLM<br>WK                | Homo<br>sapiens                  |
| 1 | 1.00 | 1 | 1 | 0.02  | 0.018  | 0.02   | 0.023  | 0.022  | t | 115761 | GLRLIHYSY<br>DV              | Mus<br>musculu<br>s              |
| 1 | 1.00 | 1 | 1 | 0.04  | 0.038  | 0.048  | 0.039  | 0.04   | t | 66085  | TRQQNNP<br>ER                | Mus<br>musculu<br>s              |

|   |      |   |   |       |        |        |        |        |   |        |                          |                                  |
|---|------|---|---|-------|--------|--------|--------|--------|---|--------|--------------------------|----------------------------------|
| 1 | 1.00 | 1 | 1 | 0.01  | 0.01   | 0.01   | 0.01   | 0.01   | t | 156843 | AHSEMG<br>RATMT          | Mus<br>musculu<br>s              |
| 1 | 1.00 | 1 | 1 | 0.01  | 0.01   | 0.01   | 0.01   | 0.01   | t | 156843 | AHSEMG<br>RATMT          | Gallus<br>gallus                 |
| 1 | 1.00 | 1 | 1 | -0.01 | -0.01  | -0.01  | -0.01  | -0.01  | t | 61289  | SSPSNVKS<br>ASPHGES      | Mus<br>musculu<br>s              |
| 1 | 1.00 | 1 | 1 | -0.03 | -0.03  | -0.03  | -0.03  | -0.03  | t | 104314 | TRKGYHQ<br>TMNSY         | Oryctola<br>gus<br>cuniculu<br>s |
| 1 | 1.00 | 1 | 1 | -0.02 | -0.01  | -0.025 | -0.023 | -0.02  | t | 75872  | YSRCGSGP<br>RITP         | Pan<br>troglody<br>tes           |
| 1 | 1.00 | 1 | 1 | 0.01  | 0.013  | 0.01   | 0.01   | 0.008  | t | 49658  | PTIAGAGD<br>VK TSAEG     | Mus<br>musculu<br>s              |
| 1 | 1.00 | 1 | 1 | -0.06 | -0.062 | -0.055 | -0.06  | -0.061 | t | 125230 | RERRGIAL                 | Mus<br>musculu<br>s              |
| 1 | 1.00 | 1 | 1 | 0.01  | 0.01   | 0.01   | 0.01   | 0.01   | t | 117409 | YLQTPMT<br>VH            | Homo<br>sapiens                  |
| 1 | 1.00 | 1 | 1 | -0.01 | -0.01  | -0.01  | -0.01  | -0.01  | t | 6723   | CNRFAGM<br>FSLGARQK<br>I | Mus<br>musculu<br>s              |
| 1 | 1.00 | 1 | 1 | 0.04  | 0.047  | 0.04   | 0.04   | 0.042  | t | 13899  | EQPTTRA<br>Q             | Cavia<br>porcellu<br>s           |
| 1 | 1.00 | 1 | 1 | 0.04  | 0.04   | 0.04   | 0.04   | 0.042  | t | 13899  | EQPTTRA<br>Q             | Oryctola<br>gus<br>cuniculu<br>s |
| 1 | 1.00 | 1 | 1 | 0.02  | 0.02   | 0.02   | 0.02   | 0.021  | t | 138525 | NVRTQEP                  | Oryctola<br>gus<br>cuniculu<br>s |
| 1 | 1.00 | 1 | 1 | -0.01 | -0.014 | -0.01  | -0.011 | -0.012 | t | 61334  | SSSDKPDN<br>KPEA         | Oryctola<br>gus<br>cuniculu<br>s |
| 1 | 1.00 | 1 | 1 | 0.03  | 0.03   | 0.03   | 0.03   | 0.03   | t | 123870 | YLAQCLED                 | Ovis<br>aries                    |

|   |      |   |   |       |        |        |        |        |   |        |                                |                                  |
|---|------|---|---|-------|--------|--------|--------|--------|---|--------|--------------------------------|----------------------------------|
| 1 | 1.00 | 1 | 1 | -0.01 | -0.009 | -0.008 | -0.011 | -0.012 | t | 56529  | RYETSNDN<br>SLI                | Oryctola<br>gus<br>cuniculu<br>s |
| 1 | 1.00 | 1 | 1 | -0.01 | -0.006 | -0.008 | -0.011 | -0.012 | t | 56529  | RYETSNDN<br>SLI                | Mus<br>musculu<br>s              |
| 1 | 1.00 | 1 | 1 | 0.01  | 0.01   | 0.01   | 0.01   | 0.01   | t | 144659 | GREGYP<br>A<br>DGGAAGY<br>CNTE | Oryctola<br>gus<br>cuniculu<br>s |
| 1 | 1.00 | 1 | 1 | 0.01  | 0.01   | 0.01   | 0.01   | 0.01   | t | 138210 | PAAPAPN<br>DPNAAPP             | Oryctola<br>gus<br>cuniculu<br>s |
| 1 | 1.00 | 1 | 1 | 0.01  | 0.013  | 0.01   | 0.01   | 0.01   | t | 119925 | HFPFDEQ<br>NGSMKLG<br>TWT      | Mus<br>musculu<br>s              |
| 1 | 1.00 | 1 | 1 | 0.01  | 0.01   | 0.01   | 0.01   | 0.01   | t | 106377 | EEMRHVV                        | Mus<br>musculu<br>s              |
| 1 | 1.00 | 1 | 1 | 0.01  | 0.01   | 0.01   | 0.01   | 0.01   | t | 104125 | MNKTFVP                        | Homo<br>sapiens                  |
| 1 | 1.00 | 1 | 1 | 0.01  | 0.01   | 0.01   | 0.01   | 0.01   | t | 107695 | YKCKVSN                        | Homo<br>sapiens                  |
| 1 | 1.00 | 1 | 1 | 0.01  | 0.01   | 0.01   | 0.01   | 0.01   | t | 108216 | WWATFFE<br>ATR                 | Homo<br>sapiens                  |
| 1 | 1.00 | 1 | 1 | 0.01  | 0.01   | 0.01   | 0.01   | 0.01   | t | 112114 | FSGFSLT                        | Homo<br>sapiens                  |
| 1 | 1.00 | 1 | 1 | 0.01  | 0.01   | 0.01   | 0.01   | 0.01   | t | 99447  | LRGRAHV<br>QVVD<br>SNG<br>N    | Homo<br>sapiens                  |
| 1 | 1.00 | 1 | 1 | 0.01  | 0.01   | 0.01   | 0.01   | 0.01   | t | 106646 | MHLTQSP                        | Homo<br>sapiens                  |
| 1 | 1.00 | 1 | 1 | 0.01  | 0.01   | 0.01   | 0.01   | 0.01   | t | 96735  | PKVTKEK<br>P<br>TP             | Homo<br>sapiens(<br>human)       |
| 1 | 1.00 | 1 | 1 | 0.01  | 0.01   | 0.01   | 0.01   | 0.01   | t | 38952  | LQPQQP<br>FS<br>QQ             | Mus<br>musculu<br>s              |
| 1 | 1.00 | 1 | 1 | 0.01  | 0.01   | 0.01   | 0.01   | 0.01   | t | 38952  | LQPQQP<br>FS<br>QQ             | Mus<br>musculu<br>s              |
| 1 | 1.00 | 1 | 1 | -0.01 | -0.01  | -0.01  | -0.01  | -0.01  | t | 149433 | QPLSQV<br>SF<br>QQ             | Homo<br>sapiens                  |

|   |      |   |   |       |       |       |       |       |   |        |                              |                                  |
|---|------|---|---|-------|-------|-------|-------|-------|---|--------|------------------------------|----------------------------------|
| 1 | 1.00 | 1 | 1 | -0.01 | -0.01 | -0.01 | -0.01 | -0.01 | t | 136593 | RHYKQYQ<br>FHF               | Homo<br>sapiens                  |
| 1 | 1.00 | 1 | 1 | -0.01 | -0.01 | -0.01 | -0.01 | -0.01 | t | 152056 | QAAKQRL<br>EPGRN             | Sus<br>scrofa                    |
| 1 | 1.00 | 1 | 1 | -0.01 | -0.01 | -0.01 | -0.01 | -0.01 | t | 136593 | RHYKQYQ<br>FHF               | Mus<br>musculu<br>s              |
| 1 | 1.00 | 1 | 1 | -0.01 | -0.01 | -0.01 | -0.01 | -0.01 | t | 149433 | QPLSQVSF<br>QQ               | Mus<br>musculu<br>s              |
| 1 | 1.00 | 1 | 1 | -0.01 | -0.01 | -0.01 | -0.01 | -0.01 | t | 115869 | NKKIEKFQ<br>SE               | Homo<br>sapiens                  |
| 1 | 1.00 | 1 | 1 | -0.01 | -0.01 | -0.01 | -0.01 | -0.01 | t | 97522  | NGNLVNK<br>AG                | Oryctola<br>gus<br>cuniculu<br>s |
| 1 | 1.00 | 1 | 1 | -0.01 | -0.01 | -0.01 | -0.01 | -0.01 | t | 47123  | PDKEVLYE<br>AFDEMEE<br>CASRA | Homo<br>sapiens                  |
| 1 | 1.00 | 1 | 1 | -0.01 | -0.01 | -0.01 | -0.01 | -0.01 | t | 16957  | FLVNAWK<br>SKKCP             | Homo<br>sapiens                  |
| 1 | 1.00 | 1 | 1 | -0.01 | -0.01 | -0.01 | -0.01 | -0.01 | t | 11963  | EFDMEA<br>CAPHLPYIE<br>QGMQ  | Homo<br>sapiens                  |
| 1 | 1.00 | 1 | 1 | -0.01 | -0.01 | -0.01 | -0.01 | -0.01 | t | 7000   | CSGFVGLF<br>SPGPSQRI         | Mus<br>musculu<br>s              |
| 1 | 1.00 | 1 | 1 | 0.06  | 0.06  | 0.056 | 0.062 | 0.062 | t | 142335 | YEQLNDSS<br>EEED             | Homo<br>sapiens                  |
| 1 | 1.00 | 1 | 1 | -0.03 | -0.03 | -0.03 | -0.03 | -0.03 | t | 112849 | TIKNTFF                      | Homo<br>sapiens                  |
| 1 | 1.00 | 1 | 1 | -0.03 | -0.03 | -0.03 | -0.03 | -0.03 | t | 103346 | LEPGVVAE<br>KVRNLPA          | Homo<br>sapiens                  |
| 1 | 1.00 | 1 | 1 | 0.01  | 0.015 | 0.01  | 0.01  | 0.01  | t | 67156  | TVSLPVGA<br>DEDDIKAT<br>YDKG | Homo<br>sapiens                  |
| 1 | 1.00 | 1 | 1 | 0.02  | 0.02  | 0.02  | 0.02  | 0.021 | t | 117223 | NTWTTCD<br>SIAFPSK           | Mus<br>musculu<br>s              |
| 1 | 1.00 | 1 | 1 | -0.01 | -0.01 | -0.01 | -0.01 | -0.01 | t | 105138 | DLTA                         | Oryctola<br>gus<br>cuniculu<br>s |

|   |      |   |   |       |        |        |        |        |   |        |                              |                       |
|---|------|---|---|-------|--------|--------|--------|--------|---|--------|------------------------------|-----------------------|
| 1 | 1.00 | 1 | 1 | 0     | 0      | 0      | 0.001  | 0.001  | t | 40332  | LVFFAEDV                     | Mus musculus          |
| 1 | 1.00 | 1 | 1 | 0     | 0      | 0      | 0.001  | 0.001  | t | 40332  | LVFFAEDV                     | Mus musculus          |
| 1 | 1.00 | 1 | 1 | -0.01 | -0.01  | -0.008 | -0.01  | -0.01  | t | 156975 | WSSTVLRV<br>SPTRTVP          | Mus musculus          |
| 1 | 1.00 | 1 | 1 | -0.03 | -0.032 | -0.03  | -0.031 | -0.03  | t | 116954 | DPTDYSTR<br>PHMW             | Mus musculus          |
| 1 | 1.00 | 1 | 1 | 0     | 0      | 0      | 0      | 0      | t | 130815 | ESDPPVAS<br>YQWRLIN          | Homo sapiens          |
| 1 | 1.00 | 1 | 1 | 0.01  | 0.01   | 0      | 0.01   | 0.012  | t | 9661   | DPKSLSKG<br>EIASTFESQ<br>NST | Mus musculus          |
| 1 | 1.00 | 1 | 1 | 0.04  | 0.04   | 0.04   | 0.04   | 0.04   | t | 111733 | RKATPTTS<br>STSTAK           | Mus musculus          |
| 1 | 1.00 | 1 | 1 | -0.01 | -0.01  | -0.001 | -0.01  | -0.01  | t | 76612  | YYTCCP                       | Mus musculus          |
| 1 | 1.00 | 1 | 1 | 0.01  | 0.01   | -0.001 | 0.007  | 0.011  | t | 156291 | FGQNKEW<br>QLNQLEAR          | Homo sapiens          |
| 1 | 1.00 | 1 | 1 | -0.02 | -0.024 | -0.02  | -0.017 | -0.017 | t | 115381 | MGLLECC<br>ARCLVGAP<br>F     | Oryctolagus cuniculus |
| 1 | 1.00 | 1 | 1 | 0     | 0.003  | 0      | 0      | 0      | t | 104147 | NGAIRFT<br>MGYQHGQ           | Sus scrofa            |
| 1 | 1.00 | 1 | 1 | 0.01  | 0.01   | 0.008  | 0.01   | 0.011  | t | 107376 | GDRSGYSS<br>PGSPG            | Mus musculus          |
| 1 | 1.00 | 1 | 1 | 0.01  | 0.007  | 0.004  | 0.01   | 0.01   | t | 30260  | KDTLRIAYL<br>TEAKVEKL        | Oryctolagus cuniculus |
| 1 | 1.00 | 1 | 1 | -0.01 | -0.01  | -0.01  | -0.01  | -0.009 | t | 48124  | PKPQRKTK<br>RNTNRRP          | Homo sapiens          |
| 1 | 1.00 | 1 | 1 | -0.01 | -0.01  | -0.007 | -0.01  | -0.012 | t | 55732  | RRRTSPSR<br>RRRS             | Mus musculus          |



|   |      |   |   |       |        |        |        |        |   |        |                              |                              |
|---|------|---|---|-------|--------|--------|--------|--------|---|--------|------------------------------|------------------------------|
| 1 | 1.00 | 1 | 1 | -0.01 | -0.007 | -0.007 | -0.01  | -0.012 | t | 55732  | RRRTSPRR<br>RRRS             | Mus<br>musculus              |
| 1 | 1.00 | 1 | 1 | 0.02  | 0.018  | 0.02   | 0.013  | 0.018  | t | 122129 | KTVTVKED<br>QVMQQN<br>PPKF   | Mus<br>musculus              |
| 1 | 1.00 | 1 | 1 | -0.01 | -0.019 | -0.013 | -0.01  | -0.012 | t | 72485  | WGNGCGL<br>FGKGSIDT<br>CAKFA | Equus<br>caballus            |
| 1 | 1.00 | 1 | 1 | -0.05 | -0.052 | -0.05  | -0.047 | -0.05  | t | 74871  | YLPVGGLR<br>RIGG             | Mus<br>musculus              |
| 1 | 1.00 | 1 | 1 | 0.06  | 0.06   | 0.057  | 0.06   | 0.06   | t | 94572  | KQWEDEV<br>TEFNYKVG<br>LQNSN | Mus<br>musculus              |
| 1 | 1.00 | 1 | 1 | 0.01  | 0.012  | -0.002 | 0.007  | 0.01   | t | 138784 | LPGLKGHN<br>GLQGLPGL<br>AGHH | Homo<br>sapiens              |
| 1 | 1.00 | 1 | 1 | 0.04  | 0.04   | 0.04   | 0.04   | 0.04   | t | 115395 | NLCSTFCK<br>EVVRNAN<br>EEEYS | Homo<br>sapiens              |
| 1 | 1.00 | 1 | 1 | 0.02  | 0.02   | 0.02   | 0.02   | 0.02   | t | 140842 | EGNTDER<br>GTPEYNIA<br>LGQRR | Oryctola<br>gus<br>cuniculus |
| 1 | 1.00 | 1 | 1 | 0.02  | 0.02   | 0.02   | 0.02   | 0.02   | t | 153274 | NLSTSNPL<br>GFFPDHQ          | Mus<br>musculus              |
| 1 | 1.00 | 1 | 1 | 0.02  | 0.02   | 0.02   | 0.02   | 0.02   | t | 140842 | EGNTDER<br>GTPEYNIA<br>LGQRR | Mus<br>musculus              |
| 1 | 1.00 | 1 | 1 | 0.02  | 0.02   | 0.02   | 0.02   | 0.02   | t | 104124 | MNKTFVD                      | Homo<br>sapiens              |
| 1 | 1.00 | 1 | 1 | 0     | 0      | 0      | 0      | 0      | t | 148565 | DKNKLQD<br>VKDNKPS<br>DVKL   | Homo<br>sapiens              |
| 1 | 1.00 | 1 | 1 | 0     | 0      | 0      | 0      | 0      | t | 148565 | DKNKLQD<br>VKDNKPS<br>DVKL   | Canis<br>lupus               |
| 1 | 1.00 | 1 | 1 | 0     | 0      | 0      | 0      | 0      | t | 115347 | LIVTQTMK<br>GL               | Homo<br>sapiens              |
| 1 | 1.00 | 1 | 1 | 0     | 0      | 0      | 0      | 0      | t | 98780  | FPQPQLPY<br>SQPQ             | Homo<br>sapiens              |

|   |      |   |   |   |   |   |   |   |   |       |                               |                |
|---|------|---|---|---|---|---|---|---|---|-------|-------------------------------|----------------|
| 1 | 1.00 | 1 | 1 | 0 | 0 | 0 | 0 | 0 | t | 99663 | SGFISYILN<br>RHDNQN           | Homo sapiens   |
| 1 | 1.00 | 1 | 1 | 0 | 0 | 0 | 0 | 0 | t | 95818 | SAQSGTSG<br>TSAQ              | Homo sapiens   |
| 1 | 1.00 | 1 | 1 | 0 | 0 | 0 | 0 | 0 | t | 78161 | GDDRLLF                       | Equus caballus |
| 1 | 1.00 | 1 | 1 | 0 | 0 | 0 | 0 | 0 | t | 63091 | TCPGEDC<br>HSMYPFTY<br>RGY    | Mus musculus   |
| 1 | 1.00 | 1 | 1 | 0 | 0 | 0 | 0 | 0 | t | 95841 | SGTSAQSG<br>TSAQ              | Homo sapiens   |
| 1 | 1.00 | 1 | 1 | 0 | 0 | 0 | 0 | 0 | t | 79446 | VCDQVQ<br>WMTRLAC<br>Q        | Mus musculus   |
| 1 | 1.00 | 1 | 1 | 0 | 0 | 0 | 0 | 0 | t | 95818 | SAQSGTSG<br>TSAQ              | Mus musculus   |
| 1 | 1.00 | 1 | 1 | 0 | 0 | 0 | 0 | 0 | t | 95818 | SAQSGTSG<br>TSAQ              | Homo sapiens   |
| 1 | 1.00 | 1 | 1 | 0 | 0 | 0 | 0 | 0 | t | 95818 | SAQSGTSG<br>TSAQ              | Homo sapiens   |
| 1 | 1.00 | 1 | 1 | 0 | 0 | 0 | 0 | 0 | t | 75874 | YSREQLNK<br>LFGIDMT           | Homo sapiens   |
| 1 | 1.00 | 1 | 1 | 0 | 0 | 0 | 0 | 0 | t | 95841 | SGTSAQSG<br>TSAQ              | Homo sapiens   |
| 1 | 1.00 | 1 | 1 | 0 | 0 | 0 | 0 | 0 | t | 47127 | PDKEVLYQ<br>QYDEEMEE<br>CSQAG | Homo sapiens   |
| 1 | 1.00 | 1 | 1 | 0 | 0 | 0 | 0 | 0 | t | 39402 | LSGRPAVV<br>PDREVLYQ<br>EFDE  | Homo sapiens   |
| 1 | 1.00 | 1 | 1 | 0 | 0 | 0 | 0 | 0 | t | 39371 | LSGKPAIIP<br>DREALYQ<br>QFDE  | Homo sapiens   |
| 1 | 1.00 | 1 | 1 | 0 | 0 | 0 | 0 | 0 | t | 50108 | PYIEQGM<br>QLAEQLK<br>QKALGL  | Homo sapiens   |

|   |      |   |   |       |        |        |        |        |   |        |                              |                                  |
|---|------|---|---|-------|--------|--------|--------|--------|---|--------|------------------------------|----------------------------------|
| 1 | 1.00 | 1 | 1 | 0     | 0      | 0      | 0      | 0      | t | 21840  | GPYAGPLE<br>RQKPLK           | Bos<br>taurus                    |
| 1 | 1.00 | 1 | 1 | 0     | 0      | 0      | 0      | 0      | t | 21840  | GPYAGPLE<br>RQKPLK           | Bos<br>taurus                    |
| 1 | 1.00 | 1 | 1 | 0     | 0      | 0      | 0      | 0      | t | 21840  | GPYAGPLE<br>RQKPLK           | Bos<br>taurus                    |
| 1 | 1.00 | 1 | 1 | 0     | 0      | 0      | 0      | 0      | t | 3971   | AQGQYSN<br>TLLRIYRDN<br>KSIN | Oryctola<br>gus<br>cuniculu<br>s |
| 1 | 1.00 | 1 | 1 | -0.02 | -0.02  | -0.02  | -0.02  | -0.02  | t | 110587 | GARGLTG<br>RPGDAGP<br>Q      | Mus<br>musculu<br>s              |
| 1 | 1.00 | 1 | 1 | -0.02 | -0.02  | -0.02  | -0.02  | -0.02  | t | 96006  | WTAFCGP<br>VGA               | Homo<br>sapiens                  |
| 1 | 1.00 | 1 | 1 | -0.04 | -0.04  | -0.04  | -0.04  | -0.04  | t | 78312  | WLHYYS                       | Homo<br>sapiens                  |
| 1 | 1.00 | 1 | 1 | -0.03 | -0.027 | -0.035 | -0.03  | -0.03  | t | 117295 | GITKPAIRR<br>LARRGG          | Mus<br>musculu<br>s              |
| 1 | 1.00 | 1 | 1 | -0.06 | -0.06  | -0.06  | -0.06  | -0.06  | t | 115823 | KHKEMPF<br>PKY               | Homo<br>sapiens                  |
| 1 | 1.00 | 1 | 1 | -0.01 | -0.012 | -0.01  | -0.011 | -0.008 | t | 149345 | KDFPILPGE<br>IF              | Homo<br>sapiens                  |
| 1 | 1.00 | 1 | 1 | 0     | 0      | 0      | 0      | 0      | t | 24871  | HSVRGFTS<br>LFSA             | Homo<br>sapiens                  |
| 1 | 1.00 | 1 | 1 | -0.01 | -0.01  | -0.01  | -0.01  | -0.01  | t | 117684 | VKSKKREA<br>VAGRGRG          | Homo<br>sapiens                  |
| 1 | 1.00 | 1 | 1 | -0.01 | -0.003 | -0.01  | -0.01  | -0.01  | t | 55951  | RSRSES                       | Cavia<br>porcellu<br>s           |
| 1 | 1.00 | 1 | 1 | -0.01 | -0.007 | -0.01  | -0.01  | -0.01  | t | 55951  | RSRSES                       | Mus<br>musculu<br>s              |

|   |      |   |   |       |        |        |        |        |   |        |                              |                               |
|---|------|---|---|-------|--------|--------|--------|--------|---|--------|------------------------------|-------------------------------|
| 1 | 1.00 | 1 | 1 | -0.01 | -0.006 | -0.01  | -0.01  | -0.01  | t | 55951  | RSRSES                       | Cavia porcellu<br>s           |
| 1 | 1.00 | 1 | 1 | 0.04  | 0.04   | 0.035  | 0.04   | 0.042  | t | 28290  | IRFKDDSSY<br>EEVN            | Mus musculu<br>s              |
| 1 | 1.00 | 1 | 1 | 0.02  | 0.018  | 0.018  | 0.018  | 0.02   | t | 33441  | KSMKVTV<br>AFNQFGP<br>N      | Mus musculu<br>s              |
| 1 | 1.00 | 1 | 1 | 0.03  | 0.03   | 0.03   | 0.03   | 0.031  | t | 133535 | CKPGEVQ<br>QC                | Mus musculu<br>s              |
| 1 | 1.00 | 1 | 1 | 0     | 0.002  | 0      | 0.007  | -0.001 | t | 127957 | EESRGRTS<br>SKTAFYQA<br>LQNS | Homo sapiens                  |
| 1 | 1.00 | 1 | 1 | 0     | 0.004  | 0      | 0.007  | -0.001 | t | 127957 | EESRGRTS<br>SKTAFYQA<br>LQNS | Homo sapiens                  |
| 1 | 1.00 | 1 | 1 | 0     | 0.002  | 0.003  | 0.007  | 0      | t | 125396 | EITDNPYM<br>TSIPVNAF<br>QGLC | Homo sapiens                  |
| 1 | 1.00 | 1 | 1 | -0.04 | -0.038 | -0.041 | -0.039 | -0.039 | t | 120410 | ARLVVLAS<br>GTGSLLR          | Homo sapiens                  |
| 1 | 1.00 | 1 | 1 | -0.07 | -0.073 | -0.07  | -0.07  | -0.072 | t | 143228 | YFDDQVF<br>WKFPHLA<br>VGF    | Oryctola<br>gus cuniculu<br>s |
| 1 | 1.00 | 1 | 1 | 0.01  | 0.016  | 0.01   | 0.01   | 0.01   | t | 123487 | MESNRFIK<br>W                | Ovis aries                    |
| 1 | 1.00 | 1 | 1 | -0.04 | -0.042 | -0.037 | -0.037 | -0.041 | t | 11497  | EEAILRPLR<br>VQGKRAK         | Mus musculu<br>s              |
| 1 | 1.00 | 1 | 1 | 0.02  | 0.014  | 0.02   | 0.02   | 0.02   | t | 123692 | REKRKPKS                     | Oryctola<br>gus cuniculu<br>s |
| 1 | 1.00 | 1 | 1 | -0.03 | -0.03  | -0.03  | -0.03  | -0.03  | t | 75149  | YNGANGA<br>MKH               | Homo sapiens                  |
| 1 | 1.00 | 1 | 1 | -0.03 | -0.026 | -0.03  | -0.031 | -0.032 | t | 123027 | APGMRPP<br>MGG               | Homo sapiens                  |

|   |      |   |   |       |        |        |        |       |   |        |                              |                                  |
|---|------|---|---|-------|--------|--------|--------|-------|---|--------|------------------------------|----------------------------------|
| 1 | 1.00 | 1 | 1 | 0     | -0.002 | 0.007  | 0.003  | 0     | t | 23390  | GYKVLVLN<br>PSVAAT           | Mus<br>musculu<br>s              |
| 1 | 1.00 | 1 | 1 | -0.01 | -0.01  | -0.01  | -0.01  | -0.01 | t | 94471  | CNPACGP<br>K                 | Oryctola<br>gus<br>cuniculu<br>s |
| 1 | 1.00 | 1 | 1 | -0.01 | -0.003 | -0.01  | -0.01  | -0.01 | t | 94471  | CNPACGP<br>K                 | Capra<br>hircus                  |
| 1 | 1.00 | 1 | 1 | 0.02  | 0.02   | 0.013  | 0.016  | 0.023 | t | 138254 | TPTIM                        | Homo<br>sapiens                  |
| 1 | 1.00 | 1 | 1 | 0     | 0      | -0.005 | -0.003 | 0     | t | 33745  | KTKRNTN                      | Homo<br>sapiens                  |
| 1 | 1.00 | 1 | 1 | 0.03  | 0.029  | 0.033  | 0.031  | 0.03  | t | 15176  | FAGDSDSS<br>SSADDAA<br>GKATV | Canis<br>lupus                   |
| 1 | 1.00 | 1 | 1 | 0.01  | -0.002 | 0.014  | 0.01   | 0.012 | t | 110257 | GNPGADG<br>I                 | Macaca<br>mulatta                |
| 1 | 1.00 | 1 | 1 | 0.01  | 0.001  | 0.014  | 0.01   | 0.012 | t | 110257 | GNPGADG<br>I                 | Macaca<br>mulatta                |
| 1 | 1.00 | 1 | 1 | 0.01  | 0.013  | 0.011  | 0.01   | 0.01  | t | 35096  | LCSEYRNT<br>QI               | Mus<br>musculu<br>s              |
| 1 | 1.00 | 1 | 1 | -0.03 | -0.03  | -0.03  | -0.027 | -0.03 | t | 18587  | GAGGGAG<br>AGGAGAG<br>GGGRGR | Homo<br>sapiens                  |
| 1 | 1.00 | 1 | 1 | 0.01  | 0.01   | 0.01   | 0.009  | 0.01  | t | 40110  | LTPLEELY                     | Mus<br>musculu<br>s              |
| 1 | 1.00 | 1 | 1 | 0.03  | 0.03   | 0.03   | 0.03   | 0.03  | t | 99141  | DEELQEGH<br>VLVVPQN          | Homo<br>sapiens                  |
| 1 | 1.00 | 1 | 1 | 0.01  | 0.01   | 0.01   | 0.01   | 0.01  | t | 142136 | EEDEIDGP<br>AGQA             | Homo<br>sapiens                  |
| 1 | 1.00 | 1 | 1 | 0.01  | 0.01   | 0.01   | 0.01   | 0.01  | t | 131080 | SQTTANPS<br>APEGT            | Rattus<br>norvegic<br>us         |
| 1 | 1.00 | 1 | 1 | 0.01  | 0.01   | 0.01   | 0.01   | 0.01  | t | 132120 | WGDGQKS<br>SQGWSVS<br>A      | Homo<br>sapiens                  |

|   |      |   |   |       |        |        |       |        |   |        |                              |                       |
|---|------|---|---|-------|--------|--------|-------|--------|---|--------|------------------------------|-----------------------|
| 1 | 1.00 | 1 | 1 | 0.01  | 0.01   | 0.01   | 0.01  | 0.01   | t | 98932  | PGDYDDD<br>RRQPRREE          | Homo sapiens          |
| 1 | 1.00 | 1 | 1 | 0.01  | 0.01   | 0.01   | 0.01  | 0.01   | t | 78417  | HVWSSPQ<br>ALQRFLHD<br>PTLTW | Mus musculus          |
| 1 | 1.00 | 1 | 1 | 0.01  | 0.01   | 0.01   | 0.01  | 0.01   | t | 78417  | HVWSSPQ<br>ALQRFLHD<br>PTLTW | Mus musculus          |
| 1 | 1.00 | 1 | 1 | 0.01  | 0.01   | 0.01   | 0.01  | 0.01   | t | 78417  | HVWSSPQ<br>ALQRFLHD<br>PTLTW | Mus musculus          |
| 1 | 1.00 | 1 | 1 | 0.01  | 0.007  | 0.01   | 0.01  | 0.01   | t | 54103  | RHVKNYH<br>SRSESTIE          | Mus musculus          |
| 1 | 1.00 | 1 | 1 | -0.05 | -0.047 | -0.05  | -0.05 | -0.052 | t | 135475 | KRPKPGG<br>W                 | Mus musculus          |
| 1 | 1.00 | 1 | 1 | -0.01 | -0.01  | -0.01  | -0.01 | -0.01  | t | 139800 | LGPYSFV                      | Ovis aries            |
| 1 | 1.00 | 1 | 1 | -0.01 | -0.01  | -0.01  | -0.01 | -0.01  | t | 137746 | DTPLTVQG<br>LKL              | Mus musculus          |
| 1 | 1.00 | 1 | 1 | -0.01 | -0.01  | -0.01  | -0.01 | -0.01  | t | 50103  | PYIEQGM<br>MLAEQFK<br>QKALGL | Homo sapiens          |
| 1 | 1.00 | 1 | 1 | -0.01 | -0.01  | -0.01  | -0.01 | -0.01  | t | 11966  | EFDEMEEC<br>ASHLPYIE<br>QGMH | Homo sapiens          |
| 1 | 1.00 | 1 | 1 | -0.01 | -0.01  | -0.01  | -0.01 | -0.01  | t | 6329   | CGPFLLAA<br>SVC              | Homo sapiens          |
| 1 | 1.00 | 1 | 1 | -0.03 | -0.03  | -0.03  | -0.03 | -0.03  | t | 141663 | GRSLEGVY<br>VPPRRQQ<br>L     | Oryctolagus cuniculus |
| 1 | 1.00 | 1 | 1 | -0.03 | -0.03  | -0.03  | -0.03 | -0.03  | t | 98892  | LRVYVEEL<br>KP               | Homo sapiens          |
| 1 | 1.00 | 1 | 1 | -0.04 | -0.045 | -0.045 | -0.04 | -0.04  | t | 4444   | ASHAHKS<br>HRKPKRS<br>WNVYVG | Canis lupus           |
| 1 | 1.00 | 1 | 1 | 0.02  | 0.02   | 0.021  | 0.02  | 0.02   | t | 144807 | VFSYIPWS<br>EDKGEITA<br>CGIP | Mus musculus          |
| 1 | 1.00 | 1 | 1 | -0.03 | -0.03  | -0.035 | -0.03 | -0.03  | t | 108268 | AKVFSRRG<br>GNVTLPCK<br>FYR  | Mus musculus          |

|   |      |   |   |       |        |        |        |        |   |        |                     |                       |
|---|------|---|---|-------|--------|--------|--------|--------|---|--------|---------------------|-----------------------|
| 1 | 1.00 | 1 | 1 | 0     | 0.002  | 0      | 0.001  | 0      | t | 72483  | WGNGCG              | Homo sapiens          |
| 1 | 1.00 | 1 | 1 | 0     | 0.002  | 0.012  | -0.003 | -0.002 | t | 11149  | EANQGQF EHF         | Homo sapiens          |
| 1 | 1.00 | 1 | 1 | 0     | 0.002  | 0.012  | -0.003 | -0.002 | t | 11149  | EANQGQF EHF         | Homo sapiens          |
| 1 | 1.00 | 1 | 1 | 0.06  | 0.06   | 0.051  | 0.06   | 0.06   | t | 128140 | VPESMREE YRKEQQSA V | Mus musculus          |
| 1 | 1.00 | 1 | 1 | 0.01  | 0.008  | 0.01   | 0.009  | 0.01   | t | 116957 | DSMNTDD STRPR       | Mus musculus          |
| 1 | 1.00 | 1 | 1 | -0.03 | -0.032 | -0.029 | -0.031 | -0.029 | t | 21823  | GPVLRR              | Mus musculus          |
| 1 | 1.00 | 1 | 1 | -0.03 | -0.026 | -0.032 | -0.033 | -0.033 | t | 105743 | EEERQQD RRRGRGSR    | Homo sapiens          |
| 1 | 1.00 | 1 | 1 | -0.03 | -0.03  | -0.025 | -0.03  | -0.03  | t | 125843 | DRPVPY              | Mus musculus          |
| 1 | 1.00 | 1 | 1 | -0.04 | -0.04  | -0.038 | -0.036 | -0.04  | t | 118566 | QDFSQQRS LKFRPKG    | Homo sapiens          |
| 1 | 1.00 | 1 | 1 | -0.02 | -0.02  | -0.02  | -0.019 | -0.02  | t | 80394  | ALVSAGW LQEGK       | Homo sapiens          |
| 1 | 1.00 | 1 | 1 | -0.02 | -0.024 | -0.015 | -0.017 | -0.019 | t | 78107  | ATYQSEYL AHRRIPP    | Oryctolagus cuniculus |
| 1 | 1.00 | 1 | 1 | -0.04 | -0.036 | -0.04  | -0.039 | -0.04  | t | 137848 | FDRFKGSG PGYY       | Homo sapiens          |
| 1 | 1.00 | 1 | 1 | 0     | 0.002  | -0.001 | 0.003  | 0.002  | t | 25284  | IAGFVFSCI VVLT      | Ovis aries            |
| 1 | 1.00 | 1 | 1 | 0.01  | 0.01   | 0.005  | 0.01   | 0.009  | t | 120172 | RKIPKRPG SVHRTPSR Q | Oryctolagus cuniculus |

|   |      |   |   |       |        |        |        |        |   |        |                              |                                  |
|---|------|---|---|-------|--------|--------|--------|--------|---|--------|------------------------------|----------------------------------|
| 1 | 1.00 | 1 | 1 | 0.01  | 0.007  | 0.005  | 0.01   | 0.009  | t | 120172 | RKIPKRPG<br>SVHRTPSR<br>Q    | Oryctola<br>gus<br>cuniculu<br>s |
| 1 | 1.00 | 1 | 1 | -0.02 | -0.016 | -0.022 | -0.019 | -0.018 | t | 49275  | PRVVTYKA<br>AA               | Homo<br>sapiens                  |
| 1 | 1.00 | 1 | 1 | -0.03 | -0.03  | -0.023 | -0.026 | -0.034 | t | 138246 | TDKTPFLL<br>WRVH             | Homo<br>sapiens                  |
| 1 | 1.00 | 1 | 1 | 0     | 0      | 0      | 0      | 0      | t | 109348 | IPVDL                        | Mus<br>musculu<br>s              |
| 1 | 1.00 | 1 | 1 | 0     | 0      | 0      | 0      | 0      | t | 109348 | IPVDL                        | Mus<br>musculu<br>s              |
| 1 | 1.00 | 1 | 1 | 0.02  | 0.02   | 0.02   | 0.02   | 0.02   | t | 123725 | RVSMIEGA<br>A                | Ovis<br>aries                    |
| 1 | 1.00 | 1 | 1 | 0.02  | 0.02   | 0.02   | 0.02   | 0.02   | t | 111171 | CSSGPIAP<br>C                | Homo<br>sapiens                  |
| 1 | 1.00 | 1 | 1 | 0.02  | 0.02   | 0.02   | 0.02   | 0.02   | t | 99874  | AEDVGSN<br>KGA               | Oryctola<br>gus<br>cuniculu<br>s |
| 1 | 1.00 | 1 | 1 | 0     | 0      | 0      | 0      | 0      | t | 147064 | KHQGAQY<br>VWNRTA            | Homo<br>sapiens                  |
| 1 | 1.00 | 1 | 1 | 0     | 0      | 0      | 0      | 0      | t | 138259 | WANKQPT<br>IIWRS             | Homo<br>sapiens                  |
| 1 | 1.00 | 1 | 1 | 0     | 0      | 0      | 0      | 0      | t | 151060 | SVIEKMNT<br>QFTAVGK          | Homo<br>sapiens                  |
| 1 | 1.00 | 1 | 1 | 0     | 0      | 0      | 0      | 0      | t | 142318 | TVQDILEN<br>YRPNWTV<br>PEFTL | Felis<br>catus                   |
| 1 | 1.00 | 1 | 1 | 0     | 0      | 0      | 0      | 0      | t | 137736 | DTALTVA<br>LKL               | Mus<br>musculu<br>s              |
| 1 | 1.00 | 1 | 1 | 0     | 0      | 0      | 0      | 0      | t | 127685 | HPAFARA<br>HGEAGAG<br>R      | Homo<br>sapiens                  |
| 1 | 1.00 | 1 | 1 | 0     | 0      | 0      | 0      | 0      | t | 110611 | GPKGQAG<br>EPGIAGFK          | Mus<br>musculu<br>s              |
| 1 | 1.00 | 1 | 1 | 0     | 0      | 0      | 0      | 0      | t | 103197 | GDDDRLH<br>GMLTDRDI          | Homo<br>sapiens                  |
| 1 | 1.00 | 1 | 1 | 0     | 0      | 0      | 0      | 0      | t | 108282 | AQAYDLSP<br>S                | Homo<br>sapiens                  |



|   |      |   |   |       |        |        |       |        |   |        |                              |                                  |
|---|------|---|---|-------|--------|--------|-------|--------|---|--------|------------------------------|----------------------------------|
| 1 | 1.00 | 1 | 1 | 0     | 0      | 0      | 0     | 0      | t | 93030  | ITDSDGND<br>KL               | Ovis<br>aries                    |
| 1 | 1.00 | 1 | 1 | 0     | 0      | 0      | 0     | 0      | t | 95849  | SGTSGTSG<br>TSAQ             | Homo<br>sapiens                  |
| 1 | 1.00 | 1 | 1 | 0     | 0      | 0      | 0     | 0      | t | 96208  | EDEEDEED<br>KE               | Homo<br>sapiens                  |
| 1 | 1.00 | 1 | 1 | 0     | 0      | 0      | 0     | 0      | t | 95849  | SGTSGTSG<br>TSAQ             | Homo<br>sapiens                  |
| 1 | 1.00 | 1 | 1 | 0     | 0      | 0      | 0     | 0      | t | 79626  | PRNVRVT<br>GCYQCGT<br>PALVEG | Homo<br>sapiens                  |
| 1 | 1.00 | 1 | 1 | 0     | 0      | 0      | 0     | 0      | t | 47188  | PDREVLQ<br>QFDEEMEE<br>CSKHL | Homo<br>sapiens                  |
| 1 | 1.00 | 1 | 1 | 0     | 0      | 0      | 0     | 0      | t | 51671  | QNAPQVE<br>NAPQAE            | Bos<br>taurus                    |
| 1 | 1.00 | 1 | 1 | 0     | 0      | 0      | 0     | 0      | t | 6075   | CCRHKQK<br>DVGPKVKQ<br>TLPPS | Ovis<br>aries                    |
| 1 | 1.00 | 1 | 1 | 0     | 0      | 0      | 0     | 0      | t | 1260   | AFASRGN<br>HVAPTHY<br>VTESDA | Homo<br>sapiens                  |
| 1 | 1.00 | 1 | 1 | -0.02 | -0.02  | -0.02  | -0.02 | -0.02  | t | 133951 | WIFNNF                       | Mus<br>musculu<br>s              |
| 1 | 1.00 | 1 | 1 | -0.02 | -0.02  | -0.02  | -0.02 | -0.02  | t | 102884 | VDPLPSGY<br>QFNPEATK<br>AASP | Mus<br>musculu<br>s              |
| 1 | 1.00 | 1 | 1 | 0     | 0      | 0      | 0     | -0.001 | t | 153379 | EQEIFTNIT<br>DRV             | Mus<br>musculu<br>s              |
| 1 | 1.00 | 1 | 1 | 0     | 0      | 0      | 0     | -0.001 | t | 153379 | EQEIFTNIT<br>DRV             | Mus<br>musculu<br>s              |
| 1 | 1.00 | 1 | 1 | -0.02 | -0.023 | -0.024 | -0.02 | -0.02  | t | 122915 | THKANPSP<br>EPNMHEC          | Oryctola<br>gus<br>cuniculu<br>s |
| 1 | 1.00 | 1 | 1 | -0.02 | -0.023 | -0.024 | -0.02 | -0.02  | t | 122915 | THKANPSP<br>EPNMHEC          | Oryctola<br>gus<br>cuniculu<br>s |

|   |      |   |   |       |        |        |        |        |   |        |                              |                                  |
|---|------|---|---|-------|--------|--------|--------|--------|---|--------|------------------------------|----------------------------------|
| 1 | 1.00 | 1 | 1 | 0.05  | 0.053  | 0.044  | 0.05   | 0.052  | t | 51772  | QNTEEME<br>NLSDRVAS          | Mus<br>musculu<br>s              |
| 1 | 1.00 | 1 | 1 | -0.03 | -0.03  | -0.037 | -0.03  | -0.031 | t | 130802 | EHRMTW<br>DPAQPPR<br>DLTEAFL | Homo<br>sapiens                  |
| 1 | 1.00 | 1 | 1 | 0.02  | 0.016  | 0.023  | 0.017  | 0.018  | t | 33090  | KQVTIRIG<br>CKTSSS           | Oryctola<br>gus<br>cuniculu<br>s |
| 1 | 1.00 | 1 | 1 | -0.03 | -0.04  | -0.03  | -0.029 | -0.03  | t | 55067  | RNTNRRP                      | Homo<br>sapiens                  |
| 1 | 1.00 | 1 | 1 | 0.07  | 0.07   | 0.068  | 0.064  | 0.068  | t | 60470  | SQKGKQQ<br>EEEENEGS          | Homo<br>sapiens                  |
| 1 | 1.00 | 1 | 1 | -0.02 | -0.018 | -0.02  | -0.021 | -0.02  | t | 149431 | QPFPPQQ<br>PYP               | Homo<br>sapiens                  |
| 1 | 1.00 | 1 | 1 | 0.03  | 0.03   | 0.026  | 0.037  | 0.03   | t | 6482   | CKGTHGG<br>TGAGAGA<br>GGAGAG | Homo<br>sapiens                  |
| 1 | 1.00 | 1 | 1 | -0.03 | -0.033 | -0.03  | -0.03  | -0.03  | t | 153414 | LPHWHPH<br>SHLQP             | Oryctola<br>gus<br>cuniculu<br>s |
| 1 | 1.00 | 1 | 1 | -0.07 | -0.068 | -0.07  | -0.063 | -0.07  | t | 138222 | PTPTGPS<br>RR                | Homo<br>sapiens                  |
| 1 | 1.00 | 1 | 1 | -0.01 | -0.008 | -0.008 | -0.007 | -0.01  | t | 122173 | QSIQQSIE<br>RLWCRLW<br>PLPFP | Homo<br>sapiens                  |
| 1 | 1.00 | 1 | 1 | 0.03  | 0.025  | 0.023  | 0.03   | 0.032  | t | 132891 | QVSCPAIQ<br>ADEVLGE          | Trichosu<br>rus<br>vulpecul<br>a |
| 1 | 1.00 | 1 | 1 | 0.02  | 0.02   | 0.02   | 0.02   | 0.02   | t | 121811 | RRARARA<br>R                 | Homo<br>sapiens                  |
| 1 | 1.00 | 1 | 1 | 0     | 0      | -0.005 | 0      | 0.003  | t | 26374  | IHFGSD                       | Mus<br>musculu<br>s              |
| 1 | 1.00 | 1 | 1 | -0.01 | -0.01  | -0.015 | -0.01  | -0.009 | t | 76185  | YTTGGAQS<br>HTLR             | Mus<br>musculu<br>s              |
| 1 | 1.00 | 1 | 1 | -0.07 | -0.077 | -0.061 | -0.067 | -0.07  | t | 109948 | SRYCLSSRL<br>RVSATFW         | Homo<br>sapiens                  |

|   |      |   |   |       |        |        |        |        |   |        |                              |                                  |
|---|------|---|---|-------|--------|--------|--------|--------|---|--------|------------------------------|----------------------------------|
| 1 | 1.00 | 1 | 1 | -0.02 | -0.025 | -0.024 | -0.017 | -0.017 | t | 42475  | MRKTKLA<br>PTVAHGV<br>F      | Bos<br>taurus                    |
| 1 | 1.00 | 1 | 1 | 0.01  | 0.01   | 0.01   | 0.01   | 0.01   | t | 56175  | RTS                          | MD                               |
| 1 | 1.00 | 1 | 1 | -0.01 | -0.01  | -0.01  | -0.01  | -0.01  | t | 7001   | CSGFVSL<br>APGAKQN           | Mus<br>musculu<br>s              |
| 1 | 1.00 | 1 | 1 | -0.01 | -0.01  | -0.01  | -0.01  | -0.01  | t | 925    | AEGEFKTL<br>RNTNRLDP<br>AK   | Homo<br>sapiens                  |
| 1 | 1.00 | 1 | 1 | -0.01 | -0.01  | -0.01  | -0.01  | -0.01  | t | 925    | AEGEFKTL<br>RNTNRLDP<br>AK   | Homo<br>sapiens                  |
| 1 | 1.00 | 1 | 1 | 0.01  | 0.01   | 0.005  | 0.01   | 0.011  | t | 122073 | AEEQARH<br>VKNGLE            | Oryctola<br>gus<br>cuniculu<br>s |
| 1 | 1.00 | 1 | 1 | 0.03  | 0.03   | 0.03   | 0.03   | 0.03   | t | 113259 | AEEIELQTI<br>T               | Oryctola<br>gus<br>cuniculu<br>s |
| 1 | 1.00 | 1 | 1 | 0.03  | 0.03   | 0.03   | 0.03   | 0.03   | t | 110582 | GANGDPG<br>RPGEPLP           | Mus<br>musculu<br>s              |
| 1 | 1.00 | 1 | 1 | 0.01  | 0.01   | 0.01   | 0.01   | 0.01   | t | 131078 | SQTTANAS<br>CPEGT            | Rattus<br>norvegic<br>us         |
| 1 | 1.00 | 1 | 1 | 0.01  | 0.01   | 0.01   | 0.01   | 0.01   | t | 128098 | SCWQPGT<br>RTSTSPGV<br>SEDCL | Homo<br>sapiens                  |
| 1 | 1.00 | 1 | 1 | 0.01  | 0.01   | 0.01   | 0.01   | 0.01   | t | 123794 | TQYPPGR<br>G                 | Oryctola<br>gus<br>cuniculu<br>s |
| 1 | 1.00 | 1 | 1 | 0.01  | 0.01   | 0.01   | 0.01   | 0.01   | t | 132119 | WESGAAN<br>SQSTSWG<br>S      | Homo<br>sapiens                  |
| 1 | 1.00 | 1 | 1 | 0.01  | 0.01   | 0.01   | 0.01   | 0.01   | t | 75877  | YSREQLSK<br>LFGIDTQ          | Homo<br>sapiens                  |
| 1 | 1.00 | 1 | 1 | 0.01  | 0.01   | 0.01   | 0.01   | 0.01   | t | 78235  | PHSNSYHT                     | Homo<br>sapiens                  |
| 1 | 1.00 | 1 | 1 | 0.01  | 0.01   | 0.01   | 0.01   | 0.01   | t | 51121  | QIPYNLKIF<br>AIELDTLKK<br>LT | Aotus<br>nancyma<br>ae           |
| 1 | 1.00 | 1 | 1 | 0.01  | 0.01   | 0.01   | 0.01   | 0.01   | t | 47230  | PDYEPPVV                     | Homo<br>sapiens                  |

|   |      |   |   |       |        |        |        |        |   |        |                          |                   |
|---|------|---|---|-------|--------|--------|--------|--------|---|--------|--------------------------|-------------------|
| 1 | 1.00 | 1 | 1 | 0.01  | 0.01   | 0.01   | 0.01   | 0.01   | t | 7374   | CYGLPDSE<br>PTKTNGK      | Equus<br>caballus |
| 1 | 1.00 | 1 | 1 | 0.01  | 0.006  | 0.01   | 0.01   | 0.01   | t | 7374   | CYGLPDSE<br>PTKTNGK      | Mus<br>musculus   |
| 1 | 1.00 | 1 | 1 | 0.01  | 0.013  | 0.01   | 0.01   | 0.01   | t | 7374   | CYGLPDSE<br>PTKTNGK      | Mus<br>musculus   |
| 1 | 1.00 | 1 | 1 | 0.01  | 0.009  | 0.01   | 0.01   | 0.01   | t | 7374   | CYGLPDSE<br>PTKTNGK      | Equus<br>caballus |
| 1 | 1.00 | 1 | 1 | 0.01  | 0.01   | 0.01   | 0.01   | 0.01   | t | 6290   | CGGLTNLF<br>SLGSQQKV     | Mus<br>musculus   |
| 1 | 1.00 | 1 | 1 | 0.01  | 0.016  | 0.01   | 0.01   | 0.01   | t | 7374   | CYGLPDSE<br>PTKTNGK      | Equus<br>caballus |
| 1 | 1.00 | 1 | 1 | 0.01  | 0.013  | 0.01   | 0.01   | 0.01   | t | 7374   | CYGLPDSE<br>PTKTNGK      | Mus<br>musculus   |
| 1 | 1.00 | 1 | 1 | 0.01  | 0.01   | 0.01   | 0.01   | 0.01   | t | 7374   | CYGLPDSE<br>PTKTNGK      | Mus<br>musculus   |
| 1 | 1.00 | 1 | 1 | 0.01  | 0.006  | 0.01   | 0.01   | 0.01   | t | 7374   | CYGLPDSE<br>PTKTNGK      | Mus<br>musculus   |
| 1 | 1.00 | 1 | 1 | -0.01 | -0.006 | -0.013 | -0.007 | -0.009 | t | 124068 | ELMALHT<br>GQSLEQIE<br>R | Homo<br>sapiens   |
| 1 | 1.00 | 1 | 1 | -0.01 | -0.01  | -0.01  | -0.01  | -0.01  | t | 149067 | LNFDPPS                  | Sus<br>scrofa     |
| 1 | 1.00 | 1 | 1 | -0.01 | -0.01  | -0.01  | -0.01  | -0.01  | t | 123735 | SHVDFMV<br>YE            | Ovis<br>aries     |
| 1 | 1.00 | 1 | 1 | -0.01 | -0.01  | -0.01  | -0.01  | -0.01  | t | 38950  | LQPQQPF<br>PQQ           | Mus<br>musculus   |
| 1 | 1.00 | 1 | 1 | -0.01 | -0.01  | -0.01  | -0.01  | -0.01  | t | 49087  | PQQPFPQ<br>QPQ           | Mus<br>musculus   |
| 1 | 1.00 | 1 | 1 | -0.01 | -0.01  | -0.01  | -0.01  | -0.01  | t | 49087  | PQQPFPQ<br>QPQ           | Mus<br>musculus   |

|   |      |   |   |       |        |        |        |        |   |        |                              |                                  |
|---|------|---|---|-------|--------|--------|--------|--------|---|--------|------------------------------|----------------------------------|
| 1 | 1.00 | 1 | 1 | -0.01 | -0.01  | -0.01  | -0.01  | -0.01  | t | 51922  | QPQQPFP<br>QPQ               | Mus<br>musculu<br>s              |
| 1 | 1.00 | 1 | 1 | -0.01 | -0.01  | -0.01  | -0.01  | -0.01  | t | 38950  | LQPQQPF<br>PQQ               | Mus<br>musculu<br>s              |
| 1 | 1.00 | 1 | 1 | -0.01 | -0.01  | -0.01  | -0.01  | -0.01  | t | 7209   | CTSRFASLF<br>NLGPQQQ         | Mus<br>musculu<br>s              |
| 1 | 1.00 | 1 | 1 | -0.03 | -0.03  | -0.03  | -0.03  | -0.03  | t | 101925 | NISQHQC<br>VK                | Homo<br>sapiens                  |
| 1 | 1.00 | 1 | 1 | -0.05 | -0.05  | -0.05  | -0.05  | -0.05  | t | 79537  | EHPWPLL                      | Oryctola<br>gus<br>cuniculu<br>s |
| 1 | 1.00 | 1 | 1 | 0     | 0      | -0.004 | 0      | 0.002  | t | 52158  | QQTFPQQ<br>PQL               | Mus<br>musculu<br>s              |
| 1 | 1.00 | 1 | 1 | 0.02  | 0.017  | 0.018  | 0.02   | 0.02   | t | 10580  | DVENSML<br>QAN               | Oryctola<br>gus<br>cuniculu<br>s |
| 1 | 1.00 | 1 | 1 | -0.01 | -0.01  | -0.021 | -0.01  | -0.01  | t | 17278  | FPELKPGE<br>SRHTSDH<br>MSIYK | Homo<br>sapiens                  |
| 1 | 1.00 | 1 | 1 | -0.02 | -0.022 | -0.025 | -0.017 | -0.018 | t | 118290 | DGDFAIVK<br>FTKVLLDY<br>TGHI | Rattus<br>norvegic<br>us         |
| 1 | 1.00 | 1 | 1 | 0.1   | 0.1    | 0.105  | 0.1    | 0.101  | t | 114234 | TQDENP                       | Mus<br>musculu<br>s              |
| 1 | 1.00 | 1 | 1 | 0.01  | 0.008  | 0.015  | 0.009  | 0.008  | t | 10808  | DWERPTP<br>YELSI             | Mus<br>musculu<br>s              |
| 1 | 1.00 | 1 | 1 | 0.02  | 0.018  | 0.02   | 0.019  | 0.021  | t | 59982  | SPAPERRG<br>YSGYDVPD<br>Y    | Mus<br>musculu<br>s              |
| 1 | 1.00 | 1 | 1 | -0.04 | -0.04  | -0.051 | -0.034 | -0.036 | t | 138758 | AMVYLGA<br>KDSTRQI           | Mus<br>musculu<br>s              |
| 1 | 1.00 | 1 | 1 | -0.03 | -0.032 | -0.03  | -0.031 | -0.03  | t | 110385 | QLYKTCKQ<br>AGTCPPDII<br>PKV | Mus<br>musculu<br>s              |
| 1 | 1.00 | 1 | 1 | 0.02  | 0.017  | 0.013  | 0.02   | 0.02   | t | 106257 | ANYIGSDK<br>YFHARGN<br>YDA   | Oryctola<br>gus<br>cuniculu<br>s |

|   |      |   |   |       |        |        |        |        |   |        |                     |                       |
|---|------|---|---|-------|--------|--------|--------|--------|---|--------|---------------------|-----------------------|
| 1 | 1.00 | 1 | 1 | 0.01  | 0.01   | 0.01   | 0.01   | 0.012  | t | 75990  | YTDAPSFSDI          | Homo sapiens          |
| 1 | 1.00 | 1 | 1 | -0.03 | -0.028 | -0.036 | -0.033 | -0.028 | t | 47345  | PELFRQFYQL          | Homo sapiens          |
| 1 | 1.00 | 1 | 1 | -0.03 | -0.026 | -0.036 | -0.033 | -0.028 | t | 47345  | PELFRQFYQL          | Homo sapiens          |
| 1 | 1.00 | 1 | 1 | -0.02 | -0.017 | -0.011 | -0.02  | -0.022 | t | 67932  | VDEKMN              | Mus musculus          |
| 1 | 1.00 | 1 | 1 | -0.03 | -0.034 | -0.035 | -0.037 | -0.03  | t | 134065 | GLLECCARC           | Oryctolagus cuniculus |
| 1 | 1.00 | 1 | 1 | -0.01 | -0.01  | -0.008 | -0.01  | -0.011 | t | 151723 | RSITTIIDTFHQYSRK    | Mus musculus          |
| 1 | 1.00 | 1 | 1 | 0.02  | 0.022  | 0.022  | 0.023  | 0.021  | t | 119598 | INPESDQPDLSNFMESG   | Homo sapiens          |
| 1 | 1.00 | 1 | 1 | -0.03 | -0.03  | -0.025 | -0.032 | -0.032 | t | 136569 | PYYRWQYKYD          | Homo sapiens          |
| 1 | 1.00 | 1 | 1 | 0.01  | 0.006  | 0      | 0.013  | 0.012  | t | 76239  | YVATRSETDYYAGNSPPQ  | Oryctolagus cuniculus |
| 1 | 1.00 | 1 | 1 | 0.01  | 0.01   | 0.009  | 0.01   | 0.009  | t | 41869  | MKNQTFHLQGFVDGL     | Mus musculus          |
| 1 | 1.00 | 1 | 1 | -0.01 | -0.01  | -0.01  | -0.009 | -0.011 | t | 7763   | DDEDLDEFKPIVQYDNFQD | Homo sapiens          |
| 1 | 1.00 | 1 | 1 | -0.01 | -0.012 | 0      | -0.005 | -0.01  | t | 67461  | TYSIP               | Mus musculus          |
| 1 | 1.00 | 1 | 1 | -0.01 | -0.008 | -0.007 | -0.007 | -0.008 | t | 16031  | FGPLWILQASLLKV      | Homo sapiens          |
| 1 | 1.00 | 1 | 1 | 0     | 0      | 0      | 0      | 0      | t | 46550  | NWNFD               | Mus musculus          |
| 1 | 1.00 | 1 | 1 | 0     | 0      | 0      | 0      | 0      | t | 46550  | NWNFD               | Mus musculus          |

|   |      |   |   |       |       |       |        |        |   |        |                               |                   |
|---|------|---|---|-------|-------|-------|--------|--------|---|--------|-------------------------------|-------------------|
| 1 | 1.00 | 1 | 1 | 0.05  | 0.05  | 0.055 | 0.047  | 0.051  | t | 59593  | SLYELTH                       | Homo sapiens      |
| 1 | 1.00 | 1 | 1 | 0     | 0     | 0     | 0      | 0      | t | 107486 | KKPTPST                       | Rattus norvegicus |
| 1 | 1.00 | 1 | 1 | -0.01 | -0.01 | -0.01 | -0.014 | -0.013 | t | 134255 | VGPAPGM<br>RPPMGGH<br>MPMM    | Homo sapiens      |
| 1 | 1.00 | 1 | 1 | 0.02  | 0.02  | 0.02  | 0.02   | 0.02   | t | 149536 | YPQPQPQ<br>YSQ                | Mus musculus      |
| 1 | 1.00 | 1 | 1 | 0     | 0     | 0     | 0      | 0      | t | 123261 | GRDDREK<br>WL                 | Ovis aries        |
| 1 | 1.00 | 1 | 1 | 0     | 0     | 0     | 0      | 0      | t | 116004 | TSTPTTEA<br>VE                | Homo sapiens      |
| 1 | 1.00 | 1 | 1 | 0     | 0     | 0     | 0      | 0      | t | 111091 | AEPDRAH<br>YNIIVTFCC<br>KCDST | Rattus norvegicus |
| 1 | 1.00 | 1 | 1 | 0     | 0     | 0     | 0      | 0      | t | 111091 | AEPDRAH<br>YNIIVTFCC<br>KCDST | Mus musculus      |
| 1 | 1.00 | 1 | 1 | 0     | 0     | 0     | 0      | 0      | t | 111091 | AEPDRAH<br>YNIIVTFCC<br>KCDST | Mus musculus      |
| 1 | 1.00 | 1 | 1 | 0     | 0     | 0     | 0      | 0      | t | 79412  | TCLEVNW<br>LTRMACM            | Mus musculus      |
| 1 | 1.00 | 1 | 1 | 0     | 0     | 0     | 0      | 0      | t | 47187  | PDREVLYQ<br>GFDEMEE<br>CASHL  | Homo sapiens      |
| 1 | 1.00 | 1 | 1 | 0     | 0     | 0     | 0      | 0      | t | 25021  | HVAPTHY<br>VTESDASQ<br>RVTQL  | Homo sapiens      |
| 1 | 1.00 | 1 | 1 | 0     | 0     | 0     | 0      | 0      | t | 16958  | FLVNAWK<br>SKKNP              | Homo sapiens      |
| 1 | 1.00 | 1 | 1 | 0     | 0     | 0     | 0      | 0      | t | 25009  | HTYSPHEL<br>SRVAAT            | Homo sapiens      |
| 1 | 1.00 | 1 | 1 | 0     | 0     | 0     | 0      | 0      | t | 25009  | HTYSPHEL<br>SRVAAT            | Homo sapiens      |
| 1 | 1.00 | 1 | 1 | -0.02 | -0.02 | -0.02 | -0.02  | -0.02  | t | 106304 | CDRSYTTR<br>RW                | Homo sapiens      |
| 1 | 1.00 | 1 | 1 | -0.02 | -0.02 | -0.02 | -0.02  | -0.02  | t | 110584 | GAPGFPG<br>PRGPPGP<br>Q       | Mus musculus      |

|   |      |   |   |       |        |        |        |        |   |        |                      |                       |
|---|------|---|---|-------|--------|--------|--------|--------|---|--------|----------------------|-----------------------|
| 1 | 1.00 | 1 | 1 | -0.02 | -0.02  | -0.02  | -0.02  | -0.02  | t | 49108  | PQQQPFPPQ            | Mus musculus          |
| 1 | 1.00 | 1 | 1 | -0.02 | -0.02  | -0.02  | -0.02  | -0.02  | t | 49108  | PQQQPFPPQ            | Mus musculus          |
| 1 | 1.00 | 1 | 1 | -0.04 | -0.04  | -0.04  | -0.04  | -0.04  | t | 115252 | FLPYPYAKPAAVRSPAQIL  | Homo sapiens          |
| 1 | 1.00 | 1 | 1 | -0.04 | -0.04  | -0.04  | -0.04  | -0.04  | t | 101925 | NISQHQCVRK           | Homo sapiens          |
| 1 | 1.00 | 1 | 1 | -0.04 | -0.04  | -0.04  | -0.04  | -0.04  | t | 80009  | RMLVCGIAAKLG         | Mus musculus          |
| 1 | 1.00 | 1 | 1 | 0.01  | 0.008  | 0.018  | 0.009  | 0.01   | t | 11411  | EDPASR               | Mus musculus          |
| 1 | 1.00 | 1 | 1 | -0.06 | -0.058 | -0.067 | -0.061 | -0.06  | t | 107828 | ERGLKGHRGFT          | Homo sapiens          |
| 1 | 1.00 | 1 | 1 | -0.02 | -0.02  | -0.015 | -0.013 | -0.018 | t | 142448 | NKYRGTAGNALMDGASQL   | Homo sapiens          |
| 1 | 1.00 | 1 | 1 | 0     | -0.002 | 0      | 0      | 0      | t | 119992 | KLGTWTYDGSVVAINP     | Oryctolagus cuniculus |
| 1 | 1.00 | 1 | 1 | 0     | 0      | 0      | 0      | 0      | t | 119992 | KLGTWTYDGSVVAINP     | Mus musculus          |
| 1 | 1.00 | 1 | 1 | 0     | 0      | 0      | 0      | 0      | t | 1261   | AFASRGNHVAPTHYVVESDA | Homo sapiens          |
| 1 | 1.00 | 1 | 1 | 0     | 0      | 0      | 0      | 0      | t | 1261   | AFASRGNHVAPTHYVVESDA | Homo sapiens          |
| 1 | 1.00 | 1 | 1 | 0.02  | 0.02   | 0.027  | 0.024  | 0.02   | t | 73272  | WYGMEIRPLSEKEENMV    | Homo sapiens          |
| 1 | 1.00 | 1 | 1 | 0     | 0      | 0      | -0.003 | -0.001 | t | 14435  | ETIYNTTLKY           | Homo sapiens          |
| 1 | 1.00 | 1 | 1 | -0.03 | -0.03  | -0.03  | -0.03  | -0.03  | t | 105763 | EVHHQK               | Mus musculus          |



|   |      |   |   |       |        |        |        |        |   |        |                              |                                  |
|---|------|---|---|-------|--------|--------|--------|--------|---|--------|------------------------------|----------------------------------|
| 1 | 1.00 | 1 | 1 | 0.01  | 0.013  | 0.016  | 0.01   | 0.01   | t | 23511  | GYYPSPDP<br>NTFYAPPY<br>S    | Mus<br>musculu<br>s              |
| 1 | 1.00 | 1 | 1 | 0.01  | 0.01   | 0.016  | 0.01   | 0.01   | t | 23511  | GYYPSPDP<br>NTFYAPPY<br>S    | Mus<br>musculu<br>s              |
| 1 | 1.00 | 1 | 1 | 0.01  | 0.01   | 0.01   | 0.01   | 0.011  | t | 108860 | DGVNH                        | Mus<br>musculu<br>s              |
| 1 | 1.00 | 1 | 1 | 0.01  | 0.01   | 0.01   | 0.01   | 0.011  | t | 108860 | DGVNH                        | Mus<br>musculu<br>s              |
| 1 | 1.00 | 1 | 1 | -0.02 | -0.02  | -0.02  | -0.02  | -0.021 | t | 113660 | NIPLVSGP<br>DIPINITDQ<br>APS | Cavia<br>porcellu<br>s           |
| 1 | 1.00 | 1 | 1 | 0.03  | 0.028  | 0.031  | 0.029  | 0.031  | t | 46984  | PAVARDD<br>AEGLSDPR          | Mus<br>musculu<br>s              |
| 1 | 1.00 | 1 | 1 | 0     | 0.002  | -0.01  | 0.001  | 0      | t | 10022  | DRNLGIGN<br>TGNW             | Homo<br>sapiens                  |
| 1 | 1.00 | 1 | 1 | -0.01 | -0.012 | -0.005 | -0.013 | -0.01  | t | 47965  | PIQNLPGY<br>VF               | Mus<br>musculu<br>s              |
| 1 | 1.00 | 1 | 1 | -0.02 | -0.02  | -0.022 | -0.02  | -0.02  | t | 122034 | WNPAD                        | Rattus<br>norvegic<br>us         |
| 1 | 1.00 | 1 | 1 | -0.02 | -0.02  | -0.02  | -0.02  | -0.02  | t | 105506 | SAENEL                       | Oryctola<br>gus<br>cuniculu<br>s |
| 1 | 1.00 | 1 | 1 | -0.01 | -0.01  | 0.001  | -0.01  | -0.01  | t | 36947  | LKLNWF                       | Homo<br>sapiens                  |
| 1 | 1.00 | 1 | 1 | 0     | -0.003 | 0.001  | 0      | 0.002  | t | 6762   | CPFIKPEVK<br>PGTPA           | Oryctola<br>gus<br>cuniculu<br>s |
| 1 | 1.00 | 1 | 1 | 0.01  | 0.008  | 0.003  | 0.009  | 0.011  | t | 9723   | DPPPPNP<br>NDPPPPN<br>PND    | Mus<br>musculu<br>s              |
| 1 | 1.00 | 1 | 1 | -0.02 | -0.022 | -0.028 | -0.021 | -0.02  | t | 953    | AEGRAINR<br>RVE              | Mus<br>musculu<br>s              |
| 1 | 1.00 | 1 | 1 | 0.01  | 0.012  | 0.015  | 0.013  | 0.008  | t | 39164  | LRPGPVSQ<br>PYHHWDT<br>DK    | Homo<br>sapiens                  |

|   |      |   |   |       |        |        |        |       |   |        |                              |                    |
|---|------|---|---|-------|--------|--------|--------|-------|---|--------|------------------------------|--------------------|
| 1 | 1.00 | 1 | 1 | -0.01 | -0.01  | -0.01  | -0.01  | -0.01 | t | 55760  | RRVGLSNP                     | Anas platyrhynchos |
| 1 | 1.00 | 1 | 1 | 0     | 0.004  | 0      | 0.001  | 0.002 | t | 51391  | QLKLNW                       | Homo sapiens       |
| 1 | 1.00 | 1 | 1 | -0.01 | -0.008 | -0.014 | -0.011 | -0.01 | t | 32887  | KPSTLYKM<br>TVEAVK           | Ovis aries         |
| 1 | 1.00 | 1 | 1 | 0.05  | 0.05   | 0.05   | 0.05   | 0.05  | t | 115456 | QSEEQQQ<br>TEDELQDK<br>IHPFA | Homo sapiens       |
| 1 | 1.00 | 1 | 1 | 0.03  | 0.03   | 0.028  | 0.03   | 0.03  | t | 114676 | WSREEQE<br>REERKERE          | Homo sapiens       |
| 1 | 1.00 | 1 | 1 | 0.01  | 0.01   | 0.01   | 0.01   | 0.01  | t | 142389 | AVGNSRG<br>ACLAC             | Mus musculus       |
| 1 | 1.00 | 1 | 1 | 0.01  | 0.01   | 0.01   | 0.01   | 0.01  | t | 121686 | NVVPLSVA<br>NPLVDAF          | Mus musculus       |
| 1 | 1.00 | 1 | 1 | 0.01  | 0.01   | 0.01   | 0.01   | 0.01  | t | 121686 | NVVPLSVA<br>NPLVDAF          | Mus musculus       |
| 1 | 1.00 | 1 | 1 | 0.01  | 0.01   | 0.01   | 0.01   | 0.01  | t | 123347 | KEGYLKDL<br>P                | Ovis aries         |
| 1 | 1.00 | 1 | 1 | 0.01  | 0.01   | 0.01   | 0.01   | 0.01  | t | 114750 | AVSVCSE<br>YP                | Homo sapiens       |
| 1 | 1.00 | 1 | 1 | 0.01  | 0.01   | 0.01   | 0.01   | 0.01  | t | 103531 | QSG LGDN<br>GYIIPDE          | Homo sapiens       |
| 1 | 1.00 | 1 | 1 | 0.01  | 0.01   | 0.01   | 0.01   | 0.01  | t | 79599  | LHIRAGPY<br>GHATVEM<br>PEWIH | Homo sapiens       |
| 1 | 1.00 | 1 | 1 | -0.01 | -0.01  | -0.01  | -0.01  | -0.01 | t | 149447 | QVPLVQE<br>QQF               | Homo sapiens       |
| 1 | 1.00 | 1 | 1 | -0.01 | -0.01  | -0.01  | -0.01  | -0.01 | t | 149447 | QVPLVQE<br>QQF               | Mus musculus       |
| 1 | 1.00 | 1 | 1 | -0.01 | -0.01  | -0.01  | -0.01  | -0.01 | t | 142942 | PEEETGE<br>MGQLVHR           | Homo sapiens       |

|   |      |   |   |       |       |       |       |       |   |        |                              |                       |
|---|------|---|---|-------|-------|-------|-------|-------|---|--------|------------------------------|-----------------------|
| 1 | 1.00 | 1 | 1 | -0.01 | -0.01 | -0.01 | -0.01 | -0.01 | t | 123107 | EALPKIKAY                    | Ovis aries            |
| 1 | 1.00 | 1 | 1 | -0.01 | -0.01 | -0.01 | -0.01 | -0.01 | t | 106781 | RKYFGNRP<br>TM               | Homo sapiens          |
| 1 | 1.00 | 1 | 1 | -0.01 | -0.01 | -0.01 | -0.01 | -0.01 | t | 99280  | GHVLVVP<br>QNFAVAG<br>K      | Homo sapiens          |
| 1 | 1.00 | 1 | 1 | -0.01 | -0.01 | -0.01 | -0.01 | -0.01 | t | 78303  | WHSIFAP                      | Homo sapiens          |
| 1 | 1.00 | 1 | 1 | -0.01 | -0.01 | -0.01 | -0.01 | -0.01 | t | 95848  | SGTSGTSG<br>PSGT             | Homo sapiens          |
| 1 | 1.00 | 1 | 1 | -0.01 | -0.01 | -0.01 | -0.01 | -0.01 | t | 62878  | TAHPAYPP<br>PSRA             | Mus musculus          |
| 1 | 1.00 | 1 | 1 | -0.01 | -0.01 | -0.01 | -0.01 | -0.01 | t | 95848  | SGTSGTSG<br>PSGT             | Homo sapiens          |
| 1 | 1.00 | 1 | 1 | -0.01 | -0.01 | -0.01 | -0.01 | -0.01 | t | 95848  | SGTSGTSG<br>PSGT             | Homo sapiens          |
| 1 | 1.00 | 1 | 1 | -0.01 | -0.01 | -0.01 | -0.01 | -0.01 | t | 41336  | MEECSKHL<br>PLVEHGLQ<br>LAEQ | Homo sapiens          |
| 1 | 1.00 | 1 | 1 | -0.01 | -0.01 | -0.01 | -0.01 | -0.01 | t | 51669  | QNAPQAQ<br>NAPQAQ            | Bos taurus            |
| 1 | 1.00 | 1 | 1 | -0.01 | -0.01 | -0.01 | -0.01 | -0.01 | t | 22236  | GRVILSGK<br>PAIIPDREV<br>LYR | Homo sapiens          |
| 1 | 1.00 | 1 | 1 | -0.01 | -0.01 | -0.01 | -0.01 | -0.01 | t | 8535   | DHEGCKFS<br>CFIRPAG          | Equus caballus        |
| 1 | 1.00 | 1 | 1 | -0.03 | -0.03 | -0.03 | -0.03 | -0.03 | t | 92843  | GNDRLF<br>GKG                | Ovis aries            |
| 1 | 1.00 | 1 | 1 | 0.01  | 0.008 | 0.012 | 0.011 | 0.007 | t | 40921  | LYREALES<br>P<br>EHC         | Mus musculus          |
| 1 | 1.00 | 1 | 1 | 0.03  | 0.026 | 0.023 | 0.027 | 0.03  | t | 136338 | GSVTKKRK<br>LESTES           | Oryctolagus cuniculus |

|   |      |   |   |       |        |        |        |        |   |        |                      |                       |
|---|------|---|---|-------|--------|--------|--------|--------|---|--------|----------------------|-----------------------|
| 1 | 1.00 | 1 | 1 | -0.02 | -0.018 | -0.017 | -0.017 | -0.018 | t | 151713 | RGEARK               | Homo sapiens          |
| 1 | 1.00 | 1 | 1 | 0     | -0.004 | -0.011 | -0.007 | -0.002 | t | 140167 | AYNNGQEINGFKA        | Oryctolagus cuniculus |
| 1 | 1.00 | 1 | 1 | 0     | 0      | 0      | 0      | 0.001  | t | 610    | ACYLPFQLSCGGKS       | Mus musculus          |
| 1 | 1.00 | 1 | 1 | 0.01  | 0.005  | 0.011  | 0.009  | 0.01   | t | 148559 | DDSKLPVIKVEDKSKLQD   | Canis lupus           |
| 1 | 1.00 | 1 | 1 | 0.02  | 0.024  | 0.021  | 0.02   | 0.019  | t | 10436  | DTNSVYEPYYHSDHAESSWV | Cavia porcellus       |
| 1 | 1.00 | 1 | 1 | 0.02  | 0.02   | 0.02   | 0.02   | 0.019  | t | 29159  | ITYGACPKYVKQNTLK     | Mus musculus          |
| 1 | 1.00 | 1 | 1 | 0.02  | 0.02   | 0.02   | 0.02   | 0.019  | t | 29159  | ITYGACPKYVKQNTLK     | Mus musculus          |
| 1 | 1.00 | 1 | 1 | 0.02  | 0.02   | 0.02   | 0.02   | 0.019  | t | 29159  | ITYGACPKYVKQNTLK     | Mus musculus          |
| 1 | 1.00 | 1 | 1 | 0     | -0.005 | -0.008 | 0.003  | 0.002  | t | 157740 | PHRAGETS AAGL        | Canis lupus           |
| 1 | 1.00 | 1 | 1 | 0.02  | 0.028  | 0.015  | 0.02   | 0.02   | t | 61631  | STGNNVFQTQAGCLIG     | Gallus gallus         |
| 1 | 1.00 | 1 | 1 | 0.03  | 0.032  | 0.03   | 0.029  | 0.03   | t | 149428 | QLQLQNP SQQ          | Homo sapiens          |
| 1 | 1.00 | 1 | 1 | 0.02  | 0.017  | 0.02   | 0.02   | 0.021  | t | 135439 | ADAAAAY              | Oryctolagus cuniculus |
| 1 | 1.00 | 1 | 1 | 0     | 0      | 0      | 0      | 0      | t | 94474  | CNPACGR              | Capra hircus          |
| 1 | 1.00 | 1 | 1 | 0     | 0.007  | 0      | 0      | 0      | t | 94474  | CNPACGR              | Capra hircus          |
| 1 | 1.00 | 1 | 1 | 0     | 0      | 0      | 0      | 0      | t | 94474  | CNPACGR              | Oryctolagus cuniculus |

|   |      |   |   |       |        |       |        |        |   |        |                                  |                                  |
|---|------|---|---|-------|--------|-------|--------|--------|---|--------|----------------------------------|----------------------------------|
| 1 | 1.00 | 1 | 1 | -0.02 | -0.02  | -0.02 | -0.016 | -0.022 | t | 124367 | KLKARVDE<br>LERIRRS              | Homo<br>sapiens                  |
| 1 | 1.00 | 1 | 1 | 0.05  | 0.05   | 0.05  | 0.044  | 0.048  | t | 96210  | EDKEEDEE<br>ED                   | Homo<br>sapiens                  |
| 1 | 1.00 | 1 | 1 | 0     | 0.004  | 0     | -0.003 | 0      | t | 32913  | KPTTKQRQ<br>NKPP                 | Homo<br>sapiens                  |
| 1 | 1.00 | 1 | 1 | 0.02  | 0.02   | 0.02  | 0.02   | 0.02   | t | 153333 | ACLDAKLQ<br>QCGGGS               | Mus<br>musculu<br>s              |
| 1 | 1.00 | 1 | 1 | 0.02  | 0.02   | 0.02  | 0.02   | 0.02   | t | 123746 | SNFLGDRH<br>Y                    | Ovis<br>aries                    |
| 1 | 1.00 | 1 | 1 | 0.02  | 0.02   | 0.02  | 0.02   | 0.02   | t | 119519 | RKVVQTSL<br>E                    | Homo<br>sapiens                  |
| 1 | 1.00 | 1 | 1 | 0.02  | 0.02   | 0.02  | 0.02   | 0.02   | t | 79103  | TTTLSESFE<br>NGIPASW<br>KTID     | Homo<br>sapiens                  |
| 1 | 1.00 | 1 | 1 | 0.02  | 0.02   | 0.02  | 0.02   | 0.02   | t | 95841  | SGTSAQSG<br>TSAQ                 | Homo<br>sapiens                  |
| 1 | 1.00 | 1 | 1 | 0.02  | 0.02   | 0.02  | 0.02   | 0.02   | t | 22169  | GRPSA                            | Homo<br>sapiens                  |
| 1 | 1.00 | 1 | 1 | 0     | 0      | 0     | 0      | 0      | t | 123440 | LLEYGEKYE                        | Ovis<br>aries                    |
| 1 | 1.00 | 1 | 1 | 0     | -0.003 | 0     | 0      | 0      | t | 79821  | FEGKPALE<br>LIRM                 | Oryctola<br>gus<br>cuniculu<br>s |
| 1 | 1.00 | 1 | 1 | 0     | 0      | 0     | 0      | 0      | t | 75874  | YSREQLNK<br>LFGIDMT              | Homo<br>sapiens                  |
| 1 | 1.00 | 1 | 1 | 0     | 0      | 0     | 0      | 0      | t | 79821  | FEGKPALE<br>LIRM                 | Mus<br>musculu<br>s              |
| 1 | 1.00 | 1 | 1 | 0     | 0      | 0     | 0      | 0      | t | 93028  | ISSVSAFTS<br>S                   | Ovis<br>aries                    |
| 1 | 1.00 | 1 | 1 | 0     | 0      | 0     | 0      | 0      | t | 40021  | LTLNWP<br>GDM                    | Rattus<br>norvegic<br>us         |
| 1 | 1.00 | 1 | 1 | 0     | 0      | 0     | 0      | 0      | t | 39401  | LSGRPAVI<br>PDREVL<br>YR<br>EFDE | Homo<br>sapiens                  |

|   |      |   |   |       |        |       |        |       |   |        |                              |                          |
|---|------|---|---|-------|--------|-------|--------|-------|---|--------|------------------------------|--------------------------|
| 1 | 1.00 | 1 | 1 | 0     | 0      | 0     | 0      | 0     | t | 41726  | MIKAAFLP<br>TGAFKADR<br>YKSH | Aotus<br>nancyma<br>ae   |
| 1 | 1.00 | 1 | 1 | 0     | 0      | 0     | 0      | 0     | t | 41668  | MHNISQH<br>QSVMKMS<br>DQNS   | Aotus<br>nancyma<br>ae   |
| 1 | 1.00 | 1 | 1 | 0     | 0      | 0     | 0      | 0     | t | 22084  | GRIILSGRP<br>AIIPDREAL<br>YQ | Homo<br>sapiens          |
| 1 | 1.00 | 1 | 1 | 0     | 0      | 0     | 0      | 0     | t | 22090  | GRIILSGRP<br>AVIPDREV<br>LYR | Homo<br>sapiens          |
| 1 | 1.00 | 1 | 1 | 0     | 0      | 0     | 0      | 0     | t | 22084  | GRIILSGRP<br>AIIPDREAL<br>YQ | Homo<br>sapiens          |
| 1 | 1.00 | 1 | 1 | 0     | 0      | 0     | 0      | 0     | t | 22074  | GRIILSGKP<br>AIIPDREAL<br>YQ | Homo<br>sapiens          |
| 1 | 1.00 | 1 | 1 | 0     | 0      | 0     | 0      | 0     | t | 33065  | KQSGENF<br>AYLTAYQA          | Homo<br>sapiens          |
| 1 | 1.00 | 1 | 1 | 0     | 0      | 0     | 0      | 0     | t | 22074  | GRIILSGKP<br>AIIPDREAL<br>YQ | Homo<br>sapiens          |
| 1 | 1.00 | 1 | 1 | 0     | 0      | 0     | 0      | 0     | t | 6723   | CNRFAGM<br>FSLGARQK<br>I     | Mus<br>musculu<br>s      |
| 1 | 1.00 | 1 | 1 | -0.02 | -0.02  | -0.02 | -0.02  | -0.02 | t | 115933 | QWQVLSN<br>TVP               | Homo<br>sapiens          |
| 1 | 1.00 | 1 | 1 | -0.02 | -0.02  | -0.02 | -0.02  | -0.02 | t | 78759  | PGLRPQNL<br>YTLWGGG<br>VVCMY | Homo<br>sapiens          |
| 1 | 1.00 | 1 | 1 | -0.02 | -0.02  | -0.02 | -0.02  | -0.02 | t | 49649  | PTHYFGSP<br>M                | Homo<br>sapiens          |
| 1 | 1.00 | 1 | 1 | -0.02 | -0.033 | -0.02 | -0.02  | -0.02 | t | 33512  | KSSLEDQKI<br>KEKLQP          | Aotus<br>trivirgat<br>us |
| 1 | 1.00 | 1 | 1 | -0.04 | -0.04  | -0.04 | -0.04  | -0.04 | t | 135754 | RYVNWIKE                     | Homo<br>sapiens          |
| 1 | 1.00 | 1 | 1 | -0.01 | -0.008 | -0.01 | -0.01  | -0.01 | t | 118579 | RDMLLAN<br>KVPAAR<br>A       | Homo<br>sapiens          |
| 1 | 1.00 | 1 | 1 | -0.02 | -0.018 | -0.02 | -0.017 | -0.02 | t | 55780  | RRYPDAVY<br>LHRIDLG          | Homo<br>sapiens          |
| 1 | 1.00 | 1 | 1 | 0.02  | 0.02   | 0.02  | 0.02   | 0.02  | t | 111111 | ANQSLPD<br>RLYKS             | Homo<br>sapiens          |

|   |      |   |   |       |        |        |        |        |   |        |                              |                       |
|---|------|---|---|-------|--------|--------|--------|--------|---|--------|------------------------------|-----------------------|
| 1 | 1.00 | 1 | 1 | -0.05 | -0.05  | -0.05  | -0.05  | -0.05  | t | 137419 | HSPRWHL                      | Mus musculus          |
| 1 | 1.00 | 1 | 1 | -0.04 | -0.04  | -0.051 | -0.04  | -0.04  | t | 67170  | TVSTEQNV<br>PDPQVGI          | Homo sapiens          |
| 1 | 1.00 | 1 | 1 | 0     | 0      | 0.005  | 0.003  | 0.002  | t | 4856   | ASYVKKPK<br>EDVD             | Homo sapiens          |
| 1 | 1.00 | 1 | 1 | 0.01  | 0.013  | 0.002  | 0.01   | 0.01   | t | 24369  | HNDKRAD<br>PAFVCRQ<br>GVVDRG | Equus caballus        |
| 1 | 1.00 | 1 | 1 | 0.01  | 0.007  | 0.01   | 0.01   | 0.011  | t | 131579 | PDIITGFSS                    | Oryctolagus cuniculus |
| 1 | 1.00 | 1 | 1 | -0.01 | -0.006 | -0.001 | -0.01  | -0.01  | t | 76234  | YVAGMAE<br>LGAFESI           | Myodes glareolus      |
| 1 | 1.00 | 1 | 1 | -0.01 | -0.009 | -0.001 | -0.01  | -0.01  | t | 76234  | YVAGMAE<br>LGAFESI           | Myodes glareolus      |
| 1 | 1.00 | 1 | 1 | 0     | -0.002 | 0      | -0.003 | -0.001 | t | 58077  | SGHRMA<br>WDMMM<br>NW        | Mus musculus          |
| 1 | 1.00 | 1 | 1 | -0.05 | -0.05  | -0.05  | -0.05  | -0.052 | t | 47897  | PIFKSGRG<br>CGSCFEI          | Homo sapiens          |
| 1 | 1.00 | 1 | 1 | -0.05 | -0.053 | -0.05  | -0.05  | -0.048 | t | 140898 | RRADAVK<br>GYLAG             | Oryctolagus cuniculus |
| 1 | 1.00 | 1 | 1 | 0.01  | 0.012  | 0      | 0.009  | 0.012  | t | 53191  | RARFEELC<br>GDLFRSTI<br>QPVE | Homo sapiens          |
| 1 | 1.00 | 1 | 1 | 0.03  | 0.032  | 0.032  | 0.033  | 0.032  | t | 94159  | VLVAPTS<br>MLD               | Ovis aries            |
| 1 | 1.00 | 1 | 1 | 0     | 0      | 0      | 0.004  | 0.002  | t | 122445 | KQYSIEAA<br>LRCRRISKE<br>EYH | Homo sapiens          |
| 1 | 1.00 | 1 | 1 | -0.02 | -0.023 | -0.022 | -0.02  | -0.02  | t | 120921 | RMKRPGE<br>DKVRPAC<br>QHK    | Oryctolagus cuniculus |

|   |      |   |   |       |        |        |        |        |   |        |                              |                                  |
|---|------|---|---|-------|--------|--------|--------|--------|---|--------|------------------------------|----------------------------------|
| 1 | 1.00 | 1 | 1 | -0.02 | -0.02  | -0.025 | -0.023 | -0.022 | t | 98858  | LACQCLVR<br>TP               | Homo<br>sapiens                  |
| 1 | 1.00 | 1 | 1 | 0.03  | 0.03   | 0.03   | 0.03   | 0.03   | t | 118311 | DVEVNEKK<br>DRVTD            | Homo<br>sapiens                  |
| 1 | 1.00 | 1 | 1 | 0.03  | 0.03   | 0.03   | 0.03   | 0.03   | t | 123168 | FGGGDAA<br>PA                | Ovis<br>aries                    |
| 1 | 1.00 | 1 | 1 | 0.01  | 0.01   | 0.01   | 0.01   | 0.01   | t | 141575 | WKAQKRF<br>MKKSG             | Rattus                           |
| 1 | 1.00 | 1 | 1 | 0.01  | 0.01   | 0.01   | 0.01   | 0.01   | t | 153329 | ACFLPHPS<br>RCGGGS           | Mus<br>musculu<br>s              |
| 1 | 1.00 | 1 | 1 | 0.01  | 0.01   | 0.01   | 0.01   | 0.01   | t | 131081 | SQTTANPS<br>CAEGT            | Rattus<br>norvegic<br>us         |
| 1 | 1.00 | 1 | 1 | 0.01  | 0.01   | 0.01   | 0.01   | 0.01   | t | 99316  | HKSFNSLN<br>DFLR             | Oryctola<br>gus<br>cuniculu<br>s |
| 1 | 1.00 | 1 | 1 | 0.01  | 0.01   | 0.01   | 0.01   | 0.01   | t | 110609 | GPKGANG<br>DPGRPGE<br>P      | Mus<br>musculu<br>s              |
| 1 | 1.00 | 1 | 1 | 0.01  | 0.01   | 0.01   | 0.01   | 0.01   | t | 99992  | EHPTDFSV<br>EF               | Mus<br>musculu<br>s              |
| 1 | 1.00 | 1 | 1 | 0.01  | 0.01   | 0.01   | 0.01   | 0.01   | t | 115904 | PTVMFPP<br>QSV               | Homo<br>sapiens                  |
| 1 | 1.00 | 1 | 1 | 0.01  | 0.01   | 0.01   | 0.01   | 0.01   | t | 42750  | MTDVIRFR<br>YSNNYEAS<br>DH   | Aotus<br>nancyma<br>ae           |
| 1 | 1.00 | 1 | 1 | -0.01 | -0.01  | -0.01  | -0.01  | -0.01  | t | 151956 | KSVYWHVI<br>GMG              | Homo<br>sapiens                  |
| 1 | 1.00 | 1 | 1 | -0.01 | -0.01  | -0.01  | -0.01  | -0.01  | t | 121846 | SGVCLLPRI<br>SDVVSC          | Mus<br>musculu<br>s              |
| 1 | 1.00 | 1 | 1 | -0.01 | -0.01  | -0.01  | -0.01  | -0.01  | t | 123704 | RIEALPKIK                    | Ovis<br>aries                    |
| 1 | 1.00 | 1 | 1 | -0.01 | -0.012 | -0.01  | -0.01  | -0.01  | t | 112139 | GQFRVIGP<br>RHPIRALV<br>GDEV | Mus<br>musculu<br>s              |
| 1 | 1.00 | 1 | 1 | -0.01 | -0.01  | -0.01  | -0.01  | -0.01  | t | 95749  | QVYNKLG<br>MYPPN             | Oryctola<br>gus<br>cuniculu<br>s |
| 1 | 1.00 | 1 | 1 | -0.01 | -0.01  | -0.01  | -0.01  | -0.01  | t | 70813  | VRRKDDR<br>RGALLSP           | Homo<br>sapiens                  |



|   |      |   |   |       |        |        |        |       |   |        |                              |                        |
|---|------|---|---|-------|--------|--------|--------|-------|---|--------|------------------------------|------------------------|
| 1 | 1.00 | 1 | 1 | -0.01 | -0.01  | -0.01  | -0.01  | -0.01 | t | 41334  | MEECSASL<br>PYMDETR<br>AIAGQ | Homo<br>sapiens        |
| 1 | 1.00 | 1 | 1 | -0.01 | -0.01  | -0.01  | -0.01  | -0.01 | t | 50745  | QFDEMEE<br>CSKHLPLV<br>EHGLQ | Homo<br>sapiens        |
| 1 | 1.00 | 1 | 1 | -0.01 | -0.01  | -0.01  | -0.01  | -0.01 | t | 41340  | MEECSQA<br>GPYIEQAQ<br>VIAHQ | Homo<br>sapiens        |
| 1 | 1.00 | 1 | 1 | -0.01 | -0.01  | -0.01  | -0.01  | -0.01 | t | 50105  | PYIEQGM<br>QLAAEFKQ<br>KALGL | Homo<br>sapiens        |
| 1 | 1.00 | 1 | 1 | -0.03 | -0.042 | -0.03  | -0.03  | -0.03 | t | 137868 | GFYPGSIE<br>VRWFLNG          | Mus<br>musculu<br>s    |
| 1 | 1.00 | 1 | 1 | -0.03 | -0.018 | -0.03  | -0.03  | -0.03 | t | 137868 | GFYPGSIE<br>VRWFLNG          | Pan<br>troglody<br>tes |
| 1 | 1.00 | 1 | 1 | -0.03 | -0.03  | -0.03  | -0.03  | -0.03 | t | 137868 | GFYPGSIE<br>VRWFLNG          | Pan<br>troglody<br>tes |
| 1 | 1.00 | 1 | 1 | -0.03 | -0.03  | -0.03  | -0.03  | -0.03 | t | 137868 | GFYPGSIE<br>VRWFLNG          | Mus<br>musculu<br>s    |
| 1 | 1.00 | 1 | 1 | -0.03 | -0.03  | -0.03  | -0.03  | -0.03 | t | 137868 | GFYPGSIE<br>VRWFLNG          | Homo<br>sapiens        |
| 1 | 1.00 | 1 | 1 | -0.03 | -0.03  | -0.03  | -0.03  | -0.03 | t | 92463  | DKLISSVSA<br>F               | Ovis<br>aries          |
| 1 | 1.00 | 1 | 1 | -0.05 | -0.05  | -0.05  | -0.05  | -0.05 | t | 149130 | YALHSTP                      | Sus<br>scrofa          |
| 1 | 1.00 | 1 | 1 | 0     | 0.002  | -0.015 | -0.003 | 0.001 | t | 48618  | PNDPNRN<br>VD                | Homo<br>sapiens        |
| 1 | 1.00 | 1 | 1 | 0.03  | 0.034  | 0.045  | 0.031  | 0.03  | t | 18784  | GATEIQ                       | Homo<br>sapiens        |
| 1 | 1.00 | 1 | 1 | 0.01  | 0.014  | 0.003  | 0.007  | 0.01  | t | 50172  | PYSPSQDP<br>YSPSQDP          | Homo<br>sapiens        |
| 1 | 1.00 | 1 | 1 | -0.03 | -0.027 | -0.034 | -0.03  | -0.03 | t | 99419  | LGYTDRIG                     | Mus<br>musculu<br>s    |

|   |      |   |   |       |        |        |        |        |   |        |                              |              |
|---|------|---|---|-------|--------|--------|--------|--------|---|--------|------------------------------|--------------|
| 1 | 1.00 | 1 | 1 | -0.02 | -0.02  | -0.015 | -0.017 | -0.02  | t | 46817  | PAHYANYLP                    | Homo sapiens |
| 1 | 1.00 | 1 | 1 | -0.03 | -0.03  | -0.034 | -0.03  | -0.029 | t | 38982  | LQSARRGE                     | Homo sapiens |
| 1 | 1.00 | 1 | 1 | 0.02  | 0.02   | 0.017  | 0.023  | 0.022  | t | 52026  | QQFIYAGS<br>LSALLDPS<br>QGMG | Homo sapiens |
| 1 | 1.00 | 1 | 1 | -0.02 | -0.018 | -0.028 | -0.023 | -0.02  | t | 45162  | NNLGLLCE<br>YQAIGSA          | Homo sapiens |
| 1 | 1.00 | 1 | 1 | -0.01 | -0.01  | -0.013 | -0.014 | -0.01  | t | 22542  | GSTKSCAR<br>TLVSGSF          | Homo sapiens |
| 1 | 1.00 | 1 | 1 | -0.05 | -0.05  | -0.055 | -0.05  | -0.05  | t | 132861 | LKRGIEKA<br>V                | Mus musculus |
| 1 | 1.00 | 1 | 1 | 0.01  | 0.012  | 0.016  | 0.011  | 0.01   | t | 26308  | IGQMFETT<br>MR               | Homo sapiens |
| 1 | 1.00 | 1 | 1 | 0     | 0      | 0      | 0      | 0      | t | 114941 | RQDENYEE<br>AIVHLKVA<br>ALGS | Homo sapiens |
| 1 | 1.00 | 1 | 1 | 0     | 0      | 0      | 0      | 0      | t | 50989  | QGYQEPP<br>PPQAPYQ<br>GYQEPP | Homo sapiens |
| 1 | 1.00 | 1 | 1 | 0     | 0.002  | 0.012  | 0.003  | 0      | t | 8565   | DHSAPL                       | Homo sapiens |
| 1 | 1.00 | 1 | 1 | 0.01  | 0.01   | 0.007  | 0.01   | 0.01   | t | 62715  | SYSYNKDN<br>NELSHFA          | Mus musculus |
| 1 | 1.00 | 1 | 1 | -0.02 | -0.018 | -0.02  | -0.019 | -0.02  | t | 18758  | GASAQGS<br>SGPSGTPS          | Homo sapiens |
| 1 | 1.00 | 1 | 1 | -0.04 | -0.042 | -0.035 | -0.037 | -0.04  | t | 158838 | IHNDVEA<br>WMDRYKY<br>YP     | Mus musculus |
| 1 | 1.00 | 1 | 1 | 0.02  | 0.02   | 0.015  | 0.02   | 0.02   | t | 32723  | KPGKKTTT<br>KPTK             | Mus musculus |
| 1 | 1.00 | 1 | 1 | 0.02  | 0.022  | 0.02   | 0.021  | 0.02   | t | 117059 | PQTDGSTR<br>PRGL             | Homo sapiens |

|   |      |   |   |       |       |        |       |        |   |        |                              |                              |
|---|------|---|---|-------|-------|--------|-------|--------|---|--------|------------------------------|------------------------------|
| 1 | 1.00 | 1 | 1 | 0     | 0     | 0      | 0     | 0      | t | 57299  | SDTRGDP<br>VFNLPFQ           | Mus<br>musculus              |
| 1 | 1.00 | 1 | 1 | 0.01  | 0.013 | 0.01   | 0.01  | 0.01   | t | 44571  | NKPPNKP<br>NNDFH             | Mus<br>musculus              |
| 1 | 1.00 | 1 | 1 | 0.01  | 0.012 | 0.01   | 0.017 | 0.01   | t | 131543 | LLTSMYVK<br>EFLISSQD<br>GHQ  | Homo<br>sapiens              |
| 1 | 1.00 | 1 | 1 | -0.01 | -0.01 | -0.005 | -0.01 | -0.009 | t | 39160  | LRPFHQILY<br>GMS             | Mus<br>musculus              |
| 1 | 1.00 | 1 | 1 | 0.04  | 0.04  | 0.04   | 0.04  | 0.04   | t | 135691 | ILDNITQS                     | Homo<br>sapiens              |
| 1 | 1.00 | 1 | 1 | 0.02  | 0.02  | 0.02   | 0.02  | 0.02   | t | 156872 | FSKSSSWE<br>SWLP             | Gallus<br>gallus             |
| 1 | 1.00 | 1 | 1 | 0     | 0     | 0      | 0     | 0      | t | 153448 | QPNHRDH<br>FKLPAGGG<br>S     | Mus<br>musculus              |
| 1 | 1.00 | 1 | 1 | 0     | 0     | 0      | 0     | 0      | t | 123075 | DFLGKNPY<br>L                | Ovis<br>aries                |
| 1 | 1.00 | 1 | 1 | 0     | 0     | 0      | 0     | 0      | t | 123167 | FGAGDAP<br>PS                | Ovis<br>aries                |
| 1 | 1.00 | 1 | 1 | 0     | 0     | 0      | 0     | 0      | t | 108104 | RRLPFGSQ<br>M                | Mus<br>musculus              |
| 1 | 1.00 | 1 | 1 | 0     | 0     | 0      | 0     | 0      | t | 99645  | RSPPGERT<br>RGRQPGD          | Homo<br>sapiens              |
| 1 | 1.00 | 1 | 1 | 0     | 0     | 0      | 0     | 0      | t | 96235  | EKDKGLQT<br>SQ               | Homo<br>sapiens              |
| 1 | 1.00 | 1 | 1 | 0     | 0     | 0      | 0     | 0      | t | 60674  | SRGNHDS<br>PTHYVPES<br>DAAAR | Homo<br>sapiens              |
| 1 | 1.00 | 1 | 1 | 0     | 0     | 0      | 0     | 0      | t | 78303  | WHSIFAP                      | Homo<br>sapiens              |
| 1 | 1.00 | 1 | 1 | 0     | 0     | 0      | 0     | 0      | t | 65515  | TPCAAEEQ<br>KLPINA           | Homo<br>sapiens              |
| 1 | 1.00 | 1 | 1 | 0     | 0     | 0      | 0     | 0      | t | 97290  | EVELKLNL<br>A                | Oryctola<br>gus<br>cuniculus |
| 1 | 1.00 | 1 | 1 | 0     | 0     | 0      | 0     | 0      | t | 41735  | MIKVGfHP<br>TGAFKSPR<br>WKSH | Aotus<br>nancyma<br>ae       |
| 1 | 1.00 | 1 | 1 | 0     | 0     | 0      | 0     | 0      | t | 51574  | QLVNSNG<br>SWHIN             | Rattus<br>norvegicus         |

|   |      |   |   |       |       |        |       |       |   |        |                              |                                  |
|---|------|---|---|-------|-------|--------|-------|-------|---|--------|------------------------------|----------------------------------|
| 1 | 1.00 | 1 | 1 | 0     | 0     | 0      | 0     | 0     | t | 39376  | LSGKPATIP<br>DREALYRE<br>FDE | Homo<br>sapiens                  |
| 1 | 1.00 | 1 | 1 | 0     | 0     | 0      | 0     | 0     | t | 51574  | QLVNSNG<br>SWHIN             | Mus<br>musculu<br>s              |
| 1 | 1.00 | 1 | 1 | 0     | 0     | 0      | 0     | 0     | t | 47177  | PDREILYQ<br>QFDEMEE<br>CSRHI | Homo<br>sapiens                  |
| 1 | 1.00 | 1 | 1 | 0     | 0     | 0      | 0     | 0     | t | 39392  | LSGRPAIIP<br>DREALYQE<br>FDE | Homo<br>sapiens                  |
| 1 | 1.00 | 1 | 1 | 0     | 0     | 0      | 0     | 0     | t | 39370  | LSGKPAIIP<br>DREALYQE<br>FDE | Homo<br>sapiens                  |
| 1 | 1.00 | 1 | 1 | 0     | 0     | 0      | 0     | 0     | t | 51574  | QLVNSNG<br>SWHIN             | Homo<br>sapiens                  |
| 1 | 1.00 | 1 | 1 | 0     | 0     | 0      | 0     | 0     | t | 51574  | QLVNSNG<br>SWHIN             | Mus<br>musculu<br>s              |
| 1 | 1.00 | 1 | 1 | 0     | 0     | 0      | 0     | 0     | t | 19471  | GEVTELDIS<br>GCSGDT          | Oryctola<br>gus<br>cuniculu<br>s |
| 1 | 1.00 | 1 | 1 | 0     | 0     | 0      | 0     | 0     | t | 20039  | GGSVASV<br>ASGGSGG<br>S      | Homo<br>sapiens                  |
| 1 | 1.00 | 1 | 1 | 0     | 0     | 0      | 0     | 0     | t | 11971  | EFDEMEEC<br>PSHLPYIE<br>QGMQ | Homo<br>sapiens                  |
| 1 | 1.00 | 1 | 1 | -0.02 | -0.02 | -0.02  | -0.02 | -0.02 | t | 153284 | PTPLSPPLR<br>NTHPQA          | Mus<br>musculu<br>s              |
| 1 | 1.00 | 1 | 1 | -0.02 | -0.02 | -0.02  | -0.02 | -0.02 | t | 147562 | CYGSLPW<br>MC                | Homo<br>sapiens                  |
| 1 | 1.00 | 1 | 1 | -0.04 | -0.04 | -0.04  | -0.04 | -0.04 | t | 103566 | RRFPLPDV<br>PWTRFFG          | Homo<br>sapiens                  |
| 1 | 1.00 | 1 | 1 | -0.04 | -0.04 | -0.04  | -0.04 | -0.04 | t | 78185  | KKWLAA                       | Equus<br>caballus                |
| 1 | 1.00 | 1 | 1 | -0.06 | -0.06 | -0.06  | -0.06 | -0.06 | t | 115601 | DPFYWVS<br>PGVLV             | Homo<br>sapiens                  |
| 1 | 1.00 | 1 | 1 | -0.06 | -0.06 | -0.06  | -0.06 | -0.06 | t | 115601 | DPFYWVS<br>PGVLV             | Homo<br>sapiens                  |
| 1 | 1.00 | 1 | 1 | 0     | 0     | -0.008 | 0     | 0.002 | t | 7343   | CWVDNEE<br>DIDVILKKS<br>TI   | Mus<br>musculu<br>s              |

|   |      |   |   |       |        |        |        |        |   |        |                                |                                  |
|---|------|---|---|-------|--------|--------|--------|--------|---|--------|--------------------------------|----------------------------------|
| 1 | 1.00 | 1 | 1 | 0     | 0.003  | -0.008 | 0      | 0.002  | t | 7343   | CWVDNEE<br>DIDVILKKS<br>TI     | Mus<br>musculu<br>s              |
| 1 | 1.00 | 1 | 1 | 0     | 0      | 0.001  | 0      | 0      | t | 21719  | GPPAA                          | Homo<br>sapiens                  |
| 1 | 1.00 | 1 | 1 | 0     | 0      | 0      | 0      | 0      | t | 117111 | WPMNDD<br>STRPR                | Homo<br>sapiens                  |
| 1 | 1.00 | 1 | 1 | 0     | 0      | 0      | -0.003 | -0.001 | t | 14435  | ETIYNTTLK<br>Y                 | Homo<br>sapiens                  |
| 1 | 1.00 | 1 | 1 | 0.01  | 0.01   | 0.008  | 0.009  | 0.01   | t | 153292 | TLPANPPP<br>ASTNRQS            | Mus<br>musculu<br>s              |
| 1 | 1.00 | 1 | 1 | 0     | 0      | 0      | -0.007 | -0.001 | t | 103839 | DAEFRHDS<br>GYEVH              | Mus<br>musculu<br>s              |
| 1 | 1.00 | 1 | 1 | 0     | -0.003 | 0      | -0.007 | -0.001 | t | 103839 | DAEFRHDS<br>GYEVH              | Oryctola<br>gus<br>cuniculu<br>s |
| 1 | 1.00 | 1 | 1 | 0     | -0.011 | 0.007  | 0      | 0      | t | 146795 | CCELCCNP<br>QCAGCY             | Oryctola<br>gus<br>cuniculu<br>s |
| 1 | 1.00 | 1 | 1 | 0.11  | 0.113  | 0.114  | 0.11   | 0.108  | t | 133669 | QQQQQQ<br>QQQQQ                | Mus<br>musculu<br>s              |
| 1 | 1.00 | 1 | 1 | -0.02 | -0.017 | -0.02  | -0.02  | -0.021 | t | 21930  | GQPGPSG<br>AAQGQVIS<br>N       | Mus<br>musculu<br>s              |
| 1 | 1.00 | 1 | 1 | 0.04  | 0.04   | 0.039  | 0.04   | 0.04   | t | 94485  | DELA KIAQ<br>T WANQCD<br>FNHDD | Mus<br>musculu<br>s              |
| 1 | 1.00 | 1 | 1 | -0.01 | -0.007 | -0.007 | -0.01  | -0.01  | t | 97459  | LLGNATAL                       | Mus<br>musculu<br>s              |
| 1 | 1.00 | 1 | 1 | 0.04  | 0.044  | 0.039  | 0.041  | 0.045  | t | 74945  | YLTQDL                         | Homo<br>sapiens                  |
| 1 | 1.00 | 1 | 1 | 0     | -0.006 | 0      | 0      | 0      | t | 123813 | VGAVQGP<br>V                   | Oryctola<br>gus<br>cuniculu<br>s |

|   |      |   |   |       |       |       |       |       |   |        |                      |                                  |
|---|------|---|---|-------|-------|-------|-------|-------|---|--------|----------------------|----------------------------------|
| 1 | 1.00 | 1 | 1 | 0.01  | 0.013 | 0.01  | 0.01  | 0.011 | t | 103838 | DAEFRHDS<br>GYEV     | Mus<br>musculu<br>s              |
| 1 | 1.00 | 1 | 1 | 0.01  | 0.01  | 0.008 | 0.01  | 0.011 | t | 119837 | ELIPSTSSA<br>VPLIGK  | Mus<br>musculu<br>s              |
| 1 | 1.00 | 1 | 1 | 0.03  | 0.032 | 0.027 | 0.03  | 0.031 | t | 50617  | QEIENSDS<br>DYDREKLQ | Rattus<br>norvegic<br>us         |
| 1 | 1.00 | 1 | 1 | 0.02  | 0.022 | 0.02  | 0.027 | 0.023 | t | 108198 | VQFKESNR<br>LNSPLAL  | Homo<br>sapiens                  |
| 1 | 1.00 | 1 | 1 | 0.03  | 0.03  | 0.03  | 0.03  | 0.03  | t | 137846 | FADGQPKL<br>VSDQ     | Oryctola<br>gus<br>cuniculu<br>s |
| 1 | 1.00 | 1 | 1 | 0.03  | 0.03  | 0.03  | 0.03  | 0.03  | t | 111907 | VEVGRGQ<br>PLGVGISG  | Mus<br>musculu<br>s              |
| 1 | 1.00 | 1 | 1 | 0.03  | 0.03  | 0.03  | 0.03  | 0.03  | t | 111558 | MPLTQKD              | Homo<br>sapiens                  |
| 1 | 1.00 | 1 | 1 | 0.03  | 0.03  | 0.03  | 0.03  | 0.03  | t | 94178  | VSAFTSSN<br>DS       | Ovis<br>aries                    |
| 1 | 1.00 | 1 | 1 | 0.01  | 0.01  | 0.01  | 0.01  | 0.01  | t | 156930 | PISKEHV              | Gallus<br>gallus                 |
| 1 | 1.00 | 1 | 1 | 0.01  | 0.01  | 0.01  | 0.01  | 0.01  | t | 122845 | LQVQDQL<br>MNEELTER  | Oryctola<br>gus<br>cuniculu<br>s |
| 1 | 1.00 | 1 | 1 | 0.01  | 0.01  | 0.01  | 0.01  | 0.01  | t | 103548 | RGLRAAAE<br>AGVRLAF  | Homo<br>sapiens                  |
| 1 | 1.00 | 1 | 1 | 0.01  | 0.01  | 0.01  | 0.01  | 0.01  | t | 112387 | VLYSSDH              | Homo<br>sapiens                  |
| 1 | 1.00 | 1 | 1 | 0.01  | 0.01  | 0.01  | 0.01  | 0.01  | t | 111558 | MPLTQKD              | Homo<br>sapiens                  |
| 1 | 1.00 | 1 | 1 | -0.01 | -0.01 | -0.01 | -0.01 | -0.01 | t | 141578 | WKVRKAF<br>LFAKN     | Rattus                           |
| 1 | 1.00 | 1 | 1 | -0.01 | -0.01 | -0.01 | -0.01 | -0.01 | t | 153354 | ACWHPLQ<br>WRCGGGS   | Mus<br>musculu<br>s              |
| 1 | 1.00 | 1 | 1 | -0.01 | -0.01 | -0.01 | -0.01 | -0.01 | t | 132940 | WGSNVTS              | Homo<br>sapiens                  |
| 1 | 1.00 | 1 | 1 | -0.01 | -0.01 | -0.01 | -0.01 | -0.01 | t | 123396 | KSRIEALPK            | Ovis<br>aries                    |

|   |      |   |   |       |       |        |       |       |   |        |                              |                       |
|---|------|---|---|-------|-------|--------|-------|-------|---|--------|------------------------------|-----------------------|
| 1 | 1.00 | 1 | 1 | -0.01 | -0.01 | -0.01  | -0.01 | -0.01 | t | 127694 | IHKNSSV                      | Homo sapiens          |
| 1 | 1.00 | 1 | 1 | -0.01 | -0.01 | -0.01  | -0.01 | -0.01 | t | 128094 | RQGLKKA<br>DCSFWSKY<br>ISSLK | Homo sapiens          |
| 1 | 1.00 | 1 | 1 | -0.01 | -0.01 | -0.01  | -0.01 | -0.01 | t | 113750 | QGGQQGQ<br>QPGQQGP<br>G      | Homo sapiens          |
| 1 | 1.00 | 1 | 1 | -0.01 | -0.01 | -0.01  | -0.01 | -0.01 | t | 115848 | LPLLQSW<br>MHQ               | Homo sapiens          |
| 1 | 1.00 | 1 | 1 | -0.01 | -0.01 | -0.01  | -0.01 | -0.01 | t | 66237  | TSGTSGPS<br>GPSGTSP          | Homo sapiens          |
| 1 | 1.00 | 1 | 1 | -0.01 | -0.01 | -0.01  | -0.01 | -0.01 | t | 50911  | QGMQLAA<br>EFKQKALG<br>LLQTA | Homo sapiens          |
| 1 | 1.00 | 1 | 1 | -0.01 | -0.01 | -0.01  | -0.01 | -0.01 | t | 55644  | RRLHNWIT<br>EDCPIP           | Homo sapiens          |
| 1 | 1.00 | 1 | 1 | -0.01 | -0.01 | -0.01  | -0.01 | -0.01 | t | 47123  | PDKEVLYE<br>AFDEMEE<br>CASRA | Homo sapiens          |
| 1 | 1.00 | 1 | 1 | -0.01 | -0.01 | -0.01  | -0.01 | -0.01 | t | 39375  | LSGKPAIIP<br>DREVLYRE<br>FDE | Homo sapiens          |
| 1 | 1.00 | 1 | 1 | -0.01 | -0.01 | -0.01  | -0.01 | -0.01 | t | 6077   | CCRHKQKI<br>VAPVKQTL<br>PPS  | Ovis aries            |
| 1 | 1.00 | 1 | 1 | -0.03 | -0.03 | -0.03  | -0.03 | -0.03 | t | 132888 | QAYVVDSF<br>GNEIFRC          | Trichosurus vulpecula |
| 1 | 1.00 | 1 | 1 | -0.03 | -0.03 | -0.03  | -0.03 | -0.03 | t | 103018 | AFLHWAIT<br>DGNKASF          | Homo sapiens          |
| 1 | 1.00 | 1 | 1 | -0.03 | -0.03 | -0.03  | -0.03 | -0.03 | t | 108614 | RPPHSAS<br>WR                | Homo sapiens          |
| 1 | 1.00 | 1 | 1 | -0.05 | -0.05 | -0.05  | -0.05 | -0.05 | t | 112277 | QSPKLLI                      | Homo sapiens          |
| 1 | 1.00 | 1 | 1 | -0.05 | -0.05 | -0.05  | -0.05 | -0.05 | t | 102249 | YNPWPLL                      | Homo sapiens          |
| 1 | 1.00 | 1 | 1 | 0.01  | 0.01  | 0.01   | 0.006 | 0.01  | t | 30474  | KEKLQKTY<br>SQ               | Homo sapiens          |
| 1 | 1.00 | 1 | 1 | 0     | 0     | -0.004 | 0     | 0.002 | t | 51929  | QPQQPQQ<br>SFP               | Mus musculus          |

|   |      |   |   |       |        |        |        |       |   |        |                    |                     |
|---|------|---|---|-------|--------|--------|--------|-------|---|--------|--------------------|---------------------|
| 1 | 1.00 | 1 | 1 | 0     | 0      | -0.004 | 0      | 0.002 | t | 52089  | QQPFPQS<br>QQP     | Mus<br>musculu<br>s |
| 1 | 1.00 | 1 | 1 | 0     | 0      | -0.004 | 0      | 0.002 | t | 52085  | QQPFPQP<br>QQQ     | Mus<br>musculu<br>s |
| 1 | 1.00 | 1 | 1 | 0     | 0.005  | 0      | 0      | 0     | t | 71568  | VTVVTTS<br>GS      | Homo<br>sapiens     |
| 1 | 1.00 | 1 | 1 | 0     | 0.005  | 0      | 0      | 0     | t | 71568  | VTVVTTS<br>GS      | Homo<br>sapiens     |
| 1 | 1.00 | 1 | 1 | 0     | 0.005  | 0      | 0      | 0     | t | 71568  | VTVVTTS<br>GS      | Homo<br>sapiens     |
| 1 | 1.00 | 1 | 1 | 0     | 0.005  | 0      | 0      | 0     | t | 71568  | VTVVTTS<br>GS      | Homo<br>sapiens     |
| 1 | 1.00 | 1 | 1 | 0     | 0.005  | 0      | 0      | 0     | t | 53800  | RFVKTPSK<br>KKTKSR | Homo<br>sapiens     |
| 1 | 1.00 | 1 | 1 | 0     | 0.005  | 0      | 0      | 0     | t | 53800  | RFVKTPSK<br>KKTKSR | Homo<br>sapiens     |
| 1 | 1.00 | 1 | 1 | 0     | 0.005  | 0      | 0      | 0     | t | 53800  | RFVKTPSK<br>KKTKSR | Homo<br>sapiens     |
| 1 | 1.00 | 1 | 1 | 0     | 0.005  | 0      | 0      | 0     | t | 20046  | GGTEESVV<br>TASRS  | Homo<br>sapiens     |
| 1 | 1.00 | 1 | 1 | 0     | 0.005  | 0      | 0      | 0     | t | 20046  | GGTEESVV<br>TASRS  | Homo<br>sapiens     |
| 1 | 1.00 | 1 | 1 | 0     | 0.005  | 0      | 0      | 0     | t | 20046  | GGTEESVV<br>TASRS  | Homo<br>sapiens     |
| 1 | 1.00 | 1 | 1 | 0.02  | 0.02   | 0.019  | 0.02   | 0.02  | t | 98180  | KQYEADLA<br>AV     | Mus<br>musculu<br>s |
| 1 | 1.00 | 1 | 1 | 0.02  | 0.023  | 0.019  | 0.02   | 0.02  | t | 98180  | KQYEADLA<br>AV     | Mus<br>musculu<br>s |
| 1 | 1.00 | 1 | 1 | -0.01 | -0.012 | -0.016 | -0.013 | -0.01 | t | 48409  | PLLRTQF            | Mus<br>musculu<br>s |
| 1 | 1.00 | 1 | 1 | 0.01  | 0.01   | 0.01   | 0.01   | 0.01  | t | 136826 | CYSQVNPT<br>TL     | Mus<br>musculu<br>s |



|   |      |   |   |       |        |        |        |        |   |        |                      |                       |
|---|------|---|---|-------|--------|--------|--------|--------|---|--------|----------------------|-----------------------|
| 1 | 1.00 | 1 | 1 | 0.01  | 0.01   | 0.01   | 0.01   | 0.01   | t | 38314  | LNPTIAGAGDV          | Oryctolagus cuniculus |
| 1 | 1.00 | 1 | 1 | 0     | 0      | 0      | 0      | 0      | t | 79368  | RGDLARGDLARGDL       | Cavia porcellus       |
| 1 | 1.00 | 1 | 1 | 0     | 0.007  | 0      | 0      | 0      | t | 79368  | RGDLARGDLARGDL       | Cavia porcellus       |
| 1 | 1.00 | 1 | 1 | -0.02 | -0.02  | -0.02  | -0.02  | -0.02  | t | 156868 | FHRHPLE              | Gallus gallus         |
| 1 | 1.00 | 1 | 1 | 0.01  | 0.012  | -0.002 | 0.011  | 0.01   | t | 101410 | WCCRSCTLPPLRYRGEDGCW | Homo sapiens          |
| 1 | 1.00 | 1 | 1 | -0.02 | -0.023 | -0.02  | -0.02  | -0.021 | t | 106789 | RSFFSFLGEAFDGARDM    | Oryctolagus cuniculus |
| 1 | 1.00 | 1 | 1 | -0.01 | -0.008 | -0.005 | -0.009 | -0.01  | t | 12571  | EIRQVGDFHYVTGM       | Homo sapiens          |
| 1 | 1.00 | 1 | 1 | 0.03  | 0.03   | 0.022  | 0.03   | 0.031  | t | 60024  | SPDVDLGDISGINAS      | Mus musculus          |
| 1 | 1.00 | 1 | 1 | 0     | 0      | 0      | 0      | 0      | t | 103965 | GYKYLGPGLNSLDQGEPT   | Oryctolagus cuniculus |
| 1 | 1.00 | 1 | 1 | 0.02  | 0.027  | 0.014  | 0.02   | 0.02   | t | 7209   | CTSRFASLFNLGPQQQ     | Mus musculus          |
| 1 | 1.00 | 1 | 1 | 0.01  | 0.008  | 0.009  | 0.012  | 0.012  | t | 107026 | YQLPPKFWFISP         | Mus musculus          |
| 1 | 1.00 | 1 | 1 | 0.01  | 0.01   | 0.01   | 0.01   | 0.009  | t | 106376 | EEKKGNYVVDH          | Mus musculus          |
| 1 | 1.00 | 1 | 1 | 0     | 0.001  | -0.009 | 0      | 0      | t | 12536  | EINTEEEGTPDQISSLIK   | Mus musculus          |
| 1 | 1.00 | 1 | 1 | -0.02 | -0.018 | -0.016 | -0.013 | -0.02  | t | 120699 | KMFPEVKEKGMAALPRL    | Homo sapiens          |

|   |      |   |   |       |        |        |        |        |   |        |                              |                         |
|---|------|---|---|-------|--------|--------|--------|--------|---|--------|------------------------------|-------------------------|
| 1 | 1.00 | 1 | 1 | -0.05 | -0.049 | -0.051 | -0.05  | -0.053 | t | 56852  | SALEDKLA<br>DYKRRM           | Myodes<br>glareolu<br>s |
| 1 | 1.00 | 1 | 1 | -0.05 | -0.049 | -0.051 | -0.05  | -0.053 | t | 56852  | SALEDKLA<br>DYKRRM           | Myodes<br>glareolu<br>s |
| 1 | 1.00 | 1 | 1 | 0     | -0.001 | 0      | 0.001  | 0.001  | t | 40167  | LTSGHLKC<br>RVKMEKL<br>QLKGT | Homo<br>sapiens         |
| 1 | 1.00 | 1 | 1 | 0     | 0      | 0      | 0.001  | 0.001  | t | 16101  | FHENWPS                      | Mus<br>musculu<br>s     |
| 1 | 1.00 | 1 | 1 | 0     | 0      | 0      | 0.001  | 0.001  | t | 9524   | DNPASTT<br>NKDK              | Mus<br>musculu<br>s     |
| 1 | 1.00 | 1 | 1 | 0     | -0.002 | -0.005 | -0.003 | 0      | t | 56122  | RTLTMFS<br>LGARQKI           | Mus<br>musculu<br>s     |
| 1 | 1.00 | 1 | 1 | -0.01 | -0.01  | -0.006 | -0.01  | -0.01  | t | 43212  | NALSFTNK                     | Mus<br>musculu<br>s     |
| 1 | 1.00 | 1 | 1 | -0.01 | -0.007 | -0.006 | -0.01  | -0.01  | t | 43212  | NALSFTNK                     | Mus<br>musculu<br>s     |
| 1 | 1.00 | 1 | 1 | -0.01 | -0.01  | 0.001  | -0.006 | -0.01  | t | 41058  | MAKNKP                       | Homo<br>sapiens         |
| 1 | 1.00 | 1 | 1 | 0.02  | 0.02   | 0.03   | 0.017  | 0.018  | t | 12382  | EIAAILKDF<br>D               | Homo<br>sapiens         |
| 1 | 1.00 | 1 | 1 | 0.02  | 0.02   | 0.03   | 0.017  | 0.018  | t | 12382  | EIAAILKDF<br>D               | Homo<br>sapiens         |
| 1 | 1.00 | 1 | 1 | 0.02  | 0.02   | 0.02   | 0.02   | 0.021  | t | 144778 | SGTHPFLD<br>KSFS             | Mus<br>musculu<br>s     |
| 1 | 1.00 | 1 | 1 | 0     | 0      | 0      | 0      | 0      | t | 142428 | KAQKEATA<br>AKLKA            | Homo<br>sapiens         |
| 1 | 1.00 | 1 | 1 | 0.01  | 0.01   | 0.008  | 0.01   | 0.011  | t | 97769  | WNPSLLG<br>N                 | Mus<br>musculu<br>s     |
| 1 | 1.00 | 1 | 1 | 0.01  | 0.01   | 0.008  | 0.01   | 0.011  | t | 97769  | WNPSLLG<br>N                 | Mus<br>musculu<br>s     |

|   |      |   |   |       |        |        |        |        |   |        |                              |                                  |
|---|------|---|---|-------|--------|--------|--------|--------|---|--------|------------------------------|----------------------------------|
| 1 | 1.00 | 1 | 1 | -0.02 | -0.022 | -0.018 | -0.021 | -0.019 | t | 48913  | PPSFCPNFI<br>PCTDGL          | Mus<br>musculu<br>s              |
| 1 | 1.00 | 1 | 1 | 0.02  | 0.02   | 0.017  | 0.02   | 0.02   | t | 157219 | EQRCCNEL<br>NR               | Homo<br>sapiens                  |
| 1 | 1.00 | 1 | 1 | -0.03 | -0.03  | -0.023 | -0.024 | -0.028 | t | 72171  | VYTFYGM<br>WP                | Homo<br>sapiens                  |
| 1 | 1.00 | 1 | 1 | 0.04  | 0.04   | 0.04   | 0.04   | 0.04   | t | 156934 | PLHTSL                       | Gallus<br>gallus                 |
| 1 | 1.00 | 1 | 1 | 0.02  | 0.017  | 0.013  | 0.02   | 0.022  | t | 79926  | MASMTG<br>GQQMG              | Oryctola<br>gus<br>cuniculu<br>s |
| 1 | 1.00 | 1 | 1 | 0     | 0      | 0      | 0      | 0      | t | 149295 | ELDHWAS                      | Homo<br>sapiens                  |
| 1 | 1.00 | 1 | 1 | 0     | 0      | 0      | 0      | 0      | t | 121677 | NVLALCVH<br>SYLVDGA          | Mus<br>musculu<br>s              |
| 1 | 1.00 | 1 | 1 | 0     | 0      | 0      | 0      | 0      | t | 121677 | NVLALCVH<br>SYLVDGA          | Mus<br>musculu<br>s              |
| 1 | 1.00 | 1 | 1 | 0     | 0      | 0      | 0      | 0      | t | 121079 | YFTDIDLVE<br>H               | Mus<br>musculu<br>s              |
| 1 | 1.00 | 1 | 1 | 0     | 0      | 0      | 0      | 0      | t | 113775 | QQGQQP<br>GQGQQPG<br>Q       | Homo<br>sapiens                  |
| 1 | 1.00 | 1 | 1 | 0     | 0      | 0      | 0      | 0      | t | 103900 | FNKSWFP                      | Homo<br>sapiens                  |
| 1 | 1.00 | 1 | 1 | 0     | 0      | 0      | 0      | 0      | t | 115907 | PVVVPPFL<br>QP               | Homo<br>sapiens                  |
| 1 | 1.00 | 1 | 1 | 0     | 0      | 0      | 0      | 0      | t | 47133  | PDQDYQI<br>RKAKSS            | Gallus<br>gallus                 |
| 1 | 1.00 | 1 | 1 | 0     | 0      | 0      | 0      | 0      | t | 11969  | EFDEMEEC<br>ASQLPYIE<br>QGMQ | Homo<br>sapiens                  |
| 1 | 1.00 | 1 | 1 | 0     | 0      | 0      | 0      | 0      | t | 6027   | CARSLATL<br>FSPGARQ<br>Q     | Mus<br>musculu<br>s              |
| 1 | 1.00 | 1 | 1 | -0.02 | -0.02  | -0.02  | -0.02  | -0.02  | t | 78312  | WLHYYS                       | Homo<br>sapiens                  |

|   |      |   |   |       |        |        |        |        |   |        |                    |                       |
|---|------|---|---|-------|--------|--------|--------|--------|---|--------|--------------------|-----------------------|
| 1 | 1.00 | 1 | 1 | -0.04 | -0.04  | -0.04  | -0.04  | -0.04  | t | 119669 | VSWNSGAL           | Homo sapiens          |
| 1 | 1.00 | 1 | 1 | -0.01 | -0.01  | -0.014 | -0.01  | -0.008 | t | 52084  | QQPFPQPQQP         | Mus musculus          |
| 1 | 1.00 | 1 | 1 | -0.03 | -0.035 | -0.031 | -0.027 | -0.028 | t | 55899  | RSLYLRWVNAVCGDA    | Bos taurus            |
| 1 | 1.00 | 1 | 1 | 0     | 0.003  | 0      | 0      | 0      | t | 135441 | AGLGAGIP           | Mus musculus          |
| 1 | 1.00 | 1 | 1 | 0     | 0      | 0      | 0      | 0      | t | 103721 | VTWNPVKMMGVLLQC    | Homo sapiens          |
| 1 | 1.00 | 1 | 1 | -0.02 | -0.02  | -0.024 | -0.023 | -0.02  | t | 80315  | AKKQSNLFGA         | Homo sapiens          |
| 1 | 1.00 | 1 | 1 | -0.03 | -0.034 | -0.03  | -0.027 | -0.027 | t | 115529 | TYNFAVLKLMGRGTKF   | Oryctolagus cuniculus |
| 1 | 1.00 | 1 | 1 | 0.01  | 0      | 0.01   | 0.013  | 0.011  | t | 134264 | VPYVKRVKTWRMHFLTGI | Homo sapiens          |
| 1 | 1.00 | 1 | 1 | -0.04 | -0.037 | -0.036 | -0.04  | -0.04  | t | 124601 | QGPGLTDWLFPRR      | Mus musculus          |
| 1 | 1.00 | 1 | 1 | 0.01  | 0.008  | 0.017  | 0.013  | 0.01   | t | 106909 | TISQLYSSYPSP       | Mus musculus          |
| 1 | 1.00 | 1 | 1 | 0     | 0      | 0      | 0      | 0      | t | 8132   | DEQFIPK            | Mus musculus          |
| 1 | 1.00 | 1 | 1 | 0.02  | 0.017  | 0.02   | 0.02   | 0.018  | t | 65535  | TPDNNQTSPPARR      | Oryctolagus cuniculus |
| 1 | 1.00 | 1 | 1 | 0.02  | 0.014  | 0.02   | 0.02   | 0.018  | t | 65535  | TPDNNQTSPPARR      | Oryctolagus cuniculus |

|   |      |   |   |       |        |        |        |        |   |        |                            |                                  |
|---|------|---|---|-------|--------|--------|--------|--------|---|--------|----------------------------|----------------------------------|
| 1 | 1.00 | 1 | 1 | 0.02  | 0.018  | 0.02   | 0.013  | 0.019  | t | 113942 | TQDENPV<br>VHF             | Mus<br>musculu<br>s              |
| 1 | 1.00 | 1 | 1 | 0.02  | 0.018  | 0.02   | 0.013  | 0.019  | t | 113942 | TQDENPV<br>VHF             | Mus<br>musculu<br>s              |
| 1 | 1.00 | 1 | 1 | 0.03  | 0.03   | 0.03   | 0.03   | 0.031  | t | 131296 | EVGLHECG<br>NSMQVTD<br>DAL | Callithrix<br>pygmae<br>a        |
| 1 | 1.00 | 1 | 1 | 0.02  | 0.02   | 0.02   | 0.02   | 0.021  | t | 109252 | GSLPQKSQ<br>RSQDENP<br>V   | Rattus<br>norvegic<br>us         |
| 1 | 1.00 | 1 | 1 | -0.01 | -0.012 | -0.004 | -0.013 | -0.012 | t | 53407  | RDPVFYAF<br>GFGVNYP        | Mus<br>musculu<br>s              |
| 1 | 1.00 | 1 | 1 | 0.03  | 0.028  | 0.023  | 0.029  | 0.03   | t | 29278  | IVGAGDSS                   | Mus<br>musculu<br>s              |
| 1 | 1.00 | 1 | 1 | -0.02 | -0.017 | -0.02  | -0.02  | -0.019 | t | 69176  | VKAETRLN<br>P              | Mus<br>musculu<br>s              |
| 1 | 1.00 | 1 | 1 | 0     | 0.003  | 0.005  | 0      | -0.002 | t | 73053  | WRTFSRV<br>DRAFFL          | Mus<br>musculu<br>s              |
| 1 | 1.00 | 1 | 1 | 0     | -0.003 | 0.008  | 0      | -0.004 | t | 58316  | SGYCYWV<br>HILCYCYG        | Oryctola<br>gus<br>cuniculu<br>s |
| 1 | 1.00 | 1 | 1 | -0.04 | -0.037 | -0.038 | -0.04  | -0.042 | t | 28277  | IRECTGLA<br>WEWWRT<br>V    | Mus<br>musculu<br>s              |
| 1 | 1.00 | 1 | 1 | 0.05  | 0.049  | 0.059  | 0.047  | 0.05   | t | 783    | ADTQGS                     | Homo<br>sapiens                  |
| 1 | 1.00 | 1 | 1 | 0.02  | 0.02   | 0.02   | 0.02   | 0.021  | t | 926    | AEGEFKTR<br>RNTNYQD<br>PAK | Homo<br>sapiens                  |
| 1 | 1.00 | 1 | 1 | 0.01  | 0.01   | 0.01   | 0.01   | 0.01   | t | 137739 | DTELTQKG<br>LKL V          | Mus<br>musculu<br>s              |
| 1 | 1.00 | 1 | 1 | 0.01  | 0.01   | 0.01   | 0.01   | 0.01   | t | 110957 | PAAVTLAE<br>ADRT           | Macaca                           |

|   |      |   |   |       |        |        |        |       |   |        |                      |                                  |
|---|------|---|---|-------|--------|--------|--------|-------|---|--------|----------------------|----------------------------------|
| 1 | 1.00 | 1 | 1 | 0.01  | 0.01   | 0.01   | 0.01   | 0.01  | t | 114788 | EFGTNISKE<br>H       | Homo<br>sapiens                  |
| 1 | 1.00 | 1 | 1 | -0.01 | -0.01  | -0.01  | -0.01  | -0.01 | t | 132826 | FPEDLGNK<br>SWQAYVV  | Trichosu<br>rus<br>vulpecul<br>a |
| 1 | 1.00 | 1 | 1 | -0.01 | -0.01  | -0.01  | -0.01  | -0.01 | t | 103536 | QVGSQFG<br>PYQLRL    | Homo<br>sapiens                  |
| 1 | 1.00 | 1 | 1 | -0.01 | -0.01  | -0.01  | -0.01  | -0.01 | t | 80035  | SSPMEVM<br>LRAVF     | Mus<br>musculu<br>s              |
| 1 | 1.00 | 1 | 1 | -0.01 | -0.01  | -0.01  | -0.01  | -0.01 | t | 80035  | SSPMEVM<br>LRAVF     | Mus<br>musculu<br>s              |
| 1 | 1.00 | 1 | 1 | -0.01 | -0.01  | -0.01  | -0.01  | -0.01 | t | 80035  | SSPMEVM<br>LRAVF     | Mus<br>musculu<br>s              |
| 1 | 1.00 | 1 | 1 | -0.01 | -0.01  | -0.01  | -0.01  | -0.01 | t | 80035  | SSPMEVM<br>LRAVF     | Mus<br>musculu<br>s              |
| 1 | 1.00 | 1 | 1 | -0.03 | -0.03  | -0.03  | -0.03  | -0.03 | t | 77920  | IPPFYKNF<br>WWP      | Mus<br>musculu<br>s              |
| 1 | 1.00 | 1 | 1 | 0.04  | 0.036  | 0.042  | 0.039  | 0.04  | t | 10220  | DSQTITNP<br>AYDE     | Oryctola<br>gus<br>cuniculu<br>s |
| 1 | 1.00 | 1 | 1 | 0     | 0      | -0.004 | 0      | 0.002 | t | 51925  | QPQQPFP<br>QSQ       | Mus<br>musculu<br>s              |
| 1 | 1.00 | 1 | 1 | -0.04 | -0.042 | -0.033 | -0.039 | -0.04 | t | 64837  | TLHPLHLW<br>RPLS     | Mus<br>musculu<br>s              |
| 1 | 1.00 | 1 | 1 | 0.07  | 0.066  | 0.07   | 0.069  | 0.071 | t | 122746 | EEQEDEIIG<br>FGQELKN | Oryctola<br>gus<br>cuniculu<br>s |
| 1 | 1.00 | 1 | 1 | 0.01  | 0.006  | 0      | 0.009  | 0.01  | t | 54848  | RMADAVS<br>RKKMDTK   | Oryctola<br>gus<br>cuniculu<br>s |

|   |      |   |   |       |        |        |        |        |   |        |                        |                       |
|---|------|---|---|-------|--------|--------|--------|--------|---|--------|------------------------|-----------------------|
| 1 | 1.00 | 1 | 1 | 0     | -0.004 | 0      | -0.007 | -0.003 | t | 138304 | ATVQLPQ                | Oryctolagus cuniculus |
| 1 | 1.00 | 1 | 1 | 0     | -0.004 | 0      | -0.007 | -0.003 | t | 138608 | RVGAHDP                | Oryctolagus cuniculus |
| 1 | 1.00 | 1 | 1 | -0.01 | -0.008 | -0.01  | -0.011 | -0.01  | t | 149425 | QGFFQPSQQN             | Homo sapiens          |
| 1 | 1.00 | 1 | 1 | -0.01 | -0.012 | -0.01  | -0.011 | -0.01  | t | 116981 | FSTDWSTRPRLV           | Mus musculus          |
| 1 | 1.00 | 1 | 1 | -0.03 | -0.027 | -0.03  | -0.03  | -0.031 | t | 156904 | KPGDPRH                | Mus musculus          |
| 1 | 1.00 | 1 | 1 | 0.04  | 0.046  | 0.04   | 0.04   | 0.04   | t | 123246 | GMLGTTP EE             | Ovis aries            |
| 1 | 1.00 | 1 | 1 | 0.01  | 0.01   | 0.01   | 0.01   | 0.012  | t | 43729  | NEREDERT               | Oryctolagus cuniculus |
| 1 | 1.00 | 1 | 1 | 0     | -0.004 | 0.002  | 0      | 0      | t | 20939  | GLIVDTRDVEERVHV        | Bos taurus            |
| 1 | 1.00 | 1 | 1 | 0.01  | 0.013  | 0.009  | 0.01   | 0.013  | t | 141560 | SDEALPPG SPR           | Mus musculus          |
| 1 | 1.00 | 1 | 1 | -0.04 | -0.038 | -0.039 | -0.039 | -0.04  | t | 44140  | NHFVPQP PSRTW          | Homo sapiens          |
| 1 | 1.00 | 1 | 1 | -0.04 | -0.038 | -0.039 | -0.039 | -0.04  | t | 44140  | NHFVPQP PSRTW          | Homo sapiens          |
| 1 | 1.00 | 1 | 1 | 0     | 0      | 0      | 0.003  | 0      | t | 110834 | EQLKGQG KSRLGDLY EEEMR | Mus musculus          |

|   |      |   |   |       |        |        |        |        |   |        |                              |                                  |
|---|------|---|---|-------|--------|--------|--------|--------|---|--------|------------------------------|----------------------------------|
| 1 | 1.00 | 1 | 1 | 0     | -0.005 | -0.014 | -0.003 | 0      | t | 6194   | CEQVLRLA<br>VVTSTEGI<br>HQLQ | Bos<br>taurus                    |
| 1 | 1.00 | 1 | 1 | 0     | -0.002 | 0      | -0.001 | 0      | t | 11571  | EEEDDDM<br>GGLFD             | Mus<br>musculu<br>s              |
| 1 | 1.00 | 1 | 1 | 0.01  | 0.01   | 0.011  | 0.008  | 0.01   | t | 144763 | RIEDPPFN<br>SLL              | Homo<br>sapiens                  |
| 1 | 1.00 | 1 | 1 | -0.02 | -0.018 | -0.015 | -0.02  | -0.022 | t | 117591 | NTHLKAVK<br>MTLKN            | Homo<br>sapiens                  |
| 1 | 1.00 | 1 | 1 | 0     | 0.003  | 0.005  | 0      | 0      | t | 59376  | SLNVLFDG<br>RD               | Mus<br>musculu<br>s              |
| 1 | 1.00 | 1 | 1 | 0.01  | 0.014  | 0.01   | 0.01   | 0.011  | t | 75790  | YSLFQKEK                     | Homo<br>sapiens                  |
| 1 | 1.00 | 1 | 1 | 0.02  | 0.018  | 0.013  | 0.02   | 0.022  | t | 120108 | NFMESGE<br>WVIKESRG<br>W     | Oryctola<br>gus<br>cuniculu<br>s |
| 1 | 1.00 | 1 | 1 | -0.04 | -0.038 | -0.037 | -0.039 | -0.04  | t | 22716  | GTIVIR                       | Homo<br>sapiens                  |
| 1 | 1.00 | 1 | 1 | 0.03  | 0.032  | 0.036  | 0.031  | 0.029  | t | 13641  | EPEQVELQ<br>PPPQGG           | Homo<br>sapiens                  |
| 1 | 1.00 | 1 | 1 | -0.02 | -0.014 | -0.02  | -0.019 | -0.02  | t | 50637  | QELDCWH<br>YQHCVTS<br>TKS    | MD                               |
| 1 | 1.00 | 1 | 1 | 0.03  | 0.032  | 0.033  | 0.037  | 0.032  | t | 122198 | TEADVNP<br>KPIPSQMPT<br>SP   | Homo<br>sapiens                  |
| 1 | 1.00 | 1 | 1 | 0.02  | 0.02   | 0.02   | 0.02   | 0.02   | t | 127681 | HFHRPTQ                      | Homo<br>sapiens                  |
| 1 | 1.00 | 1 | 1 | 0.02  | 0.02   | 0.02   | 0.02   | 0.02   | t | 103531 | QSGLGDN<br>GYIPIPDE          | Homo<br>sapiens                  |
| 1 | 1.00 | 1 | 1 | 0     | 0      | 0      | 0      | 0      | t | 136524 | NFREAMRI<br>GAEVYHN<br>LKN   | Homo<br>sapiens                  |
| 1 | 1.00 | 1 | 1 | 0     | 0      | 0      | 0      | 0      | t | 156930 | PISKEHV                      | Gallus<br>gallus                 |
| 1 | 1.00 | 1 | 1 | 0     | 0      | 0      | 0      | 0      | t | 131076 | SQTAANPS<br>CPEGT            | Rattus<br>norvegic<br>us         |



|   |      |   |   |   |        |   |   |   |   |        |                              |                 |
|---|------|---|---|---|--------|---|---|---|---|--------|------------------------------|-----------------|
| 1 | 1.00 | 1 | 1 | 0 | 0      | 0 | 0 | 0 | t | 113781 | QQPGQG<br>QQPGQG<br>QQ       | Homo sapiens    |
| 1 | 1.00 | 1 | 1 | 0 | 0      | 0 | 0 | 0 | t | 95497  | KIIAPAKQ                     | Bos taurus      |
| 1 | 1.00 | 1 | 1 | 0 | 0      | 0 | 0 | 0 | t | 95712  | QKIIAPAK                     | Bos taurus      |
| 1 | 1.00 | 1 | 1 | 0 | 0      | 0 | 0 | 0 | t | 95517  | KQKIIAPA                     | Bos taurus      |
| 1 | 1.00 | 1 | 1 | 0 | 0.008  | 0 | 0 | 0 | t | 95712  | QKIIAPAK                     | Cavia porcellus |
| 1 | 1.00 | 1 | 1 | 0 | -0.008 | 0 | 0 | 0 | t | 95517  | KQKIIAPA                     | Bos taurus      |
| 1 | 1.00 | 1 | 1 | 0 | 0      | 0 | 0 | 0 | t | 78064  | VPLSPTME<br>FMRK             | Mus musculus    |
| 1 | 1.00 | 1 | 1 | 0 | 0      | 0 | 0 | 0 | t | 95517  | KQKIIAPA                     | Cavia porcellus |
| 1 | 1.00 | 1 | 1 | 0 | 0      | 0 | 0 | 0 | t | 95712  | QKIIAPAK                     | Cavia porcellus |
| 1 | 1.00 | 1 | 1 | 0 | 0      | 0 | 0 | 0 | t | 51122  | QIPYNLKIF<br>AIMLDTHK<br>MLT | Aotus nancymae  |
| 1 | 1.00 | 1 | 1 | 0 | 0      | 0 | 0 | 0 | t | 50913  | QGMQLAE<br>QFKQKAL<br>GLLQQA | Homo sapiens    |
| 1 | 1.00 | 1 | 1 | 0 | 0      | 0 | 0 | 0 | t | 45221  | NNRAVPD<br>KIDWRESG<br>YVTE  | Bos taurus      |

|   |      |   |   |       |        |        |        |        |   |        |                             |                                  |
|---|------|---|---|-------|--------|--------|--------|--------|---|--------|-----------------------------|----------------------------------|
| 1 | 1.00 | 1 | 1 | 0     | 0      | 0      | 0      | 0      | t | 38950  | LQPQQPF<br>PQQ              | Mus<br>musculu<br>s              |
| 1 | 1.00 | 1 | 1 | 0     | 0.015  | 0      | 0      | 0      | t | 45221  | NNRAVPD<br>KIDWRESG<br>YVTE | Rattus<br>rattus                 |
| 1 | 1.00 | 1 | 1 | 0     | 0.003  | 0      | 0      | 0      | t | 1790   | AHKWYSQ<br>WLPHR            | Mus<br>musculu<br>s              |
| 1 | 1.00 | 1 | 1 | 0     | 0      | 0      | 0      | 0      | t | 9895   | DQRPYCW<br>HYA              | Homo<br>sapiens                  |
| 1 | 1.00 | 1 | 1 | -0.02 | -0.02  | -0.02  | -0.02  | -0.02  | t | 120918 | RLFKHLFG<br>GYNRWAR<br>PV   | Oryctola<br>gus<br>cuniculu<br>s |
| 1 | 1.00 | 1 | 1 | -0.02 | -0.02  | -0.02  | -0.02  | -0.02  | t | 112165 | IGVGWIR                     | Homo<br>sapiens                  |
| 1 | 1.00 | 1 | 1 | -0.05 | -0.044 | -0.043 | -0.043 | -0.052 | t | 127846 | SWERRRLS<br>PGHRALA         | Homo<br>sapiens                  |
| 1 | 1.00 | 1 | 1 | -0.04 | -0.04  | -0.04  | -0.04  | -0.04  | t | 128523 | EILSDVQLI<br>KTGDKV         | Homo<br>sapiens                  |
| 1 | 1.00 | 1 | 1 | 0     | -0.003 | -0.008 | 0      | -0.001 | t | 39023  | LQYGSFCT<br>QLNRALSG<br>I   | Oryctola<br>gus<br>cuniculu<br>s |
| 1 | 1.00 | 1 | 1 | 0     | 0.003  | 0      | 0      | 0.002  | t | 31722  | KKTTTKPT<br>KKPT            | Mus<br>musculu<br>s              |
| 1 | 1.00 | 1 | 1 | 0     | 0      | 0      | 0      | 0      | t | 139830 | MKKISSVI<br>AIALFGTIA       | Homo<br>sapiens                  |
| 1 | 1.00 | 1 | 1 | 0     | 0      | 0      | 0      | 0      | t | 150858 | ISSLYNLVK<br>SS             | Mus<br>musculu<br>s              |
| 1 | 1.00 | 1 | 1 | 0     | 0      | 0      | 0      | 0      | t | 139935 | VIAIALFGT<br>IATANAAD       | Homo<br>sapiens                  |
| 1 | 1.00 | 1 | 1 | 0     | -0.003 | 0      | 0      | 0      | t | 135799 | YGKDVKDL<br>FDYAQE          | Oryctola<br>gus<br>cuniculu<br>s |
| 1 | 1.00 | 1 | 1 | 0     | 0      | 0      | 0      | 0      | t | 135799 | YGKDVKDL<br>FDYAQE          | Mus<br>musculu<br>s              |

|   |      |   |   |      |        |        |        |        |   |        |                              |                          |
|---|------|---|---|------|--------|--------|--------|--------|---|--------|------------------------------|--------------------------|
| 1 | 1.00 | 1 | 1 | 0    | 0      | 0      | 0      | 0      | t | 142913 | MVLNEGTS<br>GTA              | Oryctolagus<br>cuniculus |
| 1 | 1.00 | 1 | 1 | 0    | 0      | 0      | 0      | 0      | t | 130524 | KFHPKDIP<br>YQVW             | Mus<br>musculus          |
| 1 | 1.00 | 1 | 1 | 0    | 0      | 0      | 0      | 0      | t | 130524 | KFHPKDIP<br>YQVW             | Mus<br>musculus          |
| 1 | 1.00 | 1 | 1 | 0    | 0      | 0      | 0      | 0      | t | 40167  | LTSGHLKC<br>RVKMEKL<br>QLKGT | Equus<br>caballus        |
| 1 | 1.00 | 1 | 1 | 0    | 0      | 0      | 0      | 0      | t | 11463  | EDVNGIRK<br>PK               | Mus<br>musculus          |
| 1 | 1.00 | 1 | 1 | 0    | 0      | 0      | 0      | 0      | t | 17135  | FNCLGMS<br>NRDFLEGV<br>SGATW | Equus<br>caballus        |
| 1 | 1.00 | 1 | 1 | 0    | 0      | 0      | 0      | 0      | t | 33003  | KQIRDSITE<br>EWS             | Mus<br>musculus          |
| 1 | 1.00 | 1 | 1 | 0.04 | 0.044  | 0.046  | 0.037  | 0.04   | t | 32267  | KLYQAQY<br>DLSF              | Homo<br>sapiens          |
| 1 | 1.00 | 1 | 1 | 0    | 0      | 0      | 0      | 0      | t | 77881  | GANYKSPT<br>GFLRG            | Mus<br>musculus          |
| 1 | 1.00 | 1 | 1 | 0.01 | 0.01   | 0.01   | 0.01   | 0.01   | t | 132943 | WQNVSHS                      | Homo<br>sapiens          |
| 1 | 1.00 | 1 | 1 | 0.03 | 0.03   | 0.03   | 0.03   | 0.031  | t | 122254 | AGETKPSS<br>SLSIGSIISK<br>SP | Homo<br>sapiens          |
| 1 | 1.00 | 1 | 1 | 0    | 0.002  | 0      | -0.001 | 0      | t | 149435 | QPQYSQP<br>QQP               | Homo<br>sapiens          |
| 1 | 1.00 | 1 | 1 | 0    | 0      | 0      | 0      | 0      | t | 147197 | PLVQEQQ<br>F                 | Homo<br>sapiens          |
| 1 | 1.00 | 1 | 1 | 0.02 | 0.023  | 0.022  | 0.02   | 0.021  | t | 5962   | CAALASLF<br>LSLGPQQK         | Mus<br>musculus          |
| 1 | 1.00 | 1 | 1 | -0.1 | -0.094 | -0.094 | -0.093 | -0.102 | t | 127779 | PSRRRRRR<br>KATLAPA          | Homo<br>sapiens          |

|   |      |   |   |       |        |        |        |        |   |        |                              |                                  |
|---|------|---|---|-------|--------|--------|--------|--------|---|--------|------------------------------|----------------------------------|
| 1 | 1.00 | 1 | 1 | -0.02 | -0.024 | -0.021 | -0.021 | -0.02  | t | 78819  | RRWQQR<br>NTPFY              | Oryctola<br>gus<br>cuniculu<br>s |
| 1 | 1.00 | 1 | 1 | -0.01 | -0.004 | -0.01  | -0.01  | -0.01  | t | 123588 | PKFEQLKE<br>G                | Ovis<br>aries                    |
| 1 | 1.00 | 1 | 1 | 0     | 0      | 0      | 0.002  | 0.001  | t | 55671  | RRPFNIGI<br>NNQQ             | Homo<br>sapiens                  |
| 1 | 1.00 | 1 | 1 | 0     | 0.001  | 0.002  | 0      | 0      | t | 74009  | YGGPANK<br>KNAG              | Aotus                            |
| 1 | 1.00 | 1 | 1 | 0     | 0      | 0.002  | 0      | 0      | t | 74009  | YGGPANK<br>KNAG              | Aotus<br>nancyma<br>ae           |
| 1 | 1.00 | 1 | 1 | 0     | 0      | 0.002  | 0      | 0      | t | 8066   | DELEAETQ<br>NVYAA            | Aotus<br>nancyma<br>ae           |
| 1 | 1.00 | 1 | 1 | 0     | 0.001  | 0.002  | 0      | 0      | t | 8066   | DELEAETQ<br>NVYAA            | Aotus                            |
| 1 | 1.00 | 1 | 1 | -0.01 | -0.008 | -0.01  | -0.009 | -0.01  | t | 142202 | KISEASRK<br>GLRRDLDA<br>SREA | Homo<br>sapiens                  |
| 1 | 1.00 | 1 | 1 | -0.01 | -0.01  | -0.01  | -0.01  | -0.01  | t | 22031  | GRFKSQD<br>A                 | Oryctola<br>gus<br>cuniculu<br>s |
| 1 | 1.00 | 1 | 1 | 0.03  | 0.03   | 0.035  | 0.03   | 0.03   | t | 133748 | YNAELLV                      | Mus<br>musculu<br>s              |
| 1 | 1.00 | 1 | 1 | -0.01 | -0.01  | -0.007 | -0.01  | -0.008 | t | 2046   | AIPLEVIK                     | Homo<br>sapiens                  |
| 1 | 1.00 | 1 | 1 | -0.01 | -0.008 | -0.007 | -0.009 | -0.01  | t | 7063   | CSQHLPYI<br>EQGMQLA          | Homo<br>sapiens                  |
| 1 | 1.00 | 1 | 1 | -0.01 | -0.006 | -0.007 | -0.009 | -0.01  | t | 7063   | CSQHLPYI<br>EQGMQLA          | Homo<br>sapiens                  |

|   |      |   |   |       |        |        |       |        |   |        |                         |                                  |
|---|------|---|---|-------|--------|--------|-------|--------|---|--------|-------------------------|----------------------------------|
| 1 | 1.00 | 1 | 1 | 0     | 0.002  | 0      | 0     | 0.001  | t | 48331  | PLGFFPDH<br>QLDP        | Homo<br>sapiens                  |
| 1 | 1.00 | 1 | 1 | 0.01  | 0.01   | 0.021  | 0.013 | 0.008  | t | 60396  | SQCKLGSV<br>DLN         | Homo<br>sapiens                  |
| 1 | 1.00 | 1 | 1 | -0.02 | -0.02  | -0.016 | -0.02 | -0.022 | t | 51924  | QPQQPFP<br>QRP          | Mus<br>musculu<br>s              |
| 1 | 1.00 | 1 | 1 | 0     | 0      | 0      | 0     | 0      | t | 70728  | VRGLYF                  | Mus<br>musculu<br>s              |
| 1 | 1.00 | 1 | 1 | 0.03  | 0.03   | 0.03   | 0.03  | 0.03   | t | 103371 | LPADTAA<br>QLTSAGRE     | Homo<br>sapiens                  |
| 1 | 1.00 | 1 | 1 | 0.01  | 0.01   | 0.01   | 0.01  | 0.01   | t | 153335 | ACNALNQ<br>WLCGGGS      | Mus<br>musculu<br>s              |
| 1 | 1.00 | 1 | 1 | 0.01  | 0.01   | 0.01   | 0.01  | 0.01   | t | 135752 | RTTEFWK<br>Q            | Homo<br>sapiens                  |
| 1 | 1.00 | 1 | 1 | 0.01  | 0.01   | 0.01   | 0.01  | 0.01   | t | 110588 | GARGPEG<br>AQGSRGE<br>P | Mus<br>musculu<br>s              |
| 1 | 1.00 | 1 | 1 | 0.01  | 0.01   | 0.01   | 0.01  | 0.01   | t | 109208 | GPRGEPG<br>T            | Rattus<br>norvegic<br>us         |
| 1 | 1.00 | 1 | 1 | 0.01  | 0.01   | 0.01   | 0.01  | 0.01   | t | 113765 | QPGQGQ<br>QGQQPG<br>QG  | Homo<br>sapiens                  |
| 1 | 1.00 | 1 | 1 | -0.01 | -0.01  | -0.01  | -0.01 | -0.01  | t | 149119 | TFMRVVT<br>DVYRPRLS     | Rattus<br>norvegic<br>us         |
| 1 | 1.00 | 1 | 1 | -0.01 | -0.012 | -0.01  | -0.01 | -0.01  | t | 141697 | LEGVYVPP<br>RRQQCLCY    | Oryctola<br>gus<br>cuniculu<br>s |
| 1 | 1.00 | 1 | 1 | -0.01 | -0.01  | -0.01  | -0.01 | -0.01  | t | 141697 | LEGVYVPP<br>RRQQCLCY    | Oryctola<br>gus<br>cuniculu<br>s |
| 1 | 1.00 | 1 | 1 | -0.01 | -0.01  | -0.01  | -0.01 | -0.01  | t | 149055 | GSSLHDI                 | Sus<br>scrofa                    |
| 1 | 1.00 | 1 | 1 | -0.01 | -0.01  | -0.01  | -0.01 | -0.01  | t | 151671 | KLIVINGKPI<br>TIFQERD   | Mus<br>musculu<br>s              |

|   |      |   |   |       |       |       |       |        |   |        |                              |                          |
|---|------|---|---|-------|-------|-------|-------|--------|---|--------|------------------------------|--------------------------|
| 1 | 1.00 | 1 | 1 | -0.01 | -0.01 | -0.01 | -0.01 | -0.01  | t | 131082 | SQTTANPS<br>CPAGT            | Rattus<br>norvegicus     |
| 1 | 1.00 | 1 | 1 | -0.01 | -0.01 | -0.01 | -0.01 | -0.01  | t | 133039 | DHLKDYKE<br>SNEIKLK          | Oryctolagus<br>cuniculus |
| 1 | 1.00 | 1 | 1 | -0.01 | -0.01 | -0.01 | -0.01 | -0.01  | t | 120408 | APYNVRRRL<br>PPPVEP          | Homo<br>sapiens          |
| 1 | 1.00 | 1 | 1 | -0.01 | -0.01 | -0.01 | -0.01 | -0.01  | t | 113729 | PTSPQQP<br>GQGQQPG           | Homo<br>sapiens          |
| 1 | 1.00 | 1 | 1 | -0.01 | -0.01 | -0.01 | -0.01 | -0.01  | t | 117095 | TISNRDYIR<br>PMD             | Homo<br>sapiens          |
| 1 | 1.00 | 1 | 1 | -0.01 | -0.01 | -0.01 | -0.01 | -0.01  | t | 103578 | SAAIGLSM<br>AGSSAMI          | Homo<br>sapiens          |
| 1 | 1.00 | 1 | 1 | -0.01 | -0.01 | -0.01 | -0.01 | -0.01  | t | 103125 | DVVQHVA<br>RRPGESPP          | Homo<br>sapiens          |
| 1 | 1.00 | 1 | 1 | -0.01 | -0.01 | -0.01 | -0.01 | -0.01  | t | 115430 | PVPQKAV<br>PYPQRDM<br>PIQAFL | Homo<br>sapiens          |
| 1 | 1.00 | 1 | 1 | -0.01 | -0.01 | -0.01 | -0.01 | -0.01  | t | 37712  | LLQQATR<br>QA                | Homo<br>sapiens          |
| 1 | 1.00 | 1 | 1 | -0.01 | -0.01 | -0.01 | -0.01 | -0.01  | t | 778    | ADTIASGA                     | Mus<br>musculus          |
| 1 | 1.00 | 1 | 1 | -0.03 | -0.03 | -0.03 | -0.03 | -0.03  | t | 114888 | LLCAHKVE<br>QG               | Homo<br>sapiens          |
| 1 | 1.00 | 1 | 1 | -0.03 | -0.03 | -0.03 | -0.03 | -0.03  | t | 92808  | GGKGDDIF<br>VH               | Ovis<br>aries            |
| 1 | 1.00 | 1 | 1 | 0.01  | 0.013 | 0.011 | 0.01  | 0.012  | t | 75371  | YPNQVYYR<br>PVDQYSN          | Mus<br>musculus          |
| 1 | 1.00 | 1 | 1 | 0     | 0     | 0.002 | 0     | -0.002 | t | 50735  | QFAALGG<br>WGLHQPP<br>PQIFLK | Homo<br>sapiens          |
| 1 | 1.00 | 1 | 1 | 0.02  | 0.02  | 0.02  | 0.02  | 0.019  | t | 144673 | GTFCGGEE<br>CMRG             | Mus<br>musculus          |

|   |      |   |   |       |        |        |        |        |   |        |                              |                       |
|---|------|---|---|-------|--------|--------|--------|--------|---|--------|------------------------------|-----------------------|
| 1 | 1.00 | 1 | 1 | 0.02  | 0.024  | 0.02   | 0.023  | 0.022  | t | 41738  | MILAVQG<br>VQDYINNE          | Homo sapiens          |
| 1 | 1.00 | 1 | 1 | 0.04  | 0.042  | 0.045  | 0.041  | 0.04   | t | 33425  | KSLTER                       | Homo sapiens          |
| 1 | 1.00 | 1 | 1 | 0.01  | 0.01   | 0.006  | 0.01   | 0.007  | t | 42041  | MLQEMG<br>REPTPEEL<br>AER    | Mus musculus          |
| 1 | 1.00 | 1 | 1 | 0     | -0.003 | 0      | 0      | 0      | t | 118877 | LDVEQLGI<br>PEQEYSC          | Oryctolagus cuniculus |
| 1 | 1.00 | 1 | 1 | 0     | -0.003 | 0      | 0      | 0      | t | 95524  | KRQIYTDIE<br>MNRLGK          | Oryctolagus cuniculus |
| 1 | 1.00 | 1 | 1 | 0     | -0.003 | 0      | 0      | 0      | t | 10801  | DWEDRYR<br>RE                | Oryctolagus cuniculus |
| 1 | 1.00 | 1 | 1 | -0.01 | -0.01  | -0.024 | -0.01  | -0.009 | t | 59899  | SNSAAGRL<br>ILPEDIKYE<br>VGV | Mus musculus          |
| 1 | 1.00 | 1 | 1 | -0.01 | -0.006 | -0.006 | -0.007 | -0.01  | t | 44864  | NLSCTHPL<br>GSPPPAP          | Homo sapiens          |
| 1 | 1.00 | 1 | 1 | -0.01 | -0.012 | -0.006 | -0.007 | -0.01  | t | 44864  | NLSCTHPL<br>GSPPPAP          | Homo sapiens          |
| 1 | 1.00 | 1 | 1 | 0.04  | 0.042  | 0.04   | 0.039  | 0.041  | t | 72548  | WHQTTTPQ<br>PYLPG            | Rattus norvegicus     |
| 1 | 1.00 | 1 | 1 | 0.01  | 0.01   | 0.003  | 0.01   | 0.009  | t | 122135 | LDSRRSYR<br>VRESGLNG<br>VVKH | Homo sapiens          |
| 1 | 1.00 | 1 | 1 | -0.01 | -0.01  | -0.015 | -0.01  | -0.008 | t | 134003 | AKTQGPY<br>DVVVLP<br>G       | Mus musculus          |
| 1 | 1.00 | 1 | 1 | 0.03  | 0.004  | 0.035  | 0.031  | 0.032  | t | 61824  | STPLLYPSL<br>A               | Homo sapiens          |
| 1 | 1.00 | 1 | 1 | 0.03  | 0.028  | 0.019  | 0.029  | 0.03   | t | 24814  | HSMKEGI<br>HAQQKEP<br>MIGVNQ | Mus musculus          |
| 1 | 1.00 | 1 | 1 | 0.02  | 0.02   | 0.02   | 0.02   | 0.022  | t | 14409  | ETHVTGGS                     | Mus musculus          |

|   |      |   |   |       |        |        |        |        |   |        |                        |                       |
|---|------|---|---|-------|--------|--------|--------|--------|---|--------|------------------------|-----------------------|
| 1 | 1.00 | 1 | 1 | 0.02  | 0.02   | 0.02   | 0.02   | 0.022  | t | 14409  | ETHVTGGS               | Rattus norvegicus     |
| 1 | 1.00 | 1 | 1 | -0.01 | -0.006 | -0.004 | -0.009 | -0.011 | t | 10226  | DSSAATKK TAAW          | Homo sapiens          |
| 1 | 1.00 | 1 | 1 | 0     | 0      | -0.008 | -0.001 | 0      | t | 82374  | FSKRTSAL VSAG          | Homo sapiens          |
| 1 | 1.00 | 1 | 1 | 0     | 0      | 0.01   | 0      | 0.001  | t | 21090  | GLQYTPS WMLVG          | Mus musculus          |
| 1 | 1.00 | 1 | 1 | -0.02 | -0.02  | -0.02  | -0.02  | -0.02  | t | 52292  | QSARRGEK               | Oryctolagus cuniculus |
| 1 | 1.00 | 1 | 1 | -0.03 | -0.027 | -0.041 | -0.03  | -0.031 | t | 22362  | GSGVRVR KRKNVNK QPENLT | Mus musculus          |
| 1 | 1.00 | 1 | 1 | 0     | 0      | -0.008 | -0.003 | -0.002 | t | 52829  | QWELQGD RRC            | Homo sapiens          |
| 1 | 1.00 | 1 | 1 | 0.03  | 0.04   | 0.03   | 0.027  | 0.03   | t | 72489  | WGPISYANGS             | Pan troglodytes       |
| 1 | 1.00 | 1 | 1 | 0.01  | 0.01   | 0.014  | 0.01   | 0.01   | t | 151817 | CLTSQAAS QRLE          | Sus scrofa            |
| 1 | 1.00 | 1 | 1 | -0.01 | -0.01  | -0.01  | -0.01  | -0.01  | t | 140853 | GEYVQILD AHAAYLN ATPAA | Mus musculus          |
| 1 | 1.00 | 1 | 1 | -0.01 | -0.01  | -0.002 | -0.01  | -0.01  | t | 121473 | KKAKAKAK               | Homo sapiens          |
| 1 | 1.00 | 1 | 1 | 0.03  | 0.03   | 0.039  | 0.03   | 0.03   | t | 12225  | EGLTATTF EEDGVAA       | Mus musculus          |
| 1 | 1.00 | 1 | 1 | -0.02 | -0.02  | -0.035 | -0.017 | -0.018 | t | 7705   | DCHLLGTE ELSGIPPP RGV  | Homo sapiens          |
| 1 | 1.00 | 1 | 1 | -0.01 | -0.013 | -0.009 | -0.009 | -0.01  | t | 38369  | LNVSREVL QESRILRVI KKK | Canis lupus           |



|   |      |   |   |       |        |       |        |        |   |        |                      |                       |
|---|------|---|---|-------|--------|-------|--------|--------|---|--------|----------------------|-----------------------|
| 1 | 1.00 | 1 | 1 | 0.02  | 0.02   | 0.02  | 0.02   | 0.02   | t | 114831 | GGCRKELAV            | Homo sapiens          |
| 1 | 1.00 | 1 | 1 | 0     | 0      | 0     | 0      | 0      | t | 137803 | ALADRASSFMVD         | Oryctolagus cuniculus |
| 1 | 1.00 | 1 | 1 | 0     | 0      | 0     | 0      | 0      | t | 110604 | GLTGRPGDAGPQGKV      | Mus musculus          |
| 1 | 1.00 | 1 | 1 | 0     | 0      | 0     | 0      | 0      | t | 60676  | SRGNHVAPTHYVVESDASQR | Homo sapiens          |
| 1 | 1.00 | 1 | 1 | 0     | 0      | 0     | 0      | 0      | t | 39391  | LSGQPAVIPDREVLYQQFDE | Homo sapiens          |
| 1 | 1.00 | 1 | 1 | 0     | 0      | 0     | 0      | 0      | t | 45698  | NRLIAFASRGNHVAPTHYVT | Homo sapiens          |
| 1 | 1.00 | 1 | 1 | 0     | 0      | 0     | 0      | 0      | t | 57704  | SEYPPQPS             | Homo sapiens          |
| 1 | 1.00 | 1 | 1 | 0     | 0      | 0     | 0      | 0      | t | 39391  | LSGQPAVIPDREVLYQQFDE | Homo sapiens          |
| 1 | 1.00 | 1 | 1 | 0     | 0      | 0     | 0      | 0      | t | 46991  | PAVIPDREVLYQEFDEMEEC | Homo sapiens          |
| 1 | 1.00 | 1 | 1 | 0     | 0      | 0     | 0      | 0      | t | 22092  | GRIILSGRPVVDPREVLYR  | Homo sapiens          |
| 1 | 1.00 | 1 | 1 | 0     | 0      | 0     | 0      | 0      | t | 22079  | GRIILSGKPATVPDREVLYQ | Homo sapiens          |
| 1 | 1.00 | 1 | 1 | 0     | 0      | 0     | 0      | 0      | t | 22077  | GRIILSGKPATIPDREAVLY | Homo sapiens          |
| 1 | 1.00 | 1 | 1 | 0     | 0      | 0     | 0      | 0      | t | 23464  | GYSLFQKEMKTHNEGTSGTA | Aotus nancymae        |
| 1 | 1.00 | 1 | 1 | -0.02 | -0.02  | -0.02 | -0.02  | -0.02  | t | 136656 | SSKLTIFIDFHRN        | Gallus gallus         |
| 1 | 1.00 | 1 | 1 | -0.02 | -0.02  | -0.02 | -0.02  | -0.02  | t | 31557  | KKGSSIGKM            | Mus musculus          |
| 1 | 1.00 | 1 | 1 | -0.02 | -0.02  | -0.02 | -0.02  | -0.02  | t | 31352  | KIMSKWVNVFNINAYIMSNF | Aotus nancymae        |
| 1 | 1.00 | 1 | 1 | -0.01 | -0.006 | -0.01 | -0.009 | -0.008 | t | 51392  | QLKLNWF              | Homo sapiens          |

|   |      |   |   |       |        |        |        |        |   |        |                             |                          |
|---|------|---|---|-------|--------|--------|--------|--------|---|--------|-----------------------------|--------------------------|
| 1 | 1.00 | 1 | 1 | 0.01  | 0.012  | 0.012  | 0.01   | 0.012  | t | 73558  | YDLNWPQ<br>NA               | Rattus<br>norvegicus     |
| 1 | 1.00 | 1 | 1 | 0.01  | 0.014  | 0.001  | 0.011  | 0.011  | t | 49349  | PSDTMQT<br>RHKVNYH<br>SRSES | Homo<br>sapiens          |
| 1 | 1.00 | 1 | 1 | 0.04  | 0.042  | 0.035  | 0.04   | 0.04   | t | 136066 | IETDKTSV<br>QV              | Rattus<br>norvegicus     |
| 1 | 1.00 | 1 | 1 | 0.04  | 0.04   | 0.035  | 0.04   | 0.04   | t | 136066 | IETDKTSV<br>QV              | Oryctolagus<br>cuniculus |
| 1 | 1.00 | 1 | 1 | -0.02 | -0.018 | -0.013 | -0.013 | -0.018 | t | 132144 | AGPCLLLA<br>PDRCPG          | Homo<br>sapiens          |
| 1 | 1.00 | 1 | 1 | 0     | 0      | 0      | 0      | 0      | t | 151731 | SAQSQRA<br>PDR              | Mus<br>musculus          |
| 1 | 1.00 | 1 | 1 | 0     | 0      | 0      | 0      | 0      | t | 119468 | ISGKQVTG<br>EVIFQTPLIK      | Oryctolagus<br>cuniculus |
| 1 | 1.00 | 1 | 1 | 0     | 0      | 0      | 0      | 0      | t | 120849 | NSQPEILE<br>RTRAELD         | Mus<br>musculus          |
| 1 | 1.00 | 1 | 1 | 0     | 0      | 0      | 0      | 0      | t | 120849 | NSQPEILE<br>RTRAELD         | Mus<br>musculus          |
| 1 | 1.00 | 1 | 1 | 0     | 0      | 0      | 0      | 0      | t | 120849 | NSQPEILE<br>RTRAELD         | Mus<br>musculus          |
| 1 | 1.00 | 1 | 1 | 0     | 0      | 0      | 0      | 0      | t | 119454 | GGIKKIRLP<br>SDDVWLPD       | Oryctolagus<br>cuniculus |
| 1 | 1.00 | 1 | 1 | 0     | 0      | 0      | 0      | 0      | t | 119467 | ISGKPGPP<br>PMGFHSP<br>LIK  | Oryctolagus<br>cuniculus |
| 1 | 1.00 | 1 | 1 | 0     | 0      | 0      | 0      | 0      | t | 119443 | DLKLRRSS<br>SVGYIS          | Oryctolagus<br>cuniculus |
| 1 | 1.00 | 1 | 1 | 0     | 0      | 0      | 0      | 0      | t | 113879 | SQRSQDEN                    | Rattus<br>norvegicus     |

|   |      |   |   |       |        |        |        |        |   |        |                           |                       |
|---|------|---|---|-------|--------|--------|--------|--------|---|--------|---------------------------|-----------------------|
| 1 | 1.00 | 1 | 1 | 0     | 0      | 0      | 0      | 0      | t | 102344 | DAEFR                     | Mus musculus          |
| 1 | 1.00 | 1 | 1 | 0     | 0      | 0      | 0      | 0      | t | 113321 | DENPVVH<br>FFKNIVTP<br>RT | Homo sapiens          |
| 1 | 1.00 | 1 | 1 | 0     | 0      | 0      | 0      | 0      | t | 102344 | DAEFR                     | Mus musculus          |
| 1 | 1.00 | 1 | 1 | -0.01 | -0.012 | -0.015 | -0.017 | -0.01  | t | 122442 | KPMSNFR<br>FGENHA         | Rattus norvegicus     |
| 1 | 1.00 | 1 | 1 | 0.06  | 0.06   | 0.06   | 0.06   | 0.062  | t | 106428 | FVEIYSP                   | Homo sapiens          |
| 1 | 1.00 | 1 | 1 | 0.03  | 0.03   | 0.031  | 0.03   | 0.029  | t | 52048  | QQKWDA<br>TATELNN         | Homo sapiens          |
| 1 | 1.00 | 1 | 1 | -0.06 | -0.06  | -0.06  | -0.06  | -0.06  | t | 136057 | DISAFAD                   | Rattus norvegicus     |
| 1 | 1.00 | 1 | 1 | -0.02 | -0.016 | -0.008 | -0.013 | -0.021 | t | 119535 | TQDLGYSR<br>V             | Homo sapiens          |
| 1 | 1.00 | 1 | 1 | -0.04 | -0.038 | -0.035 | -0.039 | -0.04  | t | 33259  | KRYISWCL<br>WWLQYF        | Homo sapiens          |
| 1 | 1.00 | 1 | 1 | -0.03 | -0.028 | -0.03  | -0.034 | -0.03  | t | 135655 | DVTCNIKN                  | Homo sapiens          |
| 1 | 1.00 | 1 | 1 | 0     | -0.002 | 0      | 0.003  | 0.002  | t | 59922  | SNTFINNA                  | Mus musculus          |
| 1 | 1.00 | 1 | 1 | 0     | -0.002 | 0      | 0.003  | 0.002  | t | 59922  | SNTFINNA                  | Mus musculus          |
| 1 | 1.00 | 1 | 1 | -0.01 | -0.008 | -0.01  | -0.009 | -0.01  | t | 18759  | GASQSG<br>ASQSGAS         | Homo sapiens          |
| 1 | 1.00 | 1 | 1 | 0.05  | 0.046  | 0.043  | 0.051  | 0.053  | t | 131128 | VEMKKED<br>FDIYDEDE       | Oryctolagus cuniculus |
| 1 | 1.00 | 1 | 1 | -0.01 | -0.01  | -0.013 | -0.009 | -0.01  | t | 65635  | TPLFKIIGD<br>EVGLRT       | Homo sapiens          |

|   |      |   |   |       |        |       |       |        |   |        |                              |                          |
|---|------|---|---|-------|--------|-------|-------|--------|---|--------|------------------------------|--------------------------|
| 1 | 1.00 | 1 | 1 | 0.04  | 0.04   | 0.04  | 0.04  | 0.04   | t | 117441 | ANNGNLQ<br>LRNKEVT<br>WEVLEG | Homo<br>sapiens          |
| 1 | 1.00 | 1 | 1 | 0.01  | 0.012  | 0.01  | 0.011 | 0.01   | t | 117107 | VQTDGST<br>KSHRH             | Homo<br>sapiens          |
| 1 | 1.00 | 1 | 1 | -0.01 | -0.01  | -0.01 | -0.01 | -0.01  | t | 141613 | DANKKAC<br>CAIRGSFY<br>D     | Rattus<br>norvegicus     |
| 1 | 1.00 | 1 | 1 | -0.01 | -0.01  | -0.01 | -0.01 | -0.01  | t | 141613 | DANKKAC<br>CAIRGSFY<br>D     | Oryctolagus<br>cuniculus |
| 1 | 1.00 | 1 | 1 | 0.01  | 0.008  | 0.01  | 0.009 | 0.01   | t | 109325 | IDGVNH                       | Mus<br>musculus          |
| 1 | 1.00 | 1 | 1 | 0     | 0      | 0     | 0     | 0.002  | t | 118127 | SDDDMGF<br>GLFD              | Homo<br>sapiens          |
| 1 | 1.00 | 1 | 1 | -0.02 | -0.017 | -0.02 | -0.02 | -0.022 | t | 140895 | QRRADAV<br>KGYLAGKG<br>VDAGK | Mus<br>musculus          |
| 1 | 1.00 | 1 | 1 | 0.03  | 0.03   | 0.03  | 0.03  | 0.03   | t | 135756 | SCKDDINS                     | Homo<br>sapiens          |
| 1 | 1.00 | 1 | 1 | 0.03  | 0.03   | 0.03  | 0.03  | 0.03   | t | 115206 | DIGSESTE<br>DQAMEDI<br>KQMEA | Homo<br>sapiens          |
| 1 | 1.00 | 1 | 1 | 0.01  | 0.01   | 0.01  | 0.01  | 0.01   | t | 142166 | GLRRDLDA<br>SREAKKQL<br>EAEQ | Homo<br>sapiens          |
| 1 | 1.00 | 1 | 1 | 0.01  | 0.01   | 0.01  | 0.01  | 0.01   | t | 142166 | GLRRDLDA<br>SREAKKQL<br>EAEQ | Homo<br>sapiens          |
| 1 | 1.00 | 1 | 1 | 0.01  | 0.008  | 0.01  | 0.01  | 0.01   | t | 141686 | KKYIKKLEN<br>GRSLEGV         | Oryctolagus<br>cuniculus |
| 1 | 1.00 | 1 | 1 | 0.01  | 0.01   | 0.01  | 0.01  | 0.01   | t | 149106 | SITNPTQ                      | Sus<br>scrofa            |
| 1 | 1.00 | 1 | 1 | 0.01  | 0.01   | 0.01  | 0.01  | 0.01   | t | 115689 | AQILQWQ<br>VLS               | Homo<br>sapiens          |
| 1 | 1.00 | 1 | 1 | 0.01  | 0.01   | 0.01  | 0.01  | 0.01   | t | 95816  | SAQSGTSA<br>QSGT             | Homo<br>sapiens          |

|   |      |   |   |       |        |       |       |       |   |        |                              |                                  |
|---|------|---|---|-------|--------|-------|-------|-------|---|--------|------------------------------|----------------------------------|
| 1 | 1.00 | 1 | 1 | 0.01  | 0.01   | 0.01  | 0.01  | 0.01  | t | 95815  | SAQSGASA<br>QSGT             | Homo<br>sapiens                  |
| 1 | 1.00 | 1 | 1 | 0.01  | 0.01   | 0.01  | 0.01  | 0.01  | t | 57746  | SFEEDTEE<br>DK               | Oryctola<br>gus<br>cuniculu<br>s |
| 1 | 1.00 | 1 | 1 | -0.01 | -0.01  | -0.01 | -0.01 | -0.01 | t | 149694 | FGAADFKT<br>LNASKSD          | Oryctola<br>gus<br>cuniculu<br>s |
| 1 | 1.00 | 1 | 1 | -0.01 | -0.01  | -0.01 | -0.01 | -0.01 | t | 149026 | ANITQSS                      | Sus<br>scrofa                    |
| 1 | 1.00 | 1 | 1 | -0.01 | -0.01  | -0.01 | -0.01 | -0.01 | t | 136666 | SWSSAERL<br>YTMN             | Gallus<br>gallus                 |
| 1 | 1.00 | 1 | 1 | -0.01 | -0.01  | -0.01 | -0.01 | -0.01 | t | 153869 | RDGNPYA<br>VCDKCLKF<br>YSKIS | Cavia<br>porcellu<br>s           |
| 1 | 1.00 | 1 | 1 | -0.01 | -0.01  | -0.01 | -0.01 | -0.01 | t | 123123 | EFKSRIEAL                    | Ovis<br>aries                    |
| 1 | 1.00 | 1 | 1 | -0.01 | -0.007 | -0.01 | -0.01 | -0.01 | t | 120180 | RQWKAEF<br>HRW               | Mus<br>musculu<br>s              |
| 1 | 1.00 | 1 | 1 | -0.01 | -0.013 | -0.01 | -0.01 | -0.01 | t | 120180 | RQWKAEF<br>HRW               | Oryctola<br>gus<br>cuniculu<br>s |
| 1 | 1.00 | 1 | 1 | -0.01 | -0.01  | -0.01 | -0.01 | -0.01 | t | 132924 | WGANPGL                      | Homo<br>sapiens                  |
| 1 | 1.00 | 1 | 1 | -0.01 | -0.007 | -0.01 | -0.01 | -0.01 | t | 120180 | RQWKAEF<br>HRW               | Mus<br>musculu<br>s              |
| 1 | 1.00 | 1 | 1 | -0.01 | -0.01  | -0.01 | -0.01 | -0.01 | t | 120180 | RQWKAEF<br>HRW               | Mus<br>musculu<br>s              |
| 1 | 1.00 | 1 | 1 | -0.01 | -0.01  | -0.01 | -0.01 | -0.01 | t | 120180 | RQWKAEF<br>HRW               | Mus<br>musculu<br>s              |
| 1 | 1.00 | 1 | 1 | -0.01 | -0.01  | -0.01 | -0.01 | -0.01 | t | 121679 | NVQVLCV<br>ASPLVDVF          | Mus<br>musculu<br>s              |
| 1 | 1.00 | 1 | 1 | -0.01 | -0.01  | -0.01 | -0.01 | -0.01 | t | 120180 | RQWKAEF<br>HRW               | Oryctola<br>gus<br>cuniculu<br>s |

|   |      |   |   |       |       |       |       |       |   |        |                              |                                  |
|---|------|---|---|-------|-------|-------|-------|-------|---|--------|------------------------------|----------------------------------|
| 1 | 1.00 | 1 | 1 | -0.01 | -0.01 | -0.01 | -0.01 | -0.01 | t | 121970 | VGNPFRPK<br>NYSGIPS          | Mus<br>musculu<br>s              |
| 1 | 1.00 | 1 | 1 | -0.01 | -0.01 | -0.01 | -0.01 | -0.01 | t | 103431 | MWELYLA<br>YSEAGFRS          | Homo<br>sapiens                  |
| 1 | 1.00 | 1 | 1 | -0.01 | -0.01 | -0.01 | -0.01 | -0.01 | t | 95843  | SGTSGPSG<br>PSGP             | Homo<br>sapiens                  |
| 1 | 1.00 | 1 | 1 | -0.01 | -0.01 | -0.01 | -0.01 | -0.01 | t | 95832  | SGPSGPSG<br>PSGP             | Homo<br>sapiens                  |
| 1 | 1.00 | 1 | 1 | -0.01 | -0.01 | -0.01 | -0.01 | -0.01 | t | 95843  | SGTSGPSG<br>PSGP             | Homo<br>sapiens                  |
| 1 | 1.00 | 1 | 1 | -0.01 | -0.01 | -0.01 | -0.01 | -0.01 | t | 95832  | SGPSGPSG<br>PSGP             | Homo<br>sapiens                  |
| 1 | 1.00 | 1 | 1 | -0.01 | -0.01 | -0.01 | -0.01 | -0.01 | t | 95843  | SGTSGPSG<br>PSGP             | Homo<br>sapiens                  |
| 1 | 1.00 | 1 | 1 | -0.01 | -0.01 | -0.01 | -0.01 | -0.01 | t | 41336  | MEECSKHL<br>PLVEHGLQ<br>LAEQ | Homo<br>sapiens                  |
| 1 | 1.00 | 1 | 1 | -0.01 | -0.01 | -0.01 | -0.01 | -0.01 | t | 41322  | MEECASH<br>LPYIEQGM<br>HLAEQ | Homo<br>sapiens                  |
| 1 | 1.00 | 1 | 1 | -0.01 | -0.01 | -0.01 | -0.01 | -0.01 | t | 47190  | PDREVLJR<br>EFDMEA<br>CAHL   | Homo<br>sapiens                  |
| 1 | 1.00 | 1 | 1 | -0.01 | -0.01 | -0.01 | -0.01 | -0.01 | t | 25791  | IEEVALGH<br>EGEIPF           | Homo<br>sapiens                  |
| 1 | 1.00 | 1 | 1 | -0.01 | -0.01 | -0.01 | -0.01 | -0.01 | t | 5575   | AVTPLGPP<br>AAEY             | Oryctola<br>gus<br>cuniculu<br>s |
| 1 | 1.00 | 1 | 1 | -0.01 | -0.01 | -0.01 | -0.01 | -0.01 | t | 1796   | AHLRLPTR<br>TSMKVT           | Mus<br>musculu<br>s              |
| 1 | 1.00 | 1 | 1 | -0.01 | -0.01 | -0.01 | -0.01 | -0.01 | t | 5333   | AVFVTLYM<br>PQLSY            | Mus<br>musculu<br>s              |
| 1 | 1.00 | 1 | 1 | -0.03 | -0.03 | -0.03 | -0.03 | -0.03 | t | 135734 | PGQFPWQ<br>V                 | Homo<br>sapiens                  |

|   |      |   |   |       |        |        |       |        |   |        |                         |                       |
|---|------|---|---|-------|--------|--------|-------|--------|---|--------|-------------------------|-----------------------|
| 1 | 1.00 | 1 | 1 | -0.03 | -0.03  | -0.03  | -0.03 | -0.03  | t | 78231  | PHMQLHHL                | Homo sapiens          |
| 1 | 1.00 | 1 | 1 | -0.01 | -0.01  | -0.01  | -0.01 | -0.007 | t | 134769 | QIFNL                   | Mus musculus          |
| 1 | 1.00 | 1 | 1 | 0.01  | 0.014  | 0.01   | 0.011 | 0.012  | t | 61333  | SSSDKPDN                | Homo sapiens          |
| 1 | 1.00 | 1 | 1 | -0.06 | -0.063 | -0.06  | -0.06 | -0.062 | t | 6956   | CRWPDVLLWC              | Oryctolagus cuniculus |
| 1 | 1.00 | 1 | 1 | 0.01  | 0.01   | 0.01   | 0.01  | 0.01   | t | 135560 | IEQAIGRV TPIF           | Oryctolagus cuniculus |
| 1 | 1.00 | 1 | 1 | 0.01  | 0.01   | 0.01   | 0.01  | 0.01   | t | 135560 | IEQAIGRV TPIF           | Oryctolagus cuniculus |
| 1 | 1.00 | 1 | 1 | 0.01  | 0.01   | 0.01   | 0.01  | 0.01   | t | 116943 | DFRDYSTR PFAL           | Homo sapiens          |
| 1 | 1.00 | 1 | 1 | 0.01  | 0.012  | 0.01   | 0.013 | 0.011  | t | 120066 | LKQQWVD YNLKWNP DD      | Homo sapiens          |
| 1 | 1.00 | 1 | 1 | 0.01  | 0.012  | 0.01   | 0.013 | 0.011  | t | 120066 | LKQQWVD YNLKWNP DD      | Homo sapiens          |
| 1 | 1.00 | 1 | 1 | 0.01  | 0.014  | 0.01   | 0.013 | 0.011  | t | 120066 | LKQQWVD YNLKWNP DD      | Homo sapiens          |
| 1 | 1.00 | 1 | 1 | 0     | 0      | -0.01  | 0.003 | 0.002  | t | 50119  | PYKELRLE VGKQRLKY AQEE  | Homo sapiens          |
| 1 | 1.00 | 1 | 1 | -0.02 | -0.008 | -0.024 | -0.02 | -0.022 | t | 110248 | GGLGIGTG SGTGGRT GYIPL  | Mus musculus          |
| 1 | 1.00 | 1 | 1 | -0.01 | -0.013 | -0.01  | -0.01 | -0.01  | t | 43224  | NANANNA VK              | Oryctolagus cuniculus |
| 1 | 1.00 | 1 | 1 | 0.01  | 0.01   | 0.01   | 0.006 | 0.01   | t | 29760  | KAASNTFINNA             | Homo sapiens          |
| 1 | 1.00 | 1 | 1 | 0.01  | 0.008  | 0.01   | 0.009 | 0.01   | t | 142200 | KGLRRDLDD ASREAKKQ LEAE | Mus musculus          |

|   |      |   |   |       |        |       |        |        |   |        |                              |                                  |
|---|------|---|---|-------|--------|-------|--------|--------|---|--------|------------------------------|----------------------------------|
| 1 | 1.00 | 1 | 1 | 0     | 0.002  | 0.008 | -0.001 | 0      | t | 49335  | PSDPLVYK<br>RQTAKF           | Ovis<br>aries                    |
| 1 | 1.00 | 1 | 1 | -0.01 | -0.014 | 0.009 | -0.007 | -0.012 | t | 70362  | VPLPLRSK                     | Oryctola<br>gus<br>cuniculu<br>s |
| 1 | 1.00 | 1 | 1 | 0.01  | 0.012  | 0.003 | 0.007  | 0.01   | t | 50504  | QDPDRRD<br>PYSPSPYD          | Homo<br>sapiens                  |
| 1 | 1.00 | 1 | 1 | -0.01 | -0.008 | 0.002 | -0.007 | -0.008 | t | 8565   | DHSAPL                       | Homo<br>sapiens                  |
| 1 | 1.00 | 1 | 1 | 0.02  | 0.018  | 0.02  | 0.023  | 0.02   | t | 104357 | YGSHSNL                      | Mus<br>musculu<br>s              |
| 1 | 1.00 | 1 | 1 | -0.02 | -0.02  | -0.02 | -0.02  | -0.02  | t | 156479 | WVHQYKE                      | Homo<br>sapiens                  |
| 1 | 1.00 | 1 | 1 | 0.06  | 0.062  | 0.052 | 0.06   | 0.062  | t | 125236 | RIEKDTDR<br>DNFMSAE<br>EAQ   | Homo<br>sapiens                  |
| 1 | 1.00 | 1 | 1 | 0.02  | 0.02   | 0.025 | 0.022  | 0.022  | t | 75904  | YSTPSSILD<br>THPLYK          | Homo<br>sapiens                  |
| 1 | 1.00 | 1 | 1 | 0     | 0      | 0     | 0      | 0      | t | 8391   | DGGKMV<br>QV                 | Oryctola<br>gus<br>cuniculu<br>s |
| 1 | 1.00 | 1 | 1 | 0.03  | 0.03   | 0.03  | 0.03   | 0.03   | t | 149962 | SWLQLVTS<br>KSTL             | Capra<br>hircus                  |
| 1 | 1.00 | 1 | 1 | -0.02 | -0.01  | -0.02 | -0.023 | -0.02  | t | 4023   | AQPGYPW<br>PLY               | Pan<br>troglody<br>tes           |
| 1 | 1.00 | 1 | 1 | 0     | 0      | 0.007 | -0.004 | 0      | t | 32267  | KLYQAQY<br>DLSF              | Homo<br>sapiens                  |
| 1 | 1.00 | 1 | 1 | 0.01  | 0.01   | 0.01  | 0.006  | 0.008  | t | 117695 | YITTIAGV<br>M                | Homo<br>sapiens                  |
| 1 | 1.00 | 1 | 1 | 0.04  | 0.04   | 0.04  | 0.04   | 0.04   | t | 114904 | NISKEHDG<br>EC               | Homo<br>sapiens                  |
| 1 | 1.00 | 1 | 1 | 0.02  | 0.02   | 0.02  | 0.02   | 0.02   | t | 128098 | SCWQPGT<br>RTSTSPGV<br>SEDCL | Homo<br>sapiens                  |
| 1 | 1.00 | 1 | 1 | 0     | 0      | 0     | 0      | 0      | t | 136719 | VIKHMRF<br>HADYQAP<br>FLGGGY | Aotus                            |



|   |      |   |   |       |        |       |       |       |   |        |                              |                     |
|---|------|---|---|-------|--------|-------|-------|-------|---|--------|------------------------------|---------------------|
| 1 | 1.00 | 1 | 1 | 0     | 0      | 0     | 0     | 0     | t | 133955 | WIMNNF                       | Mus<br>musculu<br>s |
| 1 | 1.00 | 1 | 1 | 0     | 0      | 0     | 0     | 0     | t | 117876 | GIMAPPP<br>GMR               | Mus<br>musculu<br>s |
| 1 | 1.00 | 1 | 1 | 0     | 0      | 0     | 0     | 0     | t | 111156 | CMNKPAY<br>AC                | Homo<br>sapiens     |
| 1 | 1.00 | 1 | 1 | 0     | 0      | 0     | 0     | 0     | t | 99281  | GILVLASVS<br>ATHAKS          | Homo<br>sapiens     |
| 1 | 1.00 | 1 | 1 | 0     | 0      | 0     | 0     | 0     | t | 107434 | GVQVHNA                      | Homo<br>sapiens     |
| 1 | 1.00 | 1 | 1 | 0     | 0      | 0     | 0     | 0     | t | 69885  | VLYQEFDE<br>MEECASH<br>LPYIE | Homo<br>sapiens     |
| 1 | 1.00 | 1 | 1 | 0     | 0      | 0     | 0     | 0     | t | 49082  | PQQPFPQ<br>PQQ               | Mus<br>musculu<br>s |
| 1 | 1.00 | 1 | 1 | 0     | 0      | 0     | 0     | 0     | t | 39379  | LSGKPATIP<br>DREVLRYE<br>FDE | Homo<br>sapiens     |
| 1 | 1.00 | 1 | 1 | 0     | 0      | 0     | 0     | 0     | t | 49082  | PQQPFPQ<br>PQQ               | Mus<br>musculu<br>s |
| 1 | 1.00 | 1 | 1 | 0     | 0      | 0     | 0     | 0     | t | 58195  | SGPSGPSG<br>TSPSSRS          | Homo<br>sapiens     |
| 1 | 1.00 | 1 | 1 | 0     | 0      | 0     | 0     | 0     | t | 16962  | FLVNTWK<br>SKKNP             | Homo<br>sapiens     |
| 1 | 1.00 | 1 | 1 | 0     | 0      | 0     | 0     | 0     | t | 1260   | AFASRGN<br>HVAPTHY<br>VTESDA | Homo<br>sapiens     |
| 1 | 1.00 | 1 | 1 | -0.02 | -0.017 | -0.02 | -0.02 | -0.02 | t | 153397 | HTKIHNHP<br>RLPT             | Mus<br>musculu<br>s |
| 1 | 1.00 | 1 | 1 | -0.02 | -0.02  | -0.02 | -0.02 | -0.02 | t | 103061 | ASFLDQVH<br>FQPLPPA          | Homo<br>sapiens     |
| 1 | 1.00 | 1 | 1 | -0.04 | -0.04  | -0.04 | -0.04 | -0.04 | t | 140590 | PYHLALAG<br>V                | Mus<br>musculu<br>s |
| 1 | 1.00 | 1 | 1 | -0.04 | -0.04  | -0.04 | -0.04 | -0.04 | t | 140590 | PYHLALAG<br>V                | Mus<br>musculu<br>s |

|   |      |   |   |       |        |        |        |        |   |        |                              |                                  |
|---|------|---|---|-------|--------|--------|--------|--------|---|--------|------------------------------|----------------------------------|
| 1 | 1.00 | 1 | 1 | -0.01 | -0.007 | -0.01  | -0.01  | -0.01  | t | 7317   | CVTQTVDF<br>SLDPTFTI         | Mus<br>musculu<br>s              |
| 1 | 1.00 | 1 | 1 | 0     | 0.004  | 0.015  | 0      | 0      | t | 139862 | PWYSSAL                      | Ovis<br>aries                    |
| 1 | 1.00 | 1 | 1 | -0.02 | -0.022 | -0.021 | -0.023 | -0.02  | t | 25598  | IDKLCVW<br>NNK               | Mus<br>musculu<br>s              |
| 1 | 1.00 | 1 | 1 | -0.02 | -0.015 | -0.02  | -0.02  | -0.02  | t | 43514  | NDPTQQIP<br>KLVANNTR<br>LWVY | Homo<br>sapiens                  |
| 1 | 1.00 | 1 | 1 | -0.02 | -0.018 | -0.025 | -0.023 | -0.019 | t | 158932 | KTALEARK<br>AADTFNF          | Homo<br>sapiens                  |
| 1 | 1.00 | 1 | 1 | 0.01  | 0.006  | 0.017  | 0.011  | 0.011  | t | 46551  | NWNFDFG                      | Mus<br>musculu<br>s              |
| 1 | 1.00 | 1 | 1 | 0     | 0      | 0      | 0      | 0      | t | 105545 | TKSSDF                       | Oryctola<br>gus<br>cuniculu<br>s |
| 1 | 1.00 | 1 | 1 | 0     | 0.003  | 0      | 0      | -0.002 | t | 140933 | YDITGEYV<br>QILDAHAA<br>YLNA | Mus<br>musculu<br>s              |
| 1 | 1.00 | 1 | 1 | -0.01 | -0.01  | -0.01  | -0.01  | -0.01  | t | 122725 | DLASINLQ<br>RGRDHG           | Oryctola<br>gus<br>cuniculu<br>s |
| 1 | 1.00 | 1 | 1 | -0.01 | -0.014 | -0.011 | -0.01  | -0.01  | t | 61720  | STLGNDL<br>RTYNDKDL<br>L     | Bos<br>taurus                    |
| 1 | 1.00 | 1 | 1 | -0.04 | -0.037 | -0.038 | -0.04  | -0.039 | t | 133749 | YNLLMHLS<br>SML              | Mus<br>musculu<br>s              |
| 1 | 1.00 | 1 | 1 | 0     | 0      | 0.004  | 0      | 0      | t | 122036 | WNPDD                        | Rattus<br>norvegic<br>us         |
| 1 | 1.00 | 1 | 1 | 0.01  | 0.01   | 0.005  | 0.01   | 0.01   | t | 65797  | TPVGLAVD<br>TPWVEKES<br>ALSI | Homo<br>sapiens                  |
| 1 | 1.00 | 1 | 1 | 0.04  | 0.04   | 0.04   | 0.04   | 0.04   | t | 135944 | KEQFEFAL<br>TAVAEVC          | Homo<br>sapiens                  |
| 1 | 1.00 | 1 | 1 | 0.04  | 0.04   | 0.04   | 0.04   | 0.04   | t | 135944 | KEQFEFAL<br>TAVAEVC          | Homo<br>sapiens                  |

|   |      |   |   |       |        |        |        |        |   |        |                      |                   |
|---|------|---|---|-------|--------|--------|--------|--------|---|--------|----------------------|-------------------|
| 1 | 1.00 | 1 | 1 | 0     | 0      | 0      | 0      | 0      | t | 116085 | EPANPSEK             | Mus musculus      |
| 1 | 1.00 | 1 | 1 | 0     | 0      | 0      | 0      | 0      | t | 19636  | GFTTNEERYNVFAE       | Mus musculus      |
| 1 | 1.00 | 1 | 1 | 0     | 0      | -0.008 | -0.004 | 0      | t | 2594   | ALGQRRADAVKGYLA      | Homo sapiens      |
| 1 | 1.00 | 1 | 1 | -0.05 | -0.05  | -0.056 | -0.056 | -0.05  | t | 35962  | LFRQFYQLDA           | Homo sapiens      |
| 1 | 1.00 | 1 | 1 | -0.02 | -0.02  | -0.02  | -0.023 | -0.02  | t | 69659  | VLNENLLRFF           | Homo sapiens      |
| 1 | 1.00 | 1 | 1 | 0     | 0      | -0.001 | 0      | 0      | t | 50218  | QAASAALGALGRFDE      | Mus musculus      |
| 1 | 1.00 | 1 | 1 | 0.02  | 0.02   | 0.02   | 0.02   | 0.02   | t | 117968 | KVTWLVSWTENIQGSIKYIM | Homo sapiens      |
| 1 | 1.00 | 1 | 1 | 0     | 0      | 0      | 0      | 0      | t | 98979  | REGEPDLSNNFGKLF      | Homo sapiens      |
| 1 | 1.00 | 1 | 1 | 0     | 0      | 0      | 0.004  | 0      | t | 67730  | VARALAHGVRVLEDGVNFAT | Homo sapiens      |
| 1 | 1.00 | 1 | 1 | -0.02 | -0.022 | -0.017 | -0.017 | -0.018 | t | 5597   | AVVGGLGGY            | Mus musculus      |
| 1 | 1.00 | 1 | 1 | -0.02 | -0.022 | -0.034 | -0.021 | -0.018 | t | 70489  | VPSYSFIRAHDESVQDLIA  | Rattus norvegicus |
| 1 | 1.00 | 1 | 1 | -0.02 | -0.022 | -0.034 | -0.021 | -0.018 | t | 70489  | VPSYSFIRAHDESVQDLIA  | Rattus norvegicus |
| 1 | 1.00 | 1 | 1 | -0.01 | -0.01  | -0.01  | -0.01  | -0.01  | t | 3290   | ANGAGNQPGANGAGNQPG   | Homo sapiens      |
| 1 | 1.00 | 1 | 1 | 0     | 0      | 0      | 0      | 0.001  | t | 43240  | NANPNANP             | Mus musculus      |
| 1 | 1.00 | 1 | 1 | 0.05  | 0.05   | 0.05   | 0.05   | 0.05   | t | 112099 | ESGVPDR              | Homo sapiens      |

|   |      |   |   |       |       |       |       |       |   |        |                        |                                  |
|---|------|---|---|-------|-------|-------|-------|-------|---|--------|------------------------|----------------------------------|
| 1 | 1.00 | 1 | 1 | 0.03  | 0.03  | 0.03  | 0.03  | 0.03  | t | 79555  | GHQVSRL                | Oryctola<br>gus<br>cuniculu<br>s |
| 1 | 1.00 | 1 | 1 | 0.01  | 0.01  | 0.01  | 0.01  | 0.01  | t | 142382 | AEDAAEEA<br>KEAAKK     | Homo<br>sapiens                  |
| 1 | 1.00 | 1 | 1 | 0.01  | 0.01  | 0.01  | 0.01  | 0.01  | t | 124280 | HPLASSVS<br>A          | Homo<br>sapiens                  |
| 1 | 1.00 | 1 | 1 | 0.01  | 0.01  | 0.01  | 0.01  | 0.01  | t | 104121 | MNKSYTI                | Homo<br>sapiens                  |
| 1 | 1.00 | 1 | 1 | 0.01  | 0.012 | 0.01  | 0.013 | 0.01  | t | 136015 | YHVYEVNL<br>VSEH       | Homo<br>sapiens                  |
| 1 | 1.00 | 1 | 1 | -0.01 | -0.01 | -0.01 | -0.01 | -0.01 | t | 136067 | KATI                   | Oryctola<br>gus<br>cuniculu<br>s |
| 1 | 1.00 | 1 | 1 | -0.01 | -0.01 | -0.01 | -0.01 | -0.01 | t | 135934 | GWGSPKV<br>TKDGV       | Homo<br>sapiens                  |
| 1 | 1.00 | 1 | 1 | -0.01 | -0.01 | -0.01 | -0.01 | -0.01 | t | 123348 | KELPKTLK<br>M          | Ovis<br>aries                    |
| 1 | 1.00 | 1 | 1 | -0.01 | -0.01 | -0.01 | -0.01 | -0.01 | t | 115598 | ATGMEVG<br>WYRPP       | Homo<br>sapiens                  |
| 1 | 1.00 | 1 | 1 | -0.01 | -0.01 | -0.01 | -0.01 | -0.01 | t | 104363 | YNKSFFM                | Homo<br>sapiens                  |
| 1 | 1.00 | 1 | 1 | -0.01 | -0.01 | -0.01 | -0.01 | -0.01 | t | 113753 | QGQQPG<br>QGQHGG<br>QP | Homo<br>sapiens                  |
| 1 | 1.00 | 1 | 1 | -0.01 | -0.01 | -0.01 | -0.01 | -0.01 | t | 95848  | SGTSGTSG<br>PSGT       | Homo<br>sapiens                  |
| 1 | 1.00 | 1 | 1 | -0.01 | -0.01 | -0.01 | -0.01 | -0.01 | t | 95848  | SGTSGTSG<br>PSGT       | Homo<br>sapiens                  |
| 1 | 1.00 | 1 | 1 | -0.01 | -0.01 | -0.01 | -0.01 | -0.01 | t | 95829  | SGASAQSG<br>GTSGP      | Homo<br>sapiens                  |
| 1 | 1.00 | 1 | 1 | -0.01 | -0.01 | -0.01 | -0.01 | -0.01 | t | 95833  | SGPSGPSG<br>PSGT       | Homo<br>sapiens                  |
| 1 | 1.00 | 1 | 1 | -0.01 | -0.01 | -0.01 | -0.01 | -0.01 | t | 95848  | SGTSGTSG<br>PSGT       | Homo<br>sapiens                  |

|   |      |   |   |       |       |       |       |       |   |        |                              |                        |
|---|------|---|---|-------|-------|-------|-------|-------|---|--------|------------------------------|------------------------|
| 1 | 1.00 | 1 | 1 | -0.01 | -0.01 | -0.01 | -0.01 | -0.01 | t | 95829  | SGASAQS<br>GTSGP             | Mus<br>musculu<br>s    |
| 1 | 1.00 | 1 | 1 | -0.01 | -0.01 | -0.01 | -0.01 | -0.01 | t | 65637  | TPLGPPAA<br>EYW              | Homo<br>sapiens        |
| 1 | 1.00 | 1 | 1 | -0.01 | -0.01 | -0.01 | -0.01 | -0.01 | t | 95829  | SGASAQS<br>GTSGP             | Homo<br>sapiens        |
| 1 | 1.00 | 1 | 1 | -0.01 | -0.01 | -0.01 | -0.01 | -0.01 | t | 95829  | SGASAQS<br>GTSGP             | Homo<br>sapiens        |
| 1 | 1.00 | 1 | 1 | -0.01 | -0.01 | -0.01 | -0.01 | -0.01 | t | 39382  | LSGKPAVI<br>PDREVLQ<br>AFDE  | Homo<br>sapiens        |
| 1 | 1.00 | 1 | 1 | -0.01 | -0.01 | -0.01 | -0.01 | -0.01 | t | 45359  | NPGNAEIE<br>DLIFLAR          | Mus<br>musculu<br>s    |
| 1 | 1.00 | 1 | 1 | -0.01 | -0.01 | -0.01 | -0.01 | -0.01 | t | 50105  | PYIEQGM<br>QLAAEFKQ<br>KALGL | Homo<br>sapiens        |
| 1 | 1.00 | 1 | 1 | -0.01 | -0.01 | -0.01 | -0.01 | -0.01 | t | 11966  | EFDEMEEC<br>ASHLPYIE<br>QGMH | Homo<br>sapiens        |
| 1 | 1.00 | 1 | 1 | -0.01 | -0.01 | -0.01 | -0.01 | -0.01 | t | 4451   | ASHLPYIE<br>QGMHLAE<br>QFKQK | Homo<br>sapiens        |
| 1 | 1.00 | 1 | 1 | -0.03 | -0.03 | -0.03 | -0.03 | -0.03 | t | 115900 | PQRDMPI<br>QAF               | Homo<br>sapiens        |
| 1 | 1.00 | 1 | 1 | -0.05 | -0.05 | -0.05 | -0.05 | -0.05 | t | 123426 | LGKNPYLR<br>G                | Ovis<br>aries          |
| 1 | 1.00 | 1 | 1 | -0.05 | -0.05 | -0.05 | -0.05 | -0.05 | t | 123424 | LGDKFNM<br>GL                | Ovis<br>aries          |
| 1 | 1.00 | 1 | 1 | 0.01  | 0.02  | 0.01  | 0.009 | 0.01  | t | 55070  | RNTNRRP<br>QDV               | Pan<br>troglody<br>tes |
| 1 | 1.00 | 1 | 1 | 0     | 0.01  | 0     | 0.001 | 0.002 | t | 28909  | ITGHRMA<br>WDM               | Pan<br>troglody<br>tes |
| 1 | 1.00 | 1 | 1 | 0.05  | 0.052 | 0.05  | 0.051 | 0.05  | t | 7818   | DDLDEGIE<br>KSSEELSEE<br>K   | Homo<br>sapiens        |
| 1 | 1.00 | 1 | 1 | 0.03  | 0.034 | 0.034 | 0.03  | 0.03  | t | 9118   | DLIAYKQ                      | Homo<br>sapiens        |

|   |      |   |   |       |        |        |        |        |   |        |                        |                       |
|---|------|---|---|-------|--------|--------|--------|--------|---|--------|------------------------|-----------------------|
| 1 | 1.00 | 1 | 0 | -0.02 | -0.016 | 0.002  | -0.023 | -0.008 | t | 104047 | LNKTFYY                | Homo sapiens          |
| 1 | 1.00 | 1 | 1 | 0     | 0      | 0      | 0.001  | 0.001  | t | 65678  | TPPAYR                 | Mus musculus          |
| 1 | 1.00 | 1 | 1 | 0     | -0.002 | 0      | 0.001  | 0.001  | t | 61589  | STEQNVP DPQVG          | Homo sapiens          |
| 1 | 1.00 | 1 | 1 | 0     | 0      | 0      | 0.001  | 0.001  | t | 46841  | PAKLLKER GFFGAIAG FLE  | Mus musculus          |
| 1 | 1.00 | 1 | 1 | 0     | 0      | 0      | 0.001  | 0.001  | t | 16101  | FHENWPS                | Mus musculus          |
| 1 | 1.00 | 1 | 1 | 0     | 0      | 0      | 0.001  | 0.001  | t | 9586   | DPAFR                  | Mus musculus          |
| 1 | 1.00 | 1 | 1 | -0.02 | -0.02  | -0.013 | -0.02  | -0.02  | t | 44598  | NKSLGACP IR            | Oryctolagus cuniculus |
| 1 | 1.00 | 1 | 1 | 0     | 0      | -0.004 | 0      | 0      | t | 61523  | STANAKVL VEIE          | Mus musculus          |
| 1 | 1.00 | 1 | 1 | 0.02  | 0.02   | 0.02   | 0.02   | 0.021  | t | 144778 | SGTHPFLD KSFS          | Mus musculus          |
| 1 | 1.00 | 1 | 1 | 0.01  | 0.006  | 0.01   | 0.009  | 0.01   | t | 137935 | NFNTVRY DYYGD          | Oryctolagus cuniculus |
| 1 | 1.00 | 1 | 1 | 0     | -0.001 | 0      | 0.003  | 0.002  | t | 47201  | PDSDPQIP PPYVEPTA PQVL | Homo sapiens          |
| 1 | 1.00 | 1 | 1 | 0     | 0.002  | 0      | 0.003  | 0.002  | t | 47201  | PDSDPQIP PPYVEPTA PQVL | Homo sapiens          |
| 1 | 1.00 | 1 | 1 | 0.01  | 0.007  | 0.009  | 0.01   | 0.01   | t | 22281  | GSAMSRP LIHFGN         | Oryctolagus cuniculus |
| 1 | 1.00 | 1 | 1 | -0.01 | -0.01  | -0.017 | -0.01  | -0.012 | t | 124198 | GLLFLGIAL AEEVRKLK AR  | Homo sapiens          |

|   |      |   |   |       |        |        |        |        |   |        |                              |                                  |
|---|------|---|---|-------|--------|--------|--------|--------|---|--------|------------------------------|----------------------------------|
| 1 | 1.00 | 1 | 1 | -0.04 | -0.036 | -0.04  | -0.043 | -0.04  | t | 55185  | RPKHPIKH<br>QG               | Homo<br>sapiens                  |
| 1 | 1.00 | 1 | 1 | -0.06 | -0.062 | -0.062 | -0.06  | -0.062 | t | 52850  | QWNKPSK<br>PKTNM             | Oryctola<br>gus<br>cuniculu<br>s |
| 1 | 1.00 | 1 | 1 | -0.01 | -0.013 | -0.004 | -0.01  | -0.009 | t | 72484  | WGNGCGL<br>FG                | Mus<br>musculu<br>s              |
| 1 | 1.00 | 1 | 1 | -0.03 | -0.03  | -0.029 | -0.033 | -0.032 | t | 74358  | YIQQGNGI<br>FGMIFPG          | Homo<br>sapiens                  |
| 1 | 1.00 | 1 | 1 | 0.03  | 0.03   | 0.03   | 0.03   | 0.03   | t | 132928 | WGENFIQ<br>VPVSE             | Homo<br>sapiens                  |
| 1 | 1.00 | 1 | 1 | 0     | 0.002  | -0.014 | -0.003 | 0.003  | t | 70460  | VPQYLRW<br>FEEWAED<br>FCRK   | Homo<br>sapiens                  |
| 1 | 1.00 | 1 | 1 | -0.03 | -0.03  | -0.035 | -0.029 | -0.03  | t | 100117 | HNPTKVTS<br>KVRIYM           | Homo<br>sapiens                  |
| 1 | 1.00 | 1 | 1 | 0.01  | 0.01   | -0.001 | 0.01   | 0.01   | t | 21427  | GNGAGGQ<br>AAGNGAG<br>GQAA   | Homo<br>sapiens                  |
| 1 | 1.00 | 1 | 1 | 0.01  | 0.012  | 0.011  | 0.013  | 0.01   | t | 640    | ADCTLWF<br>CPQTSN            | Homo<br>sapiens                  |
| 1 | 1.00 | 1 | 1 | 0.04  | 0.04   | 0.04   | 0.04   | 0.04   | t | 100411 | QEINLSLEE<br>L               | Mus<br>musculu<br>s              |
| 1 | 1.00 | 1 | 1 | 0     | 0      | 0      | 0      | 0.001  | t | 41289  | MDWNM<br>H                   | Mus<br>musculu<br>s              |
| 1 | 1.00 | 1 | 1 | 0.02  | 0.02   | 0.02   | 0.02   | 0.02   | t | 151868 | FRPHGVSA<br>AQEK             | Sus<br>scrofa                    |
| 1 | 1.00 | 1 | 1 | 0.02  | 0.02   | 0.02   | 0.02   | 0.02   | t | 123839 | VYEALDAI<br>R                | Ovis<br>aries                    |
| 1 | 1.00 | 1 | 1 | 0.02  | 0.02   | 0.02   | 0.02   | 0.02   | t | 115560 | WPWHTS<br>HYNTAQ             | Mus<br>musculu<br>s              |
| 1 | 1.00 | 1 | 1 | 0.02  | 0.02   | 0.02   | 0.02   | 0.02   | t | 79665  | VEGLAPG<br>GGNCHLT<br>VNGEDV | Homo<br>sapiens                  |
| 1 | 1.00 | 1 | 1 | 0     | 0      | 0      | 0      | 0      | t | 153352 | ACVLPWS<br>HVCGGGS           | Mus<br>musculu<br>s              |

|   |      |   |   |       |        |        |        |        |   |        |                               |                              |
|---|------|---|---|-------|--------|--------|--------|--------|---|--------|-------------------------------|------------------------------|
| 1 | 1.00 | 1 | 1 | 0     | 0      | 0      | 0      | 0      | t | 150854 | HPGGQQP                       | Mus<br>musculus              |
| 1 | 1.00 | 1 | 1 | 0     | 0      | 0      | 0      | 0      | t | 153352 | ACVLPWS<br>HVCGGGS            | Mus<br>musculus              |
| 1 | 1.00 | 1 | 1 | 0     | 0      | 0      | 0      | 0      | t | 153347 | ACRTSNQ<br>WLCGGGS            | Mus<br>musculus              |
| 1 | 1.00 | 1 | 1 | 0     | 0      | 0      | 0      | 0      | t | 150854 | HPGGQQP                       | Mus<br>musculus              |
| 1 | 1.00 | 1 | 1 | 0     | 0      | 0      | 0      | 0      | t | 123245 | GMLGSTP<br>EE                 | Ovis<br>aries                |
| 1 | 1.00 | 1 | 1 | 0     | 0      | 0      | 0      | 0      | t | 100384 | PKQQDSL<br>DTKASG             | Oryctola<br>gus<br>cuniculus |
| 1 | 1.00 | 1 | 1 | 0     | 0      | 0      | 0      | 0      | t | 70696  | VRDAMGF<br>PLLDQ              | Mus<br>musculus              |
| 1 | 1.00 | 1 | 1 | 0     | 0      | 0      | 0      | 0      | t | 47177  | PDREILYQ<br>QFDEEMEE<br>CSRHI | Homo<br>sapiens              |
| 1 | 1.00 | 1 | 1 | 0     | 0      | 0      | 0      | 0      | t | 36208  | LGLLQRAT<br>Q                 | Homo<br>sapiens              |
| 1 | 1.00 | 1 | 1 | -0.02 | -0.02  | -0.02  | -0.02  | -0.02  | t | 99261  | FYFPSRRFS<br>TRYGNQ           | Homo<br>sapiens              |
| 1 | 1.00 | 1 | 1 | -0.05 | -0.047 | -0.05  | -0.05  | -0.051 | t | 107084 | AKFRHD                        | Mus<br>musculus              |
| 1 | 1.00 | 1 | 1 | -0.05 | -0.051 | -0.045 | -0.049 | -0.05  | t | 50070  | PYCWHYP<br>PKPCGIVP<br>A      | Homo<br>sapiens              |
| 1 | 1.00 | 1 | 1 | -0.05 | -0.051 | -0.045 | -0.049 | -0.05  | t | 50070  | PYCWHYP<br>PKPCGIVP<br>A      | Homo<br>sapiens              |
| 1 | 1.00 | 1 | 1 | -0.02 | -0.02  | -0.02  | -0.022 | -0.02  | t | 73594  | YDTRCF                        | Homo<br>sapiens              |
| 1 | 1.00 | 1 | 1 | -0.01 | -0.012 | -0.016 | -0.011 | -0.009 | t | 68299  | VENGLISR<br>VLDGLV            | Mus<br>musculus              |
| 1 | 1.00 | 1 | 1 | 0     | 0      | 0      | 0      | 0      | t | 117110 | WNTDFST<br>RAAHT              | Homo<br>sapiens              |
| 1 | 1.00 | 1 | 1 | 0     | 0      | 0      | 0      | 0      | t | 117110 | WNTDFST<br>RAAHT              | Mus<br>musculus              |



|   |      |   |   |       |        |        |        |        |   |        |                              |                                  |
|---|------|---|---|-------|--------|--------|--------|--------|---|--------|------------------------------|----------------------------------|
| 1 | 1.00 | 1 | 1 | 0     | 0      | 0      | 0      | 0      | t | 1262   | AFASRGN<br>HVSPAHYV<br>PESDA | Homo<br>sapiens                  |
| 1 | 1.00 | 1 | 1 | 0.04  | 0.04   | 0.03   | 0.037  | 0.041  | t | 39184  | LRRDLEAS<br>REANKKVT<br>SELT | Homo<br>sapiens                  |
| 1 | 1.00 | 1 | 1 | -0.03 | -0.028 | -0.03  | -0.023 | -0.028 | t | 137399 | FCGLPRLE                     | Homo<br>sapiens                  |
| 1 | 1.00 | 1 | 1 | 0.01  | 0.007  | 0.009  | 0.01   | 0.01   | t | 45667  | NRDQGRK<br>PTPPTPP           | Oryctola<br>gus<br>cuniculu<br>s |
| 1 | 1.00 | 1 | 1 | 0     | 0.002  | 0.007  | 0.007  | 0.002  | t | 74871  | YLPVGGLR<br>RIGG             | Homo<br>sapiens                  |
| 1 | 1.00 | 1 | 1 | 0.02  | 0.022  | 0.022  | 0.02   | 0.022  | t | 52844  | QWKQLQPG<br>D                | Anas<br>platyrhy<br>nchos        |
| 1 | 1.00 | 1 | 1 | -0.01 | -0.008 | -0.008 | -0.007 | -0.01  | t | 7173   | CTKPTDG<br>NCTCIPIPS<br>SWAF | Homo<br>sapiens                  |
| 1 | 1.00 | 1 | 1 | -0.01 | -0.01  | -0.002 | -0.01  | -0.01  | t | 638    | ADAVSRKK<br>MD               | Mus<br>musculu<br>s              |
| 1 | 1.00 | 1 | 1 | -0.01 | -0.01  | -0.01  | -0.01  | -0.01  | t | 51853  | QPHGGG<br>W                  | Mus<br>musculu<br>s              |
| 1 | 1.00 | 1 | 1 | -0.02 | -0.017 | -0.02  | -0.021 | -0.02  | t | 55969  | RSSSSHHR<br>SPSPRK           | Anas<br>platyrhy<br>nchos        |
| 1 | 1.00 | 1 | 1 | 0     | 0.002  | 0.024  | 0.007  | 0      | t | 112855 | TTPLTNL                      | Homo<br>sapiens                  |
| 1 | 1.00 | 1 | 1 | -0.02 | -0.02  | -0.016 | -0.016 | -0.02  | t | 5773   | AYFPREGV<br>FVFNGTS<br>WF    | Homo<br>sapiens                  |
| 1 | 1.00 | 1 | 1 | 0     | -0.004 | -0.005 | 0      | 0.001  | t | 144364 | ITDAVITVP<br>AYFND           | Bos<br>taurus                    |
| 1 | 1.00 | 1 | 1 | 0     | 0.004  | -0.005 | 0      | 0.001  | t | 144364 | ITDAVITVP<br>AYFND           | Capra<br>hircus                  |
| 1 | 1.00 | 1 | 1 | -0.02 | -0.018 | -0.017 | -0.023 | -0.02  | t | 94626  | NPTCWAI<br>CKRIP             | Homo<br>sapiens                  |

|   |      |   |   |       |        |        |        |        |   |        |                              |                                  |
|---|------|---|---|-------|--------|--------|--------|--------|---|--------|------------------------------|----------------------------------|
| 1 | 1.00 | 1 | 1 | -0.01 | -0.01  | -0.003 | -0.004 | -0.008 | t | 14599  | ETWKKPD<br>Y                 | Homo<br>sapiens                  |
| 1 | 1.00 | 1 | 1 | 0.01  | 0.01   | 0.01   | 0.014  | 0.008  | t | 132108 | VDHLRDR<br>NSGSSSSL          | Homo<br>sapiens                  |
| 1 | 1.00 | 1 | 1 | -0.01 | -0.014 | -0.015 | -0.011 | -0.009 | t | 54975  | RNCKKLGP<br>RENV             | Oryctola<br>gus<br>cuniculu<br>s |
| 1 | 1.00 | 1 | 1 | -0.01 | -0.017 | -0.011 | -0.011 | -0.01  | t | 91211  | DSKLTILV<br>KNGGIV           | Oryctola<br>gus<br>cuniculu<br>s |
| 1 | 1.00 | 1 | 1 | -0.03 | -0.032 | -0.023 | -0.027 | -0.03  | t | 106976 | VPTQLYNL<br>YPPL             | Mus<br>musculu<br>s              |
| 1 | 1.00 | 1 | 1 | -0.02 | -0.022 | -0.02  | -0.017 | -0.014 | t | 147908 | LGLPPFLN<br>S                | Mus<br>musculu<br>s              |
| 1 | 1.00 | 1 | 1 | -0.04 | -0.042 | -0.04  | -0.041 | -0.04  | t | 65485  | TNYISRLRT<br>WLSTP           | Anas<br>platyrhy<br>nchos        |
| 1 | 1.00 | 1 | 1 | 0     | 0      | 0      | 0      | 0.001  | t | 135834 | CEFRDGA<br>GSICG             | Mus<br>musculu<br>s              |
| 1 | 1.00 | 1 | 1 | 0.02  | 0.02   | 0.024  | 0.017  | 0.02   | t | 58060  | SGGSWV                       | Homo<br>sapiens                  |
| 1 | 1.00 | 1 | 1 | 0.03  | 0.03   | 0.03   | 0.03   | 0.03   | t | 122140 | LQDSGVH<br>DVAVISEA<br>QAATA | Homo<br>sapiens                  |
| 1 | 1.00 | 1 | 1 | 0.01  | 0.01   | 0.01   | 0.01   | 0.01   | t | 149062 | IPPNPQS                      | Sus<br>scrofa                    |
| 1 | 1.00 | 1 | 1 | 0.01  | 0.01   | 0.01   | 0.01   | 0.01   | t | 110593 | GFPGPRG<br>PPGPQGA<br>T      | Mus<br>musculu<br>s              |
| 1 | 1.00 | 1 | 1 | -0.01 | -0.01  | -0.01  | -0.01  | -0.01  | t | 135982 | RDRSGLAP<br>KRPG             | Homo<br>sapiens                  |
| 1 | 1.00 | 1 | 1 | -0.01 | -0.01  | -0.01  | -0.01  | -0.01  | t | 120941 | SGLVPEHA<br>DA               | Mus<br>musculu<br>s              |
| 1 | 1.00 | 1 | 1 | -0.01 | -0.01  | -0.01  | -0.01  | -0.01  | t | 133468 | YYYNEIKLK<br>ESYKLKD         | Oryctola<br>gus<br>cuniculu<br>s |
| 1 | 1.00 | 1 | 1 | -0.01 | -0.01  | -0.01  | -0.01  | -0.01  | t | 123454 | LPKTLKM<br>WS                | Ovis<br>aries                    |

|   |      |   |   |       |       |       |       |       |   |        |                              |                     |
|---|------|---|---|-------|-------|-------|-------|-------|---|--------|------------------------------|---------------------|
| 1 | 1.00 | 1 | 1 | -0.01 | -0.01 | -0.01 | -0.01 | -0.01 | t | 123148 | ERFIKWPL<br>H                | Ovis<br>aries       |
| 1 | 1.00 | 1 | 1 | -0.01 | -0.01 | -0.01 | -0.01 | -0.01 | t | 104120 | MNKSYHL                      | Homo<br>sapiens     |
| 1 | 1.00 | 1 | 1 | -0.01 | -0.01 | -0.01 | -0.01 | -0.01 | t | 97595  | QTPLTMA<br>ALELF             | Mus<br>musculu<br>s |
| 1 | 1.00 | 1 | 1 | -0.01 | -0.01 | -0.01 | -0.01 | -0.01 | t | 97595  | QTPLTMA<br>ALELF             | Mus<br>musculu<br>s |
| 1 | 1.00 | 1 | 1 | -0.01 | -0.01 | -0.01 | -0.01 | -0.01 | t | 97595  | QTPLTMA<br>ALELF             | Mus<br>musculu<br>s |
| 1 | 1.00 | 1 | 1 | -0.01 | -0.01 | -0.01 | -0.01 | -0.01 | t | 47182  | PDREVLQY<br>DFDEMEE<br>CASHL | Homo<br>sapiens     |
| 1 | 1.00 | 1 | 1 | -0.01 | -0.01 | -0.01 | -0.01 | -0.01 | t | 47179  | PDRELLYR<br>EFDEMEE<br>PSHL  | Homo<br>sapiens     |
| 1 | 1.00 | 1 | 1 | -0.01 | -0.01 | -0.01 | -0.01 | -0.01 | t | 47125  | PDKEVLQY<br>QYDEMEE<br>CSKAR | Homo<br>sapiens     |
| 1 | 1.00 | 1 | 1 | -0.01 | -0.01 | -0.01 | -0.01 | -0.01 | t | 47181  | PDREVLQY<br>AFDEMEE<br>CASHL | Homo<br>sapiens     |
| 1 | 1.00 | 1 | 1 | -0.01 | -0.01 | -0.01 | -0.01 | -0.01 | t | 925    | AEGEFKTL<br>RNTNRLDP<br>AK   | Homo<br>sapiens     |
| 1 | 1.00 | 1 | 1 | -0.01 | -0.01 | -0.01 | -0.01 | -0.01 | t | 925    | AEGEFKTL<br>RNTNRLDP<br>AK   | Homo<br>sapiens     |
| 1 | 1.00 | 1 | 1 | -0.01 | -0.01 | -0.01 | -0.01 | -0.01 | t | 4452   | ASHLPYIE<br>QGMQLAA<br>EFKQK | Homo<br>sapiens     |
| 1 | 1.00 | 1 | 1 | 0.03  | 0.03  | 0.023 | 0.03  | 0.034 | t | 76485  | YYALDVYA<br>YDVT             | Mus<br>musculu<br>s |
| 1 | 1.00 | 1 | 1 | -0.03 | -0.03 | -0.03 | -0.03 | -0.03 | t | 142485 | YNIYSEKEK                    | Homo<br>sapiens     |
| 1 | 1.00 | 1 | 1 | -0.03 | -0.03 | -0.03 | -0.03 | -0.03 | t | 142485 | YNIYSEKEK                    | Homo<br>sapiens     |
| 1 | 1.00 | 1 | 1 | -0.03 | -0.03 | -0.03 | -0.03 | -0.03 | t | 136665 | SVPLAKRH<br>LISL             | Gallus<br>gallus    |
| 1 | 1.00 | 1 | 1 | -0.03 | -0.03 | -0.03 | -0.03 | -0.03 | t | 123243 | GLSRISYDP                    | Ovis<br>aries       |

|   |      |   |   |       |        |        |        |        |   |        |                      |                       |
|---|------|---|---|-------|--------|--------|--------|--------|---|--------|----------------------|-----------------------|
| 1 | 1.00 | 1 | 1 | -0.01 | -0.01  | -0.012 | -0.01  | -0.01  | t | 10665  | DVLNKN               | Mus musculus          |
| 1 | 1.00 | 1 | 1 | -0.02 | -0.02  | -0.02  | -0.021 | -0.02  | t | 105650 | AEFRH                | Mus musculus          |
| 1 | 1.00 | 1 | 1 | 0.03  | 0.03   | 0.02   | 0.03   | 0.033  | t | 95155  | TDHYLQWNVSE          | Rattus norvegicus     |
| 1 | 1.00 | 1 | 1 | 0.04  | 0.04   | 0.039  | 0.044  | 0.04   | t | 33220  | KRTATKQYNVTQAFGR     | Homo sapiens          |
| 1 | 1.00 | 1 | 1 | 0     | 0.004  | 0      | 0.001  | 0.001  | t | 42540  | MSDNGPQSNQRSAPRI     | Homo sapiens          |
| 1 | 1.00 | 1 | 1 | 0.01  | 0.01   | 0.02   | 0.004  | 0.003  | t | 142806 | KATALTYDPYVNYSS      | Sus scrofa            |
| 1 | 1.00 | 1 | 1 | -0.02 | -0.009 | -0.02  | -0.02  | -0.022 | t | 156895 | KFQNGCAHPCHKKP       | Gallus gallus         |
| 1 | 1.00 | 1 | 1 | 0.01  | 0.012  | 0.01   | 0.009  | 0.01   | t | 149425 | QGFFQPSQQN           | Homo sapiens          |
| 1 | 1.00 | 1 | 1 | 0     | -0.004 | -0.01  | 0      | 0      | t | 44018  | NGKQVESPAPSGHTHLKKPA | Mesocricetus auratus  |
| 1 | 1.00 | 1 | 1 | -0.02 | -0.022 | -0.02  | -0.021 | -0.02  | t | 30611  | KESQAYYDGRR          | Mus musculus          |
| 1 | 1.00 | 1 | 1 | 0     | 0      | 0      | 0.003  | 0.001  | t | 65390  | TNPMSTGALLRAS        | Homo sapiens          |
| 1 | 1.00 | 1 | 1 | -0.01 | -0.012 | -0.01  | -0.011 | -0.01  | t | 111165 | CPPLEINTVIQDGD       | Mus musculus          |
| 1 | 1.00 | 1 | 1 | 0.08  | 0.076  | 0.08   | 0.077  | 0.08   | t | 134148 | LQSDQEEIDY           | Oryctolagus cuniculus |
| 1 | 1.00 | 1 | 1 | -0.02 | -0.016 | -0.02  | -0.013 | -0.019 | t | 117568 | LKYLEAVEKVKRTKDELEVI | Homo sapiens          |

|   |      |   |   |       |        |        |        |        |   |        |                             |                                  |
|---|------|---|---|-------|--------|--------|--------|--------|---|--------|-----------------------------|----------------------------------|
| 1 | 1.00 | 1 | 1 | 0.04  | 0.046  | 0.04   | 0.04   | 0.04   | t | 123496 | MIEGAAM<br>DL               | Ovis<br>aries                    |
| 1 | 1.00 | 1 | 1 | 0     | -0.002 | 0.004  | -0.003 | 0      | t | 75661  | YRPPNAPI<br>L               | Mus<br>musculu<br>s              |
| 1 | 1.00 | 1 | 1 | -0.01 | -0.01  | -0.003 | -0.01  | -0.01  | t | 78389  | FVRFYNLE<br>TLQQRYP         | Mus<br>musculu<br>s              |
| 1 | 1.00 | 1 | 1 | 0     | 0      | 0.004  | 0.003  | -0.001 | t | 3076   | AMDPIYDE<br>PTTTTSVP<br>L   | Homo<br>sapiens                  |
| 1 | 1.00 | 1 | 1 | 0.01  | 0.012  | 0.01   | 0.007  | 0.01   | t | 47538  | PFPQPELP                    | Homo<br>sapiens                  |
| 1 | 1.00 | 1 | 1 | -0.01 | -0.01  | -0.01  | -0.01  | -0.01  | t | 142424 | GDEFDTYD<br>DIKKVT          | Homo<br>sapiens                  |
| 1 | 1.00 | 1 | 1 | -0.01 | -0.01  | -0.018 | -0.01  | -0.01  | t | 106822 | SDPAHKAR<br>LERP            | Homo<br>sapiens                  |
| 1 | 1.00 | 1 | 1 | -0.03 | -0.03  | -0.03  | -0.03  | -0.029 | t | 25164  | HYHKF                       | Mus<br>musculu<br>s              |
| 1 | 1.00 | 1 | 1 | 0     | 0      | 0      | 0      | 0      | t | 60400  | SQDADYH<br>R                | Oryctola<br>gus<br>cuniculu<br>s |
| 1 | 1.00 | 1 | 1 | -0.02 | -0.02  | -0.02  | -0.02  | -0.02  | t | 37716  | LLQSARRG                    | Oryctola<br>gus<br>cuniculu<br>s |
| 1 | 1.00 | 1 | 1 | 0     | 0.003  | 0      | 0      | -0.001 | t | 80000  | RGTGSYNR<br>SSFES           | Mus<br>musculu<br>s              |
| 1 | 1.00 | 1 | 1 | 0.02  | 0.02   | 0.02   | 0.02   | 0.018  | t | 104213 | QQFNQQA<br>PLNLENTN<br>NGTL | Oryctola<br>gus<br>cuniculu<br>s |
| 1 | 1.00 | 1 | 1 | 0.01  | 0.01   | 0      | 0.007  | 0.01   | t | 24104  | HITHSGME<br>GMGVST          | Homo<br>sapiens                  |

|   |      |   |   |       |        |        |        |        |   |        |                              |                                  |
|---|------|---|---|-------|--------|--------|--------|--------|---|--------|------------------------------|----------------------------------|
| 1 | 1.00 | 1 | 1 | 0     | 0.002  | 0.014  | 0.001  | -0.002 | t | 53667  | REVLREF<br>DEME              | Homo<br>sapiens                  |
| 1 | 1.00 | 1 | 1 | 0     | 0      | 0.001  | 0      | 0      | t | 53634  | RESQAYYQ<br>R                | Mus<br>musculu<br>s              |
| 1 | 1.00 | 1 | 1 | -0.02 | -0.02  | -0.02  | -0.02  | -0.02  | t | 35241  | LDNLGGN<br>G                 | Oryctola<br>gus<br>cuniculu<br>s |
| 1 | 1.00 | 1 | 1 | -0.01 | -0.007 | -0.001 | -0.007 | -0.01  | t | 78182  | IRRSTL                       | Equus<br>caballus                |
| 1 | 1.00 | 1 | 1 | -0.02 | -0.016 | -0.013 | -0.013 | -0.02  | t | 108002 | LGWMRY<br>HPQA               | Homo<br>sapiens                  |
| 1 | 1.00 | 1 | 1 | 0.02  | 0.02   | 0.02   | 0.02   | 0.02   | t | 140934 | YGEEKPAV<br>LGHD             | Oryctola<br>gus<br>cuniculu<br>s |
| 1 | 1.00 | 1 | 1 | 0.02  | 0.02   | 0.02   | 0.02   | 0.02   | t | 110583 | GAPGERG<br>PSGLAGPK          | Mus<br>musculu<br>s              |
| 1 | 1.00 | 1 | 1 | 0.02  | 0.02   | 0.02   | 0.02   | 0.02   | t | 106316 | CSGTKKLS<br>EEVK             | Homo<br>sapiens                  |
| 1 | 1.00 | 1 | 1 | 0.02  | 0.02   | 0.02   | 0.02   | 0.02   | t | 110588 | GARGPEG<br>AQGSERGE<br>P     | Mus<br>musculu<br>s              |
| 1 | 1.00 | 1 | 1 | 0.02  | 0.02   | 0.02   | 0.02   | 0.02   | t | 95126  | NTVSGQQ<br>CSNGNML<br>YIGFRG | Rattus<br>norvegic<br>us         |
| 1 | 1.00 | 1 | 1 | 0     | 0      | 0      | 0      | 0      | t | 135671 | FCAGFHEG                     | Homo<br>sapiens                  |
| 1 | 1.00 | 1 | 1 | 0     | 0.003  | 0      | 0      | 0      | t | 143808 | AHKDHVV<br>STWVP             | Mus<br>musculu<br>s              |
| 1 | 1.00 | 1 | 1 | 0     | 0      | 0      | 0      | 0      | t | 146311 | HQGALGV<br>FAIPEYC           | Homo<br>sapiens                  |
| 1 | 1.00 | 1 | 1 | 0     | 0      | 0      | 0      | 0      | t | 144667 | GREGYPA<br>DGGKIWT<br>SETN   | Oryctola<br>gus<br>cuniculu<br>s |
| 1 | 1.00 | 1 | 1 | 0     | 0      | 0      | 0      | 0      | t | 119675 | WNSGALT<br>S                 | Homo<br>sapiens                  |

|   |      |   |   |       |        |        |        |        |   |        |                              |                                  |
|---|------|---|---|-------|--------|--------|--------|--------|---|--------|------------------------------|----------------------------------|
| 1 | 1.00 | 1 | 1 | 0     | 0      | 0      | 0      | 0      | t | 63756  | TFTNKLKE<br>KHTDLGK          | Mus<br>musculu<br>s              |
| 1 | 1.00 | 1 | 1 | 0     | 0      | 0      | 0      | 0      | t | 60676  | SRGNHVA<br>PTHYVVES<br>DASQR | Homo<br>sapiens                  |
| 1 | 1.00 | 1 | 1 | 0     | 0      | 0      | 0      | 0      | t | 39379  | LSGKPATIP<br>DREVLVRE<br>FDE | Homo<br>sapiens                  |
| 1 | 1.00 | 1 | 1 | 0     | 0      | 0      | 0      | 0      | t | 20141  | GHIELEGK<br>PALVPDKE<br>VLYQ | Homo<br>sapiens                  |
| 1 | 1.00 | 1 | 1 | 0.01  | 0.004  | 0.003  | 0.003  | 0.012  | t | 127557 | ACAPVPAE<br>PLSK             | Trichosu<br>rus<br>vulpecul<br>a |
| 1 | 1.00 | 1 | 1 | -0.02 | -0.02  | -0.02  | -0.02  | -0.02  | t | 135789 | VTAAHCVE                     | Homo<br>sapiens                  |
| 1 | 1.00 | 1 | 1 | -0.02 | -0.02  | -0.02  | -0.02  | -0.02  | t | 123132 | EKFIKWPL<br>N                | Ovis<br>aries                    |
| 1 | 1.00 | 1 | 1 | -0.02 | -0.02  | -0.02  | -0.02  | -0.02  | t | 114969 | VCNKDLRP<br>IC               | Homo<br>sapiens                  |
| 1 | 1.00 | 1 | 1 | -0.02 | -0.02  | -0.02  | -0.02  | -0.02  | t | 98908  | NASSELHL<br>LGFGINA          | Homo<br>sapiens                  |
| 1 | 1.00 | 1 | 1 | 0.03  | 0.03   | 0.022  | 0.03   | 0.032  | t | 95819  | SAQSGTSG<br>TSGT             | Homo<br>sapiens                  |
| 1 | 1.00 | 1 | 1 | -0.02 | -0.022 | -0.02  | -0.023 | -0.02  | t | 45573  | NQLAGRM<br>IP                | Anas<br>platyrhy<br>nchos        |
| 1 | 1.00 | 1 | 1 | 0     | 0      | -0.001 | 0      | 0.002  | t | 63972  | TGTAYPVP<br>LELTPENA         | Mus<br>musculu<br>s              |
| 1 | 1.00 | 1 | 1 | 0.01  | 0.01   | 0.01   | 0.01   | 0.01   | t | 141927 | INELKKEH<br>TDKIQIVSK<br>L   | Mus<br>musculu<br>s              |
| 1 | 1.00 | 1 | 1 | 0.01  | 0.01   | 0.01   | 0.01   | 0.01   | t | 141927 | INELKKEH<br>TDKIQIVSK<br>L   | Mus<br>musculu<br>s              |
| 1 | 1.00 | 1 | 1 | -0.02 | -0.017 | -0.021 | -0.02  | -0.018 | t | 24080  | HIPAYATH<br>V                | Mus<br>musculu<br>s              |
| 1 | 1.00 | 1 | 1 | 0     | 0      | 0      | 0      | 0      | t | 149254 | ALDKWAS                      | Homo<br>sapiens                  |

|   |      |   |   |       |        |        |        |        |   |        |                              |                                  |
|---|------|---|---|-------|--------|--------|--------|--------|---|--------|------------------------------|----------------------------------|
| 1 | 1.00 | 1 | 1 | 0     | 0      | 0      | 0      | 0      | t | 105279 | LDTTTL                       | Oryctola<br>gus<br>cuniculu<br>s |
| 1 | 1.00 | 1 | 1 | 0     | -0.001 | 0      | -0.001 | 0      | t | 13247  | ELRGLAQA<br>LIDQKV           | Myodes<br>glareolu<br>s          |
| 1 | 1.00 | 1 | 1 | 0.01  | 0.008  | 0.009  | 0.01   | 0.012  | t | 39917  | LTGKPAVI<br>PDREILYQ<br>QFDE | Mus<br>musculu<br>s              |
| 1 | 1.00 | 1 | 1 | 0.03  | 0.03   | 0.024  | 0.02   | 0.03   | t | 52180  | QQYPQQQ                      | Homo<br>sapiens                  |
| 1 | 1.00 | 1 | 1 | 0.03  | 0.032  | 0.028  | 0.032  | 0.032  | t | 65473  | TNVDQDL<br>VGWPAPP           | Homo<br>sapiens                  |
| 1 | 1.00 | 1 | 1 | -0.08 | -0.084 | -0.086 | -0.081 | -0.082 | t | 19722  | GGERRRPP<br>LGVREGR<br>GRT   | Oryctola<br>gus<br>cuniculu<br>s |
| 1 | 1.00 | 1 | 1 | -0.03 | -0.03  | -0.03  | -0.028 | -0.03  | t | 8408   | DGIMHTR<br>CHCGAEI           | Homo<br>sapiens                  |
| 1 | 1.00 | 1 | 1 | 0     | 0      | 0      | 0      | 0      | t | 144618 | DSNLDWS<br>HNF               | Homo<br>sapiens                  |
| 1 | 1.00 | 1 | 1 | 0.03  | 0.03   | 0.028  | 0.03   | 0.032  | t | 141764 | TLNFNAEG<br>EPELLMLA<br>NWR  | Mus<br>musculu<br>s              |
| 1 | 1.00 | 1 | 1 | 0.02  | 0.018  | 0.02   | 0.013  | 0.019  | t | 139475 | ATPRAHEV<br>SE               | Mus<br>musculu<br>s              |
| 1 | 1.00 | 1 | 1 | 0     | 0.004  | 0.003  | 0      | 0      | t | 141064 | NSIGLTW<br>QR                | Ovis<br>aries                    |
| 1 | 1.00 | 1 | 1 | 0.01  | 0.01   | 0.003  | 0.003  | 0.01   | t | 119546 | WTAN                         | Homo<br>sapiens                  |
| 1 | 1.00 | 1 | 1 | 0     | 0      | 0      | 0      | 0      | t | 151609 | DETPMRG<br>ETRKV             | Homo<br>sapiens                  |
| 1 | 1.00 | 1 | 1 | 0     | 0      | 0      | 0      | 0      | t | 138862 | KFPED                        | Mus<br>musculu<br>s              |
| 1 | 1.00 | 1 | 1 | 0     | 0      | 0      | 0      | 0      | t | 144820 | YLEDWIKY<br>NNQK             | Mus<br>musculu<br>s              |
| 1 | 1.00 | 1 | 1 | 0     | 0      | 0      | 0      | 0      | t | 151713 | RGEARK                       | Homo<br>sapiens                  |



|   |      |   |   |   |   |   |   |   |   |        |                            |              |
|---|------|---|---|---|---|---|---|---|---|--------|----------------------------|--------------|
| 1 | 1.00 | 1 | 1 | 0 | 0 | 0 | 0 | 0 | t | 135569 | KTNMK                      | Mus musculus |
| 1 | 1.00 | 1 | 1 | 0 | 0 | 0 | 0 | 0 | t | 130924 | KLFPEEDE<br>MRTETQR        | Homo sapiens |
| 1 | 1.00 | 1 | 1 | 0 | 0 | 0 | 0 | 0 | t | 120167 | RFQSSAV<br>MALQEAC<br>EAYL | Mus musculus |
| 1 | 1.00 | 1 | 1 | 0 | 0 | 0 | 0 | 0 | t | 133624 | KPGEMRG<br>AA              | Mus musculus |
| 1 | 1.00 | 1 | 1 | 0 | 0 | 0 | 0 | 0 | t | 131274 | VVRF                       | Mus musculus |
| 1 | 1.00 | 1 | 1 | 0 | 0 | 0 | 0 | 0 | t | 133531 | CDTLKPGE<br>C              | Mus musculus |
| 1 | 1.00 | 1 | 1 | 0 | 0 | 0 | 0 | 0 | t | 133542 | DGRRDVV<br>VRSATFYL        | Mus musculus |
| 1 | 1.00 | 1 | 1 | 0 | 0 | 0 | 0 | 0 | t | 131116 | TQSYPPPP<br>AWRAASR        | Homo sapiens |
| 1 | 1.00 | 1 | 1 | 0 | 0 | 0 | 0 | 0 | t | 119297 | NTFCDSCI<br>PKTFWN         | Homo sapiens |
| 1 | 1.00 | 1 | 1 | 0 | 0 | 0 | 0 | 0 | t | 130817 | ESVMQSY<br>PPHLQIPG        | Homo sapiens |
| 1 | 1.00 | 1 | 1 | 0 | 0 | 0 | 0 | 0 | t | 132143 | AGPCILLA<br>RDRCPG         | Homo sapiens |
| 1 | 1.00 | 1 | 1 | 0 | 0 | 0 | 0 | 0 | t | 130844 | GDQSTDY<br>GIFQINSR        | Mus musculus |
| 1 | 1.00 | 1 | 1 | 0 | 0 | 0 | 0 | 0 | t | 133630 | LPPGLHVF<br>PLASNRS        | Mus musculus |
| 1 | 1.00 | 1 | 1 | 0 | 0 | 0 | 0 | 0 | t | 133623 | KPGEMR                     | Mus musculus |
| 1 | 1.00 | 1 | 1 | 0 | 0 | 0 | 0 | 0 | t | 131075 | SQSYPEPA<br>RGSVPMP        | Homo sapiens |
| 1 | 1.00 | 1 | 1 | 0 | 0 | 0 | 0 | 0 | t | 130927 | KNSRQSYP<br>EPAPVYH        | Homo sapiens |
| 1 | 1.00 | 1 | 1 | 0 | 0 | 0 | 0 | 0 | t | 130815 | ESDPPVAS<br>YQWRLIN        | Homo sapiens |

|   |      |   |   |   |   |   |   |   |   |        |                           |                          |
|---|------|---|---|---|---|---|---|---|---|--------|---------------------------|--------------------------|
| 1 | 1.00 | 1 | 1 | 0 | 0 | 0 | 0 | 0 | t | 133535 | CKPGEVQ<br>QC             | Mus<br>musculu<br>s      |
| 1 | 1.00 | 1 | 1 | 0 | 0 | 0 | 0 | 0 | t | 130868 | GQSYPPRP<br>DTSLHVT       | Homo<br>sapiens          |
| 1 | 1.00 | 1 | 1 | 0 | 0 | 0 | 0 | 0 | t | 120155 | QPSPYNG<br>WRMEI          | Rattus<br>norvegic<br>us |
| 1 | 1.00 | 1 | 1 | 0 | 0 | 0 | 0 | 0 | t | 133580 | GFLSSCNF<br>RFCELVR       | Mus<br>musculu<br>s      |
| 1 | 1.00 | 1 | 1 | 0 | 0 | 0 | 0 | 0 | t | 133536 | CKPVENRA<br>C             | Mus<br>musculu<br>s      |
| 1 | 1.00 | 1 | 1 | 0 | 0 | 0 | 0 | 0 | t | 131040 | RLAPEPDD<br>PITPMTK       | Homo<br>sapiens          |
| 1 | 1.00 | 1 | 1 | 0 | 0 | 0 | 0 | 0 | t | 130808 | ENEPPVW<br>TTESKLQS       | Homo<br>sapiens          |
| 1 | 1.00 | 1 | 1 | 0 | 0 | 0 | 0 | 0 | t | 133705 | SSKTRSFG<br>VHLVGPY       | Mus<br>musculu<br>s      |
| 1 | 1.00 | 1 | 1 | 0 | 0 | 0 | 0 | 0 | t | 125415 | FSPDGKPC<br>TPPALNCY<br>W | Mus<br>musculu<br>s      |
| 1 | 1.00 | 1 | 1 | 0 | 0 | 0 | 0 | 0 | t | 117614 | QGFPFYDK<br>PMRI          | Mus<br>musculu<br>s      |
| 1 | 1.00 | 1 | 1 | 0 | 0 | 0 | 0 | 0 | t | 118060 | PPPGMRP<br>P              | Homo<br>sapiens          |
| 1 | 1.00 | 1 | 1 | 0 | 0 | 0 | 0 | 0 | t | 133528 | CADQKPG<br>EC             | Mus<br>musculu<br>s      |
| 1 | 1.00 | 1 | 1 | 0 | 0 | 0 | 0 | 0 | t | 103496 | PRGYPGQ<br>V              | Mus<br>musculu<br>s      |
| 1 | 1.00 | 1 | 1 | 0 | 0 | 0 | 0 | 0 | t | 102423 | FEYQD                     | Mus<br>musculu<br>s      |
| 1 | 1.00 | 1 | 1 | 0 | 0 | 0 | 0 | 0 | t | 107166 | GPPGPQG                   | Mus<br>musculu<br>s      |
| 1 | 1.00 | 1 | 1 | 0 | 0 | 0 | 0 | 0 | t | 75950  | YTASARGD<br>LAHLTTT       | Mus<br>musculu<br>s      |

|   |      |   |   |   |   |   |   |   |   |       |                           |                     |
|---|------|---|---|---|---|---|---|---|---|-------|---------------------------|---------------------|
| 1 | 1.00 | 1 | 1 | 0 | 0 | 0 | 0 | 0 | t | 64031 | THGQWN<br>KPSK            | Mus<br>musculu<br>s |
| 1 | 1.00 | 1 | 1 | 0 | 0 | 0 | 0 | 0 | t | 79867 | INNLIVELI<br>RGT          | Mus<br>musculu<br>s |
| 1 | 1.00 | 1 | 1 | 0 | 0 | 0 | 0 | 0 | t | 75950 | YTASARGD<br>LAHLTTT       | Mus<br>musculu<br>s |
| 1 | 1.00 | 1 | 1 | 0 | 0 | 0 | 0 | 0 | t | 68320 | VEQHHRR<br>TD             | Mus<br>musculu<br>s |
| 1 | 1.00 | 1 | 1 | 0 | 0 | 0 | 0 | 0 | t | 97252 | DTPLTTAA<br>LRLV          | Mus<br>musculu<br>s |
| 1 | 1.00 | 1 | 1 | 0 | 0 | 0 | 0 | 0 | t | 75954 | YTASTRGD<br>LAHLTAT       | Mus<br>musculu<br>s |
| 1 | 1.00 | 1 | 1 | 0 | 0 | 0 | 0 | 0 | t | 67967 | VDGSDP                    | Mus<br>musculu<br>s |
| 1 | 1.00 | 1 | 1 | 0 | 0 | 0 | 0 | 0 | t | 76185 | YTTGGAQS<br>HTLR          | Mus<br>musculu<br>s |
| 1 | 1.00 | 1 | 1 | 0 | 0 | 0 | 0 | 0 | t | 75950 | YTASARGD<br>LAHLTTT       | Mus<br>musculu<br>s |
| 1 | 1.00 | 1 | 1 | 0 | 0 | 0 | 0 | 0 | t | 75954 | YTASTRGD<br>LAHLTAT       | Mus<br>musculu<br>s |
| 1 | 1.00 | 1 | 1 | 0 | 0 | 0 | 0 | 0 | t | 45932 | NSNNPDW<br>DF             | Mus<br>musculu<br>s |
| 1 | 1.00 | 1 | 1 | 0 | 0 | 0 | 0 | 0 | t | 59982 | SPAPERRG<br>YSGYDVPD<br>Y | Mus<br>musculu<br>s |
| 1 | 1.00 | 1 | 1 | 0 | 0 | 0 | 0 | 0 | t | 55671 | RRPFNIGI<br>NNQQ          | Homo<br>sapiens     |
| 1 | 1.00 | 1 | 1 | 0 | 0 | 0 | 0 | 0 | t | 51854 | QPHGGSW                   | Mus<br>musculu<br>s |

|   |      |   |   |   |   |   |   |   |   |       |                              |                       |
|---|------|---|---|---|---|---|---|---|---|-------|------------------------------|-----------------------|
| 1 | 1.00 | 1 | 1 | 0 | 0 | 0 | 0 | 0 | t | 51853 | QPHGGGW                      | Mus musculus          |
| 1 | 1.00 | 1 | 1 | 0 | 0 | 0 | 0 | 0 | t | 38304 | LNPKTNKWEDK                  | Homo sapiens          |
| 1 | 1.00 | 1 | 1 | 0 | 0 | 0 | 0 | 0 | t | 50222 | QACKGKIQALCEN                | Mus musculus          |
| 1 | 1.00 | 1 | 1 | 0 | 0 | 0 | 0 | 0 | t | 25146 | HWYISKPQ                     | Mus musculus          |
| 1 | 1.00 | 1 | 1 | 0 | 0 | 0 | 0 | 0 | t | 15981 | FGGETFTP<br>DWMMEV           | Mus musculus          |
| 1 | 1.00 | 1 | 1 | 0 | 0 | 0 | 0 | 0 | t | 25139 | HWSISKPQ                     | Mus musculus          |
| 1 | 1.00 | 1 | 1 | 0 | 0 | 0 | 0 | 0 | t | 18746 | GAQSHTLR<br>GV               | Mus musculus          |
| 1 | 1.00 | 1 | 1 | 0 | 0 | 0 | 0 | 0 | t | 25108 | HVTSTLTSL<br>F               | Mus musculus          |
| 1 | 1.00 | 1 | 1 | 0 | 0 | 0 | 0 | 0 | t | 18363 | FWRGDLV<br>FDFQV             | Homo sapiens          |
| 1 | 1.00 | 1 | 1 | 0 | 0 | 0 | 0 | 0 | t | 24970 | HTRVTGG<br>VQG               | Mus musculus          |
| 1 | 1.00 | 1 | 1 | 0 | 0 | 0 | 0 | 0 | t | 32808 | KPNLSSKR<br>SELSQLSM<br>YRVF | Mus musculus          |
| 1 | 1.00 | 1 | 1 | 0 | 0 | 0 | 0 | 0 | t | 17262 | FPCDRLSG<br>YWERGIPS<br>PCVR | Homo sapiens          |
| 1 | 1.00 | 1 | 1 | 0 | 0 | 0 | 0 | 0 | t | 10433 | DTNNN                        | Mus musculus          |
| 1 | 1.00 | 1 | 1 | 0 | 0 | 0 | 0 | 0 | t | 571   | ACKSTQDP<br>MFTPKGCDN        | Oryctolagus cuniculus |
| 1 | 1.00 | 1 | 1 | 0 | 0 | 0 | 0 | 0 | t | 6816  | CPNSLTPA<br>DPTMDY           | Mus musculus          |
| 1 | 1.00 | 1 | 1 | 0 | 0 | 0 | 0 | 0 | t | 9232  | DLPDYGDY<br>GEDLFDY          | Mus musculus          |

|   |      |   |   |       |        |        |        |        |   |        |                              |                                  |
|---|------|---|---|-------|--------|--------|--------|--------|---|--------|------------------------------|----------------------------------|
| 1 | 1.00 | 1 | 1 | 0     | 0      | 0      | 0      | 0      | t | 10320  | DTDSGYD<br>VPDY              | Mus<br>musculu<br>s              |
| 1 | 1.00 | 1 | 1 | 0     | 0      | 0      | 0      | 0      | t | 4907   | ATCDKLF<br>GYYERGIPL<br>CAL  | Homo<br>sapiens                  |
| 1 | 1.00 | 1 | 1 | 0.04  | 0.043  | 0.035  | 0.04   | 0.042  | t | 49006  | PQGQGV<br>T                  | Mus<br>musculu<br>s              |
| 1 | 1.00 | 1 | 1 | 0.04  | 0.043  | 0.035  | 0.04   | 0.042  | t | 49006  | PQGQGV<br>T                  | Mus<br>musculu<br>s              |
| 1 | 1.00 | 1 | 1 | 0.04  | 0.04   | 0.035  | 0.04   | 0.042  | t | 49006  | PQGQGV<br>T                  | Oryctola<br>gus<br>cuniculu<br>s |
| 1 | 1.00 | 1 | 1 | 0     | 0      | -0.007 | -0.009 | 0      | t | 119508 | QFIGYPI                      | Homo<br>sapiens                  |
| 1 | 1.00 | 1 | 1 | 0.01  | 0.01   | 0.01   | 0.01   | 0.011  | t | 58464  | SICSNNPT<br>CWAICK           | Mus<br>musculu<br>s              |
| 1 | 1.00 | 1 | 1 | 0     | -0.002 | 0      | 0.003  | 0.001  | t | 28676  | ISQAVHAA<br>HAEINEAG<br>R    | Mus<br>musculu<br>s              |
| 1 | 1.00 | 1 | 1 | 0.02  | 0.02   | 0.027  | 0.02   | 0.021  | t | 107744 | APVDSRTY<br>TRVADHI          | Homo<br>sapiens                  |
| 1 | 1.00 | 1 | 1 | 0     | 0      | 0.004  | 0      | 0      | t | 151816 | CLTSQAAK<br>QRLE             | Sus<br>scrofa                    |
| 1 | 1.00 | 1 | 1 | 0.03  | 0.03   | 0.029  | 0.027  | 0.03   | t | 47806  | PHDIDLGE<br>SRVVIQDY<br>DNQH | Homo<br>sapiens                  |
| 1 | 1.00 | 1 | 1 | 0.01  | 0.017  | 0.018  | 0.01   | 0.01   | t | 110962 | PIDVVDP                      | Mus<br>musculu<br>s              |
| 1 | 1.00 | 1 | 1 | -0.01 | -0.008 | -0.01  | -0.009 | -0.008 | t | 22132  | GRLITV                       | Homo<br>sapiens                  |
| 1 | 1.00 | 1 | 1 | -0.03 | -0.028 | -0.021 | -0.03  | -0.03  | t | 99916  | CIPPLCKLR<br>LHE             | Ovis<br>aries                    |
| 1 | 1.00 | 1 | 1 | 0     | 0.003  | 0      | 0      | 0.001  | t | 43246  | NANPNAN<br>PNANPNA<br>NP     | Mus<br>musculu<br>s              |

|   |      |   |   |       |       |       |       |       |   |        |                              |                                  |
|---|------|---|---|-------|-------|-------|-------|-------|---|--------|------------------------------|----------------------------------|
| 1 | 1.00 | 1 | 1 | 0.01  | 0.01  | 0.014 | 0.01  | 0.008 | t | 43348  | NAYCDKLC<br>KDKKADS          | Mus<br>musculu<br>s              |
| 1 | 1.00 | 1 | 1 | 0.05  | 0.05  | 0.05  | 0.05  | 0.05  | t | 135719 | MEEKCSFE                     | Homo<br>sapiens                  |
| 1 | 1.00 | 1 | 1 | 0.01  | 0.01  | 0.01  | 0.01  | 0.01  | t | 127741 | MHSPAAT                      | Homo<br>sapiens                  |
| 1 | 1.00 | 1 | 1 | 0.01  | 0.01  | 0.01  | 0.01  | 0.01  | t | 116951 | DLNTNRT<br>QMV LH            | Homo<br>sapiens                  |
| 1 | 1.00 | 1 | 1 | 0.01  | 0.01  | 0.01  | 0.01  | 0.01  | t | 116951 | DLNTNRT<br>QMV LH            | Mus<br>musculu<br>s              |
| 1 | 1.00 | 1 | 1 | 0.01  | 0.01  | 0.01  | 0.01  | 0.01  | t | 95842  | SGTSAQSG<br>TSGT             | Homo<br>sapiens                  |
| 1 | 1.00 | 1 | 1 | 0.01  | 0.01  | 0.01  | 0.01  | 0.01  | t | 95842  | SGTSAQSG<br>TSGT             | Homo<br>sapiens                  |
| 1 | 1.00 | 1 | 1 | 0.01  | 0.01  | 0.01  | 0.01  | 0.01  | t | 95846  | SGTSGTSA<br>QSGT             | Homo<br>sapiens                  |
| 1 | 1.00 | 1 | 1 | -0.01 | -0.01 | -0.01 | -0.01 | -0.01 | t | 135442 | AGLGGL                       | Oryctola<br>gus<br>cuniculu<br>s |
| 1 | 1.00 | 1 | 1 | -0.01 | -0.01 | -0.01 | -0.01 | -0.01 | t | 140461 | EVSLHDM<br>NLATH             | Mus<br>musculu<br>s              |
| 1 | 1.00 | 1 | 1 | -0.01 | -0.01 | -0.01 | -0.01 | -0.01 | t | 123638 | PVRLFLEYL                    | Ovis<br>aries                    |
| 1 | 1.00 | 1 | 1 | -0.01 | -0.01 | -0.01 | -0.01 | -0.01 | t | 118451 | KGIIDPTKV<br>VRTA            | Homo<br>sapiens                  |
| 1 | 1.00 | 1 | 1 | -0.01 | -0.01 | -0.01 | -0.01 | -0.01 | t | 124281 | HPLATGPH<br>L                | Homo<br>sapiens                  |
| 1 | 1.00 | 1 | 1 | -0.01 | -0.01 | -0.01 | -0.01 | -0.01 | t | 106883 | SWTPYPDL<br>LSPR             | Mus<br>musculu<br>s              |
| 1 | 1.00 | 1 | 1 | -0.01 | -0.01 | -0.01 | -0.01 | -0.01 | t | 110616 | GPSGLAGP<br>KGANGDP          | Mus<br>musculu<br>s              |
| 1 | 1.00 | 1 | 1 | -0.01 | -0.01 | -0.01 | -0.01 | -0.01 | t | 74045  | YGLLAVDP<br>LFKP             | Gallus<br>gallus                 |
| 1 | 1.00 | 1 | 1 | -0.01 | -0.01 | -0.01 | -0.01 | -0.01 | t | 22080  | GRIILSGKP<br>AVIPDRELL<br>YR | Homo<br>sapiens                  |

|   |      |   |   |       |        |        |        |        |   |        |                              |                                  |
|---|------|---|---|-------|--------|--------|--------|--------|---|--------|------------------------------|----------------------------------|
| 1 | 1.00 | 1 | 1 | -0.01 | -0.01  | -0.01  | -0.01  | -0.01  | t | 22087  | GRIILSGRP<br>AIIPDREVL<br>YR | Homo<br>sapiens                  |
| 1 | 1.00 | 1 | 1 | -0.01 | -0.01  | -0.01  | -0.01  | -0.01  | t | 27555  | IMSGEKPT<br>VEDVVN           | Homo<br>sapiens                  |
| 1 | 1.00 | 1 | 1 | -0.01 | -0.01  | -0.01  | -0.01  | -0.01  | t | 11966  | EFDEMEEC<br>ASHLPYIE<br>QGMH | Homo<br>sapiens                  |
| 1 | 1.00 | 1 | 1 | -0.03 | -0.03  | -0.03  | -0.03  | -0.03  | t | 106861 | SPDWFRH                      | Mus<br>musculu<br>s              |
| 1 | 1.00 | 1 | 1 | -0.04 | -0.042 | -0.035 | -0.04  | -0.042 | t | 113145 | RARRLIELY<br>KEAGIS          | Oryctola<br>gus<br>cuniculu<br>s |
| 1 | 1.00 | 1 | 1 | -0.04 | -0.042 | -0.035 | -0.04  | -0.042 | t | 113145 | RARRLIELY<br>KEAGIS          | Oryctola<br>gus<br>cuniculu<br>s |
| 1 | 1.00 | 1 | 1 | 0.01  | 0.008  | 0.015  | 0.009  | 0.011  | t | 72512  | WGQPHG<br>GSW                | Mus<br>musculu<br>s              |
| 1 | 1.00 | 1 | 1 | 0.01  | 0.01   | 0.01   | 0.01   | 0.01   | t | 42782  | MTDVNRY<br>RYSNNYEQ<br>EPHIS | Aotus<br>nancyma<br>ae           |
| 1 | 1.00 | 1 | 1 | -0.05 | -0.05  | -0.05  | -0.05  | -0.052 | t | 135475 | KRPKPGG<br>W                 | Mus<br>musculu<br>s              |
| 1 | 1.00 | 1 | 1 | -0.01 | -0.01  | -0.007 | -0.01  | -0.01  | t | 41012  | MACMSA<br>DLEVVTST           | Homo<br>sapiens                  |
| 1 | 1.00 | 1 | 1 | 0     | 0      | -0.012 | -0.007 | 0      | t | 96806  | QTELARVQ<br>KA               | Homo<br>sapiens(<br>human)       |
| 1 | 1.00 | 1 | 1 | 0     | 0      | 0      | 0      | 0.001  | t | 6892   | CQQFLSVR<br>ALC              | Mus<br>musculu<br>s              |
| 1 | 1.00 | 1 | 1 | 0.02  | 0.02   | 0.029  | 0.02   | 0.018  | t | 95116  | LLPHSNLD<br>HILEPSIPW<br>KS  | Mus<br>musculu<br>s              |
| 1 | 1.00 | 1 | 1 | 0     | 0      | -0.004 | 0.003  | -0.001 | t | 36413  | LHQPPPQI<br>FLKILPQSG<br>PIG | Homo<br>sapiens                  |
| 1 | 1.00 | 1 | 1 | -0.01 | -0.01  | 0.008  | -0.009 | -0.01  | t | 37372  | LLGTTL                       | Mus<br>musculu<br>s              |

|   |      |   |   |       |        |        |        |        |   |        |                              |                                  |
|---|------|---|---|-------|--------|--------|--------|--------|---|--------|------------------------------|----------------------------------|
| 1 | 1.00 | 1 | 1 | 0.03  | 0.026  | 0.037  | 0.029  | 0.03   | t | 45460  | NPQLGISP<br>SNPSEIT          | Oryctola<br>gus<br>cuniculu<br>s |
| 1 | 1.00 | 1 | 1 | 0.01  | 0.008  | 0.006  | 0.007  | 0.011  | t | 158947 | LDIDIDPKV<br>KVATLS          | Mus<br>musculu<br>s              |
| 1 | 1.00 | 1 | 1 | -0.01 | -0.01  | -0.005 | -0.003 | -0.01  | t | 146298 | GVYATRSS<br>AVRLRSSV         | Homo<br>sapiens                  |
| 1 | 1.00 | 1 | 1 | 0     | -0.004 | 0      | -0.007 | -0.003 | t | 129973 | SPRSFQKK<br>T                | Oryctola<br>gus<br>cuniculu<br>s |
| 1 | 1.00 | 1 | 1 | 0     | 0.002  | 0.007  | 0.001  | 0      | t | 29752  | KAALIEEG<br>QRMAEM           | Homo<br>sapiens                  |
| 1 | 1.00 | 1 | 1 | 0.01  | 0.012  | 0.01   | 0.007  | 0.009  | t | 55457  | RQNKPPN<br>KPNND             | Homo<br>sapiens                  |
| 1 | 1.00 | 1 | 1 | -0.01 | -0.01  | -0.008 | -0.01  | -0.013 | t | 52090  | QQPFSQP<br>QQP               | Mus<br>musculu<br>s              |
| 1 | 1.00 | 1 | 1 | -0.04 | -0.042 | -0.046 | -0.041 | -0.04  | t | 19006  | GDINKVLE<br>KLGYSGGD<br>LLG  | Mus<br>musculu<br>s              |
| 1 | 1.00 | 1 | 1 | -0.01 | -0.008 | -0.01  | -0.009 | -0.009 | t | 4739   | ASREAKKQ<br>VEKA             | Homo<br>sapiens                  |
| 1 | 1.00 | 1 | 1 | 0.01  | 0.01   | 0.01   | 0.01   | 0.011  | t | 48595  | PNAN                         | Mus<br>musculu<br>s              |
| 1 | 1.00 | 1 | 1 | 0.02  | 0.02   | 0.02   | 0.02   | 0.02   | t | 128484 | EADDDRRL<br>NKVISELN         | Homo<br>sapiens                  |
| 1 | 1.00 | 1 | 1 | 0.02  | 0.02   | 0.02   | 0.02   | 0.02   | t | 95147  | SGHPSEGD<br>PDLAKILEE<br>VRY | Rattus<br>norvegic<br>us         |
| 1 | 1.00 | 1 | 1 | 0.04  | 0.034  | 0.033  | 0.033  | 0.041  | t | 127638 | ELQMTPD<br>SLIYS             | Trichosu<br>rus<br>vulpecul<br>a |
| 1 | 1.00 | 1 | 1 | 0     | 0      | 0      | 0      | 0      | t | 153338 | ACPNFELH<br>WCGGGS           | Mus<br>musculu<br>s              |
| 1 | 1.00 | 1 | 1 | 0     | 0      | 0      | 0      | 0      | t | 106884 | SWYSPNP<br>GDWLS             | Mus<br>musculu<br>s              |
| 1 | 1.00 | 1 | 1 | 0     | 0      | 0      | 0      | 0      | t | 61992  | STVSDQED<br>SEICCS           | Homo<br>sapiens                  |



|   |      |   |   |       |        |        |        |        |   |        |                               |                       |
|---|------|---|---|-------|--------|--------|--------|--------|---|--------|-------------------------------|-----------------------|
| 1 | 1.00 | 1 | 1 | 0     | 0      | 0      | 0      | 0      | t | 79556  | GHWTRFA                       | Oryctolagus cuniculus |
| 1 | 1.00 | 1 | 1 | 0     | 0      | 0      | 0      | 0      | t | 79575  | IPKARRPE<br>GRTWAQPGY         | Homo sapiens          |
| 1 | 1.00 | 1 | 1 | 0     | 0      | 0      | 0      | 0      | t | 88987  | SQDINGN<br>RHVPNAEPRET        | Aotus                 |
| 1 | 1.00 | 1 | 1 | 0     | 0      | 0      | 0      | 0      | t | 46826  | PAIIPDREV<br>LHREFDE<br>MEEC  | Homo sapiens          |
| 1 | 1.00 | 1 | 1 | 0     | 0      | 0      | 0      | 0      | t | 22078  | GRIILSGKP<br>ATIPDREVL<br>LYR | Homo sapiens          |
| 1 | 1.00 | 1 | 1 | 0     | 0      | 0      | 0      | 0      | t | 22079  | GRIILSGKP<br>ATVPDREVL<br>LYQ | Homo sapiens          |
| 1 | 1.00 | 1 | 1 | 0     | 0      | 0      | 0      | 0      | t | 7501   | DAEVAGT<br>QWFDPSG<br>KSPVFG  | Aotus nancyma<br>ae   |
| 1 | 1.00 | 1 | 1 | -0.03 | -0.032 | -0.035 | -0.037 | -0.03  | t | 122500 | NKQFRNC<br>MVTTL              | Rattus norvegicus     |
| 1 | 1.00 | 1 | 1 | -0.02 | -0.02  | -0.02  | -0.02  | -0.02  | t | 139837 | NLSRAPF                       | Ovis aries            |
| 1 | 1.00 | 1 | 1 | -0.02 | -0.02  | -0.02  | -0.02  | -0.02  | t | 115886 | PHLSFMAI<br>PP                | Homo sapiens          |
| 1 | 1.00 | 1 | 1 | -0.06 | -0.06  | -0.06  | -0.06  | -0.06  | t | 115639 | QFRVIGPR<br>HPIR              | Homo sapiens          |
| 1 | 1.00 | 1 | 1 | -0.06 | -0.06  | -0.06  | -0.06  | -0.06  | t | 115639 | QFRVIGPR<br>HPIR              | Homo sapiens          |
| 1 | 1.00 | 1 | 1 | 0     | 0.002  | 0      | 0.001  | 0.002  | t | 128066 | NSYDVL<br>LSGNLKL             | Homo sapiens          |
| 1 | 1.00 | 1 | 1 | -0.02 | -0.02  | -0.02  | -0.02  | -0.021 | t | 119939 | IFAQRLMR<br>YW                | Mus musculus          |
| 1 | 1.00 | 1 | 1 | 0     | 0.002  | 0      | -0.001 | 0      | t | 149438 | QQPQQQY<br>PSG                | Homo sapiens          |
| 1 | 1.00 | 1 | 1 | -0.03 | -0.03  | -0.03  | -0.03  | -0.029 | t | 98985  | RIPSGFISYI<br>LNRHD           | Homo sapiens          |
| 1 | 1.00 | 1 | 1 | 0.01  | 0.01   | 0.008  | 0.01   | 0.011  | t | 125051 | FQSKANCL<br>NT                | Mus musculus          |

|   |      |   |   |       |        |        |        |        |   |        |                              |                                  |
|---|------|---|---|-------|--------|--------|--------|--------|---|--------|------------------------------|----------------------------------|
| 1 | 1.00 | 1 | 1 | 0.05  | 0.048  | 0.053  | 0.049  | 0.052  | t | 103372 | LPGEEDLP<br>G                | Mus<br>musculu<br>s              |
| 1 | 1.00 | 1 | 1 | -0.05 | -0.048 | -0.05  | -0.043 | -0.047 | t | 110785 | ARGHRPL<br>DKKREEAP<br>SLRPA | Homo<br>sapiens                  |
| 1 | 1.00 | 1 | 1 | -0.05 | -0.048 | -0.05  | -0.043 | -0.047 | t | 110784 | ARGHRPL<br>DKKREEAP<br>SLRPA | Homo<br>sapiens                  |
| 1 | 1.00 | 1 | 1 | 0.01  | 0.01   | 0.014  | 0.008  | 0.01   | t | 37301  | LLFTGH                       | Homo<br>sapiens                  |
| 1 | 1.00 | 1 | 1 | 0     | 0      | 0.002  | 0      | 0      | t | 58388  | SHLVEALY<br>LVCGERG          | Mus<br>musculu<br>s              |
| 1 | 1.00 | 1 | 1 | 0     | 0      | 0.002  | 0      | 0      | t | 58388  | SHLVEALY<br>LVCGERG          | Mus<br>musculu<br>s              |
| 1 | 1.00 | 1 | 1 | 0.02  | 0.018  | 0.02   | 0.013  | 0.021  | t | 117614 | QGFPFYDK<br>PMRI             | Mus<br>musculu<br>s              |
| 1 | 1.00 | 1 | 1 | -0.03 | -0.032 | -0.031 | -0.029 | -0.032 | t | 11532  | EECQLPSL<br>KIFIAGNSA<br>Y   | Mus<br>musculu<br>s              |
| 1 | 1.00 | 1 | 1 | -0.04 | -0.042 | -0.04  | -0.039 | -0.041 | t | 72551  | WHRPPW<br>WPSSSL             | Oryctola<br>gus<br>cuniculu<br>s |
| 1 | 1.00 | 1 | 1 | -0.02 | -0.024 | -0.029 | -0.027 | -0.021 | t | 117399 | VMIKSLPA<br>LNSPTVEE         | Oryctola<br>gus<br>cuniculu<br>s |
| 1 | 1.00 | 1 | 1 | -0.01 | -0.01  | -0.01  | -0.01  | -0.01  | t | 27959  | IPNGTYRA                     | Oryctola<br>gus<br>cuniculu<br>s |
| 1 | 1.00 | 1 | 1 | 0.06  | 0.056  | 0.063  | 0.059  | 0.06   | t | 68092  | VDVVTGA<br>T                 | Oryctola<br>gus<br>cuniculu<br>s |
| 1 | 1.00 | 1 | 1 | 0.02  | 0.02   | 0.02   | 0.02   | 0.022  | t | 135483 | MDRHDFG<br>F                 | Mus<br>musculu<br>s              |
| 1 | 1.00 | 1 | 1 | -0.01 | -0.008 | -0.003 | -0.003 | -0.01  | t | 108052 | NWLSLITA<br>AR               | Homo<br>sapiens                  |
| 1 | 1.00 | 1 | 1 | 0.01  | 0.008  | 0.021  | 0.013  | 0.011  | t | 62016  | STYQYIYNL<br>T               | Sus<br>scrofa                    |

|   |      |   |   |       |       |        |        |        |   |        |                              |                     |
|---|------|---|---|-------|-------|--------|--------|--------|---|--------|------------------------------|---------------------|
| 1 | 1.00 | 1 | 1 | 0     | 0     | 0.004  | 0.006  | 0.003  | t | 76242  | YVCLPPER<br>D                | Homo<br>sapiens     |
| 1 | 1.00 | 1 | 1 | 0     | 0     | -0.002 | 0      | 0.001  | t | 150855 | HPGGSQP                      | Mus<br>musculu<br>s |
| 1 | 1.00 | 1 | 1 | -0.06 | -0.06 | -0.059 | -0.056 | -0.06  | t | 99823  | IPPNWHIP<br>SIQ              | Homo<br>sapiens     |
| 1 | 1.00 | 1 | 1 | 0.01  | 0.01  | 0.01   | 0.01   | 0.011  | t | 105497 | RHDSGYE                      | Mus<br>musculu<br>s |
| 1 | 1.00 | 1 | 1 | 0.01  | 0.01  | -0.013 | 0.003  | 0.012  | t | 119570 | ETGETVEE<br>GLYAVPLP<br>KD   | Homo<br>sapiens     |
| 1 | 1.00 | 1 | 1 | -0.04 | -0.04 | -0.045 | -0.043 | -0.042 | t | 99005  | SLAMAAS<br>DIS               | Homo<br>sapiens     |
| 1 | 1.00 | 1 | 1 | 0     | 0.004 | 0.019  | 0.001  | 0      | t | 14690  | EVFCVQ                       | Homo<br>sapiens     |
| 1 | 1.00 | 1 | 1 | 0     | 0.004 | 0.019  | 0.001  | 0      | t | 14690  | EVFCVQ                       | Homo<br>sapiens     |
| 1 | 1.00 | 1 | 1 | 0.03  | 0.03  | 0.03   | 0.03   | 0.03   | t | 115464 | QYTDAPSF<br>SDIPNPIGS<br>ENS | Homo<br>sapiens     |
| 1 | 1.00 | 1 | 1 | 0.01  | 0.01  | 0.01   | 0.01   | 0.01   | t | 149055 | GSSLHDI                      | Sus<br>scrofa       |
| 1 | 1.00 | 1 | 1 | 0.01  | 0.01  | 0.01   | 0.01   | 0.01   | t | 131250 | NHVQAW<br>EQFWDS             | Homo<br>sapiens     |
| 1 | 1.00 | 1 | 1 | 0.01  | 0.01  | 0.01   | 0.01   | 0.01   | t | 108167 | TRAFGNEA<br>T                | Mus<br>musculu<br>s |
| 1 | 1.00 | 1 | 1 | 0.01  | 0.01  | 0.01   | 0.01   | 0.01   | t | 108167 | TRAFGNEA<br>T                | Mus<br>musculu<br>s |
| 1 | 1.00 | 1 | 1 | 0.01  | 0.01  | 0.01   | 0.01   | 0.01   | t | 79254  | ICADDEE<br>WYSAMCA           | Mus<br>musculu<br>s |
| 1 | 1.00 | 1 | 1 | -0.01 | -0.01 | -0.01  | -0.01  | -0.01  | t | 135174 | NKKITSSKK<br>IRLLYT          | Sus<br>scrofa       |
| 1 | 1.00 | 1 | 1 | -0.01 | -0.01 | -0.01  | -0.01  | -0.01  | t | 147441 | YTLRGTSIF<br>GLAP            | Homo<br>sapiens     |

|   |      |   |   |       |        |       |        |        |   |        |                              |                          |
|---|------|---|---|-------|--------|-------|--------|--------|---|--------|------------------------------|--------------------------|
| 1 | 1.00 | 1 | 1 | -0.01 | -0.01  | -0.01 | -0.01  | -0.01  | t | 131058 | SATTANPS<br>CPEGT            | Rattus<br>norvegicus     |
| 1 | 1.00 | 1 | 1 | -0.01 | -0.01  | -0.01 | -0.01  | -0.01  | t | 110587 | GARGLTG<br>RPGDAGP<br>Q      | Mus<br>musculus          |
| 1 | 1.00 | 1 | 1 | -0.01 | -0.01  | -0.01 | -0.01  | -0.01  | t | 104126 | MNKTFWF                      | Homo<br>sapiens          |
| 1 | 1.00 | 1 | 1 | -0.01 | -0.01  | -0.01 | -0.01  | -0.01  | t | 73496  | YCIEAKLTN<br>TTTASRCP<br>TQG | Mus<br>musculus          |
| 1 | 1.00 | 1 | 1 | -0.01 | -0.01  | -0.01 | -0.01  | -0.01  | t | 63916  | TGPCKTCT<br>TPAQ             | Mus<br>musculus          |
| 1 | 1.00 | 1 | 1 | 0     | 0      | 0     | 0      | 0      | t | 133722 | TSKSKYPL<br>VV               | Mus<br>musculus          |
| 1 | 1.00 | 1 | 1 | -0.03 | -0.03  | -0.03 | -0.03  | -0.03  | t | 112401 | WLAHIW<br>W                  | Homo<br>sapiens          |
| 1 | 1.00 | 1 | 1 | -0.03 | -0.03  | -0.03 | -0.03  | -0.03  | t | 97169  | ADPVATKP<br>L                | Oryctolagus<br>cuniculus |
| 1 | 1.00 | 1 | 1 | 0.01  | 0.008  | 0.01  | 0.009  | 0.01   | t | 110424 | SGTGGRT<br>GYIPLGTR<br>PPT   | Mus<br>musculus          |
| 1 | 1.00 | 1 | 1 | 0     | -0.004 | 0     | -0.007 | -0.001 | t | 107435 | GVVIA                        | Oryctolagus<br>cuniculus |
| 1 | 1.00 | 1 | 1 | 0.01  | 0.01   | 0.01  | 0.004  | 0.008  | t | 118646 | VAVTMGP<br>KGRTVI            | Homo<br>sapiens          |
| 1 | 1.00 | 1 | 1 | -0.02 | -0.018 | -0.02 | -0.017 | -0.02  | t | 131766 | YCQTWGS                      | Homo<br>sapiens          |
| 1 | 1.00 | 1 | 1 | 0.02  | 0.022  | 0.022 | 0.021  | 0.02   | t | 97735  | VKEVASKT<br>ND               | Homo<br>sapiens          |
| 1 | 1.00 | 1 | 1 | -0.02 | -0.018 | -0.02 | -0.012 | -0.019 | t | 110385 | QLYKTCKQ<br>AGTCPPDII<br>PKV | Homo<br>sapiens          |
| 1 | 1.00 | 1 | 1 | 0.01  | 0.01   | 0.01  | 0.01   | 0.01   | t | 99834  | QGQQGYYP                     | Mus<br>musculus          |
| 1 | 1.00 | 1 | 1 | 0.01  | 0.01   | 0.01  | 0.01   | 0.01   | t | 99834  | QGQQGYYP                     | Mus<br>musculus          |

|   |      |   |   |      |       |       |        |       |   |        |                         |              |
|---|------|---|---|------|-------|-------|--------|-------|---|--------|-------------------------|--------------|
| 1 | 1.00 | 1 | 1 | 0.01 | 0.01  | 0.01  | 0.01   | 0.01  | t | 99834  | QGGQGGYYP               | Mus musculus |
| 1 | 1.00 | 1 | 1 | 0    | 0     | 0.002 | 0.001  | 0.003 | t | 65678  | TPPAYR                  | Mus musculus |
| 1 | 1.00 | 1 | 1 | 0.04 | 0.04  | 0.043 | 0.04   | 0.042 | t | 125250 | SDEFNPCE<br>DIMGYK      | Mus musculus |
| 1 | 1.00 | 1 | 1 | 0    | 0.006 | 0     | 0      | 0     | t | 123519 | MRYIADK<br>HG           | Ovis aries   |
| 1 | 1.00 | 1 | 1 | 0.03 | 0.034 | 0.023 | 0.027  | 0.031 | t | 20097  | GGYGDGG<br>AHGGGYG<br>G | Homo sapiens |
| 1 | 1.00 | 1 | 1 | 0    | 0     | 0     | 0      | 0     | t | 144811 | VSWLSKE<br>WAK          | Homo sapiens |
| 1 | 1.00 | 1 | 1 | 0    | 0     | 0     | 0      | 0     | t | 144600 | CQREFALK<br>HL          | Homo sapiens |
| 1 | 1.00 | 1 | 1 | 0    | 0     | 0     | 0      | 0     | t | 144619 | DYIWNTL<br>NSG          | Homo sapiens |
| 1 | 1.00 | 1 | 1 | 0    | 0     | 0     | 0      | 0     | t | 144644 | FRQQHGK<br>TVV          | Homo sapiens |
| 1 | 1.00 | 1 | 1 | 0    | 0     | 0     | 0      | 0     | t | 144697 | IYRNLYWE<br>GS          | Homo sapiens |
| 1 | 1.00 | 1 | 1 | 0    | 0     | 0     | 0      | 0     | t | 144783 | SHVVTML<br>DNF          | Homo sapiens |
| 1 | 1.00 | 1 | 1 | 0    | 0     | 0     | 0      | 0     | t | 144700 | KEWAKRA<br>ALP          | Homo sapiens |
| 1 | 1.00 | 1 | 1 | 0    | 0     | 0     | 0      | 0     | t | 144759 | RAALPSHV<br>VT          | Homo sapiens |
| 1 | 1.00 | 1 | 1 | 0    | 0     | 0     | 0      | 0     | t | 144614 | DMMYGG<br>MRGM          | Homo sapiens |
| 1 | 1.00 | 1 | 1 | 0    | 0     | 0     | 0      | 0     | t | 144823 | YWEGSGI<br>GAI          | Homo sapiens |
| 1 | 1.00 | 1 | 1 | 0    | 0     | 0     | 0      | 0     | t | 144616 | DPRYTCQR<br>EF          | Homo sapiens |
| 1 | 1.00 | 1 | 1 | 0    | 0     | 0     | 0      | 0     | t | 144649 | GIGAIDSN<br>LD          | Homo sapiens |
| 1 | 1.00 | 1 | 1 | 0    | 0     | 0     | 0      | 0     | t | 144594 | ARGISRTK<br>YW          | Homo sapiens |
| 1 | 1.00 | 1 | 1 | 0    | 0     | 0     | 0      | 0     | t | 144639 | FAQAYAR<br>GIS          | Homo sapiens |
| 1 | 1.00 | 1 | 1 | 0    | 0.004 | 0     | -0.003 | 0     | t | 118568 | QKIGIEIKR<br>TLK        | Homo sapiens |

|   |      |   |   |       |        |        |        |        |   |        |                              |                       |
|---|------|---|---|-------|--------|--------|--------|--------|---|--------|------------------------------|-----------------------|
| 1 | 1.00 | 1 | 1 | 0.02  | 0.022  | 0.021  | 0.027  | 0.021  | t | 141934 | KIHAREIFD<br>SRGNPTVE        | Homo sapiens          |
| 1 | 1.00 | 1 | 1 | 0     | 0      | 0      | 0      | 0      | t | 138812 | SSVLYGGP<br>PSAA             | Rattus norvegicus     |
| 1 | 1.00 | 1 | 1 | 0     | 0      | 0      | 0      | 0      | t | 134804 | TIFILFCCSK<br>EKRRKKQA<br>AT | Homo sapiens          |
| 1 | 1.00 | 1 | 1 | 0     | 0      | 0      | 0      | 0      | t | 135471 | KDKATFGC<br>HDGC             | Homo sapiens          |
| 1 | 1.00 | 1 | 1 | 0     | 0      | 0      | 0      | 0      | t | 119601 | KGNNVHG<br>FQKQIIRSF<br>Y    | Rattus norvegicus     |
| 1 | 1.00 | 1 | 1 | 0     | 0      | 0      | 0      | 0      | t | 120849 | NSQPEILE<br>RTRAELD          | Mus musculus          |
| 1 | 1.00 | 1 | 1 | 0     | 0      | 0      | 0      | 0      | t | 120849 | NSQPEILE<br>RTRAELD          | Mus musculus          |
| 1 | 1.00 | 1 | 1 | 0     | 0      | 0      | 0      | 0      | t | 113879 | SQRSQDE<br>N                 | Oryctolagus cuniculus |
| 1 | 1.00 | 1 | 1 | 0     | 0      | 0      | 0      | 0      | t | 104443 | DAEFRHDS<br>GYE              | Homo sapiens          |
| 1 | 1.00 | 1 | 1 | 0     | 0      | 0      | 0      | 0      | t | 113879 | SQRSQDE<br>N                 | Rattus norvegicus     |
| 1 | 1.00 | 1 | 1 | -0.03 | -0.032 | -0.031 | -0.037 | -0.033 | t | 122407 | IFMYHNN<br>RRYHTCG<br>GILL   | Mus musculus          |
| 1 | 1.00 | 1 | 1 | 0.02  | 0.02   | 0.034  | 0.02   | 0.016  | t | 146012 | SSPSTPLLY                    | Mus musculus          |
| 1 | 1.00 | 1 | 1 | 0.03  | 0.033  | 0.035  | 0.03   | 0.032  | t | 61409  | SSTQVQHT<br>LLQT             | Mus musculus          |
| 1 | 1.00 | 1 | 1 | -0.03 | -0.028 | -0.039 | -0.029 | -0.027 | t | 110965 | PNNNKILV<br>PKVSGLQY<br>RVFR | Homo sapiens          |
| 1 | 1.00 | 1 | 1 | 0.04  | 0.04   | 0.032  | 0.04   | 0.044  | t | 141748 | SLLTEVETP                    | Mus musculus          |

|   |      |   |   |      |       |       |      |       |   |        |                              |                                  |
|---|------|---|---|------|-------|-------|------|-------|---|--------|------------------------------|----------------------------------|
| 1 | 1.00 | 1 | 1 | 0.04 | 0.038 | 0.032 | 0.04 | 0.044 | t | 141748 | SLLTEVETP                    | Oryctola<br>gus<br>cuniculu<br>s |
| 1 | 1.00 | 1 | 1 | 0.04 | 0.04  | 0.04  | 0.04 | 0.04  | t | 99877  | AEQYTHQ<br>DEI               | Mus<br>musculu<br>s              |
| 1 | 1.00 | 1 | 1 | 0.02 | 0.02  | 0.02  | 0.02 | 0.02  | t | 115896 | PPKKNQD<br>KTE               | Homo<br>sapiens                  |
| 1 | 1.00 | 1 | 1 | 0.02 | 0.02  | 0.02  | 0.02 | 0.02  | t | 115277 | GYDTQAIV<br>QN               | Homo<br>sapiens                  |
| 1 | 1.00 | 1 | 1 | 0.02 | 0.02  | 0.02  | 0.02 | 0.02  | t | 79044  | PNPNPNP<br>NPGTTLS<br>ESFEN  | Homo<br>sapiens                  |
| 1 | 1.00 | 1 | 1 | 0    | 0     | 0     | 0    | 0     | t | 158583 | APPHLPP                      | Homo<br>sapiens                  |
| 1 | 1.00 | 1 | 1 | 0    | 0     | 0     | 0    | 0     | t | 132143 | AGPCILLA<br>RDRCPG           | Homo<br>sapiens                  |
| 1 | 1.00 | 1 | 1 | 0    | 0     | 0     | 0    | 0     | t | 119627 | QDWLNGK<br>E                 | Homo<br>sapiens                  |
| 1 | 1.00 | 1 | 1 | 0    | 0     | 0     | 0    | 0     | t | 131080 | SQTTANPS<br>APEGT            | Rattus<br>norvegic<br>us         |
| 1 | 1.00 | 1 | 1 | 0    | 0     | 0     | 0    | 0     | t | 115845 | LHLPLPLL<br>QS               | Homo<br>sapiens                  |
| 1 | 1.00 | 1 | 1 | 0    | 0     | 0     | 0    | 0     | t | 115463 | QYLYQGPI<br>VLNPWDQ<br>VKRNA | Homo<br>sapiens                  |
| 1 | 1.00 | 1 | 1 | 0    | 0     | 0     | 0    | 0     | t | 103744 | YDREKLQE<br>RLAKLAG          | Homo<br>sapiens                  |
| 1 | 1.00 | 1 | 1 | 0    | 0     | 0     | 0    | 0     | t | 61333  | SSSDKPDN                     | Homo<br>sapiens                  |
| 1 | 1.00 | 1 | 1 | 0    | 0     | 0     | 0    | 0     | t | 96967  | TKEKPTPP<br>VK               | Homo<br>sapiens(<br>human)       |
| 1 | 1.00 | 1 | 1 | 0    | 0     | 0     | 0    | 0     | t | 58293  | SGVLTTC<br>GNTLTC            | Homo<br>sapiens                  |
| 1 | 1.00 | 1 | 1 | 0    | 0     | 0     | 0    | 0     | t | 58293  | SGVLTTC<br>GNTLTC            | Homo<br>sapiens                  |
| 1 | 1.00 | 1 | 1 | 0    | 0     | 0     | 0    | 0     | t | 10832  | DWVCSILT<br>DFKNWL           | Homo<br>sapiens                  |
| 1 | 1.00 | 1 | 1 | 0    | 0     | 0     | 0    | 0     | t | 16354  | FKDKVLGL<br>LQRASQQ<br>EAEIR | Homo<br>sapiens                  |

|   |      |   |   |       |        |        |        |        |   |        |                                  |                                  |
|---|------|---|---|-------|--------|--------|--------|--------|---|--------|----------------------------------|----------------------------------|
| 1 | 1.00 | 1 | 1 | 0     | 0      | 0      | 0      | 0      | t | 7501   | DAEVAGT<br>QWFDPSG<br>KSPVFG     | Aotus<br>nancyma<br>ae           |
| 1 | 1.00 | 1 | 1 | -0.02 | -0.02  | -0.02  | -0.02  | -0.02  | t | 137896 | IANGYRDV<br>VADV                 | Homo<br>sapiens                  |
| 1 | 1.00 | 1 | 1 | -0.02 | -0.02  | -0.02  | -0.02  | -0.02  | t | 137896 | IANGYRDV<br>VADV                 | Oryctola<br>gus<br>cuniculu<br>s |
| 1 | 1.00 | 1 | 1 | -0.04 | -0.04  | -0.04  | -0.04  | -0.04  | t | 115913 | QAQPTTM<br>ARH                   | Homo<br>sapiens                  |
| 1 | 1.00 | 1 | 1 | 0.01  | 0.013  | 0.008  | 0.01   | 0.01   | t | 38007  | LMDHEGC<br>KLSCFIRP              | Equus<br>caballus                |
| 1 | 1.00 | 1 | 1 | 0.01  | 0.01   | 0.014  | 0.01   | 0.011  | t | 23961  | HGTIVI                           | Homo<br>sapiens                  |
| 1 | 1.00 | 1 | 1 | 0.02  | 0.016  | 0.008  | 0.023  | 0.022  | t | 14695  | EVFLISED<br>L<br>KTPINITNS<br>NS | Oryctola<br>gus<br>cuniculu<br>s |
| 1 | 1.00 | 1 | 1 | -0.01 | -0.012 | -0.003 | -0.009 | -0.01  | t | 117010 | IRTDESTKR<br>LPP                 | Mus<br>musculu<br>s              |
| 1 | 1.00 | 1 | 1 | 0.01  | 0.012  | 0.01   | 0.013  | 0.01   | t | 17590  | FRGKELKK<br>SIQPDEA              | Homo<br>sapiens                  |
| 1 | 1.00 | 1 | 1 | 0     | 0      | -0.002 | 0      | 0.001  | t | 23685  | HEGKAYFP<br>REGV                 | Homo<br>sapiens                  |
| 1 | 1.00 | 1 | 1 | 0.03  | 0.026  | 0.03   | 0.033  | 0.032  | t | 106313 | CQQYGSS<br>PQTFG                 | Oryctola<br>gus<br>cuniculu<br>s |
| 1 | 1.00 | 1 | 1 | -0.02 | -0.02  | -0.026 | -0.02  | -0.019 | t | 159035 | NRFEHQM<br>WESVRDE<br>LN         | Mus<br>musculu<br>s              |
| 1 | 1.00 | 1 | 1 | 0.03  | 0.032  | 0.027  | 0.031  | 0.03   | t | 47209  | PDTAKEKP<br>QEGTVVA              | Homo<br>sapiens                  |
| 1 | 1.00 | 1 | 1 | -0.01 | -0.01  | -0.01  | -0.01  | -0.007 | t | 9591   | DPAKAAF<br>D                     | Mus<br>musculu<br>s              |
| 1 | 1.00 | 1 | 1 | 0.02  | 0.022  | 0.025  | 0.019  | 0.021  | t | 135725 | NITQSTQS<br>FN                   | Homo<br>sapiens                  |



|   |      |   |   |       |        |        |        |        |   |        |                              |                                  |
|---|------|---|---|-------|--------|--------|--------|--------|---|--------|------------------------------|----------------------------------|
| 1 | 1.00 | 1 | 1 | 0.01  | 0.006  | 0.013  | 0.013  | 0.01   | t | 43701  | NENKLCIK<br>LGQGLTFN<br>SNNI | Oryctola<br>gus<br>cuniculu<br>s |
| 1 | 1.00 | 1 | 1 | 0.02  | 0.02   | 0.017  | 0.02   | 0.022  | t | 91903  | RNERATGS<br>GNGSGGG          | Oryctola<br>gus<br>cuniculu<br>s |
| 1 | 1.00 | 1 | 1 | 0     | -0.003 | 0      | 0      | 0      | t | 74136  | YHRVMYA<br>SSG               | Oryctola<br>gus<br>cuniculu<br>s |
| 1 | 1.00 | 1 | 1 | 0.03  | 0.028  | 0.033  | 0.037  | 0.033  | t | 103477 | PGSGFWS<br>FGSEDGS           | Mus<br>musculu<br>s              |
| 1 | 1.00 | 1 | 1 | -0.03 | -0.026 | -0.019 | -0.023 | -0.029 | t | 122105 | GRTSRTV                      | Homo<br>sapiens                  |
| 1 | 1.00 | 1 | 1 | 0.03  | 0.028  | 0.014  | 0.023  | 0.032  | t | 136062 | FGISETQA<br>EAILE            | Mus<br>musculu<br>s              |
| 1 | 1.00 | 1 | 1 | -0.01 | -0.01  | -0.01  | -0.01  | -0.01  | t | 94623  | NPACGRH                      | Capra<br>hircus                  |
| 1 | 1.00 | 1 | 1 | 0.02  | 0.018  | 0.015  | 0.019  | 0.02   | t | 73784  | YEVRAELP<br>GVDPDKD<br>VDIMV | Mus<br>musculu<br>s              |
| 1 | 1.00 | 1 | 1 | 0.01  | 0.01   | 0.013  | 0.01   | 0.01   | t | 35247  | LDPAFR                       | Mus<br>musculu<br>s              |
| 1 | 1.00 | 1 | 1 | 0     | -0.003 | -0.011 | 0      | 0.003  | t | 58511  | SIFYTYGTA<br>PARISVPY<br>VGI | Oryctola<br>gus<br>cuniculu<br>s |
| 1 | 1.00 | 1 | 1 | 0     | 0      | -0.011 | 0      | 0.003  | t | 58511  | SIFYTYGTA<br>PARISVPY<br>VGI | Rattus<br>norvegic<br>us         |
| 1 | 1.00 | 1 | 1 | -0.02 | -0.018 | -0.026 | -0.017 | -0.019 | t | 118809 | GGRPGAP<br>GGSGSGP<br>RHRDGV | Homo<br>sapiens                  |
| 1 | 1.00 | 1 | 1 | 0.03  | 0.027  | 0.041  | 0.03   | 0.028  | t | 111415 | IFEMFNEN<br>QKAGGIE          | Oryctola<br>gus<br>cuniculu<br>s |

|   |      |   |   |       |       |       |       |       |   |        |                              |                                  |
|---|------|---|---|-------|-------|-------|-------|-------|---|--------|------------------------------|----------------------------------|
| 1 | 1.00 | 1 | 1 | 0.03  | 0.034 | 0.036 | 0.031 | 0.028 | t | 54494  | RLCSVSYP<br>EPSLLWTS<br>SCFD | Myodes<br>glareolu<br>s          |
| 1 | 1.00 | 1 | 1 | 0.05  | 0.05  | 0.05  | 0.05  | 0.05  | t | 107592 | REQQYNS                      | Homo<br>sapiens                  |
| 1 | 1.00 | 1 | 1 | 0.03  | 0.03  | 0.03  | 0.03  | 0.03  | t | 127802 | RLGGEGP<br>GAGDRRR<br>E      | Homo<br>sapiens                  |
| 1 | 1.00 | 1 | 1 | 0.03  | 0.03  | 0.03  | 0.03  | 0.03  | t | 115235 | EQQQTED<br>ELQDKIHP<br>FAQTQ | Homo<br>sapiens                  |
| 1 | 1.00 | 1 | 1 | 0.03  | 0.03  | 0.03  | 0.03  | 0.03  | t | 115459 | QTEDELQ<br>DKIHPFAQ<br>TQSLV | Homo<br>sapiens                  |
| 1 | 1.00 | 1 | 1 | 0.01  | 0.01  | 0.01  | 0.01  | 0.01  | t | 137514 | AIPAGVAH<br>WCYNEGN          | Homo<br>sapiens                  |
| 1 | 1.00 | 1 | 1 | 0.01  | 0.01  | 0.01  | 0.01  | 0.01  | t | 133602 | HSIYSEWQ<br>PMWP             | Homo<br>sapiens                  |
| 1 | 1.00 | 1 | 1 | 0.01  | 0.01  | 0.01  | 0.01  | 0.01  | t | 119630 | QQGNVFS<br>C                 | Homo<br>sapiens                  |
| 1 | 1.00 | 1 | 1 | 0.01  | 0.01  | 0.01  | 0.01  | 0.01  | t | 98944  | PSQQQPQ<br>EQVPL             | Homo<br>sapiens                  |
| 1 | 1.00 | 1 | 1 | 0.01  | 0.01  | 0.01  | 0.01  | 0.01  | t | 116979 | FQTD MST<br>RPRGA            | Homo<br>sapiens                  |
| 1 | 1.00 | 1 | 1 | 0.01  | 0.01  | 0.01  | 0.01  | 0.01  | t | 115291 | ILDKVGINY<br>W               | Homo<br>sapiens                  |
| 1 | 1.00 | 1 | 1 | 0.01  | 0.01  | 0.01  | 0.01  | 0.01  | t | 115291 | ILDKVGINY<br>W               | Homo<br>sapiens                  |
| 1 | 1.00 | 1 | 1 | 0.01  | 0.01  | 0.01  | 0.01  | 0.01  | t | 116979 | FQTD MST<br>RPRGA            | Mus<br>musculu<br>s              |
| 1 | 1.00 | 1 | 1 | 0.01  | 0.01  | 0.01  | 0.01  | 0.01  | t | 79508  | AHKSTLR                      | Oryctola<br>gus<br>cuniculu<br>s |
| 1 | 1.00 | 1 | 1 | -0.01 | -0.01 | -0.01 | -0.01 | -0.01 | t | 144663 | GREGYP A<br>DGGGCKIT<br>CFL  | Oryctola<br>gus<br>cuniculu<br>s |
| 1 | 1.00 | 1 | 1 | -0.01 | -0.01 | -0.01 | -0.01 | -0.01 | t | 121678 | NVLTLRVA<br>KPLVDTF          | Mus<br>musculu<br>s              |
| 1 | 1.00 | 1 | 1 | -0.01 | -0.01 | -0.01 | -0.01 | -0.01 | t | 121678 | NVLTLRVA<br>KPLVDTF          | Mus<br>musculu<br>s              |

|   |      |   |   |       |        |        |       |       |   |        |                              |                                  |
|---|------|---|---|-------|--------|--------|-------|-------|---|--------|------------------------------|----------------------------------|
| 1 | 1.00 | 1 | 1 | -0.01 | -0.01  | -0.01  | -0.01 | -0.01 | t | 115433 | QDKIHPFA<br>QTQSLVYP<br>FPGP | Homo<br>sapiens                  |
| 1 | 1.00 | 1 | 1 | -0.01 | -0.01  | -0.01  | -0.01 | -0.01 | t | 79510  | AIWQHGV                      | Oryctola<br>gus<br>cuniculu<br>s |
| 1 | 1.00 | 1 | 1 | -0.01 | -0.01  | -0.01  | -0.01 | -0.01 | t | 97287  | ETPLTETAL<br>KWH             | Mus<br>musculu<br>s              |
| 1 | 1.00 | 1 | 1 | -0.01 | -0.01  | -0.01  | -0.01 | -0.01 | t | 97287  | ETPLTETAL<br>KWH             | Mus<br>musculu<br>s              |
| 1 | 1.00 | 1 | 1 | -0.01 | -0.01  | -0.01  | -0.01 | -0.01 | t | 66901  | TTVQQQF<br>ADAWKPS<br>PVMTVR | Oryctola<br>gus<br>cuniculu<br>s |
| 1 | 1.00 | 1 | 1 | -0.01 | -0.01  | -0.01  | -0.01 | -0.01 | t | 92809  | GGKGDDIL<br>DG               | Ovis<br>aries                    |
| 1 | 1.00 | 1 | 1 | -0.01 | -0.01  | -0.01  | -0.01 | -0.01 | t | 97287  | ETPLTETAL<br>KWH             | Mus<br>musculu<br>s              |
| 1 | 1.00 | 1 | 1 | -0.01 | -0.01  | -0.01  | -0.01 | -0.01 | t | 63922  | TGPCRTCT<br>IPAQ             | Mus<br>musculu<br>s              |
| 1 | 1.00 | 1 | 1 | -0.01 | -0.01  | -0.01  | -0.01 | -0.01 | t | 39372  | LSGKPAIIP<br>DREVLYQA<br>FDE | Homo<br>sapiens                  |
| 1 | 1.00 | 1 | 1 | -0.01 | -0.01  | -0.01  | -0.01 | -0.01 | t | 49106  | PQQQFPQ<br>PQQ               | Mus<br>musculu<br>s              |
| 1 | 1.00 | 1 | 1 | -0.01 | -0.01  | -0.01  | -0.01 | -0.01 | t | 39404  | LSGRPVIV<br>PDREVLYR<br>EFDE | Homo<br>sapiens                  |
| 1 | 1.00 | 1 | 1 | -0.01 | -0.01  | -0.01  | -0.01 | -0.01 | t | 7395   | CYKKVWR<br>AHRGTI            | Mus<br>musculu<br>s              |
| 1 | 1.00 | 1 | 1 | -0.03 | -0.03  | -0.03  | -0.03 | -0.03 | t | 93332  | LSSLQFAR<br>AA               | Ovis<br>aries                    |
| 1 | 1.00 | 1 | 1 | 0.01  | 0.012  | -0.002 | 0.007 | 0.011 | t | 302    | AALTAENT<br>AIKQRNEN<br>AKA  | Homo<br>sapiens                  |
| 1 | 1.00 | 1 | 1 | -0.01 | -0.005 | -0.005 | -0.01 | -0.01 | t | 62773  | TAACRAAK<br>LQDCTM           | Homo<br>sapiens                  |

|   |      |   |   |       |        |        |        |        |   |        |                              |                                  |
|---|------|---|---|-------|--------|--------|--------|--------|---|--------|------------------------------|----------------------------------|
| 1 | 1.00 | 1 | 1 | -0.02 | -0.02  | -0.024 | -0.02  | -0.018 | t | 47544  | PFPQPQQ<br>PFC               | Mus<br>musculu<br>s              |
| 1 | 1.00 | 1 | 1 | -0.02 | -0.018 | -0.021 | -0.023 | -0.022 | t | 113876 | SPQQSGQ<br>GQPGYYP           | Homo<br>sapiens                  |
| 1 | 1.00 | 1 | 1 | 0.02  | 0.02   | 0.02   | 0.02   | 0.02   | t | 140854 | GFDKYDIT<br>GEYVQILD<br>AHAA | Oryctola<br>gus<br>cuniculu<br>s |
| 1 | 1.00 | 1 | 1 | -0.01 | -0.008 | -0.005 | -0.011 | -0.009 | t | 135734 | PGQFPWQ<br>V                 | Homo<br>sapiens                  |
| 1 | 1.00 | 1 | 1 | 0.06  | 0.064  | 0.056  | 0.057  | 0.06   | t | 97762  | VVCAMIE<br>GAQGALE<br>RE     | Homo<br>sapiens                  |
| 1 | 1.00 | 1 | 1 | 0.02  | 0.02   | 0.014  | 0.02   | 0.02   | t | 48752  | PPAVGPP<br>AAGPPAA<br>GPPAAG | Homo<br>sapiens                  |
| 1 | 1.00 | 1 | 1 | 0.01  | 0.012  | 0.01   | 0.009  | 0.01   | t | 51908  | QPQPFP<br>QQP                | Homo<br>sapiens                  |
| 1 | 1.00 | 1 | 1 | 0     | 0      | 0      | 0      | 0      | t | 42795  | MTEQQW<br>NFGIEAA<br>AS      | Homo<br>sapiens                  |
| 1 | 1.00 | 1 | 1 | -0.01 | -0.01  | -0.008 | -0.01  | -0.009 | t | 153254 | ERHTKFPS<br>V                | Mus<br>musculu<br>s              |
| 1 | 1.00 | 1 | 1 | -0.01 | -0.01  | -0.01  | -0.01  | -0.008 | t | 131866 | EPLEVFISA<br>PRS             | Homo<br>sapiens                  |
| 1 | 1.00 | 1 | 1 | -0.03 | -0.027 | -0.029 | -0.03  | -0.031 | t | 21928  | GQPAVRN<br>ERATGS            | Mus<br>musculu<br>s              |
| 1 | 1.00 | 1 | 1 | 0.05  | 0.05   | 0.05   | 0.059  | 0.053  | t | 130808 | ENEPPVW<br>TTESKLQS          | Homo<br>sapiens                  |
| 1 | 1.00 | 1 | 1 | 0.04  | 0.042  | 0.04   | 0.036  | 0.04   | t | 118011 | LYKEKALS                     | Homo<br>sapiens                  |
| 1 | 1.00 | 1 | 1 | 0.02  | 0.017  | 0.022  | 0.02   | 0.02   | t | 23589  | HCDGFQN<br>EKWDLFV<br>E      | Oryctola<br>gus<br>cuniculu<br>s |
| 1 | 1.00 | 1 | 1 | -0.05 | -0.05  | -0.05  | -0.05  | -0.051 | t | 134333 | CIPIPSSW<br>AFARFLW          | Homo<br>sapiens                  |
| 1 | 1.00 | 1 | 1 | 0.06  | 0.06   | 0.06   | 0.06   | 0.06   | t | 99371  | KEDQEEEN<br>QGGKGPL          | Homo<br>sapiens                  |

|   |      |   |   |       |       |       |       |       |   |        |                              |                |
|---|------|---|---|-------|-------|-------|-------|-------|---|--------|------------------------------|----------------|
| 1 | 1.00 | 1 | 1 | 0.02  | 0.02  | 0.02  | 0.02  | 0.02  | t | 147218 | QGSFQP                       | Homo sapiens   |
| 1 | 1.00 | 1 | 1 | 0.02  | 0.02  | 0.02  | 0.02  | 0.02  | t | 151670 | KLVIIESDL<br>ERAEEERA        | Mus musculus   |
| 1 | 1.00 | 1 | 1 | 0     | 0     | 0     | 0     | 0     | t | 119618 | NHYTQKSL                     | Homo sapiens   |
| 1 | 1.00 | 1 | 1 | 0     | 0     | 0     | 0     | 0     | t | 123593 | PLNGWAA<br>SF                | Ovis aries     |
| 1 | 1.00 | 1 | 1 | 0     | 0     | 0     | 0     | 0     | t | 103931 | GKLPKMT                      | Homo sapiens   |
| 1 | 1.00 | 1 | 1 | 0     | 0     | 0     | 0     | 0     | t | 115258 | FYPELFRQ<br>FYQLDAYP<br>SGAW | Homo sapiens   |
| 1 | 1.00 | 1 | 1 | 0     | 0     | 0     | 0     | 0     | t | 114975 | VLCNRAFNPV                   | Homo sapiens   |
| 1 | 1.00 | 1 | 1 | 0     | 0     | 0     | 0     | 0     | t | 103195 | GASVTVTG<br>QGNSLKV          | Homo sapiens   |
| 1 | 1.00 | 1 | 1 | 0     | 0     | 0     | 0     | 0     | t | 68167  | VEEQEQE<br>QEEQEEQ<br>ELE    | Homo sapiens   |
| 1 | 1.00 | 1 | 1 | 0     | 0     | 0     | 0     | 0     | t | 56771  | SAFDDNLT<br>AANAMGL<br>ILNKR | Aotus nancymae |
| 1 | 1.00 | 1 | 1 | 0     | 0     | 0     | 0     | 0     | t | 56771  | SAFDDNLT<br>AANAMGL<br>ILNKR | Aotus nancymae |
| 1 | 1.00 | 1 | 1 | 0     | 0     | 0     | 0     | 0     | t | 39379  | LSGKPATIP<br>DREVLRYE<br>FDE | Homo sapiens   |
| 1 | 1.00 | 1 | 1 | 0     | 0     | 0     | 0     | 0     | t | 22124  | GRLHINQR<br>TVVAPDKE<br>VLYE | Homo sapiens   |
| 1 | 1.00 | 1 | 1 | 0     | 0     | 0     | 0     | 0     | t | 19728  | GGFSSDPG<br>FLLRPRG          | Mus musculus   |
| 1 | 1.00 | 1 | 1 | 0     | 0     | 0     | 0     | 0     | t | 19728  | GGFSSDPG<br>FLLRPRG          | Mus musculus   |
| 1 | 1.00 | 1 | 1 | 0     | 0     | 0     | 0     | 0     | t | 6075   | CCRHKQK<br>DVGPVKQ<br>TLPPS  | Ovis aries     |
| 1 | 1.00 | 1 | 1 | -0.02 | -0.02 | -0.02 | -0.02 | -0.02 | t | 118452 | KGVITVKD<br>GKTLN            | Homo sapiens   |

|   |      |   |   |       |        |        |        |        |   |        |                              |                                  |
|---|------|---|---|-------|--------|--------|--------|--------|---|--------|------------------------------|----------------------------------|
| 1 | 1.00 | 1 | 1 | -0.02 | -0.02  | -0.02  | -0.02  | -0.02  | t | 123579 | PGMIPPP<br>G                 | Oryctola<br>gus<br>cuniculu<br>s |
| 1 | 1.00 | 1 | 1 | -0.02 | -0.02  | -0.02  | -0.02  | -0.02  | t | 78312  | WLHYYS                       | Homo<br>sapiens                  |
| 1 | 1.00 | 1 | 1 | 0.05  | 0.047  | 0.048  | 0.05   | 0.051  | t | 21933  | GQPQAQG<br>DGANA             | Oryctola<br>gus<br>cuniculu<br>s |
| 1 | 1.00 | 1 | 1 | 0     | 0.003  | 0.002  | 0      | 0      | t | 122375 | GLINRAKA<br>VKQFEESQ<br>G    | Mus<br>musculu<br>s              |
| 1 | 1.00 | 1 | 1 | -0.01 | -0.012 | -0.006 | -0.007 | -0.01  | t | 51933  | QPQQSFP<br>QQP               | Mus<br>musculu<br>s              |
| 1 | 1.00 | 1 | 1 | 0.03  | 0.034  | 0.026  | 0.03   | 0.029  | t | 112728 | YIKGSGST<br>ANLASSNY<br>FPTP | Cavia<br>porcellu<br>s           |
| 1 | 1.00 | 1 | 1 | -0.03 | -0.026 | -0.03  | -0.023 | -0.03  | t | 135498 | SCKLPVKK<br>ATVVQGE<br>RVKIQ | Homo<br>sapiens                  |
| 1 | 1.00 | 1 | 1 | -0.01 | -0.01  | -0.005 | -0.01  | -0.01  | t | 65519  | TPCILSGSA<br>S               | Homo<br>sapiens                  |
| 1 | 1.00 | 1 | 1 | 0.02  | 0.02   | 0.02   | 0.02   | 0.02   | t | 141978 | PKGQTRTL<br>GSNRERER<br>I    | Mus<br>musculu<br>s              |
| 1 | 1.00 | 1 | 1 | 0.02  | 0.02   | 0.02   | 0.02   | 0.02   | t | 141978 | PKGQTRTL<br>GSNRERER<br>I    | Sus<br>scrofa                    |
| 1 | 1.00 | 1 | 1 | -0.01 | -0.007 | -0.01  | -0.01  | -0.007 | t | 42717  | MSWQAY<br>V                  | Mus<br>musculu<br>s              |
| 1 | 1.00 | 1 | 1 | 0.02  | 0.016  | 0.013  | 0.013  | 0.02   | t | 135445 | AKAAQFG                      | Oryctola<br>gus<br>cuniculu<br>s |
| 1 | 1.00 | 1 | 1 | -0.03 | -0.03  | -0.03  | -0.03  | -0.032 | t | 99838  | QQRPF                        | Mus<br>musculu<br>s              |
| 1 | 1.00 | 1 | 1 | 0.01  | 0.008  | 0.005  | 0.011  | 0.01   | t | 135736 | PRIGGQRE<br>LKKITE           | Mus<br>musculu<br>s              |
| 1 | 1.00 | 1 | 1 | 0     | -0.002 | 0      | -0.001 | 0      | t | 39917  | LTGKPAVI<br>PDREILYQ<br>QFDE | Mus<br>musculu<br>s              |

|   |      |   |   |       |        |        |        |        |   |        |                                  |                                  |
|---|------|---|---|-------|--------|--------|--------|--------|---|--------|----------------------------------|----------------------------------|
| 1 | 1.00 | 1 | 1 | -0.02 | -0.023 | -0.022 | -0.02  | -0.02  | t | 142288 | SEASRKGL<br>RRDLDA<br>SR<br>EAKK | Mus<br>musculu<br>s              |
| 1 | 1.00 | 1 | 1 | -0.03 | -0.033 | -0.03  | -0.03  | -0.032 | t | 137399 | FCGLPRLE                         | Oryctola<br>gus<br>cuniculu<br>s |
| 1 | 1.00 | 1 | 1 | 0.03  | 0.03   | 0.03   | 0.03   | 0.032  | t | 61800  | STNS                             | Mus<br>musculu<br>s              |
| 1 | 1.00 | 1 | 1 | 0     | 0.002  | -0.004 | -0.003 | 0      | t | 158728 | DVKKAFKV<br>IDQDASG              | Homo<br>sapiens                  |
| 1 | 1.00 | 1 | 1 | 0.03  | 0.028  | 0.026  | 0.029  | 0.03   | t | 72466  | WGENDTD<br>VFVLNNTR              | Mus<br>musculu<br>s              |
| 1 | 1.00 | 1 | 1 | -0.01 | -0.01  | -0.01  | -0.01  | -0.01  | t | 7488   | DADYHRV<br>M                     | Oryctola<br>gus<br>cuniculu<br>s |
| 1 | 1.00 | 1 | 1 | -0.05 | -0.054 | -0.039 | -0.047 | -0.051 | t | 25224  | IAAISM                           | Oryctola<br>gus<br>cuniculu<br>s |
| 1 | 1.00 | 1 | 1 | -0.01 | -0.008 | -0.01  | -0.009 | -0.01  | t | 117059 | PQTDGSTR<br>PRGL                 | Homo<br>sapiens                  |
| 1 | 1.00 | 1 | 1 | -0.01 | -0.01  | -0.01  | -0.01  | -0.01  | t | 45702  | NRLIAFAS<br>RGNHVSP<br>RHYV      | Homo<br>sapiens                  |
| 1 | 1.00 | 1 | 1 | 0.01  | 0.013  | 0.012  | 0.01   | 0.013  | t | 79367  | RGDL                             | Mus<br>musculu<br>s              |
| 1 | 1.00 | 1 | 1 | 0.03  | 0.033  | 0.03   | 0.03   | 0.028  | t | 135465 | GSDYEDRY<br>YREN                 | Mus<br>musculu<br>s              |
| 1 | 1.00 | 1 | 1 | 0     | -0.002 | 0.002  | 0.003  | 0.002  | t | 33143  | KRGPGSG                          | Mus<br>musculu<br>s              |
| 1 | 1.00 | 1 | 1 | 0.03  | 0.03   | 0.03   | 0.03   | 0.03   | t | 99621  | RNAMRHL<br>RPEDTLEE              | Equus<br>caballus                |
| 1 | 1.00 | 1 | 1 | 0.01  | 0.01   | 0.01   | 0.01   | 0.01   | t | 132120 | WGDGQKS<br>SQGWSVS<br>A          | Homo<br>sapiens                  |

|   |      |   |   |       |       |       |       |       |   |        |                              |                                  |
|---|------|---|---|-------|-------|-------|-------|-------|---|--------|------------------------------|----------------------------------|
| 1 | 1.00 | 1 | 1 | 0.01  | 0.01  | 0.01  | 0.01  | 0.01  | t | 113686 | PGQQQQG<br>QQPGQG<br>Q       | Homo<br>sapiens                  |
| 1 | 1.00 | 1 | 1 | -0.01 | -0.01 | -0.01 | -0.01 | -0.01 | t | 153473 | THRPLSHN<br>FRDFGGGS         | Mus<br>musculu<br>s              |
| 1 | 1.00 | 1 | 1 | -0.01 | -0.01 | -0.01 | -0.01 | -0.01 | t | 134809 | VASPERPS<br>PAFP             | Oryctola<br>gus<br>cuniculu<br>s |
| 1 | 1.00 | 1 | 1 | -0.01 | -0.01 | -0.01 | -0.01 | -0.01 | t | 131082 | SQTTANPS<br>CPAGT            | Rattus<br>norvegic<br>us         |
| 1 | 1.00 | 1 | 1 | -0.01 | -0.01 | -0.01 | -0.01 | -0.01 | t | 121680 | NVQVLSV<br>ARPLVDYF          | Mus<br>musculu<br>s              |
| 1 | 1.00 | 1 | 1 | -0.01 | -0.01 | -0.01 | -0.01 | -0.01 | t | 121680 | NVQVLSV<br>ARPLVDYF          | Mus<br>musculu<br>s              |
| 1 | 1.00 | 1 | 1 | -0.01 | -0.01 | -0.01 | -0.01 | -0.01 | t | 110804 | DIMRLREK<br>LQEEMLQ<br>REEAE | Mus<br>musculu<br>s              |
| 1 | 1.00 | 1 | 1 | -0.01 | -0.01 | -0.01 | -0.01 | -0.01 | t | 79841  | GKPALELIR<br>MVE             | Mus<br>musculu<br>s              |
| 1 | 1.00 | 1 | 1 | -0.01 | -0.01 | -0.01 | -0.01 | -0.01 | t | 79841  | GKPALELIR<br>MVE             | Mus<br>musculu<br>s              |
| 1 | 1.00 | 1 | 1 | -0.01 | -0.01 | -0.01 | -0.01 | -0.01 | t | 60796  | SRSERRKD<br>RGGREDIL         | Homo<br>sapiens                  |
| 1 | 1.00 | 1 | 1 | -0.01 | -0.01 | -0.01 | -0.01 | -0.01 | t | 63540  | TESTLSTAL<br>AELAT           | Homo<br>sapiens                  |
| 1 | 1.00 | 1 | 1 | -0.01 | -0.01 | -0.01 | -0.01 | -0.01 | t | 62924  | TALVVAQL<br>LRIPQAI          | Homo<br>sapiens                  |
| 1 | 1.00 | 1 | 1 | -0.01 | -0.01 | -0.01 | -0.01 | -0.01 | t | 93947  | SRNVLVAP<br>TS               | Ovis<br>aries                    |
| 1 | 1.00 | 1 | 1 | -0.01 | -0.01 | -0.01 | -0.01 | -0.01 | t | 41668  | MHNISQH<br>QSVMKMS<br>DQNS   | Aotus<br>nancyma<br>ae           |
| 1 | 1.00 | 1 | 1 | -0.01 | -0.01 | -0.01 | -0.01 | -0.01 | t | 39383  | LSGKPAVI<br>PDREVLYQ<br>GFDE | Homo<br>sapiens                  |
| 1 | 1.00 | 1 | 1 | -0.01 | -0.01 | -0.01 | -0.01 | -0.01 | t | 46827  | PAIIPDREV<br>LYQAFDE<br>MEEC | Homo<br>sapiens                  |



|   |      |   |   |       |        |        |        |        |   |        |                              |                |
|---|------|---|---|-------|--------|--------|--------|--------|---|--------|------------------------------|----------------|
| 1 | 1.00 | 1 | 1 | -0.03 | -0.03  | -0.03  | -0.03  | -0.03  | t | 127712 | KNWSTPF                      | Homo sapiens   |
| 1 | 1.00 | 1 | 1 | -0.03 | -0.03  | -0.03  | -0.03  | -0.03  | t | 78762  | PLLPHVIFC<br>HPGQLGA<br>FLTN | Homo sapiens   |
| 1 | 1.00 | 1 | 1 | -0.05 | -0.05  | -0.05  | -0.05  | -0.05  | t | 115904 | PTVMFPP<br>QSV               | Homo sapiens   |
| 1 | 1.00 | 1 | 1 | 0     | 0.004  | -0.01  | 0.001  | 0.003  | t | 44251  | NIISCNKN<br>DKNQ             | Homo sapiens   |
| 1 | 1.00 | 1 | 1 | -0.01 | -0.008 | -0.007 | -0.009 | -0.009 | t | 36542  | LIGVII                       | Homo sapiens   |
| 1 | 1.00 | 1 | 1 | 0.02  | 0.02   | 0.02   | 0.02   | 0.021  | t | 934    | AEGFPPQ<br>DARFPGG<br>GDPK   | Homo sapiens   |
| 1 | 1.00 | 1 | 1 | 0.01  | 0.01   | 0.01   | 0.014  | 0.012  | t | 117537 | KALSVETE<br>KLLKYLEAV<br>EKV | Homo sapiens   |
| 1 | 1.00 | 1 | 1 | 0     | 0      | 0      | 0      | 0.002  | t | 8636   | DIETPRAG<br>KKESTV           | Ovis aries     |
| 1 | 1.00 | 1 | 1 | -0.01 | -0.008 | -0.01  | -0.011 | -0.01  | t | 17365  | FPQPQFP<br>PQ                | Homo sapiens   |
| 1 | 1.00 | 1 | 1 | 0     | 0.002  | 0.005  | 0.003  | 0      | t | 1890   | AIEPCTVG<br>HRRYFT           | Homo sapiens   |
| 1 | 1.00 | 1 | 1 | -0.02 | -0.02  | -0.013 | -0.018 | -0.02  | t | 6233   | CFKKPPKY<br>PPALPI           | Homo sapiens   |
| 1 | 1.00 | 1 | 1 | -0.02 | -0.017 | -0.014 | -0.02  | -0.022 | t | 36807  | LKASSGYC<br>AWPACYC          | Equus caballus |
| 1 | 1.00 | 1 | 1 | 0.01  | 0.014  | 0.005  | 0.011  | 0.012  | t | 82831  | GPTHSKEI<br>PALTAVE          | Homo sapiens   |
| 1 | 1.00 | 1 | 1 | -0.04 | -0.034 | -0.04  | -0.04  | -0.04  | t | 123391 | KRFIKWPL<br>N                | Ovis aries     |

|   |      |   |   |       |        |        |        |        |   |        |                               |                                  |
|---|------|---|---|-------|--------|--------|--------|--------|---|--------|-------------------------------|----------------------------------|
| 1 | 1.00 | 1 | 1 | 0     | 0.002  | -0.001 | 0.001  | 0      | t | 120870 | PHVKPAAL<br>AEQPG             | Homo<br>sapiens                  |
| 1 | 1.00 | 1 | 1 | -0.01 | -0.012 | -0.013 | -0.007 | -0.009 | t | 141769 | TVPGGGT<br>TYIRAI AAL<br>EGLK | Mus<br>musculu<br>s              |
| 1 | 1.00 | 1 | 1 | 0.01  | 0.01   | 0.014  | 0.01   | 0.01   | t | 152056 | QAAKQRL<br>EPGRN              | Sus<br>scrofa                    |
| 1 | 1.00 | 1 | 1 | 0     | 0      | 0      | 0      | 0      | t | 94471  | CNPACGP<br>K                  | Oryctola<br>gus<br>cuniculu<br>s |
| 1 | 1.00 | 1 | 1 | 0     | 0.007  | 0      | 0      | 0      | t | 94471  | CNPACGP<br>K                  | Capra<br>hircus                  |
| 1 | 1.00 | 1 | 1 | 0     | 0      | 0      | 0      | 0      | t | 94471  | CNPACGP<br>K                  | Capra<br>hircus                  |
| 1 | 1.00 | 1 | 1 | 0     | -0.007 | 0      | 0      | 0      | t | 94471  | CNPACGP<br>K                  | Oryctola<br>gus<br>cuniculu<br>s |
| 1 | 1.00 | 1 | 1 | -0.01 | 0      | -0.013 | -0.013 | -0.011 | t | 55668  | RRPEGRT<br>WAQ                | Pan<br>troglody<br>tes           |
| 1 | 1.00 | 1 | 1 | 0.02  | 0.022  | 0.022  | 0.017  | 0.02   | t | 159060 | RELTAET<br>KAFLKAG            | Homo<br>sapiens                  |
| 1 | 1.00 | 1 | 1 | -0.01 | -0.01  | -0.01  | -0.01  | -0.012 | t | 110198 | CPPDIIPKV<br>EGKTIA           | Mus<br>musculu<br>s              |
| 1 | 1.00 | 1 | 1 | 0.04  | 0.04   | 0.04   | 0.04   | 0.04   | t | 105715 | DLESIKGT                      | Oryctola<br>gus<br>cuniculu<br>s |
| 1 | 1.00 | 1 | 1 | 0.04  | 0.04   | 0.04   | 0.04   | 0.041  | t | 71849  | VVTGATVS<br>SQ                | Oryctola<br>gus<br>cuniculu<br>s |
| 1 | 1.00 | 1 | 1 | 0.02  | 0.02   | 0.02   | 0.02   | 0.02   | t | 79447  | VCEHPENK<br>APPCCP            | Mus<br>musculu<br>s              |
| 1 | 1.00 | 1 | 1 | 0.02  | 0.02   | 0.02   | 0.02   | 0.02   | t | 78307  | WHSQLSP                       | Homo<br>sapiens                  |
| 1 | 1.00 | 1 | 1 | 0     | 0      | 0      | 0      | 0      | t | 149082 | NPSQGPL                       | Sus<br>scrofa                    |

|   |      |   |   |       |        |       |       |       |   |        |                              |                   |
|---|------|---|---|-------|--------|-------|-------|-------|---|--------|------------------------------|-------------------|
| 1 | 1.00 | 1 | 1 | 0     | 0      | 0     | 0     | 0     | t | 151671 | KLVIINGKPI<br>TIFQERD        | Mus<br>musculus   |
| 1 | 1.00 | 1 | 1 | 0     | 0      | 0     | 0     | 0     | t | 143676 | DRVGLRNL<br>RGYY             | Mus<br>musculus   |
| 1 | 1.00 | 1 | 1 | 0     | 0      | 0     | 0     | 0     | t | 122478 | LTDTKTGL<br>HFNINEAIE<br>QGT | Homo<br>sapiens   |
| 1 | 1.00 | 1 | 1 | 0     | 0      | 0     | 0     | 0     | t | 113766 | QPGQGQ<br>QPGQGQP<br>G       | Homo<br>sapiens   |
| 1 | 1.00 | 1 | 1 | 0     | 0      | 0     | 0     | 0     | t | 78228  | PHANMTH<br>I                 | Homo<br>sapiens   |
| 1 | 1.00 | 1 | 1 | 0     | 0      | 0     | 0     | 0     | t | 88467  | SEDRETRP<br>HGRNNLM<br>RSYNR | Aotus             |
| 1 | 1.00 | 1 | 1 | 0     | 0      | 0     | 0     | 0     | t | 69124  | VITGSI                       | Homo<br>sapiens   |
| 1 | 1.00 | 1 | 1 | 0     | 0      | 0     | 0     | 0     | t | 47176  | PDREALYR<br>EFDEMEEC<br>ASHL | Homo<br>sapiens   |
| 1 | 1.00 | 1 | 1 | 0     | -0.004 | 0     | 0     | 0     | t | 21057  | GLPDSEPT<br>KTNGKCK          | Mus<br>musculus   |
| 1 | 1.00 | 1 | 1 | 0     | -0.004 | 0     | 0     | 0     | t | 21057  | GLPDSEPT<br>KTNGKCK          | Mus<br>musculus   |
| 1 | 1.00 | 1 | 1 | 0     | 0.003  | 0     | 0     | 0     | t | 21057  | GLPDSEPT<br>KTNGKCK          | Mus<br>musculus   |
| 1 | 1.00 | 1 | 1 | 0     | -0.001 | 0     | 0     | 0     | t | 21057  | GLPDSEPT<br>KTNGKCK          | Equus<br>caballus |
| 1 | 1.00 | 1 | 1 | 0     | 0.003  | 0     | 0     | 0     | t | 21057  | GLPDSEPT<br>KTNGKCK          | Equus<br>caballus |
| 1 | 1.00 | 1 | 1 | 0     | 0      | 0     | 0     | 0     | t | 21057  | GLPDSEPT<br>KTNGKCK          | Mus<br>musculus   |
| 1 | 1.00 | 1 | 1 | 0     | 0.006  | 0     | 0     | 0     | t | 21057  | GLPDSEPT<br>KTNGKCK          | Equus<br>caballus |
| 1 | 1.00 | 1 | 1 | -0.02 | -0.02  | -0.02 | -0.02 | -0.02 | t | 123391 | KRFIKWPL<br>N                | Ovis<br>aries     |

|   |      |   |   |       |       |        |        |        |   |        |                      |                                  |
|---|------|---|---|-------|-------|--------|--------|--------|---|--------|----------------------|----------------------------------|
| 1 | 1.00 | 1 | 1 | -0.02 | -0.02 | -0.02  | -0.02  | -0.02  | t | 114760 | CSRFPNAT<br>DK       | Homo<br>sapiens                  |
| 1 | 1.00 | 1 | 1 | -0.02 | -0.02 | -0.02  | -0.02  | -0.02  | t | 106642 | MHLNTPP              | Homo<br>sapiens                  |
| 1 | 1.00 | 1 | 1 | -0.02 | -0.02 | -0.02  | -0.02  | -0.02  | t | 114869 | KDVLVCNK<br>DL       | Homo<br>sapiens                  |
| 1 | 1.00 | 1 | 1 | -0.02 | -0.02 | -0.02  | -0.02  | -0.02  | t | 106642 | MHLNTPP              | Homo<br>sapiens                  |
| 1 | 1.00 | 1 | 1 | 0.01  | 0.01  | 0.01   | 0.01   | 0.012  | t | 79235  | GRDGYIV              | Oryctola<br>gus<br>cuniculu<br>s |
| 1 | 1.00 | 1 | 1 | -0.02 | -0.02 | -0.026 | -0.02  | -0.017 | t | 48996  | PQFKPQ               | Mus<br>musculu<br>s              |
| 1 | 1.00 | 1 | 1 | 0.01  | 0.01  | 0.016  | 0.01   | 0.007  | t | 71681  | VVGYGWV<br>PAY       | Mus<br>musculu<br>s              |
| 1 | 1.00 | 1 | 1 | -0.02 | -0.02 | -0.02  | -0.02  | -0.019 | t | 141760 | TAPPLLPH             | Rattus<br>norvegic<br>us         |
| 1 | 1.00 | 1 | 1 | -0.03 | -0.03 | -0.03  | -0.03  | -0.03  | t | 137413 | HAPRWH<br>W          | Mus<br>musculu<br>s              |
| 1 | 1.00 | 1 | 1 | -0.03 | -0.03 | -0.035 | -0.028 | -0.03  | t | 65948  | TQTLGTT<br>VGGVIW    | Homo<br>sapiens                  |
| 1 | 1.00 | 1 | 1 | 0.02  | 0.02  | 0.024  | 0.02   | 0.02   | t | 75494  | YQGVQKK<br>WD        | Oryctola<br>gus<br>cuniculu<br>s |
| 1 | 1.00 | 1 | 1 | -0.04 | -0.04 | -0.04  | -0.04  | -0.038 | t | 101716 | HQPTPAA              | Mus<br>musculu<br>s              |
| 1 | 1.00 | 1 | 1 | 0     | 0.003 | 0.003  | 0      | 0      | t | 6031   | CASGLTSL<br>FSPGSKQH | Mus<br>musculu<br>s              |
| 1 | 1.00 | 1 | 1 | -0.03 | -0.03 | -0.024 | -0.03  | -0.03  | t | 133517 | ARLLIGTSP<br>DFF     | Homo<br>sapiens                  |
| 1 | 1.00 | 1 | 1 | 0.03  | 0.033 | 0.031  | 0.03   | 0.032  | t | 59227  | SLKLMATL<br>FSTYASAD | Mus<br>musculu<br>s              |
| 1 | 1.00 | 1 | 1 | 0     | 0.004 | -0.005 | -0.003 | 0      | t | 141619 | DLNLIGFGI<br>NAKNNQ  | Homo<br>sapiens                  |

|   |      |   |   |       |        |        |        |        |   |        |                              |                    |
|---|------|---|---|-------|--------|--------|--------|--------|---|--------|------------------------------|--------------------|
| 1 | 1.00 | 1 | 1 | 0     | 0      | 0.005  | 0      | 0      | t | 68449  | VFEEAFFSFC                   | Homo sapiens       |
| 1 | 1.00 | 1 | 1 | -0.02 | -0.02  | -0.012 | -0.019 | -0.018 | t | 2046   | AIPLEVIK                     | Homo sapiens       |
| 1 | 1.00 | 1 | 1 | -0.05 | -0.05  | -0.05  | -0.048 | -0.05  | t | 96211  | EDKKRKEE<br>EE               | Homo sapiens       |
| 1 | 1.00 | 1 | 1 | 0     | 0      | 0      | 0      | -0.003 | t | 132027 | QCSTIGQ<br>MPNNQSI<br>N      | Homo sapiens       |
| 1 | 1.00 | 1 | 1 | 0.03  | 0.03   | 0.03   | 0.03   | 0.029  | t | 132801 | ELYRQKVE<br>PLRAELQE         | Mus musculus       |
| 1 | 1.00 | 1 | 1 | 0.05  | 0.048  | 0.049  | 0.052  | 0.052  | t | 106522 | HVTPISKL<br>MWFN             | Mus musculus       |
| 1 | 1.00 | 1 | 1 | 0.01  | 0.008  | 0.002  | 0.007  | 0.01   | t | 133635 | LSRSTKEY<br>NKLK             | Mus musculus       |
| 1 | 1.00 | 1 | 1 | -0.02 | -0.01  | -0.025 | -0.023 | -0.02  | t | 75872  | YSRCGSGP<br>RITP             | Pan troglodytes    |
| 1 | 1.00 | 1 | 1 | 0.04  | 0.038  | 0.036  | 0.039  | 0.04   | t | 53100  | RAFMAV<br>MHFSLTA<br>DRIDDDI | Mus musculus       |
| 1 | 1.00 | 1 | 1 | -0.02 | -0.018 | -0.013 | -0.013 | -0.018 | t | 130815 | ESDPPVAS<br>YQWRLIN          | Homo sapiens       |
| 1 | 1.00 | 1 | 1 | 0.02  | 0.02   | 0.016  | 0.02   | 0.02   | t | 74053  | YGLTTLFD<br>PGPRQQI          | Mus musculus       |
| 1 | 1.00 | 1 | 1 | -0.01 | -0.011 | -0.004 | -0.009 | -0.009 | t | 72483  | WGNGCG                       | Homo sapiens       |
| 1 | 1.00 | 1 | 1 | 0.06  | 0.058  | 0.053  | 0.057  | 0.06   | t | 46849  | PALDKLKL<br>TGDEATG<br>A     | Mus musculus       |
| 1 | 1.00 | 1 | 1 | 0.06  | 0.058  | 0.053  | 0.057  | 0.06   | t | 46849  | PALDKLKL<br>TGDEATG<br>A     | Mus musculus       |
| 1 | 1.00 | 1 | 1 | 0.03  | 0.034  | 0.029  | 0.031  | 0.03   | t | 16375  | FKHKFAEL<br>LEQQKAA<br>QYPSK | Homo sapiens       |
| 1 | 1.00 | 1 | 1 | -0.06 | -0.061 | -0.067 | -0.06  | -0.058 | t | 9949   | DRARRLL<br>WWHYNC<br>L       | Anas platyrhynchos |

|   |      |   |   |       |       |       |       |       |   |        |                              |                                  |
|---|------|---|---|-------|-------|-------|-------|-------|---|--------|------------------------------|----------------------------------|
| 1 | 1.00 | 1 | 1 | 0.02  | 0.022 | 0.02  | 0.021 | 0.02  | t | 118478 | KVISELNG<br>KNIEDVI          | Homo<br>sapiens                  |
| 1 | 1.00 | 1 | 1 | 0.02  | 0.022 | 0.009 | 0.017 | 0.021 | t | 30951  | KGGWFGK<br>HRGQGS            | Homo<br>sapiens                  |
| 1 | 1.00 | 1 | 1 | 0.03  | 0.03  | 0.03  | 0.03  | 0.03  | t | 115901 | PQSVLSLS<br>QS               | Homo<br>sapiens                  |
| 1 | 1.00 | 1 | 1 | 0.01  | 0.01  | 0.01  | 0.01  | 0.01  | t | 141575 | WKAQKRF<br>MKKSG             | Rattus                           |
| 1 | 1.00 | 1 | 1 | 0.01  | 0.01  | 0.01  | 0.01  | 0.01  | t | 149112 | SSPNTTQ                      | Sus<br>scrofa                    |
| 1 | 1.00 | 1 | 1 | 0.01  | 0.01  | 0.01  | 0.01  | 0.01  | t | 135677 | FTRVVGGE                     | Homo<br>sapiens                  |
| 1 | 1.00 | 1 | 1 | 0.01  | 0.01  | 0.01  | 0.01  | 0.01  | t | 103737 | WRSLDVE<br>MTAVQRS<br>F      | Homo<br>sapiens                  |
| 1 | 1.00 | 1 | 1 | 0.01  | 0.01  | 0.01  | 0.01  | 0.01  | t | 115850 | LPVPQKAV<br>PY               | Homo<br>sapiens                  |
| 1 | 1.00 | 1 | 1 | 0.01  | 0.01  | 0.01  | 0.01  | 0.01  | t | 117088 | SRLPLSQP<br>SPNS             | Homo<br>sapiens                  |
| 1 | 1.00 | 1 | 1 | 0.01  | 0.01  | 0.01  | 0.01  | 0.01  | t | 79641  | SGIAVNP                      | Oryctola<br>gus<br>cuniculu<br>s |
| 1 | 1.00 | 1 | 1 | -0.01 | -0.01 | -0.01 | -0.01 | -0.01 | t | 153419 | LTPPPWQ<br>NPFPFGG<br>GS     | Mus<br>musculu<br>s              |
| 1 | 1.00 | 1 | 1 | -0.01 | -0.01 | -0.01 | -0.01 | -0.01 | t | 136594 | RHYQNFQ<br>FHF               | Homo<br>sapiens                  |
| 1 | 1.00 | 1 | 1 | -0.01 | -0.01 | -0.01 | -0.01 | -0.01 | t | 153419 | LTPPPWQ<br>NPFPFGG<br>GS     | Mus<br>musculu<br>s              |
| 1 | 1.00 | 1 | 1 | -0.01 | -0.01 | -0.01 | -0.01 | -0.01 | t | 119548 | YRKSSAE<br>L                 | Homo<br>sapiens                  |
| 1 | 1.00 | 1 | 1 | -0.01 | -0.01 | -0.01 | -0.01 | -0.01 | t | 100076 | GPPGEVM<br>GRAIARVA<br>DTIGS | Sus<br>scrofa                    |
| 1 | 1.00 | 1 | 1 | -0.01 | -0.01 | -0.01 | -0.01 | -0.01 | t | 78229  | PHMNNFH<br>L                 | Homo<br>sapiens                  |
| 1 | 1.00 | 1 | 1 | -0.01 | -0.01 | -0.01 | -0.01 | -0.01 | t | 39379  | LSGKPATIP<br>DREVLYRE<br>FDE | Homo<br>sapiens                  |
| 1 | 1.00 | 1 | 1 | -0.01 | -0.01 | -0.01 | -0.01 | -0.01 | t | 47181  | PDREVLYQ<br>AFDEMEE<br>CASHL | Homo<br>sapiens                  |
| 1 | 1.00 | 1 | 1 | -0.01 | -0.01 | -0.01 | -0.01 | -0.01 | t | 22078  | GRIILSGKP<br>ATIPDREV<br>LYR | Homo<br>sapiens                  |

|   |      |   |   |       |        |        |        |        |   |        |                              |                                  |
|---|------|---|---|-------|--------|--------|--------|--------|---|--------|------------------------------|----------------------------------|
| 1 | 1.00 | 1 | 1 | -0.01 | -0.01  | -0.01  | -0.01  | -0.01  | t | 22082  | GRIILSGKP<br>AVIPDREV<br>LYR | Homo<br>sapiens                  |
| 1 | 1.00 | 1 | 1 | -0.01 | -0.01  | -0.01  | -0.01  | -0.01  | t | 22125  | GRLHLINQ<br>RAVVAPD<br>KEVLY | Homo<br>sapiens                  |
| 1 | 1.00 | 1 | 1 | -0.01 | -0.01  | -0.01  | -0.01  | -0.01  | t | 22080  | GRIILSGKP<br>AVIPDRELL<br>YR | Homo<br>sapiens                  |
| 1 | 1.00 | 1 | 1 | -0.01 | -0.01  | -0.01  | -0.01  | -0.01  | t | 22105  | GRIVLSGR<br>PAIIPDREV<br>LYR | Homo<br>sapiens                  |
| 1 | 1.00 | 1 | 1 | -0.03 | -0.03  | -0.03  | -0.03  | -0.03  | t | 135752 | RTTEFWK<br>Q                 | Homo<br>sapiens                  |
| 1 | 1.00 | 1 | 1 | -0.03 | -0.03  | -0.03  | -0.03  | -0.03  | t | 115743 | FPPQSVLS<br>LS               | Homo<br>sapiens                  |
| 1 | 1.00 | 1 | 1 | -0.05 | -0.05  | -0.05  | -0.05  | -0.05  | t | 149066 | LLATQPA                      | Sus<br>scrofa                    |
| 1 | 1.00 | 1 | 1 | -0.03 | -0.03  | -0.032 | -0.031 | -0.03  | t | 53239  | RAVTPLGP<br>PAA              | Homo<br>sapiens                  |
| 1 | 1.00 | 1 | 1 | 0     | 0      | -0.005 | -0.005 | -0.001 | t | 144382 | KIQTSEHC<br>CGVKGP<br>DYKG   | Homo<br>sapiens                  |
| 1 | 1.00 | 1 | 1 | -0.02 | -0.02  | -0.015 | -0.018 | -0.02  | t | 79041  | PKARQPE<br>GRAWAQ<br>P       | Homo<br>sapiens                  |
| 1 | 1.00 | 1 | 1 | 0.03  | 0.031  | 0.028  | 0.03   | 0.03   | t | 64645  | TKPTDPTG<br>IEPDDH           | Myodes<br>glareolu<br>s          |
| 1 | 1.00 | 1 | 1 | -0.02 | -0.02  | -0.02  | -0.02  | -0.02  | t | 55067  | RNTNRRP                      | Homo<br>sapiens                  |
| 1 | 1.00 | 1 | 1 | -0.01 | -0.015 | -0.018 | -0.011 | -0.008 | t | 13678  | EPKIGLPG<br>PPSAPVP          | Bos<br>taurus                    |
| 1 | 1.00 | 1 | 1 | -0.01 | -0.007 | -0.008 | -0.01  | -0.01  | t | 141757 | SVVPSKAT<br>WGFA             | Mus<br>musculu<br>s              |
| 1 | 1.00 | 1 | 1 | -0.02 | -0.02  | -0.028 | -0.02  | -0.02  | t | 48664  | PNKTACM<br>YGGVTLH<br>DNNRLT | Oryctola<br>gus<br>cuniculu<br>s |
| 1 | 1.00 | 1 | 1 | 0     | 0      | 0      | 0.004  | 0.002  | t | 11813  | EENVEENV                     | Homo<br>sapiens                  |

|   |      |   |   |       |        |        |        |        |   |        |                            |                                  |
|---|------|---|---|-------|--------|--------|--------|--------|---|--------|----------------------------|----------------------------------|
| 1 | 1.00 | 1 | 1 | 0     | 0      | 0.004  | 0      | 0.001  | t | 7559   | DAKFRPN                    | Mus<br>musculu<br>s              |
| 1 | 1.00 | 1 | 1 | 0.01  | 0.01   | 0.01   | 0.01   | 0.012  | t | 140507 | TKTWQSM                    | Mus<br>musculu<br>s              |
| 1 | 1.00 | 1 | 1 | -0.04 | -0.04  | -0.033 | -0.031 | -0.04  | t | 119503 | NRKLKSN<br>MM              | Homo<br>sapiens                  |
| 1 | 1.00 | 1 | 1 | 0.03  | 0.026  | 0.033  | 0.033  | 0.033  | t | 115302 | IVTAGEER<br>AVTT           | Oryctola<br>gus<br>cuniculu<br>s |
| 1 | 1.00 | 1 | 1 | -0.03 | -0.03  | -0.025 | -0.024 | -0.027 | t | 115832 | KTGQFL                     | Homo<br>sapiens                  |
| 1 | 1.00 | 1 | 1 | 0.04  | 0.04   | 0.037  | 0.04   | 0.044  | t | 61996  | STVSSEAN<br>AEDVVC         | Homo<br>sapiens                  |
| 1 | 1.00 | 1 | 1 | 0     | 0.007  | 0      | 0      | 0      | t | 94470  | CNPACGP                    | Capra<br>hircus                  |
| 1 | 1.00 | 1 | 1 | 0     | 0      | 0      | 0      | 0      | t | 94470  | CNPACGP                    | Capra<br>hircus                  |
| 1 | 1.00 | 1 | 1 | -0.01 | -0.008 | -0.012 | -0.01  | -0.009 | t | 46792  | PAFGANS<br>NNPDWDF<br>NP   | Homo<br>sapiens                  |
| 1 | 1.00 | 1 | 1 | -0.03 | -0.03  | -0.03  | -0.03  | -0.031 | t | 112540 | HVQLAPPI<br>ALRH           | Homo<br>sapiens                  |
| 1 | 1.00 | 1 | 1 | 0     | 0      | 0.005  | 0.003  | 0      | t | 60170  | SPNVSVPS<br>SSSTPLLY       | Homo<br>sapiens                  |
| 1 | 1.00 | 1 | 1 | 0     | 0.014  | 0.005  | 0.003  | 0      | t | 60170  | SPNVSVPS<br>SSSTPLLY       | Homo<br>sapiens                  |
| 1 | 1.00 | 1 | 1 | 0.02  | 0.017  | 0.02   | 0.02   | 0.019  | t | 144597 | CFLTAAGY<br>GGGLPDS<br>VKI | Oryctola<br>gus<br>cuniculu<br>s |
| 1 | 1.00 | 1 | 1 | 0.01  | 0.01   | 0.01   | 0.01   | 0.01   | t | 102153 | TQYTAYSP<br>VPLL           | Homo<br>sapiens                  |
| 1 | 1.00 | 1 | 1 | 0     | 0      | 0      | 0      | 0      | t | 94617  | NPACG                      | Capra<br>hircus                  |



|   |      |   |   |       |        |        |        |        |   |        |                              |                       |
|---|------|---|---|-------|--------|--------|--------|--------|---|--------|------------------------------|-----------------------|
| 1 | 1.00 | 1 | 1 | 0     | 0      | 0      | 0      | 0      | t | 94467  | CNPA                         | Oryctolagus cuniculus |
| 1 | 1.00 | 1 | 1 | 0     | 0      | 0      | 0      | 0      | t | 94467  | CNPA                         | Capra hircus          |
| 1 | 1.00 | 1 | 1 | 0     | 0.007  | 0      | 0      | 0      | t | 94467  | CNPA                         | Capra hircus          |
| 1 | 1.00 | 1 | 1 | 0.04  | 0.04   | 0.029  | 0.037  | 0.04   | t | 3080   | AMEDIKQ MEA                  | Homo sapiens          |
| 1 | 1.00 | 1 | 1 | 0.02  | 0.023  | 0.019  | 0.02   | 0.021  | t | 140077 | VQIINKKL<br>DLSNVQSK<br>C    | Mus musculus          |
| 1 | 1.00 | 1 | 1 | -0.02 | -0.018 | -0.022 | -0.023 | -0.022 | t | 105306 | LPQQCGLR<br>APQR             | Homo sapiens          |
| 1 | 1.00 | 1 | 1 | 0.04  | 0.04   | 0.04   | 0.04   | 0.04   | t | 114972 | VEQGASV<br>DKR               | Homo sapiens          |
| 1 | 1.00 | 1 | 1 | 0     | 0      | 0      | 0      | 0      | t | 149045 | FNVTQGP                      | Sus scrofa            |
| 1 | 1.00 | 1 | 1 | 0     | 0      | 0      | 0      | 0      | t | 123840 | WAASFGA<br>GD                | Ovis aries            |
| 1 | 1.00 | 1 | 1 | 0     | 0      | 0      | 0      | 0      | t | 104039 | LIKCDERG<br>KMIPSDLE<br>RRIL | Mus musculus          |
| 1 | 1.00 | 1 | 1 | 0     | 0      | 0      | 0      | 0      | t | 95127  | PDITFTVT<br>MRRRTLYY<br>GLNL | Rattus norvegicus     |
| 1 | 1.00 | 1 | 1 | 0     | 0      | 0      | 0      | 0      | t | 6074   | CCRHKQK<br>DVGDKVQK<br>TLPPS | Ovis aries            |
| 1 | 1.00 | 1 | 1 | -0.02 | -0.02  | -0.02  | -0.02  | -0.02  | t | 137747 | DTPLTYAG<br>LRLV             | Mus musculus          |
| 1 | 1.00 | 1 | 1 | -0.02 | -0.02  | -0.02  | -0.02  | -0.02  | t | 137747 | DTPLTYAG<br>LRLV             | Mus musculus          |
| 1 | 1.00 | 1 | 1 | -0.02 | -0.02  | -0.02  | -0.02  | -0.02  | t | 98396  | QQQQFLG<br>QQQPFPP<br>QQPY   | Homo sapiens( human)  |
| 1 | 1.00 | 1 | 1 | -0.02 | -0.02  | -0.02  | -0.02  | -0.02  | t | 98396  | QQQQFLG<br>QQQPFPP<br>QQPY   | Homo sapiens( human)  |

|   |      |   |   |       |        |        |        |        |   |        |                               |                       |
|---|------|---|---|-------|--------|--------|--------|--------|---|--------|-------------------------------|-----------------------|
| 1 | 1.00 | 1 | 1 | -0.02 | -0.02  | -0.02  | -0.02  | -0.02  | t | 47191  | PDREVLRYR<br>EFDEMEEC<br>AAHI | Homo sapiens          |
| 1 | 1.00 | 1 | 1 | -0.01 | -0.01  | 0.001  | -0.01  | -0.01  | t | 10298  | DTAWDF                        | Homo sapiens          |
| 1 | 1.00 | 1 | 1 | 0     | -0.003 | 0.007  | 0      | -0.002 | t | 130607 | SHNLVSSA<br>FPSA              | Camelus dromedarius   |
| 1 | 1.00 | 1 | 1 | -0.07 | -0.066 | -0.07  | -0.063 | -0.069 | t | 126137 | GLKKMLRT<br>CAVHITL           | Homo sapiens          |
| 1 | 1.00 | 1 | 1 | -0.04 | -0.04  | -0.04  | -0.04  | -0.04  | t | 115879 | NYYQQKP<br>VAL                | Homo sapiens          |
| 1 | 1.00 | 1 | 1 | 0     | 0.003  | 0.007  | 0      | 0      | t | 78695  | KDTNNNL<br>YNGK               | Mus musculus          |
| 1 | 1.00 | 1 | 1 | 0.03  | 0.03   | 0.037  | 0.03   | 0.03   | t | 123180 | FLEYLGEKY                     | Ovis aries            |
| 1 | 1.00 | 1 | 1 | 0     | -0.003 | -0.002 | 0      | 0      | t | 145799 | GLIADSVK<br>DNQITSAL<br>STQ   | Oryctolagus cuniculus |
| 1 | 1.00 | 1 | 1 | 0     | 0      | 0      | 0      | 0      | t | 70670  | VQWMNR<br>LIAFASRG<br>NHVAPT  | Homo sapiens          |
| 1 | 1.00 | 1 | 1 | 0     | 0      | 0      | 0      | 0      | t | 1260   | AFASRGN<br>HVAPTHY<br>VTESDA  | Homo sapiens          |
| 1 | 1.00 | 1 | 1 | 0     | -0.002 | 0      | -0.001 | 0      | t | 47839  | PHKAAVD<br>VGPLSVGP<br>QS     | Mus musculus          |
| 1 | 1.00 | 1 | 1 | 0     | 0      | -0.004 | -0.003 | 0      | t | 82531  | GADLAAA<br>QAA                | Homo sapiens          |
| 1 | 1.00 | 1 | 1 | 0     | 0.002  | -0.006 | -0.001 | 0.002  | t | 133798 | DKIRGEG<br>MRYIIILD           | Homo sapiens          |
| 1 | 1.00 | 1 | 1 | -0.02 | -0.017 | -0.02  | -0.02  | -0.021 | t | 24015  | HHRGAAP<br>NS                 | Equus caballus        |
| 1 | 1.00 | 1 | 1 | 0.04  | 0.038  | 0.037  | 0.039  | 0.04   | t | 29832  | KAISQIQES<br>LTTTSTAL         | Mus musculus          |

|   |      |   |   |       |        |        |        |        |   |        |                            |                                  |
|---|------|---|---|-------|--------|--------|--------|--------|---|--------|----------------------------|----------------------------------|
| 1 | 1.00 | 1 | 1 | -0.01 | -0.01  | -0.021 | -0.01  | -0.01  | t | 29756  | KAANYQY<br>NYLRDGE<br>QVTA | Mus<br>musculu<br>s              |
| 1 | 1.00 | 1 | 1 | -0.01 | -0.01  | -0.021 | -0.01  | -0.01  | t | 29756  | KAANYQY<br>NYLRDGE<br>QVTA | Mus<br>musculu<br>s              |
| 1 | 1.00 | 1 | 1 | 0     | -0.004 | 0      | -0.001 | 0      | t | 144099 | TLQQNMP<br>LALVW           | Oryctola<br>gus<br>cuniculu<br>s |
| 1 | 1.00 | 1 | 1 | 0.01  | 0.01   | 0.014  | 0.01   | 0.009  | t | 68969  | VIGHEITH<br>GFD            | Oryctola<br>gus<br>cuniculu<br>s |
| 1 | 1.00 | 1 | 1 | -0.01 | -0.005 | 0      | -0.007 | -0.01  | t | 42652  | MSRLWL<br>MKAHGISS<br>E    | Homo<br>sapiens                  |
| 1 | 1.00 | 1 | 1 | 0.01  | 0.01   | 0.001  | 0.003  | 0.01   | t | 135931 | GDVEEAIE<br>RAVV           | Homo<br>sapiens                  |
| 1 | 1.00 | 1 | 1 | 0.01  | 0.01   | 0.008  | 0.01   | 0.012  | t | 32807  | KPNLSSKR<br>SELSQLS        | Mus<br>musculu<br>s              |
| 1 | 1.00 | 1 | 1 | 0     | 0.004  | 0.006  | 0.001  | 0      | t | 30597  | KERSSLRY<br>GNVLDV         | Homo<br>sapiens                  |
| 1 | 1.00 | 1 | 1 | 0     | 0      | 0      | -0.002 | 0      | t | 47026  | PCKPLLRD<br>DITFMV         | Homo<br>sapiens                  |
| 1 | 1.00 | 1 | 1 | -0.01 | -0.01  | -0.01  | -0.012 | -0.01  | t | 4247   | ARRPEGRT                   | Homo<br>sapiens                  |
| 1 | 1.00 | 1 | 1 | -0.01 | -0.014 | -0.005 | -0.007 | -0.007 | t | 115230 | ENPVVHF                    | Oryctola<br>gus<br>cuniculu<br>s |
| 1 | 1.00 | 1 | 1 | -0.04 | -0.04  | -0.037 | -0.04  | -0.043 | t | 58941  | SKSRGATG<br>K              | Homo<br>sapiens                  |
| 1 | 1.00 | 1 | 1 | 0.01  | 0.01   | 0.014  | 0.01   | 0.01   | t | 74476  | YKLPDHVR<br>T              | Mus<br>musculu<br>s              |
| 1 | 1.00 | 1 | 1 | 0     | 0      | 0      | 0      | 0      | t | 139225 | REAEQRR                    | Oryctola<br>gus<br>cuniculu<br>s |
| 1 | 1.00 | 1 | 1 | 0.04  | 0.04   | 0.04   | 0.04   | 0.041  | t | 117700 | YSPTSPS                    | Homo<br>sapiens                  |

|   |      |   |   |       |        |        |        |        |   |        |                              |                                  |
|---|------|---|---|-------|--------|--------|--------|--------|---|--------|------------------------------|----------------------------------|
| 1 | 1.00 | 1 | 1 | 0     | 0      | 0      | 0.006  | 0.003  | t | 868    | AEEAFDL<br>WNECAKA<br>CV     | Homo<br>sapiens                  |
| 1 | 1.00 | 1 | 1 | 0.03  | 0.03   | 0.021  | 0.03   | 0.03   | t | 139891 | SAKLAEQY<br>DTFVKFTY<br>DQ   | Ovis<br>aries                    |
| 1 | 1.00 | 1 | 1 | 0.04  | 0.036  | 0.033  | 0.043  | 0.042  | t | 106885 | SYELTQPP<br>SVSVSPGQ<br>TAR  | Oryctola<br>gus<br>cuniculu<br>s |
| 1 | 1.00 | 1 | 1 | -0.02 | -0.02  | -0.018 | -0.02  | -0.02  | t | 122034 | WNPAD                        | Rattus<br>norvegic<br>us         |
| 1 | 1.00 | 1 | 1 | 0.01  | 0.01   | 0.008  | 0.01   | 0.01   | t | 95728  | QPPVSQF<br>HIQGQ             | Homo<br>sapiens                  |
| 1 | 1.00 | 1 | 1 | 0     | -0.004 | 0      | -0.001 | -0.002 | t | 2157   | AKAVYQQ<br>FVEFYEKV<br>TGTDL | Oryctola<br>gus<br>cuniculu<br>s |
| 1 | 1.00 | 1 | 1 | 0.02  | 0.02   | 0.021  | 0.018  | 0.015  | t | 37638  | LLNYIDEN<br>KLYLIGSAE<br>YE  | Homo<br>sapiens                  |
| 1 | 1.00 | 1 | 1 | 0     | 0      | 0      | 0      | 0.001  | t | 63811  | TGEDPGFF<br>NV               | Oryctola<br>gus<br>cuniculu<br>s |
| 1 | 1.00 | 1 | 1 | 0.03  | 0.03   | 0.03   | 0.03   | 0.03   | t | 123860 | YEEHLYGR<br>D                | Ovis<br>aries                    |
| 1 | 1.00 | 1 | 1 | 0.01  | 0.01   | 0.01   | 0.01   | 0.01   | t | 149433 | QPLSQVSF<br>QQ               | Mus<br>musculu<br>s              |
| 1 | 1.00 | 1 | 1 | 0.01  | 0.01   | 0.01   | 0.01   | 0.01   | t | 149433 | QPLSQVSF<br>QQ               | Homo<br>sapiens                  |
| 1 | 1.00 | 1 | 1 | 0.01  | 0.01   | 0.01   | 0.01   | 0.01   | t | 109779 | QVSLTCL                      | Homo<br>sapiens                  |
| 1 | 1.00 | 1 | 1 | 0.01  | 0.01   | 0.01   | 0.01   | 0.01   | t | 103729 | WGPSSDP<br>AWERNDP<br>T      | Homo<br>sapiens                  |
| 1 | 1.00 | 1 | 1 | 0.01  | 0.01   | 0.01   | 0.01   | 0.01   | t | 66681  | TTKPKEVP<br>TTKP             | Homo<br>sapiens                  |
| 1 | 1.00 | 1 | 1 | 0.01  | 0.01   | 0.01   | 0.01   | 0.01   | t | 30980  | KGIPNTKA<br>P                | Homo<br>sapiens                  |

|   |      |   |   |       |       |       |       |       |   |        |                               |              |
|---|------|---|---|-------|-------|-------|-------|-------|---|--------|-------------------------------|--------------|
| 1 | 1.00 | 1 | 1 | 0.01  | 0.01  | 0.01  | 0.01  | 0.01  | t | 30980  | KGIPNTKAP                     | Homo sapiens |
| 1 | 1.00 | 1 | 1 | -0.01 | -0.01 | -0.01 | -0.01 | -0.01 | t | 135754 | RYVNWIKE                      | Homo sapiens |
| 1 | 1.00 | 1 | 1 | -0.01 | -0.01 | -0.01 | -0.01 | -0.01 | t | 141576 | WKLRKWF<br>FKDGG              | Rattus       |
| 1 | 1.00 | 1 | 1 | -0.01 | -0.01 | -0.01 | -0.01 | -0.01 | t | 132009 | PPEFRPGE<br>PWKGYPN           | Homo sapiens |
| 1 | 1.00 | 1 | 1 | -0.01 | -0.01 | -0.01 | -0.01 | -0.01 | t | 115893 | PNSLPQNI<br>PP                | Homo sapiens |
| 1 | 1.00 | 1 | 1 | -0.01 | -0.01 | -0.01 | -0.01 | -0.01 | t | 108269 | AKYSNQRAQ                     | Homo sapiens |
| 1 | 1.00 | 1 | 1 | -0.01 | -0.01 | -0.01 | -0.01 | -0.01 | t | 80031  | SPDAHVPF<br>CFGK              | Mus musculus |
| 1 | 1.00 | 1 | 1 | -0.01 | -0.01 | -0.01 | -0.01 | -0.01 | t | 80031  | SPDAHVPF<br>CFGK              | Mus musculus |
| 1 | 1.00 | 1 | 1 | -0.01 | -0.01 | -0.01 | -0.01 | -0.01 | t | 41322  | MEECASH<br>LPYIEQGM<br>HLAEQ  | Homo sapiens |
| 1 | 1.00 | 1 | 1 | -0.01 | -0.01 | -0.01 | -0.01 | -0.01 | t | 39401  | LSGRPAVI<br>PDREVLRY<br>EFDE  | Homo sapiens |
| 1 | 1.00 | 1 | 1 | -0.01 | -0.01 | -0.01 | -0.01 | -0.01 | t | 46989  | PAVIPDRE<br>LLYREFDE<br>MEEC  | Homo sapiens |
| 1 | 1.00 | 1 | 1 | -0.01 | -0.01 | -0.01 | -0.01 | -0.01 | t | 47183  | PDREVLRYQ<br>EFDEMEEC<br>ASHL | Homo sapiens |
| 1 | 1.00 | 1 | 1 | -0.01 | -0.01 | -0.01 | -0.01 | -0.01 | t | 50911  | QGMQLAA<br>EFKQKALG<br>LLQTA  | Homo sapiens |
| 1 | 1.00 | 1 | 1 | -0.01 | -0.01 | -0.01 | -0.01 | -0.01 | t | 39399  | LSGRPAIV<br>PDREVLRY<br>EFDE  | Homo sapiens |
| 1 | 1.00 | 1 | 1 | -0.01 | -0.01 | -0.01 | -0.01 | -0.01 | t | 47179  | PDRELLRY<br>EFDEMEEC<br>PSHL  | Homo sapiens |
| 1 | 1.00 | 1 | 1 | -0.01 | -0.01 | -0.01 | -0.01 | -0.01 | t | 39384  | LSGKPAVI<br>PDREVLRY<br>EFDE  | Homo sapiens |
| 1 | 1.00 | 1 | 1 | -0.01 | -0.01 | -0.01 | -0.01 | -0.01 | t | 11966  | EFDEMEEC<br>ASHLPYIE<br>QGMH  | Homo sapiens |
| 1 | 1.00 | 1 | 1 | -0.01 | -0.01 | -0.01 | -0.01 | -0.01 | t | 7146   | CTGFSNLF<br>NLGSQQK<br>V      | Mus musculus |

|   |      |   |   |       |        |        |        |        |   |        |                              |                                  |
|---|------|---|---|-------|--------|--------|--------|--------|---|--------|------------------------------|----------------------------------|
| 1 | 1.00 | 1 | 1 | -0.03 | -0.03  | -0.03  | -0.03  | -0.03  | t | 151068 | VGSSRYSK<br>KFKPEIA          | Homo<br>sapiens                  |
| 1 | 1.00 | 1 | 1 | -0.03 | -0.03  | -0.03  | -0.03  | -0.03  | t | 79143  | ACNMLR<br>WDKTIPCR           | Mus<br>musculu<br>s              |
| 1 | 1.00 | 1 | 1 | -0.03 | -0.03  | -0.03  | -0.03  | -0.03  | t | 79606  | LPYTMWV                      | Oryctola<br>gus<br>cuniculu<br>s |
| 1 | 1.00 | 1 | 1 | -0.05 | -0.05  | -0.05  | -0.05  | -0.05  | t | 109857 | RRDSGGFE<br>QIWG             | Mus<br>musculu<br>s              |
| 1 | 1.00 | 1 | 1 | 0.04  | 0.037  | 0.052  | 0.04   | 0.038  | t | 94496  | EEEEYMP<br>MEDLYLDI<br>LPEE  | Oryctola<br>gus<br>cuniculu<br>s |
| 1 | 1.00 | 1 | 1 | 0.03  | 0.03   | 0.03   | 0.03   | 0.03   | t | 79359  | RCGPASRE<br>KHALCT           | Mus<br>musculu<br>s              |
| 1 | 1.00 | 1 | 1 | -0.01 | -0.008 | -0.001 | -0.003 | -0.01  | t | 8464   | DGNPPEV<br>KSVGLGN<br>VNGVTL | Homo<br>sapiens                  |
| 1 | 1.00 | 1 | 1 | 0.03  | 0.032  | 0.029  | 0.03   | 0.032  | t | 51979  | QPTQMSA<br>QEDLGDD<br>TGIHVI | Cavia<br>porcellu<br>s           |
| 1 | 1.00 | 1 | 1 | -0.03 | -0.028 | -0.03  | -0.031 | -0.03  | t | 149479 | STTIAPFGI<br>F               | Homo<br>sapiens                  |
| 1 | 1.00 | 1 | 1 | 0.02  | 0.024  | 0.015  | 0.017  | 0.02   | t | 78111  | CLVRTPEV<br>DDEALEKF<br>DKAL | Homo<br>sapiens                  |
| 1 | 1.00 | 1 | 1 | 0     | -0.002 | 0.004  | -0.003 | 0      | t | 74056  | YGMEIRPL<br>K                | Mus<br>musculu<br>s              |
| 1 | 1.00 | 1 | 1 | -0.01 | -0.006 | 0.006  | -0.009 | -0.012 | t | 52487  | QTCKTVDS<br>NDCL             | Myodes<br>glareolu<br>s          |
| 1 | 1.00 | 1 | 1 | 0     | -0.004 | 0.005  | 0.003  | 0      | t | 95370  | EVGYTRAE<br>GLYS             | Oryctola<br>gus<br>cuniculu<br>s |
| 1 | 1.00 | 1 | 1 | 0.02  | 0.018  | 0.02   | 0.023  | 0.02   | t | 66675  | TTKGENFT<br>ETDVKMM<br>ERVVE | Mus<br>musculu<br>s              |

|   |      |   |   |       |        |       |        |        |   |        |                              |                                  |
|---|------|---|---|-------|--------|-------|--------|--------|---|--------|------------------------------|----------------------------------|
| 1 | 1.00 | 1 | 1 | -0.04 | -0.038 | -0.04 | -0.033 | -0.038 | t | 117495 | ERDRKREK<br>RKPKS            | Homo<br>sapiens                  |
| 1 | 1.00 | 1 | 1 | 0.06  | 0.06   | 0.06  | 0.06   | 0.06   | t | 97326  | GEGQFND<br>AE                | Oryctola<br>gus<br>cuniculu<br>s |
| 1 | 1.00 | 1 | 1 | 0.04  | 0.04   | 0.04  | 0.04   | 0.04   | t | 115211 | DSPEVIESP<br>PEINTVQV<br>TST | Homo<br>sapiens                  |
| 1 | 1.00 | 1 | 1 | 0.02  | 0.02   | 0.02  | 0.02   | 0.02   | t | 135461 | GGLGVS                       | Oryctola<br>gus<br>cuniculu<br>s |
| 1 | 1.00 | 1 | 1 | 0.02  | 0.02   | 0.02  | 0.02   | 0.02   | t | 108376 | GASGDIAK<br>Q                | Homo<br>sapiens                  |
| 1 | 1.00 | 1 | 1 | 0.02  | 0.02   | 0.02  | 0.02   | 0.02   | t | 115877 | NVPGEIVE<br>SL               | Homo<br>sapiens                  |
| 1 | 1.00 | 1 | 1 | 0     | 0      | 0     | 0      | 0      | t | 123168 | FGGGDAA<br>PA                | Ovis<br>aries                    |
| 1 | 1.00 | 1 | 1 | 0     | 0      | 0     | 0      | 0      | t | 104125 | MNKTFVP                      | Homo<br>sapiens                  |
| 1 | 1.00 | 1 | 1 | 0     | 0      | 0     | 0      | 0      | t | 103476 | PGQGAYA<br>AANSWVD<br>V      | Homo<br>sapiens                  |
| 1 | 1.00 | 1 | 1 | 0     | 0      | 0     | 0      | 0      | t | 78384  | FPAGVAN<br>DPSVAGPF          | Mus<br>musculu<br>s              |
| 1 | 1.00 | 1 | 1 | -0.02 | -0.02  | -0.02 | -0.02  | -0.02  | t | 142413 | EIAAEVAK<br>AKVAK            | Homo<br>sapiens                  |
| 1 | 1.00 | 1 | 1 | -0.02 | -0.02  | -0.02 | -0.02  | -0.02  | t | 135677 | FTRVVGGE                     | Homo<br>sapiens                  |
| 1 | 1.00 | 1 | 1 | -0.02 | -0.02  | -0.02 | -0.02  | -0.02  | t | 121674 | NVKKLLVA<br>KPLVDWF          | Mus<br>musculu<br>s              |
| 1 | 1.00 | 1 | 1 | -0.02 | -0.02  | -0.02 | -0.02  | -0.02  | t | 105007 | TWDANKP<br>YSW               | Homo<br>sapiens                  |
| 1 | 1.00 | 1 | 1 | -0.02 | -0.02  | -0.02 | -0.02  | -0.02  | t | 110595 | GIAGAPGF<br>PGPRGPP          | Mus<br>musculu<br>s              |
| 1 | 1.00 | 1 | 1 | 0.01  | 0.008  | 0     | 0.013  | 0.013  | t | 8475   | DGQPAGD<br>RADGQPA<br>GDRA   | Mus<br>musculu<br>s              |
| 1 | 1.00 | 1 | 1 | -0.01 | -0.012 | -0.01 | -0.011 | -0.011 | t | 153358 | AHPPWPL<br>QYVFRGG<br>GS     | Mus<br>musculu<br>s              |

|   |      |   |   |       |        |        |        |        |   |        |                              |                              |
|---|------|---|---|-------|--------|--------|--------|--------|---|--------|------------------------------|------------------------------|
| 1 | 1.00 | 1 | 1 | 0     | 0      | 0      | 0.003  | 0.002  | t | 121858 | SKLIKIFQD<br>HPLQKTYN        | Mus<br>musculus              |
| 1 | 1.00 | 1 | 1 | 0.02  | 0.02   | 0.013  | 0.02   | 0.022  | t | 133640 | LYVEDISEP<br>PLHDFYCS<br>RL  | Mus<br>musculus              |
| 1 | 1.00 | 1 | 1 | 0.01  | 0.006  | 0.01   | 0.009  | 0.01   | t | 44907  | NLTTWNP<br>T                 | Oryctola<br>gus<br>cuniculus |
| 1 | 1.00 | 1 | 1 | 0     | 0      | 0      | 0      | 0      | t | 141616 | DIKGNL<br>VHDEYTKY<br>I      | Rattus<br>norvegicus         |
| 1 | 1.00 | 1 | 1 | 0     | 0      | 0      | 0      | 0      | t | 141616 | DIKGNL<br>VHDEYTKY<br>I      | Oryctola<br>gus<br>cuniculus |
| 1 | 1.00 | 1 | 1 | 0.01  | 0.014  | 0.007  | 0.007  | 0.01   | t | 115484 | SFSDIPNPI<br>GSENSEKT<br>TMP | Homo<br>sapiens              |
| 1 | 1.00 | 1 | 1 | -0.03 | -0.031 | -0.025 | -0.03  | -0.03  | t | 49893  | PVKKPVAL<br>KVKAKN           | Bos<br>taurus                |
| 1 | 1.00 | 1 | 1 | 0     | 0      | 0      | 0      | 0      | t | 38150  | LMVPKPQ<br>GPL               | Homo<br>sapiens              |
| 1 | 1.00 | 1 | 1 | -0.02 | -0.02  | -0.028 | -0.02  | -0.02  | t | 106407 | EVPKHCGI<br>VD               | Homo<br>sapiens              |
| 1 | 1.00 | 1 | 1 | -0.04 | -0.038 | -0.035 | -0.049 | -0.047 | t | 125509 | NLYSNRSA<br>VTSL             | Homo<br>sapiens              |
| 1 | 1.00 | 1 | 1 | -0.02 | -0.02  | -0.02  | -0.02  | -0.02  | t | 135930 | GDKVSFFC<br>KNKEKKC          | Homo<br>sapiens              |
| 1 | 1.00 | 1 | 1 | 0.01  | 0.01   | 0.008  | 0.01   | 0.009  | t | 153252 | DHQLDPA<br>FRANTAN<br>P      | Mus<br>musculus              |
| 1 | 1.00 | 1 | 1 | -0.01 | -0.008 | -0.005 | -0.009 | -0.01  | t | 109962 | SVMHEGL                      | Homo<br>sapiens              |
| 1 | 1.00 | 1 | 1 | -0.01 | -0.01  | -0.01  | -0.01  | -0.01  | t | 106407 | EVPKHCGI<br>VD               | Homo<br>sapiens              |
| 1 | 1.00 | 1 | 1 | 0.03  | 0.034  | 0.029  | 0.03   | 0.034  | t | 34065  | KVKEISNQ<br>EPLKI            | Myodes<br>glareolus          |



|   |      |   |   |       |        |        |       |        |   |        |                              |                                  |
|---|------|---|---|-------|--------|--------|-------|--------|---|--------|------------------------------|----------------------------------|
| 1 | 1.00 | 1 | 1 | 0.04  | 0.042  | 0.024  | 0.033 | 0.04   | t | 112716 | VVSTDEYV<br>ARTNIYYH<br>AGTS | Cavia<br>porcellu<br>s           |
| 1 | 1.00 | 1 | 1 | 0     | 0.003  | 0      | 0     | 0.001  | t | 144678 | GTQPTLEV<br>VPMGRGS          | Mus<br>musculu<br>s              |
| 1 | 1.00 | 1 | 1 | 0.03  | 0.032  | 0.023  | 0.027 | 0.03   | t | 97762  | VVCAMIE<br>GAQGALE<br>RE     | Homo<br>sapiens                  |
| 1 | 1.00 | 1 | 1 | 0.03  | 0.032  | 0.023  | 0.027 | 0.03   | t | 97762  | VVCAMIE<br>GAQGALE<br>RE     | Homo<br>sapiens                  |
| 1 | 1.00 | 1 | 1 | -0.04 | -0.043 | -0.027 | -0.04 | -0.043 | t | 4427   | ASGLVSMF<br>SV               | Oryctola<br>gus<br>cuniculu<br>s |
| 1 | 1.00 | 1 | 1 | -0.01 | -0.01  | -0.003 | 0     | -0.008 | t | 106652 | MHTPNRSR                     | Homo<br>sapiens                  |
| 1 | 1.00 | 1 | 1 | 0.03  | 0.03   | 0.03   | 0.03  | 0.03   | t | 114873 | KPDCTAED<br>RP               | Homo<br>sapiens                  |
| 1 | 1.00 | 1 | 1 | 0.01  | 0.01   | 0.01   | 0.01  | 0.01   | t | 123106 | EALDAIRYL                    | Ovis<br>aries                    |
| 1 | 1.00 | 1 | 1 | -0.01 | -0.01  | -0.01  | -0.01 | -0.01  | t | 135739 | QFCKNSA<br>D                 | Homo<br>sapiens                  |
| 1 | 1.00 | 1 | 1 | -0.01 | -0.01  | -0.01  | -0.01 | -0.01  | t | 158304 | SSRPSPPS<br>KVSS             | Canis<br>lupus                   |
| 1 | 1.00 | 1 | 1 | -0.01 | -0.01  | -0.01  | -0.01 | -0.01  | t | 124278 | HPLAPVPR<br>Q                | Homo<br>sapiens                  |
| 1 | 1.00 | 1 | 1 | -0.01 | -0.01  | -0.01  | -0.01 | -0.01  | t | 115881 | PEINTVQV<br>TS               | Homo<br>sapiens                  |
| 1 | 1.00 | 1 | 1 | -0.01 | -0.01  | -0.01  | -0.01 | -0.01  | t | 113474 | GQQGQQ<br>PGQGQQP<br>G       | Homo<br>sapiens                  |
| 1 | 1.00 | 1 | 1 | -0.01 | -0.01  | -0.01  | -0.01 | -0.01  | t | 98779  | FPPQQPYP<br>QPQP             | Homo<br>sapiens                  |
| 1 | 1.00 | 1 | 1 | -0.01 | -0.01  | -0.01  | -0.01 | -0.01  | t | 103017 | AFDLDRLL<br>FKRNICH          | Homo<br>sapiens                  |
| 1 | 1.00 | 1 | 1 | -0.01 | -0.01  | -0.01  | -0.01 | -0.01  | t | 50105  | PYIEQGM<br>QLAAEFKQ<br>KALGL | Homo<br>sapiens                  |

|   |      |   |   |       |        |        |        |        |   |        |                              |                                  |
|---|------|---|---|-------|--------|--------|--------|--------|---|--------|------------------------------|----------------------------------|
| 1 | 1.00 | 1 | 1 | -0.01 | -0.01  | -0.01  | -0.01  | -0.01  | t | 6077   | CCRHKQKI<br>VAPVKQTL<br>PPS  | Ovis<br>aries                    |
| 1 | 1.00 | 1 | 1 | -0.03 | -0.03  | -0.03  | -0.03  | -0.03  | t | 112306 | SDHKNYL                      | Homo<br>sapiens                  |
| 1 | 1.00 | 1 | 1 | -0.03 | -0.03  | -0.03  | -0.03  | -0.03  | t | 100153 | INDQIKFII<br>N               | Mus<br>musculu<br>s              |
| 1 | 1.00 | 1 | 1 | -0.03 | -0.03  | -0.03  | -0.03  | -0.03  | t | 112345 | TCSFSGF                      | Homo<br>sapiens                  |
| 1 | 1.00 | 1 | 1 | -0.05 | -0.05  | -0.05  | -0.05  | -0.05  | t | 102709 | PCKKMCT<br>VSDYISELY<br>NKPL | Mus<br>musculu<br>s              |
| 1 | 1.00 | 1 | 1 | -0.05 | -0.05  | -0.05  | -0.05  | -0.05  | t | 115835 | KVLPVPQK<br>AV               | Homo<br>sapiens                  |
| 1 | 1.00 | 1 | 1 | -0.02 | -0.02  | -0.022 | -0.02  | -0.019 | t | 97223  | AWNPSLL<br>G                 | Mus<br>musculu<br>s              |
| 1 | 1.00 | 1 | 1 | 0.03  | 0.027  | 0.035  | 0.03   | 0.03   | t | 118139 | SIPWKSLL<br>LTLV             | Oryctola<br>gus<br>cuniculu<br>s |
| 1 | 1.00 | 1 | 1 | -0.03 | -0.03  | -0.029 | -0.03  | -0.03  | t | 113211 | VPVLAFDA<br>ARLRLE           | Homo<br>sapiens                  |
| 1 | 1.00 | 1 | 1 | 0.04  | 0.042  | 0.04   | 0.047  | 0.042  | t | 103993 | IPPSLRTLE<br>DNEERMS         | Homo<br>sapiens                  |
| 1 | 1.00 | 1 | 1 | -0.01 | -0.012 | -0.01  | -0.011 | -0.01  | t | 32769  | KPKHKKLK<br>QPGDGNP          | Mus<br>musculu<br>s              |
| 1 | 1.00 | 1 | 1 | -0.01 | -0.012 | -0.01  | -0.011 | -0.01  | t | 32769  | KPKHKKLK<br>QPGDGNP          | Mus<br>musculu<br>s              |
| 1 | 1.00 | 1 | 1 | 0.01  | 0.01   | 0.017  | 0.01   | 0.009  | t | 116338 | GLSATVTG<br>GQK              | Oryctola<br>gus<br>cuniculu<br>s |
| 1 | 1.00 | 1 | 1 | 0.01  | 0.01   | 0.005  | 0.01   | 0.012  | t | 66107  | TRTIGGSQ<br>AQ               | Oryctola<br>gus<br>cuniculu<br>s |
| 1 | 1.00 | 1 | 1 | 0     | -0.004 | 0      | -0.003 | -0.001 | t | 42196  | MNDIQIKT<br>ITIYI            | Oryctola<br>gus<br>cuniculu<br>s |

|   |      |   |   |       |        |        |        |        |   |        |                              |                                  |
|---|------|---|---|-------|--------|--------|--------|--------|---|--------|------------------------------|----------------------------------|
| 1 | 1.00 | 1 | 1 | 0     | -0.004 | 0      | -0.003 | -0.001 | t | 42196  | MNDIQIKT<br>ITIIYI           | Oryctola<br>gus<br>cuniculu<br>s |
| 1 | 1.00 | 1 | 1 | 0     | -0.002 | 0      | -0.003 | -0.001 | t | 37660  | LLPHSNLD<br>HILEPSIPW<br>KSK | Mus<br>musculu<br>s              |
| 1 | 1.00 | 1 | 1 | 0.02  | 0.017  | 0.013  | 0.02   | 0.023  | t | 79926  | MASMTG<br>GQQMG              | Oryctola<br>gus<br>cuniculu<br>s |
| 1 | 1.00 | 1 | 1 | -0.01 | -0.01  | -0.01  | -0.01  | -0.01  | t | 142426 | KAAYGLLK<br>TKNQYVL          | Homo<br>sapiens                  |
| 1 | 1.00 | 1 | 1 | -0.01 | -0.01  | -0.015 | -0.01  | -0.009 | t | 76185  | YTTGGAQS<br>HTLR             | Mus<br>musculu<br>s              |
| 1 | 1.00 | 1 | 1 | -0.01 | -0.01  | -0.011 | -0.01  | -0.01  | t | 81394  | EASGPTHS<br>KEIPALT          | Homo<br>sapiens                  |
| 1 | 1.00 | 1 | 1 | 0.02  | 0.02   | 0.011  | 0.013  | 0.02   | t | 135980 | QSRRRGD<br>MSTLN             | Homo<br>sapiens                  |
| 1 | 1.00 | 1 | 1 | -0.08 | -0.08  | -0.08  | -0.078 | -0.08  | t | 110652 | LCLIGCKPP<br>IGEHWGK<br>GSPC | Homo<br>sapiens                  |
| 1 | 1.00 | 1 | 1 | 0     | 0      | 0      | -0.004 | 0      | t | 118172 | TEKLLKYL                     | Homo<br>sapiens                  |
| 1 | 1.00 | 1 | 1 | 0.02  | 0.023  | 0.013  | 0.02   | 0.021  | t | 53633  | RESNGETK                     | Equus<br>caballus                |
| 1 | 1.00 | 1 | 1 | 0.02  | 0.02   | 0.013  | 0.02   | 0.021  | t | 53633  | RESNGETK                     | Mus<br>musculu<br>s              |
| 1 | 1.00 | 1 | 1 | 0.01  | 0.008  | 0.021  | 0.013  | 0.01   | t | 159000 | LWGDGVL<br>ESDLIIPIT         | Mus<br>musculu<br>s              |
| 1 | 1.00 | 1 | 1 | 0.03  | 0.026  | 0.025  | 0.029  | 0.03   | t | 37810  | LLSNTDNA<br>SFPQMTKS<br>YKNT | Oryctola<br>gus<br>cuniculu<br>s |
| 1 | 1.00 | 1 | 1 | 0.04  | 0.052  | 0.04   | 0.037  | 0.04   | t | 156866 | FGSSSAG                      | Gallus<br>gallus                 |

|   |      |   |   |       |        |        |        |        |   |        |                              |                        |
|---|------|---|---|-------|--------|--------|--------|--------|---|--------|------------------------------|------------------------|
| 1 | 1.00 | 1 | 1 | -0.03 | -0.032 | -0.024 | -0.031 | -0.03  | t | 60671  | SRGKGPG<br>KKNK              | Sus<br>scrofa          |
| 1 | 1.00 | 1 | 1 | 0     | 0.002  | 0.01   | 0.001  | 0      | t | 16552  | FLDLPL                       | Homo<br>sapiens        |
| 1 | 1.00 | 1 | 1 | -0.01 | -0.008 | -0.015 | -0.009 | -0.009 | t | 56996  | SASQLSAP<br>SLKATCTT<br>HHDS | Homo<br>sapiens        |
| 1 | 1.00 | 1 | 1 | 0.01  | 0.013  | 0.022  | 0.01   | 0.008  | t | 136827 | DFGSVGG<br>VL                | Mus<br>musculu<br>s    |
| 1 | 1.00 | 1 | 1 | -0.03 | -0.032 | -0.035 | -0.031 | -0.03  | t | 52000  | QQACKGKI<br>QALCENP          | Mus<br>musculu<br>s    |
| 1 | 1.00 | 1 | 1 | -0.03 | -0.032 | -0.035 | -0.031 | -0.03  | t | 52000  | QQACKGKI<br>QALCENP          | Mus<br>musculu<br>s    |
| 1 | 1.00 | 1 | 1 | 0.02  | 0.02   | 0.029  | 0.02   | 0.018  | t | 23934  | HGPDWAS<br>P                 | Mus<br>musculu<br>s    |
| 1 | 1.00 | 1 | 1 | -0.02 | -0.02  | -0.031 | -0.02  | -0.018 | t | 74478  | YKLTRPYM<br>ARC              | Mus<br>musculu<br>s    |
| 1 | 1.00 | 1 | 1 | -0.03 | -0.03  | -0.03  | -0.03  | -0.03  | t | 134694 | ISPFCLK                      | MD                     |
| 1 | 1.00 | 1 | 1 | 0.02  | 0.018  | 0.02   | 0.019  | 0.021  | t | 59982  | SPAPERRG<br>YSGYDVPD<br>Y    | Mus<br>musculu<br>s    |
| 1 | 1.00 | 1 | 1 | 0.01  | 0.012  | 0.01   | 0.011  | 0.012  | t | 37310  | LLGACFSF                     | Homo<br>sapiens        |
| 1 | 1.00 | 1 | 1 | 0     | 0.01   | 0      | -0.003 | 0      | t | 42694  | MSTNPKP<br>QRKTK             | Pan<br>troglody<br>tes |
| 1 | 1.00 | 1 | 1 | 0.04  | 0.04   | 0.04   | 0.04   | 0.04   | t | 121442 | KAAEQTA<br>AREQAKE<br>A      | Homo<br>sapiens        |
| 1 | 1.00 | 1 | 1 | 0.02  | 0.02   | 0.02   | 0.02   | 0.02   | t | 149132 | YLENATQ                      | Sus<br>scrofa          |
| 1 | 1.00 | 1 | 1 | 0.02  | 0.02   | 0.02   | 0.02   | 0.02   | t | 112801 | LATPNPS                      | Homo<br>sapiens        |
| 1 | 1.00 | 1 | 1 | 0     | 0      | 0      | 0      | 0      | t | 153335 | ACNALNQ<br>WLCGGGS           | Mus<br>musculu<br>s    |
| 1 | 1.00 | 1 | 1 | 0     | 0      | 0      | 0      | 0      | t | 149423 | QEQVPLV<br>QEQ               | Mus<br>musculu<br>s    |

|   |      |   |   |       |       |        |        |        |   |        |                              |              |
|---|------|---|---|-------|-------|--------|--------|--------|---|--------|------------------------------|--------------|
| 1 | 1.00 | 1 | 1 | 0     | 0     | 0      | 0      | 0      | t | 149423 | QEQVPLV<br>QEQ               | Homo sapiens |
| 1 | 1.00 | 1 | 1 | 0     | 0     | 0      | 0      | 0      | t | 119474 | KIRY                         | Homo sapiens |
| 1 | 1.00 | 1 | 1 | 0     | 0     | 0      | 0      | 0      | t | 119474 | KIRY                         | Homo sapiens |
| 1 | 1.00 | 1 | 1 | 0     | 0     | 0      | 0      | 0      | t | 110427 | STWPTTPP<br>RPIPKPSP<br>WAPK | Homo sapiens |
| 1 | 1.00 | 1 | 1 | 0     | 0     | 0      | 0      | 0      | t | 106310 | CLHFVKGE<br>EK               | Homo sapiens |
| 1 | 1.00 | 1 | 1 | 0     | 0     | 0      | 0      | 0      | t | 100646 | YAKEGYEP<br>VL               | Mus musculus |
| 1 | 1.00 | 1 | 1 | 0     | 0     | 0      | 0      | 0      | t | 63391  | TEHRDYHP<br>QQRG             | Mus musculus |
| 1 | 1.00 | 1 | 1 | 0     | 0     | 0      | 0      | 0      | t | 68099  | VDYLKEKE<br>KDQDL            | Homo sapiens |
| 1 | 1.00 | 1 | 1 | 0     | 0     | 0      | 0      | 0      | t | 47180  | PDREVLHR<br>EFDEMEEC<br>ASHL | Homo sapiens |
| 1 | 1.00 | 1 | 1 | 0     | 0     | 0      | 0      | 0      | t | 42652  | MSRLWL<br>MKAHGISS<br>E      | Homo sapiens |
| 1 | 1.00 | 1 | 1 | 0     | 0     | 0      | 0      | 0      | t | 46826  | PAIIPDREV<br>LHREFDE<br>MEEC | Homo sapiens |
| 1 | 1.00 | 1 | 1 | 0     | 0     | 0      | 0      | 0      | t | 18887  | GCNCSIYP<br>GHITGHR<br>MAW   | Homo sapiens |
| 1 | 1.00 | 1 | 1 | -0.02 | -0.02 | -0.02  | -0.02  | -0.02  | t | 149028 | AVTNATQ                      | Sus scrofa   |
| 1 | 1.00 | 1 | 1 | -0.04 | -0.04 | -0.04  | -0.04  | -0.04  | t | 97676  | TAWNPSLL                     | Mus musculus |
| 1 | 1.00 | 1 | 1 | -0.01 | -0.01 | -0.012 | -0.01  | -0.009 | t | 56434  | RVTVSTRR<br>SQQTIPNI<br>G    | Homo sapiens |
| 1 | 1.00 | 1 | 1 | -0.01 | -0.01 | -0.014 | -0.01  | -0.008 | t | 47545  | PFPQPQQ<br>QFP               | Mus musculus |
| 1 | 1.00 | 1 | 1 | 0     | 0.002 | -0.005 | -0.003 | -0.001 | t | 66683  | TTKQRQN<br>KPPNK             | Homo sapiens |

|   |      |   |   |       |        |        |        |       |   |        |                              |                       |
|---|------|---|---|-------|--------|--------|--------|-------|---|--------|------------------------------|-----------------------|
| 1 | 1.00 | 1 | 1 | 0.01  | 0.01   | -0.004 | 0.006  | 0.01  | t | 67529  | VAANNAK<br>NTEIAAAN<br>EEIR  | Homo sapiens          |
| 1 | 1.00 | 1 | 1 | 0.01  | 0.012  | 0.003  | 0.011  | 0.01  | t | 7155   | CTIAALGSS<br>DRDTVV          | Homo sapiens          |
| 1 | 1.00 | 1 | 1 | -0.01 | -0.014 | -0.01  | -0.011 | -0.01 | t | 46240  | NTREVFA<br>QVKQMYK<br>TPT    | Oryctolagus cuniculus |
| 1 | 1.00 | 1 | 1 | 0     | 0      | 0      | 0      | 0     | t | 108312 | DHDRVIHI<br>QAENGPR<br>LLVEA | Mus musculus          |
| 1 | 1.00 | 1 | 1 | -0.01 | -0.01  | -0.01  | -0.01  | -0.01 | t | 156959 | SLHTTQR                      | Gallus gallus         |
| 1 | 1.00 | 1 | 1 | 0.04  | 0.04   | 0.047  | 0.049  | 0.042 | t | 130987 | NPVENM<br>MDRDSQ             | Homo sapiens          |
| 1 | 1.00 | 1 | 1 | 0     | 0.002  | 0      | -0.001 | 0     | t | 148820 | QPYLQLQP<br>FP               | Homo sapiens          |
| 1 | 1.00 | 1 | 1 | -0.02 | -0.02  | -0.02  | -0.02  | -0.02 | t | 156840 | AAPKMCS<br>TWCQMW<br>Q       | Mus musculus          |
| 1 | 1.00 | 1 | 1 | -0.02 | -0.02  | -0.02  | -0.02  | -0.02 | t | 156840 | AAPKMCS<br>TWCQMW<br>Q       | Gallus gallus         |
| 1 | 1.00 | 1 | 1 | 0.04  | 0.042  | 0.042  | 0.037  | 0.038 | t | 53557  | RELEELNV<br>PGEIVE           | Homo sapiens          |
| 1 | 1.00 | 1 | 1 | -0.04 | -0.042 | -0.024 | -0.034 | -0.04 | t | 142224 | LLDTKGGL<br>YRWRSVP          | Sus scrofa            |
| 1 | 1.00 | 1 | 1 | 0     | -0.002 | 0      | -0.001 | 0     | t | 39917  | LTGKPAVI<br>PDREILYQ<br>QFDE | Mus musculus          |
| 1 | 1.00 | 1 | 1 | 0.02  | 0.016  | 0.008  | 0.013  | 0.023 | t | 30299  | KEALDKYE<br>LENHD            | Oryctolagus cuniculus |
| 1 | 1.00 | 1 | 1 | -0.01 | -0.01  | -0.006 | -0.01  | -0.01 | t | 71877  | VVVLGS                       | Homo sapiens          |
| 1 | 1.00 | 1 | 1 | -0.01 | -0.007 | -0.01  | -0.01  | -0.01 | t | 127984 | FTNLKFKV<br>RKITSSHR<br>GN   | Mus musculus          |
| 1 | 1.00 | 1 | 1 | 0.01  | 0.012  | 0.015  | 0.011  | 0.011 | t | 153420 | MDWINPF<br>PNFNSSGG<br>GS    | Homo sapiens          |

|   |      |   |   |       |        |        |        |       |   |        |                              |                                  |
|---|------|---|---|-------|--------|--------|--------|-------|---|--------|------------------------------|----------------------------------|
| 1 | 1.00 | 1 | 1 | 0.04  | 0.044  | 0.035  | 0.04   | 0.042 | t | 11208  | EAVEAERA<br>GRGTG            | Homo<br>sapiens                  |
| 1 | 1.00 | 1 | 1 | 0.01  | 0.014  | 0.008  | 0.013  | 0.01  | t | 2226   | AKKVPETF<br>PELKPGES<br>RHTS | Homo<br>sapiens                  |
| 1 | 1.00 | 1 | 1 | -0.04 | -0.041 | -0.045 | -0.04  | -0.04 | t | 47994  | PITARIHA<br>HLKAYA           | Anas<br>platyrhy<br>nchos        |
| 1 | 1.00 | 1 | 1 | -0.05 | -0.048 | -0.05  | -0.047 | -0.05 | t | 49637  | PTGQIHW<br>GNLSKIGV          | Homo<br>sapiens                  |
| 1 | 1.00 | 1 | 1 | -0.02 | -0.024 | -0.01  | -0.02  | -0.02 | t | 74497  | YKQKIAP                      | Mus<br>musculu<br>s              |
| 1 | 1.00 | 1 | 1 | 0.01  | 0.013  | 0.005  | 0.01   | 0.01  | t | 105830 | GKSGDRS<br>GYSSPGSP<br>GTPG  | Mus<br>musculu<br>s              |
| 1 | 1.00 | 1 | 1 | 0.03  | 0.03   | 0.03   | 0.03   | 0.03  | t | 149090 | NSTQGPV                      | Sus<br>scrofa                    |
| 1 | 1.00 | 1 | 1 | 0.03  | 0.033  | 0.03   | 0.03   | 0.03  | t | 142473 | SEAKDGS<br>HGEKG             | Mus<br>musculu<br>s              |
| 1 | 1.00 | 1 | 1 | 0.03  | 0.033  | 0.03   | 0.03   | 0.03  | t | 142436 | KVAATSLE<br>RWQQ             | Mus<br>musculu<br>s              |
| 1 | 1.00 | 1 | 1 | 0.03  | 0.03   | 0.03   | 0.03   | 0.03  | t | 105540 | TDNELA                       | Oryctola<br>gus<br>cuniculu<br>s |
| 1 | 1.00 | 1 | 1 | 0.01  | 0.01   | 0.01   | 0.01   | 0.01  | t | 121682 | NVSDLTVA<br>GPLVDLF          | Mus<br>musculu<br>s              |
| 1 | 1.00 | 1 | 1 | 0.01  | 0.01   | 0.01   | 0.01   | 0.01  | t | 121682 | NVSDLTVA<br>GPLVDLF          | Mus<br>musculu<br>s              |
| 1 | 1.00 | 1 | 1 | 0.01  | 0.01   | 0.01   | 0.01   | 0.01  | t | 98694  | ALQTLPA<br>MCNVY             | Homo<br>sapiens                  |
| 1 | 1.00 | 1 | 1 | 0.01  | 0.01   | 0.01   | 0.01   | 0.01  | t | 106736 | QHYSPTP<br>WQQWT             | Mus<br>musculu<br>s              |

|   |      |   |   |       |        |        |        |        |   |        |                              |                       |
|---|------|---|---|-------|--------|--------|--------|--------|---|--------|------------------------------|-----------------------|
| 1 | 1.00 | 1 | 1 | 0.01  | 0.01   | 0.01   | 0.01   | 0.01   | t | 104877 | LDQRSSK                      | Homo sapiens          |
| 1 | 1.00 | 1 | 1 | 0.01  | 0.01   | 0.01   | 0.01   | 0.01   | t | 115184 | APLRVYVE<br>ELKPTPEG<br>DLEI | Homo sapiens          |
| 1 | 1.00 | 1 | 1 | -0.01 | -0.01  | -0.01  | -0.01  | -0.01  | t | 149721 | GLMPSVL<br>QNWEIGV<br>Q      | Oryctolagus cuniculus |
| 1 | 1.00 | 1 | 1 | -0.01 | -0.01  | -0.01  | -0.01  | -0.01  | t | 119666 | VMHEALH<br>N                 | Homo sapiens          |
| 1 | 1.00 | 1 | 1 | -0.01 | -0.01  | -0.01  | -0.01  | -0.01  | t | 111552 | MKVSNSK                      | Homo sapiens          |
| 1 | 1.00 | 1 | 1 | -0.01 | -0.01  | -0.01  | -0.01  | -0.01  | t | 97348  | GLFGAIAG<br>FIEGGW           | Oryctolagus cuniculus |
| 1 | 1.00 | 1 | 1 | -0.01 | -0.01  | -0.01  | -0.01  | -0.01  | t | 36427  | LHSTSSDG<br>N                | Homo sapiens          |
| 1 | 1.00 | 1 | 1 | -0.03 | -0.03  | -0.03  | -0.03  | -0.03  | t | 137516 | ALVLPHW<br>NLNSHSII          | Homo sapiens          |
| 1 | 1.00 | 1 | 1 | -0.03 | -0.03  | -0.03  | -0.03  | -0.03  | t | 115993 | TEIPTINTI<br>A               | Homo sapiens          |
| 1 | 1.00 | 1 | 1 | -0.02 | -0.02  | -0.023 | -0.02  | -0.02  | t | 98869  | LEKFDKAL<br>KA               | Homo sapiens          |
| 1 | 1.00 | 1 | 1 | -0.03 | -0.033 | -0.03  | -0.03  | -0.028 | t | 135462 | GGVPGV                       | Oryctolagus cuniculus |
| 1 | 1.00 | 1 | 1 | 0.02  | 0.016  | 0.018  | 0.019  | 0.021  | t | 46179  | NTMDVIK<br>KMLADQT<br>V      | Oryctolagus cuniculus |
| 1 | 1.00 | 1 | 1 | -0.04 | -0.038 | -0.038 | -0.039 | -0.041 | t | 103361 | LLDIYRKLR<br>PGEPT           | Homo sapiens          |
| 1 | 1.00 | 1 | 1 | 0.04  | 0.042  | 0.058  | 0.043  | 0.034  | t | 65119  | TLVDITDTE<br>TSAKPPVT<br>TAY | Homo sapiens          |
| 1 | 1.00 | 1 | 1 | -0.01 | -0.008 | -0.01  | -0.011 | -0.01  | t | 149442 | QQYPSGQ<br>GFF               | Homo sapiens          |



|   |      |   |   |       |        |        |        |        |   |        |                              |                                  |
|---|------|---|---|-------|--------|--------|--------|--------|---|--------|------------------------------|----------------------------------|
| 1 | 1.00 | 1 | 1 | -0.05 | -0.052 | -0.049 | -0.051 | -0.05  | t | 11575  | EEEEEDG<br>FMGFGMF<br>D      | Mus<br>musculu<br>s              |
| 1 | 1.00 | 1 | 1 | 0.03  | 0.03   | 0.03   | 0.03   | 0.032  | t | 45538  | NQELAYFY<br>PE               | Homo<br>sapiens                  |
| 1 | 1.00 | 1 | 1 | 0     | 0.002  | 0      | 0      | 0.001  | t | 105206 | GAIIGLMV<br>GGVV             | Homo<br>sapiens                  |
| 1 | 1.00 | 1 | 1 | 0     | 0      | 0      | 0      | 0.001  | t | 37315  | LLGCIGSTC                    | Mus<br>musculu<br>s              |
| 1 | 1.00 | 1 | 1 | 0     | 0      | 0      | 0      | 0.001  | t | 37315  | LLGCIGSTC                    | Mus<br>musculu<br>s              |
| 1 | 1.00 | 1 | 1 | -0.02 | -0.02  | -0.018 | -0.02  | -0.02  | t | 10109  | DSESGGHI<br>TH               | Oryctola<br>gus<br>cuniculu<br>s |
| 1 | 1.00 | 1 | 1 | -0.03 | -0.03  | -0.03  | -0.03  | -0.031 | t | 140545 | CGVDGRW<br>PRW               | Mus<br>musculu<br>s              |
| 1 | 1.00 | 1 | 1 | -0.03 | -0.028 | -0.031 | -0.027 | -0.029 | t | 144759 | RAALPSHV<br>VT               | Homo<br>sapiens                  |
| 1 | 1.00 | 1 | 1 | -0.01 | -0.007 | -0.015 | -0.01  | -0.008 | t | 98081  | GSVQFVPI<br>QN               | Mus<br>musculu<br>s              |
| 1 | 1.00 | 1 | 1 | 0.03  | 0.034  | 0.025  | 0.03   | 0.032  | t | 94037  | TIQNWFR<br>EAD               | Ovis<br>aries                    |
| 1 | 1.00 | 1 | 1 | 0.01  | 0.013  | 0.013  | 0.01   | 0.009  | t | 23156  | GVSTANA<br>TVYMIDSV<br>LMPPA | Mus<br>musculu<br>s              |
| 1 | 1.00 | 1 | 1 | -0.03 | -0.03  | -0.025 | -0.028 | -0.03  | t | 70002  | VMPECLSR<br>LCDFDM           | Homo<br>sapiens                  |
| 1 | 1.00 | 1 | 1 | 0     | 0      | -0.004 | 0      | 0.001  | t | 4149   | ARGSLAVT<br>I                | Mus<br>musculu<br>s              |
| 1 | 1.00 | 1 | 1 | 0.01  | 0.01   | 0.01   | 0.01   | 0.011  | t | 3514   | APDTR                        | Mus<br>musculu<br>s              |
| 1 | 1.00 | 1 | 1 | 0     | 0      | 0      | 0      | 0      | t | 94444  | CCHPACG<br>KH                | Capra<br>hircus                  |

|   |      |   |   |       |        |        |       |        |   |        |                              |                       |
|---|------|---|---|-------|--------|--------|-------|--------|---|--------|------------------------------|-----------------------|
| 1 | 1.00 | 1 | 1 | 0.02  | 0.022  | 0.029  | 0.027 | 0.02   | t | 112337 | STRESGV                      | Homo sapiens          |
| 1 | 1.00 | 1 | 1 | 0.02  | 0.017  | 0.02   | 0.02  | 0.021  | t | 32568  | KNNNNEE<br>PS                | Oryctolagus cuniculus |
| 1 | 1.00 | 1 | 1 | 0.01  | 0.01   | 0.01   | 0.01  | 0.012  | t | 136081 | R TTLQSDQ<br>EEIDY           | Oryctolagus cuniculus |
| 1 | 1.00 | 1 | 1 | -0.03 | -0.027 | -0.041 | -0.03 | -0.028 | t | 111219 | DVNVYHIF<br>FQMSLWL<br>PSEAT | Mus musculus          |
| 1 | 1.00 | 1 | 1 | 0.02  | 0.02   | 0.02   | 0.02  | 0.02   | t | 149076 | NATQAST                      | Sus scrofa            |
| 1 | 1.00 | 1 | 1 | 0.02  | 0.02   | 0.02   | 0.02  | 0.02   | t | 132870 | MQTLTLQ<br>EAMQQGY<br>S      | Trichosurus vulpecula |
| 1 | 1.00 | 1 | 1 | 0.02  | 0.02   | 0.02   | 0.02  | 0.02   | t | 103479 | PGYPVAG<br>QVWEATA<br>T      | Homo sapiens          |
| 1 | 1.00 | 1 | 1 | 0.02  | 0.02   | 0.02   | 0.02  | 0.02   | t | 110922 | KQMDIKSI<br>NDLQ             | Homo sapiens          |
| 1 | 1.00 | 1 | 1 | 0.02  | 0.02   | 0.02   | 0.02  | 0.02   | t | 110922 | KQMDIKSI<br>NDLQ             | Macaca                |
| 1 | 1.00 | 1 | 1 | 0     | 0.003  | 0      | 0     | 0      | t | 153400 | IPFHKHPH<br>HRGT             | Mus musculus          |
| 1 | 1.00 | 1 | 1 | 0     | 0      | 0      | 0     | 0      | t | 148569 | DKSKLRDV<br>KDNKSTD<br>VKL   | Canis lupus           |
| 1 | 1.00 | 1 | 1 | 0     | 0      | 0      | 0     | 0      | t | 148569 | DKSKLRDV<br>KDNKSTD<br>VKL   | Homo sapiens          |
| 1 | 1.00 | 1 | 1 | 0     | 0      | 0      | 0     | 0      | t | 137742 | DTPLTHAG<br>LKL V            | Mus musculus          |
| 1 | 1.00 | 1 | 1 | 0     | 0      | 0      | 0     | 0      | t | 153400 | IPFHKHPH<br>HRGT             | Mus musculus          |

|   |      |   |   |       |       |       |       |       |   |        |                              |                        |
|---|------|---|---|-------|-------|-------|-------|-------|---|--------|------------------------------|------------------------|
| 1 | 1.00 | 1 | 1 | 0     | 0     | 0     | 0     | 0     | t | 110584 | GAPGFPG<br>PRGPPGP<br>Q      | Mus<br>musculu<br>s    |
| 1 | 1.00 | 1 | 1 | 0     | 0     | 0     | 0     | 0     | t | 108299 | CKYWLSRC                     | Homo<br>sapiens        |
| 1 | 1.00 | 1 | 1 | 0     | 0     | 0     | 0     | 0     | t | 75876  | YSREQLNK<br>MFGIEIS          | Homo<br>sapiens        |
| 1 | 1.00 | 1 | 1 | 0     | 0     | 0     | 0     | 0     | t | 79904  | LGAAASSP<br>DAHV             | Mus<br>musculu<br>s    |
| 1 | 1.00 | 1 | 1 | 0     | 0     | 0     | 0     | 0     | t | 49118  | PQRPFAQ<br>QPE               | Mus<br>musculu<br>s    |
| 1 | 1.00 | 1 | 1 | 0     | 0     | 0     | 0     | 0     | t | 49118  | PQRPFAQ<br>QPE               | Mus<br>musculu<br>s    |
| 1 | 1.00 | 1 | 1 | -0.02 | -0.02 | -0.02 | -0.02 | -0.02 | t | 146066 | VPKVSGLQ<br>Y                | Mus<br>musculu<br>s    |
| 1 | 1.00 | 1 | 1 | -0.02 | -0.02 | -0.02 | -0.02 | -0.02 | t | 124737 | SPWTLGA                      | Homo<br>sapiens        |
| 1 | 1.00 | 1 | 1 | -0.02 | -0.02 | -0.02 | -0.02 | -0.02 | t | 123850 | WSDFLGK<br>NP                | Ovis<br>aries          |
| 1 | 1.00 | 1 | 1 | -0.02 | -0.02 | -0.02 | -0.02 | -0.02 | t | 112398 | WFAYWG<br>Q                  | Homo<br>sapiens        |
| 1 | 1.00 | 1 | 1 | -0.02 | -0.02 | -0.02 | -0.02 | -0.02 | t | 115484 | SFSDIPNPI<br>GSENSEKT<br>TMP | Homo<br>sapiens        |
| 1 | 1.00 | 1 | 1 | -0.02 | -0.02 | -0.02 | -0.02 | -0.02 | t | 103620 | SVPANVSR<br>RAKVDVL          | Homo<br>sapiens        |
| 1 | 1.00 | 1 | 1 | -0.02 | -0.02 | -0.02 | -0.02 | -0.02 | t | 66238  | TSGTSGPS<br>GTSPSSR          | Homo<br>sapiens        |
| 1 | 1.00 | 1 | 1 | -0.02 | -0.02 | -0.02 | -0.02 | -0.02 | t | 31351  | KIMSKWV<br>NTFNINAY<br>IMSNF | Aotus<br>nancyma<br>ae |
| 1 | 1.00 | 1 | 1 | -0.02 | -0.02 | -0.02 | -0.02 | -0.02 | t | 3880   | APTYSWG<br>A                 | Mus<br>musculu<br>s    |
| 1 | 1.00 | 1 | 1 | 0.01  | 0.008 | 0.012 | 0.009 | 0.01  | t | 7147   | CTGGLVSL<br>FNPGPSQ<br>D     | Mus<br>musculu<br>s    |
| 1 | 1.00 | 1 | 1 | 0.02  | 0.02  | 0.02  | 0.016 | 0.02  | t | 115603 | ELKVEDPF<br>YWVS             | Homo<br>sapiens        |

|   |      |   |   |       |        |        |        |       |   |        |                     |                                  |
|---|------|---|---|-------|--------|--------|--------|-------|---|--------|---------------------|----------------------------------|
| 1 | 1.00 | 1 | 1 | 0     | 0.003  | 0      | 0      | 0.001 | t | 61944  | STTNK               | Mus<br>musculu<br>s              |
| 1 | 1.00 | 1 | 1 | -0.02 | -0.023 | -0.008 | -0.019 | -0.02 | t | 72561  | WHWTWL<br>SDYPPP    | Oryctola<br>gus<br>cuniculu<br>s |
| 1 | 1.00 | 1 | 1 | -0.02 | -0.023 | -0.008 | -0.019 | -0.02 | t | 72561  | WHWTWL<br>SDYPPP    | Oryctola<br>gus<br>cuniculu<br>s |
| 1 | 1.00 | 1 | 1 | 0     | -0.003 | -0.009 | 0      | 0.002 | t | 139225 | REAEQRR             | Oryctola<br>gus<br>cuniculu<br>s |
| 1 | 1.00 | 1 | 1 | -0.02 | -0.018 | -0.02  | -0.021 | -0.02 | t | 149434 | QPQPFLP<br>QQP      | Homo<br>sapiens                  |
| 1 | 1.00 | 1 | 1 | -0.02 | -0.018 | -0.02  | -0.021 | -0.02 | t | 149535 | YPQPQPFL<br>PQ      | Homo<br>sapiens                  |
| 1 | 1.00 | 1 | 1 | 0     | 0      | 0      | 0      | 0     | t | 117110 | WNTDFST<br>RAAHT    | Homo<br>sapiens                  |
| 1 | 1.00 | 1 | 1 | 0     | 0      | 0      | 0      | 0     | t | 117110 | WNTDFST<br>RAAHT    | Mus<br>musculu<br>s              |
| 1 | 1.00 | 1 | 1 | -0.01 | -0.02  | -0.01  | -0.009 | -0.01 | t | 22220  | GRTWAQP<br>G        | Homo<br>sapiens                  |
| 1 | 1.00 | 1 | 1 | 0.01  | 0.01   | 0.013  | 0.017  | 0.013 | t | 103104 | DFLIEEIERL<br>GQDL  | Homo<br>sapiens                  |
| 1 | 1.00 | 1 | 1 | -0.02 | -0.02  | -0.022 | -0.02  | -0.02 | t | 81565  | EIPALTAVE<br>TGATNP | Homo<br>sapiens                  |
| 1 | 1.00 | 1 | 1 | -0.05 | -0.05  | -0.05  | -0.05  | -0.05 | t | 46353  | NVDPN               | Mus<br>musculu<br>s              |
| 1 | 1.00 | 1 | 1 | 0.07  | 0.066  | 0.07   | 0.067  | 0.07  | t | 142006 | SDSAQGS<br>DVSLTA   | Oryctola<br>gus<br>cuniculu<br>s |

|   |      |   |   |       |        |        |        |        |   |        |                              |                      |
|---|------|---|---|-------|--------|--------|--------|--------|---|--------|------------------------------|----------------------|
| 1 | 1.00 | 1 | 1 | -0.01 | -0.011 | -0.01  | -0.009 | -0.01  | t | 148221 | SDGAVQP<br>DG                | Canis<br>lupus       |
| 1 | 1.00 | 1 | 1 | -0.04 | -0.038 | -0.028 | -0.033 | -0.041 | t | 122564 | RTAGFDIK<br>LIDT             | Homo<br>sapiens      |
| 1 | 1.00 | 1 | 1 | 0.01  | 0.014  | 0.01   | 0.013  | 0.01   | t | 122874 | PPARALKR<br>SLWVEVD<br>LLIGS | Homo<br>sapiens      |
| 1 | 1.00 | 1 | 1 | 0.01  | 0.01   | 0      | 0.01   | 0.011  | t | 95160  | TVLLSLTVF<br>MLLVAEI<br>MPAT | Rattus<br>norvegicus |
| 1 | 1.00 | 1 | 1 | -0.01 | -0.01  | -0.008 | -0.01  | -0.01  | t | 95518  | KQKIVAPV                     | Cavia<br>porcellus   |
| 1 | 1.00 | 1 | 1 | -0.01 | -0.018 | -0.008 | -0.01  | -0.01  | t | 95518  | KQKIVAPV                     | Bos<br>taurus        |
| 1 | 1.00 | 1 | 1 | 0.03  | 0.03   | 0.03   | 0.03   | 0.03   | t | 111556 | MPLQNSK                      | Homo<br>sapiens      |
| 1 | 1.00 | 1 | 1 | 0.03  | 0.03   | 0.03   | 0.03   | 0.03   | t | 112422 | YWASTRE                      | Homo<br>sapiens      |
| 1 | 1.00 | 1 | 1 | 0.01  | 0.01   | 0.01   | 0.01   | 0.01   | t | 141667 | HEIGSLAG<br>LAMR             | Mus<br>musculus      |
| 1 | 1.00 | 1 | 1 | 0.01  | 0.01   | 0.01   | 0.01   | 0.01   | t | 149438 | QQPQQQY<br>PSG               | Homo<br>sapiens      |
| 1 | 1.00 | 1 | 1 | 0.01  | 0.01   | 0.01   | 0.01   | 0.01   | t | 149438 | QQPQQQY<br>PSG               | Mus<br>musculus      |
| 1 | 1.00 | 1 | 1 | 0.01  | 0.01   | 0.01   | 0.01   | 0.01   | t | 121368 | HDDPQLG<br>AEAQAFTF          | Mus<br>musculus      |
| 1 | 1.00 | 1 | 1 | 0.01  | 0.01   | 0.01   | 0.01   | 0.01   | t | 121368 | HDDPQLG<br>AEAQAFTF          | Mus<br>musculus      |
| 1 | 1.00 | 1 | 1 | 0.01  | 0.01   | 0.01   | 0.01   | 0.01   | t | 111556 | MPLQNSK                      | Homo<br>sapiens      |
| 1 | 1.00 | 1 | 1 | -0.01 | -0.01  | -0.01  | -0.01  | -0.01  | t | 150995 | HLGKCNI<br>A<br>GWILGNP      | Homo<br>sapiens      |

|   |      |   |   |       |        |        |        |       |   |        |                              |                              |
|---|------|---|---|-------|--------|--------|--------|-------|---|--------|------------------------------|------------------------------|
| 1 | 1.00 | 1 | 1 | -0.01 | -0.01  | -0.01  | -0.01  | -0.01 | t | 121678 | NVLTLRVA<br>KPLVDTF          | Mus<br>musculus              |
| 1 | 1.00 | 1 | 1 | -0.01 | -0.01  | -0.01  | -0.01  | -0.01 | t | 115460 | QTPVVVPP<br>FLQPEVM<br>GVSKV | Homo<br>sapiens              |
| 1 | 1.00 | 1 | 1 | -0.01 | -0.01  | -0.01  | -0.01  | -0.01 | t | 106853 | SLWTPYPD<br>QLSR             | Mus<br>musculus              |
| 1 | 1.00 | 1 | 1 | -0.01 | -0.01  | -0.01  | -0.01  | -0.01 | t | 66238  | TSGTSGPS<br>GTSPSSR          | Homo<br>sapiens              |
| 1 | 1.00 | 1 | 1 | -0.01 | -0.01  | -0.01  | -0.01  | -0.01 | t | 97339  | GIFGAIAG<br>FIEGGW           | Oryctola<br>gus<br>cuniculus |
| 1 | 1.00 | 1 | 1 | -0.01 | -0.01  | -0.01  | -0.01  | -0.01 | t | 22087  | GRIILSGRP<br>AIIPDREVL<br>YR | Homo<br>sapiens              |
| 1 | 1.00 | 1 | 1 | -0.01 | -0.01  | -0.01  | -0.01  | -0.01 | t | 11776  | EELVEEVIP                    | Homo<br>sapiens              |
| 1 | 1.00 | 1 | 1 | 0.02  | 0.02   | 0.02   | 0.02   | 0.022 | t | 38918  | LQND                         | Mus<br>musculus              |
| 1 | 1.00 | 1 | 1 | -0.02 | -0.02  | -0.016 | -0.02  | -0.02 | t | 8773   | DIRTLEDLL<br>MGTLGIVC<br>PIC | Mus<br>musculus              |
| 1 | 1.00 | 1 | 1 | -0.02 | -0.02  | -0.021 | -0.026 | -0.02 | t | 67294  | TWRMHLF<br>TGI               | Homo<br>sapiens              |
| 1 | 1.00 | 1 | 1 | -0.04 | -0.042 | -0.035 | -0.041 | -0.04 | t | 3861   | APTHWCY<br>YPPLI             | Mus<br>musculus              |
| 1 | 1.00 | 1 | 1 | -0.04 | -0.042 | -0.035 | -0.041 | -0.04 | t | 3861   | APTHWCY<br>YPPLI             | Mus<br>musculus              |
| 1 | 1.00 | 1 | 1 | 0     | -0.002 | -0.005 | 0.001  | 0     | t | 135741 | QGETEEAL<br>IQKRSY           | Mus<br>musculus              |
| 1 | 1.00 | 1 | 1 | 0     | -0.001 | -0.002 | -0.003 | 0     | t | 22882  | GTVVAVG<br>PGRWDED<br>G      | Homo<br>sapiens              |
| 1 | 1.00 | 1 | 1 | 0     | -0.002 | -0.009 | -0.007 | 0     | t | 109277 | GVNH                         | Mus<br>musculus              |

|   |      |   |   |       |        |        |        |        |   |        |                              |                       |
|---|------|---|---|-------|--------|--------|--------|--------|---|--------|------------------------------|-----------------------|
| 1 | 1.00 | 1 | 1 | -0.05 | -0.057 | -0.051 | -0.047 | -0.05  | t | 22447  | GSPRRPP<br>PGRRPFFH<br>PVGE  | Homo sapiens          |
| 1 | 1.00 | 1 | 1 | -0.01 | -0.01  | -0.01  | -0.01  | -0.01  | t | 136085 | TDKATIGF                     | Oryctolagus cuniculus |
| 1 | 1.00 | 1 | 1 | 0     | 0      | 0      | 0      | 0      | t | 774    | ADSVGGKD                     | Mus musculus          |
| 1 | 1.00 | 1 | 1 | 0.02  | 0.023  | 0.022  | 0.02   | 0.02   | t | 119560 | DLVLYNNA<br>DGDFAIK          | Mus musculus          |
| 1 | 1.00 | 1 | 1 | -0.03 | -0.026 | -0.019 | -0.023 | -0.028 | t | 140413 | VVLGAHN<br>V                 | Homo sapiens          |
| 1 | 1.00 | 1 | 1 | 0     | 0.004  | -0.01  | 0.003  | 0.002  | t | 50119  | PYKELRLE<br>VGKQRLKY<br>AQEE | Homo sapiens          |
| 1 | 1.00 | 1 | 1 | 0     | -0.003 | 0      | 0      | -0.002 | t | 106341 | DIQMTQS<br>PSSLSASV<br>GDRV  | Oryctolagus cuniculus |
| 1 | 1.00 | 1 | 1 | 0.02  | 0.018  | 0.025  | 0.019  | 0.02   | t | 20077  | GGVSAVPF<br>MDYFPSW          | Mus musculus          |
| 1 | 1.00 | 1 | 1 | 0.01  | 0.008  | 0.018  | 0.007  | 0.009  | t | 110962 | PIDVVD                       | Mus musculus          |
| 1 | 1.00 | 1 | 1 | -0.02 | -0.02  | -0.02  | -0.024 | -0.02  | t | 117449 | CVP                          | Homo sapiens          |
| 1 | 1.00 | 1 | 1 | -0.03 | -0.032 | -0.021 | -0.029 | -0.031 | t | 37627  | LLNQTTARA<br>FPDCA           | Mus musculus          |
| 1 | 1.00 | 1 | 1 | -0.01 | -0.01  | -0.007 | -0.01  | -0.01  | t | 133590 | GMVDGW<br>YG                 | Mus musculus          |
| 1 | 1.00 | 1 | 1 | -0.01 | -0.01  | -0.007 | -0.01  | -0.01  | t | 133590 | GMVDGW<br>YG                 | Mus musculus          |
| 1 | 1.00 | 1 | 1 | 0     | 0      | 0.001  | 0      | -0.001 | t | 144805 | VCSARHVP<br>EYIEKLPEI<br>RAK | Mus musculus          |

|   |      |   |   |       |        |        |        |        |   |        |                              |                       |
|---|------|---|---|-------|--------|--------|--------|--------|---|--------|------------------------------|-----------------------|
| 1 | 1.00 | 1 | 1 | -0.02 | -0.02  | -0.025 | -0.02  | -0.02  | t | 65932  | TQSFLGTTI<br>SGVLW           | Homo sapiens          |
| 1 | 1.00 | 1 | 1 | 0     | 0.004  | 0      | -0.003 | 0      | t | 11813  | EENVEENV                     | Homo sapiens          |
| 1 | 1.00 | 1 | 1 | 0     | 0.004  | 0      | -0.003 | 0      | t | 11813  | EENVEENV                     | Homo sapiens          |
| 1 | 1.00 | 1 | 1 | 0     | 0.004  | 0      | -0.003 | 0      | t | 11813  | EENVEENV                     | Homo sapiens          |
| 1 | 1.00 | 1 | 1 | 0.01  | 0.01   | 0.018  | 0.012  | 0.01   | t | 66336  | TSNFPCPAG<br>GPCSPHG         | Homo sapiens          |
| 1 | 1.00 | 1 | 1 | -0.01 | -0.008 | -0.013 | -0.011 | -0.01  | t | 36421  | LHSQGYTG<br>SNVKVAV          | Cavia porcellus       |
| 1 | 1.00 | 1 | 1 | -0.01 | -0.018 | -0.01  | -0.01  | -0.009 | t | 156966 | SVTKLGDP<br>RAPR             | Mus musculus          |
| 1 | 1.00 | 1 | 1 | 0.02  | 0.02   | 0.02   | 0.02   | 0.02   | t | 123511 | MPPMTQ<br>AP                 | Homo sapiens          |
| 1 | 1.00 | 1 | 1 | 0.02  | 0.02   | 0.02   | 0.02   | 0.02   | t | 79449  | VCPTSEILA<br>GATCR           | Mus musculus          |
| 1 | 1.00 | 1 | 1 | 0     | 0      | 0      | 0      | 0      | t | 149088 | NQTQHSV                      | Sus scrofa            |
| 1 | 1.00 | 1 | 1 | 0     | 0      | 0      | 0      | 0      | t | 121670 | NVFQLEVA<br>MALVDGL          | Mus musculus          |
| 1 | 1.00 | 1 | 1 | 0     | 0      | 0      | 0      | 0      | t | 121737 | QCRLAISR<br>YVSGLPY          | Mus musculus          |
| 1 | 1.00 | 1 | 1 | 0     | 0      | 0      | 0      | 0      | t | 121670 | NVFQLEVA<br>MALVDGL          | Mus musculus          |
| 1 | 1.00 | 1 | 1 | 0     | 0      | 0      | 0      | 0      | t | 131080 | SQTTANPS<br>APEGT            | Rattus norvegicus     |
| 1 | 1.00 | 1 | 1 | 0     | 0      | 0      | 0      | 0      | t | 105153 | DVTTL                        | Oryctolagus cuniculus |
| 1 | 1.00 | 1 | 1 | 0     | 0      | 0      | 0      | 0      | t | 60674  | SRGNHDS<br>PTHYVPES<br>DAAAR | Homo sapiens          |



|   |      |   |   |       |        |       |       |       |   |        |                              |                                  |
|---|------|---|---|-------|--------|-------|-------|-------|---|--------|------------------------------|----------------------------------|
| 1 | 1.00 | 1 | 1 | 0     | 0      | 0     | 0     | 0     | t | 67930  | VDEKKK                       | Mus<br>musculu<br>s              |
| 1 | 1.00 | 1 | 1 | 0     | 0      | 0     | 0     | 0     | t | 67930  | VDEKKK                       | Mus<br>musculu<br>s              |
| 1 | 1.00 | 1 | 1 | 0     | 0      | 0     | 0     | 0     | t | 67930  | VDEKKK                       | Mus<br>musculu<br>s              |
| 1 | 1.00 | 1 | 1 | 0     | 0      | 0     | 0     | 0     | t | 67930  | VDEKKK                       | Mus<br>musculu<br>s              |
| 1 | 1.00 | 1 | 1 | 0     | 0      | 0     | 0     | 0     | t | 51828  | QFPQPQ<br>QTF                | Mus<br>musculu<br>s              |
| 1 | 1.00 | 1 | 1 | 0     | 0      | 0     | 0     | 0     | t | 22076  | GRIILSGKP<br>ATIPDREA<br>LYR | Homo<br>sapiens                  |
| 1 | 1.00 | 1 | 1 | -0.02 | -0.02  | -0.02 | -0.02 | -0.02 | t | 119547 | YKKGARPI<br>Q                | Homo<br>sapiens                  |
| 1 | 1.00 | 1 | 1 | 0     | -0.004 | 0     | 0.001 | 0     | t | 135595 | SNKKKRD<br>DFE               | Oryctola<br>gus<br>cuniculu<br>s |
| 1 | 1.00 | 1 | 1 | -0.04 | -0.04  | -0.04 | -0.04 | -0.04 | t | 135928 | GCSAVSA<br>HGCLF             | Homo<br>sapiens                  |
| 1 | 1.00 | 1 | 1 | -0.04 | -0.04  | -0.04 | -0.04 | -0.04 | t | 110789 | ARLKSWE<br>PLVEDMQ<br>RQWAG  | Mus<br>musculu<br>s              |
| 1 | 1.00 | 1 | 1 | -0.04 | -0.04  | -0.04 | -0.04 | -0.04 | t | 97734  | VIDPAKVT<br>RV               | Homo<br>sapiens                  |
| 1 | 1.00 | 1 | 1 | -0.04 | -0.04  | -0.04 | -0.04 | -0.04 | t | 97734  | VIDPAKVT<br>RV               | Homo<br>sapiens                  |
| 1 | 1.00 | 1 | 1 | -0.04 | -0.04  | -0.04 | -0.04 | -0.04 | t | 97734  | VIDPAKVT<br>RV               | Homo<br>sapiens                  |
| 1 | 1.00 | 1 | 1 | -0.04 | -0.04  | -0.04 | -0.04 | -0.04 | t | 97734  | VIDPAKVT<br>RV               | Homo<br>sapiens                  |

|   |      |   |   |       |        |        |        |       |   |        |                            |                                  |
|---|------|---|---|-------|--------|--------|--------|-------|---|--------|----------------------------|----------------------------------|
| 1 | 1.00 | 1 | 1 | 0     | 0.003  | 0.003  | 0      | 0     | t | 16760  | FLLVLLDY<br>QGMLPV         | Mus<br>musculu<br>s              |
| 1 | 1.00 | 1 | 1 | -0.04 | -0.042 | -0.039 | -0.041 | -0.04 | t | 55733  | RRRTQKAP<br>KRIRLP         | Mus<br>musculu<br>s              |
| 1 | 1.00 | 1 | 1 | -0.04 | -0.044 | -0.039 | -0.041 | -0.04 | t | 55733  | RRRTQKAP<br>KRIRLP         | Oryctola<br>gus<br>cuniculu<br>s |
| 1 | 1.00 | 1 | 1 | -0.02 | -0.016 | -0.02  | -0.023 | -0.02 | t | 52829  | QWELQGD<br>RRC             | Homo<br>sapiens                  |
| 1 | 1.00 | 1 | 1 | 0.01  | 0.01   | 0.005  | 0.01   | 0.011 | t | 122073 | AEEQARH<br>VKNGLE          | Oryctola<br>gus<br>cuniculu<br>s |
| 1 | 1.00 | 1 | 1 | 0     | -0.003 | 0      | -0.001 | 0     | t | 50180  | PYVEPTAP<br>QVL            | Oryctola<br>gus<br>cuniculu<br>s |
| 1 | 1.00 | 1 | 1 | 0     | -0.003 | 0      | -0.001 | 0     | t | 50180  | PYVEPTAP<br>QVL            | Oryctola<br>gus<br>cuniculu<br>s |
| 1 | 1.00 | 1 | 1 | 0     | -0.003 | 0      | -0.001 | 0     | t | 7171   | CTKPTDG<br>NC              | Oryctola<br>gus<br>cuniculu<br>s |
| 1 | 1.00 | 1 | 1 | 0     | 0.002  | 0.009  | 0.001  | 0     | t | 59487  | SLSVSL                     | Homo<br>sapiens                  |
| 1 | 1.00 | 1 | 1 | 0     | 0      | 0      | 0      | 0     | t | 45320  | NPDPPDN                    | Mus<br>musculu<br>s              |
| 1 | 1.00 | 1 | 1 | -0.02 | -0.02  | -0.02  | -0.02  | -0.02 | t | 135459 | GACLGKAC                   | Oryctola<br>gus<br>cuniculu<br>s |
| 1 | 1.00 | 1 | 1 | 0.04  | 0.041  | 0.042  | 0.04   | 0.04  | t | 19407  | GERCNLED<br>RDRSELS<br>LLS | Oryctola<br>gus<br>cuniculu<br>s |

|   |      |   |   |       |       |        |       |        |   |        |                              |                                  |
|---|------|---|---|-------|-------|--------|-------|--------|---|--------|------------------------------|----------------------------------|
| 1 | 1.00 | 1 | 1 | 0.02  | 0.017 | 0.024  | 0.02  | 0.022  | t | 56587  | RYLSQLCS<br>GGYT             | Oryctola<br>gus<br>cuniculu<br>s |
| 1 | 1.00 | 1 | 1 | 0     | 0     | 0      | 0     | 0      | t | 139881 | RGDKSRPP<br>VWYVEGE          | Mus<br>musculu<br>s              |
| 1 | 1.00 | 1 | 1 | 0     | 0     | 0      | 0     | 0      | t | 1547   | AGHATLRE<br>HLRDIKAE<br>NTDA | Mus<br>musculu<br>s              |
| 1 | 1.00 | 1 | 1 | 0     | 0     | 0      | 0     | 0      | t | 4429   | ASGQ                         | Mus<br>musculu<br>s              |
| 1 | 1.00 | 1 | 1 | 0.01  | 0.01  | 0.01   | 0.01  | 0.01   | t | 131455 | GSCLEEFR<br>ASPFLECH         | Rattus<br>norvegic<br>us         |
| 1 | 1.00 | 1 | 1 | -0.03 | -0.03 | -0.041 | -0.03 | -0.027 | t | 24224  | HLHRFFSS                     | Mus<br>musculu<br>s              |
| 1 | 1.00 | 1 | 1 | 0     | 0.002 | 0      | 0.001 | 0      | t | 133686 | RTLDSHWI<br>RVGG             | Homo<br>sapiens                  |
| 1 | 1.00 | 1 | 1 | -0.02 | -0.02 | -0.01  | -0.02 | -0.019 | t | 45420  | NPNDPP                       | Mus<br>musculu<br>s              |
| 1 | 1.00 | 1 | 1 | -0.02 | -0.02 | -0.01  | -0.02 | -0.019 | t | 45420  | NPNDPP                       | Mus<br>musculu<br>s              |
| 1 | 1.00 | 1 | 1 | -0.02 | -0.02 | -0.02  | -0.02 | -0.02  | t | 47805  | PHDGNRA<br>FPRTKVT<br>M      | Mus<br>musculu<br>s              |
| 1 | 1.00 | 1 | 1 | 0     | 0     | 0.001  | 0     | 0      | t | 159041 | NTFVIDGP<br>ETKECPTQ         | Mus<br>musculu<br>s              |
| 1 | 1.00 | 1 | 1 | 0.01  | 0.012 | -0.006 | 0.007 | 0.01   | t | 38694  | LPRSNTSS<br>GASPPAD          | Homo<br>sapiens                  |
| 1 | 1.00 | 1 | 1 | 0.03  | 0.03  | 0.018  | 0.024 | 0.031  | t | 105039 | YCSPDHNC<br>QS               | Homo<br>sapiens                  |
| 1 | 1.00 | 1 | 1 | 0     | 0.004 | 0.012  | 0.007 | 0      | t | 119465 | HRKSTVAG<br>S                | Homo<br>sapiens                  |
| 1 | 1.00 | 1 | 1 | 0.02  | 0.02  | 0.02   | 0.018 | 0.02   | t | 70427  | VPPPRRKR<br>TIQLDG           | Homo<br>sapiens                  |
| 1 | 1.00 | 1 | 1 | 0     | 0     | 0      | 0     | 0      | t | 151665 | KIETELRDI<br>CNDVLSLL<br>EKF | Mus<br>musculu<br>s              |

|   |      |   |   |       |        |        |        |        |   |        |                          |                       |
|---|------|---|---|-------|--------|--------|--------|--------|---|--------|--------------------------|-----------------------|
| 1 | 1.00 | 1 | 1 | -0.02 | -0.017 | -0.014 | -0.02  | -0.021 | t | 58560  | SIINFEKL                 | Mus musculus          |
| 1 | 1.00 | 1 | 1 | -0.02 | -0.017 | -0.014 | -0.02  | -0.021 | t | 58560  | SIINFEKL                 | Mus musculus          |
| 1 | 1.00 | 1 | 1 | 0     | 0      | 0.001  | 0      | 0      | t | 111856 | TTHYGSLPQK               | Oryctolagus cuniculus |
| 1 | 1.00 | 1 | 1 | 0     | 0      | 0.001  | 0      | 0      | t | 111856 | TTHYGSLPQK               | Oryctolagus cuniculus |
| 1 | 1.00 | 1 | 1 | 0     | 0      | -0.001 | 0.003  | 0.002  | t | 98793  | GEQFMQWFLQEQIE<br>EVALMA | Homo sapiens          |
| 1 | 1.00 | 1 | 1 | -0.01 | -0.01  | -0.01  | -0.01  | -0.01  | t | 7108   | CTARVAGLFNPGSQQR         | Mus musculus          |
| 1 | 1.00 | 1 | 1 | -0.02 | -0.01  | -0.025 | -0.023 | -0.02  | t | 75872  | YSRCGSGPRITP             | Pan troglodytes       |
| 1 | 1.00 | 1 | 1 | 0.01  | 0.01   | 0.01   | 0.01   | 0.011  | t | 68865  | VHLDSAFWFVRTDFD          | Mus musculus          |
| 1 | 1.00 | 1 | 1 | -0.02 | -0.017 | -0.015 | -0.02  | -0.021 | t | 122083 | DPNIKLVLDDCWATS          | Mus musculus          |
| 1 | 1.00 | 1 | 1 | 0     | 0      | 0      | -0.003 | -0.001 | t | 43242  | NANPNANPNANP             | Homo sapiens          |
| 1 | 1.00 | 1 | 1 | 0     | 0      | 0      | -0.003 | -0.001 | t | 37660  | LLPHSNLDHILEPSIPWKSK     | Homo sapiens          |
| 1 | 1.00 | 1 | 1 | 0     | 0      | 0      | -0.003 | -0.001 | t | 48125  | PKPQRKTKRNTNRRPQDVK      | Homo sapiens          |
| 1 | 1.00 | 1 | 1 | 0     | 0      | 0      | -0.003 | -0.001 | t | 43242  | NANPNANPNANP             | Homo sapiens          |

|   |      |   |   |       |        |        |        |        |   |        |                           |                                  |
|---|------|---|---|-------|--------|--------|--------|--------|---|--------|---------------------------|----------------------------------|
| 1 | 1.00 | 1 | 1 | 0     | 0      | 0      | -0.003 | -0.001 | t | 23032  | GVLAQDV<br>RFSQV          | Homo<br>sapiens                  |
| 1 | 1.00 | 1 | 1 | -0.03 | -0.033 | -0.033 | -0.03  | -0.028 | t | 67169  | TVSSQSFR<br>RL            | Oryctola<br>gus<br>cuniculu<br>s |
| 1 | 1.00 | 1 | 1 | -0.03 | -0.03  | -0.03  | -0.03  | -0.03  | t | 62971  | TAQRCDH<br>S              | Oryctola<br>gus<br>cuniculu<br>s |
| 1 | 1.00 | 1 | 1 | 0.03  | 0.03   | 0.03   | 0.03   | 0.03   | t | 144660 | GREGYP<br>DGGASAS<br>ASAS | Oryctola<br>gus<br>cuniculu<br>s |
| 1 | 1.00 | 1 | 1 | 0.03  | 0.03   | 0.03   | 0.03   | 0.03   | t | 119617 | NGQPENN<br>Y              | Homo<br>sapiens                  |
| 1 | 1.00 | 1 | 1 | 0.01  | 0.01   | 0.01   | 0.01   | 0.01   | t | 149064 | LAANLTQ                   | Sus<br>scrofa                    |
| 1 | 1.00 | 1 | 1 | 0.01  | 0.01   | 0.01   | 0.01   | 0.01   | t | 159166 | TRLEHQM<br>WESVRDE<br>LN  | Mus<br>musculu<br>s              |
| 1 | 1.00 | 1 | 1 | 0.01  | 0.01   | 0.01   | 0.01   | 0.01   | t | 138209 | NNAKAAV<br>RLGSDMG        | Oryctola<br>gus<br>cuniculu<br>s |
| 1 | 1.00 | 1 | 1 | 0.01  | 0.01   | 0.01   | 0.01   | 0.01   | t | 149080 | NMTQAA<br>Q               | Sus<br>scrofa                    |
| 1 | 1.00 | 1 | 1 | 0.01  | 0.01   | 0.01   | 0.01   | 0.01   | t | 114818 | FCNAVVES<br>NG            | Homo<br>sapiens                  |
| 1 | 1.00 | 1 | 1 | 0.01  | 0.01   | 0.01   | 0.01   | 0.01   | t | 117107 | VQTDGST<br>KSHRH          | Homo<br>sapiens                  |
| 1 | 1.00 | 1 | 1 | 0.01  | 0.01   | 0.01   | 0.01   | 0.01   | t | 117107 | VQTDGST<br>KSHRH          | Mus<br>musculu<br>s              |
| 1 | 1.00 | 1 | 1 | 0.01  | 0.01   | 0.01   | 0.01   | 0.01   | t | 111559 | MPLVSQK                   | Homo<br>sapiens                  |
| 1 | 1.00 | 1 | 1 | -0.01 | -0.01  | -0.01  | -0.01  | -0.01  | t | 140874 | KGYLAGKG<br>VDAG          | Oryctola<br>gus<br>cuniculu<br>s |
| 1 | 1.00 | 1 | 1 | -0.01 | -0.01  | -0.01  | -0.01  | -0.01  | t | 137580 | VIRPSRSQ<br>SERGSES       | Homo<br>sapiens                  |
| 1 | 1.00 | 1 | 1 | -0.01 | -0.01  | -0.01  | -0.01  | -0.01  | t | 138154 | DHRSPPW<br>LTSLLTIS       | Homo<br>sapiens                  |

|   |      |   |   |       |        |        |        |        |   |        |                              |                                  |
|---|------|---|---|-------|--------|--------|--------|--------|---|--------|------------------------------|----------------------------------|
| 1 | 1.00 | 1 | 1 | -0.01 | -0.01  | -0.01  | -0.01  | -0.01  | t | 135460 | GGLGVG                       | Oryctola<br>gus<br>cuniculu<br>s |
| 1 | 1.00 | 1 | 1 | -0.01 | -0.01  | -0.01  | -0.01  | -0.01  | t | 123329 | IPPGAMPP                     | Homo<br>sapiens                  |
| 1 | 1.00 | 1 | 1 | -0.01 | -0.01  | -0.01  | -0.01  | -0.01  | t | 123329 | IPPGAMPP                     | Oryctola<br>gus<br>cuniculu<br>s |
| 1 | 1.00 | 1 | 1 | -0.01 | -0.01  | -0.01  | -0.01  | -0.01  | t | 99088  | AFDQFRQ<br>TYRQWIIE          | Equus<br>caballus                |
| 1 | 1.00 | 1 | 1 | -0.01 | -0.01  | -0.01  | -0.01  | -0.01  | t | 111560 | MPMTPAK                      | Homo<br>sapiens                  |
| 1 | 1.00 | 1 | 1 | -0.01 | -0.01  | -0.01  | -0.01  | -0.01  | t | 99242  | FEVKPDKK<br>NPQLQDL          | Homo<br>sapiens                  |
| 1 | 1.00 | 1 | 1 | -0.01 | -0.01  | -0.01  | -0.01  | -0.01  | t | 106363 | DVYWLMP<br>DPPTS             | Mus<br>musculu<br>s              |
| 1 | 1.00 | 1 | 1 | -0.01 | -0.01  | -0.01  | -0.01  | -0.01  | t | 79539  | EHQTGTW                      | Oryctola<br>gus<br>cuniculu<br>s |
| 1 | 1.00 | 1 | 1 | -0.01 | -0.01  | -0.01  | -0.01  | -0.01  | t | 46829  | PAIIPDREV<br>LYREFDEM<br>EEC | Homo<br>sapiens                  |
| 1 | 1.00 | 1 | 1 | -0.01 | -0.01  | -0.01  | -0.01  | -0.01  | t | 46989  | PAVIPDRE<br>LLYREFDE<br>MEEC | Homo<br>sapiens                  |
| 1 | 1.00 | 1 | 1 | -0.01 | -0.01  | -0.01  | -0.01  | -0.01  | t | 39399  | LSGRPAIV<br>PDREVLRY<br>EFDE | Homo<br>sapiens                  |
| 1 | 1.00 | 1 | 1 | -0.01 | -0.01  | -0.01  | -0.01  | -0.01  | t | 28914  | ITGHRMA<br>WDMMVN<br>WS      | Homo<br>sapiens                  |
| 1 | 1.00 | 1 | 1 | -0.01 | -0.022 | -0.01  | -0.01  | -0.01  | t | 4701   | ASQKIQLI                     | Mus<br>musculu<br>s              |
| 1 | 1.00 | 1 | 1 | -0.01 | -0.01  | -0.01  | -0.01  | -0.01  | t | 7395   | CYKKVWR<br>AHRGTI            | Mus<br>musculu<br>s              |
| 1 | 1.00 | 1 | 1 | -0.03 | -0.03  | -0.03  | -0.03  | -0.03  | t | 112721 | WHAPQTP<br>YWASM             | Homo<br>sapiens                  |
| 1 | 1.00 | 1 | 1 | -0.02 | -0.022 | -0.009 | -0.021 | -0.022 | t | 23975  | HHAEMQ<br>NPVYLIPET<br>VPYIK | Mus<br>musculu<br>s              |

|   |      |   |   |       |        |        |        |        |   |        |                              |                                  |
|---|------|---|---|-------|--------|--------|--------|--------|---|--------|------------------------------|----------------------------------|
| 1 | 1.00 | 1 | 1 | 0     | -0.003 | 0.006  | 0      | 0      | t | 134801 | SSATPNRL<br>TWLL             | Oryctola<br>gus<br>cuniculu<br>s |
| 1 | 1.00 | 1 | 1 | 0.03  | 0.03   | 0.03   | 0.027  | 0.03   | t | 96940  | TAPTKPTY<br>ET               | Homo<br>sapiens(<br>human)       |
| 1 | 1.00 | 1 | 1 | 0.03  | 0.026  | 0.035  | 0.029  | 0.03   | t | 6371   | CGYSLFQK<br>EKMVLGC          | Oryctola<br>gus<br>cuniculu<br>s |
| 1 | 1.00 | 1 | 1 | -0.06 | -0.062 | -0.068 | -0.061 | -0.06  | t | 9949   | DRARRLL<br>WWHYNC<br>L       | Anas<br>platyrhy<br>nchos        |
| 1 | 1.00 | 1 | 1 | 0.01  | 0.01   | 0.01   | 0.01   | 0.01   | t | 127242 | TRVPMDA<br>FQVGKFPE<br>DFESC | Oryctola<br>gus<br>cuniculu<br>s |
| 1 | 1.00 | 1 | 1 | -0.01 | -0.007 | -0.003 | -0.01  | -0.009 | t | 133748 | YNAELLV                      | Mus<br>musculu<br>s              |
| 1 | 1.00 | 1 | 1 | 0.04  | 0.037  | 0.051  | 0.04   | 0.038  | t | 111738 | RPGKEIEA<br>YIFEMFN          | Oryctola<br>gus<br>cuniculu<br>s |
| 1 | 1.00 | 1 | 1 | 0     | 0      | -0.002 | 0      | 0.001  | t | 125175 | NNNNFQS<br>KAN               | Mus<br>musculu<br>s              |
| 1 | 1.00 | 1 | 1 | -0.03 | -0.032 | -0.022 | -0.031 | -0.037 | t | 9478   | DNIHVKM<br>FKVIMNN<br>DKSELI | Aotus<br>sp.                     |
| 1 | 1.00 | 1 | 1 | 0.01  | 0.008  | 0.006  | 0.01   | 0.012  | t | 137824 | DQAVSLG<br>Q                 | Oryctola<br>gus<br>cuniculu<br>s |
| 1 | 1.00 | 1 | 1 | 0.01  | 0.016  | 0.009  | 0.01   | 0.011  | t | 49335  | PSDPLVYK<br>RQTAKF           | Ovis<br>aries                    |
| 1 | 1.00 | 1 | 1 | 0.01  | 0.012  | 0.01   | 0.007  | 0.01   | t | 44569  | NKPNNDF<br>HFEVF             | Homo<br>sapiens                  |
| 1 | 1.00 | 1 | 1 | 0     | 0.002  | 0.008  | 0.001  | 0      | t | 3820   | APSQGGV<br>NSPVNV            | Homo<br>sapiens                  |

|   |      |   |   |       |        |        |        |        |   |        |                               |                                  |
|---|------|---|---|-------|--------|--------|--------|--------|---|--------|-------------------------------|----------------------------------|
| 1 | 1.00 | 1 | 1 | -0.02 | -0.024 | -0.025 | -0.017 | -0.02  | t | 66976  | TVDNPA<br>STNKDKLFA<br>VWK    | Oryctola<br>gus<br>cuniculu<br>s |
| 1 | 1.00 | 1 | 1 | -0.02 | -0.02  | -0.028 | -0.02  | -0.018 | t | 3539   | APENKGT<br>G                  | Mus<br>musculu<br>s              |
| 1 | 1.00 | 1 | 1 | 0     | 0.004  | 0.007  | -0.003 | -0.004 | t | 106742 | QRRQIEAG<br>LN                | Homo<br>sapiens                  |
| 1 | 1.00 | 1 | 1 | -0.05 | -0.05  | -0.037 | -0.048 | -0.054 | t | 142007 | SDWRFLR<br>GYHQYA             | Homo<br>sapiens                  |
| 1 | 1.00 | 1 | 1 | -0.01 | -0.01  | -0.01  | -0.01  | -0.01  | t | 132471 | MAHRPPS<br>PALASVLL           | Homo<br>sapiens                  |
| 1 | 1.00 | 1 | 1 | -0.04 | -0.037 | -0.038 | -0.04  | -0.038 | t | 133749 | YNLLMHLS<br>SML               | Mus<br>musculu<br>s              |
| 1 | 1.00 | 1 | 1 | -0.02 | -0.024 | -0.015 | -0.017 | -0.02  | t | 95932  | TTRTVNPL<br>GFFK              | Oryctola<br>gus<br>cuniculu<br>s |
| 1 | 1.00 | 1 | 1 | -0.04 | -0.038 | -0.04  | -0.039 | -0.04  | t | 116944 | DFRYSTRP<br>FAL               | Homo<br>sapiens                  |
| 1 | 1.00 | 1 | 1 | -0.02 | -0.02  | -0.019 | -0.02  | -0.018 | t | 42039  | MLQDMAI<br>LTGGQVI            | Mus<br>musculu<br>s              |
| 1 | 1.00 | 1 | 1 | 0.03  | 0.028  | 0.025  | 0.029  | 0.03   | t | 29972  | KAVEKVTE<br>TLLKGAK           | Rattus<br>norvegic<br>us         |
| 1 | 1.00 | 1 | 1 | -0.02 | -0.02  | -0.02  | -0.02  | -0.02  | t | 151662 | KFSPLTAN<br>LMNLLAE<br>NGRL   | Mus<br>musculu<br>s              |
| 1 | 1.00 | 1 | 1 | 0.04  | 0.04   | 0.04   | 0.04   | 0.04   | t | 131981 | NGWKSTE<br>EEDQGSAT           | Homo<br>sapiens                  |
| 1 | 1.00 | 1 | 1 | 0.04  | 0.04   | 0.04   | 0.04   | 0.04   | t | 115479 | SEESA EVA<br>TEEVKITV<br>DDKH | Homo<br>sapiens                  |
| 1 | 1.00 | 1 | 1 | 0     | 0.003  | -0.001 | 0      | -0.002 | t | 68972  | VIGIINNTV<br>YDPLQPEL<br>DSF  | Mus<br>musculu<br>s              |



|   |      |   |   |       |        |       |       |        |   |        |                              |                 |
|---|------|---|---|-------|--------|-------|-------|--------|---|--------|------------------------------|-----------------|
| 1 | 1.00 | 1 | 1 | 0.02  | 0.02   | 0.02  | 0.02  | 0.02   | t | 151630 | FSTNWM<br>NQHRPS             | Mus<br>musculus |
| 1 | 1.00 | 1 | 1 | 0.02  | 0.02   | 0.02  | 0.02  | 0.02   | t | 125386 | DVSQTSVT<br>ALPSKGLE<br>HLKE | Homo<br>sapiens |
| 1 | 1.00 | 1 | 1 | 0.02  | 0.02   | 0.02  | 0.02  | 0.02   | t | 110616 | GPSGLAGP<br>KGANGDP          | Mus<br>musculus |
| 1 | 1.00 | 1 | 1 | 0.02  | 0.02   | 0.02  | 0.02  | 0.02   | t | 109630 | NQVSLTC                      | Homo<br>sapiens |
| 1 | 1.00 | 1 | 1 | 0     | 0      | 0     | 0     | 0      | t | 135672 | FCGGSIVN                     | Homo<br>sapiens |
| 1 | 1.00 | 1 | 1 | 0     | 0      | 0     | 0     | 0      | t | 124283 | HPLLPGTA<br>S                | Homo<br>sapiens |
| 1 | 1.00 | 1 | 1 | 0     | 0      | 0     | 0     | 0      | t | 111140 | CAEPNNLL<br>C                | Homo<br>sapiens |
| 1 | 1.00 | 1 | 1 | 0     | 0      | 0     | 0     | 0      | t | 115787 | IASGEPTST<br>P               | Homo<br>sapiens |
| 1 | 1.00 | 1 | 1 | 0     | 0      | 0     | 0     | 0      | t | 110607 | GNRGFPG<br>QDGLAGP<br>K      | Mus<br>musculus |
| 1 | 1.00 | 1 | 1 | 0     | 0      | 0     | 0     | 0      | t | 98956  | QGSVQPQ<br>QLPQF             | Homo<br>sapiens |
| 1 | 1.00 | 1 | 1 | 0     | 0      | 0     | 0     | 0      | t | 79344  | QCDAFAV<br>PVEGACM           | Mus<br>musculus |
| 1 | 1.00 | 1 | 1 | 0     | 0      | 0     | 0     | 0      | t | 79384  | SCNSFMIP<br>AQPST            | Mus<br>musculus |
| 1 | 1.00 | 1 | 1 | -0.02 | -0.02  | -0.02 | -0.02 | -0.02  | t | 151044 | PRYAFAM<br>ERNAGSGI          | Homo<br>sapiens |
| 1 | 1.00 | 1 | 1 | -0.02 | -0.02  | -0.02 | -0.02 | -0.02  | t | 111142 | CALHPPPQ<br>C                | Homo<br>sapiens |
| 1 | 1.00 | 1 | 1 | -0.02 | -0.02  | -0.02 | -0.02 | -0.02  | t | 78247  | PQNAFDH<br>L                 | Homo<br>sapiens |
| 1 | 1.00 | 1 | 1 | -0.02 | -0.02  | -0.02 | -0.02 | -0.02  | t | 78236  | PHSSLWHL                     | Homo<br>sapiens |
| 1 | 1.00 | 1 | 1 | 0.04  | 0.04   | 0.039 | 0.043 | 0.038  | t | 19949  | GGPEEFEG<br>AGDGEPP<br>EDDDS | Homo<br>sapiens |
| 1 | 1.00 | 1 | 1 | -0.02 | -0.017 | -0.02 | -0.02 | -0.019 | t | 107228 | REEFRHEA                     | Mus<br>musculus |

|   |      |   |   |       |        |        |        |        |   |        |                              |                          |
|---|------|---|---|-------|--------|--------|--------|--------|---|--------|------------------------------|--------------------------|
| 1 | 1.00 | 1 | 1 | -0.03 | -0.03  | -0.037 | -0.029 | -0.031 | t | 31124  | KHKKVSTN<br>LCTHSFRK<br>KQVR | Homo<br>sapiens          |
| 1 | 1.00 | 1 | 1 | 0.02  | 0.02   | 0.02   | 0.02   | 0.02   | t | 99020  | TELPSIPG                     | Homo<br>sapiens          |
| 1 | 1.00 | 1 | 1 | -0.02 | -0.02  | -0.02  | -0.02  | -0.02  | t | 142431 | KKAEEAKK<br>IVDKI            | Homo<br>sapiens          |
| 1 | 1.00 | 1 | 1 | 0.01  | 0.01   | 0.01   | 0.016  | 0.014  | t | 142636 | EQIYRVDL<br>RTLGRYY          | Rattus<br>norvegicus     |
| 1 | 1.00 | 1 | 1 | -0.02 | -0.017 | -0.018 | -0.02  | -0.02  | t | 125845 | DSDFPIQN<br>LPYGVFS          | Mus<br>musculus          |
| 1 | 1.00 | 1 | 1 | 0     | 0.002  | 0      | 0.001  | 0.002  | t | 68971  | VIGIINNTV<br>YDPLQPEL        | Homo<br>sapiens          |
| 1 | 1.00 | 1 | 1 | -0.03 | -0.032 | -0.032 | -0.037 | -0.033 | t | 121070 | WVYYTCC<br>PDTPYL            | Rattus<br>norvegicus     |
| 1 | 1.00 | 1 | 1 | 0.02  | 0.02   | 0.02   | 0.02   | 0.02   | t | 156848 | ALTVRCTA<br>PCPQRN           | Gallus<br>gallus         |
| 1 | 1.00 | 1 | 1 | -0.02 | -0.022 | -0.018 | -0.017 | -0.018 | t | 98787  | GDALAGG<br>AVP               | Mus<br>musculus          |
| 1 | 1.00 | 1 | 1 | 0.01  | 0.012  | 0.01   | 0.013  | 0.01   | t | 32790  | KPLHCGDT<br>FCSLNQ           | Homo<br>sapiens          |
| 1 | 1.00 | 1 | 1 | -0.03 | -0.032 | -0.03  | -0.037 | -0.032 | t | 133289 | PRSPKM                       | Mus<br>musculus          |
| 1 | 1.00 | 1 | 1 | -0.01 | -0.007 | -0.007 | -0.01  | -0.01  | t | 97742  | VLNLTAW<br>N                 | Mus<br>musculus          |
| 1 | 1.00 | 1 | 1 | -0.01 | -0.013 | -0.012 | -0.01  | -0.01  | t | 19647  | GFVSASIF<br>GFQAEVG<br>PNNTR | Oryctolagus<br>cuniculus |
| 1 | 1.00 | 1 | 1 | 0     | -0.002 | 0.005  | -0.001 | -0.002 | t | 49146  | PQVMFDF<br>A                 | Mus<br>musculus          |
| 1 | 1.00 | 1 | 1 | -0.03 | -0.027 | -0.025 | -0.03  | -0.031 | t | 64551  | TKELADKL<br>SNAEASRD<br>K    | Equus<br>caballus        |

|   |      |   |   |       |        |        |        |        |   |        |                             |                                  |
|---|------|---|---|-------|--------|--------|--------|--------|---|--------|-----------------------------|----------------------------------|
| 1 | 1.00 | 1 | 1 | 0     | 0      | 0.002  | 0.001  | 0      | t | 153251 | AKAFSYW<br>TPFDGKSL<br>YSST | Mus<br>musculu<br>s              |
| 1 | 1.00 | 1 | 1 | -0.03 | -0.025 | -0.034 | -0.027 | -0.03  | t | 77791  | NKVSARG<br>CTFYGCW<br>KGLVG | Homo<br>sapiens                  |
| 1 | 1.00 | 1 | 1 | -0.01 | -0.012 | 0.001  | -0.011 | -0.01  | t | 6771   | CPHPDKAS<br>C               | Mus<br>musculu<br>s              |
| 1 | 1.00 | 1 | 1 | 0     | 0.002  | 0      | 0.001  | 0      | t | 32984  | KQGGENF<br>AYLTAYQA         | Homo<br>sapiens                  |
| 1 | 1.00 | 1 | 1 | 0.01  | 0.008  | 0.006  | 0.009  | 0.01   | t | 47730  | PGQAEPP<br>QAFIDEV          | Mus<br>musculu<br>s              |
| 1 | 1.00 | 1 | 1 | 0.02  | 0.02   | 0.02   | 0.016  | 0.02   | t | 20012  | GGSGGSV<br>ASGGSVAS         | Homo<br>sapiens                  |
| 1 | 1.00 | 1 | 1 | -0.01 | -0.01  | -0.013 | -0.01  | -0.011 | t | 52089  | QQPFPQS<br>QQP              | Mus<br>musculu<br>s              |
| 1 | 1.00 | 1 | 1 | 0.01  | 0.01   | 0.01   | 0.01   | 0.012  | t | 129014 | IWAQKTN<br>T                | Homo<br>sapiens                  |
| 1 | 1.00 | 1 | 1 | 0.01  | 0.011  | 0.004  | 0.01   | 0.01   | t | 19081  | GDPTSPD<br>NIDSPNA          | Myodes<br>glareolu<br>s          |
| 1 | 1.00 | 1 | 1 | -0.01 | -0.01  | -0.015 | -0.01  | -0.01  | t | 103173 | FKADEKKF<br>WGKLYEI<br>ARR  | Oryctola<br>gus<br>cuniculu<br>s |
| 1 | 1.00 | 1 | 1 | 0.03  | 0.03   | 0.03   | 0.03   | 0.03   | t | 108269 | AKYSNQR<br>AQ               | Homo<br>sapiens                  |
| 1 | 1.00 | 1 | 1 | 0.01  | 0.01   | 0.01   | 0.01   | 0.01   | t | 148888 | QQSFPQQ<br>SQQ              | Homo<br>sapiens                  |
| 1 | 1.00 | 1 | 1 | 0.01  | 0.01   | 0.01   | 0.01   | 0.01   | t | 149411 | PQFEEIRN<br>LA              | Mus<br>musculu<br>s              |
| 1 | 1.00 | 1 | 1 | 0.01  | 0.01   | 0.01   | 0.01   | 0.01   | t | 133528 | CADQKPG<br>EC               | Mus<br>musculu<br>s              |
| 1 | 1.00 | 1 | 1 | 0.01  | 0.01   | 0.01   | 0.01   | 0.01   | t | 133528 | CADQKPG<br>EC               | Mus<br>musculu<br>s              |
| 1 | 1.00 | 1 | 1 | 0.01  | 0.01   | 0.01   | 0.01   | 0.01   | t | 131222 | GWYSPFQ<br>LGWPQ            | Homo<br>sapiens                  |

|   |      |   |   |       |        |        |        |        |   |        |                              |                     |
|---|------|---|---|-------|--------|--------|--------|--------|---|--------|------------------------------|---------------------|
| 1 | 1.00 | 1 | 1 | 0.01  | 0.01   | 0.01   | 0.01   | 0.01   | t | 115172 | ACQCLVRT<br>PEVDDEAL<br>EKFD | Homo<br>sapiens     |
| 1 | 1.00 | 1 | 1 | 0.01  | 0.01   | 0.01   | 0.01   | 0.01   | t | 111097 | AGTMGDT<br>VPQSLYIK<br>GTGMR | Mus<br>musculu<br>s |
| 1 | 1.00 | 1 | 1 | 0.01  | 0.01   | 0.01   | 0.01   | 0.01   | t | 112278 | QSVLYSS                      | Homo<br>sapiens     |
| 1 | 1.00 | 1 | 1 | 0.01  | 0.01   | 0.01   | 0.01   | 0.01   | t | 93930  | SNDSRNV<br>LVA               | Ovis<br>aries       |
| 1 | 1.00 | 1 | 1 | -0.01 | -0.01  | -0.01  | -0.01  | -0.01  | t | 123172 | FIKWPLHS<br>W                | Ovis<br>aries       |
| 1 | 1.00 | 1 | 1 | -0.01 | -0.01  | -0.01  | -0.01  | -0.01  | t | 108536 | LSRASLCTL                    | Homo<br>sapiens     |
| 1 | 1.00 | 1 | 1 | -0.01 | -0.01  | -0.01  | -0.01  | -0.01  | t | 106306 | CIVRATKGI<br>S               | Homo<br>sapiens     |
| 1 | 1.00 | 1 | 1 | -0.01 | -0.01  | -0.01  | -0.01  | -0.01  | t | 110603 | GLPGARGL<br>TGRPGDA          | Mus<br>musculu<br>s |
| 1 | 1.00 | 1 | 1 | -0.01 | -0.01  | -0.01  | -0.01  | -0.01  | t | 113462 | GQQQQA<br>QQPGQG<br>QQ       | Homo<br>sapiens     |
| 1 | 1.00 | 1 | 1 | -0.01 | -0.01  | -0.01  | -0.01  | -0.01  | t | 115185 | AQKKIIAEK<br>TKIPAVFKI<br>DA | Homo<br>sapiens     |
| 1 | 1.00 | 1 | 1 | -0.01 | -0.01  | -0.01  | -0.01  | -0.01  | t | 39401  | LSGRPAVI<br>PDREVLRY<br>EFDE | Homo<br>sapiens     |
| 1 | 1.00 | 1 | 1 | -0.01 | -0.01  | -0.01  | -0.01  | -0.01  | t | 46970  | PATIPDRE<br>ALYREFDE<br>MEEC | Homo<br>sapiens     |
| 1 | 1.00 | 1 | 1 | -0.03 | -0.03  | -0.03  | -0.03  | -0.03  | t | 111550 | MKVNILR                      | Homo<br>sapiens     |
| 1 | 1.00 | 1 | 1 | -0.05 | -0.05  | -0.05  | -0.05  | -0.05  | t | 100628 | VRIYMKPK<br>HVRVWC           | Homo<br>sapiens     |
| 1 | 1.00 | 1 | 1 | 0     | 0      | 0      | 0      | 0      | t | 144820 | YLEDWIKY<br>NNQK             | Mus<br>musculu<br>s |
| 1 | 1.00 | 1 | 1 | -0.04 | -0.042 | -0.035 | -0.041 | -0.039 | t | 41290  | MDWNM<br>HAA                 | Mus<br>musculu<br>s |
| 1 | 1.00 | 1 | 1 | 0.03  | 0.03   | 0.03   | 0.03   | 0.032  | t | 52120  | QQQP                         | Mus<br>musculu<br>s |

|   |      |   |   |       |        |        |        |        |   |        |                              |                                  |
|---|------|---|---|-------|--------|--------|--------|--------|---|--------|------------------------------|----------------------------------|
| 1 | 1.00 | 1 | 1 | 0.03  | 0.03   | 0.03   | 0.03   | 0.032  | t | 52120  | QQQP                         | Mus<br>musculu<br>s              |
| 1 | 1.00 | 1 | 1 | 0.03  | 0.032  | 0.025  | 0.03   | 0.03   | t | 136066 | IETDKTSV<br>QV               | Rattus<br>norvegic<br>us         |
| 1 | 1.00 | 1 | 1 | 0.03  | 0.03   | 0.025  | 0.03   | 0.03   | t | 136066 | IETDKTSV<br>QV               | Oryctola<br>gus<br>cuniculu<br>s |
| 1 | 1.00 | 1 | 1 | 0.03  | 0.034  | 0.032  | 0.031  | 0.034  | t | 30199  | KDLLED                       | Homo<br>sapiens                  |
| 1 | 1.00 | 1 | 1 | 0     | 0      | 0      | 0      | 0.002  | t | 140247 | KAAESEIEK<br>LTTK            | Oryctola<br>gus<br>cuniculu<br>s |
| 1 | 1.00 | 1 | 1 | -0.01 | -0.012 | 0.002  | -0.007 | -0.008 | t | 21617  | GPFFLSPTS                    | Mus<br>musculu<br>s              |
| 1 | 1.00 | 1 | 1 | 0     | -0.002 | 0      | -0.001 | 0      | t | 66630  | TTGYRFTN<br>FEPFTV           | Mus<br>musculu<br>s              |
| 1 | 1.00 | 1 | 1 | 0.02  | 0.016  | 0.013  | 0.023  | 0.023  | t | 107013 | YGASSRAT<br>GIPDR            | Oryctola<br>gus<br>cuniculu<br>s |
| 1 | 1.00 | 1 | 1 | -0.02 | -0.02  | -0.021 | -0.02  | -0.018 | t | 122156 | NLHIDPTLI                    | Mus<br>musculu<br>s              |
| 1 | 1.00 | 1 | 1 | -0.01 | -0.01  | -0.01  | -0.01  | -0.01  | t | 118375 | GKALCWV<br>CAQSRKH<br>RDHAMV | Homo<br>sapiens                  |
| 1 | 1.00 | 1 | 1 | -0.02 | -0.02  | -0.015 | -0.02  | -0.02  | t | 125004 | DAPDTDW<br>CDSIP             | Mus<br>musculu<br>s              |
| 1 | 1.00 | 1 | 1 | 0.03  | 0.03   | 0.03   | 0.03   | 0.029  | t | 119569 | ESNGQPE<br>N                 | Homo<br>sapiens                  |
| 1 | 1.00 | 1 | 1 | -0.04 | -0.044 | -0.043 | -0.043 | -0.042 | t | 75659  | YRPLGPGT<br>PPMRARL<br>PA    | Oryctola<br>gus<br>cuniculu<br>s |
| 1 | 1.00 | 1 | 1 | -0.02 | -0.018 | -0.019 | -0.02  | -0.022 | t | 58377  | SHLKLFTIK<br>YVDVNTN<br>ELLK | Homo<br>sapiens                  |

|   |      |   |   |       |        |        |        |        |   |        |                             |                                  |
|---|------|---|---|-------|--------|--------|--------|--------|---|--------|-----------------------------|----------------------------------|
| 1 | 1.00 | 1 | 1 | 0.01  | 0.006  | 0.001  | 0.009  | 0.013  | t | 63038  | TAVSPTTL<br>RTEVVK          | Oryctola<br>gus<br>cuniculu<br>s |
| 1 | 1.00 | 1 | 1 | -0.03 | -0.03  | -0.028 | -0.03  | -0.031 | t | 48832  | PPLSQRRAL                   | Mus<br>musculu<br>s              |
| 1 | 1.00 | 1 | 1 | 0.02  | 0.028  | 0.02   | 0.02   | 0.018  | t | 156865 | EQATCDH<br>TNEWCAK<br>MM    | Gallus<br>gallus                 |
| 1 | 1.00 | 1 | 1 | 0.03  | 0.03   | 0.03   | 0.03   | 0.03   | t | 153396 | HSFEPWS<br>ARDMLGG<br>GS    | Mus<br>musculu<br>s              |
| 1 | 1.00 | 1 | 1 | -0.02 | -0.019 | -0.021 | -0.021 | -0.02  | t | 43106  | MYYLKNT<br>NF               | Oryctola<br>gus<br>cuniculu<br>s |
| 1 | 1.00 | 1 | 1 | -0.01 | -0.01  | -0.007 | -0.01  | -0.012 | t | 9819   | DPYSPSQD<br>PDRRDY          | Homo<br>sapiens                  |
| 1 | 1.00 | 1 | 1 | 0.01  | 0.014  | 0.01   | 0.013  | 0.011  | t | 122892 | RSILPYGDS<br>MDRIE          | Homo<br>sapiens                  |
| 1 | 1.00 | 1 | 1 | 0.02  | 0.022  | 0.02   | 0.017  | 0.021  | t | 98379  | QNTK                        | Homo<br>sapiens                  |
| 1 | 1.00 | 1 | 1 | 0.02  | 0.02   | 0.02   | 0.02   | 0.02   | t | 131032 | RDEIESVKE<br>LKDTGKDA<br>VN | Oryctola<br>gus<br>cuniculu<br>s |
| 1 | 1.00 | 1 | 1 | 0.02  | 0.021  | 0.024  | 0.017  | 0.018  | t | 58593  | SILDLDLTK<br>FTTQKQ         | Homo<br>sapiens                  |
| 1 | 1.00 | 1 | 1 | 0.03  | 0.032  | 0.028  | 0.031  | 0.03   | t | 40740  | LYDVVS                      | Homo<br>sapiens                  |
| 1 | 1.00 | 1 | 1 | 0     | -0.004 | -0.002 | 0      | 0      | t | 36866  | LKGNNLIW<br>TLKDSAGE        | Mus<br>musculu<br>s              |
| 1 | 1.00 | 1 | 1 | 0.04  | 0.037  | 0.04   | 0.04   | 0.042  | t | 135472 | KDRHDF                      | Oryctola<br>gus<br>cuniculu<br>s |

|   |      |   |   |      |        |        |        |       |   |        |                              |                                  |
|---|------|---|---|------|--------|--------|--------|-------|---|--------|------------------------------|----------------------------------|
| 1 | 1.00 | 1 | 1 | 0.03 | 0.032  | 0.015  | 0.03   | 0.032 | t | 9095   | DLGEAIRE<br>QPEQARL<br>ALTLA | Homo<br>sapiens                  |
| 1 | 1.00 | 1 | 1 | 0.01 | 0.014  | 0.017  | 0.011  | 0.012 | t | 21469  | GNLLLSCL                     | Homo<br>sapiens                  |
| 1 | 1.00 | 1 | 1 | 0    | -0.004 | -0.012 | -0.001 | 0.001 | t | 53916  | RGLIVFHT<br>STEPSVNY<br>DLFG | Oryctola<br>gus<br>cuniculu<br>s |
| 1 | 1.00 | 1 | 1 | 0.02 | 0.02   | 0.02   | 0.02   | 0.02  | t | 134151 | LRRVIGD                      | Homo<br>sapiens                  |
| 1 | 1.00 | 1 | 1 | 0.02 | 0.02   | 0.02   | 0.02   | 0.02  | t | 123578 | PGLAPGQI                     | Oryctola<br>gus<br>cuniculu<br>s |
| 1 | 1.00 | 1 | 1 | 0.02 | 0.02   | 0.02   | 0.02   | 0.02  | t | 114992 | YKPDCTA<br>ED                | Homo<br>sapiens                  |
| 1 | 1.00 | 1 | 1 | 0.02 | 0.02   | 0.02   | 0.02   | 0.02  | t | 105880 | IKGTAPFE                     | Oryctola<br>gus<br>cuniculu<br>s |
| 1 | 1.00 | 1 | 1 | 0    | 0      | 0      | 0      | 0     | t | 138174 | GAPGTPA<br>APGAPAA           | Oryctola<br>gus<br>cuniculu<br>s |
| 1 | 1.00 | 1 | 1 | 0    | 0      | 0      | 0      | 0     | t | 149295 | ELDHWAS                      | Homo<br>sapiens                  |
| 1 | 1.00 | 1 | 1 | 0    | 0.003  | 0      | 0      | 0     | t | 119410 | YKMFPEVK<br>EKGMA            | Mus<br>musculu<br>s              |
| 1 | 1.00 | 1 | 1 | 0    | 0      | 0      | 0      | 0     | t | 119410 | YKMFPEVK<br>EKGMA            | Mus<br>musculu<br>s              |
| 1 | 1.00 | 1 | 1 | 0    | 0      | 0      | 0      | 0     | t | 131969 | LSQLNQLS<br>QISQLQR          | Homo<br>sapiens                  |
| 1 | 1.00 | 1 | 1 | 0    | 0      | 0      | 0      | 0     | t | 115334 | KYKVPQLE<br>IVPNSAEE<br>RLHS | Homo<br>sapiens                  |
| 1 | 1.00 | 1 | 1 | 0    | 0      | 0      | 0      | 0     | t | 99117  | ASSRDQSS<br>YLQGFSR          | Homo<br>sapiens                  |

|   |      |   |   |       |        |        |        |       |   |        |                              |                                  |
|---|------|---|---|-------|--------|--------|--------|-------|---|--------|------------------------------|----------------------------------|
| 1 | 1.00 | 1 | 1 | 0     | 0      | 0      | 0      | 0     | t | 79508  | AHKSTLR                      | Oryctola<br>gus<br>cuniculu<br>s |
| 1 | 1.00 | 1 | 1 | 0     | 0      | 0      | 0      | 0     | t | 69888  | VLYQEFDE<br>MEECSQH<br>LPYIE | Homo<br>sapiens                  |
| 1 | 1.00 | 1 | 1 | 0     | 0      | 0      | 0      | 0     | t | 79298  | LQWLWE<br>WPRT               | Mus<br>musculu<br>s              |
| 1 | 1.00 | 1 | 1 | -0.02 | -0.02  | -0.02  | -0.02  | -0.02 | t | 95832  | SGPSGPSG<br>PSGP             | Homo<br>sapiens                  |
| 1 | 1.00 | 1 | 1 | -0.02 | -0.02  | -0.02  | -0.02  | -0.02 | t | 79509  | AHRPTLL                      | Oryctola<br>gus<br>cuniculu<br>s |
| 1 | 1.00 | 1 | 1 | -0.02 | -0.02  | -0.02  | -0.02  | -0.02 | t | 33846  | KTRRMRID<br>Q                | Homo<br>sapiens                  |
| 1 | 1.00 | 1 | 1 | -0.02 | -0.02  | -0.02  | -0.02  | -0.02 | t | 33846  | KTRRMRID<br>Q                | Homo<br>sapiens                  |
| 1 | 1.00 | 1 | 1 | -0.03 | -0.03  | -0.026 | -0.03  | -0.03 | t | 78707  | KLRERLKQ<br>R                | Oryctola<br>gus<br>cuniculu<br>s |
| 1 | 1.00 | 1 | 1 | -0.03 | -0.033 | -0.026 | -0.03  | -0.03 | t | 78707  | KLRERLKQ<br>R                | Oryctola<br>gus<br>cuniculu<br>s |
| 1 | 1.00 | 1 | 1 | -0.05 | -0.046 | -0.046 | -0.047 | -0.05 | t | 58073  | SGHMAW<br>DMMNWS<br>PT       | Homo<br>sapiens                  |
| 1 | 1.00 | 1 | 1 | 0     | 0      | 0      | 0      | 0     | t | 142423 | GAKKAAG<br>EAKKASI           | Homo<br>sapiens                  |
| 1 | 1.00 | 1 | 1 | -0.02 | -0.025 | -0.026 | -0.023 | -0.02 | t | 72324  | WDQKLW<br>CRHFCVLA<br>D      | Bos<br>taurus                    |
| 1 | 1.00 | 1 | 1 | -0.01 | -0.01  | -0.003 | -0.01  | -0.01 | t | 151630 | FSTNWM<br>NQHRPS             | Mus<br>musculu<br>s              |
| 1 | 1.00 | 1 | 1 | 0     | 0.003  | 0      | 0      | 0     | t | 135441 | AGLGAGIP                     | Mus<br>musculu<br>s              |
| 1 | 1.00 | 1 | 1 | 0.02  | 0.02   | 0.006  | 0.017  | 0.02  | t | 51847  | QPGVDIIE<br>GPVKNA<br>VPLY   | Homo<br>sapiens                  |



|   |      |   |   |   |        |   |        |   |   |        |                          |                                  |
|---|------|---|---|---|--------|---|--------|---|---|--------|--------------------------|----------------------------------|
| 1 | 1.00 | 1 | 1 | 0 | -0.004 | 0 | -0.001 | 0 | t | 137800 | AGELGQSR<br>DVLL         | Oryctola<br>gus<br>cuniculu<br>s |
| 1 | 1.00 | 1 | 1 | 0 | -0.004 | 0 | -0.001 | 0 | t | 137794 | ADFTPGTE                 | Oryctola<br>gus<br>cuniculu<br>s |
| 1 | 1.00 | 1 | 1 | 0 | -0.002 | 0 | -0.001 | 0 | t | 144712 | KSLSTEFI<br>PN           | Mus<br>musculu<br>s              |
| 1 | 1.00 | 1 | 1 | 0 | -0.004 | 0 | -0.001 | 0 | t | 137867 | GEIKFEAV<br>EGAV         | Oryctola<br>gus<br>cuniculu<br>s |
| 1 | 1.00 | 1 | 1 | 0 | -0.004 | 0 | -0.001 | 0 | t | 137811 | AVSLGQN<br>V             | Oryctola<br>gus<br>cuniculu<br>s |
| 1 | 1.00 | 1 | 1 | 0 | -0.002 | 0 | -0.001 | 0 | t | 153382 | FAENKKD<br>HFSPGGG<br>GS | Mus<br>musculu<br>s              |
| 1 | 1.00 | 1 | 1 | 0 | -0.011 | 0 | -0.001 | 0 | t | 136486 | LQATRGV<br>VVAKW         | Mus<br>musculu<br>s              |
| 1 | 1.00 | 1 | 1 | 0 | -0.002 | 0 | -0.001 | 0 | t | 153480 | TPSWRNP<br>FPTFYGGG<br>S | Mus<br>musculu<br>s              |
| 1 | 1.00 | 1 | 1 | 0 | -0.004 | 0 | -0.001 | 0 | t | 137797 | ADYWAGE<br>LGQSR         | Oryctola<br>gus<br>cuniculu<br>s |
| 1 | 1.00 | 1 | 1 | 0 | -0.004 | 0 | -0.001 | 0 | t | 137817 | DAGMFDA<br>VSRAT         | Oryctola<br>gus<br>cuniculu<br>s |
| 1 | 1.00 | 1 | 1 | 0 | -0.002 | 0 | -0.001 | 0 | t | 144940 | RHVLGRLI<br>TVNPIVT      | Mus<br>musculu<br>s              |
| 1 | 1.00 | 1 | 1 | 0 | -0.004 | 0 | -0.001 | 0 | t | 139500 | FHTHISV                  | Oryctola<br>gus<br>cuniculu<br>s |
| 1 | 1.00 | 1 | 1 | 0 | -0.011 | 0 | -0.001 | 0 | t | 136537 | NTDVVNV<br>SVLCR         | Mus<br>musculu<br>s              |
| 1 | 1.00 | 1 | 1 | 0 | -0.002 | 0 | -0.001 | 0 | t | 144763 | RIEDPPFN<br>SLL          | Mus<br>musculu<br>s              |

|   |      |   |   |   |        |   |        |   |   |        |                              |                                  |
|---|------|---|---|---|--------|---|--------|---|---|--------|------------------------------|----------------------------------|
| 1 | 1.00 | 1 | 1 | 0 | -0.004 | 0 | -0.001 | 0 | t | 137858 | FTPGTEYT                     | Oryctola<br>gus<br>cuniculu<br>s |
| 1 | 1.00 | 1 | 1 | 0 | -0.002 | 0 | -0.001 | 0 | t | 144885 | EPGQLKLN<br>WFKKGSS          | Mus<br>musculu<br>s              |
| 1 | 1.00 | 1 | 1 | 0 | -0.002 | 0 | -0.001 | 0 | t | 150995 | HLGKCNI<br>GWILGNP           | Mus<br>musculu<br>s              |
| 1 | 1.00 | 1 | 1 | 0 | -0.002 | 0 | -0.001 | 0 | t | 141765 | TLVVNRLR<br>GSLKICAV<br>KAPG | Mus<br>musculu<br>s              |
| 1 | 1.00 | 1 | 1 | 0 | -0.004 | 0 | -0.001 | 0 | t | 137945 | PGTEYTV                      | Oryctola<br>gus<br>cuniculu<br>s |
| 1 | 1.00 | 1 | 1 | 0 | -0.002 | 0 | -0.001 | 0 | t | 151031 | LVKKGNSY<br>PKLSKSY          | Mus<br>musculu<br>s              |
| 1 | 1.00 | 1 | 1 | 0 | -0.002 | 0 | -0.001 | 0 | t | 151023 | LCKLRGVA<br>PLHLGKC          | Mus<br>musculu<br>s              |
| 1 | 1.00 | 1 | 1 | 0 | -0.004 | 0 | -0.001 | 0 | t | 137820 | DFTPGTEY                     | Oryctola<br>gus<br>cuniculu<br>s |
| 1 | 1.00 | 1 | 1 | 0 | -0.002 | 0 | -0.001 | 0 | t | 138456 | KEQFEFAL<br>TAVAEV           | Mus<br>musculu<br>s              |
| 1 | 1.00 | 1 | 1 | 0 | -0.002 | 0 | -0.001 | 0 | t | 136749 | WMLRAAE<br>EYSMNLG<br>F      | Mus<br>musculu<br>s              |
| 1 | 1.00 | 1 | 1 | 0 | -0.002 | 0 | -0.001 | 0 | t | 153447 | QPAIWNP<br>FPAWGGG<br>S      | Mus<br>musculu<br>s              |
| 1 | 1.00 | 1 | 1 | 0 | -0.004 | 0 | -0.001 | 0 | t | 138456 | KEQFEFAL<br>TAVAEV           | Oryctola<br>gus<br>cuniculu<br>s |
| 1 | 1.00 | 1 | 1 | 0 | -0.004 | 0 | -0.001 | 0 | t | 137927 | LSADFTPG                     | Oryctola<br>gus<br>cuniculu<br>s |
| 1 | 1.00 | 1 | 1 | 0 | -0.002 | 0 | -0.001 | 0 | t | 153359 | ALLPFKDH<br>LPYPGGGS         | Mus<br>musculu<br>s              |
| 1 | 1.00 | 1 | 1 | 0 | -0.011 | 0 | -0.001 | 0 | t | 136518 | MVRKGEK<br>KLAKP             | Mus<br>musculu<br>s              |

|   |      |   |   |   |        |   |        |   |   |        |                              |                                  |
|---|------|---|---|---|--------|---|--------|---|---|--------|------------------------------|----------------------------------|
| 1 | 1.00 | 1 | 1 | 0 | -0.002 | 0 | -0.001 | 0 | t | 141646 | FSKWRKN<br>HMRQKSN<br>K      | Mus<br>musculu<br>s              |
| 1 | 1.00 | 1 | 1 | 0 | -0.011 | 0 | -0.001 | 0 | t | 136156 | CRWSVRLS<br>VPSL             | Mus<br>musculu<br>s              |
| 1 | 1.00 | 1 | 1 | 0 | -0.002 | 0 | -0.001 | 0 | t | 153341 | ACQVPHFF<br>GCGGGS           | Mus<br>musculu<br>s              |
| 1 | 1.00 | 1 | 1 | 0 | -0.002 | 0 | -0.001 | 0 | t | 153346 | ACRDHYPL<br>SCGGGS           | Mus<br>musculu<br>s              |
| 1 | 1.00 | 1 | 1 | 0 | -0.004 | 0 | -0.001 | 0 | t | 139602 | SDSMLSW                      | Oryctola<br>gus<br>cuniculu<br>s |
| 1 | 1.00 | 1 | 1 | 0 | -0.002 | 0 | -0.001 | 0 | t | 142204 | KLEEQNKI<br>SEASRKGL<br>RRDL | Mus<br>musculu<br>s              |
| 1 | 1.00 | 1 | 1 | 0 | -0.004 | 0 | -0.001 | 0 | t | 143851 | DPEQPAPL<br>FLVS             | Oryctola<br>gus<br>cuniculu<br>s |
| 1 | 1.00 | 1 | 1 | 0 | -0.002 | 0 | -0.001 | 0 | t | 142217 | LDASREAK<br>KQLEAEQ<br>QKLEE | Mus<br>musculu<br>s              |
| 1 | 1.00 | 1 | 1 | 0 | -0.004 | 0 | -0.001 | 0 | t | 137965 | RFLPKYEG<br>NIDI             | Oryctola<br>gus<br>cuniculu<br>s |
| 1 | 1.00 | 1 | 1 | 0 | -0.004 | 0 | -0.001 | 0 | t | 137848 | FDRFKGSG<br>PGYY             | Oryctola<br>gus<br>cuniculu<br>s |
| 1 | 1.00 | 1 | 1 | 0 | -0.004 | 0 | -0.001 | 0 | t | 144099 | TLQQNMP<br>LALVW             | Oryctola<br>gus<br>cuniculu<br>s |
| 1 | 1.00 | 1 | 1 | 0 | -0.002 | 0 | -0.001 | 0 | t | 142201 | KGLRRDLD<br>ASREAKKQ<br>VEKA | Mus<br>musculu<br>s              |
| 1 | 1.00 | 1 | 1 | 0 | -0.002 | 0 | -0.001 | 0 | t | 141671 | IAESKQLT<br>VKQKTEQI<br>K    | Mus<br>musculu<br>s              |

|   |      |   |   |   |        |   |        |   |   |        |                              |                                  |
|---|------|---|---|---|--------|---|--------|---|---|--------|------------------------------|----------------------------------|
| 1 | 1.00 | 1 | 1 | 0 | -0.002 | 0 | -0.001 | 0 | t | 142167 | GLRRDLDA<br>SREAKKQV<br>EKAL | Mus<br>musculu<br>s              |
| 1 | 1.00 | 1 | 1 | 0 | -0.004 | 0 | -0.001 | 0 | t | 141544 | KELLQEGY<br>EEIVGETPS<br>FKK | Oryctola<br>gus<br>cuniculu<br>s |
| 1 | 1.00 | 1 | 1 | 0 | -0.004 | 0 | -0.001 | 0 | t | 137883 | GQNVLSA<br>DFTPG             | Oryctola<br>gus<br>cuniculu<br>s |
| 1 | 1.00 | 1 | 1 | 0 | -0.004 | 0 | -0.001 | 0 | t | 137896 | IANGYRDV<br>VADV             | Oryctola<br>gus<br>cuniculu<br>s |
| 1 | 1.00 | 1 | 1 | 0 | -0.002 | 0 | -0.001 | 0 | t | 144799 | TLNLT                        | Mus<br>musculu<br>s              |
| 1 | 1.00 | 1 | 1 | 0 | -0.002 | 0 | -0.001 | 0 | t | 136686 | TLHDMGIF<br>SITSSDS          | Mus<br>musculu<br>s              |
| 1 | 1.00 | 1 | 1 | 0 | -0.002 | 0 | -0.001 | 0 | t | 136315 | GGGTGPA<br>DGTNATTI          | Mus<br>musculu<br>s              |
| 1 | 1.00 | 1 | 1 | 0 | -0.002 | 0 | -0.001 | 0 | t | 142116 | ASRKGLRR<br>DLDA<br>SREAKKQV | Mus<br>musculu<br>s              |
| 1 | 1.00 | 1 | 1 | 0 | -0.002 | 0 | -0.001 | 0 | t | 136315 | GGGTGPA<br>DGTNATTI          | Mus<br>musculu<br>s              |
| 1 | 1.00 | 1 | 1 | 0 | -0.004 | 0 | -0.001 | 0 | t | 137824 | DQAVSLG<br>Q                 | Oryctola<br>gus<br>cuniculu<br>s |
| 1 | 1.00 | 1 | 1 | 0 | -0.004 | 0 | -0.001 | 0 | t | 137884 | GQSRDVLL<br>AGNA             | Oryctola<br>gus<br>cuniculu<br>s |
| 1 | 1.00 | 1 | 1 | 0 | -0.004 | 0 | -0.001 | 0 | t | 137900 | IGGADAET<br>LMDA             | Oryctola<br>gus<br>cuniculu<br>s |
| 1 | 1.00 | 1 | 1 | 0 | -0.004 | 0 | -0.001 | 0 | t | 137939 | NVLSADFT                     | Oryctola<br>gus<br>cuniculu<br>s |

|   |      |   |   |   |        |   |        |   |   |        |                     |                                  |
|---|------|---|---|---|--------|---|--------|---|---|--------|---------------------|----------------------------------|
| 1 | 1.00 | 1 | 1 | 0 | -0.004 | 0 | -0.001 | 0 | t | 137950 | QAVSLGQ<br>N        | Oryctola<br>gus<br>cuniculu<br>s |
| 1 | 1.00 | 1 | 1 | 0 | -0.004 | 0 | -0.001 | 0 | t | 137828 | DVLLAGN<br>AEADR    | Oryctola<br>gus<br>cuniculu<br>s |
| 1 | 1.00 | 1 | 1 | 0 | -0.004 | 0 | -0.001 | 0 | t | 137844 | EYETDPSV<br>TKMV    | Oryctola<br>gus<br>cuniculu<br>s |
| 1 | 1.00 | 1 | 1 | 0 | -0.011 | 0 | -0.001 | 0 | t | 136451 | KWWESRT<br>VRPQY    | Mus<br>musculu<br>s              |
| 1 | 1.00 | 1 | 1 | 0 | -0.002 | 0 | -0.001 | 0 | t | 141734 | RADESKTD<br>PQTEA   | Mus<br>musculu<br>s              |
| 1 | 1.00 | 1 | 1 | 0 | -0.004 | 0 | -0.001 | 0 | t | 138025 | RVPRISCGI<br>NYG    | Oryctola<br>gus<br>cuniculu<br>s |
| 1 | 1.00 | 1 | 1 | 0 | -0.004 | 0 | -0.001 | 0 | t | 141580 | YIGVAPRK<br>AIPA    | Oryctola<br>gus<br>cuniculu<br>s |
| 1 | 1.00 | 1 | 1 | 0 | -0.002 | 0 | -0.001 | 0 | t | 150987 | GKCPKYVK<br>STKLRLA | Mus<br>musculu<br>s              |
| 1 | 1.00 | 1 | 1 | 0 | -0.004 | 0 | -0.001 | 0 | t | 138079 | VSDQAVSL<br>GQNV    | Oryctola<br>gus<br>cuniculu<br>s |
| 1 | 1.00 | 1 | 1 | 0 | -0.004 | 0 | -0.001 | 0 | t | 137907 | KGSGPGYY<br>RLTL    | Oryctola<br>gus<br>cuniculu<br>s |
| 1 | 1.00 | 1 | 1 | 0 | -0.004 | 0 | -0.001 | 0 | t | 144042 | QEPLMGT<br>VPIRA    | Oryctola<br>gus<br>cuniculu<br>s |
| 1 | 1.00 | 1 | 1 | 0 | -0.004 | 0 | -0.001 | 0 | t | 138057 | TPGTEYTV            | Oryctola<br>gus<br>cuniculu<br>s |
| 1 | 1.00 | 1 | 1 | 0 | -0.004 | 0 | -0.001 | 0 | t | 137935 | NFNTVRY<br>DYYGD    | Oryctola<br>gus<br>cuniculu<br>s |

|   |      |   |   |   |        |   |        |   |   |        |                               |                                  |
|---|------|---|---|---|--------|---|--------|---|---|--------|-------------------------------|----------------------------------|
| 1 | 1.00 | 1 | 1 | 0 | -0.004 | 0 | -0.001 | 0 | t | 137928 | LSADFTPG<br>TEYT              | Oryctola<br>gus<br>cuniculu<br>s |
| 1 | 1.00 | 1 | 1 | 0 | -0.011 | 0 | -0.001 | 0 | t | 136579 | QPRRRAN<br>NRRRS              | Mus<br>musculu<br>s              |
| 1 | 1.00 | 1 | 1 | 0 | -0.002 | 0 | -0.001 | 0 | t | 153396 | HSFEPWS<br>ARDMLGG<br>GS      | Mus<br>musculu<br>s              |
| 1 | 1.00 | 1 | 1 | 0 | -0.004 | 0 | -0.001 | 0 | t | 141566 | SSIVIPAAV<br>GIKLNVT<br>E DA  | Oryctola<br>gus<br>cuniculu<br>s |
| 1 | 1.00 | 1 | 1 | 0 | -0.002 | 0 | -0.001 | 0 | t | 142202 | KISEASRK<br>GLRRDLDA<br>SREA  | Mus<br>musculu<br>s              |
| 1 | 1.00 | 1 | 1 | 0 | -0.004 | 0 | -0.001 | 0 | t | 155744 | SAHSTPS                       | Oryctola<br>gus<br>cuniculu<br>s |
| 1 | 1.00 | 1 | 1 | 0 | -0.004 | 0 | -0.001 | 0 | t | 137888 | GTEYTVEV                      | Oryctola<br>gus<br>cuniculu<br>s |
| 1 | 1.00 | 1 | 1 | 0 | -0.004 | 0 | -0.001 | 0 | t | 138094 | YGYATLSY<br>ADYW              | Oryctola<br>gus<br>cuniculu<br>s |
| 1 | 1.00 | 1 | 1 | 0 | -0.004 | 0 | -0.001 | 0 | t | 141568 | VFPKDKEG<br>RALQKFLG<br>TIR   | Oryctola<br>gus<br>cuniculu<br>s |
| 1 | 1.00 | 1 | 1 | 0 | -0.004 | 0 | -0.001 | 0 | t | 141569 | VRSSNTCT<br>VGPSDPAC<br>FQNP  | Oryctola<br>gus<br>cuniculu<br>s |
| 1 | 1.00 | 1 | 1 | 0 | -0.002 | 0 | -0.001 | 0 | t | 142288 | SEASRKGL<br>RRDLDA<br>SR EAKK | Mus<br>musculu<br>s              |
| 1 | 1.00 | 1 | 1 | 0 | -0.004 | 0 | -0.001 | 0 | t | 137834 | EDSRVTEN<br>TNGL              | Oryctola<br>gus<br>cuniculu<br>s |
| 1 | 1.00 | 1 | 1 | 0 | -0.004 | 0 | -0.001 | 0 | t | 138028 | SAGALQLL<br>VVG               | Oryctola<br>gus<br>cuniculu<br>s |

|   |      |   |   |   |        |   |        |   |   |        |                              |                                  |
|---|------|---|---|---|--------|---|--------|---|---|--------|------------------------------|----------------------------------|
| 1 | 1.00 | 1 | 1 | 0 | -0.002 | 0 | -0.001 | 0 | t | 153362 | APWSLRD<br>HLAVTGG<br>GS     | Mus<br>musculu<br>s              |
| 1 | 1.00 | 1 | 1 | 0 | -0.004 | 0 | -0.001 | 0 | t | 118146 | SNLDHILE<br>PSIP             | Oryctola<br>gus<br>cuniculu<br>s |
| 1 | 1.00 | 1 | 1 | 0 | -0.002 | 0 | -0.001 | 0 | t | 127984 | FTNLKFKV<br>RKITSSHR<br>GN   | Mus<br>musculu<br>s              |
| 1 | 1.00 | 1 | 1 | 0 | -0.004 | 0 | -0.001 | 0 | t | 127919 | AFSLPDRS<br>LSAIPLFDV<br>SFE | Oryctola<br>gus<br>cuniculu<br>s |
| 1 | 1.00 | 1 | 1 | 0 | -0.002 | 0 | -0.001 | 0 | t | 127944 | DLVNCNL<br>NTNCVAV<br>AFSLPD | Mus<br>musculu<br>s              |
| 1 | 1.00 | 1 | 1 | 0 | -0.002 | 0 | -0.001 | 0 | t | 128066 | NSYDVLSA<br>LSGNLKL          | Mus<br>musculu<br>s              |
| 1 | 1.00 | 1 | 1 | 0 | -0.004 | 0 | -0.001 | 0 | t | 118139 | SIPWKS KL<br>LTLV            | Oryctola<br>gus<br>cuniculu<br>s |
| 1 | 1.00 | 1 | 1 | 0 | -0.004 | 0 | -0.001 | 0 | t | 127984 | FTNLKFKV<br>RKITSSHR<br>GN   | Oryctola<br>gus<br>cuniculu<br>s |
| 1 | 1.00 | 1 | 1 | 0 | -0.004 | 0 | -0.001 | 0 | t | 120682 | KILPEVKEK<br>HEFLSRL         | Oryctola<br>gus<br>cuniculu<br>s |
| 1 | 1.00 | 1 | 1 | 0 | -0.004 | 0 | -0.001 | 0 | t | 120699 | KMFPEVKE<br>KGMAALP<br>RL    | Oryctola<br>gus<br>cuniculu<br>s |
| 1 | 1.00 | 1 | 1 | 0 | -0.002 | 0 | -0.001 | 0 | t | 119910 | GQYFAKPR<br>NQGG             | Mus<br>musculu<br>s              |
| 1 | 1.00 | 1 | 1 | 0 | -0.004 | 0 | -0.001 | 0 | t | 117742 | AKAQTD R<br>EDLRTLLRY        | Oryctola<br>gus<br>cuniculu<br>s |

|   |      |   |   |   |        |   |        |   |   |        |                              |                                  |
|---|------|---|---|---|--------|---|--------|---|---|--------|------------------------------|----------------------------------|
| 1 | 1.00 | 1 | 1 | 0 | -0.002 | 0 | -0.001 | 0 | t | 127919 | AFSLPDRS<br>LSAIPFLDV<br>SFE | Mus<br>musculu<br>s              |
| 1 | 1.00 | 1 | 1 | 0 | -0.004 | 0 | -0.001 | 0 | t | 127944 | DLVNCNL<br>NTNCVAV<br>AFSLPD | Oryctola<br>gus<br>cuniculu<br>s |
| 1 | 1.00 | 1 | 1 | 0 | -0.002 | 0 | -0.001 | 0 | t | 128004 | GMIEVQS<br>NYGFVWD<br>VSLKKV | Mus<br>musculu<br>s              |
| 1 | 1.00 | 1 | 1 | 0 | -0.004 | 0 | -0.001 | 0 | t | 117960 | KLLTLVQLT<br>LQS             | Oryctola<br>gus<br>cuniculu<br>s |
| 1 | 1.00 | 1 | 1 | 0 | -0.002 | 0 | -0.001 | 0 | t | 120220 | SSQRGRSG<br>SGNF             | Mus<br>musculu<br>s              |
| 1 | 1.00 | 1 | 1 | 0 | -0.004 | 0 | -0.001 | 0 | t | 130285 | VRMMLIPL<br>DATLIKV          | Oryctola<br>gus<br>cuniculu<br>s |
| 1 | 1.00 | 1 | 1 | 0 | -0.004 | 0 | -0.001 | 0 | t | 119910 | GQYFAKPR<br>NQGG             | Oryctola<br>gus<br>cuniculu<br>s |
| 1 | 1.00 | 1 | 1 | 0 | -0.004 | 0 | -0.001 | 0 | t | 117773 | CNSRQTD<br>REDELI            | Oryctola<br>gus<br>cuniculu<br>s |
| 1 | 1.00 | 1 | 1 | 0 | -0.002 | 0 | -0.001 | 0 | t | 128084 | QKNACSF<br>DLCNSYDV<br>L     | Mus<br>musculu<br>s              |
| 1 | 1.00 | 1 | 1 | 0 | -0.004 | 0 | -0.001 | 0 | t | 117786 | DHILEPSIP<br>WKS             | Oryctola<br>gus<br>cuniculu<br>s |
| 1 | 1.00 | 1 | 1 | 0 | -0.002 | 0 | -0.001 | 0 | t | 117118 | YPLHLNTD<br>YSTR             | Mus<br>musculu<br>s              |
| 1 | 1.00 | 1 | 1 | 0 | -0.004 | 0 | -0.001 | 0 | t | 113400 | FKLGGRDS<br>R                | Oryctola<br>gus<br>cuniculu<br>s |



|   |      |   |   |   |        |   |        |   |   |        |                            |                                |
|---|------|---|---|---|--------|---|--------|---|---|--------|----------------------------|--------------------------------|
| 1 | 1.00 | 1 | 1 | 0 | -0.004 | 0 | -0.001 | 0 | t | 113401 | FKLPGLNS<br>R              | Oryctola<br>gus<br>cunicu<br>s |
| 1 | 1.00 | 1 | 1 | 0 | -0.002 | 0 | -0.001 | 0 | t | 117103 | TYQDFSTR<br>PRSF           | Mus<br>musculu<br>s            |
| 1 | 1.00 | 1 | 1 | 0 | -0.002 | 0 | -0.001 | 0 | t | 117097 | TLSTDQST<br>TRNW           | Mus<br>musculu<br>s            |
| 1 | 1.00 | 1 | 1 | 0 | -0.002 | 0 | -0.001 | 0 | t | 117122 | YTYTDYST<br>RPHY           | Mus<br>musculu<br>s            |
| 1 | 1.00 | 1 | 1 | 0 | -0.002 | 0 | -0.001 | 0 | t | 110828 | EIDGPAGQ<br>AEPDRAH<br>YNI | Mus<br>musculu<br>s            |
| 1 | 1.00 | 1 | 1 | 0 | -0.002 | 0 | -0.001 | 0 | t | 117107 | VQTDGST<br>KSHRH           | Mus<br>musculu<br>s            |
| 1 | 1.00 | 1 | 1 | 0 | -0.004 | 0 | -0.001 | 0 | t | 117366 | RRREGPDR<br>SPR            | Oryctola<br>gus<br>cunicu<br>s |
| 1 | 1.00 | 1 | 1 | 0 | -0.002 | 0 | -0.001 | 0 | t | 110733 | VGENVPD<br>DLYIKGSG        | Mus<br>musculu<br>s            |
| 1 | 1.00 | 1 | 1 | 0 | -0.002 | 0 | -0.001 | 0 | t | 99033  | TWDDD                      | Mus<br>musculu<br>s            |
| 1 | 1.00 | 1 | 1 | 0 | -0.002 | 0 | -0.001 | 0 | t | 117111 | WPMNDD<br>STRPR            | Mus<br>musculu<br>s            |
| 1 | 1.00 | 1 | 1 | 0 | -0.002 | 0 | -0.001 | 0 | t | 117069 | QRYYSTRP<br>RAL            | Mus<br>musculu<br>s            |
| 1 | 1.00 | 1 | 1 | 0 | -0.004 | 0 | -0.001 | 0 | t | 110284 | HKSAIVTLT<br>YDSEWQR<br>DQ | Oryctola<br>gus<br>cunicu<br>s |
| 1 | 1.00 | 1 | 1 | 0 | -0.002 | 0 | -0.001 | 0 | t | 117059 | PQTDGSTR<br>PRGL           | Mus<br>musculu<br>s            |
| 1 | 1.00 | 1 | 1 | 0 | -0.004 | 0 | -0.001 | 0 | t | 117348 | PTRAPSGP<br>RPP            | Oryctola<br>gus<br>cunicu<br>s |
| 1 | 1.00 | 1 | 1 | 0 | -0.002 | 0 | -0.001 | 0 | t | 110920 | KPSPWAP<br>KKHRRLS         | Mus<br>musculu<br>s            |

|   |      |   |   |   |        |   |        |   |   |        |                              |                                  |
|---|------|---|---|---|--------|---|--------|---|---|--------|------------------------------|----------------------------------|
| 1 | 1.00 | 1 | 1 | 0 | -0.002 | 0 | -0.001 | 0 | t | 110284 | HKSAIVTLT<br>YDSEWQR<br>DQ   | Mus<br>musculu<br>s              |
| 1 | 1.00 | 1 | 1 | 0 | -0.004 | 0 | -0.001 | 0 | t | 102773 | RQFSKFKD<br>ASDRYGN<br>YLHFF | Oryctola<br>gus<br>cuniculu<br>s |
| 1 | 1.00 | 1 | 1 | 0 | -0.002 | 0 | -0.001 | 0 | t | 102069 | SKSSITITN<br>KRLTRKC         | Mus<br>musculu<br>s              |
| 1 | 1.00 | 1 | 1 | 0 | -0.002 | 0 | -0.001 | 0 | t | 117049 | NYKSPLFA<br>VPMT             | Mus<br>musculu<br>s              |
| 1 | 1.00 | 1 | 1 | 0 | -0.002 | 0 | -0.001 | 0 | t | 117044 | MISYSTRP<br>DRQ              | Mus<br>musculu<br>s              |
| 1 | 1.00 | 1 | 1 | 0 | -0.002 | 0 | -0.001 | 0 | t | 117112 | WPMNDD<br>STRR               | Mus<br>musculu<br>s              |
| 1 | 1.00 | 1 | 1 | 0 | -0.004 | 0 | -0.001 | 0 | t | 102823 | SSSIKIWN<br>KLGWNTVI<br>AGTR | Oryctola<br>gus<br>cuniculu<br>s |
| 1 | 1.00 | 1 | 1 | 0 | -0.002 | 0 | -0.001 | 0 | t | 111013 | RTGYIPLG<br>TRPPT            | Mus<br>musculu<br>s              |
| 1 | 1.00 | 1 | 1 | 0 | -0.004 | 0 | -0.001 | 0 | t | 102671 | NGALYPRF<br>FPDYSILM<br>FPII | Oryctola<br>gus<br>cuniculu<br>s |
| 1 | 1.00 | 1 | 1 | 0 | -0.002 | 0 | -0.001 | 0 | t | 117018 | KIVMFWH<br>EPVYA             | Mus<br>musculu<br>s              |
| 1 | 1.00 | 1 | 1 | 0 | -0.002 | 0 | -0.001 | 0 | t | 110869 | GQAEPDR<br>AHYNIVTF<br>CCKCD | Mus<br>musculu<br>s              |
| 1 | 1.00 | 1 | 1 | 0 | -0.002 | 0 | -0.001 | 0 | t | 117010 | IRTDESTKR<br>LPP             | Mus<br>musculu<br>s              |
| 1 | 1.00 | 1 | 1 | 0 | -0.002 | 0 | -0.001 | 0 | t | 116981 | FSTDWSTR<br>PRLV             | Mus<br>musculu<br>s              |
| 1 | 1.00 | 1 | 1 | 0 | -0.002 | 0 | -0.001 | 0 | t | 116930 | AYKLPQTD<br>DST              | Mus<br>musculu<br>s              |
| 1 | 1.00 | 1 | 1 | 0 | -0.002 | 0 | -0.001 | 0 | t | 116978 | FPSHYWLY<br>PPPT             | Mus<br>musculu<br>s              |
| 1 | 1.00 | 1 | 1 | 0 | -0.002 | 0 | -0.001 | 0 | t | 116958 | DSMNTDT<br>STRPR             | Mus<br>musculu<br>s              |

|   |      |   |   |   |        |   |        |   |   |        |                              |                                  |
|---|------|---|---|---|--------|---|--------|---|---|--------|------------------------------|----------------------------------|
| 1 | 1.00 | 1 | 1 | 0 | -0.002 | 0 | -0.001 | 0 | t | 110884 | HEYMLDL<br>QPETTDLY<br>CYE   | Mus<br>musculu<br>s              |
| 1 | 1.00 | 1 | 1 | 0 | -0.002 | 0 | -0.001 | 0 | t | 107852 | GE PQSSIIQ<br>Y              | Mus<br>musculu<br>s              |
| 1 | 1.00 | 1 | 1 | 0 | -0.002 | 0 | -0.001 | 0 | t | 116947 | DIDYSDYS<br>TR               | Mus<br>musculu<br>s              |
| 1 | 1.00 | 1 | 1 | 0 | -0.002 | 0 | -0.001 | 0 | t | 116944 | DFRYSTRP<br>FAL              | Mus<br>musculu<br>s              |
| 1 | 1.00 | 1 | 1 | 0 | -0.004 | 0 | -0.001 | 0 | t | 111585 | NKSEVPLD<br>ICTSICKYP<br>DYI | Oryctola<br>gus<br>cuniculu<br>s |
| 1 | 1.00 | 1 | 1 | 0 | -0.004 | 0 | -0.001 | 0 | t | 113848 | SGKDGHH<br>AA                | Oryctola<br>gus<br>cuniculu<br>s |
| 1 | 1.00 | 1 | 1 | 0 | -0.002 | 0 | -0.001 | 0 | t | 116943 | DFRDYSTR<br>PFAL             | Mus<br>musculu<br>s              |
| 1 | 1.00 | 1 | 1 | 0 | -0.002 | 0 | -0.001 | 0 | t | 116917 | AESDDSS<br>T<br>RRH          | Mus<br>musculu<br>s              |
| 1 | 1.00 | 1 | 1 | 0 | -0.002 | 0 | -0.001 | 0 | t | 96062  | ADTIQKGF<br>YY               | Mus<br>musculu<br>s              |
| 1 | 1.00 | 1 | 1 | 0 | -0.002 | 0 | -0.001 | 0 | t | 75863  | YSPSRFSY<br>FYPFRL           | Mus<br>musculu<br>s              |
| 1 | 1.00 | 1 | 1 | 0 | -0.002 | 0 | -0.001 | 0 | t | 75863  | YSPSRFSY<br>FYPFRL           | Mus<br>musculu<br>s              |
| 1 | 1.00 | 1 | 1 | 0 | -0.004 | 0 | -0.001 | 0 | t | 62845  | TAFSKN                       | Oryctola<br>gus<br>cuniculu<br>s |
| 1 | 1.00 | 1 | 1 | 0 | -0.004 | 0 | -0.001 | 0 | t | 71902  | VVYDYQH<br>K                 | Oryctola<br>gus<br>cuniculu<br>s |
| 1 | 1.00 | 1 | 1 | 0 | -0.002 | 0 | -0.001 | 0 | t | 64662  | TKRNTNRR<br>PQDVKFP<br>GGGQI | Mus<br>musculu<br>s              |
| 1 | 1.00 | 1 | 1 | 0 | -0.002 | 0 | -0.001 | 0 | t | 67170  | TVSTEQNV<br>PDPQVGI          | Mus<br>musculu<br>s              |

|   |      |   |   |   |        |   |        |   |   |       |                              |                                  |
|---|------|---|---|---|--------|---|--------|---|---|-------|------------------------------|----------------------------------|
| 1 | 1.00 | 1 | 1 | 0 | 0      | 0 | -0.001 | 0 | t | 64050 | THLRALFG<br>YSEVRKVIL<br>TKR | Mesocric<br>etus<br>auratus      |
| 1 | 1.00 | 1 | 1 | 0 | -0.002 | 0 | -0.001 | 0 | t | 66051 | TRLENLM<br>WK                | Mus<br>musculu<br>s              |
| 1 | 1.00 | 1 | 1 | 0 | -0.004 | 0 | -0.001 | 0 | t | 63618 | TFDGGKM<br>V                 | Oryctola<br>gus<br>cuniculu<br>s |
| 1 | 1.00 | 1 | 1 | 0 | -0.002 | 0 | -0.001 | 0 | t | 70628 | VQQEGAQ<br>QPA               | Mus<br>musculu<br>s              |
| 1 | 1.00 | 1 | 1 | 0 | -0.002 | 0 | -0.001 | 0 | t | 62908 | TALGKLQD<br>VVNQNAQ<br>AL    | Mus<br>musculu<br>s              |
| 1 | 1.00 | 1 | 1 | 0 | -0.002 | 0 | -0.001 | 0 | t | 75924 | YSWKTWG<br>KA                | Mus<br>musculu<br>s              |
| 1 | 1.00 | 1 | 1 | 0 | -0.004 | 0 | -0.001 | 0 | t | 61026 | SSGIGPEK                     | Oryctola<br>gus<br>cuniculu<br>s |
| 1 | 1.00 | 1 | 1 | 0 | 0.008  | 0 | -0.001 | 0 | t | 73649 | YEEPNDGE<br>ERQS             | Capra<br>hircus                  |
| 1 | 1.00 | 1 | 1 | 0 | -0.002 | 0 | -0.001 | 0 | t | 64662 | TKRNTNRR<br>PQDVKFP<br>GGGQI | Mus<br>musculu<br>s              |
| 1 | 1.00 | 1 | 1 | 0 | -0.002 | 0 | -0.001 | 0 | t | 73483 | YCADVAA<br>EELMNAL<br>V      | Mus<br>musculu<br>s              |
| 1 | 1.00 | 1 | 1 | 0 | 0      | 0 | -0.001 | 0 | t | 65863 | TQGVVKE<br>RRWTLVN<br>ENRPIW | Mesocric<br>etus<br>auratus      |
| 1 | 1.00 | 1 | 1 | 0 | 0      | 0 | -0.001 | 0 | t | 70402 | VPNTNIKL<br>YVRRVFIT<br>DEFR | Mesocric<br>etus<br>auratus      |
| 1 | 1.00 | 1 | 1 | 0 | -0.005 | 0 | -0.001 | 0 | t | 65863 | TQGVVKE<br>RRWTLVN<br>ENRPIW | Mesocric<br>etus<br>auratus      |
| 1 | 1.00 | 1 | 1 | 0 | -0.002 | 0 | -0.001 | 0 | t | 73744 | YEPYYHSD<br>HAESSWV<br>NRGES | Mus<br>musculu<br>s              |

|   |      |   |   |   |        |   |        |   |   |       |                              |                                  |
|---|------|---|---|---|--------|---|--------|---|---|-------|------------------------------|----------------------------------|
| 1 | 1.00 | 1 | 1 | 0 | -0.004 | 0 | -0.001 | 0 | t | 61410 | SSTRGGSR<br>VEGIFAGL<br>FMNA | Oryctola<br>gus<br>cuniculu<br>s |
| 1 | 1.00 | 1 | 1 | 0 | -0.004 | 0 | -0.001 | 0 | t | 60827 | SRVKNLNS<br>SEGVPDLL<br>V    | Oryctola<br>gus<br>cuniculu<br>s |
| 1 | 1.00 | 1 | 1 | 0 | -0.002 | 0 | -0.001 | 0 | t | 62932 | TANGFYRL<br>PSG              | Mus<br>musculu<br>s              |
| 1 | 1.00 | 1 | 1 | 0 | -0.002 | 0 | -0.001 | 0 | t | 73483 | YCADVAA<br>EELMNAL<br>V      | Mus<br>musculu<br>s              |
| 1 | 1.00 | 1 | 1 | 0 | -0.004 | 0 | -0.001 | 0 | t | 75920 | YSVLYNST<br>FFSTFKCY<br>G    | Oryctola<br>gus<br>cuniculu<br>s |
| 1 | 1.00 | 1 | 1 | 0 | -0.002 | 0 | -0.001 | 0 | t | 77968 | PPPYAPNP<br>GPPPPYTG<br>A    | Mus<br>musculu<br>s              |
| 1 | 1.00 | 1 | 1 | 0 | -0.004 | 0 | -0.001 | 0 | t | 73449 | YASSGIGP                     | Oryctola<br>gus<br>cuniculu<br>s |
| 1 | 1.00 | 1 | 1 | 0 | -0.002 | 0 | -0.001 | 0 | t | 61840 | STPSTPAD<br>SSAHSTPS<br>TPV  | Mus<br>musculu<br>s              |
| 1 | 1.00 | 1 | 1 | 0 | -0.002 | 0 | -0.001 | 0 | t | 66257 | TSHHDSH<br>GLHRV             | Mus<br>musculu<br>s              |
| 1 | 1.00 | 1 | 1 | 0 | -0.002 | 0 | -0.001 | 0 | t | 82078 | FHQNGQV<br>TEVTT             | Mus<br>musculu<br>s              |
| 1 | 1.00 | 1 | 1 | 0 | -0.002 | 0 | -0.001 | 0 | t | 66051 | TRLENLM<br>WK                | Mus<br>musculu<br>s              |
| 1 | 1.00 | 1 | 1 | 0 | -0.004 | 0 | -0.001 | 0 | t | 75222 | YNSSRSYW<br>T                | Oryctola<br>gus<br>cuniculu<br>s |
| 1 | 1.00 | 1 | 1 | 0 | -0.015 | 0 | -0.001 | 0 | t | 60795 | SRSERR                       | Marmot<br>a monax                |
| 1 | 1.00 | 1 | 1 | 0 | 0.01   | 0 | -0.001 | 0 | t | 66044 | TRKTSERS<br>QP               | Pan<br>troglody<br>tes           |
| 1 | 1.00 | 1 | 1 | 0 | -0.002 | 0 | -0.001 | 0 | t | 63077 | TCGVGVR<br>VRRRVNA<br>ANKKPE | Mus<br>musculu<br>s              |

|   |      |   |   |   |        |   |        |   |   |       |                              |                                  |
|---|------|---|---|---|--------|---|--------|---|---|-------|------------------------------|----------------------------------|
| 1 | 1.00 | 1 | 1 | 0 | -0.002 | 0 | -0.001 | 0 | t | 63077 | TCGVGVR<br>VRRRVNA<br>ANKKPE | Mus<br>musculu<br>s              |
| 1 | 1.00 | 1 | 1 | 0 | -0.002 | 0 | -0.001 | 0 | t | 63077 | TCGVGVR<br>VRRRVNA<br>ANKKPE | Mus<br>musculu<br>s              |
| 1 | 1.00 | 1 | 1 | 0 | -0.002 | 0 | -0.001 | 0 | t | 61124 | SSIVYEAA<br>DMIMHT           | Mus<br>musculu<br>s              |
| 1 | 1.00 | 1 | 1 | 0 | -0.004 | 0 | -0.001 | 0 | t | 71999 | VYDYQHK<br>E                 | Oryctola<br>gus<br>cuniculu<br>s |
| 1 | 1.00 | 1 | 1 | 0 | -0.002 | 0 | -0.001 | 0 | t | 62051 | SVASGGSG<br>GSVASGG          | Mus<br>musculu<br>s              |
| 1 | 1.00 | 1 | 1 | 0 | -0.002 | 0 | -0.001 | 0 | t | 75920 | YSVLNST<br>FFSTFKCY<br>G     | Mus<br>musculu<br>s              |
| 1 | 1.00 | 1 | 1 | 0 | -0.004 | 0 | -0.001 | 0 | t | 75843 | YSNVTGFH<br>T                | Oryctola<br>gus<br>cuniculu<br>s |
| 1 | 1.00 | 1 | 1 | 0 | -0.004 | 0 | -0.001 | 0 | t | 64306 | TIGGSQAQ<br>TA               | Oryctola<br>gus<br>cuniculu<br>s |
| 1 | 1.00 | 1 | 1 | 0 | -0.002 | 0 | -0.001 | 0 | t | 66242 | TSGTSGTS<br>GTSPSSR          | Mus<br>musculu<br>s              |
| 1 | 1.00 | 1 | 1 | 0 | -0.004 | 0 | -0.001 | 0 | t | 71284 | VTEEI                        | Oryctola<br>gus<br>cuniculu<br>s |
| 1 | 1.00 | 1 | 1 | 0 | -0.002 | 0 | -0.001 | 0 | t | 66241 | TSGTSGTS<br>GTSGTSG          | Mus<br>musculu<br>s              |
| 1 | 1.00 | 1 | 1 | 0 | -0.002 | 0 | -0.001 | 0 | t | 71163 | VSTQSAKN<br>PPGATVP          | Mus<br>musculu<br>s              |
| 1 | 1.00 | 1 | 1 | 0 | -0.002 | 0 | -0.001 | 0 | t | 64662 | TKRNTNRR<br>PQDVKFP<br>GGGQI | Mus<br>musculu<br>s              |
| 1 | 1.00 | 1 | 1 | 0 | -0.004 | 0 | -0.001 | 0 | t | 74367 | YISDAFSLD<br>VSEKSGNF        | Oryctola<br>gus<br>cuniculu<br>s |

|   |      |   |   |   |        |   |        |   |   |       |                               |                                  |
|---|------|---|---|---|--------|---|--------|---|---|-------|-------------------------------|----------------------------------|
| 1 | 1.00 | 1 | 1 | 0 | -0.004 | 0 | -0.001 | 0 | t | 64978 | TLNKDQLL<br>SSSKYTIQR<br>STG  | Oryctola<br>gus<br>cuniculu<br>s |
| 1 | 1.00 | 1 | 1 | 0 | -0.002 | 0 | -0.001 | 0 | t | 95060 | APIDTGISE<br>GITPNGSI         | Mus<br>musculu<br>s              |
| 1 | 1.00 | 1 | 1 | 0 | 0.008  | 0 | -0.001 | 0 | t | 67327 | TYEEPNDG<br>EERQ              | Capra<br>hircus                  |
| 1 | 1.00 | 1 | 1 | 0 | -0.004 | 0 | -0.001 | 0 | t | 60721 | SRKSYKKM<br>LKEMGEV<br>APEYR  | Oryctola<br>gus<br>cuniculu<br>s |
| 1 | 1.00 | 1 | 1 | 0 | -0.002 | 0 | -0.001 | 0 | t | 95104 | ITGAGPKY<br>VKQNTLK           | Mus<br>musculu<br>s              |
| 1 | 1.00 | 1 | 1 | 0 | -0.004 | 0 | -0.001 | 0 | t | 70437 | VPPTQSKK<br>KNKNET            | Oryctola<br>gus<br>cuniculu<br>s |
| 1 | 1.00 | 1 | 1 | 0 | -0.002 | 0 | -0.001 | 0 | t | 63077 | TCGVGVVR<br>VRRRVNA<br>ANKKPE | Mus<br>musculu<br>s              |
| 1 | 1.00 | 1 | 1 | 0 | -0.004 | 0 | -0.001 | 0 | t | 75498 | YQHKEGRF                      | Oryctola<br>gus<br>cuniculu<br>s |
| 1 | 1.00 | 1 | 1 | 0 | -0.002 | 0 | -0.001 | 0 | t | 66050 | TRLENLM<br>WK                 | Mus<br>musculu<br>s              |
| 1 | 1.00 | 1 | 1 | 0 | -0.002 | 0 | -0.001 | 0 | t | 66539 | TTASGKLIT                     | Mus<br>musculu<br>s              |
| 1 | 1.00 | 1 | 1 | 0 | -0.002 | 0 | -0.001 | 0 | t | 71009 | VSKGNCS<br>GPTTIRGQ           | Mus<br>musculu<br>s              |
| 1 | 1.00 | 1 | 1 | 0 | -0.004 | 0 | -0.001 | 0 | t | 74135 | YHRVMYA<br>S                  | Oryctola<br>gus<br>cuniculu<br>s |
| 1 | 1.00 | 1 | 1 | 0 | -0.002 | 0 | -0.001 | 0 | t | 79535 | EDDDDDF<br>GMGALF             | Mus<br>musculu<br>s              |
| 1 | 1.00 | 1 | 1 | 0 | -0.002 | 0 | -0.001 | 0 | t | 69344 | VKYTS                         | Mus<br>musculu<br>s              |
| 1 | 1.00 | 1 | 1 | 0 | -0.002 | 0 | -0.001 | 0 | t | 75923 | YSWKTWG                       | Mus<br>musculu<br>s              |

|   |      |   |   |   |        |   |        |   |   |       |                              |                              |
|---|------|---|---|---|--------|---|--------|---|---|-------|------------------------------|------------------------------|
| 1 | 1.00 | 1 | 1 | 0 | -0.002 | 0 | -0.001 | 0 | t | 69899 | VLYREFDE                     | Mus<br>musculus              |
| 1 | 1.00 | 1 | 1 | 0 | -0.002 | 0 | -0.001 | 0 | t | 74173 | YICGDSTE<br>CANLLLQY<br>G    | Mus<br>musculus              |
| 1 | 1.00 | 1 | 1 | 0 | -0.002 | 0 | -0.001 | 0 | t | 72324 | WDQKLW<br>CRHFCVLA<br>D      | Mus<br>musculus              |
| 1 | 1.00 | 1 | 1 | 0 | -0.002 | 0 | -0.001 | 0 | t | 68896 | VHTWTEQ<br>YK                | Mus<br>musculus              |
| 1 | 1.00 | 1 | 1 | 0 | -0.002 | 0 | -0.001 | 0 | t | 69235 | VKIDNASP<br>AS               | Mus<br>musculus              |
| 1 | 1.00 | 1 | 1 | 0 | -0.004 | 0 | -0.001 | 0 | t | 66107 | TRTIGGSQ<br>AQ               | Oryctola<br>gus<br>cuniculus |
| 1 | 1.00 | 1 | 1 | 0 | -0.004 | 0 | -0.001 | 0 | t | 67444 | TYRATYQD                     | Oryctola<br>gus<br>cuniculus |
| 1 | 1.00 | 1 | 1 | 0 | -0.004 | 0 | -0.001 | 0 | t | 60663 | SRGAPGG<br>GFVPSLQG<br>VP    | Oryctola<br>gus<br>cuniculus |
| 1 | 1.00 | 1 | 1 | 0 | -0.004 | 0 | -0.001 | 0 | t | 71189 | VSVITPGT<br>NASSEVAV<br>L    | Oryctola<br>gus<br>cuniculus |
| 1 | 1.00 | 1 | 1 | 0 | -0.004 | 0 | -0.001 | 0 | t | 70038 | VMYASSG                      | Oryctola<br>gus<br>cuniculus |
| 1 | 1.00 | 1 | 1 | 0 | -0.004 | 0 | -0.001 | 0 | t | 60714 | SRKKMDT<br>KPTDPTG           | Oryctola<br>gus<br>cuniculus |
| 1 | 1.00 | 1 | 1 | 0 | -0.002 | 0 | -0.001 | 0 | t | 68896 | VHTWTEQ<br>YK                | Mus<br>musculus              |
| 1 | 1.00 | 1 | 1 | 0 | -0.003 | 0 | -0.001 | 0 | t | 70937 | VSFQYNA<br>VGPYLNIN<br>FFDSS | Mus<br>musculus              |
| 1 | 1.00 | 1 | 1 | 0 | -0.004 | 0 | -0.001 | 0 | t | 65110 | TLTSGSDL<br>DRCTTFDD<br>V    | Oryctola<br>gus<br>cuniculus |



|   |      |   |   |   |        |   |        |   |   |       |                              |                                  |
|---|------|---|---|---|--------|---|--------|---|---|-------|------------------------------|----------------------------------|
| 1 | 1.00 | 1 | 1 | 0 | -0.004 | 0 | -0.001 | 0 | t | 71284 | VTEEI                        | Oryctola<br>gus<br>cuniculu<br>s |
| 1 | 1.00 | 1 | 1 | 0 | -0.002 | 0 | -0.001 | 0 | t | 76584 | YYQSGLSI<br>VMPVGG<br>QSSFYS | Mus<br>musculu<br>s              |
| 1 | 1.00 | 1 | 1 | 0 | -0.002 | 0 | -0.001 | 0 | t | 71189 | VSVITPGT<br>NASSEVAV<br>L    | Mus<br>musculu<br>s              |
| 1 | 1.00 | 1 | 1 | 0 | -0.002 | 0 | -0.001 | 0 | t | 68895 | VHTWTEQ<br>YK                | Mus<br>musculu<br>s              |
| 1 | 1.00 | 1 | 1 | 0 | -0.004 | 0 | -0.001 | 0 | t | 60549 | SQSFRRLG                     | Oryctola<br>gus<br>cuniculu<br>s |
| 1 | 1.00 | 1 | 1 | 0 | -0.002 | 0 | -0.001 | 0 | t | 68281 | VELRNLGG<br>TWRP             | Mus<br>musculu<br>s              |
| 1 | 1.00 | 1 | 1 | 0 | -0.002 | 0 | -0.001 | 0 | t | 65479 | TNVVIRAC<br>NFELCDNP<br>F    | Mus<br>musculu<br>s              |
| 1 | 1.00 | 1 | 1 | 0 | -0.004 | 0 | -0.001 | 0 | t | 61112 | SSIPNGTY                     | Oryctola<br>gus<br>cuniculu<br>s |
| 1 | 1.00 | 1 | 1 | 0 | -0.004 | 0 | -0.001 | 0 | t | 71284 | VTEEI                        | Oryctola<br>gus<br>cuniculu<br>s |
| 1 | 1.00 | 1 | 1 | 0 | 0.011  | 0 | -0.001 | 0 | t | 60663 | SRGAPGG<br>GFVPSLQG<br>VP    | Oryctola<br>gus<br>cuniculu<br>s |
| 1 | 1.00 | 1 | 1 | 0 | 0.008  | 0 | -0.001 | 0 | t | 63611 | TFASRGTS<br>MDDE             | Capra<br>hircus                  |
| 1 | 1.00 | 1 | 1 | 0 | -0.004 | 0 | -0.001 | 0 | t | 71848 | VVTGATVS                     | Oryctola<br>gus<br>cuniculu<br>s |
| 1 | 1.00 | 1 | 1 | 0 | -0.004 | 0 | -0.001 | 0 | t | 69595 | VLLGACSF                     | Oryctola<br>gus<br>cuniculu<br>s |
| 1 | 1.00 | 1 | 1 | 0 | -0.002 | 0 | -0.001 | 0 | t | 71844 | VVSWKNK<br>EL                | Mus<br>musculu<br>s              |

|   |      |   |   |   |        |   |        |   |   |       |                            |                                  |
|---|------|---|---|---|--------|---|--------|---|---|-------|----------------------------|----------------------------------|
| 1 | 1.00 | 1 | 1 | 0 | -0.004 | 0 | -0.001 | 0 | t | 69760 | VLSFELLN<br>APATVCGP<br>K  | Oryctola<br>gus<br>cuniculu<br>s |
| 1 | 1.00 | 1 | 1 | 0 | -0.002 | 0 | -0.001 | 0 | t | 96494 | KQMGQT<br>GGSY             | Mus<br>musculu<br>s              |
| 1 | 1.00 | 1 | 1 | 0 | 0      | 0 | -0.001 | 0 | t | 94762 | AAPAKKA<br>APAKKAA<br>A    | Homo<br>sapiens                  |
| 1 | 1.00 | 1 | 1 | 0 | -0.002 | 0 | -0.001 | 0 | t | 75287 | YPFRLPIKG<br>VPIELQ        | Mus<br>musculu<br>s              |
| 1 | 1.00 | 1 | 1 | 0 | 0.025  | 0 | -0.001 | 0 | t | 60663 | SRGAPGG<br>GFVPSLQG<br>VP  | Pan<br>troglody<br>tes           |
| 1 | 1.00 | 1 | 1 | 0 | -0.002 | 0 | -0.001 | 0 | t | 79535 | EDDDDDF<br>GMGALF          | Mus<br>musculu<br>s              |
| 1 | 1.00 | 1 | 1 | 0 | -0.002 | 0 | -0.001 | 0 | t | 65635 | TPLFKIIGD<br>EVGLRT        | Mus<br>musculu<br>s              |
| 1 | 1.00 | 1 | 1 | 0 | -0.002 | 0 | -0.001 | 0 | t | 62932 | TANGFYRL<br>PSG            | Mus<br>musculu<br>s              |
| 1 | 1.00 | 1 | 1 | 0 | -0.004 | 0 | -0.001 | 0 | t | 66337 | TSNFRVVP<br>SGDVVRFP<br>N  | Oryctola<br>gus<br>cuniculu<br>s |
| 1 | 1.00 | 1 | 1 | 0 | -0.004 | 0 | -0.001 | 0 | t | 71312 | VTGATVS                    | Oryctola<br>gus<br>cuniculu<br>s |
| 1 | 1.00 | 1 | 1 | 0 | 0.01   | 0 | -0.001 | 0 | t | 75567 | YQVRNSS<br>GLYHV           | Pan<br>troglody<br>tes           |
| 1 | 1.00 | 1 | 1 | 0 | -0.004 | 0 | -0.001 | 0 | t | 71297 | VTFDGGK<br>M               | Oryctola<br>gus<br>cuniculu<br>s |
| 1 | 1.00 | 1 | 1 | 0 | -0.002 | 0 | -0.001 | 0 | t | 67257 | TWGENET<br>DVLLNNT<br>RPPQ | Mus<br>musculu<br>s              |
| 1 | 1.00 | 1 | 1 | 0 | -0.002 | 0 | -0.001 | 0 | t | 72649 | WIRTPPAY<br>R              | Mus<br>musculu<br>s              |
| 1 | 1.00 | 1 | 1 | 0 | 0.01   | 0 | -0.001 | 0 | t | 75431 | YPWPLYG<br>NEG             | Pan<br>troglody<br>tes           |

|   |      |   |   |   |        |   |        |   |   |       |                              |                                  |
|---|------|---|---|---|--------|---|--------|---|---|-------|------------------------------|----------------------------------|
| 1 | 1.00 | 1 | 1 | 0 | -0.002 | 0 | -0.001 | 0 | t | 60710 | SRKAYDH<br>NSPYIWPR<br>NDYDG | Mus<br>musculu<br>s              |
| 1 | 1.00 | 1 | 1 | 0 | -0.002 | 0 | -0.001 | 0 | t | 85833 | LSIIAEQSN<br>STVDNQK         | Mus<br>musculu<br>s              |
| 1 | 1.00 | 1 | 1 | 0 | 0.008  | 0 | -0.001 | 0 | t | 60684 | SRGTSMD<br>DEADR             | Capra<br>hircus                  |
| 1 | 1.00 | 1 | 1 | 0 | -0.002 | 0 | -0.001 | 0 | t | 97117 | YIQMKRIA<br>VG               | Mus<br>musculu<br>s              |
| 1 | 1.00 | 1 | 1 | 0 | -0.002 | 0 | -0.001 | 0 | t | 65754 | TPRYNRIG<br>SH               | Mus<br>musculu<br>s              |
| 1 | 1.00 | 1 | 1 | 0 | -0.004 | 0 | -0.001 | 0 | t | 97104 | WVGVNLE<br>DPASRDV<br>VSVVN  | Oryctola<br>gus<br>cuniculu<br>s |
| 1 | 1.00 | 1 | 1 | 0 | -0.004 | 0 | -0.001 | 0 | t | 85833 | LSIIAEQSN<br>STVDNQK         | Oryctola<br>gus<br>cuniculu<br>s |
| 1 | 1.00 | 1 | 1 | 0 | -0.004 | 0 | -0.001 | 0 | t | 94914 | RELADALL<br>E                | Oryctola<br>gus<br>cuniculu<br>s |
| 1 | 1.00 | 1 | 1 | 0 | -0.004 | 0 | -0.001 | 0 | t | 73385 | YALADASL<br>KMADPNR<br>FRGKD | Oryctola<br>gus<br>cuniculu<br>s |
| 1 | 1.00 | 1 | 1 | 0 | -0.002 | 0 | -0.001 | 0 | t | 74056 | YGMEIRPL<br>K                | Mus<br>musculu<br>s              |
| 1 | 1.00 | 1 | 1 | 0 | 0.011  | 0 | -0.001 | 0 | t | 63217 | TDQMEVD<br>SGPRKRPL<br>RGG   | Oryctola<br>gus<br>cuniculu<br>s |
| 1 | 1.00 | 1 | 1 | 0 | -0.004 | 0 | -0.001 | 0 | t | 75425 | YPVDRSTF<br>W                | Oryctola<br>gus<br>cuniculu<br>s |
| 1 | 1.00 | 1 | 1 | 0 | -0.002 | 0 | -0.001 | 0 | t | 75425 | YPVDRSTF<br>W                | Mus<br>musculu<br>s              |
| 1 | 1.00 | 1 | 1 | 0 | 0.025  | 0 | -0.001 | 0 | t | 63217 | TDQMEVD<br>SGPRKRPL<br>RGG   | Pan<br>troglody<br>tes           |

|   |      |   |   |   |        |   |        |   |   |       |                              |                                  |
|---|------|---|---|---|--------|---|--------|---|---|-------|------------------------------|----------------------------------|
| 1 | 1.00 | 1 | 1 | 0 | -0.004 | 0 | -0.001 | 0 | t | 69299 | VKQMYKT<br>PTLKYFGG<br>FN    | Oryctola<br>gus<br>cuniculu<br>s |
| 1 | 1.00 | 1 | 1 | 0 | 0.008  | 0 | -0.001 | 0 | t | 73920 | YFTYEEP<br>NDGEE             | Capra<br>hircus                  |
| 1 | 1.00 | 1 | 1 | 0 | -0.002 | 0 | -0.001 | 0 | t | 68801 | VGTEWTP<br>CSVTCGVG<br>VRVRR | Mus<br>musculu<br>s              |
| 1 | 1.00 | 1 | 1 | 0 | -0.002 | 0 | -0.001 | 0 | t | 68801 | VGTEWTP<br>CSVTCGVG<br>VRVRR | Mus<br>musculu<br>s              |
| 1 | 1.00 | 1 | 1 | 0 | -0.002 | 0 | -0.001 | 0 | t | 63458 | TELRYSWK<br>T                | Mus<br>musculu<br>s              |
| 1 | 1.00 | 1 | 1 | 0 | -0.004 | 0 | -0.001 | 0 | t | 71138 | VSSQSFR                      | Oryctola<br>gus<br>cuniculu<br>s |
| 1 | 1.00 | 1 | 1 | 0 | -0.004 | 0 | -0.001 | 0 | t | 64645 | TKPTDPTG<br>IEPDDH           | Oryctola<br>gus<br>cuniculu<br>s |
| 1 | 1.00 | 1 | 1 | 0 | -0.004 | 0 | -0.001 | 0 | t | 74430 | YKAYVSYK<br>KRKAQEK          | Oryctola<br>gus<br>cuniculu<br>s |
| 1 | 1.00 | 1 | 1 | 0 | -0.004 | 0 | -0.001 | 0 | t | 73611 | YDYQHKE<br>G                 | Oryctola<br>gus<br>cuniculu<br>s |
| 1 | 1.00 | 1 | 1 | 0 | -0.002 | 0 | -0.001 | 0 | t | 75222 | YNSSRSYW<br>T                | Mus<br>musculu<br>s              |
| 1 | 1.00 | 1 | 1 | 0 | -0.004 | 0 | -0.001 | 0 | t | 65832 | TQDLFLPF<br>YSNVTGFH<br>T    | Oryctola<br>gus<br>cuniculu<br>s |
| 1 | 1.00 | 1 | 1 | 0 | -0.004 | 0 | -0.001 | 0 | t | 72205 | VYYPDEIFR<br>SDTLYLTD        | Oryctola<br>gus<br>cuniculu<br>s |
| 1 | 1.00 | 1 | 1 | 0 | -0.002 | 0 | -0.001 | 0 | t | 63458 | TELRYSWK<br>T                | Mus<br>musculu<br>s              |
| 1 | 1.00 | 1 | 1 | 0 | -0.002 | 0 | -0.001 | 0 | t | 70549 | VQEGVQQ<br>EGA               | Mus<br>musculu<br>s              |

|   |      |   |   |   |        |   |        |   |   |       |                              |                                  |
|---|------|---|---|---|--------|---|--------|---|---|-------|------------------------------|----------------------------------|
| 1 | 1.00 | 1 | 1 | 0 | -0.004 | 0 | -0.001 | 0 | t | 62872 | TAGWTFG<br>AGAALQIP<br>FA    | Oryctola<br>gus<br>cuniculu<br>s |
| 1 | 1.00 | 1 | 1 | 0 | 0.025  | 0 | -0.001 | 0 | t | 67615 | VAGRKKLE<br>ELERDLRK<br>TK   | Pan<br>troglody<br>tes           |
| 1 | 1.00 | 1 | 1 | 0 | -0.002 | 0 | -0.001 | 0 | t | 63077 | TCGVGVR<br>VRRRVNA<br>ANKKPE | Mus<br>musculu<br>s              |
| 1 | 1.00 | 1 | 1 | 0 | -0.004 | 0 | -0.001 | 0 | t | 66304 | TSLNDRQ<br>GNATK             | Oryctola<br>gus<br>cuniculu<br>s |
| 1 | 1.00 | 1 | 1 | 0 | -0.004 | 0 | -0.001 | 0 | t | 63792 | TGATVSSQ                     | Oryctola<br>gus<br>cuniculu<br>s |
| 1 | 1.00 | 1 | 1 | 0 | 0.01   | 0 | -0.001 | 0 | t | 67615 | VAGRKKLE<br>ELERDLRK<br>TK   | Pan<br>troglody<br>tes           |
| 1 | 1.00 | 1 | 1 | 0 | -0.002 | 0 | -0.001 | 0 | t | 72549 | WHRHWP<br>SHPTQK             | Mus<br>musculu<br>s              |
| 1 | 1.00 | 1 | 1 | 0 | -0.002 | 0 | -0.001 | 0 | t | 36991 | LKPIFKLPL<br>GINITNFR        | Mus<br>musculu<br>s              |
| 1 | 1.00 | 1 | 1 | 0 | -0.004 | 0 | -0.001 | 0 | t | 49968 | PVSMAKT<br>SVDCNMYI<br>CGDS  | Oryctola<br>gus<br>cuniculu<br>s |
| 1 | 1.00 | 1 | 1 | 0 | -0.002 | 0 | -0.001 | 0 | t | 44544 | NKLKEKHT<br>DLGKE            | Mus<br>musculu<br>s              |
| 1 | 1.00 | 1 | 1 | 0 | -0.004 | 0 | -0.001 | 0 | t | 47315 | PEKAFREL                     | Oryctola<br>gus<br>cuniculu<br>s |
| 1 | 1.00 | 1 | 1 | 0 | -0.002 | 0 | -0.001 | 0 | t | 43248 | NANPNAN<br>PNANPNA<br>NPNANP | Mus<br>musculu<br>s              |
| 1 | 1.00 | 1 | 1 | 0 | -0.002 | 0 | -0.001 | 0 | t | 43248 | NANPNAN<br>PNANPNA<br>NPNANP | Mus<br>musculu<br>s              |
| 1 | 1.00 | 1 | 1 | 0 | -0.002 | 0 | -0.001 | 0 | t | 43248 | NANPNAN<br>PNANPNA<br>NPNANP | Mus<br>musculu<br>s              |

|   |      |   |   |   |        |   |        |   |   |       |                              |                                  |
|---|------|---|---|---|--------|---|--------|---|---|-------|------------------------------|----------------------------------|
| 1 | 1.00 | 1 | 1 | 0 | -0.002 | 0 | -0.001 | 0 | t | 49968 | PVSMAKT<br>SVDCNMYI<br>CGDS  | Mus<br>musculu<br>s              |
| 1 | 1.00 | 1 | 1 | 0 | -0.002 | 0 | -0.001 | 0 | t | 43248 | NANPNAN<br>PNANPNA<br>NPNANP | Mus<br>musculu<br>s              |
| 1 | 1.00 | 1 | 1 | 0 | -0.004 | 0 | -0.001 | 0 | t | 46417 | NVLDVNAI<br>DIEEPS           | Oryctola<br>gus<br>cuniculu<br>s |
| 1 | 1.00 | 1 | 1 | 0 | -0.004 | 0 | -0.001 | 0 | t | 38982 | LQSARRGE                     | Oryctola<br>gus<br>cuniculu<br>s |
| 1 | 1.00 | 1 | 1 | 0 | -0.004 | 0 | -0.001 | 0 | t | 45368 | NPIDHSAR<br>S                | Oryctola<br>gus<br>cuniculu<br>s |
| 1 | 1.00 | 1 | 1 | 0 | -0.002 | 0 | -0.001 | 0 | t | 52000 | QQACKGKI<br>QALCENP          | Mus<br>musculu<br>s              |
| 1 | 1.00 | 1 | 1 | 0 | -0.001 | 0 | -0.001 | 0 | t | 46417 | NVLDVNAI<br>DIEEPS           | Myodes<br>glareolu<br>s          |
| 1 | 1.00 | 1 | 1 | 0 | -0.002 | 0 | -0.001 | 0 | t | 51456 | QLNRALSG<br>IAAEQDRN<br>T    | Mus<br>musculu<br>s              |
| 1 | 1.00 | 1 | 1 | 0 | -0.002 | 0 | -0.001 | 0 | t | 43248 | NANPNAN<br>PNANPNA<br>NPNANP | Mus<br>musculu<br>s              |
| 1 | 1.00 | 1 | 1 | 0 | -0.002 | 0 | -0.001 | 0 | t | 39998 | LTKSGSTY<br>PVLNVT           | Mus<br>musculu<br>s              |
| 1 | 1.00 | 1 | 1 | 0 | 0.01   | 0 | -0.001 | 0 | t | 38031 | LMGYIPLV<br>GA               | Pan<br>troglody<br>tes           |
| 1 | 1.00 | 1 | 1 | 0 | -0.002 | 0 | -0.001 | 0 | t | 49872 | PVGGQSSF<br>YSDWYSP<br>ACGKA | Mus<br>musculu<br>s              |
| 1 | 1.00 | 1 | 1 | 0 | -0.002 | 0 | -0.001 | 0 | t | 43248 | NANPNAN<br>PNANPNA<br>NPNANP | Mus<br>musculu<br>s              |
| 1 | 1.00 | 1 | 1 | 0 | -0.002 | 0 | -0.001 | 0 | t | 58057 | SGGSVASG<br>GSGNSRR          | Mus<br>musculu<br>s              |

|   |      |   |   |   |        |   |        |   |   |       |                              |                                  |
|---|------|---|---|---|--------|---|--------|---|---|-------|------------------------------|----------------------------------|
| 1 | 1.00 | 1 | 1 | 0 | -0.002 | 0 | -0.001 | 0 | t | 55826 | RSELSQLS<br>MYRVFEV          | Mus<br>musculu<br>s              |
| 1 | 1.00 | 1 | 1 | 0 | -0.002 | 0 | -0.001 | 0 | t | 51974 | QPTELRY<br>S W               | Mus<br>musculu<br>s              |
| 1 | 1.00 | 1 | 1 | 0 | -0.002 | 0 | -0.001 | 0 | t | 38330 | LNRSGGN<br>YTKTDDEA          | Mus<br>musculu<br>s              |
| 1 | 1.00 | 1 | 1 | 0 | -0.002 | 0 | -0.001 | 0 | t | 53758 | RFPRGQG<br>VPINTNSG<br>PDDQI | Mus<br>musculu<br>s              |
| 1 | 1.00 | 1 | 1 | 0 | -0.002 | 0 | -0.001 | 0 | t | 51974 | QPTELRY<br>S W               | Mus<br>musculu<br>s              |
| 1 | 1.00 | 1 | 1 | 0 | -0.004 | 0 | -0.001 | 0 | t | 46379 | NVFQTQA<br>GCLIGAEH<br>VD    | Oryctola<br>gus<br>cuniculu<br>s |
| 1 | 1.00 | 1 | 1 | 0 | -0.002 | 0 | -0.001 | 0 | t | 52000 | QQACKGKI<br>QALCENP          | Mus<br>musculu<br>s              |
| 1 | 1.00 | 1 | 1 | 0 | -0.005 | 0 | -0.001 | 0 | t | 57166 | SDARQRV<br>ADRKREK<br>YDSFF  | Mesocric<br>etus<br>auratus      |
| 1 | 1.00 | 1 | 1 | 0 | -0.004 | 0 | -0.001 | 0 | t | 53729 | RFKSQDA<br>D                 | Oryctola<br>gus<br>cuniculu<br>s |
| 1 | 1.00 | 1 | 1 | 0 | -0.002 | 0 | -0.001 | 0 | t | 42493 | MRQLDTN<br>VER               | Mus<br>musculu<br>s              |
| 1 | 1.00 | 1 | 1 | 0 | -0.002 | 0 | -0.001 | 0 | t | 59922 | SNTFINNA                     | Mus<br>musculu<br>s              |
| 1 | 1.00 | 1 | 1 | 0 | -0.004 | 0 | -0.001 | 0 | t | 53766 | RFQPFQQ<br>FGRDVSD<br>FTD    | Oryctola<br>gus<br>cuniculu<br>s |
| 1 | 1.00 | 1 | 1 | 0 | -0.002 | 0 | -0.001 | 0 | t | 47479 | PFAMQM<br>AYRFNGIG<br>VTQ    | Mus<br>musculu<br>s              |
| 1 | 1.00 | 1 | 1 | 0 | -0.002 | 0 | -0.001 | 0 | t | 59856 | SNKSASQ<br>NVR               | Mus<br>musculu<br>s              |
| 1 | 1.00 | 1 | 1 | 0 | -0.001 | 0 | -0.001 | 0 | t | 55066 | RNTIMASK<br>TVGTAE           | Myodes<br>glareolu<br>s          |

|   |      |   |   |   |        |   |        |   |   |       |                               |                                  |
|---|------|---|---|---|--------|---|--------|---|---|-------|-------------------------------|----------------------------------|
| 1 | 1.00 | 1 | 1 | 0 | -0.002 | 0 | -0.001 | 0 | t | 46681 | NYNYKYRY<br>LRHGKLRP<br>F     | Mus<br>musculu<br>s              |
| 1 | 1.00 | 1 | 1 | 0 | -0.002 | 0 | -0.001 | 0 | t | 39391 | LSGQPAVI<br>PDREVLQYQ<br>QFDE | Mus<br>musculu<br>s              |
| 1 | 1.00 | 1 | 1 | 0 | -0.002 | 0 | -0.001 | 0 | t | 50213 | QAAPVQE<br>GVQ                | Mus<br>musculu<br>s              |
| 1 | 1.00 | 1 | 1 | 0 | -0.004 | 0 | -0.001 | 0 | t | 58082 | SGIGPEKA                      | Oryctola<br>gus<br>cuniculu<br>s |
| 1 | 1.00 | 1 | 1 | 0 | -0.002 | 0 | -0.001 | 0 | t | 39391 | LSGQPAVI<br>PDREVLQYQ<br>QFDE | Mus<br>musculu<br>s              |
| 1 | 1.00 | 1 | 1 | 0 | -0.002 | 0 | -0.001 | 0 | t | 55383 | RPYCWHY<br>PPQQCGIV<br>PASQV  | Mus<br>musculu<br>s              |
| 1 | 1.00 | 1 | 1 | 0 | -0.004 | 0 | -0.001 | 0 | t | 40594 | LVSMFSVG<br>PS                | Oryctola<br>gus<br>cuniculu<br>s |
| 1 | 1.00 | 1 | 1 | 0 | -0.002 | 0 | -0.001 | 0 | t | 59922 | SNTFINNA                      | Mus<br>musculu<br>s              |
| 1 | 1.00 | 1 | 1 | 0 | -0.004 | 0 | -0.001 | 0 | t | 56364 | RVMYASS<br>G                  | Oryctola<br>gus<br>cuniculu<br>s |
| 1 | 1.00 | 1 | 1 | 0 | -0.002 | 0 | -0.001 | 0 | t | 41667 | MHMLSNK<br>SAS                | Mus<br>musculu<br>s              |
| 1 | 1.00 | 1 | 1 | 0 | -0.002 | 0 | -0.001 | 0 | t | 56283 | RVFEVGI<br>RNPGLGA            | Mus<br>musculu<br>s              |
| 1 | 1.00 | 1 | 1 | 0 | -0.002 | 0 | -0.001 | 0 | t | 50273 | QAGRTAH<br>AVTNIFSV<br>G      | Mus<br>musculu<br>s              |
| 1 | 1.00 | 1 | 1 | 0 | -0.002 | 0 | -0.001 | 0 | t | 54599 | RLITGRLQS<br>LQTYVTQ<br>Q     | Mus<br>musculu<br>s              |
| 1 | 1.00 | 1 | 1 | 0 | -0.004 | 0 | -0.001 | 0 | t | 53116 | RAILTAESP<br>AQDIWGT<br>S     | Oryctola<br>gus<br>cuniculu<br>s |
| 1 | 1.00 | 1 | 1 | 0 | -0.004 | 0 | -0.001 | 0 | t | 39023 | LQYGSFCT<br>QLNRALSG<br>I     | Oryctola<br>gus<br>cuniculu<br>s |



|   |      |   |   |   |        |   |        |   |   |       |                              |                                  |
|---|------|---|---|---|--------|---|--------|---|---|-------|------------------------------|----------------------------------|
| 1 | 1.00 | 1 | 1 | 0 | -0.004 | 0 | -0.001 | 0 | t | 56079 | RTIGGSQA<br>QT               | Oryctola<br>gus<br>cuniculu<br>s |
| 1 | 1.00 | 1 | 1 | 0 | -0.002 | 0 | -0.001 | 0 | t | 51454 | QLNPKDN<br>DVEL              | Mus<br>musculu<br>s              |
| 1 | 1.00 | 1 | 1 | 0 | -0.004 | 0 | -0.001 | 0 | t | 43825 | NFELCDNP<br>FFAVSKPM<br>G    | Oryctola<br>gus<br>cuniculu<br>s |
| 1 | 1.00 | 1 | 1 | 0 | -0.002 | 0 | -0.001 | 0 | t | 48282 | PLCNRTRS<br>RQSGI            | Mus<br>musculu<br>s              |
| 1 | 1.00 | 1 | 1 | 0 | -0.004 | 0 | -0.001 | 0 | t | 49273 | PRVRSKPV<br>V                | Oryctola<br>gus<br>cuniculu<br>s |
| 1 | 1.00 | 1 | 1 | 0 | -0.004 | 0 | -0.001 | 0 | t | 60400 | SQDADYH<br>R                 | Oryctola<br>gus<br>cuniculu<br>s |
| 1 | 1.00 | 1 | 1 | 0 | -0.005 | 0 | -0.001 | 0 | t | 45225 | NNRNRLT<br>KLFRYKSSR<br>SESE | Mesocric<br>etus<br>auratus      |
| 1 | 1.00 | 1 | 1 | 0 | -0.004 | 0 | -0.001 | 0 | t | 41238 | MDIDPYKE<br>FGATVELL<br>SFLP | Oryctola<br>gus<br>cuniculu<br>s |
| 1 | 1.00 | 1 | 1 | 0 | -0.002 | 0 | -0.001 | 0 | t | 59922 | SNTFINNA                     | Mus<br>musculu<br>s              |
| 1 | 1.00 | 1 | 1 | 0 | -0.002 | 0 | -0.001 | 0 | t | 45589 | NQMHML<br>SNKS               | Mus<br>musculu<br>s              |
| 1 | 1.00 | 1 | 1 | 0 | -0.002 | 0 | -0.001 | 0 | t | 53989 | RGSRPSW<br>GPTDPRRR<br>SRNLG | Mus<br>musculu<br>s              |
| 1 | 1.00 | 1 | 1 | 0 | 0.006  | 0 | -0.001 | 0 | t | 43242 | NANPNAN<br>PNANP             | Macaca<br>fascicula<br>ris       |
| 1 | 1.00 | 1 | 1 | 0 | -0.001 | 0 | -0.001 | 0 | t | 50494 | QDMRNTI<br>MASKTVG           | Myodes<br>glareolu<br>s          |
| 1 | 1.00 | 1 | 1 | 0 | 0      | 0 | -0.001 | 0 | t | 45225 | NNRNRLT<br>KLFRYKSSR<br>SESE | Mesocric<br>etus<br>auratus      |

|   |      |   |   |   |        |   |        |   |   |       |                               |                                  |
|---|------|---|---|---|--------|---|--------|---|---|-------|-------------------------------|----------------------------------|
| 1 | 1.00 | 1 | 1 | 0 | -0.002 | 0 | -0.001 | 0 | t | 51074 | QIGYYRRA<br>TRRVRGG<br>DGK    | Mus<br>musculu<br>s              |
| 1 | 1.00 | 1 | 1 | 0 | 0.01   | 0 | -0.001 | 0 | t | 42694 | MSTNPKP<br>QRKTK              | Pan<br>troglody<br>tes           |
| 1 | 1.00 | 1 | 1 | 0 | -0.002 | 0 | -0.001 | 0 | t | 59120 | SLGADSSI<br>AYSNNITAI         | Mus<br>musculu<br>s              |
| 1 | 1.00 | 1 | 1 | 0 | -0.004 | 0 | -0.001 | 0 | t | 56895 | SAMILAAY<br>HPQQFIYA<br>GSLs  | Oryctola<br>gus<br>cuniculu<br>s |
| 1 | 1.00 | 1 | 1 | 0 | -0.004 | 0 | -0.001 | 0 | t | 48383 | PLKPTKRS<br>FIEDLLFNK         | Oryctola<br>gus<br>cuniculu<br>s |
| 1 | 1.00 | 1 | 1 | 0 | 0.004  | 0 | -0.001 | 0 | t | 46371 | NVESQPG<br>GQPNT              | Mus<br>musculu<br>s              |
| 1 | 1.00 | 1 | 1 | 0 | -0.004 | 0 | -0.001 | 0 | t | 38522 | LPHSNL                        | Oryctola<br>gus<br>cuniculu<br>s |
| 1 | 1.00 | 1 | 1 | 0 | -0.002 | 0 | -0.001 | 0 | t | 39398 | LSGRPAIV<br>PDREVLVYQ<br>EFDE | Mus<br>musculu<br>s              |
| 1 | 1.00 | 1 | 1 | 0 | -0.004 | 0 | -0.001 | 0 | t | 54545 | RLGAALLQ                      | Oryctola<br>gus<br>cuniculu<br>s |
| 1 | 1.00 | 1 | 1 | 0 | -0.002 | 0 | -0.001 | 0 | t | 43246 | NANPNAN<br>PNANPN<br>NP       | Mus<br>musculu<br>s              |
| 1 | 1.00 | 1 | 1 | 0 | -0.004 | 0 | -0.001 | 0 | t | 48648 | PNGTYRAT                      | Oryctola<br>gus<br>cuniculu<br>s |
| 1 | 1.00 | 1 | 1 | 0 | -0.002 | 0 | -0.001 | 0 | t | 43246 | NANPNAN<br>PNANPN<br>NP       | Mus<br>musculu<br>s              |
| 1 | 1.00 | 1 | 1 | 0 | -0.002 | 0 | -0.001 | 0 | t | 43246 | NANPNAN<br>PNANPN<br>NP       | Mus<br>musculu<br>s              |
| 1 | 1.00 | 1 | 1 | 0 | -0.002 | 0 | -0.001 | 0 | t | 39398 | LSGRPAIV<br>PDREVLVYQ<br>EFDE | Mus<br>musculu<br>s              |

|   |      |   |   |   |        |   |        |   |   |       |                              |                                  |
|---|------|---|---|---|--------|---|--------|---|---|-------|------------------------------|----------------------------------|
| 1 | 1.00 | 1 | 1 | 0 | -0.002 | 0 | -0.001 | 0 | t | 41660 | MHGDTPT<br>LHEYMLDL<br>QPETT | Mus<br>musculu<br>s              |
| 1 | 1.00 | 1 | 1 | 0 | -0.002 | 0 | -0.001 | 0 | t | 59922 | SNTFINNA                     | Mus<br>musculu<br>s              |
| 1 | 1.00 | 1 | 1 | 0 | 0.008  | 0 | -0.001 | 0 | t | 56534 | RYFTYEPP<br>NDGE             | Capra<br>hircus                  |
| 1 | 1.00 | 1 | 1 | 0 | -0.002 | 0 | -0.001 | 0 | t | 48370 | PLITHGSG<br>MDLYKSN          | Mus<br>musculu<br>s              |
| 1 | 1.00 | 1 | 1 | 0 | -0.002 | 0 | -0.001 | 0 | t | 41660 | MHGDTPT<br>LHEYMLDL<br>QPETT | Mus<br>musculu<br>s              |
| 1 | 1.00 | 1 | 1 | 0 | -0.004 | 0 | -0.001 | 0 | t | 39626 | LSREM                        | Oryctola<br>gus<br>cuniculu<br>s |
| 1 | 1.00 | 1 | 1 | 0 | -0.004 | 0 | -0.001 | 0 | t | 49764 | PTRTIGGS<br>QA               | Oryctola<br>gus<br>cuniculu<br>s |
| 1 | 1.00 | 1 | 1 | 0 | -0.002 | 0 | -0.001 | 0 | t | 42308 | MPPYPTG<br>GPPPV             | Mus<br>musculu<br>s              |
| 1 | 1.00 | 1 | 1 | 0 | -0.004 | 0 | -0.001 | 0 | t | 58136 | SGLVSMFS<br>VG               | Oryctola<br>gus<br>cuniculu<br>s |
| 1 | 1.00 | 1 | 1 | 0 | -0.004 | 0 | -0.001 | 0 | t | 56962 | SARDGIRD<br>AMIGLREE<br>MIEK | Oryctola<br>gus<br>cuniculu<br>s |
| 1 | 1.00 | 1 | 1 | 0 | -0.002 | 0 | -0.001 | 0 | t | 59922 | SNTFINNA                     | Mus<br>musculu<br>s              |
| 1 | 1.00 | 1 | 1 | 0 | -0.002 | 0 | -0.001 | 0 | t | 58485 | SIEHQVKD<br>VLTPLFK          | Mus<br>musculu<br>s              |
| 1 | 1.00 | 1 | 1 | 0 | -0.004 | 0 | -0.001 | 0 | t | 54848 | RMADAVS<br>RKKMDTK           | Oryctola<br>gus<br>cuniculu<br>s |
| 1 | 1.00 | 1 | 1 | 0 | -0.002 | 0 | -0.001 | 0 | t | 41177 | MAYRFNG<br>IGVTQNVL<br>YE    | Mus<br>musculu<br>s              |

|   |      |   |   |   |        |   |        |   |   |       |                              |                                  |
|---|------|---|---|---|--------|---|--------|---|---|-------|------------------------------|----------------------------------|
| 1 | 1.00 | 1 | 1 | 0 | -0.002 | 0 | -0.001 | 0 | t | 59192 | SLINTNGS<br>WHIN             | Mus<br>musculu<br>s              |
| 1 | 1.00 | 1 | 1 | 0 | -0.002 | 0 | -0.001 | 0 | t | 39917 | LTGKPAVI<br>PDREILYQ<br>QFDE | Mus<br>musculu<br>s              |
| 1 | 1.00 | 1 | 1 | 0 | -0.004 | 0 | -0.001 | 0 | t | 37310 | LLGACSF                      | Oryctola<br>gus<br>cuniculu<br>s |
| 1 | 1.00 | 1 | 1 | 0 | -0.002 | 0 | -0.001 | 0 | t | 49993 | PVVAESPK<br>KP               | Mus<br>musculu<br>s              |
| 1 | 1.00 | 1 | 1 | 0 | -0.004 | 0 | -0.001 | 0 | t | 47641 | PGFGDNR<br>KNQ               | Oryctola<br>gus<br>cuniculu<br>s |
| 1 | 1.00 | 1 | 1 | 0 | -0.002 | 0 | -0.001 | 0 | t | 56962 | SARDGIRD<br>AMIGLREE<br>MIEK | Mus<br>musculu<br>s              |
| 1 | 1.00 | 1 | 1 | 0 | -0.002 | 0 | -0.001 | 0 | t | 58252 | SGTENKPA<br>TG               | Mus<br>musculu<br>s              |
| 1 | 1.00 | 1 | 1 | 0 | -0.004 | 0 | -0.001 | 0 | t | 51454 | QLNPKDN<br>DVEL              | Oryctola<br>gus<br>cuniculu<br>s |
| 1 | 1.00 | 1 | 1 | 0 | -0.002 | 0 | -0.001 | 0 | t | 44747 | NLINTNGS<br>WHIN             | Mus<br>musculu<br>s              |
| 1 | 1.00 | 1 | 1 | 0 | -0.002 | 0 | -0.001 | 0 | t | 44747 | NLINTNGS<br>WHIN             | Rattus<br>norvegic<br>us         |
| 1 | 1.00 | 1 | 1 | 0 | -0.002 | 0 | -0.001 | 0 | t | 50767 | QFGRDVS<br>DFTDSVRD<br>PK    | Mus<br>musculu<br>s              |
| 1 | 1.00 | 1 | 1 | 0 | -0.002 | 0 | -0.001 | 0 | t | 46319 | NTYFTAFL<br>DGPK             | Mus<br>musculu<br>s              |
| 1 | 1.00 | 1 | 1 | 0 | -0.002 | 0 | -0.001 | 0 | t | 42308 | MPPYPTG<br>GPPPV             | Sus<br>scrofa                    |
| 1 | 1.00 | 1 | 1 | 0 | 0      | 0 | -0.001 | 0 | t | 44018 | NGKQVES<br>PAPSGHT<br>HLKKPA | Mesocric<br>etus<br>auratus      |
| 1 | 1.00 | 1 | 1 | 0 | -0.004 | 0 | -0.001 | 0 | t | 52321 | QSFRRLLGA                    | Oryctola<br>gus<br>cuniculu<br>s |

|   |      |   |   |   |        |   |        |   |   |       |                              |                                  |
|---|------|---|---|---|--------|---|--------|---|---|-------|------------------------------|----------------------------------|
| 1 | 1.00 | 1 | 1 | 0 | -0.001 | 0 | -0.001 | 0 | t | 50307 | QALIDQKV<br>KEISNQ           | Myodes<br>glareolu<br>s          |
| 1 | 1.00 | 1 | 1 | 0 | -0.001 | 0 | -0.001 | 0 | t | 44002 | NGIRRPKH<br>LYVSMP           | Myodes<br>glareolu<br>s          |
| 1 | 1.00 | 1 | 1 | 0 | -0.004 | 0 | -0.001 | 0 | t | 58252 | SGTENKPA<br>TG               | Oryctola<br>gus<br>cuniculu<br>s |
| 1 | 1.00 | 1 | 1 | 0 | -0.001 | 0 | -0.001 | 0 | t | 58614 | SILQDMR<br>NTIMASK           | Myodes<br>glareolu<br>s          |
| 1 | 1.00 | 1 | 1 | 0 | -0.002 | 0 | -0.001 | 0 | t | 56275 | RVEHAVVY<br>YVYSPSR          | Mus<br>musculu<br>s              |
| 1 | 1.00 | 1 | 1 | 0 | -0.002 | 0 | -0.001 | 0 | t | 51374 | QLINTNGS<br>WHVN             | Mus<br>musculu<br>s              |
| 1 | 1.00 | 1 | 1 | 0 | -0.002 | 0 | -0.001 | 0 | t | 51374 | QLINTNGS<br>WHVN             | Rattus<br>norvegic<br>us         |
| 1 | 1.00 | 1 | 1 | 0 | -0.004 | 0 | -0.001 | 0 | t | 38215 | LNFKGRW<br>LRDRL             | Oryctola<br>gus<br>cuniculu<br>s |
| 1 | 1.00 | 1 | 1 | 0 | -0.002 | 0 | -0.001 | 0 | t | 56275 | RVEHAVVY<br>YVYSPSR          | Mus<br>musculu<br>s              |
| 1 | 1.00 | 1 | 1 | 0 | -0.004 | 0 | -0.001 | 0 | t | 59571 | SLVTCPAQ<br>GSLQSSPS<br>MEIK | Oryctola<br>gus<br>cuniculu<br>s |
| 1 | 1.00 | 1 | 1 | 0 | -0.002 | 0 | -0.001 | 0 | t | 46198 | NTNSGPD<br>DQIGYYRR<br>ATR   | Mus<br>musculu<br>s              |
| 1 | 1.00 | 1 | 1 | 0 | -0.002 | 0 | -0.001 | 0 | t | 37055 | LKVIRK                       | Mus<br>musculu<br>s              |
| 1 | 1.00 | 1 | 1 | 0 | -0.002 | 0 | -0.001 | 0 | t | 51374 | QLINTNGS<br>WHVN             | Mus<br>musculu<br>s              |
| 1 | 1.00 | 1 | 1 | 0 | -0.002 | 0 | -0.001 | 0 | t | 38215 | LNFKGRW<br>LRDRL             | Mus<br>musculu<br>s              |
| 1 | 1.00 | 1 | 1 | 0 | 0.01   | 0 | -0.001 | 0 | t | 47662 | PGGGQIV<br>GGVYLLPR<br>R     | Pan<br>troglody<br>tes           |
| 1 | 1.00 | 1 | 1 | 0 | -0.002 | 0 | -0.001 | 0 | t | 54863 | RMAWDM<br>MMNW               | Mus<br>musculu<br>s              |

|   |      |   |   |   |        |   |        |   |   |       |                     |                       |
|---|------|---|---|---|--------|---|--------|---|---|-------|---------------------|-----------------------|
| 1 | 1.00 | 1 | 1 | 0 | -0.004 | 0 | -0.001 | 0 | t | 49557 | PSVYAWERKKISNCVAD   | Oryctolagus cuniculus |
| 1 | 1.00 | 1 | 1 | 0 | -0.002 | 0 | -0.001 | 0 | t | 50030 | PWHLGKLEEM          | Mus musculus          |
| 1 | 1.00 | 1 | 1 | 0 | -0.004 | 0 | -0.001 | 0 | t | 52292 | QSARRGEK            | Oryctolagus cuniculus |
| 1 | 1.00 | 1 | 1 | 0 | -0.004 | 0 | -0.001 | 0 | t | 42541 | MSDNGPQSNQRSAPRIT   | Oryctolagus cuniculus |
| 1 | 1.00 | 1 | 1 | 0 | -0.002 | 0 | -0.001 | 0 | t | 59483 | SLSTNLDVTNSIEHQ     | Mus musculus          |
| 1 | 1.00 | 1 | 1 | 0 | -0.002 | 0 | -0.001 | 0 | t | 48823 | PPLLESWKDPDYVPPVVHG | Mus musculus          |
| 1 | 1.00 | 1 | 1 | 0 | -0.002 | 0 | -0.001 | 0 | t | 51874 | QPLPQRQKKQPTVTLL    | Mus musculus          |
| 1 | 1.00 | 1 | 1 | 0 | -0.006 | 0 | -0.001 | 0 | t | 44852 | NLQKDEPNGRASDT      | Oryctolagus cuniculus |
| 1 | 1.00 | 1 | 1 | 0 | -0.002 | 0 | -0.001 | 0 | t | 43893 | NFNGLTGTGVLTPSSKR   | Mus musculus          |
| 1 | 1.00 | 1 | 1 | 0 | -0.002 | 0 | -0.001 | 0 | t | 59922 | SNTFINNA            | Mus musculus          |
| 1 | 1.00 | 1 | 1 | 0 | -0.002 | 0 | -0.001 | 0 | t | 56958 | SAQSGTSGTSAQSGT     | Mus musculus          |
| 1 | 1.00 | 1 | 1 | 0 | -0.004 | 0 | -0.001 | 0 | t | 58405 | SHRLLQTYWSSA        | Oryctolagus cuniculus |
| 1 | 1.00 | 1 | 1 | 0 | -0.004 | 0 | -0.001 | 0 | t | 58922 | SKPTTKQRQNKPPSK     | Oryctolagus cuniculus |
| 1 | 1.00 | 1 | 1 | 0 | -0.002 | 0 | -0.001 | 0 | t | 59192 | SLINTNGSWHIN        | Rattus norvegicus     |

|   |      |   |   |   |        |   |        |   |   |       |                              |                                  |
|---|------|---|---|---|--------|---|--------|---|---|-------|------------------------------|----------------------------------|
| 1 | 1.00 | 1 | 1 | 0 | -0.004 | 0 | -0.001 | 0 | t | 50429 | QDADYHR<br>V                 | Oryctola<br>gus<br>cuniculu<br>s |
| 1 | 1.00 | 1 | 1 | 0 | 0.01   | 0 | -0.001 | 0 | t | 49116 | PQRKTKR<br>NTNRR             | Pan<br>troglody<br>tes           |
| 1 | 1.00 | 1 | 1 | 0 | -0.002 | 0 | -0.001 | 0 | t | 43013 | MWLDVM<br>YLKGGG             | Mus<br>musculu<br>s              |
| 1 | 1.00 | 1 | 1 | 0 | -0.004 | 0 | -0.001 | 0 | t | 43893 | NFNGLTGT<br>GVLTPSSK<br>R    | Oryctola<br>gus<br>cuniculu<br>s |
| 1 | 1.00 | 1 | 1 | 0 | -0.002 | 0 | -0.001 | 0 | t | 58409 | SHSAFNM<br>FDFGVGPP          | Mus<br>musculu<br>s              |
| 1 | 1.00 | 1 | 1 | 0 | -0.002 | 0 | -0.001 | 0 | t | 53355 | RDGQLTIK<br>AERTEQKD<br>FDGR | Mus<br>musculu<br>s              |
| 1 | 1.00 | 1 | 1 | 0 | -0.004 | 0 | -0.001 | 0 | t | 42532 | MSDLTDIQ<br>EDITRH           | Oryctola<br>gus<br>cuniculu<br>s |
| 1 | 1.00 | 1 | 1 | 0 | -0.002 | 0 | -0.001 | 0 | t | 42187 | MNALVNS<br>TLLETRTT          | Mus<br>musculu<br>s              |
| 1 | 1.00 | 1 | 1 | 0 | -0.004 | 0 | -0.001 | 0 | t | 44251 | NIISCNKN<br>DKNQ             | Oryctola<br>gus<br>cuniculu<br>s |
| 1 | 1.00 | 1 | 1 | 0 | -0.002 | 0 | -0.001 | 0 | t | 58416 | SHSQLGPP<br>VGGPP            | Mus<br>musculu<br>s              |
| 1 | 1.00 | 1 | 1 | 0 | -0.004 | 0 | -0.001 | 0 | t | 49505 | PSSKRFQP<br>FQQFGRD          | Oryctola<br>gus<br>cuniculu<br>s |
| 1 | 1.00 | 1 | 1 | 0 | -0.002 | 0 | -0.001 | 0 | t | 47890 | PIELQVECF<br>TWDQKL          | Mus<br>musculu<br>s              |
| 1 | 1.00 | 1 | 1 | 0 | -0.002 | 0 | -0.001 | 0 | t | 58465 | SICSNNPT<br>CWAICKR          | Mus<br>musculu<br>s              |
| 1 | 1.00 | 1 | 1 | 0 | -0.002 | 0 | -0.001 | 0 | t | 43013 | MWLDVM<br>YLKGGG             | Mus<br>musculu<br>s              |
| 1 | 1.00 | 1 | 1 | 0 | -0.002 | 0 | -0.001 | 0 | t | 56201 | RTTTASGK<br>L                | Mus<br>musculu<br>s              |

|   |      |   |   |   |        |   |        |   |   |       |                              |                                  |
|---|------|---|---|---|--------|---|--------|---|---|-------|------------------------------|----------------------------------|
| 1 | 1.00 | 1 | 1 | 0 | -0.004 | 0 | -0.001 | 0 | t | 60170 | SPNVSVPS<br>SSSTPLLY         | Oryctola<br>gus<br>cuniculu<br>s |
| 1 | 1.00 | 1 | 1 | 0 | 0.011  | 0 | -0.001 | 0 | t | 50977 | QGVPESPF<br>SRTGEGLD         | Oryctola<br>gus<br>cuniculu<br>s |
| 1 | 1.00 | 1 | 1 | 0 | -0.004 | 0 | -0.001 | 0 | t | 50977 | QGVPESPF<br>SRTGEGLD         | Oryctola<br>gus<br>cuniculu<br>s |
| 1 | 1.00 | 1 | 1 | 0 | -0.004 | 0 | -0.001 | 0 | t | 58465 | SICSNNPT<br>CWAICKR          | Oryctola<br>gus<br>cuniculu<br>s |
| 1 | 1.00 | 1 | 1 | 0 | -0.002 | 0 | -0.001 | 0 | t | 46242 | NTRNIDAT<br>STGN             | Mus<br>musculu<br>s              |
| 1 | 1.00 | 1 | 1 | 0 | -0.004 | 0 | -0.001 | 0 | t | 59985 | SPAQDIW<br>GTSAAAYF<br>VG    | Oryctola<br>gus<br>cuniculu<br>s |
| 1 | 1.00 | 1 | 1 | 0 | -0.002 | 0 | -0.001 | 0 | t | 54989 | RNFTTAPA<br>ICHEGKAY<br>F    | Mus<br>musculu<br>s              |
| 1 | 1.00 | 1 | 1 | 0 | -0.002 | 0 | -0.001 | 0 | t | 54118 | RIADQAQY<br>NQ               | Mus<br>musculu<br>s              |
| 1 | 1.00 | 1 | 1 | 0 | 0.008  | 0 | -0.001 | 0 | t | 59640 | SMDDEAD<br>RYFTY             | Capra<br>hircus                  |
| 1 | 1.00 | 1 | 1 | 0 | 0      | 0 | -0.001 | 0 | t | 51867 | QPKVDAN<br>ADEEAEAV<br>GEDDL | Mesocric<br>etus<br>auratus      |
| 1 | 1.00 | 1 | 1 | 0 | -0.002 | 0 | -0.001 | 0 | t | 51146 | QIVGGVYL                     | Mus<br>musculu<br>s              |
| 1 | 1.00 | 1 | 1 | 0 | 0.01   | 0 | -0.001 | 0 | t | 55930 | RSQPRGR<br>RQPIP             | Pan<br>troglody<br>tes           |
| 1 | 1.00 | 1 | 1 | 0 | 0.008  | 0 | -0.001 | 0 | t | 51233 | QKPLK                        | Capra<br>hircus                  |



|   |      |   |   |   |        |   |        |   |   |       |                              |                                  |
|---|------|---|---|---|--------|---|--------|---|---|-------|------------------------------|----------------------------------|
| 1 | 1.00 | 1 | 1 | 0 | -0.002 | 0 | -0.001 | 0 | t | 39255 | LRYSWKT<br>WG                | Mus<br>musculu<br>s              |
| 1 | 1.00 | 1 | 1 | 0 | -0.002 | 0 | -0.001 | 0 | t | 45151 | NNKSQSVI<br>IINNSTNV<br>V    | Mus<br>musculu<br>s              |
| 1 | 1.00 | 1 | 1 | 0 | -0.02  | 0 | -0.001 | 0 | t | 42797 | MTEQQW<br>NFAGIEAA<br>ASAIQG | Macaca<br>mulatta                |
| 1 | 1.00 | 1 | 1 | 0 | 0.004  | 0 | -0.001 | 0 | t | 51233 | QKPLK                        | Mus<br>musculu<br>s              |
| 1 | 1.00 | 1 | 1 | 0 | -0.002 | 0 | -0.001 | 0 | t | 51574 | QLVNSNG<br>SWHIN             | Mus<br>musculu<br>s              |
| 1 | 1.00 | 1 | 1 | 0 | -0.002 | 0 | -0.001 | 0 | t | 51574 | QLVNSNG<br>SWHIN             | Rattus<br>norvegic<br>us         |
| 1 | 1.00 | 1 | 1 | 0 | -0.004 | 0 | -0.001 | 0 | t | 57910 | SFSSIPNG                     | Oryctola<br>gus<br>cuniculu<br>s |
| 1 | 1.00 | 1 | 1 | 0 | -0.002 | 0 | -0.001 | 0 | t | 60433 | SQERNFV<br>DSIGQSFQ          | Mus<br>musculu<br>s              |
| 1 | 1.00 | 1 | 1 | 0 | -0.002 | 0 | -0.001 | 0 | t | 56434 | RVTVSTRR<br>SQQTIIPNI<br>G   | Mus<br>musculu<br>s              |
| 1 | 1.00 | 1 | 1 | 0 | -0.002 | 0 | -0.001 | 0 | t | 60170 | SPNVSVPS<br>SSSTPLLY         | Mus<br>musculu<br>s              |
| 1 | 1.00 | 1 | 1 | 0 | -0.002 | 0 | -0.001 | 0 | t | 51575 | QLVNTNG<br>SWHIN             | Mus<br>musculu<br>s              |
| 1 | 1.00 | 1 | 1 | 0 | -0.002 | 0 | -0.001 | 0 | t | 51575 | QLVNTNG<br>SWHIN             | Rattus<br>norvegic<br>us         |
| 1 | 1.00 | 1 | 1 | 0 | -0.002 | 0 | -0.001 | 0 | t | 51370 | QLINSNGS<br>WHIN             | Mus<br>musculu<br>s              |
| 1 | 1.00 | 1 | 1 | 0 | -0.002 | 0 | -0.001 | 0 | t | 37660 | LLPHSNLD<br>HILEPSIPW<br>KSK | Mus<br>musculu<br>s              |

|   |      |   |   |   |        |   |        |   |   |       |                              |                                  |
|---|------|---|---|---|--------|---|--------|---|---|-------|------------------------------|----------------------------------|
| 1 | 1.00 | 1 | 1 | 0 | -0.002 | 0 | -0.001 | 0 | t | 37660 | LLPHSNLD<br>HILEPSIPW<br>KSK | Mus<br>musculu<br>s              |
| 1 | 1.00 | 1 | 1 | 0 | -0.002 | 0 | -0.001 | 0 | t | 39255 | LRYSWKT<br>WG                | Mus<br>musculu<br>s              |
| 1 | 1.00 | 1 | 1 | 0 | -0.002 | 0 | -0.001 | 0 | t | 37660 | LLPHSNLD<br>HILEPSIPW<br>KSK | Mus<br>musculu<br>s              |
| 1 | 1.00 | 1 | 1 | 0 | -0.004 | 0 | -0.001 | 0 | t | 58663 | SIPNGTYR                     | Oryctola<br>gus<br>cuniculu<br>s |
| 1 | 1.00 | 1 | 1 | 0 | -0.004 | 0 | -0.001 | 0 | t | 56918 | SANND AEI<br>GNLI            | Oryctola<br>gus<br>cuniculu<br>s |
| 1 | 1.00 | 1 | 1 | 0 | -0.004 | 0 | -0.001 | 0 | t | 55639 | RRLGAALL                     | Oryctola<br>gus<br>cuniculu<br>s |
| 1 | 1.00 | 1 | 1 | 0 | -0.002 | 0 | -0.001 | 0 | t | 53012 | QYNQMH<br>MLSN               | Mus<br>musculu<br>s              |
| 1 | 1.00 | 1 | 1 | 0 | -0.004 | 0 | -0.001 | 0 | t | 42984 | MVQVVYD                      | Oryctola<br>gus<br>cuniculu<br>s |
| 1 | 1.00 | 1 | 1 | 0 | -0.002 | 0 | -0.001 | 0 | t | 58418 | SHSSESHR<br>VKSAGPP          | Mus<br>musculu<br>s              |
| 1 | 1.00 | 1 | 1 | 0 | -0.002 | 0 | -0.001 | 0 | t | 54918 | RMLNILN                      | Mus<br>musculu<br>s              |
| 1 | 1.00 | 1 | 1 | 0 | -0.002 | 0 | -0.001 | 0 | t | 46792 | PAFGANS<br>NNPDWDF<br>NP     | Mus<br>musculu<br>s              |
| 1 | 1.00 | 1 | 1 | 0 | -0.004 | 0 | -0.001 | 0 | t | 42932 | MVDVVTG<br>A                 | Oryctola<br>gus<br>cuniculu<br>s |
| 1 | 1.00 | 1 | 1 | 0 | -0.002 | 0 | -0.001 | 0 | t | 51371 | QLINTNGS<br>WHIN             | Mus<br>musculu<br>s              |

|   |      |   |   |   |        |   |        |   |   |       |                              |                                  |
|---|------|---|---|---|--------|---|--------|---|---|-------|------------------------------|----------------------------------|
| 1 | 1.00 | 1 | 1 | 0 | -0.004 | 0 | -0.001 | 0 | t | 60433 | SQERNFV<br>DSIGQS FQ         | Oryctola<br>gus<br>cuniculu<br>s |
| 1 | 1.00 | 1 | 1 | 0 | -0.004 | 0 | -0.001 | 0 | t | 57386 | SEEGKQET                     | Oryctola<br>gus<br>cuniculu<br>s |
| 1 | 1.00 | 1 | 1 | 0 | -0.004 | 0 | -0.001 | 0 | t | 49749 | PTPSDNPF<br>SKLYKETIE<br>TFD | Oryctola<br>gus<br>cuniculu<br>s |
| 1 | 1.00 | 1 | 1 | 0 | -0.002 | 0 | -0.001 | 0 | t | 57386 | SEEGKQET                     | Mus<br>musculu<br>s              |
| 1 | 1.00 | 1 | 1 | 0 | -0.002 | 0 | -0.001 | 0 | t | 55293 | RPQDV KFP                    | Mus<br>musculu<br>s              |
| 1 | 1.00 | 1 | 1 | 0 | -0.002 | 0 | -0.001 | 0 | t | 39164 | LRPGPV SQ<br>PYHHWDT<br>DK   | Mus<br>musculu<br>s              |
| 1 | 1.00 | 1 | 1 | 0 | -0.002 | 0 | -0.001 | 0 | t | 58422 | SHSVTKSL<br>RVFGGPP          | Mus<br>musculu<br>s              |
| 1 | 1.00 | 1 | 1 | 0 | -0.002 | 0 | -0.001 | 0 | t | 51371 | QLINTNGS<br>WHIN             | Mus<br>musculu<br>s              |
| 1 | 1.00 | 1 | 1 | 0 | 0.008  | 0 | -0.001 | 0 | t | 48613 | PNDGEER<br>QSYWF             | Capra<br>hircus                  |
| 1 | 1.00 | 1 | 1 | 0 | -0.002 | 0 | -0.001 | 0 | t | 47565 | PFSPDGKP<br>CTPP             | Mus<br>musculu<br>s              |
| 1 | 1.00 | 1 | 1 | 0 | -0.002 | 0 | -0.001 | 0 | t | 59927 | SNTLPRSN<br>TSSGASP          | Mus<br>musculu<br>s              |
| 1 | 1.00 | 1 | 1 | 0 | -0.004 | 0 | -0.001 | 0 | t | 47765 | PGTPAQEI<br>EMLKRN           | Oryctola<br>gus<br>cuniculu<br>s |
| 1 | 1.00 | 1 | 1 | 0 | -0.002 | 0 | -0.001 | 0 | t | 37641 | LLPAADM<br>DDFSRQL<br>QNSM   | Mus<br>musculu<br>s              |
| 1 | 1.00 | 1 | 1 | 0 | -0.002 | 0 | -0.001 | 0 | t | 39917 | LTGKPAVI<br>PDREILYQ<br>QFDE | Mus<br>musculu<br>s              |

|   |      |   |   |   |        |   |        |   |   |       |                              |                       |
|---|------|---|---|---|--------|---|--------|---|---|-------|------------------------------|-----------------------|
| 1 | 1.00 | 1 | 1 | 0 | -0.004 | 0 | -0.001 | 0 | t | 52476 | QTASGLVSMF                   | Oryctolagus cuniculus |
| 1 | 1.00 | 1 | 1 | 0 | -0.002 | 0 | -0.001 | 0 | t | 39391 | LSGQPAVIPDREVLYQQFDE         | Mus musculus          |
| 1 | 1.00 | 1 | 1 | 0 | -0.004 | 0 | -0.001 | 0 | t | 48927 | PPSSPTHDPDSDP                | Oryctolagus cuniculus |
| 1 | 1.00 | 1 | 1 | 0 | -0.002 | 0 | -0.001 | 0 | t | 46258 | NTSDSQKE                     | Mus musculus          |
| 1 | 1.00 | 1 | 1 | 0 | -0.004 | 0 | -0.001 | 0 | t | 58458 | SICGNNQLCKSICKT              | Oryctolagus cuniculus |
| 1 | 1.00 | 1 | 1 | 0 | -0.002 | 0 | -0.001 | 0 | t | 49749 | PTPSDNPF<br>SKLYKETIE<br>TFD | Mus musculus          |
| 1 | 1.00 | 1 | 1 | 0 | -0.002 | 0 | -0.001 | 0 | t | 44915 | NLVILPGQDLQYVLA              | Mus musculus          |
| 1 | 1.00 | 1 | 1 | 0 | 0.008  | 0 | -0.001 | 0 | t | 41219 | MDDEADRYFTYE                 | Capra hircus          |
| 1 | 1.00 | 1 | 1 | 0 | 0.004  | 0 | -0.001 | 0 | t | 40938 | LYRPSDSSL<br>AGP             | Mus musculus          |
| 1 | 1.00 | 1 | 1 | 0 | -0.002 | 0 | -0.001 | 0 | t | 58458 | SICGNNQLCKSICKT              | Mus musculus          |
| 1 | 1.00 | 1 | 1 | 0 | -0.002 | 0 | -0.001 | 0 | t | 29832 | KAISQIQESLTTTSTAL            | Mus musculus          |
| 1 | 1.00 | 1 | 1 | 0 | -0.002 | 0 | -0.001 | 0 | t | 19098 | GDRADGQPAGDRADGQPA           | Mus musculus          |
| 1 | 1.00 | 1 | 1 | 0 | -0.002 | 0 | -0.001 | 0 | t | 35235 | LDNIKGNVGKMEDIYK<br>KNNK     | Mus musculus          |
| 1 | 1.00 | 1 | 1 | 0 | -0.004 | 0 | -0.001 | 0 | t | 10677 | DVNAIDIE<br>EPSGQT           | Oryctolagus cuniculus |

|   |      |   |   |   |        |   |        |   |   |       |                               |                                  |
|---|------|---|---|---|--------|---|--------|---|---|-------|-------------------------------|----------------------------------|
| 1 | 1.00 | 1 | 1 | 0 | -0.002 | 0 | -0.001 | 0 | t | 19098 | GDRADGQ<br>PAGDRAD<br>GQPA    | Mus<br>musculu<br>s              |
| 1 | 1.00 | 1 | 1 | 0 | 0.004  | 0 | -0.001 | 0 | t | 32691 | KPEENK                        | Mus<br>musculu<br>s              |
| 1 | 1.00 | 1 | 1 | 0 | -0.002 | 0 | -0.001 | 0 | t | 35235 | LDNIKGNV<br>GKMEDIYIK<br>KNNK | Mus<br>musculu<br>s              |
| 1 | 1.00 | 1 | 1 | 0 | -0.002 | 0 | -0.001 | 0 | t | 17128 | FNASDSVG<br>QQIKVIP           | Mus<br>musculu<br>s              |
| 1 | 1.00 | 1 | 1 | 0 | -0.002 | 0 | -0.001 | 0 | t | 32037 | KLNDLCFS<br>NVYADSFV<br>V     | Mus<br>musculu<br>s              |
| 1 | 1.00 | 1 | 1 | 0 | -0.004 | 0 | -0.001 | 0 | t | 13421 | EMVDVVT<br>G                  | Oryctola<br>gus<br>cuniculu<br>s |
| 1 | 1.00 | 1 | 1 | 0 | -0.004 | 0 | -0.001 | 0 | t | 36042 | LGAALLQS                      | Oryctola<br>gus<br>cuniculu<br>s |
| 1 | 1.00 | 1 | 1 | 0 | -0.004 | 0 | -0.001 | 0 | t | 30349 | KEEKEEKE<br>EKEEKEKE<br>KE    | Oryctola<br>gus<br>cuniculu<br>s |
| 1 | 1.00 | 1 | 1 | 0 | -0.002 | 0 | -0.001 | 0 | t | 33859 | KTSESRQP<br>RGRRQPIP<br>KARR  | Mus<br>musculu<br>s              |
| 1 | 1.00 | 1 | 1 | 0 | -0.002 | 0 | -0.001 | 0 | t | 31894 | KLGVWKS<br>PTDMQS<br>WV       | Mus<br>musculu<br>s              |
| 1 | 1.00 | 1 | 1 | 0 | -0.002 | 0 | -0.001 | 0 | t | 13913 | EQQSDLE<br>QERLAKEK<br>LQ     | Mus<br>musculu<br>s              |
| 1 | 1.00 | 1 | 1 | 0 | -0.004 | 0 | -0.001 | 0 | t | 13913 | EQQSDLE<br>QERLAKEK<br>LQ     | Oryctola<br>gus<br>cuniculu<br>s |
| 1 | 1.00 | 1 | 1 | 0 | 0.025  | 0 | -0.001 | 0 | t | 19269 | GEGAPPA<br>KRARTDQ<br>ME      | Pan<br>troglody<br>tes           |
| 1 | 1.00 | 1 | 1 | 0 | 0.008  | 0 | -0.001 | 0 | t | 15281 | FASRGTS<br>MDDEA              | Capra<br>hircus                  |

|   |      |   |   |   |        |   |        |   |   |       |                              |                                  |
|---|------|---|---|---|--------|---|--------|---|---|-------|------------------------------|----------------------------------|
| 1 | 1.00 | 1 | 1 | 0 | -0.004 | 0 | -0.001 | 0 | t | 10785 | DVVTGAT<br>V                 | Oryctola<br>gus<br>cuniculu<br>s |
| 1 | 1.00 | 1 | 1 | 0 | -0.002 | 0 | -0.001 | 0 | t | 14641 | EVDGDVKL<br>SSNLVIL          | Mus<br>musculu<br>s              |
| 1 | 1.00 | 1 | 1 | 0 | -0.002 | 0 | -0.001 | 0 | t | 10639 | DVKFPGG<br>GQIVGGV<br>YLLPRR | Mus<br>musculu<br>s              |
| 1 | 1.00 | 1 | 1 | 0 | -0.002 | 0 | -0.001 | 0 | t | 24012 | HHPSTNQ<br>EQTSLYVQ<br>AS    | Mus<br>musculu<br>s              |
| 1 | 1.00 | 1 | 1 | 0 | -0.002 | 0 | -0.001 | 0 | t | 13680 | EPKKDKKK<br>KTDEAQPL         | Mus<br>musculu<br>s              |
| 1 | 1.00 | 1 | 1 | 0 | -0.004 | 0 | -0.001 | 0 | t | 28643 | ISPCAFGG<br>VSVITPGT<br>N    | Oryctola<br>gus<br>cuniculu<br>s |
| 1 | 1.00 | 1 | 1 | 0 | -0.002 | 0 | -0.001 | 0 | t | 33859 | KTSERSQP<br>RGRRQPIP<br>KARR | Mus<br>musculu<br>s              |
| 1 | 1.00 | 1 | 1 | 0 | -0.002 | 0 | -0.001 | 0 | t | 14380 | ETFTNKLK<br>EKHTD            | Mus<br>musculu<br>s              |
| 1 | 1.00 | 1 | 1 | 0 | -0.002 | 0 | -0.001 | 0 | t | 36579 | LIKNQCVN<br>FNFNGLTG<br>T    | Mus<br>musculu<br>s              |
| 1 | 1.00 | 1 | 1 | 0 | -0.001 | 0 | -0.001 | 0 | t | 25653 | IDQKVKEIS<br>NQEPL           | Myodes<br>glareolu<br>s          |
| 1 | 1.00 | 1 | 1 | 0 | -0.004 | 0 | -0.001 | 0 | t | 14751 | EVKPGTPA<br>QEIEML           | Oryctola<br>gus<br>cuniculu<br>s |
| 1 | 1.00 | 1 | 1 | 0 | -0.004 | 0 | -0.001 | 0 | t | 29899 | KANGNGS<br>GDNGDTT<br>W      | Oryctola<br>gus<br>cuniculu<br>s |
| 1 | 1.00 | 1 | 1 | 0 | -0.004 | 0 | -0.001 | 0 | t | 27959 | IPNGTYRA                     | Oryctola<br>gus<br>cuniculu<br>s |
| 1 | 1.00 | 1 | 1 | 0 | -0.004 | 0 | -0.001 | 0 | t | 16376 | FKHLREFV<br>FKNKDGFL<br>Y    | Oryctola<br>gus<br>cuniculu<br>s |
| 1 | 1.00 | 1 | 1 | 0 | -0.002 | 0 | -0.001 | 0 | t | 17572 | FRDLTWCI<br>NPPERIK          | Mus<br>musculu<br>s              |

|   |      |   |   |   |        |   |        |   |   |       |                              |                                  |
|---|------|---|---|---|--------|---|--------|---|---|-------|------------------------------|----------------------------------|
| 1 | 1.00 | 1 | 1 | 0 | -0.002 | 0 | -0.001 | 0 | t | 19639 | GFTWTGV<br>TQNG              | Mus<br>musculu<br>s              |
| 1 | 1.00 | 1 | 1 | 0 | -0.002 | 0 | -0.001 | 0 | t | 23051 | GVLTPSSK<br>RFQPFQQ<br>FG    | Mus<br>musculu<br>s              |
| 1 | 1.00 | 1 | 1 | 0 | -0.002 | 0 | -0.001 | 0 | t | 10639 | DVKFPGG<br>GQIVGGV<br>YLLPRR | Mus<br>musculu<br>s              |
| 1 | 1.00 | 1 | 1 | 0 | -0.002 | 0 | -0.001 | 0 | t | 10639 | DVKFPGG<br>GQIVGGV<br>YLLPRR | Mus<br>musculu<br>s              |
| 1 | 1.00 | 1 | 1 | 0 | -0.004 | 0 | -0.001 | 0 | t | 17580 | FRELADAL                     | Oryctola<br>gus<br>cuniculu<br>s |
| 1 | 1.00 | 1 | 1 | 0 | -0.002 | 0 | -0.001 | 0 | t | 14487 | ETMTPSGL<br>VIPENAK          | Mus<br>musculu<br>s              |
| 1 | 1.00 | 1 | 1 | 0 | -0.002 | 0 | -0.001 | 0 | t | 24730 | HSDHAESS<br>WVNRGES<br>SRKAY | Mus<br>musculu<br>s              |
| 1 | 1.00 | 1 | 1 | 0 | -0.002 | 0 | -0.001 | 0 | t | 12944 | ELAKLRAG<br>KASDSQTP<br>DT   | Mus<br>musculu<br>s              |
| 1 | 1.00 | 1 | 1 | 0 | -0.002 | 0 | -0.001 | 0 | t | 19639 | GFTWTGV<br>TQNG              | Mus<br>musculu<br>s              |
| 1 | 1.00 | 1 | 1 | 0 | -0.002 | 0 | -0.001 | 0 | t | 22828 | GTSGETSAQ<br>SGTSGTS         | Mus<br>musculu<br>s              |
| 1 | 1.00 | 1 | 1 | 0 | -0.004 | 0 | -0.001 | 0 | t | 19900 | GGKMOVV<br>VV                | Oryctola<br>gus<br>cuniculu<br>s |
| 1 | 1.00 | 1 | 1 | 0 | -0.004 | 0 | -0.001 | 0 | t | 35006 | LAVLLGAC                     | Oryctola<br>gus<br>cuniculu<br>s |
| 1 | 1.00 | 1 | 1 | 0 | 0.01   | 0 | -0.001 | 0 | t | 19491 | GFADLMG<br>YIP               | Pan<br>troglody<br>tes           |
| 1 | 1.00 | 1 | 1 | 0 | -0.004 | 0 | -0.001 | 0 | t | 22898 | GTYRATYQ                     | Oryctola<br>gus<br>cuniculu<br>s |

|   |      |   |   |   |        |   |        |   |   |       |                              |                                  |
|---|------|---|---|---|--------|---|--------|---|---|-------|------------------------------|----------------------------------|
| 1 | 1.00 | 1 | 1 | 0 | -0.002 | 0 | -0.001 | 0 | t | 20012 | GGSGGSV<br>ASGGSVAS          | Mus<br>musculu<br>s              |
| 1 | 1.00 | 1 | 1 | 0 | -0.002 | 0 | -0.001 | 0 | t | 19096 | GDRADGQ<br>PA                | Mus<br>musculu<br>s              |
| 1 | 1.00 | 1 | 1 | 0 | -0.002 | 0 | -0.001 | 0 | t | 11441 | EDSITIPYQ<br>GSGKGV          | Mus<br>musculu<br>s              |
| 1 | 1.00 | 1 | 1 | 0 | -0.002 | 0 | -0.001 | 0 | t | 20012 | GGSGGSV<br>ASGGSVAS          | Mus<br>musculu<br>s              |
| 1 | 1.00 | 1 | 1 | 0 | -0.004 | 0 | -0.001 | 0 | t | 19585 | GFMKQYG<br>ECLGDINA<br>RD    | Oryctola<br>gus<br>cuniculu<br>s |
| 1 | 1.00 | 1 | 1 | 0 | -0.002 | 0 | -0.001 | 0 | t | 17284 | FPFNASDS<br>VGQQIKVI<br>P    | Mus<br>musculu<br>s              |
| 1 | 1.00 | 1 | 1 | 0 | -0.004 | 0 | -0.001 | 0 | t | 13460 | ENDVLNQ<br>ETEEEMEK          | Oryctola<br>gus<br>cuniculu<br>s |
| 1 | 1.00 | 1 | 1 | 0 | -0.004 | 0 | -0.001 | 0 | t | 34210 | KVTAFAQH<br>QNSKKTTK         | Oryctola<br>gus<br>cuniculu<br>s |
| 1 | 1.00 | 1 | 1 | 0 | -0.004 | 0 | -0.001 | 0 | t | 19520 | GFFGAIA<br>G FIE             | Oryctola<br>gus<br>cuniculu<br>s |
| 1 | 1.00 | 1 | 1 | 0 | -0.002 | 0 | -0.001 | 0 | t | 23520 | HADQLTP<br>AWRIYSTG<br>NN    | Mus<br>musculu<br>s              |
| 1 | 1.00 | 1 | 1 | 0 | -0.001 | 0 | -0.001 | 0 | t | 11354 | EDINGIRR<br>PKHLYV           | Myodes<br>glareolu<br>s          |
| 1 | 1.00 | 1 | 1 | 0 | -0.002 | 0 | -0.001 | 0 | t | 36841 | LKEQLAKQ<br>AEELAKLR<br>AGKA | Mus<br>musculu<br>s              |
| 1 | 1.00 | 1 | 1 | 0 | -0.004 | 0 | -0.001 | 0 | t | 17843 | FSSIPNGT                     | Oryctola<br>gus<br>cuniculu<br>s |
| 1 | 1.00 | 1 | 1 | 0 | -0.002 | 0 | -0.001 | 0 | t | 11872 | EESDDDM<br>GFGFLFD           | Mus<br>musculu<br>s              |



|   |      |   |   |   |        |   |        |   |   |       |                           |                                  |
|---|------|---|---|---|--------|---|--------|---|---|-------|---------------------------|----------------------------------|
| 1 | 1.00 | 1 | 1 | 0 | -0.004 | 0 | -0.001 | 0 | t | 32662 | KPATGEAP<br>SQ            | Oryctola<br>gus<br>cuniculu<br>s |
| 1 | 1.00 | 1 | 1 | 0 | -0.002 | 0 | -0.001 | 0 | t | 19520 | GFFGAIAG<br>FIE           | Mus<br>musculu<br>s              |
| 1 | 1.00 | 1 | 1 | 0 | -0.004 | 0 | -0.001 | 0 | t | 36579 | LIKNQCVN<br>FNFNGLTG<br>T | Oryctola<br>gus<br>cuniculu<br>s |
| 1 | 1.00 | 1 | 1 | 0 | -0.004 | 0 | -0.001 | 0 | t | 22031 | GRFKSQD<br>A              | Oryctola<br>gus<br>cuniculu<br>s |
| 1 | 1.00 | 1 | 1 | 0 | -0.002 | 0 | -0.001 | 0 | t | 11872 | EESDDDM<br>GFGFLFD        | Mus<br>musculu<br>s              |
| 1 | 1.00 | 1 | 1 | 0 | -0.002 | 0 | -0.001 | 0 | t | 23068 | GVNLEDP<br>ASRDL          | Mus<br>musculu<br>s              |
| 1 | 1.00 | 1 | 1 | 0 | -0.002 | 0 | -0.001 | 0 | t | 11821 | EENVEHD<br>AEENVEH<br>DA  | Mus<br>musculu<br>s              |
| 1 | 1.00 | 1 | 1 | 0 | -0.002 | 0 | -0.001 | 0 | t | 32662 | KPATGEAP<br>SQ            | Mus<br>musculu<br>s              |
| 1 | 1.00 | 1 | 1 | 0 | -0.002 | 0 | -0.001 | 0 | t | 14435 | ETIYNTTLK<br>Y            | Mus<br>musculu<br>s              |
| 1 | 1.00 | 1 | 1 | 0 | -0.002 | 0 | -0.001 | 0 | t | 11821 | EENVEHD<br>AEENVEH<br>DA  | Mus<br>musculu<br>s              |
| 1 | 1.00 | 1 | 1 | 0 | -0.002 | 0 | -0.001 | 0 | t | 20838 | GLFGAIAG<br>FIE           | Mus<br>musculu<br>s              |
| 1 | 1.00 | 1 | 1 | 0 | -0.002 | 0 | -0.001 | 0 | t | 13126 | ELKLAALC<br>HGEDSIT       | Mus<br>musculu<br>s              |
| 1 | 1.00 | 1 | 1 | 0 | -0.002 | 0 | -0.001 | 0 | t | 32844 | KPQEEKEK<br>ITKEILNGK     | Mus<br>musculu<br>s              |
| 1 | 1.00 | 1 | 1 | 0 | -0.002 | 0 | -0.001 | 0 | t | 31679 | KKQPTVTL<br>LPAADMD<br>DF | Mus<br>musculu<br>s              |
| 1 | 1.00 | 1 | 1 | 0 | -0.002 | 0 | -0.001 | 0 | t | 20838 | GLFGAIAG<br>FIE           | Mus<br>musculu<br>s              |

|   |      |   |   |   |        |   |        |   |   |       |                          |                                  |
|---|------|---|---|---|--------|---|--------|---|---|-------|--------------------------|----------------------------------|
| 1 | 1.00 | 1 | 1 | 0 | -0.002 | 0 | -0.001 | 0 | t | 11813 | EENVEENV                 | Mus<br>musculu<br>s              |
| 1 | 1.00 | 1 | 1 | 0 | -0.002 | 0 | -0.001 | 0 | t | 20838 | GLFGAIAG<br>FIE          | Mus<br>musculu<br>s              |
| 1 | 1.00 | 1 | 1 | 0 | -0.002 | 0 | -0.001 | 0 | t | 20838 | GLFGAIAG<br>FIE          | Mus<br>musculu<br>s              |
| 1 | 1.00 | 1 | 1 | 0 | -0.002 | 0 | -0.001 | 0 | t | 20838 | GLFGAIAG<br>FIE          | Mus<br>musculu<br>s              |
| 1 | 1.00 | 1 | 1 | 0 | -0.002 | 0 | -0.001 | 0 | t | 11813 | EENVEENV                 | Mus<br>musculu<br>s              |
| 1 | 1.00 | 1 | 1 | 0 | -0.004 | 0 | -0.001 | 0 | t | 34953 | LASAGGQ<br>DN            | Oryctola<br>gus<br>cuniculu<br>s |
| 1 | 1.00 | 1 | 1 | 0 | -0.004 | 0 | -0.001 | 0 | t | 16458 | FKSQDADY                 | Oryctola<br>gus<br>cuniculu<br>s |
| 1 | 1.00 | 1 | 1 | 0 | -0.002 | 0 | -0.001 | 0 | t | 11821 | EENVEHD<br>AEENVEH<br>DA | Mus<br>musculu<br>s              |
| 1 | 1.00 | 1 | 1 | 0 | -0.002 | 0 | -0.001 | 0 | t | 32844 | KPQEEKEK<br>ITKEILNGK    | Mus<br>musculu<br>s              |
| 1 | 1.00 | 1 | 1 | 0 | -0.002 | 0 | -0.001 | 0 | t | 32844 | KPQEEKEK<br>ITKEILNGK    | Mus<br>musculu<br>s              |
| 1 | 1.00 | 1 | 1 | 0 | -0.002 | 0 | -0.001 | 0 | t | 11821 | EENVEHD<br>AEENVEH<br>DA | Mus<br>musculu<br>s              |
| 1 | 1.00 | 1 | 1 | 0 | -0.004 | 0 | -0.001 | 0 | t | 12625 | EKA FREL                 | Oryctola<br>gus<br>cuniculu<br>s |
| 1 | 1.00 | 1 | 1 | 0 | -0.004 | 0 | -0.001 | 0 | t | 33478 | KSQDADY<br>H             | Oryctola<br>gus<br>cuniculu<br>s |

|   |      |   |   |   |        |   |        |   |   |       |                           |                                  |
|---|------|---|---|---|--------|---|--------|---|---|-------|---------------------------|----------------------------------|
| 1 | 1.00 | 1 | 1 | 0 | -0.004 | 0 | -0.001 | 0 | t | 32037 | KLNDLCFS<br>NVYADSFV<br>V | Oryctola<br>gus<br>cuniculu<br>s |
| 1 | 1.00 | 1 | 1 | 0 | -0.002 | 0 | -0.001 | 0 | t | 27732 | INRIADQA<br>QY            | Mus<br>musculu<br>s              |
| 1 | 1.00 | 1 | 1 | 0 | -0.004 | 0 | -0.001 | 0 | t | 27357 | ILSRDKVE<br>AEVQIDRL      | Oryctola<br>gus<br>cuniculu<br>s |
| 1 | 1.00 | 1 | 1 | 0 | 0.011  | 0 | -0.001 | 0 | t | 19269 | GEGAPPA<br>KRARTDQ<br>ME  | Oryctola<br>gus<br>cuniculu<br>s |
| 1 | 1.00 | 1 | 1 | 0 | -0.002 | 0 | -0.001 | 0 | t | 32844 | KPQEEKEK<br>ITKEILNGK     | Mus<br>musculu<br>s              |
| 1 | 1.00 | 1 | 1 | 0 | -0.002 | 0 | -0.001 | 0 | t | 32971 | KQELDEIST<br>NIRQAG       | Mus<br>musculu<br>s              |
| 1 | 1.00 | 1 | 1 | 0 | -0.002 | 0 | -0.001 | 0 | t | 35050 | LCENPEW<br>APLKDNRI       | Mus<br>musculu<br>s              |
| 1 | 1.00 | 1 | 1 | 0 | -0.004 | 0 | -0.001 | 0 | t | 23051 | GVLTPSSK<br>RFQPFQQ<br>FG | Oryctola<br>gus<br>cuniculu<br>s |
| 1 | 1.00 | 1 | 1 | 0 | -0.004 | 0 | -0.001 | 0 | t | 22028 | GRFDEAM<br>QDQIRQLE       | Oryctola<br>gus<br>cuniculu<br>s |
| 1 | 1.00 | 1 | 1 | 0 | -0.002 | 0 | -0.001 | 0 | t | 10778 | DVVNQNA<br>QALNTLVK<br>QL | Mus<br>musculu<br>s              |
| 1 | 1.00 | 1 | 1 | 0 | -0.004 | 0 | -0.001 | 0 | t | 24978 | HTSSMRG<br>VYYPDEIFR<br>S | Oryctola<br>gus<br>cuniculu<br>s |
| 1 | 1.00 | 1 | 1 | 0 | -0.002 | 0 | -0.001 | 0 | t | 33669 | KTFPPTep<br>KKDKKKK       | Mus<br>musculu<br>s              |
| 1 | 1.00 | 1 | 1 | 0 | -0.004 | 0 | -0.001 | 0 | t | 23048 | GVLSVDLS<br>LTVELKI       | Oryctola<br>gus<br>cuniculu<br>s |

|   |      |   |   |   |        |   |        |   |   |       |                              |                                  |
|---|------|---|---|---|--------|---|--------|---|---|-------|------------------------------|----------------------------------|
| 1 | 1.00 | 1 | 1 | 0 | -0.004 | 0 | -0.001 | 0 | t | 35199 | LDKNHVA<br>DIDKLID           | Oryctola<br>gus<br>cuniculu<br>s |
| 1 | 1.00 | 1 | 1 | 0 | -0.004 | 0 | -0.001 | 0 | t | 10892 | DYHRVMY                      | Oryctola<br>gus<br>cuniculu<br>s |
| 1 | 1.00 | 1 | 1 | 0 | -0.002 | 0 | -0.001 | 0 | t | 22028 | GRFDEAM<br>QDQIRQLE          | Mus<br>musculu<br>s              |
| 1 | 1.00 | 1 | 1 | 0 | -0.002 | 0 | -0.001 | 0 | t | 11489 | EEADDDM<br>GFGFLD            | Mus<br>musculu<br>s              |
| 1 | 1.00 | 1 | 1 | 0 | -0.002 | 0 | -0.001 | 0 | t | 16183 | FIEDLLFNK<br>VTLADAGF        | Mus<br>musculu<br>s              |
| 1 | 1.00 | 1 | 1 | 0 | 0.01   | 0 | -0.001 | 0 | t | 12134 | EGCGWAG<br>WLL               | Pan<br>troglody<br>tes           |
| 1 | 1.00 | 1 | 1 | 0 | 0.01   | 0 | -0.001 | 0 | t | 29936 | KARRPEGR<br>TWAQ             | Pan<br>troglody<br>tes           |
| 1 | 1.00 | 1 | 1 | 0 | -0.002 | 0 | -0.001 | 0 | t | 23134 | GVSCTVTR<br>EDGTNRR          | Mus<br>musculu<br>s              |
| 1 | 1.00 | 1 | 1 | 0 | -0.004 | 0 | -0.001 | 0 | t | 36048 | LGACSFSS                     | Oryctola<br>gus<br>cuniculu<br>s |
| 1 | 1.00 | 1 | 1 | 0 | -0.002 | 0 | -0.001 | 0 | t | 10639 | DVKFPGG<br>GQIVGGV<br>YLLPRR | Mus<br>musculu<br>s              |
| 1 | 1.00 | 1 | 1 | 0 | -0.002 | 0 | -0.001 | 0 | t | 31794 | KLDVVKLL<br>YNEQFAV<br>QGLLR | Mus<br>musculu<br>s              |
| 1 | 1.00 | 1 | 1 | 0 | 0.01   | 0 | -0.001 | 0 | t | 29936 | KARRPEGR<br>TWAQ             | Pan<br>troglody<br>tes           |
| 1 | 1.00 | 1 | 1 | 0 | -0.002 | 0 | -0.001 | 0 | t | 13267 | ELRYSWKT<br>WGKAKML<br>STELH | Mus<br>musculu<br>s              |
| 1 | 1.00 | 1 | 1 | 0 | -0.002 | 0 | -0.001 | 0 | t | 18694 | GANAPNE<br>KSVKEYLD<br>KVRAT | Mus<br>musculu<br>s              |
| 1 | 1.00 | 1 | 1 | 0 | -0.002 | 0 | -0.001 | 0 | t | 18694 | GANAPNE<br>KSVKEYLD<br>KVRAT | Mus<br>musculu<br>s              |

|   |      |   |   |   |        |   |        |   |   |       |                            |                                  |
|---|------|---|---|---|--------|---|--------|---|---|-------|----------------------------|----------------------------------|
| 1 | 1.00 | 1 | 1 | 0 | -0.004 | 0 | -0.001 | 0 | t | 19269 | GEGAPPA<br>KRARTDQ<br>ME   | Oryctola<br>gus<br>cuniculu<br>s |
| 1 | 1.00 | 1 | 1 | 0 | -0.002 | 0 | -0.001 | 0 | t | 35050 | LCENPEW<br>APLKDNRI        | Mus<br>musculu<br>s              |
| 1 | 1.00 | 1 | 1 | 0 | -0.002 | 0 | -0.001 | 0 | t | 20179 | GHRMAW<br>DMM              | Mus<br>musculu<br>s              |
| 1 | 1.00 | 1 | 1 | 0 | -0.004 | 0 | -0.001 | 0 | t | 24712 | HRVMYAS<br>S               | Oryctola<br>gus<br>cuniculu<br>s |
| 1 | 1.00 | 1 | 1 | 0 | -0.002 | 0 | -0.001 | 0 | t | 19637 | GFTTNEPR<br>YNVFAE         | Mus<br>musculu<br>s              |
| 1 | 1.00 | 1 | 1 | 0 | -0.004 | 0 | -0.001 | 0 | t | 29802 | KAFRELAD                   | Oryctola<br>gus<br>cuniculu<br>s |
| 1 | 1.00 | 1 | 1 | 0 | -0.002 | 0 | -0.001 | 0 | t | 18025 | FTNKLKEK<br>HTDLG          | Mus<br>musculu<br>s              |
| 1 | 1.00 | 1 | 1 | 0 | 0.008  | 0 | -0.001 | 0 | t | 22835 | GTSMDDE<br>ADRYF           | Capra<br>hircus                  |
| 1 | 1.00 | 1 | 1 | 0 | -0.004 | 0 | -0.001 | 0 | t | 30661 | KEVPALTA<br>VETGAT         | Oryctola<br>gus<br>cuniculu<br>s |
| 1 | 1.00 | 1 | 1 | 0 | -0.004 | 0 | -0.001 | 0 | t | 32070 | KLPDDFM<br>GCVLAWN<br>TRN  | Oryctola<br>gus<br>cuniculu<br>s |
| 1 | 1.00 | 1 | 1 | 0 | -0.002 | 0 | -0.001 | 0 | t | 16123 | FHLPYNHN<br>WFAL           | Mus<br>musculu<br>s              |
| 1 | 1.00 | 1 | 1 | 0 | -0.001 | 0 | -0.001 | 0 | t | 28291 | IRFKDDTSF<br>EDING         | Myodes<br>glareolu<br>s          |
| 1 | 1.00 | 1 | 1 | 0 | -0.002 | 0 | -0.001 | 0 | t | 25073 | HVNGRTT<br>ALVGLLTP<br>AKN | Rattus<br>norvegic<br>us         |
| 1 | 1.00 | 1 | 1 | 0 | -0.004 | 0 | -0.001 | 0 | t | 25031 | HVDTSYEC<br>DIPIGAGIC      | Oryctola<br>gus<br>cuniculu<br>s |

|   |      |   |   |   |        |   |        |   |   |       |                            |                                  |
|---|------|---|---|---|--------|---|--------|---|---|-------|----------------------------|----------------------------------|
| 1 | 1.00 | 1 | 1 | 0 | -0.002 | 0 | -0.001 | 0 | t | 19928 | GGMPGG<br>MPGGMP<br>GGMNFP | Mus<br>musculu<br>s              |
| 1 | 1.00 | 1 | 1 | 0 | -0.004 | 0 | -0.001 | 0 | t | 17929 | FTDSVRDP<br>KTSEILDIS      | Oryctola<br>gus<br>cuniculu<br>s |
| 1 | 1.00 | 1 | 1 | 0 | -0.004 | 0 | -0.001 | 0 | t | 33874 | KTSVDCN<br>MYICGDST<br>EC  | Oryctola<br>gus<br>cuniculu<br>s |
| 1 | 1.00 | 1 | 1 | 0 | -0.002 | 0 | -0.001 | 0 | t | 11819 | EENVEHD<br>A               | Mus<br>musculu<br>s              |
| 1 | 1.00 | 1 | 1 | 0 | -0.002 | 0 | -0.001 | 0 | t | 11819 | EENVEHD<br>A               | Mus<br>musculu<br>s              |
| 1 | 1.00 | 1 | 1 | 0 | -0.004 | 0 | -0.001 | 0 | t | 32415 | KMVQVVY<br>D               | Oryctola<br>gus<br>cuniculu<br>s |
| 1 | 1.00 | 1 | 1 | 0 | -0.002 | 0 | -0.001 | 0 | t | 11819 | EENVEHD<br>A               | Mus<br>musculu<br>s              |
| 1 | 1.00 | 1 | 1 | 0 | 0.008  | 0 | -0.001 | 0 | t | 11013 | EADRYFTY<br>EEPN           | Capra<br>hircus                  |
| 1 | 1.00 | 1 | 1 | 0 | -0.002 | 0 | -0.001 | 0 | t | 26610 | IINNSTNV<br>VIRACNFE<br>L  | Mus<br>musculu<br>s              |
| 1 | 1.00 | 1 | 1 | 0 | -0.004 | 0 | -0.001 | 0 | t | 21277 | GMGVSCT<br>VTREDGT<br>NRR  | Oryctola<br>gus<br>cuniculu<br>s |
| 1 | 1.00 | 1 | 1 | 0 | -0.002 | 0 | -0.001 | 0 | t | 26329 | IGTRNPNN<br>NAATVLQL       | Mus<br>musculu<br>s              |
| 1 | 1.00 | 1 | 1 | 0 | -0.004 | 0 | -0.001 | 0 | t | 30661 | KEVPALTA<br>VETGAT         | Oryctola<br>gus<br>cuniculu<br>s |
| 1 | 1.00 | 1 | 1 | 0 | -0.004 | 0 | -0.001 | 0 | t | 30661 | KEVPALTA<br>VETGAT         | Oryctola<br>gus<br>cuniculu<br>s |

|   |      |   |   |   |        |   |        |   |   |       |                              |                                  |
|---|------|---|---|---|--------|---|--------|---|---|-------|------------------------------|----------------------------------|
| 1 | 1.00 | 1 | 1 | 0 | -0.004 | 0 | -0.001 | 0 | t | 30409 | KEGRFKSQ                     | Oryctola<br>gus<br>cuniculu<br>s |
| 1 | 1.00 | 1 | 1 | 0 | -0.004 | 0 | -0.001 | 0 | t | 30661 | KEVPALTA<br>VETGAT           | Oryctola<br>gus<br>cuniculu<br>s |
| 1 | 1.00 | 1 | 1 | 0 | -0.004 | 0 | -0.001 | 0 | t | 18511 | GAALLQSA                     | Oryctola<br>gus<br>cuniculu<br>s |
| 1 | 1.00 | 1 | 1 | 0 | -0.002 | 0 | -0.001 | 0 | t | 13481 | ENHSPVNI<br>AHKL             | Mus<br>musculu<br>s              |
| 1 | 1.00 | 1 | 1 | 0 | -0.002 | 0 | -0.001 | 0 | t | 21469 | GNLLSCL                      | Mus<br>musculu<br>s              |
| 1 | 1.00 | 1 | 1 | 0 | -0.015 | 0 | -0.001 | 0 | t | 30151 | KDGEGA                       | Marmot<br>a monax                |
| 1 | 1.00 | 1 | 1 | 0 | -0.004 | 0 | -0.001 | 0 | t | 12258 | EGRFKSQD                     | Oryctola<br>gus<br>cuniculu<br>s |
| 1 | 1.00 | 1 | 1 | 0 | -0.002 | 0 | -0.001 | 0 | t | 23511 | GYYPSPDP<br>NTFYAPPY<br>S    | Mus<br>musculu<br>s              |
| 1 | 1.00 | 1 | 1 | 0 | -0.002 | 0 | -0.001 | 0 | t | 31005 | KGLRRDL<br>ASREAKKQ          | Mus<br>musculu<br>s              |
| 1 | 1.00 | 1 | 1 | 0 | -0.004 | 0 | -0.001 | 0 | t | 31124 | KHKKVSTN<br>LCTHSFRK<br>KQVR | Oryctola<br>gus<br>cuniculu<br>s |
| 1 | 1.00 | 1 | 1 | 0 | 0.01   | 0 | -0.001 | 0 | t | 24696 | HRMAWN<br>MMMWN<br>SPT       | Pan<br>troglody<br>tes           |
| 1 | 1.00 | 1 | 1 | 0 | -0.004 | 0 | -0.001 | 0 | t | 20638 | GKMVQVV<br>Y                 | Oryctola<br>gus<br>cuniculu<br>s |
| 1 | 1.00 | 1 | 1 | 0 | -0.002 | 0 | -0.001 | 0 | t | 11820 | EENVEHD<br>AEENVEEN<br>V     | Mus<br>musculu<br>s              |
| 1 | 1.00 | 1 | 1 | 0 | -0.002 | 0 | -0.001 | 0 | t | 20095 | GGWYSFD<br>SPYLMSITE<br>MRLR | Mus<br>musculu<br>s              |

|   |      |   |   |   |        |   |        |   |   |       |                           |                                  |
|---|------|---|---|---|--------|---|--------|---|---|-------|---------------------------|----------------------------------|
| 1 | 1.00 | 1 | 1 | 0 | 0.008  | 0 | -0.001 | 0 | t | 19251 | GEERQSY<br>WFENR          | Capra<br>hircus                  |
| 1 | 1.00 | 1 | 1 | 0 | -0.004 | 0 | -0.001 | 0 | t | 25219 | IAAEQDRN<br>TREVFAQV<br>K | Oryctola<br>gus<br>cuniculu<br>s |
| 1 | 1.00 | 1 | 1 | 0 | -0.002 | 0 | -0.001 | 0 | t | 23422 | GYNVSSIV<br>TMTSQG<br>M   | Mus<br>musculu<br>s              |
| 1 | 1.00 | 1 | 1 | 0 | -0.004 | 0 | -0.001 | 0 | t | 10946 | DYQHKEG<br>R              | Oryctola<br>gus<br>cuniculu<br>s |
| 1 | 1.00 | 1 | 1 | 0 | -0.002 | 0 | -0.001 | 0 | t | 18139 | FVDSIGQS<br>FQNTWEG       | Mus<br>musculu<br>s              |
| 1 | 1.00 | 1 | 1 | 0 | -0.002 | 0 | -0.001 | 0 | t | 11821 | EENVEHD<br>AEENVEH<br>DA  | Mus<br>musculu<br>s              |
| 1 | 1.00 | 1 | 1 | 0 | -0.002 | 0 | -0.001 | 0 | t | 36890 | LKIKIASGF<br>GPLITH       | Mus<br>musculu<br>s              |
| 1 | 1.00 | 1 | 1 | 0 | -0.004 | 0 | -0.001 | 0 | t | 21881 | GQHGHEM<br>HG             | Oryctola<br>gus<br>cuniculu<br>s |
| 1 | 1.00 | 1 | 1 | 0 | 0.009  | 0 | -0.001 | 0 | t | 21571 | GPARRGA<br>PY             | Oryctola<br>gus<br>cuniculu<br>s |
| 1 | 1.00 | 1 | 1 | 0 | -0.002 | 0 | -0.001 | 0 | t | 21881 | GQHGHEM<br>HG             | Mus<br>musculu<br>s              |
| 1 | 1.00 | 1 | 1 | 0 | -0.002 | 0 | -0.001 | 0 | t | 25863 | IEKTNEKF<br>HQIEK         | Mus<br>musculu<br>s              |
| 1 | 1.00 | 1 | 1 | 0 | -0.002 | 0 | -0.001 | 0 | t | 18929 | GCVVSWK<br>NK             | Mus<br>musculu<br>s              |
| 1 | 1.00 | 1 | 1 | 0 | -0.002 | 0 | -0.001 | 0 | t | 22755 | GTLVKTIT<br>DDQIEV        | Mus<br>musculu<br>s              |
| 1 | 1.00 | 1 | 1 | 0 | -0.002 | 0 | -0.001 | 0 | t | 30386 | KEFSEVEG<br>RIQDLEKY<br>V | Mus<br>musculu<br>s              |



|   |      |   |   |   |        |   |        |   |   |       |                              |                                  |
|---|------|---|---|---|--------|---|--------|---|---|-------|------------------------------|----------------------------------|
| 1 | 1.00 | 1 | 1 | 0 | -0.002 | 0 | -0.001 | 0 | t | 19636 | GFTTNEER<br>YNVFAE           | Mus<br>musculu<br>s              |
| 1 | 1.00 | 1 | 1 | 0 | -0.004 | 0 | -0.001 | 0 | t | 21812 | GPTRTIGG<br>SQ               | Oryctola<br>gus<br>cuniculu<br>s |
| 1 | 1.00 | 1 | 1 | 0 | -0.002 | 0 | -0.001 | 0 | t | 10639 | DVKFPGG<br>GQIVGGV<br>YLLPRR | Mus<br>musculu<br>s              |
| 1 | 1.00 | 1 | 1 | 0 | 0.025  | 0 | -0.001 | 0 | t | 29852 | KALENKKK<br>QLSAGGK<br>NLS   | Pan<br>troglody<br>tes           |
| 1 | 1.00 | 1 | 1 | 0 | -0.004 | 0 | -0.001 | 0 | t | 36815 | LKCSVKSFE<br>IDKGIYQT        | Oryctola<br>gus<br>cuniculu<br>s |
| 1 | 1.00 | 1 | 1 | 0 | -0.002 | 0 | -0.001 | 0 | t | 22755 | GTLVKTIT<br>DDQIEV           | Mus<br>musculu<br>s              |
| 1 | 1.00 | 1 | 1 | 0 | -0.002 | 0 | -0.001 | 0 | t | 10639 | DVKFPGG<br>GQIVGGV<br>YLLPRR | Mus<br>musculu<br>s              |
| 1 | 1.00 | 1 | 1 | 0 | -0.002 | 0 | -0.001 | 0 | t | 11038 | EAEVQIDR<br>LITGRLQSL        | Mus<br>musculu<br>s              |
| 1 | 1.00 | 1 | 1 | 0 | -0.004 | 0 | -0.001 | 0 | t | 29852 | KALENKKK<br>QLSAGGK<br>NLS   | Oryctola<br>gus<br>cuniculu<br>s |
| 1 | 1.00 | 1 | 1 | 0 | -0.002 | 0 | -0.001 | 0 | t | 18814 | GAVIIRGH<br>LRMAGHS<br>LGR   | Mus<br>musculu<br>s              |
| 1 | 1.00 | 1 | 1 | 0 | 0.01   | 0 | -0.001 | 0 | t | 28909 | ITGHRMA<br>WDM               | Pan<br>troglody<br>tes           |
| 1 | 1.00 | 1 | 1 | 0 | -0.002 | 0 | -0.001 | 0 | t | 12345 | EHKYSWK<br>S                 | Mus<br>musculu<br>s              |
| 1 | 1.00 | 1 | 1 | 0 | -0.002 | 0 | -0.001 | 0 | t | 30386 | KEFSEVEG<br>RIQDLEKY<br>V    | Mus<br>musculu<br>s              |
| 1 | 1.00 | 1 | 1 | 0 | -0.002 | 0 | -0.001 | 0 | t | 33831 | KTQIDQVE<br>STAGSLQ          | Mus<br>musculu<br>s              |
| 1 | 1.00 | 1 | 1 | 0 | -0.004 | 0 | -0.001 | 0 | t | 26235 | IGGSQAQT<br>AS               | Oryctola<br>gus<br>cuniculu<br>s |

|   |      |   |   |   |        |   |        |   |   |       |                              |                                  |
|---|------|---|---|---|--------|---|--------|---|---|-------|------------------------------|----------------------------------|
| 1 | 1.00 | 1 | 1 | 0 | -0.004 | 0 | -0.001 | 0 | t | 15389 | FDGGKMV<br>Q                 | Oryctola<br>gus<br>cuniculu<br>s |
| 1 | 1.00 | 1 | 1 | 0 | -0.002 | 0 | -0.001 | 0 | t | 29129 | ITVEELKQL<br>LEQWNLVI        | Mus<br>musculu<br>s              |
| 1 | 1.00 | 1 | 1 | 0 | -0.004 | 0 | -0.001 | 0 | t | 32619 | KNTLTPL<br>ELYPT             | Oryctola<br>gus<br>cuniculu<br>s |
| 1 | 1.00 | 1 | 1 | 0 | 0.01   | 0 | -0.001 | 0 | t | 4023  | AQPGYPW<br>PLY               | Pan<br>troglody<br>tes           |
| 1 | 1.00 | 1 | 1 | 0 | -0.002 | 0 | -0.001 | 0 | t | 9319  | DLVKFISD<br>KIKFLNP          | Mus<br>musculu<br>s              |
| 1 | 1.00 | 1 | 1 | 0 | -0.002 | 0 | -0.001 | 0 | t | 4417  | ASGGSVAS<br>GGSVASG          | Mus<br>musculu<br>s              |
| 1 | 1.00 | 1 | 1 | 0 | -0.002 | 0 | -0.001 | 0 | t | 7812  | DDKLRME<br>TCFQQAC<br>K      | Mus<br>musculu<br>s              |
| 1 | 1.00 | 1 | 1 | 0 | -0.002 | 0 | -0.001 | 0 | t | 3893  | APVQEGV<br>QQE               | Mus<br>musculu<br>s              |
| 1 | 1.00 | 1 | 1 | 0 | -0.004 | 0 | -0.001 | 0 | t | 4770  | ASSGIGPE                     | Oryctola<br>gus<br>cuniculu<br>s |
| 1 | 1.00 | 1 | 1 | 0 | -0.002 | 0 | -0.001 | 0 | t | 9939  | DRAAGQP<br>AGDRADG<br>QPAGDR | Mus<br>musculu<br>s              |
| 1 | 1.00 | 1 | 1 | 0 | -0.002 | 0 | -0.001 | 0 | t | 9939  | DRAAGQP<br>AGDRADG<br>QPAGDR | Mus<br>musculu<br>s              |
| 1 | 1.00 | 1 | 1 | 0 | -0.002 | 0 | -0.001 | 0 | t | 9939  | DRAAGQP<br>AGDRADG<br>QPAGDR | Mus<br>musculu<br>s              |
| 1 | 1.00 | 1 | 1 | 0 | -0.004 | 0 | -0.001 | 0 | t | 7383  | CYGVSATK<br>LNDLCFSN<br>V    | Oryctola<br>gus<br>cuniculu<br>s |
| 1 | 1.00 | 1 | 1 | 0 | 0.008  | 0 | -0.001 | 0 | t | 8370  | DGEERQSY<br>WFEN             | Capra<br>hircus                  |
| 1 | 1.00 | 1 | 1 | 0 | -0.015 | 0 | -0.001 | 0 | t | 8697  | DILFPA                       | Marmot<br>a monax                |

|   |      |   |   |   |        |   |        |   |   |       |                              |                                  |
|---|------|---|---|---|--------|---|--------|---|---|-------|------------------------------|----------------------------------|
| 1 | 1.00 | 1 | 1 | 0 | -0.002 | 0 | -0.001 | 0 | t | 9939  | DRAAGQP<br>AGDRADG<br>QPAGDR | Mus<br>musculu<br>s              |
| 1 | 1.00 | 1 | 1 | 0 | 0.003  | 0 | -0.001 | 0 | t | 8355  | DGAVQPD<br>GG                | Mus<br>musculu<br>s              |
| 1 | 1.00 | 1 | 1 | 0 | -0.002 | 0 | -0.001 | 0 | t | 7171  | CTKPTDG<br>NC                | Mus<br>musculu<br>s              |
| 1 | 1.00 | 1 | 1 | 0 | -0.004 | 0 | -0.001 | 0 | t | 3367  | ANNSANN<br>GKKNNAE<br>E      | Oryctola<br>gus<br>cuniculu<br>s |
| 1 | 1.00 | 1 | 1 | 0 | -0.002 | 0 | -0.001 | 0 | t | 6983  | CSETFTNK<br>LKEKH            | Mus<br>musculu<br>s              |
| 1 | 1.00 | 1 | 1 | 0 | -0.002 | 0 | -0.001 | 0 | t | 752   | ADQAQYN<br>QMH               | Mus<br>musculu<br>s              |
| 1 | 1.00 | 1 | 1 | 0 | -0.002 | 0 | -0.001 | 0 | t | 9939  | DRAAGQP<br>AGDRADG<br>QPAGDR | Mus<br>musculu<br>s              |
| 1 | 1.00 | 1 | 1 | 0 | -0.002 | 0 | -0.001 | 0 | t | 9365  | DMIAAYT<br>AALVSGTA<br>TA    | Mus<br>musculu<br>s              |
| 1 | 1.00 | 1 | 1 | 0 | -0.004 | 0 | -0.001 | 0 | t | 1385  | AFRELADA                     | Oryctola<br>gus<br>cuniculu<br>s |
| 1 | 1.00 | 1 | 1 | 0 | -0.002 | 0 | -0.001 | 0 | t | 9582  | DNYWSFS<br>DSTYWTLR<br>YSSG  | Mus<br>musculu<br>s              |
| 1 | 1.00 | 1 | 1 | 0 | -0.004 | 0 | -0.001 | 0 | t | 5437  | AVLLGACS                     | Oryctola<br>gus<br>cuniculu<br>s |
| 1 | 1.00 | 1 | 1 | 0 | -0.002 | 0 | -0.001 | 0 | t | 7756  | DDDMGFG<br>LFD               | Mus<br>musculu<br>s              |
| 1 | 1.00 | 1 | 1 | 0 | -0.004 | 0 | -0.001 | 0 | t | 5387  | AVIRRANN<br>VLKNEMK<br>RYKGL | Oryctola<br>gus<br>cuniculu<br>s |
| 1 | 1.00 | 1 | 1 | 0 | -0.002 | 0 | -0.001 | 0 | t | 10124 | DSGCVVS<br>WK                | Mus<br>musculu<br>s              |
| 1 | 1.00 | 1 | 1 | 0 | -0.002 | 0 | -0.001 | 0 | t | 1171  | AESVSQN<br>N                 | Mus<br>musculu<br>s              |

|   |      |   |   |   |        |   |        |   |   |      |                              |                       |
|---|------|---|---|---|--------|---|--------|---|---|------|------------------------------|-----------------------|
| 1 | 1.00 | 1 | 1 | 0 | 0.008  | 0 | -0.001 | 0 | t | 4749 | ASRGTSMDDEAD                 | Capra hircus          |
| 1 | 1.00 | 1 | 1 | 0 | -0.002 | 0 | -0.001 | 0 | t | 9944 | DRADGQPAGDRADGQ<br>QPAGDR    | Mus musculus          |
| 1 | 1.00 | 1 | 1 | 0 | -0.002 | 0 | -0.001 | 0 | t | 3983 | AQKFNGLT<br>VLPLLTD<br>D     | Mus musculus          |
| 1 | 1.00 | 1 | 1 | 0 | -0.002 | 0 | -0.001 | 0 | t | 7771 | DDFHTDE<br>DKLDTNSV<br>YEPYY | Mus musculus          |
| 1 | 1.00 | 1 | 1 | 0 | -0.002 | 0 | -0.001 | 0 | t | 9956 | DRCTTFDD<br>VQAPNYT<br>QH    | Mus musculus          |
| 1 | 1.00 | 1 | 1 | 0 | -0.002 | 0 | -0.001 | 0 | t | 9944 | DRADGQPAGDRADGQ<br>QPAGDR    | Mus musculus          |
| 1 | 1.00 | 1 | 1 | 0 | -0.004 | 0 | -0.001 | 0 | t | 8544 | DHILEPSIP<br>WKSLLTL<br>VQL  | Oryctolagus cuniculus |
| 1 | 1.00 | 1 | 1 | 0 | -0.002 | 0 | -0.001 | 0 | t | 2598 | ALGVINTL<br>EWIPRFK          | Mus musculus          |
| 1 | 1.00 | 1 | 1 | 0 | -0.002 | 0 | -0.001 | 0 | t | 1790 | AHKWYSQ<br>WLPHR             | Mus musculus          |
| 1 | 1.00 | 1 | 1 | 0 | 0      | 0 | -0.001 | 0 | t | 879  | AEEGSLDE<br>GAVEEDP<br>DKEGD | Mesocricetus auratus  |
| 1 | 1.00 | 1 | 1 | 0 | -0.002 | 0 | -0.001 | 0 | t | 3290 | ANGAGNQPGANGAG<br>NQPG       | Mus musculus          |
| 1 | 1.00 | 1 | 1 | 0 | 0.008  | 0 | -0.001 | 0 | t | 7901 | DEADRYFT<br>YEPP             | Capra hircus          |
| 1 | 1.00 | 1 | 1 | 0 | -0.004 | 0 | -0.001 | 0 | t | 3076 | AMDPIYDE<br>PTTTTSVPL        | Oryctolagus cuniculus |
| 1 | 1.00 | 1 | 1 | 0 | -0.002 | 0 | -0.001 | 0 | t | 9944 | DRADGQPAGDRADGQ<br>QPAGDR    | Mus musculus          |

|   |      |   |   |   |        |   |        |   |   |      |                              |                                  |
|---|------|---|---|---|--------|---|--------|---|---|------|------------------------------|----------------------------------|
| 1 | 1.00 | 1 | 1 | 0 | -0.004 | 0 | -0.001 | 0 | t | 1433 | AGAGGGA<br>GGAGAGG<br>GAGGAG | Oryctola<br>gus<br>cuniculu<br>s |
| 1 | 1.00 | 1 | 1 | 0 | -0.004 | 0 | -0.001 | 0 | t | 7128 | CTDVSTAI<br>HADQLTP<br>AW    | Oryctola<br>gus<br>cuniculu<br>s |
| 1 | 1.00 | 1 | 1 | 0 | -0.004 | 0 | -0.001 | 0 | t | 7671 | DAVSRKK<br>MDTKPTD           | Oryctola<br>gus<br>cuniculu<br>s |
| 1 | 1.00 | 1 | 1 | 0 | -0.002 | 0 | -0.001 | 0 | t | 7128 | CTDVSTAI<br>HADQLTP<br>AW    | Mus<br>musculu<br>s              |
| 1 | 1.00 | 1 | 1 | 0 | -0.002 | 0 | -0.001 | 0 | t | 187  | AAGTAAQ<br>AAVVRFQ<br>E      | Mus<br>musculu<br>s              |
| 1 | 1.00 | 1 | 1 | 0 | -0.004 | 0 | -0.001 | 0 | t | 7488 | DADYHRV<br>M                 | Oryctola<br>gus<br>cuniculu<br>s |
| 1 | 1.00 | 1 | 1 | 0 | -0.002 | 0 | -0.001 | 0 | t | 9944 | DRADGQP<br>AGDRADG<br>QPAGDR | Mus<br>musculu<br>s              |
| 1 | 1.00 | 1 | 1 | 0 | -0.002 | 0 | -0.001 | 0 | t | 9944 | DRADGQP<br>AGDRADG<br>QPAGDR | Mus<br>musculu<br>s              |
| 1 | 1.00 | 1 | 1 | 0 | -0.002 | 0 | -0.001 | 0 | t | 5773 | AYFPREGV<br>FVFNGTS<br>WF    | Mus<br>musculu<br>s              |
| 1 | 1.00 | 1 | 1 | 0 | -0.002 | 0 | -0.001 | 0 | t | 8119 | DEPAGE                       | Mus<br>musculu<br>s              |
| 1 | 1.00 | 1 | 1 | 0 | -0.004 | 0 | -0.001 | 0 | t | 8119 | DEPAGE                       | Oryctola<br>gus<br>cuniculu<br>s |
| 1 | 1.00 | 1 | 1 | 0 | -0.002 | 0 | -0.001 | 0 | t | 9677 | DPLTSLHA<br>MQRR             | Mus<br>musculu<br>s              |
| 1 | 1.00 | 1 | 1 | 0 | -0.002 | 0 | -0.001 | 0 | t | 2220 | AKKQVEK<br>ALEEANSK<br>LAAL  | Mus<br>musculu<br>s              |
| 1 | 1.00 | 1 | 1 | 0 | -0.002 | 0 | -0.001 | 0 | t | 476  | AATVLQLP<br>QGTTLPKG<br>FYAE | Macaca<br>cyclopis               |

|   |      |   |   |   |        |   |        |   |   |      |                              |                                  |
|---|------|---|---|---|--------|---|--------|---|---|------|------------------------------|----------------------------------|
| 1 | 1.00 | 1 | 1 | 0 | 0.008  | 0 | -0.001 | 0 | t | 7761 | DDEADRYF<br>TYEE             | Capra<br>hircus                  |
| 1 | 1.00 | 1 | 1 | 0 | -0.004 | 0 | -0.001 | 0 | t | 1460 | AGCLIGAE<br>HVDTSYEC<br>D    | Oryctola<br>gus<br>cuniculu<br>s |
| 1 | 1.00 | 1 | 1 | 0 | -0.004 | 0 | -0.001 | 0 | t | 7064 | CSQNPLAE<br>LKCSVKSFE        | Oryctola<br>gus<br>cuniculu<br>s |
| 1 | 1.00 | 1 | 1 | 0 | 0.001  | 0 | -0.001 | 0 | t | 8355 | DGAVQPD<br>GG                | Oryctola<br>gus<br>cuniculu<br>s |
| 1 | 1.00 | 1 | 1 | 0 | -0.002 | 0 | -0.001 | 0 | t | 2092 | AISSVLNDI<br>LSRLDKVE        | Mus<br>musculu<br>s              |
| 1 | 1.00 | 1 | 1 | 0 | -0.004 | 0 | -0.001 | 0 | t | 6995 | CSFSSIPN                     | Oryctola<br>gus<br>cuniculu<br>s |
| 1 | 1.00 | 1 | 1 | 0 | -0.002 | 0 | -0.001 | 0 | t | 4740 | ASREAKKQ<br>VEKALE           | Mus<br>musculu<br>s              |
| 1 | 1.00 | 1 | 1 | 0 | -0.001 | 0 | -0.001 | 0 | t | 1299 | AFFSILQD<br>MRNTIM           | Myodes<br>glareolu<br>s          |
| 1 | 1.00 | 1 | 1 | 0 | -0.004 | 0 | -0.001 | 0 | t | 307  | AALVSGTA<br>TAGWTFG<br>AG    | Oryctola<br>gus<br>cuniculu<br>s |
| 1 | 1.00 | 1 | 1 | 0 | -0.002 | 0 | -0.001 | 0 | t | 9943 | DRADGQP<br>AGDRAAG<br>QPAGDR | Mus<br>musculu<br>s              |
| 1 | 1.00 | 1 | 1 | 0 | -0.002 | 0 | -0.001 | 0 | t | 9943 | DRADGQP<br>AGDRAAG<br>QPAGDR | Mus<br>musculu<br>s              |
| 1 | 1.00 | 1 | 1 | 0 | -0.004 | 0 | -0.001 | 0 | t | 7193 | CTPPALNC<br>YWPLNDY<br>GF    | Oryctola<br>gus<br>cuniculu<br>s |
| 1 | 1.00 | 1 | 1 | 0 | -0.002 | 0 | -0.001 | 0 | t | 3236 | ANCASILC<br>KCYTTGT          | Mus<br>musculu<br>s              |
| 1 | 1.00 | 1 | 1 | 0 | -0.002 | 0 | -0.001 | 0 | t | 9943 | DRADGQP<br>AGDRAAG<br>QPAGDR | Mus<br>musculu<br>s              |

|   |      |   |   |   |        |   |        |   |   |      |                              |                          |
|---|------|---|---|---|--------|---|--------|---|---|------|------------------------------|--------------------------|
| 1 | 1.00 | 1 | 1 | 0 | -0.002 | 0 | -0.001 | 0 | t | 5927 | AYSNNNTIAI<br>PTNFSISI       | Mus<br>musculus          |
| 1 | 1.00 | 1 | 1 | 0 | -0.002 | 0 | -0.001 | 0 | t | 9943 | DRADGQP<br>AGDRAAG<br>QPAGDR | Mus<br>musculus          |
| 1 | 1.00 | 1 | 1 | 0 | -0.002 | 0 | -0.001 | 0 | t | 3245 | ANDVDNS<br>NPVVQAE<br>QLNWL  | Rattus<br>norvegicus     |
| 1 | 1.00 | 1 | 1 | 0 | -0.002 | 0 | -0.001 | 0 | t | 3245 | ANDVDNS<br>NPVVQAE<br>QLNWL  | Mus<br>musculus          |
| 1 | 1.00 | 1 | 1 | 0 | -0.002 | 0 | -0.001 | 0 | t | 9943 | DRADGQP<br>AGDRAAG<br>QPAGDR | Mus<br>musculus          |
| 1 | 1.00 | 1 | 1 | 0 | -0.004 | 0 | -0.001 | 0 | t | 2053 | AIPTNFSISI<br>TTEVMPV        | Oryctolagus<br>cuniculus |
| 1 | 1.00 | 1 | 1 | 0 | -0.002 | 0 | -0.001 | 0 | t | 3656 | APMSTPS<br>ATSVR             | Mus<br>musculus          |
| 1 | 1.00 | 1 | 1 | 0 | -0.002 | 0 | -0.001 | 0 | t | 3290 | ANGAGNQ<br>PGANGAG<br>NQPG   | Mus<br>musculus          |
| 1 | 1.00 | 1 | 1 | 0 | -0.002 | 0 | -0.001 | 0 | t | 3290 | ANGAGNQ<br>PGANGAG<br>NQPG   | Mus<br>musculus          |
| 1 | 1.00 | 1 | 1 | 0 | -0.002 | 0 | -0.001 | 0 | t | 6332 | CGPKLSTD<br>LIKNQCVN<br>F    | Mus<br>musculus          |
| 1 | 1.00 | 1 | 1 | 0 | -0.004 | 0 | -0.001 | 0 | t | 6540 | CLAVLLGA                     | Oryctolagus<br>cuniculus |
| 1 | 1.00 | 1 | 1 | 0 | 0.01   | 0 | -0.001 | 0 | t | 1439 | AGAHWG<br>VLGA               | Pan<br>troglodytes       |
| 1 | 1.00 | 1 | 1 | 0 | -0.002 | 0 | -0.001 | 0 | t | 9943 | DRADGQP<br>AGDRAAG<br>QPAGDR | Mus<br>musculus          |
| 1 | 1.00 | 1 | 1 | 0 | -0.015 | 0 | -0.001 | 0 | t | 8371 | DGEGAP                       | Marmota<br>monax         |
| 1 | 1.00 | 1 | 1 | 0 | -0.002 | 0 | -0.001 | 0 | t | 7765 | DDEHVEEP<br>TVA              | Mus<br>musculus          |
| 1 | 1.00 | 1 | 1 | 0 | -0.002 | 0 | -0.001 | 0 | t | 6632 | CLTFGRET<br>VIEY             | Mus<br>musculus          |

|   |      |   |   |   |        |   |        |   |   |      |                              |                                  |
|---|------|---|---|---|--------|---|--------|---|---|------|------------------------------|----------------------------------|
| 1 | 1.00 | 1 | 1 | 0 | -0.002 | 0 | -0.001 | 0 | t | 6632 | CLTFGRET<br>VIEY             | Mus<br>musculu<br>s              |
| 1 | 1.00 | 1 | 1 | 0 | -0.004 | 0 | -0.001 | 0 | t | 8391 | DGGKMV<br>QV                 | Oryctola<br>gus<br>cuniculu<br>s |
| 1 | 1.00 | 1 | 1 | 0 | -0.004 | 0 | -0.001 | 0 | t | 4427 | ASGLVSMF<br>SV               | Oryctola<br>gus<br>cuniculu<br>s |
| 1 | 1.00 | 1 | 1 | 0 | -0.004 | 0 | -0.001 | 0 | t | 6332 | CGPKLSTD<br>LIKNQCVN<br>F    | Oryctola<br>gus<br>cuniculu<br>s |
| 1 | 1.00 | 1 | 1 | 0 | -0.004 | 0 | -0.001 | 0 | t | 6015 | CAPESIEFP<br>VSEARVLE<br>D   | Oryctola<br>gus<br>cuniculu<br>s |
| 1 | 1.00 | 1 | 1 | 0 | -0.004 | 0 | -0.001 | 0 | t | 293  | AALLQSAR                     | Oryctola<br>gus<br>cuniculu<br>s |
| 1 | 1.00 | 1 | 1 | 0 | -0.002 | 0 | -0.001 | 0 | t | 6015 | CAPESIEFP<br>VSEARVLE<br>D   | Mus<br>musculu<br>s              |
| 1 | 1.00 | 1 | 1 | 0 | -0.002 | 0 | -0.001 | 0 | t | 570  | ACKRGPGS<br>GFFSRLN          | Mus<br>musculu<br>s              |
| 1 | 1.00 | 1 | 1 | 0 | -0.004 | 0 | -0.001 | 0 | t | 2724 | ALLQSARR                     | Oryctola<br>gus<br>cuniculu<br>s |
| 1 | 1.00 | 1 | 1 | 0 | -0.002 | 0 | -0.001 | 0 | t | 570  | ACKRGPGS<br>GFFSRLN          | Mus<br>musculu<br>s              |
| 1 | 1.00 | 1 | 1 | 0 | -0.002 | 0 | -0.001 | 0 | t | 9940 | DRAAGQP<br>AGNGAGG<br>QAAGGN | Mus<br>musculu<br>s              |
| 1 | 1.00 | 1 | 1 | 0 | -0.002 | 0 | -0.001 | 0 | t | 3290 | ANGAGNQ<br>PGANGAG<br>NQPG   | Mus<br>musculu<br>s              |
| 1 | 1.00 | 1 | 1 | 0 | -0.002 | 0 | -0.001 | 0 | t | 7756 | DDDMGFG<br>LFD               | Mus<br>musculu<br>s              |
| 1 | 1.00 | 1 | 1 | 0 | -0.002 | 0 | -0.001 | 0 | t | 9940 | DRAAGQP<br>AGNGAGG<br>QAAGGN | Mus<br>musculu<br>s              |



|   |      |   |   |       |        |        |        |        |   |        |                              |                                  |
|---|------|---|---|-------|--------|--------|--------|--------|---|--------|------------------------------|----------------------------------|
| 1 | 1.00 | 1 | 1 | 0     | -0.002 | 0      | -0.001 | 0      | t | 9940   | DRAAGQP<br>AGNGAGG<br>QAAGGN | Mus<br>musculu<br>s              |
| 1 | 1.00 | 1 | 1 | 0     | -0.002 | 0      | -0.001 | 0      | t | 9940   | DRAAGQP<br>AGNGAGG<br>QAAGGN | Mus<br>musculu<br>s              |
| 1 | 1.00 | 1 | 1 | 0     | -0.014 | 0      | -0.001 | 0      | t | 6742   | CNYSKFW<br>YLEHAK            | Macaca<br>mulatta                |
| 1 | 1.00 | 1 | 1 | 0     | -0.002 | 0      | -0.001 | 0      | t | 6742   | CNYSKFW<br>YLEHAK            | Mus<br>musculu<br>s              |
| 1 | 1.00 | 1 | 1 | 0     | -0.004 | 0      | -0.001 | 0      | t | 800    | ADYHRVM<br>Y                 | Oryctola<br>gus<br>cuniculu<br>s |
| 1 | 1.00 | 1 | 1 | 0     | -0.004 | 0      | -0.001 | 0      | t | 677    | ADIDKLIDY<br>AASGD           | Oryctola<br>gus<br>cuniculu<br>s |
| 1 | 1.00 | 1 | 1 | 0     | 0.004  | 0      | 0.001  | 0.002  | t | 22133  | GRLITVNP                     | MD                               |
| 1 | 1.00 | 1 | 1 | -0.03 | -0.024 | -0.03  | -0.03  | -0.03  | t | 123568 | PAKLGYW<br>KL                | Ovis<br>aries                    |
| 1 | 1.00 | 1 | 1 | -0.03 | -0.024 | -0.03  | -0.03  | -0.03  | t | 123567 | PAKLGYW<br>KI                | Ovis<br>aries                    |
| 1 | 1.00 | 1 | 1 | -0.02 | -0.018 | -0.017 | -0.013 | -0.019 | t | 30302  | KEALISLT<br>RGKLYTQ<br>Q     | Homo<br>sapiens                  |
| 1 | 1.00 | 1 | 1 | -0.01 | -0.01  | -0.01  | -0.01  | -0.012 | t | 23269  | GWLAGLF<br>YQHKF             | Mus<br>musculu<br>s              |
| 1 | 1.00 | 1 | 1 | -0.05 | -0.05  | -0.05  | -0.05  | -0.048 | t | 105697 | CCAVLNG<br>AY                | Mus<br>musculu<br>s              |
| 1 | 1.00 | 1 | 1 | 0     | 0      | 0      | 0      | 0.001  | t | 24401  | HNQWKN                       | Mus<br>musculu<br>s              |

|   |      |   |   |       |        |        |       |       |   |        |                              |                       |
|---|------|---|---|-------|--------|--------|-------|-------|---|--------|------------------------------|-----------------------|
| 1 | 1.00 | 1 | 1 | 0     | 0      | 0.005  | 0.003 | 0.002 | t | 99033  | TWDDD                        | Homo sapiens          |
| 1 | 1.00 | 1 | 1 | -0.02 | -0.02  | -0.022 | -0.02 | -0.02 | t | 61589  | STEQNVP<br>DPQVG             | Mus musculus          |
| 1 | 1.00 | 1 | 1 | 0.01  | 0.012  | 0.011  | 0.011 | 0.011 | t | 68541  | VFPDLG                       | Homo sapiens          |
| 1 | 1.00 | 1 | 1 | -0.01 | -0.007 | 0.001  | -0.01 | -0.01 | t | 79773  | DAHVPFCF<br>GKDL             | Mus musculus          |
| 1 | 1.00 | 1 | 1 | 0.02  | 0.02   | 0.02   | 0.02  | 0.02  | t | 124016 | DKTEDVDI<br>EEMALKLD<br>NVLL | Homo sapiens          |
| 1 | 1.00 | 1 | 1 | 0.01  | 0.01   | 0.01   | 0.01  | 0.01  | t | 144662 | GREGYPA<br>DGGDSVKI<br>WTS   | Oryctolagus cuniculus |
| 1 | 1.00 | 1 | 1 | 0.01  | 0.01   | 0.01   | 0.01  | 0.01  | t | 144803 | TSAHSKLA<br>VAAL             | Mus musculus          |
| 1 | 1.00 | 1 | 1 | 0.01  | 0.01   | 0.01   | 0.01  | 0.01  | t | 114787 | EDRPLCGS<br>DN               | Homo sapiens          |
| 1 | 1.00 | 1 | 1 | 0.01  | 0.01   | 0.01   | 0.01  | 0.01  | t | 99448  | LRNLPQQC<br>GLRAPQR          | Homo sapiens          |
| 1 | 1.00 | 1 | 1 | 0.01  | 0.01   | 0.01   | 0.01  | 0.01  | t | 104342 | VSAAQYL                      | Mus musculus          |
| 1 | 1.00 | 1 | 1 | 0.01  | 0.01   | 0.01   | 0.01  | 0.01  | t | 101081 | NLEQSND<br>VAS               | Mus musculus          |
| 1 | 1.00 | 1 | 1 | 0.02  | 0.018  | 0.026  | 0.017 | 0.02  | t | 22445  | GSPLRQRS<br>L                | Mus musculus          |
| 1 | 1.00 | 1 | 1 | 0.06  | 0.058  | 0.06   | 0.053 | 0.058 | t | 107874 | GTSSPSAD                     | Rattus norvegicus     |
| 1 | 1.00 | 1 | 1 | -0.01 | -0.01  | -0.01  | -0.01 | -0.01 | t | 153342 | ACRDHFST<br>HCGGGS           | Mus musculus          |
| 1 | 1.00 | 1 | 1 | -0.01 | -0.01  | -0.01  | -0.01 | -0.01 | t | 149725 | GSEKEAPS<br>KDFYLKN          | Oryctolagus cuniculus |
| 1 | 1.00 | 1 | 1 | -0.01 | -0.01  | -0.01  | -0.01 | -0.01 | t | 123072 | DDREKWL<br>GD                | Ovis aries            |

|   |      |   |   |       |        |        |        |        |   |        |                              |                                  |
|---|------|---|---|-------|--------|--------|--------|--------|---|--------|------------------------------|----------------------------------|
| 1 | 1.00 | 1 | 1 | -0.01 | -0.01  | -0.01  | -0.01  | -0.01  | t | 62463  | SWHLPSH<br>MRSAV             | Mus<br>musculu<br>s              |
| 1 | 1.00 | 1 | 1 | -0.01 | -0.01  | -0.01  | -0.01  | -0.01  | t | 46829  | PAIIPDREV<br>LYREFDEM<br>EEC | Homo<br>sapiens                  |
| 1 | 1.00 | 1 | 1 | -0.03 | -0.03  | -0.03  | -0.03  | -0.03  | t | 115704 | DELQDKIH<br>PF               | Homo<br>sapiens                  |
| 1 | 1.00 | 1 | 1 | -0.03 | -0.03  | -0.03  | -0.03  | -0.03  | t | 63236  | TDSPGG                       | Oryctola<br>gus<br>cuniculu<br>s |
| 1 | 1.00 | 1 | 1 | -0.05 | -0.05  | -0.05  | -0.05  | -0.05  | t | 115726 | ENLHLPLP<br>LL               | Homo<br>sapiens                  |
| 1 | 1.00 | 1 | 1 | -0.06 | -0.062 | -0.06  | -0.057 | -0.06  | t | 57620  | SESHNFDA<br>VMSKLG<br>VSWATR | Mus<br>musculu<br>s              |
| 1 | 1.00 | 1 | 1 | -0.06 | -0.062 | -0.06  | -0.057 | -0.06  | t | 57620  | SESHNFDA<br>VMSKLG<br>VSWATR | Mus<br>musculu<br>s              |
| 1 | 1.00 | 1 | 1 | 0     | -0.002 | 0      | -0.003 | -0.001 | t | 105206 | GAIIGLMV<br>GGVV             | Mus<br>musculu<br>s              |
| 1 | 1.00 | 1 | 1 | -0.01 | -0.006 | -0.001 | -0.009 | -0.01  | t | 10149  | DSITWQL<br>QAAVLHV           | Homo<br>sapiens                  |
| 1 | 1.00 | 1 | 1 | 0.02  | 0.022  | 0.016  | 0.011  | 0.02   | t | 112837 | SGYIPANT<br>TIPF             | Homo<br>sapiens                  |
| 1 | 1.00 | 1 | 1 | 0     | 0      | 0      | 0.002  | 0.001  | t | 55671  | RRPFNIGI<br>NNQQ             | Homo<br>sapiens                  |
| 1 | 1.00 | 1 | 1 | 0.01  | 0.015  | 0.019  | 0.01   | 0.01   | t | 30937  | KGGIVT                       | Homo<br>sapiens                  |
| 1 | 1.00 | 1 | 1 | 0.01  | 0.011  | 0.014  | 0.007  | 0.01   | t | 28143  | IQDITYTQK<br>LS              | Homo<br>sapiens                  |
| 1 | 1.00 | 1 | 1 | -0.02 | -0.02  | -0.03  | -0.023 | -0.02  | t | 86469  | MQTRHVK<br>NYHSRSES          | Homo<br>sapiens                  |
| 1 | 1.00 | 1 | 1 | 0.03  | 0.034  | 0.042  | 0.031  | 0.032  | t | 17402  | FPSDEF                       | Homo<br>sapiens                  |

|   |      |   |   |       |        |        |        |        |   |        |                              |                                  |
|---|------|---|---|-------|--------|--------|--------|--------|---|--------|------------------------------|----------------------------------|
| 1 | 1.00 | 1 | 1 | -0.01 | -0.01  | -0.01  | -0.01  | -0.008 | t | 136082 | SDDPSPGA<br>IDSNNS           | Oryctola<br>gus<br>cuniculu<br>s |
| 1 | 1.00 | 1 | 1 | -0.01 | -0.01  | -0.012 | -0.004 | -0.007 | t | 117211 | GYWSWI<br>RQPPGKG<br>EEWIG   | Mus<br>musculu<br>s              |
| 1 | 1.00 | 1 | 1 | -0.01 | -0.008 | -0.01  | -0.011 | -0.01  | t | 149431 | QPFPPQQ<br>PYP               | Homo<br>sapiens                  |
| 1 | 1.00 | 1 | 1 | 0.03  | 0.028  | 0.033  | 0.03   | 0.03   | t | 63802  | TGDFDSVI<br>D                | Mus<br>musculu<br>s              |
| 1 | 1.00 | 1 | 1 | 0.02  | 0.02   | 0.02   | 0.02   | 0.022  | t | 117510 | GRGRGM<br>GRGNIFQK<br>R      | Homo<br>sapiens                  |
| 1 | 1.00 | 1 | 1 | -0.01 | -0.01  | -0.013 | -0.01  | -0.01  | t | 94580  | LDNKYAGK<br>GY               | Mus<br>musculu<br>s              |
| 1 | 1.00 | 1 | 1 | -0.01 | -0.01  | 0.002  | -0.003 | -0.01  | t | 102882 | VDKCLELA<br>EYLYNIIKN<br>REG | Mus<br>musculu<br>s              |
| 1 | 1.00 | 1 | 1 | -0.01 | 0.001  | -0.01  | -0.01  | -0.012 | t | 156889 | HNRKCDY<br>YIAECNVM<br>P     | Gallus<br>gallus                 |
| 1 | 1.00 | 1 | 1 | 0     | -0.002 | -0.001 | -0.003 | 0      | t | 7064   | CSQNPLAE<br>LKCSVKSFE        | Mus<br>musculu<br>s              |
| 1 | 1.00 | 1 | 1 | -0.01 | -0.006 | -0.002 | -0.009 | -0.01  | t | 52417  | QSQQQGN<br>SRRGPRVV<br>P     | Capra<br>hircus                  |
| 1 | 1.00 | 1 | 1 | 0.03  | 0.03   | 0.03   | 0.026  | 0.03   | t | 110284 | HKSAIVTLT<br>YDSEWQR<br>DQ   | Homo<br>sapiens                  |
| 1 | 1.00 | 1 | 1 | -0.01 | -0.008 | -0.01  | -0.013 | -0.009 | t | 11819  | EENVEHD<br>A                 | Homo<br>sapiens                  |
| 1 | 1.00 | 1 | 1 | -0.02 | -0.02  | -0.02  | -0.018 | -0.02  | t | 119505 | NSTMGY                       | Homo<br>sapiens                  |
| 1 | 1.00 | 1 | 1 | 0     | 0.004  | -0.003 | 0.001  | 0      | t | 23437  | GYQPYRV<br>VVLSEFEL<br>NA    | Homo<br>sapiens                  |

|   |      |   |   |       |        |        |        |        |   |        |                             |                                  |
|---|------|---|---|-------|--------|--------|--------|--------|---|--------|-----------------------------|----------------------------------|
| 1 | 1.00 | 1 | 1 | -0.04 | -0.036 | -0.038 | -0.033 | -0.04  | t | 121112 | AACDPRH<br>GRYLTVA          | Homo<br>sapiens                  |
| 1 | 1.00 | 1 | 1 | -0.01 | -0.008 | -0.013 | -0.017 | -0.013 | t | 103476 | PGQGAYA<br>AANSWVD<br>V     | Homo<br>sapiens                  |
| 1 | 1.00 | 1 | 1 | 0     | -0.003 | 0      | -0.003 | -0.001 | t | 72178  | VYVEELKP<br>TPEGDLIL<br>LQK | Oryctola<br>gus<br>cuniculu<br>s |
| 1 | 1.00 | 1 | 1 | -0.02 | -0.018 | -0.02  | -0.021 | -0.02  | t | 48852  | PPPGRRPF<br>FHPVGE          | Homo<br>sapiens                  |
| 1 | 1.00 | 1 | 1 | 0.04  | 0.04   | 0.053  | 0.038  | 0.037  | t | 98682  | AEPEQSLA<br>CQ              | Homo<br>sapiens                  |
| 1 | 1.00 | 1 | 1 | 0     | 0.004  | 0.011  | 0.003  | 0      | t | 86674  | NDVFREA<br>QRSYL            | Homo<br>sapiens                  |
| 1 | 1.00 | 1 | 1 | 0     | 0      | 0      | -0.001 | 0      | t | 65423  | TNSHVPIL<br>QERPPLE         | Homo<br>sapiens                  |
| 1 | 1.00 | 1 | 1 | -0.02 | -0.02  | -0.02  | -0.02  | -0.021 | t | 135545 | DVFYPYPY<br>ASGS            | Mus<br>musculu<br>s              |
| 1 | 1.00 | 1 | 1 | 0     | 0      | 0      | 0      | 0      | t | 94619  | NPACGPK                     | Capra<br>hircus                  |
| 1 | 1.00 | 1 | 1 | 0     | 0      | 0.007  | 0.003  | 0      | t | 75876  | YSREQLNK<br>MFGIEIS         | Homo<br>sapiens                  |
| 1 | 1.00 | 1 | 1 | 0.04  | 0.04   | 0.04   | 0.04   | 0.04   | t | 119585 | GQPREPQ<br>V                | Homo<br>sapiens                  |
| 1 | 1.00 | 1 | 1 | 0.02  | 0.02   | 0.02   | 0.02   | 0.02   | t | 123610 | PPGAMPP<br>Q                | Oryctola<br>gus<br>cuniculu<br>s |
| 1 | 1.00 | 1 | 1 | 0.02  | 0.02   | 0.02   | 0.02   | 0.02   | t | 123610 | PPGAMPP<br>Q                | Homo<br>sapiens                  |
| 1 | 1.00 | 1 | 1 | 0.02  | 0.02   | 0.02   | 0.02   | 0.02   | t | 79908  | LIRMVECS<br>GKQD            | Mus<br>musculu<br>s              |
| 1 | 1.00 | 1 | 1 | 0.02  | 0.02   | 0.02   | 0.02   | 0.02   | t | 79908  | LIRMVECS<br>GKQD            | Mus<br>musculu<br>s              |

|   |      |   |   |       |        |        |        |        |   |        |                              |                              |
|---|------|---|---|-------|--------|--------|--------|--------|---|--------|------------------------------|------------------------------|
| 1 | 1.00 | 1 | 1 | 0     | 0      | 0      | 0      | 0      | t | 145775 | FDTGAFDP<br>DWPA             | Mus<br>musculus              |
| 1 | 1.00 | 1 | 1 | 0     | 0      | 0      | 0      | 0      | t | 145775 | FDTGAFDP<br>DWPA             | Mus<br>musculus              |
| 1 | 1.00 | 1 | 1 | 0     | 0      | 0      | 0      | 0      | t | 145775 | FDTGAFDP<br>DWPA             | Mus<br>musculus              |
| 1 | 1.00 | 1 | 1 | 0     | 0      | 0      | 0      | 0      | t | 131081 | SQTTANPS<br>CAEGT            | Rattus<br>norvegicus         |
| 1 | 1.00 | 1 | 1 | 0     | 0      | 0      | 0      | 0      | t | 116953 | DNHSPVNI<br>AHKL             | Homo<br>sapiens              |
| 1 | 1.00 | 1 | 1 | 0     | 0      | 0      | 0      | 0      | t | 114976 | VLVCNKDL<br>RP               | Homo<br>sapiens              |
| 1 | 1.00 | 1 | 1 | 0     | 0      | 0      | 0      | 0      | t | 106669 | NATQRRQI<br>EA               | Homo<br>sapiens              |
| 1 | 1.00 | 1 | 1 | 0     | 0      | 0      | 0      | 0      | t | 78307  | WHSQLSP                      | Homo<br>sapiens              |
| 1 | 1.00 | 1 | 1 | 0     | 0      | 0      | 0      | 0      | t | 55266  | RPPRFQLS<br>S                | Mus<br>musculus              |
| 1 | 1.00 | 1 | 1 | 0     | 0      | 0      | 0      | 0      | t | 48987  | PQEFSKKT<br>YQ               | Homo<br>sapiens              |
| 1 | 1.00 | 1 | 1 | -0.03 | -0.024 | -0.023 | -0.023 | -0.032 | t | 127628 | DRRREGP<br>DRSPRQPP          | Homo<br>sapiens              |
| 1 | 1.00 | 1 | 1 | -0.02 | -0.02  | -0.02  | -0.02  | -0.02  | t | 132931 | WGQNIKA                      | Homo<br>sapiens              |
| 1 | 1.00 | 1 | 1 | -0.02 | -0.02  | -0.02  | -0.02  | -0.02  | t | 92864  | GSKFNDAF<br>NG               | Ovis<br>aries                |
| 1 | 1.00 | 1 | 1 | -0.02 | -0.02  | -0.02  | -0.02  | -0.02  | t | 47192  | PDREVLRY<br>EFDEMEEC<br>ASHL | Homo<br>sapiens              |
| 1 | 1.00 | 1 | 1 | -0.04 | -0.04  | -0.04  | -0.04  | -0.04  | t | 136665 | SVPLAKRH<br>LISL             | Gallus<br>gallus             |
| 1 | 1.00 | 1 | 1 | -0.07 | -0.064 | -0.063 | -0.063 | -0.072 | t | 127866 | TLRPAATA<br>RRKRRWA          | Homo<br>sapiens              |
| 1 | 1.00 | 1 | 1 | 0.03  | 0.026  | 0.036  | 0.03   | 0.03   | t | 21721  | GPPAAEYG<br>PPAAEY           | Oryctola<br>gus<br>cuniculus |

|   |      |   |   |       |        |        |        |        |   |        |                              |                                  |
|---|------|---|---|-------|--------|--------|--------|--------|---|--------|------------------------------|----------------------------------|
| 1 | 1.00 | 1 | 1 | 0.03  | 0.03   | 0.032  | 0.03   | 0.031  | t | 80011  | RMVECSG<br>KQDCP             | Mus<br>musculu<br>s              |
| 1 | 1.00 | 1 | 1 | 0.03  | 0.03   | 0.032  | 0.03   | 0.031  | t | 80011  | RMVECSG<br>KQDCP             | Mus<br>musculu<br>s              |
| 1 | 1.00 | 1 | 1 | 0.01  | 0.007  | 0.01   | 0.01   | 0.012  | t | 140933 | YDITGEYV<br>QILDAHAA<br>YLNA | Oryctola<br>gus<br>cuniculu<br>s |
| 1 | 1.00 | 1 | 1 | 0.03  | 0.03   | 0.031  | 0.03   | 0.03   | t | 144785 | SKSIGWAD<br>EEGRTKRY<br>ALVI | Mus<br>musculu<br>s              |
| 1 | 1.00 | 1 | 1 | 0     | 0.006  | -0.006 | 0      | 0.002  | t | 123801 | TTPEERARI                    | Ovis<br>aries                    |
| 1 | 1.00 | 1 | 1 | 0.02  | 0.02   | 0.035  | 0.02   | 0.018  | t | 8359   | DGDALTLR<br>TATN             | Homo<br>sapiens                  |
| 1 | 1.00 | 1 | 1 | 0     | -0.002 | 0      | 0.003  | 0.002  | t | 50934  | QGPHVISR<br>IYQTAT           | Mus<br>musculu<br>s              |
| 1 | 1.00 | 1 | 1 | 0     | -0.002 | 0      | 0.003  | 0.002  | t | 52106  | QQPQQSF<br>PQQ               | Mus<br>musculu<br>s              |
| 1 | 1.00 | 1 | 1 | 0     | -0.002 | 0      | 0.003  | 0.002  | t | 6249   | CFPYCYP<br>S<br>ESA          | Mus<br>musculu<br>s              |
| 1 | 1.00 | 1 | 1 | 0     | -0.002 | 0      | 0.003  | 0.002  | t | 1367   | AFNQFGP<br>NAGQR             | Mus<br>musculu<br>s              |
| 1 | 1.00 | 1 | 1 | 0     | 0      | 0      | -0.001 | 0      | t | 102344 | DAEFR                        | Mus<br>musculu<br>s              |
| 1 | 1.00 | 1 | 1 | 0     | 0      | 0      | -0.004 | -0.002 | t | 96211  | EDKKRKEE<br>EE               | Homo<br>sapiens                  |
| 1 | 1.00 | 1 | 1 | 0     | 0      | 0      | -0.004 | -0.002 | t | 96455  | KGKNVLIN<br>KD               | Homo<br>sapiens                  |
| 1 | 1.00 | 1 | 1 | -0.01 | -0.016 | -0.024 | -0.013 | -0.01  | t | 132804 | EVLGEML<br>AATNCTK<br>D      | Trichosu<br>rus<br>vulpecul<br>a |
| 1 | 1.00 | 1 | 1 | 0.01  | 0.01   | 0.01   | 0.01   | 0.011  | t | 108088 | RAAPFGN<br>QW                | Mus<br>musculu<br>s              |

|   |      |   |   |       |       |       |        |        |   |        |                           |                       |
|---|------|---|---|-------|-------|-------|--------|--------|---|--------|---------------------------|-----------------------|
| 1 | 1.00 | 1 | 1 | -0.01 | -0.01 | -0.01 | -0.01  | -0.009 | t | 112248 | NYLAWYQ                   | Homo sapiens          |
| 1 | 1.00 | 1 | 1 | 0     | 0.002 | 0     | -0.001 | 0      | t | 136567 | PYWKWQ<br>YKYD            | Homo sapiens          |
| 1 | 1.00 | 1 | 1 | 0.03  | 0.034 | 0.032 | 0.027  | 0.032  | t | 95378  | FCMENS                    | Homo sapiens          |
| 1 | 1.00 | 1 | 1 | 0.03  | 0.03  | 0.028 | 0.03   | 0.03   | t | 21930  | GQGPSG<br>AAQGQVIS<br>N   | Mus musculus          |
| 1 | 1.00 | 1 | 1 | 0.02  | 0.018 | 0.027 | 0.017  | 0.016  | t | 135898 | ARDTQGL<br>GWGAS          | Mus musculus          |
| 1 | 1.00 | 1 | 1 | -0.01 | -0.01 | -0.01 | -0.01  | -0.008 | t | 140460 | EKLKHS                    | Mus musculus          |
| 1 | 1.00 | 1 | 1 | 0.02  | 0.018 | 0.013 | 0.02   | 0.021  | t | 38422  | LPAYQDYT<br>ARAQVSE       | Oryctolagus cuniculus |
| 1 | 1.00 | 1 | 1 | 0     | 0     | 0     | 0      | 0      | t | 79933  | MLRAVFM<br>QQRPL          | Mus musculus          |
| 1 | 1.00 | 1 | 1 | 0     | 0     | 0     | 0.001  | 0.001  | t | 7492   | DAEFRHDS<br>GYEVHHQ<br>KL | Mus musculus          |
| 1 | 1.00 | 1 | 1 | 0     | 0.004 | 0.002 | 0      | 0      | t | 72324  | WDQKLW<br>CRHFCVL<br>AD   | Mus musculus          |
| 1 | 1.00 | 1 | 1 | 0     | 0     | 0.002 | 0      | 0      | t | 73483  | YCADVAA<br>EELMNAL<br>V   | Mus musculus          |
| 1 | 1.00 | 1 | 1 | 0     | 0     | 0.002 | 0      | 0      | t | 39329  | LSEIKGVIV<br>HRLEGV       | Mus musculus          |
| 1 | 1.00 | 1 | 1 | 0     | 0.004 | 0.002 | 0      | 0      | t | 47890  | PIELQVECF<br>TWDQKL       | Mus musculus          |
| 1 | 1.00 | 1 | 1 | 0     | 0     | 0.002 | 0      | 0      | t | 39329  | LSEIKGVIV<br>HRLEGV       | Mus musculus          |
| 1 | 1.00 | 1 | 1 | 0     | 0     | 0.002 | 0      | 0      | t | 39329  | LSEIKGVIV<br>HRLEGV       | Mus musculus          |
| 1 | 1.00 | 1 | 1 | 0     | 0     | 0.002 | 0      | 0      | t | 39329  | LSEIKGVIV<br>HRLEGV       | Mus musculus          |



|   |      |   |   |       |        |       |        |       |   |        |                      |                                  |
|---|------|---|---|-------|--------|-------|--------|-------|---|--------|----------------------|----------------------------------|
| 1 | 1.00 | 1 | 1 | 0     | 0      | 0.002 | 0      | 0     | t | 39329  | LSEIKGVIV<br>HRLEGV  | Mus<br>musculu<br>s              |
| 1 | 1.00 | 1 | 1 | 0     | 0      | 0.002 | 0      | 0     | t | 49998  | PVVEVNG<br>VTIQVGSR  | Mus<br>musculu<br>s              |
| 1 | 1.00 | 1 | 1 | 0     | 0      | 0.002 | 0      | 0     | t | 39329  | LSEIKGVIV<br>HRLEGV  | Mus<br>musculu<br>s              |
| 1 | 1.00 | 1 | 1 | 0     | 0      | 0.002 | 0      | 0     | t | 39329  | LSEIKGVIV<br>HRLEGV  | Mus<br>musculu<br>s              |
| 1 | 1.00 | 1 | 1 | 0     | 0      | 0.002 | 0      | 0     | t | 39329  | LSEIKGVIV<br>HRLEGV  | Mus<br>musculu<br>s              |
| 1 | 1.00 | 1 | 1 | 0     | 0      | 0.002 | 0      | 0     | t | 9319   | DLVKFISD<br>KIKFLNP  | Mus<br>musculu<br>s              |
| 1 | 1.00 | 1 | 1 | -0.01 | -0.01  | -0.02 | -0.01  | -0.01 | t | 50528  | QDVLDKN<br>HVADIDK   | Homo<br>sapiens                  |
| 1 | 1.00 | 1 | 1 | 0     | 0      | 0.001 | -0.006 | 0     | t | 32901  | KPTKKPTF<br>KTTK     | Homo<br>sapiens                  |
| 1 | 1.00 | 1 | 1 | 0.03  | 0.033  | 0.033 | 0.03   | 0.031 | t | 12542  | EIPDPVEA<br>GEEV     | Mus<br>musculu<br>s              |
| 1 | 1.00 | 1 | 1 | 0     | 0.002  | 0     | 0.001  | 0.001 | t | 48331  | PLGFFPDH<br>QLDP     | Homo<br>sapiens                  |
| 1 | 1.00 | 1 | 1 | 0.01  | 0.014  | 0.007 | 0.01   | 0.01  | t | 110762 | AGSSIVPLE<br>EYPAEIP | Oryctola<br>gus<br>cuniculu<br>s |
| 1 | 1.00 | 1 | 1 | 0.02  | 0.02   | 0.02  | 0.016  | 0.018 | t | 118158 | SRNLYDIG<br>E        | Homo<br>sapiens                  |
| 1 | 1.00 | 1 | 1 | 0.02  | 0.02   | 0.016 | 0.02   | 0.022 | t | 148521 | CNTKCQTP<br>MGAINSS  | Gallus<br>gallus                 |
| 1 | 1.00 | 1 | 1 | 0.02  | 0.02   | 0.016 | 0.02   | 0.022 | t | 148521 | CNTKCQTP<br>MGAINSS  | Homo<br>sapiens                  |
| 1 | 1.00 | 1 | 1 | 0     | -0.003 | 0     | 0.001  | 0.001 | t | 105127 | DAEFRHD              | Oryctola<br>gus<br>cuniculu<br>s |
| 1 | 1.00 | 1 | 1 | 0     | -0.002 | 0     | 0.001  | 0.001 | t | 99922  | DAEFRHDS<br>GY       | Mus<br>musculu<br>s              |

|   |      |   |   |       |        |       |       |       |   |        |                              |                                  |
|---|------|---|---|-------|--------|-------|-------|-------|---|--------|------------------------------|----------------------------------|
| 1 | 1.00 | 1 | 1 | 0     | -0.002 | 0     | 0.001 | 0.001 | t | 7491   | DAEFRHDS<br>GYEVHHQ<br>K     | Mus<br>musculu<br>s              |
| 1 | 1.00 | 1 | 1 | 0.03  | 0.03   | 0.03  | 0.03  | 0.03  | t | 123146 | ERARISMI<br>E                | Ovis<br>aries                    |
| 1 | 1.00 | 1 | 1 | 0.01  | 0.01   | 0.01  | 0.01  | 0.01  | t | 148758 | QEQKQQL<br>QQQ               | Homo<br>sapiens                  |
| 1 | 1.00 | 1 | 1 | 0.01  | 0.01   | 0.01  | 0.01  | 0.01  | t | 153335 | ACNALNQ<br>WLCGGGS           | Mus<br>musculu<br>s              |
| 1 | 1.00 | 1 | 1 | 0.01  | 0.01   | 0.01  | 0.01  | 0.01  | t | 137542 | LKWLQLSV<br>EKGVLKY          | Homo<br>sapiens                  |
| 1 | 1.00 | 1 | 1 | 0.01  | 0.01   | 0.01  | 0.01  | 0.01  | t | 80091  | VTTSGGER<br>QE               | Oryctola<br>gus<br>cuniculu<br>s |
| 1 | 1.00 | 1 | 1 | -0.01 | -0.01  | -0.01 | -0.01 | -0.01 | t | 137320 | VTANVTD<br>ESYLY             | Sus<br>scrofa                    |
| 1 | 1.00 | 1 | 1 | -0.01 | -0.01  | -0.01 | -0.01 | -0.01 | t | 112114 | FSGFSLT                      | Homo<br>sapiens                  |
| 1 | 1.00 | 1 | 1 | -0.01 | -0.01  | -0.01 | -0.01 | -0.01 | t | 39375  | LSGKPAIIP<br>DREVLRYE<br>FDE | Homo<br>sapiens                  |
| 1 | 1.00 | 1 | 1 | -0.01 | -0.01  | -0.01 | -0.01 | -0.01 | t | 39375  | LSGKPAIIP<br>DREVLRYE<br>FDE | Homo<br>sapiens                  |
| 1 | 1.00 | 1 | 1 | -0.01 | -0.01  | -0.01 | -0.01 | -0.01 | t | 22076  | GRIILSGKP<br>ATIPDREA<br>LYR | Homo<br>sapiens                  |
| 1 | 1.00 | 1 | 1 | -0.03 | -0.03  | -0.03 | -0.03 | -0.03 | t | 93721  | RLFGGKG<br>DDI               | Ovis<br>aries                    |
| 1 | 1.00 | 1 | 1 | -0.05 | -0.05  | -0.05 | -0.05 | -0.05 | t | 150995 | HLGKCNIA<br>GWILGNP          | Homo<br>sapiens                  |
| 1 | 1.00 | 1 | 1 | -0.05 | -0.05  | -0.05 | -0.05 | -0.05 | t | 123426 | LGKNPYLR<br>G                | Ovis<br>aries                    |
| 1 | 1.00 | 1 | 1 | -0.05 | -0.05  | -0.05 | -0.05 | -0.05 | t | 93332  | LSSLQFAR<br>AA               | Ovis<br>aries                    |

|   |      |   |   |       |        |        |        |        |   |        |                             |                                  |
|---|------|---|---|-------|--------|--------|--------|--------|---|--------|-----------------------------|----------------------------------|
| 1 | 1.00 | 1 | 1 | -0.05 | -0.05  | -0.05  | -0.05  | -0.05  | t | 54509  | RLDLAML<br>AAIRRVYG         | Oryctola<br>gus<br>cuniculu<br>s |
| 1 | 1.00 | 1 | 1 | 0.02  | 0.018  | 0.018  | 0.013  | 0.022  | t | 120609 | IFAD                        | Rattus<br>norvegic<br>us         |
| 1 | 1.00 | 1 | 1 | 0.02  | 0.02   | 0.027  | 0.02   | 0.02   | t | 52713  | QVIAEHQF<br>K               | Homo<br>sapiens                  |
| 1 | 1.00 | 1 | 1 | 0     | 0.001  | 0.007  | 0.003  | 0      | t | 24200  | HLFEAH                      | Equus<br>caballus                |
| 1 | 1.00 | 1 | 1 | 0     | -0.002 | -0.007 | -0.001 | 0      | t | 133551 | EAPPPTLP<br>PDMAQVT<br>VGPG | Mus<br>musculu<br>s              |
| 1 | 1.00 | 1 | 1 | 0     | 0      | 0.002  | 0      | -0.001 | t | 55255  | RPPKWVS<br>AQ               | Mus<br>musculu<br>s              |
| 1 | 1.00 | 1 | 1 | 0.05  | 0.052  | 0.048  | 0.047  | 0.049  | t | 20825  | GLEQLESII<br>N              | Homo<br>sapiens                  |
| 1 | 1.00 | 1 | 1 | -0.03 | -0.032 | -0.021 | -0.027 | -0.03  | t | 78252  | PVQNL                       | Mus<br>musculu<br>s              |
| 1 | 1.00 | 1 | 1 | 0     | 0      | 0.002  | 0      | 0.001  | t | 142505 | ADWADW<br>LDYPG             | Mus<br>musculu<br>s              |
| 1 | 1.00 | 1 | 1 | 0     | 0      | 0.002  | 0      | 0.001  | t | 142505 | ADWADW<br>LDYPG             | Mus<br>musculu<br>s              |
| 1 | 1.00 | 1 | 1 | 0     | 0      | 0      | 0.002  | 0      | t | 148771 | QKQQLQQ<br>QQQ              | Homo<br>sapiens                  |
| 1 | 1.00 | 1 | 1 | 0.05  | 0.048  | 0.056  | 0.047  | 0.05   | t | 53194  | RARGIYET<br>ETRA            | Mus<br>musculu<br>s              |
| 1 | 1.00 | 1 | 1 | -0.03 | -0.028 | -0.035 | -0.023 | -0.027 | t | 125453 | KDRLQGM<br>APAAGAD          | Homo<br>sapiens                  |
| 1 | 1.00 | 1 | 1 | 0.01  | 0.012  | 0.01   | 0.007  | 0.01   | t | 57630  | SESTEDQA<br>MEDIKQM<br>EAE  | Homo<br>sapiens                  |
| 1 | 1.00 | 1 | 1 | 0.02  | 0.017  | 0.02   | 0.02   | 0.019  | t | 144795 | TAAGYCNT<br>GGGLPDS<br>VKI  | Oryctola<br>gus<br>cuniculu<br>s |

|   |      |   |   |       |        |        |        |        |   |        |                              |                       |
|---|------|---|---|-------|--------|--------|--------|--------|---|--------|------------------------------|-----------------------|
| 1 | 1.00 | 1 | 1 | -0.01 | -0.006 | -0.015 | -0.007 | -0.008 | t | 48736  | PPAAGPP<br>AAGPPAA<br>GPRILA | Homo sapiens          |
| 1 | 1.00 | 1 | 1 | 0.03  | 0.03   | 0.025  | 0.03   | 0.031  | t | 61977  | STVKEQLIE<br>KLIEDDEN<br>SQC | Oryctolagus cuniculus |
| 1 | 1.00 | 1 | 1 | 0     | 0      | 0.004  | 0.003  | 0      | t | 86944  | NNLPNDV<br>FREAQ             | Homo sapiens          |
| 1 | 1.00 | 1 | 1 | 0     | -0.002 | 0      | -0.007 | -0.003 | t | 134804 | TIFILCCSK<br>EKRRKKQA<br>AT  | Mus musculus          |
| 1 | 1.00 | 1 | 1 | -0.02 | -0.02  | -0.013 | -0.024 | -0.021 | t | 122477 | LSLSDLLT<br>FRT              | Homo sapiens          |
| 1 | 1.00 | 1 | 1 | 0.04  | 0.042  | 0.038  | 0.041  | 0.04   | t | 16132  | FHPPSSNQ<br>CESTPIIA<br>MDAW | Homo sapiens          |
| 1 | 1.00 | 1 | 1 | 0.02  | 0.02   | 0.02   | 0.02   | 0.02   | t | 140588 | PWSRFSLSE                    | Mus musculus          |
| 1 | 1.00 | 1 | 1 | 0.02  | 0.02   | 0.02   | 0.02   | 0.02   | t | 140588 | PWSRFSLSE                    | Mus musculus          |
| 1 | 1.00 | 1 | 1 | 0.02  | 0.02   | 0.02   | 0.02   | 0.02   | t | 128439 | DNVGSKQ<br>MQQIRMS<br>L      | Homo sapiens          |
| 1 | 1.00 | 1 | 1 | 0.02  | 0.02   | 0.02   | 0.02   | 0.02   | t | 107019 | YLTDESH<br>LHWFG             | Mus musculus          |
| 1 | 1.00 | 1 | 1 | 0     | 0      | 0      | 0      | 0      | t | 139518 | HDASASL                      | Oryctolagus cuniculus |
| 1 | 1.00 | 1 | 1 | 0     | 0      | 0      | 0      | 0      | t | 131078 | SQTTANAS<br>CPEGT            | Rattus norvegicus     |
| 1 | 1.00 | 1 | 1 | 0     | 0      | 0      | 0      | 0      | t | 121675 | NVKKLLVA<br>NPLVDSF          | Mus musculus          |
| 1 | 1.00 | 1 | 1 | 0     | 0      | 0      | 0      | 0      | t | 121675 | NVKKLLVA<br>NPLVDSF          | Mus musculus          |
| 1 | 1.00 | 1 | 1 | 0     | 0      | 0      | 0      | 0      | t | 108287 | ATADYPQ<br>KS                | Homo sapiens          |

|   |      |   |   |       |        |        |        |        |   |        |                              |                          |
|---|------|---|---|-------|--------|--------|--------|--------|---|--------|------------------------------|--------------------------|
| 1 | 1.00 | 1 | 1 | 0     | 0      | 0      | 0      | 0      | t | 104480 | ESKENEKA<br>LNELLEKT<br>VKDK | Rattus<br>norvegicus     |
| 1 | 1.00 | 1 | 1 | 0     | 0      | 0      | 0      | 0      | t | 68346  | VESLDVAT<br>RTPSFS           | Homo<br>sapiens          |
| 1 | 1.00 | 1 | 1 | 0     | 0      | 0      | 0      | 0      | t | 93058  | KATKDEKI<br>EE               | Ovis<br>aries            |
| 1 | 1.00 | 1 | 1 | 0     | 0      | 0      | 0      | 0      | t | 55266  | RPPRFQLS<br>S                | Mus<br>musculus          |
| 1 | 1.00 | 1 | 1 | -0.02 | -0.02  | -0.02  | -0.02  | -0.02  | t | 156545 | PTTTPVNT<br>TNKYSTSP<br>S    | Mus<br>musculus          |
| 1 | 1.00 | 1 | 1 | -0.02 | -0.02  | -0.02  | -0.02  | -0.02  | t | 156545 | PTTTPVNT<br>TNKYSTSP<br>S    | Mus<br>musculus          |
| 1 | 1.00 | 1 | 1 | -0.02 | -0.02  | -0.02  | -0.02  | -0.02  | t | 115741 | FMAIPPKK<br>NQ               | Homo<br>sapiens          |
| 1 | 1.00 | 1 | 1 | -0.04 | -0.04  | -0.04  | -0.04  | -0.04  | t | 52844  | QWKLQPG<br>D                 | Anas<br>platyrhynchos    |
| 1 | 1.00 | 1 | 1 | 0     | -0.003 | 0.007  | 0      | 0      | t | 153856 | MFQDPQE<br>R                 | Oryctolagus<br>cuniculus |
| 1 | 1.00 | 1 | 1 | -0.06 | -0.057 | -0.065 | -0.06  | -0.059 | t | 131967 | LRLDCRHE<br>N                | Mus<br>musculus          |
| 1 | 1.00 | 1 | 1 | 0     | 0.002  | 0      | 0.003  | 0      | t | 9853   | DQILRSMK<br>GLSSTSI          | Homo<br>sapiens          |
| 1 | 1.00 | 1 | 1 | -0.02 | -0.023 | -0.02  | -0.02  | -0.018 | t | 135460 | GGLGVG                       | Oryctolagus<br>cuniculus |
| 1 | 1.00 | 1 | 1 | 0     | 0.003  | -0.008 | 0      | -0.001 | t | 72485  | WGNGCGL<br>FGKGSIDT<br>CAKFA | Equus<br>caballus        |
| 1 | 1.00 | 1 | 1 | -0.01 | -0.01  | -0.011 | -0.01  | -0.01  | t | 159170 | TTASGKLV<br>TDWCCRS<br>C     | Mus<br>musculus          |
| 1 | 1.00 | 1 | 1 | 0     | 0.008  | 0      | -0.003 | -0.002 | t | 28984  | ITLSSTSNP<br>PHGL            | Cavia<br>porcellus       |

|   |      |   |   |       |        |        |        |        |   |        |                              |                                  |
|---|------|---|---|-------|--------|--------|--------|--------|---|--------|------------------------------|----------------------------------|
| 1 | 1.00 | 1 | 1 | 0     | 0.002  | 0      | -0.001 | 0      | t | 149430 | QPFLPQQ<br>PYP               | Homo<br>sapiens                  |
| 1 | 1.00 | 1 | 1 | -0.01 | -0.01  | -0.01  | -0.01  | -0.009 | t | 36956  | LKMADPN<br>RFRG              | Mus<br>musculu<br>s              |
| 1 | 1.00 | 1 | 1 | -0.01 | -0.008 | -0.012 | -0.013 | -0.011 | t | 27961  | IPNKKPGK<br>KTTT             | Homo<br>sapiens                  |
| 1 | 1.00 | 1 | 1 | 0     | -0.005 | 0      | -0.001 | 0      | t | 148567 | DKSKLQDV<br>KDNKPSD<br>VKL   | Canis<br>lupus                   |
| 1 | 1.00 | 1 | 1 | 0.04  | 0.036  | 0.037  | 0.043  | 0.04   | t | 35860  | LFIQGYSIY<br>ENYGNIKE<br>FNA | Oryctola<br>gus<br>cuniculu<br>s |
| 1 | 1.00 | 1 | 1 | 0.01  | 0.006  | 0.01   | 0.007  | 0.008  | t | 156601 | ADEPNNL<br>NSK               | Oryctola<br>gus<br>cuniculu<br>s |
| 1 | 1.00 | 1 | 1 | 0.01  | 0.012  | 0.017  | 0.013  | 0.01   | t | 14435  | ETIYNTTLK<br>Y               | Homo<br>sapiens                  |
| 1 | 1.00 | 1 | 1 | 0.01  | 0.009  | 0.017  | 0.013  | 0.01   | t | 14435  | ETIYNTTLK<br>Y               | Homo<br>sapiens                  |
| 1 | 1.00 | 1 | 1 | -0.01 | -0.012 | -0.001 | -0.007 | -0.008 | t | 105697 | CCAVLNG<br>AY                | Mus<br>musculu<br>s              |
| 1 | 1.00 | 1 | 1 | 0.01  | 0.01   | 0.01   | 0.01   | 0.01   | t | 99834  | QGQQGY<br>P                  | Mus<br>musculu<br>s              |
| 1 | 1.00 | 1 | 1 | 0.04  | 0.045  | 0.05   | 0.04   | 0.039  | t | 132878 | NSSSSQFQ<br>IH               | Mus<br>musculu<br>s              |
| 1 | 1.00 | 1 | 1 | 0.05  | 0.05   | 0.051  | 0.05   | 0.049  | t | 49373  | PSGDSGLS<br>TGADAA           | Homo<br>sapiens                  |
| 1 | 1.00 | 1 | 1 | 0.01  | 0.012  | 0.006  | 0.007  | 0.012  | t | 51807  | QPELPYPQ                     | Homo<br>sapiens                  |

|   |      |   |   |       |        |        |        |        |   |        |                              |                     |
|---|------|---|---|-------|--------|--------|--------|--------|---|--------|------------------------------|---------------------|
| 1 | 1.00 | 1 | 1 | 0.03  | 0.033  | 0.04   | 0.03   | 0.03   | t | 61824  | STPLLYPSL<br>A               | Mus<br>musculu<br>s |
| 1 | 1.00 | 1 | 1 | -0.03 | -0.033 | -0.034 | -0.03  | -0.03  | t | 1023   | AEKQRLED<br>LGQKFERL<br>KQRS | Mus<br>musculu<br>s |
| 1 | 1.00 | 1 | 1 | 0     | 0.004  | 0.006  | 0.001  | -0.001 | t | 4912   | ATCMQVN<br>LEIMTST           | Homo<br>sapiens     |
| 1 | 1.00 | 1 | 1 | 0.01  | 0.01   | 0.01   | 0.01   | 0.01   | t | 150865 | KSITIGPGR<br>A               | Homo<br>sapiens     |
| 1 | 1.00 | 1 | 1 | 0     | 0.003  | 0.003  | 0      | 0      | t | 19895  | GGKFLEG                      | Mus<br>musculu<br>s |
| 1 | 1.00 | 1 | 1 | 0.02  | 0.02   | 0.02   | 0.02   | 0.02   | t | 137447 | SHKIHPFQ<br>TTPY             | Mus<br>musculu<br>s |
| 1 | 1.00 | 1 | 1 | -0.01 | -0.014 | -0.003 | -0.01  | -0.008 | t | 10860  | DYDGYGW<br>RE                | Mus<br>musculu<br>s |
| 1 | 1.00 | 1 | 1 | -0.01 | -0.008 | -0.01  | -0.009 | -0.01  | t | 110938 | LYIKGSGST<br>ANLASSNY<br>FPT | Homo<br>sapiens     |
| 1 | 1.00 | 1 | 1 | -0.01 | -0.008 | -0.01  | -0.009 | -0.01  | t | 110938 | LYIKGSGST<br>ANLASSNY<br>FPT | Homo<br>sapiens     |
| 1 | 1.00 | 1 | 1 | 0     | 0.002  | 0      | 0      | 0.001  | t | 118060 | PPPGMRP<br>P                 | Homo<br>sapiens     |
| 1 | 1.00 | 1 | 1 | 0     | 0.002  | 0      | 0      | 0.001  | t | 118060 | PPPGMRP<br>P                 | Homo<br>sapiens     |
| 1 | 1.00 | 1 | 1 | 0.05  | 0.05   | 0.05   | 0.05   | 0.05   | t | 119011 | SGPEGSG<br>GSGPQRR<br>GGDNHG | Homo<br>sapiens     |
| 1 | 1.00 | 1 | 1 | 0.05  | 0.05   | 0.05   | 0.05   | 0.05   | t | 119011 | SGPEGSG<br>GSGPQRR<br>GGDNHG | Homo<br>sapiens     |
| 1 | 1.00 | 1 | 1 | 0.05  | 0.05   | 0.05   | 0.05   | 0.05   | t | 115600 | DHSYQEEA<br>AMEL             | Homo<br>sapiens     |
| 1 | 1.00 | 1 | 1 | 0.05  | 0.05   | 0.05   | 0.05   | 0.05   | t | 115600 | DHSYQEEA<br>AMEL             | Homo<br>sapiens     |

|   |      |   |   |       |       |       |       |       |   |        |                              |                                  |
|---|------|---|---|-------|-------|-------|-------|-------|---|--------|------------------------------|----------------------------------|
| 1 | 1.00 | 1 | 1 | 0.01  | 0.01  | 0.01  | 0.01  | 0.01  | t | 147976 | MSDGA VQ<br>PD               | Canis<br>lupus                   |
| 1 | 1.00 | 1 | 1 | 0.01  | 0.01  | 0.01  | 0.01  | 0.01  | t | 135732 | PCLNGGSC                     | Homo<br>sapiens                  |
| 1 | 1.00 | 1 | 1 | 0.01  | 0.01  | 0.01  | 0.01  | 0.01  | t | 137527 | FHGCLASR<br>QEWQQQ<br>D      | Homo<br>sapiens                  |
| 1 | 1.00 | 1 | 1 | 0.01  | 0.01  | 0.01  | 0.01  | 0.01  | t | 119590 | HQDWLN<br>GK                 | Homo<br>sapiens                  |
| 1 | 1.00 | 1 | 1 | 0.01  | 0.01  | 0.01  | 0.01  | 0.01  | t | 112931 | DATTNPSL<br>ILAAAQM          | Oryctola<br>gus<br>cuniculu<br>s |
| 1 | 1.00 | 1 | 1 | 0.01  | 0.01  | 0.01  | 0.01  | 0.01  | t | 112931 | DATTNPSL<br>ILAAAQM          | Homo<br>sapiens                  |
| 1 | 1.00 | 1 | 1 | 0.01  | 0.01  | 0.01  | 0.01  | 0.01  | t | 104123 | MNKTFSA                      | Homo<br>sapiens                  |
| 1 | 1.00 | 1 | 1 | 0.01  | 0.01  | 0.01  | 0.01  | 0.01  | t | 117386 | TRPINTAQ<br>CGDC             | Homo<br>sapiens                  |
| 1 | 1.00 | 1 | 1 | 0.01  | 0.01  | 0.01  | 0.01  | 0.01  | t | 40019  | LTLNMDS<br>GQ                | Rattus<br>norvegic<br>us         |
| 1 | 1.00 | 1 | 1 | -0.01 | -0.01 | -0.01 | -0.01 | -0.01 | t | 149296 | ELDKWAG                      | Homo<br>sapiens                  |
| 1 | 1.00 | 1 | 1 | -0.01 | -0.01 | -0.01 | -0.01 | -0.01 | t | 70138  | VNNTDTN<br>FHRDITFR          | Homo<br>sapiens                  |
| 1 | 1.00 | 1 | 1 | -0.01 | -0.01 | -0.01 | -0.01 | -0.01 | t | 79466  | YCDAFLIE<br>QANHCW           | Mus<br>musculu<br>s              |
| 1 | 1.00 | 1 | 1 | -0.01 | -0.01 | -0.01 | -0.01 | -0.01 | t | 91303  | FKGF EAVS<br>VDLAA           | Equus<br>caballus                |
| 1 | 1.00 | 1 | 1 | -0.01 | -0.01 | -0.01 | -0.01 | -0.01 | t | 49082  | PQQPFPQ<br>PQQ               | Mus<br>musculu<br>s              |
| 1 | 1.00 | 1 | 1 | -0.01 | -0.01 | -0.01 | -0.01 | -0.01 | t | 41325  | MEECASH<br>LPYIEQGV<br>QLAEQ | Homo<br>sapiens                  |
| 1 | 1.00 | 1 | 1 | -0.01 | -0.01 | -0.01 | -0.01 | -0.01 | t | 49082  | PQQPFPQ<br>PQQ               | Mus<br>musculu<br>s              |
| 1 | 1.00 | 1 | 1 | -0.01 | -0.01 | -0.01 | -0.01 | -0.01 | t | 4453   | ASHLPYIE<br>QGMQLAE<br>QFKQK | Homo<br>sapiens                  |



|   |      |   |   |       |        |        |        |        |   |        |                          |                                  |
|---|------|---|---|-------|--------|--------|--------|--------|---|--------|--------------------------|----------------------------------|
| 1 | 1.00 | 1 | 1 | -0.03 | -0.03  | -0.03  | -0.03  | -0.03  | t | 135737 | PWQVVLN<br>G             | Homo<br>sapiens                  |
| 1 | 1.00 | 1 | 1 | -0.03 | -0.03  | -0.03  | -0.03  | -0.03  | t | 123243 | GLSRISYDP                | Ovis<br>aries                    |
| 1 | 1.00 | 1 | 1 | -0.03 | -0.03  | -0.03  | -0.03  | -0.03  | t | 115694 | AVPYPQR<br>DMP           | Homo<br>sapiens                  |
| 1 | 1.00 | 1 | 1 | -0.03 | -0.03  | -0.03  | -0.03  | -0.03  | t | 112142 | GQSPKLL                  | Homo<br>sapiens                  |
| 1 | 1.00 | 1 | 1 | -0.03 | -0.03  | -0.03  | -0.03  | -0.03  | t | 111142 | CALHPPPQ<br>C            | Homo<br>sapiens                  |
| 1 | 1.00 | 1 | 1 | 0.01  | 0.013  | 0.01   | 0.01   | 0.012  | t | 144705 | KGTHSLYS<br>QIAG         | Mus<br>musculu<br>s              |
| 1 | 1.00 | 1 | 1 | 0.04  | 0.038  | 0.033  | 0.033  | 0.038  | t | 134133 | LGGAKQA<br>GDV           | Mus<br>musculu<br>s              |
| 1 | 1.00 | 1 | 1 | -0.02 | -0.019 | -0.02  | -0.023 | -0.018 | t | 130461 | CWNYCLP                  | Mus<br>musculu<br>s              |
| 1 | 1.00 | 1 | 1 | 0.04  | 0.048  | 0.04   | 0.04   | 0.041  | t | 156941 | PTEKKHV                  | Gallus<br>gallus                 |
| 1 | 1.00 | 1 | 1 | 0     | -0.008 | 0      | 0      | 0      | t | 50273  | QAGRTAH<br>AVTNIFSV<br>G | Mus<br>musculu<br>s              |
| 1 | 1.00 | 1 | 1 | 0.02  | 0.018  | 0.015  | 0.021  | 0.02   | t | 135727 | NRSPSTGE<br>QKSSGI       | Mus<br>musculu<br>s              |
| 1 | 1.00 | 1 | 1 | 0.02  | 0.024  | 0.025  | 0.023  | 0.021  | t | 122145 | LTLFPSRDT<br>PLSSQTD     | Homo<br>sapiens                  |
| 1 | 1.00 | 1 | 1 | -0.05 | -0.047 | -0.045 | -0.05  | -0.051 | t | 97301  | FFWTILKP                 | Mus<br>musculu<br>s              |
| 1 | 1.00 | 1 | 1 | -0.04 | -0.045 | -0.048 | -0.037 | -0.038 | t | 157277 | FRAISTPRT<br>GTMP        | Canis<br>lupus                   |
| 1 | 1.00 | 1 | 1 | 0.04  | 0.04   | 0.051  | 0.04   | 0.038  | t | 30057  | KCGVNVP<br>YKISTSTN      | Oryctola<br>gus<br>cuniculu<br>s |
| 1 | 1.00 | 1 | 1 | 0.04  | 0.037  | 0.051  | 0.04   | 0.038  | t | 30057  | KCGVNVP<br>YKISTSTN      | Oryctola<br>gus<br>cuniculu<br>s |

|   |      |   |   |       |       |        |       |        |   |        |                           |                                  |
|---|------|---|---|-------|-------|--------|-------|--------|---|--------|---------------------------|----------------------------------|
| 1 | 1.00 | 1 | 1 | 0.01  | 0.012 | 0.015  | 0.013 | 0.008  | t | 39164  | LRPGPVSQ<br>PYHHWDT<br>DK | Homo<br>sapiens                  |
| 1 | 1.00 | 1 | 1 | 0.05  | 0.053 | 0.053  | 0.05  | 0.052  | t | 78938  | CAPGQNL<br>CY             | Mus<br>musculu<br>s              |
| 1 | 1.00 | 1 | 1 | 0.02  | 0.02  | 0.031  | 0.02  | 0.018  | t | 6763   | CPFLKQNE<br>PEDIDCW       | Mus<br>musculu<br>s              |
| 1 | 1.00 | 1 | 1 | 0.02  | 0.024 | 0.02   | 0.021 | 0.02   | t | 6040   | CASYHTVS<br>LLRSTSQK<br>S | Homo<br>sapiens                  |
| 1 | 1.00 | 1 | 1 | 0     | 0.003 | -0.003 | 0     | 0.001  | t | 125238 | RLPLPPNQ<br>KR            | Mus<br>musculu<br>s              |
| 1 | 1.00 | 1 | 1 | 0.01  | 0.008 | 0.013  | 0.009 | 0.01   | t | 68024  | VDDMMRF<br>NINDFLPP<br>G  | Sus<br>scrofa                    |
| 1 | 1.00 | 1 | 1 | -0.02 | -0.02 | -0.017 | -0.02 | -0.022 | t | 133534 | CKLTANPS<br>LAAVV         | Rattus<br>norvegic<br>us         |
| 1 | 1.00 | 1 | 1 | 0     | 0     | 0      | 0.001 | 0.001  | t | 78695  | KDTNNNL<br>YNGK           | Mus<br>musculu<br>s              |
| 1 | 1.00 | 1 | 1 | 0     | 0     | 0      | 0.001 | 0.001  | t | 78854  | TKDTNNN<br>LKG            | Mus<br>musculu<br>s              |
| 1 | 1.00 | 1 | 1 | 0.01  | 0.008 | 0.01   | 0.003 | 0.01   | t | 134699 | KDRHDFG<br>F              | Mus<br>musculu<br>s              |
| 1 | 1.00 | 1 | 1 | 0     | 0     | 0      | 0     | 0      | t | 137136 | DQQTQIA<br>KDTAQT         | Mus<br>musculu<br>s              |
| 1 | 1.00 | 1 | 1 | 0     | 0     | 0      | 0     | 0      | t | 134770 | QIFNLFSTK<br>DSSAA        | Mus<br>musculu<br>s              |
| 1 | 1.00 | 1 | 1 | 0     | 0     | 0      | 0     | 0      | t | 138029 | SASGSDVS<br>LTA           | Oryctola<br>gus<br>cuniculu<br>s |
| 1 | 1.00 | 1 | 1 | 0     | 0     | 0      | 0     | 0      | t | 134654 | DQQNQFQ<br>KAET           | Mus<br>musculu<br>s              |

|   |      |   |   |   |        |   |   |   |   |        |                              |                                   |
|---|------|---|---|---|--------|---|---|---|---|--------|------------------------------|-----------------------------------|
| 1 | 1.00 | 1 | 1 | 0 | 0      | 0 | 0 | 0 | t | 138162 | EKKYSPCA<br>WEVVRAE          | Mus<br>musculu<br>s               |
| 1 | 1.00 | 1 | 1 | 0 | 0      | 0 | 0 | 0 | t | 134699 | KDRHDFG<br>F                 | Mus<br>musculu<br>s               |
| 1 | 1.00 | 1 | 1 | 0 | 0      | 0 | 0 | 0 | t | 134578 | TVIESLESL<br>NNY             | Cricetulu<br>s<br>migrator<br>ius |
| 1 | 1.00 | 1 | 1 | 0 | 0      | 0 | 0 | 0 | t | 120155 | QPSPYNG<br>WRMEI             | Rattus<br>norvegic<br>us          |
| 1 | 1.00 | 1 | 1 | 0 | 0      | 0 | 0 | 0 | t | 131654 | SGFGVVKK<br>PNY              | Oryctola<br>gus<br>cuniculu<br>s  |
| 1 | 1.00 | 1 | 1 | 0 | -0.003 | 0 | 0 | 0 | t | 131128 | VEMKKED<br>FDIYDEDE          | Oryctola<br>gus<br>cuniculu<br>s  |
| 1 | 1.00 | 1 | 1 | 0 | 0      | 0 | 0 | 0 | t | 120343 | YNLKWNP<br>DDYGGVK<br>KIHI   | Rattus<br>norvegic<br>us          |
| 1 | 1.00 | 1 | 1 | 0 | 0      | 0 | 0 | 0 | t | 122543 | QRSQDEN                      | Rattus<br>norvegic<br>us          |
| 1 | 1.00 | 1 | 1 | 0 | 0      | 0 | 0 | 0 | t | 120172 | RKIPKRPG<br>SVHRTPSR<br>Q    | Oryctola<br>gus<br>cuniculu<br>s  |
| 1 | 1.00 | 1 | 1 | 0 | 0      | 0 | 0 | 0 | t | 123064 | CPTMTRVL<br>QGVLPALP<br>QVVC | Mus<br>musculu<br>s               |
| 1 | 1.00 | 1 | 1 | 0 | 0      | 0 | 0 | 0 | t | 119649 | SYCEIIVTH<br>FPFDQQN<br>CT   | Oryctola<br>gus<br>cuniculu<br>s  |
| 1 | 1.00 | 1 | 1 | 0 | 0      | 0 | 0 | 0 | t | 119677 | WVYYTCC<br>PDTPYLDIT<br>YHF  | Rattus<br>norvegic<br>us          |
| 1 | 1.00 | 1 | 1 | 0 | 0      | 0 | 0 | 0 | t | 119869 | FNIKSRSEL<br>MFEKQS          | Oryctola<br>gus<br>cuniculu<br>s  |
| 1 | 1.00 | 1 | 1 | 0 | -0.003 | 0 | 0 | 0 | t | 123064 | CPTMTRVL<br>QGVLPALP<br>QVVC | Oryctola<br>gus<br>cuniculu<br>s  |

|   |      |   |   |   |   |   |   |   |   |        |                              |                                  |
|---|------|---|---|---|---|---|---|---|---|--------|------------------------------|----------------------------------|
| 1 | 1.00 | 1 | 1 | 0 | 0 | 0 | 0 | 0 | t | 131904 | HCQICHCD<br>VVNLTCE          | Homo<br>sapiens                  |
| 1 | 1.00 | 1 | 1 | 0 | 0 | 0 | 0 | 0 | t | 123063 | CPTMTRVL<br>QGVLPALP<br>Q    | Mus<br>musculu<br>s              |
| 1 | 1.00 | 1 | 1 | 0 | 0 | 0 | 0 | 0 | t | 131031 | RAYATEPH<br>AK               | Mus<br>musculu<br>s              |
| 1 | 1.00 | 1 | 1 | 0 | 0 | 0 | 0 | 0 | t | 134037 | DYDDTIS                      | Oryctola<br>gus<br>cuniculu<br>s |
| 1 | 1.00 | 1 | 1 | 0 | 0 | 0 | 0 | 0 | t | 119923 | GYISKAQE<br>YFN              | Oryctola<br>gus<br>cuniculu<br>s |
| 1 | 1.00 | 1 | 1 | 0 | 0 | 0 | 0 | 0 | t | 119642 | SEHETRLV<br>ANLLENYN<br>KVIR | Oryctola<br>gus<br>cuniculu<br>s |
| 1 | 1.00 | 1 | 1 | 0 | 0 | 0 | 0 | 0 | t | 120343 | YNLKWNP<br>DDYGGVK<br>KIHI   | Rattus<br>norvegic<br>us         |
| 1 | 1.00 | 1 | 1 | 0 | 0 | 0 | 0 | 0 | t | 113966 | TTHYGSLP<br>QKAQGHR<br>PQDE  | Rattus<br>norvegic<br>us         |
| 1 | 1.00 | 1 | 1 | 0 | 0 | 0 | 0 | 0 | t | 113942 | TQDENPV<br>VHF               | Mus<br>musculu<br>s              |
| 1 | 1.00 | 1 | 1 | 0 | 0 | 0 | 0 | 0 | t | 116001 | TQDQDPV<br>VHF               | Oryctola<br>gus<br>cuniculu<br>s |
| 1 | 1.00 | 1 | 1 | 0 | 0 | 0 | 0 | 0 | t | 116001 | TQDQDPV<br>VHF               | Oryctola<br>gus<br>cuniculu<br>s |
| 1 | 1.00 | 1 | 1 | 0 | 0 | 0 | 0 | 0 | t | 116001 | TQDQDPV<br>VHF               | Ovis<br>aries                    |
| 1 | 1.00 | 1 | 1 | 0 | 0 | 0 | 0 | 0 | t | 113966 | TTHYGSLP<br>QKAQGHR<br>PQDE  | Oryctola<br>gus<br>cuniculu<br>s |
| 1 | 1.00 | 1 | 1 | 0 | 0 | 0 | 0 | 0 | t | 113879 | SQRSQDE<br>N                 | Rattus<br>norvegic<br>us         |
| 1 | 1.00 | 1 | 1 | 0 | 0 | 0 | 0 | 0 | t | 113014 | GSLPQKSQ<br>RSQDENG          | Rattus<br>norvegic<br>us         |

|   |      |   |   |   |       |   |   |   |   |        |                             |                          |
|---|------|---|---|---|-------|---|---|---|---|--------|-----------------------------|--------------------------|
| 1 | 1.00 | 1 | 1 | 0 | 0.002 | 0 | 0 | 0 | t | 114041 | YGSLPQKA<br>QGHRPQD<br>EN   | Rattus<br>norvegicus     |
| 1 | 1.00 | 1 | 1 | 0 | 0     | 0 | 0 | 0 | t | 114042 | YGSLPQKA<br>QRPQDEN<br>G    | Rattus<br>norvegicus     |
| 1 | 1.00 | 1 | 1 | 0 | 0     | 0 | 0 | 0 | t | 116468 | RPQDENP<br>VVH              | Oryctolagus<br>cuniculus |
| 1 | 1.00 | 1 | 1 | 0 | 0     | 0 | 0 | 0 | t | 114042 | YGSLPQKA<br>QRPQDEN<br>G    | Rattus<br>norvegicus     |
| 1 | 1.00 | 1 | 1 | 0 | 0.002 | 0 | 0 | 0 | t | 114142 | PQKSQRS<br>QDEN             | Rattus<br>norvegicus     |
| 1 | 1.00 | 1 | 1 | 0 | 0     | 0 | 0 | 0 | t | 114149 | YGSLPQKA<br>QGHRPQD<br>E    | Rattus<br>norvegicus     |
| 1 | 1.00 | 1 | 1 | 0 | 0     | 0 | 0 | 0 | t | 114149 | YGSLPQKA<br>QGHRPQD<br>E    | Oryctolagus<br>cuniculus |
| 1 | 1.00 | 1 | 1 | 0 | 0     | 0 | 0 | 0 | t | 115664 | YGSLPQKA<br>QGHRPQD<br>ENG  | Rattus<br>norvegicus     |
| 1 | 1.00 | 1 | 1 | 0 | 0     | 0 | 0 | 0 | t | 114224 | PQDENPV<br>VHF              | Mus<br>musculus          |
| 1 | 1.00 | 1 | 1 | 0 | 0     | 0 | 0 | 0 | t | 113966 | TTHYGSLP<br>QKAQGHR<br>PQDE | Oryctolagus<br>cuniculus |
| 1 | 1.00 | 1 | 1 | 0 | 0     | 0 | 0 | 0 | t | 109253 | GSLPQKSQ<br>RSQDENP<br>VVHF | Rattus<br>norvegicus     |
| 1 | 1.00 | 1 | 1 | 0 | 0     | 0 | 0 | 0 | t | 113966 | TTHYGSLP<br>QKAQGHR<br>PQDE | Oryctolagus<br>cuniculus |
| 1 | 1.00 | 1 | 1 | 0 | 0     | 0 | 0 | 0 | t | 117315 | KALSVETE<br>KLLKYLEAV       | Homo<br>sapiens          |
| 1 | 1.00 | 1 | 1 | 0 | 0     | 0 | 0 | 0 | t | 111856 | TTHYGSLP<br>QK              | Oryctolagus<br>cuniculus |

|   |      |   |   |   |        |   |   |   |   |        |                             |                          |
|---|------|---|---|---|--------|---|---|---|---|--------|-----------------------------|--------------------------|
| 1 | 1.00 | 1 | 1 | 0 | 0.002  | 0 | 0 | 0 | t | 113966 | TTHYGSLP<br>QKAQGHR<br>PQDE | Rattus<br>norvegicus     |
| 1 | 1.00 | 1 | 1 | 0 | 0      | 0 | 0 | 0 | t | 113966 | TTHYGSLP<br>QKAQGHR<br>PQDE | Oryctolagus<br>cuniculus |
| 1 | 1.00 | 1 | 1 | 0 | 0      | 0 | 0 | 0 | t | 100378 | PGSGFWS<br>FGSEDGSG<br>DSEN | Mus<br>musculus          |
| 1 | 1.00 | 1 | 1 | 0 | 0.012  | 0 | 0 | 0 | t | 114142 | PQKSQRS<br>QDEN             | Rattus<br>norvegicus     |
| 1 | 1.00 | 1 | 1 | 0 | -0.011 | 0 | 0 | 0 | t | 116164 | RTPPPSG                     | Oryctolagus<br>cuniculus |
| 1 | 1.00 | 1 | 1 | 0 | 0      | 0 | 0 | 0 | t | 113013 | GSLPQKSQ<br>RSQDEN          | Rattus<br>norvegicus     |
| 1 | 1.00 | 1 | 1 | 0 | 0      | 0 | 0 | 0 | t | 116164 | RTPPPSG                     | Oryctolagus<br>cuniculus |
| 1 | 1.00 | 1 | 1 | 0 | 0      | 0 | 0 | 0 | t | 115612 | GSLPQKA<br>QRPQDEN<br>G     | Rattus<br>norvegicus     |
| 1 | 1.00 | 1 | 1 | 0 | 0      | 0 | 0 | 0 | t | 114042 | YGSLPQKA<br>QRPQDEN<br>G    | Rattus<br>norvegicus     |
| 1 | 1.00 | 1 | 1 | 0 | -0.009 | 0 | 0 | 0 | t | 116164 | RTPPPSG                     | Rattus<br>norvegicus     |
| 1 | 1.00 | 1 | 1 | 0 | 0      | 0 | 0 | 0 | t | 116164 | RTPPPSG                     | Gallus<br>gallus         |
| 1 | 1.00 | 1 | 1 | 0 | 0      | 0 | 0 | 0 | t | 94954  | TTAETLDA<br>TC              | Mus<br>musculus          |
| 1 | 1.00 | 1 | 1 | 0 | 0      | 0 | 0 | 0 | t | 78286  | TTAETLDA<br>TR              | Mus<br>musculus          |
| 1 | 1.00 | 1 | 1 | 0 | 0      | 0 | 0 | 0 | t | 94954  | TTAETLDA<br>TC              | Mus<br>musculus          |

|   |      |   |   |   |   |   |   |   |   |       |                              |                          |
|---|------|---|---|---|---|---|---|---|---|-------|------------------------------|--------------------------|
| 1 | 1.00 | 1 | 1 | 0 | 0 | 0 | 0 | 0 | t | 78286 | TTAETLDA<br>TR               | Mus<br>musculu<br>s      |
| 1 | 1.00 | 1 | 1 | 0 | 0 | 0 | 0 | 0 | t | 94953 | TTAEMLD<br>ATR               | Mus<br>musculu<br>s      |
| 1 | 1.00 | 1 | 1 | 0 | 0 | 0 | 0 | 0 | t | 78286 | TTAETLDA<br>TR               | Mus<br>musculu<br>s      |
| 1 | 1.00 | 1 | 1 | 0 | 0 | 0 | 0 | 0 | t | 78286 | TTAETLDA<br>TR               | Mus<br>musculu<br>s      |
| 1 | 1.00 | 1 | 1 | 0 | 0 | 0 | 0 | 0 | t | 78286 | TTAETLDA<br>TR               | Mus<br>musculu<br>s      |
| 1 | 1.00 | 1 | 1 | 0 | 0 | 0 | 0 | 0 | t | 70620 | VQNTVED<br>LKLNTLGR          | Homo<br>sapiens          |
| 1 | 1.00 | 1 | 1 | 0 | 0 | 0 | 0 | 0 | t | 73554 | YDKPYMYL<br>NLYDPNKY<br>VDV  | Mus<br>musculu<br>s      |
| 1 | 1.00 | 1 | 1 | 0 | 0 | 0 | 0 | 0 | t | 73554 | YDKPYMYL<br>NLYDPNKY<br>VDV  | Mus<br>musculu<br>s      |
| 1 | 1.00 | 1 | 1 | 0 | 0 | 0 | 0 | 0 | t | 95094 | IGFRGLDG<br>VHCTPTTD<br>SGVI | Rattus<br>norvegic<br>us |
| 1 | 1.00 | 1 | 1 | 0 | 0 | 0 | 0 | 0 | t | 95048 | VIFQTPLIK<br>NPDVKSAI<br>EG  | Rattus<br>norvegic<br>us |
| 1 | 1.00 | 1 | 1 | 0 | 0 | 0 | 0 | 0 | t | 72649 | WIRTPPAY<br>R                | Mus<br>musculu<br>s      |
| 1 | 1.00 | 1 | 1 | 0 | 0 | 0 | 0 | 0 | t | 95036 | RTCMTTA<br>QGTSMP<br>SC      | Mus<br>musculu<br>s      |
| 1 | 1.00 | 1 | 1 | 0 | 0 | 0 | 0 | 0 | t | 95036 | RTCMTTA<br>QGTSMP<br>SC      | Mus<br>musculu<br>s      |
| 1 | 1.00 | 1 | 1 | 0 | 0 | 0 | 0 | 0 | t | 78940 | CRRHNYG<br>FWVC              | Mus<br>musculu<br>s      |

|   |      |   |   |   |        |   |   |   |   |       |                              |                                  |
|---|------|---|---|---|--------|---|---|---|---|-------|------------------------------|----------------------------------|
| 1 | 1.00 | 1 | 1 | 0 | 0      | 0 | 0 | 0 | t | 70304 | VPGIDPNA<br>CHYMKC           | Homo<br>sapiens                  |
| 1 | 1.00 | 1 | 1 | 0 | 0      | 0 | 0 | 0 | t | 95042 | SPESDRPD<br>LST              | Oryctola<br>gus<br>cuniculu<br>s |
| 1 | 1.00 | 1 | 1 | 0 | 0      | 0 | 0 | 0 | t | 78939 | CINHRGY<br>WVC               | Mus<br>musculu<br>s              |
| 1 | 1.00 | 1 | 1 | 0 | -0.002 | 0 | 0 | 0 | t | 72805 | WLTEKEGS<br>YP               | Mus<br>musculu<br>s              |
| 1 | 1.00 | 1 | 1 | 0 | 0      | 0 | 0 | 0 | t | 67729 | VAQYKALP<br>VVLENA           | Homo<br>sapiens                  |
| 1 | 1.00 | 1 | 1 | 0 | 0      | 0 | 0 | 0 | t | 61317 | SSRGKVVE                     | Mus<br>musculu<br>s              |
| 1 | 1.00 | 1 | 1 | 0 | 0      | 0 | 0 | 0 | t | 69271 | VKMAETC<br>PIFYDVF           | Mus<br>musculu<br>s              |
| 1 | 1.00 | 1 | 1 | 0 | 0      | 0 | 0 | 0 | t | 55260 | RPPNAP                       | Mus<br>musculu<br>s              |
| 1 | 1.00 | 1 | 1 | 0 | 0      | 0 | 0 | 0 | t | 37660 | LLPHSNLD<br>HILEPSIPW<br>KSK | Homo<br>sapiens                  |
| 1 | 1.00 | 1 | 1 | 0 | 0      | 0 | 0 | 0 | t | 57751 | SFERFEIFP<br>KE              | Oryctola<br>gus<br>cuniculu<br>s |
| 1 | 1.00 | 1 | 1 | 0 | 0      | 0 | 0 | 0 | t | 43242 | NANPNAN<br>PNANP             | Oryctola<br>gus<br>cuniculu<br>s |
| 1 | 1.00 | 1 | 1 | 0 | 0.002  | 0 | 0 | 0 | t | 53326 | RDALPNTE<br>ASGPTHSK<br>E    | Rattus<br>norvegic<br>us         |
| 1 | 1.00 | 1 | 1 | 0 | 0      | 0 | 0 | 0 | t | 53326 | RDALPNTE<br>ASGPTHSK<br>E    | Rattus<br>norvegic<br>us         |
| 1 | 1.00 | 1 | 1 | 0 | 0      | 0 | 0 | 0 | t | 56150 | RTPPAYR                      | Mus<br>musculu<br>s              |



|   |      |   |   |   |   |   |   |   |   |       |                             |                                  |
|---|------|---|---|---|---|---|---|---|---|-------|-----------------------------|----------------------------------|
| 1 | 1.00 | 1 | 1 | 0 | 0 | 0 | 0 | 0 | t | 57751 | SFERFEIFP<br>KE             | Oryctola<br>gus<br>cuniculu<br>s |
| 1 | 1.00 | 1 | 1 | 0 | 0 | 0 | 0 | 0 | t | 43242 | NANPNAN<br>PNANP            | Homo<br>sapiens                  |
| 1 | 1.00 | 1 | 1 | 0 | 0 | 0 | 0 | 0 | t | 45824 | NSGILKDF<br>WGDYLQY<br>DKPY | Mus<br>musculu<br>s              |
| 1 | 1.00 | 1 | 1 | 0 | 0 | 0 | 0 | 0 | t | 43242 | NANPNAN<br>PNANP            | Homo<br>sapiens                  |
| 1 | 1.00 | 1 | 1 | 0 | 0 | 0 | 0 | 0 | t | 57751 | SFERFEIFP<br>KE             | Oryctola<br>gus<br>cuniculu<br>s |
| 1 | 1.00 | 1 | 1 | 0 | 0 | 0 | 0 | 0 | t | 45824 | NSGILKDF<br>WGDYLQY<br>DKPY | Mus<br>musculu<br>s              |
| 1 | 1.00 | 1 | 1 | 0 | 0 | 0 | 0 | 0 | t | 57751 | SFERFEIFP<br>KE             | Oryctola<br>gus<br>cuniculu<br>s |
| 1 | 1.00 | 1 | 1 | 0 | 0 | 0 | 0 | 0 | t | 57751 | SFERFEIFP<br>KE             | Oryctola<br>gus<br>cuniculu<br>s |
| 1 | 1.00 | 1 | 1 | 0 | 0 | 0 | 0 | 0 | t | 43270 | NAPILSTLP                   | Mus<br>musculu<br>s              |
| 1 | 1.00 | 1 | 1 | 0 | 0 | 0 | 0 | 0 | t | 50180 | PYVEPTAP<br>QVL             | Mus<br>musculu<br>s              |
| 1 | 1.00 | 1 | 1 | 0 | 0 | 0 | 0 | 0 | t | 50180 | PYVEPTAP<br>QVL             | Oryctola<br>gus<br>cuniculu<br>s |
| 1 | 1.00 | 1 | 1 | 0 | 0 | 0 | 0 | 0 | t | 50339 | QAQGDGA<br>NAGQP            | Mus<br>musculu<br>s              |

|   |      |   |   |   |        |   |   |   |   |       |                             |                                  |
|---|------|---|---|---|--------|---|---|---|---|-------|-----------------------------|----------------------------------|
| 1 | 1.00 | 1 | 1 | 0 | 0      | 0 | 0 | 0 | t | 48927 | PPSSPTHD<br>PPSDP           | Oryctola<br>gus<br>cuniculu<br>s |
| 1 | 1.00 | 1 | 1 | 0 | 0      | 0 | 0 | 0 | t | 57751 | SFERFEIFP<br>KE             | Oryctola<br>gus<br>cuniculu<br>s |
| 1 | 1.00 | 1 | 1 | 0 | 0      | 0 | 0 | 0 | t | 45824 | NSGILKDF<br>WGDYLQY<br>DKPY | Mus<br>musculu<br>s              |
| 1 | 1.00 | 1 | 1 | 0 | 0      | 0 | 0 | 0 | t | 58388 | SHLVEALY<br>LVCGERG         | Mus<br>musculu<br>s              |
| 1 | 1.00 | 1 | 1 | 0 | 0      | 0 | 0 | 0 | t | 45824 | NSGILKDF<br>WGDYLQY<br>DKPY | Mus<br>musculu<br>s              |
| 1 | 1.00 | 1 | 1 | 0 | 0      | 0 | 0 | 0 | t | 58388 | SHLVEALY<br>LVCGERG         | Mus<br>musculu<br>s              |
| 1 | 1.00 | 1 | 1 | 0 | 0      | 0 | 0 | 0 | t | 13644 | EPERTAM<br>KKIQDCY          | Mus<br>musculu<br>s              |
| 1 | 1.00 | 1 | 1 | 0 | 0      | 0 | 0 | 0 | t | 35401 | LEDPISRDL                   | Mus<br>musculu<br>s              |
| 1 | 1.00 | 1 | 1 | 0 | 0      | 0 | 0 | 0 | t | 17629 | FRPSQQN                     | Oryctola<br>gus<br>cuniculu<br>s |
| 1 | 1.00 | 1 | 1 | 0 | 0      | 0 | 0 | 0 | t | 24654 | HQTLQDP<br>RVRGLYLP<br>AGG  | Mus<br>musculu<br>s              |
| 1 | 1.00 | 1 | 1 | 0 | 0.002  | 0 | 0 | 0 | t | 17629 | FRPSQQN                     | Rattus<br>norvegic<br>us         |
| 1 | 1.00 | 1 | 1 | 0 | 0      | 0 | 0 | 0 | t | 31365 | KINIGSKV<br>NFPIDKN<br>QIQ  | Mus<br>musculu<br>s              |
| 1 | 1.00 | 1 | 1 | 0 | 0      | 0 | 0 | 0 | t | 31580 | KKIQDCYV<br>ENGLIS          | Mus<br>musculu<br>s              |
| 1 | 1.00 | 1 | 1 | 0 | -0.005 | 0 | 0 | 0 | t | 20064 | GGVATY                      | Macaca<br>mulatta                |

|   |      |   |   |      |       |       |       |      |   |        |                             |                                  |
|---|------|---|---|------|-------|-------|-------|------|---|--------|-----------------------------|----------------------------------|
| 1 | 1.00 | 1 | 1 | 0    | 0     | 0     | 0     | 0    | t | 11815  | EENVEENV<br>EENVEENV        | Mus<br>musculu<br>s              |
| 1 | 1.00 | 1 | 1 | 0    | 0     | 0     | 0     | 0    | t | 31365  | KINIGSKV<br>NFDPIDKN<br>QIQ | Mus<br>musculu<br>s              |
| 1 | 1.00 | 1 | 1 | 0    | 0     | 0     | 0     | 0    | t | 27965  | IPNPLLGL<br>D               | Mus<br>musculu<br>s              |
| 1 | 1.00 | 1 | 1 | 0    | 0     | 0     | 0     | 0    | t | 9723   | DPPPPNP<br>NDPPPPN<br>PND   | Mus<br>musculu<br>s              |
| 1 | 1.00 | 1 | 1 | 0    | 0     | 0     | 0     | 0    | t | 9755   | DPRVRGLY<br>FPA             | Mus<br>musculu<br>s              |
| 1 | 1.00 | 1 | 1 | 0    | 0     | 0     | 0     | 0    | t | 9654   | DPISRD                      | Mus<br>musculu<br>s              |
| 1 | 1.00 | 1 | 1 | 0    | 0     | 0     | 0     | 0    | t | 7562   | DAKMTEE<br>DKENALS          | Homo<br>sapiens                  |
| 1 | 1.00 | 1 | 1 | 0    | 0     | 0     | 0     | 0    | t | 7171   | CTKPTDG<br>NC               | Oryctola<br>gus<br>cuniculu<br>s |
| 1 | 1.00 | 1 | 1 | 0    | 0     | 0     | 0     | 0    | t | 9755   | DPRVRGLY<br>FPA             | Mus<br>musculu<br>s              |
| 1 | 1.00 | 1 | 1 | 0    | 0.003 | 0     | 0     | 0    | t | 7171   | CTKPTDG<br>NC               | Sus<br>scrofa                    |
| 1 | 1.00 | 1 | 1 | 0    | 0     | 0     | 0     | 0    | t | 8859   | DKENALSL<br>LDKIYT          | Mus<br>musculu<br>s              |
| 1 | 1.00 | 1 | 1 | 0    | 0     | 0     | 0     | 0    | t | 7171   | CTKPTDG<br>NC               | Oryctola<br>gus<br>cuniculu<br>s |
| 1 | 1.00 | 1 | 1 | 0    | 0     | 0     | 0     | 0    | t | 7313   | CVTIMTVD<br>NPASTTNK<br>DK  | Rattus<br>norvegic<br>us         |
| 1 | 1.00 | 1 | 1 | 0.04 | 0.038 | 0.041 | 0.039 | 0.04 | t | 50036  | PWLDISDF<br>Q               | Mus<br>musculu<br>s              |
| 1 | 1.00 | 1 | 1 | 0.02 | 0.02  | 0.02  | 0.02  | 0.02 | t | 156933 | PLEKSHL                     | Gallus<br>gallus                 |
| 1 | 1.00 | 1 | 1 | 0.02 | 0.02  | 0.02  | 0.02  | 0.02 | t | 117097 | TLSTDQST<br>TRNW            | Homo<br>sapiens                  |

|   |      |   |   |       |        |        |        |       |   |        |                              |                     |
|---|------|---|---|-------|--------|--------|--------|-------|---|--------|------------------------------|---------------------|
| 1 | 1.00 | 1 | 1 | 0     | 0      | 0      | 0      | 0     | t | 141575 | WKAQKRF<br>MKKSG             | Rattus              |
| 1 | 1.00 | 1 | 1 | 0     | 0      | 0      | 0      | 0     | t | 123106 | EALDAIRYL                    | Ovis<br>aries       |
| 1 | 1.00 | 1 | 1 | 0     | 0      | 0      | 0      | 0     | t | 131614 | QSWVHQI<br>ALRMEVL<br>GCEAQD | Homo<br>sapiens     |
| 1 | 1.00 | 1 | 1 | 0     | 0      | 0      | 0      | 0     | t | 115465 | RCEKDERF<br>FSDKIAKYI<br>PIQ | Homo<br>sapiens     |
| 1 | 1.00 | 1 | 1 | 0     | 0      | 0      | 0      | 0     | t | 82531  | GADLAAA<br>QAA               | Homo<br>sapiens     |
| 1 | 1.00 | 1 | 1 | 0     | 0      | 0      | 0      | 0     | t | 41339  | MEECSQA<br>APYIEQAQ<br>VIAHQ | Homo<br>sapiens     |
| 1 | 1.00 | 1 | 1 | -0.02 | -0.02  | -0.02  | -0.02  | -0.02 | t | 123726 | RYIADKHG<br>M                | Ovis<br>aries       |
| 1 | 1.00 | 1 | 1 | -0.02 | -0.02  | -0.02  | -0.02  | -0.02 | t | 62462  | SWHLPRH<br>SIPPW             | Mus<br>musculu<br>s |
| 1 | 1.00 | 1 | 1 | -0.02 | -0.02  | -0.02  | -0.02  | -0.02 | t | 59927  | SNTLPRSN<br>TSSGASP          | Homo<br>sapiens     |
| 1 | 1.00 | 1 | 1 | -0.02 | -0.02  | -0.02  | -0.02  | -0.02 | t | 33846  | KTRMRID<br>Q                 | Homo<br>sapiens     |
| 1 | 1.00 | 1 | 1 | -0.04 | -0.04  | -0.04  | -0.04  | -0.04 | t | 110293 | IPKPSPWA<br>PKKHRRLS<br>SDQD | Homo<br>sapiens     |
| 1 | 1.00 | 1 | 1 | -0.04 | -0.04  | -0.04  | -0.04  | -0.04 | t | 110293 | IPKPSPWA<br>PKKHRRLS<br>SDQD | Homo<br>sapiens     |
| 1 | 1.00 | 1 | 1 | -0.04 | -0.04  | -0.04  | -0.04  | -0.04 | t | 92808  | GGKGDDIF<br>VH               | Ovis<br>aries       |
| 1 | 1.00 | 1 | 1 | -0.02 | -0.02  | -0.016 | -0.017 | -0.02 | t | 5773   | AYFPREGV<br>FVFNGTS<br>WF    | Homo<br>sapiens     |
| 1 | 1.00 | 1 | 1 | 0     | 0.005  | 0.002  | 0      | 0     | t | 33220  | KRTATKQY<br>NVTQAFG<br>RR    | Homo<br>sapiens     |
| 1 | 1.00 | 1 | 1 | -0.01 | -0.012 | -0.01  | -0.017 | -0.01 | t | 131413 | ERILTIS                      | Mus<br>musculu<br>s |

|   |      |   |   |       |        |        |        |        |   |        |                              |                       |
|---|------|---|---|-------|--------|--------|--------|--------|---|--------|------------------------------|-----------------------|
| 1 | 1.00 | 1 | 1 | 0.02  | 0.021  | 0.026  | 0.021  | 0.02   | t | 66189  | TSERSQPR                     | Homo sapiens          |
| 1 | 1.00 | 1 | 1 | 0.03  | 0.028  | 0.023  | 0.023  | 0.031  | t | 108202 | VVSHFND                      | Mus musculus          |
| 1 | 1.00 | 1 | 1 | 0.02  | 0.02   | 0.02   | 0.02   | 0.02   | t | 104049 | LPPKLLTEP<br>TTEGDQH<br>PGT  | Oryctolagus cuniculus |
| 1 | 1.00 | 1 | 1 | 0     | 0      | 0      | 0      | 0      | t | 42429  | MQWNST<br>AFHQTLLQ           | Mus musculus          |
| 1 | 1.00 | 1 | 1 | 0     | 0      | 0      | 0      | 0      | t | 42429  | MQWNST<br>AFHQTLLQ           | Mus musculus          |
| 1 | 1.00 | 1 | 1 | -0.04 | -0.042 | -0.038 | -0.043 | -0.04  | t | 117947 | KFKGKATL                     | Mus musculus          |
| 1 | 1.00 | 1 | 1 | -0.01 | -0.01  | -0.008 | 0      | -0.008 | t | 98728  | DFWATW<br>CGPCKMV<br>APVLEEI | Homo sapiens          |
| 1 | 1.00 | 1 | 1 | -0.02 | -0.02  | -0.017 | -0.02  | -0.022 | t | 35401  | LEDPISRDL                    | Mus musculus          |
| 1 | 1.00 | 1 | 1 | -0.02 | -0.02  | -0.017 | -0.02  | -0.022 | t | 35401  | LEDPISRDL                    | Mus musculus          |
| 1 | 1.00 | 1 | 1 | 0.02  | 0.02   | 0.02   | 0.02   | 0.02   | t | 78410  | GSCFEIKCT<br>KPESCSGE<br>AV  | Homo sapiens          |
| 1 | 1.00 | 1 | 1 | 0     | 0.002  | 0      | 0      | 0      | t | 136057 | DISAFAD                      | Rattus norvegicus     |
| 1 | 1.00 | 1 | 1 | 0     | -0.002 | 0      | -0.001 | 0      | t | 39391  | LSGQPAVI<br>PDREVLYQ<br>QFDE | Mus musculus          |
| 1 | 1.00 | 1 | 1 | 0     | -0.002 | 0      | -0.001 | 0      | t | 39391  | LSGQPAVI<br>PDREVLYQ<br>QFDE | Mus musculus          |
| 1 | 1.00 | 1 | 1 | -0.02 | -0.022 | -0.02  | -0.021 | -0.02  | t | 150987 | GKCPKYVK<br>STKLRLA          | Mus musculus          |
| 1 | 1.00 | 1 | 1 | -0.02 | -0.02  | -0.02  | -0.02  | -0.02  | t | 118129 | SEELKTHI<br>SKG              | Homo sapiens          |
| 1 | 1.00 | 1 | 1 | 0     | 0      | 0.005  | 0.006  | 0.003  | t | 115785 | HSYQE                        | Homo sapiens          |

|   |      |   |   |       |        |        |        |        |   |        |                              |                                  |
|---|------|---|---|-------|--------|--------|--------|--------|---|--------|------------------------------|----------------------------------|
| 1 | 1.00 | 1 | 1 | 0     | -0.003 | -0.005 | 0      | 0.002  | t | 1545   | AGGYKAA<br>DMWGPSS<br>DPAWER | Oryctola<br>gus<br>cuniculu<br>s |
| 1 | 1.00 | 1 | 1 | 0     | 0.002  | 0.001  | 0.001  | 0      | t | 66539  | TTASGKLIT                    | Homo<br>sapiens                  |
| 1 | 1.00 | 1 | 1 | -0.01 | -0.006 | -0.008 | -0.013 | -0.011 | t | 34505  | KYLIDGYEE<br>INELLYK         | Homo<br>sapiens                  |
| 1 | 1.00 | 1 | 1 | -0.01 | -0.01  | -0.01  | -0.013 | -0.01  | t | 48124  | PKPQRKTK<br>RNTNRRP          | Homo<br>sapiens                  |
| 1 | 1.00 | 1 | 1 | -0.01 | -0.01  | -0.01  | -0.01  | -0.01  | t | 26246  | IGISNR                       | Homo<br>sapiens                  |
| 1 | 1.00 | 1 | 1 | 0.02  | 0.024  | 0.011  | 0.019  | 0.02   | t | 37035  | LKTKNEGL<br>KTENEGLK<br>TE   | Mus<br>musculu<br>s              |
| 1 | 1.00 | 1 | 1 | -0.01 | -0.007 | -0.006 | -0.009 | -0.008 | t | 50168  | PYSASFT                      | Mus<br>musculu<br>s              |
| 1 | 1.00 | 1 | 1 | -0.01 | 0.002  | -0.01  | -0.013 | -0.01  | t | 156978 | YHAHPLD                      | Gallus<br>gallus                 |
| 1 | 1.00 | 1 | 1 | 0     | -0.002 | -0.005 | -0.007 | 0.001  | t | 122944 | WEGVGVV<br>PDV               | Rattus<br>norvegic<br>us         |
| 1 | 1.00 | 1 | 1 | 0.05  | 0.028  | 0.05   | 0.053  | 0.05   | t | 111133 | AVGGEPL<br>DLQGLVQ<br>N      | Cricetina<br>e                   |
| 1 | 1.00 | 1 | 1 | -0.01 | -0.01  | -0.007 | -0.01  | -0.01  | t | 157694 | NDWEDP<br>MATKHFS<br>V       | Canis<br>lupus                   |
| 1 | 1.00 | 1 | 1 | 0.03  | 0.03   | 0.021  | 0.03   | 0.03   | t | 139766 | GSPSATPP<br>AADCGPA<br>SPT   | Ovis<br>aries                    |
| 1 | 1.00 | 1 | 1 | -0.02 | -0.019 | -0.015 | -0.017 | -0.019 | t | 49386  | PSGPTPQH<br>IPLF             | Homo<br>sapiens                  |
| 1 | 1.00 | 1 | 1 | -0.01 | -0.008 | -0.015 | -0.009 | -0.011 | t | 43264  | NAPATVC<br>GPKLSTDLI<br>K    | Homo<br>sapiens                  |
| 1 | 1.00 | 1 | 1 | -0.02 | -0.017 | -0.031 | -0.02  | -0.018 | t | 111929 | VTFCKCD<br>STLRCLVQ<br>STHV  | Mus<br>musculu<br>s              |

|   |      |   |   |       |        |       |        |        |   |        |                              |                                  |
|---|------|---|---|-------|--------|-------|--------|--------|---|--------|------------------------------|----------------------------------|
| 1 | 1.00 | 1 | 1 | 0.03  | 0.03   | 0.03  | 0.03   | 0.03   | t | 150963 | AGSGIIISD<br>TPVHDC          | Homo<br>sapiens                  |
| 1 | 1.00 | 1 | 1 | 0     | -0.004 | 0     | -0.007 | -0.003 | t | 119143 | EPTITFGTA<br>I               | Oryctola<br>gus<br>cuniculu<br>s |
| 1 | 1.00 | 1 | 1 | 0.01  | 0.01   | 0.01  | 0.01   | 0.01   | t | 151670 | KLVIIESDL<br>ERAEEERA        | Mus<br>musculu<br>s              |
| 1 | 1.00 | 1 | 1 | 0.01  | 0.01   | 0.01  | 0.01   | 0.01   | t | 121848 | SGVPLCPL<br>ESNVISC          | Mus<br>musculu<br>s              |
| 1 | 1.00 | 1 | 1 | 0.01  | 0.01   | 0.01  | 0.01   | 0.01   | t | 99140  | DEEEEGSN<br>REVRRTY          | Homo<br>sapiens                  |
| 1 | 1.00 | 1 | 1 | 0.01  | 0.01   | 0.01  | 0.01   | 0.01   | t | 103629 | TAALRAAE<br>DDCPPP           | Homo<br>sapiens                  |
| 1 | 1.00 | 1 | 1 | 0.01  | 0.01   | 0.01  | 0.01   | 0.01   | t | 103754 | YRADSV<br>LIAAHL             | Homo<br>sapiens                  |
| 1 | 1.00 | 1 | 1 | 0.01  | 0.013  | 0.01  | 0.01   | 0.01   | t | 58404  | SHRLHNT<br>MPSES             | Mus<br>musculu<br>s              |
| 1 | 1.00 | 1 | 1 | 0.01  | 0.01   | 0.01  | 0.01   | 0.01   | t | 58404  | SHRLHNT<br>MPSES             | Oryctola<br>gus<br>cuniculu<br>s |
| 1 | 1.00 | 1 | 1 | 0.01  | 0.013  | 0.01  | 0.01   | 0.01   | t | 58404  | SHRLHNT<br>MPSES             | Mus<br>musculu<br>s              |
| 1 | 1.00 | 1 | 1 | 0.01  | 0.01   | 0.01  | 0.01   | 0.01   | t | 10784  | DVVSTLPQ<br>VVMG             | Homo<br>sapiens                  |
| 1 | 1.00 | 1 | 1 | -0.01 | -0.01  | -0.01 | -0.01  | -0.01  | t | 79768  | CFGKDLKR<br>PGSS             | Mus<br>musculu<br>s              |
| 1 | 1.00 | 1 | 1 | -0.01 | -0.01  | -0.01 | -0.01  | -0.01  | t | 97286  | ETPLTEPA<br>FKRH             | Mus<br>musculu<br>s              |
| 1 | 1.00 | 1 | 1 | -0.01 | -0.01  | -0.01 | -0.01  | -0.01  | t | 77979  | QPPQWL<br>WPQKEV             | Mus<br>musculu<br>s              |
| 1 | 1.00 | 1 | 1 | -0.01 | -0.01  | -0.01 | -0.01  | -0.01  | t | 70397  | VPNLRGD<br>RQVLAQK<br>VARTLP | Cavia<br>porcellu<br>s           |

|   |      |   |   |       |        |        |        |        |   |        |                      |                       |
|---|------|---|---|-------|--------|--------|--------|--------|---|--------|----------------------|-----------------------|
| 1 | 1.00 | 1 | 1 | -0.01 | -0.01  | -0.01  | -0.01  | -0.01  | t | 51853  | QPHGGGW              | Mus musculus          |
| 1 | 1.00 | 1 | 1 | -0.01 | -0.01  | -0.01  | -0.01  | -0.01  | t | 47174  | PDREALYQEFDEMEECASHL | Homo sapiens          |
| 1 | 1.00 | 1 | 1 | -0.01 | -0.01  | -0.01  | -0.01  | -0.01  | t | 39403  | LSGRPAVVPDREVLRYEFDE | Homo sapiens          |
| 1 | 1.00 | 1 | 1 | -0.01 | -0.01  | -0.01  | -0.01  | -0.01  | t | 51853  | QPHGGGW              | Mus musculus          |
| 1 | 1.00 | 1 | 1 | -0.01 | -0.01  | -0.01  | -0.01  | -0.01  | t | 16957  | FLVNAWKSKKCP         | Homo sapiens          |
| 1 | 1.00 | 1 | 1 | -0.03 | -0.03  | -0.03  | -0.03  | -0.03  | t | 115463 | QYLYQGPIVLNPWDQVKRNA | Homo sapiens          |
| 1 | 1.00 | 1 | 1 | 0     | -0.004 | 0      | -0.003 | 0.001  | t | 110768 | ANPENYFT             | Oryctolagus cuniculus |
| 1 | 1.00 | 1 | 1 | -0.02 | -0.025 | -0.022 | -0.02  | -0.023 | t | 74048  | YGLPNWVKVWDRATN      | Equus caballus        |
| 1 | 1.00 | 1 | 1 | -0.02 | -0.028 | -0.022 | -0.02  | -0.023 | t | 74048  | YGLPNWVKVWDRATN      | Mus musculus          |
| 1 | 1.00 | 1 | 1 | 0     | 0      | 0      | -0.001 | 0      | t | 98230  | LPYSQPQPFRPQQPY      | Homo sapiens(human)   |
| 1 | 1.00 | 1 | 1 | 0     | 0      | 0      | -0.001 | 0      | t | 98397  | QQQQPSSQVSFQQPLQQY   | Homo sapiens(human)   |
| 1 | 1.00 | 1 | 1 | 0     | 0      | 0      | -0.001 | 0      | t | 98344  | PPQQPYPPQPFPSQQPY    | Homo sapiens(human)   |
| 1 | 1.00 | 1 | 1 | 0     | 0      | 0      | -0.001 | 0      | t | 98396  | QQQQFLGQQQPFPPQQPY   | Homo sapiens(human)   |
| 1 | 1.00 | 1 | 1 | 0     | 0.002  | 0.002  | -0.001 | 0.001  | t | 53691  | RFDLELTFVIT          | Homo sapiens          |
| 1 | 1.00 | 1 | 1 | -0.01 | -0.01  | -0.01  | -0.01  | -0.008 | t | 134764 | PTPGPSRRGP           | Homo sapiens          |



|   |      |   |   |       |        |        |        |        |   |        |                              |                          |
|---|------|---|---|-------|--------|--------|--------|--------|---|--------|------------------------------|--------------------------|
| 1 | 1.00 | 1 | 1 | 0     | -0.004 | 0.002  | -0.003 | -0.002 | t | 78638  | EKSLTSLSE<br>VVLQNRRLD       | Oryctolagus<br>cuniculus |
| 1 | 1.00 | 1 | 1 | -0.01 | -0.01  | -0.01  | -0.01  | -0.01  | t | 135459 | GACLGKAC                     | Oryctolagus<br>cuniculus |
| 1 | 1.00 | 1 | 1 | 0     | 0.002  | 0      | 0.001  | 0      | t | 116937 | DDHSTRC<br>WVS               | Homo<br>sapiens          |
| 1 | 1.00 | 1 | 1 | 0.06  | 0.058  | 0.06   | 0.053  | 0.059  | t | 108155 | TDHGAE                       | Mus<br>musculus          |
| 1 | 1.00 | 1 | 1 | 0.06  | 0.058  | 0.06   | 0.053  | 0.059  | t | 108155 | TDHGAE                       | Mus<br>musculus          |
| 1 | 1.00 | 1 | 1 | -0.01 | -0.012 | -0.01  | -0.011 | -0.01  | t | 71534  | VTTSTPGS<br>KGSVASG          | Mus<br>musculus          |
| 1 | 1.00 | 1 | 1 | -0.03 | -0.028 | -0.037 | -0.033 | -0.028 | t | 68788  | VGRVWIG<br>FWL               | Homo<br>sapiens          |
| 1 | 1.00 | 1 | 1 | 0     | 0.003  | 0      | 0      | 0.001  | t | 58921  | SKPTTKQR<br>QNKP             | Mus<br>musculus          |
| 1 | 1.00 | 1 | 1 | 0.01  | 0.008  | 0.01   | 0.014  | 0.01   | t | 135660 | ECPEGYIL<br>DDGFICTD<br>IDE  | Mus<br>musculus          |
| 1 | 1.00 | 1 | 1 | -0.05 | -0.05  | -0.056 | -0.053 | -0.052 | t | 11453  | EDTQAMP<br>FRV               | Homo<br>sapiens          |
| 1 | 1.00 | 1 | 1 | 0     | 0.004  | 0      | 0.007  | 0.003  | t | 118103 | RIANFKIEP<br>PGLFRGRG<br>NHP | Homo<br>sapiens          |
| 1 | 1.00 | 1 | 1 | -0.03 | -0.028 | -0.027 | -0.03  | -0.029 | t | 132906 | SYSMEHFR<br>WG               | Oryctolagus<br>cuniculus |
| 1 | 1.00 | 1 | 1 | 0.03  | 0.026  | 0.023  | 0.033  | 0.032  | t | 106413 | FFGHGAE<br>DSLADQAN<br>ANE   | Oryctolagus<br>cuniculus |
| 1 | 1.00 | 1 | 1 | 0.03  | 0.032  | 0.035  | 0.033  | 0.033  | t | 142621 | EISVTTVYP<br>P               | Homo<br>sapiens          |
| 1 | 1.00 | 1 | 1 | 0.01  | 0.012  | 0.011  | 0.009  | 0.01   | t | 44865  | NLSDAHKK<br>NLYDHAL          | Cavia<br>porcellus       |

|   |      |   |   |       |        |        |        |        |   |        |                              |                   |
|---|------|---|---|-------|--------|--------|--------|--------|---|--------|------------------------------|-------------------|
| 1 | 1.00 | 1 | 1 | 0     | 0.002  | -0.005 | -0.003 | 0      | t | 44569  | NKPNNDF<br>HFEVF             | Homo sapiens      |
| 1 | 1.00 | 1 | 1 | -0.04 | -0.04  | -0.047 | -0.04  | -0.04  | t | 68018  | VDLPQLGL<br>RR               | Mus musculus      |
| 1 | 1.00 | 1 | 1 | -0.04 | -0.04  | -0.04  | -0.04  | -0.04  | t | 119838 | ENGWAI<br>DFCPGVIR           | Rattus norvegicus |
| 1 | 1.00 | 1 | 1 | -0.01 | -0.01  | -0.01  | -0.01  | -0.009 | t | 72249  | WAP                          | Mus musculus      |
| 1 | 1.00 | 1 | 1 | -0.01 | -0.012 | 0.006  | -0.003 | -0.009 | t | 112725 | WHTSDPL<br>PPAQP             | Homo sapiens      |
| 1 | 1.00 | 1 | 1 | 0.04  | 0.04   | 0.04   | 0.04   | 0.04   | t | 132538 | PPGELGPD<br>GP               | Homo sapiens      |
| 1 | 1.00 | 1 | 1 | 0.04  | 0.04   | 0.04   | 0.04   | 0.04   | t | 99433  | LMQKIQR<br>DEDSYERD          | Homo sapiens      |
| 1 | 1.00 | 1 | 1 | 0.02  | 0.02   | 0.02   | 0.02   | 0.02   | t | 95126  | NTVSGQQ<br>CSNGNML<br>YIGFRG | Rattus norvegicus |
| 1 | 1.00 | 1 | 1 | 0     | 0      | 0      | 0      | 0      | t | 107658 | VHNAKTK                      | Homo sapiens      |
| 1 | 1.00 | 1 | 1 | 0     | 0      | 0      | 0      | 0      | t | 41331  | MEECASR<br>AALLEEGQ<br>RIAEM | Homo sapiens      |
| 1 | 1.00 | 1 | 1 | -0.02 | -0.02  | -0.02  | -0.02  | -0.02  | t | 149068 | LNLQSR                       | Sus scrofa        |
| 1 | 1.00 | 1 | 1 | -0.02 | -0.02  | -0.02  | -0.02  | -0.02  | t | 153455 | RVPNVLPL<br>FPFLGGGS         | Mus musculus      |
| 1 | 1.00 | 1 | 1 | -0.02 | -0.02  | -0.02  | -0.02  | -0.02  | t | 123491 | MGLDLPN<br>LP                | Ovis aries        |
| 1 | 1.00 | 1 | 1 | -0.02 | -0.02  | -0.02  | -0.02  | -0.02  | t | 121733 | QCALAIW<br>NDRKVLPY          | Mus musculus      |
| 1 | 1.00 | 1 | 1 | -0.02 | -0.02  | -0.02  | -0.02  | -0.02  | t | 78298  | WHHMYV<br>P                  | Homo sapiens      |
| 1 | 1.00 | 1 | 1 | -0.01 | -0.01  | -0.014 | -0.01  | -0.008 | t | 49070  | PQPQQQF<br>PQP               | Mus musculus      |
| 1 | 1.00 | 1 | 1 | -0.02 | -0.018 | -0.02  | -0.021 | -0.02  | t | 152051 | PVVNSLDP<br>PLL              | Homo sapiens      |
| 1 | 1.00 | 1 | 1 | 0.01  | 0.01   | 0.008  | 0.01   | 0.01   | t | 10831  | DWTKVTL<br>DGRPLSTI<br>Q     | Homo sapiens      |

|   |      |   |   |       |        |        |        |        |   |        |                              |                                  |
|---|------|---|---|-------|--------|--------|--------|--------|---|--------|------------------------------|----------------------------------|
| 1 | 1.00 | 1 | 1 | -0.05 | -0.038 | -0.055 | -0.05  | -0.05  | t | 50164  | PYRLWHY<br>PCTIN             | Pan<br>troglody<br>tes           |
| 1 | 1.00 | 1 | 1 | 0.01  | 0.014  | 0.01   | 0.01   | 0.01   | t | 123356 | KFEEVKEE<br>Y                | Ovis<br>aries                    |
| 1 | 1.00 | 1 | 1 | -0.02 | -0.018 | -0.02  | -0.021 | -0.02  | t | 149442 | QQYPSGQ<br>GFF               | Homo<br>sapiens                  |
| 1 | 1.00 | 1 | 1 | 0.03  | 0.026  | 0.026  | 0.029  | 0.03   | t | 65840  | TQETGDDT<br>PSAYSMS          | Oryctola<br>gus<br>cuniculu<br>s |
| 1 | 1.00 | 1 | 1 | 0     | 0.003  | 0.002  | 0      | 0      | t | 44915  | NLVILPGQ<br>DLQYVLA          | Mus<br>musculu<br>s              |
| 1 | 1.00 | 1 | 1 | 0     | 0.003  | 0.005  | 0      | -0.001 | t | 119466 | IRGERA                       | Mus<br>musculu<br>s              |
| 1 | 1.00 | 1 | 1 | 0.02  | 0.014  | 0.02   | 0.02   | 0.02   | t | 123342 | KAVQGGG<br>A                 | Oryctola<br>gus<br>cuniculu<br>s |
| 1 | 1.00 | 1 | 1 | 0     | -0.006 | 0      | 0      | 0      | t | 123628 | PQQLMPG<br>Q                 | Oryctola<br>gus<br>cuniculu<br>s |
| 1 | 1.00 | 1 | 1 | -0.01 | -0.01  | -0.011 | -0.01  | -0.01  | t | 22685  | GTHNGQI<br>GNDPNRD<br>I      | Mus<br>musculu<br>s              |
| 1 | 1.00 | 1 | 1 | 0.05  | 0.052  | 0.05   | 0.051  | 0.051  | t | 153396 | HSFEPWS<br>ARDMLGG<br>GS     | Homo<br>sapiens                  |
| 1 | 1.00 | 1 | 1 | -0.01 | -0.007 | -0.008 | -0.01  | -0.01  | t | 127204 | TGHCQGD<br>GYRVGFG<br>Q      | Mus<br>musculu<br>s              |
| 1 | 1.00 | 1 | 1 | -0.01 | -0.006 | -0.002 | -0.009 | -0.01  | t | 15328  | FCIDPTKG<br>GKKPAR           | Homo<br>sapiens                  |
| 1 | 1.00 | 1 | 1 | -0.01 | -0.006 | -0.01  | -0.013 | -0.01  | t | 118430 | ISDAMKKV<br>GRKGV            | Homo<br>sapiens                  |
| 1 | 1.00 | 1 | 1 | 0.02  | 0.02   | 0.011  | 0.02   | 0.02   | t | 33891  | KTTQLSDIT<br>SRFNSAIE<br>ALN | Mus<br>musculu<br>s              |

|   |      |   |   |       |        |        |        |        |   |        |                              |                                  |
|---|------|---|---|-------|--------|--------|--------|--------|---|--------|------------------------------|----------------------------------|
| 1 | 1.00 | 1 | 1 | 0.02  | 0.016  | 0.026  | 0.021  | 0.019  | t | 99018  | SYSITTPSQ<br>FV              | Oryctola<br>gus<br>cuniculu<br>s |
| 1 | 1.00 | 1 | 1 | 0     | 0      | 0.005  | 0      | 0      | t | 107109 | EFRHDS                       | Mus<br>musculu<br>s              |
| 1 | 1.00 | 1 | 1 | -0.01 | -0.01  | -0.01  | -0.01  | -0.009 | t | 16018  | FGNDYED<br>RYYR              | Mus<br>musculu<br>s              |
| 1 | 1.00 | 1 | 1 | -0.04 | -0.042 | -0.041 | -0.04  | -0.04  | t | 66051  | TRLENLM<br>WK                | Oryctola<br>gus<br>cuniculu<br>s |
| 1 | 1.00 | 1 | 1 | -0.01 | -0.01  | -0.004 | -0.01  | -0.011 | t | 159026 | NLAIHSDL<br>SYWIESRL         | Mus<br>musculu<br>s              |
| 1 | 1.00 | 1 | 1 | -0.01 | -0.013 | -0.018 | -0.01  | -0.01  | t | 73067  | WSERIREF<br>MEKECP           | Oryctola<br>gus<br>cuniculu<br>s |
| 1 | 1.00 | 1 | 1 | -0.01 | -0.01  | -0.01  | -0.01  | -0.009 | t | 122150 | MSKTLHA<br>QLGFKKT           | Oryctola<br>gus<br>cuniculu<br>s |
| 1 | 1.00 | 1 | 1 | -0.04 | -0.038 | -0.035 | -0.039 | -0.044 | t | 55930  | RSQPRGR<br>RQPIP             | Homo<br>sapiens                  |
| 1 | 1.00 | 1 | 1 | -0.03 | -0.028 | -0.025 | -0.031 | -0.03  | t | 136568 | PYYRVFYK<br>YD               | Homo<br>sapiens                  |
| 1 | 1.00 | 1 | 1 | 0.01  | 0.01   | 0.01   | 0.009  | 0.01   | t | 10691  | DVPDYAS                      | Mus<br>musculu<br>s              |
| 1 | 1.00 | 1 | 1 | 0.05  | 0.052  | 0.051  | 0.053  | 0.053  | t | 122406 | IEIGLEGKG<br>FEPTLEALF<br>GK | Homo<br>sapiens                  |
| 1 | 1.00 | 1 | 1 | 0.03  | 0.03   | 0.03   | 0.03   | 0.03   | t | 115340 | LDDDLTDD<br>IM               | Homo<br>sapiens                  |
| 1 | 1.00 | 1 | 1 | 0.01  | 0.01   | 0.01   | 0.01   | 0.01   | t | 143678 | DRVNLRNL<br>RGYY             | Mus<br>musculu<br>s              |
| 1 | 1.00 | 1 | 1 | 0.01  | 0.01   | 0.01   | 0.01   | 0.01   | t | 158601 | MQAHQTK                      | Homo<br>sapiens                  |
| 1 | 1.00 | 1 | 1 | 0.01  | 0.01   | 0.01   | 0.01   | 0.01   | t | 111567 | MRLETSK                      | Homo<br>sapiens                  |
| 1 | 1.00 | 1 | 1 | 0.01  | 0.01   | 0.01   | 0.01   | 0.01   | t | 115310 | KHIQKEDV<br>PSERYLGY<br>LEQL | Homo<br>sapiens                  |

|   |      |   |   |       |        |        |        |        |   |        |                              |                                  |
|---|------|---|---|-------|--------|--------|--------|--------|---|--------|------------------------------|----------------------------------|
| 1 | 1.00 | 1 | 1 | 0.01  | 0.01   | 0.01   | 0.01   | 0.01   | t | 96815  | RCQSQLER<br>A                | Mus<br>musculu<br>s              |
| 1 | 1.00 | 1 | 1 | 0.01  | 0.013  | 0.01   | 0.01   | 0.01   | t | 96268  | ETIFDV                       | Mus<br>musculu<br>s              |
| 1 | 1.00 | 1 | 1 | -0.01 | -0.01  | -0.01  | -0.01  | -0.01  | t | 115896 | PPKKNQD<br>KTE               | Homo<br>sapiens                  |
| 1 | 1.00 | 1 | 1 | -0.01 | -0.01  | -0.01  | -0.01  | -0.01  | t | 106451 | GGHWRG<br>ANAT               | Homo<br>sapiens                  |
| 1 | 1.00 | 1 | 1 | -0.01 | -0.01  | -0.01  | -0.01  | -0.01  | t | 114787 | EDRPLCGS<br>DN               | Homo<br>sapiens                  |
| 1 | 1.00 | 1 | 1 | -0.01 | -0.01  | -0.01  | -0.01  | -0.01  | t | 95519  | KQLLPPSG                     | Cavia<br>porcellu<br>s           |
| 1 | 1.00 | 1 | 1 | -0.01 | -0.002 | -0.01  | -0.01  | -0.01  | t | 95519  | KQLLPPSG                     | Cavia<br>porcellu<br>s           |
| 1 | 1.00 | 1 | 1 | -0.04 | -0.034 | -0.033 | -0.033 | -0.042 | t | 127672 | GPGAGDR<br>RREGPDRS          | Homo<br>sapiens                  |
| 1 | 1.00 | 1 | 1 | -0.03 | -0.03  | -0.03  | -0.03  | -0.03  | t | 112971 | FGAEILKKI<br>PGRVST          | Homo<br>sapiens                  |
| 1 | 1.00 | 1 | 1 | 0.02  | 0.02   | 0.02   | 0.02   | 0.022  | t | 142480 | VAAVTEKL<br>RAGT             | Mus<br>musculu<br>s              |
| 1 | 1.00 | 1 | 1 | -0.01 | -0.006 | -0.012 | -0.007 | -0.01  | t | 74494  | YKPWCEN<br>NKCKPLA           | Homo<br>sapiens                  |
| 1 | 1.00 | 1 | 1 | -0.01 | -0.014 | -0.021 | -0.013 | -0.01  | t | 86822  | NKGKDKD<br>VNAGTSG<br>THT    | Oryctola<br>gus<br>cuniculu<br>s |
| 1 | 1.00 | 1 | 1 | 0     | 0.002  | 0      | 0.003  | 0.001  | t | 9940   | DRAAGQP<br>AGNGAGG<br>QAAGGN | Homo<br>sapiens                  |
| 1 | 1.00 | 1 | 1 | -0.01 | -0.01  | 0.001  | -0.007 | -0.01  | t | 39132  | LRKYCI                       | Homo<br>sapiens                  |
| 1 | 1.00 | 1 | 1 | 0.03  | 0.032  | 0.021  | 0.023  | 0.03   | t | 110980 | QPLGVGIS<br>GHPLLNL<br>DDTE  | Cavia<br>porcellu<br>s           |
| 1 | 1.00 | 1 | 1 | 0.03  | 0.03   | 0.03   | 0.03   | 0.03   | t | 41670  | MHNISQL<br>QTVKKQT<br>DQNS   | Aotus<br>nancyma<br>ae           |

|   |      |   |   |       |        |        |        |        |   |        |                              |                                  |
|---|------|---|---|-------|--------|--------|--------|--------|---|--------|------------------------------|----------------------------------|
| 1 | 1.00 | 1 | 1 | -0.02 | -0.02  | -0.021 | -0.019 | -0.02  | t | 40283  | LVCAPAPC<br>NFFTSA           | Homo<br>sapiens                  |
| 1 | 1.00 | 1 | 1 | -0.05 | -0.05  | -0.045 | -0.05  | -0.051 | t | 137132 | DINCFRPH<br>GVSA             | Sus<br>scrofa                    |
| 1 | 1.00 | 1 | 1 | -0.05 | -0.046 | -0.043 | -0.043 | -0.048 | t | 138264 | YSNKTPHL<br>QWRL             | Homo<br>sapiens                  |
| 1 | 1.00 | 1 | 1 | -0.02 | -0.024 | -0.021 | -0.021 | -0.02  | t | 49879  | PVGTVP<br>QIPPNWHI<br>PSIQD  | Oryctola<br>gus<br>cuniculu<br>s |
| 1 | 1.00 | 1 | 1 | -0.02 | -0.022 | -0.021 | -0.021 | -0.02  | t | 49879  | PVGTVP<br>QIPPNWHI<br>PSIQD  | Mus<br>musculu<br>s              |
| 1 | 1.00 | 1 | 1 | -0.02 | -0.022 | -0.018 | -0.017 | -0.02  | t | 36413  | LHQPPPQI<br>FLKILPQSG<br>PIG | Homo<br>sapiens                  |
| 1 | 1.00 | 1 | 1 | 0.02  | 0.02   | 0.013  | 0.02   | 0.02   | t | 119495 | MAENGD<br>NEKMAAL<br>EAKICHQ | Homo<br>sapiens                  |
| 1 | 1.00 | 1 | 1 | 0.01  | 0.013  | 0.012  | 0.01   | 0.01   | t | 122721 | CSNSSSSQ<br>FQIHGPR          | Mus<br>musculu<br>s              |
| 1 | 1.00 | 1 | 1 | 0.03  | 0.03   | 0.03   | 0.03   | 0.032  | t | 31064  | KGSSIAAD                     | Oryctola<br>gus<br>cuniculu<br>s |
| 1 | 1.00 | 1 | 1 | -0.02 | -0.025 | -0.024 | -0.017 | -0.018 | t | 158292 | SQQLLGQ<br>RLYGLWK           | Canis<br>lupus                   |
| 1 | 1.00 | 1 | 1 | -0.03 | -0.026 | -0.031 | -0.033 | -0.032 | t | 99058  | WRQPRED<br>WRRPSHQ<br>Q      | Homo<br>sapiens                  |
| 1 | 1.00 | 1 | 1 | 0     | 0      | 0      | 0      | 0      | t | 135482 | LMDRHD                       | Mus<br>musculu<br>s              |
| 1 | 1.00 | 1 | 1 | -0.01 | -0.006 | -0.015 | -0.007 | -0.008 | t | 48738  | PPAAGPRI<br>LAPLSAGP<br>PAAG | Homo<br>sapiens                  |
| 1 | 1.00 | 1 | 1 | 0.02  | 0.02   | 0.023  | 0.02   | 0.02   | t | 75441  | YPYDVPDY<br>A                | Mus<br>musculu<br>s              |

|   |      |   |   |       |        |        |       |       |   |        |                                 |                                  |
|---|------|---|---|-------|--------|--------|-------|-------|---|--------|---------------------------------|----------------------------------|
| 1 | 1.00 | 1 | 1 | 0.02  | 0.017  | 0.023  | 0.02  | 0.02  | t | 75441  | YPYDVDPY<br>A                   | Mus<br>musculu<br>s              |
| 1 | 1.00 | 1 | 1 | 0.02  | 0.022  | 0.025  | 0.021 | 0.02  | t | 51166  | QKALGLLQ<br>T                   | Homo<br>sapiens                  |
| 1 | 1.00 | 1 | 1 | -0.05 | -0.047 | -0.043 | -0.05 | -0.05 | t | 125843 | DRPVVPY                         | Mus<br>musculu<br>s              |
| 1 | 1.00 | 1 | 1 | 0     | 0      | 0      | 0.001 | 0.001 | t | 47984  | PISLLFNEK<br>EADDNDH<br>EPQI    | Homo<br>sapiens                  |
| 1 | 1.00 | 1 | 1 | 0     | 0      | 0      | 0.001 | 0.001 | t | 38810  | LQAMRKY<br>SPFRNGY<br>MEPTLG    | Homo<br>sapiens                  |
| 1 | 1.00 | 1 | 1 | 0.03  | 0.028  | 0.035  | 0.033 | 0.032 | t | 18527  | GAASSYFE<br>YVDTYG              | Mus<br>musculu<br>s              |
| 1 | 1.00 | 1 | 1 | 0.02  | 0.02   | 0.02   | 0.02  | 0.02  | t | 144659 | GREGYP<br>A<br>DGGGAAGY<br>CNTE | Oryctola<br>gus<br>cuniculu<br>s |
| 1 | 1.00 | 1 | 1 | 0.02  | 0.02   | 0.02   | 0.02  | 0.02  | t | 112323 | SLTTYGI                         | Homo<br>sapiens                  |
| 1 | 1.00 | 1 | 1 | 0.02  | 0.02   | 0.02   | 0.02  | 0.02  | t | 40017  | LTLNHASS<br>G                   | Rattus<br>norvegic<br>us         |
| 1 | 1.00 | 1 | 1 | 0.02  | 0.02   | 0.02   | 0.02  | 0.02  | t | 7514   | DAGDSAYS<br>Q                   | Mus<br>musculu<br>s              |
| 1 | 1.00 | 1 | 1 | 0     | 0      | 0      | 0     | 0     | t | 158609 | SFGTALW                         | Homo<br>sapiens                  |
| 1 | 1.00 | 1 | 1 | 0     | 0      | 0      | 0     | 0     | t | 153350 | ACTSPNQ<br>WLCGGGS              | Mus<br>musculu<br>s              |
| 1 | 1.00 | 1 | 1 | 0     | 0      | 0      | 0     | 0     | t | 133957 | WIRANF                          | Mus<br>musculu<br>s              |
| 1 | 1.00 | 1 | 1 | 0     | 0.002  | 0      | 0     | 0     | t | 130634 | WEWDWP<br>RIELNI                | Homo<br>sapiens                  |

|   |      |   |   |       |        |        |        |        |   |        |                              |                                  |
|---|------|---|---|-------|--------|--------|--------|--------|---|--------|------------------------------|----------------------------------|
| 1 | 1.00 | 1 | 1 | 0     | 0      | 0.002  | 0      | 0      | t | 114529 | QETTLVRS<br>SRSSSER          | Homo<br>sapiens                  |
| 1 | 1.00 | 1 | 1 | -0.02 | -0.02  | -0.02  | -0.02  | -0.02  | t | 149124 | TNPTQTK                      | Sus<br>scrofa                    |
| 1 | 1.00 | 1 | 1 | -0.02 | -0.02  | -0.02  | -0.02  | -0.02  | t | 107647 | TVLHQNW                      | Homo<br>sapiens                  |
| 1 | 1.00 | 1 | 1 | -0.02 | -0.02  | -0.02  | -0.02  | -0.02  | t | 104184 | PRGRRQPI<br>PKARRPEG<br>RTWA | Homo<br>sapiens                  |
| 1 | 1.00 | 1 | 1 | -0.02 | -0.02  | -0.02  | -0.02  | -0.02  | t | 66214  | TSGFASLF<br>RLGPSQK          | Mus<br>musculu<br>s              |
| 1 | 1.00 | 1 | 1 | 0.01  | 0.01   | 0.01   | 0.01   | 0.012  | t | 137733 | DTALTIQA<br>LKLK             | Mus<br>musculu<br>s              |
| 1 | 1.00 | 1 | 1 | -0.07 | -0.072 | -0.068 | -0.071 | -0.072 | t | 46899  | PAPRRKFQ<br>QVKRL            | Mus<br>musculu<br>s              |
| 1 | 1.00 | 1 | 1 | -0.01 | -0.013 | -0.017 | -0.01  | -0.009 | t | 7313   | CVTIMTVD<br>NPASTTNK<br>DK   | Oryctola<br>gus<br>cuniculu<br>s |
| 1 | 1.00 | 1 | 1 | 0.06  | 0.058  | 0.059  | 0.059  | 0.061  | t | 68877  | VHPQDGD<br>A                 | Mus<br>musculu<br>s              |
| 1 | 1.00 | 1 | 1 | 0.03  | 0.031  | 0.031  | 0.03   | 0.03   | t | 49213  | PRLKHEQS<br>V                | Equus<br>caballus                |
| 1 | 1.00 | 1 | 1 | 0.02  | 0.02   | 0.02   | 0.016  | 0.02   | t | 132526 | PGSHFCG<br>GTLIHPSF          | Homo<br>sapiens                  |
| 1 | 1.00 | 1 | 1 | -0.02 | -0.018 | -0.025 | -0.018 | -0.02  | t | 118377 | GKEAWDL<br>GVCRDVS<br>RRKG   | Homo<br>sapiens                  |
| 1 | 1.00 | 1 | 1 | -0.02 | -0.022 | -0.02  | -0.02  | -0.02  | t | 141616 | DIIKGNL<br>VHDEYTKY<br>I     | Oryctola<br>gus<br>cuniculu<br>s |
| 1 | 1.00 | 1 | 1 | -0.02 | -0.018 | -0.02  | -0.02  | -0.02  | t | 141616 | DIIKGNL<br>VHDEYTKY<br>I     | Rattus<br>norvegic<br>us         |
| 1 | 1.00 | 1 | 1 | -0.02 | -0.02  | -0.02  | -0.02  | -0.02  | t | 141616 | DIIKGNL<br>VHDEYTKY<br>I     | Rattus<br>norvegic<br>us         |
| 1 | 1.00 | 1 | 1 | -0.02 | -0.02  | -0.02  | -0.02  | -0.018 | t | 110975 | QIFNKPY<br>WLQRAQG<br>H      | Mus<br>musculu<br>s              |



|   |      |   |   |       |        |        |        |        |   |        |                      |                       |
|---|------|---|---|-------|--------|--------|--------|--------|---|--------|----------------------|-----------------------|
| 1 | 1.00 | 1 | 1 | 0.02  | 0.018  | 0.02   | 0.017  | 0.02   | t | 134028 | DDTIS                | Mus musculus          |
| 1 | 1.00 | 1 | 1 | -0.04 | -0.037 | -0.04  | -0.04  | -0.042 | t | 135484 | MSRPLIHFGN           | Mus musculus          |
| 1 | 1.00 | 1 | 1 | 0     | -0.005 | 0      | -0.001 | 0      | t | 148565 | DKNKLQDVKDNKPSDVKL   | Canis lupus           |
| 1 | 1.00 | 1 | 1 | 0.05  | 0.052  | 0.07   | 0.057  | 0.05   | t | 141777 | VVDSLEDPLN           | Homo sapiens          |
| 1 | 1.00 | 1 | 1 | -0.03 | -0.028 | -0.03  | -0.023 | -0.029 | t | 139630 | VDIDIKIRSCRGSCS      | Homo sapiens          |
| 1 | 1.00 | 1 | 1 | 0.04  | 0.038  | 0.046  | 0.043  | 0.039  | t | 114455 | LKPEEVAQEAAEEPLIEPL  | Rattus norvegicus     |
| 1 | 1.00 | 1 | 1 | 0     | 0      | 0      | 0      | 0      | t | 10808  | DWERPTPYELSI         | Mus musculus          |
| 1 | 1.00 | 1 | 1 | 0.01  | 0.01   | 0.01   | 0.01   | 0.012  | t | 11814  | EENVEENV EENV        | Oryctolagus cuniculus |
| 1 | 1.00 | 1 | 1 | 0.03  | 0.028  | 0.031  | 0.03   | 0.03   | t | 39213  | LRSPNGFLTLDQ         | Mus musculus          |
| 1 | 1.00 | 1 | 1 | -0.02 | -0.018 | -0.015 | -0.013 | -0.018 | t | 129659 | PTQYPPGR             | Homo sapiens          |
| 1 | 1.00 | 1 | 1 | 0     | 0.003  | 0      | 0      | -0.001 | t | 142439 | LARLARLGEACG         | Mus musculus          |
| 1 | 1.00 | 1 | 1 | -0.01 | -0.008 | -0.017 | -0.009 | -0.008 | t | 18700  | GANIPAEFLENFVRSSNLKF | Homo sapiens          |
| 1 | 1.00 | 1 | 1 | -0.01 | -0.008 | -0.01  | -0.009 | -0.01  | t | 117043 | MISDYSTRPDRR         | Homo sapiens          |
| 1 | 1.00 | 1 | 1 | 0.03  | 0.03   | 0.03   | 0.03   | 0.03   | t | 135686 | GRVSVSQT             | Homo sapiens          |
| 1 | 1.00 | 1 | 1 | 0.03  | 0.03   | 0.03   | 0.03   | 0.03   | t | 122327 | EEVTTSGPCGEESVLLDRKS | Homo sapiens          |

|   |      |   |   |       |        |        |        |       |   |        |                              |                                  |
|---|------|---|---|-------|--------|--------|--------|-------|---|--------|------------------------------|----------------------------------|
| 1 | 1.00 | 1 | 1 | 0.03  | 0.03   | 0.03   | 0.03   | 0.03  | t | 114956 | SSYANTTS<br>ED               | Homo<br>sapiens                  |
| 1 | 1.00 | 1 | 1 | 0.01  | 0.01   | 0.01   | 0.01   | 0.01  | t | 78376  | EQSYPCW<br>LSGTPSTP          | Mus<br>musculu<br>s              |
| 1 | 1.00 | 1 | 1 | 0.01  | 0.01   | 0.01   | 0.01   | 0.01  | t | 79641  | SGIAVNP                      | Oryctola<br>gus<br>cuniculu<br>s |
| 1 | 1.00 | 1 | 1 | 0.01  | 0.01   | 0.01   | 0.01   | 0.01  | t | 7514   | DAGDSAYS<br>Q                | Mus<br>musculu<br>s              |
| 1 | 1.00 | 1 | 1 | -0.01 | -0.01  | -0.01  | -0.01  | -0.01 | t | 138627 | SQKEVLEG<br>ARASVDR<br>VC    | Oryctola<br>gus<br>cuniculu<br>s |
| 1 | 1.00 | 1 | 1 | -0.01 | -0.01  | -0.01  | -0.01  | -0.01 | t | 117388 | TRPNSHM<br>HTTPY             | Homo<br>sapiens                  |
| 1 | 1.00 | 1 | 1 | -0.01 | -0.01  | -0.01  | -0.01  | -0.01 | t | 103633 | TAQTLQAF<br>LHWAITD          | Homo<br>sapiens                  |
| 1 | 1.00 | 1 | 1 | -0.01 | -0.01  | -0.01  | -0.01  | -0.01 | t | 115409 | PAAVRSPA<br>QILQWQV<br>LSNTV | Homo<br>sapiens                  |
| 1 | 1.00 | 1 | 1 | -0.01 | -0.01  | -0.01  | -0.01  | -0.01 | t | 96005  | WRSKYGW<br>TAF               | Homo<br>sapiens                  |
| 1 | 1.00 | 1 | 1 | -0.01 | -0.01  | -0.01  | -0.01  | -0.01 | t | 22077  | GRIILSGKP<br>ATIPDREA<br>VLY | Homo<br>sapiens                  |
| 1 | 1.00 | 1 | 1 | -0.01 | -0.01  | -0.01  | -0.01  | -0.01 | t | 20043  | GGSWGQP<br>HGGGW             | Mus<br>musculu<br>s              |
| 1 | 1.00 | 1 | 1 | -0.03 | -0.03  | -0.03  | -0.03  | -0.03 | t | 109099 | GGGGDIV<br>PIWAR             | Mus<br>musculu<br>s              |
| 1 | 1.00 | 1 | 1 | -0.01 | -0.012 | -0.015 | -0.011 | -0.01 | t | 74708  | YLILSARDV<br>L               | Mus<br>musculu<br>s              |
| 1 | 1.00 | 1 | 1 | 0.01  | 0.01   | 0.01   | 0.01   | 0.011 | t | 146624 | WNWFDIT<br>N                 | Homo<br>sapiens                  |
| 1 | 1.00 | 1 | 1 | 0.01  | 0.008  | 0.015  | 0.009  | 0.01  | t | 49414  | PSKPTTKQ<br>RQNK             | Mus<br>musculu<br>s              |

|   |      |   |   |       |        |        |        |        |   |        |                              |                                  |
|---|------|---|---|-------|--------|--------|--------|--------|---|--------|------------------------------|----------------------------------|
| 1 | 1.00 | 1 | 1 | -0.01 | -0.014 | -0.016 | -0.01  | -0.008 | t | 128086 | QTGWCAF<br>QLCNSYDL<br>F     | Mus<br>musculu<br>s              |
| 1 | 1.00 | 1 | 1 | -0.01 | -0.013 | -0.012 | -0.01  | -0.009 | t | 61006  | SSFSPNNT                     | Oryctola<br>gus<br>cuniculu<br>s |
| 1 | 1.00 | 1 | 1 | -0.02 | -0.018 | -0.021 | -0.017 | -0.017 | t | 144433 | PNEEITAT<br>MDKIQTSF<br>HCC  | Homo<br>sapiens                  |
| 1 | 1.00 | 1 | 1 | -0.02 | -0.024 | -0.033 | -0.021 | -0.02  | t | 71851  | VVTHEMA<br>HALG              | Oryctola<br>gus<br>cuniculu<br>s |
| 1 | 1.00 | 1 | 1 | -0.03 | -0.03  | -0.034 | -0.03  | -0.03  | t | 7671   | DAVSRKK<br>MDTKPTD           | Homo<br>sapiens                  |
| 1 | 1.00 | 1 | 1 | 0.02  | 0.014  | 0.02   | 0.02   | 0.02   | t | 123013 | AIFSQFGQ<br>ILDILV           | Oryctola<br>gus<br>cuniculu<br>s |
| 1 | 1.00 | 1 | 1 | 0.01  | -0.002 | 0.01   | 0.013  | 0.01   | t | 156918 | MAITDHP<br>GSAMV             | Bos<br>taurus                    |
| 1 | 1.00 | 1 | 1 | 0.01  | 0.012  | 0.015  | 0.011  | 0.01   | t | 71297  | VTFDGGK<br>M                 | Homo<br>sapiens                  |
| 1 | 1.00 | 1 | 1 | -0.02 | -0.024 | -0.025 | -0.017 | -0.02  | t | 66977  | TVDNSAST<br>KNKDKLFT<br>VWK  | Oryctola<br>gus<br>cuniculu<br>s |
| 1 | 1.00 | 1 | 1 | -0.02 | -0.022 | -0.025 | -0.017 | -0.02  | t | 66977  | TVDNSAST<br>KNKDKLFT<br>VWK  | Rattus<br>norvegic<br>us         |
| 1 | 1.00 | 1 | 1 | -0.03 | -0.03  | -0.007 | -0.023 | -0.03  | t | 119595 | ICNVNHKP                     | Homo<br>sapiens                  |
| 1 | 1.00 | 1 | 1 | 0.01  | 0.013  | 0.01   | 0.01   | 0.01   | t | 108010 | LMPNMN<br>APITGRAL<br>E      | Mus<br>musculu<br>s              |
| 1 | 1.00 | 1 | 1 | 0     | 0      | -0.001 | 0      | 0      | t | 6456   | CITQYERES<br>QAYYQRG<br>S    | Mus<br>musculu<br>s              |
| 1 | 1.00 | 1 | 1 | 0.02  | 0.022  | 0.033  | 0.023  | 0.018  | t | 8379   | DGEPPED<br>DDSATGLA<br>FRTPN | Homo<br>sapiens                  |

|   |      |   |   |       |        |        |        |        |   |        |                        |               |
|---|------|---|---|-------|--------|--------|--------|--------|---|--------|------------------------|---------------|
| 1 | 1.00 | 1 | 1 | 0.01  | 0.01   | 0.01   | 0.01   | 0.01   | t | 54291  | RISNLND                | Homo sapiens  |
| 1 | 1.00 | 1 | 1 | -0.08 | -0.08  | -0.08  | -0.08  | -0.08  | t | 132153 | AKKK                   | Mus musculus  |
| 1 | 1.00 | 1 | 1 | 0.02  | 0.02   | 0.02   | 0.02   | 0.021  | t | 125245 | RRLDQYQ IHL            | Mus musculus  |
| 1 | 1.00 | 1 | 1 | 0.05  | 0.061  | 0.05   | 0.05   | 0.05   | t | 134161 | MGSASGH FTD FE         | Rattus rattus |
| 1 | 1.00 | 1 | 1 | -0.01 | -0.01  | -0.01  | -0.01  | -0.013 | t | 132010 | PPGLTGQK PPLSTWD       | Homo sapiens  |
| 1 | 1.00 | 1 | 1 | -0.01 | -0.003 | -0.002 | -0.011 | -0.01  | t | 67908  | VDASSGSN RFAALPAF      | Gallus gallus |
| 1 | 1.00 | 1 | 1 | 0     | 0      | 0      | -0.004 | -0.002 | t | 134220 | RQGAEP RKNFVKPNE TKTY  | Homo sapiens  |
| 1 | 1.00 | 1 | 1 | 0.01  | 0.01   | 0.017  | 0.01   | 0.011  | t | 106561 | KHYAAFPE NLLI          | Mus musculus  |
| 1 | 1.00 | 1 | 1 | 0.01  | 0.01   | 0.017  | 0.01   | 0.011  | t | 106561 | KHYAAFPE NLLI          | Mus musculus  |
| 1 | 1.00 | 1 | 1 | -0.03 | -0.03  | -0.026 | -0.03  | -0.032 | t | 49110  | PQQSFPQ PQH            | Mus musculus  |
| 1 | 1.00 | 1 | 1 | 0.04  | 0.04   | 0.04   | 0.04   | 0.04   | t | 101918 | NENNGGC DA             | Homo sapiens  |
| 1 | 1.00 | 1 | 1 | 0.02  | 0.02   | 0.02   | 0.02   | 0.02   | t | 119648 | SWNSGAL T              | Homo sapiens  |
| 1 | 1.00 | 1 | 1 | 0.02  | 0.02   | 0.02   | 0.02   | 0.02   | t | 78883  | VTPYWPP VQSIRSPG TPSMD | Homo sapiens  |
| 1 | 1.00 | 1 | 1 | 0     | 0      | 0      | 0      | 0      | t | 149090 | NSTQGPV                | Sus scrofa    |
| 1 | 1.00 | 1 | 1 | 0     | 0      | 0      | 0      | 0      | t | 148830 | QQLAQIP QQL            | Homo sapiens  |

|   |      |   |   |       |        |       |        |        |   |        |                              |                                  |
|---|------|---|---|-------|--------|-------|--------|--------|---|--------|------------------------------|----------------------------------|
| 1 | 1.00 | 1 | 1 | 0     | 0      | 0     | 0      | 0      | t | 119979 | KAEFHRW<br>SSY               | Mus<br>musculu<br>s              |
| 1 | 1.00 | 1 | 1 | 0     | 0      | 0     | 0      | 0      | t | 119979 | KAEFHRW<br>SSY               | Mus<br>musculu<br>s              |
| 1 | 1.00 | 1 | 1 | 0     | 0      | 0     | 0      | 0      | t | 119979 | KAEFHRW<br>SSY               | Oryctola<br>gus<br>cuniculu<br>s |
| 1 | 1.00 | 1 | 1 | 0     | 0      | 0     | 0      | 0      | t | 124734 | SPLSLGR                      | Homo<br>sapiens                  |
| 1 | 1.00 | 1 | 1 | 0     | 0      | 0     | 0      | 0      | t | 99559  | QEEREFSP<br>RGQHSRR          | Homo<br>sapiens                  |
| 1 | 1.00 | 1 | 1 | 0     | 0      | 0     | 0      | 0      | t | 79045  | PQANAKI<br>WIAGQGP<br>TKEDDY | Homo<br>sapiens                  |
| 1 | 1.00 | 1 | 1 | 0     | 0      | 0     | 0      | 0      | t | 60022  | SPDVDLG<br>DASGINAS          | Mus<br>musculu<br>s              |
| 1 | 1.00 | 1 | 1 | -0.02 | -0.022 | -0.02 | -0.027 | -0.021 | t | 131274 | VVRF                         | Mus<br>musculu<br>s              |
| 1 | 1.00 | 1 | 1 | -0.02 | -0.02  | -0.02 | -0.02  | -0.02  | t | 138626 | SQKDILER<br>KRAAVDR<br>VC    | Oryctola<br>gus<br>cuniculu<br>s |
| 1 | 1.00 | 1 | 1 | -0.02 | -0.02  | -0.02 | -0.02  | -0.02  | t | 138626 | SQKDILER<br>KRAAVDR<br>VC    | Oryctola<br>gus<br>cuniculu<br>s |
| 1 | 1.00 | 1 | 1 | -0.02 | -0.02  | -0.02 | -0.02  | -0.02  | t | 127740 | MHRPNLE                      | Homo<br>sapiens                  |
| 1 | 1.00 | 1 | 1 | -0.02 | -0.02  | -0.02 | -0.02  | -0.02  | t | 115793 | INNQLFPY<br>PY               | Homo<br>sapiens                  |
| 1 | 1.00 | 1 | 1 | -0.02 | -0.02  | -0.02 | -0.02  | -0.02  | t | 99581  | QPRREEG<br>GRWGPAG<br>P      | Homo<br>sapiens                  |
| 1 | 1.00 | 1 | 1 | -0.02 | -0.02  | -0.02 | -0.02  | -0.02  | t | 107021 | YNRYPEM<br>MLVTG             | Mus<br>musculu<br>s              |
| 1 | 1.00 | 1 | 1 | -0.02 | -0.02  | -0.02 | -0.02  | -0.02  | t | 47193  | PDREVLJR<br>EFDEMEEC<br>GSHL | Homo<br>sapiens                  |
| 1 | 1.00 | 1 | 1 | -0.04 | -0.04  | -0.04 | -0.04  | -0.04  | t | 137848 | FDRFKGSG<br>PGYY             | Oryctola<br>gus<br>cuniculu<br>s |

|   |      |   |   |       |        |        |        |        |   |        |                              |                                  |
|---|------|---|---|-------|--------|--------|--------|--------|---|--------|------------------------------|----------------------------------|
| 1 | 1.00 | 1 | 1 | -0.04 | -0.04  | -0.04  | -0.04  | -0.04  | t | 98815  | HRIFLAGD<br>KD               | Homo<br>sapiens                  |
| 1 | 1.00 | 1 | 1 | -0.01 | -0.01  | -0.014 | -0.01  | -0.008 | t | 49068  | PQPQQPF<br>CQQ               | Mus<br>musculu<br>s              |
| 1 | 1.00 | 1 | 1 | 0     | -0.002 | 0.007  | 0.009  | 0.002  | t | 115750 | GFYTTGAV<br>RQIFGDY          | Mus<br>musculu<br>s              |
| 1 | 1.00 | 1 | 1 | 0.05  | 0.052  | 0.051  | 0.053  | 0.053  | t | 122406 | IEIGLEGKG<br>FEPTLEALF<br>GK | Homo<br>sapiens                  |
| 1 | 1.00 | 1 | 1 | -0.03 | -0.028 | -0.025 | -0.023 | -0.028 | t | 126757 | NKPLITVT<br>NSKY             | Homo<br>sapiens                  |
| 1 | 1.00 | 1 | 1 | 0.02  | 0.02   | 0.02   | 0.02   | 0.02   | t | 78977  | GDGRFHFL<br>RGFFDSD          | Mus<br>musculu<br>s              |
| 1 | 1.00 | 1 | 1 | 0     | 0      | 0      | 0      | 0      | t | 151659 | KATDLLLD<br>DSLVSFLG<br>NRRL | Mus<br>musculu<br>s              |
| 1 | 1.00 | 1 | 1 | 0     | 0      | -0.005 | -0.001 | 0.002  | t | 10868  | DYEDRYR<br>E                 | Mus<br>musculu<br>s              |
| 1 | 1.00 | 1 | 1 | 0     | 0.002  | -0.004 | 0.003  | 0      | t | 66046  | TRKTSERS<br>QPRGRR           | Homo<br>sapiens                  |
| 1 | 1.00 | 1 | 1 | 0     | 0.002  | -0.004 | 0.003  | 0      | t | 66046  | TRKTSERS<br>QPRGRR           | Homo<br>sapiens                  |
| 1 | 1.00 | 1 | 1 | -0.01 | -0.008 | -0.01  | -0.009 | -0.009 | t | 58409  | SHSAFNM<br>FDFGVGPP          | Homo<br>sapiens                  |
| 1 | 1.00 | 1 | 1 | 0.04  | 0.04   | 0.043  | 0.04   | 0.04   | t | 33663  | KTFGSSGS<br>SAVDSG           | Homo<br>sapiens                  |
| 1 | 1.00 | 1 | 1 | 0.01  | 0.013  | 0.024  | 0.01   | 0.008  | t | 28228  | IQTAFNQG<br>A                | Mus<br>musculu<br>s              |
| 1 | 1.00 | 1 | 1 | -0.08 | -0.074 | -0.074 | -0.073 | -0.082 | t | 127779 | PSRRRRRR<br>KATLAPA          | Homo<br>sapiens                  |
| 1 | 1.00 | 1 | 1 | 0     | -0.002 | 0      | 0      | -0.002 | t | 107355 | EYGFDTSD<br>YYYYY            | Oryctola<br>gus<br>cuniculu<br>s |
| 1 | 1.00 | 1 | 1 | -0.02 | -0.019 | -0.014 | -0.019 | -0.02  | t | 21214  | GLVSMFSV<br>GP               | Homo<br>sapiens                  |

|   |      |   |   |       |        |        |        |        |   |        |                              |                       |
|---|------|---|---|-------|--------|--------|--------|--------|---|--------|------------------------------|-----------------------|
| 1 | 1.00 | 1 | 1 | -0.01 | -0.008 | -0.012 | -0.007 | -0.01  | t | 122947 | WTQEPQP<br>LEEKWQH<br>RVVE   | Homo sapiens          |
| 1 | 1.00 | 1 | 1 | 0.02  | 0.017  | 0.019  | 0.02   | 0.02   | t | 150050 | YEDTVLPE<br>APAIVTP          | Oryctolagus cuniculus |
| 1 | 1.00 | 1 | 1 | 0     | 0      | 0      | 0      | 0      | t | 132143 | AGPCILLA<br>RDRCPG           | Homo sapiens          |
| 1 | 1.00 | 1 | 1 | 0.01  | 0.008  | -0.006 | 0.009  | 0.012  | t | 149247 | AEQQWAL<br>YADGSIRP<br>Q     | Mus musculus          |
| 1 | 1.00 | 1 | 1 | -0.02 | -0.02  | -0.02  | -0.02  | -0.021 | t | 95118  | LQFHHD<br>PQAGKMP<br>RWVRVI  | Rattus norvegicus     |
| 1 | 1.00 | 1 | 1 | 0     | 0      | -0.005 | 0      | 0      | t | 140506 | THYGSLPQ<br>KSQH             | Mus musculus          |
| 1 | 1.00 | 1 | 1 | -0.04 | -0.042 | -0.04  | -0.047 | -0.04  | t | 135482 | LMDRHD                       | Mus musculus          |
| 1 | 1.00 | 1 | 1 | 0     | 0      | -0.003 | 0      | -0.002 | t | 91911  | RRQQLQ<br>EIERRNA            | Oryctolagus cuniculus |
| 1 | 1.00 | 1 | 1 | 0.05  | 0.05   | 0.05   | 0.05   | 0.05   | t | 132821 | FGSNQSQ                      | Homo sapiens          |
| 1 | 1.00 | 1 | 1 | 0.03  | 0.03   | 0.03   | 0.03   | 0.03   | t | 149033 | EDFRFESSL<br>SINDHA          | Rattus norvegicus     |
| 1 | 1.00 | 1 | 1 | 0.01  | 0.01   | 0.01   | 0.01   | 0.01   | t | 149039 | FLHTRLFV<br>SDGINS           | Rattus norvegicus     |
| 1 | 1.00 | 1 | 1 | 0.01  | 0.01   | 0.01   | 0.01   | 0.01   | t | 121741 | QCVLAIFN<br>DVYWLPY          | Mus musculus          |
| 1 | 1.00 | 1 | 1 | -0.01 | -0.01  | -0.01  | -0.01  | -0.01  | t | 147548 | CIGHLPW<br>MC                | Homo sapiens          |
| 1 | 1.00 | 1 | 1 | -0.01 | -0.01  | -0.01  | -0.01  | -0.01  | t | 119627 | QDWLNGK<br>E                 | Homo sapiens          |
| 1 | 1.00 | 1 | 1 | -0.01 | -0.01  | -0.01  | -0.01  | -0.01  | t | 123452 | LPKIKAYM<br>E                | Ovis aries            |
| 1 | 1.00 | 1 | 1 | -0.01 | -0.01  | -0.01  | -0.01  | -0.01  | t | 60678  | SRGNHVS<br>PRHYVPES<br>EPAAR | Homo sapiens          |

|   |      |   |   |       |       |        |        |        |   |        |                              |                                  |
|---|------|---|---|-------|-------|--------|--------|--------|---|--------|------------------------------|----------------------------------|
| 1 | 1.00 | 1 | 1 | -0.01 | -0.01 | -0.01  | -0.01  | -0.01  | t | 60674  | SRGNHDS<br>PTHYVPES<br>DAAAR | Homo<br>sapiens                  |
| 1 | 1.00 | 1 | 1 | -0.01 | -0.01 | -0.01  | -0.01  | -0.01  | t | 46989  | PAVIPDRE<br>LLYREFDE<br>MEEC | Homo<br>sapiens                  |
| 1 | 1.00 | 1 | 1 | -0.01 | -0.01 | -0.01  | -0.01  | -0.01  | t | 32780  | KPLAMDP<br>LHVST             | Gallus<br>gallus                 |
| 1 | 1.00 | 1 | 1 | 0.01  | 0.012 | 0.002  | 0.009  | 0.01   | t | 28396  | IRSAEVVS<br>RMLVH            | Homo<br>sapiens                  |
| 1 | 1.00 | 1 | 1 | -0.03 | -0.03 | -0.03  | -0.03  | -0.03  | t | 131770 | YLMKINS                      | Mus<br>musculu<br>s              |
| 1 | 1.00 | 1 | 1 | -0.03 | -0.03 | -0.03  | -0.03  | -0.03  | t | 103227 | GNKASFLD<br>QVHFQPL          | Homo<br>sapiens                  |
| 1 | 1.00 | 1 | 1 | -0.05 | -0.05 | -0.05  | -0.05  | -0.05  | t | 115465 | RCEKDERF<br>FSDKIAKYI<br>PIQ | Homo<br>sapiens                  |
| 1 | 1.00 | 1 | 1 | -0.05 | -0.05 | -0.053 | -0.05  | -0.051 | t | 115271 | GQKGRGS<br>RG                | Oryctola<br>gus<br>cuniculu<br>s |
| 1 | 1.00 | 1 | 1 | 0     | 0.004 | 0.004  | -0.003 | -0.002 | t | 56186  | RTTADRQT<br>ACNCLKN          | Homo<br>sapiens                  |
| 1 | 1.00 | 1 | 1 | 0     | 0     | -0.005 | 0      | 0      | t | 50156  | PYQGSGK<br>GVS               | Mus<br>musculu<br>s              |
| 1 | 1.00 | 1 | 1 | 0.01  | 0.01  | 0.01   | 0.01   | 0.01   | t | 135580 | MDIPPPTG<br>PT               | Oryctola<br>gus<br>cuniculu<br>s |
| 1 | 1.00 | 1 | 1 | -0.04 | -0.04 | -0.047 | -0.043 | -0.042 | t | 3912   | APYHFDLS<br>GHAFGAM          | Homo<br>sapiens                  |
| 1 | 1.00 | 1 | 1 | 0.04  | 0.038 | 0.031  | 0.033  | 0.04   | t | 113679 | PEVPEVED<br>E                | Mus<br>musculu<br>s              |
| 1 | 1.00 | 1 | 1 | 0     | 0     | 0      | 0      | 0.001  | t | 22360  | GSGVRGD<br>FGSLAPRV<br>ARQL  | Cavia<br>porcellu<br>s           |



|   |      |   |   |       |        |        |        |        |   |        |                                  |                                  |
|---|------|---|---|-------|--------|--------|--------|--------|---|--------|----------------------------------|----------------------------------|
| 1 | 1.00 | 1 | 1 | -0.03 | -0.03  | -0.031 | -0.03  | -0.033 | t | 6225   | CFGKDLKR<br>PGSSPME<br>V         | Mus<br>musculu<br>s              |
| 1 | 1.00 | 1 | 1 | -0.01 | -0.004 | -0.022 | -0.01  | -0.009 | t | 100072 | GNGQGH<br>NMPNDP<br>NRNVDEN<br>A | Aotus<br>nancyma<br>ae           |
| 1 | 1.00 | 1 | 1 | 0     | 0.002  | -0.011 | -0.003 | 0.001  | t | 33149  | KRHDGGC<br>RKELAAV               | Homo<br>sapiens                  |
| 1 | 1.00 | 1 | 1 | 0.03  | 0.028  | 0.037  | 0.023  | 0.027  | t | 140620 | YSLYQALT<br>A                    | Mus<br>musculu<br>s              |
| 1 | 1.00 | 1 | 1 | 0.05  | 0.054  | 0.047  | 0.051  | 0.052  | t | 53092  | RAETDDVE<br>PSVAAEC              | Homo<br>sapiens                  |
| 1 | 1.00 | 1 | 1 | 0.07  | 0.072  | 0.071  | 0.067  | 0.068  | t | 106872 | SSSSSGSG<br>SG                   | Homo<br>sapiens                  |
| 1 | 1.00 | 1 | 1 | -0.02 | -0.02  | -0.028 | -0.021 | -0.02  | t | 81856  | ETSRSVFH<br>QNGQ                 | Homo<br>sapiens                  |
| 1 | 1.00 | 1 | 1 | 0.03  | 0.019  | 0.03   | 0.03   | 0.03   | t | 106494 | GYENPTYK<br>FFEQMQRN             | Oryctola<br>gus<br>cuniculu<br>s |
| 1 | 1.00 | 1 | 1 | 0.02  | 0.02   | 0.023  | 0.019  | 0.02   | t | 20455  | GITGETTTT<br>EYSNARYV            | Homo<br>sapiens                  |
| 1 | 1.00 | 1 | 1 | -0.01 | -0.01  | -0.009 | -0.013 | -0.012 | t | 43262  | NANSIIYAL<br>NGRALV              | Homo<br>sapiens                  |
| 1 | 1.00 | 1 | 1 | 0.02  | 0.02   | 0.019  | 0.02   | 0.022  | t | 39082  | LRFDQNG<br>VLMENSSL              | Oryctola<br>gus<br>cuniculu<br>s |
| 1 | 1.00 | 1 | 1 | 0     | 0.007  | 0.011  | 0.001  | 0      | t | 75161  | YNHALS                           | Homo<br>sapiens                  |
| 1 | 1.00 | 1 | 1 | 0     | 0      | 0      | 0      | 0      | t | 94623  | NPACGRH                          | Capra<br>hircus                  |

|   |      |   |   |       |        |       |        |       |   |        |                              |                                  |
|---|------|---|---|-------|--------|-------|--------|-------|---|--------|------------------------------|----------------------------------|
| 1 | 1.00 | 1 | 1 | 0     | 0      | 0     | 0      | 0     | t | 94623  | NPACGRH                      | Oryctola<br>gus<br>cuniculu<br>s |
| 1 | 1.00 | 1 | 1 | 0     | -0.007 | 0     | 0      | 0     | t | 94623  | NPACGRH                      | Oryctola<br>gus<br>cuniculu<br>s |
| 1 | 1.00 | 1 | 1 | 0     | 0.007  | 0     | 0      | 0     | t | 94623  | NPACGRH                      | Capra<br>hircus                  |
| 1 | 1.00 | 1 | 1 | -0.05 | -0.05  | -0.05 | -0.046 | -0.05 | t | 140648 | ALREYRKK<br>MDIPA            | Homo<br>sapiens                  |
| 1 | 1.00 | 1 | 1 | 0.01  | 0.008  | 0.014 | 0.009  | 0.01  | t | 54989  | RNFTTAPA<br>ICHEGKAY<br>F    | Mus<br>musculu<br>s              |
| 1 | 1.00 | 1 | 1 | 0.01  | 0.006  | 0.014 | 0.009  | 0.01  | t | 54989  | RNFTTAPA<br>ICHEGKAY<br>F    | Oryctola<br>gus<br>cuniculu<br>s |
| 1 | 1.00 | 1 | 1 | 0.02  | 0.02   | 0.02  | 0.02   | 0.02  | t | 104123 | MNKTFSA                      | Homo<br>sapiens                  |
| 1 | 1.00 | 1 | 1 | 0.02  | 0.02   | 0.02  | 0.02   | 0.02  | t | 97324  | GDSQATY<br>NY                | Oryctola<br>gus<br>cuniculu<br>s |
| 1 | 1.00 | 1 | 1 | 0     | 0      | 0     | 0      | 0     | t | 137449 | SHRLPAK                      | Mus<br>musculu<br>s              |
| 1 | 1.00 | 1 | 1 | 0     | 0      | 0     | 0      | 0     | t | 149514 | VPQLQLQ<br>NPS               | Mus<br>musculu<br>s              |
| 1 | 1.00 | 1 | 1 | 0     | 0      | 0     | 0      | 0     | t | 149514 | VPQLQLQ<br>NPS               | Homo<br>sapiens                  |
| 1 | 1.00 | 1 | 1 | 0     | 0      | 0     | 0      | 0     | t | 123639 | PVRLLEY<br>G                 | Ovis<br>aries                    |
| 1 | 1.00 | 1 | 1 | 0     | 0      | 0     | 0      | 0     | t | 128099 | SEGWPAI<br>DGSFLAAV<br>GNLIV | Homo<br>sapiens                  |
| 1 | 1.00 | 1 | 1 | 0     | 0      | 0     | 0      | 0     | t | 107532 | NSTYRVV                      | Homo<br>sapiens                  |
| 1 | 1.00 | 1 | 1 | 0     | 0      | 0     | 0      | 0     | t | 62051  | SVASGGSG<br>GSVASGG          | Homo<br>sapiens                  |

|   |      |   |   |       |       |        |        |        |   |        |                              |                     |
|---|------|---|---|-------|-------|--------|--------|--------|---|--------|------------------------------|---------------------|
| 1 | 1.00 | 1 | 1 | 0     | 0     | 0      | 0      | 0      | t | 67649  | VAKPAGA<br>VSTQSAKN          | Homo<br>sapiens     |
| 1 | 1.00 | 1 | 1 | 0     | 0     | 0      | 0      | 0      | t | 79410  | TCKELQW<br>LPRLRCL           | Mus<br>musculu<br>s |
| 1 | 1.00 | 1 | 1 | 0     | 0     | 0      | 0      | 0      | t | 78399  | GLLNDS                       | Mus<br>musculu<br>s |
| 1 | 1.00 | 1 | 1 | 0     | 0     | 0      | 0      | 0      | t | 55270  | RPPRYLAN<br>Q                | Mus<br>musculu<br>s |
| 1 | 1.00 | 1 | 1 | 0     | 0     | 0      | 0      | 0      | t | 25646  | IDPSFRLGF<br>VPVSRG          | Mus<br>musculu<br>s |
| 1 | 1.00 | 1 | 1 | -0.02 | -0.02 | -0.02  | -0.02  | -0.02  | t | 144675 | GTHPFLSQ<br>W                | Mus<br>musculu<br>s |
| 1 | 1.00 | 1 | 1 | -0.02 | -0.02 | -0.02  | -0.02  | -0.02  | t | 144675 | GTHPFLSQ<br>W                | Mus<br>musculu<br>s |
| 1 | 1.00 | 1 | 1 | -0.02 | -0.02 | -0.02  | -0.02  | -0.02  | t | 144675 | GTHPFLSQ<br>W                | Mus<br>musculu<br>s |
| 1 | 1.00 | 1 | 1 | -0.02 | -0.02 | -0.02  | -0.02  | -0.02  | t | 130605 | SCRLFGKT<br>YLCH             | Mus<br>musculu<br>s |
| 1 | 1.00 | 1 | 1 | -0.02 | -0.02 | -0.02  | -0.02  | -0.02  | t | 130605 | SCRLFGKT<br>YLCH             | Mus<br>musculu<br>s |
| 1 | 1.00 | 1 | 1 | -0.02 | -0.02 | -0.02  | -0.02  | -0.02  | t | 133959 | WIRMNF                       | Mus<br>musculu<br>s |
| 1 | 1.00 | 1 | 1 | -0.02 | -0.02 | -0.02  | -0.02  | -0.02  | t | 103420 | MSFVTIQP<br>VVLAAAT          | Homo<br>sapiens     |
| 1 | 1.00 | 1 | 1 | -0.02 | -0.02 | -0.02  | -0.02  | -0.02  | t | 79142  | ACDPSTV<br>MVPWPCS           | Mus<br>musculu<br>s |
| 1 | 1.00 | 1 | 1 | -0.04 | -0.04 | -0.04  | -0.04  | -0.04  | t | 156423 | QNQLDQV<br>PRRFYLAG          | Homo<br>sapiens     |
| 1 | 1.00 | 1 | 1 | -0.01 | -0.01 | -0.01  | -0.01  | -0.008 | t | 51084  | QIISQQPF<br>PL               | Mus<br>musculu<br>s |
| 1 | 1.00 | 1 | 1 | -0.03 | -0.03 | -0.025 | -0.027 | -0.032 | t | 4907   | ATCDKLFG<br>YYERGIPLP<br>CAL | Homo<br>sapiens     |

|   |      |   |   |       |        |        |        |       |   |        |                              |                                  |
|---|------|---|---|-------|--------|--------|--------|-------|---|--------|------------------------------|----------------------------------|
| 1 | 1.00 | 1 | 1 | 0     | -0.003 | -0.002 | 0      | 0     | t | 127187 | TDAQRREL<br>EKHSLSRVI<br>C   | Oryctola<br>gus<br>cuniculu<br>s |
| 1 | 1.00 | 1 | 1 | 0.01  | 0.008  | 0.007  | 0.009  | 0.01  | t | 64655  | TKQYNVT<br>QAFGRRG<br>P      | Macaca<br>cyclopis               |
| 1 | 1.00 | 1 | 1 | 0     | -0.005 | 0      | -0.001 | 0     | t | 148565 | DKNKLQD<br>VKDNKPS<br>DVKL   | Canis<br>lupus                   |
| 1 | 1.00 | 1 | 1 | -0.01 | -0.007 | -0.007 | -0.01  | -0.01 | t | 97525  | NLTAWN<br>P<br>S             | Mus<br>musculu<br>s              |
| 1 | 1.00 | 1 | 1 | 0.01  | 0.01   | 0.008  | 0.011  | 0.009 | t | 99920  | DADNILVI<br>QQGQATV<br>TVANG | Homo<br>sapiens                  |
| 1 | 1.00 | 1 | 1 | 0     | 0.002  | 0.001  | 0      | 0     | t | 20354  | GILGFVFTL                    | Homo<br>sapiens                  |
| 1 | 1.00 | 1 | 1 | 0     | 0.004  | 0.001  | 0      | 0     | t | 20354  | GILGFVFTL                    | Homo<br>sapiens                  |
| 1 | 1.00 | 1 | 1 | 0.02  | 0.017  | 0.013  | 0.02   | 0.02  | t | 153286 | QKLVFFAE<br>DVGSNKG<br>A     | Oryctola<br>gus<br>cuniculu<br>s |
| 1 | 1.00 | 1 | 1 | -0.02 | -0.02  | -0.013 | -0.02  | -0.02 | t | 119521 | RRKPGTEQ<br>L                | Homo<br>sapiens                  |
| 1 | 1.00 | 1 | 1 | -0.01 | -0.012 | -0.008 | -0.009 | -0.01 | t | 131037 | RHWTTQG<br>CNC               | Mus<br>musculu<br>s              |
| 1 | 1.00 | 1 | 1 | 0.01  | 0.01   | 0.01   | 0.007  | 0.01  | t | 72668  | WKDLLE                       | Homo<br>sapiens                  |
| 1 | 1.00 | 1 | 1 | -0.01 | -0.008 | -0.01  | -0.007 | -0.01 | t | 110113 | WYRQTM<br>MRGLELLI<br>YF     | Homo<br>sapiens                  |
| 1 | 1.00 | 1 | 1 | 0.01  | 0.014  | -0.002 | 0.007  | 0.012 | t | 33077  | KQSYAATV<br>ATAPAVKY<br>TVFE | Homo<br>sapiens                  |
| 1 | 1.00 | 1 | 1 | 0     | -0.003 | 0.001  | 0      | 0.001 | t | 133674 | RHRY                         | Oryctola<br>gus<br>cuniculu<br>s |

|   |      |   |   |       |        |        |        |        |   |        |                              |                       |
|---|------|---|---|-------|--------|--------|--------|--------|---|--------|------------------------------|-----------------------|
| 1 | 1.00 | 1 | 1 | 0.04  | 0.04   | 0.039  | 0.034  | 0.041  | t | 45279  | NNVDQI                       | Homo sapiens          |
| 1 | 1.00 | 1 | 1 | -0.03 | -0.028 | -0.03  | -0.023 | -0.028 | t | 117432 | AARGRGR<br>GMGRGNIF          | Homo sapiens          |
| 1 | 1.00 | 1 | 1 | 0.03  | 0.03   | 0.03   | 0.03   | 0.03   | t | 100372 | NYMDKFN<br>EQE               | Mus musculus          |
| 1 | 1.00 | 1 | 1 | 0.01  | 0.01   | 0.01   | 0.01   | 0.01   | t | 103296 | IVMSTNN<br>DDPAGACR          | Homo sapiens          |
| 1 | 1.00 | 1 | 1 | 0.01  | 0.01   | 0.01   | 0.01   | 0.01   | t | 79770  | CGIAAKLG<br>AAAS             | Mus musculus          |
| 1 | 1.00 | 1 | 1 | 0.01  | 0.01   | 0.015  | 0.012  | 0.01   | t | 20657  | GKPALVPD<br>KE               | Homo sapiens          |
| 1 | 1.00 | 1 | 1 | -0.01 | -0.01  | -0.01  | -0.01  | -0.01  | t | 103490 | PPGYDITA<br>LLQAHPH          | Homo sapiens          |
| 1 | 1.00 | 1 | 1 | -0.01 | -0.01  | -0.01  | -0.01  | -0.01  | t | 101253 | SPNHNSF                      | Homo sapiens          |
| 1 | 1.00 | 1 | 1 | -0.01 | -0.01  | -0.01  | -0.01  | -0.01  | t | 71536  | VTTSTPGS<br>SGSVASG          | Homo sapiens          |
| 1 | 1.00 | 1 | 1 | -0.01 | -0.01  | -0.01  | -0.01  | -0.01  | t | 65931  | TQSFLATC<br>VNGVCW           | Homo sapiens          |
| 1 | 1.00 | 1 | 1 | -0.01 | -0.01  | -0.01  | -0.01  | -0.01  | t | 41322  | MEECASH<br>LPYIEQGM<br>HLAEQ | Homo sapiens          |
| 1 | 1.00 | 1 | 1 | -0.01 | -0.01  | -0.01  | -0.01  | -0.01  | t | 39376  | LSGKPATIP<br>DREALYRE<br>FDE | Homo sapiens          |
| 1 | 1.00 | 1 | 1 | -0.02 | -0.017 | -0.022 | -0.02  | -0.022 | t | 64081  | THSWEYW<br>GAQLNAM<br>KPDQLR | Mus musculus          |
| 1 | 1.00 | 1 | 1 | -0.03 | -0.03  | -0.03  | -0.03  | -0.03  | t | 149780 | KLSLDLDQ<br>FPLGRRF          | Oryctolagus cuniculus |

|   |      |   |   |       |       |        |       |       |   |        |                             |                                  |
|---|------|---|---|-------|-------|--------|-------|-------|---|--------|-----------------------------|----------------------------------|
| 1 | 1.00 | 1 | 1 | -0.03 | -0.03 | -0.03  | -0.03 | -0.03 | t | 149780 | KLSLDLDQ<br>FPLGRRF         | Oryctola<br>gus<br>cuniculu<br>s |
| 1 | 1.00 | 1 | 1 | -0.03 | -0.03 | -0.03  | -0.03 | -0.03 | t | 120471 | EFLNLIKSL<br>S              | Mus<br>musculu<br>s              |
| 1 | 1.00 | 1 | 1 | 0     | 0.003 | -0.005 | 0     | 0     | t | 56610  | RYPGQGS<br>PGGNRYP<br>PQG   | Mus<br>musculu<br>s              |
| 1 | 1.00 | 1 | 1 | 0.05  | 0.05  | 0.05   | 0.046 | 0.05  | t | 115605 | GDEVELPC<br>RISP            | Homo<br>sapiens                  |
| 1 | 1.00 | 1 | 1 | 0     | 0     | 0      | 0     | 0     | t | 138892 | REQAPNL<br>VY               | Mus<br>musculu<br>s              |
| 1 | 1.00 | 1 | 1 | 0     | 0     | 0      | 0     | 0     | t | 146185 | DAEFGH                      | Macaca<br>mulatta                |
| 1 | 1.00 | 1 | 1 | 0     | 0     | 0      | 0     | 0     | t | 134220 | RQGAEP<br>KNFVKPNE<br>TKTY  | Homo<br>sapiens                  |
| 1 | 1.00 | 1 | 1 | 0     | 0     | 0      | 0     | 0     | t | 147098 | LNKPLITVS<br>NSKI           | Gallus<br>gallus                 |
| 1 | 1.00 | 1 | 1 | 0     | 0     | 0      | 0     | 0     | t | 134830 | YSPCAWE<br>VVR              | MD                               |
| 1 | 1.00 | 1 | 1 | 0     | 0     | 0      | 0     | 0     | t | 138840 | DREQAPN<br>LVYM             | Mus<br>musculu<br>s              |
| 1 | 1.00 | 1 | 1 | 0     | 0     | 0      | 0     | 0     | t | 153472 | TGLRNGIT<br>NKVNSVIE<br>KAA | Mus<br>musculu<br>s              |
| 1 | 1.00 | 1 | 1 | 0     | 0     | 0      | 0     | 0     | t | 148481 | YTRDLVYK                    | Rattus<br>norvegic<br>us         |
| 1 | 1.00 | 1 | 1 | 0     | 0     | 0      | 0     | 0     | t | 135475 | KRPKPGG<br>W                | Mus<br>musculu<br>s              |
| 1 | 1.00 | 1 | 1 | 0     | 0     | 0      | 0     | 0     | t | 144742 | PFYGYRE                     | Mus<br>musculu<br>s              |
| 1 | 1.00 | 1 | 1 | 0     | 0     | 0      | 0     | 0     | t | 147559 | CTVRGLG                     | Rattus<br>norvegic<br>us         |
| 1 | 1.00 | 1 | 1 | 0     | 0     | 0      | 0     | 0     | t | 147288 | SKFQDTH<br>NNAHYV<br>FFEE   | Gallus<br>gallus                 |
| 1 | 1.00 | 1 | 1 | 0     | 0     | 0      | 0     | 0     | t | 150858 | ISSLYNLVK<br>SS             | Mus<br>musculu<br>s              |

|   |      |   |   |   |   |   |   |   |   |        |                              |                                  |
|---|------|---|---|---|---|---|---|---|---|--------|------------------------------|----------------------------------|
| 1 | 1.00 | 1 | 1 | 0 | 0 | 0 | 0 | 0 | t | 140853 | GEYVQILD<br>AHAAYLN<br>ATPAA | Mus<br>musculu<br>s              |
| 1 | 1.00 | 1 | 1 | 0 | 0 | 0 | 0 | 0 | t | 148424 | VYKDPARP                     | Rattus<br>norvegic<br>us         |
| 1 | 1.00 | 1 | 1 | 0 | 0 | 0 | 0 | 0 | t | 150204 | FHSVVTHTL<br>LEWLMEK<br>ELMV | Mus<br>musculu<br>s              |
| 1 | 1.00 | 1 | 1 | 0 | 0 | 0 | 0 | 0 | t | 146795 | CCELCCNP<br>QCAGCY           | Oryctola<br>gus<br>cuniculu<br>s |
| 1 | 1.00 | 1 | 1 | 0 | 0 | 0 | 0 | 0 | t | 135484 | MSRPLIHF<br>GN               | Mus<br>musculu<br>s              |
| 1 | 1.00 | 1 | 1 | 0 | 0 | 0 | 0 | 0 | t | 135497 | RYPNQVYY<br>RPM              | Mus<br>musculu<br>s              |
| 1 | 1.00 | 1 | 1 | 0 | 0 | 0 | 0 | 0 | t | 136064 | HQIALRME<br>VLGCEAQ<br>DLY   | Homo<br>sapiens                  |
| 1 | 1.00 | 1 | 1 | 0 | 0 | 0 | 0 | 0 | t | 141523 | ALEPPHNL<br>PVP              | Mus<br>musculu<br>s              |
| 1 | 1.00 | 1 | 1 | 0 | 0 | 0 | 0 | 0 | t | 134860 | AGPKAQV<br>EAIQKY            | Mus<br>musculu<br>s              |
| 1 | 1.00 | 1 | 1 | 0 | 0 | 0 | 0 | 0 | t | 147083 | LCSEYRNT<br>QIYTIN           | Oryctola<br>gus<br>cuniculu<br>s |
| 1 | 1.00 | 1 | 1 | 0 | 0 | 0 | 0 | 0 | t | 141963 | MVDRGW<br>G                  | Mus<br>musculu<br>s              |
| 1 | 1.00 | 1 | 1 | 0 | 0 | 0 | 0 | 0 | t | 135465 | GSDYEDRY<br>YREN             | Mus<br>musculu<br>s              |
| 1 | 1.00 | 1 | 1 | 0 | 0 | 0 | 0 | 0 | t | 134641 | ALILLAQM<br>GR               | MD                               |
| 1 | 1.00 | 1 | 1 | 0 | 0 | 0 | 0 | 0 | t | 137770 | TLARSFII<br>CIQM             | Mus<br>musculu<br>s              |
| 1 | 1.00 | 1 | 1 | 0 | 0 | 0 | 0 | 0 | t | 134200 | PVVNSLDP<br>PLLTRY           | Homo<br>sapiens                  |
| 1 | 1.00 | 1 | 1 | 0 | 0 | 0 | 0 | 0 | t | 134694 | ISPFCLK                      | MD                               |

|   |      |   |   |   |   |   |   |   |   |        |                              |                                  |
|---|------|---|---|---|---|---|---|---|---|--------|------------------------------|----------------------------------|
| 1 | 1.00 | 1 | 1 | 0 | 0 | 0 | 0 | 0 | t | 140892 | QILDAHAA<br>YLNATPAA<br>KVLV | Mus<br>musculu<br>s              |
| 1 | 1.00 | 1 | 1 | 0 | 0 | 0 | 0 | 0 | t | 138194 | IIPKSSWS                     | Homo<br>sapiens                  |
| 1 | 1.00 | 1 | 1 | 0 | 0 | 0 | 0 | 0 | t | 142913 | MVLNEGT<br>SGTA              | Oryctola<br>gus<br>cuniculu<br>s |
| 1 | 1.00 | 1 | 1 | 0 | 0 | 0 | 0 | 0 | t | 139029 | DLQVLT                       | Mus<br>musculu<br>s              |
| 1 | 1.00 | 1 | 1 | 0 | 0 | 0 | 0 | 0 | t | 128084 | QKNACSF<br>DLCNSYDV<br>L     | Mus<br>musculu<br>s              |
| 1 | 1.00 | 1 | 1 | 0 | 0 | 0 | 0 | 0 | t | 133551 | EAPPPTLP<br>PDMAQVT<br>VGPG  | Mus<br>musculu<br>s              |
| 1 | 1.00 | 1 | 1 | 0 | 0 | 0 | 0 | 0 | t | 131967 | LRLDCRHE<br>N                | Mus<br>musculu<br>s              |
| 1 | 1.00 | 1 | 1 | 0 | 0 | 0 | 0 | 0 | t | 130916 | KEDFDIYD<br>EDE              | Mus<br>musculu<br>s              |
| 1 | 1.00 | 1 | 1 | 0 | 0 | 0 | 0 | 0 | t | 127944 | DLVNCNL<br>NTNCVAV<br>AFSLPD | Mus<br>musculu<br>s              |
| 1 | 1.00 | 1 | 1 | 0 | 0 | 0 | 0 | 0 | t | 131274 | VVRF                         | Mus<br>musculu<br>s              |
| 1 | 1.00 | 1 | 1 | 0 | 0 | 0 | 0 | 0 | t | 129973 | SPRSFQKK<br>T                | Oryctola<br>gus<br>cuniculu<br>s |
| 1 | 1.00 | 1 | 1 | 0 | 0 | 0 | 0 | 0 | t | 127919 | AFSLPDRS<br>LSAIPLDV<br>SFE  | Mus<br>musculu<br>s              |
| 1 | 1.00 | 1 | 1 | 0 | 0 | 0 | 0 | 0 | t | 127933 | APDDSFKK<br>LEDRTNL<br>KF    | Mus<br>musculu<br>s              |
| 1 | 1.00 | 1 | 1 | 0 | 0 | 0 | 0 | 0 | t | 118877 | LDVEQLGI<br>PEQEYSC          | Mus<br>musculu<br>s              |



|   |      |   |   |   |       |   |   |   |   |        |                              |                                  |
|---|------|---|---|---|-------|---|---|---|---|--------|------------------------------|----------------------------------|
| 1 | 1.00 | 1 | 1 | 0 | 0     | 0 | 0 | 0 | t | 128136 | VFIADSDG<br>KLNFKEWS<br>VCVG | Mus<br>musculu<br>s              |
| 1 | 1.00 | 1 | 1 | 0 | 0     | 0 | 0 | 0 | t | 134020 | CPEEPQLR<br>MKNNEEA<br>EDYDD | Homo<br>sapiens                  |
| 1 | 1.00 | 1 | 1 | 0 | 0     | 0 | 0 | 0 | t | 122113 | IIASTEKL                     | Mus<br>musculu<br>s              |
| 1 | 1.00 | 1 | 1 | 0 | 0     | 0 | 0 | 0 | t | 131164 | YRLWHYP<br>CT                | Mus<br>musculu<br>s              |
| 1 | 1.00 | 1 | 1 | 0 | 0     | 0 | 0 | 0 | t | 125015 | DNESSYSR<br>GFDMTYT<br>E     | Mus<br>musculu<br>s              |
| 1 | 1.00 | 1 | 1 | 0 | 0     | 0 | 0 | 0 | t | 134015 | CDKNTGD<br>YYEDSYED          | Homo<br>sapiens                  |
| 1 | 1.00 | 1 | 1 | 0 | 0     | 0 | 0 | 0 | t | 125127 | LDPENLTL                     | Mus<br>musculu<br>s              |
| 1 | 1.00 | 1 | 1 | 0 | 0     | 0 | 0 | 0 | t | 130994 | PDQRPYC<br>WHYPKP<br>C       | Mus<br>musculu<br>s              |
| 1 | 1.00 | 1 | 1 | 0 | 0     | 0 | 0 | 0 | t | 128043 | LDAMPAG<br>NPAFPVIP<br>G     | Mus<br>musculu<br>s              |
| 1 | 1.00 | 1 | 1 | 0 | 0     | 0 | 0 | 0 | t | 122892 | RSILPYGDS<br>MDRIE           | Oryctola<br>gus<br>cuniculu<br>s |
| 1 | 1.00 | 1 | 1 | 0 | 0     | 0 | 0 | 0 | t | 131037 | RHWTTQG<br>CNC               | Mus<br>musculu<br>s              |
| 1 | 1.00 | 1 | 1 | 0 | 0     | 0 | 0 | 0 | t | 130513 | IGYQPSMP<br>LDMP             | Camelus<br>dromed<br>arius       |
| 1 | 1.00 | 1 | 1 | 0 | 0     | 0 | 0 | 0 | t | 133611 | IVSYLCDLA<br>PEAPPPTL<br>PP  | Mus<br>musculu<br>s              |
| 1 | 1.00 | 1 | 1 | 0 | 0     | 0 | 0 | 0 | t | 130469 | DQPPTSrv<br>PSLR             | Camelus<br>dromed<br>arius       |
| 1 | 1.00 | 1 | 1 | 0 | 0.006 | 0 | 0 | 0 | t | 124588 | PQEETLQA<br>FDSHYDYT         | Ovis<br>aries                    |

|   |      |   |   |   |   |   |   |   |   |        |                              |                                  |
|---|------|---|---|---|---|---|---|---|---|--------|------------------------------|----------------------------------|
| 1 | 1.00 | 1 | 1 | 0 | 0 | 0 | 0 | 0 | t | 125055 | FVYGGCQ<br>GNN               | Mus<br>musculu<br>s              |
| 1 | 1.00 | 1 | 1 | 0 | 0 | 0 | 0 | 0 | t | 122857 | MGCSSPP<br>CECHQEE           | Mus<br>musculu<br>s              |
| 1 | 1.00 | 1 | 1 | 0 | 0 | 0 | 0 | 0 | t | 128004 | GMIEVQS<br>NYGFVWD<br>VSLKKV | Mus<br>musculu<br>s              |
| 1 | 1.00 | 1 | 1 | 0 | 0 | 0 | 0 | 0 | t | 130607 | SHNLVSSA<br>FPSA             | Camelus<br>dromed<br>arius       |
| 1 | 1.00 | 1 | 1 | 0 | 0 | 0 | 0 | 0 | t | 130614 | STLPYLPTY<br>SKH             | Camelus<br>dromed<br>arius       |
| 1 | 1.00 | 1 | 1 | 0 | 0 | 0 | 0 | 0 | t | 122083 | DPNIKLVL<br>DDCWATS          | Mus<br>musculu<br>s              |
| 1 | 1.00 | 1 | 1 | 0 | 0 | 0 | 0 | 0 | t | 125472 | LDAVYLNK<br>NKYLTVID<br>KDAF | Homo<br>sapiens                  |
| 1 | 1.00 | 1 | 1 | 0 | 0 | 0 | 0 | 0 | t | 122202 | TSPPLLWD<br>SVHL             | Mus<br>musculu<br>s              |
| 1 | 1.00 | 1 | 1 | 0 | 0 | 0 | 0 | 0 | t | 121292 | FATFVYAK                     | Mus<br>musculu<br>s              |
| 1 | 1.00 | 1 | 1 | 0 | 0 | 0 | 0 | 0 | t | 130622 | TGLVAQG<br>TDSIG             | Camelus<br>dromed<br>arius       |
| 1 | 1.00 | 1 | 1 | 0 | 0 | 0 | 0 | 0 | t | 130518 | ITQSTQSF<br>NDFTRVV          | Mus<br>musculu<br>s              |
| 1 | 1.00 | 1 | 1 | 0 | 0 | 0 | 0 | 0 | t | 125250 | SDEFNPCE<br>DIMGYK           | Mus<br>musculu<br>s              |
| 1 | 1.00 | 1 | 1 | 0 | 0 | 0 | 0 | 0 | t | 103886 | EQHNPINA<br>GTELSAT          | Oryctola<br>gus<br>cuniculu<br>s |
| 1 | 1.00 | 1 | 1 | 0 | 0 | 0 | 0 | 0 | t | 106347 | DMQLYPV<br>LPTPH             | Mus<br>musculu<br>s              |
| 1 | 1.00 | 1 | 1 | 0 | 0 | 0 | 0 | 0 | t | 108482 | IINPSENG<br>DTSTNGIK<br>K    | Mus<br>musculu<br>s              |
| 1 | 1.00 | 1 | 1 | 0 | 0 | 0 | 0 | 0 | t | 110980 | QPLGVGIS<br>GHPLLNLK<br>DDTE | Mus<br>musculu<br>s              |

|   |      |   |   |   |   |   |   |   |   |        |                              |                       |
|---|------|---|---|---|---|---|---|---|---|--------|------------------------------|-----------------------|
| 1 | 1.00 | 1 | 1 | 0 | 0 | 0 | 0 | 0 | t | 106909 | TISQLYSSYPSP                 | Mus musculus          |
| 1 | 1.00 | 1 | 1 | 0 | 0 | 0 | 0 | 0 | t | 108291 | AVGADES<br>VVKEAHREVINS      | Mus musculus          |
| 1 | 1.00 | 1 | 1 | 0 | 0 | 0 | 0 | 0 | t | 99824  | ITQSTQSF<br>N                | Homo sapiens          |
| 1 | 1.00 | 1 | 1 | 0 | 0 | 0 | 0 | 0 | t | 105163 | EFRHD                        | Mus musculus          |
| 1 | 1.00 | 1 | 1 | 0 | 0 | 0 | 0 | 0 | t | 103998 | IVKWDRD<br>M                 | Mus musculus          |
| 1 | 1.00 | 1 | 1 | 0 | 0 | 0 | 0 | 0 | t | 115630 | NFDKLYIW<br>G                | Homo sapiens          |
| 1 | 1.00 | 1 | 1 | 0 | 0 | 0 | 0 | 0 | t | 108412 | GTTDHVG<br>VPTYDWG<br>K      | Capra hircus          |
| 1 | 1.00 | 1 | 1 | 0 | 0 | 0 | 0 | 0 | t | 104175 | PINAGTEL<br>SATGNESG         | Oryctolagus cuniculus |
| 1 | 1.00 | 1 | 1 | 0 | 0 | 0 | 0 | 0 | t | 103792 | AGTELSAT<br>GNESGGG          | Oryctolagus cuniculus |
| 1 | 1.00 | 1 | 1 | 0 | 0 | 0 | 0 | 0 | t | 110385 | QLYKTCKQ<br>AGTCPPDII<br>PKV | Mus musculus          |
| 1 | 1.00 | 1 | 1 | 0 | 0 | 0 | 0 | 0 | t | 106938 | TTVQLYST<br>YPAP             | Mus musculus          |
| 1 | 1.00 | 1 | 1 | 0 | 0 | 0 | 0 | 0 | t | 108227 | YIHEGLK                      | Mus musculus          |
| 1 | 1.00 | 1 | 1 | 0 | 0 | 0 | 0 | 0 | t | 106322 | DAEFRHDS<br>G                | Mus musculus          |
| 1 | 1.00 | 1 | 1 | 0 | 0 | 0 | 0 | 0 | t | 117235 | SS                           | Mus musculus          |
| 1 | 1.00 | 1 | 1 | 0 | 0 | 0 | 0 | 0 | t | 102344 | DAEFR                        | Mus musculus          |
| 1 | 1.00 | 1 | 1 | 0 | 0 | 0 | 0 | 0 | t | 106850 | SLQQLYDE<br>YPGP             | Mus musculus          |

|   |      |   |   |   |   |   |   |   |   |        |                              |                                  |
|---|------|---|---|---|---|---|---|---|---|--------|------------------------------|----------------------------------|
| 1 | 1.00 | 1 | 1 | 0 | 0 | 0 | 0 | 0 | t | 106941 | TVKQLYTL<br>YPAA             | Mus<br>musculu<br>s              |
| 1 | 1.00 | 1 | 1 | 0 | 0 | 0 | 0 | 0 | t | 104327 | VEQHNPIN<br>AGTELSAT         | Sus<br>scrofa                    |
| 1 | 1.00 | 1 | 1 | 0 | 0 | 0 | 0 | 0 | t | 106363 | DVYWLMP<br>DPPTS             | Mus<br>musculu<br>s              |
| 1 | 1.00 | 1 | 1 | 0 | 0 | 0 | 0 | 0 | t | 106535 | IFPSFLRPD<br>PPL             | Mus<br>musculu<br>s              |
| 1 | 1.00 | 1 | 1 | 0 | 0 | 0 | 0 | 0 | t | 115652 | SSRISIWWT<br>IVKP            | Homo<br>sapiens                  |
| 1 | 1.00 | 1 | 1 | 0 | 0 | 0 | 0 | 0 | t | 108551 | NDSLNTGF<br>LAFLFYTKK        | Capra<br>hircus                  |
| 1 | 1.00 | 1 | 1 | 0 | 0 | 0 | 0 | 0 | t | 106487 | GTSTEVWL<br>APDP             | Mus<br>musculu<br>s              |
| 1 | 1.00 | 1 | 1 | 0 | 0 | 0 | 0 | 0 | t | 111013 | RTGYIPLG<br>TRPPT            | Oryctola<br>gus<br>cuniculu<br>s |
| 1 | 1.00 | 1 | 1 | 0 | 0 | 0 | 0 | 0 | t | 99849  | VNSTEAET<br>I                | Homo<br>sapiens                  |
| 1 | 1.00 | 1 | 1 | 0 | 0 | 0 | 0 | 0 | t | 104132 | MSENVEQ<br>HNPINAGT          | Oryctola<br>gus<br>cuniculu<br>s |
| 1 | 1.00 | 1 | 1 | 0 | 0 | 0 | 0 | 0 | t | 110248 | GGLGIGTG<br>SGTGGRT<br>GYIPL | Oryctola<br>gus<br>cuniculu<br>s |
| 1 | 1.00 | 1 | 1 | 0 | 0 | 0 | 0 | 0 | t | 115540 | VKNKRTEFL<br>SPWISNI         | Mus<br>musculu<br>s              |
| 1 | 1.00 | 1 | 1 | 0 | 0 | 0 | 0 | 0 | t | 106515 | HLPSFLRP<br>DPPL             | Mus<br>musculu<br>s              |
| 1 | 1.00 | 1 | 1 | 0 | 0 | 0 | 0 | 0 | t | 110248 | GGLGIGTG<br>SGTGGRT<br>GYIPL | Oryctola<br>gus<br>cuniculu<br>s |
| 1 | 1.00 | 1 | 1 | 0 | 0 | 0 | 0 | 0 | t | 98822  | IEAGAIGFK<br>IHEDWG          | Mus<br>musculu<br>s              |

|   |      |   |   |   |        |   |   |   |   |        |                              |                                  |
|---|------|---|---|---|--------|---|---|---|---|--------|------------------------------|----------------------------------|
| 1 | 1.00 | 1 | 1 | 0 | 0      | 0 | 0 | 0 | t | 104327 | VEQHNPIN<br>AGTELSAT         | Oryctola<br>gus<br>cuniculu<br>s |
| 1 | 1.00 | 1 | 1 | 0 | 0      | 0 | 0 | 0 | t | 117195 | DT                           | Mus<br>musculu<br>s              |
| 1 | 1.00 | 1 | 1 | 0 | 0      | 0 | 0 | 0 | t | 115351 | LKQKSSNS<br>RKKRSTS          | Mus<br>musculu<br>s              |
| 1 | 1.00 | 1 | 1 | 0 | 0      | 0 | 0 | 0 | t | 70656  | VQTRHVV<br>QHRSRSES<br>SIESF | Rattus<br>norvegic<br>us         |
| 1 | 1.00 | 1 | 1 | 0 | 0      | 0 | 0 | 0 | t | 91100  | AFQTPVHS                     | Mus<br>musculu<br>s              |
| 1 | 1.00 | 1 | 1 | 0 | 0      | 0 | 0 | 0 | t | 96102  | APLLPH                       | Homo<br>sapiens                  |
| 1 | 1.00 | 1 | 1 | 0 | -0.007 | 0 | 0 | 0 | t | 79369  | RGDLRGDL<br>RGDL             | Oryctola<br>gus<br>cuniculu<br>s |
| 1 | 1.00 | 1 | 1 | 0 | 0      | 0 | 0 | 0 | t | 66841  | TTTCFRDT<br>DTGK             | Mus<br>musculu<br>s              |
| 1 | 1.00 | 1 | 1 | 0 | 0      | 0 | 0 | 0 | t | 73889  | YFRTLEDA<br>AH               | Mus<br>musculu<br>s              |
| 1 | 1.00 | 1 | 1 | 0 | 0      | 0 | 0 | 0 | t | 61801  | STNSGINN                     | Mus<br>musculu<br>s              |
| 1 | 1.00 | 1 | 1 | 0 | 0      | 0 | 0 | 0 | t | 79369  | RGDLRGDL<br>RGDL             | Oryctola<br>gus<br>cuniculu<br>s |
| 1 | 1.00 | 1 | 1 | 0 | -0.003 | 0 | 0 | 0 | t | 64698  | TKWCPPG<br>QLVNLHDF<br>RSDEI | Oryctola<br>gus<br>cuniculu<br>s |
| 1 | 1.00 | 1 | 1 | 0 | 0      | 0 | 0 | 0 | t | 78107  | ATYQSEYL<br>AHRRIPP          | Oryctola<br>gus<br>cuniculu<br>s |

|   |      |   |   |   |   |   |   |   |   |       |                              |                                  |
|---|------|---|---|---|---|---|---|---|---|-------|------------------------------|----------------------------------|
| 1 | 1.00 | 1 | 1 | 0 | 0 | 0 | 0 | 0 | t | 70391 | VPNLRGDL<br>QVLAQKV<br>ARTLP | Oryctola<br>gus<br>cuniculu<br>s |
| 1 | 1.00 | 1 | 1 | 0 | 0 | 0 | 0 | 0 | t | 79444 | VARGDLA<br>ARGDLAA<br>RGDLA  | Cavia<br>porcellu<br>s           |
| 1 | 1.00 | 1 | 1 | 0 | 0 | 0 | 0 | 0 | t | 76290 | YVHDNC                       | Mus<br>musculu<br>s              |
| 1 | 1.00 | 1 | 1 | 0 | 0 | 0 | 0 | 0 | t | 72910 | WNSTTFH<br>QTL               | Mus<br>musculu<br>s              |
| 1 | 1.00 | 1 | 1 | 0 | 0 | 0 | 0 | 0 | t | 70437 | VPPTQSKK<br>KNKNET           | Oryctola<br>gus<br>cuniculu<br>s |
| 1 | 1.00 | 1 | 1 | 0 | 0 | 0 | 0 | 0 | t | 80049 | TGELTMY<br>WV                | Mus<br>musculu<br>s              |
| 1 | 1.00 | 1 | 1 | 0 | 0 | 0 | 0 | 0 | t | 79368 | RGDLARG<br>DLARGDL           | Cavia<br>porcellu<br>s           |
| 1 | 1.00 | 1 | 1 | 0 | 0 | 0 | 0 | 0 | t | 89660 | TQKIPKAN<br>AADADTD<br>TT    | Mus<br>musculu<br>s              |
| 1 | 1.00 | 1 | 1 | 0 | 0 | 0 | 0 | 0 | t | 63756 | TFTNKLKE<br>KHTDLGK          | Mus<br>musculu<br>s              |
| 1 | 1.00 | 1 | 1 | 0 | 0 | 0 | 0 | 0 | t | 78424 | IPRSRQIDL<br>QIG             | Mus<br>musculu<br>s              |
| 1 | 1.00 | 1 | 1 | 0 | 0 | 0 | 0 | 0 | t | 74871 | YLPVGGLR<br>RIGG             | Mus<br>musculu<br>s              |
| 1 | 1.00 | 1 | 1 | 0 | 0 | 0 | 0 | 0 | t | 64698 | TKWCPPG<br>QLVNLHDF<br>RSDEI | Oryctola<br>gus<br>cuniculu<br>s |
| 1 | 1.00 | 1 | 1 | 0 | 0 | 0 | 0 | 0 | t | 73889 | YFRTLEDA<br>AH               | Mus<br>musculu<br>s              |
| 1 | 1.00 | 1 | 1 | 0 | 0 | 0 | 0 | 0 | t | 95058 | AGLQND                       | Mus<br>musculu<br>s              |

|   |      |   |   |   |        |   |   |   |   |       |                          |                                  |
|---|------|---|---|---|--------|---|---|---|---|-------|--------------------------|----------------------------------|
| 1 | 1.00 | 1 | 1 | 0 | 0      | 0 | 0 | 0 | t | 71798 | VVQAMYV<br>PPGAPNP<br>KE | Oryctola<br>gus<br>cuniculu<br>s |
| 1 | 1.00 | 1 | 1 | 0 | 0      | 0 | 0 | 0 | t | 94580 | LDNKYAGK<br>GY           | Mus<br>musculu<br>s              |
| 1 | 1.00 | 1 | 1 | 0 | 0      | 0 | 0 | 0 | t | 73636 | YEDRYYRE                 | Mus<br>musculu<br>s              |
| 1 | 1.00 | 1 | 1 | 0 | 0      | 0 | 0 | 0 | t | 96367 | HSNLDHI                  | Homo<br>sapiens                  |
| 1 | 1.00 | 1 | 1 | 0 | 0      | 0 | 0 | 0 | t | 64010 | TGYRYDSR<br>TGFFATN      | Mus<br>musculu<br>s              |
| 1 | 1.00 | 1 | 1 | 0 | 0      | 0 | 0 | 0 | t | 61800 | STNS                     | Mus<br>musculu<br>s              |
| 1 | 1.00 | 1 | 1 | 0 | 0      | 0 | 0 | 0 | t | 63037 | TAVSPTTL<br>R            | Oryctola<br>gus<br>cuniculu<br>s |
| 1 | 1.00 | 1 | 1 | 0 | -0.007 | 0 | 0 | 0 | t | 79368 | RGDLARG<br>DLARGDL       | Oryctola<br>gus<br>cuniculu<br>s |
| 1 | 1.00 | 1 | 1 | 0 | 0      | 0 | 0 | 0 | t | 70729 | VRGLYFP                  | Mus<br>musculu<br>s              |
| 1 | 1.00 | 1 | 1 | 0 | 0      | 0 | 0 | 0 | t | 95524 | KRQIYTDIE<br>MNRLGK      | Mus<br>musculu<br>s              |
| 1 | 1.00 | 1 | 1 | 0 | 0      | 0 | 0 | 0 | t | 67253 | TWEVLH                   | Mus<br>musculu<br>s              |
| 1 | 1.00 | 1 | 1 | 0 | 0      | 0 | 0 | 0 | t | 63022 | TATRLLSST<br>NSRLC       | Mus<br>musculu<br>s              |
| 1 | 1.00 | 1 | 1 | 0 | 0      | 0 | 0 | 0 | t | 91109 | AHFVQQT<br>P             | Mus<br>musculu<br>s              |

|   |      |   |   |   |        |   |   |   |   |       |                             |                                  |
|---|------|---|---|---|--------|---|---|---|---|-------|-----------------------------|----------------------------------|
| 1 | 1.00 | 1 | 1 | 0 | 0      | 0 | 0 | 0 | t | 79369 | RGDLRGDL<br>RGDL            | Cavia<br>porcellu<br>s           |
| 1 | 1.00 | 1 | 1 | 0 | 0      | 0 | 0 | 0 | t | 96854 | SAPSISTE                    | Mus<br>musculu<br>s              |
| 1 | 1.00 | 1 | 1 | 0 | 0      | 0 | 0 | 0 | t | 64010 | TGYRYDSR<br>TGFFATN         | Mus<br>musculu<br>s              |
| 1 | 1.00 | 1 | 1 | 0 | 0      | 0 | 0 | 0 | t | 64010 | TGYRYDSR<br>TGFFATN         | Mus<br>musculu<br>s              |
| 1 | 1.00 | 1 | 1 | 0 | 0      | 0 | 0 | 0 | t | 66976 | TVDNPAST<br>TNKDKLFA<br>VWK | Rattus<br>norvegic<br>us         |
| 1 | 1.00 | 1 | 1 | 0 | 0      | 0 | 0 | 0 | t | 64587 | TKINADNP<br>VPILELE         | Mus<br>musculu<br>s              |
| 1 | 1.00 | 1 | 1 | 0 | 0      | 0 | 0 | 0 | t | 65574 | TPGENK                      | Mus<br>musculu<br>s              |
| 1 | 1.00 | 1 | 1 | 0 | 0      | 0 | 0 | 0 | t | 73636 | YEDRYRE                     | Mus<br>musculu<br>s              |
| 1 | 1.00 | 1 | 1 | 0 | -0.003 | 0 | 0 | 0 | t | 62440 | SWFDNFL<br>YPTH             | Oryctola<br>gus<br>cuniculu<br>s |
| 1 | 1.00 | 1 | 1 | 0 | 0      | 0 | 0 | 0 | t | 78159 | GALATYQS<br>EYLAHRRP<br>PP  | Oryctola<br>gus<br>cuniculu<br>s |
| 1 | 1.00 | 1 | 1 | 0 | 0      | 0 | 0 | 0 | t | 66704 | TTLNPTIA                    | Mus<br>musculu<br>s              |
| 1 | 1.00 | 1 | 1 | 0 | 0      | 0 | 0 | 0 | t | 64985 | TLNPTI                      | Mus<br>musculu<br>s              |
| 1 | 1.00 | 1 | 1 | 0 | 0      | 0 | 0 | 0 | t | 74430 | YKAYVSYK<br>KRKAQEK         | Oryctola<br>gus<br>cuniculu<br>s |



|   |      |   |   |   |   |   |   |   |   |       |                              |                                  |
|---|------|---|---|---|---|---|---|---|---|-------|------------------------------|----------------------------------|
| 1 | 1.00 | 1 | 1 | 0 | 0 | 0 | 0 | 0 | t | 96874 | SIAPDLSLD<br>FEKLVN          | Mus<br>musculu<br>s              |
| 1 | 1.00 | 1 | 1 | 0 | 0 | 0 | 0 | 0 | t | 64266 | TIDGKKYY<br>FN               | Oryctola<br>gus<br>cuniculu<br>s |
| 1 | 1.00 | 1 | 1 | 0 | 0 | 0 | 0 | 0 | t | 63038 | TAVSPTTL<br>RTEVVK           | Sus<br>scrofa                    |
| 1 | 1.00 | 1 | 1 | 0 | 0 | 0 | 0 | 0 | t | 89067 | SRTRTTSV<br>GDKQVAS<br>KV    | Mus<br>musculu<br>s              |
| 1 | 1.00 | 1 | 1 | 0 | 0 | 0 | 0 | 0 | t | 70656 | VQTRHVV<br>QHRSRSES<br>SIESF | Oryctola<br>gus<br>cuniculu<br>s |
| 1 | 1.00 | 1 | 1 | 0 | 0 | 0 | 0 | 0 | t | 75418 | YPTFGEHK<br>QEKDLEY          | Mus<br>musculu<br>s              |
| 1 | 1.00 | 1 | 1 | 0 | 0 | 0 | 0 | 0 | t | 97348 | GLFGAIAG<br>FIEGGW           | Oryctola<br>gus<br>cuniculu<br>s |
| 1 | 1.00 | 1 | 1 | 0 | 0 | 0 | 0 | 0 | t | 73131 | WTGVAQ<br>D                  | Oryctola<br>gus<br>cuniculu<br>s |
| 1 | 1.00 | 1 | 1 | 0 | 0 | 0 | 0 | 0 | t | 63839 | TGGSTDG<br>KQG               | Mus<br>musculu<br>s              |
| 1 | 1.00 | 1 | 1 | 0 | 0 | 0 | 0 | 0 | t | 60991 | SSFFSYGEI                    | Mus<br>musculu<br>s              |
| 1 | 1.00 | 1 | 1 | 0 | 0 | 0 | 0 | 0 | t | 68972 | VIGIINNTV<br>YDPLQPEL<br>DSF | Mus<br>musculu<br>s              |
| 1 | 1.00 | 1 | 1 | 0 | 0 | 0 | 0 | 0 | t | 61944 | STTNK                        | Mus<br>musculu<br>s              |
| 1 | 1.00 | 1 | 1 | 0 | 0 | 0 | 0 | 0 | t | 65910 | TQPELVPE<br>DPED             | Mus<br>musculu<br>s              |
| 1 | 1.00 | 1 | 1 | 0 | 0 | 0 | 0 | 0 | t | 97484 | LVEETSFID<br>AGAP            | Oryctola<br>gus<br>cuniculu<br>s |
| 1 | 1.00 | 1 | 1 | 0 | 0 | 0 | 0 | 0 | t | 72911 | WNSTTFH<br>QTLQDP            | Mus<br>musculu<br>s              |

|   |      |   |   |   |        |   |   |   |   |       |                     |                                  |
|---|------|---|---|---|--------|---|---|---|---|-------|---------------------|----------------------------------|
| 1 | 1.00 | 1 | 1 | 0 | 0      | 0 | 0 | 0 | t | 97484 | LVEETSFID<br>AGAP   | Mus<br>musculu<br>s              |
| 1 | 1.00 | 1 | 1 | 0 | 0      | 0 | 0 | 0 | t | 66539 | TTASGKLIT           | Mus<br>musculu<br>s              |
| 1 | 1.00 | 1 | 1 | 0 | 0      | 0 | 0 | 0 | t | 64587 | TKINADNP<br>VPILELE | Mus<br>musculu<br>s              |
| 1 | 1.00 | 1 | 1 | 0 | 0      | 0 | 0 | 0 | t | 67253 | TWEVLH              | Mus<br>musculu<br>s              |
| 1 | 1.00 | 1 | 1 | 0 | 0      | 0 | 0 | 0 | t | 65421 | TNSGINNS            | Mus<br>musculu<br>s              |
| 1 | 1.00 | 1 | 1 | 0 | -0.003 | 0 | 0 | 0 | t | 65910 | TQPELVPE<br>DPED    | Oryctola<br>gus<br>cuniculu<br>s |
| 1 | 1.00 | 1 | 1 | 0 | 0      | 0 | 0 | 0 | t | 53634 | RESQAYYQ<br>R       | Mus<br>musculu<br>s              |
| 1 | 1.00 | 1 | 1 | 0 | 0      | 0 | 0 | 0 | t | 58582 | SIKEDVQF            | Mus<br>musculu<br>s              |
| 1 | 1.00 | 1 | 1 | 0 | -0.003 | 0 | 0 | 0 | t | 57306 | SDVEGLQ<br>NDP      | Oryctola<br>gus<br>cuniculu<br>s |
| 1 | 1.00 | 1 | 1 | 0 | 0      | 0 | 0 | 0 | t | 45932 | NSNNPDW<br>DF       | Mus<br>musculu<br>s              |
| 1 | 1.00 | 1 | 1 | 0 | 0      | 0 | 0 | 0 | t | 48690 | PNPNDP              | Mus<br>musculu<br>s              |
| 1 | 1.00 | 1 | 1 | 0 | 0      | 0 | 0 | 0 | t | 43242 | NANPNAN<br>PNANP    | Oryctola<br>gus<br>cuniculu<br>s |
| 1 | 1.00 | 1 | 1 | 0 | 0      | 0 | 0 | 0 | t | 51772 | QNTEEME<br>NLSDRVAS | Mus<br>musculu<br>s              |

|   |      |   |   |   |   |   |   |   |   |       |                      |                                  |
|---|------|---|---|---|---|---|---|---|---|-------|----------------------|----------------------------------|
| 1 | 1.00 | 1 | 1 | 0 | 0 | 0 | 0 | 0 | t | 51772 | QNTEEME<br>NLSDRVAS  | Mus<br>musculu<br>s              |
| 1 | 1.00 | 1 | 1 | 0 | 0 | 0 | 0 | 0 | t | 43233 | NANP                 | Mus<br>musculu<br>s              |
| 1 | 1.00 | 1 | 1 | 0 | 0 | 0 | 0 | 0 | t | 38522 | LPHSNL               | Rattus<br>norvegic<br>us         |
| 1 | 1.00 | 1 | 1 | 0 | 0 | 0 | 0 | 0 | t | 49645 | PTGTAAA<br>NYKTP     | Mus<br>musculu<br>s              |
| 1 | 1.00 | 1 | 1 | 0 | 0 | 0 | 0 | 0 | t | 38946 | LQPGKTS              | Mus<br>musculu<br>s              |
| 1 | 1.00 | 1 | 1 | 0 | 0 | 0 | 0 | 0 | t | 47427 | PESRESLA<br>WQTATNP  | Mus<br>musculu<br>s              |
| 1 | 1.00 | 1 | 1 | 0 | 0 | 0 | 0 | 0 | t | 39092 | LRGDLQVL<br>AQKVARTL | Oryctola<br>gus<br>cuniculu<br>s |
| 1 | 1.00 | 1 | 1 | 0 | 0 | 0 | 0 | 0 | t | 45443 | NPNVDP               | Mus<br>musculu<br>s              |
| 1 | 1.00 | 1 | 1 | 0 | 0 | 0 | 0 | 0 | t | 48597 | PNANPN               | Mus<br>musculu<br>s              |
| 1 | 1.00 | 1 | 1 | 0 | 0 | 0 | 0 | 0 | t | 38522 | LPHSNL               | Rattus<br>norvegic<br>us         |
| 1 | 1.00 | 1 | 1 | 0 | 0 | 0 | 0 | 0 | t | 38617 | LPPIQNTR<br>NVVP     | Gallus<br>gallus                 |
| 1 | 1.00 | 1 | 1 | 0 | 0 | 0 | 0 | 0 | t | 44474 | NKDKLFAV<br>WK       | Rattus<br>norvegic<br>us         |
| 1 | 1.00 | 1 | 1 | 0 | 0 | 0 | 0 | 0 | t | 43227 | NANDPP               | Mus<br>musculu<br>s              |

|   |      |   |   |   |   |   |   |   |   |       |                              |                                  |
|---|------|---|---|---|---|---|---|---|---|-------|------------------------------|----------------------------------|
| 1 | 1.00 | 1 | 1 | 0 | 0 | 0 | 0 | 0 | t | 57726 | SFANTNTN<br>TNSK             | Mus<br>musculu<br>s              |
| 1 | 1.00 | 1 | 1 | 0 | 0 | 0 | 0 | 0 | t | 38522 | LPHSNL                       | Homo<br>sapiens                  |
| 1 | 1.00 | 1 | 1 | 0 | 0 | 0 | 0 | 0 | t | 39504 | LSN                          | Mus<br>musculu<br>s              |
| 1 | 1.00 | 1 | 1 | 0 | 0 | 0 | 0 | 0 | t | 48715 | PNVDPN                       | Mus<br>musculu<br>s              |
| 1 | 1.00 | 1 | 1 | 0 | 0 | 0 | 0 | 0 | t | 43246 | NANPNAN<br>PNANPNA<br>NP     | Mus<br>musculu<br>s              |
| 1 | 1.00 | 1 | 1 | 0 | 0 | 0 | 0 | 0 | t | 58511 | SIFYTYGTA<br>PARISVPY<br>VGI | Oryctola<br>gus<br>cuniculu<br>s |
| 1 | 1.00 | 1 | 1 | 0 | 0 | 0 | 0 | 0 | t | 57644 | SETFTNKL<br>KEKHTDLG<br>KEG  | Mus<br>musculu<br>s              |
| 1 | 1.00 | 1 | 1 | 0 | 0 | 0 | 0 | 0 | t | 43242 | NANPNAN<br>PNANP             | Oryctola<br>gus<br>cuniculu<br>s |
| 1 | 1.00 | 1 | 1 | 0 | 0 | 0 | 0 | 0 | t | 58511 | SIFYTYGTA<br>PARISVPY<br>VGI | Rattus<br>norvegic<br>us         |
| 1 | 1.00 | 1 | 1 | 0 | 0 | 0 | 0 | 0 | t | 57320 | SDYEDRY<br>REN               | Mus<br>musculu<br>s              |
| 1 | 1.00 | 1 | 1 | 0 | 0 | 0 | 0 | 0 | t | 38918 | LQND                         | Mus<br>musculu<br>s              |
| 1 | 1.00 | 1 | 1 | 0 | 0 | 0 | 0 | 0 | t | 58872 | SKKSVTV                      | Mus<br>musculu<br>s              |
| 1 | 1.00 | 1 | 1 | 0 | 0 | 0 | 0 | 0 | t | 40739 | LYDSYAY<br>YG                | Mus<br>musculu<br>s              |

|   |      |   |   |   |        |   |   |   |   |       |                            |                              |
|---|------|---|---|---|--------|---|---|---|---|-------|----------------------------|------------------------------|
| 1 | 1.00 | 1 | 1 | 0 | 0      | 0 | 0 | 0 | t | 48685 | PNPLGFFP                   | Mus<br>musculus              |
| 1 | 1.00 | 1 | 1 | 0 | 0      | 0 | 0 | 0 | t | 56373 | RVNQVAE<br>VLQL            | Mus<br>musculus              |
| 1 | 1.00 | 1 | 1 | 0 | 0      | 0 | 0 | 0 | t | 41019 | MADPNRF<br>RG              | Mus<br>musculus              |
| 1 | 1.00 | 1 | 1 | 0 | 0      | 0 | 0 | 0 | t | 49629 | PTGDRHK<br>QPLVAPAK<br>QLL | Mus<br>musculus              |
| 1 | 1.00 | 1 | 1 | 0 | -0.003 | 0 | 0 | 0 | t | 41019 | MADPNRF<br>RG              | Oryctola<br>gus<br>cuniculus |
| 1 | 1.00 | 1 | 1 | 0 | 0      | 0 | 0 | 0 | t | 54058 | RHKQKIVA<br>PVKQTL         | Oryctola<br>gus<br>cuniculus |
| 1 | 1.00 | 1 | 1 | 0 | 0      | 0 | 0 | 0 | t | 59229 | SLKMADP<br>NRFRGKDL<br>P   | Mus<br>musculus              |
| 1 | 1.00 | 1 | 1 | 0 | 0      | 0 | 0 | 0 | t | 46008 | NSTNSGIN                   | Mus<br>musculus              |
| 1 | 1.00 | 1 | 1 | 0 | 0      | 0 | 0 | 0 | t | 45202 | NNNSTNS<br>G               | Mus<br>musculus              |
| 1 | 1.00 | 1 | 1 | 0 | 0      | 0 | 0 | 0 | t | 59229 | SLKMADP<br>NRFRGKDL<br>P   | Oryctola<br>gus<br>cuniculus |
| 1 | 1.00 | 1 | 1 | 0 | 0      | 0 | 0 | 0 | t | 58802 | SKDVKIEV<br>YL             | Homo<br>sapiens              |
| 1 | 1.00 | 1 | 1 | 0 | 0      | 0 | 0 | 0 | t | 48017 | PIYGKTIST<br>PSDYM         | Mus<br>musculus              |

|   |      |   |   |   |        |   |   |   |   |       |                              |                                  |
|---|------|---|---|---|--------|---|---|---|---|-------|------------------------------|----------------------------------|
| 1 | 1.00 | 1 | 1 | 0 | 0      | 0 | 0 | 0 | t | 59229 | SLKMADP<br>NRFRGKDL<br>P     | Oryctola<br>gus<br>cuniculu<br>s |
| 1 | 1.00 | 1 | 1 | 0 | 0      | 0 | 0 | 0 | t | 48017 | PIYGKTIST<br>PSDYM           | Mus<br>musculu<br>s              |
| 1 | 1.00 | 1 | 1 | 0 | 0      | 0 | 0 | 0 | t | 59876 | SNPPGMA<br>LSAPP             | Mus<br>musculu<br>s              |
| 1 | 1.00 | 1 | 1 | 0 | 0      | 0 | 0 | 0 | t | 50396 | QAYQQGV<br>TVD               | Oryctola<br>gus<br>cuniculu<br>s |
| 1 | 1.00 | 1 | 1 | 0 | 0      | 0 | 0 | 0 | t | 56599 | RYNLVFSG<br>DSDRICSN<br>RA   | Mus<br>musculu<br>s              |
| 1 | 1.00 | 1 | 1 | 0 | 0      | 0 | 0 | 0 | t | 48620 | PNDPPP                       | Mus<br>musculu<br>s              |
| 1 | 1.00 | 1 | 1 | 0 | 0      | 0 | 0 | 0 | t | 41126 | MASLIYRQ<br>LL               | Gallus<br>gallus                 |
| 1 | 1.00 | 1 | 1 | 0 | 0      | 0 | 0 | 0 | t | 39092 | LRGDLQVL<br>AQKVARTL         | Oryctola<br>gus<br>cuniculu<br>s |
| 1 | 1.00 | 1 | 1 | 0 | 0      | 0 | 0 | 0 | t | 50929 | QGPGAP                       | Mus<br>musculu<br>s              |
| 1 | 1.00 | 1 | 1 | 0 | 0      | 0 | 0 | 0 | t | 43242 | NANPNAN<br>PNANP             | Mus<br>musculu<br>s              |
| 1 | 1.00 | 1 | 1 | 0 | 0      | 0 | 0 | 0 | t | 40332 | LVFFAEDV                     | Mus<br>musculu<br>s              |
| 1 | 1.00 | 1 | 1 | 0 | -0.003 | 0 | 0 | 0 | t | 37660 | LLPHSNLD<br>HILEPSIPW<br>KSK | Oryctola<br>gus<br>cuniculu<br>s |
| 1 | 1.00 | 1 | 1 | 0 | 0      | 0 | 0 | 0 | t | 44531 | NKKP                         | Mus<br>musculu<br>s              |
| 1 | 1.00 | 1 | 1 | 0 | 0      | 0 | 0 | 0 | t | 40332 | LVFFAEDV                     | Mus<br>musculu<br>s              |

|   |      |   |   |   |       |   |   |   |   |       |                              |                                  |
|---|------|---|---|---|-------|---|---|---|---|-------|------------------------------|----------------------------------|
| 1 | 1.00 | 1 | 1 | 0 | 0     | 0 | 0 | 0 | t | 41126 | MASLIYRQ<br>LL               | Mus<br>musculu<br>s              |
| 1 | 1.00 | 1 | 1 | 0 | 0     | 0 | 0 | 0 | t | 53326 | RDALPNTE<br>ASGPTHSK<br>E    | Oryctola<br>gus<br>cuniculu<br>s |
| 1 | 1.00 | 1 | 1 | 0 | 0     | 0 | 0 | 0 | t | 57648 | SETLKS                       | Mus<br>musculu<br>s              |
| 1 | 1.00 | 1 | 1 | 0 | 0     | 0 | 0 | 0 | t | 59810 | SNEFAPVQ<br>NLTGSSVG         | Mus<br>musculu<br>s              |
| 1 | 1.00 | 1 | 1 | 0 | 0     | 0 | 0 | 0 | t | 44251 | NIISCNKN<br>DKNQ             | Oryctola<br>gus<br>cuniculu<br>s |
| 1 | 1.00 | 1 | 1 | 0 | 0     | 0 | 0 | 0 | t | 41019 | MADPNRF<br>RG                | Mus<br>musculu<br>s              |
| 1 | 1.00 | 1 | 1 | 0 | 0.002 | 0 | 0 | 0 | t | 58511 | SIFYTYGTA<br>PARISVPY<br>VGI | Rattus<br>norvegic<br>us         |
| 1 | 1.00 | 1 | 1 | 0 | 0     | 0 | 0 | 0 | t | 28277 | IRECTGLA<br>WEWWRT<br>V      | Mus<br>musculu<br>s              |
| 1 | 1.00 | 1 | 1 | 0 | 0     | 0 | 0 | 0 | t | 29567 | IYDKLTVQ<br>TTG              | Oryctola<br>gus<br>cuniculu<br>s |
| 1 | 1.00 | 1 | 1 | 0 | 0     | 0 | 0 | 0 | t | 22509 | GSSIAADQ<br>LP               | Mus<br>musculu<br>s              |
| 1 | 1.00 | 1 | 1 | 0 | 0     | 0 | 0 | 0 | t | 30036 | KAYSNCYP<br>YDVPDY           | Oryctola<br>gus<br>cuniculu<br>s |
| 1 | 1.00 | 1 | 1 | 0 | 0     | 0 | 0 | 0 | t | 11819 | EENVEHD<br>A                 | Mus<br>musculu<br>s              |
| 1 | 1.00 | 1 | 1 | 0 | 0     | 0 | 0 | 0 | t | 11819 | EENVEHD<br>A                 | Mus<br>musculu<br>s              |

|   |      |   |   |   |   |   |   |   |   |       |                            |                                  |
|---|------|---|---|---|---|---|---|---|---|-------|----------------------------|----------------------------------|
| 1 | 1.00 | 1 | 1 | 0 | 0 | 0 | 0 | 0 | t | 10801 | DWEDRY<br>RE               | Oryctola<br>gus<br>cuniculu<br>s |
| 1 | 1.00 | 1 | 1 | 0 | 0 | 0 | 0 | 0 | t | 11575 | EEEEEDG<br>FMGFGMF<br>D    | Mus<br>musculu<br>s              |
| 1 | 1.00 | 1 | 1 | 0 | 0 | 0 | 0 | 0 | t | 27614 | INDSTTVE<br>PILD           | Gallus<br>gallus                 |
| 1 | 1.00 | 1 | 1 | 0 | 0 | 0 | 0 | 0 | t | 11819 | EENVEHD<br>A               | Mus<br>musculu<br>s              |
| 1 | 1.00 | 1 | 1 | 0 | 0 | 0 | 0 | 0 | t | 10579 | DVELSLRS<br>SDIA           | Homo<br>sapiens                  |
| 1 | 1.00 | 1 | 1 | 0 | 0 | 0 | 0 | 0 | t | 21399 | GNDLGKV<br>QVA             | Mus<br>musculu<br>s              |
| 1 | 1.00 | 1 | 1 | 0 | 0 | 0 | 0 | 0 | t | 29088 | ITSHTGYL<br>QLRL           | Mus<br>musculu<br>s              |
| 1 | 1.00 | 1 | 1 | 0 | 0 | 0 | 0 | 0 | t | 30349 | KEEKEEKE<br>EKEEKEKE<br>KE | Oryctola<br>gus<br>cuniculu<br>s |
| 1 | 1.00 | 1 | 1 | 0 | 0 | 0 | 0 | 0 | t | 22652 | GTGA                       | Mus<br>musculu<br>s              |
| 1 | 1.00 | 1 | 1 | 0 | 0 | 0 | 0 | 0 | t | 11819 | EENVEHD<br>A               | Oryctola<br>gus<br>cuniculu<br>s |
| 1 | 1.00 | 1 | 1 | 0 | 0 | 0 | 0 | 0 | t | 34169 | KVPTL                      | Mus<br>musculu<br>s              |
| 1 | 1.00 | 1 | 1 | 0 | 0 | 0 | 0 | 0 | t | 11819 | EENVEHD<br>A               | Mus<br>musculu<br>s              |
| 1 | 1.00 | 1 | 1 | 0 | 0 | 0 | 0 | 0 | t | 27997 | IPQPQWT<br>P               | Mus<br>musculu<br>s              |
| 1 | 1.00 | 1 | 1 | 0 | 0 | 0 | 0 | 0 | t | 11819 | EENVEHD<br>A               | Homo<br>sapiens                  |



|   |      |   |   |   |   |   |   |   |   |       |                      |                       |
|---|------|---|---|---|---|---|---|---|---|-------|----------------------|-----------------------|
| 1 | 1.00 | 1 | 1 | 0 | 0 | 0 | 0 | 0 | t | 11819 | EENVEHDA             | Oryctolagus cuniculus |
| 1 | 1.00 | 1 | 1 | 0 | 0 | 0 | 0 | 0 | t | 27997 | IPQPQWTP             | Mus musculus          |
| 1 | 1.00 | 1 | 1 | 0 | 0 | 0 | 0 | 0 | t | 22027 | GREVKAETRLNP         | Mus musculus          |
| 1 | 1.00 | 1 | 1 | 0 | 0 | 0 | 0 | 0 | t | 19375 | GENK                 | Mus musculus          |
| 1 | 1.00 | 1 | 1 | 0 | 0 | 0 | 0 | 0 | t | 17642 | FRRYQEER             | Mus musculus          |
| 1 | 1.00 | 1 | 1 | 0 | 0 | 0 | 0 | 0 | t | 35852 | LFIG                 | Mus musculus          |
| 1 | 1.00 | 1 | 1 | 0 | 0 | 0 | 0 | 0 | t | 31916 | KLILAYTPPGARGPQD     | Oryctolagus cuniculus |
| 1 | 1.00 | 1 | 1 | 0 | 0 | 0 | 0 | 0 | t | 28299 | IRGDTFATR            | Mus musculus          |
| 1 | 1.00 | 1 | 1 | 0 | 0 | 0 | 0 | 0 | t | 35329 | LDVTTLNP TI          | Mus musculus          |
| 1 | 1.00 | 1 | 1 | 0 | 0 | 0 | 0 | 0 | t | 22792 | GTQETGDTTPSAYSMS     | Oryctolagus cuniculus |
| 1 | 1.00 | 1 | 1 | 0 | 0 | 0 | 0 | 0 | t | 32808 | KPNLSSKRSELSQLSMYRVF | Mus musculus          |
| 1 | 1.00 | 1 | 1 | 0 | 0 | 0 | 0 | 0 | t | 11148 | EANNREGVEG           | Mus musculus          |
| 1 | 1.00 | 1 | 1 | 0 | 0 | 0 | 0 | 0 | t | 24006 | HHPITDSDQTRLY        | Oryctolagus cuniculus |
| 1 | 1.00 | 1 | 1 | 0 | 0 | 0 | 0 | 0 | t | 21856 | GQDLTAH              | Mus musculus          |

|   |      |   |   |   |   |   |   |   |   |       |                              |                                  |
|---|------|---|---|---|---|---|---|---|---|-------|------------------------------|----------------------------------|
| 1 | 1.00 | 1 | 1 | 0 | 0 | 0 | 0 | 0 | t | 13460 | ENDVLNQ<br>ETEEEMEK          | Oryctola<br>gus<br>cuniculu<br>s |
| 1 | 1.00 | 1 | 1 | 0 | 0 | 0 | 0 | 0 | t | 30036 | KAYSNCYP<br>YDVDPY           | Oryctola<br>gus<br>cuniculu<br>s |
| 1 | 1.00 | 1 | 1 | 0 | 0 | 0 | 0 | 0 | t | 21084 | GLQN                         | Mus<br>musculu<br>s              |
| 1 | 1.00 | 1 | 1 | 0 | 0 | 0 | 0 | 0 | t | 30036 | KAYSNCYP<br>YDVDPY           | Oryctola<br>gus<br>cuniculu<br>s |
| 1 | 1.00 | 1 | 1 | 0 | 0 | 0 | 0 | 0 | t | 32691 | KPEENK                       | Mus<br>musculu<br>s              |
| 1 | 1.00 | 1 | 1 | 0 | 0 | 0 | 0 | 0 | t | 14808 | EVLYLKPLA<br>GVYRSLKK<br>QLE | Mus<br>musculu<br>s              |
| 1 | 1.00 | 1 | 1 | 0 | 0 | 0 | 0 | 0 | t | 31105 | KHFRETEV                     | Mus<br>musculu<br>s              |
| 1 | 1.00 | 1 | 1 | 0 | 0 | 0 | 0 | 0 | t | 11148 | EANNREG<br>VEG               | Mus<br>musculu<br>s              |
| 1 | 1.00 | 1 | 1 | 0 | 0 | 0 | 0 | 0 | t | 17881 | FSWDWSG<br>HNYINEIE<br>ATSS  | Oryctola<br>gus<br>cuniculu<br>s |
| 1 | 1.00 | 1 | 1 | 0 | 0 | 0 | 0 | 0 | t | 33163 | KRIPNKPK<br>GKKTTT           | Oryctola<br>gus<br>cuniculu<br>s |
| 1 | 1.00 | 1 | 1 | 0 | 0 | 0 | 0 | 0 | t | 28512 | ISGINASVV<br>NIQKEIDRL<br>NE | Mus<br>musculu<br>s              |
| 1 | 1.00 | 1 | 1 | 0 | 0 | 0 | 0 | 0 | t | 14809 | EVLYLKPLA<br>GVYRSLKK<br>QLE | Mus<br>musculu<br>s              |
| 1 | 1.00 | 1 | 1 | 0 | 0 | 0 | 0 | 0 | t | 22870 | GTVAPQIP<br>PNWHIPSI<br>QD   | Mus<br>musculu<br>s              |

|   |      |   |   |   |        |   |   |   |   |       |                             |                                  |
|---|------|---|---|---|--------|---|---|---|---|-------|-----------------------------|----------------------------------|
| 1 | 1.00 | 1 | 1 | 0 | 0      | 0 | 0 | 0 | t | 17470 | FQEPFWLE<br>DG              | Mus<br>musculu<br>s              |
| 1 | 1.00 | 1 | 1 | 0 | 0      | 0 | 0 | 0 | t | 14435 | ETIYNTTLK<br>Y              | Homo<br>sapiens                  |
| 1 | 1.00 | 1 | 1 | 0 | -0.003 | 0 | 0 | 0 | t | 17408 | FPSPYYSP<br>AFTKGEKV<br>DL  | Oryctola<br>gus<br>cuniculu<br>s |
| 1 | 1.00 | 1 | 1 | 0 | 0      | 0 | 0 | 0 | t | 21928 | GQPAVRN<br>ERATGS           | Mus<br>musculu<br>s              |
| 1 | 1.00 | 1 | 1 | 0 | 0      | 0 | 0 | 0 | t | 17470 | FQEPFWLE<br>DG              | Mus<br>musculu<br>s              |
| 1 | 1.00 | 1 | 1 | 0 | 0      | 0 | 0 | 0 | t | 11813 | EENVEENV                    | Oryctola<br>gus<br>cuniculu<br>s |
| 1 | 1.00 | 1 | 1 | 0 | 0      | 0 | 0 | 0 | t | 11463 | EDVNGIRK<br>PK              | Mus<br>musculu<br>s              |
| 1 | 1.00 | 1 | 1 | 0 | 0      | 0 | 0 | 0 | t | 30716 | KFDWNTP<br>D                | Mus<br>musculu<br>s              |
| 1 | 1.00 | 1 | 1 | 0 | -0.003 | 0 | 0 | 0 | t | 22870 | GTVAPQIP<br>PNWHIPSI<br>QD  | Oryctola<br>gus<br>cuniculu<br>s |
| 1 | 1.00 | 1 | 1 | 0 | 0      | 0 | 0 | 0 | t | 32570 | KNNNSTN<br>S                | Mus<br>musculu<br>s              |
| 1 | 1.00 | 1 | 1 | 0 | 0      | 0 | 0 | 0 | t | 9585  | DPAF                        | Mus<br>musculu<br>s              |
| 1 | 1.00 | 1 | 1 | 0 | 0      | 0 | 0 | 0 | t | 1698  | AGTK                        | Mus<br>musculu<br>s              |
| 1 | 1.00 | 1 | 1 | 0 | 0      | 0 | 0 | 0 | t | 6226  | CFGNSEY                     | Mus<br>musculu<br>s              |
| 1 | 1.00 | 1 | 1 | 0 | 0      | 0 | 0 | 0 | t | 6171  | CEKAKRAV<br>RGRQDRP<br>KEFP | Oryctola<br>gus<br>cuniculu<br>s |

|   |      |   |   |   |       |   |   |   |   |      |                              |                                  |
|---|------|---|---|---|-------|---|---|---|---|------|------------------------------|----------------------------------|
| 1 | 1.00 | 1 | 1 | 0 | 0     | 0 | 0 | 0 | t | 8936 | DKLTTREIE<br>QVE             | Oryctola<br>gus<br>cuniculu<br>s |
| 1 | 1.00 | 1 | 1 | 0 | 0     | 0 | 0 | 0 | t | 9516 | DNNLVSG<br>P                 | Mus<br>musculu<br>s              |
| 1 | 1.00 | 1 | 1 | 0 | 0     | 0 | 0 | 0 | t | 9516 | DNNLVSG<br>P                 | Oryctola<br>gus<br>cuniculu<br>s |
| 1 | 1.00 | 1 | 1 | 0 | 0     | 0 | 0 | 0 | t | 868  | AEEAFDL<br>WNECAKA<br>CV     | Homo<br>sapiens                  |
| 1 | 1.00 | 1 | 1 | 0 | 0     | 0 | 0 | 0 | t | 9516 | DNNLVSG<br>P                 | Mus<br>musculu<br>s              |
| 1 | 1.00 | 1 | 1 | 0 | 0     | 0 | 0 | 0 | t | 279  | AALGDSLY<br>GAASLNDF<br>GILA | Rattus<br>norvegic<br>us         |
| 1 | 1.00 | 1 | 1 | 0 | 0     | 0 | 0 | 0 | t | 9753 | DPRVRGLY                     | Mus<br>musculu<br>s              |
| 1 | 1.00 | 1 | 1 | 0 | 0     | 0 | 0 | 0 | t | 6093 | CDCDRTA<br>A                 | Mus<br>musculu<br>s              |
| 1 | 1.00 | 1 | 1 | 0 | 0     | 0 | 0 | 0 | t | 6015 | CAPESIEFP<br>VSEARVLE<br>D   | Homo<br>sapiens                  |
| 1 | 1.00 | 1 | 1 | 0 | 0.002 | 0 | 0 | 0 | t | 6832 | CPRPPRAV<br>AAYGPGV<br>DYK   | Rattus<br>norvegic<br>us         |
| 1 | 1.00 | 1 | 1 | 0 | 0     | 0 | 0 | 0 | t | 3242 | ANDPPP                       | Mus<br>musculu<br>s              |
| 1 | 1.00 | 1 | 1 | 0 | 0     | 0 | 0 | 0 | t | 4401 | ASFFD                        | Mus<br>musculu<br>s              |
| 1 | 1.00 | 1 | 1 | 0 | 0     | 0 | 0 | 0 | t | 7768 | DDEIYGND<br>GHP              | Mus<br>musculu<br>s              |
| 1 | 1.00 | 1 | 1 | 0 | 0     | 0 | 0 | 0 | t | 9520 | DNNQTSP                      | Mus<br>musculu<br>s              |

|   |      |   |   |   |       |   |   |   |   |      |                              |                                  |
|---|------|---|---|---|-------|---|---|---|---|------|------------------------------|----------------------------------|
| 1 | 1.00 | 1 | 1 | 0 | 0     | 0 | 0 | 0 | t | 494  | AAVLNLTT<br>WNPTLL           | Mus<br>musculu<br>s              |
| 1 | 1.00 | 1 | 1 | 0 | 0     | 0 | 0 | 0 | t | 7492 | DAEFRHDS<br>GYEVHHQ<br>KL    | Mus<br>musculu<br>s              |
| 1 | 1.00 | 1 | 1 | 0 | 0.002 | 0 | 0 | 0 | t | 7313 | CVTIMTVD<br>NPASTTNK<br>DK   | Rattus<br>norvegic<br>us         |
| 1 | 1.00 | 1 | 1 | 0 | 0     | 0 | 0 | 0 | t | 5109 | ATPYHPPA<br>TP               | Oryctola<br>gus<br>cuniculu<br>s |
| 1 | 1.00 | 1 | 1 | 0 | 0     | 0 | 0 | 0 | t | 1700 | AGTN                         | Mus<br>musculu<br>s              |
| 1 | 1.00 | 1 | 1 | 0 | 0     | 0 | 0 | 0 | t | 2157 | AKAVYQQ<br>FVEFYEKV<br>TGTDL | Oryctola<br>gus<br>cuniculu<br>s |
| 1 | 1.00 | 1 | 1 | 0 | 0     | 0 | 0 | 0 | t | 9524 | DNPASTT<br>NKDK              | Mus<br>musculu<br>s              |
| 1 | 1.00 | 1 | 1 | 0 | 0     | 0 | 0 | 0 | t | 9524 | DNPASTT<br>NKDK              | Mus<br>musculu<br>s              |
| 1 | 1.00 | 1 | 1 | 0 | 0     | 0 | 0 | 0 | t | 4331 | ASARGDLA<br>HLTTTHAR<br>HLP  | Mus<br>musculu<br>s              |
| 1 | 1.00 | 1 | 1 | 0 | 0     | 0 | 0 | 0 | t | 4331 | ASARGDLA<br>HLTTTHAR<br>HLP  | Mus<br>musculu<br>s              |
| 1 | 1.00 | 1 | 1 | 0 | 0     | 0 | 0 | 0 | t | 6832 | CPRPPRAV<br>AAYGPGV<br>DYK   | Oryctola<br>gus<br>cuniculu<br>s |
| 1 | 1.00 | 1 | 1 | 0 | 0     | 0 | 0 | 0 | t | 7851 | DDPPATVY<br>RYDSRPPE<br>DV   | Oryctola<br>gus<br>cuniculu<br>s |
| 1 | 1.00 | 1 | 1 | 0 | 0     | 0 | 0 | 0 | t | 4038 | AQPVKIDN<br>ASPAST           | Oryctola<br>gus<br>cuniculu<br>s |

|   |      |   |   |       |        |        |        |        |   |        |                              |                                  |
|---|------|---|---|-------|--------|--------|--------|--------|---|--------|------------------------------|----------------------------------|
| 1 | 1.00 | 1 | 1 | -0.05 | -0.05  | -0.057 | -0.05  | -0.052 | t | 133527 | AYIGLKDR<br>KRPSELRRRI<br>AS | Mus<br>musculu<br>s              |
| 1 | 1.00 | 1 | 1 | 0     | 0      | 0      | 0      | 0.001  | t | 81130  | DLFHVNG<br>RDTMNIIV<br>DENKY | Aotus                            |
| 1 | 1.00 | 1 | 1 | 0.01  | 0.01   | 0.01   | 0.01   | 0.012  | t | 56763  | SAETIFD                      | Oryctola<br>gus<br>cuniculu<br>s |
| 1 | 1.00 | 1 | 1 | 0.01  | 0.01   | 0.01   | 0.01   | 0.012  | t | 56763  | SAETIFD                      | Oryctola<br>gus<br>cuniculu<br>s |
| 1 | 1.00 | 1 | 1 | -0.03 | -0.033 | -0.023 | -0.03  | -0.03  | t | 58083  | SGIGPEKA<br>FR               | Oryctola<br>gus<br>cuniculu<br>s |
| 1 | 1.00 | 1 | 1 | 0.02  | 0.02   | 0.016  | 0.02   | 0.018  | t | 59853  | SNKEGVA<br>ADGDALN<br>K      | Oryctola<br>gus<br>cuniculu<br>s |
| 1 | 1.00 | 1 | 1 | -0.03 | -0.028 | -0.023 | -0.033 | -0.03  | t | 123878 | YMPPPGM<br>I                 | Oryctola<br>gus<br>cuniculu<br>s |
| 1 | 1.00 | 1 | 1 | 0     | 0      | 0      | 0      | 0.003  | t | 52082  | QQPFP                        | Mus<br>musculu<br>s              |
| 1 | 1.00 | 1 | 1 | 0     | 0      | 0.005  | 0      | -0.001 | t | 112672 | TAEFQMT<br>FHLFI             | Oryctola<br>gus<br>cuniculu<br>s |
| 1 | 1.00 | 1 | 1 | -0.03 | -0.026 | -0.013 | -0.027 | -0.033 | t | 117449 | CVP                          | Homo<br>sapiens                  |
| 1 | 1.00 | 1 | 1 | 0.02  | 0.017  | 0.015  | 0.02   | 0.02   | t | 60721  | SRKSYKKM<br>LKEMGEV<br>APEYR | Oryctola<br>gus<br>cuniculu<br>s |
| 1 | 1.00 | 1 | 1 | -0.03 | -0.028 | -0.028 | -0.023 | -0.027 | t | 121194 | DGKAKVK<br>DEPQRRSA          | Homo<br>sapiens                  |
| 1 | 1.00 | 1 | 1 | -0.09 | -0.09  | -0.094 | -0.09  | -0.093 | t | 136060 | EKPCLRKD<br>MYKKMIE<br>VDPL  | Mus<br>musculu<br>s              |

|   |      |   |   |       |        |       |        |        |   |        |                              |                                  |
|---|------|---|---|-------|--------|-------|--------|--------|---|--------|------------------------------|----------------------------------|
| 1 | 1.00 | 1 | 1 | 0.01  | 0.01   | 0.009 | 0.013  | 0.012  | t | 98852  | KMVAPVL<br>EEIATERAT<br>DLTV | Homo<br>sapiens                  |
| 1 | 1.00 | 1 | 1 | 0.02  | 0.017  | 0.02  | 0.02   | 0.021  | t | 132145 | AHDPPAQ<br>VLQELNVT          | Oryctola<br>gus<br>cuniculu<br>s |
| 1 | 1.00 | 1 | 1 | -0.04 | -0.036 | -0.04 | -0.033 | -0.041 | t | 134034 | DSYEDISA<br>YLLSKNNAI<br>EPR | Homo<br>sapiens                  |
| 1 | 1.00 | 1 | 1 | 0.02  | 0.02   | 0.02  | 0.02   | 0.02   | t | 147218 | QGSFQP                       | Homo<br>sapiens                  |
| 1 | 1.00 | 1 | 1 | 0.02  | 0.02   | 0.02  | 0.02   | 0.02   | t | 158582 | APAHQIP                      | Homo<br>sapiens                  |
| 1 | 1.00 | 1 | 1 | 0.02  | 0.02   | 0.02  | 0.02   | 0.02   | t | 132007 | PLSSTAQS<br>TSARNSD          | Homo<br>sapiens                  |
| 1 | 1.00 | 1 | 1 | 0.02  | 0.02   | 0.02  | 0.02   | 0.02   | t | 115932 | QVLSNTVP<br>AK               | Homo<br>sapiens                  |
| 1 | 1.00 | 1 | 1 | 0.02  | 0.02   | 0.02  | 0.02   | 0.02   | t | 111558 | MPLTQKD                      | Homo<br>sapiens                  |
| 1 | 1.00 | 1 | 1 | 0.02  | 0.02   | 0.02  | 0.02   | 0.02   | t | 103328 | KTLDAAG<br>KLLDNDK           | Homo<br>sapiens                  |
| 1 | 1.00 | 1 | 1 | 0     | 0      | 0     | 0      | 0      | t | 149046 | FQINPTQ                      | Sus<br>scrofa                    |
| 1 | 1.00 | 1 | 1 | 0     | 0      | 0     | 0      | 0      | t | 130473 | ECIVYGKT<br>ALCT             | Mus<br>musculu<br>s              |
| 1 | 1.00 | 1 | 1 | 0     | 0      | 0     | 0      | 0      | t | 130473 | ECIVYGKT<br>ALCT             | Mus<br>musculu<br>s              |
| 1 | 1.00 | 1 | 1 | 0     | 0      | 0     | 0      | 0      | t | 110609 | GPKGANG<br>DPGRPGE<br>P      | Mus<br>musculu<br>s              |
| 1 | 1.00 | 1 | 1 | 0     | 0      | 0     | 0      | 0      | t | 100868 | GDLGSI                       | Oryctola<br>gus<br>cuniculu<br>s |
| 1 | 1.00 | 1 | 1 | 0     | 0      | 0     | 0      | 0      | t | 41340  | MEECSQA<br>GPYIEQAQ<br>VIAHQ | Homo<br>sapiens                  |
| 1 | 1.00 | 1 | 1 | -0.02 | -0.02  | -0.02 | -0.02  | -0.02  | t | 132864 | LQEKLSPL                     | Mus<br>musculu<br>s              |

|   |      |   |   |       |        |        |        |       |   |        |                              |                                  |
|---|------|---|---|-------|--------|--------|--------|-------|---|--------|------------------------------|----------------------------------|
| 1 | 1.00 | 1 | 1 | -0.02 | -0.02  | -0.02  | -0.02  | -0.02 | t | 123792 | TQAPRIM<br>H                 | Oryctola<br>gus<br>cuniculu<br>s |
| 1 | 1.00 | 1 | 1 | -0.02 | -0.02  | -0.02  | -0.02  | -0.02 | t | 79412  | TCLEVNW<br>LTRMACM           | Mus<br>musculu<br>s              |
| 1 | 1.00 | 1 | 1 | -0.04 | -0.04  | -0.04  | -0.04  | -0.04 | t | 115204 | DEALEKFD<br>KALKALPM<br>HIRL | Homo<br>sapiens                  |
| 1 | 1.00 | 1 | 1 | -0.02 | -0.018 | -0.017 | -0.017 | -0.02 | t | 48762  | PPDHSA                       | Homo<br>sapiens                  |
| 1 | 1.00 | 1 | 1 | 0.01  | 0.01   | 0.013  | 0.01   | 0.012 | t | 7246   | CTYSFVSLL<br>SPGAKQN         | Mus<br>musculu<br>s              |
| 1 | 1.00 | 1 | 1 | 0.01  | 0.01   | 0.013  | 0.01   | 0.01  | t | 45222  | NNRDVPA<br>SIDWREYG<br>YVTE  | Bos<br>taurus                    |
| 1 | 1.00 | 1 | 1 | -0.03 | -0.024 | -0.03  | -0.03  | -0.03 | t | 62971  | TAQRCDH<br>S                 | Equus<br>caballus                |
| 1 | 1.00 | 1 | 1 | 0.02  | 0.02   | 0.02   | 0.02   | 0.02  | t | 156935 | PLSKMHI                      | Gallus<br>gallus                 |
| 1 | 1.00 | 1 | 1 | 0     | 0.003  | 0      | 0      | 0     | t | 111304 | GAVGENV<br>PDDLIIKG          | Mus<br>musculu<br>s              |
| 1 | 1.00 | 1 | 1 | -0.02 | -0.023 | -0.008 | -0.019 | -0.02 | t | 72562  | WHWTWL<br>SEYPPP             | Oryctola<br>gus<br>cuniculu<br>s |
| 1 | 1.00 | 1 | 1 | -0.02 | -0.023 | -0.008 | -0.019 | -0.02 | t | 72562  | WHWTWL<br>SEYPPP             | Oryctola<br>gus<br>cuniculu<br>s |
| 1 | 1.00 | 1 | 1 | 0.01  | 0.01   | 0.011  | 0.01   | 0.01  | t | 23295  | GWVDHFA<br>DGYDEVIA          | Mus<br>musculu<br>s              |
| 1 | 1.00 | 1 | 1 | 0     | -0.001 | -0.006 | 0.001  | 0.002 | t | 23296  | GWVFGST<br>MNNKSQS<br>VII    | Homo<br>sapiens                  |
| 1 | 1.00 | 1 | 1 | 0.02  | 0.022  | 0.016  | 0.021  | 0.021 | t | 73068  | WSEVDAV<br>SSP               | Homo<br>sapiens                  |



|   |      |   |   |       |        |        |        |       |   |        |                               |                     |
|---|------|---|---|-------|--------|--------|--------|-------|---|--------|-------------------------------|---------------------|
| 1 | 1.00 | 1 | 1 | -0.03 | -0.032 | -0.03  | -0.027 | -0.03 | t | 74801  | YLLQKL RN                     | Mus<br>musculu<br>s |
| 1 | 1.00 | 1 | 1 | -0.03 | -0.032 | -0.03  | -0.027 | -0.03 | t | 74801  | YLLQKL RN                     | Mus<br>musculu<br>s |
| 1 | 1.00 | 1 | 1 | 0     | 0      | 0      | 0      | 0     | t | 136522 | NDFFTYHI<br>RHGEVHC<br>GTNVR  | Homo<br>sapiens     |
| 1 | 1.00 | 1 | 1 | 0     | 0      | 0      | 0      | 0     | t | 130916 | KEDFDIYD<br>EDE               | Mus<br>musculu<br>s |
| 1 | 1.00 | 1 | 1 | 0     | 0      | 0      | 0      | 0     | t | 115652 | SSRISYWT<br>IVKP              | Homo<br>sapiens     |
| 1 | 1.00 | 1 | 1 | 0     | 0      | 0      | 0      | 0     | t | 115630 | NFDKLYIW<br>G                 | Homo<br>sapiens     |
| 1 | 1.00 | 1 | 1 | 0     | 0      | 0      | 0      | 0     | t | 109996 | TRLSRTIGY<br>TVK              | Mus<br>musculu<br>s |
| 1 | 1.00 | 1 | 1 | 0     | 0      | 0      | 0      | 0     | t | 44576  | NKPVQA                        | Homo<br>sapiens     |
| 1 | 1.00 | 1 | 1 | 0     | 0      | 0      | 0      | 0     | t | 58450  | SIAMNNID                      | Homo<br>sapiens     |
| 1 | 1.00 | 1 | 1 | 0     | 0      | 0      | 0      | 0     | t | 39183  | LRRDL DAS<br>REAKKQVE<br>KALE | Homo<br>sapiens     |
| 1 | 1.00 | 1 | 1 | 0     | 0      | 0      | 0      | 0     | t | 28911  | ITGHRMA<br>WMMMM<br>NWS       | Homo<br>sapiens     |
| 1 | 1.00 | 1 | 1 | 0     | 0      | 0      | 0      | 0     | t | 7491   | DAEFRHDS<br>GYEVHHQ<br>K      | Mus<br>musculu<br>s |
| 1 | 1.00 | 1 | 1 | 0.01  | 0.01   | 0.006  | 0.01   | 0.01  | t | 72908  | WNSQKDI<br>LEQARA             | Mus<br>musculu<br>s |
| 1 | 1.00 | 1 | 1 | 0     | -0.005 | -0.01  | 0.002  | 0.003 | t | 157443 | KAKDAEKK<br>KAKTD             | Canis<br>lupus      |
| 1 | 1.00 | 1 | 1 | -0.04 | -0.04  | -0.038 | -0.04  | -0.04 | t | 62345  | SVTCPQQ<br>V                  | Mus<br>musculu<br>s |

|   |      |   |   |       |        |        |        |        |   |        |                              |                     |
|---|------|---|---|-------|--------|--------|--------|--------|---|--------|------------------------------|---------------------|
| 1 | 1.00 | 1 | 1 | 0.02  | 0.02   | 0.02   | 0.02   | 0.02   | t | 94644  | PNKKPGKK<br>TTTKPTK          | Mus<br>musculu<br>s |
| 1 | 1.00 | 1 | 1 | -0.03 | -0.028 | -0.035 | -0.03  | -0.03  | t | 146333 | ILVAYAPP<br>GAQPPT           | Homo<br>sapiens     |
| 1 | 1.00 | 1 | 1 | -0.04 | -0.04  | -0.042 | -0.04  | -0.04  | t | 46985  | PAVASRRR<br>PTTAGAAP<br>LT   | Homo<br>sapiens     |
| 1 | 1.00 | 1 | 1 | 0.01  | 0.012  | 0.013  | 0.011  | 0.01   | t | 133687 | SAEALLRL<br>QA               | Homo<br>sapiens     |
| 1 | 1.00 | 1 | 1 | -0.04 | -0.042 | -0.051 | -0.041 | -0.04  | t | 67170  | TVSTEQNV<br>PDPQVGI          | Mus<br>musculu<br>s |
| 1 | 1.00 | 1 | 1 | 0     | 0      | 0.007  | -0.009 | -0.003 | t | 131129 | VFQSYFSM<br>PTPAHL           | Homo<br>sapiens     |
| 1 | 1.00 | 1 | 1 | 0     | 0      | 0      | -0.004 | -0.002 | t | 118185 | TSQFTGLK<br>C                | Homo<br>sapiens     |
| 1 | 1.00 | 1 | 1 | -0.03 | -0.029 | -0.03  | -0.033 | -0.03  | t | 130610 | SMCMHG<br>GAYCFP             | Mus<br>musculu<br>s |
| 1 | 1.00 | 1 | 1 | 0.02  | 0.023  | 0.019  | 0.02   | 0.019  | t | 133738 | VTPYFSYP<br>WAISCKC          | Mus<br>musculu<br>s |
| 1 | 1.00 | 1 | 1 | -0.05 | -0.046 | -0.05  | -0.043 | -0.048 | t | 131144 | WEKPFRR<br>HPEHFLDA<br>QGHEV | Homo<br>sapiens     |
| 1 | 1.00 | 1 | 1 | 0     | 0.004  | 0.014  | -0.003 | -0.002 | t | 76244  | YVDDHLM<br>CDI               | Homo<br>sapiens     |
| 1 | 1.00 | 1 | 1 | 0.05  | 0.05   | 0.05   | 0.05   | 0.05   | t | 149474 | SQVLQEST<br>YQ               | Mus<br>musculu<br>s |
| 1 | 1.00 | 1 | 1 | 0.03  | 0.03   | 0.03   | 0.03   | 0.03   | t | 149124 | TNPTQTK                      | Sus<br>scrofa       |
| 1 | 1.00 | 1 | 1 | 0.01  | 0.01   | 0.01   | 0.01   | 0.01   | t | 127768 | PQDPRSP<br>GPAPRRR<br>R      | Homo<br>sapiens     |
| 1 | 1.00 | 1 | 1 | 0.01  | 0.01   | 0.01   | 0.01   | 0.01   | t | 113463 | GQGQQG<br>QQPGQG<br>QQ       | Homo<br>sapiens     |

|   |      |   |   |       |       |       |       |       |   |        |                              |                |
|---|------|---|---|-------|-------|-------|-------|-------|---|--------|------------------------------|----------------|
| 1 | 1.00 | 1 | 1 | 0.01  | 0.01  | 0.01  | 0.01  | 0.01  | t | 103078 | AYVITSVD<br>EEMRHNE          | Homo sapiens   |
| 1 | 1.00 | 1 | 1 | 0.01  | 0.01  | 0.01  | 0.01  | 0.01  | t | 113466 | GQGQQPG<br>QGQQGQ<br>Q       | Homo sapiens   |
| 1 | 1.00 | 1 | 1 | 0.01  | 0.01  | 0.01  | 0.01  | 0.01  | t | 113687 | PGQGQQP<br>GQGQQGY           | Homo sapiens   |
| 1 | 1.00 | 1 | 1 | 0.01  | 0.01  | 0.01  | 0.01  | 0.01  | t | 79192  | ECEHWGG<br>QSQVQCR           | Mus musculus   |
| 1 | 1.00 | 1 | 1 | -0.01 | -0.01 | -0.01 | -0.01 | -0.01 | t | 141731 | QSDKHWG<br>MATPP             | Mus musculus   |
| 1 | 1.00 | 1 | 1 | -0.01 | -0.01 | -0.01 | -0.01 | -0.01 | t | 123181 | FLGDRHYL<br>T                | Ovis aries     |
| 1 | 1.00 | 1 | 1 | -0.01 | -0.01 | -0.01 | -0.01 | -0.01 | t | 78243  | PLFRPS                       | Equus caballus |
| 1 | 1.00 | 1 | 1 | -0.01 | -0.01 | -0.01 | -0.01 | -0.01 | t | 95814  | SAQSGASA<br>QSGA             | Homo sapiens   |
| 1 | 1.00 | 1 | 1 | -0.01 | -0.01 | -0.01 | -0.01 | -0.01 | t | 95814  | SAQSGASA<br>QSGA             | Homo sapiens   |
| 1 | 1.00 | 1 | 1 | -0.01 | -0.01 | -0.01 | -0.01 | -0.01 | t | 95814  | SAQSGASA<br>QSGA             | Homo sapiens   |
| 1 | 1.00 | 1 | 1 | -0.01 | -0.01 | -0.01 | -0.01 | -0.01 | t | 79623  | PDCSRLVG<br>ATPERPRL<br>RLVD | Homo sapiens   |
| 1 | 1.00 | 1 | 1 | -0.01 | -0.01 | -0.01 | -0.01 | -0.01 | t | 95814  | SAQSGASA<br>QSGA             | Homo sapiens   |
| 1 | 1.00 | 1 | 1 | -0.01 | -0.01 | -0.01 | -0.01 | -0.01 | t | 95814  | SAQSGASA<br>QSGA             | Homo sapiens   |
| 1 | 1.00 | 1 | 1 | -0.03 | -0.03 | -0.03 | -0.03 | -0.03 | t | 138191 | HPTWSSL                      | Mus musculus   |
| 1 | 1.00 | 1 | 1 | -0.03 | -0.03 | -0.03 | -0.03 | -0.03 | t | 138191 | HPTWSSL                      | Homo sapiens   |

|   |      |   |   |       |        |        |        |        |   |        |                              |                       |
|---|------|---|---|-------|--------|--------|--------|--------|---|--------|------------------------------|-----------------------|
| 1 | 1.00 | 1 | 1 | -0.03 | -0.03  | -0.03  | -0.03  | -0.03  | t | 156873 | GGNFMRA                      | Gallus gallus         |
| 1 | 1.00 | 1 | 1 | -0.03 | -0.026 | -0.03  | -0.03  | -0.03  | t | 138191 | HPTWSSL                      | MD                    |
| 1 | 1.00 | 1 | 1 | -0.03 | -0.028 | -0.03  | -0.03  | -0.03  | t | 130635 | WGPRVIFE<br>DVTV             | Homo sapiens          |
| 1 | 1.00 | 1 | 1 | -0.03 | -0.03  | -0.03  | -0.03  | -0.03  | t | 79050  | QKSKPF                       | Mus musculus          |
| 1 | 1.00 | 1 | 1 | -0.07 | -0.073 | -0.07  | -0.07  | -0.07  | t | 142441 | LFSPWLRV<br>QNHF             | Oryctolagus cuniculus |
| 1 | 1.00 | 1 | 1 | 0.01  | 0.01   | 0.015  | 0.01   | 0.011  | t | 153434 | NSPFMLH<br>SALSGGGS          | Mus musculus          |
| 1 | 1.00 | 1 | 1 | -0.04 | -0.04  | -0.035 | -0.038 | -0.04  | t | 79041  | PKARQPE<br>GRAWAQPG          | Homo sapiens          |
| 1 | 1.00 | 1 | 1 | 0.01  | 0.01   | 0.013  | 0.007  | 0.008  | t | 68300  | VENGNAT<br>PQLTK             | Homo sapiens          |
| 1 | 1.00 | 1 | 1 | -0.02 | -0.022 | -0.008 | -0.017 | -0.02  | t | 96771  | QFFRRMD<br>Y                 | Mus musculus          |
| 1 | 1.00 | 1 | 1 | 0     | 0      | -0.001 | 0      | 0      | t | 158721 | DSGCAIDL<br>QRRELKCG         | Mus musculus          |
| 1 | 1.00 | 1 | 1 | 0.02  | 0.021  | 0.031  | 0.021  | 0.02   | t | 65937  | TQSLASL                      | Homo sapiens          |
| 1 | 1.00 | 1 | 1 | 0.02  | 0.02   | 0.011  | 0.021  | 0.022  | t | 2136   | AIYHTENA<br>YVSVVSSH<br>YNR  | Mus musculus          |
| 1 | 1.00 | 1 | 1 | 0     | 0      | 0      | 0      | 0.001  | t | 115081 | LLRFFVAPF<br>PEV             | Homo sapiens          |
| 1 | 1.00 | 1 | 1 | 0.02  | 0.006  | 0.006  | 0.017  | 0.024  | t | 33893  | KTTTSSHP                     | Macaca mulatta        |
| 1 | 1.00 | 1 | 1 | 0     | 0      | 0.006  | 0.003  | -0.002 | t | 3275   | ANETIYNT<br>TLKYGDVV<br>GVNT | Homo sapiens          |
| 1 | 1.00 | 1 | 1 | 0.01  | 0.012  | 0.019  | 0.011  | 0.012  | t | 82633  | GFYVLEND<br>YS               | Homo sapiens          |

|   |      |   |   |       |        |        |        |        |   |        |                              |                                  |
|---|------|---|---|-------|--------|--------|--------|--------|---|--------|------------------------------|----------------------------------|
| 1 | 1.00 | 1 | 1 | -0.03 | -0.032 | -0.03  | -0.031 | -0.03  | t | 151041 | PFQNIHPIT<br>IGKCPK          | Mus<br>musculus                  |
| 1 | 1.00 | 1 | 1 | 0.01  | 0.014  | 0.015  | 0.017  | 0.01   | t | 133841 | GRGNGDP<br>GGGMEKD<br>G      | Homo<br>sapiens                  |
| 1 | 1.00 | 1 | 1 | 0     | 0      | 0      | 0      | 0      | t | 11571  | EEEDDDM<br>GFGFLD            | Mus<br>musculus                  |
| 1 | 1.00 | 1 | 1 | -0.03 | -0.034 | -0.034 | -0.031 | -0.029 | t | 38982  | LQSARRGE                     | Oryctola<br>gus<br>cuniculu<br>s |
| 1 | 1.00 | 1 | 1 | -0.01 | -0.01  | -0.008 | -0.009 | -0.012 | t | 153266 | IVTARARH<br>DWNWVQ<br>RSSRSL | Mus<br>musculus                  |
| 1 | 1.00 | 1 | 1 | 0.03  | 0.032  | 0.033  | 0.037  | 0.03   | t | 125607 | YVSIDVTL<br>QQLESHSF<br>YNLS | Homo<br>sapiens                  |
| 1 | 1.00 | 1 | 1 | 0.03  | 0.032  | 0.033  | 0.037  | 0.03   | t | 125607 | YVSIDVTL<br>QQLESHSF<br>YNLS | Homo<br>sapiens                  |
| 1 | 1.00 | 1 | 1 | 0.03  | 0.03   | 0.034  | 0.03   | 0.03   | t | 157276 | FQSQPPP<br>GVPQG             | Canis<br>lupus                   |
| 1 | 1.00 | 1 | 1 | 0.07  | 0.072  | 0.07   | 0.07   | 0.07   | t | 119987 | KIDIDTEAY<br>TENGEW          | Rattus<br>norvegic<br>us         |
| 1 | 1.00 | 1 | 1 | 0.07  | 0.07   | 0.07   | 0.07   | 0.07   | t | 119987 | KIDIDTEAY<br>TENGEW          | Rattus<br>norvegic<br>us         |
| 1 | 1.00 | 1 | 1 | 0.07  | 0.07   | 0.07   | 0.07   | 0.07   | t | 119987 | KIDIDTEAY<br>TENGEW          | Rattus<br>norvegic<br>us         |
| 1 | 1.00 | 1 | 1 | 0.01  | 0.008  | 0.01   | 0.007  | 0.011  | t | 75902  | YSTEVR                       | Mus<br>musculus                  |
| 1 | 1.00 | 1 | 1 | 0.01  | 0.01   | 0.008  | 0.01   | 0.012  | t | 118565 | QALGITTKI<br>SRGT            | Homo<br>sapiens                  |
| 1 | 1.00 | 1 | 1 | -0.03 | -0.03  | -0.03  | -0.03  | -0.028 | t | 44340  | NISGHVR<br>MGTMKIT           | Homo<br>sapiens                  |
| 1 | 1.00 | 1 | 1 | -0.02 | -0.023 | -0.02  | -0.02  | -0.02  | t | 126884 | QLPEEARP<br>AAGTAC           | Oryctola<br>gus<br>cuniculu<br>s |

|   |      |   |   |       |        |        |        |       |   |        |                              |                                  |
|---|------|---|---|-------|--------|--------|--------|-------|---|--------|------------------------------|----------------------------------|
| 1 | 1.00 | 1 | 1 | 0     | -0.004 | -0.001 | -0.001 | 0     | t | 50027  | PWFLAHH<br>TGGD              | Oryctola<br>gus<br>cuniculu<br>s |
| 1 | 1.00 | 1 | 1 | 0.02  | 0.017  | 0.021  | 0.02   | 0.02  | t | 44978  | NMGLIAG<br>AVG               | Oryctola<br>gus<br>cuniculu<br>s |
| 1 | 1.00 | 1 | 1 | 0.07  | 0.066  | 0.07   | 0.067  | 0.07  | t | 142006 | SDSAQGS<br>DVSLTA            | Oryctola<br>gus<br>cuniculu<br>s |
| 1 | 1.00 | 1 | 1 | 0.04  | 0.04   | 0.04   | 0.04   | 0.04  | t | 103349 | LGENGNG<br>GMVTGCA<br>E      | Homo<br>sapiens                  |
| 1 | 1.00 | 1 | 1 | 0.04  | 0.04   | 0.04   | 0.04   | 0.04  | t | 99140  | DEEEEGSN<br>REVRRT           | Homo<br>sapiens                  |
| 1 | 1.00 | 1 | 1 | 0.02  | 0.02   | 0.02   | 0.02   | 0.02  | t | 106098 | SADQISTV                     | Oryctola<br>gus<br>cuniculu<br>s |
| 1 | 1.00 | 1 | 1 | 0     | 0      | 0      | 0      | 0     | t | 153353 | ACWALRD<br>PLCGGS            | Mus<br>musculu<br>s              |
| 1 | 1.00 | 1 | 1 | 0     | 0      | 0      | 0      | 0     | t | 142411 | EAQKACEK<br>AKKAHA           | Homo<br>sapiens                  |
| 1 | 1.00 | 1 | 1 | 0     | 0      | 0      | 0      | 0     | t | 123725 | RVSMIEGA<br>A                | Ovis<br>aries                    |
| 1 | 1.00 | 1 | 1 | 0     | 0      | 0      | 0      | 0     | t | 119527 | SRKATASL<br>P                | Homo<br>sapiens                  |
| 1 | 1.00 | 1 | 1 | 0     | 0      | 0      | 0      | 0     | t | 104748 | DEYCSPDH<br>NC               | Homo<br>sapiens                  |
| 1 | 1.00 | 1 | 1 | 0     | 0      | 0      | 0      | 0     | t | 105884 | IMAKFTQF                     | Oryctola<br>gus<br>cuniculu<br>s |
| 1 | 1.00 | 1 | 1 | 0     | 0      | 0      | 0      | 0     | t | 95128  | PFDVQKC<br>NLKFGSW<br>TYGGWS | Rattus<br>norvegic<br>us         |
| 1 | 1.00 | 1 | 1 | 0.02  | 0.02   | 0.007  | 0.014  | 0.02  | t | 141967 | NGDKSTQ<br>KYNELKT           | Homo<br>sapiens                  |
| 1 | 1.00 | 1 | 1 | -0.02 | -0.02  | -0.02  | -0.02  | -0.02 | t | 153269 | LSPPLRNT<br>HPQAMQ<br>W      | Mus<br>musculu<br>s              |

|   |      |   |   |       |        |        |        |        |   |        |                              |                                  |
|---|------|---|---|-------|--------|--------|--------|--------|---|--------|------------------------------|----------------------------------|
| 1 | 1.00 | 1 | 1 | -0.02 | -0.02  | -0.02  | -0.02  | -0.02  | t | 133953 | WIINNF                       | Mus<br>musculu<br>s              |
| 1 | 1.00 | 1 | 1 | -0.02 | -0.02  | -0.02  | -0.02  | -0.02  | t | 115684 | ALINNQFL<br>PY               | Homo<br>sapiens                  |
| 1 | 1.00 | 1 | 1 | -0.02 | -0.02  | -0.02  | -0.02  | -0.02  | t | 117387 | TRPIPSHM<br>HDKW             | Homo<br>sapiens                  |
| 1 | 1.00 | 1 | 1 | -0.02 | -0.02  | -0.02  | -0.02  | -0.02  | t | 18758  | GASAQGS<br>SGPSGTPS          | Homo<br>sapiens                  |
| 1 | 1.00 | 1 | 1 | 0.02  | 0.02   | 0.02   | 0.02   | 0.02   | t | 117059 | PQTDGSTR<br>PRGL             | Homo<br>sapiens                  |
| 1 | 1.00 | 1 | 1 | 0.01  | 0.01   | 0.015  | 0.009  | 0.01   | t | 100103 | HHQKLVFF<br>AE               | Homo<br>sapiens(<br>human)       |
| 1 | 1.00 | 1 | 1 | -0.02 | -0.017 | -0.02  | -0.02  | -0.02  | t | 32738  | KPIVQYDN<br>F                | Mus<br>musculu<br>s              |
| 1 | 1.00 | 1 | 1 | -0.02 | -0.02  | -0.02  | -0.02  | -0.02  | t | 32738  | KPIVQYDN<br>F                | Oryctola<br>gus<br>cuniculu<br>s |
| 1 | 1.00 | 1 | 1 | 0     | 0      | 0      | 0      | 0.002  | t | 130454 | CLFPNNSY<br>C                | Mus<br>musculu<br>s              |
| 1 | 1.00 | 1 | 1 | 0     | 0      | 0      | 0.003  | 0      | t | 71921  | VWARPDY<br>N                 | Homo<br>sapiens                  |
| 1 | 1.00 | 1 | 1 | 0     | 0      | 0.003  | 0      | -0.001 | t | 97231  | CNTKCQTP                     | Mus<br>musculu<br>s              |
| 1 | 1.00 | 1 | 1 | -0.03 | -0.026 | -0.013 | -0.023 | -0.031 | t | 117449 | CVP                          | Homo<br>sapiens                  |
| 1 | 1.00 | 1 | 1 | 0     | 0.004  | 0.006  | 0.003  | 0      | t | 54232  | RIRADFNA<br>SMDLL            | Homo<br>sapiens                  |
| 1 | 1.00 | 1 | 1 | -0.01 | -0.008 | -0.011 | -0.007 | -0.01  | t | 58121  | SGLPGTRG<br>GSGVPGPI<br>NPPN | Homo<br>sapiens                  |
| 1 | 1.00 | 1 | 1 | -0.01 | -0.012 | -0.015 | -0.009 | -0.01  | t | 135787 | VPLDGKTI<br>TNNQRI           | Mus<br>musculu<br>s              |
| 1 | 1.00 | 1 | 1 | 0     | -0.002 | 0      | -0.001 | 0      | t | 51574  | QLVNSNG<br>SWHIN             | Mus<br>musculu<br>s              |

|   |      |   |   |       |        |        |        |        |   |        |                               |                                  |
|---|------|---|---|-------|--------|--------|--------|--------|---|--------|-------------------------------|----------------------------------|
| 1 | 1.00 | 1 | 1 | 0     | 0.002  | 0.001  | 0.007  | 0.002  | t | 122655 | YKRGII DR<br>GQYLQLQ<br>ELECD | Homo sapiens                     |
| 1 | 1.00 | 1 | 1 | 0.01  | 0.006  | 0.011  | 0.013  | 0.012  | t | 99060  | WTT PDT S<br>PNCRIDQD         | Oryctola<br>gus<br>cuniculu<br>s |
| 1 | 1.00 | 1 | 1 | -0.01 | -0.014 | -0.013 | -0.01  | -0.011 | t | 132857 | LHFNKRILK<br>SKMSES           | Trichosu<br>rus<br>vulpecul<br>a |
| 1 | 1.00 | 1 | 1 | 0     | -0.002 | 0      | -0.001 | 0      | t | 117111 | WPMNDD<br>STRPR               | Mus<br>musculu<br>s              |
| 1 | 1.00 | 1 | 1 | -0.01 | -0.01  | -0.01  | -0.01  | -0.01  | t | 774    | ADSVGGK<br>D                  | Mus<br>musculu<br>s              |
| 1 | 1.00 | 1 | 1 | 0.03  | 0.028  | 0.029  | 0.029  | 0.031  | t | 133611 | IVSYLCDLA<br>PEAPPPTL<br>PP   | Mus<br>musculu<br>s              |
| 1 | 1.00 | 1 | 1 | 0.01  | 0.008  | 0.01   | 0.009  | 0.01   | t | 102139 | TLQPDRS                       | Mus<br>musculu<br>s              |
| 1 | 1.00 | 1 | 1 | -0.03 | -0.028 | -0.03  | -0.029 | -0.03  | t | 142204 | KLEEQNKI<br>SEASRKGL<br>RRDL  | Homo sapiens                     |
| 1 | 1.00 | 1 | 1 | 0.04  | 0.042  | 0.043  | 0.04   | 0.04   | t | 58914  | SKPFATDS<br>GA                | Homo sapiens                     |
| 1 | 1.00 | 1 | 1 | 0.03  | 0.03   | 0.028  | 0.03   | 0.03   | t | 68185  | VEFTKDTQ<br>TGMSGQT<br>ASQ    | Mus<br>musculu<br>s              |
| 1 | 1.00 | 1 | 1 | 0.03  | 0.03   | 0.028  | 0.03   | 0.03   | t | 68185  | VEFTKDTQ<br>TGMSGQT<br>ASQ    | Mus<br>musculu<br>s              |
| 1 | 1.00 | 1 | 1 | 0.05  | 0.05   | 0.05   | 0.05   | 0.05   | t | 115929 | QSLTLTDV<br>EN                | Homo sapiens                     |
| 1 | 1.00 | 1 | 1 | 0.01  | 0.01   | 0.01   | 0.01   | 0.01   | t | 122555 | RITNRDPRI<br>SSGSL S          | Mus<br>musculu<br>s              |
| 1 | 1.00 | 1 | 1 | -0.01 | -0.01  | -0.01  | -0.01  | -0.01  | t | 140935 | YGEEKPAV<br>LGHDEAAY<br>SKNR  | Mus<br>musculu<br>s              |



|   |      |   |   |       |        |        |        |       |   |        |                              |                                  |
|---|------|---|---|-------|--------|--------|--------|-------|---|--------|------------------------------|----------------------------------|
| 1 | 1.00 | 1 | 1 | -0.01 | -0.01  | -0.01  | -0.01  | -0.01 | t | 140935 | YGEEKPAV<br>LGHDEAA<br>YSKNR | Oryctola<br>gus<br>cuniculu<br>s |
| 1 | 1.00 | 1 | 1 | -0.01 | -0.01  | -0.01  | -0.01  | -0.01 | t | 143674 | DRVALRNL<br>LRRY             | Mus<br>musculu<br>s              |
| 1 | 1.00 | 1 | 1 | -0.01 | -0.01  | -0.01  | -0.01  | -0.01 | t | 147545 | CFGHKPW<br>MC                | Homo<br>sapiens                  |
| 1 | 1.00 | 1 | 1 | -0.01 | -0.01  | -0.01  | -0.01  | -0.01 | t | 110593 | GFPGPRG<br>PPGPQGA<br>T      | Mus<br>musculu<br>s              |
| 1 | 1.00 | 1 | 1 | -0.01 | -0.01  | -0.01  | -0.01  | -0.01 | t | 115851 | LQDKIHPF<br>AQ               | Homo<br>sapiens                  |
| 1 | 1.00 | 1 | 1 | -0.01 | -0.01  | -0.01  | -0.01  | -0.01 | t | 115879 | NYQQKP<br>VAL                | Homo<br>sapiens                  |
| 1 | 1.00 | 1 | 1 | -0.01 | -0.01  | -0.01  | -0.01  | -0.01 | t | 95827  | SGASAQS<br>GASAQ             | Homo<br>sapiens                  |
| 1 | 1.00 | 1 | 1 | -0.01 | -0.01  | -0.01  | -0.01  | -0.01 | t | 95827  | SGASAQS<br>GASAQ             | Homo<br>sapiens                  |
| 1 | 1.00 | 1 | 1 | -0.01 | -0.01  | -0.01  | -0.01  | -0.01 | t | 95827  | SGASAQS<br>GASAQ             | Homo<br>sapiens                  |
| 1 | 1.00 | 1 | 1 | -0.01 | -0.01  | -0.01  | -0.01  | -0.01 | t | 95827  | SGASAQS<br>GASAQ             | Homo<br>sapiens                  |
| 1 | 1.00 | 1 | 1 | -0.01 | -0.01  | -0.01  | -0.01  | -0.01 | t | 58195  | SGPSGPSG<br>TSPSSRS          | Homo<br>sapiens                  |
| 1 | 1.00 | 1 | 1 | -0.01 | -0.01  | -0.01  | -0.01  | -0.01 | t | 22078  | GRIILSGKP<br>ATIPDREV<br>LYR | Homo<br>sapiens                  |
| 1 | 1.00 | 1 | 1 | -0.03 | -0.03  | -0.03  | -0.03  | -0.03 | t | 35175  | LDHVLDH<br>V                 | Anas<br>platyrhy<br>nchos        |
| 1 | 1.00 | 1 | 1 | -0.01 | -0.008 | -0.005 | -0.007 | -0.01 | t | 428    | AASEALDP<br>HAFHLLN<br>TYGR  | Homo<br>sapiens                  |
| 1 | 1.00 | 1 | 1 | -0.02 | -0.022 | -0.019 | -0.02  | -0.02 | t | 140601 | SLYSFPEPE<br>A               | Homo<br>sapiens                  |

|   |      |   |   |       |        |        |        |        |   |        |                            |                                  |
|---|------|---|---|-------|--------|--------|--------|--------|---|--------|----------------------------|----------------------------------|
| 1 | 1.00 | 1 | 1 | 0     | 0      | 0      | 0      | 0.001  | t | 28075  | IPSTAFTDI<br>AWVRLPN<br>HY | Homo<br>sapiens                  |
| 1 | 1.00 | 1 | 1 | -0.01 | -0.01  | -0.01  | -0.01  | -0.01  | t | 149506 | VEFTDHLF                   | Homo<br>sapiens                  |
| 1 | 1.00 | 1 | 1 | 0.05  | 0.052  | 0.057  | 0.057  | 0.053  | t | 135471 | KDKATFGC<br>HDGC           | Homo<br>sapiens                  |
| 1 | 1.00 | 1 | 1 | 0.04  | 0.042  | 0.045  | 0.041  | 0.042  | t | 57716  | SEYSSQPS<br>S              | Homo<br>sapiens                  |
| 1 | 1.00 | 1 | 1 | 0.05  | 0.052  | 0.048  | 0.051  | 0.051  | t | 22755  | GTLVKTIT<br>DDQIEV         | Homo<br>sapiens                  |
| 1 | 1.00 | 1 | 1 | 0.03  | 0.026  | 0.03   | 0.029  | 0.03   | t | 137846 | FADGQPKL<br>VSDQ           | Oryctola<br>gus<br>cuniculu<br>s |
| 1 | 1.00 | 1 | 1 | 0     | 0.002  | 0      | 0.001  | 0.001  | t | 3289   | ANGAGNQ<br>PGANGAG<br>GQAA | Homo<br>sapiens                  |
| 1 | 1.00 | 1 | 1 | -0.02 | -0.017 | -0.014 | -0.02  | -0.022 | t | 7381   | CYGVPDHI<br>KVWDYAT        | Mus<br>musculu<br>s              |
| 1 | 1.00 | 1 | 1 | -0.02 | -0.017 | -0.014 | -0.02  | -0.022 | t | 7381   | CYGVPDHI<br>KVWDYAT        | Mus<br>musculu<br>s              |
| 1 | 1.00 | 1 | 1 | -0.02 | -0.014 | -0.014 | -0.02  | -0.022 | t | 7381   | CYGVPDHI<br>KVWDYAT        | Equus<br>caballus                |
| 1 | 1.00 | 1 | 1 | 0     | -0.005 | 0      | -0.001 | 0      | t | 62975  | TAQSTMK<br>AEEITP          | Mus                              |
| 1 | 1.00 | 1 | 1 | 0     | -0.005 | 0      | -0.001 | 0      | t | 64782  | TLETKLGL<br>KRQL           | Mus                              |
| 1 | 1.00 | 1 | 1 | 0     | 0.005  | 0      | -0.001 | 0      | t | 71568  | VTVVTTSG<br>S              | Homo<br>sapiens                  |
| 1 | 1.00 | 1 | 1 | 0     | -0.005 | 0      | -0.001 | 0      | t | 39198  | LRRTQSM<br>GIQLDQ          | Mus                              |

|   |      |   |   |       |        |       |        |       |   |        |                              |                 |
|---|------|---|---|-------|--------|-------|--------|-------|---|--------|------------------------------|-----------------|
| 1 | 1.00 | 1 | 1 | 0     | -0.005 | 0     | -0.001 | 0     | t | 53763  | RFQEALKK<br>SLKKP            | Mus             |
| 1 | 1.00 | 1 | 1 | 0     | -0.005 | 0     | -0.001 | 0     | t | 54923  | RMMATK<br>DSFQSFN            | Mus             |
| 1 | 1.00 | 1 | 1 | 0     | -0.005 | 0     | -0.001 | 0     | t | 44602  | NKSTLQNR<br>RAAVS            | Mus             |
| 1 | 1.00 | 1 | 1 | 0     | -0.005 | 0     | -0.001 | 0     | t | 44917  | NLVLNRDV<br>SFQDL            | Mus             |
| 1 | 1.00 | 1 | 1 | 0     | -0.005 | 0     | -0.001 | 0     | t | 52720  | QVKARNII<br>SPVMG            | Mus             |
| 1 | 1.00 | 1 | 1 | 0     | -0.005 | 0     | -0.001 | 0     | t | 25200  | HYTNESKF<br>KFILE            | Mus             |
| 1 | 1.00 | 1 | 1 | 0     | -0.005 | 0     | -0.001 | 0     | t | 13080  | ELGLISIEA<br>ASDI            | Mus             |
| 1 | 1.00 | 1 | 1 | 0     | -0.005 | 0     | -0.001 | 0     | t | 23727  | HEQQLVT<br>ARQKLK            | Mus             |
| 1 | 1.00 | 1 | 1 | 0     | -0.005 | 0     | -0.001 | 0     | t | 35161  | LDFSLPSSS<br>SYSY            | Mus             |
| 1 | 1.00 | 1 | 1 | 0     | -0.005 | 0     | -0.001 | 0     | t | 7496   | DAEKAVEV<br>DPDDV            | Mus             |
| 1 | 1.00 | 1 | 1 | 0     | -0.005 | 0     | -0.001 | 0     | t | 723    | ADLVAAQ<br>KLATKP            | Mus             |
| 1 | 1.00 | 1 | 1 | 0.01  | 0.01   | 0.008 | 0.01   | 0.011 | t | 53355  | RDGQLTIK<br>AERTEQKD<br>FDGR | Mus<br>musculus |
| 1 | 1.00 | 1 | 1 | -0.02 | -0.02  | -0.02 | -0.02  | -0.02 | t | 135497 | RYPNQVYY<br>RPM              | Mus<br>musculus |

|   |      |   |   |       |        |        |        |        |   |        |                       |                       |
|---|------|---|---|-------|--------|--------|--------|--------|---|--------|-----------------------|-----------------------|
| 1 | 1.00 | 1 | 1 | 0.05  | 0.047  | 0.045  | 0.05   | 0.052  | t | 97296  | FAITNVTTN             | Oryctolagus cuniculus |
| 1 | 1.00 | 1 | 1 | 0     | 0      | -0.001 | 0      | 0      | t | 127768 | PQDPRSPGPAPRRHR       | Homo sapiens          |
| 1 | 1.00 | 1 | 1 | 0     | -0.002 | 0      | -0.007 | -0.003 | t | 135864 | VNDIFERI              | Mus musculus          |
| 1 | 1.00 | 1 | 1 | 0.06  | 0.06   | 0.06   | 0.06   | 0.06   | t | 112145 | GSGSGTD               | Homo sapiens          |
| 1 | 1.00 | 1 | 1 | 0.02  | 0.02   | 0.02   | 0.02   | 0.02   | t | 158593 | GRQAQYY               | Homo sapiens          |
| 1 | 1.00 | 1 | 1 | 0     | 0      | 0      | 0      | 0      | t | 148860 | QQQLPQPQQP            | Homo sapiens          |
| 1 | 1.00 | 1 | 1 | 0     | 0      | 0      | 0      | 0      | t | 124279 | HPLASSLHA             | Homo sapiens          |
| 1 | 1.00 | 1 | 1 | 0     | 0      | 0      | 0      | 0      | t | 119667 | VNHKPSNT              | Homo sapiens          |
| 1 | 1.00 | 1 | 1 | 0     | 0      | 0      | 0      | 0      | t | 115731 | EPVLGPVRGP            | Homo sapiens          |
| 1 | 1.00 | 1 | 1 | 0     | 0      | 0      | 0      | 0      | t | 115987 | SVLSLSQSKV            | Homo sapiens          |
| 1 | 1.00 | 1 | 1 | 0     | 0      | 0      | 0      | 0      | t | 31350  | KIMSKWGNFNFNINAYNMSNF | Aotus nancymaiae      |
| 1 | 1.00 | 1 | 1 | 0     | 0      | 0      | 0      | 0      | t | 1811   | AHQWHFPRSRSTTTN       | Mus musculus          |
| 1 | 1.00 | 1 | 1 | -0.02 | -0.02  | -0.02  | -0.02  | -0.02  | t | 120836 | NLIKSGVATK            | Mus musculus          |
| 1 | 1.00 | 1 | 1 | -0.02 | -0.02  | -0.02  | -0.02  | -0.02  | t | 114280 | CKWSVAHLC             | Mus musculus          |
| 1 | 1.00 | 1 | 1 | -0.02 | -0.02  | -0.02  | -0.02  | -0.02  | t | 114280 | CKWSVAHLC             | Mus musculus          |
| 1 | 1.00 | 1 | 1 | -0.02 | -0.02  | -0.02  | -0.02  | -0.02  | t | 86900  | NLPNDVFR EAQR         | Homo sapiens          |
| 1 | 1.00 | 1 | 1 | -0.04 | -0.04  | -0.04  | -0.04  | -0.04  | t | 115599 | DEGGFTCF FRDH         | Homo sapiens          |
| 1 | 1.00 | 1 | 1 | -0.04 | -0.04  | -0.04  | -0.04  | -0.04  | t | 115969 | SLPQNIPPLT            | Homo sapiens          |
| 1 | 1.00 | 1 | 1 | -0.04 | -0.04  | -0.04  | -0.04  | -0.04  | t | 79385  | SCRLSTFSMRMVCN        | Mus musculus          |

|   |      |   |   |       |        |        |        |        |   |        |                              |                                  |
|---|------|---|---|-------|--------|--------|--------|--------|---|--------|------------------------------|----------------------------------|
| 1 | 1.00 | 1 | 1 | 0.02  | 0.017  | 0.017  | 0.02   | 0.022  | t | 52139  | QQQTAPK<br>APTE              | Oryctola<br>gus<br>cuniculu<br>s |
| 1 | 1.00 | 1 | 1 | 0.01  | 0.008  | 0.005  | 0.003  | 0.008  | t | 130063 | TEVPFRL                      | Rattus<br>norvegic<br>us         |
| 1 | 1.00 | 1 | 1 | -0.03 | -0.033 | -0.032 | -0.03  | -0.032 | t | 31554  | KKGSSGYC<br>AWPACYC          | Oryctola<br>gus<br>cuniculu<br>s |
| 1 | 1.00 | 1 | 1 | -0.03 | -0.027 | -0.032 | -0.03  | -0.032 | t | 31554  | KKGSSGYC<br>AWPACYC          | Equus<br>caballus                |
| 1 | 1.00 | 1 | 1 | 0.01  | 0.013  | 0.011  | 0.01   | 0.011  | t | 64759  | TLDTAH                       | Equus<br>caballus                |
| 1 | 1.00 | 1 | 1 | -0.02 | -0.024 | -0.026 | -0.023 | -0.02  | t | 33483  | KSQGERS<br>WTWRKEA<br>H      | Oryctola<br>gus<br>cuniculu<br>s |
| 1 | 1.00 | 1 | 1 | -0.01 | -0.01  | -0.01  | -0.01  | -0.011 | t | 144777 | SGTHMNL<br>YLHDTAFA          | Mus<br>musculu<br>s              |
| 1 | 1.00 | 1 | 1 | -0.02 | -0.02  | -0.013 | -0.017 | -0.02  | t | 49400  | PSHYVPRI<br>Y                | Homo<br>sapiens                  |
| 1 | 1.00 | 1 | 1 | -0.01 | -0.008 | -0.01  | -0.009 | -0.01  | t | 117112 | WPMNDD<br>STRR               | Homo<br>sapiens                  |
| 1 | 1.00 | 1 | 1 | -0.03 | -0.032 | -0.031 | -0.031 | -0.03  | t | 33053  | KQPYNLT<br>AWFRMG<br>G       | Mus<br>musculu<br>s              |
| 1 | 1.00 | 1 | 1 | 0.04  | 0.038  | 0.044  | 0.039  | 0.038  | t | 44142  | NHGNYS<br>A<br>QVGASQ        | Mus<br>musculu<br>s              |
| 1 | 1.00 | 1 | 1 | -0.03 | -0.032 | -0.029 | -0.027 | -0.028 | t | 98183  | KSAYTPAY<br>YT               | Mus<br>musculu<br>s              |
| 1 | 1.00 | 1 | 1 | 0     | -0.004 | -0.007 | 0.003  | 0.001  | t | 5558   | AVTFASFD<br>VPSKQPT          | Oryctola<br>gus<br>cuniculu<br>s |
| 1 | 1.00 | 1 | 1 | -0.04 | -0.04  | -0.053 | -0.04  | -0.04  | t | 11930  | EEWSQCS<br>VYCGSGVR<br>VRKRK | Mus<br>musculu<br>s              |

|   |      |   |   |       |        |        |        |        |   |        |                              |                                  |
|---|------|---|---|-------|--------|--------|--------|--------|---|--------|------------------------------|----------------------------------|
| 1 | 1.00 | 1 | 1 | 0.02  | 0.022  | 0.013  | 0.017  | 0.022  | t | 46676  | NYNVLMV<br>PKP               | Homo<br>sapiens                  |
| 1 | 1.00 | 1 | 1 | -0.01 | -0.01  | -0.01  | -0.008 | -0.01  | t | 119473 | KILKVIRK                     | Homo<br>sapiens                  |
| 1 | 1.00 | 1 | 1 | 0.01  | 0.01   | 0.01   | 0.01   | 0.01   | t | 149083 | NPTQGSP                      | Sus<br>scrofa                    |
| 1 | 1.00 | 1 | 1 | -0.01 | -0.01  | -0.01  | -0.01  | -0.01  | t | 153344 | ACRDHSDL<br>WCGGGS           | Mus<br>musculu<br>s              |
| 1 | 1.00 | 1 | 1 | -0.01 | -0.01  | -0.01  | -0.01  | -0.01  | t | 107882 | HEHTFGR<br>QW                | Mus<br>musculu<br>s              |
| 1 | 1.00 | 1 | 1 | -0.01 | -0.01  | -0.01  | -0.01  | -0.01  | t | 105148 | DVAGL                        | Oryctola<br>gus<br>cuniculu<br>s |
| 1 | 1.00 | 1 | 1 | -0.01 | -0.01  | -0.01  | -0.01  | -0.01  | t | 105148 | DVAGL                        | Oryctola<br>gus<br>cuniculu<br>s |
| 1 | 1.00 | 1 | 1 | -0.01 | -0.01  | -0.01  | -0.01  | -0.01  | t | 105148 | DVAGL                        | Oryctola<br>gus<br>cuniculu<br>s |
| 1 | 1.00 | 1 | 1 | -0.01 | -0.01  | -0.01  | -0.01  | -0.01  | t | 111552 | MKVSNSK                      | Homo<br>sapiens                  |
| 1 | 1.00 | 1 | 1 | -0.01 | -0.01  | -0.01  | -0.01  | -0.01  | t | 107882 | HEHTFGR<br>QW                | Mus<br>musculu<br>s              |
| 1 | 1.00 | 1 | 1 | -0.01 | -0.01  | -0.01  | -0.01  | -0.01  | t | 41335  | MEECSKA<br>RPYIEQAQ<br>VIAHQ | Homo<br>sapiens                  |
| 1 | 1.00 | 1 | 1 | -0.01 | -0.01  | -0.01  | -0.01  | -0.01  | t | 30603  | KESHDQFL<br>QHRILFKG<br>FFTD | Oryctola<br>gus<br>cuniculu<br>s |
| 1 | 1.00 | 1 | 1 | -0.01 | -0.011 | -0.008 | -0.01  | -0.009 | t | 31074  | KGTLTWS<br>G                 | Anas<br>platyrhy<br>nchos        |
| 1 | 1.00 | 1 | 1 | -0.03 | -0.03  | -0.03  | -0.03  | -0.03  | t | 149414 | PQLPYPQP<br>QP               | Mus<br>musculu<br>s              |
| 1 | 1.00 | 1 | 1 | -0.03 | -0.03  | -0.03  | -0.03  | -0.03  | t | 119591 | HTCPPCPA                     | Homo<br>sapiens                  |
| 1 | 1.00 | 1 | 1 | -0.05 | -0.05  | -0.05  | -0.05  | -0.05  | t | 111160 | CNKLSRPV<br>C                | Homo<br>sapiens                  |
| 1 | 1.00 | 1 | 1 | -0.02 | -0.02  | -0.024 | -0.014 | -0.016 | t | 138758 | AMVYLGA<br>KDSTRQI           | Mus<br>musculu<br>s              |

|   |      |   |   |       |        |        |        |        |   |        |                              |                                  |
|---|------|---|---|-------|--------|--------|--------|--------|---|--------|------------------------------|----------------------------------|
| 1 | 1.00 | 1 | 1 | 0.01  | 0.012  | 0.013  | 0.017  | 0.012  | t | 125453 | KDRLQGM<br>APAAGAD           | Homo<br>sapiens                  |
| 1 | 1.00 | 1 | 1 | -0.01 | -0.01  | -0.013 | -0.01  | -0.011 | t | 42039  | MLQDMAI<br>LTGGQVI           | Mus<br>musculu<br>s              |
| 1 | 1.00 | 1 | 1 | 0     | -0.004 | 0.004  | -0.001 | -0.002 | t | 47024  | PCIGYVRS<br>GGAVPPA          | Oryctola<br>gus<br>cuniculu<br>s |
| 1 | 1.00 | 1 | 1 | 0.02  | 0.024  | 0.02   | 0.023  | 0.02   | t | 45681  | NRGKMDV<br>SGVQAPV<br>GAITTI | Homo<br>sapiens                  |
| 1 | 1.00 | 1 | 1 | 0.01  | 0.014  | 0.01   | 0.011  | 0.012  | t | 37656  | LLPHSNLD                     | Homo<br>sapiens                  |
| 1 | 1.00 | 1 | 1 | 0     | -0.002 | 0      | 0.001  | 0.001  | t | 111581 | NGICWGN<br>QLFVTVVD<br>TTRST | Homo<br>sapiens                  |
| 1 | 1.00 | 1 | 1 | 0     | -0.002 | 0      | 0.001  | 0.001  | t | 111915 | VHTGFGA<br>MDFTTLQ<br>ANKSEV | Homo<br>sapiens                  |
| 1 | 1.00 | 1 | 1 | 0     | -0.002 | 0      | 0.001  | 0.001  | t | 111585 | NKSEVPLD<br>ICTSICKYP<br>DYI | Homo<br>sapiens                  |
| 1 | 1.00 | 1 | 1 | 0     | -0.003 | 0      | 0.001  | 0.001  | t | 108600 | QLINTNGS                     | Homo<br>sapiens                  |
| 1 | 1.00 | 1 | 1 | 0.02  | 0.023  | 0.014  | 0.02   | 0.022  | t | 53633  | RESNGETK                     | Equus<br>caballus                |
| 1 | 1.00 | 1 | 1 | -0.01 | -0.008 | -0.012 | -0.013 | -0.01  | t | 22882  | GTVVAVG<br>PGRWDED<br>G      | Homo<br>sapiens                  |
| 1 | 1.00 | 1 | 1 | -0.04 | -0.04  | -0.043 | -0.04  | -0.042 | t | 67615  | VAGRKKLE<br>ELERDLRK<br>TK   | Homo<br>sapiens                  |
| 1 | 1.00 | 1 | 1 | -0.01 | -0.008 | -0.013 | -0.003 | -0.009 | t | 105967 | MKRGLTV<br>AVAGAAIL<br>VAGLS | Homo<br>sapiens                  |
| 1 | 1.00 | 1 | 1 | 0.05  | 0.048  | 0.05   | 0.05   | 0.05   | t | 129830 | RSILPYGDS<br>MDRIEKD         | Homo<br>sapiens                  |

|   |      |   |   |       |        |        |       |        |   |        |                              |                                  |
|---|------|---|---|-------|--------|--------|-------|--------|---|--------|------------------------------|----------------------------------|
| 1 | 1.00 | 1 | 1 | 0     | 0      | -0.005 | 0     | 0.002  | t | 122746 | EEQEDEIIG<br>FGQELKN         | Oryctola<br>gus<br>cuniculu<br>s |
| 1 | 1.00 | 1 | 1 | 0     | 0      | 0.001  | 0     | 0      | t | 73636  | YEDRYYRE                     | Mus<br>musculu<br>s              |
| 1 | 1.00 | 1 | 1 | -0.05 | -0.053 | -0.052 | -0.05 | -0.049 | t | 133744 | YGGFMRF                      | Oryctola<br>gus<br>cuniculu<br>s |
| 1 | 1.00 | 1 | 1 | -0.02 | -0.02  | -0.019 | -0.02 | -0.019 | t | 119614 | LWDQTYG<br>VPD               | Homo<br>sapiens                  |
| 1 | 1.00 | 1 | 1 | 0.01  | 0.01   | 0.015  | 0.01  | 0.01   | t | 95268  | CAQVYNKL<br>GMYP             | Homo<br>sapiens                  |
| 1 | 1.00 | 1 | 1 | 0.01  | 0.01   | 0.015  | 0.01  | 0.01   | t | 95268  | CAQVYNKL<br>GMYP             | Oryctola<br>gus<br>cuniculu<br>s |
| 1 | 1.00 | 1 | 1 | 0     | 0.004  | 0.003  | 0     | 0      | t | 15657  | FESSAAK                      | Cavia<br>porcellu<br>s           |
| 1 | 1.00 | 1 | 1 | 0     | 0      | 0      | 0     | 0      | t | 55677  | RRPQDVK                      | Homo<br>sapiens                  |
| 1 | 1.00 | 1 | 1 | -0.02 | -0.02  | -0.02  | -0.02 | -0.02  | t | 19737  | GGGAGAG<br>GAGAGGG<br>GR     | Oryctola<br>gus<br>cuniculu<br>s |
| 1 | 1.00 | 1 | 1 | 0.01  | 0.01   | 0.01   | 0.01  | 0.01   | t | 130612 | SPNTAHIT<br>SKSL             | Camelus<br>dromed<br>arius       |
| 1 | 1.00 | 1 | 1 | 0.05  | 0.046  | 0.043  | 0.053 | 0.052  | t | 106344 | DIVMTQSP<br>NSLAVSLG<br>ERA  | Oryctola<br>gus<br>cuniculu<br>s |
| 1 | 1.00 | 1 | 1 | 0.02  | 0.02   | 0.02   | 0.02  | 0.021  | t | 130925 | KLLPEDDE<br>SRTYHTV          | Homo<br>sapiens                  |
| 1 | 1.00 | 1 | 1 | 0.03  | 0.027  | 0.029  | 0.03  | 0.031  | t | 43840  | NFGDQDLI<br>RQGTDYK<br>HWPQI | Oryctola<br>gus<br>cuniculu<br>s |
| 1 | 1.00 | 1 | 1 | 0.04  | 0.04   | 0.04   | 0.04  | 0.04   | t | 115324 | KNQDKTEI<br>PTINTIASG<br>EPT | Homo<br>sapiens                  |
| 1 | 1.00 | 1 | 1 | 0.02  | 0.02   | 0.02   | 0.02  | 0.02   | t | 151670 | KLVIIESDL<br>ERAEERA         | Mus<br>musculu<br>s              |



|   |      |   |   |       |        |        |        |        |   |        |                     |                                  |
|---|------|---|---|-------|--------|--------|--------|--------|---|--------|---------------------|----------------------------------|
| 1 | 1.00 | 1 | 1 | 0.02  | 0.02   | 0.02   | 0.02   | 0.02   | t | 119676 | WQQGNV<br>FS        | Homo<br>sapiens                  |
| 1 | 1.00 | 1 | 1 | 0.02  | 0.02   | 0.02   | 0.02   | 0.02   | t | 114787 | EDRPLCGS<br>DN      | Homo<br>sapiens                  |
| 1 | 1.00 | 1 | 1 | 0.02  | 0.02   | 0.02   | 0.02   | 0.02   | t | 115881 | PEINTVQV<br>TS      | Homo<br>sapiens                  |
| 1 | 1.00 | 1 | 1 | 0     | 0      | -0.002 | 0      | 0      | t | 114555 | QSENDHR<br>RSIVRVEG | Homo<br>sapiens                  |
| 1 | 1.00 | 1 | 1 | 0     | 0      | 0      | 0      | 0      | t | 135562 | IHAMDIPP<br>PTG     | Oryctola<br>gus<br>cuniculu<br>s |
| 1 | 1.00 | 1 | 1 | 0     | 0      | 0      | 0      | 0      | t | 118052 | PPGAMPP             | Homo<br>sapiens                  |
| 1 | 1.00 | 1 | 1 | 0     | 0      | 0      | 0      | 0      | t | 124285 | HPLSPHPS<br>Y       | Homo<br>sapiens                  |
| 1 | 1.00 | 1 | 1 | 0     | 0      | 0      | 0      | 0      | t | 127715 | KQDPPSL             | Homo<br>sapiens                  |
| 1 | 1.00 | 1 | 1 | 0     | 0      | 0      | 0      | 0      | t | 108031 | MGTVLLP<br>NGEFSIEN | Homo<br>sapiens                  |
| 1 | 1.00 | 1 | 1 | 0     | 0      | 0      | 0      | 0      | t | 98988  | RQPRREEG<br>GRWGPAG | Homo<br>sapiens                  |
| 1 | 1.00 | 1 | 1 | 0     | 0      | 0      | 0      | 0      | t | 108558 | NNSFEKVK<br>Q       | Homo<br>sapiens                  |
| 1 | 1.00 | 1 | 1 | -0.02 | -0.02  | -0.02  | -0.02  | -0.02  | t | 121683 | NVSLLLVA<br>RPKYLLF | Mus<br>musculu<br>s              |
| 1 | 1.00 | 1 | 1 | -0.02 | -0.02  | -0.02  | -0.02  | -0.02  | t | 121683 | NVSLLLVA<br>RPKYLLF | Mus<br>musculu<br>s              |
| 1 | 1.00 | 1 | 1 | -0.02 | -0.02  | -0.02  | -0.02  | -0.02  | t | 132481 | MMPVGP<br>APGM      | Homo<br>sapiens                  |
| 1 | 1.00 | 1 | 1 | -0.02 | -0.02  | -0.02  | -0.02  | -0.02  | t | 97590  | QRDKVNL<br>TL       | Oryctola<br>gus<br>cuniculu<br>s |
| 1 | 1.00 | 1 | 1 | -0.01 | -0.014 | -0.004 | -0.01  | -0.014 | t | 92794  | GENKRPN<br>DKAGEV   | Mus<br>musculu<br>s              |
| 1 | 1.00 | 1 | 1 | 0.03  | 0.033  | 0.032  | 0.03   | 0.032  | t | 79621  | NQAVDSY<br>DPD      | Mus<br>musculu<br>s              |
| 1 | 1.00 | 1 | 1 | -0.01 | -0.006 | 0.001  | -0.003 | -0.008 | t | 122101 | GKGAGDL             | Homo<br>sapiens                  |

|   |      |   |   |       |        |        |        |        |   |        |                      |                       |
|---|------|---|---|-------|--------|--------|--------|--------|---|--------|----------------------|-----------------------|
| 1 | 1.00 | 1 | 1 | 0.01  | 0.01   | 0.021  | 0.014  | 0.012  | t | 21173  | GLTSLFT              | Homo sapiens          |
| 1 | 1.00 | 1 | 1 | 0.01  | 0.01   | 0.01   | 0.006  | 0.01   | t | 134116 | KGDVTAQIALQ          | Homo sapiens          |
| 1 | 1.00 | 1 | 1 | -0.01 | -0.013 | -0.01  | -0.01  | -0.008 | t | 135461 | GGLGVS               | Oryctolagus cuniculus |
| 1 | 1.00 | 1 | 1 | 0.02  | 0.022  | 0.025  | 0.02   | 0.019  | t | 20679  | GKRPEGENASYHLAYDKDRY | Homo sapiens          |
| 1 | 1.00 | 1 | 1 | 0.02  | 0.023  | 0.01   | 0.02   | 0.02   | t | 74004  | YGGIPGGISTPITQQSEK   | Equus caballus        |
| 1 | 1.00 | 1 | 1 | 0.01  | 0.014  | 0.016  | 0.017  | 0.011  | t | 106131 | TAIPSCPEGTVP LYS     | Homo sapiens          |
| 1 | 1.00 | 1 | 1 | -0.02 | -0.022 | -0.037 | -0.027 | -0.017 | t | 118151 | SRFSWGA E            | Rattus norvegicus     |
| 1 | 1.00 | 1 | 1 | 0.01  | 0.007  | -0.002 | 0.01   | 0.011  | t | 78394  | GEAVTVTITDDNEEPIAPY  | Oryctolagus cuniculus |
| 1 | 1.00 | 1 | 1 | 0.01  | 0.01   | 0.01   | 0.01   | 0.01   | t | 105541 | TGN                  | Oryctolagus cuniculus |
| 1 | 1.00 | 1 | 1 | 0.02  | 0.02   | 0.022  | 0.017  | 0.018  | t | 60658  | SRFPNATDKE           | Homo sapiens          |
| 1 | 1.00 | 1 | 1 | -0.01 | -0.012 | -0.015 | -0.007 | -0.01  | t | 106327 | DDDKLEQIRRDYTSGA     | Mus musculus          |
| 1 | 1.00 | 1 | 1 | -0.01 | -0.014 | -0.013 | -0.011 | -0.008 | t | 70039  | VMYASSGIGP           | Oryctolagus cuniculus |
| 1 | 1.00 | 1 | 1 | 0.02  | 0.024  | 0.03   | 0.017  | 0.018  | t | 66759  | TTPDRQAAC            | Homo sapiens          |
| 1 | 1.00 | 1 | 1 | -0.01 | -0.008 | -0.01  | -0.009 | -0.01  | t | 117118 | YPLHLNTDYSTR         | Homo sapiens          |
| 1 | 1.00 | 1 | 1 | 0.02  | 0.02   | 0.024  | 0.017  | 0.02   | t | 65798  | TPVIGSQA             | Homo sapiens          |

|   |      |   |   |       |        |        |        |        |   |        |                              |                     |
|---|------|---|---|-------|--------|--------|--------|--------|---|--------|------------------------------|---------------------|
| 1 | 1.00 | 1 | 1 | -0.03 | -0.028 | -0.03  | -0.027 | -0.031 | t | 75885  | YRSWLM<br>KAHGLELG           | Homo<br>sapiens     |
| 1 | 1.00 | 1 | 1 | 0.02  | 0.02   | 0.02   | 0.02   | 0.022  | t | 35529  | LEIVPNSAE<br>E               | Homo<br>sapiens     |
| 1 | 1.00 | 1 | 1 | -0.01 | -0.01  | -0.007 | -0.006 | -0.012 | t | 107799 | DSGHRGY<br>SGSQASD<br>NEGH   | Homo<br>sapiens     |
| 1 | 1.00 | 1 | 1 | -0.02 | 0.002  | -0.016 | -0.017 | -0.018 | t | 114914 | PGFGYGG                      | Rattus              |
| 1 | 1.00 | 1 | 1 | -0.02 | -0.02  | -0.023 | -0.027 | -0.021 | t | 115630 | NFDKLYIW<br>G                | Homo<br>sapiens     |
| 1 | 1.00 | 1 | 1 | -0.02 | -0.022 | -0.015 | -0.017 | -0.021 | t | 115118 | TVGLVFLC<br>LQYRLRGK<br>LRAE | Mus<br>musculu<br>s |
| 1 | 1.00 | 1 | 1 | 0.03  | 0.03   | 0.03   | 0.03   | 0.03   | t | 135765 | TILDNITQ                     | Homo<br>sapiens     |
| 1 | 1.00 | 1 | 1 | 0.01  | 0.01   | 0.01   | 0.01   | 0.01   | t | 119619 | NNYKTPP                      | Homo<br>sapiens     |
| 1 | 1.00 | 1 | 1 | 0.01  | 0.01   | 0.01   | 0.01   | 0.01   | t | 115423 | PPKKNQD<br>KTEIPTINTI<br>ASG | Homo<br>sapiens     |
| 1 | 1.00 | 1 | 1 | 0.01  | 0.01   | 0.01   | 0.01   | 0.01   | t | 101441 | YTGQVEK<br>NTS               | Mus<br>musculu<br>s |
| 1 | 1.00 | 1 | 1 | 0.01  | 0.01   | 0.01   | 0.01   | 0.01   | t | 77790  | NKVSARG<br>CTF               | Homo<br>sapiens     |
| 1 | 1.00 | 1 | 1 | -0.01 | -0.01  | -0.01  | -0.01  | -0.01  | t | 151064 | TPKGAINT<br>SLPFQNI          | Homo<br>sapiens     |
| 1 | 1.00 | 1 | 1 | -0.01 | -0.01  | -0.01  | -0.01  | -0.01  | t | 142202 | KISEASRK<br>GLRRDLDA<br>SREA | Mus<br>musculu<br>s |
| 1 | 1.00 | 1 | 1 | -0.01 | -0.01  | -0.01  | -0.01  | -0.01  | t | 142202 | KISEASRK<br>GLRRDLDA<br>SREA | Homo<br>sapiens     |
| 1 | 1.00 | 1 | 1 | -0.01 | -0.01  | -0.01  | -0.01  | -0.01  | t | 151075 | YNAELLVL<br>LENERTL          | Homo<br>sapiens     |
| 1 | 1.00 | 1 | 1 | -0.01 | -0.01  | -0.01  | -0.01  | -0.01  | t | 142202 | KISEASRK<br>GLRRDLDA<br>SREA | Homo<br>sapiens     |
| 1 | 1.00 | 1 | 1 | -0.01 | -0.01  | -0.01  | -0.01  | -0.01  | t | 115600 | DHSYQEEA<br>AMEL             | Homo<br>sapiens     |
| 1 | 1.00 | 1 | 1 | -0.01 | -0.01  | -0.01  | -0.01  | -0.01  | t | 115600 | DHSYQEEA<br>AMEL             | Homo<br>sapiens     |

|   |      |   |   |       |       |       |        |       |   |        |                              |                                  |
|---|------|---|---|-------|-------|-------|--------|-------|---|--------|------------------------------|----------------------------------|
| 1 | 1.00 | 1 | 1 | -0.01 | -0.01 | -0.01 | -0.01  | -0.01 | t | 110603 | GLPGARGL<br>TGRPGDA          | Mus<br>musculu<br>s              |
| 1 | 1.00 | 1 | 1 | -0.01 | -0.01 | -0.01 | -0.01  | -0.01 | t | 114900 | NAVVESN<br>GTL               | Homo<br>sapiens                  |
| 1 | 1.00 | 1 | 1 | -0.01 | -0.01 | -0.01 | -0.01  | -0.01 | t | 103361 | LLDIYRKLR<br>PGEPT           | Homo<br>sapiens                  |
| 1 | 1.00 | 1 | 1 | -0.01 | -0.01 | -0.01 | -0.01  | -0.01 | t | 50916  | QGMQLAE<br>QFKQKAR<br>GLLQTA | Homo<br>sapiens                  |
| 1 | 1.00 | 1 | 1 | -0.03 | -0.03 | -0.03 | -0.03  | -0.03 | t | 124276 | HPLAPPH<br>S                 | Homo<br>sapiens                  |
| 1 | 1.00 | 1 | 1 | 0     | 0     | 0     | 0      | 0.001 | t | 66108  | TRTNPWP<br>ALAEFE            | Oryctola<br>gus<br>cuniculu<br>s |
| 1 | 1.00 | 1 | 1 | 0     | 0     | 0     | 0      | 0.001 | t | 73385  | YALADASL<br>KMADPNR<br>FRGKD | Oryctola<br>gus<br>cuniculu<br>s |
| 1 | 1.00 | 1 | 1 | 0     | 0     | 0     | 0      | 0.001 | t | 73385  | YALADASL<br>KMADPNR<br>FRGKD | Oryctola<br>gus<br>cuniculu<br>s |
| 1 | 1.00 | 1 | 1 | 0     | 0     | 0     | 0      | 0.001 | t | 59389  | SLPITVYYA<br>V               | Oryctola<br>gus<br>cuniculu<br>s |
| 1 | 1.00 | 1 | 1 | 0     | 0     | 0     | 0      | 0.001 | t | 49015  | PQIPPNW<br>HIP               | Oryctola<br>gus<br>cuniculu<br>s |
| 1 | 1.00 | 1 | 1 | 0     | 0     | 0     | 0      | 0.001 | t | 49015  | PQIPPNW<br>HIP               | Oryctola<br>gus<br>cuniculu<br>s |
| 1 | 1.00 | 1 | 1 | 0     | 0     | 0     | 0      | 0.001 | t | 5109   | ATPYHPPA<br>TP               | Oryctola<br>gus<br>cuniculu<br>s |
| 1 | 1.00 | 1 | 1 | -0.01 | -0.01 | -0.01 | -0.014 | -0.01 | t | 30474  | KEKLQKTY<br>SQ               | Homo<br>sapiens                  |
| 1 | 1.00 | 1 | 1 | -0.01 | -0.01 | -0.01 | -0.014 | -0.01 | t | 30474  | KEKLQKTY<br>SQ               | Homo<br>sapiens                  |

|   |      |   |   |       |        |        |        |        |   |        |                   |                       |
|---|------|---|---|-------|--------|--------|--------|--------|---|--------|-------------------|-----------------------|
| 1 | 1.00 | 1 | 1 | 0.01  | 0.013  | 0.012  | 0.01   | 0.013  | t | 52868  | QWYDDR            | Mus musculus          |
| 1 | 1.00 | 1 | 1 | 0.01  | 0.01   | 0.01   | 0.01   | 0.01   | t | 149497 | TIFDETKSW         | Homo sapiens          |
| 1 | 1.00 | 1 | 1 | 0.01  | 0.01   | 0.01   | 0.01   | 0.01   | t | 128693 | GDSMDRIEKDRLQGMMA | Homo sapiens          |
| 1 | 1.00 | 1 | 1 | -0.01 | -0.01  | -0.007 | -0.01  | -0.01  | t | 7063   | CSQHLPYIEQGMQLA   | Homo sapiens          |
| 1 | 1.00 | 1 | 1 | 0.06  | 0.06   | 0.075  | 0.06   | 0.058  | t | 104151 | NKAPESSEEM        | Oryctolagus cuniculus |
| 1 | 1.00 | 1 | 1 | 0.01  | 0.012  | 0.01   | 0.009  | 0.01   | t | 149449 | QYSQPQQPIS        | Homo sapiens          |
| 1 | 1.00 | 1 | 1 | -0.01 | -0.005 | 0.004  | -0.01  | -0.012 | t | 132850 | KLDLYLSYPQPY      | Mus musculus          |
| 1 | 1.00 | 1 | 1 | -0.02 | -0.024 | -0.018 | -0.019 | -0.02  | t | 96409  | INDMPITNDQKKL     | Oryctolagus cuniculus |
| 1 | 1.00 | 1 | 1 | -0.08 | -0.082 | -0.081 | -0.077 | -0.078 | t | 106876 | STLFRHD           | Mus musculus          |
| 1 | 1.00 | 1 | 1 | 0.02  | 0.026  | 0.02   | 0.02   | 0.02   | t | 123640 | PVRLLELYL         | Ovis aries            |
| 1 | 1.00 | 1 | 1 | -0.01 | -0.014 | -0.006 | -0.011 | -0.01  | t | 62091  | SVDWTKATVDGVQVKT  | Oryctolagus cuniculus |
| 1 | 1.00 | 1 | 1 | 0.02  | 0.022  | 0.03   | 0.021  | 0.02   | t | 21919  | GQNCGY            | Homo sapiens          |
| 1 | 1.00 | 1 | 1 | 0     | 0      | -0.001 | 0      | 0      | t | 122924 | TQPRREK           | Rattus norvegicus     |

|   |      |   |   |       |        |        |        |        |   |        |                            |                                  |
|---|------|---|---|-------|--------|--------|--------|--------|---|--------|----------------------------|----------------------------------|
| 1 | 1.00 | 1 | 1 | 0     | -0.004 | 0      | -0.001 | 0      | t | 63217  | TDQMEVD<br>SGPRKRPL<br>RGG | Oryctola<br>gus<br>cuniculu<br>s |
| 1 | 1.00 | 1 | 1 | 0     | -0.004 | 0      | -0.001 | 0      | t | 50977  | QGVPESPF<br>SRTGEGLD       | Oryctola<br>gus<br>cuniculu<br>s |
| 1 | 1.00 | 1 | 1 | 0     | -0.004 | 0      | -0.001 | 0      | t | 19269  | GEGAPPA<br>KRARTDQ<br>ME   | Oryctola<br>gus<br>cuniculu<br>s |
| 1 | 1.00 | 1 | 1 | 0     | -0.004 | 0      | -0.001 | 0      | t | 29852  | KALENKKK<br>QLSAGGK<br>NLS | Oryctola<br>gus<br>cuniculu<br>s |
| 1 | 1.00 | 1 | 1 | 0.01  | 0.013  | 0.015  | 0.01   | 0.01   | t | 60991  | SSFFSYGEI                  | Mus<br>musculu<br>s              |
| 1 | 1.00 | 1 | 1 | -0.01 | -0.005 | -0.006 | -0.013 | -0.012 | t | 158326 | SYEGQGR<br>R               | Homo<br>sapiens                  |
| 1 | 1.00 | 1 | 1 | 0.01  | 0.012  | 0.011  | 0.009  | 0.01   | t | 44865  | NLSDAHKK<br>NLYDHAL        | Cavia<br>porcellu<br>s           |
| 1 | 1.00 | 1 | 1 | 0.01  | 0.006  | 0.011  | 0.009  | 0.01   | t | 44865  | NLSDAHKK<br>NLYDHAL        | Oryctola<br>gus<br>cuniculu<br>s |
| 1 | 1.00 | 1 | 1 | 0.02  | 0.018  | 0.013  | 0.013  | 0.018  | t | 145369 | MWCKIGH<br>DRCEE           | Mus<br>musculu<br>s              |
| 1 | 1.00 | 1 | 1 | 0     | 0.003  | 0.012  | 0      | -0.001 | t | 78357  | DFPAGYLN<br>DSTLFPP        | Mus<br>musculu<br>s              |
| 1 | 1.00 | 1 | 1 | 0     | 0      | 0      | 0      | 0      | t | 144042 | QEPLMGT<br>VPIRA           | Homo<br>sapiens                  |
| 1 | 1.00 | 1 | 1 | 0     | 0      | 0      | 0      | 0      | t | 127724 | LNTTLKV                    | Homo<br>sapiens                  |
| 1 | 1.00 | 1 | 1 | 0     | 0      | 0      | 0      | 0      | t | 115896 | PPKKNQD<br>KTE             | Homo<br>sapiens                  |
| 1 | 1.00 | 1 | 1 | 0     | 0      | 0      | 0      | 0      | t | 114917 | PMNCSSY<br>ANT             | Homo<br>sapiens                  |
| 1 | 1.00 | 1 | 1 | 0     | 0      | 0      | 0      | 0      | t | 102094 | STSPWVQ<br>WQPMR           | Homo<br>sapiens                  |
| 1 | 1.00 | 1 | 1 | 0     | 0      | 0      | 0      | 0      | t | 6074   | CCRHKQK<br>DVGDKQ<br>TLPPS | Ovis<br>aries                    |

|   |      |   |   |       |        |        |        |       |   |        |                              |                                  |
|---|------|---|---|-------|--------|--------|--------|-------|---|--------|------------------------------|----------------------------------|
| 1 | 1.00 | 1 | 1 | -0.02 | -0.02  | -0.02  | -0.02  | -0.02 | t | 149086 | NPTQRPD                      | Sus<br>scrofa                    |
| 1 | 1.00 | 1 | 1 | -0.02 | -0.02  | -0.02  | -0.02  | -0.02 | t | 149130 | YALHSTP                      | Sus<br>scrofa                    |
| 1 | 1.00 | 1 | 1 | -0.02 | -0.02  | -0.02  | -0.02  | -0.02 | t | 121683 | NVSLLLVA<br>RPKYLLF          | Mus<br>musculu<br>s              |
| 1 | 1.00 | 1 | 1 | -0.02 | -0.02  | -0.02  | -0.02  | -0.02 | t | 121683 | NVSLLLVA<br>RPKYLLF          | Mus<br>musculu<br>s              |
| 1 | 1.00 | 1 | 1 | -0.02 | -0.02  | -0.02  | -0.02  | -0.02 | t | 124279 | HPLASSLH<br>A                | Homo<br>sapiens                  |
| 1 | 1.00 | 1 | 1 | -0.02 | -0.02  | -0.02  | -0.02  | -0.02 | t | 110615 | GPRGPPG<br>PQGATGP<br>L      | Mus<br>musculu<br>s              |
| 1 | 1.00 | 1 | 1 | -0.02 | -0.02  | -0.02  | -0.02  | -0.02 | t | 78197  | LNPWDQV<br>KRNAVPI<br>PTLNR  | Homo<br>sapiens                  |
| 1 | 1.00 | 1 | 1 | -0.01 | -0.01  | -0.003 | -0.007 | -0.01 | t | 70816  | VRRRGDS<br>RGSLLSP           | Homo<br>sapiens                  |
| 1 | 1.00 | 1 | 1 | 0.01  | 0.013  | 0.013  | 0.01   | 0.01  | t | 19895  | GGKFLEG                      | Mus<br>musculu<br>s              |
| 1 | 1.00 | 1 | 1 | -0.06 | -0.06  | -0.06  | -0.06  | -0.06 | t | 115883 | PFPGPIPN<br>SL               | Homo<br>sapiens                  |
| 1 | 1.00 | 1 | 1 | -0.02 | -0.026 | -0.024 | -0.02  | -0.02 | t | 93874  | SFDADTIRI<br>AQP             | Oryctola<br>gus<br>cuniculu<br>s |
| 1 | 1.00 | 1 | 1 | -0.01 | -0.013 | -0.01  | -0.01  | -0.01 | t | 125052 | FSLRLMEE<br>NW               | Oryctola<br>gus<br>cuniculu<br>s |
| 1 | 1.00 | 1 | 1 | 0.02  | 0.02   | 0.02   | 0.02   | 0.02  | t | 136236 | FQEQQNE<br>GHGEALLF<br>EGIKK | Homo<br>sapiens                  |
| 1 | 1.00 | 1 | 1 | -0.02 | -0.018 | -0.02  | -0.021 | -0.02 | t | 149315 | FLPQQPYP<br>QP               | Homo<br>sapiens                  |
| 1 | 1.00 | 1 | 1 | 0     | 0.002  | -0.003 | -0.001 | 0     | t | 56885  | SALTSAIA<br>GFVFSC           | Ovis<br>aries                    |
| 1 | 1.00 | 1 | 1 | 0     | 0.002  | -0.003 | -0.001 | 0     | t | 56885  | SALTSAIA<br>GFVFSC           | Ovis<br>aries                    |

|   |      |   |   |       |        |        |        |        |   |        |                              |                   |
|---|------|---|---|-------|--------|--------|--------|--------|---|--------|------------------------------|-------------------|
| 1 | 1.00 | 1 | 1 | -0.03 | -0.028 | -0.036 | -0.033 | -0.031 | t | 38208  | LNENLLRF<br>FVAPFPQV<br>FGKE | Homo sapiens      |
| 1 | 1.00 | 1 | 1 | -0.02 | -0.02  | -0.016 | -0.02  | -0.022 | t | 22134  | GRLITVNPI<br>VT              | Mus musculus      |
| 1 | 1.00 | 1 | 1 | 0     | 0      | 0      | 0      | 0.002  | t | 43703  | NENLLRFF<br>VA               | Homo sapiens      |
| 1 | 1.00 | 1 | 1 | 0.01  | 0.008  | 0.012  | 0.013  | 0.01   | t | 41066  | MAKTIAYD<br>EEARRGL          | Rattus norvegicus |
| 1 | 1.00 | 1 | 1 | -0.01 | -0.01  | -0.007 | -0.013 | -0.009 | t | 142291 | SHLQIYNL                     | Sus scrofa        |
| 1 | 1.00 | 1 | 1 | 0.01  | 0.013  | 0.013  | 0.01   | 0.01   | t | 97442  | LFGVKGTT                     | Mus musculus      |
| 1 | 1.00 | 1 | 1 | 0.07  | 0.07   | 0.07   | 0.07   | 0.072  | t | 122746 | EEQEDEIIG<br>FGQELKN         | Homo sapiens      |
| 1 | 1.00 | 1 | 1 | 0     | 0      | -0.004 | 0      | 0      | t | 39324  | LSEALRIIA<br>GTLEVHGV<br>KPA | Mus musculus      |
| 1 | 1.00 | 1 | 1 | 0     | 0      | -0.004 | 0      | 0      | t | 39324  | LSEALRIIA<br>GTLEVHGV<br>KPA | Mus musculus      |
| 1 | 1.00 | 1 | 1 | 0     | 0      | -0.004 | 0      | 0      | t | 39324  | LSEALRIIA<br>GTLEVHGV<br>KPA | Mus musculus      |
| 1 | 1.00 | 1 | 1 | 0     | 0      | -0.004 | 0      | 0      | t | 39324  | LSEALRIIA<br>GTLEVHGV<br>KPA | Mus musculus      |
| 1 | 1.00 | 1 | 1 | 0     | 0      | -0.004 | 0      | 0      | t | 39324  | LSEALRIIA<br>GTLEVHGV<br>KPA | Mus musculus      |
| 1 | 1.00 | 1 | 1 | 0     | 0      | -0.004 | 0      | 0      | t | 39324  | LSEALRIIA<br>GTLEVHGV<br>KPA | Mus musculus      |
| 1 | 1.00 | 1 | 1 | 0.02  | 0.022  | 0.021  | 0.021  | 0.022  | t | 89062  | SRSESSVE<br>NFLCRSA          | Homo sapiens      |
| 1 | 1.00 | 1 | 1 | 0.02  | 0.018  | 0.027  | 0.019  | 0.021  | t | 125403 | ETTKLQRF<br>QAML             | Mus musculus      |



|   |      |   |   |       |        |        |        |        |   |        |                              |                       |
|---|------|---|---|-------|--------|--------|--------|--------|---|--------|------------------------------|-----------------------|
| 1 | 1.00 | 1 | 1 | 0     | 0.003  | 0      | 0      | 0.002  | t | 10800  | DWEDRY                       | Mus musculus          |
| 1 | 1.00 | 1 | 1 | 0.01  | 0.008  | 0.015  | 0.009  | 0.009  | t | 65409  | TNRNPQ                       | Mus musculus          |
| 1 | 1.00 | 1 | 1 | 0.06  | 0.056  | 0.06   | 0.053  | 0.06   | t | 134795 | SFGAYGA<br>QEEAQC            | Oryctolagus cuniculus |
| 1 | 1.00 | 1 | 1 | 0.01  | 0.008  | 0.001  | 0.009  | 0.01   | t | 60763  | SRPLNDLV<br>SQKTTQLS<br>DITS | Mus musculus          |
| 1 | 1.00 | 1 | 1 | -0.01 | -0.01  | -0.019 | -0.017 | -0.01  | t | 110863 | GLKAKPKF<br>TLGKRKAT<br>PTTS | Homo sapiens          |
| 1 | 1.00 | 1 | 1 | -0.01 | -0.01  | -0.01  | -0.01  | -0.01  | t | 114192 | AEYWNSQ<br>PEILERTRA<br>E    | Mus musculus          |
| 1 | 1.00 | 1 | 1 | -0.01 | -0.01  | -0.01  | -0.01  | -0.01  | t | 114192 | AEYWNSQ<br>PEILERTRA<br>E    | Mus musculus          |
| 1 | 1.00 | 1 | 1 | -0.02 | -0.024 | -0.024 | -0.021 | -0.019 | t | 38983  | LQSARRGE<br>KE               | Oryctolagus cuniculus |
| 1 | 1.00 | 1 | 1 | 0     | 0      | -0.002 | -0.006 | 0      | t | 115769 | GRASDYKS<br>AH               | Mus musculus          |
| 1 | 1.00 | 1 | 1 | 0.03  | 0.03   | 0.03   | 0.03   | 0.03   | t | 158613 | SQSVAAS                      | Homo sapiens          |
| 1 | 1.00 | 1 | 1 | 0.03  | 0.03   | 0.03   | 0.03   | 0.03   | t | 78513  | SEELLVESS<br>AIRSRE          | Mus musculus          |
| 1 | 1.00 | 1 | 1 | -0.05 | -0.052 | -0.05  | -0.047 | -0.05  | t | 74871  | YLPVGGLR<br>RIGG             | Mus musculus          |
| 1 | 1.00 | 1 | 1 | 0.01  | 0.01   | 0.01   | 0.01   | 0.01   | t | 144666 | GREGYPA<br>DGGKGSS<br>GYCA   | Oryctolagus cuniculus |
| 1 | 1.00 | 1 | 1 | 0.01  | 0.01   | 0.01   | 0.01   | 0.01   | t | 148759 | QEQVPLV<br>QQQ               | Homo sapiens          |
| 1 | 1.00 | 1 | 1 | 0.01  | 0.01   | 0.01   | 0.01   | 0.01   | t | 158584 | APPHQMP                      | Homo sapiens          |
| 1 | 1.00 | 1 | 1 | 0.01  | 0.01   | 0.01   | 0.01   | 0.01   | t | 124283 | HPLLPGTAS                    | Homo sapiens          |

|   |      |   |   |       |       |       |       |       |   |        |                           |                                  |
|---|------|---|---|-------|-------|-------|-------|-------|---|--------|---------------------------|----------------------------------|
| 1 | 1.00 | 1 | 1 | 0.01  | 0.01  | 0.01  | 0.01  | 0.01  | t | 124280 | HPLASSVS<br>A             | Homo<br>sapiens                  |
| 1 | 1.00 | 1 | 1 | 0.01  | 0.01  | 0.01  | 0.01  | 0.01  | t | 103501 | PVAGQVW<br>EATATVNA       | Homo<br>sapiens                  |
| 1 | 1.00 | 1 | 1 | 0.01  | 0.01  | 0.01  | 0.01  | 0.01  | t | 114749 | ATDKEGK<br>DVL            | Homo<br>sapiens                  |
| 1 | 1.00 | 1 | 1 | 0.01  | 0.01  | 0.01  | 0.01  | 0.01  | t | 110604 | GLTGRPG<br>DAGPQGK<br>V   | Mus<br>musculu<br>s              |
| 1 | 1.00 | 1 | 1 | 0.01  | 0.01  | 0.01  | 0.01  | 0.01  | t | 115925 | QQTEDEL<br>QDK            | Homo<br>sapiens                  |
| 1 | 1.00 | 1 | 1 | -0.01 | -0.01 | -0.01 | -0.01 | -0.01 | t | 150978 | EKNVTVTH<br>SVNLLED       | Homo<br>sapiens                  |
| 1 | 1.00 | 1 | 1 | -0.01 | -0.01 | -0.01 | -0.01 | -0.01 | t | 156911 | LGMSTNP<br>GPRIL          | Gallus<br>gallus                 |
| 1 | 1.00 | 1 | 1 | -0.01 | -0.01 | -0.01 | -0.01 | -0.01 | t | 144669 | GREGYP<br>DGGTECTL<br>KKG | Oryctola<br>gus<br>cuniculu<br>s |
| 1 | 1.00 | 1 | 1 | -0.01 | -0.01 | -0.01 | -0.01 | -0.01 | t | 113469 | GQHGQQP<br>GQGQQG<br>Q    | Homo<br>sapiens                  |
| 1 | 1.00 | 1 | 1 | -0.01 | -0.01 | -0.01 | -0.01 | -0.01 | t | 115657 | TLRIRNVR<br>FSDE          | Homo<br>sapiens                  |
| 1 | 1.00 | 1 | 1 | -0.01 | -0.01 | -0.01 | -0.01 | -0.01 | t | 115657 | TLRIRNVR<br>FSDE          | Homo<br>sapiens                  |
| 1 | 1.00 | 1 | 1 | -0.01 | -0.01 | -0.01 | -0.01 | -0.01 | t | 111944 | WAPYMT<br>N               | Homo<br>sapiens                  |
| 1 | 1.00 | 1 | 1 | -0.01 | -0.01 | -0.01 | -0.01 | -0.01 | t | 18759  | GASAQSG<br>ASAQSGAS       | Homo<br>sapiens                  |
| 1 | 1.00 | 1 | 1 | -0.01 | -0.01 | -0.01 | -0.01 | -0.01 | t | 2976   | ALVNNSHT<br>MPLW          | Sus<br>scrofa                    |
| 1 | 1.00 | 1 | 1 | -0.03 | -0.03 | -0.03 | -0.03 | -0.03 | t | 92470  | DLTFEKVK<br>HN            | Ovis<br>aries                    |
| 1 | 1.00 | 1 | 1 | -0.05 | -0.05 | -0.05 | -0.05 | -0.05 | t | 114837 | GKVMVLC<br>NRA            | Homo<br>sapiens                  |
| 1 | 1.00 | 1 | 1 | 0.01  | 0.012 | 0.005 | 0.013 | 0.01  | t | 131344 | AIGDRSKT<br>DRENSVSI<br>G | Homo<br>sapiens                  |
| 1 | 1.00 | 1 | 1 | 0.03  | 0.03  | 0.03  | 0.03  | 0.03  | t | 105506 | SAENEL                    | Oryctola<br>gus<br>cuniculu<br>s |

|   |      |   |   |       |        |        |        |        |   |        |                     |                                  |
|---|------|---|---|-------|--------|--------|--------|--------|---|--------|---------------------|----------------------------------|
| 1 | 1.00 | 1 | 1 | 0.01  | 0.01   | 0.01   | 0.01   | 0.01   | t | 117107 | VQTDGST<br>KSHRH    | Homo<br>sapiens                  |
| 1 | 1.00 | 1 | 1 | 0.01  | 0.01   | 0.01   | 0.01   | 0.01   | t | 117107 | VQTDGST<br>KSHRH    | Mus<br>musculu<br>s              |
| 1 | 1.00 | 1 | 1 | 0     | 0      | -0.005 | 0      | 0.001  | t | 123836 | VTEIPTDLP<br>RN     | Oryctola<br>gus<br>cuniculu<br>s |
| 1 | 1.00 | 1 | 1 | 0     | 0.003  | 0.01   | 0      | -0.002 | t | 34806  | LAHLTTTH<br>ARHLP   | Mus<br>musculu<br>s              |
| 1 | 1.00 | 1 | 1 | -0.01 | -0.008 | -0.01  | -0.011 | -0.01  | t | 149440 | QQQQQPL<br>SQV      | Homo<br>sapiens                  |
| 1 | 1.00 | 1 | 1 | 0.02  | 0.024  | 0.022  | 0.017  | 0.022  | t | 95332  | EALEKF              | Homo<br>sapiens                  |
| 1 | 1.00 | 1 | 1 | 0.02  | 0.018  | 0.027  | 0.013  | 0.02   | t | 128148 | WTLGPYV             | Mus<br>musculu<br>s              |
| 1 | 1.00 | 1 | 1 | 0     | 0      | 0      | 0      | 0.001  | t | 103496 | PRGYPGQ<br>V        | Mus<br>musculu<br>s              |
| 1 | 1.00 | 1 | 1 | 0     | 0      | 0      | 0      | 0.001  | t | 14435  | ETIYNTTLK<br>Y      | Homo<br>sapiens                  |
| 1 | 1.00 | 1 | 1 | 0     | 0      | 0      | 0      | 0.001  | t | 9524   | DNPASTT<br>NKDK     | Mus<br>musculu<br>s              |
| 1 | 1.00 | 1 | 1 | -0.02 | -0.022 | -0.025 | -0.027 | -0.02  | t | 122642 | VTVQHKKL<br>RTPLNYI | Rattus<br>norvegic<br>us         |
| 1 | 1.00 | 1 | 1 | 0     | 0.003  | 0.002  | 0      | 0.003  | t | 57102  | SCISAACFC<br>I      | Mus<br>musculu<br>s              |
| 1 | 1.00 | 1 | 1 | -0.03 | -0.028 | -0.032 | -0.03  | -0.03  | t | 26240  | IGHPLPLRL           | Homo<br>sapiens                  |
| 1 | 1.00 | 1 | 1 | 0.05  | 0.052  | 0.051  | 0.047  | 0.048  | t | 106858 | SNCHTHE<br>GGQ      | Homo<br>sapiens                  |

|   |      |   |   |       |        |        |        |       |   |        |                              |                        |
|---|------|---|---|-------|--------|--------|--------|-------|---|--------|------------------------------|------------------------|
| 1 | 1.00 | 1 | 1 | 0.04  | 0.043  | 0.04   | 0.04   | 0.04  | t | 132848 | KKEDFDIY<br>DEDENQS<br>PR    | Mus<br>musculu<br>s    |
| 1 | 1.00 | 1 | 1 | 0.01  | 0.013  | 0.01   | 0.01   | 0.01  | t | 153396 | HSFEPWS<br>ARDMLGG<br>GS     | Mus<br>musculu<br>s    |
| 1 | 1.00 | 1 | 1 | -0.02 | -0.02  | -0.02  | -0.02  | -0.02 | t | 34245  | KVVR                         | Mus<br>musculu<br>s    |
| 1 | 1.00 | 1 | 1 | 0.04  | 0.038  | 0.053  | 0.039  | 0.041 | t | 138862 | KFPED                        | Mus<br>musculu<br>s    |
| 1 | 1.00 | 1 | 1 | 0     | 0      | 0      | 0      | 0.001 | t | 112726 | YFPTPSGS<br>MVTSDAQ<br>IFNKP | Cavia<br>porcellu<br>s |
| 1 | 1.00 | 1 | 1 | -0.03 | -0.032 | -0.025 | -0.031 | -0.03 | t | 10076  | DRYYREN<br>MYRYPNQ<br>V      | Mus<br>musculu<br>s    |
| 1 | 1.00 | 1 | 1 | 0     | 0      | -0.005 | 0      | 0     | t | 45053  | NNCTRVEI<br>AEYRRL           | Homo<br>sapiens        |
| 1 | 1.00 | 1 | 1 | 0.02  | 0.022  | 0.013  | 0.021  | 0.022 | t | 22396  | GSKTLAGP<br>KGPIQ            | Homo<br>sapiens        |
| 1 | 1.00 | 1 | 1 | 0.01  | 0.007  | 0.007  | 0.01   | 0.012 | t | 7376   | CYGLTTLF<br>DPGPRQQI         | Mus<br>musculu<br>s    |
| 1 | 1.00 | 1 | 1 | 0.01  | 0.01   | 0.007  | 0.01   | 0.012 | t | 7376   | CYGLTTLF<br>DPGPRQQI         | Mus<br>musculu<br>s    |
| 1 | 1.00 | 1 | 1 | 0.01  | 0.01   | 0.007  | 0.01   | 0.012 | t | 7376   | CYGLTTLF<br>DPGPRQQI         | Mus<br>musculu<br>s    |
| 1 | 1.00 | 1 | 1 | 0.02  | 0.02   | 0.02   | 0.02   | 0.021 | t | 153380 | ETELTIAAL<br>KYV             | Mus<br>musculu<br>s    |
| 1 | 1.00 | 1 | 1 | 0.02  | 0.02   | 0.02   | 0.02   | 0.02  | t | 149113 | STPNVTQ                      | Sus<br>scrofa          |
| 1 | 1.00 | 1 | 1 | 0.02  | 0.02   | 0.02   | 0.02   | 0.02  | t | 5368   | AVIEPIVAT<br>NWQKL           | Homo<br>sapiens        |
| 1 | 1.00 | 1 | 1 | 0.02  | 0.02   | 0.02   | 0.02   | 0.02  | t | 5368   | AVIEPIVAT<br>NWQKL           | Homo<br>sapiens        |
| 1 | 1.00 | 1 | 1 | 0     | 0      | 0      | 0      | 0     | t | 153252 | DHQLDPA<br>FRANTAN<br>P      | Mus<br>musculu<br>s    |

|   |      |   |   |       |        |        |        |        |   |        |                          |                          |
|---|------|---|---|-------|--------|--------|--------|--------|---|--------|--------------------------|--------------------------|
| 1 | 1.00 | 1 | 1 | 0     | 0      | 0      | 0      | 0      | t | 144669 | GREGYPADGGTECTL<br>KKG   | Oryctolagus<br>cuniculus |
| 1 | 1.00 | 1 | 1 | 0     | 0      | 0      | 0      | 0      | t | 101918 | NENNGGCDA                | Homo<br>sapiens          |
| 1 | 1.00 | 1 | 1 | 0     | 0      | 0      | 0      | 0      | t | 102337 | CNGETKYFRCEEKNG<br>NTSWN | Mus<br>musculus          |
| 1 | 1.00 | 1 | 1 | 0     | 0      | 0      | 0      | 0      | t | 115311 | KHQGLPQEVLNENLL<br>RFFVA | Homo<br>sapiens          |
| 1 | 1.00 | 1 | 1 | 0     | 0      | 0      | 0      | 0      | t | 5334   | AVFVTSEMPQLPY            | Mus<br>musculus          |
| 1 | 1.00 | 1 | 1 | -0.02 | -0.02  | -0.02  | -0.02  | -0.02  | t | 130456 | CRPQVNNPKEWSCA<br>AC     | Homo<br>sapiens          |
| 1 | 1.00 | 1 | 1 | -0.02 | -0.02  | -0.02  | -0.02  | -0.02  | t | 128095 | RQKPANVLNDAQTKL<br>LAVSG | Homo<br>sapiens          |
| 1 | 1.00 | 1 | 1 | -0.02 | -0.02  | -0.02  | -0.02  | -0.02  | t | 123728 | SDFLGDRHY                | Ovis<br>aries            |
| 1 | 1.00 | 1 | 1 | -0.02 | -0.02  | -0.02  | -0.02  | -0.02  | t | 99393  | KPNTLVLPKHADADN          | Homo<br>sapiens          |
| 1 | 1.00 | 1 | 1 | -0.02 | -0.02  | -0.02  | -0.02  | -0.02  | t | 79467  | YCGELAAHKTFMCN           | Mus<br>musculus          |
| 1 | 1.00 | 1 | 1 | -0.02 | -0.02  | -0.02  | -0.02  | -0.02  | t | 41341  | MEECSQARPYIEQAQ<br>VIAHQ | Homo<br>sapiens          |
| 1 | 1.00 | 1 | 1 | -0.02 | -0.02  | -0.02  | -0.02  | -0.02  | t | 47194  | PDREVLRYEFDEMEEC<br>SQHL | Homo<br>sapiens          |
| 1 | 1.00 | 1 | 1 | -0.04 | -0.04  | -0.04  | -0.04  | -0.04  | t | 149068 | LNLQTSR                  | Sus<br>scrofa            |
| 1 | 1.00 | 1 | 1 | -0.04 | -0.04  | -0.039 | -0.033 | -0.04  | t | 67299  | TWVAGVIFYGGSKTS<br>LYNLR | Homo<br>sapiens          |
| 1 | 1.00 | 1 | 1 | -0.05 | -0.047 | -0.05  | -0.05  | -0.052 | t | 135475 | KRPKPGGW                 | Mus<br>musculus          |

|   |      |   |   |       |       |        |        |        |   |        |                            |                         |
|---|------|---|---|-------|-------|--------|--------|--------|---|--------|----------------------------|-------------------------|
| 1 | 1.00 | 1 | 1 | 0     | 0     | -0.005 | 0      | 0      | t | 47850  | PHSALALL<br>EDTMDYP<br>ARA | Homo<br>sapiens         |
| 1 | 1.00 | 1 | 1 | -0.01 | -0.01 | -0.01  | -0.01  | -0.011 | t | 51827  | QPFPQPQ<br>LPYPQPQ         | Mus<br>musculu<br>s     |
| 1 | 1.00 | 1 | 1 | 0.03  | 0.03  | 0.037  | 0.033  | 0.032  | t | 29855  | KALGLLQT<br>A              | Homo<br>sapiens         |
| 1 | 1.00 | 1 | 1 | 0     | 0.002 | 0      | 0.001  | 0.002  | t | 48331  | PLGFFPDH<br>QLDP           | Homo<br>sapiens         |
| 1 | 1.00 | 1 | 1 | 0     | 0.004 | 0      | -0.003 | 0      | t | 52191  | QRCDLDV<br>ESGG            | Homo<br>sapiens         |
| 1 | 1.00 | 1 | 1 | 0.03  | 0.029 | 0.025  | 0.03   | 0.03   | t | 20769  | GLAQALID<br>QKVKEI         | Myodes<br>glareolu<br>s |
| 1 | 1.00 | 1 | 1 | 0     | 0.002 | 0      | -0.001 | 0      | t | 157917 | RTVKKNIE<br>EN             | Homo<br>sapiens         |
| 1 | 1.00 | 1 | 1 | 0     | 0.002 | 0      | -0.001 | 0      | t | 148880 | QQQQQQ<br>QQLQ             | Homo<br>sapiens         |
| 1 | 1.00 | 1 | 1 | 0     | 0.002 | 0      | -0.001 | 0      | t | 157147 | CSRTVKKN<br>IIEEN          | Homo<br>sapiens         |
| 1 | 1.00 | 1 | 1 | 0     | 0     | 0      | -0.001 | 0      | t | 105164 | EFRHDSG                    | Mus<br>musculu<br>s     |
| 1 | 1.00 | 1 | 1 | 0     | 0     | 0      | -0.001 | 0      | t | 102384 | EFRH                       | Mus<br>musculu<br>s     |
| 1 | 1.00 | 1 | 1 | 0     | 0     | 0      | -0.001 | 0      | t | 104443 | DAEFRHDS<br>GYE            | Mus<br>musculu<br>s     |
| 1 | 1.00 | 1 | 1 | 0     | 0     | 0      | -0.001 | 0      | t | 102384 | EFRH                       | Mus<br>musculu<br>s     |
| 1 | 1.00 | 1 | 1 | 0     | 0     | 0      | -0.001 | 0      | t | 102344 | DAEFR                      | Mus<br>musculu<br>s     |
| 1 | 1.00 | 1 | 1 | 0     | 0     | 0      | -0.001 | 0      | t | 106442 | GDLKRTTG<br>GGC            | Mus<br>musculu<br>s     |

|   |      |   |   |   |        |   |        |   |   |        |                              |                     |
|---|------|---|---|---|--------|---|--------|---|---|--------|------------------------------|---------------------|
| 1 | 1.00 | 1 | 1 | 0 | 0      | 0 | -0.001 | 0 | t | 104443 | DAEFRHDS<br>GYE              | Mus<br>musculu<br>s |
| 1 | 1.00 | 1 | 1 | 0 | 0      | 0 | -0.001 | 0 | t | 106597 | LDLKRTTT<br>THTSGGG<br>C     | Mus<br>musculu<br>s |
| 1 | 1.00 | 1 | 1 | 0 | 0      | 0 | -0.001 | 0 | t | 105127 | DAEFRHD                      | Mus<br>musculu<br>s |
| 1 | 1.00 | 1 | 1 | 0 | 0      | 0 | -0.001 | 0 | t | 66312  | TSLNLQKD<br>EPNGRAS<br>DTAGQ | Equus<br>caballus   |
| 1 | 1.00 | 1 | 1 | 0 | -0.001 | 0 | -0.001 | 0 | t | 73763  | YESNHLIDL<br>SRYASKINI<br>G  | Homo<br>sapiens     |
| 1 | 1.00 | 1 | 1 | 0 | -0.001 | 0 | -0.001 | 0 | t | 75691  | YRYNIYSEK<br>EKSINIDF<br>N   | Homo<br>sapiens     |
| 1 | 1.00 | 1 | 1 | 0 | 0      | 0 | -0.001 | 0 | t | 75691  | YRYNIYSEK<br>EKSINIDF<br>N   | Homo<br>sapiens     |
| 1 | 1.00 | 1 | 1 | 0 | -0.001 | 0 | -0.001 | 0 | t | 74849  | YLNSSLYR<br>GTKFIKKY<br>AS   | Homo<br>sapiens     |
| 1 | 1.00 | 1 | 1 | 0 | -0.001 | 0 | -0.001 | 0 | t | 73893  | YFSIFNTEL<br>SQSNIEER<br>YK  | Homo<br>sapiens     |
| 1 | 1.00 | 1 | 1 | 0 | -0.007 | 0 | -0.001 | 0 | t | 65481  | TNWLAKV<br>NTQIDLIRK<br>KMK  | Homo<br>sapiens     |
| 1 | 1.00 | 1 | 1 | 0 | -0.007 | 0 | -0.001 | 0 | t | 64525  | TKAIINYQY<br>NQYTEEEK<br>NN  | Homo<br>sapiens     |
| 1 | 1.00 | 1 | 1 | 0 | 0      | 0 | -0.001 | 0 | t | 64843  | TLIDINGKT<br>KSVFFEYNI<br>R  | Homo<br>sapiens     |
| 1 | 1.00 | 1 | 1 | 0 | 0      | 0 | -0.001 | 0 | t | 73893  | YFSIFNTEL<br>SQSNIEER<br>YK  | Homo<br>sapiens     |

|   |      |   |   |   |        |   |        |   |   |       |                             |                 |
|---|------|---|---|---|--------|---|--------|---|---|-------|-----------------------------|-----------------|
| 1 | 1.00 | 1 | 1 | 0 | -0.001 | 0 | -0.001 | 0 | t | 65481 | TNWLAKV<br>NTQIDLIRK<br>KMK | Homo<br>sapiens |
| 1 | 1.00 | 1 | 1 | 0 | 0      | 0 | -0.001 | 0 | t | 65481 | TNWLAKV<br>NTQIDLIRK<br>KMK | Homo<br>sapiens |
| 1 | 1.00 | 1 | 1 | 0 | 0      | 0 | -0.001 | 0 | t | 74737 | YLGPRGS<br>VMTTNIYL<br>NSS  | Homo<br>sapiens |
| 1 | 1.00 | 1 | 1 | 0 | 0      | 0 | -0.001 | 0 | t | 64525 | TKAIINYQY<br>NQYTEEEK<br>NN | Homo<br>sapiens |
| 1 | 1.00 | 1 | 1 | 0 | -0.007 | 0 | -0.001 | 0 | t | 74849 | YLNSSLYR<br>GTKFIIKKY<br>AS | Homo<br>sapiens |
| 1 | 1.00 | 1 | 1 | 0 | -0.007 | 0 | -0.001 | 0 | t | 73763 | YESNHLIDL<br>SRYASKINI<br>G | Homo<br>sapiens |
| 1 | 1.00 | 1 | 1 | 0 | 0      | 0 | -0.001 | 0 | t | 74849 | YLNSSLYR<br>GTKFIIKKY<br>AS | Homo<br>sapiens |
| 1 | 1.00 | 1 | 1 | 0 | -0.007 | 0 | -0.001 | 0 | t | 74279 | YIKNIINTSI<br>LNLRYESN<br>H | Homo<br>sapiens |
| 1 | 1.00 | 1 | 1 | 0 | 0      | 0 | -0.001 | 0 | t | 74279 | YIKNIINTSI<br>LNLRYESN<br>H | Homo<br>sapiens |
| 1 | 1.00 | 1 | 1 | 0 | 0      | 0 | -0.001 | 0 | t | 43826 | NFENAFEI<br>AGASILFE<br>IP  | Homo<br>sapiens |
| 1 | 1.00 | 1 | 1 | 0 | 0      | 0 | -0.001 | 0 | t | 44491 | NKFLNQCS<br>VSYLMNS<br>MIPY | Homo<br>sapiens |
| 1 | 1.00 | 1 | 1 | 0 | -0.001 | 0 | -0.001 | 0 | t | 45598 | NQNSKYIN<br>YRDLYIGE<br>KFI | Homo<br>sapiens |



|   |      |   |   |   |        |   |        |   |   |       |                             |                 |
|---|------|---|---|---|--------|---|--------|---|---|-------|-----------------------------|-----------------|
| 1 | 1.00 | 1 | 1 | 0 | -0.007 | 0 | -0.001 | 0 | t | 43525 | NDRVYINV<br>VVKNKEYR<br>LAT | Homo<br>sapiens |
| 1 | 1.00 | 1 | 1 | 0 | -0.007 | 0 | -0.001 | 0 | t | 45130 | NNIMFKLD<br>GCRDTHR<br>YIWI | Homo<br>sapiens |
| 1 | 1.00 | 1 | 1 | 0 | -0.001 | 0 | -0.001 | 0 | t | 45130 | NNIMFKLD<br>GCRDTHR<br>YIWI | Homo<br>sapiens |
| 1 | 1.00 | 1 | 1 | 0 | 0      | 0 | -0.001 | 0 | t | 37638 | LLNYIDEN<br>KLYLIGSAE<br>YE | Homo<br>sapiens |
| 1 | 1.00 | 1 | 1 | 0 | 0      | 0 | -0.001 | 0 | t | 45130 | NNIMFKLD<br>GCRDTHR<br>YIWI | Homo<br>sapiens |
| 1 | 1.00 | 1 | 1 | 0 | -0.007 | 0 | -0.001 | 0 | t | 53998 | RGTIGQV<br>DRLKDKV<br>NNTL  | Homo<br>sapiens |
| 1 | 1.00 | 1 | 1 | 0 | -0.007 | 0 | -0.001 | 0 | t | 58886 | SKLNEINK<br>AMININKF<br>LN  | Homo<br>sapiens |
| 1 | 1.00 | 1 | 1 | 0 | -0.001 | 0 | -0.001 | 0 | t | 44491 | NKFLNQCS<br>VSYLMNS<br>MIPY | Homo<br>sapiens |
| 1 | 1.00 | 1 | 1 | 0 | 0      | 0 | -0.001 | 0 | t | 45124 | NNIILNLRY<br>KDNNLIDL<br>SG | Homo<br>sapiens |
| 1 | 1.00 | 1 | 1 | 0 | 0      | 0 | -0.001 | 0 | t | 45598 | NQNSKYIN<br>YRDLYIGE<br>KFI | Homo<br>sapiens |
| 1 | 1.00 | 1 | 1 | 0 | 0      | 0 | -0.001 | 0 | t | 56657 | RYSRNAV<br>NV               | Bos<br>taurus   |
| 1 | 1.00 | 1 | 1 | 0 | -0.001 | 0 | -0.001 | 0 | t | 45824 | NSGILKDF<br>WGDYLQY<br>DKPY | Homo<br>sapiens |

|   |      |   |   |   |        |   |        |   |   |       |                              |                 |
|---|------|---|---|---|--------|---|--------|---|---|-------|------------------------------|-----------------|
| 1 | 1.00 | 1 | 1 | 0 | -0.007 | 0 | -0.001 | 0 | t | 45824 | NSGILKDF<br>WGDYLQY<br>DKPY  | Homo<br>sapiens |
| 1 | 1.00 | 1 | 1 | 0 | 0      | 0 | -0.001 | 0 | t | 44468 | NKCKMNL<br>QDNNGN<br>DIGFIG  | Homo<br>sapiens |
| 1 | 1.00 | 1 | 1 | 0 | 0      | 0 | -0.001 | 0 | t | 53998 | RGTLIGQV<br>DRLKDKV<br>NNTL  | Homo<br>sapiens |
| 1 | 1.00 | 1 | 1 | 0 | 0      | 0 | -0.001 | 0 | t | 52274 | QRVVFKEYS<br>QMINISDY<br>INR | Homo<br>sapiens |
| 1 | 1.00 | 1 | 1 | 0 | -0.007 | 0 | -0.001 | 0 | t | 52274 | QRVVFKEYS<br>QMINISDY<br>INR | Homo<br>sapiens |
| 1 | 1.00 | 1 | 1 | 0 | -0.001 | 0 | -0.001 | 0 | t | 58886 | SKLNEKINK<br>AMININKF<br>LN  | Homo<br>sapiens |
| 1 | 1.00 | 1 | 1 | 0 | 0      | 0 | -0.001 | 0 | t | 57988 | SGAVILLEF<br>IPEIAIPVL<br>G  | Homo<br>sapiens |
| 1 | 1.00 | 1 | 1 | 0 | -0.001 | 0 | -0.001 | 0 | t | 52274 | QRVVFKEYS<br>QMINISDY<br>INR | Homo<br>sapiens |
| 1 | 1.00 | 1 | 1 | 0 | -0.001 | 0 | -0.001 | 0 | t | 53998 | RGTLIGQV<br>DRLKDKV<br>NNTL  | Homo<br>sapiens |
| 1 | 1.00 | 1 | 1 | 0 | -0.007 | 0 | -0.001 | 0 | t | 33198 | KRNEKWD<br>EVYKYIVT<br>NWLA  | Homo<br>sapiens |
| 1 | 1.00 | 1 | 1 | 0 | 0      | 0 | -0.001 | 0 | t | 32595 | KNQIQLFN<br>LESSKIEVIL<br>K  | Homo<br>sapiens |
| 1 | 1.00 | 1 | 1 | 0 | 0      | 0 | -0.001 | 0 | t | 11870 | EERYKIQSY<br>SEYLKDFW<br>GN  | Homo<br>sapiens |

|   |      |   |   |   |        |   |        |   |   |       |                              |                 |
|---|------|---|---|---|--------|---|--------|---|---|-------|------------------------------|-----------------|
| 1 | 1.00 | 1 | 1 | 0 | -0.007 | 0 | -0.001 | 0 | t | 32595 | KNQIQLFN<br>LESSKIEVIL<br>K  | Homo<br>sapiens |
| 1 | 1.00 | 1 | 1 | 0 | -0.001 | 0 | -0.001 | 0 | t | 32595 | KNQIQLFN<br>LESSKIEVIL<br>K  | Homo<br>sapiens |
| 1 | 1.00 | 1 | 1 | 0 | -0.007 | 0 | -0.001 | 0 | t | 19297 | GEIIWTLQ<br>DTQEIKQR<br>VVF  | Homo<br>sapiens |
| 1 | 1.00 | 1 | 1 | 0 | 0      | 0 | -0.001 | 0 | t | 26132 | IFNSVFLDF<br>SVSFWIRIP<br>K  | Homo<br>sapiens |
| 1 | 1.00 | 1 | 1 | 0 | 0      | 0 | -0.001 | 0 | t | 33198 | KRNEKWD<br>EVYKYIVT<br>NWL A | Homo<br>sapiens |
| 1 | 1.00 | 1 | 1 | 0 | -0.001 | 0 | -0.001 | 0 | t | 33198 | KRNEKWD<br>EVYKYIVT<br>NWL A | Homo<br>sapiens |
| 1 | 1.00 | 1 | 1 | 0 | 0      | 0 | -0.001 | 0 | t | 19297 | GEIIWTLQ<br>DTQEIKQR<br>VVF  | Homo<br>sapiens |
| 1 | 1.00 | 1 | 1 | 0 | 0      | 0 | -0.001 | 0 | t | 28322 | IRIPKYKND<br>GIQNYIHN<br>EY  | Homo<br>sapiens |
| 1 | 1.00 | 1 | 1 | 0 | -0.001 | 0 | -0.001 | 0 | t | 27308 | ILSALEIPD<br>VGNLSQV<br>VVM  | Homo<br>sapiens |
| 1 | 1.00 | 1 | 1 | 0 | -0.001 | 0 | -0.001 | 0 | t | 31365 | KINIGSKV<br>NFPIDKN<br>QIQ   | Homo<br>sapiens |
| 1 | 1.00 | 1 | 1 | 0 | 0      | 0 | -0.001 | 0 | t | 34622 | KYVDVNN<br>VGIRGYM<br>YLKGP  | Homo<br>sapiens |
| 1 | 1.00 | 1 | 1 | 0 | -0.007 | 0 | -0.001 | 0 | t | 34622 | KYVDVNN<br>VGIRGYM<br>YLKGP  | Homo<br>sapiens |

|   |      |   |   |   |        |   |        |   |   |       |                             |                 |
|---|------|---|---|---|--------|---|--------|---|---|-------|-----------------------------|-----------------|
| 1 | 1.00 | 1 | 1 | 0 | -0.001 | 0 | -0.001 | 0 | t | 28322 | IRIPKYKND<br>GIQNYIHNE<br>Y | Homo<br>sapiens |
| 1 | 1.00 | 1 | 1 | 0 | -0.001 | 0 | -0.001 | 0 | t | 34612 | KYTMFHYL<br>RAQFEH<br>GKSR  | Homo<br>sapiens |
| 1 | 1.00 | 1 | 1 | 0 | -0.001 | 0 | -0.001 | 0 | t | 22949 | GVELNDK<br>NQFKLTSS<br>ANSK | Homo<br>sapiens |
| 1 | 1.00 | 1 | 1 | 0 | -0.007 | 0 | -0.001 | 0 | t | 14730 | EVILKNAIV<br>YNSMYEN<br>FST | Homo<br>sapiens |
| 1 | 1.00 | 1 | 1 | 0 | -0.007 | 0 | -0.001 | 0 | t | 11800 | EENISLDLI<br>QQYYLTFF<br>D  | Homo<br>sapiens |
| 1 | 1.00 | 1 | 1 | 0 | -0.001 | 0 | -0.001 | 0 | t | 34622 | KYVDVNN<br>VGIRGYM<br>YLKGP | Homo<br>sapiens |
| 1 | 1.00 | 1 | 1 | 0 | -0.001 | 0 | -0.001 | 0 | t | 11800 | EENISLDLI<br>QQYYLTFF<br>D  | Homo<br>sapiens |
| 1 | 1.00 | 1 | 1 | 0 | 0      | 0 | -0.001 | 0 | t | 14730 | EVILKNAIV<br>YNSMYEN<br>FST | Homo<br>sapiens |
| 1 | 1.00 | 1 | 1 | 0 | 0      | 0 | -0.001 | 0 | t | 27724 | INQAIDNI<br>NNFINGCS<br>VSY | Homo<br>sapiens |
| 1 | 1.00 | 1 | 1 | 0 | -0.001 | 0 | -0.001 | 0 | t | 34621 | KYVDNQR<br>LLSTFTEYI<br>KNI | Homo<br>sapiens |
| 1 | 1.00 | 1 | 1 | 0 | 0      | 0 | -0.001 | 0 | t | 13471 | ENFSTSF<br>WIRIPKYFNSI<br>S | Homo<br>sapiens |
| 1 | 1.00 | 1 | 1 | 0 | -0.001 | 0 | -0.001 | 0 | t | 13471 | ENFSTSF<br>WIRIPKYFNSI<br>S | Homo<br>sapiens |

|   |      |   |   |   |        |   |        |   |   |       |                             |                 |
|---|------|---|---|---|--------|---|--------|---|---|-------|-----------------------------|-----------------|
| 1 | 1.00 | 1 | 1 | 0 | -0.007 | 0 | -0.001 | 0 | t | 13471 | ENFSTSFW<br>IRIPKYFNSI<br>S | Homo<br>sapiens |
| 1 | 1.00 | 1 | 1 | 0 | 0      | 0 | -0.001 | 0 | t | 8265  | DFFNLNQE<br>WRVYTYK<br>YFKK | Homo<br>sapiens |
| 1 | 1.00 | 1 | 1 | 0 | 0      | 0 | -0.001 | 0 | t | 2806  | ALNYQAQ<br>ALEEIIKYR<br>YNI | Homo<br>sapiens |
| 1 | 1.00 | 1 | 1 | 0 | -0.007 | 0 | -0.001 | 0 | t | 4528  | ASLKDALL<br>KYIYDNRG<br>TLI | Homo<br>sapiens |
| 1 | 1.00 | 1 | 1 | 0 | -0.001 | 0 | -0.001 | 0 | t | 9863  | DQKPISNL<br>GNIHASN<br>NIMF | Homo<br>sapiens |
| 1 | 1.00 | 1 | 1 | 0 | 0      | 0 | -0.001 | 0 | t | 2772  | ALNDLCIK<br>VNNWDLF<br>FSPS | Homo<br>sapiens |
| 1 | 1.00 | 1 | 1 | 0 | 0      | 0 | -0.001 | 0 | t | 2720  | ALLNPSRV<br>YTFFSSDY<br>VKK | Homo<br>sapiens |
| 1 | 1.00 | 1 | 1 | 0 | -0.007 | 0 | -0.001 | 0 | t | 6650  | CMENNSG<br>WKVSLNY<br>GEIIW | Homo<br>sapiens |
| 1 | 1.00 | 1 | 1 | 0 | 0      | 0 | -0.001 | 0 | t | 4528  | ASLKDALL<br>KYIYDNRG<br>TLI | Homo<br>sapiens |
| 1 | 1.00 | 1 | 1 | 0 | -0.001 | 0 | -0.001 | 0 | t | 4528  | ASLKDALL<br>KYIYDNRG<br>TLI | Homo<br>sapiens |
| 1 | 1.00 | 1 | 1 | 0 | 0      | 0 | -0.001 | 0 | t | 6650  | CMENNSG<br>WKVSLNY<br>GEIIW | Homo<br>sapiens |
| 1 | 1.00 | 1 | 1 | 0 | -0.001 | 0 | -0.001 | 0 | t | 7097  | CSVSYLMK<br>KMIPLAVE<br>KLL | Homo<br>sapiens |

|   |      |   |   |       |        |        |        |        |   |        |                             |                                  |
|---|------|---|---|-------|--------|--------|--------|--------|---|--------|-----------------------------|----------------------------------|
| 1 | 1.00 | 1 | 1 | 0     | -0.007 | 0      | -0.001 | 0      | t | 2720   | ALLNPSRV<br>YTFFSSDY<br>VKK | Homo<br>sapiens                  |
| 1 | 1.00 | 1 | 1 | 0     | 0      | 0      | -0.001 | 0      | t | 7097   | CSVSYLMK<br>KMIPLAVE<br>KLL | Homo<br>sapiens                  |
| 1 | 1.00 | 1 | 1 | 0     | 0      | 0      | 0      | 0      | t | 117747 | AMKISFAK<br>K               | Homo<br>sapiens                  |
| 1 | 1.00 | 1 | 1 | 0.05  | 0.05   | 0.05   | 0.05   | 0.048  | t | 135454 | DYEDRY                      | Mus<br>musculu<br>s              |
| 1 | 1.00 | 1 | 1 | 0.03  | 0.03   | 0.035  | 0.03   | 0.033  | t | 35922  | LFNLGPQ<br>QQ               | Mus<br>musculu<br>s              |
| 1 | 1.00 | 1 | 1 | 0.01  | 0.012  | 0.004  | 0.011  | 0.01   | t | 54848  | RMADAVS<br>RKKMDTK          | Homo<br>sapiens                  |
| 1 | 1.00 | 1 | 1 | -0.01 | -0.01  | -0.017 | -0.017 | -0.01  | t | 119546 | WTAN                        | Homo<br>sapiens                  |
| 1 | 1.00 | 1 | 1 | -0.01 | -0.006 | -0.005 | -0.01  | -0.01  | t | 123668 | QLKEGYLK<br>D               | Ovis<br>aries                    |
| 1 | 1.00 | 1 | 1 | 0.01  | 0.005  | 0.003  | 0.01   | 0.01   | t | 44917  | NLVLNRDV<br>SFQDL           | Mus                              |
| 1 | 1.00 | 1 | 1 | -0.01 | -0.01  | -0.012 | -0.013 | -0.012 | t | 28850  | ITDELDQT<br>FSELSGY         | Homo<br>sapiens                  |
| 1 | 1.00 | 1 | 1 | 0.01  | 0.01   | 0.01   | 0.01   | 0.01   | t | 98968  | QQNPQA<br>QGSVQP            | Homo<br>sapiens                  |
| 1 | 1.00 | 1 | 1 | 0.01  | 0.01   | 0.01   | 0.01   | 0.01   | t | 79210  | FCLPTREST<br>GRACP          | Mus<br>musculu<br>s              |
| 1 | 1.00 | 1 | 1 | 0.01  | 0.01   | 0.01   | 0.01   | 0.01   | t | 78232  | PHSNKSHL                    | Homo<br>sapiens                  |
| 1 | 1.00 | 1 | 1 | 0.01  | 0.007  | 0.016  | 0.01   | 0.01   | t | 40889  | LYPANNTV                    | Oryctola<br>gus<br>cuniculu<br>s |
| 1 | 1.00 | 1 | 1 | -0.01 | -0.01  | -0.01  | -0.01  | -0.01  | t | 153342 | ACRDHFST<br>HCGGGS          | Mus<br>musculu<br>s              |

|   |      |   |   |       |        |       |       |       |   |        |                              |                                  |
|---|------|---|---|-------|--------|-------|-------|-------|---|--------|------------------------------|----------------------------------|
| 1 | 1.00 | 1 | 1 | -0.01 | -0.01  | -0.01 | -0.01 | -0.01 | t | 135361 | VLSKDNK<br>KITSSKK           | Sus<br>scrofa                    |
| 1 | 1.00 | 1 | 1 | -0.01 | -0.007 | -0.01 | -0.01 | -0.01 | t | 98319  | PAVVGKP<br>GSD               | Mus<br>musculu<br>s              |
| 1 | 1.00 | 1 | 1 | -0.01 | -0.01  | -0.01 | -0.01 | -0.01 | t | 111154 | CMKNMK<br>QPC                | Homo<br>sapiens                  |
| 1 | 1.00 | 1 | 1 | -0.01 | -0.013 | -0.01 | -0.01 | -0.01 | t | 98319  | PAVVGKP<br>GSD               | Oryctola<br>gus<br>cuniculu<br>s |
| 1 | 1.00 | 1 | 1 | -0.01 | -0.01  | -0.01 | -0.01 | -0.01 | t | 78309  | WHTLLAA                      | Homo<br>sapiens                  |
| 1 | 1.00 | 1 | 1 | -0.01 | -0.01  | -0.01 | -0.01 | -0.01 | t | 51669  | QNAPQAQ<br>NAPQAQ            | Bos<br>taurus                    |
| 1 | 1.00 | 1 | 1 | -0.01 | -0.01  | -0.01 | -0.01 | -0.01 | t | 34752  | LAEQFKQK<br>ALGLLQTA<br>TRQA | Homo<br>sapiens                  |
| 1 | 1.00 | 1 | 1 | -0.03 | -0.03  | -0.03 | -0.03 | -0.03 | t | 123107 | EALPKIKAY                    | Ovis<br>aries                    |
| 1 | 1.00 | 1 | 1 | 0.01  | 0.013  | 0.022 | 0.01  | 0.01  | t | 48663  | PNKPNND<br>FHFEV             | Mus<br>musculu<br>s              |
| 1 | 1.00 | 1 | 1 | 0.01  | 0.013  | 0.022 | 0.01  | 0.01  | t | 48663  | PNKPNND<br>FHFEV             | Mus<br>musculu<br>s              |
| 1 | 1.00 | 1 | 1 | 0     | 0.003  | 0     | 0     | 0.001 | t | 32878  | KPSKPKTN<br>MKHMAG<br>A      | Mus<br>musculu<br>s              |
| 1 | 1.00 | 1 | 1 | 0.02  | 0.018  | 0.022 | 0.02  | 0.021 | t | 122512 | PEPAKSAP<br>APKKGSK          | Mus<br>musculu<br>s              |
| 1 | 1.00 | 1 | 1 | 0.01  | 0.01   | 0.001 | 0.008 | 0.01  | t | 151076 | YPGDFIDY<br>EELREQL          | Homo<br>sapiens                  |
| 1 | 1.00 | 1 | 1 | 0.01  | 0.006  | 0.003 | 0.003 | 0.01  | t | 131016 | QESLDMN<br>SARDF             | Oryctola<br>gus<br>cuniculu<br>s |

|   |      |   |   |       |        |        |        |        |   |        |                              |                                  |
|---|------|---|---|-------|--------|--------|--------|--------|---|--------|------------------------------|----------------------------------|
| 1 | 1.00 | 1 | 1 | 0     | -0.002 | 0      | 0      | 0.001  | t | 21815  | GPVEDAIT<br>AAIGRVA          | Oryctola<br>gus<br>cuniculu<br>s |
| 1 | 1.00 | 1 | 1 | 0.01  | 0.005  | 0.003  | 0.012  | 0.013  | t | 157447 | KDVTKEEY<br>AAFYKA           | Canis<br>lupus                   |
| 1 | 1.00 | 1 | 1 | 0     | -0.004 | -0.008 | 0.003  | 0.002  | t | 43323  | NATHAAF<br>EYSKSIGGT<br>PALD | Oryctola<br>gus<br>cuniculu<br>s |
| 1 | 1.00 | 1 | 1 | 0.01  | 0.012  | -0.003 | 0.009  | 0.01   | t | 79039  | PGNAPGIA<br>GYNSNGC<br>VYSES | Homo<br>sapiens                  |
| 1 | 1.00 | 1 | 1 | -0.01 | -0.017 | -0.018 | -0.01  | -0.01  | t | 110841 | EVTPAIKSE<br>VSL             | Macaca                           |
| 1 | 1.00 | 1 | 1 | -0.01 | -0.017 | -0.018 | -0.01  | -0.01  | t | 110841 | EVTPAIKSE<br>VSL             | Macaca                           |
| 1 | 1.00 | 1 | 1 | 0.02  | 0.02   | 0.013  | 0.011  | 0.018  | t | 130816 | ESKAISDA<br>QITASSYFT<br>NM  | Homo<br>sapiens                  |
| 1 | 1.00 | 1 | 1 | -0.02 | -0.02  | -0.023 | -0.02  | -0.02  | t | 69839  | VLVNANN<br>SSSSHQSI<br>YN    | Sus<br>scrofa                    |
| 1 | 1.00 | 1 | 1 | -0.01 | -0.008 | -0.017 | -0.003 | -0.01  | t | 128147 | WTGSWD<br>ASKPRASC<br>WQPGTR | Homo<br>sapiens                  |
| 1 | 1.00 | 1 | 1 | 0     | 0      | 0.002  | 0      | 0      | t | 44915  | NLVILPGQ<br>DLQYVLA          | Homo<br>sapiens                  |
| 1 | 1.00 | 1 | 1 | -0.01 | -0.01  | -0.01  | -0.01  | -0.011 | t | 144777 | SGTHMNL<br>YLHDTAFA          | Mus<br>musculu<br>s              |
| 1 | 1.00 | 1 | 1 | -0.02 | -0.018 | -0.009 | -0.023 | -0.022 | t | 111348 | GLFYPNKQ<br>P                | Homo<br>sapiens                  |
| 1 | 1.00 | 1 | 1 | 0.03  | 0.027  | 0.032  | 0.03   | 0.03   | t | 53814  | RGADCNE                      | Oryctola<br>gus<br>cuniculu<br>s |
| 1 | 1.00 | 1 | 1 | 0.03  | 0.032  | 0.027  | 0.031  | 0.03   | t | 46379  | NVFQTQA<br>GCLIGAEH<br>VD    | Homo<br>sapiens                  |



|   |      |   |   |       |       |        |       |        |   |        |                              |                                  |
|---|------|---|---|-------|-------|--------|-------|--------|---|--------|------------------------------|----------------------------------|
| 1 | 1.00 | 1 | 1 | 0     | 0     | 0      | 0     | 0      | t | 135462 | GGVPGV                       | Oryctola<br>gus<br>cuniculu<br>s |
| 1 | 1.00 | 1 | 1 | 0     | 0     | 0      | 0     | 0      | t | 133957 | WIRANF                       | Mus<br>musculu<br>s              |
| 1 | 1.00 | 1 | 1 | 0     | 0     | 0      | 0     | 0      | t | 103244 | GVPSRLGY<br>LLDLAPK          | Homo<br>sapiens                  |
| 1 | 1.00 | 1 | 1 | 0     | 0     | 0      | 0     | 0      | t | 102158 | TSTWLQW                      | Homo<br>sapiens                  |
| 1 | 1.00 | 1 | 1 | 0     | 0     | 0      | 0     | 0      | t | 110610 | GPKGAPG<br>ERGPSGLA          | Mus<br>musculu<br>s              |
| 1 | 1.00 | 1 | 1 | 0     | 0     | 0      | 0     | 0      | t | 97699  | TNAGKAT<br>AL                | Oryctola<br>gus<br>cuniculu<br>s |
| 1 | 1.00 | 1 | 1 | -0.02 | -0.02 | -0.02  | -0.02 | -0.02  | t | 142307 | TLHEYMLD<br>LQPE             | Homo<br>sapiens                  |
| 1 | 1.00 | 1 | 1 | -0.02 | -0.02 | -0.02  | -0.02 | -0.02  | t | 137514 | AIPAGVAH<br>WCYNEGN          | Homo<br>sapiens                  |
| 1 | 1.00 | 1 | 1 | -0.02 | -0.02 | -0.02  | -0.02 | -0.02  | t | 140254 | KYEHGGNI<br>ID               | Mus<br>musculu<br>s              |
| 1 | 1.00 | 1 | 1 | -0.02 | -0.02 | -0.02  | -0.02 | -0.02  | t | 151044 | PRYAFAM<br>ERNAGSGI          | Homo<br>sapiens                  |
| 1 | 1.00 | 1 | 1 | -0.02 | -0.02 | -0.02  | -0.02 | -0.02  | t | 41335  | MEECSKA<br>RPYIEQAQ<br>VIAHQ | Homo<br>sapiens                  |
| 1 | 1.00 | 1 | 1 | -0.02 | -0.02 | -0.02  | -0.02 | -0.02  | t | 47181  | PDREVLQY<br>AFDEMEE<br>CASHL | Homo<br>sapiens                  |
| 1 | 1.00 | 1 | 1 | 0.05  | 0.05  | 0.043  | 0.05  | 0.051  | t | 130485 | EVVTGSPR<br>GDSQSS           | Mus<br>musculu<br>s              |
| 1 | 1.00 | 1 | 1 | -0.03 | -0.03 | -0.022 | -0.03 | -0.033 | t | 110975 | QIFNKPY<br>WLQRAQG<br>H      | Mus<br>musculu<br>s              |
| 1 | 1.00 | 1 | 1 | 0.01  | 0.013 | 0.01   | 0.01  | 0.013  | t | 144705 | KGTHSLYS<br>QIAG             | Mus<br>musculu<br>s              |

|   |      |   |   |       |        |        |        |        |   |        |                              |                        |
|---|------|---|---|-------|--------|--------|--------|--------|---|--------|------------------------------|------------------------|
| 1 | 1.00 | 1 | 1 | -0.03 | -0.032 | -0.032 | -0.033 | -0.03  | t | 119562 | DYTGKIM<br>WTPPAIFK<br>S     | Mus<br>musculu<br>s    |
| 1 | 1.00 | 1 | 1 | -0.02 | -0.02  | -0.024 | -0.021 | -0.02  | t | 51297  | QLCQLLGA<br>MI               | Mus<br>musculu<br>s    |
| 1 | 1.00 | 1 | 1 | -0.04 | -0.04  | -0.04  | -0.04  | -0.04  | t | 136120 | AFFPNMV<br>NMLVLGK<br>HLGIPK | Homo<br>sapiens        |
| 1 | 1.00 | 1 | 1 | 0.02  | 0.02   | 0.017  | 0.02   | 0.019  | t | 56993  | SASLPYMD<br>ETRAIAGQ<br>FKEK | Homo<br>sapiens        |
| 1 | 1.00 | 1 | 1 | -0.02 | -0.016 | -0.015 | -0.02  | -0.02  | t | 70682  | VQYNLSHS<br>YAGDA            | Cavia<br>porcellu<br>s |
| 1 | 1.00 | 1 | 1 | 0.05  | 0.05   | 0.051  | 0.05   | 0.05   | t | 9276   | DLSKLSKD<br>VVQYEQEI<br>ESLE | Mus<br>musculu<br>s    |
| 1 | 1.00 | 1 | 1 | -0.02 | -0.02  | -0.02  | -0.02  | -0.019 | t | 69898  | VLYREF                       | Homo<br>sapiens        |
| 1 | 1.00 | 1 | 1 | 0     | 0      | -0.001 | 0      | 0      | t | 38648  | LPQGTTLP<br>KG               | Homo<br>sapiens        |
| 1 | 1.00 | 1 | 1 | 0.02  | 0.02   | 0.02   | 0.02   | 0.02   | t | 156918 | MAITDHP<br>GSAMV             | Gallus<br>gallus       |
| 1 | 1.00 | 1 | 1 | 0.01  | 0.012  | 0.015  | 0.007  | 0.009  | t | 95093  | HQQGGW<br>STLIEDNIP          | Homo<br>sapiens        |
| 1 | 1.00 | 1 | 1 | 0.02  | 0.02   | 0.022  | 0.024  | 0.02   | t | 67405  | TYNWGEN<br>ETDVFL            | Homo<br>sapiens        |
| 1 | 1.00 | 1 | 1 | -0.07 | -0.069 | -0.065 | -0.07  | -0.072 | t | 55232  | RPMIHF                       | Mus<br>musculu<br>s    |
| 1 | 1.00 | 1 | 1 | 0     | 0      | 0      | 0.001  | 0.001  | t | 70817  | VRRRVNA<br>ANKKPEDL<br>TLNDL | Homo<br>sapiens        |
| 1 | 1.00 | 1 | 1 | -0.01 | -0.01  | -0.01  | -0.01  | -0.01  | t | 151652 | HWWRAE<br>SDEARRCY<br>NDPKC  | Mus<br>musculu<br>s    |
| 1 | 1.00 | 1 | 1 | -0.01 | -0.01  | -0.01  | -0.01  | -0.01  | t | 124281 | HPLATGPH<br>L                | Homo<br>sapiens        |
| 1 | 1.00 | 1 | 1 | -0.01 | -0.01  | -0.01  | -0.01  | -0.01  | t | 127981 | FRRAVLM<br>GGSALSPA<br>AVISH | Homo<br>sapiens        |
| 1 | 1.00 | 1 | 1 | -0.01 | -0.01  | -0.01  | -0.01  | -0.01  | t | 103530 | QSGGNNS<br>PAVYLLDG          | Homo<br>sapiens        |

|   |      |   |   |       |        |        |        |        |   |        |                              |                                  |
|---|------|---|---|-------|--------|--------|--------|--------|---|--------|------------------------------|----------------------------------|
| 1 | 1.00 | 1 | 1 | -0.01 | -0.01  | -0.01  | -0.01  | -0.01  | t | 46826  | PAIIPDREV<br>LHREFDE<br>MEEC | Homo<br>sapiens                  |
| 1 | 1.00 | 1 | 1 | -0.01 | -0.01  | -0.01  | -0.01  | -0.01  | t | 4454   | ASHLPYIE<br>QGMQLAE<br>QLKQK | Homo<br>sapiens                  |
| 1 | 1.00 | 1 | 1 | -0.03 | -0.03  | -0.03  | -0.03  | -0.03  | t | 108280 | APRRLFDI<br>A                | Homo<br>sapiens                  |
| 1 | 1.00 | 1 | 1 | 0     | -0.004 | 0      | -0.001 | 0      | t | 118970 | PPPGRRP                      | Oryctola<br>gus<br>cuniculu<br>s |
| 1 | 1.00 | 1 | 1 | 0.02  | 0.017  | 0.022  | 0.02   | 0.022  | t | 23308  | GYAMNW<br>SDS                | Rattus<br>norvegic<br>us         |
| 1 | 1.00 | 1 | 1 | 0     | 0.002  | 0      | -0.003 | 0.002  | t | 49078  | PQQPF                        | Homo<br>sapiens                  |
| 1 | 1.00 | 1 | 1 | -0.01 | -0.008 | -0.004 | -0.011 | -0.01  | t | 70682  | VQYNLSHS<br>YAGDA            | Cavia<br>porcellu<br>s           |
| 1 | 1.00 | 1 | 1 | -0.01 | -0.014 | -0.004 | -0.011 | -0.01  | t | 70682  | VQYNLSHS<br>YAGDA            | Oryctola<br>gus<br>cuniculu<br>s |
| 1 | 1.00 | 1 | 1 | 0.05  | 0.046  | 0.048  | 0.05   | 0.05   | t | 100126 | HVGLGTAF<br>ENSIYDQE<br>YN   | Sus<br>scrofa                    |
| 1 | 1.00 | 1 | 1 | 0.01  | 0.012  | 0.013  | 0.013  | 0.01   | t | 48072  | PKGRTVII<br>E<br>Q           | Homo<br>sapiens                  |
| 1 | 1.00 | 1 | 1 | 0.01  | 0.012  | 0.01   | 0.009  | 0.01   | t | 149410 | PLVQEQQ<br>FQG               | Homo<br>sapiens                  |
| 1 | 1.00 | 1 | 1 | -0.02 | -0.023 | -0.02  | -0.02  | -0.021 | t | 66749  | TTPAQGN<br>SMFPSC            | Oryctola<br>gus<br>cuniculu<br>s |
| 1 | 1.00 | 1 | 1 | -0.03 | -0.03  | -0.03  | -0.026 | -0.028 | t | 118565 | QALGITTKI<br>SRGT            | Homo<br>sapiens                  |
| 1 | 1.00 | 1 | 1 | 0.05  | 0.052  | 0.047  | 0.051  | 0.052  | t | 150980 | ETPSSDNG<br>TCYPGDF          | Homo<br>sapiens                  |
| 1 | 1.00 | 1 | 1 | 0.07  | 0.072  | 0.075  | 0.073  | 0.07   | t | 114207 | FLGELTSSE<br>VATEV           | Homo<br>sapiens                  |

|   |      |   |   |       |        |       |        |        |   |        |                              |                       |
|---|------|---|---|-------|--------|-------|--------|--------|---|--------|------------------------------|-----------------------|
| 1 | 1.00 | 1 | 1 | -0.01 | -0.01  | -0.01 | -0.01  | -0.01  | t | 97391  | IAEAMRKV<br>KKEGVIT          | Homo sapiens          |
| 1 | 1.00 | 1 | 1 | -0.01 | -0.01  | 0.001 | -0.003 | -0.012 | t | 30302  | KEALISLT<br>RGKLYTQ<br>Q     | Homo sapiens          |
| 1 | 1.00 | 1 | 1 | 0     | 0      | 0     | 0      | 0      | t | 108049 | NPVEIRRG<br>VMLAVDA          | Rattus norvegicus     |
| 1 | 1.00 | 1 | 1 | 0     | 0.003  | 0.002 | 0      | 0      | t | 135834 | CEFRDGA<br>GSICG             | Mus musculus          |
| 1 | 1.00 | 1 | 1 | -0.01 | -0.007 | -0.01 | -0.01  | -0.009 | t | 144678 | GTQPTLEV<br>VPMGRGS          | Mus musculus          |
| 1 | 1.00 | 1 | 1 | 0     | -0.004 | 0.004 | 0.003  | -0.001 | t | 3076   | AMDPIYDE<br>PTTTTSVPL        | Oryctolagus cuniculus |
| 1 | 1.00 | 1 | 1 | 0.01  | -0.004 | 0.015 | 0.01   | 0.012  | t | 21991  | GRAINRRVE                    | Mus musculus          |
| 1 | 1.00 | 1 | 1 | 0.02  | 0.02   | 0.02  | 0.02   | 0.02   | t | 140489 | MSQDGHT                      | Mus musculus          |
| 1 | 1.00 | 1 | 1 | 0.02  | 0.02   | 0.02  | 0.02   | 0.02   | t | 140489 | MSQDGHT                      | Mus musculus          |
| 1 | 1.00 | 1 | 1 | 0.02  | 0.02   | 0.02  | 0.02   | 0.02   | t | 115459 | QTEDELQ<br>DKIHPFAQ<br>TQSLV | Homo sapiens          |
| 1 | 1.00 | 1 | 1 | 0     | 0      | 0     | 0      | 0      | t | 142168 | GPAGQAE<br>PDRAH             | Homo sapiens          |
| 1 | 1.00 | 1 | 1 | 0     | 0      | 0     | 0      | 0      | t | 137884 | GQSRDVLL<br>AGNA             | Homo sapiens          |
| 1 | 1.00 | 1 | 1 | 0     | 0      | 0     | 0      | 0      | t | 115213 | DVPSERYL<br>GYLEQLLR<br>LKKY | Homo sapiens          |
| 1 | 1.00 | 1 | 1 | -0.02 | -0.02  | -0.02 | -0.02  | -0.02  | t | 113008 | GRILDWH<br>VANTDKKS          | Homo sapiens          |

|   |      |   |   |       |        |        |        |        |   |        |                              |                                  |
|---|------|---|---|-------|--------|--------|--------|--------|---|--------|------------------------------|----------------------------------|
| 1 | 1.00 | 1 | 1 | -0.02 | -0.02  | -0.02  | -0.02  | -0.02  | t | 22125  | GRLHLINQ<br>RAVVAPD<br>KEVLY | Homo<br>sapiens                  |
| 1 | 1.00 | 1 | 1 | -0.06 | -0.06  | -0.06  | -0.06  | -0.06  | t | 115204 | DEALEKFD<br>KALKALPM<br>HIRL | Homo<br>sapiens                  |
| 1 | 1.00 | 1 | 1 | 0     | -0.002 | 0      | -0.002 | 0      | t | 51306  | QLDPAFG                      | Mus<br>musculu<br>s              |
| 1 | 1.00 | 1 | 1 | 0     | 0      | 0      | 0      | -0.002 | t | 128989 | IRRSILPYG<br>DSMDRIE         | Homo<br>sapiens                  |
| 1 | 1.00 | 1 | 1 | 0.01  | 0.006  | -0.002 | 0.007  | 0.01   | t | 4052   | AQRAIDSQ<br>NMTKAAQ<br>SLNSI | Oryctola<br>gus<br>cuniculu<br>s |
| 1 | 1.00 | 1 | 1 | -0.02 | -0.016 | -0.026 | -0.019 | -0.02  | t | 35235  | LDNIKGNV<br>GKMEDYIK<br>KNNK | Homo<br>sapiens                  |
| 1 | 1.00 | 1 | 1 | -0.06 | -0.06  | -0.064 | -0.063 | -0.062 | t | 10045  | DRRRGRG<br>SRGRGNGI          | Homo<br>sapiens                  |
| 1 | 1.00 | 1 | 1 | 0     | 0.004  | -0.001 | -0.001 | 0      | t | 9524   | DNPASTT<br>NKDK              | Cavia<br>porcellu<br>s           |
| 1 | 1.00 | 1 | 1 | 0     | 0      | -0.001 | -0.001 | 0      | t | 9524   | DNPASTT<br>NKDK              | Mus<br>musculu<br>s              |
| 1 | 1.00 | 1 | 1 | 0.01  | 0.006  | 0.002  | 0.007  | 0.01   | t | 19585  | GFMKQYG<br>ECLGDINA<br>RD    | Oryctola<br>gus<br>cuniculu<br>s |
| 1 | 1.00 | 1 | 1 | 0.01  | 0.008  | 0.018  | 0.007  | 0.01   | t | 13763  | EPSEGQTA<br>DWY              | Mus<br>musculu<br>s              |
| 1 | 1.00 | 1 | 1 | 0     | 0      | 0      | 0      | 0      | t | 153458 | SELSPAML<br>HFMFGGG<br>S     | Mus<br>musculu<br>s              |
| 1 | 1.00 | 1 | 1 | -0.02 | -0.018 | -0.027 | -0.017 | -0.018 | t | 142448 | NKYRGTA<br>GNALMDG<br>ASQL   | Homo<br>sapiens                  |
| 1 | 1.00 | 1 | 1 | -0.02 | -0.018 | -0.027 | -0.017 | -0.018 | t | 142447 | NKYRGTA<br>GNALMDG<br>ASQL   | Homo<br>sapiens                  |
| 1 | 1.00 | 1 | 1 | 0.02  | 0.02   | 0.013  | 0.02   | 0.02   | t | 108050 | NRDNTYN<br>RVSEDLRS<br>RI    | Homo<br>sapiens                  |
| 1 | 1.00 | 1 | 1 | 0.03  | 0.03   | 0.034  | 0.033  | 0.03   | t | 84989  | LASSAPST<br>AVAQ             | Homo<br>sapiens                  |

|   |      |   |   |       |        |        |        |        |   |        |                             |                         |
|---|------|---|---|-------|--------|--------|--------|--------|---|--------|-----------------------------|-------------------------|
| 1 | 1.00 | 1 | 1 | -0.01 | -0.01  | -0.01  | -0.01  | -0.01  | t | 79445  | VCAKGPP<br>QLPRCP           | Mus<br>musculu<br>s     |
| 1 | 1.00 | 1 | 1 | -0.01 | -0.012 | -0.011 | -0.011 | -0.009 | t | 46984  | PAVARDD<br>AEGLS DPR        | Mus<br>musculu<br>s     |
| 1 | 1.00 | 1 | 1 | 0     | -0.002 | -0.001 | -0.003 | 0      | t | 122269 | ARQNLKD<br>AGE              | Mus<br>musculu<br>s     |
| 1 | 1.00 | 1 | 1 | -0.01 | -0.009 | -0.012 | -0.01  | -0.01  | t | 66194  | TSFEDINGI<br>RRPKH          | Myodes<br>glareolu<br>s |
| 1 | 1.00 | 1 | 1 | 0.03  | 0.028  | 0.028  | 0.029  | 0.032  | t | 141764 | TLNFNAEG<br>EPELLMLA<br>NWR | Mus<br>musculu<br>s     |
| 1 | 1.00 | 1 | 1 | -0.01 | -0.01  | -0.01  | -0.01  | -0.007 | t | 134769 | QIFNL                       | Mus<br>musculu<br>s     |
| 1 | 1.00 | 1 | 1 | 0.03  | 0.03   | 0.027  | 0.03   | 0.032  | t | 70212  | VNVGDHC<br>EGL              | Mus<br>musculu<br>s     |
| 1 | 1.00 | 1 | 1 | 0.02  | 0.024  | 0.022  | 0.017  | 0.02   | t | 95682  | PQYLQYLY<br>QG              | Homo<br>sapiens         |
| 1 | 1.00 | 1 | 1 | 0     | 0      | 0      | 0      | 0      | t | 153824 | EKEYKSIT<br>DELDQTFS<br>E   | Homo<br>sapiens         |
| 1 | 1.00 | 1 | 1 | -0.02 | -0.016 | -0.018 | -0.023 | -0.02  | t | 95560  | LNFLKKISQ<br>R              | Homo<br>sapiens         |
| 1 | 1.00 | 1 | 1 | -0.02 | -0.02  | -0.025 | -0.017 | -0.018 | t | 35756  | LEWRNTS<br>GLYVLT           | Homo<br>sapiens         |
| 1 | 1.00 | 1 | 1 | 0.03  | 0.03   | 0.03   | 0.03   | 0.03   | t | 149125 | TTL DANQ                    | Sus<br>scrofa           |
| 1 | 1.00 | 1 | 1 | 0.01  | 0.01   | 0.01   | 0.01   | 0.01   | t | 141542 | GRKSFHKL<br>DGSF            | Rattus                  |
| 1 | 1.00 | 1 | 1 | 0.01  | 0.01   | 0.01   | 0.01   | 0.01   | t | 135854 | IQQSIERL                    | Mus<br>musculu<br>s     |
| 1 | 1.00 | 1 | 1 | 0.01  | 0.01   | 0.01   | 0.01   | 0.01   | t | 156427 | QQGRQQ<br>QQQQQG<br>QQG     | Homo<br>sapiens         |
| 1 | 1.00 | 1 | 1 | 0.01  | 0.01   | 0.01   | 0.01   | 0.01   | t | 77923  | ISPTQLYA<br>QVRA            | Mus<br>musculu<br>s     |

|   |      |   |   |       |       |       |       |        |   |        |                       |                       |
|---|------|---|---|-------|-------|-------|-------|--------|---|--------|-----------------------|-----------------------|
| 1 | 1.00 | 1 | 1 | -0.01 | -0.01 | -0.01 | -0.01 | -0.01  | t | 144661 | GREGYPADGGCAWPACYC    | Oryctolagus cuniculus |
| 1 | 1.00 | 1 | 1 | -0.01 | -0.01 | -0.01 | -0.01 | -0.01  | t | 146901 | ETHGGEDVAVFAR         | Homo sapiens          |
| 1 | 1.00 | 1 | 1 | -0.01 | -0.01 | -0.01 | -0.01 | -0.01  | t | 108507 | KSDKARYDREMKNYV       | Homo sapiens          |
| 1 | 1.00 | 1 | 1 | -0.01 | -0.01 | -0.01 | -0.01 | -0.01  | t | 98973  | QSLACQCLVR            | Homo sapiens          |
| 1 | 1.00 | 1 | 1 | -0.01 | -0.01 | -0.01 | -0.01 | -0.01  | t | 82527  | GAATPYAGEPARPPE TLGEE | Aotus                 |
| 1 | 1.00 | 1 | 1 | -0.01 | -0.01 | -0.01 | -0.01 | -0.01  | t | 92714  | FNDAFNGGDG            | Ovis aries            |
| 1 | 1.00 | 1 | 1 | -0.01 | -0.01 | -0.01 | -0.01 | -0.01  | t | 44816  | NLNFEMYGAVYSVN        | Homo sapiens          |
| 1 | 1.00 | 1 | 1 | -0.01 | -0.01 | -0.01 | -0.01 | -0.01  | t | 47180  | PDREVLHREFDEMEEC ASHL | Homo sapiens          |
| 1 | 1.00 | 1 | 1 | -0.01 | -0.01 | -0.01 | -0.01 | -0.01  | t | 7108   | CTARVAGLFNPGSQQR      | Mus musculus          |
| 1 | 1.00 | 1 | 1 | -0.05 | -0.05 | -0.05 | -0.05 | -0.05  | t | 116808 | QFRHDWY               | Oryctolagus cuniculus |
| 1 | 1.00 | 1 | 1 | 0.03  | 0.027 | 0.03  | 0.03  | 0.031  | t | 125414 | FSEEKLVFS LRLMEEN     | Oryctolagus cuniculus |
| 1 | 1.00 | 1 | 1 | 0.01  | 0.012 | 0.005 | 0.007 | 0.011  | t | 159048 | PKARELTD AETKAFL      | Homo sapiens          |
| 1 | 1.00 | 1 | 1 | 0.02  | 0.02  | 0.032 | 0.02  | 0.02   | t | 19264  | GEFMFDFDGDEIF         | Mus musculus          |
| 1 | 1.00 | 1 | 1 | 0.02  | 0.02  | 0.02  | 0.02  | 0.021  | t | 33142  | KRGPDSG               | Mus musculus          |
| 1 | 1.00 | 1 | 1 | 0.01  | 0.01  | 0.01  | 0.01  | 0.01   | t | 55900  | RSMANEGS              | Mus musculus          |
| 1 | 1.00 | 1 | 1 | -0.02 | -0.02 | -0.02 | -0.02 | -0.019 | t | 118127 | SDDDMGFGLFD           | Homo sapiens          |

|   |      |   |   |       |        |        |        |        |   |        |                              |                                  |
|---|------|---|---|-------|--------|--------|--------|--------|---|--------|------------------------------|----------------------------------|
| 1 | 1.00 | 1 | 1 | 0.03  | 0.032  | 0.023  | 0.029  | 0.032  | t | 130608 | SIDLKDKYK<br>NIGA            | Homo<br>sapiens                  |
| 1 | 1.00 | 1 | 1 | -0.01 | -0.007 | -0.01  | -0.01  | -0.01  | t | 135441 | AGLGAGIP                     | Mus<br>musculu<br>s              |
| 1 | 1.00 | 1 | 1 | 0.01  | 0.013  | 0.022  | 0.01   | 0.009  | t | 103172 | FHDHKTA<br>NQ                | Mus<br>musculu<br>s              |
| 1 | 1.00 | 1 | 1 | -0.02 | -0.016 | -0.011 | -0.013 | -0.019 | t | 108510 | KTMSAKEK<br>SKFEDMA          | Homo<br>sapiens                  |
| 1 | 1.00 | 1 | 1 | 0     | 0.002  | -0.009 | -0.002 | 0.003  | t | 110828 | EIDGPAGQ<br>AEPDRAH<br>YNI   | Homo<br>sapiens                  |
| 1 | 1.00 | 1 | 1 | 0.03  | 0.027  | 0.035  | 0.03   | 0.031  | t | 78630  | DYGEILTEK<br>VEDLYKGV<br>LL  | Oryctola<br>gus<br>cuniculu<br>s |
| 1 | 1.00 | 1 | 1 | 0.02  | 0.02   | 0.023  | 0.02   | 0.02   | t | 100389 | PNTLVLPK<br>HADADNIL<br>VIQQ | Homo<br>sapiens                  |
| 1 | 1.00 | 1 | 1 | -0.01 | -0.013 | -0.026 | -0.01  | -0.004 | t | 31067  | KGTAPEFGV<br>AFGNS           | Oryctola<br>gus<br>cuniculu<br>s |
| 1 | 1.00 | 1 | 1 | -0.01 | -0.013 | -0.026 | -0.01  | -0.004 | t | 31067  | KGTAPEFGV<br>AFGNS           | Oryctola<br>gus<br>cuniculu<br>s |
| 1 | 1.00 | 1 | 1 | -0.03 | -0.026 | -0.041 | -0.029 | -0.028 | t | 111921 | VRYKCGK<br>NRETIEKLL<br>SKLL | Homo<br>sapiens                  |
| 1 | 1.00 | 1 | 1 | 0     | -0.002 | 0      | -0.003 | -0.001 | t | 132504 | NNAIEPRS<br>FSQNPV           | Mus<br>musculu<br>s              |
| 1 | 1.00 | 1 | 1 | 0     | -0.002 | 0      | -0.003 | -0.001 | t | 131457 | GSHTRGD                      | Mus<br>musculu<br>s              |
| 1 | 1.00 | 1 | 1 | 0     | -0.002 | 0      | -0.003 | -0.001 | t | 131628 | RGYDSYA                      | Mus<br>musculu<br>s              |
| 1 | 1.00 | 1 | 1 | 0     | -0.002 | 0      | -0.003 | -0.001 | t | 105021 | VHHQKLV<br>FFAEDVGS<br>NK    | Mus<br>musculu<br>s              |



|   |      |   |   |       |        |        |        |        |   |        |                         |                                  |
|---|------|---|---|-------|--------|--------|--------|--------|---|--------|-------------------------|----------------------------------|
| 1 | 1.00 | 1 | 1 | 0     | -0.004 | 0      | -0.003 | -0.001 | t | 109406 | KIQPSEPR<br>DSAVYFCA    | Oryctola<br>gus<br>cuniculu<br>s |
| 1 | 1.00 | 1 | 1 | 0     | -0.004 | 0      | -0.003 | -0.001 | t | 3274   | ANETIYNT<br>TLKYGDV     | Mus<br>musculu<br>s              |
| 1 | 1.00 | 1 | 1 | -0.02 | -0.02  | -0.02  | -0.021 | -0.019 | t | 24590  | HQLDPAF<br>GAN          | Mus<br>musculu<br>s              |
| 1 | 1.00 | 1 | 1 | -0.02 | -0.02  | -0.02  | -0.021 | -0.019 | t | 24590  | HQLDPAF<br>GAN          | Mus<br>musculu<br>s              |
| 1 | 1.00 | 1 | 1 | -0.01 | -0.01  | -0.011 | -0.01  | -0.01  | t | 72484  | WGNGCGL<br>FG           | Mus<br>musculu<br>s              |
| 1 | 1.00 | 1 | 1 | -0.01 | -0.013 | -0.01  | -0.01  | -0.008 | t | 135495 | RITLYL                  | Oryctola<br>gus<br>cuniculu<br>s |
| 1 | 1.00 | 1 | 1 | 0.01  | 0.014  | 0.012  | 0.007  | 0.01   | t | 95544  | LCSTFCKE<br>VV          | Homo<br>sapiens                  |
| 1 | 1.00 | 1 | 1 | 0     | 0      | 0      | 0      | 0      | t | 136322 | GLFTPKS<br>PAKT         | Gallus<br>gallus                 |
| 1 | 1.00 | 1 | 1 | 0     | 0      | 0      | 0      | 0      | t | 113780 | QQPGQG<br>QQGQQP<br>GQ  | Homo<br>sapiens                  |
| 1 | 1.00 | 1 | 1 | 0     | 0      | 0      | 0      | 0      | t | 113781 | QQPGQG<br>QQPGQG<br>QQ  | Homo<br>sapiens                  |
| 1 | 1.00 | 1 | 1 | -0.02 | -0.02  | -0.02  | -0.02  | -0.02  | t | 151068 | VGSSRYSK<br>KFKPEIA     | Homo<br>sapiens                  |
| 1 | 1.00 | 1 | 1 | -0.02 | -0.02  | -0.02  | -0.02  | -0.02  | t | 132803 | ETMGREP<br>QVAWTVI<br>V | Trichosu<br>rus<br>vulpecul<br>a |
| 1 | 1.00 | 1 | 1 | -0.02 | -0.02  | -0.02  | -0.02  | -0.02  | t | 133958 | WIRLNF                  | Mus<br>musculu<br>s              |
| 1 | 1.00 | 1 | 1 | -0.02 | -0.02  | -0.02  | -0.02  | -0.02  | t | 24006  | HHPITDSD<br>QTRLY       | Oryctola<br>gus<br>cuniculu<br>s |

|   |      |   |   |       |        |        |        |        |   |        |                      |                       |
|---|------|---|---|-------|--------|--------|--------|--------|---|--------|----------------------|-----------------------|
| 1 | 1.00 | 1 | 1 | -0.04 | -0.04  | -0.04  | -0.04  | -0.04  | t | 140598 | SLISDEWPRW           | Mus musculus          |
| 1 | 1.00 | 1 | 1 | -0.04 | -0.04  | -0.04  | -0.04  | -0.04  | t | 149099 | RVLTSMD              | Sus scrofa            |
| 1 | 1.00 | 1 | 1 | -0.04 | -0.04  | -0.04  | -0.04  | -0.04  | t | 103344 | LEAAGDKKIGVIKVV      | Homo sapiens          |
| 1 | 1.00 | 1 | 1 | -0.04 | -0.04  | -0.04  | -0.04  | -0.04  | t | 95501  | KKISQRYQKF           | Homo sapiens          |
| 1 | 1.00 | 1 | 1 | -0.02 | -0.017 | -0.015 | -0.02  | -0.021 | t | 122083 | DPNIKLVLLDCWATS      | Mus musculus          |
| 1 | 1.00 | 1 | 1 | 0     | 0.003  | 0.007  | 0      | -0.002 | t | 11561  | EEDQKAREA            | Mus musculus          |
| 1 | 1.00 | 1 | 1 | 0.03  | 0.027  | 0.023  | 0.031  | 0.03   | t | 106880 | SVLTQPPSVSGAPGQRT    | Oryctolagus cuniculus |
| 1 | 1.00 | 1 | 1 | -0.01 | -0.01  | -0.002 | -0.01  | -0.01  | t | 48401  | PLLPIF               | Mus musculus          |
| 1 | 1.00 | 1 | 1 | 0     | 0      | -0.002 | 0      | 0      | t | 52330  | QSGRQPTPISP          | Mus musculus          |
| 1 | 1.00 | 1 | 1 | 0.03  | 0.03   | 0.03   | 0.03   | 0.03   | t | 140896 | QRYNTVYFGFDKYDITGEYV | Oryctolagus cuniculus |
| 1 | 1.00 | 1 | 1 | -0.02 | -0.015 | -0.013 | -0.02  | -0.021 | t | 132802 | ESTLHLVLR            | Mus musculus          |
| 1 | 1.00 | 1 | 1 | -0.01 | -0.01  | -0.002 | -0.01  | -0.01  | t | 106552 | IYRKYFGNRP           | Homo sapiens          |
| 1 | 1.00 | 1 | 1 | -0.02 | -0.018 | -0.013 | -0.023 | -0.023 | t | 107034 | YTTRR                | Homo sapiens          |
| 1 | 1.00 | 1 | 1 | 0.02  | 0.018  | 0.012  | 0.021  | 0.022  | t | 31707  | KKTDEAQP             | Homo sapiens          |
| 1 | 1.00 | 1 | 1 | 0.01  | 0.012  | 0.01   | 0.011  | 0.01   | t | 116937 | DDHSTRCWVS           | Homo sapiens          |

|   |      |   |   |       |        |        |        |        |   |        |                              |                                  |
|---|------|---|---|-------|--------|--------|--------|--------|---|--------|------------------------------|----------------------------------|
| 1 | 1.00 | 1 | 1 | 0.07  | 0.07   | 0.072  | 0.07   | 0.07   | t | 69324  | VKTKNTTT<br>TQTQ             | Homo<br>sapiens                  |
| 1 | 1.00 | 1 | 1 | -0.04 | -0.042 | -0.04  | -0.041 | -0.04  | t | 66216  | TSGFTGLF<br>SSGAKQT          | Mus<br>musculu<br>s              |
| 1 | 1.00 | 1 | 1 | 0.02  | 0.024  | 0.027  | 0.02   | 0.018  | t | 38627  | LPPSRDEL                     | Capra<br>hircus                  |
| 1 | 1.00 | 1 | 1 | 0     | 0      | 0      | 0      | 0.002  | t | 128066 | NSYDVLSA<br>LSGNLKL          | Mus<br>musculu<br>s              |
| 1 | 1.00 | 1 | 1 | 0     | 0      | -0.002 | 0      | -0.001 | t | 119672 | WNPADYG<br>GIKKIRLPS<br>DD   | Rattus<br>norvegic<br>us         |
| 1 | 1.00 | 1 | 1 | 0.01  | 0.014  | 0.014  | 0.007  | 0.01   | t | 134335 | CTKPSDGN<br>CT               | Homo<br>sapiens                  |
| 1 | 1.00 | 1 | 1 | 0.02  | 0.02   | 0.02   | 0.02   | 0.02   | t | 151665 | KIETELRDI<br>CNDVLSLL<br>EKF | Mus<br>musculu<br>s              |
| 1 | 1.00 | 1 | 1 | 0.04  | 0.044  | 0.035  | 0.04   | 0.042  | t | 94038  | TIYGNDGN<br>DR               | Ovis<br>aries                    |
| 1 | 1.00 | 1 | 1 | 0.03  | 0.03   | 0.028  | 0.03   | 0.03   | t | 8226   | DEYSNQN<br>NFVHDC            | Mus<br>musculu<br>s              |
| 1 | 1.00 | 1 | 1 | 0.03  | 0.03   | 0.028  | 0.03   | 0.03   | t | 8226   | DEYSNQN<br>NFVHDC            | Mus<br>musculu<br>s              |
| 1 | 1.00 | 1 | 1 | 0.02  | 0.02   | 0.02   | 0.02   | 0.02   | t | 156872 | FSKSSSWE<br>SWLP             | Gallus<br>gallus                 |
| 1 | 1.00 | 1 | 1 | -0.02 | -0.024 | -0.023 | -0.021 | -0.021 | t | 10779  | DVVRDLPS<br>GFNTLKPI         | Oryctola<br>gus<br>cuniculu<br>s |
| 1 | 1.00 | 1 | 1 | -0.01 | -0.009 | -0.01  | -0.013 | -0.01  | t | 130606 | SCTVYGKT<br>PLCG             | Mus<br>musculu<br>s              |
| 1 | 1.00 | 1 | 1 | 0.01  | 0.021  | 0.011  | 0.01   | 0.01   | t | 19866  | GGGWGQ<br>GGGTHNQ<br>WNK     | Gallus<br>gallus                 |

|   |      |   |   |       |        |       |       |       |   |        |                              |                       |
|---|------|---|---|-------|--------|-------|-------|-------|---|--------|------------------------------|-----------------------|
| 1 | 1.00 | 1 | 1 | 0.01  | 0.021  | 0.011 | 0.01  | 0.01  | t | 19866  | GGGWGQ<br>GGGTHNQ<br>WNK     | Gallus<br>gallus      |
| 1 | 1.00 | 1 | 1 | 0.02  | 0.02   | 0.018 | 0.02  | 0.021 | t | 112783 | GSLPQKSH<br>GRTQDEN          | Rattus<br>norvegicus  |
| 1 | 1.00 | 1 | 1 | 0     | -0.001 | 0     | 0     | 0     | t | 27987  | IPPTTTPVP<br>PGYLI           | Anas<br>platyrhynchos |
| 1 | 1.00 | 1 | 1 | 0.03  | 0.03   | 0.03  | 0.03  | 0.03  | t | 142225 | LNDSSEEE<br>DEID             | Homo<br>sapiens       |
| 1 | 1.00 | 1 | 1 | 0.01  | 0.01   | 0.01  | 0.01  | 0.01  | t | 122020 | VVDPHGP<br>PNYINIPS          | Mus<br>musculus       |
| 1 | 1.00 | 1 | 1 | 0.01  | 0.01   | 0.01  | 0.01  | 0.01  | t | 122020 | VVDPHGP<br>PNYINIPS          | Mus<br>musculus       |
| 1 | 1.00 | 1 | 1 | 0.01  | 0.01   | 0.01  | 0.01  | 0.01  | t | 126242 | HYQRLSES<br>RSLREA           | Mus<br>musculus       |
| 1 | 1.00 | 1 | 1 | -0.01 | -0.01  | -0.01 | -0.01 | -0.01 | t | 121369 | HDDPQRF<br>ADAQVFP<br>F      | Mus<br>musculus       |
| 1 | 1.00 | 1 | 1 | -0.01 | -0.01  | -0.01 | -0.01 | -0.01 | t | 114286 | CSIKTHSW<br>C                | Mus<br>musculus       |
| 1 | 1.00 | 1 | 1 | -0.01 | -0.01  | -0.01 | -0.01 | -0.01 | t | 112104 | FCHQYLS                      | Homo<br>sapiens       |
| 1 | 1.00 | 1 | 1 | -0.01 | -0.01  | -0.01 | -0.01 | -0.01 | t | 77793  | PKSKLSVK<br>KC               | Homo<br>sapiens       |
| 1 | 1.00 | 1 | 1 | -0.01 | -0.01  | -0.01 | -0.01 | -0.01 | t | 93898  | SKKEKVTI<br>QN               | Ovis<br>aries         |
| 1 | 1.00 | 1 | 1 | -0.01 | -0.01  | -0.01 | -0.01 | -0.01 | t | 50107  | PYIEQGM<br>QLAEQFK<br>QKARGL | Homo<br>sapiens       |
| 1 | 1.00 | 1 | 1 | -0.03 | -0.03  | -0.03 | -0.03 | -0.03 | t | 127719 | KWSFTPP                      | Homo<br>sapiens       |
| 1 | 1.00 | 1 | 1 | -0.03 | -0.03  | -0.03 | -0.03 | -0.03 | t | 111097 | AGTMGDT<br>VPQSLYIK<br>GTGMR | Mus<br>musculus       |
| 1 | 1.00 | 1 | 1 | -0.03 | -0.03  | -0.03 | -0.03 | -0.03 | t | 78884  | VVCMYLY<br>QLSPPIW<br>PLLPH  | Homo<br>sapiens       |

|   |      |   |   |       |        |        |        |        |   |        |                              |                          |
|---|------|---|---|-------|--------|--------|--------|--------|---|--------|------------------------------|--------------------------|
| 1 | 1.00 | 1 | 1 | 0     | 0      | 0      | 0.001  | 0.001  | t | 46443  | NVPEKQT                      | Mus<br>musculus          |
| 1 | 1.00 | 1 | 1 | 0     | 0      | 0      | 0.001  | 0.001  | t | 46443  | NVPEKQT                      | Mus<br>musculus          |
| 1 | 1.00 | 1 | 1 | 0     | 0      | 0      | 0.001  | 0.001  | t | 46443  | NVPEKQT                      | Mus<br>musculus          |
| 1 | 1.00 | 1 | 1 | 0     | 0      | 0      | 0.001  | 0.001  | t | 7171   | CTKPTDGN                     | Mus<br>musculus          |
| 1 | 1.00 | 1 | 1 | 0     | 0      | 0      | 0.001  | 0.001  | t | 7171   | CTKPTDGN                     | Mus<br>musculus          |
| 1 | 1.00 | 1 | 1 | 0.01  | -0.004 | 0.013  | 0.01   | 0.008  | t | 75426  | YPVEYDNC<br>AYICWNY          | Oryctolagus<br>cuniculus |
| 1 | 1.00 | 1 | 1 | -0.04 | -0.042 | -0.04  | -0.039 | -0.038 | t | 5674   | AWLVHR                       | Homo<br>sapiens          |
| 1 | 1.00 | 1 | 1 | 0     | 0      | 0      | -0.003 | 0      | t | 36760  | LIVTQTMK                     | Homo<br>sapiens          |
| 1 | 1.00 | 1 | 1 | -0.02 | -0.016 | -0.019 | -0.017 | -0.02  | t | 125413 | FRVTCKDI<br>QRIPSLPPS<br>TQT | Homo<br>sapiens          |
| 1 | 1.00 | 1 | 1 | -0.02 | -0.02  | -0.02  | -0.02  | -0.018 | t | 140460 | EKLKHS                       | Mus<br>musculus          |
| 1 | 1.00 | 1 | 1 | 0     | -0.011 | 0.007  | 0      | 0      | t | 146795 | CCELCCNP<br>QCAGCY           | Oryctolagus<br>cuniculus |
| 1 | 1.00 | 1 | 1 | -0.03 | -0.027 | -0.03  | -0.03  | -0.031 | t | 133676 | RIYMRMK<br>HVR               | Mus<br>musculus          |
| 1 | 1.00 | 1 | 1 | -0.01 | -0.01  | -0.01  | -0.01  | -0.01  | t | 36426  | LHSTSPEG<br>NPSP             | Homo<br>sapiens          |
| 1 | 1.00 | 1 | 1 | 0     | 0.002  | -0.009 | -0.003 | 0      | t | 29965  | KATYEAAV<br>AANNAKNAALT      | Homo<br>sapiens          |
| 1 | 1.00 | 1 | 1 | -0.03 | -0.028 | -0.03  | -0.029 | -0.029 | t | 69898  | VLYREF                       | Homo<br>sapiens          |

|   |      |   |   |       |        |        |        |        |   |        |                              |                       |
|---|------|---|---|-------|--------|--------|--------|--------|---|--------|------------------------------|-----------------------|
| 1 | 1.00 | 1 | 1 | 0.01  | 0.01   | 0.013  | 0.013  | 0.01   | t | 79574  | IMNYTGN<br>QQSRWGL<br>GSPNCH | Homo sapiens          |
| 1 | 1.00 | 1 | 1 | 0     | 0.002  | 0      | 0.001  | 0.001  | t | 51146  | QIVGGVYL                     | Homo sapiens          |
| 1 | 1.00 | 1 | 1 | -0.02 | -0.022 | -0.015 | -0.017 | -0.017 | t | 141693 | KTWG                         | Mus musculus          |
| 1 | 1.00 | 1 | 1 | 0     | -0.003 | 0      | 0      | 0      | t | 135566 | KCSRLYTA<br>CVY              | Oryctolagus cuniculus |
| 1 | 1.00 | 1 | 1 | 0     | -0.003 | 0      | 0      | 0      | t | 135566 | KCSRLYTA<br>CVY              | Oryctolagus cuniculus |
| 1 | 1.00 | 1 | 1 | -0.01 | -0.01  | -0.013 | -0.017 | -0.013 | t | 115652 | SSRISYWT<br>IVKP             | Homo sapiens          |
| 1 | 1.00 | 1 | 1 | 0     | 0.003  | -0.001 | 0      | 0.002  | t | 44268  | NIKPLEDKI<br>L               | Mus musculus          |
| 1 | 1.00 | 1 | 1 | 0     | -0.003 | 0.007  | 0      | -0.001 | t | 140053 | MEDDYNL<br>KDMFSRA<br>VTM    | Oryctolagus cuniculus |
| 1 | 1.00 | 1 | 1 | 0     | 0.002  | -0.005 | 0.001  | 0      | t | 62141  | SVGHMTG<br>RFTSLFSV<br>G     | Homo sapiens          |
| 1 | 1.00 | 1 | 1 | 0.03  | 0.028  | 0.03   | 0.029  | 0.03   | t | 98798  | GGFGPGG<br>FGP               | Mus musculus          |
| 1 | 1.00 | 1 | 1 | 0     | 0      | -0.005 | 0      | 0      | t | 24941  | HTLTTGGH<br>AARLTSGF<br>AGLF | Mus musculus          |
| 1 | 1.00 | 1 | 1 | 0.04  | 0.04   | 0.04   | 0.04   | 0.04   | t | 119646 | SNGQPEN<br>N                 | Homo sapiens          |
| 1 | 1.00 | 1 | 1 | 0.04  | 0.04   | 0.04   | 0.04   | 0.04   | t | 116809 | QFRSDST                      | Oryctolagus cuniculus |
| 1 | 1.00 | 1 | 1 | 0     | 0.002  | 0.001  | 0.001  | 0      | t | 156371 | LRKVGDSV<br>KAASKE           | Homo sapiens          |
| 1 | 1.00 | 1 | 1 | 0.02  | 0.02   | 0.02   | 0.02   | 0.02   | t | 149123 | TNPTQMA                      | Sus scrofa            |
| 1 | 1.00 | 1 | 1 | 0.02  | 0.02   | 0.02   | 0.02   | 0.02   | t | 119511 | QKRAKGLS<br>A                | Homo sapiens          |

|   |      |   |   |       |        |        |        |        |   |        |                              |                                  |
|---|------|---|---|-------|--------|--------|--------|--------|---|--------|------------------------------|----------------------------------|
| 1 | 1.00 | 1 | 1 | 0.02  | 0.02   | 0.02   | 0.02   | 0.02   | t | 114882 | LAAVSVDC<br>SE               | Homo<br>sapiens                  |
| 1 | 1.00 | 1 | 1 | 0.02  | 0.02   | 0.02   | 0.02   | 0.02   | t | 105895 | KDLESIKG                     | Oryctola<br>gus<br>cuniculu<br>s |
| 1 | 1.00 | 1 | 1 | 0.02  | 0.02   | 0.02   | 0.02   | 0.02   | t | 115199 | DAPSFSDI<br>PNPIGSEN<br>SEKT | Homo<br>sapiens                  |
| 1 | 1.00 | 1 | 1 | 0     | 0      | 0      | 0      | 0.001  | t | 53009  | QYNLAFSD<br>RQSAQ            | Mus<br>musculu<br>s              |
| 1 | 1.00 | 1 | 1 | 0     | 0      | 0      | 0      | 0      | t | 78310  | WHTSYLP                      | Homo<br>sapiens                  |
| 1 | 1.00 | 1 | 1 | -0.02 | -0.02  | -0.02  | -0.02  | -0.02  | t | 114758 | CNRAFNP<br>VCG               | Homo<br>sapiens                  |
| 1 | 1.00 | 1 | 1 | -0.02 | -0.02  | -0.02  | -0.02  | -0.02  | t | 79360  | RCPYYTRH<br>PSMRCN           | Mus<br>musculu<br>s              |
| 1 | 1.00 | 1 | 1 | 0     | 0      | 0      | -0.003 | 0      | t | 72255  | WAQPGYP<br>W                 | Homo<br>sapiens                  |
| 1 | 1.00 | 1 | 1 | 0.02  | 0.022  | 0.02   | 0.017  | 0.02   | t | 72940  | WPKD TDT                     | Homo<br>sapiens                  |
| 1 | 1.00 | 1 | 1 | -0.01 | -0.008 | -0.004 | -0.009 | -0.01  | t | 39883  | LTERLY                       | Homo<br>sapiens                  |
| 1 | 1.00 | 1 | 1 | -0.03 | -0.03  | -0.039 | -0.032 | -0.03  | t | 135980 | QSRRRGD<br>MSTLN             | Homo<br>sapiens                  |
| 1 | 1.00 | 1 | 1 | 0     | 0.003  | 0      | 0      | 0      | t | 104298 | TEATAIRP<br>AQVGYNT          | Sus<br>scrofa                    |
| 1 | 1.00 | 1 | 1 | 0     | 0      | 0      | 0      | 0      | t | 111140 | CAEPNNLL<br>C                | Homo<br>sapiens                  |
| 1 | 1.00 | 1 | 1 | 0     | 0.007  | 0      | 0      | 0      | t | 79368  | RGDLARG<br>DLARGDL           | Cavia<br>porcellu<br>s           |
| 1 | 1.00 | 1 | 1 | -0.03 | -0.027 | -0.031 | -0.03  | -0.029 | t | 94513  | FHPDK                        | Mus<br>musculu<br>s              |
| 1 | 1.00 | 1 | 1 | -0.02 | -0.022 | -0.018 | -0.017 | -0.018 | t | 98788  | GDAPAGG<br>AVP               | Mus<br>musculu<br>s              |

|   |      |   |   |      |        |        |        |        |   |        |                              |                                  |
|---|------|---|---|------|--------|--------|--------|--------|---|--------|------------------------------|----------------------------------|
| 1 | 1.00 | 1 | 1 | 0    | -0.003 | -0.005 | 0      | 0      | t | 6697   | CNIGGLGN<br>NTLICPTD<br>CFRK | Oryctola<br>gus<br>cuniculu<br>s |
| 1 | 1.00 | 1 | 1 | 0.01 | 0.014  | 0.017  | 0.017  | 0.011  | t | 135471 | KDKATFGC<br>HDGC             | Homo<br>sapiens                  |
| 1 | 1.00 | 1 | 1 | 0.02 | 0.022  | 0.028  | 0.02   | 0.02   | t | 24973  | HTSLGHED<br>T                | Rattus<br>norvegic<br>us         |
| 1 | 1.00 | 1 | 1 | 0.01 | 0.007  | 0.012  | 0.013  | 0.01   | t | 34135  | KVNFPHG<br>MLDLEEIA<br>ANSKD | Homo<br>sapiens                  |
| 1 | 1.00 | 1 | 1 | 0.03 | 0.028  | 0.024  | 0.027  | 0.028  | t | 10168  | DSLPHQ<br>QATDDSG<br>H       | Mus<br>musculu<br>s              |
| 1 | 1.00 | 1 | 1 | 0    | 0      | 0      | 0      | 0      | t | 104202 | QHGHLLTS<br>SQELERYT<br>FNP  | Oryctola<br>gus<br>cuniculu<br>s |
| 1 | 1.00 | 1 | 1 | 0.03 | 0.03   | 0.028  | 0.03   | 0.031  | t | 117605 | PNHPSSSG<br>SFSDADLA<br>D    | Mus<br>musculu<br>s              |
| 1 | 1.00 | 1 | 1 | 0.02 | 0.02   | 0.02   | 0.02   | 0.02   | t | 134119 | KMVYEDT<br>LTLFPFSGE<br>TVFM | Homo<br>sapiens                  |
| 1 | 1.00 | 1 | 1 | 0.02 | 0.02   | 0.02   | 0.02   | 0.02   | t | 134119 | KMVYEDT<br>LTLFPFSGE<br>TVFM | Homo<br>sapiens                  |
| 1 | 1.00 | 1 | 1 | 0.02 | 0.02   | 0.02   | 0.02   | 0.02   | t | 137447 | SHKIHPFQ<br>TTPY             | Mus<br>musculu<br>s              |
| 1 | 1.00 | 1 | 1 | 0    | -0.004 | -0.003 | -0.001 | -0.001 | t | 10779  | DVVRDLPS<br>GFNTLKPI         | Oryctola<br>gus<br>cuniculu<br>s |
| 1 | 1.00 | 1 | 1 | 0.02 | 0.016  | 0.02   | 0.013  | 0.019  | t | 122730 | DPAQPPR<br>D                 | Oryctola<br>gus<br>cuniculu<br>s |
| 1 | 1.00 | 1 | 1 | 0.02 | 0.02   | 0.008  | 0.02   | 0.022  | t | 60592  | SQWGWG<br>GSTDEYCS<br>PDHNCQ | Mus<br>musculu<br>s              |
| 1 | 1.00 | 1 | 1 | 0.01 | 0.012  | 0.008  | 0.011  | 0.011  | t | 96367  | HSNLDHI                      | Homo<br>sapiens                  |



|   |      |   |   |       |        |        |        |        |   |        |                            |                       |
|---|------|---|---|-------|--------|--------|--------|--------|---|--------|----------------------------|-----------------------|
| 1 | 1.00 | 1 | 1 | 0     | -0.002 | 0      | -0.007 | -0.001 | t | 132276 | ERIYHFV                    | Mus musculus          |
| 1 | 1.00 | 1 | 1 | -0.02 | -0.018 | -0.011 | -0.013 | -0.018 | t | 110854 | FFSARGHR<br>PLDKKREE<br>AP | Homo sapiens          |
| 1 | 1.00 | 1 | 1 | -0.01 | -0.013 | -0.011 | -0.01  | -0.01  | t | 30200  | KDLLEQKR<br>AAVDTYC        | Oryctolagus cuniculus |
| 1 | 1.00 | 1 | 1 | 0.03  | 0.03   | 0.03   | 0.03   | 0.03   | t | 79542  | EQTINQW                    | Oryctolagus cuniculus |
| 1 | 1.00 | 1 | 1 | 0.01  | 0.01   | 0.01   | 0.01   | 0.01   | t | 121735 | QCCLAIPH<br>TENSHPY        | Mus musculus          |
| 1 | 1.00 | 1 | 1 | 0.01  | 0.01   | 0.01   | 0.01   | 0.01   | t | 121735 | QCCLAIPH<br>TENSHPY        | Mus musculus          |
| 1 | 1.00 | 1 | 1 | 0.01  | 0.01   | 0.01   | 0.01   | 0.01   | t | 127737 | MHETTKA                    | Homo sapiens          |
| 1 | 1.00 | 1 | 1 | 0.01  | 0.013  | 0.01   | 0.01   | 0.01   | t | 98455  | SGSVQFVP<br>IQ             | Mus musculus          |
| 1 | 1.00 | 1 | 1 | 0.01  | 0.01   | 0.01   | 0.01   | 0.01   | t | 115789 | IHPFAQTQ<br>SL             | Homo sapiens          |
| 1 | 1.00 | 1 | 1 | 0.01  | 0.01   | 0.01   | 0.01   | 0.01   | t | 93030  | ITDSDGND<br>KL             | Ovis aries            |
| 1 | 1.00 | 1 | 1 | 0.01  | 0.01   | 0.01   | 0.01   | 0.01   | t | 23314  | GYCGREC<br>GIKKGSSG        | Equus caballus        |
| 1 | 1.00 | 1 | 1 | 0.01  | 0.013  | 0.01   | 0.01   | 0.01   | t | 23314  | GYCGREC<br>GIKKGSSG        | Equus caballus        |
| 1 | 1.00 | 1 | 1 | -0.01 | -0.01  | -0.01  | -0.01  | -0.01  | t | 138196 | KLTSLLRC<br>NCPPLRF        | Homo sapiens          |
| 1 | 1.00 | 1 | 1 | -0.01 | -0.01  | -0.01  | -0.01  | -0.01  | t | 132931 | WGQNIKA                    | Homo sapiens          |
| 1 | 1.00 | 1 | 1 | -0.01 | -0.01  | -0.01  | -0.01  | -0.01  | t | 112102 | EWLAHIW                    | Homo sapiens          |
| 1 | 1.00 | 1 | 1 | -0.01 | -0.01  | -0.01  | -0.01  | -0.01  | t | 114965 | TSLEDGKV<br>MVL            | Homo sapiens          |
| 1 | 1.00 | 1 | 1 | -0.01 | -0.01  | -0.01  | -0.01  | -0.01  | t | 79508  | AHKSTLR                    | Oryctolagus cuniculus |

|   |      |   |   |       |        |        |        |        |   |        |                              |                          |
|---|------|---|---|-------|--------|--------|--------|--------|---|--------|------------------------------|--------------------------|
| 1 | 1.00 | 1 | 1 | -0.01 | -0.01  | -0.01  | -0.01  | -0.01  | t | 92782  | GDDILDGG<br>NG               | Ovis<br>aries            |
| 1 | 1.00 | 1 | 1 | -0.03 | -0.03  | -0.03  | -0.03  | -0.03  | t | 119547 | YKKGARPI<br>Q                | Homo<br>sapiens          |
| 1 | 1.00 | 1 | 1 | -0.03 | -0.03  | -0.03  | -0.03  | -0.03  | t | 95120  | MPKWTRV<br>ILLNWCA<br>WFLRMK | Rattus<br>norvegic<br>us |
| 1 | 1.00 | 1 | 1 | 0     | -0.002 | 0.002  | -0.001 | 0      | t | 7146   | CTGFSNLF<br>NLGSQQK<br>V     | Mus<br>musculu<br>s      |
| 1 | 1.00 | 1 | 1 | -0.03 | -0.03  | -0.023 | -0.03  | -0.031 | t | 133705 | SSKTRSG<br>VHLVGPY           | Mus<br>musculu<br>s      |
| 1 | 1.00 | 1 | 1 | 0.01  | 0.012  | 0.01   | 0.007  | 0.01   | t | 47219  | PDVPYVKR                     | Homo<br>sapiens          |
| 1 | 1.00 | 1 | 1 | -0.03 | -0.032 | -0.03  | -0.031 | -0.03  | t | 98797  | GGFGP                        | Mus<br>musculu<br>s      |
| 1 | 1.00 | 1 | 1 | 0.02  | 0.02   | 0.01   | 0.02   | 0.021  | t | 48093  | PKKPNENK<br>LKQPNE           | Mus<br>musculu<br>s      |
| 1 | 1.00 | 1 | 1 | 0.01  | 0.01   | 0.009  | 0.01   | 0.012  | t | 73636  | YEDRYRE                      | Mus<br>musculu<br>s      |
| 1 | 1.00 | 1 | 1 | 0     | -0.002 | -0.003 | 0.003  | 0.002  | t | 19499  | GFASKTPA<br>NQAIS            | Mus<br>musculu<br>s      |
| 1 | 1.00 | 1 | 1 | -0.03 | -0.038 | -0.03  | -0.03  | -0.031 | t | 32145  | KLRRSTN<br>WG                | Mus<br>musculu<br>s      |
| 1 | 1.00 | 1 | 1 | 0.02  | 0.02   | 0.02   | 0.02   | 0.021  | t | 135839 | DYMGNIQ<br>DFDT              | Mus<br>musculu<br>s      |
| 1 | 1.00 | 1 | 1 | 0.02  | 0.02   | 0.02   | 0.02   | 0.021  | t | 135839 | DYMGNIQ<br>DFDT              | Mus<br>musculu<br>s      |
| 1 | 1.00 | 1 | 1 | -0.01 | -0.008 | -0.01  | -0.011 | -0.01  | t | 149433 | QPLSQVSF<br>QQ               | Homo<br>sapiens          |
| 1 | 1.00 | 1 | 1 | -0.01 | -0.008 | -0.01  | -0.011 | -0.01  | t | 136593 | RHYKQYQ<br>FHF               | Homo<br>sapiens          |

|   |      |   |   |       |        |        |        |        |   |        |                            |                          |
|---|------|---|---|-------|--------|--------|--------|--------|---|--------|----------------------------|--------------------------|
| 1 | 1.00 | 1 | 1 | 0.01  | 0.008  | 0.01   | 0.009  | 0.01   | t | 116979 | FQTD MST<br>RPRGA          | Mus<br>musculus          |
| 1 | 1.00 | 1 | 1 | 0.01  | 0.008  | 0.01   | 0.009  | 0.01   | t | 29816  | KAHDLSTA<br>SRPHVVT        | Mus<br>musculus          |
| 1 | 1.00 | 1 | 1 | -0.01 | -0.012 | -0.01  | -0.011 | -0.01  | t | 133655 | NIAHPDR<br>WDRLR           | Mus<br>musculus          |
| 1 | 1.00 | 1 | 1 | -0.04 | -0.044 | -0.025 | -0.04  | -0.042 | t | 79009  | KTWCD A<br>WCG             | Mus<br>musculus          |
| 1 | 1.00 | 1 | 1 | -0.04 | -0.04  | -0.042 | -0.04  | -0.041 | t | 125510 | NPCFPIQL<br>PEEARPA        | Mus<br>musculus          |
| 1 | 1.00 | 1 | 1 | -0.04 | -0.034 | -0.04  | -0.04  | -0.04  | t | 123589 | PKLKEFKS<br>R              | Ovis<br>aries            |
| 1 | 1.00 | 1 | 1 | -0.01 | -0.008 | -0.01  | -0.007 | -0.006 | t | 10812  | DWICEVLS<br>DFKTWL         | Homo<br>sapiens          |
| 1 | 1.00 | 1 | 1 | 0.01  | 0.01   | 0.012  | 0.01   | 0.011  | t | 120343 | YNLKWNP<br>DDYGGVK<br>KIHI | Rattus<br>norvegicus     |
| 1 | 1.00 | 1 | 1 | 0.01  | 0.012  | 0.012  | 0.01   | 0.011  | t | 120343 | YNLKWNP<br>DDYGGVK<br>KIHI | Rattus<br>norvegicus     |
| 1 | 1.00 | 1 | 1 | -0.01 | -0.01  | 0.013  | -0.003 | -0.01  | t | 119566 | ENNYKTP                    | Homo<br>sapiens          |
| 1 | 1.00 | 1 | 1 | 0.02  | 0.016  | 0.016  | 0.019  | 0.018  | t | 14227  | ESPANNP<br>GLSTVRDE        | Oryctolagus<br>cuniculus |
| 1 | 1.00 | 1 | 1 | 0.01  | 0.012  | 0.015  | 0.013  | 0.011  | t | 48555  | PMHECLS<br>APSVCAD<br>NY   | Homo<br>sapiens          |
| 1 | 1.00 | 1 | 1 | 0.01  | 0.012  | 0.018  | 0.011  | 0.01   | t | 47478  | PFAEC SNP<br>TRLP          | Homo<br>sapiens          |
| 1 | 1.00 | 1 | 1 | -0.02 | -0.014 | -0.026 | -0.02  | -0.02  | t | 32887  | KPSTLYKM<br>TVEAVK         | Ovis<br>aries            |

|   |      |   |   |       |        |        |        |        |   |        |                              |              |
|---|------|---|---|-------|--------|--------|--------|--------|---|--------|------------------------------|--------------|
| 1 | 1.00 | 1 | 1 | -0.03 | -0.03  | -0.021 | -0.023 | -0.03  | t | 135983 | RLRPPEPR<br>PRDR             | Homo sapiens |
| 1 | 1.00 | 1 | 1 | 0.01  | 0.01   | 0.005  | 0.006  | 0.01   | t | 72294  | WDEEDGEK<br>RIPLDVAE         | Homo sapiens |
| 1 | 1.00 | 1 | 1 | -0.03 | -0.026 | -0.018 | -0.029 | -0.03  | t | 24875  | HSVWKD                       | Homo sapiens |
| 1 | 1.00 | 1 | 1 | -0.03 | -0.026 | -0.018 | -0.029 | -0.03  | t | 24875  | HSVWKD                       | Homo sapiens |
| 1 | 1.00 | 1 | 1 | -0.06 | -0.06  | -0.06  | -0.06  | -0.06  | t | 96141  | CGLRAPQ                      | Mus musculus |
| 1 | 1.00 | 1 | 1 | 0     | 0.003  | 0.002  | 0      | 0      | t | 122721 | CSNSSSSQ<br>FQIHGPR          | Mus musculus |
| 1 | 1.00 | 1 | 1 | -0.05 | -0.046 | -0.023 | -0.05  | -0.057 | t | 61833  | STPPVPPP<br>SVSRRKP          | Capra hircus |
| 1 | 1.00 | 1 | 1 | -0.05 | -0.052 | -0.055 | -0.047 | -0.05  | t | 78122  | DNFPCSKL<br>TNRTIGNQ<br>WN   | Mus musculus |
| 1 | 1.00 | 1 | 1 | 0     | 0      | 0.002  | 0.003  | 0      | t | 47821  | PHGPADA<br>PPGSPAPP<br>PPEHR | Homo sapiens |
| 1 | 1.00 | 1 | 1 | -0.03 | -0.03  | -0.031 | -0.03  | -0.03  | t | 50030  | PWHLGKL<br>EM                | Mus musculus |
| 1 | 1.00 | 1 | 1 | 0.03  | 0.034  | 0.03   | 0.027  | 0.03   | t | 95997  | WCGSTDE<br>YCS               | Homo sapiens |
| 1 | 1.00 | 1 | 1 | -0.01 | -0.01  | -0.01  | -0.01  | -0.011 | t | 51827  | QPFPPQPQ<br>LPYPQPQ          | Mus musculus |
| 1 | 1.00 | 1 | 1 | 0.03  | 0.03   | 0.029  | 0.034  | 0.03   | t | 53963  | RGRGRGE<br>KRPRSPSS<br>QSSSS | Homo sapiens |
| 1 | 1.00 | 1 | 1 | 0.02  | 0.02   | 0.02   | 0.02   | 0.02   | t | 109929 | SLSLSPG                      | Homo sapiens |

|   |      |   |   |       |        |        |        |        |   |        |                              |                                  |
|---|------|---|---|-------|--------|--------|--------|--------|---|--------|------------------------------|----------------------------------|
| 1 | 1.00 | 1 | 1 | 0.02  | 0.02   | 0.02   | 0.02   | 0.02   | t | 93476  | NDKLSFSD<br>SN               | Ovis<br>aries                    |
| 1 | 1.00 | 1 | 1 | 0     | 0      | 0      | 0      | 0      | t | 135442 | AGLGGL                       | Oryctola<br>gus<br>cuniculu<br>s |
| 1 | 1.00 | 1 | 1 | 0     | 0      | 0      | 0      | 0      | t | 149083 | NPTQGSP                      | Sus<br>scrofa                    |
| 1 | 1.00 | 1 | 1 | 0     | 0      | 0      | 0      | 0      | t | 141669 | HNHGSISA<br>LMHL             | Mus<br>musculu<br>s              |
| 1 | 1.00 | 1 | 1 | 0     | 0      | 0      | 0      | 0      | t | 123578 | PGLAPGQI                     | Oryctola<br>gus<br>cuniculu<br>s |
| 1 | 1.00 | 1 | 1 | 0     | 0      | 0      | 0      | 0      | t | 93930  | SNDSRNVL<br>VA               | Ovis<br>aries                    |
| 1 | 1.00 | 1 | 1 | -0.02 | -0.02  | -0.02  | -0.02  | -0.02  | t | 115476 | SAEERLHS<br>MKEGIHA<br>QQKEP | Homo<br>sapiens                  |
| 1 | 1.00 | 1 | 1 | -0.02 | -0.02  | -0.02  | -0.02  | -0.02  | t | 70395  | VPNLRGD<br>RHALA             | Mus<br>musculu<br>s              |
| 1 | 1.00 | 1 | 1 | -0.06 | -0.06  | -0.06  | -0.06  | -0.06  | t | 135801 | YNAAINKY                     | Homo<br>sapiens                  |
| 1 | 1.00 | 1 | 1 | -0.02 | -0.016 | -0.028 | -0.02  | -0.022 | t | 141056 | MSDGA VQ<br>PDGGQPA<br>VRNER | Cavia<br>porcellu<br>s           |
| 1 | 1.00 | 1 | 1 | -0.02 | -0.024 | -0.011 | -0.017 | -0.02  | t | 53768  | RFRGKDLP                     | Oryctola<br>gus<br>cuniculu<br>s |
| 1 | 1.00 | 1 | 1 | 0     | 0      | 0.007  | 0      | 0.002  | t | 141539 | FSPAYLRD<br>AALK             | Mus<br>musculu<br>s              |
| 1 | 1.00 | 1 | 1 | 0.04  | 0.04   | 0.04   | 0.036  | 0.04   | t | 135991 | SEKKISSIQ<br>SIV             | Homo<br>sapiens                  |
| 1 | 1.00 | 1 | 1 | 0     | 0      | 0      | 0      | 0.002  | t | 136823 | ASIILEFFL                    | Mus<br>musculu<br>s              |
| 1 | 1.00 | 1 | 1 | 0     | 0.002  | 0.012  | 0.007  | 0.001  | t | 96503  | KSGTIFDN<br>FL               | Homo<br>sapiens                  |

|   |      |   |   |       |        |        |        |        |   |        |                              |                                  |
|---|------|---|---|-------|--------|--------|--------|--------|---|--------|------------------------------|----------------------------------|
| 1 | 1.00 | 1 | 1 | -0.02 | -0.017 | -0.02  | -0.021 | -0.019 | t | 31663  | KKPNRNG<br>GG                | Capra<br>hircus                  |
| 1 | 1.00 | 1 | 1 | -0.03 | -0.026 | -0.03  | -0.033 | -0.033 | t | 115325 | KPVALINN<br>QFLPYPPY<br>AKPA | Homo<br>sapiens                  |
| 1 | 1.00 | 1 | 1 | 0.01  | 0.011  | 0.01   | 0.01   | 0.01   | t | 12498  | EIKYNGEE<br>YL               | Mus<br>musculu<br>s              |
| 1 | 1.00 | 1 | 1 | 0.02  | 0.024  | 0.027  | 0.021  | 0.02   | t | 5249   | AVAEAEG<br>G                 | Homo<br>sapiens                  |
| 1 | 1.00 | 1 | 1 | -0.02 | -0.022 | -0.009 | -0.017 | -0.02  | t | 23975  | HHAEMQ<br>NPVYLIPET<br>VPYIK | Mus<br>musculu<br>s              |
| 1 | 1.00 | 1 | 1 | -0.07 | -0.066 | -0.072 | -0.07  | -0.07  | t | 65536  | TPDPRIGF                     | Equus<br>caballus                |
| 1 | 1.00 | 1 | 1 | -0.07 | -0.069 | -0.072 | -0.07  | -0.07  | t | 65536  | TPDPRIGF                     | Mus<br>musculu<br>s              |
| 1 | 1.00 | 1 | 1 | -0.04 | -0.04  | -0.035 | -0.04  | -0.04  | t | 115036 | AVLPVLLL<br>QITVGLVF<br>LCLQ | Mus<br>musculu<br>s              |
| 1 | 1.00 | 1 | 1 | 0.01  | 0.012  | 0.01   | 0.011  | 0.01   | t | 58418  | SHSSESHR<br>VKSAGPP          | Homo<br>sapiens                  |
| 1 | 1.00 | 1 | 1 | 0     | -0.003 | -0.001 | 0      | 0      | t | 49910  | PVLTTASP<br>LSSIFSRIG<br>DP  | Oryctola<br>gus<br>cuniculu<br>s |
| 1 | 1.00 | 1 | 1 | 0.03  | 0.019  | 0.03   | 0.03   | 0.03   | t | 106494 | GYENPTYK<br>FFEQMQRN         | Oryctola<br>gus<br>cuniculu<br>s |
| 1 | 1.00 | 1 | 1 | 0.03  | 0.03   | 0.03   | 0.03   | 0.03   | t | 114901 | NCSSYANT<br>TS               | Homo<br>sapiens                  |
| 1 | 1.00 | 1 | 1 | 0.01  | 0.007  | 0.01   | 0.01   | 0.01   | t | 13974  | EREDERTL                     | Oryctola<br>gus<br>cuniculu<br>s |

|   |      |   |   |       |       |       |       |        |   |        |                              |                        |
|---|------|---|---|-------|-------|-------|-------|--------|---|--------|------------------------------|------------------------|
| 1 | 1.00 | 1 | 1 | -0.01 | -0.01 | -0.01 | -0.01 | -0.01  | t | 140547 | CSIGEALS<br>HGC              | Mus<br>musculu<br>s    |
| 1 | 1.00 | 1 | 1 | -0.01 | -0.01 | -0.01 | -0.01 | -0.01  | t | 139180 | NLNKTLVD<br>LDWLNRIE<br>TYVK | Felis<br>catus         |
| 1 | 1.00 | 1 | 1 | -0.01 | -0.01 | -0.01 | -0.01 | -0.01  | t | 140584 | PWHQMA<br>ATS                | Mus<br>musculu<br>s    |
| 1 | 1.00 | 1 | 1 | -0.01 | -0.01 | -0.01 | -0.01 | -0.01  | t | 140547 | CSIGEALS<br>HGC              | Mus<br>musculu<br>s    |
| 1 | 1.00 | 1 | 1 | -0.01 | -0.01 | -0.01 | -0.01 | -0.01  | t | 140584 | PWHQMA<br>ATS                | Mus<br>musculu<br>s    |
| 1 | 1.00 | 1 | 1 | -0.01 | -0.01 | -0.01 | -0.01 | -0.01  | t | 133960 | WIVNNF                       | Mus<br>musculu<br>s    |
| 1 | 1.00 | 1 | 1 | -0.01 | -0.01 | -0.01 | -0.01 | -0.01  | t | 104123 | MNKTFS                       | Homo<br>sapiens        |
| 1 | 1.00 | 1 | 1 | -0.01 | -0.01 | -0.01 | -0.01 | -0.01  | t | 60678  | SRGNHVS<br>PRHYVPES<br>EPAAR | Homo<br>sapiens        |
| 1 | 1.00 | 1 | 1 | -0.01 | -0.01 | -0.01 | -0.01 | -0.01  | t | 78136  | EEPKHETK<br>ETE              | Homo<br>sapiens        |
| 1 | 1.00 | 1 | 1 | -0.01 | -0.01 | -0.01 | -0.01 | -0.01  | t | 79410  | TCKELQW<br>LPLRLCL           | Mus<br>musculu<br>s    |
| 1 | 1.00 | 1 | 1 | -0.01 | -0.01 | -0.01 | -0.01 | -0.01  | t | 41736  | MIKVGHP<br>TGAFMSP<br>RWKSH  | Aotus<br>nancyma<br>ae |
| 1 | 1.00 | 1 | 1 | -0.01 | -0.01 | -0.01 | -0.01 | -0.01  | t | 52023  | QQFHQQ<br>Q                  | Homo<br>sapiens        |
| 1 | 1.00 | 1 | 1 | -0.03 | -0.03 | -0.03 | -0.03 | -0.03  | t | 137554 | QDRHQKI<br>RRFRRGDI          | Homo<br>sapiens        |
| 1 | 1.00 | 1 | 1 | -0.03 | -0.03 | -0.03 | -0.03 | -0.03  | t | 116016 | VLGPVRGP<br>FP               | Homo<br>sapiens        |
| 1 | 1.00 | 1 | 1 | -0.05 | -0.05 | -0.05 | -0.05 | -0.05  | t | 115982 | SRYPYGL<br>NY                | Homo<br>sapiens        |
| 1 | 1.00 | 1 | 1 | -0.01 | 0.001 | -0.01 | -0.01 | -0.012 | t | 156861 | DSQKPCKC<br>HCTMTQ           | Gallus<br>gallus       |

|   |      |   |   |       |        |        |        |        |   |        |                              |                                  |
|---|------|---|---|-------|--------|--------|--------|--------|---|--------|------------------------------|----------------------------------|
| 1 | 1.00 | 1 | 1 | -0.01 | -0.01  | -0.01  | -0.01  | -0.008 | t | 63037  | TAVSPTTL<br>R                | Mus<br>musculu<br>s              |
| 1 | 1.00 | 1 | 1 | -0.04 | -0.038 | -0.048 | -0.039 | -0.04  | t | 146178 | AYAPPGA<br>QPPTSRL           | Homo<br>sapiens                  |
| 1 | 1.00 | 1 | 1 | -0.01 | -0.01  | -0.01  | -0.01  | -0.01  | t | 119382 | VISCAKDAI<br>EDEEGSC         | Oryctola<br>gus<br>cuniculu<br>s |
| 1 | 1.00 | 1 | 1 | -0.01 | -0.01  | -0.01  | -0.01  | -0.01  | t | 117059 | PQTDGSTR<br>PRGL             | Mus<br>musculu<br>s              |
| 1 | 1.00 | 1 | 1 | -0.01 | -0.01  | -0.01  | -0.01  | -0.01  | t | 117059 | PQTDGSTR<br>PRGL             | Homo<br>sapiens                  |
| 1 | 1.00 | 1 | 1 | -0.04 | -0.038 | -0.045 | -0.039 | -0.04  | t | 140577 | LVDYPYRL<br>WHYPCTI          | Homo<br>sapiens                  |
| 1 | 1.00 | 1 | 1 | 0     | -0.01  | 0      | 0.003  | 0.001  | t | 134202 | QKLSVPDG<br>FKVSNSAR<br>GW   | Homo<br>sapiens                  |
| 1 | 1.00 | 1 | 1 | 0     | 0.004  | 0.011  | -0.003 | -0.006 | t | 70792  | VRNSWDT<br>NWGDNG<br>Y       | Homo<br>sapiens                  |
| 1 | 1.00 | 1 | 1 | 0.02  | 0.016  | 0.025  | 0.019  | 0.02   | t | 70422  | VPPNTKS<br>MALSG             | Oryctola<br>gus<br>cuniculu<br>s |
| 1 | 1.00 | 1 | 1 | 0.01  | 0.007  | 0.005  | 0.01   | 0.01   | t | 97171  | ADVVISPN<br>D                | Oryctola<br>gus<br>cuniculu<br>s |
| 1 | 1.00 | 1 | 1 | 0.03  | 0.03   | 0.039  | 0.024  | 0.028  | t | 68903  | VIAGMDW<br>AV                | Homo<br>sapiens                  |
| 1 | 1.00 | 1 | 1 | 0     | 0      | -0.01  | 0      | 0.003  | t | 44251  | NIISCNKN<br>DKNQ             | Oryctola<br>gus<br>cuniculu<br>s |
| 1 | 1.00 | 1 | 1 | -0.01 | -0.01  | -0.005 | -0.01  | -0.01  | t | 329    | AANKYKTF<br>VATFGAAS<br>NKAF | Homo<br>sapiens                  |
| 1 | 1.00 | 1 | 1 | 0     | -0.004 | 0      | -0.007 | -0.003 | t | 122892 | RSILPYGDS<br>MDRIE           | Oryctola<br>gus<br>cuniculu<br>s |



|   |      |   |   |       |        |        |        |        |   |        |                              |                                  |
|---|------|---|---|-------|--------|--------|--------|--------|---|--------|------------------------------|----------------------------------|
| 1 | 1.00 | 1 | 1 | 0     | -0.003 | -0.007 | 0      | -0.001 | t | 137416 | HARLRDSG<br>RAYLPFVP<br>PRAP | Oryctola<br>gus<br>cuniculu<br>s |
| 1 | 1.00 | 1 | 1 | -0.01 | -0.013 | -0.008 | -0.01  | -0.012 | t | 144789 | SSGYCAW<br>PGGGLPDS<br>VKI   | Oryctola<br>gus<br>cuniculu<br>s |
| 1 | 1.00 | 1 | 1 | 0     | -0.002 | 0.011  | -0.003 | -0.002 | t | 6692   | CNFCNAV<br>VES               | Homo<br>sapiens                  |
| 1 | 1.00 | 1 | 1 | -0.02 | -0.016 | -0.025 | -0.019 | -0.02  | t | 53676  | REWARRN<br>GHNVSTR<br>GRI    | Homo<br>sapiens                  |
| 1 | 1.00 | 1 | 1 | 0.01  | 0.01   | 0.01   | 0.014  | 0.01   | t | 115148 | KAVSEKKA<br>KGLGESRK<br>DKK  | Homo<br>sapiens                  |
| 1 | 1.00 | 1 | 1 | 0     | 0      | 0      | 0      | 0      | t | 136084 | SPPTPSA                      | Oryctola<br>gus<br>cuniculu<br>s |
| 1 | 1.00 | 1 | 1 | 0.02  | 0.02   | 0.02   | 0.02   | 0.018  | t | 132123 | WGSSSVG<br>PQALSKSG          | Homo<br>sapiens                  |
| 1 | 1.00 | 1 | 1 | -0.02 | -0.016 | -0.014 | -0.019 | -0.022 | t | 54494  | RLCSVSYP<br>EPSLLWTS<br>SCFD | Myodes<br>glareolu<br>s          |
| 1 | 1.00 | 1 | 1 | 0.02  | 0.02   | 0.012  | 0.02   | 0.02   | t | 30504  | KELLDKTS<br>RTGDEVR<br>ALAND | Mus<br>musculu<br>s              |
| 1 | 1.00 | 1 | 1 | 0.02  | 0.016  | 0.016  | 0.019  | 0.018  | t | 47588  | PFVKNQF<br>NYKDPVN<br>GV     | Oryctola<br>gus<br>cuniculu<br>s |
| 1 | 1.00 | 1 | 1 | 0.02  | 0.02   | 0.02   | 0.02   | 0.02   | t | 153379 | EQEIFTNIT<br>DRV             | Mus<br>musculu<br>s              |
| 1 | 1.00 | 1 | 1 | 0.02  | 0.02   | 0.02   | 0.02   | 0.02   | t | 156948 | QVHTSI                       | Gallus<br>gallus                 |
| 1 | 1.00 | 1 | 1 | 0.02  | 0.02   | 0.02   | 0.02   | 0.02   | t | 115933 | QWQVLSN<br>TVP               | Homo<br>sapiens                  |
| 1 | 1.00 | 1 | 1 | 0.02  | 0.02   | 0.02   | 0.02   | 0.02   | t | 113773 | QQGQQLG<br>QGQQGQ<br>Q       | Homo<br>sapiens                  |
| 1 | 1.00 | 1 | 1 | 0.02  | 0.02   | 0.02   | 0.02   | 0.02   | t | 111169 | CQLDSQKI<br>C                | Homo<br>sapiens                  |

|   |      |   |   |       |        |        |        |        |   |        |                              |                       |
|---|------|---|---|-------|--------|--------|--------|--------|---|--------|------------------------------|-----------------------|
| 1 | 1.00 | 1 | 1 | 0     | 0      | 0      | 0      | 0      | t | 133788 | CRTSPWRC                     | Mus musculus          |
| 1 | 1.00 | 1 | 1 | 0     | 0      | 0      | 0      | 0      | t | 112972 | FHAIDEYK<br>PQDATTN          | Homo sapiens          |
| 1 | 1.00 | 1 | 1 | 0     | 0      | 0      | 0      | 0      | t | 79640  | SASIRPQ                      | Oryctolagus cuniculus |
| 1 | 1.00 | 1 | 1 | -0.02 | -0.02  | -0.02  | -0.02  | -0.02  | t | 153287 | RQSGRQP<br>TPLSPPLR          | Mus musculus          |
| 1 | 1.00 | 1 | 1 | -0.06 | -0.06  | -0.06  | -0.06  | -0.06  | t | 115213 | DVPSERYL<br>GYLEQLLR<br>LKKY | Homo sapiens          |
| 1 | 1.00 | 1 | 1 | 0.01  | 0.025  | 0.013  | 0.01   | 0.01   | t | 45221  | NNRAVPD<br>KIDWRESG<br>YVTE  | Rattus rattus         |
| 1 | 1.00 | 1 | 1 | -0.04 | -0.036 | -0.04  | -0.04  | -0.039 | t | 34912  | LAPRVAR                      | Mus musculus          |
| 1 | 1.00 | 1 | 1 | 0.05  | 0.05   | 0.05   | 0.053  | 0.053  | t | 111041 | TIGRLQDEI<br>QNMKEE<br>MARHL | Mus musculus          |
| 1 | 1.00 | 1 | 1 | 0.01  | 0.008  | 0.017  | 0.003  | 0.011  | t | 108107 | RYAFGSQI<br>A                | Mus musculus          |
| 1 | 1.00 | 1 | 1 | -0.02 | -0.018 | -0.018 | -0.019 | -0.019 | t | 86870  | NLFGATLV<br>NA               | Homo sapiens          |
| 1 | 1.00 | 1 | 1 | -0.02 | -0.01  | -0.013 | -0.021 | -0.019 | t | 66121  | TRVPRR                       | Pan troglodytes       |
| 1 | 1.00 | 1 | 1 | -0.02 | -0.02  | -0.015 | -0.01  | -0.017 | t | 115674 | ADARM                        | Homo sapiens          |
| 1 | 1.00 | 1 | 1 | 0.01  | 0.012  | 0.014  | 0.013  | 0.01   | t | 122198 | TEADVNP<br>KPIPSQMPT<br>SP   | Homo sapiens          |
| 1 | 1.00 | 1 | 1 | 0     | 0      | 0      | 0      | 0      | t | 135504 | VPGVGGL<br>G                 | Oryctolagus cuniculus |
| 1 | 1.00 | 1 | 1 | 0     | 0      | 0      | 0      | 0      | t | 7533   | DAHHAAD<br>AHHATDA<br>HHA    | Oryctolagus cuniculus |

|   |      |   |   |      |        |       |        |       |   |        |                   |                       |
|---|------|---|---|------|--------|-------|--------|-------|---|--------|-------------------|-----------------------|
| 1 | 1.00 | 1 | 1 | 0    | 0      | 0     | -0.001 | 0     | t | 69124  | VITGSI            | Homo sapiens          |
| 1 | 1.00 | 1 | 1 | 0    | 0      | 0.002 | 0      | 0     | t | 134418 | KGAIIGLM VGGVV    | Homo sapiens          |
| 1 | 1.00 | 1 | 1 | 0    | 0      | 0.002 | 0      | 0     | t | 118581 | RDRDRDR E         | Mus musculus          |
| 1 | 1.00 | 1 | 1 | 0    | 0      | 0.002 | 0      | 0     | t | 125565 | STDDYASF SRAL     | Mus musculus          |
| 1 | 1.00 | 1 | 1 | 0    | 0.003  | 0.002 | 0      | 0     | t | 125052 | FSLRLMEE NW       | Mus musculus          |
| 1 | 1.00 | 1 | 1 | 0    | 0      | 0.002 | 0      | 0     | t | 118581 | RDRDRDR E         | Mus musculus          |
| 1 | 1.00 | 1 | 1 | 0    | 0.003  | 0.002 | 0      | 0     | t | 108382 | GGVVIA            | Mus musculus          |
| 1 | 1.00 | 1 | 1 | 0    | 0      | 0.002 | 0      | 0     | t | 58388  | SHLVEALY LVCGERG  | Mus musculus          |
| 1 | 1.00 | 1 | 1 | 0    | 0      | 0.002 | 0      | 0     | t | 25140  | HWSYGLR PG        | Mus musculus          |
| 1 | 1.00 | 1 | 1 | 0.02 | 0.018  | 0.023 | 0.017  | 0.018 | t | 31439  | KITCFLTAA GYCNT E | Mus musculus          |
| 1 | 1.00 | 1 | 1 | 0.02 | 0.021  | 0.023 | 0.017  | 0.018 | t | 31439  | KITCFLTAA GYCNT E | Equus caballus        |
| 1 | 1.00 | 1 | 1 | 0    | 0.003  | 0     | 0      | 0.001 | t | 99921  | DAEFRHDS          | Mus musculus          |
| 1 | 1.00 | 1 | 1 | 0    | -0.003 | 0     | 0      | 0.001 | t | 69178  | VKAETRLN PDLQPTE  | Oryctolagus cuniculus |
| 1 | 1.00 | 1 | 1 | 0    | -0.003 | 0     | 0      | 0.001 | t | 95524  | KRQIYTDIE MNRLGK  | Oryctolagus cuniculus |

|   |      |   |   |       |        |        |        |       |   |       |                              |                                  |
|---|------|---|---|-------|--------|--------|--------|-------|---|-------|------------------------------|----------------------------------|
| 1 | 1.00 | 1 | 1 | 0     | -0.003 | 0      | 0      | 0.001 | t | 70391 | VPNLRGDL<br>QVLAQKV<br>ARTLP | Oryctola<br>gus<br>cuniculu<br>s |
| 1 | 1.00 | 1 | 1 | 0     | -0.003 | 0      | 0      | 0.001 | t | 70391 | VPNLRGDL<br>QVLAQKV<br>ARTLP | Oryctola<br>gus<br>cuniculu<br>s |
| 1 | 1.00 | 1 | 1 | 0     | -0.003 | 0      | 0      | 0.001 | t | 37660 | LLPHSNLD<br>HILEPSIPW<br>KSK | Oryctola<br>gus<br>cuniculu<br>s |
| 1 | 1.00 | 1 | 1 | 0     | -0.003 | 0      | 0      | 0.001 | t | 37660 | LLPHSNLD<br>HILEPSIPW<br>KSK | Oryctola<br>gus<br>cuniculu<br>s |
| 1 | 1.00 | 1 | 1 | 0     | -0.003 | 0      | 0      | 0.001 | t | 37660 | LLPHSNLD<br>HILEPSIPW<br>KSK | Oryctola<br>gus<br>cuniculu<br>s |
| 1 | 1.00 | 1 | 1 | 0     | -0.004 | 0      | 0      | 0.001 | t | 9524  | DNPASTT<br>NKDK              | Mus<br>musculu<br>s              |
| 1 | 1.00 | 1 | 1 | -0.07 | -0.07  | -0.07  | -0.07  | -0.07 | t | 78564 | WRRWFY<br>QFPTRA<br>WAS      | Mus<br>musculu<br>s              |
| 1 | 1.00 | 1 | 1 | 0.02  | 0.02   | 0.02   | 0.018  | 0.02  | t | 17589 | FRGETKTF<br>NPEEVSS          | Homo<br>sapiens                  |
| 1 | 1.00 | 1 | 1 | 0.05  | 0.052  | 0.05   | 0.051  | 0.052 | t | 23986 | HHFSSDPR<br>PDLH             | Homo<br>sapiens                  |
| 1 | 1.00 | 1 | 1 | -0.02 | -0.018 | -0.009 | -0.017 | -0.02 | t | 71203 | VSVPAEIL                     | Homo<br>sapiens                  |
| 1 | 1.00 | 1 | 1 | 0.01  | 0.008  | 0.001  | 0.009  | 0.01  | t | 82657 | GGYEFLLA<br>NDVDNSN<br>PVVQ  | Rattus<br>norvegic<br>us         |
| 1 | 1.00 | 1 | 1 | 0     | -0.005 | 0.003  | 0      | 0     | t | 64049 | THLKASSG<br>YCAWPAC          | Equus<br>caballus                |

|   |      |   |   |       |        |       |        |        |   |        |                              |                            |
|---|------|---|---|-------|--------|-------|--------|--------|---|--------|------------------------------|----------------------------|
| 1 | 1.00 | 1 | 1 | 0.01  | 0.013  | 0.001 | 0.01   | 0.011  | t | 56557  | RYIWIKYF<br>NLFDKELN<br>EKE  | Mus<br>musculu<br>s        |
| 1 | 1.00 | 1 | 1 | 0.01  | 0.01   | 0.01  | 0.01   | 0.01   | t | 116021 | VPQKAVP<br>YPQ               | Homo<br>sapiens            |
| 1 | 1.00 | 1 | 1 | 0.01  | 0.01   | 0.01  | 0.01   | 0.01   | t | 103021 | AGAGTVA<br>TTPASSPV          | Homo<br>sapiens            |
| 1 | 1.00 | 1 | 1 | 0.01  | 0.01   | 0.012 | 0.01   | 0.01   | t | 114587 | RQEWERQ<br>ERQERESE          | Homo<br>sapiens            |
| 1 | 1.00 | 1 | 1 | -0.01 | -0.01  | -0.01 | -0.01  | -0.01  | t | 140853 | GEYVQILD<br>AHAAYLN<br>ATPAA | Mus<br>musculu<br>s        |
| 1 | 1.00 | 1 | 1 | -0.01 | -0.01  | -0.01 | -0.01  | -0.01  | t | 114762 | DCTAEDRP<br>LC               | Homo<br>sapiens            |
| 1 | 1.00 | 1 | 1 | -0.01 | -0.01  | -0.01 | -0.01  | -0.01  | t | 92799  | GERITSKQ<br>VD               | Ovis<br>aries              |
| 1 | 1.00 | 1 | 1 | -0.01 | -0.01  | -0.01 | -0.01  | -0.01  | t | 51669  | QNAPQAQ<br>NAPQAQ            | Bos<br>taurus              |
| 1 | 1.00 | 1 | 1 | -0.01 | -0.01  | -0.01 | -0.01  | -0.01  | t | 48969  | PQAQNAP<br>QAQNAP            | Bos<br>taurus              |
| 1 | 1.00 | 1 | 1 | -0.01 | -0.01  | -0.01 | -0.01  | -0.01  | t | 25092  | HVSPAHYV<br>PESDAAAR<br>VTAL | Homo<br>sapiens            |
| 1 | 1.00 | 1 | 1 | -0.03 | -0.03  | -0.03 | -0.03  | -0.03  | t | 109026 | GAPGPAG<br>A                 | Rattus<br>norvegic<br>us   |
| 1 | 1.00 | 1 | 1 | -0.03 | -0.03  | -0.03 | -0.03  | -0.03  | t | 101580 | EDSGSSRK<br>K                | Homo<br>sapiens            |
| 1 | 1.00 | 1 | 1 | 0.03  | 0.03   | 0.03  | 0.027  | 0.03   | t | 96755  | PTAPTKPT<br>YE               | Homo<br>sapiens(<br>human) |
| 1 | 1.00 | 1 | 1 | 0.02  | 0.018  | 0.016 | 0.019  | 0.02   | t | 74053  | YGLTTLFD<br>PGPRQQI          | Mus<br>musculu<br>s        |
| 1 | 1.00 | 1 | 1 | 0     | -0.002 | 0     | -0.003 | -0.001 | t | 121858 | SKLIKIFQD<br>HPLQKTYN        | Mus<br>musculu<br>s        |

|   |      |   |   |       |        |        |        |        |   |        |                              |                                  |
|---|------|---|---|-------|--------|--------|--------|--------|---|--------|------------------------------|----------------------------------|
| 1 | 1.00 | 1 | 1 | 0     | -0.003 | 0      | -0.003 | -0.001 | t | 99922  | DAEFRHDS<br>GY               | Oryctola<br>gus<br>cuniculu<br>s |
| 1 | 1.00 | 1 | 1 | -0.01 | -0.007 | -0.01  | -0.01  | -0.012 | t | 140854 | GFDKYDIT<br>GEYVQILD<br>AHAA | Mus<br>musculu<br>s              |
| 1 | 1.00 | 1 | 1 | 0     | 0      | 0      | 0.003  | 0.002  | t | 134337 | CYCQDPYV<br>KEAENLKK<br>YFNA | Oryctola<br>gus<br>cuniculu<br>s |
| 1 | 1.00 | 1 | 1 | 0     | 0      | 0      | 0.003  | 0.002  | t | 107307 | DAEFGHD<br>SGF               | Mus<br>musculu<br>s              |
| 1 | 1.00 | 1 | 1 | 0     | 0      | 0      | 0      | 0.001  | t | 112537 | HLILAPSIR<br>HAP             | Homo<br>sapiens                  |
| 1 | 1.00 | 1 | 1 | -0.01 | -0.01  | -0.01  | -0.01  | -0.01  | t | 78143  | EKIEKTEEP<br>AP              | Homo<br>sapiens                  |
| 1 | 1.00 | 1 | 1 | -0.01 | -0.012 | -0.01  | -0.011 | -0.01  | t | 153419 | LTPPPWQ<br>NPFPFGG<br>GS     | Mus<br>musculu<br>s              |
| 1 | 1.00 | 1 | 1 | -0.04 | -0.044 | -0.043 | -0.04  | -0.04  | t | 141017 | FTTWSPW<br>SQPLA             | Mus<br>musculu<br>s              |
| 1 | 1.00 | 1 | 1 | 0.03  | 0.028  | 0.029  | 0.029  | 0.03   | t | 54103  | RHVKNYH<br>SRSESTIE          | Mus<br>musculu<br>s              |
| 1 | 1.00 | 1 | 1 | -0.01 | -0.007 | -0.01  | -0.01  | -0.01  | t | 127972 | FDVSFEVK<br>VGGLKQYY<br>RLP  | Mus<br>musculu<br>s              |
| 1 | 1.00 | 1 | 1 | -0.05 | -0.05  | -0.06  | -0.054 | -0.05  | t | 11000  | EAAYSKNR<br>RAVLAY           | Homo<br>sapiens                  |
| 1 | 1.00 | 1 | 1 | 0     | -0.002 | 0      | 0.003  | 0.002  | t | 11813  | EENVEENV                     | Mus<br>musculu<br>s              |
| 1 | 1.00 | 1 | 1 | 0     | -0.004 | 0      | 0.003  | 0.002  | t | 34965  | LASLRKAF<br>ADTVPVRP<br>PSNY | Oryctola<br>gus<br>cuniculu<br>s |
| 1 | 1.00 | 1 | 1 | 0     | -0.004 | 0      | 0.003  | 0.002  | t | 28075  | IPSTAFTDI<br>AWVRLPN<br>HY   | Oryctola<br>gus<br>cuniculu<br>s |

|   |      |   |   |       |        |        |       |       |   |        |                              |                              |
|---|------|---|---|-------|--------|--------|-------|-------|---|--------|------------------------------|------------------------------|
| 1 | 1.00 | 1 | 1 | 0     | -0.002 | 0      | 0.003 | 0.002 | t | 28075  | IPSTAFTDI<br>AWVRLPN<br>HY   | Rattus<br>norvegicus         |
| 1 | 1.00 | 1 | 1 | -0.03 | -0.022 | -0.038 | -0.03 | -0.03 | t | 43525  | NDRVYINV<br>VVKNKEYR<br>LAT  | Gallus<br>gallus             |
| 1 | 1.00 | 1 | 1 | -0.03 | -0.028 | -0.038 | -0.03 | -0.03 | t | 43525  | NDRVYINV<br>VVKNKEYR<br>LAT  | Homo<br>sapiens              |
| 1 | 1.00 | 1 | 1 | 0     | -0.006 | -0.009 | 0     | 0     | t | 139806 | LLSPVRRD<br>QPLFTFRQ<br>VG   | Oryctola<br>gus<br>cuniculus |
| 1 | 1.00 | 1 | 1 | 0     | 0      | -0.009 | 0     | 0     | t | 139806 | LLSPVRRD<br>QPLFTFRQ<br>VG   | Ovis<br>aries                |
| 1 | 1.00 | 1 | 1 | 0.03  | 0.032  | 0.02   | 0.031 | 0.03  | t | 6323   | CGNGTPN<br>ELGGANIP<br>AEFLE | Homo<br>sapiens              |
| 1 | 1.00 | 1 | 1 | 0.01  | 0.013  | 0.015  | 0.01  | 0.007 | t | 1731   | AGYCNTEC<br>TLKKGSS          | Equus<br>caballus            |
| 1 | 1.00 | 1 | 1 | 0.02  | 0.016  | 0.019  | 0.019 | 0.02  | t | 50396  | QAYQQGV<br>TVD               | Oryctola<br>gus<br>cuniculus |
| 1 | 1.00 | 1 | 1 | 0.03  | 0.028  | 0.03   | 0.029 | 0.03  | t | 98799  | GGFGPVL<br>DGW               | Mus<br>musculus              |
| 1 | 1.00 | 1 | 1 | 0.02  | 0.02   | 0.02   | 0.02  | 0.02  | t | 114001 | VPDSDFM<br>DII               | Oryctola<br>gus<br>cuniculus |
| 1 | 1.00 | 1 | 1 | 0.02  | 0.02   | 0.02   | 0.02  | 0.02  | t | 115954 | SEESITRIN<br>K               | Homo<br>sapiens              |
| 1 | 1.00 | 1 | 1 | 0     | 0.002  | 0.001  | 0.003 | 0.001 | t | 134002 | AKLVTILQ<br>AHPLQQS<br>YD    | Homo<br>sapiens              |
| 1 | 1.00 | 1 | 1 | 0     | 0      | 0      | 0     | 0     | t | 149039 | FLHTRLFV<br>SDGINS           | Rattus<br>norvegicus         |
| 1 | 1.00 | 1 | 1 | 0     | 0      | 0      | 0     | 0     | t | 148917 | RDVVLQQ<br>HNI               | Homo<br>sapiens              |

|   |      |   |   |       |       |       |       |       |   |        |                              |                                  |
|---|------|---|---|-------|-------|-------|-------|-------|---|--------|------------------------------|----------------------------------|
| 1 | 1.00 | 1 | 1 | 0     | 0     | 0     | 0     | 0     | t | 148917 | RDVVLQQ<br>HNI               | Mus<br>musculu<br>s              |
| 1 | 1.00 | 1 | 1 | 0     | 0     | 0     | 0     | 0     | t | 134224 | RYYSSFVN<br>MERDLAS<br>GLIGP | Homo<br>sapiens                  |
| 1 | 1.00 | 1 | 1 | 0     | 0     | 0     | 0     | 0     | t | 123616 | PPMTQAP<br>R                 | Oryctola<br>gus<br>cuniculu<br>s |
| 1 | 1.00 | 1 | 1 | 0     | 0     | 0     | 0     | 0     | t | 123616 | PPMTQAP<br>R                 | Homo<br>sapiens                  |
| 1 | 1.00 | 1 | 1 | 0     | 0     | 0     | 0     | 0     | t | 110610 | GPKGAPG<br>ERGPSGLA          | Mus<br>musculu<br>s              |
| 1 | 1.00 | 1 | 1 | 0     | 0     | 0     | 0     | 0     | t | 111437 | IYNALSSA<br>GLQNQIK          | Oryctola<br>gus<br>cuniculu<br>s |
| 1 | 1.00 | 1 | 1 | 0     | 0     | 0     | 0     | 0     | t | 115463 | QYLYQGPI<br>VLNPWDQ<br>VKRNA | Homo<br>sapiens                  |
| 1 | 1.00 | 1 | 1 | -0.02 | -0.02 | -0.02 | -0.02 | -0.02 | t | 149417 | PQQQYPS<br>GQG               | Homo<br>sapiens                  |
| 1 | 1.00 | 1 | 1 | -0.02 | -0.02 | -0.02 | -0.02 | -0.02 | t | 136002 | TKQMVQ<br>MRRKLE             | Homo<br>sapiens                  |
| 1 | 1.00 | 1 | 1 | -0.02 | -0.02 | -0.02 | -0.02 | -0.02 | t | 149417 | PQQQYPS<br>GQG               | Mus<br>musculu<br>s              |
| 1 | 1.00 | 1 | 1 | -0.02 | -0.02 | -0.02 | -0.02 | -0.02 | t | 123615 | PPMGRGA<br>P                 | Oryctola<br>gus<br>cuniculu<br>s |
| 1 | 1.00 | 1 | 1 | -0.02 | -0.02 | -0.02 | -0.02 | -0.02 | t | 103038 | ALMSGNF<br>SNGILWR<br>G      | Homo<br>sapiens                  |
| 1 | 1.00 | 1 | 1 | 0.01  | 0.012 | 0.011 | 0.013 | 0.01  | t | 6067   | CCNLEPEA<br>RKVISS           | Homo<br>sapiens                  |
| 1 | 1.00 | 1 | 1 | -0.04 | -0.04 | -0.04 | -0.04 | -0.04 | t | 135783 | VGGEDAK<br>P                 | Homo<br>sapiens                  |
| 1 | 1.00 | 1 | 1 | -0.04 | -0.04 | -0.04 | -0.04 | -0.04 | t | 119667 | VNHKPSN<br>T                 | Homo<br>sapiens                  |
| 1 | 1.00 | 1 | 1 | -0.04 | -0.04 | -0.04 | -0.04 | -0.04 | t | 114903 | NGTLTSH<br>FG                | Homo<br>sapiens                  |



|   |      |   |   |       |        |        |        |        |   |        |                              |                                  |
|---|------|---|---|-------|--------|--------|--------|--------|---|--------|------------------------------|----------------------------------|
| 1 | 1.00 | 1 | 1 | 0     | 0.008  | 0.007  | 0      | -0.001 | t | 41430  | MERVVEQ<br>MCITQYQ<br>RESQAY | Gallus<br>gallus                 |
| 1 | 1.00 | 1 | 1 | 0     | 0      | 0.007  | 0      | -0.001 | t | 41430  | MERVVEQ<br>MCITQYQ<br>RESQAY | Mus<br>musculu<br>s              |
| 1 | 1.00 | 1 | 1 | -0.01 | -0.011 | -0.008 | -0.01  | -0.009 | t | 50873  | QGGRKTT<br>TGTRKPR           | Anas<br>platyrhy<br>nchos        |
| 1 | 1.00 | 1 | 1 | 0.02  | 0.018  | 0.02   | 0.019  | 0.023  | t | 43976  | NGEYLILS<br>A                | Mus<br>musculu<br>s              |
| 1 | 1.00 | 1 | 1 | 0     | 0.002  | 0      | 0.001  | 0      | t | 41843  | MKKDDQI<br>AAAIALRG<br>MA    | Homo<br>sapiens                  |
| 1 | 1.00 | 1 | 1 | -0.01 | -0.013 | -0.009 | -0.01  | -0.009 | t | 159024 | NKGAIIGL<br>MVGGVVI<br>A     | Oryctola<br>gus<br>cuniculu<br>s |
| 1 | 1.00 | 1 | 1 | 0     | -0.002 | -0.001 | -0.003 | 0.001  | t | 72251  | WAPSV                        | Mus<br>musculu<br>s              |
| 1 | 1.00 | 1 | 1 | 0     | 0.002  | 0.005  | -0.001 | 0.001  | t | 135732 | PCLNGGSC                     | Homo<br>sapiens                  |
| 1 | 1.00 | 1 | 1 | -0.02 | -0.02  | -0.027 | -0.02  | -0.019 | t | 107866 | GNEITRGG<br>STS              | Mus<br>musculu<br>s              |
| 1 | 1.00 | 1 | 1 | -0.02 | -0.02  | -0.012 | -0.02  | -0.02  | t | 75527  | YQPGAGW<br>LA                | Homo<br>sapiens                  |
| 1 | 1.00 | 1 | 1 | 0.01  | 0.01   | 0.012  | 0.007  | 0.01   | t | 4094   | AQVTLPIR<br>TPNA             | Homo<br>sapiens                  |
| 1 | 1.00 | 1 | 1 | -0.03 | -0.03  | -0.031 | -0.03  | -0.03  | t | 127960 | EKVPKGKK<br>GKADAGK          | Homo<br>sapiens                  |
| 1 | 1.00 | 1 | 1 | -0.03 | -0.026 | -0.033 | -0.03  | -0.029 | t | 50487  | QDLDAIW<br>RGFYIAGD<br>PALAY | Homo<br>sapiens                  |
| 1 | 1.00 | 1 | 1 | 0     | -0.002 | -0.005 | -0.003 | 0      | t | 31894  | KLGVWKS<br>PTDMQS<br>WV      | Mus<br>musculu<br>s              |
| 1 | 1.00 | 1 | 1 | 0     | 0      | 0      | -0.002 | 0      | t | 70426  | VPPPRKKR<br>TVVLTE           | Homo<br>sapiens                  |
| 1 | 1.00 | 1 | 1 | 0     | 0      | 0      | -0.002 | 0      | t | 96171  | DEEDKEED<br>EE               | Homo<br>sapiens                  |

|   |      |   |   |       |        |        |        |        |   |        |                              |              |
|---|------|---|---|-------|--------|--------|--------|--------|---|--------|------------------------------|--------------|
| 1 | 1.00 | 1 | 1 | 0.01  | 0.01   | 0.01   | 0.01   | 0.01   | t | 118131 | SEESDDD<br>MGFGLFD           | Homo sapiens |
| 1 | 1.00 | 1 | 1 | -0.07 | -0.07  | -0.07  | -0.07  | -0.068 | t | 129051 | KDRMVN                       | Homo sapiens |
| 1 | 1.00 | 1 | 1 | -0.01 | -0.006 | -0.01  | -0.009 | -0.01  | t | 144093 | THNHQVP<br>LAIS              | Homo sapiens |
| 1 | 1.00 | 1 | 1 | 0.01  | 0.012  | 0.021  | 0.012  | 0.011  | t | 25113  | HVVDLP                       | Homo sapiens |
| 1 | 1.00 | 1 | 1 | 0.01  | 0.008  | 0.014  | 0.013  | 0.01   | t | 105498 | RHDSGYEV                     | Mus musculus |
| 1 | 1.00 | 1 | 1 | 0.03  | 0.03   | 0.03   | 0.03   | 0.033  | t | 7673   | DAVTE                        | Mus musculus |
| 1 | 1.00 | 1 | 1 | 0.01  | 0.011  | 0.006  | 0.01   | 0.009  | t | 48395  | PLLGICGST<br>CAEDGN          | Mus musculus |
| 1 | 1.00 | 1 | 1 | -0.03 | -0.031 | -0.03  | -0.03  | -0.03  | t | 431    | AASGDGTI<br>TFTGKVID<br>APCG | Mus musculus |
| 1 | 1.00 | 1 | 1 | -0.03 | -0.026 | -0.031 | -0.029 | -0.03  | t | 147064 | KHQGAQY<br>VWNRTA            | Homo sapiens |
| 1 | 1.00 | 1 | 1 | -0.03 | -0.03  | -0.032 | -0.03  | -0.03  | t | 9586   | DPAFR                        | Mus musculus |
| 1 | 1.00 | 1 | 1 | 0.04  | 0.042  | 0.042  | 0.041  | 0.041  | t | 43854  | NFISGIQYL<br>AGLSTLPG<br>NPA | Homo sapiens |
| 1 | 1.00 | 1 | 1 | -0.08 | -0.08  | -0.08  | -0.08  | -0.082 | t | 143687 | FRVNLRTL<br>RRYY             | Mus musculus |
| 1 | 1.00 | 1 | 1 | 0.03  | 0.033  | 0.03   | 0.03   | 0.029  | t | 139499 | FGEFSFQY<br>DCSSWGC          | Mus musculus |
| 1 | 1.00 | 1 | 1 | -0.05 | -0.052 | -0.05  | -0.049 | -0.05  | t | 152108 | SASGNRAY<br>AVRK             | Sus scrofa   |
| 1 | 1.00 | 1 | 1 | 0     | 0      | 0      | 0      | 0.001  | t | 3516   | APDTRP                       | Mus musculus |
| 1 | 1.00 | 1 | 1 | 0.03  | 0.03   | 0.03   | 0.03   | 0.03   | t | 107497 | KVSNKAL                      | Homo sapiens |

|   |      |   |   |       |        |        |        |        |   |        |                              |                                  |
|---|------|---|---|-------|--------|--------|--------|--------|---|--------|------------------------------|----------------------------------|
| 1 | 1.00 | 1 | 1 | 0.01  | 0.01   | 0.01   | 0.01   | 0.01   | t | 149312 | FEEIRNLAL<br>Q               | Mus<br>musculu<br>s              |
| 1 | 1.00 | 1 | 1 | 0.01  | 0.01   | 0.01   | 0.01   | 0.01   | t | 114845 | GTDGVTYT<br>ND               | Homo<br>sapiens                  |
| 1 | 1.00 | 1 | 1 | 0.01  | 0.01   | 0.01   | 0.01   | 0.01   | t | 112069 | CSFSGFS                      | Homo<br>sapiens                  |
| 1 | 1.00 | 1 | 1 | -0.01 | -0.01  | -0.01  | -0.01  | -0.01  | t | 149058 | HLPNATQ                      | Sus<br>scrofa                    |
| 1 | 1.00 | 1 | 1 | -0.01 | -0.01  | -0.01  | -0.01  | -0.01  | t | 110074 | VTPPW<br>TAPKSR              | Mus<br>musculu<br>s              |
| 1 | 1.00 | 1 | 1 | -0.01 | -0.01  | -0.01  | -0.01  | -0.01  | t | 112623 | PPLELINTV<br>IQDGD<br>MVHTGF | Cavia<br>porcellu<br>s           |
| 1 | 1.00 | 1 | 1 | -0.01 | -0.01  | -0.01  | -0.01  | -0.01  | t | 115823 | KHKEMPF<br>PKY               | Homo<br>sapiens                  |
| 1 | 1.00 | 1 | 1 | -0.01 | -0.01  | -0.01  | -0.01  | -0.01  | t | 103198 | GDLPTIGT<br>AVSARNT          | Homo<br>sapiens                  |
| 1 | 1.00 | 1 | 1 | -0.01 | -0.01  | -0.01  | -0.01  | -0.01  | t | 110074 | VTPPW<br>TAPKSR              | Mus<br>musculu<br>s              |
| 1 | 1.00 | 1 | 1 | -0.01 | -0.01  | -0.01  | -0.01  | -0.01  | t | 79361  | RCQALSRL<br>FREKCT           | Mus<br>musculu<br>s              |
| 1 | 1.00 | 1 | 1 | -0.01 | -0.01  | -0.01  | -0.01  | -0.01  | t | 45768  | NSARARA<br>DSCRI             | Homo<br>sapiens                  |
| 1 | 1.00 | 1 | 1 | -0.03 | -0.03  | -0.03  | -0.03  | -0.03  | t | 132115 | VNMW<br>NKNVP<br>NGNSRS      | Homo<br>sapiens                  |
| 1 | 1.00 | 1 | 1 | -0.05 | -0.06  | -0.05  | -0.051 | -0.052 | t | 134160 | MGGPPM<br>MPMMGP<br>PPPGM    | Homo<br>sapiens                  |
| 1 | 1.00 | 1 | 1 | -0.02 | -0.024 | -0.016 | -0.021 | -0.022 | t | 6065   | CCNGIR<br>TINGL<br>ARTT      | Oryctola<br>gus<br>cuniculu<br>s |
| 1 | 1.00 | 1 | 1 | -0.01 | -0.01  | -0.01  | -0.01  | -0.01  | t | 142408 | DQVTKEK<br>KTIKKA            | Homo<br>sapiens                  |
| 1 | 1.00 | 1 | 1 | -0.01 | -0.004 | -0.01  | -0.009 | -0.008 | t | 44851  | NLQKDEP<br>NGRA              | Equus<br>caballus                |

|   |      |   |   |       |        |        |        |        |   |        |                              |                          |
|---|------|---|---|-------|--------|--------|--------|--------|---|--------|------------------------------|--------------------------|
| 1 | 1.00 | 1 | 1 | -0.01 | -0.008 | -0.01  | -0.011 | -0.01  | t | 149447 | QVPLVQE<br>QQF               | Homo<br>sapiens          |
| 1 | 1.00 | 1 | 1 | -0.02 | -0.022 | -0.025 | -0.027 | -0.02  | t | 122806 | ITVICPWE<br>AFNHL            | Rattus<br>norvegicus     |
| 1 | 1.00 | 1 | 1 | -0.02 | -0.022 | -0.025 | -0.019 | -0.02  | t | 135736 | PRIGGQRE<br>LKKITE           | Mus<br>musculus          |
| 1 | 1.00 | 1 | 1 | -0.02 | -0.018 | -0.014 | -0.019 | -0.02  | t | 44095  | NGTYRATY                     | Homo<br>sapiens          |
| 1 | 1.00 | 1 | 1 | -0.01 | -0.008 | -0.012 | -0.013 | -0.009 | t | 36612  | LILNR                        | Homo<br>sapiens          |
| 1 | 1.00 | 1 | 1 | 0.01  | 0.01   | 0.01   | 0.006  | 0.01   | t | 118445 | KCEFQDAY<br>VLLSE            | Homo<br>sapiens          |
| 1 | 1.00 | 1 | 1 | -0.03 | -0.03  | -0.026 | -0.03  | -0.031 | t | 75829  | YSNIGVCK                     | Mus<br>musculus          |
| 1 | 1.00 | 1 | 1 | 0     | -0.003 | 0      | 0      | -0.001 | t | 144672 | GREGYPA<br>DGGYCYG<br>LPDS   | Oryctolagus<br>cuniculus |
| 1 | 1.00 | 1 | 1 | 0.02  | 0.022  | 0.025  | 0.021  | 0.02   | t | 109733 | PSRDELT                      | Homo<br>sapiens          |
| 1 | 1.00 | 1 | 1 | -0.01 | -0.007 | -0.011 | -0.01  | -0.009 | t | 60595  | SQWNKPS<br>KPKT              | Mus<br>musculus          |
| 1 | 1.00 | 1 | 1 | -0.01 | -0.007 | -0.011 | -0.01  | -0.009 | t | 60595  | SQWNKPS<br>KPKT              | Mus<br>musculus          |
| 1 | 1.00 | 1 | 1 | -0.02 | -0.018 | -0.02  | -0.019 | -0.02  | t | 39393  | LSGRPAIIP<br>DREVLHRE<br>FDE | Homo<br>sapiens          |
| 1 | 1.00 | 1 | 1 | -0.02 | -0.02  | -0.013 | -0.011 | -0.017 | t | 130815 | ESDPPVAS<br>YQWRLIN          | Homo<br>sapiens          |
| 1 | 1.00 | 1 | 1 | -0.02 | -0.018 | -0.011 | -0.02  | -0.018 | t | 39219  | LRTAPGPG                     | Homo<br>sapiens          |
| 1 | 1.00 | 1 | 1 | -0.03 | -0.026 | -0.03  | -0.023 | -0.029 | t | 117345 | PRRRSRKP<br>EAPRRRS          | Homo<br>sapiens          |

|   |      |   |   |       |        |        |        |        |   |        |                              |                                  |
|---|------|---|---|-------|--------|--------|--------|--------|---|--------|------------------------------|----------------------------------|
| 1 | 1.00 | 1 | 1 | -0.02 | -0.032 | -0.02  | -0.02  | -0.018 | t | 9756   | DPRVRGLY<br>FPAGG            | Mus<br>musculu<br>s              |
| 1 | 1.00 | 1 | 1 | -0.02 | -0.032 | -0.02  | -0.02  | -0.018 | t | 9756   | DPRVRGLY<br>FPAGG            | Mus<br>musculu<br>s              |
| 1 | 1.00 | 1 | 1 | -0.02 | -0.02  | -0.013 | -0.024 | -0.021 | t | 122477 | LSLSLDLLT<br>FRT             | Homo<br>sapiens                  |
| 1 | 1.00 | 1 | 1 | -0.01 | -0.021 | -0.01  | -0.01  | -0.009 | t | 134170 | MVRHENR<br>CVA               | Mus<br>musculu<br>s              |
| 1 | 1.00 | 1 | 1 | 0.04  | 0.04   | 0.04   | 0.04   | 0.04   | t | 119670 | WESNGQP<br>E                 | Homo<br>sapiens                  |
| 1 | 1.00 | 1 | 1 | -0.02 | -0.017 | -0.02  | -0.02  | -0.019 | t | 106321 | DAEFRH                       | Mus<br>musculu<br>s              |
| 1 | 1.00 | 1 | 1 | 0.02  | 0.02   | 0.02   | 0.02   | 0.02   | t | 145737 | DARAYDTE<br>V                | Mus<br>musculu<br>s              |
| 1 | 1.00 | 1 | 1 | 0     | 0      | 0      | 0      | 0      | t | 112845 | SWYARHT                      | Homo<br>sapiens                  |
| 1 | 1.00 | 1 | 1 | 0     | 0      | 0      | 0      | 0      | t | 79363  | RCSCRPPS<br>EATTCK           | Mus<br>musculu<br>s              |
| 1 | 1.00 | 1 | 1 | 0     | 0      | 0      | 0      | 0      | t | 95403  | GDVTFTEV<br>GYTR             | Oryctola<br>gus<br>cuniculu<br>s |
| 1 | 1.00 | 1 | 1 | 0     | 0      | 0      | 0      | 0      | t | 31350  | KIMSKWG<br>NTFNINAY<br>NMSNF | Aotus<br>nancyma<br>ae           |
| 1 | 1.00 | 1 | 1 | -0.02 | -0.02  | -0.02  | -0.02  | -0.02  | t | 140588 | PWSRFSL<br>S<br>E            | Mus<br>musculu<br>s              |
| 1 | 1.00 | 1 | 1 | -0.02 | -0.02  | -0.02  | -0.02  | -0.02  | t | 150500 | PNNMMG<br>TFSVRTVG<br>T      | Oryctola<br>gus<br>cuniculu<br>s |
| 1 | 1.00 | 1 | 1 | -0.02 | -0.02  | -0.02  | -0.02  | -0.02  | t | 131412 | ERGLRYL                      | Mus<br>musculu<br>s              |
| 1 | 1.00 | 1 | 1 | -0.02 | -0.02  | -0.02  | -0.02  | -0.02  | t | 131412 | ERGLRYL                      | Homo<br>sapiens                  |
| 1 | 1.00 | 1 | 1 | -0.02 | -0.02  | -0.02  | -0.02  | -0.02  | t | 131412 | ERGLRYL                      | Homo<br>sapiens                  |
| 1 | 1.00 | 1 | 1 | -0.02 | -0.02  | -0.02  | -0.02  | -0.02  | t | 107534 | NWYVDGV                      | Homo<br>sapiens                  |

|   |      |   |   |       |        |        |        |        |   |        |                              |                                  |
|---|------|---|---|-------|--------|--------|--------|--------|---|--------|------------------------------|----------------------------------|
| 1 | 1.00 | 1 | 1 | -0.02 | -0.02  | -0.02  | -0.02  | -0.02  | t | 115449 | QPIRCEKD<br>ERFFSDKIA<br>KYI | Homo<br>sapiens                  |
| 1 | 1.00 | 1 | 1 | -0.02 | -0.02  | -0.02  | -0.02  | -0.02  | t | 97294  | EVNDVRKF<br>F                | Oryctola<br>gus<br>cuniculu<br>s |
| 1 | 1.00 | 1 | 1 | 0.02  | 0.022  | 0.025  | 0.02   | 0.021  | t | 94646  | PPKVPPDL<br>MS               | Homo<br>sapiens                  |
| 1 | 1.00 | 1 | 1 | 0.02  | 0.009  | 0.016  | 0.02   | 0.022  | t | 147083 | LCSEYRNT<br>QIYTIN           | Oryctola<br>gus<br>cuniculu<br>s |
| 1 | 1.00 | 1 | 1 | 0.03  | 0.03   | 0.037  | 0.03   | 0.032  | t | 95579  | LVLDTD                       | Homo<br>sapiens                  |
| 1 | 1.00 | 1 | 1 | 0     | 0      | 0      | 0      | 0      | t | 78853  | TKDTNNN<br>LCGN              | Mus<br>musculu<br>s              |
| 1 | 1.00 | 1 | 1 | 0.01  | 0.013  | 0.013  | 0.01   | 0.01   | t | 43818  | NFDFGLLG<br>TTLNLDA          | Mus<br>musculu<br>s              |
| 1 | 1.00 | 1 | 1 | 0     | -0.002 | 0      | -0.003 | 0      | t | 40076  | LTPCD                        | Mus<br>musculu<br>s              |
| 1 | 1.00 | 1 | 1 | 0.03  | 0.028  | 0.035  | 0.029  | 0.03   | t | 6361   | CGVVNNK<br>VAT               | Mus<br>musculu<br>s              |
| 1 | 1.00 | 1 | 1 | -0.02 | -0.02  | -0.02  | -0.02  | -0.02  | t | 158292 | SQQLLGQ<br>RLYGLWK           | Canis<br>lupus                   |
| 1 | 1.00 | 1 | 1 | -0.02 | -0.022 | -0.021 | -0.021 | -0.02  | t | 68587  | VFTLSAHV                     | Mus<br>musculu<br>s              |
| 1 | 1.00 | 1 | 1 | 0.01  | 0.01   | 0.012  | 0.01   | 0.01   | t | 78533  | TLLTLCPAT<br>CILPLGEPF<br>S  | Mus<br>musculu<br>s              |
| 1 | 1.00 | 1 | 1 | 0.02  | 0.02   | 0.02   | 0.02   | 0.022  | t | 135482 | LMDRHD                       | Mus<br>musculu<br>s              |
| 1 | 1.00 | 1 | 1 | -0.01 | -0.008 | -0.008 | -0.013 | -0.011 | t | 99286  | GLIFPGCP<br>RHYEEPH          | Homo<br>sapiens                  |
| 1 | 1.00 | 1 | 1 | -0.03 | -0.03  | -0.023 | -0.021 | -0.03  | t | 119456 | GGTTTPRT<br>T                | Homo<br>sapiens                  |
| 1 | 1.00 | 1 | 1 | -0.01 | -0.01  | -0.004 | -0.004 | -0.009 | t | 30332  | KEDTSFGG<br>NLGRAVF<br>QAKKR | Homo<br>sapiens                  |

|   |      |   |   |       |        |        |        |        |   |        |                              |                                  |
|---|------|---|---|-------|--------|--------|--------|--------|---|--------|------------------------------|----------------------------------|
| 1 | 1.00 | 1 | 1 | 0.03  | 0.027  | 0.037  | 0.03   | 0.028  | t | 99935  | DFSQTATL<br>TNTN             | Oryctola<br>gus<br>cuniculu<br>s |
| 1 | 1.00 | 1 | 1 | -0.01 | -0.01  | -0.005 | -0.012 | -0.012 | t | 118146 | SNLDHILE<br>PSIP             | Homo<br>sapiens                  |
| 1 | 1.00 | 1 | 1 | 0.05  | 0.05   | 0.045  | 0.056  | 0.056  | t | 131024 | QTTANPSC<br>PEG              | Rattus<br>norvegic<br>us         |
| 1 | 1.00 | 1 | 1 | 0     | 0.004  | 0.005  | 0.001  | 0      | t | 57937  | SFVMRDG<br>AAA               | Homo<br>sapiens                  |
| 1 | 1.00 | 1 | 1 | 0     | 0.002  | 0.005  | 0.001  | 0      | t | 57937  | SFVMRDG<br>AAA               | Homo<br>sapiens                  |
| 1 | 1.00 | 1 | 1 | 0     | -0.006 | 0      | 0      | 0      | t | 123710 | RKPKSQET                     | Oryctola<br>gus<br>cuniculu<br>s |
| 1 | 1.00 | 1 | 1 | -0.04 | -0.038 | -0.029 | -0.04  | -0.041 | t | 124603 | QHWSYPL<br>RPG               | Rattus<br>norvegic<br>us         |
| 1 | 1.00 | 1 | 1 | 0.03  | 0.028  | 0.036  | 0.027  | 0.029  | t | 118826 | GSGKGAGI<br>GLGVGGG<br>VGA   | Mus<br>musculu<br>s              |
| 1 | 1.00 | 1 | 1 | 0.01  | 0.006  | 0.003  | 0.007  | 0.012  | t | 111039 | TGVPIDPA<br>VPDSSIVPL<br>LES | Bos<br>taurus                    |
| 1 | 1.00 | 1 | 1 | 0     | -0.011 | 0      | 0      | 0.002  | t | 156893 | IPHPKLG<br>DPRPM             | Oryctola<br>gus<br>cuniculu<br>s |
| 1 | 1.00 | 1 | 1 | -0.04 | -0.042 | -0.035 | -0.041 | -0.039 | t | 22230  | GRVCLR                       | Mus<br>musculu<br>s              |
| 1 | 1.00 | 1 | 1 | -0.03 | -0.028 | -0.028 | -0.029 | -0.031 | t | 69299  | VKQMYKT<br>PTLKYFGG<br>FN    | Homo<br>sapiens                  |
| 1 | 1.00 | 1 | 1 | 0.01  | 0.008  | 0.005  | 0.013  | 0.01   | t | 58880  | SKLGVSW<br>ATRQIGNT<br>VTPTV | Mus<br>musculu<br>s              |

|   |      |   |   |       |        |        |        |        |   |        |                              |                                  |
|---|------|---|---|-------|--------|--------|--------|--------|---|--------|------------------------------|----------------------------------|
| 1 | 1.00 | 1 | 1 | 0.01  | 0.008  | -0.006 | 0.009  | 0.012  | t | 149247 | AEQQWAL<br>YADGSIRP<br>Q     | Mus<br>musculu<br>s              |
| 1 | 1.00 | 1 | 1 | -0.01 | -0.01  | -0.012 | -0.01  | -0.01  | t | 95749  | QVYNKLG<br>MYPPN             | Homo<br>sapiens                  |
| 1 | 1.00 | 1 | 1 | 0.01  | 0.01   | 0.009  | 0.013  | 0.01   | t | 72252  | WAPTAPL<br>PGDMNPA<br>N      | Homo<br>sapiens                  |
| 1 | 1.00 | 1 | 1 | 0.03  | 0.03   | 0.03   | 0.03   | 0.03   | t | 84003  | ITGPGTNN<br>PE               | Homo<br>sapiens                  |
| 1 | 1.00 | 1 | 1 | -0.01 | -0.01  | -0.01  | -0.01  | -0.01  | t | 127680 | HFHRPPT                      | Homo<br>sapiens                  |
| 1 | 1.00 | 1 | 1 | -0.01 | -0.01  | -0.01  | -0.01  | -0.01  | t | 127796 | RAHGEAG<br>AGRVRTSA          | Homo<br>sapiens                  |
| 1 | 1.00 | 1 | 1 | -0.01 | -0.01  | -0.01  | -0.01  | -0.01  | t | 131539 | LISSSQDG<br>HQWTLFF<br>QNGKV | Homo<br>sapiens                  |
| 1 | 1.00 | 1 | 1 | -0.01 | -0.01  | -0.01  | -0.01  | -0.01  | t | 113082 | LVEEAIAY<br>GRKLGGS          | Oryctola<br>gus<br>cuniculu<br>s |
| 1 | 1.00 | 1 | 1 | -0.01 | -0.01  | -0.01  | -0.01  | -0.01  | t | 111570 | MRPDNAK                      | Homo<br>sapiens                  |
| 1 | 1.00 | 1 | 1 | -0.01 | -0.01  | -0.01  | -0.01  | -0.01  | t | 82527  | GAATPYA<br>GEPARPPE<br>TLGEE | Aotus                            |
| 1 | 1.00 | 1 | 1 | -0.01 | -0.01  | -0.01  | -0.01  | -0.01  | t | 47180  | PDREVLHR<br>EFDEMEEC<br>ASHL | Homo<br>sapiens                  |
| 1 | 1.00 | 1 | 1 | 0.03  | 0.029  | 0.03   | 0.03   | 0.031  | t | 30121  | KDCMGEA<br>VQNTVED           | Mus<br>musculu<br>s              |
| 1 | 1.00 | 1 | 1 | -0.05 | -0.05  | -0.05  | -0.05  | -0.05  | t | 115733 | ERFFSDKIA<br>K               | Homo<br>sapiens                  |
| 1 | 1.00 | 1 | 1 | 0     | 0.005  | 0.008  | 0      | 0.001  | t | 50180  | PYVEPTAP<br>QVL              | Homo<br>sapiens                  |
| 1 | 1.00 | 1 | 1 | -0.01 | -0.008 | -0.012 | -0.009 | -0.008 | t | 46792  | PAFGANS<br>NNPDWDF<br>NP     | Homo<br>sapiens                  |



|   |      |   |   |       |        |        |        |        |   |        |                              |                                  |
|---|------|---|---|-------|--------|--------|--------|--------|---|--------|------------------------------|----------------------------------|
| 1 | 1.00 | 1 | 1 | -0.01 | -0.01  | -0.01  | -0.01  | -0.01  | t | 135710 | LAKEQKSK<br>QNIGALKQ<br>ELAK | Homo<br>sapiens                  |
| 1 | 1.00 | 1 | 1 | -0.03 | -0.03  | -0.035 | -0.03  | -0.028 | t | 130869 | GRDRQPR<br>L                 | Oryctola<br>gus<br>cuniculu<br>s |
| 1 | 1.00 | 1 | 1 | 0     | 0.004  | 0      | 0.003  | 0.002  | t | 11081  | EAIPALTA<br>VETGHTSQ<br>V    | Homo<br>sapiens                  |
| 1 | 1.00 | 1 | 1 | 0     | 0      | 0      | 0      | 0.001  | t | 135841 | HVTDMM<br>ELYTLG             | Mus<br>musculu<br>s              |
| 1 | 1.00 | 1 | 1 | 0.01  | 0.01   | 0.01   | 0.006  | 0.008  | t | 123884 | YYQKWME<br>EQA               | Homo<br>sapiens                  |
| 1 | 1.00 | 1 | 1 | -0.01 | -0.018 | -0.01  | -0.01  | -0.011 | t | 71212  | VSVTDHKK<br>WQFNSPF<br>VP    | Mus<br>musculu<br>s              |
| 1 | 1.00 | 1 | 1 | -0.02 | -0.02  | -0.01  | -0.026 | -0.023 | t | 109702 | PLKP                         | Mus<br>musculu<br>s              |
| 1 | 1.00 | 1 | 1 | 0     | 0.002  | 0.007  | 0.007  | 0.002  | t | 74871  | YLPVGGLR<br>RIGG             | Homo<br>sapiens                  |
| 1 | 1.00 | 1 | 1 | -0.03 | -0.03  | -0.023 | -0.033 | -0.03  | t | 69068  | VIPLAIEFT<br>PRP             | Homo<br>sapiens                  |
| 1 | 1.00 | 1 | 1 | 0.03  | 0.028  | 0.035  | 0.029  | 0.033  | t | 75902  | YSTEVR                       | Mus<br>musculu<br>s              |
| 1 | 1.00 | 1 | 1 | 0.02  | 0.022  | 0.026  | 0.017  | 0.02   | t | 49535  | PSTPGSRQ<br>NM               | Homo<br>sapiens                  |
| 1 | 1.00 | 1 | 1 | 0.02  | 0.024  | 0.026  | 0.017  | 0.02   | t | 49535  | PSTPGSRQ<br>NM               | Homo<br>sapiens                  |
| 1 | 1.00 | 1 | 1 | -0.01 | -0.012 | -0.002 | -0.009 | -0.012 | t | 138841 | EASPQAW<br>WDESQ             | Mus<br>musculu<br>s              |
| 1 | 1.00 | 1 | 1 | -0.02 | -0.02  | -0.034 | -0.02  | -0.017 | t | 314    | AANAHHA<br>ANAHH             | Homo<br>sapiens                  |
| 1 | 1.00 | 1 | 1 | -0.05 | -0.048 | -0.048 | -0.049 | -0.048 | t | 7311   | CVTGHWR<br>C                 | Homo<br>sapiens                  |

|   |      |   |   |       |        |        |        |       |   |        |                              |                                  |
|---|------|---|---|-------|--------|--------|--------|-------|---|--------|------------------------------|----------------------------------|
| 1 | 1.00 | 1 | 1 | -0.03 | -0.032 | -0.023 | -0.027 | -0.03 | t | 106976 | VPTQLYNL<br>YPPL             | Mus<br>musculu<br>s              |
| 1 | 1.00 | 1 | 1 | 0.01  | 0.008  | 0.014  | 0.013  | 0.008 | t | 49071  | PQPQQQL<br>PLQ               | Mus<br>musculu<br>s              |
| 1 | 1.00 | 1 | 1 | 0     | -0.004 | -0.006 | -0.003 | 0     | t | 50299  | QALCENPE<br>CVPLKDN          | Oryctola<br>gus<br>cuniculu<br>s |
| 1 | 1.00 | 1 | 1 | 0.03  | 0.03   | 0.03   | 0.034  | 0.032 | t | 118439 | IVLERSES<br>WNLKDLDI         | Homo<br>sapiens                  |
| 1 | 1.00 | 1 | 1 | 0.02  | 0.02   | 0.022  | 0.02   | 0.019 | t | 77954  | LVVMVVA<br>PLTVNTEG<br>APQIK | Mus<br>musculu<br>s              |
| 1 | 1.00 | 1 | 1 | 0.01  | 0.01   | 0.012  | 0.011  | 0.008 | t | 40921  | LYREALESP<br>EHC             | Mus<br>musculu<br>s              |
| 1 | 1.00 | 1 | 1 | 0.02  | 0.02   | 0.02   | 0.02   | 0.02  | t | 138753 | AAHAEINE<br>AGREVVG          | Mus<br>musculu<br>s              |
| 1 | 1.00 | 1 | 1 | 0.02  | 0.022  | 0.02   | 0.02   | 0.02  | t | 130636 | WPQIWFD<br>DEEDV             | Homo<br>sapiens                  |
| 1 | 1.00 | 1 | 1 | 0     | 0      | 0      | 0      | 0     | t | 140584 | PWHQMA<br>ATS                | Mus<br>musculu<br>s              |
| 1 | 1.00 | 1 | 1 | 0     | 0      | 0      | 0      | 0     | t | 140584 | PWHQMA<br>ATS                | Mus<br>musculu<br>s              |
| 1 | 1.00 | 1 | 1 | 0     | 0      | 0      | 0      | 0     | t | 123860 | YEEHLYGR<br>D                | Ovis<br>aries                    |
| 1 | 1.00 | 1 | 1 | 0     | 0      | 0      | 0      | 0     | t | 107008 | YEFRHSS                      | Mus<br>musculu<br>s              |
| 1 | 1.00 | 1 | 1 | 0     | 0      | 0      | 0      | 0     | t | 103530 | QSGGNNS<br>PAVYLLDG          | Homo<br>sapiens                  |
| 1 | 1.00 | 1 | 1 | 0     | 0      | 0      | 0      | 0     | t | 86972  | NPITESAH<br>LN               | Homo<br>sapiens                  |
| 1 | 1.00 | 1 | 1 | -0.02 | -0.02  | -0.02  | -0.02  | -0.02 | t | 150995 | HLGKCNI<br>A<br>GWILGNP      | Homo<br>sapiens                  |

|   |      |   |   |       |        |        |       |        |   |        |                              |                                  |
|---|------|---|---|-------|--------|--------|-------|--------|---|--------|------------------------------|----------------------------------|
| 1 | 1.00 | 1 | 1 | -0.02 | -0.02  | -0.02  | -0.02 | -0.02  | t | 123453 | LPKIKEYM<br>K                | Ovis<br>aries                    |
| 1 | 1.00 | 1 | 1 | -0.02 | -0.02  | -0.02  | -0.02 | -0.02  | t | 66573  | TTDSGDG<br>RQTIT             | Oryctola<br>gus<br>cuniculu<br>s |
| 1 | 1.00 | 1 | 1 | -0.02 | -0.02  | -0.02  | -0.02 | -0.02  | t | 66844  | TTTDSGDG<br>RQTI             | Oryctola<br>gus<br>cuniculu<br>s |
| 1 | 1.00 | 1 | 1 | -0.04 | -0.04  | -0.04  | -0.04 | -0.04  | t | 128150 | YFIICPIID<br>MASAWA<br>KRARG | Homo<br>sapiens                  |
| 1 | 1.00 | 1 | 1 | -0.04 | -0.04  | -0.04  | -0.04 | -0.04  | t | 111550 | MKVNILR                      | Homo<br>sapiens                  |
| 1 | 1.00 | 1 | 1 | -0.01 | -0.013 | 0.001  | -0.01 | -0.012 | t | 111844 | TPRRPGKE<br>IEAYIFE          | Oryctola<br>gus<br>cuniculu<br>s |
| 1 | 1.00 | 1 | 1 | -0.01 | -0.013 | 0.001  | -0.01 | -0.012 | t | 111844 | TPRRPGKE<br>IEAYIFE          | Oryctola<br>gus<br>cuniculu<br>s |
| 1 | 1.00 | 1 | 1 | 0.03  | 0.026  | 0.044  | 0.029 | 0.028  | t | 19023  | GDLGSIA                      | Oryctola<br>gus<br>cuniculu<br>s |
| 1 | 1.00 | 1 | 1 | 0.01  | 0.008  | 0.016  | 0.009 | 0.009  | t | 21059  | GLPDSVKI<br>WTSETNK          | Mus<br>musculu<br>s              |
| 1 | 1.00 | 1 | 1 | -0.03 | -0.027 | -0.03  | -0.03 | -0.027 | t | 103496 | PRGYPGQ<br>V                 | Mus<br>musculu<br>s              |
| 1 | 1.00 | 1 | 1 | -0.03 | -0.028 | -0.023 | -0.03 | -0.03  | t | 47721  | PGPGEVW<br>V                 | Homo<br>sapiens                  |
| 1 | 1.00 | 1 | 1 | 0     | -0.003 | 0      | 0     | 0.001  | t | 141935 | KKPGGPG                      | Mus<br>musculu<br>s              |
| 1 | 1.00 | 1 | 1 | 0.03  | 0.025  | 0.028  | 0.03  | 0.03   | t | 15281  | FASRGTS<br>MDDEA             | Bos<br>taurus                    |
| 1 | 1.00 | 1 | 1 | 0     | 0.004  | 0.005  | 0.007 | 0      | t | 133841 | GRGNGDP<br>GGGMEKD<br>G      | Homo<br>sapiens                  |

|   |      |   |   |       |        |        |        |        |   |        |                        |                       |
|---|------|---|---|-------|--------|--------|--------|--------|---|--------|------------------------|-----------------------|
| 1 | 1.00 | 1 | 1 | 0.01  | 0.01   | 0.013  | 0.01   | 0.01   | t | 5438   | AVLLGACSF              | Oryctolagus cuniculus |
| 1 | 1.00 | 1 | 1 | 0.03  | 0.032  | 0.035  | 0.033  | 0.03   | t | 60915  | SSAVDSGTATAPPD         | Homo sapiens          |
| 1 | 1.00 | 1 | 1 | -0.04 | -0.04  | -0.038 | -0.04  | -0.038 | t | 125011 | DFHFEVFN FVP           | Mus musculus          |
| 1 | 1.00 | 1 | 1 | 0.01  | 0.01   | 0.01   | 0.01   | 0.011  | t | 23463  | GYSLFQKE MKTDNEG TSGTA | Aotus nancymae        |
| 1 | 1.00 | 1 | 1 | -0.02 | -0.023 | -0.017 | -0.02  | -0.019 | t | 133744 | YGGFMRF                | Oryctolagus cuniculus |
| 1 | 1.00 | 1 | 1 | -0.01 | -0.012 | -0.012 | -0.011 | -0.009 | t | 56434  | RVTVSTRR SQQTIIPNIG    | Mus musculus          |
| 1 | 1.00 | 1 | 1 | -0.03 | -0.03  | -0.034 | -0.03  | -0.03  | t | 95142  | RIKNTDGSIS             | Oryctolagus cuniculus |
| 1 | 1.00 | 1 | 1 | 0     | 0.008  | 0.011  | 0      | -0.003 | t | 44221  | NIETVIEFQ QKNNRLE      | Cavia porcellus       |
| 1 | 1.00 | 1 | 1 | 0     | 0      | 0      | -0.002 | 0      | t | 29936  | KARRPEGR TWAQ          | Homo sapiens          |
| 1 | 1.00 | 1 | 1 | -0.08 | -0.082 | -0.094 | -0.087 | -0.081 | t | 133691 | SFNKTLSTRK             | Mus musculus          |
| 1 | 1.00 | 1 | 1 | -0.04 | -0.04  | -0.052 | -0.044 | -0.04  | t | 96260  | EPNANLSL TTDGKFLK ASA  | Homo sapiens(human)   |
| 1 | 1.00 | 1 | 1 | -0.02 | -0.022 | -0.018 | -0.021 | -0.02  | t | 64663  | TKRRITPKD              | Mus musculus          |
| 1 | 1.00 | 1 | 1 | 0.02  | 0.02   | 0.011  | 0.017  | 0.02   | t | 97497  | MIEGAQG ALERELKRT      | Homo sapiens          |
| 1 | 1.00 | 1 | 1 | 0     | 0      | 0.007  | 0      | -0.002 | t | 43557  | NEALPGD ARDTT          | Oryctolagus cuniculus |
| 1 | 1.00 | 1 | 1 | 0     | -0.002 | -0.005 | -0.003 | -0.002 | t | 32808  | KPNLSSKR SELSQLSM YRVF | Mus musculus          |

|   |      |   |   |       |        |        |        |        |   |        |                              |                                  |
|---|------|---|---|-------|--------|--------|--------|--------|---|--------|------------------------------|----------------------------------|
| 1 | 1.00 | 1 | 1 | 0     | 0.003  | -0.01  | 0      | 0.001  | t | 59967  | SNYYSDNE<br>IEQHTAKQ<br>PKL  | Mus<br>musculu<br>s              |
| 1 | 1.00 | 1 | 1 | 0.03  | 0.032  | 0.035  | 0.031  | 0.029  | t | 60915  | SSAVDSGT<br>ATAPPD           | Homo<br>sapiens                  |
| 1 | 1.00 | 1 | 1 | 0     | 0      | 0.001  | 0      | 0.001  | t | 53634  | RESQAYYQ<br>R                | Mus<br>musculu<br>s              |
| 1 | 1.00 | 1 | 1 | 0.01  | 0.01   | 0.01   | 0.01   | 0.01   | t | 103055 | AQAQHLT<br>MANIVTSA          | Homo<br>sapiens                  |
| 1 | 1.00 | 1 | 1 | -0.01 | -0.01  | -0.01  | -0.01  | -0.01  | t | 143673 | DRANLGT<br>L RGY             | Mus<br>musculu<br>s              |
| 1 | 1.00 | 1 | 1 | -0.01 | -0.01  | -0.01  | -0.01  | -0.01  | t | 132048 | RRERGM<br>MKGGNK<br>QEE      | Homo<br>sapiens                  |
| 1 | 1.00 | 1 | 1 | -0.01 | -0.01  | -0.01  | -0.01  | -0.01  | t | 108526 | LLRPVARD<br>T                | Homo<br>sapiens                  |
| 1 | 1.00 | 1 | 1 | -0.01 | -0.01  | -0.01  | -0.01  | -0.01  | t | 25794  | IEEVALSNT<br>GEIPF           | Homo<br>sapiens                  |
| 1 | 1.00 | 1 | 1 | -0.01 | -0.01  | -0.01  | -0.01  | -0.01  | t | 28482  | ISESQGNE<br>EDERNL           | Homo<br>sapiens                  |
| 1 | 1.00 | 1 | 1 | -0.03 | -0.03  | -0.03  | -0.03  | -0.03  | t | 135726 | NLERECM<br>E                 | Homo<br>sapiens                  |
| 1 | 1.00 | 1 | 1 | -0.03 | -0.03  | -0.03  | -0.03  | -0.03  | t | 100410 | QEEHLKEI<br>MK               | Mus<br>musculu<br>s              |
| 1 | 1.00 | 1 | 1 | -0.03 | -0.03  | -0.03  | -0.03  | -0.03  | t | 99556  | QCGLRAP<br>QRCDLDV<br>E      | Homo<br>sapiens                  |
| 1 | 1.00 | 1 | 1 | -0.01 | -0.014 | -0.01  | -0.017 | -0.01  | t | 128024 | IKKVATPK<br>KASPKK           | Oryctola<br>gus<br>cuniculu<br>s |
| 1 | 1.00 | 1 | 1 | -0.03 | -0.032 | -0.035 | -0.027 | -0.029 | t | 95080  | FLRMKRP<br>GEDKVRP<br>ACQHKQ | Rattus<br>norvegic<br>us         |
| 1 | 1.00 | 1 | 1 | -0.01 | -0.006 | -0.015 | -0.01  | -0.008 | t | 99963  | DTVQLRRK<br>LEFFTY           | Homo<br>sapiens                  |
| 1 | 1.00 | 1 | 1 | 0     | 0      | 0      | -0.003 | 0      | t | 48345  | PLGLRSEF<br>PI               | Homo<br>sapiens                  |
| 1 | 1.00 | 1 | 1 | 0.02  | 0.018  | 0.018  | 0.019  | 0.023  | t | 36406  | LHNNEAG<br>RTTVFS            | Mus<br>musculu<br>s              |

|   |      |   |   |       |        |        |        |       |   |        |                              |                                  |
|---|------|---|---|-------|--------|--------|--------|-------|---|--------|------------------------------|----------------------------------|
| 1 | 1.00 | 1 | 1 | -0.03 | -0.03  | -0.03  | -0.03  | -0.03 | t | 135459 | GACLGKAC                     | Oryctola<br>gus<br>cuniculu<br>s |
| 1 | 1.00 | 1 | 1 | 0.02  | 0.018  | 0.026  | 0.023  | 0.023 | t | 21763  | GPRLQPY                      | Mus<br>musculu<br>s              |
| 1 | 1.00 | 1 | 1 | 0     | 0      | -0.008 | -0.001 | 0.002 | t | 7323   | CVWNNKT<br>PNS               | Mus<br>musculu<br>s              |
| 1 | 1.00 | 1 | 1 | 0     | 0      | 0      | 0.004  | 0     | t | 117993 | LNYLDPRIT<br>VAWCKK<br>WGVPI | Homo<br>sapiens                  |
| 1 | 1.00 | 1 | 1 | 0     | 0      | 0.005  | 0.003  | 0     | t | 53220  | RATLSNEH<br>GITI             | Homo<br>sapiens                  |
| 1 | 1.00 | 1 | 1 | -0.01 | -0.008 | -0.01  | -0.011 | -0.01 | t | 110562 | DIILECVYC<br>KQQLLRRE<br>VVD | Cavia<br>porcellu<br>s           |
| 1 | 1.00 | 1 | 1 | 0.02  | 0.022  | 0.02   | 0.021  | 0.02  | t | 110303 | KHRRLLSD<br>QDQSQTP<br>ETPAT | Homo<br>sapiens                  |
| 1 | 1.00 | 1 | 1 | 0     | 0.003  | 0.007  | 0.001  | 0.001 | t | 78695  | KDTNNNL<br>YNGK              | Mus<br>musculu<br>s              |
| 1 | 1.00 | 1 | 1 | 0.02  | 0.02   | 0.021  | 0.023  | 0.02  | t | 79676  | VSCNVTE<br>HPFCNTPH<br>GQLE  | Homo<br>sapiens                  |
| 1 | 1.00 | 1 | 1 | 0.02  | 0.016  | 0.031  | 0.017  | 0.018 | t | 111445 | KEIEAYIFE<br>MFNENQ          | Oryctola<br>gus<br>cuniculu<br>s |
| 1 | 1.00 | 1 | 1 | -0.01 | -0.006 | -0.008 | -0.013 | -0.01 | t | 96020  | YLKTVYQH<br>QK               | Homo<br>sapiens                  |
| 1 | 1.00 | 1 | 1 | 0.02  | 0.022  | 0.02   | 0.021  | 0.02  | t | 117065 | QFTGSTRQ<br>HAG              | Homo<br>sapiens                  |
| 1 | 1.00 | 1 | 1 | 0.04  | 0.04   | 0.04   | 0.04   | 0.04  | t | 107357 | EYKCKVS                      | Homo<br>sapiens                  |
| 1 | 1.00 | 1 | 1 | 0.02  | 0.02   | 0.02   | 0.02   | 0.02  | t | 78216  | NKLSAA                       | Equus<br>caballus                |
| 1 | 1.00 | 1 | 1 | 0     | 0      | 0      | 0      | 0     | t | 135945 | KFGADAR<br>ALMLQ             | Homo<br>sapiens                  |
| 1 | 1.00 | 1 | 1 | 0     | 0      | 0      | 0      | 0     | t | 115310 | KHIQKEDV<br>PSERYLGY<br>LEQL | Homo<br>sapiens                  |
| 1 | 1.00 | 1 | 1 | 0     | 0      | 0      | 0      | 0     | t | 101706 | HEQPHWL<br>LWQPP             | Homo<br>sapiens                  |

|   |      |   |   |       |        |        |        |        |   |        |                      |                       |
|---|------|---|---|-------|--------|--------|--------|--------|---|--------|----------------------|-----------------------|
| 1 | 1.00 | 1 | 1 | 0     | 0      | 0      | 0      | 0      | t | 93098  | KIEEIIGQNG           | Ovis aries            |
| 1 | 1.00 | 1 | 1 | 0     | 0      | 0      | 0      | 0      | t | 77892  | GMEPPKTPEAAAHCHAEWD  | Mus musculus          |
| 1 | 1.00 | 1 | 1 | 0.05  | 0.054  | 0.032  | 0.05   | 0.058  | t | 78286  | TTAETLDATR           | Cavia porcellus       |
| 1 | 1.00 | 1 | 1 | -0.02 | -0.02  | -0.02  | -0.02  | -0.02  | t | 121674 | NVKKLLVAKPLVDWF      | Mus musculus          |
| 1 | 1.00 | 1 | 1 | -0.02 | -0.02  | -0.02  | -0.02  | -0.02  | t | 121674 | NVKKLLVAKPLVDWF      | Mus musculus          |
| 1 | 1.00 | 1 | 1 | -0.02 | -0.02  | -0.02  | -0.02  | -0.02  | t | 115518 | TPEGDLEILQKWENG ECAQ | Homo sapiens          |
| 1 | 1.00 | 1 | 1 | -0.02 | -0.02  | -0.02  | -0.02  | -0.02  | t | 115954 | SEESITRINK           | Homo sapiens          |
| 1 | 1.00 | 1 | 1 | -0.02 | -0.02  | -0.02  | -0.02  | -0.02  | t | 113883 | SRGSHEWAVLFRFY       | Homo sapiens          |
| 1 | 1.00 | 1 | 1 | -0.02 | -0.02  | -0.02  | -0.02  | -0.02  | t | 41335  | MEECSKARPYIEQAQVIAHQ | Homo sapiens          |
| 1 | 1.00 | 1 | 1 | -0.08 | -0.08  | -0.08  | -0.08  | -0.08  | t | 115731 | EPVLGPVRGP           | Homo sapiens          |
| 1 | 1.00 | 1 | 1 | 0.02  | 0.02   | 0.02   | 0.02   | 0.02   | t | 131309 | RVALTEDRLP           | Homo sapiens          |
| 1 | 1.00 | 1 | 1 | -0.01 | -0.006 | -0.003 | -0.013 | -0.01  | t | 26844  | IKLPALF              | Homo sapiens          |
| 1 | 1.00 | 1 | 1 | 0.01  | 0.01   | 0.01   | 0.01   | 0.01   | t | 79305  | MCEYSHWSGFAFCK       | Mus musculus          |
| 1 | 1.00 | 1 | 1 | 0.01  | 0.006  | 0.01   | 0.01   | 0.011  | t | 138189 | HILGSTA              | Mus musculus          |
| 1 | 1.00 | 1 | 1 | -0.01 | -0.01  | -0.01  | -0.01  | -0.009 | t | 103830 | CHAVKVGNPSC          | Oryctolagus cuniculus |
| 1 | 1.00 | 1 | 1 | 0.02  | 0.02   | 0.024  | 0.026  | 0.022  | t | 106084 | RPRSPSSQSSSSGSPRRP   | Homo sapiens          |

|   |      |   |   |       |        |        |        |       |   |        |                              |                                  |
|---|------|---|---|-------|--------|--------|--------|-------|---|--------|------------------------------|----------------------------------|
| 1 | 1.00 | 1 | 1 | 0     | 0      | -0.007 | 0      | 0     | t | 159079 | RSNHNRR<br>PGYKTQN<br>QG     | Mus<br>musculu<br>s              |
| 1 | 1.00 | 1 | 1 | -0.01 | -0.013 | -0.01  | -0.01  | -0.01 | t | 21467  | GNLLFTGH                     | Oryctola<br>gus<br>cuniculu<br>s |
| 1 | 1.00 | 1 | 1 | -0.01 | -0.013 | -0.01  | -0.01  | -0.01 | t | 21467  | GNLLFTGH                     | Oryctola<br>gus<br>cuniculu<br>s |
| 1 | 1.00 | 1 | 1 | 0     | -0.005 | 0      | -0.001 | 0     | t | 148569 | DKSKLRDV<br>KDNKSTD<br>VKL   | Canis<br>lupus                   |
| 1 | 1.00 | 1 | 1 | 0     | 0.003  | 0      | 0      | 0.002 | t | 41019  | MADPNRF<br>RG                | Mus<br>musculu<br>s              |
| 1 | 1.00 | 1 | 1 | 0.01  | 0.01   | 0.02   | 0.01   | 0.006 | t | 142806 | KATALTYD<br>PYVNYSS          | Sus<br>scrofa                    |
| 1 | 1.00 | 1 | 1 | 0.02  | 0.023  | 0.012  | 0.019  | 0.02  | t | 65669  | TPNLTTAH<br>GAGS             | Equus<br>caballus                |
| 1 | 1.00 | 1 | 1 | -0.02 | -0.02  | -0.02  | -0.02  | -0.02 | t | 151662 | KFSPLTAN<br>LMNLLAE<br>NGRL  | Mus<br>musculu<br>s              |
| 1 | 1.00 | 1 | 1 | 0.01  | 0.007  | -0.002 | 0.01   | 0.011 | t | 78394  | GEAVTVTI<br>TDDNEEPI<br>APY  | Oryctola<br>gus<br>cuniculu<br>s |
| 1 | 1.00 | 1 | 1 | 0.01  | 0.006  | 0.016  | 0.013  | 0.011 | t | 27670  | INKDAREL                     | Oryctola<br>gus<br>cuniculu<br>s |
| 1 | 1.00 | 1 | 1 | 0     | -0.002 | -0.006 | 0.003  | 0.002 | t | 21664  | GPIRPTLPP<br>GILGPLAP<br>NTP | Homo<br>sapiens                  |
| 1 | 1.00 | 1 | 1 | 0.01  | 0.009  | 0.014  | 0.009  | 0.01  | t | 52059  | QQLIVARQ<br>KLKDAE           | Myodes<br>glareolu<br>s          |
| 1 | 1.00 | 1 | 1 | 0     | 0      | -0.003 | 0.003  | 0.002 | t | 22387  | GSINTGW<br>FNTGNAN<br>TG     | Homo<br>sapiens                  |



|   |      |   |   |       |        |        |        |        |   |        |                              |                                  |
|---|------|---|---|-------|--------|--------|--------|--------|---|--------|------------------------------|----------------------------------|
| 1 | 1.00 | 1 | 1 | -0.02 | -0.024 | -0.013 | -0.021 | -0.02  | t | 44598  | NKSLGACP<br>IR               | Oryctola<br>gus<br>cuniculu<br>s |
| 1 | 1.00 | 1 | 1 | -0.02 | -0.02  | -0.008 | -0.02  | -0.024 | t | 133665 | PVLLFCFLA<br>GRCVSV          | Mus<br>musculu<br>s              |
| 1 | 1.00 | 1 | 1 | 0     | 0      | 0.003  | 0      | 0      | t | 60679  | SRGNHVS<br>PTHYVPES<br>DAAAK | Homo<br>sapiens                  |
| 1 | 1.00 | 1 | 1 | -0.02 | -0.02  | -0.015 | -0.02  | -0.021 | t | 24441  | HPDVPYVK                     | Homo<br>sapiens                  |
| 1 | 1.00 | 1 | 1 | -0.01 | -0.003 | -0.01  | -0.01  | -0.01  | t | 94446  | CCHPACG<br>KN                | Capra<br>hircus                  |
| 1 | 1.00 | 1 | 1 | 0     | -0.004 | 0      | -0.007 | -0.003 | t | 129973 | SPRSFQKK<br>T                | Oryctola<br>gus<br>cuniculu<br>s |
| 1 | 1.00 | 1 | 1 | 0.01  | 0.01   | 0.01   | 0.01   | 0.01   | t | 121742 | QCVLAIFN<br>NVYGLPY          | Mus<br>musculu<br>s              |
| 1 | 1.00 | 1 | 1 | 0.01  | 0.01   | 0.01   | 0.01   | 0.01   | t | 121742 | QCVLAIFN<br>NVYGLPY          | Mus<br>musculu<br>s              |
| 1 | 1.00 | 1 | 1 | 0.01  | 0.01   | 0.01   | 0.01   | 0.01   | t | 115905 | PVALINNQ<br>FL               | Homo<br>sapiens                  |
| 1 | 1.00 | 1 | 1 | 0.01  | 0.01   | 0.01   | 0.01   | 0.01   | t | 79447  | VCEHPENK<br>APPCCP           | Mus<br>musculu<br>s              |
| 1 | 1.00 | 1 | 1 | -0.01 | -0.01  | -0.01  | -0.01  | -0.01  | t | 149066 | LLATQPA                      | Sus<br>scrofa                    |
| 1 | 1.00 | 1 | 1 | -0.01 | -0.01  | -0.01  | -0.01  | -0.01  | t | 103686 | VALFGEPS<br>SGFSSML          | Homo<br>sapiens                  |
| 1 | 1.00 | 1 | 1 | -0.01 | -0.01  | -0.01  | -0.01  | -0.01  | t | 79162  | AVWEWM<br>WWDA               | Mus<br>musculu<br>s              |
| 1 | 1.00 | 1 | 1 | -0.01 | -0.01  | -0.01  | -0.01  | -0.01  | t | 77782  | GRVSARG<br>CTFVACW<br>KGVVG  | Homo<br>sapiens                  |
| 1 | 1.00 | 1 | 1 | -0.03 | -0.03  | -0.03  | -0.03  | -0.03  | t | 111091 | AEPDRAH<br>YNIVTFCC<br>KCDST | Mus<br>musculu<br>s              |
| 1 | 1.00 | 1 | 1 | -0.03 | -0.03  | -0.03  | -0.03  | -0.03  | t | 111091 | AEPDRAH<br>YNIVTFCC<br>KCDST | Mus<br>musculu<br>s              |

|   |      |   |   |       |        |        |        |        |   |        |                              |                                  |
|---|------|---|---|-------|--------|--------|--------|--------|---|--------|------------------------------|----------------------------------|
| 1 | 1.00 | 1 | 1 | -0.05 | -0.05  | -0.05  | -0.05  | -0.05  | t | 115598 | ATGMEVG<br>WYRPP             | Homo<br>sapiens                  |
| 1 | 1.00 | 1 | 1 | -0.05 | -0.05  | -0.05  | -0.05  | -0.05  | t | 115598 | ATGMEVG<br>WYRPP             | Homo<br>sapiens                  |
| 1 | 1.00 | 1 | 1 | -0.05 | -0.05  | -0.05  | -0.05  | -0.05  | t | 115905 | PVALINNQ<br>FL               | Homo<br>sapiens                  |
| 1 | 1.00 | 1 | 1 | 0.01  | 0.01   | 0.017  | 0.016  | 0.01   | t | 24464  | HPKVGEGI<br>DFTSIVP          | Homo<br>sapiens                  |
| 1 | 1.00 | 1 | 1 | 0     | 0.003  | 0.005  | 0      | -0.002 | t | 6104   | CDGYCKT<br>HLKASSGY          | Mus<br>musculu<br>s              |
| 1 | 1.00 | 1 | 1 | -0.02 | -0.02  | -0.025 | -0.022 | -0.02  | t | 65694  | TPPPRRRR<br>TVGLSE           | Homo<br>sapiens                  |
| 1 | 1.00 | 1 | 1 | 0.01  | 0.014  | 0.01   | 0.017  | 0.01   | t | 132108 | VDHLRDR<br>NSGSSSSL          | Homo<br>sapiens                  |
| 1 | 1.00 | 1 | 1 | 0.01  | 0.006  | 0.011  | 0.013  | 0.012  | t | 52822  | QVYLNGD<br>KTKPVTLT          | Oryctola<br>gus<br>cuniculu<br>s |
| 1 | 1.00 | 1 | 1 | -0.02 | -0.02  | -0.02  | -0.021 | -0.02  | t | 98396  | QQQQFLG<br>QQQPFP<br>QQPY    | Homo<br>sapiens(<br>human)       |
| 1 | 1.00 | 1 | 1 | -0.01 | -0.01  | -0.01  | -0.014 | -0.008 | t | 132067 | SLVLTNEL                     | Homo<br>sapiens                  |
| 1 | 1.00 | 1 | 1 | -0.01 | -0.008 | -0.005 | -0.011 | -0.009 | t | 135739 | QFCKNSA<br>D                 | Homo<br>sapiens                  |
| 1 | 1.00 | 1 | 1 | 0.02  | 0.02   | 0.02   | 0.02   | 0.021  | t | 56718  | SAAYATSS<br>FSSLFTRG         | Homo<br>sapiens                  |
| 1 | 1.00 | 1 | 1 | 0.02  | 0.02   | 0.014  | 0.02   | 0.02   | t | 91903  | RNERATGS<br>GNGSGGG          | Oryctola<br>gus<br>cuniculu<br>s |
| 1 | 1.00 | 1 | 1 | 0.03  | 0.023  | 0.025  | 0.03   | 0.031  | t | 70444  | VPQLEIVP<br>NSAEERLH<br>SMKE | Oryctola<br>gus<br>cuniculu<br>s |
| 1 | 1.00 | 1 | 1 | -0.04 | -0.042 | -0.033 | -0.04  | -0.04  | t | 64837  | TLHLPHLW<br>RPLS             | Mus<br>musculu<br>s              |
| 1 | 1.00 | 1 | 1 | -0.04 | -0.04  | -0.033 | -0.04  | -0.04  | t | 64837  | TLHLPHLW<br>RPLS             | Mus<br>musculu<br>s              |

|   |      |   |   |       |        |        |        |        |   |        |                             |                                  |
|---|------|---|---|-------|--------|--------|--------|--------|---|--------|-----------------------------|----------------------------------|
| 1 | 1.00 | 1 | 1 | -0.01 | -0.01  | -0.008 | -0.01  | -0.01  | t | 125052 | FSLRLMEE<br>NW              | Mus<br>musculu<br>s              |
| 1 | 1.00 | 1 | 1 | 0     | -0.003 | 0      | 0      | 0.001  | t | 135415 | AAKAAA                      | Oryctola<br>gus<br>cuniculu<br>s |
| 1 | 1.00 | 1 | 1 | 0.03  | 0.032  | 0.023  | 0.027  | 0.033  | t | 13908  | EQQKEQC<br>VKECEKYY         | Homo<br>sapiens                  |
| 1 | 1.00 | 1 | 1 | -0.04 | -0.037 | -0.04  | -0.04  | -0.04  | t | 141073 | REGVRWR<br>VMAIQ            | Mus<br>musculu<br>s              |
| 1 | 1.00 | 1 | 1 | 0.05  | 0.052  | 0.045  | 0.051  | 0.052  | t | 73072  | WSGEDSA<br>TLGAGGVL         | Homo<br>sapiens                  |
| 1 | 1.00 | 1 | 1 | -0.03 | -0.028 | -0.031 | -0.033 | -0.029 | t | 36679  | LIRALFGL                    | Homo<br>sapiens                  |
| 1 | 1.00 | 1 | 1 | 0.01  | 0.01   | 0.01   | 0.01   | 0.007  | t | 134767 | QDPYVKE<br>AENLKKYF<br>NAG  | Mus<br>musculu<br>s              |
| 1 | 1.00 | 1 | 1 | -0.02 | -0.018 | -0.015 | -0.023 | -0.022 | t | 45574  | NQLDQMP<br>RRFYLAGN         | Homo<br>sapiens                  |
| 1 | 1.00 | 1 | 1 | -0.02 | -0.018 | -0.015 | -0.023 | -0.022 | t | 45574  | NQLDQMP<br>RRFYLAGN         | Homo<br>sapiens                  |
| 1 | 1.00 | 1 | 1 | -0.02 | -0.02  | -0.025 | -0.03  | -0.022 | t | 115574 | YWLAHKA<br>LCS              | Homo<br>sapiens                  |
| 1 | 1.00 | 1 | 1 | -0.04 | -0.04  | -0.04  | -0.04  | -0.04  | t | 115614 | HCLGKWL<br>GHPDKF           | Mus<br>musculu<br>s              |
| 1 | 1.00 | 1 | 1 | 0.05  | 0.046  | 0.048  | 0.043  | 0.048  | t | 105963 | MDPGLKE<br>SPLQTPAD<br>DGSE | Oryctola<br>gus<br>cuniculu<br>s |
| 1 | 1.00 | 1 | 1 | 0.04  | 0.04   | 0.04   | 0.04   | 0.04   | t | 135678 | GEDAKPG<br>Q                | Homo<br>sapiens                  |
| 1 | 1.00 | 1 | 1 | 0.02  | 0.02   | 0.02   | 0.02   | 0.02   | t | 114814 | ESNGTLTL<br>SH              | Homo<br>sapiens                  |
| 1 | 1.00 | 1 | 1 | 0.02  | 0.02   | 0.02   | 0.02   | 0.02   | t | 115842 | LEELNVP<br>EI               | Homo<br>sapiens                  |

|   |      |   |   |       |        |        |        |        |   |        |                              |                                  |
|---|------|---|---|-------|--------|--------|--------|--------|---|--------|------------------------------|----------------------------------|
| 1 | 1.00 | 1 | 1 | 0     | -0.003 | -0.002 | 0      | 0      | t | 135843 | QELVDCAS<br>QHGCH            | Oryctola<br>gus<br>cuniculu<br>s |
| 1 | 1.00 | 1 | 1 | 0     | 0      | 0      | 0      | 0      | t | 135321 | TKLPNTLIP<br>YSSVEV          | Sus<br>scrofa                    |
| 1 | 1.00 | 1 | 1 | 0     | 0      | 0      | 0      | 0      | t | 118818 | GPAPGMR<br>PP                | Homo<br>sapiens                  |
| 1 | 1.00 | 1 | 1 | -0.02 | -0.02  | -0.02  | -0.02  | -0.02  | t | 156924 | NLNHWYK<br>SWLLP             | Gallus<br>gallus                 |
| 1 | 1.00 | 1 | 1 | -0.02 | -0.02  | -0.02  | -0.02  | -0.02  | t | 109210 | GPRGLPGE                     | Rattus<br>norvegic<br>us         |
| 1 | 1.00 | 1 | 1 | -0.02 | -0.02  | -0.02  | -0.02  | -0.02  | t | 116037 | YIPIQVLS<br>R                | Homo<br>sapiens                  |
| 1 | 1.00 | 1 | 1 | -0.02 | -0.02  | -0.02  | -0.02  | -0.02  | t | 99762  | VLASVSAT<br>HAKSSPY          | Homo<br>sapiens                  |
| 1 | 1.00 | 1 | 1 | -0.02 | -0.02  | -0.02  | -0.02  | -0.02  | t | 98903  | MHIRLSFN<br>PT               | Homo<br>sapiens                  |
| 1 | 1.00 | 1 | 1 | -0.02 | -0.02  | -0.02  | -0.02  | -0.02  | t | 22105  | GRIVLSGR<br>PAIIPDREV<br>LYR | Homo<br>sapiens                  |
| 1 | 1.00 | 1 | 1 | -0.01 | -0.01  | -0.01  | -0.014 | -0.01  | t | 118217 | VTKYITKG<br>WKEVH            | Homo<br>sapiens                  |
| 1 | 1.00 | 1 | 1 | 0.03  | 0.03   | 0.033  | 0.027  | 0.03   | t | 78759  | PGLRPQNL<br>YTLWGGG<br>VVCMY | Homo<br>sapiens                  |
| 1 | 1.00 | 1 | 1 | 0     | 0      | 0      | 0      | 0.002  | t | 130637 | WSSCVFSV<br>SYCL             | Mus<br>musculu<br>s              |
| 1 | 1.00 | 1 | 1 | -0.01 | -0.01  | -0.01  | -0.01  | -0.008 | t | 135488 | PIFPGG                       | Oryctola<br>gus<br>cuniculu<br>s |
| 1 | 1.00 | 1 | 1 | -0.01 | -0.01  | -0.01  | -0.01  | -0.008 | t | 14099  | ERYLGYLE<br>QL               | Homo<br>sapiens                  |
| 1 | 1.00 | 1 | 1 | -0.03 | -0.032 | -0.035 | -0.029 | -0.03  | t | 135787 | VPLDGKTI<br>TNNQRI           | Mus<br>musculu<br>s              |

|   |      |   |   |       |        |        |        |        |   |        |                              |                     |
|---|------|---|---|-------|--------|--------|--------|--------|---|--------|------------------------------|---------------------|
| 1 | 1.00 | 1 | 1 | -0.04 | -0.038 | -0.04  | -0.039 | -0.04  | t | 10639  | DVKFPGG<br>GQIVGGV<br>YLLPRR | Homo<br>sapiens     |
| 1 | 1.00 | 1 | 1 | 0.01  | 0.013  | 0.01   | 0.01   | 0.013  | t | 64031  | THGQWN<br>KPSK               | Mus<br>musculu<br>s |
| 1 | 1.00 | 1 | 1 | 0.02  | 0.02   | 0.016  | 0.017  | 0.02   | t | 53334  | RDEDSYER<br>DPYSPSQ          | Homo<br>sapiens     |
| 1 | 1.00 | 1 | 1 | 0     | 0.002  | 0.005  | 0.001  | -0.002 | t | 5907   | AYQVRNS<br>TGLYHVTN<br>DCPNS | Homo<br>sapiens     |
| 1 | 1.00 | 1 | 1 | -0.01 | -0.01  | -0.01  | -0.01  | -0.009 | t | 9722   | DPPPPNP<br>NDPPPPN<br>PN     | Mus<br>musculu<br>s |
| 1 | 1.00 | 1 | 1 | 0.02  | 0.02   | 0.02   | 0.02   | 0.02   | t | 78355  | DCLSDVAG<br>LQNDPTT<br>WCW   | Mus<br>musculu<br>s |
| 1 | 1.00 | 1 | 1 | -0.01 | -0.007 | -0.014 | -0.01  | -0.009 | t | 116677 | ASATQLYK<br>TCKQAGT<br>CPPD  | Mus<br>musculu<br>s |
| 1 | 1.00 | 1 | 1 | 0.03  | 0.034  | 0.039  | 0.037  | 0.032  | t | 117214 | KGEQGEP<br>GA                | Homo<br>sapiens     |
| 1 | 1.00 | 1 | 1 | -0.01 | -0.01  | -0.01  | -0.01  | -0.009 | t | 108860 | DGVNH                        | Mus<br>musculu<br>s |
| 1 | 1.00 | 1 | 1 | 0     | 0.002  | 0.001  | -0.003 | -0.002 | t | 106679 | NGDKANV<br>LFR               | Homo<br>sapiens     |
| 1 | 1.00 | 1 | 1 | -0.02 | -0.018 | -0.02  | -0.019 | -0.022 | t | 66389  | TSQNTRISL<br>RPGPVSQP<br>YHH | Homo<br>sapiens     |
| 1 | 1.00 | 1 | 1 | 0.04  | 0.039  | 0.042  | 0.041  | 0.039  | t | 17140  | FNDSQRQ<br>ATKDAGTI<br>AGLEV | Canis<br>lupus      |
| 1 | 1.00 | 1 | 1 | 0     | 0      | 0      | 0      | 0.001  | t | 151813 | CGADSYE<br>MEEDGVR<br>KC     | Mus<br>musculu<br>s |
| 1 | 1.00 | 1 | 1 | 0     | 0      | 0      | 0      | 0.001  | t | 151729 | RYSPSLNT<br>RL               | Mus<br>musculu<br>s |
| 1 | 1.00 | 1 | 1 | 0     | 0      | 0      | 0      | 0.001  | t | 108202 | VVSHFND                      | Mus<br>musculu<br>s |

|   |      |   |   |       |        |        |        |        |   |        |                            |                 |
|---|------|---|---|-------|--------|--------|--------|--------|---|--------|----------------------------|-----------------|
| 1 | 1.00 | 1 | 1 | 0     | 0      | 0      | 0      | 0.001  | t | 104461 | EFRHDS                     | Mus<br>musculus |
| 1 | 1.00 | 1 | 1 | 0     | 0      | 0      | 0      | 0.001  | t | 105163 | EFRHD                      | Mus<br>musculus |
| 1 | 1.00 | 1 | 1 | 0     | 0      | 0      | 0      | 0.001  | t | 45932  | NSNNPDW<br>DF              | Mus<br>musculus |
| 1 | 1.00 | 1 | 1 | 0     | 0      | 0      | 0      | 0.001  | t | 23988  | HHHHHH                     | Mus<br>musculus |
| 1 | 1.00 | 1 | 1 | 0     | 0      | 0      | 0      | 0.001  | t | 11571  | EEEDDDM<br>GGLFD           | Mus<br>musculus |
| 1 | 1.00 | 1 | 1 | 0     | 0      | 0      | 0      | 0.001  | t | 11571  | EEEDDDM<br>GGLFD           | Mus<br>musculus |
| 1 | 1.00 | 1 | 1 | 0     | 0      | 0      | 0      | 0.001  | t | 9524   | DNPASTT<br>NKDK            | Mus<br>musculus |
| 1 | 1.00 | 1 | 1 | 0.01  | 0.006  | 0.018  | 0.01   | 0.01   | t | 31093  | KGYLVDKN<br>TGCKY          | Mus<br>musculus |
| 1 | 1.00 | 1 | 1 | 0.01  | 0.008  | 0.01   | 0.009  | 0.013  | t | 63972  | TGTAYPVP<br>LELTPENA       | Mus<br>musculus |
| 1 | 1.00 | 1 | 1 | 0     | 0      | 0      | 0      | 0      | t | 134773 | QKSTHLLIR<br>KLPSFR        | Homo<br>sapiens |
| 1 | 1.00 | 1 | 1 | -0.04 | -0.04  | -0.04  | -0.04  | -0.04  | t | 142426 | KAAYGLLK<br>TKNQYVL        | Homo<br>sapiens |
| 1 | 1.00 | 1 | 1 | -0.01 | -0.012 | 0.002  | -0.007 | -0.01  | t | 74674  | YLGLTPM                    | Mus<br>musculus |
| 1 | 1.00 | 1 | 1 | -0.01 | -0.012 | -0.011 | -0.007 | -0.009 | t | 106946 | VATALNPD<br>PSQK           | Mus<br>musculus |
| 1 | 1.00 | 1 | 1 | -0.04 | -0.04  | -0.051 | -0.04  | -0.039 | t | 79743  | AALAARKA<br>DLEKALEG<br>AM | Mus<br>musculus |
| 1 | 1.00 | 1 | 1 | -0.01 | -0.007 | -0.006 | -0.01  | -0.009 | t | 122205 | VFTLPPPL<br>PETH           | Mus<br>musculus |

|   |      |   |   |       |        |        |        |        |   |        |                              |                                  |
|---|------|---|---|-------|--------|--------|--------|--------|---|--------|------------------------------|----------------------------------|
| 1 | 1.00 | 1 | 1 | -0.04 | -0.037 | -0.04  | -0.04  | -0.037 | t | 131031 | RAYATEPH<br>AK               | Mus<br>musculu<br>s              |
| 1 | 1.00 | 1 | 1 | -0.02 | -0.017 | -0.016 | -0.02  | -0.021 | t | 153284 | PTPLSPPLR<br>NTHPQA          | Mus<br>musculu<br>s              |
| 1 | 1.00 | 1 | 1 | 0.02  | 0.016  | 0.013  | 0.019  | 0.02   | t | 46313  | NTWEGQA<br>ASAALGAL          | Oryctola<br>gus<br>cuniculu<br>s |
| 1 | 1.00 | 1 | 1 | 0.02  | 0.018  | 0.013  | 0.019  | 0.02   | t | 46313  | NTWEGQA<br>ASAALGAL          | Mus<br>musculu<br>s              |
| 1 | 1.00 | 1 | 1 | -0.01 | -0.008 | -0.005 | -0.009 | -0.011 | t | 3592   | APHLPYIE<br>QGMQLAE<br>QFKQK | Homo<br>sapiens                  |
| 1 | 1.00 | 1 | 1 | 0.05  | 0.05   | 0.05   | 0.05   | 0.05   | t | 156948 | QVHTSI                       | Gallus<br>gallus                 |
| 1 | 1.00 | 1 | 1 | 0.03  | 0.03   | 0.03   | 0.03   | 0.03   | t | 119584 | GQPENNY<br>K                 | Homo<br>sapiens                  |
| 1 | 1.00 | 1 | 1 | 0.03  | 0.03   | 0.03   | 0.03   | 0.03   | t | 115901 | PQSVLSLS<br>QS               | Homo<br>sapiens                  |
| 1 | 1.00 | 1 | 1 | 0.04  | 0.034  | 0.033  | 0.033  | 0.042  | t | 127869 | TQSPAPGS<br>SFSP             | Trichosu<br>rus<br>vulpecul<br>a |
| 1 | 1.00 | 1 | 1 | 0.01  | 0.01   | 0.01   | 0.01   | 0.01   | t | 137555 | QEWQQQ<br>DECQIDRL<br>D      | Homo<br>sapiens                  |
| 1 | 1.00 | 1 | 1 | 0.02  | 0.02   | 0.02   | 0.023  | 0.022  | t | 69083  | VIQDYDN<br>QHEQDRP<br>TPSPAP | Homo<br>sapiens                  |
| 1 | 1.00 | 1 | 1 | -0.01 | -0.01  | -0.01  | -0.01  | -0.01  | t | 142410 | EAPNSSRH<br>HLRNGF           | Homo<br>sapiens                  |
| 1 | 1.00 | 1 | 1 | -0.01 | -0.01  | -0.01  | -0.01  | -0.01  | t | 149124 | TNPTQTK                      | Sus<br>scrofa                    |
| 1 | 1.00 | 1 | 1 | -0.01 | -0.01  | -0.01  | -0.01  | -0.01  | t | 135902 | AVSAHGCL<br>FDRR             | Homo<br>sapiens                  |
| 1 | 1.00 | 1 | 1 | -0.01 | -0.01  | -0.01  | -0.01  | -0.01  | t | 137812 | AVSLGQN<br>VLSAD             | Oryctola<br>gus<br>cuniculu<br>s |
| 1 | 1.00 | 1 | 1 | -0.01 | -0.01  | -0.01  | -0.01  | -0.01  | t | 20654  | GKPAIIPDR<br>E               | Homo<br>sapiens                  |
| 1 | 1.00 | 1 | 1 | -0.05 | -0.05  | -0.05  | -0.05  | -0.05  | t | 115709 | DKIHPFAQ<br>TQ               | Homo<br>sapiens                  |

|   |      |   |   |       |        |        |        |        |   |        |                              |                                  |
|---|------|---|---|-------|--------|--------|--------|--------|---|--------|------------------------------|----------------------------------|
| 1 | 1.00 | 1 | 1 | -0.02 | -0.018 | 0      | -0.013 | -0.02  | t | 141780 | WSKAHPP<br>E                 | Homo<br>sapiens                  |
| 1 | 1.00 | 1 | 1 | -0.01 | -0.01  | -0.006 | -0.01  | -0.01  | t | 41052  | MAILGD                       | Homo<br>sapiens                  |
| 1 | 1.00 | 1 | 1 | 0     | -0.002 | 0.009  | -0.001 | -0.003 | t | 110933 | LQGNRINE<br>FSISSFCTV<br>VDV | Mus<br>musculu<br>s              |
| 1 | 1.00 | 1 | 1 | 0     | -0.003 | 0.007  | 0      | 0      | t | 5994   | CAKSPRYT<br>LD               | Oryctola<br>gus<br>cuniculu<br>s |
| 1 | 1.00 | 1 | 1 | 0     | -0.002 | 0      | -0.003 | -0.001 | t | 139499 | FGEFSFQY<br>DCSSWGC          | Mus<br>musculu<br>s              |
| 1 | 1.00 | 1 | 1 | 0     | -0.002 | 0      | -0.003 | -0.001 | t | 69883  | VLYQEFD                      | Mus<br>musculu<br>s              |
| 1 | 1.00 | 1 | 1 | 0     | -0.002 | 0      | -0.003 | -0.001 | t | 58381  | SHLPYIEQ<br>GMQLAEQ<br>F     | Mus<br>musculu<br>s              |
| 1 | 1.00 | 1 | 1 | 0     | -0.002 | 0      | -0.003 | -0.001 | t | 52420  | QSRGEAR                      | Mus<br>musculu<br>s              |
| 1 | 1.00 | 1 | 1 | 0     | -0.002 | 0      | -0.003 | -0.001 | t | 51307  | QLDPAFG<br>A                 | Mus<br>musculu<br>s              |
| 1 | 1.00 | 1 | 1 | 0     | -0.002 | 0      | -0.003 | -0.001 | t | 55726  | RRRSQSPR<br>RRR              | Mus<br>musculu<br>s              |
| 1 | 1.00 | 1 | 1 | 0     | -0.002 | 0      | -0.003 | -0.001 | t | 41870  | MKNYLSF<br>GMFALL            | Mus<br>musculu<br>s              |
| 1 | 1.00 | 1 | 1 | 0     | -0.001 | 0      | -0.003 | -0.001 | t | 17262  | FPCDRLSG<br>YWERGIPS<br>PCVR | Myodes<br>glareolu<br>s          |
| 1 | 1.00 | 1 | 1 | 0     | -0.002 | 0      | -0.003 | -0.001 | t | 7171   | CTKPTDG<br>NC                | Mus<br>musculu<br>s              |
| 1 | 1.00 | 1 | 1 | -0.01 | -0.01  | -0.01  | -0.01  | -0.01  | t | 141104 | VVHVETH<br>RCNISWEI<br>S     | Oryctola<br>gus<br>cuniculu<br>s |
| 1 | 1.00 | 1 | 1 | -0.01 | -0.013 | -0.01  | -0.01  | -0.01  | t | 141104 | VVHVETH<br>RCNISWEI<br>S     | Oryctola<br>gus<br>cuniculu<br>s |



|   |      |   |   |       |       |       |       |       |   |        |                              |                                  |
|---|------|---|---|-------|-------|-------|-------|-------|---|--------|------------------------------|----------------------------------|
| 1 | 1.00 | 1 | 1 | 0.02  | 0.021 | 0.02  | 0.019 | 0.02  | t | 30150  | KDGDTTN<br>R                 | Equus<br>caballus                |
| 1 | 1.00 | 1 | 1 | 0.02  | 0.018 | 0.02  | 0.019 | 0.02  | t | 30150  | KDGDTTN<br>R                 | Mus<br>musculu<br>s              |
| 1 | 1.00 | 1 | 1 | 0.03  | 0.03  | 0.03  | 0.03  | 0.032 | t | 138088 | WLDLSKT                      | Mus<br>musculu<br>s              |
| 1 | 1.00 | 1 | 1 | -0.03 | -0.03 | -0.03 | -0.03 | -0.03 | t | 157357 | GVAPPGW<br>YDPPVQ            | Canis<br>lupus                   |
| 1 | 1.00 | 1 | 1 | -0.05 | -0.05 | -0.05 | -0.05 | -0.05 | t | 156942 | PWSKMHI                      | Gallus<br>gallus                 |
| 1 | 1.00 | 1 | 1 | 0.04  | 0.04  | 0.031 | 0.04  | 0.039 | t | 102383 | EEKNGNTS<br>WNDTVTC<br>PNAEC | Mus<br>musculu<br>s              |
| 1 | 1.00 | 1 | 1 | 0.03  | 0.033 | 0.033 | 0.03  | 0.032 | t | 73132  | WTGVTQN                      | Mus<br>musculu<br>s              |
| 1 | 1.00 | 1 | 1 | 0.03  | 0.033 | 0.033 | 0.03  | 0.032 | t | 73132  | WTGVTQN                      | Mus<br>musculu<br>s              |
| 1 | 1.00 | 1 | 1 | 0.03  | 0.033 | 0.033 | 0.03  | 0.032 | t | 73132  | WTGVTQN                      | Mus<br>musculu<br>s              |
| 1 | 1.00 | 1 | 1 | 0.01  | 0.006 | 0.006 | 0.007 | 0.008 | t | 42583  | MSKKSGK<br>WWESDD<br>KFAKAVY | Oryctola<br>gus<br>cuniculu<br>s |
| 1 | 1.00 | 1 | 1 | 0.01  | 0.008 | 0.01  | 0.009 | 0.01  | t | 117107 | VQTDGST<br>KSHRH             | Mus<br>musculu<br>s              |
| 1 | 1.00 | 1 | 1 | 0.03  | 0.026 | 0.028 | 0.031 | 0.03  | t | 10067  | DRYFTYEE<br>PNDG             | Bos<br>taurus                    |
| 1 | 1.00 | 1 | 1 | 0     | 0     | 0.002 | 0     | 0.001 | t | 142576 | DGASYSW<br>MYEA              | Mus<br>musculu<br>s              |

|   |      |   |   |       |        |       |       |       |   |        |                              |                                  |
|---|------|---|---|-------|--------|-------|-------|-------|---|--------|------------------------------|----------------------------------|
| 1 | 1.00 | 1 | 1 | 0.03  | 0.031  | 0.034 | 0.03  | 0.031 | t | 47259  | PEDSALLE<br>D                | Mus<br>musculu<br>s              |
| 1 | 1.00 | 1 | 1 | 0.03  | 0.032  | 0.028 | 0.033 | 0.031 | t | 114277 | CDAISNFF<br>KNIGYAN          | Homo<br>sapiens                  |
| 1 | 1.00 | 1 | 1 | 0.02  | 0.021  | 0.023 | 0.019 | 0.02  | t | 58359  | SHGNYST<br>QVGATQA<br>GRFSIT | Equus<br>caballus                |
| 1 | 1.00 | 1 | 1 | -0.01 | -0.016 | -0.01 | -0.01 | -0.01 | t | 123692 | REKRKPKS                     | Oryctola<br>gus<br>cuniculu<br>s |
| 1 | 1.00 | 1 | 1 | 0.03  | 0.03   | 0.021 | 0.03  | 0.034 | t | 133698 | SLLTEVETP<br>IRNEWG          | Mus<br>musculu<br>s              |
| 1 | 1.00 | 1 | 1 | 0.01  | 0.008  | 0.008 | 0.013 | 0.012 | t | 61686  | STKAAKPP<br>EAKREAI          | Mus<br>musculu<br>s              |
| 1 | 1.00 | 1 | 1 | 0     | 0      | 0.009 | 0.003 | 0     | t | 47769  | PGVAGSG<br>A                 | Homo<br>sapiens                  |
| 1 | 1.00 | 1 | 1 | 0.01  | 0.012  | 0.004 | 0.011 | 0.014 | t | 133618 | KKLLVRGL<br>YRISFTTYK        | Homo<br>sapiens                  |
| 1 | 1.00 | 1 | 1 | 0.01  | 0.013  | 0.011 | 0.01  | 0.011 | t | 9524   | DNPASTT<br>NKDK              | Mus<br>musculu<br>s              |
| 1 | 1.00 | 1 | 1 | -0.02 | -0.02  | -0.02 | -0.02 | -0.02 | t | 156875 | GHTSLR                       | Gallus<br>gallus                 |
| 1 | 1.00 | 1 | 1 | 0.01  | 0.01   | 0.014 | 0.01  | 0.01  | t | 157341 | GQVEGRT<br>YDAAMVA           | Canis<br>lupus                   |
| 1 | 1.00 | 1 | 1 | 0     | 0      | 0     | 0     | 0     | t | 108683 | VPVDAGT<br>AK                | Homo<br>sapiens                  |
| 1 | 1.00 | 1 | 1 | 0     | 0      | 0     | 0     | 0     | t | 104232 | SAMWDF                       | Mus<br>musculu<br>s              |
| 1 | 1.00 | 1 | 1 | 0     | 0      | 0     | 0     | 0     | t | 79225  | GCAIPQNA<br>IRPPCS           | Mus<br>musculu<br>s              |
| 1 | 1.00 | 1 | 1 | 0     | 0      | 0     | 0     | 0     | t | 97745  | VNKAGASI<br>G                | Oryctola<br>gus<br>cuniculu<br>s |

|   |      |   |   |       |        |        |        |        |   |        |                            |                                  |
|---|------|---|---|-------|--------|--------|--------|--------|---|--------|----------------------------|----------------------------------|
| 1 | 1.00 | 1 | 1 | -0.02 | -0.02  | -0.02  | -0.02  | -0.02  | t | 133721 | TSKNTSWF<br>DWQA           | Homo<br>sapiens                  |
| 1 | 1.00 | 1 | 1 | -0.04 | -0.04  | -0.04  | -0.04  | -0.04  | t | 107700 | YRVVSVL                    | Homo<br>sapiens                  |
| 1 | 1.00 | 1 | 1 | -0.04 | -0.038 | -0.04  | -0.04  | -0.04  | t | 83458  | IGLKGGFG<br>KLRV           | Homo<br>sapiens                  |
| 1 | 1.00 | 1 | 1 | 0.06  | 0.062  | 0.055  | 0.061  | 0.06   | t | 128141 | VTNDCSNS<br>SIVYEAAD<br>VI | Homo<br>sapiens                  |
| 1 | 1.00 | 1 | 1 | -0.03 | -0.032 | -0.02  | -0.027 | -0.03  | t | 76368  | YVNTNMG<br>LKIRQ           | Mus<br>musculu<br>s              |
| 1 | 1.00 | 1 | 1 | 0.03  | 0.03   | 0.035  | 0.03   | 0.029  | t | 136542 | PDGSESPT<br>DQET           | Mus<br>musculu<br>s              |
| 1 | 1.00 | 1 | 1 | 0.02  | 0.022  | 0.025  | 0.021  | 0.02   | t | 78863  | TPSMDALS<br>AQLYSSL<br>DSP | Homo<br>sapiens                  |
| 1 | 1.00 | 1 | 1 | 0.02  | 0.024  | 0.025  | 0.021  | 0.02   | t | 78863  | TPSMDALS<br>AQLYSSL<br>DSP | Homo<br>sapiens                  |
| 1 | 1.00 | 1 | 1 | -0.04 | -0.04  | -0.04  | -0.04  | -0.04  | t | 116944 | DFRYSTRP<br>FAL            | Mus<br>musculu<br>s              |
| 1 | 1.00 | 1 | 1 | -0.03 | -0.034 | -0.031 | -0.031 | -0.032 | t | 59231  | SLKMADP<br>NRFRGKNL<br>P   | Oryctola<br>gus<br>cuniculu<br>s |
| 1 | 1.00 | 1 | 1 | -0.03 | -0.032 | -0.031 | -0.031 | -0.032 | t | 59231  | SLKMADP<br>NRFRGKNL<br>P   | Mus<br>musculu<br>s              |
| 1 | 1.00 | 1 | 1 | 0.01  | 0.01   | 0.01   | 0.01   | 0.011  | t | 13623  | EPDKMTT                    | Homo<br>sapiens                  |
| 1 | 1.00 | 1 | 1 | 0.04  | 0.037  | 0.04   | 0.04   | 0.041  | t | 113344 | DTFVVSS<br>DS              | Oryctola<br>gus<br>cuniculu<br>s |
| 1 | 1.00 | 1 | 1 | -0.02 | -0.018 | -0.02  | -0.017 | -0.016 | t | 10813  | DWICTVLT<br>DFKTWL         | Homo<br>sapiens                  |
| 1 | 1.00 | 1 | 1 | 0     | 0      | 0      | -0.001 | 0      | t | 41866  | MKNNPIYS<br>EGSL           | Equus<br>caballus                |

|   |      |   |   |       |        |        |        |        |   |        |                              |                                  |
|---|------|---|---|-------|--------|--------|--------|--------|---|--------|------------------------------|----------------------------------|
| 1 | 1.00 | 1 | 1 | 0     | 0      | 0      | -0.001 | 0      | t | 41866  | MKNNPIYS<br>EGSL             | Equus<br>caballus                |
| 1 | 1.00 | 1 | 1 | -0.01 | -0.014 | -0.011 | -0.007 | -0.008 | t | 68927  | VIDLMQT<br>HQHGLVG<br>ALLRAA | Oryctola<br>gus<br>cuniculu<br>s |
| 1 | 1.00 | 1 | 1 | 0     | 0      | 0      | -0.006 | -0.002 | t | 48779  | PPFSLSPV<br>PTLGSRSR<br>R    | Homo<br>sapiens                  |
| 1 | 1.00 | 1 | 1 | 0.02  | 0.02   | 0.02   | 0.02   | 0.02   | t | 149316 | FMAYTDE<br>TFK               | Homo<br>sapiens                  |
| 1 | 1.00 | 1 | 1 | 0     | 0.002  | 0.002  | -0.003 | 0      | t | 42306  | MPNYDRL                      | Homo<br>sapiens                  |
| 1 | 1.00 | 1 | 1 | 0.01  | 0.008  | 0.017  | 0.013  | 0.01   | t | 106225 | ADIWLTPD<br>PTTP             | Mus<br>musculu<br>s              |
| 1 | 1.00 | 1 | 1 | 0     | 0.002  | 0.009  | -0.003 | 0      | t | 115349 | LKGYGGS<br>LP                | Homo<br>sapiens                  |
| 1 | 1.00 | 1 | 1 | 0.01  | 0.011  | 0.001  | 0.01   | 0.01   | t | 8567   | DHSDLVAE<br>KQRLEDLG<br>QKFE | Mus<br>musculu<br>s              |
| 1 | 1.00 | 1 | 1 | 0.03  | 0.03   | 0.031  | 0.03   | 0.03   | t | 58231  | SGSGSNNS<br>SSSA             | Sus<br>scrofa                    |
| 1 | 1.00 | 1 | 1 | -0.01 | -0.012 | -0.001 | -0.007 | -0.008 | t | 10037  | DRPVY                        | Mus<br>musculu<br>s              |
| 1 | 1.00 | 1 | 1 | -0.01 | -0.01  | -0.013 | -0.01  | -0.009 | t | 49950  | PVRVAWS<br>SPVQNCEP<br>WIPP  | Mus<br>musculu<br>s              |
| 1 | 1.00 | 1 | 1 | -0.03 | -0.03  | -0.03  | -0.03  | -0.03  | t | 108134 | SLCINLRA<br>AR               | Homo<br>sapiens                  |
| 1 | 1.00 | 1 | 1 | -0.06 | -0.06  | -0.06  | -0.06  | -0.058 | t | 62334  | SVSRARTR<br>HLLLCL           | Homo<br>sapiens                  |
| 1 | 1.00 | 1 | 1 | 0.02  | 0.02   | 0.019  | 0.021  | 0.022  | t | 44662  | NLDDRDR<br>SESPLLS<br>TTEW   | Homo<br>sapiens                  |
| 1 | 1.00 | 1 | 1 | 0.02  | 0.022  | 0.02   | 0.023  | 0.019  | t | 130623 | TSDVEVNE<br>KKERVTEA         | Homo<br>sapiens                  |

|   |      |   |   |       |        |        |       |        |   |        |                                |                                  |
|---|------|---|---|-------|--------|--------|-------|--------|---|--------|--------------------------------|----------------------------------|
| 1 | 1.00 | 1 | 1 | 0.03  | 0.029  | 0.032  | 0.03  | 0.03   | t | 111758 | SAQLPGET<br>SASDNVY            | Bos<br>taurus                    |
| 1 | 1.00 | 1 | 1 | -0.01 | -0.01  | -0.01  | -0.01 | -0.008 | t | 128973 | IQEVRSKS                       | Homo<br>sapiens                  |
| 1 | 1.00 | 1 | 1 | 0.03  | 0.03   | 0.033  | 0.03  | 0.029  | t | 113129 | QLELPAVT<br>PEDDGE             | Mus<br>musculu<br>s              |
| 1 | 1.00 | 1 | 1 | 0.03  | 0.03   | 0.03   | 0.03  | 0.03   | t | 115875 | NTIASGEP<br>TS                 | Homo<br>sapiens                  |
| 1 | 1.00 | 1 | 1 | 0.01  | 0.01   | 0.01   | 0.01  | 0.01   | t | 135678 | GEDAKPG<br>Q                   | Homo<br>sapiens                  |
| 1 | 1.00 | 1 | 1 | 0.01  | 0.01   | 0.01   | 0.01  | 0.01   | t | 144667 | GREGYP<br>A<br>DGGKIWT<br>SETN | Oryctola<br>gus<br>cuniculu<br>s |
| 1 | 1.00 | 1 | 1 | 0.01  | 0.01   | 0.01   | 0.01  | 0.01   | t | 103530 | QSGGNNS<br>PAVYLLDG            | Homo<br>sapiens                  |
| 1 | 1.00 | 1 | 1 | 0.01  | 0.01   | 0.01   | 0.01  | 0.01   | t | 107533 | NWLDGKE                        | Homo<br>sapiens                  |
| 1 | 1.00 | 1 | 1 | 0     | 0.002  | -0.008 | 0.001 | 0      | t | 39023  | LQYGSFCT<br>QLNRALSG<br>I      | Homo<br>sapiens                  |
| 1 | 1.00 | 1 | 1 | -0.01 | -0.01  | -0.01  | -0.01 | -0.01  | t | 106878 | STSSSSSGS<br>G                 | Homo<br>sapiens                  |
| 1 | 1.00 | 1 | 1 | -0.01 | -0.01  | -0.01  | -0.01 | -0.01  | t | 115424 | PQRDMPI<br>QAFLLYQE<br>PVLGP   | Homo<br>sapiens                  |
| 1 | 1.00 | 1 | 1 | -0.01 | -0.01  | -0.01  | -0.01 | -0.01  | t | 39376  | LSGKPATIP<br>DREALYRE<br>FDE   | Homo<br>sapiens                  |
| 1 | 1.00 | 1 | 1 | -0.01 | -0.01  | -0.01  | -0.01 | -0.01  | t | 32648  | KPAIIPDRE                      | Homo<br>sapiens                  |
| 1 | 1.00 | 1 | 1 | -0.03 | -0.03  | -0.03  | -0.03 | -0.03  | t | 104732 | ASAYCST<br>WDA                 | Homo<br>sapiens                  |
| 1 | 1.00 | 1 | 1 | 0.01  | 0.01   | 0.012  | 0.01  | 0.009  | t | 2891   | ALSRCTLN<br>RNALRRP            | Homo<br>sapiens                  |
| 1 | 1.00 | 1 | 1 | -0.01 | -0.01  | -0.008 | -0.01 | -0.011 | t | 58037  | SGFTLEFLE<br>HAFSVD            | Homo<br>sapiens                  |
| 1 | 1.00 | 1 | 1 | -0.02 | -0.017 | -0.02  | -0.02 | -0.018 | t | 69175  | VKAETRLN                       | Mus<br>musculu<br>s              |

|   |      |   |   |       |        |        |        |        |   |        |                              |                                  |
|---|------|---|---|-------|--------|--------|--------|--------|---|--------|------------------------------|----------------------------------|
| 1 | 1.00 | 1 | 1 | 0.02  | 0.02   | 0.02   | 0.017  | 0.02   | t | 135588 | QESYSSKK<br>LCT              | Oryctola<br>gus<br>cuniculu<br>s |
| 1 | 1.00 | 1 | 1 | 0.02  | 0.02   | 0.015  | 0.02   | 0.021  | t | 107083 | AKDVKFG<br>ADARALM<br>L      | Rattus<br>norvegic<br>us         |
| 1 | 1.00 | 1 | 1 | 0.01  | 0.01   | 0.009  | 0.013  | 0.01   | t | 43764  | NETIYNTTL<br>KYGDV           | Homo<br>sapiens                  |
| 1 | 1.00 | 1 | 1 | 0.01  | 0.01   | 0.01   | 0.01   | 0.01   | t | 20654  | GKPAIIPDR<br>E               | Homo<br>sapiens                  |
| 1 | 1.00 | 1 | 1 | -0.03 | -0.03  | -0.03  | -0.03  | -0.03  | t | 94953  | TTAEMLD<br>ATR               | Mus<br>musculu<br>s              |
| 1 | 1.00 | 1 | 1 | -0.01 | -0.01  | -0.006 | -0.01  | -0.01  | t | 102323 | ATTSPARE<br>NYFMRWL<br>SDLRE | Mus<br>musculu<br>s              |
| 1 | 1.00 | 1 | 1 | -0.01 | -0.01  | -0.023 | -0.011 | -0.008 | t | 8217   | DEYCSPDH<br>NCQSCK<br>DSGEG  | Mus<br>musculu<br>s              |
| 1 | 1.00 | 1 | 1 | 0.03  | 0.028  | 0.037  | 0.029  | 0.03   | t | 78498  | QSSDSPPG<br>GLQNDFP          | Mus<br>musculu<br>s              |
| 1 | 1.00 | 1 | 1 | -0.01 | -0.007 | -0.007 | -0.01  | -0.01  | t | 78636  | EKKIAKME<br>KASSVFNV<br>VN   | Mus<br>musculu<br>s              |
| 1 | 1.00 | 1 | 1 | 0     | 0.002  | 0      | 0      | 0.001  | t | 114125 | HYGSLPQK<br>SQRSQDE<br>NPV   | Rattus<br>norvegic<br>us         |
| 1 | 1.00 | 1 | 1 | 0.02  | 0.02   | 0.02   | 0.02   | 0.021  | t | 119658 | TYGIVLLSG<br>V               | Homo<br>sapiens                  |
| 1 | 1.00 | 1 | 1 | 0     | -0.003 | 0      | 0      | 0.001  | t | 156904 | KPGDPRH                      | Oryctola<br>gus<br>cuniculu<br>s |
| 1 | 1.00 | 1 | 1 | 0     | -0.003 | 0      | 0      | 0.001  | t | 156905 | KPGDPRQ                      | Oryctola<br>gus<br>cuniculu<br>s |
| 1 | 1.00 | 1 | 1 | 0     | -0.003 | 0      | 0      | 0.001  | t | 156966 | SVTKLGDP<br>RAPR             | Oryctola<br>gus<br>cuniculu<br>s |

|   |      |   |   |       |        |       |        |       |   |        |                             |                                  |
|---|------|---|---|-------|--------|-------|--------|-------|---|--------|-----------------------------|----------------------------------|
| 1 | 1.00 | 1 | 1 | 0     | -0.003 | 0     | 0      | 0.001 | t | 156900 | KLGDPRIA<br>TTLF            | Oryctola<br>gus<br>cuniculu<br>s |
| 1 | 1.00 | 1 | 1 | 0     | -0.002 | 0     | 0      | 0.001 | t | 130643 | YSLLEPYT<br>FDP             | Mus<br>musculu<br>s              |
| 1 | 1.00 | 1 | 1 | 0     | -0.002 | 0     | 0      | 0.001 | t | 130482 | EIYPWYP<br>MAERS            | Mus<br>musculu<br>s              |
| 1 | 1.00 | 1 | 1 | 0     | -0.002 | 0     | 0      | 0.001 | t | 130634 | WEWDWP<br>RIELNI            | Mus<br>musculu<br>s              |
| 1 | 1.00 | 1 | 1 | 0     | -0.002 | 0     | 0      | 0.001 | t | 130470 | DWPALIFD<br>QDML            | Mus<br>musculu<br>s              |
| 1 | 1.00 | 1 | 1 | 0     | 0.004  | 0     | 0      | 0.001 | t | 72805  | WLTEKEGS<br>YP              | Ovis<br>aries                    |
| 1 | 1.00 | 1 | 1 | 0     | -0.003 | 0     | 0      | 0.001 | t | 69183  | VKAVTTLL<br>KA              | Oryctola<br>gus<br>cuniculu<br>s |
| 1 | 1.00 | 1 | 1 | 0     | 0      | 0     | 0      | 0.001 | t | 39183  | LRRDLAS<br>REAKKQVE<br>KALE | Rattus<br>norvegic<br>us         |
| 1 | 1.00 | 1 | 1 | 0     | -0.003 | 0     | 0      | 0.001 | t | 26849  | IKMVSSLK<br>TKIT            | Oryctola<br>gus<br>cuniculu<br>s |
| 1 | 1.00 | 1 | 1 | 0.01  | 0.01   | 0.005 | 0.01   | 0.01  | t | 3221   | ANAANE<br>DYQAKLTA<br>YQTE  | Mus<br>musculu<br>s              |
| 1 | 1.00 | 1 | 1 | 0.01  | 0.01   | 0.005 | 0.01   | 0.01  | t | 3221   | ANAANE<br>DYQAKLTA<br>YQTE  | Mus<br>musculu<br>s              |
| 1 | 1.00 | 1 | 1 | 0.02  | 0.022  | 0.025 | 0.021  | 0.02  | t | 109734 | PSREEMT                     | Homo<br>sapiens                  |
| 1 | 1.00 | 1 | 1 | -0.02 | -0.013 | -0.02 | -0.02  | -0.02 | t | 94475  | CNPACGR<br>H                | Capra<br>hircus                  |
| 1 | 1.00 | 1 | 1 | 0     | -0.002 | 0.004 | -0.007 | 0     | t | 115053 | GGSYFMIS<br>R               | Mus<br>musculu<br>s              |
| 1 | 1.00 | 1 | 1 | 0     | -0.002 | 0.004 | -0.007 | 0     | t | 115053 | GGSYFMIS<br>R               | Mus<br>musculu<br>s              |

|   |      |   |   |       |        |        |        |        |   |        |                              |                          |
|---|------|---|---|-------|--------|--------|--------|--------|---|--------|------------------------------|--------------------------|
| 1 | 1.00 | 1 | 1 | 0     | -0.002 | 0.004  | -0.007 | 0      | t | 115053 | GGSYFMIS<br>R                | Mus<br>musculu<br>s      |
| 1 | 1.00 | 1 | 1 | 0.05  | 0.048  | 0.05   | 0.05   | 0.05   | t | 117598 | PEPAKSAP<br>APKKG            | Mus<br>musculu<br>s      |
| 1 | 1.00 | 1 | 1 | -0.02 | -0.022 | -0.012 | -0.017 | -0.018 | t | 23809  | HFPLA                        | Mus<br>musculu<br>s      |
| 1 | 1.00 | 1 | 1 | 0.02  | 0.024  | 0.022  | 0.023  | 0.022  | t | 118381 | GKTCPEI<br>PKGSKNT           | Homo<br>sapiens          |
| 1 | 1.00 | 1 | 1 | -0.01 | -0.01  | -0.01  | -0.01  | -0.008 | t | 28719  | ISSIFSR                      | Mus<br>musculu<br>s      |
| 1 | 1.00 | 1 | 1 | -0.01 | -0.01  | -0.01  | -0.01  | -0.008 | t | 28719  | ISSIFSR                      | Mus<br>musculu<br>s      |
| 1 | 1.00 | 1 | 1 | 0.05  | 0.05   | 0.05   | 0.05   | 0.05   | t | 119858 | FDEQNCS<br>MKLGWTW<br>YD     | Rattus<br>norvegic<br>us |
| 1 | 1.00 | 1 | 1 | 0     | 0.002  | -0.003 | 0.001  | 0      | t | 30988  | KGIYQTSN<br>FRVVP<br>SGDVVRF | Homo<br>sapiens          |
| 1 | 1.00 | 1 | 1 | -0.01 | -0.01  | -0.008 | -0.01  | -0.012 | t | 138034 | SDHSRNG<br>FDTDS             | Mus<br>musculu<br>s      |
| 1 | 1.00 | 1 | 1 | 0.01  | 0.009  | 0.008  | 0.007  | 0.01   | t | 22799  | GTRIRFKD<br>DTSFED           | Myodes<br>glareolu<br>s  |
| 1 | 1.00 | 1 | 1 | -0.01 | -0.01  | -0.01  | -0.01  | -0.009 | t | 133668 | QEGPEYW<br>DRNT              | Mus<br>musculu<br>s      |
| 1 | 1.00 | 1 | 1 | 0.02  | 0.02   | 0.02   | 0.02   | 0.02   | t | 111149 | CIPASGQT<br>C                | Homo<br>sapiens          |
| 1 | 1.00 | 1 | 1 | 0     | 0      | 0      | 0      | 0      | t | 135645 | CSCTEGYR                     | Homo<br>sapiens          |
| 1 | 1.00 | 1 | 1 | 0     | 0      | 0      | 0      | 0      | t | 135745 | QTSKLTRA                     | Homo<br>sapiens          |
| 1 | 1.00 | 1 | 1 | 0     | 0      | 0      | 0      | 0      | t | 130759 | CRQSRKRP<br>C                | Homo<br>sapiens          |
| 1 | 1.00 | 1 | 1 | 0     | 0      | 0      | 0      | 0      | t | 119502 | NNLGTI                       | Homo<br>sapiens          |
| 1 | 1.00 | 1 | 1 | 0     | 0      | 0      | 0      | 0      | t | 128095 | RQKPANV<br>LNDAQTKL<br>LAVSG | Homo<br>sapiens          |



|   |      |   |   |       |        |        |        |        |   |        |                             |                                  |
|---|------|---|---|-------|--------|--------|--------|--------|---|--------|-----------------------------|----------------------------------|
| 1 | 1.00 | 1 | 1 | 0     | 0.004  | 0.005  | 0.003  | -0.003 | t | 134220 | RQGAEP<br>KNFVKPNE<br>TKTY  | Homo<br>sapiens                  |
| 1 | 1.00 | 1 | 1 | -0.02 | -0.02  | -0.02  | -0.02  | -0.02  | t | 133467 | YYTYFGRN<br>AYNETKLK        | Oryctola<br>gus<br>cuniculu<br>s |
| 1 | 1.00 | 1 | 1 | -0.02 | -0.02  | -0.02  | -0.02  | -0.02  | t | 132925 | WGANSPL                     | Homo<br>sapiens                  |
| 1 | 1.00 | 1 | 1 | -0.04 | -0.04  | -0.04  | -0.04  | -0.04  | t | 98733  | DKALKALP<br>MH              | Homo<br>sapiens                  |
| 1 | 1.00 | 1 | 1 | -0.04 | -0.04  | -0.04  | -0.04  | -0.04  | t | 110595 | GIAGAPGF<br>PGPRGPP         | Mus<br>musculu<br>s              |
| 1 | 1.00 | 1 | 1 | -0.03 | -0.03  | -0.027 | -0.03  | -0.03  | t | 64994  | TLNWPPTL<br>WGMH            | Mus<br>musculu<br>s              |
| 1 | 1.00 | 1 | 1 | 0.02  | 0.023  | 0.02   | 0.02   | 0.019  | t | 135490 | QIFNLFTTK<br>DSSAA          | Mus<br>musculu<br>s              |
| 1 | 1.00 | 1 | 1 | -0.01 | -0.01  | -0.01  | -0.014 | -0.012 | t | 122452 | KTTKQSF<br>LSVKAQYK<br>KNKH | Homo<br>sapiens                  |
| 1 | 1.00 | 1 | 1 | 0.02  | 0.016  | 0.02   | 0.013  | 0.02   | t | 119923 | GYISKAQE<br>YFN             | Oryctola<br>gus<br>cuniculu<br>s |
| 1 | 1.00 | 1 | 1 | -0.06 | -0.058 | -0.06  | -0.061 | -0.06  | t | 130729 | APHKHKAS<br>LSIY            | Homo<br>sapiens                  |
| 1 | 1.00 | 1 | 1 | -0.06 | -0.06  | -0.06  | -0.06  | -0.06  | t | 130810 | EPWWSM<br>H                 | Homo<br>sapiens                  |
| 1 | 1.00 | 1 | 1 | 0.01  | 0.013  | 0.017  | 0.01   | 0.012  | t | 21469  | GNLLLSCL                    | Mus<br>musculu<br>s              |
| 1 | 1.00 | 1 | 1 | 0.04  | 0.038  | 0.029  | 0.033  | 0.04   | t | 65042  | TLRITYLTE<br>T              | Mus<br>musculu<br>s              |
| 1 | 1.00 | 1 | 1 | -0.04 | -0.042 | -0.045 | -0.041 | -0.04  | t | 108928 | ERGRTGPA                    | Rattus<br>norvegic<br>us         |
| 1 | 1.00 | 1 | 1 | 0.02  | 0.02   | 0.02   | 0.02   | 0.02   | t | 54570  | RLGVRATR<br>KTSE            | Homo<br>sapiens                  |
| 1 | 1.00 | 1 | 1 | 0     | 0      | -0.003 | 0      | 0      | t | 51967  | QPSKPTTK<br>QRQN            | Mus<br>musculu<br>s              |

|   |      |   |   |       |        |        |        |        |   |        |                              |                                  |
|---|------|---|---|-------|--------|--------|--------|--------|---|--------|------------------------------|----------------------------------|
| 1 | 1.00 | 1 | 1 | 0.03  | 0.034  | 0.04   | 0.027  | 0.029  | t | 13272  | ELSKDIGSE<br>S               | Homo<br>sapiens                  |
| 1 | 1.00 | 1 | 1 | 0     | 0      | -0.007 | 0      | 0      | t | 68174  | VEFDLPGI<br>KADSLDI          | Homo<br>sapiens                  |
| 1 | 1.00 | 1 | 1 | -0.06 | -0.058 | -0.06  | -0.053 | -0.057 | t | 105966 | MKKRH                        | Homo<br>sapiens                  |
| 1 | 1.00 | 1 | 1 | 0     | 0      | 0      | -0.003 | -0.001 | t | 14435  | ETIYNTTLK<br>Y               | Homo<br>sapiens                  |
| 1 | 1.00 | 1 | 1 | 0.01  | 0.01   | 0.015  | 0.01   | 0.01   | t | 153481 | TPTWPLLT<br>IFPSGGGS         | Mus<br>musculu<br>s              |
| 1 | 1.00 | 1 | 1 | -0.01 | -0.007 | -0.01  | -0.01  | -0.01  | t | 126900 | QVAALTW<br>VQTHIRGF<br>GGD   | Mus<br>musculu<br>s              |
| 1 | 1.00 | 1 | 1 | 0.03  | 0.027  | 0.026  | 0.03   | 0.029  | t | 7558   | DAKDGKEI<br>DTKHL PST<br>C   | Oryctola<br>gus<br>cuniculu<br>s |
| 1 | 1.00 | 1 | 1 | -0.01 | -0.012 | -0.015 | -0.007 | -0.007 | t | 51775  | QNTRNIVP<br>VSIVSR           | Mus<br>musculu<br>s              |
| 1 | 1.00 | 1 | 1 | -0.05 | -0.05  | -0.05  | -0.047 | -0.05  | t | 46856  | PALPVWA<br>R                 | Homo<br>sapiens                  |
| 1 | 1.00 | 1 | 1 | -0.03 | -0.033 | -0.027 | -0.03  | -0.032 | t | 62961  | TAPTDPT<br>RTVWTFG           | Oryctola<br>gus<br>cuniculu<br>s |
| 1 | 1.00 | 1 | 1 | 0.03  | 0.03   | 0.03   | 0.03   | 0.03   | t | 119602 | KGQPREP<br>Q                 | Homo<br>sapiens                  |
| 1 | 1.00 | 1 | 1 | 0.01  | 0.01   | 0.01   | 0.01   | 0.01   | t | 108033 | MQTPPGN<br>LENAVETL          | Homo<br>sapiens                  |
| 1 | 1.00 | 1 | 1 | 0.01  | 0.01   | 0.01   | 0.01   | 0.01   | t | 115992 | TEDELQDK<br>IH               | Homo<br>sapiens                  |
| 1 | 1.00 | 1 | 1 | 0.01  | 0.01   | 0.012  | 0.01   | 0.01   | t | 114467 | MAKLILVS<br>FSLCLLV          | Homo<br>sapiens                  |
| 1 | 1.00 | 1 | 1 | -0.01 | -0.01  | -0.01  | -0.01  | -0.01  | t | 124734 | SPLSLGR                      | Homo<br>sapiens                  |
| 1 | 1.00 | 1 | 1 | -0.01 | -0.01  | -0.01  | -0.01  | -0.01  | t | 119278 | MSKTEWN<br>ASQLPRLG<br>GKEDR | Rattus<br>norvegic<br>us         |

|   |      |   |   |       |        |        |        |        |   |        |                              |                                  |
|---|------|---|---|-------|--------|--------|--------|--------|---|--------|------------------------------|----------------------------------|
| 1 | 1.00 | 1 | 1 | -0.01 | -0.01  | -0.01  | -0.01  | -0.01  | t | 103746 | YHVVAGQ<br>TSPANVV<br>G      | Homo<br>sapiens                  |
| 1 | 1.00 | 1 | 1 | -0.01 | -0.01  | -0.01  | -0.01  | -0.01  | t | 39393  | LSGRPAIIP<br>DREVLHRE<br>FDE | Homo<br>sapiens                  |
| 1 | 1.00 | 1 | 1 | -0.03 | -0.03  | -0.03  | -0.03  | -0.03  | t | 131764 | YAIAWHQ                      | Mus<br>musculu<br>s              |
| 1 | 1.00 | 1 | 1 | -0.05 | -0.05  | -0.05  | -0.05  | -0.05  | t | 141070 | PSLRDIFAW                    | Ovis<br>aries                    |
| 1 | 1.00 | 1 | 1 | -0.05 | -0.05  | -0.05  | -0.05  | -0.05  | t | 114905 | NKCNFCN<br>AVV               | Homo<br>sapiens                  |
| 1 | 1.00 | 1 | 1 | 0.01  | 0.014  | 0.017  | 0.007  | 0.01   | t | 106762 | QYFALEAY<br>AF               | Homo<br>sapiens                  |
| 1 | 1.00 | 1 | 1 | 0.01  | 0.006  | 0.016  | 0.009  | 0.01   | t | 36048  | LGACSFSS                     | Oryctola<br>gus<br>cuniculu<br>s |
| 1 | 1.00 | 1 | 1 | -0.02 | -0.02  | -0.019 | -0.023 | -0.022 | t | 61155  | SSLFQLWK<br>SE               | Homo<br>sapiens                  |
| 1 | 1.00 | 1 | 1 | 0.02  | 0.02   | 0.01   | 0.018  | 0.02   | t | 22662  | GTGKRNQI<br>TITNDKGR<br>LSKD | Homo<br>sapiens                  |
| 1 | 1.00 | 1 | 1 | 0.02  | 0.02   | 0.02   | 0.02   | 0.02   | t | 156955 | SDYTLTAVI<br>PAPRSL          | Gallus<br>gallus                 |
| 1 | 1.00 | 1 | 1 | 0.04  | 0.04   | 0.04   | 0.036  | 0.038  | t | 107856 | GGQGSRH<br>QQAR              | Homo<br>sapiens                  |
| 1 | 1.00 | 1 | 1 | 0     | -0.004 | 0      | -0.001 | 0.001  | t | 48927  | PPSSPTHD<br>PPSDP            | Oryctola<br>gus<br>cuniculu<br>s |
| 1 | 1.00 | 1 | 1 | -0.03 | -0.033 | -0.033 | -0.03  | -0.03  | t | 50027  | PWFLAHH<br>TGGD              | Oryctola<br>gus<br>cuniculu<br>s |
| 1 | 1.00 | 1 | 1 | 0     | -0.004 | -0.005 | -0.007 | -0.001 | t | 122730 | DPAQPPR<br>D                 | Oryctola<br>gus<br>cuniculu<br>s |
| 1 | 1.00 | 1 | 1 | 0     | 0.002  | -0.001 | 0.001  | 0.002  | t | 74664  | YLGAMV                       | Homo<br>sapiens                  |

|   |      |   |   |       |        |        |        |       |   |        |                              |                                  |
|---|------|---|---|-------|--------|--------|--------|-------|---|--------|------------------------------|----------------------------------|
| 1 | 1.00 | 1 | 1 | -0.02 | -0.02  | -0.029 | -0.027 | -0.02 | t | 135913 | EEAIERAV<br>VHVA             | Homo<br>sapiens                  |
| 1 | 1.00 | 1 | 1 | -0.02 | -0.015 | -0.013 | -0.019 | -0.02 | t | 15918  | FFTEVDGV<br>RLHYA            | Homo<br>sapiens                  |
| 1 | 1.00 | 1 | 1 | 0     | -0.006 | -0.007 | 0      | 0     | t | 57505  | SEKSEEINE<br>KDLRKKSE<br>LQG | Oryctola<br>gus<br>cuniculu<br>s |
| 1 | 1.00 | 1 | 1 | 0     | -0.006 | -0.007 | 0      | 0     | t | 57505  | SEKSEEINE<br>KDLRKKSE<br>LQG | Oryctola<br>gus<br>cuniculu<br>s |
| 1 | 1.00 | 1 | 1 | -0.03 | -0.028 | -0.03  | -0.027 | -0.03 | t | 47336  | PEKTPLPV<br>SATAMAP<br>SVDPS | Homo<br>sapiens                  |
| 1 | 1.00 | 1 | 1 | -0.03 | -0.026 | -0.03  | -0.027 | -0.03 | t | 47336  | PEKTPLPV<br>SATAMAP<br>SVDPS | Homo<br>sapiens                  |
| 1 | 1.00 | 1 | 1 | 0.03  | 0.033  | 0.021  | 0.03   | 0.031 | t | 40439  | LVLGENLD<br>TERILASYQ<br>EGV | Mus<br>musculu<br>s              |
| 1 | 1.00 | 1 | 1 | -0.02 | -0.022 | -0.02  | -0.021 | -0.02 | t | 133693 | SGRHSRL                      | Mus<br>musculu<br>s              |
| 1 | 1.00 | 1 | 1 | -0.04 | -0.037 | -0.041 | -0.04  | -0.04 | t | 141540 | FTPQSRRL<br>RELPLAAD<br>ALTF | Mus<br>musculu<br>s              |
| 1 | 1.00 | 1 | 1 | -0.01 | -0.01  | -0.01  | -0.01  | -0.01 | t | 111231 | EDLLMGTL<br>GIVCPICSQ<br>KP  | Mus<br>musculu<br>s              |
| 1 | 1.00 | 1 | 1 | -0.02 | -0.018 | -0.02  | -0.019 | -0.02 | t | 25096  | HVSPTHYV<br>PESDAAAR<br>VTQI | Homo<br>sapiens                  |
| 1 | 1.00 | 1 | 1 | 0.02  | 0.02   | 0.036  | 0.02   | 0.018 | t | 139338 | VEDILY                       | Mus<br>musculu<br>s              |
| 1 | 1.00 | 1 | 1 | 0.03  | 0.028  | 0.033  | 0.029  | 0.03  | t | 63802  | TGDFDSVI<br>D                | Mus<br>musculu<br>s              |
| 1 | 1.00 | 1 | 1 | 0.04  | 0.043  | 0.035  | 0.04   | 0.043 | t | 49006  | PQGQGKV<br>T                 | Mus<br>musculu<br>s              |

|   |      |   |   |       |        |        |        |        |   |        |                              |                                  |
|---|------|---|---|-------|--------|--------|--------|--------|---|--------|------------------------------|----------------------------------|
| 1 | 1.00 | 1 | 1 | 0     | -0.001 | -0.006 | -0.001 | 0      | t | 29205  | IVARQKLK<br>DAERAV           | Myodes<br>glareolu<br>s          |
| 1 | 1.00 | 1 | 1 | -0.01 | -0.01  | -0.01  | -0.014 | -0.009 | t | 11819  | EENVEHD<br>A                 | Homo<br>sapiens                  |
| 1 | 1.00 | 1 | 1 | -0.04 | -0.04  | -0.04  | -0.04  | -0.04  | t | 79362  | RCRKVLIC<br>RRICP            | Mus<br>musculu<br>s              |
| 1 | 1.00 | 1 | 1 | -0.04 | -0.038 | -0.038 | -0.037 | -0.04  | t | 78873  | VKFPGGG<br>QIVGGVYL<br>LPRRG | Homo<br>sapiens                  |
| 1 | 1.00 | 1 | 1 | 0.01  | 0.01   | 0.015  | 0.01   | 0.01   | t | 49240  | PRRGPRLG                     | Homo<br>sapiens                  |
| 1 | 1.00 | 1 | 1 | 0.02  | 0.02   | 0.02   | 0.02   | 0.02   | t | 113686 | PGQGQQG<br>QQPGQG<br>Q       | Homo<br>sapiens                  |
| 1 | 1.00 | 1 | 1 | 0.02  | 0.02   | 0.02   | 0.02   | 0.02   | t | 79665  | VEGLAPG<br>GGNCHLT<br>VNGEDV | Homo<br>sapiens                  |
| 1 | 1.00 | 1 | 1 | 0     | 0      | 0      | 0      | 0      | t | 137414 | HAPRYHTI<br>YGWP             | Mus<br>musculu<br>s              |
| 1 | 1.00 | 1 | 1 | 0     | 0      | 0      | 0      | 0      | t | 97443  | LFILTRDG<br>M                | Oryctola<br>gus<br>cuniculu<br>s |
| 1 | 1.00 | 1 | 1 | -0.01 | -0.012 | -0.005 | -0.011 | -0.01  | t | 65519  | TPCILSGSA<br>S               | Mus<br>musculu<br>s              |
| 1 | 1.00 | 1 | 1 | -0.02 | -0.02  | -0.02  | -0.02  | -0.02  | t | 107497 | KVSNKAL                      | Homo<br>sapiens                  |
| 1 | 1.00 | 1 | 1 | -0.02 | -0.02  | -0.02  | -0.02  | -0.02  | t | 114778 | DNECLLCA<br>HK               | Homo<br>sapiens                  |
| 1 | 1.00 | 1 | 1 | -0.02 | -0.02  | -0.02  | -0.02  | -0.02  | t | 111546 | MHPSNSK<br>SPPRH             | Homo<br>sapiens                  |
| 1 | 1.00 | 1 | 1 | -0.02 | -0.02  | -0.02  | -0.02  | -0.02  | t | 78310  | WHTSYLP                      | Homo<br>sapiens                  |
| 1 | 1.00 | 1 | 1 | -0.04 | -0.04  | -0.04  | -0.04  | -0.04  | t | 123267 | GRNDREK<br>WL                | Ovis<br>aries                    |
| 1 | 1.00 | 1 | 1 | -0.06 | -0.06  | -0.061 | -0.062 | -0.061 | t | 137907 | KGSGPGYY<br>RLTL             | Homo<br>sapiens                  |
| 1 | 1.00 | 1 | 1 | 0.01  | 0.01   | 0.005  | 0.012  | 0.012  | t | 136554 | PLDLPQIE<br>R                | Homo<br>sapiens                  |

|   |      |   |   |   |        |   |        |   |   |        |                              |                                  |
|---|------|---|---|---|--------|---|--------|---|---|--------|------------------------------|----------------------------------|
| 1 | 1.00 | 1 | 1 | 0 | 0.01   | 0 | -0.001 | 0 | t | 137869 | GGVSTGLI<br>QDDWTFQ          | Pan<br>troglody<br>tes           |
| 1 | 1.00 | 1 | 1 | 0 | 0.01   | 0 | -0.001 | 0 | t | 137829 | DWTFQTL<br>VMLETVP<br>R      | Pan<br>troglody<br>tes           |
| 1 | 1.00 | 1 | 1 | 0 | -0.003 | 0 | -0.001 | 0 | t | 151456 | TATTEK                       | Mus<br>musculu<br>s              |
| 1 | 1.00 | 1 | 1 | 0 | -0.002 | 0 | -0.001 | 0 | t | 137869 | GGVSTGLI<br>QDDWTFQ          | Mus<br>musculu<br>s              |
| 1 | 1.00 | 1 | 1 | 0 | -0.002 | 0 | -0.001 | 0 | t | 137842 | ETVPRSGE<br>VYTSQVE          | Mus<br>musculu<br>s              |
| 1 | 1.00 | 1 | 1 | 0 | 0.01   | 0 | -0.001 | 0 | t | 137868 | GFYPGSIE<br>VRWFLNG          | Pan<br>troglody<br>tes           |
| 1 | 1.00 | 1 | 1 | 0 | -0.002 | 0 | -0.001 | 0 | t | 138041 | SPLTVEWR<br>ARSESAQS<br>KM   | Mus<br>musculu<br>s              |
| 1 | 1.00 | 1 | 1 | 0 | 0.01   | 0 | -0.001 | 0 | t | 138059 | TSQVEHPS<br>VTSPLTV          | Pan<br>troglody<br>tes           |
| 1 | 1.00 | 1 | 1 | 0 | 0.01   | 0 | -0.001 | 0 | t | 138083 | VYPSKTQP<br>LQHNNLL          | Pan<br>troglody<br>tes           |
| 1 | 1.00 | 1 | 1 | 0 | -0.002 | 0 | -0.001 | 0 | t | 138059 | TSQVEHPS<br>VTSPLTV          | Mus<br>musculu<br>s              |
| 1 | 1.00 | 1 | 1 | 0 | -0.002 | 0 | -0.001 | 0 | t | 137868 | GFYPGSIE<br>VRWFLNG          | Mus<br>musculu<br>s              |
| 1 | 1.00 | 1 | 1 | 0 | -0.002 | 0 | -0.001 | 0 | t | 138083 | VYPSKTQP<br>LQHNNLL          | Mus<br>musculu<br>s              |
| 1 | 1.00 | 1 | 1 | 0 | -0.003 | 0 | -0.001 | 0 | t | 151493 | VVDGPETK<br>EC               | Mus<br>musculu<br>s              |
| 1 | 1.00 | 1 | 1 | 0 | -0.003 | 0 | -0.001 | 0 | t | 117320 | KPKAAKPK<br>KAAAKKK          | Oryctola<br>gus<br>cuniculu<br>s |
| 1 | 1.00 | 1 | 1 | 0 | -0.003 | 0 | -0.001 | 0 | t | 117331 | MKLVRFL<br>MKLSHETV<br>TIELK | Oryctola<br>gus<br>cuniculu<br>s |
| 1 | 1.00 | 1 | 1 | 0 | -0.006 | 0 | -0.001 | 0 | t | 79926  | MASMTG<br>GQQMG              | Oryctola<br>gus<br>cuniculu<br>s |

|   |      |   |   |   |        |   |        |   |   |       |                    |                            |
|---|------|---|---|---|--------|---|--------|---|---|-------|--------------------|----------------------------|
| 1 | 1.00 | 1 | 1 | 0 | -0.004 | 0 | -0.001 | 0 | t | 51252 | QKSKQNI<br>GALKQEL | Oryctola<br>guscunicu<br>s |
| 1 | 1.00 | 1 | 1 | 0 | -0.003 | 0 | -0.001 | 0 | t | 43233 | NANP               | Oryctola<br>guscunicu<br>s |
| 1 | 1.00 | 1 | 1 | 0 | -0.003 | 0 | -0.001 | 0 | t | 50180 | PYVEPTAP<br>QVL    | Oryctola<br>guscunicu<br>s |
| 1 | 1.00 | 1 | 1 | 0 | -0.003 | 0 | -0.001 | 0 | t | 51806 | QPELAPED<br>PED    | Oryctola<br>guscunicu<br>s |
| 1 | 1.00 | 1 | 1 | 0 | -0.003 | 0 | -0.001 | 0 | t | 50180 | PYVEPTAP<br>QVL    | Oryctola<br>guscunicu<br>s |
| 1 | 1.00 | 1 | 1 | 0 | -0.003 | 0 | -0.001 | 0 | t | 40110 | LTPLEELY           | Oryctola<br>guscunicu<br>s |
| 1 | 1.00 | 1 | 1 | 0 | -0.003 | 0 | -0.001 | 0 | t | 50156 | PYQGSGK<br>GVS     | Oryctola<br>guscunicu<br>s |
| 1 | 1.00 | 1 | 1 | 0 | -0.003 | 0 | -0.001 | 0 | t | 50180 | PYVEPTAP<br>QVL    | Oryctola<br>guscunicu<br>s |
| 1 | 1.00 | 1 | 1 | 0 | 0      | 0 | -0.001 | 0 | t | 16101 | FHENWPS            | Rattus<br>norvegic<br>us   |
| 1 | 1.00 | 1 | 1 | 0 | -0.003 | 0 | -0.001 | 0 | t | 9524  | DNPASTT<br>NKDK    | Oryctola<br>guscunicu<br>s |
| 1 | 1.00 | 1 | 1 | 0 | -0.006 | 0 | -0.001 | 0 | t | 2270  | AKQPATLR           | Oryctola<br>guscunicu<br>s |
| 1 | 1.00 | 1 | 1 | 0 | -0.003 | 0 | -0.001 | 0 | t | 10109 | DSESGGHI<br>TH     | Oryctola<br>guscunicu<br>s |

|   |      |   |   |       |        |        |        |        |   |        |                              |                          |
|---|------|---|---|-------|--------|--------|--------|--------|---|--------|------------------------------|--------------------------|
| 1 | 1.00 | 1 | 1 | 0     | -0.003 | 0      | -0.001 | 0      | t | 7171   | CTKPTDGN<br>C                | Oryctolagus<br>cuniculus |
| 1 | 1.00 | 1 | 1 | 0     | 0      | 0      | 0      | 0      | t | 156933 | PLEKSHL                      | Gallus<br>gallus         |
| 1 | 1.00 | 1 | 1 | -0.02 | -0.02  | -0.02  | -0.02  | -0.02  | t | 159282 | EENW                         | Oryctolagus<br>cuniculus |
| 1 | 1.00 | 1 | 1 | -0.01 | -0.008 | -0.015 | -0.013 | -0.01  | t | 115258 | FYPELFRQ<br>FYQLDAYP<br>SGAW | Homo<br>sapiens          |
| 1 | 1.00 | 1 | 1 | -0.01 | -0.01  | -0.01  | -0.01  | -0.01  | t | 120316 | WNPADYG<br>GIKKIRLPS         | Mus<br>musculus          |
| 1 | 1.00 | 1 | 1 | -0.01 | -0.01  | -0.01  | -0.01  | -0.01  | t | 120316 | WNPADYG<br>GIKKIRLPS         | Mus<br>musculus          |
| 1 | 1.00 | 1 | 1 | 0.03  | 0.03   | 0.03   | 0.03   | 0.03   | t | 145804 | GPVGPSD<br>PSIVSLVEE         | Mus<br>musculus          |
| 1 | 1.00 | 1 | 1 | -0.02 | -0.02  | -0.02  | -0.02  | -0.018 | t | 102005 | QPDQHHQ                      | Mus<br>musculus          |
| 1 | 1.00 | 1 | 1 | 0     | 0.003  | 0.002  | 0      | -0.001 | t | 122290 | CSNSSSSQ<br>FQIHGPRQ         | Mus<br>musculus          |
| 1 | 1.00 | 1 | 1 | -0.04 | -0.044 | -0.034 | -0.037 | -0.04  | t | 48460  | PLPWLP<br>GA                 | Oryctolagus<br>cuniculus |
| 1 | 1.00 | 1 | 1 | -0.02 | -0.023 | -0.027 | -0.019 | -0.018 | t | 70402  | VPNTNIKL<br>YVRRVFIT<br>DEFR | Canis<br>lupus           |
| 1 | 1.00 | 1 | 1 | 0     | 0.002  | 0.003  | 0.004  | 0.001  | t | 50637  | QELDCWH<br>YQHVCVTS<br>TKS   | MD                       |
| 1 | 1.00 | 1 | 1 | -0.06 | -0.056 | -0.054 | -0.059 | -0.06  | t | 36813  | LKCRLR                       | Homo<br>sapiens          |
| 1 | 1.00 | 1 | 1 | -0.06 | -0.058 | -0.054 | -0.059 | -0.06  | t | 36813  | LKCRLR                       | Homo<br>sapiens          |



|   |      |   |   |       |        |        |        |        |   |        |                                |                                  |
|---|------|---|---|-------|--------|--------|--------|--------|---|--------|--------------------------------|----------------------------------|
| 1 | 1.00 | 1 | 1 | 0.01  | 0.014  | 0.007  | 0.007  | 0.011  | t | 31580  | KKIQDCYV<br>ENGLIS             | Homo<br>sapiens                  |
| 1 | 1.00 | 1 | 1 | -0.04 | -0.04  | -0.04  | -0.04  | -0.041 | t | 108666 | TRCAQCH<br>TLK                 | Homo<br>sapiens                  |
| 1 | 1.00 | 1 | 1 | -0.06 | -0.057 | -0.06  | -0.06  | -0.061 | t | 57620  | SESHNFDA<br>VMSKLG<br>VSWATR   | Mus<br>musculu<br>s              |
| 1 | 1.00 | 1 | 1 | -0.06 | -0.06  | -0.053 | -0.06  | -0.06  | t | 119481 | KRRASAG<br>GP                  | Homo<br>sapiens                  |
| 1 | 1.00 | 1 | 1 | -0.04 | -0.04  | -0.04  | -0.04  | -0.04  | t | 133701 | SRNKHKR                        | Mus<br>musculu<br>s              |
| 1 | 1.00 | 1 | 1 | -0.01 | -0.012 | -0.008 | -0.007 | -0.008 | t | 51168  | QKAREAFR                       | Anas<br>platyrhy<br>nchos        |
| 1 | 1.00 | 1 | 1 | -0.01 | -0.012 | -0.006 | -0.013 | -0.011 | t | 66462  | TSTGPCKT<br>CTTPAQ             | Mus<br>musculu<br>s              |
| 1 | 1.00 | 1 | 1 | 0.08  | 0.078  | 0.066  | 0.073  | 0.082  | t | 125871 | EEEEEEEE<br>E                  | Mus<br>musculu<br>s              |
| 1 | 1.00 | 1 | 1 | 0.03  | 0.004  | 0.037  | 0.031  | 0.029  | t | 20217  | GIAKGIKEI<br>VEAA              | Homo<br>sapiens                  |
| 1 | 1.00 | 1 | 1 | 0.01  | 0.01   | 0.01   | 0.01   | 0.01   | t | 107496 | KTKPREQ                        | Homo<br>sapiens                  |
| 1 | 1.00 | 1 | 1 | 0.01  | 0.01   | 0.01   | 0.01   | 0.01   | t | 111548 | MHQTTAQ<br>PLRSP               | Homo<br>sapiens                  |
| 1 | 1.00 | 1 | 1 | 0.01  | 0.01   | 0.01   | 0.01   | 0.01   | t | 78396  | GLANDV                         | Mus<br>musculu<br>s              |
| 1 | 1.00 | 1 | 1 | -0.01 | -0.01  | -0.01  | -0.01  | -0.01  | t | 150996 | HPSTSADQ<br>QSLYQNA            | Homo<br>sapiens                  |
| 1 | 1.00 | 1 | 1 | -0.01 | -0.01  | -0.01  | -0.01  | -0.01  | t | 137419 | HSPRWHL                        | Mus<br>musculu<br>s              |
| 1 | 1.00 | 1 | 1 | -0.01 | -0.01  | -0.01  | -0.01  | -0.01  | t | 144667 | GREGYP<br>A<br>DGGKIWT<br>SETN | Oryctola<br>gus<br>cuniculu<br>s |
| 1 | 1.00 | 1 | 1 | -0.01 | -0.01  | -0.01  | -0.01  | -0.01  | t | 112103 | FAYWGQG                        | Homo<br>sapiens                  |

|   |      |   |   |       |        |        |        |        |   |        |                              |                                  |
|---|------|---|---|-------|--------|--------|--------|--------|---|--------|------------------------------|----------------------------------|
| 1 | 1.00 | 1 | 1 | -0.01 | -0.014 | -0.01  | -0.01  | -0.01  | t | 110766 | AIKSEVSLT<br>GAL             | Macaca                           |
| 1 | 1.00 | 1 | 1 | -0.01 | -0.01  | -0.01  | -0.01  | -0.01  | t | 41735  | MIKVGFP<br>TGAFKSP<br>WKSH   | Aotus<br>nancyma<br>ae           |
| 1 | 1.00 | 1 | 1 | -0.01 | -0.01  | -0.01  | -0.01  | -0.01  | t | 15437  | FDPLRAEE<br>DEREVS           | Homo<br>sapiens                  |
| 1 | 1.00 | 1 | 1 | 0.06  | 0.056  | 0.058  | 0.053  | 0.062  | t | 121718 | PSDDV                        | Oryctola<br>gus<br>cuniculu<br>s |
| 1 | 1.00 | 1 | 1 | -0.03 | -0.03  | -0.03  | -0.03  | -0.03  | t | 115204 | DEALEKFD<br>KALKALPM<br>HIRL | Homo<br>sapiens                  |
| 1 | 1.00 | 1 | 1 | -0.03 | -0.03  | -0.03  | -0.03  | -0.03  | t | 79512  | AIWYPHV                      | Oryctola<br>gus<br>cuniculu<br>s |
| 1 | 1.00 | 1 | 1 | -0.02 | -0.02  | -0.02  | -0.02  | -0.018 | t | 17365  | FPQPQFP<br>PQ                | Mus<br>musculu<br>s              |
| 1 | 1.00 | 1 | 1 | -0.04 | -0.038 | -0.043 | -0.039 | -0.043 | t | 103116 | DSIYYVDA<br>NASIQEM          | Homo<br>sapiens                  |
| 1 | 1.00 | 1 | 1 | 0.04  | 0.038  | 0.034  | 0.039  | 0.038  | t | 24697  | HRMQEAV<br>EAERAGR<br>GTGH   | Mus<br>musculu<br>s              |
| 1 | 1.00 | 1 | 1 | 0     | 0      | 0      | 0      | 0.004  | t | 116292 | DPVVHFFK<br>NIVTP            | Homo<br>sapiens                  |
| 1 | 1.00 | 1 | 1 | 0     | 0.002  | 0      | 0      | 0.001  | t | 48331  | PLGFFPDH<br>QLDP             | Homo<br>sapiens                  |
| 1 | 1.00 | 1 | 1 | 0     | 0      | 0      | 0      | 0.001  | t | 141559 | SDEALPLG<br>SPR              | Mus<br>musculu<br>s              |
| 1 | 1.00 | 1 | 1 | 0.02  | 0.027  | 0.016  | 0.019  | 0.022  | t | 148521 | CNTKCQTP<br>MGAINSS          | Gallus<br>gallus                 |
| 1 | 1.00 | 1 | 1 | 0.02  | 0.02   | 0.02   | 0.02   | 0.02   | t | 55137  | RPDYQPAT<br>VAGCALPP<br>P    | Homo<br>sapiens                  |
| 1 | 1.00 | 1 | 1 | -0.01 | -0.01  | -0.01  | -0.01  | -0.008 | t | 95475  | IRLSFN                       | Homo<br>sapiens                  |

|   |      |   |   |       |        |        |        |        |   |        |                              |                              |
|---|------|---|---|-------|--------|--------|--------|--------|---|--------|------------------------------|------------------------------|
| 1 | 1.00 | 1 | 1 | 0.02  | 0.02   | 0.014  | 0.02   | 0.022  | t | 22685  | GTHNGQI<br>GNDPNRDI          | Mus<br>musculus              |
| 1 | 1.00 | 1 | 1 | 0.03  | 0.032  | 0.03   | 0.027  | 0.03   | t | 95901  | TEKPLEPA<br>PVEPSYEAEPTP     | Homo<br>sapiens              |
| 1 | 1.00 | 1 | 1 | 0.02  | 0.017  | 0.02   | 0.02   | 0.019  | t | 108845 | DAGVIQSP<br>RHEVTEMGQ        | Oryctola<br>gus<br>cuniculus |
| 1 | 1.00 | 1 | 1 | -0.01 | -0.01  | -0.014 | -0.002 | -0.01  | t | 47636  | PGEGPSTG<br>PRGQGDG<br>GRRKK | Homo<br>sapiens              |
| 1 | 1.00 | 1 | 1 | 0.02  | 0.023  | 0.011  | 0.02   | 0.023  | t | 75691  | YRYNIYSEK<br>EKSNNIDFN       | Equus<br>caballus            |
| 1 | 1.00 | 1 | 1 | 0.01  | 0.01   | 0.01   | 0.008  | 0.01   | t | 65947  | TQTFLGTSI<br>SGVLW           | Homo<br>sapiens              |
| 1 | 1.00 | 1 | 1 | -0.03 | -0.026 | -0.027 | -0.03  | -0.03  | t | 141052 | LRDIFAWEP                    | Ovis<br>aries                |
| 1 | 1.00 | 1 | 1 | 0.02  | 0.023  | 0.024  | 0.02   | 0.021  | t | 106771 | RERMS                        | Mus<br>musculus              |
| 1 | 1.00 | 1 | 1 | 0     | 0      | 0      | -0.003 | 0      | t | 29936  | KARRPEGR<br>TWAQ             | Homo<br>sapiens              |
| 1 | 1.00 | 1 | 1 | -0.03 | -0.03  | -0.03  | -0.03  | -0.03  | t | 8071   | DELGFMV<br>PPGLSSE           | Sus<br>scrofa                |
| 1 | 1.00 | 1 | 1 | 0.01  | 0.01   | 0.008  | 0.01   | 0.012  | t | 32807  | KPNLSSKR<br>SELSQLS          | Mus<br>musculus              |
| 1 | 1.00 | 1 | 1 | 0.02  | 0.023  | 0.026  | 0.02   | 0.022  | t | 8133   | DEQFIPK                      | Mus<br>musculus              |
| 1 | 1.00 | 1 | 1 | 0     | 0.003  | 0.006  | 0      | 0      | t | 63735  | TFQVEVPG<br>SQ               | Mus<br>musculus              |
| 1 | 1.00 | 1 | 1 | -0.01 | -0.015 | -0.001 | -0.007 | -0.01  | t | 33799  | KTNSSLLT                     | Bos<br>taurus                |
| 1 | 1.00 | 1 | 1 | -0.02 | -0.023 | -0.015 | -0.02  | -0.021 | t | 104586 | NRVAPNV<br>RQ                | Oryctola<br>gus<br>cuniculus |

|   |      |   |   |       |        |        |        |        |   |        |                           |                          |
|---|------|---|---|-------|--------|--------|--------|--------|---|--------|---------------------------|--------------------------|
| 1 | 1.00 | 1 | 1 | -0.01 | -0.006 | -0.009 | -0.01  | -0.01  | t | 69199  | VKDWSERI<br>REFMEK        | Myodes<br>glareolu<br>s  |
| 1 | 1.00 | 1 | 1 | 0     | 0      | -0.001 | 0      | 0      | t | 127870 | TRGPAHP<br>AFARAHG<br>E   | Homo<br>sapiens          |
| 1 | 1.00 | 1 | 1 | -0.09 | -0.086 | -0.088 | -0.087 | -0.092 | t | 121503 | KRLKISKKP<br>KDPEPP       | Homo<br>sapiens          |
| 1 | 1.00 | 1 | 1 | 0     | 0      | 0      | 0      | 0      | t | 141642 | FHDTSLLS<br>HHLA          | Mus<br>musculu<br>s      |
| 1 | 1.00 | 1 | 1 | 0     | 0      | 0      | 0      | 0      | t | 113755 | QGQQPG<br>QGQQPG<br>QG    | Homo<br>sapiens          |
| 1 | 1.00 | 1 | 1 | 0     | 0      | 0      | 0      | 0      | t | 86153  | MANTGA<br>MELV            | Homo<br>sapiens          |
| 1 | 1.00 | 1 | 1 | -0.02 | -0.02  | -0.02  | -0.02  | -0.02  | t | 140606 | TMWDALE<br>AP             | Mus<br>musculu<br>s      |
| 1 | 1.00 | 1 | 1 | -0.02 | -0.02  | -0.02  | -0.02  | -0.02  | t | 140606 | TMWDALE<br>AP             | Mus<br>musculu<br>s      |
| 1 | 1.00 | 1 | 1 | -0.02 | -0.02  | -0.02  | -0.02  | -0.02  | t | 151032 | LYQNADTY<br>VFGSSR        | Homo<br>sapiens          |
| 1 | 1.00 | 1 | 1 | -0.02 | -0.02  | -0.02  | -0.02  | -0.02  | t | 107698 | YNSTYRV                   | Homo<br>sapiens          |
| 1 | 1.00 | 1 | 1 | -0.02 | -0.02  | -0.02  | -0.02  | -0.02  | t | 86900  | NLPNDVFR<br>EAQR          | Homo<br>sapiens          |
| 1 | 1.00 | 1 | 1 | 0.02  | 0.021  | 0.017  | 0.023  | 0.02   | t | 42977  | MVNINDT<br>DTWIPKG<br>CNE | Equus<br>caballus        |
| 1 | 1.00 | 1 | 1 | 0.03  | 0.03   | 0.046  | 0.03   | 0.03   | t | 136059 | EGY                       | Rattus<br>norvegic<br>us |
| 1 | 1.00 | 1 | 1 | -0.04 | -0.04  | -0.048 | -0.04  | -0.038 | t | 125454 | KDYKTMV<br>KFCN           | Mus<br>musculu<br>s      |
| 1 | 1.00 | 1 | 1 | -0.01 | -0.01  | -0.012 | -0.011 | -0.01  | t | 153287 | RQSGRQP<br>TPLSPPLR       | Mus<br>musculu<br>s      |

|   |      |   |   |       |        |        |        |        |   |        |                              |                                  |
|---|------|---|---|-------|--------|--------|--------|--------|---|--------|------------------------------|----------------------------------|
| 1 | 1.00 | 1 | 1 | 0.03  | 0.03   | 0.03   | 0.03   | 0.03   | t | 140865 | GYLAGKG<br>VDAGKLG<br>TVSYGE | Oryctola<br>gus<br>cuniculu<br>s |
| 1 | 1.00 | 1 | 1 | 0.02  | 0.018  | 0.013  | 0.013  | 0.02   | t | 108213 | WQQGNV<br>F                  | Mus<br>musculu<br>s              |
| 1 | 1.00 | 1 | 1 | 0.02  | 0.018  | 0.013  | 0.013  | 0.02   | t | 108213 | WQQGNV<br>F                  | Mus<br>musculu<br>s              |
| 1 | 1.00 | 1 | 1 | 0.02  | 0.02   | 0.02   | 0.02   | 0.02   | t | 79958  | PALELIRM<br>VECSGK           | Mus<br>musculu<br>s              |
| 1 | 1.00 | 1 | 1 | 0.04  | 0.038  | 0.053  | 0.039  | 0.041  | t | 138862 | KFPED                        | Mus<br>musculu<br>s              |
| 1 | 1.00 | 1 | 1 | -0.01 | -0.013 | -0.015 | -0.01  | -0.008 | t | 107155 | GKWLGH<br>PDK                | Oryctola<br>gus<br>cuniculu<br>s |
| 1 | 1.00 | 1 | 1 | 0.02  | 0.023  | 0.017  | 0.02   | 0.023  | t | 66751  | TTPAQGTS<br>M                | Mus<br>musculu<br>s              |
| 1 | 1.00 | 1 | 1 | 0.01  | 0.01   | 0.003  | 0.01   | 0.01   | t | 119542 | VRGAKEGI<br>ILFKEKAKE<br>ALG | Homo<br>sapiens                  |
| 1 | 1.00 | 1 | 1 | 0.01  | 0.017  | 0.01   | 0.009  | 0.01   | t | 46737  | PAADLNW<br>GENQDGI<br>VWV    | Gallus<br>gallus                 |
| 1 | 1.00 | 1 | 1 | 0     | 0      | 0.005  | 0.006  | 0.003  | t | 115785 | HSYQE                        | Homo<br>sapiens                  |
| 1 | 1.00 | 1 | 1 | -0.05 | -0.044 | -0.036 | -0.043 | -0.05  | t | 132890 | QSPWQT<br>WFTRAL             | Homo<br>sapiens                  |
| 1 | 1.00 | 1 | 1 | 0.01  | 0.01   | 0.01   | 0.007  | 0.01   | t | 52735  | QVLDSHY<br>QDVLKEV           | Homo<br>sapiens                  |
| 1 | 1.00 | 1 | 1 | 0.05  | 0.05   | 0.05   | 0.05   | 0.05   | t | 105140 | DN                           | Oryctola<br>gus<br>cuniculu<br>s |
| 1 | 1.00 | 1 | 1 | 0     | -0.006 | 0      | 0      | 0      | t | 123641 | PVVGAVQ<br>G                 | Oryctola<br>gus<br>cuniculu<br>s |

|   |      |   |   |       |        |        |        |        |   |        |                              |                                  |
|---|------|---|---|-------|--------|--------|--------|--------|---|--------|------------------------------|----------------------------------|
| 1 | 1.00 | 1 | 1 | 0.01  | 0.009  | -0.001 | 0.01   | 0.012  | t | 23309  | GYAQDQE<br>PDARGRIR<br>NGALL | Homo<br>sapiens                  |
| 1 | 1.00 | 1 | 1 | 0.01  | 0.012  | 0.01   | 0.013  | 0.011  | t | 56730  | SADGTTVT<br>SGSTKDT<br>LQ    | Homo<br>sapiens                  |
| 1 | 1.00 | 1 | 1 | -0.05 | -0.05  | -0.05  | -0.05  | -0.05  | t | 57620  | SESHNFDA<br>VMSKLG<br>VSWATR | Mus<br>musculu<br>s              |
| 1 | 1.00 | 1 | 1 | 0.02  | 0.024  | 0.025  | 0.023  | 0.022  | t | 78153  | FDPQIQAI<br>VSSPCHNS         | Homo<br>sapiens                  |
| 1 | 1.00 | 1 | 1 | 0     | -0.002 | 0      | -0.003 | -0.001 | t | 61124  | SSIVYEAA<br>DMIMHT           | Mus<br>musculu<br>s              |
| 1 | 1.00 | 1 | 1 | 0     | -0.002 | 0      | -0.003 | -0.001 | t | 58077  | SGHRMA<br>WDMMM<br>NW        | Mus<br>musculu<br>s              |
| 1 | 1.00 | 1 | 1 | 0     | -0.002 | 0      | -0.003 | -0.001 | t | 48627  | PNEPDDAL<br>AMRIIRI          | Mus<br>musculu<br>s              |
| 1 | 1.00 | 1 | 1 | 0     | -0.002 | 0      | -0.003 | -0.001 | t | 35252  | LDPHAFHL<br>LL               | Mus<br>musculu<br>s              |
| 1 | 1.00 | 1 | 1 | 0.08  | 0.08   | 0.087  | 0.08   | 0.08   | t | 95244  | ANEEEYSI<br>GS               | Homo<br>sapiens                  |
| 1 | 1.00 | 1 | 1 | 0     | -0.004 | 0      | -0.001 | 0      | t | 18494  | GAAAAGA<br>VVGGLG            | Oryctola<br>gus<br>cuniculu<br>s |
| 1 | 1.00 | 1 | 1 | -0.03 | -0.026 | -0.022 | -0.029 | -0.031 | t | 146401 | KSIHLGPG<br>RAFYA            | Homo<br>sapiens                  |
| 1 | 1.00 | 1 | 1 | 0.04  | 0.04   | 0.037  | 0.04   | 0.04   | t | 46522  | NVYADSFV<br>VKGDDVR<br>QI    | Homo<br>sapiens                  |
| 1 | 1.00 | 1 | 1 | 0.03  | 0.026  | 0.035  | 0.033  | 0.03   | t | 96025  | YSMLVER<br>DHKNE             | Oryctola<br>gus<br>cuniculu<br>s |
| 1 | 1.00 | 1 | 1 | 0     | 0.004  | 0.002  | -0.003 | 0      | t | 95750  | QYLYQGPI<br>VL               | Homo<br>sapiens                  |

|   |      |   |   |       |        |        |        |        |   |        |                              |                     |
|---|------|---|---|-------|--------|--------|--------|--------|---|--------|------------------------------|---------------------|
| 1 | 1.00 | 1 | 1 | 0.01  | 0.01   | 0.01   | 0.01   | 0.01   | t | 79446  | VCDQVQ<br>WMTRLAC<br>Q       | Mus<br>musculu<br>s |
| 1 | 1.00 | 1 | 1 | 0     | 0.004  | 0.002  | 0      | 0      | t | 433    | AASGPKVV<br>IDGKDQN<br>VTGSV | Homo<br>sapiens     |
| 1 | 1.00 | 1 | 1 | -0.01 | -0.01  | -0.01  | -0.01  | -0.01  | t | 149295 | ELDHWAS                      | Homo<br>sapiens     |
| 1 | 1.00 | 1 | 1 | -0.01 | -0.01  | -0.01  | -0.01  | -0.01  | t | 132689 | TCSADGGT<br>LFYNLCH          | Mus<br>musculu<br>s |
| 1 | 1.00 | 1 | 1 | -0.01 | -0.01  | -0.01  | -0.01  | -0.01  | t | 122206 | VISRSRV                      | Homo<br>sapiens     |
| 1 | 1.00 | 1 | 1 | -0.01 | -0.01  | -0.01  | -0.01  | -0.01  | t | 132689 | TCSADGGT<br>LFYNLCH          | Mus<br>musculu<br>s |
| 1 | 1.00 | 1 | 1 | -0.01 | -0.01  | -0.01  | -0.01  | -0.01  | t | 130747 | CELSPSSRC                    | Homo<br>sapiens     |
| 1 | 1.00 | 1 | 1 | -0.01 | -0.01  | -0.01  | -0.01  | -0.01  | t | 114778 | DNECLLCA<br>HK               | Homo<br>sapiens     |
| 1 | 1.00 | 1 | 1 | -0.01 | -0.01  | -0.01  | -0.01  | -0.01  | t | 20653  | GKPAIIPDR                    | Homo<br>sapiens     |
| 1 | 1.00 | 1 | 1 | -0.03 | -0.03  | -0.03  | -0.03  | -0.03  | t | 115913 | QAQPTTM<br>ARH               | Homo<br>sapiens     |
| 1 | 1.00 | 1 | 1 | -0.05 | -0.05  | -0.05  | -0.05  | -0.05  | t | 114977 | VMVLCNR<br>AFN               | Homo<br>sapiens     |
| 1 | 1.00 | 1 | 1 | 0.02  | 0.02   | 0.027  | 0.02   | 0.02   | t | 123180 | FLEYLGEKY                    | Ovis<br>aries       |
| 1 | 1.00 | 1 | 1 | -0.01 | -0.006 | -0.004 | -0.009 | -0.01  | t | 16376  | FKHLREFV<br>FKNKDGL<br>Y     | Homo<br>sapiens     |
| 1 | 1.00 | 1 | 1 | -0.01 | -0.01  | -0.01  | -0.01  | -0.01  | t | 137143 | EDAKCERG<br>KLFANCK          | Homo<br>sapiens     |
| 1 | 1.00 | 1 | 1 | 0.01  | 0.013  | 0.01   | 0.01   | 0.008  | t | 140895 | QRRADAV<br>KGYLAGKG<br>VDAGK | Mus<br>musculu<br>s |
| 1 | 1.00 | 1 | 1 | -0.03 | -0.03  | -0.025 | -0.03  | -0.029 | t | 58371  | SHITSYPAY<br>FW              | Mus<br>musculu<br>s |
| 1 | 1.00 | 1 | 1 | -0.03 | -0.03  | -0.023 | -0.024 | -0.03  | t | 39131  | LRKSRRFA                     | Homo<br>sapiens     |

|   |      |   |   |       |        |        |        |        |   |        |                     |                       |
|---|------|---|---|-------|--------|--------|--------|--------|---|--------|---------------------|-----------------------|
| 1 | 1.00 | 1 | 1 | -0.03 | -0.03  | -0.028 | -0.03  | -0.031 | t | 48832  | PPLSQRRAL           | Mus musculus          |
| 1 | 1.00 | 1 | 1 | 0.01  | 0.01   | 0.019  | 0.01   | 0.01   | t | 6128   | CDPQPDFSC           | Mus musculus          |
| 1 | 1.00 | 1 | 1 | -0.05 | -0.05  | -0.052 | -0.05  | -0.05  | t | 46985  | PAVASRRRPTTAGAAPLT  | Homo sapiens          |
| 1 | 1.00 | 1 | 1 | 0     | 0      | -0.007 | 0      | 0.001  | t | 46859  | PALTAVETGATNPL      | Homo sapiens          |
| 1 | 1.00 | 1 | 1 | 0     | 0      | 0      | 0      | 0      | t | 95048  | VIFQTPLIKNPDVKSAIEG | Rattus norvegicus     |
| 1 | 1.00 | 1 | 1 | -0.01 | -0.016 | 0.002  | -0.01  | -0.011 | t | 41406  | MENITSGFLGPLLVLQ    | Oryctolagus cuniculus |
| 1 | 1.00 | 1 | 1 | 0     | 0      | 0.004  | 0.006  | 0.002  | t | 7945   | DESDSSDGYPPNRQ      | Homo sapiens          |
| 1 | 1.00 | 1 | 1 | 0     | 0.004  | 0      | -0.003 | 0      | t | 118434 | ISKGANPVEIRRG       | Homo sapiens          |
| 1 | 1.00 | 1 | 1 | 0     | 0.002  | 0.004  | 0.001  | 0      | t | 54850  | RMAILG              | Homo sapiens          |
| 1 | 1.00 | 1 | 1 | 0.01  | 0.008  | 0.011  | 0.007  | 0.01   | t | 60310  | SPVFTDNSPPVVPQS     | Mus musculus          |
| 1 | 1.00 | 1 | 1 | 0.02  | 0.022  | 0.022  | 0.02   | 0.022  | t | 60914  | SSATK               | Homo sapiens          |
| 1 | 1.00 | 1 | 1 | -0.01 | -0.008 | -0.006 | -0.01  | -0.01  | t | 134333 | CIPIPSSWAFARFLW     | Homo sapiens          |
| 1 | 1.00 | 1 | 1 | 0.02  | 0.02   | 0.028  | 0.02   | 0.02   | t | 48601  | PNAPIL              | Mus musculus          |
| 1 | 1.00 | 1 | 1 | 0.02  | 0.022  | 0.02   | 0.017  | 0.019  | t | 106766 | RATKGISGINKNE       | Homo sapiens          |
| 1 | 1.00 | 1 | 1 | 0     | 0.004  | 0      | -0.003 | 0      | t | 32622  | KNTTTTQTQPSK        | Homo sapiens          |



|   |      |   |   |       |        |        |        |       |   |        |                              |                              |
|---|------|---|---|-------|--------|--------|--------|-------|---|--------|------------------------------|------------------------------|
| 1 | 1.00 | 1 | 1 | 0     | 0      | 0      | 0      | 0     | t | 121841 | SGGSCLPV<br>ISHYASC          | Mus<br>musculus              |
| 1 | 1.00 | 1 | 1 | 0     | 0      | 0      | 0      | 0     | t | 121841 | SGGSCLPV<br>ISHYASC          | Mus<br>musculus              |
| 1 | 1.00 | 1 | 1 | -0.02 | -0.02  | -0.02  | -0.02  | -0.02 | t | 141021 | GHKEVT<br>VT                 | Ovis<br>aries                |
| 1 | 1.00 | 1 | 1 | -0.02 | -0.02  | -0.02  | -0.02  | -0.02 | t | 127682 | HFHRPYH                      | Homo<br>sapiens              |
| 1 | 1.00 | 1 | 1 | -0.02 | -0.02  | -0.02  | -0.02  | -0.02 | t | 110612 | GPPGERG<br>APGNRGP           | Mus<br>musculus              |
| 1 | 1.00 | 1 | 1 | -0.02 | -0.02  | -0.02  | -0.02  | -0.02 | t | 103018 | AFLHWAIT<br>DGNKASF          | Homo<br>sapiens              |
| 1 | 1.00 | 1 | 1 | -0.02 | -0.02  | -0.02  | -0.02  | -0.02 | t | 99413  | LEEKMYAC<br>RDIGTTK          | Equus<br>caballus            |
| 1 | 1.00 | 1 | 1 | -0.03 | -0.034 | -0.039 | -0.031 | -0.03 | t | 57886  | SFRRLGAA<br>LL               | Oryctola<br>gus<br>cuniculus |
| 1 | 1.00 | 1 | 1 | 0.01  | 0.01   | 0.015  | 0.013  | 0.011 | t | 115729 | EPQVVTLP<br>PSR              | Homo<br>sapiens              |
| 1 | 1.00 | 1 | 1 | 0.02  | 0.02   | 0.02   | 0.02   | 0.018 | t | 121891 | TAAREQA<br>KEACKAAA          | Homo<br>sapiens              |
| 1 | 1.00 | 1 | 1 | -0.05 | -0.05  | -0.053 | -0.05  | -0.05 | t | 98840  | KALPMHIR<br>LS               | Homo<br>sapiens              |
| 1 | 1.00 | 1 | 1 | 0     | -0.001 | -0.004 | 0.001  | 0     | t | 59749  | SMSHRTM<br>SIVNSYVN<br>DVMER | Canis<br>lupus               |
| 1 | 1.00 | 1 | 1 | 0.01  | 0.014  | 0.007  | 0.007  | 0.01  | t | 115486 | SISSEEIVP<br>NSVEQKHI<br>QK  | Homo<br>sapiens              |
| 1 | 1.00 | 1 | 1 | -0.01 | -0.01  | -0.001 | -0.006 | -0.01 | t | 135956 | LRQLTPEQ<br>LSTL             | Homo<br>sapiens              |
| 1 | 1.00 | 1 | 1 | 0.01  | 0.01   | 0.013  | 0.01   | 0.011 | t | 56208  | RTVGSLSN<br>S                | Homo<br>sapiens              |
| 1 | 1.00 | 1 | 1 | -0.04 | -0.044 | -0.043 | -0.041 | -0.04 | t | 75659  | YRPLPGGT<br>PPMRARL<br>PA    | Oryctola<br>gus<br>cuniculus |

|   |      |   |   |       |        |        |        |        |   |        |                              |                                  |
|---|------|---|---|-------|--------|--------|--------|--------|---|--------|------------------------------|----------------------------------|
| 1 | 1.00 | 1 | 1 | -0.02 | -0.022 | -0.02  | -0.021 | -0.02  | t | 59927  | SNTLPRSN<br>TSSGASP          | Mus<br>musculu<br>s              |
| 1 | 1.00 | 1 | 1 | 0.01  | 0.014  | 0.01   | 0.007  | 0.012  | t | 11813  | EENVEENV                     | Homo<br>sapiens                  |
| 1 | 1.00 | 1 | 1 | -0.05 | -0.047 | -0.042 | -0.05  | -0.052 | t | 121292 | FATFVYAK                     | Mus<br>musculu<br>s              |
| 1 | 1.00 | 1 | 1 | -0.02 | -0.02  | -0.018 | -0.02  | -0.019 | t | 153267 | IWENAGR<br>MV                | Mus<br>musculu<br>s              |
| 1 | 1.00 | 1 | 1 | -0.02 | -0.022 | -0.02  | -0.023 | -0.02  | t | 134100 | IPPWEAPK<br>EHKYKA           | Mus<br>musculu<br>s              |
| 1 | 1.00 | 1 | 1 | 0.04  | 0.037  | 0.038  | 0.04   | 0.042  | t | 35662  | LEQPVSND<br>LS               | Oryctola<br>gus<br>cuniculu<br>s |
| 1 | 1.00 | 1 | 1 | -0.03 | -0.03  | -0.035 | -0.024 | -0.028 | t | 11700  | EEITQVATI<br>SANSDHNI<br>GKL | Homo<br>sapiens                  |
| 1 | 1.00 | 1 | 1 | 0.01  | 0.01   | 0.01   | 0.013  | 0.01   | t | 135595 | SNKKKRD<br>DFE               | Oryctola<br>gus<br>cuniculu<br>s |
| 1 | 1.00 | 1 | 1 | -0.03 | -0.03  | -0.022 | -0.03  | -0.03  | t | 8918   | DKLADYKR<br>RM               | Mus<br>musculu<br>s              |
| 1 | 1.00 | 1 | 1 | -0.04 | -0.04  | -0.031 | -0.04  | -0.04  | t | 52696  | QVFGAI                       | Homo<br>sapiens                  |
| 1 | 1.00 | 1 | 1 | 0     | 0      | 0.001  | 0      | 0      | t | 66539  | TTASGKLIT                    | Mus<br>musculu<br>s              |
| 1 | 1.00 | 1 | 1 | 0.01  | 0.01   | 0.014  | 0.01   | 0.01   | t | 54850  | RMAILG                       | Homo<br>sapiens                  |
| 1 | 1.00 | 1 | 1 | 0.04  | 0.04   | 0.035  | 0.04   | 0.04   | t | 107207 | LLTTAEAV<br>VTEIPKE          | Rattus<br>norvegic<br>us         |
| 1 | 1.00 | 1 | 1 | 0     | -0.002 | 0      | -0.002 | 0      | t | 117331 | MKLVRFL<br>MKLSHETV<br>TIELK | Mus<br>musculu<br>s              |

|   |      |   |   |       |        |        |       |        |   |        |                           |                       |
|---|------|---|---|-------|--------|--------|-------|--------|---|--------|---------------------------|-----------------------|
| 1 | 1.00 | 1 | 1 | 0     | 0      | 0      | 0     | 0.001  | t | 48927  | PPSSPTHD<br>PPSDP         | Homo sapiens          |
| 1 | 1.00 | 1 | 1 | 0.06  | 0.063  | 0.056  | 0.06  | 0.061  | t | 2273   | AKREAIVK<br>ADEDDNE<br>ET | Mus musculus          |
| 1 | 1.00 | 1 | 1 | 0.01  | 0.006  | 0.023  | 0.01  | 0.01   | t | 29201  | IVAPVKQTL                 | Oryctolagus cuniculus |
| 1 | 1.00 | 1 | 1 | -0.02 | -0.017 | -0.02  | -0.02 | -0.019 | t | 144793 | SYGGRKGT<br>HPGLEMP       | Mus musculus          |
| 1 | 1.00 | 1 | 1 | -0.01 | -0.003 | -0.012 | -0.01 | -0.01  | t | 65465  | TNTSGSRS                  | Cavia porcellus       |
| 1 | 1.00 | 1 | 1 | 0.01  | 0.01   | 0.01   | 0.01  | 0.011  | t | 108133 | SKTTTMPY<br>TPGPTAL       | Homo sapiens          |
| 1 | 1.00 | 1 | 1 | 0.02  | 0.02   | 0.027  | 0.023 | 0.02   | t | 51428  | QLLRIPQAI<br>MDM          | Homo sapiens          |
| 1 | 1.00 | 1 | 1 | 0.02  | 0.016  | 0.023  | 0.023 | 0.023  | t | 115406 | NRKVKPTT<br>EGGVETE       | Oryctolagus cuniculus |
| 1 | 1.00 | 1 | 1 | 0.03  | 0.03   | 0.03   | 0.03  | 0.03   | t | 135644 | CQGDSGG<br>P              | Homo sapiens          |
| 1 | 1.00 | 1 | 1 | 0.02  | 0.02   | 0.031  | 0.017 | 0.02   | t | 17418  | FPTFPDGH<br>DY            | Homo sapiens          |
| 1 | 1.00 | 1 | 1 | 0.01  | 0.01   | 0.01   | 0.01  | 0.01   | t | 149121 | THANSTQ                   | Sus scrofa            |
| 1 | 1.00 | 1 | 1 | 0.01  | 0.01   | 0.01   | 0.01  | 0.01   | t | 119618 | NHYTQKSL                  | Homo sapiens          |
| 1 | 1.00 | 1 | 1 | 0.01  | 0.01   | 0.01   | 0.01  | 0.01   | t | 106648 | MHNPSMT                   | Homo sapiens          |
| 1 | 1.00 | 1 | 1 | 0.01  | 0.01   | 0.01   | 0.01  | 0.01   | t | 106648 | MHNPSMT                   | Homo sapiens          |
| 1 | 1.00 | 1 | 1 | 0.01  | 0.01   | 0.01   | 0.01  | 0.01   | t | 111150 | CKEGKKSP<br>C             | Homo sapiens          |
| 1 | 1.00 | 1 | 1 | -0.01 | -0.01  | -0.01  | -0.01 | -0.01  | t | 141072 | QVVHVET<br>HRCNI          | Mus musculus          |

|   |      |   |   |       |        |        |        |        |   |        |                              |                                  |
|---|------|---|---|-------|--------|--------|--------|--------|---|--------|------------------------------|----------------------------------|
| 1 | 1.00 | 1 | 1 | -0.01 | -0.01  | -0.01  | -0.01  | -0.01  | t | 41331  | MEECASR<br>AALLEEQ<br>RIAEM  | Homo<br>sapiens                  |
| 1 | 1.00 | 1 | 1 | -0.03 | -0.03  | -0.03  | -0.03  | -0.03  | t | 148887 | QQSFPQQ<br>QRP               | Homo<br>sapiens                  |
| 1 | 1.00 | 1 | 1 | -0.03 | -0.03  | -0.03  | -0.03  | -0.03  | t | 134694 | ISPFCLK                      | MD                               |
| 1 | 1.00 | 1 | 1 | -0.03 | -0.03  | -0.03  | -0.03  | -0.03  | t | 156850 | APHNKWP<br>HLNPP             | Mus<br>musculu<br>s              |
| 1 | 1.00 | 1 | 1 | -0.03 | -0.03  | -0.03  | -0.03  | -0.03  | t | 139569 | PRKQCSKE<br>DGGGW<br>Y       | Homo<br>sapiens                  |
| 1 | 1.00 | 1 | 1 | -0.03 | -0.03  | -0.03  | -0.03  | -0.03  | t | 134694 | ISPFCLK                      | MD                               |
| 1 | 1.00 | 1 | 1 | 0.01  | 0.01   | 0.014  | 0.01   | 0.01   | t | 58324  | SGYKRMM<br>ATKDSF            | Homo<br>sapiens                  |
| 1 | 1.00 | 1 | 1 | 0.02  | 0.016  | 0.02   | 0.013  | 0.019  | t | 107656 | VGGVV                        | Oryctola<br>gus<br>cuniculu<br>s |
| 1 | 1.00 | 1 | 1 | 0     | 0      | 0      | 0      | 0.001  | t | 39887  | LTEVETPIR<br>NEWG            | Mus<br>musculu<br>s              |
| 1 | 1.00 | 1 | 1 | -0.05 | -0.052 | -0.059 | -0.057 | -0.05  | t | 112352 | TGNKYPGY<br>P                | Mus<br>musculu<br>s              |
| 1 | 1.00 | 1 | 1 | -0.04 | -0.038 | -0.047 | -0.033 | -0.038 | t | 156697 | KIHAREIFD<br>SRGNPTVE        | Homo<br>sapiens                  |
| 1 | 1.00 | 1 | 1 | 0.03  | 0.027  | 0.035  | 0.029  | 0.03   | t | 121071 | YAINSEQS<br>KE               | Mus<br>musculu<br>s              |
| 1 | 1.00 | 1 | 1 | -0.04 | -0.04  | -0.04  | -0.04  | -0.04  | t | 141621 | DNWHGS<br>NRP                | Oryctola<br>gus<br>cuniculu<br>s |
| 1 | 1.00 | 1 | 1 | -0.01 | -0.006 | -0.02  | -0.009 | -0.008 | t | 9924   | DQVHFQP<br>LPPAVVKL<br>SDALI | Homo<br>sapiens                  |
| 1 | 1.00 | 1 | 1 | -0.02 | -0.017 | -0.02  | -0.02  | -0.018 | t | 69176  | VKAETRLN<br>P                | Mus<br>musculu<br>s              |

|   |      |   |   |       |        |        |        |        |   |        |                              |                                  |
|---|------|---|---|-------|--------|--------|--------|--------|---|--------|------------------------------|----------------------------------|
| 1 | 1.00 | 1 | 1 | -0.02 | -0.017 | -0.02  | -0.02  | -0.018 | t | 69176  | VKAETRLN<br>P                | Mus<br>musculu<br>s              |
| 1 | 1.00 | 1 | 1 | 0.01  | 0.008  | 0.003  | 0.003  | 0.01   | t | 108213 | WQQGNV<br>F                  | Mus<br>musculu<br>s              |
| 1 | 1.00 | 1 | 1 | 0.01  | 0.008  | 0.003  | 0.003  | 0.01   | t | 108213 | WQQGNV<br>F                  | Mus<br>musculu<br>s              |
| 1 | 1.00 | 1 | 1 | 0.03  | 0.03   | 0.03   | 0.03   | 0.03   | t | 121824 | RVDGQRE<br>AADEAQA<br>FWF    | Mus<br>musculu<br>s              |
| 1 | 1.00 | 1 | 1 | 0     | 0.002  | 0      | 0.001  | -0.001 | t | 18742  | GAQITGH<br>VKNGSMR<br>IVGPKT | Homo<br>sapiens                  |
| 1 | 1.00 | 1 | 1 | 0     | -0.004 | -0.004 | -0.001 | 0.001  | t | 48377  | PLKDNRI<br>SYGVLSV           | Oryctola<br>gus<br>cuniculu<br>s |
| 1 | 1.00 | 1 | 1 | 0.01  | 0.008  | 0.01   | 0.009  | 0.01   | t | 58404  | SHRLHNT<br>MPSES             | Mus<br>musculu<br>s              |
| 1 | 1.00 | 1 | 1 | 0.01  | 0.008  | 0.01   | 0.009  | 0.01   | t | 58404  | SHRLHNT<br>MPSES             | Mus<br>musculu<br>s              |
| 1 | 1.00 | 1 | 1 | 0.01  | 0.013  | 0.01   | 0.01   | 0.013  | t | 62347  | SVTEEIAEE<br>DK              | Mus<br>musculu<br>s              |
| 1 | 1.00 | 1 | 1 | 0.03  | 0.04   | 0.03   | 0.027  | 0.029  | t | 134149 | LRENQLLP<br>GFEL             | Rattus<br>rattus                 |
| 1 | 1.00 | 1 | 1 | -0.01 | -0.01  | -0.01  | -0.01  | -0.01  | t | 91218  | DVLEATYA<br>MVQHVAK          | Capra<br>hircus                  |
| 1 | 1.00 | 1 | 1 | -0.01 | -0.01  | -0.01  | -0.01  | -0.01  | t | 91218  | DVLEATYA<br>MVQHVAK          | Capra<br>hircus                  |
| 1 | 1.00 | 1 | 1 | -0.01 | -0.01  | -0.01  | -0.01  | -0.01  | t | 91218  | DVLEATYA<br>MVQHVAK          | Capra<br>hircus                  |
| 1 | 1.00 | 1 | 1 | 0.01  | 0.008  | 0.017  | 0.007  | 0.01   | t | 144015 | NFCASCLL<br>PVSR             | Mus<br>musculu<br>s              |
| 1 | 1.00 | 1 | 1 | -0.02 | -0.02  | -0.019 | -0.023 | -0.02  | t | 3780   | APRIVLDV<br>AS               | Homo<br>sapiens                  |
| 1 | 1.00 | 1 | 1 | -0.01 | -0.01  | -0.01  | -0.01  | -0.008 | t | 53666  | REVLREF<br>D                 | Homo<br>sapiens                  |

|   |      |   |   |       |        |        |        |        |   |        |                              |                                  |
|---|------|---|---|-------|--------|--------|--------|--------|---|--------|------------------------------|----------------------------------|
| 1 | 1.00 | 1 | 1 | 0     | 0.003  | -0.011 | 0      | 0.003  | t | 111193 | DGPAGQA<br>EPDRAHY<br>NI     | Mus<br>musculu<br>s              |
| 1 | 1.00 | 1 | 1 | 0     | 0      | 0      | 0      | 0      | t | 116937 | DDHSTRC<br>WVS               | Mus<br>musculu<br>s              |
| 1 | 1.00 | 1 | 1 | 0     | 0      | 0      | 0      | 0      | t | 116937 | DDHSTRC<br>WVS               | Homo<br>sapiens                  |
| 1 | 1.00 | 1 | 1 | 0.01  | 0.013  | 0.013  | 0.01   | 0.01   | t | 28278  | IREDDQPS<br>SHQPLFY          | Mus<br>musculu<br>s              |
| 1 | 1.00 | 1 | 1 | -0.01 | -0.01  | -0.01  | -0.01  | -0.007 | t | 128316 | ARRCYND                      | Homo<br>sapiens                  |
| 1 | 1.00 | 1 | 1 | -0.02 | -0.02  | -0.022 | -0.02  | -0.018 | t | 34734  | LAEIKQRS<br>LMVHVGG          | Mus<br>musculu<br>s              |
| 1 | 1.00 | 1 | 1 | 0     | 0      | -0.003 | 0.003  | 0.002  | t | 69544  | VLIFDLGG<br>GTDFVTLL<br>TIDG | Homo<br>sapiens                  |
| 1 | 1.00 | 1 | 1 | -0.02 | -0.018 | -0.016 | -0.02  | -0.02  | t | 137921 | LIKNPDV                      | Rattus<br>norvegic<br>us         |
| 1 | 1.00 | 1 | 1 | 0.06  | 0.06   | 0.06   | 0.06   | 0.06   | t | 115955 | SGEPTSTP<br>TT               | Homo<br>sapiens                  |
| 1 | 1.00 | 1 | 1 | 0.01  | 0.01   | 0.01   | 0.012  | 0.01   | t | 98978  | RCLQSCQ<br>QEPDDLK<br>QKACES | Homo<br>sapiens                  |
| 1 | 1.00 | 1 | 1 | 0     | 0.004  | 0      | -0.003 | 0      | t | 58921  | SKPTTKQR<br>QNKP             | Homo<br>sapiens                  |
| 1 | 1.00 | 1 | 1 | 0     | 0      | 0      | 0      | 0      | t | 141789 | YNPTGKGI<br>DDANKKA<br>C     | Oryctola<br>gus<br>cuniculu<br>s |
| 1 | 1.00 | 1 | 1 | 0     | 0      | 0      | 0      | 0      | t | 149058 | HLPNATQ                      | Sus<br>scrofa                    |
| 1 | 1.00 | 1 | 1 | 0     | 0      | 0      | 0      | 0      | t | 149088 | NQTQHSV                      | Sus<br>scrofa                    |
| 1 | 1.00 | 1 | 1 | 0     | 0      | 0      | 0      | 0      | t | 108210 | WFTSWER<br>DWW               | Homo<br>sapiens                  |
| 1 | 1.00 | 1 | 1 | 0     | 0      | 0      | 0      | 0      | t | 108210 | WFTSWER<br>DWW               | Homo<br>sapiens                  |
| 1 | 1.00 | 1 | 1 | 0     | 0      | 0      | 0      | 0      | t | 111678 | QLNKIQHF<br>TTNS             | Homo<br>sapiens                  |

|   |      |   |   |       |        |        |        |        |   |        |                              |                       |
|---|------|---|---|-------|--------|--------|--------|--------|---|--------|------------------------------|-----------------------|
| 1 | 1.00 | 1 | 1 | 0     | 0      | 0      | 0      | 0      | t | 113754 | QGGQPG<br>QGGQGG<br>QP       | Homo sapiens          |
| 1 | 1.00 | 1 | 1 | -0.02 | -0.02  | -0.02  | -0.02  | -0.02  | t | 149066 | LLATQPA                      | Sus scrofa            |
| 1 | 1.00 | 1 | 1 | -0.02 | -0.02  | -0.02  | -0.02  | -0.02  | t | 118459 | KKVGRKG<br>VITVKD            | Homo sapiens          |
| 1 | 1.00 | 1 | 1 | -0.02 | -0.02  | -0.02  | -0.02  | -0.02  | t | 123453 | LPKIKEYM<br>K                | Ovis aries            |
| 1 | 1.00 | 1 | 1 | -0.02 | -0.02  | -0.02  | -0.02  | -0.02  | t | 52088  | QQPFPQR<br>PQQ               | Mus musculus          |
| 1 | 1.00 | 1 | 1 | -0.02 | -0.02  | -0.02  | -0.02  | -0.02  | t | 52088  | QQPFPQR<br>PQQ               | Mus musculus          |
| 1 | 1.00 | 1 | 1 | -0.04 | -0.04  | -0.04  | -0.04  | -0.04  | t | 115512 | TKKTKLTEE<br>EKNRLNFL<br>KKI | Homo sapiens          |
| 1 | 1.00 | 1 | 1 | 0.04  | 0.038  | 0.045  | 0.043  | 0.042  | t | 105164 | EFRHDSG                      | Mus musculus          |
| 1 | 1.00 | 1 | 1 | 0     | 0.004  | -0.004 | 0      | 0.002  | t | 13438  | ENANANN<br>AV                | Mus musculus          |
| 1 | 1.00 | 1 | 1 | 0     | 0.002  | -0.01  | -0.003 | 0      | t | 56675  | RYVKQEV<br>QRGGR             | Homo sapiens          |
| 1 | 1.00 | 1 | 1 | -0.01 | -0.01  | -0.01  | -0.01  | -0.009 | t | 36957  | LKMADPN<br>RFRGK             | Mus musculus          |
| 1 | 1.00 | 1 | 1 | -0.01 | -0.01  | -0.01  | -0.01  | -0.009 | t | 36957  | LKMADPN<br>RFRGK             | Mus musculus          |
| 1 | 1.00 | 1 | 1 | -0.01 | -0.01  | -0.01  | -0.01  | -0.009 | t | 36957  | LKMADPN<br>RFRGK             | Mus musculus          |
| 1 | 1.00 | 1 | 1 | -0.03 | -0.033 | -0.03  | -0.03  | -0.028 | t | 135462 | GGVPGV                       | Oryctolagus cuniculus |
| 1 | 1.00 | 1 | 1 | 0.03  | 0.03   | 0.03   | 0.03   | 0.03   | t | 79306  | MCNTDAS<br>YPHVPCD           | Mus musculus          |
| 1 | 1.00 | 1 | 1 | -0.04 | -0.036 | -0.046 | -0.039 | -0.04  | t | 35235  | LDNIKGNV<br>GKMEDIYK<br>KNNK | Homo sapiens          |

|   |      |   |   |       |        |        |        |        |   |        |                              |                                  |
|---|------|---|---|-------|--------|--------|--------|--------|---|--------|------------------------------|----------------------------------|
| 1 | 1.00 | 1 | 1 | 0     | 0      | 0      | -0.004 | 0      | t | 132098 | TLLLEGVM<br>AA               | Homo<br>sapiens                  |
| 1 | 1.00 | 1 | 1 | 0     | 0.002  | 0      | -0.003 | 0      | t | 43233  | NANP                         | Homo<br>sapiens                  |
| 1 | 1.00 | 1 | 1 | -0.04 | -0.04  | -0.04  | -0.041 | -0.04  | t | 90424  | VSYAHGFK<br>GLVD             | Homo<br>sapiens                  |
| 1 | 1.00 | 1 | 1 | -0.04 | -0.042 | -0.04  | -0.041 | -0.04  | t | 90424  | VSYAHGFK<br>GLVD             | Mus<br>musculu<br>s              |
| 1 | 1.00 | 1 | 1 | 0.03  | 0.03   | 0.023  | 0.03   | 0.03   | t | 119462 | HDENGAT<br>GPVKRARE<br>ETDKE | Homo<br>sapiens                  |
| 1 | 1.00 | 1 | 1 | -0.04 | -0.028 | -0.037 | -0.04  | -0.038 | t | 24696  | HRMAWN<br>MMMNW<br>SPT       | Pan<br>troglody<br>tes           |
| 1 | 1.00 | 1 | 1 | 0     | -0.002 | -0.001 | 0.002  | 0.002  | t | 107020 | YMTPSKHL<br>YWLP             | Mus<br>musculu<br>s              |
| 1 | 1.00 | 1 | 1 | -0.05 | -0.052 | -0.049 | -0.051 | -0.05  | t | 11575  | EEEEEDG<br>FMGFGMF<br>D      | Mus<br>musculu<br>s              |
| 1 | 1.00 | 1 | 1 | -0.05 | -0.047 | -0.051 | -0.05  | -0.05  | t | 137770 | TLARSFICI<br>QM              | Mus<br>musculu<br>s              |
| 1 | 1.00 | 1 | 1 | 0     | -0.002 | 0.004  | -0.001 | 0      | t | 54180  | RILAGALA<br>TYQ              | Mus<br>musculu<br>s              |
| 1 | 1.00 | 1 | 1 | -0.02 | -0.023 | -0.023 | -0.02  | -0.02  | t | 97430  | KRLRLALA<br>S                | Oryctola<br>gus<br>cuniculu<br>s |
| 1 | 1.00 | 1 | 1 | -0.02 | -0.023 | -0.023 | -0.02  | -0.02  | t | 97430  | KRLRLALA<br>S                | Oryctola<br>gus<br>cuniculu<br>s |
| 1 | 1.00 | 1 | 1 | 0.01  | 0.015  | 0.014  | 0.007  | 0.008  | t | 157770 | QEYEQHR<br>RQQQH             | Homo<br>sapiens                  |



|   |      |   |   |       |        |        |        |        |   |        |                              |                                  |
|---|------|---|---|-------|--------|--------|--------|--------|---|--------|------------------------------|----------------------------------|
| 1 | 1.00 | 1 | 1 | 0     | -0.003 | -0.001 | 0      | 0      | t | 149729 | GTVTGHPT<br>FNALLDA          | Oryctola<br>gus<br>cuniculu<br>s |
| 1 | 1.00 | 1 | 1 | 0     | 0.002  | 0.009  | -0.003 | 0      | t | 115347 | LIVTQTMK<br>GL               | Homo<br>sapiens                  |
| 1 | 1.00 | 1 | 1 | 0.02  | 0.022  | 0.021  | 0.02   | 0.021  | t | 37638  | LLNYIDEN<br>KLYLIGSAE<br>YE  | Homo<br>sapiens                  |
| 1 | 1.00 | 1 | 1 | 0     | -0.004 | -0.003 | -0.001 | -0.001 | t | 63375  | TEGALNTP<br>KDHIGTRN<br>PNNN | Oryctola<br>gus<br>cuniculu<br>s |
| 1 | 1.00 | 1 | 1 | 0.01  | 0.01   | 0.012  | 0.01   | 0.012  | t | 120744 | LDTLLVDV<br>EPKVKSK          | Mus<br>musculu<br>s              |
| 1 | 1.00 | 1 | 1 | -0.04 | -0.04  | -0.035 | -0.04  | -0.04  | t | 62932  | TANGFYRL<br>PSG              | Homo<br>sapiens                  |
| 1 | 1.00 | 1 | 1 | 0.02  | 0.022  | 0.02   | 0.023  | 0.022  | t | 104443 | DAEFRHDS<br>GYE              | Homo<br>sapiens                  |
| 1 | 1.00 | 1 | 1 | 0.04  | 0.038  | 0.049  | 0.039  | 0.04   | t | 45255  | NNT                          | Mus<br>musculu<br>s              |
| 1 | 1.00 | 1 | 1 | 0.04  | 0.04   | 0.031  | 0.04   | 0.04   | t | 115048 | EQAPEYRG<br>RTELLKESI<br>GEG | Rattus<br>norvegic<br>us         |
| 1 | 1.00 | 1 | 1 | -0.05 | -0.05  | -0.05  | -0.052 | -0.05  | t | 39367  | LSGHRMA<br>WDMMM<br>NWS      | Homo<br>sapiens                  |
| 1 | 1.00 | 1 | 1 | 0     | -0.004 | 0      | 0      | 0.001  | t | 75791  | YSLFQKEK<br>MVL              | Mus<br>musculu<br>s              |
| 1 | 1.00 | 1 | 1 | 0.05  | 0.05   | 0.05   | 0.05   | 0.051  | t | 153396 | HSFEPWS<br>ARDMLGG<br>GS     | Mus<br>musculu<br>s              |
| 1 | 1.00 | 1 | 1 | -0.01 | -0.01  | -0.013 | -0.01  | -0.01  | t | 41601  | MGLIAGA<br>VGGSLLA<br>LV     | Mus<br>musculu<br>s              |
| 1 | 1.00 | 1 | 1 | 0.03  | 0.03   | 0.03   | 0.03   | 0.03   | t | 123862 | YERDDGEK<br>W                | Ovis<br>aries                    |
| 1 | 1.00 | 1 | 1 | -0.01 | -0.01  | -0.01  | -0.01  | -0.01  | t | 149058 | HLPNATQ                      | Sus<br>scrofa                    |

|   |      |   |   |       |        |        |        |        |   |        |                              |                          |
|---|------|---|---|-------|--------|--------|--------|--------|---|--------|------------------------------|--------------------------|
| 1 | 1.00 | 1 | 1 | -0.01 | -0.01  | -0.01  | -0.01  | -0.01  | t | 22091  | GRIILSGRP<br>AVVPDRE<br>VLYQ | Homo<br>sapiens          |
| 1 | 1.00 | 1 | 1 | -0.01 | -0.01  | -0.01  | -0.01  | -0.01  | t | 24200  | HLFEAH                       | Equus<br>caballus        |
| 1 | 1.00 | 1 | 1 | -0.03 | -0.03  | -0.03  | -0.03  | -0.03  | t | 112722 | WHIPPNIG<br>RTFS             | Homo<br>sapiens          |
| 1 | 1.00 | 1 | 1 | -0.03 | -0.03  | -0.03  | -0.03  | -0.03  | t | 95574  | LSFNPT                       | Homo<br>sapiens          |
| 1 | 1.00 | 1 | 1 | -0.01 | -0.01  | -0.01  | -0.01  | -0.01  | t | 95094  | IGFRGLDG<br>VHCTPTTD<br>SGVI | Rattus<br>norvegicus     |
| 1 | 1.00 | 1 | 1 | 0.01  | 0.01   | 0.01   | 0.01   | 0.01   | t | 105553 | TQSSNF                       | Oryctolagus<br>cuniculus |
| 1 | 1.00 | 1 | 1 | 0.01  | 0.014  | 0.016  | 0.013  | 0.012  | t | 39061  | LRDPISAEI<br>SIQALS          | Homo<br>sapiens          |
| 1 | 1.00 | 1 | 1 | -0.05 | -0.046 | -0.05  | -0.043 | -0.05  | t | 146463 | MSTRSVSS<br>SSYRRMFG         | Homo<br>sapiens          |
| 1 | 1.00 | 1 | 1 | -0.03 | -0.03  | -0.037 | -0.039 | -0.03  | t | 119475 | KKIK                         | Homo<br>sapiens          |
| 1 | 1.00 | 1 | 1 | -0.02 | -0.02  | -0.009 | -0.02  | -0.02  | t | 18929  | GCVVSWK<br>NK                | Homo<br>sapiens          |
| 1 | 1.00 | 1 | 1 | -0.02 | -0.017 | -0.02  | -0.02  | -0.019 | t | 107228 | REEFRHEA                     | Mus<br>musculus          |
| 1 | 1.00 | 1 | 1 | -0.04 | -0.028 | -0.035 | -0.04  | -0.044 | t | 55930  | RSQPRGR<br>RQPIP             | Pan<br>troglodytes       |
| 1 | 1.00 | 1 | 1 | 0     | 0      | 0.005  | 0.001  | 0.004  | t | 138238 | SMLDTPT                      | Mus<br>musculus          |
| 1 | 1.00 | 1 | 1 | 0.01  | 0.014  | 0.007  | 0.007  | 0.01   | t | 111669 | QGGSKKG<br>KSQKLNS           | Homo<br>sapiens          |
| 1 | 1.00 | 1 | 1 | 0     | 0      | -0.008 | 0      | 0      | t | 29852  | KALENKKK<br>QLSAGGK<br>NLS   | Homo<br>sapiens          |
| 1 | 1.00 | 1 | 1 | 0     | -0.004 | -0.004 | -0.001 | 0      | t | 58640  | SINMTPID                     | Oryctolagus<br>cuniculus |

|   |      |   |   |       |        |        |        |        |   |        |                              |                                  |
|---|------|---|---|-------|--------|--------|--------|--------|---|--------|------------------------------|----------------------------------|
| 1 | 1.00 | 1 | 1 | -0.02 | -0.016 | -0.025 | -0.02  | -0.019 | t | 66194  | TSFEDINGI<br>RRPKH           | Myodes<br>glareolu<br>s          |
| 1 | 1.00 | 1 | 1 | -0.01 | -0.01  | -0.01  | -0.01  | -0.011 | t | 119656 | TVDKSRW<br>Q                 | Homo<br>sapiens                  |
| 1 | 1.00 | 1 | 1 | 0     | 0      | 0      | 0      | 0.001  | t | 75441  | YPYDVDPY<br>A                | Mus<br>musculu<br>s              |
| 1 | 1.00 | 1 | 1 | 0     | 0      | 0      | 0      | 0.001  | t | 75441  | YPYDVDPY<br>A                | Mus<br>musculu<br>s              |
| 1 | 1.00 | 1 | 1 | 0.01  | 0.006  | 0.011  | 0.01   | 0.011  | t | 21625  | GPFYTSAP<br>Q                | Oryctola<br>gus<br>cuniculu<br>s |
| 1 | 1.00 | 1 | 1 | 0     | 0      | 0.001  | 0      | 0      | t | 137942 | PGSEYT                       | Oryctola<br>gus<br>cuniculu<br>s |
| 1 | 1.00 | 1 | 1 | 0.02  | 0.024  | 0.018  | 0.02   | 0.021  | t | 98556  | TVNNLK                       | Ovis<br>aries                    |
| 1 | 1.00 | 1 | 1 | 0.01  | 0.008  | 0.011  | 0.009  | 0.01   | t | 65698  | TPPRPAGD<br>NATVAAG<br>HAT   | Mus<br>musculu<br>s              |
| 1 | 1.00 | 1 | 1 | -0.01 | -0.008 | -0.017 | -0.009 | -0.01  | t | 125401 | ELLTEHRM<br>TWDPAQP<br>PRDLT | Homo<br>sapiens                  |
| 1 | 1.00 | 1 | 1 | -0.01 | -0.01  | -0.01  | -0.01  | -0.008 | t | 72910  | WNSTTFH<br>QTL               | Mus<br>musculu<br>s              |
| 1 | 1.00 | 1 | 1 | 0.05  | 0.054  | 0.061  | 0.051  | 0.048  | t | 57880  | SFRGSAQG<br>IEGS             | Homo<br>sapiens                  |
| 1 | 1.00 | 1 | 1 | 0.02  | 0.015  | 0.013  | 0.02   | 0.022  | t | 132910 | TLIPEFPG<br>ALTAIS           | Trichosu<br>rus<br>vulpecul<br>a |
| 1 | 1.00 | 1 | 1 | 0.02  | 0.017  | 0.018  | 0.02   | 0.02   | t | 125772 | CAPEPGIP<br>GETRG            | Oryctola<br>gus<br>cuniculu<br>s |
| 1 | 1.00 | 1 | 1 | -0.03 | -0.03  | -0.02  | -0.03  | -0.03  | t | 34286  | KWDLFVE<br>RSK               | Mus<br>musculu<br>s              |

|   |      |   |   |       |        |        |        |        |   |        |                              |                                  |
|---|------|---|---|-------|--------|--------|--------|--------|---|--------|------------------------------|----------------------------------|
| 1 | 1.00 | 1 | 1 | -0.02 | -0.022 | -0.018 | -0.017 | -0.019 | t | 98687  | AKAPPAPK<br>PAPQPGP          | Mus<br>musculu<br>s              |
| 1 | 1.00 | 1 | 1 | 0     | 0      | -0.012 | -0.006 | 0      | t | 71199  | VSVNDPFI<br>DLEYM            | Homo<br>sapiens                  |
| 1 | 1.00 | 1 | 1 | 0.02  | 0.024  | 0.022  | 0.02   | 0.019  | t | 70391  | VPNLRGDL<br>QVLAQKV<br>ARTLP | Cavia<br>porcellu<br>s           |
| 1 | 1.00 | 1 | 1 | 0.02  | 0.024  | 0.022  | 0.02   | 0.019  | t | 70391  | VPNLRGDL<br>QVLAQKV<br>ARTLP | Cavia<br>porcellu<br>s           |
| 1 | 1.00 | 1 | 1 | -0.03 | -0.03  | -0.026 | -0.024 | -0.028 | t | 108893 | EGAQGPR<br>G                 | Rattus<br>norvegic<br>us         |
| 1 | 1.00 | 1 | 1 | -0.03 | -0.03  | -0.021 | -0.03  | -0.03  | t | 153499 | WSWQPPL<br>FPTDS             | Mus<br>musculu<br>s              |
| 1 | 1.00 | 1 | 1 | 0.02  | 0.02   | 0.02   | 0.02   | 0.02   | t | 156424 | QQEEGRQ<br>QEQQQG<br>QQ      | Homo<br>sapiens                  |
| 1 | 1.00 | 1 | 1 | 0.02  | 0.02   | 0.02   | 0.02   | 0.02   | t | 79511  | AIWSTRT                      | Oryctola<br>gus<br>cuniculu<br>s |
| 1 | 1.00 | 1 | 1 | 0     | 0      | 0      | 0      | 0      | t | 156426 | QQEQQQE<br>RQGRQQG<br>R      | Homo<br>sapiens                  |
| 1 | 1.00 | 1 | 1 | 0     | 0      | 0      | 0      | 0      | t | 119669 | VSWNSGA<br>L                 | Homo<br>sapiens                  |
| 1 | 1.00 | 1 | 1 | 0     | 0      | 0      | 0      | 0      | t | 114927 | QGASVDK<br>RHD               | Homo<br>sapiens                  |
| 1 | 1.00 | 1 | 1 | 0     | 0      | 0      | 0      | 0      | t | 78218  | NKQWFT                       | Equus<br>caballus                |
| 1 | 1.00 | 1 | 1 | 0     | 0      | 0      | 0      | 0      | t | 80205  | AENQEAA<br>GLI               | Homo<br>sapiens                  |
| 1 | 1.00 | 1 | 1 | -0.02 | -0.02  | -0.02  | -0.02  | -0.02  | t | 151659 | KATDLLLD<br>DSLVSFLG<br>NRRL | Mus<br>musculu<br>s              |
| 1 | 1.00 | 1 | 1 | -0.02 | -0.02  | -0.02  | -0.02  | -0.02  | t | 158703 | CKEADIKT<br>ALEARKA          | Homo<br>sapiens                  |

|   |      |   |   |       |        |        |        |        |   |        |                           |                                  |
|---|------|---|---|-------|--------|--------|--------|--------|---|--------|---------------------------|----------------------------------|
| 1 | 1.00 | 1 | 1 | -0.02 | -0.02  | -0.02  | -0.02  | -0.02  | t | 158703 | CKEADIKT<br>ALEARKA       | Homo<br>sapiens                  |
| 1 | 1.00 | 1 | 1 | -0.02 | -0.02  | -0.02  | -0.02  | -0.02  | t | 123685 | RARVSMIE<br>G             | Ovis<br>aries                    |
| 1 | 1.00 | 1 | 1 | -0.02 | -0.02  | -0.02  | -0.02  | -0.02  | t | 119517 | RKRTRHLE<br>G             | Homo<br>sapiens                  |
| 1 | 1.00 | 1 | 1 | -0.04 | -0.04  | -0.04  | -0.04  | -0.04  | t | 119659 | VDKSRWQ<br>Q              | Homo<br>sapiens                  |
| 1 | 1.00 | 1 | 1 | -0.03 | -0.028 | -0.028 | -0.029 | -0.03  | t | 97685  | TGIEIVKRA<br>I            | Homo<br>sapiens                  |
| 1 | 1.00 | 1 | 1 | -0.03 | -0.028 | -0.028 | -0.029 | -0.03  | t | 97685  | TGIEIVKRA<br>I            | Homo<br>sapiens                  |
| 1 | 1.00 | 1 | 1 | 0     | 0      | 0      | 0      | 0.001  | t | 136074 | LVKK                      | Mus<br>musculu<br>s              |
| 1 | 1.00 | 1 | 1 | 0     | 0      | 0      | 0      | 0.001  | t | 59229  | SLKMADP<br>NRFRGKDL<br>P  | Mus<br>musculu<br>s              |
| 1 | 1.00 | 1 | 1 | 0     | -0.004 | 0.008  | -0.001 | -0.002 | t | 8526   | DGYPVEYD<br>NCAYICW       | Oryctola<br>gus<br>cuniculu<br>s |
| 1 | 1.00 | 1 | 1 | 0.04  | 0.04   | 0.045  | 0.043  | 0.042  | t | 54071  | RHNLSFDA<br>SQ            | Homo<br>sapiens                  |
| 1 | 1.00 | 1 | 1 | -0.04 | -0.04  | -0.04  | -0.04  | -0.04  | t | 118279 | CAFTGPLR<br>PFFSPGFN      | Homo<br>sapiens                  |
| 1 | 1.00 | 1 | 1 | -0.01 | -0.008 | -0.012 | -0.013 | -0.011 | t | 27961  | IPNKKPGK<br>KTTT          | Homo<br>sapiens                  |
| 1 | 1.00 | 1 | 1 | -0.01 | -0.007 | -0.01  | -0.01  | -0.009 | t | 116745 | GSNKGAI<br>GLMVGGV<br>VIA | Mus<br>musculu<br>s              |
| 1 | 1.00 | 1 | 1 | 0.01  | 0.008  | 0.019  | 0.013  | 0.012  | t | 105682 | ARSLFGVD                  | Mus<br>musculu<br>s              |
| 1 | 1.00 | 1 | 1 | 0     | 0      | 0      | 0      | 0      | t | 123620 | PPPGMRP<br>GPPP           | Oryctola<br>gus<br>cuniculu<br>s |
| 1 | 1.00 | 1 | 1 | -0.02 | -0.022 | -0.011 | -0.017 | -0.02  | t | 31633  | KKMKVFC<br>PRPTLFFP       | Mus<br>musculu<br>s              |

|   |      |   |   |       |        |        |        |        |   |        |                      |                       |
|---|------|---|---|-------|--------|--------|--------|--------|---|--------|----------------------|-----------------------|
| 1 | 1.00 | 1 | 1 | 0     | -0.001 | 0      | 0      | 0.002  | t | 18953  | GDDPLLGN             | Anas platyrhynchos    |
| 1 | 1.00 | 1 | 1 | 0     | 0.002  | 0.003  | -0.003 | 0      | t | 50188  | PYVKRVKT             | Homo sapiens          |
| 1 | 1.00 | 1 | 1 | -0.03 | -0.034 | -0.033 | -0.03  | -0.03  | t | 141074 | RHLEFEAR TLSP        | Mus musculus          |
| 1 | 1.00 | 1 | 1 | -0.02 | -0.026 | -0.02  | -0.02  | -0.02  | t | 123210 | GAVQGPVP             | Oryctolagus cuniculus |
| 1 | 1.00 | 1 | 1 | 0.04  | 0.038  | 0.035  | 0.033  | 0.04   | t | 133634 | LSQDVCTY             | Mus musculus          |
| 1 | 1.00 | 1 | 1 | 0     | 0      | 0.005  | 0      | 0      | t | 95696  | PVSQFHIGQVY          | Homo sapiens          |
| 1 | 1.00 | 1 | 1 | -0.01 | -0.01  | -0.012 | -0.01  | -0.009 | t | 119741 | AIFKSYGEIIVTHFPFD    | Mus musculus          |
| 1 | 1.00 | 1 | 1 | -0.01 | -0.01  | -0.012 | -0.01  | -0.009 | t | 119741 | AIFKSYGEIIVTHFPFD    | Mus musculus          |
| 1 | 1.00 | 1 | 1 | -0.01 | -0.007 | -0.012 | -0.01  | -0.009 | t | 119741 | AIFKSYGEIIVTHFPFD    | Mus musculus          |
| 1 | 1.00 | 1 | 1 | -0.01 | -0.008 | -0.019 | -0.011 | -0.008 | t | 21479  | GNNGHQTIINKTAHEIDA   | Homo sapiens          |
| 1 | 1.00 | 1 | 1 | 0.03  | 0.028  | 0.024  | 0.027  | 0.032  | t | 151711 | RATHQE               | Mus musculus          |
| 1 | 1.00 | 1 | 1 | 0.01  | 0.01   | 0.01   | 0.01   | 0.01   | t | 132073 | SPGWQSLGSSQSRLG      | Homo sapiens          |
| 1 | 1.00 | 1 | 1 | -0.01 | -0.01  | -0.01  | -0.01  | -0.01  | t | 124278 | HPLAPVPRQ            | Homo sapiens          |
| 1 | 1.00 | 1 | 1 | -0.01 | -0.01  | -0.01  | -0.01  | -0.01  | t | 132926 | WGANTNL              | Homo sapiens          |
| 1 | 1.00 | 1 | 1 | -0.01 | -0.01  | -0.01  | -0.01  | -0.01  | t | 115311 | KHQGLPQEVLNENLLRFFVA | Homo sapiens          |
| 1 | 1.00 | 1 | 1 | -0.01 | -0.01  | -0.01  | -0.01  | -0.01  | t | 104993 | SWRSKYG WTA          | Homo sapiens          |

|   |      |   |   |       |        |        |        |        |   |        |                              |                          |
|---|------|---|---|-------|--------|--------|--------|--------|---|--------|------------------------------|--------------------------|
| 1 | 1.00 | 1 | 1 | -0.01 | -0.01  | -0.01  | -0.01  | -0.01  | t | 79839  | GKDLKRP<br>GSSPM             | Mus<br>musculu<br>s      |
| 1 | 1.00 | 1 | 1 | -0.01 | -0.01  | -0.01  | -0.01  | -0.01  | t | 79839  | GKDLKRP<br>GSSPM             | Mus<br>musculu<br>s      |
| 1 | 1.00 | 1 | 1 | -0.01 | -0.01  | -0.01  | -0.01  | -0.01  | t | 79839  | GKDLKRP<br>GSSPM             | Mus<br>musculu<br>s      |
| 1 | 1.00 | 1 | 1 | 0.02  | 0.018  | 0.02   | 0.013  | 0.019  | t | 135546 | DWEYS                        | Mus<br>musculu<br>s      |
| 1 | 1.00 | 1 | 1 | -0.04 | -0.037 | -0.045 | -0.04  | -0.042 | t | 79624  | PEEQVPQL<br>IPPIIPRA<br>G    | Mus<br>musculu<br>s      |
| 1 | 1.00 | 1 | 1 | 0.02  | 0.018  | 0.001  | 0.013  | 0.021  | t | 104581 | NKISEASR<br>KGLRRDL<br>DASRE | Rattus<br>norvegic<br>us |
| 1 | 1.00 | 1 | 1 | 0.01  | 0.01   | 0.01   | 0.01   | 0.011  | t | 98765  | EPDDLKQK<br>ACESRCT          | Homo<br>sapiens          |
| 1 | 1.00 | 1 | 1 | 0.05  | 0.048  | 0.05   | 0.043  | 0.05   | t | 117520 | GSFSDADL<br>AD               | Mus<br>musculu<br>s      |
| 1 | 1.00 | 1 | 1 | -0.02 | -0.02  | -0.022 | -0.024 | -0.02  | t | 70266  | VPDGFKVS<br>NS               | Homo<br>sapiens          |
| 1 | 1.00 | 1 | 1 | 0     | 0      | 0      | -0.003 | 0      | t | 36760  | LIVTQTMK                     | Homo<br>sapiens          |
| 1 | 1.00 | 1 | 1 | -0.01 | -0.01  | -0.01  | -0.01  | -0.01  | t | 117043 | MISDYSTR<br>PDRR             | Homo<br>sapiens          |
| 1 | 1.00 | 1 | 1 | -0.01 | -0.01  | -0.01  | -0.01  | -0.01  | t | 117043 | MISDYSTR<br>PDRR             | Mus<br>musculu<br>s      |
| 1 | 1.00 | 1 | 1 | -0.01 | -0.008 | -0.007 | -0.007 | -0.007 | t | 151713 | RGEARK                       | Homo<br>sapiens          |
| 1 | 1.00 | 1 | 1 | 0     | 0      | 0      | 0      | 0.002  | t | 140510 | TTTHFLAT<br>KFYK             | Mus<br>musculu<br>s      |
| 1 | 1.00 | 1 | 1 | 0     | 0      | 0.011  | 0.003  | 0      | t | 104309 | TLPQPPCA<br>HGQHYGH<br>HHHQL | Homo<br>sapiens          |

|   |      |   |   |      |        |       |       |       |   |        |                              |                                  |
|---|------|---|---|------|--------|-------|-------|-------|---|--------|------------------------------|----------------------------------|
| 1 | 1.00 | 1 | 1 | 0    | -0.003 | 0     | 0     | 0.001 | t | 119048 | VSDYEMKL<br>MDLDVEQ          | Oryctola<br>gus<br>cuniculu<br>s |
| 1 | 1.00 | 1 | 1 | 0    | -0.003 | 0     | 0     | 0.001 | t | 119468 | ISGKQVTG<br>EVIFQTPLI<br>K   | Oryctola<br>gus<br>cuniculu<br>s |
| 1 | 1.00 | 1 | 1 | 0    | -0.003 | 0     | 0     | 0.001 | t | 118877 | LDVEQLGI<br>PEQEYSC          | Oryctola<br>gus<br>cuniculu<br>s |
| 1 | 1.00 | 1 | 1 | 0    | -0.003 | 0     | 0     | 0.001 | t | 108382 | GGVVIA                       | Oryctola<br>gus<br>cuniculu<br>s |
| 1 | 1.00 | 1 | 1 | 0    | -0.003 | 0     | 0     | 0.001 | t | 113742 | QDENPVV                      | Oryctola<br>gus<br>cuniculu<br>s |
| 1 | 1.00 | 1 | 1 | 0    | -0.003 | 0     | 0     | 0.001 | t | 97484  | LVEETSFID<br>AGAP            | Oryctola<br>gus<br>cuniculu<br>s |
| 1 | 1.00 | 1 | 1 | 0    | -0.003 | 0     | 0     | 0.001 | t | 55621  | RRKAHAG<br>NKKAEDLT<br>MDDLE | Oryctola<br>gus<br>cuniculu<br>s |
| 1 | 1.00 | 1 | 1 | 0    | -0.003 | 0     | 0     | 0.001 | t | 59922  | SNTFINNA                     | Oryctola<br>gus<br>cuniculu<br>s |
| 1 | 1.00 | 1 | 1 | 0    | -0.003 | 0     | 0     | 0.001 | t | 48093  | PKKPENK<br>LKQPNE            | Oryctola<br>gus<br>cuniculu<br>s |
| 1 | 1.00 | 1 | 1 | 0    | -0.003 | 0     | 0     | 0.001 | t | 11819  | EENVEHD<br>A                 | Oryctola<br>gus<br>cuniculu<br>s |
| 1 | 1.00 | 1 | 1 | 0    | -0.003 | 0     | 0     | 0.001 | t | 13819  | EQELNFPH<br>EVLDDAA          | Oryctola<br>gus<br>cuniculu<br>s |
| 1 | 1.00 | 1 | 1 | 0    | -0.003 | 0     | 0     | 0.001 | t | 10801  | DWEDRY<br>RE                 | Oryctola<br>gus<br>cuniculu<br>s |
| 1 | 1.00 | 1 | 1 | 0.02 | 0.019  | 0.016 | 0.021 | 0.02  | t | 46753  | PAASSCHN<br>ASGKEAKV<br>CTIS | Homo<br>sapiens                  |



|   |      |   |   |       |        |        |        |        |   |        |                              |                                  |
|---|------|---|---|-------|--------|--------|--------|--------|---|--------|------------------------------|----------------------------------|
| 1 | 1.00 | 1 | 1 | 0.02  | 0.022  | 0.016  | 0.021  | 0.02   | t | 46753  | PAASSCHN<br>ASGKEAKV<br>CTIS | Homo<br>sapiens                  |
| 1 | 1.00 | 1 | 1 | 0.01  | 0.008  | 0.015  | 0.007  | 0.008  | t | 10810  | DWGSQHY<br>DP                | Mus<br>musculu<br>s              |
| 1 | 1.00 | 1 | 1 | 0.03  | 0.03   | 0.037  | 0.03   | 0.03   | t | 105945 | LTHCGSGA<br>S                | Mus<br>musculu<br>s              |
| 1 | 1.00 | 1 | 1 | 0     | 0      | 0      | 0      | 0.001  | t | 141683 | KDWG                         | Mus<br>musculu<br>s              |
| 1 | 1.00 | 1 | 1 | 0     | 0      | 0      | 0      | 0.001  | t | 141693 | KTWG                         | Mus<br>musculu<br>s              |
| 1 | 1.00 | 1 | 1 | 0     | 0      | 0      | 0      | 0.001  | t | 100129 | HYKWLND<br>PLAAW             | Ovis<br>aries                    |
| 1 | 1.00 | 1 | 1 | 0     | 0      | 0      | 0      | 0.001  | t | 52891  | QYDSNGT<br>KLE               | Mus<br>musculu<br>s              |
| 1 | 1.00 | 1 | 1 | 0     | 0      | 0      | 0      | 0.001  | t | 7673   | DAVTE                        | Mus<br>musculu<br>s              |
| 1 | 1.00 | 1 | 1 | 0     | 0      | 0      | 0      | 0.001  | t | 12632  | EKASVPGG<br>GDMGGM<br>DF     | Mus<br>musculu<br>s              |
| 1 | 1.00 | 1 | 1 | 0     | -0.003 | -0.003 | 0      | -0.001 | t | 122153 | NASGLSRP<br>SPSAH            | Oryctola<br>gus<br>cuniculu<br>s |
| 1 | 1.00 | 1 | 1 | -0.01 | -0.01  | -0.013 | -0.01  | -0.01  | t | 25250  | IADYNYKL<br>PDDFMGC<br>VL    | Homo<br>sapiens                  |
| 1 | 1.00 | 1 | 1 | 0.03  | 0.03   | 0.03   | 0.026  | 0.031  | t | 131697 | TGTSSDVG<br>GYNYVSW<br>Y     | Homo<br>sapiens                  |
| 1 | 1.00 | 1 | 1 | -0.03 | -0.034 | -0.034 | -0.031 | -0.03  | t | 7671   | DAVSRKK<br>MDTKPTD           | Oryctola<br>gus<br>cuniculu<br>s |
| 1 | 1.00 | 1 | 1 | 0     | 0.002  | 0.007  | 0      | -0.002 | t | 120697 | KLLLDYTG<br>KIWNPAD<br>YGGIK | Rattus<br>norvegic<br>us         |
| 1 | 1.00 | 1 | 1 | 0.01  | 0.007  | 0.015  | 0.01   | 0.01   | t | 71297  | VTFDGGK<br>M                 | Oryctola<br>gus<br>cuniculu<br>s |

|   |      |   |   |       |        |        |        |        |   |        |                              |                                |
|---|------|---|---|-------|--------|--------|--------|--------|---|--------|------------------------------|--------------------------------|
| 1 | 1.00 | 1 | 1 | -0.01 | -0.01  | -0.009 | -0.02  | -0.012 | t | 114937 | RFPNATDK<br>EG               | Homo<br>sapiens                |
| 1 | 1.00 | 1 | 1 | 0.02  | 0.02   | 0.02   | 0.02   | 0.02   | t | 78301  | WHQQMS<br>P                  | Homo<br>sapiens                |
| 1 | 1.00 | 1 | 1 | 0     | 0      | 0      | 0      | 0      | t | 158609 | SFGTALW                      | Homo<br>sapiens                |
| 1 | 1.00 | 1 | 1 | 0     | 0      | 0      | 0      | 0      | t | 158609 | SFGTALW                      | Homo<br>sapiens                |
| 1 | 1.00 | 1 | 1 | 0     | 0      | 0      | 0      | 0      | t | 144670 | GREGYP<br>DGGTSET<br>NKCG    | Oryctola<br>gus<br>cunicu<br>s |
| 1 | 1.00 | 1 | 1 | 0     | 0      | 0      | 0      | 0      | t | 111339 | GGANVAV<br>VVSSEGW<br>P      | Oryctola<br>gus<br>cunicu<br>s |
| 1 | 1.00 | 1 | 1 | 0     | 0      | 0      | 0      | 0      | t | 110617 | GPTGARG<br>PEGAQGS<br>R      | Mus<br>musculu<br>s            |
| 1 | 1.00 | 1 | 1 | -0.02 | -0.02  | -0.02  | -0.02  | -0.02  | t | 134676 | GASSHQH<br>SRRRQGW<br>L      | Homo<br>sapiens                |
| 1 | 1.00 | 1 | 1 | -0.02 | -0.02  | -0.02  | -0.02  | -0.02  | t | 119638 | RWQQGN<br>VF                 | Homo<br>sapiens                |
| 1 | 1.00 | 1 | 1 | -0.02 | -0.02  | -0.02  | -0.02  | -0.02  | t | 100779 | DLAHLT                       | Oryctola<br>gus<br>cunicu<br>s |
| 1 | 1.00 | 1 | 1 | -0.02 | -0.02  | -0.02  | -0.02  | -0.02  | t | 78232  | PHSNKSHL                     | Homo<br>sapiens                |
| 1 | 1.00 | 1 | 1 | -0.02 | -0.02  | -0.02  | -0.02  | -0.02  | t | 1784   | AHIRHHK<br>MPVTNLR<br>H      | Mus<br>musculu<br>s            |
| 1 | 1.00 | 1 | 1 | -0.06 | -0.06  | -0.06  | -0.06  | -0.06  | t | 115517 | TMARHPH<br>PHLSFMAI<br>PPKKN | Homo<br>sapiens                |
| 1 | 1.00 | 1 | 1 | -0.01 | -0.007 | 0.001  | -0.009 | -0.009 | t | 138166 | FHEFWPT                      | Mus<br>musculu<br>s            |
| 1 | 1.00 | 1 | 1 | 0     | -0.005 | -0.006 | -0.001 | 0      | t | 72324  | WDQKLW<br>CRHFCVLA<br>D      | Bos<br>taurus                  |
| 1 | 1.00 | 1 | 1 | 0     | -0.002 | -0.006 | -0.001 | 0      | t | 72324  | WDQKLW<br>CRHFCVLA<br>D      | Mus<br>musculu<br>s            |
| 1 | 1.00 | 1 | 1 | -0.02 | -0.02  | -0.017 | -0.02  | -0.022 | t | 35401  | LEDPISRDL                    | Mus<br>musculu<br>s            |

|   |      |   |   |       |        |        |        |        |   |        |                              |                                  |
|---|------|---|---|-------|--------|--------|--------|--------|---|--------|------------------------------|----------------------------------|
| 1 | 1.00 | 1 | 1 | 0     | -0.002 | -0.016 | -0.007 | 0      | t | 112759 | CSNNAITP<br>GDC              | Mus<br>musculu<br>s              |
| 1 | 1.00 | 1 | 1 | -0.03 | -0.03  | -0.03  | -0.034 | -0.032 | t | 118144 | SLCQSLRE<br>R                | Homo<br>sapiens                  |
| 1 | 1.00 | 1 | 1 | 0.02  | 0.02   | 0.009  | 0.02   | 0.02   | t | 18787  | GATFQVE<br>VPGSQHID<br>SQKKA | Mus<br>musculu<br>s              |
| 1 | 1.00 | 1 | 1 | 0.06  | 0.062  | 0.068  | 0.063  | 0.059  | t | 9679   | DPLVAEED                     | Homo<br>sapiens                  |
| 1 | 1.00 | 1 | 1 | 0.01  | 0.01   | 0.003  | 0.01   | 0.01   | t | 119489 | LILFKDDYF<br>AKKNEERK<br>QNK | Homo<br>sapiens                  |
| 1 | 1.00 | 1 | 1 | 0.03  | 0.032  | 0.035  | 0.031  | 0.031  | t | 118139 | SIPWWSKL<br>LTLV             | Homo<br>sapiens                  |
| 1 | 1.00 | 1 | 1 | -0.01 | -0.01  | -0.019 | -0.009 | -0.01  | t | 65797  | TPVGLAVD<br>TPWVEKES<br>ALSI | Homo<br>sapiens                  |
| 1 | 1.00 | 1 | 1 | -0.01 | -0.013 | -0.01  | -0.01  | -0.009 | t | 48617  | PNDPNRN<br>V                 | Oryctola<br>gus<br>cuniculu<br>s |
| 1 | 1.00 | 1 | 1 | 0.03  | 0.03   | 0.021  | 0.029  | 0.032  | t | 28375  | IRQLESIVD<br>KLNRSG          | Mus<br>musculu<br>s              |
| 1 | 1.00 | 1 | 1 | 0.03  | 0.027  | 0.021  | 0.029  | 0.032  | t | 28375  | IRQLESIVD<br>KLNRSG          | Oryctola<br>gus<br>cuniculu<br>s |
| 1 | 1.00 | 1 | 1 | 0.01  | 0.01   | 0.01   | 0.007  | 0.01   | t | 38169  | LNAMKGD<br>LQSSLGAG          | Homo<br>sapiens                  |
| 1 | 1.00 | 1 | 1 | -0.03 | -0.032 | -0.03  | -0.033 | -0.032 | t | 49950  | PVRVAWS<br>SPVQNCEP<br>WIPP  | Mus<br>musculu<br>s              |
| 1 | 1.00 | 1 | 1 | 0.02  | 0.018  | 0.013  | 0.013  | 0.02   | t | 138228 | QLDFEDV                      | Mus<br>musculu<br>s              |
| 1 | 1.00 | 1 | 1 | 0     | 0      | -0.003 | -0.003 | 0      | t | 50977  | QGVPESPF<br>SRTGEGLD         | Homo<br>sapiens                  |
| 1 | 1.00 | 1 | 1 | -0.02 | -0.02  | -0.011 | -0.018 | -0.02  | t | 135977 | PVSRVLAP<br>HLTR             | Homo<br>sapiens                  |

|   |      |   |   |       |        |        |        |        |   |        |                              |                                  |
|---|------|---|---|-------|--------|--------|--------|--------|---|--------|------------------------------|----------------------------------|
| 1 | 1.00 | 1 | 1 | -0.06 | -0.064 | -0.058 | -0.057 | -0.06  | t | 60260  | SPSLPITM<br>RFPARWRF         | Oryctola<br>gus<br>cuniculu<br>s |
| 1 | 1.00 | 1 | 1 | -0.03 | -0.03  | -0.025 | -0.03  | -0.029 | t | 58371  | SHITSYPAY<br>FW              | Mus<br>musculu<br>s              |
| 1 | 1.00 | 1 | 1 | -0.01 | -0.014 | -0.016 | -0.011 | -0.01  | t | 86822  | NKGKDKD<br>VNAGTSG<br>THT    | Oryctola<br>gus<br>cuniculu<br>s |
| 1 | 1.00 | 1 | 1 | -0.01 | -0.008 | -0.01  | -0.009 | -0.01  | t | 117069 | QRYYSTRP<br>RAL              | Homo<br>sapiens                  |
| 1 | 1.00 | 1 | 1 | 0.01  | 0.01   | 0.01   | 0.01   | 0.01   | t | 144670 | GREGYP<br>DGGTSET<br>NKCG    | Oryctola<br>gus<br>cuniculu<br>s |
| 1 | 1.00 | 1 | 1 | 0.01  | 0.01   | 0.01   | 0.01   | 0.01   | t | 115791 | ILQWQVLS<br>NT               | Homo<br>sapiens                  |
| 1 | 1.00 | 1 | 1 | 0.01  | 0.01   | 0.01   | 0.01   | 0.01   | t | 78307  | WHSQLSP                      | Homo<br>sapiens                  |
| 1 | 1.00 | 1 | 1 | -0.01 | -0.01  | -0.01  | -0.01  | -0.01  | t | 133494 | ADNPIKW<br>DRART             | Mus<br>musculu<br>s              |
| 1 | 1.00 | 1 | 1 | -0.01 | -0.01  | -0.01  | -0.01  | -0.01  | t | 23791  | HFKDPQYP<br>VWELTIRV<br>WSEL | Homo<br>sapiens                  |
| 1 | 1.00 | 1 | 1 | 0.01  | 0.006  | 0.01   | 0.013  | 0.01   | t | 111344 | GIEQNFG<br>L FYPNKQP         | Oryctola<br>gus<br>cuniculu<br>s |
| 1 | 1.00 | 1 | 1 | 0     | 0      | -0.004 | 0      | 0.002  | t | 49079  | PQQPFCQ<br>QPQ               | Mus<br>musculu<br>s              |
| 1 | 1.00 | 1 | 1 | -0.03 | -0.03  | -0.028 | -0.03  | -0.03  | t | 95478  | ISQRYQKF<br>AL               | Homo<br>sapiens                  |
| 1 | 1.00 | 1 | 1 | 0     | 0      | 0      | 0      | 0.001  | t | 926    | AEGEFKTR<br>RNTNYQD<br>PAK   | Homo<br>sapiens                  |
| 1 | 1.00 | 1 | 1 | 0.05  | 0.05   | 0.053  | 0.05   | 0.052  | t | 78938  | CAPGQNL<br>CY                | Mus<br>musculu<br>s              |
| 1 | 1.00 | 1 | 1 | -0.03 | -0.028 | -0.019 | -0.029 | -0.03  | t | 8843   | DKAWLV                       | Homo<br>sapiens                  |
| 1 | 1.00 | 1 | 1 | -0.02 | -0.018 | -0.015 | -0.019 | -0.02  | t | 66653  | TTIMAK                       | Homo<br>sapiens                  |

|   |      |   |   |       |        |        |        |        |   |        |                              |                                  |
|---|------|---|---|-------|--------|--------|--------|--------|---|--------|------------------------------|----------------------------------|
| 1 | 1.00 | 1 | 1 | -0.01 | -0.007 | -0.001 | -0.01  | -0.01  | t | 67932  | VDEKNM                       | Mus<br>musculu<br>s              |
| 1 | 1.00 | 1 | 1 | 0.01  | 0.01   | 0.006  | 0.01   | 0.012  | t | 68996  | VIITFKSGA<br>T               | Mus<br>musculu<br>s              |
| 1 | 1.00 | 1 | 1 | -0.05 | -0.052 | -0.05  | -0.047 | -0.048 | t | 115870 | NKVTLKGG<br>KVT              | Mus<br>musculu<br>s              |
| 1 | 1.00 | 1 | 1 | 0     | 0      | 0.009  | 0      | -0.003 | t | 102118 | THEDFRYD<br>DVFEGN           | Mus<br>musculu<br>s              |
| 1 | 1.00 | 1 | 1 | 0.05  | 0.052  | 0.047  | 0.047  | 0.05   | t | 46895  | PAPQAPY<br>QGYQEPP<br>APQAPY | Homo<br>sapiens                  |
| 1 | 1.00 | 1 | 1 | 0.02  | 0.022  | 0.018  | 0.023  | 0.022  | t | 78478  | PDSDPQI                      | Homo<br>sapiens                  |
| 1 | 1.00 | 1 | 1 | 0.02  | 0.022  | 0.018  | 0.023  | 0.022  | t | 78478  | PDSDPQI                      | Homo<br>sapiens                  |
| 1 | 1.00 | 1 | 1 | 0.01  | 0.01   | 0.013  | 0.013  | 0.01   | t | 79574  | IMNYTGN<br>QQSRWGL<br>GSPNCH | Homo<br>sapiens                  |
| 1 | 1.00 | 1 | 1 | -0.01 | -0.01  | -0.012 | -0.01  | -0.008 | t | 118514 | MASAARL<br>TMMWEE            | Homo<br>sapiens                  |
| 1 | 1.00 | 1 | 1 | 0     | 0.002  | 0      | 0.007  | 0.001  | t | 122885 | QVAALTW<br>VQTHIRGF<br>GGDPR | Homo<br>sapiens                  |
| 1 | 1.00 | 1 | 1 | 0.01  | 0.011  | 0.002  | 0.006  | 0.012  | t | 47770  | PGVDIIEG<br>PVKNV            | Homo<br>sapiens                  |
| 1 | 1.00 | 1 | 1 | 0.02  | 0.016  | 0.016  | 0.019  | 0.018  | t | 47588  | PFVНКQF<br>NYKDPVN<br>GV     | Oryctola<br>gus<br>cuniculu<br>s |
| 1 | 1.00 | 1 | 1 | -0.01 | -0.008 | -0.013 | -0.009 | -0.01  | t | 25031  | HVDTSYEC<br>DIPIGAGIC        | Homo<br>sapiens                  |
| 1 | 1.00 | 1 | 1 | 0.02  | 0.02   | 0.02   | 0.02   | 0.02   | t | 115969 | SLPQNIPPL<br>T               | Homo<br>sapiens                  |
| 1 | 1.00 | 1 | 1 | 0     | 0      | 0      | 0      | 0      | t | 115355 | LLFCMENS<br>AEPEQSLA<br>CQCL | Homo<br>sapiens                  |

|   |      |   |   |       |        |        |        |        |   |        |                             |                                  |
|---|------|---|---|-------|--------|--------|--------|--------|---|--------|-----------------------------|----------------------------------|
| 1 | 1.00 | 1 | 1 | 0     | 0      | 0      | 0      | 0      | t | 92285  | AFNGGGDG<br>VDT             | Ovis<br>aries                    |
| 1 | 1.00 | 1 | 1 | 0     | 0.008  | 0.003  | 0      | 0      | t | 2772   | ALNDLCIK<br>VNNWDLF<br>FSPS | Gallus<br>gallus                 |
| 1 | 1.00 | 1 | 1 | -0.02 | -0.02  | -0.02  | -0.02  | -0.02  | t | 149123 | TNPTQMA                     | Sus<br>scrofa                    |
| 1 | 1.00 | 1 | 1 | -0.02 | -0.02  | -0.02  | -0.02  | -0.02  | t | 108105 | RRLPFGSS<br>L               | Mus<br>musculu<br>s              |
| 1 | 1.00 | 1 | 1 | -0.02 | -0.02  | -0.02  | -0.02  | -0.02  | t | 108105 | RRLPFGSS<br>L               | Mus<br>musculu<br>s              |
| 1 | 1.00 | 1 | 1 | 0.01  | 0.01   | 0.009  | 0.01   | 0.01   | t | 44684  | NLEDPASR<br>DL              | Homo<br>sapiens                  |
| 1 | 1.00 | 1 | 1 | -0.02 | -0.023 | -0.019 | -0.02  | -0.02  | t | 123837 | VVGAVQG<br>P                | Oryctola<br>gus<br>cuniculu<br>s |
| 1 | 1.00 | 1 | 1 | -0.01 | -0.01  | -0.014 | -0.01  | -0.01  | t | 53337  | RDEVTFTV<br>GLNSFV          | Homo<br>sapiens                  |
| 1 | 1.00 | 1 | 1 | 0.01  | 0.008  | 0.008  | 0.007  | 0.01   | t | 13984  | ERESQAY                     | Mus<br>musculu<br>s              |
| 1 | 1.00 | 1 | 1 | 0     | 0.003  | 0.009  | 0.001  | -0.001 | t | 64682  | TKTDVALA                    | Mus<br>musculu<br>s              |
| 1 | 1.00 | 1 | 1 | 0     | 0      | 0      | 0      | 0      | t | 78142  | EKEEPTAA<br>PAE             | Homo<br>sapiens                  |
| 1 | 1.00 | 1 | 1 | 0     | -0.002 | 0      | -0.001 | 0      | t | 62051  | SVASGGSG<br>GSVASGG         | Mus<br>musculu<br>s              |
| 1 | 1.00 | 1 | 1 | 0     | 0      | -0.005 | 0      | 0      | t | 72324  | WDQKLW<br>CRHFCVLA<br>D     | Homo<br>sapiens                  |
| 1 | 1.00 | 1 | 1 | 0.03  | 0.032  | 0.03   | 0.031  | 0.032  | t | 62993  | TASITSPLT<br>TQNTL          | Homo<br>sapiens                  |
| 1 | 1.00 | 1 | 1 | -0.03 | -0.028 | -0.029 | -0.03  | -0.031 | t | 36312  | LGRWKAV<br>EKSVAMK<br>H     | Homo<br>sapiens                  |

|   |      |   |   |       |        |        |        |        |   |        |                              |                                  |
|---|------|---|---|-------|--------|--------|--------|--------|---|--------|------------------------------|----------------------------------|
| 1 | 1.00 | 1 | 1 | 0.01  | 0.013  | 0.019  | 0.01   | 0.012  | t | 21469  | GNLLLSCL                     | Sus<br>scrofa                    |
| 1 | 1.00 | 1 | 1 | -0.02 | -0.018 | -0.02  | -0.019 | -0.02  | t | 22491  | GSRTLGA<br>KHPALQ            | Homo<br>sapiens                  |
| 1 | 1.00 | 1 | 1 | -0.01 | -0.017 | -0.01  | -0.01  | -0.01  | t | 94475  | CNPACGR<br>H                 | Oryctola<br>gus<br>cuniculu<br>s |
| 1 | 1.00 | 1 | 1 | -0.01 | -0.01  | -0.01  | -0.01  | -0.01  | t | 94475  | CNPACGR<br>H                 | Oryctola<br>gus<br>cuniculu<br>s |
| 1 | 1.00 | 1 | 1 | 0     | 0      | 0.001  | 0      | 0      | t | 133739 | WDRF                         | Oryctola<br>gus<br>cuniculu<br>s |
| 1 | 1.00 | 1 | 1 | -0.04 | -0.043 | -0.027 | -0.039 | -0.046 | t | 20519  | GKATVLLG<br>MVLSLMA<br>LVVVW | Canis<br>lupus                   |
| 1 | 1.00 | 1 | 1 | -0.02 | -0.018 | 0      | -0.013 | -0.02  | t | 118736 | AFQQGKIP<br>P                | Homo<br>sapiens                  |
| 1 | 1.00 | 1 | 1 | -0.02 | -0.02  | -0.019 | -0.03  | -0.022 | t | 114939 | RPICGTDG<br>VT               | Homo<br>sapiens                  |
| 1 | 1.00 | 1 | 1 | 0.03  | 0.03   | 0.03   | 0.03   | 0.03   | t | 108022 | LTNSNAPS<br>ITVQGLE          | Homo<br>sapiens                  |
| 1 | 1.00 | 1 | 1 | 0.02  | 0.018  | 0.018  | 0.019  | 0.021  | t | 103334 | LAKHSEHP<br>TVDDEEK          | Mus<br>musculu<br>s              |
| 1 | 1.00 | 1 | 1 | 0.01  | 0.01   | 0.01   | 0.01   | 0.01   | t | 148855 | QQQFPGQ<br>QQQ               | Homo<br>sapiens                  |
| 1 | 1.00 | 1 | 1 | 0.01  | 0.01   | 0.01   | 0.01   | 0.01   | t | 133599 | HLQSMSS<br>RWIEW             | Homo<br>sapiens                  |
| 1 | 1.00 | 1 | 1 | 0.01  | 0.01   | 0.01   | 0.01   | 0.01   | t | 104238 | SDWWDF                       | Mus<br>musculu<br>s              |
| 1 | 1.00 | 1 | 1 | -0.01 | -0.01  | -0.01  | -0.01  | -0.01  | t | 134522 | RVRVSWSP<br>P                | Homo<br>sapiens                  |
| 1 | 1.00 | 1 | 1 | -0.01 | -0.01  | -0.01  | -0.01  | -0.01  | t | 87157  | NWVDAEG<br>KTY               | Homo<br>sapiens                  |

|   |      |   |   |       |        |        |        |        |   |        |                             |                                  |
|---|------|---|---|-------|--------|--------|--------|--------|---|--------|-----------------------------|----------------------------------|
| 1 | 1.00 | 1 | 1 | -0.03 | -0.03  | -0.03  | -0.03  | -0.03  | t | 149085 | NPTQIRR                     | Sus<br>scrofa                    |
| 1 | 1.00 | 1 | 1 | -0.03 | -0.03  | -0.03  | -0.03  | -0.03  | t | 124278 | HPLAPVPR<br>Q               | Homo<br>sapiens                  |
| 1 | 1.00 | 1 | 1 | -0.05 | -0.05  | -0.05  | -0.05  | -0.05  | t | 135716 | LRSTKFTI                    | Homo<br>sapiens                  |
| 1 | 1.00 | 1 | 1 | -0.05 | -0.05  | -0.05  | -0.05  | -0.05  | t | 119515 | RKKKPPGL<br>A               | Homo<br>sapiens                  |
| 1 | 1.00 | 1 | 1 | -0.02 | -0.018 | -0.015 | -0.017 | -0.02  | t | 107087 | ARGLTGRP<br>GDA             | Homo<br>sapiens                  |
| 1 | 1.00 | 1 | 1 | 0.02  | 0.02   | 0.02   | 0.02   | 0.022  | t | 75391  | YPQPQFPF<br>SQ              | Mus<br>musculu<br>s              |
| 1 | 1.00 | 1 | 1 | -0.02 | -0.02  | -0.026 | -0.023 | -0.02  | t | 70370  | VPLYNRFS<br>YIPNGALK<br>FVD | Homo<br>sapiens                  |
| 1 | 1.00 | 1 | 1 | 0.01  | 0.012  | 0.01   | 0.009  | 0.01   | t | 149433 | QPLSQVSF<br>QQ              | Homo<br>sapiens                  |
| 1 | 1.00 | 1 | 1 | 0.01  | 0.01   | 0.005  | 0.01   | 0.012  | t | 134131 | LEEAKTQG<br>PYDVVVL         | Mus<br>musculu<br>s              |
| 1 | 1.00 | 1 | 1 | 0     | -0.002 | -0.005 | -0.001 | 0      | t | 56610  | RYPGQGS<br>PGGNRYP<br>PQG   | Mus<br>musculu<br>s              |
| 1 | 1.00 | 1 | 1 | 0     | 0      | 0.015  | 0      | -0.003 | t | 107427 | GRGDSVA<br>YGLR             | Mus<br>musculu<br>s              |
| 1 | 1.00 | 1 | 1 | -0.03 | -0.034 | -0.037 | -0.031 | -0.03  | t | 960    | AEHARDH<br>TLRFG            | Oryctola<br>gus<br>cuniculu<br>s |
| 1 | 1.00 | 1 | 1 | -0.03 | -0.032 | -0.037 | -0.031 | -0.03  | t | 960    | AEHARDH<br>TLRFG            | Mus<br>musculu<br>s              |
| 1 | 1.00 | 1 | 1 | -0.03 | -0.03  | -0.026 | -0.036 | -0.03  | t | 54190  | RILLFKPP<br>K               | Homo<br>sapiens                  |
| 1 | 1.00 | 1 | 1 | -0.05 | -0.046 | -0.055 | -0.049 | -0.05  | t | 70421  | VPPLRVW<br>RHRARSV          | Homo<br>sapiens                  |
| 1 | 1.00 | 1 | 1 | 0.03  | 0.03   | 0.03   | 0.03   | 0.03   | t | 111458 | KLALSNGA<br>IAQP            | Homo<br>sapiens                  |
| 1 | 1.00 | 1 | 1 | 0.01  | 0.01   | 0.01   | 0.01   | 0.01   | t | 102153 | TQYTAYSP<br>VPLL            | Homo<br>sapiens                  |



|   |      |   |   |       |        |        |        |        |   |        |                      |                       |
|---|------|---|---|-------|--------|--------|--------|--------|---|--------|----------------------|-----------------------|
| 1 | 1.00 | 1 | 1 | -0.02 | -0.02  | -0.015 | -0.02  | -0.019 | t | 60758  | SRPIIHFGS            | Mus musculus          |
| 1 | 1.00 | 1 | 1 | -0.06 | -0.056 | -0.049 | -0.06  | -0.06  | t | 123279 | GYWKIRGLA            | Ovis aries            |
| 1 | 1.00 | 1 | 1 | 0     | -0.009 | 0.006  | 0      | -0.001 | t | 32523  | KNITVTASV            | Macaca mulatta        |
| 1 | 1.00 | 1 | 1 | 0     | -0.002 | 0.003  | 0.001  | 0      | t | 59192  | SLINTNGSWHIN         | Homo sapiens          |
| 1 | 1.00 | 1 | 1 | 0.02  | 0.02   | 0.02   | 0.02   | 0.02   | t | 112177 | KGLEWLA              | Homo sapiens          |
| 1 | 1.00 | 1 | 1 | 0     | 0      | 0      | 0      | 0      | t | 108608 | RGGIRRQSL            | Homo sapiens          |
| 1 | 1.00 | 1 | 1 | -0.02 | -0.02  | -0.02  | -0.02  | -0.02  | t | 153388 | GKFKKIVKGTHHWWMLLTF  | Oryctolagus cuniculus |
| 1 | 1.00 | 1 | 1 | -0.02 | -0.02  | -0.02  | -0.02  | -0.02  | t | 125375 | DHTLFAASHNHR         | Mus musculus          |
| 1 | 1.00 | 1 | 1 | -0.02 | -0.02  | -0.02  | -0.02  | -0.02  | t | 125375 | DHTLFAASHNHR         | Sus scrofa            |
| 1 | 1.00 | 1 | 1 | -0.04 | -0.04  | -0.04  | -0.04  | -0.04  | t | 135714 | LNGKVDAF             | Homo sapiens          |
| 1 | 1.00 | 1 | 1 | 0.02  | 0.022  | 0.02   | 0.017  | 0.021  | t | 43159  | NAGVLTCSLSK          | Homo sapiens          |
| 1 | 1.00 | 1 | 1 | -0.01 | -0.01  | -0.013 | -0.012 | -0.01  | t | 3400   | ANRAVKPTGSAAIGLSMAGS | Homo sapiens          |
| 1 | 1.00 | 1 | 1 | -0.02 | -0.022 | -0.031 | -0.021 | -0.02  | t | 42667  | MSSFLGKWKLSESHNFDVAM | Mus musculus          |
| 1 | 1.00 | 1 | 1 | -0.02 | -0.022 | -0.031 | -0.021 | -0.02  | t | 42667  | MSSFLGKWKLSESHNFDVAM | Mus musculus          |
| 1 | 1.00 | 1 | 1 | 0     | 0      | 0      | 0      | 0      | t | 135445 | AKAAQFG              | Oryctolagus cuniculus |

|   |      |   |   |       |        |        |        |        |   |        |                              |                                  |
|---|------|---|---|-------|--------|--------|--------|--------|---|--------|------------------------------|----------------------------------|
| 1 | 1.00 | 1 | 1 | 0     | 0.002  | -0.002 | -0.003 | 0      | t | 20468  | GITVKKTN<br>QA               | Homo<br>sapiens                  |
| 1 | 1.00 | 1 | 1 | 0.01  | 0.008  | 0.014  | 0.01   | 0.01   | t | 16874  | FLRFLTIPP<br>T               | Mus<br>musculu<br>s              |
| 1 | 1.00 | 1 | 1 | 0.01  | 0.007  | 0.01   | 0.01   | 0.01   | t | 107229 | RHEVTEM<br>GQEV              | Oryctola<br>gus<br>cuniculu<br>s |
| 1 | 1.00 | 1 | 1 | -0.01 | -0.01  | -0.01  | -0.01  | -0.009 | t | 114280 | CKWSVAH<br>LC                | Mus<br>musculu<br>s              |
| 1 | 1.00 | 1 | 1 | 0.03  | 0.032  | 0.042  | 0.031  | 0.032  | t | 17402  | FPSDEF                       | Homo<br>sapiens                  |
| 1 | 1.00 | 1 | 1 | 0.01  | 0.01   | -0.001 | 0.004  | 0.011  | t | 4923   | ATDKEGK<br>DVLVCNK           | Homo<br>sapiens                  |
| 1 | 1.00 | 1 | 1 | 0.01  | 0.01   | 0.013  | 0.009  | 0.01   | t | 45222  | NNRDVPA<br>SIDWREYG<br>YVTE  | Bos<br>taurus                    |
| 1 | 1.00 | 1 | 1 | 0.01  | 0.005  | 0.013  | 0.009  | 0.01   | t | 45222  | NNRDVPA<br>SIDWREYG<br>YVTE  | Bos<br>taurus                    |
| 1 | 1.00 | 1 | 1 | 0     | 0      | -0.002 | -0.006 | -0.002 | t | 55787  | RRYTARLK<br>EG               | Homo<br>sapiens                  |
| 1 | 1.00 | 1 | 1 | -0.01 | -0.012 | -0.005 | -0.011 | -0.012 | t | 5586   | AVTRGTIN<br>DPQRAKE<br>ALDYE | Mus<br>musculu<br>s              |
| 1 | 1.00 | 1 | 1 | 0     | -0.015 | 0      | 0      | 0      | t | 60663  | SRGAPGG<br>GFVPSLQG<br>VP    | Marmot<br>a monax                |
| 1 | 1.00 | 1 | 1 | 0     | 0      | 0      | 0      | 0      | t | 60663  | SRGAPGG<br>GFVPSLQG<br>VP    | Homo<br>sapiens                  |
| 1 | 1.00 | 1 | 1 | 0     | -0.002 | -0.006 | -0.001 | 0      | t | 50384  | QAVHAAH<br>AEINE             | Mus<br>musculu<br>s              |
| 1 | 1.00 | 1 | 1 | 0.01  | 0.007  | 0.01   | 0.01   | 0.012  | t | 10801  | DWEDRYR<br>RE                | Oryctola<br>gus<br>cuniculu<br>s |

|   |      |   |   |       |        |        |        |        |   |        |                              |                                  |
|---|------|---|---|-------|--------|--------|--------|--------|---|--------|------------------------------|----------------------------------|
| 1 | 1.00 | 1 | 1 | -0.02 | -0.016 | -0.02  | -0.02  | -0.021 | t | 75951  | YTASARGD<br>LAHLTTTH<br>AR   | Cavia<br>porcellu<br>s           |
| 1 | 1.00 | 1 | 1 | -0.02 | -0.016 | -0.02  | -0.02  | -0.021 | t | 75951  | YTASARGD<br>LAHLTTTH<br>AR   | Cavia<br>porcellu<br>s           |
| 1 | 1.00 | 1 | 1 | 0.01  | 0.007  | 0.013  | 0.01   | 0.009  | t | 56614  | RYPHYSLIK<br>PESSL           | Oryctola<br>gus<br>cuniculu<br>s |
| 1 | 1.00 | 1 | 1 | 0.01  | 0.01   | 0.016  | 0.01   | 0.01   | t | 50109  | PYIEQGVQ<br>LAEQFKQK<br>ALGL | Homo<br>sapiens                  |
| 1 | 1.00 | 1 | 1 | -0.05 | -0.05  | -0.054 | -0.05  | -0.048 | t | 9657   | DPKHVCV<br>DTRDIPKN<br>AGCFR | Mus<br>musculu<br>s              |
| 1 | 1.00 | 1 | 1 | -0.02 | -0.018 | -0.02  | -0.019 | -0.02  | t | 53004  | QYLYGVGS<br>SIASWAIK<br>WEYV | Homo<br>sapiens                  |
| 1 | 1.00 | 1 | 1 | -0.02 | -0.018 | -0.013 | -0.013 | -0.018 | t | 132890 | QSPWQT<br>WFTRAL             | Homo<br>sapiens                  |
| 1 | 1.00 | 1 | 1 | 0.01  | 0.01   | 0.01   | 0.01   | 0.01   | t | 147558 | CTGTQPW<br>MC                | Homo<br>sapiens                  |
| 1 | 1.00 | 1 | 1 | -0.01 | -0.01  | -0.01  | -0.01  | -0.01  | t | 140914 | VLGHDEA<br>AYSKN             | Oryctola<br>gus<br>cuniculu<br>s |
| 1 | 1.00 | 1 | 1 | -0.01 | -0.01  | -0.01  | -0.01  | -0.01  | t | 115568 | YPYYAKPA<br>AVRSPAQI<br>LQWQ | Homo<br>sapiens                  |
| 1 | 1.00 | 1 | 1 | -0.01 | -0.01  | -0.01  | -0.01  | -0.01  | t | 105148 | DVAGL                        | Oryctola<br>gus<br>cuniculu<br>s |
| 1 | 1.00 | 1 | 1 | -0.01 | -0.01  | -0.01  | -0.01  | -0.01  | t | 111154 | CMKNNMK<br>QPC               | Homo<br>sapiens                  |
| 1 | 1.00 | 1 | 1 | -0.03 | -0.03  | -0.03  | -0.03  | -0.03  | t | 103347 | LFSRVEDV<br>LGLPQNT          | Homo<br>sapiens                  |
| 1 | 1.00 | 1 | 1 | -0.05 | -0.05  | -0.05  | -0.05  | -0.05  | t | 123437 | LKMWSDF<br>LG                | Ovis<br>aries                    |

|   |      |   |   |       |        |        |        |        |   |        |                               |                                  |
|---|------|---|---|-------|--------|--------|--------|--------|---|--------|-------------------------------|----------------------------------|
| 1 | 1.00 | 1 | 1 | -0.05 | -0.05  | -0.05  | -0.05  | -0.05  | t | 114880 | KTYGNKC<br>NFC                | Homo<br>sapiens                  |
| 1 | 1.00 | 1 | 1 | 0.02  | 0.02   | 0.02   | 0.02   | 0.022  | t | 122328 | EEYHLYKD<br>GHLPSEFA<br>LLV   | Homo<br>sapiens                  |
| 1 | 1.00 | 1 | 1 | -0.05 | -0.048 | -0.05  | -0.046 | -0.047 | t | 110996 | RARPAKA<br>AATQKKVE<br>RKA    | Homo<br>sapiens                  |
| 1 | 1.00 | 1 | 1 | 0.02  | 0.02   | 0.023  | 0.017  | 0.02   | t | 78762  | PLLPHVIFC<br>HPGQLGA<br>FLTNT | Homo<br>sapiens                  |
| 1 | 1.00 | 1 | 1 | -0.01 | -0.01  | -0.01  | -0.01  | -0.01  | t | 141892 | FEEDKKML<br>ELFVQKL           | Mus<br>musculu<br>s              |
| 1 | 1.00 | 1 | 1 | -0.01 | -0.01  | 0      | -0.004 | -0.009 | t | 49016  | PQIPPPYV<br>EPT               | Homo<br>sapiens                  |
| 1 | 1.00 | 1 | 1 | 0.01  | 0.01   | 0.019  | 0.012  | 0.01   | t | 136004 | TTPEEIAQ<br>VATI              | Homo<br>sapiens                  |
| 1 | 1.00 | 1 | 1 | 0.01  | 0.01   | 0.011  | 0.01   | 0.01   | t | 9038   | DLDANGIL<br>NVSAEEKG<br>TGKR  | Homo<br>sapiens                  |
| 1 | 1.00 | 1 | 1 | -0.01 | -0.01  | -0.01  | -0.01  | -0.01  | t | 132941 | WGSNVYN<br>SPFHS              | Homo<br>sapiens                  |
| 1 | 1.00 | 1 | 1 | -0.01 | -0.008 | -0.012 | -0.009 | -0.008 | t | 69833  | VLVLNPSV<br>AATLGFGA<br>YMSK  | Homo<br>sapiens                  |
| 1 | 1.00 | 1 | 1 | 0.01  | 0.005  | 0.006  | 0.013  | 0.012  | t | 148652 | KKIKEYDE<br>DYTITYYYD<br>DD   | Canis<br>lupus                   |
| 1 | 1.00 | 1 | 1 | 0     | 0      | 0.001  | 0      | 0.001  | t | 72503  | WGQGG                         | Mus<br>musculu<br>s              |
| 1 | 1.00 | 1 | 1 | -0.02 | -0.024 | -0.01  | -0.021 | -0.02  | t | 88723  | SIYGLYDG<br>TYL               | Oryctola<br>gus<br>cuniculu<br>s |
| 1 | 1.00 | 1 | 1 | 0     | 0      | 0.007  | 0      | 0      | t | 153440 | PRLKNPPK<br>KPKDDY            | Mus<br>musculu<br>s              |
| 1 | 1.00 | 1 | 1 | -0.01 | -0.01  | -0.01  | -0.006 | -0.011 | t | 134253 | VFFSGYTF<br>KHKMVYE<br>DTLTL  | Homo<br>sapiens                  |

|   |      |   |   |       |        |        |        |        |   |        |                              |                       |
|---|------|---|---|-------|--------|--------|--------|--------|---|--------|------------------------------|-----------------------|
| 1 | 1.00 | 1 | 1 | -0.03 | -0.032 | -0.014 | -0.023 | -0.029 | t | 112724 | WHTQPAH<br>VVTPM             | Homo sapiens          |
| 1 | 1.00 | 1 | 1 | 0.02  | 0.02   | 0.02   | 0.02   | 0.02   | t | 146910 | EYPDDASV<br>NGVRK            | Homo sapiens          |
| 1 | 1.00 | 1 | 1 | 0.02  | 0.02   | 0.02   | 0.02   | 0.02   | t | 135753 | RVVGGED<br>A                 | Homo sapiens          |
| 1 | 1.00 | 1 | 1 | 0.02  | 0.02   | 0.02   | 0.02   | 0.02   | t | 134245 | TSLSGIQ                      | Homo sapiens          |
| 1 | 1.00 | 1 | 1 | 0.02  | 0.02   | 0.02   | 0.02   | 0.02   | t | 137544 | LNSHSIIYG<br>CKGKGQ          | Homo sapiens          |
| 1 | 1.00 | 1 | 1 | 0.02  | 0.016  | 0.02   | 0.02   | 0.02   | t | 100557 | TKASGPAH<br>SKEVPA           | Oryctolagus cuniculus |
| 1 | 1.00 | 1 | 1 | -0.02 | -0.02  | -0.02  | -0.02  | -0.02  | t | 123106 | EALDAIRYL                    | Ovis aries            |
| 1 | 1.00 | 1 | 1 | -0.02 | -0.02  | -0.02  | -0.02  | -0.02  | t | 95998  | WDANKPY<br>SWR               | Homo sapiens          |
| 1 | 1.00 | 1 | 1 | -0.02 | -0.02  | -0.02  | -0.02  | -0.02  | t | 50357  | QASNVFG<br>GVFLNMA<br>MREHDC | Oryctolagus cuniculus |
| 1 | 1.00 | 1 | 1 | -0.02 | -0.02  | -0.02  | -0.02  | -0.02  | t | 8252   | DFDSVPQI<br>HG               | Oryctolagus cuniculus |
| 1 | 1.00 | 1 | 1 | -0.04 | -0.04  | -0.04  | -0.04  | -0.04  | t | 106867 | SSCNATQR<br>RQ               | Homo sapiens          |
| 1 | 1.00 | 1 | 1 | 0.03  | 0.03   | 0.035  | 0.028  | 0.03   | t | 33364  | KSKDLQSA<br>P                | Homo sapiens          |
| 1 | 1.00 | 1 | 1 | 0     | 0      | 0      | -0.003 | 0      | t | 97049  | VKPTAPTK<br>PT               | Homo sapiens(human)   |
| 1 | 1.00 | 1 | 1 | 0.03  | 0.034  | 0.03   | 0.027  | 0.029  | t | 118450 | KGDKAQIE<br>KRIQE            | Homo sapiens          |
| 1 | 1.00 | 1 | 1 | 0     | 0      | 0.005  | 0      | 0.002  | t | 32841  | KPPTPPPE<br>PET              | Mus musculus          |

|   |      |   |   |       |        |        |        |        |   |        |                              |                                  |
|---|------|---|---|-------|--------|--------|--------|--------|---|--------|------------------------------|----------------------------------|
| 1 | 1.00 | 1 | 1 | 0.01  | 0.01   | 0.01   | 0.01   | 0.012  | t | 140578 | LYFEDYRC<br>EL               | Mus<br>musculu<br>s              |
| 1 | 1.00 | 1 | 1 | -0.03 | -0.032 | -0.028 | -0.037 | -0.032 | t | 130994 | PDQRPYC<br>WHYPPKP<br>C      | Mus<br>musculu<br>s              |
| 1 | 1.00 | 1 | 1 | -0.03 | -0.026 | -0.033 | -0.033 | -0.03  | t | 115402 | NNQFLPYP<br>YYAKPAAV<br>RSPA | Homo<br>sapiens                  |
| 1 | 1.00 | 1 | 1 | -0.02 | -0.02  | -0.019 | -0.02  | -0.018 | t | 79578  | IVCHTTATI<br>PSSAVTC         | Mus<br>musculu<br>s              |
| 1 | 1.00 | 1 | 1 | 0     | 0.002  | 0      | -0.001 | 0      | t | 149423 | QEQVPLV<br>QEQ               | Homo<br>sapiens                  |
| 1 | 1.00 | 1 | 1 | -0.05 | -0.044 | -0.05  | -0.05  | -0.05  | t | 123383 | KMWSDFL<br>GK                | Ovis<br>aries                    |
| 1 | 1.00 | 1 | 1 | 0     | 0.001  | 0.003  | 0.003  | -0.001 | t | 22619  | GTDGPCK<br>VPISSVASL<br>NDLT | Equus<br>caballus                |
| 1 | 1.00 | 1 | 1 | 0     | 0      | 0.015  | 0      | -0.003 | t | 107427 | GRGDSVA<br>YGLR              | Mus<br>musculu<br>s              |
| 1 | 1.00 | 1 | 1 | 0.02  | 0.02   | 0.023  | 0.022  | 0.02   | t | 50300  | QALDAH<br>YDSVLKDI           | Homo<br>sapiens                  |
| 1 | 1.00 | 1 | 1 | -0.02 | -0.023 | -0.027 | -0.02  | -0.021 | t | 135533 | AELSPA<br>AKTGKRKRSQ<br>M    | Oryctola<br>gus<br>cuniculu<br>s |
| 1 | 1.00 | 1 | 1 | 0.02  | 0.02   | 0.02   | 0.02   | 0.02   | t | 151665 | KIETELRDI<br>CNDVLSLL<br>EKF | Mus<br>musculu<br>s              |
| 1 | 1.00 | 1 | 1 | 0     | 0      | 0      | 0      | 0      | t | 110767 | AKEEISFVA<br>TFS             | Oryctola<br>gus<br>cuniculu<br>s |
| 1 | 1.00 | 1 | 1 | -0.01 | -0.012 | -0.003 | -0.007 | -0.01  | t | 106535 | IFPSFLRPD<br>PPL             | Mus<br>musculu<br>s              |
| 1 | 1.00 | 1 | 1 | 0.01  | 0.01   | 0.011  | 0.01   | 0.011  | t | 119614 | LWDQTYG<br>VPD               | Homo<br>sapiens                  |

|   |      |   |   |       |        |        |        |        |   |        |                              |                                  |
|---|------|---|---|-------|--------|--------|--------|--------|---|--------|------------------------------|----------------------------------|
| 1 | 1.00 | 1 | 1 | 0.01  | 0.015  | 0.017  | 0.01   | 0.008  | t | 132801 | ELYRQKVE<br>PLRAELQE         | Mus<br>musculu<br>s              |
| 1 | 1.00 | 1 | 1 | -0.01 | -0.002 | -0.005 | -0.01  | -0.011 | t | 156901 | KLHHNGS                      | Gallus<br>gallus                 |
| 1 | 1.00 | 1 | 1 | -0.01 | -0.016 | -0.01  | -0.01  | -0.008 | t | 17132  | FNATKFPS<br>VYAWERK<br>KI    | Oryctola<br>gus<br>cuniculu<br>s |
| 1 | 1.00 | 1 | 1 | -0.04 | -0.04  | -0.04  | -0.031 | -0.04  | t | 119523 | SDYKSAHK<br>GFKGVDA<br>QGTL  | Homo<br>sapiens                  |
| 1 | 1.00 | 1 | 1 | -0.01 | -0.01  | -0.01  | -0.01  | -0.01  | t | 128092 | RGFGGDP<br>RRVSLAAD<br>RGGAD | Homo<br>sapiens                  |
| 1 | 1.00 | 1 | 1 | -0.01 | -0.01  | -0.01  | -0.01  | -0.01  | t | 131257 | RHFPNDY<br>NPFL              | Homo<br>sapiens                  |
| 1 | 1.00 | 1 | 1 | -0.01 | -0.01  | -0.01  | -0.01  | -0.01  | t | 111170 | CSPLTHAIC                    | Homo<br>sapiens                  |
| 1 | 1.00 | 1 | 1 | -0.01 | -0.01  | -0.01  | -0.01  | -0.01  | t | 48520  | PLVESWKR<br>PDYQPA           | Homo<br>sapiens                  |
| 1 | 1.00 | 1 | 1 | -0.03 | -0.03  | -0.03  | -0.03  | -0.03  | t | 142204 | KLEEQNKI<br>SEASRKGL<br>RRDL | Mus<br>musculu<br>s              |
| 1 | 1.00 | 1 | 1 | -0.03 | -0.03  | -0.03  | -0.03  | -0.03  | t | 142204 | KLEEQNKI<br>SEASRKGL<br>RRDL | Homo<br>sapiens                  |
| 1 | 1.00 | 1 | 1 | -0.05 | -0.05  | -0.05  | -0.05  | -0.05  | t | 49151  | PQWKLQP<br>G                 | Anas<br>platyrhy<br>nchos        |
| 1 | 1.00 | 1 | 1 | 0     | 0      | 0      | 0      | 0.002  | t | 101554 | DPLAQQS                      | Mus<br>musculu<br>s              |
| 1 | 1.00 | 1 | 1 | 0.01  | 0.008  | 0.003  | 0.003  | 0.01   | t | 108003 | LHNHYT                       | Mus<br>musculu<br>s              |
| 1 | 1.00 | 1 | 1 | 0.01  | 0.006  | 0.003  | 0.003  | 0.01   | t | 108003 | LHNHYT                       | Oryctola<br>gus<br>cuniculu<br>s |
| 1 | 1.00 | 1 | 1 | 0.02  | 0.02   | 0.02   | 0.02   | 0.021  | t | 131141 | VRRLAME<br>NNIKLSEV<br>VGSG  | Homo<br>sapiens                  |
| 1 | 1.00 | 1 | 1 | -0.01 | -0.01  | -0.01  | -0.01  | -0.01  | t | 141971 | NKPVTDN<br>PVTDR             | Mus<br>musculu<br>s              |

|   |      |   |   |       |        |        |        |        |   |        |                              |                     |
|---|------|---|---|-------|--------|--------|--------|--------|---|--------|------------------------------|---------------------|
| 1 | 1.00 | 1 | 1 | -0.01 | -0.01  | -0.01  | -0.01  | -0.01  | t | 141971 | NKPVTDN<br>PVTDR             | Sus<br>scrofa       |
| 1 | 1.00 | 1 | 1 | 0.01  | 0.002  | 0.01   | 0.01   | 0.012  | t | 156941 | PTEKKHV                      | Mus<br>musculu<br>s |
| 1 | 1.00 | 1 | 1 | 0.02  | 0.022  | 0.022  | 0.027  | 0.021  | t | 122861 | NALNSPLH<br>QEYEENL          | Homo<br>sapiens     |
| 1 | 1.00 | 1 | 1 | -0.04 | -0.036 | -0.026 | -0.033 | -0.04  | t | 119178 | GIMAPPP<br>GMRPPM            | Homo<br>sapiens     |
| 1 | 1.00 | 1 | 1 | -0.03 | -0.024 | -0.019 | -0.03  | -0.032 | t | 63855  | TGIDPRGK                     | MD                  |
| 1 | 1.00 | 1 | 1 | -0.03 | -0.027 | -0.019 | -0.03  | -0.032 | t | 63855  | TGIDPRGK                     | MD                  |
| 1 | 1.00 | 1 | 1 | 0.04  | 0.04   | 0.038  | 0.034  | 0.038  | t | 37300  | LLFSLGLS<br>SSSSIS           | Homo<br>sapiens     |
| 1 | 1.00 | 1 | 1 | 0.02  | 0.02   | 0.02   | 0.02   | 0.022  | t | 110275 | GPVGPSD<br>PSIVSLVEE<br>TSFI | Mus<br>musculu<br>s |
| 1 | 1.00 | 1 | 1 | 0.02  | 0.023  | 0.02   | 0.02   | 0.022  | t | 110275 | GPVGPSD<br>PSIVSLVEE<br>TSFI | Mus<br>musculu<br>s |
| 1 | 1.00 | 1 | 1 | 0.04  | 0.04   | 0.026  | 0.04   | 0.043  | t | 47995  | PITEAAET<br>ATTEVPVE<br>KTEE | Mus<br>musculu<br>s |
| 1 | 1.00 | 1 | 1 | 0.01  | 0.01   | 0.01   | 0.01   | 0.01   | t | 142049 | VCKVDKD<br>CGSGEHC<br>V      | Mus<br>musculu<br>s |
| 1 | 1.00 | 1 | 1 | 0.01  | 0.01   | 0.01   | 0.01   | 0.01   | t | 142049 | VCKVDKD<br>CGSGEHC<br>V      | Mus<br>musculu<br>s |
| 1 | 1.00 | 1 | 1 | 0     | 0      | -0.003 | 0      | -0.001 | t | 52930  | QYIKANSK<br>FIGITEL          | Mus<br>musculu<br>s |
| 1 | 1.00 | 1 | 1 | 0     | 0      | -0.003 | 0      | -0.001 | t | 52930  | QYIKANSK<br>FIGITEL          | Mus<br>musculu<br>s |
| 1 | 1.00 | 1 | 1 | 0     | 0      | -0.003 | 0      | -0.001 | t | 52930  | QYIKANSK<br>FIGITEL          | Mus<br>musculu<br>s |



|   |      |   |   |       |        |        |        |        |   |        |                            |                     |
|---|------|---|---|-------|--------|--------|--------|--------|---|--------|----------------------------|---------------------|
| 1 | 1.00 | 1 | 1 | 0.02  | 0.013  | 0.013  | 0.02   | 0.021  | t | 139948 | VYEKERN<br>YATV            | Canis<br>lupus      |
| 1 | 1.00 | 1 | 1 | -0.02 | -0.022 | -0.018 | -0.019 | -0.02  | t | 131037 | RHWTTQG<br>CNC             | Mus<br>musculu<br>s |
| 1 | 1.00 | 1 | 1 | 0.01  | 0.006  | 0.01   | 0.01   | 0.008  | t | 139846 | PEWWLEE<br>PPFISSGK        | Mus<br>musculu<br>s |
| 1 | 1.00 | 1 | 1 | 0.04  | 0.04   | 0.028  | 0.029  | 0.04   | t | 117773 | CNSRQTD<br>REDELI          | Homo<br>sapiens     |
| 1 | 1.00 | 1 | 1 | -0.02 | -0.019 | -0.014 | -0.021 | -0.022 | t | 7381   | CYGVDPDH<br>KVWDYAT        | Equus<br>caballus   |
| 1 | 1.00 | 1 | 1 | -0.01 | -0.008 | -0.018 | -0.009 | -0.01  | t | 52389  | QSNQRSA<br>PRITFGGP<br>TDS | Homo<br>sapiens     |
| 1 | 1.00 | 1 | 1 | 0     | 0      | 0.002  | 0      | 0      | t | 75152  | YNGEYLIL<br>SARDVL         | Homo<br>sapiens     |
| 1 | 1.00 | 1 | 1 | 0     | 0      | 0.002  | 0      | 0      | t | 67656  | VAKVNIKP<br>LEDKILV        | Homo<br>sapiens     |
| 1 | 1.00 | 1 | 1 | 0     | 0      | 0.002  | 0      | 0      | t | 75152  | YNGEYLIL<br>SARDVL         | Homo<br>sapiens     |
| 1 | 1.00 | 1 | 1 | 0     | 0      | 0.002  | 0      | 0      | t | 22882  | GTVVAVG<br>PGRWDED<br>G    | Homo<br>sapiens     |
| 1 | 1.00 | 1 | 1 | 0     | 0      | 0.002  | 0      | 0      | t | 22882  | GTVVAVG<br>PGRWDED<br>G    | Homo<br>sapiens     |
| 1 | 1.00 | 1 | 1 | 0     | 0      | 0.002  | 0      | 0      | t | 4132   | ARDVLAV<br>VSK             | Homo<br>sapiens     |
| 1 | 1.00 | 1 | 1 | -0.03 | -0.03  | -0.028 | -0.026 | -0.03  | t | 139565 | PEWKALT<br>DMPQMR<br>ME    | Homo<br>sapiens     |
| 1 | 1.00 | 1 | 1 | -0.04 | -0.04  | -0.046 | -0.04  | -0.042 | t | 127811 | RVPRIPRD<br>PRPPRPP        | Homo<br>sapiens     |

|   |      |   |   |       |       |       |       |       |   |        |                              |                                  |
|---|------|---|---|-------|-------|-------|-------|-------|---|--------|------------------------------|----------------------------------|
| 1 | 1.00 | 1 | 1 | 0.01  | 0.01  | 0.014 | 0.01  | 0.008 | t | 22871  | GTVAPQIP<br>PNWHIPSI<br>QD   | Mus<br>musculu<br>s              |
| 1 | 1.00 | 1 | 1 | 0.04  | 0.034 | 0.033 | 0.033 | 0.041 | t | 127638 | ELQMTPD<br>SLIYS             | Trichosu<br>rus<br>vulpecul<br>a |
| 1 | 1.00 | 1 | 1 | 0.02  | 0.02  | 0.02  | 0.02  | 0.02  | t | 115435 | QEQNQEQ<br>PIRCEKDE<br>RFFSD | Homo<br>sapiens                  |
| 1 | 1.00 | 1 | 1 | 0     | 0     | 0     | 0     | 0     | t | 140595 | RHEDGDW<br>PRV               | Mus<br>musculu<br>s              |
| 1 | 1.00 | 1 | 1 | 0     | 0     | 0     | 0     | 0     | t | 103425 | MTAHTHD<br>GTRTWRT<br>G      | Homo<br>sapiens                  |
| 1 | 1.00 | 1 | 1 | 0     | 0     | 0     | 0     | 0     | t | 16354  | FKDKVLGL<br>LQRASQQ<br>EAEIR | Homo<br>sapiens                  |
| 1 | 1.00 | 1 | 1 | -0.02 | -0.02 | -0.02 | -0.02 | -0.02 | t | 149411 | PQFEEIRN<br>LA               | Homo<br>sapiens                  |
| 1 | 1.00 | 1 | 1 | -0.02 | -0.02 | -0.02 | -0.02 | -0.02 | t | 149086 | NPTQRPD                      | Sus<br>scrofa                    |
| 1 | 1.00 | 1 | 1 | -0.02 | -0.02 | -0.02 | -0.02 | -0.02 | t | 114949 | SKEHDGEC<br>KE               | Homo<br>sapiens                  |
| 1 | 1.00 | 1 | 1 | -0.02 | -0.02 | -0.02 | -0.02 | -0.02 | t | 99919  | CVYDPRG<br>HTGTTNQ<br>RSPPG  | Homo<br>sapiens                  |
| 1 | 1.00 | 1 | 1 | -0.02 | -0.02 | -0.02 | -0.02 | -0.02 | t | 78715  | LATCPEHQ<br>ITWDPIDG<br>RVIG | Homo<br>sapiens                  |
| 1 | 1.00 | 1 | 1 | -0.02 | -0.02 | -0.02 | -0.02 | -0.02 | t | 47180  | PDREVLHR<br>EFDEMEEC<br>ASHL | Homo<br>sapiens                  |
| 1 | 1.00 | 1 | 1 | -0.04 | -0.04 | -0.04 | -0.04 | -0.04 | t | 135788 | VSGWGRV<br>F                 | Homo<br>sapiens                  |
| 1 | 1.00 | 1 | 1 | -0.04 | -0.04 | -0.04 | -0.04 | -0.04 | t | 115709 | DKIHPFAQ<br>TQ               | Homo<br>sapiens                  |
| 1 | 1.00 | 1 | 1 | -0.04 | -0.04 | -0.04 | -0.04 | -0.04 | t | 105801 | GAA                          | Mus<br>musculu<br>s              |

|   |      |   |   |       |        |        |        |        |   |        |                              |                                  |
|---|------|---|---|-------|--------|--------|--------|--------|---|--------|------------------------------|----------------------------------|
| 1 | 1.00 | 1 | 1 | 0.02  | 0.022  | 0.025  | 0.021  | 0.02   | t | 78723  | LFQTPDSG<br>PKTCTPSG<br>EAPL | Homo<br>sapiens                  |
| 1 | 1.00 | 1 | 1 | 0.02  | 0.024  | 0.025  | 0.021  | 0.02   | t | 78723  | LFQTPDSG<br>PKTCTPSG<br>EAPL | Homo<br>sapiens                  |
| 1 | 1.00 | 1 | 1 | 0     | -0.004 | 0.004  | 0      | 0      | t | 30553  | KENYIYGT<br>CYYTASDR<br>TAFP | Oryctola<br>gus<br>cuniculu<br>s |
| 1 | 1.00 | 1 | 1 | -0.02 | -0.02  | -0.022 | -0.02  | -0.02  | t | 110614 | GPRGLPGE<br>RGRTPGA<br>GAAG  | Rattus<br>norvegic<br>us         |
| 1 | 1.00 | 1 | 1 | -0.01 | -0.01  | -0.01  | -0.01  | -0.009 | t | 133536 | CKPVENRA<br>C                | Mus<br>musculu<br>s              |
| 1 | 1.00 | 1 | 1 | -0.01 | -0.01  | -0.01  | -0.01  | -0.009 | t | 118763 | CYGSFARP<br>MN               | Mus<br>musculu<br>s              |
| 1 | 1.00 | 1 | 1 | -0.01 | -0.012 | -0.013 | -0.013 | -0.01  | t | 25315  | IAIGGAAT<br>GIAAVLTD<br>GNPP | Mus<br>musculu<br>s              |
| 1 | 1.00 | 1 | 1 | -0.01 | -0.01  | -0.013 | -0.013 | -0.01  | t | 25315  | IAIGGAAT<br>GIAAVLTD<br>GNPP | Homo<br>sapiens                  |
| 1 | 1.00 | 1 | 1 | -0.01 | -0.014 | -0.013 | -0.01  | -0.01  | t | 140940 | YRQKVEPL<br>RAEL             | Mus<br>musculu<br>s              |
| 1 | 1.00 | 1 | 1 | -0.02 | -0.02  | -0.013 | -0.011 | -0.017 | t | 130815 | ESDPPVAS<br>YQWRLIN          | Homo<br>sapiens                  |
| 1 | 1.00 | 1 | 1 | 0.02  | 0.017  | 0.02   | 0.02   | 0.02   | t | 46348  | NVDENAN<br>A                 | Oryctola<br>gus<br>cuniculu<br>s |
| 1 | 1.00 | 1 | 1 | 0     | 0.004  | 0.007  | -0.003 | -0.002 | t | 98734  | DLEILLQK<br>WE               | Homo<br>sapiens                  |
| 1 | 1.00 | 1 | 1 | 0.03  | 0.03   | 0.033  | 0.03   | 0.03   | t | 47641  | PGFGDNR<br>KNQ               | Homo<br>sapiens                  |

|   |      |   |   |       |        |        |       |        |   |        |                            |                                  |
|---|------|---|---|-------|--------|--------|-------|--------|---|--------|----------------------------|----------------------------------|
| 1 | 1.00 | 1 | 1 | 0.02  | 0.018  | 0.02   | 0.013 | 0.02   | t | 107860 | GHSYYISPE<br>LKP           | Mus<br>musculu<br>s              |
| 1 | 1.00 | 1 | 1 | -0.02 | -0.02  | -0.02  | -0.02 | -0.02  | t | 104295 | TAIRPAQV<br>GYNTPYM<br>NF  | Oryctola<br>gus<br>cuniculu<br>s |
| 1 | 1.00 | 1 | 1 | -0.01 | -0.01  | -0.01  | -0.01 | -0.01  | t | 106770 | RER                        | Mus<br>musculu<br>s              |
| 1 | 1.00 | 1 | 1 | 0     | -0.002 | 0      | 0     | -0.001 | t | 108295 | CKRDSTW<br>C               | Mus<br>musculu<br>s              |
| 1 | 1.00 | 1 | 1 | 0.06  | 0.065  | 0.07   | 0.057 | 0.061  | t | 10990  | EAAKQGE                    | Homo<br>sapiens                  |
| 1 | 1.00 | 1 | 1 | -0.05 | -0.05  | -0.043 | -0.05 | -0.051 | t | 114223 | PFSRVVHL                   | Rattus<br>norvegic<br>us         |
| 1 | 1.00 | 1 | 1 | -0.02 | -0.023 | -0.027 | -0.02 | -0.02  | t | 125842 | DPLIRGLLA<br>RPAK          | Oryctola<br>gus<br>cuniculu<br>s |
| 1 | 1.00 | 1 | 1 | 0     | 0      | 0      | 0     | 0      | t | 134767 | QDPYVKE<br>AENLKKYF<br>NAG | Mus<br>musculu<br>s              |
| 1 | 1.00 | 1 | 1 | -0.03 | -0.03  | -0.03  | -0.03 | -0.03  | t | 156875 | GHTSLR                     | Gallus<br>gallus                 |
| 1 | 1.00 | 1 | 1 | 0.03  | 0.03   | 0.033  | 0.033 | 0.032  | t | 115649 | SPGKNAT<br>GMEVG           | Homo<br>sapiens                  |
| 1 | 1.00 | 1 | 1 | 0.01  | 0.01   | 0.01   | 0.01  | 0.01   | t | 102246 | YNNHALL                    | Homo<br>sapiens                  |
| 1 | 1.00 | 1 | 1 | -0.01 | -0.01  | -0.01  | -0.01 | -0.01  | t | 134797 | SHQHSRR<br>RQGWLKEI        | Homo<br>sapiens                  |
| 1 | 1.00 | 1 | 1 | -0.01 | -0.01  | -0.01  | -0.01 | -0.01  | t | 142428 | KAQKEATA<br>AKLKA          | Homo<br>sapiens                  |
| 1 | 1.00 | 1 | 1 | -0.01 | -0.01  | -0.01  | -0.01 | -0.01  | t | 133630 | LPPGLHVF<br>PLASNRS        | Mus<br>musculu<br>s              |
| 1 | 1.00 | 1 | 1 | -0.03 | -0.03  | -0.03  | -0.03 | -0.03  | t | 156904 | KPGDPRH                    | Mus<br>musculu<br>s              |
| 1 | 1.00 | 1 | 1 | -0.03 | -0.03  | -0.03  | -0.03 | -0.03  | t | 156904 | KPGDPRH                    | Mus<br>musculu<br>s              |

|   |      |   |   |       |        |        |        |        |   |        |                       |                       |
|---|------|---|---|-------|--------|--------|--------|--------|---|--------|-----------------------|-----------------------|
| 1 | 1.00 | 1 | 1 | -0.03 | -0.03  | -0.03  | -0.03  | -0.03  | t | 156904 | KPGDPRH               | Oryctolagus cuniculus |
| 1 | 1.00 | 1 | 1 | -0.03 | -0.03  | -0.03  | -0.03  | -0.03  | t | 103694 | VGNVGLST IAGRLLG      | Homo sapiens          |
| 1 | 1.00 | 1 | 1 | -0.08 | -0.074 | -0.073 | -0.073 | -0.082 | t | 127881 | VPRLRPRH RHPQDPR      | Homo sapiens          |
| 1 | 1.00 | 1 | 1 | 0.03  | 0.034  | 0.03   | 0.033  | 0.031  | t | 139499 | FGEFSFQY DCSSWGC      | Homo sapiens          |
| 1 | 1.00 | 1 | 1 | 0     | 0      | 0      | 0      | 0.001  | t | 69175  | VKAETRLN              | Mus musculus          |
| 1 | 1.00 | 1 | 1 | -0.02 | -0.022 | -0.029 | -0.021 | -0.02  | t | 12514  | EILVEFEEP HATKQS      | Mus musculus          |
| 1 | 1.00 | 1 | 1 | -0.01 | -0.01  | -0.01  | -0.01  | -0.01  | t | 28074  | IPSTACTDI AWWRLPC HYG | Rattus norvegicus     |
| 1 | 1.00 | 1 | 1 | 0.07  | 0.068  | 0.07   | 0.071  | 0.073  | t | 130916 | KEDFDIYD EDE          | Mus musculus          |
| 1 | 1.00 | 1 | 1 | -0.01 | -0.01  | -0.01  | -0.01  | -0.012 | t | 107482 | KGEPGLPG RGFPGF       | Mus musculus          |
| 1 | 1.00 | 1 | 1 | -0.04 | -0.038 | -0.039 | -0.039 | -0.039 | t | 44140  | NHFVPQP PSRTW         | Homo sapiens          |
| 1 | 1.00 | 1 | 1 | 0.01  | 0.012  | 0.01   | 0.009  | 0.01   | t | 149438 | QQPQQQY PSG           | Homo sapiens          |
| 1 | 1.00 | 1 | 1 | 0.01  | 0.012  | 0.01   | 0.007  | 0.01   | t | 71162  | VSTQSAKN PPGATV       | Homo sapiens          |
| 1 | 1.00 | 1 | 1 | -0.04 | -0.038 | -0.035 | -0.039 | -0.04  | t | 49150  | PQVVMG                | Homo sapiens          |
| 1 | 1.00 | 1 | 1 | 0     | 0.002  | 0.009  | 0.007  | 0.003  | t | 112314 | SGVPDRF               | Homo sapiens          |

|   |      |   |   |       |        |        |        |        |   |        |                            |                                  |
|---|------|---|---|-------|--------|--------|--------|--------|---|--------|----------------------------|----------------------------------|
| 1 | 1.00 | 1 | 1 | 0.04  | 0.04   | 0.04   | 0.04   | 0.042  | t | 135473 | KDRHDFG<br>FPQ             | Mus<br>musculu<br>s              |
| 1 | 1.00 | 1 | 1 | 0     | 0.004  | 0.001  | 0.001  | -0.002 | t | 36831  | LKEKHTDL<br>GKEGV          | Homo<br>sapiens                  |
| 1 | 1.00 | 1 | 1 | -0.01 | -0.01  | -0.012 | -0.014 | -0.01  | t | 118681 | YAKDVKFG<br>ADARA          | Homo<br>sapiens                  |
| 1 | 1.00 | 1 | 1 | -0.01 | -0.01  | -0.009 | -0.01  | -0.008 | t | 64541  | TKDTNNN<br>L               | Mus<br>musculu<br>s              |
| 1 | 1.00 | 1 | 1 | 0.02  | 0.018  | 0.024  | 0.023  | 0.021  | t | 105497 | RHDSGYE                    | Mus<br>musculu<br>s              |
| 1 | 1.00 | 1 | 1 | 0.04  | 0.04   | 0.045  | 0.04   | 0.04   | t | 12333  | EHGAMEI                    | Mus<br>musculu<br>s              |
| 1 | 1.00 | 1 | 1 | 0     | 0      | 0      | -0.004 | 0      | t | 117140 | DWEYSVW<br>LSN             | Homo<br>sapiens                  |
| 1 | 1.00 | 1 | 1 | -0.01 | -0.018 | -0.01  | -0.013 | -0.01  | t | 110922 | KQMDIKSI<br>NDLQ           | Macaca                           |
| 1 | 1.00 | 1 | 1 | 0.05  | 0.048  | 0.043  | 0.043  | 0.05   | t | 141948 | LKPREEYQ<br>PS             | Mus<br>musculu<br>s              |
| 1 | 1.00 | 1 | 1 | 0.05  | 0.048  | 0.043  | 0.043  | 0.05   | t | 141948 | LKPREEYQ<br>PS             | Sus<br>crofa                     |
| 1 | 1.00 | 1 | 1 | -0.04 | -0.038 | -0.033 | -0.037 | -0.04  | t | 21953  | GQRVEFLV<br>QAWKSK         | Homo<br>sapiens                  |
| 1 | 1.00 | 1 | 1 | -0.04 | -0.036 | -0.033 | -0.037 | -0.04  | t | 21953  | GQRVEFLV<br>QAWKSK         | Homo<br>sapiens                  |
| 1 | 1.00 | 1 | 1 | 0     | -0.003 | 0      | 0      | 0.001  | t | 122293 | CTYVLDPE<br>NLTLKAPY<br>EA | Oryctola<br>gus<br>cuniculu<br>s |
| 1 | 1.00 | 1 | 1 | 0     | -0.003 | 0      | 0      | 0.001  | t | 122293 | CTYVLDPE<br>NLTLKAPY<br>EA | Oryctola<br>gus<br>cuniculu<br>s |
| 1 | 1.00 | 1 | 1 | 0     | -0.008 | 0      | 0      | 0.001  | t | 125246 | RRQPHVM<br>S               | Mus<br>musculu<br>s              |

|   |      |   |   |   |        |   |   |       |   |        |                              |                                  |
|---|------|---|---|---|--------|---|---|-------|---|--------|------------------------------|----------------------------------|
| 1 | 1.00 | 1 | 1 | 0 | -0.003 | 0 | 0 | 0.001 | t | 122083 | DPNIKLVL<br>DDCWATS          | Oryctola<br>gus<br>cuniculu<br>s |
| 1 | 1.00 | 1 | 1 | 0 | -0.003 | 0 | 0 | 0.001 | t | 119048 | VSDYEMKL<br>MDLDVEQ          | Oryctola<br>gus<br>cuniculu<br>s |
| 1 | 1.00 | 1 | 1 | 0 | -0.007 | 0 | 0 | 0.001 | t | 114011 | VTTVTTHN<br>NPTFTDPS<br>VLQP | Oryctola<br>gus<br>cuniculu<br>s |
| 1 | 1.00 | 1 | 1 | 0 | -0.007 | 0 | 0 | 0.001 | t | 110855 | FNRAGTV<br>GENVPDD<br>LYIKGS | Oryctola<br>gus<br>cuniculu<br>s |
| 1 | 1.00 | 1 | 1 | 0 | -0.004 | 0 | 0 | 0.001 | t | 110980 | QPLGVGIS<br>GHPLLNLK<br>DDTE | Mus<br>musculu<br>s              |
| 1 | 1.00 | 1 | 1 | 0 | -0.007 | 0 | 0 | 0.001 | t | 111585 | NKSEVPLD<br>ICTSICKYP<br>DYI | Oryctola<br>gus<br>cuniculu<br>s |
| 1 | 1.00 | 1 | 1 | 0 | 0      | 0 | 0 | 0.001 | t | 100437 | QPNNKRN<br>QLWRLRQ<br>TAGN   | Sus<br>scrofa                    |
| 1 | 1.00 | 1 | 1 | 0 | -0.003 | 0 | 0 | 0.001 | t | 102510 | HHQKLVEF<br>AEDVGSN<br>K     | Oryctola<br>gus<br>cuniculu<br>s |
| 1 | 1.00 | 1 | 1 | 0 | -0.004 | 0 | 0 | 0.001 | t | 110855 | FNRAGTV<br>GENVPDD<br>LYIKGS | Mus<br>musculu<br>s              |
| 1 | 1.00 | 1 | 1 | 0 | 0.002  | 0 | 0 | 0.001 | t | 112739 | YTTGAVR<br>QIFGDYKT<br>TICGK | Rattus<br>norvegic<br>us         |
| 1 | 1.00 | 1 | 1 | 0 | -0.003 | 0 | 0 | 0.001 | t | 65409  | TNRNPQ                       | Oryctola<br>gus<br>cuniculu<br>s |
| 1 | 1.00 | 1 | 1 | 0 | -0.003 | 0 | 0 | 0.001 | t | 75441  | YPYDVDPY<br>A                | Oryctola<br>gus<br>cuniculu<br>s |
| 1 | 1.00 | 1 | 1 | 0 | 0      | 0 | 0 | 0.001 | t | 65000  | TLPERVRP<br>PDDWAT           | Sus<br>scrofa                    |

|   |      |   |   |   |        |   |   |       |   |       |                           |                                  |
|---|------|---|---|---|--------|---|---|-------|---|-------|---------------------------|----------------------------------|
| 1 | 1.00 | 1 | 1 | 0 | -0.003 | 0 | 0 | 0.001 | t | 75791 | YSLFQKEK<br>MVL           | Oryctola<br>gus<br>cuniculu<br>s |
| 1 | 1.00 | 1 | 1 | 0 | 0      | 0 | 0 | 0.001 | t | 49928 | PVPAPRRK<br>VGSDCGS       | Sus<br>scrofa                    |
| 1 | 1.00 | 1 | 1 | 0 | 0      | 0 | 0 | 0.001 | t | 49967 | PVSLGGDV<br>PNS           | Sus<br>scrofa                    |
| 1 | 1.00 | 1 | 1 | 0 | -0.002 | 0 | 0 | 0.001 | t | 43242 | NANPNAN<br>PNANP          | Homo<br>sapiens                  |
| 1 | 1.00 | 1 | 1 | 0 | 0      | 0 | 0 | 0.001 | t | 51958 | QPRKTKPV<br>KSLPERK       | Sus<br>scrofa                    |
| 1 | 1.00 | 1 | 1 | 0 | -0.002 | 0 | 0 | 0.001 | t | 43242 | NANPNAN<br>PNANP          | Homo<br>sapiens                  |
| 1 | 1.00 | 1 | 1 | 0 | -0.008 | 0 | 0 | 0.001 | t | 43242 | NANPNAN<br>PNANP          | Mus<br>musculu<br>s              |
| 1 | 1.00 | 1 | 1 | 0 | -0.003 | 0 | 0 | 0.001 | t | 51775 | QNTRNIVP<br>VSIVSR        | Oryctola<br>gus<br>cuniculu<br>s |
| 1 | 1.00 | 1 | 1 | 0 | -0.003 | 0 | 0 | 0.001 | t | 48618 | PNDPNRN<br>VD             | Oryctola<br>gus<br>cuniculu<br>s |
| 1 | 1.00 | 1 | 1 | 0 | -0.003 | 0 | 0 | 0.001 | t | 43246 | NANPNAN<br>PNANPNA<br>NP  | Oryctola<br>gus<br>cuniculu<br>s |
| 1 | 1.00 | 1 | 1 | 0 | 0      | 0 | 0 | 0.001 | t | 46899 | PAPRRKFQ<br>QVKRL         | Sus<br>scrofa                    |
| 1 | 1.00 | 1 | 1 | 0 | 0      | 0 | 0 | 0.001 | t | 23511 | GYYYPSDP<br>NTFYAPPY<br>S | Sus<br>scrofa                    |
| 1 | 1.00 | 1 | 1 | 0 | 0.013  | 0 | 0 | 0.001 | t | 19096 | GDRADGQ<br>PA             | Mus<br>musculu<br>s              |
| 1 | 1.00 | 1 | 1 | 0 | -0.003 | 0 | 0 | 0.001 | t | 32571 | KNNNSTN<br>SGI            | Oryctola<br>gus<br>cuniculu<br>s |



|   |      |   |   |       |        |        |        |        |   |        |                              |                                  |
|---|------|---|---|-------|--------|--------|--------|--------|---|--------|------------------------------|----------------------------------|
| 1 | 1.00 | 1 | 1 | 0     | 0      | 0      | 0      | 0.001  | t | 10908  | DYKDDDD<br>K                 | Sus<br>scrofa                    |
| 1 | 1.00 | 1 | 1 | 0     | -0.007 | 0      | 0      | 0.001  | t | 28085  | IPTGGIQR<br>GGRGPCQ<br>RQQRS | Oryctola<br>gus<br>cuniculu<br>s |
| 1 | 1.00 | 1 | 1 | 0     | -0.003 | 0      | 0      | 0.001  | t | 13438  | ENANANN<br>AV                | Oryctola<br>gus<br>cuniculu<br>s |
| 1 | 1.00 | 1 | 1 | 0     | -0.003 | 0      | 0      | 0.001  | t | 10801  | DWEDRY<br>RE                 | Oryctola<br>gus<br>cuniculu<br>s |
| 1 | 1.00 | 1 | 1 | 0     | -0.003 | 0      | 0      | 0.001  | t | 10227  | DSSAHGTP<br>STPA             | Oryctola<br>gus<br>cuniculu<br>s |
| 1 | 1.00 | 1 | 1 | 0     | 0.012  | 0      | 0      | 0.001  | t | 7491   | DAEFRHDS<br>GYEVHHQ<br>K     | Mus<br>musculu<br>s              |
| 1 | 1.00 | 1 | 1 | 0     | -0.003 | 0      | 0      | 0.001  | t | 9694   | DPNANPN<br>VDPNANP<br>NV     | Saimiri<br>sciureus              |
| 1 | 1.00 | 1 | 1 | 0     | 0.012  | 0      | 0      | 0.001  | t | 7491   | DAEFRHDS<br>GYEVHHQ<br>K     | Mus<br>musculu<br>s              |
| 1 | 1.00 | 1 | 1 | 0     | -0.003 | 0      | 0      | 0.001  | t | 9694   | DPNANPN<br>VDPNANP<br>NV     | Saimiri<br>sciureus              |
| 1 | 1.00 | 1 | 1 | 0.03  | 0.037  | 0.035  | 0.029  | 0.03   | t | 147288 | SKFQDTH<br>NNAHYV<br>FFEE    | Gallus<br>gallus                 |
| 1 | 1.00 | 1 | 1 | 0     | -0.002 | 0.007  | 0.003  | 0      | t | 44021  | NGKVNNK<br>VAY               | Mus<br>musculu<br>s              |
| 1 | 1.00 | 1 | 1 | -0.01 | -0.012 | -0.008 | -0.007 | -0.008 | t | 36982  | LKNTVDVV<br>SV               | Mus<br>musculu<br>s              |
| 1 | 1.00 | 1 | 1 | 0.06  | 0.06   | 0.06   | 0.06   | 0.059  | t | 78456  | LQLISGLN<br>DTSSN            | Mus<br>musculu<br>s              |
| 1 | 1.00 | 1 | 1 | 0.02  | 0.02   | 0.02   | 0.02   | 0.02   | t | 119462 | HDENGAT<br>GPVKRARE<br>ETDKE | Homo<br>sapiens                  |
| 1 | 1.00 | 1 | 1 | 0.02  | 0.02   | 0.02   | 0.02   | 0.02   | t | 115851 | LQDKIHPF<br>AQ               | Homo<br>sapiens                  |

|   |      |   |   |       |        |        |        |        |   |        |                              |                                  |
|---|------|---|---|-------|--------|--------|--------|--------|---|--------|------------------------------|----------------------------------|
| 1 | 1.00 | 1 | 1 | 0.02  | 0.02   | 0.02   | 0.02   | 0.02   | t | 115382 | MHIRLSFN<br>PTQLEEQC<br>HI   | Homo<br>sapiens                  |
| 1 | 1.00 | 1 | 1 | 0     | 0      | 0      | 0      | 0      | t | 150251 | GNSIKPTG<br>ASRTAIT          | Oryctola<br>gus<br>cuniculu<br>s |
| 1 | 1.00 | 1 | 1 | 0     | 0      | 0      | 0      | 0      | t | 99782  | YDPRCVYD<br>PRGHTGT          | Homo<br>sapiens                  |
| 1 | 1.00 | 1 | 1 | 0     | 0      | 0      | 0      | 0      | t | 103373 | LPGVSEHL<br>KLNGKVL          | Homo<br>sapiens                  |
| 1 | 1.00 | 1 | 1 | -0.02 | -0.02  | -0.02  | -0.02  | -0.02  | t | 127694 | IHKNSSV                      | Homo<br>sapiens                  |
| 1 | 1.00 | 1 | 1 | -0.02 | -0.02  | -0.02  | -0.02  | -0.02  | t | 77800  | RGCTFYGC<br>WK               | Homo<br>sapiens                  |
| 1 | 1.00 | 1 | 1 | -0.02 | -0.02  | -0.02  | -0.02  | -0.02  | t | 7512   | DAGDHRA<br>AA                | Mus<br>musculu<br>s              |
| 1 | 1.00 | 1 | 1 | -0.01 | -0.01  | -0.01  | -0.01  | -0.011 | t | 7398   | CYKKVWR<br>DHRGTI            | Mus<br>musculu<br>s              |
| 1 | 1.00 | 1 | 1 | -0.01 | -0.01  | -0.01  | -0.01  | -0.011 | t | 7401   | CYKKVWR<br>DHRGTI            | Mus<br>musculu<br>s              |
| 1 | 1.00 | 1 | 1 | -0.03 | -0.032 | -0.03  | -0.027 | -0.03  | t | 74801  | YLLQKLRN                     | Mus<br>musculu<br>s              |
| 1 | 1.00 | 1 | 1 | 0.04  | 0.04   | 0.04   | 0.04   | 0.04   | t | 156933 | PLEKSHL                      | Gallus<br>gallus                 |
| 1 | 1.00 | 1 | 1 | 0.01  | 0.008  | 0.026  | 0.009  | 0.006  | t | 135912 | EALVLDTN<br>GLMS             | Mus<br>musculu<br>s              |
| 1 | 1.00 | 1 | 1 | 0.01  | 0.01   | 0.004  | 0.01   | 0.013  | t | 6479   | CKGKIQAL<br>CENPEWA          | Mus<br>musculu<br>s              |
| 1 | 1.00 | 1 | 1 | 0.03  | 0.032  | 0.033  | 0.033  | 0.032  | t | 111585 | NKSEVPLD<br>ICTSICKYP<br>DYI | Cavia<br>porcellu<br>s           |
| 1 | 1.00 | 1 | 1 | -0.05 | -0.051 | -0.048 | -0.053 | -0.05  | t | 50058  | PWYVWL<br>GFIAGLIAI<br>VM    | Homo<br>sapiens                  |
| 1 | 1.00 | 1 | 1 | -0.03 | -0.026 | -0.019 | -0.023 | -0.028 | t | 122206 | VISRSRV                      | Homo<br>sapiens                  |

|   |      |   |   |       |        |        |        |       |   |        |                             |                                  |
|---|------|---|---|-------|--------|--------|--------|-------|---|--------|-----------------------------|----------------------------------|
| 1 | 1.00 | 1 | 1 | 0     | 0      | 0      | -0.002 | 0     | t | 110651 | LCLIGCKPP<br>IGEHWGK<br>GSP | Homo<br>sapiens                  |
| 1 | 1.00 | 1 | 1 | -0.01 | -0.01  | -0.004 | -0.007 | -0.01 | t | 50525  | QDVKFPG<br>GGQIVGG<br>V     | Homo<br>sapiens                  |
| 1 | 1.00 | 1 | 1 | -0.01 | -0.01  | -0.004 | -0.007 | -0.01 | t | 50525  | QDVKFPG<br>GGQIVGG<br>V     | Homo<br>sapiens                  |
| 1 | 1.00 | 1 | 1 | -0.05 | -0.047 | -0.047 | -0.05  | -0.05 | t | 97431  | KTFSMGA<br>K                | Mus<br>musculu<br>s              |
| 1 | 1.00 | 1 | 1 | 0.03  | 0.026  | 0.03   | 0.03   | 0.031 | t | 123001 | AASE DPR                    | Mus<br>musculu<br>s              |
| 1 | 1.00 | 1 | 1 | 0.02  | 0.024  | 0.018  | 0.017  | 0.018 | t | 105977 | NHEQEFLR<br>YQQQSRR         | Homo<br>sapiens                  |
| 1 | 1.00 | 1 | 1 | 0     | -0.007 | 0      | 0      | 0.002 | t | 19033  | GDLQVLA                     | Oryctola<br>gus<br>cuniculu<br>s |
| 1 | 1.00 | 1 | 1 | 0     | -0.007 | 0      | 0      | 0.002 | t | 19033  | GDLQVLA                     | Oryctola<br>gus<br>cuniculu<br>s |
| 1 | 1.00 | 1 | 1 | 0.02  | 0.02   | 0.019  | 0.02   | 0.02  | t | 23801  | HFLSQNFF<br>G               | Mus<br>musculu<br>s              |
| 1 | 1.00 | 1 | 1 | -0.01 | -0.01  | -0.023 | -0.009 | -0.01 | t | 138935 | YDQREPQ<br>AWCRPNE<br>NQSWT | Homo<br>sapiens                  |
| 1 | 1.00 | 1 | 1 | -0.01 | -0.01  | -0.01  | -0.01  | -0.01 | t | 127187 | TDAQRREL<br>EKHSLSRVI<br>C  | Oryctola<br>gus<br>cuniculu<br>s |
| 1 | 1.00 | 1 | 1 | 0.03  | 0.03   | 0.035  | 0.03   | 0.031 | t | 140701 | LNEDLRS<br>WTA              | Mus<br>musculu<br>s              |
| 1 | 1.00 | 1 | 1 | -0.01 | -0.01  | -0.003 | -0.001 | -0.01 | t | 119482 | KSVKPRQA<br>T               | Homo<br>sapiens                  |
| 1 | 1.00 | 1 | 1 | 0.02  | 0.02   | 0.02   | 0.02   | 0.02  | t | 141943 | LEKKETLG<br>CDESESCV        | Mus<br>musculu<br>s              |

|   |      |   |   |       |        |        |       |       |   |        |                     |                       |
|---|------|---|---|-------|--------|--------|-------|-------|---|--------|---------------------|-----------------------|
| 1 | 1.00 | 1 | 1 | 0.01  | 0.013  | 0.01   | 0.01  | 0.01  | t | 56751  | SAEGQL              | Mus musculus          |
| 1 | 1.00 | 1 | 1 | 0.05  | 0.048  | 0.044  | 0.049 | 0.051 | t | 9232   | DLPDYGDY<br>GEDLFDY | Mus musculus          |
| 1 | 1.00 | 1 | 1 | 0     | 0      | 0      | 0     | 0.002 | t | 48596  | PNANP               | Mus musculus          |
| 1 | 1.00 | 1 | 1 | 0.01  | 0.01   | 0.01   | 0.01  | 0.01  | t | 119585 | GQPREPQ<br>V        | Homo sapiens          |
| 1 | 1.00 | 1 | 1 | 0.01  | 0.01   | 0.01   | 0.01  | 0.01  | t | 119590 | HQDWLN<br>GK        | Homo sapiens          |
| 1 | 1.00 | 1 | 1 | 0.01  | 0.01   | 0.01   | 0.01  | 0.01  | t | 103629 | TAALRAAE<br>DDCPPP  | Homo sapiens          |
| 1 | 1.00 | 1 | 1 | 0.02  | 0.014  | 0.013  | 0.013 | 0.022 | t | 127560 | ADEWLVP<br>EGPRD    | Trichosurus vulpecula |
| 1 | 1.00 | 1 | 1 | -0.01 | -0.01  | -0.01  | -0.01 | -0.01 | t | 132827 | FSQILPSF<br>DETMGR  | Trichosurus vulpecula |
| 1 | 1.00 | 1 | 1 | -0.01 | -0.01  | -0.01  | -0.01 | -0.01 | t | 117118 | YPLHLNTD<br>YSTR    | Mus musculus          |
| 1 | 1.00 | 1 | 1 | -0.01 | -0.01  | -0.01  | -0.01 | -0.01 | t | 99499  | NLNQHRS<br>LSIP     | Oryctolagus cuniculus |
| 1 | 1.00 | 1 | 1 | -0.01 | -0.01  | -0.01  | -0.01 | -0.01 | t | 23298  | GWWEHD<br>GQL       | Mus musculus          |
| 1 | 1.00 | 1 | 1 | -0.03 | -0.03  | -0.03  | -0.03 | -0.03 | t | 97294  | EVNDVRKF<br>F       | Oryctolagus cuniculus |
| 1 | 1.00 | 1 | 1 | -0.05 | -0.05  | -0.05  | -0.05 | -0.05 | t | 108400 | GPPRRLID<br>T       | Homo sapiens          |
| 1 | 1.00 | 1 | 1 | 0.02  | 0.02   | 0.02   | 0.02  | 0.022 | t | 118762 | CYGSFAKP<br>TN      | Mus musculus          |
| 1 | 1.00 | 1 | 1 | -0.03 | -0.026 | -0.015 | -0.03 | -0.03 | t | 139863 | PYGAWWF             | Ovis aries            |

|   |      |   |   |       |        |        |        |        |   |        |                              |                                  |
|---|------|---|---|-------|--------|--------|--------|--------|---|--------|------------------------------|----------------------------------|
| 1 | 1.00 | 1 | 1 | -0.03 | -0.026 | -0.025 | -0.023 | -0.028 | t | 122904 | SNTRVFPN<br>PNNKQAL<br>Y     | Homo<br>sapiens                  |
| 1 | 1.00 | 1 | 1 | -0.01 | -0.01  | -0.01  | -0.01  | -0.01  | t | 142407 | DKTIAAAK<br>KAKKARE          | Homo<br>sapiens                  |
| 1 | 1.00 | 1 | 1 | -0.04 | -0.04  | -0.04  | -0.036 | -0.038 | t | 107788 | DHEGTHST<br>KRGHAKSR<br>PVRG | Homo<br>sapiens                  |
| 1 | 1.00 | 1 | 1 | 0     | 0      | 0      | 0      | 0.001  | t | 112537 | HLILAPSIR<br>HAP             | Homo<br>sapiens                  |
| 1 | 1.00 | 1 | 1 | -0.01 | -0.01  | -0.01  | -0.01  | -0.01  | t | 158330 | TERPEGAN<br>FATP             | Canis<br>lupus                   |
| 1 | 1.00 | 1 | 1 | -0.03 | -0.03  | -0.03  | -0.03  | -0.03  | t | 116943 | DFRDYSTR<br>PFAL             | Homo<br>sapiens                  |
| 1 | 1.00 | 1 | 1 | -0.01 | -0.012 | -0.01  | -0.011 | -0.01  | t | 142202 | KISEASRK<br>GLRRDLDA<br>SREA | Mus<br>musculu<br>s              |
| 1 | 1.00 | 1 | 1 | 0.01  | 0.01   | 0.01   | 0.006  | 0.012  | t | 132029 | QLGPTCLS<br>SL               | Homo<br>sapiens                  |
| 1 | 1.00 | 1 | 1 | 0.01  | 0.008  | 0.018  | 0.01   | 0.009  | t | 100437 | QPNNKRN<br>QLWRLQ<br>TAGN    | Mus<br>musculu<br>s              |
| 1 | 1.00 | 1 | 1 | 0     | 0.004  | -0.002 | -0.003 | 0.001  | t | 5990   | CAISGGYP<br>VC               | Homo<br>sapiens                  |
| 1 | 1.00 | 1 | 1 | 0.02  | 0.022  | 0.02   | 0.023  | 0.022  | t | 104443 | DAEFRHDS<br>GYE              | Homo<br>sapiens                  |
| 1 | 1.00 | 1 | 1 | -0.01 | -0.012 | -0.001 | -0.007 | -0.01  | t | 50170  | PYSLNWP<br>DE                | Rattus<br>norvegic<br>us         |
| 1 | 1.00 | 1 | 1 | 0     | 0      | 0.006  | 0      | 0.002  | t | 35310  | LDTNGGT<br>GTAIV             | Mus<br>musculu<br>s              |
| 1 | 1.00 | 1 | 1 | 0     | -0.003 | 0.006  | 0      | 0.002  | t | 35310  | LDTNGGT<br>GTAIV             | Oryctola<br>gus<br>cuniculu<br>s |
| 1 | 1.00 | 1 | 1 | -0.02 | -0.018 | -0.019 | -0.019 | -0.02  | t | 61139  | SSKLLPKM<br>PGIPFI           | Homo<br>sapiens                  |

|   |      |   |   |       |        |        |       |        |   |        |                              |                                  |
|---|------|---|---|-------|--------|--------|-------|--------|---|--------|------------------------------|----------------------------------|
| 1 | 1.00 | 1 | 1 | 0     | 0.004  | 0.001  | 0     | 0      | t | 41416  | MENYFH<br>WGPVTNQ<br>SIQ     | Sus<br>scrofa                    |
| 1 | 1.00 | 1 | 1 | -0.02 | -0.023 | -0.024 | -0.02 | -0.018 | t | 122734 | DSVPKWD<br>RLPC              | Oryctola<br>gus<br>cuniculu<br>s |
| 1 | 1.00 | 1 | 1 | 0.02  | 0.022  | 0.02   | 0.021 | 0.02   | t | 111821 | TEETQTTI<br>QRPRSEP          | Homo<br>sapiens                  |
| 1 | 1.00 | 1 | 1 | 0.01  | 0.013  | 0.019  | 0.01  | 0.013  | t | 79284  | LDAVPL                       | Mus<br>musculu<br>s              |
| 1 | 1.00 | 1 | 1 | -0.02 | -0.018 | -0.02  | -0.02 | -0.02  | t | 118021 | MKCGMW<br>GRA                | Homo<br>sapiens                  |
| 1 | 1.00 | 1 | 1 | 0.06  | 0.062  | 0.066  | 0.057 | 0.062  | t | 7740   | DDAAD                        | Homo<br>sapiens                  |
| 1 | 1.00 | 1 | 1 | -0.02 | -0.02  | -0.025 | -0.02 | -0.02  | t | 122115 | IKGANDLA<br>KFHQMLM<br>KIIMK | Oryctola<br>gus<br>cuniculu<br>s |
| 1 | 1.00 | 1 | 1 | 0.02  | 0.02   | 0.028  | 0.02  | 0.02   | t | 87988  | RLFAQPQ                      | Homo<br>sapiens                  |
| 1 | 1.00 | 1 | 1 | 0.01  | 0.01   | 0.01   | 0.01  | 0.011  | t | 153357 | ACWYSTR<br>DHC GGGS          | Mus<br>musculu<br>s              |
| 1 | 1.00 | 1 | 1 | 0     | 0      | 0.004  | 0     | 0      | t | 51921  | QPQQPFP<br>LQP               | Mus<br>musculu<br>s              |
| 1 | 1.00 | 1 | 1 | 0     | 0      | 0      | 0     | 0      | t | 149121 | THANSTQ                      | Sus<br>scrofa                    |
| 1 | 1.00 | 1 | 1 | 0     | 0      | 0      | 0     | 0      | t | 135576 | LRYSTGTV<br>SG               | Oryctola<br>gus<br>cuniculu<br>s |
| 1 | 1.00 | 1 | 1 | 0     | 0      | 0      | 0     | 0      | t | 110603 | GLPGARGL<br>TGRPGDA          | Mus<br>musculu<br>s              |
| 1 | 1.00 | 1 | 1 | 0     | 0      | 0      | 0     | 0      | t | 107890 | HRLAFGQ<br>NT                | Mus<br>musculu<br>s              |

|   |      |   |   |       |        |        |        |        |   |        |                              |                                  |
|---|------|---|---|-------|--------|--------|--------|--------|---|--------|------------------------------|----------------------------------|
| 1 | 1.00 | 1 | 1 | 0     | 0      | 0      | 0      | 0      | t | 115900 | PQRDMPI<br>QAF               | Homo<br>sapiens                  |
| 1 | 1.00 | 1 | 1 | -0.02 | -0.02  | -0.02  | -0.02  | -0.02  | t | 115255 | FQINNKIW<br>CK               | Homo<br>sapiens                  |
| 1 | 1.00 | 1 | 1 | -0.02 | -0.02  | -0.02  | -0.02  | -0.02  | t | 95681  | PQYLKTVY<br>QH               | Homo<br>sapiens                  |
| 1 | 1.00 | 1 | 1 | -0.02 | -0.02  | -0.02  | -0.02  | -0.02  | t | 97240  | DFRNEFD<br>HLLIEQAN<br>H     | Homo<br>sapiens                  |
| 1 | 1.00 | 1 | 1 | -0.04 | -0.04  | -0.04  | -0.04  | -0.04  | t | 111310 | GDWIRRN<br>VVAYWPS<br>V      | Oryctola<br>gus<br>cuniculu<br>s |
| 1 | 1.00 | 1 | 1 | 0     | -0.004 | 0.021  | 0.003  | -0.002 | t | 153856 | MFQDPQE<br>R                 | Oryctola<br>gus<br>cuniculu<br>s |
| 1 | 1.00 | 1 | 1 | -0.01 | -0.01  | -0.017 | -0.01  | -0.01  | t | 106483 | GSRSRTPS<br>LPTPTRE          | Mus<br>musculu<br>s              |
| 1 | 1.00 | 1 | 1 | -0.05 | -0.048 | -0.049 | -0.043 | -0.051 | t | 125578 | TLAWGLLL<br>MILHPDV<br>QRRVQ | Homo<br>sapiens                  |
| 1 | 1.00 | 1 | 1 | 0.01  | 0.006  | 0.01   | 0.013  | 0.012  | t | 118385 | GMTSNGFI<br>ADPDDRG<br>ML    | Oryctola<br>gus<br>cuniculu<br>s |
| 1 | 1.00 | 1 | 1 | -0.01 | -0.012 | -0.018 | -0.011 | -0.009 | t | 2040   | AINRRVE                      | Mus<br>musculu<br>s              |
| 1 | 1.00 | 1 | 1 | 0     | 0      | 0.002  | 0.006  | 0      | t | 65834  | TQDNVEG<br>VLREMAD           | Homo<br>sapiens                  |
| 1 | 1.00 | 1 | 1 | -0.01 | -0.01  | -0.01  | -0.01  | -0.01  | t | 6737   | CNWTRGE<br>R                 | Mus<br>musculu<br>s              |
| 1 | 1.00 | 1 | 1 | -0.01 | 0.002  | -0.01  | -0.01  | -0.01  | t | 6737   | CNWTRGE<br>R                 | Mus<br>musculu<br>s              |
| 1 | 1.00 | 1 | 1 | -0.01 | -0.01  | -0.01  | -0.01  | -0.01  | t | 6737   | CNWTRGE<br>R                 | Mus<br>musculu<br>s              |

|   |      |   |   |       |        |        |        |       |   |        |                            |                                  |
|---|------|---|---|-------|--------|--------|--------|-------|---|--------|----------------------------|----------------------------------|
| 1 | 1.00 | 1 | 1 | 0.02  | 0.02   | 0.025  | 0.02   | 0.021 | t | 138456 | KEQFEFAL<br>TAVAEV         | Oryctola<br>gus<br>cuniculu<br>s |
| 1 | 1.00 | 1 | 1 | 0     | -0.002 | 0      | -0.002 | 0     | t | 65476  | TNVGLKIR<br>QLLW           | Mus<br>musculu<br>s              |
| 1 | 1.00 | 1 | 1 | 0     | -0.002 | 0      | -0.002 | 0     | t | 40921  | LYREALESP<br>EHC           | Mus<br>musculu<br>s              |
| 1 | 1.00 | 1 | 1 | 0     | -0.002 | 0      | -0.002 | 0     | t | 39172  | LRQAILCW<br>GELM           | Mus<br>musculu<br>s              |
| 1 | 1.00 | 1 | 1 | 0     | -0.002 | 0      | -0.002 | 0     | t | 14230  | ESPEHCSP<br>HHTA           | Mus<br>musculu<br>s              |
| 1 | 1.00 | 1 | 1 | 0     | -0.002 | 0      | -0.002 | 0     | t | 16114  | FHISCLTFG<br>RET           | Mus<br>musculu<br>s              |
| 1 | 1.00 | 1 | 1 | 0.02  | 0.018  | 0.02   | 0.019  | 0.02  | t | 133497 | AEPFYSW<br>DRASR           | Mus<br>musculu<br>s              |
| 1 | 1.00 | 1 | 1 | 0     | -0.004 | 0      | -0.001 | 0     | t | 144042 | QEPLMGT<br>VPIRA           | Oryctola<br>gus<br>cuniculu<br>s |
| 1 | 1.00 | 1 | 1 | -0.01 | -0.01  | -0.003 | -0.008 | -0.01 | t | 70816  | VRRRGDS<br>RGSLLSP         | Homo<br>sapiens                  |
| 1 | 1.00 | 1 | 1 | 0.01  | 0.008  | 0.013  | 0.009  | 0.01  | t | 19895  | GGKFLEG                    | Mus<br>musculu<br>s              |
| 1 | 1.00 | 1 | 1 | -0.02 | -0.02  | -0.012 | -0.019 | -0.02 | t | 83498  | IHPTILCVY<br>G             | Homo<br>sapiens                  |
| 1 | 1.00 | 1 | 1 | -0.02 | -0.018 | -0.012 | -0.019 | -0.02 | t | 83498  | IHPTILCVY<br>G             | Homo<br>sapiens                  |
| 1 | 1.00 | 1 | 1 | 0.02  | 0.018  | 0.02   | 0.017  | 0.02  | t | 922    | AEGEFDYA<br>WDQTHQ<br>DPAK | Rattus<br>norvegic<br>us         |
| 1 | 1.00 | 1 | 1 | 0.02  | 0.022  | 0.027  | 0.02   | 0.02  | t | 129414 | MLPSVLD                    | MD                               |
| 1 | 1.00 | 1 | 1 | -0.02 | -0.02  | -0.02  | -0.02  | -0.02 | t | 79830  | FMQQRPL<br>RMFLGPK<br>QLT  | Mus<br>musculu<br>s              |



|   |      |   |   |       |        |        |        |        |   |        |                              |                                  |
|---|------|---|---|-------|--------|--------|--------|--------|---|--------|------------------------------|----------------------------------|
| 1 | 1.00 | 1 | 1 | -0.07 | -0.073 | -0.08  | -0.07  | -0.07  | t | 140939 | YNIALGQR<br>RADA             | Oryctola<br>gus<br>cuniculu<br>s |
| 1 | 1.00 | 1 | 1 | -0.01 | -0.013 | -0.003 | -0.01  | -0.01  | t | 130622 | TGLVAQG<br>TDSIG             | Camelus<br>dromed<br>arius       |
| 1 | 1.00 | 1 | 1 | -0.01 | -0.01  | -0.015 | -0.02  | -0.013 | t | 115672 | AAVRSPA<br>QIL               | Homo<br>sapiens                  |
| 1 | 1.00 | 1 | 1 | 0.02  | 0.02   | 0.03   | 0.02   | 0.02   | t | 66759  | TTPDRQA<br>AC                | Oryctola<br>gus<br>cuniculu<br>s |
| 1 | 1.00 | 1 | 1 | -0.07 | -0.072 | -0.066 | -0.067 | -0.07  | t | 21101  | GLRFRER                      | Mus<br>musculu<br>s              |
| 1 | 1.00 | 1 | 1 | -0.03 | -0.034 | -0.028 | -0.03  | -0.03  | t | 42475  | MRKTKLA<br>PTVAHG<br>V F     | Bos<br>taurus                    |
| 1 | 1.00 | 1 | 1 | 0.07  | 0.066  | 0.07   | 0.069  | 0.072  | t | 122746 | EEQEDEIIG<br>FGQELKN         | Oryctola<br>gus<br>cuniculu<br>s |
| 1 | 1.00 | 1 | 1 | -0.02 | -0.016 | -0.016 | -0.019 | -0.02  | t | 22133  | GRLITVNP                     | MD                               |
| 1 | 1.00 | 1 | 1 | 0.03  | 0.028  | 0.032  | 0.033  | 0.032  | t | 98940  | PQPGPQP<br>PQPPQP<br>P       | Mus<br>musculu<br>s              |
| 1 | 1.00 | 1 | 1 | 0.02  | 0.02   | 0.023  | 0.02   | 0.02   | t | 69863  | VLVEAFDE<br>MEECASR<br>AALLE | Homo<br>sapiens                  |
| 1 | 1.00 | 1 | 1 | 0.02  | 0.02   | 0.023  | 0.02   | 0.02   | t | 69862  | VLVEAFDE<br>MEECASR<br>AALIE | Homo<br>sapiens                  |
| 1 | 1.00 | 1 | 1 | 0.05  | 0.05   | 0.057  | 0.05   | 0.05   | t | 117288 | FGDFNLPR<br>DKFLKEQI<br>KLDE | Mus<br>musculu<br>s              |
| 1 | 1.00 | 1 | 1 | 0.05  | 0.05   | 0.057  | 0.05   | 0.05   | t | 117288 | FGDFNLPR<br>DKFLKEQI<br>KLDE | Mus<br>musculu<br>s              |
| 1 | 1.00 | 1 | 1 | 0.03  | 0.03   | 0.03   | 0.03   | 0.03   | t | 84003  | ITGPGTNN<br>PE               | Homo<br>sapiens                  |
| 1 | 1.00 | 1 | 1 | 0.01  | 0.01   | 0.01   | 0.01   | 0.01   | t | 115599 | DEGGFTCF<br>FRDH             | Homo<br>sapiens                  |

|   |      |   |   |       |        |       |        |       |   |        |                              |                                  |
|---|------|---|---|-------|--------|-------|--------|-------|---|--------|------------------------------|----------------------------------|
| 1 | 1.00 | 1 | 1 | 0.01  | 0.01   | 0.01  | 0.01   | 0.01  | t | 115599 | DEGGFTCF<br>FRDH             | Homo<br>sapiens                  |
| 1 | 1.00 | 1 | 1 | 0.01  | 0.01   | 0.01  | 0.01   | 0.01  | t | 20464  | GITQGIVE                     | Oryctola<br>gus<br>cuniculu<br>s |
| 1 | 1.00 | 1 | 1 | -0.01 | -0.008 | -0.01 | -0.01  | -0.01 | t | 149927 | SDYHKNLI<br>NNAK             | Homo<br>sapiens                  |
| 1 | 1.00 | 1 | 1 | -0.01 | -0.01  | -0.01 | -0.01  | -0.01 | t | 149114 | STPRLPD                      | Sus<br>scrofa                    |
| 1 | 1.00 | 1 | 1 | -0.01 | -0.01  | -0.01 | -0.01  | -0.01 | t | 41341  | MEECSQA<br>RPYIEQAQ<br>VIAHQ | Homo<br>sapiens                  |
| 1 | 1.00 | 1 | 1 | -0.01 | -0.01  | -0.01 | -0.01  | -0.01 | t | 48827  | PPLPHV                       | Homo<br>sapiens                  |
| 1 | 1.00 | 1 | 1 | -0.01 | -0.01  | -0.01 | -0.01  | -0.01 | t | 33850  | KTRTHTNA<br>T                | Homo<br>sapiens                  |
| 1 | 1.00 | 1 | 1 | -0.01 | -0.01  | -0.01 | -0.01  | -0.01 | t | 33850  | KTRTHTNA<br>T                | Homo<br>sapiens                  |
| 1 | 1.00 | 1 | 1 | -0.03 | -0.03  | -0.03 | -0.03  | -0.03 | t | 149081 | NPNQTRM                      | Sus<br>scrofa                    |
| 1 | 1.00 | 1 | 1 | -0.03 | -0.03  | -0.03 | -0.03  | -0.03 | t | 140612 | VPVCDWE<br>LNC               | Mus<br>musculu<br>s              |
| 1 | 1.00 | 1 | 1 | -0.03 | -0.03  | -0.03 | -0.03  | -0.03 | t | 103125 | DVVQHVA<br>RRPGESPP          | Homo<br>sapiens                  |
| 1 | 1.00 | 1 | 1 | -0.05 | -0.05  | -0.05 | -0.05  | -0.05 | t | 105801 | GAA                          | Mus<br>musculu<br>s              |
| 1 | 1.00 | 1 | 1 | -0.07 | -0.07  | -0.07 | -0.07  | -0.07 | t | 79297  | LQKVHR                       | Mus<br>musculu<br>s              |
| 1 | 1.00 | 1 | 1 | -0.01 | -0.014 | -0.02 | -0.017 | -0.01 | t | 131819 | AKEERRYL<br>RDER             | Oryctola<br>gus<br>cuniculu<br>s |
| 1 | 1.00 | 1 | 1 | 0.01  | 0.01   | 0.013 | 0.007  | 0.008 | t | 63409  | TEISLKDS                     | Homo<br>sapiens                  |
| 1 | 1.00 | 1 | 1 | 0     | 0      | 0     | 0      | 0     | t | 13498  | ENKFLENQ<br>VKERNVA          | Mus<br>musculu<br>s              |
| 1 | 1.00 | 1 | 1 | 0     | -0.002 | 0.003 | -0.001 | 0     | t | 29108  | ITTDNTFV<br>SGNCDVVI<br>G    | Mus<br>musculu<br>s              |

|   |      |   |   |       |        |        |        |        |   |        |                           |                                  |
|---|------|---|---|-------|--------|--------|--------|--------|---|--------|---------------------------|----------------------------------|
| 1 | 1.00 | 1 | 1 | -0.02 | -0.018 | -0.022 | -0.017 | -0.018 | t | 133871 | LAKLGGAG<br>QAARAGT       | Homo<br>sapiens                  |
| 1 | 1.00 | 1 | 1 | 0     | 0      | 0      | 0      | 0.001  | t | 130559 | NAHYVVF<br>EEQE           | Mus<br>musculu<br>s              |
| 1 | 1.00 | 1 | 1 | 0.01  | 0.012  | 0.01   | 0.009  | 0.01   | t | 149411 | PQFEEIRN<br>LA            | Homo<br>sapiens                  |
| 1 | 1.00 | 1 | 1 | -0.04 | -0.038 | -0.044 | -0.039 | -0.038 | t | 17639  | FRRLGAAL                  | Homo<br>sapiens                  |
| 1 | 1.00 | 1 | 1 | -0.01 | -0.012 | -0.01  | -0.011 | -0.01  | t | 150978 | EKNVTVTH<br>SVNLLED       | Mus<br>musculu<br>s              |
| 1 | 1.00 | 1 | 1 | 0.01  | 0.007  | 0.01   | 0.01   | 0.008  | t | 7533   | DAHHAAD<br>AHHATDA<br>HHA | Oryctola<br>gus<br>cuniculu<br>s |
| 1 | 1.00 | 1 | 1 | 0     | 0.002  | 0      | 0.001  | 0.002  | t | 97221  | AVMVQKV<br>KEG            | Homo<br>sapiens                  |
| 1 | 1.00 | 1 | 1 | 0.01  | 0.006  | 0.004  | 0.007  | 0.011  | t | 74436  | YKDGTLTP<br>LSTKDLTTY     | Oryctola<br>gus<br>cuniculu<br>s |
| 1 | 1.00 | 1 | 1 | -0.01 | -0.012 | -0.015 | -0.009 | -0.01  | t | 39089  | LRFTSARR<br>METTVN        | Homo<br>sapiens                  |
| 1 | 1.00 | 1 | 1 | -0.01 | -0.006 | -0.015 | -0.009 | -0.01  | t | 39089  | LRFTSARR<br>METTVN        | Homo<br>sapiens                  |
| 1 | 1.00 | 1 | 1 | 0.01  | 0.013  | 0.005  | 0.01   | 0.012  | t | 134199 | PVQCSR<br>DVVICP<br>DTS   | Mus<br>musculu<br>s              |
| 1 | 1.00 | 1 | 1 | -0.02 | -0.02  | -0.007 | -0.022 | -0.023 | t | 98824  | IIAEKTKIP<br>A            | Homo<br>sapiens                  |
| 1 | 1.00 | 1 | 1 | 0     | 0      | 0      | 0      | 0.001  | t | 45251  | NNSSNIAS                  | Mus<br>musculu<br>s              |

|   |      |   |   |       |        |        |        |        |   |        |                              |                     |
|---|------|---|---|-------|--------|--------|--------|--------|---|--------|------------------------------|---------------------|
| 1 | 1.00 | 1 | 1 | 0     | 0.004  | 0      | -0.001 | 0      | t | 72549  | WHRHWP<br>SHPTQK             | Homo<br>sapiens     |
| 1 | 1.00 | 1 | 1 | 0.03  | 0.034  | 0.03   | 0.031  | 0.03   | t | 45291  | NNYNNNA<br>KNVNDMY<br>RDGE   | Homo<br>sapiens     |
| 1 | 1.00 | 1 | 1 | -0.03 | -0.03  | -0.035 | -0.03  | -0.029 | t | 24970  | HTRVTGG<br>VQG               | Mus<br>musculu<br>s |
| 1 | 1.00 | 1 | 1 | 0     | 0      | 0      | -0.006 | -0.002 | t | 118327 | EKKDRVTD<br>ALNAT            | Homo<br>sapiens     |
| 1 | 1.00 | 1 | 1 | 0.02  | 0.019  | 0.021  | 0.028  | 0.022  | t | 141934 | KIHAREIFD<br>SRGNPTVE        | Homo<br>sapiens     |
| 1 | 1.00 | 1 | 1 | 0.02  | 0.02   | 0.02   | 0.02   | 0.02   | t | 134797 | SHQHSRR<br>RQGWLKEI          | Homo<br>sapiens     |
| 1 | 1.00 | 1 | 1 | 0.02  | 0.02   | 0.02   | 0.02   | 0.02   | t | 134799 | SRKPEAPR<br>RRSPSPT          | Homo<br>sapiens     |
| 1 | 1.00 | 1 | 1 | 0     | 0      | 0      | 0      | 0      | t | 149102 | SGPNATQ                      | Sus<br>scrofa       |
| 1 | 1.00 | 1 | 1 | 0     | 0      | 0      | 0      | 0      | t | 141753 | SSNDTKA<br>WGFAV             | Mus<br>musculu<br>s |
| 1 | 1.00 | 1 | 1 | 0     | 0      | 0      | 0      | 0      | t | 149091 | NSTQMRI                      | Sus<br>scrofa       |
| 1 | 1.00 | 1 | 1 | 0     | 0      | 0      | 0      | 0      | t | 115179 | ALPMHIRL<br>SFNPTQLE<br>EQCH | Homo<br>sapiens     |
| 1 | 1.00 | 1 | 1 | 0     | 0      | 0      | 0      | 0      | t | 103649 | TGNMISN<br>QAKYVSDT          | Homo<br>sapiens     |
| 1 | 1.00 | 1 | 1 | -0.02 | -0.02  | -0.02  | -0.02  | -0.02  | t | 153257 | FNPNKDT<br>WPDANKV<br>G      | Mus<br>musculu<br>s |
| 1 | 1.00 | 1 | 1 | -0.02 | -0.02  | -0.02  | -0.02  | -0.02  | t | 120977 | TDIDLVEH<br>KE               | Mus<br>musculu<br>s |
| 1 | 1.00 | 1 | 1 | -0.02 | -0.028 | -0.008 | -0.019 | -0.022 | t | 32776  | KPKTNMK<br>HMA               | Mus<br>musculu<br>s |
| 1 | 1.00 | 1 | 1 | 0     | 0      | 0      | 0.007  | 0.002  | t | 125108 | KILGNQGS<br>FLTGPSK<br>L     | Mus<br>musculu<br>s |
| 1 | 1.00 | 1 | 1 | -0.05 | -0.052 | -0.052 | -0.047 | -0.047 | t | 96170  | DEDSYERD<br>P                | Mus<br>musculu<br>s |

|   |      |   |   |       |        |        |        |        |   |        |                             |                                  |
|---|------|---|---|-------|--------|--------|--------|--------|---|--------|-----------------------------|----------------------------------|
| 1 | 1.00 | 1 | 1 | 0.02  | 0.023  | 0.02   | 0.02   | 0.022  | t | 31827  | KLESHKFD                    | Equus<br>caballus                |
| 1 | 1.00 | 1 | 1 | -0.02 | -0.022 | -0.022 | -0.02  | -0.02  | t | 8575   | DHTLRFGS<br>KSPF            | Oryctola<br>gus<br>cuniculu<br>s |
| 1 | 1.00 | 1 | 1 | -0.02 | -0.019 | -0.022 | -0.02  | -0.02  | t | 8575   | DHTLRFGS<br>KSPF            | Mus<br>musculu<br>s              |
| 1 | 1.00 | 1 | 1 | -0.01 | -0.01  | -0.01  | -0.01  | -0.009 | t | 99975  | EEKELLKRI<br>Q              | Mus<br>musculu<br>s              |
| 1 | 1.00 | 1 | 1 | 0.01  | 0.01   | 0.01   | 0.013  | 0.01   | t | 96127  | AVNVPKV<br>TKEKPTPP<br>VKPT | Homo<br>sapiens(<br>human)       |
| 1 | 1.00 | 1 | 1 | -0.01 | -0.01  | -0.01  | -0.01  | -0.009 | t | 99483  | NALFVAHY<br>NTNAHSI         | Homo<br>sapiens                  |
| 1 | 1.00 | 1 | 1 | -0.05 | -0.048 | -0.043 | -0.049 | -0.05  | t | 25592  | IDIISGAH<br>WGVMFG<br>LA    | Homo<br>sapiens                  |
| 1 | 1.00 | 1 | 1 | -0.05 | -0.048 | -0.043 | -0.049 | -0.05  | t | 25592  | IDIISGAH<br>WGVMFG<br>LA    | Homo<br>sapiens                  |
| 1 | 1.00 | 1 | 1 | -0.05 | -0.048 | -0.043 | -0.049 | -0.05  | t | 25592  | IDIISGAH<br>WGVMFG<br>LA    | Homo<br>sapiens                  |
| 1 | 1.00 | 1 | 1 | 0.01  | 0.01   | 0.01   | 0.01   | 0.013  | t | 915    | AEGDDPA<br>KA               | Mus<br>musculu<br>s              |
| 1 | 1.00 | 1 | 1 | -0.02 | -0.024 | -0.025 | -0.023 | -0.02  | t | 134242 | TSASIGTLC                   | Oryctola<br>gus<br>cuniculu<br>s |
| 1 | 1.00 | 1 | 1 | -0.04 | -0.04  | -0.043 | -0.04  | -0.04  | t | 6941   | CRRVASFLI<br>RGSAQKI        | Mus<br>musculu<br>s              |
| 1 | 1.00 | 1 | 1 | 0.02  | 0.02   | 0.019  | 0.02   | 0.021  | t | 122200 | TQQNAAL<br>NRDLF            | Mus<br>musculu<br>s              |
| 1 | 1.00 | 1 | 1 | 0.01  | 0.01   | 0.009  | 0.007  | 0.011  | t | 39349  | LSFNPTQL<br>EEQCHI          | Homo<br>sapiens                  |

|   |      |   |   |       |        |        |        |        |   |        |                              |                                  |
|---|------|---|---|-------|--------|--------|--------|--------|---|--------|------------------------------|----------------------------------|
| 1 | 1.00 | 1 | 1 | -0.02 | -0.02  | -0.02  | -0.02  | -0.02  | t | 36426  | LHSTSPEG<br>NPSP             | Homo<br>sapiens                  |
| 1 | 1.00 | 1 | 1 | 0.05  | 0.054  | 0.07   | 0.057  | 0.05   | t | 141655 | GESKEQVA<br>NSA              | Homo<br>sapiens                  |
| 1 | 1.00 | 1 | 1 | 0.03  | 0.03   | 0.023  | 0.03   | 0.032  | t | 131652 | SFDSSNPE<br>YFDGYWGS         | Oryctola<br>gus<br>cuniculu<br>s |
| 1 | 1.00 | 1 | 1 | 0.01  | 0.014  | 0.011  | 0.01   | 0.01   | t | 72630  | WIKKPNR<br>QGLG              | Capra<br>hircus                  |
| 1 | 1.00 | 1 | 1 | -0.02 | -0.02  | -0.015 | -0.017 | -0.02  | t | 20458  | GITGRTFIR<br>MARPTED<br>VGVL | Homo<br>sapiens                  |
| 1 | 1.00 | 1 | 1 | -0.02 | -0.024 | -0.02  | -0.027 | -0.021 | t | 135451 | CLGKAC                       | Oryctola<br>gus<br>cuniculu<br>s |
| 1 | 1.00 | 1 | 1 | 0.02  | 0.018  | 0.028  | 0.017  | 0.02   | t | 112316 | SIKNPTNA<br>K                | Mus<br>musculu<br>s              |
| 1 | 1.00 | 1 | 1 | -0.01 | -0.012 | -0.006 | -0.007 | -0.01  | t | 52090  | QQPFSQP<br>QQP               | Mus<br>musculu<br>s              |
| 1 | 1.00 | 1 | 1 | 0.01  | 0.01   | 0.016  | 0.01   | 0.01   | t | 50108  | PYIEQGM<br>QLAEQLK<br>QKALGL | Homo<br>sapiens                  |
| 1 | 1.00 | 1 | 1 | -0.01 | -0.01  | -0.011 | -0.01  | -0.01  | t | 157813 | QRRQQEE<br>RER               | Homo<br>sapiens                  |
| 1 | 1.00 | 1 | 1 | 0     | 0      | 0      | 0.001  | 0.002  | t | 46841  | PAKLLKER<br>GFFGAIAG<br>FLE  | Mus<br>musculu<br>s              |
| 1 | 1.00 | 1 | 1 | 0     | -0.002 | 0      | -0.003 | -0.001 | t | 40619  | LVTVNPV<br>SVATANS           | Mus<br>musculu<br>s              |
| 1 | 1.00 | 1 | 1 | 0.01  | 0.007  | 0.004  | 0.01   | 0.01   | t | 54848  | RMADAVS<br>RKKMDTK           | Oryctola<br>gus<br>cuniculu<br>s |
| 1 | 1.00 | 1 | 1 | 0.04  | 0.044  | 0.033  | 0.041  | 0.044  | t | 137859 | FTPGTEYT<br>VEVR             | Homo<br>sapiens                  |

|   |      |   |   |       |       |        |       |        |   |        |                              |                      |
|---|------|---|---|-------|-------|--------|-------|--------|---|--------|------------------------------|----------------------|
| 1 | 1.00 | 1 | 1 | 0.02  | 0.02  | 0.021  | 0.02  | 0.022  | t | 57638  | SESVEFTK<br>DTQTGMSG         | Mus<br>musculus      |
| 1 | 1.00 | 1 | 1 | 0.01  | 0.012 | 0.008  | 0.007 | 0.01   | t | 4132   | ARDVLAV<br>VSK               | Homo<br>sapiens      |
| 1 | 1.00 | 1 | 1 | -0.02 | -0.02 | -0.024 | -0.02 | -0.019 | t | 138758 | AMVYLGA<br>KDSTRTQI          | Mus<br>musculus      |
| 1 | 1.00 | 1 | 1 | 0.01  | 0.01  | 0.01   | 0.01  | 0.01   | t | 99100  | AIVTVRGG<br>LRILSPD          | Homo<br>sapiens      |
| 1 | 1.00 | 1 | 1 | 0.01  | 0.01  | 0.01   | 0.01  | 0.01   | t | 78301  | WHQQMS<br>P                  | Homo<br>sapiens      |
| 1 | 1.00 | 1 | 1 | 0.01  | 0.01  | 0.01   | 0.01  | 0.01   | t | 78399  | GLLNDS                       | Mus<br>musculus      |
| 1 | 1.00 | 1 | 1 | -0.01 | -0.01 | -0.01  | -0.01 | -0.01  | t | 149731 | GVSDYHK<br>NLINN             | Mus<br>musculus      |
| 1 | 1.00 | 1 | 1 | -0.01 | -0.01 | -0.01  | -0.01 | -0.01  | t | 122202 | TSPPLLWD<br>SVHL             | Mus<br>musculus      |
| 1 | 1.00 | 1 | 1 | -0.01 | -0.01 | -0.01  | -0.01 | -0.01  | t | 122202 | TSPPLLWD<br>SVHL             | Mus<br>musculus      |
| 1 | 1.00 | 1 | 1 | -0.01 | -0.01 | -0.01  | -0.01 | -0.01  | t | 99581  | QPRREEG<br>GRWGPA<br>P       | Homo<br>sapiens      |
| 1 | 1.00 | 1 | 1 | -0.01 | -0.01 | -0.01  | -0.01 | -0.01  | t | 114904 | NISKEHDG<br>EC               | Homo<br>sapiens      |
| 1 | 1.00 | 1 | 1 | -0.01 | -0.01 | -0.01  | -0.01 | -0.01  | t | 115343 | LEIVPNSAE<br>ERLHSMKE<br>GIH | Homo<br>sapiens      |
| 1 | 1.00 | 1 | 1 | -0.01 | -0.01 | -0.01  | -0.01 | -0.01  | t | 103260 | HRSDGSG<br>DTFLFTQY          | Homo<br>sapiens      |
| 1 | 1.00 | 1 | 1 | -0.01 | -0.01 | -0.01  | -0.01 | -0.01  | t | 66939  | TVAHATRR<br>FTNLLTRG         | Homo<br>sapiens      |
| 1 | 1.00 | 1 | 1 | -0.03 | -0.03 | -0.03  | -0.03 | -0.03  | t | 112537 | HLILAPSIR<br>HAP             | Homo<br>sapiens      |
| 1 | 1.00 | 1 | 1 | -0.03 | -0.03 | -0.03  | -0.03 | -0.03  | t | 40021  | LTLNWPG<br>DM                | Rattus<br>norvegicus |

|   |      |   |   |       |        |        |        |        |   |        |                              |                      |
|---|------|---|---|-------|--------|--------|--------|--------|---|--------|------------------------------|----------------------|
| 1 | 1.00 | 1 | 1 | -0.03 | -0.028 | -0.035 | -0.03  | -0.03  | t | 107083 | AKDVKFG<br>ADARALM<br>L      | Rattus<br>norvegicus |
| 1 | 1.00 | 1 | 1 | -0.02 | -0.016 | -0.009 | -0.019 | -0.02  | t | 84160  | KAGKNYIG<br>YS               | Homo<br>sapiens      |
| 1 | 1.00 | 1 | 1 | -0.01 | -0.011 | -0.01  | -0.013 | -0.01  | t | 78315  | WQTFYSP                      | Homo<br>sapiens      |
| 1 | 1.00 | 1 | 1 | 0.06  | 0.06   | 0.06   | 0.06   | 0.061  | t | 99945  | DIRDSLSEE<br>E               | Mus<br>musculus      |
| 1 | 1.00 | 1 | 1 | 0     | 0      | 0      | 0      | 0.001  | t | 74035  | YGLFHKEK<br>MIL              | Mus<br>musculus      |
| 1 | 1.00 | 1 | 1 | -0.06 | -0.06  | -0.055 | -0.06  | -0.061 | t | 95040  | SHRPREAK                     | Mus<br>musculus      |
| 1 | 1.00 | 1 | 1 | -0.01 | -0.012 | -0.002 | -0.011 | -0.009 | t | 34912  | LAPRVAR                      | Mus<br>musculus      |
| 1 | 1.00 | 1 | 1 | 0     | 0      | 0      | -0.004 | -0.001 | t | 122452 | KTTKQSF<br>LSVKAQYK<br>KNKH  | Homo<br>sapiens      |
| 1 | 1.00 | 1 | 1 | 0     | -0.002 | 0      | -0.004 | -0.001 | t | 122452 | KTTKQSF<br>LSVKAQYK<br>KNKH  | Mus<br>musculus      |
| 1 | 1.00 | 1 | 1 | 0     | 0      | 0      | -0.004 | -0.001 | t | 122406 | IEIGLEGK<br>FEPTLEALF<br>GK  | Homo<br>sapiens      |
| 1 | 1.00 | 1 | 1 | -0.02 | -0.022 | -0.02  | -0.019 | -0.02  | t | 67697  | VANNTRL<br>WVYCGNG<br>TPNELG | Homo<br>sapiens      |
| 1 | 1.00 | 1 | 1 | 0     | 0      | 0.006  | -0.002 | 0      | t | 67732  | VARDDKG<br>RRYYLT            | Homo<br>sapiens      |
| 1 | 1.00 | 1 | 1 | -0.02 | -0.02  | -0.02  | -0.02  | -0.018 | t | 141760 | TAPPLPH                      | Rattus<br>norvegicus |
| 1 | 1.00 | 1 | 1 | 0.01  | 0.008  | 0.018  | 0.011  | 0.009  | t | 45122  | NNHVSIVE<br>AWSNDT<br>PYLHD  | Rattus<br>norvegicus |



|   |      |   |   |       |        |        |        |        |   |        |                              |                                  |
|---|------|---|---|-------|--------|--------|--------|--------|---|--------|------------------------------|----------------------------------|
| 1 | 1.00 | 1 | 1 | 0     | -0.001 | -0.003 | 0      | 0      | t | 13243  | ELQVIDKV<br>DAAFKVA<br>ATAAN | Mus<br>musculu<br>s              |
| 1 | 1.00 | 1 | 1 | 0     | -0.001 | -0.003 | 0      | 0      | t | 13243  | ELQVIDKV<br>DAAFKVA<br>ATAAN | Mus<br>musculu<br>s              |
| 1 | 1.00 | 1 | 1 | 0.02  | 0.018  | 0.011  | 0.019  | 0.02   | t | 23156  | GVSTANA<br>TVYMIDSV<br>LMPPA | Mus<br>musculu<br>s              |
| 1 | 1.00 | 1 | 1 | -0.02 | -0.02  | -0.02  | -0.02  | -0.022 | t | 49961  | PVSGPFGP<br>LPSLAFA<br>VPAD  | Mus<br>musculu<br>s              |
| 1 | 1.00 | 1 | 1 | -0.01 | -0.01  | -0.013 | -0.01  | -0.01  | t | 97370  | GTVLVTRK<br>AL               | Mus<br>musculu<br>s              |
| 1 | 1.00 | 1 | 1 | 0     | 0.003  | 0.006  | 0      | 0      | t | 32062  | KLNWFKK<br>GSSIGQ            | Mus<br>musculu<br>s              |
| 1 | 1.00 | 1 | 1 | 0.03  | 0.03   | 0.03   | 0.03   | 0.031  | t | 4429   | ASGQ                         | Mus<br>musculu<br>s              |
| 1 | 1.00 | 1 | 1 | -0.01 | -0.008 | -0.012 | -0.013 | -0.011 | t | 65300  | TNDKFTVF<br>ESAF             | Homo<br>sapiens                  |
| 1 | 1.00 | 1 | 1 | 0     | -0.002 | 0.002  | -0.001 | 0      | t | 44915  | NLVILPGQ<br>DLQYVLA          | Mus<br>musculu<br>s              |
| 1 | 1.00 | 1 | 1 | 0     | -0.005 | -0.005 | 0      | 0      | t | 15911  | FFTEEFKRK<br>NKGKNLAS<br>SHR | Canis<br>lupus                   |
| 1 | 1.00 | 1 | 1 | 0.02  | 0.02   | 0.02   | 0.02   | 0.02   | t | 144660 | GREGYPA<br>DGGASAS<br>ASAS   | Oryctola<br>gus<br>cuniculu<br>s |
| 1 | 1.00 | 1 | 1 | 0     | 0      | 0      | 0      | 0      | t | 137797 | ADYWAGE<br>LGQSR             | Homo<br>sapiens                  |
| 1 | 1.00 | 1 | 1 | 0     | 0      | 0      | 0      | 0      | t | 127681 | HFHRPTQ                      | Homo<br>sapiens                  |
| 1 | 1.00 | 1 | 1 | 0     | 0      | 0      | 0      | 0      | t | 101918 | NENNGGC<br>DA                | Homo<br>sapiens                  |
| 1 | 1.00 | 1 | 1 | 0     | 0      | 0      | 0      | 0      | t | 112897 | AATGAAT<br>AAA               | Mus<br>musculu<br>s              |

|   |      |   |   |       |        |        |        |        |   |        |                              |                                  |
|---|------|---|---|-------|--------|--------|--------|--------|---|--------|------------------------------|----------------------------------|
| 1 | 1.00 | 1 | 1 | 0     | 0      | 0      | 0      | 0      | t | 115875 | NTIASGEP<br>TS               | Homo<br>sapiens                  |
| 1 | 1.00 | 1 | 1 | 0     | 0      | 0      | 0      | 0      | t | 111171 | CSSGPIAP<br>C                | Homo<br>sapiens                  |
| 1 | 1.00 | 1 | 1 | 0     | 0      | 0      | 0      | 0      | t | 78239  | PHTQTLHL                     | Homo<br>sapiens                  |
| 1 | 1.00 | 1 | 1 | -0.02 | -0.02  | -0.02  | -0.02  | -0.02  | t | 132927 | WGANVPS                      | Homo<br>sapiens                  |
| 1 | 1.00 | 1 | 1 | -0.02 | -0.02  | -0.02  | -0.02  | -0.02  | t | 79313  | NCGSRTQ<br>YCKSRCT           | Mus<br>musculu<br>s              |
| 1 | 1.00 | 1 | 1 | -0.01 | -0.01  | -0.017 | -0.017 | -0.01  | t | 122486 | MILHPDV<br>QRRVQQEI<br>DDVI  | Homo<br>sapiens                  |
| 1 | 1.00 | 1 | 1 | 0     | 0.002  | -0.011 | 0.001  | 0      | t | 58366  | SHIECRKPY<br>KELRLEVG<br>KQR | Homo<br>sapiens                  |
| 1 | 1.00 | 1 | 1 | -0.01 | -0.01  | -0.01  | -0.01  | -0.009 | t | 57541  | SELSQL                       | Mus<br>musculu<br>s              |
| 1 | 1.00 | 1 | 1 | 0     | 0      | 0.001  | 0      | 0.001  | t | 60596  | SQWNKPS<br>KPKTN             | Oryctola<br>gus<br>cuniculu<br>s |
| 1 | 1.00 | 1 | 1 | 0     | 0      | 0.001  | 0      | 0.001  | t | 56610  | RYPGQGS<br>PGGNRYP<br>PQG    | Mus<br>musculu<br>s              |
| 1 | 1.00 | 1 | 1 | 0     | 0      | 0.001  | 0      | 0.001  | t | 19868  | GGGWGQ<br>PHGGGW<br>GQPH     | Mus<br>musculu<br>s              |
| 1 | 1.00 | 1 | 1 | 0     | -0.003 | 0.001  | 0      | 0.001  | t | 19868  | GGGWGQ<br>PHGGGW<br>GQPH     | Oryctola<br>gus<br>cuniculu<br>s |
| 1 | 1.00 | 1 | 1 | 0.02  | 0.022  | 0.02   | 0.019  | 0.02   | t | 149410 | PLVQEQQ<br>FQG               | Homo<br>sapiens                  |
| 1 | 1.00 | 1 | 1 | 0.03  | 0.027  | 0.027  | 0.03   | 0.03   | t | 46379  | NVFQTQA<br>GCLIGAEH<br>VD    | Oryctola<br>gus<br>cuniculu<br>s |
| 1 | 1.00 | 1 | 1 | 0     | 0.002  | -0.015 | -0.003 | 0.002  | t | 48618  | PNDPNRN<br>VD                | Homo<br>sapiens                  |
| 1 | 1.00 | 1 | 1 | -0.01 | -0.01  | -0.014 | -0.01  | -0.009 | t | 122659 | YTSLHGYF<br>VFGPTGC<br>NLEGF | Rattus<br>norvegic<br>us         |

|   |      |   |   |       |        |        |        |        |   |        |                           |                                  |
|---|------|---|---|-------|--------|--------|--------|--------|---|--------|---------------------------|----------------------------------|
| 1 | 1.00 | 1 | 1 | 0.01  | 0.008  | 0.015  | 0.009  | 0.011  | t | 65409  | TNRNPQ                    | Mus<br>musculu<br>s              |
| 1 | 1.00 | 1 | 1 | 0.02  | 0.02   | 0.011  | 0.02   | 0.021  | t | 100777 | DIDFLIEEIE<br>RLGQDL      | Oryctola<br>gus<br>cuniculu<br>s |
| 1 | 1.00 | 1 | 1 | -0.02 | -0.022 | -0.02  | -0.017 | -0.018 | t | 115892 | PNGYKVSR<br>PSQ           | Mus<br>musculu<br>s              |
| 1 | 1.00 | 1 | 1 | 0.03  | 0.032  | 0.03   | 0.031  | 0.031  | t | 153396 | HSFEPWS<br>ARDMLGG<br>GS  | Homo<br>sapiens                  |
| 1 | 1.00 | 1 | 1 | 0     | 0.004  | 0      | -0.003 | 0.002  | t | 32901  | KPTKKPTF<br>KTTK          | Homo<br>sapiens                  |
| 1 | 1.00 | 1 | 1 | 0.02  | 0.02   | 0.024  | 0.02   | 0.02   | t | 75494  | YQGVQQK<br>WD             | Oryctola<br>gus<br>cuniculu<br>s |
| 1 | 1.00 | 1 | 1 | 0     | 0      | 0      | -0.002 | 0      | t | 10753  | DVTRIESD<br>SKVIVL        | Homo<br>sapiens                  |
| 1 | 1.00 | 1 | 1 | 0.02  | 0.024  | 0.02   | 0.019  | 0.022  | t | 132064 | SLLGQLSG<br>QV            | Homo<br>sapiens                  |
| 1 | 1.00 | 1 | 1 | 0.04  | 0.043  | 0.056  | 0.04   | 0.04   | t | 110421 | SFVSLVEET<br>AFID         | Mus<br>musculu<br>s              |
| 1 | 1.00 | 1 | 1 | -0.02 | -0.02  | -0.027 | -0.02  | -0.019 | t | 114197 | DHARHGF<br>LPRHRDTG<br>IL | Mus<br>musculu<br>s              |
| 1 | 1.00 | 1 | 1 | 0.03  | 0.03   | 0.025  | 0.03   | 0.03   | t | 66219  | TSGITGDN<br>TTSSE         | Homo<br>sapiens                  |
| 1 | 1.00 | 1 | 1 | 0.02  | 0.02   | 0.02   | 0.016  | 0.019  | t | 131437 | GASVKVT                   | Homo<br>sapiens                  |
| 1 | 1.00 | 1 | 1 | 0.02  | 0.018  | 0.02   | 0.019  | 0.018  | t | 35060  | LCKDKKAD<br>SGYCYWV       | Mus<br>musculu<br>s              |
| 1 | 1.00 | 1 | 1 | 0.01  | 0.012  | 0.019  | 0.011  | 0.01   | t | 32782  | KPLDERA                   | Homo<br>sapiens                  |

|   |      |   |   |       |        |        |        |        |   |        |                              |                       |
|---|------|---|---|-------|--------|--------|--------|--------|---|--------|------------------------------|-----------------------|
| 1 | 1.00 | 1 | 1 | 0.01  | 0.01   | 0.024  | 0.01   | 0.006  | t | 146012 | SSPSTPLLY                    | Mus musculus          |
| 1 | 1.00 | 1 | 1 | 0.05  | 0.05   | 0.057  | 0.05   | 0.053  | t | 57531  | SELPQWD                      | Mus musculus          |
| 1 | 1.00 | 1 | 1 | -0.01 | -0.01  | -0.01  | -0.01  | -0.01  | t | 96020  | YLKTVYQH<br>QK               | Homo sapiens          |
| 1 | 1.00 | 1 | 1 | -0.03 | -0.03  | -0.03  | -0.03  | -0.03  | t | 110593 | GFPGPRG<br>PPGPQGA<br>T      | Mus musculus          |
| 1 | 1.00 | 1 | 1 | 0     | 0      | 0      | 0      | 0.001  | t | 46317  | NTWTTCC<br>SIAFPSK           | Mus musculus          |
| 1 | 1.00 | 1 | 1 | 0     | 0      | 0      | 0      | 0.001  | t | 24786  | HSLGKWL<br>GHPDKF            | Mus musculus          |
| 1 | 1.00 | 1 | 1 | 0     | 0      | 0      | 0      | 0.001  | t | 24786  | HSLGKWL<br>GHPDKF            | Mus musculus          |
| 1 | 1.00 | 1 | 1 | 0     | 0      | 0      | 0      | 0.001  | t | 18705  | GANSNNP<br>DW                | Mus musculus          |
| 1 | 1.00 | 1 | 1 | 0     | 0.002  | -0.001 | -0.003 | 0      | t | 14905  | EVWREEA<br>YHAADIKD          | Homo sapiens          |
| 1 | 1.00 | 1 | 1 | -0.04 | -0.04  | -0.039 | -0.04  | -0.042 | t | 132742 | WRKNIDA                      | Mus musculus          |
| 1 | 1.00 | 1 | 1 | 0     | 0.004  | 0      | 0      | 0.001  | t | 134702 | KEKKYS                       | Ovis aries            |
| 1 | 1.00 | 1 | 1 | 0     | 0      | 0      | 0      | 0.001  | t | 136420 | KIHAREIFD<br>SRGNPTVE        | Homo sapiens          |
| 1 | 1.00 | 1 | 1 | 0     | -0.004 | 0      | 0      | 0.001  | t | 138191 | HPTWSSL                      | Mus musculus          |
| 1 | 1.00 | 1 | 1 | 0     | -0.003 | 0      | 0      | 0.001  | t | 138456 | KEQFEFAL<br>TAVAEV           | Oryctolagus cuniculus |
| 1 | 1.00 | 1 | 1 | 0     | -0.003 | 0      | 0      | 0.001  | t | 139305 | TAAQITQR<br>KWEAARE<br>AEQRR | Oryctolagus cuniculus |

|   |      |   |   |   |        |   |   |       |   |        |                              |                                  |
|---|------|---|---|---|--------|---|---|-------|---|--------|------------------------------|----------------------------------|
| 1 | 1.00 | 1 | 1 | 0 | -0.003 | 0 | 0 | 0.001 | t | 141105 | WEISQASH<br>YFERHLE          | Oryctola<br>gus<br>cuniculu<br>s |
| 1 | 1.00 | 1 | 1 | 0 | -0.003 | 0 | 0 | 0.001 | t | 119331 | RTVLVSM<br>NYR               | Oryctola<br>gus<br>cuniculu<br>s |
| 1 | 1.00 | 1 | 1 | 0 | -0.003 | 0 | 0 | 0.001 | t | 130485 | EVVTGSPR<br>GDSQSS           | Oryctola<br>gus<br>cuniculu<br>s |
| 1 | 1.00 | 1 | 1 | 0 | -0.003 | 0 | 0 | 0.001 | t | 123282 | HACQKKLL<br>KFEALQQE<br>EGEE | Oryctola<br>gus<br>cuniculu<br>s |
| 1 | 1.00 | 1 | 1 | 0 | -0.003 | 0 | 0 | 0.001 | t | 125610 | YYVFFEEQ<br>EDEIIGFG<br>QELK | Oryctola<br>gus<br>cuniculu<br>s |
| 1 | 1.00 | 1 | 1 | 0 | -0.003 | 0 | 0 | 0.001 | t | 122048 | YCEIIV                       | Oryctola<br>gus<br>cuniculu<br>s |
| 1 | 1.00 | 1 | 1 | 0 | -0.003 | 0 | 0 | 0.001 | t | 125384 | DSHYDYTI<br>CGDSEDM<br>VCTPK | Oryctola<br>gus<br>cuniculu<br>s |
| 1 | 1.00 | 1 | 1 | 0 | -0.003 | 0 | 0 | 0.001 | t | 125384 | DSHYDYTI<br>CGDSEDM<br>VCTPK | Oryctola<br>gus<br>cuniculu<br>s |
| 1 | 1.00 | 1 | 1 | 0 | -0.003 | 0 | 0 | 0.001 | t | 125610 | YYVFFEEQ<br>EDEIIGFG<br>QELK | Oryctola<br>gus<br>cuniculu<br>s |
| 1 | 1.00 | 1 | 1 | 0 | 0      | 0 | 0 | 0.001 | t | 124008 | DGVVLVD                      | Rattus<br>norvegic<br>us         |
| 1 | 1.00 | 1 | 1 | 0 | 0      | 0 | 0 | 0.001 | t | 118336 | ERADLIAYL<br>KKATNE          | Mus<br>musculu<br>s              |
| 1 | 1.00 | 1 | 1 | 0 | -0.003 | 0 | 0 | 0.001 | t | 119187 | GNAEVHA<br>SFFDIGG           | Oryctola<br>gus<br>cuniculu<br>s |
| 1 | 1.00 | 1 | 1 | 0 | -0.002 | 0 | 0 | 0.001 | t | 121858 | SKLIKIFQD<br>HPLQKTYN        | Mus<br>musculu<br>s              |

|   |      |   |   |   |        |   |   |       |   |        |                              |                          |
|---|------|---|---|---|--------|---|---|-------|---|--------|------------------------------|--------------------------|
| 1 | 1.00 | 1 | 1 | 0 | 0      | 0 | 0 | 0.001 | t | 120615 | IGTVSVFA<br>GRLIELSQEG       | Rattus<br>norvegicus     |
| 1 | 1.00 | 1 | 1 | 0 | -0.003 | 0 | 0 | 0.001 | t | 119642 | SEHETRLV<br>ANLLENYN<br>KVIR | Oryctolagus<br>cuniculus |
| 1 | 1.00 | 1 | 1 | 0 | -0.003 | 0 | 0 | 0.001 | t | 125610 | YYVFFEEQ<br>EDEIIGFG<br>QELK | Oryctolagus<br>cuniculus |
| 1 | 1.00 | 1 | 1 | 0 | 0.011  | 0 | 0 | 0.001 | t | 122780 | GQELKNP<br>QEETLQAF<br>DSHYD | Oryctolagus<br>cuniculus |
| 1 | 1.00 | 1 | 1 | 0 | -0.003 | 0 | 0 | 0.001 | t | 130488 | FDIYDEDE                     | Oryctolagus<br>cuniculus |
| 1 | 1.00 | 1 | 1 | 0 | 0.002  | 0 | 0 | 0.001 | t | 131576 | NSRQTDR<br>EDELI             | Rattus<br>norvegicus     |
| 1 | 1.00 | 1 | 1 | 0 | -0.003 | 0 | 0 | 0.001 | t | 107662 | VLTVLHQN<br>WL               | Oryctolagus<br>cuniculus |
| 1 | 1.00 | 1 | 1 | 0 | -0.002 | 0 | 0 | 0.001 | t | 108834 | CKPISGHN<br>SLFWYRQT         | Mus<br>musculus          |
| 1 | 1.00 | 1 | 1 | 0 | -0.003 | 0 | 0 | 0.001 | t | 113942 | TQDENPV<br>VHF               | Oryctolagus<br>cuniculus |
| 1 | 1.00 | 1 | 1 | 0 | -0.004 | 0 | 0 | 0.001 | t | 102384 | EFRH                         | Mus<br>musculus          |
| 1 | 1.00 | 1 | 1 | 0 | -0.003 | 0 | 0 | 0.001 | t | 105021 | VHHQKLV<br>FFAEDVGS<br>NK    | Oryctolagus<br>cuniculus |
| 1 | 1.00 | 1 | 1 | 0 | -0.003 | 0 | 0 | 0.001 | t | 108003 | LHNHYT                       | Oryctolagus<br>cuniculus |
| 1 | 1.00 | 1 | 1 | 0 | -0.003 | 0 | 0 | 0.001 | t | 117260 | ANNGNLQ<br>LRNKEVT<br>WEVLEG | Oryctolagus<br>cuniculus |

|   |      |   |   |   |        |   |   |       |   |        |                              |                                  |
|---|------|---|---|---|--------|---|---|-------|---|--------|------------------------------|----------------------------------|
| 1 | 1.00 | 1 | 1 | 0 | -0.006 | 0 | 0 | 0.001 | t | 99232  | EVHHQKL<br>VFFAEDVG          | Canis<br>lupus                   |
| 1 | 1.00 | 1 | 1 | 0 | 0      | 0 | 0 | 0.001 | t | 108630 | SHQESTRG<br>RSRGRSGR<br>SGS  | Homo<br>sapiens                  |
| 1 | 1.00 | 1 | 1 | 0 | -0.003 | 0 | 0 | 0.001 | t | 113942 | TQDENPV<br>VHF               | Oryctola<br>gus<br>cuniculu<br>s |
| 1 | 1.00 | 1 | 1 | 0 | 0.002  | 0 | 0 | 0.001 | t | 112603 | MIAATYNF<br>AVLKLMG<br>RGTKF | Rattus<br>norvegic<br>us         |
| 1 | 1.00 | 1 | 1 | 0 | -0.003 | 0 | 0 | 0.001 | t | 107814 | EGLHNHY                      | Oryctola<br>gus<br>cuniculu<br>s |
| 1 | 1.00 | 1 | 1 | 0 | -0.003 | 0 | 0 | 0.001 | t | 114226 | QKSHGRT<br>QDENPVV<br>HF     | Oryctola<br>gus<br>cuniculu<br>s |
| 1 | 1.00 | 1 | 1 | 0 | -0.003 | 0 | 0 | 0.001 | t | 108213 | WQQGNV<br>F                  | Oryctola<br>gus<br>cuniculu<br>s |
| 1 | 1.00 | 1 | 1 | 0 | -0.003 | 0 | 0 | 0.001 | t | 107479 | KFNWYVD                      | Oryctola<br>gus<br>cuniculu<br>s |
| 1 | 1.00 | 1 | 1 | 0 | -0.003 | 0 | 0 | 0.001 | t | 107949 | KSLSLSP                      | Oryctola<br>gus<br>cuniculu<br>s |
| 1 | 1.00 | 1 | 1 | 0 | 0.004  | 0 | 0 | 0.001 | t | 110949 | NAEKVLEK<br>LGYA             | Oryctola<br>gus<br>cuniculu<br>s |
| 1 | 1.00 | 1 | 1 | 0 | -0.002 | 0 | 0 | 0.001 | t | 99134  | DAEFRHDS<br>GYEVHHQ          | Mus<br>musculu<br>s              |
| 1 | 1.00 | 1 | 1 | 0 | -0.003 | 0 | 0 | 0.001 | t | 113942 | TQDENPV<br>VHF               | Oryctola<br>gus<br>cuniculu<br>s |
| 1 | 1.00 | 1 | 1 | 0 | -0.003 | 0 | 0 | 0.001 | t | 107784 | DGSFFLY                      | Oryctola<br>gus<br>cuniculu<br>s |

|   |      |   |   |   |        |   |   |       |   |        |                              |                                  |
|---|------|---|---|---|--------|---|---|-------|---|--------|------------------------------|----------------------------------|
| 1 | 1.00 | 1 | 1 | 0 | 0      | 0 | 0 | 0.001 | t | 108624 | SHQESTRG<br>RSRGRSGR<br>SGS  | Homo<br>sapiens                  |
| 1 | 1.00 | 1 | 1 | 0 | -0.006 | 0 | 0 | 0.001 | t | 99134  | DAEFRHDS<br>GYEVHHQ          | Canis<br>lupus                   |
| 1 | 1.00 | 1 | 1 | 0 | -0.003 | 0 | 0 | 0.001 | t | 113942 | TQDENPV<br>VHF               | Oryctola<br>gus<br>cuniculu<br>s |
| 1 | 1.00 | 1 | 1 | 0 | -0.003 | 0 | 0 | 0.001 | t | 74226  | YIIDHVDQ<br>HNATEIC          | Oryctola<br>gus<br>cuniculu<br>s |
| 1 | 1.00 | 1 | 1 | 0 | -0.003 | 0 | 0 | 0.001 | t | 96216  | EEEEGLKKS<br>ADTLWN<br>MQK   | Oryctola<br>gus<br>cuniculu<br>s |
| 1 | 1.00 | 1 | 1 | 0 | -0.003 | 0 | 0 | 0.001 | t | 95051  | YSQFEKSY                     | Oryctola<br>gus<br>cuniculu<br>s |
| 1 | 1.00 | 1 | 1 | 0 | -0.003 | 0 | 0 | 0.001 | t | 62715  | SYSYNKDN<br>NELSHFA          | Oryctola<br>gus<br>cuniculu<br>s |
| 1 | 1.00 | 1 | 1 | 0 | -0.003 | 0 | 0 | 0.001 | t | 74689  | YLGYLEQL<br>LRLKKYKV<br>PQLE | Oryctola<br>gus<br>cuniculu<br>s |
| 1 | 1.00 | 1 | 1 | 0 | -0.003 | 0 | 0 | 0.001 | t | 95040  | SHRPREAK                     | Oryctola<br>gus<br>cuniculu<br>s |
| 1 | 1.00 | 1 | 1 | 0 | -0.003 | 0 | 0 | 0.001 | t | 95043  | SPHQVYN                      | Oryctola<br>gus<br>cuniculu<br>s |
| 1 | 1.00 | 1 | 1 | 0 | -0.003 | 0 | 0 | 0.001 | t | 70444  | VPQLEIVP<br>NSAEERLH<br>SMKE | Oryctola<br>gus<br>cuniculu<br>s |
| 1 | 1.00 | 1 | 1 | 0 | -0.004 | 0 | 0 | 0.001 | t | 69178  | VKAETRLN<br>PDLQPT           | Mus<br>musculu<br>s              |
| 1 | 1.00 | 1 | 1 | 0 | -0.007 | 0 | 0 | 0.001 | t | 67701  | VAPAADA<br>PQGFYVLE<br>NDYSA | Oryctola<br>gus<br>cuniculu<br>s |



|   |      |   |   |   |        |   |   |       |   |       |                             |                                  |
|---|------|---|---|---|--------|---|---|-------|---|-------|-----------------------------|----------------------------------|
| 1 | 1.00 | 1 | 1 | 0 | -0.003 | 0 | 0 | 0.001 | t | 96228 | EGLLKLL<br>DTLENML<br>K     | Oryctola<br>gus<br>cuniculu<br>s |
| 1 | 1.00 | 1 | 1 | 0 | -0.003 | 0 | 0 | 0.001 | t | 95032 | PAGTGDR                     | Oryctola<br>gus<br>cuniculu<br>s |
| 1 | 1.00 | 1 | 1 | 0 | -0.003 | 0 | 0 | 0.001 | t | 68322 | VEQKHIQK<br>EDVPSE<br>RGLYL | Oryctola<br>gus<br>cuniculu<br>s |
| 1 | 1.00 | 1 | 1 | 0 | -0.003 | 0 | 0 | 0.001 | t | 62715 | SYSYNKDN<br>NELSHFA         | Oryctola<br>gus<br>cuniculu<br>s |
| 1 | 1.00 | 1 | 1 | 0 | -0.003 | 0 | 0 | 0.001 | t | 72113 | VYNKTISG<br>SGP             | Oryctola<br>gus<br>cuniculu<br>s |
| 1 | 1.00 | 1 | 1 | 0 | 0.003  | 0 | 0 | 0.001 | t | 63037 | TAVSP<br>TTLR               | Sus<br>scrofa                    |
| 1 | 1.00 | 1 | 1 | 0 | -0.004 | 0 | 0 | 0.001 | t | 39092 | LRGDLQVL<br>AQKVARTL        | Mus<br>musculu<br>s              |
| 1 | 1.00 | 1 | 1 | 0 | -0.003 | 0 | 0 | 0.001 | t | 55924 | RSQDACIE<br>FVQQEVD         | Oryctola<br>gus<br>cuniculu<br>s |
| 1 | 1.00 | 1 | 1 | 0 | 0.004  | 0 | 0 | 0.001 | t | 42475 | MRKTKLA<br>PTVAHGV<br>F     | Mus<br>musculu<br>s              |
| 1 | 1.00 | 1 | 1 | 0 | -0.003 | 0 | 0 | 0.001 | t | 54057 | RHKQKIVA<br>PVK             | Oryctola<br>gus<br>cuniculu<br>s |
| 1 | 1.00 | 1 | 1 | 0 | -0.004 | 0 | 0 | 0.001 | t | 43246 | NANPNAN<br>PNANPNA<br>NP    | Mus<br>musculu<br>s              |
| 1 | 1.00 | 1 | 1 | 0 | -0.003 | 0 | 0 | 0.001 | t | 57743 | SFDVPSKQ<br>PTIDIDL         | Oryctola<br>gus<br>cuniculu<br>s |

|   |      |   |   |   |        |   |   |       |   |       |                             |                                  |
|---|------|---|---|---|--------|---|---|-------|---|-------|-----------------------------|----------------------------------|
| 1 | 1.00 | 1 | 1 | 0 | -0.003 | 0 | 0 | 0.001 | t | 57743 | SFDVPSKQ<br>PTIDIDL         | Oryctola<br>gus<br>cuniculu<br>s |
| 1 | 1.00 | 1 | 1 | 0 | 0.004  | 0 | 0 | 0.001 | t | 51233 | QKPLK                       | Ovis<br>aries                    |
| 1 | 1.00 | 1 | 1 | 0 | -0.003 | 0 | 0 | 0.001 | t | 57504 | SEKSEEIN                    | Oryctola<br>gus<br>cuniculu<br>s |
| 1 | 1.00 | 1 | 1 | 0 | 0      | 0 | 0 | 0.001 | t | 43946 | NFVPTSVT<br>EGRTDIT<br>TM   | Sus<br>scrofa                    |
| 1 | 1.00 | 1 | 1 | 0 | -0.003 | 0 | 0 | 0.001 | t | 39788 | LTAELKIYS<br>VIQAEINK<br>HL | Oryctola<br>gus<br>cuniculu<br>s |
| 1 | 1.00 | 1 | 1 | 0 | -0.003 | 0 | 0 | 0.001 | t | 39788 | LTAELKIYS<br>VIQAEINK<br>HL | Oryctola<br>gus<br>cuniculu<br>s |
| 1 | 1.00 | 1 | 1 | 0 | 0.004  | 0 | 0 | 0.001 | t | 42475 | MRKTKLA<br>PTVAHGV<br>F     | Mus<br>musculu<br>s              |
| 1 | 1.00 | 1 | 1 | 0 | 0.002  | 0 | 0 | 0.001 | t | 38522 | LPHSNL                      | Rattus<br>norvegic<br>us         |
| 1 | 1.00 | 1 | 1 | 0 | 0      | 0 | 0 | 0.001 | t | 36958 | LKMADPN<br>RFRGKD           | Mus<br>musculu<br>s              |
| 1 | 1.00 | 1 | 1 | 0 | -0.004 | 0 | 0 | 0.001 | t | 39092 | LRGDLQVL<br>AQKVARTL        | Mus<br>musculu<br>s              |
| 1 | 1.00 | 1 | 1 | 0 | -0.003 | 0 | 0 | 0.001 | t | 56022 | RTCAHPGE<br>H               | Oryctola<br>gus<br>cuniculu<br>s |
| 1 | 1.00 | 1 | 1 | 0 | -0.003 | 0 | 0 | 0.001 | t | 52016 | QQEVDYII<br>DHVDQHN         | Oryctola<br>gus<br>cuniculu<br>s |

|   |      |   |   |   |        |   |   |       |   |       |                              |                                  |
|---|------|---|---|---|--------|---|---|-------|---|-------|------------------------------|----------------------------------|
| 1 | 1.00 | 1 | 1 | 0 | -0.003 | 0 | 0 | 0.001 | t | 43730 | NEREDERT<br>LTKEYEDIV<br>LK  | Oryctola<br>gus<br>cuniculu<br>s |
| 1 | 1.00 | 1 | 1 | 0 | -0.008 | 0 | 0 | 0.001 | t | 43242 | NANPNAN<br>PNANP             | Mus<br>musculu<br>s              |
| 1 | 1.00 | 1 | 1 | 0 | -0.003 | 0 | 0 | 0.001 | t | 37627 | LLNQATAR<br>FPDCA            | Oryctola<br>gus<br>cuniculu<br>s |
| 1 | 1.00 | 1 | 1 | 0 | 0.007  | 0 | 0 | 0.001 | t | 42475 | MRKTKLA<br>PTVAHGV<br>F      | Ovis<br>aries                    |
| 1 | 1.00 | 1 | 1 | 0 | 0.004  | 0 | 0 | 0.001 | t | 42475 | MRKTKLA<br>PTVAHGV<br>F      | Ovis<br>aries                    |
| 1 | 1.00 | 1 | 1 | 0 | 0.004  | 0 | 0 | 0.001 | t | 42475 | MRKTKLA<br>PTVAHGV<br>F      | Mus<br>musculu<br>s              |
| 1 | 1.00 | 1 | 1 | 0 | -0.003 | 0 | 0 | 0.001 | t | 45990 | NSSSFNTT<br>QGWHHPS<br>QRLLF | Oryctola<br>gus<br>cuniculu<br>s |
| 1 | 1.00 | 1 | 1 | 0 | 0.003  | 0 | 0 | 0.001 | t | 58382 | SHLQLIYNL                    | Sus<br>scrofa                    |
| 1 | 1.00 | 1 | 1 | 0 | -0.008 | 0 | 0 | 0.001 | t | 43242 | NANPNAN<br>PNANP             | Mus<br>musculu<br>s              |
| 1 | 1.00 | 1 | 1 | 0 | -0.003 | 0 | 0 | 0.001 | t | 52016 | QQEVDYII<br>DHVDQHN          | Oryctola<br>gus<br>cuniculu<br>s |
| 1 | 1.00 | 1 | 1 | 0 | -0.003 | 0 | 0 | 0.001 | t | 46179 | NTMDVIK<br>KMLADQT<br>V      | Oryctola<br>gus<br>cuniculu<br>s |
| 1 | 1.00 | 1 | 1 | 0 | -0.003 | 0 | 0 | 0.001 | t | 31383 | KIPDPPQP<br>DFPQLNSD<br>WVPS | Oryctola<br>gus<br>cuniculu<br>s |

|   |      |   |   |   |        |   |   |       |   |       |                              |                                  |
|---|------|---|---|---|--------|---|---|-------|---|-------|------------------------------|----------------------------------|
| 1 | 1.00 | 1 | 1 | 0 | -0.003 | 0 | 0 | 0.001 | t | 24037 | HIDSQKKA<br>IERMK            | Oryctola<br>gus<br>cuniculu<br>s |
| 1 | 1.00 | 1 | 1 | 0 | -0.003 | 0 | 0 | 0.001 | t | 36940 | LKLKSIVS<br>WAKKVL           | Oryctola<br>gus<br>cuniculu<br>s |
| 1 | 1.00 | 1 | 1 | 0 | -0.003 | 0 | 0 | 0.001 | t | 26829 | IKKMLAD<br>QTVEEHIG          | Oryctola<br>gus<br>cuniculu<br>s |
| 1 | 1.00 | 1 | 1 | 0 | -0.003 | 0 | 0 | 0.001 | t | 24814 | HSMKEGI<br>HAQQKEP<br>MIGVNQ | Oryctola<br>gus<br>cuniculu<br>s |
| 1 | 1.00 | 1 | 1 | 0 | -0.003 | 0 | 0 | 0.001 | t | 28537 | ISIKYDPRK<br>DSEVFA          | Oryctola<br>gus<br>cuniculu<br>s |
| 1 | 1.00 | 1 | 1 | 0 | -0.003 | 0 | 0 | 0.001 | t | 28537 | ISIKYDPRK<br>DSEVFA          | Oryctola<br>gus<br>cuniculu<br>s |
| 1 | 1.00 | 1 | 1 | 0 | -0.003 | 0 | 0 | 0.001 | t | 36940 | LKLKSIVS<br>WAKKVL           | Oryctola<br>gus<br>cuniculu<br>s |
| 1 | 1.00 | 1 | 1 | 0 | -0.003 | 0 | 0 | 0.001 | t | 25587 | IDIDLCDIC<br>TNTMDV          | Oryctola<br>gus<br>cuniculu<br>s |
| 1 | 1.00 | 1 | 1 | 0 | -0.003 | 0 | 0 | 0.001 | t | 28676 | ISQAVHAA<br>HAEINEAG<br>R    | Oryctola<br>gus<br>cuniculu<br>s |
| 1 | 1.00 | 1 | 1 | 0 | -0.003 | 0 | 0 | 0.001 | t | 21625 | GPFYTSAP<br>Q                | Oryctola<br>gus<br>cuniculu<br>s |
| 1 | 1.00 | 1 | 1 | 0 | -0.004 | 0 | 0 | 0.001 | t | 23947 | HGRVGIYF<br>GMK              | Mus<br>musculu<br>s              |
| 1 | 1.00 | 1 | 1 | 0 | -0.002 | 0 | 0 | 0.001 | t | 11208 | EAVEAERA<br>GRGTG            | Mus<br>musculu<br>s              |

|   |      |   |   |   |        |   |   |       |   |       |                              |                                  |
|---|------|---|---|---|--------|---|---|-------|---|-------|------------------------------|----------------------------------|
| 1 | 1.00 | 1 | 1 | 0 | 0      | 0 | 0 | 0.001 | t | 34806 | LAHLTTTH<br>ARHLP            | Sus<br>scrofa                    |
| 1 | 1.00 | 1 | 1 | 0 | -0.003 | 0 | 0 | 0.001 | t | 26341 | IGVNQELA<br>YFYPELFR<br>QFYQ | Oryctola<br>gus<br>cuniculu<br>s |
| 1 | 1.00 | 1 | 1 | 0 | 0      | 0 | 0 | 0.001 | t | 25140 | HWSYGLR<br>PG                | Rattus<br>norvegic<br>us         |
| 1 | 1.00 | 1 | 1 | 0 | -0.003 | 0 | 0 | 0.001 | t | 32524 | KNKDLAD<br>K                 | Oryctola<br>gus<br>cuniculu<br>s |
| 1 | 1.00 | 1 | 1 | 0 | -0.008 | 0 | 0 | 0.001 | t | 6139  | CDSSDRPR<br>VYTIT            | Mus<br>musculu<br>s              |
| 1 | 1.00 | 1 | 1 | 0 | -0.003 | 0 | 0 | 0.001 | t | 8756  | DIPNPIGSE<br>NSEKTTM<br>PLW  | Oryctola<br>gus<br>cuniculu<br>s |
| 1 | 1.00 | 1 | 1 | 0 | 0.012  | 0 | 0 | 0.001 | t | 7491  | DAEFRHDS<br>GYEVHHQ<br>K     | Mus<br>musculu<br>s              |
| 1 | 1.00 | 1 | 1 | 0 | -0.003 | 0 | 0 | 0.001 | t | 6412  | CIEFVQQE<br>VDYIIDH          | Oryctola<br>gus<br>cuniculu<br>s |
| 1 | 1.00 | 1 | 1 | 0 | -0.003 | 0 | 0 | 0.001 | t | 7171  | CTKPTDG<br>NC                | Oryctola<br>gus<br>cuniculu<br>s |
| 1 | 1.00 | 1 | 1 | 0 | -0.003 | 0 | 0 | 0.001 | t | 5558  | AVTFASFD<br>VPSKQPT          | Oryctola<br>gus<br>cuniculu<br>s |
| 1 | 1.00 | 1 | 1 | 0 | -0.008 | 0 | 0 | 0.001 | t | 4149  | ARGSLAVT<br>I                | Mus<br>musculu<br>s              |
| 1 | 1.00 | 1 | 1 | 0 | -0.003 | 0 | 0 | 0.001 | t | 757   | ADQTVEE<br>HIGYLVKY          | Oryctola<br>gus<br>cuniculu<br>s |
| 1 | 1.00 | 1 | 1 | 0 | 0      | 0 | 0 | 0.001 | t | 8132  | DEQFIPK                      | Mus<br>musculu<br>s              |

|   |      |   |   |       |        |        |        |        |   |        |                              |                        |
|---|------|---|---|-------|--------|--------|--------|--------|---|--------|------------------------------|------------------------|
| 1 | 1.00 | 1 | 1 | -0.04 | -0.04  | -0.048 | -0.04  | -0.038 | t | 43747  | NESKYSNT<br>FINNAYN<br>MSIR  | Mus<br>musculu<br>s    |
| 1 | 1.00 | 1 | 1 | 0     | 0      | 0      | 0      | 0.002  | t | 27674  | INKRKYDS                     | Homo<br>sapiens        |
| 1 | 1.00 | 1 | 1 | -0.01 | -0.008 | 0.004  | -0.009 | -0.01  | t | 968    | AEHQFKEK<br>V                | Homo<br>sapiens        |
| 1 | 1.00 | 1 | 1 | 0     | 0.004  | 0.005  | 0      | 0      | t | 123840 | WAASFGA<br>GD                | Ovis<br>aries          |
| 1 | 1.00 | 1 | 1 | 0.01  | 0.01   | 0.01   | 0.008  | 0.01   | t | 4911   | ATCMQAD<br>LEVMTST           | Homo<br>sapiens        |
| 1 | 1.00 | 1 | 1 | -0.01 | -0.008 | -0.007 | -0.009 | -0.01  | t | 22717  | GTIVIRVQ<br>YEG              | Homo<br>sapiens        |
| 1 | 1.00 | 1 | 1 | 0     | 0      | -0.01  | 0      | 0      | t | 73311  | YAAANPT<br>GPASVQG<br>MSQDPV | Mus<br>musculu<br>s    |
| 1 | 1.00 | 1 | 1 | -0.06 | -0.06  | -0.06  | -0.059 | -0.06  | t | 82048  | FGKLRVGR<br>LNSV             | Homo<br>sapiens        |
| 1 | 1.00 | 1 | 1 | 0     | 0.004  | 0.007  | 0      | -0.002 | t | 8273   | DFGSLAPR<br>VA               | Cavia<br>porcellu<br>s |
| 1 | 1.00 | 1 | 1 | 0     | 0.004  | 0.007  | 0      | -0.002 | t | 8273   | DFGSLAPR<br>VA               | Cavia<br>porcellu<br>s |
| 1 | 1.00 | 1 | 1 | 0     | -0.012 | 0      | 0      | 0.001  | t | 71506  | VTSTLTSLF<br>RPGASQKI<br>QL  | Mus<br>musculu<br>s    |
| 1 | 1.00 | 1 | 1 | -0.03 | -0.03  | -0.024 | -0.03  | -0.03  | t | 46375  | NVFFLLLFS<br>LTHFPLAQ        | Homo<br>sapiens        |
| 1 | 1.00 | 1 | 1 | -0.04 | -0.038 | -0.04  | -0.033 | -0.038 | t | 117495 | ERDRKREK<br>RKPKS            | Homo<br>sapiens        |

|   |      |   |   |       |        |        |        |        |   |        |                              |                                  |
|---|------|---|---|-------|--------|--------|--------|--------|---|--------|------------------------------|----------------------------------|
| 1 | 1.00 | 1 | 1 | 0.04  | 0.04   | 0.04   | 0.04   | 0.04   | t | 97326  | GEGQFND<br>AE                | Oryctola<br>gus<br>cuniculu<br>s |
| 1 | 1.00 | 1 | 1 | -0.01 | -0.012 | -0.01  | -0.013 | -0.009 | t | 131656 | SGKLEEFV<br>Q                | Mus<br>musculu<br>s              |
| 1 | 1.00 | 1 | 1 | 0.02  | 0.02   | 0.02   | 0.02   | 0.02   | t | 78301  | WHQQMS<br>P                  | Homo<br>sapiens                  |
| 1 | 1.00 | 1 | 1 | 0     | 0      | 0      | 0      | 0      | t | 123273 | GTSVSHVD<br>F                | Ovis<br>aries                    |
| 1 | 1.00 | 1 | 1 | -0.02 | -0.02  | -0.02  | -0.02  | -0.02  | t | 156864 | EPNPTRL                      | Gallus<br>gallus                 |
| 1 | 1.00 | 1 | 1 | 0.02  | 0.021  | 0.022  | 0.023  | 0.02   | t | 57506  | SEKSKCEE<br>NTMFQPY          | Equus<br>caballus                |
| 1 | 1.00 | 1 | 1 | -0.01 | -0.006 | -0.01  | -0.013 | -0.011 | t | 118271 | ARALMLQ<br>GVDLLA            | Homo<br>sapiens                  |
| 1 | 1.00 | 1 | 1 | -0.01 | -0.006 | -0.005 | -0.013 | -0.012 | t | 75481  | YQEPVLGP<br>VR               | Homo<br>sapiens                  |
| 1 | 1.00 | 1 | 1 | 0     | -0.004 | 0      | 0.003  | 0.001  | t | 106603 | LFPPSSEEL<br>QANKATL<br>V    | Oryctola<br>gus<br>cuniculu<br>s |
| 1 | 1.00 | 1 | 1 | 0     | 0.003  | 0.007  | 0      | -0.001 | t | 103172 | FHDHKTA<br>NQ                | Mus<br>musculu<br>s              |
| 1 | 1.00 | 1 | 1 | 0     | 0      | 0      | 0      | 0      | t | 151715 | RIMNVIGE<br>PIDERGPIK<br>T   | Mus<br>musculu<br>s              |
| 1 | 1.00 | 1 | 1 | 0.02  | 0.025  | 0.023  | 0.02   | 0.02   | t | 46489  | NVSVPSST<br>STPLLY           | Homo<br>sapiens                  |
| 1 | 1.00 | 1 | 1 | 0.01  | 0.012  | 0.011  | 0.013  | 0.013  | t | 118776 | EADYFEYH<br>QEGGPDG<br>EPDVP | Homo<br>sapiens                  |
| 1 | 1.00 | 1 | 1 | 0     | 0      | 0      | 0      | 0      | t | 151662 | KFSPLTAN<br>LMNLLAE<br>NGRL  | Mus<br>musculu<br>s              |
| 1 | 1.00 | 1 | 1 | 0     | 0.004  | 0.009  | 0.001  | 0      | t | 56283  | RVFEVGV<br>RNPGLGA           | Homo<br>sapiens                  |

|   |      |   |   |       |        |        |        |        |   |        |                              |                       |
|---|------|---|---|-------|--------|--------|--------|--------|---|--------|------------------------------|-----------------------|
| 1 | 1.00 | 1 | 1 | 0     | -0.006 | 0      | 0      | 0      | t | 123136 | EKRKPKSQ                     | Oryctolagus cuniculus |
| 1 | 1.00 | 1 | 1 | 0.04  | 0.042  | 0.04   | 0.037  | 0.04   | t | 103901 | FNKSYYG                      | Homo sapiens          |
| 1 | 1.00 | 1 | 1 | 0     | 0.002  | 0.005  | 0      | -0.004 | t | 14917  | EVVSYLRYT<br>GTPIPDNP<br>NDK | Homo sapiens          |
| 1 | 1.00 | 1 | 1 | 0     | 0      | 0.007  | 0      | 0      | t | 63096  | TCRNMWS<br>GT                | Homo sapiens          |
| 1 | 1.00 | 1 | 1 | -0.02 | -0.017 | -0.026 | -0.02  | -0.02  | t | 35235  | LDNIKGNV<br>GKMEDIYK<br>KNNK | Mus musculus          |
| 1 | 1.00 | 1 | 1 | 0.01  | 0.01   | 0.005  | 0.01   | 0.01   | t | 153426 | MSKHKNQ<br>RTARTLEK<br>TWD   | Mus musculus          |
| 1 | 1.00 | 1 | 1 | 0.01  | 0.013  | 0.005  | 0.01   | 0.01   | t | 153426 | MSKHKNQ<br>RTARTLEK<br>TWD   | Mus musculus          |
| 1 | 1.00 | 1 | 1 | 0.01  | 0.012  | 0.012  | 0.01   | 0.01   | t | 122733 | DSKPTIISR<br>AN              | Rattus norvegicus     |
| 1 | 1.00 | 1 | 1 | 0     | 0      | 0      | 0.001  | 0.002  | t | 130518 | ITQSTQSF<br>NDFTRVV          | Mus musculus          |
| 1 | 1.00 | 1 | 1 | 0     | 0      | 0      | 0.001  | 0.002  | t | 43233  | NANP                         | Mus musculus          |
| 1 | 1.00 | 1 | 1 | 0     | 0      | 0      | 0.001  | 0.002  | t | 40111  | LTPLEELYP                    | Mus musculus          |
| 1 | 1.00 | 1 | 1 | 0     | 0      | 0      | 0.001  | 0.002  | t | 9524   | DNPASTT<br>NKDK              | Mus musculus          |
| 1 | 1.00 | 1 | 1 | -0.02 | -0.012 | -0.02  | -0.02  | -0.022 | t | 136631 | SHDGASSK<br>IRPA             | Gallus gallus         |
| 1 | 1.00 | 1 | 1 | -0.02 | -0.02  | -0.014 | -0.019 | -0.022 | t | 19696  | GGDDPDH<br>DPDHPHD<br>L      | Mus musculus          |



|   |      |   |   |       |        |        |        |        |   |        |                              |                       |
|---|------|---|---|-------|--------|--------|--------|--------|---|--------|------------------------------|-----------------------|
| 1 | 1.00 | 1 | 1 | 0.03  | 0.03   | 0.03   | 0.03   | 0.03   | t | 149432 | QPISQQQ<br>QQQ               | Homo sapiens          |
| 1 | 1.00 | 1 | 1 | -0.01 | -0.01  | -0.01  | -0.01  | -0.01  | t | 103462 | PDRSAERC<br>GSPAIDL          | Homo sapiens          |
| 1 | 1.00 | 1 | 1 | -0.01 | -0.01  | -0.01  | -0.01  | -0.01  | t | 114762 | DCTAEDRP<br>LC               | Homo sapiens          |
| 1 | 1.00 | 1 | 1 | -0.01 | -0.01  | -0.01  | -0.01  | -0.01  | t | 86153  | MANTGA<br>MELV               | Homo sapiens          |
| 1 | 1.00 | 1 | 1 | -0.01 | -0.01  | -0.01  | -0.01  | -0.01  | t | 41331  | MEECASR<br>AALLEEGQ<br>RIAEM | Homo sapiens          |
| 1 | 1.00 | 1 | 1 | -0.01 | -0.01  | -0.01  | -0.01  | -0.01  | t | 33847  | KTRRNTNY<br>Q                | Homo sapiens          |
| 1 | 1.00 | 1 | 1 | -0.01 | -0.01  | -0.01  | -0.01  | -0.01  | t | 22444  | GSPLRQRR<br>S                | Mus musculus          |
| 1 | 1.00 | 1 | 1 | -0.03 | -0.03  | -0.03  | -0.03  | -0.03  | t | 123075 | DFLGKNPY<br>L                | Ovis aries            |
| 1 | 1.00 | 1 | 1 | -0.03 | -0.03  | -0.03  | -0.03  | -0.03  | t | 119516 | RKLAHPGT<br>S                | Homo sapiens          |
| 1 | 1.00 | 1 | 1 | -0.02 | -0.02  | -0.027 | -0.02  | -0.019 | t | 18970  | GDEVRLA<br>NDLKAFLD<br>SEYG  | Mus musculus          |
| 1 | 1.00 | 1 | 1 | -0.02 | -0.02  | -0.027 | -0.02  | -0.019 | t | 18970  | GDEVRLA<br>NDLKAFLD<br>SEYG  | Mus musculus          |
| 1 | 1.00 | 1 | 1 | -0.01 | -0.01  | -0.01  | -0.01  | -0.01  | t | 123373 | KITQNN<br>MKI                | Oryctolagus cuniculus |
| 1 | 1.00 | 1 | 1 | -0.02 | -0.022 | -0.03  | -0.021 | -0.02  | t | 70621  | VQPDGGQ<br>PAVRNER<br>A      | Mus musculus          |
| 1 | 1.00 | 1 | 1 | 0     | 0.004  | -0.003 | -0.003 | 0      | t | 115404 | NQEQPIRC<br>EKDERFFS<br>DKIA | Homo sapiens          |
| 1 | 1.00 | 1 | 1 | 0.01  | 0.012  | 0.005  | 0.011  | 0.01   | t | 54408  | RKPLVSFK<br>EDPTPSDN<br>PFSK | Homo sapiens          |

|   |      |   |   |       |        |        |        |        |   |        |                              |                                  |
|---|------|---|---|-------|--------|--------|--------|--------|---|--------|------------------------------|----------------------------------|
| 1 | 1.00 | 1 | 1 | 0.03  | 0.03   | 0.028  | 0.03   | 0.03   | t | 78657  | FVHAKKKE<br>EGEDDTA<br>RQEI  | Mus<br>musculu<br>s              |
| 1 | 1.00 | 1 | 1 | -0.03 | -0.03  | -0.021 | -0.023 | -0.029 | t | 135930 | GDKVSFFC<br>KNKEKKC          | Homo<br>sapiens                  |
| 1 | 1.00 | 1 | 1 | 0     | 0.004  | 0.007  | 0.007  | 0.002  | t | 130868 | GQSYPPRP<br>DTSLHVT          | Homo<br>sapiens                  |
| 1 | 1.00 | 1 | 1 | 0.04  | 0.038  | 0.018  | 0.033  | 0.042  | t | 144623 | EEAEGTTD<br>AQIDANRK<br>RESE | Mus<br>musculu<br>s              |
| 1 | 1.00 | 1 | 1 | 0     | 0      | 0      | 0      | 0.001  | t | 130916 | KEDFDIYD<br>EDE              | Mus<br>musculu<br>s              |
| 1 | 1.00 | 1 | 1 | 0     | 0      | 0      | 0      | 0.001  | t | 10127  | DSGERLM<br>QPTQMSA<br>Q      | Mus<br>musculu<br>s              |
| 1 | 1.00 | 1 | 1 | 0     | -0.004 | 0      | 0.003  | 0.003  | t | 115381 | MGLLECC<br>ARCLVGAP<br>F     | Oryctola<br>gus<br>cuniculu<br>s |
| 1 | 1.00 | 1 | 1 | -0.03 | -0.034 | -0.034 | -0.031 | -0.034 | t | 75802  | YSLRLTPRP<br>VSRFLGNN<br>SIL | Oryctola<br>gus<br>cuniculu<br>s |
| 1 | 1.00 | 1 | 1 | 0.03  | 0.033  | 0.027  | 0.03   | 0.032  | t | 76395  | YVRFDLEL<br>TFVITST          | Mus<br>musculu<br>s              |
| 1 | 1.00 | 1 | 1 | 0.04  | 0.036  | 0.034  | 0.039  | 0.04   | t | 530    | AAYIKLETK<br>GSDPDTSF<br>LEG | Oryctola<br>gus<br>cuniculu<br>s |
| 1 | 1.00 | 1 | 1 | -0.03 | -0.03  | -0.03  | -0.03  | -0.03  | t | 156874 | GHFPPTPI<br>KTLA             | Gallus<br>gallus                 |
| 1 | 1.00 | 1 | 1 | -0.01 | -0.012 | -0.014 | -0.017 | -0.01  | t | 122197 | TDVVFNSK<br>GIGN             | Mus<br>musculu<br>s              |
| 1 | 1.00 | 1 | 1 | 0.04  | 0.038  | 0.049  | 0.043  | 0.041  | t | 8076   | DEKLDQM<br>EED               | Mus<br>musculu<br>s              |
| 1 | 1.00 | 1 | 1 | 0     | 0      | -0.009 | -0.003 | 0.003  | t | 110828 | EIDGPAGQ<br>AEPDRAH<br>YNI   | Mus<br>musculu<br>s              |
| 1 | 1.00 | 1 | 1 | -0.02 | -0.025 | -0.02  | -0.02  | -0.02  | t | 67139  | TVSAGDG<br>RGTPIAFQ<br>AEVSK | Canis<br>lupus                   |

|   |      |   |   |       |        |        |        |        |   |        |                              |                                  |
|---|------|---|---|-------|--------|--------|--------|--------|---|--------|------------------------------|----------------------------------|
| 1 | 1.00 | 1 | 1 | 0.04  | 0.036  | 0.04   | 0.04   | 0.04   | t | 100135 | IEVDNEQP<br>TTRAQK           | Oryctola<br>gus<br>cuniculu<br>s |
| 1 | 1.00 | 1 | 1 | -0.02 | -0.02  | -0.02  | -0.018 | -0.02  | t | 58951  | SKTRAIDA<br>CPLDYSILC<br>RMY | Homo<br>sapiens                  |
| 1 | 1.00 | 1 | 1 | 0     | 0      | 0      | 0      | 0      | t | 133296 | PYGQWAG<br>RNAYNETHK<br>LK   | Oryctola<br>gus<br>cuniculu<br>s |
| 1 | 1.00 | 1 | 1 | 0     | 0      | 0      | 0      | 0      | t | 115497 | SSNICNISC<br>D               | Homo<br>sapiens                  |
| 1 | 1.00 | 1 | 1 | -0.02 | -0.02  | -0.02  | -0.02  | -0.02  | t | 115179 | ALPMHIRL<br>SFNPTQLE<br>EQCH | Homo<br>sapiens                  |
| 1 | 1.00 | 1 | 1 | -0.02 | -0.02  | -0.02  | -0.02  | -0.02  | t | 79142  | ACDPSTV<br>MVPWPCS           | Mus<br>musculu<br>s              |
| 1 | 1.00 | 1 | 1 | -0.02 | -0.02  | -0.02  | -0.02  | -0.02  | t | 40017  | LTLNHASS<br>G                | Rattus<br>norvegic<br>us         |
| 1 | 1.00 | 1 | 1 | -0.02 | -0.02  | -0.02  | -0.02  | -0.02  | t | 22093  | GRIILSGRP<br>VIVPDREV<br>LYR | Homo<br>sapiens                  |
| 1 | 1.00 | 1 | 1 | -0.04 | -0.04  | -0.04  | -0.04  | -0.04  | t | 123726 | RYIADKHG<br>M                | Ovis<br>aries                    |
| 1 | 1.00 | 1 | 1 | 0.02  | 0.02   | 0.02   | 0.02   | 0.023  | t | 11033  | EAESISSE<br>EIVPNSVE         | Homo<br>sapiens                  |
| 1 | 1.00 | 1 | 1 | 0     | -0.003 | -0.007 | 0      | 0.001  | t | 105747 | EEVVRVPT<br>TAASTPDA         | Oryctola<br>gus<br>cuniculu<br>s |
| 1 | 1.00 | 1 | 1 | 0     | 0      | 0.007  | 0.004  | -0.002 | t | 36831  | LKEKHTDL<br>GKEGV            | Homo<br>sapiens                  |
| 1 | 1.00 | 1 | 1 | 0     | 0      | 0.001  | -0.01  | -0.002 | t | 105975 | NGIEETICT<br>ASFKKN          | Homo<br>sapiens                  |
| 1 | 1.00 | 1 | 1 | 0.02  | 0.025  | 0.03   | 0.018  | 0.017  | t | 157463 | KKETLICS                     | Homo<br>sapiens                  |
| 1 | 1.00 | 1 | 1 | 0.01  | 0.014  | 0.007  | 0.007  | 0.011  | t | 31580  | KKIQDCYV<br>ENGLIS           | Homo<br>sapiens                  |

|   |      |   |   |       |        |        |        |        |   |        |                              |                                  |
|---|------|---|---|-------|--------|--------|--------|--------|---|--------|------------------------------|----------------------------------|
| 1 | 1.00 | 1 | 1 | -0.01 | -0.022 | -0.005 | -0.01  | -0.01  | t | 72488  | WGPFQYA<br>AG                | Mus<br>musculu<br>s              |
| 1 | 1.00 | 1 | 1 | 0     | 0      | 0      | 0      | 0      | t | 266    | AALANSLS<br>LGPQQKV          | Mus<br>musculu<br>s              |
| 1 | 1.00 | 1 | 1 | 0     | 0      | 0      | 0      | 0      | t | 266    | AALANSLS<br>LGPQQKV          | Mus<br>musculu<br>s              |
| 1 | 1.00 | 1 | 1 | 0.02  | 0.02   | 0.03   | 0.02   | 0.018  | t | 76310  | YVKGGGA<br>VP                | Homo<br>sapiens                  |
| 1 | 1.00 | 1 | 1 | 0.03  | 0.029  | 0.03   | 0.033  | 0.032  | t | 130607 | SHNLVSSA<br>FPSA             | Camelus<br>dromed<br>arius       |
| 1 | 1.00 | 1 | 1 | 0.02  | 0.017  | 0.021  | 0.02   | 0.022  | t | 51763  | QNSGNQS<br>FEE               | Oryctola<br>gus<br>cuniculu<br>s |
| 1 | 1.00 | 1 | 1 | 0.02  | 0.017  | 0.021  | 0.02   | 0.022  | t | 51763  | QNSGNQS<br>FEE               | Oryctola<br>gus<br>cuniculu<br>s |
| 1 | 1.00 | 1 | 1 | -0.01 | -0.008 | -0.004 | -0.003 | -0.01  | t | 122842 | LLDLPRDL<br>GGMGCSS<br>PPCE  | Homo<br>sapiens                  |
| 1 | 1.00 | 1 | 1 | 0.02  | 0.022  | 0.02   | 0.017  | 0.02   | t | 72940  | WPKD TDT                     | Homo<br>sapiens                  |
| 1 | 1.00 | 1 | 1 | -0.03 | -0.018 | -0.021 | -0.03  | -0.033 | t | 110213 | EGHLIDLK<br>RV               | Mus<br>musculu<br>s              |
| 1 | 1.00 | 1 | 1 | 0     | 0.001  | 0      | 0      | 0      | t | 54233  | RIREFMEK<br>ECPFIK           | Myodes<br>glareolu<br>s          |
| 1 | 1.00 | 1 | 1 | 0.08  | 0.08   | 0.083  | 0.08   | 0.08   | t | 110317 | LFEETSFID<br>AGAP            | Mus<br>musculu<br>s              |
| 1 | 1.00 | 1 | 1 | 0.06  | 0.062  | 0.068  | 0.063  | 0.059  | t | 9679   | DPLVAEED                     | Homo<br>sapiens                  |
| 1 | 1.00 | 1 | 1 | 0.02  | 0.02   | 0.021  | 0.02   | 0.021  | t | 144807 | VFSYIPWS<br>EDKGEITA<br>CGIP | Mus<br>musculu<br>s              |
| 1 | 1.00 | 1 | 1 | 0.01  | 0.01   | 0.01   | 0.01   | 0.01   | t | 116937 | DDHSTRC<br>WVS               | Homo<br>sapiens                  |

|   |      |   |   |       |        |       |        |        |   |        |                             |                                  |
|---|------|---|---|-------|--------|-------|--------|--------|---|--------|-----------------------------|----------------------------------|
| 1 | 1.00 | 1 | 1 | 0.01  | 0.014  | 0.007 | 0.011  | 0.01   | t | 61840  | STPSTPAD<br>SSAHSTPS<br>TPV | Homo<br>sapiens                  |
| 1 | 1.00 | 1 | 1 | 0.01  | 0.01   | 0.01  | 0.01   | 0.01   | t | 149364 | LGGPSGSA<br>ALKAAVD         | Cavia<br>porcellu<br>s           |
| 1 | 1.00 | 1 | 1 | 0     | 0.003  | 0.006 | 0      | 0.001  | t | 119322 | QRVFKEKV<br>DTKAPEPP        | Mus<br>musculu<br>s              |
| 1 | 1.00 | 1 | 1 | -0.03 | -0.03  | -0.03 | -0.03  | -0.03  | t | 123075 | DFLGKNPY<br>L               | Ovis<br>aries                    |
| 1 | 1.00 | 1 | 1 | -0.03 | -0.03  | -0.03 | -0.03  | -0.03  | t | 108500 | KKGKKKDP<br>NAPKRPP         | Homo<br>sapiens                  |
| 1 | 1.00 | 1 | 1 | -0.03 | -0.03  | -0.03 | -0.03  | -0.03  | t | 115887 | PHPHLSF<br>MAI              | Homo<br>sapiens                  |
| 1 | 1.00 | 1 | 1 | -0.03 | -0.03  | -0.03 | -0.03  | -0.03  | t | 45005  | NMMNYI<br>MDPRTH            | Mus<br>musculu<br>s              |
| 1 | 1.00 | 1 | 1 | -0.03 | -0.03  | -0.03 | -0.03  | -0.03  | t | 45005  | NMMNYI<br>MDPRTH            | Oryctola<br>gus<br>cuniculu<br>s |
| 1 | 1.00 | 1 | 1 | -0.03 | -0.03  | -0.03 | -0.03  | -0.03  | t | 45005  | NMMNYI<br>MDPRTH            | Oryctola<br>gus<br>cuniculu<br>s |
| 1 | 1.00 | 1 | 1 | -0.03 | -0.03  | -0.03 | -0.03  | -0.03  | t | 45005  | NMMNYI<br>MDPRTH            | Oryctola<br>gus<br>cuniculu<br>s |
| 1 | 1.00 | 1 | 1 | -0.03 | -0.027 | -0.03 | -0.03  | -0.03  | t | 45005  | NMMNYI<br>MDPRTH            | Mus<br>musculu<br>s              |
| 1 | 1.00 | 1 | 1 | -0.02 | -0.018 | -0.02 | -0.013 | -0.018 | t | 132763 | YMASLQM<br>RGNPGSH<br>F     | Homo<br>sapiens                  |
| 1 | 1.00 | 1 | 1 | 0.04  | 0.038  | 0.036 | 0.033  | 0.039  | t | 144699 | KASITEIKA<br>DKT            | Mus<br>musculu<br>s              |
| 1 | 1.00 | 1 | 1 | 0     | -0.004 | 0     | -0.007 | -0.003 | t | 54393  | RKLWCHH<br>FC               | Mus<br>musculu<br>s              |

|   |      |   |   |       |        |        |        |        |   |        |                              |                                  |
|---|------|---|---|-------|--------|--------|--------|--------|---|--------|------------------------------|----------------------------------|
| 1 | 1.00 | 1 | 1 | 0.02  | 0.024  | 0.01   | 0.017  | 0.021  | t | 68707  | VGLDAFSA<br>DELKKLKF         | Homo<br>sapiens                  |
| 1 | 1.00 | 1 | 1 | 0     | -0.004 | -0.004 | -0.007 | -0.004 | t | 125136 | LGSISESRR<br>ALQDSQR         | Oryctola<br>gus<br>cuniculu<br>s |
| 1 | 1.00 | 1 | 1 | 0.08  | 0.082  | 0.084  | 0.08   | 0.079  | t | 133671 | QVLTANPS<br>SQSSP            | Rattus<br>norvegic<br>us         |
| 1 | 1.00 | 1 | 1 | 0.02  | 0.024  | 0.022  | 0.017  | 0.022  | t | 95547  | LEKFDK                       | Homo<br>sapiens                  |
| 1 | 1.00 | 1 | 1 | 0.01  | 0.006  | 0.013  | 0.009  | 0.008  | t | 75426  | YPVEYDNC<br>AYICWNY          | Oryctola<br>gus<br>cuniculu<br>s |
| 1 | 1.00 | 1 | 1 | 0.01  | 0.014  | 0.017  | 0.017  | 0.013  | t | 135547 | DWEYSVW<br>SLN               | Homo<br>sapiens                  |
| 1 | 1.00 | 1 | 1 | -0.02 | -0.018 | 0.002  | -0.017 | -0.02  | t | 95977  | VPNLRGDL                     | Cavia<br>porcellu<br>s           |
| 1 | 1.00 | 1 | 1 | 0     | -0.003 | 0      | 0      | 0.001  | t | 22015  | GREGYP<br>ASKGCKIT           | Mus<br>musculu<br>s              |
| 1 | 1.00 | 1 | 1 | 0     | -0.003 | 0      | 0      | 0.001  | t | 21059  | GLPDSVKI<br>WTSETNK          | Mus<br>musculu<br>s              |
| 1 | 1.00 | 1 | 1 | 0.03  | 0.03   | 0.031  | 0.03   | 0.03   | t | 127962 | ENYKEFSE<br>LLPNRQGL<br>KKAD | Homo<br>sapiens                  |
| 1 | 1.00 | 1 | 1 | 0.03  | 0.03   | 0.035  | 0.027  | 0.03   | t | 6067   | CCNLEPEA<br>RKVISS           | Homo<br>sapiens                  |
| 1 | 1.00 | 1 | 1 | -0.02 | -0.02  | -0.02  | -0.02  | -0.02  | t | 110892 | HSTKRGH<br>AKSRPVRG          | Homo<br>sapiens                  |
| 1 | 1.00 | 1 | 1 | -0.02 | -0.02  | -0.02  | -0.02  | -0.02  | t | 110893 | HSTKRGH<br>AKSRPVRG          | Homo<br>sapiens                  |
| 1 | 1.00 | 1 | 1 | -0.02 | -0.02  | -0.02  | -0.02  | -0.02  | t | 110890 | HSTKRGH<br>AKSRPVRG          | Homo<br>sapiens                  |

|   |      |   |   |       |        |        |        |        |   |        |                              |                                  |
|---|------|---|---|-------|--------|--------|--------|--------|---|--------|------------------------------|----------------------------------|
| 1 | 1.00 | 1 | 1 | -0.02 | -0.02  | -0.02  | -0.02  | -0.02  | t | 110892 | HSTKRGH<br>AKSRPVRG          | Homo<br>sapiens                  |
| 1 | 1.00 | 1 | 1 | -0.02 | -0.02  | -0.02  | -0.02  | -0.02  | t | 110891 | HSTKRGH<br>AKSRPVRG          | Homo<br>sapiens                  |
| 1 | 1.00 | 1 | 1 | -0.02 | -0.02  | -0.02  | -0.02  | -0.02  | t | 110893 | HSTKRGH<br>AKSRPVRG          | Homo<br>sapiens                  |
| 1 | 1.00 | 1 | 1 | -0.02 | -0.02  | -0.02  | -0.02  | -0.02  | t | 110893 | HSTKRGH<br>AKSRPVRG          | Homo<br>sapiens                  |
| 1 | 1.00 | 1 | 1 | -0.02 | -0.02  | -0.02  | -0.02  | -0.02  | t | 110892 | HSTKRGH<br>AKSRPVRG          | Homo<br>sapiens                  |
| 1 | 1.00 | 1 | 1 | 0     | 0      | 0      | 0      | 0.001  | t | 109348 | IPVDL                        | Mus<br>musculu<br>s              |
| 1 | 1.00 | 1 | 1 | 0     | -0.003 | -0.008 | -0.001 | 0.002  | t | 65766  | TPSKYGLG<br>GDILFGWE<br>RTRE | Oryctola<br>gus<br>cuniculu<br>s |
| 1 | 1.00 | 1 | 1 | -0.02 | -0.023 | -0.02  | -0.02  | -0.021 | t | 144702 | KGCKITCF<br>GGGLPDS<br>VKI   | Oryctola<br>gus<br>cuniculu<br>s |
| 1 | 1.00 | 1 | 1 | -0.01 | 0.002  | -0.01  | -0.01  | -0.009 | t | 61635  | STGPCR                       | Pan<br>troglody<br>tes           |
| 1 | 1.00 | 1 | 1 | 0.01  | 0.01   | 0.004  | 0.013  | 0.011  | t | 75031  | YLYLSRT<br>NTPSGTTT<br>QSRL  | Homo<br>sapiens                  |
| 1 | 1.00 | 1 | 1 | -0.05 | -0.05  | -0.05  | -0.059 | -0.052 | t | 131052 | RRRMMM<br>QSGR               | Homo<br>sapiens                  |
| 1 | 1.00 | 1 | 1 | -0.03 | -0.03  | -0.03  | -0.03  | -0.029 | t | 69898  | VLYREF                       | Homo<br>sapiens                  |
| 1 | 1.00 | 1 | 1 | -0.02 | -0.02  | -0.02  | -0.02  | -0.02  | t | 123032 | APPSHEKK                     | Ovis<br>aries                    |
| 1 | 1.00 | 1 | 1 | 0.01  | 0.014  | 0.01   | 0.007  | 0.01   | t | 95324  | DQCSNGG<br>LDL               | Homo<br>sapiens                  |
| 1 | 1.00 | 1 | 1 | -0.02 | -0.02  | -0.011 | -0.02  | -0.024 | t | 108088 | RAAPFGN<br>QW                | Mus<br>musculu<br>s              |
| 1 | 1.00 | 1 | 1 | 0.02  | 0.02   | 0.02   | 0.02   | 0.02   | t | 120633 | INSEQSKE<br>VY               | Mus<br>musculu<br>s              |

|   |      |   |   |       |        |        |        |        |   |        |                     |                       |
|---|------|---|---|-------|--------|--------|--------|--------|---|--------|---------------------|-----------------------|
| 1 | 1.00 | 1 | 1 | 0     | 0      | 0      | 0      | 0      | t | 111570 | MRPDNAK             | Homo sapiens          |
| 1 | 1.00 | 1 | 1 | -0.02 | -0.02  | -0.02  | -0.02  | -0.02  | t | 121740 | QCSLAITIRPWMLPY     | Mus musculus          |
| 1 | 1.00 | 1 | 1 | -0.02 | -0.02  | -0.02  | -0.02  | -0.02  | t | 121740 | QCSLAITIRPWMLPY     | Mus musculus          |
| 1 | 1.00 | 1 | 1 | -0.06 | -0.06  | -0.06  | -0.06  | -0.06  | t | 92781  | GDDIFVHRKG          | Ovis aries            |
| 1 | 1.00 | 1 | 1 | 0     | 0      | 0      | 0      | 0.001  | t | 51146  | QIVGGVYL            | Mus musculus          |
| 1 | 1.00 | 1 | 1 | 0.02  | 0.02   | 0.02   | 0.02   | 0.02   | t | 157020 | AAAAASSPSIAP        | Canis lupus           |
| 1 | 1.00 | 1 | 1 | -0.01 | -0.008 | -0.005 | -0.007 | -0.01  | t | 428    | AASEALDPHAFHLLNTYGR | Homo sapiens          |
| 1 | 1.00 | 1 | 1 | -0.03 | -0.036 | -0.044 | -0.033 | -0.03  | t | 132803 | ETMGREPQVAWTVIV     | Trichosurus vulpecula |
| 1 | 1.00 | 1 | 1 | 0.01  | 0.01   | 0.01   | 0.01   | 0.011  | t | 112206 | LIYWAST             | Homo sapiens          |
| 1 | 1.00 | 1 | 1 | -0.02 | -0.022 | -0.02  | -0.021 | -0.02  | t | 85207  | LGNGLKAIWQVE        | Mus musculus          |
| 1 | 1.00 | 1 | 1 | -0.02 | -0.02  | -0.02  | -0.021 | -0.02  | t | 85207  | LGNGLKAIWQVE        | Homo sapiens          |
| 1 | 1.00 | 1 | 1 | -0.04 | -0.037 | -0.045 | -0.04  | -0.041 | t | 79624  | PEEQVPQLIPPPIIPRAG  | Mus musculus          |
| 1 | 1.00 | 1 | 1 | 0.01  | 0.01   | 0.01   | 0.01   | 0.013  | t | 56185  | RTTADRQTA           | Homo sapiens          |
| 1 | 1.00 | 1 | 1 | 0.02  | 0.018  | 0.013  | 0.013  | 0.02   | t | 107986 | LAGQRGIV            | Mus musculus          |
| 1 | 1.00 | 1 | 1 | 0.03  | 0.03   | 0.03   | 0.03   | 0.031  | t | 108523 | LKAGEGNKIGPE        | Homo sapiens          |
| 1 | 1.00 | 1 | 1 | 0     | -0.004 | 0.005  | 0      | 0.002  | t | 66462  | TSTGPCKTCTTPAQ      | Mus musculus          |



|   |      |   |   |       |        |        |        |        |   |        |                              |                                  |
|---|------|---|---|-------|--------|--------|--------|--------|---|--------|------------------------------|----------------------------------|
| 1 | 1.00 | 1 | 1 | -0.01 | -0.006 | -0.012 | -0.013 | -0.011 | t | 99383  | KKNPQLQ<br>DLDMMLT<br>C      | Homo<br>sapiens                  |
| 1 | 1.00 | 1 | 1 | 0     | 0.007  | 0      | 0      | 0.002  | t | 43246  | NANPNAN<br>PNANPNA<br>NP     | Cavia<br>porcellu<br>s           |
| 1 | 1.00 | 1 | 1 | 0     | 0.003  | 0      | 0      | 0.002  | t | 43246  | NANPNAN<br>PNANPNA<br>NP     | Mus<br>musculu<br>s              |
| 1 | 1.00 | 1 | 1 | -0.03 | -0.03  | -0.029 | -0.03  | -0.03  | t | 21719  | GPPAA                        | Homo<br>sapiens                  |
| 1 | 1.00 | 1 | 1 | 0     | -0.004 | 0.001  | -0.001 | 0.001  | t | 137944 | PGTEYT                       | Oryctola<br>gus<br>cuniculu<br>s |
| 1 | 1.00 | 1 | 1 | 0.01  | 0.01   | 0.01   | 0.012  | 0.01   | t | 98978  | RCLQSCQ<br>QEPDDLK<br>QKACES | Homo<br>sapiens                  |
| 1 | 1.00 | 1 | 1 | 0.01  | 0.006  | 0.012  | 0.007  | 0.008  | t | 136698 | TTRGKRKR<br>VDVEES           | Oryctola<br>gus<br>cuniculu<br>s |
| 1 | 1.00 | 1 | 1 | -0.02 | -0.02  | -0.02  | -0.02  | -0.02  | t | 135497 | RYPNQVYY<br>RPM              | Mus<br>musculu<br>s              |
| 1 | 1.00 | 1 | 1 | 0.02  | 0.018  | 0.015  | 0.019  | 0.022  | t | 22563  | GSVNSFFS<br>RLNWL            | Mus<br>musculu<br>s              |
| 1 | 1.00 | 1 | 1 | 0.02  | 0.018  | 0.028  | 0.019  | 0.02   | t | 24973  | HTSLGHED<br>T                | Rattus<br>norvegic<br>us         |
| 1 | 1.00 | 1 | 1 | 0     | 0      | 0      | 0      | 0.001  | t | 141693 | KTWG                         | Mus<br>musculu<br>s              |
| 1 | 1.00 | 1 | 1 | -0.01 | -0.006 | -0.01  | -0.007 | -0.01  | t | 136015 | YHVYEVNL<br>VSEH             | Homo<br>sapiens                  |
| 1 | 1.00 | 1 | 1 | 0.03  | 0.028  | 0.03   | 0.023  | 0.028  | t | 107668 | VSETLK                       | Rattus<br>norvegic<br>us         |
| 1 | 1.00 | 1 | 1 | -0.04 | -0.04  | -0.031 | -0.04  | -0.04  | t | 153500 | WSWQPPL<br>FPTNP             | Mus<br>musculu<br>s              |

|   |      |   |   |       |        |        |        |       |   |        |                              |                                  |
|---|------|---|---|-------|--------|--------|--------|-------|---|--------|------------------------------|----------------------------------|
| 1 | 1.00 | 1 | 1 | -0.01 | -0.018 | -0.01  | -0.01  | -0.01 | t | 19862  | GGGTHNQ<br>WNKPSKP<br>KTNLKH | Mus<br>musculu<br>s              |
| 1 | 1.00 | 1 | 1 | -0.01 | -0.006 | -0.008 | -0.009 | -0.01 | t | 7812   | DDKLRME<br>TCFQQAC<br>K      | Homo<br>sapiens                  |
| 1 | 1.00 | 1 | 1 | 0.03  | 0.03   | 0.03   | 0.03   | 0.03  | t | 123641 | PVVGAVQ<br>G                 | Oryctola<br>gus<br>cuniculu<br>s |
| 1 | 1.00 | 1 | 1 | -0.01 | -0.01  | -0.01  | -0.01  | -0.01 | t | 134205 | QRGNQIM<br>SDKRNVIL<br>FSVFD | Homo<br>sapiens                  |
| 1 | 1.00 | 1 | 1 | -0.01 | -0.01  | -0.01  | -0.01  | -0.01 | t | 103744 | YDREKLQE<br>RLAKLAG          | Homo<br>sapiens                  |
| 1 | 1.00 | 1 | 1 | -0.01 | -0.01  | -0.01  | -0.01  | -0.01 | t | 115416 | PIVLNPW<br>DQVKRNA<br>VPITPT | Homo<br>sapiens                  |
| 1 | 1.00 | 1 | 1 | -0.01 | -0.01  | -0.01  | -0.01  | -0.01 | t | 113753 | QGQQPG<br>QGQHGGQ<br>QP      | Homo<br>sapiens                  |
| 1 | 1.00 | 1 | 1 | -0.01 | -0.01  | -0.01  | -0.01  | -0.01 | t | 115476 | SAEERLHS<br>MKEGIHA<br>QQKEP | Homo<br>sapiens                  |
| 1 | 1.00 | 1 | 1 | -0.01 | -0.007 | -0.01  | -0.01  | -0.01 | t | 79815  | EVMLRAV<br>FMQQR             | Mus<br>musculu<br>s              |
| 1 | 1.00 | 1 | 1 | -0.01 | -0.01  | -0.01  | -0.01  | -0.01 | t | 63824  | TGFSKHN<br>NMGSQQ<br>KV      | Mus<br>musculu<br>s              |
| 1 | 1.00 | 1 | 1 | -0.01 | -0.01  | -0.01  | -0.01  | -0.01 | t | 8164   | DESERM<br>RVLENRSL           | Homo<br>sapiens                  |
| 1 | 1.00 | 1 | 1 | 0     | 0.003  | 0.007  | 0      | 0.001 | t | 135546 | DWEYS                        | Mus<br>musculu<br>s              |
| 1 | 1.00 | 1 | 1 | -0.03 | -0.03  | -0.03  | -0.03  | -0.03 | t | 121733 | QCALAIW<br>NDRKVL<br>PY      | Mus<br>musculu<br>s              |
| 1 | 1.00 | 1 | 1 | -0.03 | -0.03  | -0.03  | -0.03  | -0.03 | t | 79314  | NCKSVRSG<br>VIERCW           | Mus<br>musculu<br>s              |

|   |      |   |   |       |        |        |        |        |   |        |                              |                                  |
|---|------|---|---|-------|--------|--------|--------|--------|---|--------|------------------------------|----------------------------------|
| 1 | 1.00 | 1 | 1 | 0.02  | 0.02   | 0.02   | 0.02   | 0.022  | t | 137745 | DTPLTTAA<br>LALV             | Mus<br>musculu<br>s              |
| 1 | 1.00 | 1 | 1 | 0.01  | 0.01   | 0.01   | 0.004  | 0.01   | t | 3274   | ANETIYNT<br>TLKYGDV          | Homo<br>sapiens                  |
| 1 | 1.00 | 1 | 1 | -0.02 | -0.02  | -0.02  | -0.02  | -0.021 | t | 144654 | GPHPTLEV<br>VPMGRGS          | Mus<br>musculu<br>s              |
| 1 | 1.00 | 1 | 1 | 0.02  | 0.017  | 0.02   | 0.02   | 0.022  | t | 45192  | NNNNEEP<br>SD                | Oryctola<br>gus<br>cuniculu<br>s |
| 1 | 1.00 | 1 | 1 | 0.01  | 0.008  | 0.025  | 0.013  | 0.009  | t | 96370  | IAAQKPKV                     | Mus<br>musculu<br>s              |
| 1 | 1.00 | 1 | 1 | 0.01  | 0.008  | 0.01   | 0.003  | 0.01   | t | 37793  | LLSHSNLD<br>HI               | Mus<br>musculu<br>s              |
| 1 | 1.00 | 1 | 1 | -0.03 | -0.03  | -0.037 | -0.039 | -0.03  | t | 119475 | KKIK                         | Homo<br>sapiens                  |
| 1 | 1.00 | 1 | 1 | 0.02  | 0.02   | 0.02   | 0.02   | 0.021  | t | 108215 | WVAMHP<br>QGDL               | Homo<br>sapiens                  |
| 1 | 1.00 | 1 | 1 | 0     | 0      | 0      | 0      | 0.001  | t | 23464  | GYSLFQKE<br>MKTHNEG<br>TSGTA | Aotus<br>nancyma<br>ae           |
| 1 | 1.00 | 1 | 1 | -0.01 | -0.01  | -0.01  | -0.01  | -0.01  | t | 135459 | GACLGKAC                     | Oryctola<br>gus<br>cuniculu<br>s |
| 1 | 1.00 | 1 | 1 | 0.02  | 0.018  | 0.019  | 0.023  | 0.023  | t | 106548 | IVYTPHPEY<br>LWP             | Mus<br>musculu<br>s              |
| 1 | 1.00 | 1 | 1 | 0.01  | 0.004  | 0.011  | 0.01   | 0.01   | t | 32168  | KLSLESNG<br>GAKFDTK<br>GSAKT | Oryctola<br>gus<br>cuniculu<br>s |
| 1 | 1.00 | 1 | 1 | 0.02  | 0.019  | 0.021  | 0.017  | 0.021  | t | 99764  | VNTPGQF<br>EDFFPASS          | Homo<br>sapiens                  |
| 1 | 1.00 | 1 | 1 | -0.03 | -0.032 | -0.023 | -0.029 | -0.029 | t | 2691   | ALLDPRVR<br>GLYFP            | Mus<br>musculu<br>s              |
| 1 | 1.00 | 1 | 1 | -0.01 | -0.012 | -0.005 | -0.011 | -0.012 | t | 69946  | VMFDFAS<br>G                 | Mus<br>musculu<br>s              |

|   |      |   |   |       |        |        |        |        |   |        |                              |                              |
|---|------|---|---|-------|--------|--------|--------|--------|---|--------|------------------------------|------------------------------|
| 1 | 1.00 | 1 | 1 | -0.01 | -0.008 | -0.019 | -0.013 | -0.012 | t | 106008 | PREQARQ<br>LKNNNPFK          | Homo<br>sapiens              |
| 1 | 1.00 | 1 | 1 | -0.03 | -0.029 | -0.03  | -0.031 | -0.03  | t | 62971  | TAQRCDH<br>S                 | Equus<br>caballus            |
| 1 | 1.00 | 1 | 1 | -0.05 | -0.048 | -0.057 | -0.05  | -0.048 | t | 107193 | LADAVAVT<br>MGPKGRT          | Rattus<br>norvegicus         |
| 1 | 1.00 | 1 | 1 | -0.01 | -0.01  | -0.01  | -0.012 | -0.01  | t | 148992 | YIPPHCSTT<br>I               | Homo<br>sapiens              |
| 1 | 1.00 | 1 | 1 | 0     | 0.008  | 0      | 0      | 0      | t | 116164 | RTPPPSG                      | Gallus<br>gallus             |
| 1 | 1.00 | 1 | 1 | -0.05 | -0.047 | -0.06  | -0.05  | -0.051 | t | 111359 | GPAGQAE<br>PDRAHYNI<br>VTFCC | Mus<br>musculus              |
| 1 | 1.00 | 1 | 1 | -0.05 | -0.047 | -0.06  | -0.05  | -0.051 | t | 111359 | GPAGQAE<br>PDRAHYNI<br>VTFCC | Mus<br>musculus              |
| 1 | 1.00 | 1 | 1 | 0.01  | 0.01   | 0.01   | 0.01   | 0.012  | t | 12951  | ELAPEDPE<br>DS               | Oryctola<br>gus<br>cuniculus |
| 1 | 1.00 | 1 | 1 | -0.02 | -0.02  | -0.02  | -0.018 | -0.02  | t | 73595  | YDTRCFDS<br>T                | Homo<br>sapiens              |
| 1 | 1.00 | 1 | 1 | -0.04 | -0.038 | -0.04  | -0.04  | -0.038 | t | 107346 | ERMFRK                       | Rattus<br>norvegicus         |
| 1 | 1.00 | 1 | 1 | 0.01  | 0.01   | 0.018  | 0.01   | 0.01   | t | 47478  | PFAECSNP<br>TRLP             | Homo<br>sapiens              |
| 1 | 1.00 | 1 | 1 | 0.03  | 0.027  | 0.026  | 0.03   | 0.03   | t | 122090 | ESPQEISK<br>HQALG            | Oryctola<br>gus<br>cuniculus |
| 1 | 1.00 | 1 | 1 | 0.04  | 0.04   | 0.04   | 0.04   | 0.04   | t | 153885 | SEEEDEID<br>GPAGQAE<br>PDRAH | Cavia<br>porcellus           |
| 1 | 1.00 | 1 | 1 | 0.02  | 0.02   | 0.02   | 0.02   | 0.02   | t | 111759 | SASHPPP                      | Homo<br>sapiens              |
| 1 | 1.00 | 1 | 1 | 0     | 0      | 0      | 0      | 0      | t | 78067  | VVSPTGLS<br>KHAP             | Mus<br>musculus              |

|   |      |   |   |       |        |        |        |        |   |        |                                  |                               |
|---|------|---|---|-------|--------|--------|--------|--------|---|--------|----------------------------------|-------------------------------|
| 1 | 1.00 | 1 | 1 | -0.02 | -0.02  | -0.02  | -0.02  | -0.02  | t | 103112 | DPRYNQLL<br>GPLPFRH              | Homo sapiens                  |
| 1 | 1.00 | 1 | 1 | -0.02 | -0.02  | -0.02  | -0.02  | -0.02  | t | 112857 | VDHQHPS                          | Homo sapiens                  |
| 1 | 1.00 | 1 | 1 | -0.02 | -0.02  | -0.02  | -0.02  | -0.02  | t | 113660 | NIPLVSGP<br>DIPINITDQ<br>APS     | Cavia porcellu<br>s           |
| 1 | 1.00 | 1 | 1 | -0.02 | -0.02  | -0.02  | -0.02  | -0.02  | t | 78554  | VMRQEC<br>WWWPCN<br>DLY          | Mus musculu<br>s              |
| 1 | 1.00 | 1 | 1 | -0.02 | -0.02  | -0.02  | -0.02  | -0.02  | t | 39489  | LSLNWGSS<br>A                    | Rattus norvegic<br>us         |
| 1 | 1.00 | 1 | 1 | -0.04 | -0.04  | -0.04  | -0.04  | -0.04  | t | 127629 | DRWSSLF                          | Homo sapiens                  |
| 1 | 1.00 | 1 | 1 | -0.02 | -0.02  | -0.02  | -0.019 | -0.02  | t | 62484  | SWNSVDI<br>WHMSS                 | Mus musculu<br>s              |
| 1 | 1.00 | 1 | 1 | 0     | -0.01  | -0.001 | 0.003  | 0      | t | 48494  | PLTASPPA<br>TAPGPSAA<br>NVSV     | Homo sapiens                  |
| 1 | 1.00 | 1 | 1 | 0.01  | 0.013  | 0.016  | 0.01   | 0.01   | t | 49000  | PQGGG                            | Mus musculu<br>s              |
| 1 | 1.00 | 1 | 1 | -0.01 | -0.01  | -0.01  | -0.01  | -0.009 | t | 61791  | STNPKPQR<br>KTKRNTNR<br>RPQ      | Homo sapiens                  |
| 1 | 1.00 | 1 | 1 | -0.02 | -0.017 | -0.02  | -0.02  | -0.02  | t | 78875  | VLHSDYCI<br>VPNKGGT<br>SIGS      | Mus musculu<br>s              |
| 1 | 1.00 | 1 | 1 | -0.02 | -0.023 | -0.02  | -0.02  | -0.02  | t | 78875  | VLHSDYCI<br>VPNKGGT<br>SIGS      | Oryctola<br>gus cuniculu<br>s |
| 1 | 1.00 | 1 | 1 | -0.02 | -0.02  | -0.02  | -0.02  | -0.02  | t | 78875  | VLHSDYCI<br>VPNKGGT<br>SIGS      | Mus musculu<br>s              |
| 1 | 1.00 | 1 | 1 | -0.01 | -0.01  | -0.015 | -0.01  | -0.008 | t | 10803  | DWEDRY<br>RENMYR                 | Mus musculu<br>s              |
| 1 | 1.00 | 1 | 1 | 0.01  | 0.01   | 0.01   | 0.019  | 0.012  | t | 130996 | PEMGDQA<br>HMPYT<br>TA<br>VIHEVQ | Homo sapiens                  |
| 1 | 1.00 | 1 | 1 | -0.01 | -0.01  | -0.005 | -0.01  | -0.012 | t | 23372  | GYIWIQRN<br>TG                   | Homo sapiens                  |

|   |      |   |   |       |        |        |        |        |   |        |                              |                                  |
|---|------|---|---|-------|--------|--------|--------|--------|---|--------|------------------------------|----------------------------------|
| 1 | 1.00 | 1 | 1 | -0.01 | -0.003 | -0.001 | -0.01  | -0.012 | t | 53839  | RGDLQVL<br>AQK               | Cavia<br>porcellu<br>s           |
| 1 | 1.00 | 1 | 1 | -0.01 | -0.003 | -0.001 | -0.01  | -0.012 | t | 53839  | RGDLQVL<br>AQK               | Cavia<br>porcellu<br>s           |
| 1 | 1.00 | 1 | 1 | 0     | 0      | 0      | 0      | 0.001  | t | 134988 | GPPGARG<br>LTGRPGDA<br>GPP   | Mus<br>musculu<br>s              |
| 1 | 1.00 | 1 | 1 | 0     | 0      | 0      | 0      | 0.001  | t | 134988 | GPPGARG<br>LTGRPGDA<br>GPP   | Mus<br>musculu<br>s              |
| 1 | 1.00 | 1 | 1 | 0     | -0.003 | 0      | 0      | 0.001  | t | 68401  | VEVPGSQ<br>HIDSQKKA          | Oryctola<br>gus<br>cuniculu<br>s |
| 1 | 1.00 | 1 | 1 | 0     | -0.003 | 0      | 0      | 0.001  | t | 69178  | VKAETRLN<br>PDLQPT           | Oryctola<br>gus<br>cuniculu<br>s |
| 1 | 1.00 | 1 | 1 | 0     | -0.003 | 0      | 0      | 0.001  | t | 68401  | VEVPGSQ<br>HIDSQKKA          | Oryctola<br>gus<br>cuniculu<br>s |
| 1 | 1.00 | 1 | 1 | 0     | 0      | 0      | 0      | 0.001  | t | 9524   | DNPASTT<br>NKDK              | Rattus<br>norvegic<br>us         |
| 1 | 1.00 | 1 | 1 | 0     | -0.003 | 0      | 0      | 0.001  | t | 9524   | DNPASTT<br>NKDK              | Oryctola<br>gus<br>cuniculu<br>s |
| 1 | 1.00 | 1 | 1 | 0     | 0      | 0      | 0      | 0      | t | 131299 | ISPNTTYP<br>SL               | Homo<br>sapiens                  |
| 1 | 1.00 | 1 | 1 | -0.03 | -0.032 | -0.023 | -0.029 | -0.029 | t | 133835 | GDCFFGFL<br>NSPWRVC          | Mus<br>musculu<br>s              |
| 1 | 1.00 | 1 | 1 | -0.02 | -0.018 | -0.02  | -0.017 | -0.019 | t | 151609 | DETPMRG<br>ETRKV             | Homo<br>sapiens                  |
| 1 | 1.00 | 1 | 1 | -0.02 | -0.026 | -0.02  | -0.02  | -0.02  | t | 123136 | EKRKPKSQ                     | Oryctola<br>gus<br>cuniculu<br>s |
| 1 | 1.00 | 1 | 1 | 0     | -0.003 | 0      | 0.001  | 0      | t | 6141   | CDTATRTY<br>SVQVRGS<br>MDYVS | Canis<br>lupus                   |

|   |      |   |   |       |        |        |        |       |   |        |                      |                       |
|---|------|---|---|-------|--------|--------|--------|-------|---|--------|----------------------|-----------------------|
| 1 | 1.00 | 1 | 1 | 0.02  | 0.02   | 0.02   | 0.016  | 0.02  | t | 144697 | IYRNLYWEGS           | Homo sapiens          |
| 1 | 1.00 | 1 | 1 | 0.06  | 0.058  | 0.057  | 0.053  | 0.06  | t | 128140 | VPESMREERYKEQQSAV    | Mus musculus          |
| 1 | 1.00 | 1 | 1 | -0.02 | -0.02  | -0.014 | -0.02  | -0.02 | t | 4217   | ARQAIK               | Homo sapiens          |
| 1 | 1.00 | 1 | 1 | 0.04  | 0.04   | 0.04   | 0.04   | 0.04  | t | 149740 | HDTSETKGLTDT         | Capra hircus          |
| 1 | 1.00 | 1 | 1 | -0.01 | -0.008 | -0.008 | -0.007 | -0.01 | t | 38386  | LPAAAAATPGAGHTNTSSAS | Homo sapiens          |
| 1 | 1.00 | 1 | 1 | -0.01 | -0.008 | -0.008 | -0.007 | -0.01 | t | 38386  | LPAAAAATPGAGHTNTSSAS | Homo sapiens          |
| 1 | 1.00 | 1 | 1 | 0.06  | 0.062  | 0.052  | 0.06   | 0.063 | t | 125236 | RIEKDTDRDNFMSAEAEQ   | Homo sapiens          |
| 1 | 1.00 | 1 | 1 | -0.01 | -0.01  | -0.01  | -0.01  | -0.01 | t | 153354 | ACWHPLQWRCGGGS       | Mus musculus          |
| 1 | 1.00 | 1 | 1 | -0.01 | -0.01  | -0.01  | -0.01  | -0.01 | t | 135947 | KTGHPRYFNQLS         | Homo sapiens          |
| 1 | 1.00 | 1 | 1 | -0.01 | -0.01  | -0.01  | -0.01  | -0.01 | t | 149103 | SGPNPTQ              | Sus scrofa            |
| 1 | 1.00 | 1 | 1 | -0.01 | -0.01  | -0.01  | -0.01  | -0.01 | t | 122588 | SRIDRIRLNPVSPIS      | Mus musculus          |
| 1 | 1.00 | 1 | 1 | -0.01 | -0.01  | -0.01  | -0.01  | -0.01 | t | 103480 | PILGAPWLADLVRRS      | Homo sapiens          |
| 1 | 1.00 | 1 | 1 | -0.01 | -0.01  | -0.01  | -0.01  | -0.01 | t | 79655  | TASFHRN              | Oryctolagus cuniculus |
| 1 | 1.00 | 1 | 1 | -0.01 | -0.01  | -0.01  | -0.01  | -0.01 | t | 7201   | CTQSLAGLFRPGASQN     | Mus musculus          |
| 1 | 1.00 | 1 | 1 | -0.03 | -0.03  | -0.03  | -0.03  | -0.03 | t | 106602 | LEYNPWPWRNLI         | Mus musculus          |
| 1 | 1.00 | 1 | 1 | -0.03 | -0.03  | -0.03  | -0.03  | -0.03 | t | 115606 | GEGKVTLRIRNV         | Homo sapiens          |
| 1 | 1.00 | 1 | 1 | -0.03 | -0.03  | -0.03  | -0.03  | -0.03 | t | 115606 | GEGKVTLRIRNV         | Homo sapiens          |
| 1 | 1.00 | 1 | 1 | -0.03 | -0.03  | -0.03  | -0.03  | -0.03 | t | 114850 | HDGGCRKELA           | Homo sapiens          |

|   |      |   |   |       |        |        |        |        |   |        |                          |                       |
|---|------|---|---|-------|--------|--------|--------|--------|---|--------|--------------------------|-----------------------|
| 1 | 1.00 | 1 | 1 | 0.02  | 0.018  | 0.027  | 0.017  | 0.02   | t | 11692  | EEINTLQN                 | Anas platyrhynchos    |
| 1 | 1.00 | 1 | 1 | 0.02  | 0.02   | 0.02   | 0.02   | 0.022  | t | 52086  | QQPFPQQPQQ               | Mus musculus          |
| 1 | 1.00 | 1 | 1 | -0.05 | -0.047 | -0.051 | -0.05  | -0.05  | t | 94741  | WEQWW                    | Mus musculus          |
| 1 | 1.00 | 1 | 1 | -0.03 | -0.03  | -0.028 | -0.03  | -0.03  | t | 95351  | EKNRLNFLKK               | Homo sapiens          |
| 1 | 1.00 | 1 | 1 | 0.01  | 0.006  | 0.017  | 0.01   | 0.01   | t | 30560  | KEPGGEVV DVEKRGP         | Oryctolagus cuniculus |
| 1 | 1.00 | 1 | 1 | 0     | -0.003 | -0.002 | 0      | 0.001  | t | 123559 | NSKQAERE                 | Oryctolagus cuniculus |
| 1 | 1.00 | 1 | 1 | 0.02  | 0.023  | 0.02   | 0.02   | 0.019  | t | 5853   | AYKSAEGA TPEAKYDD YVAT   | Mus musculus          |
| 1 | 1.00 | 1 | 1 | 0.01  | 0.006  | 0.01   | 0.003  | 0.01   | t | 134006 | ALRMEVL GCEAQDLY         | Oryctolagus cuniculus |
| 1 | 1.00 | 1 | 1 | 0.06  | 0.056  | 0.06   | 0.053  | 0.058  | t | 118902 | LVFEAPNQ EKVS DY E       | Oryctolagus cuniculus |
| 1 | 1.00 | 1 | 1 | 0     | 0      | 0      | 0      | 0.001  | t | 136719 | VIKHMRF HADYQAP FLGGGY   | Aotus                 |
| 1 | 1.00 | 1 | 1 | -0.04 | -0.042 | -0.04  | -0.041 | -0.039 | t | 151006 | KLRGVAPL HLGKC           | Mus musculus          |
| 1 | 1.00 | 1 | 1 | 0.04  | 0.039  | 0.04   | 0.037  | 0.04   | t | 67208  | TVVTT SVA EE GEEENQ RGCE | Homo sapiens          |
| 1 | 1.00 | 1 | 1 | 0     | 0      | 0      | 0      | 0.003  | t | 70387  | VPNLRGDL QV              | Cavia porcellus       |



|   |      |   |   |       |        |        |        |        |   |        |                           |                                  |
|---|------|---|---|-------|--------|--------|--------|--------|---|--------|---------------------------|----------------------------------|
| 1 | 1.00 | 1 | 1 | 0     | 0      | 0      | 0      | 0.003  | t | 70387  | VPNLRGDL<br>QV            | Cavia<br>porcellu<br>s           |
| 1 | 1.00 | 1 | 1 | -0.01 | -0.008 | 0.004  | -0.009 | -0.01  | t | 53666  | REVLREF<br>D              | Homo<br>sapiens                  |
| 1 | 1.00 | 1 | 1 | -0.01 | -0.01  | -0.012 | -0.01  | -0.01  | t | 81565  | EIPALTAVE<br>TGATNP       | Homo<br>sapiens                  |
| 1 | 1.00 | 1 | 1 | 0.02  | 0.024  | 0.034  | 0.02   | 0.019  | t | 142159 | GAPTYSW<br>GANDTDV        | Capra<br>hircus                  |
| 1 | 1.00 | 1 | 1 | -0.02 | -0.023 | -0.027 | -0.02  | -0.018 | t | 61308  | SSQSFRRLL                 | Oryctola<br>gus<br>cuniculu<br>s |
| 1 | 1.00 | 1 | 1 | -0.01 | -0.012 | -0.01  | -0.011 | -0.01  | t | 117059 | PQTDGSTR<br>PRGL          | Mus<br>musculu<br>s              |
| 1 | 1.00 | 1 | 1 | -0.05 | -0.056 | -0.05  | -0.05  | -0.05  | t | 123035 | APRIMHH<br>M              | Oryctola<br>gus<br>cuniculu<br>s |
| 1 | 1.00 | 1 | 1 | -0.03 | -0.033 | -0.028 | -0.03  | -0.03  | t | 70719  | VRFPNITN<br>LCPFGEVF<br>N | Oryctola<br>gus<br>cuniculu<br>s |
| 1 | 1.00 | 1 | 1 | 0.01  | 0.01   | 0.017  | 0.01   | 0.009  | t | 107744 | APVDSRTY<br>TRVADHI       | Homo<br>sapiens                  |
| 1 | 1.00 | 1 | 1 | -0.02 | -0.018 | -0.017 | -0.019 | -0.02  | t | 55141  | RPEGRTW<br>A              | Homo<br>sapiens                  |
| 1 | 1.00 | 1 | 1 | 0.01  | 0.012  | 0.008  | 0.007  | 0.009  | t | 99602  | RDQSSYLQ<br>GFSRNTL       | Homo<br>sapiens                  |
| 1 | 1.00 | 1 | 1 | 0     | 0.002  | 0.01   | -0.003 | 0      | t | 52687  | QVELPKG                   | Homo<br>sapiens                  |
| 1 | 1.00 | 1 | 1 | 0     | 0.004  | 0      | 0      | 0      | t | 123675 | QPLWLLQ<br>G              | marmos<br>ets                    |
| 1 | 1.00 | 1 | 1 | 0     | 0      | 0      | 0      | 0      | t | 115678 | AIPPKKNQ<br>DK            | Homo<br>sapiens                  |

|   |      |   |   |       |        |        |       |        |   |        |                              |                              |
|---|------|---|---|-------|--------|--------|-------|--------|---|--------|------------------------------|------------------------------|
| 1 | 1.00 | 1 | 1 | -0.02 | -0.02  | -0.02  | -0.02 | -0.02  | t | 122588 | SRIDRIRLN<br>PVSPIS          | Mus<br>musculus              |
| 1 | 1.00 | 1 | 1 | -0.04 | -0.04  | -0.04  | -0.04 | -0.04  | t | 115979 | SPAQILQ<br>WQV               | Homo<br>sapiens              |
| 1 | 1.00 | 1 | 1 | 0.02  | 0.024  | 0.034  | 0.027 | 0.02   | t | 117760 | ATLDDIKE<br>WLEDKGQ          | Homo<br>sapiens              |
| 1 | 1.00 | 1 | 1 | -0.06 | -0.06  | -0.06  | -0.06 | -0.06  | t | 135788 | VSGWGRV<br>F                 | Homo<br>sapiens              |
| 1 | 1.00 | 1 | 1 | -0.01 | -0.01  | -0.014 | -0.01 | -0.008 | t | 51912  | QPQPFRP<br>QQP               | Mus<br>musculus              |
| 1 | 1.00 | 1 | 1 | 0     | 0      | 0      | 0.003 | 0.003  | t | 140567 | KEAWLDS<br>TKAT              | Sus<br>scrofa                |
| 1 | 1.00 | 1 | 1 | -0.06 | -0.062 | -0.055 | -0.06 | -0.06  | t | 125230 | RERRGIAL                     | Mus<br>musculus              |
| 1 | 1.00 | 1 | 1 | -0.06 | -0.062 | -0.055 | -0.06 | -0.06  | t | 125230 | RERRGIAL                     | Mus<br>musculus              |
| 1 | 1.00 | 1 | 1 | 0.02  | 0.02   | 0.02   | 0.02  | 0.02   | t | 145810 | GTGGRTG<br>Y                 | Mus<br>musculus              |
| 1 | 1.00 | 1 | 1 | 0     | 0      | 0      | 0     | 0.001  | t | 146839 | DLRTL                        | Mus<br>musculus              |
| 1 | 1.00 | 1 | 1 | 0     | 0      | 0      | 0     | 0.001  | t | 64884  | TLKREIEKD<br>G               | Mus<br>musculus              |
| 1 | 1.00 | 1 | 1 | 0     | 0      | 0      | 0     | 0.001  | t | 79303  | LVAAGVD<br>YEDERISF<br>QDWPK | Rattus<br>norvegicus         |
| 1 | 1.00 | 1 | 1 | 0     | 0      | 0      | 0     | 0.001  | t | 57618  | SERVQLLH<br>SQNTSLIN<br>QK   | Homo<br>sapiens              |
| 1 | 1.00 | 1 | 1 | 0     | 0      | 0      | 0     | 0.001  | t | 28564  | ISKQEYDA<br>AVTAK            | Oryctola<br>gus<br>cuniculus |
| 1 | 1.00 | 1 | 1 | 0     | 0      | 0      | 0     | 0.001  | t | 30302  | KEALISLT<br>RGKLTYTQ<br>Q    | Homo<br>sapiens              |

|   |      |   |   |       |        |        |        |        |   |        |                              |                                  |
|---|------|---|---|-------|--------|--------|--------|--------|---|--------|------------------------------|----------------------------------|
| 1 | 1.00 | 1 | 1 | 0     | 0      | 0      | 0      | 0.001  | t | 6763   | CPFLKQNE<br>PEDIDCW          | Mus<br>musculu<br>s              |
| 1 | 1.00 | 1 | 1 | 0     | 0      | 0      | 0      | 0.001  | t | 5109   | ATPYHPPA<br>TP               | Oryctola<br>gus<br>cuniculu<br>s |
| 1 | 1.00 | 1 | 1 | 0.01  | 0.01   | 0.01   | 0.01   | 0.011  | t | 108216 | WWATFFE<br>ATR               | Homo<br>sapiens                  |
| 1 | 1.00 | 1 | 1 | 0.01  | 0.01   | 0.013  | 0.009  | 0.01   | t | 45221  | NNRAVPD<br>KIDWRESG<br>YVTE  | Bos<br>taurus                    |
| 1 | 1.00 | 1 | 1 | 0.01  | 0.02   | 0.013  | 0.009  | 0.01   | t | 45221  | NNRAVPD<br>KIDWRESG<br>YVTE  | Rattus<br>rattus                 |
| 1 | 1.00 | 1 | 1 | 0.01  | 0.005  | 0.013  | 0.009  | 0.01   | t | 45221  | NNRAVPD<br>KIDWRESG<br>YVTE  | Bos<br>taurus                    |
| 1 | 1.00 | 1 | 1 | -0.01 | -0.022 | -0.015 | -0.01  | -0.008 | t | 64050  | THLRALFG<br>YSEVRKVIL<br>TKR | Mesocric<br>etus<br>auratus      |
| 1 | 1.00 | 1 | 1 | 0     | 0.002  | 0      | 0.007  | 0.002  | t | 134236 | SNIMHSIN<br>GYVFDSLQ<br>LSVC | Homo<br>sapiens                  |
| 1 | 1.00 | 1 | 1 | 0     | 0.002  | 0      | 0      | 0      | t | 51372  | QLINTNGS<br>WHINSTA          | Homo<br>sapiens                  |
| 1 | 1.00 | 1 | 1 | 0     | 0.002  | 0      | 0      | 0      | t | 51372  | QLINTNGS<br>WHINSTA          | Homo<br>sapiens                  |
| 1 | 1.00 | 1 | 1 | 0     | 0.002  | 0      | 0      | 0      | t | 51372  | QLINTNGS<br>WHINSTA          | Homo<br>sapiens                  |
| 1 | 1.00 | 1 | 1 | 0.01  | 0.01   | 0.005  | 0.003  | 0.01   | t | 140674 | ESQPDPKP<br>DELHKS           | Mus<br>musculu<br>s              |
| 1 | 1.00 | 1 | 1 | 0     | 0.003  | 0.013  | 0      | 0      | t | 105682 | ARSLFGVD                     | Mus<br>musculu<br>s              |
| 1 | 1.00 | 1 | 1 | 0     | 0      | 0      | -0.002 | 0      | t | 10833  | DWVCSVL<br>ADFKAWL           | Homo<br>sapiens                  |
| 1 | 1.00 | 1 | 1 | 0.01  | 0.01   | 0.01   | 0.01   | 0.011  | t | 135725 | NITQSTQS<br>FN               | Homo<br>sapiens                  |

|   |      |   |   |       |        |        |        |        |   |        |                           |                     |
|---|------|---|---|-------|--------|--------|--------|--------|---|--------|---------------------------|---------------------|
| 1 | 1.00 | 1 | 1 | -0.01 | -0.006 | -0.01  | -0.009 | -0.01  | t | 137797 | ADYWAGE<br>LGQSR          | Homo<br>sapiens     |
| 1 | 1.00 | 1 | 1 | 0.01  | 0.008  | 0.003  | 0.003  | 0.012  | t | 113194 | TGGAYQSY<br>KF            | Mus<br>musculu<br>s |
| 1 | 1.00 | 1 | 1 | 0     | 0      | 0      | 0      | 0.001  | t | 46954  | PASTNRQS<br>GRQP          | Mus<br>musculu<br>s |
| 1 | 1.00 | 1 | 1 | 0     | 0      | 0      | 0      | 0.001  | t | 46954  | PASTNRQS<br>GRQP          | Mus<br>musculu<br>s |
| 1 | 1.00 | 1 | 1 | -0.02 | -0.022 | -0.013 | -0.017 | -0.022 | t | 78059  | VLDWKTR<br>GKDLP          | Mus<br>musculu<br>s |
| 1 | 1.00 | 1 | 1 | -0.02 | -0.017 | -0.02  | -0.02  | -0.018 | t | 119905 | GLRAQAC<br>AFW            | Mus<br>musculu<br>s |
| 1 | 1.00 | 1 | 1 | -0.03 | -0.026 | -0.023 | -0.027 | -0.03  | t | 57279  | SDSESCSS<br>MPPLEG        | Homo<br>sapiens     |
| 1 | 1.00 | 1 | 1 | 0.03  | 0.028  | 0.035  | 0.029  | 0.03   | t | 35622  | LENIPSEN<br>QYFQ          | Mus<br>musculu<br>s |
| 1 | 1.00 | 1 | 1 | -0.04 | -0.038 | -0.031 | -0.039 | -0.04  | t | 21713  | GPNHTKV                   | Homo<br>sapiens     |
| 1 | 1.00 | 1 | 1 | 0.01  | 0.013  | 0.015  | 0.01   | 0.01   | t | 60991  | SSFFSYGEI                 | Mus<br>musculu<br>s |
| 1 | 1.00 | 1 | 1 | 0.01  | 0.01   | 0.01   | 0.01   | 0.012  | t | 43190  | NAKATYEA<br>ALKQYEAD<br>L | Mus<br>musculu<br>s |
| 1 | 1.00 | 1 | 1 | 0.01  | 0.01   | 0.01   | 0.01   | 0.012  | t | 43190  | NAKATYEA<br>ALKQYEAD<br>L | Mus<br>musculu<br>s |
| 1 | 1.00 | 1 | 1 | 0.03  | 0.03   | 0.03   | 0.03   | 0.03   | t | 135679 | GGEDAKP<br>G              | Homo<br>sapiens     |
| 1 | 1.00 | 1 | 1 | 0.01  | 0.01   | 0.01   | 0.01   | 0.01   | t | 110591 | GDPGRPG<br>EPGLPGAR       | Mus<br>musculu<br>s |
| 1 | 1.00 | 1 | 1 | -0.01 | -0.01  | -0.01  | -0.01  | -0.01  | t | 158620 | VLNWHPF                   | Homo<br>sapiens     |

|   |      |   |   |       |        |        |        |        |   |        |                              |                              |
|---|------|---|---|-------|--------|--------|--------|--------|---|--------|------------------------------|------------------------------|
| 1 | 1.00 | 1 | 1 | -0.01 | -0.01  | -0.01  | -0.01  | -0.01  | t | 121739 | QCSLAIRIP<br>YQKLPY          | Mus<br>musculus              |
| 1 | 1.00 | 1 | 1 | -0.01 | -0.01  | -0.01  | -0.01  | -0.01  | t | 110612 | GPPGERG<br>APGNRGP           | Mus<br>musculus              |
| 1 | 1.00 | 1 | 1 | -0.03 | -0.03  | -0.03  | -0.03  | -0.03  | t | 99247  | FLLAHAS<br>ARQQWEL           | Homo<br>sapiens              |
| 1 | 1.00 | 1 | 1 | -0.03 | -0.03  | -0.03  | -0.03  | -0.03  | t | 79554  | GEVWVTP<br>VIGSQARK<br>CGLHI | Homo<br>sapiens              |
| 1 | 1.00 | 1 | 1 | -0.03 | -0.03  | -0.03  | -0.03  | -0.03  | t | 97531  | NQTIQRDK<br>V                | Oryctola<br>gus<br>cuniculus |
| 1 | 1.00 | 1 | 1 | -0.02 | -0.019 | -0.017 | -0.021 | -0.022 | t | 58834  | SKGCKITCF<br>LTAAGY          | Equus<br>caballus            |
| 1 | 1.00 | 1 | 1 | -0.02 | -0.022 | -0.017 | -0.021 | -0.022 | t | 58834  | SKGCKITCF<br>LTAAGY          | Mus<br>musculus              |
| 1 | 1.00 | 1 | 1 | 0.03  | 0.03   | 0.03   | 0.026  | 0.03   | t | 115605 | GDEVELPC<br>RISP             | Homo<br>sapiens              |
| 1 | 1.00 | 1 | 1 | 0.01  | 0.01   | 0.01   | 0.006  | 0.01   | t | 115653 | SSYAGQFR<br>VIGP             | Homo<br>sapiens              |
| 1 | 1.00 | 1 | 1 | 0.01  | 0.007  | 0.01   | 0.01   | 0.01   | t | 111381 | GTGSGTG<br>GRTGYVPL          | Oryctola<br>gus<br>cuniculus |
| 1 | 1.00 | 1 | 1 | -0.01 | -0.008 | -0.01  | -0.013 | -0.01  | t | 31253  | KIFQDHPL                     | Homo<br>sapiens              |
| 1 | 1.00 | 1 | 1 | 0.01  | 0.014  | 0.01   | 0.013  | 0.012  | t | 111010 | RLGSEHVD<br>RPLTTP           | Homo<br>sapiens              |
| 1 | 1.00 | 1 | 1 | -0.05 | -0.05  | -0.05  | -0.05  | -0.051 | t | 159287 | KTQGHSY<br>HLRRKNG<br>VKHPVY | Aotus                        |
| 1 | 1.00 | 1 | 1 | 0     | 0      | 0      | 0      | 0.001  | t | 150854 | HPGGQQP                      | Mus<br>musculus              |
| 1 | 1.00 | 1 | 1 | -0.01 | -0.01  | -0.01  | -0.01  | -0.01  | t | 57707  | SEYPSQPP<br>SPSN             | Homo<br>sapiens              |
| 1 | 1.00 | 1 | 1 | -0.03 | -0.03  | -0.037 | -0.03  | -0.03  | t | 66123  | TRVSRYS<br>TARHRLRR<br>GA    | Homo<br>sapiens              |

|   |      |   |   |       |        |        |        |        |   |        |                            |                     |
|---|------|---|---|-------|--------|--------|--------|--------|---|--------|----------------------------|---------------------|
| 1 | 1.00 | 1 | 1 | -0.05 | -0.05  | -0.052 | -0.05  | -0.05  | t | 46985  | PAVASRRR<br>PTTAGAAP<br>LT | Homo<br>sapiens     |
| 1 | 1.00 | 1 | 1 | 0.01  | 0.017  | 0.008  | 0.01   | 0.01   | t | 11831  | EEPNDGEE<br>RQSY           | Capra<br>hircus     |
| 1 | 1.00 | 1 | 1 | 0     | 0.002  | -0.007 | 0.001  | 0.002  | t | 43084  | MYRVFEVS<br>VIRNPGL        | Homo<br>sapiens     |
| 1 | 1.00 | 1 | 1 | 0.02  | 0.022  | 0.021  | 0.021  | 0.022  | t | 89062  | SRSESSVE<br>NFLCRSA        | Homo<br>sapiens     |
| 1 | 1.00 | 1 | 1 | -0.02 | -0.017 | -0.01  | -0.02  | -0.02  | t | 35284  | LDRNAHG<br>QLLVR           | Mus<br>musculu<br>s |
| 1 | 1.00 | 1 | 1 | -0.03 | -0.032 | -0.035 | -0.033 | -0.031 | t | 140657 | ATRLNNEV<br>L              | Mus<br>musculu<br>s |
| 1 | 1.00 | 1 | 1 | 0.01  | 0.012  | 0.01   | 0.007  | 0.01   | t | 36584  | LIKTSPRSE<br>RYA           | Homo<br>sapiens     |
| 1 | 1.00 | 1 | 1 | 0     | 0      | 0.011  | 0      | -0.001 | t | 79741  | AAASSPDA<br>HVPF           | Mus<br>musculu<br>s |
| 1 | 1.00 | 1 | 1 | 0.01  | 0.018  | 0.011  | 0.01   | 0.011  | t | 74051  | YGLTALDP<br>LFKP           | Gallus<br>gallus    |
| 1 | 1.00 | 1 | 1 | -0.04 | -0.037 | -0.034 | -0.04  | -0.04  | t | 105932 | LMVGGVV                    | Mus<br>musculu<br>s |
| 1 | 1.00 | 1 | 1 | 0     | 0      | 0      | -0.007 | 0      | t | 103839 | DAEFRHDS<br>GYEVH          | Mus<br>musculu<br>s |
| 1 | 1.00 | 1 | 1 | 0.02  | 0.02   | 0.013  | 0.016  | 0.024  | t | 138254 | TPTIM                      | Homo<br>sapiens     |
| 1 | 1.00 | 1 | 1 | 0.02  | 0.02   | 0.02   | 0.02   | 0.02   | t | 110588 | GARGPEG<br>AQGSRGE<br>P    | Mus<br>musculu<br>s |
| 1 | 1.00 | 1 | 1 | 0.02  | 0.02   | 0.02   | 0.02   | 0.02   | t | 112279 | QTEDLAV                    | Homo<br>sapiens     |
| 1 | 1.00 | 1 | 1 | -0.02 | -0.02  | -0.02  | -0.02  | -0.02  | t | 158581 | APAHPPP                    | Homo<br>sapiens     |
| 1 | 1.00 | 1 | 1 | -0.04 | -0.04  | -0.04  | -0.04  | -0.04  | t | 102246 | YNNHALL                    | Homo<br>sapiens     |

|   |      |   |   |       |        |        |        |        |   |        |                              |                       |
|---|------|---|---|-------|--------|--------|--------|--------|---|--------|------------------------------|-----------------------|
| 1 | 1.00 | 1 | 1 | 0.05  | 0.048  | 0.05   | 0.043  | 0.05   | t | 104342 | VSAAQYL                      | Mus musculus          |
| 1 | 1.00 | 1 | 1 | 0.02  | 0.02   | 0.02   | 0.02   | 0.02   | t | 135439 | ADAAAAY                      | Oryctolagus cuniculus |
| 1 | 1.00 | 1 | 1 | 0     | 0.003  | 0      | 0      | 0      | t | 135414 | AAAYKAA                      | Mus musculus          |
| 1 | 1.00 | 1 | 1 | 0.01  | 0.01   | 0.01   | 0.01   | 0.012  | t | 125384 | DSHYDYTI<br>CGDSEDM<br>VCTPK | Homo sapiens          |
| 1 | 1.00 | 1 | 1 | 0.03  | 0.027  | 0.03   | 0.03   | 0.03   | t | 7558   | DAKDGKEI<br>DTKHLPS<br>T     | Oryctolagus cuniculus |
| 1 | 1.00 | 1 | 1 | 0.02  | 0.02   | 0.014  | 0.016  | 0.02   | t | 68449  | VFEEAFFS<br>T                | Homo sapiens          |
| 1 | 1.00 | 1 | 1 | -0.01 | -0.01  | -0.015 | -0.01  | -0.011 | t | 8360   | DGDGAAA<br>MRYTEAR<br>MTK    | Homo sapiens          |
| 1 | 1.00 | 1 | 1 | 0.02  | 0.02   | 0.012  | 0.02   | 0.028  | t | 45630  | NQSTVKT                      | Mus musculus          |
| 1 | 1.00 | 1 | 1 | 0.01  | 0.013  | 0.014  | 0.01   | 0.01   | t | 55261  | RPPNAPIL                     | Mus musculus          |
| 1 | 1.00 | 1 | 1 | -0.04 | -0.042 | -0.051 | -0.041 | -0.039 | t | 37698  | LLQAHRQL<br>EER              | Mus musculus          |
| 1 | 1.00 | 1 | 1 | 0.03  | 0.034  | 0.02   | 0.027  | 0.03   | t | 29248  | IVEEDAPA<br>TEEIDEIE         | Homo sapiens          |
| 1 | 1.00 | 1 | 1 | 0.03  | 0.034  | 0.02   | 0.027  | 0.03   | t | 29248  | IVEEDAPA<br>TEEIDEIE         | Homo sapiens          |
| 1 | 1.00 | 1 | 1 | -0.03 | -0.028 | -0.018 | -0.03  | -0.031 | t | 27125  | ILKEPVHG<br>V                | Homo sapiens          |

|   |      |   |   |       |        |        |        |        |   |        |                      |                       |
|---|------|---|---|-------|--------|--------|--------|--------|---|--------|----------------------|-----------------------|
| 1 | 1.00 | 1 | 1 | -0.03 | -0.034 | -0.023 | -0.031 | -0.032 | t | 9018   | DLAHLTA              | Oryctolagus cuniculus |
| 1 | 1.00 | 1 | 1 | -0.01 | -0.013 | -0.009 | -0.01  | -0.01  | t | 37690  | LLPSRRGDQLTL         | Oryctolagus cuniculus |
| 1 | 1.00 | 1 | 1 | -0.05 | -0.047 | -0.048 | -0.05  | -0.051 | t | 130905 | IRCFKRHGAEVIDTPVFE   | Mus musculus          |
| 1 | 1.00 | 1 | 1 | -0.01 | -0.01  | -0.01  | -0.01  | -0.009 | t | 63755  | TFTNKLKAKHTDLGK      | Mus musculus          |
| 1 | 1.00 | 1 | 1 | -0.01 | -0.006 | -0.003 | -0.007 | -0.01  | t | 10833  | DWVCSVLADFKAWL       | Homo sapiens          |
| 1 | 1.00 | 1 | 1 | -0.03 | -0.03  | -0.03  | -0.03  | -0.028 | t | 105650 | AEFRH                | Mus musculus          |
| 1 | 1.00 | 1 | 1 | 0.03  | 0.032  | 0.028  | 0.031  | 0.032  | t | 28291  | IRFKDDTSFEDING       | Homo sapiens          |
| 1 | 1.00 | 1 | 1 | 0.04  | 0.044  | 0.035  | 0.041  | 0.042  | t | 103822 | CASHLPYIEQGMQLAEQFKQ | Homo sapiens          |
| 1 | 1.00 | 1 | 1 | 0.01  | 0.01   | 0.01   | 0.01   | 0.01   | t | 117044 | MISYSTRPDRQ          | Mus musculus          |
| 1 | 1.00 | 1 | 1 | 0.01  | 0.01   | 0.01   | 0.01   | 0.01   | t | 149124 | TNPTQTK              | Sus scrofa            |
| 1 | 1.00 | 1 | 1 | 0.01  | 0.01   | 0.01   | 0.01   | 0.01   | t | 115848 | LPLLQSWMHQ           | Homo sapiens          |
| 1 | 1.00 | 1 | 1 | -0.01 | -0.01  | -0.01  | -0.01  | -0.01  | t | 139597 | RGHAKSRPVRGIHTS      | Homo sapiens          |
| 1 | 1.00 | 1 | 1 | -0.01 | -0.01  | -0.01  | -0.01  | -0.01  | t | 67139  | TVSAGDGRGTPIAFQAEVSK | Canis lupus           |
| 1 | 1.00 | 1 | 1 | -0.01 | -0.01  | -0.015 | -0.006 | -0.009 | t | 71346  | VTGSVVCTTAAGNVNIAIGG | Homo sapiens          |
| 1 | 1.00 | 1 | 1 | 0.02  | 0.02   | 0.02   | 0.02   | 0.022  | t | 99836  | QFPQPQ               | Mus musculus          |



|   |      |   |   |       |        |        |        |        |   |        |                              |                                  |
|---|------|---|---|-------|--------|--------|--------|--------|---|--------|------------------------------|----------------------------------|
| 1 | 1.00 | 1 | 1 | 0     | 0      | 0      | 0      | 0.002  | t | 49081  | PQQPFPL<br>QPQ               | Mus<br>musculu<br>s              |
| 1 | 1.00 | 1 | 1 | 0     | 0      | 0.005  | 0.003  | 0.002  | t | 98922  | PAPQPP                       | Homo<br>sapiens                  |
| 1 | 1.00 | 1 | 1 | 0.05  | 0.05   | 0.05   | 0.05   | 0.049  | t | 115253 | FPEVFGKE<br>KVNELSKD<br>IGSE | Homo<br>sapiens                  |
| 1 | 1.00 | 1 | 1 | 0.03  | 0.03   | 0.022  | 0.03   | 0.032  | t | 60024  | SPDVDLG<br>DISGINAS          | Mus<br>musculu<br>s              |
| 1 | 1.00 | 1 | 1 | 0.03  | 0.03   | 0.022  | 0.03   | 0.032  | t | 60024  | SPDVDLG<br>DISGINAS          | Mus<br>musculu<br>s              |
| 1 | 1.00 | 1 | 1 | 0.03  | 0.03   | 0.022  | 0.03   | 0.032  | t | 60024  | SPDVDLG<br>DISGINAS          | Mus<br>musculu<br>s              |
| 1 | 1.00 | 1 | 1 | -0.01 | -0.012 | -0.01  | -0.004 | -0.01  | t | 134687 | GWLKEIRK<br>LQKSTHL          | Homo<br>sapiens                  |
| 1 | 1.00 | 1 | 1 | 0     | 0      | 0.003  | -0.003 | 0      | t | 46489  | NVSVPSST<br>STPLLY           | Homo<br>sapiens                  |
| 1 | 1.00 | 1 | 1 | 0.01  | 0.012  | 0.012  | 0.01   | 0.011  | t | 120343 | YNLKWNP<br>DDYGGVK<br>KIH    | Rattus<br>norvegic<br>us         |
| 1 | 1.00 | 1 | 1 | -0.02 | -0.02  | -0.013 | -0.018 | -0.02  | t | 70813  | VRRKDDR<br>RGALLSP           | Homo<br>sapiens                  |
| 1 | 1.00 | 1 | 1 | -0.02 | -0.023 | -0.024 | -0.02  | -0.019 | t | 122915 | THKANPSP<br>EPNMHEC          | Oryctola<br>gus<br>cuniculu<br>s |
| 1 | 1.00 | 1 | 1 | -0.03 | -0.03  | -0.037 | -0.03  | -0.03  | t | 130802 | EHRMTW<br>DPAQPPR<br>DLTEAFL | Homo<br>sapiens                  |
| 1 | 1.00 | 1 | 1 | 0.01  | 0.012  | 0.015  | 0.01   | 0.01   | t | 119463 | HKKSLSSP<br>S                | Homo<br>sapiens                  |
| 1 | 1.00 | 1 | 1 | 0     | 0.002  | -0.009 | -0.002 | 0.003  | t | 110828 | EIDGPAGQ<br>AEPDRAH<br>YNI   | Homo<br>sapiens                  |
| 1 | 1.00 | 1 | 1 | 0     | 0.002  | 0      | 0.003  | -0.003 | t | 3693   | APPPPEHR<br>GGPEEFEG<br>AGDG | Homo<br>sapiens                  |
| 1 | 1.00 | 1 | 1 | -0.03 | -0.032 | -0.041 | -0.031 | -0.03  | t | 35413  | LEDNSTQA<br>SLEEAILR         | Mus<br>musculu<br>s              |

|   |      |   |   |       |        |        |        |        |   |        |                              |                                  |
|---|------|---|---|-------|--------|--------|--------|--------|---|--------|------------------------------|----------------------------------|
| 1 | 1.00 | 1 | 1 | 0.03  | 0.024  | 0.024  | 0.033  | 0.032  | t | 15509  | FEDVKGTG<br>GESRDLP<br>S GQG | Papio                            |
| 1 | 1.00 | 1 | 1 | -0.02 | -0.024 | -0.024 | -0.017 | -0.018 | t | 60401  | SQDADYH<br>RVM               | Oryctola<br>gus<br>cuniculu<br>s |
| 1 | 1.00 | 1 | 1 | 0     | 0      | 0      | 0      | 0      | t | 135679 | GGEDAKP<br>G                 | Homo<br>sapiens                  |
| 1 | 1.00 | 1 | 1 | -0.02 | -0.02  | -0.02  | -0.02  | -0.02  | t | 119517 | RKRTRHLE<br>G                | Homo<br>sapiens                  |
| 1 | 1.00 | 1 | 1 | -0.02 | -0.02  | -0.02  | -0.02  | -0.02  | t | 133957 | WIRANF                       | Mus<br>musculu<br>s              |
| 1 | 1.00 | 1 | 1 | -0.02 | -0.02  | -0.02  | -0.02  | -0.02  | t | 95080  | FLRMKRP<br>GEDKVRP<br>ACQHKQ | Rattus<br>norvegic<br>us         |
| 1 | 1.00 | 1 | 1 | -0.02 | -0.02  | -0.02  | -0.02  | -0.02  | t | 6028   | CARSLVNL<br>FTPGARQ<br>N     | Mus<br>musculu<br>s              |
| 1 | 1.00 | 1 | 1 | -0.04 | -0.04  | -0.04  | -0.04  | -0.04  | t | 140840 | EAAYSKNR<br>RAVL             | Oryctola<br>gus<br>cuniculu<br>s |
| 1 | 1.00 | 1 | 1 | 0.01  | 0.008  | -0.002 | 0.003  | 0.012  | t | 30300  | KEALDKYE<br>LENHDLKT<br>KN   | Mus<br>musculu<br>s              |
| 1 | 1.00 | 1 | 1 | -0.02 | -0.02  | -0.019 | -0.02  | -0.02  | t | 102686 | NPKTSQYS<br>Y                | Mus<br>musculu<br>s              |
| 1 | 1.00 | 1 | 1 | 0.01  | 0.01   | 0.01   | 0.01   | 0.011  | t | 48595  | PNAN                         | Mus<br>musculu<br>s              |
| 1 | 1.00 | 1 | 1 | 0     | 0      | 0      | -0.004 | 0      | t | 125515 | PDLTKVYS<br>TDIFFILEIT<br>DN | Homo<br>sapiens                  |
| 1 | 1.00 | 1 | 1 | -0.06 | -0.06  | -0.055 | -0.06  | -0.057 | t | 133744 | YGGFMRF                      | Oryctola<br>gus<br>cuniculu<br>s |
| 1 | 1.00 | 1 | 1 | 0.01  | 0.014  | 0.003  | 0.007  | 0.012  | t | 70351  | VPKPQG<br>PLP                | Homo<br>sapiens                  |

|   |      |   |   |       |        |        |        |        |   |        |                              |                                  |
|---|------|---|---|-------|--------|--------|--------|--------|---|--------|------------------------------|----------------------------------|
| 1 | 1.00 | 1 | 1 | -0.01 | -0.012 | -0.008 | -0.013 | -0.012 | t | 48947  | PPWDFDA<br>GEGIH             | Mus<br>musculu<br>s              |
| 1 | 1.00 | 1 | 1 | 0     | -0.004 | 0      | 0      | 0.003  | t | 70396  | VPNLRGD<br>RQALA             | Mus<br>musculu<br>s              |
| 1 | 1.00 | 1 | 1 | 0.01  | 0.01   | -0.01  | 0.01   | 0.015  | t | 50932  | QGPGAPQ<br>GPGAPQG<br>PGAPQG | Mus<br>musculu<br>s              |
| 1 | 1.00 | 1 | 1 | 0.01  | 0.013  | -0.01  | 0.01   | 0.015  | t | 50932  | QGPGAPQ<br>GPGAPQG<br>PGAPQG | Mus<br>musculu<br>s              |
| 1 | 1.00 | 1 | 1 | -0.02 | -0.017 | -0.02  | -0.02  | -0.02  | t | 119867 | FMESGEW<br>VMKDYRG<br>WKH    | Mus<br>musculu<br>s              |
| 1 | 1.00 | 1 | 1 | -0.02 | -0.017 | -0.02  | -0.02  | -0.02  | t | 119867 | FMESGEW<br>VMKDYRG<br>WKH    | Mus<br>musculu<br>s              |
| 1 | 1.00 | 1 | 1 | -0.02 | -0.017 | -0.02  | -0.02  | -0.02  | t | 119867 | FMESGEW<br>VMKDYRG<br>WKH    | Mus<br>musculu<br>s              |
| 1 | 1.00 | 1 | 1 | 0.03  | 0.027  | 0.028  | 0.03   | 0.03   | t | 145799 | GLIADSVK<br>DNQITSAL<br>STQ  | Oryctola<br>gus<br>cuniculu<br>s |
| 1 | 1.00 | 1 | 1 | 0.01  | 0.01   | 0.003  | 0.01   | 0.01   | t | 119489 | LILFKDDYF<br>AKKNEERK<br>QNK | Homo<br>sapiens                  |
| 1 | 1.00 | 1 | 1 | -0.02 | -0.017 | -0.02  | -0.02  | -0.018 | t | 111745 | RSSRTR                       | Mus<br>musculu<br>s              |
| 1 | 1.00 | 1 | 1 | 0.02  | 0.02   | 0.02   | 0.02   | 0.02   | t | 139689 | APDPSTVIL<br>ENS             | Oryctola<br>gus<br>cuniculu<br>s |
| 1 | 1.00 | 1 | 1 | 0.03  | 0.032  | 0.022  | 0.033  | 0.032  | t | 34910  | LAPNTPRP<br>PAQAPAK<br>DMPSG | Homo<br>sapiens                  |
| 1 | 1.00 | 1 | 1 | 0     | -0.002 | 0      | 0.001  | 0.002  | t | 46275  | NTTASDQL<br>LVENAAG<br>HRV   | Homo<br>sapiens                  |

|   |      |   |   |       |        |        |        |        |   |        |                             |                                  |
|---|------|---|---|-------|--------|--------|--------|--------|---|--------|-----------------------------|----------------------------------|
| 1 | 1.00 | 1 | 1 | 0     | 0.003  | -0.004 | 0      | 0      | t | 78816  | RQEIRKA<br>WVKGMP<br>YMDFSK | Mus<br>musculu<br>s              |
| 1 | 1.00 | 1 | 1 | -0.03 | -0.032 | -0.026 | -0.027 | -0.03  | t | 52148  | QQSFPQQ<br>PQR              | Mus<br>musculu<br>s              |
| 1 | 1.00 | 1 | 1 | -0.07 | -0.07  | -0.069 | -0.067 | -0.07  | t | 5286   | AVCLGGLI<br>GIPALIC         | Homo<br>sapiens                  |
| 1 | 1.00 | 1 | 1 | 0.02  | 0.024  | 0.012  | 0.021  | 0.023  | t | 17243  | FNVPKEA<br>GEDCHAP          | Homo<br>sapiens                  |
| 1 | 1.00 | 1 | 1 | -0.06 | -0.06  | -0.06  | -0.067 | -0.062 | t | 125267 | TCSMFVY<br>GGC              | Mus<br>musculu<br>s              |
| 1 | 1.00 | 1 | 1 | -0.01 | -0.016 | 0      | -0.01  | -0.01  | t | 139090 | IKRSNSTA                    | Oryctola<br>gus<br>cuniculu<br>s |
| 1 | 1.00 | 1 | 1 | -0.02 | -0.02  | -0.02  | -0.02  | -0.021 | t | 144654 | GPHPTLEV<br>VPMGRGS         | Mus<br>musculu<br>s              |
| 1 | 1.00 | 1 | 1 | -0.01 | -0.008 | -0.012 | -0.007 | -0.008 | t | 48779  | PPFSLSPV<br>PTLGSRSR<br>R   | Homo<br>sapiens                  |
| 1 | 1.00 | 1 | 1 | 0.02  | 0.016  | 0.013  | 0.023  | 0.022  | t | 106344 | DIVMTQSP<br>NSLAVSLG<br>ERA | Oryctola<br>gus<br>cuniculu<br>s |
| 1 | 1.00 | 1 | 1 | 0.06  | 0.06   | 0.06   | 0.06   | 0.06   | t | 61613  | STGADTG<br>GDIVQQP          | Homo<br>sapiens                  |
| 1 | 1.00 | 1 | 1 | 0.01  | 0.01   | 0.009  | 0.01   | 0.01   | t | 41869  | MKNQTFH<br>LQGFVDGL         | Mus<br>musculu<br>s              |
| 1 | 1.00 | 1 | 1 | 0.01  | 0.01   | 0.009  | 0.01   | 0.01   | t | 41869  | MKNQTFH<br>LQGFVDGL         | Mus<br>musculu<br>s              |
| 1 | 1.00 | 1 | 1 | 0     | 0      | 0      | 0      | 0.001  | t | 46550  | NWNFD                       | Mus<br>musculu<br>s              |
| 1 | 1.00 | 1 | 1 | 0     | 0      | 0      | 0      | 0.001  | t | 46550  | NWNFD                       | Mus<br>musculu<br>s              |

|   |      |   |   |       |        |        |       |        |   |        |                              |                                  |
|---|------|---|---|-------|--------|--------|-------|--------|---|--------|------------------------------|----------------------------------|
| 1 | 1.00 | 1 | 1 | 0.01  | 0.01   | 0.01   | 0.01  | 0.01   | t | 79751  | AKLGAAAS<br>SPDA             | Mus<br>musculu<br>s              |
| 1 | 1.00 | 1 | 1 | 0.01  | 0.01   | 0.01   | 0.01  | 0.01   | t | 79751  | AKLGAAAS<br>SPDA             | Mus<br>musculu<br>s              |
| 1 | 1.00 | 1 | 1 | -0.01 | -0.007 | -0.01  | -0.01 | -0.01  | t | 119930 | HRWSSYM<br>VHW               | Mus<br>musculu<br>s              |
| 1 | 1.00 | 1 | 1 | -0.01 | -0.01  | -0.01  | -0.01 | -0.01  | t | 121826 | RVVGPYST<br>STWFRVK          | Mus<br>musculu<br>s              |
| 1 | 1.00 | 1 | 1 | -0.01 | -0.01  | -0.01  | -0.01 | -0.01  | t | 119930 | HRWSSYM<br>VHW               | Mus<br>musculu<br>s              |
| 1 | 1.00 | 1 | 1 | -0.01 | -0.007 | -0.01  | -0.01 | -0.01  | t | 119930 | HRWSSYM<br>VHW               | Mus<br>musculu<br>s              |
| 1 | 1.00 | 1 | 1 | -0.01 | -0.01  | -0.01  | -0.01 | -0.01  | t | 111154 | CMKNMK<br>QPC                | Homo<br>sapiens                  |
| 1 | 1.00 | 1 | 1 | -0.03 | -0.03  | -0.03  | -0.03 | -0.03  | t | 115204 | DEALEKFD<br>KALKALPM<br>HIRL | Homo<br>sapiens                  |
| 1 | 1.00 | 1 | 1 | -0.03 | -0.03  | -0.03  | -0.03 | -0.03  | t | 100288 | LSKINQPY<br>QK               | Mus<br>musculu<br>s              |
| 1 | 1.00 | 1 | 1 | -0.03 | -0.03  | -0.03  | -0.03 | -0.03  | t | 106307 | CKCIVRAT<br>KG               | Homo<br>sapiens                  |
| 1 | 1.00 | 1 | 1 | -0.05 | -0.05  | -0.05  | -0.05 | -0.05  | t | 79592  | KSFNSPH                      | Oryctola<br>gus<br>cuniculu<br>s |
| 1 | 1.00 | 1 | 1 | 0.05  | 0.05   | 0.05   | 0.046 | 0.05   | t | 135999 | SQIATIEQT<br>APS             | Homo<br>sapiens                  |
| 1 | 1.00 | 1 | 1 | -0.03 | -0.033 | -0.028 | -0.03 | -0.031 | t | 69299  | VKQMYKT<br>PTLKYFGG<br>FN    | Oryctola<br>gus<br>cuniculu<br>s |
| 1 | 1.00 | 1 | 1 | 0.01  | 0.012  | 0.01   | 0.01  | 0.013  | t | 3274   | ANETIYNT<br>TLKYGDV          | MD                               |
| 1 | 1.00 | 1 | 1 | 0.06  | 0.057  | 0.061  | 0.06  | 0.063  | t | 119220 | ISCAKDGG<br>IPEQEYSC         | Oryctola<br>gus<br>cuniculu<br>s |

|   |      |   |   |       |        |        |        |        |   |        |                              |                                  |
|---|------|---|---|-------|--------|--------|--------|--------|---|--------|------------------------------|----------------------------------|
| 1 | 1.00 | 1 | 1 | 0.02  | 0.02   | 0.02   | 0.02   | 0.021  | t | 112153 | HIWWND<br>N                  | Homo<br>sapiens                  |
| 1 | 1.00 | 1 | 1 | -0.02 | -0.02  | -0.022 | -0.021 | -0.02  | t | 4715   | ASQKRPSQ<br>RHGSKYLA<br>TAST | Homo<br>sapiens                  |
| 1 | 1.00 | 1 | 1 | -0.01 | -0.007 | -0.009 | -0.01  | -0.01  | t | 74112  | YHGRASSI<br>VV               | Mus<br>musculu<br>s              |
| 1 | 1.00 | 1 | 1 | -0.03 | -0.03  | -0.03  | -0.03  | -0.03  | t | 105148 | DVAGL                        | Oryctola<br>gus<br>cuniculu<br>s |
| 1 | 1.00 | 1 | 1 | -0.03 | -0.03  | -0.03  | -0.03  | -0.03  | t | 105148 | DVAGL                        | Oryctola<br>gus<br>cuniculu<br>s |
| 1 | 1.00 | 1 | 1 | -0.03 | -0.03  | -0.03  | -0.03  | -0.03  | t | 105148 | DVAGL                        | Oryctola<br>gus<br>cuniculu<br>s |
| 1 | 1.00 | 1 | 1 | 0.01  | 0.006  | 0.005  | 0.003  | 0.009  | t | 133775 | AETNRAPF<br>DLAEAE           | Oryctola<br>gus<br>cuniculu<br>s |
| 1 | 1.00 | 1 | 1 | 0.01  | 0.008  | 0.018  | 0.009  | 0.011  | t | 11411  | EDPASR                       | Mus<br>musculu<br>s              |
| 1 | 1.00 | 1 | 1 | 0.01  | 0.012  | 0.022  | 0.01   | 0.008  | t | 28322  | IRIPKYKND<br>GIQNYIHN<br>EY  | Homo<br>sapiens                  |
| 1 | 1.00 | 1 | 1 | 0.01  | 0.013  | 0.022  | 0.01   | 0.008  | t | 28322  | IRIPKYKND<br>GIQNYIHN<br>EY  | Equus<br>caballus                |
| 1 | 1.00 | 1 | 1 | 0.01  | 0.01   | 0.022  | 0.01   | 0.008  | t | 28322  | IRIPKYKND<br>GIQNYIHN<br>EY  | Mus<br>musculu<br>s              |
| 1 | 1.00 | 1 | 1 | -0.01 | -0.008 | -0.012 | -0.01  | -0.008 | t | 46792  | PAFGANS<br>NNPDWDF<br>NP     | Homo<br>sapiens                  |
| 1 | 1.00 | 1 | 1 | 0     | 0.002  | 0      | -0.003 | -0.001 | t | 106317 | CSKIQSTIF<br>RGY             | Homo<br>sapiens                  |
| 1 | 1.00 | 1 | 1 | 0     | 0      | -0.005 | 0.003  | 0.002  | t | 68297  | VENAQQD<br>KGIAIPHDI<br>DLGE | Homo<br>sapiens                  |

|   |      |   |   |       |        |        |        |        |   |        |                              |                       |
|---|------|---|---|-------|--------|--------|--------|--------|---|--------|------------------------------|-----------------------|
| 1 | 1.00 | 1 | 1 | -0.05 | -0.055 | -0.043 | -0.051 | -0.051 | t | 138835 | CLNSFLRSC                    | Canis lupus           |
| 1 | 1.00 | 1 | 1 | -0.02 | -0.022 | -0.024 | -0.02  | -0.02  | t | 25735  | IEATLHCY<br>GAYLTIGK<br>NPDF | Oryctolagus cuniculus |
| 1 | 1.00 | 1 | 1 | 0.01  | 0.01   | 0.01   | 0.008  | 0.01   | t | 62325  | SVSHARPR<br>LLLLCL           | Homo sapiens          |
| 1 | 1.00 | 1 | 1 | -0.01 | -0.01  | -0.017 | -0.01  | -0.01  | t | 122471 | LLTEHRMT<br>WDPAQPP<br>RDL   | Homo sapiens          |
| 1 | 1.00 | 1 | 1 | -0.01 | -0.01  | -0.017 | -0.01  | -0.01  | t | 122471 | LLTEHRMT<br>WDPAQPP<br>RDL   | Homo sapiens          |
| 1 | 1.00 | 1 | 1 | 0.01  | 0.006  | 0.016  | 0.013  | 0.01   | t | 27670  | INKDAREL                     | Oryctolagus cuniculus |
| 1 | 1.00 | 1 | 1 | 0.01  | 0.01   | 0.008  | 0.01   | 0.012  | t | 125051 | FQSKANCL<br>NT               | Mus musculus          |
| 1 | 1.00 | 1 | 1 | 0     | -0.002 | 0      | 0.001  | 0      | t | 149429 | QLWQIPE<br>QSR               | Mus musculus          |
| 1 | 1.00 | 1 | 1 | -0.01 | -0.018 | -0.01  | -0.01  | -0.008 | t | 156911 | LGMSTNP<br>GPRIL             | Mus musculus          |
| 1 | 1.00 | 1 | 1 | 0     | 0.002  | 0.001  | 0.001  | 0      | t | 63451  | TELKLAPP<br>VLNAPPL          | Homo sapiens          |
| 1 | 1.00 | 1 | 1 | 0     | 0.002  | 0.001  | 0.001  | 0      | t | 63451  | TELKLAPP<br>VLNAPPL          | Homo sapiens          |
| 1 | 1.00 | 1 | 1 | 0.01  | 0.01   | 0.01   | 0.006  | 0.01   | t | 109865 | RSLDFQAT<br>TMF              | Homo sapiens          |
| 1 | 1.00 | 1 | 1 | -0.02 | -0.018 | -0.018 | -0.019 | -0.02  | t | 78873  | VKFPGGG<br>QIVGGVYL<br>LPRRG | Homo sapiens          |
| 1 | 1.00 | 1 | 1 | -0.03 | -0.026 | -0.031 | -0.029 | -0.03  | t | 147074 | KRKQNLV<br>QAWQAK            | Homo sapiens          |
| 1 | 1.00 | 1 | 1 | 0.02  | 0.022  | 0.022  | 0.017  | 0.02   | t | 158943 | KVIDQDAS<br>GFIEVEE          | Homo sapiens          |

|   |      |   |   |       |        |       |       |       |   |        |                              |                                  |
|---|------|---|---|-------|--------|-------|-------|-------|---|--------|------------------------------|----------------------------------|
| 1 | 1.00 | 1 | 1 | 0.03  | 0.026  | 0.023 | 0.033 | 0.032 | t | 106386 | EIVLTQSP<br>GTLSSLSPG<br>ERA | Oryctola<br>gus<br>cuniculu<br>s |
| 1 | 1.00 | 1 | 1 | 0.06  | 0.06   | 0.06  | 0.06  | 0.06  | t | 115925 | QQTEDEL<br>QDK               | Homo<br>sapiens                  |
| 1 | 1.00 | 1 | 1 | 0     | 0      | 0     | 0     | 0     | t | 149064 | LAANLTQ                      | Sus<br>scrofa                    |
| 1 | 1.00 | 1 | 1 | 0     | 0      | 0     | 0     | 0     | t | 110609 | GPKGANG<br>DPGRPGE<br>P      | Mus<br>musculu<br>s              |
| 1 | 1.00 | 1 | 1 | 0     | 0      | 0     | 0     | 0     | t | 112170 | IRQRSGK                      | Homo<br>sapiens                  |
| 1 | 1.00 | 1 | 1 | 0     | 0      | 0     | 0     | 0     | t | 112205 | LEWLAHI                      | Homo<br>sapiens                  |
| 1 | 1.00 | 1 | 1 | 0     | 0      | 0     | 0     | 0     | t | 79246  | HCGQNSH<br>PMWRKC<br>Q       | Mus<br>musculu<br>s              |
| 1 | 1.00 | 1 | 1 | 0     | 0      | 0     | 0     | 0     | t | 79471  | YCRTNQS<br>GAFARCT           | Mus<br>musculu<br>s              |
| 1 | 1.00 | 1 | 1 | 0     | -0.003 | 0     | 0     | 0     | t | 78811  | RKRNGVD<br>VDPNKGK<br>WKEHI  | Oryctola<br>gus<br>cuniculu<br>s |
| 1 | 1.00 | 1 | 1 | 0     | 0      | 0     | 0     | 0     | t | 78811  | RKRNGVD<br>VDPNKGK<br>WKEHI  | Oryctola<br>gus<br>cuniculu<br>s |
| 1 | 1.00 | 1 | 1 | 0     | 0      | 0     | 0     | 0     | t | 95158  | TNVLVNSS<br>GHCQYLPP<br>GIFK | Rattus<br>norvegic<br>us         |
| 1 | 1.00 | 1 | 1 | -0.02 | -0.02  | -0.02 | -0.02 | -0.02 | t | 132826 | FPEDLGNK<br>SWQAYVV          | Trichosu<br>rus<br>vulpecul<br>a |
| 1 | 1.00 | 1 | 1 | -0.02 | -0.02  | -0.02 | -0.02 | -0.02 | t | 108526 | LLRPVARD<br>T                | Homo<br>sapiens                  |
| 1 | 1.00 | 1 | 1 | -0.02 | -0.02  | -0.02 | -0.02 | -0.02 | t | 99338  | IKSEGHPQ<br>EISKFLT          | Equus<br>caballus                |
| 1 | 1.00 | 1 | 1 | 0.02  | 0.02   | 0.02  | 0.02  | 0.018 | t | 129197 | LAALGGNS<br>SPSAKDI          | Homo<br>sapiens                  |
| 1 | 1.00 | 1 | 1 | 0.02  | 0.023  | 0.022 | 0.02  | 0.022 | t | 5962   | CAALASLF<br>LSLGPQQK         | Mus<br>musculu<br>s              |
| 1 | 1.00 | 1 | 1 | 0.01  | 0.01   | 0.014 | 0.01  | 0.011 | t | 51816  | QPFPLQP<br>QQP               | Mus<br>musculu<br>s              |



|   |      |   |   |       |        |        |        |        |   |        |                              |                                  |
|---|------|---|---|-------|--------|--------|--------|--------|---|--------|------------------------------|----------------------------------|
| 1 | 1.00 | 1 | 1 | 0     | 0      | 0      | -0.003 | 0      | t | 74004  | YGGIPGGI<br>STPITQQS<br>EK   | Equus<br>caballus                |
| 1 | 1.00 | 1 | 1 | -0.01 | -0.01  | -0.012 | -0.01  | -0.01  | t | 60526  | SQPNT EQS<br>PAIVLPF         | Mus<br>musculu<br>s              |
| 1 | 1.00 | 1 | 1 | -0.01 | -0.01  | -0.012 | -0.01  | -0.01  | t | 60526  | SQPNT EQS<br>PAIVLPF         | Mus<br>musculu<br>s              |
| 1 | 1.00 | 1 | 1 | 0.02  | 0.017  | 0.02   | 0.02   | 0.023  | t | 138029 | SASGSDVS<br>LTA              | Oryctola<br>gus<br>cuniculu<br>s |
| 1 | 1.00 | 1 | 1 | -0.02 | -0.024 | -0.021 | -0.027 | -0.02  | t | 124069 | ELQIAKDE<br>RYGS             | Oryctola<br>gus<br>cuniculu<br>s |
| 1 | 1.00 | 1 | 1 | 0     | -0.004 | 0      | 0      | 0.003  | t | 70396  | VPNLRGD<br>RQALA             | Mus<br>musculu<br>s              |
| 1 | 1.00 | 1 | 1 | -0.02 | -0.018 | -0.017 | -0.017 | -0.017 | t | 151713 | RGEARK                       | Homo<br>sapiens                  |
| 1 | 1.00 | 1 | 1 | 0     | -0.007 | -0.005 | 0.001  | -0.001 | t | 1248   | AFAFAGN<br>HVSPTHYV<br>PESDA | Homo<br>sapiens                  |
| 1 | 1.00 | 1 | 1 | 0.04  | 0.044  | 0.049  | 0.041  | 0.04   | t | 71292  | VTENDI                       | Homo<br>sapiens                  |
| 1 | 1.00 | 1 | 1 | -0.02 | -0.022 | -0.02  | -0.021 | -0.02  | t | 150995 | HLGKCNIA<br>GWILGNP          | Mus<br>musculu<br>s              |
| 1 | 1.00 | 1 | 1 | 0     | -0.003 | -0.007 | 0      | 0      | t | 6516   | CKRGPDS<br>G                 | Oryctola<br>gus<br>cuniculu<br>s |
| 1 | 1.00 | 1 | 1 | -0.04 | -0.04  | -0.04  | -0.04  | -0.04  | t | 98373  | QLKKFLKIA<br>LETPARI         | Homo<br>sapiens                  |
| 1 | 1.00 | 1 | 1 | 0.04  | 0.04   | 0.054  | 0.04   | 0.038  | t | 9520   | DNNQTSP                      | Mus<br>musculu<br>s              |
| 1 | 1.00 | 1 | 1 | 0     | -0.002 | 0.007  | -0.001 | 0      | t | 71212  | VSVTDHKK<br>WQFNPF<br>VP     | Mus<br>musculu<br>s              |
| 1 | 1.00 | 1 | 1 | -0.02 | -0.02  | -0.015 | -0.014 | -0.017 | t | 115832 | KTGQFL                       | Homo<br>sapiens                  |

|   |      |   |   |       |        |        |        |        |   |        |                               |                                  |
|---|------|---|---|-------|--------|--------|--------|--------|---|--------|-------------------------------|----------------------------------|
| 1 | 1.00 | 1 | 1 | 0.03  | 0.025  | 0.028  | 0.029  | 0.03   | t | 15281  | FASRGTS<br>MDDEA              | Bos<br>taurus                    |
| 1 | 1.00 | 1 | 1 | 0.03  | 0.033  | 0.028  | 0.029  | 0.03   | t | 15281  | FASRGTS<br>MDDEA              | Capra<br>hircus                  |
| 1 | 1.00 | 1 | 1 | -0.01 | -0.008 | -0.008 | -0.003 | -0.007 | t | 121702 | PEPKPKKA<br>PAKKGEK           | Homo<br>sapiens                  |
| 1 | 1.00 | 1 | 1 | -0.02 | -0.019 | -0.014 | -0.02  | -0.018 | t | 56089  | RTIVCGLFP<br>TQIQV            | Myodes<br>glareolu<br>s          |
| 1 | 1.00 | 1 | 1 | 0     | 0      | 0.007  | 0      | -0.001 | t | 133843 | GTKAVTKY<br>TSSK              | Oryctola<br>gus<br>cuniculu<br>s |
| 1 | 1.00 | 1 | 1 | -0.01 | -0.006 | -0.007 | -0.009 | -0.011 | t | 22786  | GTPSMDA<br>LSALLSNTL<br>SLAS  | Homo<br>sapiens                  |
| 1 | 1.00 | 1 | 1 | -0.02 | -0.017 | -0.012 | -0.02  | -0.023 | t | 110948 | MVTSDAQ<br>IFNKPYWL           | Mus<br>musculu<br>s              |
| 1 | 1.00 | 1 | 1 | -0.01 | -0.01  | -0.01  | -0.01  | -0.01  | t | 141946 | LKEDSRDR<br>T                 | Mus<br>musculu<br>s              |
| 1 | 1.00 | 1 | 1 | -0.01 | -0.01  | -0.01  | -0.01  | -0.01  | t | 141946 | LKEDSRDR<br>T                 | Mus<br>musculu<br>s              |
| 1 | 1.00 | 1 | 1 | 0     | -0.003 | 0.019  | 0      | 0.001  | t | 139029 | DLQVLT                        | Mus<br>musculu<br>s              |
| 1 | 1.00 | 1 | 1 | 0.01  | 0.01   | 0.01   | 0.01   | 0.012  | t | 73659  | YEGFSTGV<br>TQKAKGIT          | Mus<br>musculu<br>s              |
| 1 | 1.00 | 1 | 1 | 0.01  | 0.01   | 0.009  | 0.01   | 0.01   | t | 51782  | QNVDPDPQ<br>VGITTMKD<br>LKGKA | Homo<br>sapiens                  |
| 1 | 1.00 | 1 | 1 | -0.01 | -0.01  | -0.01  | -0.013 | -0.01  | t | 28911  | ITGHRMA<br>WMMMM<br>NWS       | Homo<br>sapiens                  |
| 1 | 1.00 | 1 | 1 | 0.05  | 0.05   | 0.05   | 0.05   | 0.05   | t | 119660 | VEWESNG<br>Q                  | Homo<br>sapiens                  |

|   |      |   |   |       |        |        |        |        |   |        |                            |                                  |
|---|------|---|---|-------|--------|--------|--------|--------|---|--------|----------------------------|----------------------------------|
| 1 | 1.00 | 1 | 1 | 0.03  | 0.03   | 0.03   | 0.03   | 0.03   | t | 114756 | CGTDGVT<br>YDN             | Homo<br>sapiens                  |
| 1 | 1.00 | 1 | 1 | 0.01  | 0.01   | 0.01   | 0.01   | 0.01   | t | 107019 | YLTDESHL<br>HWFG           | Mus<br>musculu<br>s              |
| 1 | 1.00 | 1 | 1 | -0.03 | -0.03  | -0.03  | -0.03  | -0.03  | t | 149091 | NSTQMRI                    | Sus<br>scrofa                    |
| 1 | 1.00 | 1 | 1 | -0.03 | -0.03  | -0.03  | -0.03  | -0.03  | t | 48390  | PLLDRWK<br>APDYVPP         | Homo<br>sapiens                  |
| 1 | 1.00 | 1 | 1 | 0.02  | 0.022  | 0.021  | 0.027  | 0.022  | t | 141934 | KIHAREIFD<br>SRGNPTVE      | Homo<br>sapiens                  |
| 1 | 1.00 | 1 | 1 | 0.01  | 0.01   | 0.014  | 0.01   | 0.01   | t | 67266  | TWIGMN                     | Homo<br>sapiens                  |
| 1 | 1.00 | 1 | 1 | 0.01  | 0.012  | 0.003  | 0.009  | 0.01   | t | 70     | AACAGNR<br>VRRSVGSS<br>LKC | Cavia<br>porcellu<br>s           |
| 1 | 1.00 | 1 | 1 | 0.02  | 0.02   | 0.02   | 0.02   | 0.021  | t | 153333 | ACLDAKLQ<br>QCGGGS         | Mus<br>musculu<br>s              |
| 1 | 1.00 | 1 | 1 | 0.02  | 0.016  | 0.015  | 0.02   | 0.022  | t | 1461   | AGCTALSA<br>VDDVPGC        | Mus<br>musculu<br>s              |
| 1 | 1.00 | 1 | 1 | -0.03 | -0.03  | -0.03  | -0.03  | -0.03  | t | 111142 | CALHPPPQ<br>C              | Homo<br>sapiens                  |
| 1 | 1.00 | 1 | 1 | 0.04  | 0.04   | 0.039  | 0.04   | 0.04   | t | 124367 | KLKARVDE<br>LERIRRS        | Oryctola<br>gus<br>cuniculu<br>s |
| 1 | 1.00 | 1 | 1 | -0.01 | -0.012 | 0      | -0.009 | -0.012 | t | 133802 | DSPAPIKL<br>GG             | Mus<br>musculu<br>s              |
| 1 | 1.00 | 1 | 1 | -0.01 | -0.003 | 0      | -0.009 | -0.012 | t | 133802 | DSPAPIKL<br>GG             | Gallus<br>gallus                 |
| 1 | 1.00 | 1 | 1 | -0.03 | -0.026 | -0.018 | -0.023 | -0.031 | t | 119537 | TRKALTQN<br>T              | Homo<br>sapiens                  |
| 1 | 1.00 | 1 | 1 | 0.01  | 0.01   | 0.01   | 0.01   | 0.01   | t | 74485  | YKNTHLDL<br>IYNA           | Sus<br>scrofa                    |

|   |      |   |   |       |        |        |        |        |   |        |                              |                                  |
|---|------|---|---|-------|--------|--------|--------|--------|---|--------|------------------------------|----------------------------------|
| 1 | 1.00 | 1 | 1 | -0.03 | -0.028 | -0.032 | -0.031 | -0.031 | t | 78850  | TGAPSLGD<br>YVRPAYIV<br>TPYW | Homo<br>sapiens                  |
| 1 | 1.00 | 1 | 1 | 0.01  | 0.01   | 0.01   | 0.008  | 0.01   | t | 10812  | DWICEVLS<br>DFKTWL           | Homo<br>sapiens                  |
| 1 | 1.00 | 1 | 1 | -0.01 | -0.008 | -0.01  | -0.003 | -0.006 | t | 138222 | PTPTPGPS<br>RR               | Homo<br>sapiens                  |
| 1 | 1.00 | 1 | 1 | 0.02  | 0.02   | 0.02   | 0.022  | 0.021  | t | 24861  | HSTTEWA<br>VLPCSYSD          | Homo<br>sapiens                  |
| 1 | 1.00 | 1 | 1 | -0.02 | -0.03  | -0.02  | -0.019 | -0.02  | t | 37814  | LLSPRGSR<br>PSWG             | Homo<br>sapiens                  |
| 1 | 1.00 | 1 | 1 | 0.01  | 0.008  | 0.012  | 0.011  | 0.01   | t | 133877 | LEAKICHQI<br>EYFGDFN<br>L    | Mus<br>musculu<br>s              |
| 1 | 1.00 | 1 | 1 | -0.02 | -0.02  | -0.02  | -0.016 | -0.018 | t | 117777 | CSLPMIW<br>AQKTNT            | Homo<br>sapiens                  |
| 1 | 1.00 | 1 | 1 | 0.01  | 0.012  | 0.01   | 0.011  | 0.012  | t | 64079  | THSWEYW<br>GAQLNAM<br>KGDLS  | Homo<br>sapiens                  |
| 1 | 1.00 | 1 | 1 | -0.04 | -0.037 | -0.043 | -0.04  | -0.04  | t | 25215  | IAAAIVLRG<br>MAKDG           | Mus<br>musculu<br>s              |
| 1 | 1.00 | 1 | 1 | 0.06  | 0.057  | 0.058  | 0.06   | 0.06   | t | 131155 | YDEDENQ<br>SPRSFQKK          | Oryctola<br>gus<br>cuniculu<br>s |
| 1 | 1.00 | 1 | 1 | 0     | 0      | 0.009  | -0.001 | 0.001  | t | 134909 | EEKLVF                       | Mus<br>musculu<br>s              |
| 1 | 1.00 | 1 | 1 | -0.01 | -0.006 | -0.003 | -0.009 | -0.009 | t | 46857  | PALSTGLI                     | Homo<br>sapiens                  |
| 1 | 1.00 | 1 | 1 | 0.04  | 0.04   | 0.04   | 0.04   | 0.04   | t | 135664 | EHNIEETE                     | Homo<br>sapiens                  |
| 1 | 1.00 | 1 | 1 | 0.02  | 0.02   | 0.02   | 0.02   | 0.02   | t | 123611 | PPGLAPG<br>Q                 | Oryctola<br>gus<br>cuniculu<br>s |
| 1 | 1.00 | 1 | 1 | 0.02  | 0.02   | 0.02   | 0.02   | 0.02   | t | 110592 | GERGAPG<br>NRGFPGQ<br>D      | Mus<br>musculu<br>s              |

|   |      |   |   |       |        |        |        |        |   |        |                              |                                  |
|---|------|---|---|-------|--------|--------|--------|--------|---|--------|------------------------------|----------------------------------|
| 1 | 1.00 | 1 | 1 | 0     | 0      | 0      | 0      | 0      | t | 140855 | GHDEAAY<br>SKNRR             | Oryctola<br>gus<br>cuniculu<br>s |
| 1 | 1.00 | 1 | 1 | 0     | 0      | 0      | 0      | 0      | t | 135716 | LRSTKFTI                     | Homo<br>sapiens                  |
| 1 | 1.00 | 1 | 1 | 0     | 0      | 0      | 0      | 0      | t | 106341 | DIQMTQS<br>PSSLASV<br>GDRV   | Oryctola<br>gus<br>cuniculu<br>s |
| 1 | 1.00 | 1 | 1 | -0.02 | -0.02  | -0.02  | -0.02  | -0.02  | t | 151056 | SQLKNN<br>KEIGNGCF           | Homo<br>sapiens                  |
| 1 | 1.00 | 1 | 1 | -0.02 | -0.02  | -0.02  | -0.02  | -0.02  | t | 131698 | TGVDVSM<br>NTHLKAVK<br>MTLKN | Homo<br>sapiens                  |
| 1 | 1.00 | 1 | 1 | -0.02 | -0.02  | -0.02  | -0.02  | -0.02  | t | 98881  | LLDAQSAP<br>LR               | Homo<br>sapiens                  |
| 1 | 1.00 | 1 | 1 | -0.02 | -0.02  | -0.02  | -0.02  | -0.02  | t | 99097  | AGVALSRL<br>VLRRNAL          | Homo<br>sapiens                  |
| 1 | 1.00 | 1 | 1 | -0.02 | -0.02  | -0.02  | -0.02  | -0.02  | t | 77951  | LPTMLSPT<br>GLSR             | Mus<br>musculu<br>s              |
| 1 | 1.00 | 1 | 1 | 0.01  | 0.013  | 0.01   | 0.01   | 0.012  | t | 125600 | WESYPFRV<br>GTSL             | Mus<br>musculu<br>s              |
| 1 | 1.00 | 1 | 1 | -0.01 | -0.01  | -0.01  | -0.01  | -0.008 | t | 51906  | QPQFPFP<br>QLP               | Mus<br>musculu<br>s              |
| 1 | 1.00 | 1 | 1 | 0.02  | 0.02   | 0.027  | 0.029  | 0.023  | t | 131020 | QLSPESDY<br>DDHGMRY          | Homo<br>sapiens                  |
| 1 | 1.00 | 1 | 1 | -0.01 | -0.01  | -0.008 | -0.01  | -0.01  | t | 119674 | WNPDDYG<br>GVKKIHIPS         | Mus<br>musculu<br>s              |
| 1 | 1.00 | 1 | 1 | -0.06 | -0.063 | -0.065 | -0.06  | -0.06  | t | 130869 | GRDRQPR<br>L                 | Oryctola<br>gus<br>cuniculu<br>s |
| 1 | 1.00 | 1 | 1 | 0     | 0      | 0      | -0.003 | 0      | t | 97049  | VKPTAPTK<br>PT               | Homo<br>sapiens(<br>human)       |
| 1 | 1.00 | 1 | 1 | -0.02 | -0.02  | -0.02  | -0.019 | -0.023 | t | 153266 | IVTARARH<br>DWNWVQ<br>RSSRSL | Mus<br>musculu<br>s              |

|   |      |   |   |       |        |        |        |        |   |        |                              |                                  |
|---|------|---|---|-------|--------|--------|--------|--------|---|--------|------------------------------|----------------------------------|
| 1 | 1.00 | 1 | 1 | 0     | 0      | 0      | 0      | 0.002  | t | 125551 | RNLTYIDP<br>DALKELPLL<br>KFL | Homo<br>sapiens                  |
| 1 | 1.00 | 1 | 1 | 0.04  | 0.037  | 0.049  | 0.04   | 0.04   | t | 100249 | LDPLSEKG<br>LTTY             | Oryctola<br>gus<br>cuniculu<br>s |
| 1 | 1.00 | 1 | 1 | -0.01 | -0.008 | -0.007 | -0.007 | -0.008 | t | 7063   | CSQHLPYI<br>EQGMQLA          | Homo<br>sapiens                  |
| 1 | 1.00 | 1 | 1 | -0.03 | -0.034 | -0.028 | -0.037 | -0.032 | t | 132045 | RMATPLL<br>MRPMSM            | Oryctola<br>gus<br>cuniculu<br>s |
| 1 | 1.00 | 1 | 1 | 0.02  | 0.02   | 0.02   | 0.02   | 0.02   | t | 117065 | QFTGSTRQ<br>HAG              | Mus<br>musculu<br>s              |
| 1 | 1.00 | 1 | 1 | 0.02  | 0.021  | 0.028  | 0.02   | 0.018  | t | 72922  | WPACYCY<br>GLPNWVK<br>V      | Mus<br>musculu<br>s              |
| 1 | 1.00 | 1 | 1 | 0.02  | 0.021  | 0.028  | 0.02   | 0.018  | t | 72922  | WPACYCY<br>GLPNWVK<br>V      | Mus<br>musculu<br>s              |
| 1 | 1.00 | 1 | 1 | -0.01 | -0.007 | -0.01  | -0.01  | -0.011 | t | 107813 | EGGGVRG<br>PRVV              | Mus<br>musculu<br>s              |
| 1 | 1.00 | 1 | 1 | 0.02  | 0.02   | 0.02   | 0.016  | 0.019  | t | 135927 | GAKLVQD<br>VANNT             | Homo<br>sapiens                  |
| 1 | 1.00 | 1 | 1 | 0.05  | 0.053  | 0.06   | 0.05   | 0.05   | t | 140886 | LQEKLSPL<br>GEE              | Mus<br>musculu<br>s              |
| 1 | 1.00 | 1 | 1 | 0     | -0.003 | 0      | 0      | 0      | t | 38825  | LQDPRVR<br>GLYFPAGG          | Oryctola<br>gus<br>cuniculu<br>s |
| 1 | 1.00 | 1 | 1 | 0.02  | 0.018  | 0.02   | 0.019  | 0.02   | t | 31160  | KHVAGAA<br>AAGAVVG<br>GLGGY  | Mus<br>musculu<br>s              |
| 1 | 1.00 | 1 | 1 | -0.03 | -0.026 | -0.03  | -0.033 | -0.03  | t | 106310 | CLHFVKGE<br>EK               | Homo<br>sapiens                  |
| 1 | 1.00 | 1 | 1 | -0.01 | -0.007 | -0.006 | -0.01  | -0.01  | t | 31154  | KHSMVDR<br>GWGNCG            | Mus<br>musculu<br>s              |

|   |      |   |   |       |        |       |        |       |   |        |                               |                                  |
|---|------|---|---|-------|--------|-------|--------|-------|---|--------|-------------------------------|----------------------------------|
| 1 | 1.00 | 1 | 1 | 0     | 0      | 0     | 0      | 0     | t | 117459 | DLLRLSHL<br>KPSSEGLAI<br>VTK  | Homo<br>sapiens                  |
| 1 | 1.00 | 1 | 1 | 0.03  | 0.026  | 0.038 | 0.033  | 0.032 | t | 137393 | EDFESCDSI<br>TGMNLEA          | Oryctola<br>gus<br>cuniculu<br>s |
| 1 | 1.00 | 1 | 1 | -0.03 | -0.029 | -0.03 | -0.033 | -0.03 | t | 130605 | SCRLFGKT<br>YLCH              | Mus<br>musculu<br>s              |
| 1 | 1.00 | 1 | 1 | 0.01  | 0.01   | 0.016 | 0.01   | 0.009 | t | 158723 | DTGCAIDIS<br>RQELRCG          | Mus<br>musculu<br>s              |
| 1 | 1.00 | 1 | 1 | 0.01  | 0.01   | 0.015 | 0.01   | 0.008 | t | 145704 | AEGLT<br>TTT<br>WKDYDHN<br>LQ | Sus<br>scrofa                    |
| 1 | 1.00 | 1 | 1 | 0     | -0.003 | 0     | 0      | 0.002 | t | 104319 | TTSSQELE<br>RYTFNPQ           | Oryctola<br>gus<br>cuniculu<br>s |
| 1 | 1.00 | 1 | 1 | 0.03  | 0.03   | 0.037 | 0.03   | 0.033 | t | 57532  | SELPQWI                       | Mus<br>musculu<br>s              |
| 1 | 1.00 | 1 | 1 | 0.01  | 0.01   | 0.01  | 0.01   | 0.01  | t | 141064 | NSIGLTW<br>QR                 | Ovis<br>aries                    |
| 1 | 1.00 | 1 | 1 | 0.01  | 0.01   | 0.01  | 0.01   | 0.01  | t | 92857  | GQNGERIT<br>SK                | Ovis<br>aries                    |
| 1 | 1.00 | 1 | 1 | -0.01 | -0.01  | -0.01 | -0.01  | -0.01 | t | 137446 | SHDWRLM<br>LSHLQ              | Mus<br>musculu<br>s              |
| 1 | 1.00 | 1 | 1 | -0.01 | -0.01  | -0.01 | -0.01  | -0.01 | t | 115689 | AQILQWQ<br>VLS                | Homo<br>sapiens                  |
| 1 | 1.00 | 1 | 1 | -0.03 | -0.03  | -0.03 | -0.03  | -0.03 | t | 115845 | LHLPLPLL<br>QS                | Homo<br>sapiens                  |
| 1 | 1.00 | 1 | 1 | -0.03 | -0.03  | -0.03 | -0.03  | -0.03 | t | 80216  | AEWVLVG<br>QNA                | Homo<br>sapiens                  |
| 1 | 1.00 | 1 | 1 | -0.05 | -0.05  | -0.05 | -0.05  | -0.05 | t | 132816 | FGQNAPR                       | Homo<br>sapiens                  |
| 1 | 1.00 | 1 | 1 | 0     | 0      | 0     | 0      | 0.002 | t | 50171  | PYSPSQDP<br>YSPSPYD           | Homo<br>sapiens                  |
| 1 | 1.00 | 1 | 1 | 0.01  | 0.01   | 0.01  | 0.01   | 0.011 | t | 98843  | KEGDVFIM<br>PAAHPVA           | Homo<br>sapiens                  |

|   |      |   |   |       |        |        |        |        |   |        |                              |                          |
|---|------|---|---|-------|--------|--------|--------|--------|---|--------|------------------------------|--------------------------|
| 1 | 1.00 | 1 | 1 | 0.02  | 0.022  | 0.022  | 0.02   | 0.019  | t | 119914 | GSVVAINP<br>ESDQPDLS         | Rattus<br>norvegicus     |
| 1 | 1.00 | 1 | 1 | 0.02  | 0.02   | 0.022  | 0.02   | 0.019  | t | 119914 | GSVVAINP<br>ESDQPDLS         | Oryctolagus<br>cuniculus |
| 1 | 1.00 | 1 | 1 | 0.02  | 0.023  | 0.022  | 0.02   | 0.019  | t | 119914 | GSVVAINP<br>ESDQPDLS         | Mus<br>musculus          |
| 1 | 1.00 | 1 | 1 | -0.02 | -0.017 | -0.015 | -0.02  | -0.02  | t | 122083 | DPNIKLV<br>DDCWATS           | Mus<br>musculus          |
| 1 | 1.00 | 1 | 1 | -0.01 | -0.006 | -0.017 | -0.01  | -0.006 | t | 141267 | FEGWFN                       | Capra<br>hircus          |
| 1 | 1.00 | 1 | 1 | -0.02 | -0.016 | -0.02  | -0.02  | -0.021 | t | 75951  | YTASARGD<br>LAHLTTTH<br>AR   | Cavia<br>porcellus       |
| 1 | 1.00 | 1 | 1 | -0.04 | -0.038 | -0.031 | -0.039 | -0.04  | t | 98217  | LKPKKGIK<br>VN               | Homo<br>sapiens          |
| 1 | 1.00 | 1 | 1 | 0     | 0      | 0      | 0      | 0.001  | t | 108104 | RRLPFGSQ<br>M                | Mus<br>musculus          |
| 1 | 1.00 | 1 | 1 | 0.01  | 0.008  | -0.002 | 0.003  | 0.01   | t | 130864 | GPKGQAG<br>EPGIAGFK<br>GDQ   | Mus<br>musculus          |
| 1 | 1.00 | 1 | 1 | 0.03  | 0.03   | 0.032  | 0.03   | 0.03   | t | 41204  | MCQCQVK<br>YGTEFCKK<br>RLA   | Mus<br>musculus          |
| 1 | 1.00 | 1 | 1 | 0.01  | 0.008  | 0.005  | 0.003  | 0.01   | t | 127999 | GLIEVQSD<br>YGIVWGLS<br>LQKV | Mus<br>musculus          |
| 1 | 1.00 | 1 | 1 | 0.01  | 0.014  | 0.01   | 0.007  | 0.01   | t | 11652  | EEGPVDEE<br>IVQEEGTV         | Homo<br>sapiens          |
| 1 | 1.00 | 1 | 1 | -0.02 | -0.017 | -0.014 | -0.02  | -0.021 | t | 95137  | RGLSLGM<br>RLEN              | Mus<br>musculus          |



|   |      |   |   |       |        |        |        |        |   |        |                  |                       |
|---|------|---|---|-------|--------|--------|--------|--------|---|--------|------------------|-----------------------|
| 1 | 1.00 | 1 | 1 | 0.03  | 0.028  | 0.04   | 0.029  | 0.028  | t | 61317  | SSRGKVVE         | Mus musculus          |
| 1 | 1.00 | 1 | 1 | 0     | 0.002  | 0      | -0.003 | 0.002  | t | 49046  | PQPELPYP         | Homo sapiens          |
| 1 | 1.00 | 1 | 1 | -0.01 | -0.011 | -0.01  | -0.007 | -0.009 | t | 130469 | DQPPTSRYVPSLR    | Camelus dromedarius   |
| 1 | 1.00 | 1 | 1 | 0.01  | 0.01   | 0.01   | 0.01   | 0.012  | t | 741    | ADPNRFRGKD       | Oryctolagus cuniculus |
| 1 | 1.00 | 1 | 1 | 0.01  | 0.007  | 0.01   | 0.01   | 0.012  | t | 741    | ADPNRFRGKD       | Oryctolagus cuniculus |
| 1 | 1.00 | 1 | 1 | 0     | 0.002  | 0      | 0.003  | 0.003  | t | 55726  | RRRSQSPRRRR      | Homo sapiens          |
| 1 | 1.00 | 1 | 1 | -0.02 | -0.02  | -0.018 | -0.02  | -0.02  | t | 43578  | NEDQKIGIEIKRALKI | Mus musculus          |
| 1 | 1.00 | 1 | 1 | -0.01 | -0.012 | -0.018 | -0.017 | -0.012 | t | 122205 | VFTLPPPLPETH     | Mus musculus          |
| 1 | 1.00 | 1 | 1 | 0     | -0.007 | 0.006  | 0.001  | 0      | t | 73181  | WVDIVL           | Homo sapiens          |
| 1 | 1.00 | 1 | 1 | -0.01 | -0.009 | -0.01  | -0.013 | -0.01  | t | 130606 | SCTVYGKTPLCG     | Mus musculus          |
| 1 | 1.00 | 1 | 1 | -0.04 | -0.038 | -0.033 | -0.039 | -0.04  | t | 9896   | DQRPYCWHP        | Homo sapiens          |
| 1 | 1.00 | 1 | 1 | -0.02 | -0.022 | -0.01  | -0.023 | -0.022 | t | 43218  | NALWMPT          | Mus musculus          |
| 1 | 1.00 | 1 | 1 | 0     | 0      | 0      | 0      | 0      | t | 134788 | RRGPSLGASSHQHSR  | Homo sapiens          |
| 1 | 1.00 | 1 | 1 | 0     | 0      | 0      | 0      | 0      | t | 112849 | TIKNTFF          | Homo sapiens          |
| 1 | 1.00 | 1 | 1 | -0.02 | -0.02  | -0.02  | -0.02  | -0.02  | t | 135894 | AHGCLFDRRLCS     | Homo sapiens          |
| 1 | 1.00 | 1 | 1 | -0.02 | -0.02  | -0.02  | -0.02  | -0.02  | t | 132052 | RYTPGSSWGESSSGR  | Homo sapiens          |

|   |      |   |   |       |        |        |        |        |   |        |                              |                                  |
|---|------|---|---|-------|--------|--------|--------|--------|---|--------|------------------------------|----------------------------------|
| 1 | 1.00 | 1 | 1 | -0.02 | -0.02  | -0.02  | -0.02  | -0.02  | t | 132612 | RKRREKIER<br>R               | Homo<br>sapiens                  |
| 1 | 1.00 | 1 | 1 | -0.02 | -0.02  | -0.02  | -0.02  | -0.02  | t | 99451  | LRRNALRR<br>PFYSNAP          | Homo<br>sapiens                  |
| 1 | 1.00 | 1 | 1 | -0.04 | -0.04  | -0.04  | -0.04  | -0.04  | t | 115835 | KVLPVPQK<br>AV               | Homo<br>sapiens                  |
| 1 | 1.00 | 1 | 1 | -0.01 | -0.007 | -0.021 | -0.01  | -0.008 | t | 49005  | PQGP GAP<br>QGPGAPQ<br>GPGAP | Mus<br>musculu<br>s              |
| 1 | 1.00 | 1 | 1 | -0.02 | -0.018 | -0.024 | -0.017 | -0.02  | t | 55299  | RPQKRPS<br>IGCKGTHG<br>GTGA  | Homo<br>sapiens                  |
| 1 | 1.00 | 1 | 1 | 0.01  | 0.013  | 0.021  | 0.013  | 0.01   | t | 94549  | ICCN PACG<br>PK              | Capra<br>hircus                  |
| 1 | 1.00 | 1 | 1 | 0.01  | 0.01   | 0.01   | 0.01   | 0.011  | t | 122845 | LQVQDQL<br>MNEELTER          | Oryctola<br>gus<br>cuniculu<br>s |
| 1 | 1.00 | 1 | 1 | 0     | 0      | 0      | 0      | 0      | t | 119567 | EPDLEEIVS<br>ILKNDKEGI<br>SE | Homo<br>sapiens                  |
| 1 | 1.00 | 1 | 1 | 0.05  | 0.048  | 0.049  | 0.049  | 0.05   | t | 54103  | RHVKNYH<br>SRSESTIE          | Mus<br>musculu<br>s              |
| 1 | 1.00 | 1 | 1 | 0     | -0.003 | -0.001 | 0      | 0.001  | t | 50218  | QAASAAL<br>GALGRFDE          | Oryctola<br>gus<br>cuniculu<br>s |
| 1 | 1.00 | 1 | 1 | 0     | 0      | -0.001 | 0      | 0.001  | t | 50218  | QAASAAL<br>GALGRFDE          | Mus<br>musculu<br>s              |
| 1 | 1.00 | 1 | 1 | 0     | 0      | -0.003 | 0      | 0.002  | t | 111051 | VGP LEVIP<br>EAVDPAG<br>SSIV | Oryctola<br>gus<br>cuniculu<br>s |
| 1 | 1.00 | 1 | 1 | -0.02 | -0.016 | -0.015 | -0.017 | -0.02  | t | 133900 | NEHPVFAY<br>LKDKLP           | Homo<br>sapiens                  |
| 1 | 1.00 | 1 | 1 | -0.02 | -0.016 | -0.015 | -0.017 | -0.02  | t | 133900 | NEHPVFAY<br>LKDKLP           | Homo<br>sapiens                  |
| 1 | 1.00 | 1 | 1 | -0.04 | -0.042 | -0.04  | -0.037 | -0.038 | t | 115870 | NKVTLKGG<br>KVT              | Mus<br>musculu<br>s              |

|   |      |   |   |       |        |        |        |        |   |        |                              |                 |
|---|------|---|---|-------|--------|--------|--------|--------|---|--------|------------------------------|-----------------|
| 1 | 1.00 | 1 | 1 | -0.02 | -0.02  | -0.02  | -0.02  | -0.018 | t | 106321 | DAEFRH                       | Mus<br>musculus |
| 1 | 1.00 | 1 | 1 | -0.02 | -0.02  | -0.019 | -0.023 | -0.023 | t | 58377  | SHLKLFTIK<br>YVDVNTN<br>ELLK | Homo<br>sapiens |
| 1 | 1.00 | 1 | 1 | 0     | 0      | 0      | -0.002 | 0      | t | 144099 | TLQQNMP<br>LALVW             | Homo<br>sapiens |
| 1 | 1.00 | 1 | 1 | 0.02  | 0.018  | 0.026  | 0.019  | 0.02   | t | 48147  | PKSGKELG<br>ETQ              | Mus<br>musculus |
| 1 | 1.00 | 1 | 1 | -0.04 | -0.04  | -0.04  | -0.04  | -0.04  | t | 10639  | DVKFPGG<br>GQIVGGV<br>YLLPRR | Mus<br>musculus |
| 1 | 1.00 | 1 | 1 | 0.02  | 0.027  | 0.014  | 0.02   | 0.021  | t | 7209   | CTSRFASLF<br>NLGPQQQ         | Mus<br>musculus |
| 1 | 1.00 | 1 | 1 | 0     | 0.002  | 0      | -0.003 | 0      | t | 76384  | YVPLGTQY<br>TDAPSFSD<br>IPN  | Homo<br>sapiens |
| 1 | 1.00 | 1 | 1 | -0.01 | -0.008 | -0.01  | -0.007 | -0.01  | t | 111088 | ACQKHTP<br>PAPKEDDP<br>LKKYT | Homo<br>sapiens |
| 1 | 1.00 | 1 | 1 | 0     | 0.004  | 0      | 0.001  | 0      | t | 4219   | ARQKLKD<br>AER               | Homo<br>sapiens |
| 1 | 1.00 | 1 | 1 | 0     | 0      | 0      | 0.001  | 0.002  | t | 16101  | FHENWPS                      | Mus<br>musculus |
| 1 | 1.00 | 1 | 1 | 0     | -0.002 | -0.003 | -0.001 | 0      | t | 5641   | AVYYCTRG<br>YHGSSLY          | Mus<br>musculus |
| 1 | 1.00 | 1 | 1 | 0.03  | 0.035  | 0.025  | 0.027  | 0.03   | t | 70444  | VPQLEIVP<br>NSAEERLH<br>SMKE | Homo<br>sapiens |
| 1 | 1.00 | 1 | 1 | 0.03  | 0.028  | 0.025  | 0.027  | 0.03   | t | 70444  | VPQLEIVP<br>NSAEERLH<br>SMKE | Homo<br>sapiens |
| 1 | 1.00 | 1 | 1 | -0.04 | -0.038 | -0.034 | -0.033 | -0.039 | t | 145144 | DPGQLRL<br>WRLAS             | Homo<br>sapiens |

|   |      |   |   |       |        |        |        |        |   |        |                              |                                  |
|---|------|---|---|-------|--------|--------|--------|--------|---|--------|------------------------------|----------------------------------|
| 1 | 1.00 | 1 | 1 | -0.01 | -0.013 | -0.015 | -0.01  | -0.01  | t | 73418  | YAPQPCGI<br>VPASEVCG<br>PVYC | Oryctola<br>gus<br>cuniculu<br>s |
| 1 | 1.00 | 1 | 1 | -0.02 | -0.022 | -0.015 | -0.021 | -0.02  | t | 141972 | NKSYGKPD<br>PEPT             | Mus<br>musculu<br>s              |
| 1 | 1.00 | 1 | 1 | 0.01  | 0.012  | 0.01   | 0.007  | 0.01   | t | 39083  | LRFFVAPF<br>PE               | Homo<br>sapiens                  |
| 1 | 1.00 | 1 | 1 | 0.01  | 0.01   | 0.01   | 0.01   | 0.01   | t | 135801 | YNAAINKY                     | Homo<br>sapiens                  |
| 1 | 1.00 | 1 | 1 | 0.01  | 0.01   | 0.01   | 0.01   | 0.01   | t | 79640  | SASIRPQ                      | Oryctola<br>gus<br>cuniculu<br>s |
| 1 | 1.00 | 1 | 1 | -0.01 | -0.01  | -0.01  | -0.01  | -0.01  | t | 102333 | CCKRNDE<br>VLFRLNH<br>AETLR  | Mus<br>musculu<br>s              |
| 1 | 1.00 | 1 | 1 | -0.01 | -0.01  | -0.01  | -0.01  | -0.01  | t | 96020  | YLKTVYQH<br>QK               | Homo<br>sapiens                  |
| 1 | 1.00 | 1 | 1 | 0.06  | 0.056  | 0.058  | 0.053  | 0.062  | t | 121718 | PSDDV                        | Oryctola<br>gus<br>cuniculu<br>s |
| 1 | 1.00 | 1 | 1 | 0.02  | 0.02   | 0.02   | 0.02   | 0.022  | t | 144778 | SGTHPFLD<br>KSFS             | Mus<br>musculu<br>s              |
| 1 | 1.00 | 1 | 1 | -0.03 | -0.03  | -0.03  | -0.03  | -0.03  | t | 103017 | AFDLDRLL<br>FKRNICH          | Homo<br>sapiens                  |
| 1 | 1.00 | 1 | 1 | -0.03 | -0.03  | -0.03  | -0.03  | -0.03  | t | 115995 | TINTIASGE<br>P               | Homo<br>sapiens                  |
| 1 | 1.00 | 1 | 1 | -0.02 | -0.023 | -0.013 | -0.02  | -0.02  | t | 159024 | NKGAIIGL<br>MVGGVVI<br>A     | Oryctola<br>gus<br>cuniculu<br>s |
| 1 | 1.00 | 1 | 1 | 0.03  | 0.032  | 0.03   | 0.027  | 0.03   | t | 33715  | KTIENINEL<br>IEES            | Homo<br>sapiens                  |
| 1 | 1.00 | 1 | 1 | -0.02 | -0.023 | -0.027 | -0.02  | -0.021 | t | 135533 | AELSPAAM<br>TGKRKRSQ<br>M    | Oryctola<br>gus<br>cuniculu<br>s |
| 1 | 1.00 | 1 | 1 | 0.03  | 0.03   | 0.025  | 0.022  | 0.029  | t | 124604 | QIERDTER<br>DRFLSAPE<br>AV   | Homo<br>sapiens                  |

|   |      |   |   |       |        |        |        |        |   |        |                              |                                  |
|---|------|---|---|-------|--------|--------|--------|--------|---|--------|------------------------------|----------------------------------|
| 1 | 1.00 | 1 | 1 | 0     | 0      | 0      | 0      | 0.001  | t | 6027   | CARSLATL<br>FSPGARQ<br>Q     | Mus<br>musculu<br>s              |
| 1 | 1.00 | 1 | 1 | -0.04 | -0.04  | -0.04  | -0.04  | -0.039 | t | 104779 | FRH                          | Mus<br>musculu<br>s              |
| 1 | 1.00 | 1 | 1 | -0.04 | -0.04  | -0.04  | -0.04  | -0.039 | t | 104779 | FRH                          | Mus<br>musculu<br>s              |
| 1 | 1.00 | 1 | 1 | 0.02  | 0.023  | 0.026  | 0.02   | 0.02   | t | 78222  | NTTTERSC<br>PT               | Mus<br>musculu<br>s              |
| 1 | 1.00 | 1 | 1 | 0.03  | 0.03   | 0.021  | 0.019  | 0.031  | t | 20064  | GGVATY                       | Homo<br>sapiens                  |
| 1 | 1.00 | 1 | 1 | -0.01 | -0.01  | -0.014 | -0.01  | -0.01  | t | 22127  | GRLHLND<br>RV                | Homo<br>sapiens                  |
| 1 | 1.00 | 1 | 1 | 0.02  | 0.018  | 0.015  | 0.017  | 0.019  | t | 55621  | RRKAHAG<br>NKKAEDLT<br>MDDLE | Mus<br>musculu<br>s              |
| 1 | 1.00 | 1 | 1 | 0     | 0.007  | 0      | 0      | 0      | t | 79368  | RGDLARG<br>DLARGDL           | Cavia<br>porcellu<br>s           |
| 1 | 1.00 | 1 | 1 | -0.04 | -0.042 | -0.03  | -0.039 | -0.039 | t | 78940  | CRRHNYG<br>FWVC              | Mus<br>musculu<br>s              |
| 1 | 1.00 | 1 | 1 | 0.01  | 0.012  | 0.01   | 0.007  | 0.01   | t | 142200 | KGLRRDLD<br>ASREAKKQ<br>LEAE | Homo<br>sapiens                  |
| 1 | 1.00 | 1 | 1 | -0.01 | -0.01  | -0.01  | -0.01  | -0.01  | t | 137213 | KKKKKKKL<br>DATR             | Cavia<br>porcellu<br>s           |
| 1 | 1.00 | 1 | 1 | 0.02  | 0.022  | 0.027  | 0.02   | 0.02   | t | 120679 | KIFADDID                     | Rattus<br>norvegic<br>us         |
| 1 | 1.00 | 1 | 1 | 0     | -0.002 | 0      | 0      | -0.001 | t | 112603 | MIAATYNF<br>AVLKLMG<br>RGTKF | Oryctola<br>gus<br>cuniculu<br>s |
| 1 | 1.00 | 1 | 1 | 0     | 0      | -0.007 | -0.003 | -0.002 | t | 6173   | CEKDERFF<br>SDKIAK           | Homo<br>sapiens                  |
| 1 | 1.00 | 1 | 1 | -0.01 | -0.01  | -0.01  | -0.01  | -0.008 | t | 21927  | GQPAVRN<br>ERA               | Mus<br>musculu<br>s              |

|   |      |   |   |       |        |        |        |        |   |        |                              |                                  |
|---|------|---|---|-------|--------|--------|--------|--------|---|--------|------------------------------|----------------------------------|
| 1 | 1.00 | 1 | 1 | 0.01  | 0.01   | 0.01   | 0.008  | 0.01   | t | 14888  | EVTQHGSY<br>HYITGL           | Homo<br>sapiens                  |
| 1 | 1.00 | 1 | 1 | 0.01  | 0.01   | 0.01   | 0.006  | 0.01   | t | 144639 | FAQAYAR<br>GIS               | Homo<br>sapiens                  |
| 1 | 1.00 | 1 | 1 | 0.03  | 0.028  | 0.037  | 0.029  | 0.03   | t | 6963   | CSAGICFSE                    | Mus<br>musculu<br>s              |
| 1 | 1.00 | 1 | 1 | -0.05 | -0.052 | -0.055 | -0.047 | -0.048 | t | 14636  | EVCVRQLK<br>AIANK            | Mus<br>musculu<br>s              |
| 1 | 1.00 | 1 | 1 | -0.05 | -0.052 | -0.055 | -0.047 | -0.048 | t | 14636  | EVCVRQLK<br>AIANK            | Mus<br>musculu<br>s              |
| 1 | 1.00 | 1 | 1 | -0.03 | -0.03  | -0.007 | -0.023 | -0.03  | t | 119630 | QQGNVFS<br>C                 | Homo<br>sapiens                  |
| 1 | 1.00 | 1 | 1 | -0.01 | -0.017 | -0.01  | -0.01  | -0.008 | t | 39090  | LRGDLQVL                     | Oryctola<br>gus<br>cuniculu<br>s |
| 1 | 1.00 | 1 | 1 | -0.01 | -0.01  | -0.01  | -0.01  | -0.008 | t | 39090  | LRGDLQVL                     | Cavia<br>porcellu<br>s           |
| 1 | 1.00 | 1 | 1 | 0.01  | 0.009  | 0.012  | 0.01   | 0.01   | t | 12537  | EINTLQNQ                     | Anas<br>platyrhy<br>nchos        |
| 1 | 1.00 | 1 | 1 | 0.02  | 0.018  | 0.02   | 0.013  | 0.02   | t | 113942 | TQDENPV<br>VHF               | Mus<br>musculu<br>s              |
| 1 | 1.00 | 1 | 1 | 0.04  | 0.04   | 0.04   | 0.04   | 0.04   | t | 118392 | GVGGPSQ<br>Q                 | Homo<br>sapiens                  |
| 1 | 1.00 | 1 | 1 | 0.02  | 0.02   | 0.02   | 0.02   | 0.02   | t | 140549 | DGEWPRE<br>GWS               | Mus<br>musculu<br>s              |
| 1 | 1.00 | 1 | 1 | 0.02  | 0.02   | 0.02   | 0.02   | 0.02   | t | 149440 | QQQQQPL<br>SQV               | Mus<br>musculu<br>s              |
| 1 | 1.00 | 1 | 1 | -0.02 | -0.02  | -0.02  | -0.02  | -0.02  | t | 102246 | YNNHALL                      | Homo<br>sapiens                  |
| 1 | 1.00 | 1 | 1 | -0.02 | -0.02  | -0.02  | -0.02  | -0.02  | t | 114586 | RQERESEQ<br>ERERQRR          | Homo<br>sapiens                  |
| 1 | 1.00 | 1 | 1 | -0.02 | -0.02  | -0.02  | -0.02  | -0.02  | t | 39393  | LSGRPAIIP<br>DREVLHRE<br>FDE | Homo<br>sapiens                  |

|   |      |   |   |       |        |        |        |        |   |        |                              |                                  |
|---|------|---|---|-------|--------|--------|--------|--------|---|--------|------------------------------|----------------------------------|
| 1 | 1.00 | 1 | 1 | -0.02 | -0.02  | -0.02  | -0.02  | -0.02  | t | 39393  | LSGRPAIIP<br>DREVLHRE<br>FDE | Homo<br>sapiens                  |
| 1 | 1.00 | 1 | 1 | -0.04 | -0.04  | -0.04  | -0.04  | -0.04  | t | 104737 | AYCSTWD<br>ANK               | Homo<br>sapiens                  |
| 1 | 1.00 | 1 | 1 | -0.02 | -0.02  | -0.02  | -0.02  | -0.02  | t | 134152 | LRRVLLP                      | Homo<br>sapiens                  |
| 1 | 1.00 | 1 | 1 | -0.02 | -0.02  | -0.02  | -0.02  | -0.02  | t | 156922 | NLHLGLA                      | Gallus<br>gallus                 |
| 1 | 1.00 | 1 | 1 | 0     | 0      | -0.009 | -0.002 | 0      | t | 151075 | YNAELLVL<br>LENERTL          | Homo<br>sapiens                  |
| 1 | 1.00 | 1 | 1 | -0.01 | -0.01  | 0.014  | -0.007 | -0.013 | t | 39172  | LRQAILCW<br>GELM             | Homo<br>sapiens                  |
| 1 | 1.00 | 1 | 1 | 0.01  | 0.019  | 0.005  | 0.01   | 0.01   | t | 44852  | NLQKDEP<br>NGRASDT           | Oryctola<br>gus<br>cuniculu<br>s |
| 1 | 1.00 | 1 | 1 | 0.01  | 0.01   | -0.002 | 0.01   | 0.011  | t | 145841 | KEDFRYAIS<br>STNEIGLLG<br>A  | Sus<br>scrofa                    |
| 1 | 1.00 | 1 | 1 | 0     | 0.002  | 0      | -0.003 | 0      | t | 28075  | IPSTAFTDI<br>AWVRLPN<br>HY   | Homo<br>sapiens                  |
| 1 | 1.00 | 1 | 1 | 0.01  | 0.002  | 0.01   | 0.01   | 0.011  | t | 156907 | KVGDPPLW                     | Mus<br>musculu<br>s              |
| 1 | 1.00 | 1 | 1 | 0     | 0      | 0      | 0      | 0      | t | 2780   | ALNGNGD<br>PNNMDKA<br>VKLY   | Mus<br>musculu<br>s              |
| 1 | 1.00 | 1 | 1 | -0.01 | -0.014 | -0.01  | -0.007 | -0.008 | t | 106313 | CQQYGSS<br>PQTFG             | Oryctola<br>gus<br>cuniculu<br>s |
| 1 | 1.00 | 1 | 1 | -0.04 | -0.042 | -0.04  | -0.041 | -0.04  | t | 116944 | DFRYSTRP<br>FAL              | Mus<br>musculu<br>s              |
| 1 | 1.00 | 1 | 1 | 0.03  | 0.03   | 0.042  | 0.032  | 0.03   | t | 53145  | RALEDGIN<br>FA               | Homo<br>sapiens                  |
| 1 | 1.00 | 1 | 1 | 0.04  | 0.026  | 0.049  | 0.04   | 0.037  | t | 115650 | SQGHRSQ<br>DEN               | Macaca<br>mulatta                |

|   |      |   |   |       |        |        |        |        |   |        |                      |                       |
|---|------|---|---|-------|--------|--------|--------|--------|---|--------|----------------------|-----------------------|
| 1 | 1.00 | 1 | 1 | 0     | -0.004 | 0      | -0.007 | -0.003 | t | 138304 | ATVQLPQ              | Oryctolagus cuniculus |
| 1 | 1.00 | 1 | 1 | -0.03 | -0.032 | -0.025 | -0.027 | -0.03  | t | 158838 | IHNDVEAWMDRYKYYP     | Mus musculus          |
| 1 | 1.00 | 1 | 1 | 0.01  | 0.01   | 0.01   | 0.01   | 0.01   | t | 157844 | RHQDTNAPAGS          | Canis lupus           |
| 1 | 1.00 | 1 | 1 | 0.01  | 0.01   | 0.01   | 0.01   | 0.01   | t | 133727 | VERKECAY             | Mus musculus          |
| 1 | 1.00 | 1 | 1 | 0.04  | 0.04   | 0.057  | 0.04   | 0.04   | t | 63053  | TAYQYATVAPPQ         | Mus musculus          |
| 1 | 1.00 | 1 | 1 | 0.01  | 0.01   | 0.01   | 0.01   | 0.013  | t | 48817  | PPLENRVLTG           | MD                    |
| 1 | 1.00 | 1 | 1 | 0     | 0      | 0      | 0      | 0      | t | 136010 | VMIKSLPALNSPTVEEC    | Homo sapiens          |
| 1 | 1.00 | 1 | 1 | 0     | 0      | 0      | 0      | 0      | t | 136010 | VMIKSLPALNSPTVEEC    | Homo sapiens          |
| 1 | 1.00 | 1 | 1 | 0.03  | 0.03   | 0.03   | 0.03   | 0.03   | t | 110926 | KSEKDSTNNNK          | Homo sapiens          |
| 1 | 1.00 | 1 | 1 | 0     | -0.006 | 0      | 0      | 0      | t | 123017 | AKMKGTFFVER          | Oryctolagus cuniculus |
| 1 | 1.00 | 1 | 1 | -0.04 | -0.04  | -0.04  | -0.044 | -0.04  | t | 53960  | RGRAGRRIYAHPSVR      | Homo sapiens          |
| 1 | 1.00 | 1 | 1 | 0     | -0.002 | 0.009  | -0.001 | -0.003 | t | 110933 | LQGNRINEFSISSFCTVVDV | Mus musculus          |
| 1 | 1.00 | 1 | 1 | 0.01  | 0.008  | 0.01   | 0.003  | 0.007  | t | 135854 | IQQSIERL             | Mus musculus          |
| 1 | 1.00 | 1 | 1 | 0     | 0      | 0.002  | -0.003 | 0      | t | 42306  | MPNYDRL              | Homo sapiens          |



|   |      |   |   |       |        |        |        |        |   |        |                              |                                  |
|---|------|---|---|-------|--------|--------|--------|--------|---|--------|------------------------------|----------------------------------|
| 1 | 1.00 | 1 | 1 | 0.03  | 0.03   | 0.03   | 0.03   | 0.03   | t | 149441 | QQQQQQ<br>QPLS               | Mus<br>musculu<br>s              |
| 1 | 1.00 | 1 | 1 | 0.01  | 0.01   | 0.01   | 0.01   | 0.01   | t | 149102 | SGPNATQ                      | Sus<br>scrofa                    |
| 1 | 1.00 | 1 | 1 | 0.01  | 0.01   | 0.01   | 0.01   | 0.01   | t | 123124 | EFKSRIEDL                    | Ovis<br>aries                    |
| 1 | 1.00 | 1 | 1 | -0.01 | -0.01  | -0.01  | -0.01  | -0.01  | t | 149473 | SQPQQPIS<br>QQ               | Mus<br>musculu<br>s              |
| 1 | 1.00 | 1 | 1 | -0.01 | -0.01  | -0.01  | -0.01  | -0.01  | t | 103384 | LQAHPHA<br>VNGTAMR<br>E      | Homo<br>sapiens                  |
| 1 | 1.00 | 1 | 1 | -0.03 | -0.03  | -0.03  | -0.03  | -0.03  | t | 133959 | WIRMNF                       | Mus<br>musculu<br>s              |
| 1 | 1.00 | 1 | 1 | 0.02  | 0.018  | 0.019  | 0.02   | 0.022  | t | 44662  | NLDDRDR<br>SELSPLLS<br>TTEW  | Mus<br>musculu<br>s              |
| 1 | 1.00 | 1 | 1 | 0.02  | 0.02   | 0.025  | 0.027  | 0.03   | t | 103960 | GTYFLRS                      | Homo<br>sapiens                  |
| 1 | 1.00 | 1 | 1 | -0.02 | -0.018 | -0.028 | -0.019 | -0.018 | t | 38118  | LMSFPQA<br>APHGVVFL<br>HV    | Homo<br>sapiens                  |
| 1 | 1.00 | 1 | 1 | 0.04  | 0.04   | 0.048  | 0.04   | 0.04   | t | 106336 | DHFADGY<br>DEV               | Homo<br>sapiens                  |
| 1 | 1.00 | 1 | 1 | 0     | -0.003 | -0.008 | 0      | 0      | t | 39023  | LQYGSFCT<br>QLNRALSG<br>I    | Oryctola<br>gus<br>cuniculu<br>s |
| 1 | 1.00 | 1 | 1 | -0.04 | -0.04  | -0.033 | -0.04  | -0.041 | t | 133665 | PVLLFCFLA<br>GRCVSV          | Mus<br>musculu<br>s              |
| 1 | 1.00 | 1 | 1 | 0.01  | 0.01   | 0.004  | 0.01   | 0.01   | t | 37641  | LLPAADM<br>DDFSRQL<br>QNSM   | Homo<br>sapiens                  |
| 1 | 1.00 | 1 | 1 | 0.01  | 0.014  | -0.001 | 0.007  | 0.011  | t | 111489 | LKQIAAHA<br>GKEGAIIF<br>QQVM | Homo<br>sapiens                  |

|   |      |   |   |       |        |        |        |        |   |        |                     |                     |
|---|------|---|---|-------|--------|--------|--------|--------|---|--------|---------------------|---------------------|
| 1 | 1.00 | 1 | 1 | -0.01 | -0.01  | -0.01  | -0.01  | -0.01  | t | 138246 | TDKTPFLL<br>WRVH    | Homo<br>sapiens     |
| 1 | 1.00 | 1 | 1 | 0.02  | 0.02   | 0.014  | 0.01   | 0.021  | t | 67729  | VAQYKALP<br>VVLENA  | Homo<br>sapiens     |
| 1 | 1.00 | 1 | 1 | 0.01  | 0.006  | 0.01   | 0.01   | 0.017  | t | 17197  | FNLVYT              | Mus<br>musculu<br>s |
| 1 | 1.00 | 1 | 1 | 0     | -0.002 | -0.001 | -0.007 | -0.002 | t | 122269 | ARQNLKD<br>AGE      | Mus<br>musculu<br>s |
| 1 | 1.00 | 1 | 1 | 0     | 0      | 0      | 0      | 0      | t | 157340 | GQRREFQ<br>QDRHQ    | Homo<br>sapiens     |
| 1 | 1.00 | 1 | 1 | 0     | 0      | 0      | 0      | 0      | t | 133499 | AHSSPRSV<br>WYEW    | Homo<br>sapiens     |
| 1 | 1.00 | 1 | 1 | 0     | 0      | 0      | 0      | 0      | t | 115893 | PNSLPQNI<br>PP      | Homo<br>sapiens     |
| 1 | 1.00 | 1 | 1 | -0.02 | -0.02  | -0.02  | -0.02  | -0.02  | t | 124276 | HPLAPPHP<br>S       | Homo<br>sapiens     |
| 1 | 1.00 | 1 | 1 | -0.02 | -0.02  | -0.02  | -0.02  | -0.02  | t | 120484 | EIGKIPLKL<br>D      | Mus<br>musculu<br>s |
| 1 | 1.00 | 1 | 1 | -0.02 | -0.02  | -0.02  | -0.02  | -0.02  | t | 111831 | TISRTGI             | Homo<br>sapiens     |
| 1 | 1.00 | 1 | 1 | -0.02 | -0.02  | -0.02  | -0.02  | -0.02  | t | 112306 | SDHKNYL             | Homo<br>sapiens     |
| 1 | 1.00 | 1 | 1 | -0.04 | -0.04  | -0.04  | -0.04  | -0.04  | t | 100371 | NYLVDGN<br>GRF      | Mus<br>musculu<br>s |
| 1 | 1.00 | 1 | 1 | -0.01 | -0.006 | -0.01  | -0.007 | -0.008 | t | 21729  | GPPLGCLS<br>LSCYDVA | Homo<br>sapiens     |
| 1 | 1.00 | 1 | 1 | -0.02 | -0.018 | -0.022 | -0.023 | -0.022 | t | 98790  | GDKDNVI<br>DQIEKQAK | Homo<br>sapiens     |
| 1 | 1.00 | 1 | 1 | 0     | 0      | 0      | 0      | 0      | t | 79840  | GKDLKRP<br>GSSPME   | Mus<br>musculu<br>s |
| 1 | 1.00 | 1 | 1 | 0     | 0      | 0      | 0      | 0      | t | 79840  | GKDLKRP<br>GSSPME   | Mus<br>musculu<br>s |
| 1 | 1.00 | 1 | 1 | -0.04 | -0.04  | -0.04  | -0.04  | -0.04  | t | 79412  | TCLEVNW<br>LTRMACM  | Mus<br>musculu<br>s |

|   |      |   |   |       |        |        |        |        |   |        |                         |                            |
|---|------|---|---|-------|--------|--------|--------|--------|---|--------|-------------------------|----------------------------|
| 1 | 1.00 | 1 | 1 | -0.04 | -0.047 | -0.05  | -0.041 | -0.04  | t | 32096  | KLQACEHP<br>IGEWCM<br>M | Bos<br>indicus             |
| 1 | 1.00 | 1 | 1 | -0.02 | -0.02  | -0.02  | -0.02  | -0.022 | t | 129022 | KAAGVNV<br>EPFWPGLF     | Homo<br>sapiens            |
| 1 | 1.00 | 1 | 1 | 0.04  | 0.04   | 0.053  | 0.04   | 0.04   | t | 61037  | SSGLYHVT<br>NDC         | Mus<br>musculu<br>s        |
| 1 | 1.00 | 1 | 1 | 0.02  | 0.018  | 0.02   | 0.013  | 0.02   | t | 139475 | ATPRAHEV<br>SE          | Mus<br>musculu<br>s        |
| 1 | 1.00 | 1 | 1 | 0     | 0      | 0      | 0      | 0.002  | t | 18705  | GANSNNP<br>DW           | Mus<br>musculu<br>s        |
| 1 | 1.00 | 1 | 1 | 0.02  | 0.02   | 0.02   | 0.02   | 0.02   | t | 144673 | GTFCGGEE<br>CMRG        | Mus<br>musculu<br>s        |
| 1 | 1.00 | 1 | 1 | 0.02  | 0.02   | 0.02   | 0.02   | 0.02   | t | 144673 | GTFCGGEE<br>CMRG        | Mus<br>musculu<br>s        |
| 1 | 1.00 | 1 | 1 | 0.02  | 0.02   | 0.02   | 0.02   | 0.02   | t | 144673 | GTFCGGEE<br>CMRG        | Mus<br>musculu<br>s        |
| 1 | 1.00 | 1 | 1 | -0.01 | -0.008 | -0.01  | -0.009 | -0.009 | t | 96521  | KVTKEKPT<br>PP          | Homo<br>sapiens(<br>human) |
| 1 | 1.00 | 1 | 1 | -0.03 | -0.027 | -0.023 | -0.03  | -0.03  | t | 121436 | IVIGRYSTQ<br>PWFRVG     | Mus<br>musculu<br>s        |
| 1 | 1.00 | 1 | 1 | 0     | 0      | 0      | -0.002 | 0      | t | 27554  | IMSGEKPS<br>MEDVVN      | Homo<br>sapiens            |
| 1 | 1.00 | 1 | 1 | 0.01  | 0.008  | -0.002 | 0.003  | 0.01   | t | 96494  | KQMGQT<br>GGSY          | Mus<br>musculu<br>s        |
| 1 | 1.00 | 1 | 1 | 0     | -0.002 | 0      | -0.007 | -0.003 | t | 140547 | CSIGEALS<br>HGC         | Mus<br>musculu<br>s        |
| 1 | 1.00 | 1 | 1 | 0     | -0.002 | 0      | -0.007 | -0.003 | t | 140606 | TMWDALE<br>AP           | Mus<br>musculu<br>s        |
| 1 | 1.00 | 1 | 1 | 0     | -0.002 | 0      | -0.007 | -0.003 | t | 140546 | CNLWEVM<br>HGTC         | Mus<br>musculu<br>s        |

|   |      |   |   |       |        |        |        |        |   |        |                               |                                  |
|---|------|---|---|-------|--------|--------|--------|--------|---|--------|-------------------------------|----------------------------------|
| 1 | 1.00 | 1 | 1 | 0     | -0.002 | 0      | -0.007 | -0.003 | t | 140582 | PWATLV<br>AES                 | Mus<br>musculu<br>s              |
| 1 | 1.00 | 1 | 1 | 0     | -0.002 | 0      | -0.007 | -0.003 | t | 117495 | ERDRKREK<br>RKPKS             | Mus<br>musculu<br>s              |
| 1 | 1.00 | 1 | 1 | 0     | -0.004 | 0      | -0.007 | -0.003 | t | 118383 | GLKKMLRT<br>CAVHITLD          | Oryctola<br>gus<br>cuniculu<br>s |
| 1 | 1.00 | 1 | 1 | 0     | -0.004 | 0      | -0.007 | -0.003 | t | 118374 | GKALCWV<br>CAQSRKH<br>RD      | Oryctola<br>gus<br>cuniculu<br>s |
| 1 | 1.00 | 1 | 1 | 0     | -0.004 | 0      | -0.007 | -0.003 | t | 121154 | ASAARLT<br>MMW                | Oryctola<br>gus<br>cuniculu<br>s |
| 1 | 1.00 | 1 | 1 | 0     | -0.004 | 0      | -0.007 | -0.003 | t | 131874 | EVFISAPR                      | Oryctola<br>gus<br>cuniculu<br>s |
| 1 | 1.00 | 1 | 1 | 0     | -0.002 | 0      | -0.007 | -0.003 | t | 113281 | ARTAHYGS<br>LPQKSHG           | Mus<br>musculu<br>s              |
| 1 | 1.00 | 1 | 1 | 0     | -0.004 | 0      | -0.007 | -0.003 | t | 51252  | QKSKQNIG<br>ALKQEL            | Oryctola<br>gus<br>cuniculu<br>s |
| 1 | 1.00 | 1 | 1 | 0.02  | 0.023  | 0.019  | 0.02   | 0.02   | t | 91093  | AEFYQEVL<br>FKGFE             | Equus<br>caballus                |
| 1 | 1.00 | 1 | 1 | 0.03  | 0.026  | 0.019  | 0.029  | 0.031  | t | 24814  | HSMKEGI<br>HAQQKEP<br>MIGVNVQ | Oryctola<br>gus<br>cuniculu<br>s |
| 1 | 1.00 | 1 | 1 | 0     | 0.002  | 0      | -0.001 | -0.002 | t | 134160 | MGGPPM<br>MPMMGP<br>PPPGM     | Homo<br>sapiens                  |
| 1 | 1.00 | 1 | 1 | -0.01 | -0.006 | -0.004 | -0.009 | -0.01  | t | 10226  | DSSAATKK<br>TAAW              | Homo<br>sapiens                  |
| 1 | 1.00 | 1 | 1 | -0.05 | -0.049 | -0.037 | -0.047 | -0.053 | t | 6530   | CKTHLKAS<br>SGYCAWP           | Equus<br>caballus                |

|   |      |   |   |       |        |        |        |        |   |        |                              |                                  |
|---|------|---|---|-------|--------|--------|--------|--------|---|--------|------------------------------|----------------------------------|
| 1 | 1.00 | 1 | 1 | -0.05 | -0.052 | -0.037 | -0.047 | -0.053 | t | 6530   | CKTHLKAS<br>SGYCAWP          | Mus<br>musculu<br>s              |
| 1 | 1.00 | 1 | 1 | -0.01 | -0.01  | -0.009 | -0.013 | -0.01  | t | 18502  | GAAARTT                      | Homo<br>sapiens                  |
| 1 | 1.00 | 1 | 1 | -0.03 | -0.032 | -0.026 | -0.037 | -0.032 | t | 141706 | MLEPFQIL                     | Mus<br>musculu<br>s              |
| 1 | 1.00 | 1 | 1 | -0.01 | -0.01  | -0.01  | -0.013 | -0.01  | t | 54430  | RKTKRNT                      | Homo<br>sapiens                  |
| 1 | 1.00 | 1 | 1 | 0.02  | 0.016  | 0.02   | 0.019  | 0.02   | t | 137918 | LGEKVLSK<br>QETE             | Oryctola<br>gus<br>cuniculu<br>s |
| 1 | 1.00 | 1 | 1 | 0.02  | 0.016  | 0.02   | 0.02   | 0.023  | t | 75950  | YTASARGD<br>LAHLTTT          | Mus<br>musculu<br>s              |
| 1 | 1.00 | 1 | 1 | 0.02  | 0.016  | 0.02   | 0.02   | 0.023  | t | 75950  | YTASARGD<br>LAHLTTT          | Mus<br>musculu<br>s              |
| 1 | 1.00 | 1 | 1 | 0.01  | 0.01   | 0.01   | 0.01   | 0.01   | t | 99239  | FDQRSRQF<br>QNLQNH           | Homo<br>sapiens                  |
| 1 | 1.00 | 1 | 1 | -0.01 | -0.01  | -0.01  | -0.01  | -0.01  | t | 151062 | TAVGKEFN<br>HLEKRIE          | Homo<br>sapiens                  |
| 1 | 1.00 | 1 | 1 | -0.01 | -0.01  | -0.01  | -0.01  | -0.01  | t | 88469  | SEDRETRP<br>HGRNNM<br>NFVYNR | Aotus                            |
| 1 | 1.00 | 1 | 1 | -0.03 | -0.03  | -0.03  | -0.03  | -0.03  | t | 99442  | LQRFDQRS<br>RQFQNLQ          | Homo<br>sapiens                  |
| 1 | 1.00 | 1 | 1 | -0.03 | -0.03  | -0.03  | -0.03  | -0.03  | t | 114977 | VMVLCNR<br>AFN               | Homo<br>sapiens                  |
| 1 | 1.00 | 1 | 1 | -0.03 | -0.03  | -0.03  | -0.03  | -0.03  | t | 111022 | SGIGTLDG<br>FRHRHPDE<br>AA   | Homo<br>sapiens                  |
| 1 | 1.00 | 1 | 1 | -0.03 | -0.03  | -0.03  | -0.03  | -0.03  | t | 108283 | AQSAITAC<br>W                | Homo<br>sapiens                  |
| 1 | 1.00 | 1 | 1 | -0.03 | -0.03  | -0.03  | -0.03  | -0.03  | t | 29127  | ITVATSRT                     | Homo<br>sapiens                  |

|   |      |   |   |       |        |        |        |        |   |        |                              |                                  |
|---|------|---|---|-------|--------|--------|--------|--------|---|--------|------------------------------|----------------------------------|
| 1 | 1.00 | 1 | 1 | 0.03  | 0.026  | 0.037  | 0.03   | 0.03   | t | 43798  | NEYIEKANI<br>TTDDK           | Bos<br>taurus                    |
| 1 | 1.00 | 1 | 1 | 0.03  | 0.026  | 0.037  | 0.03   | 0.03   | t | 43798  | NEYIEKANI<br>TTDDK           | Bos<br>taurus                    |
| 1 | 1.00 | 1 | 1 | 0.01  | 0.012  | 0.009  | 0.011  | 0.008  | t | 21912  | GQLSDHP<br>HALSSSS<br>HAEPR  | Homo<br>sapiens                  |
| 1 | 1.00 | 1 | 1 | -0.01 | -0.01  | -0.006 | -0.01  | -0.01  | t | 102766 | RLENHAET<br>LRAAMISL<br>AKKI | Mus<br>musculu<br>s              |
| 1 | 1.00 | 1 | 1 | 0.01  | 0.012  | 0.004  | 0.011  | 0.01   | t | 10080  | DSAVAEFF<br>QSFPSGEP<br>SNSK | Homo<br>sapiens                  |
| 1 | 1.00 | 1 | 1 | -0.01 | -0.008 | -0.01  | -0.01  | -0.01  | t | 120343 | YNLKWNP<br>DDYGGVK<br>KIHI   | Rattus<br>norvegic<br>us         |
| 1 | 1.00 | 1 | 1 | -0.01 | -0.008 | -0.01  | -0.01  | -0.01  | t | 120343 | YNLKWNP<br>DDYGGVK<br>KIHI   | Rattus<br>norvegic<br>us         |
| 1 | 1.00 | 1 | 1 | 0     | 0.003  | -0.001 | 0      | 0.002  | t | 56610  | RYPGQGS<br>PGGNRYP<br>PQG    | Mus<br>musculu<br>s              |
| 1 | 1.00 | 1 | 1 | 0     | 0      | -0.001 | 0      | 0.002  | t | 56610  | RYPGQGS<br>PGGNRYP<br>PQG    | Oryctola<br>gus<br>cuniculu<br>s |
| 1 | 1.00 | 1 | 1 | -0.03 | -0.034 | -0.027 | -0.031 | -0.032 | t | 62961  | TAPTDPT<br>RTVWTFG           | Oryctola<br>gus<br>cuniculu<br>s |
| 1 | 1.00 | 1 | 1 | -0.05 | -0.047 | -0.059 | -0.05  | -0.051 | t | 78635  | EKIERNNK<br>LKQPPPPP<br>NPN  | Mus<br>musculu<br>s              |
| 1 | 1.00 | 1 | 1 | 0.01  | 0.01   | 0.008  | 0.01   | 0.012  | t | 97769  | WNPSLLG<br>N                 | Mus<br>musculu<br>s              |

|   |      |   |   |       |        |        |        |        |   |        |                   |                       |
|---|------|---|---|-------|--------|--------|--------|--------|---|--------|-------------------|-----------------------|
| 1 | 1.00 | 1 | 1 | 0.01  | 0.01   | 0.008  | 0.01   | 0.012  | t | 97769  | WNPSLLGN          | Mus musculus          |
| 1 | 1.00 | 1 | 1 | 0     | 0      | 0      | -0.006 | -0.002 | t | 129688 | QIHGPR            | Mus musculus          |
| 1 | 1.00 | 1 | 1 | 0     | 0      | -0.005 | 0      | 0      | t | 116111 | KGQGQKAKMRCIPEKGH | Mus musculus          |
| 1 | 1.00 | 1 | 1 | -0.01 | -0.008 | 0.007  | -0.003 | -0.011 | t | 109938 | SPRSGDLSVY        | Homo sapiens          |
| 1 | 1.00 | 1 | 1 | 0.01  | 0.01   | 0.012  | 0.01   | 0.009  | t | 151723 | RSITTIIDTFHQYSRK  | Mus musculus          |
| 1 | 1.00 | 1 | 1 | -0.03 | -0.032 | -0.035 | -0.029 | -0.028 | t | 63848  | TGHRMAWDMMNW      | Homo sapiens          |
| 1 | 1.00 | 1 | 1 | -0.06 | -0.057 | -0.064 | -0.06  | -0.057 | t | 47859  | PHWA              | Mus musculus          |
| 1 | 1.00 | 1 | 1 | -0.01 | -0.01  | -0.01  | -0.01  | -0.008 | t | 99833  | PPFSQQ            | Mus musculus          |
| 1 | 1.00 | 1 | 1 | -0.01 | -0.007 | -0.015 | -0.018 | -0.012 | t | 144208 | AQAGGPDGAAAGGG    | Capra hircus          |
| 1 | 1.00 | 1 | 1 | -0.01 | -0.015 | -0.015 | -0.018 | -0.012 | t | 144208 | AQAGGPDGAAAGGG    | Bos taurus            |
| 1 | 1.00 | 1 | 1 | -0.01 | -0.007 | -0.01  | -0.01  | -0.009 | t | 42429  | MQWNSTAFHQTLQ     | Mus musculus          |
| 1 | 1.00 | 1 | 1 | -0.01 | -0.007 | -0.01  | -0.01  | -0.009 | t | 42429  | MQWNSTAFHQTLQ     | Mus musculus          |
| 1 | 1.00 | 1 | 1 | 0     | -0.003 | -0.002 | 0      | 0.001  | t | 132723 | VQLPQQDQPVPHGTQ   | Oryctolagus cuniculus |
| 1 | 1.00 | 1 | 1 | 0     | 0      | 0.007  | 0      | -0.001 | t | 112406 | YEYLINVIHAFQYV    | Mus musculus          |

|   |      |   |   |       |        |        |        |        |   |        |                              |                                  |
|---|------|---|---|-------|--------|--------|--------|--------|---|--------|------------------------------|----------------------------------|
| 1 | 1.00 | 1 | 1 | 0.01  | 0.014  | 0.01   | 0.01   | 0.009  | t | 123815 | VKEEYVKE<br>L                | Ovis<br>aries                    |
| 1 | 1.00 | 1 | 1 | -0.02 | -0.023 | -0.017 | -0.02  | -0.02  | t | 142072 | YKGEELQY<br>VEGKVVKR<br>PCN  | Mus<br>musculu<br>s              |
| 1 | 1.00 | 1 | 1 | -0.04 | -0.042 | -0.041 | -0.041 | -0.04  | t | 141540 | FTPQSRRL<br>RELPLAAD<br>ALTF | Mus<br>musculu<br>s              |
| 1 | 1.00 | 1 | 1 | 0     | 0      | 0      | 0      | 0      | t | 131859 | EKGTGESQ<br>SRDRRKI          | Homo<br>sapiens                  |
| 1 | 1.00 | 1 | 1 | 0     | 0      | 0      | 0      | 0      | t | 99294  | GQHSRRE<br>RAGQEE<br>N       | Homo<br>sapiens                  |
| 1 | 1.00 | 1 | 1 | 0     | 0      | 0      | 0      | 0      | t | 115932 | QVLSNTVP<br>AK               | Homo<br>sapiens                  |
| 1 | 1.00 | 1 | 1 | 0     | 0      | 0      | 0      | 0      | t | 79658  | THQRPAT                      | Oryctola<br>gus<br>cuniculu<br>s |
| 1 | 1.00 | 1 | 1 | -0.02 | -0.02  | -0.02  | -0.02  | -0.02  | t | 140587 | PWQRGLR<br>DL                | Mus<br>musculu<br>s              |
| 1 | 1.00 | 1 | 1 | -0.02 | -0.02  | -0.02  | -0.02  | -0.02  | t | 111142 | CALHPPPQ<br>C                | Homo<br>sapiens                  |
| 1 | 1.00 | 1 | 1 | -0.04 | -0.037 | -0.04  | -0.04  | -0.04  | t | 153449 | QQPPGAP<br>RLPQL             | Mus<br>musculu<br>s              |
| 1 | 1.00 | 1 | 1 | -0.04 | -0.04  | -0.04  | -0.04  | -0.04  | t | 135702 | KLTRAEAV                     | Homo<br>sapiens                  |
| 1 | 1.00 | 1 | 1 | 0     | -0.002 | 0.004  | 0.003  | 0.002  | t | 114924 | QDENPVV<br>HFFKNIV           | Rattus<br>norvegic<br>us         |
| 1 | 1.00 | 1 | 1 | -0.03 | -0.028 | -0.028 | -0.033 | -0.031 | t | 65614  | TPIRHR                       | Homo<br>sapiens                  |
| 1 | 1.00 | 1 | 1 | 0     | 0      | 0      | -0.003 | 0      | t | 60679  | SRGNHVS<br>PTHYVPES<br>DAAAK | Homo<br>sapiens                  |
| 1 | 1.00 | 1 | 1 | 0.06  | 0.058  | 0.06   | 0.054  | 0.06   | t | 138244 | SSTIANT                      | Mus<br>musculu<br>s              |
| 1 | 1.00 | 1 | 1 | 0     | 0      | 0      | 0      | 0.003  | t | 118127 | SDDDMGF<br>GLFD              | Homo<br>sapiens                  |
| 1 | 1.00 | 1 | 1 | 0     | 0.002  | 0.002  | 0.001  | 0.001  | t | 86972  | NPITESAH<br>LN               | Homo<br>sapiens                  |



|   |      |   |   |       |        |        |        |        |   |        |                              |                                  |
|---|------|---|---|-------|--------|--------|--------|--------|---|--------|------------------------------|----------------------------------|
| 1 | 1.00 | 1 | 1 | 0.01  | 0.012  | 0.006  | 0.011  | 0.01   | t | 47984  | PISLLFNEK<br>EADDNDH<br>EPQI | Homo<br>sapiens                  |
| 1 | 1.00 | 1 | 1 | -0.01 | -0.01  | -0.01  | -0.01  | -0.009 | t | 9818   | DPYSPSPY<br>DRRGAGS          | Homo<br>sapiens                  |
| 1 | 1.00 | 1 | 1 | -0.01 | -0.013 | -0.015 | -0.01  | -0.009 | t | 122626 | VDVPNGR<br>GDSLAYGL<br>RS    | Oryctola<br>gus<br>cuniculu<br>s |
| 1 | 1.00 | 1 | 1 | -0.02 | -0.02  | -0.022 | -0.02  | -0.018 | t | 97223  | AWNPSLL<br>G                 | Mus<br>musculu<br>s              |
| 1 | 1.00 | 1 | 1 | 0.01  | 0.01   | 0.01   | 0.01   | 0.012  | t | 135489 | QFPLGGV                      | Oryctola<br>gus<br>cuniculu<br>s |
| 1 | 1.00 | 1 | 1 | -0.06 | -0.064 | -0.061 | -0.063 | -0.061 | t | 137907 | KGSGPGYY<br>RLTL             | Oryctola<br>gus<br>cuniculu<br>s |
| 1 | 1.00 | 1 | 1 | -0.01 | -0.013 | -0.002 | -0.01  | -0.008 | t | 137391 | DTHKRDTY                     | Oryctola<br>gus<br>cuniculu<br>s |
| 1 | 1.00 | 1 | 1 | 0.04  | 0.042  | 0.04   | 0.047  | 0.043  | t | 103993 | IPPSLRTLE<br>DNEERMS         | Homo<br>sapiens                  |
| 1 | 1.00 | 1 | 1 | 0     | -0.006 | 0      | 0      | 0      | t | 123710 | RKPKSQET                     | Oryctola<br>gus<br>cuniculu<br>s |
| 1 | 1.00 | 1 | 1 | 0.01  | 0.01   | 0.01   | 0.01   | 0.011  | t | 105497 | RHDSGYE                      | Mus<br>musculu<br>s              |
| 1 | 1.00 | 1 | 1 | 0.01  | 0.014  | 0.01   | 0.011  | 0.011  | t | 153396 | HSFEPWS<br>ARDMLGG<br>GS     | Homo<br>sapiens                  |
| 1 | 1.00 | 1 | 1 | 0.01  | 0.01   | 0.01   | 0.01   | 0.011  | t | 119573 | EWEDTYGI<br>VL               | Homo<br>sapiens                  |
| 1 | 1.00 | 1 | 1 | 0     | 0      | 0      | -0.003 | 0      | t | 43242  | NANPNAN<br>PNANP             | Homo<br>sapiens                  |
| 1 | 1.00 | 1 | 1 | 0.01  | 0.01   | 0.011  | 0.01   | 0.011  | t | 119614 | LWDQTYG<br>VPD               | Homo<br>sapiens                  |

|   |      |   |   |       |        |        |        |        |   |        |                              |                                  |
|---|------|---|---|-------|--------|--------|--------|--------|---|--------|------------------------------|----------------------------------|
| 1 | 1.00 | 1 | 1 | -0.04 | -0.04  | -0.046 | -0.046 | -0.039 | t | 27553  | IMSALAM<br>VYLGAK            | Homo<br>sapiens                  |
| 1 | 1.00 | 1 | 1 | 0     | 0      | 0      | -0.003 | 0      | t | 36413  | LHQPPPQI<br>FLKILPQSG<br>PIG | Homo<br>sapiens                  |
| 1 | 1.00 | 1 | 1 | 0     | 0      | 0      | 0      | 0.001  | t | 7491   | DAEFRHDS<br>GYEVHHQ<br>K     | Mus<br>musculu<br>s              |
| 1 | 1.00 | 1 | 1 | 0     | 0      | 0      | 0      | 0.001  | t | 7491   | DAEFRHDS<br>GYEVHHQ<br>K     | Mus<br>musculu<br>s              |
| 1 | 1.00 | 1 | 1 | 0.01  | 0.01   | 0.01   | 0.004  | 0.01   | t | 32108  | KLQKTYSQ                     | Homo<br>sapiens                  |
| 1 | 1.00 | 1 | 1 | -0.03 | -0.03  | -0.028 | -0.03  | -0.03  | t | 54065  | RHLLCLLL<br>LTVGG            | Homo<br>sapiens                  |
| 1 | 1.00 | 1 | 1 | 0.03  | 0.03   | 0.037  | 0.03   | 0.03   | t | 75662  | YRPPNAPI<br>LSTLPETT         | Homo<br>sapiens                  |
| 1 | 1.00 | 1 | 1 | -0.01 | -0.01  | -0.01  | -0.01  | -0.01  | t | 123374 | KKAVQGG<br>G                 | Oryctola<br>gus<br>cuniculu<br>s |
| 1 | 1.00 | 1 | 1 | -0.06 | -0.06  | -0.054 | -0.06  | -0.06  | t | 36813  | LKCRLR                       | Homo<br>sapiens                  |
| 1 | 1.00 | 1 | 1 | -0.01 | -0.012 | -0.024 | -0.011 | -0.01  | t | 1975   | AIKKRNAD<br>AKADYEAK<br>LAK  | Mus<br>musculu<br>s              |
| 1 | 1.00 | 1 | 1 | 0.01  | 0.01   | 0.007  | 0.007  | 0.011  | t | 31580  | KKIQDCYV<br>ENGLIS           | Homo<br>sapiens                  |
| 1 | 1.00 | 1 | 1 | 0     | 0      | 0.002  | -0.007 | -0.001 | t | 57612  | SERSQPRG                     | Homo<br>sapiens                  |
| 1 | 1.00 | 1 | 1 | 0.02  | 0.024  | 0.02   | 0.027  | 0.02   | t | 135486 | PELEETLTH<br>TITKLNAE<br>NNA | Homo<br>sapiens                  |
| 1 | 1.00 | 1 | 1 | -0.02 | -0.022 | -0.021 | -0.023 | -0.02  | t | 75924  | YSWKTWG<br>KA                | Mus<br>musculu<br>s              |
| 1 | 1.00 | 1 | 1 | 0.01  | 0.01   | 0.01   | 0.01   | 0.01   | t | 132935 | WGSNAEH                      | Homo<br>sapiens                  |
| 1 | 1.00 | 1 | 1 | 0.01  | 0.01   | 0.01   | 0.01   | 0.01   | t | 100410 | QEEHLKEI<br>MK               | Mus<br>musculu<br>s              |
| 1 | 1.00 | 1 | 1 | -0.03 | -0.03  | -0.03  | -0.03  | -0.03  | t | 140614 | WCEADYG<br>RCP               | Mus<br>musculu<br>s              |

|   |      |   |   |       |        |        |        |        |   |        |                              |                                  |
|---|------|---|---|-------|--------|--------|--------|--------|---|--------|------------------------------|----------------------------------|
| 1 | 1.00 | 1 | 1 | -0.03 | -0.03  | -0.03  | -0.03  | -0.03  | t | 93721  | RLFGGKG<br>DDI               | Ovis<br>aries                    |
| 1 | 1.00 | 1 | 1 | -0.03 | -0.03  | -0.03  | -0.03  | -0.03  | t | 95691  | PTTNVA                       | Mus<br>musculu<br>s              |
| 1 | 1.00 | 1 | 1 | 0     | 0      | 0      | 0      | 0.002  | t | 144598 | CFVGT<br>HPQLRC              | Mus<br>musculu<br>s              |
| 1 | 1.00 | 1 | 1 | 0     | 0.003  | -0.005 | 0      | 0.001  | t | 56610  | RYPGQGS<br>PGGNRYP<br>PQG    | Mus<br>musculu<br>s              |
| 1 | 1.00 | 1 | 1 | -0.03 | -0.034 | -0.021 | -0.027 | -0.03  | t | 53770  | RFRGKNLP                     | Oryctola<br>gus<br>cuniculu<br>s |
| 1 | 1.00 | 1 | 1 | 0     | -0.004 | 0.003  | -0.001 | 0      | t | 80618  | CAVFVRD<br>GQSV              | Oryctola<br>gus<br>cuniculu<br>s |
| 1 | 1.00 | 1 | 1 | 0.01  | 0.01   | 0.01   | 0.01   | 0.009  | t | 115252 | FLPYPPYA<br>KPAAVRSP<br>AQIL | Homo<br>sapiens                  |
| 1 | 1.00 | 1 | 1 | 0.01  | 0.006  | 0.018  | 0.009  | 0.01   | t | 30211  | KDLTT                        | Oryctola<br>gus<br>cuniculu<br>s |
| 1 | 1.00 | 1 | 1 | -0.02 | -0.02  | -0.003 | -0.02  | -0.022 | t | 97252  | DTPLTTAA<br>LRLV             | Mus<br>musculu<br>s              |
| 1 | 1.00 | 1 | 1 | -0.03 | -0.03  | -0.03  | -0.023 | -0.029 | t | 144898 | GQSRGQS<br>RG                | Homo<br>sapiens                  |
| 1 | 1.00 | 1 | 1 | -0.03 | -0.034 | -0.028 | -0.031 | -0.03  | t | 1457   | AGAVVGG<br>LGGYMLG<br>SAMS   | Oryctola<br>gus<br>cuniculu<br>s |
| 1 | 1.00 | 1 | 1 | -0.01 | -0.006 | -0.021 | -0.013 | -0.008 | t | 29897  | KANADAK<br>AAYEAAV<br>AANNA  | Homo<br>sapiens                  |
| 1 | 1.00 | 1 | 1 | 0.02  | 0.024  | 0.02   | 0.021  | 0.021  | t | 10778  | DVVNQNA<br>QALNTLVK<br>QL    | Homo<br>sapiens                  |

|   |      |   |   |       |        |        |        |        |   |        |                              |                       |
|---|------|---|---|-------|--------|--------|--------|--------|---|--------|------------------------------|-----------------------|
| 1 | 1.00 | 1 | 1 | -0.02 | -0.02  | -0.02  | -0.02  | -0.015 | t | 123294 | HMPGQPPY                     | Oryctolagus cuniculus |
| 1 | 1.00 | 1 | 1 | -0.03 | -0.033 | -0.03  | -0.03  | -0.028 | t | 104314 | TRKGYHQT<br>MNNSY            | Oryctolagus cuniculus |
| 1 | 1.00 | 1 | 1 | 0     | -0.003 | 0      | 0      | 0.001  | t | 30093  | KCTSDQDE<br>QFIPKGC<br>SK    | Oryctolagus cuniculus |
| 1 | 1.00 | 1 | 1 | -0.01 | -0.01  | -0.003 | -0.01  | -0.011 | t | 70816  | VRRRGDS<br>RGSLLSP           | Homo sapiens          |
| 1 | 1.00 | 1 | 1 | 0.07  | 0.07   | 0.07   | 0.07   | 0.072  | t | 103792 | AGTELSAT<br>GNESGGG          | Oryctolagus cuniculus |
| 1 | 1.00 | 1 | 1 | 0     | 0.002  | 0      | 0.001  | -0.002 | t | 149318 | FYYGKGLI<br>NVQAAAQ          | Cavia porcellus       |
| 1 | 1.00 | 1 | 1 | 0     | 0      | 0      | 0      | 0.001  | t | 61398  | SSTKNLIYT<br>STLCELNV<br>TGF | Sus scrofa            |
| 1 | 1.00 | 1 | 1 | 0.01  | 0.01   | 0.01   | 0.01   | 0.01   | t | 132928 | WGENFIQ<br>VPVSE             | Homo sapiens          |
| 1 | 1.00 | 1 | 1 | 0.01  | 0.01   | 0.01   | 0.01   | 0.01   | t | 106376 | EEKKGNVY<br>VTDH             | Mus musculus          |
| 1 | 1.00 | 1 | 1 | -0.02 | -0.023 | -0.03  | -0.02  | -0.02  | t | 76248  | YVDISLDA<br>GQYVLVM<br>KANSS | Oryctolagus cuniculus |
| 1 | 1.00 | 1 | 1 | -0.03 | -0.026 | -0.031 | -0.029 | -0.03  | t | 147064 | KHQGAQY<br>VWNRTA            | Homo sapiens          |
| 1 | 1.00 | 1 | 1 | 0     | 0.01   | 0      | -0.003 | 0      | t | 29936  | KARRPEGR<br>TWAQ             | Pan troglodytes       |
| 1 | 1.00 | 1 | 1 | 0.04  | 0.04   | 0.04   | 0.04   | 0.04   | t | 119617 | NGQPENNY                     | Homo sapiens          |
| 1 | 1.00 | 1 | 1 | 0     | 0      | 0      | 0      | 0      | t | 158604 | PVGPWTN                      | Homo sapiens          |

|   |      |   |   |       |        |        |        |        |   |        |                              |                                  |
|---|------|---|---|-------|--------|--------|--------|--------|---|--------|------------------------------|----------------------------------|
| 1 | 1.00 | 1 | 1 | 0     | 0      | 0      | 0      | 0      | t | 77790  | NKVSARG<br>CTF               | Homo<br>sapiens                  |
| 1 | 1.00 | 1 | 1 | -0.02 | -0.02  | -0.02  | -0.02  | -0.02  | t | 106741 | QQFAPWP<br>NWTLV             | Mus<br>musculu<br>s              |
| 1 | 1.00 | 1 | 1 | -0.02 | -0.02  | -0.02  | -0.02  | -0.02  | t | 78302  | WHRLLA                       | Homo<br>sapiens                  |
| 1 | 1.00 | 1 | 1 | -0.02 | -0.02  | -0.02  | -0.02  | -0.02  | t | 87229  | PEARLISVR<br>YDS             | Homo<br>sapiens                  |
| 1 | 1.00 | 1 | 1 | -0.02 | -0.018 | -0.02  | -0.02  | -0.02  | t | 87229  | PEARLISVR<br>YDS             | Homo<br>sapiens                  |
| 1 | 1.00 | 1 | 1 | 0     | 0      | 0.001  | 0      | -0.002 | t | 41431  | MERVVEQ<br>MCVTQYQ<br>KESQAY | Oryctola<br>gus<br>cuniculu<br>s |
| 1 | 1.00 | 1 | 1 | -0.04 | -0.04  | -0.04  | -0.04  | -0.04  | t | 79596  | LERTPGK                      | Oryctola<br>gus<br>cuniculu<br>s |
| 1 | 1.00 | 1 | 1 | 0.03  | 0.034  | 0.036  | 0.03   | 0.031  | t | 63215  | TDPTGIEP<br>DDHLKE           | Myodes<br>glareolu<br>s          |
| 1 | 1.00 | 1 | 1 | 0.03  | 0.028  | 0.032  | 0.029  | 0.03   | t | 40619  | LVTVPFV<br>SVATANS           | Mus<br>musculu<br>s              |
| 1 | 1.00 | 1 | 1 | 0     | 0      | 0      | -0.004 | 0      | t | 135977 | PVSRVLAP<br>HLTR             | Homo<br>sapiens                  |
| 1 | 1.00 | 1 | 1 | -0.01 | -0.01  | -0.004 | -0.01  | -0.01  | t | 67269  | TWKIEKAS<br>F                | Homo<br>sapiens                  |
| 1 | 1.00 | 1 | 1 | -0.06 | -0.054 | -0.051 | -0.06  | -0.06  | t | 139926 | TPSWFRW                      | Ovis<br>aries                    |
| 1 | 1.00 | 1 | 1 | -0.03 | -0.03  | -0.025 | -0.03  | -0.03  | t | 140672 | EQIYRVDL<br>RTL              | Rattus<br>norvegic<br>us         |
| 1 | 1.00 | 1 | 1 | 0.01  | 0.01   | 0.013  | 0.01   | 0.011  | t | 35247  | LDPAFR                       | Mus<br>musculu<br>s              |
| 1 | 1.00 | 1 | 1 | 0     | 0.006  | 0.004  | 0      | 0      | t | 8839   | DKAKADA<br>ELAAANDT<br>IA    | Equus<br>caballus                |

|   |      |   |   |       |        |        |        |        |   |        |                              |                       |
|---|------|---|---|-------|--------|--------|--------|--------|---|--------|------------------------------|-----------------------|
| 1 | 1.00 | 1 | 1 | -0.06 | -0.06  | -0.069 | -0.06  | -0.06  | t | 36319  | LGSINQA<br>MVTRCEP<br>VVCYLY | Homo sapiens          |
| 1 | 1.00 | 1 | 1 | -0.05 | -0.046 | -0.05  | -0.05  | -0.049 | t | 122999 | AAMDLR<br>MGF                | Ovis aries            |
| 1 | 1.00 | 1 | 1 | -0.04 | -0.04  | -0.045 | -0.043 | -0.041 | t | 94651  | PTCWAICK<br>RIPN             | Homo sapiens          |
| 1 | 1.00 | 1 | 1 | -0.01 | -0.01  | -0.01  | -0.01  | -0.008 | t | 27462  | IMDINKRK                     | Homo sapiens          |
| 1 | 1.00 | 1 | 1 | 0     | 0.002  | -0.007 | 0      | 0.001  | t | 73554  | YDKPYMML<br>NLYDPNKY<br>VDV  | Homo sapiens          |
| 1 | 1.00 | 1 | 1 | 0     | 0.002  | 0.001  | 0.003  | 0      | t | 9126   | DLIGQKLG<br>LKLLRYY          | Homo sapiens          |
| 1 | 1.00 | 1 | 1 | 0     | 0.004  | 0.001  | 0.003  | 0      | t | 9126   | DLIGQKLG<br>LKLLRYY          | Homo sapiens          |
| 1 | 1.00 | 1 | 1 | 0.04  | 0.04   | 0.029  | 0.04   | 0.04   | t | 48395  | PLLGICGST<br>CAEDGN          | Mus musculus          |
| 1 | 1.00 | 1 | 1 | -0.02 | -0.02  | -0.022 | -0.023 | -0.021 | t | 16280  | FIQQGRGY<br>FGLIFPG          | Homo sapiens          |
| 1 | 1.00 | 1 | 1 | 0     | 0      | 0      | 0      | 0.001  | t | 62858  | TAGLVGLL<br>TPG              | Rattus norvegicus     |
| 1 | 1.00 | 1 | 1 | 0     | 0      | 0      | -0.002 | 0      | t | 50476  | QDIQPAIQ<br>SSWPKL           | Homo sapiens          |
| 1 | 1.00 | 1 | 1 | -0.04 | -0.043 | -0.045 | -0.04  | -0.04  | t | 138146 | ASHLDYGS<br>ALLSKV           | Oryctolagus cuniculus |
| 1 | 1.00 | 1 | 1 | 0     | -0.001 | 0      | 0.003  | 0.003  | t | 47201  | PDSDPQIP<br>PPYVEPTA<br>PQVL | Homo sapiens          |
| 1 | 1.00 | 1 | 1 | 0     | 0.002  | 0      | 0.003  | 0.003  | t | 47201  | PDSDPQIP<br>PPYVEPTA<br>PQVL | Homo sapiens          |

|   |      |   |   |       |        |        |        |        |   |        |                              |                                  |
|---|------|---|---|-------|--------|--------|--------|--------|---|--------|------------------------------|----------------------------------|
| 1 | 1.00 | 1 | 1 | 0.01  | 0.014  | 0.007  | 0.007  | 0.007  | t | 115263 | GEIVESLSS<br>SEESITRIN<br>KK | Homo<br>sapiens                  |
| 1 | 1.00 | 1 | 1 | -0.04 | -0.036 | -0.028 | -0.037 | -0.04  | t | 51841  | QPGLRR                       | Homo<br>sapiens                  |
| 1 | 1.00 | 1 | 1 | -0.02 | -0.022 | -0.023 | -0.02  | -0.018 | t | 132879 | PAFKNPSQ<br>DMVRFHI          | Trichosu<br>rus<br>vulpecul<br>a |
| 1 | 1.00 | 1 | 1 | 0.01  | 0.01   | 0.01   | 0.01   | 0.01   | t | 157344 | GSAASPPP<br>SGTRT            | Canis<br>lupus                   |
| 1 | 1.00 | 1 | 1 | 0.01  | 0.01   | 0.01   | 0.01   | 0.01   | t | 149076 | NATQAST                      | Sus<br>scrofa                    |
| 1 | 1.00 | 1 | 1 | 0.01  | 0.01   | 0.01   | 0.01   | 0.01   | t | 139920 | TGSWFRP                      | Ovis<br>aries                    |
| 1 | 1.00 | 1 | 1 | -0.01 | -0.007 | -0.01  | -0.01  | -0.01  | t | 98532  | TNNNLTLV<br>PA               | Mus<br>musculu<br>s              |
| 1 | 1.00 | 1 | 1 | -0.01 | -0.01  | -0.01  | -0.01  | -0.01  | t | 98532  | TNNNLTLV<br>PA               | Oryctola<br>gus<br>cuniculu<br>s |
| 1 | 1.00 | 1 | 1 | -0.01 | -0.013 | -0.01  | -0.01  | -0.01  | t | 98532  | TNNNLTLV<br>PA               | Oryctola<br>gus<br>cuniculu<br>s |
| 1 | 1.00 | 1 | 1 | -0.01 | -0.01  | -0.01  | -0.01  | -0.01  | t | 98532  | TNNNLTLV<br>PA               | Mus<br>musculu<br>s              |
| 1 | 1.00 | 1 | 1 | -0.01 | -0.01  | -0.01  | -0.01  | -0.01  | t | 98532  | TNNNLTLV<br>PA               | Mus<br>musculu<br>s              |
| 1 | 1.00 | 1 | 1 | -0.03 | -0.03  | -0.03  | -0.03  | -0.03  | t | 137540 | LDRTPRKF<br>HLAGNPK          | Homo<br>sapiens                  |
| 1 | 1.00 | 1 | 1 | -0.03 | -0.03  | -0.03  | -0.03  | -0.03  | t | 115402 | NNQFLPYP<br>YYAKPAAV<br>RSPA | Homo<br>sapiens                  |
| 1 | 1.00 | 1 | 1 | -0.03 | -0.03  | -0.03  | -0.03  | -0.03  | t | 94953  | TTAEMLD<br>ATR               | Mus<br>musculu<br>s              |

|   |      |   |   |       |        |        |        |        |   |        |                           |                                  |
|---|------|---|---|-------|--------|--------|--------|--------|---|--------|---------------------------|----------------------------------|
| 1 | 1.00 | 1 | 1 | -0.03 | -0.03  | -0.03  | -0.03  | -0.03  | t | 94953  | TTAEMLD<br>ATR            | Mus<br>musculu<br>s              |
| 1 | 1.00 | 1 | 1 | -0.05 | -0.05  | -0.05  | -0.05  | -0.05  | t | 135690 | IIPHHNYN                  | Homo<br>sapiens                  |
| 1 | 1.00 | 1 | 1 | -0.01 | -0.013 | -0.011 | -0.011 | -0.008 | t | 99456  | LSERRAQS                  | Mus<br>musculu<br>s              |
| 1 | 1.00 | 1 | 1 | 0.03  | 0.026  | 0.033  | 0.033  | 0.032  | t | 115265 | GKDITADN<br>K             | Oryctola<br>gus<br>cuniculu<br>s |
| 1 | 1.00 | 1 | 1 | 0.02  | 0.017  | 0.02   | 0.02   | 0.022  | t | 32568  | KNNNNEE<br>PS             | Oryctola<br>gus<br>cuniculu<br>s |
| 1 | 1.00 | 1 | 1 | 0.02  | 0.02   | 0.03   | 0.017  | 0.018  | t | 57928  | SFTNFGSV<br>V             | Homo<br>sapiens                  |
| 1 | 1.00 | 1 | 1 | 0.01  | 0.01   | 0.003  | 0.001  | 0.01   | t | 119546 | WTAN                      | Homo<br>sapiens                  |
| 1 | 1.00 | 1 | 1 | 0.03  | 0.02   | 0.03   | 0.031  | 0.03   | t | 15439  | FDPLVAEE<br>DEREIS        | Homo<br>sapiens                  |
| 1 | 1.00 | 1 | 1 | -0.01 | -0.01  | -0.01  | -0.01  | -0.01  | t | 106973 | VPKHCGIV<br>DSKL          | Homo<br>sapiens                  |
| 1 | 1.00 | 1 | 1 | -0.01 | -0.01  | -0.004 | -0.01  | -0.01  | t | 16376  | FKHLREFV<br>FKNKDGFL<br>Y | Oryctola<br>gus<br>cuniculu<br>s |
| 1 | 1.00 | 1 | 1 | 0.01  | 0.01   | 0.01   | 0.01   | 0.01   | t | 29683  | IYSKYGGT<br>EI            | Mus<br>musculu<br>s              |
| 1 | 1.00 | 1 | 1 | -0.05 | -0.048 | -0.045 | -0.049 | -0.05  | t | 652    | ADDVILHT<br>PGCVPC        | Homo<br>sapiens                  |
| 1 | 1.00 | 1 | 1 | -0.01 | -0.01  | -0.01  | -0.01  | -0.01  | t | 57707  | SEYPSQPP<br>SPSN          | Homo<br>sapiens                  |
| 1 | 1.00 | 1 | 1 | -0.06 | -0.054 | -0.06  | -0.06  | -0.06  | t | 123393 | KSERFIKW<br>P             | Ovis<br>aries                    |



|   |      |   |   |       |        |        |        |        |   |        |                              |                                  |
|---|------|---|---|-------|--------|--------|--------|--------|---|--------|------------------------------|----------------------------------|
| 1 | 1.00 | 1 | 1 | 0.02  | 0.02   | 0.02   | 0.02   | 0.02   | t | 105541 | TGN                          | Oryctola<br>gus<br>cuniculu<br>s |
| 1 | 1.00 | 1 | 1 | 0.02  | 0.02   | 0.02   | 0.02   | 0.022  | t | 135482 | LMDRHD                       | Mus<br>musculu<br>s              |
| 1 | 1.00 | 1 | 1 | 0.01  | 0.007  | 0.009  | 0.01   | 0.011  | t | 45667  | NRDQGRK<br>PTPPTPP           | Oryctola<br>gus<br>cuniculu<br>s |
| 1 | 1.00 | 1 | 1 | 0.01  | 0.012  | 0.015  | 0.013  | 0.012  | t | 25320  | IAIVERRN<br>NLLQAELE<br>EL   | Homo<br>sapiens                  |
| 1 | 1.00 | 1 | 1 | -0.02 | -0.022 | -0.013 | -0.017 | -0.022 | t | 1289   | AFDYSRPG<br>LLDPVFA          | Mus<br>musculu<br>s              |
| 1 | 1.00 | 1 | 1 | 0.05  | 0.049  | 0.067  | 0.05   | 0.05   | t | 39517  | LSNPTPQE                     | Anas<br>platyrhy<br>nchos        |
| 1 | 1.00 | 1 | 1 | -0.02 | -0.021 | -0.022 | -0.021 | -0.02  | t | 26227  | IGFTLPILK<br>ALYM            | Myodes<br>glareolu<br>s          |
| 1 | 1.00 | 1 | 1 | -0.01 | -0.008 | -0.008 | -0.007 | -0.009 | t | 7173   | CTKPTDG<br>NCTCIPIPS<br>SWAF | Homo<br>sapiens                  |
| 1 | 1.00 | 1 | 1 | 0     | 0      | 0.013  | -0.002 | -0.003 | t | 98923  | PAVFKIDA<br>LN               | Homo<br>sapiens                  |
| 1 | 1.00 | 1 | 1 | 0     | 0      | 0.004  | 0      | 0      | t | 157812 | QRQSQQG<br>QRREF             | Homo<br>sapiens                  |
| 1 | 1.00 | 1 | 1 | 0.02  | 0.022  | 0.022  | 0.023  | 0.02   | t | 46000  | NSTGADA<br>ADSGGRT           | Homo<br>sapiens                  |
| 1 | 1.00 | 1 | 1 | 0     | -0.002 | -0.003 | -0.001 | 0      | t | 13243  | ELQVIDKV<br>DAAFKVA<br>ATAAN | Mus<br>musculu<br>s              |
| 1 | 1.00 | 1 | 1 | -0.06 | -0.061 | -0.041 | -0.058 | -0.064 | t | 68791  | VGSDWRF<br>LRGYHQY<br>A      | Homo<br>sapiens                  |
| 1 | 1.00 | 1 | 1 | 0.03  | 0.034  | 0.026  | 0.03   | 0.03   | t | 112728 | YIKSGGST<br>ANLASSNY<br>FPTP | Cavia<br>porcellu<br>s           |
| 1 | 1.00 | 1 | 1 | -0.01 | -0.01  | -0.012 | -0.014 | -0.01  | t | 41069  | MAKVKIKP<br>LEDKILV          | Homo<br>sapiens                  |

|   |      |   |   |       |        |        |        |        |   |        |                              |                              |
|---|------|---|---|-------|--------|--------|--------|--------|---|--------|------------------------------|------------------------------|
| 1 | 1.00 | 1 | 1 | 0     | 0      | 0      | 0      | 0      | t | 121841 | SGGSCLPV<br>ISHYASC          | Mus<br>musculus              |
| 1 | 1.00 | 1 | 1 | 0     | 0      | 0      | 0      | 0      | t | 112413 | YLAWYQQ                      | Homo<br>sapiens              |
| 1 | 1.00 | 1 | 1 | -0.02 | -0.02  | -0.02  | -0.02  | -0.02  | t | 148887 | QQSFPQQ<br>QRP               | Homo<br>sapiens              |
| 1 | 1.00 | 1 | 1 | -0.02 | -0.02  | -0.02  | -0.02  | -0.02  | t | 149093 | QGRNPTQ                      | Sus<br>scrofa                |
| 1 | 1.00 | 1 | 1 | -0.06 | -0.06  | -0.06  | -0.06  | -0.06  | t | 150995 | HLGKC<br>NIA<br>GWILGNP      | Homo<br>sapiens              |
| 1 | 1.00 | 1 | 1 | 0.03  | 0.026  | 0.03   | 0.027  | 0.031  | t | 110952 | NDLQTVL<br>G                 | Oryctola<br>gus<br>cuniculus |
| 1 | 1.00 | 1 | 1 | 0.03  | 0.03   | 0.024  | 0.03   | 0.032  | t | 75920  | YSVLYNST<br>FFSTFKCY<br>G    | Mus<br>musculus              |
| 1 | 1.00 | 1 | 1 | 0.03  | 0.027  | 0.024  | 0.03   | 0.032  | t | 75920  | YSVLYNST<br>FFSTFKCY<br>G    | Oryctola<br>gus<br>cuniculus |
| 1 | 1.00 | 1 | 1 | 0.01  | 0.014  | 0.01   | 0.007  | 0.007  | t | 115324 | KNQDKTEI<br>PTINTIASG<br>EPT | Homo<br>sapiens              |
| 1 | 1.00 | 1 | 1 | 0     | -0.003 | -0.005 | 0      | 0      | t | 6357   | CGSVFLVS<br>QLFTLS<br>PRHET  | Oryctola<br>gus<br>cuniculus |
| 1 | 1.00 | 1 | 1 | -0.02 | -0.017 | -0.022 | -0.02  | -0.019 | t | 44218  | NIERFPNG<br>KKYELDKY<br>TMF  | Equus<br>caballus            |
| 1 | 1.00 | 1 | 1 | -0.04 | -0.038 | -0.04  | -0.039 | -0.041 | t | 72549  | WHRHWP<br>SHPTQK             | Homo<br>sapiens              |
| 1 | 1.00 | 1 | 1 | -0.03 | -0.026 | -0.025 | -0.023 | -0.03  | t | 131010 | PSTRWTEL<br>DDVKRLK<br>GSRS  | Homo<br>sapiens              |
| 1 | 1.00 | 1 | 1 | 0.03  | 0.033  | 0.033  | 0.03   | 0.03   | t | 97205  | ANYTTAV<br>D                 | Mus<br>musculus              |
| 1 | 1.00 | 1 | 1 | -0.02 | -0.02  | -0.02  | -0.022 | -0.02  | t | 20656  | GKPALVPD<br>K                | Homo<br>sapiens              |

|   |      |   |   |       |        |        |        |        |   |        |                               |                       |
|---|------|---|---|-------|--------|--------|--------|--------|---|--------|-------------------------------|-----------------------|
| 1 | 1.00 | 1 | 1 | -0.01 | -0.012 | 0      | -0.011 | -0.01  | t | 41759  | MIPKGTLT                      | Anas platyrhynchos    |
| 1 | 1.00 | 1 | 1 | -0.01 | -0.004 | -0.01  | -0.01  | -0.01  | t | 123519 | MRYIADKHG                     | Ovis aries            |
| 1 | 1.00 | 1 | 1 | -0.04 | -0.038 | -0.045 | -0.04  | -0.038 | t | 116971 | FAVLKLMGRGTKF                 | Rattus norvegicus     |
| 1 | 1.00 | 1 | 1 | -0.02 | -0.026 | -0.018 | -0.02  | -0.02  | t | 31414  | KIRPRGQRDSSY                  | Oryctolagus cuniculus |
| 1 | 1.00 | 1 | 1 | 0.02  | 0.022  | 0.02   | 0.017  | 0.02   | t | 103901 | FNKSYYG                       | Homo sapiens          |
| 1 | 1.00 | 1 | 1 | 0.02  | 0.03   | 0.02   | 0.017  | 0.02   | t | 37831  | LLSTTQWQVLPC                  | Pan troglodytes       |
| 1 | 1.00 | 1 | 1 | -0.02 | -0.02  | -0.02  | -0.02  | -0.02  | t | 151659 | KATDLLLD<br>DSLVSFLG<br>NRRL  | Mus musculus          |
| 1 | 1.00 | 1 | 1 | -0.05 | -0.05  | -0.05  | -0.05  | -0.049 | t | 153870 | REVYDFAF<br>RDLICIVYR<br>DGNP | Cavia porcellus       |
| 1 | 1.00 | 1 | 1 | 0     | -0.002 | 0      | 0.001  | 0.002  | t | 75391  | YPQPQFPFSQ                    | Mus musculus          |
| 1 | 1.00 | 1 | 1 | 0     | -0.002 | 0      | 0.001  | 0.002  | t | 52121  | QQQPFPQQP                     | Mus musculus          |
| 1 | 1.00 | 1 | 1 | 0     | -0.002 | 0      | 0.001  | 0.002  | t | 50945  | QGQQQFP<br>PPQ                | Mus musculus          |
| 1 | 1.00 | 1 | 1 | 0     | -0.002 | 0      | 0.001  | 0.002  | t | 50814  | QFQGQQ<br>QPFP                | Mus musculus          |
| 1 | 1.00 | 1 | 1 | 0     | -0.002 | 0      | 0.001  | 0.002  | t | 51908  | QPQFPFS<br>QQP                | Mus musculus          |
| 1 | 1.00 | 1 | 1 | 0     | -0.002 | 0      | 0.001  | 0.002  | t | 51906  | QPQFPFP<br>QLP                | Mus musculus          |

|   |      |   |   |       |        |        |        |       |   |        |                          |                                  |
|---|------|---|---|-------|--------|--------|--------|-------|---|--------|--------------------------|----------------------------------|
| 1 | 1.00 | 1 | 1 | 0     | -0.002 | 0      | 0.001  | 0.002 | t | 17365  | FPQPQFPF<br>PQ           | Mus<br>musculu<br>s              |
| 1 | 1.00 | 1 | 1 | -0.02 | -0.02  | -0.011 | -0.018 | -0.02 | t | 135979 | QMRPVSR<br>VLAPH         | Homo<br>sapiens                  |
| 1 | 1.00 | 1 | 1 | 0     | 0      | 0      | -0.002 | 0     | t | 47643  | PGFGDRR<br>KAM           | Homo<br>sapiens                  |
| 1 | 1.00 | 1 | 1 | 0     | -0.003 | -0.001 | 0      | 0     | t | 140611 | VNKKEAW<br>LDSTKAT<br>RY | Oryctola<br>gus<br>cuniculu<br>s |
| 1 | 1.00 | 1 | 1 | 0.02  | 0.02   | 0.024  | 0.02   | 0.02  | t | 27681  | INLLDDSD<br>F            | Sus<br>scrofa                    |
| 1 | 1.00 | 1 | 1 | 0     | 0.003  | 0      | 0      | 0     | t | 80000  | RGTGSYNR<br>SSFES        | Mus<br>musculu<br>s              |
| 1 | 1.00 | 1 | 1 | 0.03  | 0.03   | 0.03   | 0.03   | 0.03  | t | 149428 | QLQLQNP<br>SQQ           | Homo<br>sapiens                  |
| 1 | 1.00 | 1 | 1 | 0.03  | 0.03   | 0.03   | 0.03   | 0.03  | t | 149428 | QLQLQNP<br>SQQ           | Mus<br>musculu<br>s              |
| 1 | 1.00 | 1 | 1 | 0.01  | 0.002  | 0.01   | 0.01   | 0.01  | t | 136301 | GALHQEPS<br>SNLF         | Mus<br>musculu<br>s              |
| 1 | 1.00 | 1 | 1 | 0.01  | 0.01   | 0.01   | 0.01   | 0.01  | t | 133538 | CNKPGERT<br>C            | Mus<br>musculu<br>s              |
| 1 | 1.00 | 1 | 1 | 0.01  | 0.01   | 0.01   | 0.01   | 0.01  | t | 133538 | CNKPGERT<br>C            | Mus<br>musculu<br>s              |
| 1 | 1.00 | 1 | 1 | 0.01  | 0.01   | 0.01   | 0.01   | 0.01  | t | 133538 | CNKPGERT<br>C            | Mus<br>musculu<br>s              |
| 1 | 1.00 | 1 | 1 | 0.01  | 0.01   | 0.01   | 0.01   | 0.01  | t | 111043 | TLAEADRT<br>NAEK         | Homo<br>sapiens                  |

|   |      |   |   |       |        |        |        |        |   |        |                            |                                  |
|---|------|---|---|-------|--------|--------|--------|--------|---|--------|----------------------------|----------------------------------|
| 1 | 1.00 | 1 | 1 | 0.01  | 0.01   | 0.01   | 0.01   | 0.01   | t | 103296 | IVMSTNN<br>DDPAGAC<br>R    | Homo<br>sapiens                  |
| 1 | 1.00 | 1 | 1 | -0.01 | -0.007 | -0.01  | -0.01  | -0.01  | t | 153410 | LIPFHKHP<br>HHRG           | Mus<br>musculu<br>s              |
| 1 | 1.00 | 1 | 1 | -0.01 | -0.01  | -0.01  | -0.01  | -0.01  | t | 107458 | KCKVSNK                    | Homo<br>sapiens                  |
| 1 | 1.00 | 1 | 1 | -0.03 | -0.03  | -0.03  | -0.03  | -0.03  | t | 112277 | QSPKLLI                    | Homo<br>sapiens                  |
| 1 | 1.00 | 1 | 1 | 0.01  | 0.012  | 0.008  | 0.007  | 0.01   | t | 45541  | NQELAYFY<br>PELFRQF        | Homo<br>sapiens                  |
| 1 | 1.00 | 1 | 1 | 0.06  | 0.06   | 0.067  | 0.06   | 0.062  | t | 95638  | NSAEPE                     | Homo<br>sapiens                  |
| 1 | 1.00 | 1 | 1 | -0.02 | -0.018 | -0.013 | -0.013 | -0.019 | t | 108002 | LGWMRY<br>HPQA             | Homo<br>sapiens                  |
| 1 | 1.00 | 1 | 1 | 0     | 0.004  | 0.018  | 0.007  | 0.003  | t | 121072 | YANETCCD<br>FFTNQ          | Homo<br>sapiens                  |
| 1 | 1.00 | 1 | 1 | 0     | -0.001 | 0      | 0.003  | 0.002  | t | 130612 | SPNTAHIT<br>SKSL           | Camelus<br>dromed<br>arius       |
| 1 | 1.00 | 1 | 1 | 0     | -0.004 | 0.001  | -0.003 | 0      | t | 32902  | KPTKKPTF<br>KTTKKDLK<br>PQ | Oryctola<br>gus<br>cuniculu<br>s |
| 1 | 1.00 | 1 | 1 | 0.05  | 0.06   | 0.05   | 0.047  | 0.049  | t | 134149 | LRENQLLP<br>GFEL           | Rattus<br>rattus                 |
| 1 | 1.00 | 1 | 1 | -0.04 | -0.036 | -0.033 | -0.033 | -0.04  | t | 112540 | HVQLAPPI<br>ALRH           | Homo<br>sapiens                  |
| 1 | 1.00 | 1 | 1 | -0.01 | -0.011 | -0.008 | -0.01  | -0.008 | t | 31074  | KGTLTWS<br>G               | Anas<br>platyrhy<br>nchos        |
| 1 | 1.00 | 1 | 1 | -0.02 | -0.022 | -0.011 | -0.017 | -0.018 | t | 106192 | YCHTFHGA<br>G              | Mus<br>musculu<br>s              |
| 1 | 1.00 | 1 | 1 | -0.02 | -0.018 | -0.025 | -0.02  | -0.022 | t | 95050  | YCEIIVTHF<br>PFDQQNC<br>T  | Rattus<br>norvegic<br>us         |

|   |      |   |   |       |        |        |        |        |   |        |                              |                                  |
|---|------|---|---|-------|--------|--------|--------|--------|---|--------|------------------------------|----------------------------------|
| 1 | 1.00 | 1 | 1 | 0     | 0      | 0.003  | 0.007  | 0.002  | t | 115628 | LPCRISPGK<br>NAT             | Homo<br>sapiens                  |
| 1 | 1.00 | 1 | 1 | -0.04 | -0.038 | -0.047 | -0.043 | -0.04  | t | 106846 | SKGCCSGA<br>KRLD             | Homo<br>sapiens                  |
| 1 | 1.00 | 1 | 1 | 0     | 0.004  | 0      | 0.003  | 0.003  | t | 73327  | YAAQNRR<br>GLDLLFWE<br>QGGL  | Homo<br>sapiens                  |
| 1 | 1.00 | 1 | 1 | -0.01 | -0.007 | -0.02  | -0.01  | -0.008 | t | 9924   | DQVHFQP<br>LPPAVVKL<br>SDALI | Mus<br>musculu<br>s              |
| 1 | 1.00 | 1 | 1 | 0.01  | 0.01   | 0.01   | 0.01   | 0.012  | t | 66703  | TTLNPT                       | Mus<br>musculu<br>s              |
| 1 | 1.00 | 1 | 1 | 0     | -0.003 | 0.009  | 0      | 0      | t | 100287 | LSEKGLTTY                    | Oryctola<br>gus<br>cuniculu<br>s |
| 1 | 1.00 | 1 | 1 | 0     | -0.002 | 0      | -0.008 | -0.003 | t | 110385 | QLYKTCKQ<br>AGTCPPDII<br>PKV | Mus<br>musculu<br>s              |
| 1 | 1.00 | 1 | 1 | 0.05  | 0.05   | 0.05   | 0.05   | 0.05   | t | 111216 | DSSEEEDEI<br>DGPAGQA<br>EPDR | Mus<br>musculu<br>s              |
| 1 | 1.00 | 1 | 1 | 0.05  | 0.05   | 0.05   | 0.05   | 0.05   | t | 111216 | DSSEEEDEI<br>DGPAGQA<br>EPDR | Mus<br>musculu<br>s              |
| 1 | 1.00 | 1 | 1 | 0.02  | 0.02   | 0.02   | 0.026  | 0.024  | t | 138753 | AAHAEINE<br>AGREVVG          | Mus<br>musculu<br>s              |
| 1 | 1.00 | 1 | 1 | -0.02 | -0.02  | -0.016 | -0.017 | -0.02  | t | 86900  | NLPNDVFR<br>EAQR             | Homo<br>sapiens                  |
| 1 | 1.00 | 1 | 1 | -0.01 | -0.01  | -0.01  | -0.011 | -0.01  | t | 91218  | DVLEATYA<br>MVQHVAK          | Capra<br>hircus                  |
| 1 | 1.00 | 1 | 1 | 0.03  | 0.03   | 0.028  | 0.03   | 0.033  | t | 141764 | TLNFNAEG<br>EPELLMLA<br>NWR  | Mus<br>musculu<br>s              |
| 1 | 1.00 | 1 | 1 | 0     | 0      | 0      | 0      | 0.001  | t | 134333 | CIPIPSSW<br>AFARFLW          | Homo<br>sapiens                  |
| 1 | 1.00 | 1 | 1 | 0     | 0      | 0      | 0      | 0.001  | t | 153381 | ETPLTIAGL<br>KLK             | Mus<br>musculu<br>s              |

|   |      |   |   |   |   |   |   |       |   |        |                              |                     |
|---|------|---|---|---|---|---|---|-------|---|--------|------------------------------|---------------------|
| 1 | 1.00 | 1 | 1 | 0 | 0 | 0 | 0 | 0.001 | t | 149247 | AEQQWAL<br>YADGSIRP<br>Q     | Mus<br>musculu<br>s |
| 1 | 1.00 | 1 | 1 | 0 | 0 | 0 | 0 | 0.001 | t | 135545 | DVFYPYPY<br>ASGS             | Mus<br>musculu<br>s |
| 1 | 1.00 | 1 | 1 | 0 | 0 | 0 | 0 | 0.001 | t | 151713 | RGEARK                       | Homo<br>sapiens     |
| 1 | 1.00 | 1 | 1 | 0 | 0 | 0 | 0 | 0.001 | t | 144820 | YLEDWIKY<br>NNQK             | Mus<br>musculu<br>s |
| 1 | 1.00 | 1 | 1 | 0 | 0 | 0 | 0 | 0.001 | t | 146967 | GGPIGDTL<br>EKISNEIK         | Mus<br>musculu<br>s |
| 1 | 1.00 | 1 | 1 | 0 | 0 | 0 | 0 | 0.001 | t | 134437 | LPVCPLLP<br>GTSTTSTG<br>P    | Homo<br>sapiens     |
| 1 | 1.00 | 1 | 1 | 0 | 0 | 0 | 0 | 0.001 | t | 139632 | VKPLPSPD<br>TD               | Mus<br>musculu<br>s |
| 1 | 1.00 | 1 | 1 | 0 | 0 | 0 | 0 | 0.001 | t | 137743 | DTPLTIAGL<br>KLV             | Mus<br>musculu<br>s |
| 1 | 1.00 | 1 | 1 | 0 | 0 | 0 | 0 | 0.001 | t | 137947 | PNTMKTQ                      | Mus<br>musculu<br>s |
| 1 | 1.00 | 1 | 1 | 0 | 0 | 0 | 0 | 0.001 | t | 149403 | PCKSNT                       | Mus<br>musculu<br>s |
| 1 | 1.00 | 1 | 1 | 0 | 0 | 0 | 0 | 0.001 | t | 138807 | RLQGISP KI                   | Homo<br>sapiens     |
| 1 | 1.00 | 1 | 1 | 0 | 0 | 0 | 0 | 0.001 | t | 138089 | WLRPPTS                      | Mus<br>musculu<br>s |
| 1 | 1.00 | 1 | 1 | 0 | 0 | 0 | 0 | 0.001 | t | 134557 | TCTIPAQG<br>TSMFPSC          | Homo<br>sapiens     |
| 1 | 1.00 | 1 | 1 | 0 | 0 | 0 | 0 | 0.001 | t | 134335 | CTKPSDGN<br>CT               | Homo<br>sapiens     |
| 1 | 1.00 | 1 | 1 | 0 | 0 | 0 | 0 | 0.001 | t | 140674 | ESQDPDPK<br>DELHKS           | Mus<br>musculu<br>s |
| 1 | 1.00 | 1 | 1 | 0 | 0 | 0 | 0 | 0.001 | t | 139525 | ISSQTNDT<br>HKRDTYA<br>ATPRA | Mus<br>musculu<br>s |
| 1 | 1.00 | 1 | 1 | 0 | 0 | 0 | 0 | 0.001 | t | 151763 | WYRATHQ<br>E                 | Mus<br>musculu<br>s |
| 1 | 1.00 | 1 | 1 | 0 | 0 | 0 | 0 | 0.001 | t | 139526 | ISVRTVYPP<br>E               | Mus<br>musculu<br>s |

|   |      |   |   |   |   |   |   |       |   |        |                              |                     |
|---|------|---|---|---|---|---|---|-------|---|--------|------------------------------|---------------------|
| 1 | 1.00 | 1 | 1 | 0 | 0 | 0 | 0 | 0.001 | t | 153372 | DTELTQQA<br>LRLV             | Mus<br>musculu<br>s |
| 1 | 1.00 | 1 | 1 | 0 | 0 | 0 | 0 | 0.001 | t | 138097 | YPYPLIS                      | Mus<br>musculu<br>s |
| 1 | 1.00 | 1 | 1 | 0 | 0 | 0 | 0 | 0.001 | t | 137770 | TLARSFII<br>CIQM             | Mus<br>musculu<br>s |
| 1 | 1.00 | 1 | 1 | 0 | 0 | 0 | 0 | 0.001 | t | 137759 | NQEDAEAI<br>THLF             | Mus<br>musculu<br>s |
| 1 | 1.00 | 1 | 1 | 0 | 0 | 0 | 0 | 0.001 | t | 149530 | YDCNTAAT<br>DATRWQI          | Mus<br>musculu<br>s |
| 1 | 1.00 | 1 | 1 | 0 | 0 | 0 | 0 | 0.001 | t | 137941 | PFRSYTK                      | Mus<br>musculu<br>s |
| 1 | 1.00 | 1 | 1 | 0 | 0 | 0 | 0 | 0.001 | t | 139475 | ATPRAHEV<br>SE               | Mus<br>musculu<br>s |
| 1 | 1.00 | 1 | 1 | 0 | 0 | 0 | 0 | 0.001 | t | 151601 | ADLSLEKA<br>ANVQWD<br>E      | Homo<br>sapiens     |
| 1 | 1.00 | 1 | 1 | 0 | 0 | 0 | 0 | 0.001 | t | 151609 | DETPMRG<br>ETRKV             | Homo<br>sapiens     |
| 1 | 1.00 | 1 | 1 | 0 | 0 | 0 | 0 | 0.001 | t | 153380 | ETELTIAAL<br>KYV             | Mus<br>musculu<br>s |
| 1 | 1.00 | 1 | 1 | 0 | 0 | 0 | 0 | 0.001 | t | 134472 | PLLPGTSTT<br>STGPCKT         | Homo<br>sapiens     |
| 1 | 1.00 | 1 | 1 | 0 | 0 | 0 | 0 | 0.001 | t | 138047 | SSKPVSYS                     | Mus<br>musculu<br>s |
| 1 | 1.00 | 1 | 1 | 0 | 0 | 0 | 0 | 0.001 | t | 150858 | ISSLYNLVK<br>SS              | Mus<br>musculu<br>s |
| 1 | 1.00 | 1 | 1 | 0 | 0 | 0 | 0 | 0.001 | t | 146990 | GPGTIKKIS<br>F               | Mus<br>musculu<br>s |
| 1 | 1.00 | 1 | 1 | 0 | 0 | 0 | 0 | 0.001 | t | 133624 | KPGEMRG<br>AA                | Mus<br>musculu<br>s |
| 1 | 1.00 | 1 | 1 | 0 | 0 | 0 | 0 | 0.001 | t | 122406 | IEIGLEGKG<br>FEPTLEALF<br>GK | Homo<br>sapiens     |
| 1 | 1.00 | 1 | 1 | 0 | 0 | 0 | 0 | 0.001 | t | 130927 | KNSRQSY<br>P<br>EPAPVYH      | Homo<br>sapiens     |
| 1 | 1.00 | 1 | 1 | 0 | 0 | 0 | 0 | 0.001 | t | 130925 | KLLPEDDE<br>SRTYHTV          | Homo<br>sapiens     |



|   |      |   |   |   |   |   |   |       |   |        |                      |              |
|---|------|---|---|---|---|---|---|-------|---|--------|----------------------|--------------|
| 1 | 1.00 | 1 | 1 | 0 | 0 | 0 | 0 | 0.001 | t | 133623 | KPGEMR               | Mus musculus |
| 1 | 1.00 | 1 | 1 | 0 | 0 | 0 | 0 | 0.001 | t | 130808 | ENEPPVW<br>TTESKLQS  | Homo sapiens |
| 1 | 1.00 | 1 | 1 | 0 | 0 | 0 | 0 | 0.001 | t | 130924 | KLFPEEDE<br>MRTETQR  | Homo sapiens |
| 1 | 1.00 | 1 | 1 | 0 | 0 | 0 | 0 | 0.001 | t | 130844 | GDQSTDY<br>GIFQINSR  | Mus musculus |
| 1 | 1.00 | 1 | 1 | 0 | 0 | 0 | 0 | 0.001 | t | 118802 | GFNEPNG<br>NLQYQ     | Mus musculus |
| 1 | 1.00 | 1 | 1 | 0 | 0 | 0 | 0 | 0.001 | t | 119943 | IGLMVGG<br>VV        | Mus musculus |
| 1 | 1.00 | 1 | 1 | 0 | 0 | 0 | 0 | 0.001 | t | 118060 | PPPGMRP<br>P         | Homo sapiens |
| 1 | 1.00 | 1 | 1 | 0 | 0 | 0 | 0 | 0.001 | t | 117495 | ERDRKREK<br>RKPKS    | Mus musculus |
| 1 | 1.00 | 1 | 1 | 0 | 0 | 0 | 0 | 0.001 | t | 133622 | KPGDPSAL<br>HVVRCWIC | Mus musculus |
| 1 | 1.00 | 1 | 1 | 0 | 0 | 0 | 0 | 0.001 | t | 133531 | CDTLKPGE<br>C        | Mus musculus |
| 1 | 1.00 | 1 | 1 | 0 | 0 | 0 | 0 | 0.001 | t | 130815 | ESDPPVAS<br>YQWRLIN  | Homo sapiens |
| 1 | 1.00 | 1 | 1 | 0 | 0 | 0 | 0 | 0.001 | t | 133554 | EGLYSPW<br>WPRSLPVL  | Mus musculus |
| 1 | 1.00 | 1 | 1 | 0 | 0 | 0 | 0 | 0.001 | t | 133535 | CKPGEVQ<br>QC        | Mus musculus |
| 1 | 1.00 | 1 | 1 | 0 | 0 | 0 | 0 | 0.001 | t | 119038 | TSTNGIKKI<br>LIF     | Mus musculus |
| 1 | 1.00 | 1 | 1 | 0 | 0 | 0 | 0 | 0.001 | t | 133630 | LPPGLHVF<br>PLASNRS  | Mus musculus |
| 1 | 1.00 | 1 | 1 | 0 | 0 | 0 | 0 | 0.001 | t | 133528 | CADQKPG<br>EC        | Mus musculus |
| 1 | 1.00 | 1 | 1 | 0 | 0 | 0 | 0 | 0.001 | t | 130805 | ELNPEPDT<br>EVFPMTF  | Homo sapiens |
| 1 | 1.00 | 1 | 1 | 0 | 0 | 0 | 0 | 0.001 | t | 117614 | QGFPFYDK<br>PMRI     | Mus musculus |

|   |      |   |   |   |   |   |   |       |   |        |                           |                     |
|---|------|---|---|---|---|---|---|-------|---|--------|---------------------------|---------------------|
| 1 | 1.00 | 1 | 1 | 0 | 0 | 0 | 0 | 0.001 | t | 133539 | CYKPGEW<br>AC             | Mus<br>musculu<br>s |
| 1 | 1.00 | 1 | 1 | 0 | 0 | 0 | 0 | 0.001 | t | 133580 | GFLSSCNF<br>RFCELVR       | Mus<br>musculu<br>s |
| 1 | 1.00 | 1 | 1 | 0 | 0 | 0 | 0 | 0.001 | t | 131116 | TQSYPPPP<br>AWRAASR       | Homo<br>sapiens     |
| 1 | 1.00 | 1 | 1 | 0 | 0 | 0 | 0 | 0.001 | t | 131040 | RLAPEPDD<br>PITPMTK       | Homo<br>sapiens     |
| 1 | 1.00 | 1 | 1 | 0 | 0 | 0 | 0 | 0.001 | t | 130817 | ESVMQSY<br>PPHLQIPG       | Homo<br>sapiens     |
| 1 | 1.00 | 1 | 1 | 0 | 0 | 0 | 0 | 0.001 | t | 133538 | CNKPGERT<br>C             | Mus<br>musculu<br>s |
| 1 | 1.00 | 1 | 1 | 0 | 0 | 0 | 0 | 0.001 | t | 125415 | FSPDGKPC<br>TPPALNCY<br>W | Mus<br>musculu<br>s |
| 1 | 1.00 | 1 | 1 | 0 | 0 | 0 | 0 | 0.001 | t | 108382 | GGVVIA                    | Mus<br>musculu<br>s |
| 1 | 1.00 | 1 | 1 | 0 | 0 | 0 | 0 | 0.001 | t | 105651 | AEFRHDS                   | Mus<br>musculu<br>s |
| 1 | 1.00 | 1 | 1 | 0 | 0 | 0 | 0 | 0.001 | t | 108832 | CGDRGFYF<br>NKPTG         | Mus<br>musculu<br>s |
| 1 | 1.00 | 1 | 1 | 0 | 0 | 0 | 0 | 0.001 | t | 105206 | GAIIGLMV<br>GGVV          | Homo<br>sapiens     |
| 1 | 1.00 | 1 | 1 | 0 | 0 | 0 | 0 | 0.001 | t | 105127 | DAEFRHD                   | Mus<br>musculu<br>s |
| 1 | 1.00 | 1 | 1 | 0 | 0 | 0 | 0 | 0.001 | t | 115268 | GLQYTPS<br>WLVG           | Mus<br>musculu<br>s |
| 1 | 1.00 | 1 | 1 | 0 | 0 | 0 | 0 | 0.001 | t | 105127 | DAEFRHD                   | Mus<br>musculu<br>s |
| 1 | 1.00 | 1 | 1 | 0 | 0 | 0 | 0 | 0.001 | t | 105319 | LVFFAEDV<br>GSNK          | Homo<br>sapiens     |
| 1 | 1.00 | 1 | 1 | 0 | 0 | 0 | 0 | 0.001 | t | 107166 | GPPGPQG                   | Mus<br>musculu<br>s |
| 1 | 1.00 | 1 | 1 | 0 | 0 | 0 | 0 | 0.001 | t | 97601  | RGRRQP                    | Mus<br>musculu<br>s |
| 1 | 1.00 | 1 | 1 | 0 | 0 | 0 | 0 | 0.001 | t | 80000  | RGTGSYNR<br>SSFES         | Mus<br>musculu<br>s |

|   |      |   |   |   |   |   |   |       |   |       |                             |                 |
|---|------|---|---|---|---|---|---|-------|---|-------|-----------------------------|-----------------|
| 1 | 1.00 | 1 | 1 | 0 | 0 | 0 | 0 | 0.001 | t | 94851 | INNLIVELIR                  | Mus<br>musculus |
| 1 | 1.00 | 1 | 1 | 0 | 0 | 0 | 0 | 0.001 | t | 79867 | INNLIVELIRGT                | Mus<br>musculus |
| 1 | 1.00 | 1 | 1 | 0 | 0 | 0 | 0 | 0.001 | t | 64628 | TKNTNNNLTL                  | Mus<br>musculus |
| 1 | 1.00 | 1 | 1 | 0 | 0 | 0 | 0 | 0.001 | t | 67967 | VDGSDP                      | Mus<br>musculus |
| 1 | 1.00 | 1 | 1 | 0 | 0 | 0 | 0 | 0.001 | t | 64628 | TKNTNNNLTL                  | Mus<br>musculus |
| 1 | 1.00 | 1 | 1 | 0 | 0 | 0 | 0 | 0.001 | t | 79775 | DDATVAIR<br>SAINNLIVELIR    | Mus<br>musculus |
| 1 | 1.00 | 1 | 1 | 0 | 0 | 0 | 0 | 0.001 | t | 94874 | LIVELIRG                    | Mus<br>musculus |
| 1 | 1.00 | 1 | 1 | 0 | 0 | 0 | 0 | 0.001 | t | 75791 | YSLFQKEK<br>MVL             | Mus<br>musculus |
| 1 | 1.00 | 1 | 1 | 0 | 0 | 0 | 0 | 0.001 | t | 71506 | VTSTLTSLF<br>RPGASQKIQ<br>L | Mus<br>musculus |
| 1 | 1.00 | 1 | 1 | 0 | 0 | 0 | 0 | 0.001 | t | 97359 | GPGR                        | Mus<br>musculus |
| 1 | 1.00 | 1 | 1 | 0 | 0 | 0 | 0 | 0.001 | t | 52929 | QYIKANSK<br>FIGITE          | Mus<br>musculus |
| 1 | 1.00 | 1 | 1 | 0 | 0 | 0 | 0 | 0.001 | t | 59784 | SMYGSYN                     | Mus<br>musculus |
| 1 | 1.00 | 1 | 1 | 0 | 0 | 0 | 0 | 0.001 | t | 45673 | NRFAGMF<br>SLGARQKI         | Mus<br>musculus |
| 1 | 1.00 | 1 | 1 | 0 | 0 | 0 | 0 | 0.001 | t | 50222 | QACKGKIQ<br>ALCEN           | Mus<br>musculus |

|   |      |   |   |   |   |   |   |       |   |       |                             |                                  |
|---|------|---|---|---|---|---|---|-------|---|-------|-----------------------------|----------------------------------|
| 1 | 1.00 | 1 | 1 | 0 | 0 | 0 | 0 | 0.001 | t | 48536 | PLYISNPN<br>Y               | Macaca<br>fascicula<br>ris       |
| 1 | 1.00 | 1 | 1 | 0 | 0 | 0 | 0 | 0.001 | t | 36959 | LKMADPN<br>RFRGKD           | Mus<br>musculu<br>s              |
| 1 | 1.00 | 1 | 1 | 0 | 0 | 0 | 0 | 0.001 | t | 55818 | RSDYKFYE<br>DANGTRD<br>HKKG | Chinchilla<br>lanigera           |
| 1 | 1.00 | 1 | 1 | 0 | 0 | 0 | 0 | 0.001 | t | 58921 | SKPTTKQR<br>QNKP            | Mus<br>musculu<br>s              |
| 1 | 1.00 | 1 | 1 | 0 | 0 | 0 | 0 | 0.001 | t | 59982 | SPAPERRG<br>YSGYDVDP<br>Y   | Mus<br>musculu<br>s              |
| 1 | 1.00 | 1 | 1 | 0 | 0 | 0 | 0 | 0.001 | t | 56122 | RTLTMFS<br>LGARQKI          | Mus<br>musculu<br>s              |
| 1 | 1.00 | 1 | 1 | 0 | 0 | 0 | 0 | 0.001 | t | 38304 | LNPKTNK<br>WEDK             | Homo<br>sapiens                  |
| 1 | 1.00 | 1 | 1 | 0 | 0 | 0 | 0 | 0.001 | t | 50637 | QEIDCWH<br>YQHCVTS<br>TKS   | MD                               |
| 1 | 1.00 | 1 | 1 | 0 | 0 | 0 | 0 | 0.001 | t | 44920 | NLVPMVA<br>TV               | Homo<br>sapiens                  |
| 1 | 1.00 | 1 | 1 | 0 | 0 | 0 | 0 | 0.001 | t | 51147 | QIVGGVYL<br>L               | Mus<br>musculu<br>s              |
| 1 | 1.00 | 1 | 1 | 0 | 0 | 0 | 0 | 0.001 | t | 36956 | LKMADPN<br>RFRG             | Mus<br>musculu<br>s              |
| 1 | 1.00 | 1 | 1 | 0 | 0 | 0 | 0 | 0.001 | t | 11571 | EEEDDDM<br>GFGFLFD          | Homo<br>sapiens                  |
| 1 | 1.00 | 1 | 1 | 0 | 0 | 0 | 0 | 0.001 | t | 11571 | EEEDDDM<br>GFGFLFD          | Homo<br>sapiens                  |
| 1 | 1.00 | 1 | 1 | 0 | 0 | 0 | 0 | 0.001 | t | 15982 | FGGETFTP<br>DWMMEV<br>AIDNE | Mus<br>musculu<br>s              |
| 1 | 1.00 | 1 | 1 | 0 | 0 | 0 | 0 | 0.001 | t | 30093 | KCTSDQDE<br>QFIPKGCS<br>K   | Oryctola<br>gus<br>cuniculu<br>s |

|   |      |   |   |   |   |   |   |       |   |       |                           |                     |
|---|------|---|---|---|---|---|---|-------|---|-------|---------------------------|---------------------|
| 1 | 1.00 | 1 | 1 | 0 | 0 | 0 | 0 | 0.001 | t | 14435 | ETIYNTTLK<br>Y            | Homo<br>sapiens     |
| 1 | 1.00 | 1 | 1 | 0 | 0 | 0 | 0 | 0.001 | t | 11872 | EESDDDM<br>GGLFLD         | Homo<br>sapiens     |
| 1 | 1.00 | 1 | 1 | 0 | 0 | 0 | 0 | 0.001 | t | 31002 | KGLNGLFD<br>LGPKQKI       | Mus<br>musculu<br>s |
| 1 | 1.00 | 1 | 1 | 0 | 0 | 0 | 0 | 0.001 | t | 31772 | KLCGVL                    | Homo<br>sapiens     |
| 1 | 1.00 | 1 | 1 | 0 | 0 | 0 | 0 | 0.001 | t | 25139 | HWSISKPQ                  | Mus<br>musculu<br>s |
| 1 | 1.00 | 1 | 1 | 0 | 0 | 0 | 0 | 0.001 | t | 15981 | FGGETFTP<br>DWMMEV        | Mus<br>musculu<br>s |
| 1 | 1.00 | 1 | 1 | 0 | 0 | 0 | 0 | 0.001 | t | 18363 | FWRGDLV<br>FDFQV          | Homo<br>sapiens     |
| 1 | 1.00 | 1 | 1 | 0 | 0 | 0 | 0 | 0.001 | t | 17295 | FPGGGQIV<br>GGVYLL        | Mus<br>musculu<br>s |
| 1 | 1.00 | 1 | 1 | 0 | 0 | 0 | 0 | 0.001 | t | 28603 | ISLTEWSM<br>WYRH          | Mus<br>musculu<br>s |
| 1 | 1.00 | 1 | 1 | 0 | 0 | 0 | 0 | 0.001 | t | 11872 | EESDDDM<br>GGLFLD         | Homo<br>sapiens     |
| 1 | 1.00 | 1 | 1 | 0 | 0 | 0 | 0 | 0.001 | t | 24564 | HPYISKPQ                  | Mus<br>musculu<br>s |
| 1 | 1.00 | 1 | 1 | 0 | 0 | 0 | 0 | 0.001 | t | 25146 | HWYISKPQ                  | Mus<br>musculu<br>s |
| 1 | 1.00 | 1 | 1 | 0 | 0 | 0 | 0 | 0.001 | t | 10320 | DTDSGYD<br>VPDY           | Mus<br>musculu<br>s |
| 1 | 1.00 | 1 | 1 | 0 | 0 | 0 | 0 | 0.001 | t | 4401  | ASFFD                     | Mus<br>musculu<br>s |
| 1 | 1.00 | 1 | 1 | 0 | 0 | 0 | 0 | 0.001 | t | 1406  | AFTPDWM<br>MEVAIDN<br>E   | Mus<br>musculu<br>s |
| 1 | 1.00 | 1 | 1 | 0 | 0 | 0 | 0 | 0.001 | t | 3952  | AQEPPRQ                   | Mus<br>musculu<br>s |
| 1 | 1.00 | 1 | 1 | 0 | 0 | 0 | 0 | 0.001 | t | 7239  | CTTSGLAS<br>LFNSGARQ<br>H | Mus<br>musculu<br>s |

|   |      |   |   |       |        |        |        |        |   |        |                              |                                  |
|---|------|---|---|-------|--------|--------|--------|--------|---|--------|------------------------------|----------------------------------|
| 1 | 1.00 | 1 | 1 | 0     | 0      | 0      | 0      | 0.001  | t | 6480   | CKGLNGLF<br>DLGPKQKI         | Mus<br>musculu<br>s              |
| 1 | 1.00 | 1 | 1 | 0     | 0      | 0      | 0      | 0.001  | t | 9232   | DLPDYGDY<br>GEDLFDY          | Mus<br>musculu<br>s              |
| 1 | 1.00 | 1 | 1 | 0     | 0      | 0      | 0      | 0.001  | t | 6952   | CRTLTMGF<br>SLGARQKI         | Mus<br>musculu<br>s              |
| 1 | 1.00 | 1 | 1 | 0     | 0      | 0      | 0      | 0.001  | t | 10171  | DSLSEEEKE<br>LLNRIQVD<br>S   | Mus<br>musculu<br>s              |
| 1 | 1.00 | 1 | 1 | 0     | 0      | 0      | 0      | 0.001  | t | 7004   | CSGLVGLF<br>TPGAKQNI         | Mus<br>musculu<br>s              |
| 1 | 1.00 | 1 | 1 | 0     | 0      | 0      | 0      | 0.001  | t | 266    | AALANSLS<br>LGPQQKV          | Mus<br>musculu<br>s              |
| 1 | 1.00 | 1 | 1 | 0     | 0      | 0      | 0      | 0.001  | t | 4701   | ASQKIQLI                     | Mus<br>musculu<br>s              |
| 1 | 1.00 | 1 | 1 | 0     | 0      | 0      | 0      | 0.001  | t | 5962   | CAALASLF<br>LSLGPQQK         | Mus<br>musculu<br>s              |
| 1 | 1.00 | 1 | 1 | 0.02  | 0.017  | 0.012  | 0.021  | 0.022  | t | 67157  | TVSNAFEE<br>GGCITCPP<br>YVEV | Canis<br>lupus                   |
| 1 | 1.00 | 1 | 1 | -0.01 | -0.01  | -0.005 | -0.013 | -0.01  | t | 64099  | THWQLGE<br>RPD               | Homo<br>sapiens                  |
| 1 | 1.00 | 1 | 1 | -0.02 | -0.02  | -0.011 | -0.016 | -0.019 | t | 119297 | NTFCDSCI<br>PKTFWN           | Homo<br>sapiens                  |
| 1 | 1.00 | 1 | 1 | 0     | -0.003 | 0      | -0.001 | 0      | t | 50180  | PYVEPTAP<br>QVL              | Oryctola<br>gus<br>cuniculu<br>s |
| 1 | 1.00 | 1 | 1 | 0.04  | 0.04   | 0.04   | 0.04   | 0.04   | t | 17707  | FSFCETNG<br>LE               | Homo<br>sapiens                  |
| 1 | 1.00 | 1 | 1 | 0.02  | 0.02   | 0.02   | 0.02   | 0.02   | t | 114900 | NAVVESN<br>GTL               | Homo<br>sapiens                  |
| 1 | 1.00 | 1 | 1 | 0.02  | 0.02   | 0.02   | 0.02   | 0.02   | t | 103258 | HQGQGG<br>AKSKGSQ<br>QE      | Homo<br>sapiens                  |
| 1 | 1.00 | 1 | 1 | -0.02 | -0.02  | -0.02  | -0.02  | -0.02  | t | 149081 | NPNQTRM                      | Sus<br>scrofa                    |

|   |      |   |   |       |        |        |        |        |   |        |                               |                                  |
|---|------|---|---|-------|--------|--------|--------|--------|---|--------|-------------------------------|----------------------------------|
| 1 | 1.00 | 1 | 1 | -0.02 | -0.02  | -0.02  | -0.02  | -0.02  | t | 153348 | ACTALQQ<br>WLCGGGS            | Mus<br>musculu<br>s              |
| 1 | 1.00 | 1 | 1 | -0.02 | -0.02  | -0.02  | -0.02  | -0.02  | t | 114873 | KPDCTAED<br>RP                | Homo<br>sapiens                  |
| 1 | 1.00 | 1 | 1 | -0.02 | -0.02  | -0.02  | -0.02  | -0.02  | t | 107527 | NAKTKPR                       | Homo<br>sapiens                  |
| 1 | 1.00 | 1 | 1 | -0.02 | -0.02  | -0.02  | -0.02  | -0.02  | t | 79608  | LRPDSIF                       | Oryctola<br>gus<br>cuniculu<br>s |
| 1 | 1.00 | 1 | 1 | -0.01 | -0.012 | -0.017 | -0.007 | -0.008 | t | 6688   | CNEKSFKD<br>ILPKLTENP<br>WQ   | Rattus<br>norvegic<br>us         |
| 1 | 1.00 | 1 | 1 | 0     | -0.002 | 0      | 0.003  | 0.002  | t | 28676  | ISQAVHAA<br>HAEINEAG<br>R     | Mus<br>musculu<br>s              |
| 1 | 1.00 | 1 | 1 | 0     | -0.004 | 0      | 0.003  | 0.002  | t | 28676  | ISQAVHAA<br>HAEINEAG<br>R     | Oryctola<br>gus<br>cuniculu<br>s |
| 1 | 1.00 | 1 | 1 | -0.01 | -0.006 | -0.014 | -0.007 | -0.01  | t | 30407  | KEGLRNIT<br>AGANPIEV<br>KRG M | Homo<br>sapiens                  |
| 1 | 1.00 | 1 | 1 | -0.02 | -0.03  | -0.02  | -0.019 | -0.02  | t | 67802  | VAVRYVG<br>ATTASIRS           | Homo<br>sapiens                  |
| 1 | 1.00 | 1 | 1 | -0.03 | -0.026 | -0.027 | -0.033 | -0.03  | t | 105826 | GGLRILSP<br>DRKRRQQ           | Homo<br>sapiens                  |
| 1 | 1.00 | 1 | 1 | 0.03  | 0.03   | 0.03   | 0.03   | 0.03   | t | 140938 | YLNATPAA<br>KVLVEGNT<br>DERG  | Oryctola<br>gus<br>cuniculu<br>s |
| 1 | 1.00 | 1 | 1 | -0.03 | -0.027 | -0.027 | -0.03  | -0.032 | t | 74048  | YGLPNWV<br>KVWDRAT<br>N       | Equus<br>caballus                |
| 1 | 1.00 | 1 | 1 | -0.02 | -0.022 | -0.008 | -0.021 | -0.021 | t | 65374  | TNMKHM                        | Mus<br>musculu<br>s              |
| 1 | 1.00 | 1 | 1 | 0.06  | 0.062  | 0.047  | 0.061  | 0.063  | t | 110388 | QSQTPETP<br>ATPLSCCT<br>ETQW  | Homo<br>sapiens                  |
| 1 | 1.00 | 1 | 1 | -0.02 | -0.022 | -0.016 | -0.021 | -0.02  | t | 137921 | LIKNPDV                       | Rattus<br>norvegic<br>us         |

|   |      |   |   |       |        |        |        |       |   |        |                              |                     |
|---|------|---|---|-------|--------|--------|--------|-------|---|--------|------------------------------|---------------------|
| 1 | 1.00 | 1 | 1 | 0.01  | 0.01   | 0.013  | 0.01   | 0.009 | t | 158944 | KVQVQGP<br>WDEEDIKL<br>D     | Mus<br>musculu<br>s |
| 1 | 1.00 | 1 | 1 | 0.05  | 0.054  | 0.052  | 0.047  | 0.052 | t | 95922  | TPEVDD                       | Homo<br>sapiens     |
| 1 | 1.00 | 1 | 1 | 0     | 0      | 0      | -0.004 | 0     | t | 58921  | SKPTTKQR<br>QNKP             | Homo<br>sapiens     |
| 1 | 1.00 | 1 | 1 | 0     | 0      | 0      | -0.002 | 0     | t | 24693  | HRMAWD<br>MM                 | Homo<br>sapiens     |
| 1 | 1.00 | 1 | 1 | 0.01  | 0.008  | 0.005  | 0.003  | 0.013 | t | 129661 | PVDGVVL<br>VD                | Mus<br>musculu<br>s |
| 1 | 1.00 | 1 | 1 | -0.02 | -0.016 | -0.015 | -0.019 | -0.02 | t | 97212  | ASIAGMFL<br>TT               | Homo<br>sapiens     |
| 1 | 1.00 | 1 | 1 | 0     | 0      | 0      | -0.002 | 0     | t | 135990 | SASVPALT<br>AVET             | Homo<br>sapiens     |
| 1 | 1.00 | 1 | 1 | 0     | 0      | 0      | -0.002 | 0     | t | 135958 | LTAVETGH<br>TSQV             | Homo<br>sapiens     |
| 1 | 1.00 | 1 | 1 | 0     | 0      | 0      | -0.002 | 0     | t | 143941 | IDIINPAQ<br>NRLR             | Homo<br>sapiens     |
| 1 | 1.00 | 1 | 1 | 0     | 0      | 0      | -0.002 | 0     | t | 144093 | THNHQVP<br>LAIS              | Homo<br>sapiens     |
| 1 | 1.00 | 1 | 1 | 0     | 0      | 0      | -0.002 | 0     | t | 144059 | RKVPLLSG<br>TLPQ             | Homo<br>sapiens     |
| 1 | 1.00 | 1 | 1 | 0     | 0      | 0      | -0.002 | 0     | t | 135944 | KEQFEFAL<br>TAVAEVC          | Homo<br>sapiens     |
| 1 | 1.00 | 1 | 1 | 0     | 0      | 0      | -0.002 | 0     | t | 121057 | VTVTFMLV<br>WLINHHG<br>WSVAQ | Homo<br>sapiens     |
| 1 | 1.00 | 1 | 1 | 0     | 0      | 0      | -0.002 | 0     | t | 117773 | CNSRQTD<br>REDELI            | Homo<br>sapiens     |
| 1 | 1.00 | 1 | 1 | 0     | 0      | 0      | -0.002 | 0     | t | 117742 | AKAQTD<br>EDLRTLLRY          | Homo<br>sapiens     |
| 1 | 1.00 | 1 | 1 | 0     | 0      | 0      | -0.002 | 0     | t | 120699 | KMFPEVKE<br>KGMAALP<br>RL    | Homo<br>sapiens     |



|   |      |   |   |   |   |   |        |   |   |        |                              |                 |
|---|------|---|---|---|---|---|--------|---|---|--------|------------------------------|-----------------|
| 1 | 1.00 | 1 | 1 | 0 | 0 | 0 | -0.002 | 0 | t | 120904 | RALKRRNA<br>RTKAR            | Homo<br>sapiens |
| 1 | 1.00 | 1 | 1 | 0 | 0 | 0 | -0.002 | 0 | t | 131344 | AIGDRSKT<br>DRENSVSI<br>G    | Homo<br>sapiens |
| 1 | 1.00 | 1 | 1 | 0 | 0 | 0 | -0.002 | 0 | t | 131344 | AIGDRSKT<br>DRENSVSI<br>G    | Homo<br>sapiens |
| 1 | 1.00 | 1 | 1 | 0 | 0 | 0 | -0.002 | 0 | t | 110468 | YYVLHLCL<br>AATKYPLL<br>KLLG | Homo<br>sapiens |
| 1 | 1.00 | 1 | 1 | 0 | 0 | 0 | -0.002 | 0 | t | 110602 | GLKAKPKF<br>TLGKRKAT<br>PTT  | Homo<br>sapiens |
| 1 | 1.00 | 1 | 1 | 0 | 0 | 0 | -0.002 | 0 | t | 110652 | LCLIGCKPP<br>IGEHWGK<br>GSPC | Homo<br>sapiens |
| 1 | 1.00 | 1 | 1 | 0 | 0 | 0 | -0.002 | 0 | t | 111450 | KGSPCTNV<br>AVNPGDC<br>PPLEL | Homo<br>sapiens |
| 1 | 1.00 | 1 | 1 | 0 | 0 | 0 | -0.002 | 0 | t | 110685 | PMDTFIVS<br>TNPNTVTS<br>STPI | Homo<br>sapiens |
| 1 | 1.00 | 1 | 1 | 0 | 0 | 0 | -0.002 | 0 | t | 117348 | PTRAPSGP<br>RPP              | Homo<br>sapiens |
| 1 | 1.00 | 1 | 1 | 0 | 0 | 0 | -0.002 | 0 | t | 113400 | FKLGGRDS<br>R                | Homo<br>sapiens |
| 1 | 1.00 | 1 | 1 | 0 | 0 | 0 | -0.002 | 0 | t | 113401 | FKLPGLNS<br>R                | Homo<br>sapiens |
| 1 | 1.00 | 1 | 1 | 0 | 0 | 0 | -0.002 | 0 | t | 110293 | IPKPSPWA<br>PKKHRRLS<br>SDQD | Homo<br>sapiens |
| 1 | 1.00 | 1 | 1 | 0 | 0 | 0 | -0.002 | 0 | t | 113848 | SGKDGHH<br>AA                | Homo<br>sapiens |
| 1 | 1.00 | 1 | 1 | 0 | 0 | 0 | -0.002 | 0 | t | 110733 | VGENVPD<br>DLYIKGSG          | Homo<br>sapiens |
| 1 | 1.00 | 1 | 1 | 0 | 0 | 0 | -0.002 | 0 | t | 111581 | NGICWGN<br>QLFVTVVD<br>TTRST | Homo<br>sapiens |
| 1 | 1.00 | 1 | 1 | 0 | 0 | 0 | -0.002 | 0 | t | 110303 | KHRRLLSD<br>QDQSQTP<br>ETPAT | Homo<br>sapiens |
| 1 | 1.00 | 1 | 1 | 0 | 0 | 0 | -0.002 | 0 | t | 111583 | NKFGFPDT<br>SFYNPDTQ<br>RLVW | Homo<br>sapiens |

|   |      |   |   |   |   |   |        |   |   |        |                              |                 |
|---|------|---|---|---|---|---|--------|---|---|--------|------------------------------|-----------------|
| 1 | 1.00 | 1 | 1 | 0 | 0 | 0 | -0.002 | 0 | t | 110388 | QSQTPETP<br>ATPLSCCT<br>ETQW | Homo<br>sapiens |
| 1 | 1.00 | 1 | 1 | 0 | 0 | 0 | -0.002 | 0 | t | 111890 | VDNRECIS<br>MDYKQTQ<br>LCLIG | Homo<br>sapiens |
| 1 | 1.00 | 1 | 1 | 0 | 0 | 0 | -0.002 | 0 | t | 114463 | LTSRPAHG                     | Homo<br>sapiens |
| 1 | 1.00 | 1 | 1 | 0 | 0 | 0 | -0.002 | 0 | t | 111088 | ACQKHTP<br>PAPKEDDP<br>LKKYT | Homo<br>sapiens |
| 1 | 1.00 | 1 | 1 | 0 | 0 | 0 | -0.002 | 0 | t | 70016  | VMSGEMP<br>STEDLVN           | Homo<br>sapiens |
| 1 | 1.00 | 1 | 1 | 0 | 0 | 0 | -0.002 | 0 | t | 65797  | TPVGLAVD<br>TPWVEKES<br>ALSI | Homo<br>sapiens |
| 1 | 1.00 | 1 | 1 | 0 | 0 | 0 | -0.002 | 0 | t | 73595  | YDTRCFDS<br>T                | Homo<br>sapiens |
| 1 | 1.00 | 1 | 1 | 0 | 0 | 0 | -0.002 | 0 | t | 65473  | TNVDQDL<br>VGWPAPP           | Homo<br>sapiens |
| 1 | 1.00 | 1 | 1 | 0 | 0 | 0 | -0.002 | 0 | t | 63096  | TCRNMWS<br>GT                | Homo<br>sapiens |
| 1 | 1.00 | 1 | 1 | 0 | 0 | 0 | -0.002 | 0 | t | 70026  | VMTVEIRK<br>QNMTEF<br>MELWSQ | Homo<br>sapiens |
| 1 | 1.00 | 1 | 1 | 0 | 0 | 0 | -0.002 | 0 | t | 65473  | TNVDQDL<br>VGWPAPP           | Homo<br>sapiens |
| 1 | 1.00 | 1 | 1 | 0 | 0 | 0 | -0.002 | 0 | t | 70270  | VPDKEVLY<br>QQYDEM           | Homo<br>sapiens |
| 1 | 1.00 | 1 | 1 | 0 | 0 | 0 | -0.002 | 0 | t | 66787  | TTQETVTT<br>QETV             | Homo<br>sapiens |
| 1 | 1.00 | 1 | 1 | 0 | 0 | 0 | -0.002 | 0 | t | 68347  | VESMETT<br>MRSPVFT           | Homo<br>sapiens |
| 1 | 1.00 | 1 | 1 | 0 | 0 | 0 | -0.002 | 0 | t | 67746  | VASHVRV<br>NVYLSAIN<br>LECFA | Homo<br>sapiens |
| 1 | 1.00 | 1 | 1 | 0 | 0 | 0 | -0.002 | 0 | t | 68730  | VGMVVAH<br>VLRLPQTL          | Homo<br>sapiens |
| 1 | 1.00 | 1 | 1 | 0 | 0 | 0 | -0.002 | 0 | t | 70428  | VPPPRRRR<br>AKVLTQ           | Homo<br>sapiens |
| 1 | 1.00 | 1 | 1 | 0 | 0 | 0 | -0.002 | 0 | t | 65473  | TNVDQDL<br>VGWPAPP           | Homo<br>sapiens |
| 1 | 1.00 | 1 | 1 | 0 | 0 | 0 | -0.002 | 0 | t | 67922  | VDDPRSEE<br>DKRFESHI<br>ECRK | Homo<br>sapiens |

|   |      |   |   |   |   |   |        |   |   |       |                              |                 |
|---|------|---|---|---|---|---|--------|---|---|-------|------------------------------|-----------------|
| 1 | 1.00 | 1 | 1 | 0 | 0 | 0 | -0.002 | 0 | t | 65515 | TPCAAEEQ<br>KLPINA           | Homo<br>sapiens |
| 1 | 1.00 | 1 | 1 | 0 | 0 | 0 | -0.002 | 0 | t | 73004 | WQRSNAE<br>FEQNLENA<br>QWFAF | Homo<br>sapiens |
| 1 | 1.00 | 1 | 1 | 0 | 0 | 0 | -0.002 | 0 | t | 62993 | TASITSPLT<br>TQNTL           | Homo<br>sapiens |
| 1 | 1.00 | 1 | 1 | 0 | 0 | 0 | -0.002 | 0 | t | 67531 | VAAQLAP<br>PSAASAF           | Homo<br>sapiens |
| 1 | 1.00 | 1 | 1 | 0 | 0 | 0 | -0.002 | 0 | t | 70427 | VPPRRKR<br>TIQLDG            | Homo<br>sapiens |
| 1 | 1.00 | 1 | 1 | 0 | 0 | 0 | -0.002 | 0 | t | 73614 | YEAADAIL<br>HTP              | Homo<br>sapiens |
| 1 | 1.00 | 1 | 1 | 0 | 0 | 0 | -0.002 | 0 | t | 67572 | VAESDGV<br>DEDRAAL           | Homo<br>sapiens |
| 1 | 1.00 | 1 | 1 | 0 | 0 | 0 | -0.002 | 0 | t | 60473 | SQKIQLVN<br>TNGSWH           | Homo<br>sapiens |
| 1 | 1.00 | 1 | 1 | 0 | 0 | 0 | -0.002 | 0 | t | 67647 | VAKLVTQE<br>MFQNIK<br>KIESQ  | Homo<br>sapiens |
| 1 | 1.00 | 1 | 1 | 0 | 0 | 0 | -0.002 | 0 | t | 68334 | VERVLQD<br>AKMDKRA<br>V      | Homo<br>sapiens |
| 1 | 1.00 | 1 | 1 | 0 | 0 | 0 | -0.002 | 0 | t | 72326 | WDQMW<br>KCLI                | Homo<br>sapiens |
| 1 | 1.00 | 1 | 1 | 0 | 0 | 0 | -0.002 | 0 | t | 68027 | VDMVAGA<br>HWGVLAG<br>LA     | Homo<br>sapiens |
| 1 | 1.00 | 1 | 1 | 0 | 0 | 0 | -0.002 | 0 | t | 61994 | STVSEEAS<br>AEDVVC           | Homo<br>sapiens |
| 1 | 1.00 | 1 | 1 | 0 | 0 | 0 | -0.002 | 0 | t | 65520 | TPCSAEEE<br>KLPISP           | Homo<br>sapiens |
| 1 | 1.00 | 1 | 1 | 0 | 0 | 0 | -0.002 | 0 | t | 65482 | TNWQKLE                      | Homo<br>sapiens |
| 1 | 1.00 | 1 | 1 | 0 | 0 | 0 | -0.002 | 0 | t | 65473 | TNVDQDL<br>VGWPAPP           | Homo<br>sapiens |
| 1 | 1.00 | 1 | 1 | 0 | 0 | 0 | -0.002 | 0 | t | 67732 | VARDDKG<br>RRYYLT            | Homo<br>sapiens |
| 1 | 1.00 | 1 | 1 | 0 | 0 | 0 | -0.002 | 0 | t | 72236 | WAKHMW<br>NFI                | Homo<br>sapiens |
| 1 | 1.00 | 1 | 1 | 0 | 0 | 0 | -0.002 | 0 | t | 62924 | TALVVAQL<br>LRIPQAI          | Homo<br>sapiens |
| 1 | 1.00 | 1 | 1 | 0 | 0 | 0 | -0.002 | 0 | t | 42235 | MNPRNTV<br>FDAKRLIG<br>RKFS  | Homo<br>sapiens |
| 1 | 1.00 | 1 | 1 | 0 | 0 | 0 | -0.002 | 0 | t | 53069 | RAALIEEG<br>QRIAEM           | Homo<br>sapiens |

|   |      |   |   |   |   |   |        |   |   |       |                              |              |
|---|------|---|---|---|---|---|--------|---|---|-------|------------------------------|--------------|
| 1 | 1.00 | 1 | 1 | 0 | 0 | 0 | -0.002 | 0 | t | 56747 | SAEEKGTG<br>KRNQIVL          | Homo sapiens |
| 1 | 1.00 | 1 | 1 | 0 | 0 | 0 | -0.002 | 0 | t | 40980 | LYVGGPLT<br>NSRGEN           | Homo sapiens |
| 1 | 1.00 | 1 | 1 | 0 | 0 | 0 | -0.002 | 0 | t | 50354 | QASDDGD<br>KGSDVES           | Homo sapiens |
| 1 | 1.00 | 1 | 1 | 0 | 0 | 0 | -0.002 | 0 | t | 54065 | RHLLCLLL<br>LTVGG            | Homo sapiens |
| 1 | 1.00 | 1 | 1 | 0 | 0 | 0 | -0.002 | 0 | t | 60285 | SPTHYVPE<br>SDAAAR           | Homo sapiens |
| 1 | 1.00 | 1 | 1 | 0 | 0 | 0 | -0.002 | 0 | t | 40724 | LYCGGPM<br>FNSKGAQ           | Homo sapiens |
| 1 | 1.00 | 1 | 1 | 0 | 0 | 0 | -0.002 | 0 | t | 50119 | PYKELRLE<br>VGKQRLKY<br>AQEE | Homo sapiens |
| 1 | 1.00 | 1 | 1 | 0 | 0 | 0 | -0.002 | 0 | t | 43462 | NDKGRLSR<br>AEIERMV          | Homo sapiens |
| 1 | 1.00 | 1 | 1 | 0 | 0 | 0 | -0.002 | 0 | t | 46532 | NWFGCT<br>WMN                | Homo sapiens |
| 1 | 1.00 | 1 | 1 | 0 | 0 | 0 | -0.002 | 0 | t | 44278 | NILKDNQ<br>QKIEKAIEE<br>ADEF | Homo sapiens |
| 1 | 1.00 | 1 | 1 | 0 | 0 | 0 | -0.002 | 0 | t | 53276 | RCHARKA<br>VAHINSV           | Homo sapiens |
| 1 | 1.00 | 1 | 1 | 0 | 0 | 0 | -0.002 | 0 | t | 48520 | PLVESWKR<br>PDYQPA           | Homo sapiens |
| 1 | 1.00 | 1 | 1 | 0 | 0 | 0 | -0.002 | 0 | t | 48521 | PLVETWKK<br>PDYEPP           | Homo sapiens |
| 1 | 1.00 | 1 | 1 | 0 | 0 | 0 | -0.002 | 0 | t | 42060 | MLSKYSLPI<br>VEEPEDYK<br>EAS | Homo sapiens |
| 1 | 1.00 | 1 | 1 | 0 | 0 | 0 | -0.002 | 0 | t | 55643 | RRLHAWIT<br>EDCPVP           | Homo sapiens |
| 1 | 1.00 | 1 | 1 | 0 | 0 | 0 | -0.002 | 0 | t | 54396 | RKNKGKDL<br>STNLRAL          | Homo sapiens |
| 1 | 1.00 | 1 | 1 | 0 | 0 | 0 | -0.002 | 0 | t | 55646 | RRLHQWIS<br>SECTTP           | Homo sapiens |
| 1 | 1.00 | 1 | 1 | 0 | 0 | 0 | -0.002 | 0 | t | 44232 | NIGGEGN<br>HNESPL            | Homo sapiens |
| 1 | 1.00 | 1 | 1 | 0 | 0 | 0 | -0.002 | 0 | t | 37833 | LLSVGVGIF<br>LLPAR           | Homo sapiens |
| 1 | 1.00 | 1 | 1 | 0 | 0 | 0 | -0.002 | 0 | t | 45464 | NPRENKLK<br>QPGDRAD<br>GQPAG | Homo sapiens |
| 1 | 1.00 | 1 | 1 | 0 | 0 | 0 | -0.002 | 0 | t | 57279 | SDSESCSS<br>MPPLEG           | Homo sapiens |

|   |      |   |   |   |   |   |        |   |   |       |                              |              |
|---|------|---|---|---|---|---|--------|---|---|-------|------------------------------|--------------|
| 1 | 1.00 | 1 | 1 | 0 | 0 | 0 | -0.002 | 0 | t | 43248 | NANPNAN<br>PNANPNA<br>NPNANP | Homo sapiens |
| 1 | 1.00 | 1 | 1 | 0 | 0 | 0 | -0.002 | 0 | t | 52735 | QVLDSHY<br>QDVLKEV           | Homo sapiens |
| 1 | 1.00 | 1 | 1 | 0 | 0 | 0 | -0.002 | 0 | t | 39253 | LRVHNKVY<br>CTTSKSA          | Homo sapiens |
| 1 | 1.00 | 1 | 1 | 0 | 0 | 0 | -0.002 | 0 | t | 45464 | NPRENKLK<br>QPGDRAD<br>GQPAG | Homo sapiens |
| 1 | 1.00 | 1 | 1 | 0 | 0 | 0 | -0.002 | 0 | t | 43248 | NANPNAN<br>PNANPNA<br>NPNANP | Homo sapiens |
| 1 | 1.00 | 1 | 1 | 0 | 0 | 0 | -0.002 | 0 | t | 42646 | MSRIAAG<br>DLESSVDD<br>PRSEE | Homo sapiens |
| 1 | 1.00 | 1 | 1 | 0 | 0 | 0 | -0.002 | 0 | t | 53267 | RCEPVVCY<br>LYGKRGG<br>GKSLT | Homo sapiens |
| 1 | 1.00 | 1 | 1 | 0 | 0 | 0 | -0.002 | 0 | t | 53240 | RAVVAPD<br>KEVLYE            | Homo sapiens |
| 1 | 1.00 | 1 | 1 | 0 | 0 | 0 | -0.002 | 0 | t | 57508 | SEKTIWSLI<br>AWQRSNA<br>EFEQ | Homo sapiens |
| 1 | 1.00 | 1 | 1 | 0 | 0 | 0 | -0.002 | 0 | t | 39196 | LRRRLTAC<br>ERAKRTL          | Homo sapiens |
| 1 | 1.00 | 1 | 1 | 0 | 0 | 0 | -0.002 | 0 | t | 54197 | RIMKVEFT<br>QCSMNVV<br>SKTLF | Homo sapiens |
| 1 | 1.00 | 1 | 1 | 0 | 0 | 0 | -0.002 | 0 | t | 60285 | SPTHVPE<br>SDAAAR            | Homo sapiens |
| 1 | 1.00 | 1 | 1 | 0 | 0 | 0 | -0.002 | 0 | t | 56448 | RVVVTDPK<br>EILYEA           | Homo sapiens |
| 1 | 1.00 | 1 | 1 | 0 | 0 | 0 | -0.002 | 0 | t | 52228 | QRLKYAQE<br>ELSNEVLP<br>PPRK | Homo sapiens |
| 1 | 1.00 | 1 | 1 | 0 | 0 | 0 | -0.002 | 0 | t | 47026 | PCKPLLRD<br>DITFMV           | Homo sapiens |
| 1 | 1.00 | 1 | 1 | 0 | 0 | 0 | -0.002 | 0 | t | 50477 | QDIQPAV<br>QASWPKV           | Homo sapiens |
| 1 | 1.00 | 1 | 1 | 0 | 0 | 0 | -0.002 | 0 | t | 54232 | RIRADFNA<br>SMDLL            | Homo sapiens |
| 1 | 1.00 | 1 | 1 | 0 | 0 | 0 | -0.002 | 0 | t | 58366 | SHIECRKPY<br>KELRLEVG<br>KQR | Homo sapiens |
| 1 | 1.00 | 1 | 1 | 0 | 0 | 0 | -0.002 | 0 | t | 37304 | LLFVGVL<br>FLLPAR            | Homo sapiens |

|   |      |   |   |   |   |   |        |   |   |       |                               |              |
|---|------|---|---|---|---|---|--------|---|---|-------|-------------------------------|--------------|
| 1 | 1.00 | 1 | 1 | 0 | 0 | 0 | -0.002 | 0 | t | 37021 | LKSKIQGLL<br>QQASK            | Homo sapiens |
| 1 | 1.00 | 1 | 1 | 0 | 0 | 0 | -0.002 | 0 | t | 59160 | SLIAWQRS<br>NAEFEQNL<br>ENAQ  | Homo sapiens |
| 1 | 1.00 | 1 | 1 | 0 | 0 | 0 | -0.002 | 0 | t | 27554 | IMSGEKPS<br>MEDVVN            | Homo sapiens |
| 1 | 1.00 | 1 | 1 | 0 | 0 | 0 | -0.002 | 0 | t | 25795 | IEEVALSTT<br>GEIPF            | Homo sapiens |
| 1 | 1.00 | 1 | 1 | 0 | 0 | 0 | -0.002 | 0 | t | 35292 | LDSMTEVE<br>DDREPS            | Homo sapiens |
| 1 | 1.00 | 1 | 1 | 0 | 0 | 0 | -0.002 | 0 | t | 10754 | DVTRIESES<br>KVVVL            | Homo sapiens |
| 1 | 1.00 | 1 | 1 | 0 | 0 | 0 | -0.002 | 0 | t | 10753 | DVTRIESD<br>SKVIVL            | Homo sapiens |
| 1 | 1.00 | 1 | 1 | 0 | 0 | 0 | -0.002 | 0 | t | 32984 | KQGGENF<br>AYLTAYQA           | Homo sapiens |
| 1 | 1.00 | 1 | 1 | 0 | 0 | 0 | -0.002 | 0 | t | 18591 | GAGGTAG<br>GSAGGSA<br>GGSAGG  | Homo sapiens |
| 1 | 1.00 | 1 | 1 | 0 | 0 | 0 | -0.002 | 0 | t | 18053 | FTQCSTMN<br>VVSKTLFR<br>KSPIY | Homo sapiens |
| 1 | 1.00 | 1 | 1 | 0 | 0 | 0 | -0.002 | 0 | t | 14889 | EVTRVGDF<br>HYVTGM            | Homo sapiens |
| 1 | 1.00 | 1 | 1 | 0 | 0 | 0 | -0.002 | 0 | t | 22121 | GRLGIYRY<br>VSTGER            | Homo sapiens |
| 1 | 1.00 | 1 | 1 | 0 | 0 | 0 | -0.002 | 0 | t | 33761 | KTLLSRFL<br>WWLCYL            | Homo sapiens |
| 1 | 1.00 | 1 | 1 | 0 | 0 | 0 | -0.002 | 0 | t | 20657 | GKPALVPD<br>KE                | Homo sapiens |
| 1 | 1.00 | 1 | 1 | 0 | 0 | 0 | -0.002 | 0 | t | 20654 | GKPAIIPDR<br>E                | Homo sapiens |
| 1 | 1.00 | 1 | 1 | 0 | 0 | 0 | -0.002 | 0 | t | 17278 | FPELKPGE<br>SRHTSDH<br>MSIYK  | Homo sapiens |
| 1 | 1.00 | 1 | 1 | 0 | 0 | 0 | -0.002 | 0 | t | 34135 | KVNFPHG<br>MLDLEEIA<br>ANSKD  | Homo sapiens |
| 1 | 1.00 | 1 | 1 | 0 | 0 | 0 | -0.002 | 0 | t | 22123 | GRLGTYRY<br>VSSGER            | Homo sapiens |
| 1 | 1.00 | 1 | 1 | 0 | 0 | 0 | -0.002 | 0 | t | 17590 | FRGKELKK<br>SIQPDEA           | Homo sapiens |
| 1 | 1.00 | 1 | 1 | 0 | 0 | 0 | -0.002 | 0 | t | 25010 | HTYTPHEL<br>TRVASA            | Homo sapiens |
| 1 | 1.00 | 1 | 1 | 0 | 0 | 0 | -0.002 | 0 | t | 27909 | IPKVMQLV<br>SDFFRGKE<br>LKKS  | Homo sapiens |

|   |      |   |   |   |   |   |        |   |   |       |                              |              |
|---|------|---|---|---|---|---|--------|---|---|-------|------------------------------|--------------|
| 1 | 1.00 | 1 | 1 | 0 | 0 | 0 | -0.002 | 0 | t | 27979 | IPPPRGRV<br>PQIEVTF          | Homo sapiens |
| 1 | 1.00 | 1 | 1 | 0 | 0 | 0 | -0.002 | 0 | t | 17589 | FRGETKTF<br>NPEEVSS          | Homo sapiens |
| 1 | 1.00 | 1 | 1 | 0 | 0 | 0 | -0.002 | 0 | t | 15536 | FEGERAM<br>TKDCHLLG<br>T     | Homo sapiens |
| 1 | 1.00 | 1 | 1 | 0 | 0 | 0 | -0.002 | 0 | t | 30235 | KDRRSTGK<br>SWGK             | Homo sapiens |
| 1 | 1.00 | 1 | 1 | 0 | 0 | 0 | -0.002 | 0 | t | 33504 | KSRYGFGA<br>KEVRSL           | Homo sapiens |
| 1 | 1.00 | 1 | 1 | 0 | 0 | 0 | -0.002 | 0 | t | 33365 | KSKFGYGA<br>KDVRNL           | Homo sapiens |
| 1 | 1.00 | 1 | 1 | 0 | 0 | 0 | -0.002 | 0 | t | 10748 | DVTFQV                       | Homo sapiens |
| 1 | 1.00 | 1 | 1 | 0 | 0 | 0 | -0.002 | 0 | t | 33259 | KRYISWCL<br>WWLQYF           | Homo sapiens |
| 1 | 1.00 | 1 | 1 | 0 | 0 | 0 | -0.002 | 0 | t | 33199 | KRNQIVLT<br>NDKGRLS          | Homo sapiens |
| 1 | 1.00 | 1 | 1 | 0 | 0 | 0 | -0.002 | 0 | t | 31502 | KKDGKKAE<br>PKNPRENK<br>LDQP | Homo sapiens |
| 1 | 1.00 | 1 | 1 | 0 | 0 | 0 | -0.002 | 0 | t | 32501 | KNGLENYA<br>FSMKNAV<br>NDPN  | Homo sapiens |
| 1 | 1.00 | 1 | 1 | 0 | 0 | 0 | -0.002 | 0 | t | 12571 | EIRQVGDF<br>HYVTGM           | Homo sapiens |
| 1 | 1.00 | 1 | 1 | 0 | 0 | 0 | -0.002 | 0 | t | 27379 | ILTGGKSK<br>QTEGLLLL         | Homo sapiens |
| 1 | 1.00 | 1 | 1 | 0 | 0 | 0 | -0.002 | 0 | t | 24881 | HSYSPGEI<br>NRVASC           | Homo sapiens |
| 1 | 1.00 | 1 | 1 | 0 | 0 | 0 | -0.002 | 0 | t | 27599 | INCYTEGQ<br>CVPKPA           | Homo sapiens |
| 1 | 1.00 | 1 | 1 | 0 | 0 | 0 | -0.002 | 0 | t | 22732 | GTKSLEPC<br>TCGAVD           | Homo sapiens |
| 1 | 1.00 | 1 | 1 | 0 | 0 | 0 | -0.002 | 0 | t | 17531 | FQSFPSGE<br>PSNSKLSG<br>FFQS | Homo sapiens |
| 1 | 1.00 | 1 | 1 | 0 | 0 | 0 | -0.002 | 0 | t | 30661 | KEVPALTA<br>VETGAT           | Homo sapiens |
| 1 | 1.00 | 1 | 1 | 0 | 0 | 0 | -0.002 | 0 | t | 30661 | KEVPALTA<br>VETGAT           | Homo sapiens |
| 1 | 1.00 | 1 | 1 | 0 | 0 | 0 | -0.002 | 0 | t | 25766 | IEEADKKT<br>ITSAVEEAL<br>EWL | Homo sapiens |

|   |      |   |   |   |   |   |        |   |   |       |                              |              |
|---|------|---|---|---|---|---|--------|---|---|-------|------------------------------|--------------|
| 1 | 1.00 | 1 | 1 | 0 | 0 | 0 | -0.002 | 0 | t | 29744 | KAAASKVK<br>ANLLSV           | Homo sapiens |
| 1 | 1.00 | 1 | 1 | 0 | 0 | 0 | -0.002 | 0 | t | 10833 | DWVCSVL<br>ADFKAWL           | Homo sapiens |
| 1 | 1.00 | 1 | 1 | 0 | 0 | 0 | -0.002 | 0 | t | 36580 | LIKRNNTIP<br>TKKSQIF         | Homo sapiens |
| 1 | 1.00 | 1 | 1 | 0 | 0 | 0 | -0.002 | 0 | t | 25004 | HTYARFGI<br>EIQVQINP<br>TPFQ | Homo sapiens |
| 1 | 1.00 | 1 | 1 | 0 | 0 | 0 | -0.002 | 0 | t | 32635 | KNVVTGE<br>VQVLYTA           | Homo sapiens |
| 1 | 1.00 | 1 | 1 | 0 | 0 | 0 | -0.002 | 0 | t | 10813 | DWICTVLT<br>DFKTWL           | Homo sapiens |
| 1 | 1.00 | 1 | 1 | 0 | 0 | 0 | -0.002 | 0 | t | 16443 | FKQKALGL<br>LQTATK           | Homo sapiens |
| 1 | 1.00 | 1 | 1 | 0 | 0 | 0 | -0.002 | 0 | t | 33043 | KQNIQLIN<br>TNGSWH           | Homo sapiens |
| 1 | 1.00 | 1 | 1 | 0 | 0 | 0 | -0.002 | 0 | t | 25009 | HTYSPHEL<br>SRVAAT           | Homo sapiens |
| 1 | 1.00 | 1 | 1 | 0 | 0 | 0 | -0.002 | 0 | t | 34115 | KVLSPLQD<br>NNDSGH           | Homo sapiens |
| 1 | 1.00 | 1 | 1 | 0 | 0 | 0 | -0.002 | 0 | t | 12921 | ELAAALRG<br>MGINAV           | Homo sapiens |
| 1 | 1.00 | 1 | 1 | 0 | 0 | 0 | -0.002 | 0 | t | 27555 | IMSGEKPT<br>VEDVVN           | Homo sapiens |
| 1 | 1.00 | 1 | 1 | 0 | 0 | 0 | -0.002 | 0 | t | 27494 | IMGGECPT<br>AEDMVN           | Homo sapiens |
| 1 | 1.00 | 1 | 1 | 0 | 0 | 0 | -0.002 | 0 | t | 25497 | ICESAGVQ<br>EDAASL           | Homo sapiens |
| 1 | 1.00 | 1 | 1 | 0 | 0 | 0 | -0.002 | 0 | t | 25770 | IEEGQRIAE<br>ML              | Homo sapiens |
| 1 | 1.00 | 1 | 1 | 0 | 0 | 0 | -0.002 | 0 | t | 29938 | KARRSEGR<br>SWAQ             | Homo sapiens |
| 1 | 1.00 | 1 | 1 | 0 | 0 | 0 | -0.002 | 0 | t | 36192 | LGKQVKKA<br>VVTVPAYF<br>NDSQ | Homo sapiens |
| 1 | 1.00 | 1 | 1 | 0 | 0 | 0 | -0.002 | 0 | t | 10812 | DWICEVLS<br>DFKTWL           | Homo sapiens |
| 1 | 1.00 | 1 | 1 | 0 | 0 | 0 | -0.002 | 0 | t | 24694 | HRMAWD<br>MMM                | Homo sapiens |
| 1 | 1.00 | 1 | 1 | 0 | 0 | 0 | -0.002 | 0 | t | 32684 | KPDYEPV<br>VHGCP<br>LP       | Homo sapiens |
| 1 | 1.00 | 1 | 1 | 0 | 0 | 0 | -0.002 | 0 | t | 33776 | KTMIRFGD<br>VGLDLDFS<br>AFDA | Homo sapiens |
| 1 | 1.00 | 1 | 1 | 0 | 0 | 0 | -0.002 | 0 | t | 22491 | GSRTLGA<br>KHPALQ            | Homo sapiens |



|   |      |   |   |   |   |   |        |   |   |       |                              |              |
|---|------|---|---|---|---|---|--------|---|---|-------|------------------------------|--------------|
| 1 | 1.00 | 1 | 1 | 0 | 0 | 0 | -0.002 | 0 | t | 23797 | HFLCTFTF<br>NSNNKEYT<br>FPIT | Homo sapiens |
| 1 | 1.00 | 1 | 1 | 0 | 0 | 0 | -0.002 | 0 | t | 383   | AAPYIEQA<br>QVIAHQ           | Homo sapiens |
| 1 | 1.00 | 1 | 1 | 0 | 0 | 0 | -0.002 | 0 | t | 7063  | CSQHLPYI<br>EQGMQLA          | Homo sapiens |
| 1 | 1.00 | 1 | 1 | 0 | 0 | 0 | -0.002 | 0 | t | 4059  | AQRVEFLL<br>KAWAEK           | Homo sapiens |
| 1 | 1.00 | 1 | 1 | 0 | 0 | 0 | -0.002 | 0 | t | 5368  | AVIEPIVAT<br>NWQKL           | Homo sapiens |
| 1 | 1.00 | 1 | 1 | 0 | 0 | 0 | -0.002 | 0 | t | 6060  | CCDLAPEA<br>RQAIKS           | Homo sapiens |
| 1 | 1.00 | 1 | 1 | 0 | 0 | 0 | -0.002 | 0 | t | 6061  | CCDLDPQ<br>ARVAIKS           | Homo sapiens |
| 1 | 1.00 | 1 | 1 | 0 | 0 | 0 | -0.002 | 0 | t | 9940  | DRAAGQP<br>AGNGAGG<br>QAAGGN | Homo sapiens |
| 1 | 1.00 | 1 | 1 | 0 | 0 | 0 | -0.002 | 0 | t | 9940  | DRAAGQP<br>AGNGAGG<br>QAAGGN | Homo sapiens |
| 1 | 1.00 | 1 | 1 | 0 | 0 | 0 | -0.002 | 0 | t | 1758  | AHFTDEFK<br>RKNKGKDL<br>STNL | Homo sapiens |
| 1 | 1.00 | 1 | 1 | 0 | 0 | 0 | -0.002 | 0 | t | 92    | AADMIMH<br>TPGCVPC           | Homo sapiens |
| 1 | 1.00 | 1 | 1 | 0 | 0 | 0 | -0.002 | 0 | t | 6067  | CCNLEPEA<br>RKVISS           | Homo sapiens |
| 1 | 1.00 | 1 | 1 | 0 | 0 | 0 | -0.002 | 0 | t | 7705  | DCHLLGTE<br>ELSGIPPP<br>RGV  | Homo sapiens |
| 1 | 1.00 | 1 | 1 | 0 | 0 | 0 | -0.002 | 0 | t | 10149 | DSITWQL<br>QAAVLHV           | Homo sapiens |
| 1 | 1.00 | 1 | 1 | 0 | 0 | 0 | -0.002 | 0 | t | 4912  | ATCMQVN<br>LEIMTST           | Homo sapiens |
| 1 | 1.00 | 1 | 1 | 0 | 0 | 0 | -0.002 | 0 | t | 82    | AADAILHT<br>PGCVPC           | Homo sapiens |
| 1 | 1.00 | 1 | 1 | 0 | 0 | 0 | -0.002 | 0 | t | 568   | ACKPLLRE<br>DVTFQV           | Homo sapiens |
| 1 | 1.00 | 1 | 1 | 0 | 0 | 0 | -0.002 | 0 | t | 2226  | AKKVPETF<br>PELKPGES<br>RHTS | Homo sapiens |
| 1 | 1.00 | 1 | 1 | 0 | 0 | 0 | -0.002 | 0 | t | 10131 | DSGSRTTP<br>DELALS           | Homo sapiens |
| 1 | 1.00 | 1 | 1 | 0 | 0 | 0 | -0.002 | 0 | t | 848   | AEDAAEIS<br>VPAEIL           | Homo sapiens |

|   |      |   |   |       |        |       |        |        |   |        |                              |                         |
|---|------|---|---|-------|--------|-------|--------|--------|---|--------|------------------------------|-------------------------|
| 1 | 1.00 | 1 | 1 | 0     | 0      | 0     | -0.002 | 0      | t | 1470   | AGDLESSV<br>DDPRSEED<br>KRFE | Homo<br>sapiens         |
| 1 | 1.00 | 1 | 1 | 0     | 0      | 0     | -0.002 | 0      | t | 600    | ACSLPQEA<br>RTAIHS           | Homo<br>sapiens         |
| 1 | 1.00 | 1 | 1 | 0     | 0      | 0     | -0.002 | 0      | t | 1523   | AGGGQG<br>QNNEGAN<br>APNEDSV | Homo<br>sapiens         |
| 1 | 1.00 | 1 | 1 | 0     | 0      | 0     | -0.002 | 0      | t | 9511   | DNNDSGH<br>STGADTG           | Homo<br>sapiens         |
| 1 | 1.00 | 1 | 1 | 0     | 0      | 0     | -0.002 | 0      | t | 5380   | AVILLMCA<br>VHPTLV           | Homo<br>sapiens         |
| 1 | 1.00 | 1 | 1 | 0     | 0      | 0     | -0.002 | 0      | t | 3290   | ANGAGNQ<br>PGANGAG<br>NQPG   | Homo<br>sapiens         |
| 1 | 1.00 | 1 | 1 | 0     | 0      | 0     | -0.002 | 0      | t | 3508   | APDKEVLY<br>EAFDEM           | Homo<br>sapiens         |
| 1 | 1.00 | 1 | 1 | 0     | 0      | 0     | -0.002 | 0      | t | 5066   | ATNGDTH<br>LGGEDFD<br>N      | Homo<br>sapiens         |
| 1 | 1.00 | 1 | 1 | 0     | 0      | 0     | -0.002 | 0      | t | 2365   | ALAALAEK<br>SFPSSS           | Homo<br>sapiens         |
| 1 | 1.00 | 1 | 1 | 0     | 0      | 0     | -0.002 | 0      | t | 652    | ADDVILHT<br>PGCVPC           | Homo<br>sapiens         |
| 1 | 1.00 | 1 | 1 | 0     | 0      | 0     | -0.002 | 0      | t | 8494   | DGSNVLA<br>ALAALAE           | Homo<br>sapiens         |
| 1 | 1.00 | 1 | 1 | 0     | 0      | 0     | -0.002 | 0      | t | 6233   | CFKKPPKY<br>PPALPI           | Homo<br>sapiens         |
| 1 | 1.00 | 1 | 1 | 0     | 0      | 0     | -0.002 | 0      | t | 4911   | ATCMQAD<br>LEVMTST           | Homo<br>sapiens         |
| 1 | 1.00 | 1 | 1 | 0     | 0      | 0     | -0.002 | 0      | t | 10080  | DSAVAEFF<br>QSFPSGEP<br>SNSK | Homo<br>sapiens         |
| 1 | 1.00 | 1 | 1 | 0     | 0      | 0     | -0.002 | 0      | t | 8409   | DGIMQTT<br>CPCGAQI           | Homo<br>sapiens         |
| 1 | 1.00 | 1 | 1 | 0     | 0      | 0     | -0.002 | 0      | t | 8408   | DGIMHTR<br>CHCGAEI           | Homo<br>sapiens         |
| 1 | 1.00 | 1 | 1 | 0     | 0      | 0     | -0.002 | 0      | t | 9043   | DLDFSADF<br>ASLSPFMI<br>REAG | Homo<br>sapiens         |
| 1 | 1.00 | 1 | 1 | 0.03  | 0.029  | 0.029 | 0.023  | 0.03   | t | 432    | AASGDPTS<br>PDNIDS           | Myodes<br>glareolu<br>s |
| 1 | 1.00 | 1 | 1 | -0.04 | -0.036 | -0.04 | -0.033 | -0.038 | t | 134010 | APDDRSYK<br>SQYLNNG<br>PQRIG | Homo<br>sapiens         |

|   |      |   |   |       |        |        |        |        |   |        |                              |                       |
|---|------|---|---|-------|--------|--------|--------|--------|---|--------|------------------------------|-----------------------|
| 1 | 1.00 | 1 | 1 | -0.03 | -0.03  | -0.03  | -0.03  | -0.03  | t | 156875 | GHTSLR                       | Gallus gallus         |
| 1 | 1.00 | 1 | 1 | 0     | 0      | 0      | -0.004 | -0.001 | t | 130986 | NPIENMM<br>DRDSQ             | Homo sapiens          |
| 1 | 1.00 | 1 | 1 | 0     | -0.006 | -0.014 | -0.007 | 0      | t | 127652 | FISPRPGQ<br>NVLR             | Trichosurus vulpecula |
| 1 | 1.00 | 1 | 1 | -0.01 | -0.01  | 0.008  | -0.009 | -0.009 | t | 37372  | LLGTTL                       | Mus musculus          |
| 1 | 1.00 | 1 | 1 | -0.01 | -0.01  | 0.008  | -0.009 | -0.009 | t | 37372  | LLGTTL                       | Mus musculus          |
| 1 | 1.00 | 1 | 1 | 0     | 0      | 0      | 0      | 0.002  | t | 37171  | LLDPSFDY<br>FQLYTT           | Mus musculus          |
| 1 | 1.00 | 1 | 1 | -0.01 | -0.008 | -0.01  | -0.013 | -0.01  | t | 43233  | NANP                         | Homo sapiens          |
| 1 | 1.00 | 1 | 1 | -0.01 | -0.01  | -0.01  | -0.01  | -0.01  | t | 114988 | YGNKCNF<br>CNA               | Homo sapiens          |
| 1 | 1.00 | 1 | 1 | -0.01 | -0.01  | -0.01  | -0.01  | -0.01  | t | 115569 | YQGPIVLN<br>PWDQVKR<br>NAVPI | Homo sapiens          |
| 1 | 1.00 | 1 | 1 | -0.01 | -0.01  | -0.01  | -0.01  | -0.01  | t | 115795 | IPTINTIAS<br>G               | Homo sapiens          |
| 1 | 1.00 | 1 | 1 | -0.01 | -0.01  | -0.01  | -0.01  | -0.01  | t | 78309  | WHTLLAA                      | Homo sapiens          |
| 1 | 1.00 | 1 | 1 | 0.04  | 0.032  | 0.04   | 0.04   | 0.042  | t | 156941 | PTEKKHV                      | Mus musculus          |
| 1 | 1.00 | 1 | 1 | 0     | -0.002 | 0.005  | -0.007 | -0.002 | t | 37657  | LLPHSNLD<br>HI               | Mus musculus          |
| 1 | 1.00 | 1 | 1 | 0.01  | 0.008  | -0.001 | 0.009  | 0.01   | t | 72571  | WIARFDT<br>DKDGKVSL<br>EEFCR | Mus musculus          |
| 1 | 1.00 | 1 | 1 | 0.01  | 0.008  | -0.001 | 0.009  | 0.01   | t | 72571  | WIARFDT<br>DKDGKVSL<br>EEFCR | Mus musculus          |
| 1 | 1.00 | 1 | 1 | 0.01  | 0.008  | -0.001 | 0.009  | 0.01   | t | 72571  | WIARFDT<br>DKDGKVSL<br>EEFCR | Mus musculus          |

|   |      |   |   |       |        |        |        |        |   |        |                              |                                  |
|---|------|---|---|-------|--------|--------|--------|--------|---|--------|------------------------------|----------------------------------|
| 1 | 1.00 | 1 | 1 | -0.02 | -0.018 | -0.021 | -0.017 | -0.02  | t | 11420  | EDPVLAKK<br>VPETFPEL<br>KPGE | Homo<br>sapiens                  |
| 1 | 1.00 | 1 | 1 | -0.01 | -0.01  | -0.008 | -0.01  | -0.012 | t | 52090  | QQPFSQP<br>QQP               | Mus<br>musculu<br>s              |
| 1 | 1.00 | 1 | 1 | -0.07 | -0.07  | -0.081 | -0.077 | -0.071 | t | 133687 | SAEALLRL<br>QA               | Homo<br>sapiens                  |
| 1 | 1.00 | 1 | 1 | 0.03  | 0.03   | 0.03   | 0.03   | 0.034  | t | 56145  | RTPEVDDE<br>ALE              | Homo<br>sapiens                  |
| 1 | 1.00 | 1 | 1 | 0.01  | 0.012  | 0.02   | 0.013  | 0.013  | t | 140665 | DTAAQI                       | Homo<br>sapiens                  |
| 1 | 1.00 | 1 | 1 | 0     | 0      | 0      | 0.001  | 0.001  | t | 50636  | QELDCWH<br>YHQYCITS          | Capra<br>hircus                  |
| 1 | 1.00 | 1 | 1 | -0.03 | -0.03  | -0.028 | -0.03  | -0.029 | t | 153254 | ERHTKFPS<br>V                | Mus<br>musculu<br>s              |
| 1 | 1.00 | 1 | 1 | 0.03  | 0.027  | 0.037  | 0.03   | 0.03   | t | 25200  | HYTNESKF<br>KFILE            | Mus                              |
| 1 | 1.00 | 1 | 1 | 0     | 0      | 0      | 0      | 0.001  | t | 142007 | SDWRFLR<br>GYHQYA            | Homo<br>sapiens                  |
| 1 | 1.00 | 1 | 1 | -0.01 | -0.01  | -0.005 | -0.01  | -0.01  | t | 138315 | DAFGGVYS                     | Mus<br>musculu<br>s              |
| 1 | 1.00 | 1 | 1 | -0.02 | -0.022 | -0.009 | -0.021 | -0.02  | t | 18929  | GCVVSWK<br>NK                | Mus<br>musculu<br>s              |
| 1 | 1.00 | 1 | 1 | 0     | -0.002 | -0.007 | -0.007 | 0.002  | t | 112983 | FTVFEEAF<br>ND               | Mus<br>musculu<br>s              |
| 1 | 1.00 | 1 | 1 | 0.02  | 0.02   | 0.02   | 0.017  | 0.023  | t | 146990 | GPGTIKKIS<br>F               | Homo<br>sapiens                  |
| 1 | 1.00 | 1 | 1 | -0.05 | -0.05  | -0.051 | -0.047 | -0.052 | t | 49248  | PRRRRSQS<br>PRRR             | Homo<br>sapiens                  |
| 1 | 1.00 | 1 | 1 | -0.02 | -0.024 | -0.029 | -0.027 | -0.02  | t | 117399 | VMIKSLPA<br>LNSPTVEE         | Oryctola<br>gus<br>cuniculu<br>s |
| 1 | 1.00 | 1 | 1 | -0.02 | -0.024 | -0.029 | -0.027 | -0.02  | t | 117399 | VMIKSLPA<br>LNSPTVEE         | Oryctola<br>gus<br>cuniculu<br>s |

|   |      |   |   |       |        |        |        |        |   |        |                              |                                  |
|---|------|---|---|-------|--------|--------|--------|--------|---|--------|------------------------------|----------------------------------|
| 1 | 1.00 | 1 | 1 | -0.04 | -0.042 | -0.044 | -0.041 | -0.039 | t | 68154  | VEEARNYT<br>PTPPPV           | Mus<br>musculu<br>s              |
| 1 | 1.00 | 1 | 1 | 0.05  | 0.05   | 0.061  | 0.051  | 0.048  | t | 57880  | SFRGSAQG<br>IEGS             | Homo<br>sapiens                  |
| 1 | 1.00 | 1 | 1 | 0.02  | 0.02   | 0.02   | 0.02   | 0.02   | t | 156444 | RPSRQEG<br>GQGQQQF<br>Q      | Homo<br>sapiens                  |
| 1 | 1.00 | 1 | 1 | 0     | 0      | 0      | 0      | 0      | t | 131934 | KNKQGW<br>GDGQKSS<br>QG      | Homo<br>sapiens                  |
| 1 | 1.00 | 1 | 1 | -0.02 | -0.02  | -0.02  | -0.02  | -0.02  | t | 100427 | QKNAPKTF<br>QF               | Mus<br>musculu<br>s              |
| 1 | 1.00 | 1 | 1 | -0.04 | -0.04  | -0.04  | -0.04  | -0.04  | t | 115450 | QPTTMAR<br>HPHPHLSF<br>MAIPP | Homo<br>sapiens                  |
| 1 | 1.00 | 1 | 1 | -0.04 | -0.04  | -0.04  | -0.04  | -0.04  | t | 106555 | KARLERPQ<br>IRVP             | Homo<br>sapiens                  |
| 1 | 1.00 | 1 | 1 | -0.06 | -0.06  | -0.06  | -0.06  | -0.06  | t | 112038 | ARMRDGA                      | Homo<br>sapiens                  |
| 1 | 1.00 | 1 | 1 | -0.01 | -0.008 | -0.003 | -0.003 | -0.009 | t | 108052 | NWLSLITA<br>AR               | Homo<br>sapiens                  |
| 1 | 1.00 | 1 | 1 | 0.03  | 0.03   | 0.04   | 0.029  | 0.029  | t | 68052  | VDQYSNQ<br>NNF               | Oryctola<br>gus<br>cuniculu<br>s |
| 1 | 1.00 | 1 | 1 | 0.01  | 0.01   | 0.014  | 0.01   | 0.01   | t | 68969  | VIGHEITH<br>GFD              | Oryctola<br>gus<br>cuniculu<br>s |
| 1 | 1.00 | 1 | 1 | 0.01  | 0.013  | 0.022  | 0.01   | 0.01   | t | 110761 | AENPTNY                      | Mus<br>musculu<br>s              |
| 1 | 1.00 | 1 | 1 | -0.02 | -0.02  | -0.02  | -0.02  | -0.02  | t | 72363  | WENWM<br>MGNA                | Mus<br>musculu<br>s              |
| 1 | 1.00 | 1 | 1 | 0     | 0.002  | 0      | 0.001  | 0      | t | 58112  | SGKPAIPD<br>REVLRYEF<br>DEM  | Homo<br>sapiens                  |
| 1 | 1.00 | 1 | 1 | -0.01 | -0.012 | -0.011 | -0.007 | -0.007 | t | 106943 | TYQYSPYP<br>EPVM             | Mus<br>musculu<br>s              |
| 1 | 1.00 | 1 | 1 | 0     | 0      | 0      | -0.002 | 0      | t | 599    | ACSLPEEA<br>HTAIHS           | Homo<br>sapiens                  |

|   |      |   |   |       |        |        |        |        |   |        |                             |                                  |
|---|------|---|---|-------|--------|--------|--------|--------|---|--------|-----------------------------|----------------------------------|
| 1 | 1.00 | 1 | 1 | -0.04 | -0.04  | -0.046 | -0.046 | -0.039 | t | 27553  | IMSALAM<br>VYLGAK           | Homo<br>sapiens                  |
| 1 | 1.00 | 1 | 1 | -0.02 | -0.019 | -0.019 | -0.021 | -0.022 | t | 37031  | LKTFGEW<br>RERVL            | Oryctola<br>gus<br>cuniculu<br>s |
| 1 | 1.00 | 1 | 1 | -0.03 | -0.032 | -0.03  | -0.03  | -0.027 | t | 2040   | AINRRVE                     | Mus<br>musculu<br>s              |
| 1 | 1.00 | 1 | 1 | -0.01 | -0.008 | -0.003 | -0.007 | -0.01  | t | 10834  | DWVCTILT<br>DFKNWL          | Homo<br>sapiens                  |
| 1 | 1.00 | 1 | 1 | -0.01 | -0.006 | -0.003 | -0.007 | -0.01  | t | 10834  | DWVCTILT<br>DFKNWL          | Homo<br>sapiens                  |
| 1 | 1.00 | 1 | 1 | 0.05  | 0.048  | 0.033  | 0.049  | 0.053  | t | 82657  | GGYEFLLA<br>NDVDNSN<br>PVVQ | Rattus<br>norvegic<br>us         |
| 1 | 1.00 | 1 | 1 | 0.02  | 0.02   | 0.02   | 0.02   | 0.02   | t | 132930 | WGNNYT<br>SQIRP             | Homo<br>sapiens                  |
| 1 | 1.00 | 1 | 1 | 0.03  | 0.027  | 0.041  | 0.03   | 0.028  | t | 111670 | QIKVSTAV<br>DTGVLGT         | Oryctola<br>gus<br>cuniculu<br>s |
| 1 | 1.00 | 1 | 1 | 0.01  | 0.01   | 0.01   | 0.01   | 0.01   | t | 115799 | IRCEKDER<br>FF              | Homo<br>sapiens                  |
| 1 | 1.00 | 1 | 1 | -0.01 | -0.01  | -0.01  | -0.01  | -0.01  | t | 119647 | SRWQQG<br>NV                | Homo<br>sapiens                  |
| 1 | 1.00 | 1 | 1 | -0.01 | -0.01  | -0.01  | -0.01  | -0.01  | t | 123861 | YEEHLYGR<br>N               | Ovis<br>aries                    |
| 1 | 1.00 | 1 | 1 | -0.01 | -0.01  | -0.01  | -0.01  | -0.01  | t | 92799  | GERITSKQ<br>VD              | Ovis<br>aries                    |
| 1 | 1.00 | 1 | 1 | 0     | 0      | 0      | 0      | 0.001  | t | 135191 | NLKTTPRV<br>GGC             | Homo<br>sapiens                  |
| 1 | 1.00 | 1 | 1 | 0     | 0      | 0      | 0      | 0.001  | t | 135471 | KDKATFGC<br>HDGC            | Homo<br>sapiens                  |
| 1 | 1.00 | 1 | 1 | 0     | 0      | 0      | 0      | 0.001  | t | 135449 | CATLRVYK<br>GG              | Homo<br>sapiens                  |
| 1 | 1.00 | 1 | 1 | 0     | 0      | 0      | 0      | 0.001  | t | 146185 | DAEFGH                      | Mus<br>musculu<br>s              |
| 1 | 1.00 | 1 | 1 | 0     | 0      | 0      | 0      | 0.001  | t | 134418 | KGAIIGLM<br>VGGVV           | Homo<br>sapiens                  |

|   |      |   |   |   |   |   |   |       |   |        |                              |                      |
|---|------|---|---|---|---|---|---|-------|---|--------|------------------------------|----------------------|
| 1 | 1.00 | 1 | 1 | 0 | 0 | 0 | 0 | 0.001 | t | 138812 | SSVLYGGP<br>PSAA             | Rattus<br>norvegicus |
| 1 | 1.00 | 1 | 1 | 0 | 0 | 0 | 0 | 0.001 | t | 120109 | NIHPKAPI<br>WGIITSNF         | Rattus<br>norvegicus |
| 1 | 1.00 | 1 | 1 | 0 | 0 | 0 | 0 | 0.001 | t | 123562 | NSSSSQFQ<br>IHGPR            | Mus<br>musculus      |
| 1 | 1.00 | 1 | 1 | 0 | 0 | 0 | 0 | 0.001 | t | 131710 | TPDAPGET<br>V                | Mus<br>musculus      |
| 1 | 1.00 | 1 | 1 | 0 | 0 | 0 | 0 | 0.001 | t | 119601 | KGNNVHG<br>FQKQIIRSF<br>Y    | Rattus<br>norvegicus |
| 1 | 1.00 | 1 | 1 | 0 | 0 | 0 | 0 | 0.001 | t | 122406 | IEIGLEGKG<br>FEPTLEALF<br>GK | Homo<br>sapiens      |
| 1 | 1.00 | 1 | 1 | 0 | 0 | 0 | 0 | 0.001 | t | 120109 | NIHPKAPI<br>WGIITSNF         | Rattus<br>norvegicus |
| 1 | 1.00 | 1 | 1 | 0 | 0 | 0 | 0 | 0.001 | t | 131900 | GSSFLSPE<br>HQ               | Rattus<br>norvegicus |
| 1 | 1.00 | 1 | 1 | 0 | 0 | 0 | 0 | 0.001 | t | 105163 | EFRHD                        | Mus<br>musculus      |
| 1 | 1.00 | 1 | 1 | 0 | 0 | 0 | 0 | 0.001 | t | 113628 | LRLIHYSYD<br>VN              | Rattus<br>norvegicus |
| 1 | 1.00 | 1 | 1 | 0 | 0 | 0 | 0 | 0.001 | t | 104443 | DAEFRHDS<br>GYE              | Mus<br>musculus      |
| 1 | 1.00 | 1 | 1 | 0 | 0 | 0 | 0 | 0.001 | t | 102510 | HHQKLVFF<br>AEDVGSN<br>K     | Mus<br>musculus      |
| 1 | 1.00 | 1 | 1 | 0 | 0 | 0 | 0 | 0.001 | t | 112901 | AEYYNKQY<br>LEQTRAE<br>LDT   | Mus<br>musculus      |
| 1 | 1.00 | 1 | 1 | 0 | 0 | 0 | 0 | 0.001 | t | 103839 | DAEFRHDS<br>GYEVH            | Mus<br>musculus      |
| 1 | 1.00 | 1 | 1 | 0 | 0 | 0 | 0 | 0.001 | t | 99134  | DAEFRHDS<br>GYEVHHQ          | Mus<br>musculus      |
| 1 | 1.00 | 1 | 1 | 0 | 0 | 0 | 0 | 0.001 | t | 99134  | DAEFRHDS<br>GYEVHHQ          | Mus<br>musculus      |
| 1 | 1.00 | 1 | 1 | 0 | 0 | 0 | 0 | 0.001 | t | 106321 | DAEFRH                       | Mus<br>musculus      |

|   |      |   |   |   |   |   |   |       |   |        |                            |                                  |
|---|------|---|---|---|---|---|---|-------|---|--------|----------------------------|----------------------------------|
| 1 | 1.00 | 1 | 1 | 0 | 0 | 0 | 0 | 0.001 | t | 105835 | GLKGEQG<br>EPGA            | Mus<br>musculu<br>s              |
| 1 | 1.00 | 1 | 1 | 0 | 0 | 0 | 0 | 0.001 | t | 99134  | DAEFRHDS<br>GYEVHHQ        | Mus<br>musculu<br>s              |
| 1 | 1.00 | 1 | 1 | 0 | 0 | 0 | 0 | 0.001 | t | 102384 | EFRH                       | Mus<br>musculu<br>s              |
| 1 | 1.00 | 1 | 1 | 0 | 0 | 0 | 0 | 0.001 | t | 114192 | AEYWNSQ<br>PEILERTRA<br>E  | Mus<br>musculu<br>s              |
| 1 | 1.00 | 1 | 1 | 0 | 0 | 0 | 0 | 0.001 | t | 99134  | DAEFRHDS<br>GYEVHHQ        | Mus<br>musculu<br>s              |
| 1 | 1.00 | 1 | 1 | 0 | 0 | 0 | 0 | 0.001 | t | 114193 | AEYYNKQY<br>LEQTRAE<br>LDT | Mus<br>musculu<br>s              |
| 1 | 1.00 | 1 | 1 | 0 | 0 | 0 | 0 | 0.001 | t | 116111 | KGQGQKA<br>KMRCIPEK<br>GH  | Mus<br>musculu<br>s              |
| 1 | 1.00 | 1 | 1 | 0 | 0 | 0 | 0 | 0.001 | t | 105090 | AIIGLMVG<br>GVVIA          | Mus<br>musculu<br>s              |
| 1 | 1.00 | 1 | 1 | 0 | 0 | 0 | 0 | 0.001 | t | 105869 | IAGFKGEQ<br>GPK            | Mus<br>musculu<br>s              |
| 1 | 1.00 | 1 | 1 | 0 | 0 | 0 | 0 | 0.001 | t | 113879 | SQRSQDE<br>N               | Rattus<br>norvegic<br>us         |
| 1 | 1.00 | 1 | 1 | 0 | 0 | 0 | 0 | 0.001 | t | 106321 | DAEFRH                     | Mus<br>musculu<br>s              |
| 1 | 1.00 | 1 | 1 | 0 | 0 | 0 | 0 | 0.001 | t | 104906 | MVGGVVI<br>A               | Mus<br>musculu<br>s              |
| 1 | 1.00 | 1 | 1 | 0 | 0 | 0 | 0 | 0.001 | t | 102384 | EFRH                       | Mus<br>musculu<br>s              |
| 1 | 1.00 | 1 | 1 | 0 | 0 | 0 | 0 | 0.001 | t | 102384 | EFRH                       | Mus<br>musculu<br>s              |
| 1 | 1.00 | 1 | 1 | 0 | 0 | 0 | 0 | 0.001 | t | 116080 | ATGGTLQ<br>QLFYSITV<br>GQV | Mus<br>musculu<br>s              |
| 1 | 1.00 | 1 | 1 | 0 | 0 | 0 | 0 | 0.001 | t | 113628 | LRLIHYSYD<br>VN            | Oryctola<br>gus<br>cuniculu<br>s |



|   |      |   |   |       |        |        |        |        |   |        |                              |                       |
|---|------|---|---|-------|--------|--------|--------|--------|---|--------|------------------------------|-----------------------|
| 1 | 1.00 | 1 | 1 | 0     | 0      | 0      | 0      | 0.001  | t | 102344 | DAEFR                        | Mus musculus          |
| 1 | 1.00 | 1 | 1 | 0     | 0      | 0      | 0      | 0.001  | t | 116080 | ATGGTLQ<br>QLFYSTITV<br>GQV  | Mus musculus          |
| 1 | 1.00 | 1 | 1 | 0     | 0      | 0      | 0      | 0.001  | t | 94552  | IEDNWYT<br>HYLVCNYG<br>PGGND | Mus musculus          |
| 1 | 1.00 | 1 | 1 | 0     | 0      | 0      | 0      | 0.001  | t | 64587  | TKINADNP<br>VPILELE          | Mus musculus          |
| 1 | 1.00 | 1 | 1 | 0     | 0      | 0      | 0      | 0.001  | t | 41567  | MGETLLRA<br>VESYLL           | Mus musculus          |
| 1 | 1.00 | 1 | 1 | 0     | 0      | 0      | 0      | 0.001  | t | 43411  | NDDASVD<br>FVAEPVK           | Mus musculus          |
| 1 | 1.00 | 1 | 1 | 0     | 0      | 0      | 0      | 0.001  | t | 56469  | RWAPTGA<br>PADVTDQ<br>L      | Mus musculus          |
| 1 | 1.00 | 1 | 1 | 0     | 0      | 0      | 0      | 0.001  | t | 43411  | NDDASVD<br>FVAEPVK           | Mus musculus          |
| 1 | 1.00 | 1 | 1 | -0.03 | -0.03  | -0.03  | -0.03  | -0.03  | t | 63231  | TDSGDGR<br>QTITN             | Oryctolagus cuniculus |
| 1 | 1.00 | 1 | 1 | 0     | 0      | 0      | 0      | 0.001  | t | 7492   | DAEFRHDS<br>GYEVHHQ<br>KL    | Mus musculus          |
| 1 | 1.00 | 1 | 1 | 0.01  | 0.015  | 0.02   | 0.018  | 0.01   | t | 23722  | HEPQISPG<br>GLEPPSEK<br>HFRE | Homo sapiens          |
| 1 | 1.00 | 1 | 1 | -0.01 | -0.012 | -0.004 | -0.013 | -0.014 | t | 54229  | RIQRGSGR<br>AFVTIGK          | Mus musculus          |

|   |      |   |   |       |        |        |        |        |   |        |                             |                            |
|---|------|---|---|-------|--------|--------|--------|--------|---|--------|-----------------------------|----------------------------|
| 1 | 1.00 | 1 | 1 | -0.02 | -0.017 | -0.012 | -0.02  | -0.021 | t | 79923  | LVCGIAAK<br>LGAA            | Mus<br>musculu<br>s        |
| 1 | 1.00 | 1 | 1 | 0.04  | 0.04   | 0.046  | 0.043  | 0.039  | t | 21019  | GLLQTASR<br>QAEVIAPA<br>VQ  | Homo<br>sapiens            |
| 1 | 1.00 | 1 | 1 | 0     | 0      | -0.002 | 0      | 0.001  | t | 14670  | EVDNEQP<br>TTRAQKLF<br>A    | Mus<br>musculu<br>s        |
| 1 | 1.00 | 1 | 1 | 0     | 0.004  | -0.002 | 0      | 0.001  | t | 14670  | EVDNEQP<br>TTRAQKLF<br>A    | Cavia<br>porcellu<br>s     |
| 1 | 1.00 | 1 | 1 | 0.02  | 0.022  | 0.02   | 0.019  | 0.021  | t | 72553  | WHTTIPPV<br>FDEP            | Rattus<br>norvegic<br>us   |
| 1 | 1.00 | 1 | 1 | 0     | 0      | 0      | 0.001  | 0.002  | t | 7491   | DAEFRHDS<br>GYEVHHQ<br>K    | Mus<br>musculu<br>s        |
| 1 | 1.00 | 1 | 1 | -0.01 | -0.01  | -0.01  | -0.01  | -0.01  | t | 151716 | RLASLSEKP<br>PAIDWAYY<br>RA | Mus<br>musculu<br>s        |
| 1 | 1.00 | 1 | 1 | 0.01  | 0.012  | 0.017  | 0.011  | 0.008  | t | 42248  | MNWSPTT<br>CL               | Homo<br>sapiens            |
| 1 | 1.00 | 1 | 1 | 0.01  | 0.014  | 0.017  | 0.011  | 0.008  | t | 42248  | MNWSPTT<br>CL               | Homo<br>sapiens            |
| 1 | 1.00 | 1 | 1 | -0.01 | -0.012 | -0.01  | -0.007 | -0.008 | t | 115892 | PNGYKVSR<br>PSQ             | Mus<br>musculu<br>s        |
| 1 | 1.00 | 1 | 1 | 0     | 0      | -0.002 | 0      | -0.001 | t | 153284 | PTPLSPPLR<br>NTHPQA         | Mus<br>musculu<br>s        |
| 1 | 1.00 | 1 | 1 | 0     | 0      | 0      | 0      | 0.001  | t | 99838  | QQRPFI                      | Mus<br>musculu<br>s        |
| 1 | 1.00 | 1 | 1 | 0     | 0.006  | 0      | -0.001 | 0.001  | t | 43242  | NANPNAN<br>PNANP            | Macaca<br>fascicula<br>ris |
| 1 | 1.00 | 1 | 1 | 0     | -0.002 | 0      | -0.001 | 0.001  | t | 11815  | EENVEENV<br>EENVEENV        | Mus<br>musculu<br>s        |
| 1 | 1.00 | 1 | 1 | -0.02 | -0.02  | -0.026 | -0.023 | -0.02  | t | 21723  | GPPAAGP<br>PAAGPPA<br>A     | Homo<br>sapiens            |

|   |      |   |   |      |       |        |       |       |   |        |                    |                 |
|---|------|---|---|------|-------|--------|-------|-------|---|--------|--------------------|-----------------|
| 1 | 1.00 | 1 | 1 | 0    | 0     | -0.003 | 0     | 0.002 | t | 125230 | RERRGIAL           | Mus<br>musculus |
| 1 | 1.00 | 1 | 1 | 0.04 | 0.038 | 0.035  | 0.037 | 0.042 | t | 99788  | YNQGLSER           | Mus<br>musculus |
| 1 | 1.00 | 1 | 1 | 0    | 0     | 0      | 0     | 0.001 | t | 149384 | MSLPGRW<br>KPK     | Mus<br>musculus |
| 1 | 1.00 | 1 | 1 | 0    | 0     | 0      | 0     | 0.001 | t | 146624 | WNWFDIT<br>N       | Homo<br>sapiens |
| 1 | 1.00 | 1 | 1 | 0    | 0     | 0      | 0     | 0.001 | t | 156903 | KNRGIKTF<br>SN     | Mus<br>musculus |
| 1 | 1.00 | 1 | 1 | 0    | 0     | 0      | 0     | 0.001 | t | 156553 | YSTCYFIM           | Mus<br>musculus |
| 1 | 1.00 | 1 | 1 | 0    | 0     | 0      | 0     | 0.001 | t | 149298 | ELDKWAS            | Homo<br>sapiens |
| 1 | 1.00 | 1 | 1 | 0    | 0     | 0      | 0     | 0.001 | t | 103643 | TGALQERS<br>K      | Mus<br>musculus |
| 1 | 1.00 | 1 | 1 | 0    | 0     | 0      | 0     | 0.001 | t | 105163 | EFRHD              | Mus<br>musculus |
| 1 | 1.00 | 1 | 1 | 0    | 0     | 0      | 0     | 0.001 | t | 69178  | VKAETRLN<br>PDLQPT | Mus<br>musculus |
| 1 | 1.00 | 1 | 1 | 0    | 0     | 0      | 0     | 0.001 | t | 75949  | YTASARGD<br>LAHL   | Mus<br>musculus |
| 1 | 1.00 | 1 | 1 | 0    | 0     | 0      | 0     | 0.001 | t | 45932  | NSNNPDW<br>DF      | Mus<br>musculus |
| 1 | 1.00 | 1 | 1 | 0    | 0     | 0      | 0     | 0.001 | t | 14435  | ETIYNTTLK<br>Y     | Homo<br>sapiens |
| 1 | 1.00 | 1 | 1 | 0    | 0     | 0      | 0     | 0.001 | t | 9524   | DNPASTT<br>NKDK    | Mus<br>musculus |

|   |      |   |   |       |        |        |        |        |   |        |                              |                                  |
|---|------|---|---|-------|--------|--------|--------|--------|---|--------|------------------------------|----------------------------------|
| 1 | 1.00 | 1 | 1 | 0     | -0.004 | 0      | -0.001 | 0.001  | t | 48779  | PPFSLSPV<br>PTLGSRSR<br>R    | Oryctola<br>gus<br>cuniculu<br>s |
| 1 | 1.00 | 1 | 1 | 0     | 0.001  | 0      | -0.001 | 0      | t | 24015  | HHRGAAP<br>NS                | Equus<br>caballus                |
| 1 | 1.00 | 1 | 1 | -0.01 | -0.012 | -0.005 | -0.007 | -0.01  | t | 29378  | IVNTLNEIY<br>RYLYVR          | Mus<br>musculu<br>s              |
| 1 | 1.00 | 1 | 1 | 0     | 0      | 0      | 0      | 0      | t | 123862 | YERDDGEK<br>W                | Ovis<br>aries                    |
| 1 | 1.00 | 1 | 1 | 0     | 0      | 0      | 0      | 0      | t | 122417 | ITREPEPRL<br>RFSQNL          | Mus<br>musculu<br>s              |
| 1 | 1.00 | 1 | 1 | 0     | 0      | 0      | 0      | 0      | t | 101937 | NPNPTCN<br>EN                | Homo<br>sapiens                  |
| 1 | 1.00 | 1 | 1 | -0.02 | -0.02  | -0.02  | -0.02  | -0.02  | t | 123185 | FMSRIEAL<br>P                | Ovis<br>aries                    |
| 1 | 1.00 | 1 | 1 | -0.04 | -0.04  | -0.04  | -0.04  | -0.04  | t | 104746 | DANKPYS<br>WRS               | Homo<br>sapiens                  |
| 1 | 1.00 | 1 | 1 | 0.01  | 0.007  | 0.013  | 0.01   | 0.009  | t | 57307  | SDVININIY<br>NPCVVPNI<br>NNA | Oryctola<br>gus<br>cuniculu<br>s |
| 1 | 1.00 | 1 | 1 | 0.01  | 0.01   | 0.01   | 0.01   | 0.012  | t | 135075 | KNDVVNS<br>QDKTEKTE          | Sus<br>scrofa                    |
| 1 | 1.00 | 1 | 1 | 0.05  | 0.047  | 0.05   | 0.05   | 0.05   | t | 28375  | IRQLESIVD<br>KLNRSG          | Oryctola<br>gus<br>cuniculu<br>s |
| 1 | 1.00 | 1 | 1 | 0.01  | 0.012  | 0.002  | 0.011  | 0.016  | t | 15972  | FGEVFNAT                     | Homo<br>sapiens                  |
| 1 | 1.00 | 1 | 1 | -0.01 | -0.01  | -0.01  | -0.01  | -0.009 | t | 97287  | ETPLTETAL<br>KWH             | Mus<br>musculu<br>s              |
| 1 | 1.00 | 1 | 1 | -0.04 | -0.035 | -0.033 | -0.04  | -0.041 | t | 132802 | ESTLHLVLR<br>LR              | Mus<br>musculu<br>s              |

|   |      |   |   |       |        |        |        |        |   |        |                              |                                  |
|---|------|---|---|-------|--------|--------|--------|--------|---|--------|------------------------------|----------------------------------|
| 1 | 1.00 | 1 | 1 | 0.01  | 0.01   | 0.01   | 0.01   | 0.011  | t | 99448  | LRNLPQQC<br>GLRAPQR          | Homo<br>sapiens                  |
| 1 | 1.00 | 1 | 1 | 0     | 0.002  | 0      | 0      | 0      | t | 118019 | MGRGAPP<br>PGMMG             | Homo<br>sapiens                  |
| 1 | 1.00 | 1 | 1 | 0     | -0.003 | -0.005 | 0      | 0      | t | 56583  | RYLQEKYN<br>LYNSDVFD<br>GKVQ | Oryctola<br>gus<br>cuniculu<br>s |
| 1 | 1.00 | 1 | 1 | 0     | -0.003 | -0.005 | 0      | 0      | t | 56583  | RYLQEKYN<br>LYNSDVFD<br>GKVQ | Oryctola<br>gus<br>cuniculu<br>s |
| 1 | 1.00 | 1 | 1 | 0     | 0      | -0.005 | 0      | 0      | t | 56583  | RYLQEKYN<br>LYNSDVFD<br>GKVQ | Oryctola<br>gus<br>cuniculu<br>s |
| 1 | 1.00 | 1 | 1 | 0     | 0      | -0.005 | 0      | 0      | t | 56583  | RYLQEKYN<br>LYNSDVFD<br>GKVQ | Oryctola<br>gus<br>cuniculu<br>s |
| 1 | 1.00 | 1 | 1 | -0.02 | -0.02  | -0.016 | -0.02  | -0.02  | t | 21424  | GNFGDQD<br>LIRQGTDY<br>KHW   | Homo<br>sapiens                  |
| 1 | 1.00 | 1 | 1 | 0.01  | 0.013  | 0.013  | 0.01   | 0.01   | t | 97191  | AKPTGSAA                     | Mus<br>musculu<br>s              |
| 1 | 1.00 | 1 | 1 | 0.03  | 0.036  | 0.023  | 0.03   | 0.033  | t | 45824  | NSGILKDF<br>WGDYLQY<br>DKPY  | Equus<br>caballus                |
| 1 | 1.00 | 1 | 1 | 0     | 0      | -0.008 | -0.003 | -0.002 | t | 10277  | DSYGRDPY<br>SPSQDPY          | Homo<br>sapiens                  |
| 1 | 1.00 | 1 | 1 | 0.01  | 0.01   | 0.017  | 0.013  | 0.012  | t | 51166  | QKALGLLQ<br>T                | Homo<br>sapiens                  |
| 1 | 1.00 | 1 | 1 | -0.03 | -0.03  | -0.023 | -0.03  | -0.031 | t | 133705 | SSKTRSG<br>VHLVGPY           | Mus<br>musculu<br>s              |
| 1 | 1.00 | 1 | 1 | 0.03  | 0.028  | 0.037  | 0.031  | 0.03   | t | 131050 | RRAEITHP<br>GMMLASG          | Mus<br>musculu<br>s              |
| 1 | 1.00 | 1 | 1 | -0.02 | -0.023 | -0.029 | -0.02  | -0.018 | t | 124998 | CLQMNNK<br>DMVAIKH<br>LLSE   | Oryctola<br>gus<br>cuniculu<br>s |
| 1 | 1.00 | 1 | 1 | -0.02 | -0.02  | -0.029 | -0.02  | -0.018 | t | 124998 | CLQMNNK<br>DMVAIKH<br>LLSE   | Rattus<br>norvegic<br>us         |

|   |      |   |   |       |        |        |        |        |   |        |                              |                                  |
|---|------|---|---|-------|--------|--------|--------|--------|---|--------|------------------------------|----------------------------------|
| 1 | 1.00 | 1 | 1 | 0.04  | 0.037  | 0.039  | 0.04   | 0.038  | t | 94496  | EEEEYMP<br>MEDLYLDI<br>LPEE  | Oryctola<br>gus<br>cuniculu<br>s |
| 1 | 1.00 | 1 | 1 | 0.03  | 0.027  | 0.035  | 0.03   | 0.031  | t | 118139 | SIPWKS<br>LTLV               | Oryctola<br>gus<br>cuniculu<br>s |
| 1 | 1.00 | 1 | 1 | -0.02 | -0.023 | -0.027 | -0.02  | -0.022 | t | 62675  | SYPNPVRV<br>EAAWRILE         | Oryctola<br>gus<br>cuniculu<br>s |
| 1 | 1.00 | 1 | 1 | 0.02  | 0.02   | 0.02   | 0.02   | 0.02   | t | 106376 | EEKKGNV<br>VTDH              | Mus<br>musculu<br>s              |
| 1 | 1.00 | 1 | 1 | 0     | -0.004 | 0      | -0.001 | 0      | t | 60596  | SQWNKPS<br>KPKTN             | Oryctola<br>gus<br>cuniculu<br>s |
| 1 | 1.00 | 1 | 1 | -0.03 | -0.034 | -0.023 | -0.027 | -0.033 | t | 64563  | TKFPSVYA<br>WERKKISN<br>CVAD | Oryctola<br>gus<br>cuniculu<br>s |
| 1 | 1.00 | 1 | 1 | 0.01  | 0.013  | 0.024  | 0.009  | 0.009  | t | 142159 | GAPTYSW<br>GANDTDV           | Capra<br>hircus                  |
| 1 | 1.00 | 1 | 1 | -0.02 | -0.022 | -0.019 | -0.017 | -0.02  | t | 15624  | FEQPTLTF<br>GAGVNVP          | Homo<br>sapiens                  |
| 1 | 1.00 | 1 | 1 | -0.01 | -0.012 | -0.024 | -0.011 | -0.01  | t | 75455  | YQAKLTAY<br>QTELARVQ<br>KAN  | Mus<br>musculu<br>s              |
| 1 | 1.00 | 1 | 1 | 0.01  | 0.01   | 0.01   | 0.01   | 0.011  | t | 130924 | KLFPEEDE<br>MRTETQR          | Homo<br>sapiens                  |
| 1 | 1.00 | 1 | 1 | -0.02 | -0.022 | -0.025 | -0.021 | -0.02  | t | 78816  | RQEIRKA<br>WVKGMP<br>YMDFSK  | Mus<br>musculu<br>s              |
| 1 | 1.00 | 1 | 1 | 0.01  | 0.01   | 0.01   | 0.01   | 0.01   | t | 158746 | ETKAFLKA<br>GDADGDG          | Homo<br>sapiens                  |
| 1 | 1.00 | 1 | 1 | 0.01  | 0.01   | 0.01   | 0.01   | 0.01   | t | 158746 | ETKAFLKA<br>GDADGDG          | Homo<br>sapiens                  |
| 1 | 1.00 | 1 | 1 | -0.01 | -0.01  | -0.01  | -0.01  | -0.01  | t | 116808 | QFRHDWY                      | Oryctola<br>gus<br>cuniculu<br>s |

|   |      |   |   |       |        |       |        |        |   |        |                             |                                  |
|---|------|---|---|-------|--------|-------|--------|--------|---|--------|-----------------------------|----------------------------------|
| 1 | 1.00 | 1 | 1 | -0.03 | -0.03  | -0.03 | -0.03  | -0.03  | t | 116016 | VLGPVRGP<br>FP              | Homo<br>sapiens                  |
| 1 | 1.00 | 1 | 1 | -0.05 | -0.05  | -0.05 | -0.05  | -0.05  | t | 108272 | ALARLMP<br>GS               | Homo<br>sapiens                  |
| 1 | 1.00 | 1 | 1 | -0.05 | -0.05  | -0.05 | -0.05  | -0.05  | t | 115922 | QPIRCEKD<br>ER              | Homo<br>sapiens                  |
| 1 | 1.00 | 1 | 1 | 0.02  | 0.027  | 0.016 | 0.019  | 0.02   | t | 4149   | ARGSLAVT<br>I               | Gallus<br>gallus                 |
| 1 | 1.00 | 1 | 1 | 0     | 0.003  | 0     | 0      | 0.002  | t | 144664 | GREGYP<br>DGGGLPD<br>SVKI   | Mus<br>musculu<br>s              |
| 1 | 1.00 | 1 | 1 | 0.01  | 0.01   | 0.01  | 0.01   | 0.01   | t | 145725 | CKQAGTC<br>PP               | Mus<br>musculu<br>s              |
| 1 | 1.00 | 1 | 1 | 0.01  | 0.007  | 0.01  | 0.01   | 0.01   | t | 111193 | DGPAGQA<br>EPDRAHY<br>NI    | Oryctola<br>gus<br>cuniculu<br>s |
| 1 | 1.00 | 1 | 1 | 0.01  | 0.01   | 0.01  | 0.01   | 0.013  | t | 62347  | SVTEEIAEE<br>DK             | Homo<br>sapiens                  |
| 1 | 1.00 | 1 | 1 | 0     | 0      | 0.012 | 0      | -0.004 | t | 133642 | MCPEMSF<br>VAVHSCA<br>R     | Mus<br>musculu<br>s              |
| 1 | 1.00 | 1 | 1 | 0.01  | 0.014  | 0.001 | 0.009  | 0.011  | t | 56557  | RYIWIKYF<br>NLFDKELN<br>EKE | Homo<br>sapiens                  |
| 1 | 1.00 | 1 | 1 | 0     | 0      | 0     | 0      | 0.001  | t | 19728  | GGFSSDPG<br>FLLRPRG         | Mus<br>musculu<br>s              |
| 1 | 1.00 | 1 | 1 | -0.01 | -0.008 | -0.01 | -0.011 | -0.01  | t | 149416 | PQQPISQ<br>QQQ              | Homo<br>sapiens                  |
| 1 | 1.00 | 1 | 1 | 0.01  | 0.012  | 0.017 | 0.013  | 0.011  | t | 14435  | ETIYNTTLK<br>Y              | Homo<br>sapiens                  |
| 1 | 1.00 | 1 | 1 | 0.01  | 0.009  | 0.017 | 0.013  | 0.011  | t | 14435  | ETIYNTTLK<br>Y              | Homo<br>sapiens                  |

|   |      |   |   |       |        |        |        |        |   |        |                           |                                  |
|---|------|---|---|-------|--------|--------|--------|--------|---|--------|---------------------------|----------------------------------|
| 1 | 1.00 | 1 | 1 | -0.01 | -0.01  | -0.01  | -0.01  | -0.01  | t | 117069 | QRYYSTRP<br>RAL           | Mus<br>musculu<br>s              |
| 1 | 1.00 | 1 | 1 | 0     | 0.003  | 0.002  | 0      | 0.001  | t | 122375 | GLINRAKA<br>VKQFEESQ<br>G | Mus<br>musculu<br>s              |
| 1 | 1.00 | 1 | 1 | 0     | 0.003  | 0.002  | 0      | 0.001  | t | 122375 | GLINRAKA<br>VKQFEESQ<br>G | Mus<br>musculu<br>s              |
| 1 | 1.00 | 1 | 1 | 0.03  | 0.028  | 0.045  | 0.029  | 0.028  | t | 9520   | DNNQTSP                   | Mus<br>musculu<br>s              |
| 1 | 1.00 | 1 | 1 | -0.01 | -0.013 | -0.009 | -0.01  | -0.009 | t | 37690  | LLPSRRGD<br>QLTL          | Oryctola<br>gus<br>cuniculu<br>s |
| 1 | 1.00 | 1 | 1 | -0.01 | 0.002  | -0.01  | -0.013 | -0.01  | t | 156871 | FQNIASM<br>PHLYV          | Gallus<br>gallus                 |
| 1 | 1.00 | 1 | 1 | -0.02 | -0.017 | -0.017 | -0.02  | -0.02  | t | 97534  | NVSLSNGV                  | Mus<br>musculu<br>s              |
| 1 | 1.00 | 1 | 1 | -0.02 | -0.017 | -0.017 | -0.02  | -0.02  | t | 97534  | NVSLSNGV                  | Mus<br>musculu<br>s              |
| 1 | 1.00 | 1 | 1 | 0.01  | 0.014  | 0.01   | 0.007  | 0.01   | t | 11820  | EENVEHD<br>AEENVEEN<br>V  | Homo<br>sapiens                  |
| 1 | 1.00 | 1 | 1 | 0.02  | 0.023  | 0.023  | 0.02   | 0.024  | t | 125127 | LDPENLTL                  | Mus<br>musculu<br>s              |
| 1 | 1.00 | 1 | 1 | 0     | 0      | -0.002 | 0      | -0.001 | t | 153252 | DHQLDPA<br>FRANTAN<br>P   | Mus<br>musculu<br>s              |
| 1 | 1.00 | 1 | 1 | -0.02 | -0.017 | -0.016 | -0.02  | -0.021 | t | 48557  | PMIHFGN<br>DWEDRY<br>REN  | Mus<br>musculu<br>s              |
| 1 | 1.00 | 1 | 1 | -0.05 | -0.046 | -0.043 | -0.043 | -0.049 | t | 108182 | VDLMTIRS<br>CR            | Homo<br>sapiens                  |
| 1 | 1.00 | 1 | 1 | 0.04  | 0.04   | 0.045  | 0.04   | 0.04   | t | 44004  | NGITSLNH<br>T             | Rattus<br>norvegic<br>us         |



|   |      |   |   |       |        |        |        |        |   |        |                              |                                  |
|---|------|---|---|-------|--------|--------|--------|--------|---|--------|------------------------------|----------------------------------|
| 1 | 1.00 | 1 | 1 | -0.01 | -0.01  | -0.01  | -0.01  | -0.01  | t | 79830  | FMQQRPL<br>RMFLGPK<br>QLT    | Mus<br>musculu<br>s              |
| 1 | 1.00 | 1 | 1 | -0.01 | -0.01  | -0.01  | -0.01  | -0.01  | t | 79830  | FMQQRPL<br>RMFLGPK<br>QLT    | Mus<br>musculu<br>s              |
| 1 | 1.00 | 1 | 1 | -0.02 | -0.017 | -0.012 | -0.02  | -0.022 | t | 23402  | GYLMDHE<br>GCKLSCFI          | Equus<br>caballus                |
| 1 | 1.00 | 1 | 1 | 0     | 0      | 0      | 0      | 0      | t | 91407  | GQPAVRN<br>ERATGSG<br>N      | Oryctola<br>gus<br>cuniculu<br>s |
| 1 | 1.00 | 1 | 1 | -0.02 | -0.02  | -0.02  | -0.02  | -0.02  | t | 144805 | VCSARHVP<br>EYIEKLPEI<br>RAK | Mus<br>musculu<br>s              |
| 1 | 1.00 | 1 | 1 | -0.02 | -0.02  | -0.02  | -0.02  | -0.02  | t | 121846 | SGVCLLPRI<br>SDVVSC          | Mus<br>musculu<br>s              |
| 1 | 1.00 | 1 | 1 | -0.04 | -0.04  | -0.04  | -0.04  | -0.04  | t | 102565 | KKYKIWM<br>HVDAA             | Homo<br>sapiens                  |
| 1 | 1.00 | 1 | 1 | -0.04 | -0.04  | -0.04  | -0.04  | -0.04  | t | 103580 | SAFAAKAG<br>LMRHTIG          | Homo<br>sapiens                  |
| 1 | 1.00 | 1 | 1 | 0.04  | 0.037  | 0.04   | 0.04   | 0.04   | t | 125045 | FEEQEDEII<br>GFGQELK         | Oryctola<br>gus<br>cuniculu<br>s |
| 1 | 1.00 | 1 | 1 | -0.04 | -0.04  | -0.033 | -0.033 | -0.04  | t | 119503 | NRKLKSN<br>MM                | Homo<br>sapiens                  |
| 1 | 1.00 | 1 | 1 | 0.03  | 0.034  | 0.036  | 0.037  | 0.031  | t | 105886 | IPSTVKAG<br>ELEKI            | Homo<br>sapiens                  |
| 1 | 1.00 | 1 | 1 | 0.02  | 0.02   | 0.02   | 0.016  | 0.02   | t | 133795 | DFTYDQV<br>AFNGLPQF          | Homo<br>sapiens                  |
| 1 | 1.00 | 1 | 1 | 0.03  | 0.028  | 0.023  | 0.023  | 0.031  | t | 108202 | VVSHFND                      | Mus<br>musculu<br>s              |
| 1 | 1.00 | 1 | 1 | 0     | 0      | 0.001  | 0      | 0      | t | 54468  | RLAKLSDG<br>VAVLKVG          | Homo<br>sapiens                  |

|   |      |   |   |       |        |        |        |        |   |        |                             |                                  |
|---|------|---|---|-------|--------|--------|--------|--------|---|--------|-----------------------------|----------------------------------|
| 1 | 1.00 | 1 | 1 | -0.05 | -0.05  | -0.034 | -0.04  | -0.048 | t | 116685 | CPAGWISL<br>WKGFS           | Homo<br>sapiens                  |
| 1 | 1.00 | 1 | 1 | 0.02  | 0.02   | 0.029  | 0.02   | 0.022  | t | 6129   | CDPTMDY                     | Mus<br>musculu<br>s              |
| 1 | 1.00 | 1 | 1 | 0.02  | 0.02   | 0.029  | 0.02   | 0.022  | t | 6129   | CDPTMDY                     | Mus<br>musculu<br>s              |
| 1 | 1.00 | 1 | 1 | -0.02 | -0.018 | -0.02  | -0.021 | -0.02  | t | 149417 | PQQQYPS<br>GQG              | Homo<br>sapiens                  |
| 1 | 1.00 | 1 | 1 | 0     | 0      | 0      | 0      | 0      | t | 156916 | LNEKQCTR<br>PCLHLT          | Gallus<br>gallus                 |
| 1 | 1.00 | 1 | 1 | -0.01 | -0.013 | -0.013 | -0.01  | -0.01  | t | 25031  | HVDTSYEC<br>DIPIGAGIC       | Oryctola<br>gus<br>cuniculu<br>s |
| 1 | 1.00 | 1 | 1 | -0.01 | -0.006 | -0.021 | -0.013 | -0.007 | t | 30052  | KCEVFREL<br>KDLKGY          | Homo<br>sapiens                  |
| 1 | 1.00 | 1 | 1 | 0     | 0.003  | 0.005  | 0      | 0      | t | 94837  | GTCKELKK<br>L               | Mus<br>musculu<br>s              |
| 1 | 1.00 | 1 | 1 | -0.02 | -0.02  | -0.02  | -0.022 | -0.02  | t | 20653  | GKPAIIPDR                   | Homo<br>sapiens                  |
| 1 | 1.00 | 1 | 1 | -0.02 | -0.016 | -0.02  | -0.023 | -0.02  | t | 111589 | NLIRHVGG<br>GTPR            | Homo<br>sapiens                  |
| 1 | 1.00 | 1 | 1 | 0.02  | 0.008  | 0.02   | 0.02   | 0.02   | t | 63825  | TGFSNLFN<br>LGSQQKV         | Mus<br>musculu<br>s              |
| 1 | 1.00 | 1 | 1 | 0.01  | 0.01   | 0.015  | 0.012  | 0.012  | t | 70674  | VQWPCLS<br>KQCNDNI          | Homo<br>sapiens                  |
| 1 | 1.00 | 1 | 1 | 0     | -0.003 | 0.001  | 0      | 0.002  | t | 133674 | RHRY                        | Oryctola<br>gus<br>cuniculu<br>s |
| 1 | 1.00 | 1 | 1 | 0     | 0      | 0      | -0.007 | -0.002 | t | 125552 | RRFEYDDP<br>RFLRLDLA<br>QEG | Homo<br>sapiens                  |
| 1 | 1.00 | 1 | 1 | -0.02 | -0.017 | -0.028 | -0.02  | -0.021 | t | 12229  | EGNARLA<br>QAQEEAL<br>RDVLN | Mus<br>musculu<br>s              |

|   |      |   |   |       |        |        |        |        |   |        |                              |                                  |
|---|------|---|---|-------|--------|--------|--------|--------|---|--------|------------------------------|----------------------------------|
| 1 | 1.00 | 1 | 1 | -0.02 | -0.024 | -0.02  | -0.019 | -0.021 | t | 132066 | SLRNSPEF<br>QKLLGI           | Oryctola<br>gus<br>cuniculu<br>s |
| 1 | 1.00 | 1 | 1 | 0     | -0.002 | -0.005 | -0.001 | 0      | t | 72324  | WDQKLW<br>CRHFCVLA<br>D      | Mus<br>musculu<br>s              |
| 1 | 1.00 | 1 | 1 | -0.02 | -0.02  | -0.016 | -0.02  | -0.02  | t | 157951 | SKRYAKA<br>MAKMGLK           | Canis<br>lupus                   |
| 1 | 1.00 | 1 | 1 | 0.01  | 0.007  | 0.006  | 0.01   | 0.012  | t | 91158  | AVNGNM<br>ALDDIHAQ<br>I      | Oryctola<br>gus<br>cuniculu<br>s |
| 1 | 1.00 | 1 | 1 | 0     | 0.004  | 0      | -0.003 | 0      | t | 96011  | YCSTWDA<br>NKP               | Homo<br>sapiens                  |
| 1 | 1.00 | 1 | 1 | -0.02 | -0.02  | -0.019 | -0.03  | -0.022 | t | 114940 | RPLCGSDN<br>KT               | Homo<br>sapiens                  |
| 1 | 1.00 | 1 | 1 | -0.01 | -0.01  | -0.01  | -0.01  | -0.01  | t | 131848 | DPRVLSNS<br>GWGQTPI          | Homo<br>sapiens                  |
| 1 | 1.00 | 1 | 1 | -0.01 | -0.01  | -0.01  | -0.01  | -0.01  | t | 95094  | IGFRGLDG<br>VHCTPTTD<br>SGVI | Rattus<br>norvegic<br>us         |
| 1 | 1.00 | 1 | 1 | -0.01 | -0.01  | -0.01  | -0.01  | -0.01  | t | 96748  | PQEIRDVL<br>SK               | Homo<br>sapiens(<br>human)       |
| 1 | 1.00 | 1 | 1 | -0.03 | -0.03  | -0.03  | -0.03  | -0.03  | t | 103511 | QAQYVAQ<br>LHVWARR<br>E      | Homo<br>sapiens                  |
| 1 | 1.00 | 1 | 1 | -0.03 | -0.033 | -0.03  | -0.03  | -0.03  | t | 46348  | NVDENAN<br>A                 | Oryctola<br>gus<br>cuniculu<br>s |
| 1 | 1.00 | 1 | 1 | -0.05 | -0.05  | -0.05  | -0.05  | -0.05  | t | 96214  | EEEDKKRK<br>EE               | Homo<br>sapiens                  |
| 1 | 1.00 | 1 | 1 | -0.03 | -0.032 | -0.03  | -0.03  | -0.03  | t | 75789  | YSLFHKEK<br>MIL              | Mus<br>musculu<br>s              |
| 1 | 1.00 | 1 | 1 | 0     | 0.004  | 0.005  | 0.003  | -0.003 | t | 134220 | RQGAEP<br>KNFVKPNE<br>TKTY   | Homo<br>sapiens                  |
| 1 | 1.00 | 1 | 1 | -0.05 | -0.05  | -0.05  | -0.048 | -0.05  | t | 29744  | KAAASKVK<br>ANLLSV           | Homo<br>sapiens                  |

|   |      |   |   |       |        |        |        |        |   |        |                                |                                  |
|---|------|---|---|-------|--------|--------|--------|--------|---|--------|--------------------------------|----------------------------------|
| 1 | 1.00 | 1 | 1 | 0.01  | 0.012  | 0.01   | 0.009  | 0.01   | t | 149312 | FEEIRNLAL<br>Q                 | Homo<br>sapiens                  |
| 1 | 1.00 | 1 | 1 | -0.03 | -0.026 | -0.03  | -0.03  | -0.03  | t | 100244 | LANAYSHF<br>YDGFAK             | Homo<br>sapiens                  |
| 1 | 1.00 | 1 | 1 | 0.01  | 0.013  | 0.015  | 0.01   | 0.009  | t | 97726  | VETPIRN                        | Mus<br>musculu<br>s              |
| 1 | 1.00 | 1 | 1 | -0.02 | -0.018 | -0.018 | -0.023 | -0.021 | t | 99453  | LRWLGPS<br>AEYGNLYR            | Homo<br>sapiens                  |
| 1 | 1.00 | 1 | 1 | -0.02 | -0.018 | -0.018 | -0.019 | -0.018 | t | 8981   | DKRFLC                         | Homo<br>sapiens                  |
| 1 | 1.00 | 1 | 1 | 0     | -0.002 | 0.005  | -0.001 | 0      | t | 24249  | HLLRLSEI                       | Mus<br>musculu<br>s              |
| 1 | 1.00 | 1 | 1 | -0.03 | -0.036 | -0.03  | -0.03  | -0.03  | t | 123489 | MGIPPGR<br>G                   | Oryctola<br>gus<br>cuniculu<br>s |
| 1 | 1.00 | 1 | 1 | -0.02 | -0.022 | -0.026 | -0.021 | -0.02  | t | 68420  | VFACAPDR<br>CP                 | Mus<br>musculu<br>s              |
| 1 | 1.00 | 1 | 1 | 0     | -0.003 | 0      | 0      | -0.001 | t | 144669 | GREGYP<br>A<br>DGGTECTL<br>KKG | Oryctola<br>gus<br>cuniculu<br>s |
| 1 | 1.00 | 1 | 1 | -0.04 | -0.038 | -0.035 | -0.041 | -0.042 | t | 131022 | QSGRKGA<br>DIM                 | Homo<br>sapiens                  |
| 1 | 1.00 | 1 | 1 | 0.01  | 0.006  | 0.01   | 0.007  | 0.009  | t | 156601 | ADEPNNL<br>NSK                 | Oryctola<br>gus<br>cuniculu<br>s |
| 1 | 1.00 | 1 | 1 | -0.01 | -0.01  | -0.013 | -0.01  | -0.008 | t | 19256  | GEEYLILSA<br>R                 | Mus<br>musculu<br>s              |
| 1 | 1.00 | 1 | 1 | 0.04  | 0.038  | 0.042  | 0.043  | 0.042  | t | 95512  | KNYIGYSG<br>TGEG               | Rattus<br>norvegic<br>us         |

|   |      |   |   |       |        |        |        |        |   |        |                             |                                  |
|---|------|---|---|-------|--------|--------|--------|--------|---|--------|-----------------------------|----------------------------------|
| 1 | 1.00 | 1 | 1 | 0.01  | 0.005  | 0      | 0.008  | 0.013  | t | 157111 | ASDACDKI<br>RYQSLT          | Canis<br>lupus                   |
| 1 | 1.00 | 1 | 1 | 0.02  | 0.02   | 0.02   | 0.02   | 0.02   | t | 158669 | ADIKTALE<br>ARKAADT         | Homo<br>sapiens                  |
| 1 | 1.00 | 1 | 1 | 0.02  | 0.02   | 0.02   | 0.02   | 0.02   | t | 112145 | GSGSGTD                     | Homo<br>sapiens                  |
| 1 | 1.00 | 1 | 1 | 0     | 0      | 0      | 0      | 0      | t | 149065 | LGPNHTQ                     | Sus<br>scrofa                    |
| 1 | 1.00 | 1 | 1 | 0     | 0.006  | 0      | 0      | 0      | t | 73513  | YCYGLPN<br>WVKVWD<br>RA     | Equus<br>caballus                |
| 1 | 1.00 | 1 | 1 | -0.02 | -0.02  | -0.02  | -0.02  | -0.02  | t | 121740 | QCSLAITIR<br>PWMLPY         | Mus<br>musculu<br>s              |
| 1 | 1.00 | 1 | 1 | -0.02 | -0.02  | -0.02  | -0.02  | -0.02  | t | 121740 | QCSLAITIR<br>PWMLPY         | Mus<br>musculu<br>s              |
| 1 | 1.00 | 1 | 1 | -0.02 | -0.02  | -0.02  | -0.02  | -0.02  | t | 127557 | ACAPVPAE<br>PLSK            | Trichosu<br>rus<br>vulpecul<br>a |
| 1 | 1.00 | 1 | 1 | -0.04 | -0.04  | -0.04  | -0.04  | -0.04  | t | 79281  | LCAPCAVP<br>GNEAWS          | Mus<br>musculu<br>s              |
| 1 | 1.00 | 1 | 1 | -0.04 | -0.04  | -0.04  | -0.04  | -0.04  | t | 67263  | TWHLPSH<br>HSRRK            | Mus<br>musculu<br>s              |
| 1 | 1.00 | 1 | 1 | -0.04 | -0.04  | -0.04  | -0.04  | -0.04  | t | 77784  | HLGLRRG<br>MFR              | Homo<br>sapiens                  |
| 1 | 1.00 | 1 | 1 | -0.06 | -0.06  | -0.06  | -0.06  | -0.06  | t | 123409 | KWPLNSW<br>IA               | Ovis<br>aries                    |
| 1 | 1.00 | 1 | 1 | 0     | 0.007  | 0      | 0      | 0.001  | t | 153836 | HGPKATL<br>QDIVLHLE<br>P    | Cavia<br>porcellu<br>s           |
| 1 | 1.00 | 1 | 1 | -0.02 | -0.018 | -0.013 | -0.013 | -0.017 | t | 130815 | ESDPPVAS<br>YQWRLIN         | Homo<br>sapiens                  |
| 1 | 1.00 | 1 | 1 | 0     | 0      | 0      | 0      | 0      | t | 117410 | YLQTPMT<br>VHPH             | Homo<br>sapiens                  |
| 1 | 1.00 | 1 | 1 | -0.02 | -0.02  | -0.025 | -0.026 | -0.022 | t | 38630  | LPPTVMFP<br>PQ              | Homo<br>sapiens                  |
| 1 | 1.00 | 1 | 1 | 0.04  | 0.04   | 0.033  | 0.04   | 0.044  | t | 133611 | IVSYLCDLA<br>PEAPPPTL<br>PP | Mus<br>musculu<br>s              |

|   |      |   |   |       |        |        |        |        |   |        |                              |                                  |
|---|------|---|---|-------|--------|--------|--------|--------|---|--------|------------------------------|----------------------------------|
| 1 | 1.00 | 1 | 1 | -0.01 | -0.01  | -0.01  | -0.01  | -0.009 | t | 153419 | LTPPPWQ<br>NPFPPGG<br>GS     | Mus<br>musculu<br>s              |
| 1 | 1.00 | 1 | 1 | 0.02  | 0.022  | 0.02   | 0.019  | 0.02   | t | 149432 | QPISQQQ<br>QQQ               | Homo<br>sapiens                  |
| 1 | 1.00 | 1 | 1 | -0.02 | -0.02  | -0.02  | -0.02  | -0.02  | t | 145726 | CKQAGTC<br>PPD               | Mus<br>musculu<br>s              |
| 1 | 1.00 | 1 | 1 | 0.01  | 0.009  | 0.01   | 0.01   | 0.012  | t | 38428  | LPDDFFPKI<br>DDLVR           | Anas<br>platyrhy<br>nchos        |
| 1 | 1.00 | 1 | 1 | 0     | -0.004 | -0.012 | 0.003  | 0.003  | t | 106779 | RKPLSPG<br>MTGR              | Oryctola<br>gus<br>cuniculu<br>s |
| 1 | 1.00 | 1 | 1 | 0.02  | 0.018  | 0.03   | 0.023  | 0.02   | t | 159042 | NTFVVDG<br>PETKECPT<br>A     | Mus<br>musculu<br>s              |
| 1 | 1.00 | 1 | 1 | 0.01  | 0.01   | 0.01   | 0.01   | 0.011  | t | 153835 | HGDTPTLH<br>EYMLDLQ<br>P     | Cavia<br>porcellu<br>s           |
| 1 | 1.00 | 1 | 1 | -0.01 | -0.006 | -0.016 | -0.01  | -0.011 | t | 153907 | YSKISEYRH<br>YCYSLYGT<br>TLE | Cavia<br>porcellu<br>s           |
| 1 | 1.00 | 1 | 1 | 0.02  | 0.017  | 0.029  | 0.02   | 0.02   | t | 78629  | DQKPPSR<br>QSQIESR           | Oryctola<br>gus<br>cuniculu<br>s |
| 1 | 1.00 | 1 | 1 | 0     | -0.004 | 0      | -0.001 | 0      | t | 60663  | SRGAPGG<br>GFVPSLQG<br>VP    | Oryctola<br>gus<br>cuniculu<br>s |
| 1 | 1.00 | 1 | 1 | -0.04 | -0.044 | -0.045 | -0.047 | -0.043 | t | 131104 | TGALFKHS<br>ENYK             | Oryctola<br>gus<br>cuniculu<br>s |
| 1 | 1.00 | 1 | 1 | 0.02  | 0.02   | 0.031  | 0.02   | 0.019  | t | 6763   | CPFLKQNE<br>PEDIDCW          | Mus<br>musculu<br>s              |
| 1 | 1.00 | 1 | 1 | 0     | 0.004  | 0.005  | -0.003 | -0.002 | t | 4864   | ATAANAA<br>PTNDK             | Homo<br>sapiens                  |
| 1 | 1.00 | 1 | 1 | 0.03  | 0.03   | 0.03   | 0.03   | 0.03   | t | 112396 | WASTRES                      | Homo<br>sapiens                  |

|   |      |   |   |       |        |        |       |        |   |        |                              |                       |
|---|------|---|---|-------|--------|--------|-------|--------|---|--------|------------------------------|-----------------------|
| 1 | 1.00 | 1 | 1 | 0.03  | 0.03   | 0.03   | 0.03  | 0.03   | t | 97745  | VNKAGASIG                    | Oryctolagus cuniculus |
| 1 | 1.00 | 1 | 1 | -0.01 | -0.01  | -0.01  | -0.01 | -0.01  | t | 79565  | HFTTRL                       | Oryctolagus cuniculus |
| 1 | 1.00 | 1 | 1 | -0.03 | -0.03  | -0.03  | -0.03 | -0.03  | t | 158585 | APPHVMP                      | Homo sapiens          |
| 1 | 1.00 | 1 | 1 | -0.03 | -0.03  | -0.03  | -0.03 | -0.03  | t | 158597 | KWPIIDT                      | Homo sapiens          |
| 1 | 1.00 | 1 | 1 | -0.03 | -0.03  | -0.03  | -0.03 | -0.03  | t | 158585 | APPHVMP                      | Homo sapiens          |
| 1 | 1.00 | 1 | 1 | -0.03 | -0.03  | -0.03  | -0.03 | -0.03  | t | 133958 | WIRLNF                       | Mus musculus          |
| 1 | 1.00 | 1 | 1 | 0.03  | 0.032  | 0.023  | 0.031 | 0.032  | t | 67156  | TVSLPVGA<br>DEDDIKAT<br>YDKG | Homo sapiens          |
| 1 | 1.00 | 1 | 1 | -0.05 | -0.05  | -0.05  | -0.05 | -0.05  | t | 79400  | SRPTML                       | Mus musculus          |
| 1 | 1.00 | 1 | 1 | 0     | 0      | 0      | 0     | 0      | t | 79226  | GCEMSCEI<br>ALVVCH           | Mus musculus          |
| 1 | 1.00 | 1 | 1 | 0     | 0      | 0      | 0     | 0.001  | t | 130815 | ESDPPVAS<br>YQWRLIN          | Homo sapiens          |
| 1 | 1.00 | 1 | 1 | -0.02 | -0.02  | -0.02  | -0.02 | -0.019 | t | 31002  | KGLNGLFD<br>LGPKQKI          | Mus musculus          |
| 1 | 1.00 | 1 | 1 | -0.06 | -0.06  | -0.067 | -0.06 | -0.06  | t | 28396  | IRSAEVVS<br>RMLVH            | Homo sapiens          |
| 1 | 1.00 | 1 | 1 | 0     | -0.006 | 0      | 0     | 0      | t | 123550 | NNLNEKIK<br>DELKK            | Oryctolagus cuniculus |
| 1 | 1.00 | 1 | 1 | 0     | -0.003 | 0      | 0     | -0.001 | t | 106341 | DIQMTQS<br>PSSLSASV<br>GDRV  | Oryctolagus cuniculus |
| 1 | 1.00 | 1 | 1 | -0.02 | -0.031 | -0.021 | -0.02 | -0.02  | t | 61630  | STGNLLTR<br>LSSLKTPLN<br>HKS | Oryctolagus cuniculus |

|   |      |   |   |       |        |        |        |        |   |        |                              |                       |
|---|------|---|---|-------|--------|--------|--------|--------|---|--------|------------------------------|-----------------------|
| 1 | 1.00 | 1 | 1 | -0.02 | -0.022 | -0.013 | -0.027 | -0.02  | t | 128148 | WTLGPYV                      | Mus musculus          |
| 1 | 1.00 | 1 | 1 | -0.05 | -0.048 | -0.042 | -0.049 | -0.052 | t | 12184  | EGHRMA<br>WDMMM<br>NWS       | Homo sapiens          |
| 1 | 1.00 | 1 | 1 | -0.04 | -0.034 | -0.04  | -0.04  | -0.04  | t | 123150 | ESKRFIKW<br>P                | Ovis aries            |
| 1 | 1.00 | 1 | 1 | -0.01 | -0.01  | -0.01  | -0.01  | -0.01  | t | 9845   | DQGNSDT<br>SWNFAAK<br>YLLETI | Aotus nancymae        |
| 1 | 1.00 | 1 | 1 | 0     | 0      | 0      | -0.004 | 0      | t | 118374 | GKALCWV<br>CAQSRKH<br>RD     | Homo sapiens          |
| 1 | 1.00 | 1 | 1 | 0     | 0.004  | 0      | -0.003 | 0.001  | t | 11813  | EENVEENV                     | Homo sapiens          |
| 1 | 1.00 | 1 | 1 | -0.05 | -0.054 | -0.046 | -0.047 | -0.048 | t | 24842  | HSQWNKP<br>SKPKTNM<br>K      | Oryctolagus cuniculus |
| 1 | 1.00 | 1 | 1 | 0.02  | 0.022  | 0.02   | 0.017  | 0.019  | t | 125358 | AETVESCL<br>AKSH             | Homo sapiens          |
| 1 | 1.00 | 1 | 1 | 0.02  | 0.022  | 0.025  | 0.02   | 0.02   | t | 78863  | TPSMDALS<br>AQLYSSL<br>DSP   | Homo sapiens          |
| 1 | 1.00 | 1 | 1 | 0.02  | 0.024  | 0.025  | 0.02   | 0.02   | t | 78863  | TPSMDALS<br>AQLYSSL<br>DSP   | Homo sapiens          |
| 1 | 1.00 | 1 | 1 | 0     | 0.012  | 0      | 0      | 0.003  | t | 28909  | ITGHRMA<br>WDM               | Pan troglodytes       |
| 1 | 1.00 | 1 | 1 | -0.02 | -0.02  | -0.02  | -0.02  | -0.019 | t | 153372 | DTELTQQA<br>LRLV             | Mus musculus          |
| 1 | 1.00 | 1 | 1 | 0.03  | 0.03   | 0.038  | 0.036  | 0.033  | t | 114505 | PAPADLFF<br>KNADINV          | Homo sapiens          |
| 1 | 1.00 | 1 | 1 | 0.02  | 0.02   | 0.02   | 0.02   | 0.021  | t | 118019 | MGRGAPP<br>PGMMG             | Homo sapiens          |



|   |      |   |   |       |        |        |        |        |   |        |                         |                                  |
|---|------|---|---|-------|--------|--------|--------|--------|---|--------|-------------------------|----------------------------------|
| 1 | 1.00 | 1 | 1 | 0     | 0.003  | -0.006 | 0      | 0.002  | t | 98433  | RVQKANA<br>DAK          | Mus<br>musculu<br>s              |
| 1 | 1.00 | 1 | 1 | 0     | -0.004 | 0      | -0.007 | 0      | t | 117909 | HKGFKGV<br>D            | Oryctola<br>gus<br>cuniculu<br>s |
| 1 | 1.00 | 1 | 1 | 0.01  | 0.01   | 0.017  | 0.01   | 0.01   | t | 158910 | KNLDIDPK<br>LQEYLGK     | Mus<br>musculu<br>s              |
| 1 | 1.00 | 1 | 1 | -0.01 | -0.007 | -0.01  | -0.01  | -0.01  | t | 45177  | NNMEENI<br>NILKNEGD     | Mus<br>musculu<br>s              |
| 1 | 1.00 | 1 | 1 | 0.01  | 0.006  | 0.013  | 0.013  | 0.013  | t | 115406 | NRKVKPTT<br>EGGVETE     | Oryctola<br>gus<br>cuniculu<br>s |
| 1 | 1.00 | 1 | 1 | -0.02 | -0.023 | -0.024 | -0.02  | -0.018 | t | 17640  | FRRLGAAL<br>LQ          | Oryctola<br>gus<br>cuniculu<br>s |
| 1 | 1.00 | 1 | 1 | 0     | 0      | 0      | 0      | 0      | t | 153414 | LPHWHPH<br>SHLQP        | Oryctola<br>gus<br>cuniculu<br>s |
| 1 | 1.00 | 1 | 1 | 0     | 0      | 0      | 0      | 0      | t | 103384 | LQAHPHA<br>VNGTAMR<br>E | Homo<br>sapiens                  |
| 1 | 1.00 | 1 | 1 | -0.02 | -0.02  | -0.02  | -0.02  | -0.02  | t | 141562 | SIVQRSEN<br>NGVRPDV     | Bos<br>taurus                    |
| 1 | 1.00 | 1 | 1 | -0.02 | -0.02  | -0.02  | -0.02  | -0.02  | t | 103037 | AKVRRER<br>MGHIELAA     | Homo<br>sapiens                  |
| 1 | 1.00 | 1 | 1 | -0.02 | -0.02  | -0.02  | -0.02  | -0.02  | t | 104745 | CSTWDAN<br>KPY          | Homo<br>sapiens                  |
| 1 | 1.00 | 1 | 1 | -0.04 | -0.04  | -0.04  | -0.04  | -0.04  | t | 90647  | WYSLNGKI<br>RAVDVPK     | Homo<br>sapiens                  |
| 1 | 1.00 | 1 | 1 | 0.05  | 0.046  | 0.06   | 0.051  | 0.05   | t | 73015  | WQWTWL<br>CEHPPP        | Oryctola<br>gus<br>cuniculu<br>s |

|   |      |   |   |       |        |        |       |        |   |        |                              |                       |
|---|------|---|---|-------|--------|--------|-------|--------|---|--------|------------------------------|-----------------------|
| 1 | 1.00 | 1 | 1 | 0     | 0      | 0      | 0     | 0.001  | t | 139225 | REAEQRR                      | Oryctolagus cuniculus |
| 1 | 1.00 | 1 | 1 | -0.01 | -0.01  | -0.005 | -0.01 | -0.01  | t | 19097  | GDRADGQ<br>PAGDRAA<br>GQPA   | Mus musculus          |
| 1 | 1.00 | 1 | 1 | -0.01 | -0.01  | -0.005 | -0.01 | -0.01  | t | 19097  | GDRADGQ<br>PAGDRAA<br>GQPA   | Mus musculus          |
| 1 | 1.00 | 1 | 1 | -0.01 | -0.01  | -0.005 | -0.01 | -0.01  | t | 19097  | GDRADGQ<br>PAGDRAA<br>GQPA   | Mus musculus          |
| 1 | 1.00 | 1 | 1 | -0.01 | -0.01  | -0.005 | -0.01 | -0.01  | t | 19097  | GDRADGQ<br>PAGDRAA<br>GQPA   | Mus musculus          |
| 1 | 1.00 | 1 | 1 | -0.01 | -0.01  | -0.005 | -0.01 | -0.01  | t | 19097  | GDRADGQ<br>PAGDRAA<br>GQPA   | Mus musculus          |
| 1 | 1.00 | 1 | 1 | -0.01 | -0.01  | -0.005 | -0.01 | -0.01  | t | 19097  | GDRADGQ<br>PAGDRAA<br>GQPA   | Mus musculus          |
| 1 | 1.00 | 1 | 1 | 0.04  | 0.04   | 0.04   | 0.04  | 0.041  | t | 118226 | WWEEERY<br>PEGIKWKF<br>LEHKG | Homo sapiens          |
| 1 | 1.00 | 1 | 1 | -0.01 | -0.008 | -0.003 | -0.01 | -0.008 | t | 95003  | CTKPSDGN<br>C                | Homo sapiens          |
| 1 | 1.00 | 1 | 1 | 0.01  | 0.008  | 0.022  | 0.013 | 0.009  | t | 78402  | GLPNDWS<br>GRQASGT<br>R      | Mus musculus          |
| 1 | 1.00 | 1 | 1 | -0.02 | -0.02  | -0.02  | -0.02 | -0.02  | t | 147380 | VNIKFSGV<br>CHT              | Homo sapiens          |
| 1 | 1.00 | 1 | 1 | -0.02 | -0.02  | -0.01  | -0.02 | -0.018 | t | 45420  | NPNDPP                       | Mus musculus          |
| 1 | 1.00 | 1 | 1 | -0.02 | -0.02  | -0.01  | -0.02 | -0.018 | t | 45420  | NPNDPP                       | Mus musculus          |
| 1 | 1.00 | 1 | 1 | -0.02 | -0.017 | -0.007 | -0.02 | -0.022 | t | 137947 | PNTMKTQ                      | Mus musculus          |
| 1 | 1.00 | 1 | 1 | -0.02 | -0.02  | -0.02  | -0.02 | -0.02  | t | 106308 | CKCIVRAT<br>KGIS             | Homo sapiens          |
| 1 | 1.00 | 1 | 1 | -0.05 | -0.051 | -0.052 | -0.05 | -0.05  | t | 53800  | RFVKTPSK<br>KKTKSR           | Bos taurus            |

|   |      |   |   |       |        |        |        |        |   |        |                             |                       |
|---|------|---|---|-------|--------|--------|--------|--------|---|--------|-----------------------------|-----------------------|
| 1 | 1.00 | 1 | 1 | -0.05 | -0.05  | -0.042 | -0.05  | -0.053 | t | 113875 | SNRRPSTT                    | Mus musculus          |
| 1 | 1.00 | 1 | 1 | -0.01 | -0.01  | -0.01  | -0.01  | -0.007 | t | 1206   | AEVDCSRF<br>PNATDK          | Homo sapiens          |
| 1 | 1.00 | 1 | 1 | -0.01 | -0.006 | -0.01  | -0.011 | -0.012 | t | 123636 | PVGPAPG<br>MRP              | Homo sapiens          |
| 1 | 1.00 | 1 | 1 | -0.05 | -0.053 | -0.048 | -0.05  | -0.05  | t | 93488  | NGTLFSWL<br>PALASNFD<br>Q   | Oryctolagus cuniculus |
| 1 | 1.00 | 1 | 1 | -0.04 | -0.04  | -0.031 | -0.036 | -0.042 | t | 135970 | PPGMRPP<br>MGPMGIP<br>P     | Homo sapiens          |
| 1 | 1.00 | 1 | 1 | 0     | 0      | 0      | -0.002 | 0      | t | 119474 | KIRY                        | Homo sapiens          |
| 1 | 1.00 | 1 | 1 | -0.01 | -0.012 | -0.017 | -0.01  | -0.008 | t | 121065 | WLKVKILP<br>EVKEKHEF        | Oryctolagus cuniculus |
| 1 | 1.00 | 1 | 1 | -0.01 | -0.008 | 0.01   | -0.003 | -0.01  | t | 141664 | GSFTVRAD<br>HGEP            | Homo sapiens          |
| 1 | 1.00 | 1 | 1 | 0.02  | 0.018  | 0.02   | 0.017  | 0.02   | t | 921    | AEGEFCSP<br>PDSPGVC<br>GDPK | Mus musculus          |
| 1 | 1.00 | 1 | 1 | 0.02  | 0.018  | 0.02   | 0.017  | 0.02   | t | 921    | AEGEFCSP<br>PDSPGVC<br>GDPK | Mus musculus          |
| 1 | 1.00 | 1 | 1 | 0.04  | 0.042  | 0.045  | 0.043  | 0.042  | t | 130987 | NPVENM<br>MDRDSQ            | Homo sapiens          |
| 1 | 1.00 | 1 | 1 | -0.01 | -0.01  | -0.01  | -0.01  | -0.01  | t | 107527 | NAKTKPR                     | Homo sapiens          |
| 1 | 1.00 | 1 | 1 | -0.03 | -0.03  | -0.03  | -0.03  | -0.03  | t | 151034 | NERTLDYH<br>DSNVKLN         | Homo sapiens          |
| 1 | 1.00 | 1 | 1 | -0.03 | -0.03  | -0.03  | -0.03  | -0.03  | t | 140575 | LLDDGFW<br>PRV              | Mus musculus          |
| 1 | 1.00 | 1 | 1 | -0.03 | -0.03  | -0.03  | -0.03  | -0.03  | t | 78302  | WHRLAI                      | Homo sapiens          |
| 1 | 1.00 | 1 | 1 | -0.03 | -0.03  | -0.03  | -0.03  | -0.03  | t | 93256  | LLHGGKG<br>DDI              | Ovis aries            |

|   |      |   |   |       |        |        |        |        |   |        |                              |                                  |
|---|------|---|---|-------|--------|--------|--------|--------|---|--------|------------------------------|----------------------------------|
| 1 | 1.00 | 1 | 1 | -0.03 | -0.038 | -0.037 | -0.027 | -0.03  | t | 123809 | VAVESRN<br>GSRLHFNK          | Trichosu<br>rus<br>vulpecul<br>a |
| 1 | 1.00 | 1 | 1 | 0.02  | 0.022  | 0.021  | 0.023  | 0.02   | t | 65520  | TPCSAEEE<br>KLPISP           | Homo<br>sapiens                  |
| 1 | 1.00 | 1 | 1 | -0.03 | -0.03  | -0.03  | -0.03  | -0.03  | t | 142428 | KAQKEATA<br>AKLKA            | Homo<br>sapiens                  |
| 1 | 1.00 | 1 | 1 | -0.02 | -0.018 | -0.021 | -0.017 | -0.018 | t | 75539  | YQQQGRL                      | Homo<br>sapiens                  |
| 1 | 1.00 | 1 | 1 | -0.02 | -0.017 | -0.018 | -0.02  | -0.02  | t | 73607  | YDWRAD<br>WVKGFP             | Mus<br>musculu<br>s              |
| 1 | 1.00 | 1 | 1 | 0.01  | 0.006  | 0.011  | 0.01   | 0.01   | t | 82762  | GLMVWCI<br>ENGTSNP<br>VNGV   | Oryctola<br>gus<br>cuniculu<br>s |
| 1 | 1.00 | 1 | 1 | 0     | 0      | 0      | 0      | -0.001 | t | 140459 | EHWSHD<br>MFSPGD             | Mus<br>musculu<br>s              |
| 1 | 1.00 | 1 | 1 | 0.01  | 0.006  | 0.018  | 0.01   | 0.012  | t | 141053 | LTPDTQYE<br>FQVR             | Mus<br>musculu<br>s              |
| 1 | 1.00 | 1 | 1 | 0.02  | 0.018  | 0.02   | 0.019  | 0.022  | t | 110275 | GPVGPSD<br>PSIVSLVEE<br>TSFI | Mus<br>musculu<br>s              |
| 1 | 1.00 | 1 | 1 | -0.02 | -0.02  | -0.02  | -0.02  | -0.019 | t | 135930 | GDKVSFFC<br>KNKEKCC          | Homo<br>sapiens                  |
| 1 | 1.00 | 1 | 1 | 0.02  | 0.024  | 0.025  | 0.023  | 0.022  | t | 78153  | FDPQIQAI<br>VSSPCHNS         | Homo<br>sapiens                  |
| 1 | 1.00 | 1 | 1 | 0     | -0.002 | 0.004  | -0.003 | 0      | t | 123849 | WQDE                         | Mus<br>musculu<br>s              |
| 1 | 1.00 | 1 | 1 | -0.02 | -0.02  | -0.02  | -0.02  | -0.018 | t | 121875 | SRERSKDK                     | Homo<br>sapiens                  |
| 1 | 1.00 | 1 | 1 | -0.03 | -0.027 | -0.041 | -0.03  | -0.028 | t | 111440 | KCDSTLRL<br>CVQSTHV<br>DIRTL | Mus<br>musculu<br>s              |

|   |      |   |   |       |        |        |        |        |   |        |                              |                                  |
|---|------|---|---|-------|--------|--------|--------|--------|---|--------|------------------------------|----------------------------------|
| 1 | 1.00 | 1 | 1 | -0.03 | -0.027 | -0.041 | -0.03  | -0.028 | t | 111440 | KCDSTLRL<br>CVQSTHV<br>DIRTL | Mus<br>musculu<br>s              |
| 1 | 1.00 | 1 | 1 | 0     | 0      | 0      | 0      | 0      | t | 153379 | EQEFTNIT<br>DRV              | Mus<br>musculu<br>s              |
| 1 | 1.00 | 1 | 1 | -0.02 | -0.02  | -0.02  | -0.02  | -0.02  | t | 79564  | HAIYRPH                      | Oryctola<br>gus<br>cuniculu<br>s |
| 1 | 1.00 | 1 | 1 | -0.02 | -0.023 | -0.02  | -0.02  | -0.02  | t | 14952  | EWSPCSVT<br>CGKGTRSR<br>KR   | Oryctola<br>gus<br>cuniculu<br>s |
| 1 | 1.00 | 1 | 1 | 0     | 0.008  | -0.01  | 0      | 0.001  | t | 38617  | LPPIQNTR<br>NVVP             | Gallus<br>gallus                 |
| 1 | 1.00 | 1 | 1 | -0.06 | -0.06  | -0.06  | -0.06  | -0.06  | t | 118288 | DDRNLNKVI<br>SELNGKN         | Homo<br>sapiens                  |
| 1 | 1.00 | 1 | 1 | -0.01 | -0.018 | -0.01  | -0.01  | -0.008 | t | 156871 | FQNIASM<br>PHLYV             | Mus<br>musculu<br>s              |
| 1 | 1.00 | 1 | 1 | -0.01 | -0.01  | -0.01  | -0.01  | -0.008 | t | 75949  | YTASARGD<br>LAHL             | Mus<br>musculu<br>s              |
| 1 | 1.00 | 1 | 1 | 0.02  | 0.02   | 0.027  | 0.02   | 0.02   | t | 11987  | EFEPVGSA<br>PPSEGE           | Homo<br>sapiens                  |
| 1 | 1.00 | 1 | 1 | -0.03 | -0.03  | -0.031 | -0.03  | -0.03  | t | 159130 | SRLEHLM<br>WESIQKEL<br>N     | Mus<br>musculu<br>s              |
| 1 | 1.00 | 1 | 1 | 0.04  | 0.042  | 0.054  | 0.041  | 0.042  | t | 60589  | SQVYTTSE<br>YPSQ             | Homo<br>sapiens                  |
| 1 | 1.00 | 1 | 1 | -0.04 | -0.038 | -0.032 | -0.041 | -0.047 | t | 9479   | DNIHVKM<br>RKVIMNN<br>DKSELI | Aotus<br>nancyma<br>ae           |
| 1 | 1.00 | 1 | 1 | -0.02 | -0.016 | -0.02  | -0.019 | -0.02  | t | 137936 | NIDIGLKG<br>KVLT             | Homo<br>sapiens                  |

|   |      |   |   |       |        |        |        |        |   |        |                              |                                  |
|---|------|---|---|-------|--------|--------|--------|--------|---|--------|------------------------------|----------------------------------|
| 1 | 1.00 | 1 | 1 | -0.03 | -0.03  | -0.03  | -0.03  | -0.029 | t | 100153 | INDQIKFI<br>N                | Mus<br>musculu<br>s              |
| 1 | 1.00 | 1 | 1 | -0.01 | -0.01  | -0.008 | -0.01  | -0.01  | t | 29812  | KAGSTVYA<br>VTAVTSIFS<br>VG  | Homo<br>sapiens                  |
| 1 | 1.00 | 1 | 1 | -0.06 | -0.062 | -0.06  | -0.061 | -0.06  | t | 151023 | LCKLRGVA<br>PLHLGKC          | Mus<br>musculu<br>s              |
| 1 | 1.00 | 1 | 1 | 0     | -0.003 | 0.009  | 0      | -0.002 | t | 79778  | DGVREARS<br>G                | Oryctola<br>gus<br>cuniculu<br>s |
| 1 | 1.00 | 1 | 1 | 0     | -0.003 | 0.009  | 0      | -0.002 | t | 79778  | DGVREARS<br>G                | Oryctola<br>gus<br>cuniculu<br>s |
| 1 | 1.00 | 1 | 1 | -0.03 | -0.03  | -0.028 | -0.03  | -0.03  | t | 34103  | KVLHKRTL<br>GLSAMSTT         | Homo<br>sapiens                  |
| 1 | 1.00 | 1 | 1 | -0.02 | -0.018 | -0.017 | -0.023 | -0.022 | t | 48988  | PQEFSKKY<br>LQ               | Homo<br>sapiens                  |
| 1 | 1.00 | 1 | 1 | -0.01 | -0.01  | -0.012 | -0.01  | -0.012 | t | 95552  | LKFILNTVN<br>GTT             | Homo<br>sapiens                  |
| 1 | 1.00 | 1 | 1 | 0     | -0.002 | 0      | -0.003 | 0      | t | 62347  | SVTEEIAEE<br>DK              | Mus<br>musculu<br>s              |
| 1 | 1.00 | 1 | 1 | 0     | -0.002 | 0      | -0.003 | 0      | t | 37660  | LLPHSNLD<br>HILEPSIPW<br>KSK | Mus<br>musculu<br>s              |
| 1 | 1.00 | 1 | 1 | 0     | -0.004 | 0      | -0.003 | 0      | t | 48779  | PPFSLSPV<br>PTLGSRSR<br>R    | Oryctola<br>gus<br>cuniculu<br>s |
| 1 | 1.00 | 1 | 1 | -0.01 | -0.012 | -0.006 | -0.013 | -0.011 | t | 39423  | LSHNPGAS<br>ALL              | Mus<br>musculu<br>s              |
| 1 | 1.00 | 1 | 1 | 0.03  | 0.03   | 0.041  | 0.027  | 0.028  | t | 66935  | TVAFNQF<br>GPNAGQ            | Homo<br>sapiens                  |
| 1 | 1.00 | 1 | 1 | -0.03 | -0.026 | -0.03  | -0.027 | -0.028 | t | 5568   | AVTMGPK<br>GRT               | Homo<br>sapiens                  |

|   |      |   |   |       |        |        |        |        |   |        |                              |                         |
|---|------|---|---|-------|--------|--------|--------|--------|---|--------|------------------------------|-------------------------|
| 1 | 1.00 | 1 | 1 | -0.01 | -0.01  | -0.01  | -0.011 | -0.007 | t | 153288 | SDPRKMCI<br>Y                | Mus<br>musculu<br>s     |
| 1 | 1.00 | 1 | 1 | -0.02 | -0.02  | -0.013 | -0.02  | -0.02  | t | 15918  | FFTEVDGV<br>RLHRYA           | Homo<br>sapiens         |
| 1 | 1.00 | 1 | 1 | 0     | -0.004 | 0.008  | 0      | -0.002 | t | 140592 | PYHQLTH<br>GS                | Mus<br>musculu<br>s     |
| 1 | 1.00 | 1 | 1 | 0.01  | 0.012  | 0.012  | 0.007  | 0.01   | t | 158834 | IGFASKSA<br>DDVKKAF          | Homo<br>sapiens         |
| 1 | 1.00 | 1 | 1 | 0.03  | 0.03   | 0.03   | 0.03   | 0.03   | t | 112353 | TGSGSGT                      | Homo<br>sapiens         |
| 1 | 1.00 | 1 | 1 | -0.04 | -0.042 | -0.045 | -0.041 | -0.042 | t | 45646  | NQYGRIRV<br>LQRFNQR          | Sus<br>scrofa           |
| 1 | 1.00 | 1 | 1 | -0.03 | -0.03  | -0.03  | -0.03  | -0.03  | t | 112194 | LAHIWWN                      | Homo<br>sapiens         |
| 1 | 1.00 | 1 | 1 | -0.05 | -0.05  | -0.05  | -0.05  | -0.05  | t | 135989 | RVLAPHLT<br>RAYA             | Homo<br>sapiens         |
| 1 | 1.00 | 1 | 1 | -0.03 | -0.032 | -0.024 | -0.031 | -0.029 | t | 60671  | SRGKGPG<br>KKNK              | Mus<br>musculu<br>s     |
| 1 | 1.00 | 1 | 1 | -0.02 | -0.018 | -0.019 | -0.02  | -0.021 | t | 58377  | SHLKLFTIK<br>YVDVNTN<br>ELLK | Homo<br>sapiens         |
| 1 | 1.00 | 1 | 1 | 0.02  | 0.02   | 0.02   | 0.011  | 0.019  | t | 135647 | DAKPGQF<br>P                 | Homo<br>sapiens         |
| 1 | 1.00 | 1 | 1 | 0.01  | 0.01   | 0.012  | 0.01   | 0.011  | t | 48838  | PPNAPILST<br>LPE             | Mus<br>musculu<br>s     |
| 1 | 1.00 | 1 | 1 | 0.01  | 0.011  | 0.008  | 0.01   | 0.01   | t | 44563  | NKNTLQA<br>RQQTVSA           | Myodes<br>glareolu<br>s |
| 1 | 1.00 | 1 | 1 | 0.03  | 0.028  | 0.03   | 0.023  | 0.028  | t | 107517 | LSTNEVA<br>M                 | Mus<br>musculu<br>s     |
| 1 | 1.00 | 1 | 1 | 0     | 0      | -0.01  | -0.007 | -0.001 | t | 122097 | FPGWQPG<br>MPTIPTAP<br>PTTPV | Homo<br>sapiens         |
| 1 | 1.00 | 1 | 1 | -0.07 | -0.072 | -0.068 | -0.071 | -0.071 | t | 46899  | PAPRRKFQ<br>QVKRL            | Mus<br>musculu<br>s     |

|   |      |   |   |       |        |        |        |        |   |        |                              |                     |
|---|------|---|---|-------|--------|--------|--------|--------|---|--------|------------------------------|---------------------|
| 1 | 1.00 | 1 | 1 | -0.03 | -0.03  | -0.028 | -0.03  | -0.03  | t | 126111 | GHCQGDG<br>YRVGFGQ<br>C      | Mus<br>musculu<br>s |
| 1 | 1.00 | 1 | 1 | 0.03  | 0.03   | 0.03   | 0.033  | 0.031  | t | 139499 | FGEFSFQY<br>DCSSWGC          | Homo<br>sapiens     |
| 1 | 1.00 | 1 | 1 | 0.02  | 0.022  | 0.02   | 0.017  | 0.019  | t | 106316 | CSGTKKLS<br>EEVK             | Homo<br>sapiens     |
| 1 | 1.00 | 1 | 1 | 0.01  | 0.014  | 0.011  | 0.007  | 0.007  | t | 114960 | TAEDRPLC<br>GS               | Homo<br>sapiens     |
| 1 | 1.00 | 1 | 1 | -0.05 | -0.047 | -0.042 | -0.05  | -0.052 | t | 121292 | FATFVYAK                     | Mus<br>musculu<br>s |
| 1 | 1.00 | 1 | 1 | -0.02 | -0.022 | -0.023 | -0.017 | -0.02  | t | 76157  | YTPVEEKQ<br>NGRMIVIV<br>AKKY | Mus<br>musculu<br>s |
| 1 | 1.00 | 1 | 1 | 0.04  | 0.04   | 0.047  | 0.049  | 0.043  | t | 130987 | NPVENM<br>MDRDSQ             | Homo<br>sapiens     |
| 1 | 1.00 | 1 | 1 | -0.01 | -0.01  | -0.021 | -0.012 | -0.01  | t | 17278  | FPELKPGE<br>SRHTSDH<br>MSIYK | Homo<br>sapiens     |
| 1 | 1.00 | 1 | 1 | 0     | 0      | 0      | -0.004 | 0      | t | 117745 | ALLRNLGK<br>MTA              | Homo<br>sapiens     |
| 1 | 1.00 | 1 | 1 | 0     | 0.003  | 0.001  | 0      | -0.002 | t | 36831  | LKEKHTDL<br>GKEGV            | Mus<br>musculu<br>s |
| 1 | 1.00 | 1 | 1 | 0.03  | 0.028  | 0.029  | 0.033  | 0.032  | t | 106597 | LDLKRTTT<br>THTSGGG<br>C     | Mus<br>musculu<br>s |
| 1 | 1.00 | 1 | 1 | -0.01 | -0.008 | -0.01  | -0.009 | -0.009 | t | 153480 | TPSWRNP<br>FPTFYGGG<br>S     | Homo<br>sapiens     |
| 1 | 1.00 | 1 | 1 | -0.01 | -0.01  | -0.01  | -0.01  | -0.01  | t | 58228  | SGSGANN<br>SSSSGSGSI<br>YN   | Sus<br>crofa        |
| 1 | 1.00 | 1 | 1 | -0.03 | -0.032 | -0.03  | -0.033 | -0.03  | t | 110385 | QLYKTCKQ<br>AGTCPPDII<br>PKV | Mus<br>musculu<br>s |
| 1 | 1.00 | 1 | 1 | -0.01 | -0.01  | -0.01  | -0.01  | -0.009 | t | 56396  | RVRGLYLP<br>AGG              | Mus<br>musculu<br>s |
| 1 | 1.00 | 1 | 1 | 0     | 0.003  | 0      | 0      | 0      | t | 142439 | LARLARLG<br>EACG             | Mus<br>musculu<br>s |



|   |      |   |   |       |        |        |        |        |   |        |                              |                                  |
|---|------|---|---|-------|--------|--------|--------|--------|---|--------|------------------------------|----------------------------------|
| 1 | 1.00 | 1 | 1 | -0.02 | -0.02  | -0.02  | -0.02  | -0.02  | t | 103695 | VGPGRWD<br>EDGEKRIP          | Homo<br>sapiens                  |
| 1 | 1.00 | 1 | 1 | -0.02 | -0.02  | -0.02  | -0.02  | -0.02  | t | 99269  | GEQEERG<br>QRRWSTR<br>S      | Homo<br>sapiens                  |
| 1 | 1.00 | 1 | 1 | -0.02 | -0.02  | -0.02  | -0.02  | -0.02  | t | 79679  | WHQVSLT                      | Oryctola<br>gus<br>cuniculu<br>s |
| 1 | 1.00 | 1 | 1 | -0.02 | -0.02  | -0.02  | -0.02  | -0.02  | t | 78302  | WHRLAI                       | Homo<br>sapiens                  |
| 1 | 1.00 | 1 | 1 | -0.01 | -0.01  | -0.01  | -0.01  | -0.008 | t | 67931  | VDEKKM                       | Mus<br>musculu<br>s              |
| 1 | 1.00 | 1 | 1 | 0     | -0.002 | 0      | -0.001 | 0.001  | t | 63077  | TCGVGVR<br>VRRRVNA<br>ANKKPE | Mus<br>musculu<br>s              |
| 1 | 1.00 | 1 | 1 | 0     | -0.002 | 0      | -0.001 | 0.001  | t | 63077  | TCGVGVR<br>VRRRVNA<br>ANKKPE | Mus<br>musculu<br>s              |
| 1 | 1.00 | 1 | 1 | 0     | -0.002 | 0      | -0.001 | 0.001  | t | 63077  | TCGVGVR<br>VRRRVNA<br>ANKKPE | Mus<br>musculu<br>s              |
| 1 | 1.00 | 1 | 1 | 0     | -0.004 | 0      | -0.001 | 0.001  | t | 71284  | VTEEI                        | Oryctola<br>gus<br>cuniculu<br>s |
| 1 | 1.00 | 1 | 1 | 0     | -0.002 | 0      | -0.001 | 0.001  | t | 63077  | TCGVGVR<br>VRRRVNA<br>ANKKPE | Mus<br>musculu<br>s              |
| 1 | 1.00 | 1 | 1 | 0     | -0.002 | 0      | -0.001 | 0.001  | t | 31116  | KHIDAYKT<br>FPPTPEKK<br>DKKK | Macaca<br>cyclopis               |
| 1 | 1.00 | 1 | 1 | -0.03 | -0.03  | -0.03  | -0.03  | -0.03  | t | 134694 | ISPFCLK                      | MD                               |
| 1 | 1.00 | 1 | 1 | -0.02 | -0.024 | -0.01  | -0.02  | -0.019 | t | 74497  | YKQKIIAP                     | Mus<br>musculu<br>s              |
| 1 | 1.00 | 1 | 1 | -0.01 | -0.01  | -0.013 | -0.009 | -0.01  | t | 56017  | RTALNCN<br>DSLQTGFL<br>AALFY | Homo<br>sapiens                  |
| 1 | 1.00 | 1 | 1 | -0.03 | -0.03  | -0.023 | -0.03  | -0.032 | t | 133554 | EGLYSPW<br>WPRSLPVL          | Mus<br>musculu<br>s              |

|   |      |   |   |       |        |        |        |        |   |        |                              |                                  |
|---|------|---|---|-------|--------|--------|--------|--------|---|--------|------------------------------|----------------------------------|
| 1 | 1.00 | 1 | 1 | -0.04 | -0.037 | -0.042 | -0.04  | -0.041 | t | 5992   | CAKKVWR<br>DHRGTI            | Mus<br>musculu<br>s              |
| 1 | 1.00 | 1 | 1 | -0.01 | -0.012 | -0.008 | -0.013 | -0.009 | t | 131317 | VEALYLVC<br>GERG             | Mus<br>musculu<br>s              |
| 1 | 1.00 | 1 | 1 | -0.01 | -0.01  | -0.007 | -0.01  | -0.01  | t | 136421 | KIHAREIFD<br>SRGNPTVE        | Homo<br>sapiens                  |
| 1 | 1.00 | 1 | 1 | -0.01 | -0.014 | -0.021 | -0.017 | -0.012 | t | 122115 | IKGANDLA<br>KFHQMLM<br>KIIMK | Oryctola<br>gus<br>cuniculu<br>s |
| 1 | 1.00 | 1 | 1 | 0     | 0.004  | 0.01   | -0.003 | -0.002 | t | 68903  | VIAGMDW<br>AV                | Homo<br>sapiens                  |
| 1 | 1.00 | 1 | 1 | -0.01 | -0.007 | 0      | -0.01  | -0.01  | t | 55595  | RRHFLDQR<br>Q                | Mus<br>musculu<br>s              |
| 1 | 1.00 | 1 | 1 | -0.02 | -0.02  | -0.002 | -0.019 | -0.02  | t | 57860  | SFP                          | Mus<br>musculu<br>s              |
| 1 | 1.00 | 1 | 1 | 0.01  | 0.01   | 0.001  | 0.003  | 0.01   | t | 102972 | YVLSSLHIY<br>WGKEDDY<br>GSNH | Mus<br>musculu<br>s              |
| 1 | 1.00 | 1 | 1 | -0.03 | -0.034 | -0.023 | -0.031 | -0.032 | t | 6956   | CRWPDVL<br>LWC               | Oryctola<br>gus<br>cuniculu<br>s |
| 1 | 1.00 | 1 | 1 | 0.06  | 0.06   | 0.058  | 0.053  | 0.06   | t | 118338 | ESEESDDD<br>MGFGLFD          | Homo<br>sapiens                  |
| 1 | 1.00 | 1 | 1 | 0     | 0      | -0.005 | -0.002 | 0      | t | 79059  | RIQSTWR<br>QKTVDLPA<br>GTKYV | Homo<br>sapiens                  |
| 1 | 1.00 | 1 | 1 | 0.01  | 0.007  | 0.01   | 0.01   | 0.011  | t | 107229 | RHEVTEM<br>GQEV              | Oryctola<br>gus<br>cuniculu<br>s |
| 1 | 1.00 | 1 | 1 | 0     | 0      | 0      | 0      | 0.001  | t | 55260  | RPPNAP                       | Mus<br>musculu<br>s              |

|   |      |   |   |       |       |        |        |        |   |        |                             |                                  |
|---|------|---|---|-------|-------|--------|--------|--------|---|--------|-----------------------------|----------------------------------|
| 1 | 1.00 | 1 | 1 | 0.02  | 0.024 | 0.022  | 0.023  | 0.023  | t | 120168 | RGWKHSV<br>TYSGGPD<br>TPY   | Homo<br>sapiens                  |
| 1 | 1.00 | 1 | 1 | 0.01  | 0.01  | 0.01   | 0.01   | 0.01   | t | 135718 | LTRAEAVF                    | Homo<br>sapiens                  |
| 1 | 1.00 | 1 | 1 | -0.01 | -0.01 | -0.01  | -0.01  | -0.01  | t | 134763 | PSLGASSH<br>QHSRRRQ         | Homo<br>sapiens                  |
| 1 | 1.00 | 1 | 1 | -0.01 | -0.01 | -0.01  | -0.01  | -0.01  | t | 108281 | APSSLAGN<br>G               | Homo<br>sapiens                  |
| 1 | 1.00 | 1 | 1 | -0.01 | -0.01 | -0.01  | -0.01  | -0.01  | t | 108296 | CKYAWSR<br>C                | Homo<br>sapiens                  |
| 1 | 1.00 | 1 | 1 | -0.01 | -0.01 | -0.01  | -0.01  | -0.01  | t | 112074 | DGAWFAY                     | Homo<br>sapiens                  |
| 1 | 1.00 | 1 | 1 | -0.01 | -0.01 | -0.01  | -0.01  | -0.01  | t | 79660  | TPHNPAI                     | Oryctola<br>gus<br>cuniculu<br>s |
| 1 | 1.00 | 1 | 1 | -0.03 | -0.03 | -0.032 | -0.033 | -0.032 | t | 41056  | MAKLVL<br>SLCFLFSG          | Homo<br>sapiens                  |
| 1 | 1.00 | 1 | 1 | -0.03 | -0.03 | -0.03  | -0.03  | -0.03  | t | 139512 | GPRVVER<br>HQSACKD<br>S     | Homo<br>sapiens                  |
| 1 | 1.00 | 1 | 1 | -0.03 | -0.03 | -0.03  | -0.03  | -0.03  | t | 77908  | HSWDKNS<br>SIWWP            | Mus<br>musculu<br>s              |
| 1 | 1.00 | 1 | 1 | -0.05 | -0.05 | -0.05  | -0.05  | -0.05  | t | 139520 | HIRLSPA                     | Oryctola<br>gus<br>cuniculu<br>s |
| 1 | 1.00 | 1 | 1 | 0     | 0.004 | 0      | 0.003  | 0.002  | t | 21729  | GPPLGCLS<br>LSCYDVA         | Homo<br>sapiens                  |
| 1 | 1.00 | 1 | 1 | 0.04  | 0.045 | 0.047  | 0.04   | 0.039  | t | 132856 | LEDGRTL<br>SDYNIQKES        | Mus<br>musculu<br>s              |
| 1 | 1.00 | 1 | 1 | -0.05 | -0.05 | -0.05  | -0.05  | -0.05  | t | 79411  | TCKQLKAH<br>PPLACM          | Mus<br>musculu<br>s              |
| 1 | 1.00 | 1 | 1 | -0.02 | -0.02 | -0.024 | -0.017 | -0.02  | t | 72755  | WLLSPRGS<br>RPSWGPT         | Homo<br>sapiens                  |
| 1 | 1.00 | 1 | 1 | 0.01  | 0.013 | 0.008  | 0.01   | 0.01   | t | 21500  | GNPTYSW<br>GENDTDV<br>LLNNT | Mus<br>musculu<br>s              |
| 1 | 1.00 | 1 | 1 | -0.02 | -0.02 | -0.02  | -0.02  | -0.019 | t | 124737 | SPWTLGA                     | Homo<br>sapiens                  |

|   |      |   |   |       |        |        |        |        |   |        |                              |                                  |
|---|------|---|---|-------|--------|--------|--------|--------|---|--------|------------------------------|----------------------------------|
| 1 | 1.00 | 1 | 1 | -0.04 | -0.048 | -0.04  | -0.04  | -0.039 | t | 136509 | MMKKTRK<br>RTKRR             | Mus<br>musculu<br>s              |
| 1 | 1.00 | 1 | 1 | -0.01 | -0.012 | -0.01  | -0.011 | -0.01  | t | 117118 | YPLHLNTD<br>YSTR             | Mus<br>musculu<br>s              |
| 1 | 1.00 | 1 | 1 | -0.01 | -0.007 | -0.003 | -0.01  | -0.008 | t | 139202 | QIWYERTL<br>PFTF             | Mus<br>musculu<br>s              |
| 1 | 1.00 | 1 | 1 | 0.01  | 0.008  | 0.009  | 0.012  | 0.012  | t | 107027 | YQTPASRL<br>WLLP             | Mus<br>musculu<br>s              |
| 1 | 1.00 | 1 | 1 | 0     | -0.003 | -0.009 | 0      | 0.003  | t | 139225 | REAEQRR                      | Oryctola<br>gus<br>cuniculu<br>s |
| 1 | 1.00 | 1 | 1 | 0     | 0      | 0      | 0      | 0.001  | t | 921    | AEGEFCSP<br>PDSPGVC<br>GDPK  | Mus<br>musculu<br>s              |
| 1 | 1.00 | 1 | 1 | -0.02 | -0.022 | -0.017 | -0.021 | -0.022 | t | 16551  | FLDLMRA<br>VA                | Mus<br>musculu<br>s              |
| 1 | 1.00 | 1 | 1 | 0.03  | 0.03   | 0.031  | 0.03   | 0.031  | t | 144785 | SKSIGWAD<br>EEGRTKRY<br>ALVI | Mus<br>musculu<br>s              |
| 1 | 1.00 | 1 | 1 | -0.02 | -0.02  | -0.024 | -0.02  | -0.018 | t | 129931 | SKPRAKSG<br>ARKSPKKK         | Homo<br>sapiens                  |
| 1 | 1.00 | 1 | 1 | 0.02  | 0.02   | 0.02   | 0.02   | 0.02   | t | 115435 | QEQNQEQ<br>PIRCEKDE<br>RFFSD | Homo<br>sapiens                  |
| 1 | 1.00 | 1 | 1 | 0.02  | 0.017  | 0.022  | 0.02   | 0.022  | t | 39290  | LSAVDDLA<br>TVVYGSR          | Mus<br>musculu<br>s              |
| 1 | 1.00 | 1 | 1 | 0     | 0      | 0      | 0      | 0      | t | 135747 | RAEAVFPD                     | Homo<br>sapiens                  |
| 1 | 1.00 | 1 | 1 | 0     | 0      | 0      | 0      | 0      | t | 124279 | HPLASSLH<br>A                | Homo<br>sapiens                  |
| 1 | 1.00 | 1 | 1 | 0     | 0      | 0      | 0      | 0      | t | 123581 | PGQIPPGA                     | Oryctola<br>gus<br>cuniculu<br>s |
| 1 | 1.00 | 1 | 1 | 0     | 0      | 0      | 0      | 0      | t | 98176  | KNTNNNL<br>TLV               | Mus<br>musculu<br>s              |

|   |      |   |   |       |        |        |        |        |   |        |                             |                                  |
|---|------|---|---|-------|--------|--------|--------|--------|---|--------|-----------------------------|----------------------------------|
| 1 | 1.00 | 1 | 1 | 0     | 0      | 0      | 0      | 0      | t | 115933 | QWQVLSN<br>TVP              | Homo<br>sapiens                  |
| 1 | 1.00 | 1 | 1 | 0     | -0.003 | 0      | 0      | 0      | t | 98176  | KNTNNNL<br>TLV              | Oryctola<br>gus<br>cuniculu<br>s |
| 1 | 1.00 | 1 | 1 | -0.02 | -0.02  | -0.02  | -0.02  | -0.02  | t | 78266  | RYNPPD                      | Equus<br>caballus                |
| 1 | 1.00 | 1 | 1 | -0.02 | -0.02  | -0.02  | -0.02  | -0.02  | t | 78234  | PHSNLWH<br>G                | Homo<br>sapiens                  |
| 1 | 1.00 | 1 | 1 | -0.04 | -0.04  | -0.04  | -0.04  | -0.04  | t | 158612 | SHRPTTQ                     | Homo<br>sapiens                  |
| 1 | 1.00 | 1 | 1 | -0.04 | -0.04  | -0.04  | -0.04  | -0.04  | t | 130759 | CRQSRKRP<br>C               | Homo<br>sapiens                  |
| 1 | 1.00 | 1 | 1 | 0     | -0.004 | 0      | -0.007 | -0.002 | t | 124588 | PQEETLQA<br>FDSHYDYT        | Oryctola<br>gus<br>cuniculu<br>s |
| 1 | 1.00 | 1 | 1 | 0     | -0.002 | 0      | -0.007 | -0.002 | t | 121287 | EYFIRK                      | Rattus<br>norvegic<br>us         |
| 1 | 1.00 | 1 | 1 | 0     | -0.002 | 0      | -0.007 | -0.002 | t | 120716 | KSAIEGVK                    | Rattus<br>norvegic<br>us         |
| 1 | 1.00 | 1 | 1 | 0     | -0.002 | 0      | -0.007 | -0.002 | t | 104569 | MASPGSG<br>FWSFGSE<br>DGS   | Mus<br>musculu<br>s              |
| 1 | 1.00 | 1 | 1 | 0     | -0.002 | 0      | -0.007 | -0.002 | t | 100378 | PGSGFWS<br>FGSEDGSG<br>DSEN | Mus<br>musculu<br>s              |
| 1 | 1.00 | 1 | 1 | 0.03  | 0.03   | 0.03   | 0.03   | 0.03   | t | 143328 | DEGDTDLY<br>DYYPEE          | Mus<br>musculu<br>s              |
| 1 | 1.00 | 1 | 1 | 0.03  | 0.028  | 0.037  | 0.033  | 0.033  | t | 106573 | KPTYSPYP<br>FSMP            | Mus<br>musculu<br>s              |
| 1 | 1.00 | 1 | 1 | 0     | 0      | 0      | -0.004 | 0      | t | 135965 | NIISDAMK<br>KVGR            | Homo<br>sapiens                  |
| 1 | 1.00 | 1 | 1 | -0.01 | -0.01  | 0.016  | -0.011 | -0.02  | t | 56807  | SAHGTSTG<br>VRGP            | Mus<br>musculu<br>s              |
| 1 | 1.00 | 1 | 1 | 0     | 0      | 0      | 0.003  | 0.003  | t | 100508 | SGYEVHH<br>QKL              | Mus<br>musculu<br>s              |
| 1 | 1.00 | 1 | 1 | -0.03 | -0.034 | -0.039 | -0.027 | -0.029 | t | 115058 | GNAEVHA<br>SFFDIGGS         | Oryctola<br>gus<br>cuniculu<br>s |

|   |      |   |   |       |        |        |        |        |   |        |                              |                                  |
|---|------|---|---|-------|--------|--------|--------|--------|---|--------|------------------------------|----------------------------------|
| 1 | 1.00 | 1 | 1 | 0     | 0.002  | 0      | -0.003 | 0      | t | 142201 | KGLRRDLD<br>ASREAKKQ<br>VEKA | Homo<br>sapiens                  |
| 1 | 1.00 | 1 | 1 | 0.01  | 0.014  | 0.016  | 0.013  | 0.014  | t | 1254   | AFAQAPT<br>HQLSL             | Homo<br>sapiens                  |
| 1 | 1.00 | 1 | 1 | 0     | -0.004 | 0.009  | 0.003  | 0      | t | 62024  | STYSMSFT<br>WSWESGK          | Oryctola<br>gus<br>cuniculu<br>s |
| 1 | 1.00 | 1 | 1 | -0.04 | -0.04  | -0.035 | -0.04  | -0.041 | t | 105207 | GAIIGLMV<br>GGVVIA           | Mus<br>musculu<br>s              |
| 1 | 1.00 | 1 | 1 | -0.04 | -0.04  | -0.035 | -0.04  | -0.041 | t | 105207 | GAIIGLMV<br>GGVVIA           | Mus<br>musculu<br>s              |
| 1 | 1.00 | 1 | 1 | 0     | 0      | 0      | -0.001 | 0.002  | t | 106358 | DVHVMN<br>V                  | Mus<br>musculu<br>s              |
| 1 | 1.00 | 1 | 1 | 0.04  | 0.038  | 0.031  | 0.033  | 0.041  | t | 113679 | PEVPEVED<br>E                | Mus<br>musculu<br>s              |
| 1 | 1.00 | 1 | 1 | 0.02  | 0.02   | 0.03   | 0.02   | 0.021  | t | 17564  | FRASTDYP<br>VFGF             | Mus<br>musculu<br>s              |
| 1 | 1.00 | 1 | 1 | -0.04 | -0.037 | -0.046 | -0.04  | -0.04  | t | 35236  | LDNIKGNV<br>GKNEDIYK<br>KNKK | Mus<br>musculu<br>s              |
| 1 | 1.00 | 1 | 1 | 0.02  | 0.016  | 0.01   | 0.017  | 0.02   | t | 35285  | LDRRVQD<br>VNDTISDV<br>KQKWR | Oryctola<br>gus<br>cuniculu<br>s |
| 1 | 1.00 | 1 | 1 | 0.02  | 0.02   | 0.027  | 0.029  | 0.023  | t | 131020 | QLSPESDY<br>DDHGMRY          | Homo<br>sapiens                  |
| 1 | 1.00 | 1 | 1 | -0.01 | -0.01  | -0.01  | -0.01  | -0.008 | t | 72910  | WNSTTFH<br>QTL               | Mus<br>musculu<br>s              |
| 1 | 1.00 | 1 | 1 | -0.01 | -0.013 | -0.01  | -0.01  | -0.012 | t | 75659  | YRPLPGPT<br>PPMRARL<br>PA    | Oryctola<br>gus<br>cuniculu<br>s |
| 1 | 1.00 | 1 | 1 | 0.02  | 0.018  | 0.015  | 0.021  | 0.027  | t | 32010  | KLLSVEEA<br>CK               | Homo<br>sapiens                  |

|   |      |   |   |       |        |        |        |        |   |        |                      |                                  |
|---|------|---|---|-------|--------|--------|--------|--------|---|--------|----------------------|----------------------------------|
| 1 | 1.00 | 1 | 1 | -0.03 | -0.03  | -0.02  | -0.03  | -0.033 | t | 57119  | SCMVCVD<br>RSSLSSW   | Oryctola<br>gus<br>cuniculu<br>s |
| 1 | 1.00 | 1 | 1 | -0.03 | -0.033 | -0.02  | -0.03  | -0.033 | t | 57119  | SCMVCVD<br>RSSLSSW   | Oryctola<br>gus<br>cuniculu<br>s |
| 1 | 1.00 | 1 | 1 | 0     | 0.002  | 0.001  | -0.003 | 0      | t | 106345 | DKANVLFR<br>CD       | Homo<br>sapiens                  |
| 1 | 1.00 | 1 | 1 | -0.01 | -0.007 | -0.005 | -0.01  | -0.01  | t | 140764 | VRAVAND<br>LK        | Mus<br>musculu<br>s              |
| 1 | 1.00 | 1 | 1 | -0.01 | -0.01  | -0.009 | -0.01  | -0.01  | t | 132641 | RVDKVDE              | Mus<br>musculu<br>s              |
| 1 | 1.00 | 1 | 1 | -0.01 | -0.01  | -0.01  | -0.01  | -0.01  | t | 99363  | IYRLRGRA<br>HVQVDS   | Homo<br>sapiens                  |
| 1 | 1.00 | 1 | 1 | -0.01 | -0.01  | -0.01  | -0.01  | -0.01  | t | 97594  | QTPLTETA<br>LKWH     | Mus<br>musculu<br>s              |
| 1 | 1.00 | 1 | 1 | -0.01 | -0.01  | -0.01  | -0.01  | -0.01  | t | 97594  | QTPLTETA<br>LKWH     | Mus<br>musculu<br>s              |
| 1 | 1.00 | 1 | 1 | 0.02  | 0.02   | 0.02   | 0.016  | 0.019  | t | 108498 | KIHAREIFD<br>SRGNPTV | Homo<br>sapiens                  |
| 1 | 1.00 | 1 | 1 | -0.03 | -0.03  | -0.03  | -0.03  | -0.03  | t | 141073 | REGVRWR<br>VMAIQ     | Mus<br>musculu<br>s              |
| 1 | 1.00 | 1 | 1 | -0.05 | -0.05  | -0.05  | -0.05  | -0.05  | t | 151036 | NLLEDKHN<br>GKLCKLR  | Homo<br>sapiens                  |
| 1 | 1.00 | 1 | 1 | -0.02 | -0.018 | -0.022 | -0.019 | -0.02  | t | 72291  | WDEDGAK<br>RIPVDVSE  | Homo<br>sapiens                  |
| 1 | 1.00 | 1 | 1 | 0     | 0      | -0.005 | 0      | 0.005  | t | 133608 | INTTVCAG<br>Y        | Mus<br>musculu<br>s              |
| 1 | 1.00 | 1 | 1 | 0     | 0.023  | -0.013 | 0      | 0.005  | t | 61827  | STPPLPWP<br>WSPAAL   | Mustela                          |

|   |      |   |   |       |        |        |        |        |   |        |                              |                              |
|---|------|---|---|-------|--------|--------|--------|--------|---|--------|------------------------------|------------------------------|
| 1 | 1.00 | 1 | 1 | -0.01 | -0.01  | -0.004 | -0.01  | -0.008 | t | 73421  | YAPSSLLP<br>HSVD             | Mus<br>musculus              |
| 1 | 1.00 | 1 | 1 | 0.03  | 0.03   | 0.025  | 0.028  | 0.03   | t | 75890  | YSSMPPLE<br>GEPGDPD<br>LSDGS | Homo<br>sapiens              |
| 1 | 1.00 | 1 | 1 | -0.02 | -0.02  | -0.014 | -0.02  | -0.02  | t | 133647 | MMHVER<br>KEC                | Mus<br>musculus              |
| 1 | 1.00 | 1 | 1 | 0.02  | 0.018  | 0.02   | 0.02   | 0.02   | t | 141758 | SWRNNILR<br>TQES             | Oryctola<br>gus<br>cuniculus |
| 1 | 1.00 | 1 | 1 | -0.02 | -0.018 | -0.022 | -0.019 | -0.02  | t | 61792  | STNPKPQR<br>KTKRNTNR<br>RPQD | Homo<br>sapiens              |
| 1 | 1.00 | 1 | 1 | -0.02 | -0.02  | -0.011 | -0.023 | -0.02  | t | 35840  | LFGKGG                       | Homo<br>sapiens              |
| 1 | 1.00 | 1 | 1 | -0.05 | -0.052 | -0.055 | -0.051 | -0.05  | t | 109729 | PRGLPGER                     | Rattus<br>norvegicus         |
| 1 | 1.00 | 1 | 1 | 0     | 0      | 0      | 0      | 0.002  | t | 1186   | AETHL                        | Mus<br>musculus              |
| 1 | 1.00 | 1 | 1 | 0     | 0      | 0      | 0      | 0.001  | t | 153281 | PLRNTHPQ<br>AMQWNS<br>T      | Mus<br>musculus              |
| 1 | 1.00 | 1 | 1 | 0     | 0.002  | 0.005  | 0.007  | 0.003  | t | 133672 | RGGMR                        | Homo<br>sapiens              |
| 1 | 1.00 | 1 | 1 | -0.02 | -0.02  | -0.015 | -0.021 | -0.02  | t | 138840 | DREQAPN<br>LVYM              | Mus<br>musculus              |
| 1 | 1.00 | 1 | 1 | 0.02  | 0.016  | 0.02   | 0.02   | 0.021  | t | 146244 | FKIDALNE<br>NKV              | Oryctola<br>gus<br>cuniculus |
| 1 | 1.00 | 1 | 1 | 0.02  | 0.019  | 0.021  | 0.017  | 0.021  | t | 99242  | FEVKPDKK<br>NPQLQDL          | Homo<br>sapiens              |
| 1 | 1.00 | 1 | 1 | 0.03  | 0.03   | 0.037  | 0.023  | 0.029  | t | 130643 | YSLLEPYT<br>FDP              | Homo<br>sapiens              |
| 1 | 1.00 | 1 | 1 | 0.06  | 0.058  | 0.06   | 0.053  | 0.061  | t | 131128 | VEMKKED<br>FDIYDEDE          | Mus<br>musculus              |



|   |      |   |   |       |        |        |        |        |   |        |                                  |                                  |
|---|------|---|---|-------|--------|--------|--------|--------|---|--------|----------------------------------|----------------------------------|
| 1 | 1.00 | 1 | 1 | -0.01 | -0.008 | -0.01  | -0.003 | -0.008 | t | 133288 | PRRRSRKP<br>EA                   | Homo<br>sapiens                  |
| 1 | 1.00 | 1 | 1 | 0     | 0      | 0.005  | 0      | -0.001 | t | 24391  | HNNQRLM<br>LYGMH                 | Mus<br>musculu<br>s              |
| 1 | 1.00 | 1 | 1 | 0     | -0.002 | 0.009  | 0.003  | -0.002 | t | 17360  | FPQFKPEE                         | Mus<br>musculu<br>s              |
| 1 | 1.00 | 1 | 1 | -0.04 | -0.043 | -0.044 | -0.04  | -0.038 | t | 17639  | FRRLGAAL                         | Oryctola<br>gus<br>cuniculu<br>s |
| 1 | 1.00 | 1 | 1 | -0.01 | -0.008 | -0.002 | -0.009 | -0.01  | t | 98152  | KDKIEKVS<br>IY                   | Homo<br>sapiens                  |
| 1 | 1.00 | 1 | 1 | -0.01 | -0.006 | -0.002 | -0.009 | -0.01  | t | 98152  | KDKIEKVS<br>IY                   | Homo<br>sapiens                  |
| 1 | 1.00 | 1 | 1 | -0.01 | -0.008 | -0.019 | -0.013 | -0.009 | t | 106196 | YGLPREQA<br>RQLKNNN              | Homo<br>sapiens                  |
| 1 | 1.00 | 1 | 1 | 0     | 0.003  | -0.008 | 0      | 0      | t | 72485  | WGNGCGL<br>FGKGSIDT<br>CAKFA     | Equus<br>caballus                |
| 1 | 1.00 | 1 | 1 | 0.01  | 0.014  | 0.012  | 0.007  | 0.01   | t | 95976  | VPITPTLN<br>RE                   | Homo<br>sapiens                  |
| 1 | 1.00 | 1 | 1 | -0.02 | -0.02  | -0.02  | -0.02  | -0.02  | t | 79225  | GCAIPQNA<br>IRPPCS               | Mus<br>musculu<br>s              |
| 1 | 1.00 | 1 | 1 | -0.02 | -0.02  | -0.02  | -0.02  | -0.02  | t | 78236  | PHSSLWHL                         | Homo<br>sapiens                  |
| 1 | 1.00 | 1 | 1 | -0.04 | -0.04  | -0.04  | -0.04  | -0.04  | t | 99240  | FECAGVAL<br>SRLVLRR              | Homo<br>sapiens                  |
| 1 | 1.00 | 1 | 1 | 0.01  | 0.01   | 0.005  | 0.01   | 0.011  | t | 94569  | KNEILKRH<br>NDFRQNV<br>AKGLE     | Mus<br>musculu<br>s              |
| 1 | 1.00 | 1 | 1 | -0.03 | -0.026 | -0.027 | -0.023 | -0.03  | t | 105976 | NGVTLG<br>YTS<br>GTCQGN<br>ASATK | Homo<br>sapiens                  |
| 1 | 1.00 | 1 | 1 | 0     | 0      | 0      | -0.003 | 0      | t | 156236 | AFLPVGAF<br>NSDNFKSK<br>GRG      | Homo<br>sapiens                  |

|   |      |   |   |   |   |   |        |   |   |       |                              |                         |
|---|------|---|---|---|---|---|--------|---|---|-------|------------------------------|-------------------------|
| 1 | 1.00 | 1 | 1 | 0 | 0 | 0 | -0.003 | 0 | t | 78643 | EQGMQLA<br>EQFKQKAL<br>GL    | Homo sapiens            |
| 1 | 1.00 | 1 | 1 | 0 | 0 | 0 | -0.003 | 0 | t | 62003 | STWHVLVS<br>PNVSVPS<br>SSTP  | Homo sapiens            |
| 1 | 1.00 | 1 | 1 | 0 | 0 | 0 | -0.003 | 0 | t | 64769 | TLEEFSAKL                    | Homo sapiens            |
| 1 | 1.00 | 1 | 1 | 0 | 0 | 0 | -0.003 | 0 | t | 61578 | STEGNVTG<br>MFA              | Homo sapiens            |
| 1 | 1.00 | 1 | 1 | 0 | 0 | 0 | -0.003 | 0 | t | 66933 | TVAEEHVE<br>EPTVAEE          | Homo sapiens            |
| 1 | 1.00 | 1 | 1 | 0 | 0 | 0 | -0.003 | 0 | t | 85672 | LPHSLNDH<br>ILEPSIPWK<br>SK  | Homo sapiens            |
| 1 | 1.00 | 1 | 1 | 0 | 0 | 0 | -0.003 | 0 | t | 96521 | KVTKEKPT<br>PP               | Homo sapiens(<br>human) |
| 1 | 1.00 | 1 | 1 | 0 | 0 | 0 | -0.003 | 0 | t | 61124 | SSIVYEAA<br>DMIMHT           | Homo sapiens            |
| 1 | 1.00 | 1 | 1 | 0 | 0 | 0 | -0.003 | 0 | t | 78872 | VIPDREVL<br>YQEFDEM<br>EECAS | Homo sapiens            |
| 1 | 1.00 | 1 | 1 | 0 | 0 | 0 | -0.003 | 0 | t | 60680 | SRGNHVS<br>PTHYVPES<br>DAAAR | Homo sapiens            |
| 1 | 1.00 | 1 | 1 | 0 | 0 | 0 | -0.003 | 0 | t | 78153 | FDPQIQAI<br>VSSPCHNS         | Homo sapiens            |
| 1 | 1.00 | 1 | 1 | 0 | 0 | 0 | -0.003 | 0 | t | 97049 | VKPTAPTK<br>PT               | Homo sapiens(<br>human) |
| 1 | 1.00 | 1 | 1 | 0 | 0 | 0 | -0.003 | 0 | t | 72087 | VYLLPR                       | Homo sapiens            |
| 1 | 1.00 | 1 | 1 | 0 | 0 | 0 | -0.003 | 0 | t | 78766 | PRGSRPS<br>WGPTDPR<br>RR     | Homo sapiens            |
| 1 | 1.00 | 1 | 1 | 0 | 0 | 0 | -0.003 | 0 | t | 75662 | YRPPNAPI<br>LSTLPETT         | Homo sapiens            |

|   |      |   |   |   |   |   |        |   |   |       |                              |                 |
|---|------|---|---|---|---|---|--------|---|---|-------|------------------------------|-----------------|
| 1 | 1.00 | 1 | 1 | 0 | 0 | 0 | -0.003 | 0 | t | 66933 | TVAAEHVE<br>EPTVAEE          | Homo<br>sapiens |
| 1 | 1.00 | 1 | 1 | 0 | 0 | 0 | -0.003 | 0 | t | 56918 | SANNDAEI<br>GNLI             | Homo<br>sapiens |
| 1 | 1.00 | 1 | 1 | 0 | 0 | 0 | -0.003 | 0 | t | 58077 | SGHRMA<br>WDMMM<br>NW        | Homo<br>sapiens |
| 1 | 1.00 | 1 | 1 | 0 | 0 | 0 | -0.003 | 0 | t | 42795 | MTEQQW<br>NFAGIEAA<br>AS     | Homo<br>sapiens |
| 1 | 1.00 | 1 | 1 | 0 | 0 | 0 | -0.003 | 0 | t | 38397 | LPAHGPSL<br>S                | Homo<br>sapiens |
| 1 | 1.00 | 1 | 1 | 0 | 0 | 0 | -0.003 | 0 | t | 58073 | SGHMAW<br>DMMNWS<br>PT       | Homo<br>sapiens |
| 1 | 1.00 | 1 | 1 | 0 | 0 | 0 | -0.003 | 0 | t | 48955 | PPYVEPTA<br>PQVL             | Homo<br>sapiens |
| 1 | 1.00 | 1 | 1 | 0 | 0 | 0 | -0.003 | 0 | t | 46500 | NVTSIHSL<br>DEGKQSL          | Homo<br>sapiens |
| 1 | 1.00 | 1 | 1 | 0 | 0 | 0 | -0.003 | 0 | t | 60170 | SPNVSVPS<br>SSSTPLLY         | Homo<br>sapiens |
| 1 | 1.00 | 1 | 1 | 0 | 0 | 0 | -0.003 | 0 | t | 46895 | PAPQAPY<br>QGYQEPP<br>APQAPY | Homo<br>sapiens |
| 1 | 1.00 | 1 | 1 | 0 | 0 | 0 | -0.003 | 0 | t | 39164 | LRPGPVSQ<br>PYHHWDT<br>DK    | Homo<br>sapiens |
| 1 | 1.00 | 1 | 1 | 0 | 0 | 0 | -0.003 | 0 | t | 42416 | MQTLWDE<br>IMDINKRK          | Homo<br>sapiens |
| 1 | 1.00 | 1 | 1 | 0 | 0 | 0 | -0.003 | 0 | t | 55211 | RPLIDFDQ<br>GWGPISY          | Homo<br>sapiens |
| 1 | 1.00 | 1 | 1 | 0 | 0 | 0 | -0.003 | 0 | t | 48870 | PPPPSSPT<br>HDPDSD<br>PQIPP  | Homo<br>sapiens |

|   |      |   |   |   |        |   |        |   |   |       |                              |                   |
|---|------|---|---|---|--------|---|--------|---|---|-------|------------------------------|-------------------|
| 1 | 1.00 | 1 | 1 | 0 | 0      | 0 | -0.003 | 0 | t | 51372 | QLINTNGS<br>WHINSTA          | Homo<br>sapiens   |
| 1 | 1.00 | 1 | 1 | 0 | 0      | 0 | -0.003 | 0 | t | 42416 | MQTLWDE<br>IMDINKRK          | Homo<br>sapiens   |
| 1 | 1.00 | 1 | 1 | 0 | 0      | 0 | -0.003 | 0 | t | 51372 | QLINTNGS<br>WHINSTA          | Homo<br>sapiens   |
| 1 | 1.00 | 1 | 1 | 0 | 0      | 0 | -0.003 | 0 | t | 20650 | GKNRAIN<br>MLKRGLP<br>R      | Homo<br>sapiens   |
| 1 | 1.00 | 1 | 1 | 0 | 0      | 0 | -0.003 | 0 | t | 25541 | IDAVNKRG<br>RKQNKRG          | Homo<br>sapiens   |
| 1 | 1.00 | 1 | 1 | 0 | 0      | 0 | -0.003 | 0 | t | 23032 | GVLAKDV<br>RFSQV             | Homo<br>sapiens   |
| 1 | 1.00 | 1 | 1 | 0 | 0      | 0 | -0.003 | 0 | t | 35193 | LDKAFHLL<br>L                | Homo<br>sapiens   |
| 1 | 1.00 | 1 | 1 | 0 | 0      | 0 | -0.003 | 0 | t | 26622 | IIPDREVLV<br>REFDEMEME<br>C  | Homo<br>sapiens   |
| 1 | 1.00 | 1 | 1 | 0 | -0.014 | 0 | -0.003 | 0 | t | 21571 | GPARRGA<br>PY                | Macaca<br>mulatta |
| 1 | 1.00 | 1 | 1 | 0 | 0      | 0 | -0.003 | 0 | t | 18588 | GAGGGAG<br>GAGAGGG<br>AGGAGA | Homo<br>sapiens   |
| 1 | 1.00 | 1 | 1 | 0 | 0      | 0 | -0.003 | 0 | t | 24108 | HITQQHRP<br>VSDT             | Homo<br>sapiens   |
| 1 | 1.00 | 1 | 1 | 0 | 0      | 0 | -0.003 | 0 | t | 33747 | KTKRNTNR<br>RPQDVKF          | Homo<br>sapiens   |
| 1 | 1.00 | 1 | 1 | 0 | 0      | 0 | -0.003 | 0 | t | 35817 | LFDYNEKV<br>DNLGRSG          | Homo<br>sapiens   |
| 1 | 1.00 | 1 | 1 | 0 | 0      | 0 | -0.003 | 0 | t | 7472  | DAATAQTL<br>QAFLHWA<br>ITDGN | Homo<br>sapiens   |

|   |      |   |   |       |        |        |        |        |   |        |                              |                                  |
|---|------|---|---|-------|--------|--------|--------|--------|---|--------|------------------------------|----------------------------------|
| 1 | 1.00 | 1 | 1 | 0     | 0      | 0      | -0.003 | 0      | t | 8785   | DISQLTQAI<br>VKNHKNNL<br>K   | Homo<br>sapiens                  |
| 1 | 1.00 | 1 | 1 | 0     | 0      | 0      | -0.003 | 0      | t | 1433   | AGAGGGA<br>GGAGAGG<br>GAGGAG | Homo<br>sapiens                  |
| 1 | 1.00 | 1 | 1 | 0     | 0      | 0      | -0.003 | 0      | t | 60     | AAASAIQG<br>NVTSIHSL         | Homo<br>sapiens                  |
| 1 | 1.00 | 1 | 1 | 0     | 0      | 0      | -0.003 | 0      | t | 9924   | DQVHFQP<br>LPPAVVKL<br>SDALI | Homo<br>sapiens                  |
| 1 | 1.00 | 1 | 1 | 0     | 0.003  | 0      | -0.001 | 0      | t | 72549  | WHRHWP<br>SHPTQK             | Mus<br>musculu<br>s              |
| 1 | 1.00 | 1 | 1 | -0.01 | -0.01  | -0.008 | -0.004 | -0.009 | t | 3236   | ANCASILC<br>KCYTTGT          | Mus<br>musculu<br>s              |
| 1 | 1.00 | 1 | 1 | -0.01 | -0.011 | -0.003 | -0.01  | -0.009 | t | 43470  | NDKLYRM<br>EYWKTICK<br>DVW   | Aotus<br>sp.                     |
| 1 | 1.00 | 1 | 1 | 0.01  | 0.012  | 0.014  | 0.013  | 0.012  | t | 86     | AADHCPV<br>VEVNGVTI          | Homo<br>sapiens                  |
| 1 | 1.00 | 1 | 1 | -0.03 | -0.03  | -0.014 | -0.02  | -0.028 | t | 116688 | CYYASRND<br>KSYWLS           | Homo<br>sapiens                  |
| 1 | 1.00 | 1 | 1 | 0     | 0      | 0.009  | 0      | -0.001 | t | 122386 | GRLERPSE<br>PRLPLLA          | Mus<br>musculu<br>s              |
| 1 | 1.00 | 1 | 1 | 0.01  | 0.013  | 0.013  | 0.01   | 0.01   | t | 97442  | LFGVKGTT                     | Mus<br>musculu<br>s              |
| 1 | 1.00 | 1 | 1 | 0.01  | 0.013  | 0.01   | 0.01   | 0.011  | t | 127242 | TRVPMDA<br>FQVGKFPE<br>DFESC | Mus<br>musculu<br>s              |
| 1 | 1.00 | 1 | 1 | 0     | -0.003 | 0      | 0      | 0.001  | t | 118877 | LDVEQLGI<br>PEQEYSC          | Oryctola<br>gus<br>cuniculu<br>s |

|   |      |   |   |       |        |        |        |        |   |        |                          |                                  |
|---|------|---|---|-------|--------|--------|--------|--------|---|--------|--------------------------|----------------------------------|
| 1 | 1.00 | 1 | 1 | 0     | -0.003 | 0      | 0      | 0.001  | t | 122083 | DPNIKLVL<br>DDCWATS      | Oryctola<br>gus<br>cuniculu<br>s |
| 1 | 1.00 | 1 | 1 | 0     | -0.003 | 0      | 0      | 0.001  | t | 97484  | LVEETSFID<br>AGAP        | Oryctola<br>gus<br>cuniculu<br>s |
| 1 | 1.00 | 1 | 1 | 0     | -0.003 | 0      | 0      | 0.001  | t | 51775  | QNTRNIVP<br>VSIVSR       | Oryctola<br>gus<br>cuniculu<br>s |
| 1 | 1.00 | 1 | 1 | -0.02 | -0.018 | -0.01  | -0.019 | -0.02  | t | 49516  | PSSRRYPF<br>V            | Homo<br>sapiens                  |
| 1 | 1.00 | 1 | 1 | 0.02  | 0.022  | 0.018  | 0.023  | 0.022  | t | 117742 | AKAQTDR<br>EDLRTLRY      | Homo<br>sapiens                  |
| 1 | 1.00 | 1 | 1 | 0     | 0.003  | 0.002  | 0      | 0      | t | 29378  | IVNTLNEIY<br>RYLYVR      | Mus<br>musculu<br>s              |
| 1 | 1.00 | 1 | 1 | -0.05 | -0.05  | -0.043 | -0.05  | -0.051 | t | 114223 | PFSRVVHL                 | Rattus<br>norvegic<br>us         |
| 1 | 1.00 | 1 | 1 | 0     | 0.004  | 0      | -0.003 | 0.002  | t | 156907 | KVGDPLW                  | Mus<br>musculu<br>s              |
| 1 | 1.00 | 1 | 1 | -0.01 | -0.01  | -0.004 | -0.014 | -0.01  | t | 51266  | QKTYSQYK                 | Homo<br>sapiens                  |
| 1 | 1.00 | 1 | 1 | 0     | -0.005 | -0.007 | 0.003  | 0.002  | t | 44221  | NIETVIEFQ<br>QKNRLLLE    | Bos<br>taurus                    |
| 1 | 1.00 | 1 | 1 | 0.02  | 0.02   | 0.02   | 0.02   | 0.02   | t | 111434 | IVGTGPQP<br>SSTV         | Homo<br>sapiens                  |
| 1 | 1.00 | 1 | 1 | 0     | 0      | 0      | 0      | 0.002  | t | 38312  | LNPTI                    | Mus<br>musculu<br>s              |
| 1 | 1.00 | 1 | 1 | 0     | 0      | 0      | 0      | 0      | t | 120067 | LKWNPDD<br>YGGVKKIH<br>I | Mus<br>musculu<br>s              |
| 1 | 1.00 | 1 | 1 | 0     | 0      | 0      | 0      | 0      | t | 120067 | LKWNPDD<br>YGGVKKIH<br>I | Mus<br>musculu<br>s              |
| 1 | 1.00 | 1 | 1 | 0     | 0.002  | 0      | 0.003  | 0.001  | t | 119837 | ELIPSTSSA<br>VPLIGK      | Homo<br>sapiens                  |

|   |      |   |   |       |        |        |        |        |   |        |                            |                                  |
|---|------|---|---|-------|--------|--------|--------|--------|---|--------|----------------------------|----------------------------------|
| 1 | 1.00 | 1 | 1 | -0.03 | -0.03  | -0.03  | -0.03  | -0.03  | t | 103460 | PATVINGQ<br>FVERCWT<br>H   | Oryctola<br>gus<br>cuniculu<br>s |
| 1 | 1.00 | 1 | 1 | -0.05 | -0.05  | -0.05  | -0.05  | -0.05  | t | 104331 | VHPPRLY                    | Mus<br>musculu<br>s              |
| 1 | 1.00 | 1 | 1 | 0.07  | 0.073  | 0.072  | 0.07   | 0.073  | t | 768    | ADSAQDS<br>T               | Mus<br>musculu<br>s              |
| 1 | 1.00 | 1 | 1 | 0     | -0.002 | 0      | -0.003 | 0      | t | 104443 | DAEFRHDS<br>GYE            | Mus<br>musculu<br>s              |
| 1 | 1.00 | 1 | 1 | 0     | -0.002 | 0      | -0.003 | 0      | t | 104443 | DAEFRHDS<br>GYE            | Mus<br>musculu<br>s              |
| 1 | 1.00 | 1 | 1 | 0     | -0.002 | 0      | -0.003 | 0      | t | 104443 | DAEFRHDS<br>GYE            | Mus<br>musculu<br>s              |
| 1 | 1.00 | 1 | 1 | -0.04 | -0.042 | -0.042 | -0.04  | -0.041 | t | 120433 | DFAVTHLT<br>KAHLFYDG<br>RV | Oryctola<br>gus<br>cuniculu<br>s |
| 1 | 1.00 | 1 | 1 | 0     | 0.002  | 0      | 0      | 0.001  | t | 108296 | CKYAWSR<br>C               | Homo<br>sapiens                  |
| 1 | 1.00 | 1 | 1 | -0.01 | -0.01  | -0.017 | -0.01  | -0.008 | t | 7836   | DDNGTEE<br>WRCLLG<br>YKKGE | Mus<br>musculu<br>s              |
| 1 | 1.00 | 1 | 1 | -0.02 | -0.02  | -0.017 | -0.02  | -0.02  | t | 36815  | LKCSVKSFE<br>IDKGIYQT      | Homo<br>sapiens                  |
| 1 | 1.00 | 1 | 1 | -0.03 | -0.028 | -0.031 | -0.033 | -0.03  | t | 74398  | YIVGRVWI<br>GF             | Homo<br>sapiens                  |
| 1 | 1.00 | 1 | 1 | 0.01  | 0.01   | 0.01   | 0.01   | 0.01   | t | 156967 | SWRPWSD<br>SPQCNGNPI       | Gallus<br>gallus                 |
| 1 | 1.00 | 1 | 1 | -0.01 | -0.01  | 0.001  | -0.007 | -0.008 | t | 31649  | KKNMEG                     | Homo<br>sapiens                  |
| 1 | 1.00 | 1 | 1 | 0     | -0.002 | -0.005 | -0.003 | 0.001  | t | 56122  | RTLTMFS<br>LGARQKI         | Mus<br>musculu<br>s              |
| 1 | 1.00 | 1 | 1 | 0     | -0.002 | -0.005 | -0.001 | 0      | t | 14686  | EVETPIRN                   | Mus<br>musculu<br>s              |
| 1 | 1.00 | 1 | 1 | 0     | -0.002 | -0.005 | -0.001 | 0      | t | 14686  | EVETPIRN                   | Mus<br>musculu<br>s              |

|   |      |   |   |       |        |        |        |        |   |        |                              |                       |
|---|------|---|---|-------|--------|--------|--------|--------|---|--------|------------------------------|-----------------------|
| 1 | 1.00 | 1 | 1 | 0.03  | 0.03   | 0.034  | 0.03   | 0.032  | t | 70951  | VSGGSW                       | Homo sapiens          |
| 1 | 1.00 | 1 | 1 | 0.04  | 0.04   | 0.04   | 0.04   | 0.04   | t | 22126  | GRLHLND<br>QVVVTPD<br>KEILYE | Homo sapiens          |
| 1 | 1.00 | 1 | 1 | 0.02  | 0.02   | 0.03   | 0.02   | 0.021  | t | 95132  | PYVTYG                       | Mus musculus          |
| 1 | 1.00 | 1 | 1 | -0.02 | -0.022 | -0.016 | -0.023 | -0.02  | t | 60751  | SRNWLPG<br>PCY               | Mus musculus          |
| 1 | 1.00 | 1 | 1 | 0.02  | 0.018  | 0.016  | 0.019  | 0.021  | t | 39695  | LSTFMESG<br>EWVMK            | Mus musculus          |
| 1 | 1.00 | 1 | 1 | 0.04  | 0.04   | 0.033  | 0.04   | 0.04   | t | 131303 | PVPSTPPT<br>PSPSTPPT<br>PSPS | Homo sapiens          |
| 1 | 1.00 | 1 | 1 | -0.01 | -0.014 | -0.017 | -0.007 | -0.008 | t | 106331 | DFMLTQP<br>HSVSESPG<br>KTVT  | Oryctolagus cuniculus |
| 1 | 1.00 | 1 | 1 | 0.03  | 0.03   | 0.031  | 0.027  | 0.03   | t | 15615  | FEPLRAET<br>DDVEPS           | Homo sapiens          |
| 1 | 1.00 | 1 | 1 | -0.03 | -0.028 | -0.027 | -0.03  | -0.03  | t | 64908  | TLLGLPAA<br>EYW              | Homo sapiens          |
| 1 | 1.00 | 1 | 1 | 0.02  | 0.02   | 0.02   | 0.02   | 0.02   | t | 115858 | LTLTDVEN<br>LH               | Homo sapiens          |
| 1 | 1.00 | 1 | 1 | 0     | 0      | 0      | 0      | 0      | t | 103695 | VGPGRWD<br>EDGEKRIP          | Homo sapiens          |
| 1 | 1.00 | 1 | 1 | -0.02 | -0.02  | -0.02  | -0.02  | -0.02  | t | 131984 | NNRMNA<br>WGTVSSSS<br>N      | Homo sapiens          |
| 1 | 1.00 | 1 | 1 | -0.02 | -0.02  | -0.02  | -0.02  | -0.02  | t | 103579 | SAERCGSP<br>AWDLPTV          | Homo sapiens          |
| 1 | 1.00 | 1 | 1 | -0.02 | -0.02  | -0.02  | -0.02  | -0.02  | t | 93256  | LLHGGKG<br>DDI               | Ovis aries            |
| 1 | 1.00 | 1 | 1 | -0.04 | -0.04  | -0.04  | -0.04  | -0.04  | t | 103346 | LEPGVVAE<br>KVRNLPA          | Homo sapiens          |



|   |      |   |   |       |        |        |        |        |   |        |                             |                                  |
|---|------|---|---|-------|--------|--------|--------|--------|---|--------|-----------------------------|----------------------------------|
| 1 | 1.00 | 1 | 1 | -0.04 | -0.04  | -0.04  | -0.04  | -0.04  | t | 117088 | SRLPLSQP<br>SPNS            | Homo<br>sapiens                  |
| 1 | 1.00 | 1 | 1 | -0.04 | -0.04  | -0.04  | -0.04  | -0.04  | t | 92810  | GGKGNDL<br>LHG              | Ovis<br>aries                    |
| 1 | 1.00 | 1 | 1 | 0.1   | 0.096  | 0.095  | 0.093  | 0.097  | t | 105963 | MDPGLKE<br>SPLQTPAD<br>DGSE | Oryctola<br>gus<br>cuniculu<br>s |
| 1 | 1.00 | 1 | 1 | -0.05 | -0.046 | -0.043 | -0.053 | -0.052 | t | 106384 | EGWGWH<br>WRGA              | Homo<br>sapiens                  |
| 1 | 1.00 | 1 | 1 | 0.02  | 0.024  | 0.025  | 0.021  | 0.02   | t | 78748  | MISGPCPK<br>DGQPSLV<br>LQSS | Homo<br>sapiens                  |
| 1 | 1.00 | 1 | 1 | 0.02  | 0.022  | 0.025  | 0.021  | 0.02   | t | 78748  | MISGPCPK<br>DGQPSLV<br>LQSS | Homo<br>sapiens                  |
| 1 | 1.00 | 1 | 1 | -0.02 | -0.02  | -0.02  | -0.02  | -0.02  | t | 119505 | NSTMGY                      | Homo<br>sapiens                  |
| 1 | 1.00 | 1 | 1 | 0     | -0.005 | 0.001  | 0      | 0      | t | 108633 | SKEESTPE<br>VKAEDLQP<br>AVD | Canis<br>lupus                   |
| 1 | 1.00 | 1 | 1 | -0.02 | -0.022 | -0.02  | -0.027 | -0.022 | t | 107326 | DVSDMFS<br>K                | Rattus<br>norvegic<br>us         |
| 1 | 1.00 | 1 | 1 | -0.01 | -0.01  | -0.013 | -0.01  | -0.01  | t | 52089  | QQPFPQS<br>QQP              | Mus<br>musculu<br>s              |
| 1 | 1.00 | 1 | 1 | 0.01  | 0.01   | 0.01   | 0.01   | 0.011  | t | 133528 | CADQKPG<br>EC               | Mus<br>musculu<br>s              |
| 1 | 1.00 | 1 | 1 | 0     | 0      | 0      | 0      | 0      | t | 132485 | MSYNLLGF<br>LQRS            | Homo<br>sapiens                  |
| 1 | 1.00 | 1 | 1 | -0.07 | -0.073 | -0.07  | -0.07  | -0.069 | t | 142441 | LFSPWLRV<br>QNHF            | Oryctola<br>gus<br>cuniculu<br>s |
| 1 | 1.00 | 1 | 1 | 0     | -0.004 | 0      | -0.001 | 0      | t | 137797 | ADYWAGE<br>LGQSR            | Oryctola<br>gus<br>cuniculu<br>s |

|   |      |   |   |       |        |        |        |        |   |        |                      |                       |
|---|------|---|---|-------|--------|--------|--------|--------|---|--------|----------------------|-----------------------|
| 1 | 1.00 | 1 | 1 | 0     | -0.004 | 0.006  | -0.001 | 0      | t | 36049  | LGACSFSSIP           | Oryctolagus cuniculus |
| 1 | 1.00 | 1 | 1 | -0.04 | -0.04  | -0.035 | -0.034 | -0.037 | t | 115784 | HRTFE                | Homo sapiens          |
| 1 | 1.00 | 1 | 1 | -0.04 | -0.042 | -0.039 | -0.041 | -0.042 | t | 67988  | VDIVGPKA             | Mus musculus          |
| 1 | 1.00 | 1 | 1 | 0     | 0      | 0      | 0      | 0      | t | 79544  | FAPWDLEATGACICEIPTDV | Homo sapiens          |
| 1 | 1.00 | 1 | 1 | 0.05  | 0.048  | 0.05   | 0.043  | 0.048  | t | 107358 | FGEL                 | Rattus norvegicus     |
| 1 | 1.00 | 1 | 1 | 0     | 0      | -0.005 | 0      | 0      | t | 46851  | PALICCCRGRGNKKG      | Homo sapiens          |
| 1 | 1.00 | 1 | 1 | 0     | 0      | 0.006  | 0      | -0.001 | t | 7003   | CSGLSSLFTPGPKQQI     | Mus musculus          |
| 1 | 1.00 | 1 | 1 | -0.06 | -0.058 | -0.059 | -0.059 | -0.058 | t | 3687   | APPLRTWKSRARAV       | Homo sapiens          |
| 1 | 1.00 | 1 | 1 | 0     | -0.003 | 0.002  | 0      | 0      | t | 52156  | QQTAPKA PTE          | Oryctolagus cuniculus |
| 1 | 1.00 | 1 | 1 | 0.01  | 0.01   | 0.01   | 0.01   | 0.01   | t | 153838 | HQKRTAMFQDPQER       | Oryctolagus cuniculus |
| 1 | 1.00 | 1 | 1 | 0.01  | 0.01   | 0.01   | 0.01   | 0.01   | t | 153838 | HQKRTAMFQDPQER       | Cavia porcellus       |
| 1 | 1.00 | 1 | 1 | 0.01  | 0.006  | 0.004  | 0.009  | 0.01   | t | 86822  | NKGKDKDVNAGTSGTHT    | Oryctolagus cuniculus |
| 1 | 1.00 | 1 | 1 | 0.03  | 0.03   | 0.03   | 0.03   | 0.031  | t | 153396 | HSFEPWSARDMLGGGS     | Mus musculus          |
| 1 | 1.00 | 1 | 1 | -0.02 | -0.017 | -0.005 | -0.02  | -0.02  | t | 97776  | YKGVAFPL             | Mus musculus          |
| 1 | 1.00 | 1 | 1 | 0.02  | 0.016  | 0.024  | 0.019  | 0.02   | t | 75494  | YQGVQQKWD            | Oryctolagus cuniculus |

|   |      |   |   |       |        |        |        |        |   |        |                              |                                  |
|---|------|---|---|-------|--------|--------|--------|--------|---|--------|------------------------------|----------------------------------|
| 1 | 1.00 | 1 | 1 | 0     | 0.002  | 0.002  | -0.003 | 0      | t | 28349  | IRNVNNLA<br>RT               | Homo<br>sapiens                  |
| 1 | 1.00 | 1 | 1 | -0.01 | -0.01  | -0.01  | -0.01  | -0.01  | t | 156958 | SLHSSVQ                      | Gallus<br>gallus                 |
| 1 | 1.00 | 1 | 1 | -0.01 | -0.01  | -0.01  | -0.01  | -0.01  | t | 132932 | WGQNNW<br>T                  | Homo<br>sapiens                  |
| 1 | 1.00 | 1 | 1 | -0.01 | -0.01  | -0.01  | -0.01  | -0.01  | t | 125572 | TARNETPA<br>MRMN             | Homo<br>sapiens                  |
| 1 | 1.00 | 1 | 1 | -0.01 | -0.01  | -0.01  | -0.01  | -0.01  | t | 95934  | TTVRIVDQ<br>CS               | Homo<br>sapiens                  |
| 1 | 1.00 | 1 | 1 | 0.02  | 0.02   | 0.02   | 0.02   | 0.022  | t | 47546  | PFPQPQQ<br>QLP               | Mus<br>musculu<br>s              |
| 1 | 1.00 | 1 | 1 | 0     | -0.011 | 0      | 0      | 0.002  | t | 156862 | DVGDPRLR                     | Oryctola<br>gus<br>cuniculu<br>s |
| 1 | 1.00 | 1 | 1 | 0     | 0      | 0.007  | 0      | -0.001 | t | 134112 | KDKATF                       | Homo<br>sapiens                  |
| 1 | 1.00 | 1 | 1 | 0.1   | 0.098  | 0.1    | 0.099  | 0.1    | t | 111062 | YEQLNDSS<br>EEDEIDG<br>PAG   | Mus<br>musculu<br>s              |
| 1 | 1.00 | 1 | 1 | 0.1   | 0.098  | 0.1    | 0.099  | 0.1    | t | 111062 | YEQLNDSS<br>EEDEIDG<br>PAG   | Mus<br>musculu<br>s              |
| 1 | 1.00 | 1 | 1 | 0.02  | 0.02   | 0.02   | 0.02   | 0.02   | t | 140854 | GFDKYDIT<br>GEYVQILD<br>AHAA | Oryctola<br>gus<br>cuniculu<br>s |
| 1 | 1.00 | 1 | 1 | 0.07  | 0.063  | 0.077  | 0.067  | 0.07   | t | 106620 | LQYFALEA<br>YA               | Homo<br>sapiens                  |
| 1 | 1.00 | 1 | 1 | -0.04 | -0.042 | -0.027 | -0.037 | -0.04  | t | 115096 | PPSLLFLP                     | Mus<br>musculu<br>s              |
| 1 | 1.00 | 1 | 1 | 0     | -0.004 | 0.002  | -0.001 | 0      | t | 78638  | EKSLTSLSE<br>VVLQNRR<br>GLD  | Oryctola<br>gus<br>cuniculu<br>s |
| 1 | 1.00 | 1 | 1 | 0.02  | 0.02   | 0.027  | 0.02   | 0.021  | t | 138763 | DWEYSEG<br>L                 | Mus<br>musculu<br>s              |
| 1 | 1.00 | 1 | 1 | 0     | -0.001 | 0.001  | -0.003 | 0.001  | t | 99283  | GKLFVVKP<br>DKKNPQL          | Homo<br>sapiens                  |

|   |      |   |   |       |        |        |        |        |   |        |                             |                                  |
|---|------|---|---|-------|--------|--------|--------|--------|---|--------|-----------------------------|----------------------------------|
| 1 | 1.00 | 1 | 1 | -0.01 | -0.008 | -0.005 | -0.014 | -0.013 | t | 117594 | NWHQLH<br>GKKEAY            | Homo<br>sapiens                  |
| 1 | 1.00 | 1 | 1 | 0.01  | 0.01   | 0.01   | 0.01   | 0.012  | t | 103838 | DAEFRHDS<br>GYEV            | Mus<br>musculu<br>s              |
| 1 | 1.00 | 1 | 1 | -0.01 | -0.01  | -0.01  | -0.01  | -0.008 | t | 48002  | PITNDQKK<br>LMSNN           | Mus<br>musculu<br>s              |
| 1 | 1.00 | 1 | 1 | 0.02  | 0.02   | 0.006  | 0.017  | 0.021  | t | 51847  | QPGVDIIE<br>GPVKNVAV<br>PLY | Homo<br>sapiens                  |
| 1 | 1.00 | 1 | 1 | 0     | -0.004 | 0      | -0.001 | 0.001  | t | 139602 | SDSMLSW                     | Oryctola<br>gus<br>cuniculu<br>s |
| 1 | 1.00 | 1 | 1 | 0     | -0.002 | 0      | -0.001 | 0.001  | t | 137290 | SEIEKLKNK<br>YEVAGIP        | Mus<br>musculu<br>s              |
| 1 | 1.00 | 1 | 1 | 0     | -0.004 | 0      | -0.001 | 0.001  | t | 138456 | KEQFEFAL<br>TAVAEV          | Oryctola<br>gus<br>cuniculu<br>s |
| 1 | 1.00 | 1 | 1 | 0     | -0.004 | 0      | -0.001 | 0.001  | t | 139500 | FHTHISV                     | Oryctola<br>gus<br>cuniculu<br>s |
| 1 | 1.00 | 1 | 1 | 0     | -0.004 | 0      | -0.001 | 0.001  | t | 120699 | KMFPEVKE<br>KGMAALP<br>RL   | Oryctola<br>gus<br>cuniculu<br>s |
| 1 | 1.00 | 1 | 1 | 0     | -0.004 | 0      | -0.001 | 0.001  | t | 120682 | KILPEVKEK<br>HEFLSRL        | Oryctola<br>gus<br>cuniculu<br>s |
| 1 | 1.00 | 1 | 1 | 0     | -0.002 | 0      | -0.001 | 0.001  | t | 110733 | VGENVPD<br>DLYIKGSG         | Mus<br>musculu<br>s              |
| 1 | 1.00 | 1 | 1 | 0     | -0.004 | 0      | -0.001 | 0.001  | t | 65726  | TPQRKTTE<br>DRPQ            | Oryctola<br>gus<br>cuniculu<br>s |
| 1 | 1.00 | 1 | 1 | 0     | -0.002 | 0      | -0.001 | 0.001  | t | 66257  | TSHHDSH<br>GLHRV            | Mus<br>musculu<br>s              |
| 1 | 1.00 | 1 | 1 | 0     | -0.004 | 0      | -0.001 | 0.001  | t | 66304  | TSLNDRQ<br>GNATK            | Oryctola<br>gus<br>cuniculu<br>s |

|   |      |   |   |   |        |   |        |       |   |       |                              |                              |
|---|------|---|---|---|--------|---|--------|-------|---|-------|------------------------------|------------------------------|
| 1 | 1.00 | 1 | 1 | 0 | -0.002 | 0 | -0.001 | 0.001 | t | 65360 | TNLEDPAS<br>RDLVVS           | Mus<br>musculus              |
| 1 | 1.00 | 1 | 1 | 0 | -0.002 | 0 | -0.001 | 0.001 | t | 62932 | TANGFYRL<br>PSG              | Mus<br>musculus              |
| 1 | 1.00 | 1 | 1 | 0 | -0.002 | 0 | -0.001 | 0.001 | t | 37660 | LLPHSNLD<br>HILEPSIPW<br>KSK | Mus<br>musculus              |
| 1 | 1.00 | 1 | 1 | 0 | -0.002 | 0 | -0.001 | 0.001 | t | 39164 | LRPGPVSQ<br>PYHHWDT<br>DK    | Mus<br>musculus              |
| 1 | 1.00 | 1 | 1 | 0 | -0.004 | 0 | -0.001 | 0.001 | t | 48779 | PPFSLSPV<br>PTLGSRSR<br>R    | Oryctola<br>gus<br>cuniculus |
| 1 | 1.00 | 1 | 1 | 0 | -0.002 | 0 | -0.001 | 0.001 | t | 51371 | QLINTNGS<br>WHIN             | Mus<br>musculus              |
| 1 | 1.00 | 1 | 1 | 0 | -0.002 | 0 | -0.001 | 0.001 | t | 51371 | QLINTNGS<br>WHIN             | Mus<br>musculus              |
| 1 | 1.00 | 1 | 1 | 0 | -0.002 | 0 | -0.001 | 0.001 | t | 53355 | RDGQLTIK<br>AERTEQKD<br>FDGR | Mus<br>musculus              |
| 1 | 1.00 | 1 | 1 | 0 | -0.004 | 0 | -0.001 | 0.001 | t | 38522 | LPHSNL                       | Oryctola<br>gus<br>cuniculus |
| 1 | 1.00 | 1 | 1 | 0 | -0.002 | 0 | -0.001 | 0.001 | t | 11571 | EEEDDDM<br>GGLFD             | Mus<br>musculus              |
| 1 | 1.00 | 1 | 1 | 0 | -0.002 | 0 | -0.001 | 0.001 | t | 11815 | EENVEENV<br>EENVEENV         | Mus<br>musculus              |
| 1 | 1.00 | 1 | 1 | 0 | -0.004 | 0 | -0.001 | 0.001 | t | 30661 | KEVPALTA<br>VETGAT           | Oryctola<br>gus<br>cuniculus |
| 1 | 1.00 | 1 | 1 | 0 | -0.004 | 0 | -0.001 | 0.001 | t | 30661 | KEVPALTA<br>VETGAT           | Oryctola<br>gus<br>cuniculus |

|   |      |   |   |       |        |        |        |        |   |        |                              |                                  |
|---|------|---|---|-------|--------|--------|--------|--------|---|--------|------------------------------|----------------------------------|
| 1 | 1.00 | 1 | 1 | 0     | -0.002 | 0      | -0.001 | 0.001  | t | 10227  | DSSAHGTP<br>STPA             | Mus<br>musculu<br>s              |
| 1 | 1.00 | 1 | 1 | 0     | -0.004 | 0      | -0.001 | 0.001  | t | 1433   | AGAGGGA<br>GGAGAGG<br>GAGGAG | Oryctola<br>gus<br>cuniculu<br>s |
| 1 | 1.00 | 1 | 1 | 0.01  | 0.01   | -0.002 | 0.016  | 0.017  | t | 122627 | VEQVTNV<br>GLYSSDYI<br>KTVA  | Rattus<br>norvegic<br>us         |
| 1 | 1.00 | 1 | 1 | -0.01 | -0.007 | -0.007 | -0.01  | -0.009 | t | 24970  | HTRVTGG<br>VQG               | Mus<br>musculu<br>s              |
| 1 | 1.00 | 1 | 1 | -0.01 | -0.01  | -0.014 | -0.01  | -0.007 | t | 157811 | QRQCQQR<br>CER               | Homo<br>sapiens                  |
| 1 | 1.00 | 1 | 1 | -0.01 | -0.01  | -0.01  | -0.01  | -0.008 | t | 40578  | LVSFGVWI<br>RTPPAYRP         | Mus<br>musculu<br>s              |
| 1 | 1.00 | 1 | 1 | -0.01 | -0.013 | -0.01  | -0.01  | -0.008 | t | 40578  | LVSFGVWI<br>RTPPAYRP         | Oryctola<br>gus<br>cuniculu<br>s |
| 1 | 1.00 | 1 | 1 | -0.02 | -0.02  | -0.018 | -0.02  | -0.02  | t | 31414  | KIRPRGQR<br>DSSY             | Oryctola<br>gus<br>cuniculu<br>s |
| 1 | 1.00 | 1 | 1 | -0.02 | -0.026 | -0.018 | -0.02  | -0.02  | t | 31414  | KIRPRGQR<br>DSSY             | Oryctola<br>gus<br>cuniculu<br>s |
| 1 | 1.00 | 1 | 1 | 0.01  | 0.01   | 0.005  | 0.007  | 0.011  | t | 23972  | HGVTKPK<br>QVIKLDAD<br>PVESQ | Homo<br>sapiens                  |
| 1 | 1.00 | 1 | 1 | -0.01 | -0.014 | -0.01  | -0.01  | -0.003 | t | 17202  | FNMVYL                       | Mus<br>musculu<br>s              |
| 1 | 1.00 | 1 | 1 | 0     | 0      | 0      | 0      | 0      | t | 135717 | LTGIISWG                     | Homo<br>sapiens                  |
| 1 | 1.00 | 1 | 1 | 0     | 0      | 0      | 0      | 0      | t | 115645 | RNGKDQD<br>GDQAP             | Homo<br>sapiens                  |
| 1 | 1.00 | 1 | 1 | 0     | 0      | 0      | 0      | 0      | t | 115645 | RNGKDQD<br>GDQAP             | Homo<br>sapiens                  |
| 1 | 1.00 | 1 | 1 | 0     | 0      | 0      | 0      | 0      | t | 78212  | MTNNRI                       | Equus<br>caballus                |
| 1 | 1.00 | 1 | 1 | -0.02 | -0.02  | -0.02  | -0.02  | -0.02  | t | 99605  | REDWRRP<br>SHQQPRKI          | Homo<br>sapiens                  |

|   |      |   |   |       |        |        |        |        |   |        |                               |                       |
|---|------|---|---|-------|--------|--------|--------|--------|---|--------|-------------------------------|-----------------------|
| 1 | 1.00 | 1 | 1 | -0.03 | -0.03  | -0.03  | -0.03  | -0.03  | t | 18587  | GAGGGAG<br>AGGAGAG<br>GGGRGR  | Homo sapiens          |
| 1 | 1.00 | 1 | 1 | 0.02  | 0.02   | 0.025  | 0.02   | 0.018  | t | 145704 | AEGLT<br>TTT<br>WKDYDHN<br>LQ | Sus scrofa            |
| 1 | 1.00 | 1 | 1 | -0.06 | -0.06  | -0.06  | -0.06  | -0.06  | t | 82048  | FGKLRVGR<br>LNSV              | Mus musculus          |
| 1 | 1.00 | 1 | 1 | 0     | 0      | 0      | 0      | 0      | t | 6125   | CDPLDDA<br>C                  | Mus musculus          |
| 1 | 1.00 | 1 | 1 | -0.02 | -0.023 | -0.018 | -0.02  | -0.02  | t | 9595   | DPALLM<br>HELIHVLH<br>GLYG    | Oryctolagus cuniculus |
| 1 | 1.00 | 1 | 1 | 0.06  | 0.058  | 0.06   | 0.053  | 0.059  | t | 107874 | GTSSPSAD                      | Rattus norvegicus     |
| 1 | 1.00 | 1 | 1 | 0     | 0      | -0.003 | 0      | 0.003  | t | 41232  | MDIDPYKE<br>FG                | Mus musculus          |
| 1 | 1.00 | 1 | 1 | -0.01 | -0.01  | -0.01  | -0.01  | -0.009 | t | 16018  | FGNDYED<br>RYYR               | Mus musculus          |
| 1 | 1.00 | 1 | 1 | -0.03 | -0.028 | -0.023 | -0.033 | -0.029 | t | 95899  | TDYKKYLLF<br>CME              | Homo sapiens          |
| 1 | 1.00 | 1 | 1 | -0.01 | -0.01  | -0.004 | -0.01  | -0.01  | t | 159026 | NLAIHSDL<br>SYWIESRL          | Mus musculus          |
| 1 | 1.00 | 1 | 1 | 0     | 0      | -0.007 | 0      | 0.005  | t | 55932  | RSQQTII                       | Mus musculus          |
| 1 | 1.00 | 1 | 1 | -0.01 | -0.01  | -0.005 | -0.017 | -0.011 | t | 118221 | WKSLLTL<br>VQLT               | Homo sapiens          |
| 1 | 1.00 | 1 | 1 | -0.01 | -0.01  | -0.005 | -0.008 | -0.01  | t | 78932  | ATRKTSER<br>SQPRGRR<br>QPI    | Homo sapiens          |
| 1 | 1.00 | 1 | 1 | -0.02 | -0.02  | -0.02  | -0.02  | -0.02  | t | 153447 | QPAIWINP<br>FPAWGGG<br>S      | Mus musculus          |

|   |      |   |   |       |        |        |        |        |   |        |                              |                       |
|---|------|---|---|-------|--------|--------|--------|--------|---|--------|------------------------------|-----------------------|
| 1 | 1.00 | 1 | 1 | -0.03 | -0.032 | -0.031 | -0.028 | -0.028 | t | 106618 | LPWYQIA                      | Mus musculus          |
| 1 | 1.00 | 1 | 1 | 0.01  | 0.01   | 0.01   | 0.013  | 0.012  | t | 58073  | SGHMAW<br>DMMNWS<br>PT       | Homo sapiens          |
| 1 | 1.00 | 1 | 1 | -0.03 | -0.03  | -0.034 | -0.03  | -0.028 | t | 129931 | SKPRAKSG<br>ARKSPKKK         | Homo sapiens          |
| 1 | 1.00 | 1 | 1 | -0.01 | -0.007 | -0.003 | -0.01  | -0.008 | t | 106261 | AQFRHDW                      | Mus musculus          |
| 1 | 1.00 | 1 | 1 | -0.04 | -0.036 | -0.038 | -0.033 | -0.039 | t | 121112 | AACDPRH<br>GRYLTV            | Homo sapiens          |
| 1 | 1.00 | 1 | 1 | 0.04  | 0.04   | 0.031  | 0.041  | 0.04   | t | 102383 | EEKNGNTS<br>WNDTVTC<br>PNAEC | Mus musculus          |
| 1 | 1.00 | 1 | 1 | 0     | -0.003 | 0      | -0.003 | 0      | t | 72178  | VYVEELKP<br>TPEGDL<br>EILQK  | Oryctolagus cuniculus |
| 1 | 1.00 | 1 | 1 | 0     | 0      | 0      | -0.003 | 0      | t | 72178  | VYVEELKP<br>TPEGDL<br>EILQK  | Oryctolagus cuniculus |
| 1 | 1.00 | 1 | 1 | -0.02 | -0.022 | -0.015 | -0.017 | -0.02  | t | 29378  | IVNTLNEIY<br>RYLYVR          | Mus musculus          |
| 1 | 1.00 | 1 | 1 | -0.01 | -0.008 | -0.012 | -0.013 | -0.009 | t | 27910  | IPKVPPGP<br>NITA             | Homo sapiens          |
| 1 | 1.00 | 1 | 1 | 0.02  | 0.016  | 0.023  | 0.023  | 0.023  | t | 115488 | SKDNGWE<br>KDDNVSKS          | Oryctolagus cuniculus |
| 1 | 1.00 | 1 | 1 | 0     | 0      | 0      | 0      | 0.001  | t | 30246  | KDSPVGEI<br>LTRSKYNQ<br>NSK  | Equus caballus        |
| 1 | 1.00 | 1 | 1 | 0.01  | 0.01   | 0.01   | 0.01   | 0.01   | t | 114949 | SKEHDGEC<br>KE               | Homo sapiens          |
| 1 | 1.00 | 1 | 1 | 0.01  | 0.013  | 0.01   | 0.01   | 0.01   | t | 98647  | YTKDTNN<br>NLT               | Mus musculus          |



|   |      |   |   |       |        |        |        |        |   |        |                              |                          |
|---|------|---|---|-------|--------|--------|--------|--------|---|--------|------------------------------|--------------------------|
| 1 | 1.00 | 1 | 1 | 0.01  | 0.01   | 0.01   | 0.01   | 0.01   | t | 98647  | YTKDTNN<br>NLT               | Mus<br>musculu<br>s      |
| 1 | 1.00 | 1 | 1 | -0.01 | -0.01  | -0.01  | -0.01  | -0.01  | t | 158581 | APAHHP                       | Homo<br>sapiens          |
| 1 | 1.00 | 1 | 1 | -0.01 | -0.01  | -0.01  | -0.01  | -0.01  | t | 94145  | VKHNLVIT<br>NS               | Ovis<br>aries            |
| 1 | 1.00 | 1 | 1 | -0.03 | -0.03  | -0.03  | -0.03  | -0.03  | t | 151069 | WTGMVD<br>GWYGYHH<br>QN      | Homo<br>sapiens          |
| 1 | 1.00 | 1 | 1 | -0.07 | -0.07  | -0.07  | -0.07  | -0.07  | t | 114837 | GKVMVLC<br>NRA               | Homo<br>sapiens          |
| 1 | 1.00 | 1 | 1 | 0     | 0      | 0      | 0      | 0.002  | t | 21815  | GPVEDAIT<br>AAIGRVA          | Rattus<br>norvegic<br>us |
| 1 | 1.00 | 1 | 1 | -0.02 | -0.02  | -0.02  | -0.02  | -0.02  | t | 135545 | DVFYPYPY<br>ASGS             | Mus<br>musculu<br>s      |
| 1 | 1.00 | 1 | 1 | -0.02 | -0.02  | -0.02  | -0.02  | -0.02  | t | 135545 | DVFYPYPY<br>ASGS             | Mus<br>musculu<br>s      |
| 1 | 1.00 | 1 | 1 | 0.01  | 0.01   | 0.01   | 0.006  | 0.01   | t | 135966 | NPVEIRRG<br>VMLA             | Homo<br>sapiens          |
| 1 | 1.00 | 1 | 1 | 0.01  | 0.008  | 0.023  | 0.009  | 0.01   | t | 138097 | YPYPLIS                      | Mus<br>musculu<br>s      |
| 1 | 1.00 | 1 | 1 | 0     | 0      | 0      | 0      | 0.001  | t | 145775 | FDTGA FDP<br>DWPA            | Mus<br>musculu<br>s      |
| 1 | 1.00 | 1 | 1 | 0.02  | 0.018  | 0.02   | 0.019  | 0.02   | t | 10016  | DRLSSANL<br>YINGVLM<br>GSAEI | Mus<br>musculu<br>s      |
| 1 | 1.00 | 1 | 1 | -0.01 | -0.01  | -0.01  | -0.01  | -0.012 | t | 132068 | SNISFSRDS<br>PEENVQ          | Homo<br>sapiens          |
| 1 | 1.00 | 1 | 1 | -0.02 | -0.018 | -0.023 | -0.021 | -0.02  | t | 36421  | LHSQGYTG<br>SNVKVAV          | Cavia<br>porcellu<br>s   |
| 1 | 1.00 | 1 | 1 | 0     | 0      | 0.002  | 0      | 0      | t | 78533  | TLLTLCPAT<br>CILPLGEPS       | Mus<br>musculu<br>s      |
| 1 | 1.00 | 1 | 1 | 0     | -0.002 | 0      | 0.003  | 0.003  | t | 6249   | CFPYCYP<br>ESA               | Mus<br>musculu<br>s      |

|   |      |   |   |       |        |        |        |        |   |        |                            |                                  |
|---|------|---|---|-------|--------|--------|--------|--------|---|--------|----------------------------|----------------------------------|
| 1 | 1.00 | 1 | 1 | 0     | -0.003 | 0.007  | 0      | -0.002 | t | 99935  | DFSQTATL<br>TNTN           | Oryctola<br>gus<br>cuniculu<br>s |
| 1 | 1.00 | 1 | 1 | 0.04  | 0.043  | 0.04   | 0.04   | 0.041  | t | 132848 | KKEDFDIY<br>DEDENQS<br>PR  | Mus<br>musculu<br>s              |
| 1 | 1.00 | 1 | 1 | 0.02  | 0.016  | 0.02   | 0.02   | 0.023  | t | 75950  | YTASARGD<br>LAHLTTT        | Mus<br>musculu<br>s              |
| 1 | 1.00 | 1 | 1 | 0.02  | 0.016  | 0.02   | 0.02   | 0.023  | t | 75950  | YTASARGD<br>LAHLTTT        | Mus<br>musculu<br>s              |
| 1 | 1.00 | 1 | 1 | -0.06 | -0.057 | -0.048 | -0.06  | -0.063 | t | 137941 | PFRSYTK                    | Mus<br>musculu<br>s              |
| 1 | 1.00 | 1 | 1 | -0.03 | -0.026 | -0.028 | -0.029 | -0.03  | t | 66094  | TRRVRGG<br>DGKMKEL<br>SPRW | Homo<br>sapiens                  |
| 1 | 1.00 | 1 | 1 | 0.02  | 0.02   | 0.02   | 0.02   | 0.02   | t | 105541 | TGN                        | Oryctola<br>gus<br>cuniculu<br>s |
| 1 | 1.00 | 1 | 1 | -0.01 | -0.01  | -0.01  | -0.01  | -0.007 | t | 140460 | EKLKHSM                    | Mus<br>musculu<br>s              |
| 1 | 1.00 | 1 | 1 | 0     | -0.004 | 0      | 0      | 0.003  | t | 70388  | VPNLRGDL<br>QVLA           | Mus<br>musculu<br>s              |
| 1 | 1.00 | 1 | 1 | 0     | -0.004 | 0      | 0      | 0.003  | t | 70388  | VPNLRGDL<br>QVLA           | Mus<br>musculu<br>s              |
| 1 | 1.00 | 1 | 1 | 0.02  | 0.023  | 0.02   | 0.02   | 0.019  | t | 133738 | VTPYFSYP<br>WAISCKC        | Mus<br>musculu<br>s              |

|   |      |   |   |       |        |        |        |        |   |        |                              |                                  |
|---|------|---|---|-------|--------|--------|--------|--------|---|--------|------------------------------|----------------------------------|
| 1 | 1.00 | 1 | 1 | 0.04  | 0.036  | 0.047  | 0.039  | 0.04   | t | 9107   | DLGSIAA                      | Oryctola<br>gus<br>cuniculu<br>s |
| 1 | 1.00 | 1 | 1 | -0.06 | -0.06  | -0.06  | -0.06  | -0.059 | t | 153869 | RDGNPYA<br>VCDKCLKF<br>YSKIS | Cavia<br>porcellu<br>s           |
| 1 | 1.00 | 1 | 1 | 0     | 0      | 0.004  | 0.003  | 0      | t | 87003  | NQNNLPN<br>DVFRE             | Homo<br>sapiens                  |
| 1 | 1.00 | 1 | 1 | -0.02 | -0.019 | -0.015 | -0.02  | -0.02  | t | 56622  | RYPNQVYY<br>RPV              | Mus<br>musculu<br>s              |
| 1 | 1.00 | 1 | 1 | 0     | 0      | 0      | 0      | -0.002 | t | 131889 | GKTFTNG<br>WKSTEE<br>D       | Homo<br>sapiens                  |
| 1 | 1.00 | 1 | 1 | 0.02  | 0.02   | 0.02   | 0.02   | 0.02   | t | 107650 | TYRVVSV                      | Homo<br>sapiens                  |
| 1 | 1.00 | 1 | 1 | -0.02 | -0.02  | -0.02  | -0.02  | -0.02  | t | 79538  | EHQLNRA                      | Oryctola<br>gus<br>cuniculu<br>s |
| 1 | 1.00 | 1 | 1 | -0.04 | -0.04  | -0.04  | -0.04  | -0.04  | t | 139770 | GWYSFQH                      | Ovis<br>aries                    |
| 1 | 1.00 | 1 | 1 | -0.04 | -0.04  | -0.04  | -0.04  | -0.04  | t | 104744 | CSQWGW<br>CGST               | Homo<br>sapiens                  |
| 1 | 1.00 | 1 | 1 | -0.01 | -0.013 | 0.002  | -0.01  | -0.008 | t | 49289  | PSACLSPQ<br>AY               | Oryctola<br>gus<br>cuniculu<br>s |
| 1 | 1.00 | 1 | 1 | -0.01 | -0.008 | -0.01  | -0.009 | -0.009 | t | 39180  | LRRDLAS<br>RDVKKHV<br>GNALE  | Homo<br>sapiens                  |
| 1 | 1.00 | 1 | 1 | -0.02 | -0.02  | -0.02  | -0.02  | -0.021 | t | 115425 | PSGAWYY<br>VPLGTQYT<br>DAPSF | Homo<br>sapiens                  |
| 1 | 1.00 | 1 | 1 | -0.04 | -0.039 | -0.041 | -0.04  | -0.04  | t | 14042  | ERMKDTL<br>RIT               | Mus<br>musculu<br>s              |
| 1 | 1.00 | 1 | 1 | 0.01  | 0.012  | 0.012  | 0.009  | 0.01   | t | 8356   | DGAVQPD<br>GGQPAVR<br>NERA   | Cavia<br>porcellu<br>s           |
| 1 | 1.00 | 1 | 1 | -0.01 | -0.013 | -0.004 | -0.01  | -0.01  | t | 29962  | KATPPAAP<br>ATKWSKEY<br>CGYY | Oryctola<br>gus<br>cuniculu<br>s |

|   |      |   |   |       |        |        |        |        |   |        |                              |                                  |
|---|------|---|---|-------|--------|--------|--------|--------|---|--------|------------------------------|----------------------------------|
| 1 | 1.00 | 1 | 1 | -0.02 | -0.016 | -0.01  | -0.02  | -0.02  | t | 52600  | QTQQPQQ<br>PFP               | Mus<br>musculu<br>s              |
| 1 | 1.00 | 1 | 1 | -0.03 | -0.032 | -0.021 | -0.027 | -0.03  | t | 53407  | RDPVFYAF<br>GFGVNYP          | Mus<br>musculu<br>s              |
| 1 | 1.00 | 1 | 1 | 0     | -0.002 | 0.007  | 0.003  | -0.002 | t | 36831  | LKEKHTDL<br>GKEGV            | Mus<br>musculu<br>s              |
| 1 | 1.00 | 1 | 1 | 0.03  | 0.032  | 0.032  | 0.027  | 0.029  | t | 99122  | CESRCTKL<br>EYDPRCV          | Homo<br>sapiens                  |
| 1 | 1.00 | 1 | 1 | 0.02  | 0.016  | 0.02   | 0.019  | 0.02   | t | 155334 | PADSS                        | Oryctola<br>gus<br>cuniculu<br>s |
| 1 | 1.00 | 1 | 1 | 0.01  | 0.014  | 0.011  | 0.01   | 0.01   | t | 72630  | WIKKPNR<br>QGLG              | Capra<br>hircus                  |
| 1 | 1.00 | 1 | 1 | 0     | 0.004  | 0.006  | -0.003 | 0      | t | 28076  | IPSTAFTDI<br>AWVRLPN<br>HYG  | Homo<br>sapiens                  |
| 1 | 1.00 | 1 | 1 | 0.02  | 0.022  | 0.024  | 0.021  | 0.019  | t | 68297  | VENAQD<br>KGIAIPHD<br>DLGE   | Homo<br>sapiens                  |
| 1 | 1.00 | 1 | 1 | 0     | -0.003 | 0      | 0.001  | 0.002  | t | 108412 | GTTDHVG<br>VPTYDWG<br>K      | Homo<br>sapiens                  |
| 1 | 1.00 | 1 | 1 | 0     | -0.002 | 0      | 0.001  | 0.002  | t | 66480  | TSVENAQ<br>QDKGIAIP<br>HDIDL | Homo<br>sapiens                  |
| 1 | 1.00 | 1 | 1 | 0.02  | 0.032  | 0.02   | 0.017  | 0.02   | t | 156846 | AKLITCSKT<br>CSKWQ           | Gallus<br>gallus                 |
| 1 | 1.00 | 1 | 1 | 0     | 0      | 0      | 0      | -0.003 | t | 131872 | ESQSRDRR<br>KIDQHTL          | Homo<br>sapiens                  |
| 1 | 1.00 | 1 | 1 | 0     | -0.001 | 0      | -0.001 | 0      | t | 54233  | RIREFMEK<br>ECPFIK           | Myodes<br>glareolu<br>s          |
| 1 | 1.00 | 1 | 1 | 0     | -0.004 | 0      | -0.001 | 0      | t | 54233  | RIREFMEK<br>ECPFIK           | Oryctola<br>gus<br>cuniculu<br>s |
| 1 | 1.00 | 1 | 1 | -0.01 | -0.007 | -0.009 | -0.01  | -0.01  | t | 21406  | GNDWEDR<br>YYRENMY<br>RYPNQV | Mus<br>musculu<br>s              |

|   |      |   |   |       |        |        |        |        |   |        |                              |                                  |
|---|------|---|---|-------|--------|--------|--------|--------|---|--------|------------------------------|----------------------------------|
| 1 | 1.00 | 1 | 1 | -0.03 | -0.03  | -0.03  | -0.03  | -0.03  | t | 114960 | TAEDRPLC<br>GS               | Homo<br>sapiens                  |
| 1 | 1.00 | 1 | 1 | -0.03 | -0.03  | -0.03  | -0.03  | -0.03  | t | 84685  | KRVHARM<br>AFT               | Homo<br>sapiens                  |
| 1 | 1.00 | 1 | 1 | -0.05 | -0.049 | -0.052 | -0.05  | -0.05  | t | 8575   | DHTLRFGS<br>KSPF             | Mus<br>musculu<br>s              |
| 1 | 1.00 | 1 | 1 | -0.05 | -0.052 | -0.052 | -0.05  | -0.05  | t | 8575   | DHTLRFGS<br>KSPF             | Oryctola<br>gus<br>cuniculu<br>s |
| 1 | 1.00 | 1 | 1 | -0.01 | -0.01  | -0.009 | -0.01  | -0.01  | t | 15152  | FADKPDES<br>TLSPEMKE<br>HYDK | Homo<br>sapiens                  |
| 1 | 1.00 | 1 | 1 | 0.02  | 0.02   | 0.017  | 0.02   | 0.022  | t | 55585  | RRGRGRE<br>RARGGSRE          | Homo<br>sapiens                  |
| 1 | 1.00 | 1 | 1 | 0     | -0.003 | -0.01  | 0.003  | 0.002  | t | 49836  | PVAQYCYA<br>YPRLDDPG<br>PLGS | Homo<br>sapiens                  |
| 1 | 1.00 | 1 | 1 | -0.05 | -0.05  | -0.037 | -0.048 | -0.053 | t | 142007 | SDWRFLR<br>GYHQYA            | Homo<br>sapiens                  |
| 1 | 1.00 | 1 | 1 | 0.01  | 0.012  | 0.01   | 0.007  | 0.01   | t | 142200 | KGLRRDL<br>ASREAKKQ<br>LEAE  | Homo<br>sapiens                  |
| 1 | 1.00 | 1 | 1 | 0.02  | 0.02   | 0.02   | 0.02   | 0.022  | t | 125245 | RRLDQYQ<br>IHL               | Mus<br>musculu<br>s              |
| 1 | 1.00 | 1 | 1 | 0.02  | 0.022  | 0.025  | 0.02   | 0.02   | t | 20679  | GKRPEGE<br>NASYHLAY<br>DKDRY | Homo<br>sapiens                  |
| 1 | 1.00 | 1 | 1 | -0.03 | -0.025 | -0.037 | -0.03  | -0.028 | t | 45130  | NNIMFKLD<br>GCRDTHR<br>YIWI  | Gallus<br>gallus                 |
| 1 | 1.00 | 1 | 1 | 0     | -0.002 | 0      | 0.003  | 0.003  | t | 76385  | YVPLGTQY<br>TDAPSFSD<br>IPNP | Mus<br>musculu<br>s              |
| 1 | 1.00 | 1 | 1 | 0     | -0.002 | 0      | 0.003  | 0.003  | t | 70444  | VPQLEIVP<br>NSAEERLH<br>SMKE | Mus<br>musculu<br>s              |
| 1 | 1.00 | 1 | 1 | 0     | -0.002 | 0      | 0.003  | 0.003  | t | 57631  | SESTEDQA<br>MEDIKQM<br>EAESI | Mus<br>musculu<br>s              |

|   |      |   |   |       |        |        |        |        |   |        |                              |                                  |
|---|------|---|---|-------|--------|--------|--------|--------|---|--------|------------------------------|----------------------------------|
| 1 | 1.00 | 1 | 1 | 0     | -0.002 | 0      | 0.003  | 0.003  | t | 55419  | RQFYQLD<br>AYPSGAW<br>YYVPLG | Mus<br>musculu<br>s              |
| 1 | 1.00 | 1 | 1 | 0     | -0.002 | 0      | 0.003  | 0.003  | t | 24814  | HSMKEGI<br>HAQQKEP<br>MIGVNQ | Mus<br>musculu<br>s              |
| 1 | 1.00 | 1 | 1 | 0     | -0.002 | 0      | 0.003  | 0.003  | t | 11035  | EAESISSE<br>EIVPNSVE<br>QKH  | Mus<br>musculu<br>s              |
| 1 | 1.00 | 1 | 1 | 0     | -0.002 | 0      | 0.003  | 0.003  | t | 8756   | DIPNPIGSE<br>NSEKTTM<br>PLW  | Mus<br>musculu<br>s              |
| 1 | 1.00 | 1 | 1 | -0.06 | -0.06  | -0.053 | -0.051 | -0.06  | t | 119521 | RRKPGTEQ<br>L                | Homo<br>sapiens                  |
| 1 | 1.00 | 1 | 1 | 0.01  | 0.012  | 0.004  | 0.011  | 0.011  | t | 55055  | RNRSPERC<br>DLGDDLHL<br>Q    | Homo<br>sapiens                  |
| 1 | 1.00 | 1 | 1 | 0.01  | 0.01   | 0.017  | 0.01   | 0.01   | t | 118346 | FEYFPSHFF<br>VPELEVTT<br>C   | Homo<br>sapiens                  |
| 1 | 1.00 | 1 | 1 | -0.02 | -0.023 | -0.011 | -0.02  | -0.02  | t | 70729  | VRGLYFP                      | Mus<br>musculu<br>s              |
| 1 | 1.00 | 1 | 1 | -0.05 | -0.048 | -0.047 | -0.043 | -0.05  | t | 118827 | GSGPRHR<br>DGVRPQ<br>KRPSCI  | Homo<br>sapiens                  |
| 1 | 1.00 | 1 | 1 | -0.02 | -0.016 | -0.012 | -0.019 | -0.018 | t | 41541  | MFTCKK                       | Homo<br>sapiens                  |
| 1 | 1.00 | 1 | 1 | -0.09 | -0.094 | -0.11  | -0.097 | -0.09  | t | 141625 | DTKRARTD<br>WWENETI<br>T     | Oryctola<br>gus<br>cuniculu<br>s |
| 1 | 1.00 | 1 | 1 | 0.03  | 0.03   | 0.037  | 0.03   | 0.031  | t | 108168 | TRSFQIQA<br>T                | Mus<br>musculu<br>s              |
| 1 | 1.00 | 1 | 1 | -0.02 | -0.02  | -0.02  | -0.02  | -0.02  | t | 141037 | IRTLKSGH<br>K                | Ovis<br>aries                    |
| 1 | 1.00 | 1 | 1 | -0.02 | -0.02  | -0.02  | -0.02  | -0.02  | t | 149121 | THANSTQ                      | Sus<br>scrofa                    |
| 1 | 1.00 | 1 | 1 | -0.02 | -0.02  | -0.02  | -0.02  | -0.02  | t | 102227 | WNNTALL                      | Homo<br>sapiens                  |
| 1 | 1.00 | 1 | 1 | -0.02 | -0.02  | -0.02  | -0.02  | -0.02  | t | 112149 | GVGWIRQ                      | Homo<br>sapiens                  |
| 1 | 1.00 | 1 | 1 | -0.02 | -0.02  | -0.02  | -0.02  | -0.02  | t | 79643  | SHLSTML                      | Oryctola<br>gus<br>cuniculu<br>s |

|   |      |   |   |       |        |        |        |        |   |        |                              |                              |
|---|------|---|---|-------|--------|--------|--------|--------|---|--------|------------------------------|------------------------------|
| 1 | 1.00 | 1 | 1 | -0.06 | -0.06  | -0.06  | -0.06  | -0.06  | t | 123438 | LKMWSNFG<br>LG               | Ovis<br>aries                |
| 1 | 1.00 | 1 | 1 | -0.01 | -0.012 | -0.005 | -0.011 | -0.012 | t | 47786  | PGWFADP<br>GFHINSSF          | Mus<br>musculus              |
| 1 | 1.00 | 1 | 1 | 0.04  | 0.043  | 0.04   | 0.04   | 0.042  | t | 23588  | HCDGFQNE<br>EKWDL            | Mus<br>musculus              |
| 1 | 1.00 | 1 | 1 | 0.02  | 0.02   | 0.02   | 0.02   | 0.02   | t | 141894 | FEQEPSSE<br>EPKDSKL          | Mus<br>musculus              |
| 1 | 1.00 | 1 | 1 | 0     | 0      | -0.004 | 0      | -0.002 | t | 36413  | LHQPPPQI<br>FLKILPQSG<br>PIG | Homo<br>sapiens              |
| 1 | 1.00 | 1 | 1 | 0.03  | 0.027  | 0.03   | 0.03   | 0.032  | t | 105747 | EEVVRVPT<br>TAASTPDA         | Oryctola<br>gus<br>cuniculus |
| 1 | 1.00 | 1 | 1 | 0.01  | 0.01   | 0.001  | 0.003  | 0.01   | t | 135974 | PSNSASVP<br>ALTA             | Homo<br>sapiens              |
| 1 | 1.00 | 1 | 1 | 0.01  | 0.013  | 0.01   | 0.01   | 0.013  | t | 144705 | KGTHSLYS<br>QIAG             | Mus<br>musculus              |
| 1 | 1.00 | 1 | 1 | 0.02  | 0.02   | 0.011  | 0.02   | 0.021  | t | 100777 | DIDFLIEEIE<br>RLGQDL         | Oryctola<br>gus<br>cuniculus |
| 1 | 1.00 | 1 | 1 | -0.03 | -0.028 | -0.039 | -0.029 | -0.028 | t | 15959  | FGCTWM<br>NSTGFTKV<br>CGAPPC | Homo<br>sapiens              |
| 1 | 1.00 | 1 | 1 | 0     | 0.002  | 0.024  | 0.007  | 0      | t | 112860 | YAQPSE                       | Homo<br>sapiens              |
| 1 | 1.00 | 1 | 1 | 0.02  | 0.022  | 0.007  | 0.019  | 0.022  | t | 78944  | DADGDGH<br>GWKPNGA<br>PGIAGY | Homo<br>sapiens              |
| 1 | 1.00 | 1 | 1 | 0.01  | 0.014  | 0.008  | 0.007  | 0.009  | t | 99381  | KIQRDEDS<br>YERDPYS          | Homo<br>sapiens              |
| 1 | 1.00 | 1 | 1 | -0.03 | -0.032 | -0.021 | -0.024 | -0.029 | t | 151048 | RHAYRSM<br>AEWGFLYS          | Rattus<br>norvegicus         |

|   |      |   |   |       |        |        |        |        |   |        |                              |                                  |
|---|------|---|---|-------|--------|--------|--------|--------|---|--------|------------------------------|----------------------------------|
| 1 | 1.00 | 1 | 1 | 0     | 0      | -0.002 | -0.003 | -0.002 | t | 98859  | LAFPGSGE<br>QVEKLIK          | Homo<br>sapiens                  |
| 1 | 1.00 | 1 | 1 | -0.01 | -0.01  | -0.005 | -0.01  | -0.012 | t | 50934  | QGPHVISR<br>IYQTAT           | Homo<br>sapiens                  |
| 1 | 1.00 | 1 | 1 | 0.01  | 0.01   | 0.01   | 0.01   | 0.011  | t | 153836 | HGPKATL<br>QDIVLHLE<br>P     | Cavia<br>porcellu<br>s           |
| 1 | 1.00 | 1 | 1 | -0.04 | -0.038 | -0.042 | -0.039 | -0.04  | t | 122162 | PIPVPIIIP<br>FPGWQPG<br>MPT  | Homo<br>sapiens                  |
| 1 | 1.00 | 1 | 1 | -0.02 | -0.022 | -0.018 | -0.019 | -0.02  | t | 131037 | RHWTTQG<br>CNC               | Mus<br>musculu<br>s              |
| 1 | 1.00 | 1 | 1 | 0.01  | 0.007  | 0.021  | 0.01   | 0.008  | t | 111194 | DGRFSYQ<br>NLFDAIVD          | Oryctola<br>gus<br>cuniculu<br>s |
| 1 | 1.00 | 1 | 1 | -0.01 | -0.01  | -0.01  | -0.01  | -0.007 | t | 72959  | WPPPNML<br>TS                | Mus<br>musculu<br>s              |
| 1 | 1.00 | 1 | 1 | -0.05 | -0.047 | -0.05  | -0.05  | -0.054 | t | 63808  | TGDPKPKK<br>NKKPKNPT<br>PPRP | Mus<br>musculu<br>s              |
| 1 | 1.00 | 1 | 1 | 0     | 0      | 0      | 0      | 0.002  | t | 99838  | QQRPFI                       | Mus<br>musculu<br>s              |
| 1 | 1.00 | 1 | 1 | -0.01 | -0.01  | 0.004  | -0.007 | -0.012 | t | 156980 | YTLGHFHG<br>QPQL             | Bos<br>taurus                    |
| 1 | 1.00 | 1 | 1 | -0.05 | -0.046 | -0.063 | -0.049 | -0.048 | t | 12944  | ELAKLRAG<br>KASDSQTP<br>DT   | Homo<br>sapiens                  |
| 1 | 1.00 | 1 | 1 | -0.05 | -0.046 | -0.063 | -0.049 | -0.048 | t | 12944  | ELAKLRAG<br>KASDSQTP<br>DT   | Homo<br>sapiens                  |
| 1 | 1.00 | 1 | 1 | 0.03  | 0.03   | 0.03   | 0.03   | 0.03   | t | 123763 | STPEERARI                    | Ovis<br>aries                    |
| 1 | 1.00 | 1 | 1 | 0.01  | 0.01   | 0.01   | 0.01   | 0.01   | t | 158617 | TVQPQFH                      | Homo<br>sapiens                  |
| 1 | 1.00 | 1 | 1 | 0.01  | 0.01   | 0.01   | 0.01   | 0.01   | t | 98648  | YTKNTNN<br>NLT               | Oryctola<br>gus<br>cuniculu<br>s |



|   |      |   |   |       |       |       |       |       |   |        |                            |                                  |
|---|------|---|---|-------|-------|-------|-------|-------|---|--------|----------------------------|----------------------------------|
| 1 | 1.00 | 1 | 1 | 0.01  | 0.013 | 0.01  | 0.01  | 0.01  | t | 98648  | YTKNTNN<br>NLT             | Mus<br>musculu<br>s              |
| 1 | 1.00 | 1 | 1 | 0.01  | 0.01  | 0.01  | 0.01  | 0.01  | t | 98648  | YTKNTNN<br>NLT             | Mus<br>musculu<br>s              |
| 1 | 1.00 | 1 | 1 | -0.03 | -0.03 | -0.03 | -0.03 | -0.03 | t | 153269 | LSPPLRNT<br>HPQAMQ<br>W    | Mus<br>musculu<br>s              |
| 1 | 1.00 | 1 | 1 | -0.03 | -0.03 | -0.03 | -0.03 | -0.03 | t | 106307 | CKCIVRAT<br>KG             | Homo<br>sapiens                  |
| 1 | 1.00 | 1 | 1 | 0.01  | 0.01  | 0.014 | 0.01  | 0.008 | t | 22870  | GTVAPQIP<br>PNWHIPSI<br>QD | Mus<br>musculu<br>s              |
| 1 | 1.00 | 1 | 1 | 0     | 0     | 0     | 0     | 0.001 | t | 134685 | GVSSYMK<br>VSICLPMD<br>VE  | Oryctola<br>gus<br>cuniculu<br>s |
| 1 | 1.00 | 1 | 1 | 0     | 0     | 0     | 0     | 0.001 | t | 134412 | IPPPYV                     | Mus<br>musculu<br>s              |
| 1 | 1.00 | 1 | 1 | 0     | 0     | 0     | 0     | 0.001 | t | 137136 | DQQTQIA<br>KDTAQT          | Mus<br>musculu<br>s              |
| 1 | 1.00 | 1 | 1 | 0     | 0.002 | 0     | 0     | 0.001 | t | 121098 | YTCCPD                     | Rattus<br>norvegic<br>us         |
| 1 | 1.00 | 1 | 1 | 0     | 0     | 0     | 0     | 0.001 | t | 119052 | WNPADYG<br>GIK             | Rattus<br>norvegic<br>us         |
| 1 | 1.00 | 1 | 1 | 0     | 0     | 0     | 0     | 0.001 | t | 122748 | EHRMTW<br>DPAQPPR          | Homo<br>sapiens                  |
| 1 | 1.00 | 1 | 1 | 0     | 0     | 0     | 0     | 0.001 | t | 125370 | CDDPRFQ                    | Oryctola<br>gus<br>cuniculu<br>s |
| 1 | 1.00 | 1 | 1 | 0     | 0     | 0     | 0     | 0.001 | t | 118480 | KWNPDDY<br>GGVK            | Rattus<br>norvegic<br>us         |

|   |      |   |   |   |        |   |   |       |   |        |                              |                          |
|---|------|---|---|---|--------|---|---|-------|---|--------|------------------------------|--------------------------|
| 1 | 1.00 | 1 | 1 | 0 | 0      | 0 | 0 | 0.001 | t | 120412 | ASKEKQEN<br>KIFADDIDI<br>SD  | Rattus<br>norvegicus     |
| 1 | 1.00 | 1 | 1 | 0 | 0      | 0 | 0 | 0.001 | t | 119663 | VIVELIPST<br>SSAV            | Mus<br>musculus          |
| 1 | 1.00 | 1 | 1 | 0 | 0      | 0 | 0 | 0.001 | t | 131654 | SGFGVVKK<br>PNY              | Oryctolagus<br>cuniculus |
| 1 | 1.00 | 1 | 1 | 0 | -0.003 | 0 | 0 | 0.001 | t | 119642 | SEHETRLV<br>ANLLENYN<br>KVIR | Oryctolagus<br>cuniculus |
| 1 | 1.00 | 1 | 1 | 0 | 0      | 0 | 0 | 0.001 | t | 120601 | IDISDISGK<br>QVTGEVIF<br>QT  | Rattus<br>norvegicus     |
| 1 | 1.00 | 1 | 1 | 0 | 0      | 0 | 0 | 0.001 | t | 119673 | WNPDDYG<br>GVK               | Rattus<br>norvegicus     |
| 1 | 1.00 | 1 | 1 | 0 | 0      | 0 | 0 | 0.001 | t | 125297 | VFFEEQED<br>EIIGFG           | Mus<br>musculus          |
| 1 | 1.00 | 1 | 1 | 0 | 0      | 0 | 0 | 0.001 | t | 131658 | SGLRLLEKS<br>QH              | Oryctolagus<br>cuniculus |
| 1 | 1.00 | 1 | 1 | 0 | 0      | 0 | 0 | 0.001 | t | 119052 | WNPADYG<br>GIK               | Rattus<br>norvegicus     |
| 1 | 1.00 | 1 | 1 | 0 | 0      | 0 | 0 | 0.001 | t | 104895 | LVEALYLV<br>CGERG            | Mus<br>musculus          |
| 1 | 1.00 | 1 | 1 | 0 | 0      | 0 | 0 | 0.001 | t | 108998 | FVCGDRG<br>FYFNK             | Mus<br>musculus          |
| 1 | 1.00 | 1 | 1 | 0 | 0      | 0 | 0 | 0.001 | t | 117315 | KALSVETE<br>KLLKYLEAV        | Homo<br>sapiens          |
| 1 | 1.00 | 1 | 1 | 0 | 0      | 0 | 0 | 0.001 | t | 117315 | KALSVETE<br>KLLKYLEAV        | Homo<br>sapiens          |
| 1 | 1.00 | 1 | 1 | 0 | 0      | 0 | 0 | 0.001 | t | 109177 | GPETLCGA<br>ELVD             | Mus<br>musculus          |
| 1 | 1.00 | 1 | 1 | 0 | 0      | 0 | 0 | 0.001 | t | 102510 | HHQKLVFF<br>AEDVGSN<br>K     | Mus<br>musculus          |

|   |      |   |   |   |   |   |   |       |   |        |                             |                                  |
|---|------|---|---|---|---|---|---|-------|---|--------|-----------------------------|----------------------------------|
| 1 | 1.00 | 1 | 1 | 0 | 0 | 0 | 0 | 0.001 | t | 113942 | TQDENPV<br>VHF              | Mus<br>musculu<br>s              |
| 1 | 1.00 | 1 | 1 | 0 | 0 | 0 | 0 | 0.001 | t | 109095 | GFYFNKPT<br>GYGS            | Mus<br>musculu<br>s              |
| 1 | 1.00 | 1 | 1 | 0 | 0 | 0 | 0 | 0.001 | t | 113013 | GSLPQKSQ<br>RSQDEN          | Rattus<br>norvegic<br>us         |
| 1 | 1.00 | 1 | 1 | 0 | 0 | 0 | 0 | 0.001 | t | 105228 | GLMVGGV<br>V                | Mus<br>musculu<br>s              |
| 1 | 1.00 | 1 | 1 | 0 | 0 | 0 | 0 | 0.001 | t | 109253 | GSLPQKSQ<br>RSQDENP<br>VVHF | Rattus<br>norvegic<br>us         |
| 1 | 1.00 | 1 | 1 | 0 | 0 | 0 | 0 | 0.001 | t | 110116 | YCAPLKPA<br>KSA             | Mus<br>musculu<br>s              |
| 1 | 1.00 | 1 | 1 | 0 | 0 | 0 | 0 | 0.001 | t | 108877 | DRGFYFNK<br>PTGY            | Mus<br>musculu<br>s              |
| 1 | 1.00 | 1 | 1 | 0 | 0 | 0 | 0 | 0.001 | t | 117336 | NGWSHKD<br>LLR              | Homo<br>sapiens                  |
| 1 | 1.00 | 1 | 1 | 0 | 0 | 0 | 0 | 0.001 | t | 68401  | VEVPGSQ<br>HIDSQKKA         | Mus<br>musculu<br>s              |
| 1 | 1.00 | 1 | 1 | 0 | 0 | 0 | 0 | 0.001 | t | 69627  | VLLRRIGG                    | Mus<br>musculu<br>s              |
| 1 | 1.00 | 1 | 1 | 0 | 0 | 0 | 0 | 0.001 | t | 72805  | WLTEKEGS<br>YP              | Mus<br>musculu<br>s              |
| 1 | 1.00 | 1 | 1 | 0 | 0 | 0 | 0 | 0.001 | t | 66933  | TVAEEHVE<br>EPTVAEE         | Homo<br>sapiens                  |
| 1 | 1.00 | 1 | 1 | 0 | 0 | 0 | 0 | 0.001 | t | 78286  | TTAETLDA<br>TR              | Mus<br>musculu<br>s              |
| 1 | 1.00 | 1 | 1 | 0 | 0 | 0 | 0 | 0.001 | t | 68401  | VEVPGSQ<br>HIDSQKKA         | Oryctola<br>gus<br>cuniculu<br>s |
| 1 | 1.00 | 1 | 1 | 0 | 0 | 0 | 0 | 0.001 | t | 78286  | TTAETLDA<br>TR              | Mus<br>musculu<br>s              |

|   |      |   |   |   |   |   |   |       |   |       |                             |                                  |
|---|------|---|---|---|---|---|---|-------|---|-------|-----------------------------|----------------------------------|
| 1 | 1.00 | 1 | 1 | 0 | 0 | 0 | 0 | 0.001 | t | 63604 | TEYYLNHG<br>KWPN            | Oryctola<br>gus<br>cuniculu<br>s |
| 1 | 1.00 | 1 | 1 | 0 | 0 | 0 | 0 | 0.001 | t | 74801 | YLLQKLNR                    | Mus<br>musculu<br>s              |
| 1 | 1.00 | 1 | 1 | 0 | 0 | 0 | 0 | 0.001 | t | 95048 | VIFQTPLIK<br>NPDVKSAI<br>EG | Rattus<br>norvegic<br>us         |
| 1 | 1.00 | 1 | 1 | 0 | 0 | 0 | 0 | 0.001 | t | 94580 | LDNKYAGK<br>GY              | Mus<br>musculu<br>s              |
| 1 | 1.00 | 1 | 1 | 0 | 0 | 0 | 0 | 0.001 | t | 69627 | VLLRRIGG                    | Mus<br>musculu<br>s              |
| 1 | 1.00 | 1 | 1 | 0 | 0 | 0 | 0 | 0.001 | t | 78286 | TTAETLDA<br>TR              | Mus<br>musculu<br>s              |
| 1 | 1.00 | 1 | 1 | 0 | 0 | 0 | 0 | 0.001 | t | 68401 | VEVPGSQ<br>HIDSQKKA         | Oryctola<br>gus<br>cuniculu<br>s |
| 1 | 1.00 | 1 | 1 | 0 | 0 | 0 | 0 | 0.001 | t | 58783 | SKAFSNCY<br>PYDVDPYA<br>SL  | Oryctola<br>gus<br>cuniculu<br>s |
| 1 | 1.00 | 1 | 1 | 0 | 0 | 0 | 0 | 0.001 | t | 42441 | MQWNST<br>TFHQTLQ           | Mus<br>musculu<br>s              |
| 1 | 1.00 | 1 | 1 | 0 | 0 | 0 | 0 | 0.001 | t | 48912 | PPSDIKGK<br>YVKEVEVK        | Oryctola<br>gus<br>cuniculu<br>s |
| 1 | 1.00 | 1 | 1 | 0 | 0 | 0 | 0 | 0.001 | t | 55260 | RPPNAP                      | Mus<br>musculu<br>s              |
| 1 | 1.00 | 1 | 1 | 0 | 0 | 0 | 0 | 0.001 | t | 42441 | MQWNST<br>TFHQTLQ           | Mus<br>musculu<br>s              |
| 1 | 1.00 | 1 | 1 | 0 | 0 | 0 | 0 | 0.001 | t | 42441 | MQWNST<br>TFHQTLQ           | Mus<br>musculu<br>s              |
| 1 | 1.00 | 1 | 1 | 0 | 0 | 0 | 0 | 0.001 | t | 43242 | NANPNAN<br>PNANP            | Homo<br>sapiens                  |

|   |      |   |   |   |        |   |   |       |   |       |                              |                                  |
|---|------|---|---|---|--------|---|---|-------|---|-------|------------------------------|----------------------------------|
| 1 | 1.00 | 1 | 1 | 0 | -0.004 | 0 | 0 | 0.001 | t | 48670 | PNLRGDL<br>QVLAQKV<br>ARTLP  | Mus<br>musculu<br>s              |
| 1 | 1.00 | 1 | 1 | 0 | 0      | 0 | 0 | 0.001 | t | 59580 | SLWARRE<br>NGSVKWF<br>C      | Oryctola<br>gus<br>cuniculu<br>s |
| 1 | 1.00 | 1 | 1 | 0 | 0      | 0 | 0 | 0.001 | t | 59326 | SLLTYMK<br>M                 | Mus<br>musculu<br>s              |
| 1 | 1.00 | 1 | 1 | 0 | 0      | 0 | 0 | 0.001 | t | 40729 | LYDAAKAY<br>AEQLKEN<br>GVINY | Mus<br>musculu<br>s              |
| 1 | 1.00 | 1 | 1 | 0 | -0.004 | 0 | 0 | 0.001 | t | 48670 | PNLRGDL<br>QVLAQKV<br>ARTLP  | Mus<br>musculu<br>s              |
| 1 | 1.00 | 1 | 1 | 0 | 0      | 0 | 0 | 0.001 | t | 37660 | LLPHSNLD<br>HILEPSIPW<br>KSK | Homo<br>sapiens                  |
| 1 | 1.00 | 1 | 1 | 0 | 0      | 0 | 0 | 0.001 | t | 58388 | SHLVEALY<br>LVCGERG          | Mus<br>musculu<br>s              |
| 1 | 1.00 | 1 | 1 | 0 | 0      | 0 | 0 | 0.001 | t | 43242 | NANPNAN<br>PNANP             | Homo<br>sapiens                  |
| 1 | 1.00 | 1 | 1 | 0 | 0      | 0 | 0 | 0.001 | t | 43242 | NANPNAN<br>PNANP             | Homo<br>sapiens                  |
| 1 | 1.00 | 1 | 1 | 0 | 0      | 0 | 0 | 0.001 | t | 38422 | LPAYQDYT<br>ARAQVSE          | Oryctola<br>gus<br>cuniculu<br>s |
| 1 | 1.00 | 1 | 1 | 0 | 0      | 0 | 0 | 0.001 | t | 58388 | SHLVEALY<br>LVCGERG          | Mus<br>musculu<br>s              |
| 1 | 1.00 | 1 | 1 | 0 | 0      | 0 | 0 | 0.001 | t | 48858 | PPPPNPN<br>DPPPPNP<br>ND     | Mus<br>musculu<br>s              |
| 1 | 1.00 | 1 | 1 | 0 | 0      | 0 | 0 | 0.001 | t | 43242 | NANPNAN<br>PNANP             | Homo<br>sapiens                  |

|   |      |   |   |   |        |   |   |       |   |       |                              |                                  |
|---|------|---|---|---|--------|---|---|-------|---|-------|------------------------------|----------------------------------|
| 1 | 1.00 | 1 | 1 | 0 | 0      | 0 | 0 | 0.001 | t | 58388 | SHLVEALY<br>LVCGERG          | Mus<br>musculu<br>s              |
| 1 | 1.00 | 1 | 1 | 0 | 0      | 0 | 0 | 0.001 | t | 58997 | SLAGKRE<br>MAITF             | Oryctola<br>gus<br>cuniculu<br>s |
| 1 | 1.00 | 1 | 1 | 0 | 0      | 0 | 0 | 0.001 | t | 58388 | SHLVEALY<br>LVCGERG          | Mus<br>musculu<br>s              |
| 1 | 1.00 | 1 | 1 | 0 | 0      | 0 | 0 | 0.001 | t | 43242 | NANPNAN<br>PNANP             | Oryctola<br>gus<br>cuniculu<br>s |
| 1 | 1.00 | 1 | 1 | 0 | 0      | 0 | 0 | 0.001 | t | 58388 | SHLVEALY<br>LVCGERG          | Mus<br>musculu<br>s              |
| 1 | 1.00 | 1 | 1 | 0 | 0      | 0 | 0 | 0.001 | t | 58388 | SHLVEALY<br>LVCGERG          | Mus<br>musculu<br>s              |
| 1 | 1.00 | 1 | 1 | 0 | 0      | 0 | 0 | 0.001 | t | 43242 | NANPNAN<br>PNANP             | Homo<br>sapiens                  |
| 1 | 1.00 | 1 | 1 | 0 | 0      | 0 | 0 | 0.001 | t | 35036 | LCAEYHNT<br>QIHTL            | Oryctola<br>gus<br>cuniculu<br>s |
| 1 | 1.00 | 1 | 1 | 0 | 0      | 0 | 0 | 0.001 | t | 12248 | EGQKSAVT<br>EY               | Oryctola<br>gus<br>cuniculu<br>s |
| 1 | 1.00 | 1 | 1 | 0 | 0      | 0 | 0 | 0.001 | t | 36166 | LGIMGEYR<br>GTPRNQD<br>LYDAA | Mus<br>musculu<br>s              |
| 1 | 1.00 | 1 | 1 | 0 | 0      | 0 | 0 | 0.001 | t | 30260 | KDTRLRIAYL<br>TEAKVEKL       | Oryctola<br>gus<br>cuniculu<br>s |
| 1 | 1.00 | 1 | 1 | 0 | -0.003 | 0 | 0 | 0.001 | t | 24786 | HSLGKWL<br>GHPDKF            | Oryctola<br>gus<br>cuniculu<br>s |
| 1 | 1.00 | 1 | 1 | 0 | 0      | 0 | 0 | 0.001 | t | 12248 | EGQKSAVT<br>EY               | Oryctola<br>gus<br>cuniculu<br>s |
| 1 | 1.00 | 1 | 1 | 0 | 0      | 0 | 0 | 0.001 | t | 32844 | KPQEEKEK<br>ITKEILNGK        | Mus<br>musculu<br>s              |

|   |      |   |   |   |        |   |   |       |   |       |                              |                       |
|---|------|---|---|---|--------|---|---|-------|---|-------|------------------------------|-----------------------|
| 1 | 1.00 | 1 | 1 | 0 | 0      | 0 | 0 | 0.001 | t | 24249 | HLLRLSEI                     | Mus musculus          |
| 1 | 1.00 | 1 | 1 | 0 | 0      | 0 | 0 | 0.001 | t | 24249 | HLLRLSEI                     | Mus musculus          |
| 1 | 1.00 | 1 | 1 | 0 | 0      | 0 | 0 | 0.001 | t | 10639 | DVKFPGG<br>GQIVGGV<br>YLLPRR | Mus musculus          |
| 1 | 1.00 | 1 | 1 | 0 | 0      | 0 | 0 | 0.001 | t | 12792 | EKLCVWN<br>NKTPHAIA          | Oryctolagus cuniculus |
| 1 | 1.00 | 1 | 1 | 0 | 0      | 0 | 0 | 0.001 | t | 35036 | LCAEYHNT<br>QIHTL            | Oryctolagus cuniculus |
| 1 | 1.00 | 1 | 1 | 0 | 0      | 0 | 0 | 0.001 | t | 32844 | KPQEEKEK<br>ITKEILNGK        | Mus musculus          |
| 1 | 1.00 | 1 | 1 | 0 | -0.005 | 0 | 0 | 0.001 | t | 20064 | GGVATY                       | Macaca mulatta        |
| 1 | 1.00 | 1 | 1 | 0 | 0      | 0 | 0 | 0.001 | t | 32844 | KPQEEKEK<br>ITKEILNGK        | Mus musculus          |
| 1 | 1.00 | 1 | 1 | 0 | 0      | 0 | 0 | 0.001 | t | 19033 | GDLQVLA                      | Oryctolagus cuniculus |
| 1 | 1.00 | 1 | 1 | 0 | 0      | 0 | 0 | 0.001 | t | 19636 | GFTTNEER<br>YNVFAE           | Mus musculus          |
| 1 | 1.00 | 1 | 1 | 0 | 0.03   | 0 | 0 | 0.001 | t | 20224 | GIDKKKKK<br>KNI              | Saimiri               |
| 1 | 1.00 | 1 | 1 | 0 | 0      | 0 | 0 | 0.001 | t | 10639 | DVKFPGG<br>GQIVGGV<br>YLLPRR | Mus musculus          |
| 1 | 1.00 | 1 | 1 | 0 | 0      | 0 | 0 | 0.001 | t | 19637 | GFTTNEPR<br>YNVFAE           | Mus musculus          |

|   |      |   |   |   |   |   |   |       |   |       |                             |                                  |
|---|------|---|---|---|---|---|---|-------|---|-------|-----------------------------|----------------------------------|
| 1 | 1.00 | 1 | 1 | 0 | 0 | 0 | 0 | 0.001 | t | 10555 | DVDKPPF<br>DGMTACG<br>NEPIF | Mus<br>musculu<br>s              |
| 1 | 1.00 | 1 | 1 | 0 | 0 | 0 | 0 | 0.001 | t | 19636 | GFTTNEER<br>YNVFAE          | Mus<br>musculu<br>s              |
| 1 | 1.00 | 1 | 1 | 0 | 0 | 0 | 0 | 0.001 | t | 14457 | ETLGALAS<br>AIKETFEEG<br>TC | Mus<br>musculu<br>s              |
| 1 | 1.00 | 1 | 1 | 0 | 0 | 0 | 0 | 0.001 | t | 7558  | DAKDGKEI<br>DTKHLPS<br>C    | Oryctola<br>gus<br>cuniculu<br>s |
| 1 | 1.00 | 1 | 1 | 0 | 0 | 0 | 0 | 0.001 | t | 9753  | DPRVRGLY                    | Mus<br>musculu<br>s              |
| 1 | 1.00 | 1 | 1 | 0 | 0 | 0 | 0 | 0.001 | t | 8475  | DGQPAGD<br>RADGQPA<br>GDRA  | Mus<br>musculu<br>s              |
| 1 | 1.00 | 1 | 1 | 0 | 0 | 0 | 0 | 0.001 | t | 5867  | AYLTEAKV<br>EKL             | Oryctola<br>gus<br>cuniculu<br>s |
| 1 | 1.00 | 1 | 1 | 0 | 0 | 0 | 0 | 0.001 | t | 9723  | DPPPPNP<br>NDPPPPN<br>PND   | Mus<br>musculu<br>s              |
| 1 | 1.00 | 1 | 1 | 0 | 0 | 0 | 0 | 0.001 | t | 9753  | DPRVRGLY                    | Mus<br>musculu<br>s              |
| 1 | 1.00 | 1 | 1 | 0 | 0 | 0 | 0 | 0.001 | t | 5867  | AYLTEAKV<br>EKL             | Oryctola<br>gus<br>cuniculu<br>s |
| 1 | 1.00 | 1 | 1 | 0 | 0 | 0 | 0 | 0.001 | t | 9759  | DPRVRGLY<br>LPA             | Mus<br>musculu<br>s              |
| 1 | 1.00 | 1 | 1 | 0 | 0 | 0 | 0 | 0.001 | t | 7005  | CSGPTTIR<br>GQFS            | Mus<br>musculu<br>s              |
| 1 | 1.00 | 1 | 1 | 0 | 0 | 0 | 0 | 0.001 | t | 9759  | DPRVRGLY<br>LPA             | Mus<br>musculu<br>s              |
| 1 | 1.00 | 1 | 1 | 0 | 0 | 0 | 0 | 0.001 | t | 7005  | CSGPTTIR<br>GQFS            | Mus<br>musculu<br>s              |



|   |      |   |   |       |        |        |        |       |   |        |                              |                          |
|---|------|---|---|-------|--------|--------|--------|-------|---|--------|------------------------------|--------------------------|
| 1 | 1.00 | 1 | 1 | 0     | 0      | 0      | 0      | 0.001 | t | 9753   | DPRVRGLY                     | Mus<br>musculus          |
| 1 | 1.00 | 1 | 1 | 0     | 0      | 0      | 0      | 0.001 | t | 7171   | CTKPTDGN                     | Mus<br>musculus          |
| 1 | 1.00 | 1 | 1 | 0     | -0.003 | 0      | 0      | 0.001 | t | 7171   | CTKPTDGN                     | Oryctolagus<br>cuniculus |
| 1 | 1.00 | 1 | 1 | 0     | 0      | 0      | 0      | 0.001 | t | 9106   | DLGSIA                       | Mus<br>musculus          |
| 1 | 1.00 | 1 | 1 | 0     | 0      | 0      | 0      | 0.001 | t | 9759   | DPRVRGLYLPA                  | Mus<br>musculus          |
| 1 | 1.00 | 1 | 1 | 0     | 0      | 0      | 0      | 0.001 | t | 7171   | CTKPTDGN                     | Mus<br>musculus          |
| 1 | 1.00 | 1 | 1 | 0     | 0      | 0      | 0      | 0.001 | t | 6338   | CGQPVTR<br>TDDDTVA           | Oryctolagus<br>cuniculus |
| 1 | 1.00 | 1 | 1 | -0.01 | -0.01  | -0.01  | -0.01  | -0.01 | t | 45438  | NPNPNPN                      | Mus<br>musculus          |
| 1 | 1.00 | 1 | 1 | -0.03 | -0.03  | -0.03  | -0.03  | -0.03 | t | 144331 | HDTSLKPIS<br>VSYNPATAK       | Homo<br>sapiens          |
| 1 | 1.00 | 1 | 1 | 0     | -0.004 | 0      | -0.001 | 0.001 | t | 48779  | PPFSLSPV<br>PTLGSRSR<br>R    | Oryctolagus<br>cuniculus |
| 1 | 1.00 | 1 | 1 | 0     | -0.003 | -0.005 | 0      | 0     | t | 132039 | QYFVGKRT<br>VPPGECFI<br>QFLS | Oryctolagus<br>cuniculus |
| 1 | 1.00 | 1 | 1 | 0     | -0.006 | 0      | 0      | 0     | t | 123550 | NNLNKIK<br>DELKK             | Oryctolagus<br>cuniculus |
| 1 | 1.00 | 1 | 1 | 0.04  | 0.042  | 0.037  | 0.043  | 0.041 | t | 118930 | MSDEGPG<br>TGPGNGL<br>GEKGD  | Homo<br>sapiens          |

|   |      |   |   |       |        |        |        |        |   |        |                              |                       |
|---|------|---|---|-------|--------|--------|--------|--------|---|--------|------------------------------|-----------------------|
| 1 | 1.00 | 1 | 1 | 0.02  | 0.024  | 0.01   | 0.017  | 0.021  | t | 47747  | PGSANKPK<br>DELDYEND         | Homo sapiens          |
| 1 | 1.00 | 1 | 1 | -0.01 | -0.02  | -0.01  | -0.007 | -0.01  | t | 42684  | MSTNPKP<br>QKKNKRN<br>TNRR   | Homo sapiens          |
| 1 | 1.00 | 1 | 1 | 0.02  | 0.022  | 0.019  | 0.02   | 0.02   | t | 65021  | TLQARQQ<br>TVSALED           | Myodes glareolus      |
| 1 | 1.00 | 1 | 1 | -0.03 | -0.027 | -0.021 | -0.03  | -0.03  | t | 67931  | VDEKKM                       | Mus musculus          |
| 1 | 1.00 | 1 | 1 | -0.03 | -0.027 | -0.021 | -0.03  | -0.03  | t | 67931  | VDEKKM                       | Mus musculus          |
| 1 | 1.00 | 1 | 1 | 0     | 0      | 0      | 0      | 0      | t | 132343 | GMPFMIH<br>QLMGNGV<br>W      | Homo sapiens          |
| 1 | 1.00 | 1 | 1 | 0.01  | 0.014  | 0.01   | 0.01   | 0.011  | t | 111035 | TDGNTQQ<br>T                 | Oryctolagus cuniculus |
| 1 | 1.00 | 1 | 1 | -0.03 | -0.034 | -0.025 | -0.03  | -0.03  | t | 73065  | WSDVGLC<br>KKRPKP            | Oryctolagus cuniculus |
| 1 | 1.00 | 1 | 1 | 0.02  | 0.017  | 0.029  | 0.02   | 0.02   | t | 100287 | LSEKGLTTY                    | Oryctolagus cuniculus |
| 1 | 1.00 | 1 | 1 | -0.04 | -0.042 | -0.045 | -0.047 | -0.04  | t | 124008 | DGVVLVD                      | Mus musculus          |
| 1 | 1.00 | 1 | 1 | 0     | 0      | 0      | 0      | 0.002  | t | 45405  | NPNANP                       | Mus musculus          |
| 1 | 1.00 | 1 | 1 | -0.01 | -0.01  | -0.01  | -0.01  | -0.008 | t | 54861  | RMAWDM<br>MM                 | Homo sapiens          |
| 1 | 1.00 | 1 | 1 | 0.02  | 0.02   | 0.02   | 0.02   | 0.02   | t | 112303 | SAGEKVT                      | Homo sapiens          |
| 1 | 1.00 | 1 | 1 | 0     | 0.002  | -0.002 | 0.001  | 0      | t | 74479  | YKMFLHT<br>GAVIVLPE<br>DDLPT | Homo sapiens          |

|   |      |   |   |       |        |        |        |        |   |        |                              |                                  |
|---|------|---|---|-------|--------|--------|--------|--------|---|--------|------------------------------|----------------------------------|
| 1 | 1.00 | 1 | 1 | 0     | 0      | 0      | 0      | 0      | t | 142141 | EIDGPAGQ<br>AEPD             | Homo<br>sapiens                  |
| 1 | 1.00 | 1 | 1 | -0.02 | -0.02  | -0.02  | -0.02  | -0.02  | t | 140859 | GQRRADA<br>VKGYL             | Oryctola<br>gus<br>cuniculu<br>s |
| 1 | 1.00 | 1 | 1 | -0.02 | -0.02  | -0.02  | -0.02  | -0.02  | t | 100229 | KRKDEERN<br>KT               | Mus<br>musculu<br>s              |
| 1 | 1.00 | 1 | 1 | -0.02 | -0.02  | -0.02  | -0.02  | -0.02  | t | 79414  | TCSPGLRE<br>WAHNCL           | Mus<br>musculu<br>s              |
| 1 | 1.00 | 1 | 1 | 0     | 0      | 0.005  | 0      | 0      | t | 76396  | YVRGGGA<br>VP                | Homo<br>sapiens                  |
| 1 | 1.00 | 1 | 1 | -0.01 | -0.012 | -0.004 | -0.011 | -0.012 | t | 30236  | KDRTLIEQ<br>K                | Mus<br>musculu<br>s              |
| 1 | 1.00 | 1 | 1 | 0.06  | 0.056  | 0.06   | 0.053  | 0.061  | t | 134795 | SFGAYGA<br>QEEAQC            | Oryctola<br>gus<br>cuniculu<br>s |
| 1 | 1.00 | 1 | 1 | 0.06  | 0.056  | 0.06   | 0.053  | 0.061  | t | 134795 | SFGAYGA<br>QEEAQC            | Oryctola<br>gus<br>cuniculu<br>s |
| 1 | 1.00 | 1 | 1 | -0.07 | -0.068 | -0.073 | -0.069 | -0.073 | t | 103113 | DRFADFPA<br>LPLDPSA          | Homo<br>sapiens                  |
| 1 | 1.00 | 1 | 1 | 0     | 0.002  | -0.004 | -0.003 | 0.001  | t | 8561   | DHPLQKTY<br>NY               | Homo<br>sapiens                  |
| 1 | 1.00 | 1 | 1 | 0     | -0.004 | -0.007 | -0.007 | 0      | t | 135446 | AKAQLR                       | Oryctola<br>gus<br>cuniculu<br>s |
| 1 | 1.00 | 1 | 1 | 0.06  | 0.057  | 0.074  | 0.06   | 0.06   | t | 79647  | SLTTDEL                      | Oryctola<br>gus<br>cuniculu<br>s |
| 1 | 1.00 | 1 | 1 | -0.04 | -0.042 | -0.04  | -0.037 | -0.04  | t | 28165  | IQIIAATMS<br>KAKQYNIC<br>CKF | Mus<br>musculu<br>s              |
| 1 | 1.00 | 1 | 1 | -0.01 | -0.019 | -0.013 | -0.01  | -0.011 | t | 72485  | WGNGCGL<br>FGKGSIDT<br>CAKFA | Equus<br>caballus                |

|   |      |   |   |       |        |        |        |        |   |        |                              |                                  |
|---|------|---|---|-------|--------|--------|--------|--------|---|--------|------------------------------|----------------------------------|
| 1 | 1.00 | 1 | 1 | -0.05 | -0.052 | -0.05  | -0.047 | -0.049 | t | 74871  | YLPVGGLR<br>RIGG             | Mus<br>musculu<br>s              |
| 1 | 1.00 | 1 | 1 | 0     | 0.004  | 0      | -0.003 | 0      | t | 70536  | VQDGSVT<br>EQIIEELF          | Homo<br>sapiens                  |
| 1 | 1.00 | 1 | 1 | -0.01 | -0.016 | -0.01  | -0.01  | -0.01  | t | 123550 | NNLNEKIK<br>DELKK            | Oryctola<br>gus<br>cuniculu<br>s |
| 1 | 1.00 | 1 | 1 | -0.01 | -0.008 | -0.011 | -0.009 | -0.01  | t | 12169  | EGGDGTR<br>DTLPQS            | Homo<br>sapiens                  |
| 1 | 1.00 | 1 | 1 | -0.03 | -0.03  | -0.039 | -0.033 | -0.03  | t | 3493   | APAVKYTV<br>FETALKKAI<br>TAM | Homo<br>sapiens                  |
| 1 | 1.00 | 1 | 1 | -0.05 | -0.053 | -0.052 | -0.05  | -0.049 | t | 133739 | WDRF                         | Oryctola<br>gus<br>cuniculu<br>s |
| 1 | 1.00 | 1 | 1 | -0.01 | -0.01  | -0.01  | -0.01  | -0.009 | t | 38915  | LQN                          | Mus<br>musculu<br>s              |
| 1 | 1.00 | 1 | 1 | 0.02  | 0.02   | 0.024  | 0.02   | 0.02   | t | 67269  | TWKIEKAS<br>F                | Homo<br>sapiens                  |
| 1 | 1.00 | 1 | 1 | 0.01  | 0.008  | 0.001  | 0.003  | 0.008  | t | 119468 | ISGKQVTG<br>EVIFQTPLI<br>K   | Mus<br>musculu<br>s              |
| 1 | 1.00 | 1 | 1 | -0.03 | -0.028 | -0.038 | -0.029 | -0.03  | t | 46681  | NYNYKYRY<br>LRHGKLRP<br>F    | Homo<br>sapiens                  |
| 1 | 1.00 | 1 | 1 | 0.04  | 0.038  | 0.033  | 0.033  | 0.04   | t | 142038 | TKLDQEEK<br>KA               | Mus<br>musculu<br>s              |
| 1 | 1.00 | 1 | 1 | 0     | 0      | 0.004  | 0      | 0      | t | 78638  | EKSLTSLSE<br>VVLQNRRL<br>GLD | Oryctola<br>gus<br>cuniculu<br>s |
| 1 | 1.00 | 1 | 1 | 0.04  | 0.038  | 0.025  | 0.033  | 0.042  | t | 33717  | KTIINNDF<br>NFDDYNY          | Mus<br>musculu<br>s              |
| 1 | 1.00 | 1 | 1 | -0.05 | -0.053 | -0.058 | -0.05  | -0.048 | t | 139956 | YFFHPDN<br>QEDAE             | Oryctola<br>gus<br>cuniculu<br>s |

|   |      |   |   |       |        |        |        |        |   |        |                             |                              |
|---|------|---|---|-------|--------|--------|--------|--------|---|--------|-----------------------------|------------------------------|
| 1 | 1.00 | 1 | 1 | -0.01 | -0.012 | -0.016 | -0.013 | -0.009 | t | 68299  | VENGLISR<br>VLDGLV          | Mus<br>musculus              |
| 1 | 1.00 | 1 | 1 | 0.05  | 0.052  | 0.048  | 0.047  | 0.05   | t | 20825  | GLEQLESII<br>N              | Homo<br>sapiens              |
| 1 | 1.00 | 1 | 1 | 0.01  | 0.008  | 0.01   | 0.014  | 0.011  | t | 135660 | ECPEGYIL<br>DDGFICTD<br>IDE | Mus<br>musculus              |
| 1 | 1.00 | 1 | 1 | 0.02  | 0.017  | 0.02   | 0.02   | 0.02   | t | 104143 | NDDEPNG<br>AIRFTMGY<br>QHGG | Oryctola<br>gus<br>cuniculus |
| 1 | 1.00 | 1 | 1 | 0     | -0.003 | -0.001 | 0      | 0      | t | 140611 | VNKKEAW<br>LDSTKATRY        | Oryctola<br>gus<br>cuniculus |
| 1 | 1.00 | 1 | 1 | 0     | 0      | -0.009 | 0      | 0      | t | 40826  | LYKSNHN<br>NVYWLTIP         | Homo<br>sapiens              |
| 1 | 1.00 | 1 | 1 | -0.06 | -0.056 | -0.06  | -0.059 | -0.058 | t | 73020  | WRCPPRR<br>R                | Homo<br>sapiens              |
| 1 | 1.00 | 1 | 1 | -0.01 | -0.01  | -0.01  | -0.01  | -0.01  | t | 6367   | CGYGGPA<br>NKKNAGC          | Oryctola<br>gus<br>cuniculus |
| 1 | 1.00 | 1 | 1 | -0.02 | -0.017 | -0.02  | -0.02  | -0.019 | t | 75789  | YSLFHKEK<br>MIL             | Mus<br>musculus              |
| 1 | 1.00 | 1 | 1 | 0     | 0      | -0.008 | 0.001  | 0.001  | t | 29852  | KALENKKK<br>QLSAGGK<br>NLS  | Homo<br>sapiens              |
| 1 | 1.00 | 1 | 1 | 0     | -0.002 | 0      | -0.001 | 0.002  | t | 54859  | RMAWDM                      | Mus<br>musculus              |
| 1 | 1.00 | 1 | 1 | -0.08 | -0.08  | -0.08  | -0.08  | -0.081 | t | 63237  | TDSPRNPV<br>TR              | Oryctola<br>gus<br>cuniculus |
| 1 | 1.00 | 1 | 1 | 0.03  | 0.037  | 0.035  | 0.029  | 0.03   | t | 147288 | SKFQDTH<br>NNAHYVYV<br>FFEE | Gallus<br>gallus             |
| 1 | 1.00 | 1 | 1 | 0.01  | 0.01   | 0.01   | 0.01   | 0.01   | t | 113479 | GQQPGQA<br>QQGQQP<br>G      | Homo<br>sapiens              |

|   |      |   |   |       |        |        |        |        |   |        |                              |                                  |
|---|------|---|---|-------|--------|--------|--------|--------|---|--------|------------------------------|----------------------------------|
| 1 | 1.00 | 1 | 1 | -0.01 | -0.01  | -0.01  | -0.01  | -0.01  | t | 137889 | GTGYHSRF<br>GSDA             | Homo<br>sapiens                  |
| 1 | 1.00 | 1 | 1 | -0.03 | -0.03  | -0.03  | -0.03  | -0.03  | t | 114975 | VLCNRAFNPV                   | Homo<br>sapiens                  |
| 1 | 1.00 | 1 | 1 | -0.03 | -0.03  | -0.03  | -0.03  | -0.03  | t | 18587  | GAGGGAG<br>AGGAGAG<br>GGGRGR | Homo<br>sapiens                  |
| 1 | 1.00 | 1 | 1 | -0.05 | -0.05  | -0.05  | -0.05  | -0.05  | t | 112401 | WLAHIWW                      | Homo<br>sapiens                  |
| 1 | 1.00 | 1 | 1 | -0.07 | -0.07  | -0.07  | -0.07  | -0.07  | t | 127714 | KPWKHLK                      | Homo<br>sapiens                  |
| 1 | 1.00 | 1 | 1 | 0     | -0.003 | -0.011 | -0.001 | 0.001  | t | 36366  | LHDINHISK<br>SDT             | Oryctola<br>gus<br>cuniculu<br>s |
| 1 | 1.00 | 1 | 1 | 0.05  | 0.05   | 0.053  | 0.05   | 0.053  | t | 78938  | CAPGQNL<br>CY                | Mus<br>musculu<br>s              |
| 1 | 1.00 | 1 | 1 | 0     | 0.006  | 0      | 0      | 0      | t | 123801 | TTPEERARI                    | Ovis<br>aries                    |
| 1 | 1.00 | 1 | 1 | 0.01  | 0.01   | 0.01   | 0.01   | 0.01   | t | 135576 | LRYSTGTV<br>SG               | Oryctola<br>gus<br>cuniculu<br>s |
| 1 | 1.00 | 1 | 1 | -0.01 | -0.01  | -0.01  | -0.01  | -0.008 | t | 103853 | DLTASLMV<br>ALDTNNT          | Oryctola<br>gus<br>cuniculu<br>s |
| 1 | 1.00 | 1 | 1 | -0.03 | -0.032 | -0.03  | -0.031 | -0.03  | t | 46677  | NYNWKR                       | Mus<br>musculu<br>s              |
| 1 | 1.00 | 1 | 1 | 0.03  | 0.027  | 0.04   | 0.03   | 0.03   | t | 68052  | VDQYSNQ<br>NNF               | Oryctola<br>gus<br>cuniculu<br>s |
| 1 | 1.00 | 1 | 1 | 0.02  | 0.021  | 0.032  | 0.02   | 0.02   | t | 14751  | EVKPGTPA<br>QEIEML           | Myodes<br>glareolu<br>s          |
| 1 | 1.00 | 1 | 1 | 0.02  | 0.019  | 0.021  | 0.017  | 0.021  | t | 99530  | PGQFEDFF<br>PASSRDQ          | Homo<br>sapiens                  |
| 1 | 1.00 | 1 | 1 | -0.02 | -0.02  | -0.016 | -0.02  | -0.02  | t | 157808 | QQDRHQK<br>IRHFR             | Homo<br>sapiens                  |

|   |      |   |   |       |        |        |        |        |   |        |                              |                                  |
|---|------|---|---|-------|--------|--------|--------|--------|---|--------|------------------------------|----------------------------------|
| 1 | 1.00 | 1 | 1 | 0     | 0.003  | 0.005  | 0      | 0      | t | 94837  | GTCKELKK<br>L                | Mus<br>musculu<br>s              |
| 1 | 1.00 | 1 | 1 | 0     | 0      | 0      | 0      | 0.001  | t | 68018  | VDLPQLGL<br>RR               | Mus<br>musculu<br>s              |
| 1 | 1.00 | 1 | 1 | 0.03  | 0.032  | 0.038  | 0.027  | 0.03   | t | 98821  | IDQIEKQA<br>KD               | Homo<br>sapiens                  |
| 1 | 1.00 | 1 | 1 | 0.03  | 0.032  | 0.038  | 0.027  | 0.03   | t | 98821  | IDQIEKQA<br>KD               | Homo<br>sapiens                  |
| 1 | 1.00 | 1 | 1 | -0.02 | -0.018 | -0.035 | -0.023 | -0.015 | t | 102169 | VATATLPN<br>YC               | Homo<br>sapiens                  |
| 1 | 1.00 | 1 | 1 | 0.03  | 0.024  | 0.034  | 0.03   | 0.03   | t | 65664  | TPNATQPE<br>LAPEDPE          | Oryctola<br>gus<br>cuniculu<br>s |
| 1 | 1.00 | 1 | 1 | 0     | 0.001  | -0.002 | 0      | 0      | t | 19705  | GGDNYSD<br>KPEPLGG           | Mus<br>musculu<br>s              |
| 1 | 1.00 | 1 | 1 | -0.03 | -0.03  | -0.03  | -0.03  | -0.03  | t | 125472 | LDAVYLNK<br>NKYLTVID<br>KDAF | Homo<br>sapiens                  |
| 1 | 1.00 | 1 | 1 | 0     | 0      | 0      | 0      | 0      | t | 132105 | TSWGSGN<br>GANS GG<br>S R    | Homo<br>sapiens                  |
| 1 | 1.00 | 1 | 1 | 0     | 0      | 0      | 0      | 0      | t | 108529 | LNTAKHRE<br>S                | Homo<br>sapiens                  |
| 1 | 1.00 | 1 | 1 | 0     | 0      | 0      | 0      | 0      | t | 99188  | EERGQRR<br>WSTRSSEN          | Homo<br>sapiens                  |
| 1 | 1.00 | 1 | 1 | -0.02 | -0.02  | -0.02  | -0.02  | -0.02  | t | 112102 | EWLAHIW                      | Homo<br>sapiens                  |
| 1 | 1.00 | 1 | 1 | -0.02 | -0.02  | -0.02  | -0.02  | -0.02  | t | 97745  | VNKAGASI<br>G                | Oryctola<br>gus<br>cuniculu<br>s |
| 1 | 1.00 | 1 | 1 | 0     | 0      | 0      | 0      | 0.002  | t | 48596  | PNANP                        | Mus<br>musculu<br>s              |
| 1 | 1.00 | 1 | 1 | 0     | -0.003 | -0.001 | 0      | 0.001  | t | 9526   | DNPASTT<br>NKDKL             | Oryctola<br>gus<br>cuniculu<br>s |

|   |      |   |   |       |        |        |        |        |   |        |                              |                                  |
|---|------|---|---|-------|--------|--------|--------|--------|---|--------|------------------------------|----------------------------------|
| 1 | 1.00 | 1 | 1 | 0     | -0.001 | -0.01  | -0.001 | 0      | t | 29578  | IYFMQRQ<br>DVLDKNH           | Myodes<br>glareolu<br>s          |
| 1 | 1.00 | 1 | 1 | -0.01 | -0.014 | -0.004 | -0.007 | -0.01  | t | 158749 | FAEDVGS<br>NKGAIIGL<br>M     | Oryctola<br>gus<br>cuniculu<br>s |
| 1 | 1.00 | 1 | 1 | 0.01  | 0.013  | 0.01   | 0.01   | 0.01   | t | 134062 | GKDPVQC<br>SRDVVICP          | Mus<br>musculu<br>s              |
| 1 | 1.00 | 1 | 1 | 0.01  | 0.01   | 0.008  | 0.01   | 0.01   | t | 120260 | TYDGTKVS<br>ISPESDRP<br>DLST | Mus<br>musculu<br>s              |
| 1 | 1.00 | 1 | 1 | -0.03 | -0.03  | -0.024 | -0.03  | -0.03  | t | 133499 | AHSSPRSV<br>WYEW             | Homo<br>sapiens                  |
| 1 | 1.00 | 1 | 1 | 0.02  | 0.02   | 0.02   | 0.02   | 0.023  | t | 142480 | VAAVTEKL<br>RAGT             | Mus<br>musculu<br>s              |
| 1 | 1.00 | 1 | 1 | 0.04  | 0.04   | 0.039  | 0.037  | 0.04   | t | 12646  | EKDKALSN<br>AEGEVAA          | Homo<br>sapiens                  |
| 1 | 1.00 | 1 | 1 | 0     | 0.002  | 0.002  | 0.003  | 0.002  | t | 6623   | CLSATCDC<br>TLCGP            | Homo<br>sapiens                  |
| 1 | 1.00 | 1 | 1 | 0.05  | 0.052  | 0.052  | 0.047  | 0.049  | t | 99121  | CCNELNEF<br>ENNQRCM          | Homo<br>sapiens                  |
| 1 | 1.00 | 1 | 1 | -0.01 | -0.012 | -0.007 | -0.011 | -0.01  | t | 55435  | RQKKQPT<br>VTLLPAAD          | Mus<br>musculu<br>s              |
| 1 | 1.00 | 1 | 1 | 0.01  | 0.01   | 0.02   | 0.01   | 0.006  | t | 142705 | GVGSSAVI<br>LNDNFVT          | Sus<br>scrofa                    |
| 1 | 1.00 | 1 | 1 | 0     | 0      | 0.003  | 0      | 0      | t | 102945 | YGCYCGR<br>GG                | Mus<br>musculu<br>s              |
| 1 | 1.00 | 1 | 1 | 0     | 0      | -0.002 | 0      | 0.002  | t | 151653 | HWYRATH<br>QEAINCYA<br>NETC  | Mus<br>musculu<br>s              |
| 1 | 1.00 | 1 | 1 | -0.07 | -0.067 | -0.063 | -0.07  | -0.073 | t | 130487 | FCQPHLSC<br>YILP             | Mus<br>musculu<br>s              |
| 1 | 1.00 | 1 | 1 | -0.07 | -0.07  | -0.063 | -0.07  | -0.073 | t | 130487 | FCQPHLSC<br>YILP             | Mus<br>musculu<br>s              |



|   |      |   |   |       |        |        |        |        |   |        |                              |                       |
|---|------|---|---|-------|--------|--------|--------|--------|---|--------|------------------------------|-----------------------|
| 1 | 1.00 | 1 | 1 | -0.01 | -0.01  | -0.01  | -0.01  | -0.007 | t | 56150  | RTPPAYR                      | Mus musculus          |
| 1 | 1.00 | 1 | 1 | -0.03 | -0.026 | -0.027 | -0.029 | -0.029 | t | 55383  | RPYCWHY<br>PPQQCGIV<br>PASQV | Homo sapiens          |
| 1 | 1.00 | 1 | 1 | -0.05 | -0.046 | -0.043 | -0.043 | -0.047 | t | 138264 | YSNKTPHL<br>QWRL             | Homo sapiens          |
| 1 | 1.00 | 1 | 1 | -0.02 | -0.02  | -0.011 | -0.016 | -0.019 | t | 119297 | NTFCDSCI<br>PKTFWN           | Homo sapiens          |
| 1 | 1.00 | 1 | 1 | 0.02  | 0.02   | 0.018  | 0.017  | 0.02   | t | 139881 | RGDKSRPP<br>VWYVEGE          | Mus musculus          |
| 1 | 1.00 | 1 | 1 | 0     | -0.004 | -0.001 | 0.003  | 0.002  | t | 75499  | YQHKEGRF<br>KS               | Oryctolagus cuniculus |
| 1 | 1.00 | 1 | 1 | -0.02 | -0.02  | -0.012 | -0.02  | -0.02  | t | 80315  | AKKQSNLF<br>GA               | Homo sapiens          |
| 1 | 1.00 | 1 | 1 | 0.04  | 0.043  | 0.036  | 0.04   | 0.04   | t | 78702  | KKKEEGED<br>DTARQEIR<br>KAW  | Mus musculus          |
| 1 | 1.00 | 1 | 1 | 0.01  | 0.01   | 0      | 0.01   | 0.011  | t | 95158  | TNVLVNSS<br>GHCQYLPP<br>GIFK | Rattus norvegicus     |
| 1 | 1.00 | 1 | 1 | 0     | 0.002  | 0      | -0.003 | 0      | t | 38207  | LNENLLRF<br>FVAPFPEV<br>FGKE | Homo sapiens          |
| 1 | 1.00 | 1 | 1 | 0     | 0.003  | 0      | 0      | 0.001  | t | 24651  | HQTLQDP<br>RVRG              | Mus musculus          |
| 1 | 1.00 | 1 | 1 | 0     | 0.003  | 0      | 0      | 0.001  | t | 24651  | HQTLQDP<br>RVRG              | Mus musculus          |
| 1 | 1.00 | 1 | 1 | 0     | 0.003  | 0      | 0      | 0.001  | t | 24651  | HQTLQDP<br>RVRG              | Mus musculus          |

|   |      |   |   |       |        |        |        |        |   |        |                                |                                  |
|---|------|---|---|-------|--------|--------|--------|--------|---|--------|--------------------------------|----------------------------------|
| 1 | 1.00 | 1 | 1 | 0.01  | 0.01   | 0.01   | 0.01   | 0.01   | t | 114918 | PNATDKE<br>GKD                 | Homo<br>sapiens                  |
| 1 | 1.00 | 1 | 1 | -0.01 | -0.01  | -0.01  | -0.01  | -0.01  | t | 112063 | CHQYLSS                        | Homo<br>sapiens                  |
| 1 | 1.00 | 1 | 1 | -0.01 | -0.01  | -0.01  | -0.01  | -0.01  | t | 107647 | TVLHQNW                        | Homo<br>sapiens                  |
| 1 | 1.00 | 1 | 1 | -0.01 | -0.01  | -0.01  | -0.01  | -0.01  | t | 88467  | SEDRETRP<br>HGRNNLM<br>RSYNR   | Aotus                            |
| 1 | 1.00 | 1 | 1 | -0.03 | -0.03  | -0.03  | -0.03  | -0.03  | t | 8408   | DGIMHTR<br>CHCGAEI             | Homo<br>sapiens                  |
| 1 | 1.00 | 1 | 1 | -0.03 | -0.03  | -0.03  | -0.03  | -0.03  | t | 8408   | DGIMHTR<br>CHCGAEI             | Homo<br>sapiens                  |
| 1 | 1.00 | 1 | 1 | -0.05 | -0.05  | -0.05  | -0.05  | -0.05  | t | 149085 | NPTQIRR                        | Sus<br>scrofa                    |
| 1 | 1.00 | 1 | 1 | 0.03  | 0.034  | 0.029  | 0.027  | 0.032  | t | 12896  | EKVNELSK<br>DI                 | Homo<br>sapiens                  |
| 1 | 1.00 | 1 | 1 | -0.03 | -0.032 | -0.024 | -0.031 | -0.029 | t | 60671  | SRGKGPG<br>KKNK                | Sus<br>scrofa                    |
| 1 | 1.00 | 1 | 1 | -0.03 | -0.032 | -0.024 | -0.031 | -0.029 | t | 60671  | SRGKGPG<br>KKNK                | Mus<br>musculu<br>s              |
| 1 | 1.00 | 1 | 1 | 0     | 0      | 0      | 0      | 0.002  | t | 144664 | GREGYP<br>A<br>DGGGLPD<br>SVKI | Oryctola<br>gus<br>cuniculu<br>s |
| 1 | 1.00 | 1 | 1 | 0     | 0.003  | 0      | 0      | 0.002  | t | 144664 | GREGYP<br>A<br>DGGGLPD<br>SVKI | Mus<br>musculu<br>s              |
| 1 | 1.00 | 1 | 1 | -0.01 | -0.014 | -0.016 | -0.011 | -0.009 | t | 11253  | ECKETVP<br>MNCSSYA             | Oryctola<br>gus<br>cuniculu<br>s |
| 1 | 1.00 | 1 | 1 | -0.02 | -0.018 | -0.021 | -0.019 | -0.02  | t | 63044  | TAWDFGS<br>LGGVFTSI<br>G       | Homo<br>sapiens                  |
| 1 | 1.00 | 1 | 1 | -0.03 | -0.038 | -0.018 | -0.029 | -0.032 | t | 32776  | KPKTNMK<br>HMA                 | Mus<br>musculu<br>s              |
| 1 | 1.00 | 1 | 1 | 0.03  | 0.028  | 0.031  | 0.023  | 0.031  | t | 127958 | EHP                            | Mus<br>musculu<br>s              |
| 1 | 1.00 | 1 | 1 | 0.02  | 0.017  | 0.025  | 0.02   | 0.02   | t | 71298  | VTFDGGK<br>MVQ                 | Oryctola<br>gus<br>cuniculu<br>s |

|   |      |   |   |       |        |        |        |        |   |        |                              |                          |
|---|------|---|---|-------|--------|--------|--------|--------|---|--------|------------------------------|--------------------------|
| 1 | 1.00 | 1 | 1 | -0.01 | -0.01  | -0.01  | -0.01  | -0.01  | t | 62480  | SWNASWL<br>SHSYD             | Mus<br>musculu<br>s      |
| 1 | 1.00 | 1 | 1 | 0.02  | 0.02   | 0.02   | 0.02   | 0.022  | t | 99836  | QFPQPQ                       | Mus<br>musculu<br>s      |
| 1 | 1.00 | 1 | 1 | 0.01  | 0.013  | 0.01   | 0.01   | 0.008  | t | 140902 | SSNNDAA<br>GNGAAQT<br>FGGYSV | Mus<br>musculu<br>s      |
| 1 | 1.00 | 1 | 1 | 0     | 0      | 0.006  | 0      | -0.001 | t | 11821  | EENVEHD<br>AEENVEH<br>DA     | Homo<br>sapiens          |
| 1 | 1.00 | 1 | 1 | 0     | 0      | 0.006  | 0      | -0.001 | t | 11821  | EENVEHD<br>AEENVEH<br>DA     | Homo<br>sapiens          |
| 1 | 1.00 | 1 | 1 | 0.03  | 0.032  | 0.033  | 0.037  | 0.031  | t | 125607 | YVSIDVTL<br>QQLESHSF<br>YNLS | Homo<br>sapiens          |
| 1 | 1.00 | 1 | 1 | -0.01 | -0.012 | -0.015 | -0.011 | -0.01  | t | 108917 | EPGPAGV<br>Q                 | Rattus<br>norvegic<br>us |
| 1 | 1.00 | 1 | 1 | -0.02 | -0.02  | -0.003 | -0.02  | -0.024 | t | 145746 | DPEIVMHS<br>F                | Mus<br>musculu<br>s      |
| 1 | 1.00 | 1 | 1 | -0.01 | -0.006 | -0.013 | -0.007 | -0.008 | t | 124068 | ELMALHT<br>GQSLEQIE<br>R     | Homo<br>sapiens          |
| 1 | 1.00 | 1 | 1 | 0.01  | 0.012  | 0.01   | 0.007  | 0.01   | t | 63344  | TEEIDEIES<br>VTEEVVE         | Homo<br>sapiens          |
| 1 | 1.00 | 1 | 1 | 0.01  | 0.01   | 0.015  | 0.01   | 0.01   | t | 2583   | ALGLTSLFS<br>PGPIQH          | Mus<br>musculu<br>s      |
| 1 | 1.00 | 1 | 1 | -0.01 | -0.01  | -0.01  | -0.012 | -0.01  | t | 27555  | IMSGEKPT<br>VEDVVN           | Homo<br>sapiens          |
| 1 | 1.00 | 1 | 1 | -0.01 | -0.01  | -0.013 | -0.012 | -0.01  | t | 18161  | FVFNGTS<br>WFITQRNF<br>FS    | Homo<br>sapiens          |
| 1 | 1.00 | 1 | 1 | 0     | 0.003  | 0.002  | 0      | 0      | t | 71982  | VYAYDVTI<br>PGE              | Mus<br>musculu<br>s      |

|   |      |   |   |       |        |        |        |        |   |        |                              |                                  |
|---|------|---|---|-------|--------|--------|--------|--------|---|--------|------------------------------|----------------------------------|
| 1 | 1.00 | 1 | 1 | 0.02  | 0.02   | 0.031  | 0.02   | 0.02   | t | 111738 | RPGKEIEA<br>YIFEMFN          | Oryctola<br>gus<br>cuniculu<br>s |
| 1 | 1.00 | 1 | 1 | 0.01  | 0.01   | 0.01   | 0.01   | 0.01   | t | 94687  | SKPTTKQR<br>QNKPPNK<br>P     | Mus<br>musculu<br>s              |
| 1 | 1.00 | 1 | 1 | -0.01 | -0.022 | -0.006 | -0.01  | -0.008 | t | 110257 | GNPGADG<br>I                 | Macaca<br>mulatta                |
| 1 | 1.00 | 1 | 1 | -0.02 | -0.022 | -0.013 | -0.021 | -0.021 | t | 10496  | DTTIP                        | Mus<br>musculu<br>s              |
| 1 | 1.00 | 1 | 1 | 0.01  | 0.01   | 0.011  | 0.01   | 0.008  | t | 122293 | CTYVLDPE<br>NLTLKAPY<br>EA   | Mus<br>musculu<br>s              |
| 1 | 1.00 | 1 | 1 | 0.02  | 0.02   | 0.018  | 0.02   | 0.019  | t | 26329  | IGTRNPNN<br>NAATVLQL         | Mus<br>musculu<br>s              |
| 1 | 1.00 | 1 | 1 | -0.04 | -0.038 | -0.04  | -0.039 | -0.038 | t | 43179  | NAIRMISD<br>QR               | Homo<br>sapiens                  |
| 1 | 1.00 | 1 | 1 | -0.01 | -0.01  | -0.015 | -0.01  | -0.01  | t | 107102 | DGKTLNDE<br>LEIIEGM          | Rattus<br>norvegic<br>us         |
| 1 | 1.00 | 1 | 1 | 0     | 0      | 0      | 0      | 0      | t | 100010 | ELKDQRM<br>LAR               | Mus<br>musculu<br>s              |
| 1 | 1.00 | 1 | 1 | 0     | 0      | 0      | 0      | 0      | t | 99196  | EGDITNPI<br>NLREGEP          | Homo<br>sapiens                  |
| 1 | 1.00 | 1 | 1 | -0.02 | -0.02  | -0.02  | -0.02  | -0.02  | t | 132936 | WGSNHA<br>Q                  | Homo<br>sapiens                  |
| 1 | 1.00 | 1 | 1 | -0.02 | -0.02  | -0.02  | -0.02  | -0.02  | t | 112174 | IWWNDN<br>K                  | Homo<br>sapiens                  |
| 1 | 1.00 | 1 | 1 | -0.02 | -0.022 | -0.012 | -0.023 | -0.02  | t | 1570   | AGISYTKT<br>W                | Homo<br>sapiens                  |
| 1 | 1.00 | 1 | 1 | 0.02  | 0.017  | 0.017  | 0.02   | 0.02   | t | 37782  | LLSDTDNA<br>AFPQMTK<br>SYKNT | Oryctola<br>gus<br>cuniculu<br>s |
| 1 | 1.00 | 1 | 1 | 0.01  | 0.006  | 0.01   | 0.007  | 0.011  | t | 110911 | KATPNDG<br>Y                 | Oryctola<br>gus<br>cuniculu<br>s |

|   |      |   |   |       |        |        |        |        |   |        |                              |                                  |
|---|------|---|---|-------|--------|--------|--------|--------|---|--------|------------------------------|----------------------------------|
| 1 | 1.00 | 1 | 1 | -0.02 | -0.02  | -0.02  | -0.02  | -0.02  | t | 119939 | IFAQRLMR<br>YW               | Mus<br>musculu<br>s              |
| 1 | 1.00 | 1 | 1 | 0.02  | 0.022  | 0.02   | 0.02   | 0.022  | t | 130636 | WPQIWFD<br>DEEDV             | Homo<br>sapiens                  |
| 1 | 1.00 | 1 | 1 | 0.02  | 0.02   | 0.013  | 0.02   | 0.021  | t | 122551 | RGQYLQL<br>QELECDW<br>EEVTTS | Homo<br>sapiens                  |
| 1 | 1.00 | 1 | 1 | 0.03  | 0.03   | 0.03   | 0.03   | 0.031  | t | 122327 | EEVTTSGP<br>CGEESVLL<br>DRKS | Homo<br>sapiens                  |
| 1 | 1.00 | 1 | 1 | 0.01  | 0.017  | 0.011  | 0.009  | 0.011  | t | 74051  | YGLTALDP<br>LFKP             | Gallus<br>gallus                 |
| 1 | 1.00 | 1 | 1 | -0.01 | -0.01  | -0.01  | -0.01  | -0.009 | t | 138627 | SQKEVLEG<br>ARASVDR<br>VC    | Oryctola<br>gus<br>cuniculu<br>s |
| 1 | 1.00 | 1 | 1 | 0.01  | 0.013  | 0.02   | 0.01   | 0.01   | t | 66085  | TRQQNNP<br>ER                | Mus<br>musculu<br>s              |
| 1 | 1.00 | 1 | 1 | -0.01 | -0.01  | -0.016 | -0.01  | -0.01  | t | 21424  | GNFGDQD<br>LIRQGTDY<br>KHW   | Homo<br>sapiens                  |
| 1 | 1.00 | 1 | 1 | 0.01  | 0.011  | 0.006  | 0.01   | 0.01   | t | 48395  | PLLGICGST<br>CAEDGN          | Mus<br>musculu<br>s              |
| 1 | 1.00 | 1 | 1 | 0.04  | 0.04   | 0.04   | 0.036  | 0.04   | t | 32596  | KNQLAGK<br>DEYEAKQK<br>EAE   | Homo<br>sapiens                  |
| 1 | 1.00 | 1 | 1 | -0.06 | -0.06  | -0.06  | -0.06  | -0.059 | t | 144311 | GNLTAG                       | Homo<br>sapiens                  |
| 1 | 1.00 | 1 | 1 | -0.05 | -0.052 | -0.046 | -0.047 | -0.048 | t | 114851 | HFFKNIVT<br>PR               | Rattus<br>norvegic<br>us         |
| 1 | 1.00 | 1 | 1 | 0     | 0.002  | 0.005  | 0.003  | 0      | t | 130834 | FPDLGQEV<br>ALNANTK<br>NQKIR | Homo<br>sapiens                  |
| 1 | 1.00 | 1 | 1 | 0.03  | 0.03   | 0.034  | 0.03   | 0.03   | t | 95031  | NAYANEE<br>ATKL              | Oryctola<br>gus<br>cuniculu<br>s |
| 1 | 1.00 | 1 | 1 | -0.03 | -0.026 | -0.023 | -0.023 | -0.027 | t | 132347 | GPCILLAR<br>DRCG             | Homo<br>sapiens                  |

|   |      |   |   |       |        |        |        |        |   |        |                              |                                  |
|---|------|---|---|-------|--------|--------|--------|--------|---|--------|------------------------------|----------------------------------|
| 1 | 1.00 | 1 | 1 | -0.03 | -0.026 | -0.023 | -0.023 | -0.027 | t | 132347 | GPCILLAR<br>DRCG             | Homo<br>sapiens                  |
| 1 | 1.00 | 1 | 1 | -0.04 | -0.038 | -0.044 | -0.039 | -0.038 | t | 17639  | FRRLGAAL                     | Homo<br>sapiens                  |
| 1 | 1.00 | 1 | 1 | -0.01 | -0.01  | -0.003 | -0.01  | -0.008 | t | 69068  | VIPLAIEFT<br>PRP             | Homo<br>sapiens                  |
| 1 | 1.00 | 1 | 1 | 0     | -0.002 | -0.005 | -0.003 | 0      | t | 21434  | GNGGMV<br>TGCAETPG<br>CVAYIG | Mus<br>musculu<br>s              |
| 1 | 1.00 | 1 | 1 | 0     | 0.002  | -0.001 | 0.006  | 0      | t | 67299  | TWVAGVF<br>VYGGSKTS<br>LYNLR | Homo<br>sapiens                  |
| 1 | 1.00 | 1 | 1 | 0.02  | 0.024  | 0.014  | 0.023  | 0.022  | t | 70026  | VMTVEIRK<br>QNMTEF<br>MELWSQ | Homo<br>sapiens                  |
| 1 | 1.00 | 1 | 1 | 0.01  | 0.014  | 0.017  | 0.007  | 0.01   | t | 95493  | KFPQYLQY<br>LY               | Homo<br>sapiens                  |
| 1 | 1.00 | 1 | 1 | -0.01 | -0.01  | -0.009 | -0.013 | -0.012 | t | 43171  | NAILGPR<br>WNLNA             | Homo<br>sapiens                  |
| 1 | 1.00 | 1 | 1 | 0     | 0.004  | 0.009  | 0.001  | 0      | t | 10782  | DVVSTL                       | Homo<br>sapiens                  |
| 1 | 1.00 | 1 | 1 | 0.01  | 0.006  | 0.01   | 0.003  | 0.009  | t | 131579 | PDIITGFSS                    | Oryctola<br>gus<br>cuniculu<br>s |
| 1 | 1.00 | 1 | 1 | 0.01  | 0.006  | 0.011  | 0.009  | 0.01   | t | 30036  | KAYSNCYP<br>YDVDPY           | Oryctola<br>gus<br>cuniculu<br>s |
| 1 | 1.00 | 1 | 1 | 0     | 0.003  | 0.001  | 0      | 0.001  | t | 59982  | SPAPERRG<br>YSGYDVDP<br>Y    | Mus<br>musculu<br>s              |
| 1 | 1.00 | 1 | 1 | -0.01 | -0.02  | -0.012 | -0.009 | -0.01  | t | 22337  | GSGGGFW<br>GDRVDSQ<br>PFAI   | Homo<br>sapiens                  |
| 1 | 1.00 | 1 | 1 | 0.01  | 0.008  | 0.021  | 0.009  | 0.011  | t | 40859  | LYMPQLSL<br>YMPQLS           | Mus<br>musculu<br>s              |

|   |      |   |   |       |        |        |        |        |   |        |                     |                                  |
|---|------|---|---|-------|--------|--------|--------|--------|---|--------|---------------------|----------------------------------|
| 1 | 1.00 | 1 | 1 | 0     | 0.007  | -0.003 | -0.001 | -0.002 | t | 40319  | LVEKPNLS<br>SKRSELS | Homo<br>sapiens                  |
| 1 | 1.00 | 1 | 1 | 0.04  | 0.044  | 0.051  | 0.041  | 0.042  | t | 22912  | GVAGSGA<br>S        | Homo<br>sapiens                  |
| 1 | 1.00 | 1 | 1 | 0.01  | 0.006  | 0.005  | 0.003  | 0.009  | t | 138215 | PPVANDT<br>RIVMGRL  | Oryctola<br>gus<br>cuniculu<br>s |
| 1 | 1.00 | 1 | 1 | 0.03  | 0.03   | 0.037  | 0.023  | 0.03   | t | 139602 | SDSMLSW             | Homo<br>sapiens                  |
| 1 | 1.00 | 1 | 1 | -0.04 | -0.037 | -0.038 | -0.04  | -0.04  | t | 73606  | YDWRAD<br>W         | Mus<br>musculu<br>s              |
| 1 | 1.00 | 1 | 1 | -0.08 | -0.082 | -0.08  | -0.087 | -0.081 | t | 119905 | GLRAQAC<br>AFW      | Mus<br>musculu<br>s              |
| 1 | 1.00 | 1 | 1 | 0.05  | 0.05   | 0.05   | 0.05   | 0.05   | t | 111035 | TDGNTQQ<br>T        | Oryctola<br>gus<br>cuniculu<br>s |
| 1 | 1.00 | 1 | 1 | 0.03  | 0.03   | 0.03   | 0.03   | 0.03   | t | 149121 | THANSTQ             | Sus<br>scrofa                    |
| 1 | 1.00 | 1 | 1 | 0     | 0.002  | 0.003  | -0.001 | 0      | t | 68589  | VFTSIG              | Homo<br>sapiens                  |
| 1 | 1.00 | 1 | 1 | -0.03 | -0.03  | -0.03  | -0.03  | -0.03  | t | 121844 | SGRALAPA<br>VSWPLHV | Mus<br>musculu<br>s              |
| 1 | 1.00 | 1 | 1 | -0.03 | -0.03  | -0.03  | -0.03  | -0.03  | t | 121844 | SGRALAPA<br>VSWPLHV | Mus<br>musculu<br>s              |
| 1 | 1.00 | 1 | 1 | -0.03 | -0.03  | -0.03  | -0.03  | -0.03  | t | 111590 | NLIRHVGG<br>GTPRRPG | Oryctola<br>gus<br>cuniculu<br>s |
| 1 | 1.00 | 1 | 1 | -0.05 | -0.05  | -0.05  | -0.05  | -0.05  | t | 115734 | ESITRINKKI          | Homo<br>sapiens                  |
| 1 | 1.00 | 1 | 1 | 0.01  | 0.01   | 0.01   | 0.01   | 0.008  | t | 121712 | PLPQALSK<br>ERRERPQ | Homo<br>sapiens                  |
| 1 | 1.00 | 1 | 1 | -0.01 | -0.01  | -0.01  | -0.01  | -0.008 | t | 105651 | AEFRHDS             | Mus<br>musculu<br>s              |
| 1 | 1.00 | 1 | 1 | 0.03  | 0.031  | 0.028  | 0.03   | 0.032  | t | 28291  | IRFKDDTSF<br>EDING  | Myodes<br>glareolu<br>s          |

|   |      |   |   |       |        |        |        |        |   |        |                              |                                  |
|---|------|---|---|-------|--------|--------|--------|--------|---|--------|------------------------------|----------------------------------|
| 1 | 1.00 | 1 | 1 | 0.01  | 0.008  | 0.01   | 0.009  | 0.01   | t | 117044 | MISYSTRP<br>DRQ              | Mus<br>musculu<br>s              |
| 1 | 1.00 | 1 | 1 | -0.01 | -0.01  | 0.008  | -0.008 | -0.011 | t | 98938  | PQP                          | Homo<br>sapiens                  |
| 1 | 1.00 | 1 | 1 | 0.01  | 0.01   | 0.01   | 0.01   | 0.01   | t | 116682 | CHGRGTC<br>NYYANAYS          | Homo<br>sapiens                  |
| 1 | 1.00 | 1 | 1 | 0     | 0.003  | 0.005  | 0      | 0      | t | 78624  | DMNEKQK<br>PYFEFEYD<br>DFKP  | Equus<br>caballus                |
| 1 | 1.00 | 1 | 1 | 0     | 0      | 0.005  | 0      | 0      | t | 78624  | DMNEKQK<br>PYFEFEYD<br>DFKP  | Mus<br>musculu<br>s              |
| 1 | 1.00 | 1 | 1 | 0     | -0.002 | 0.005  | 0.003  | 0.002  | t | 98922  | PAPQPP                       | Mus<br>musculu<br>s              |
| 1 | 1.00 | 1 | 1 | -0.04 | -0.042 | -0.045 | -0.047 | -0.04  | t | 133836 | GKKRKRSR<br>KE               | Mus<br>musculu<br>s              |
| 1 | 1.00 | 1 | 1 | 0.01  | 0.007  | 0.007  | 0.01   | 0.01   | t | 97375  | GWKAAAD<br>GQ                | Oryctola<br>gus<br>cuniculu<br>s |
| 1 | 1.00 | 1 | 1 | 0.01  | 0.007  | 0.007  | 0.01   | 0.01   | t | 97375  | GWKAAAD<br>GQ                | Oryctola<br>gus<br>cuniculu<br>s |
| 1 | 1.00 | 1 | 1 | 0.01  | 0.012  | 0.011  | 0.007  | 0.008  | t | 53687  | RFDEGDLI<br>AVPTGVA          | Homo<br>sapiens                  |
| 1 | 1.00 | 1 | 1 | -0.01 | -0.013 | -0.017 | -0.01  | -0.009 | t | 132849 | KKVLGEKT<br>ENPKKFK          | Oryctola<br>gus<br>cuniculu<br>s |
| 1 | 1.00 | 1 | 1 | -0.01 | -0.01  | -0.01  | -0.01  | -0.01  | t | 111392 | HAHSRML<br>SMPM              | Homo<br>sapiens                  |
| 1 | 1.00 | 1 | 1 | 0.01  | 0.006  | 0.01   | 0.009  | 0.01   | t | 32623  | KNTTTTQT<br>QPSKPTT          | Oryctola<br>gus<br>cuniculu<br>s |
| 1 | 1.00 | 1 | 1 | 0.03  | 0.03   | 0.025  | 0.031  | 0.03   | t | 72314  | WDINTPA<br>FEWYYQS<br>GLSIVM | Homo<br>sapiens                  |
| 1 | 1.00 | 1 | 1 | -0.01 | -0.01  | -0.01  | -0.01  | -0.01  | t | 111551 | MKVSNHK<br>DIPPL             | Homo<br>sapiens                  |



|   |      |   |   |       |        |        |        |        |   |        |                              |                                  |
|---|------|---|---|-------|--------|--------|--------|--------|---|--------|------------------------------|----------------------------------|
| 1 | 1.00 | 1 | 1 | -0.01 | -0.013 | -0.008 | -0.01  | -0.01  | t | 52156  | QQTAPKA<br>PTE               | Oryctola<br>gus<br>cuniculu<br>s |
| 1 | 1.00 | 1 | 1 | -0.05 | -0.053 | -0.062 | -0.053 | -0.05  | t | 78117  | DIQKVAGT<br>WYSLAMA<br>A     | Mus<br>musculu<br>s              |
| 1 | 1.00 | 1 | 1 | 0.02  | 0.02   | 0.02   | 0.02   | 0.02   | t | 119585 | GQPREPQ<br>V                 | Homo<br>sapiens                  |
| 1 | 1.00 | 1 | 1 | 0     | 0      | 0      | 0      | 0      | t | 156894 | KAGDPRT                      | Oryctola<br>gus<br>cuniculu<br>s |
| 1 | 1.00 | 1 | 1 | 0     | 0      | 0      | 0      | 0      | t | 146178 | AYAPPGA<br>QPPTSrk           | Homo<br>sapiens                  |
| 1 | 1.00 | 1 | 1 | 0     | 0      | 0      | 0      | 0      | t | 132937 | WGSNNQ<br>N                  | Homo<br>sapiens                  |
| 1 | 1.00 | 1 | 1 | 0     | 0      | 0      | 0      | 0      | t | 119521 | RRKPGTEQ<br>L                | Homo<br>sapiens                  |
| 1 | 1.00 | 1 | 1 | -0.02 | -0.02  | -0.02  | -0.02  | -0.02  | t | 95118  | LQFHHD<br>PQAGKMP<br>RWVRVI  | Rattus<br>norvegic<br>us         |
| 1 | 1.00 | 1 | 1 | -0.02 | -0.02  | -0.02  | -0.02  | -0.02  | t | 10476  | DTRCFD                       | Homo<br>sapiens                  |
| 1 | 1.00 | 1 | 1 | -0.04 | -0.04  | -0.04  | -0.04  | -0.04  | t | 138218 | PTPAPGPG<br>RR               | Mus<br>musculu<br>s              |
| 1 | 1.00 | 1 | 1 | 0.01  | 0.01   | 0.01   | 0.01   | 0.012  | t | 51908  | QPQFPSP<br>QQP               | Mus<br>musculu<br>s              |
| 1 | 1.00 | 1 | 1 | -0.01 | -0.01  | -0.012 | -0.01  | -0.01  | t | 120347 | YRGWKH<br>WVYYTCC<br>PDTPYLD | Oryctola<br>gus<br>cuniculu<br>s |
| 1 | 1.00 | 1 | 1 | -0.01 | -0.007 | -0.012 | -0.01  | -0.01  | t | 120347 | YRGWKH<br>WVYYTCC<br>PDTPYLD | Mus<br>musculu<br>s              |
| 1 | 1.00 | 1 | 1 | -0.01 | -0.007 | -0.012 | -0.01  | -0.01  | t | 120347 | YRGWKH<br>WVYYTCC<br>PDTPYLD | Mus<br>musculu<br>s              |
| 1 | 1.00 | 1 | 1 | -0.02 | -0.02  | -0.008 | -0.02  | -0.024 | t | 133536 | CKPVENRA<br>C                | Mus<br>musculu<br>s              |
| 1 | 1.00 | 1 | 1 | -0.02 | -0.023 | -0.02  | -0.02  | -0.02  | t | 119662 | VGRIKST<br>DGGTT             | Oryctola<br>gus<br>cuniculu<br>s |

|   |      |   |   |       |        |        |        |        |   |        |                            |                                  |
|---|------|---|---|-------|--------|--------|--------|--------|---|--------|----------------------------|----------------------------------|
| 1 | 1.00 | 1 | 1 | -0.02 | -0.023 | -0.02  | -0.02  | -0.02  | t | 119662 | VGRIKSKT<br>DGGTT          | Oryctola<br>gus<br>cuniculu<br>s |
| 1 | 1.00 | 1 | 1 | -0.04 | -0.035 | -0.029 | -0.04  | -0.04  | t | 124603 | QHWSYPL<br>RPG             | Canis<br>familiari<br>s          |
| 1 | 1.00 | 1 | 1 | -0.04 | -0.038 | -0.029 | -0.04  | -0.04  | t | 124603 | QHWSYPL<br>RPG             | Rattus<br>norvegic<br>us         |
| 1 | 1.00 | 1 | 1 | 0.01  | 0.01   | 0.02   | 0.01   | 0.007  | t | 8359   | DGDALTLR<br>TATN           | Homo<br>sapiens                  |
| 1 | 1.00 | 1 | 1 | 0     | -0.003 | 0.007  | 0      | -0.002 | t | 131956 | LPKSAKPV<br>SQMRMA<br>TPLL | Oryctola<br>gus<br>cuniculu<br>s |
| 1 | 1.00 | 1 | 1 | 0     | 0      | 0      | -0.002 | 0      | t | 10832  | DWVCSILT<br>DFKNWL         | Homo<br>sapiens                  |
| 1 | 1.00 | 1 | 1 | 0.01  | 0.007  | 0.01   | 0.01   | 0.012  | t | 37311  | LLGACSFSS<br>I             | Oryctola<br>gus<br>cuniculu<br>s |
| 1 | 1.00 | 1 | 1 | -0.04 | -0.042 | -0.027 | -0.037 | -0.04  | t | 115069 | KEVDRLM<br>S               | Mus<br>musculu<br>s              |
| 1 | 1.00 | 1 | 1 | -0.02 | -0.02  | -0.02  | -0.02  | -0.022 | t | 140996 | EEIDYDDTI<br>SVEMKK        | Mus<br>musculu<br>s              |
| 1 | 1.00 | 1 | 1 | -0.02 | -0.02  | -0.024 | -0.014 | -0.016 | t | 138758 | AMVYLGA<br>KDSTRQI         | Mus<br>musculu<br>s              |
| 1 | 1.00 | 1 | 1 | 0     | -0.002 | 0.007  | -0.001 | 0      | t | 15753  | FEVFNFVP<br>CSIC           | Mus<br>musculu<br>s              |
| 1 | 1.00 | 1 | 1 | 0.02  | 0.023  | 0.012  | 0.02   | 0.023  | t | 17243  | FNVPIKEA<br>GEDCHAP        | Mus<br>musculu<br>s              |
| 1 | 1.00 | 1 | 1 | -0.01 | -0.01  | -0.01  | -0.01  | -0.01  | t | 140591 | PYHQFQT<br>GQ              | Mus<br>musculu<br>s              |
| 1 | 1.00 | 1 | 1 | -0.01 | -0.01  | -0.01  | -0.01  | -0.01  | t | 140591 | PYHQFQT<br>GQ              | Mus<br>musculu<br>s              |

|   |      |   |   |       |        |       |        |        |   |        |                              |                                  |
|---|------|---|---|-------|--------|-------|--------|--------|---|--------|------------------------------|----------------------------------|
| 1 | 1.00 | 1 | 1 | -0.01 | -0.01  | -0.01 | -0.01  | -0.01  | t | 123326 | IMHHMPG<br>Q                 | Oryctola<br>gus<br>cuniculu<br>s |
| 1 | 1.00 | 1 | 1 | -0.01 | -0.01  | -0.01 | -0.01  | -0.01  | t | 106984 | VSIFPPR                      | Mus<br>musculu<br>s              |
| 1 | 1.00 | 1 | 1 | -0.01 | -0.01  | -0.01 | -0.01  | -0.01  | t | 79511  | AIWSTRT                      | Oryctola<br>gus<br>cuniculu<br>s |
| 1 | 1.00 | 1 | 1 | -0.01 | -0.01  | -0.01 | -0.01  | -0.008 | t | 131581 | PDSRAVTC<br>GMASLSA<br>EKV   | Mus<br>musculu<br>s              |
| 1 | 1.00 | 1 | 1 | -0.01 | -0.003 | -0.01 | -0.01  | -0.009 | t | 153837 | HGRLVTLK<br>DIVLDLQP         | Cavia<br>porcellu<br>s           |
| 1 | 1.00 | 1 | 1 | 0.01  | 0.012  | 0.01  | 0.013  | 0.012  | t | 56730  | SADGTTVT<br>SGSTKDTS<br>LQ   | Homo<br>sapiens                  |
| 1 | 1.00 | 1 | 1 | -0.02 | -0.022 | -0.01 | -0.019 | -0.02  | t | 149403 | PCKSNT                       | Mus<br>musculu<br>s              |
| 1 | 1.00 | 1 | 1 | 0.02  | 0.018  | 0.015 | 0.017  | 0.02   | t | 73784  | YEVRAELP<br>GVDPDKD<br>VDIMV | Mus<br>musculu<br>s              |
| 1 | 1.00 | 1 | 1 | 0     | 0      | 0     | 0      | 0.001  | t | 139493 | EQSADSSR<br>HSGSGH           | Homo<br>sapiens                  |
| 1 | 1.00 | 1 | 1 | 0     | 0.004  | 0.004 | 0.001  | -0.001 | t | 48646  | PNGTHSW<br>EYWGAQ            | Homo<br>sapiens                  |
| 1 | 1.00 | 1 | 1 | -0.01 | -0.01  | -0.01 | -0.01  | -0.01  | t | 78271  | SSGNLLFT<br>GH               | Mus<br>musculu<br>s              |
| 1 | 1.00 | 1 | 1 | 0.02  | 0.02   | 0.025 | 0.017  | 0.02   | t | 58839  | SKGQNC                       | Homo<br>sapiens                  |
| 1 | 1.00 | 1 | 1 | 0.03  | 0.032  | 0.028 | 0.027  | 0.03   | t | 24150  | HKPQTTKP<br>KEVP             | Homo<br>sapiens                  |
| 1 | 1.00 | 1 | 1 | 0.02  | 0.02   | 0.02  | 0.02   | 0.02   | t | 140896 | QRYNTVYF<br>GFDKYDIT<br>GEYV | Oryctola<br>gus<br>cuniculu<br>s |

|   |      |   |   |       |        |        |        |        |   |        |                      |              |
|---|------|---|---|-------|--------|--------|--------|--------|---|--------|----------------------|--------------|
| 1 | 1.00 | 1 | 1 | -0.03 | -0.038 | -0.03  | -0.03  | -0.028 | t | 156942 | PWSKMHI              | Mus musculus |
| 1 | 1.00 | 1 | 1 | 0.01  | 0.014  | 0.01   | 0.011  | 0.01   | t | 138079 | VSDQAVSLGQNV         | Homo sapiens |
| 1 | 1.00 | 1 | 1 | -0.02 | -0.02  | -0.02  | -0.02  | -0.019 | t | 144675 | GTHPFLSQW            | Mus musculus |
| 1 | 1.00 | 1 | 1 | -0.03 | -0.028 | -0.03  | -0.027 | -0.029 | t | 72494  | WGPNDPRR             | Homo sapiens |
| 1 | 1.00 | 1 | 1 | -0.01 | -0.01  | -0.01  | -0.01  | -0.01  | t | 6127   | CDPPIDLDC            | Mus musculus |
| 1 | 1.00 | 1 | 1 | 0.01  | 0.012  | 0.01   | 0.007  | 0.01   | t | 95828  | SGASAQSGTSAQ         | Homo sapiens |
| 1 | 1.00 | 1 | 1 | 0.01  | 0.012  | 0.01   | 0.007  | 0.01   | t | 95828  | SGASAQSGTSAQ         | Homo sapiens |
| 1 | 1.00 | 1 | 1 | 0     | 0.002  | -0.015 | -0.003 | 0.002  | t | 48618  | PNDPNRNV             | Homo sapiens |
| 1 | 1.00 | 1 | 1 | 0.01  | 0.012  | 0.019  | 0.017  | 0.012  | t | 113912 | TCFFRDHSYQEE         | Homo sapiens |
| 1 | 1.00 | 1 | 1 | -0.01 | -0.01  | -0.006 | -0.01  | -0.01  | t | 21827  | GPVSQHN              | Homo sapiens |
| 1 | 1.00 | 1 | 1 | 0.01  | 0.012  | 0.008  | 0.011  | 0.01   | t | 99920  | DADNILVIQQGQATVTVANG | Homo sapiens |
| 1 | 1.00 | 1 | 1 | 0     | 0.004  | 0      | 0.003  | 0.002  | t | 23973  | HGYEKPEELWTAKSRVHPL  | Homo sapiens |
| 1 | 1.00 | 1 | 1 | -0.03 | -0.027 | -0.03  | -0.03  | -0.029 | t | 144786 | SMNRGRGTHPSLIWM      | Mus musculus |
| 1 | 1.00 | 1 | 1 | -0.03 | -0.03  | -0.023 | -0.03  | -0.031 | t | 105701 | CVVGC GG             | Mus musculus |
| 1 | 1.00 | 1 | 1 | -0.02 | -0.018 | -0.021 | -0.017 | -0.018 | t | 82959  | GVPRRQRAIDKRQRA      | Homo sapiens |

|   |      |   |   |       |        |        |        |        |   |        |                              |                                  |
|---|------|---|---|-------|--------|--------|--------|--------|---|--------|------------------------------|----------------------------------|
| 1 | 1.00 | 1 | 1 | -0.02 | -0.02  | -0.02  | -0.02  | -0.02  | t | 149086 | NPTQRPD                      | Sus<br>scrofa                    |
| 1 | 1.00 | 1 | 1 | -0.02 | -0.02  | -0.02  | -0.02  | -0.02  | t | 3684   | APPLPH                       | Homo<br>sapiens                  |
| 1 | 1.00 | 1 | 1 | -0.04 | -0.04  | -0.04  | -0.04  | -0.04  | t | 111572 | MSPRFPQ                      | Homo<br>sapiens                  |
| 1 | 1.00 | 1 | 1 | 0.01  | 0.01   | 0.019  | 0.01   | 0.01   | t | 42553  | MSFIPVAE<br>DS               | Mus<br>musculu<br>s              |
| 1 | 1.00 | 1 | 1 | 0.01  | 0.007  | 0.01   | 0.01   | 0.012  | t | 22508  | GSSIAADQ                     | Oryctola<br>gus<br>cuniculu<br>s |
| 1 | 1.00 | 1 | 1 | 0.04  | 0.04   | 0.04   | 0.04   | 0.039  | t | 115219 | EELNVPGE<br>IVESLSSE<br>ESI  | Homo<br>sapiens                  |
| 1 | 1.00 | 1 | 1 | 0.04  | 0.042  | 0.031  | 0.037  | 0.042  | t | 97762  | VVCAMIE<br>GAQGALE<br>RE     | Homo<br>sapiens                  |
| 1 | 1.00 | 1 | 1 | 0.01  | 0.01   | 0.017  | 0.003  | 0.01   | t | 104065 | LWDDFW                       | Mus<br>musculu<br>s              |
| 1 | 1.00 | 1 | 1 | 0.02  | 0.022  | 0.02   | 0.019  | 0.02   | t | 149441 | QQQQQQ<br>QPLS               | Homo<br>sapiens                  |
| 1 | 1.00 | 1 | 1 | 0.01  | 0.01   | 0.003  | 0.009  | 0.01   | t | 39169  | LRPTFDTR<br>LMRLEDE<br>MKEGR | Mus<br>musculu<br>s              |
| 1 | 1.00 | 1 | 1 | -0.02 | -0.024 | -0.02  | -0.02  | -0.02  | t | 134699 | KDRHDFG<br>F                 | Mus<br>musculu<br>s              |
| 1 | 1.00 | 1 | 1 | -0.02 | -0.018 | -0.025 | -0.019 | -0.022 | t | 40948  | LYSHHFQS<br>HGQLSDH<br>PHALS | Homo<br>sapiens                  |
| 1 | 1.00 | 1 | 1 | -0.04 | -0.037 | -0.04  | -0.04  | -0.04  | t | 122741 | DWRDAEK<br>CDIC              | Mus<br>musculu<br>s              |
| 1 | 1.00 | 1 | 1 | 0.02  | 0.016  | 0.009  | 0.013  | 0.019  | t | 122210 | VRVIDPSL<br>GDRKDE           | Oryctola<br>gus<br>cuniculu<br>s |
| 1 | 1.00 | 1 | 1 | 0.01  | 0.012  | 0.03   | 0.017  | 0.01   | t | 141680 | ITKHNDDE<br>QYA              | Homo<br>sapiens                  |

|   |      |   |   |       |        |        |       |        |   |        |                              |                                  |
|---|------|---|---|-------|--------|--------|-------|--------|---|--------|------------------------------|----------------------------------|
| 1 | 1.00 | 1 | 1 | 0.01  | 0.014  | 0.03   | 0.017 | 0.01   | t | 141680 | ITKHNDDE<br>QYA              | Homo<br>sapiens                  |
| 1 | 1.00 | 1 | 1 | 0.02  | 0.02   | 0.02   | 0.02  | 0.02   | t | 145803 | GPVGPSD<br>PSIVS             | Mus<br>musculu<br>s              |
| 1 | 1.00 | 1 | 1 | -0.02 | -0.012 | -0.013 | -0.02 | -0.019 | t | 123014 | AIMRYIAD<br>K                | Ovis<br>aries                    |
| 1 | 1.00 | 1 | 1 | 0     | -0.004 | -0.01  | 0.003 | 0.002  | t | 99027  | TNALGNQ<br>FQTQQAR<br>T      | Oryctola<br>gus<br>cuniculu<br>s |
| 1 | 1.00 | 1 | 1 | 0.01  | 0.007  | 0.004  | 0.01  | 0.011  | t | 30260  | KDTRLRIAYL<br>TEAKVEKL       | Oryctola<br>gus<br>cuniculu<br>s |
| 1 | 1.00 | 1 | 1 | 0     | 0.003  | 0.005  | 0     | 0      | t | 112739 | YTTGAVR<br>QIFGDYKT<br>TICGK | Mus<br>musculu<br>s              |
| 1 | 1.00 | 1 | 1 | 0     | 0      | 0.005  | 0     | 0      | t | 112672 | TAEFQMT<br>FHLFI             | Oryctola<br>gus<br>cuniculu<br>s |
| 1 | 1.00 | 1 | 1 | 0     | 0      | 0.005  | 0     | 0      | t | 112739 | YTTGAVR<br>QIFGDYKT<br>TICGK | Mus<br>musculu<br>s              |
| 1 | 1.00 | 1 | 1 | 0     | 0      | 0.005  | 0     | 0      | t | 103117 | DTDY                         | Mus<br>musculu<br>s              |
| 1 | 1.00 | 1 | 1 | 0     | 0      | 0.005  | 0     | 0      | t | 112739 | YTTGAVR<br>QIFGDYKT<br>TICGK | Mus<br>musculu<br>s              |
| 1 | 1.00 | 1 | 1 | 0     | 0      | 0.005  | 0     | 0      | t | 112662 | SICKTAEF<br>QMTF             | Oryctola<br>gus<br>cuniculu<br>s |
| 1 | 1.00 | 1 | 1 | 0     | 0.003  | 0.005  | 0     | 0      | t | 112739 | YTTGAVR<br>QIFGDYKT<br>TICGK | Mus<br>musculu<br>s              |
| 1 | 1.00 | 1 | 1 | 0     | 0      | 0.005  | 0     | 0      | t | 72503  | WGQGG                        | Mus<br>musculu<br>s              |
| 1 | 1.00 | 1 | 1 | 0     | 0      | 0.005  | 0     | 0      | t | 40332  | LVFFAEDV                     | Mus<br>musculu<br>s              |

|   |      |   |   |       |        |        |       |        |   |        |                              |                                  |
|---|------|---|---|-------|--------|--------|-------|--------|---|--------|------------------------------|----------------------------------|
| 1 | 1.00 | 1 | 1 | 0.02  | 0.024  | 0.02   | 0.021 | 0.018  | t | 120220 | SSQRGRSG<br>SGNF             | Homo<br>sapiens                  |
| 1 | 1.00 | 1 | 1 | 0.02  | 0.022  | 0.02   | 0.021 | 0.018  | t | 120220 | SSQRGRSG<br>SGNF             | Homo<br>sapiens                  |
| 1 | 1.00 | 1 | 1 | -0.09 | -0.09  | -0.094 | -0.09 | -0.092 | t | 136060 | EKPKLRKD<br>MYKKMIE<br>VDPL  | Mus<br>musculu<br>s              |
| 1 | 1.00 | 1 | 1 | 0.03  | 0.03   | 0.031  | 0.032 | 0.03   | t | 5066   | ATNGDTH<br>LGGEDFD<br>N      | Homo<br>sapiens                  |
| 1 | 1.00 | 1 | 1 | 0.03  | 0.03   | 0.03   | 0.03  | 0.03   | t | 135502 | SSSQHL                       | Oryctola<br>gus<br>cuniculu<br>s |
| 1 | 1.00 | 1 | 1 | -0.02 | -0.021 | -0.019 | -0.02 | -0.02  | t | 49876  | PVGRLVT<br>NPFVSMA<br>TANAK  | Equus<br>caballus                |
| 1 | 1.00 | 1 | 1 | -0.01 | -0.01  | -0.01  | -0.01 | -0.01  | t | 138145 | APGAPAP<br>NGQPAPA           | Oryctola<br>gus<br>cuniculu<br>s |
| 1 | 1.00 | 1 | 1 | -0.01 | -0.01  | -0.01  | -0.01 | -0.01  | t | 153269 | LSPPLRNT<br>HPQAMQ<br>W      | Mus<br>musculu<br>s              |
| 1 | 1.00 | 1 | 1 | -0.01 | -0.01  | -0.01  | -0.01 | -0.01  | t | 111341 | GGGTPRR<br>PGKEIEAY          | Oryctola<br>gus<br>cuniculu<br>s |
| 1 | 1.00 | 1 | 1 | -0.03 | -0.03  | -0.03  | -0.03 | -0.03  | t | 137554 | QDRHQKI<br>RRFRRGDI          | Homo<br>sapiens                  |
| 1 | 1.00 | 1 | 1 | -0.03 | -0.03  | -0.03  | -0.03 | -0.03  | t | 128092 | RGFGGDP<br>RRVSLAAD<br>RGGAD | Homo<br>sapiens                  |
| 1 | 1.00 | 1 | 1 | -0.03 | -0.03  | -0.03  | -0.03 | -0.03  | t | 79037  | PFWLRD                       | Mus<br>musculu<br>s              |
| 1 | 1.00 | 1 | 1 | -0.03 | -0.03  | -0.03  | -0.03 | -0.03  | t | 39487  | LSLNHARS<br>P                | Rattus<br>norvegic<br>us         |
| 1 | 1.00 | 1 | 1 | -0.03 | -0.03  | -0.03  | -0.03 | -0.03  | t | 7513   | DAGDHS<br>PQ                 | Mus<br>musculu<br>s              |
| 1 | 1.00 | 1 | 1 | -0.05 | -0.05  | -0.05  | -0.05 | -0.05  | t | 77851  | DLPRWPG<br>WYKNR             | Mus<br>musculu<br>s              |

|   |      |   |   |       |        |        |        |        |   |        |                              |                                  |
|---|------|---|---|-------|--------|--------|--------|--------|---|--------|------------------------------|----------------------------------|
| 1 | 1.00 | 1 | 1 | 0.02  | 0.02   | 0.02   | 0.02   | 0.02   | t | 135895 | ALLRCIPAL<br>DSLTPANE<br>DC  | Homo<br>sapiens                  |
| 1 | 1.00 | 1 | 1 | 0.04  | 0.043  | 0.049  | 0.04   | 0.04   | t | 70686  | VQYSRADE<br>EQQQALS          | Mus<br>musculu<br>s              |
| 1 | 1.00 | 1 | 1 | 0.01  | 0.004  | 0.013  | 0.01   | 0.01   | t | 35063  | LCKIARSQ<br>DACIEFV          | Oryctola<br>gus<br>cuniculu<br>s |
| 1 | 1.00 | 1 | 1 | 0.03  | 0.03   | 0.029  | 0.03   | 0.029  | t | 53435  | RDVSDFTD<br>SVRDPKTS<br>EI   | Homo<br>sapiens                  |
| 1 | 1.00 | 1 | 1 | 0     | 0      | 0      | 0      | 0      | t | 61125  | SSIVYEAD<br>DVILHT           | Homo<br>sapiens                  |
| 1 | 1.00 | 1 | 1 | 0     | 0.003  | 0.009  | 0      | 0      | t | 39104  | LRGMAKD<br>GQFALKD           | Mus<br>musculu<br>s              |
| 1 | 1.00 | 1 | 1 | -0.01 | -0.01  | -0.01  | -0.01  | -0.011 | t | 122790 | HQEEDFR<br>VTCKDIQR          | Homo<br>sapiens                  |
| 1 | 1.00 | 1 | 1 | 0.03  | 0.03   | 0.027  | 0.03   | 0.032  | t | 133584 | GKCNTDYS<br>D                | Mus<br>musculu<br>s              |
| 1 | 1.00 | 1 | 1 | 0     | 0      | 0      | 0      | 0.001  | t | 130473 | ECIVYGKT<br>ALCT             | Mus<br>musculu<br>s              |
| 1 | 1.00 | 1 | 1 | 0     | 0      | 0.011  | 0      | 0.002  | t | 1746   | AHAYSGY<br>DVPDY             | Mus<br>musculu<br>s              |
| 1 | 1.00 | 1 | 1 | -0.03 | -0.028 | -0.035 | -0.029 | -0.028 | t | 69833  | VLVLNPSV<br>AATLGFGA<br>YMSK | Homo<br>sapiens                  |
| 1 | 1.00 | 1 | 1 | -0.01 | -0.008 | -0.01  | -0.013 | -0.01  | t | 95817  | SAQSGTSG<br>PSGP             | Homo<br>sapiens                  |
| 1 | 1.00 | 1 | 1 | 0.05  | 0.052  | 0.037  | 0.049  | 0.052  | t | 79001  | KDVTVEGS<br>NEFAPVQ<br>NLTGS | Homo<br>sapiens                  |
| 1 | 1.00 | 1 | 1 | 0     | -0.003 | 0      | -0.003 | 0      | t | 63931  | TGPGTNN<br>PENPITES<br>AHLNV | Oryctola<br>gus<br>cuniculu<br>s |
| 1 | 1.00 | 1 | 1 | 0     | -0.003 | 0      | -0.003 | 0      | t | 20693  | GKTLAEVK<br>ALTTELT<br>ENQE  | Oryctola<br>gus<br>cuniculu<br>s |



|   |      |   |   |       |        |        |        |        |   |        |                              |                       |
|---|------|---|---|-------|--------|--------|--------|--------|---|--------|------------------------------|-----------------------|
| 1 | 1.00 | 1 | 1 | -0.03 | -0.026 | -0.03  | -0.023 | -0.028 | t | 117345 | PRRRSRKP<br>EAPRRRS          | Homo sapiens          |
| 1 | 1.00 | 1 | 1 | 0.04  | 0.038  | 0.04   | 0.033  | 0.043  | t | 130477 | EEDFRV                       | Mus musculus          |
| 1 | 1.00 | 1 | 1 | 0.05  | 0.046  | 0.05   | 0.043  | 0.05   | t | 134795 | SFGAYGA<br>QEEAQC            | Oryctolagus cuniculus |
| 1 | 1.00 | 1 | 1 | 0     | 0      | 0.006  | 0      | 0      | t | 10050  | DRSGAPTY<br>SWGENDT<br>DVFVL | Homo sapiens          |
| 1 | 1.00 | 1 | 1 | -0.01 | -0.008 | -0.003 | -0.013 | -0.009 | t | 26844  | IKLPALF                      | Homo sapiens          |
| 1 | 1.00 | 1 | 1 | -0.06 | -0.06  | -0.06  | -0.06  | -0.058 | t | 105701 | CVVGC GG<br>GV               | Mus musculus          |
| 1 | 1.00 | 1 | 1 | -0.04 | -0.04  | -0.04  | -0.044 | -0.042 | t | 118384 | GMKFDRG<br>YISPYF            | Homo sapiens          |
| 1 | 1.00 | 1 | 1 | 0     | 0.004  | 0.002  | 0      | -0.001 | t | 70391  | VPNLRGDL<br>QVLAQKV<br>ARTLP | Cavia porcellus       |
| 1 | 1.00 | 1 | 1 | 0     | 0.004  | 0.002  | 0      | -0.001 | t | 70391  | VPNLRGDL<br>QVLAQKV<br>ARTLP | Cavia porcellus       |
| 1 | 1.00 | 1 | 1 | 0     | 0      | 0.009  | 0      | 0.002  | t | 79284  | LDAVPL                       | Mus musculus          |
| 1 | 1.00 | 1 | 1 | -0.03 | -0.03  | -0.026 | -0.03  | -0.03  | t | 105602 | WRSTRDA<br>FING              | Homo sapiens          |
| 1 | 1.00 | 1 | 1 | 0     | 0      | 0.004  | 0      | 0      | t | 52083  | QQPFPLQ<br>PQQ               | Mus musculus          |
| 1 | 1.00 | 1 | 1 | 0     | 0      | 0      | 0      | 0      | t | 103703 | VLCNGGSP<br>TTQQALA          | Homo sapiens          |
| 1 | 1.00 | 1 | 1 | -0.02 | -0.02  | -0.02  | -0.02  | -0.02  | t | 149081 | NPNQTRM                      | Sus scrofa            |

|   |      |   |   |       |        |        |        |        |   |        |                              |                                  |
|---|------|---|---|-------|--------|--------|--------|--------|---|--------|------------------------------|----------------------------------|
| 1 | 1.00 | 1 | 1 | 0     | 0      | 0      | 0.001  | 0.002  | t | 130518 | ITQSTQSF<br>NDFTRVV          | Mus<br>musculu<br>s              |
| 1 | 1.00 | 1 | 1 | 0     | 0      | 0      | 0.001  | 0.002  | t | 43233  | NANP                         | Mus<br>musculu<br>s              |
| 1 | 1.00 | 1 | 1 | 0     | 0      | 0      | 0.001  | 0.002  | t | 9524   | DNPASTT<br>NKDK              | Mus<br>musculu<br>s              |
| 1 | 1.00 | 1 | 1 | 0     | 0      | -0.002 | 0      | 0.002  | t | 5925   | AYSNCYPY<br>DVPDYASL<br>R    | Mus<br>musculu<br>s              |
| 1 | 1.00 | 1 | 1 | 0     | 0      | -0.002 | 0      | 0.002  | t | 5925   | AYSNCYPY<br>DVPDYASL<br>R    | Mus<br>musculu<br>s              |
| 1 | 1.00 | 1 | 1 | 0     | 0      | -0.002 | 0      | 0.002  | t | 5925   | AYSNCYPY<br>DVPDYASL<br>R    | Mus<br>musculu<br>s              |
| 1 | 1.00 | 1 | 1 | 0     | 0.002  | -0.005 | 0.007  | 0.002  | t | 125472 | LDAVYLNK<br>NKYLTVID<br>KDAF | Homo<br>sapiens                  |
| 1 | 1.00 | 1 | 1 | -0.03 | -0.03  | -0.03  | -0.03  | -0.029 | t | 138191 | HPTWSSL                      | Mus<br>musculu<br>s              |
| 1 | 1.00 | 1 | 1 | 0.02  | 0.022  | 0.025  | 0.021  | 0.022  | t | 62855  | TAGLASL                      | Homo<br>sapiens                  |
| 1 | 1.00 | 1 | 1 | -0.02 | -0.023 | -0.02  | -0.023 | -0.022 | t | 78082  | YTLPSPTRL<br>WMQ             | Mus<br>musculu<br>s              |
| 1 | 1.00 | 1 | 1 | -0.04 | -0.038 | -0.041 | -0.043 | -0.041 | t | 33232  | KRVKTWR<br>M                 | Homo<br>sapiens                  |
| 1 | 1.00 | 1 | 1 | 0     | 0      | 0      | 0      | 0.006  | t | 37640  | LLPAAD                       | Homo<br>sapiens                  |
| 1 | 1.00 | 1 | 1 | 0.01  | 0.008  | 0.015  | 0.009  | 0.01   | t | 65409  | TNRNPQ                       | Mus<br>musculu<br>s              |
| 1 | 1.00 | 1 | 1 | 0.01  | 0.008  | 0.015  | 0.009  | 0.01   | t | 65409  | TNRNPQ                       | Mus<br>musculu<br>s              |
| 1 | 1.00 | 1 | 1 | 0     | -0.002 | 0      | -0.001 | 0.002  | t | 125551 | RNLTYIDP<br>DALKEPL<br>KFL   | Mus<br>musculu<br>s              |
| 1 | 1.00 | 1 | 1 | 0     | -0.004 | 0      | -0.001 | 0.002  | t | 125551 | RNLTYIDP<br>DALKEPL<br>KFL   | Oryctola<br>gus<br>cuniculu<br>s |

|   |      |   |   |       |        |        |        |        |   |        |                              |                                  |
|---|------|---|---|-------|--------|--------|--------|--------|---|--------|------------------------------|----------------------------------|
| 1 | 1.00 | 1 | 1 | 0.01  | 0.013  | 0.01   | 0.01   | 0.011  | t | 130787 | EDFDIYDE<br>DE               | Mus<br>musculu<br>s              |
| 1 | 1.00 | 1 | 1 | 0.02  | 0.018  | 0.024  | 0.023  | 0.018  | t | 46717  | NYTVCPPC<br>LTRQAAAE         | Sus<br>scrofa                    |
| 1 | 1.00 | 1 | 1 | -0.01 | -0.01  | -0.015 | -0.01  | -0.008 | t | 10803  | DWEDRYY<br>RENMYR            | Mus<br>musculu<br>s              |
| 1 | 1.00 | 1 | 1 | -0.03 | -0.028 | -0.03  | -0.033 | -0.03  | t | 75410  | YPSGAWY<br>YVPLGTQ           | Homo<br>sapiens                  |
| 1 | 1.00 | 1 | 1 | 0.03  | 0.032  | 0.03   | 0.037  | 0.032  | t | 117508 | GKMTANS<br>DVEPGNSE<br>VSLVC | Homo<br>sapiens                  |
| 1 | 1.00 | 1 | 1 | 0     | 0.002  | -0.005 | 0.001  | 0.005  | t | 35399  | LEDPCKV                      | Homo<br>sapiens                  |
| 1 | 1.00 | 1 | 1 | 0.02  | 0.017  | 0.02   | 0.02   | 0.022  | t | 97369  | GTVALTAG<br>A                | Oryctola<br>gus<br>cuniculu<br>s |
| 1 | 1.00 | 1 | 1 | 0     | 0      | 0.005  | 0      | 0      | t | 159130 | SRLEHLM<br>WESIQKEL<br>N     | Mus<br>musculu<br>s              |
| 1 | 1.00 | 1 | 1 | -0.08 | -0.077 | -0.074 | -0.08  | -0.08  | t | 153693 | RKIFIDTIP<br>N               | Mus<br>musculu<br>s              |
| 1 | 1.00 | 1 | 1 | -0.08 | -0.077 | -0.074 | -0.08  | -0.08  | t | 153693 | RKIFIDTIP<br>N               | Mus<br>musculu<br>s              |
| 1 | 1.00 | 1 | 1 | -0.05 | -0.05  | -0.05  | -0.05  | -0.05  | t | 135977 | PVSRVLAP<br>HLTR             | Homo<br>sapiens                  |
| 1 | 1.00 | 1 | 1 | -0.05 | -0.05  | -0.05  | -0.05  | -0.05  | t | 103755 | YRLERPLLF<br>ALQCMP          | Homo<br>sapiens                  |
| 1 | 1.00 | 1 | 1 | 0     | 0      | 0      | 0      | 0.002  | t | 27998  | IPQQPQQ<br>PFP               | Mus<br>musculu<br>s              |
| 1 | 1.00 | 1 | 1 | -0.01 | -0.007 | -0.01  | -0.01  | -0.012 | t | 74048  | YGLPNWV<br>KVWDRAT<br>N      | Equus<br>caballus                |
| 1 | 1.00 | 1 | 1 | 0.02  | 0.02   | 0.02   | 0.02   | 0.021  | t | 95162  | VIVLQYHH<br>HDPDGGK<br>MPKWT | Rattus<br>norvegic<br>us         |

|   |      |   |   |       |        |        |        |        |   |        |                              |                                  |
|---|------|---|---|-------|--------|--------|--------|--------|---|--------|------------------------------|----------------------------------|
| 1 | 1.00 | 1 | 1 | 0     | 0.002  | -0.006 | 0.003  | 0.002  | t | 31071  | KGTHGGT<br>GAGAGAG<br>GAGAG  | Homo<br>sapiens                  |
| 1 | 1.00 | 1 | 1 | 0     | 0.004  | 0.002  | 0.001  | 0      | t | 68087  | VDVSEGDI<br>VIYSKYG          | Homo<br>sapiens                  |
| 1 | 1.00 | 1 | 1 | -0.01 | -0.01  | -0.01  | -0.01  | -0.01  | t | 140381 | TKTVNENK<br>QNVDKVK<br>KA    | Oryctola<br>gus<br>cuniculu<br>s |
| 1 | 1.00 | 1 | 1 | -0.01 | -0.012 | -0.001 | -0.007 | -0.011 | t | 157147 | CSRTVKKN<br>IIEEN            | Chloroce<br>bus<br>aethiops      |
| 1 | 1.00 | 1 | 1 | 0.01  | 0.014  | 0.014  | 0.007  | 0.011  | t | 56185  | RTTADRQT<br>A                | Homo<br>sapiens                  |
| 1 | 1.00 | 1 | 1 | 0     | 0.002  | -0.002 | -0.003 | 0      | t | 60019  | SPDRKRRA<br>DEEEEYD          | Homo<br>sapiens                  |
| 1 | 1.00 | 1 | 1 | 0     | 0.002  | -0.002 | -0.003 | 0      | t | 60019  | SPDRKRRA<br>DEEEEYD          | Homo<br>sapiens                  |
| 1 | 1.00 | 1 | 1 | -0.04 | -0.044 | -0.049 | -0.047 | -0.04  | t | 113907 | TAPRPRVG<br>LY               | Oryctola<br>gus<br>cuniculu<br>s |
| 1 | 1.00 | 1 | 1 | 0.01  | 0.006  | 0.006  | 0.009  | 0.011  | t | 48641  | PNGNVPA<br>GVTPSKYG<br>LGGD  | Oryctola<br>gus<br>cuniculu<br>s |
| 1 | 1.00 | 1 | 1 | 0.01  | 0.006  | 0.006  | 0.009  | 0.011  | t | 48641  | PNGNVPA<br>GVTPSKYG<br>LGGD  | Oryctola<br>gus<br>cuniculu<br>s |
| 1 | 1.00 | 1 | 1 | 0.01  | 0.01   | 0.01   | 0.01   | 0.01   | t | 141970 | NKPEDDEE<br>SGAKPKKK<br>H    | Mus<br>musculu<br>s              |
| 1 | 1.00 | 1 | 1 | 0.01  | 0.01   | 0.01   | 0.01   | 0.01   | t | 141970 | NKPEDDEE<br>SGAKPKKK<br>H    | Mus<br>musculu<br>s              |
| 1 | 1.00 | 1 | 1 | -0.01 | -0.01  | -0.01  | -0.01  | -0.01  | t | 119473 | KILKVIRK                     | Homo<br>sapiens                  |
| 1 | 1.00 | 1 | 1 | -0.03 | -0.03  | -0.032 | -0.033 | -0.03  | t | 53239  | RAVTPLGP<br>PAA              | Homo<br>sapiens                  |
| 1 | 1.00 | 1 | 1 | 0.01  | 0.011  | 0.012  | 0.009  | 0.01   | t | 69540  | VLIELEPPF<br>GDSYIVVG<br>RGE | Equus<br>caballus                |

|   |      |   |   |       |        |        |        |        |   |        |                           |                     |
|---|------|---|---|-------|--------|--------|--------|--------|---|--------|---------------------------|---------------------|
| 1 | 1.00 | 1 | 1 | 0.02  | 0.02   | 0.02   | 0.022  | 0.021  | t | 24861  | HSTTEWA<br>VLPCSYSD       | Homo<br>sapiens     |
| 1 | 1.00 | 1 | 1 | -0.01 | -0.006 | -0.018 | -0.013 | -0.008 | t | 30289  | KEAESVCA<br>PIMSKIYQ      | Homo<br>sapiens     |
| 1 | 1.00 | 1 | 1 | -0.06 | -0.057 | -0.06  | -0.06  | -0.059 | t | 135569 | KTNMK                     | Mus<br>musculu<br>s |
| 1 | 1.00 | 1 | 1 | -0.01 | -0.006 | -0.01  | -0.013 | -0.01  | t | 95749  | QVYNKLG<br>MYPPN          | Homo<br>sapiens     |
| 1 | 1.00 | 1 | 1 | -0.02 | -0.02  | -0.006 | -0.017 | -0.022 | t | 156981 | YTSLPAPM<br>QRLP          | Bos<br>taurus       |
| 1 | 1.00 | 1 | 1 | -0.03 | -0.03  | -0.03  | -0.03  | -0.03  | t | 58229  | SGSGANN<br>SSSHFQSI<br>YN | Sus<br>scrofa       |
| 1 | 1.00 | 1 | 1 | 0.04  | 0.04   | 0.045  | 0.033  | 0.04   | t | 136322 | GLFTPKS<br>PAKT           | Mus<br>musculu<br>s |
| 1 | 1.00 | 1 | 1 | -0.04 | -0.042 | -0.026 | -0.037 | -0.042 | t | 52403  | QSPRRRRS<br>QSRE          | Mus<br>musculu<br>s |
| 1 | 1.00 | 1 | 1 | 0     | 0      | 0      | 0      | 0      | t | 149429 | QLWQIPE<br>QSR            | Mus<br>musculu<br>s |
| 1 | 1.00 | 1 | 1 | 0     | 0      | 0      | 0      | 0      | t | 149429 | QLWQIPE<br>QSR            | Homo<br>sapiens     |
| 1 | 1.00 | 1 | 1 | 0     | 0      | 0      | 0      | 0      | t | 137539 | KVKDDEL<br>R<br>VIRPSRS   | Homo<br>sapiens     |
| 1 | 1.00 | 1 | 1 | 0     | 0      | 0      | 0      | 0      | t | 128628 | FIDWQSR                   | Homo<br>sapiens     |
| 1 | 1.00 | 1 | 1 | -0.04 | -0.04  | -0.04  | -0.04  | -0.04  | t | 43582  | NEDQRVGI                  | Homo<br>sapiens     |
| 1 | 1.00 | 1 | 1 | -0.01 | -0.01  | -0.01  | -0.01  | -0.008 | t | 136392 | IPKSRKRRI<br>PQR          | Mus<br>musculu<br>s |
| 1 | 1.00 | 1 | 1 | -0.06 | -0.06  | -0.06  | -0.06  | -0.06  | t | 123408 | KWPLNG<br>WAA             | Ovis<br>aries       |

|   |      |   |   |       |        |        |        |       |   |        |                              |                              |
|---|------|---|---|-------|--------|--------|--------|-------|---|--------|------------------------------|------------------------------|
| 1 | 1.00 | 1 | 1 | 0     | 0      | 0      | -0.001 | 0.001 | t | 105127 | DAEFRHD                      | Mus<br>musculus              |
| 1 | 1.00 | 1 | 1 | 0     | 0      | 0      | -0.001 | 0.001 | t | 105164 | EFRHDSG                      | Mus<br>musculus              |
| 1 | 1.00 | 1 | 1 | -0.02 | -0.017 | -0.02  | -0.02  | -0.02 | t | 119867 | FMESGEW<br>VMKDYRG<br>WKH    | Mus<br>musculus              |
| 1 | 1.00 | 1 | 1 | -0.05 | -0.05  | -0.043 | -0.05  | -0.05 | t | 68281  | VELRNLGG<br>TWRP             | Homo<br>sapiens              |
| 1 | 1.00 | 1 | 1 | 0.02  | 0.02   | 0.02   | 0.02   | 0.02  | t | 145726 | CKQAGTC<br>PPD               | Mus<br>musculus              |
| 1 | 1.00 | 1 | 1 | 0     | -0.002 | 0      | -0.001 | 0     | t | 133520 | ASNWTDF<br>RVTDR             | Mus<br>musculus              |
| 1 | 1.00 | 1 | 1 | 0.01  | 0.012  | 0.019  | 0.017  | 0.011 | t | 102644 | MASSTPSS<br>SATSSNAG<br>ADPN | Homo<br>sapiens              |
| 1 | 1.00 | 1 | 1 | -0.02 | -0.02  | -0.024 | -0.017 | -0.02 | t | 55299  | RPQKRPS<br>IGCKGTHG<br>GTGA  | Homo<br>sapiens              |
| 1 | 1.00 | 1 | 1 | 0     | 0      | 0      | 0      | 0.001 | t | 152917 | QLPELKQK<br>SSNSRKRR<br>STSA | Homo<br>sapiens              |
| 1 | 1.00 | 1 | 1 | 0     | 0      | 0      | 0      | 0.001 | t | 152903 | PYSDFEKV<br>TGRIDKNV         | Homo<br>sapiens              |
| 1 | 1.00 | 1 | 1 | 0     | 0      | 0      | 0      | 0.001 | t | 152777 | LLNIDKDIR<br>K               | Homo<br>sapiens              |
| 1 | 1.00 | 1 | 1 | 0     | 0      | 0      | 0      | 0.001 | t | 150858 | ISSLYNLVK<br>SS              | Mus<br>musculus              |
| 1 | 1.00 | 1 | 1 | 0     | 0      | 0      | 0      | 0.001 | t | 156905 | KPGDPRQ                      | Mus<br>musculus              |
| 1 | 1.00 | 1 | 1 | 0     | 0      | 0      | 0      | 0.001 | t | 136353 | HGNAEVH<br>ASFFDIGG<br>S     | Oryctola<br>gus<br>cuniculus |
| 1 | 1.00 | 1 | 1 | 0     | 0      | 0      | 0      | 0.001 | t | 136074 | LVKK                         | Mus<br>musculus              |

|   |      |   |   |   |   |   |   |       |   |        |                              |                                  |
|---|------|---|---|---|---|---|---|-------|---|--------|------------------------------|----------------------------------|
| 1 | 1.00 | 1 | 1 | 0 | 0 | 0 | 0 | 0.001 | t | 142913 | MVLNEGT<br>SGTA              | Oryctola<br>gus<br>cuniculu<br>s |
| 1 | 1.00 | 1 | 1 | 0 | 0 | 0 | 0 | 0.001 | t | 149403 | PCKSNT                       | Mus<br>musculu<br>s              |
| 1 | 1.00 | 1 | 1 | 0 | 0 | 0 | 0 | 0.001 | t | 118963 | PNYKVVN<br>YAVTK             | Mus<br>musculu<br>s              |
| 1 | 1.00 | 1 | 1 | 0 | 0 | 0 | 0 | 0.001 | t | 133676 | RIYMRMK<br>HVR               | Mus<br>musculu<br>s              |
| 1 | 1.00 | 1 | 1 | 0 | 0 | 0 | 0 | 0.001 | t | 133722 | TSKSKYPL<br>VV               | Mus<br>musculu<br>s              |
| 1 | 1.00 | 1 | 1 | 0 | 0 | 0 | 0 | 0.001 | t | 119038 | TSTNGIKKI<br>LIF             | Mus<br>musculu<br>s              |
| 1 | 1.00 | 1 | 1 | 0 | 0 | 0 | 0 | 0.001 | t | 99210  | ELFTNRW<br>NLQSLL            | Oryctola<br>gus<br>cuniculu<br>s |
| 1 | 1.00 | 1 | 1 | 0 | 0 | 0 | 0 | 0.001 | t | 108291 | AVGADES<br>VVKEAHRE<br>VINS  | Mus<br>musculu<br>s              |
| 1 | 1.00 | 1 | 1 | 0 | 0 | 0 | 0 | 0.001 | t | 108482 | IINPSENG<br>DTSTNGIK<br>K    | Mus<br>musculu<br>s              |
| 1 | 1.00 | 1 | 1 | 0 | 0 | 0 | 0 | 0.001 | t | 63038  | TAVSPTTL<br>RTEVVK           | Sus<br>scrofa                    |
| 1 | 1.00 | 1 | 1 | 0 | 0 | 0 | 0 | 0.001 | t | 67875  | VCRQGVV<br>DRGWGN<br>GCGLFGK | Equus<br>caballus                |
| 1 | 1.00 | 1 | 1 | 0 | 0 | 0 | 0 | 0.001 | t | 97650  | SLLTEVET                     | Mus<br>musculu<br>s              |
| 1 | 1.00 | 1 | 1 | 0 | 0 | 0 | 0 | 0.001 | t | 47108  | PDHVRTK<br>GPGRCH            | Mus<br>musculu<br>s              |
| 1 | 1.00 | 1 | 1 | 0 | 0 | 0 | 0 | 0.001 | t | 44250  | NIIRTKKQ                     | Mus<br>musculu<br>s              |
| 1 | 1.00 | 1 | 1 | 0 | 0 | 0 | 0 | 0.001 | t | 44142  | NHGNYS<br>A<br>QVGASQ        | Mus<br>musculu<br>s              |

|   |      |   |   |       |        |        |       |        |   |        |                              |                                  |
|---|------|---|---|-------|--------|--------|-------|--------|---|--------|------------------------------|----------------------------------|
| 1 | 1.00 | 1 | 1 | 0     | 0      | 0      | 0     | 0.001  | t | 40619  | LVTVPFV<br>SVATANS           | Mus<br>musculu<br>s              |
| 1 | 1.00 | 1 | 1 | 0     | 0      | 0      | 0     | 0.001  | t | 55825  | RSELSQLS                     | Mus<br>musculu<br>s              |
| 1 | 1.00 | 1 | 1 | 0     | 0      | 0      | 0     | 0.001  | t | 57812  | SFKVTALN<br>VVSRRYLA<br>SLHK | Sus<br>scrofa                    |
| 1 | 1.00 | 1 | 1 | 0     | 0      | 0      | 0     | 0.001  | t | 57542  | SELSQLS                      | Mus<br>musculu<br>s              |
| 1 | 1.00 | 1 | 1 | 0     | 0      | 0      | 0     | 0.001  | t | 59229  | SLKMADP<br>NRFRGKDL<br>P     | Mus<br>musculu<br>s              |
| 1 | 1.00 | 1 | 1 | 0     | 0      | 0      | 0     | 0.001  | t | 12992  | ELDLQARR                     | Mus<br>musculu<br>s              |
| 1 | 1.00 | 1 | 1 | 0     | 0      | 0      | 0     | 0.001  | t | 11463  | EDVNGIRK<br>PK               | Mus<br>musculu<br>s              |
| 1 | 1.00 | 1 | 1 | 0     | 0      | 0      | 0     | 0.001  | t | 30337  | KEDYRY                       | Sus<br>scrofa                    |
| 1 | 1.00 | 1 | 1 | 0     | 0      | 0      | 0     | 0.001  | t | 31772  | KLCGVL                       | Homo<br>sapiens                  |
| 1 | 1.00 | 1 | 1 | 0     | 0      | 0      | 0     | 0.001  | t | 17135  | FNCLGMS<br>NRDFLEGV<br>SGATW | Equus<br>caballus                |
| 1 | 1.00 | 1 | 1 | 0     | 0      | 0      | 0     | 0.001  | t | 20836  | GLFGAIAG<br>F                | Mus<br>musculu<br>s              |
| 1 | 1.00 | 1 | 1 | 0     | 0      | 0      | 0     | 0.001  | t | 11575  | EEEEEDG<br>FMGFGMF<br>D      | Mus<br>musculu<br>s              |
| 1 | 1.00 | 1 | 1 | 0     | 0      | 0      | 0     | 0      | t | 137855 | FMVDSEYY<br>KITN             | Oryctola<br>gus<br>cuniculu<br>s |
| 1 | 1.00 | 1 | 1 | 0     | -0.008 | 0      | 0     | 0.002  | t | 156851 | AQMIIRLS<br>SPGN             | Mus<br>musculu<br>s              |
| 1 | 1.00 | 1 | 1 | -0.03 | -0.03  | -0.037 | -0.03 | -0.029 | t | 105748 | EFRHDSGY<br>EVHHQK           | Mus<br>musculu<br>s              |
| 1 | 1.00 | 1 | 1 | 0.03  | 0.032  | 0.037  | 0.027 | 0.032  | t | 7616   | DAPSFSDI<br>PN               | Homo<br>sapiens                  |



|   |      |   |   |       |        |        |        |        |   |        |                              |                          |
|---|------|---|---|-------|--------|--------|--------|--------|---|--------|------------------------------|--------------------------|
| 1 | 1.00 | 1 | 1 | -0.02 | -0.02  | -0.019 | -0.02  | -0.018 | t | 64542  | TKDTNNN<br>LTL               | Mus<br>musculu<br>s      |
| 1 | 1.00 | 1 | 1 | -0.01 | -0.01  | -0.01  | -0.017 | -0.01  | t | 2378   | ALAELATK<br>TFGSSG           | Homo<br>sapiens          |
| 1 | 1.00 | 1 | 1 | -0.01 | -0.007 | -0.013 | -0.01  | -0.008 | t | 8000   | DEGPKDIT<br>DSLPA<br>PMWRDKA | Mus<br>musculu<br>s      |
| 1 | 1.00 | 1 | 1 | -0.05 | -0.05  | -0.05  | -0.05  | -0.05  | t | 79362  | RCRKVLIC<br>RRICP            | Mus<br>musculu<br>s      |
| 1 | 1.00 | 1 | 1 | 0.07  | 0.07   | 0.065  | 0.061  | 0.07   | t | 124840 | VSKTETSQ<br>VAPA             | Homo<br>sapiens          |
| 1 | 1.00 | 1 | 1 | -0.04 | -0.04  | -0.037 | -0.04  | -0.04  | t | 98775  | FNAEFNEI<br>RR               | Homo<br>sapiens          |
| 1 | 1.00 | 1 | 1 | 0.04  | 0.04   | 0.04   | 0.04   | 0.04   | t | 136894 | VIPMVTQI<br>AMTDTTP          | Mus<br>musculu<br>s      |
| 1 | 1.00 | 1 | 1 | 0.01  | 0.013  | 0.021  | 0.01   | 0.008  | t | 60396  | SQCKLGSV<br>DLN              | Mus<br>musculu<br>s      |
| 1 | 1.00 | 1 | 1 | 0.02  | 0.02   | 0.022  | 0.023  | 0.022  | t | 4833   | ASWAIKW<br>EYVLLFL<br>LADA   | Homo<br>sapiens          |
| 1 | 1.00 | 1 | 1 | 0.01  | 0.008  | 0.011  | 0.009  | 0.01   | t | 35983  | LFSLNAPG<br>L                | Rattus<br>norvegic<br>us |
| 1 | 1.00 | 1 | 1 | -0.01 | -0.01  | -0.01  | -0.01  | -0.01  | t | 132086 | SSKGLSGK<br>KRRRERG          | Homo<br>sapiens          |
| 1 | 1.00 | 1 | 1 | -0.01 | -0.01  | -0.01  | -0.01  | -0.01  | t | 102712 | PDNPNNN<br>YIKPTKVN<br>KNENG | Mus<br>musculu<br>s      |
| 1 | 1.00 | 1 | 1 | -0.01 | -0.01  | -0.01  | -0.01  | -0.01  | t | 92857  | GQNGERIT<br>SK               | Ovis<br>aries            |
| 1 | 1.00 | 1 | 1 | -0.03 | -0.03  | -0.03  | -0.03  | -0.03  | t | 142423 | GAKKAAG<br>EAKKASI           | Homo<br>sapiens          |
| 1 | 1.00 | 1 | 1 | -0.03 | -0.03  | -0.03  | -0.03  | -0.03  | t | 99989  | EGRGLLKK<br>LQ               | Mus<br>musculu<br>s      |

|   |      |   |   |       |        |        |        |        |   |        |                                 |                     |
|---|------|---|---|-------|--------|--------|--------|--------|---|--------|---------------------------------|---------------------|
| 1 | 1.00 | 1 | 1 | -0.03 | -0.03  | -0.03  | -0.03  | -0.03  | t | 79385  | SCRLSTFS<br>MRMVCN              | Mus<br>musculu<br>s |
| 1 | 1.00 | 1 | 1 | -0.05 | -0.05  | -0.05  | -0.05  | -0.05  | t | 149068 | LNLTSQR                         | Sus<br>scrofa       |
| 1 | 1.00 | 1 | 1 | 0.02  | 0.02   | 0.02   | 0.02   | 0.022  | t | 49107  | PQQQFPQ<br>TQQ                  | Mus<br>musculu<br>s |
| 1 | 1.00 | 1 | 1 | 0.03  | 0.03   | 0.02   | 0.03   | 0.032  | t | 15509  | FEDVKGTG<br>GESRDLP<br>S<br>GQG | Mus<br>musculu<br>s |
| 1 | 1.00 | 1 | 1 | 0.01  | 0.01   | 0.015  | 0.007  | 0.009  | t | 72039  | VYHGAGS<br>KTL                  | Homo<br>sapiens     |
| 1 | 1.00 | 1 | 1 | 0.03  | 0.03   | 0.03   | 0.03   | 0.029  | t | 115205 | DELQDKIH<br>PFAQTQSL<br>VYPF    | Homo<br>sapiens     |
| 1 | 1.00 | 1 | 1 | 0     | 0.003  | -0.001 | 0      | 0      | t | 97917  | AYQTELAR<br>VQ                  | Mus<br>musculu<br>s |
| 1 | 1.00 | 1 | 1 | -0.02 | -0.02  | -0.02  | -0.02  | -0.019 | t | 137743 | DTPLTIAGL<br>KLV                | Mus<br>musculu<br>s |
| 1 | 1.00 | 1 | 1 | -0.02 | -0.02  | -0.02  | -0.02  | -0.019 | t | 153331 | ACISPNQ<br>WLCGGGS              | Mus<br>musculu<br>s |
| 1 | 1.00 | 1 | 1 | 0.06  | 0.064  | 0.062  | 0.057  | 0.062  | t | 95369  | EVDDEA                          | Homo<br>sapiens     |
| 1 | 1.00 | 1 | 1 | -0.04 | -0.042 | -0.045 | -0.039 | -0.04  | t | 135727 | NRSPSTGE<br>QKSSGI              | Mus<br>musculu<br>s |
| 1 | 1.00 | 1 | 1 | -0.03 | -0.032 | -0.03  | -0.031 | -0.03  | t | 111232 | EDTYRFVT<br>SQAACQ              | Mus<br>musculu<br>s |
| 1 | 1.00 | 1 | 1 | 0.01  | 0.012  | 0.01   | 0.007  | 0.01   | t | 94480  | CSICSNNP<br>TCWA                | Homo<br>sapiens     |
| 1 | 1.00 | 1 | 1 | -0.01 | -0.01  | -0.01  | -0.01  | -0.01  | t | 144777 | SGTHMNL<br>YLHDTAFA             | Mus<br>musculu<br>s |
| 1 | 1.00 | 1 | 1 | -0.01 | -0.01  | -0.01  | -0.01  | -0.01  | t | 144777 | SGTHMNL<br>YLHDTAFA             | Mus<br>musculu<br>s |
| 1 | 1.00 | 1 | 1 | -0.01 | -0.01  | -0.01  | -0.01  | -0.01  | t | 144777 | SGTHMNL<br>YLHDTAFA             | Mus<br>musculu<br>s |

|   |      |   |   |       |        |        |        |        |   |        |                            |                                  |
|---|------|---|---|-------|--------|--------|--------|--------|---|--------|----------------------------|----------------------------------|
| 1 | 1.00 | 1 | 1 | -0.01 | -0.01  | -0.01  | -0.01  | -0.01  | t | 79963  | PGSSPME<br>VMLRA           | Mus<br>musculu<br>s              |
| 1 | 1.00 | 1 | 1 | -0.01 | -0.01  | -0.01  | -0.014 | -0.01  | t | 49324  | PSDKHIEQ<br>YLKKIQNSL<br>S | Homo<br>sapiens                  |
| 1 | 1.00 | 1 | 1 | -0.03 | -0.028 | -0.03  | -0.024 | -0.028 | t | 132613 | RLGGGLG<br>GTR             | Homo<br>sapiens                  |
| 1 | 1.00 | 1 | 1 | 0.01  | 0.01   | 0.019  | 0.01   | 0.013  | t | 79278  | KSAVGY                     | Mus<br>musculu<br>s              |
| 1 | 1.00 | 1 | 1 | -0.02 | -0.016 | -0.02  | -0.023 | -0.021 | t | 65784  | TPTGVHIA<br>PVQT           | Homo<br>sapiens                  |
| 1 | 1.00 | 1 | 1 | 0.01  | 0.012  | 0.019  | 0.013  | 0.01   | t | 113912 | TCFFRDHS<br>YQEE           | Homo<br>sapiens                  |
| 1 | 1.00 | 1 | 1 | 0     | 0.003  | 0.002  | 0      | 0.001  | t | 125052 | FSLRLMEE<br>NW             | Mus<br>musculu<br>s              |
| 1 | 1.00 | 1 | 1 | 0     | 0      | 0.002  | 0      | 0.001  | t | 108382 | GGVVIA                     | Mus<br>musculu<br>s              |
| 1 | 1.00 | 1 | 1 | 0.01  | 0.006  | 0.01   | 0.01   | 0.008  | t | 139860 | PVQRGAW<br>RWPVVTN<br>E    | Mus<br>musculu<br>s              |
| 1 | 1.00 | 1 | 1 | -0.01 | -0.01  | -0.005 | -0.01  | -0.01  | t | 120391 | AARYKYFP<br>EVKTKGM<br>A   | Oryctola<br>gus<br>cuniculu<br>s |
| 1 | 1.00 | 1 | 1 | 0.01  | 0.014  | 0.011  | 0.011  | 0.012  | t | 364    | AAPLPPPA<br>PD             | Homo<br>sapiens                  |
| 1 | 1.00 | 1 | 1 | -0.03 | -0.032 | -0.023 | -0.027 | -0.032 | t | 77843  | AYSPTGLV<br>WHPG           | Mus<br>musculu<br>s              |
| 1 | 1.00 | 1 | 1 | 0.01  | 0.012  | 0.01   | 0.007  | 0.01   | t | 51935  | QPQQSFP<br>QQQ             | Homo<br>sapiens                  |
| 1 | 1.00 | 1 | 1 | 0.01  | 0.01   | 0.01   | 0.01   | 0.01   | t | 119998 | KQQWVDY<br>NLKWNPD<br>DY   | Mus<br>musculu<br>s              |

|   |      |   |   |       |        |        |        |        |   |        |                         |                                  |
|---|------|---|---|-------|--------|--------|--------|--------|---|--------|-------------------------|----------------------------------|
| 1 | 1.00 | 1 | 1 | 0     | 0      | 0.004  | 0      | 0      | t | 49099  | PQQPQQS<br>FPQ          | Mus<br>musculu<br>s              |
| 1 | 1.00 | 1 | 1 | 0     | 0      | 0      | 0      | 0      | t | 115800 | ITRINKKIE<br>K          | Homo<br>sapiens                  |
| 1 | 1.00 | 1 | 1 | 0     | 0      | 0      | 0      | 0      | t | 105137 | DLQN                    | Oryctola<br>gus<br>cuniculu<br>s |
| 1 | 1.00 | 1 | 1 | 0     | 0      | 0      | 0      | 0      | t | 95677  | PPSGSGRR                | Cavia<br>porcellu<br>s           |
| 1 | 1.00 | 1 | 1 | 0     | 0.008  | 0      | 0      | 0      | t | 95677  | PPSGSGRR                | Cavia<br>porcellu<br>s           |
| 1 | 1.00 | 1 | 1 | -0.02 | -0.02  | -0.02  | -0.02  | -0.02  | t | 103549 | RHGLSSLG<br>WNLCRIF     | Homo<br>sapiens                  |
| 1 | 1.00 | 1 | 1 | -0.02 | -0.02  | -0.02  | -0.02  | -0.02  | t | 103659 | TLQAFLH<br>WAITDGN<br>K | Homo<br>sapiens                  |
| 1 | 1.00 | 1 | 1 | 0.02  | 0.017  | 0.02   | 0.02   | 0.023  | t | 138029 | SASGSDVS<br>LTA         | Oryctola<br>gus<br>cuniculu<br>s |
| 1 | 1.00 | 1 | 1 | 0     | 0      | 0      | -0.004 | 0      | t | 135979 | QMRPVSR<br>VLAPH        | Homo<br>sapiens                  |
| 1 | 1.00 | 1 | 1 | -0.02 | -0.018 | -0.013 | -0.019 | -0.02  | t | 73033  | WRIGYFG<br>H            | Homo<br>sapiens                  |
| 1 | 1.00 | 1 | 1 | 0     | 0.002  | -0.009 | 0.003  | 0.004  | t | 33199  | KRNQIVLT<br>NDKGRLS     | Homo<br>sapiens                  |
| 1 | 1.00 | 1 | 1 | -0.02 | -0.022 | -0.029 | -0.027 | -0.021 | t | 108848 | DEIDGVN<br>H            | Mus<br>musculu<br>s              |
| 1 | 1.00 | 1 | 1 | -0.01 | -0.01  | -0.01  | -0.01  | -0.009 | t | 107882 | HEHTFGR<br>QW           | Mus<br>musculu<br>s              |
| 1 | 1.00 | 1 | 1 | -0.01 | -0.01  | -0.019 | -0.017 | -0.01  | t | 135985 | RRGDMST<br>LNTHG        | Homo<br>sapiens                  |
| 1 | 1.00 | 1 | 1 | -0.01 | -0.01  | -0.012 | -0.01  | -0.009 | t | 118580 | RDRDRDR<br>DRDR         | Mus<br>musculu<br>s              |

|   |      |   |   |       |        |        |        |        |   |        |                              |                                  |
|---|------|---|---|-------|--------|--------|--------|--------|---|--------|------------------------------|----------------------------------|
| 1 | 1.00 | 1 | 1 | 0.02  | 0.02   | 0.02   | 0.02   | 0.02   | t | 110616 | GPSGLAGP<br>KGANGDP          | Mus<br>musculu<br>s              |
| 1 | 1.00 | 1 | 1 | 0     | 0.004  | 0.003  | 0.001  | 0      | t | 6034   | CASKAALIE<br>EGQRMAE<br>MLKS | Homo<br>sapiens                  |
| 1 | 1.00 | 1 | 1 | 0.04  | 0.04   | 0.044  | 0.04   | 0.04   | t | 41984  | MLKYDEN<br>GTITDAVD<br>CS    | Homo<br>sapiens                  |
| 1 | 1.00 | 1 | 1 | -0.01 | -0.01  | 0.007  | -0.01  | -0.012 | t | 77924  | IYTSPTFPP<br>TAH             | Mus<br>musculu<br>s              |
| 1 | 1.00 | 1 | 1 | -0.02 | -0.02  | -0.02  | -0.02  | -0.021 | t | 112405 | YCARMRD                      | Homo<br>sapiens                  |
| 1 | 1.00 | 1 | 1 | 0     | 0      | 0      | 0      | 0.002  | t | 7109   | CTARVAGL<br>FSPGSQQR         | Mus<br>musculu<br>s              |
| 1 | 1.00 | 1 | 1 | 0     | 0.001  | 0.013  | 0      | -0.002 | t | 25280  | IAGDVRCV                     | Capra<br>hircus                  |
| 1 | 1.00 | 1 | 1 | -0.01 | -0.005 | -0.003 | -0.01  | -0.012 | t | 132801 | ELYRQKVE<br>PLRAELQE         | Mus<br>musculu<br>s              |
| 1 | 1.00 | 1 | 1 | 0     | 0      | 0      | 0      | 0      | t | 116684 | CNYYSNSY<br>SFWLASLD<br>PKR  | Homo<br>sapiens                  |
| 1 | 1.00 | 1 | 1 | 0     | -0.002 | 0      | -0.003 | 0      | t | 74371  | YISGYFVT<br>DP               | Mus<br>musculu<br>s              |
| 1 | 1.00 | 1 | 1 | 0     | 0.003  | 0.01   | 0      | 0      | t | 140837 | DEPPQSP<br>WDRVKDL<br>A      | Mus<br>musculu<br>s              |
| 1 | 1.00 | 1 | 1 | 0.01  | 0.01   | 0.01   | 0.01   | 0.01   | t | 116807 | QFRHDDP                      | Oryctola<br>gus<br>cuniculu<br>s |
| 1 | 1.00 | 1 | 1 | 0.01  | 0.01   | 0.01   | 0.01   | 0.01   | t | 97960  | DTNNNLTL<br>VP               | Oryctola<br>gus<br>cuniculu<br>s |
| 1 | 1.00 | 1 | 1 | 0.01  | 0.013  | 0.01   | 0.01   | 0.01   | t | 97960  | DTNNNLTL<br>VP               | Mus<br>musculu<br>s              |

|   |      |   |   |       |        |        |       |        |   |        |                             |                                  |
|---|------|---|---|-------|--------|--------|-------|--------|---|--------|-----------------------------|----------------------------------|
| 1 | 1.00 | 1 | 1 | 0.01  | 0.01   | 0.01   | 0.01  | 0.01   | t | 97960  | DTNNNLTL<br>VP              | Mus<br>musculu<br>s              |
| 1 | 1.00 | 1 | 1 | -0.03 | -0.03  | -0.03  | -0.03 | -0.03  | t | 135663 | EGGRDSC<br>Q                | Homo<br>sapiens                  |
| 1 | 1.00 | 1 | 1 | -0.03 | -0.03  | -0.03  | -0.03 | -0.03  | t | 134753 | MGPRRRS<br>RKPEAPRR         | Homo<br>sapiens                  |
| 1 | 1.00 | 1 | 1 | -0.03 | -0.027 | -0.03  | -0.03 | -0.03  | t | 148146 | QPAVRNE<br>RA               | Mus<br>musculu<br>s              |
| 1 | 1.00 | 1 | 1 | -0.03 | -0.03  | -0.03  | -0.03 | -0.03  | t | 114880 | KTYGNKC<br>NFC              | Homo<br>sapiens                  |
| 1 | 1.00 | 1 | 1 | -0.03 | -0.03  | -0.03  | -0.03 | -0.03  | t | 49650  | PTHYISSR<br>H               | Homo<br>sapiens                  |
| 1 | 1.00 | 1 | 1 | -0.05 | -0.05  | -0.05  | -0.05 | -0.05  | t | 92843  | GNDRLF<br>GKG               | Ovis<br>aries                    |
| 1 | 1.00 | 1 | 1 | 0.02  | 0.02   | 0.02   | 0.02  | 0.022  | t | 136647 | SNNADYK<br>QSLLL            | Gallus<br>gallus                 |
| 1 | 1.00 | 1 | 1 | 0.03  | 0.027  | 0.026  | 0.03  | 0.031  | t | 122090 | ESPQEISK<br>HQALG           | Oryctola<br>gus<br>cuniculu<br>s |
| 1 | 1.00 | 1 | 1 | -0.02 | -0.02  | -0.02  | -0.02 | -0.019 | t | 19737  | GGGAGAG<br>GAGAGGG<br>GR    | Oryctola<br>gus<br>cuniculu<br>s |
| 1 | 1.00 | 1 | 1 | 0.04  | 0.042  | 0.049  | 0.037 | 0.037  | t | 96160  | DAEDKDE<br>DEE              | Homo<br>sapiens                  |
| 1 | 1.00 | 1 | 1 | -0.01 | -0.01  | -0.01  | -0.01 | -0.01  | t | 129014 | IWAQKT<br>NT                | Homo<br>sapiens                  |
| 1 | 1.00 | 1 | 1 | -0.01 | -0.01  | -0.011 | -0.01 | -0.011 | t | 115062 | HNGQACK<br>GKIQALCE         | Mus<br>musculu<br>s              |
| 1 | 1.00 | 1 | 1 | 0.04  | 0.04   | 0.041  | 0.037 | 0.038  | t | 54145  | RIESEGGYI<br>ETWNPN         | Homo<br>sapiens                  |
| 1 | 1.00 | 1 | 1 | -0.01 | -0.014 | -0.01  | -0.01 | -0.007 | t | 70396  | VPNLRGD<br>RQALA            | Mus<br>musculu<br>s              |
| 1 | 1.00 | 1 | 1 | -0.11 | -0.107 | -0.119 | -0.11 | -0.113 | t | 94884  | MRRAHHR<br>RRRASHRR<br>MRGG | Mus<br>musculu<br>s              |

|   |      |   |   |       |        |        |        |        |   |        |                              |                       |
|---|------|---|---|-------|--------|--------|--------|--------|---|--------|------------------------------|-----------------------|
| 1 | 1.00 | 1 | 1 | 0.02  | 0.02   | 0.02   | 0.029  | 0.032  | t | 130901 | IPFPTLFAP                    | Homo sapiens          |
| 1 | 1.00 | 1 | 1 | 0     | 0      | 0.007  | 0      | 0      | t | 72503  | WGQGG                        | Mus musculus          |
| 1 | 1.00 | 1 | 1 | 0     | 0      | 0.007  | 0      | 0      | t | 72889  | WNK                          | Mus musculus          |
| 1 | 1.00 | 1 | 1 | 0     | 0      | 0.007  | 0      | 0      | t | 72503  | WGQGG                        | Mus musculus          |
| 1 | 1.00 | 1 | 1 | 0     | 0      | 0.007  | 0      | 0      | t | 41430  | MERVVEQ<br>MCITQYQ<br>RESQAY | Mus musculus          |
| 1 | 1.00 | 1 | 1 | 0     | -0.001 | -0.001 | -0.003 | 0      | t | 41592  | MGIQLDQ<br>RIILLFM           | Myodes glareolus      |
| 1 | 1.00 | 1 | 1 | 0.02  | 0.017  | 0.022  | 0.02   | 0.022  | t | 95043  | SPHQVYN                      | Oryctolagus cuniculus |
| 1 | 1.00 | 1 | 1 | 0.02  | 0.02   | 0.022  | 0.02   | 0.022  | t | 95043  | SPHQVYN                      | Mus musculus          |
| 1 | 1.00 | 1 | 1 | 0.01  | 0.012  | 0.01   | 0.007  | 0.01   | t | 142282 | RRDLASR<br>EAKKQLEA<br>EQQK  | Homo sapiens          |
| 1 | 1.00 | 1 | 1 | 0     | 0      | 0.011  | 0      | 0      | t | 54003  | RGTTTPPAY<br>G               | Mus musculus          |
| 1 | 1.00 | 1 | 1 | 0.01  | 0.006  | 0.021  | 0.013  | 0.007  | t | 30956  | KGIKEFDE<br>AGTLA            | Oryctolagus cuniculus |
| 1 | 1.00 | 1 | 1 | 0.02  | 0.018  | 0.014  | 0.019  | 0.02   | t | 54599  | RLITGRLQS<br>LQTYVTQ<br>Q    | Mus musculus          |
| 1 | 1.00 | 1 | 1 | -0.05 | -0.05  | -0.066 | -0.05  | -0.048 | t | 139324 | TRLIDERA<br>AH               | Mus musculus          |
| 1 | 1.00 | 1 | 1 | -0.01 | -0.007 | -0.01  | -0.01  | -0.008 | t | 144678 | GTQPTLEV<br>VPMGRGS          | Mus musculus          |

|   |      |   |   |       |        |        |       |        |   |        |                              |                                  |
|---|------|---|---|-------|--------|--------|-------|--------|---|--------|------------------------------|----------------------------------|
| 1 | 1.00 | 1 | 1 | 0.02  | 0.015  | 0.029  | 0.02  | 0.02   | t | 21345  | GMSQDPV<br>A                 | Bos<br>taurus                    |
| 1 | 1.00 | 1 | 1 | 0.03  | 0.027  | 0.03   | 0.03  | 0.03   | t | 71608  | VVATAAV<br>CLLFIQGYS<br>IYEN | Oryctola<br>gus<br>cuniculu<br>s |
| 1 | 1.00 | 1 | 1 | -0.01 | -0.01  | -0.013 | -0.01 | -0.01  | t | 61727  | STLLPPELS<br>ETPNAT          | Mus<br>musculu<br>s              |
| 1 | 1.00 | 1 | 1 | 0     | -0.007 | -0.008 | 0     | 0.001  | t | 110957 | PAAVTLA<br>EADRT             | Macaca                           |
| 1 | 1.00 | 1 | 1 | 0     | 0      | 0.007  | 0     | 0.002  | t | 124189 | GHPLAPP<br>QA                | Oryctola<br>gus<br>cuniculu<br>s |
| 1 | 1.00 | 1 | 1 | -0.05 | -0.05  | -0.037 | -0.05 | -0.052 | t | 742    | ADPNRFR<br>GKNLP             | Mus<br>musculu<br>s              |
| 1 | 1.00 | 1 | 1 | 0.01  | 0.012  | 0.01   | 0.007 | 0.01   | t | 51935  | QPQQSFP<br>QQQ               | Homo<br>sapiens                  |
| 1 | 1.00 | 1 | 1 | -0.01 | -0.01  | -0.002 | -0.01 | -0.01  | t | 46488  | NVSVSPSPS<br>STPLLY          | Homo<br>sapiens                  |
| 1 | 1.00 | 1 | 1 | 0     | 0      | 0.005  | 0     | 0      | t | 156900 | KLGDPRIA<br>TTLF             | Mus<br>musculu<br>s              |
| 1 | 1.00 | 1 | 1 | 0.02  | 0.02   | 0.02   | 0.02  | 0.02   | t | 149093 | QGRNPTQ                      | Sus<br>scrofa                    |
| 1 | 1.00 | 1 | 1 | 0     | 0      | 0      | 0     | 0      | t | 132936 | WGSNHA<br>Q                  | Homo<br>sapiens                  |
| 1 | 1.00 | 1 | 1 | 0     | 0      | 0      | 0     | 0      | t | 128092 | RGFGGDP<br>RRVSLAAD<br>RGGAD | Homo<br>sapiens                  |
| 1 | 1.00 | 1 | 1 | -0.02 | -0.02  | -0.02  | -0.02 | -0.02  | t | 79556  | GHWTRFA                      | Oryctola<br>gus<br>cuniculu<br>s |
| 1 | 1.00 | 1 | 1 | -0.04 | -0.04  | -0.04  | -0.04 | -0.04  | t | 103038 | ALMSGNF<br>SNGILWR<br>G      | Homo<br>sapiens                  |
| 1 | 1.00 | 1 | 1 | -0.06 | -0.06  | -0.06  | -0.06 | -0.06  | t | 115297 | INYWLAHK<br>AL               | Homo<br>sapiens                  |



|   |      |   |   |       |        |        |        |        |   |        |                              |                                  |
|---|------|---|---|-------|--------|--------|--------|--------|---|--------|------------------------------|----------------------------------|
| 1 | 1.00 | 1 | 1 | -0.08 | -0.08  | -0.08  | -0.08  | -0.08  | t | 110652 | LCLIGCKPP<br>IGEHWGK<br>GSPC | Homo<br>sapiens                  |
| 1 | 1.00 | 1 | 1 | 0.04  | 0.028  | 0.04   | 0.034  | 0.04   | t | 108923 | EQGPKGE<br>P                 | Macaca<br>mulatta                |
| 1 | 1.00 | 1 | 1 | 0.01  | 0.008  | 0.01   | 0.009  | 0.012  | t | 12306  | EGVQQEG<br>AQQ               | Mus<br>musculu<br>s              |
| 1 | 1.00 | 1 | 1 | 0.01  | 0.008  | 0.004  | 0.009  | 0.01   | t | 37641  | LLPAADM<br>DDFSRQL<br>QNSM   | Mus<br>musculu<br>s              |
| 1 | 1.00 | 1 | 1 | -0.04 | -0.04  | -0.033 | -0.033 | -0.04  | t | 119504 | NRRLLPM<br>PE                | Homo<br>sapiens                  |
| 1 | 1.00 | 1 | 1 | 0.04  | 0.038  | 0.04   | 0.033  | 0.038  | t | 107618 | SKPQSETL                     | Rattus<br>norvegic<br>us         |
| 1 | 1.00 | 1 | 1 | 0.03  | 0.027  | 0.028  | 0.03   | 0.031  | t | 64085  | THTMIFDN<br>AFNCTFEYI        | Oryctola<br>gus<br>cuniculu<br>s |
| 1 | 1.00 | 1 | 1 | 0.05  | 0.05   | 0.05   | 0.05   | 0.05   | t | 129361 | LVQTKGTG<br>ASGSFKLN         | Homo<br>sapiens                  |
| 1 | 1.00 | 1 | 1 | -0.01 | -0.01  | -0.01  | -0.01  | -0.009 | t | 137734 | DTALTCAA<br>LKLK             | Mus<br>musculu<br>s              |
| 1 | 1.00 | 1 | 1 | -0.08 | -0.078 | -0.079 | -0.082 | -0.082 | t | 106242 | AKAHILRW<br>GN               | Homo<br>sapiens                  |
| 1 | 1.00 | 1 | 1 | -0.01 | -0.008 | -0.01  | -0.01  | -0.008 | t | 141749 | SNLDHI                       | Rattus<br>norvegic<br>us         |
| 1 | 1.00 | 1 | 1 | 0     | 0      | -0.005 | 0      | 0      | t | 55264  | RPPQGNW<br>FGCTWM<br>NSTGFTK | Mus<br>musculu<br>s              |
| 1 | 1.00 | 1 | 1 | -0.06 | -0.056 | -0.038 | -0.059 | -0.063 | t | 26174  | IFTITKILL                    | Homo<br>sapiens                  |
| 1 | 1.00 | 1 | 1 | 0     | 0      | 0      | -0.002 | 0      | t | 110427 | STWPTTPP<br>RPIPKPSP<br>WAPK | Homo<br>sapiens                  |

|   |      |   |   |       |        |        |        |        |   |        |                          |                                  |
|---|------|---|---|-------|--------|--------|--------|--------|---|--------|--------------------------|----------------------------------|
| 1 | 1.00 | 1 | 1 | 0.03  | 0.027  | 0.03   | 0.03   | 0.032  | t | 125414 | FSEELVFS<br>LRLMEEN      | Oryctola<br>gus<br>cuniculu<br>s |
| 1 | 1.00 | 1 | 1 | 0.01  | 0.012  | 0.01   | 0.011  | 0.012  | t | 11820  | EENVEHD<br>AEENVEEN<br>V | Homo<br>sapiens                  |
| 1 | 1.00 | 1 | 1 | 0.01  | 0.008  | 0.021  | 0.013  | 0.013  | t | 78278  | TIVIRVQYE                | Mus<br>musculu<br>s              |
| 1 | 1.00 | 1 | 1 | 0.01  | 0.01   | 0.018  | 0.007  | 0.01   | t | 28133  | IQAIVSSP                 | Homo<br>sapiens                  |
| 1 | 1.00 | 1 | 1 | -0.01 | -0.01  | -0.01  | -0.01  | -0.01  | t | 117799 | DRNGTHL<br>DA            | Homo<br>sapiens                  |
| 1 | 1.00 | 1 | 1 | -0.03 | -0.03  | -0.03  | -0.03  | -0.03  | t | 103432 | MWLSPNG<br>TIRNILGG      | Homo<br>sapiens                  |
| 1 | 1.00 | 1 | 1 | -0.03 | -0.03  | -0.03  | -0.03  | -0.03  | t | 111729 | RHVGGGT<br>PRRPGKEI      | Oryctola<br>gus<br>cuniculu<br>s |
| 1 | 1.00 | 1 | 1 | -0.03 | -0.03  | -0.03  | -0.03  | -0.03  | t | 70421  | VPPLRVW<br>RHRARSV       | Homo<br>sapiens                  |
| 1 | 1.00 | 1 | 1 | -0.03 | -0.03  | -0.03  | -0.03  | -0.03  | t | 39488  | LSLNHHN<br>NW            | Rattus<br>norvegic<br>us         |
| 1 | 1.00 | 1 | 1 | 0.02  | 0.02   | 0.022  | 0.02   | 0.019  | t | 119914 | GSVVAINP<br>ESDQPDLS     | Oryctola<br>gus<br>cuniculu<br>s |
| 1 | 1.00 | 1 | 1 | 0.02  | 0.023  | 0.022  | 0.02   | 0.019  | t | 119914 | GSVVAINP<br>ESDQPDLS     | Mus<br>musculu<br>s              |
| 1 | 1.00 | 1 | 1 | -0.01 | -0.012 | -0.01  | -0.017 | -0.012 | t | 107448 | IPSTVKA                  | Rattus<br>norvegic<br>us         |
| 1 | 1.00 | 1 | 1 | 0     | 0      | 0      | -0.003 | -0.002 | t | 36761  | LIVTQTMK<br>GLDIQK       | Homo<br>sapiens                  |
| 1 | 1.00 | 1 | 1 | -0.01 | -0.012 | -0.031 | -0.013 | -0.008 | t | 153863 | NRRIQLE<br>EDLERSEE<br>R | Homo<br>sapiens                  |
| 1 | 1.00 | 1 | 1 | -0.01 | -0.01  | -0.017 | -0.019 | -0.01  | t | 119546 | WTAN                     | Homo<br>sapiens                  |

|   |      |   |   |       |        |        |        |        |   |        |                            |                       |
|---|------|---|---|-------|--------|--------|--------|--------|---|--------|----------------------------|-----------------------|
| 1 | 1.00 | 1 | 1 | 0     | 0      | 0.005  | 0      | 0      | t | 66223  | TSGLASL                    | Homo sapiens          |
| 1 | 1.00 | 1 | 1 | -0.03 | -0.03  | -0.019 | -0.027 | -0.03  | t | 69824  | VLGVV                      | Homo sapiens          |
| 1 | 1.00 | 1 | 1 | 0.01  | 0.01   | 0.01   | 0.01   | 0.013  | t | 47650  | PGFMFSR<br>PSDPAFAA        | Mus musculus          |
| 1 | 1.00 | 1 | 1 | 0     | 0      | 0.008  | 0      | 0      | t | 106553 | KAHILRW<br>GNE             | Homo sapiens          |
| 1 | 1.00 | 1 | 1 | -0.01 | -0.013 | 0.004  | -0.01  | -0.012 | t | 100297 | LVFFAEDV<br>GS             | Oryctolagus cuniculus |
| 1 | 1.00 | 1 | 1 | 0.01  | 0.024  | 0.017  | 0.01   | 0.008  | t | 67187  | TVTTTTKG<br>ENFTETDI<br>KI | Gallus gallus         |
| 1 | 1.00 | 1 | 1 | -0.06 | -0.056 | -0.06  | -0.053 | -0.056 | t | 122748 | EHRMTW<br>DPAQPPR          | Homo sapiens          |
| 1 | 1.00 | 1 | 1 | 0.04  | 0.038  | 0.038  | 0.039  | 0.04   | t | 73028  | WRGSNHS<br>DQTII           | Mus musculus          |
| 1 | 1.00 | 1 | 1 | -0.04 | -0.038 | -0.047 | -0.037 | -0.036 | t | 135910 | DRRLCSHL<br>EVCI           | Homo sapiens          |
| 1 | 1.00 | 1 | 1 | 0     | -0.002 | 0.005  | -0.001 | 0      | t | 75849  | YSPEVR                     | Mus musculus          |
| 1 | 1.00 | 1 | 1 | -0.04 | -0.042 | -0.04  | -0.039 | -0.04  | t | 149436 | QQHHHH<br>QEQK             | Mus musculus          |
| 1 | 1.00 | 1 | 1 | -0.01 | -0.01  | -0.004 | -0.01  | -0.011 | t | 7004   | CSGLVGLF<br>TPGAKQNI       | Mus musculus          |
| 1 | 1.00 | 1 | 1 | -0.01 | -0.01  | -0.01  | -0.01  | -0.01  | t | 133724 | TVCAGYC<br>MTRDVN          | Mus musculus          |
| 1 | 1.00 | 1 | 1 | -0.03 | -0.031 | -0.034 | -0.031 | -0.03  | t | 73067  | WSERIREF<br>MEKECP         | Myodes glareolus      |
| 1 | 1.00 | 1 | 1 | -0.03 | -0.034 | -0.034 | -0.031 | -0.03  | t | 73067  | WSERIREF<br>MEKECP         | Oryctolagus cuniculus |

|   |      |   |   |       |        |        |        |        |   |        |                              |                                  |
|---|------|---|---|-------|--------|--------|--------|--------|---|--------|------------------------------|----------------------------------|
| 1 | 1.00 | 1 | 1 | 0.07  | 0.066  | 0.07   | 0.063  | 0.068  | t | 138386 | FALTAVAE<br>EVNA             | Oryctola<br>gus<br>cuniculu<br>s |
| 1 | 1.00 | 1 | 1 | 0.02  | 0.018  | 0.019  | 0.02   | 0.025  | t | 134471 | PKPEQ                        | Mus<br>musculu<br>s              |
| 1 | 1.00 | 1 | 1 | 0.01  | 0.01   | 0.018  | 0.01   | 0.009  | t | 45122  | NNHVSIVE<br>AWSNDT<br>PYLHD  | Rattus<br>norvegic<br>us         |
| 1 | 1.00 | 1 | 1 | 0.01  | 0.008  | 0.018  | 0.01   | 0.009  | t | 45122  | NNHVSIVE<br>AWSNDT<br>PYLHD  | Rattus<br>norvegic<br>us         |
| 1 | 1.00 | 1 | 1 | -0.01 | -0.009 | -0.008 | -0.01  | -0.012 | t | 9662   | DPKTSEILD<br>ISPCSF<br>GGV   | Mus<br>musculu<br>s              |
| 1 | 1.00 | 1 | 1 | -0.05 | -0.05  | -0.05  | -0.047 | -0.05  | t | 135571 | LFRGRRAS<br>Q                | Oryctola<br>gus<br>cuniculu<br>s |
| 1 | 1.00 | 1 | 1 | 0.01  | 0.01   | 0.01   | 0.01   | 0.01   | t | 2379   | ALAEATK<br>TFGSSGSS<br>AVDS  | Homo<br>sapiens                  |
| 1 | 1.00 | 1 | 1 | 0     | 0.004  | 0      | 0      | 0.001  | t | 9845   | DQGNST<br>SWNFAAK<br>YLLETI  | Aotus<br>nancyma<br>ae           |
| 1 | 1.00 | 1 | 1 | 0.01  | 0.012  | 0.006  | 0.011  | 0.01   | t | 22130  | GRLHVNQ<br>RAVVAPD<br>KEVLYE | Homo<br>sapiens                  |
| 1 | 1.00 | 1 | 1 | 0.03  | 0.028  | 0.028  | 0.029  | 0.031  | t | 103334 | LAKHSEHP<br>TVDDEEK          | Mus<br>musculu<br>s              |
| 1 | 1.00 | 1 | 1 | 0.02  | 0.02   | 0.02   | 0.02   | 0.02   | t | 132937 | WGSNNQ<br>N                  | Homo<br>sapiens                  |
| 1 | 1.00 | 1 | 1 | -0.02 | -0.02  | -0.02  | -0.02  | -0.02  | t | 111593 | NNIARMR<br>LYDPNQA<br>A      | Oryctola<br>gus<br>cuniculu<br>s |
| 1 | 1.00 | 1 | 1 | 0.01  | 0.01   | 0.008  | 0.01   | 0.012  | t | 52098  | QQPPQQP<br>PQQPP             | Mus<br>musculu<br>s              |
| 1 | 1.00 | 1 | 1 | -0.01 | -0.01  | -0.019 | -0.017 | -0.009 | t | 110863 | GLKAKPKF<br>TLGKRKAT<br>PTTS | Homo<br>sapiens                  |
| 1 | 1.00 | 1 | 1 | -0.04 | -0.04  | -0.04  | -0.04  | -0.038 | t | 140488 | MSLLGHK                      | Mus<br>musculu<br>s              |

|   |      |   |   |       |        |        |        |        |   |        |                       |                       |
|---|------|---|---|-------|--------|--------|--------|--------|---|--------|-----------------------|-----------------------|
| 1 | 1.00 | 1 | 1 | -0.04 | -0.04  | -0.04  | -0.04  | -0.038 | t | 140479 | KHGLLSM               | Mus musculus          |
| 1 | 1.00 | 1 | 1 | -0.02 | -0.022 | -0.02  | -0.021 | -0.02  | t | 9278   | DLSLLGKARKVVVTKD      | Rattus norvegicus     |
| 1 | 1.00 | 1 | 1 | 0.02  | 0.02   | 0.013  | 0.017  | 0.02   | t | 57632  | SESTEGDAMEDIKQMEAESI  | Homo sapiens          |
| 1 | 1.00 | 1 | 1 | 0.01  | 0.014  | 0.01   | 0.013  | 0.012  | t | 111010 | RLGSEHVD RPLTPP       | Homo sapiens          |
| 1 | 1.00 | 1 | 1 | 0.03  | 0.03   | 0.019  | 0.027  | 0.03   | t | 24814  | HSMKEGIHAQQKEPMIGVNVQ | Homo sapiens          |
| 1 | 1.00 | 1 | 1 | -0.01 | -0.009 | -0.01  | -0.01  | -0.01  | t | 57009  | SATAIFDCTLNPTIAG      | Mus musculus          |
| 1 | 1.00 | 1 | 1 | 0.02  | 0.02   | 0.018  | 0.02   | 0.021  | t | 119856 | FAIVHMTKLLLDYTGK      | Mus musculus          |
| 1 | 1.00 | 1 | 1 | 0.02  | 0.02   | 0.018  | 0.02   | 0.021  | t | 119856 | FAIVHMTKLLLDYTGK      | Mus musculus          |
| 1 | 1.00 | 1 | 1 | 0.02  | 0.02   | 0.018  | 0.02   | 0.021  | t | 119856 | FAIVHMTKLLLDYTGK      | Mus musculus          |
| 1 | 1.00 | 1 | 1 | 0.02  | 0.023  | 0.018  | 0.02   | 0.021  | t | 119856 | FAIVHMTKLLLDYTGK      | Mus musculus          |
| 1 | 1.00 | 1 | 1 | 0.02  | 0.023  | 0.018  | 0.02   | 0.021  | t | 119856 | FAIVHMTKLLLDYTGK      | Mus musculus          |
| 1 | 1.00 | 1 | 1 | -0.04 | -0.038 | -0.037 | -0.04  | -0.039 | t | 132906 | SYSMEHFRWG            | Oryctolagus cuniculus |
| 1 | 1.00 | 1 | 1 | 0.01  | 0.007  | 0.01   | 0.01   | 0.009  | t | 144670 | GREGYPADGGTSETNKCG    | Oryctolagus cuniculus |
| 1 | 1.00 | 1 | 1 | 0     | 0      | -0.004 | -0.003 | -0.002 | t | 12037  | EFLEQAFQVDDRQIV       | Homo sapiens          |
| 1 | 1.00 | 1 | 1 | -0.03 | -0.03  | -0.03  | -0.03  | -0.033 | t | 134029 | DEDENQSPRSFQKKTR      | Homo sapiens          |

|   |      |   |   |       |        |        |        |        |   |        |                             |                                  |
|---|------|---|---|-------|--------|--------|--------|--------|---|--------|-----------------------------|----------------------------------|
| 1 | 1.00 | 1 | 1 | -0.04 | -0.035 | -0.044 | -0.039 | -0.038 | t | 49140  | PQTWWE<br>KNAKDIW<br>EG     | Homo<br>sapiens                  |
| 1 | 1.00 | 1 | 1 | 0     | 0      | 0      | 0      | 0.001  | t | 107126 | GAPGTPG<br>PQG              | Mus<br>musculu<br>s              |
| 1 | 1.00 | 1 | 1 | -0.02 | -0.02  | -0.021 | -0.02  | -0.02  | t | 134676 | GASSHQH<br>SRRRQGW<br>L     | Homo<br>sapiens                  |
| 1 | 1.00 | 1 | 1 | 0     | -0.002 | 0      | 0.001  | 0.002  | t | 51828  | QFPQPQ<br>QTF               | Mus<br>musculu<br>s              |
| 1 | 1.00 | 1 | 1 | -0.02 | -0.02  | -0.02  | -0.02  | -0.02  | t | 132939 | WGSNPPS<br>ATAPP            | Homo<br>sapiens                  |
| 1 | 1.00 | 1 | 1 | -0.02 | -0.02  | -0.02  | -0.02  | -0.02  | t | 1948   | AIILLTCAV<br>HPELI          | Homo<br>sapiens                  |
| 1 | 1.00 | 1 | 1 | 0.02  | 0.02   | 0.015  | 0.018  | 0.02   | t | 78927  | ALLEETITA<br>KGVRSPA<br>IRG | Homo<br>sapiens                  |
| 1 | 1.00 | 1 | 1 | 0.01  | 0.006  | 0.008  | 0.007  | 0.01   | t | 88292  | RVHVSKEE<br>QYYDYED         | Oryctola<br>gus<br>cuniculu<br>s |
| 1 | 1.00 | 1 | 1 | 0.01  | 0.013  | 0.01   | 0.01   | 0.011  | t | 153396 | HSFEPWS<br>ARDMLGG<br>GS    | Mus<br>musculu<br>s              |
| 1 | 1.00 | 1 | 1 | 0     | 0      | 0      | 0      | -0.002 | t | 153472 | TGLRNGIT<br>NKVNSVIE<br>KAA | Mus<br>musculu<br>s              |
| 1 | 1.00 | 1 | 1 | 0     | 0.004  | 0.002  | -0.003 | 0      | t | 95681  | PQYLKTVY<br>QH              | Homo<br>sapiens                  |
| 1 | 1.00 | 1 | 1 | 0.01  | 0.01   | 0.01   | 0.01   | 0.01   | t | 92924  | HSKNVTNS<br>LD              | Ovis<br>aries                    |
| 1 | 1.00 | 1 | 1 | -0.01 | -0.01  | -0.001 | -0.01  | -0.009 | t | 46054  | NTANPDW                     | Mus<br>musculu<br>s              |
| 1 | 1.00 | 1 | 1 | -0.03 | -0.032 | -0.03  | -0.03  | -0.03  | t | 141658 | GIDDANKK<br>ACCAIRGS        | Oryctola<br>gus<br>cuniculu<br>s |
| 1 | 1.00 | 1 | 1 | -0.03 | -0.03  | -0.03  | -0.03  | -0.03  | t | 123519 | MRYIADK<br>HG               | Ovis<br>aries                    |

|   |      |   |   |       |        |        |        |        |   |        |                             |                  |
|---|------|---|---|-------|--------|--------|--------|--------|---|--------|-----------------------------|------------------|
| 1 | 1.00 | 1 | 1 | 0.02  | 0.02   | 0.013  | 0.019  | 0.02   | t | 138162 | EKKYSPCA<br>WEVVRAE         | Mus<br>musculus  |
| 1 | 1.00 | 1 | 1 | 0.02  | 0.02   | 0.02   | 0.02   | 0.022  | t | 101962 | PEPVQEP                     | Mus<br>musculus  |
| 1 | 1.00 | 1 | 1 | 0     | 0.011  | 0      | 0      | 0.002  | t | 64056  | THNQWN<br>KPSKPKTN<br>FK    | Gallus<br>gallus |
| 1 | 1.00 | 1 | 1 | 0     | 0.011  | 0      | 0      | 0.002  | t | 64056  | THNQWN<br>KPSKPKTN<br>FK    | Gallus<br>gallus |
| 1 | 1.00 | 1 | 1 | -0.04 | -0.042 | -0.035 | -0.041 | -0.039 | t | 21823  | GPVLRR                      | Mus<br>musculus  |
| 1 | 1.00 | 1 | 1 | -0.06 | -0.06  | -0.055 | -0.057 | -0.058 | t | 98802  | GIRRFL                      | Homo<br>sapiens  |
| 1 | 1.00 | 1 | 1 | -0.04 | -0.04  | -0.034 | -0.038 | -0.04  | t | 68027  | VDMVAGA<br>HWGVLAG<br>LA    | Homo<br>sapiens  |
| 1 | 1.00 | 1 | 1 | -0.01 | -0.01  | -0.01  | -0.014 | -0.01  | t | 115674 | ADARM                       | Homo<br>sapiens  |
| 1 | 1.00 | 1 | 1 | -0.02 | -0.022 | -0.021 | -0.021 | -0.019 | t | 64086  | THTPLPRG<br>IGY             | Mus<br>musculus  |
| 1 | 1.00 | 1 | 1 | 0.02  | 0.02   | 0.025  | 0.02   | 0.018  | t | 133640 | LYVEDISEP<br>PLHDFYCS<br>RL | Mus<br>musculus  |
| 1 | 1.00 | 1 | 1 | -0.03 | -0.028 | -0.035 | -0.029 | -0.028 | t | 140577 | LVDYPYRL<br>WHYPCTI         | Homo<br>sapiens  |
| 1 | 1.00 | 1 | 1 | -0.04 | -0.034 | -0.04  | -0.04  | -0.04  | t | 123182 | FLGDRQYL<br>I               | Ovis<br>aries    |
| 1 | 1.00 | 1 | 1 | 0.02  | 0.023  | 0.019  | 0.02   | 0.02   | t | 97484  | LVEETSFID<br>AGAP           | Mus<br>musculus  |
| 1 | 1.00 | 1 | 1 | 0.02  | 0.024  | 0.019  | 0.02   | 0.02   | t | 97484  | LVEETSFID<br>AGAP           | Homo<br>sapiens  |

|   |      |   |   |       |        |        |       |        |   |        |                          |                              |
|---|------|---|---|-------|--------|--------|-------|--------|---|--------|--------------------------|------------------------------|
| 1 | 1.00 | 1 | 1 | -0.02 | -0.016 | -0.026 | -0.02 | -0.019 | t | 31104  | KHFNLT<br>PVGSQ<br>GIR   | Ovis<br>aries                |
| 1 | 1.00 | 1 | 1 | 0     | 0      | 0      | 0     | 0.001  | t | 53009  | QYNLAFSD<br>RQSAQ        | Mus<br>musculus              |
| 1 | 1.00 | 1 | 1 | 0     | 0.003  | 0.011  | 0     | 0      | t | 98983  | RFAPQ                    | Mus<br>musculus              |
| 1 | 1.00 | 1 | 1 | 0.01  | 0.012  | 0.008  | 0.007 | 0.008  | t | 11712  | EEKANQRE<br>EAYKEQI      | Homo<br>sapiens              |
| 1 | 1.00 | 1 | 1 | 0.04  | 0.044  | 0.041  | 0.041 | 0.04   | t | 55627  | RRKLTNPA<br>NKEES        | Homo<br>sapiens              |
| 1 | 1.00 | 1 | 1 | 0.01  | 0.01   | 0.01   | 0.01  | 0.01   | t | 119745 | AKLFKDYS<br>SVVRPVED     | Mus<br>musculus              |
| 1 | 1.00 | 1 | 1 | 0.01  | 0.01   | 0.01   | 0.01  | 0.01   | t | 119745 | AKLFKDYS<br>SVVRPVED     | Oryctola<br>gus<br>cuniculus |
| 1 | 1.00 | 1 | 1 | 0.01  | 0.013  | 0.01   | 0.01  | 0.01   | t | 119745 | AKLFKDYS<br>SVVRPVED     | Mus<br>musculus              |
| 1 | 1.00 | 1 | 1 | 0.03  | 0.032  | 0.028  | 0.031 | 0.032  | t | 28291  | IRFKDDTSF<br>EDING       | Homo<br>sapiens              |
| 1 | 1.00 | 1 | 1 | 0.02  | 0.02   | 0.013  | 0.016 | 0.02   | t | 118348 | FHSGKHY<br>WEVDVTG<br>KE | Homo<br>sapiens              |
| 1 | 1.00 | 1 | 1 | -0.01 | -0.007 | 0.01   | -0.01 | -0.012 | t | 141683 | KDWG                     | Mus<br>musculus              |
| 1 | 1.00 | 1 | 1 | -0.02 | -0.02  | -0.02  | -0.02 | -0.02  | t | 119481 | KRRASAG<br>GP            | Homo<br>sapiens              |
| 1 | 1.00 | 1 | 1 | 0.01  | 0.01   | 0.01   | 0.01  | 0.012  | t | 137746 | DTPLTVQG<br>LKL          | Mus<br>musculus              |
| 1 | 1.00 | 1 | 1 | 0.01  | 0.01   | 0.01   | 0.01  | 0.012  | t | 137733 | DTALTIQA<br>LKL          | Mus<br>musculus              |



|   |      |   |   |       |        |        |        |        |   |        |                              |                                  |
|---|------|---|---|-------|--------|--------|--------|--------|---|--------|------------------------------|----------------------------------|
| 1 | 1.00 | 1 | 1 | -0.01 | -0.01  | -0.01  | -0.01  | -0.008 | t | 28693  | ISQQPFPL<br>QP               | Mus<br>musculu<br>s              |
| 1 | 1.00 | 1 | 1 | -0.03 | -0.032 | -0.037 | -0.027 | -0.028 | t | 95990  | VTPGKPN<br>DPDNPNN<br>NYIKP  | Mus<br>musculu<br>s              |
| 1 | 1.00 | 1 | 1 | 0     | 0      | -0.01  | 0      | 0.002  | t | 59967  | SNYYSDNE<br>IEQHTAKQ<br>PKL  | Oryctola<br>gus<br>cuniculu<br>s |
| 1 | 1.00 | 1 | 1 | 0     | 0.004  | -0.01  | 0.001  | 0.002  | t | 50119  | PYKELRLE<br>VGKQRLKY<br>AQEE | Homo<br>sapiens                  |
| 1 | 1.00 | 1 | 1 | 0     | 0.003  | 0      | 0      | -0.002 | t | 140842 | EGNTDER<br>GTPEYNIA<br>LGQRR | Mus<br>musculu<br>s              |
| 1 | 1.00 | 1 | 1 | -0.01 | -0.006 | 0      | -0.007 | -0.01  | t | 57679  | SEVYCPRP<br>DRCLRAP          | Homo<br>sapiens                  |
| 1 | 1.00 | 1 | 1 | 0.02  | 0.022  | 0.025  | 0.017  | 0.02   | t | 109865 | RSLDFQAT<br>TMF              | Homo<br>sapiens                  |
| 1 | 1.00 | 1 | 1 | 0     | -0.002 | 0      | -0.001 | -0.003 | t | 110980 | QPLGVGIS<br>GHPLLNL<br>DDTE  | Mus<br>musculu<br>s              |
| 1 | 1.00 | 1 | 1 | -0.03 | -0.027 | -0.019 | -0.03  | -0.032 | t | 73053  | WRTFSRV<br>DRAFFL            | Mus<br>musculu<br>s              |
| 1 | 1.00 | 1 | 1 | 0     | -0.001 | 0      | 0      | 0.002  | t | 18954  | GDDPLL<br>NQ                 | Anas<br>platyrhy<br>nchos        |
| 1 | 1.00 | 1 | 1 | -0.02 | -0.028 | -0.015 | -0.019 | -0.019 | t | 75059  | YMIDSVL<br>M                 | Bos<br>taurus                    |
| 1 | 1.00 | 1 | 1 | 0.06  | 0.06   | 0.059  | 0.063  | 0.06   | t | 26408  | IHSDEGPG<br>TGPGNGL<br>GE    | Homo<br>sapiens                  |
| 1 | 1.00 | 1 | 1 | 0.02  | 0.02   | 0.032  | 0.02   | 0.02   | t | 104569 | MASPGSG<br>FWSFGSE<br>DGS    | Mus<br>musculu<br>s              |
| 1 | 1.00 | 1 | 1 | -0.01 | -0.012 | -0.011 | -0.008 | -0.008 | t | 106824 | SEFRHGL                      | Mus<br>musculu<br>s              |
| 1 | 1.00 | 1 | 1 | -0.01 | -0.01  | -0.008 | -0.007 | -0.008 | t | 48984  | PQDVKFP<br>GGGQI             | Homo<br>sapiens                  |

|   |      |   |   |       |        |        |        |        |   |        |                              |                                  |
|---|------|---|---|-------|--------|--------|--------|--------|---|--------|------------------------------|----------------------------------|
| 1 | 1.00 | 1 | 1 | 0.01  | 0.009  | 0.015  | 0.01   | 0.01   | t | 46459  | NVQLINTN<br>GSWHLNS<br>TAL   | Homo<br>sapiens                  |
| 1 | 1.00 | 1 | 1 | 0     | 0      | 0      | 0      | 0      | t | 137414 | HAPRYHTI<br>YGWP             | Mus<br>musculu<br>s              |
| 1 | 1.00 | 1 | 1 | -0.01 | -0.022 | -0.01  | -0.01  | -0.009 | t | 4701   | ASQKIQLI                     | Mus<br>musculu<br>s              |
| 1 | 1.00 | 1 | 1 | -0.03 | -0.03  | -0.03  | -0.03  | -0.03  | t | 143674 | DRVALRNL<br>LRRY             | Mus<br>musculu<br>s              |
| 1 | 1.00 | 1 | 1 | -0.03 | -0.03  | -0.03  | -0.03  | -0.03  | t | 108283 | AQSAITAC<br>W                | Homo<br>sapiens                  |
| 1 | 1.00 | 1 | 1 | 0.02  | 0.017  | 0.02   | 0.02   | 0.022  | t | 140905 | TPAAKVLV<br>EGNTDER<br>GTPEY | Oryctola<br>gus<br>cuniculu<br>s |
| 1 | 1.00 | 1 | 1 | 0.01  | 0.008  | 0.018  | 0.009  | 0.01   | t | 23295  | GWVDHFA<br>DGYDEVIA          | Mus<br>musculu<br>s              |
| 1 | 1.00 | 1 | 1 | 0     | 0      | 0      | 0      | 0      | t | 8455   | DGNINLTD<br>TSTSNKS          | Mus<br>musculu<br>s              |
| 1 | 1.00 | 1 | 1 | 0     | -0.005 | 0.006  | 0      | 0.002  | t | 28076  | IPSTAFTDI<br>AWVRLPN<br>HYG  | Rattus<br>norvegic<br>us         |
| 1 | 1.00 | 1 | 1 | -0.02 | -0.02  | -0.023 | -0.02  | -0.017 | t | 26132  | IFNSVFLDF<br>SVSFWIRIP<br>K  | Homo<br>sapiens                  |
| 1 | 1.00 | 1 | 1 | 0.03  | 0.026  | 0.03   | 0.023  | 0.03   | t | 156601 | ADEPNLNL<br>NSK              | Oryctola<br>gus<br>cuniculu<br>s |
| 1 | 1.00 | 1 | 1 | 0.03  | 0.032  | 0.03   | 0.029  | 0.03   | t | 149432 | QPISQQQ<br>QQQ               | Homo<br>sapiens                  |
| 1 | 1.00 | 1 | 1 | 0     | 0      | 0.003  | 0.003  | 0.002  | t | 27757  | INTTGNPE<br>H                | Homo<br>sapiens                  |
| 1 | 1.00 | 1 | 1 | -0.03 | -0.032 | -0.039 | -0.027 | -0.028 | t | 115351 | LKQKSSNS<br>RKKRSTS          | Mus<br>musculu<br>s              |
| 1 | 1.00 | 1 | 1 | -0.01 | -0.012 | -0.011 | -0.013 | -0.01  | t | 133867 | KVPAPKKG<br>SKKAV            | Mus<br>musculu<br>s              |

|   |      |   |   |       |        |        |        |        |   |        |                              |                                  |
|---|------|---|---|-------|--------|--------|--------|--------|---|--------|------------------------------|----------------------------------|
| 1 | 1.00 | 1 | 1 | -0.01 | -0.01  | -0.012 | -0.009 | -0.01  | t | 100462 | RFSTRYGN<br>QNGRIRVL<br>QRFD | Homo<br>sapiens                  |
| 1 | 1.00 | 1 | 1 | -0.01 | -0.012 | -0.01  | -0.01  | -0.01  | t | 118048 | PGMRPP<br>MGPP               | Mus<br>musculu<br>s              |
| 1 | 1.00 | 1 | 1 | -0.04 | -0.043 | -0.043 | -0.04  | -0.04  | t | 44572  | NKPSKPKT<br>NLKH             | Oryctola<br>gus<br>cuniculu<br>s |
| 1 | 1.00 | 1 | 1 | 0.04  | 0.041  | 0.043  | 0.04   | 0.04   | t | 12542  | EIPDPVEA<br>GEEV             | Mus<br>musculu<br>s              |
| 1 | 1.00 | 1 | 1 | 0     | 0      | 0.005  | 0      | 0.001  | t | 107214 | MVGGVV                       | Mus<br>musculu<br>s              |
| 1 | 1.00 | 1 | 1 | 0.05  | 0.05   | 0.048  | 0.05   | 0.051  | t | 119904 | GLQLIQLIS<br>VDEVNQI         | Mus<br>musculu<br>s              |
| 1 | 1.00 | 1 | 1 | 0.05  | 0.05   | 0.048  | 0.05   | 0.051  | t | 119904 | GLQLIQLIS<br>VDEVNQI         | Mus<br>musculu<br>s              |
| 1 | 1.00 | 1 | 1 | 0.05  | 0.05   | 0.048  | 0.05   | 0.051  | t | 119904 | GLQLIQLIS<br>VDEVNQI         | Mus<br>musculu<br>s              |
| 1 | 1.00 | 1 | 1 | 0.05  | 0.05   | 0.048  | 0.05   | 0.051  | t | 119904 | GLQLIQLIS<br>VDEVNQI         | Mus<br>musculu<br>s              |
| 1 | 1.00 | 1 | 1 | -0.01 | -0.01  | -0.01  | -0.012 | -0.01  | t | 22122  | GRLGTYRY<br>VASGER           | Homo<br>sapiens                  |
| 1 | 1.00 | 1 | 1 | 0.04  | 0.038  | 0.033  | 0.033  | 0.042  | t | 112965 | EVKATPAG<br>EL               | Mus<br>musculu<br>s              |
| 1 | 1.00 | 1 | 1 | 0     | -0.002 | 0.002  | 0.003  | -0.001 | t | 115774 | GSGKDSHT<br>RTTHYGS          | Mus<br>musculu<br>s              |
| 1 | 1.00 | 1 | 1 | -0.02 | -0.022 | -0.016 | -0.021 | -0.022 | t | 120869 | PGYRSISG<br>PDPRIRKT         | Mus<br>musculu<br>s              |
| 1 | 1.00 | 1 | 1 | 0.02  | 0.02   | 0.014  | 0.01   | 0.021  | t | 67729  | VAQYKALP<br>VVLENA           | Homo<br>sapiens                  |
| 1 | 1.00 | 1 | 1 | 0.05  | 0.053  | 0.053  | 0.053  | 0.05   | t | 53859  | RGETPGQL<br>LPEIMQ           | Capra<br>hircus                  |
| 1 | 1.00 | 1 | 1 | -0.03 | -0.032 | -0.031 | -0.027 | -0.028 | t | 2285   | AKSMDV<br>R                  | Anas<br>platyrhy<br>nchos        |

|   |      |   |   |       |        |        |        |        |   |        |                              |                                  |
|---|------|---|---|-------|--------|--------|--------|--------|---|--------|------------------------------|----------------------------------|
| 1 | 1.00 | 1 | 1 | -0.02 | -0.02  | -0.015 | -0.02  | -0.02  | t | 82     | AADAILHT<br>PGCVPC           | Homo<br>sapiens                  |
| 1 | 1.00 | 1 | 1 | -0.03 | -0.027 | -0.024 | -0.03  | -0.03  | t | 60541  | SQRPQQP<br>FPL               | Mus<br>musculu<br>s              |
| 1 | 1.00 | 1 | 1 | -0.03 | -0.03  | -0.024 | -0.03  | -0.03  | t | 60541  | SQRPQQP<br>FPL               | Mus<br>musculu<br>s              |
| 1 | 1.00 | 1 | 1 | 0.02  | 0.02   | 0.02   | 0.02   | 0.02   | t | 82611  | GEQQEAIK<br>SA               | Homo<br>sapiens                  |
| 1 | 1.00 | 1 | 1 | -0.02 | -0.02  | -0.02  | -0.02  | -0.02  | t | 99778  | WRRPSHQ<br>QPRKIRPE          | Homo<br>sapiens                  |
| 1 | 1.00 | 1 | 1 | -0.02 | -0.02  | -0.02  | -0.02  | -0.02  | t | 115569 | YQGPIVLN<br>PWDQVKR<br>NAVPI | Homo<br>sapiens                  |
| 1 | 1.00 | 1 | 1 | -0.02 | -0.02  | -0.02  | -0.02  | -0.02  | t | 79644  | SHLSTMV                      | Oryctola<br>gus<br>cuniculu<br>s |
| 1 | 1.00 | 1 | 1 | -0.04 | -0.04  | -0.04  | -0.04  | -0.04  | t | 142471 | SAAGAKRS<br>GRSS             | Mus<br>musculu<br>s              |
| 1 | 1.00 | 1 | 1 | -0.08 | -0.08  | -0.08  | -0.08  | -0.08  | t | 115517 | TMARHPH<br>PHLSFMAI<br>PPKKN | Homo<br>sapiens                  |
| 1 | 1.00 | 1 | 1 | 0.01  | 0.01   | 0.032  | 0.01   | 0.009  | t | 144622 | EDVGSNK                      | Mus<br>musculu<br>s              |
| 1 | 1.00 | 1 | 1 | 0.03  | 0.034  | 0.035  | 0.033  | 0.031  | t | 122145 | LTLFPSRDT<br>PLSSQTD         | Homo<br>sapiens                  |
| 1 | 1.00 | 1 | 1 | -0.04 | -0.038 | -0.033 | -0.034 | -0.038 | t | 103830 | CHAVKVG<br>NPSC              | Homo<br>sapiens                  |
| 1 | 1.00 | 1 | 1 | -0.02 | -0.018 | -0.02  | -0.021 | -0.02  | t | 149417 | PQQQYPS<br>GQG               | Homo<br>sapiens                  |
| 1 | 1.00 | 1 | 1 | 0     | 0      | 0      | 0      | 0      | t | 142433 | KNDSLPH<br>EPNNLE            | Homo<br>sapiens                  |
| 1 | 1.00 | 1 | 1 | -0.06 | -0.062 | -0.06  | -0.061 | -0.06  | t | 150995 | HLGKC<br>NIA<br>GWILGNP      | Mus<br>musculu<br>s              |

|   |      |   |   |       |        |        |        |        |   |        |                              |                                  |
|---|------|---|---|-------|--------|--------|--------|--------|---|--------|------------------------------|----------------------------------|
| 1 | 1.00 | 1 | 1 | 0     | 0      | 0      | -0.003 | 0      | t | 55168  | RPGYEPPT<br>VLGCALPP<br>T    | Homo<br>sapiens                  |
| 1 | 1.00 | 1 | 1 | 0.01  | 0.01   | 0.017  | 0.01   | 0.01   | t | 158837 | IHNDVEA<br>WIDRYKYY<br>P     | Mus<br>musculu<br>s              |
| 1 | 1.00 | 1 | 1 | -0.02 | -0.02  | -0.019 | -0.017 | -0.02  | t | 79669  | VKFHTETR<br>TVWQLSV<br>AGVSC | Homo<br>sapiens                  |
| 1 | 1.00 | 1 | 1 | -0.02 | -0.023 | -0.02  | -0.02  | -0.02  | t | 66749  | TTPAQGN<br>SMFPSC            | Oryctola<br>gus<br>cuniculu<br>s |
| 1 | 1.00 | 1 | 1 | -0.02 | -0.023 | -0.02  | -0.02  | -0.02  | t | 66749  | TTPAQGN<br>SMFPSC            | Oryctola<br>gus<br>cuniculu<br>s |
| 1 | 1.00 | 1 | 1 | -0.01 | -0.01  | -0.008 | -0.01  | -0.009 | t | 125052 | FSLRLMEE<br>NW               | Mus<br>musculu<br>s              |
| 1 | 1.00 | 1 | 1 | 0     | 0      | 0      | 0      | 0.001  | t | 141761 | TAPPLPH<br>SNLD              | Rattus<br>norvegic<br>us         |
| 1 | 1.00 | 1 | 1 | 0     | 0      | 0      | 0      | 0.001  | t | 141749 | SNLDHI                       | Rattus<br>norvegic<br>us         |
| 1 | 1.00 | 1 | 1 | 0     | 0      | 0      | 0      | 0.001  | t | 141726 | PTAPPLLP<br>HS               | Rattus<br>norvegic<br>us         |
| 1 | 1.00 | 1 | 1 | 0     | 0      | 0      | 0      | 0.001  | t | 140014 | DSDVGE                       | Mus<br>musculu<br>s              |
| 1 | 1.00 | 1 | 1 | 0     | 0      | 0      | 0      | 0.001  | t | 141605 | APPLLP<br>HS<br>NL           | Mus<br>musculu<br>s              |
| 1 | 1.00 | 1 | 1 | 0     | 0      | 0      | 0      | 0.001  | t | 149298 | ELDKWAS                      | Homo<br>sapiens                  |
| 1 | 1.00 | 1 | 1 | 0     | 0      | 0      | 0      | 0.001  | t | 137401 | FEDVW                        | Mus<br>musculu<br>s              |

|   |      |   |   |   |        |   |   |       |   |        |                              |                                  |
|---|------|---|---|---|--------|---|---|-------|---|--------|------------------------------|----------------------------------|
| 1 | 1.00 | 1 | 1 | 0 | -0.003 | 0 | 0 | 0.001 | t | 130872 | GSFLT KGP<br>SKLNDRA         | Oryctola<br>gus<br>cuniculu<br>s |
| 1 | 1.00 | 1 | 1 | 0 | 0      | 0 | 0 | 0.001 | t | 125015 | DNESSYSR<br>GFDMTYT<br>E     | Mus<br>musculu<br>s              |
| 1 | 1.00 | 1 | 1 | 0 | 0      | 0 | 0 | 0.001 | t | 130872 | GSFLT KGP<br>SKLNDRA         | Oryctola<br>gus<br>cuniculu<br>s |
| 1 | 1.00 | 1 | 1 | 0 | 0      | 0 | 0 | 0.001 | t | 122746 | EEQEDEIIG<br>FGQELKN         | Oryctola<br>gus<br>cuniculu<br>s |
| 1 | 1.00 | 1 | 1 | 0 | 0      | 0 | 0 | 0.001 | t | 130872 | GSFLT KGP<br>SKLNDRA         | Mus<br>musculu<br>s              |
| 1 | 1.00 | 1 | 1 | 0 | 0      | 0 | 0 | 0.001 | t | 107233 | RSFTLASSE<br>TG              | Mus<br>musculu<br>s              |
| 1 | 1.00 | 1 | 1 | 0 | 0      | 0 | 0 | 0.001 | t | 108600 | QLINTNGS                     | Capra<br>hircus                  |
| 1 | 1.00 | 1 | 1 | 0 | 0      | 0 | 0 | 0.001 | t | 100351 | NQILKPKLI<br>SYTLPPVG        | Oryctola<br>gus<br>cuniculu<br>s |
| 1 | 1.00 | 1 | 1 | 0 | 0      | 0 | 0 | 0.001 | t | 91100  | AFQTPVHS                     | Mus<br>musculu<br>s              |
| 1 | 1.00 | 1 | 1 | 0 | 0      | 0 | 0 | 0.001 | t | 76275  | YVFYSGNG<br>PKASGGD<br>YCIQS | Oryctola<br>gus<br>cuniculu<br>s |
| 1 | 1.00 | 1 | 1 | 0 | 0      | 0 | 0 | 0.001 | t | 62859  | TAGLVGLL<br>TPGA             | Mus<br>musculu<br>s              |
| 1 | 1.00 | 1 | 1 | 0 | 0      | 0 | 0 | 0.001 | t | 91109  | AHFVQQT<br>P                 | Mus<br>musculu<br>s              |
| 1 | 1.00 | 1 | 1 | 0 | 0      | 0 | 0 | 0.001 | t | 62859  | TAGLVGLL<br>TPGA             | Rattus<br>norvegic<br>us         |
| 1 | 1.00 | 1 | 1 | 0 | 0      | 0 | 0 | 0.001 | t | 97650  | SLLTEVET                     | Mus<br>musculu<br>s              |

|   |      |   |   |   |   |   |   |       |   |       |                              |                                  |
|---|------|---|---|---|---|---|---|-------|---|-------|------------------------------|----------------------------------|
| 1 | 1.00 | 1 | 1 | 0 | 0 | 0 | 0 | 0.001 | t | 37660 | LLPHSNLD<br>HILEPSIPW<br>KSK | Mus<br>musculu<br>s              |
| 1 | 1.00 | 1 | 1 | 0 | 0 | 0 | 0 | 0.001 | t | 37660 | LLPHSNLD<br>HILEPSIPW<br>KSK | Mus<br>musculu<br>s              |
| 1 | 1.00 | 1 | 1 | 0 | 0 | 0 | 0 | 0.001 | t | 57812 | SFKVTALN<br>VVSRRYLA<br>SLHK | Sus<br>scrofa                    |
| 1 | 1.00 | 1 | 1 | 0 | 0 | 0 | 0 | 0.001 | t | 57542 | SELSQLS                      | Mus<br>musculu<br>s              |
| 1 | 1.00 | 1 | 1 | 0 | 0 | 0 | 0 | 0.001 | t | 37656 | LLPHSNLD                     | Mus<br>musculu<br>s              |
| 1 | 1.00 | 1 | 1 | 0 | 0 | 0 | 0 | 0.001 | t | 59374 | SLNTGWL<br>AGLFY             | Mus<br>musculu<br>s              |
| 1 | 1.00 | 1 | 1 | 0 | 0 | 0 | 0 | 0.001 | t | 38522 | LPHSNL                       | Rattus<br>norvegic<br>us         |
| 1 | 1.00 | 1 | 1 | 0 | 0 | 0 | 0 | 0.001 | t | 48819 | PPLGNWF<br>G                 | Rattus<br>norvegic<br>us         |
| 1 | 1.00 | 1 | 1 | 0 | 0 | 0 | 0 | 0.001 | t | 49539 | PSTSSKLRP<br>RWTFTSP<br>VTT  | Oryctola<br>gus<br>cuniculu<br>s |
| 1 | 1.00 | 1 | 1 | 0 | 0 | 0 | 0 | 0.001 | t | 14435 | ETIYNTTLK<br>Y               | Homo<br>sapiens                  |
| 1 | 1.00 | 1 | 1 | 0 | 0 | 0 | 0 | 0.001 | t | 14414 | ETHVTGGS<br>AGRT             | Rattus<br>norvegic<br>us         |
| 1 | 1.00 | 1 | 1 | 0 | 0 | 0 | 0 | 0.001 | t | 10433 | DTNNN                        | Mus<br>musculu<br>s              |
| 1 | 1.00 | 1 | 1 | 0 | 0 | 0 | 0 | 0.001 | t | 23975 | HHAEMQ<br>NPVYLIPET<br>VPYIK | Oryctola<br>gus<br>cuniculu<br>s |

|   |      |   |   |       |        |        |        |        |   |        |                     |                                  |
|---|------|---|---|-------|--------|--------|--------|--------|---|--------|---------------------|----------------------------------|
| 1 | 1.00 | 1 | 1 | 0     | 0      | 0      | 0      | 0.001  | t | 4429   | ASGQ                | Mus<br>musculu<br>s              |
| 1 | 1.00 | 1 | 1 | 0     | 0      | 0      | 0      | 0.001  | t | 6479   | CKGKIQAL<br>CENPEWA | Mus<br>musculu<br>s              |
| 1 | 1.00 | 1 | 1 | -0.02 | -0.018 | -0.02  | -0.02  | -0.018 | t | 122886 | RGTDEYFI<br>RKPP    | Rattus<br>norvegic<br>us         |
| 1 | 1.00 | 1 | 1 | 0.02  | 0.02   | 0.02   | 0.02   | 0.02   | t | 111394 | HDQTLPG<br>GVRLH    | Homo<br>sapiens                  |
| 1 | 1.00 | 1 | 1 | 0.02  | 0.024  | 0.029  | 0.021  | 0.02   | t | 37713  | LLQRATQ<br>QQ       | Homo<br>sapiens                  |
| 1 | 1.00 | 1 | 1 | 0.01  | 0.008  | -0.002 | 0.003  | 0.01   | t | 122577 | SHRTATAA<br>EELA    | Mus<br>musculu<br>s              |
| 1 | 1.00 | 1 | 1 | -0.01 | -0.013 | -0.006 | -0.01  | -0.01  | t | 78629  | DQKPPSR<br>QSQIESR  | Oryctola<br>gus<br>cuniculu<br>s |
| 1 | 1.00 | 1 | 1 | -0.05 | -0.048 | -0.041 | -0.05  | -0.05  | t | 100129 | HYKWLND<br>PLAAW    | Ovis<br>aries                    |
| 1 | 1.00 | 1 | 1 | -0.01 | -0.01  | -0.01  | -0.01  | -0.01  | t | 124286 | HPLSPRPL<br>Q       | Homo<br>sapiens                  |
| 1 | 1.00 | 1 | 1 | -0.05 | -0.05  | -0.05  | -0.05  | -0.05  | t | 103717 | VRRRHGLS<br>SLGWNLC | Homo<br>sapiens                  |
| 1 | 1.00 | 1 | 1 | -0.05 | -0.05  | -0.05  | -0.05  | -0.05  | t | 7947   | DEDSYGR<br>DPYSPSQD | Homo<br>sapiens                  |
| 1 | 1.00 | 1 | 1 | 0     | 0      | 0      | 0      | 0.002  | t | 49086  | PQQPFPQ<br>QPG      | Mus<br>musculu<br>s              |
| 1 | 1.00 | 1 | 1 | 0.01  | 0.007  | 0.005  | 0.01   | 0.011  | t | 97171  | ADVVISPN<br>D       | Oryctola<br>gus<br>cuniculu<br>s |
| 1 | 1.00 | 1 | 1 | -0.04 | -0.04  | -0.04  | -0.044 | -0.04  | t | 135894 | AHGCLFDR<br>RLCS    | Homo<br>sapiens                  |
| 1 | 1.00 | 1 | 1 | -0.02 | -0.023 | -0.017 | -0.02  | -0.019 | t | 133739 | WDRF                | Oryctola<br>gus<br>cuniculu<br>s |



|   |      |   |   |       |        |        |        |        |   |        |                              |                                  |
|---|------|---|---|-------|--------|--------|--------|--------|---|--------|------------------------------|----------------------------------|
| 1 | 1.00 | 1 | 1 | 0.06  | 0.067  | 0.051  | 0.057  | 0.06   | t | 108873 | DLICYEQL<br>NDSSEED<br>EIDG  | Gallus<br>gallus                 |
| 1 | 1.00 | 1 | 1 | 0.01  | 0.014  | 0.016  | 0.011  | 0.012  | t | 65325  | TNGLASL                      | Homo<br>sapiens                  |
| 1 | 1.00 | 1 | 1 | 0.01  | 0.01   | 0.009  | 0.01   | 0.01   | t | 39352  | LSFSCYLSV<br>TEQSEFYF<br>PRA | Homo<br>sapiens                  |
| 1 | 1.00 | 1 | 1 | -0.01 | -0.01  | -0.008 | -0.01  | -0.01  | t | 72909  | WNSQPSL<br>PYIRP             | Mus<br>musculu<br>s              |
| 1 | 1.00 | 1 | 1 | -0.02 | -0.016 | -0.025 | -0.019 | -0.019 | t | 53676  | REWARRN<br>GHNVSTR<br>GRI    | Homo<br>sapiens                  |
| 1 | 1.00 | 1 | 1 | -0.02 | -0.018 | -0.025 | -0.019 | -0.02  | t | 73904  | YFSMVGN<br>WAKVLVV<br>LLFAG  | Homo<br>sapiens                  |
| 1 | 1.00 | 1 | 1 | 0.04  | 0.044  | 0.054  | 0.041  | 0.039  | t | 67191  | TVVAPDKE<br>VLYEAFDE<br>MEEC | Homo<br>sapiens                  |
| 1 | 1.00 | 1 | 1 | -0.01 | -0.012 | -0.006 | -0.007 | -0.008 | t | 106865 | SRKFLNPD<br>FIEGVCT          | Mus<br>musculu<br>s              |
| 1 | 1.00 | 1 | 1 | 0.01  | 0.008  | 0.027  | 0.01   | 0.009  | t | 70482  | VPSSSSTPL<br>LY              | Oryctola<br>gus<br>cuniculu<br>s |
| 1 | 1.00 | 1 | 1 | -0.01 | -0.012 | -0.001 | -0.007 | -0.008 | t | 10037  | DRPVVY                       | Mus<br>musculu<br>s              |
| 1 | 1.00 | 1 | 1 | -0.05 | -0.05  | -0.044 | -0.053 | -0.052 | t | 3502   | APCIPYVR<br>GG               | Homo<br>sapiens                  |
| 1 | 1.00 | 1 | 1 | -0.01 | -0.01  | -0.01  | -0.01  | -0.008 | t | 36957  | LKMADPN<br>RFRGK             | Mus<br>musculu<br>s              |
| 1 | 1.00 | 1 | 1 | -0.01 | -0.01  | -0.01  | -0.01  | -0.008 | t | 36957  | LKMADPN<br>RFRGK             | Mus<br>musculu<br>s              |
| 1 | 1.00 | 1 | 1 | -0.03 | -0.028 | -0.026 | -0.027 | -0.03  | t | 46440  | NVPAGAG<br>AAILTPTP          | Homo<br>sapiens                  |
| 1 | 1.00 | 1 | 1 | 0.04  | 0.038  | 0.038  | 0.041  | 0.04   | t | 4499   | ASKATLIEE<br>GQRIAEM<br>LKSK | Homo<br>sapiens                  |

|   |      |   |   |       |        |        |        |        |   |        |                              |                         |
|---|------|---|---|-------|--------|--------|--------|--------|---|--------|------------------------------|-------------------------|
| 1 | 1.00 | 1 | 1 | -0.01 | -0.01  | -0.01  | -0.01  | -0.008 | t | 38915  | LQN                          | Mus<br>musculu<br>s     |
| 1 | 1.00 | 1 | 1 | 0     | -0.002 | 0.005  | 0.003  | -0.001 | t | 115101 | RDHSYQEE<br>AAMELKV<br>EDPFY | Mus<br>musculu<br>s     |
| 1 | 1.00 | 1 | 1 | 0.05  | 0.052  | 0.048  | 0.051  | 0.051  | t | 41016  | MADNGTI<br>TVEELKQL<br>LEQ   | Homo<br>sapiens         |
| 1 | 1.00 | 1 | 1 | 0.02  | 0.018  | 0.023  | 0.019  | 0.021  | t | 32580  | KNPEKPHF<br>PL               | Mus<br>musculu<br>s     |
| 1 | 1.00 | 1 | 1 | -0.04 | -0.04  | -0.04  | -0.04  | -0.04  | t | 103162 | FCGRIHTR<br>YSSAYEL          | Homo<br>sapiens         |
| 1 | 1.00 | 1 | 1 | -0.02 | -0.016 | -0.016 | -0.02  | -0.02  | t | 61192  | SSLRYGNV<br>LDVNAI           | Myodes<br>glareolu<br>s |
| 1 | 1.00 | 1 | 1 | -0.03 | -0.042 | -0.03  | -0.03  | -0.028 | t | 136364 | IDPLMFKY<br>WYNM             | Bos<br>taurus           |
| 1 | 1.00 | 1 | 1 | 0     | 0      | 0.002  | 0      | 0.001  | t | 108382 | GGVVIA                       | Mus<br>musculu<br>s     |
| 1 | 1.00 | 1 | 1 | 0     | 0.003  | 0.002  | 0      | 0.001  | t | 108382 | GGVVIA                       | Mus<br>musculu<br>s     |
| 1 | 1.00 | 1 | 1 | 0     | 0      | 0.002  | 0      | 0.001  | t | 23599  | HCLGKWL<br>GHPDKF            | Mus<br>musculu<br>s     |
| 1 | 1.00 | 1 | 1 | 0     | -0.002 | -0.001 | -0.003 | 0.001  | t | 122269 | ARQNLKD<br>AGE               | Mus<br>musculu<br>s     |
| 1 | 1.00 | 1 | 1 | 0.03  | 0.028  | 0.028  | 0.029  | 0.033  | t | 141764 | TLNFNAEG<br>EPELLMLA<br>NWR  | Mus<br>musculu<br>s     |
| 1 | 1.00 | 1 | 1 | 0     | 0      | 0      | 0      | 0.001  | t | 116085 | EPANPSEK                     | Mus<br>musculu<br>s     |
| 1 | 1.00 | 1 | 1 | 0     | -0.002 | 0      | -0.001 | 0.001  | t | 28603  | ISLTEWSM<br>WYRH             | Mus<br>musculu<br>s     |
| 1 | 1.00 | 1 | 1 | 0     | 0      | -0.002 | -0.004 | 0      | t | 118430 | ISDAMKKV<br>GRKGV            | Homo<br>sapiens         |

|   |      |   |   |       |        |        |        |        |   |        |                              |                                  |
|---|------|---|---|-------|--------|--------|--------|--------|---|--------|------------------------------|----------------------------------|
| 1 | 1.00 | 1 | 1 | 0     | 0      | 0.02   | 0.006  | 0      | t | 16265  | FINTSKGQ<br>KC               | Homo<br>sapiens                  |
| 1 | 1.00 | 1 | 1 | 0     | 0.002  | 0      | -0.003 | 0      | t | 95816  | SAQSGTSA<br>QSGT             | Homo<br>sapiens                  |
| 1 | 1.00 | 1 | 1 | 0     | 0.002  | 0      | -0.003 | 0      | t | 95816  | SAQSGTSA<br>QSGT             | Homo<br>sapiens                  |
| 1 | 1.00 | 1 | 1 | 0     | 0      | 0      | -0.003 | 0      | t | 43242  | NANPNAN<br>PNANP             | Homo<br>sapiens                  |
| 1 | 1.00 | 1 | 1 | 0     | 0      | 0      | -0.003 | 0      | t | 43242  | NANPNAN<br>PNANP             | Homo<br>sapiens                  |
| 1 | 1.00 | 1 | 1 | 0     | 0      | 0      | -0.003 | 0      | t | 22986  | GVGSSAVI<br>LDDNFVT          | Sus<br>scrofa                    |
| 1 | 1.00 | 1 | 1 | 0     | 0      | 0      | -0.003 | 0      | t | 8888   | DKIDWRES<br>GYVTEVKD<br>QGNC | Bos<br>taurus                    |
| 1 | 1.00 | 1 | 1 | 0     | 0      | 0      | -0.003 | 0      | t | 9694   | DPNANPN<br>VDPNANP<br>NV     | Homo<br>sapiens                  |
| 1 | 1.00 | 1 | 1 | -0.01 | -0.01  | -0.014 | -0.007 | -0.01  | t | 30407  | KEGLRNIT<br>AGANPIEV<br>KRGm | Homo<br>sapiens                  |
| 1 | 1.00 | 1 | 1 | -0.02 | -0.02  | -0.02  | -0.02  | -0.018 | t | 118127 | SDDDMGF<br>GLFD              | Homo<br>sapiens                  |
| 1 | 1.00 | 1 | 1 | -0.08 | -0.082 | -0.078 | -0.08  | -0.081 | t | 120077 | LMRYWAN<br>FAR               | Oryctola<br>gus<br>cuniculu<br>s |
| 1 | 1.00 | 1 | 1 | -0.08 | -0.08  | -0.078 | -0.08  | -0.081 | t | 120077 | LMRYWAN<br>FAR               | Mus<br>musculu<br>s              |
| 1 | 1.00 | 1 | 1 | 0     | 0      | 0.008  | 0.006  | 0      | t | 98435  | RYPHYSSLI<br>KPESSL          | Homo<br>sapiens                  |

|   |      |   |   |      |        |       |        |        |   |        |                              |                                  |
|---|------|---|---|------|--------|-------|--------|--------|---|--------|------------------------------|----------------------------------|
| 1 | 1.00 | 1 | 1 | 0    | 0.003  | 0.014 | 0      | 0      | t | 14686  | EVETPIRN                     | Mus<br>musculu<br>s              |
| 1 | 1.00 | 1 | 1 | 0    | 0.003  | 0.014 | 0      | 0      | t | 14686  | EVETPIRN                     | Mus<br>musculu<br>s              |
| 1 | 1.00 | 1 | 1 | 0.02 | 0.022  | 0.009 | 0.021  | 0.022  | t | 44235  | NIGTGTSA<br>YTSLNVLA<br>RFTD | Homo<br>sapiens                  |
| 1 | 1.00 | 1 | 1 | 0.04 | 0.04   | 0.04  | 0.04   | 0.04   | t | 140462 | FNTKHDM<br>QGDS              | Mus<br>musculu<br>s              |
| 1 | 1.00 | 1 | 1 | 0    | -0.003 | 0     | 0      | -0.002 | t | 106264 | ARDMWR<br>AYSDMRE<br>ANYI    | Oryctola<br>gus<br>cuniculu<br>s |
| 1 | 1.00 | 1 | 1 | 0    | -0.001 | 0     | 0      | 0.002  | t | 11560  | EEDQKARE                     | Anas<br>platyrhy<br>nchos        |
| 1 | 1.00 | 1 | 1 | 0    | 0.003  | 0     | 0      | 0.002  | t | 7850   | DDPPATVY<br>RYDSRPPE<br>D    | Mus<br>musculu<br>s              |
| 1 | 1.00 | 1 | 1 | 0    | 0.003  | 0     | 0      | 0.002  | t | 7850   | DDPPATVY<br>RYDSRPPE<br>D    | Mus<br>musculu<br>s              |
| 1 | 1.00 | 1 | 1 | 0    | 0.004  | 0     | 0      | 0.002  | t | 7850   | DDPPATVY<br>RYDSRPPE<br>D    | Homo<br>sapiens                  |
| 1 | 1.00 | 1 | 1 | 0    | 0      | 0.005 | 0      | 0      | t | 159042 | NTFVVDG<br>PETKECPT<br>A     | Mus<br>musculu<br>s              |
| 1 | 1.00 | 1 | 1 | 0    | -0.004 | 0     | -0.003 | 0      | t | 138608 | RVGAHDP                      | Oryctola<br>gus<br>cuniculu<br>s |
| 1 | 1.00 | 1 | 1 | 0    | -0.004 | 0     | -0.003 | 0      | t | 136082 | SDDPSPGA<br>IDSNNS           | Oryctola<br>gus<br>cuniculu<br>s |
| 1 | 1.00 | 1 | 1 | 0    | 0.01   | 0     | -0.003 | 0      | t | 137185 | HNYGVVE<br>SFTVQRRV          | Pan<br>troglody<br>tes           |
| 1 | 1.00 | 1 | 1 | 0    | -0.004 | 0     | -0.003 | 0      | t | 138304 | ATVQLPQ                      | Oryctola<br>gus<br>cuniculu<br>s |

|   |      |   |   |   |        |   |        |   |   |        |                             |                                  |
|---|------|---|---|---|--------|---|--------|---|---|--------|-----------------------------|----------------------------------|
| 1 | 1.00 | 1 | 1 | 0 | -0.004 | 0 | -0.003 | 0 | t | 136083 | SEGAEYDD<br>QTSQREKE<br>DDK | Oryctola<br>gus<br>cuniculu<br>s |
| 1 | 1.00 | 1 | 1 | 0 | -0.002 | 0 | -0.003 | 0 | t | 137298 | TELGRPDA<br>EYWNSQK         | Mus<br>musculu<br>s              |
| 1 | 1.00 | 1 | 1 | 0 | -0.004 | 0 | -0.003 | 0 | t | 137165 | GDTRPRFL<br>WQPKREC         | Oryctola<br>gus<br>cuniculu<br>s |
| 1 | 1.00 | 1 | 1 | 0 | -0.004 | 0 | -0.003 | 0 | t | 136081 | RTTLQSDQ<br>EEIDY           | Oryctola<br>gus<br>cuniculu<br>s |
| 1 | 1.00 | 1 | 1 | 0 | -0.002 | 0 | -0.003 | 0 | t | 139044 | EYWYCGM<br>NRTGC            | Mus<br>musculu<br>s              |
| 1 | 1.00 | 1 | 1 | 0 | -0.004 | 0 | -0.003 | 0 | t | 136092 | YKSQYLNN<br>GPQRIGRK<br>YKK | Oryctola<br>gus<br>cuniculu<br>s |
| 1 | 1.00 | 1 | 1 | 0 | -0.004 | 0 | -0.003 | 0 | t | 134200 | PVVNSLDP<br>PLLTRY          | Oryctola<br>gus<br>cuniculu<br>s |
| 1 | 1.00 | 1 | 1 | 0 | 0.01   | 0 | -0.003 | 0 | t | 137298 | TELGRPDA<br>EYWNSQK         | Pan<br>troglody<br>tes           |
| 1 | 1.00 | 1 | 1 | 0 | -0.004 | 0 | -0.003 | 0 | t | 136064 | HQIALRME<br>VLGCEAQ<br>DLY  | Oryctola<br>gus<br>cuniculu<br>s |
| 1 | 1.00 | 1 | 1 | 0 | -0.002 | 0 | -0.003 | 0 | t | 140665 | DTAAQI                      | Mus<br>musculu<br>s              |
| 1 | 1.00 | 1 | 1 | 0 | -0.002 | 0 | -0.003 | 0 | t | 147564 | CYGTKPW<br>MC               | Mus<br>musculu<br>s              |
| 1 | 1.00 | 1 | 1 | 0 | -0.002 | 0 | -0.003 | 0 | t | 137165 | GDTRPRFL<br>WQPKREC         | Mus<br>musculu<br>s              |
| 1 | 1.00 | 1 | 1 | 0 | -0.004 | 0 | -0.003 | 0 | t | 136420 | KIHAREIFD<br>SRGNPTVE       | Oryctola<br>gus<br>cuniculu<br>s |
| 1 | 1.00 | 1 | 1 | 0 | -0.002 | 0 | -0.003 | 0 | t | 137185 | HNYGVVE<br>SFTVQRRV         | Mus<br>musculu<br>s              |

|   |      |   |   |   |        |   |        |   |   |        |                              |                                  |
|---|------|---|---|---|--------|---|--------|---|---|--------|------------------------------|----------------------------------|
| 1 | 1.00 | 1 | 1 | 0 | -0.002 | 0 | -0.003 | 0 | t | 119925 | HFPFDEQ<br>NGSMKLG<br>TWT    | Mus<br>musculu<br>s              |
| 1 | 1.00 | 1 | 1 | 0 | -0.002 | 0 | -0.003 | 0 | t | 119580 | FMESGEW<br>VIKESRGW<br>KH    | Mus<br>musculu<br>s              |
| 1 | 1.00 | 1 | 1 | 0 | -0.002 | 0 | -0.003 | 0 | t | 119563 | EDHRQVV<br>EVTVGLQL<br>I     | Mus<br>musculu<br>s              |
| 1 | 1.00 | 1 | 1 | 0 | -0.002 | 0 | -0.003 | 0 | t | 125386 | DVSQTSVT<br>ALPSKGLE<br>HLKE | Mus<br>musculu<br>s              |
| 1 | 1.00 | 1 | 1 | 0 | -0.002 | 0 | -0.003 | 0 | t | 117509 | GQIPPGA<br>M                 | Mus<br>musculu<br>s              |
| 1 | 1.00 | 1 | 1 | 0 | -0.004 | 0 | -0.003 | 0 | t | 125411 | FQGLCNET<br>LTLKLYNN<br>GFTS | Oryctola<br>gus<br>cuniculu<br>s |
| 1 | 1.00 | 1 | 1 | 0 | -0.002 | 0 | -0.003 | 0 | t | 125413 | FRVTCKDI<br>QRIPSLPPS<br>TQT | Mus<br>musculu<br>s              |
| 1 | 1.00 | 1 | 1 | 0 | -0.002 | 0 | -0.003 | 0 | t | 119579 | FKDYSSVV<br>RPVEDHR<br>Q     | Mus<br>musculu<br>s              |
| 1 | 1.00 | 1 | 1 | 0 | -0.004 | 0 | -0.003 | 0 | t | 134020 | CPEEPQLR<br>MKNNEEA<br>EDYDD | Oryctola<br>gus<br>cuniculu<br>s |
| 1 | 1.00 | 1 | 1 | 0 | -0.002 | 0 | -0.003 | 0 | t | 120168 | RGWKHSV<br>TYSGGPDT<br>PY    | Mus<br>musculu<br>s              |
| 1 | 1.00 | 1 | 1 | 0 | -0.004 | 0 | -0.003 | 0 | t | 117587 | NLSSLELG<br>DSALYFCA         | Oryctola<br>gus<br>cuniculu<br>s |
| 1 | 1.00 | 1 | 1 | 0 | -0.004 | 0 | -0.003 | 0 | t | 134015 | CDKNTGD<br>YYEDSYED          | Oryctola<br>gus<br>cuniculu<br>s |
| 1 | 1.00 | 1 | 1 | 0 | -0.002 | 0 | -0.003 | 0 | t | 131391 | DGSHTRG                      | Mus<br>musculu<br>s              |
| 1 | 1.00 | 1 | 1 | 0 | -0.004 | 0 | -0.003 | 0 | t | 120699 | KMFPEVKE<br>KGMAALP<br>RL    | Oryctola<br>gus<br>cuniculu<br>s |

|   |      |   |   |   |        |   |        |   |   |        |                              |                                  |
|---|------|---|---|---|--------|---|--------|---|---|--------|------------------------------|----------------------------------|
| 1 | 1.00 | 1 | 1 | 0 | -0.004 | 0 | -0.003 | 0 | t | 117653 | TLESLPAPE<br>TSVYFCA         | Oryctola<br>gus<br>cuniculu<br>s |
| 1 | 1.00 | 1 | 1 | 0 | -0.004 | 0 | -0.003 | 0 | t | 121161 | AVEKVKRT<br>KDE              | Oryctola<br>gus<br>cuniculu<br>s |
| 1 | 1.00 | 1 | 1 | 0 | -0.004 | 0 | -0.003 | 0 | t | 124604 | QIERDTER<br>DRFLSAPE<br>AV   | Oryctola<br>gus<br>cuniculu<br>s |
| 1 | 1.00 | 1 | 1 | 0 | -0.002 | 0 | -0.003 | 0 | t | 119741 | AIFKSYGEII<br>VTHFPFD        | Mus<br>musculu<br>s              |
| 1 | 1.00 | 1 | 1 | 0 | -0.002 | 0 | -0.003 | 0 | t | 131412 | ERGLRYL                      | Mus<br>musculu<br>s              |
| 1 | 1.00 | 1 | 1 | 0 | -0.002 | 0 | -0.003 | 0 | t | 131413 | ERILTIS                      | Mus<br>musculu<br>s              |
| 1 | 1.00 | 1 | 1 | 0 | -0.004 | 0 | -0.003 | 0 | t | 120930 | RYRPGTVA<br>LREIRRYQ         | Oryctola<br>gus<br>cuniculu<br>s |
| 1 | 1.00 | 1 | 1 | 0 | -0.002 | 0 | -0.003 | 0 | t | 119578 | FAIVKFTKV<br>LLQYTGH         | Mus<br>musculu<br>s              |
| 1 | 1.00 | 1 | 1 | 0 | -0.002 | 0 | -0.003 | 0 | t | 132504 | NNAIEPRS<br>FSQNPPV          | Mus<br>musculu<br>s              |
| 1 | 1.00 | 1 | 1 | 0 | -0.004 | 0 | -0.003 | 0 | t | 132336 | GHEAQPH<br>SRPYMASL          | Oryctola<br>gus<br>cuniculu<br>s |
| 1 | 1.00 | 1 | 1 | 0 | -0.002 | 0 | -0.003 | 0 | t | 119624 | PDTPYLDIT<br>YHFVMQR<br>L    | Mus<br>musculu<br>s              |
| 1 | 1.00 | 1 | 1 | 0 | -0.004 | 0 | -0.003 | 0 | t | 125540 | QSLRQRKS<br>VNALNSPL<br>HQEY | Oryctola<br>gus<br>cuniculu<br>s |
| 1 | 1.00 | 1 | 1 | 0 | -0.002 | 0 | -0.003 | 0 | t | 131762 | YAASSYL                      | Mus<br>musculu<br>s              |
| 1 | 1.00 | 1 | 1 | 0 | -0.004 | 0 | -0.003 | 0 | t | 117545 | KIQRTQQE<br>DSAVYLCA         | Oryctola<br>gus<br>cuniculu<br>s |

|   |      |   |   |   |        |   |        |   |   |        |                              |                                  |
|---|------|---|---|---|--------|---|--------|---|---|--------|------------------------------|----------------------------------|
| 1 | 1.00 | 1 | 1 | 0 | -0.002 | 0 | -0.003 | 0 | t | 119598 | INPESDQP<br>DLSNFMES<br>G    | Mus<br>musculu<br>s              |
| 1 | 1.00 | 1 | 1 | 0 | -0.002 | 0 | -0.003 | 0 | t | 131545 | LMKINS                       | Mus<br>musculu<br>s              |
| 1 | 1.00 | 1 | 1 | 0 | -0.002 | 0 | -0.003 | 0 | t | 131766 | YCQTWGS                      | Mus<br>musculu<br>s              |
| 1 | 1.00 | 1 | 1 | 0 | -0.004 | 0 | -0.003 | 0 | t | 120682 | KILPEVKEK<br>HEFLSRL         | Oryctola<br>gus<br>cuniculu<br>s |
| 1 | 1.00 | 1 | 1 | 0 | -0.004 | 0 | -0.003 | 0 | t | 122878 | PYEFSRKV<br>PTFATPW<br>PDFVP | Oryctola<br>gus<br>cuniculu<br>s |
| 1 | 1.00 | 1 | 1 | 0 | -0.004 | 0 | -0.003 | 0 | t | 123386 | KPKSQETP                     | Oryctola<br>gus<br>cuniculu<br>s |
| 1 | 1.00 | 1 | 1 | 0 | -0.002 | 0 | -0.003 | 0 | t | 119741 | AIFKSYGEII<br>VTHFPFD        | Mus<br>musculu<br>s              |
| 1 | 1.00 | 1 | 1 | 0 | -0.002 | 0 | -0.003 | 0 | t | 110733 | VGENVPD<br>DLYIKGSG          | Mus<br>musculu<br>s              |
| 1 | 1.00 | 1 | 1 | 0 | -0.002 | 0 | -0.003 | 0 | t | 105021 | VHHQKLV<br>FFAEDVGS<br>NK    | Mus<br>musculu<br>s              |
| 1 | 1.00 | 1 | 1 | 0 | -0.004 | 0 | -0.003 | 0 | t | 104586 | NRVAPNV<br>RQ                | Oryctola<br>gus<br>cuniculu<br>s |
| 1 | 1.00 | 1 | 1 | 0 | -0.002 | 0 | -0.003 | 0 | t | 107087 | ARGLTGRP<br>GDA              | Mus<br>musculu<br>s              |
| 1 | 1.00 | 1 | 1 | 0 | -0.002 | 0 | -0.003 | 0 | t | 107087 | ARGLTGRP<br>GDA              | Rattus<br>norvegic<br>us         |
| 1 | 1.00 | 1 | 1 | 0 | -0.002 | 0 | -0.003 | 0 | t | 106634 | LVGPRGER<br>GFP              | Mus<br>musculu<br>s              |
| 1 | 1.00 | 1 | 1 | 0 | -0.002 | 0 | -0.003 | 0 | t | 104443 | DAEFRHDS<br>GYE              | Mus<br>musculu<br>s              |
| 1 | 1.00 | 1 | 1 | 0 | -0.004 | 0 | -0.003 | 0 | t | 111585 | NKSEVPLD<br>ICTSICKYP<br>DYI | Oryctola<br>gus<br>cuniculu<br>s |



|   |      |   |   |   |        |   |        |   |   |        |                              |                                  |
|---|------|---|---|---|--------|---|--------|---|---|--------|------------------------------|----------------------------------|
| 1 | 1.00 | 1 | 1 | 0 | -0.002 | 0 | -0.003 | 0 | t | 105319 | LVFFAEDV<br>GSNK             | Mus<br>musculu<br>s              |
| 1 | 1.00 | 1 | 1 | 0 | -0.004 | 0 | -0.003 | 0 | t | 113848 | SGKDGHH<br>AA                | Oryctola<br>gus<br>cuniculu<br>s |
| 1 | 1.00 | 1 | 1 | 0 | -0.004 | 0 | -0.003 | 0 | t | 113401 | FKLPGLNS<br>R                | Oryctola<br>gus<br>cuniculu<br>s |
| 1 | 1.00 | 1 | 1 | 0 | -0.004 | 0 | -0.003 | 0 | t | 113400 | FKLGGRDS<br>R                | Oryctola<br>gus<br>cuniculu<br>s |
| 1 | 1.00 | 1 | 1 | 0 | -0.002 | 0 | -0.003 | 0 | t | 102564 | KKRPKPGG<br>GWNT             | Mus<br>musculu<br>s              |
| 1 | 1.00 | 1 | 1 | 0 | -0.004 | 0 | -0.003 | 0 | t | 117366 | RRREGPDR<br>SPR              | Oryctola<br>gus<br>cuniculu<br>s |
| 1 | 1.00 | 1 | 1 | 0 | -0.004 | 0 | -0.003 | 0 | t | 109406 | KIQPSEPR<br>DSAVYFCA         | Oryctola<br>gus<br>cuniculu<br>s |
| 1 | 1.00 | 1 | 1 | 0 | -0.004 | 0 | -0.003 | 0 | t | 111915 | VHTGFGA<br>MDFTTLQ<br>ANKSEV | Oryctola<br>gus<br>cuniculu<br>s |
| 1 | 1.00 | 1 | 1 | 0 | -0.004 | 0 | -0.003 | 0 | t | 105021 | VHHQKL<br>VFFAEDVGS<br>NK    | Oryctola<br>gus<br>cuniculu<br>s |
| 1 | 1.00 | 1 | 1 | 0 | -0.004 | 0 | -0.003 | 0 | t | 117348 | PTRAPSGP<br>RPP              | Oryctola<br>gus<br>cuniculu<br>s |
| 1 | 1.00 | 1 | 1 | 0 | -0.004 | 0 | -0.003 | 0 | t | 117331 | MKLVRFL<br>MKLSHETV<br>TIELK | Oryctola<br>gus<br>cuniculu<br>s |
| 1 | 1.00 | 1 | 1 | 0 | -0.004 | 0 | -0.003 | 0 | t | 76350  | YVLLSEKKI<br>S               | Oryctola<br>gus<br>cuniculu<br>s |
| 1 | 1.00 | 1 | 1 | 0 | -0.004 | 0 | -0.003 | 0 | t | 68987  | VIIEQSWG<br>SP               | Oryctola<br>gus<br>cuniculu<br>s |

|   |      |   |   |   |        |   |        |   |   |       |                              |                                  |
|---|------|---|---|---|--------|---|--------|---|---|-------|------------------------------|----------------------------------|
| 1 | 1.00 | 1 | 1 | 0 | -0.002 | 0 | -0.003 | 0 | t | 68200 | VEGMQFD<br>RGYLSPYF          | Mus<br>musculu<br>s              |
| 1 | 1.00 | 1 | 1 | 0 | -0.002 | 0 | -0.003 | 0 | t | 68200 | VEGMQFD<br>RGYLSPYF          | Mus<br>musculu<br>s              |
| 1 | 1.00 | 1 | 1 | 0 | -0.002 | 0 | -0.003 | 0 | t | 74374 | YISPYFINT<br>S               | Mus<br>musculu<br>s              |
| 1 | 1.00 | 1 | 1 | 0 | -0.002 | 0 | -0.003 | 0 | t | 74871 | YLPVGGLR<br>RIGG             | Mus<br>musculu<br>s              |
| 1 | 1.00 | 1 | 1 | 0 | -0.002 | 0 | -0.003 | 0 | t | 74871 | YLPVGGLR<br>RIGG             | Mus<br>musculu<br>s              |
| 1 | 1.00 | 1 | 1 | 0 | -0.004 | 0 | -0.003 | 0 | t | 74374 | YISPYFINT<br>S               | Oryctola<br>gus<br>cuniculu<br>s |
| 1 | 1.00 | 1 | 1 | 0 | -0.002 | 0 | -0.003 | 0 | t | 48479 | PLSLRSK                      | Mus<br>musculu<br>s              |
| 1 | 1.00 | 1 | 1 | 0 | -0.004 | 0 | -0.003 | 0 | t | 48479 | PLSLRSK                      | Oryctola<br>gus<br>cuniculu<br>s |
| 1 | 1.00 | 1 | 1 | 0 | -0.002 | 0 | -0.003 | 0 | t | 43248 | NANPNAN<br>PNANPNA<br>NPNANP | Mus<br>musculu<br>s              |
| 1 | 1.00 | 1 | 1 | 0 | -0.002 | 0 | -0.003 | 0 | t | 43248 | NANPNAN<br>PNANPNA<br>NPNANP | Mus<br>musculu<br>s              |
| 1 | 1.00 | 1 | 1 | 0 | -0.004 | 0 | -0.003 | 0 | t | 49855 | PVEIRRGV<br>ML               | Oryctola<br>gus<br>cuniculu<br>s |
| 1 | 1.00 | 1 | 1 | 0 | -0.002 | 0 | -0.003 | 0 | t | 21254 | GMDGTQL<br>DRW               | Mus<br>musculu<br>s              |
| 1 | 1.00 | 1 | 1 | 0 | -0.004 | 0 | -0.003 | 0 | t | 29342 | IVLGGGCA<br>LL               | Oryctola<br>gus<br>cuniculu<br>s |
| 1 | 1.00 | 1 | 1 | 0 | -0.004 | 0 | -0.003 | 0 | t | 30710 | KFDRGYIS<br>PY               | Oryctola<br>gus<br>cuniculu<br>s |

|   |      |   |   |       |        |        |        |        |   |        |                              |                                  |
|---|------|---|---|-------|--------|--------|--------|--------|---|--------|------------------------------|----------------------------------|
| 1 | 1.00 | 1 | 1 | 0     | -0.004 | 0      | -0.003 | 0      | t | 11081  | EAIPALTA<br>VETGHTSQ<br>V    | Oryctola<br>gus<br>cuniculu<br>s |
| 1 | 1.00 | 1 | 1 | 0     | -0.002 | 0      | -0.003 | 0      | t | 9940   | DRAAGQP<br>AGNGAGG<br>QAAGGN | Mus<br>musculu<br>s              |
| 1 | 1.00 | 1 | 1 | 0     | -0.004 | 0      | -0.003 | 0      | t | 5568   | AVTMGPK<br>GRT               | Oryctola<br>gus<br>cuniculu<br>s |
| 1 | 1.00 | 1 | 1 | 0     | -0.002 | 0      | -0.003 | 0      | t | 9940   | DRAAGQP<br>AGNGAGG<br>QAAGGN | Mus<br>musculu<br>s              |
| 1 | 1.00 | 1 | 1 | 0     | -0.002 | 0      | -0.003 | 0      | t | 3290   | ANGAGNQ<br>PGANGAG<br>NQPG   | Mus<br>musculu<br>s              |
| 1 | 1.00 | 1 | 1 | 0     | -0.002 | 0      | -0.003 | 0      | t | 3290   | ANGAGNQ<br>PGANGAG<br>NQPG   | Mus<br>musculu<br>s              |
| 1 | 1.00 | 1 | 1 | 0     | -0.002 | 0      | -0.003 | 0      | t | 3290   | ANGAGNQ<br>PGANGAG<br>NQPG   | Mus<br>musculu<br>s              |
| 1 | 1.00 | 1 | 1 | -0.03 | -0.03  | -0.021 | -0.03  | -0.034 | t | 108089 | RAGRFGY<br>QR                | Mus<br>musculu<br>s              |
| 1 | 1.00 | 1 | 1 | -0.01 | -0.01  | -0.01  | -0.01  | -0.01  | t | 136361 | HVRIPPTM<br>PEAW             | Gallus<br>gallus                 |
| 1 | 1.00 | 1 | 1 | -0.03 | -0.03  | -0.03  | -0.03  | -0.03  | t | 64498  | TIVIRV                       | Homo<br>sapiens                  |
| 1 | 1.00 | 1 | 1 | -0.03 | -0.03  | -0.03  | -0.03  | -0.03  | t | 79684  | YHQTTP                       | Oryctola<br>gus<br>cuniculu<br>s |
| 1 | 1.00 | 1 | 1 | -0.05 | -0.05  | -0.05  | -0.05  | -0.05  | t | 115607 | GPRHPIRA<br>LVGD             | Homo<br>sapiens                  |
| 1 | 1.00 | 1 | 1 | -0.05 | -0.05  | -0.05  | -0.05  | -0.05  | t | 115607 | GPRHPIRA<br>LVGD             | Homo<br>sapiens                  |
| 1 | 1.00 | 1 | 1 | 0.04  | 0.044  | 0.04   | 0.047  | 0.04   | t | 135486 | PELEETLTH<br>TITKLNAE<br>NNA | Homo<br>sapiens                  |
| 1 | 1.00 | 1 | 1 | 0     | 0      | 0      | 0      | 0.001  | t | 30262  | KDTNNN                       | Mus<br>musculu<br>s              |
| 1 | 1.00 | 1 | 1 | -0.01 | -0.01  | -0.01  | -0.014 | -0.01  | t | 115603 | ELKVEDPF<br>YWVS             | Homo<br>sapiens                  |

|   |      |   |   |       |        |        |       |        |   |        |                              |                                  |
|---|------|---|---|-------|--------|--------|-------|--------|---|--------|------------------------------|----------------------------------|
| 1 | 1.00 | 1 | 1 | 0.01  | 0.014  | 0.016  | 0.007 | 0.01   | t | 49414  | PSKPTTKQ<br>RQNK             | Homo<br>sapiens                  |
| 1 | 1.00 | 1 | 1 | 0.01  | 0.006  | 0.004  | 0.01  | 0.01   | t | 128086 | QTGWCAF<br>QLCNSYDL<br>F     | Mus<br>musculu<br>s              |
| 1 | 1.00 | 1 | 1 | 0     | 0.004  | -0.001 | 0     | 0.002  | t | 9524   | DNPASTT<br>NKDK              | Cavia<br>porcellu<br>s           |
| 1 | 1.00 | 1 | 1 | 0.05  | 0.048  | 0.05   | 0.047 | 0.05   | t | 7782   | DDGKGDR<br>SHKNEDES<br>ALASK | Mus<br>musculu<br>s              |
| 1 | 1.00 | 1 | 1 | 0     | 0.003  | 0.011  | 0     | -0.001 | t | 106347 | DMQLYPV<br>LTPH              | Mus<br>musculu<br>s              |
| 1 | 1.00 | 1 | 1 | 0.01  | 0.01   | 0.01   | 0.01  | 0.01   | t | 135836 | DLFGNVLL<br>GQRLDQG          | Mus<br>musculu<br>s              |
| 1 | 1.00 | 1 | 1 | 0.01  | 0.01   | 0.01   | 0.01  | 0.01   | t | 135836 | DLFGNVLL<br>GQRLDQG          | Mus<br>musculu<br>s              |
| 1 | 1.00 | 1 | 1 | 0     | 0      | -0.001 | 0.001 | 0      | t | 68618  | VGAESCCR<br>PFGSLG           | Homo<br>sapiens                  |
| 1 | 1.00 | 1 | 1 | 0.04  | 0.037  | 0.04   | 0.04  | 0.042  | t | 113344 | DTFVVSSS<br>DS               | Oryctola<br>gus<br>cuniculu<br>s |
| 1 | 1.00 | 1 | 1 | -0.01 | -0.01  | -0.008 | -0.01 | -0.01  | t | 110604 | GLTGRPG<br>DAGPQGK<br>V      | Mus<br>musculu<br>s              |
| 1 | 1.00 | 1 | 1 | 0     | -0.007 | 0      | 0     | 0.001  | t | 153827 | EQQYNKPL<br>CDL              | Oryctola<br>gus<br>cuniculu<br>s |
| 1 | 1.00 | 1 | 1 | 0     | -0.003 | 0      | 0     | 0.001  | t | 119048 | VSDYEMKL<br>MDLDVEQ          | Oryctola<br>gus<br>cuniculu<br>s |
| 1 | 1.00 | 1 | 1 | 0     | -0.003 | 0      | 0     | 0.001  | t | 108522 | LHEYMLDL<br>QPETDL           | Oryctola<br>gus<br>cuniculu<br>s |
| 1 | 1.00 | 1 | 1 | 0     | -0.003 | 0      | 0     | 0.001  | t | 111193 | DGPAGQA<br>EPDRAHY<br>NI     | Oryctola<br>gus<br>cuniculu<br>s |

|   |      |   |   |   |        |   |   |       |   |        |                        |                       |
|---|------|---|---|---|--------|---|---|-------|---|--------|------------------------|-----------------------|
| 1 | 1.00 | 1 | 1 | 0 | -0.003 | 0 | 0 | 0.001 | t | 111309 | GDTPTLHEYMLDLQ         | Oryctolagus cuniculus |
| 1 | 1.00 | 1 | 1 | 0 | -0.007 | 0 | 0 | 0.001 | t | 61589  | STEQNVPDPQVG           | Oryctolagus cuniculus |
| 1 | 1.00 | 1 | 1 | 0 | 0.014  | 0 | 0 | 0.001 | t | 60663  | SRGAPGGGFVPSLQGVVP     | Pan troglodytes       |
| 1 | 1.00 | 1 | 1 | 0 | -0.003 | 0 | 0 | 0.001 | t | 95058  | AGLQND                 | Oryctolagus cuniculus |
| 1 | 1.00 | 1 | 1 | 0 | -0.004 | 0 | 0 | 0.001 | t | 61589  | STEQNVPDPQVG           | Mus musculus          |
| 1 | 1.00 | 1 | 1 | 0 | 0.014  | 0 | 0 | 0.001 | t | 63217  | TDQMEVDSGPRKRPLRGG     | Pan troglodytes       |
| 1 | 1.00 | 1 | 1 | 0 | 0.002  | 0 | 0 | 0.001 | t | 55951  | RSRSES                 | Rattus norvegicus     |
| 1 | 1.00 | 1 | 1 | 0 | -0.003 | 0 | 0 | 0.001 | t | 56962  | SARDGIRDAMIGLREEMIEK   | Oryctolagus cuniculus |
| 1 | 1.00 | 1 | 1 | 0 | -0.003 | 0 | 0 | 0.001 | t | 43215  | NALTQPV DQLLK          | Oryctolagus cuniculus |
| 1 | 1.00 | 1 | 1 | 0 | -0.003 | 0 | 0 | 0.001 | t | 49749  | PTPSDNPF SKLYKETIE TFD | Oryctolagus cuniculus |
| 1 | 1.00 | 1 | 1 | 0 | 0      | 0 | 0 | 0.001 | t | 43215  | NALTQPV DQLLK          | Rattus norvegicus     |
| 1 | 1.00 | 1 | 1 | 0 | -0.003 | 0 | 0 | 0.001 | t | 37660  | LLPHSNLDHILEPSIPWKSK   | Oryctolagus cuniculus |
| 1 | 1.00 | 1 | 1 | 0 | -0.003 | 0 | 0 | 0.001 | t | 51393  | QLKLNWF KKGSS          | Oryctolagus cuniculus |

|   |      |   |   |       |        |        |        |        |   |        |                              |                                  |
|---|------|---|---|-------|--------|--------|--------|--------|---|--------|------------------------------|----------------------------------|
| 1 | 1.00 | 1 | 1 | 0     | 0.014  | 0      | 0      | 0.001  | t | 19269  | GEGAPPA<br>KRARTDQ<br>ME     | Pan<br>troglody<br>tes           |
| 1 | 1.00 | 1 | 1 | 0     | 0.002  | 0      | 0      | 0.001  | t | 10801  | DWEDRY<br>RE                 | Rattus<br>norvegic<br>us         |
| 1 | 1.00 | 1 | 1 | 0     | 0.014  | 0      | 0      | 0.001  | t | 29852  | KALENKK<br>QLSAGGK<br>NLS    | Pan<br>troglody<br>tes           |
| 1 | 1.00 | 1 | 1 | 0     | -0.003 | 0      | 0      | 0.001  | t | 9524   | DNPASTT<br>NKDK              | Oryctola<br>gus<br>cuniculu<br>s |
| 1 | 1.00 | 1 | 1 | -0.02 | -0.02  | -0.02  | -0.02  | -0.02  | t | 135545 | DVFYPYPY<br>ASGS             | Mus<br>musculu<br>s              |
| 1 | 1.00 | 1 | 1 | 0     | -0.003 | 0.005  | 0      | 0      | t | 78115  | DDPPATVY<br>RYDSRPP          | Oryctola<br>gus<br>cuniculu<br>s |
| 1 | 1.00 | 1 | 1 | -0.02 | -0.022 | -0.027 | -0.027 | -0.022 | t | 145369 | MWCKIGH<br>DRCEE             | Mus<br>musculu<br>s              |
| 1 | 1.00 | 1 | 1 | 0.01  | 0.01   | 0.005  | 0.01   | 0.012  | t | 22687  | GTHNQW<br>NKPSKPKT<br>NLK    | Mus<br>musculu<br>s              |
| 1 | 1.00 | 1 | 1 | 0.01  | 0.007  | 0.007  | 0.01   | 0.013  | t | 62831  | TAEGRAIN<br>RRVE             | Mus<br>musculu<br>s              |
| 1 | 1.00 | 1 | 1 | 0.06  | 0.058  | 0.059  | 0.063  | 0.065  | t | 106487 | GTSTEVWL<br>APDP             | Mus<br>musculu<br>s              |
| 1 | 1.00 | 1 | 1 | -0.03 | -0.034 | -0.019 | -0.031 | -0.032 | t | 9928   | DQWTAV<br>GSK                | Oryctola<br>gus<br>cuniculu<br>s |
| 1 | 1.00 | 1 | 1 | -0.01 | -0.008 | -0.01  | -0.013 | -0.01  | t | 148992 | YIPPHCSTT<br>I               | Homo<br>sapiens                  |
| 1 | 1.00 | 1 | 1 | -0.11 | -0.112 | -0.112 | -0.107 | -0.107 | t | 96141  | CGLRAPQ                      | Mus<br>musculu<br>s              |
| 1 | 1.00 | 1 | 1 | -0.01 | -0.01  | -0.01  | -0.013 | -0.01  | t | 110759 | AAHRKESY<br>SIYVYKVLK<br>QVH | Mus<br>musculu<br>s              |

|   |      |   |   |       |        |        |        |        |   |        |                       |                       |
|---|------|---|---|-------|--------|--------|--------|--------|---|--------|-----------------------|-----------------------|
| 1 | 1.00 | 1 | 1 | 0.06  | 0.06   | 0.06   | 0.06   | 0.06   | t | 112047 | ASTRESG               | Homo sapiens          |
| 1 | 1.00 | 1 | 1 | 0     | 0      | 0      | 0      | 0      | t | 115800 | ITRINKKIE K           | Homo sapiens          |
| 1 | 1.00 | 1 | 1 | 0     | -0.003 | 0      | 0      | 0.002  | t | 104319 | TTSSQELE RYTFNPQ      | Oryctolagus cuniculus |
| 1 | 1.00 | 1 | 1 | -0.06 | -0.06  | -0.06  | -0.06  | -0.06  | t | 97654  | SMGAKPT G             | Mus musculus          |
| 1 | 1.00 | 1 | 1 | 0.03  | 0.03   | 0.03   | 0.03   | 0.032  | t | 107194 | LEQTELSV TRET         | Oryctolagus cuniculus |
| 1 | 1.00 | 1 | 1 | -0.01 | -0.01  | -0.01  | -0.01  | -0.008 | t | 55305  | RPQQPFPL QP           | Mus musculus          |
| 1 | 1.00 | 1 | 1 | 0.02  | 0.017  | 0.028  | 0.02   | 0.02   | t | 56734  | SADNNNS EYSWT         | Mus musculus          |
| 1 | 1.00 | 1 | 1 | -0.01 | -0.01  | -0.013 | -0.01  | -0.008 | t | 49950  | PVRVAWS SPVQNCEP WIPP | Mus musculus          |
| 1 | 1.00 | 1 | 1 | -0.01 | -0.01  | -0.01  | -0.019 | -0.011 | t | 131903 | GVMAARG QL            | Homo sapiens          |
| 1 | 1.00 | 1 | 1 | -0.02 | -0.02  | -0.02  | -0.02  | -0.02  | t | 106308 | CKCIVRAT KGIS         | Homo sapiens          |
| 1 | 1.00 | 1 | 1 | 0.03  | 0.03   | 0.03   | 0.034  | 0.032  | t | 118539 | NNGNLQL RNKEVTW EVLEG | Homo sapiens          |
| 1 | 1.00 | 1 | 1 | -0.02 | -0.018 | -0.008 | -0.017 | -0.02  | t | 42659  | MSRTWL MKAHGIES W     | Homo sapiens          |
| 1 | 1.00 | 1 | 1 | -0.01 | -0.01  | -0.008 | -0.01  | -0.01  | t | 58037  | SGFTLEFLE HAFSVD      | Homo sapiens          |
| 1 | 1.00 | 1 | 1 | 0     | 0.003  | 0.012  | 0.003  | 0      | t | 25280  | IAGDVRCV              | Capra hircus          |
| 1 | 1.00 | 1 | 1 | 0     | 0      | 0      | -0.001 | 0.001  | t | 99921  | DAEFRHDS              | Mus musculus          |

|   |      |   |   |       |        |       |       |        |   |        |                              |                                  |
|---|------|---|---|-------|--------|-------|-------|--------|---|--------|------------------------------|----------------------------------|
| 1 | 1.00 | 1 | 1 | 0.06  | 0.06   | 0.059 | 0.056 | 0.062  | t | 127618 | DEEKDKGL<br>QTSQ             | Homo<br>sapiens                  |
| 1 | 1.00 | 1 | 1 | -0.02 | -0.02  | -0.02 | -0.02 | -0.017 | t | 140460 | EKLKHS                       | Mus<br>musculu<br>s              |
| 1 | 1.00 | 1 | 1 | 0.02  | 0.02   | 0.029 | 0.02  | 0.019  | t | 23934  | HGPDWAS<br>P                 | Mus<br>musculu<br>s              |
| 1 | 1.00 | 1 | 1 | -0.01 | -0.01  | -0.01 | -0.01 | -0.009 | t | 112623 | PPLELINTV<br>IQDGD<br>MVHTGF | Cavia<br>porcellu<br>s           |
| 1 | 1.00 | 1 | 1 | 0.02  | 0.02   | 0.02  | 0.02  | 0.02   | t | 111562 | MPSESHTS<br>VPST             | Homo<br>sapiens                  |
| 1 | 1.00 | 1 | 1 | 0.06  | 0.062  | 0.065 | 0.057 | 0.06   | t | 123440 | LLEYGEKYE                    | Ovis<br>aries                    |
| 1 | 1.00 | 1 | 1 | 0     | -0.002 | 0     | 0     | -0.002 | t | 41754  | MINVQAK<br>PAAAAS            | Oryctola<br>gus<br>cuniculu<br>s |
| 1 | 1.00 | 1 | 1 | 0.02  | 0.02   | 0.02  | 0.02  | 0.02   | t | 116684 | CNYYSNSY<br>SFWLASLD<br>PKR  | Oryctola<br>gus<br>cuniculu<br>s |
| 1 | 1.00 | 1 | 1 | 0.01  | 0.01   | 0.01  | 0.01  | 0.01   | t | 112396 | WASTRES                      | Homo<br>sapiens                  |
| 1 | 1.00 | 1 | 1 | -0.01 | -0.01  | -0.01 | -0.01 | -0.01  | t | 120181 | RRATQLA<br>HLV               | Oryctola<br>gus<br>cuniculu<br>s |
| 1 | 1.00 | 1 | 1 | -0.01 | -0.01  | -0.01 | -0.01 | -0.01  | t | 120181 | RRATQLA<br>HLV               | Mus<br>musculu<br>s              |
| 1 | 1.00 | 1 | 1 | -0.01 | -0.007 | -0.01 | -0.01 | -0.01  | t | 120181 | RRATQLA<br>HLV               | Mus<br>musculu<br>s              |
| 1 | 1.00 | 1 | 1 | -0.03 | -0.03  | -0.03 | -0.03 | -0.03  | t | 119980 | KAPQWPP<br>YTA               | Mus<br>musculu<br>s              |
| 1 | 1.00 | 1 | 1 | -0.03 | -0.03  | -0.03 | -0.03 | -0.03  | t | 119980 | KAPQWPP<br>YTA               | Oryctola<br>gus<br>cuniculu<br>s |
| 1 | 1.00 | 1 | 1 | -0.03 | -0.03  | -0.03 | -0.03 | -0.03  | t | 119980 | KAPQWPP<br>YTA               | Mus<br>musculu<br>s              |



|   |      |   |   |       |        |        |        |        |   |        |                              |                                  |
|---|------|---|---|-------|--------|--------|--------|--------|---|--------|------------------------------|----------------------------------|
| 1 | 1.00 | 1 | 1 | -0.03 | -0.033 | -0.03  | -0.03  | -0.03  | t | 119980 | KAPQWPP<br>YTA               | Oryctola<br>gus<br>cuniculu<br>s |
| 1 | 1.00 | 1 | 1 | -0.02 | -0.022 | -0.015 | -0.017 | -0.017 | t | 141693 | KTWG                         | Mus<br>musculu<br>s              |
| 1 | 1.00 | 1 | 1 | 0.02  | 0.018  | 0.02   | 0.019  | 0.02   | t | 48002  | PITNDQKK<br>LMSNN            | Mus<br>musculu<br>s              |
| 1 | 1.00 | 1 | 1 | 0.02  | 0.02   | 0.022  | 0.02   | 0.02   | t | 25250  | IADYNYKL<br>PDDFMGC<br>VL    | Homo<br>sapiens                  |
| 1 | 1.00 | 1 | 1 | -0.01 | -0.008 | -0.005 | -0.007 | -0.006 | t | 4396   | ASFDRS                       | Homo<br>sapiens                  |
| 1 | 1.00 | 1 | 1 | 0     | 0      | 0      | 0      | 0.002  | t | 140555 | DWDYGAL<br>MWA               | Mus<br>musculu<br>s              |
| 1 | 1.00 | 1 | 1 | -0.01 | -0.007 | -0.011 | -0.01  | -0.008 | t | 60595  | SQWNKPS<br>KPKT              | Mus<br>musculu<br>s              |
| 1 | 1.00 | 1 | 1 | -0.01 | -0.007 | -0.011 | -0.01  | -0.008 | t | 60595  | SQWNKPS<br>KPKT              | Mus<br>musculu<br>s              |
| 1 | 1.00 | 1 | 1 | 0.02  | 0.022  | 0.02   | 0.017  | 0.021  | t | 72940  | WPKD TDT                     | Homo<br>sapiens                  |
| 1 | 1.00 | 1 | 1 | -0.03 | -0.032 | -0.036 | -0.032 | -0.03  | t | 24454  | HPHDLDD<br>ARRDGRA<br>P      | Mus<br>musculu<br>s              |
| 1 | 1.00 | 1 | 1 | 0.01  | 0.006  | 0.009  | 0.003  | 0.01   | t | 127935 | ARLSAKPA<br>PPKPEPK          | Oryctola<br>gus<br>cuniculu<br>s |
| 1 | 1.00 | 1 | 1 | -0.02 | -0.023 | -0.02  | -0.02  | -0.021 | t | 139398 | YGCDVGP<br>DGRLLRGH<br>DQYAY | Oryctola<br>gus<br>cuniculu<br>s |
| 1 | 1.00 | 1 | 1 | -0.02 | -0.02  | -0.02  | -0.02  | -0.021 | t | 139398 | YGCDVGP<br>DGRLLRGH<br>DQYAY | Mus<br>musculu<br>s              |
| 1 | 1.00 | 1 | 1 | 0.01  | 0.011  | 0.011  | 0.009  | 0.012  | t | 47769  | PGVAGSG<br>A                 | Homo<br>sapiens                  |

|   |      |   |   |       |        |        |       |        |   |        |                              |                     |
|---|------|---|---|-------|--------|--------|-------|--------|---|--------|------------------------------|---------------------|
| 1 | 1.00 | 1 | 1 | -0.02 | -0.017 | -0.02  | -0.02 | -0.018 | t | 106321 | DAEFRH                       | Mus<br>musculu<br>s |
| 1 | 1.00 | 1 | 1 | -0.02 | -0.017 | -0.02  | -0.02 | -0.018 | t | 106321 | DAEFRH                       | Mus<br>musculu<br>s |
| 1 | 1.00 | 1 | 1 | -0.02 | -0.017 | -0.016 | -0.02 | -0.018 | t | 4220   | ARQKLKD<br>AER               | Mus<br>musculu<br>s |
| 1 | 1.00 | 1 | 1 | 0.02  | 0.02   | 0.015  | 0.01  | 0.017  | t | 116021 | VPQKAVP<br>YPQ               | Homo<br>sapiens     |
| 1 | 1.00 | 1 | 1 | 0.03  | 0.03   | 0.037  | 0.032 | 0.031  | t | 137910 | KPESEELT<br>AER              | Homo<br>sapiens     |
| 1 | 1.00 | 1 | 1 | -0.02 | -0.02  | -0.029 | -0.02 | -0.018 | t | 43545  | NDYCLREC<br>KQQGYKG          | Mus<br>musculu<br>s |
| 1 | 1.00 | 1 | 1 | 0.02  | 0.022  | 0.015  | 0.017 | 0.021  | t | 141603 | AINASSDL<br>NLIGFGI          | Homo<br>sapiens     |
| 1 | 1.00 | 1 | 1 | 0     | 0      | 0.005  | 0     | 0      | t | 65699  | TPPTTPVS<br>PKVPPAFF<br>QSMR | Homo<br>sapiens     |
| 1 | 1.00 | 1 | 1 | -0.03 | -0.03  | -0.023 | -0.03 | -0.032 | t | 68757  | VGPKASKK                     | Mus<br>musculu<br>s |
| 1 | 1.00 | 1 | 1 | 0.1   | 0.098  | 0.091  | 0.093 | 0.099  | t | 109905 | SEEEND                       | Mus<br>musculu<br>s |
| 1 | 1.00 | 1 | 1 | 0     | 0      | 0      | 0     | 0      | t | 114847 | GTNISKEH<br>DG               | Homo<br>sapiens     |
| 1 | 1.00 | 1 | 1 | -0.02 | -0.02  | -0.016 | -0.02 | -0.02  | t | 52105  | QQPQQPF<br>PLQ               | Mus<br>musculu<br>s |
| 1 | 1.00 | 1 | 1 | -0.02 | -0.02  | -0.016 | -0.02 | -0.02  | t | 52105  | QQPQQPF<br>PLQ               | Mus<br>musculu<br>s |
| 1 | 1.00 | 1 | 1 | -0.02 | -0.02  | -0.02  | -0.02 | -0.02  | t | 135754 | RYVNWIKE                     | Homo<br>sapiens     |

|   |      |   |   |       |        |        |        |        |   |        |                               |                       |
|---|------|---|---|-------|--------|--------|--------|--------|---|--------|-------------------------------|-----------------------|
| 1 | 1.00 | 1 | 1 | -0.02 | -0.02  | -0.02  | -0.02  | -0.02  | t | 134235 | SMENPGL<br>WILGCHN<br>SDFRNR  | Homo sapiens          |
| 1 | 1.00 | 1 | 1 | -0.02 | -0.02  | -0.02  | -0.02  | -0.02  | t | 108799 | ARGPPGPT                      | Rattus norvegicus     |
| 1 | 1.00 | 1 | 1 | -0.04 | -0.04  | -0.04  | -0.04  | -0.04  | t | 112575 | LFFYLRRE<br>QMFVRHL<br>FNRAAG | Cavia porcellus       |
| 1 | 1.00 | 1 | 1 | -0.01 | -0.01  | -0.01  | -0.01  | -0.008 | t | 55305  | RPQQPFPL<br>QP                | Mus musculus          |
| 1 | 1.00 | 1 | 1 | 0     | 0.006  | 0      | 0      | 0      | t | 42797  | MTEQQW<br>NFAGIEAA<br>ASAIQG  | Macaca fascicularis   |
| 1 | 1.00 | 1 | 1 | 0     | 0.011  | 0      | 0      | 0      | t | 42797  | MTEQQW<br>NFAGIEAA<br>ASAIQG  | Macaca fascicularis   |
| 1 | 1.00 | 1 | 1 | 0.01  | 0.006  | 0.018  | 0.01   | 0.01   | t | 67054  | TVKTKNTT<br>TTQT              | Mus musculus          |
| 1 | 1.00 | 1 | 1 | -0.01 | -0.008 | -0.01  | -0.007 | -0.007 | t | 918    | AEGEFATA<br>PPSHYSW<br>DPAK   | Homo sapiens          |
| 1 | 1.00 | 1 | 1 | 0.02  | 0.023  | 0.005  | 0.02   | 0.022  | t | 31451  | KITQTQKD<br>SKNTTVIV<br>REIV  | Mus musculus          |
| 1 | 1.00 | 1 | 1 | 0.02  | 0.023  | 0.005  | 0.02   | 0.022  | t | 31451  | KITQTQKD<br>SKNTTVIV<br>REIV  | Mus musculus          |
| 1 | 1.00 | 1 | 1 | -0.01 | -0.013 | -0.011 | -0.01  | -0.009 | t | 30200  | KDLLEQKR<br>AAVDTYC           | Oryctolagus cuniculus |
| 1 | 1.00 | 1 | 1 | 0     | 0.003  | 0.006  | 0      | 0      | t | 122912 | TDVRYKD<br>DMYHFFC<br>PAIQA   | Mus musculus          |
| 1 | 1.00 | 1 | 1 | -0.04 | -0.042 | -0.04  | -0.04  | -0.04  | t | 136058 | DKATV                         | Oryctolagus cuniculus |

|   |      |   |   |       |        |        |       |        |   |        |                      |                       |
|---|------|---|---|-------|--------|--------|-------|--------|---|--------|----------------------|-----------------------|
| 1 | 1.00 | 1 | 1 | 0.01  | 0.013  | 0.013  | 0.01  | 0.01   | t | 97686  | TGSAAANY             | Mus musculus          |
| 1 | 1.00 | 1 | 1 | 0.01  | 0.013  | 0.013  | 0.01  | 0.01   | t | 97686  | TGSAAANY             | Mus musculus          |
| 1 | 1.00 | 1 | 1 | 0     | 0      | -0.005 | 0     | 0      | t | 55264  | RPPQGNWFGCTWMNSTGFTK | Mus musculus          |
| 1 | 1.00 | 1 | 1 | -0.02 | -0.02  | -0.017 | -0.02 | -0.018 | t | 14371  | ETFLRGFLG            | Homo sapiens          |
| 1 | 1.00 | 1 | 1 | -0.01 | -0.01  | -0.01  | -0.01 | -0.008 | t | 21927  | GQPAVRNERA           | Mus musculus          |
| 1 | 1.00 | 1 | 1 | -0.02 | -0.02  | -0.013 | -0.02 | -0.02  | t | 22044  | GRGGIYRFVTPGER       | Homo sapiens          |
| 1 | 1.00 | 1 | 1 | -0.03 | -0.03  | -0.03  | -0.03 | -0.03  | t | 148647 | IVKVEDKSKLQDTKDKKR   | Canis lupus           |
| 1 | 1.00 | 1 | 1 | 0.03  | 0.03   | 0.03   | 0.03  | 0.03   | t | 112099 | ESGVPDR              | Homo sapiens          |
| 1 | 1.00 | 1 | 1 | 0.01  | 0.01   | 0.01   | 0.01  | 0.01   | t | 158601 | MQAHQTK              | Homo sapiens          |
| 1 | 1.00 | 1 | 1 | 0.01  | 0.01   | 0.01   | 0.01  | 0.01   | t | 94641  | PESWHTRWDE           | Homo sapiens          |
| 1 | 1.00 | 1 | 1 | -0.01 | -0.01  | -0.01  | -0.01 | -0.01  | t | 147005 | GVRKRKQLNVQAW        | Homo sapiens          |
| 1 | 1.00 | 1 | 1 | -0.01 | -0.01  | -0.01  | -0.01 | -0.01  | t | 107673 | VSNKALP              | Homo sapiens          |
| 1 | 1.00 | 1 | 1 | -0.01 | -0.01  | -0.01  | -0.01 | -0.01  | t | 99528  | PGERTGRQP GDYDD      | Homo sapiens          |
| 1 | 1.00 | 1 | 1 | -0.01 | -0.01  | -0.01  | -0.01 | -0.01  | t | 79511  | AIWSTRT              | Oryctolagus cuniculus |
| 1 | 1.00 | 1 | 1 | 0.02  | 0.018  | 0.018  | 0.017 | 0.021  | t | 55783  | RRYQEERP             | Anas platyrhynchos    |
| 1 | 1.00 | 1 | 1 | -0.03 | -0.03  | -0.03  | -0.03 | -0.03  | t | 134791 | RRRSRKPEAPRRRSP      | Homo sapiens          |
| 1 | 1.00 | 1 | 1 | -0.01 | -0.006 | -0.006 | -0.01 | -0.01  | t | 29482  | IVTPRTPPPSQGK        | Homo sapiens          |

|   |      |   |   |       |        |        |        |        |   |        |                               |                                  |
|---|------|---|---|-------|--------|--------|--------|--------|---|--------|-------------------------------|----------------------------------|
| 1 | 1.00 | 1 | 1 | -0.03 | -0.034 | -0.032 | -0.031 | -0.031 | t | 38772  | LPWRAPS<br>QPAAAF LF          | Oryctola<br>gus<br>cuniculu<br>s |
| 1 | 1.00 | 1 | 1 | 0.07  | 0.046  | 0.063  | 0.07   | 0.072  | t | 113302 | CDDDDDN<br>DGV PDSR<br>DNCRLV | Mus<br>musculu<br>s              |
| 1 | 1.00 | 1 | 1 | -0.06 | -0.056 | -0.058 | -0.057 | -0.062 | t | 121715 | PNKQTPS<br>GKKCIAAK           | Homo<br>sapiens                  |
| 1 | 1.00 | 1 | 1 | -0.02 | -0.02  | -0.02  | -0.02  | -0.018 | t | 107368 | FSSAP                         | Rattus<br>norvegic<br>us         |
| 1 | 1.00 | 1 | 1 | 0.01  | 0.008  | 0.022  | 0.013  | 0.01   | t | 2583   | ALGLTSLFS<br>PGPIQH           | Mus<br>musculu<br>s              |
| 1 | 1.00 | 1 | 1 | 0.04  | 0.039  | 0.036  | 0.041  | 0.04   | t | 49287  | PSAAAKEE<br>PEESEDDE<br>FGMG  | Canis<br>lupus                   |
| 1 | 1.00 | 1 | 1 | -0.01 | -0.011 | -0.004 | -0.009 | -0.008 | t | 72483  | WGNGCG                        | Homo<br>sapiens                  |
| 1 | 1.00 | 1 | 1 | 0.05  | 0.05   | 0.05   | 0.041  | 0.048  | t | 96208  | EDEEDEED<br>KE                | Homo<br>sapiens                  |
| 1 | 1.00 | 1 | 1 | 0.03  | 0.033  | 0.038  | 0.03   | 0.031  | t | 94954  | TTAETLDA<br>TC                | Mus<br>musculu<br>s              |
| 1 | 1.00 | 1 | 1 | -0.01 | -0.007 | -0.003 | -0.01  | -0.012 | t | 120416 | AVALREYR<br>KKMDIPA           | Mus<br>musculu<br>s              |
| 1 | 1.00 | 1 | 1 | 0     | -0.003 | 0      | -0.001 | 0.001  | t | 151493 | VVDGPETK<br>EC                | Mus<br>musculu<br>s              |
| 1 | 1.00 | 1 | 1 | 0.01  | 0.022  | 0.01   | 0.007  | 0.01   | t | 156980 | YTLGHFHG<br>QPQL              | Gallus<br>gallus                 |
| 1 | 1.00 | 1 | 1 | 0     | 0.002  | 0      | 0.001  | 0.002  | t | 9896   | DQRPYCW<br>HYP                | Homo<br>sapiens                  |
| 1 | 1.00 | 1 | 1 | -0.02 | -0.022 | -0.009 | -0.017 | -0.019 | t | 23975  | HHAEMQ<br>NPVYLIPET<br>VPYIK  | Mus<br>musculu<br>s              |
| 1 | 1.00 | 1 | 1 | -0.02 | -0.02  | -0.017 | -0.02  | -0.021 | t | 133534 | CKLTANPS<br>LAAVV             | Rattus<br>norvegic<br>us         |

|   |      |   |   |       |        |        |        |        |   |        |                              |                                  |
|---|------|---|---|-------|--------|--------|--------|--------|---|--------|------------------------------|----------------------------------|
| 1 | 1.00 | 1 | 1 | 0     | -0.004 | 0      | 0.003  | 0.002  | t | 106817 | SDARENIQ<br>RFFGHG           | Oryctola<br>gus<br>cuniculu<br>s |
| 1 | 1.00 | 1 | 1 | -0.03 | -0.028 | -0.023 | -0.03  | -0.029 | t | 47721  | PGPGEVW<br>V                 | Homo<br>sapiens                  |
| 1 | 1.00 | 1 | 1 | 0.01  | 0.01   | 0.016  | 0.01   | 0.01   | t | 38948  | LQPGVDIIE<br>G               | Homo<br>sapiens                  |
| 1 | 1.00 | 1 | 1 | 0.04  | 0.04   | 0.04   | 0.04   | 0.04   | t | 104183 | PQQMRN<br>N                  | Mus<br>musculu<br>s              |
| 1 | 1.00 | 1 | 1 | -0.02 | -0.02  | -0.02  | -0.02  | -0.02  | t | 116029 | YAKPAAVR<br>SP               | Homo<br>sapiens                  |
| 1 | 1.00 | 1 | 1 | 0.02  | 0.02   | 0.023  | 0.02   | 0.021  | t | 69171  | VIYSKYGG<br>TE               | Mus<br>musculu<br>s              |
| 1 | 1.00 | 1 | 1 | 0.02  | 0.023  | 0.011  | 0.02   | 0.022  | t | 78627  | DPDPPDA<br>NDPAPPN<br>AN     | Mus<br>musculu<br>s              |
| 1 | 1.00 | 1 | 1 | 0.01  | 0.01   | 0.017  | 0.01   | 0.01   | t | 122353 | FSLQLMEE<br>NW               | Mus<br>musculu<br>s              |
| 1 | 1.00 | 1 | 1 | -0.01 | -0.018 | -0.01  | -0.01  | -0.008 | t | 156938 | PPEKIHV                      | Mus<br>musculu<br>s              |
| 1 | 1.00 | 1 | 1 | 0     | 0      | -0.005 | -0.006 | 0      | t | 115702 | DEAELPSRI<br>SPGKNA          | Mus<br>musculu<br>s              |
| 1 | 1.00 | 1 | 1 | 0     | 0.004  | 0.005  | -0.003 | 0.001  | t | 14979  | EYAV                         | Homo<br>sapiens                  |
| 1 | 1.00 | 1 | 1 | -0.02 | -0.017 | -0.02  | -0.02  | -0.022 | t | 140839 | DERGTPEY<br>NIALGQRR<br>ADAV | Mus<br>musculu<br>s              |
| 1 | 1.00 | 1 | 1 | -0.02 | -0.025 | -0.006 | -0.017 | -0.021 | t | 95536  | LAARVVK<br>Q                 | Bos<br>taurus                    |
| 1 | 1.00 | 1 | 1 | 0.01  | 0.008  | 0.013  | 0.007  | 0.01   | t | 68024  | VDDMMRF<br>NINDFLPP<br>G     | Sus<br>scrofa                    |

|   |      |   |   |       |        |        |        |        |   |        |                              |                                  |
|---|------|---|---|-------|--------|--------|--------|--------|---|--------|------------------------------|----------------------------------|
| 1 | 1.00 | 1 | 1 | -0.02 | -0.024 | -0.015 | -0.02  | -0.02  | t | 94041  | TKRFKINAI                    | Mus<br>musculu<br>s              |
| 1 | 1.00 | 1 | 1 | -0.01 | -0.01  | -0.01  | -0.01  | -0.009 | t | 119382 | VISCAKDAI<br>EDEEGSC         | Oryctola<br>gus<br>cuniculu<br>s |
| 1 | 1.00 | 1 | 1 | 0     | -0.002 | -0.001 | 0.002  | 0.002  | t | 106829 | SETPANRL<br>HFYV             | Mus<br>musculu<br>s              |
| 1 | 1.00 | 1 | 1 | 0     | -0.002 | 0.007  | 0      | -0.002 | t | 66508  | TSYTGPA                      | Mus<br>musculu<br>s              |
| 1 | 1.00 | 1 | 1 | 0.02  | 0.022  | 0.023  | 0.021  | 0.02   | t | 35172  | LDGRPLST<br>TQ               | Homo<br>sapiens                  |
| 1 | 1.00 | 1 | 1 | -0.05 | -0.052 | -0.052 | -0.049 | -0.047 | t | 96170  | DEDSYERD<br>P                | Mus<br>musculu<br>s              |
| 1 | 1.00 | 1 | 1 | 0     | 0      | -0.002 | -0.007 | 0      | t | 12138  | EGCNGDG<br>TSYKK             | Mus<br>musculu<br>s              |
| 1 | 1.00 | 1 | 1 | 0     | -0.004 | 0      | -0.007 | -0.002 | t | 122892 | RSILPYGDS<br>MDRIE           | Oryctola<br>gus<br>cuniculu<br>s |
| 1 | 1.00 | 1 | 1 | 0     | -0.004 | 0      | -0.007 | -0.002 | t | 125448 | IRGILESLM<br>CNESSMQ<br>SLRQ | Oryctola<br>gus<br>cuniculu<br>s |
| 1 | 1.00 | 1 | 1 | 0     | -0.004 | 0      | -0.007 | -0.002 | t | 122842 | LLDLPRDL<br>GGMGCSS<br>PPCE  | Oryctola<br>gus<br>cuniculu<br>s |
| 1 | 1.00 | 1 | 1 | 0     | -0.004 | 0      | -0.007 | -0.002 | t | 126201 | GYKEKSKF<br>QDTHNNA          | Oryctola<br>gus<br>cuniculu<br>s |
| 1 | 1.00 | 1 | 1 | 0     | -0.004 | 0      | -0.007 | -0.002 | t | 124588 | PQEETLQA<br>FDSHYDYT         | Oryctola<br>gus<br>cuniculu<br>s |
| 1 | 1.00 | 1 | 1 | 0     | -0.004 | 0      | -0.007 | -0.002 | t | 122790 | HQEEDFR<br>VTCKDIQR          | Oryctola<br>gus<br>cuniculu<br>s |

|   |      |   |   |       |        |        |        |        |   |        |                         |                                  |
|---|------|---|---|-------|--------|--------|--------|--------|---|--------|-------------------------|----------------------------------|
| 1 | 1.00 | 1 | 1 | 0     | -0.002 | 0      | -0.007 | -0.002 | t | 106634 | LVGPRGER<br>GFP         | Mus<br>musculu<br>s              |
| 1 | 1.00 | 1 | 1 | 0     | -0.002 | 0      | -0.007 | -0.002 | t | 62340  | SVSVGMK<br>PSPRP        | Mus<br>musculu<br>s              |
| 1 | 1.00 | 1 | 1 | 0.03  | 0.03   | 0.03   | 0.03   | 0.03   | t | 100355 | NRIQVDSS<br>NP          | Mus<br>musculu<br>s              |
| 1 | 1.00 | 1 | 1 | 0.04  | 0.04   | 0.047  | 0.04   | 0.041  | t | 108167 | TRAFGNEA<br>T           | Mus<br>musculu<br>s              |
| 1 | 1.00 | 1 | 1 | 0.01  | 0.008  | 0.012  | 0.009  | 0.01   | t | 61741  | STLPETTV<br>V           | Mus<br>musculu<br>s              |
| 1 | 1.00 | 1 | 1 | -0.01 | -0.01  | -0.01  | -0.01  | -0.01  | t | 151057 | SSWPNHD<br>SNKGVTA<br>A | Homo<br>sapiens                  |
| 1 | 1.00 | 1 | 1 | -0.01 | -0.01  | -0.01  | -0.01  | -0.01  | t | 99597  | RAHVQVV<br>DSNGNRV<br>Y | Homo<br>sapiens                  |
| 1 | 1.00 | 1 | 1 | -0.01 | -0.01  | -0.01  | -0.01  | -0.01  | t | 100371 | NYLVDGN<br>GRF          | Mus<br>musculu<br>s              |
| 1 | 1.00 | 1 | 1 | -0.05 | -0.05  | -0.05  | -0.05  | -0.05  | t | 156421 | QNAFRISR<br>QEARNLK     | Homo<br>sapiens                  |
| 1 | 1.00 | 1 | 1 | -0.04 | -0.04  | -0.04  | -0.04  | -0.038 | t | 133668 | QEGPEYW<br>DRNT         | Mus<br>musculu<br>s              |
| 1 | 1.00 | 1 | 1 | 0     | 0      | 0.007  | 0      | 0      | t | 123038 | AQPVRLLL<br>E           | Ovis<br>aries                    |
| 1 | 1.00 | 1 | 1 | -0.01 | -0.008 | 0.006  | -0.009 | -0.01  | t | 85467  | LLKKA                   | Homo<br>sapiens                  |
| 1 | 1.00 | 1 | 1 | 0.01  | 0.007  | 0.01   | 0.01   | 0.012  | t | 73131  | WTGVAQ<br>D             | Oryctola<br>gus<br>cuniculu<br>s |
| 1 | 1.00 | 1 | 1 | -0.02 | -0.022 | -0.018 | -0.027 | -0.022 | t | 130994 | PDQRPYC<br>WHYPPKP<br>C | Mus<br>musculu<br>s              |
| 1 | 1.00 | 1 | 1 | -0.06 | -0.062 | -0.065 | -0.061 | -0.058 | t | 118141 | SKGRRFKG                | Mus<br>musculu<br>s              |



|   |      |   |   |       |        |        |        |        |   |        |                              |                                  |
|---|------|---|---|-------|--------|--------|--------|--------|---|--------|------------------------------|----------------------------------|
| 1 | 1.00 | 1 | 1 | -0.03 | -0.03  | -0.03  | -0.033 | -0.03  | t | 12111  | EFYEKVTG<br>TDLELIQIL<br>KDH | Homo<br>sapiens                  |
| 1 | 1.00 | 1 | 1 | 0.03  | 0.028  | 0.039  | 0.033  | 0.029  | t | 113534 | IDVDVSKP<br>DLTAALRD<br>VRQQ | Mus<br>musculu<br>s              |
| 1 | 1.00 | 1 | 1 | 0.03  | 0.028  | 0.039  | 0.033  | 0.029  | t | 113534 | IDVDVSKP<br>DLTAALRD<br>VRQQ | Mus<br>musculu<br>s              |
| 1 | 1.00 | 1 | 1 | 0.01  | 0.012  | 0.021  | 0.011  | 0.01   | t | 95104  | ITGAGPKY<br>VKQNTLK          | Homo<br>sapiens                  |
| 1 | 1.00 | 1 | 1 | 0     | 0      | 0.002  | 0      | 0.001  | t | 118581 | RDRDRDR<br>E                 | Mus<br>musculu<br>s              |
| 1 | 1.00 | 1 | 1 | 0     | 0.003  | 0.002  | 0      | 0.001  | t | 46317  | NTWTTCC<br>SIAFPSK           | Mus<br>musculu<br>s              |
| 1 | 1.00 | 1 | 1 | -0.02 | -0.02  | -0.019 | -0.02  | -0.02  | t | 51973  | QPSYTVPI<br>PRHA             | Mus<br>musculu<br>s              |
| 1 | 1.00 | 1 | 1 | -0.02 | -0.022 | -0.015 | -0.017 | -0.02  | t | 158938 | KTQNNQGP<br>WDEGRVE<br>ID    | Mus<br>musculu<br>s              |
| 1 | 1.00 | 1 | 1 | 0.01  | 0.014  | 0      | 0.01   | 0.01   | t | 79010  | KVDNAETI<br>KKELGLSLT<br>EP  | MD                               |
| 1 | 1.00 | 1 | 1 | -0.03 | -0.03  | -0.03  | -0.03  | -0.03  | t | 132941 | WGSNVYN<br>SPFHS             | Homo<br>sapiens                  |
| 1 | 1.00 | 1 | 1 | -0.01 | -0.01  | -0.01  | -0.01  | -0.007 | t | 131100 | TDSEMDV<br>VRFD              | Mus<br>musculu<br>s              |
| 1 | 1.00 | 1 | 1 | -0.01 | -0.008 | -0.01  | -0.009 | -0.01  | t | 7763   | DDEDLDEF<br>KPIVQYDN<br>FQD  | Homo<br>sapiens                  |
| 1 | 1.00 | 1 | 1 | 0.01  | 0.014  | 0.012  | 0.011  | 0.01   | t | 122143 | LSVVGDPD<br>APPTMVA<br>VAPVA | Homo<br>sapiens                  |
| 1 | 1.00 | 1 | 1 | 0.01  | 0.007  | 0.016  | 0.01   | 0.008  | t | 133733 | VKTLLPYG<br>SVINYYGY<br>VKPG | Oryctola<br>gus<br>cuniculu<br>s |
| 1 | 1.00 | 1 | 1 | -0.03 | -0.028 | -0.035 | -0.03  | -0.03  | t | 121348 | GQFRVIGP<br>GHPIRALV<br>GD   | Rattus<br>norvegic<br>us         |

|   |      |   |   |       |       |        |        |        |   |        |                              |                       |
|---|------|---|---|-------|-------|--------|--------|--------|---|--------|------------------------------|-----------------------|
| 1 | 1.00 | 1 | 1 | 0     | 0     | 0      | 0      | 0      | t | 109772 | QPREPQV                      | Homo sapiens          |
| 1 | 1.00 | 1 | 1 | -0.02 | -0.02 | -0.02  | -0.02  | -0.02  | t | 135686 | GRVSVSQT                     | Homo sapiens          |
| 1 | 1.00 | 1 | 1 | -0.02 | -0.02 | -0.02  | -0.02  | -0.02  | t | 127687 | HSSHRLS                      | Homo sapiens          |
| 1 | 1.00 | 1 | 1 | -0.02 | -0.02 | -0.02  | -0.02  | -0.02  | t | 79347  | QCNAREW<br>SANYICR           | Mus musculus          |
| 1 | 1.00 | 1 | 1 | -0.04 | -0.04 | -0.04  | -0.04  | -0.04  | t | 136137 | APDRKGFR<br>LLASPRSC<br>YKL  | Homo sapiens          |
| 1 | 1.00 | 1 | 1 | 0.03  | 0.033 | 0.041  | 0.031  | 0.031  | t | 138202 | LPTITNT                      | Mus musculus          |
| 1 | 1.00 | 1 | 1 | -0.01 | -0.01 | -0.01  | -0.01  | -0.008 | t | 78077  | YPYSMWK<br>NLWPS             | Mus musculus          |
| 1 | 1.00 | 1 | 1 | 0.01  | 0.008 | 0.015  | 0.007  | 0.01   | t | 44570  | NKPNWD<br>GYA                | Mus musculus          |
| 1 | 1.00 | 1 | 1 | 0.01  | 0.008 | 0.015  | 0.007  | 0.01   | t | 44570  | NKPNWD<br>GYA                | Mus musculus          |
| 1 | 1.00 | 1 | 1 | 0     | 0.002 | -0.004 | -0.003 | 0      | t | 86807  | NIYTFVPEK<br>IYGLIAKKQ<br>SN | Cavia porcellus       |
| 1 | 1.00 | 1 | 1 | 0.02  | 0.02  | 0.008  | 0.02   | 0.021  | t | 102888 | VEPSYEAE<br>PTPPTPTP<br>DQPE | Mus musculus          |
| 1 | 1.00 | 1 | 1 | 0     | 0.002 | 0      | 0.007  | 0.002  | t | 135498 | SCKLPVKK<br>ATVVQGE<br>RVKIQ | Homo sapiens          |
| 1 | 1.00 | 1 | 1 | 0     | 0     | 0.005  | 0      | 0      | t | 10868  | DYEDRYR<br>E                 | Mus musculus          |
| 1 | 1.00 | 1 | 1 | 0     | 0     | 0      | 0      | 0.002  | t | 77970  | PQTQQFIP                     | Mus musculus          |
| 1 | 1.00 | 1 | 1 | 0.01  | 0.01  | 0.001  | 0.01   | 0.01   | t | 56043  | RTEQKDFD<br>GRSEFAYG<br>SFVR | Homo sapiens          |
| 1 | 1.00 | 1 | 1 | 0.02  | 0.017 | 0.008  | 0.02   | 0.026  | t | 32     | AAAETGV<br>GVIKSIAP          | Oryctolagus cuniculus |

|   |      |   |   |       |        |        |        |        |   |        |                              |                       |
|---|------|---|---|-------|--------|--------|--------|--------|---|--------|------------------------------|-----------------------|
| 1 | 1.00 | 1 | 1 | 0.07  | 0.07   | 0.082  | 0.073  | 0.07   | t | 63792  | TGATVSSQ                     | Homo sapiens          |
| 1 | 1.00 | 1 | 1 | 0     | 0      | -0.007 | 0      | 0      | t | 63655  | TFGAASNK<br>AFAEALST<br>EPKG | Homo sapiens          |
| 1 | 1.00 | 1 | 1 | 0.01  | 0.008  | 0.023  | 0.013  | 0.01   | t | 69383  | VLAQKVA<br>RTLP              | Mus musculus          |
| 1 | 1.00 | 1 | 1 | -0.02 | -0.018 | -0.028 | -0.019 | -0.014 | t | 20260  | GIFRAAVC<br>TR               | Homo sapiens          |
| 1 | 1.00 | 1 | 1 | -0.05 | -0.054 | -0.047 | -0.051 | -0.051 | t | 61989  | STVPYPST<br>PLLPHPEN<br>L    | Oryctolagus cuniculus |
| 1 | 1.00 | 1 | 1 | -0.1  | -0.102 | -0.102 | -0.097 | -0.1   | t | 96175  | DFRWYGP<br>KYITHSIRS<br>FTPS | Mus musculus          |
| 1 | 1.00 | 1 | 1 | 0.01  | 0.012  | 0.01   | 0.017  | 0.016  | t | 96455  | KGKNVLIN<br>KD               | Homo sapiens          |
| 1 | 1.00 | 1 | 1 | -0.03 | -0.044 | -0.026 | -0.027 | -0.03  | t | 52754  | QVNSLKKA                     | Macaca mulatta        |
| 1 | 1.00 | 1 | 1 | -0.03 | -0.028 | -0.043 | -0.033 | -0.028 | t | 13661  | EPIAPYHF<br>DLSGH            | Homo sapiens          |
| 1 | 1.00 | 1 | 1 | 0     | 0.002  | 0      | 0.001  | 0.002  | t | 150977 | EEAKLNRE<br>EIDGVKL          | Homo sapiens          |
| 1 | 1.00 | 1 | 1 | 0.01  | 0.01   | 0.008  | 0.008  | 0.01   | t | 10831  | DWTKVTL<br>DGRPLSTI<br>Q     | Homo sapiens          |
| 1 | 1.00 | 1 | 1 | 0.01  | 0.012  | 0.019  | 0.011  | 0.011  | t | 43145  | NAFNCTFE<br>YISDAFSLD        | Homo sapiens          |
| 1 | 1.00 | 1 | 1 | 0.03  | 0.034  | 0.03   | 0.033  | 0.028  | t | 136083 | SEGAEYDD<br>QTSQREKE<br>DDK  | Homo sapiens          |

|   |      |   |   |       |        |        |        |        |   |        |                              |                                  |
|---|------|---|---|-------|--------|--------|--------|--------|---|--------|------------------------------|----------------------------------|
| 1 | 1.00 | 1 | 1 | -0.01 | -0.01  | -0.005 | -0.013 | -0.01  | t | 18314  | FVVEYTKK<br>W                | Homo<br>sapiens                  |
| 1 | 1.00 | 1 | 1 | -0.03 | -0.026 | -0.016 | -0.029 | -0.03  | t | 82705  | GKIRAV                       | Homo<br>sapiens                  |
| 1 | 1.00 | 1 | 1 | 0     | 0      | 0.012  | 0.006  | -0.001 | t | 157917 | RTVKKNIE<br>EN               | Homo<br>sapiens                  |
| 1 | 1.00 | 1 | 1 | 0     | -0.002 | 0      | 0      | -0.003 | t | 129974 | SPSAKDIK<br>KILDSVG          | Homo<br>sapiens                  |
| 1 | 1.00 | 1 | 1 | 0.01  | 0.01   | 0.01   | 0.01   | 0.01   | t | 78277  | TIHGSN                       | Equus<br>caballus                |
| 1 | 1.00 | 1 | 1 | -0.01 | -0.01  | -0.01  | -0.01  | -0.01  | t | 137735 | DTALTREA<br>LRLV             | Mus<br>musculu<br>s              |
| 1 | 1.00 | 1 | 1 | -0.01 | -0.01  | -0.01  | -0.01  | -0.01  | t | 132679 | SRERDKER<br>ER               | Homo<br>sapiens                  |
| 1 | 1.00 | 1 | 1 | -0.01 | -0.01  | -0.01  | -0.01  | -0.01  | t | 112306 | SDHKNYL                      | Homo<br>sapiens                  |
| 1 | 1.00 | 1 | 1 | -0.01 | -0.01  | -0.01  | -0.01  | -0.01  | t | 9537   | DNPRYTD<br>AHNAVTD<br>GRTVP  | Mus<br>musculu<br>s              |
| 1 | 1.00 | 1 | 1 | -0.03 | -0.032 | -0.024 | -0.031 | -0.029 | t | 60671  | SRGKGPG<br>KKNK              | Mus<br>musculu<br>s              |
| 1 | 1.00 | 1 | 1 | 0     | 0      | 0.001  | 0      | 0.002  | t | 53635  | RESQAYYQ<br>RGAS             | Oryctola<br>gus<br>cuniculu<br>s |
| 1 | 1.00 | 1 | 1 | -0.05 | -0.056 | -0.05  | -0.05  | -0.05  | t | 123495 | MHHMPG<br>QP                 | Oryctola<br>gus<br>cuniculu<br>s |
| 1 | 1.00 | 1 | 1 | 0     | -0.001 | 0.008  | 0      | 0      | t | 51309  | QLDPAFRA                     | Mus<br>musculu<br>s              |
| 1 | 1.00 | 1 | 1 | 0.04  | 0.042  | 0.04   | 0.047  | 0.043  | t | 103993 | IPPSLRLE<br>DNEERMS          | Homo<br>sapiens                  |
| 1 | 1.00 | 1 | 1 | 0     | 0.002  | 0      | 0.001  | 0.001  | t | 9940   | DRAAGQP<br>AGNGAGG<br>QAAGGN | Homo<br>sapiens                  |
| 1 | 1.00 | 1 | 1 | 0.01  | 0.012  | 0.022  | 0.009  | 0.008  | t | 28322  | IRIPKYKND<br>GIQNYIHN<br>EY  | Homo<br>sapiens                  |
| 1 | 1.00 | 1 | 1 | -0.05 | -0.05  | -0.044 | -0.053 | -0.052 | t | 3502   | APCIPYVR<br>GG               | Homo<br>sapiens                  |

|   |      |   |   |       |        |       |        |        |   |        |                              |                                  |
|---|------|---|---|-------|--------|-------|--------|--------|---|--------|------------------------------|----------------------------------|
| 1 | 1.00 | 1 | 1 | 0     | 0.002  | 0.006 | 0.001  | -0.002 | t | 63973  | TGTDLELI<br>QILKDHYN<br>ISLD | Homo<br>sapiens                  |
| 1 | 1.00 | 1 | 1 | -0.03 | -0.026 | -0.02 | -0.031 | -0.032 | t | 49146  | PQVMFDF<br>A                 | Mus<br>musculu<br>s              |
| 1 | 1.00 | 1 | 1 | 0     | 0      | 0     | 0      | 0      | t | 149429 | QLWQIPE<br>QSR               | Mus<br>musculu<br>s              |
| 1 | 1.00 | 1 | 1 | 0     | 0      | 0     | 0      | 0      | t | 149429 | QLWQIPE<br>QSR               | Homo<br>sapiens                  |
| 1 | 1.00 | 1 | 1 | -0.02 | -0.022 | -0.02 | -0.02  | -0.02  | t | 141698 | LENGRSLE<br>GVYVPPRR         | Oryctola<br>gus<br>cuniculu<br>s |
| 1 | 1.00 | 1 | 1 | -0.02 | -0.018 | -0.02 | -0.02  | -0.02  | t | 141698 | LENGRSLE<br>GVYVPPRR         | Rattus<br>norvegic<br>us         |
| 1 | 1.00 | 1 | 1 | -0.02 | -0.02  | -0.02 | -0.02  | -0.02  | t | 141698 | LENGRSLE<br>GVYVPPRR         | Oryctola<br>gus<br>cuniculu<br>s |
| 1 | 1.00 | 1 | 1 | -0.02 | -0.02  | -0.02 | -0.02  | -0.02  | t | 99545  | PSHQQPR<br>KIRPEGRE          | Homo<br>sapiens                  |
| 1 | 1.00 | 1 | 1 | -0.02 | -0.02  | -0.02 | -0.02  | -0.02  | t | 79246  | HCGQNSH<br>PMWRKC<br>Q       | Mus<br>musculu<br>s              |
| 1 | 1.00 | 1 | 1 | -0.02 | -0.02  | -0.02 | -0.02  | -0.02  | t | 24261  | HLNDRVV<br>VT                | Homo<br>sapiens                  |
| 1 | 1.00 | 1 | 1 | -0.06 | -0.06  | -0.06 | -0.06  | -0.06  | t | 108280 | APRRLFDI<br>A                | Homo<br>sapiens                  |
| 1 | 1.00 | 1 | 1 | 0.02  | 0.02   | 0.034 | 0.023  | 0.02   | t | 96367  | HSNLDHI                      | Homo<br>sapiens                  |
| 1 | 1.00 | 1 | 1 | -0.03 | -0.023 | -0.03 | -0.03  | -0.03  | t | 153841 | KCLKFYSKI<br>SEYRHY          | Cavia<br>porcellu<br>s           |
| 1 | 1.00 | 1 | 1 | -0.03 | -0.03  | -0.03 | -0.03  | -0.03  | t | 153841 | KCLKFYSKI<br>SEYRHY          | Oryctola<br>gus<br>cuniculu<br>s |
| 1 | 1.00 | 1 | 1 | 0.06  | 0.06   | 0.06  | 0.056  | 0.06   | t | 115638 | QDGDQAP<br>EYRGR             | Homo<br>sapiens                  |

|   |      |   |   |       |        |        |        |        |   |        |                                      |                                  |
|---|------|---|---|-------|--------|--------|--------|--------|---|--------|--------------------------------------|----------------------------------|
| 1 | 1.00 | 1 | 1 | 0.03  | 0.033  | 0.03   | 0.03   | 0.03   | t | 139499 | FGEFSFQY<br>DCSSWGC                  | Mus<br>musculu<br>s              |
| 1 | 1.00 | 1 | 1 | 0     | 0      | 0      | 0      | 0      | t | 135504 | VPGVGGL<br>G                         | Oryctola<br>gus<br>cuniculu<br>s |
| 1 | 1.00 | 1 | 1 | -0.01 | -0.012 | -0.005 | -0.011 | -0.01  | t | 19097  | GDRADGQ<br>PAGDRAA<br>GQPA           | Mus<br>musculu<br>s              |
| 1 | 1.00 | 1 | 1 | 0     | -0.002 | 0.013  | -0.001 | -0.002 | t | 110453 | VSAEQW<br>GRL                        | Sus<br>scrofa                    |
| 1 | 1.00 | 1 | 1 | 0     | 0.002  | 0      | 0.007  | 0.002  | t | 132213 | DKERERR<br>SR                        | Homo<br>sapiens                  |
| 1 | 1.00 | 1 | 1 | 0     | 0.002  | 0      | -0.003 | 0      | t | 95828  | SGASAQ<br>SGTSAQ                     | Homo<br>sapiens                  |
| 1 | 1.00 | 1 | 1 | 0     | 0.002  | 0      | -0.003 | 0      | t | 95818  | SAQSGT<br>SGTSAQ                     | Homo<br>sapiens                  |
| 1 | 1.00 | 1 | 1 | 0     | 0.002  | 0      | -0.003 | 0      | t | 95841  | SGTSAQ<br>SGTSAQ                     | Homo<br>sapiens                  |
| 1 | 1.00 | 1 | 1 | 0.04  | 0.036  | 0.029  | 0.039  | 0.042  | t | 41169  | MAVPAF<br>S<br>DIAKSAN<br>D<br>LLNKD | Oryctola<br>gus<br>cuniculu<br>s |
| 1 | 1.00 | 1 | 1 | -0.01 | -0.01  | -0.01  | -0.01  | -0.007 | t | 63037  | TAVSP<br>TTLR                        | Mus<br>musculu<br>s              |
| 1 | 1.00 | 1 | 1 | 0     | 0      | 0      | 0      | 0      | t | 51896  | QPQLP<br>FP<br>QQP                   | Mus<br>musculu<br>s              |
| 1 | 1.00 | 1 | 1 | 0.01  | 0.012  | 0.01   | 0.007  | 0.012  | t | 17362  | FPQPE<br>LPY                         | Homo<br>sapiens                  |
| 1 | 1.00 | 1 | 1 | 0.01  | 0.012  | 0.01   | 0.007  | 0.012  | t | 17362  | FPQPE<br>LPY                         | Homo<br>sapiens                  |

|   |      |   |   |       |        |        |        |        |   |        |                              |                                  |
|---|------|---|---|-------|--------|--------|--------|--------|---|--------|------------------------------|----------------------------------|
| 1 | 1.00 | 1 | 1 | -0.02 | -0.022 | -0.007 | -0.021 | -0.022 | t | 137947 | PNTMKTQ                      | Mus<br>musculu<br>s              |
| 1 | 1.00 | 1 | 1 | 0.01  | 0.006  | 0.01   | 0.013  | 0.014  | t | 106764 | QYTSIHGG<br>VVE              | Oryctola<br>gus<br>cuniculu<br>s |
| 1 | 1.00 | 1 | 1 | 0.03  | 0.028  | 0.039  | 0.03   | 0.027  | t | 110999 | REEAENTL<br>QSFRQDV<br>NTLQS | Mus<br>musculu<br>s              |
| 1 | 1.00 | 1 | 1 | -0.02 | -0.018 | -0.009 | -0.017 | -0.02  | t | 38171  | LNAMTQN<br>IRPVQSV           | Homo<br>sapiens                  |
| 1 | 1.00 | 1 | 1 | -0.03 | -0.026 | -0.023 | -0.023 | -0.031 | t | 131116 | TQSYPPPP<br>AWRAASR          | Homo<br>sapiens                  |
| 1 | 1.00 | 1 | 1 | 0     | 0      | 0.005  | -0.003 | -0.002 | t | 6238   | CFLLFSGCF<br>ALREQA          | Homo<br>sapiens                  |
| 1 | 1.00 | 1 | 1 | 0.01  | 0.013  | 0.01   | 0.01   | 0.01   | t | 139203 | QIYKAQA<br>QTDRESLR<br>NLR   | Mus<br>musculu<br>s              |
| 1 | 1.00 | 1 | 1 | -0.01 | -0.01  | -0.01  | -0.01  | -0.009 | t | 113897 | STYTTTSH<br>AASPTSIN<br>NGLY | Cavia<br>porcellu<br>s           |
| 1 | 1.00 | 1 | 1 | -0.03 | -0.032 | -0.021 | -0.027 | -0.03  | t | 8989   | DKSRYGGL<br>G                | Mus<br>musculu<br>s              |
| 1 | 1.00 | 1 | 1 | -0.01 | -0.013 | -0.003 | -0.01  | -0.012 | t | 435    | AASKSCPL<br>PQVRALES<br>LESL | Oryctola<br>gus<br>cuniculu<br>s |
| 1 | 1.00 | 1 | 1 | -0.01 | -0.006 | -0.004 | -0.01  | -0.01  | t | 7847   | DDPLLRTA                     | Homo<br>sapiens                  |
| 1 | 1.00 | 1 | 1 | -0.01 | -0.01  | -0.01  | -0.01  | -0.01  | t | 149093 | QGRNPTQ                      | Sus<br>scrofa                    |
| 1 | 1.00 | 1 | 1 | -0.03 | -0.03  | -0.03  | -0.03  | -0.03  | t | 79649  | SPSAPTH                      | Oryctola<br>gus<br>cuniculu<br>s |
| 1 | 1.00 | 1 | 1 | 0.01  | 0.01   | 0.008  | 0.01   | 0.01   | t | 503    | AAVVLPG<br>VGLAGGA<br>ATAGA  | Homo<br>sapiens                  |

|   |      |   |   |       |        |        |        |        |   |        |                      |                       |
|---|------|---|---|-------|--------|--------|--------|--------|---|--------|----------------------|-----------------------|
| 1 | 1.00 | 1 | 1 | -0.03 | -0.032 | -0.03  | -0.031 | -0.03  | t | 33063  | KQRQNKPNKPN          | Mus musculus          |
| 1 | 1.00 | 1 | 1 | 0.01  | 0.018  | 0.02   | 0.01   | 0.008  | t | 70398  | VPNLRGDSQVLAQKVARTLP | Cavia porcellus       |
| 1 | 1.00 | 1 | 1 | -0.13 | -0.128 | -0.12  | -0.127 | -0.133 | t | 144823 | YWEGSGIGAII          | Homo sapiens          |
| 1 | 1.00 | 1 | 1 | -0.02 | -0.02  | -0.013 | -0.02  | -0.02  | t | 158734 | DYKYFPLTPGLARVI      | Mus musculus          |
| 1 | 1.00 | 1 | 1 | -0.01 | -0.01  | -0.01  | -0.01  | -0.01  | t | 106846 | SKGCCSGAKRLD         | Homo sapiens          |
| 1 | 1.00 | 1 | 1 | 0     | 0      | 0.007  | 0      | 0      | t | 72506  | WGQGGSHSQWNKPSK      | Oryctolagus cuniculus |
| 1 | 1.00 | 1 | 1 | 0     | 0      | 0.007  | 0      | 0      | t | 72506  | WGQGGSHSQWNKPSK      | Oryctolagus cuniculus |
| 1 | 1.00 | 1 | 1 | 0     | 0      | 0.007  | 0      | 0      | t | 72506  | WGQGGSHSQWNKPSK      | Oryctolagus cuniculus |
| 1 | 1.00 | 1 | 1 | 0     | 0      | 0.007  | 0      | 0      | t | 72506  | WGQGGSHSQWNKPSK      | Oryctolagus cuniculus |
| 1 | 1.00 | 1 | 1 | -0.02 | -0.02  | -0.023 | -0.022 | -0.02  | t | 122143 | LSVVGDPDAPPTMVAVAPVA | Homo sapiens          |
| 1 | 1.00 | 1 | 1 | -0.04 | -0.044 | -0.041 | -0.041 | -0.042 | t | 18500  | GAAALRAHVSGRRA       | Oryctolagus cuniculus |
| 1 | 1.00 | 1 | 1 | 0.01  | 0.012  | 0.01   | 0.007  | 0.01   | t | 52152  | QQSPQQQ              | Homo sapiens          |
| 1 | 1.00 | 1 | 1 | 0.01  | 0.012  | 0.01   | 0.005  | 0.01   | t | 40110  | LTPLEELY             | Homo sapiens          |



|   |      |   |   |       |        |        |        |        |   |        |                            |                       |
|---|------|---|---|-------|--------|--------|--------|--------|---|--------|----------------------------|-----------------------|
| 1 | 1.00 | 1 | 1 | -0.07 | -0.072 | -0.077 | -0.071 | -0.068 | t | 1165   | AESPKKP                    | Homo sapiens          |
| 1 | 1.00 | 1 | 1 | -0.01 | -0.005 | -0.002 | -0.013 | -0.012 | t | 157343 | GRQQHKF<br>GQCQL           | Homo sapiens          |
| 1 | 1.00 | 1 | 1 | 0.03  | 0.027  | 0.035  | 0.03   | 0.03   | t | 113212 | VPVLSAKA<br>AQASDLE        | Oryctolagus cuniculus |
| 1 | 1.00 | 1 | 1 | 0.03  | 0.032  | 0.033  | 0.027  | 0.028  | t | 78255  | QTTPEEKP<br>AEP            | Homo sapiens          |
| 1 | 1.00 | 1 | 1 | -0.01 | -0.012 | -0.004 | -0.013 | -0.01  | t | 118798 | GAGFGHG<br>SGYGVGH<br>GK   | Mus musculus          |
| 1 | 1.00 | 1 | 1 | 0     | -0.002 | -0.001 | -0.001 | 0      | t | 30300  | KEALDKYE<br>LENHDLKT<br>KN | Mus musculus          |
| 1 | 1.00 | 1 | 1 | -0.01 | -0.01  | -0.01  | -0.01  | -0.01  | t | 135503 | VGIPGGVV<br>GAGP           | Oryctolagus cuniculus |
| 1 | 1.00 | 1 | 1 | 0.05  | 0.054  | 0.059  | 0.051  | 0.05   | t | 71292  | VTENDI                     | Homo sapiens          |
| 1 | 1.00 | 1 | 1 | 0.01  | 0.01   | 0.016  | 0.007  | 0.011  | t | 38304  | LNPKTNK<br>WEDK            | Homo sapiens          |
| 1 | 1.00 | 1 | 1 | -0.02 | -0.018 | -0.028 | -0.019 | -0.018 | t | 78936  | AWDMM<br>MNWSPTT<br>ALV    | Homo sapiens          |
| 1 | 1.00 | 1 | 1 | -0.01 | -0.01  | -0.023 | -0.018 | -0.007 | t | 98832  | IPPYCTIAP<br>FGI           | Homo sapiens          |
| 1 | 1.00 | 1 | 1 | -0.04 | -0.038 | -0.035 | -0.041 | -0.042 | t | 131022 | QSGRKGA<br>DIM             | Homo sapiens          |
| 1 | 1.00 | 1 | 1 | 0.01  | 0.014  | 0.012  | 0.011  | 0.01   | t | 22028  | GRFDEAM<br>QDQIRQLE        | Homo sapiens          |
| 1 | 1.00 | 1 | 1 | 0.05  | 0.05   | 0.056  | 0.04   | 0.051  | t | 53878  | RGGPDDL<br>TAL             | Homo sapiens          |

|   |      |   |   |       |        |        |        |       |   |        |                               |                       |
|---|------|---|---|-------|--------|--------|--------|-------|---|--------|-------------------------------|-----------------------|
| 1 | 1.00 | 1 | 1 | 0     | 0      | 0      | 0      | 0     | t | 135415 | AAKAAA                        | Oryctolagus cuniculus |
| 1 | 1.00 | 1 | 1 | -0.02 | -0.02  | -0.02  | -0.02  | -0.02 | t | 135897 | APKRPGPA<br>GELL              | Homo sapiens          |
| 1 | 1.00 | 1 | 1 | -0.02 | -0.02  | -0.02  | -0.02  | -0.02 | t | 137540 | LDRTPRKF<br>HLAGNPK           | Homo sapiens          |
| 1 | 1.00 | 1 | 1 | -0.02 | -0.02  | -0.02  | -0.02  | -0.02 | t | 117342 | PGSALLRQ<br>SMHK              | Homo sapiens          |
| 1 | 1.00 | 1 | 1 | -0.04 | -0.04  | -0.04  | -0.04  | -0.04 | t | 111828 | THMQGW<br>WWSKPW              | Homo sapiens          |
| 1 | 1.00 | 1 | 1 | 0.01  | 0.01   | 0.01   | 0.01   | 0.012 | t | 52157  | QQTFPQP<br>QQT                | Mus musculus          |
| 1 | 1.00 | 1 | 1 | -0.02 | -0.018 | -0.02  | -0.017 | -0.02 | t | 37335  | LLGILES<br>RG IKARIT          | Homo sapiens          |
| 1 | 1.00 | 1 | 1 | -0.03 | -0.028 | -0.028 | -0.029 | -0.03 | t | 69299  | VKQMYKT<br>PTLKYFGG<br>FN     | Homo sapiens          |
| 1 | 1.00 | 1 | 1 | 0.04  | 0.04   | 0.04   | 0.036  | 0.04  | t | 144651 | GKTVVGQI<br>TV                | Homo sapiens          |
| 1 | 1.00 | 1 | 1 | 0.04  | 0.04   | 0.04   | 0.036  | 0.04  | t | 115631 | NVRFSD<br>EG GFTC             | Homo sapiens          |
| 1 | 1.00 | 1 | 1 | 0     | 0.003  | -0.005 | 0      | 0     | t | 7852   | DDPPKDG<br>NKDDL<br>PKE EKKDD | Mus musculus          |
| 1 | 1.00 | 1 | 1 | 0.02  | 0.016  | 0.026  | 0.017  | 0.018 | t | 80014  | RNYPTGAE<br>FLGEG             | Oryctolagus cuniculus |
| 1 | 1.00 | 1 | 1 | 0.02  | 0.017  | 0.02   | 0.02   | 0.022 | t | 32568  | KNNNNEE<br>PS                 | Oryctolagus cuniculus |
| 1 | 1.00 | 1 | 1 | 0     | 0      | 0      | 0      | 0.002 | t | 151763 | WYRATHQ<br>E                  | Mus musculus          |
| 1 | 1.00 | 1 | 1 | 0     | 0      | 0      | 0      | 0.002 | t | 131087 | SSPPCE                        | Mus musculus          |
| 1 | 1.00 | 1 | 1 | 0     | 0      | 0      | 0      | 0.002 | t | 131087 | SSPPCE                        | Mus musculus          |

|   |      |   |   |       |        |        |        |        |   |        |                      |                       |
|---|------|---|---|-------|--------|--------|--------|--------|---|--------|----------------------|-----------------------|
| 1 | 1.00 | 1 | 1 | 0     | 0      | 0      | 0      | 0.002  | t | 131087 | SSPPCE               | Mus musculus          |
| 1 | 1.00 | 1 | 1 | 0     | 0      | 0      | 0      | 0.002  | t | 131087 | SSPPCE               | Mus musculus          |
| 1 | 1.00 | 1 | 1 | 0     | 0      | 0      | 0      | 0.002  | t | 131087 | SSPPCE               | Homo sapiens          |
| 1 | 1.00 | 1 | 1 | 0.02  | 0.02   | 0.02   | 0.02   | 0.02   | t | 111115 | APYKLAMRDQA          | Homo sapiens          |
| 1 | 1.00 | 1 | 1 | 0     | 0      | 0      | -0.004 | 0      | t | 144720 | LMKFVDSKSG           | Homo sapiens          |
| 1 | 1.00 | 1 | 1 | -0.03 | -0.03  | -0.03  | -0.03  | -0.029 | t | 156904 | KPGDPRH              | Mus musculus          |
| 1 | 1.00 | 1 | 1 | 0     | -0.003 | 0.003  | 0      | 0      | t | 43792  | NEWGCRCNDSSD         | Oryctolagus cuniculus |
| 1 | 1.00 | 1 | 1 | -0.02 | -0.018 | -0.016 | -0.023 | -0.022 | t | 76244  | YVDDHLMCDI           | Homo sapiens          |
| 1 | 1.00 | 1 | 1 | 0     | 0      | 0.005  | 0      | 0      | t | 95370  | EVGYTRAEGLYS         | Homo sapiens          |
| 1 | 1.00 | 1 | 1 | 0     | 0      | 0.002  | 0      | 0      | t | 47427  | PESRESLAWQTATNP      | Mus musculus          |
| 1 | 1.00 | 1 | 1 | 0     | 0      | 0.005  | 0      | 0      | t | 18363  | FWRGDLVDFQV          | Homo sapiens          |
| 1 | 1.00 | 1 | 1 | 0.02  | 0.022  | 0.017  | 0.021  | 0.018  | t | 35244  | LDNPLENPSSFLDLVARIKN | Homo sapiens          |
| 1 | 1.00 | 1 | 1 | 0     | 0      | -0.003 | 0      | 0      | t | 50058  | PWYVWLGFIAGLIAIVM    | Homo sapiens          |
| 1 | 1.00 | 1 | 1 | -0.01 | -0.012 | -0.01  | -0.009 | -0.01  | t | 151944 | KFPSESRPNVVK         | Sus scrofa            |
| 1 | 1.00 | 1 | 1 | -0.02 | -0.024 | -0.017 | -0.017 | -0.017 | t | 115406 | NRKVKPTTEGGVETE      | Oryctolagus cuniculus |
| 1 | 1.00 | 1 | 1 | -0.01 | -0.01  | -0.01  | -0.01  | -0.01  | t | 103262 | HVIAGQASPSRIDGT      | Homo sapiens          |
| 1 | 1.00 | 1 | 1 | -0.03 | -0.03  | -0.03  | -0.03  | -0.03  | t | 153267 | IWENAGRMV            | Mus musculus          |

|   |      |   |   |       |        |        |        |        |   |        |                              |                                  |
|---|------|---|---|-------|--------|--------|--------|--------|---|--------|------------------------------|----------------------------------|
| 1 | 1.00 | 1 | 1 | -0.03 | -0.03  | -0.03  | -0.03  | -0.03  | t | 114754 | CAHKVEQ<br>GAS               | Homo<br>sapiens                  |
| 1 | 1.00 | 1 | 1 | 0.01  | 0.01   | 0.01   | 0.01   | 0.013  | t | 151022 | LCKLRGVA<br>PLHLG            | Mus<br>musculu<br>s              |
| 1 | 1.00 | 1 | 1 | 0     | 0.003  | 0.001  | 0      | 0      | t | 65669  | TPNLTTAH<br>GAGS             | Equus<br>caballus                |
| 1 | 1.00 | 1 | 1 | 0.02  | 0.017  | 0.016  | 0.02   | 0.02   | t | 50172  | PYSPSQDP<br>YSPSQDP          | Oryctola<br>gus<br>cuniculu<br>s |
| 1 | 1.00 | 1 | 1 | 0     | -0.004 | 0      | -0.003 | 0.001  | t | 110911 | KATPNDG<br>Y                 | Oryctola<br>gus<br>cuniculu<br>s |
| 1 | 1.00 | 1 | 1 | -0.01 | -0.01  | -0.006 | -0.01  | -0.01  | t | 68896  | VHTWTEQ<br>YK                | Homo<br>sapiens                  |
| 1 | 1.00 | 1 | 1 | 0.02  | 0.023  | 0.037  | 0.02   | 0.02   | t | 49000  | PQGGG                        | Mus<br>musculu<br>s              |
| 1 | 1.00 | 1 | 1 | -0.01 | -0.012 | -0.021 | -0.011 | -0.01  | t | 12208  | EGKVSTLP<br>LDIQIIAAT<br>MSK | Mus<br>musculu<br>s              |
| 1 | 1.00 | 1 | 1 | -0.01 | -0.012 | -0.021 | -0.011 | -0.01  | t | 12208  | EGKVSTLP<br>LDIQIIAAT<br>MSK | Mus<br>musculu<br>s              |
| 1 | 1.00 | 1 | 1 | -0.01 | -0.012 | -0.021 | -0.011 | -0.01  | t | 12208  | EGKVSTLP<br>LDIQIIAAT<br>MSK | Mus<br>musculu<br>s              |
| 1 | 1.00 | 1 | 1 | -0.05 | -0.05  | -0.05  | -0.05  | -0.05  | t | 95037  | RWNPADY<br>GGIKKIRLP<br>S    | Rattus<br>norvegic<br>us         |
| 1 | 1.00 | 1 | 1 | -0.03 | -0.03  | -0.03  | -0.03  | -0.028 | t | 135586 | PFMLAQF<br>DG                | Oryctola<br>gus<br>cuniculu<br>s |
| 1 | 1.00 | 1 | 1 | -0.01 | -0.013 | 0      | -0.011 | -0.01  | t | 134831 | YVKEAENL<br>KKYFN            | Oryctola<br>gus<br>cuniculu<br>s |

|   |      |   |   |       |        |        |        |        |   |        |                              |                                  |
|---|------|---|---|-------|--------|--------|--------|--------|---|--------|------------------------------|----------------------------------|
| 1 | 1.00 | 1 | 1 | 0.02  | 0.02   | 0.022  | 0.02   | 0.02   | t | 77954  | LVVMVVA<br>PLTVNTEG<br>APQIK | Mus<br>musculu<br>s              |
| 1 | 1.00 | 1 | 1 | -0.01 | -0.008 | 0.004  | -0.009 | -0.01  | t | 66082  | TRQAQDI<br>QP                | Homo<br>sapiens                  |
| 1 | 1.00 | 1 | 1 | 0.03  | 0.03   | 0.039  | 0.032  | 0.03   | t | 138192 | HQTPLST                      | Homo<br>sapiens                  |
| 1 | 1.00 | 1 | 1 | 0.03  | 0.028  | 0.037  | 0.023  | 0.03   | t | 107891 | HRLAFGQY<br>T                | Mus<br>musculu<br>s              |
| 1 | 1.00 | 1 | 1 | 0     | 0      | 0.009  | 0      | -0.002 | t | 95116  | LLPHSNLD<br>HILEPSIPW<br>KS  | Mus<br>musculu<br>s              |
| 1 | 1.00 | 1 | 1 | 0     | 0      | -0.005 | -0.003 | 0      | t | 58829  | SKFTEPVK<br>DVMIKSLP<br>ALN  | Homo<br>sapiens                  |
| 1 | 1.00 | 1 | 1 | -0.01 | -0.01  | -0.006 | -0.004 | -0.008 | t | 21442  | GNHVSPT<br>HYVPESD           | Homo<br>sapiens                  |
| 1 | 1.00 | 1 | 1 | 0.03  | 0.028  | 0.03   | 0.023  | 0.03   | t | 107747 | ASNTNYIT<br>STLK             | Mus<br>musculu<br>s              |
| 1 | 1.00 | 1 | 1 | -0.01 | -0.014 | -0.01  | -0.01  | -0.01  | t | 110766 | AIKSEVSLT<br>GAL             | Macaca                           |
| 1 | 1.00 | 1 | 1 | -0.02 | -0.024 | -0.027 | -0.017 | -0.018 | t | 99027  | TNALGNQ<br>FQTQQAR<br>T      | Oryctola<br>gus<br>cuniculu<br>s |
| 1 | 1.00 | 1 | 1 | 0     | 0.002  | 0      | 0.001  | 0.002  | t | 58922  | SKPTTKQR<br>QNKPPSK          | Homo<br>sapiens                  |
| 1 | 1.00 | 1 | 1 | 0.01  | 0.012  | 0.006  | 0.01   | 0.01   | t | 47984  | PISLLFNEK<br>EADDNDH<br>EPQI | Homo<br>sapiens                  |
| 1 | 1.00 | 1 | 1 | 0     | 0      | 0.007  | 0      | 0      | t | 159171 | TTDSGKLIT<br>DWCCRNC         | Mus<br>musculu<br>s              |

|   |      |   |   |       |        |        |        |        |   |        |                             |                                  |
|---|------|---|---|-------|--------|--------|--------|--------|---|--------|-----------------------------|----------------------------------|
| 1 | 1.00 | 1 | 1 | 0.01  | 0.022  | 0.01   | 0.007  | 0.01   | t | 156857 | DKSKKCEK<br>NCAPMV          | Gallus<br>gallus                 |
| 1 | 1.00 | 1 | 1 | -0.03 | -0.027 | -0.034 | -0.03  | -0.029 | t | 95142  | RIKNTDGSI<br>S              | Mus<br>musculu<br>s              |
| 1 | 1.00 | 1 | 1 | -0.01 | -0.01  | 0.003  | -0.007 | -0.011 | t | 51844  | QPGPSREY<br>RYVLRTP         | Homo<br>sapiens                  |
| 1 | 1.00 | 1 | 1 | -0.03 | -0.03  | -0.027 | -0.03  | -0.029 | t | 64994  | TLNWPPTL<br>WGMH            | Mus<br>musculu<br>s              |
| 1 | 1.00 | 1 | 1 | 0     | -0.003 | 0      | 0      | 0.002  | t | 43247  | NANPNAN<br>PNANPNA<br>NPNA  | Oryctola<br>gus<br>cuniculu<br>s |
| 1 | 1.00 | 1 | 1 | 0     | -0.003 | 0      | 0      | 0.002  | t | 43247  | NANPNAN<br>PNANPNA<br>NPNA  | Oryctola<br>gus<br>cuniculu<br>s |
| 1 | 1.00 | 1 | 1 | -0.01 | -0.008 | -0.01  | -0.013 | -0.01  | t | 62339  | SVSVGCKP<br>VPRP            | Homo<br>sapiens                  |
| 1 | 1.00 | 1 | 1 | -0.01 | -0.006 | -0.01  | -0.013 | -0.01  | t | 9818   | DPYSPSPY<br>DRRGAGS         | Homo<br>sapiens                  |
| 1 | 1.00 | 1 | 1 | -0.05 | -0.05  | -0.05  | -0.05  | -0.051 | t | 95013  | GGIKKIRLP<br>SDDVWLP        | Rattus<br>norvegic<br>us         |
| 1 | 1.00 | 1 | 1 | 0.02  | 0.02   | 0.006  | 0.014  | 0.02   | t | 56837  | SAIRAAPE<br>AARSLASS<br>LPG | Homo<br>sapiens                  |
| 1 | 1.00 | 1 | 1 | -0.02 | -0.024 | -0.02  | -0.02  | -0.02  | t | 136727 | VNWNSW<br>HKTNLS            | Bos<br>taurus                    |
| 1 | 1.00 | 1 | 1 | -0.02 | -0.012 | -0.02  | -0.02  | -0.02  | t | 136727 | VNWNSW<br>HKTNLS            | Gallus<br>gallus                 |
| 1 | 1.00 | 1 | 1 | -0.02 | -0.02  | -0.02  | -0.02  | -0.02  | t | 153347 | ACRTSNQ<br>WLCGGGS          | Mus<br>musculu<br>s              |
| 1 | 1.00 | 1 | 1 | -0.04 | -0.04  | -0.04  | -0.04  | -0.04  | t | 96998  | TRRAGPM<br>Q                | Mus<br>musculu<br>s              |
| 1 | 1.00 | 1 | 1 | 0.02  | 0.024  | 0.019  | 0.02   | 0.021  | t | 1575   | AGKKESTV<br>MTSGSA          | Ovis<br>aries                    |

|   |      |   |   |       |        |        |        |        |   |        |                              |                     |
|---|------|---|---|-------|--------|--------|--------|--------|---|--------|------------------------------|---------------------|
| 1 | 1.00 | 1 | 1 | -0.06 | -0.06  | -0.06  | -0.06  | -0.06  | t | 139725 | EMRTRIRY<br>NRRS             | Mus<br>musculu<br>s |
| 1 | 1.00 | 1 | 1 | -0.06 | -0.057 | -0.06  | -0.06  | -0.06  | t | 139725 | EMRTRIRY<br>NRRS             | Mus<br>musculu<br>s |
| 1 | 1.00 | 1 | 1 | 0.02  | 0.02   | 0.02   | 0.02   | 0.019  | t | 115572 | YQQKPVA<br>LINNQFLP<br>YPYYA | Homo<br>sapiens     |
| 1 | 1.00 | 1 | 1 | -0.04 | -0.04  | -0.029 | -0.037 | -0.04  | t | 42053  | MLRTWL<br>MKTQGIES<br>W      | Homo<br>sapiens     |
| 1 | 1.00 | 1 | 1 | -0.04 | -0.041 | -0.039 | -0.043 | -0.04  | t | 99619  | RLVLRRNA<br>LRRPFYS          | Homo<br>sapiens     |
| 1 | 1.00 | 1 | 1 | -0.03 | -0.028 | -0.023 | -0.033 | -0.033 | t | 107035 | YTTRRWLV<br>SM               | Homo<br>sapiens     |
| 1 | 1.00 | 1 | 1 | -0.03 | -0.032 | -0.029 | -0.031 | -0.028 | t | 63944  | TGQHGH<br>MH                 | Mus<br>musculu<br>s |
| 1 | 1.00 | 1 | 1 | 0.06  | 0.058  | 0.06   | 0.053  | 0.06   | t | 108155 | TDHGAE                       | Mus<br>musculu<br>s |
| 1 | 1.00 | 1 | 1 | 0     | 0.004  | 0      | -0.003 | 0.001  | t | 11813  | EENVEENV                     | Homo<br>sapiens     |
| 1 | 1.00 | 1 | 1 | -0.01 | -0.01  | -0.01  | -0.01  | -0.009 | t | 153480 | TPSWRNP<br>FPTFYGGG<br>S     | Mus<br>musculu<br>s |
| 1 | 1.00 | 1 | 1 | -0.01 | -0.01  | -0.01  | -0.01  | -0.009 | t | 137744 | DTPLTRQA<br>LKLK             | Mus<br>musculu<br>s |
| 1 | 1.00 | 1 | 1 | -0.03 | -0.026 | -0.027 | -0.029 | -0.028 | t | 150874 | NWFDISK<br>WLWYI             | Homo<br>sapiens     |
| 1 | 1.00 | 1 | 1 | 0.02  | 0.02   | 0.022  | 0.02   | 0.021  | t | 119598 | INPESDQP<br>DLSNFMES<br>G    | Mus<br>musculu<br>s |
| 1 | 1.00 | 1 | 1 | 0.03  | 0.03   | 0.03   | 0.026  | 0.03   | t | 135929 | GDKEIGNII<br>SDA             | Homo<br>sapiens     |
| 1 | 1.00 | 1 | 1 | -0.02 | -0.017 | -0.018 | -0.02  | -0.02  | t | 146031 | TLAPVRPP<br>LTVGPVGP<br>SDP  | Mus<br>musculu<br>s |

|   |      |   |   |       |        |        |        |        |   |        |                              |                                  |
|---|------|---|---|-------|--------|--------|--------|--------|---|--------|------------------------------|----------------------------------|
| 1 | 1.00 | 1 | 1 | 0.01  | 0.01   | 0.005  | 0.01   | 0.012  | t | 122073 | AEEQARH<br>VKNGLE            | Oryctola<br>gus<br>cuniculu<br>s |
| 1 | 1.00 | 1 | 1 | -0.01 | -0.01  | -0.008 | -0.01  | -0.008 | t | 95008  | EDVFQNG<br>FTAW              | Mus<br>musculu<br>s              |
| 1 | 1.00 | 1 | 1 | 0     | 0      | 0      | 0      | 0.002  | t | 141683 | KDWG                         | Mus<br>musculu<br>s              |
| 1 | 1.00 | 1 | 1 | 0     | 0      | 0      | 0      | 0.002  | t | 141693 | KTWG                         | Mus<br>musculu<br>s              |
| 1 | 1.00 | 1 | 1 | 0.01  | 0.007  | 0.01   | 0.01   | 0.012  | t | 66703  | TTLNPT                       | Oryctola<br>gus<br>cuniculu<br>s |
| 1 | 1.00 | 1 | 1 | -0.01 | -0.008 | -0.004 | -0.007 | -0.008 | t | 30710  | KFDRGYIS<br>PY               | Homo<br>sapiens                  |
| 1 | 1.00 | 1 | 1 | 0     | 0      | 0      | 0      | 0.002  | t | 12632  | EKASVPGG<br>GDMGGM<br>DF     | Mus<br>musculu<br>s              |
| 1 | 1.00 | 1 | 1 | -0.01 | -0.007 | -0.01  | -0.01  | -0.01  | t | 97916  | AVVGKPG<br>SDV               | Mus<br>musculu<br>s              |
| 1 | 1.00 | 1 | 1 | -0.05 | -0.05  | -0.05  | -0.05  | -0.05  | t | 112120 | GAWFAY<br>W                  | Homo<br>sapiens                  |
| 1 | 1.00 | 1 | 1 | -0.01 | -0.01  | -0.017 | -0.01  | -0.008 | t | 133577 | FVVDMMME<br>RLRISQKW<br>VRVA | Mus<br>musculu<br>s              |
| 1 | 1.00 | 1 | 1 | 0     | -0.003 | 0      | 0      | 0.002  | t | 122850 | LSNSSTLDL<br>ASINLQ          | Oryctola<br>gus<br>cuniculu<br>s |
| 1 | 1.00 | 1 | 1 | 0.01  | 0.01   | 0.01   | 0.01   | 0.011  | t | 131040 | RLAPEPDD<br>PITPMTK          | Homo<br>sapiens                  |
| 1 | 1.00 | 1 | 1 | -0.01 | -0.006 | -0.006 | -0.009 | -0.01  | t | 28371  | IRQGTDYK<br>HWPQIAQ<br>FA    | Homo<br>sapiens                  |
| 1 | 1.00 | 1 | 1 | -0.01 | -0.006 | -0.003 | -0.013 | -0.009 | t | 26844  | IKLPALF                      | Homo<br>sapiens                  |



|   |      |   |   |       |        |        |        |        |   |        |                            |                                  |
|---|------|---|---|-------|--------|--------|--------|--------|---|--------|----------------------------|----------------------------------|
| 1 | 1.00 | 1 | 1 | 0.06  | 0.06   | 0.062  | 0.053  | 0.06   | t | 128141 | VTNDCSNS<br>SIVYEAAD<br>VI | Homo<br>sapiens                  |
| 1 | 1.00 | 1 | 1 | -0.01 | -0.008 | -0.01  | -0.013 | -0.01  | t | 48662  | PNKKPGKK<br>TTTK           | Homo<br>sapiens                  |
| 1 | 1.00 | 1 | 1 | -0.01 | -0.01  | -0.01  | -0.01  | -0.01  | t | 99836  | QFPQPQ                     | Mus<br>musculu<br>s              |
| 1 | 1.00 | 1 | 1 | 0.03  | 0.027  | 0.028  | 0.03   | 0.032  | t | 64085  | THTMIFDN<br>AFNCTFEYI      | Oryctola<br>gus<br>cuniculu<br>s |
| 1 | 1.00 | 1 | 1 | -0.01 | -0.012 | -0.003 | -0.017 | -0.014 | t | 135912 | EALVLDTN<br>GLMS           | Mus<br>musculu<br>s              |
| 1 | 1.00 | 1 | 1 | 0.01  | 0.009  | 0.017  | 0.013  | 0.009  | t | 130622 | TGLVAQG<br>TDSIG           | Camelus<br>dromed<br>arius       |
| 1 | 1.00 | 1 | 1 | -0.03 | -0.03  | -0.026 | -0.03  | -0.03  | t | 63458  | TELRYSWK<br>T              | Homo<br>sapiens                  |
| 1 | 1.00 | 1 | 1 | 0.02  | 0.022  | 0.024  | 0.021  | 0.022  | t | 56060  | RTGLDF                     | Homo<br>sapiens                  |
| 1 | 1.00 | 1 | 1 | 0     | 0      | 0.005  | 0.001  | 0.004  | t | 138198 | KPTSTLT                    | Mus<br>musculu<br>s              |
| 1 | 1.00 | 1 | 1 | -0.04 | -0.04  | -0.036 | -0.04  | -0.04  | t | 38771  | LPWLPG                     | Homo<br>sapiens                  |
| 1 | 1.00 | 1 | 1 | -0.01 | -0.008 | 0.011  | -0.007 | -0.012 | t | 153827 | EQQYNKPL<br>CDL            | Cavia<br>porcellu<br>s           |
| 1 | 1.00 | 1 | 1 | 0     | 0      | -0.005 | -0.01  | -0.003 | t | 115672 | AAVRSPA<br>QIL             | Homo<br>sapiens                  |
| 1 | 1.00 | 1 | 1 | 0     | 0.002  | 0.005  | -0.003 | 0      | t | 27758  | INTVDSNN<br>LPIL           | Homo<br>sapiens                  |
| 1 | 1.00 | 1 | 1 | 0.03  | 0.033  | 0.032  | 0.03   | 0.032  | t | 107307 | DAEFGHD<br>SGF             | Mus<br>musculu<br>s              |
| 1 | 1.00 | 1 | 1 | 0.02  | 0.016  | 0.025  | 0.019  | 0.02   | t | 6367   | CGYGGPA<br>NKKNAGC         | Oryctola<br>gus<br>cuniculu<br>s |
| 1 | 1.00 | 1 | 1 | 0.02  | 0.02   | 0.02   | 0.02   | 0.02   | t | 115873 | NQDKTEIP<br>TI             | Homo<br>sapiens                  |

|   |      |   |   |       |        |        |        |        |   |        |                              |                                  |
|---|------|---|---|-------|--------|--------|--------|--------|---|--------|------------------------------|----------------------------------|
| 1 | 1.00 | 1 | 1 | 0.02  | 0.02   | 0.02   | 0.02   | 0.02   | t | 99480  | NAGGEQE<br>ERGQRRW<br>S      | Homo<br>sapiens                  |
| 1 | 1.00 | 1 | 1 | 0     | 0      | 0      | 0      | 0      | t | 127911 | AADRGGA<br>DVASIHLT<br>ARAT  | Homo<br>sapiens                  |
| 1 | 1.00 | 1 | 1 | -0.04 | -0.04  | -0.04  | -0.04  | -0.04  | t | 140859 | GQRRADA<br>VKGYL             | Oryctola<br>gus<br>cuniculu<br>s |
| 1 | 1.00 | 1 | 1 | -0.08 | -0.08  | -0.08  | -0.08  | -0.08  | t | 115924 | QPTTMAR<br>HPH               | Homo<br>sapiens                  |
| 1 | 1.00 | 1 | 1 | 0     | 0      | -0.002 | -0.004 | 0.002  | t | 118554 | PPGIRGP                      | Homo<br>sapiens                  |
| 1 | 1.00 | 1 | 1 | 0     | 0.003  | 0.002  | 0      | 0      | t | 122290 | CSNSSSQ<br>FQIHGPRQ          | Mus<br>musculu<br>s              |
| 1 | 1.00 | 1 | 1 | 0     | 0.003  | 0.002  | 0      | 0      | t | 122290 | CSNSSSQ<br>FQIHGPRQ          | Mus<br>musculu<br>s              |
| 1 | 1.00 | 1 | 1 | -0.01 | -0.01  | -0.01  | -0.01  | -0.008 | t | 118763 | CYGSFARP<br>MN               | Mus<br>musculu<br>s              |
| 1 | 1.00 | 1 | 1 | -0.01 | -0.01  | -0.01  | -0.011 | -0.008 | t | 72320  | WDMMM<br>NW                  | Homo<br>sapiens                  |
| 1 | 1.00 | 1 | 1 | -0.01 | -0.012 | -0.01  | -0.011 | -0.008 | t | 72320  | WDMMM<br>NW                  | Mus<br>musculu<br>s              |
| 1 | 1.00 | 1 | 1 | -0.01 | -0.003 | -0.016 | -0.01  | -0.008 | t | 43547  | NDYDGFLE<br>NAHEHHG<br>VYNQG | Cavia<br>porcellu<br>s           |
| 1 | 1.00 | 1 | 1 | 0.02  | 0.02   | 0.02   | 0.02   | 0.022  | t | 25145  | HWYDAEV<br>L                 | Mus<br>musculu<br>s              |
| 1 | 1.00 | 1 | 1 | 0     | 0.002  | 0.003  | 0.004  | 0.002  | t | 50637  | QELDCWH<br>YQHCVTS<br>TKS    | MD                               |
| 1 | 1.00 | 1 | 1 | 0.02  | 0.022  | 0.02   | 0.019  | 0.02   | t | 149440 | QQQQQPL<br>SQV               | Homo<br>sapiens                  |
| 1 | 1.00 | 1 | 1 | -0.02 | -0.02  | -0.02  | -0.019 | -0.021 | t | 153294 | TYNHDYKT<br>GMVIYSPF<br>MTYP | Mus<br>musculu<br>s              |

|   |      |   |   |       |        |        |        |        |   |        |                              |                                  |
|---|------|---|---|-------|--------|--------|--------|--------|---|--------|------------------------------|----------------------------------|
| 1 | 1.00 | 1 | 1 | 0.02  | 0.02   | 0.02   | 0.02   | 0.023  | t | 140582 | PWATLV<br>AES                | Mus<br>musculu<br>s              |
| 1 | 1.00 | 1 | 1 | -0.01 | -0.01  | -0.012 | -0.016 | -0.01  | t | 32826  | KPPKYHPD<br>VP               | Homo<br>sapiens                  |
| 1 | 1.00 | 1 | 1 | 0.01  | 0.01   | 0.01   | 0.01   | 0.012  | t | 140507 | TKTWQSM                      | Mus<br>musculu<br>s              |
| 1 | 1.00 | 1 | 1 | 0.04  | 0.045  | 0.048  | 0.037  | 0.038  | t | 158291 | SQQGQRR<br>EFQQD             | Homo<br>sapiens                  |
| 1 | 1.00 | 1 | 1 | 0.03  | 0.027  | 0.035  | 0.03   | 0.03   | t | 6277   | CGDELEAE<br>TQNVYAA<br>GC    | Oryctola<br>gus<br>cuniculu<br>s |
| 1 | 1.00 | 1 | 1 | -0.03 | -0.028 | -0.028 | -0.033 | -0.031 | t | 99784  | YGNLYRN<br>ALFVAHYN          | Homo<br>sapiens                  |
| 1 | 1.00 | 1 | 1 | 0.01  | 0.012  | 0.015  | 0.013  | 0.009  | t | 39164  | LRPGPVSQ<br>PYHHWDT<br>DK    | Homo<br>sapiens                  |
| 1 | 1.00 | 1 | 1 | 0     | -0.002 | -0.004 | 0      | 0      | t | 49879  | PVGTVAP<br>QIPPNWHI<br>PSIQD | Mus<br>musculu<br>s              |
| 1 | 1.00 | 1 | 1 | -0.03 | -0.028 | -0.032 | -0.027 | -0.027 | t | 9586   | DPAFR                        | Homo<br>sapiens                  |
| 1 | 1.00 | 1 | 1 | -0.02 | -0.02  | -0.013 | -0.02  | -0.021 | t | 53010  | QYNLTFSD<br>RQSAQ            | Mus<br>musculu<br>s              |
| 1 | 1.00 | 1 | 1 | 0     | -0.004 | -0.007 | -0.007 | 0      | t | 128038 | KSPKKAKA<br>AKPKKAP          | Oryctola<br>gus<br>cuniculu<br>s |
| 1 | 1.00 | 1 | 1 | 0     | 0      | 0.009  | 0.002  | 0      | t | 135929 | GDKEIGNII<br>SDA             | Homo<br>sapiens                  |
| 1 | 1.00 | 1 | 1 | 0     | 0      | -0.004 | -0.006 | 0.001  | t | 106057 | REFSPRGQ<br>HGRRERA          | Homo<br>sapiens                  |
| 1 | 1.00 | 1 | 1 | 0     | 0      | 0      | -0.004 | 0      | t | 142201 | KGLRRDLD<br>ASREAKKQ<br>VEKA | Homo<br>sapiens                  |

|   |      |   |   |       |        |        |        |        |   |        |                          |                                  |
|---|------|---|---|-------|--------|--------|--------|--------|---|--------|--------------------------|----------------------------------|
| 1 | 1.00 | 1 | 1 | -0.02 | -0.017 | -0.021 | -0.02  | -0.02  | t | 94743  | YGTDEWE<br>QWW           | Mus<br>musculu<br>s              |
| 1 | 1.00 | 1 | 1 | 0.01  | 0.008  | 0.01   | 0.009  | 0.013  | t | 50609  | QEGVQQE<br>GA            | Mus<br>musculu<br>s              |
| 1 | 1.00 | 1 | 1 | 0.06  | 0.06   | 0.06   | 0.05   | 0.058  | t | 108612 | RNDLITFLE<br>QETK        | Homo<br>sapiens                  |
| 1 | 1.00 | 1 | 1 | 0.03  | 0.034  | 0.033  | 0.029  | 0.03   | t | 62289  | SVPSSSS                  | Mus<br>musculu<br>s              |
| 1 | 1.00 | 1 | 1 | 0.02  | 0.018  | 0.03   | 0.019  | 0.021  | t | 17564  | FRASTDYP<br>VFGF         | Mus<br>musculu<br>s              |
| 1 | 1.00 | 1 | 1 | 0.01  | 0.01   | 0.01   | 0.01   | 0.01   | t | 79642  | SGTSHIR                  | Oryctola<br>gus<br>cuniculu<br>s |
| 1 | 1.00 | 1 | 1 | -0.02 | -0.023 | -0.012 | -0.02  | -0.017 | t | 62147  | SVGPPH                   | Mus<br>musculu<br>s              |
| 1 | 1.00 | 1 | 1 | -0.01 | -0.007 | -0.01  | -0.011 | -0.01  | t | 72552  | WHRTPSTL<br>WGVl         | Mus<br>musculu<br>s              |
| 1 | 1.00 | 1 | 1 | 0     | 0      | 0      | 0      | 0.002  | t | 128225 | AGAAKRK<br>ASGPPVSE<br>L | Homo<br>sapiens                  |
| 1 | 1.00 | 1 | 1 | 0     | -0.003 | -0.002 | 0      | 0.001  | t | 135843 | QELVDCAS<br>QHGCH        | Oryctola<br>gus<br>cuniculu<br>s |
| 1 | 1.00 | 1 | 1 | 0     | -0.003 | -0.002 | 0      | 0.001  | t | 135843 | QELVDCAS<br>QHGCH        | Oryctola<br>gus<br>cuniculu<br>s |
| 1 | 1.00 | 1 | 1 | 0.03  | 0.032  | 0.03   | 0.029  | 0.03   | t | 149441 | QQQQQQ<br>QPLS           | Homo<br>sapiens                  |
| 1 | 1.00 | 1 | 1 | -0.01 | -0.014 | -0.009 | -0.009 | -0.01  | t | 72562  | WHWTWL<br>SEYPPP         | Oryctola<br>gus<br>cuniculu<br>s |
| 1 | 1.00 | 1 | 1 | 0     | 0      | -0.002 | 0      | 0.002  | t | 50900  | QGLPQEV<br>LNE           | Homo<br>sapiens                  |

|   |      |   |   |       |        |        |        |        |   |        |                              |                                  |
|---|------|---|---|-------|--------|--------|--------|--------|---|--------|------------------------------|----------------------------------|
| 1 | 1.00 | 1 | 1 | -0.01 | -0.01  | -0.01  | -0.01  | -0.01  | t | 10340  | DTGCAIDI<br>TRKEMRC          | Homo<br>sapiens                  |
| 1 | 1.00 | 1 | 1 | -0.01 | -0.01  | -0.01  | -0.004 | -0.01  | t | 43248  | NANPNAN<br>PNANPNA<br>NPNANP | Homo<br>sapiens                  |
| 1 | 1.00 | 1 | 1 | 0.01  | 0.006  | 0.01   | 0.007  | 0.011  | t | 131579 | PDIITGFSS                    | Oryctola<br>gus<br>cuniculu<br>s |
| 1 | 1.00 | 1 | 1 | 0     | 0      | 0      | 0      | 0      | t | 111733 | RKATPTTS<br>STSTAK           | Mus<br>musculu<br>s              |
| 1 | 1.00 | 1 | 1 | -0.07 | -0.07  | -0.07  | -0.07  | -0.068 | t | 129293 | LPPARGTP                     | Homo<br>sapiens                  |
| 1 | 1.00 | 1 | 1 | 0.02  | 0.023  | 0.023  | 0.02   | 0.021  | t | 7187   | CTNGLTAL<br>FTPGAKQ<br>N     | Mus<br>musculu<br>s              |
| 1 | 1.00 | 1 | 1 | 0.01  | 0.008  | 0.007  | 0.003  | 0.01   | t | 128110 | SLLTEVETP<br>IRNEWGC<br>R    | Mus<br>musculu<br>s              |
| 1 | 1.00 | 1 | 1 | -0.02 | -0.016 | -0.018 | -0.019 | -0.018 | t | 29566  | IYDKKISVL<br>K               | Homo<br>sapiens                  |
| 1 | 1.00 | 1 | 1 | -0.05 | -0.04  | -0.05  | -0.051 | -0.049 | t | 66121  | TRVPRR                       | Pan<br>troglody<br>tes           |
| 1 | 1.00 | 1 | 1 | 0     | 0.004  | 0.017  | 0.007  | -0.001 | t | 117448 | CTLAEK                       | Homo<br>sapiens                  |
| 1 | 1.00 | 1 | 1 | -0.02 | -0.021 | -0.018 | -0.02  | -0.018 | t | 20564  | GKFPTLDH                     | Anas<br>platyrhy<br>nchos        |
| 1 | 1.00 | 1 | 1 | 0.02  | 0.018  | 0.025  | 0.017  | 0.019  | t | 159043 | NTFVVDG<br>PETKECPT<br>Q     | Mus<br>musculu<br>s              |
| 1 | 1.00 | 1 | 1 | 0.01  | 0.01   | 0.013  | 0.004  | 0.008  | t | 68300  | VENGNAT<br>PQLTK             | Homo<br>sapiens                  |
| 1 | 1.00 | 1 | 1 | 0.02  | 0.017  | 0.013  | 0.02   | 0.022  | t | 106343 | DIVMTQSP<br>LSLPVTPG<br>EPA  | Oryctola<br>gus<br>cuniculu<br>s |
| 1 | 1.00 | 1 | 1 | -0.01 | -0.01  | -0.01  | -0.01  | -0.01  | t | 111685 | QPIENYKL<br>MPST             | Homo<br>sapiens                  |

|   |      |   |   |       |        |        |        |        |   |        |                          |                 |
|---|------|---|---|-------|--------|--------|--------|--------|---|--------|--------------------------|-----------------|
| 1 | 1.00 | 1 | 1 | 0     | 0      | 0.002  | 0.002  | 0      | t | 25766  | IEEADKKTITSAVEEAL<br>EWL | Homo sapiens    |
| 1 | 1.00 | 1 | 1 | -0.02 | -0.02  | -0.015 | -0.02  | -0.019 | t | 125004 | DAPDTDWCDSIP             | Mus musculus    |
| 1 | 1.00 | 1 | 1 | 0.03  | 0.03   | 0.034  | 0.03   | 0.03   | t | 77965  | NTGSIINNYMQQYQNSMDT      | Mus musculus    |
| 1 | 1.00 | 1 | 1 | 0.03  | 0.03   | 0.034  | 0.03   | 0.03   | t | 77965  | NTGSIINNYMQQYQNSMDT      | Mus musculus    |
| 1 | 1.00 | 1 | 1 | 0     | 0      | 0.004  | 0      | 0      | t | 52086  | QQPFPQQPQQ               | Mus musculus    |
| 1 | 1.00 | 1 | 1 | 0     | 0      | 0.004  | 0      | 0      | t | 52086  | QQPFPQQPQQ               | Mus musculus    |
| 1 | 1.00 | 1 | 1 | 0     | 0      | 0      | 0      | 0      | t | 103680 | TWQTKSGGTRTGNVT          | Homo sapiens    |
| 1 | 1.00 | 1 | 1 | -0.02 | -0.02  | -0.02  | -0.02  | -0.02  | t | 137207 | ISFGKSSQCREA             | Sus scrofa      |
| 1 | 1.00 | 1 | 1 | -0.06 | -0.06  | -0.06  | -0.06  | -0.06  | t | 158600 | MFNWHPF                  | Homo sapiens    |
| 1 | 1.00 | 1 | 1 | 0     | 0      | 0      | 0      | 0.002  | t | 131818 | AKEERRY                  | Homo sapiens    |
| 1 | 1.00 | 1 | 1 | 0.02  | 0.022  | 0.015  | 0.017  | 0.02   | t | 32723  | KPGKKTTKPTK              | Homo sapiens    |
| 1 | 1.00 | 1 | 1 | -0.02 | -0.016 | -0.025 | -0.02  | -0.02  | t | 61720  | STLGNDSLRTYNDKDL<br>L    | Cavia porcellus |
| 1 | 1.00 | 1 | 1 | -0.03 | -0.032 | -0.02  | -0.031 | -0.032 | t | 35126  | LDDPVFGFARRVPVV          | Mus musculus    |
| 1 | 1.00 | 1 | 1 | 0     | 0.012  | 0      | -0.003 | 0      | t | 156965 | SVQERYYAFWST             | Gallus gallus   |
| 1 | 1.00 | 1 | 1 | 0     | 0.012  | 0      | -0.003 | 0      | t | 156911 | LGMSTNPGPRIL             | Gallus gallus   |

|   |      |   |   |   |        |   |        |   |   |        |                         |                                  |
|---|------|---|---|---|--------|---|--------|---|---|--------|-------------------------|----------------------------------|
| 1 | 1.00 | 1 | 1 | 0 | 0.01   | 0 | -0.003 | 0 | t | 140868 | HLINTNGS<br>WHINSTA     | Pan<br>troglody<br>tes           |
| 1 | 1.00 | 1 | 1 | 0 | 0.012  | 0 | -0.003 | 0 | t | 156850 | APHNKWP<br>HLNPP        | Gallus<br>gallus                 |
| 1 | 1.00 | 1 | 1 | 0 | 0.012  | 0 | -0.003 | 0 | t | 156872 | FSKSSSWE<br>SWLP        | Gallus<br>gallus                 |
| 1 | 1.00 | 1 | 1 | 0 | 0.012  | 0 | -0.003 | 0 | t | 156843 | AHSEMG<br>T RATMT       | Gallus<br>gallus                 |
| 1 | 1.00 | 1 | 1 | 0 | 0.012  | 0 | -0.003 | 0 | t | 156918 | MAITDHP<br>GSAMV        | Gallus<br>gallus                 |
| 1 | 1.00 | 1 | 1 | 0 | 0.012  | 0 | -0.003 | 0 | t | 156871 | FQNIASM<br>PHLYV        | Gallus<br>gallus                 |
| 1 | 1.00 | 1 | 1 | 0 | 0.012  | 0 | -0.003 | 0 | t | 156981 | YTSLPAPM<br>QRLP        | Gallus<br>gallus                 |
| 1 | 1.00 | 1 | 1 | 0 | -0.002 | 0 | -0.003 | 0 | t | 119301 | PEVVVLGS<br>QEGAMHT     | Mus<br>musculu<br>s              |
| 1 | 1.00 | 1 | 1 | 0 | -0.004 | 0 | -0.003 | 0 | t | 118490 | LKDKYKNI<br>GAKLV       | Oryctola<br>gus<br>cuniculu<br>s |
| 1 | 1.00 | 1 | 1 | 0 | -0.004 | 0 | -0.003 | 0 | t | 118275 | ATVLARSI<br>AKEGF       | Oryctola<br>gus<br>cuniculu<br>s |
| 1 | 1.00 | 1 | 1 | 0 | -0.002 | 0 | -0.003 | 0 | t | 119367 | TQLATLRK<br>LCIEGKI     | Mus<br>musculu<br>s              |
| 1 | 1.00 | 1 | 1 | 0 | -0.002 | 0 | -0.003 | 0 | t | 119255 | LLTMKNK<br>AWMVHR<br>QW | Mus<br>musculu<br>s              |
| 1 | 1.00 | 1 | 1 | 0 | -0.004 | 0 | -0.003 | 0 | t | 118451 | KGIIDPTKV<br>VRTA       | Oryctola<br>gus<br>cuniculu<br>s |
| 1 | 1.00 | 1 | 1 | 0 | -0.008 | 0 | -0.003 | 0 | t | 110841 | EVTPAIKSE<br>VSL        | Macaca                           |
| 1 | 1.00 | 1 | 1 | 0 | -0.008 | 0 | -0.003 | 0 | t | 110839 | ETTSQMIV<br>KDIK        | Macaca                           |
| 1 | 1.00 | 1 | 1 | 0 | -0.008 | 0 | -0.003 | 0 | t | 111036 | TESTFTGE<br>AYSV        | Macaca                           |

|   |      |   |   |   |        |   |        |   |   |        |                     |                     |
|---|------|---|---|---|--------|---|--------|---|---|--------|---------------------|---------------------|
| 1 | 1.00 | 1 | 1 | 0 | -0.008 | 0 | -0.003 | 0 | t | 110964 | PNLKLNN<br>GTDYK    | Macaca              |
| 1 | 1.00 | 1 | 1 | 0 | -0.008 | 0 | -0.003 | 0 | t | 110971 | PVSDLNLKI<br>DGL    | Macaca              |
| 1 | 1.00 | 1 | 1 | 0 | -0.008 | 0 | -0.003 | 0 | t | 110949 | NAEKVLEK<br>LGYA    | Macaca              |
| 1 | 1.00 | 1 | 1 | 0 | -0.008 | 0 | -0.003 | 0 | t | 110913 | KDIKANPE<br>NYFT    | Macaca              |
| 1 | 1.00 | 1 | 1 | 0 | -0.002 | 0 | -0.003 | 0 | t | 98822  | IEAGAIGFK<br>IHEDWG | Mus<br>musculu<br>s |
| 1 | 1.00 | 1 | 1 | 0 | -0.008 | 0 | -0.003 | 0 | t | 110766 | AIKSEVSLT<br>GAL    | Macaca              |
| 1 | 1.00 | 1 | 1 | 0 | -0.008 | 0 | -0.003 | 0 | t | 110769 | ANPENYFT<br>NGEA    | Macaca              |
| 1 | 1.00 | 1 | 1 | 0 | -0.008 | 0 | -0.003 | 0 | t | 110795 | CDLIPNLKL<br>NNG    | Macaca              |
| 1 | 1.00 | 1 | 1 | 0 | -0.008 | 0 | -0.003 | 0 | t | 110932 | LNLKIDGL<br>KISV    | Macaca              |
| 1 | 1.00 | 1 | 1 | 0 | -0.008 | 0 | -0.003 | 0 | t | 111043 | TLAEADRT<br>NAEK    | Macaca              |
| 1 | 1.00 | 1 | 1 | 0 | -0.008 | 0 | -0.003 | 0 | t | 110922 | KQMDIKSI<br>NDLQ    | Macaca              |
| 1 | 1.00 | 1 | 1 | 0 | -0.002 | 0 | -0.003 | 0 | t | 69303  | VKQSRGE<br>A        | Mus<br>musculu<br>s |
| 1 | 1.00 | 1 | 1 | 0 | -0.002 | 0 | -0.003 | 0 | t | 75539  | YQQQGRL             | Mus<br>musculu<br>s |



|   |      |   |   |   |        |   |        |   |   |       |                              |                                  |
|---|------|---|---|---|--------|---|--------|---|---|-------|------------------------------|----------------------------------|
| 1 | 1.00 | 1 | 1 | 0 | -0.004 | 0 | -0.003 | 0 | t | 62348 | SVTEEIAEE<br>DKSVIEEA<br>V   | Oryctola<br>gus<br>cuniculu<br>s |
| 1 | 1.00 | 1 | 1 | 0 | -0.004 | 0 | -0.003 | 0 | t | 97777 | YKNMILGT<br>SVNIYEYIG<br>KLQ | Oryctola<br>gus<br>cuniculu<br>s |
| 1 | 1.00 | 1 | 1 | 0 | 0.007  | 0 | -0.003 | 0 | t | 70261 | VPCSTCEG<br>NLACLSLC<br>Q    | Ovis<br>aries                    |
| 1 | 1.00 | 1 | 1 | 0 | -0.002 | 0 | -0.003 | 0 | t | 65521 | TPCSK                        | Mus<br>musculu<br>s              |
| 1 | 1.00 | 1 | 1 | 0 | -0.002 | 0 | -0.003 | 0 | t | 76368 | YVNTNMG<br>LKIRQ             | Mus<br>musculu<br>s              |
| 1 | 1.00 | 1 | 1 | 0 | -0.007 | 0 | -0.003 | 0 | t | 66101 | TRSQSGLT<br>FA               | Oryctola<br>gus<br>cuniculu<br>s |
| 1 | 1.00 | 1 | 1 | 0 | -0.004 | 0 | -0.003 | 0 | t | 69359 | VLAETIYE<br>GLR              | Oryctola<br>gus<br>cuniculu<br>s |
| 1 | 1.00 | 1 | 1 | 0 | -0.004 | 0 | -0.003 | 0 | t | 97605 | RIVRGPAN<br>LRNLKEFK<br>E    | Oryctola<br>gus<br>cuniculu<br>s |
| 1 | 1.00 | 1 | 1 | 0 | -0.002 | 0 | -0.003 | 0 | t | 94481 | CSNNPTC<br>WAICK             | Mus<br>musculu<br>s              |
| 1 | 1.00 | 1 | 1 | 0 | -0.002 | 0 | -0.003 | 0 | t | 94613 | NNPTCWA<br>ICKRI             | Mus<br>musculu<br>s              |
| 1 | 1.00 | 1 | 1 | 0 | -0.002 | 0 | -0.003 | 0 | t | 94695 | SNNPTCW<br>AICKR             | Mus<br>musculu<br>s              |
| 1 | 1.00 | 1 | 1 | 0 | -0.007 | 0 | -0.003 | 0 | t | 62820 | TADSELRR<br>WVKY             | Oryctola<br>gus<br>cuniculu<br>s |
| 1 | 1.00 | 1 | 1 | 0 | -0.002 | 0 | -0.003 | 0 | t | 94651 | PTCWAICK<br>RIPN             | Mus<br>musculu<br>s              |

|   |      |   |   |   |        |   |        |   |   |       |                              |                       |
|---|------|---|---|---|--------|---|--------|---|---|-------|------------------------------|-----------------------|
| 1 | 1.00 | 1 | 1 | 0 | -0.007 | 0 | -0.003 | 0 | t | 76165 | YTQQRVIGEFR                  | Oryctolagus cuniculus |
| 1 | 1.00 | 1 | 1 | 0 | -0.002 | 0 | -0.003 | 0 | t | 54214 | RIPNKKPGKKT                  | Mus musculus          |
| 1 | 1.00 | 1 | 1 | 0 | -0.004 | 0 | -0.003 | 0 | t | 56918 | SANNDAEIGNLI                 | Oryctolagus cuniculus |
| 1 | 1.00 | 1 | 1 | 0 | -0.004 | 0 | -0.003 | 0 | t | 52749 | QVMSRSA<br>NEGVD             | Oryctolagus cuniculus |
| 1 | 1.00 | 1 | 1 | 0 | -0.002 | 0 | -0.003 | 0 | t | 60396 | SQCKLGSDLN                   | Mus musculus          |
| 1 | 1.00 | 1 | 1 | 0 | -0.002 | 0 | -0.003 | 0 | t | 55732 | RRRTSPRRRRS                  | Mus musculus          |
| 1 | 1.00 | 1 | 1 | 0 | -0.002 | 0 | -0.003 | 0 | t | 48681 | PNNDFHEVFNF                  | Mus musculus          |
| 1 | 1.00 | 1 | 1 | 0 | -0.002 | 0 | -0.003 | 0 | t | 47045 | PCSICSNN<br>PTCWAICK         | Mus musculus          |
| 1 | 1.00 | 1 | 1 | 0 | -0.002 | 0 | -0.003 | 0 | t | 55726 | RRRSQSPRRRR                  | Mus musculus          |
| 1 | 1.00 | 1 | 1 | 0 | -0.002 | 0 | -0.003 | 0 | t | 49650 | PTHYISSRH                    | Mus musculus          |
| 1 | 1.00 | 1 | 1 | 0 | -0.002 | 0 | -0.003 | 0 | t | 58077 | SGHRMA<br>WDMMNW             | Mus musculus          |
| 1 | 1.00 | 1 | 1 | 0 | -0.002 | 0 | -0.003 | 0 | t | 47336 | PEKTPLPV<br>SATAMAP<br>SVDPS | Mus musculus          |
| 1 | 1.00 | 1 | 1 | 0 | -0.002 | 0 | -0.003 | 0 | t | 47045 | PCSICSNN<br>PTCWAICK         | Mus musculus          |
| 1 | 1.00 | 1 | 1 | 0 | -0.002 | 0 | -0.003 | 0 | t | 56152 | RTPPGYRPNAP                  | Mus musculus          |
| 1 | 1.00 | 1 | 1 | 0 | -0.004 | 0 | -0.003 | 0 | t | 40578 | LVSFGVWIRTPPAYRP             | Oryctolagus cuniculus |

|   |      |   |   |   |        |   |        |   |   |       |                         |                                  |
|---|------|---|---|---|--------|---|--------|---|---|-------|-------------------------|----------------------------------|
| 1 | 1.00 | 1 | 1 | 0 | -0.002 | 0 | -0.003 | 0 | t | 40578 | LVSFGVWI<br>RTPPAYRP    | Mus<br>musculu<br>s              |
| 1 | 1.00 | 1 | 1 | 0 | -0.002 | 0 | -0.003 | 0 | t | 48627 | PNEPDDAL<br>AMRIIRI     | Mus<br>musculu<br>s              |
| 1 | 1.00 | 1 | 1 | 0 | -0.002 | 0 | -0.003 | 0 | t | 44606 | NKTKQNP<br>NL           | Mus<br>musculu<br>s              |
| 1 | 1.00 | 1 | 1 | 0 | -0.002 | 0 | -0.003 | 0 | t | 49998 | PVVEVNG<br>VTIQVGSR     | Mus<br>musculu<br>s              |
| 1 | 1.00 | 1 | 1 | 0 | -0.007 | 0 | -0.003 | 0 | t | 53859 | RGETPGQL<br>LPEIMQ      | Oryctola<br>gus<br>cuniculu<br>s |
| 1 | 1.00 | 1 | 1 | 0 | -0.002 | 0 | -0.003 | 0 | t | 37335 | LLGILES<br>RG<br>IKARIT | Mus<br>musculu<br>s              |
| 1 | 1.00 | 1 | 1 | 0 | -0.002 | 0 | -0.003 | 0 | t | 41870 | MKNYLSF<br>GMFALL       | Mus<br>musculu<br>s              |
| 1 | 1.00 | 1 | 1 | 0 | -0.004 | 0 | -0.003 | 0 | t | 53195 | RARGRGR<br>GRGEKRP      | Oryctola<br>gus<br>cuniculu<br>s |
| 1 | 1.00 | 1 | 1 | 0 | -0.002 | 0 | -0.003 | 0 | t | 43435 | NDFHFEVF<br>NFVP        | Mus<br>musculu<br>s              |
| 1 | 1.00 | 1 | 1 | 0 | -0.002 | 0 | -0.003 | 0 | t | 39146 | LRNCEQDF<br>FTLN        | Mus<br>musculu<br>s              |
| 1 | 1.00 | 1 | 1 | 0 | -0.002 | 0 | -0.003 | 0 | t | 55641 | RRLGRQTY<br>DNES        | Mus<br>musculu<br>s              |
| 1 | 1.00 | 1 | 1 | 0 | -0.002 | 0 | -0.003 | 0 | t | 52403 | QSPRRRRS<br>QSRE        | Mus<br>musculu<br>s              |
| 1 | 1.00 | 1 | 1 | 0 | -0.002 | 0 | -0.003 | 0 | t | 40619 | LVTVNP<br>FV<br>SVATANS | Mus<br>musculu<br>s              |
| 1 | 1.00 | 1 | 1 | 0 | -0.002 | 0 | -0.003 | 0 | t | 49137 | PQTTKPKE<br>VPTT        | Mus<br>musculu<br>s              |
| 1 | 1.00 | 1 | 1 | 0 | -0.002 | 0 | -0.003 | 0 | t | 52420 | QSRGEAR                 | Mus<br>musculu<br>s              |

|   |      |   |   |   |        |   |        |   |   |       |                          |                                  |
|---|------|---|---|---|--------|---|--------|---|---|-------|--------------------------|----------------------------------|
| 1 | 1.00 | 1 | 1 | 0 | -0.002 | 0 | -0.003 | 0 | t | 40076 | LTPCD                    | Mus<br>musculu<br>s              |
| 1 | 1.00 | 1 | 1 | 0 | -0.002 | 0 | -0.003 | 0 | t | 44569 | NKPNNDF<br>HFEVF         | Mus<br>musculu<br>s              |
| 1 | 1.00 | 1 | 1 | 0 | -0.002 | 0 | -0.003 | 0 | t | 44571 | NKPPNKP<br>NNDFH         | Mus<br>musculu<br>s              |
| 1 | 1.00 | 1 | 1 | 0 | -0.002 | 0 | -0.003 | 0 | t | 49248 | PRRRRSQS<br>PRRR         | Mus<br>musculu<br>s              |
| 1 | 1.00 | 1 | 1 | 0 | -0.004 | 0 | -0.003 | 0 | t | 45160 | NNLEDPAS<br>RDLVVNYV     | Oryctola<br>gus<br>cuniculu<br>s |
| 1 | 1.00 | 1 | 1 | 0 | -0.007 | 0 | -0.003 | 0 | t | 53814 | RGADCNE                  | Oryctola<br>gus<br>cuniculu<br>s |
| 1 | 1.00 | 1 | 1 | 0 | -0.002 | 0 | -0.003 | 0 | t | 55588 | RRGRSPRR<br>RTPS         | Mus<br>musculu<br>s              |
| 1 | 1.00 | 1 | 1 | 0 | -0.002 | 0 | -0.003 | 0 | t | 40077 | LTPCDN                   | Mus<br>musculu<br>s              |
| 1 | 1.00 | 1 | 1 | 0 | -0.004 | 0 | -0.003 | 0 | t | 43153 | NAGKEGAI<br>IFQQ         | Oryctola<br>gus<br>cuniculu<br>s |
| 1 | 1.00 | 1 | 1 | 0 | -0.002 | 0 | -0.003 | 0 | t | 48839 | PPNKPNN<br>DFHFE         | Mus<br>musculu<br>s              |
| 1 | 1.00 | 1 | 1 | 0 | -0.002 | 0 | -0.003 | 0 | t | 19211 | GEASGLCC<br>RWSSLKG<br>C | Mus<br>musculu<br>s              |
| 1 | 1.00 | 1 | 1 | 0 | -0.002 | 0 | -0.003 | 0 | t | 23616 | HDEGRQII<br>QFEE         | Mus<br>musculu<br>s              |
| 1 | 1.00 | 1 | 1 | 0 | -0.002 | 0 | -0.003 | 0 | t | 14580 | ETTVVRRR<br>GRSP         | Mus<br>musculu<br>s              |
| 1 | 1.00 | 1 | 1 | 0 | -0.002 | 0 | -0.003 | 0 | t | 20563 | GKFPGSKP<br>S            | Mus<br>musculu<br>s              |

|   |      |   |   |   |        |   |        |   |   |       |                             |                                  |
|---|------|---|---|---|--------|---|--------|---|---|-------|-----------------------------|----------------------------------|
| 1 | 1.00 | 1 | 1 | 0 | -0.004 | 0 | -0.003 | 0 | t | 18621 | GAIIFQQV<br>MSRS            | Oryctola<br>gus<br>cuniculu<br>s |
| 1 | 1.00 | 1 | 1 | 0 | -0.004 | 0 | -0.003 | 0 | t | 19108 | GDRRKAM<br>FEDIA            | Oryctola<br>gus<br>cuniculu<br>s |
| 1 | 1.00 | 1 | 1 | 0 | -0.004 | 0 | -0.003 | 0 | t | 10768 | DVVDGM<br>NFNRGY            | Oryctola<br>gus<br>cuniculu<br>s |
| 1 | 1.00 | 1 | 1 | 0 | -0.002 | 0 | -0.003 | 0 | t | 36278 | LGQGSFRP<br>SQQN            | Mus<br>musculu<br>s              |
| 1 | 1.00 | 1 | 1 | 0 | -0.004 | 0 | -0.003 | 0 | t | 19737 | GGGAGAG<br>GAGAGGG<br>GR    | Oryctola<br>gus<br>cuniculu<br>s |
| 1 | 1.00 | 1 | 1 | 0 | -0.002 | 0 | -0.003 | 0 | t | 32809 | KPNNDFH<br>FEVFN            | Mus<br>musculu<br>s              |
| 1 | 1.00 | 1 | 1 | 0 | -0.004 | 0 | -0.003 | 0 | t | 27244 | ILPGGGTA<br>LIRC            | Oryctola<br>gus<br>cuniculu<br>s |
| 1 | 1.00 | 1 | 1 | 0 | -0.002 | 0 | -0.003 | 0 | t | 35252 | LDPHAFHL<br>LL              | Mus<br>musculu<br>s              |
| 1 | 1.00 | 1 | 1 | 0 | -0.002 | 0 | -0.003 | 0 | t | 32145 | KLRRSTN<br>WG               | Mus<br>musculu<br>s              |
| 1 | 1.00 | 1 | 1 | 0 | -0.008 | 0 | -0.003 | 0 | t | 18911 | GCSGKLIC<br>T               | Macaca                           |
| 1 | 1.00 | 1 | 1 | 0 | -0.008 | 0 | -0.003 | 0 | t | 20064 | GGVATY                      | Macaca                           |
| 1 | 1.00 | 1 | 1 | 0 | -0.002 | 0 | -0.003 | 0 | t | 29965 | KATYEAAV<br>AANNAKN<br>AALT | Mus<br>musculu<br>s              |
| 1 | 1.00 | 1 | 1 | 0 | -0.002 | 0 | -0.003 | 0 | t | 16103 | FHFEVFNF<br>VPCS            | Mus<br>musculu<br>s              |
| 1 | 1.00 | 1 | 1 | 0 | -0.002 | 0 | -0.003 | 0 | t | 23770 | HFEVFNFV<br>PCSI            | Mus<br>musculu<br>s              |

|   |      |   |   |       |        |        |        |       |   |        |                              |                                  |
|---|------|---|---|-------|--------|--------|--------|-------|---|--------|------------------------------|----------------------------------|
| 1 | 1.00 | 1 | 1 | 0     | 0.026  | 0      | -0.003 | 0     | t | 20224  | GIDKKKKK<br>KNI              | Saimiri                          |
| 1 | 1.00 | 1 | 1 | 0     | -0.004 | 0      | -0.003 | 0     | t | 21571  | GPARRGA<br>PY                | Oryctola<br>gus<br>cuniculu<br>s |
| 1 | 1.00 | 1 | 1 | 0     | -0.002 | 0      | -0.003 | 0     | t | 32827  | KPPNKPN<br>NDFHF             | Mus<br>musculu<br>s              |
| 1 | 1.00 | 1 | 1 | 0     | -0.002 | 0      | -0.003 | 0     | t | 3693   | APPPPEHR<br>GGPEEFEG<br>AGDG | Mus<br>musculu<br>s              |
| 1 | 1.00 | 1 | 1 | 0     | -0.002 | 0      | -0.003 | 0     | t | 9586   | DPAFR                        | Mus<br>musculu<br>s              |
| 1 | 1.00 | 1 | 1 | 0     | -0.002 | 0      | -0.003 | 0     | t | 8379   | DGEPPED<br>DDSATGLA<br>FRTPN | Mus<br>musculu<br>s              |
| 1 | 1.00 | 1 | 1 | 0     | -0.007 | 0      | -0.003 | 0     | t | 7996   | DEGESPTP<br>AT               | Oryctola<br>gus<br>cuniculu<br>s |
| 1 | 1.00 | 1 | 1 | 0     | -0.002 | 0      | -0.003 | 0     | t | 9924   | DQVHFQP<br>LPPAVVKL<br>SDALI | Mus<br>musculu<br>s              |
| 1 | 1.00 | 1 | 1 | 0     | -0.002 | 0      | -0.003 | 0     | t | 4024   | AQPGYPW<br>PLYGNEG           | Mus<br>musculu<br>s              |
| 1 | 1.00 | 1 | 1 | 0     | -0.002 | 0      | -0.003 | 0     | t | 1254   | AFAQAPT<br>HQLSL             | Mus<br>musculu<br>s              |
| 1 | 1.00 | 1 | 1 | 0     | -0.008 | 0      | -0.003 | 0     | t | 7214   | CTTAVPW<br>N                 | Macaca                           |
| 1 | 1.00 | 1 | 1 | 0     | 0.007  | 0      | -0.003 | 0     | t | 6696   | CNICEGDS<br>ACLSLCQD<br>R    | Ovis<br>aries                    |
| 1 | 1.00 | 1 | 1 | -0.01 | -0.008 | -0.012 | -0.007 | -0.01 | t | 47027  | PCKPLLRE<br>EVSEFRV          | Homo<br>sapiens                  |
| 1 | 1.00 | 1 | 1 | 0     | 0.004  | 0      | -0.003 | 0     | t | 118449 | KFGADAR<br>ALMLQG            | Homo<br>sapiens                  |

|   |      |   |   |       |        |        |        |        |   |        |                              |                          |
|---|------|---|---|-------|--------|--------|--------|--------|---|--------|------------------------------|--------------------------|
| 1 | 1.00 | 1 | 1 | -0.01 | -0.006 | -0.003 | -0.013 | -0.012 | t | 106453 | GHWRGA<br>NATS               | Homo<br>sapiens          |
| 1 | 1.00 | 1 | 1 | -0.04 | -0.04  | -0.04  | -0.04  | -0.04  | t | 142423 | GAKKAAG<br>EAKKASI           | Homo<br>sapiens          |
| 1 | 1.00 | 1 | 1 | 0.01  | 0.007  | 0.015  | 0.018  | 0.012  | t | 144355 | IICKESISVS<br>SEQLAQF        | Homo<br>sapiens          |
| 1 | 1.00 | 1 | 1 | 0.01  | 0.012  | 0.015  | 0.018  | 0.012  | t | 144355 | IICKESISVS<br>SEQLAQF        | Homo<br>sapiens          |
| 1 | 1.00 | 1 | 1 | 0.01  | 0.008  | 0.018  | 0.013  | 0.013  | t | 137394 | EDHRQVV<br>E                 | Rattus<br>norvegicus     |
| 1 | 1.00 | 1 | 1 | 0.02  | 0.02   | 0.023  | 0.021  | 0.02   | t | 50300  | QALDAH<br>YDSVLKDI           | Homo<br>sapiens          |
| 1 | 1.00 | 1 | 1 | 0.01  | 0.01   | 0.01   | 0.01   | 0.014  | t | 21407  | GNDYEDR<br>YYREN             | Mus<br>musculus          |
| 1 | 1.00 | 1 | 1 | 0     | -0.004 | 0      | -0.001 | 0.001  | t | 71284  | VTEEI                        | Oryctolagus<br>cuniculus |
| 1 | 1.00 | 1 | 1 | -0.02 | -0.02  | -0.01  | -0.02  | -0.02  | t | 49516  | PSSRRYPF<br>V                | Homo<br>sapiens          |
| 1 | 1.00 | 1 | 1 | -0.02 | -0.016 | -0.013 | -0.017 | -0.019 | t | 103834 | CPRDLNGK<br>SGC              | Homo<br>sapiens          |
| 1 | 1.00 | 1 | 1 | 0     | 0.004  | 0.006  | 0.001  | 0      | t | 54232  | RIRADFNA<br>SMDLL            | Homo<br>sapiens          |
| 1 | 1.00 | 1 | 1 | 0.01  | 0.01   | 0.01   | 0.014  | 0.01   | t | 131543 | LLTSMYVK<br>EFLISSSQD<br>GHQ | Homo<br>sapiens          |
| 1 | 1.00 | 1 | 1 | -0.01 | -0.012 | -0.016 | -0.011 | -0.009 | t | 8859   | DKENALSL<br>LDKIYT           | Mus<br>musculus          |
| 1 | 1.00 | 1 | 1 | 0     | 0      | 0      | 0      | 0      | t | 156918 | MAITDHP<br>GSAMV             | Gallus<br>gallus         |

|   |      |   |   |       |        |        |        |        |   |        |                              |                                  |
|---|------|---|---|-------|--------|--------|--------|--------|---|--------|------------------------------|----------------------------------|
| 1 | 1.00 | 1 | 1 | 0.01  | 0.008  | 0.008  | 0.013  | 0.013  | t | 61686  | STKAAKPP<br>EAKREAI          | Mus<br>musculu<br>s              |
| 1 | 1.00 | 1 | 1 | -0.01 | -0.01  | -0.01  | -0.01  | -0.01  | t | 112673 | TGGQKGR<br>GSRGQHQ<br>AHSLER | Rattus<br>norvegic<br>us         |
| 1 | 1.00 | 1 | 1 | -0.01 | -0.01  | -0.01  | -0.01  | -0.01  | t | 103386 | LSEGDMA<br>AHKGLMN<br>I      | Homo<br>sapiens                  |
| 1 | 1.00 | 1 | 1 | 0.01  | 0.012  | 0.014  | 0.011  | 0.011  | t | 42859  | MTQKAR                       | Homo<br>sapiens                  |
| 1 | 1.00 | 1 | 1 | -0.03 | -0.03  | -0.03  | -0.03  | -0.03  | t | 133957 | WIRANF                       | Mus<br>musculu<br>s              |
| 1 | 1.00 | 1 | 1 | -0.03 | -0.028 | -0.03  | -0.037 | -0.031 | t | 23176  | GVTRPSAP<br>PLPHVV           | Homo<br>sapiens                  |
| 1 | 1.00 | 1 | 1 | -0.02 | -0.02  | -0.013 | -0.02  | -0.021 | t | 134829 | YSHVHALS<br>TYAR             | Oryctola<br>gus<br>cuniculu<br>s |
| 1 | 1.00 | 1 | 1 | 0.01  | 0.01   | 0.01   | 0.006  | 0.01   | t | 141719 | NTEEYIDG                     | Homo<br>sapiens                  |
| 1 | 1.00 | 1 | 1 | 0.01  | 0.016  | 0.01   | 0.01   | 0.01   | t | 19481  | GEYGEVTV<br>DCEPRSGI<br>DTNA | Equus<br>caballus                |
| 1 | 1.00 | 1 | 1 | 0.01  | 0.014  | 0.017  | 0.013  | 0.01   | t | 72540  | WHINSTAL<br>NCNESL           | Homo<br>sapiens                  |
| 1 | 1.00 | 1 | 1 | 0.01  | 0.012  | 0.017  | 0.013  | 0.01   | t | 72540  | WHINSTAL<br>NCNESL           | Homo<br>sapiens                  |
| 1 | 1.00 | 1 | 1 | -0.04 | -0.041 | -0.031 | -0.037 | -0.04  | t | 809    | AEAAGRRL<br>AR               | Homo<br>sapiens                  |
| 1 | 1.00 | 1 | 1 | -0.03 | -0.027 | -0.023 | -0.03  | -0.028 | t | 102860 | TPYTSLYT<br>W                | Mus<br>musculu<br>s              |
| 1 | 1.00 | 1 | 1 | 0.03  | 0.032  | 0.026  | 0.027  | 0.031  | t | 64582  | TKIAIVVSG<br>EGCVEI          | Homo<br>sapiens                  |



|   |      |   |   |       |        |        |        |        |   |        |                               |                                  |
|---|------|---|---|-------|--------|--------|--------|--------|---|--------|-------------------------------|----------------------------------|
| 1 | 1.00 | 1 | 1 | 0.03  | 0.03   | 0.035  | 0.03   | 0.03   | t | 136542 | PDGSESPT<br>DQET              | Mus<br>musculu<br>s              |
| 1 | 1.00 | 1 | 1 | 0.03  | 0.03   | 0.035  | 0.03   | 0.03   | t | 136542 | PDGSESPT<br>DQET              | Mus<br>musculu<br>s              |
| 1 | 1.00 | 1 | 1 | -0.01 | -0.01  | -0.01  | -0.01  | -0.01  | t | 42684  | MSTNPKP<br>QKKNKRN<br>TNRR    | Homo<br>sapiens                  |
| 1 | 1.00 | 1 | 1 | -0.01 | -0.01  | -0.015 | -0.006 | -0.008 | t | 71346  | VTGSVVCT<br>TAAGNVNI<br>AIGG  | Homo<br>sapiens                  |
| 1 | 1.00 | 1 | 1 | -0.03 | -0.033 | -0.03  | -0.03  | -0.03  | t | 119806 | DPKAPQW<br>PPY                | Oryctola<br>gus<br>cuniculu<br>s |
| 1 | 1.00 | 1 | 1 | 0.02  | 0.019  | 0.021  | 0.017  | 0.021  | t | 99379  | KGTGNLEL<br>VAVRKEQ           | Homo<br>sapiens                  |
| 1 | 1.00 | 1 | 1 | 0.03  | 0.032  | 0.017  | 0.029  | 0.032  | t | 78945  | DAPNGTP<br>NPNPNPN<br>PNPNPG  | Homo<br>sapiens                  |
| 1 | 1.00 | 1 | 1 | 0.01  | 0.01   | 0.002  | 0.01   | 0.014  | t | 52789  | QVSFTPDI<br>EGYAELA<br>WGIAS  | Oryctola<br>gus<br>cuniculu<br>s |
| 1 | 1.00 | 1 | 1 | -0.02 | -0.022 | -0.017 | -0.021 | -0.02  | t | 36815  | LKCSVKSE<br>IDKGIYQT          | Mus<br>musculu<br>s              |
| 1 | 1.00 | 1 | 1 | -0.01 | -0.01  | -0.01  | -0.01  | -0.008 | t | 57541  | SELSQL                        | Mus<br>musculu<br>s              |
| 1 | 1.00 | 1 | 1 | -0.02 | -0.02  | -0.019 | -0.02  | -0.02  | t | 59984  | SPAPSRPF<br>SVLRANDV<br>LWLS  | Homo<br>sapiens                  |
| 1 | 1.00 | 1 | 1 | -0.02 | -0.018 | -0.019 | -0.017 | -0.021 | t | 9652   | DPILRSLAY<br>SNANKEC<br>QKLL  | Homo<br>sapiens                  |
| 1 | 1.00 | 1 | 1 | 0.01  | 0.01   | -0.004 | 0.01   | 0.012  | t | 60592  | SQWGWGC<br>GSTDEYCS<br>PDHNCQ | Mus<br>musculu<br>s              |
| 1 | 1.00 | 1 | 1 | -0.07 | -0.073 | -0.075 | -0.07  | -0.07  | t | 117173 | TYFSKNYQ<br>DYEY              | Oryctola<br>gus<br>cuniculu<br>s |

|   |      |   |   |       |        |        |        |        |   |        |                     |                       |
|---|------|---|---|-------|--------|--------|--------|--------|---|--------|---------------------|-----------------------|
| 1 | 1.00 | 1 | 1 | 0     | 0.002  | 0.002  | -0.003 | 0.001  | t | 42306  | MPNYDRL             | Homo sapiens          |
| 1 | 1.00 | 1 | 1 | 0     | -0.003 | 0      | 0      | 0      | t | 156906 | KPGDPRS             | Oryctolagus cuniculus |
| 1 | 1.00 | 1 | 1 | 0     | 0      | 0      | 0      | 0      | t | 156906 | KPGDPRS             | Oryctolagus cuniculus |
| 1 | 1.00 | 1 | 1 | -0.04 | -0.04  | -0.04  | -0.04  | -0.04  | t | 135703 | KNGRCEQF            | Homo sapiens          |
| 1 | 1.00 | 1 | 1 | -0.04 | -0.04  | -0.04  | -0.04  | -0.04  | t | 104331 | VHPPRLY             | Mus musculus          |
| 1 | 1.00 | 1 | 1 | -0.02 | -0.02  | -0.025 | -0.022 | -0.02  | t | 70671  | VQWMNRLIAFASRGNHVSP | Homo sapiens          |
| 1 | 1.00 | 1 | 1 | -0.03 | -0.03  | -0.03  | -0.03  | -0.029 | t | 108134 | SLCINLRAR           | Homo sapiens          |
| 1 | 1.00 | 1 | 1 | -0.04 | -0.038 | -0.04  | -0.043 | -0.038 | t | 75409  | YPSGAWYVYP          | Homo sapiens          |
| 1 | 1.00 | 1 | 1 | -0.01 | -0.008 | -0.012 | -0.007 | -0.009 | t | 47026  | PCKPLLRDITFMV       | Homo sapiens          |
| 1 | 1.00 | 1 | 1 | 0     | 0      | 0      | 0      | 0.002  | t | 144979 | VQGSGAFGR           | Mus musculus          |
| 1 | 1.00 | 1 | 1 | 0     | 0      | 0      | 0      | 0.002  | t | 68401  | VEVPGSQHIDSQKKA     | Mus musculus          |
| 1 | 1.00 | 1 | 1 | 0     | 0      | 0      | 0      | 0.002  | t | 23876  | HFVQQTPKSQPTLV      | Mus musculus          |
| 1 | 1.00 | 1 | 1 | -0.01 | -0.007 | -0.009 | -0.011 | -0.008 | t | 53634  | RESQAYYQR           | Mus musculus          |
| 1 | 1.00 | 1 | 1 | 0.02  | 0.02   | 0.027  | 0.02   | 0.02   | t | 106946 | VATALNPDPK          | Mus musculus          |
| 1 | 1.00 | 1 | 1 | -0.02 | -0.017 | -0.02  | -0.02  | -0.017 | t | 69175  | VKAETRLN            | Mus musculus          |
| 1 | 1.00 | 1 | 1 | -0.02 | -0.022 | -0.025 | -0.027 | -0.018 | t | 129244 | LINRAKAVK           | Mus musculus          |

|   |      |   |   |       |        |        |        |        |   |        |                              |                                  |
|---|------|---|---|-------|--------|--------|--------|--------|---|--------|------------------------------|----------------------------------|
| 1 | 1.00 | 1 | 1 | 0     | 0      | 0.006  | 0      | 0      | t | 91742  | NCIEYGK<br>QNPDSKL           | Oryctola<br>gus<br>cuniculu<br>s |
| 1 | 1.00 | 1 | 1 | 0.03  | 0.028  | 0.045  | 0.029  | 0.028  | t | 9520   | DNNQTSP                      | Mus<br>musculu<br>s              |
| 1 | 1.00 | 1 | 1 | 0.01  | 0.008  | 0.012  | 0.009  | 0.011  | t | 32890  | KPTDGN                       | Mus<br>musculu<br>s              |
| 1 | 1.00 | 1 | 1 | 0     | -0.003 | 0.008  | 0      | -0.002 | t | 100223 | KPGVSDD<br>QLTGN             | Oryctola<br>gus<br>cuniculu<br>s |
| 1 | 1.00 | 1 | 1 | 0     | -0.003 | 0.008  | 0      | -0.002 | t | 100223 | KPGVSDD<br>QLTGN             | Oryctola<br>gus<br>cuniculu<br>s |
| 1 | 1.00 | 1 | 1 | -0.02 | -0.017 | -0.02  | -0.02  | -0.018 | t | 144793 | SYGGRKGT<br>HPGLEMP          | Mus<br>musculu<br>s              |
| 1 | 1.00 | 1 | 1 | 0     | 0      | 0      | 0      | 0.002  | t | 74035  | YGLFHKEK<br>MIL              | Mus<br>musculu<br>s              |
| 1 | 1.00 | 1 | 1 | 0.01  | 0.006  | 0.005  | 0.01   | 0.008  | t | 70656  | VQTRHVV<br>QHRSRSES<br>SIESF | Oryctola<br>gus<br>cuniculu<br>s |
| 1 | 1.00 | 1 | 1 | 0     | -0.002 | 0.001  | 0      | 0      | t | 38505  | LPGKCGV<br>NVPYKIST          | Oryctola<br>gus<br>cuniculu<br>s |
| 1 | 1.00 | 1 | 1 | 0     | -0.002 | 0.001  | 0      | 0      | t | 38505  | LPGKCGV<br>NVPYKIST          | Oryctola<br>gus<br>cuniculu<br>s |
| 1 | 1.00 | 1 | 1 | 0.03  | 0.027  | 0.041  | 0.03   | 0.028  | t | 111776 | SGVVVQD<br>GRFSYQNL          | Oryctola<br>gus<br>cuniculu<br>s |
| 1 | 1.00 | 1 | 1 | -0.01 | -0.006 | -0.005 | -0.013 | -0.012 | t | 75482  | YQEPVLGP<br>VRGPFPP          | Homo<br>sapiens                  |

|   |      |   |   |       |        |        |        |        |   |        |                              |                                  |
|---|------|---|---|-------|--------|--------|--------|--------|---|--------|------------------------------|----------------------------------|
| 1 | 1.00 | 1 | 1 | 0.03  | 0.037  | 0.024  | 0.03   | 0.032  | t | 69178  | VKAETRLN<br>PDLQPTE          | Cavia<br>porcellu<br>s           |
| 1 | 1.00 | 1 | 1 | -0.01 | -0.012 | -0.01  | -0.016 | -0.012 | t | 156664 | GGTHSQW<br>NKPSKPKT<br>NM    | Mus<br>musculu<br>s              |
| 1 | 1.00 | 1 | 1 | 0.02  | 0.02   | 0.023  | 0.02   | 0.02   | t | 125004 | DAPDTDW<br>CDSIP             | Mus<br>musculu<br>s              |
| 1 | 1.00 | 1 | 1 | 0     | 0      | 0      | 0      | 0.001  | t | 9753   | DPRVRGLY                     | Mus<br>musculu<br>s              |
| 1 | 1.00 | 1 | 1 | -0.02 | -0.019 | -0.017 | -0.02  | -0.02  | t | 72183  | VYVIGFTLP<br>IILKA           | Myodes<br>glareolu<br>s          |
| 1 | 1.00 | 1 | 1 | 0.01  | 0.01   | 0.01   | 0.01   | 0.01   | t | 123130 | EHLYGRDD<br>R                | Ovis<br>aries                    |
| 1 | 1.00 | 1 | 1 | -0.01 | -0.01  | -0.01  | -0.01  | -0.01  | t | 137735 | DTALTREA<br>LRLV             | Mus<br>musculu<br>s              |
| 1 | 1.00 | 1 | 1 | -0.01 | -0.01  | -0.01  | -0.01  | -0.01  | t | 123146 | ERARISMI<br>E                | Ovis<br>aries                    |
| 1 | 1.00 | 1 | 1 | -0.01 | -0.01  | -0.01  | -0.01  | -0.01  | t | 102712 | PDNPNNN<br>YIKPTKVN<br>KNENG | Mus<br>musculu<br>s              |
| 1 | 1.00 | 1 | 1 | -0.03 | -0.03  | -0.03  | -0.03  | -0.03  | t | 106775 | RHAKAHIL<br>RW               | Homo<br>sapiens                  |
| 1 | 1.00 | 1 | 1 | -0.03 | -0.03  | -0.03  | -0.03  | -0.03  | t | 79538  | EHQLNRA                      | Oryctola<br>gus<br>cuniculu<br>s |
| 1 | 1.00 | 1 | 1 | 0     | 0      | 0      | 0      | 0.002  | t | 49297  | PSAPPLPH<br>VVDLPQLG<br>PRR  | Cavia<br>porcellu<br>s           |
| 1 | 1.00 | 1 | 1 | 0.05  | 0.048  | 0.05   | 0.05   | 0.051  | t | 117598 | PEPAKSAP<br>APKKG            | Mus<br>musculu<br>s              |
| 1 | 1.00 | 1 | 1 | 0.02  | 0.024  | 0.027  | 0.017  | 0.018  | t | 98803  | GLDIQKVA<br>GT               | Homo<br>sapiens                  |
| 1 | 1.00 | 1 | 1 | 0     | 0.003  | 0      | 0      | -0.002 | t | 135487 | PGGWNTG<br>G                 | Mus<br>musculu<br>s              |

|   |      |   |   |       |        |        |        |        |   |        |                              |                                  |
|---|------|---|---|-------|--------|--------|--------|--------|---|--------|------------------------------|----------------------------------|
| 1 | 1.00 | 1 | 1 | -0.02 | -0.02  | -0.02  | -0.02  | -0.019 | t | 134929 | ERVGETPL                     | Oryctola<br>gus<br>cuniculu<br>s |
| 1 | 1.00 | 1 | 1 | 0.01  | 0.01   | 0.01   | 0.01   | 0.01   | t | 151731 | SAQSQRA<br>PDR               | Mus<br>musculu<br>s              |
| 1 | 1.00 | 1 | 1 | -0.06 | -0.06  | -0.054 | -0.058 | -0.06  | t | 10080  | DSAVAEFF<br>QSFPSGEP<br>SNSK | Homo<br>sapiens                  |
| 1 | 1.00 | 1 | 1 | -0.02 | -0.018 | -0.001 | -0.019 | -0.021 | t | 57723  | SFAIKWEY<br>VL               | Homo<br>sapiens                  |
| 1 | 1.00 | 1 | 1 | -0.01 | -0.01  | -0.01  | -0.014 | -0.011 | t | 122452 | KTTKQSF<br>LSVKAQYK<br>KNKH  | Homo<br>sapiens                  |
| 1 | 1.00 | 1 | 1 | 0     | 0.004  | 0.012  | 0.003  | 0      | t | 140868 | HLINTNGS<br>WHINSTA          | Homo<br>sapiens                  |
| 1 | 1.00 | 1 | 1 | -0.06 | -0.058 | -0.06  | -0.061 | -0.059 | t | 130729 | APHKHKAS<br>LSIY             | Homo<br>sapiens                  |
| 1 | 1.00 | 1 | 1 | 0.03  | 0.034  | 0.03   | 0.027  | 0.03   | t | 118450 | KGDKAQIE<br>KRIQE            | Homo<br>sapiens                  |
| 1 | 1.00 | 1 | 1 | 0.04  | 0.04   | 0.049  | 0.04   | 0.04   | t | 37713  | LLQRATQ<br>QQ                | Homo<br>sapiens                  |
| 1 | 1.00 | 1 | 1 | -0.01 | -0.013 | -0.017 | -0.01  | -0.011 | t | 6517   | CKRGPDS<br>GFFSRLN<br>WLY    | Oryctola<br>gus<br>cuniculu<br>s |
| 1 | 1.00 | 1 | 1 | -0.04 | -0.04  | -0.04  | -0.04  | -0.04  | t | 78511  | SCDESRRR<br>QGRCS            | Mus<br>musculu<br>s              |
| 1 | 1.00 | 1 | 1 | -0.01 | -0.008 | -0.006 | -0.01  | -0.01  | t | 137937 | NKIFADDI                     | Rattus<br>norvegic<br>us         |
| 1 | 1.00 | 1 | 1 | 0.01  | 0.01   | 0.01   | 0.01   | 0.01   | t | 137446 | SHDWRLM<br>LSHLQ             | Mus<br>musculu<br>s              |
| 1 | 1.00 | 1 | 1 | 0     | 0      | 0.005  | 0      | 0.001  | t | 13572  | ENPVVHFF<br>KNIVTPR          | Mus<br>musculu<br>s              |

|   |      |   |   |       |        |        |        |        |   |        |                              |                          |
|---|------|---|---|-------|--------|--------|--------|--------|---|--------|------------------------------|--------------------------|
| 1 | 1.00 | 1 | 1 | -0.01 | -0.007 | -0.008 | -0.01  | -0.01  | t | 126844 | PRIGVAIG<br>DQILDLS          | Mus<br>musculu<br>s      |
| 1 | 1.00 | 1 | 1 | 0     | 0.002  | -0.007 | -0.003 | 0      | t | 97456  | LKRTDLNIL<br>ERFNYEE         | Homo<br>sapiens          |
| 1 | 1.00 | 1 | 1 | -0.06 | -0.057 | -0.048 | -0.06  | -0.063 | t | 137941 | PFRSYTK                      | Mus<br>musculu<br>s      |
| 1 | 1.00 | 1 | 1 | 0     | 0      | 0      | 0      | 0      | t | 129628 | PPGRGTPP                     | Homo<br>sapiens          |
| 1 | 1.00 | 1 | 1 | -0.02 | -0.02  | -0.02  | -0.02  | -0.02  | t | 110617 | GPTGARG<br>PEGAQGS<br>R      | Mus<br>musculu<br>s      |
| 1 | 1.00 | 1 | 1 | -0.01 | -0.012 | -0.007 | -0.011 | -0.009 | t | 24970  | HTRVTGG<br>VQG               | Mus<br>musculu<br>s      |
| 1 | 1.00 | 1 | 1 | 0.01  | 0.013  | 0.01   | 0.01   | 0.012  | t | 125051 | FQSKANCL<br>NT               | Mus<br>musculu<br>s      |
| 1 | 1.00 | 1 | 1 | 0.02  | 0.02   | 0.02   | 0.016  | 0.02   | t | 115606 | GEGKVTLR<br>IRNV             | Homo<br>sapiens          |
| 1 | 1.00 | 1 | 1 | -0.01 | -0.008 | -0.012 | -0.01  | -0.011 | t | 99919  | CVYDPRG<br>HTGTTNQ<br>RSPPGE | Homo<br>sapiens          |
| 1 | 1.00 | 1 | 1 | 0.04  | 0.042  | 0.047  | 0.041  | 0.04   | t | 141734 | RADESKTD<br>PQTEA            | Homo<br>sapiens          |
| 1 | 1.00 | 1 | 1 | -0.03 | -0.03  | -0.029 | -0.03  | -0.028 | t | 34124  | KVLVLL                       | Homo<br>sapiens          |
| 1 | 1.00 | 1 | 1 | 0.02  | 0.02   | 0.02   | 0.02   | 0.024  | t | 14409  | ETHVTGGS                     | Rattus<br>norvegic<br>us |
| 1 | 1.00 | 1 | 1 | 0.02  | 0.02   | 0.02   | 0.02   | 0.024  | t | 14409  | ETHVTGGS                     | Mus<br>musculu<br>s      |
| 1 | 1.00 | 1 | 1 | -0.02 | -0.018 | -0.021 | -0.019 | -0.021 | t | 18671  | GALNTPKD<br>HIGTRNPN<br>NNA  | Homo<br>sapiens          |
| 1 | 1.00 | 1 | 1 | 0.01  | 0.008  | 0.012  | 0.007  | 0.01   | t | 130571 | NTTDMMI<br>FDLIHNYN<br>R     | Mus<br>musculu<br>s      |

|   |      |   |   |       |        |        |        |        |   |        |                              |                                  |
|---|------|---|---|-------|--------|--------|--------|--------|---|--------|------------------------------|----------------------------------|
| 1 | 1.00 | 1 | 1 | -0.04 | -0.04  | -0.026 | -0.037 | -0.042 | t | 52403  | QSPRRRRS<br>QSRE             | Homo<br>sapiens                  |
| 1 | 1.00 | 1 | 1 | -0.06 | -0.062 | -0.06  | -0.061 | -0.06  | t | 82048  | FGKLRVGR<br>LNSV             | Mus<br>musculu<br>s              |
| 1 | 1.00 | 1 | 1 | 0     | 0.001  | -0.001 | 0      | 0      | t | 61779  | STNDNIKD<br>LLDWYSSG         | Oryctola<br>gus<br>cuniculu<br>s |
| 1 | 1.00 | 1 | 1 | 0     | 0.001  | -0.001 | 0      | 0      | t | 61779  | STNDNIKD<br>LLDWYSSG         | Oryctola<br>gus<br>cuniculu<br>s |
| 1 | 1.00 | 1 | 1 | -0.01 | -0.012 | -0.011 | -0.007 | -0.008 | t | 107008 | YEFRHSS                      | Mus<br>musculu<br>s              |
| 1 | 1.00 | 1 | 1 | 0.01  | 0.01   | 0.02   | 0.017  | 0.01   | t | 23722  | HEPQISPG<br>GLEPPSEK<br>HFRE | Homo<br>sapiens                  |
| 1 | 1.00 | 1 | 1 | 0.05  | 0.05   | 0.054  | 0.05   | 0.052  | t | 70952  | VSGGSWV<br>DIVLE             | Homo<br>sapiens                  |
| 1 | 1.00 | 1 | 1 | -0.02 | -0.019 | -0.019 | -0.02  | -0.018 | t | 67042  | TVKENKGT<br>RIRFKD           | Myodes<br>glareolu<br>s          |
| 1 | 1.00 | 1 | 1 | -0.03 | -0.033 | -0.025 | -0.033 | -0.03  | t | 42957  | MVKSHIGS<br>WILVLFVA         | Mus<br>musculu<br>s              |
| 1 | 1.00 | 1 | 1 | -0.01 | -0.01  | -0.017 | -0.01  | -0.01  | t | 127700 | IPSHAFSNL<br>PNISRIYVS<br>IA | Homo<br>sapiens                  |
| 1 | 1.00 | 1 | 1 | 0     | 0.002  | -0.007 | -0.001 | 0.001  | t | 73554  | YDKPYMYL<br>NLYDPNKY<br>VDV  | Homo<br>sapiens                  |
| 1 | 1.00 | 1 | 1 | -0.01 | -0.012 | -0.016 | -0.007 | -0.007 | t | 63122  | TDAYNQKL<br>SERRAN           | Mus<br>musculu<br>s              |
| 1 | 1.00 | 1 | 1 | -0.03 | -0.034 | -0.023 | -0.03  | -0.031 | t | 76167  | YTRMMIG<br>RFAQMH<br>S       | Bos<br>taurus                    |

|   |      |   |   |       |        |       |        |        |   |        |                             |                                  |
|---|------|---|---|-------|--------|-------|--------|--------|---|--------|-----------------------------|----------------------------------|
| 1 | 1.00 | 1 | 1 | 0.02  | 0.022  | 0.021 | 0.017  | 0.02   | t | 106512 | HILRWGN<br>ESE              | Homo<br>sapiens                  |
| 1 | 1.00 | 1 | 1 | 0     | -0.001 | 0     | 0      | 0.002  | t | 65026  | TLQNQGA<br>W                | Anas<br>platyrhy<br>nchos        |
| 1 | 1.00 | 1 | 1 | -0.03 | -0.034 | -0.03 | -0.031 | -0.029 | t | 66976  | TVDNPAST<br>TNKDKLFA<br>VWK | Oryctola<br>gus<br>cuniculu<br>s |
| 1 | 1.00 | 1 | 1 | 0     | 0.003  | 0.01  | 0      | 0.003  | t | 66766  | TTPGPWF                     | Mus<br>musculu<br>s              |
| 1 | 1.00 | 1 | 1 | 0.01  | 0.01   | 0.01  | 0.006  | 0.01   | t | 119579 | FKDYSSVV<br>RPVEDHR<br>Q    | Homo<br>sapiens                  |
| 1 | 1.00 | 1 | 1 | 0     | -0.002 | 0     | 0.003  | 0.002  | t | 106322 | DAEFRHDS<br>G               | Mus<br>musculu<br>s              |
| 1 | 1.00 | 1 | 1 | -0.01 | -0.01  | -0.01 | -0.01  | -0.01  | t | 114558 | QVVRPERS<br>RQEWERQ         | Homo<br>sapiens                  |
| 1 | 1.00 | 1 | 1 | -0.05 | -0.05  | -0.05 | -0.05  | -0.05  | t | 103264 | HWLRPITP<br>TFRPSWP         | Homo<br>sapiens                  |
| 1 | 1.00 | 1 | 1 | -0.05 | -0.05  | -0.05 | -0.05  | -0.05  | t | 108286 | ASKAKARP<br>V               | Homo<br>sapiens                  |
| 1 | 1.00 | 1 | 1 | -0.05 | -0.05  | -0.05 | -0.05  | -0.05  | t | 100575 | TSKVRIYM<br>KPKHVR          | Homo<br>sapiens                  |
| 1 | 1.00 | 1 | 1 | 0     | 0      | 0     | 0      | 0.002  | t | 51939  | QPQQTFP<br>QPQ              | Mus<br>musculu<br>s              |
| 1 | 1.00 | 1 | 1 | 0     | 0      | 0     | 0      | 0.002  | t | 55306  | RPQQPFP<br>QPQ              | Mus<br>musculu<br>s              |
| 1 | 1.00 | 1 | 1 | 0.03  | 0.03   | 0.03  | 0.026  | 0.03   | t | 135999 | SQIATIEQT<br>APS            | Homo<br>sapiens                  |
| 1 | 1.00 | 1 | 1 | -0.01 | -0.008 | -0.01 | -0.009 | -0.008 | t | 58409  | SHSAFNM<br>FDFGVGPP         | Homo<br>sapiens                  |
| 1 | 1.00 | 1 | 1 | 0.04  | 0.042  | 0.041 | 0.041  | 0.041  | t | 58293  | SGVLTTC<br>GNTLTC           | Homo<br>sapiens                  |



|   |      |   |   |       |        |        |        |        |   |        |                              |                              |
|---|------|---|---|-------|--------|--------|--------|--------|---|--------|------------------------------|------------------------------|
| 1 | 1.00 | 1 | 1 | -0.03 | -0.03  | -0.03  | -0.03  | -0.03  | t | 107324 | DTLKAGLI<br>R                | Rattus<br>norvegicus         |
| 1 | 1.00 | 1 | 1 | -0.03 | -0.03  | -0.03  | -0.03  | -0.03  | t | 107324 | DTLKAGLI<br>R                | Rattus<br>norvegicus         |
| 1 | 1.00 | 1 | 1 | -0.02 | -0.02  | -0.02  | -0.02  | -0.019 | t | 49534  | PSTPGERV<br>RH               | Homo<br>sapiens              |
| 1 | 1.00 | 1 | 1 | 0.01  | 0.01   | 0.01   | 0.001  | 0.01   | t | 107745 | ARGAQGP<br>PGATGFP           | Homo<br>sapiens              |
| 1 | 1.00 | 1 | 1 | 0.01  | 0.01   | 0.013  | 0.012  | 0.01   | t | 70950  | VSGGLCST<br>RLHRHALL<br>ATCP | Homo<br>sapiens              |
| 1 | 1.00 | 1 | 1 | 0     | -0.001 | 0.001  | -0.003 | 0.001  | t | 99762  | VLASVSAT<br>HAKSSPY          | Homo<br>sapiens              |
| 1 | 1.00 | 1 | 1 | 0     | 0      | -0.002 | 0      | -0.001 | t | 153287 | RQSGRQP<br>TPLSPPLR          | Mus<br>musculus              |
| 1 | 1.00 | 1 | 1 | -0.02 | -0.02  | -0.02  | -0.02  | -0.019 | t | 135725 | NITQSTQS<br>FN               | Homo<br>sapiens              |
| 1 | 1.00 | 1 | 1 | -0.01 | -0.01  | -0.01  | -0.01  | -0.01  | t | 130544 | LNSSSMPL<br>GMESKAIS<br>AAC  | Homo<br>sapiens              |
| 1 | 1.00 | 1 | 1 | 0     | 0.002  | 0      | 0.001  | 0.002  | t | 7064   | CSQNPLAE<br>LKCSVKSE         | Homo<br>sapiens              |
| 1 | 1.00 | 1 | 1 | -0.01 | -0.014 | -0.005 | -0.011 | -0.01  | t | 125022 | EAERAGR<br>GTG               | Oryctola<br>gus<br>cuniculus |
| 1 | 1.00 | 1 | 1 | 0     | 0      | 0.007  | 0      | 0      | t | 159077 | RSKHNRRE<br>GYKTQNG          | Mus<br>musculus              |
| 1 | 1.00 | 1 | 1 | -0.04 | -0.04  | -0.04  | -0.04  | -0.04  | t | 108666 | TRCAQCH<br>TLK               | Homo<br>sapiens              |
| 1 | 1.00 | 1 | 1 | 0     | 0      | 0      | -0.003 | 0      | t | 7171   | CTKPTDGN                     | Homo<br>sapiens              |
| 1 | 1.00 | 1 | 1 | 0.02  | 0.017  | 0.021  | 0.02   | 0.021  | t | 65996  | TRAPRREE<br>LEWDDH           | Oryctola<br>gus<br>cuniculus |
| 1 | 1.00 | 1 | 1 | -0.02 | -0.02  | -0.02  | -0.02  | -0.02  | t | 156945 | QLHTSI                       | Gallus<br>gallus             |

|   |      |   |   |       |        |        |        |        |   |        |                              |                                  |
|---|------|---|---|-------|--------|--------|--------|--------|---|--------|------------------------------|----------------------------------|
| 1 | 1.00 | 1 | 1 | 0.01  | 0.01   | 0.01   | 0.01   | 0.012  | t | 137741 | DTPLTHAA<br>LTLV             | Mus<br>musculu<br>s              |
| 1 | 1.00 | 1 | 1 | 0.01  | 0.01   | 0.01   | 0.01   | 0.012  | t | 49106  | PQQQFPQ<br>PQQ               | Mus<br>musculu<br>s              |
| 1 | 1.00 | 1 | 1 | 0     | 0      | 0.004  | 0      | 0      | t | 102726 | PSSTCIDG<br>KWNPVLP<br>ICVRT | Mus<br>musculu<br>s              |
| 1 | 1.00 | 1 | 1 | 0.01  | 0.008  | 0.01   | 0.009  | 0.012  | t | 54859  | RMAWDM                       | Mus<br>musculu<br>s              |
| 1 | 1.00 | 1 | 1 | 0.01  | 0.008  | 0.01   | 0.007  | 0.011  | t | 62349  | SVTEEIAEE<br>DKSVTEE         | Mus<br>musculu<br>s              |
| 1 | 1.00 | 1 | 1 | -0.01 | -0.014 | -0.01  | -0.017 | -0.012 | t | 117735 | AEGLMVT<br>GGR               | Oryctola<br>gus<br>cuniculu<br>s |
| 1 | 1.00 | 1 | 1 | -0.01 | -0.013 | -0.01  | -0.017 | -0.012 | t | 117735 | AEGLMVT<br>GGR               | Oryctola<br>gus<br>cuniculu<br>s |
| 1 | 1.00 | 1 | 1 | 0.01  | 0.01   | 0.017  | 0.01   | 0.01   | t | 1406   | AFTPDWM<br>MEVAIDN<br>E      | Mus<br>musculu<br>s              |
| 1 | 1.00 | 1 | 1 | 0.04  | 0.041  | 0.035  | 0.039  | 0.04   | t | 36343  | LGVLEDNK<br>GVVRGDY<br>TAC   | Equus<br>caballus                |
| 1 | 1.00 | 1 | 1 | -0.03 | -0.03  | -0.03  | -0.03  | -0.029 | t | 135837 | DMYGD<br>IRLTGLI             | Mus<br>musculu<br>s              |
| 1 | 1.00 | 1 | 1 | -0.01 | -0.01  | -0.01  | -0.003 | -0.008 | t | 147139 | MSGRGKQ<br>GGKARAK<br>AKTRSS | Homo<br>sapiens                  |
| 1 | 1.00 | 1 | 1 | 0.03  | 0.03   | 0.03   | 0.03   | 0.032  | t | 110974 | QDIVLHLE<br>PQNEIPVD<br>LL   | Mus<br>musculu<br>s              |
| 1 | 1.00 | 1 | 1 | 0     | -0.002 | -0.003 | -0.001 | 0.003  | t | 42487  | MRNVPEK<br>QT                | Mus<br>musculu<br>s              |
| 1 | 1.00 | 1 | 1 | 0     | -0.002 | -0.003 | -0.001 | 0.003  | t | 42487  | MRNVPEK<br>QT                | Mus<br>musculu<br>s              |
| 1 | 1.00 | 1 | 1 | -0.01 | -0.01  | -0.003 | -0.009 | -0.01  | t | 70816  | VRRRGDS<br>RGSLLSP           | Homo<br>sapiens                  |

|   |      |   |   |       |        |        |        |        |   |        |                              |                                  |
|---|------|---|---|-------|--------|--------|--------|--------|---|--------|------------------------------|----------------------------------|
| 1 | 1.00 | 1 | 1 | -0.02 | -0.02  | -0.01  | -0.02  | -0.019 | t | 6834   | CPRSPRYT<br>LD               | Oryctola<br>gus<br>cuniculu<br>s |
| 1 | 1.00 | 1 | 1 | 0.04  | 0.038  | 0.036  | 0.033  | 0.04   | t | 144699 | KASITEIKA<br>DKT             | Mus<br>musculu<br>s              |
| 1 | 1.00 | 1 | 1 | 0     | 0      | -0.002 | 0      | 0      | t | 81394  | EASGPTHS<br>KEIPALT          | Homo<br>sapiens                  |
| 1 | 1.00 | 1 | 1 | 0.02  | 0.02   | 0.023  | 0.02   | 0.02   | t | 19617  | GFSGNMV<br>ETEDTKEP          | Mus<br>musculu<br>s              |
| 1 | 1.00 | 1 | 1 | 0.01  | 0.013  | 0.011  | 0.009  | 0.01   | t | 72630  | WIKKPNR<br>QGLG              | Capra<br>hircus                  |
| 1 | 1.00 | 1 | 1 | 0.03  | 0.028  | 0.024  | 0.027  | 0.03   | t | 7210   | CTSSLTSIF<br>TQGAQKN         | Mus<br>musculu<br>s              |
| 1 | 1.00 | 1 | 1 | 0.01  | 0.01   | 0.01   | 0.01   | 0.01   | t | 115869 | NKKIEKFQ<br>SE               | Homo<br>sapiens                  |
| 1 | 1.00 | 1 | 1 | 0.01  | 0.01   | 0.01   | 0.01   | 0.01   | t | 77908  | HSWDKNS<br>SIWWP             | Mus<br>musculu<br>s              |
| 1 | 1.00 | 1 | 1 | -0.01 | -0.01  | -0.013 | -0.012 | -0.01  | t | 142167 | GLRRDLDA<br>SREAKKQV<br>EKAL | Homo<br>sapiens                  |
| 1 | 1.00 | 1 | 1 | -0.01 | -0.01  | -0.006 | -0.01  | -0.01  | t | 49099  | PQQPQQS<br>FPQ               | Mus<br>musculu<br>s              |
| 1 | 1.00 | 1 | 1 | 0     | -0.005 | 0      | 0      | 0.002  | t | 156350 | KSLTALTN<br>KITAWK           | Platyrrhi<br>ni                  |
| 1 | 1.00 | 1 | 1 | 0     | -0.008 | 0      | 0      | 0.002  | t | 156911 | LGMSTNP<br>GPRIL             | Mus<br>musculu<br>s              |
| 1 | 1.00 | 1 | 1 | 0     | -0.008 | 0      | 0      | 0.002  | t | 156933 | PLEKSHL                      | Mus<br>musculu<br>s              |
| 1 | 1.00 | 1 | 1 | 0     | -0.008 | 0      | 0      | 0.002  | t | 136647 | SNNADYK<br>QSLLL             | Mus<br>musculu<br>s              |

|   |      |   |   |   |        |   |   |       |   |        |                              |                                  |
|---|------|---|---|---|--------|---|---|-------|---|--------|------------------------------|----------------------------------|
| 1 | 1.00 | 1 | 1 | 0 | -0.008 | 0 | 0 | 0.002 | t | 136635 | SIPTYTPDK<br>VTY             | Mus<br>musculu<br>s              |
| 1 | 1.00 | 1 | 1 | 0 | -0.003 | 0 | 0 | 0.002 | t | 140842 | EGNTDER<br>GTPEYNIA<br>LGQRR | Oryctola<br>gus<br>cuniculu<br>s |
| 1 | 1.00 | 1 | 1 | 0 | -0.008 | 0 | 0 | 0.002 | t | 156871 | FQNIASM<br>PHLYV             | Mus<br>musculu<br>s              |
| 1 | 1.00 | 1 | 1 | 0 | -0.005 | 0 | 0 | 0.002 | t | 156417 | QILGEKSLT<br>ALTN            | Platyrrhi<br>ni                  |
| 1 | 1.00 | 1 | 1 | 0 | -0.003 | 0 | 0 | 0.002 | t | 140839 | DERGTPEY<br>NIALGQRR<br>ADAV | Oryctola<br>gus<br>cuniculu<br>s |
| 1 | 1.00 | 1 | 1 | 0 | -0.008 | 0 | 0 | 0.002 | t | 156850 | APHNKWP<br>HLNPP             | Mus<br>musculu<br>s              |
| 1 | 1.00 | 1 | 1 | 0 | -0.003 | 0 | 0 | 0.002 | t | 140906 | TPEYNIAL<br>GQRRADA<br>VKGYL | Oryctola<br>gus<br>cuniculu<br>s |
| 1 | 1.00 | 1 | 1 | 0 | -0.008 | 0 | 0 | 0.002 | t | 156865 | EQATCDH<br>TNEWCAK<br>MM     | Mus<br>musculu<br>s              |
| 1 | 1.00 | 1 | 1 | 0 | -0.008 | 0 | 0 | 0.002 | t | 136364 | IDPLMFKY<br>WYNM             | Mus<br>musculu<br>s              |
| 1 | 1.00 | 1 | 1 | 0 | -0.008 | 0 | 0 | 0.002 | t | 136685 | TLFTPDKS<br>PAKT             | Mus<br>musculu<br>s              |
| 1 | 1.00 | 1 | 1 | 0 | -0.008 | 0 | 0 | 0.002 | t | 136162 | DAWKMRL<br>SQMYD             | Mus<br>musculu<br>s              |
| 1 | 1.00 | 1 | 1 | 0 | -0.008 | 0 | 0 | 0.002 | t | 156938 | PPEKIHV                      | Mus<br>musculu<br>s              |
| 1 | 1.00 | 1 | 1 | 0 | -0.008 | 0 | 0 | 0.002 | t | 136631 | SHDGASSK<br>IRPA             | Mus<br>musculu<br>s              |
| 1 | 1.00 | 1 | 1 | 0 | -0.003 | 0 | 0 | 0.002 | t | 140835 | DAVKGYLA<br>GKGVDAG<br>KLGTV | Oryctola<br>gus<br>cuniculu<br>s |
| 1 | 1.00 | 1 | 1 | 0 | -0.008 | 0 | 0 | 0.002 | t | 156843 | AHSEMGT<br>RATMT             | Mus<br>musculu<br>s              |

|   |      |   |   |   |        |   |   |       |   |        |                              |                                  |
|---|------|---|---|---|--------|---|---|-------|---|--------|------------------------------|----------------------------------|
| 1 | 1.00 | 1 | 1 | 0 | -0.003 | 0 | 0 | 0.002 | t | 140938 | YLNATPAA<br>KVLVEGNT<br>DERG | Oryctola<br>gus<br>cuniculu<br>s |
| 1 | 1.00 | 1 | 1 | 0 | -0.003 | 0 | 0 | 0.002 | t | 140854 | GFDKYDIT<br>GEYVQILD<br>AHAA | Oryctola<br>gus<br>cuniculu<br>s |
| 1 | 1.00 | 1 | 1 | 0 | -0.008 | 0 | 0 | 0.002 | t | 156851 | AQMIIRLS<br>SPGN             | Mus<br>musculu<br>s              |
| 1 | 1.00 | 1 | 1 | 0 | -0.008 | 0 | 0 | 0.002 | t | 156942 | PWSKMHI                      | Mus<br>musculu<br>s              |
| 1 | 1.00 | 1 | 1 | 0 | -0.003 | 0 | 0 | 0.002 | t | 140905 | TPAAKVLV<br>EGNTDER<br>GTPEY | Oryctola<br>gus<br>cuniculu<br>s |
| 1 | 1.00 | 1 | 1 | 0 | -0.003 | 0 | 0 | 0.002 | t | 140825 | AGKLGTVS<br>YGEEKPAV<br>LGHD | Oryctola<br>gus<br>cuniculu<br>s |
| 1 | 1.00 | 1 | 1 | 0 | -0.008 | 0 | 0 | 0.002 | t | 136728 | VNYNGKE<br>HLLIP             | Mus<br>musculu<br>s              |
| 1 | 1.00 | 1 | 1 | 0 | -0.008 | 0 | 0 | 0.002 | t | 156840 | AAPKMCS<br>TWCQMW<br>Q       | Mus<br>musculu<br>s              |
| 1 | 1.00 | 1 | 1 | 0 | -0.008 | 0 | 0 | 0.002 | t | 136727 | VNWNSW<br>HKTNLS             | Mus<br>musculu<br>s              |
| 1 | 1.00 | 1 | 1 | 0 | -0.008 | 0 | 0 | 0.002 | t | 156947 | QTKSECTE<br>VCKNLT           | Mus<br>musculu<br>s              |
| 1 | 1.00 | 1 | 1 | 0 | -0.003 | 0 | 0 | 0.002 | t | 140895 | QRRADAV<br>KGYLAGKG<br>VDAGK | Oryctola<br>gus<br>cuniculu<br>s |
| 1 | 1.00 | 1 | 1 | 0 | 0      | 0 | 0 | 0.002 | t | 145655 | YQYIYNLT<br>CEL              | Sus<br>crofa                     |
| 1 | 1.00 | 1 | 1 | 0 | -0.003 | 0 | 0 | 0.002 | t | 140935 | YGEEKPAV<br>LGHDEAAY<br>SKNR | Oryctola<br>gus<br>cuniculu<br>s |
| 1 | 1.00 | 1 | 1 | 0 | -0.003 | 0 | 0 | 0.002 | t | 127944 | DLVNCNL<br>NTNCVAV<br>AFSLPD | Oryctola<br>gus<br>cuniculu<br>s |

|   |      |   |   |   |        |   |   |       |   |        |                              |                                  |
|---|------|---|---|---|--------|---|---|-------|---|--------|------------------------------|----------------------------------|
| 1 | 1.00 | 1 | 1 | 0 | -0.003 | 0 | 0 | 0.002 | t | 123439 | LLARDAPD<br>TDWCDSIP         | Oryctola<br>gus<br>cuniculu<br>s |
| 1 | 1.00 | 1 | 1 | 0 | -0.003 | 0 | 0 | 0.002 | t | 128084 | QKNACSF<br>DLCNSYDV<br>L     | Oryctola<br>gus<br>cuniculu<br>s |
| 1 | 1.00 | 1 | 1 | 0 | -0.003 | 0 | 0 | 0.002 | t | 127986 | FVGVGAD<br>YRHASCP<br>IDYIIA | Oryctola<br>gus<br>cuniculu<br>s |
| 1 | 1.00 | 1 | 1 | 0 | -0.003 | 0 | 0 | 0.002 | t | 121064 | WKHWVY<br>YTCCPDTP<br>YLDITY | Oryctola<br>gus<br>cuniculu<br>s |
| 1 | 1.00 | 1 | 1 | 0 | -0.003 | 0 | 0 | 0.002 | t | 118877 | LDVEQLGI<br>PEQEYSC          | Oryctola<br>gus<br>cuniculu<br>s |
| 1 | 1.00 | 1 | 1 | 0 | 0.014  | 0 | 0 | 0.002 | t | 125478 | LHQEYEEN<br>LGDSIVGY<br>KEKS | Mus<br>musculu<br>s              |
| 1 | 1.00 | 1 | 1 | 0 | -0.003 | 0 | 0 | 0.002 | t | 134006 | ALRMEVL<br>GCEAQDLY          | Oryctola<br>gus<br>cuniculu<br>s |
| 1 | 1.00 | 1 | 1 | 0 | -0.003 | 0 | 0 | 0.002 | t | 127980 | FPVIPGINI<br>EQKNACS         | Oryctola<br>gus<br>cuniculu<br>s |
| 1 | 1.00 | 1 | 1 | 0 | 0.014  | 0 | 0 | 0.002 | t | 125605 | YKEKSKFQ<br>DTHNNAH<br>YYVFF | Mus<br>musculu<br>s              |
| 1 | 1.00 | 1 | 1 | 0 | -0.003 | 0 | 0 | 0.002 | t | 122932 | VCTPKSDE<br>FNPCEDIM<br>GYK  | Oryctola<br>gus<br>cuniculu<br>s |
| 1 | 1.00 | 1 | 1 | 0 | -0.003 | 0 | 0 | 0.002 | t | 117509 | GQIPPGAM                     | Oryctola<br>gus<br>cuniculu<br>s |
| 1 | 1.00 | 1 | 1 | 0 | 0.011  | 0 | 0 | 0.002 | t | 125605 | YKEKSKFQ<br>DTHNNAH<br>YYVFF | Oryctola<br>gus<br>cuniculu<br>s |

|   |      |   |   |   |        |   |   |       |   |        |                               |                                  |
|---|------|---|---|---|--------|---|---|-------|---|--------|-------------------------------|----------------------------------|
| 1 | 1.00 | 1 | 1 | 0 | -0.003 | 0 | 0 | 0.002 | t | 127984 | FTNLKFKV<br>RKITSSHR<br>GN    | Oryctola<br>gus<br>cuniculu<br>s |
| 1 | 1.00 | 1 | 1 | 0 | -0.002 | 0 | 0 | 0.002 | t | 118060 | PPPGMRP<br>P                  | Mus<br>musculu<br>s              |
| 1 | 1.00 | 1 | 1 | 0 | -0.003 | 0 | 0 | 0.002 | t | 122083 | DPNIKLV<br>DDCWATS            | Oryctola<br>gus<br>cuniculu<br>s |
| 1 | 1.00 | 1 | 1 | 0 | -0.003 | 0 | 0 | 0.002 | t | 127919 | AFSLPDRS<br>LSAIPFDV<br>SFE   | Oryctola<br>gus<br>cuniculu<br>s |
| 1 | 1.00 | 1 | 1 | 0 | -0.004 | 0 | 0 | 0.002 | t | 110824 | EDEIDGPA<br>GQAEPDR<br>AHYNI  | Mus<br>musculu<br>s              |
| 1 | 1.00 | 1 | 1 | 0 | 0.003  | 0 | 0 | 0.002 | t | 104327 | VEQHNPIN<br>AGTELSAT          | Sus<br>scrofa                    |
| 1 | 1.00 | 1 | 1 | 0 | 0      | 0 | 0 | 0.002 | t | 110824 | EDEIDGPA<br>GQAEPDR<br>AHYNI  | Rattus<br>norvegic<br>us         |
| 1 | 1.00 | 1 | 1 | 0 | -0.004 | 0 | 0 | 0.002 | t | 110824 | EDEIDGPA<br>GQAEPDR<br>AHYNI  | Mus<br>musculu<br>s              |
| 1 | 1.00 | 1 | 1 | 0 | -0.003 | 0 | 0 | 0.002 | t | 110385 | QLYKTCKQ<br>AGTCPPDII<br>PKV  | Oryctola<br>gus<br>cuniculu<br>s |
| 1 | 1.00 | 1 | 1 | 0 | -0.004 | 0 | 0 | 0.002 | t | 110824 | EDEIDGPA<br>GQAEPDR<br>AHYNI  | Mus<br>musculu<br>s              |
| 1 | 1.00 | 1 | 1 | 0 | -0.003 | 0 | 0 | 0.002 | t | 106374 | EDHAGTY<br>GLGDRK             | Oryctola<br>gus<br>cuniculu<br>s |
| 1 | 1.00 | 1 | 1 | 0 | -0.003 | 0 | 0 | 0.002 | t | 110855 | FNRA GTV<br>GENVPDD<br>LYIKGS | Oryctola<br>gus<br>cuniculu<br>s |
| 1 | 1.00 | 1 | 1 | 0 | -0.008 | 0 | 0 | 0.002 | t | 67187  | TVTTTTKG<br>ENFTETDI<br>KI    | Mus<br>musculu<br>s              |
| 1 | 1.00 | 1 | 1 | 0 | -0.015 | 0 | 0 | 0.002 | t | 60663  | SRGAPGG<br>GFVPSLQG<br>VP     | Marmot<br>a monax                |

|   |      |   |   |   |        |   |   |       |   |       |                              |                                  |
|---|------|---|---|---|--------|---|---|-------|---|-------|------------------------------|----------------------------------|
| 1 | 1.00 | 1 | 1 | 0 | -0.003 | 0 | 0 | 0.002 | t | 97484 | LVEETSFID<br>AGAP            | Oryctola<br>gus<br>cuniculu<br>s |
| 1 | 1.00 | 1 | 1 | 0 | -0.008 | 0 | 0 | 0.002 | t | 75372 | YPNQVYYR<br>PVDRYSN<br>QNNFV | Mus<br>musculu<br>s              |
| 1 | 1.00 | 1 | 1 | 0 | -0.003 | 0 | 0 | 0.002 | t | 64985 | TLNPTI                       | Oryctola<br>gus<br>cuniculu<br>s |
| 1 | 1.00 | 1 | 1 | 0 | -0.015 | 0 | 0 | 0.002 | t | 67615 | VAGRKKLE<br>ELERDLRK<br>TK   | Marmot<br>a monax                |
| 1 | 1.00 | 1 | 1 | 0 | -0.003 | 0 | 0 | 0.002 | t | 63022 | TATRLLSST<br>NSRLC           | Oryctola<br>gus<br>cuniculu<br>s |
| 1 | 1.00 | 1 | 1 | 0 | 0      | 0 | 0 | 0.002 | t | 65000 | TLPERVRP<br>PDDWAT           | Sus<br>scrofa                    |
| 1 | 1.00 | 1 | 1 | 0 | -0.003 | 0 | 0 | 0.002 | t | 95058 | AGLQND                       | Oryctola<br>gus<br>cuniculu<br>s |
| 1 | 1.00 | 1 | 1 | 0 | -0.015 | 0 | 0 | 0.002 | t | 63217 | TDQMEVD<br>SGPRKRPL<br>RGG   | Marmot<br>a monax                |
| 1 | 1.00 | 1 | 1 | 0 | 0.003  | 0 | 0 | 0.002 | t | 63037 | TAVSPTTL<br>R                | Sus<br>scrofa                    |
| 1 | 1.00 | 1 | 1 | 0 | -0.011 | 0 | 0 | 0.002 | t | 75372 | YPNQVYYR<br>PVDRYSN<br>QNNFV | Oryctola<br>gus<br>cuniculu<br>s |
| 1 | 1.00 | 1 | 1 | 0 | 0.003  | 0 | 0 | 0.002 | t | 63038 | TAVSPTTL<br>RTEVVK           | Sus<br>scrofa                    |
| 1 | 1.00 | 1 | 1 | 0 | -0.003 | 0 | 0 | 0.002 | t | 63037 | TAVSPTTL<br>R                | Oryctola<br>gus<br>cuniculu<br>s |
| 1 | 1.00 | 1 | 1 | 0 | -0.011 | 0 | 0 | 0.002 | t | 67187 | TVTTTTKG<br>ENFTETDI<br>KI   | Oryctola<br>gus<br>cuniculu<br>s |



|   |      |   |   |   |        |   |   |       |   |       |                          |                                  |
|---|------|---|---|---|--------|---|---|-------|---|-------|--------------------------|----------------------------------|
| 1 | 1.00 | 1 | 1 | 0 | -0.004 | 0 | 0 | 0.002 | t | 75791 | YSLFQKEK<br>MVL          | Mus<br>musculu<br>s              |
| 1 | 1.00 | 1 | 1 | 0 | -0.004 | 0 | 0 | 0.002 | t | 75791 | YSLFQKEK<br>MVL          | Mus<br>musculu<br>s              |
| 1 | 1.00 | 1 | 1 | 0 | -0.03  | 0 | 0 | 0.002 | t | 61827 | STPPLPWP<br>WSPAAL       | Oryctola<br>gus<br>cuniculu<br>s |
| 1 | 1.00 | 1 | 1 | 0 | 0.003  | 0 | 0 | 0.002 | t | 63038 | TAVSPTTL<br>RTEVVK       | Sus<br>scrofa                    |
| 1 | 1.00 | 1 | 1 | 0 | -0.003 | 0 | 0 | 0.002 | t | 63037 | TAVSPTTL<br>R            | Oryctola<br>gus<br>cuniculu<br>s |
| 1 | 1.00 | 1 | 1 | 0 | -0.003 | 0 | 0 | 0.002 | t | 64985 | TLNPTI                   | Oryctola<br>gus<br>cuniculu<br>s |
| 1 | 1.00 | 1 | 1 | 0 | -0.004 | 0 | 0 | 0.002 | t | 88388 | SAWNSDS<br>EKPFDDHL      | Mus<br>musculu<br>s              |
| 1 | 1.00 | 1 | 1 | 0 | -0.003 | 0 | 0 | 0.002 | t | 75441 | YPYDVPDY<br>A            | Oryctola<br>gus<br>cuniculu<br>s |
| 1 | 1.00 | 1 | 1 | 0 | 0      | 0 | 0 | 0.002 | t | 75441 | YPYDVPDY<br>A            | Rattus<br>norvegic<br>us         |
| 1 | 1.00 | 1 | 1 | 0 | -0.003 | 0 | 0 | 0.002 | t | 66841 | TTTCFRDT<br>DTGK         | Oryctola<br>gus<br>cuniculu<br>s |
| 1 | 1.00 | 1 | 1 | 0 | 0      | 0 | 0 | 0.002 | t | 59229 | SLKMADP<br>NRFRGKDL<br>P | Mus<br>musculu<br>s              |
| 1 | 1.00 | 1 | 1 | 0 | 0      | 0 | 0 | 0.002 | t | 49928 | PVPAPRRK<br>VGSDCGS      | Sus<br>scrofa                    |
| 1 | 1.00 | 1 | 1 | 0 | 0      | 0 | 0 | 0.002 | t | 51958 | QPRKTKPV<br>KSLPERK      | Sus<br>scrofa                    |
| 1 | 1.00 | 1 | 1 | 0 | -0.003 | 0 | 0 | 0.002 | t | 48006 | PIVNKQSC<br>SISNIETV     | Oryctola<br>gus<br>cuniculu<br>s |

|   |      |   |   |   |        |   |   |       |   |       |                           |                                  |
|---|------|---|---|---|--------|---|---|-------|---|-------|---------------------------|----------------------------------|
| 1 | 1.00 | 1 | 1 | 0 | 0.003  | 0 | 0 | 0.002 | t | 59229 | SLKMADP<br>NRFRGKDL<br>P  | Mus<br>musculu<br>s              |
| 1 | 1.00 | 1 | 1 | 0 | -0.004 | 0 | 0 | 0.002 | t | 39092 | LRGDLQVL<br>AQKVARTL      | Mus<br>musculu<br>s              |
| 1 | 1.00 | 1 | 1 | 0 | -0.003 | 0 | 0 | 0.002 | t | 58404 | SHRLHNT<br>MPSES          | Oryctola<br>gus<br>cuniculu<br>s |
| 1 | 1.00 | 1 | 1 | 0 | 0.003  | 0 | 0 | 0.002 | t | 59229 | SLKMADP<br>NRFRGKDL<br>P  | Mus<br>musculu<br>s              |
| 1 | 1.00 | 1 | 1 | 0 | 0.002  | 0 | 0 | 0.002 | t | 57306 | SDVEGLQ<br>NDP            | Rattus<br>norvegic<br>us         |
| 1 | 1.00 | 1 | 1 | 0 | 0.003  | 0 | 0 | 0.002 | t | 59229 | SLKMADP<br>NRFRGKDL<br>P  | Mus<br>musculu<br>s              |
| 1 | 1.00 | 1 | 1 | 0 | -0.008 | 0 | 0 | 0.002 | t | 56610 | RYPGQGS<br>PGGNRYP<br>PQG | Mus<br>musculu<br>s              |
| 1 | 1.00 | 1 | 1 | 0 | -0.006 | 0 | 0 | 0.002 | t | 55106 | RPADKTRH<br>KFPTNINK<br>Q | Oryctola<br>gus<br>cuniculu<br>s |
| 1 | 1.00 | 1 | 1 | 0 | -0.003 | 0 | 0 | 0.002 | t | 38313 | LNPTIA                    | Oryctola<br>gus<br>cuniculu<br>s |
| 1 | 1.00 | 1 | 1 | 0 | 0.003  | 0 | 0 | 0.002 | t | 59229 | SLKMADP<br>NRFRGKDL<br>P  | Mus<br>musculu<br>s              |
| 1 | 1.00 | 1 | 1 | 0 | -0.003 | 0 | 0 | 0.002 | t | 43233 | NANP                      | Oryctola<br>gus<br>cuniculu<br>s |
| 1 | 1.00 | 1 | 1 | 0 | -0.003 | 0 | 0 | 0.002 | t | 55106 | RPADKTRH<br>KFPTNINK<br>Q | Oryctola<br>gus<br>cuniculu<br>s |

|   |      |   |   |   |        |   |   |       |   |       |                              |                                  |
|---|------|---|---|---|--------|---|---|-------|---|-------|------------------------------|----------------------------------|
| 1 | 1.00 | 1 | 1 | 0 | -0.003 | 0 | 0 | 0.002 | t | 43246 | NANPNAN<br>PNANPNA<br>NP     | Oryctola<br>gus<br>cuniculu<br>s |
| 1 | 1.00 | 1 | 1 | 0 | -0.011 | 0 | 0 | 0.002 | t | 56610 | RYPGQGS<br>PGGNRYP<br>PQG    | Oryctola<br>gus<br>cuniculu<br>s |
| 1 | 1.00 | 1 | 1 | 0 | -0.008 | 0 | 0 | 0.002 | t | 41430 | MERVVEQ<br>MCITQYQ<br>RESQAY | Mus<br>musculu<br>s              |
| 1 | 1.00 | 1 | 1 | 0 | -0.011 | 0 | 0 | 0.002 | t | 41430 | MERVVEQ<br>MCITQYQ<br>RESQAY | Oryctola<br>gus<br>cuniculu<br>s |
| 1 | 1.00 | 1 | 1 | 0 | -0.003 | 0 | 0 | 0.002 | t | 41430 | MERVVEQ<br>MCITQYQ<br>RESQAY | Oryctola<br>gus<br>cuniculu<br>s |
| 1 | 1.00 | 1 | 1 | 0 | 0      | 0 | 0 | 0.002 | t | 52085 | QQPFPQP<br>QQQ               | Mus<br>musculu<br>s              |
| 1 | 1.00 | 1 | 1 | 0 | -0.003 | 0 | 0 | 0.002 | t | 58582 | SIKEDVQF                     | Oryctola<br>gus<br>cuniculu<br>s |
| 1 | 1.00 | 1 | 1 | 0 | -0.004 | 0 | 0 | 0.002 | t | 53839 | RGDLQVL<br>AQK               | Mus<br>musculu<br>s              |
| 1 | 1.00 | 1 | 1 | 0 | 0.006  | 0 | 0 | 0.002 | t | 54058 | RHKQKIVA<br>PVKQTL           | Ovis<br>aries                    |
| 1 | 1.00 | 1 | 1 | 0 | 0      | 0 | 0 | 0.002 | t | 46899 | PAPRRKFQ<br>QVKRL            | Sus<br>scrofa                    |
| 1 | 1.00 | 1 | 1 | 0 | -0.003 | 0 | 0 | 0.002 | t | 52304 | QSCSISNIE<br>TVIEFQQ         | Oryctola<br>gus<br>cuniculu<br>s |
| 1 | 1.00 | 1 | 1 | 0 | -0.008 | 0 | 0 | 0.002 | t | 41126 | MASLIYRQ<br>LL               | Mus<br>musculu<br>s              |
| 1 | 1.00 | 1 | 1 | 0 | -0.003 | 0 | 0 | 0.002 | t | 37657 | LLPHSNLD<br>HI               | Oryctola<br>gus<br>cuniculu<br>s |

|   |      |   |   |   |        |   |   |       |   |       |                              |                                  |
|---|------|---|---|---|--------|---|---|-------|---|-------|------------------------------|----------------------------------|
| 1 | 1.00 | 1 | 1 | 0 | -0.003 | 0 | 0 | 0.002 | t | 59922 | SNTFINNA                     | Oryctola<br>gus<br>cuniculu<br>s |
| 1 | 1.00 | 1 | 1 | 0 | -0.003 | 0 | 0 | 0.002 | t | 43242 | NANPNAN<br>PNANP             | Oryctola<br>gus<br>cuniculu<br>s |
| 1 | 1.00 | 1 | 1 | 0 | 0.002  | 0 | 0 | 0.002 | t | 32844 | KPQEEKEK<br>ITKEILNGK        | Rattus<br>norvegic<br>us         |
| 1 | 1.00 | 1 | 1 | 0 | -0.003 | 0 | 0 | 0.002 | t | 21928 | GQPAVRN<br>ERATGS            | Oryctola<br>gus<br>cuniculu<br>s |
| 1 | 1.00 | 1 | 1 | 0 | -0.001 | 0 | 0 | 0.002 | t | 32480 | KNESKYSN<br>TFINNAYN<br>MSIR | Aotus<br>sp.                     |
| 1 | 1.00 | 1 | 1 | 0 | -0.003 | 0 | 0 | 0.002 | t | 11819 | EENVEHD<br>A                 | Oryctola<br>gus<br>cuniculu<br>s |
| 1 | 1.00 | 1 | 1 | 0 | -0.011 | 0 | 0 | 0.002 | t | 19868 | GGGWGQ<br>PHGGGW<br>GQPH     | Oryctola<br>gus<br>cuniculu<br>s |
| 1 | 1.00 | 1 | 1 | 0 | -0.003 | 0 | 0 | 0.002 | t | 11815 | EENVEENV<br>EENVEENV         | Oryctola<br>gus<br>cuniculu<br>s |
| 1 | 1.00 | 1 | 1 | 0 | 0.005  | 0 | 0 | 0.002 | t | 15911 | FFTEEFKRK<br>NKGKNLAS<br>SHR | Homo<br>sapiens                  |
| 1 | 1.00 | 1 | 1 | 0 | -0.003 | 0 | 0 | 0.002 | t | 32783 | KPLDKFGN<br>IYDYHYEH         | Oryctola<br>gus<br>cuniculu<br>s |
| 1 | 1.00 | 1 | 1 | 0 | -0.015 | 0 | 0 | 0.002 | t | 19269 | GEGAPPA<br>KRARTDQ<br>ME     | Marmot<br>a monax                |
| 1 | 1.00 | 1 | 1 | 0 | -0.015 | 0 | 0 | 0.002 | t | 29852 | KALENKKK<br>QLSAGGK<br>NLS   | Marmot<br>a monax                |
| 1 | 1.00 | 1 | 1 | 0 | 0      | 0 | 0 | 0.002 | t | 16101 | FHENWPS                      | Rattus<br>norvegic<br>us         |

|   |      |   |   |   |        |   |   |       |   |       |                              |                                  |
|---|------|---|---|---|--------|---|---|-------|---|-------|------------------------------|----------------------------------|
| 1 | 1.00 | 1 | 1 | 0 | -0.003 | 0 | 0 | 0.002 | t | 32571 | KNNNSTN<br>SGI               | Oryctola<br>gus<br>cuniculu<br>s |
| 1 | 1.00 | 1 | 1 | 0 | -0.003 | 0 | 0 | 0.002 | t | 35329 | LDVTTLNP<br>TI               | Oryctola<br>gus<br>cuniculu<br>s |
| 1 | 1.00 | 1 | 1 | 0 | -0.003 | 0 | 0 | 0.002 | t | 19833 | GGGGWG<br>QGGSHSQ<br>WNK     | Oryctola<br>gus<br>cuniculu<br>s |
| 1 | 1.00 | 1 | 1 | 0 | -0.007 | 0 | 0 | 0.002 | t | 28085 | IPTGGIQR<br>GGRGPCQ<br>RQQRS | Oryctola<br>gus<br>cuniculu<br>s |
| 1 | 1.00 | 1 | 1 | 0 | -0.011 | 0 | 0 | 0.002 | t | 24842 | HSQWNKP<br>SKPKTNM<br>K      | Oryctola<br>gus<br>cuniculu<br>s |
| 1 | 1.00 | 1 | 1 | 0 | -0.008 | 0 | 0 | 0.002 | t | 19868 | GGGWGQ<br>PHGGGW<br>GQPH     | Mus<br>musculu<br>s              |
| 1 | 1.00 | 1 | 1 | 0 | -0.003 | 0 | 0 | 0.002 | t | 10868 | DYEDRYR<br>E                 | Oryctola<br>gus<br>cuniculu<br>s |
| 1 | 1.00 | 1 | 1 | 0 | -0.003 | 0 | 0 | 0.002 | t | 32716 | KPGGGW<br>NTGGSRYP<br>GQGS   | Oryctola<br>gus<br>cuniculu<br>s |
| 1 | 1.00 | 1 | 1 | 0 | 0.002  | 0 | 0 | 0.002 | t | 10801 | DWEDRYR<br>RE                | Rattus<br>norvegic<br>us         |
| 1 | 1.00 | 1 | 1 | 0 | -0.011 | 0 | 0 | 0.002 | t | 19833 | GGGGWG<br>QGGSHSQ<br>WNK     | Oryctola<br>gus<br>cuniculu<br>s |
| 1 | 1.00 | 1 | 1 | 0 | -0.011 | 0 | 0 | 0.002 | t | 21408 | GNDYEDR<br>YYRENMY<br>RYPNQ  | Oryctola<br>gus<br>cuniculu<br>s |
| 1 | 1.00 | 1 | 1 | 0 | -0.003 | 0 | 0 | 0.002 | t | 21408 | GNDYEDR<br>YYRENMY<br>RYPNQ  | Oryctola<br>gus<br>cuniculu<br>s |
| 1 | 1.00 | 1 | 1 | 0 | -0.008 | 0 | 0 | 0.002 | t | 32716 | KPGGGW<br>NTGGSRYP<br>GQGS   | Mus<br>musculu<br>s              |

|   |      |   |   |       |        |        |       |        |   |        |                             |                                  |
|---|------|---|---|-------|--------|--------|-------|--------|---|--------|-----------------------------|----------------------------------|
| 1 | 1.00 | 1 | 1 | 0     | -0.003 | 0      | 0     | 0.002  | t | 10801  | DWEDRY<br>RE                | Oryctola<br>gus<br>cuniculu<br>s |
| 1 | 1.00 | 1 | 1 | 0     | -0.003 | 0      | 0     | 0.002  | t | 11819  | EENVEHD<br>A                | Oryctola<br>gus<br>cuniculu<br>s |
| 1 | 1.00 | 1 | 1 | 0     | -0.003 | 0      | 0     | 0.002  | t | 5609   | AVVYNNE<br>GTNVELG          | Oryctola<br>gus<br>cuniculu<br>s |
| 1 | 1.00 | 1 | 1 | 0     | -0.003 | 0      | 0     | 0.002  | t | 10227  | DSSAHGTP<br>STPA            | Oryctola<br>gus<br>cuniculu<br>s |
| 1 | 1.00 | 1 | 1 | 0     | -0.003 | 0      | 0     | 0.002  | t | 9516   | DNNLVSG<br>P                | Oryctola<br>gus<br>cuniculu<br>s |
| 1 | 1.00 | 1 | 1 | 0     | -0.003 | 0      | 0     | 0.002  | t | 7851   | DDPPATVY<br>RYDSRPPE<br>DV  | Oryctola<br>gus<br>cuniculu<br>s |
| 1 | 1.00 | 1 | 1 | 0     | 0      | 0      | 0     | 0.002  | t | 8076   | DEKDDQM<br>EED              | Sus<br>scrofa                    |
| 1 | 1.00 | 1 | 1 | 0     | -0.003 | 0      | 0     | 0.002  | t | 9524   | DNPASTT<br>NKDK             | Oryctola<br>gus<br>cuniculu<br>s |
| 1 | 1.00 | 1 | 1 | 0     | -0.003 | 0      | 0     | 0.002  | t | 9524   | DNPASTT<br>NKDK             | Oryctola<br>gus<br>cuniculu<br>s |
| 1 | 1.00 | 1 | 1 | 0     | -0.003 | 0      | 0     | 0.002  | t | 8119   | DEPAGE                      | Oryctola<br>gus<br>cuniculu<br>s |
| 1 | 1.00 | 1 | 1 | 0     | -0.003 | 0      | 0     | 0.002  | t | 952    | AEGQLG                      | Oryctola<br>gus<br>cuniculu<br>s |
| 1 | 1.00 | 1 | 1 | 0.01  | 0.01   | 0.01   | 0.01  | 0.009  | t | 115287 | IAKYIPIQY<br>VLSRPSY<br>GLN | Homo<br>sapiens                  |
| 1 | 1.00 | 1 | 1 | -0.02 | -0.023 | -0.024 | -0.02 | -0.018 | t | 17640  | FRRLGAAL<br>LQ              | Oryctola<br>gus<br>cuniculu<br>s |

|   |      |   |   |       |        |        |        |        |   |        |                              |                       |
|---|------|---|---|-------|--------|--------|--------|--------|---|--------|------------------------------|-----------------------|
| 1 | 1.00 | 1 | 1 | -0.03 | -0.028 | -0.025 | -0.027 | -0.03  | t | 63991  | TGVMTTR<br>CPCGANI           | Homo sapiens          |
| 1 | 1.00 | 1 | 1 | 0.05  | 0.053  | 0.05   | 0.05   | 0.051  | t | 107149 | GIAGFKGE<br>QGPKGET          | Mus musculus          |
| 1 | 1.00 | 1 | 1 | 0.03  | 0.032  | 0.03   | 0.029  | 0.03   | t | 149428 | QLQLQNP<br>SQQ               | Homo sapiens          |
| 1 | 1.00 | 1 | 1 | 0.02  | 0.022  | 0.02   | 0.023  | 0.022  | t | 110303 | KHRRLLSD<br>QDQSQTP<br>ETPAT | Homo sapiens          |
| 1 | 1.00 | 1 | 1 | 0     | 0.006  | 0      | 0      | 0      | t | 123206 | GAAVDLR<br>QG                | Ovis aries            |
| 1 | 1.00 | 1 | 1 | 0.01  | 0.012  | 0.01   | 0.007  | 0.01   | t | 142166 | GLRRDLDA<br>SREAKKQL<br>EAEQ | Homo sapiens          |
| 1 | 1.00 | 1 | 1 | 0.01  | 0.007  | 0.021  | 0.01   | 0.01   | t | 95136  | QPVGREKF                     | Oryctolagus cuniculus |
| 1 | 1.00 | 1 | 1 | 0     | 0      | 0.004  | 0      | 0      | t | 56329  | RVKMEKLK<br>LKGTTYG<br>MC    | Mus musculus          |
| 1 | 1.00 | 1 | 1 | 0.02  | 0.018  | 0.013  | 0.013  | 0.021  | t | 108213 | WQQGNV<br>F                  | Mus musculus          |
| 1 | 1.00 | 1 | 1 | -0.04 | -0.038 | -0.043 | -0.043 | -0.041 | t | 106715 | PSKECCSG<br>TKKL             | Homo sapiens          |
| 1 | 1.00 | 1 | 1 | 0     | 0      | 0      | 0      | 0.001  | t | 122468 | LLDRKSGK<br>QYSIEAAL<br>RCRR | Homo sapiens          |
| 1 | 1.00 | 1 | 1 | -0.01 | -0.01  | -0.008 | -0.01  | -0.01  | t | 110593 | GFPGPRG<br>PPGPQGA<br>T      | Mus musculus          |
| 1 | 1.00 | 1 | 1 | 0.01  | 0.013  | 0.018  | 0.01   | 0.011  | t | 60013  | SPDDPAFR<br>FAPYFTP          | Mus musculus          |
| 1 | 1.00 | 1 | 1 | -0.01 | 0.004  | -0.01  | -0.01  | -0.008 | t | 134197 | PVFPTAEQ<br>FRRM             | Rattus rattus         |

|   |      |   |   |       |        |        |        |        |   |        |                              |                                  |
|---|------|---|---|-------|--------|--------|--------|--------|---|--------|------------------------------|----------------------------------|
| 1 | 1.00 | 1 | 1 | -0.05 | -0.044 | -0.036 | -0.043 | -0.049 | t | 132890 | QSPWQT<br>WFTRAL             | Homo<br>sapiens                  |
| 1 | 1.00 | 1 | 1 | 0.01  | 0.01   | 0.01   | 0.006  | 0.01   | t | 142200 | KGLRRDLD<br>ASREAKKQ<br>LEAE | Homo<br>sapiens                  |
| 1 | 1.00 | 1 | 1 | -0.03 | -0.032 | -0.023 | -0.033 | -0.028 | t | 107891 | HRLAFGQY<br>T                | Mus<br>musculu<br>s              |
| 1 | 1.00 | 1 | 1 | 0.02  | 0.016  | 0.025  | 0.019  | 0.02   | t | 6367   | CGYGGPA<br>NKKNAGC           | Oryctola<br>gus<br>cuniculu<br>s |
| 1 | 1.00 | 1 | 1 | -0.03 | -0.026 | -0.026 | -0.029 | -0.028 | t | 111549 | MKIPNNKL<br>FLPV             | Homo<br>sapiens                  |
| 1 | 1.00 | 1 | 1 | 0     | 0      | 0      | 0      | 0      | t | 141643 | FHTLDNNI<br>RNVN             | Mus<br>musculu<br>s              |
| 1 | 1.00 | 1 | 1 | -0.02 | -0.02  | -0.02  | -0.02  | -0.02  | t | 117114 | WTRDNST<br>RPIVR             | Homo<br>sapiens                  |
| 1 | 1.00 | 1 | 1 | -0.04 | -0.042 | -0.034 | -0.041 | -0.039 | t | 60671  | SRGKGPG<br>KKNK              | Mus<br>musculu<br>s              |
| 1 | 1.00 | 1 | 1 | -0.04 | -0.042 | -0.034 | -0.041 | -0.039 | t | 60671  | SRGKGPG<br>KKNK              | Sus<br>scrofa                    |
| 1 | 1.00 | 1 | 1 | -0.01 | -0.01  | -0.01  | -0.01  | -0.008 | t | 52084  | QQPFPQP<br>QQP               | Mus<br>musculu<br>s              |
| 1 | 1.00 | 1 | 1 | 0.01  | 0.01   | 0.01   | 0.01   | 0.011  | t | 120066 | LKQQWVD<br>YNLKWNP<br>DD     | Mus<br>musculu<br>s              |
| 1 | 1.00 | 1 | 1 | 0     | -0.002 | -0.002 | 0.001  | 0      | t | 39950  | LTIDGGIFE<br>VKATNGD<br>THLG | Homo<br>sapiens                  |
| 1 | 1.00 | 1 | 1 | 0.03  | 0.027  | 0.026  | 0.03   | 0.031  | t | 122090 | ESPQEISK<br>HQALG            | Oryctola<br>gus<br>cuniculu<br>s |
| 1 | 1.00 | 1 | 1 | -0.01 | -0.009 | -0.009 | -0.011 | -0.01  | t | 54912  | RMKSSR                       | Equus<br>caballus                |
| 1 | 1.00 | 1 | 1 | 0     | 0      | 0.001  | 0.003  | 0      | t | 79665  | VEGLAPG<br>GGNCHLT<br>VNGEDV | Homo<br>sapiens                  |



|   |      |   |   |       |        |        |        |        |   |        |                              |                       |
|---|------|---|---|-------|--------|--------|--------|--------|---|--------|------------------------------|-----------------------|
| 1 | 1.00 | 1 | 1 | 0     | 0.002  | 0      | -0.003 | 0      | t | 43248  | NANPNAN<br>PNANPNA<br>NPNANP | Homo sapiens          |
| 1 | 1.00 | 1 | 1 | 0     | 0.01   | 0      | -0.001 | 0      | t | 72229  | WAGWLLS<br>PRG               | Pan troglodytes       |
| 1 | 1.00 | 1 | 1 | -0.03 | -0.03  | -0.025 | -0.03  | -0.028 | t | 58371  | SHITSYPAY<br>FW              | Mus musculus          |
| 1 | 1.00 | 1 | 1 | -0.01 | -0.012 | 0.003  | -0.007 | -0.013 | t | 33531  | KSTQRSTR<br>RNLS             | Mus musculus          |
| 1 | 1.00 | 1 | 1 | 0.02  | 0.018  | 0.025  | 0.017  | 0.02   | t | 96874  | SIAPDLSLD<br>FEKLVN          | Mus musculus          |
| 1 | 1.00 | 1 | 1 | -0.02 | -0.018 | -0.025 | -0.017 | -0.019 | t | 144382 | KIQTSFHC<br>CGVKGPD<br>DYKG  | Homo sapiens          |
| 1 | 1.00 | 1 | 1 | -0.01 | -0.01  | -0.005 | -0.013 | -0.01  | t | 42592  | MSLLDGR<br>GPVRFVLA          | Homo sapiens          |
| 1 | 1.00 | 1 | 1 | 0.01  | 0.007  | 0.021  | 0.01   | 0.008  | t | 111229 | EAYIFEMF<br>NENQKAG          | Oryctolagus cuniculus |
| 1 | 1.00 | 1 | 1 | 0.06  | 0.06   | 0.058  | 0.053  | 0.06   | t | 118338 | ESEESDDD<br>MGFGLFD          | Homo sapiens          |
| 1 | 1.00 | 1 | 1 | 0     | 0.002  | 0.006  | 0.001  | 0      | t | 65044  | TLRKYC                       | Homo sapiens          |
| 1 | 1.00 | 1 | 1 | 0     | 0      | 0      | 0      | 0.002  | t | 116085 | EPANPSEK                     | Mus musculus          |
| 1 | 1.00 | 1 | 1 | -0.01 | -0.01  | -0.01  | -0.01  | -0.01  | t | 135752 | RTTEFWK<br>Q                 | Homo sapiens          |
| 1 | 1.00 | 1 | 1 | -0.05 | -0.05  | -0.05  | -0.05  | -0.05  | t | 149085 | NPTQIRR                      | Sus scrofa            |
| 1 | 1.00 | 1 | 1 | -0.05 | -0.05  | -0.05  | -0.05  | -0.05  | t | 90675  | YANVPWL<br>SRN               | Homo sapiens          |
| 1 | 1.00 | 1 | 1 | 0     | 0.008  | -0.01  | 0      | 0.002  | t | 38617  | LPPIQNTR<br>NVVP             | Gallus gallus         |

|   |      |   |   |       |        |        |        |        |   |        |                              |                                  |
|---|------|---|---|-------|--------|--------|--------|--------|---|--------|------------------------------|----------------------------------|
| 1 | 1.00 | 1 | 1 | 0.03  | 0.032  | 0.017  | 0.027  | 0.03   | t | 105814 | GELPNIEA<br>DVNTFVAS<br>HKPR | Homo<br>sapiens                  |
| 1 | 1.00 | 1 | 1 | 0.01  | 0.013  | 0.01   | 0.01   | 0.008  | t | 140935 | YGEEKPAV<br>LGHDEAAY<br>SKNR | Mus<br>musculu<br>s              |
| 1 | 1.00 | 1 | 1 | -0.05 | -0.047 | -0.063 | -0.05  | -0.048 | t | 12944  | ELAKLRAG<br>KASDSQTP<br>DT   | Mus<br>musculu<br>s              |
| 1 | 1.00 | 1 | 1 | -0.05 | -0.047 | -0.063 | -0.05  | -0.048 | t | 12944  | ELAKLRAG<br>KASDSQTP<br>DT   | Mus<br>musculu<br>s              |
| 1 | 1.00 | 1 | 1 | 0.05  | 0.052  | 0.047  | 0.047  | 0.051  | t | 46895  | PAPQAPY<br>QGYQEPP<br>APQAPY | Homo<br>sapiens                  |
| 1 | 1.00 | 1 | 1 | 0     | 0      | -0.002 | 0      | 0.002  | t | 49272  | PRVRGLYL<br>PAGG             | Oryctola<br>gus<br>cuniculu<br>s |
| 1 | 1.00 | 1 | 1 | -0.01 | -0.008 | -0.01  | -0.013 | -0.01  | t | 95829  | SGASAQS<br>GTSGP             | Homo<br>sapiens                  |
| 1 | 1.00 | 1 | 1 | 0.03  | 0.03   | 0.03   | 0.03   | 0.032  | t | 141620 | DNPRPND<br>KTGS              | Oryctola<br>gus<br>cuniculu<br>s |
| 1 | 1.00 | 1 | 1 | 0     | -0.002 | 0      | -0.001 | 0.001  | t | 79167  | CESLKGST<br>GKLAVG           | Mus<br>musculu<br>s              |
| 1 | 1.00 | 1 | 1 | 0     | -0.002 | 0      | -0.001 | 0.001  | t | 79303  | LVAAGVD<br>YEDERISF<br>QDWPK | Mus<br>musculu<br>s              |
| 1 | 1.00 | 1 | 1 | 0     | -0.002 | 0      | -0.001 | 0.001  | t | 19637  | GFTTNEPR<br>YNVFAE           | Mus<br>musculu<br>s              |
| 1 | 1.00 | 1 | 1 | 0     | -0.002 | 0      | -0.001 | 0.001  | t | 19637  | GFTTNEPR<br>YNVFAE           | Mus<br>musculu<br>s              |
| 1 | 1.00 | 1 | 1 | 0     | -0.004 | 0      | -0.007 | -0.002 | t | 132111 | VIDLWDL                      | Oryctola<br>gus<br>cuniculu<br>s |

|   |      |   |   |       |        |        |        |        |   |        |                            |                              |
|---|------|---|---|-------|--------|--------|--------|--------|---|--------|----------------------------|------------------------------|
| 1 | 1.00 | 1 | 1 | -0.02 | -0.02  | -0.018 | -0.02  | -0.022 | t | 120677 | KHPEVKSA<br>IEGIKYI        | Rattus<br>norvegicus         |
| 1 | 1.00 | 1 | 1 | 0     | -0.002 | 0.007  | 0.003  | 0      | t | 23390  | GYKVLVLN<br>PSVAAT         | Mus<br>musculus              |
| 1 | 1.00 | 1 | 1 | 0     | 0.002  | 0      | 0.001  | 0.002  | t | 9895   | DQRPYCW<br>HYA             | Homo<br>sapiens              |
| 1 | 1.00 | 1 | 1 | 0.03  | 0.03   | 0.03   | 0.03   | 0.03   | t | 141977 | PKDSQHG<br>REYQEFSA<br>NRH | Mus<br>musculus              |
| 1 | 1.00 | 1 | 1 | -0.01 | -0.01  | -0.01  | -0.007 | -0.01  | t | 42684  | MSTNPKP<br>QKKNKRN<br>TNRR | Homo<br>sapiens              |
| 1 | 1.00 | 1 | 1 | -0.01 | -0.01  | -0.01  | -0.01  | -0.009 | t | 114192 | AEYWNSQ<br>PEILERTRA<br>E  | Mus<br>musculus              |
| 1 | 1.00 | 1 | 1 | -0.01 | -0.006 | -0.005 | -0.009 | -0.01  | t | 25200  | HYTNESKF<br>KFILE          | Homo<br>sapiens              |
| 1 | 1.00 | 1 | 1 | 0     | -0.002 | 0.002  | -0.007 | -0.002 | t | 117745 | ALLRNLGK<br>MTA            | Mus<br>musculus              |
| 1 | 1.00 | 1 | 1 | 0.01  | 0.013  | 0.017  | 0.01   | 0.01   | t | 50216  | QAAPYIEQ<br>AQVIAHQF       | Mus<br>musculus              |
| 1 | 1.00 | 1 | 1 | 0     | 0      | 0.004  | 0      | 0      | t | 51933  | QPQQSFP<br>QQP             | Mus<br>musculus              |
| 1 | 1.00 | 1 | 1 | 0     | 0      | 0.004  | 0      | 0      | t | 51933  | QPQQSFP<br>QQP             | Mus<br>musculus              |
| 1 | 1.00 | 1 | 1 | -0.02 | -0.02  | -0.02  | -0.02  | -0.02  | t | 119754 | AQRLMRY<br>WAN             | Oryctola<br>gus<br>cuniculus |
| 1 | 1.00 | 1 | 1 | -0.01 | -0.008 | -0.009 | -0.009 | -0.008 | t | 156370 | LRGMAKD<br>GKFAVKD         | Homo<br>sapiens              |
| 1 | 1.00 | 1 | 1 | -0.06 | -0.064 | -0.054 | -0.06  | -0.062 | t | 92303  | AKRFKINAI                  | Mus<br>musculus              |

|   |      |   |   |       |        |        |        |        |   |        |                             |                                  |
|---|------|---|---|-------|--------|--------|--------|--------|---|--------|-----------------------------|----------------------------------|
| 1 | 1.00 | 1 | 1 | 0.04  | 0.044  | 0.051  | 0.037  | 0.038  | t | 30057  | KCGVNV<br>YKISTSTN          | Homo<br>sapiens                  |
| 1 | 1.00 | 1 | 1 | 0.02  | 0.022  | 0.017  | 0.021  | 0.022  | t | 150979 | EKRIENLN<br>KKVDDGF         | Homo<br>sapiens                  |
| 1 | 1.00 | 1 | 1 | -0.02 | -0.02  | -0.016 | -0.02  | -0.02  | t | 52351  | QSKGKDIS<br>NGYGASY<br>GDQD | Mus<br>musculu<br>s              |
| 1 | 1.00 | 1 | 1 | -0.05 | -0.052 | -0.059 | -0.051 | -0.05  | t | 55969  | RSSSSHHR<br>SPSPRK          | Anas<br>platyrhy<br>nchos        |
| 1 | 1.00 | 1 | 1 | 0.01  | 0.008  | 0.003  | 0.003  | 0.011  | t | 108213 | WQQGNV<br>F                 | Mus<br>musculu<br>s              |
| 1 | 1.00 | 1 | 1 | 0.01  | 0.006  | 0.003  | 0.003  | 0.011  | t | 108213 | WQQGNV<br>F                 | Oryctola<br>gus<br>cuniculu<br>s |
| 1 | 1.00 | 1 | 1 | 0.06  | 0.06   | 0.06   | 0.06   | 0.06   | t | 115072 | KQMEAESI<br>SSSEIIVP        | Homo<br>sapiens                  |
| 1 | 1.00 | 1 | 1 | -0.02 | -0.018 | -0.008 | -0.013 | -0.02  | t | 131020 | QLSPESDY<br>DDHGMRY         | Homo<br>sapiens                  |
| 1 | 1.00 | 1 | 1 | -0.01 | -0.011 | -0.004 | -0.013 | -0.012 | t | 1656   | AGQRMPR<br>ARYGLV           | Homo<br>sapiens                  |
| 1 | 1.00 | 1 | 1 | -0.02 | -0.018 | 0      | -0.013 | -0.019 | t | 118736 | AFQQGKIP<br>P               | Homo<br>sapiens                  |
| 1 | 1.00 | 1 | 1 | 0     | 0.002  | 0      | 0.001  | 0      | t | 110869 | GQAEPDR<br>AHYIVTF<br>CCKCD | Homo<br>sapiens                  |
| 1 | 1.00 | 1 | 1 | 0.04  | 0.04   | 0.04   | 0.04   | 0.04   | t | 111111 | ANQSLPD<br>RLYKS            | Homo<br>sapiens                  |
| 1 | 1.00 | 1 | 1 | -0.07 | -0.072 | -0.058 | -0.071 | -0.07  | t | 10090  | DSDFPQ<br>NLP               | Mus<br>musculu<br>s              |
| 1 | 1.00 | 1 | 1 | -0.01 | -0.012 | -0.005 | -0.007 | -0.01  | t | 50934  | QGPHVISR<br>IYQTAT          | Mus<br>musculu<br>s              |
| 1 | 1.00 | 1 | 1 | -0.01 | -0.01  | -0.005 | -0.01  | -0.01  | t | 46488  | NVSVSPS<br>STPLLY           | Homo<br>sapiens                  |

|   |      |   |   |       |        |        |        |        |   |        |                              |                                  |
|---|------|---|---|-------|--------|--------|--------|--------|---|--------|------------------------------|----------------------------------|
| 1 | 1.00 | 1 | 1 | -0.03 | -0.027 | -0.03  | -0.03  | -0.032 | t | 8593   | DIAYNLM<br>NPFLGKLF<br>NDYNH | Mus<br>musculu<br>s              |
| 1 | 1.00 | 1 | 1 | 0.02  | 0.018  | 0.024  | 0.019  | 0.02   | t | 67269  | TWKIEKAS<br>F                | Mus<br>musculu<br>s              |
| 1 | 1.00 | 1 | 1 | 0     | 0      | 0      | 0      | 0      | t | 80615  | CASPYEGR<br>YRDMYDA<br>LR    | Oryctola<br>gus<br>cuniculu<br>s |
| 1 | 1.00 | 1 | 1 | 0.03  | 0.028  | 0.021  | 0.027  | 0.032  | t | 28375  | IRQLESIVD<br>KLNRSG          | Mus<br>musculu<br>s              |
| 1 | 1.00 | 1 | 1 | -0.03 | -0.03  | -0.038 | -0.03  | -0.03  | t | 46681  | NYNYKYRY<br>LRHGKLRP<br>F    | Mus<br>musculu<br>s              |
| 1 | 1.00 | 1 | 1 | -0.02 | -0.018 | -0.016 | -0.017 | -0.02  | t | 64601  | TKKPGGP<br>GKNRAIN<br>M      | Homo<br>sapiens                  |
| 1 | 1.00 | 1 | 1 | 0.01  | 0.013  | 0.013  | 0.01   | 0.01   | t | 7201   | CTQSLAGL<br>FRPGASQ<br>N     | Mus<br>musculu<br>s              |
| 1 | 1.00 | 1 | 1 | -0.03 | -0.03  | -0.03  | -0.03  | -0.03  | t | 79935  | MQQRPLR<br>MFLGP             | Mus<br>musculu<br>s              |
| 1 | 1.00 | 1 | 1 | 0     | 0      | 0      | 0      | 0.002  | t | 49068  | PQPQQPF<br>CQQ               | Mus<br>musculu<br>s              |
| 1 | 1.00 | 1 | 1 | -0.01 | -0.01  | -0.01  | -0.013 | -0.01  | t | 96714  | NVPKINPK<br>KD               | Homo<br>sapiens(<br>human)       |
| 1 | 1.00 | 1 | 1 | 0.03  | 0.03   | 0.03   | 0.03   | 0.029  | t | 115207 | DISLLDAQ<br>SAPLRVYV<br>EELK | Homo<br>sapiens                  |
| 1 | 1.00 | 1 | 1 | -0.03 | -0.03  | -0.03  | -0.03  | -0.03  | t | 142411 | EAQKACEK<br>AKKAHA           | Homo<br>sapiens                  |
| 1 | 1.00 | 1 | 1 | -0.05 | -0.05  | -0.05  | -0.05  | -0.05  | t | 79410  | TCKELQW<br>LPRLRCL           | Mus<br>musculu<br>s              |
| 1 | 1.00 | 1 | 1 | 0.02  | 0.018  | 0.027  | 0.017  | 0.02   | t | 135939 | IPVLDENG<br>LFAP             | Mus<br>musculu<br>s              |
| 1 | 1.00 | 1 | 1 | 0     | 0      | 0      | 0      | 0.001  | t | 108210 | WFTSWER<br>DWW               | Homo<br>sapiens                  |

|   |      |   |   |       |        |        |        |        |   |        |                              |              |
|---|------|---|---|-------|--------|--------|--------|--------|---|--------|------------------------------|--------------|
| 1 | 1.00 | 1 | 1 | 0     | 0      | 0      | -0.001 | 0.001  | t | 105650 | AEFRH                        | Mus musculus |
| 1 | 1.00 | 1 | 1 | 0     | 0      | 0      | -0.001 | 0.001  | t | 105650 | AEFRH                        | Mus musculus |
| 1 | 1.00 | 1 | 1 | 0     | 0      | 0      | -0.001 | 0.001  | t | 105497 | RHDSGYE                      | Mus musculus |
| 1 | 1.00 | 1 | 1 | 0     | 0      | 0      | -0.001 | 0.001  | t | 105650 | AEFRH                        | Mus musculus |
| 1 | 1.00 | 1 | 1 | 0     | 0      | 0      | -0.001 | 0.001  | t | 105164 | EFRHDSG                      | Mus musculus |
| 1 | 1.00 | 1 | 1 | -0.03 | -0.03  | -0.024 | -0.029 | -0.03  | t | 1448   | AGAPDRA<br>RGQYP             | Mus musculus |
| 1 | 1.00 | 1 | 1 | -0.05 | -0.05  | -0.05  | -0.05  | -0.05  | t | 141717 | NPDHPIVE<br>TL               | Homo sapiens |
| 1 | 1.00 | 1 | 1 | 0.01  | 0.008  | 0.01   | 0.009  | 0.01   | t | 133494 | ADNPIKW<br>DRART             | Mus musculus |
| 1 | 1.00 | 1 | 1 | 0     | 0.003  | 0.007  | 0      | -0.002 | t | 121064 | WKHWVY<br>YTCCPDTP<br>YLDITY | Mus musculus |
| 1 | 1.00 | 1 | 1 | -0.02 | -0.021 | -0.024 | -0.019 | -0.015 | t | 30294  | KEAIVTK                      | Bos taurus   |
| 1 | 1.00 | 1 | 1 | 0     | 0      | 0      | -0.006 | -0.001 | t | 3236   | ANCASILC<br>KCYTTGT          | Mus musculus |
| 1 | 1.00 | 1 | 1 | 0     | 0      | 0      | -0.006 | -0.001 | t | 3236   | ANCASILC<br>KCYTTGT          | Mus musculus |
| 1 | 1.00 | 1 | 1 | -0.01 | -0.012 | -0.005 | -0.011 | -0.01  | t | 47689  | PGKKT<br>PTTK                | Mus musculus |
| 1 | 1.00 | 1 | 1 | 0     | 0      | 0      | 0      | 0      | t | 21804  | GPSYGFQY<br>SPGQRVEF<br>LVNT | Homo sapiens |
| 1 | 1.00 | 1 | 1 | 0.02  | 0.02   | 0.027  | 0.02   | 0.02   | t | 153364 | CDLEDRDR<br>SELS             | Mus musculus |
| 1 | 1.00 | 1 | 1 | 0     | -0.002 | 0.012  | -0.001 | 0      | t | 142449 | NNQNLSV<br>VQALL             | Mus musculus |

|   |      |   |   |       |        |        |        |        |   |        |                              |                                  |
|---|------|---|---|-------|--------|--------|--------|--------|---|--------|------------------------------|----------------------------------|
| 1 | 1.00 | 1 | 1 | 0.02  | 0.016  | 0.013  | 0.013  | 0.021  | t | 133862 | KLKKIDDL<br>DAKEN            | Oryctola<br>gus<br>cuniculu<br>s |
| 1 | 1.00 | 1 | 1 | 0.02  | 0.02   | 0.032  | 0.016  | 0.018  | t | 96240  | EKQMKDK<br>QDE               | Homo<br>sapiens                  |
| 1 | 1.00 | 1 | 1 | 0.02  | 0.02   | 0.019  | 0.02   | 0.022  | t | 122200 | TQQNAAL<br>NRDLF             | Mus<br>musculu<br>s              |
| 1 | 1.00 | 1 | 1 | -0.04 | -0.038 | -0.04  | -0.037 | -0.039 | t | 134132 | LFKPPKYH<br>PDVPYVKR<br>VKT  | Homo<br>sapiens                  |
| 1 | 1.00 | 1 | 1 | -0.01 | -0.01  | -0.007 | -0.011 | -0.01  | t | 47721  | PGPGEVW<br>V                 | Homo<br>sapiens                  |
| 1 | 1.00 | 1 | 1 | -0.02 | -0.02  | -0.02  | -0.02  | -0.02  | t | 140556 | DWRHFM<br>ES                 | Mus<br>musculu<br>s              |
| 1 | 1.00 | 1 | 1 | -0.02 | -0.02  | -0.02  | -0.02  | -0.02  | t | 140556 | DWRHFM<br>ES                 | Mus<br>musculu<br>s              |
| 1 | 1.00 | 1 | 1 | -0.01 | -0.01  | -0.017 | -0.01  | -0.007 | t | 40453  | LVLNRLKV<br>GLQVVAV<br>KAPGF | Mus<br>musculu<br>s              |
| 1 | 1.00 | 1 | 1 | 0     | 0      | 0      | 0      | 0      | t | 123776 | TKKAVQG<br>G                 | Oryctola<br>gus<br>cuniculu<br>s |
| 1 | 1.00 | 1 | 1 | 0     | 0      | 0      | 0      | 0      | t | 78402  | GLPNDWS<br>GRQASGT<br>R      | Mus<br>musculu<br>s              |
| 1 | 1.00 | 1 | 1 | -0.04 | -0.04  | -0.04  | -0.04  | -0.04  | t | 107580 | QNWLDGK                      | Homo<br>sapiens                  |
| 1 | 1.00 | 1 | 1 | -0.01 | -0.01  | -0.01  | -0.01  | -0.008 | t | 105802 | GAD                          | Mus<br>musculu<br>s              |
| 1 | 1.00 | 1 | 1 | -0.04 | -0.042 | -0.034 | -0.041 | -0.038 | t | 141539 | FSPAYLRD<br>AALK             | Mus<br>musculu<br>s              |
| 1 | 1.00 | 1 | 1 | -0.04 | -0.04  | -0.035 | -0.04  | -0.039 | t | 62932  | TANGFYRL<br>PSG              | Homo<br>sapiens                  |
| 1 | 1.00 | 1 | 1 | 0.01  | 0.006  | 0.015  | 0.013  | 0.013  | t | 141750 | SNLDHILE<br>PSI              | Oryctola<br>gus<br>cuniculu<br>s |
| 1 | 1.00 | 1 | 1 | 0.03  | 0.03   | 0.025  | 0.024  | 0.03   | t | 49022  | PQLEIVPN<br>SA               | Homo<br>sapiens                  |

|   |      |   |   |       |        |        |        |        |   |        |                              |                                  |
|---|------|---|---|-------|--------|--------|--------|--------|---|--------|------------------------------|----------------------------------|
| 1 | 1.00 | 1 | 1 | 0.02  | 0.02   | 0.017  | 0.02   | 0.02   | t | 10778  | DVVNQNA<br>QALNTLVK<br>QL    | Homo<br>sapiens                  |
| 1 | 1.00 | 1 | 1 | -0.01 | -0.01  | -0.01  | -0.01  | -0.009 | t | 122202 | TSPPLLWD<br>SVHL             | Mus<br>musculu<br>s              |
| 1 | 1.00 | 1 | 1 | 0.05  | 0.05   | 0.05   | 0.05   | 0.052  | t | 104850 | KEGILQYC<br>QEVYPELQ         | Mus<br>musculu<br>s              |
| 1 | 1.00 | 1 | 1 | 0.02  | 0.02   | 0.028  | 0.021  | 0.02   | t | 87157  | NWVDAEG<br>KTY               | Homo<br>sapiens                  |
| 1 | 1.00 | 1 | 1 | -0.01 | -0.008 | -0.01  | -0.007 | -0.011 | t | 9940   | DRAAGQP<br>AGNGAGG<br>QAAGGN | Homo<br>sapiens                  |
| 1 | 1.00 | 1 | 1 | -0.02 | -0.018 | -0.02  | -0.019 | -0.019 | t | 53004  | QYLYGVGS<br>SIASWAIK<br>WEYV | Homo<br>sapiens                  |
| 1 | 1.00 | 1 | 1 | 0     | 0      | 0.005  | 0.001  | 0.004  | t | 138238 | SMLDTPT                      | Mus<br>musculu<br>s              |
| 1 | 1.00 | 1 | 1 | 0.01  | 0.009  | 0.019  | 0.011  | 0.008  | t | 64547  | TKEGDSSN<br>TGAGKALT<br>GLST | Homo<br>sapiens                  |
| 1 | 1.00 | 1 | 1 | 0.03  | 0.03   | 0.03   | 0.03   | 0.032  | t | 135559 | GSDPQHY<br>EG                | Oryctola<br>gus<br>cuniculu<br>s |
| 1 | 1.00 | 1 | 1 | 0     | 0      | 0.001  | 0      | 0.001  | t | 137942 | PGSEYT                       | Oryctola<br>gus<br>cuniculu<br>s |
| 1 | 1.00 | 1 | 1 | -0.04 | -0.04  | -0.04  | -0.04  | -0.04  | t | 129296 | LPYGDSM<br>DRIEKDRL<br>Q     | Homo<br>sapiens                  |
| 1 | 1.00 | 1 | 1 | -0.01 | -0.01  | -0.019 | -0.01  | -0.01  | t | 139766 | GSPSATPP<br>AADC GPA<br>SPT  | Ovis<br>aries                    |
| 1 | 1.00 | 1 | 1 | -0.03 | -0.027 | -0.027 | -0.03  | -0.029 | t | 55383  | RPYCWHY<br>PPQQCGIV<br>PASQV | Mus<br>musculu<br>s              |
| 1 | 1.00 | 1 | 1 | 0.01  | 0.012  | 0.005  | 0.007  | 0.009  | t | 141691 | KQVQRYR<br>ARLSPGDV          | Homo<br>sapiens                  |



|   |      |   |   |       |        |        |        |        |   |        |                              |                                  |
|---|------|---|---|-------|--------|--------|--------|--------|---|--------|------------------------------|----------------------------------|
| 1 | 1.00 | 1 | 1 | 0.01  | 0.013  | 0.01   | 0.01   | 0.01   | t | 78702  | KKKEEGED<br>DTARQEIR<br>KAW  | Mus<br>musculu<br>s              |
| 1 | 1.00 | 1 | 1 | -0.01 | -0.01  | -0.01  | -0.01  | -0.01  | t | 120790 | LVPEHADA<br>FK               | Mus<br>musculu<br>s              |
| 1 | 1.00 | 1 | 1 | -0.01 | -0.01  | -0.01  | -0.01  | -0.01  | t | 116008 | TTMARHP<br>HPH               | Homo<br>sapiens                  |
| 1 | 1.00 | 1 | 1 | -0.02 | -0.02  | -0.02  | -0.02  | -0.021 | t | 49961  | PVSGPFGP<br>LPSLAFSA<br>VPAD | Mus<br>musculu<br>s              |
| 1 | 1.00 | 1 | 1 | -0.03 | -0.03  | -0.03  | -0.03  | -0.03  | t | 77784  | HLGLRRG<br>MFR               | Homo<br>sapiens                  |
| 1 | 1.00 | 1 | 1 | -0.01 | -0.01  | -0.01  | -0.01  | -0.008 | t | 99759  | VKDGYIV                      | Oryctola<br>gus<br>cuniculu<br>s |
| 1 | 1.00 | 1 | 1 | -0.01 | -0.008 | -0.017 | -0.011 | -0.008 | t | 46559  | NWRKGDP<br>TLNA              | MD                               |
| 1 | 1.00 | 1 | 1 | -0.01 | -0.01  | -0.01  | -0.013 | -0.01  | t | 60678  | SRGNHVS<br>PRHYVPES<br>EPAAR | Homo<br>sapiens                  |
| 1 | 1.00 | 1 | 1 | 0.05  | 0.046  | 0.052  | 0.053  | 0.052  | t | 97025  | VDDALIDS<br>TKIYSYFPS<br>V   | Oryctola<br>gus<br>cuniculu<br>s |
| 1 | 1.00 | 1 | 1 | 0     | -0.002 | -0.009 | -0.001 | 0      | t | 59483  | SLSTNLDV<br>TNSIEHQ          | Mus<br>musculu<br>s              |
| 1 | 1.00 | 1 | 1 | 0.06  | 0.06   | 0.067  | 0.06   | 0.062  | t | 95369  | EVDDEA                       | Homo<br>sapiens                  |
| 1 | 1.00 | 1 | 1 | -0.03 | -0.03  | -0.023 | -0.03  | -0.03  | t | 30261  | KDTLRITYL<br>T               | Mus<br>musculu<br>s              |
| 1 | 1.00 | 1 | 1 | 0.01  | 0.008  | 0.015  | 0.013  | 0.012  | t | 43160  | NAGVLTC<br>LSKR              | Mus<br>musculu<br>s              |
| 1 | 1.00 | 1 | 1 | -0.02 | -0.02  | 0      | -0.014 | -0.024 | t | 33915  | KTWGQY<br>WQV                | Homo<br>sapiens                  |
| 1 | 1.00 | 1 | 1 | -0.03 | -0.032 | -0.032 | -0.033 | -0.03  | t | 78871  | VDVDPNK<br>GKWKEHI<br>KEVTE  | Mus<br>musculu<br>s              |

|   |      |   |   |       |        |        |        |        |   |        |                              |                                  |
|---|------|---|---|-------|--------|--------|--------|--------|---|--------|------------------------------|----------------------------------|
| 1 | 1.00 | 1 | 1 | -0.03 | -0.034 | -0.032 | -0.033 | -0.03  | t | 78871  | VDVDPNK<br>GKWKEHI<br>KEVTE  | Oryctola<br>gus<br>cuniculu<br>s |
| 1 | 1.00 | 1 | 1 | -0.02 | -0.02  | -0.013 | -0.02  | -0.02  | t | 4296   | ASAACR                       | Homo<br>sapiens                  |
| 1 | 1.00 | 1 | 1 | -0.04 | -0.038 | -0.042 | -0.039 | -0.038 | t | 55930  | RSQPRGR<br>RQPIP             | Homo<br>sapiens                  |
| 1 | 1.00 | 1 | 1 | 0     | 0      | 0.001  | 0      | 0.002  | t | 53634  | RESQAYYQ<br>R                | Mus<br>musculu<br>s              |
| 1 | 1.00 | 1 | 1 | 0     | 0      | 0.001  | 0      | 0.002  | t | 56610  | RYPGQGS<br>PGGNRYP<br>PQG    | Mus<br>musculu<br>s              |
| 1 | 1.00 | 1 | 1 | 0     | -0.003 | 0.001  | 0      | 0.002  | t | 56610  | RYPGQGS<br>PGGNRYP<br>PQG    | Oryctola<br>gus<br>cuniculu<br>s |
| 1 | 1.00 | 1 | 1 | 0     | 0      | 0.001  | 0      | 0.002  | t | 19868  | GGGWGQ<br>PHGGGW<br>GQPH     | Mus<br>musculu<br>s              |
| 1 | 1.00 | 1 | 1 | 0     | -0.003 | 0.001  | 0      | 0.002  | t | 19868  | GGGWGQ<br>PHGGGW<br>GQPH     | Oryctola<br>gus<br>cuniculu<br>s |
| 1 | 1.00 | 1 | 1 | 0     | -0.002 | 0.006  | -0.001 | -0.001 | t | 11821  | EENVEHD<br>AEENVEH<br>DA     | Mus<br>musculu<br>s              |
| 1 | 1.00 | 1 | 1 | 0.02  | 0.018  | 0.02   | 0.021  | 0.02   | t | 149333 | HHQEQQ<br>QLQ                | Mus<br>musculu<br>s              |
| 1 | 1.00 | 1 | 1 | 0.03  | 0.033  | 0.035  | 0.03   | 0.03   | t | 38203  | LNEKEIKDL<br>YDNQSNS<br>GIL  | Mus<br>musculu<br>s              |
| 1 | 1.00 | 1 | 1 | 0     | 0.002  | -0.003 | 0.003  | 0.002  | t | 125118 | KVAAEQSL<br>ITVEGDK          | Homo<br>sapiens                  |
| 1 | 1.00 | 1 | 1 | 0.01  | 0.008  | 0.015  | 0.009  | 0.01   | t | 2583   | ALGLTSLFS<br>PGPIQH          | Mus<br>musculu<br>s              |
| 1 | 1.00 | 1 | 1 | 0.01  | 0.01   | 0      | 0.01   | 0.012  | t | 10016  | DRLSSANL<br>YINGVLM<br>GSAEI | Mus<br>musculu<br>s              |

|   |      |   |   |       |        |        |        |        |   |        |                              |                     |
|---|------|---|---|-------|--------|--------|--------|--------|---|--------|------------------------------|---------------------|
| 1 | 1.00 | 1 | 1 | 0     | -0.002 | 0.002  | -0.001 | 0      | t | 71982  | VYAYDVTI<br>PGEG             | Mus<br>musculu<br>s |
| 1 | 1.00 | 1 | 1 | 0     | 0      | 0      | 0      | 0      | t | 145810 | GTGGRTG<br>Y                 | Mus<br>musculu<br>s |
| 1 | 1.00 | 1 | 1 | 0     | 0.002  | 0.001  | -0.003 | 0      | t | 106345 | DKANVLFR<br>CD               | Homo<br>sapiens     |
| 1 | 1.00 | 1 | 1 | 0.05  | 0.053  | 0.062  | 0.05   | 0.051  | t | 873    | AEEDKSVT<br>EEIAEEDK         | Mus<br>musculu<br>s |
| 1 | 1.00 | 1 | 1 | 0.05  | 0.05   | 0.062  | 0.05   | 0.051  | t | 873    | AEEDKSVT<br>EEIAEEDK         | Mus<br>musculu<br>s |
| 1 | 1.00 | 1 | 1 | 0     | 0.002  | 0.006  | 0.001  | -0.002 | t | 12111  | EFYEKVTG<br>TDLELIQIL<br>KDH | Homo<br>sapiens     |
| 1 | 1.00 | 1 | 1 | 0.01  | 0.01   | 0.017  | 0.01   | 0.012  | t | 103996 | ITMWDF                       | Mus<br>musculu<br>s |
| 1 | 1.00 | 1 | 1 | 0.04  | 0.044  | 0.051  | 0.041  | 0.039  | t | 655    | ADEEQQQ<br>ALSSQMG<br>F      | Homo<br>sapiens     |
| 1 | 1.00 | 1 | 1 | 0.02  | 0.02   | 0.02   | 0.02   | 0.02   | t | 156926 | NSRTWLT                      | Gallus<br>gallus    |
| 1 | 1.00 | 1 | 1 | 0     | 0.002  | 0.005  | 0.001  | 0      | t | 78715  | LATCPEHQ<br>ITWDPIDG<br>RVIG | Homo<br>sapiens     |
| 1 | 1.00 | 1 | 1 | 0     | 0.004  | 0.005  | 0.001  | 0      | t | 78715  | LATCPEHQ<br>ITWDPIDG<br>RVIG | Homo<br>sapiens     |
| 1 | 1.00 | 1 | 1 | -0.01 | -0.008 | -0.009 | -0.003 | -0.01  | t | 66693  | TTLGMHC<br>GSFGSAPS<br>NG    | Homo<br>sapiens     |
| 1 | 1.00 | 1 | 1 | 0.02  | 0.018  | 0.02   | 0.013  | 0.02   | t | 135546 | DWEYS                        | Mus<br>musculu<br>s |
| 1 | 1.00 | 1 | 1 | 0.02  | 0.018  | 0.02   | 0.013  | 0.02   | t | 135546 | DWEYS                        | Mus<br>musculu<br>s |

|   |      |   |   |       |        |        |        |        |   |        |                             |                    |
|---|------|---|---|-------|--------|--------|--------|--------|---|--------|-----------------------------|--------------------|
| 1 | 1.00 | 1 | 1 | 0.02  | 0.018  | 0.02   | 0.019  | 0.02   | t | 102071 | SLQPDRS                     | Mus musculus       |
| 1 | 1.00 | 1 | 1 | 0.03  | 0.034  | 0.021  | 0.027  | 0.033  | t | 156415 | QGRQQEQ<br>EQERQQQ<br>Q     | Homo sapiens       |
| 1 | 1.00 | 1 | 1 | 0     | 0      | 0.005  | 0.006  | 0.003  | t | 115677 | AHRET                       | Homo sapiens       |
| 1 | 1.00 | 1 | 1 | -0.02 | -0.017 | -0.012 | -0.02  | -0.022 | t | 21475  | GNMVETE<br>DTKEPGVL         | Mus musculus       |
| 1 | 1.00 | 1 | 1 | 0     | -0.002 | 0      | 0.001  | 0.002  | t | 45130  | NNIMFKLD<br>GCRDTHR<br>YIWI | Mus musculus       |
| 1 | 1.00 | 1 | 1 | 0     | -0.002 | 0      | 0.001  | 0.002  | t | 44491  | NKFLNQCS<br>VSYLMNS<br>MIPY | Mus musculus       |
| 1 | 1.00 | 1 | 1 | 0     | -0.002 | 0      | 0.001  | 0.002  | t | 34612  | KYTMFHYL<br>RAQEFEH<br>GKSR | Mus musculus       |
| 1 | 1.00 | 1 | 1 | 0.05  | 0.048  | 0.05   | 0.043  | 0.051  | t | 117520 | GSFSDADL<br>AD              | Mus musculus       |
| 1 | 1.00 | 1 | 1 | -0.03 | -0.031 | -0.021 | -0.03  | -0.03  | t | 66077  | TRPIQVAQ<br>GGRKTT          | Anas platyrhynchos |
| 1 | 1.00 | 1 | 1 | -0.01 | -0.01  | -0.005 | -0.01  | -0.01  | t | 58039  | SGFVAGK<br>GFRLDGFS         | Mus musculus       |
| 1 | 1.00 | 1 | 1 | 0.03  | 0.032  | 0.031  | 0.031  | 0.032  | t | 49261  | PRTGLD                      | Homo sapiens       |
| 1 | 1.00 | 1 | 1 | -0.02 | -0.02  | -0.015 | -0.021 | -0.02  | t | 138840 | DREQAPN<br>LVYM             | Mus musculus       |
| 1 | 1.00 | 1 | 1 | 0.04  | 0.039  | 0.043  | 0.043  | 0.04   | t | 66740  | TTNQAIEA<br>IRQAGQE         | Homo sapiens       |
| 1 | 1.00 | 1 | 1 | -0.02 | -0.02  | -0.02  | -0.02  | -0.022 | t | 119636 | RMARMA<br>RKAGNFYV<br>PAEPK | Homo sapiens       |

|   |      |   |   |       |        |        |        |        |   |        |                              |                                  |
|---|------|---|---|-------|--------|--------|--------|--------|---|--------|------------------------------|----------------------------------|
| 1 | 1.00 | 1 | 1 | 0.02  | 0.02   | 0.02   | 0.02   | 0.02   | t | 84229  | KEEGGKET<br>KDADVDR<br>R     | Oryctola<br>gus<br>cuniculu<br>s |
| 1 | 1.00 | 1 | 1 | 0.04  | 0.038  | 0.04   | 0.033  | 0.041  | t | 115108 | SHGRTQD<br>ENP               | Mus<br>musculu<br>s              |
| 1 | 1.00 | 1 | 1 | 0.01  | 0.01   | 0.021  | 0.01   | 0.01   | t | 94468  | CNPAC                        | Capra<br>hircus                  |
| 1 | 1.00 | 1 | 1 | 0.01  | 0.01   | 0.021  | 0.01   | 0.01   | t | 94468  | CNPAC                        | Oryctola<br>gus<br>cuniculu<br>s |
| 1 | 1.00 | 1 | 1 | 0.01  | 0.017  | 0.021  | 0.01   | 0.01   | t | 94468  | CNPAC                        | Capra<br>hircus                  |
| 1 | 1.00 | 1 | 1 | 0     | 0      | 0      | 0      | 0.002  | t | 12632  | EKASVPGG<br>GDMGGM<br>DF     | Mus<br>musculu<br>s              |
| 1 | 1.00 | 1 | 1 | 0.01  | 0.014  | 0.024  | 0.011  | 0.01   | t | 86712  | NFKQGQG                      | Homo<br>sapiens                  |
| 1 | 1.00 | 1 | 1 | 0.01  | 0.01   | 0.01   | 0.01   | 0.012  | t | 25806  | IEFQQKNN<br>RLLEITRE         | Mus<br>musculu<br>s              |
| 1 | 1.00 | 1 | 1 | 0     | 0      | 0.009  | 0      | 0      | t | 10782  | DVVSTL                       | Homo<br>sapiens                  |
| 1 | 1.00 | 1 | 1 | 0     | 0.005  | -0.003 | -0.001 | -0.002 | t | 40319  | LVEKPNLS<br>SKRSELS          | Mus<br>musculu<br>s              |
| 1 | 1.00 | 1 | 1 | 0     | 0.002  | 0.007  | 0      | -0.001 | t | 120697 | KLLLDYTG<br>KIWNPAD<br>YGGIK | Rattus<br>norvegic<br>us         |
| 1 | 1.00 | 1 | 1 | -0.04 | -0.042 | -0.04  | -0.043 | -0.04  | t | 66216  | TSGFTGLF<br>SSGAKQT          | Mus<br>musculu<br>s              |
| 1 | 1.00 | 1 | 1 | 0.01  | 0.01   | 0.017  | 0.01   | 0.01   | t | 128630 | FIEVPWK                      | Homo<br>sapiens                  |
| 1 | 1.00 | 1 | 1 | -0.05 | -0.048 | -0.05  | -0.047 | -0.047 | t | 130564 | NIPAFAAA<br>YF               | Homo<br>sapiens                  |
| 1 | 1.00 | 1 | 1 | 0     | 0      | 0      | -0.003 | 0      | t | 36413  | LHQPPPQI<br>FLKILPQSG<br>PIG | Homo<br>sapiens                  |

|   |      |   |   |       |        |        |        |        |   |        |                              |                                  |
|---|------|---|---|-------|--------|--------|--------|--------|---|--------|------------------------------|----------------------------------|
| 1 | 1.00 | 1 | 1 | -0.01 | -0.01  | -0.008 | -0.004 | -0.009 | t | 3236   | ANCASILC<br>KCYTTGT          | Mus<br>musculu<br>s              |
| 1 | 1.00 | 1 | 1 | -0.01 | -0.01  | -0.008 | -0.004 | -0.009 | t | 3236   | ANCASILC<br>KCYTTGT          | Mus<br>musculu<br>s              |
| 1 | 1.00 | 1 | 1 | -0.01 | -0.006 | -0.013 | -0.007 | -0.008 | t | 15519  | FEELCGELF<br>RGTLQPV         | Homo<br>sapiens                  |
| 1 | 1.00 | 1 | 1 | -0.01 | -0.01  | -0.016 | -0.014 | -0.01  | t | 39742  | LSVPDGFK<br>VS               | Homo<br>sapiens                  |
| 1 | 1.00 | 1 | 1 | -0.03 | -0.028 | -0.023 | -0.024 | -0.028 | t | 103834 | CPRDLNGK<br>SGC              | Homo<br>sapiens                  |
| 1 | 1.00 | 1 | 1 | -0.01 | -0.008 | -0.004 | -0.013 | -0.012 | t | 42476  | MRLAENIP<br>SRCNLS           | Homo<br>sapiens                  |
| 1 | 1.00 | 1 | 1 | 0     | -0.004 | 0.003  | 0.003  | 0      | t | 111211 | DPVGPSD<br>PSIVSLVEE<br>TSF  | Oryctola<br>gus<br>cuniculu<br>s |
| 1 | 1.00 | 1 | 1 | -0.04 | -0.037 | -0.024 | -0.04  | -0.04  | t | 30337  | KEDYRY                       | Sus<br>scrofa                    |
| 1 | 1.00 | 1 | 1 | -0.01 | -0.01  | -0.004 | -0.01  | -0.012 | t | 1367   | AFNQFGP<br>NAGQR             | Homo<br>sapiens                  |
| 1 | 1.00 | 1 | 1 | -0.02 | -0.013 | -0.013 | -0.027 | -0.022 | t | 136123 | AGLPNHN<br>AMLLT             | Gallus<br>gallus                 |
| 1 | 1.00 | 1 | 1 | 0.03  | 0.03   | 0.035  | 0.03   | 0.028  | t | 132856 | LEDGRTLS<br>DYNIQKES         | Mus<br>musculu<br>s              |
| 1 | 1.00 | 1 | 1 | 0.02  | 0.02   | 0.028  | 0.021  | 0.02   | t | 34754  | LAEQFKQK<br>ALGLLQTS<br>TKQA | Homo<br>sapiens                  |
| 1 | 1.00 | 1 | 1 | -0.05 | -0.05  | -0.041 | -0.043 | -0.05  | t | 135971 | PRPRDRSG<br>LAPK             | Homo<br>sapiens                  |
| 1 | 1.00 | 1 | 1 | 0.02  | 0.02   | 0.028  | 0.02   | 0.02   | t | 106512 | HILRWGN<br>ESE               | Homo<br>sapiens                  |
| 1 | 1.00 | 1 | 1 | 0.01  | 0.002  | 0.01   | 0.01   | 0.012  | t | 156843 | AHSEMGT<br>RATMT             | Mus<br>musculu<br>s              |
| 1 | 1.00 | 1 | 1 | -0.01 | -0.008 | -0.011 | -0.007 | -0.01  | t | 47957  | PIPTRFPPP<br>PMPLQDS<br>MAVG | Homo<br>sapiens                  |

|   |      |   |   |       |        |        |        |        |   |        |                              |                       |
|---|------|---|---|-------|--------|--------|--------|--------|---|--------|------------------------------|-----------------------|
| 1 | 1.00 | 1 | 1 | 0.01  | 0.01   | 0.005  | 0.008  | 0.01   | t | 78934  | AVGQKVT<br>LKWDAPN<br>GTPNPN | Homo sapiens          |
| 1 | 1.00 | 1 | 1 | -0.05 | -0.052 | -0.049 | -0.051 | -0.049 | t | 11575  | EEEEEDG<br>FMGFGMF<br>D      | Mus musculus          |
| 1 | 1.00 | 1 | 1 | -0.02 | -0.02  | -0.02  | -0.02  | -0.02  | t | 79566  | HGLHLPV                      | Oryctolagus cuniculus |
| 1 | 1.00 | 1 | 1 | 0.01  | 0.01   | 0.01   | 0.01   | 0.012  | t | 38952  | LQPQQPFS<br>QQ               | Mus musculus          |
| 1 | 1.00 | 1 | 1 | 0.02  | 0.017  | 0.02   | 0.02   | 0.019  | t | 144672 | GREGYPA<br>DGGYCYG<br>LPDS   | Oryctolagus cuniculus |
| 1 | 1.00 | 1 | 1 | -0.06 | -0.054 | -0.056 | -0.06  | -0.063 | t | 53466  | RECGIKKG<br>SSGYCAW          | Equus caballus        |
| 1 | 1.00 | 1 | 1 | -0.01 | -0.01  | -0.012 | -0.01  | -0.008 | t | 118314 | ECISQVGK<br>GGGSVCA<br>V     | Homo sapiens          |
| 1 | 1.00 | 1 | 1 | 0.03  | 0.03   | 0.03   | 0.03   | 0.031  | t | 41140  | MASVEVE<br>SAATALPK<br>NETPE | Mus musculus          |
| 1 | 1.00 | 1 | 1 | 0.02  | 0.02   | 0.02   | 0.02   | 0.021  | t | 3400   | ANRAVKP<br>TGSAAIL<br>SMAGS  | Homo sapiens          |
| 1 | 1.00 | 1 | 1 | 0     | 0.002  | 0.014  | 0.003  | 0      | t | 18648  | GAKSLEPC<br>ACISSD           | Homo sapiens          |
| 1 | 1.00 | 1 | 1 | 0     | 0.002  | 0.003  | -0.003 | 0      | t | 64653  | TKQRQNK<br>PPNKP             | Homo sapiens          |
| 1 | 1.00 | 1 | 1 | 0.02  | 0.018  | 0.02   | 0.013  | 0.02   | t | 122129 | KTVTVKED<br>QVMQQN<br>PPKF   | Mus musculus          |
| 1 | 1.00 | 1 | 1 | 0     | 0      | 0      | 0      | 0.002  | t | 125538 | QQQPFP                       | Mus musculus          |
| 1 | 1.00 | 1 | 1 | 0     | 0      | 0      | 0      | 0.002  | t | 115630 | NFDKLYIW<br>G                | Homo sapiens          |

|   |      |   |   |       |       |        |       |        |   |        |                              |                                  |
|---|------|---|---|-------|-------|--------|-------|--------|---|--------|------------------------------|----------------------------------|
| 1 | 1.00 | 1 | 1 | 0     | 0     | 0      | 0     | 0.002  | t | 115652 | SSRISYWT<br>IVKP             | Homo<br>sapiens                  |
| 1 | 1.00 | 1 | 1 | 0     | 0     | 0      | 0     | 0.002  | t | 43242  | NANPNAN<br>PNANP             | Mus<br>musculu<br>s              |
| 1 | 1.00 | 1 | 1 | 0     | 0     | 0      | 0     | 0.002  | t | 43242  | NANPNAN<br>PNANP             | Mus<br>musculu<br>s              |
| 1 | 1.00 | 1 | 1 | 0     | 0     | 0      | 0     | 0.002  | t | 51827  | QFPQPQ<br>LPYPQPQ            | Mus<br>musculu<br>s              |
| 1 | 1.00 | 1 | 1 | 0     | 0     | 0      | 0     | 0.002  | t | 43242  | NANPNAN<br>PNANP             | Mus<br>musculu<br>s              |
| 1 | 1.00 | 1 | 1 | 0     | 0     | 0      | 0     | 0.002  | t | 43242  | NANPNAN<br>PNANP             | Mus<br>musculu<br>s              |
| 1 | 1.00 | 1 | 1 | 0     | 0     | 0      | 0     | 0.002  | t | 51826  | QFPQPQ<br>LPYPQPQ            | Mus<br>musculu<br>s              |
| 1 | 1.00 | 1 | 1 | 0     | 0     | 0      | 0     | 0.002  | t | 7491   | DAEFRHDS<br>GYEVHHQ<br>K     | Mus<br>musculu<br>s              |
| 1 | 1.00 | 1 | 1 | 0.01  | 0.01  | 0.01   | 0.01  | 0.011  | t | 99834  | QGQQGY<br>P                  | Mus<br>musculu<br>s              |
| 1 | 1.00 | 1 | 1 | -0.03 | -0.03 | -0.025 | -0.03 | -0.032 | t | 134678 | GEWNLPD<br>NCRGGVS           | Mus<br>musculu<br>s              |
| 1 | 1.00 | 1 | 1 | 0     | 0     | 0      | 0     | 0.001  | t | 153357 | ACWYSTR<br>DHCGGS            | Mus<br>musculu<br>s              |
| 1 | 1.00 | 1 | 1 | -0.01 | -0.01 | -0.01  | -0.01 | -0.01  | t | 7516   | DAGEGGP<br>RV                | Mus<br>musculu<br>s              |
| 1 | 1.00 | 1 | 1 | -0.03 | -0.03 | -0.03  | -0.03 | -0.03  | t | 137413 | HAPRWH<br>W                  | Mus<br>musculu<br>s              |
| 1 | 1.00 | 1 | 1 | 0.02  | 0.017 | 0.02   | 0.02  | 0.022  | t | 140842 | EGNTDER<br>GTPEYNIA<br>LGQRR | Oryctola<br>gus<br>cuniculu<br>s |



|   |      |   |   |       |        |        |        |        |   |        |                              |                       |
|---|------|---|---|-------|--------|--------|--------|--------|---|--------|------------------------------|-----------------------|
| 1 | 1.00 | 1 | 1 | 0.01  | 0.01   | 0.01   | 0.006  | 0.01   | t | 135982 | RDRSGLAP<br>KRP              | Homo sapiens          |
| 1 | 1.00 | 1 | 1 | 0.02  | 0.018  | 0.024  | 0.023  | 0.022  | t | 105497 | RHDSGYE                      | Mus musculus          |
| 1 | 1.00 | 1 | 1 | -0.04 | -0.039 | -0.037 | -0.04  | -0.04  | t | 21113  | GLRSEFPI<br>WM               | Mus musculus          |
| 1 | 1.00 | 1 | 1 | 0     | 0.002  | 0.003  | 0      | 0.001  | t | 2772   | ALNDLCIK<br>VNNWDLF<br>FSPS  | Homo sapiens          |
| 1 | 1.00 | 1 | 1 | 0     | 0.008  | 0.003  | 0      | 0.001  | t | 2772   | ALNDLCIK<br>VNNWDLF<br>FSPS  | Gallus gallus         |
| 1 | 1.00 | 1 | 1 | -0.02 | -0.02  | -0.02  | -0.02  | -0.019 | t | 108105 | RRLPFGSSL                    | Mus musculus          |
| 1 | 1.00 | 1 | 1 | 0.01  | 0.01   | 0.01   | 0.01   | 0.013  | t | 118762 | CYGSFAKP<br>TN               | Mus musculus          |
| 1 | 1.00 | 1 | 1 | -0.01 | 0.006  | 0      | -0.01  | -0.011 | t | 42791  | MTDVVFY<br>RYSNNYEG<br>QPHIS | Aotus nancymae        |
| 1 | 1.00 | 1 | 1 | 0     | 0      | 0.004  | 0      | -0.001 | t | 48646  | PNGTHSW<br>EYWGAQ            | Homo sapiens          |
| 1 | 1.00 | 1 | 1 | 0.07  | 0.07   | 0.061  | 0.066  | 0.072  | t | 119173 | GDQHQVG<br>NETQGVTA          | Homo sapiens          |
| 1 | 1.00 | 1 | 1 | 0.01  | 0.01   | 0.01   | 0.01   | 0.01   | t | 138079 | VSDQAVSL<br>GQNV             | Oryctolagus cuniculus |
| 1 | 1.00 | 1 | 1 | 0.01  | 0.013  | 0.025  | 0.009  | 0.007  | t | 68053  | VDRAFSFE<br>GIYVYSS          | Mus musculus          |
| 1 | 1.00 | 1 | 1 | -0.01 | -0.014 | -0.008 | -0.011 | -0.01  | t | 52252  | QRRQHTD<br>VSFIMDRF<br>VK    | Oryctolagus cuniculus |
| 1 | 1.00 | 1 | 1 | -0.03 | -0.03  | -0.036 | -0.03  | -0.028 | t | 62264  | SVNPKMVR                     | Mus musculus          |

|   |      |   |   |       |        |        |        |        |   |        |                           |                                  |
|---|------|---|---|-------|--------|--------|--------|--------|---|--------|---------------------------|----------------------------------|
| 1 | 1.00 | 1 | 1 | -0.04 | -0.042 | -0.03  | -0.041 | -0.04  | t | 58039  | SGFVAGK<br>GFRLDGFS       | Mus<br>musculu<br>s              |
| 1 | 1.00 | 1 | 1 | 0     | 0.002  | 0.005  | -0.003 | -0.001 | t | 95093  | HQQGGW<br>STLIEDNIP       | Homo<br>sapiens                  |
| 1 | 1.00 | 1 | 1 | 0.04  | 0.04   | 0.04   | 0.04   | 0.04   | t | 115920 | QNQEQPI<br>RCE            | Homo<br>sapiens                  |
| 1 | 1.00 | 1 | 1 | -0.04 | -0.04  | -0.04  | -0.04  | -0.04  | t | 140587 | PWQRGLR<br>DL             | Mus<br>musculu<br>s              |
| 1 | 1.00 | 1 | 1 | -0.04 | -0.04  | -0.04  | -0.04  | -0.04  | t | 140587 | PWQRGLR<br>DL             | Mus<br>musculu<br>s              |
| 1 | 1.00 | 1 | 1 | -0.04 | -0.04  | -0.04  | -0.04  | -0.04  | t | 79645  | SLGMHPL                   | Oryctola<br>gus<br>cuniculu<br>s |
| 1 | 1.00 | 1 | 1 | 0.01  | 0.013  | 0.008  | 0.007  | 0.01   | t | 67056  | TVKTPAVD<br>AAGPVEV       | Capra<br>hircus                  |
| 1 | 1.00 | 1 | 1 | -0.01 | -0.01  | -0.01  | -0.01  | -0.008 | t | 137746 | DTPLTVQG<br>LKLK          | Mus<br>musculu<br>s              |
| 1 | 1.00 | 1 | 1 | 0.02  | 0.008  | 0.02   | 0.014  | 0.02   | t | 109750 | QGPKGEP<br>G              | Macaca<br>mulatta                |
| 1 | 1.00 | 1 | 1 | 0.01  | 0.008  | 0.012  | 0.01   | 0.011  | t | 138029 | SASGSDVS<br>LTA           | Oryctola<br>gus<br>cuniculu<br>s |
| 1 | 1.00 | 1 | 1 | -0.03 | -0.032 | -0.03  | -0.031 | -0.029 | t | 151028 | LRGVAPLH<br>LGKC          | Mus<br>musculu<br>s              |
| 1 | 1.00 | 1 | 1 | -0.03 | -0.026 | -0.019 | -0.023 | -0.028 | t | 122105 | GRTSRTV                   | Homo<br>sapiens                  |
| 1 | 1.00 | 1 | 1 | -0.02 | -0.022 | -0.02  | -0.027 | -0.022 | t | 107487 | KKPTPSTL                  | Rattus<br>norvegic<br>us         |
| 1 | 1.00 | 1 | 1 | 0     | -0.003 | -0.002 | 0      | -0.001 | t | 106264 | ARDMWR<br>AYSDMRE<br>ANYI | Oryctola<br>gus<br>cuniculu<br>s |
| 1 | 1.00 | 1 | 1 | -0.05 | -0.05  | -0.045 | -0.05  | -0.05  | t | 137132 | DINCFRPH<br>GVSA          | Sus<br>scrofa                    |

|   |      |   |   |       |        |        |        |        |   |        |                      |                       |
|---|------|---|---|-------|--------|--------|--------|--------|---|--------|----------------------|-----------------------|
| 1 | 1.00 | 1 | 1 | -0.01 | -0.01  | -0.01  | -0.01  | -0.007 | t | 56150  | RTPPAYR              | Mus musculus          |
| 1 | 1.00 | 1 | 1 | -0.02 | -0.02  | -0.023 | -0.024 | -0.02  | t | 34833  | LAKLAGGVAV           | Homo sapiens          |
| 1 | 1.00 | 1 | 1 | 0.03  | 0.032  | 0.038  | 0.029  | 0.032  | t | 149497 | TIFDETKSW            | Homo sapiens          |
| 1 | 1.00 | 1 | 1 | 0.01  | 0.012  | 0.012  | 0.007  | 0.01   | t | 7268   | CVGSQV               | Homo sapiens          |
| 1 | 1.00 | 1 | 1 | 0.03  | 0.03   | 0.037  | 0.033  | 0.032  | t | 29855  | KALGLLQTA            | Homo sapiens          |
| 1 | 1.00 | 1 | 1 | -0.02 | -0.018 | -0.028 | -0.019 | -0.014 | t | 20260  | GIFRAAVCTR           | Homo sapiens          |
| 1 | 1.00 | 1 | 1 | 0.01  | 0.01   | 0.01   | 0.01   | 0.01   | t | 71730  | VVLAGAALGVATAAQ      | Homo sapiens          |
| 1 | 1.00 | 1 | 1 | -0.01 | -0.012 | -0.01  | -0.006 | -0.008 | t | 118581 | RDRDRDRRE            | Mus musculus          |
| 1 | 1.00 | 1 | 1 | -0.04 | -0.044 | -0.04  | -0.043 | -0.04  | t | 131610 | QRHLSSEPLSRKKL       | Oryctolagus cuniculus |
| 1 | 1.00 | 1 | 1 | -0.02 | -0.022 | -0.022 | -0.023 | -0.02  | t | 142288 | SEASRKGLRRDLDAEREAKK | Homo sapiens          |
| 1 | 1.00 | 1 | 1 | -0.01 | -0.016 | 0      | -0.01  | -0.01  | t | 13743  | EPRCPYVGADHFDCP      | Oryctolagus cuniculus |
| 1 | 1.00 | 1 | 1 | -0.04 | -0.043 | -0.033 | -0.04  | -0.04  | t | 960    | AEHARDHTLRFG         | Oryctolagus cuniculus |
| 1 | 1.00 | 1 | 1 | -0.04 | -0.04  | -0.033 | -0.04  | -0.04  | t | 960    | AEHARDHTLRFG         | Mus musculus          |
| 1 | 1.00 | 1 | 1 | 0     | 0      | -0.001 | 0      | 0.003  | t | 71809  | VVRFDKLPFGGDSIE      | Homo sapiens          |
| 1 | 1.00 | 1 | 1 | -0.02 | -0.02  | -0.009 | -0.02  | -0.021 | t | 46857  | PALSTGLI             | Homo sapiens          |

|   |      |   |   |       |        |        |        |        |   |        |                              |                   |
|---|------|---|---|-------|--------|--------|--------|--------|---|--------|------------------------------|-------------------|
| 1 | 1.00 | 1 | 1 | -0.03 | -0.03  | -0.03  | -0.03  | -0.03  | t | 137412 | HAPRWHL                      | Mus musculus      |
| 1 | 1.00 | 1 | 1 | -0.03 | -0.03  | -0.03  | -0.03  | -0.03  | t | 128147 | WTGSWD<br>ASKPRASC<br>WQPGTR | Homo sapiens      |
| 1 | 1.00 | 1 | 1 | -0.02 | -0.022 | -0.02  | -0.027 | -0.021 | t | 131639 | RYLMKIN                      | Mus musculus      |
| 1 | 1.00 | 1 | 1 | 0.01  | 0.008  | 0.018  | 0.01   | 0.01   | t | 100437 | QPNNKRN<br>QLWLRQLQ<br>TAGN  | Sus scrofa        |
| 1 | 1.00 | 1 | 1 | 0.01  | 0.008  | 0.018  | 0.01   | 0.01   | t | 100437 | QPNNKRN<br>QLWLRQLQ<br>TAGN  | Mus musculus      |
| 1 | 1.00 | 1 | 1 | 0.03  | 0.03   | 0.03   | 0.026  | 0.03   | t | 115653 | SSYAGQFR<br>VIGP             | Homo sapiens      |
| 1 | 1.00 | 1 | 1 | -0.01 | -0.012 | -0.001 | -0.007 | -0.009 | t | 50170  | PYSLNWP<br>DE                | Rattus norvegicus |
| 1 | 1.00 | 1 | 1 | 0     | -0.012 | 0.006  | 0      | 0      | t | 32523  | KNITVTAS<br>V                | Macaca mulatta    |
| 1 | 1.00 | 1 | 1 | -0.01 | -0.012 | -0.01  | -0.016 | -0.012 | t | 156664 | GGTHSQW<br>NKPSKPKT<br>NM    | Mus musculus      |
| 1 | 1.00 | 1 | 1 | -0.02 | -0.02  | -0.02  | -0.02  | -0.02  | t | 79227  | GCKLAMT<br>TTTLACH           | Mus musculus      |
| 1 | 1.00 | 1 | 1 | 0.02  | 0.023  | 0.02   | 0.02   | 0.018  | t | 120220 | SSQRGRSG<br>SGNF             | Mus musculus      |
| 1 | 1.00 | 1 | 1 | 0.02  | 0.02   | 0.02   | 0.02   | 0.018  | t | 120220 | SSQRGRSG<br>SGNF             | Mus musculus      |
| 1 | 1.00 | 1 | 1 | -0.02 | -0.02  | -0.02  | -0.02  | -0.019 | t | 125375 | DHTLFAAS<br>HNHR             | Mus musculus      |
| 1 | 1.00 | 1 | 1 | 0.03  | 0.03   | 0.032  | 0.03   | 0.031  | t | 76195  | YTTSTRGD<br>LAHVTAT          | Mus musculus      |
| 1 | 1.00 | 1 | 1 | 0.03  | 0.03   | 0.032  | 0.03   | 0.031  | t | 76195  | YTTSTRGD<br>LAHVTAT          | Mus musculus      |

|   |      |   |   |       |        |        |        |        |   |        |                              |                       |
|---|------|---|---|-------|--------|--------|--------|--------|---|--------|------------------------------|-----------------------|
| 1 | 1.00 | 1 | 1 | -0.02 | -0.017 | -0.017 | -0.02  | -0.02  | t | 97479  | LTAWNPSL                     | Mus musculus          |
| 1 | 1.00 | 1 | 1 | 0     | 0.007  | -0.005 | -0.007 | 0      | t | 116169 | TPRTPPPS<br>QGKG             | Gallus gallus         |
| 1 | 1.00 | 1 | 1 | 0.02  | 0.018  | 0.019  | 0.022  | 0.022  | t | 106247 | ALASQGQ                      | Mus musculus          |
| 1 | 1.00 | 1 | 1 | -0.01 | -0.007 | -0.01  | -0.01  | -0.012 | t | 135466 | GSDYEDRY<br>YRENMHR<br>YPN   | Mus musculus          |
| 1 | 1.00 | 1 | 1 | 0     | 0.001  | 0.004  | -0.001 | 0.001  | t | 50636  | QELDCWH<br>YHQYCITS          | Capra hircus          |
| 1 | 1.00 | 1 | 1 | -0.02 | -0.019 | -0.015 | -0.021 | -0.02  | t | 17052  | FMLEWGK<br>EMVDHFH           | Myodes glareolus      |
| 1 | 1.00 | 1 | 1 | -0.04 | -0.042 | -0.044 | -0.04  | -0.039 | t | 134334 | CRVNHVTL<br>SQPKIVK          | Mus musculus          |
| 1 | 1.00 | 1 | 1 | 0.02  | 0.016  | 0.025  | 0.017  | 0.02   | t | 70422  | VPPNTKS<br>MALSG             | Oryctolagus cuniculus |
| 1 | 1.00 | 1 | 1 | 0     | 0      | -0.007 | 0      | 0      | t | 63655  | TFGAASNK<br>AFAEALST<br>EPKG | Homo sapiens          |
| 1 | 1.00 | 1 | 1 | 0.02  | 0.018  | 0.014  | 0.017  | 0.02   | t | 7209   | CTSRFASLF<br>NLGPQQQ         | Mus musculus          |
| 1 | 1.00 | 1 | 1 | 0     | 0.002  | 0.011  | 0.001  | -0.002 | t | 61560  | STDPAATD                     | Homo sapiens          |
| 1 | 1.00 | 1 | 1 | -0.01 | -0.01  | -0.01  | -0.01  | -0.01  | t | 135413 | AAAAKAA<br>KYGAA             | Oryctolagus cuniculus |
| 1 | 1.00 | 1 | 1 | -0.02 | -0.02  | -0.02  | -0.02  | -0.02  | t | 110592 | GERGAPG<br>NRGFPGQ<br>D      | Mus musculus          |
| 1 | 1.00 | 1 | 1 | -0.02 | -0.02  | -0.02  | -0.02  | -0.02  | t | 78217  | NKNWWS                       | Equus caballus        |

|   |      |   |   |       |        |        |        |        |   |        |                              |                       |
|---|------|---|---|-------|--------|--------|--------|--------|---|--------|------------------------------|-----------------------|
| 1 | 1.00 | 1 | 1 | -0.01 | -0.01  | -0.01  | -0.01  | -0.009 | t | 6737   | CNWTRGER                     | Mus musculus          |
| 1 | 1.00 | 1 | 1 | -0.01 | -0.01  | -0.01  | -0.01  | -0.008 | t | 38950  | LQPQQPF<br>PQQ               | Mus musculus          |
| 1 | 1.00 | 1 | 1 | 0     | 0      | 0      | 0      | -0.001 | t | 115355 | LLFCMENS<br>AEPEQSLA<br>CQCL | Homo sapiens          |
| 1 | 1.00 | 1 | 1 | -0.02 | -0.02  | -0.018 | -0.02  | -0.021 | t | 140695 | KGRFTISR<br>DNAKSTLY<br>L    | Mus musculus          |
| 1 | 1.00 | 1 | 1 | -0.02 | -0.018 | -0.031 | -0.019 | -0.018 | t | 28205  | IQPVERVL<br>QDAKMDK<br>RSVHD | Homo sapiens          |
| 1 | 1.00 | 1 | 1 | -0.03 | -0.03  | -0.027 | -0.03  | -0.03  | t | 22490  | GSRSRRA                      | Homo sapiens          |
| 1 | 1.00 | 1 | 1 | 0.03  | 0.03   | 0.034  | 0.03   | 0.03   | t | 95031  | NAYANEE<br>ATKL              | Oryctolagus cuniculus |
| 1 | 1.00 | 1 | 1 | 0     | -0.002 | 0.016  | 0.003  | 0      | t | 1895   | AIERMKDT<br>LR               | Mus musculus          |
| 1 | 1.00 | 1 | 1 | 0     | 0.002  | -0.004 | -0.003 | 0.001  | t | 158728 | DVKKAFKV<br>IDQDASG          | Homo sapiens          |
| 1 | 1.00 | 1 | 1 | 0.03  | 0.03   | 0.037  | 0.03   | 0.032  | t | 145371 | NALTESKY<br>VKLL             | Homo sapiens          |
| 1 | 1.00 | 1 | 1 | 0.01  | 0.01   | 0.015  | 0.007  | 0.008  | t | 36948  | LKLSAQYG<br>SLRKNAM          | Homo sapiens          |
| 1 | 1.00 | 1 | 1 | 0     | -0.002 | -0.002 | -0.001 | 0.002  | t | 5925   | AYSNCYPY<br>DVPDYASL<br>R    | Mus musculus          |
| 1 | 1.00 | 1 | 1 | 0     | -0.002 | -0.002 | -0.001 | 0.002  | t | 5925   | AYSNCYPY<br>DVPDYASL<br>R    | Mus musculus          |
| 1 | 1.00 | 1 | 1 | -0.02 | -0.017 | -0.011 | -0.02  | -0.02  | t | 67932  | VDEKNM                       | Mus musculus          |

|   |      |   |   |       |        |        |        |       |   |        |                              |                                  |
|---|------|---|---|-------|--------|--------|--------|-------|---|--------|------------------------------|----------------------------------|
| 1 | 1.00 | 1 | 1 | 0.03  | 0.032  | 0.042  | 0.037  | 0.032 | t | 106628 | LSSREPQA<br>R                | Homo<br>sapiens                  |
| 1 | 1.00 | 1 | 1 | 0.01  | 0.011  | 0.013  | 0.009  | 0.008 | t | 6229   | CFIRPSGYC<br>GRECGI          | Equus<br>caballus                |
| 1 | 1.00 | 1 | 1 | 0.01  | 0.01   | 0.019  | 0.01   | 0.012 | t | 19256  | GEEYLILSA<br>R               | Mus<br>musculu<br>s              |
| 1 | 1.00 | 1 | 1 | -0.01 | -0.008 | 0.006  | -0.007 | -0.01 | t | 52440  | QSTCLSHP<br>LLCLSWN          | Homo<br>sapiens                  |
| 1 | 1.00 | 1 | 1 | 0     | 0      | 0      | 0      | 0.002 | t | 107486 | KKPTPST                      | Rattus<br>norvegic<br>us         |
| 1 | 1.00 | 1 | 1 | 0     | 0      | 0.003  | 0      | 0     | t | 98844  | KESHFVSA<br>RP               | Homo<br>sapiens                  |
| 1 | 1.00 | 1 | 1 | 0.02  | 0.02   | 0.015  | 0.019  | 0.022 | t | 14247  | ESQRNGIA<br>PQSDS            | Mus<br>musculu<br>s              |
| 1 | 1.00 | 1 | 1 | 0     | -0.003 | -0.002 | 0      | 0     | t | 6883   | CQIYPPNA<br>NKIREALA<br>Q    | Oryctola<br>gus<br>cuniculu<br>s |
| 1 | 1.00 | 1 | 1 | 0.03  | 0.032  | 0.028  | 0.029  | 0.032 | t | 65474  | TNVDQDL<br>VGWPAPQ           | Homo<br>sapiens                  |
| 1 | 1.00 | 1 | 1 | -0.08 | -0.08  | -0.093 | -0.087 | -0.08 | t | 141646 | FSKWRKN<br>HMRQKSN<br>K      | Homo<br>sapiens                  |
| 1 | 1.00 | 1 | 1 | 0.01  | 0.01   | 0.011  | 0.01   | 0.01  | t | 54197  | RIMKVEFT<br>QCSMNVV<br>SKTLF | Homo<br>sapiens                  |
| 1 | 1.00 | 1 | 1 | 0.03  | 0.034  | 0.042  | 0.037  | 0.032 | t | 130868 | GQSYPPRP<br>DTSLHVT          | Homo<br>sapiens                  |
| 1 | 1.00 | 1 | 1 | -0.01 | -0.01  | -0.01  | -0.01  | -0.01 | t | 135757 | SFNDFTRV                     | Homo<br>sapiens                  |
| 1 | 1.00 | 1 | 1 | -0.01 | -0.01  | -0.01  | -0.01  | -0.01 | t | 123495 | MHHMPG<br>QP                 | Oryctola<br>gus<br>cuniculu<br>s |
| 1 | 1.00 | 1 | 1 | -0.03 | -0.03  | -0.03  | -0.03  | -0.03 | t | 119622 | NVNHKPS<br>N                 | Homo<br>sapiens                  |

|   |      |   |   |       |        |        |        |       |   |        |                              |                       |
|---|------|---|---|-------|--------|--------|--------|-------|---|--------|------------------------------|-----------------------|
| 1 | 1.00 | 1 | 1 | -0.03 | -0.03  | -0.03  | -0.03  | -0.03 | t | 97191  | AKPTGSAA                     | Mus musculus          |
| 1 | 1.00 | 1 | 1 | -0.03 | -0.03  | -0.03  | -0.03  | -0.03 | t | 6255   | CFRHLDER                     | Mus musculus          |
| 1 | 1.00 | 1 | 1 | -0.05 | -0.05  | -0.05  | -0.05  | -0.05 | t | 138545 | PRRKAGI                      | Homo sapiens          |
| 1 | 1.00 | 1 | 1 | 0.02  | 0.02   | 0.02   | 0.02   | 0.022 | t | 58251  | SGTEEILEK<br>VSASQEI         | Mus musculus          |
| 1 | 1.00 | 1 | 1 | 0.02  | 0.02   | 0.02   | 0.02   | 0.022 | t | 58251  | SGTEEILEK<br>VSASQEI         | Oryctolagus cuniculus |
| 1 | 1.00 | 1 | 1 | 0.02  | 0.023  | 0.02   | 0.02   | 0.022 | t | 58251  | SGTEEILEK<br>VSASQEI         | Mus musculus          |
| 1 | 1.00 | 1 | 1 | -0.01 | -0.006 | -0.01  | -0.009 | -0.01 | t | 53758  | RFPRGQG<br>VPINTNSG<br>PDDQI | Homo sapiens          |
| 1 | 1.00 | 1 | 1 | 0     | 0.002  | 0.005  | -0.003 | 0     | t | 27758  | INTVDSNN<br>LPIL             | Homo sapiens          |
| 1 | 1.00 | 1 | 1 | -0.01 | -0.01  | -0.01  | -0.01  | -0.01 | t | 9537   | DNPRYTD<br>AHNAVTVQ<br>GRTVP | Mus musculus          |
| 1 | 1.00 | 1 | 1 | -0.01 | -0.01  | -0.01  | -0.01  | -0.01 | t | 9537   | DNPRYTD<br>AHNAVTVQ<br>GRTVP | Mus musculus          |
| 1 | 1.00 | 1 | 1 | -0.01 | -0.01  | -0.012 | -0.01  | -0.01 | t | 110614 | GPRGLPGE<br>RGRTGPA<br>GAAG  | Rattus norvegicus     |
| 1 | 1.00 | 1 | 1 | 0.01  | 0.017  | 0.015  | 0.009  | 0.01  | t | 146808 | CTPKSDEF<br>NPCEDIM<br>GYKFL | Gallus gallus         |
| 1 | 1.00 | 1 | 1 | 0.02  | 0.022  | 0.034  | 0.019  | 0.018 | t | 39092  | LRGDLQVL<br>AQKVARTL         | Cavia porcellus       |



|   |      |   |   |       |        |        |        |        |   |        |                      |                       |
|---|------|---|---|-------|--------|--------|--------|--------|---|--------|----------------------|-----------------------|
| 1 | 1.00 | 1 | 1 | -0.01 | -0.006 | 0      | -0.01  | -0.008 | t | 20788  | GLCTLVAML            | Homo sapiens          |
| 1 | 1.00 | 1 | 1 | 0.02  | 0.02   | 0.013  | 0.02   | 0.02   | t | 119462 | HDENGATGPVKRAREETDKE | Homo sapiens          |
| 1 | 1.00 | 1 | 1 | 0     | 0      | 0.005  | 0      | 0.003  | t | 32841  | KPPTPPPEPET          | Mus musculus          |
| 1 | 1.00 | 1 | 1 | 0.01  | 0.012  | 0.013  | 0.017  | 0.013  | t | 125453 | KDRLQGMAPAAGAD       | Homo sapiens          |
| 1 | 1.00 | 1 | 1 | -0.07 | -0.076 | -0.07  | -0.07  | -0.07  | t | 123629 | PRIMHHMP             | Oryctolagus cuniculus |
| 1 | 1.00 | 1 | 1 | -0.01 | -0.01  | -0.01  | -0.014 | -0.01  | t | 109427 | KPISGHNSLF           | Homo sapiens          |
| 1 | 1.00 | 1 | 1 | -0.04 | -0.043 | -0.034 | -0.04  | -0.038 | t | 123643 | PYMPPPGM             | Oryctolagus cuniculus |
| 1 | 1.00 | 1 | 1 | 0     | 0      | 0.002  | 0      | 0      | t | 68087  | VDVSEGDIVISKYG       | Homo sapiens          |
| 1 | 1.00 | 1 | 1 | 0.02  | 0.034  | 0.02   | 0.017  | 0.022  | t | 134197 | PVFPTAEQFRRM         | Rattus rattus         |
| 1 | 1.00 | 1 | 1 | 0.02  | 0.024  | 0.035  | 0.017  | 0.018  | t | 57928  | SFTNFGSVV            | Homo sapiens          |
| 1 | 1.00 | 1 | 1 | 0     | -0.003 | 0      | 0.001  | 0.002  | t | 108600 | QLINTNGS             | Homo sapiens          |
| 1 | 1.00 | 1 | 1 | 0     | -0.003 | 0      | 0.001  | 0.002  | t | 108412 | GTTDHVGVPITYDWGK     | Homo sapiens          |
| 1 | 1.00 | 1 | 1 | -0.02 | -0.02  | -0.02  | -0.02  | -0.018 | t | 105650 | AEFRH                | Mus musculus          |
| 1 | 1.00 | 1 | 1 | -0.02 | -0.02  | -0.02  | -0.02  | -0.018 | t | 105650 | AEFRH                | Mus musculus          |
| 1 | 1.00 | 1 | 1 | 0.01  | 0.01   | 0.015  | 0.01   | 0.01   | t | 200    | AAHIPYLEQGMHLAEQFKQK | Homo sapiens          |

|   |      |   |   |       |        |       |       |        |   |        |                              |                                  |
|---|------|---|---|-------|--------|-------|-------|--------|---|--------|------------------------------|----------------------------------|
| 1 | 1.00 | 1 | 1 | 0.02  | 0.023  | 0.026 | 0.02  | 0.019  | t | 61946  | STTNTPLV<br>SHLEHRS          | Mus<br>musculu<br>s              |
| 1 | 1.00 | 1 | 1 | 0.02  | 0.023  | 0.026 | 0.02  | 0.019  | t | 61946  | STTNTPLV<br>SHLEHRS          | Mus<br>musculu<br>s              |
| 1 | 1.00 | 1 | 1 | 0.02  | 0.02   | 0.02  | 0.02  | 0.02   | t | 103296 | IVMSTNN<br>DDPAGAC<br>R      | Homo<br>sapiens                  |
| 1 | 1.00 | 1 | 1 | -0.02 | -0.02  | -0.02 | -0.02 | -0.02  | t | 140906 | TPEYNIAL<br>GQRRADA<br>VKGYL | Oryctola<br>gus<br>cuniculu<br>s |
| 1 | 1.00 | 1 | 1 | -0.02 | -0.02  | -0.02 | -0.02 | -0.02  | t | 79510  | AIWQHGV                      | Oryctola<br>gus<br>cuniculu<br>s |
| 1 | 1.00 | 1 | 1 | -0.02 | -0.02  | -0.02 | -0.02 | -0.02  | t | 95700  | QDHGWD<br>LNAA               | Homo<br>sapiens                  |
| 1 | 1.00 | 1 | 1 | 0     | -0.002 | 0     | 0.001 | 0.003  | t | 136593 | RHYKQYQ<br>FHF               | Mus<br>musculu<br>s              |
| 1 | 1.00 | 1 | 1 | 0.03  | 0.032  | 0.034 | 0.031 | 0.03   | t | 47137  | PDLGFISEP<br>S               | Homo<br>sapiens                  |
| 1 | 1.00 | 1 | 1 | 0.03  | 0.028  | 0.029 | 0.032 | 0.032  | t | 106597 | LDLKRTTT<br>THTSGGG<br>C     | Mus<br>musculu<br>s              |
| 1 | 1.00 | 1 | 1 | -0.01 | -0.012 | 0     | -0.01 | -0.012 | t | 133041 | DHVKDYK<br>ESNETKLK          | Oryctola<br>gus<br>cuniculu<br>s |
| 1 | 1.00 | 1 | 1 | -0.01 | -0.012 | 0.005 | -0.01 | -0.011 | t | 136079 | QVLLP                        | Rattus<br>norvegic<br>us         |
| 1 | 1.00 | 1 | 1 | -0.01 | -0.01  | -0.01 | -0.01 | -0.007 | t | 129973 | SPRSFQKK<br>T                | Homo<br>sapiens                  |
| 1 | 1.00 | 1 | 1 | 0     | -0.003 | 0.002 | 0     | 0.001  | t | 56195  | RTTPDRQ<br>AA                | Oryctola<br>gus<br>cuniculu<br>s |
| 1 | 1.00 | 1 | 1 | 0     | 0.004  | 0.01  | 0     | 0      | t | 30597  | KERSSLRY<br>GNVLDV           | Myodes<br>glareolu<br>s          |

|   |      |   |   |       |        |        |        |        |   |        |                              |                                  |
|---|------|---|---|-------|--------|--------|--------|--------|---|--------|------------------------------|----------------------------------|
| 1 | 1.00 | 1 | 1 | -0.01 | -0.008 | -0.011 | -0.01  | -0.01  | t | 18951  | GDDMDPE<br>LRGLAQA           | Myodes<br>glareolu<br>s          |
| 1 | 1.00 | 1 | 1 | 0.01  | 0.01   | 0.007  | 0.008  | 0.01   | t | 122140 | LQDSGVH<br>DVAVISEA<br>QAATA | Homo<br>sapiens                  |
| 1 | 1.00 | 1 | 1 | 0.02  | 0.022  | 0.025  | 0.021  | 0.022  | t | 62855  | TAGLASL                      | Homo<br>sapiens                  |
| 1 | 1.00 | 1 | 1 | 0.01  | 0.01   | 0.01   | 0.01   | 0.013  | t | 156941 | PTEKKHV                      | Gallus<br>gallus                 |
| 1 | 1.00 | 1 | 1 | 0.02  | 0.018  | 0.02   | 0.019  | 0.02   | t | 4166   | ARIYYRYD<br>GFAY             | Mus<br>musculu<br>s              |
| 1 | 1.00 | 1 | 1 | -0.05 | -0.052 | -0.043 | -0.051 | -0.05  | t | 68281  | VELRNLGG<br>TWRP             | Mus<br>musculu<br>s              |
| 1 | 1.00 | 1 | 1 | 0.01  | 0.012  | 0.011  | 0.011  | 0.01   | t | 6067   | CCNLEPEA<br>RKVISS           | Homo<br>sapiens                  |
| 1 | 1.00 | 1 | 1 | 0     | 0.002  | 0.009  | -0.003 | 0      | t | 24441  | HPDVPYVK                     | Homo<br>sapiens                  |
| 1 | 1.00 | 1 | 1 | -0.02 | -0.016 | -0.013 | -0.02  | -0.021 | t | 149242 | AALILSKHP<br>NWTNTQ          | Cavia<br>porcellu<br>s           |
| 1 | 1.00 | 1 | 1 | -0.05 | -0.048 | -0.043 | -0.049 | -0.05  | t | 47675  | PGHVSUGH<br>RMAWDM<br>MM     | Homo<br>sapiens                  |
| 1 | 1.00 | 1 | 1 | -0.05 | -0.048 | -0.043 | -0.049 | -0.05  | t | 47675  | PGHVSUGH<br>RMAWDM<br>MM     | Homo<br>sapiens                  |
| 1 | 1.00 | 1 | 1 | -0.02 | -0.02  | -0.02  | -0.02  | -0.018 | t | 144677 | GTHPTLVV<br>HSREL            | Mus<br>musculu<br>s              |
| 1 | 1.00 | 1 | 1 | -0.01 | -0.01  | -0.012 | -0.01  | -0.009 | t | 120022 | LENYNKVI<br>RPVEHHT<br>H     | Mus<br>musculu<br>s              |
| 1 | 1.00 | 1 | 1 | -0.01 | -0.01  | -0.012 | -0.01  | -0.009 | t | 120022 | LENYNKVI<br>RPVEHHT<br>H     | Mus<br>musculu<br>s              |
| 1 | 1.00 | 1 | 1 | -0.01 | -0.01  | -0.012 | -0.01  | -0.009 | t | 120022 | LENYNKVI<br>RPVEHHT<br>H     | Mus<br>musculu<br>s              |
| 1 | 1.00 | 1 | 1 | -0.01 | -0.013 | -0.004 | -0.01  | -0.01  | t | 7675   | DAVTPLRI<br>FIVPPAA<br>EYEQ  | Oryctola<br>gus<br>cuniculu<br>s |

|   |      |   |   |       |        |        |        |        |   |        |                              |                                  |
|---|------|---|---|-------|--------|--------|--------|--------|---|--------|------------------------------|----------------------------------|
| 1 | 1.00 | 1 | 1 | -0.02 | -0.023 | -0.019 | -0.02  | -0.02  | t | 30260  | KDTRLRIAYL<br>TEAKVEKL       | Oryctola<br>gus<br>cuniculu<br>s |
| 1 | 1.00 | 1 | 1 | -0.01 | -0.01  | -0.01  | -0.01  | -0.009 | t | 149297 | ELDKWAN                      | Homo<br>sapiens                  |
| 1 | 1.00 | 1 | 1 | 0     | 0.004  | 0      | -0.003 | 0.002  | t | 32913  | KPTTKQRQ<br>NKPP             | Homo<br>sapiens                  |
| 1 | 1.00 | 1 | 1 | 0     | 0      | 0      | 0      | 0.002  | t | 74035  | YGLFHKEK<br>MIL              | Mus<br>musculu<br>s              |
| 1 | 1.00 | 1 | 1 | -0.02 | -0.02  | -0.02  | -0.02  | -0.02  | t | 113782 | QQPGQLQ<br>QPAQGQQ           | Homo<br>sapiens                  |
| 1 | 1.00 | 1 | 1 | -0.02 | -0.015 | -0.015 | -0.021 | -0.02  | t | 100217 | KMDAEFR<br>HDS               | Homo<br>sapiens(<br>human)       |
| 1 | 1.00 | 1 | 1 | -0.02 | -0.02  | -0.019 | -0.02  | -0.018 | t | 51804  | QPEKGG                       | Homo<br>sapiens                  |
| 1 | 1.00 | 1 | 1 | 0.01  | 0.008  | 0.021  | 0.009  | 0.008  | t | 60396  | SQCKLGSV<br>DLN              | Mus<br>musculu<br>s              |
| 1 | 1.00 | 1 | 1 | 0     | 0      | 0      | 0      | 0.001  | t | 140595 | RHEDGDW<br>PRV               | Mus<br>musculu<br>s              |
| 1 | 1.00 | 1 | 1 | 0.02  | 0.022  | 0.022  | 0.021  | 0.02   | t | 90405  | VSSRPTNS<br>ESIPALT          | Homo<br>sapiens                  |
| 1 | 1.00 | 1 | 1 | 0     | 0      | 0.002  | 0      | 0.001  | t | 134418 | KGAIIGLM<br>VGGVV            | Homo<br>sapiens                  |
| 1 | 1.00 | 1 | 1 | -0.01 | -0.01  | 0.007  | -0.01  | -0.01  | t | 102436 | FPKMSAY<br>DY                | Mus<br>musculu<br>s              |
| 1 | 1.00 | 1 | 1 | 0     | 0.002  | -0.002 | 0      | -0.002 | t | 98978  | RCLQSCQ<br>QEPDDLK<br>QKACES | Homo<br>sapiens                  |

|   |      |   |   |       |        |        |        |        |   |        |                             |                       |
|---|------|---|---|-------|--------|--------|--------|--------|---|--------|-----------------------------|-----------------------|
| 1 | 1.00 | 1 | 1 | 0.01  | 0.01   | 0.017  | 0.01   | 0.01   | t | 72615  | WIGMNS                      | Homo sapiens          |
| 1 | 1.00 | 1 | 1 | 0.01  | 0.012  | 0.01   | 0.007  | 0.01   | t | 66681  | TTKPKEVP<br>TTKP            | Homo sapiens          |
| 1 | 1.00 | 1 | 1 | 0.02  | 0.02   | 0.022  | 0.02   | 0.02   | t | 22028  | GRFDEAM<br>QDQIRQLE         | Oryctolagus cuniculus |
| 1 | 1.00 | 1 | 1 | 0.02  | 0.02   | 0.022  | 0.02   | 0.02   | t | 22028  | GRFDEAM<br>QDQIRQLE         | Homo sapiens          |
| 1 | 1.00 | 1 | 1 | 0.01  | 0.01   | 0.028  | 0.012  | 0.009  | t | 98860  | LAGSGL                      | Homo sapiens          |
| 1 | 1.00 | 1 | 1 | -0.02 | -0.024 | -0.016 | -0.023 | -0.022 | t | 6065   | CCNGIRTI<br>NGLARTT         | Oryctolagus cuniculus |
| 1 | 1.00 | 1 | 1 | -0.01 | -0.008 | -0.002 | -0.013 | -0.01  | t | 98815  | HRIFLAGD<br>KD              | Homo sapiens          |
| 1 | 1.00 | 1 | 1 | 0     | 0      | 0.012  | 0.001  | 0      | t | 58810  | SKEKPPSL<br>NWPAC           | Homo sapiens          |
| 1 | 1.00 | 1 | 1 | -0.05 | -0.05  | -0.053 | -0.05  | -0.05  | t | 115271 | GQKGRGS<br>RG               | Oryctolagus cuniculus |
| 1 | 1.00 | 1 | 1 | 0.02  | 0.02   | 0.02   | 0.02   | 0.019  | t | 115241 | EVIESPPEI<br>NTVQVTST<br>AV | Homo sapiens          |
| 1 | 1.00 | 1 | 1 | 0     | 0      | 0      | 0      | 0      | t | 108295 | CKRDSTW<br>C                | Homo sapiens          |
| 1 | 1.00 | 1 | 1 | -0.02 | -0.02  | -0.02  | -0.02  | -0.02  | t | 151034 | NERTLDYH<br>DSNVKNL         | Homo sapiens          |
| 1 | 1.00 | 1 | 1 | -0.06 | -0.06  | -0.06  | -0.06  | -0.06  | t | 149025 | ANILSRR                     | Sus scrofa            |
| 1 | 1.00 | 1 | 1 | 0.01  | -0.001 | 0.01   | 0.01   | 0.012  | t | 156907 | KVGDPLW                     | Oryctolagus cuniculus |

|   |      |   |   |       |        |        |        |        |   |        |                              |                                  |
|---|------|---|---|-------|--------|--------|--------|--------|---|--------|------------------------------|----------------------------------|
| 1 | 1.00 | 1 | 1 | -0.01 | -0.01  | -0.006 | -0.01  | -0.01  | t | 157771 | QGDRYTG<br>EWYQGKK           | Canis<br>lupus                   |
| 1 | 1.00 | 1 | 1 | -0.01 | -0.01  | -0.005 | -0.01  | -0.01  | t | 58039  | SGFVAGK<br>GFRLDFGS          | Mus<br>musculu<br>s              |
| 1 | 1.00 | 1 | 1 | -0.02 | -0.018 | -0.02  | -0.019 | -0.02  | t | 128004 | GMIEVQS<br>NYGFVWD<br>VSLKKV | Homo<br>sapiens                  |
| 1 | 1.00 | 1 | 1 | -0.01 | -0.01  | -0.009 | -0.01  | -0.008 | t | 21928  | GQPAVRN<br>ERATGS            | Mus<br>musculu<br>s              |
| 1 | 1.00 | 1 | 1 | 0.01  | 0.01   | 0.012  | 0.01   | 0.01   | t | 151723 | RSITTIIDTF<br>HQYSRK         | Mus<br>musculu<br>s              |
| 1 | 1.00 | 1 | 1 | -0.01 | -0.006 | -0.011 | -0.007 | -0.009 | t | 1454   | AGASDIRD<br>QSRNWL<br>GPCYR  | Homo<br>sapiens                  |
| 1 | 1.00 | 1 | 1 | -0.03 | -0.03  | -0.018 | -0.03  | -0.03  | t | 57102  | SCISAACFC<br>I               | Mus<br>musculu<br>s              |
| 1 | 1.00 | 1 | 1 | -0.02 | -0.018 | -0.028 | -0.023 | -0.018 | t | 45162  | NNLGLLCE<br>YQAIGSA          | Homo<br>sapiens                  |
| 1 | 1.00 | 1 | 1 | 0     | 0      | -0.002 | 0      | 0.002  | t | 151653 | HWYRATH<br>QEAINCYA<br>NETC  | Mus<br>musculu<br>s              |
| 1 | 1.00 | 1 | 1 | -0.03 | -0.03  | -0.015 | -0.026 | -0.031 | t | 142434 | KSTEDLSV<br>AKDK             | Homo<br>sapiens                  |
| 1 | 1.00 | 1 | 1 | 0.01  | 0.006  | 0.025  | 0.013  | 0.01   | t | 111934 | VVQDGRF<br>SYQNLFDA          | Oryctola<br>gus<br>cuniculu<br>s |
| 1 | 1.00 | 1 | 1 | 0     | 0      | 0      | 0      | 0.002  | t | 57299  | SDTRGDP<br>VFNLPFQ           | Mus<br>musculu<br>s              |
| 1 | 1.00 | 1 | 1 | -0.01 | -0.012 | 0      | -0.011 | -0.01  | t | 103643 | TGALQERS<br>K                | Mus<br>musculu<br>s              |
| 1 | 1.00 | 1 | 1 | 0     | 0      | 0.003  | 0      | 0      | t | 6034   | CASKAALIE<br>EGQRMAE<br>MLKS | Homo<br>sapiens                  |

|   |      |   |   |       |        |       |        |       |   |        |                              |                                  |
|---|------|---|---|-------|--------|-------|--------|-------|---|--------|------------------------------|----------------------------------|
| 1 | 1.00 | 1 | 1 | -0.02 | -0.018 | -0.02 | -0.013 | -0.02 | t | 131759 | WTLFFQN<br>GKVKVFQ<br>GNQDSF | Homo<br>sapiens                  |
| 1 | 1.00 | 1 | 1 | 0.04  | 0.038  | 0.044 | 0.039  | 0.04  | t | 41984  | MLKYDEN<br>GTITDAVD<br>CS    | Mus<br>musculu<br>s              |
| 1 | 1.00 | 1 | 1 | -0.01 | -0.007 | -0.01 | -0.01  | -0.01 | t | 142471 | SAAGAKRS<br>GRSS             | Mus<br>musculu<br>s              |
| 1 | 1.00 | 1 | 1 | 0     | 0.003  | 0     | 0      | 0.002 | t | 105561 | VAVVRTPP<br>KSPSSAK          | Mus<br>musculu<br>s              |
| 1 | 1.00 | 1 | 1 | 0     | 0.002  | 0     | 0      | 0.002 | t | 112603 | MIAATYNF<br>AVLKLMG<br>RGTKF | Rattus<br>norvegic<br>us         |
| 1 | 1.00 | 1 | 1 | 0     | -0.003 | 0     | 0      | 0.002 | t | 74008  | YGGL                         | Oryctola<br>gus<br>cuniculu<br>s |
| 1 | 1.00 | 1 | 1 | 0     | -0.003 | 0     | 0      | 0.002 | t | 63037  | TAVSPTTL<br>R                | Oryctola<br>gus<br>cuniculu<br>s |
| 1 | 1.00 | 1 | 1 | 0     | 0      | 0     | 0      | 0.002 | t | 51233  | QKPLK                        | Sus<br>scrofa                    |
| 1 | 1.00 | 1 | 1 | 0     | -0.008 | 0     | 0      | 0.002 | t | 43242  | NANPNAN<br>PNANP             | Mus<br>musculu<br>s              |
| 1 | 1.00 | 1 | 1 | 0     | -0.003 | 0     | 0      | 0.002 | t | 53447  | REACR                        | Oryctola<br>gus<br>cuniculu<br>s |
| 1 | 1.00 | 1 | 1 | 0     | 0.004  | 0     | 0      | 0.002 | t | 51233  | QKPLK                        | Ovis<br>aries                    |
| 1 | 1.00 | 1 | 1 | 0     | -0.003 | 0     | 0      | 0.002 | t | 39689  | LSSY                         | Oryctola<br>gus<br>cuniculu<br>s |
| 1 | 1.00 | 1 | 1 | 0     | 0.012  | 0     | 0      | 0.002 | t | 7491   | DAEFRHDS<br>GYEVHHQ<br>K     | Mus<br>musculu<br>s              |

|   |      |   |   |       |        |        |        |        |   |        |                              |                                  |
|---|------|---|---|-------|--------|--------|--------|--------|---|--------|------------------------------|----------------------------------|
| 1 | 1.00 | 1 | 1 | 0     | -0.003 | 0      | 0      | 0.002  | t | 10227  | DSSAHGTP<br>STPA             | Oryctola<br>gus<br>cuniculu<br>s |
| 1 | 1.00 | 1 | 1 | 0     | 0.012  | 0      | 0      | 0.002  | t | 7491   | DAEFRHDS<br>GYEVHHQ<br>K     | Mus<br>musculu<br>s              |
| 1 | 1.00 | 1 | 1 | 0     | 0      | 0      | 0      | -0.001 | t | 153839 | HQKRTAM<br>FQDPQER<br>PRKLPQ | Cavia<br>porcellu<br>s           |
| 1 | 1.00 | 1 | 1 | 0.07  | 0.072  | 0.075  | 0.071  | 0.07   | t | 67191  | TVVAPDKE<br>VLYEAFDE<br>MEEC | Homo<br>sapiens                  |
| 1 | 1.00 | 1 | 1 | -0.02 | -0.02  | -0.014 | -0.02  | -0.019 | t | 34341  | KWYISKPQ                     | Mus<br>musculu<br>s              |
| 1 | 1.00 | 1 | 1 | -0.02 | -0.02  | -0.019 | -0.012 | -0.02  | t | 22162  | GRPGAPG<br>GSGSGPR<br>HRDGVR | Homo<br>sapiens                  |
| 1 | 1.00 | 1 | 1 | 0.06  | 0.06   | 0.06   | 0.06   | 0.06   | t | 78456  | LQLISGLLN<br>DTSSSN          | Mus<br>musculu<br>s              |
| 1 | 1.00 | 1 | 1 | 0     | 0      | 0.006  | 0.002  | 0      | t | 54232  | RIRADFNA<br>SMDLL            | Homo<br>sapiens                  |
| 1 | 1.00 | 1 | 1 | -0.02 | -0.022 | -0.02  | -0.021 | -0.02  | t | 62997  | TASNKNR<br>GIIKTFS           | Mus<br>musculu<br>s              |
| 1 | 1.00 | 1 | 1 | -0.03 | -0.033 | -0.029 | -0.03  | -0.028 | t | 98183  | KSAYTPAY<br>YT               | Oryctola<br>gus<br>cuniculu<br>s |
| 1 | 1.00 | 1 | 1 | -0.03 | -0.032 | -0.03  | -0.027 | -0.029 | t | 74801  | YLLQKLNR                     | Mus<br>musculu<br>s              |
| 1 | 1.00 | 1 | 1 | 0     | 0      | 0.005  | 0      | 0      | t | 67170  | TVSTEQNV<br>PDPQVGI          | Mus<br>musculu<br>s              |
| 1 | 1.00 | 1 | 1 | 0     | 0      | 0.005  | 0      | 0      | t | 67170  | TVSTEQNV<br>PDPQVGI          | Mus<br>musculu<br>s              |
| 1 | 1.00 | 1 | 1 | 0     | 0.007  | 0.005  | 0      | 0      | t | 61589  | STEQNVP<br>DPQVG             | Cavia<br>porcellu<br>s           |
| 1 | 1.00 | 1 | 1 | 0     | 0.007  | 0.005  | 0      | 0      | t | 61589  | STEQNVP<br>DPQVG             | Cavia<br>porcellu<br>s           |



|   |      |   |   |       |        |        |        |        |   |        |                              |                                  |
|---|------|---|---|-------|--------|--------|--------|--------|---|--------|------------------------------|----------------------------------|
| 1 | 1.00 | 1 | 1 | 0     | 0      | 0.005  | 0      | 0      | t | 18363  | FWRGDLV<br>FDFQV             | Homo<br>sapiens                  |
| 1 | 1.00 | 1 | 1 | -0.01 | -0.01  | -0.008 | -0.013 | -0.01  | t | 47719  | PGPARVIY<br>TY               | Homo<br>sapiens                  |
| 1 | 1.00 | 1 | 1 | -0.01 | -0.01  | -0.01  | -0.01  | -0.01  | t | 123835 | VSSATNAL<br>RSM              | Oryctola<br>gus<br>cuniculu<br>s |
| 1 | 1.00 | 1 | 1 | -0.01 | -0.01  | -0.008 | -0.007 | -0.008 | t | 72816  | WLTYHGAI<br>KLDDKDP<br>QF    | Homo<br>sapiens                  |
| 1 | 1.00 | 1 | 1 | 0.04  | 0.043  | 0.046  | 0.04   | 0.04   | t | 105898 | KGEQG                        | Mus<br>musculu<br>s              |
| 1 | 1.00 | 1 | 1 | 0.04  | 0.043  | 0.046  | 0.04   | 0.04   | t | 105898 | KGEQG                        | Mus<br>musculu<br>s              |
| 1 | 1.00 | 1 | 1 | 0.05  | 0.052  | 0.05   | 0.053  | 0.052  | t | 55211  | RPLIDFDQ<br>GWGPISY          | Homo<br>sapiens                  |
| 1 | 1.00 | 1 | 1 | 0.02  | 0.017  | 0.037  | 0.02   | 0.019  | t | 7428   | CYPYDVPD<br>Y                | Oryctola<br>gus<br>cuniculu<br>s |
| 1 | 1.00 | 1 | 1 | 0.02  | 0.027  | 0.02   | 0.02   | 0.019  | t | 114011 | VTTVTTHN<br>NPTFTDPS<br>VLQP | Cavia<br>porcellu<br>s           |
| 1 | 1.00 | 1 | 1 | -0.01 | -0.013 | -0.009 | -0.01  | -0.009 | t | 37690  | LLPSRRGD<br>QLTL             | Oryctola<br>gus<br>cuniculu<br>s |
| 1 | 1.00 | 1 | 1 | 0     | 0      | 0      | 0      | 0      | t | 98648  | YTKNTNN<br>NLT               | Oryctola<br>gus<br>cuniculu<br>s |
| 1 | 1.00 | 1 | 1 | 0     | 0      | 0      | 0      | 0      | t | 98648  | YTKNTNN<br>NLT               | Mus<br>musculu<br>s              |
| 1 | 1.00 | 1 | 1 | 0     | -0.003 | 0      | 0      | 0      | t | 98648  | YTKNTNN<br>NLT               | Oryctola<br>gus<br>cuniculu<br>s |
| 1 | 1.00 | 1 | 1 | 0     | 0      | 0      | 0      | 0      | t | 117043 | MISDYSTR<br>PDRR             | Homo<br>sapiens                  |

|   |      |   |   |       |        |        |        |        |   |        |                              |                     |
|---|------|---|---|-------|--------|--------|--------|--------|---|--------|------------------------------|---------------------|
| 1 | 1.00 | 1 | 1 | 0     | 0      | 0      | 0      | 0      | t | 117043 | MISDYSTR<br>PDRR             | Mus<br>musculu<br>s |
| 1 | 1.00 | 1 | 1 | -0.04 | -0.04  | -0.04  | -0.04  | -0.04  | t | 136005 | TVAQSRRR<br>GDMS             | Homo<br>sapiens     |
| 1 | 1.00 | 1 | 1 | -0.04 | -0.04  | -0.04  | -0.04  | -0.04  | t | 131685 | SYAIAWH                      | Homo<br>sapiens     |
| 1 | 1.00 | 1 | 1 | -0.01 | -0.012 | -0.007 | -0.013 | -0.009 | t | 66736  | TTNIMEILR<br>GDFSS           | Mus<br>musculu<br>s |
| 1 | 1.00 | 1 | 1 | -0.01 | -0.01  | -0.01  | -0.01  | -0.008 | t | 63755  | TFTNKLKA<br>KHTDLGK          | Mus<br>musculu<br>s |
| 1 | 1.00 | 1 | 1 | 0     | 0      | 0.004  | -0.003 | -0.002 | t | 47024  | PCIGYVRS<br>GGAVPPA          | Homo<br>sapiens     |
| 1 | 1.00 | 1 | 1 | -0.01 | -0.006 | -0.01  | -0.009 | -0.01  | t | 125438 | HGVFAFLV<br>SPSPYELC<br>AVPR | Homo<br>sapiens     |
| 1 | 1.00 | 1 | 1 | 0.01  | 0.012  | 0.015  | 0.013  | 0.009  | t | 79616  | NCHGPD<br>WASPVQC<br>RHSPDCS | Homo<br>sapiens     |
| 1 | 1.00 | 1 | 1 | 0.01  | 0.014  | 0.015  | 0.013  | 0.009  | t | 79616  | NCHGPD<br>WASPVQC<br>RHSPDCS | Homo<br>sapiens     |
| 1 | 1.00 | 1 | 1 | 0.01  | 0.01   | -0.004 | 0.01   | 0.014  | t | 145951 | PVGPSDPS<br>IVSLVEE          | Mus<br>musculu<br>s |
| 1 | 1.00 | 1 | 1 | 0     | -0.002 | 0.007  | -0.003 | 0      | t | 133786 | CMTSPWR<br>C                 | Mus<br>musculu<br>s |
| 1 | 1.00 | 1 | 1 | -0.01 | -0.01  | -0.019 | -0.013 | -0.01  | t | 30872  | KFVDSTVV<br>ASVTIIDRS<br>LP  | Homo<br>sapiens     |
| 1 | 1.00 | 1 | 1 | 0.01  | 0.018  | 0.015  | 0.003  | 0.008  | t | 136162 | DAWKMRL<br>SQMYD             | Gallus<br>gallus    |
| 1 | 1.00 | 1 | 1 | 0.02  | 0.02   | 0.02   | 0.02   | 0.023  | t | 118762 | CYGSFAKP<br>TN               | Mus<br>musculu<br>s |
| 1 | 1.00 | 1 | 1 | 0.01  | 0.01   | 0.016  | 0.01   | 0.007  | t | 144738 | NVGEACH<br>SLHEC             | Mus<br>musculu<br>s |

|   |      |   |   |       |        |        |        |        |   |        |                              |                                  |
|---|------|---|---|-------|--------|--------|--------|--------|---|--------|------------------------------|----------------------------------|
| 1 | 1.00 | 1 | 1 | -0.09 | -0.088 | -0.085 | -0.086 | -0.091 | t | 133062 | EAPRRRSP<br>SP               | Homo<br>sapiens                  |
| 1 | 1.00 | 1 | 1 | 0.01  | 0.012  | -0.002 | 0.011  | 0.012  | t | 101410 | WCCRSTL<br>PPLRYRGE<br>DGCW  | Homo<br>sapiens                  |
| 1 | 1.00 | 1 | 1 | -0.08 | -0.078 | -0.08  | -0.081 | -0.08  | t | 110652 | LCLIGCKPP<br>IGEHWGK<br>GSPC | Cavia<br>porcellu<br>s           |
| 1 | 1.00 | 1 | 1 | 0.01  | 0.01   | 0.001  | 0.003  | 0.01   | t | 136005 | TVAQSRRR<br>GDMS             | Homo<br>sapiens                  |
| 1 | 1.00 | 1 | 1 | 0.03  | 0.028  | 0.028  | 0.023  | 0.032  | t | 120610 | IFADDID                      | Rattus<br>norvegic<br>us         |
| 1 | 1.00 | 1 | 1 | 0     | -0.006 | 0.007  | 0      | 0      | t | 116001 | TQDQDPV<br>VHF               | Oryctola<br>gus<br>cuniculu<br>s |
| 1 | 1.00 | 1 | 1 | 0     | 0      | 0      | 0      | 0.002  | t | 103965 | GYKYLPGP<br>NSLDQGE<br>PT    | Oryctola<br>gus<br>cuniculu<br>s |
| 1 | 1.00 | 1 | 1 | -0.01 | -0.013 | -0.002 | -0.01  | -0.01  | t | 42885  | MTTAQGT<br>SMYPSC            | Oryctola<br>gus<br>cuniculu<br>s |
| 1 | 1.00 | 1 | 1 | -0.04 | -0.04  | -0.038 | -0.039 | -0.042 | t | 153266 | IVTARARH<br>DWNWVQ<br>RSSRSL | Mus<br>musculu<br>s              |
| 1 | 1.00 | 1 | 1 | 0.01  | 0.014  | 0.015  | 0.007  | 0.01   | t | 95268  | CAQVYNKL<br>GMYP             | Homo<br>sapiens                  |
| 1 | 1.00 | 1 | 1 | 0.01  | 0.012  | 0.01   | 0.01   | 0.011  | t | 120097 | MKRPSRE<br>KQDKKIFT<br>EDID  | Rattus<br>norvegic<br>us         |
| 1 | 1.00 | 1 | 1 | 0.01  | 0.012  | 0.012  | 0.01   | 0.011  | t | 122733 | DSKPTIISR<br>AN              | Rattus<br>norvegic<br>us         |
| 1 | 1.00 | 1 | 1 | 0     | 0.002  | -0.005 | 0.001  | 0.005  | t | 35399  | LEDPCKV                      | Homo<br>sapiens                  |
| 1 | 1.00 | 1 | 1 | 0.01  | 0.008  | 0.01   | 0.007  | 0.008  | t | 27389  | ILTVSVAVS<br>EGKPTEKH<br>IQI | Mus<br>musculu<br>s              |

|   |      |   |   |       |        |        |        |        |   |        |                              |                 |
|---|------|---|---|-------|--------|--------|--------|--------|---|--------|------------------------------|-----------------|
| 1 | 1.00 | 1 | 1 | 0.01  | 0.008  | 0.008  | 0.009  | 0.01   | t | 89851  | VAGTWYS<br>LAMAASDI          | Mus<br>musculus |
| 1 | 1.00 | 1 | 1 | 0.03  | 0.032  | 0.038  | 0.027  | 0.03   | t | 98821  | IDQIEKQA<br>KD               | Homo<br>sapiens |
| 1 | 1.00 | 1 | 1 | 0.03  | 0.03   | 0.032  | 0.034  | 0.03   | t | 56962  | SARDGIRD<br>AMIGLREE<br>MIEK | Homo<br>sapiens |
| 1 | 1.00 | 1 | 1 | -0.03 | -0.03  | -0.03  | -0.03  | -0.03  | t | 147353 | VALRVVSR<br>NPRGF            | Homo<br>sapiens |
| 1 | 1.00 | 1 | 1 | -0.03 | -0.03  | -0.03  | -0.03  | -0.03  | t | 147366 | VFARGPQ<br>AHLVHG            | Homo<br>sapiens |
| 1 | 1.00 | 1 | 1 | 0.03  | 0.03   | 0.03   | 0.03   | 0.032  | t | 137284 | RTNTTQG<br>KVPSQ             | Sus<br>scrofa   |
| 1 | 1.00 | 1 | 1 | 0     | -0.002 | -0.005 | -0.001 | 0      | t | 62998  | TASPGAAS<br>GPKVVIDG<br>KDQN | Mus<br>musculus |
| 1 | 1.00 | 1 | 1 | -0.01 | -0.01  | -0.01  | -0.01  | -0.008 | t | 140458 | EHNDFPM<br>YTWRP             | Mus<br>musculus |
| 1 | 1.00 | 1 | 1 | 0     | 0      | 0      | 0      | 0.001  | t | 107890 | HRLAFGQ<br>NT                | Mus<br>musculus |
| 1 | 1.00 | 1 | 1 | -0.03 | -0.03  | -0.025 | -0.03  | -0.03  | t | 22687  | GTHNQW<br>NKPSKPKT<br>NLK    | Mus<br>musculus |
| 1 | 1.00 | 1 | 1 | 0     | 0.003  | 0.007  | 0      | 0      | t | 35061  | LCKGPDAL<br>CLSNLTPM<br>L    | Mus<br>musculus |
| 1 | 1.00 | 1 | 1 | 0.02  | 0.02   | 0.02   | 0.02   | 0.02   | t | 134069 | GMTALLK<br>VSSCDKNT<br>GDYYE | Homo<br>sapiens |
| 1 | 1.00 | 1 | 1 | -0.02 | -0.02  | -0.02  | -0.02  | -0.02  | t | 78361  | DLPGGML<br>NDKVRGM<br>L      | Mus<br>musculus |
| 1 | 1.00 | 1 | 1 | 0.04  | 0.044  | 0.041  | 0.041  | 0.041  | t | 60589  | SQVYTTSE<br>YPSQ             | Homo<br>sapiens |
| 1 | 1.00 | 1 | 1 | 0.02  | 0.02   | 0.037  | 0.02   | 0.016  | t | 145921 | NPEIVIQY                     | Mus<br>musculus |
| 1 | 1.00 | 1 | 1 | 0.04  | 0.042  | 0.045  | 0.036  | 0.041  | t | 140665 | DTAAQI                       | Homo<br>sapiens |

|   |      |   |   |       |        |        |        |        |   |        |                              |                                  |
|---|------|---|---|-------|--------|--------|--------|--------|---|--------|------------------------------|----------------------------------|
| 1 | 1.00 | 1 | 1 | -0.02 | -0.02  | -0.022 | -0.02  | -0.021 | t | 153261 | GRQPTPLS<br>PPLRNTH          | Mus<br>musculu<br>s              |
| 1 | 1.00 | 1 | 1 | 0.04  | 0.038  | 0.049  | 0.043  | 0.042  | t | 8076   | DEKLDQM<br>EED               | Mus<br>musculu<br>s              |
| 1 | 1.00 | 1 | 1 | -0.01 | -0.01  | -0.01  | -0.012 | -0.01  | t | 25794  | IEEVALSNT<br>GEIPF           | Homo<br>sapiens                  |
| 1 | 1.00 | 1 | 1 | 0.01  | 0.007  | 0.01   | 0.01   | 0.01   | t | 46349  | NVDENAN<br>AN                | Oryctola<br>gus<br>cuniculu<br>s |
| 1 | 1.00 | 1 | 1 | 0     | 0.002  | 0      | -0.003 | 0.002  | t | 47538  | PFPQPELP                     | Homo<br>sapiens                  |
| 1 | 1.00 | 1 | 1 | 0     | 0      | 0.001  | 0.006  | 0.002  | t | 18961  | GDEDSOSS<br>DGYPNR<br>QDPRF  | Homo<br>sapiens                  |
| 1 | 1.00 | 1 | 1 | -0.03 | -0.032 | -0.03  | -0.033 | -0.029 | t | 113535 | IGGRVHFF<br>KDISPIA          | Homo<br>sapiens                  |
| 1 | 1.00 | 1 | 1 | 0.01  | 0.01   | 0.017  | 0.003  | 0.008  | t | 126948 | RLLIADPPS<br>PRE             | Mus<br>musculu<br>s              |
| 1 | 1.00 | 1 | 1 | 0.02  | 0.02   | 0.02   | 0.02   | 0.02   | t | 139839 | PAAAQAL                      | Ovis<br>aries                    |
| 1 | 1.00 | 1 | 1 | 0.02  | 0.02   | 0.02   | 0.02   | 0.02   | t | 99324  | HYEEPHTQ<br>GRRSQSQ          | Homo<br>sapiens                  |
| 1 | 1.00 | 1 | 1 | -0.02 | -0.02  | -0.02  | -0.02  | -0.02  | t | 158586 | APSHPPP                      | Homo<br>sapiens                  |
| 1 | 1.00 | 1 | 1 | -0.01 | -0.01  | -0.005 | -0.01  | -0.011 | t | 117331 | MKLVRFL<br>MKLSHETV<br>TIELK | Homo<br>sapiens                  |
| 1 | 1.00 | 1 | 1 | 0.08  | 0.08   | 0.084  | 0.083  | 0.082  | t | 50578  | QEEQEQQ<br>EEQEQELE<br>EQ    | Homo<br>sapiens                  |
| 1 | 1.00 | 1 | 1 | -0.05 | -0.05  | -0.045 | -0.047 | -0.049 | t | 115729 | EPQVVTLP<br>PSR              | Homo<br>sapiens                  |
| 1 | 1.00 | 1 | 1 | 0.03  | 0.03   | 0.03   | 0.03   | 0.03   | t | 104144 | NDSQCWK<br>LGCIAEK           | Homo<br>sapiens                  |
| 1 | 1.00 | 1 | 1 | -0.01 | -0.012 | -0.006 | -0.011 | -0.01  | t | 28299  | IRGDTFAT<br>R                | Mus<br>musculu<br>s              |
| 1 | 1.00 | 1 | 1 | 0.07  | 0.066  | 0.07   | 0.069  | 0.073  | t | 122746 | EEQEDEIIG<br>FGQELKN         | Oryctola<br>gus<br>cuniculu<br>s |

|   |      |   |   |       |        |        |        |        |   |        |                              |                                  |
|---|------|---|---|-------|--------|--------|--------|--------|---|--------|------------------------------|----------------------------------|
| 1 | 1.00 | 1 | 1 | 0.01  | 0.01   | 0.004  | 0.01   | 0.01   | t | 58143  | SGNCDVVI<br>GIINNTVY<br>D    | Homo<br>sapiens                  |
| 1 | 1.00 | 1 | 1 | 0     | 0      | 0      | -0.004 | 0      | t | 144616 | DPRYTCQR<br>EF               | Homo<br>sapiens                  |
| 1 | 1.00 | 1 | 1 | 0     | 0      | 0      | -0.004 | 0      | t | 135945 | KFGADAR<br>ALMLQ             | Homo<br>sapiens                  |
| 1 | 1.00 | 1 | 1 | 0.01  | 0.012  | 0.01   | 0.01   | 0.009  | t | 41554  | MGAQVST<br>QKTGAHE<br>TSLSAS | Homo<br>sapiens                  |
| 1 | 1.00 | 1 | 1 | -0.03 | -0.03  | -0.002 | -0.03  | -0.035 | t | 12345  | EHKYSWK<br>S                 | Homo<br>sapiens                  |
| 1 | 1.00 | 1 | 1 | 0.01  | 0.014  | 0.003  | 0.007  | 0.012  | t | 70352  | VPKPQGPN                     | Homo<br>sapiens                  |
| 1 | 1.00 | 1 | 1 | -0.04 | -0.043 | -0.04  | -0.039 | -0.037 | t | 107510 | LMVGGV<br>IA                 | Oryctola<br>gus<br>cuniculu<br>s |
| 1 | 1.00 | 1 | 1 | 0.01  | 0.01   | 0.015  | 0.01   | 0.01   | t | 122291 | CTYILDPEK<br>LTLRATYD<br>N   | Oryctola<br>gus<br>cuniculu<br>s |
| 1 | 1.00 | 1 | 1 | 0.01  | 0.01   | 0.015  | 0.01   | 0.01   | t | 122291 | CTYILDPEK<br>LTLRATYD<br>N   | Oryctola<br>gus<br>cuniculu<br>s |
| 1 | 1.00 | 1 | 1 | 0.01  | 0.01   | 0.015  | 0.01   | 0.01   | t | 122291 | CTYILDPEK<br>LTLRATYD<br>N   | Oryctola<br>gus<br>cuniculu<br>s |
| 1 | 1.00 | 1 | 1 | -0.02 | -0.018 | -0.02  | -0.017 | -0.018 | t | 22491  | GSRTLGA<br>KHPALQ            | Homo<br>sapiens                  |
| 1 | 1.00 | 1 | 1 | 0.01  | 0.014  | 0.019  | 0.01   | 0.011  | t | 140730 | QFAYDGK<br>DY                | Mus<br>musculu<br>s              |
| 1 | 1.00 | 1 | 1 | -0.01 | -0.01  | -0.012 | -0.01  | -0.008 | t | 122733 | DSKPTISR<br>AN               | Rattus<br>norvegic<br>us         |
| 1 | 1.00 | 1 | 1 | 0     | -0.002 | 0.003  | -0.003 | 0      | t | 118380 | GKPIPNPL<br>LGLDST           | Mus<br>musculu<br>s              |
| 1 | 1.00 | 1 | 1 | -0.05 | -0.051 | -0.045 | -0.053 | -0.05  | t | 50070  | PYCWHYP<br>PKPCGIVP<br>A     | Homo<br>sapiens                  |
| 1 | 1.00 | 1 | 1 | 0.01  | 0.011  | 0.019  | 0.01   | 0.01   | t | 56202  | RTTTASGK<br>LIT              | Mus<br>musculu<br>s              |

|   |      |   |   |       |        |        |        |        |   |        |                      |                       |
|---|------|---|---|-------|--------|--------|--------|--------|---|--------|----------------------|-----------------------|
| 1 | 1.00 | 1 | 1 | 0.02  | 0.023  | 0.015  | 0.02   | 0.022  | t | 6952   | CRTLTMGMSLGARQKI     | Mus musculus          |
| 1 | 1.00 | 1 | 1 | 0.01  | 0.006  | 0.013  | 0.009  | 0.011  | t | 103463 | PECPSGYTMNSSNLLC     | Oryctolagus cuniculus |
| 1 | 1.00 | 1 | 1 | 0.01  | 0.007  | 0.021  | 0.01   | 0.008  | t | 111935 | VVVSESGWPSAGGGA      | Oryctolagus cuniculus |
| 1 | 1.00 | 1 | 1 | 0.01  | 0.01   | 0.015  | 0.01   | 0.01   | t | 48627  | PNEPDDALAMRIIRI      | Homo sapiens          |
| 1 | 1.00 | 1 | 1 | -0.02 | -0.02  | -0.016 | -0.017 | -0.02  | t | 64601  | TKKPGGPKGNRAINM      | Homo sapiens          |
| 1 | 1.00 | 1 | 1 | 0.01  | 0.01   | 0.01   | 0.01   | 0.01   | t | 119659 | VDKSRWQQ             | Homo sapiens          |
| 1 | 1.00 | 1 | 1 | -0.01 | -0.01  | -0.01  | -0.01  | -0.01  | t | 103519 | QGQWRGAAGTAAQAA      | Homo sapiens          |
| 1 | 1.00 | 1 | 1 | -0.03 | -0.027 | -0.02  | -0.031 | -0.029 | t | 41290  | MDWNMHAA             | Mus musculus          |
| 1 | 1.00 | 1 | 1 | 0.02  | 0.021  | 0.017  | 0.019  | 0.02   | t | 16949  | FLVHREWFMDLNLPWSSAGS | Equus caballus        |
| 1 | 1.00 | 1 | 1 | 0     | 0      | 0      | 0      | 0.002  | t | 38950  | LQPQQPFQQQ           | Mus musculus          |
| 1 | 1.00 | 1 | 1 | -0.02 | -0.02  | -0.02  | -0.02  | -0.018 | t | 120918 | RLFKHLFGYNRWARPV     | Oryctolagus cuniculus |
| 1 | 1.00 | 1 | 1 | 0.04  | 0.042  | 0.033  | 0.041  | 0.04   | t | 78500  | RASLSTWHVLYSPNVSVPS  | Homo sapiens          |
| 1 | 1.00 | 1 | 1 | 0.02  | -0.004 | 0.032  | 0.02   | 0.019  | t | 101625 | FFDEIIHSCRSQNG       | Mus musculus          |
| 1 | 1.00 | 1 | 1 | 0.02  | 0.02   | 0.02   | 0.014  | 0.02   | t | 41948  | MLGNAPSVVPNTTLGM     | Homo sapiens          |

|   |      |   |   |       |        |        |        |        |   |        |                              |                                  |
|---|------|---|---|-------|--------|--------|--------|--------|---|--------|------------------------------|----------------------------------|
| 1 | 1.00 | 1 | 1 | -0.01 | -0.012 | -0.008 | -0.017 | -0.011 | t | 119735 | AEFHRWS<br>SYM               | Mus<br>musculu<br>s              |
| 1 | 1.00 | 1 | 1 | 0.02  | 0.02   | 0.015  | 0.023  | 0.026  | t | 59106  | SLFSSGAQ<br>QK               | Homo<br>sapiens                  |
| 1 | 1.00 | 1 | 1 | -0.02 | -0.02  | -0.015 | -0.018 | -0.02  | t | 73588  | YDSY CIMN<br>FCGHAA          | Homo<br>sapiens                  |
| 1 | 1.00 | 1 | 1 | 0.01  | 0.01   | 0.005  | 0.01   | 0.012  | t | 138458 | KEVPALTA<br>VETGATNP<br>LV   | Oryctola<br>gus<br>cuniculu<br>s |
| 1 | 1.00 | 1 | 1 | 0     | 0      | 0      | 0.002  | 0.003  | t | 55671  | RRPFNIGI<br>NNQQ             | Homo<br>sapiens                  |
| 1 | 1.00 | 1 | 1 | 0     | 0      | 0.002  | 0      | 0.002  | t | 74009  | YGGPANK<br>KNAG              | Aotus<br>nancyma<br>ae           |
| 1 | 1.00 | 1 | 1 | 0     | -0.006 | 0.002  | 0      | 0.002  | t | 74009  | YGGPANK<br>KNAG              | Oryctola<br>gus<br>cuniculu<br>s |
| 1 | 1.00 | 1 | 1 | 0     | 0.001  | 0.002  | 0      | 0.002  | t | 74009  | YGGPANK<br>KNAG              | Aotus                            |
| 1 | 1.00 | 1 | 1 | 0     | 0      | 0.002  | 0      | 0.002  | t | 8066   | DELEAETQ<br>NVYAA            | Aotus<br>nancyma<br>ae           |
| 1 | 1.00 | 1 | 1 | 0     | 0.001  | 0.002  | 0      | 0.002  | t | 8066   | DELEAETQ<br>NVYAA            | Aotus                            |
| 1 | 1.00 | 1 | 1 | 0     | -0.006 | 0.002  | 0      | 0.002  | t | 8066   | DELEAETQ<br>NVYAA            | Oryctola<br>gus<br>cuniculu<br>s |
| 1 | 1.00 | 1 | 1 | 0     | 0.003  | 0.001  | 0      | 0.002  | t | 144583 | ACGIPINY<br>NASKEWA<br>DKKVI | Mus<br>musculu<br>s              |
| 1 | 1.00 | 1 | 1 | 0.02  | 0.022  | 0.029  | 0.017  | 0.017  | t | 115350 | LKPTPEGD<br>LEILLQKW<br>ENGE | Homo<br>sapiens                  |
| 1 | 1.00 | 1 | 1 | 0.02  | 0.02   | 0.032  | 0.016  | 0.018  | t | 96235  | EKDKGLQT<br>SQ               | Homo<br>sapiens                  |



|   |      |   |   |       |        |        |        |        |   |        |                              |                                  |
|---|------|---|---|-------|--------|--------|--------|--------|---|--------|------------------------------|----------------------------------|
| 1 | 1.00 | 1 | 1 | 0.01  | 0.01   | 0.015  | 0.017  | 0.012  | t | 142386 | ANKYQISV<br>NKYRGTA<br>GNAL  | Homo<br>sapiens                  |
| 1 | 1.00 | 1 | 1 | -0.03 | -0.03  | -0.036 | -0.03  | -0.028 | t | 38208  | LNENLLRF<br>FVAPFPQV<br>FGKE | Mus<br>musculu<br>s              |
| 1 | 1.00 | 1 | 1 | 0.01  | 0.005  | 0.027  | 0.013  | 0.009  | t | 157810 | QRELKMOV<br>VAQS             | Canis<br>lupus                   |
| 1 | 1.00 | 1 | 1 | 0     | 0.002  | 0      | 0      | 0.003  | t | 48331  | PLGFFPDH<br>QLDP             | Homo<br>sapiens                  |
| 1 | 1.00 | 1 | 1 | 0.02  | 0.016  | 0.028  | 0.019  | 0.02   | t | 10580  | DVENSML<br>QAN               | Oryctola<br>gus<br>cuniculu<br>s |
| 1 | 1.00 | 1 | 1 | 0.04  | 0.04   | 0.04   | 0.04   | 0.04   | t | 112047 | ASTRESG                      | Homo<br>sapiens                  |
| 1 | 1.00 | 1 | 1 | 0     | 0.003  | -0.002 | 0      | 0      | t | 52693  | QVETEDTK<br>EPGVLMG<br>G     | Mus<br>musculu<br>s              |
| 1 | 1.00 | 1 | 1 | 0     | 0.003  | -0.002 | 0      | 0      | t | 52693  | QVETEDTK<br>EPGVLMG<br>G     | Mus<br>musculu<br>s              |
| 1 | 1.00 | 1 | 1 | -0.03 | -0.028 | -0.03  | -0.029 | -0.03  | t | 67625  | VAHDGAG<br>KRVYYLT           | Homo<br>sapiens                  |
| 1 | 1.00 | 1 | 1 | 0     | 0      | 0      | 0      | 0      | t | 101108 | PANAHPQ                      | Homo<br>sapiens                  |
| 1 | 1.00 | 1 | 1 | -0.05 | -0.047 | -0.048 | -0.05  | -0.05  | t | 125791 | CSFWSKYI<br>QTLK             | Mus<br>musculu<br>s              |
| 1 | 1.00 | 1 | 1 | -0.02 | -0.02  | -0.016 | -0.02  | -0.02  | t | 51924  | QPQQPFP<br>QRP               | Mus<br>musculu<br>s              |
| 1 | 1.00 | 1 | 1 | -0.02 | -0.02  | -0.02  | -0.02  | -0.02  | t | 132814 | FGENRPA                      | Homo<br>sapiens                  |
| 1 | 1.00 | 1 | 1 | -0.02 | -0.02  | -0.02  | -0.02  | -0.02  | t | 7513   | DAGDHS<br>PQ                 | Mus<br>musculu<br>s              |
| 1 | 1.00 | 1 | 1 | -0.01 | -0.013 | -0.017 | -0.01  | -0.009 | t | 126374 | KALRDGD<br>WFWWEN<br>SHVFTD  | Oryctola<br>gus<br>cuniculu<br>s |

|   |      |   |   |       |        |        |        |        |   |        |                              |                                  |
|---|------|---|---|-------|--------|--------|--------|--------|---|--------|------------------------------|----------------------------------|
| 1 | 1.00 | 1 | 1 | 0     | 0      | 0      | -0.004 | 0      | t | 135896 | APHLTRAY<br>AKDV             | Homo<br>sapiens                  |
| 1 | 1.00 | 1 | 1 | -0.02 | -0.017 | -0.012 | -0.02  | -0.022 | t | 110948 | MVTSDAQ<br>IFNKPYWL          | Mus<br>musculu<br>s              |
| 1 | 1.00 | 1 | 1 | 0.02  | 0.02   | 0.029  | 0.02   | 0.018  | t | 8921   | DKLCKDKK<br>ADSGYCY          | Mus<br>musculu<br>s              |
| 1 | 1.00 | 1 | 1 | -0.03 | -0.03  | -0.03  | -0.03  | -0.03  | t | 63835  | TGGIGNLP<br>IRNWNFD<br>FG    | Mus<br>musculu<br>s              |
| 1 | 1.00 | 1 | 1 | -0.02 | -0.023 | -0.02  | -0.02  | -0.018 | t | 47770  | PGVDIIEG<br>PVKNV            | Oryctola<br>gus<br>cuniculu<br>s |
| 1 | 1.00 | 1 | 1 | 0.04  | 0.04   | 0.041  | 0.04   | 0.04   | t | 55627  | RRKLTNPA<br>NKEES            | Homo<br>sapiens                  |
| 1 | 1.00 | 1 | 1 | 0.03  | 0.031  | 0.028  | 0.03   | 0.032  | t | 28291  | IRFKDDTSF<br>EDING           | Myodes<br>glareolu<br>s          |
| 1 | 1.00 | 1 | 1 | 0.05  | 0.05   | 0.05   | 0.05   | 0.052  | t | 104850 | KEGILQYC<br>QEVYPELQ         | Mus<br>musculu<br>s              |
| 1 | 1.00 | 1 | 1 | -0.03 | -0.03  | -0.021 | -0.033 | -0.03  | t | 23160  | GVSWTM                       | Homo<br>sapiens                  |
| 1 | 1.00 | 1 | 1 | 0.04  | 0.036  | 0.043  | 0.043  | 0.042  | t | 115272 | GREAADA<br>FSPE              | Oryctola<br>gus<br>cuniculu<br>s |
| 1 | 1.00 | 1 | 1 | 0.01  | 0.01   | 0      | 0.01   | 0.013  | t | 95160  | TVLLSLTVF<br>MLLVAEI<br>MPAT | Rattus<br>norvegic<br>us         |
| 1 | 1.00 | 1 | 1 | 0.03  | 0.032  | 0.033  | 0.029  | 0.03   | t | 74500  | YKRQTAKF<br>SDGQLT           | Ovis<br>aries                    |
| 1 | 1.00 | 1 | 1 | 0     | 0      | 0.004  | -0.003 | 0      | t | 65799  | TPVIGSQA<br>RK               | Homo<br>sapiens                  |
| 1 | 1.00 | 1 | 1 | -0.03 | -0.03  | -0.03  | -0.03  | -0.03  | t | 116838 | SYEFRHH                      | Oryctola<br>gus<br>cuniculu<br>s |
| 1 | 1.00 | 1 | 1 | -0.03 | -0.03  | -0.03  | -0.03  | -0.03  | t | 106046 | QQGRRHQ<br>SQRPPRRF          | Homo<br>sapiens                  |

|   |      |   |   |       |        |        |        |        |   |        |                              |                                  |
|---|------|---|---|-------|--------|--------|--------|--------|---|--------|------------------------------|----------------------------------|
| 1 | 1.00 | 1 | 1 | -0.07 | -0.07  | -0.07  | -0.07  | -0.07  | t | 158600 | MFNWHP<br>F                  | Homo<br>sapiens                  |
| 1 | 1.00 | 1 | 1 | 0.02  | 0.02   | 0.032  | 0.018  | 0.018  | t | 96058  | AAEKQMK<br>DKQ               | Homo<br>sapiens                  |
| 1 | 1.00 | 1 | 1 | -0.01 | -0.01  | -0.01  | -0.014 | -0.01  | t | 136731 | VRVFQATR<br>GKLSSKCS<br>VVLG | Homo<br>sapiens                  |
| 1 | 1.00 | 1 | 1 | -0.01 | -0.01  | -0.01  | -0.014 | -0.01  | t | 135966 | NPVEIRRG<br>VMLA             | Homo<br>sapiens                  |
| 1 | 1.00 | 1 | 1 | -0.05 | -0.05  | -0.05  | -0.054 | -0.05  | t | 115633 | PPFSRVVH<br>LYRN             | Homo<br>sapiens                  |
| 1 | 1.00 | 1 | 1 | 0.01  | 0.006  | 0.007  | 0.009  | 0.009  | t | 55389  | RQAESSEA<br>MAAWSER<br>AGEA  | Oryctola<br>gus<br>cuniculu<br>s |
| 1 | 1.00 | 1 | 1 | -0.03 | -0.028 | -0.023 | -0.031 | -0.029 | t | 122127 | KRSRLDV                      | Homo<br>sapiens                  |
| 1 | 1.00 | 1 | 1 | 0.01  | 0.01   | 0.014  | 0.01   | 0.01   | t | 56201  | RTTTASGK<br>L                | Homo<br>sapiens                  |
| 1 | 1.00 | 1 | 1 | 0.02  | 0.02   | 0.02   | 0.02   | 0.02   | t | 78503  | RFPYWVFL<br>PPIATVD          | Mus<br>musculu<br>s              |
| 1 | 1.00 | 1 | 1 | 0     | 0      | 0.007  | 0      | 0      | t | 159041 | NTFVIDGP<br>ETKECPTQ         | Mus<br>musculu<br>s              |
| 1 | 1.00 | 1 | 1 | 0.03  | 0.032  | 0.033  | 0.031  | 0.03   | t | 78659  | GEAPLSAC<br>TSTSFPPPS<br>PGP | Homo<br>sapiens                  |
| 1 | 1.00 | 1 | 1 | -0.02 | -0.023 | -0.02  | -0.02  | -0.02  | t | 130908 | ITRTTLQSD<br>QEEIDY          | Oryctola<br>gus<br>cuniculu<br>s |
| 1 | 1.00 | 1 | 1 | -0.03 | -0.03  | -0.03  | -0.034 | -0.03  | t | 118540 | NPVEIRRG<br>VMLAV            | Homo<br>sapiens                  |
| 1 | 1.00 | 1 | 1 | -0.01 | -0.008 | -0.005 | -0.007 | -0.009 | t | 73595  | YDTRCFDS<br>T                | Homo<br>sapiens                  |
| 1 | 1.00 | 1 | 1 | 0     | -0.003 | 0.007  | 0      | -0.001 | t | 131956 | LPKSAKPV<br>SQMRMA<br>TPLL   | Oryctola<br>gus<br>cuniculu<br>s |
| 1 | 1.00 | 1 | 1 | 0.02  | 0.02   | 0.02   | 0.02   | 0.02   | t | 22125  | GRLHLINQ<br>RAVVAPD<br>KEVLY | Homo<br>sapiens                  |

|   |      |   |   |       |        |        |        |        |   |        |                              |                                  |
|---|------|---|---|-------|--------|--------|--------|--------|---|--------|------------------------------|----------------------------------|
| 1 | 1.00 | 1 | 1 | 0.01  | 0.01   | 0.01   | 0.006  | 0.011  | t | 131697 | TGTSSDVG<br>GYNYVSW<br>Y     | Homo<br>sapiens                  |
| 1 | 1.00 | 1 | 1 | -0.01 | -0.01  | -0.007 | -0.01  | -0.01  | t | 5865   | AYLSPIDLN<br>QLAK            | Oryctola<br>gus<br>cuniculu<br>s |
| 1 | 1.00 | 1 | 1 | -0.05 | -0.046 | -0.063 | -0.049 | -0.047 | t | 12944  | ELAKLRAG<br>KASDSQTP<br>DT   | Homo<br>sapiens                  |
| 1 | 1.00 | 1 | 1 | 0     | 0      | 0      | 0      | 0      | t | 159078 | RSKHNRRE<br>GYKVQVQ<br>G     | Mus<br>musculu<br>s              |
| 1 | 1.00 | 1 | 1 | 0     | 0      | 0      | 0      | 0      | t | 115678 | AIPPKKNQ<br>DK               | Homo<br>sapiens                  |
| 1 | 1.00 | 1 | 1 | -0.02 | -0.02  | -0.016 | -0.02  | -0.02  | t | 51924  | QPQQPFP<br>QRP               | Mus<br>musculu<br>s              |
| 1 | 1.00 | 1 | 1 | -0.04 | -0.04  | -0.04  | -0.04  | -0.04  | t | 134753 | MGPRRRS<br>RKPEAPRR          | Homo<br>sapiens                  |
| 1 | 1.00 | 1 | 1 | 0.03  | 0.027  | 0.035  | 0.03   | 0.032  | t | 78630  | DYGEILTEK<br>VEDLYKGV<br>LL  | Oryctola<br>gus<br>cuniculu<br>s |
| 1 | 1.00 | 1 | 1 | -0.01 | -0.01  | -0.014 | -0.01  | -0.01  | t | 78708  | KLVEYCDF<br>LTTFVHAK<br>KKE  | Oryctola<br>gus<br>cuniculu<br>s |
| 1 | 1.00 | 1 | 1 | 0.02  | 0.023  | 0.031  | 0.02   | 0.016  | t | 133624 | KPGEMRG<br>AA                | Mus<br>musculu<br>s              |
| 1 | 1.00 | 1 | 1 | 0     | 0      | 0      | 0      | -0.002 | t | 128795 | GSLICNVG<br>AGGPAPA          | Homo<br>sapiens                  |
| 1 | 1.00 | 1 | 1 | 0.02  | 0.021  | 0.023  | 0.017  | 0.02   | t | 58359  | SHGNYST<br>QVGATQA<br>GRFSIT | Equus<br>caballus                |
| 1 | 1.00 | 1 | 1 | 0.02  | 0.02   | 0.02   | 0.016  | 0.02   | t | 131437 | GASVKVT                      | Homo<br>sapiens                  |
| 1 | 1.00 | 1 | 1 | -0.01 | -0.01  | -0.004 | -0.009 | -0.009 | t | 48854  | PPPLSEAA<br>PKPRAAA          | Mus<br>musculu<br>s              |
| 1 | 1.00 | 1 | 1 | 0.03  | 0.027  | 0.041  | 0.03   | 0.028  | t | 111736 | RLYDPNQ<br>AALQALR<br>N      | Oryctola<br>gus<br>cuniculu<br>s |

|   |      |   |   |       |        |        |        |        |   |        |                                  |                                  |
|---|------|---|---|-------|--------|--------|--------|--------|---|--------|----------------------------------|----------------------------------|
| 1 | 1.00 | 1 | 1 | -0.05 | -0.053 | -0.038 | -0.05  | -0.052 | t | 95808  | RTVNPLGF<br>FKKE                 | Oryctola<br>gus<br>cuniculu<br>s |
| 1 | 1.00 | 1 | 1 | -0.01 | -0.01  | -0.005 | -0.013 | -0.01  | t | 33851  | KTRVYTNN<br>S                    | Homo<br>sapiens                  |
| 1 | 1.00 | 1 | 1 | 0.03  | 0.03   | 0.03   | 0.03   | 0.03   | t | 140862 | GTVSYGEE<br>KPAVLGH<br>DEAAY     | Oryctola<br>gus<br>cuniculu<br>s |
| 1 | 1.00 | 1 | 1 | -0.01 | -0.006 | -0.016 | -0.013 | -0.01  | t | 67969  | VDGVHAP<br>DKEVKVH<br>ADKS       | Homo<br>sapiens                  |
| 1 | 1.00 | 1 | 1 | -0.01 | -0.012 | -0.01  | -0.017 | -0.012 | t | 132450 | LRAHLKQ                          | Mus<br>musculu<br>s              |
| 1 | 1.00 | 1 | 1 | -0.03 | -0.038 | -0.037 | -0.03  | -0.031 | t | 123809 | VAVESRN<br>GSRLHFNK              | Trichosu<br>rus<br>vulpecul<br>a |
| 1 | 1.00 | 1 | 1 | -0.02 | -0.017 | -0.015 | -0.02  | -0.019 | t | 122083 | DPNIKLV<br>DDCWATS               | Mus<br>musculu<br>s              |
| 1 | 1.00 | 1 | 1 | 0.02  | 0.02   | 0.024  | 0.02   | 0.022  | t | 5645   | AWDFGS                           | Homo<br>sapiens                  |
| 1 | 1.00 | 1 | 1 | -0.01 | -0.01  | -0.001 | -0.01  | -0.012 | t | 30988  | KGIYQTSN<br>FRVVP<br>SGDVVR<br>F | Oryctola<br>gus<br>cuniculu<br>s |
| 1 | 1.00 | 1 | 1 | -0.01 | -0.01  | -0.008 | -0.007 | -0.008 | t | 48984  | PQDVKEP<br>GGGQI                 | Homo<br>sapiens                  |
| 1 | 1.00 | 1 | 1 | -0.01 | -0.014 | -0.01  | -0.013 | -0.009 | t | 110818 | DSTNNNK<br>YTVTL                 | Oryctola<br>gus<br>cuniculu<br>s |
| 1 | 1.00 | 1 | 1 | 0     | -0.012 | 0      | 0      | 0.001  | t | 47046  | PCSICSNN<br>PTCWAICK<br>R        | Mus<br>musculu<br>s              |
| 1 | 1.00 | 1 | 1 | 0.03  | 0.03   | 0.03   | 0.03   | 0.03   | t | 110029 | VEWGSND                          | Homo<br>sapiens                  |
| 1 | 1.00 | 1 | 1 | -0.01 | -0.01  | -0.01  | -0.01  | -0.01  | t | 123130 | EHLYGRDD<br>R                    | Ovis<br>aries                    |
| 1 | 1.00 | 1 | 1 | -0.01 | -0.01  | -0.01  | -0.01  | -0.01  | t | 99330  | IGKPKAQN<br>IRQGAKE              | Equus<br>caballus                |
| 1 | 1.00 | 1 | 1 | -0.03 | -0.03  | -0.03  | -0.03  | -0.03  | t | 151057 | SSWPNHD<br>SNKGVT<br>A           | Homo<br>sapiens                  |

|   |      |   |   |       |        |        |        |        |   |        |                              |                                  |
|---|------|---|---|-------|--------|--------|--------|--------|---|--------|------------------------------|----------------------------------|
| 1 | 1.00 | 1 | 1 | -0.05 | -0.05  | -0.05  | -0.05  | -0.05  | t | 131542 | LLTRYLRIH<br>PQSWVHQ<br>IALR | Homo<br>sapiens                  |
| 1 | 1.00 | 1 | 1 | -0.07 | -0.07  | -0.07  | -0.07  | -0.07  | t | 127714 | KPWKHLK                      | Homo<br>sapiens                  |
| 1 | 1.00 | 1 | 1 | 0.06  | 0.056  | 0.06   | 0.053  | 0.059  | t | 118902 | LVFEAPNQ<br>EKVSDYE          | Oryctola<br>gus<br>cuniculu<br>s |
| 1 | 1.00 | 1 | 1 | -0.01 | -0.007 | -0.01  | -0.01  | -0.008 | t | 7317   | CVTQTVDF<br>SLDPTFTI         | Mus<br>musculu<br>s              |
| 1 | 1.00 | 1 | 1 | 0     | 0.001  | -0.007 | 0      | 0.002  | t | 8804   | DITRHEQQ<br>LIVARQ           | Myodes<br>glareolu<br>s          |
| 1 | 1.00 | 1 | 1 | -0.01 | -0.011 | -0.009 | -0.013 | -0.01  | t | 99619  | RLVLRRNA<br>LRRPFYS          | Homo<br>sapiens                  |
| 1 | 1.00 | 1 | 1 | 0.01  | 0.007  | 0.01   | 0.01   | 0.012  | t | 22508  | GSSIAADQ                     | Oryctola<br>gus<br>cuniculu<br>s |
| 1 | 1.00 | 1 | 1 | 0     | 0      | 0      | 0      | 0      | t | 140933 | YDITGEYV<br>QILDAHAA<br>YLNA | Oryctola<br>gus<br>cuniculu<br>s |
| 1 | 1.00 | 1 | 1 | 0.01  | 0.01   | 0.012  | 0.01   | 0.01   | t | 69905  | VLYREFDE<br>MEECSQH<br>LPYIE | Homo<br>sapiens                  |
| 1 | 1.00 | 1 | 1 | 0     | -0.002 | 0.002  | -0.001 | -0.002 | t | 57259  | SDPPLVAN<br>QVVTCPD<br>KKSTA | Rattus<br>norvegic<br>us         |
| 1 | 1.00 | 1 | 1 | -0.01 | -0.008 | -0.01  | -0.003 | -0.007 | t | 132737 | WIRSTLRR<br>VEAKGRP          | Homo<br>sapiens                  |
| 1 | 1.00 | 1 | 1 | 0     | 0      | 0      | 0      | 0.002  | t | 149403 | PCKSNT                       | Mus<br>musculu<br>s              |
| 1 | 1.00 | 1 | 1 | 0     | 0      | 0      | 0      | 0.002  | t | 150858 | ISSLYNLVK<br>SS              | Mus<br>musculu<br>s              |
| 1 | 1.00 | 1 | 1 | 0     | 0      | 0      | 0      | 0.002  | t | 119038 | TSTNGIKKI<br>LIF             | Mus<br>musculu<br>s              |
| 1 | 1.00 | 1 | 1 | 0     | 0      | 0      | 0      | 0.002  | t | 118963 | PNYKVVV<br>YAVTK             | Mus<br>musculu<br>s              |
| 1 | 1.00 | 1 | 1 | 0     | 0      | 0      | 0      | 0.002  | t | 31772  | KLCGVL                       | Homo<br>sapiens                  |

|   |      |   |   |       |        |        |        |        |   |        |                              |                                  |
|---|------|---|---|-------|--------|--------|--------|--------|---|--------|------------------------------|----------------------------------|
| 1 | 1.00 | 1 | 1 | 0.03  | 0.026  | 0.029  | 0.023  | 0.03   | t | 134685 | GVSSYMK<br>VSICLPMD<br>VE    | Oryctola<br>gus<br>cuniculu<br>s |
| 1 | 1.00 | 1 | 1 | 0     | -0.002 | 0.017  | -0.001 | 0      | t | 79278  | KSAVGY                       | Mus<br>musculu<br>s              |
| 1 | 1.00 | 1 | 1 | -0.02 | -0.02  | -0.02  | -0.02  | -0.021 | t | 133622 | KPGDPSAL<br>HVVRCWI<br>C     | Mus<br>musculu<br>s              |
| 1 | 1.00 | 1 | 1 | 0.01  | 0.008  | 0.012  | 0.01   | 0.01   | t | 136694 | TSLRKALL<br>HAPTGSYS<br>DGQ  | Mus<br>musculu<br>s              |
| 1 | 1.00 | 1 | 1 | 0.04  | 0.04   | 0.043  | 0.04   | 0.04   | t | 98732  | DITNPINLR<br>EGEPDL          | Homo<br>sapiens                  |
| 1 | 1.00 | 1 | 1 | -0.01 | -0.012 | -0.01  | -0.009 | -0.008 | t | 96457  | KGTVNLT<br>WSR               | Mus<br>musculu<br>s              |
| 1 | 1.00 | 1 | 1 | -0.01 | -0.008 | -0.001 | -0.009 | -0.009 | t | 48392  | PLLESWKD<br>PDYVPP           | Homo<br>sapiens                  |
| 1 | 1.00 | 1 | 1 | -0.03 | -0.032 | -0.033 | -0.027 | -0.03  | t | 23134  | GVSCTVTR<br>EDGTNRR          | Mus<br>musculu<br>s              |
| 1 | 1.00 | 1 | 1 | 0.03  | 0.03   | 0.041  | 0.033  | 0.03   | t | 31131  | KHLTSFKR<br>ELGTLID          | Homo<br>sapiens                  |
| 1 | 1.00 | 1 | 1 | -0.01 | -0.01  | -0.01  | -0.01  | -0.008 | t | 74036  | YGLFHKEK<br>MLL              | Mus<br>musculu<br>s              |
| 1 | 1.00 | 1 | 1 | 0.04  | 0.04   | 0.04   | 0.04   | 0.039  | t | 115295 | INPSKENL<br>CSTFCKEV<br>VRNA | Homo<br>sapiens                  |
| 1 | 1.00 | 1 | 1 | 0     | 0      | 0      | -0.004 | 0      | t | 121719 | PSGKKCIA<br>AKKIKQS          | Homo<br>sapiens                  |
| 1 | 1.00 | 1 | 1 | 0.02  | 0.024  | 0.02   | 0.017  | 0.021  | t | 78381  | FKDGRGC<br>GSCFEIKCT<br>KP   | Homo<br>sapiens                  |
| 1 | 1.00 | 1 | 1 | 0     | -0.003 | 0      | 0.001  | 0.003  | t | 68054  | VDREGRD<br>NVRSGKV           | Oryctola<br>gus<br>cuniculu<br>s |

|   |      |   |   |       |        |        |        |        |   |        |                       |                       |
|---|------|---|---|-------|--------|--------|--------|--------|---|--------|-----------------------|-----------------------|
| 1 | 1.00 | 1 | 1 | 0     | 0      | 0      | 0.001  | 0.003  | t | 16101  | FHENWPS               | Mus musculus          |
| 1 | 1.00 | 1 | 1 | 0     | 0      | 0      | 0.001  | 0.003  | t | 9586   | DPAFR                 | Mus musculus          |
| 1 | 1.00 | 1 | 1 | 0     | 0      | 0      | 0.001  | 0.003  | t | 7491   | DAEFRHDSGYEVHHQK      | Mus musculus          |
| 1 | 1.00 | 1 | 1 | -0.02 | -0.022 | -0.008 | -0.023 | -0.021 | t | 65374  | TNMKHM                | Mus musculus          |
| 1 | 1.00 | 1 | 1 | -0.03 | -0.034 | -0.041 | -0.037 | -0.03  | t | 138212 | PAAPPAAPGGPGAP        | Oryctolagus cuniculus |
| 1 | 1.00 | 1 | 1 | -0.02 | -0.022 | -0.017 | -0.013 | -0.017 | t | 102974 | YVVKSFDRSTKVIDFHY PNE | Mus musculus          |
| 1 | 1.00 | 1 | 1 | -0.01 | -0.013 | -0.003 | -0.01  | -0.012 | t | 100645 | YACGQGIDCGPI          | Oryctolagus cuniculus |
| 1 | 1.00 | 1 | 1 | -0.01 | -0.01  | -0.005 | -0.01  | -0.01  | t | 64704  | TLAAHVLD RSPY         | Homo sapiens          |
| 1 | 1.00 | 1 | 1 | -0.02 | -0.02  | -0.018 | -0.02  | -0.02  | t | 110603 | GLPGARGLTGRPGDA       | Mus musculus          |
| 1 | 1.00 | 1 | 1 | 0     | -0.002 | 0.012  | 0.003  | 0.002  | t | 6222   | CFDYAPYVSAVDDIC       | Mus musculus          |
| 1 | 1.00 | 1 | 1 | 0     | 0      | 0      | -0.004 | 0      | t | 20012  | GGSGGSVASGGSVAS       | Homo sapiens          |
| 1 | 1.00 | 1 | 1 | 0.03  | 0.016  | 0.045  | 0.03   | 0.031  | t | 61549  | STDEPAGE SA           | Oryctolagus cuniculus |
| 1 | 1.00 | 1 | 1 | 0.02  | 0.02   | 0.013  | 0.019  | 0.02   | t | 138162 | EKKYSPCAWEVVRAE       | Mus musculus          |
| 1 | 1.00 | 1 | 1 | -0.03 | -0.03  | -0.033 | -0.03  | -0.03  | t | 68048  | VDQHNAT EICRLIKLC     | Oryctolagus cuniculus |
| 1 | 1.00 | 1 | 1 | -0.01 | -0.01  | -0.01  | -0.01  | -0.01  | t | 127560 | ADEWLPEV EGPRD        | Trichosurus vulpecula |



|   |      |   |   |       |        |        |        |        |   |        |                                |                                  |
|---|------|---|---|-------|--------|--------|--------|--------|---|--------|--------------------------------|----------------------------------|
| 1 | 1.00 | 1 | 1 | -0.05 | -0.05  | -0.05  | -0.05  | -0.05  | t | 159287 | KTQGHSY<br>HLRRKNG<br>VKHPVY   | Aotus                            |
| 1 | 1.00 | 1 | 1 | -0.02 | -0.02  | -0.02  | -0.02  | -0.02  | t | 156878 | GQKKKCV<br>RDCLPAT             | Gallus<br>gallus                 |
| 1 | 1.00 | 1 | 1 | -0.03 | -0.029 | -0.03  | -0.033 | -0.029 | t | 130610 | SMCMHG<br>GAYCFP               | Mus<br>musculu<br>s              |
| 1 | 1.00 | 1 | 1 | 0.02  | 0.024  | 0.02   | 0.017  | 0.017  | t | 115555 | WDQVKR<br>NAVPIPT<br>LNREQL    | Homo<br>sapiens                  |
| 1 | 1.00 | 1 | 1 | 0     | 0      | 0      | -0.007 | -0.001 | t | 13860  | EQKSKQ                         | Homo<br>sapiens                  |
| 1 | 1.00 | 1 | 1 | -0.02 | -0.02  | -0.02  | -0.02  | -0.019 | t | 108104 | RRLPFGSQ<br>M                  | Mus<br>musculu<br>s              |
| 1 | 1.00 | 1 | 1 | -0.04 | -0.038 | -0.033 | -0.043 | -0.041 | t | 107110 | EKERRPSPI<br>GTATLL            | Homo<br>sapiens                  |
| 1 | 1.00 | 1 | 1 | 0.04  | 0.037  | 0.05   | 0.04   | 0.042  | t | 46021  | NSVDFEED<br>TL                 | Oryctola<br>gus<br>cuniculu<br>s |
| 1 | 1.00 | 1 | 1 | 0     | 0      | 0.009  | 0.003  | 0.001  | t | 110821 | DVRQQYE<br>SVAAKNL<br>QEAEW    | Mus<br>musculu<br>s              |
| 1 | 1.00 | 1 | 1 | 0     | 0      | 0.009  | 0.003  | 0.001  | t | 110821 | DVRQQYE<br>SVAAKNL<br>QEAEW    | Mus<br>musculu<br>s              |
| 1 | 1.00 | 1 | 1 | 0.02  | 0.02   | 0.014  | 0.02   | 0.025  | t | 122293 | CTYVLDP<br>E<br>NLTLKAPY<br>EA | Mus<br>musculu<br>s              |
| 1 | 1.00 | 1 | 1 | 0.03  | 0.03   | 0.037  | 0.03   | 0.03   | t | 106002 | PPTNVGS<br>NTY                 | Mus<br>musculu<br>s              |
| 1 | 1.00 | 1 | 1 | 0.01  | 0.01   | 0.007  | 0.01   | 0.01   | t | 9956   | DRCTTFDD<br>VQAPNYT<br>QH      | Homo<br>sapiens                  |
| 1 | 1.00 | 1 | 1 | -0.04 | -0.044 | -0.036 | -0.041 | -0.042 | t | 18816  | GAVPPAC<br>CNGIRTIN            | Oryctola<br>gus<br>cuniculu<br>s |
| 1 | 1.00 | 1 | 1 | -0.03 | -0.028 | -0.03  | -0.033 | -0.03  | t | 75410  | YPSGAWY<br>YVPLGTQ             | Homo<br>sapiens                  |

|   |      |   |   |       |        |        |        |        |   |        |                              |                          |
|---|------|---|---|-------|--------|--------|--------|--------|---|--------|------------------------------|--------------------------|
| 1 | 1.00 | 1 | 1 | -0.03 | -0.03  | -0.03  | -0.03  | -0.03  | t | 115829 | KRSGSKDS<br>HHPARTAHY        | Oryctolagus<br>cuniculus |
| 1 | 1.00 | 1 | 1 | -0.03 | -0.036 | -0.03  | -0.03  | -0.03  | t | 115829 | KRSGSKDS<br>HHPARTAHY        | Oryctolagus<br>cuniculus |
| 1 | 1.00 | 1 | 1 | -0.03 | -0.03  | -0.03  | -0.03  | -0.03  | t | 115829 | KRSGSKDS<br>HHPARTAHY        | Ovis<br>aries            |
| 1 | 1.00 | 1 | 1 | 0     | 0      | 0.008  | 0      | 0      | t | 87988  | RLFAQPQ                      | Homo<br>sapiens          |
| 1 | 1.00 | 1 | 1 | 0     | 0      | 0      | 0      | 0.002  | t | 45629  | NQSTVK                       | Mus<br>musculus          |
| 1 | 1.00 | 1 | 1 | -0.03 | -0.028 | -0.019 | -0.029 | -0.03  | t | 24595  | HQNILRVA<br>Q                | Homo<br>sapiens          |
| 1 | 1.00 | 1 | 1 | -0.02 | -0.017 | -0.023 | -0.02  | -0.02  | t | 10282  | DSYIVVGR<br>GEQQINH<br>HWHKS | Equus<br>caballus        |
| 1 | 1.00 | 1 | 1 | 0.06  | 0.06   | 0.06   | 0.06   | 0.059  | t | 115206 | DIGSESTE<br>DQAMEDIKQMEA     | Homo<br>sapiens          |
| 1 | 1.00 | 1 | 1 | -0.02 | -0.018 | -0.023 | -0.023 | -0.021 | t | 96779  | QKVAGTW<br>YSLAMAAS          | Homo<br>sapiens          |
| 1 | 1.00 | 1 | 1 | 0     | 0.003  | 0.006  | 0      | 0.002  | t | 119322 | QRVFKEKV<br>DTKAPEPP         | Mus<br>musculus          |
| 1 | 1.00 | 1 | 1 | 0.02  | 0.02   | 0.02   | 0.02   | 0.02   | t | 130457 | CRQPGNN<br>YC                | Mus<br>musculus          |
| 1 | 1.00 | 1 | 1 | 0.02  | 0.02   | 0.02   | 0.02   | 0.02   | t | 130457 | CRQPGNN<br>YC                | Mus<br>musculus          |
| 1 | 1.00 | 1 | 1 | 0     | -0.004 | 0      | -0.007 | -0.002 | t | 54393  | RKLWCHH<br>FC                | Mus<br>musculus          |
| 1 | 1.00 | 1 | 1 | 0     | -0.004 | 0      | -0.007 | -0.002 | t | 38345  | LNTEPSQL<br>PPTAPP           | Oryctolagus<br>cuniculus |

|   |      |   |   |       |        |        |        |        |   |        |                              |                                  |
|---|------|---|---|-------|--------|--------|--------|--------|---|--------|------------------------------|----------------------------------|
| 1 | 1.00 | 1 | 1 | 0     | -0.004 | 0      | -0.007 | -0.002 | t | 6918   | CRFPNITN<br>SHVPILQE         | Oryctola<br>gus<br>cuniculu<br>s |
| 1 | 1.00 | 1 | 1 | 0     | 0.002  | 0      | -0.003 | 0      | t | 95827  | SGASAQS<br>GASAQ             | Homo<br>sapiens                  |
| 1 | 1.00 | 1 | 1 | 0     | 0.002  | 0      | -0.003 | 0      | t | 32895  | KPTFKTTK<br>KDHK             | Homo<br>sapiens                  |
| 1 | 1.00 | 1 | 1 | 0.01  | 0.01   | 0.01   | 0.019  | 0.012  | t | 131415 | ESKAISDA<br>QITASSYFT<br>NMF | Homo<br>sapiens                  |
| 1 | 1.00 | 1 | 1 | 0     | 0      | 0      | 0      | 0.002  | t | 24401  | HNQWNK                       | Mus<br>musculu<br>s              |
| 1 | 1.00 | 1 | 1 | -0.01 | -0.012 | -0.005 | -0.013 | -0.01  | t | 65519  | TPCILSGSA<br>S               | Mus<br>musculu<br>s              |
| 1 | 1.00 | 1 | 1 | 0     | -0.002 | 0.004  | -0.003 | 0      | t | 51974  | QPTELRY<br>S                 | Mus<br>musculu<br>s              |
| 1 | 1.00 | 1 | 1 | 0.01  | 0.014  | 0.008  | 0.007  | 0.013  | t | 52124  | QQQPP                        | Homo<br>sapiens                  |
| 1 | 1.00 | 1 | 1 | 0.01  | 0.012  | 0.01   | 0.007  | 0.012  | t | 47538  | PFPQPELP                     | Homo<br>sapiens                  |
| 1 | 1.00 | 1 | 1 | 0.02  | 0.024  | 0.018  | 0.017  | 0.022  | t | 52152  | QQSPQQQ                      | Homo<br>sapiens                  |
| 1 | 1.00 | 1 | 1 | -0.01 | -0.008 | -0.01  | -0.009 | -0.01  | t | 116917 | AESDDSS<br>T                 | Homo<br>sapiens                  |
| 1 | 1.00 | 1 | 1 | 0     | -0.002 | 0.008  | -0.001 | 0.001  | t | 36317  | LGSGAFGT<br>IYKG             | Mus<br>musculu<br>s              |
| 1 | 1.00 | 1 | 1 | -0.02 | -0.018 | -0.013 | -0.013 | -0.018 | t | 108216 | WWATFFE<br>ATR               | Homo<br>sapiens                  |
| 1 | 1.00 | 1 | 1 | 0.02  | 0.02   | 0.02   | 0.02   | 0.02   | t | 104213 | QQFNQQA<br>PLNLENTN<br>NGTL  | Oryctola<br>gus<br>cuniculu<br>s |

|   |      |   |   |       |        |        |        |        |   |        |                              |                                  |
|---|------|---|---|-------|--------|--------|--------|--------|---|--------|------------------------------|----------------------------------|
| 1 | 1.00 | 1 | 1 | 0.02  | 0.02   | 0.02   | 0.02   | 0.02   | t | 104213 | QQFNQQA<br>PLNLENTN<br>NGTL  | Oryctola<br>gus<br>cuniculu<br>s |
| 1 | 1.00 | 1 | 1 | -0.05 | -0.046 | -0.053 | -0.053 | -0.048 | t | 51431  | QLRLKKY<br>KV                | Homo<br>sapiens                  |
| 1 | 1.00 | 1 | 1 | 0.01  | 0.01   | 0.02   | 0.004  | 0.01   | t | 28804  | ITADMYT                      | Homo<br>sapiens                  |
| 1 | 1.00 | 1 | 1 | 0.01  | 0.01   | 0.009  | 0.01   | 0.014  | t | 6455   | CITQYERES<br>QAYY            | Mus<br>musculu<br>s              |
| 1 | 1.00 | 1 | 1 | 0.02  | 0.016  | 0.016  | 0.023  | 0.021  | t | 39070  | LREGVTLG<br>VGASFDT<br>QKL   | Oryctola<br>gus<br>cuniculu<br>s |
| 1 | 1.00 | 1 | 1 | -0.01 | -0.01  | -0.01  | -0.01  | -0.01  | t | 149065 | LGPNHTQ                      | Sus<br>scrofa                    |
| 1 | 1.00 | 1 | 1 | -0.01 | -0.01  | -0.01  | -0.01  | -0.01  | t | 149305 | EQSRCQAI<br>HN               | Mus<br>musculu<br>s              |
| 1 | 1.00 | 1 | 1 | -0.01 | -0.01  | -0.01  | -0.01  | -0.01  | t | 119590 | HQDWLN<br>GK                 | Homo<br>sapiens                  |
| 1 | 1.00 | 1 | 1 | -0.01 | -0.01  | -0.01  | -0.01  | -0.01  | t | 79642  | SGTSHIR                      | Oryctola<br>gus<br>cuniculu<br>s |
| 1 | 1.00 | 1 | 1 | 0     | 0.004  | 0.009  | 0.001  | 0      | t | 24978  | HTSSMRG<br>VYYPDEIFR<br>S    | Homo<br>sapiens                  |
| 1 | 1.00 | 1 | 1 | -0.01 | -0.003 | -0.004 | -0.01  | -0.01  | t | 86807  | NIYTFVPEK<br>IYGLIAKKQ<br>SN | Cavia<br>porcellu<br>s           |
| 1 | 1.00 | 1 | 1 | -0.01 | -0.01  | -0.013 | -0.01  | -0.009 | t | 94580  | LDNKYAGK<br>GY               | Mus<br>musculu<br>s              |
| 1 | 1.00 | 1 | 1 | -0.04 | -0.042 | -0.032 | -0.037 | -0.038 | t | 114281 | CNYKTHS<br>WC                | Mus<br>musculu<br>s              |
| 1 | 1.00 | 1 | 1 | -0.03 | -0.032 | -0.023 | -0.027 | -0.028 | t | 12331  | EHFWEQR<br>PR                | Mus<br>musculu<br>s              |
| 1 | 1.00 | 1 | 1 | -0.02 | -0.02  | -0.011 | -0.02  | -0.023 | t | 108088 | RAAPFGN<br>QW                | Mus<br>musculu<br>s              |

|   |      |   |   |       |        |        |        |        |   |        |                              |                                  |
|---|------|---|---|-------|--------|--------|--------|--------|---|--------|------------------------------|----------------------------------|
| 1 | 1.00 | 1 | 0 | -0.05 | -0.054 | -0.022 | -0.047 | -0.038 | t | 116838 | SYEFRHH                      | Oryctola<br>gus<br>cuniculu<br>s |
| 1 | 1.00 | 1 | 1 | -0.02 | -0.02  | -0.013 | -0.02  | -0.019 | t | 137432 | NHNYPPLS<br>LLTF             | Mus<br>musculu<br>s              |
| 1 | 1.00 | 1 | 1 | 0     | 0.002  | 0      | 0.001  | 0.002  | t | 43893  | NFNGLTGT<br>GVLTPSSK<br>R    | Homo<br>sapiens                  |
| 1 | 1.00 | 1 | 1 | 0.04  | 0.04   | 0.04   | 0.04   | 0.042  | t | 135559 | GSDPQHY<br>EG                | Oryctola<br>gus<br>cuniculu<br>s |
| 1 | 1.00 | 1 | 1 | -0.02 | -0.017 | -0.008 | -0.02  | -0.021 | t | 78361  | DLPGGML<br>NDKVRGM<br>L      | Mus<br>musculu<br>s              |
| 1 | 1.00 | 1 | 1 | 0.03  | 0.03   | 0.029  | 0.027  | 0.032  | t | 47806  | PHDIDLGE<br>SRVVIQDY<br>DNQH | Homo<br>sapiens                  |
| 1 | 1.00 | 1 | 1 | 0.02  | 0.018  | 0.022  | 0.019  | 0.02   | t | 58231  | SGSGSNNS<br>SSSA             | Sus<br>scrofa                    |
| 1 | 1.00 | 1 | 1 | 0.03  | 0.034  | 0.037  | 0.027  | 0.03   | t | 76161  | YTQKLSVP<br>DG               | Homo<br>sapiens                  |
| 1 | 1.00 | 1 | 1 | 0     | 0.003  | 0      | 0      | 0.003  | t | 43246  | NANPNAN<br>PNANPNA<br>NP     | Mus<br>musculu<br>s              |
| 1 | 1.00 | 1 | 1 | 0.01  | 0.011  | 0.007  | 0.009  | 0.01   | t | 16949  | FLVHREW<br>FMDLNL<br>WSSAGS  | Equus<br>caballus                |
| 1 | 1.00 | 1 | 1 | 0.01  | 0.013  | 0.01   | 0.01   | 0.012  | t | 144664 | GREGYP<br>DGGGLPD<br>SVKI    | Mus<br>musculu<br>s              |
| 1 | 1.00 | 1 | 1 | -0.01 | -0.01  | -0.012 | -0.01  | -0.008 | t | 27961  | IPNKKPGK<br>KTTT             | Mus<br>musculu<br>s              |
| 1 | 1.00 | 1 | 1 | 0     | -0.002 | 0      | -0.007 | -0.002 | t | 125363 | APKTYVSV<br>SGMV             | Mus<br>musculu<br>s              |
| 1 | 1.00 | 1 | 1 | 0     | -0.004 | 0      | -0.007 | -0.002 | t | 125602 | WMSYPDR<br>TLRTS             | Oryctola<br>gus<br>cuniculu<br>s |

|   |      |   |   |       |        |        |        |        |   |        |                              |                                  |
|---|------|---|---|-------|--------|--------|--------|--------|---|--------|------------------------------|----------------------------------|
| 1 | 1.00 | 1 | 1 | 0     | -0.002 | 0      | -0.007 | -0.002 | t | 125602 | WMSYPDR<br>TLRTS             | Mus<br>musculu<br>s              |
| 1 | 1.00 | 1 | 1 | 0     | -0.002 | 0      | -0.007 | -0.002 | t | 113281 | ARTAHYGS<br>LPQKSHG          | Mus<br>musculu<br>s              |
| 1 | 1.00 | 1 | 1 | 0     | -0.002 | 0      | -0.007 | -0.002 | t | 100378 | PGSGFWS<br>FGSEDGSG<br>DSEN  | Mus<br>musculu<br>s              |
| 1 | 1.00 | 1 | 1 | -0.03 | -0.026 | -0.035 | -0.03  | -0.028 | t | 65938  | TQSMGIQ<br>LDQRIIL           | Myodes<br>glareolu<br>s          |
| 1 | 1.00 | 1 | 1 | -0.02 | -0.027 | -0.02  | -0.02  | -0.02  | t | 130438 | AFRGHIAR<br>EEAKK            | Macaca                           |
| 1 | 1.00 | 1 | 1 | -0.02 | -0.026 | -0.02  | -0.02  | -0.02  | t | 130438 | AFRGHIAR<br>EEAKK            | Papio                            |
| 1 | 1.00 | 1 | 1 | 0.02  | 0.024  | 0.02   | 0.023  | 0.018  | t | 136083 | SEGAEYDD<br>QTSQREKE<br>DDK  | Homo<br>sapiens                  |
| 1 | 1.00 | 1 | 1 | -0.03 | -0.03  | -0.02  | -0.03  | -0.03  | t | 48685  | PNPLGFFP                     | Mus<br>musculu<br>s              |
| 1 | 1.00 | 1 | 1 | -0.03 | -0.034 | -0.028 | -0.027 | -0.03  | t | 6171   | CEKAKRAV<br>RGRQDRP<br>KEFP  | Oryctola<br>gus<br>cuniculu<br>s |
| 1 | 1.00 | 1 | 1 | 0.01  | 0.01   | 0.01   | 0.01   | 0.011  | t | 99239  | FDQRSRQF<br>QNLQNHR          | Homo<br>sapiens                  |
| 1 | 1.00 | 1 | 1 | -0.02 | -0.027 | -0.017 | -0.023 | -0.02  | t | 22389  | GSITTATSL<br>DFPALW          | Homo<br>sapiens                  |
| 1 | 1.00 | 1 | 1 | 0     | -0.009 | 0      | -0.001 | 0      | t | 42797  | MTEQQW<br>NFAGIEAA<br>ASAIQG | Macaca<br>mulatta                |
| 1 | 1.00 | 1 | 1 | 0     | -0.014 | 0      | -0.001 | 0      | t | 42797  | MTEQQW<br>NFAGIEAA<br>ASAIQG | Macaca<br>mulatta                |
| 1 | 1.00 | 1 | 1 | -0.02 | -0.018 | -0.02  | -0.019 | -0.02  | t | 52060  | QQLIVARQ<br>KLKDAER          | Homo<br>sapiens                  |

|   |      |   |   |       |        |        |        |        |   |        |                              |                                  |
|---|------|---|---|-------|--------|--------|--------|--------|---|--------|------------------------------|----------------------------------|
| 1 | 1.00 | 1 | 1 | 0     | 0.002  | 0      | 0.001  | 0.003  | t | 11571  | EEEDDDM<br>GFGFLD            | Homo<br>sapiens                  |
| 1 | 1.00 | 1 | 1 | 0     | 0      | 0.001  | 0      | 0      | t | 16017  | FGNDWED<br>RYYRENM<br>Y      | Mus<br>musculu<br>s              |
| 1 | 1.00 | 1 | 1 | -0.02 | -0.02  | -0.02  | -0.02  | -0.02  | t | 144654 | GPHPTLEV<br>VPMGRGS          | Mus<br>musculu<br>s              |
| 1 | 1.00 | 1 | 1 | -0.02 | -0.02  | -0.02  | -0.02  | -0.02  | t | 144654 | GPHPTLEV<br>VPMGRGS          | Mus<br>musculu<br>s              |
| 1 | 1.00 | 1 | 1 | 0     | 0      | 0.011  | 0      | -0.001 | t | 101412 | WIRNNF                       | Mus<br>musculu<br>s              |
| 1 | 1.00 | 1 | 1 | 0     | 0      | -0.001 | 0.003  | 0.002  | t | 20462  | GITLKQAT<br>TAPCAVM<br>DITGV | Homo<br>sapiens                  |
| 1 | 1.00 | 1 | 1 | 0     | -0.003 | 0.004  | 0      | 0      | t | 3959   | AQFDQIAS<br>GLSQERN          | Oryctola<br>gus<br>cuniculu<br>s |
| 1 | 1.00 | 1 | 1 | 0     | -0.002 | 0      | -0.007 | 0      | t | 108085 | QTATYLP<br>HLKV              | Mus<br>musculu<br>s              |
| 1 | 1.00 | 1 | 1 | -0.03 | -0.03  | -0.028 | -0.03  | -0.03  | t | 6946   | CRTCAHP<br>GEHA              | Mus<br>musculu<br>s              |
| 1 | 1.00 | 1 | 1 | -0.03 | -0.03  | -0.028 | -0.03  | -0.03  | t | 6946   | CRTCAHP<br>GEHA              | Mus<br>musculu<br>s              |
| 1 | 1.00 | 1 | 1 | 0.05  | 0.054  | 0.061  | 0.051  | 0.05   | t | 81709  | ENDYSAN<br>GGT               | Homo<br>sapiens                  |
| 1 | 1.00 | 1 | 1 | -0.02 | -0.024 | -0.011 | -0.017 | -0.018 | t | 113757 | QHPVTNIS<br>DT               | Oryctola<br>gus<br>cuniculu<br>s |
| 1 | 1.00 | 1 | 1 | 0     | 0.003  | 0.011  | 0      | 0      | t | 10943  | DYQGMLP<br>VCP               | Mus<br>musculu<br>s              |
| 1 | 1.00 | 1 | 1 | 0     | 0      | 0      | 0      | 0.002  | t | 142485 | YNIYSEKEK                    | Homo<br>sapiens                  |

|   |      |   |   |       |        |        |        |        |   |        |                           |                                  |
|---|------|---|---|-------|--------|--------|--------|--------|---|--------|---------------------------|----------------------------------|
| 1 | 1.00 | 1 | 1 | 0     | 0      | 0      | 0      | 0.002  | t | 142486 | YNQYTEEE<br>K             | Homo<br>sapiens                  |
| 1 | 1.00 | 1 | 1 | 0.02  | 0.016  | 0.02   | 0.013  | 0.018  | t | 127898 | YEENLGDS<br>IV            | Oryctola<br>gus<br>cuniculu<br>s |
| 1 | 1.00 | 1 | 1 | 0.01  | 0.006  | 0.014  | 0.007  | 0.01   | t | 49706  | PTLPGTNI<br>VLGALPE       | Oryctola<br>gus<br>cuniculu<br>s |
| 1 | 1.00 | 1 | 1 | -0.01 | -0.01  | -0.01  | -0.01  | -0.01  | t | 108752 | AGVDTDW<br>EPHGR          | Mus<br>musculu<br>s              |
| 1 | 1.00 | 1 | 1 | -0.01 | -0.01  | -0.01  | -0.01  | -0.01  | t | 106853 | SLWTPYPD<br>QLSR          | Mus<br>musculu<br>s              |
| 1 | 1.00 | 1 | 1 | 0.03  | 0.03   | 0.03   | 0.03   | 0.032  | t | 135570 | LFDASDSS<br>S             | Oryctola<br>gus<br>cuniculu<br>s |
| 1 | 1.00 | 1 | 1 | -0.03 | -0.03  | -0.03  | -0.03  | -0.03  | t | 79509  | AHRPTLL                   | Oryctola<br>gus<br>cuniculu<br>s |
| 1 | 1.00 | 1 | 1 | 0.01  | 0.01   | 0.01   | 0.01   | 0.013  | t | 48595  | PNAN                      | Mus<br>musculu<br>s              |
| 1 | 1.00 | 1 | 1 | -0.03 | -0.03  | -0.03  | -0.03  | -0.029 | t | 107156 | GLAGAPGL<br>R             | Mus<br>musculu<br>s              |
| 1 | 1.00 | 1 | 1 | 0     | 0      | 0.016  | 0      | 0      | t | 30767  | KFLEGAA                   | Mus<br>musculu<br>s              |
| 1 | 1.00 | 1 | 1 | 0     | -0.003 | 0.016  | 0      | 0      | t | 30767  | KFLEGAA                   | Oryctola<br>gus<br>cuniculu<br>s |
| 1 | 1.00 | 1 | 1 | -0.04 | -0.043 | -0.032 | -0.04  | -0.042 | t | 95414  | GLDLDVN<br>VFR            | Oryctola<br>gus<br>cuniculu<br>s |
| 1 | 1.00 | 1 | 1 | -0.02 | -0.018 | -0.006 | -0.017 | -0.02  | t | 65803  | TPVNGNS<br>PWAPTAP<br>L   | Homo<br>sapiens                  |
| 1 | 1.00 | 1 | 1 | 0.04  | 0.04   | 0.037  | 0.038  | 0.04   | t | 46522  | NVYADSFV<br>VKGDDVR<br>QI | Homo<br>sapiens                  |



|   |      |   |   |       |        |        |        |        |   |        |                              |                                  |
|---|------|---|---|-------|--------|--------|--------|--------|---|--------|------------------------------|----------------------------------|
| 1 | 1.00 | 1 | 1 | 0     | -0.003 | 0.011  | 0      | -0.002 | t | 111738 | RPGKEIEA<br>YIFEMFN          | Oryctola<br>gus<br>cuniculu<br>s |
| 1 | 1.00 | 1 | 1 | -0.02 | -0.024 | -0.019 | -0.017 | -0.018 | t | 98154  | KDTNNNL<br>TLV               | Oryctola<br>gus<br>cuniculu<br>s |
| 1 | 1.00 | 1 | 1 | 0.01  | 0.01   | 0.006  | 0.01   | 0.01   | t | 72295  | WDEGIKS<br>TIVEAAK           | Homo<br>sapiens                  |
| 1 | 1.00 | 1 | 1 | 0     | 0      | 0      | 0      | 0.002  | t | 75950  | YTASARGD<br>LAHLTTT          | Sus<br>scrofa                    |
| 1 | 1.00 | 1 | 1 | -0.03 | -0.033 | -0.03  | -0.03  | -0.03  | t | 132350 | GPNICTTR<br>GVSSC            | Oryctola<br>gus<br>cuniculu<br>s |
| 1 | 1.00 | 1 | 1 | 0     | 0.002  | 0      | 0.001  | 0.002  | t | 51370  | QLINSNGS<br>WHIN             | Homo<br>sapiens                  |
| 1 | 1.00 | 1 | 1 | -0.02 | -0.02  | -0.02  | -0.02  | -0.022 | t | 131862 | ELPSSNTG<br>AWRVSTM          | Homo<br>sapiens                  |
| 1 | 1.00 | 1 | 1 | -0.01 | -0.01  | -0.01  | -0.01  | -0.01  | t | 156861 | DSQKPCKC<br>HCTMTQ           | Gallus<br>gallus                 |
| 1 | 1.00 | 1 | 1 | 0.02  | 0.02   | 0.02   | 0.02   | 0.019  | t | 115440 | QKEDVPSE<br>RYLGYLEQ<br>LLRL | Homo<br>sapiens                  |
| 1 | 1.00 | 1 | 1 | 0.09  | 0.09   | 0.097  | 0.09   | 0.092  | t | 95218  | AEPEQS                       | Homo<br>sapiens                  |
| 1 | 1.00 | 1 | 1 | 0.01  | 0.01   | 0.01   | 0.01   | 0.012  | t | 99834  | QGQQGYYP                     | Mus<br>musculu<br>s              |
| 1 | 1.00 | 1 | 1 | 0.02  | 0.02   | 0.03   | 0.02   | 0.022  | t | 95132  | PYVTYG                       | Mus<br>musculu<br>s              |
| 1 | 1.00 | 1 | 1 | 0     | -0.002 | 0.005  | -0.001 | 0      | t | 61824  | STPLLYPSL<br>A               | Mus<br>musculu<br>s              |
| 1 | 1.00 | 1 | 1 | -0.03 | -0.03  | -0.03  | -0.03  | -0.03  | t | 134782 | RGRGRGG<br>PRR               | Homo<br>sapiens                  |

|   |      |   |   |       |        |        |        |        |   |        |                              |                                  |
|---|------|---|---|-------|--------|--------|--------|--------|---|--------|------------------------------|----------------------------------|
| 1 | 1.00 | 1 | 1 | -0.07 | -0.073 | -0.061 | -0.07  | -0.073 | t | 11565  | EEDTEKDK<br>PK               | Oryctola<br>gus<br>cuniculu<br>s |
| 1 | 1.00 | 1 | 1 | 0.04  | 0.038  | 0.036  | 0.033  | 0.04   | t | 144699 | KASITEIKA<br>DKT             | Mus<br>musculu<br>s              |
| 1 | 1.00 | 1 | 1 | -0.01 | -0.007 | -0.01  | -0.01  | -0.009 | t | 139525 | ISSQTNDT<br>HKRDTYA<br>ATPRA | Mus<br>musculu<br>s              |
| 1 | 1.00 | 1 | 1 | -0.01 | -0.004 | -0.008 | -0.01  | -0.01  | t | 151    | AAGFASKT<br>PANQAIS<br>MIDGP | Mus<br>musculu<br>s              |
| 1 | 1.00 | 1 | 1 | -0.04 | -0.038 | -0.04  | -0.033 | -0.037 | t | 135453 | CNAEVYV<br>VPWEKK            | Homo<br>sapiens                  |
| 1 | 1.00 | 1 | 1 | 0     | 0      | -0.005 | 0      | 0      | t | 55264  | RPPQGNW<br>FGCTWM<br>NSTGFTK | Mus<br>musculu<br>s              |
| 1 | 1.00 | 1 | 1 | 0.04  | 0.038  | 0.033  | 0.033  | 0.04   | t | 141946 | LKEDSRDR<br>T                | Mus<br>musculu<br>s              |
| 1 | 1.00 | 1 | 1 | -0.02 | -0.02  | -0.02  | -0.02  | -0.02  | t | 122333 | EKPFRFHP<br>EHFLDAQ<br>GHFVK | Homo<br>sapiens                  |
| 1 | 1.00 | 1 | 1 | -0.01 | -0.014 | -0.003 | -0.01  | -0.01  | t | 72241  | WALQGKR<br>RGALIDFE          | Bos<br>taurus                    |
| 1 | 1.00 | 1 | 1 | 0.01  | 0.006  | 0.017  | 0.01   | 0.01   | t | 21721  | GPPAAEYG<br>PPAAEY           | Oryctola<br>gus<br>cuniculu<br>s |
| 1 | 1.00 | 1 | 1 | 0.01  | 0.012  | 0.008  | 0.01   | 0.01   | t | 119464 | HPMLPNY<br>KNFKGTIQ<br>ELGQN | Homo<br>sapiens                  |
| 1 | 1.00 | 1 | 1 | -0.01 | -0.013 | -0.008 | -0.01  | -0.01  | t | 73021  | WRCVVYP<br>GNGFVSAS<br>IFGFQ | Oryctola<br>gus<br>cuniculu<br>s |
| 1 | 1.00 | 1 | 1 | 0     | -0.002 | 0.007  | -0.001 | -0.002 | t | 66508  | TSYTGPA                      | Mus<br>musculu<br>s              |

|   |      |   |   |       |        |        |        |        |   |        |                              |                                  |
|---|------|---|---|-------|--------|--------|--------|--------|---|--------|------------------------------|----------------------------------|
| 1 | 1.00 | 1 | 1 | 0     | -0.003 | 0      | 0      | 0      | t | 20591  | GKISSDEA<br>KNPFIG           | Oryctola<br>gus<br>cuniculu<br>s |
| 1 | 1.00 | 1 | 1 | 0.01  | 0.013  | 0.015  | 0.01   | 0.01   | t | 97726  | VETPIRN                      | Mus<br>musculu<br>s              |
| 1 | 1.00 | 1 | 1 | -0.01 | -0.01  | -0.01  | -0.01  | -0.01  | t | 114854 | HKVEQGA<br>SVD               | Homo<br>sapiens                  |
| 1 | 1.00 | 1 | 1 | -0.01 | -0.013 | -0.004 | -0.01  | -0.01  | t | 44096  | NGTYRATY<br>QD               | Oryctola<br>gus<br>cuniculu<br>s |
| 1 | 1.00 | 1 | 1 | -0.01 | -0.01  | -0.01  | -0.013 | -0.01  | t | 96714  | NVPKINPK<br>KD               | Homo<br>sapiens(<br>human)       |
| 1 | 1.00 | 1 | 1 | 0.01  | 0.009  | 0.01   | 0.01   | 0.012  | t | 27985  | IPPSSPPQ                     | Anas<br>platyrhy<br>nchos        |
| 1 | 1.00 | 1 | 1 | 0.01  | 0.009  | 0.01   | 0.01   | 0.012  | t | 27985  | IPPSSPPQ                     | Anas<br>platyrhy<br>nchos        |
| 1 | 1.00 | 1 | 1 | 0.03  | 0.03   | 0.03   | 0.03   | 0.031  | t | 48928  | PPSSPTHD<br>PPDSDPQI         | Homo<br>sapiens                  |
| 1 | 1.00 | 1 | 1 | 0.01  | 0.01   | 0.01   | 0.01   | 0.011  | t | 74485  | YKNTHLDL<br>IYNA             | Sus<br>scrofa                    |
| 1 | 1.00 | 1 | 1 | 0     | 0      | 0.001  | 0.008  | 0      | t | 22162  | GRPGAPG<br>GSGSGPR<br>HRDGVR | Homo<br>sapiens                  |
| 1 | 1.00 | 1 | 1 | 0     | -0.002 | 0      | 0.003  | 0.003  | t | 51729  | QNKPPNK<br>PNPDF             | Mus<br>musculu<br>s              |
| 1 | 1.00 | 1 | 1 | 0.01  | 0.01   | 0.01   | 0.006  | 0.01   | t | 107892 | HSASQDG<br>QDTIRGHP<br>GSS   | Homo<br>sapiens                  |
| 1 | 1.00 | 1 | 1 | 0.03  | 0.03   | 0.034  | 0.03   | 0.03   | t | 75208  | YNQRQESL<br>RECC             | Homo<br>sapiens                  |
| 1 | 1.00 | 1 | 1 | 0     | 0.002  | 0.008  | -0.003 | -0.006 | t | 45627  | NQSLDLAE<br>QELVDCAS<br>QHGC | Homo<br>sapiens                  |

|   |      |   |   |       |        |        |        |        |   |        |                              |                       |
|---|------|---|---|-------|--------|--------|--------|--------|---|--------|------------------------------|-----------------------|
| 1 | 1.00 | 1 | 1 | -0.06 | -0.062 | -0.055 | -0.06  | -0.059 | t | 125230 | RERRGIAL                     | Mus musculus          |
| 1 | 1.00 | 1 | 1 | -0.01 | -0.01  | -0.004 | -0.012 | -0.011 | t | 56201  | RTTTASGKL                    | Homo sapiens          |
| 1 | 1.00 | 1 | 1 | -0.01 | -0.01  | -0.012 | -0.01  | -0.008 | t | 151652 | HWWRAE<br>SDEARRCY<br>NDPKC  | Mus musculus          |
| 1 | 1.00 | 1 | 1 | 0.01  | 0.012  | 0.03   | 0.013  | 0.01   | t | 20152  | GHLAPL                       | Homo sapiens          |
| 1 | 1.00 | 1 | 1 | 0.01  | 0.01   | 0.013  | 0.01   | 0.012  | t | 35247  | LDPAFR                       | Mus musculus          |
| 1 | 1.00 | 1 | 1 | 0.03  | 0.032  | 0.038  | 0.031  | 0.03   | t | 76132  | YTNIPVSIL<br>FNKEEADD<br>NGD | Homo sapiens          |
| 1 | 1.00 | 1 | 1 | -0.03 | -0.026 | -0.029 | -0.033 | -0.03  | t | 132023 | PVFIPAPR                     | Homo sapiens          |
| 1 | 1.00 | 1 | 1 | 0     | 0      | -0.002 | 0      | 0      | t | 119672 | WNPADYG<br>GIKKIRLPS<br>DD   | Rattus norvegicus     |
| 1 | 1.00 | 1 | 1 | 0.01  | 0.01   | 0.021  | 0.01   | 0.01   | t | 95104  | ITGAGPKY<br>VKQNTLK          | Mus musculus          |
| 1 | 1.00 | 1 | 1 | 0.03  | 0.034  | 0.039  | 0.031  | 0.03   | t | 12955  | ELATKTFG<br>SSGSSAVD<br>SGTA | Homo sapiens          |
| 1 | 1.00 | 1 | 1 | -0.02 | -0.02  | -0.02  | -0.02  | -0.02  | t | 135446 | AKAQLR                       | Oryctolagus cuniculus |
| 1 | 1.00 | 1 | 1 | -0.01 | -0.01  | -0.01  | -0.014 | -0.011 | t | 135710 | LAKEQKSK<br>QNIGALKQ<br>ELAK | Homo sapiens          |
| 1 | 1.00 | 1 | 1 | -0.03 | -0.026 | -0.037 | -0.029 | -0.028 | t | 18814  | GAVIIRGH<br>LRMAGHS<br>LGR   | Homo sapiens          |

|   |      |   |   |       |        |        |        |        |   |        |                              |                       |
|---|------|---|---|-------|--------|--------|--------|--------|---|--------|------------------------------|-----------------------|
| 1 | 1.00 | 1 | 1 | -0.08 | -0.076 | -0.08  | -0.08  | -0.08  | t | 100382 | PKHVRVW<br>CPRPPRA           | Homo sapiens          |
| 1 | 1.00 | 1 | 1 | -0.01 | -0.01  | -0.01  | -0.01  | -0.008 | t | 49106  | PQQQFPQ<br>PQQ               | Mus musculus          |
| 1 | 1.00 | 1 | 1 | -0.02 | -0.02  | -0.02  | -0.02  | -0.019 | t | 20059  | GGTWGQ<br>PHGGGW             | Mus musculus          |
| 1 | 1.00 | 1 | 1 | 0.01  | 0.01   | 0.01   | 0.01   | 0.011  | t | 135492 | RAEIM                        | Oryctolagus cuniculus |
| 1 | 1.00 | 1 | 1 | -0.03 | -0.032 | -0.025 | -0.031 | -0.03  | t | 141971 | NKPVTDN<br>PVTDLR            | Sus scrofa            |
| 1 | 1.00 | 1 | 1 | -0.01 | -0.01  | -0.01  | -0.019 | -0.011 | t | 131903 | GVMAARG<br>QL                | Homo sapiens          |
| 1 | 1.00 | 1 | 1 | -0.04 | -0.04  | -0.04  | -0.04  | -0.04  | t | 72901  | WNPKEH<br>W                  | Mus musculus          |
| 1 | 1.00 | 1 | 1 | -0.02 | -0.02  | -0.025 | -0.022 | -0.02  | t | 70670  | VQWMNR<br>LIAFASRG<br>NHVAPT | Homo sapiens          |
| 1 | 1.00 | 1 | 1 | -0.01 | -0.01  | -0.01  | -0.01  | -0.01  | t | 7763   | DDEDLDEF<br>KPIVQYDN<br>FQD  | Homo sapiens          |
| 1 | 1.00 | 1 | 1 | 0     | 0      | 0      | 0      | 0.003  | t | 137743 | DTPLTIAGL<br>KLV             | Mus musculus          |
| 1 | 1.00 | 1 | 1 | 0.04  | 0.042  | 0.04   | 0.04   | 0.04   | t | 98397  | QQQQPSS<br>QVSFQQP<br>LQQY   | Homo sapiens( human)  |
| 1 | 1.00 | 1 | 1 | -0.04 | -0.043 | -0.04  | -0.043 | -0.042 | t | 11011  | EADRKYDE<br>VARKLAM          | Homo sapiens          |
| 1 | 1.00 | 1 | 1 | -0.01 | -0.012 | -0.009 | -0.011 | -0.01  | t | 40017  | LTLNHASS<br>G                | Rattus norvegicus     |
| 1 | 1.00 | 1 | 1 | 0.02  | 0.022  | 0.023  | 0.021  | 0.02   | t | 14208  | ESLTTTSTA<br>LGKLQDVV        | Homo sapiens          |

|   |      |   |   |       |        |        |        |        |   |        |                              |                       |
|---|------|---|---|-------|--------|--------|--------|--------|---|--------|------------------------------|-----------------------|
| 1 | 1.00 | 1 | 1 | -0.02 | -0.022 | -0.014 | -0.021 | -0.019 | t | 76290  | YVHDNC                       | Mus musculus          |
| 1 | 1.00 | 1 | 1 | 0     | -0.004 | -0.004 | -0.001 | -0.002 | t | 17881  | FSWDWSG<br>HNYINEIE<br>ATSS  | Oryctolagus cuniculus |
| 1 | 1.00 | 1 | 1 | 0.01  | 0.01   | 0.016  | 0.01   | 0.01   | t | 158723 | DTGCAIDIS<br>RQELRCG         | Mus musculus          |
| 1 | 1.00 | 1 | 1 | 0.01  | 0.013  | 0.011  | 0.01   | 0.012  | t | 9524   | DNPASTT<br>NKDK              | Mus musculus          |
| 1 | 1.00 | 1 | 1 | -0.04 | -0.04  | -0.048 | -0.04  | -0.04  | t | 106739 | QKREACKC<br>IVRA             | Homo sapiens          |
| 1 | 1.00 | 1 | 1 | -0.03 | -0.03  | -0.03  | -0.033 | -0.03  | t | 31652  | KKNPMG                       | Homo sapiens          |
| 1 | 1.00 | 1 | 1 | -0.01 | -0.008 | -0.014 | -0.013 | -0.01  | t | 51930  | QPQQPQQ<br>SFPQQQR<br>PF     | Homo sapiens          |
| 1 | 1.00 | 1 | 1 | -0.03 | -0.023 | -0.03  | -0.031 | -0.03  | t | 29165  | ITYKVMRE<br>VRALAYFV<br>NGTA | Gallus gallus         |
| 1 | 1.00 | 1 | 1 | -0.01 | -0.01  | -0.01  | -0.01  | -0.009 | t | 149295 | ELDHWAS                      | Homo sapiens          |
| 1 | 1.00 | 1 | 1 | 0     | 0.002  | 0.003  | 0.001  | 0.001  | t | 97231  | CNTKCQTP                     | Homo sapiens          |
| 1 | 1.00 | 1 | 1 | -0.07 | -0.07  | -0.07  | -0.07  | -0.07  | t | 108614 | RPPHSAS<br>WR                | Homo sapiens          |
| 1 | 1.00 | 1 | 1 | 0     | 0      | 0      | -0.004 | 0      | t | 60170  | SPNVSVPS<br>SSSTPLLY         | Homo sapiens          |
| 1 | 1.00 | 1 | 1 | -0.03 | -0.019 | -0.03  | -0.03  | -0.032 | t | 156895 | KFQNGCA<br>HPCHKKP           | Gallus gallus         |
| 1 | 1.00 | 1 | 1 | -0.01 | -0.012 | -0.006 | -0.007 | -0.008 | t | 51933  | QPQQSFP<br>QQP               | Mus musculus          |

|   |      |   |   |       |        |        |        |        |   |        |                             |                     |
|---|------|---|---|-------|--------|--------|--------|--------|---|--------|-----------------------------|---------------------|
| 1 | 1.00 | 1 | 1 | -0.03 | -0.032 | -0.017 | -0.031 | -0.032 | t | 138840 | DREQAPN<br>LVYM             | Mus<br>musculu<br>s |
| 1 | 1.00 | 1 | 1 | 0     | 0.003  | 0.011  | 0      | 0      | t | 79741  | AAASSPDA<br>HVPF            | Mus<br>musculu<br>s |
| 1 | 1.00 | 1 | 1 | 0     | 0.003  | 0.011  | 0      | 0      | t | 79741  | AAASSPDA<br>HVPF            | Mus<br>musculu<br>s |
| 1 | 1.00 | 1 | 1 | -0.01 | -0.01  | -0.01  | -0.01  | -0.008 | t | 106936 | TTSEFRH                     | Mus<br>musculu<br>s |
| 1 | 1.00 | 1 | 1 | 0.01  | 0.008  | 0.011  | 0.009  | 0.01   | t | 62489  | SWPLYDA<br>SGLG             | Mus<br>musculu<br>s |
| 1 | 1.00 | 1 | 1 | -0.03 | -0.03  | -0.03  | -0.03  | -0.03  | t | 99838  | QQRPI                       | Mus<br>musculu<br>s |
| 1 | 1.00 | 1 | 1 | 0.06  | 0.061  | 0.065  | 0.061  | 0.061  | t | 18946  | GDDGDDG<br>DEGGDGD<br>E     | Homo<br>sapiens     |
| 1 | 1.00 | 1 | 1 | 0.06  | 0.064  | 0.065  | 0.061  | 0.061  | t | 18946  | GDDGDDG<br>DEGGDGD<br>E     | Homo<br>sapiens     |
| 1 | 1.00 | 1 | 1 | -0.03 | -0.026 | -0.022 | -0.029 | -0.03  | t | 49273  | PRVRSKPV<br>V               | Homo<br>sapiens     |
| 1 | 1.00 | 1 | 1 | 0     | -0.002 | 0.005  | -0.003 | -0.001 | t | 119466 | IRGERA                      | Mus<br>musculu<br>s |
| 1 | 1.00 | 1 | 1 | -0.01 | -0.012 | -0.018 | -0.017 | -0.011 | t | 122205 | VFTLPPPL<br>PETH            | Mus<br>musculu<br>s |
| 1 | 1.00 | 1 | 1 | -0.04 | -0.026 | -0.048 | -0.04  | -0.038 | t | 146181 | CGSMMAT<br>GKILVAY          | Homo<br>sapiens     |
| 1 | 1.00 | 1 | 1 | -0.05 | -0.05  | -0.057 | -0.05  | -0.05  | t | 133527 | AYIGLKDR<br>KRPSELRR<br>IAS | Mus<br>musculu<br>s |
| 1 | 1.00 | 1 | 1 | -0.02 | -0.022 | -0.037 | -0.021 | -0.017 | t | 19620  | GFSPEEME<br>AVASKFR         | Mus<br>musculu<br>s |
| 1 | 1.00 | 1 | 1 | -0.01 | -0.01  | -0.01  | -0.01  | -0.008 | t | 72249  | WAP                         | Mus<br>musculu<br>s |

|   |      |   |   |       |        |        |        |        |   |        |                              |                                  |
|---|------|---|---|-------|--------|--------|--------|--------|---|--------|------------------------------|----------------------------------|
| 1 | 1.00 | 1 | 1 | 0.01  | 0.006  | 0.016  | 0.007  | 0.011  | t | 65788  | TPTPTPTP<br>SPTP             | Oryctola<br>gus<br>cuniculu<br>s |
| 1 | 1.00 | 1 | 1 | 0.03  | 0.028  | 0.03   | 0.023  | 0.029  | t | 131073 | SQATANPS<br>CPEGT            | Rattus<br>norvegic<br>us         |
| 1 | 1.00 | 1 | 1 | -0.01 | -0.008 | -0.002 | -0.013 | -0.01  | t | 45776  | NSDDDPV<br>NPAPG             | Homo<br>sapiens                  |
| 1 | 1.00 | 1 | 1 | -0.01 | -0.012 | -0.011 | -0.013 | -0.008 | t | 59982  | SPAPERRG<br>YSGYDVDP<br>Y    | Mus<br>musculu<br>s              |
| 1 | 1.00 | 1 | 1 | -0.02 | -0.02  | -0.02  | -0.02  | -0.02  | t | 149068 | LNLTSQR                      | Sus<br>scrofa                    |
| 1 | 1.00 | 1 | 1 | -0.01 | -0.013 | -0.018 | -0.01  | -0.009 | t | 73067  | WSERIREF<br>MEKECP           | Oryctola<br>gus<br>cuniculu<br>s |
| 1 | 1.00 | 1 | 1 | 0     | 0      | 0      | 0      | -0.002 | t | 153472 | TGLRNGIT<br>NKVNSVIE<br>KAA  | Mus<br>musculu<br>s              |
| 1 | 1.00 | 1 | 1 | -0.03 | -0.032 | -0.032 | -0.037 | -0.033 | t | 122562 | RRQPHVV<br>SQW               | Mus<br>musculu<br>s              |
| 1 | 1.00 | 1 | 1 | 0.03  | 0.028  | 0.027  | 0.03   | 0.033  | t | 28460  | ISDSDEFY<br>NTIQIKEYD<br>EQ  | Mus<br>musculu<br>s              |
| 1 | 1.00 | 1 | 1 | -0.01 | -0.01  | -0.01  | -0.01  | -0.01  | t | 153825 | ENQLKEAR<br>FLAEEADR<br>KYDE | Homo<br>sapiens                  |
| 1 | 1.00 | 1 | 1 | -0.07 | -0.07  | -0.07  | -0.07  | -0.071 | t | 130971 | MILHPDV<br>QRRVQQEI<br>DDVIG | Homo<br>sapiens                  |
| 1 | 1.00 | 1 | 1 | 0     | 0.004  | 0.003  | 0.001  | 0      | t | 25022  | HVAPTHY<br>VVESDASQ<br>RVTQV | Homo<br>sapiens                  |
| 1 | 1.00 | 1 | 1 | 0.03  | 0.028  | 0.03   | 0.029  | 0.03   | t | 139499 | FGEFSFY<br>DCSSWGC           | Mus<br>musculu<br>s              |
| 1 | 1.00 | 1 | 1 | -0.01 | -0.01  | -0.01  | -0.014 | -0.01  | t | 135928 | GCSAVSA<br>HGCLF             | Homo<br>sapiens                  |
| 1 | 1.00 | 1 | 1 | -0.01 | -0.01  | -0.01  | -0.016 | -0.013 | t | 141603 | AINASSDL<br>NLIGFGI          | Homo<br>sapiens                  |



|   |      |   |   |       |        |        |        |        |   |        |                              |                                  |
|---|------|---|---|-------|--------|--------|--------|--------|---|--------|------------------------------|----------------------------------|
| 1 | 1.00 | 1 | 1 | -0.02 | -0.016 | -0.003 | -0.013 | -0.021 | t | 115638 | QDGDQAP<br>EYRGR             | Homo<br>sapiens                  |
| 1 | 1.00 | 1 | 1 | 0.04  | 0.038  | 0.033  | 0.033  | 0.04   | t | 107866 | GNEITRGG<br>STS              | Mus<br>musculu<br>s              |
| 1 | 1.00 | 1 | 1 | -0.02 | -0.008 | -0.02  | -0.023 | -0.02  | t | 156840 | AAPKMCS<br>TWCQMW<br>Q       | Gallus<br>gallus                 |
| 1 | 1.00 | 1 | 1 | -0.04 | -0.044 | -0.024 | -0.037 | -0.04  | t | 142224 | LLDTKGGL<br>YRWRSVP          | Oryctola<br>gus<br>cuniculu<br>s |
| 1 | 1.00 | 1 | 1 | 0     | 0      | 0.005  | -0.006 | -0.001 | t | 107214 | MVGGVV                       | Mus<br>musculu<br>s              |
| 1 | 1.00 | 1 | 1 | -0.03 | -0.033 | -0.032 | -0.03  | -0.028 | t | 138938 | YLPIYTIPS<br>MVY             | Canis<br>lupus                   |
| 1 | 1.00 | 1 | 1 | 0.01  | 0.01   | 0.01   | 0.006  | 0.012  | t | 128512 | EGPPPKDT                     | Homo<br>sapiens                  |
| 1 | 1.00 | 1 | 1 | 0.01  | 0.01   | 0.016  | 0.01   | 0.009  | t | 71681  | VVGYGWV<br>PAY               | Mus<br>musculu<br>s              |
| 1 | 1.00 | 1 | 1 | -0.05 | -0.049 | -0.038 | -0.051 | -0.052 | t | 141935 | KKPGGPG                      | Equus<br>caballus                |
| 1 | 1.00 | 1 | 1 | 0     | 0.002  | 0.008  | -0.003 | -0.002 | t | 67957  | VDGGCNS<br>ACNVFK            | Homo<br>sapiens                  |
| 1 | 1.00 | 1 | 1 | 0     | -0.002 | 0      | 0      | 0      | t | 112603 | MIAATYNF<br>AVLKLMG<br>RGTKF | Oryctola<br>gus<br>cuniculu<br>s |
| 1 | 1.00 | 1 | 1 | -0.01 | -0.01  | -0.01  | -0.01  | -0.01  | t | 49413  | PSKPKNL<br>KHVAGAA<br>AAGAV  | Mus<br>musculu<br>s              |
| 1 | 1.00 | 1 | 1 | 0     | 0.006  | 0      | 0      | 0      | t | 123308 | IEGAAVDL<br>R                | Ovis<br>aries                    |
| 1 | 1.00 | 1 | 1 | 0     | -0.002 | 0      | 0.003  | 0      | t | 70489  | VPSYSFIRA<br>HDSEVQD<br>LIA  | Rattus<br>norvegic<br>us         |
| 1 | 1.00 | 1 | 1 | 0     | -0.002 | 0      | 0.003  | 0      | t | 70489  | VPSYSFIRA<br>HDSEVQD<br>LIA  | Rattus<br>norvegic<br>us         |

|   |      |   |   |       |        |        |        |        |   |        |                              |                                  |
|---|------|---|---|-------|--------|--------|--------|--------|---|--------|------------------------------|----------------------------------|
| 1 | 1.00 | 1 | 1 | 0.02  | 0.016  | 0.015  | 0.02   | 0.023  | t | 59873  | SNNVQIVR<br>QQSYSI           | Bos<br>taurus                    |
| 1 | 1.00 | 1 | 1 | 0     | 0      | 0.002  | 0      | 0      | t | 149786 | KVTAQTTD<br>DRKQTGL          | Oryctola<br>gus<br>cuniculu<br>s |
| 1 | 1.00 | 1 | 1 | -0.02 | -0.022 | -0.013 | -0.023 | -0.022 | t | 110081 | VWTRAELI<br>GAFG             | Mus<br>musculu<br>s              |
| 1 | 1.00 | 1 | 1 | -0.02 | -0.02  | -0.022 | -0.026 | -0.02  | t | 70266  | VPDGFKVS<br>NS               | Homo<br>sapiens                  |
| 1 | 1.00 | 1 | 1 | -0.01 | -0.008 | -0.01  | -0.013 | -0.01  | t | 8448   | DGNCEDIP<br>HVNEFSAI<br>DL   | Homo<br>sapiens                  |
| 1 | 1.00 | 1 | 1 | -0.01 | -0.008 | -0.005 | -0.007 | -0.01  | t | 17278  | FPELKPGE<br>SRHTSDH<br>MSIYK | Homo<br>sapiens                  |
| 1 | 1.00 | 1 | 1 | 0.05  | 0.05   | 0.059  | 0.05   | 0.05   | t | 71292  | VTENDI                       | Homo<br>sapiens                  |
| 1 | 1.00 | 1 | 1 | -0.04 | -0.04  | -0.04  | -0.04  | -0.04  | t | 156957 | SLHSHLS                      | Gallus<br>gallus                 |
| 1 | 1.00 | 1 | 1 | 0.01  | 0.007  | 0.01   | 0.01   | 0.01   | t | 7534   | DAHHA<br>DAHAH<br>A          | Oryctola<br>gus<br>cuniculu<br>s |
| 1 | 1.00 | 1 | 1 | 0.02  | 0.02   | 0.02   | 0.02   | 0.019  | t | 115315 | KITVDDKH<br>YQKALNEI<br>NQFY | Homo<br>sapiens                  |
| 1 | 1.00 | 1 | 1 | 0     | 0      | 0      | 0      | -0.001 | t | 115439 | QKAVPYP<br>QRDMPIQ<br>AFLLYQ | Homo<br>sapiens                  |
| 1 | 1.00 | 1 | 1 | 0.03  | 0.028  | 0.03   | 0.029  | 0.03   | t | 60641  | SREAKKQL<br>EAEQQKLE<br>EQ   | Mus<br>musculu<br>s              |
| 1 | 1.00 | 1 | 1 | -0.01 | -0.01  | -0.007 | -0.01  | -0.008 | t | 41012  | MACMSA<br>DLEVVTST           | Homo<br>sapiens                  |
| 1 | 1.00 | 1 | 1 | 0     | 0      | 0.005  | 0      | 0      | t | 105079 | AFNHFGK<br>RLIQR             | Homo<br>sapiens                  |
| 1 | 1.00 | 1 | 1 | -0.03 | -0.033 | -0.028 | -0.03  | -0.03  | t | 69299  | VKQMYKT<br>PTLKYFGG<br>FN    | Oryctola<br>gus<br>cuniculu<br>s |

|   |      |   |   |       |        |        |        |        |   |        |                              |                                  |
|---|------|---|---|-------|--------|--------|--------|--------|---|--------|------------------------------|----------------------------------|
| 1 | 1.00 | 1 | 1 | -0.05 | -0.044 | -0.05  | -0.05  | -0.05  | t | 123181 | FLGDRHYL<br>T                | Ovis<br>aries                    |
| 1 | 1.00 | 1 | 1 | 0.02  | 0.02   | 0.02   | 0.02   | 0.022  | t | 135969 | PPEPRPRD<br>RSGL             | Homo<br>sapiens                  |
| 1 | 1.00 | 1 | 1 | 0.02  | 0.02   | 0.022  | 0.02   | 0.021  | t | 107951 | KTTICGKG<br>LSATVT           | Mus<br>musculu<br>s              |
| 1 | 1.00 | 1 | 1 | 0     | -0.005 | -0.006 | -0.003 | 0      | t | 72324  | WDQKLW<br>CRHFCVLA<br>D      | Bos<br>taurus                    |
| 1 | 1.00 | 1 | 1 | 0     | -0.002 | -0.006 | -0.003 | 0      | t | 72324  | WDQKLW<br>CRHFCVLA<br>D      | Mus<br>musculu<br>s              |
| 1 | 1.00 | 1 | 1 | -0.01 | -0.003 | -0.007 | -0.011 | -0.01  | t | 17524  | FQQFGRD<br>VSDFTDSV<br>RDPKT | Gallus<br>gallus                 |
| 1 | 1.00 | 1 | 1 | -0.01 | -0.012 | -0.007 | -0.011 | -0.01  | t | 17524  | FQQFGRD<br>VSDFTDSV<br>RDPKT | Mus<br>musculu<br>s              |
| 1 | 1.00 | 1 | 1 | -0.01 | -0.012 | -0.007 | -0.011 | -0.01  | t | 17524  | FQQFGRD<br>VSDFTDSV<br>RDPKT | Mus<br>musculu<br>s              |
| 1 | 1.00 | 1 | 1 | 0.02  | 0.02   | 0.021  | 0.02   | 0.02   | t | 58228  | SGSGANN<br>SSSSGSGSI<br>YN   | Sus<br>scrofa                    |
| 1 | 1.00 | 1 | 1 | -0.04 | -0.038 | -0.041 | -0.043 | -0.041 | t | 33233  | KRVKTWR<br>MHL               | Homo<br>sapiens                  |
| 1 | 1.00 | 1 | 1 | -0.01 | -0.008 | -0.012 | -0.01  | -0.007 | t | 46792  | PAFGANS<br>NNPDWDF<br>NP     | Homo<br>sapiens                  |
| 1 | 1.00 | 1 | 1 | -0.04 | -0.04  | -0.031 | -0.038 | -0.04  | t | 135928 | GCSAVSA<br>HGCLF             | Homo<br>sapiens                  |
| 1 | 1.00 | 1 | 1 | -0.02 | -0.023 | -0.019 | -0.02  | -0.022 | t | 47925  | PILQERPPL<br>ENR             | Oryctola<br>gus<br>cuniculu<br>s |
| 1 | 1.00 | 1 | 1 | -0.02 | -0.023 | -0.019 | -0.02  | -0.022 | t | 47925  | PILQERPPL<br>ENR             | Oryctola<br>gus<br>cuniculu<br>s |

|   |      |   |   |       |        |        |        |        |   |        |                              |                                  |
|---|------|---|---|-------|--------|--------|--------|--------|---|--------|------------------------------|----------------------------------|
| 1 | 1.00 | 1 | 1 | 0     | 0.004  | 0      | -0.003 | 0      | t | 95403  | GDVTFTEV<br>GYTR             | Homo<br>sapiens                  |
| 1 | 1.00 | 1 | 1 | -0.03 | -0.044 | -0.024 | -0.031 | -0.03  | t | 70189  | VNSLKKAL                     | Macaca<br>mulatta                |
| 1 | 1.00 | 1 | 1 | -0.01 | -0.012 | -0.017 | -0.017 | -0.009 | t | 106221 | AAVTPEER                     | Mus<br>musculu<br>s              |
| 1 | 1.00 | 1 | 1 | 0.01  | 0.006  | 0.016  | 0.013  | 0.012  | t | 27670  | INKDAREL                     | Oryctola<br>gus<br>cuniculu<br>s |
| 1 | 1.00 | 1 | 1 | -0.02 | -0.02  | -0.02  | -0.02  | -0.018 | t | 137747 | DTPLTYAG<br>LRLV             | Mus<br>musculu<br>s              |
| 1 | 1.00 | 1 | 1 | 0.03  | 0.034  | 0.037  | 0.027  | 0.032  | t | 95579  | LVLDTD                       | Homo<br>sapiens                  |
| 1 | 1.00 | 1 | 1 | -0.03 | -0.028 | -0.03  | -0.033 | -0.03  | t | 75411  | YPSGAWY<br>YVPLGTQY<br>T     | Homo<br>sapiens                  |
| 1 | 1.00 | 1 | 1 | -0.02 | -0.018 | -0.018 | -0.019 | -0.019 | t | 78873  | VKFPGGG<br>QIVGGVYL<br>LPRRG | Homo<br>sapiens                  |
| 1 | 1.00 | 1 | 1 | -0.03 | -0.03  | -0.03  | -0.034 | -0.03  | t | 115658 | VGWYRPP<br>FSRVV             | Homo<br>sapiens                  |
| 1 | 1.00 | 1 | 1 | -0.02 | -0.02  | -0.02  | -0.02  | -0.019 | t | 112407 | YFCHQYL                      | Homo<br>sapiens                  |
| 1 | 1.00 | 1 | 1 | 0.01  | 0.013  | 0.01   | 0.01   | 0.011  | t | 108010 | LMPMNM<br>APITGRAL<br>E      | Mus<br>musculu<br>s              |
| 1 | 1.00 | 1 | 1 | 0     | -0.002 | -0.002 | -0.003 | -0.002 | t | 46804  | PAGFCDG<br>YCKTHLKA          | Mus<br>musculu<br>s              |
| 1 | 1.00 | 1 | 1 | 0     | -0.002 | -0.002 | -0.003 | -0.002 | t | 46804  | PAGFCDG<br>YCKTHLKA          | Mus<br>musculu<br>s              |
| 1 | 1.00 | 1 | 1 | -0.01 | -0.01  | -0.012 | -0.01  | -0.009 | t | 60526  | SQPNTeqS<br>PAIVLPF          | Mus<br>musculu<br>s              |
| 1 | 1.00 | 1 | 1 | -0.01 | -0.012 | -0.006 | -0.011 | -0.01  | t | 68896  | VHTWTEQ<br>YK                | Mus<br>musculu<br>s              |
| 1 | 1.00 | 1 | 1 | -0.01 | -0.012 | -0.006 | -0.011 | -0.01  | t | 68896  | VHTWTEQ<br>YK                | Mus<br>musculu<br>s              |

|   |      |   |   |       |        |        |        |        |   |        |                              |                                   |
|---|------|---|---|-------|--------|--------|--------|--------|---|--------|------------------------------|-----------------------------------|
| 1 | 1.00 | 1 | 1 | -0.03 | -0.026 | -0.027 | -0.029 | -0.027 | t | 150874 | NWFDISK<br>WLWYI             | Homo<br>sapiens                   |
| 1 | 1.00 | 1 | 1 | -0.01 | -0.01  | -0.01  | -0.012 | -0.01  | t | 23791  | HFKDPQYP<br>VWELTIRV<br>WSEL | Homo<br>sapiens                   |
| 1 | 1.00 | 1 | 1 | 0.04  | 0.038  | 0.042  | 0.039  | 0.041  | t | 63087  | TCMTTAQ<br>GTSMPSC           | Mus<br>musculu<br>s               |
| 1 | 1.00 | 1 | 1 | -0.02 | -0.02  | -0.015 | -0.018 | -0.02  | t | 78984  | GPRLGVRA<br>TRKTSERS<br>QP   | Homo<br>sapiens                   |
| 1 | 1.00 | 1 | 1 | 0.02  | 0.018  | 0.017  | 0.023  | 0.022  | t | 58022  | SGETTTAA<br>GTTASPGA<br>ASGP | Mus<br>musculu<br>s               |
| 1 | 1.00 | 1 | 1 | -0.02 | -0.017 | -0.011 | -0.02  | -0.02  | t | 52818  | QVWPSSH                      | Mus<br>musculu<br>s               |
| 1 | 1.00 | 1 | 1 | 0     | 0      | 0      | 0      | 0.002  | t | 142006 | SDSAQGS<br>DVSLTA            | Oryctola<br>gus<br>cuniculu<br>s  |
| 1 | 1.00 | 1 | 1 | 0     | 0      | 0      | 0      | 0.002  | t | 144324 | GVSTITAD<br>EIR              | Mus<br>musculu<br>s               |
| 1 | 1.00 | 1 | 1 | 0     | 0      | 0      | 0      | 0.002  | t | 144439 | QALTGTNT<br>GGAIDGVS<br>TTD  | Mus<br>musculu<br>s               |
| 1 | 1.00 | 1 | 1 | 0     | 0      | 0      | 0      | 0.002  | t | 134471 | PKPEQ                        | Mus<br>musculu<br>s               |
| 1 | 1.00 | 1 | 1 | 0     | 0      | 0      | 0      | 0.002  | t | 124471 | LQAFDSHY<br>DY               | Mus<br>musculu<br>s               |
| 1 | 1.00 | 1 | 1 | 0     | 0      | 0      | 0      | 0.002  | t | 125478 | LHQEYEEN<br>LGDSIVGY<br>KEKS | Cricetulu<br>s<br>migrator<br>ius |
| 1 | 1.00 | 1 | 1 | 0     | 0      | 0      | 0      | 0.002  | t | 124924 | YYVFFEEQ<br>EDE              | Mus<br>musculu<br>s               |
| 1 | 1.00 | 1 | 1 | 0     | 0      | 0      | 0      | 0.002  | t | 125015 | DNESSYSR<br>GFDMTYT<br>E     | Mus<br>musculu<br>s               |

|   |      |   |   |   |        |   |   |       |   |        |                      |                       |
|---|------|---|---|---|--------|---|---|-------|---|--------|----------------------|-----------------------|
| 1 | 1.00 | 1 | 1 | 0 | 0      | 0 | 0 | 0.002 | t | 132615 | RLPPSDT              | Mus musculus          |
| 1 | 1.00 | 1 | 1 | 0 | 0      | 0 | 0 | 0.002 | t | 124258 | GYKEKSKFQD           | Mus musculus          |
| 1 | 1.00 | 1 | 1 | 0 | 0      | 0 | 0 | 0.002 | t | 104695 | YLLYYTEFTPTEK        | Mus musculus          |
| 1 | 1.00 | 1 | 1 | 0 | 0      | 0 | 0 | 0.002 | t | 91109  | AHFVQQTP             | Mus musculus          |
| 1 | 1.00 | 1 | 1 | 0 | 0      | 0 | 0 | 0.002 | t | 91100  | AFQTPVHS             | Mus musculus          |
| 1 | 1.00 | 1 | 1 | 0 | 0      | 0 | 0 | 0.002 | t | 39224  | LRTGKKLELDATNAPAPANG | Mus musculus          |
| 1 | 1.00 | 1 | 1 | 0 | 0      | 0 | 0 | 0.002 | t | 46371  | NVESQPGGQPNT         | Mus musculus          |
| 1 | 1.00 | 1 | 1 | 0 | 0      | 0 | 0 | 0.002 | t | 41713  | MIHFGND              | Mus musculus          |
| 1 | 1.00 | 1 | 1 | 0 | 0      | 0 | 0 | 0.002 | t | 38522  | LPHSNL               | Rattus norvegicus     |
| 1 | 1.00 | 1 | 1 | 0 | 0      | 0 | 0 | 0.002 | t | 46488  | NVSVSPSPSSTPLLY      | Mus musculus          |
| 1 | 1.00 | 1 | 1 | 0 | -0.003 | 0 | 0 | 0.002 | t | 21408  | GNDYEDRYRENMYRYPNQ   | Oryctolagus cuniculus |
| 1 | 1.00 | 1 | 1 | 0 | 0      | 0 | 0 | 0.002 | t | 11571  | EEEDDDMGFGLFD        | Mus musculus          |
| 1 | 1.00 | 1 | 1 | 0 | 0      | 0 | 0 | 0.002 | t | 11571  | EEEDDDMGFGLFD        | Mus musculus          |
| 1 | 1.00 | 1 | 1 | 0 | 0      | 0 | 0 | 0.002 | t | 22280  | GSAMSRPIIHFGSDYEDRY  | Mus musculus          |
| 1 | 1.00 | 1 | 1 | 0 | 0      | 0 | 0 | 0.002 | t | 21408  | GNDYEDRYRENMYRYPNQ   | Mus musculus          |

|   |      |   |   |       |        |        |        |        |   |        |                         |                       |
|---|------|---|---|-------|--------|--------|--------|--------|---|--------|-------------------------|-----------------------|
| 1 | 1.00 | 1 | 1 | 0     | 0      | 0      | 0      | 0.002  | t | 1165   | AESPKKP                 | Homo sapiens          |
| 1 | 1.00 | 1 | 1 | -0.01 | -0.006 | 0.006  | -0.01  | -0.012 | t | 35106  | LCVPSRVG                | Capra hircus          |
| 1 | 1.00 | 1 | 1 | 0.04  | 0.038  | 0.042  | 0.033  | 0.039  | t | 132397 | KEENLVKS<br>LVSAGSG     | Mus musculus          |
| 1 | 1.00 | 1 | 1 | 0     | 0      | 0      | 0      | 0      | t | 141665 | GSSDTNDI<br>DTKRARTD    | Oryctolagus cuniculus |
| 1 | 1.00 | 1 | 1 | 0     | 0.002  | 0      | 0      | 0      | t | 141665 | GSSDTNDI<br>DTKRARTD    | Rattus norvegicus     |
| 1 | 1.00 | 1 | 1 | 0     | 0      | 0      | 0      | 0      | t | 141665 | GSSDTNDI<br>DTKRARTD    | Rattus norvegicus     |
| 1 | 1.00 | 1 | 1 | -0.02 | -0.02  | -0.02  | -0.02  | -0.02  | t | 107507 | LHQNWLD                 | Homo sapiens          |
| 1 | 1.00 | 1 | 1 | 0     | -0.003 | 0      | 0      | 0.002  | t | 58922  | SKPTTKQR<br>QNKPPSK     | Oryctolagus cuniculus |
| 1 | 1.00 | 1 | 1 | -0.01 | -0.01  | -0.01  | -0.01  | -0.008 | t | 91100  | AFQTPVHS                | Mus musculus          |
| 1 | 1.00 | 1 | 1 | 0.01  | 0.01   | 0.01   | 0.009  | 0.01   | t | 106829 | SETPANRL<br>HFYV        | Mus musculus          |
| 1 | 1.00 | 1 | 1 | 0.02  | 0.02   | 0.02   | 0.02   | 0.021  | t | 144673 | GTFCGGEE<br>CMRG        | Mus musculus          |
| 1 | 1.00 | 1 | 1 | 0.02  | 0.015  | 0.029  | 0.02   | 0.02   | t | 21345  | GMSQDPV<br>A            | Bos taurus            |
| 1 | 1.00 | 1 | 1 | -0.03 | -0.03  | -0.03  | -0.03  | -0.029 | t | 112408 | YGIGVGW                 | Homo sapiens          |
| 1 | 1.00 | 1 | 1 | -0.07 | -0.066 | -0.063 | -0.069 | -0.07  | t | 61621  | STGLIHLH                | Homo sapiens          |
| 1 | 1.00 | 1 | 1 | 0     | 0      | 0      | 0      | 0      | t | 110615 | GPRGPPG<br>PQGATGP<br>L | Mus musculus          |

|   |      |   |   |       |        |        |        |        |   |        |                              |                          |
|---|------|---|---|-------|--------|--------|--------|--------|---|--------|------------------------------|--------------------------|
| 1 | 1.00 | 1 | 1 | 0.02  | 0.02   | 0.023  | 0.023  | 0.022  | t | 115626 | LKDAIGEG<br>KVTL             | Homo<br>sapiens          |
| 1 | 1.00 | 1 | 1 | -0.03 | -0.026 | -0.027 | -0.029 | -0.03  | t | 570    | ACKRGP GS<br>GFFSRLN         | Homo<br>sapiens          |
| 1 | 1.00 | 1 | 1 | -0.01 | -0.012 | 0.014  | -0.009 | -0.013 | t | 39172  | LRQAILCW<br>GELM             | Mus<br>musculu<br>s      |
| 1 | 1.00 | 1 | 1 | -0.03 | -0.026 | -0.032 | -0.033 | -0.031 | t | 99385  | KLEYDPRC<br>VYDPRGH          | Homo<br>sapiens          |
| 1 | 1.00 | 1 | 1 | -0.02 | -0.018 | -0.017 | -0.017 | -0.017 | t | 151713 | RGEARK                       | Homo<br>sapiens          |
| 1 | 1.00 | 1 | 1 | -0.04 | -0.036 | -0.037 | -0.041 | -0.041 | t | 33795  | KTNMKH<br>MAGA               | Mus<br>musculu<br>s      |
| 1 | 1.00 | 1 | 1 | -0.01 | -0.01  | -0.016 | -0.008 | -0.01  | t | 2226   | AKKVPETF<br>PELKPGES<br>RHTS | Homo<br>sapiens          |
| 1 | 1.00 | 1 | 1 | -0.01 | -0.01  | -0.01  | -0.01  | -0.01  | t | 127722 | LGRNSTV                      | Homo<br>sapiens          |
| 1 | 1.00 | 1 | 1 | -0.01 | -0.002 | -0.01  | -0.01  | -0.01  | t | 95565  | LPPSGSGR                     | Cavia<br>porcellu<br>s   |
| 1 | 1.00 | 1 | 1 | 0     | 0.004  | 0.007  | 0.003  | 0.001  | t | 135449 | CATLRVYK<br>GG               | Homo<br>sapiens          |
| 1 | 1.00 | 1 | 1 | -0.03 | -0.03  | -0.03  | -0.03  | -0.03  | t | 119979 | KAEFHRW<br>SSY               | Mus<br>musculu<br>s      |
| 1 | 1.00 | 1 | 1 | -0.03 | -0.027 | -0.03  | -0.03  | -0.03  | t | 119979 | KAEFHRW<br>SSY               | Mus<br>musculu<br>s      |
| 1 | 1.00 | 1 | 1 | -0.03 | -0.027 | -0.03  | -0.03  | -0.03  | t | 119979 | KAEFHRW<br>SSY               | Mus<br>musculu<br>s      |
| 1 | 1.00 | 1 | 1 | -0.05 | -0.05  | -0.05  | -0.05  | -0.05  | t | 145244 | HWRHWL<br>ADTAFP             | Homo<br>sapiens          |
| 1 | 1.00 | 1 | 1 | 0     | 0      | 0      | -0.006 | -0.001 | t | 130837 | FTRHSQTT<br>ANPSCPE          | Rattus<br>norvegic<br>us |
| 1 | 1.00 | 1 | 1 | 0     | 0      | 0      | -0.006 | -0.001 | t | 117211 | GYWWSWI<br>RQPPGKG<br>EEWIG  | Mus<br>musculu<br>s      |



|   |      |   |   |       |        |        |        |        |   |        |                              |                                  |
|---|------|---|---|-------|--------|--------|--------|--------|---|--------|------------------------------|----------------------------------|
| 1 | 1.00 | 1 | 1 | 0     | 0      | 0      | -0.006 | -0.001 | t | 21254  | GMDGTQL<br>DRW               | Mus<br>musculu<br>s              |
| 1 | 1.00 | 1 | 1 | 0     | 0      | 0      | -0.006 | -0.001 | t | 21254  | GMDGTQL<br>DRW               | Mus<br>musculu<br>s              |
| 1 | 1.00 | 1 | 1 | 0     | 0      | 0      | -0.006 | -0.001 | t | 21254  | GMDGTQL<br>DRW               | Mus<br>musculu<br>s              |
| 1 | 1.00 | 1 | 1 | 0     | 0      | 0      | -0.006 | -0.001 | t | 6986   | CSEYREPLL<br>C               | Mus<br>musculu<br>s              |
| 1 | 1.00 | 1 | 1 | 0     | 0      | 0      | -0.006 | -0.001 | t | 6895   | CQQTLSVR<br>ALC              | Mus<br>musculu<br>s              |
| 1 | 1.00 | 1 | 1 | 0     | 0      | -0.003 | 0      | 0.003  | t | 125230 | RERRGIAL                     | Mus<br>musculu<br>s              |
| 1 | 1.00 | 1 | 1 | -0.02 | -0.024 | -0.032 | -0.021 | -0.02  | t | 35214  | LDLGVDVR<br>TYMPVHY<br>KVLKA | Oryctola<br>gus<br>cuniculu<br>s |
| 1 | 1.00 | 1 | 1 | -0.01 | -0.01  | -0.01  | -0.01  | -0.011 | t | 115233 | EPMIGVN<br>QELAYFYP<br>ELFRQ | Homo<br>sapiens                  |
| 1 | 1.00 | 1 | 1 | -0.01 | -0.017 | -0.01  | -0.01  | -0.01  | t | 3381   | ANPNPYTS<br>RRSV             | Oryctola<br>gus<br>cuniculu<br>s |
| 1 | 1.00 | 1 | 1 | -0.02 | -0.02  | -0.009 | -0.02  | -0.018 | t | 141052 | LRDIFAW<br>E<br>P            | Ovis<br>aries                    |
| 1 | 1.00 | 1 | 1 | -0.01 | -0.015 | -0.003 | -0.01  | -0.01  | t | 31916  | KLILAYTP<br>GARGPQD          | Oryctola<br>gus<br>cuniculu<br>s |
| 1 | 1.00 | 1 | 1 | 0.01  | 0.008  | 0.003  | 0.003  | 0.009  | t | 108049 | NPVEIRRG<br>VMLAVDA          | Rattus<br>norvegic<br>us         |
| 1 | 1.00 | 1 | 1 | -0.02 | -0.022 | -0.013 | -0.023 | -0.02  | t | 67076  | TVLRDPVF<br>YQ               | Homo<br>sapiens                  |
| 1 | 1.00 | 1 | 1 | 0.01  | 0.014  | 0.018  | 0.01   | 0.008  | t | 5684   | AWPACYC<br>YGVDPHIK          | Equus<br>caballus                |
| 1 | 1.00 | 1 | 1 | 0.04  | 0.04   | 0.041  | 0.04   | 0.04   | t | 55627  | RRKLTNPA<br>NKEES            | Mus                              |

|   |      |   |   |       |        |        |        |       |   |        |                             |                                  |
|---|------|---|---|-------|--------|--------|--------|-------|---|--------|-----------------------------|----------------------------------|
| 1 | 1.00 | 1 | 1 | 0.01  | 0.008  | 0.01   | 0.009  | 0.01  | t | 2128   | AIVVEYSSS<br>VKLT           | Mus<br>musculu<br>s              |
| 1 | 1.00 | 1 | 1 | -0.05 | -0.05  | -0.054 | -0.048 | -0.05 | t | 62326  | SVSHARPR<br>WFWFCL          | Homo<br>sapiens                  |
| 1 | 1.00 | 1 | 1 | -0.01 | -0.01  | -0.01  | -0.01  | -0.01 | t | 107813 | EGGGVRG<br>PRVV             | Mus<br>musculu<br>s              |
| 1 | 1.00 | 1 | 1 | -0.03 | -0.03  | -0.03  | -0.03  | -0.03 | t | 146401 | KSIHLGPG<br>RAFYA           | Homo<br>sapiens                  |
| 1 | 1.00 | 1 | 1 | 0.02  | 0.02   | 0.02   | 0.016  | 0.02  | t | 135927 | GAKLVQD<br>VANNT            | Homo<br>sapiens                  |
| 1 | 1.00 | 1 | 1 | -0.01 | -0.01  | -0.01  | -0.01  | -0.01 | t | 138246 | TDKTPFLL<br>WRVH            | Homo<br>sapiens                  |
| 1 | 1.00 | 1 | 1 | 0.01  | 0.01   | 0.01   | 0.004  | 0.01  | t | 44569  | NKPNNDF<br>HFEVF            | Homo<br>sapiens                  |
| 1 | 1.00 | 1 | 1 | 0     | 0.004  | 0      | 0      | 0.002 | t | 7850   | DDPPATVY<br>RYDSRPPE<br>D   | Homo<br>sapiens                  |
| 1 | 1.00 | 1 | 1 | 0     | 0.003  | 0      | 0      | 0.002 | t | 7850   | DDPPATVY<br>RYDSRPPE<br>D   | Mus<br>musculu<br>s              |
| 1 | 1.00 | 1 | 1 | 0     | -0.004 | 0      | -0.003 | 0     | t | 134200 | PVVNSLDP<br>PLLTRY          | Oryctola<br>gus<br>cuniculu<br>s |
| 1 | 1.00 | 1 | 1 | 0     | -0.004 | 0      | -0.003 | 0     | t | 136064 | HQIALRME<br>VLGCEAQ<br>DLY  | Oryctola<br>gus<br>cuniculu<br>s |
| 1 | 1.00 | 1 | 1 | 0     | -0.004 | 0      | -0.003 | 0     | t | 134220 | RQGAEPR<br>KNFVKPNE<br>TKTY | Oryctola<br>gus<br>cuniculu<br>s |
| 1 | 1.00 | 1 | 1 | 0     | -0.002 | 0      | -0.003 | 0     | t | 134006 | ALRMEVL<br>GCEAQDLY         | Mus<br>musculu<br>s              |
| 1 | 1.00 | 1 | 1 | 0     | -0.004 | 0      | -0.003 | 0     | t | 134015 | CDKNTGD<br>YYEDSYED         | Oryctola<br>gus<br>cuniculu<br>s |

|   |      |   |   |       |        |        |        |        |   |        |                              |                                  |
|---|------|---|---|-------|--------|--------|--------|--------|---|--------|------------------------------|----------------------------------|
| 1 | 1.00 | 1 | 1 | 0     | 0      | 0.002  | 0      | 0      | t | 133738 | VTPYFSYP<br>WAISCKC          | Mus<br>musculu<br>s              |
| 1 | 1.00 | 1 | 1 | 0.04  | 0.04   | 0.04   | 0.04   | 0.039  | t | 115208 | DKTEIPTIN<br>TIASGEPTS<br>TP | Homo<br>sapiens                  |
| 1 | 1.00 | 1 | 1 | 0.03  | 0.03   | 0.037  | 0.033  | 0.03   | t | 49352  | PSEGECEVI<br>DSDSK           | Homo<br>sapiens                  |
| 1 | 1.00 | 1 | 1 | 0.02  | 0.022  | 0.027  | 0.017  | 0.02   | t | 68358  | VESTVATL<br>ED               | Homo<br>sapiens                  |
| 1 | 1.00 | 1 | 1 | -0.01 | -0.014 | -0.01  | -0.011 | -0.01  | t | 80425  | APQQIDIS<br>NTRATQS<br>QFD   | Oryctola<br>gus<br>cuniculu<br>s |
| 1 | 1.00 | 1 | 1 | -0.02 | -0.02  | -0.01  | -0.02  | -0.022 | t | 44625  | NKVVPPS                      | Mus<br>musculu<br>s              |
| 1 | 1.00 | 1 | 1 | 0.01  | 0.008  | 0.017  | 0.009  | 0.01   | t | 49513  | PSSPPQW<br>K                 | Anas<br>platyrhy<br>nchos        |
| 1 | 1.00 | 1 | 1 | 0     | 0.004  | -0.001 | 0      | 0.002  | t | 9524   | DNPASTT<br>NKDK              | Cavia<br>porcellu<br>s           |
| 1 | 1.00 | 1 | 1 | 0     | -0.003 | -0.001 | 0      | 0.002  | t | 9526   | DNPASTT<br>NKDKL             | Oryctola<br>gus<br>cuniculu<br>s |
| 1 | 1.00 | 1 | 1 | 0.04  | 0.04   | 0.04   | 0.04   | 0.042  | t | 23589  | HCDGFQN<br>EKWDLFV<br>E      | Oryctola<br>gus<br>cuniculu<br>s |
| 1 | 1.00 | 1 | 1 | 0.03  | 0.03   | 0.032  | 0.03   | 0.031  | t | 41204  | MCQCVQK<br>YGTEFCKK<br>RLA   | Mus<br>musculu<br>s              |
| 1 | 1.00 | 1 | 1 | 0.02  | 0.032  | 0.02   | 0.017  | 0.02   | t | 156848 | ALTVRCTA<br>PCPQRN           | Gallus<br>gallus                 |
| 1 | 1.00 | 1 | 1 | 0     | 0.003  | -0.005 | 0      | 0.001  | t | 56610  | RYPGQGS<br>PGGNRYP<br>PQG    | Mus<br>musculu<br>s              |
| 1 | 1.00 | 1 | 1 | 0     | 0.002  | 0.01   | 0.001  | 0.002  | t | 16552  | FLDLPL                       | Homo<br>sapiens                  |

|   |      |   |   |       |        |        |        |        |   |        |                              |                     |
|---|------|---|---|-------|--------|--------|--------|--------|---|--------|------------------------------|---------------------|
| 1 | 1.00 | 1 | 1 | -0.02 | -0.016 | -0.017 | -0.019 | -0.02  | t | 18515  | GAALQIPF<br>AMQMAY<br>RFN    | Homo<br>sapiens     |
| 1 | 1.00 | 1 | 1 | 0.04  | 0.04   | 0.047  | 0.038  | 0.04   | t | 96207  | EDDAEDK<br>DED               | Homo<br>sapiens     |
| 1 | 1.00 | 1 | 1 | -0.02 | -0.02  | 0.009  | -0.02  | -0.022 | t | 42122  | MMHF                         | Mus<br>musculu<br>s |
| 1 | 1.00 | 1 | 1 | -0.02 | -0.02  | -0.026 | -0.02  | -0.02  | t | 86469  | MQTRHVK<br>NYHSRSES          | Homo<br>sapiens     |
| 1 | 1.00 | 1 | 1 | -0.05 | -0.05  | -0.05  | -0.05  | -0.05  | t | 99234  | EWGTPGS<br>HVREETSR          | Homo<br>sapiens     |
| 1 | 1.00 | 1 | 1 | 0     | -0.002 | -0.007 | -0.003 | 0      | t | 8469   | DGPQKSV<br>SQGGVSL<br>DLYSKL | Mus<br>musculu<br>s |
| 1 | 1.00 | 1 | 1 | -0.02 | -0.022 | -0.02  | -0.027 | -0.02  | t | 107503 | LFPPKPK                      | Mus<br>musculu<br>s |
| 1 | 1.00 | 1 | 1 | 0.01  | 0.01   | 0.01   | 0.01   | 0.009  | t | 115496 | SSEEIVPNS<br>VEQKHIQK<br>EDV | Homo<br>sapiens     |
| 1 | 1.00 | 1 | 1 | 0.06  | 0.062  | 0.05   | 0.057  | 0.062  | t | 48684  | PNPIGSEN<br>SE               | Homo<br>sapiens     |
| 1 | 1.00 | 1 | 1 | 0.03  | 0.028  | 0.037  | 0.023  | 0.03   | t | 130643 | YSLLEPYT<br>FDP              | Mus<br>musculu<br>s |
| 1 | 1.00 | 1 | 1 | 0.03  | 0.03   | 0.037  | 0.023  | 0.03   | t | 130643 | YSLLEPYT<br>FDP              | Homo<br>sapiens     |
| 1 | 1.00 | 1 | 1 | -0.01 | -0.009 | -0.01  | -0.013 | -0.009 | t | 130606 | SCTVYGKT<br>PLCG             | Mus<br>musculu<br>s |
| 1 | 1.00 | 1 | 1 | -0.04 | -0.038 | -0.038 | -0.039 | -0.038 | t | 79576  | IPKDRRST<br>GKSWGKPY         | Homo<br>sapiens     |
| 1 | 1.00 | 1 | 1 | -0.02 | -0.028 | -0.02  | -0.02  | -0.018 | t | 156840 | AAPKMCS<br>TWCQMW<br>Q       | Mus<br>musculu<br>s |
| 1 | 1.00 | 1 | 1 | 0     | -0.002 | 0.012  | 0.003  | 0      | t | 5507   | AVPNVRG<br>DLQ               | Mus<br>musculu<br>s |

|   |      |   |   |       |        |        |        |        |   |        |                            |                           |
|---|------|---|---|-------|--------|--------|--------|--------|---|--------|----------------------------|---------------------------|
| 1 | 1.00 | 1 | 1 | 0.04  | 0.038  | 0.049  | 0.043  | 0.042  | t | 106119 | SQNSAEG<br>AW              | Mus<br>musculu<br>s       |
| 1 | 1.00 | 1 | 1 | -0.01 | -0.008 | -0.01  | -0.013 | -0.01  | t | 95814  | SAQSGASA<br>QSGA           | Homo<br>sapiens           |
| 1 | 1.00 | 1 | 1 | -0.01 | -0.008 | -0.01  | -0.013 | -0.01  | t | 95814  | SAQSGASA<br>QSGA           | Homo<br>sapiens           |
| 1 | 1.00 | 1 | 1 | -0.03 | -0.027 | -0.033 | -0.03  | -0.028 | t | 111125 | ASQKRPSQ<br>R              | Mus<br>musculu<br>s       |
| 1 | 1.00 | 1 | 1 | 0     | 0.003  | 0.007  | -0.001 | 0.002  | t | 107010 | YESPPKFW<br>FISP           | Mus<br>musculu<br>s       |
| 1 | 1.00 | 1 | 1 | 0.05  | 0.048  | 0.053  | 0.049  | 0.053  | t | 103372 | LPGEEDLP<br>G              | Mus<br>musculu<br>s       |
| 1 | 1.00 | 1 | 1 | -0.02 | -0.018 | -0.016 | -0.017 | -0.02  | t | 70810  | VRRDSAW<br>DVRPLTET        | Homo<br>sapiens           |
| 1 | 1.00 | 1 | 1 | -0.01 | -0.01  | -0.01  | -0.01  | -0.008 | t | 127984 | FTNLKFKV<br>RKITSSHR<br>GN | Mus<br>musculu<br>s       |
| 1 | 1.00 | 1 | 1 | 0.05  | 0.052  | 0.059  | 0.047  | 0.052  | t | 11493  | EEAFFSFCE<br>T             | Homo<br>sapiens           |
| 1 | 1.00 | 1 | 1 | 0.02  | 0.023  | 0.025  | 0.02   | 0.022  | t | 134188 | PMSTPSAT<br>SVR            | Mus<br>musculu<br>s       |
| 1 | 1.00 | 1 | 1 | 0.02  | 0.02   | 0.015  | 0.023  | 0.022  | t | 72078  | VYLHRIDL<br>GPPISLE        | Homo<br>sapiens           |
| 1 | 1.00 | 1 | 1 | -0.02 | -0.02  | -0.02  | -0.02  | -0.017 | t | 106321 | DAEFRH                     | Mus<br>musculu<br>s       |
| 1 | 1.00 | 1 | 1 | -0.04 | -0.041 | -0.045 | -0.04  | -0.038 | t | 47994  | PITARIHA<br>HLKAYA         | Anas<br>platyrhy<br>nchos |
| 1 | 1.00 | 1 | 1 | 0     | 0      | 0      | 0      | 0.001  | t | 111304 | GAVGENV<br>PDDLVIKG        | Mus<br>musculu<br>s       |

|   |      |   |   |       |        |        |        |        |   |        |                              |                           |
|---|------|---|---|-------|--------|--------|--------|--------|---|--------|------------------------------|---------------------------|
| 1 | 1.00 | 1 | 1 | -0.01 | -0.01  | -0.005 | -0.01  | -0.01  | t | 159170 | TTASGKLV<br>TDWCCRS<br>C     | Mus<br>musculu<br>s       |
| 1 | 1.00 | 1 | 1 | 0.01  | 0.011  | 0.01   | 0.007  | 0.01   | t | 130613 | SSYCLRSV<br>CLSD             | Mus<br>musculu<br>s       |
| 1 | 1.00 | 1 | 1 | 0.01  | 0.011  | 0.01   | 0.007  | 0.01   | t | 130613 | SSYCLRSV<br>CLSD             | Mus<br>musculu<br>s       |
| 1 | 1.00 | 1 | 1 | 0.01  | 0.008  | 0.025  | 0.009  | 0.01   | t | 13763  | EPSGQTA<br>DWY               | Mus<br>musculu<br>s       |
| 1 | 1.00 | 1 | 1 | 0.02  | 0.018  | 0.023  | 0.019  | 0.021  | t | 7187   | CTNGLTAL<br>FTPGAKQ<br>N     | Mus<br>musculu<br>s       |
| 1 | 1.00 | 1 | 1 | -0.02 | -0.02  | -0.02  | -0.02  | -0.02  | t | 107441 | HQNWLD<br>G                  | Homo<br>sapiens           |
| 1 | 1.00 | 1 | 1 | -0.02 | -0.02  | -0.02  | -0.02  | -0.02  | t | 103262 | HVIAGQAS<br>PSRIDGT          | Homo<br>sapiens           |
| 1 | 1.00 | 1 | 1 | -0.04 | -0.04  | -0.04  | -0.04  | -0.04  | t | 79143  | ACNMLR<br>WDKTIPCR           | Mus<br>musculu<br>s       |
| 1 | 1.00 | 1 | 1 | -0.01 | -0.006 | 0.002  | -0.003 | -0.008 | t | 132982 | AHCLRDIP<br>QRLVNV           | Homo<br>sapiens           |
| 1 | 1.00 | 1 | 1 | 0.01  | 0.012  | 0.013  | 0.011  | 0.01   | t | 56614  | RYPHYSLIK<br>PESSL           | Homo<br>sapiens           |
| 1 | 1.00 | 1 | 1 | 0.04  | 0.04   | 0.04   | 0.036  | 0.04   | t | 115602 | EEAAMELK<br>VEDP             | Homo<br>sapiens           |
| 1 | 1.00 | 1 | 1 | 0.01  | 0.01   | 0.01   | 0.01   | 0.01   | t | 156852 | AYQLGYSP<br>PPLPNPH          | Gallus<br>gallus          |
| 1 | 1.00 | 1 | 1 | -0.02 | -0.02  | -0.025 | -0.022 | -0.02  | t | 70672  | VQWMNR<br>LIAFASRG<br>NHVSPA | Homo<br>sapiens           |
| 1 | 1.00 | 1 | 1 | 0.01  | 0.012  | 0.011  | 0.01   | 0.01   | t | 27918  | IPLGDLFK<br>HQEERI           | Anas<br>platyrhy<br>nchos |
| 1 | 1.00 | 1 | 1 | -0.01 | -0.01  | -0.01  | -0.01  | -0.009 | t | 108002 | LGWMRY<br>HPQA               | Homo<br>sapiens           |
| 1 | 1.00 | 1 | 1 | 0.01  | 0.01   | 0.011  | 0.008  | 0.01   | t | 9038   | DLDANGIL<br>NVSAEEKG<br>TGKR | Homo<br>sapiens           |

|   |      |   |   |       |        |        |        |        |   |        |                                |                                  |
|---|------|---|---|-------|--------|--------|--------|--------|---|--------|--------------------------------|----------------------------------|
| 1 | 1.00 | 1 | 1 | -0.03 | -0.03  | -0.023 | -0.03  | -0.03  | t | 153366 | CFRKHPEA<br>TYSR               | Mus<br>musculu<br>s              |
| 1 | 1.00 | 1 | 1 | -0.02 | -0.023 | -0.027 | -0.02  | -0.02  | t | 135533 | AELSPA<br>AKTGKRKRSQ<br>M      | Oryctola<br>gus<br>cuniculu<br>s |
| 1 | 1.00 | 1 | 1 | 0.01  | 0.01   | 0.011  | 0.01   | 0.01   | t | 52016  | QQEVDYII<br>DHVDQHN            | Mus<br>musculu<br>s              |
| 1 | 1.00 | 1 | 1 | 0.01  | 0.01   | 0.011  | 0.01   | 0.01   | t | 52016  | QQEVDYII<br>DHVDQHN            | Mus<br>musculu<br>s              |
| 1 | 1.00 | 1 | 1 | 0.03  | 0.03   | 0.025  | 0.022  | 0.03   | t | 124604 | QIERDTER<br>DRFLSAPE<br>AV     | Homo<br>sapiens                  |
| 1 | 1.00 | 1 | 1 | 0     | 0      | 0      | 0      | 0.002  | t | 6249   | CFPYCYP<br>SESA                | Mus<br>musculu<br>s              |
| 1 | 1.00 | 1 | 1 | 0.02  | 0.016  | 0.023  | 0.023  | 0.022  | t | 115302 | IVTAGEER<br>AVTT               | Oryctola<br>gus<br>cuniculu<br>s |
| 1 | 1.00 | 1 | 1 | -0.02 | -0.02  | -0.02  | -0.024 | -0.02  | t | 132067 | SLVLTNL<br>NEL                 | Homo<br>sapiens                  |
| 1 | 1.00 | 1 | 1 | 0     | 0      | 0      | 0      | 0.002  | t | 55260  | RPPNAP                         | Mus<br>musculu<br>s              |
| 1 | 1.00 | 1 | 1 | -0.02 | -0.022 | -0.004 | -0.021 | -0.024 | t | 30612  | KESQAYY<br>DGRRS               | Mus<br>musculu<br>s              |
| 1 | 1.00 | 1 | 1 | -0.05 | -0.048 | -0.045 | -0.051 | -0.051 | t | 69871  | VLYHKPLA<br>GVYRALKK<br>QLG    | Aotus<br>nancyma<br>ae           |
| 1 | 1.00 | 1 | 1 | 0.02  | 0.022  | 0.028  | 0.021  | 0.021  | t | 57789  | SFHNHLHL<br>L FDEYTNIP<br>VSIL | Homo<br>sapiens                  |
| 1 | 1.00 | 1 | 1 | -0.03 | -0.032 | -0.008 | -0.027 | -0.031 | t | 116605 | VNIPFVRL                       | Mus<br>musculu<br>s              |
| 1 | 1.00 | 1 | 1 | 0.01  | 0.01   | 0.005  | 0.007  | 0.008  | t | 69084  | VIQHTFNL<br>KSQQARQ            | Homo<br>sapiens                  |
| 1 | 1.00 | 1 | 1 | 0     | 0.002  | -0.002 | 0.001  | 0      | t | 11328  | EDGAGNQ<br>PGANGAG<br>NQPG     | Homo<br>sapiens                  |

|   |      |   |   |       |        |        |        |        |   |        |                              |                                  |
|---|------|---|---|-------|--------|--------|--------|--------|---|--------|------------------------------|----------------------------------|
| 1 | 1.00 | 1 | 1 | 0     | 0.002  | -0.002 | 0.001  | 0      | t | 11328  | EDGAGNQ<br>PGANGAG<br>NQPG   | Homo<br>sapiens                  |
| 1 | 1.00 | 1 | 1 | 0     | 0      | 0.004  | 0      | 0      | t | 66409  | TSRTLSYYK<br>LGASQRV         | Homo<br>sapiens                  |
| 1 | 1.00 | 1 | 1 | 0.01  | 0.008  | 0.016  | 0.013  | 0.01   | t | 70879  | VSALEDKL<br>AD               | Mus<br>musculu<br>s              |
| 1 | 1.00 | 1 | 1 | 0     | 0      | 0      | 0      | 0.002  | t | 49118  | PQRPFAQ<br>QPE               | Mus<br>musculu<br>s              |
| 1 | 1.00 | 1 | 1 | 0.02  | 0.02   | 0.023  | 0.02   | 0.02   | t | 50300  | QALDAH<br>DSVLKDI            | Homo<br>sapiens                  |
| 1 | 1.00 | 1 | 1 | -0.07 | -0.068 | -0.056 | -0.069 | -0.07  | t | 35352  | LEAFWHK<br>HM                | Homo<br>sapiens                  |
| 1 | 1.00 | 1 | 1 | -0.01 | -0.007 | -0.01  | -0.01  | -0.012 | t | 140905 | TPAAKVLV<br>EGNTDER<br>GTPEY | Mus<br>musculu<br>s              |
| 1 | 1.00 | 1 | 1 | -0.02 | -0.023 | -0.013 | -0.02  | -0.022 | t | 99951  | DQLTGNIN<br>YACG             | Oryctola<br>gus<br>cuniculu<br>s |
| 1 | 1.00 | 1 | 1 | -0.01 | -0.008 | -0.01  | -0.013 | -0.01  | t | 95827  | SGASAQS<br>GASQAQ            | Homo<br>sapiens                  |
| 1 | 1.00 | 1 | 1 | -0.01 | -0.008 | -0.01  | -0.013 | -0.01  | t | 95827  | SGASAQS<br>GASQAQ            | Homo<br>sapiens                  |
| 1 | 1.00 | 1 | 1 | -0.06 | -0.062 | -0.06  | -0.061 | -0.059 | t | 150972 | CKLRGVAP<br>LHLGKC           | Mus<br>musculu<br>s              |
| 1 | 1.00 | 1 | 1 | 0     | 0      | 0.021  | 0      | 0      | t | 32486  | KNEVFC                       | Homo<br>sapiens                  |
| 1 | 1.00 | 1 | 1 | -0.08 | -0.077 | -0.08  | -0.08  | -0.077 | t | 143687 | FRVNLRTL<br>RRYY             | Mus<br>musculu<br>s              |
| 1 | 1.00 | 1 | 1 | -0.01 | -0.01  | -0.01  | -0.012 | -0.01  | t | 48520  | PLVESWKR<br>PDYQPA           | Homo<br>sapiens                  |



|   |      |   |   |       |        |        |        |        |   |        |                              |                                  |
|---|------|---|---|-------|--------|--------|--------|--------|---|--------|------------------------------|----------------------------------|
| 1 | 1.00 | 1 | 1 | 0     | 0.002  | 0      | -0.003 | 0.001  | t | 28075  | IPSTAFTDI<br>AWVRLPN<br>HY   | Homo<br>sapiens                  |
| 1 | 1.00 | 1 | 1 | 0.07  | 0.066  | 0.07   | 0.067  | 0.071  | t | 142006 | SDSAQGS<br>DVSLTA            | Oryctola<br>gus<br>cuniculu<br>s |
| 1 | 1.00 | 1 | 1 | -0.03 | -0.03  | -0.025 | -0.03  | -0.03  | t | 51012  | QHLLSPNV<br>RPPH             | Mus<br>musculu<br>s              |
| 1 | 1.00 | 1 | 1 | -0.04 | -0.04  | -0.047 | -0.043 | -0.042 | t | 47869  | PIAPYHFD<br>LSGHAFG          | Homo<br>sapiens                  |
| 1 | 1.00 | 1 | 1 | -0.05 | -0.05  | -0.05  | -0.05  | -0.048 | t | 107895 | HSTKRGH<br>AKSRPVRG          | Homo<br>sapiens                  |
| 1 | 1.00 | 1 | 1 | -0.04 | -0.04  | -0.045 | -0.04  | -0.04  | t | 6952   | CRTLTMGMF<br>SLGARQKI        | Mus<br>musculu<br>s              |
| 1 | 1.00 | 1 | 1 | -0.01 | -0.01  | -0.001 | -0.013 | -0.009 | t | 30780  | KFLVNGR<br>WID               | Homo<br>sapiens                  |
| 1 | 1.00 | 1 | 1 | 0     | 0      | 0      | 0      | 0      | t | 112362 | TRESGVP                      | Homo<br>sapiens                  |
| 1 | 1.00 | 1 | 1 | -0.01 | -0.014 | -0.01  | -0.017 | -0.01  | t | 129973 | SPRSFQKK<br>T                | Oryctola<br>gus<br>cuniculu<br>s |
| 1 | 1.00 | 1 | 1 | -0.04 | -0.04  | -0.04  | -0.04  | -0.04  | t | 149436 | QQHHHH<br>QEQK               | Homo<br>sapiens                  |
| 1 | 1.00 | 1 | 1 | -0.04 | -0.04  | -0.04  | -0.04  | -0.04  | t | 149436 | QQHHHH<br>QEQK               | Mus<br>musculu<br>s              |
| 1 | 1.00 | 1 | 1 | 0     | 0      | 0      | 0      | 0.002  | t | 45406  | NPNANPN                      | Mus<br>musculu<br>s              |
| 1 | 1.00 | 1 | 1 | 0     | 0.008  | 0.01   | 0      | -0.002 | t | 70399  | VPNLRGDT<br>QVLAQKV<br>ARTLP | Cavia<br>porcellu<br>s           |
| 1 | 1.00 | 1 | 1 | 0.01  | 0.01   | 0.025  | 0.012  | 0.01   | t | 98098  | HKSGANA<br>ASS               | Homo<br>sapiens                  |

|   |      |   |   |       |        |        |        |        |   |        |                                 |                                  |
|---|------|---|---|-------|--------|--------|--------|--------|---|--------|---------------------------------|----------------------------------|
| 1 | 1.00 | 1 | 1 | 0.01  | 0.008  | -0.002 | 0.003  | 0.013  | t | 30300  | KEALDKYE<br>LENHDLKT<br>KN      | Mus<br>musculu<br>s              |
| 1 | 1.00 | 1 | 1 | -0.01 | -0.006 | 0.001  | -0.009 | -0.01  | t | 2270   | AKQPATLR                        | MD                               |
| 1 | 1.00 | 1 | 1 | 0     | 0      | 0.002  | -0.003 | 0.001  | t | 42306  | MPNYDRL                         | Homo<br>sapiens                  |
| 1 | 1.00 | 1 | 1 | 0     | 0      | -0.005 | 0      | 0.004  | t | 122746 | EEQEDEIIG<br>FGQELKN            | Oryctola<br>gus<br>cuniculu<br>s |
| 1 | 1.00 | 1 | 1 | 0.04  | 0.04   | 0.06   | 0.043  | 0.04   | t | 43781  | NEVFCV                          | Homo<br>sapiens                  |
| 1 | 1.00 | 1 | 1 | -0.09 | -0.094 | -0.088 | -0.089 | -0.09  | t | 96409  | INDMPITN<br>DQKKL               | Oryctola<br>gus<br>cuniculu<br>s |
| 1 | 1.00 | 1 | 1 | 0     | -0.006 | 0      | 0.003  | 0.004  | t | 15509  | FEDVKGTG<br>GESRDLP<br>S<br>GQG | Papio                            |
| 1 | 1.00 | 1 | 1 | 0     | -0.006 | 0      | 0.003  | 0.004  | t | 6925   | CRGFTSFK<br>KPPTPPPE<br>PET     | Papio                            |
| 1 | 1.00 | 1 | 1 | 0     | 0.002  | 0.005  | 0      | 0      | t | 119465 | HRKSTVAG<br>S                   | Homo<br>sapiens                  |
| 1 | 1.00 | 1 | 1 | -0.03 | -0.031 | -0.029 | -0.033 | -0.029 | t | 99167  | DVFIMPAA<br>HPVAINA             | Homo<br>sapiens                  |
| 1 | 1.00 | 1 | 1 | 0     | 0.004  | 0.009  | 0.001  | 0      | t | 47769  | PGVAGSG<br>A                    | Homo<br>sapiens                  |
| 1 | 1.00 | 1 | 1 | 0.02  | 0.02   | 0.02   | 0.02   | 0.02   | t | 141978 | PKGQTRTL<br>GSNRERER<br>I       | Mus<br>musculu<br>s              |
| 1 | 1.00 | 1 | 1 | 0.02  | 0.02   | 0.02   | 0.02   | 0.02   | t | 141978 | PKGQTRTL<br>GSNRERER<br>I       | Sus<br>scrofa                    |
| 1 | 1.00 | 1 | 1 | -0.04 | -0.04  | -0.04  | -0.04  | -0.04  | t | 107662 | VLTVLHQN<br>WL                  | Mus<br>musculu<br>s              |

|   |      |   |   |       |        |        |        |        |   |        |                              |                                  |
|---|------|---|---|-------|--------|--------|--------|--------|---|--------|------------------------------|----------------------------------|
| 1 | 1.00 | 1 | 1 | 0.03  | 0.03   | 0.043  | 0.028  | 0.027  | t | 98777  | FNPTQLEE<br>QC               | Homo<br>sapiens                  |
| 1 | 1.00 | 1 | 1 | 0.02  | 0.016  | 0.032  | 0.02   | 0.02   | t | 10550  | DVCSDS<br>NDGVCDN<br>V       | Mus<br>musculu<br>s              |
| 1 | 1.00 | 1 | 1 | 0.02  | 0.023  | 0.032  | 0.02   | 0.02   | t | 10550  | DVCSDS<br>NDGVCDN<br>V       | Mus<br>musculu<br>s              |
| 1 | 1.00 | 1 | 1 | 0.04  | 0.04   | 0.04   | 0.036  | 0.04   | t | 135944 | KEQFEFAL<br>TAVAEVC          | Homo<br>sapiens                  |
| 1 | 1.00 | 1 | 1 | -0.04 | -0.045 | -0.05  | -0.038 | -0.037 | t | 157111 | ASDACDKI<br>RYQSLT           | Canis<br>lupus                   |
| 1 | 1.00 | 1 | 1 | 0.03  | 0.026  | 0.027  | 0.029  | 0.03   | t | 8974   | DKQLLP<br>IVNKQSCSIS         | Oryctola<br>gus<br>cuniculu<br>s |
| 1 | 1.00 | 1 | 1 | 0     | 0.004  | 0.004  | 0.001  | 0.002  | t | 111288 | FPITTNAPI<br>YGS             | Homo<br>sapiens                  |
| 1 | 1.00 | 1 | 1 | 0.01  | 0.006  | 0.005  | 0.009  | 0.008  | t | 70656  | VQTRHV<br>VQHRSRSES<br>SIESF | Oryctola<br>gus<br>cuniculu<br>s |
| 1 | 1.00 | 1 | 1 | -0.04 | -0.04  | -0.033 | -0.04  | -0.04  | t | 133665 | PVLLFCFLA<br>GRCVSV          | Mus<br>musculu<br>s              |
| 1 | 1.00 | 1 | 1 | -0.03 | -0.03  | -0.03  | -0.03  | -0.03  | t | 131893 | GNGANS<br>GSRRGWG<br>T       | Homo<br>sapiens                  |
| 1 | 1.00 | 1 | 1 | 0     | 0      | 0      | -0.001 | 0.002  | t | 37315  | LLGCIGSTC                    | Mus<br>musculu<br>s              |
| 1 | 1.00 | 1 | 1 | 0     | 0      | 0      | 0      | 0.002  | t | 67930  | VDEKKK                       | Mus<br>musculu<br>s              |
| 1 | 1.00 | 1 | 1 | 0     | 0      | 0      | 0      | 0.002  | t | 67930  | VDEKKK                       | Mus<br>musculu<br>s              |

|   |      |   |   |       |        |        |        |        |   |        |                              |                                  |
|---|------|---|---|-------|--------|--------|--------|--------|---|--------|------------------------------|----------------------------------|
| 1 | 1.00 | 1 | 1 | 0     | 0      | 0      | 0      | 0.002  | t | 51828  | QPFPQPQ<br>QTF               | Mus<br>musculu<br>s              |
| 1 | 1.00 | 1 | 1 | -0.04 | -0.04  | -0.04  | -0.043 | -0.042 | t | 25086  | HVSGHRM<br>AW                | Homo<br>sapiens                  |
| 1 | 1.00 | 1 | 1 | -0.04 | -0.043 | -0.028 | -0.04  | -0.04  | t | 69183  | VKAVTTLL<br>KA               | Oryctola<br>gus<br>cuniculu<br>s |
| 1 | 1.00 | 1 | 1 | -0.04 | -0.04  | -0.028 | -0.04  | -0.04  | t | 69183  | VKAVTTLL<br>KA               | Mus<br>musculu<br>s              |
| 1 | 1.00 | 1 | 1 | 0     | 0      | 0.002  | 0.003  | 0.002  | t | 53046  | QYVLATYD<br>TSRVEHA          | Homo<br>sapiens                  |
| 1 | 1.00 | 1 | 1 | 0     | 0      | 0      | 0      | 0.002  | t | 117514 | GRGRGRG<br>RGRGGPR<br>R      | Homo<br>sapiens                  |
| 1 | 1.00 | 1 | 1 | 0.01  | 0.006  | 0.007  | 0.007  | 0.01   | t | 110762 | AGSSIVPLE<br>EYPAEIP         | Oryctola<br>gus<br>cuniculu<br>s |
| 1 | 1.00 | 1 | 1 | 0     | 0      | 0.017  | 0      | -0.004 | t | 145737 | DARAYDTE<br>V                | Mus<br>musculu<br>s              |
| 1 | 1.00 | 1 | 1 | 0.02  | 0.017  | 0.016  | 0.02   | 0.022  | t | 148982 | VVKVEDKS<br>KLQDTKDK<br>KR   | Canis<br>lupus                   |
| 1 | 1.00 | 1 | 1 | 0.01  | 0.013  | 0.018  | 0.01   | 0.01   | t | 47757  | PGSTTTST<br>GPCKTC           | Mus<br>musculu<br>s              |
| 1 | 1.00 | 1 | 1 | -0.01 | -0.01  | -0.002 | -0.01  | -0.009 | t | 34502  | KYLGFBVQD<br>AA              | Homo<br>sapiens                  |
| 1 | 1.00 | 1 | 1 | -0.03 | -0.035 | -0.022 | -0.033 | -0.033 | t | 1453   | AGARRGD<br>LAHLAAAH<br>ARHLP | Bos<br>taurus                    |
| 1 | 1.00 | 1 | 1 | -0.03 | -0.035 | -0.022 | -0.033 | -0.033 | t | 1453   | AGARRGD<br>LAHLAAAH<br>ARHLP | Bos<br>taurus                    |

|   |      |   |   |   |   |   |   |       |   |        |                              |                 |
|---|------|---|---|---|---|---|---|-------|---|--------|------------------------------|-----------------|
| 1 | 1.00 | 1 | 1 | 0 | 0 | 0 | 0 | 0.002 | t | 135569 | KTNMK                        | Mus<br>musculus |
| 1 | 1.00 | 1 | 1 | 0 | 0 | 0 | 0 | 0.002 | t | 135569 | KTNMK                        | Mus<br>musculus |
| 1 | 1.00 | 1 | 1 | 0 | 0 | 0 | 0 | 0.002 | t | 138862 | KFPED                        | Mus<br>musculus |
| 1 | 1.00 | 1 | 1 | 0 | 0 | 0 | 0 | 0.002 | t | 150858 | ISSLYNLVK<br>SS              | Mus<br>musculus |
| 1 | 1.00 | 1 | 1 | 0 | 0 | 0 | 0 | 0.002 | t | 139475 | ATPRAHEV<br>SE               | Mus<br>musculus |
| 1 | 1.00 | 1 | 1 | 0 | 0 | 0 | 0 | 0.002 | t | 139525 | ISSQTNDT<br>HKRDTYA<br>ATPRA | Mus<br>musculus |
| 1 | 1.00 | 1 | 1 | 0 | 0 | 0 | 0 | 0.002 | t | 122406 | IEIGLEGKG<br>FEPTLEALF<br>GK | Homo<br>sapiens |
| 1 | 1.00 | 1 | 1 | 0 | 0 | 0 | 0 | 0.002 | t | 122452 | KTTKQSF<br>LSVKAQYK<br>KNKH  | Homo<br>sapiens |
| 1 | 1.00 | 1 | 1 | 0 | 0 | 0 | 0 | 0.002 | t | 118734 | AEFRHDSG<br>Y                | Mus<br>musculus |
| 1 | 1.00 | 1 | 1 | 0 | 0 | 0 | 0 | 0.002 | t | 102931 | WQALCAY<br>QAE               | Mus<br>musculus |
| 1 | 1.00 | 1 | 1 | 0 | 0 | 0 | 0 | 0.002 | t | 108382 | GGVVIA                       | Mus<br>musculus |
| 1 | 1.00 | 1 | 1 | 0 | 0 | 0 | 0 | 0.002 | t | 107166 | GPPGPQG                      | Mus<br>musculus |
| 1 | 1.00 | 1 | 1 | 0 | 0 | 0 | 0 | 0.002 | t | 100378 | PGSGFWS<br>FGSEDGSG<br>DSEN  | Mus<br>musculus |
| 1 | 1.00 | 1 | 1 | 0 | 0 | 0 | 0 | 0.002 | t | 102423 | FEYQD                        | Mus<br>musculus |
| 1 | 1.00 | 1 | 1 | 0 | 0 | 0 | 0 | 0.002 | t | 108382 | GGVVIA                       | Mus<br>musculus |
| 1 | 1.00 | 1 | 1 | 0 | 0 | 0 | 0 | 0.002 | t | 75791  | YSLFQKEK<br>MVL              | Mus<br>musculus |

|   |      |   |   |       |        |        |        |        |   |        |                              |                     |
|---|------|---|---|-------|--------|--------|--------|--------|---|--------|------------------------------|---------------------|
| 1 | 1.00 | 1 | 1 | 0     | 0      | 0      | 0      | 0.002  | t | 75791  | YSLFQKEK<br>MVL              | Mus<br>musculu<br>s |
| 1 | 1.00 | 1 | 1 | 0     | 0      | 0      | 0      | 0.002  | t | 75441  | YPYDVPDY<br>A                | Mus<br>musculu<br>s |
| 1 | 1.00 | 1 | 1 | 0     | 0      | 0      | 0      | 0.002  | t | 50222  | QACKGKIQ<br>ALCEN            | Mus<br>musculu<br>s |
| 1 | 1.00 | 1 | 1 | 0     | 0      | 0      | 0      | 0.002  | t | 43242  | NANPNAN<br>PNANP             | Mus<br>musculu<br>s |
| 1 | 1.00 | 1 | 1 | 0     | 0      | 0      | 0      | 0.002  | t | 40332  | LVFFAEDV                     | Mus<br>musculu<br>s |
| 1 | 1.00 | 1 | 1 | 0     | 0      | 0      | 0      | 0.002  | t | 43242  | NANPNAN<br>PNANP             | Mus<br>musculu<br>s |
| 1 | 1.00 | 1 | 1 | 0     | 0      | 0      | 0      | 0.002  | t | 50637  | QELDCWH<br>YQHCVTS<br>TKS    | MD                  |
| 1 | 1.00 | 1 | 1 | -0.05 | -0.05  | -0.042 | -0.05  | -0.052 | t | 113875 | SNRRPSTT                     | Mus<br>musculu<br>s |
| 1 | 1.00 | 1 | 1 | -0.01 | -0.01  | -0.01  | -0.01  | -0.008 | t | 7108   | CTARVAGL<br>FNPGSQQ<br>R     | Mus<br>musculu<br>s |
| 1 | 1.00 | 1 | 1 | 0.02  | 0.02   | 0.02   | 0.02   | 0.021  | t | 144673 | GTFCGGEE<br>CMRG             | Mus<br>musculu<br>s |
| 1 | 1.00 | 1 | 1 | 0.01  | 0.01   | 0.01   | 0.01   | 0.01   | t | 99016  | SSRDQSSY<br>LQGFSRN          | Homo<br>sapiens     |
| 1 | 1.00 | 1 | 1 | -0.03 | -0.033 | -0.028 | -0.029 | -0.03  | t | 41155  | MATPRSA<br>KKAARKSG<br>SKSAK | Canis<br>lupus      |
| 1 | 1.00 | 1 | 1 | -0.03 | -0.033 | -0.028 | -0.029 | -0.03  | t | 41155  | MATPRSA<br>KKAARKSG<br>SKSAK | Canis<br>lupus      |
| 1 | 1.00 | 1 | 1 | -0.03 | -0.033 | -0.028 | -0.029 | -0.03  | t | 41155  | MATPRSA<br>KKAARKSG<br>SKSAK | Canis<br>lupus      |
| 1 | 1.00 | 1 | 1 | -0.04 | -0.04  | -0.04  | -0.04  | -0.04  | t | 135776 | VDRATCLR                     | Homo<br>sapiens     |

|   |      |   |   |       |        |       |        |        |   |        |                              |                                  |
|---|------|---|---|-------|--------|-------|--------|--------|---|--------|------------------------------|----------------------------------|
| 1 | 1.00 | 1 | 1 | -0.04 | -0.04  | -0.04 | -0.04  | -0.04  | t | 103037 | AKVRRER<br>MGHIELAA          | Homo<br>sapiens                  |
| 1 | 1.00 | 1 | 1 | 0     | -0.004 | 0     | -0.007 | -0.002 | t | 141777 | VVDSEDLP<br>LN               | Oryctola<br>gus<br>cuniculu<br>s |
| 1 | 1.00 | 1 | 1 | 0     | -0.004 | 0     | -0.007 | -0.002 | t | 123760 | SSYAKVSIC<br>LPMDTETP<br>LAL | Oryctola<br>gus<br>cuniculu<br>s |
| 1 | 1.00 | 1 | 1 | 0     | -0.002 | 0     | -0.007 | -0.002 | t | 117509 | GQIPPGAM                     | Mus<br>musculu<br>s              |
| 1 | 1.00 | 1 | 1 | 0     | -0.002 | 0     | -0.007 | -0.002 | t | 122932 | VCTPKSDE<br>FNPCEDIM<br>GYK  | Mus<br>musculu<br>s              |
| 1 | 1.00 | 1 | 1 | 0     | -0.004 | 0     | -0.007 | -0.002 | t | 118374 | GKALCWV<br>CAQSRKHD          | Oryctola<br>gus<br>cuniculu<br>s |
| 1 | 1.00 | 1 | 1 | 0     | -0.004 | 0     | -0.007 | -0.002 | t | 119410 | YKMFPEVK<br>EKGMA            | Oryctola<br>gus<br>cuniculu<br>s |
| 1 | 1.00 | 1 | 1 | 0     | -0.004 | 0     | -0.007 | -0.002 | t | 121154 | ASAARLT<br>MMW               | Oryctola<br>gus<br>cuniculu<br>s |
| 1 | 1.00 | 1 | 1 | 0     | -0.002 | 0     | -0.007 | -0.002 | t | 118077 | QEMPLTA<br>LLRNLGK<br>MT     | Mus<br>musculu<br>s              |
| 1 | 1.00 | 1 | 1 | 0     | -0.004 | 0     | -0.007 | -0.002 | t | 122892 | RSILPYGDS<br>MDRIE           | Oryctola<br>gus<br>cuniculu<br>s |
| 1 | 1.00 | 1 | 1 | 0     | -0.003 | 0     | -0.007 | -0.002 | t | 117344 | PPGMRPP                      | Oryctola<br>gus<br>cuniculu<br>s |
| 1 | 1.00 | 1 | 1 | 0     | -0.004 | 0     | -0.007 | -0.002 | t | 117366 | RRREGPDR<br>SPR              | Oryctola<br>gus<br>cuniculu<br>s |
| 1 | 1.00 | 1 | 1 | 0     | -0.004 | 0     | -0.007 | -0.002 | t | 103830 | CHAVKVG<br>NPSC              | Oryctola<br>gus<br>cuniculu<br>s |

|   |      |   |   |       |        |        |        |        |   |        |                              |                                  |
|---|------|---|---|-------|--------|--------|--------|--------|---|--------|------------------------------|----------------------------------|
| 1 | 1.00 | 1 | 1 | 0     | -0.004 | 0      | -0.007 | -0.002 | t | 117348 | PTRAPSGP<br>RPP              | Oryctola<br>gus<br>cuniculu<br>s |
| 1 | 1.00 | 1 | 1 | 0     | -0.004 | 0      | -0.007 | -0.002 | t | 31330  | KILPEVKEK<br>HEF             | Oryctola<br>gus<br>cuniculu<br>s |
| 1 | 1.00 | 1 | 1 | -0.08 | -0.078 | -0.071 | -0.073 | -0.08  | t | 120775 | LPKKTESH<br>HKAKGK           | Homo<br>sapiens                  |
| 1 | 1.00 | 1 | 1 | 0     | 0      | 0      | 0      | 0.002  | t | 140256 | KYEQGGNI<br>ID               | Mus<br>musculu<br>s              |
| 1 | 1.00 | 1 | 1 | 0     | 0      | 0      | 0      | 0.002  | t | 140256 | KYEQGGNI<br>ID               | Mus<br>musculu<br>s              |
| 1 | 1.00 | 1 | 1 | -0.04 | -0.04  | -0.04  | -0.04  | -0.038 | t | 137375 | AHHFSE                       | Oryctola<br>gus<br>cuniculu<br>s |
| 1 | 1.00 | 1 | 1 | 0     | 0.002  | 0.01   | 0.007  | 0      | t | 136745 | WGPCGQ<br>GAILLVNC<br>DRDNLE | Homo<br>sapiens                  |
| 1 | 1.00 | 1 | 1 | -0.04 | -0.036 | -0.033 | -0.039 | -0.04  | t | 21953  | GQRVEFLV<br>QAWKSK           | Homo<br>sapiens                  |
| 1 | 1.00 | 1 | 1 | -0.02 | -0.022 | -0.02  | -0.017 | -0.016 | t | 70783  | VRLIRVTAS<br>PSA             | Mus<br>musculu<br>s              |
| 1 | 1.00 | 1 | 1 | -0.02 | -0.022 | -0.018 | -0.027 | -0.022 | t | 130994 | PDQRPYC<br>WHYPPKP<br>C      | Mus<br>musculu<br>s              |
| 1 | 1.00 | 1 | 1 | -0.02 | -0.02  | -0.02  | -0.02  | -0.02  | t | 75764  | YSIISSMKK<br>HLSI            | Mus<br>musculu<br>s              |
| 1 | 1.00 | 1 | 1 | -0.02 | -0.021 | -0.02  | -0.023 | -0.02  | t | 78240  | PHTSLYHL                     | Homo<br>sapiens                  |
| 1 | 1.00 | 1 | 1 | 0.04  | 0.04   | 0.047  | 0.04   | 0.04   | t | 141734 | RADESKTD<br>PQTEA            | Mus<br>musculu<br>s              |



|   |      |   |   |       |        |        |        |        |   |        |                              |                                  |
|---|------|---|---|-------|--------|--------|--------|--------|---|--------|------------------------------|----------------------------------|
| 1 | 1.00 | 1 | 1 | -0.01 | -0.009 | -0.01  | -0.009 | -0.01  | t | 32387  | KMQQGN<br>GRRGIRVV<br>PS     | Capra<br>hircus                  |
| 1 | 1.00 | 1 | 1 | 0     | 0.003  | 0      | 0      | 0.002  | t | 30246  | KDSPVGEI<br>LTRSKYNQ<br>NSK  | Equus<br>caballus                |
| 1 | 1.00 | 1 | 1 | 0.02  | 0.024  | 0.025  | 0.021  | 0.022  | t | 78153  | FDPQIQAI<br>VSSPCHNS         | Homo<br>sapiens                  |
| 1 | 1.00 | 1 | 1 | -0.02 | -0.02  | -0.02  | -0.02  | -0.02  | t | 101710 | HKHIDNPL<br>ALLL             | Homo<br>sapiens                  |
| 1 | 1.00 | 1 | 1 | -0.02 | -0.024 | -0.011 | -0.017 | -0.018 | t | 113757 | QHPVTNIS<br>DT               | Oryctola<br>gus<br>cuniculu<br>s |
| 1 | 1.00 | 1 | 1 | -0.01 | -0.01  | -0.01  | -0.01  | -0.012 | t | 130716 | AAIRGPGV<br>LAGGRSA<br>GAR   | Homo<br>sapiens                  |
| 1 | 1.00 | 1 | 1 | -0.01 | -0.01  | -0.01  | -0.01  | -0.01  | t | 99677  | SPRGQHS<br>RRERAGQ<br>E      | Homo<br>sapiens                  |
| 1 | 1.00 | 1 | 1 | -0.03 | -0.03  | -0.03  | -0.03  | -0.03  | t | 111123 | ARTYNQN<br>LIRHVGGG          | Oryctola<br>gus<br>cuniculu<br>s |
| 1 | 1.00 | 1 | 1 | -0.02 | -0.02  | -0.02  | -0.02  | -0.018 | t | 129829 | RSGVSLAA<br>LKKALAAA         | Homo<br>sapiens                  |
| 1 | 1.00 | 1 | 1 | -0.03 | -0.03  | -0.03  | -0.03  | -0.031 | t | 115424 | PQRDMPI<br>QAFLLYQE<br>PVLGP | Homo<br>sapiens                  |
| 1 | 1.00 | 1 | 1 | 0     | 0      | 0.007  | 0      | 0.001  | t | 106548 | IVYTPHPEY<br>LWP             | Mus<br>musculu<br>s              |
| 1 | 1.00 | 1 | 1 | 0     | -0.002 | 0.007  | 0      | 0      | t | 119466 | IRGERA                       | Mus<br>musculu<br>s              |
| 1 | 1.00 | 1 | 1 | 0.02  | 0.02   | 0.02   | 0.02   | 0.02   | t | 140873 | KGVDAGK<br>LGTVSYGE<br>EKPAV | Oryctola<br>gus<br>cuniculu<br>s |
| 1 | 1.00 | 1 | 1 | 0     | 0      | 0      | 0      | 0      | t | 33366  | KSKFGYSA<br>KDVRSL           | Homo<br>sapiens                  |
| 1 | 1.00 | 1 | 1 | -0.03 | -0.032 | -0.032 | -0.037 | -0.031 | t | 121070 | WVYYTCC<br>PDTPYL            | Rattus<br>norvegic<br>us         |

|   |      |   |   |       |        |        |        |        |   |        |                              |                                  |
|---|------|---|---|-------|--------|--------|--------|--------|---|--------|------------------------------|----------------------------------|
| 1 | 1.00 | 1 | 1 | 0     | 0.002  | 0      | 0.007  | 0.002  | t | 135498 | SCKLPVKK<br>ATVVQGE<br>RVKIQ | Homo<br>sapiens                  |
| 1 | 1.00 | 1 | 1 | 0.03  | 0.037  | 0.028  | 0.029  | 0.031  | t | 33198  | KRNEKWD<br>EVYKYIVT<br>NWL A | Gallus<br>gallus                 |
| 1 | 1.00 | 1 | 1 | 0.03  | 0.026  | 0.029  | 0.029  | 0.033  | t | 110862 | GGPTLVSL<br>HELPAETP         | Oryctola<br>gus<br>cuniculu<br>s |
| 1 | 1.00 | 1 | 1 | -0.02 | -0.02  | -0.017 | -0.021 | -0.02  | t | 68587  | VFTLSAHV                     | Mus<br>musculu<br>s              |
| 1 | 1.00 | 1 | 1 | -0.03 | -0.028 | -0.028 | -0.033 | -0.03  | t | 65614  | TPIRHRS                      | Homo<br>sapiens                  |
| 1 | 1.00 | 1 | 1 | -0.03 | -0.028 | -0.028 | -0.033 | -0.03  | t | 65614  | TPIRHRS                      | Homo<br>sapiens                  |
| 1 | 1.00 | 1 | 1 | -0.01 | -0.01  | -0.01  | -0.013 | -0.01  | t | 11971  | EFDEMEEC<br>PSHLPYIE<br>QGMQ | Homo<br>sapiens                  |
| 1 | 1.00 | 1 | 1 | 0.06  | 0.058  | 0.06   | 0.054  | 0.061  | t | 138244 | SSTIANT                      | Mus<br>musculu<br>s              |
| 1 | 1.00 | 1 | 1 | -0.03 | -0.032 | -0.03  | -0.037 | -0.03  | t | 133289 | PRSPKM                       | Mus<br>musculu<br>s              |
| 1 | 1.00 | 1 | 1 | -0.01 | -0.008 | -0.01  | -0.013 | -0.01  | t | 142202 | KISEASRK<br>GLRRDLDA<br>SREA | Homo<br>sapiens                  |
| 1 | 1.00 | 1 | 1 | -0.02 | -0.02  | -0.023 | -0.021 | -0.017 | t | 26132  | IFNSVFLDF<br>SVSFWIRIP<br>K  | Homo<br>sapiens                  |
| 1 | 1.00 | 1 | 1 | -0.02 | -0.018 | -0.02  | -0.017 | -0.021 | t | 136731 | VRVFQATR<br>GKLSSKCS<br>VVLG | Homo<br>sapiens                  |
| 1 | 1.00 | 1 | 1 | 0.01  | 0.012  | 0.006  | 0.011  | 0.011  | t | 47984  | PISLLFNEK<br>EADDNDH<br>EPQI | Homo<br>sapiens                  |
| 1 | 1.00 | 1 | 1 | -0.07 | -0.07  | -0.069 | -0.07  | -0.072 | t | 142005 | SDFRRQN<br>RRGGTNK<br>RTT    | Oryctola<br>gus<br>cuniculu<br>s |

|   |      |   |   |       |        |        |        |        |   |        |                              |                     |
|---|------|---|---|-------|--------|--------|--------|--------|---|--------|------------------------------|---------------------|
| 1 | 1.00 | 1 | 1 | -0.01 | -0.008 | -0.005 | -0.009 | -0.01  | t | 25309  | IAHQFKEK<br>VLGLLQRA<br>TQQQ | Homo<br>sapiens     |
| 1 | 1.00 | 1 | 1 | 0.03  | 0.028  | 0.03   | 0.023  | 0.03   | t | 107747 | ASNTNYIT<br>STLK             | Mus<br>musculu<br>s |
| 1 | 1.00 | 1 | 1 | 0.02  | 0.02   | 0.037  | 0.02   | 0.016  | t | 145921 | NPEIVYQY                     | Mus<br>musculu<br>s |
| 1 | 1.00 | 1 | 1 | -0.03 | -0.024 | -0.028 | -0.031 | -0.03  | t | 61429  | SSVASLND<br>LTPVGRLV<br>TVNP | Equus<br>caballus   |
| 1 | 1.00 | 1 | 1 | -0.01 | -0.012 | -0.01  | -0.013 | -0.01  | t | 7021   | CSKPKNRT<br>C                | Mus<br>musculu<br>s |
| 1 | 1.00 | 1 | 1 | 0     | 0.002  | -0.001 | 0.003  | 0      | t | 34135  | KVNFPHG<br>MLDLEEIA<br>ANSKD | Homo<br>sapiens     |
| 1 | 1.00 | 1 | 1 | 0.01  | 0.01   | 0.022  | 0.014  | 0.01   | t | 96463  | KIKDPDAS<br>KP               | Homo<br>sapiens     |
| 1 | 1.00 | 1 | 1 | 0     | -0.002 | 0      | -0.003 | 0      | t | 73091  | WSPGQQR<br>LHNST             | Mus<br>musculu<br>s |
| 1 | 1.00 | 1 | 1 | -0.03 | -0.027 | -0.032 | -0.03  | -0.029 | t | 71004  | VSISPESDR<br>PDLSTF          | Mus<br>musculu<br>s |
| 1 | 1.00 | 1 | 1 | 0.01  | 0.01   | 0.012  | 0.01   | 0.009  | t | 151715 | RIMNVIGE<br>PIDERGPIK<br>T   | Mus<br>musculu<br>s |
| 1 | 1.00 | 1 | 1 | -0.01 | -0.01  | -0.005 | -0.01  | -0.01  | t | 158721 | DSGCAIDL<br>QRRELKCG         | Mus<br>musculu<br>s |
| 1 | 1.00 | 1 | 1 | -0.02 | -0.02  | -0.008 | -0.02  | -0.019 | t | 104461 | EFRHDS                       | Mus<br>musculu<br>s |
| 1 | 1.00 | 1 | 1 | -0.01 | -0.01  | -0.009 | -0.01  | -0.012 | t | 47651  | PGFMRGS<br>RPSDPAFA          | Mus<br>musculu<br>s |
| 1 | 1.00 | 1 | 1 | -0.01 | -0.01  | -0.01  | -0.01  | -0.01  | t | 113777 | QQPAQGQ<br>QGQQPG<br>Q       | Homo<br>sapiens     |

|   |      |   |   |       |        |        |        |       |   |        |                              |                                  |
|---|------|---|---|-------|--------|--------|--------|-------|---|--------|------------------------------|----------------------------------|
| 1 | 1.00 | 1 | 1 | -0.02 | -0.012 | -0.013 | -0.023 | -0.02 | t | 123014 | AIMRYIAD<br>K                | Ovis<br>aries                    |
| 1 | 1.00 | 1 | 1 | 0.05  | 0.052  | 0.062  | 0.051  | 0.052 | t | 74139  | YHSTSSEG<br>N                | Homo<br>sapiens                  |
| 1 | 1.00 | 1 | 1 | 0     | 0.005  | 0.005  | 0.003  | 0.001 | t | 48125  | PKPQRKTK<br>RNTNRRP<br>QDVK  | Homo<br>sapiens                  |
| 1 | 1.00 | 1 | 1 | -0.04 | -0.04  | -0.04  | -0.04  | -0.04 | t | 46026  | NSVGANA<br>PNADTIAS          | Mus<br>musculu<br>s              |
| 1 | 1.00 | 1 | 1 | 0     | 0      | 0      | 0      | 0.002 | t | 7064   | CSQNPLAE<br>LKCSVKSE         | Mus<br>musculu<br>s              |
| 1 | 1.00 | 1 | 1 | -0.02 | -0.02  | -0.025 | -0.022 | -0.02 | t | 70673  | VQWMNR<br>LIAFASRG<br>NHVSPT | Homo<br>sapiens                  |
| 1 | 1.00 | 1 | 1 | 0     | -0.004 | 0      | -0.003 | 0     | t | 64642  | TKPTDGN<br>CTCIPISS<br>WAF   | Oryctola<br>gus<br>cuniculu<br>s |
| 1 | 1.00 | 1 | 1 | -0.04 | -0.044 | -0.043 | -0.043 | -0.04 | t | 75659  | YRPLPGPT<br>PPMRARL<br>PA    | Oryctola<br>gus<br>cuniculu<br>s |
| 1 | 1.00 | 1 | 1 | 0.02  | 0.02   | 0.018  | 0.02   | 0.022 | t | 79767  | AYSNCYPY<br>DVPDYASL<br>R    | Mus<br>musculu<br>s              |
| 1 | 1.00 | 1 | 1 | 0.02  | 0.017  | 0.034  | 0.02   | 0.02  | t | 59851  | SNIVFSDEI<br>PA              | Oryctola<br>gus<br>cuniculu<br>s |
| 1 | 1.00 | 1 | 1 | 0.01  | 0.012  | 0      | 0.011  | 0.012 | t | 24522  | HPTTTYKA<br>FDWDQAY<br>RKPIT | Homo<br>sapiens                  |
| 1 | 1.00 | 1 | 1 | 0     | -0.004 | 0.007  | 0      | 0     | t | 21841  | GPYAGPM<br>ERQKPLK           | Bos<br>taurus                    |
| 1 | 1.00 | 1 | 1 | 0.01  | 0.01   | 0.01   | 0.01   | 0.017 | t | 23221  | GVYLLPRR                     | Homo<br>sapiens                  |

|   |      |   |   |       |        |        |        |        |   |        |                              |                                  |
|---|------|---|---|-------|--------|--------|--------|--------|---|--------|------------------------------|----------------------------------|
| 1 | 1.00 | 1 | 1 | -0.01 | -0.006 | -0.009 | -0.013 | -0.012 | t | 30141  | KDERFFSD<br>KI               | Homo<br>sapiens                  |
| 1 | 1.00 | 1 | 1 | 0.02  | 0.02   | 0.02   | 0.02   | 0.02   | t | 156865 | EQATCDH<br>TNEWCAK<br>MM     | Gallus<br>gallus                 |
| 1 | 1.00 | 1 | 1 | 0.03  | 0.028  | 0.034  | 0.029  | 0.031  | t | 47259  | PEDSALLE<br>D                | Mus<br>musculu<br>s              |
| 1 | 1.00 | 1 | 1 | 0     | 0      | 0      | 0      | 0.002  | t | 123562 | NSSSSQFQ<br>IHGPR            | Mus<br>musculu<br>s              |
| 1 | 1.00 | 1 | 1 | 0     | 0      | 0      | 0      | 0.002  | t | 119468 | ISGKQVTG<br>EVIFQTPLI<br>K   | Oryctola<br>gus<br>cuniculu<br>s |
| 1 | 1.00 | 1 | 1 | 0     | 0      | 0      | 0      | 0.002  | t | 119467 | ISGKPGPP<br>PMGFHSP<br>LIK   | Oryctola<br>gus<br>cuniculu<br>s |
| 1 | 1.00 | 1 | 1 | 0     | 0      | 0      | 0      | 0.002  | t | 122406 | IEIGLEGKG<br>FEPTLEALF<br>GK | Homo<br>sapiens                  |
| 1 | 1.00 | 1 | 1 | 0     | 0      | 0      | 0      | 0.002  | t | 104443 | DAEFRHDS<br>GYE              | Homo<br>sapiens                  |
| 1 | 1.00 | 1 | 1 | 0     | 0      | 0      | 0      | 0.002  | t | 102344 | DAEFR                        | Mus<br>musculu<br>s              |
| 1 | 1.00 | 1 | 1 | 0     | 0      | 0      | 0      | 0.002  | t | 104461 | EFRHDS                       | Mus<br>musculu<br>s              |
| 1 | 1.00 | 1 | 1 | 0     | 0      | 0      | 0      | 0.002  | t | 102344 | DAEFR                        | Mus<br>musculu<br>s              |
| 1 | 1.00 | 1 | 1 | 0     | 0      | 0      | 0      | 0.002  | t | 102344 | DAEFR                        | Mus<br>musculu<br>s              |
| 1 | 1.00 | 1 | 1 | 0     | 0      | 0      | 0      | 0.002  | t | 99134  | DAEFRHDS<br>GYEVHHQ          | Mus<br>musculu<br>s              |
| 1 | 1.00 | 1 | 1 | 0     | 0      | 0      | 0      | 0.002  | t | 99134  | DAEFRHDS<br>GYEVHHQ          | Mus<br>musculu<br>s              |
| 1 | 1.00 | 1 | 1 | 0     | 0      | 0      | 0      | 0.002  | t | 106770 | RER                          | Mus<br>musculu<br>s              |
| 1 | 1.00 | 1 | 1 | 0     | 0      | 0      | 0      | 0.002  | t | 102510 | HHQKLVFF<br>AEDVGSN<br>K     | Mus<br>musculu<br>s              |

|   |      |   |   |       |        |        |        |       |   |        |                              |                                  |
|---|------|---|---|-------|--------|--------|--------|-------|---|--------|------------------------------|----------------------------------|
| 1 | 1.00 | 1 | 1 | 0     | 0      | 0      | 0      | 0.002 | t | 103839 | DAEFRHDS<br>GYEVH            | Mus<br>musculu<br>s              |
| 1 | 1.00 | 1 | 1 | 0     | 0      | 0      | 0      | 0.002 | t | 106771 | RERMS                        | Mus<br>musculu<br>s              |
| 1 | 1.00 | 1 | 1 | 0     | 0      | 0      | 0      | 0.002 | t | 104443 | DAEFRHDS<br>GYE              | Mus<br>musculu<br>s              |
| 1 | 1.00 | 1 | 1 | 0     | 0      | 0      | 0      | 0.002 | t | 104906 | MVGGVVI<br>A                 | Mus<br>musculu<br>s              |
| 1 | 1.00 | 1 | 1 | 0     | 0      | 0      | 0      | 0.002 | t | 106321 | DAEFRH                       | Mus<br>musculu<br>s              |
| 1 | 1.00 | 1 | 1 | 0     | 0      | 0      | 0      | 0.002 | t | 106321 | DAEFRH                       | Mus<br>musculu<br>s              |
| 1 | 1.00 | 1 | 1 | 0     | 0      | 0      | 0      | 0.002 | t | 104443 | DAEFRHDS<br>GYE              | Mus<br>musculu<br>s              |
| 1 | 1.00 | 1 | 1 | -0.01 | -0.01  | -0.005 | -0.008 | -0.01 | t | 21887  | GQICYGR<br>DAYLCFL           | Homo<br>sapiens                  |
| 1 | 1.00 | 1 | 1 | 0.02  | 0.016  | 0.017  | 0.019  | 0.02  | t | 72154  | VYRYDSRP<br>PEDV             | Oryctola<br>gus<br>cuniculu<br>s |
| 1 | 1.00 | 1 | 1 | 0     | 0.002  | 0.011  | 0.003  | 0     | t | 44606  | NKTKQNP<br>NL                | Homo<br>sapiens                  |
| 1 | 1.00 | 1 | 1 | 0.03  | 0.03   | 0.035  | 0.03   | 0.027 | t | 133733 | VKTLLPYG<br>SVINYGY<br>VKPG  | Oryctola<br>gus<br>cuniculu<br>s |
| 1 | 1.00 | 1 | 1 | 0     | 0      | 0      | 0.003  | 0.003 | t | 110859 | GEESRISLP<br>LPNFSSLN<br>LRE | Mus<br>musculu<br>s              |
| 1 | 1.00 | 1 | 1 | -0.05 | -0.042 | -0.038 | -0.05  | -0.05 | t | 14379  | ETFTCISAP<br>WTCVTWL         | Homo<br>sapiens                  |
| 1 | 1.00 | 1 | 1 | 0.03  | 0.03   | 0.03   | 0.03   | 0.03  | t | 98827  | IILHQQQK<br>QQQQ             | Homo<br>sapiens                  |
| 1 | 1.00 | 1 | 1 | -0.05 | -0.05  | -0.05  | -0.05  | -0.05 | t | 103717 | VRRRHGLS<br>SLGWNLC          | Homo<br>sapiens                  |
| 1 | 1.00 | 1 | 1 | 0.01  | 0.01   | 0.014  | 0.01   | 0.01  | t | 36734  | LITVNP                       | Homo<br>sapiens                  |

|   |      |   |   |      |        |       |        |       |   |        |                             |                                  |
|---|------|---|---|------|--------|-------|--------|-------|---|--------|-----------------------------|----------------------------------|
| 1 | 1.00 | 1 | 1 | 0.01 | 0.007  | 0.017 | 0.01   | 0.009 | t | 133469 | YYNETKL<br>KESYKVKD         | Oryctola<br>gus<br>cuniculu<br>s |
| 1 | 1.00 | 1 | 1 | 0    | -0.002 | 0     | -0.001 | 0     | t | 51390  | QLKLDWF<br>KKGSS            | Mus<br>musculu<br>s              |
| 1 | 1.00 | 1 | 1 | 0    | 0.001  | 0.003 | -0.001 | 0.001 | t | 45598  | NQNSKYIN<br>YRDLYIGE<br>KFI | Equus<br>caballus                |
| 1 | 1.00 | 1 | 1 | 0    | -0.002 | 0     | -0.001 | 0.002 | t | 139358 | VLKTDVNK<br>E               | Mus<br>musculu<br>s              |
| 1 | 1.00 | 1 | 1 | 0    | -0.002 | 0     | -0.001 | 0.002 | t | 139324 | TRLIDERA<br>AH              | Mus<br>musculu<br>s              |
| 1 | 1.00 | 1 | 1 | 0    | 0.01   | 0     | -0.001 | 0.002 | t | 67615  | VAGRKKLE<br>ELERDLRK<br>TK  | Pan<br>troglody<br>tes           |
| 1 | 1.00 | 1 | 1 | 0    | -0.002 | 0     | -0.001 | 0.002 | t | 64534  | TKDASIDY<br>HE              | Mus<br>musculu<br>s              |
| 1 | 1.00 | 1 | 1 | 0    | 0.01   | 0     | -0.001 | 0.002 | t | 63217  | TDQMEVD<br>SGPRKRPL<br>RGG  | Pan<br>troglody<br>tes           |
| 1 | 1.00 | 1 | 1 | 0    | -0.004 | 0     | -0.001 | 0.002 | t | 63217  | TDQMEVD<br>SGPRKRPL<br>RGG  | Oryctola<br>gus<br>cuniculu<br>s |
| 1 | 1.00 | 1 | 1 | 0    | 0.01   | 0     | -0.001 | 0.002 | t | 60663  | SRGAPGG<br>GFVPSLQG<br>VP   | Pan<br>troglody<br>tes           |
| 1 | 1.00 | 1 | 1 | 0    | -0.004 | 0     | -0.001 | 0.002 | t | 60663  | SRGAPGG<br>GFVPSLQG<br>VP   | Oryctola<br>gus<br>cuniculu<br>s |
| 1 | 1.00 | 1 | 1 | 0    | -0.002 | 0     | -0.001 | 0.002 | t | 38522  | LPHSNL                      | Rattus<br>norvegic<br>us         |
| 1 | 1.00 | 1 | 1 | 0    | 0.006  | 0     | -0.001 | 0.002 | t | 43242  | NANPNAN<br>PNANP            | Macaca<br>fascicula<br>ris       |

|   |      |   |   |      |        |      |        |       |   |       |                            |                                  |
|---|------|---|---|------|--------|------|--------|-------|---|-------|----------------------------|----------------------------------|
| 1 | 1.00 | 1 | 1 | 0    | 0.01   | 0    | -0.001 | 0.002 | t | 50977 | QGVPESPF<br>SRTGEGLD       | Pan<br>troglody<br>tes           |
| 1 | 1.00 | 1 | 1 | 0    | -0.002 | 0    | -0.001 | 0.002 | t | 37055 | LKVIRK                     | Mus<br>musculu<br>s              |
| 1 | 1.00 | 1 | 1 | 0    | -0.002 | 0    | -0.001 | 0.002 | t | 42493 | MRQLDTN<br>VER             | Mus<br>musculu<br>s              |
| 1 | 1.00 | 1 | 1 | 0    | -0.004 | 0    | -0.001 | 0.002 | t | 29852 | KALENKKK<br>QLSAGGK<br>NLS | Oryctola<br>gus<br>cuniculu<br>s |
| 1 | 1.00 | 1 | 1 | 0    | -0.002 | 0    | -0.001 | 0.002 | t | 11819 | EENVEHD<br>A               | Mus<br>musculu<br>s              |
| 1 | 1.00 | 1 | 1 | 0    | -0.002 | 0    | -0.001 | 0.002 | t | 20179 | GHRMAW<br>DMM              | Mus<br>musculu<br>s              |
| 1 | 1.00 | 1 | 1 | 0    | -0.002 | 0    | -0.001 | 0.002 | t | 14435 | ETIYNTTLK<br>Y             | Mus<br>musculu<br>s              |
| 1 | 1.00 | 1 | 1 | 0    | -0.004 | 0    | -0.001 | 0.002 | t | 19269 | GEGAPPA<br>KRARTDQ<br>ME   | Oryctola<br>gus<br>cuniculu<br>s |
| 1 | 1.00 | 1 | 1 | 0    | -0.002 | 0    | -0.001 | 0.002 | t | 11819 | EENVEHD<br>A               | Mus<br>musculu<br>s              |
| 1 | 1.00 | 1 | 1 | 0    | 0.01   | 0    | -0.001 | 0.002 | t | 29852 | KALENKKK<br>QLSAGGK<br>NLS | Pan<br>troglody<br>tes           |
| 1 | 1.00 | 1 | 1 | 0    | -0.002 | 0    | -0.001 | 0.002 | t | 11571 | EEEDDDM<br>GFGFLD          | Mus<br>musculu<br>s              |
| 1 | 1.00 | 1 | 1 | 0    | -0.002 | 0    | -0.001 | 0.002 | t | 11819 | EENVEHD<br>A               | Mus<br>musculu<br>s              |
| 1 | 1.00 | 1 | 1 | 0    | -0.002 | 0    | -0.001 | 0.002 | t | 12307 | EGVQQEG<br>AQQPA           | Mus<br>musculu<br>s              |
| 1 | 1.00 | 1 | 1 | 0    | -0.004 | 0    | -0.001 | 0.002 | t | 8119  | DEPAGE                     | Oryctola<br>gus<br>cuniculu<br>s |
| 1 | 1.00 | 1 | 1 | 0.01 | 0.01   | 0.01 | 0.01   | 0.01  | t | 78355 | DCLSDVAG<br>LQNDPTT<br>WCW | Mus<br>musculu<br>s              |



|   |      |   |   |       |        |        |        |        |   |        |                              |                       |
|---|------|---|---|-------|--------|--------|--------|--------|---|--------|------------------------------|-----------------------|
| 1 | 1.00 | 1 | 1 | -0.03 | -0.028 | -0.025 | -0.029 | -0.029 | t | 73594  | YDTRCF                       | Homo sapiens          |
| 1 | 1.00 | 1 | 1 | 0     | 0.004  | 0.019  | 0.001  | 0      | t | 17771  | FSLGPKQ                      | Homo sapiens          |
| 1 | 1.00 | 1 | 1 | 0     | -0.002 | 0.003  | -0.003 | 0      | t | 29108  | ITTDNTFV<br>SGNCDVVI<br>G    | Mus musculus          |
| 1 | 1.00 | 1 | 1 | 0     | -0.004 | 0      | -0.007 | -0.001 | t | 6918   | CRFPNITN<br>SHVPILQE         | Oryctolagus cuniculus |
| 1 | 1.00 | 1 | 1 | 0     | -0.004 | 0      | -0.007 | -0.001 | t | 6429   | CILRQLRHL<br>PSRVRYPH<br>YS  | Oryctolagus cuniculus |
| 1 | 1.00 | 1 | 1 | 0.01  | 0.01   | 0.01   | 0.006  | 0.01   | t | 142166 | GLRRDLDA<br>SREAKKQL<br>EAEQ | Homo sapiens          |
| 1 | 1.00 | 1 | 1 | 0.01  | 0.01   | 0.008  | 0.01   | 0.01   | t | 81394  | EASGPTHS<br>KEIPALT          | Homo sapiens          |
| 1 | 1.00 | 1 | 1 | -0.03 | -0.03  | -0.04  | -0.024 | -0.023 | t | 142695 | GSHSLRYF<br>YTAVSRP          | Rattus norvegicus     |
| 1 | 1.00 | 1 | 1 | 0     | 0      | 0.006  | 0      | 0      | t | 7903   | DEAGTLAP<br>TGMFIA           | Oryctolagus cuniculus |
| 1 | 1.00 | 1 | 1 | 0.03  | 0.03   | 0.03   | 0.03   | 0.03   | t | 145951 | PVGPSDPS<br>IVSLVEE          | Mus musculus          |
| 1 | 1.00 | 1 | 1 | 0     | 0      | 0      | 0      | 0      | t | 139837 | NLSRAPF                      | Ovis aries            |
| 1 | 1.00 | 1 | 1 | -0.02 | -0.02  | -0.02  | -0.02  | -0.02  | t | 149051 | GGQMRQ<br>G                  | Sus scrofa            |
| 1 | 1.00 | 1 | 1 | 0.01  | 0.008  | 0.018  | 0.009  | 0.011  | t | 60013  | SPDDPAFR<br>FAPYFTP          | Mus musculus          |
| 1 | 1.00 | 1 | 1 | -0.03 | -0.032 | -0.022 | -0.027 | -0.028 | t | 114290 | CYGNWFS<br>NC                | Mus musculus          |
| 1 | 1.00 | 1 | 1 | 0     | 0      | 0      | 0.002  | 0.003  | t | 55671  | RRPFNIGI<br>NNQQ             | Homo sapiens          |

|   |      |   |   |       |        |        |        |        |   |        |                      |                                  |
|---|------|---|---|-------|--------|--------|--------|--------|---|--------|----------------------|----------------------------------|
| 1 | 1.00 | 1 | 1 | 0     | 0      | 0      | 0      | 0.002  | t | 78107  | ATYQSEYL<br>AHRRIPP  | Oryctola<br>gus<br>cuniculu<br>s |
| 1 | 1.00 | 1 | 1 | -0.01 | -0.01  | -0.003 | -0.01  | -0.01  | t | 114579 | RKVVTDF<br>KNIPQRI   | Homo<br>sapiens                  |
| 1 | 1.00 | 1 | 1 | 0     | 0.004  | 0.005  | -0.001 | 0.001  | t | 135790 | VVGGEDA<br>K         | Homo<br>sapiens                  |
| 1 | 1.00 | 1 | 1 | -0.02 | -0.02  | -0.02  | -0.02  | -0.018 | t | 135580 | MDIPPPTG<br>PT       | Oryctola<br>gus<br>cuniculu<br>s |
| 1 | 1.00 | 1 | 1 | -0.03 | -0.032 | -0.019 | -0.027 | -0.03  | t | 159084 | RYKYPET<br>PRSLAKIV  | Mus<br>musculu<br>s              |
| 1 | 1.00 | 1 | 1 | -0.02 | -0.022 | -0.02  | -0.021 | -0.02  | t | 117114 | WTRDNST<br>RPIVR     | Mus<br>musculu<br>s              |
| 1 | 1.00 | 1 | 1 | 0     | 0      | 0      | 0      | 0      | t | 21610  | GPEQLLFL<br>RPEP     | Mus<br>musculu<br>s              |
| 1 | 1.00 | 1 | 1 | 0     | 0.003  | 0      | 0      | 0      | t | 21610  | GPEQLLFL<br>RPEP     | Mus<br>musculu<br>s              |
| 1 | 1.00 | 1 | 1 | -0.04 | -0.043 | -0.041 | -0.04  | -0.039 | t | 60550  | SQSFRRLG<br>AA       | Oryctola<br>gus<br>cuniculu<br>s |
| 1 | 1.00 | 1 | 1 | -0.02 | -0.023 | -0.027 | -0.02  | -0.021 | t | 62675  | SYPNPVRV<br>EAAWRILE | Oryctola<br>gus<br>cuniculu<br>s |
| 1 | 1.00 | 1 | 1 | 0.02  | 0.02   | 0.02   | 0.018  | 0.02   | t | 36244  | LGPADSLE<br>GQGWRL   | Homo<br>sapiens                  |
| 1 | 1.00 | 1 | 1 | 0.01  | 0.008  | 0.011  | 0.007  | 0.01   | t | 55487  | RQSTPIGL<br>GQALYTT  | Mus<br>musculu<br>s              |
| 1 | 1.00 | 1 | 1 | -0.01 | -0.01  | -0.006 | -0.01  | -0.01  | t | 11263  | ECSPT                | Homo<br>sapiens                  |
| 1 | 1.00 | 1 | 1 | -0.02 | -0.018 | -0.02  | -0.021 | -0.018 | t | 48852  | PPPGRPPF<br>FHPVGE   | Homo<br>sapiens                  |

|   |      |   |   |       |        |        |        |        |   |        |                              |                                  |
|---|------|---|---|-------|--------|--------|--------|--------|---|--------|------------------------------|----------------------------------|
| 1 | 1.00 | 1 | 1 | 0.01  | 0.013  | 0.001  | 0.01   | 0.02   | t | 31639  | KKND                         | Mus<br>musculu<br>s              |
| 1 | 1.00 | 1 | 1 | 0.02  | 0.022  | 0.022  | 0.021  | 0.022  | t | 10057  | DRTAVTG<br>ASYFTSVD<br>QSSVH | Homo<br>sapiens                  |
| 1 | 1.00 | 1 | 1 | -0.02 | -0.017 | -0.015 | -0.02  | -0.02  | t | 132912 | VKAKVQP                      | Mus<br>musculu<br>s              |
| 1 | 1.00 | 1 | 1 | 0.05  | 0.048  | 0.056  | 0.049  | 0.05   | t | 48788  | PPGEFLQV<br>SIQDTRNA<br>VRAC | Mus<br>musculu<br>s              |
| 1 | 1.00 | 1 | 1 | -0.02 | -0.022 | -0.017 | -0.021 | -0.021 | t | 16551  | FLDLMRA<br>VA                | Mus<br>musculu<br>s              |
| 1 | 1.00 | 1 | 1 | -0.01 | -0.01  | -0.01  | -0.01  | -0.01  | t | 79642  | SGTSHIR                      | Oryctola<br>gus<br>cuniculu<br>s |
| 1 | 1.00 | 1 | 1 | -0.05 | -0.05  | -0.05  | -0.05  | -0.05  | t | 108286 | ASKAKARP<br>V                | Homo<br>sapiens                  |
| 1 | 1.00 | 1 | 1 | -0.07 | -0.07  | -0.07  | -0.07  | -0.07  | t | 137554 | QDRHQKI<br>RRFRRGDI          | Homo<br>sapiens                  |
| 1 | 1.00 | 1 | 1 | -0.01 | -0.012 | -0.01  | -0.009 | -0.007 | t | 136593 | RHYKQYQ<br>FHF               | Mus<br>musculu<br>s              |
| 1 | 1.00 | 1 | 1 | 0     | 0      | 0      | 0      | 0.002  | t | 122889 | RLDASFQE<br>HPDLPG           | Oryctola<br>gus<br>cuniculu<br>s |
| 1 | 1.00 | 1 | 1 | 0.01  | 0.012  | 0.013  | 0.013  | 0.011  | t | 56614  | RYPHYSLIK<br>PESSL           | Homo<br>sapiens                  |
| 1 | 1.00 | 1 | 1 | -0.01 | -0.01  | -0.01  | -0.008 | -0.009 | t | 158948 | LEARKAAD<br>TFNFKTF          | Homo<br>sapiens                  |
| 1 | 1.00 | 1 | 1 | 0     | 0      | 0.003  | 0.003  | 0.001  | t | 115628 | LPCRISPGK<br>NAT             | Homo<br>sapiens                  |
| 1 | 1.00 | 1 | 1 | -0.01 | -0.01  | -0.01  | -0.01  | -0.009 | t | 95741  | QSAPLRVY<br>VEEL             | Homo<br>sapiens                  |
| 1 | 1.00 | 1 | 1 | 0.04  | 0.038  | 0.04   | 0.037  | 0.04   | t | 130563 | NIFEYQVD<br>AQPL             | Mus<br>musculu<br>s              |

|   |      |   |   |   |   |   |        |   |   |        |                              |              |
|---|------|---|---|---|---|---|--------|---|---|--------|------------------------------|--------------|
| 1 | 1.00 | 1 | 1 | 0 | 0 | 0 | -0.004 | 0 | t | 146879 | EFRHD                        | Homo sapiens |
| 1 | 1.00 | 1 | 1 | 0 | 0 | 0 | -0.004 | 0 | t | 157292 | GAIGLM                       | Homo sapiens |
| 1 | 1.00 | 1 | 1 | 0 | 0 | 0 | -0.004 | 0 | t | 157147 | CSRTVKKN<br>IIEEN            | Homo sapiens |
| 1 | 1.00 | 1 | 1 | 0 | 0 | 0 | -0.004 | 0 | t | 157127 | CFNLFLNS<br>QEKHY            | Homo sapiens |
| 1 | 1.00 | 1 | 1 | 0 | 0 | 0 | -0.004 | 0 | t | 157178 | EASNCF                       | Homo sapiens |
| 1 | 1.00 | 1 | 1 | 0 | 0 | 0 | -0.004 | 0 | t | 157463 | KKETLICS                     | Homo sapiens |
| 1 | 1.00 | 1 | 1 | 0 | 0 | 0 | -0.004 | 0 | t | 157917 | RTVKKNIE<br>EN               | Homo sapiens |
| 1 | 1.00 | 1 | 1 | 0 | 0 | 0 | -0.004 | 0 | t | 133822 | ERPLKQIA<br>FNGGLEP          | Homo sapiens |
| 1 | 1.00 | 1 | 1 | 0 | 0 | 0 | -0.004 | 0 | t | 133900 | NEHPVFAY<br>LKDKLP           | Homo sapiens |
| 1 | 1.00 | 1 | 1 | 0 | 0 | 0 | -0.004 | 0 | t | 131261 | SHMPLAN<br>QYQWA             | Homo sapiens |
| 1 | 1.00 | 1 | 1 | 0 | 0 | 0 | -0.004 | 0 | t | 131250 | NHVQAW<br>EQFWDS             | Homo sapiens |
| 1 | 1.00 | 1 | 1 | 0 | 0 | 0 | -0.004 | 0 | t | 133787 | CQALVRM<br>LAKKPGW<br>K      | Homo sapiens |
| 1 | 1.00 | 1 | 1 | 0 | 0 | 0 | -0.004 | 0 | t | 132099 | TLNELPNR<br>T                | Homo sapiens |
| 1 | 1.00 | 1 | 1 | 0 | 0 | 0 | -0.004 | 0 | t | 132067 | SLVLTNEL                     | Homo sapiens |
| 1 | 1.00 | 1 | 1 | 0 | 0 | 0 | -0.004 | 0 | t | 131227 | KHYPEVGP<br>NGFI             | Homo sapiens |
| 1 | 1.00 | 1 | 1 | 0 | 0 | 0 | -0.004 | 0 | t | 122452 | KTTKQSF<br>LSVKAQYK<br>KNKH  | Homo sapiens |
| 1 | 1.00 | 1 | 1 | 0 | 0 | 0 | -0.004 | 0 | t | 133841 | GRGNLDP<br>GGGMEKD<br>G      | Homo sapiens |
| 1 | 1.00 | 1 | 1 | 0 | 0 | 0 | -0.004 | 0 | t | 131038 | RKIAKDEG<br>AK               | Homo sapiens |
| 1 | 1.00 | 1 | 1 | 0 | 0 | 0 | -0.004 | 0 | t | 122406 | IEIGLEGKG<br>FEPTLEALF<br>GK | Homo sapiens |
| 1 | 1.00 | 1 | 1 | 0 | 0 | 0 | -0.004 | 0 | t | 130623 | TSDVEVNE<br>KKERVTEA         | Homo sapiens |
| 1 | 1.00 | 1 | 1 | 0 | 0 | 0 | -0.004 | 0 | t | 133795 | DFTYDQV<br>AFNGLPQF          | Homo sapiens |

|   |      |   |   |       |        |        |        |        |   |        |                            |              |
|---|------|---|---|-------|--------|--------|--------|--------|---|--------|----------------------------|--------------|
| 1 | 1.00 | 1 | 1 | 0     | 0      | 0      | -0.004 | 0      | t | 133776 | AGDLSKVD<br>AKQPGDY        | Homo sapiens |
| 1 | 1.00 | 1 | 1 | 0     | 0      | 0      | -0.004 | 0      | t | 132504 | NNAIEPRS<br>FSQNPPV        | Homo sapiens |
| 1 | 1.00 | 1 | 1 | 0     | 0      | 0      | -0.004 | 0      | t | 130608 | SIDLKDKYK<br>NIGA          | Homo sapiens |
| 1 | 1.00 | 1 | 1 | 0     | 0      | 0      | -0.004 | 0      | t | 105041 | YEVHHQKL<br>VFF            | Homo sapiens |
| 1 | 1.00 | 1 | 1 | 0     | 0      | 0      | -0.004 | 0      | t | 117015 | KEQFLDGD<br>GWTSRWI<br>ESK | Homo sapiens |
| 1 | 1.00 | 1 | 1 | 0     | 0      | 0      | -0.004 | 0      | t | 107087 | ARGLTGRP<br>GDA            | Homo sapiens |
| 1 | 1.00 | 1 | 1 | 0     | 0      | 0      | -0.004 | 0      | t | 63098  | TCRRMLAF<br>LKDKENR        | Homo sapiens |
| 1 | 1.00 | 1 | 1 | -0.02 | -0.02  | -0.014 | -0.023 | -0.02  | t | 57209  | SDGYDHP<br>PRTRV           | Homo sapiens |
| 1 | 1.00 | 1 | 1 | 0     | 0.004  | -0.004 | -0.003 | 0      | t | 97460  | LLIEQANH<br>AIEKGEHQ       | Homo sapiens |
| 1 | 1.00 | 1 | 1 | 0     | 0.002  | 0.008  | -0.004 | -0.002 | t | 33440  | KSMKVTV<br>AFNQFG          | Homo sapiens |
| 1 | 1.00 | 1 | 1 | 0     | 0.002  | 0.008  | -0.004 | -0.002 | t | 33440  | KSMKVTV<br>AFNQFG          | Homo sapiens |
| 1 | 1.00 | 1 | 1 | 0.01  | 0.01   | 0.01   | 0.01   | 0.01   | t | 142594 | DTYPAHTA<br>NEVSE          | Homo sapiens |
| 1 | 1.00 | 1 | 1 | -0.06 | -0.057 | -0.06  | -0.06  | -0.058 | t | 97854  | ADYQAKLT<br>AY             | Mus musculus |
| 1 | 1.00 | 1 | 1 | 0.03  | 0.032  | 0.047  | 0.037  | 0.029  | t | 118148 | SQEGRTTK<br>Q              | Homo sapiens |
| 1 | 1.00 | 1 | 1 | 0.03  | 0.032  | 0.042  | 0.037  | 0.03   | t | 122497 | NGSSESRR<br>ALQDSQR        | Homo sapiens |
| 1 | 1.00 | 1 | 1 | 0     | 0      | 0.008  | -0.006 | -0.002 | t | 46455  | NVPYKISA<br>STNCATVK       | Homo sapiens |

|   |      |   |   |       |        |        |        |        |   |        |                              |                                  |
|---|------|---|---|-------|--------|--------|--------|--------|---|--------|------------------------------|----------------------------------|
| 1 | 1.00 | 1 | 1 | 0.01  | 0.014  | 0.022  | 0.007  | 0.01   | t | 48663  | PNKPNND<br>FHFEV             | Homo<br>sapiens                  |
| 1 | 1.00 | 1 | 1 | 0.01  | 0.014  | 0.022  | 0.007  | 0.01   | t | 48663  | PNKPNND<br>FHFEV             | Homo<br>sapiens                  |
| 1 | 1.00 | 1 | 1 | -0.01 | -0.006 | 0.011  | -0.007 | -0.011 | t | 71350  | VTGTDLELI<br>QILK            | Homo<br>sapiens                  |
| 1 | 1.00 | 1 | 1 | -0.02 | -0.02  | -0.02  | -0.024 | -0.02  | t | 118028 | MWGRAL<br>RKAIA              | Homo<br>sapiens                  |
| 1 | 1.00 | 1 | 1 | -0.01 | -0.014 | -0.01  | -0.01  | -0.012 | t | 139860 | PVQRGAW<br>RWPVVTN<br>E      | Mus<br>musculu<br>s              |
| 1 | 1.00 | 1 | 1 | 0.03  | 0.03   | 0.035  | 0.03   | 0.03   | t | 96025  | YSMLVER<br>DHKNE             | Homo<br>sapiens                  |
| 1 | 1.00 | 1 | 1 | 0.01  | 0.008  | 0.005  | 0.003  | 0.012  | t | 131900 | GSSFLSPE<br>HQ               | Rattus<br>norvegic<br>us         |
| 1 | 1.00 | 1 | 1 | -0.04 | -0.04  | -0.045 | -0.04  | -0.037 | t | 116971 | FAVLKLM<br>GRGTKF            | Oryctola<br>gus<br>cuniculu<br>s |
| 1 | 1.00 | 1 | 1 | 0.01  | 0.01   | 0.005  | 0.006  | 0.009  | t | 122173 | QSIQQSIE<br>RLWCRLW<br>PLPFP | Homo<br>sapiens                  |
| 1 | 1.00 | 1 | 1 | -0.01 | -0.01  | 0.006  | -0.01  | -0.013 | t | 48084  | PKINRSAP<br>EPSL             | Oryctola<br>gus<br>cuniculu<br>s |
| 1 | 1.00 | 1 | 1 | 0.03  | 0.027  | 0.026  | 0.03   | 0.031  | t | 7558   | DAKDGKEI<br>DTKHLPT<br>C     | Oryctola<br>gus<br>cuniculu<br>s |
| 1 | 1.00 | 1 | 1 | -0.02 | -0.02  | -0.02  | -0.02  | -0.02  | t | 110057 | VMHEGLH                      | Homo<br>sapiens                  |
| 1 | 1.00 | 1 | 1 | -0.04 | -0.04  | -0.04  | -0.04  | -0.04  | t | 119517 | RKRTRHLE<br>G                | Homo<br>sapiens                  |
| 1 | 1.00 | 1 | 1 | -0.06 | -0.06  | -0.06  | -0.06  | -0.06  | t | 103264 | HWLRPITP<br>TFRPSWP          | Homo<br>sapiens                  |
| 1 | 1.00 | 1 | 1 | 0     | -0.002 | 0      | 0.001  | 0.003  | t | 136569 | PYYRWQY<br>KYD               | Mus<br>musculu<br>s              |

|   |      |   |   |       |        |        |        |        |   |        |                              |                                  |
|---|------|---|---|-------|--------|--------|--------|--------|---|--------|------------------------------|----------------------------------|
| 1 | 1.00 | 1 | 1 | 0.03  | 0.03   | 0.037  | 0.03   | 0.03   | t | 121827 | RVVPLLVA<br>DPLVDPF          | Mus<br>musculu<br>s              |
| 1 | 1.00 | 1 | 1 | -0.01 | -0.01  | -0.005 | -0.01  | -0.01  | t | 64978  | TLNKDQLL<br>SSSKYTIQR<br>STG | Homo<br>sapiens                  |
| 1 | 1.00 | 1 | 1 | 0     | 0.002  | 0      | -0.009 | 0      | t | 27727  | INQQLNPK                     | Homo<br>sapiens                  |
| 1 | 1.00 | 1 | 1 | 0.01  | 0.007  | 0.019  | 0.01   | 0.008  | t | 79966  | PIFCNAKN<br>QTEYRR           | Oryctola<br>gus<br>cuniculu<br>s |
| 1 | 1.00 | 1 | 1 | 0     | 0.004  | 0      | 0      | 0.002  | t | 123357 | KFEEVKGD<br>Y                | Ovis<br>aries                    |
| 1 | 1.00 | 1 | 1 | 0     | -0.002 | 0.009  | 0.003  | 0      | t | 71952  | VWNNKTP<br>NSI               | Mus<br>musculu<br>s              |
| 1 | 1.00 | 1 | 1 | 0     | 0      | 0      | 0      | 0      | t | 78355  | DCLSDVAG<br>LQNDPTT<br>WCW   | Mus<br>musculu<br>s              |
| 1 | 1.00 | 1 | 1 | 0     | -0.003 | 0.004  | 0      | 0.002  | t | 12138  | EGCNGDG<br>TSYKK             | Oryctola<br>gus<br>cuniculu<br>s |
| 1 | 1.00 | 1 | 1 | 0     | 0      | 0.004  | 0      | 0.002  | t | 12138  | EGCNGDG<br>TSYKK             | Mus<br>musculu<br>s              |
| 1 | 1.00 | 1 | 1 | -0.02 | -0.018 | -0.023 | -0.017 | -0.019 | t | 120711 | KQLATKAA<br>RKSAPAT          | Homo<br>sapiens                  |
| 1 | 1.00 | 1 | 1 | 0     | 0.004  | 0.004  | 0.003  | 0.002  | t | 7945   | DESDSDSD<br>GYPPNRQ          | Homo<br>sapiens                  |
| 1 | 1.00 | 1 | 1 | 0.01  | 0.01   | 0.017  | 0.01   | 0.009  | t | 63975  | TGTEKLIET<br>YFSKNYQD<br>YEY | Mus<br>musculu<br>s              |
| 1 | 1.00 | 1 | 1 | 0.01  | 0.01   | 0.017  | 0.01   | 0.009  | t | 63975  | TGTEKLIET<br>YFSKNYQD<br>YEY | Mus<br>musculu<br>s              |
| 1 | 1.00 | 1 | 1 | 0.01  | 0.01   | 0.021  | 0.016  | 0.012  | t | 60649  | SREQLNKL<br>FGIE             | Homo<br>sapiens                  |
| 1 | 1.00 | 1 | 1 | 0.01  | 0.008  | 0.015  | 0.009  | 0.008  | t | 74762  | YLLARGHD<br>PAFVHMS          | Mus<br>musculu<br>s              |

|   |      |   |   |       |        |        |        |        |   |        |                              |                       |
|---|------|---|---|-------|--------|--------|--------|--------|---|--------|------------------------------|-----------------------|
| 1 | 1.00 | 1 | 1 | -0.02 | -0.021 | -0.011 | -0.023 | -0.02  | t | 35062  | LCKHSM                       | Homo sapiens          |
| 1 | 1.00 | 1 | 1 | -0.01 | -0.01  | -0.01  | -0.01  | -0.009 | t | 118580 | RDRDRDR<br>DRDR              | Mus musculus          |
| 1 | 1.00 | 1 | 1 | 0     | 0.002  | -0.003 | 0.001  | 0.004  | t | 48554  | PMGTQTH<br>TMIFDNAF<br>NC    | Homo sapiens          |
| 1 | 1.00 | 1 | 1 | 0.02  | 0.02   | 0.028  | 0.02   | 0.02   | t | 113000 | GIKQLQAR<br>VLAVERY          | Oryctolagus cuniculus |
| 1 | 1.00 | 1 | 1 | -0.01 | -0.01  | -0.017 | -0.01  | -0.01  | t | 31813  | KLEEQNKI<br>SEASRKGL<br>RR   | Mus musculus          |
| 1 | 1.00 | 1 | 1 | -0.03 | -0.03  | -0.03  | -0.03  | -0.03  | t | 140855 | GHDEAAY<br>SKNRR             | Oryctolagus cuniculus |
| 1 | 1.00 | 1 | 1 | -0.03 | -0.03  | -0.03  | -0.03  | -0.03  | t | 127742 | MHSPSTQ                      | Homo sapiens          |
| 1 | 1.00 | 1 | 1 | 0.02  | 0.02   | 0.013  | 0.02   | 0.022  | t | 136474 | LLDTSNLEL<br>PEAVVFQ<br>DSVV | Homo sapiens          |
| 1 | 1.00 | 1 | 1 | 0     | 0      | 0      | 0      | 0      | t | 110869 | GQAEPDR<br>AHYNIWTF<br>CCKCD | Mus musculus          |
| 1 | 1.00 | 1 | 1 | -0.06 | -0.052 | -0.052 | -0.06  | -0.06  | t | 21527  | GNSRRGP<br>RVVPSAPP<br>ML    | Capra hircus          |
| 1 | 1.00 | 1 | 1 | 0     | 0.002  | -0.002 | 0      | 0.001  | t | 119677 | WVYYTCC<br>PDTPYLDIT<br>YHF  | Rattus norvegicus     |
| 1 | 1.00 | 1 | 1 | 0     | 0      | -0.002 | 0      | 0.001  | t | 119677 | WVYYTCC<br>PDTPYLDIT<br>YHF  | Rattus norvegicus     |
| 1 | 1.00 | 1 | 1 | 0.01  | 0.01   | 0.005  | 0.01   | 0.012  | t | 140506 | THYGSLPQ<br>KSQH             | Mus musculus          |
| 1 | 1.00 | 1 | 1 | 0.03  | 0.03   | 0.016  | 0.029  | 0.033  | t | 75278  | YPEKAVLD<br>EYDYRYNR<br>PK   | Mus musculus          |
| 1 | 1.00 | 1 | 1 | -0.02 | -0.02  | -0.011 | -0.02  | -0.022 | t | 125175 | NNNNFQS<br>KAN               | Mus musculus          |



|   |      |   |   |       |        |        |        |        |   |        |                      |                       |
|---|------|---|---|-------|--------|--------|--------|--------|---|--------|----------------------|-----------------------|
| 1 | 1.00 | 1 | 1 | -0.01 | -0.01  | -0.005 | -0.013 | -0.009 | t | 64099  | THWQLGERPD           | Homo sapiens          |
| 1 | 1.00 | 1 | 1 | 0     | 0      | 0.001  | 0      | 0.001  | t | 47669  | PGGPDRFTLLTPGSH      | Mus musculus          |
| 1 | 1.00 | 1 | 1 | -0.02 | -0.016 | -0.013 | -0.023 | -0.02  | t | 106492 | GWVDHFADGY           | Homo sapiens          |
| 1 | 1.00 | 1 | 1 | 0.01  | 0.006  | 0.01   | 0.007  | 0.01   | t | 156601 | ADEPNNLNSK           | Oryctolagus cuniculus |
| 1 | 1.00 | 1 | 1 | 0.01  | 0.01   | 0.01   | 0.006  | 0.01   | t | 118189 | TYIKEQKGL            | Homo sapiens          |
| 1 | 1.00 | 1 | 1 | 0.01  | 0.01   | 0.013  | 0.01   | 0.01   | t | 158944 | KVQVQGPWDEEDIKLD     | Mus musculus          |
| 1 | 1.00 | 1 | 1 | -0.05 | -0.046 | -0.047 | -0.05  | -0.05  | t | 141037 | IRTLKSGHK            | Ovis aries            |
| 1 | 1.00 | 1 | 1 | 0.03  | 0.003  | 0.04   | 0.03   | 0.032  | t | 61824  | STPLLYPSLA           | Mus musculus          |
| 1 | 1.00 | 1 | 1 | 0.03  | 0.028  | 0.037  | 0.027  | 0.028  | t | 77924  | IYTSPTFPPTAH         | Mus musculus          |
| 1 | 1.00 | 1 | 1 | -0.01 | -0.013 | -0.01  | -0.01  | -0.009 | t | 105485 | QKLVFFAEDVGSNK       | Oryctolagus cuniculus |
| 1 | 1.00 | 1 | 1 | 0.04  | 0.026  | 0.055  | 0.04   | 0.041  | t | 61549  | STDEPAGE SA          | Oryctolagus cuniculus |
| 1 | 1.00 | 1 | 1 | 0.04  | 0.036  | 0.055  | 0.04   | 0.041  | t | 61549  | STDEPAGE SA          | Oryctolagus cuniculus |
| 1 | 1.00 | 1 | 1 | -0.04 | -0.041 | -0.052 | -0.046 | -0.043 | t | 78197  | LNPWDQVKRNAVPITPTLNR | Homo sapiens          |
| 1 | 1.00 | 1 | 1 | 0.01  | 0.01   | 0.01   | 0.01   | 0.01   | t | 156918 | MAITDHPGSAMV         | Gallus gallus         |
| 1 | 1.00 | 1 | 1 | -0.03 | -0.03  | -0.03  | -0.03  | -0.03  | t | 10781  | DVVSKLPLAVMG         | Homo sapiens          |

|   |      |   |   |       |        |        |        |        |   |        |                              |                                  |
|---|------|---|---|-------|--------|--------|--------|--------|---|--------|------------------------------|----------------------------------|
| 1 | 1.00 | 1 | 1 | 0.06  | 0.056  | 0.072  | 0.063  | 0.06   | t | 63793  | TGATVSSQ<br>SF               | Oryctola<br>gus<br>cuniculu<br>s |
| 1 | 1.00 | 1 | 1 | -0.02 | -0.02  | -0.02  | -0.02  | -0.02  | t | 107354 | EWKGQVN<br>VNPFDY            | Oryctola<br>gus<br>cuniculu<br>s |
| 1 | 1.00 | 1 | 1 | -0.01 | -0.008 | -0.004 | -0.007 | -0.008 | t | 30710  | KFDRGYIS<br>PY               | Homo<br>sapiens                  |
| 1 | 1.00 | 1 | 1 | 0     | -0.005 | -0.007 | 0.003  | 0.003  | t | 44221  | NIETVIEFQ<br>QKNNRLLE        | Bos<br>taurus                    |
| 1 | 1.00 | 1 | 1 | 0.02  | 0.02   | 0.033  | 0.02   | 0.018  | t | 8379   | DGEPPED<br>DDSATGLA<br>FRTPN | Mus<br>musculu<br>s              |
| 1 | 1.00 | 1 | 1 | 0     | -0.002 | -0.016 | -0.007 | 0      | t | 112759 | CSNNAITP<br>GDC              | Mus<br>musculu<br>s              |
| 1 | 1.00 | 1 | 1 | 0     | 0      | 0      | -0.004 | 0      | t | 130986 | NPIENMM<br>DRDSQ             | Homo<br>sapiens                  |
| 1 | 1.00 | 1 | 1 | 0     | 0      | 0      | 0      | 0.003  | t | 37171  | LLDPSFDY<br>FQLYTT           | Mus<br>musculu<br>s              |
| 1 | 1.00 | 1 | 1 | 0     | -0.002 | 0      | 0.001  | 0.003  | t | 105041 | YEVHHQKL<br>VFF              | Mus<br>musculu<br>s              |
| 1 | 1.00 | 1 | 1 | -0.05 | -0.052 | -0.05  | -0.047 | -0.047 | t | 57620  | SESHNFDA<br>VMSKLGV<br>SWATR | Mus<br>musculu<br>s              |
| 1 | 1.00 | 1 | 1 | 0     | -0.003 | -0.005 | 0      | 0.003  | t | 132906 | SYSMEHFR<br>WG               | Oryctola<br>gus<br>cuniculu<br>s |
| 1 | 1.00 | 1 | 1 | 0.01  | 0.008  | 0.013  | 0.01   | 0.01   | t | 48072  | PKGRTVII<br>E<br>Q           | Oryctola<br>gus<br>cuniculu<br>s |
| 1 | 1.00 | 1 | 1 | 0.05  | 0.048  | 0.055  | 0.049  | 0.051  | t | 38673  | LPRETHFG<br>SHSN             | Mus<br>musculu<br>s              |
| 1 | 1.00 | 1 | 1 | 0.04  | 0.038  | 0.04   | 0.037  | 0.039  | t | 134048 | EQFRRMR<br>AAEDP             | Mus<br>musculu<br>s              |
| 1 | 1.00 | 1 | 1 | 0.04  | 0.04   | 0.04   | 0.04   | 0.043  | t | 156941 | PTEKKHV                      | Gallus<br>gallus                 |

|   |      |   |   |       |        |        |        |        |   |        |                              |                     |
|---|------|---|---|-------|--------|--------|--------|--------|---|--------|------------------------------|---------------------|
| 1 | 1.00 | 1 | 1 | 0.01  | 0.008  | 0.021  | 0.009  | 0.01   | t | 110619 | GPVGPAG<br>GPGFPGA<br>P      | Mus<br>musculu<br>s |
| 1 | 1.00 | 1 | 1 | 0.02  | 0.024  | 0.02   | 0.017  | 0.021  | t | 78410  | GSCFEIKCT<br>KPESCSGE<br>AV  | Homo<br>sapiens     |
| 1 | 1.00 | 1 | 1 | -0.02 | -0.02  | -0.018 | -0.023 | -0.02  | t | 135954 | LNTGWLA<br>GLFYQHKF          | Homo<br>sapiens     |
| 1 | 1.00 | 1 | 1 | -0.03 | -0.029 | -0.029 | -0.031 | -0.03  | t | 10344  | DTGHHR                       | Equus<br>caballus   |
| 1 | 1.00 | 1 | 1 | 0.01  | 0.01   | 0.022  | 0.01   | 0.009  | t | 131575 | NSDGSHT                      | Mus<br>musculu<br>s |
| 1 | 1.00 | 1 | 1 | 0.01  | 0.01   | 0.01   | 0.01   | 0.011  | t | 156905 | KPGDPRQ                      | Mus<br>musculu<br>s |
| 1 | 1.00 | 1 | 1 | 0     | 0.002  | 0.007  | 0.001  | 0.002  | t | 49764  | PTRTIGGS<br>QA               | Homo<br>sapiens     |
| 1 | 1.00 | 1 | 1 | -0.02 | -0.02  | -0.02  | -0.02  | -0.02  | t | 110869 | GQAEPDR<br>AHYNIVTF<br>CCKCD | Homo<br>sapiens     |
| 1 | 1.00 | 1 | 1 | 0.01  | 0.012  | 0.004  | 0.007  | 0.011  | t | 105854 | GVTHDQL<br>NNFRAGF<br>VSYMKA | Homo<br>sapiens     |
| 1 | 1.00 | 1 | 1 | -0.02 | -0.015 | -0.018 | -0.02  | -0.014 | t | 70897  | VSDFTDSV                     | Homo<br>sapiens     |
| 1 | 1.00 | 1 | 1 | -0.03 | -0.03  | -0.03  | -0.03  | -0.03  | t | 112846 | SWYARHY                      | Homo<br>sapiens     |
| 1 | 1.00 | 1 | 1 | -0.05 | -0.05  | -0.05  | -0.05  | -0.05  | t | 95931  | TTNVAR                       | Mus<br>musculu<br>s |
| 1 | 1.00 | 1 | 1 | 0.02  | 0.012  | 0.02   | 0.02   | 0.022  | t | 156933 | PLEKSHL                      | Mus<br>musculu<br>s |
| 1 | 1.00 | 1 | 1 | -0.01 | -0.01  | -0.01  | -0.01  | -0.009 | t | 101546 | DLNPLDPL<br>AQQS             | Mus<br>musculu<br>s |
| 1 | 1.00 | 1 | 1 | -0.02 | -0.02  | -0.007 | -0.02  | -0.02  | t | 17580  | FRELADAL                     | Homo<br>sapiens     |
| 1 | 1.00 | 1 | 1 | 0     | 0.004  | 0.009  | 0.001  | 0      | t | 12253  | EGQRMAE<br>ML                | Homo<br>sapiens     |

|   |      |   |   |       |        |        |        |        |   |        |                             |                                  |
|---|------|---|---|-------|--------|--------|--------|--------|---|--------|-----------------------------|----------------------------------|
| 1 | 1.00 | 1 | 1 | 0.03  | 0.026  | 0.023  | 0.023  | 0.03   | t | 124588 | PQEETLQA<br>FDSHYDYT        | Oryctola<br>gus<br>cuniculu<br>s |
| 1 | 1.00 | 1 | 1 | 0.02  | 0.02   | 0.02   | 0.02   | 0.022  | t | 104049 | LPPKLLTEP<br>TTEGDQH<br>PGT | Oryctola<br>gus<br>cuniculu<br>s |
| 1 | 1.00 | 1 | 1 | -0.03 | -0.028 | -0.022 | -0.029 | -0.028 | t | 8917   | DKLADYKR<br>RM              | Homo<br>sapiens                  |
| 1 | 1.00 | 1 | 1 | 0.06  | 0.062  | 0.06   | 0.057  | 0.06   | t | 60270  | SPSSTKSSS<br>PSSTKSSS       | Homo<br>sapiens                  |
| 1 | 1.00 | 1 | 1 | -0.02 | -0.02  | -0.02  | -0.02  | -0.019 | t | 6027   | CARSLATL<br>FSPGARQ<br>Q    | Mus<br>musculu<br>s              |
| 1 | 1.00 | 1 | 1 | 0     | 0      | 0.007  | 0      | -0.001 | t | 13568  | ENPVVHFF<br>ANIVTPRT<br>P   | Mus<br>musculu<br>s              |
| 1 | 1.00 | 1 | 1 | -0.03 | -0.028 | -0.034 | -0.029 | -0.029 | t | 3652   | APLTRGSC<br>RKRNRSPE<br>R   | Homo<br>sapiens                  |
| 1 | 1.00 | 1 | 1 | 0.01  | 0.008  | 0.008  | 0.003  | 0.01   | t | 132041 | RDTKAVN                     | Mus<br>musculu<br>s              |
| 1 | 1.00 | 1 | 1 | -0.02 | -0.022 | -0.013 | -0.023 | -0.019 | t | 142441 | LFSPWLRV<br>QNHF            | Mus<br>musculu<br>s              |
| 1 | 1.00 | 1 | 1 | 0     | 0      | 0      | 0      | 0.001  | t | 144793 | SYGGRKGT<br>HPGLEMP         | Mus<br>musculu<br>s              |
| 1 | 1.00 | 1 | 1 | -0.04 | -0.028 | -0.042 | -0.04  | -0.038 | t | 55930  | RSQPRGR<br>RQPIP            | Pan<br>troglody<br>tes           |
| 1 | 1.00 | 1 | 1 | -0.02 | -0.02  | -0.008 | -0.02  | -0.019 | t | 104461 | EFRHDS                      | Mus<br>musculu<br>s              |
| 1 | 1.00 | 1 | 1 | 0.01  | 0.01   | 0.017  | 0.013  | 0.012  | t | 21764  | GPRLTHSG<br>DLHL            | Homo<br>sapiens                  |
| 1 | 1.00 | 1 | 1 | 0.01  | 0.014  | 0.026  | 0.017  | 0.01   | t | 98374  | QLKPPQEE<br>GEPLL           | Homo<br>sapiens                  |

|   |      |   |   |       |        |        |        |        |   |        |                              |                                  |
|---|------|---|---|-------|--------|--------|--------|--------|---|--------|------------------------------|----------------------------------|
| 1 | 1.00 | 1 | 1 | 0.01  | 0.012  | 0.026  | 0.017  | 0.01   | t | 98374  | QLKPPQEE<br>GEPLL            | Homo<br>sapiens                  |
| 1 | 1.00 | 1 | 1 | -0.04 | -0.04  | -0.04  | -0.04  | -0.04  | t | 153261 | GRQPTPLS<br>PPLRNTH          | Mus<br>musculu<br>s              |
| 1 | 1.00 | 1 | 1 | -0.04 | -0.04  | -0.04  | -0.04  | -0.04  | t | 103744 | YDREKLQE<br>RLAKLAG          | Homo<br>sapiens                  |
| 1 | 1.00 | 1 | 1 | 0.01  | 0.01   | 0.022  | 0.008  | 0.008  | t | 96503  | KSGTIFDN<br>FL               | Homo<br>sapiens                  |
| 1 | 1.00 | 1 | 1 | -0.01 | -0.014 | 0.011  | -0.007 | -0.012 | t | 153820 | DTPTLHEY<br>MLDLQP           | Oryctola<br>gus<br>cuniculu<br>s |
| 1 | 1.00 | 1 | 1 | -0.02 | -0.02  | -0.011 | -0.02  | -0.02  | t | 134492 | QIQRSP<br>M                  | Mus<br>musculu<br>s              |
| 1 | 1.00 | 1 | 1 | 0.02  | 0.02   | 0.031  | 0.023  | 0.02   | t | 53274  | RCGRLICG<br>LSTTAQYP<br>PTRF | Homo<br>sapiens                  |
| 1 | 1.00 | 1 | 1 | -0.03 | -0.03  | -0.021 | -0.026 | -0.03  | t | 135988 | RTALLDAA<br>GVAS             | Homo<br>sapiens                  |
| 1 | 1.00 | 1 | 1 | -0.02 | -0.016 | -0.015 | -0.02  | -0.021 | t | 72457  | WGEGKRA<br>SHTTPVLM<br>EKPY  | Aotus<br>nancyma<br>ae           |
| 1 | 1.00 | 1 | 1 | -0.02 | -0.016 | -0.018 | -0.023 | -0.02  | t | 50752  | QFEEQQR<br>FRNCQ             | Homo<br>sapiens                  |
| 1 | 1.00 | 1 | 1 | 0     | 0      | 0      | 0      | 0.002  | t | 47012  | PAYYTKDT<br>NNNL             | Mus<br>musculu<br>s              |
| 1 | 1.00 | 1 | 1 | 0.01  | 0.013  | 0.017  | 0.01   | 0.011  | t | 126667 | MDWNM<br>HAA                 | Mus<br>musculu<br>s              |
| 1 | 1.00 | 1 | 1 | -0.01 | -0.008 | -0.01  | -0.009 | -0.008 | t | 127984 | FTNLKFKV<br>RKITSSHR<br>GN   | Homo<br>sapiens                  |
| 1 | 1.00 | 1 | 1 | -0.01 | -0.006 | -0.003 | -0.013 | -0.012 | t | 36083  | LGDYLIEQ<br>GL               | Homo<br>sapiens                  |

|   |      |   |   |       |        |        |        |        |   |        |                              |                                  |
|---|------|---|---|-------|--------|--------|--------|--------|---|--------|------------------------------|----------------------------------|
| 1 | 1.00 | 1 | 1 | 0.04  | 0.044  | 0.041  | 0.041  | 0.04   | t | 78883  | VTPYWPP<br>VQSIRSPG<br>TPSMD | Homo<br>sapiens                  |
| 1 | 1.00 | 1 | 1 | 0     | -0.003 | 0      | 0      | 0.002  | t | 48093  | PKKPNENK<br>LKQPNE           | Oryctola<br>gus<br>cuniculu<br>s |
| 1 | 1.00 | 1 | 1 | 0     | 0      | 0      | 0      | 0.002  | t | 9722   | DPPPPNP<br>NDPPPPN<br>PN     | Rattus<br>norvegic<br>us         |
| 1 | 1.00 | 1 | 1 | 0     | 0.012  | 0      | 0      | 0.002  | t | 9757   | DPRVRGLY<br>FPAGGSSS<br>GTV  | Pan<br>troglody<br>tes           |
| 1 | 1.00 | 1 | 1 | 0     | -0.002 | -0.003 | -0.003 | 0.001  | t | 30093  | KCTSDQDE<br>QFIPKGCS<br>K    | Mus<br>musculu<br>s              |
| 1 | 1.00 | 1 | 1 | 0.04  | 0.038  | 0.056  | 0.039  | 0.039  | t | 28733  | ISSTNEI                      | Sus<br>scrofa                    |
| 1 | 1.00 | 1 | 1 | -0.05 | -0.046 | -0.048 | -0.049 | -0.047 | t | 78176  | HLP                          | MD                               |
| 1 | 1.00 | 1 | 1 | 0     | 0.002  | 0.007  | 0      | 0      | t | 11560  | EEDQKARE                     | Anas<br>platyrhy<br>nchos        |
| 1 | 1.00 | 1 | 1 | -0.02 | -0.02  | -0.015 | -0.02  | -0.019 | t | 125004 | DAPDTDW<br>CDSIP             | Mus<br>musculu<br>s              |
| 1 | 1.00 | 1 | 1 | 0.01  | 0.012  | 0.01   | 0.006  | 0.01   | t | 118004 | LRLSHLKPS                    | Homo<br>sapiens                  |
| 1 | 1.00 | 1 | 1 | 0.01  | 0.01   | 0.01   | 0.01   | 0.01   | t | 135753 | RVVGGED<br>A                 | Homo<br>sapiens                  |
| 1 | 1.00 | 1 | 1 | -0.01 | -0.01  | -0.01  | -0.01  | -0.01  | t | 99560  | QEFLRYQQ<br>QSRQSRR          | Homo<br>sapiens                  |
| 1 | 1.00 | 1 | 1 | -0.01 | -0.014 | -0.003 | -0.013 | -0.01  | t | 116855 | WPVGGEH                      | Oryctola<br>gus<br>cuniculu<br>s |
| 1 | 1.00 | 1 | 1 | -0.02 | -0.02  | -0.026 | -0.023 | -0.019 | t | 21723  | GPPAAGP<br>PAAGPPA<br>A      | Homo<br>sapiens                  |

|   |      |   |   |       |        |        |        |        |   |        |                              |                       |
|---|------|---|---|-------|--------|--------|--------|--------|---|--------|------------------------------|-----------------------|
| 1 | 1.00 | 1 | 1 | -0.06 | -0.057 | -0.047 | -0.06  | -0.063 | t | 137941 | PFRSYTK                      | Mus musculus          |
| 1 | 1.00 | 1 | 1 | 0.03  | 0.034  | 0.03   | 0.03   | 0.031  | t | 41175  | MAYGSDD<br>NDDKNKS<br>LDHKHN | Aotus nancymae        |
| 1 | 1.00 | 1 | 1 | -0.03 | -0.026 | -0.03  | -0.033 | -0.032 | t | 141775 | VKELAFPG<br>SSREVDR          | Homo sapiens          |
| 1 | 1.00 | 1 | 1 | -0.04 | -0.034 | -0.034 | -0.04  | -0.041 | t | 3073   | AMDHEGC<br>KFSCFIRP          | Equus caballus        |
| 1 | 1.00 | 1 | 1 | 0.01  | 0.006  | 0.029  | 0.013  | 0.01   | t | 35662  | LEQPVSND<br>LS               | Oryctolagus cuniculus |
| 1 | 1.00 | 1 | 1 | -0.02 | -0.018 | -0.011 | -0.013 | -0.018 | t | 108510 | KTMSAKEK<br>SKFEDMA          | Homo sapiens          |
| 1 | 1.00 | 1 | 1 | -0.04 | -0.04  | -0.041 | -0.04  | -0.04  | t | 38482  | LPFNWTH<br>CFDPQ             | Homo sapiens          |
| 1 | 1.00 | 1 | 1 | -0.01 | -0.008 | -0.01  | -0.009 | -0.01  | t | 109332 | IHSMNSTI<br>L                | Homo sapiens          |
| 1 | 1.00 | 1 | 1 | 0.01  | 0.014  | 0.01   | 0.01   | 0.012  | t | 123356 | KFEEVKEE<br>Y                | Ovis aries            |
| 1 | 1.00 | 1 | 1 | -0.05 | -0.05  | -0.04  | -0.05  | -0.05  | t | 29229  | IVDIDFDSV<br>P               | Oryctolagus cuniculus |
| 1 | 1.00 | 1 | 1 | -0.03 | -0.028 | -0.025 | -0.023 | -0.028 | t | 122262 | ALRCRRISK<br>EEYHLYKD<br>GHL | Homo sapiens          |
| 1 | 1.00 | 1 | 1 | -0.03 | -0.028 | -0.025 | -0.023 | -0.028 | t | 122262 | ALRCRRISK<br>EEYHLYKD<br>GHL | Homo sapiens          |
| 1 | 1.00 | 1 | 1 | -0.01 | -0.006 | -0.006 | -0.009 | -0.01  | t | 20281  | GIGNIGDR<br>NLGI             | Homo sapiens          |
| 1 | 1.00 | 1 | 1 | 0     | -0.002 | 0.007  | -0.001 | -0.001 | t | 120697 | KLLLDYTG<br>KIWNPAD<br>YGGIK | Rattus norvegicus     |

|   |      |   |   |       |        |        |        |        |   |        |                              |                                  |
|---|------|---|---|-------|--------|--------|--------|--------|---|--------|------------------------------|----------------------------------|
| 1 | 1.00 | 1 | 1 | -0.01 | -0.01  | -0.006 | -0.007 | -0.008 | t | 52188  | QRATQQQ<br>AV                | Homo<br>sapiens                  |
| 1 | 1.00 | 1 | 1 | -0.01 | -0.01  | -0.005 | -0.013 | -0.012 | t | 14697  | EVFTKKTK<br>LT               | Homo<br>sapiens                  |
| 1 | 1.00 | 1 | 1 | 0     | 0.002  | 0      | 0      | 0.001  | t | 118019 | MGRGAPP<br>PGMMG             | Homo<br>sapiens                  |
| 1 | 1.00 | 1 | 1 | -0.01 | -0.01  | -0.01  | -0.01  | -0.01  | t | 128079 | PSPDITSTT<br>KTRNFDLV<br>NCN | Mus<br>musculu<br>s              |
| 1 | 1.00 | 1 | 1 | -0.01 | -0.007 | -0.01  | -0.01  | -0.01  | t | 128079 | PSPDITSTT<br>KTRNFDLV<br>NCN | Mus<br>musculu<br>s              |
| 1 | 1.00 | 1 | 1 | 0     | 0      | 0.013  | -0.002 | -0.003 | t | 98974  | QTMKGLD<br>IQK               | Homo<br>sapiens                  |
| 1 | 1.00 | 1 | 1 | -0.03 | -0.03  | -0.023 | -0.03  | -0.03  | t | 133705 | SSKTRSG<br>VHLVGPY           | Mus<br>musculu<br>s              |
| 1 | 1.00 | 1 | 1 | 0.06  | 0.058  | 0.06   | 0.053  | 0.06   | t | 121813 | RRHKSAPS<br>S                | Mus<br>musculu<br>s              |
| 1 | 1.00 | 1 | 1 | 0     | 0.003  | 0      | 0      | 0.003  | t | 144678 | GTQPTLEV<br>VPMGRGS          | Mus<br>musculu<br>s              |
| 1 | 1.00 | 1 | 1 | -0.03 | -0.03  | -0.03  | -0.03  | -0.028 | t | 142485 | YNIYSEKEK                    | Homo<br>sapiens                  |
| 1 | 1.00 | 1 | 1 | -0.03 | -0.03  | -0.026 | -0.03  | -0.029 | t | 53866  | RGFRKEI                      | Homo<br>sapiens                  |
| 1 | 1.00 | 1 | 1 | -0.01 | -0.006 | -0.002 | -0.009 | -0.011 | t | 52417  | QSQQQGN<br>SRRGPRVV<br>P     | Capra<br>hircus                  |
| 1 | 1.00 | 1 | 1 | -0.03 | -0.032 | -0.023 | -0.027 | -0.028 | t | 106377 | EEMRHVV                      | Mus<br>musculu<br>s              |
| 1 | 1.00 | 1 | 1 | -0.06 | -0.06  | -0.053 | -0.06  | -0.06  | t | 132794 | DRLYAQYP<br>VPTP             | Mus<br>musculu<br>s              |
| 1 | 1.00 | 1 | 1 | 0.01  | 0.006  | 0.01   | 0.003  | 0.01   | t | 118556 | PPPGMIPP                     | Oryctola<br>gus<br>cuniculu<br>s |



|   |      |   |   |       |        |        |        |        |   |        |                           |                       |
|---|------|---|---|-------|--------|--------|--------|--------|---|--------|---------------------------|-----------------------|
| 1 | 1.00 | 1 | 1 | 0.03  | 0.032  | 0.034  | 0.027  | 0.029  | t | 44051  | NGPQEIYI<br>QQGNGIF       | Homo sapiens          |
| 1 | 1.00 | 1 | 1 | -0.01 | -0.012 | -0.014 | -0.011 | -0.01  | t | 42957  | MVKSHIGS<br>WILVLFVA      | Mus musculus          |
| 1 | 1.00 | 1 | 1 | 0.04  | 0.042  | 0.04   | 0.039  | 0.04   | t | 149473 | SQPQQPIS<br>QQ            | Homo sapiens          |
| 1 | 1.00 | 1 | 1 | 0.02  | 0.018  | 0.016  | 0.019  | 0.021  | t | 4149   | ARGSLAVT<br>I             | Mus musculus          |
| 1 | 1.00 | 1 | 1 | -0.07 | -0.073 | -0.062 | -0.07  | -0.07  | t | 56937  | SAPPTRVR<br>R             | Oryctolagus cuniculus |
| 1 | 1.00 | 1 | 1 | -0.04 | -0.039 | -0.03  | -0.041 | -0.04  | t | 10344  | DTGHHR                    | Equus caballus        |
| 1 | 1.00 | 1 | 1 | 0.01  | 0.01   | 0.011  | 0.004  | 0.01   | t | 144763 | RIEDPPFN<br>SLL           | Homo sapiens          |
| 1 | 1.00 | 1 | 1 | -0.01 | -0.013 | -0.005 | -0.01  | -0.01  | t | 7100   | CSVTCGVG<br>VRVRSRV<br>NA | Oryctolagus cuniculus |
| 1 | 1.00 | 1 | 1 | -0.01 | -0.013 | -0.005 | -0.01  | -0.01  | t | 7100   | CSVTCGVG<br>VRVRSRV<br>NA | Saimiri sciureus      |
| 1 | 1.00 | 1 | 1 | -0.01 | -0.012 | -0.006 | -0.011 | -0.01  | t | 22042  | GRGDKQI<br>NHHWHK<br>A    | Mus musculus          |
| 1 | 1.00 | 1 | 1 | 0.01  | 0.009  | 0.011  | 0.007  | 0.011  | t | 99224  | ERDPYSPS<br>QDPYSPS       | Homo sapiens          |
| 1 | 1.00 | 1 | 1 | 0.06  | 0.06   | 0.056  | 0.06   | 0.062  | t | 138753 | AAHAEINE<br>AGREVG        | Mus musculus          |
| 1 | 1.00 | 1 | 1 | 0     | -0.002 | 0      | -0.007 | -0.002 | t | 131087 | SSPPCE                    | Mus musculus          |
| 1 | 1.00 | 1 | 1 | 0     | -0.002 | 0      | -0.007 | -0.002 | t | 131087 | SSPPCE                    | Mus musculus          |

|   |      |   |   |       |        |        |        |        |   |        |                     |                     |
|---|------|---|---|-------|--------|--------|--------|--------|---|--------|---------------------|---------------------|
| 1 | 1.00 | 1 | 1 | 0     | -0.004 | 0.007  | 0      | 0      | t | 21840  | GPYAGPLE<br>RQKPLK  | Bos<br>taurus       |
| 1 | 1.00 | 1 | 1 | 0     | 0      | 0.004  | 0      | 0.002  | t | 54850  | RMAILG              | Homo<br>sapiens     |
| 1 | 1.00 | 1 | 1 | -0.05 | -0.05  | -0.047 | -0.05  | -0.05  | t | 99048  | VRRYTARL<br>KEGDVFI | Homo<br>sapiens     |
| 1 | 1.00 | 1 | 1 | -0.01 | -0.007 | -0.001 | -0.01  | -0.01  | t | 52818  | QVWPSSH             | Mus<br>musculu<br>s |
| 1 | 1.00 | 1 | 1 | -0.03 | -0.027 | -0.018 | -0.03  | -0.032 | t | 41183  | MCAVRDP<br>AFSRRLS  | Mus<br>musculu<br>s |
| 1 | 1.00 | 1 | 1 | 0.02  | 0.018  | 0.02   | 0.017  | 0.02   | t | 94644  | PNKKPGKK<br>TTTKPTK | Mus<br>musculu<br>s |
| 1 | 1.00 | 1 | 1 | -0.06 | -0.062 | -0.053 | -0.059 | -0.06  | t | 133789 | CYRSPWR<br>C        | Mus<br>musculu<br>s |
| 1 | 1.00 | 1 | 1 | -0.03 | -0.03  | -0.03  | -0.03  | -0.03  | t | 140592 | PYHQLTH<br>GS       | Mus<br>musculu<br>s |
| 1 | 1.00 | 1 | 1 | -0.03 | -0.03  | -0.03  | -0.03  | -0.03  | t | 140592 | PYHQLTH<br>GS       | Mus<br>musculu<br>s |
| 1 | 1.00 | 1 | 1 | -0.03 | -0.03  | -0.03  | -0.03  | -0.03  | t | 122206 | VISRSRV             | Homo<br>sapiens     |
| 1 | 1.00 | 1 | 1 | -0.03 | -0.03  | -0.03  | -0.03  | -0.03  | t | 104746 | DANKPYS<br>WRS      | Homo<br>sapiens     |
| 1 | 1.00 | 1 | 1 | 0.03  | 0.032  | 0.027  | 0.027  | 0.03   | t | 47209  | PDTAKEKP<br>QEGTVVA | Homo<br>sapiens     |
| 1 | 1.00 | 1 | 1 | 0.03  | 0.032  | 0.027  | 0.027  | 0.03   | t | 47209  | PDTAKEKP<br>QEGTVVA | Homo<br>sapiens     |
| 1 | 1.00 | 1 | 1 | 0.02  | 0.018  | 0.02   | 0.013  | 0.017  | t | 130916 | KEDFDIYD<br>EDE     | Mus<br>musculu<br>s |
| 1 | 1.00 | 1 | 1 | -0.07 | -0.072 | -0.068 | -0.071 | -0.07  | t | 46899  | PAPRRKFQ<br>QVKRL   | Mus<br>musculu<br>s |

|   |      |   |   |       |        |        |        |        |   |        |                     |                       |
|---|------|---|---|-------|--------|--------|--------|--------|---|--------|---------------------|-----------------------|
| 1 | 1.00 | 1 | 1 | -0.01 | -0.01  | -0.01  | -0.016 | -0.01  | t | 27462  | IMDINKRK            | Homo sapiens          |
| 1 | 1.00 | 1 | 1 | -0.02 | -0.02  | -0.02  | -0.02  | -0.019 | t | 137744 | DTPLTRQALKLV        | Mus musculus          |
| 1 | 1.00 | 1 | 1 | -0.02 | -0.02  | -0.015 | -0.017 | -0.02  | t | 38397  | LPAHGPSLS           | Homo sapiens          |
| 1 | 1.00 | 1 | 1 | -0.01 | -0.012 | -0.004 | -0.007 | -0.01  | t | 1367   | AFNQFGPNAGQR        | Mus musculus          |
| 1 | 1.00 | 1 | 1 | 0.01  | 0.01   | 0.005  | 0.01   | 0.01   | t | 108313 | DHHSDNYTVDHDRVHIQA  | Mus musculus          |
| 1 | 1.00 | 1 | 1 | -0.03 | -0.032 | -0.03  | -0.031 | -0.03  | t | 5970   | CADSWGLDLRC         | Mus musculus          |
| 1 | 1.00 | 1 | 1 | -0.01 | -0.01  | -0.008 | -0.01  | -0.008 | t | 45673  | NRFAGMFSLGARQKI     | Mus musculus          |
| 1 | 1.00 | 1 | 1 | -0.06 | -0.06  | -0.058 | -0.06  | -0.06  | t | 60260  | SPSLPITMRFPARWRF    | Oryctolagus cuniculus |
| 1 | 1.00 | 1 | 1 | -0.04 | -0.04  | -0.04  | -0.036 | -0.038 | t | 117829 | EKVKRTKDELEVIH      | Homo sapiens          |
| 1 | 1.00 | 1 | 1 | 0     | -0.003 | 0      | 0      | 0.002  | t | 58405  | SHRLLQTYWSSA        | Oryctolagus cuniculus |
| 1 | 1.00 | 1 | 1 | -0.06 | -0.06  | -0.065 | -0.07  | -0.063 | t | 115910 | PYPYYAKPAA          | Homo sapiens          |
| 1 | 1.00 | 1 | 1 | -0.01 | -0.014 | 0      | -0.011 | -0.011 | t | 42791  | MTDVVFYRYSNNYEQPHIS | Aotus nancymae        |
| 1 | 1.00 | 1 | 1 | 0.02  | 0.022  | 0.029  | 0.02   | 0.02   | t | 120525 | FDEQNCSMKLG         | Rattus norvegicus     |
| 1 | 1.00 | 1 | 1 | 0.01  | 0.006  | 0.01   | 0.009  | 0.01   | t | 138079 | VSDQAVSLGQNV        | Oryctolagus cuniculus |
| 1 | 1.00 | 1 | 1 | 0.01  | 0.01   | 0.01   | 0.01   | 0.012  | t | 97340  | GIFGAIAGFIENGW      | Oryctolagus cuniculus |
| 1 | 1.00 | 1 | 1 | 0.01  | 0.01   | 0.004  | 0.007  | 0.011  | t | 11253  | ECKETVPMNCSSYA      | Homo sapiens          |

|   |      |   |   |       |        |        |        |        |   |        |                               |                              |
|---|------|---|---|-------|--------|--------|--------|--------|---|--------|-------------------------------|------------------------------|
| 1 | 1.00 | 1 | 1 | -0.02 | -0.02  | -0.02  | -0.02  | -0.02  | t | 79347  | QCNAREW<br>SANYICR            | Mus<br>musculus              |
| 1 | 1.00 | 1 | 1 | -0.04 | -0.04  | -0.04  | -0.04  | -0.04  | t | 111398 | HLVCRPS                       | Homo<br>sapiens              |
| 1 | 1.00 | 1 | 1 | -0.03 | -0.03  | -0.03  | -0.029 | -0.03  | t | 110965 | PNNNKILV<br>PKVSGQLQY<br>RVFR | Homo<br>sapiens              |
| 1 | 1.00 | 1 | 1 | 0     | 0      | 0      | 0      | 0.001  | t | 95048  | VIFQTPLIK<br>NPDVKSAI<br>EG   | Mus<br>musculus              |
| 1 | 1.00 | 1 | 1 | 0.01  | 0.01   | 0.012  | 0.01   | 0.012  | t | 99948  | DLISEVAQ<br>GALTLS            | Oryctola<br>gus<br>cuniculus |
| 1 | 1.00 | 1 | 1 | -0.04 | -0.042 | -0.037 | -0.041 | -0.039 | t | 61612  | STFYGKPT<br>GAGPK             | Mus<br>musculus              |
| 1 | 1.00 | 1 | 1 | -0.02 | -0.023 | -0.019 | -0.02  | -0.021 | t | 47925  | PILQERPPL<br>ENR              | Oryctola<br>gus<br>cuniculus |
| 1 | 1.00 | 1 | 1 | -0.02 | -0.02  | -0.02  | -0.024 | -0.02  | t | 115601 | DPFYWVS<br>PGVLV              | Homo<br>sapiens              |
| 1 | 1.00 | 1 | 1 | -0.01 | -0.006 | -0.006 | -0.013 | -0.012 | t | 106008 | PREQARQ<br>LKNNNPFK           | Homo<br>sapiens              |
| 1 | 1.00 | 1 | 1 | -0.02 | -0.02  | -0.02  | -0.02  | -0.02  | t | 142410 | EAPNSSRH<br>HLRNGF            | Homo<br>sapiens              |
| 1 | 1.00 | 1 | 1 | -0.03 | -0.03  | -0.03  | -0.03  | -0.029 | t | 119520 | RRKLRTNA<br>G                 | Homo<br>sapiens              |
| 1 | 1.00 | 1 | 1 | 0     | 0.002  | 0      | -0.001 | 0      | t | 149429 | QLWQIPE<br>QSR                | Homo<br>sapiens              |
| 1 | 1.00 | 1 | 1 | 0     | 0      | 0      | -0.003 | 0      | t | 34744  | LAEQFKQK<br>ALGLLQQA<br>SKQA  | Homo<br>sapiens              |
| 1 | 1.00 | 1 | 1 | 0.04  | 0.044  | 0.039  | 0.041  | 0.042  | t | 32273  | KLYTSVEN<br>AQQDKGI<br>AIPHD  | Homo<br>sapiens              |
| 1 | 1.00 | 1 | 1 | 0.01  | 0.01   | 0.015  | 0.01   | 0.011  | t | 16101  | FHENWPS                       | Mus<br>musculus              |

|   |      |   |   |       |        |        |        |        |   |        |                              |                       |
|---|------|---|---|-------|--------|--------|--------|--------|---|--------|------------------------------|-----------------------|
| 1 | 1.00 | 1 | 1 | 0.01  | 0.01   | 0.002  | 0.013  | 0.015  | t | 26842  | IKLNG                        | Homo sapiens          |
| 1 | 1.00 | 1 | 1 | 0     | 0      | 0.007  | 0      | 0      | t | 95514  | KPWIQPKT<br>KV               | Homo sapiens          |
| 1 | 1.00 | 1 | 1 | 0     | 0      | 0      | 0      | 0      | t | 111548 | MHQTTAQ<br>PLRSP             | Homo sapiens          |
| 1 | 1.00 | 1 | 1 | -0.02 | -0.02  | -0.02  | -0.02  | -0.02  | t | 144252 | EIINVGHSE<br>HVNFEEDN<br>DNR | Homo sapiens          |
| 1 | 1.00 | 1 | 1 | 0.02  | 0.023  | 0.02   | 0.02   | 0.023  | t | 125245 | RRLDQYQ<br>IHL               | Mus musculus          |
| 1 | 1.00 | 1 | 1 | -0.04 | -0.037 | -0.04  | -0.037 | -0.04  | t | 125793 | CSFWSKYI<br>SSLKTSAD<br>GAK  | Mus musculus          |
| 1 | 1.00 | 1 | 1 | 0.05  | 0.061  | 0.05   | 0.05   | 0.052  | t | 134161 | MGSASGH<br>FTDFE             | Rattus rattus         |
| 1 | 1.00 | 1 | 1 | -0.03 | -0.03  | -0.026 | -0.03  | -0.03  | t | 49110  | PQQSFPQ<br>PQH               | Mus musculus          |
| 1 | 1.00 | 1 | 1 | 0.01  | 0.008  | 0.014  | 0.013  | 0.012  | t | 114924 | QDENPVV<br>HFFKNIV           | Rattus norvegicus     |
| 1 | 1.00 | 1 | 1 | -0.01 | -0.012 | -0.012 | -0.01  | -0.01  | t | 120393 | AEERLLKRL<br>FSGYNK          | Oryctolagus cuniculus |
| 1 | 1.00 | 1 | 1 | 0.01  | 0.008  | 0.01   | 0.007  | 0.01   | t | 38754  | LPVGYHGR<br>AS               | Mus musculus          |
| 1 | 1.00 | 1 | 1 | -0.04 | -0.042 | -0.04  | -0.041 | -0.038 | t | 149334 | HNIFNPPII<br>AR              | Homo sapiens          |
| 1 | 1.00 | 1 | 1 | -0.01 | -0.01  | -0.01  | -0.014 | -0.01  | t | 135950 | LLCLLLSS<br>RPG              | Homo sapiens          |
| 1 | 1.00 | 1 | 1 | 0     | 0      | 0      | 0      | 0.002  | t | 142007 | SDWRFLR<br>GYHQYA            | Homo sapiens          |
| 1 | 1.00 | 1 | 1 | 0     | 0      | 0      | 0      | 0.002  | t | 151813 | CGADSYE<br>MEEDGVR<br>KC     | Mus musculus          |
| 1 | 1.00 | 1 | 1 | 0     | 0      | 0      | 0      | 0.002  | t | 122746 | EEQEDEIIG<br>FGQELKN         | Oryctolagus cuniculus |

|   |      |   |   |       |        |       |        |       |   |        |                              |                                  |
|---|------|---|---|-------|--------|-------|--------|-------|---|--------|------------------------------|----------------------------------|
| 1 | 1.00 | 1 | 1 | 0     | 0      | 0     | 0      | 0.002 | t | 117520 | GSFSDADL<br>AD               | Mus<br>musculu<br>s              |
| 1 | 1.00 | 1 | 1 | 0     | 0      | 0     | 0      | 0.002 | t | 132045 | RMATPLL<br>MRPMSM            | Oryctola<br>gus<br>cuniculu<br>s |
| 1 | 1.00 | 1 | 1 | 0     | 0      | 0     | 0      | 0.002 | t | 131956 | LPKSAKPV<br>SQMRMA<br>TPLL   | Oryctola<br>gus<br>cuniculu<br>s |
| 1 | 1.00 | 1 | 1 | 0     | 0      | 0     | 0      | 0.002 | t | 117506 | GGAHFSVS<br>SLAEG            | Mus<br>musculu<br>s              |
| 1 | 1.00 | 1 | 1 | 0     | 0      | 0     | 0      | 0.002 | t | 122861 | NALNSPLH<br>QEYEENL          | Oryctola<br>gus<br>cuniculu<br>s |
| 1 | 1.00 | 1 | 1 | 0     | 0      | 0     | 0      | 0.002 | t | 124471 | LQAFDSHY<br>DY               | Mus<br>musculu<br>s              |
| 1 | 1.00 | 1 | 1 | 0     | -0.003 | 0     | 0      | 0.002 | t | 76586  | YYR                          | Oryctola<br>gus<br>cuniculu<br>s |
| 1 | 1.00 | 1 | 1 | 0     | 0      | 0     | 0      | 0.002 | t | 76586  | YYR                          | Mus<br>musculu<br>s              |
| 1 | 1.00 | 1 | 1 | 0     | 0      | 0     | 0      | 0.002 | t | 76491  | YYDGRRS                      | Mus<br>musculu<br>s              |
| 1 | 1.00 | 1 | 1 | 0     | 0      | 0     | 0      | 0.002 | t | 37660  | LLPHSNLD<br>HILEPSIPW<br>KSK | Mus<br>musculu<br>s              |
| 1 | 1.00 | 1 | 1 | 0     | 0      | 0     | 0      | 0.002 | t | 41826  | MKHM                         | Mus<br>musculu<br>s              |
| 1 | 1.00 | 1 | 1 | 0     | 0      | 0     | 0      | 0.002 | t | 48557  | PMIHFGN<br>DWEDRYR<br>REN    | Mus<br>musculu<br>s              |
| 1 | 1.00 | 1 | 1 | 0     | 0      | 0     | 0      | 0.002 | t | 14435  | ETIYNTTLK<br>Y               | Homo<br>sapiens                  |
| 1 | 1.00 | 1 | 1 | 0     | 0      | 0     | 0      | 0.002 | t | 4397   | ASFEAQG<br>ALANIAVD<br>KA    | Mus<br>musculu<br>s              |
| 1 | 1.00 | 1 | 1 | -0.01 | -0.012 | -0.01 | -0.011 | -0.01 | t | 102071 | SLQPDRS                      | Mus<br>musculu<br>s              |

|   |      |   |   |       |        |        |        |        |   |        |                              |                                  |
|---|------|---|---|-------|--------|--------|--------|--------|---|--------|------------------------------|----------------------------------|
| 1 | 1.00 | 1 | 1 | 0     | -0.002 | 0      | 0      | 0      | t | 107355 | EYGFDTSD<br>YYYYY            | Oryctola<br>gus<br>cuniculu<br>s |
| 1 | 1.00 | 1 | 1 | -0.02 | -0.02  | -0.014 | -0.02  | -0.02  | t | 30409  | KEGRFKSQ                     | Homo<br>sapiens                  |
| 1 | 1.00 | 1 | 1 | 0     | 0.002  | 0.009  | 0.003  | 0      | t | 1575   | AGKKESTV<br>MTSGSA           | Ovis<br>aries                    |
| 1 | 1.00 | 1 | 1 | 0.01  | 0.008  | 0.011  | 0.009  | 0.01   | t | 70946  | VSGDPRG<br>RYEDI             | Mus<br>musculu<br>s              |
| 1 | 1.00 | 1 | 1 | -0.05 | -0.05  | -0.052 | -0.05  | -0.049 | t | 120319 | WTPPAIFK<br>SYCEIIVTH<br>FPF | Mus<br>musculu<br>s              |
| 1 | 1.00 | 1 | 1 | 0.03  | 0.036  | 0.035  | 0.03   | 0.03   | t | 38203  | LNEKEIKDL<br>YDNQSNS<br>GIL  | Equus<br>caballus                |
| 1 | 1.00 | 1 | 1 | 0.02  | 0.02   | 0.026  | 0.014  | 0.018  | t | 33440  | KSMKVTV<br>AFNQFG            | Homo<br>sapiens                  |
| 1 | 1.00 | 1 | 1 | -0.01 | -0.01  | -0.011 | -0.007 | -0.008 | t | 98906  | MLVQHLL<br>DRDLRVEI<br>PGVDT | Homo<br>sapiens                  |
| 1 | 1.00 | 1 | 1 | 0     | 0      | 0      | 0      | 0.002  | t | 100508 | SGYEVHH<br>QKL               | Mus<br>musculu<br>s              |
| 1 | 1.00 | 1 | 1 | -0.02 | -0.018 | -0.024 | -0.019 | -0.019 | t | 48905  | PPRRRAGR                     | Homo<br>sapiens                  |
| 1 | 1.00 | 1 | 1 | -0.04 | -0.04  | -0.029 | -0.04  | -0.042 | t | 111682 | QNFGFLFYP<br>NKQPVYQ         | Oryctola<br>gus<br>cuniculu<br>s |
| 1 | 1.00 | 1 | 1 | 0.01  | 0.013  | 0.015  | 0.01   | 0.009  | t | 97480  | LTEVETPIR<br>N               | Mus<br>musculu<br>s              |
| 1 | 1.00 | 1 | 1 | -0.01 | -0.012 | -0.008 | -0.009 | -0.009 | t | 4071   | AQSRNVR<br>TFTGLFTS<br>G     | Homo<br>sapiens                  |
| 1 | 1.00 | 1 | 1 | -0.01 | -0.008 | -0.005 | -0.013 | -0.01  | t | 329    | AANKYKTF<br>VATFGAAS<br>NKAF | Homo<br>sapiens                  |

|   |      |   |   |       |        |        |        |        |   |        |                              |                       |
|---|------|---|---|-------|--------|--------|--------|--------|---|--------|------------------------------|-----------------------|
| 1 | 1.00 | 1 | 1 | -0.02 | -0.017 | -0.009 | -0.02  | -0.02  | t | 54918  | RMLNILN                      | Mus musculus          |
| 1 | 1.00 | 1 | 1 | -0.01 | -0.008 | -0.007 | -0.009 | -0.01  | t | 66705  | TTLPALST<br>GLIHLHQ<br>IVDV  | Homo sapiens          |
| 1 | 1.00 | 1 | 1 | 0     | 0      | 0.011  | 0      | 0      | t | 94616  | NPAC                         | Capra hircus          |
| 1 | 1.00 | 1 | 1 | -0.02 | -0.018 | -0.013 | -0.02  | -0.018 | t | 130339 | WRPWSE<br>Q                  | MD                    |
| 1 | 1.00 | 1 | 1 | -0.01 | -0.01  | -0.004 | -0.01  | -0.01  | t | 91816  | QCYYKASD<br>GALFPLEV         | Oryctolagus cuniculus |
| 1 | 1.00 | 1 | 1 | -0.04 | -0.04  | -0.04  | -0.04  | -0.04  | t | 140595 | RHEDGDW<br>PRV               | Mus musculus          |
| 1 | 1.00 | 1 | 1 | -0.06 | -0.06  | -0.06  | -0.06  | -0.06  | t | 141037 | IRTLKSGH<br>K                | Ovis aries            |
| 1 | 1.00 | 1 | 1 | -0.02 | -0.006 | -0.026 | -0.02  | -0.02  | t | 19266  | GEFPRHVK<br>LKNEIENLL<br>DQV | Mus musculus          |
| 1 | 1.00 | 1 | 1 | 0.01  | 0.006  | 0.01   | 0.003  | 0.01   | t | 121915 | TKQEPMFL                     | Oryctolagus cuniculus |
| 1 | 1.00 | 1 | 1 | -0.01 | -0.01  | -0.019 | -0.017 | -0.009 | t | 110864 | GLKAKPKL<br>KRAAPTST<br>RTSS | Homo sapiens          |
| 1 | 1.00 | 1 | 1 | -0.01 | -0.01  | -0.019 | -0.017 | -0.009 | t | 110864 | GLKAKPKL<br>KRAAPTST<br>RTSS | Homo sapiens          |
| 1 | 1.00 | 1 | 1 | -0.01 | -0.01  | -0.008 | -0.01  | -0.011 | t | 97771  | WYGYHHS<br>N                 | Mus musculus          |
| 1 | 1.00 | 1 | 1 | -0.06 | -0.056 | -0.068 | -0.06  | -0.058 | t | 103144 | EMPENYA<br>KTRIINRKK         | Capra hircus          |
| 1 | 1.00 | 1 | 1 | 0.03  | 0.034  | 0.032  | 0.031  | 0.03   | t | 44088  | NGTPSELG<br>GTNPVPAE         | Homo sapiens          |
| 1 | 1.00 | 1 | 1 | -0.02 | -0.02  | -0.014 | -0.021 | -0.019 | t | 68833  | VHASFFDI<br>G                | Homo sapiens          |



|   |      |   |   |       |        |       |        |        |   |        |                      |                       |
|---|------|---|---|-------|--------|-------|--------|--------|---|--------|----------------------|-----------------------|
| 1 | 1.00 | 1 | 1 | 0.01  | 0.008  | 0.008 | 0.002  | 0.01   | t | 132041 | RDTKAVN              | Mus musculus          |
| 1 | 1.00 | 1 | 1 | -0.01 | -0.01  | -0.01 | -0.01  | -0.01  | t | 109767 | QPLKEQPALNDSRYCL     | Homo sapiens          |
| 1 | 1.00 | 1 | 1 | 0.01  | 0.01   | 0.005 | 0.003  | 0.011  | t | 140674 | ESQPDPKPDELHKS       | Mus musculus          |
| 1 | 1.00 | 1 | 1 | 0.03  | 0.026  | 0.046 | 0.033  | 0.028  | t | 1731   | AGYCNTECTLKKGSS      | Oryctolagus cuniculus |
| 1 | 1.00 | 1 | 1 | 0.03  | 0.031  | 0.046 | 0.033  | 0.028  | t | 1731   | AGYCNTECTLKKGSS      | Equus caballus        |
| 1 | 1.00 | 1 | 1 | 0.03  | 0.03   | 0.037 | 0.02   | 0.03   | t | 117411 | YLWSAFTP PP          | Homo sapiens          |
| 1 | 1.00 | 1 | 1 | -0.04 | -0.04  | -0.04 | -0.04  | -0.038 | t | 140940 | YRQKVEPLRAEL         | Mus musculus          |
| 1 | 1.00 | 1 | 1 | 0.01  | 0.01   | 0.008 | 0.007  | 0.007  | t | 26341  | IGVNQELAYFYPELFRQFYQ | Homo sapiens          |
| 1 | 1.00 | 1 | 1 | 0     | 0      | 0.001 | 0      | 0      | t | 58229  | SGSGANNSSSHFQSIYN    | Sus scrofa            |
| 1 | 1.00 | 1 | 1 | -0.02 | -0.024 | -0.02 | -0.02  | -0.022 | t | 139860 | PVQRGAWRWPVVNTNE     | Mus musculus          |
| 1 | 1.00 | 1 | 1 | 0     | 0      | 0.018 | 0.002  | -0.001 | t | 98922  | PAPQPP               | Homo sapiens          |
| 1 | 1.00 | 1 | 1 | -0.01 | -0.008 | 0.01  | -0.003 | -0.01  | t | 141787 | YLEERRVKEVVK         | Homo sapiens          |
| 1 | 1.00 | 1 | 1 | 0.02  | 0.022  | 0.013 | 0.019  | 0.02   | t | 79031  | NSNGCVYSESFGLGGIGVLT | Homo sapiens          |
| 1 | 1.00 | 1 | 1 | 0     | 0      | 0.009 | 0.002  | 0      | t | 135935 | IEQGWGSPKVTK         | Homo sapiens          |
| 1 | 1.00 | 1 | 1 | 0.01  | 0.01   | 0.011 | 0.013  | 0.009  | t | 20797  | GLDHILSLADIEEQMIQSV  | Homo sapiens          |

|   |      |   |   |       |        |        |        |        |   |        |                              |                                  |
|---|------|---|---|-------|--------|--------|--------|--------|---|--------|------------------------------|----------------------------------|
| 1 | 1.00 | 1 | 1 | -0.01 | -0.01  | -0.004 | -0.01  | -0.01  | t | 15510  | FEDVNGIR<br>KP               | Mus<br>musculu<br>s              |
| 1 | 1.00 | 1 | 1 | 0.05  | 0.046  | 0.063  | 0.049  | 0.046  | t | 141859 | ASSNSAQ<br>GSDSLIA           | Oryctola<br>gus<br>cuniculu<br>s |
| 1 | 1.00 | 1 | 1 | -0.01 | -0.01  | -0.01  | -0.01  | -0.01  | t | 107566 | PQVKFNW                      | Homo<br>sapiens                  |
| 1 | 1.00 | 1 | 1 | -0.03 | -0.03  | -0.03  | -0.03  | -0.03  | t | 130759 | CRQSRKRP<br>C                | Homo<br>sapiens                  |
| 1 | 1.00 | 1 | 1 | 0     | -0.004 | 0      | -0.007 | 0.001  | t | 117909 | HKGFKGV<br>D                 | Oryctola<br>gus<br>cuniculu<br>s |
| 1 | 1.00 | 1 | 1 | 0.01  | 0.013  | 0.014  | 0.01   | 0.01   | t | 6559   | CLFKDWEE<br>LGEEIRLKV        | Mus<br>musculu<br>s              |
| 1 | 1.00 | 1 | 1 | 0.03  | 0.027  | 0.033  | 0.03   | 0.029  | t | 136071 | LLYGEVGD<br>TLLIIFK          | Oryctola<br>gus<br>cuniculu<br>s |
| 1 | 1.00 | 1 | 1 | -0.01 | -0.011 | -0.005 | -0.009 | -0.01  | t | 74580  | YLCHARAI<br>DTTCIWPE<br>PCFD | Myodes<br>glareolu<br>s          |
| 1 | 1.00 | 1 | 1 | -0.02 | -0.02  | -0.02  | -0.02  | -0.02  | t | 78398  | GLKNDSA<br>VLVYLVGS          | Mus<br>musculu<br>s              |
| 1 | 1.00 | 1 | 1 | -0.01 | -0.01  | -0.01  | -0.01  | -0.009 | t | 133718 | TRDVNGKL<br>FLP              | Mus<br>musculu<br>s              |
| 1 | 1.00 | 1 | 1 | 0     | 0      | 0      | -0.003 | 0.001  | t | 11819  | EENVEHD<br>A                 | Homo<br>sapiens                  |
| 1 | 1.00 | 1 | 1 | 0     | 0      | 0      | -0.003 | 0.001  | t | 11813  | EENVEENV                     | Homo<br>sapiens                  |
| 1 | 1.00 | 1 | 1 | 0     | 0      | 0      | -0.003 | 0.001  | t | 11819  | EENVEHD<br>A                 | Homo<br>sapiens                  |
| 1 | 1.00 | 1 | 1 | 0.08  | 0.08   | 0.085  | 0.08   | 0.081  | t | 133671 | QVLTANPS<br>SQSSP            | Rattus<br>norvegic<br>us         |
| 1 | 1.00 | 1 | 1 | -0.04 | -0.038 | -0.038 | -0.039 | -0.043 | t | 103116 | DSIYYVDA<br>NASIQEM          | Homo<br>sapiens                  |

|   |      |   |   |       |        |        |       |        |   |        |                              |                                  |
|---|------|---|---|-------|--------|--------|-------|--------|---|--------|------------------------------|----------------------------------|
| 1 | 1.00 | 1 | 1 | -0.02 | -0.02  | -0.02  | -0.02 | -0.02  | t | 103425 | MTAHTHD<br>GTRTWRT<br>G      | Homo<br>sapiens                  |
| 1 | 1.00 | 1 | 1 | 0.02  | 0.018  | 0.02   | 0.017 | 0.021  | t | 921    | AEGEFCS<br>PDSPGVC<br>GDPAK  | Mus<br>musculu<br>s              |
| 1 | 1.00 | 1 | 1 | -0.04 | -0.04  | -0.038 | -0.04 | -0.039 | t | 6940   | CRQTRTM<br>PGC               | Mus<br>musculu<br>s              |
| 1 | 1.00 | 1 | 1 | 0     | 0.003  | -0.005 | 0     | 0.002  | t | 56610  | RYPGQGS<br>PGGNRY<br>PQG     | Mus<br>musculu<br>s              |
| 1 | 1.00 | 1 | 1 | 0     | 0.002  | 0      | 0.007 | 0.007  | t | 119671 | WLNGKEY<br>K                 | Homo<br>sapiens                  |
| 1 | 1.00 | 1 | 1 | -0.04 | -0.043 | -0.04  | -0.04 | -0.04  | t | 46349  | NVDENAN<br>AN                | Oryctola<br>gus<br>cuniculu<br>s |
| 1 | 1.00 | 1 | 1 | 0     | 0      | 0      | 0     | 0.002  | t | 140479 | KHGLLSM                      | Mus<br>musculu<br>s              |
| 1 | 1.00 | 1 | 1 | 0     | -0.003 | 0      | 0     | 0.002  | t | 150108 | AGGTGTE<br>DSHPPYKQ          | Oryctola<br>gus<br>cuniculu<br>s |
| 1 | 1.00 | 1 | 1 | 0     | -0.003 | 0      | 0     | 0.002  | t | 150616 | TEDSHPPY<br>KQTQPGA          | Oryctola<br>gus<br>cuniculu<br>s |
| 1 | 1.00 | 1 | 1 | 0     | -0.003 | 0      | 0     | 0.002  | t | 156905 | KPGDPRQ                      | Oryctola<br>gus<br>cuniculu<br>s |
| 1 | 1.00 | 1 | 1 | 0     | -0.003 | 0      | 0     | 0.002  | t | 119187 | GNAEVHA<br>SFFDIGG           | Oryctola<br>gus<br>cuniculu<br>s |
| 1 | 1.00 | 1 | 1 | 0     | -0.003 | 0      | 0     | 0.002  | t | 127986 | FVGVGAD<br>YRHASCPI<br>DYIIA | Oryctola<br>gus<br>cuniculu<br>s |
| 1 | 1.00 | 1 | 1 | 0     | -0.003 | 0      | 0     | 0.002  | t | 127984 | FTNLKFKV<br>RKITSSHR<br>GN   | Oryctola<br>gus<br>cuniculu<br>s |

|   |      |   |   |   |        |   |   |       |   |        |                              |                                  |
|---|------|---|---|---|--------|---|---|-------|---|--------|------------------------------|----------------------------------|
| 1 | 1.00 | 1 | 1 | 0 | -0.003 | 0 | 0 | 0.002 | t | 128084 | QKNACSF<br>DLCNSYDVL         | Oryctola<br>gus<br>cuniculu<br>s |
| 1 | 1.00 | 1 | 1 | 0 | -0.003 | 0 | 0 | 0.002 | t | 127919 | AFSLPDRS<br>LSAIPFDV<br>SFE  | Oryctola<br>gus<br>cuniculu<br>s |
| 1 | 1.00 | 1 | 1 | 0 | -0.003 | 0 | 0 | 0.002 | t | 128004 | GMIEVQS<br>NYGFVWD<br>VSLKKV | Oryctola<br>gus<br>cuniculu<br>s |
| 1 | 1.00 | 1 | 1 | 0 | -0.003 | 0 | 0 | 0.002 | t | 118877 | LDVEQLGI<br>PEQEYSC          | Oryctola<br>gus<br>cuniculu<br>s |
| 1 | 1.00 | 1 | 1 | 0 | -0.003 | 0 | 0 | 0.002 | t | 111486 | LIEESAIINA<br>GAP            | Oryctola<br>gus<br>cuniculu<br>s |
| 1 | 1.00 | 1 | 1 | 0 | 0      | 0 | 0 | 0.002 | t | 106634 | LVGPRGER<br>GFP              | Rattus<br>norvegic<br>us         |
| 1 | 1.00 | 1 | 1 | 0 | 0.003  | 0 | 0 | 0.002 | t | 104327 | VEQHNPIN<br>AGTELSAT         | Sus<br>scrofa                    |
| 1 | 1.00 | 1 | 1 | 0 | 0      | 0 | 0 | 0.002 | t | 102510 | HHQKLVFF<br>AEDVGSN<br>K     | Rattus<br>norvegic<br>us         |
| 1 | 1.00 | 1 | 1 | 0 | -0.003 | 0 | 0 | 0.002 | t | 111486 | LIEESAIINA<br>GAP            | Oryctola<br>gus<br>cuniculu<br>s |
| 1 | 1.00 | 1 | 1 | 0 | -0.003 | 0 | 0 | 0.002 | t | 110248 | GGLGIGTG<br>SGTGGRT<br>GYIPL | Oryctola<br>gus<br>cuniculu<br>s |
| 1 | 1.00 | 1 | 1 | 0 | -0.003 | 0 | 0 | 0.002 | t | 110198 | CPPDIIPKV<br>EGKTIA          | Oryctola<br>gus<br>cuniculu<br>s |
| 1 | 1.00 | 1 | 1 | 0 | -0.003 | 0 | 0 | 0.002 | t | 111486 | LIEESAIINA<br>GAP            | Oryctola<br>gus<br>cuniculu<br>s |
| 1 | 1.00 | 1 | 1 | 0 | -0.003 | 0 | 0 | 0.002 | t | 110248 | GGLGIGTG<br>SGTGGRT<br>GYIPL | Oryctola<br>gus<br>cuniculu<br>s |

|   |      |   |   |   |        |   |   |       |   |        |                              |                                  |
|---|------|---|---|---|--------|---|---|-------|---|--------|------------------------------|----------------------------------|
| 1 | 1.00 | 1 | 1 | 0 | -0.003 | 0 | 0 | 0.002 | t | 111486 | LIEESAIINA<br>GAP            | Oryctola<br>gus<br>cuniculu<br>s |
| 1 | 1.00 | 1 | 1 | 0 | 0.003  | 0 | 0 | 0.002 | t | 63037  | TAVSPTTL<br>R                | Sus<br>scrofa                    |
| 1 | 1.00 | 1 | 1 | 0 | -0.003 | 0 | 0 | 0.002 | t | 67373  | TYKADGET<br>ATEKT            | Oryctola<br>gus<br>cuniculu<br>s |
| 1 | 1.00 | 1 | 1 | 0 | -0.003 | 0 | 0 | 0.002 | t | 66108  | TRTNPWP<br>ALAEGEF           | unidentif<br>ied                 |
| 1 | 1.00 | 1 | 1 | 0 | -0.004 | 0 | 0 | 0.002 | t | 70391  | VPNLRGDL<br>QVLAQKV<br>ARTLP | Mus<br>musculu<br>s              |
| 1 | 1.00 | 1 | 1 | 0 | -0.002 | 0 | 0 | 0.002 | t | 69178  | VKAETRLN<br>PDLQPT           | Mus<br>musculu<br>s              |
| 1 | 1.00 | 1 | 1 | 0 | -0.003 | 0 | 0 | 0.002 | t | 69178  | VKAETRLN<br>PDLQPT           | Oryctola<br>gus<br>cuniculu<br>s |
| 1 | 1.00 | 1 | 1 | 0 | -0.003 | 0 | 0 | 0.002 | t | 61589  | STEQNPV<br>DPQVG             | Oryctola<br>gus<br>cuniculu<br>s |
| 1 | 1.00 | 1 | 1 | 0 | -0.004 | 0 | 0 | 0.002 | t | 61945  | STTNKDK                      | Mus<br>musculu<br>s              |
| 1 | 1.00 | 1 | 1 | 0 | -0.004 | 0 | 0 | 0.002 | t | 69178  | VKAETRLN<br>PDLQPT           | Mus<br>musculu<br>s              |
| 1 | 1.00 | 1 | 1 | 0 | -0.004 | 0 | 0 | 0.002 | t | 69178  | VKAETRLN<br>PDLQPT           | Mus<br>musculu<br>s              |
| 1 | 1.00 | 1 | 1 | 0 | -0.002 | 0 | 0 | 0.002 | t | 69178  | VKAETRLN<br>PDLQPT           | Mus<br>musculu<br>s              |
| 1 | 1.00 | 1 | 1 | 0 | -0.003 | 0 | 0 | 0.002 | t | 95058  | AGLQND                       | Oryctola<br>gus<br>cuniculu<br>s |

|   |      |   |   |   |        |   |   |       |   |       |                              |                                  |
|---|------|---|---|---|--------|---|---|-------|---|-------|------------------------------|----------------------------------|
| 1 | 1.00 | 1 | 1 | 0 | -0.004 | 0 | 0 | 0.002 | t | 70391 | VPNLRGDL<br>QVLAQKV<br>ARTLP | Mus<br>musculu<br>s              |
| 1 | 1.00 | 1 | 1 | 0 | -0.003 | 0 | 0 | 0.002 | t | 64985 | TLNPTI                       | Oryctola<br>gus<br>cuniculu<br>s |
| 1 | 1.00 | 1 | 1 | 0 | 0.002  | 0 | 0 | 0.002 | t | 61945 | STTNKDK                      | Rattus<br>norvegic<br>us         |
| 1 | 1.00 | 1 | 1 | 0 | -0.003 | 0 | 0 | 0.002 | t | 70391 | VPNLRGDL<br>QVLAQKV<br>ARTLP | Oryctola<br>gus<br>cuniculu<br>s |
| 1 | 1.00 | 1 | 1 | 0 | -0.004 | 0 | 0 | 0.002 | t | 70391 | VPNLRGDL<br>QVLAQKV<br>ARTLP | Mus<br>musculu<br>s              |
| 1 | 1.00 | 1 | 1 | 0 | -0.003 | 0 | 0 | 0.002 | t | 64985 | TLNPTI                       | Oryctola<br>gus<br>cuniculu<br>s |
| 1 | 1.00 | 1 | 1 | 0 | 0.002  | 0 | 0 | 0.002 | t | 65535 | TPDNNQT<br>SPARR             | Rattus<br>norvegic<br>us         |
| 1 | 1.00 | 1 | 1 | 0 | -0.003 | 0 | 0 | 0.002 | t | 70391 | VPNLRGDL<br>QVLAQKV<br>ARTLP | Oryctola<br>gus<br>cuniculu<br>s |
| 1 | 1.00 | 1 | 1 | 0 | -0.002 | 0 | 0 | 0.002 | t | 97484 | LVEETSFID<br>AGAP            | Mus<br>musculu<br>s              |
| 1 | 1.00 | 1 | 1 | 0 | -0.003 | 0 | 0 | 0.002 | t | 70391 | VPNLRGDL<br>QVLAQKV<br>ARTLP | Oryctola<br>gus<br>cuniculu<br>s |
| 1 | 1.00 | 1 | 1 | 0 | -0.007 | 0 | 0 | 0.002 | t | 61945 | STTNKDK                      | Oryctola<br>gus<br>cuniculu<br>s |

|   |      |   |   |   |        |   |   |       |   |       |                              |                                  |
|---|------|---|---|---|--------|---|---|-------|---|-------|------------------------------|----------------------------------|
| 1 | 1.00 | 1 | 1 | 0 | 0.008  | 0 | 0 | 0.002 | t | 70390 | VPNLRGDL<br>QVLAQKV<br>ART   | Cavia<br>porcellu<br>s           |
| 1 | 1.00 | 1 | 1 | 0 | 0.002  | 0 | 0 | 0.002 | t | 61945 | STTNKDK                      | Rattus<br>norvegic<br>us         |
| 1 | 1.00 | 1 | 1 | 0 | -0.003 | 0 | 0 | 0.002 | t | 74497 | YKQKIAP                      | Oryctola<br>gus<br>cuniculu<br>s |
| 1 | 1.00 | 1 | 1 | 0 | 0.004  | 0 | 0 | 0.002 | t | 91165 | CCELCCNP<br>ACAGCY           | Sus<br>scrofa                    |
| 1 | 1.00 | 1 | 1 | 0 | -0.003 | 0 | 0 | 0.002 | t | 70391 | VPNLRGDL<br>QVLAQKV<br>ARTLP | Oryctola<br>gus<br>cuniculu<br>s |
| 1 | 1.00 | 1 | 1 | 0 | -0.003 | 0 | 0 | 0.002 | t | 97484 | LVEETSFID<br>AGAP            | Oryctola<br>gus<br>cuniculu<br>s |
| 1 | 1.00 | 1 | 1 | 0 | -0.003 | 0 | 0 | 0.002 | t | 70391 | VPNLRGDL<br>QVLAQKV<br>ARTLP | Oryctola<br>gus<br>cuniculu<br>s |
| 1 | 1.00 | 1 | 1 | 0 | -0.002 | 0 | 0 | 0.002 | t | 72320 | WDMMM<br>NW                  | Mus<br>musculu<br>s              |
| 1 | 1.00 | 1 | 1 | 0 | -0.007 | 0 | 0 | 0.002 | t | 61589 | STEQNVP<br>DPQVG             | Oryctola<br>gus<br>cuniculu<br>s |
| 1 | 1.00 | 1 | 1 | 0 | 0      | 0 | 0 | 0.002 | t | 66841 | TTTCFRDT<br>DTGK             | Sus<br>scrofa                    |
| 1 | 1.00 | 1 | 1 | 0 | -0.003 | 0 | 0 | 0.002 | t | 39092 | LRGDLQVL<br>AQKVARTL         | Oryctola<br>gus<br>cuniculu<br>s |
| 1 | 1.00 | 1 | 1 | 0 | 0.006  | 0 | 0 | 0.002 | t | 54058 | RHKQKIVA<br>PVKQTL           | Ovis<br>aries                    |

|   |      |   |   |   |        |   |   |       |   |       |                              |                                  |
|---|------|---|---|---|--------|---|---|-------|---|-------|------------------------------|----------------------------------|
| 1 | 1.00 | 1 | 1 | 0 | 0.008  | 0 | 0 | 0.002 | t | 54058 | RHKQKIVA<br>PVKQTL           | Cavia<br>porcellu<br>s           |
| 1 | 1.00 | 1 | 1 | 0 | 0.006  | 0 | 0 | 0.002 | t | 47063 | PDCAICWE<br>PSPPWAP<br>E     | Ovis<br>aries                    |
| 1 | 1.00 | 1 | 1 | 0 | 0      | 0 | 0 | 0.002 | t | 57306 | SDVEGLQ<br>NDP               | Rattus<br>norvegic<br>us         |
| 1 | 1.00 | 1 | 1 | 0 | -0.003 | 0 | 0 | 0.002 | t | 58582 | SIKEDVQF                     | Oryctola<br>gus<br>cuniculu<br>s |
| 1 | 1.00 | 1 | 1 | 0 | 0.004  | 0 | 0 | 0.002 | t | 56657 | RYSRNAV<br>NV                | Mus<br>musculu<br>s              |
| 1 | 1.00 | 1 | 1 | 0 | -0.003 | 0 | 0 | 0.002 | t | 38919 | LQNDPTT<br>NVA               | Oryctola<br>gus<br>cuniculu<br>s |
| 1 | 1.00 | 1 | 1 | 0 | -0.003 | 0 | 0 | 0.002 | t | 37660 | LLPHSNLD<br>HILEPSIPW<br>KSK | Oryctola<br>gus<br>cuniculu<br>s |
| 1 | 1.00 | 1 | 1 | 0 | -0.003 | 0 | 0 | 0.002 | t | 37660 | LLPHSNLD<br>HILEPSIPW<br>KSK | Oryctola<br>gus<br>cuniculu<br>s |
| 1 | 1.00 | 1 | 1 | 0 | 0      | 0 | 0 | 0.002 | t | 51371 | QLINTNGS<br>WHIN             | Rattus<br>norvegic<br>us         |
| 1 | 1.00 | 1 | 1 | 0 | 0.001  | 0 | 0 | 0.002 | t | 46094 | NTFYCCEL<br>CCNPACA<br>GCY   | Oryctola<br>gus<br>cuniculu<br>s |
| 1 | 1.00 | 1 | 1 | 0 | -0.006 | 0 | 0 | 0.002 | t | 51286 | QLAKDKV<br>NE                | Oryctola<br>gus<br>cuniculu<br>s |
| 1 | 1.00 | 1 | 1 | 0 | -0.004 | 0 | 0 | 0.002 | t | 49772 | PTSGDKID<br>MTPRAGV<br>LMLE  | Mus<br>musculu<br>s              |



|   |      |   |   |   |        |   |   |       |   |       |                             |                       |
|---|------|---|---|---|--------|---|---|-------|---|-------|-----------------------------|-----------------------|
| 1 | 1.00 | 1 | 1 | 0 | 0.002  | 0 | 0 | 0.002 | t | 55951 | RSRSES                      | Rattus norvegicus     |
| 1 | 1.00 | 1 | 1 | 0 | -0.007 | 0 | 0 | 0.002 | t | 48670 | PNLRGDL<br>QVLAQKV<br>ARTLP | Oryctolagus cuniculus |
| 1 | 1.00 | 1 | 1 | 0 | -0.003 | 0 | 0 | 0.002 | t | 43233 | NANP                        | Oryctolagus cuniculus |
| 1 | 1.00 | 1 | 1 | 0 | 0.003  | 0 | 0 | 0.002 | t | 46094 | NTFYCCEL<br>CCNPACAGCY      | Sus scrofa            |
| 1 | 1.00 | 1 | 1 | 0 | 0.001  | 0 | 0 | 0.002 | t | 46094 | NTFYCCEL<br>CCNPACAGCY      | Oryctolagus cuniculus |
| 1 | 1.00 | 1 | 1 | 0 | 0.003  | 0 | 0 | 0.002 | t | 51390 | QLKLDWF<br>KKGSS            | Mus musculus          |
| 1 | 1.00 | 1 | 1 | 0 | -0.005 | 0 | 0 | 0.002 | t | 46094 | NTFYCCEL<br>CCNPACAGCY      | Bos taurus            |
| 1 | 1.00 | 1 | 1 | 0 | -0.006 | 0 | 0 | 0.002 | t | 57766 | SFFSYGEI                    | Oryctolagus cuniculus |
| 1 | 1.00 | 1 | 1 | 0 | -0.003 | 0 | 0 | 0.002 | t | 51775 | QNTRNIVP<br>VSIVSR          | Oryctolagus cuniculus |
| 1 | 1.00 | 1 | 1 | 0 | 0.004  | 0 | 0 | 0.002 | t | 56657 | RYSRNAV<br>NV               | Mus musculus          |
| 1 | 1.00 | 1 | 1 | 0 | -0.003 | 0 | 0 | 0.002 | t | 57306 | SDVEGLQ<br>NDP              | Oryctolagus cuniculus |
| 1 | 1.00 | 1 | 1 | 0 | 0.002  | 0 | 0 | 0.002 | t | 28075 | IPSTAFTDI<br>AWVRLPN<br>HY  | Rattus norvegicus     |

|   |      |   |   |   |        |   |   |       |   |       |                      |                       |
|---|------|---|---|---|--------|---|---|-------|---|-------|----------------------|-----------------------|
| 1 | 1.00 | 1 | 1 | 0 | -0.003 | 0 | 0 | 0.002 | t | 11819 | EENVEHDA             | Oryctolagus cuniculus |
| 1 | 1.00 | 1 | 1 | 0 | -0.003 | 0 | 0 | 0.002 | t | 11821 | EENVEHDAEENVEHDA     | Oryctolagus cuniculus |
| 1 | 1.00 | 1 | 1 | 0 | -0.003 | 0 | 0 | 0.002 | t | 17408 | FPSPYYSPAFTKGEKVDL   | Oryctolagus cuniculus |
| 1 | 1.00 | 1 | 1 | 0 | 0      | 0 | 0 | 0.002 | t | 22359 | GSGVRGDFGSLAPRVARQL  | Sus scrofa            |
| 1 | 1.00 | 1 | 1 | 0 | -0.004 | 0 | 0 | 0.002 | t | 22360 | GSGVRGDFGSLAPRVARQL  | Mus musculus          |
| 1 | 1.00 | 1 | 1 | 0 | -0.003 | 0 | 0 | 0.002 | t | 23975 | HHAEMQNPVYLIPETVPYIK | Oryctolagus cuniculus |
| 1 | 1.00 | 1 | 1 | 0 | -0.003 | 0 | 0 | 0.002 | t | 14670 | EVDNEQPTTRAQKLF A    | Oryctolagus cuniculus |
| 1 | 1.00 | 1 | 1 | 0 | 0      | 0 | 0 | 0.002 | t | 23269 | GWLAGLFYQHKF         | Rattus norvegicus     |
| 1 | 1.00 | 1 | 1 | 0 | 0.002  | 0 | 0 | 0.002 | t | 10801 | DWEDRYRE             | Rattus norvegicus     |
| 1 | 1.00 | 1 | 1 | 0 | -0.003 | 0 | 0 | 0.002 | t | 19983 | GGQPAVRNER           | Oryctolagus cuniculus |
| 1 | 1.00 | 1 | 1 | 0 | 0      | 0 | 0 | 0.002 | t | 35329 | LDVTTLNPTI           | Rattus norvegicus     |
| 1 | 1.00 | 1 | 1 | 0 | -0.004 | 0 | 0 | 0.002 | t | 22360 | GSGVRGDFGSLAPRVARQL  | Mus musculus          |

|   |      |   |   |   |        |   |   |       |   |       |                              |                                  |
|---|------|---|---|---|--------|---|---|-------|---|-------|------------------------------|----------------------------------|
| 1 | 1.00 | 1 | 1 | 0 | -0.007 | 0 | 0 | 0.002 | t | 21553 | GNVNYKY<br>RYLRHGKL<br>RPFER | Oryctola<br>gus<br>cuniculu<br>s |
| 1 | 1.00 | 1 | 1 | 0 | 0.002  | 0 | 0 | 0.002 | t | 15990 | FGGVSD<br>DVPSFHK<br>PPSSR   | Rattus<br>norvegic<br>us         |
| 1 | 1.00 | 1 | 1 | 0 | -0.003 | 0 | 0 | 0.002 | t | 21928 | GQPAVRN<br>ERATGS            | Oryctola<br>gus<br>cuniculu<br>s |
| 1 | 1.00 | 1 | 1 | 0 | -0.004 | 0 | 0 | 0.002 | t | 21553 | GNVNYKY<br>RYLRHGKL<br>RPFER | Mus<br>musculu<br>s              |
| 1 | 1.00 | 1 | 1 | 0 | 0.002  | 0 | 0 | 0.002 | t | 34965 | LASLRKAF<br>ADTVVPRP<br>PSNY | Rattus<br>norvegic<br>us         |
| 1 | 1.00 | 1 | 1 | 0 | -0.003 | 0 | 0 | 0.002 | t | 9524  | DNPASTT<br>NKDK              | Oryctola<br>gus<br>cuniculu<br>s |
| 1 | 1.00 | 1 | 1 | 0 | 0.002  | 0 | 0 | 0.002 | t | 9557  | DNTVRET                      | Rattus<br>norvegic<br>us         |
| 1 | 1.00 | 1 | 1 | 0 | 0.002  | 0 | 0 | 0.002 | t | 9557  | DNTVRET                      | Rattus<br>norvegic<br>us         |
| 1 | 1.00 | 1 | 1 | 0 | -0.003 | 0 | 0 | 0.002 | t | 7461  | DAADL                        | Oryctola<br>gus<br>cuniculu<br>s |
| 1 | 1.00 | 1 | 1 | 0 | 0      | 0 | 0 | 0.002 | t | 922   | AEGEFDYA<br>WDQTHQ<br>DPAK   | Rattus<br>norvegic<br>us         |
| 1 | 1.00 | 1 | 1 | 0 | -0.003 | 0 | 0 | 0.002 | t | 9106  | DLGSIA                       | Oryctola<br>gus<br>cuniculu<br>s |
| 1 | 1.00 | 1 | 1 | 0 | 0      | 0 | 0 | 0.002 | t | 3245  | ANDVDNS<br>NPVVQAE<br>QLNWL  | Rattus<br>norvegic<br>us         |
| 1 | 1.00 | 1 | 1 | 0 | -0.003 | 0 | 0 | 0.002 | t | 9524  | DNPASTT<br>NKDK              | Oryctola<br>gus<br>cuniculu<br>s |

|   |      |   |   |       |        |        |        |        |   |        |                              |                              |
|---|------|---|---|-------|--------|--------|--------|--------|---|--------|------------------------------|------------------------------|
| 1 | 1.00 | 1 | 1 | 0     | 0.002  | 0      | 0      | 0.002  | t | 9524   | DNPASTT<br>NKDK              | Rattus<br>norvegicus         |
| 1 | 1.00 | 1 | 1 | -0.02 | -0.02  | -0.018 | -0.017 | -0.018 | t | 54967  | RMYVGGV<br>EHRLEAAC<br>NWTRG | Homo<br>sapiens              |
| 1 | 1.00 | 1 | 1 | -0.05 | -0.05  | -0.057 | -0.05  | -0.05  | t | 133527 | AYIGLKDR<br>KRPSELRRI<br>AS  | Mus<br>musculus              |
| 1 | 1.00 | 1 | 1 | -0.03 | -0.033 | -0.02  | -0.03  | -0.03  | t | 48099  | PKLAAAVL                     | Oryctola<br>gus<br>cuniculus |
| 1 | 1.00 | 1 | 1 | -0.02 | -0.013 | -0.02  | -0.02  | -0.02  | t | 153818 | DSTLRLCV<br>QSTHVDIR         | Cavia<br>porcellus           |
| 1 | 1.00 | 1 | 1 | -0.02 | -0.022 | -0.025 | -0.021 | -0.02  | t | 65936  | TQSLAGLF<br>RPGASQN          | Mus<br>musculus              |
| 1 | 1.00 | 1 | 1 | 0     | -0.002 | -0.005 | -0.001 | 0      | t | 109245 | GSAGAPGI                     | Rattus<br>norvegicus         |
| 1 | 1.00 | 1 | 1 | 0.01  | 0.012  | 0.005  | 0.01   | 0.011  | t | 95030  | KRASKEKQ<br>ENKIFADDI        | Rattus<br>norvegicus         |
| 1 | 1.00 | 1 | 1 | -0.01 | -0.014 | -0.011 | -0.007 | -0.007 | t | 50824  | QFYQLDAY<br>PSGAWYY<br>VPL   | Oryctola<br>gus<br>cuniculus |
| 1 | 1.00 | 1 | 1 | -0.06 | -0.056 | -0.056 | -0.057 | -0.058 | t | 22806  | GTRTIASP<br>KGPVIQ           | Homo<br>sapiens              |
| 1 | 1.00 | 1 | 1 | -0.04 | -0.036 | -0.042 | -0.043 | -0.038 | t | 35659  | LEQLRLKK<br>Y                | Homo<br>sapiens              |
| 1 | 1.00 | 1 | 1 | 0.02  | 0.017  | 0.015  | 0.02   | 0.022  | t | 60721  | SRKSYKKM<br>LKEMGEV<br>APEYR | Oryctola<br>gus<br>cuniculus |
| 1 | 1.00 | 1 | 1 | 0.02  | 0.006  | 0.017  | 0.02   | 0.02   | t | 19482  | GEYGGVIK<br>DGTPGGA          | Oryctola<br>gus<br>cuniculus |

|   |      |   |   |       |        |        |        |        |   |        |                              |                          |
|---|------|---|---|-------|--------|--------|--------|--------|---|--------|------------------------------|--------------------------|
| 1 | 1.00 | 1 | 1 | 0.04  | 0.042  | 0.04   | 0.04   | 0.04   | t | 120268 | VEFTFAVD<br>NDGKTIN          | Rattus<br>norvegicus     |
| 1 | 1.00 | 1 | 1 | 0     | 0      | 0      | 0      | 0      | t | 140459 | EHWSHD<br>MFSPGD             | Mus<br>musculus          |
| 1 | 1.00 | 1 | 1 | 0     | 0      | 0      | 0      | 0      | t | 140459 | EHWSHD<br>MFSPGD             | Mus<br>musculus          |
| 1 | 1.00 | 1 | 1 | 0     | 0      | 0      | 0      | 0      | t | 140459 | EHWSHD<br>MFSPGD             | Mus<br>musculus          |
| 1 | 1.00 | 1 | 1 | 0.04  | 0.04   | 0.059  | 0.04   | 0.037  | t | 114359 | GGRGRDV<br>NGFEETIC          | Homo<br>sapiens          |
| 1 | 1.00 | 1 | 1 | 0     | -0.001 | -0.001 | -0.001 | 0      | t | 39199  | LRRTQSM<br>GIQLDQR           | Myodes<br>glareolus      |
| 1 | 1.00 | 1 | 1 | 0.01  | 0.007  | 0.002  | 0.011  | 0.012  | t | 67139  | TVSAGDG<br>RGTPIAFQ<br>AEVSK | Canis<br>lupus           |
| 1 | 1.00 | 1 | 1 | -0.05 | -0.05  | -0.035 | -0.046 | -0.051 | t | 142431 | KKAEAEAKK<br>IVDKI           | Homo<br>sapiens          |
| 1 | 1.00 | 1 | 1 | 0     | 0.003  | 0      | 0      | 0.002  | t | 144664 | GREGYP<br>A DGGGLPD<br>SVKI  | Mus<br>musculus          |
| 1 | 1.00 | 1 | 1 | 0     | -0.011 | 0      | 0      | 0.002  | t | 156894 | KAGDPRT                      | Oryctolagus<br>cuniculus |
| 1 | 1.00 | 1 | 1 | 0     | 0      | 0.007  | 0      | 0      | t | 51948  | QPRDANG<br>FAATL             | Mus<br>musculus          |
| 1 | 1.00 | 1 | 1 | 0     | 0      | 0.004  | 0.003  | 0      | t | 74684  | YLGTGPEA<br>SLPYGANK         | Homo<br>sapiens          |
| 1 | 1.00 | 1 | 1 | 0     | 0.002  | 0.018  | 0.001  | -0.001 | t | 12988  | ELDKWA                       | Homo<br>sapiens          |
| 1 | 1.00 | 1 | 1 | 0     | -0.002 | 0.004  | -0.003 | 0.001  | t | 123849 | WQDE                         | Mus<br>musculus          |

|   |      |   |   |       |        |        |        |        |   |        |                     |                       |
|---|------|---|---|-------|--------|--------|--------|--------|---|--------|---------------------|-----------------------|
| 1 | 1.00 | 1 | 1 | -0.06 | -0.056 | -0.06  | -0.06  | -0.061 | t | 139951 | WWKPAHL             | Ovis aries            |
| 1 | 1.00 | 1 | 1 | 0.04  | 0.042  | 0.047  | 0.037  | 0.037  | t | 105086 | AGESHGPDQGH         | Homo sapiens          |
| 1 | 1.00 | 1 | 1 | 0.03  | 0.028  | 0.03   | 0.029  | 0.03   | t | 102155 | TRQPDRS             | Mus musculus          |
| 1 | 1.00 | 1 | 1 | 0.02  | 0.02   | 0.02   | 0.02   | 0.02   | t | 77782  | GRVSARGCTFVACWKG    | Homo sapiens          |
| 1 | 1.00 | 1 | 1 | 0.01  | 0.01   | 0.013  | 0.007  | 0.011  | t | 94838  | GTSSCRLVP           | Homo sapiens          |
| 1 | 1.00 | 1 | 1 | 0.01  | 0.01   | 0.01   | 0.01   | 0.01   | t | 125789 | CQGDGYRVGFGQCA      | Mus musculus          |
| 1 | 1.00 | 1 | 1 | 0.01  | -0.002 | 0.01   | 0.01   | 0.01   | t | 63824  | TGFSKHNNMGSSQKV     | Mus musculus          |
| 1 | 1.00 | 1 | 1 | -0.01 | -0.01  | -0.01  | -0.01  | -0.009 | t | 101546 | DLNPLDPLAQQS        | Mus musculus          |
| 1 | 1.00 | 1 | 1 | 0.01  | 0.01   | 0.026  | 0.008  | 0.007  | t | 98953  | QEPDDLKQKA          | Homo sapiens          |
| 1 | 1.00 | 1 | 1 | -0.04 | -0.04  | -0.042 | -0.04  | -0.041 | t | 153269 | LSPPLRNTHPQAMQW     | Mus musculus          |
| 1 | 1.00 | 1 | 1 | 0.05  | 0.05   | 0.045  | 0.05   | 0.051  | t | 125015 | DNESSYSRGFDMTYTE    | Mus musculus          |
| 1 | 1.00 | 1 | 1 | -0.03 | -0.032 | -0.025 | -0.031 | -0.029 | t | 136569 | PYYRWQYKYD          | Mus musculus          |
| 1 | 1.00 | 1 | 1 | -0.01 | -0.014 | -0.017 | -0.011 | -0.012 | t | 1047   | AELKSALQSCSAEPLDDH  | Oryctolagus cuniculus |
| 1 | 1.00 | 1 | 1 | -0.01 | -0.01  | -0.008 | -0.01  | -0.009 | t | 29812  | KAGSTVYAVTAVTSIFSVG | Homo sapiens          |
| 1 | 1.00 | 1 | 1 | -0.06 | -0.062 | -0.06  | -0.061 | -0.059 | t | 151023 | LCKLRGVAPLHLGKC     | Mus musculus          |

|   |      |   |   |       |       |        |        |       |   |        |                              |                       |
|---|------|---|---|-------|-------|--------|--------|-------|---|--------|------------------------------|-----------------------|
| 1 | 1.00 | 1 | 1 | 0.01  | 0.008 | 0.023  | 0.009  | 0.01  | t | 74497  | YKQKIIAP                     | Mus musculus          |
| 1 | 1.00 | 1 | 1 | -0.03 | -0.03 | -0.023 | -0.03  | -0.03 | t | 145629 | VVPKYWWSAELP                 | Homo sapiens          |
| 1 | 1.00 | 1 | 1 | -0.01 | -0.01 | -0.001 | -0.008 | -0.01 | t | 135984 | RPGGCSA<br>VSAHG             | Homo sapiens          |
| 1 | 1.00 | 1 | 1 | 0.02  | 0.02  | 0.02   | 0.014  | 0.02  | t | 158694 | ASGFIEVEE<br>LKLFLQ          | Homo sapiens          |
| 1 | 1.00 | 1 | 1 | 0.03  | 0.032 | 0.031  | 0.037  | 0.033 | t | 118776 | EADYFEYH<br>QEGGPDG<br>EPDVP | Homo sapiens          |
| 1 | 1.00 | 1 | 1 | -0.01 | -0.01 | -0.004 | -0.007 | -0.01 | t | 42599  | MSLQFIGL<br>QRRDVVA<br>LVNFL | Homo sapiens          |
| 1 | 1.00 | 1 | 1 | 0.02  | 0.018 | 0.022  | 0.019  | 0.02  | t | 22028  | GRFDEAM<br>QDQIRQLE          | Mus musculus          |
| 1 | 1.00 | 1 | 1 | 0.02  | 0.016 | 0.022  | 0.019  | 0.02  | t | 22028  | GRFDEAM<br>QDQIRQLE          | Oryctolagus cuniculus |
| 1 | 1.00 | 1 | 1 | 0.02  | 0.018 | 0.033  | 0.023  | 0.019 | t | 115069 | KEVDRLM<br>S                 | Mus musculus          |
| 1 | 1.00 | 1 | 1 | 0.01  | 0.008 | 0.012  | 0.01   | 0.011 | t | 138029 | SASGSDVSLTA                  | Oryctolagus cuniculus |
| 1 | 1.00 | 1 | 1 | 0     | 0     | 0      | 0      | 0     | t | 123131 | EHLYGRNDR                    | Ovis aries            |
| 1 | 1.00 | 1 | 1 | 0     | 0     | 0.001  | 0.006  | 0     | t | 57508  | SEKTIWSLI<br>AWQRSNA<br>EFEQ | Homo sapiens          |
| 1 | 1.00 | 1 | 1 | 0.01  | 0.008 | 0.01   | 0.003  | 0.01  | t | 121812 | RRATQLAH                     | Mus musculus          |
| 1 | 1.00 | 1 | 1 | 0.04  | 0.04  | 0.04   | 0.036  | 0.04  | t | 135991 | SEKKISSIQ<br>SIV             | Homo sapiens          |
| 1 | 1.00 | 1 | 1 | -0.03 | -0.03 | -0.027 | -0.03  | -0.03 | t | 48920  | PPSPEAHV<br>PPPVEPT<br>TTQ   | Homo sapiens          |

|   |      |   |   |       |        |        |        |        |   |        |                              |                                  |
|---|------|---|---|-------|--------|--------|--------|--------|---|--------|------------------------------|----------------------------------|
| 1 | 1.00 | 1 | 1 | -0.01 | -0.008 | -0.018 | -0.009 | -0.004 | t | 8825   | DIYHSLSR<br>AR               | Homo<br>sapiens                  |
| 1 | 1.00 | 1 | 1 | -0.04 | -0.04  | -0.041 | -0.037 | -0.039 | t | 38482  | LPFNWTH<br>CFDPQ             | Homo<br>sapiens                  |
| 1 | 1.00 | 1 | 1 | 0.01  | 0.01   | 0.01   | 0.01   | 0.012  | t | 118131 | SEESDDD<br>MGFGLFD           | Homo<br>sapiens                  |
| 1 | 1.00 | 1 | 1 | 0.02  | 0.02   | 0.02   | 0.011  | 0.02   | t | 135647 | DAKPGQF<br>P                 | Homo<br>sapiens                  |
| 1 | 1.00 | 1 | 1 | 0     | 0      | 0      | 0      | 0      | t | 133724 | TVCAGYC<br>MTRDVN            | Mus<br>musculu<br>s              |
| 1 | 1.00 | 1 | 1 | -0.02 | -0.02  | -0.014 | -0.02  | -0.02  | t | 91775  | NTLWTGP<br>KPEANCII          | Oryctola<br>gus<br>cuniculu<br>s |
| 1 | 1.00 | 1 | 1 | 0.04  | 0.038  | 0.056  | 0.043  | 0.039  | t | 61068  | SSHLQLIY<br>NLTLCELN<br>G    | Sus<br>scrofa                    |
| 1 | 1.00 | 1 | 1 | -0.03 | -0.035 | -0.025 | -0.031 | -0.03  | t | 61536  | STCEGNLA<br>CLSLSK           | Bos<br>taurus                    |
| 1 | 1.00 | 1 | 1 | -0.01 | -0.01  | -0.003 | -0.01  | -0.01  | t | 159084 | RYKYPET<br>PRSLAKIV          | Mus<br>musculu<br>s              |
| 1 | 1.00 | 1 | 1 | 0     | -0.004 | -0.003 | 0.003  | 0      | t | 17457  | FQAEVGP<br>NNTRSIRK<br>FNTMQ | Oryctola<br>gus<br>cuniculu<br>s |
| 1 | 1.00 | 1 | 1 | 0.02  | 0.018  | 0.027  | 0.023  | 0.022  | t | 31555  | KKGSSGYS                     | Mus<br>musculu<br>s              |
| 1 | 1.00 | 1 | 1 | 0.01  | 0.008  | 0.01   | 0.013  | 0.01   | t | 7682   | DAWREGE<br>EFVVEFDL<br>PGIKA | Mus<br>musculu<br>s              |
| 1 | 1.00 | 1 | 1 | 0.01  | 0.008  | 0.01   | 0.013  | 0.01   | t | 7682   | DAWREGE<br>EFVVEFDL<br>PGIKA | Mus<br>musculu<br>s              |
| 1 | 1.00 | 1 | 1 | -0.01 | -0.014 | -0.007 | -0.011 | -0.009 | t | 103460 | PATVINGQ<br>FVERCWT<br>H     | Oryctola<br>gus<br>cuniculu<br>s |
| 1 | 1.00 | 1 | 1 | 0.02  | 0.018  | 0.02   | 0.013  | 0.019  | t | 131058 | SATTANPS<br>CPEGT            | Rattus<br>norvegic<br>us         |



|   |      |   |   |       |        |        |        |        |   |        |                              |                                  |
|---|------|---|---|-------|--------|--------|--------|--------|---|--------|------------------------------|----------------------------------|
| 1 | 1.00 | 1 | 1 | 0.02  | 0.02   | 0.022  | 0.023  | 0.022  | t | 16448  | FKQKALGL<br>LQTSTKQA<br>EAAA | Homo<br>sapiens                  |
| 1 | 1.00 | 1 | 1 | -0.03 | -0.028 | -0.025 | -0.029 | -0.03  | t | 70086  | VNHIHS                       | Homo<br>sapiens                  |
| 1 | 1.00 | 1 | 1 | -0.03 | -0.028 | -0.024 | -0.029 | -0.032 | t | 122781 | GQVRRPE<br>MGDQA             | Homo<br>sapiens                  |
| 1 | 1.00 | 1 | 1 | -0.04 | -0.042 | -0.04  | -0.041 | -0.04  | t | 111231 | EDLLMGTL<br>GIVCPICSQ<br>KP  | Mus<br>musculu<br>s              |
| 1 | 1.00 | 1 | 1 | -0.02 | -0.018 | -0.019 | -0.021 | -0.018 | t | 51804  | QPEKGG                       | Homo<br>sapiens                  |
| 1 | 1.00 | 1 | 1 | 0     | 0      | 0      | 0      | 0.003  | t | 104905 | MVGGV                        | Mus<br>musculu<br>s              |
| 1 | 1.00 | 1 | 1 | 0     | -0.004 | 0      | -0.003 | 0      | t | 118431 | ISDAMKKV<br>GRKGVITV<br>KD   | Oryctola<br>gus<br>cuniculu<br>s |
| 1 | 1.00 | 1 | 1 | 0     | 0      | 0      | 0      | 0.004  | t | 133539 | CYKPGEW<br>AC                | Mus<br>musculu<br>s              |
| 1 | 1.00 | 1 | 1 | 0.05  | 0.05   | 0.063  | 0.043  | 0.05   | t | 102879 | VDDL                         | Mus<br>musculu<br>s              |
| 1 | 1.00 | 1 | 1 | -0.02 | -0.02  | -0.027 | -0.02  | -0.018 | t | 106483 | GSRSRTPS<br>LPTPTRE          | Mus<br>musculu<br>s              |
| 1 | 1.00 | 1 | 1 | -0.02 | -0.018 | -0.024 | -0.023 | -0.02  | t | 141705 | LSPGDVLV<br>IPAGHPV          | Homo<br>sapiens                  |
| 1 | 1.00 | 1 | 1 | -0.04 | -0.04  | -0.028 | -0.04  | -0.043 | t | 159298 | SNSWF                        | Oryctola<br>gus<br>cuniculu<br>s |
| 1 | 1.00 | 1 | 1 | 0     | -0.003 | 0.007  | 0      | -0.002 | t | 112982 | FTTVVADT<br>GDFHAID          | Oryctola<br>gus<br>cuniculu<br>s |
| 1 | 1.00 | 1 | 1 | 0.01  | 0.012  | 0.013  | 0.011  | 0.01   | t | 45151  | NNKSQSVI<br>IINNSTNV<br>V    | Homo<br>sapiens                  |

|   |      |   |   |       |        |        |        |        |   |        |                              |                                  |
|---|------|---|---|-------|--------|--------|--------|--------|---|--------|------------------------------|----------------------------------|
| 1 | 1.00 | 1 | 1 | -0.01 | -0.013 | 0      | -0.01  | -0.01  | t | 111308 | GDTGPR                       | Oryctola<br>gus<br>cuniculu<br>s |
| 1 | 1.00 | 1 | 1 | 0     | 0      | 0.005  | 0      | 0.001  | t | 156900 | KLGDPRIA<br>TTLF             | Mus<br>musculu<br>s              |
| 1 | 1.00 | 1 | 1 | -0.03 | -0.03  | -0.027 | -0.03  | -0.028 | t | 78661  | GFADLMG<br>YIPLVGAPL<br>G    | Mus<br>musculu<br>s              |
| 1 | 1.00 | 1 | 1 | -0.04 | -0.037 | -0.042 | -0.04  | -0.04  | t | 5992   | CAKKVWR<br>DHRGTI            | Mus<br>musculu<br>s              |
| 1 | 1.00 | 1 | 1 | 0     | -0.002 | 0.001  | -0.007 | 0      | t | 145175 | EQDRKPR<br>N                 | Mus<br>musculu<br>s              |
| 1 | 1.00 | 1 | 1 | 0     | -0.002 | 0.005  | -0.001 | 0      | t | 67170  | TVSTEQNV<br>PDPQVGI          | Mus<br>musculu<br>s              |
| 1 | 1.00 | 1 | 1 | 0     | -0.002 | 0.005  | -0.001 | 0      | t | 18363  | FWRGDLV<br>FDFQV             | Mus<br>musculu<br>s              |
| 1 | 1.00 | 1 | 1 | 0.01  | 0.008  | 0.018  | 0.007  | 0.011  | t | 11411  | EDPASR                       | Mus<br>musculu<br>s              |
| 1 | 1.00 | 1 | 1 | -0.03 | -0.03  | -0.036 | -0.03  | -0.03  | t | 86469  | MQTRHVK<br>NYHSRSES          | Homo<br>sapiens                  |
| 1 | 1.00 | 1 | 1 | 0.03  | 0.03   | 0.028  | 0.03   | 0.032  | t | 68185  | VEFTKDTQ<br>TGMSGQT<br>ASQ   | Mus<br>musculu<br>s              |
| 1 | 1.00 | 1 | 1 | -0.04 | -0.04  | -0.04  | -0.04  | -0.04  | t | 58057  | SGGSVASG<br>GSGNSRR          | Homo<br>sapiens                  |
| 1 | 1.00 | 1 | 1 | -0.01 | -0.013 | -0.01  | -0.01  | -0.008 | t | 140935 | YGEEKPAV<br>LGHDEAAY<br>SKNR | Oryctola<br>gus<br>cuniculu<br>s |
| 1 | 1.00 | 1 | 1 | 0     | 0      | 0      | 0      | 0.002  | t | 45251  | NNSSNIAS                     | Mus<br>musculu<br>s              |
| 1 | 1.00 | 1 | 1 | 0.01  | 0.008  | 0.015  | 0.009  | 0.011  | t | 25146  | HWYISKPQ                     | Mus<br>musculu<br>s              |

|   |      |   |   |       |        |        |        |        |   |        |                              |                                  |
|---|------|---|---|-------|--------|--------|--------|--------|---|--------|------------------------------|----------------------------------|
| 1 | 1.00 | 1 | 1 | 0.03  | 0.032  | 0.034  | 0.027  | 0.029  | t | 158943 | KVIDQDAS<br>GFIEVEE          | Homo<br>sapiens                  |
| 1 | 1.00 | 1 | 1 | -0.02 | -0.018 | -0.015 | -0.021 | -0.019 | t | 135793 | WGEECA<br>MK                 | Homo<br>sapiens                  |
| 1 | 1.00 | 1 | 1 | -0.01 | -0.008 | -0.01  | -0.01  | -0.009 | t | 108296 | CKYAWSR<br>C                 | Homo<br>sapiens                  |
| 1 | 1.00 | 1 | 1 | 0.03  | 0.027  | 0.04   | 0.029  | 0.032  | t | 135350 | VGVTTETPL                    | Oryctola<br>gus<br>cuniculu<br>s |
| 1 | 1.00 | 1 | 1 | -0.02 | -0.022 | -0.02  | -0.021 | -0.02  | t | 66028  | TRGHFLQ<br>NR                | Mus<br>musculu<br>s              |
| 1 | 1.00 | 1 | 1 | -0.02 | -0.016 | -0.012 | -0.019 | -0.02  | t | 69292  | VKPPNPRP<br>TMSLW            | Homo<br>sapiens                  |
| 1 | 1.00 | 1 | 1 | -0.05 | -0.05  | -0.048 | -0.049 | -0.05  | t | 22110  | GRKPAR                       | Homo<br>sapiens                  |
| 1 | 1.00 | 1 | 1 | 0     | -0.002 | 0      | 0      | 0.002  | t | 141758 | SWRNNILR<br>TQES             | Oryctola<br>gus<br>cuniculu<br>s |
| 1 | 1.00 | 1 | 1 | 0.04  | 0.04   | 0.04   | 0.037  | 0.04   | t | 37876  | LLTTNTTG<br>NPEY             | Homo<br>sapiens                  |
| 1 | 1.00 | 1 | 1 | 0.02  | 0.018  | 0.019  | 0.019  | 0.02   | t | 24592  | HQLDPAF<br>GANSTNP<br>DWDFNP | Mus<br>musculu<br>s              |
| 1 | 1.00 | 1 | 1 | 0.02  | 0.018  | 0.019  | 0.019  | 0.02   | t | 24592  | HQLDPAF<br>GANSTNP<br>DWDFNP | Mus<br>musculu<br>s              |
| 1 | 1.00 | 1 | 1 | 0.02  | 0.018  | 0.019  | 0.019  | 0.02   | t | 24592  | HQLDPAF<br>GANSTNP<br>DWDFNP | Mus<br>musculu<br>s              |
| 1 | 1.00 | 1 | 1 | 0.02  | 0.018  | 0.02   | 0.014  | 0.02   | t | 138189 | HILGSTA                      | Mus<br>musculu<br>s              |
| 1 | 1.00 | 1 | 1 | -0.05 | -0.05  | -0.05  | -0.05  | -0.05  | t | 108565 | PDHLPRH<br>VS                | Homo<br>sapiens                  |

|   |      |   |   |       |        |        |        |        |   |        |                             |                                  |
|---|------|---|---|-------|--------|--------|--------|--------|---|--------|-----------------------------|----------------------------------|
| 1 | 1.00 | 1 | 1 | -0.02 | -0.024 | -0.02  | -0.027 | -0.021 | t | 135452 | CLKDRHDF                    | Oryctola<br>gus<br>cuniculu<br>s |
| 1 | 1.00 | 1 | 1 | -0.03 | -0.032 | -0.039 | -0.037 | -0.032 | t | 109785 | RAHYNIVT<br>FCKCDS          | Mus<br>musculu<br>s              |
| 1 | 1.00 | 1 | 1 | 0     | -0.002 | 0.011  | 0.003  | 0      | t | 158925 | KSCTWPET<br>HTLWGDG<br>V    | Mus<br>musculu<br>s              |
| 1 | 1.00 | 1 | 1 | -0.04 | -0.036 | -0.046 | -0.043 | -0.04  | t | 44168  | NHSQTPR<br>YRRPKFP<br>WFK   | Homo<br>sapiens                  |
| 1 | 1.00 | 1 | 1 | -0.03 | -0.033 | -0.032 | -0.03  | -0.03  | t | 31554  | KKGSSGYC<br>AWPACYC         | Oryctola<br>gus<br>cuniculu<br>s |
| 1 | 1.00 | 1 | 1 | -0.03 | -0.027 | -0.032 | -0.03  | -0.03  | t | 31554  | KKGSSGYC<br>AWPACYC         | Equus<br>caballus                |
| 1 | 1.00 | 1 | 1 | -0.03 | -0.026 | -0.027 | -0.029 | -0.03  | t | 570    | ACKRGPGS<br>GFFSRLN         | Homo<br>sapiens                  |
| 1 | 1.00 | 1 | 1 | -0.04 | -0.042 | -0.024 | -0.037 | -0.04  | t | 142224 | LLDTKGGL<br>YRWRSVP         | Sus<br>scrofa                    |
| 1 | 1.00 | 1 | 1 | -0.02 | -0.02  | -0.02  | -0.02  | -0.02  | t | 78397  | GLKNSA<br>VLVLVGS           | Mus<br>musculu<br>s              |
| 1 | 1.00 | 1 | 1 | 0.04  | 0.043  | 0.04   | 0.04   | 0.042  | t | 132848 | KKEDFDIY<br>DEDENQS<br>PR   | Mus<br>musculu<br>s              |
| 1 | 1.00 | 1 | 1 | 0     | -0.004 | 0      | -0.007 | -0.001 | t | 122861 | NALNSPLH<br>QEYEENL         | Oryctola<br>gus<br>cuniculu<br>s |
| 1 | 1.00 | 1 | 1 | 0     | -0.004 | 0      | -0.007 | -0.001 | t | 126201 | GYKEKSKF<br>QDTHNNA         | Oryctola<br>gus<br>cuniculu<br>s |
| 1 | 1.00 | 1 | 1 | 0     | -0.004 | 0      | -0.007 | -0.001 | t | 122842 | LLDLPRDL<br>GGMGCSS<br>PPCE | Oryctola<br>gus<br>cuniculu<br>s |

|   |      |   |   |       |        |        |        |        |   |        |                      |                       |
|---|------|---|---|-------|--------|--------|--------|--------|---|--------|----------------------|-----------------------|
| 1 | 1.00 | 1 | 1 | 0     | -0.003 | 0      | -0.007 | -0.001 | t | 118058 | PPPGIRGP             | Oryctolagus cuniculus |
| 1 | 1.00 | 1 | 1 | 0.03  | 0.03   | 0.03   | 0.03   | 0.031  | t | 143328 | DEGDTDLYDYYPEE       | Mus musculus          |
| 1 | 1.00 | 1 | 1 | 0.03  | 0.03   | 0.03   | 0.03   | 0.031  | t | 143328 | DEGDTDLYDYYPEE       | Mus musculus          |
| 1 | 1.00 | 1 | 1 | -0.04 | -0.036 | -0.041 | -0.039 | -0.038 | t | 41461  | MEVTPSGTWLTYHGAIK    | Homo sapiens          |
| 1 | 1.00 | 1 | 1 | 0     | 0.014  | 0.009  | 0      | 0      | t | 27946  | IPLVGAPLGG           | Pan troglodytes       |
| 1 | 1.00 | 1 | 1 | -0.01 | -0.006 | -0.01  | -0.009 | -0.01  | t | 10108  | DSERLIGDAAKNQVAMNPHN | Homo sapiens          |
| 1 | 1.00 | 1 | 1 | 0     | 0      | 0.01   | 0.003  | -0.001 | t | 2005   | AILSSLTVTQLLRR       | Homo sapiens          |
| 1 | 1.00 | 1 | 1 | -0.01 | -0.01  | 0      | -0.01  | -0.009 | t | 23125  | GVRLLSGVFSDPAFA      | Mus musculus          |
| 1 | 1.00 | 1 | 1 | -0.01 | -0.008 | -0.001 | -0.009 | -0.01  | t | 11441  | EDSITIPYQGSKGKV      | Homo sapiens          |
| 1 | 1.00 | 1 | 1 | 0     | 0      | 0      | -0.004 | 0      | t | 142447 | NKYRGTAGNALMDGASQL   | Homo sapiens          |
| 1 | 1.00 | 1 | 1 | 0     | 0      | 0      | -0.004 | 0      | t | 136420 | KIHAREIFDSRGNPTEVE   | Homo sapiens          |
| 1 | 1.00 | 1 | 1 | 0     | -0.002 | 0      | -0.004 | 0      | t | 118549 | PEPAKSAPAPKKGSKKAV   | Mus musculus          |
| 1 | 1.00 | 1 | 1 | 0     | -0.002 | 0      | -0.004 | 0      | t | 125462 | KLPLSLSFHLTRADLSYPS  | Mus musculus          |
| 1 | 1.00 | 1 | 1 | 0     | -0.002 | 0      | -0.004 | 0      | t | 118550 | PEPAKSAPAPKKGSKKAV   | Mus musculus          |
| 1 | 1.00 | 1 | 1 | 0     | 0      | 0      | -0.004 | 0      | t | 115056 | GLSLSRFSWGAEGQRPFGF  | Homo sapiens          |

|   |      |   |   |       |        |        |        |        |   |        |                              |                                  |
|---|------|---|---|-------|--------|--------|--------|--------|---|--------|------------------------------|----------------------------------|
| 1 | 1.00 | 1 | 1 | 0     | 0.002  | 0.005  | 0.001  | 0      | t | 24909  | HTFDDFCP<br>ECRPLGLQ<br>GC   | Homo<br>sapiens                  |
| 1 | 1.00 | 1 | 1 | 0.02  | 0.02   | 0.02   | 0.02   | 0.02   | t | 130460 | CSSSQDG<br>HQWTLCA<br>AC     | Homo<br>sapiens                  |
| 1 | 1.00 | 1 | 1 | 0     | -0.002 | 0.003  | 0.007  | 0.003  | t | 102974 | YVVKSFDR<br>STKVIDFH<br>YPNE | Mus<br>musculu<br>s              |
| 1 | 1.00 | 1 | 1 | 0.03  | 0.03   | 0.03   | 0.03   | 0.032  | t | 140489 | MSQDGHT                      | Mus<br>musculu<br>s              |
| 1 | 1.00 | 1 | 1 | -0.04 | -0.04  | -0.043 | -0.04  | -0.04  | t | 67615  | VAGRKKLE<br>ELERDLRK<br>TK   | Homo<br>sapiens                  |
| 1 | 1.00 | 1 | 1 | -0.03 | -0.03  | -0.03  | -0.034 | -0.027 | t | 131933 | KLLRDSHV<br>L                | Homo<br>sapiens                  |
| 1 | 1.00 | 1 | 1 | -0.03 | -0.028 | -0.03  | -0.027 | -0.028 | t | 72494  | WGPNDPR<br>R                 | Homo<br>sapiens                  |
| 1 | 1.00 | 1 | 1 | 0     | 0      | 0.001  | 0      | 0.002  | t | 53634  | RESQAYYQ<br>R                | Mus<br>musculu<br>s              |
| 1 | 1.00 | 1 | 1 | 0     | 0      | 0      | 0.004  | 0.002  | t | 118504 | LSEDRRQV<br>RLGDTQQ<br>S     | Homo<br>sapiens                  |
| 1 | 1.00 | 1 | 1 | 0     | 0.002  | -0.003 | 0.003  | 0.002  | t | 125118 | KVAAEQSL<br>ITVEGDK          | Homo<br>sapiens                  |
| 1 | 1.00 | 1 | 1 | -0.03 | -0.03  | -0.032 | -0.03  | -0.03  | t | 114339 | FNRQUESTL<br>VRSRPSR         | Homo<br>sapiens                  |
| 1 | 1.00 | 1 | 1 | 0.01  | 0.006  | 0.016  | 0.009  | 0.01   | t | 18051  | FTPSPVVV<br>GTTDRSGV<br>PTYR | Oryctola<br>gus<br>cuniculu<br>s |
| 1 | 1.00 | 1 | 1 | 0.02  | 0.02   | 0.031  | 0.02   | 0.02   | t | 6763   | CPFLKQNE<br>PEDIDCW          | Mus<br>musculu<br>s              |
| 1 | 1.00 | 1 | 1 | -0.01 | -0.01  | -0.01  | -0.01  | -0.008 | t | 151816 | CLTSQAAK<br>QRLE             | Sus<br>scrofa                    |
| 1 | 1.00 | 1 | 1 | 0.01  | 0.01   | 0.017  | 0.01   | 0.012  | t | 103996 | ITMWDF                       | Mus<br>musculu<br>s              |

|   |      |   |   |       |        |       |        |        |   |        |                              |                       |
|---|------|---|---|-------|--------|-------|--------|--------|---|--------|------------------------------|-----------------------|
| 1 | 1.00 | 1 | 1 | 0.06  | 0.062  | 0.08  | 0.063  | 0.06   | t | 141611 | CETNTGEV                     | Homo sapiens          |
| 1 | 1.00 | 1 | 1 | -0.04 | -0.038 | -0.03 | -0.033 | -0.038 | t | 136304 | GARGLTG<br>RPGDA             | Homo sapiens          |
| 1 | 1.00 | 1 | 1 | -0.03 | -0.027 | -0.03 | -0.03  | -0.032 | t | 140906 | TPEYNIAL<br>GQRRADA<br>VKGYL | Mus musculus          |
| 1 | 1.00 | 1 | 1 | 0.02  | 0.016  | 0.02  | 0.013  | 0.02   | t | 131106 | TGLE                         | Oryctolagus cuniculus |
| 1 | 1.00 | 1 | 1 | 0.04  | 0.04   | 0.047 | 0.03   | 0.04   | t | 117409 | YLQTPMT<br>VH                | Homo sapiens          |
| 1 | 1.00 | 1 | 1 | 0     | 0      | 0     | -0.003 | 0.001  | t | 78873  | VKFPGGG<br>QIVGGVYL<br>LPRRG | Homo sapiens          |
| 1 | 1.00 | 1 | 1 | 0     | 0      | 0     | -0.003 | 0.001  | t | 60170  | SPNVSVPS<br>SSSTPLLY         | Homo sapiens          |
| 1 | 1.00 | 1 | 1 | 0     | 0      | 0     | -0.003 | 0.001  | t | 55174  | RPIDDFDQ<br>GWGPITY          | Homo sapiens          |
| 1 | 1.00 | 1 | 1 | 0     | 0      | 0     | -0.003 | 0.001  | t | 58073  | SGHMAW<br>DMMNWS<br>PT       | Homo sapiens          |
| 1 | 1.00 | 1 | 1 | 0     | 0      | 0     | -0.003 | 0.001  | t | 39164  | LRPGPVSQ<br>PYHHWDT<br>DK    | Homo sapiens          |
| 1 | 1.00 | 1 | 1 | -0.01 | -0.01  | -0.01 | -0.01  | -0.007 | t | 50102  | PYIEQGM<br>ML                | Homo sapiens          |
| 1 | 1.00 | 1 | 1 | 0.02  | 0.017  | 0.021 | 0.02   | 0.022  | t | 89658  | TQEENTER<br>HTTEDVSP<br>S    | Oryctolagus cuniculus |
| 1 | 1.00 | 1 | 1 | 0     | 0.002  | 0.008 | 0.001  | 0      | t | 70878  | VSALEDKL<br>AD               | Homo sapiens          |
| 1 | 1.00 | 1 | 1 | 0     | 0.002  | 0.008 | 0.001  | 0      | t | 47077  | PDDVNKN<br>TLQ               | Homo sapiens          |
| 1 | 1.00 | 1 | 1 | 0     | 0.002  | 0.008 | 0.001  | 0      | t | 4226   | ARQQTVS<br>ALE               | Homo sapiens          |

|   |      |   |   |       |        |        |        |        |   |        |                              |                     |
|---|------|---|---|-------|--------|--------|--------|--------|---|--------|------------------------------|---------------------|
| 1 | 1.00 | 1 | 1 | 0     | 0.002  | 0.008  | 0.001  | 0      | t | 5310   | AVEVDPD<br>DVN               | Homo<br>sapiens     |
| 1 | 1.00 | 1 | 1 | 0     | 0.002  | 0.008  | 0.001  | 0      | t | 4219   | ARQKLKD<br>AER               | Homo<br>sapiens     |
| 1 | 1.00 | 1 | 1 | 0.02  | 0.024  | 0.03   | 0.017  | 0.02   | t | 66759  | TTPDRQA<br>AC                | Homo<br>sapiens     |
| 1 | 1.00 | 1 | 1 | 0.02  | 0.022  | 0.018  | 0.023  | 0.023  | t | 117742 | AKAQTDR<br>EDLRTLRY          | Homo<br>sapiens     |
| 1 | 1.00 | 1 | 1 | 0.03  | 0.03   | 0.026  | 0.033  | 0.03   | t | 6482   | CKGTHGG<br>TGAGAGA<br>GGAGAG | Homo<br>sapiens     |
| 1 | 1.00 | 1 | 1 | 0     | 0      | 0      | 0      | 0      | t | 112174 | IWWNDN<br>K                  | Homo<br>sapiens     |
| 1 | 1.00 | 1 | 1 | -0.02 | -0.02  | -0.02  | -0.02  | -0.02  | t | 112194 | LAHIWWN                      | Homo<br>sapiens     |
| 1 | 1.00 | 1 | 1 | -0.02 | -0.02  | -0.02  | -0.02  | -0.02  | t | 103283 | IRGSVTPA<br>VSQFNAR          | Homo<br>sapiens     |
| 1 | 1.00 | 1 | 1 | 0.02  | 0.02   | 0.018  | 0.02   | 0.02   | t | 66860  | TTTKGENF<br>TETDVKM<br>MERVV | Mus<br>musculu<br>s |
| 1 | 1.00 | 1 | 1 | -0.06 | -0.063 | -0.061 | -0.061 | -0.058 | t | 99745  | VCLAPDRR                     | Mus<br>musculu<br>s |
| 1 | 1.00 | 1 | 1 | 0     | 0      | 0.005  | 0      | 0.001  | t | 10868  | DYEDRYR<br>E                 | Mus<br>musculu<br>s |
| 1 | 1.00 | 1 | 1 | 0     | 0      | 0.005  | 0      | 0.001  | t | 10868  | DYEDRYR<br>E                 | Mus<br>musculu<br>s |
| 1 | 1.00 | 1 | 1 | -0.02 | -0.02  | -0.02  | -0.024 | -0.02  | t | 136003 | TRKDINTV<br>TTVA             | Homo<br>sapiens     |
| 1 | 1.00 | 1 | 1 | 0     | 0      | 0      | 0      | 0.002  | t | 28910  | ITGHRMA<br>WDMMLN<br>WS      | Homo<br>sapiens     |
| 1 | 1.00 | 1 | 1 | 0.03  | 0.03   | 0.042  | 0.024  | 0.028  | t | 55575  | RRGMEPH<br>MSECCEQ           | Homo<br>sapiens     |
| 1 | 1.00 | 1 | 1 | 0.01  | 0.01   | 0.01   | 0.01   | 0.01   | t | 79365  | RCYNPAE<br>WAEPLCY           | Mus<br>musculu<br>s |



|   |      |   |   |       |        |        |        |        |   |        |                              |                       |
|---|------|---|---|-------|--------|--------|--------|--------|---|--------|------------------------------|-----------------------|
| 1 | 1.00 | 1 | 1 | -0.01 | -0.006 | -0.001 | -0.009 | -0.012 | t | 40104  | LTPKELD                      | Homo sapiens          |
| 1 | 1.00 | 1 | 1 | 0     | 0.002  | 0.005  | 0.001  | -0.001 | t | 141566 | SSIVIPAAV<br>GIKLVNTE<br>DA  | Homo sapiens          |
| 1 | 1.00 | 1 | 1 | 0     | 0      | 0      | 0      | 0.003  | t | 140606 | TMWDALE<br>AP                | Mus musculus          |
| 1 | 1.00 | 1 | 1 | 0     | -0.002 | 0      | -0.007 | -0.001 | t | 125478 | LHQYEEN<br>LGDSIVGY<br>KEKS  | Mus musculus          |
| 1 | 1.00 | 1 | 1 | -0.02 | -0.024 | -0.018 | -0.019 | -0.018 | t | 96409  | INDMPITN<br>DQKKL            | Oryctolagus cuniculus |
| 1 | 1.00 | 1 | 1 | -0.04 | -0.038 | -0.042 | -0.039 | -0.039 | t | 122162 | PIPVPIIIP<br>FPGWQPG<br>MPT  | Homo sapiens          |
| 1 | 1.00 | 1 | 1 | -0.03 | -0.032 | -0.017 | -0.027 | -0.03  | t | 138840 | DREQAPN<br>LVYM              | Mus musculus          |
| 1 | 1.00 | 1 | 1 | 0.02  | 0.018  | 0.02   | 0.013  | 0.019  | t | 132767 | YRDKSYPS<br>PFWCHRT          | Mus musculus          |
| 1 | 1.00 | 1 | 1 | -0.04 | -0.04  | -0.035 | -0.04  | -0.04  | t | 18893  | GCPLPSTK<br>APPIPPPR<br>RK   | Homo sapiens          |
| 1 | 1.00 | 1 | 1 | -0.01 | -0.008 | -0.021 | -0.01  | -0.007 | t | 95130  | PGIFKSSCY<br>IDVRWFPP<br>DVQ | Rattus norvegicus     |
| 1 | 1.00 | 1 | 1 | -0.02 | -0.02  | -0.011 | -0.014 | -0.02  | t | 75203  | YNPLYGSR<br>LGVPDTLG<br>GDPK | Homo sapiens          |
| 1 | 1.00 | 1 | 1 | 0.01  | 0.014  | 0.016  | 0.007  | 0.008  | t | 70663  | VQVVGDE<br>GRSVF             | Homo sapiens          |
| 1 | 1.00 | 1 | 1 | -0.03 | -0.028 | -0.03  | -0.029 | -0.03  | t | 117114 | WTRDNST<br>RPIVR             | Homo sapiens          |

|   |      |   |   |       |        |        |        |        |   |        |                              |                                  |
|---|------|---|---|-------|--------|--------|--------|--------|---|--------|------------------------------|----------------------------------|
| 1 | 1.00 | 1 | 1 | -0.01 | -0.007 | -0.003 | -0.01  | -0.012 | t | 38973  | LQRFNQRS<br>PQLQNL           | Sus<br>scrofa                    |
| 1 | 1.00 | 1 | 1 | 0     | 0      | 0      | -0.006 | -0.001 | t | 123562 | NSSSSQFQ<br>IHGPR            | Mus<br>musculu<br>s              |
| 1 | 1.00 | 1 | 1 | 0     | 0      | 0      | -0.006 | -0.001 | t | 123562 | NSSSSQFQ<br>IHGPR            | Mus<br>musculu<br>s              |
| 1 | 1.00 | 1 | 1 | -0.01 | -0.008 | -0.005 | -0.01  | -0.009 | t | 21254  | GMDGTQL<br>DRW               | Homo<br>sapiens                  |
| 1 | 1.00 | 1 | 1 | 0.02  | 0.018  | 0.013  | 0.013  | 0.02   | t | 145369 | MWCKIGH<br>DRCEE             | Mus<br>musculu<br>s              |
| 1 | 1.00 | 1 | 1 | 0.03  | 0.03   | 0.03   | 0.026  | 0.03   | t | 136134 | ANGWGV<br>MVSHRSG<br>ETEDT   | Homo<br>sapiens                  |
| 1 | 1.00 | 1 | 1 | -0.05 | -0.052 | -0.057 | -0.05  | -0.048 | t | 127896 | WVPFHSTL<br>SREQ             | Trichosu<br>rus<br>vulpecul<br>a |
| 1 | 1.00 | 1 | 1 | 0     | 0      | 0      | 0      | 0.002  | t | 134411 | IPP                          | Mus<br>musculu<br>s              |
| 1 | 1.00 | 1 | 1 | 0     | 0      | 0      | 0      | 0.002  | t | 123001 | AASEDPR                      | Mus<br>musculu<br>s              |
| 1 | 1.00 | 1 | 1 | 0     | 0      | 0      | 0      | 0.002  | t | 131654 | SGFGVVKK<br>PNY              | Oryctola<br>gus<br>cuniculu<br>s |
| 1 | 1.00 | 1 | 1 | 0     | 0      | 0      | 0      | 0.002  | t | 119467 | ISGKPGPP<br>PMGFHSP<br>LIK   | Oryctola<br>gus<br>cuniculu<br>s |
| 1 | 1.00 | 1 | 1 | 0     | 0      | 0      | 0      | 0.002  | t | 120498 | ELMFEEQK<br>DRHGLKR<br>VNKMT | Rattus<br>norvegic<br>us         |
| 1 | 1.00 | 1 | 1 | 0     | 0      | 0      | 0      | 0.002  | t | 132856 | LEDGRTLS<br>DYNIQKES         | Mus<br>musculu<br>s              |
| 1 | 1.00 | 1 | 1 | 0     | 0      | 0      | 0      | 0.002  | t | 132802 | ESTLHLVLR<br>LR              | Mus<br>musculu<br>s              |

|   |      |   |   |   |        |   |   |       |   |        |                               |                          |
|---|------|---|---|---|--------|---|---|-------|---|--------|-------------------------------|--------------------------|
| 1 | 1.00 | 1 | 1 | 0 | 0      | 0 | 0 | 0.002 | t | 120629 | IMIKAE EYI<br>LKKPRSEL<br>MFE | Rattus<br>norvegicus     |
| 1 | 1.00 | 1 | 1 | 0 | 0      | 0 | 0 | 0.002 | t | 117451 | DDGFFYIP<br>KD                | Oryctolagus<br>cuniculus |
| 1 | 1.00 | 1 | 1 | 0 | -0.007 | 0 | 0 | 0.002 | t | 105201 | FVNQHLCY                      | Oryctolagus<br>cuniculus |
| 1 | 1.00 | 1 | 1 | 0 | 0      | 0 | 0 | 0.002 | t | 100378 | PGSGFWS<br>FGSE DGSG<br>DSEN  | Mus<br>musculus          |
| 1 | 1.00 | 1 | 1 | 0 | -0.007 | 0 | 0 | 0.002 | t | 105202 | FVNQHLYK                      | Oryctolagus<br>cuniculus |
| 1 | 1.00 | 1 | 1 | 0 | 0      | 0 | 0 | 0.002 | t | 105202 | FVNQHLYK                      | Cavia<br>porcellus       |
| 1 | 1.00 | 1 | 1 | 0 | 0      | 0 | 0 | 0.002 | t | 48858  | PPPPNPN<br>DPPPPNP<br>ND      | Mus<br>musculus          |
| 1 | 1.00 | 1 | 1 | 0 | 0      | 0 | 0 | 0.002 | t | 48093  | PKKPENK<br>LKQPNE             | Oryctolagus<br>cuniculus |
| 1 | 1.00 | 1 | 1 | 0 | 0      | 0 | 0 | 0.002 | t | 43242  | NANPNAN<br>PNANP              | Mus<br>musculus          |
| 1 | 1.00 | 1 | 1 | 0 | 0      | 0 | 0 | 0.002 | t | 48093  | PKKPENK<br>LKQPNE             | Oryctolagus<br>cuniculus |
| 1 | 1.00 | 1 | 1 | 0 | 0      | 0 | 0 | 0.002 | t | 48093  | PKKPENK<br>LKQPNE             | Mus<br>musculus          |
| 1 | 1.00 | 1 | 1 | 0 | 0      | 0 | 0 | 0.002 | t | 55621  | RRKAHAG<br>NKKAEDLT<br>MDDLE  | Oryctolagus<br>cuniculus |
| 1 | 1.00 | 1 | 1 | 0 | 0      | 0 | 0 | 0.002 | t | 55621  | RRKAHAG<br>NKKAEDLT<br>MDDLE  | Oryctolagus<br>cuniculus |

|   |      |   |   |       |        |        |        |       |   |        |                              |                                  |
|---|------|---|---|-------|--------|--------|--------|-------|---|--------|------------------------------|----------------------------------|
| 1 | 1.00 | 1 | 1 | 0     | 0      | 0      | 0      | 0.002 | t | 43242  | NANPNAN<br>PNANP             | Mus<br>musculu<br>s              |
| 1 | 1.00 | 1 | 1 | 0     | 0      | 0      | 0      | 0.002 | t | 40729  | LYDAAKAY<br>AEQLKEN<br>GVINY | Mus<br>musculu<br>s              |
| 1 | 1.00 | 1 | 1 | 0     | 0      | 0      | 0      | 0.002 | t | 55621  | RRKAHAG<br>NKKAEDLT<br>MDDLE | Mus<br>musculu<br>s              |
| 1 | 1.00 | 1 | 1 | 0     | 0      | 0      | 0      | 0.002 | t | 51438  | QLSSSKYT<br>IQRSTGDN<br>IDT  | Mus<br>musculu<br>s              |
| 1 | 1.00 | 1 | 1 | 0     | 0      | 0      | 0      | 0.002 | t | 58388  | SHLVEALY<br>LVCGERG          | Mus<br>musculu<br>s              |
| 1 | 1.00 | 1 | 1 | 0     | -0.003 | 0      | 0      | 0.002 | t | 55621  | RRKAHAG<br>NKKAEDLT<br>MDDLE | Oryctola<br>gus<br>cuniculu<br>s |
| 1 | 1.00 | 1 | 1 | 0     | 0      | 0      | 0      | 0.002 | t | 10639  | DVKFPGG<br>GQIVGGV<br>YLLPRR | Mus<br>musculu<br>s              |
| 1 | 1.00 | 1 | 1 | 0     | 0      | 0      | 0      | 0.002 | t | 11815  | EENVEENV<br>EENVEENV         | Mus<br>musculu<br>s              |
| 1 | 1.00 | 1 | 1 | 0     | 0      | 0      | 0      | 0.002 | t | 36166  | LGIMGEYR<br>GTPRNQD<br>LYDAA | Mus<br>musculu<br>s              |
| 1 | 1.00 | 1 | 1 | 0     | 0      | 0      | 0      | 0.002 | t | 21933  | GQPQAQG<br>DGANA             | Oryctola<br>gus<br>cuniculu<br>s |
| 1 | 1.00 | 1 | 1 | 0     | 0      | 0      | 0      | 0.002 | t | 9723   | DPPPPNP<br>NDPPPPN<br>PND    | Mus<br>musculu<br>s              |
| 1 | 1.00 | 1 | 1 | 0     | 0      | 0      | 0      | 0.002 | t | 9722   | DPPPPNP<br>NDPPPPN<br>PN     | Mus<br>musculu<br>s              |
| 1 | 1.00 | 1 | 1 | 0     | 0      | 0      | 0      | 0.002 | t | 9722   | DPPPPNP<br>NDPPPPN<br>PN     | Mus<br>musculu<br>s              |
| 1 | 1.00 | 1 | 1 | -0.03 | -0.03  | -0.013 | -0.027 | -0.03 | t | 46473  | NVSAIFMA<br>VLLTLQT          | Homo<br>sapiens                  |
| 1 | 1.00 | 1 | 1 | 0.02  | 0.02   | 0.02   | 0.02   | 0.02  | t | 156925 | NLVADFPR<br>PLLS             | Gallus<br>gallus                 |

|   |      |   |   |       |        |        |        |        |   |        |                               |                       |
|---|------|---|---|-------|--------|--------|--------|--------|---|--------|-------------------------------|-----------------------|
| 1 | 1.00 | 1 | 1 | -0.03 | -0.03  | -0.03  | -0.03  | -0.03  | t | 156959 | SLHTTQR                       | Gallus gallus         |
| 1 | 1.00 | 1 | 1 | -0.05 | -0.05  | -0.05  | -0.05  | -0.05  | t | 106992 | WGGHWR<br>GANA                | Homo sapiens          |
| 1 | 1.00 | 1 | 1 | 0     | 0      | 0      | -0.006 | -0.001 | t | 46317  | NTW TTCQ<br>SIAFPSK           | Mus musculus          |
| 1 | 1.00 | 1 | 1 | 0     | -0.002 | 0.01   | -0.001 | 0.001  | t | 66687  | TTL DTHPL<br>RTLL             | Mus musculus          |
| 1 | 1.00 | 1 | 1 | 0.05  | 0.046  | 0.05   | 0.043  | 0.051  | t | 134795 | SFGAYGA<br>QEEAQC             | Oryctolagus cuniculus |
| 1 | 1.00 | 1 | 1 | -0.02 | -0.022 | -0.016 | -0.023 | -0.019 | t | 60751  | SRNWLPG<br>PCY                | Mus musculus          |
| 1 | 1.00 | 1 | 1 | 0.01  | 0.012  | 0.016  | 0.013  | 0.012  | t | 67086  | TVMTSGS<br>AL TSAIA           | Ovis aries            |
| 1 | 1.00 | 1 | 1 | 0.05  | 0.05   | 0.045  | 0.05   | 0.051  | t | 125015 | DNESSYSR<br>GFD MTYT<br>E     | Mus musculus          |
| 1 | 1.00 | 1 | 1 | 0.02  | 0.02   | 0.02   | 0.02   | 0.02   | t | 140839 | DERGTPEY<br>NIALGQRR<br>ADAV  | Oryctolagus cuniculus |
| 1 | 1.00 | 1 | 1 | -0.01 | -0.01  | -0.001 | -0.01  | -0.013 | t | 110947 | MSTRSVSS<br>SSYRRMFG<br>GPGT  | Mus musculus          |
| 1 | 1.00 | 1 | 1 | -0.02 | -0.02  | -0.02  | -0.02  | -0.02  | t | 79387  | SCTSPVSQ<br>GTQPCK            | Mus musculus          |
| 1 | 1.00 | 1 | 1 | 0     | 0      | 0      | 0      | 0      | t | 129060 | KEIKKVAT<br>PKKASKPK<br>K     | Homo sapiens          |
| 1 | 1.00 | 1 | 1 | -0.02 | -0.02  | -0.016 | -0.02  | -0.02  | t | 22134  | GRLITVNPI<br>VT               | Mus musculus          |
| 1 | 1.00 | 1 | 1 | -0.01 | -0.008 | -0.01  | -0.009 | -0.01  | t | 111088 | ACQKHTP<br>PAPKEDDP<br>LK KYT | Homo sapiens          |
| 1 | 1.00 | 1 | 1 | -0.04 | -0.04  | -0.04  | -0.044 | -0.04  | t | 135942 | KDVKFGA<br>DARAL              | Homo sapiens          |

|   |      |   |   |       |        |        |        |        |   |        |                              |                                  |
|---|------|---|---|-------|--------|--------|--------|--------|---|--------|------------------------------|----------------------------------|
| 1 | 1.00 | 1 | 1 | -0.02 | -0.016 | -0.018 | -0.019 | -0.018 | t | 40310  | LVDWLRQ<br>YA                | Homo<br>sapiens                  |
| 1 | 1.00 | 1 | 1 | -0.01 | -0.01  | -0.012 | -0.01  | -0.01  | t | 54992  | RNGHNVS<br>TRGRIPAD          | Homo<br>sapiens                  |
| 1 | 1.00 | 1 | 1 | 0.02  | 0.022  | 0.02   | 0.023  | 0.022  | t | 108844 | DAGVIQSP<br>RHEVTEM<br>G     | Homo<br>sapiens                  |
| 1 | 1.00 | 1 | 1 | -0.03 | -0.025 | -0.022 | -0.033 | -0.032 | t | 157741 | PHYSNAP<br>QLVYI             | Homo<br>sapiens                  |
| 1 | 1.00 | 1 | 1 | -0.02 | -0.02  | -0.02  | -0.02  | -0.022 | t | 127671 | GPDRSPR<br>QPPVLPAA          | Homo<br>sapiens                  |
| 1 | 1.00 | 1 | 1 | -0.02 | -0.024 | -0.014 | -0.021 | -0.022 | t | 7675   | DAVTPLRI<br>FIVPPAA<br>EYEQ  | Oryctola<br>gus<br>cuniculu<br>s |
| 1 | 1.00 | 1 | 1 | 0     | 0.004  | 0.009  | 0.001  | 0      | t | 62908  | TALGKLQD<br>VVNQNAQ<br>AL    | Homo<br>sapiens                  |
| 1 | 1.00 | 1 | 1 | -0.01 | -0.01  | -0.01  | -0.01  | -0.01  | t | 135503 | VGIPGGVV<br>GAGP             | Oryctola<br>gus<br>cuniculu<br>s |
| 1 | 1.00 | 1 | 1 | 0.04  | 0.04   | 0.04   | 0.04   | 0.04   | t | 107567 | PREQQYN                      | Homo<br>sapiens                  |
| 1 | 1.00 | 1 | 1 | -0.01 | -0.019 | -0.013 | -0.01  | -0.01  | t | 72485  | WGNCGCL<br>FGKGSIDT<br>CAKFA | Equus<br>caballus                |
| 1 | 1.00 | 1 | 1 | -0.04 | -0.04  | -0.04  | -0.04  | -0.04  | t | 112381 | VGWIRQR                      | Homo<br>sapiens                  |
| 1 | 1.00 | 1 | 1 | -0.03 | -0.026 | -0.026 | -0.033 | -0.032 | t | 105975 | NGIETICT<br>ASFKKN           | Homo<br>sapiens                  |
| 1 | 1.00 | 1 | 1 | -0.04 | -0.04  | -0.04  | -0.04  | -0.04  | t | 78707  | KLRERLKQ<br>R                | Oryctola<br>gus<br>cuniculu<br>s |
| 1 | 1.00 | 1 | 1 | -0.01 | -0.008 | -0.005 | -0.009 | -0.008 | t | 143    | AAGAGPR<br>VRQ               | Homo<br>sapiens                  |
| 1 | 1.00 | 1 | 1 | -0.01 | -0.012 | -0.01  | -0.013 | -0.01  | t | 7938   | DEDKLDTN<br>SVYEPYYH<br>SDHA | Mus<br>musculu<br>s              |

|   |      |   |   |       |        |        |        |        |   |        |                              |                                  |
|---|------|---|---|-------|--------|--------|--------|--------|---|--------|------------------------------|----------------------------------|
| 1 | 1.00 | 1 | 1 | -0.01 | -0.008 | -0.01  | -0.013 | -0.01  | t | 7938   | DEDKLDTN<br>SVYEPYYH<br>SDHA | Cavia<br>porcellu<br>s           |
| 1 | 1.00 | 1 | 1 | 0     | 0      | 0.007  | 0      | 0      | t | 134136 | LKTPRV                       | Homo<br>sapiens                  |
| 1 | 1.00 | 1 | 1 | 0     | 0      | 0.007  | 0      | 0      | t | 134112 | KDKATF                       | Homo<br>sapiens                  |
| 1 | 1.00 | 1 | 1 | 0     | -0.006 | 0.007  | 0      | 0      | t | 116001 | TQDQDPV<br>VHF               | Oryctola<br>gus<br>cuniculu<br>s |
| 1 | 1.00 | 1 | 1 | 0     | 0      | 0.007  | 0      | 0      | t | 116001 | TQDQDPV<br>VHF               | Oryctola<br>gus<br>cuniculu<br>s |
| 1 | 1.00 | 1 | 1 | 0     | 0      | 0.007  | 0      | 0      | t | 20088  | GGWGQP<br>HGGGWG<br>QG       | Mus<br>musculu<br>s              |
| 1 | 1.00 | 1 | 1 | 0     | 0      | 0      | 0      | 0.002  | t | 117231 | RQIFGDYK<br>TTICGK           | Mus<br>musculu<br>s              |
| 1 | 1.00 | 1 | 1 | -0.01 | -0.012 | -0.002 | -0.011 | -0.01  | t | 7867   | DDRRAGF<br>GSA               | Mus<br>musculu<br>s              |
| 1 | 1.00 | 1 | 1 | -0.01 | -0.007 | -0.01  | -0.01  | -0.008 | t | 55951  | RSRSES                       | Mus<br>musculu<br>s              |
| 1 | 1.00 | 1 | 1 | -0.01 | -0.01  | -0.01  | -0.01  | -0.008 | t | 55951  | RSRSES                       | Oryctola<br>gus<br>cuniculu<br>s |
| 1 | 1.00 | 1 | 1 | 0     | -0.002 | 0      | -0.003 | 0      | t | 72119  | VYNQGRGI<br>DSGERLM<br>QPTQM | Mus<br>musculu<br>s              |
| 1 | 1.00 | 1 | 1 | -0.05 | -0.053 | -0.043 | -0.05  | -0.051 | t | 131654 | SGFGVVKK<br>PNY              | Oryctola<br>gus<br>cuniculu<br>s |
| 1 | 1.00 | 1 | 1 | -0.04 | -0.042 | -0.027 | -0.037 | -0.039 | t | 115096 | PPSLLFLP                     | Mus<br>musculu<br>s              |
| 1 | 1.00 | 1 | 1 | -0.02 | -0.02  | -0.02  | -0.02  | -0.02  | t | 137924 | LQLLVVGC<br>GSSH             | Homo<br>sapiens                  |
| 1 | 1.00 | 1 | 1 | 0     | 0.002  | 0.006  | 0.001  | 0.002  | t | 70205  | VNTWKS                       | Homo<br>sapiens                  |

|   |      |   |   |       |        |        |        |        |   |        |                         |               |
|---|------|---|---|-------|--------|--------|--------|--------|---|--------|-------------------------|---------------|
| 1 | 1.00 | 1 | 1 | 0.01  | 0.012  | 0.009  | 0.011  | 0.009  | t | 79041  | PKARQPE<br>GRAWAQPG     | Homo sapiens  |
| 1 | 1.00 | 1 | 1 | -0.01 | -0.008 | -0.005 | -0.014 | -0.012 | t | 117594 | NWHQLH<br>GKKEAY        | Homo sapiens  |
| 1 | 1.00 | 1 | 1 | -0.02 | -0.02  | -0.02  | -0.02  | -0.02  | t | 111557 | MPLSQNV<br>APFRT        | Homo sapiens  |
| 1 | 1.00 | 1 | 1 | 0.04  | 0.04   | 0.04   | 0.034  | 0.04   | t | 118505 | LSEKKISSI<br>QSIV       | Homo sapiens  |
| 1 | 1.00 | 1 | 1 | -0.01 | -0.01  | -0.012 | -0.014 | -0.01  | t | 70266  | VPDGFKVS<br>NS          | Homo sapiens  |
| 1 | 1.00 | 1 | 1 | 0.01  | 0.013  | 0.003  | 0.01   | 0.011  | t | 45003  | NMLYKDD<br>FVGALIFSGAVI | Mus musculus  |
| 1 | 1.00 | 1 | 1 | 0.01  | 0.018  | 0.003  | 0.01   | 0.011  | t | 45003  | NMLYKDD<br>FVGALIFSGAVI | Gallus gallus |
| 1 | 1.00 | 1 | 1 | 0.01  | 0.021  | 0.003  | 0.01   | 0.011  | t | 45003  | NMLYKDD<br>FVGALIFSGAVI | Gallus gallus |
| 1 | 1.00 | 1 | 1 | -0.05 | -0.048 | -0.05  | -0.049 | -0.05  | t | 75149  | YNGANGA<br>MKH          | Homo sapiens  |
| 1 | 1.00 | 1 | 1 | -0.03 | -0.03  | -0.03  | -0.03  | -0.03  | t | 131884 | GDYNRTV<br>GKGPGSRP     | Homo sapiens  |
| 1 | 1.00 | 1 | 1 | -0.05 | -0.05  | -0.05  | -0.05  | -0.05  | t | 149085 | NPTQIRR                 | Sus scrofa    |
| 1 | 1.00 | 1 | 1 | -0.02 | -0.021 | -0.017 | -0.019 | -0.017 | t | 62141  | SVGHMTG<br>RFTSLFSVG    | Homo sapiens  |
| 1 | 1.00 | 1 | 1 | -0.01 | -0.007 | -0.004 | -0.01  | -0.01  | t | 47248  | PEDDWAS<br>DYDLAQA      | Sus scrofa    |
| 1 | 1.00 | 1 | 1 | 0     | -0.002 | 0      | -0.007 | 0      | t | 103963 | GWWSALY                 | Mus musculus  |
| 1 | 1.00 | 1 | 1 | 0.02  | 0.018  | 0.028  | 0.013  | 0.019  | t | 112316 | SIKNPTNA<br>K           | Mus musculus  |
| 1 | 1.00 | 1 | 1 | 0.01  | 0.01   | 0.01   | 0.009  | 0.012  | t | 40110  | LTPLEELY                | Mus musculus  |



|   |      |   |   |       |        |        |        |        |   |        |                              |                                  |
|---|------|---|---|-------|--------|--------|--------|--------|---|--------|------------------------------|----------------------------------|
| 1 | 1.00 | 1 | 1 | -0.04 | -0.044 | -0.051 | -0.047 | -0.04  | t | 138215 | PPVANDT<br>RIVMGRLL          | Oryctola<br>gus<br>cuniculu<br>s |
| 1 | 1.00 | 1 | 1 | 0.02  | 0.018  | 0.021  | 0.019  | 0.021  | t | 33151  | KRHFLSQR<br>Q                | Mus<br>musculu<br>s              |
| 1 | 1.00 | 1 | 1 | -0.01 | -0.01  | 0.006  | -0.01  | -0.013 | t | 48084  | PKINRSAP<br>EPSL             | Oryctola<br>gus<br>cuniculu<br>s |
| 1 | 1.00 | 1 | 1 | -0.01 | -0.01  | 0.006  | -0.01  | -0.013 | t | 48084  | PKINRSAP<br>EPSL             | Oryctola<br>gus<br>cuniculu<br>s |
| 1 | 1.00 | 1 | 1 | 0     | 0.012  | 0      | -0.001 | 0.002  | t | 146185 | DAEFGH                       | Mus<br>musculu<br>s              |
| 1 | 1.00 | 1 | 1 | 0     | 0      | 0      | -0.001 | 0.002  | t | 99134  | DAEFRHDS<br>GYEVHHQ          | Mus<br>musculu<br>s              |
| 1 | 1.00 | 1 | 1 | 0     | 0      | 0      | -0.001 | 0.002  | t | 99134  | DAEFRHDS<br>GYEVHHQ          | Mus<br>musculu<br>s              |
| 1 | 1.00 | 1 | 1 | 0     | 0      | 0      | -0.001 | 0.002  | t | 99134  | DAEFRHDS<br>GYEVHHQ          | Mus<br>musculu<br>s              |
| 1 | 1.00 | 1 | 1 | -0.03 | -0.032 | -0.022 | -0.027 | -0.027 | t | 114282 | CNYSVAHL<br>C                | Mus<br>musculu<br>s              |
| 1 | 1.00 | 1 | 1 | -0.03 | -0.032 | -0.022 | -0.027 | -0.027 | t | 114282 | CNYSVAHL<br>C                | Mus<br>musculu<br>s              |
| 1 | 1.00 | 1 | 1 | 0.02  | 0.024  | 0.027  | 0.017  | 0.02   | t | 117346 | PSALLRQF<br>TTAL             | Homo<br>sapiens                  |
| 1 | 1.00 | 1 | 1 | -0.02 | -0.018 | -0.018 | -0.02  | -0.019 | t | 9595   | DPALLLM<br>HELIHVLH<br>GLYG  | Homo<br>sapiens                  |
| 1 | 1.00 | 1 | 1 | 0     | 0.002  | 0.019  | 0.003  | 0      | t | 640    | ADCTLWF<br>CPQTSN            | Homo<br>sapiens                  |
| 1 | 1.00 | 1 | 1 | 0.01  | 0.008  | 0.015  | 0.009  | 0.011  | t | 25146  | HWYISKPQ                     | Mus<br>musculu<br>s              |
| 1 | 1.00 | 1 | 1 | 0.02  | 0.02   | 0.015  | 0.02   | 0.023  | t | 122771 | GELTSSEV<br>ATEVPFRL<br>MHPQ | Rattus<br>norvegic<br>us         |

|   |      |   |   |       |        |        |        |        |   |        |                            |                                  |
|---|------|---|---|-------|--------|--------|--------|--------|---|--------|----------------------------|----------------------------------|
| 1 | 1.00 | 1 | 1 | 0     | 0      | 0.011  | 0      | -0.002 | t | 44904  | NLTQHPSA<br>PTMP           | Oryctola<br>gus<br>cuniculu<br>s |
| 1 | 1.00 | 1 | 1 | -0.01 | -0.002 | 0.001  | -0.01  | -0.01  | t | 45631  | NQTARDEI<br>RRA            | Gallus<br>gallus                 |
| 1 | 1.00 | 1 | 1 | 0.01  | 0.012  | 0.005  | 0.007  | 0.01   | t | 3221   | ANAANE<br>DYQAKLTA<br>YQTE | Homo<br>sapiens                  |
| 1 | 1.00 | 1 | 1 | -0.01 | -0.01  | -0.005 | -0.008 | -0.01  | t | 70273  | VPDREVL<br>YREFDEM         | Homo<br>sapiens                  |
| 1 | 1.00 | 1 | 1 | -0.01 | -0.014 | -0.01  | -0.007 | -0.008 | t | 115529 | TYNFAVL<br>KLMGRGTF        | Oryctola<br>gus<br>cuniculu<br>s |
| 1 | 1.00 | 1 | 1 | 0     | -0.002 | 0      | 0      | 0.003  | t | 21815  | GPVEDAIT<br>AAIGRVA        | Oryctola<br>gus<br>cuniculu<br>s |
| 1 | 1.00 | 1 | 1 | -0.02 | -0.02  | -0.02  | -0.02  | -0.019 | t | 135545 | DVFYPYP<br>YASGS           | Mus<br>musculu<br>s              |
| 1 | 1.00 | 1 | 1 | -0.07 | -0.068 | -0.061 | -0.069 | -0.07  | t | 73147  | WTMKIL                     | Homo<br>sapiens                  |
| 1 | 1.00 | 1 | 1 | -0.01 | -0.017 | -0.018 | -0.01  | -0.008 | t | 110841 | EVTPAIK<br>SEVSL           | Macaca                           |
| 1 | 1.00 | 1 | 1 | 0     | -0.002 | 0      | 0.001  | 0.003  | t | 50180  | PYVEPTA<br>PQVL            | Mus<br>musculu<br>s              |
| 1 | 1.00 | 1 | 1 | 0.02  | 0.023  | 0.027  | 0.019  | 0.017  | t | 142442 | LKGDDSA<br>GEQEL           | Mus<br>musculu<br>s              |
| 1 | 1.00 | 1 | 1 | 0     | 0.002  | -0.003 | -0.003 | 0      | t | 51967  | QPSKPTT<br>KQRQN           | Homo<br>sapiens                  |
| 1 | 1.00 | 1 | 1 | 0.01  | 0.01   | 0.017  | 0.01   | 0.009  | t | 130805 | ELNPEPD<br>TEVFPMTF        | Homo<br>sapiens                  |
| 1 | 1.00 | 1 | 1 | 0.01  | 0.01   | 0.01   | 0.01   | 0.01   | t | 107621 | SNKALPA                    | Homo<br>sapiens                  |

|   |      |   |   |       |        |        |        |        |   |        |                              |                                  |
|---|------|---|---|-------|--------|--------|--------|--------|---|--------|------------------------------|----------------------------------|
| 1 | 1.00 | 1 | 1 | -0.03 | -0.03  | -0.03  | -0.03  | -0.03  | t | 123212 | GDRHYLT<br>GS                | Ovis<br>aries                    |
| 1 | 1.00 | 1 | 1 | -0.03 | -0.028 | -0.029 | -0.033 | -0.03  | t | 106346 | DLMHRLY<br>HVP               | Homo<br>sapiens                  |
| 1 | 1.00 | 1 | 1 | -0.01 | -0.012 | -0.004 | -0.011 | -0.009 | t | 27728  | INQQLNPK<br>TNKWEDK          | Mus<br>musculu<br>s              |
| 1 | 1.00 | 1 | 1 | -0.05 | -0.05  | -0.05  | -0.05  | -0.05  | t | 135838 | DSFGNWR<br>LWAPIG            | Mus<br>musculu<br>s              |
| 1 | 1.00 | 1 | 1 | -0.05 | -0.05  | -0.05  | -0.05  | -0.05  | t | 135838 | DSFGNWR<br>LWAPIG            | Mus<br>musculu<br>s              |
| 1 | 1.00 | 1 | 1 | 0     | 0      | 0      | 0      | 0      | t | 99915  | CIFPLCLGR<br>PIAASYPP<br>KTR | Ovis<br>aries                    |
| 1 | 1.00 | 1 | 1 | 0.01  | 0.01   | 0.01   | 0.01   | 0.01   | t | 152975 | SETRTISKN<br>TSTSR           | Homo<br>sapiens                  |
| 1 | 1.00 | 1 | 1 | 0.01  | 0.01   | 0.01   | 0.01   | 0.013  | t | 133555 | EGPEYWD<br>RET               | Mus<br>musculu<br>s              |
| 1 | 1.00 | 1 | 1 | 0.01  | 0.013  | 0.01   | 0.01   | 0.014  | t | 134077 | GYYYPSDP<br>NT               | Mus<br>musculu<br>s              |
| 1 | 1.00 | 1 | 1 | -0.01 | -0.008 | -0.018 | -0.011 | -0.009 | t | 149242 | AALILSKHP<br>NWTNTQ          | Cavia<br>porcellu<br>s           |
| 1 | 1.00 | 1 | 1 | 0.05  | 0.052  | 0.054  | 0.053  | 0.05   | t | 1433   | AGAGGGA<br>GGAGAGG<br>GAGGAG | Homo<br>sapiens                  |
| 1 | 1.00 | 1 | 1 | -0.03 | -0.03  | -0.022 | -0.03  | -0.031 | t | 110975 | QIFNKPY<br>WLQRAQG<br>H      | Mus<br>musculu<br>s              |
| 1 | 1.00 | 1 | 1 | 0.02  | 0.016  | 0.025  | 0.013  | 0.019  | t | 122730 | DPAQPPR<br>D                 | Oryctola<br>gus<br>cuniculu<br>s |
| 1 | 1.00 | 1 | 1 | 0.05  | 0.05   | 0.05   | 0.05   | 0.052  | t | 132293 | FGFPEHLL<br>VDFLQSLs         | Mus<br>musculu<br>s              |

|   |      |   |   |       |        |        |        |        |   |        |                              |                                  |
|---|------|---|---|-------|--------|--------|--------|--------|---|--------|------------------------------|----------------------------------|
| 1 | 1.00 | 1 | 1 | 0.05  | 0.047  | 0.05   | 0.05   | 0.052  | t | 132293 | FGFPEHLL<br>VDFLQSLs         | Oryctola<br>gus<br>cuniculu<br>s |
| 1 | 1.00 | 1 | 1 | 0.03  | 0.03   | 0.03   | 0.026  | 0.03   | t | 117545 | KIQRTQQE<br>DSAVYLCA         | Homo<br>sapiens                  |
| 1 | 1.00 | 1 | 1 | 0     | 0.007  | 0.011  | 0      | 0      | t | 94450  | CCNPAC                       | Capra<br>hircus                  |
| 1 | 1.00 | 1 | 1 | -0.02 | -0.022 | -0.013 | -0.017 | -0.019 | t | 106376 | EEKKGNYV<br>VTDH             | Mus<br>musculu<br>s              |
| 1 | 1.00 | 1 | 1 | -0.02 | -0.018 | -0.019 | -0.019 | -0.02  | t | 33366  | KSKFGYSA<br>KDVRSL           | Homo<br>sapiens                  |
| 1 | 1.00 | 1 | 1 | -0.02 | -0.02  | -0.018 | -0.017 | -0.02  | t | 25534  | IDALFENV<br>DFQATITR<br>ARFE | Homo<br>sapiens                  |
| 1 | 1.00 | 1 | 1 | -0.02 | -0.022 | -0.013 | -0.021 | -0.02  | t | 10496  | DTTIP                        | Mus<br>musculu<br>s              |
| 1 | 1.00 | 1 | 1 | 0.02  | 0.018  | 0.023  | 0.019  | 0.021  | t | 43527  | NDSSSHLQ                     | Sus<br>scrofa                    |
| 1 | 1.00 | 1 | 1 | -0.01 | -0.012 | -0.012 | -0.017 | -0.012 | t | 125318 | WWYDKK<br>DNTC               | Mus<br>musculu<br>s              |
| 1 | 1.00 | 1 | 1 | 0.03  | 0.034  | 0.038  | 0.031  | 0.03   | t | 98525  | TKAQSYEI<br>KA               | Homo<br>sapiens                  |
| 1 | 1.00 | 1 | 1 | -0.01 | -0.01  | -0.015 | -0.01  | -0.009 | t | 107102 | DGKTLNDE<br>LEIIEGM          | Rattus<br>norvegic<br>us         |
| 1 | 1.00 | 1 | 1 | -0.01 | -0.01  | -0.013 | -0.01  | -0.01  | t | 50781  | QFKDNVIL<br>LNKHIDAY<br>K    | Homo<br>sapiens                  |
| 1 | 1.00 | 1 | 1 | -0.03 | -0.033 | -0.031 | -0.03  | -0.03  | t | 140611 | VNKKEAW<br>LDSTKATR<br>Y     | Oryctola<br>gus<br>cuniculu<br>s |
| 1 | 1.00 | 1 | 1 | 0.02  | 0.012  | 0.02   | 0.02   | 0.022  | t | 156918 | MAITDHP<br>GSAMV             | Mus<br>musculu<br>s              |
| 1 | 1.00 | 1 | 1 | 0.02  | 0.022  | 0.025  | 0.016  | 0.017  | t | 28349  | IRNVNNLA<br>RT               | Homo<br>sapiens                  |

|   |      |   |   |       |        |        |        |        |   |        |                              |                          |
|---|------|---|---|-------|--------|--------|--------|--------|---|--------|------------------------------|--------------------------|
| 1 | 1.00 | 1 | 1 | 0     | 0      | 0      | -0.01  | -0.003 | t | 11035  | EAESISSE<br>EIVPNSVE<br>QKH  | Homo<br>sapiens          |
| 1 | 1.00 | 1 | 1 | 0     | 0.002  | 0.023  | 0.003  | -0.006 | t | 72885  | WNDYCT<br>MNQCDT<br>HN       | Homo<br>sapiens          |
| 1 | 1.00 | 1 | 1 | 0.06  | 0.058  | 0.072  | 0.057  | 0.059  | t | 114329 | EVAQEAA<br>EEPLIE            | Rattus<br>norvegicus     |
| 1 | 1.00 | 1 | 1 | -0.03 | -0.032 | -0.03  | -0.033 | -0.03  | t | 131764 | YAIAWHQ                      | Mus<br>musculus          |
| 1 | 1.00 | 1 | 1 | -0.05 | -0.05  | -0.05  | -0.053 | -0.05  | t | 110997 | RCHAANP<br>NGRYYWG<br>GQYTWD | Mus<br>musculus          |
| 1 | 1.00 | 1 | 1 | -0.05 | -0.05  | -0.05  | -0.053 | -0.05  | t | 110997 | RCHAANP<br>NGRYYWG<br>GQYTWD | Mus<br>musculus          |
| 1 | 1.00 | 1 | 1 | -0.01 | -0.01  | -0.013 | -0.01  | -0.01  | t | 12383  | EIAAKAIGK<br>KIHQNNG         | Homo<br>sapiens          |
| 1 | 1.00 | 1 | 1 | 0     | 0.002  | -0.007 | -0.003 | 0      | t | 78341  | AALTAENT<br>AIKKNAD<br>AKA   | Homo<br>sapiens          |
| 1 | 1.00 | 1 | 1 | -0.02 | -0.02  | -0.02  | -0.02  | -0.02  | t | 115672 | AAVRSPA<br>QIL               | Homo<br>sapiens          |
| 1 | 1.00 | 1 | 1 | -0.02 | -0.018 | -0.013 | -0.017 | -0.019 | t | 86900  | NLPNDVFR<br>EAQR             | Homo<br>sapiens          |
| 1 | 1.00 | 1 | 1 | -0.01 | -0.01  | -0.01  | -0.01  | -0.008 | t | 138627 | SQKEVLEG<br>ARASVDR<br>VC    | Oryctolagus<br>cuniculus |
| 1 | 1.00 | 1 | 1 | 0.01  | 0.008  | 0.007  | 0.009  | 0.01   | t | 9956   | DRCTTFDD<br>VQAPNYT<br>QH    | Mus<br>musculus          |
| 1 | 1.00 | 1 | 1 | -0.02 | -0.018 | -0.02  | -0.019 | -0.02  | t | 68723  | VGLRTPQR<br>FTDLVKF          | Homo<br>sapiens          |
| 1 | 1.00 | 1 | 1 | 0.05  | 0.046  | 0.048  | 0.05   | 0.052  | t | 100126 | HVGLGTAF<br>ENSIYDQE<br>YN   | Sus<br>scrofa            |
| 1 | 1.00 | 1 | 1 | 0.05  | 0.052  | 0.059  | 0.051  | 0.05   | t | 74139  | YHSTSSEG<br>N                | Homo<br>sapiens          |

|   |      |   |   |       |        |        |        |        |   |        |                              |                                  |
|---|------|---|---|-------|--------|--------|--------|--------|---|--------|------------------------------|----------------------------------|
| 1 | 1.00 | 1 | 1 | 0     | 0      | 0      | -0.003 | 0.001  | t | 14435  | ETIYNTTLK<br>Y               | Homo<br>sapiens                  |
| 1 | 1.00 | 1 | 1 | 0.01  | 0.01   | 0.011  | 0.01   | 0.01   | t | 126280 | IITGHCQG<br>DGYRVGF          | Mus<br>musculu<br>s              |
| 1 | 1.00 | 1 | 1 | -0.01 | -0.008 | 0.004  | -0.009 | -0.008 | t | 68179  | VEFLVN                       | Homo<br>sapiens                  |
| 1 | 1.00 | 1 | 1 | -0.03 | -0.032 | -0.026 | -0.03  | -0.03  | t | 27113  | ILIRGIHHV<br>L               | Mus<br>musculu<br>s              |
| 1 | 1.00 | 1 | 1 | 0     | 0      | 0.007  | 0      | 0.001  | t | 72503  | WGQGG                        | Mus<br>musculu<br>s              |
| 1 | 1.00 | 1 | 1 | 0.03  | 0.034  | 0.029  | 0.027  | 0.03   | t | 1577   | AGKLGTVS<br>YGEEKPA          | Homo<br>sapiens                  |
| 1 | 1.00 | 1 | 1 | 0     | -0.004 | 0      | 0.003  | 0.003  | t | 70444  | VPQLEIVP<br>NSAEERLH<br>SMKE | Oryctola<br>gus<br>cuniculu<br>s |
| 1 | 1.00 | 1 | 1 | 0     | -0.004 | 0      | 0.003  | 0.003  | t | 38207  | LNENLLRF<br>FVAPFPEV<br>FGKE | Oryctola<br>gus<br>cuniculu<br>s |
| 1 | 1.00 | 1 | 1 | 0     | -0.004 | 0      | 0.003  | 0.003  | t | 26341  | IGVNQELA<br>YFYPELFR<br>QFYQ | Oryctola<br>gus<br>cuniculu<br>s |
| 1 | 1.00 | 1 | 1 | 0     | -0.004 | 0      | 0.003  | 0.003  | t | 8756   | DIPNPIGSE<br>NSEKTTM<br>PLW  | Oryctola<br>gus<br>cuniculu<br>s |
| 1 | 1.00 | 1 | 1 | 0.05  | 0.048  | 0.033  | 0.049  | 0.059  | t | 134684 | GSLPQKSQ<br>RDEN             | Rattus<br>norvegic<br>us         |
| 1 | 1.00 | 1 | 1 | -0.01 | -0.01  | -0.013 | -0.012 | -0.01  | t | 142167 | GLRRDLDA<br>SREAKKQV<br>EKAL | Homo<br>sapiens                  |
| 1 | 1.00 | 1 | 1 | -0.01 | -0.01  | -0.01  | -0.01  | -0.01  | t | 116917 | AESDDSS<br>T<br>RRH          | Mus<br>musculu<br>s              |
| 1 | 1.00 | 1 | 1 | -0.03 | -0.03  | -0.03  | -0.03  | -0.03  | t | 104744 | CSQWGW<br>CGST               | Homo<br>sapiens                  |

|   |      |   |   |       |        |        |        |        |   |        |                             |                                  |
|---|------|---|---|-------|--------|--------|--------|--------|---|--------|-----------------------------|----------------------------------|
| 1 | 1.00 | 1 | 1 | -0.02 | -0.02  | -0.02  | -0.02  | -0.018 | t | 138626 | SQKDILER<br>KRAAVDR<br>VC   | Oryctola<br>gus<br>cuniculu<br>s |
| 1 | 1.00 | 1 | 1 | -0.02 | -0.032 | -0.015 | -0.02  | -0.022 | t | 15445  | FDPVFSEL<br>FWRARST         | Mus<br>musculu<br>s              |
| 1 | 1.00 | 1 | 1 | 0.01  | 0.01   | 0.01   | 0.01   | 0.008  | t | 131934 | KNKQGW<br>GDGQKSS<br>QG     | Homo<br>sapiens                  |
| 1 | 1.00 | 1 | 1 | 0     | -0.003 | 0.005  | 0      | 0.001  | t | 78624  | DMNEKQK<br>PYFEFEYD<br>DFKP | Oryctola<br>gus<br>cuniculu<br>s |
| 1 | 1.00 | 1 | 1 | 0     | 0.003  | 0.005  | 0      | 0.001  | t | 78624  | DMNEKQK<br>PYFEFEYD<br>DFKP | Equus<br>caballus                |
| 1 | 1.00 | 1 | 1 | -0.05 | -0.048 | -0.047 | -0.043 | -0.049 | t | 118827 | GSGPRHR<br>DGVRPQ<br>KRPSCI | Homo<br>sapiens                  |
| 1 | 1.00 | 1 | 1 | 0     | -0.004 | -0.011 | -0.007 | 0      | t | 140167 | AYNNGQEI<br>NGFKA           | Oryctola<br>gus<br>cuniculu<br>s |
| 1 | 1.00 | 1 | 1 | 0     | 0.004  | -0.004 | -0.003 | 0      | t | 97244  | DLNILERF<br>NYEEAQTL        | Homo<br>sapiens                  |
| 1 | 1.00 | 1 | 1 | -0.01 | -0.013 | -0.017 | -0.01  | -0.008 | t | 132849 | KKVLGEKT<br>ENPKKFK         | Oryctola<br>gus<br>cuniculu<br>s |
| 1 | 1.00 | 1 | 1 | -0.01 | -0.01  | -0.003 | -0.01  | -0.01  | t | 96207  | EDDAEDK<br>DED              | Homo<br>sapiens                  |
| 1 | 1.00 | 1 | 1 | 0     | 0      | 0.009  | 0      | 0      | t | 24978  | HTSSMRG<br>VYYPDEIFR<br>S   | Oryctola<br>gus<br>cuniculu<br>s |
| 1 | 1.00 | 1 | 1 | -0.01 | -0.01  | -0.003 | -0.01  | -0.01  | t | 48084  | PKINRSAP<br>EPSL            | Oryctola<br>gus<br>cuniculu<br>s |
| 1 | 1.00 | 1 | 1 | -0.05 | -0.048 | -0.052 | -0.053 | -0.052 | t | 105726 | DRRRGRG<br>SRGSGNGI         | Homo<br>sapiens                  |
| 1 | 1.00 | 1 | 1 | 0.03  | 0.033  | 0.039  | 0.03   | 0.03   | t | 117214 | KGEQGEP<br>GA               | Mus<br>musculu<br>s              |

|   |      |   |   |       |        |        |        |        |   |        |                              |                                  |
|---|------|---|---|-------|--------|--------|--------|--------|---|--------|------------------------------|----------------------------------|
| 1 | 1.00 | 1 | 1 | -0.01 | -0.01  | -0.012 | -0.01  | -0.01  | t | 70385  | VPNLRGDI<br>QVLAQKV<br>ARTLP | Cavia<br>porcellu<br>s           |
| 1 | 1.00 | 1 | 1 | 0     | -0.002 | -0.003 | 0      | 0      | t | 36953  | LKLYDDKN<br>ASL              | Mus<br>musculu<br>s              |
| 1 | 1.00 | 1 | 1 | 0.03  | 0.032  | 0.03   | 0.031  | 0.033  | t | 138836 | CRTVYPSE<br>EETGE            | Homo<br>sapiens                  |
| 1 | 1.00 | 1 | 1 | -0.04 | -0.04  | -0.038 | -0.04  | -0.04  | t | 73607  | YDWRAD<br>WVKGFP             | Oryctola<br>gus<br>cuniculu<br>s |
| 1 | 1.00 | 1 | 1 | -0.04 | -0.037 | -0.038 | -0.04  | -0.04  | t | 73607  | YDWRAD<br>WVKGFP             | Mus<br>musculu<br>s              |
| 1 | 1.00 | 1 | 1 | -0.03 | -0.03  | -0.032 | -0.027 | -0.027 | t | 96103  | APPLLPHS<br>NLDHI            | Homo<br>sapiens                  |
| 1 | 1.00 | 1 | 1 | 0     | 0.002  | 0.005  | 0.007  | 0.003  | t | 122254 | AGETKPSS<br>SLSIGSIISK<br>SP | Homo<br>sapiens                  |
| 1 | 1.00 | 1 | 1 | -0.01 | -0.003 | -0.001 | -0.009 | -0.01  | t | 48643  | PNGRASD<br>TAGQ              | Equus<br>caballus                |
| 1 | 1.00 | 1 | 1 | -0.02 | -0.023 | -0.015 | -0.02  | -0.02  | t | 28288  | IRFDENG<br>VLLNNSFL          | Oryctola<br>gus<br>cuniculu<br>s |
| 1 | 1.00 | 1 | 1 | -0.01 | -0.008 | -0.012 | -0.009 | -0.01  | t | 99919  | CVYDPRG<br>HTGTTNQ<br>RSPPG  | Homo<br>sapiens                  |
| 1 | 1.00 | 1 | 1 | -0.06 | -0.06  | -0.065 | -0.07  | -0.063 | t | 115907 | PVVVPPFL<br>QP               | Homo<br>sapiens                  |
| 1 | 1.00 | 1 | 1 | -0.02 | -0.024 | -0.015 | -0.017 | -0.017 | t | 115230 | ENPVVHF                      | Oryctola<br>gus<br>cuniculu<br>s |
| 1 | 1.00 | 1 | 1 | 0.02  | 0.017  | 0.031  | 0.02   | 0.018  | t | 111415 | IFEMFNEN<br>QKAGGIE          | Oryctola<br>gus<br>cuniculu<br>s |



|   |      |   |   |       |        |        |        |        |   |        |                              |                                  |
|---|------|---|---|-------|--------|--------|--------|--------|---|--------|------------------------------|----------------------------------|
| 1 | 1.00 | 1 | 1 | 0     | -0.003 | 0      | 0      | 0.002  | t | 43893  | NFNGLTGT<br>GVLTPSSK<br>R    | Oryctola<br>gus<br>cuniculu<br>s |
| 1 | 1.00 | 1 | 1 | 0     | 0      | 0      | 0      | 0.002  | t | 43893  | NFNGLTGT<br>GVLTPSSK<br>R    | Mus<br>musculu<br>s              |
| 1 | 1.00 | 1 | 1 | 0     | 0      | 0      | 0      | 0.001  | t | 153282 | PLRNTHPQ<br>AMQWNS<br>TTF    | Mus<br>musculu<br>s              |
| 1 | 1.00 | 1 | 1 | -0.05 | -0.05  | -0.053 | -0.05  | -0.049 | t | 115271 | GQKGRGS<br>RG                | Oryctola<br>gus<br>cuniculu<br>s |
| 1 | 1.00 | 1 | 1 | -0.02 | -0.02  | -0.025 | -0.02  | -0.017 | t | 132860 | LKKLKPGL<br>EKDF             | Rattus<br>norvegic<br>us         |
| 1 | 1.00 | 1 | 1 | 0     | 0.005  | 0.011  | -0.006 | -0.002 | t | 6692   | CNFCNAV<br>VES               | Homo<br>sapiens                  |
| 1 | 1.00 | 1 | 1 | 0     | -0.002 | -0.003 | 0      | -0.001 | t | 123734 | SFSKASNS<br>WFPVEGP<br>ADICQ | marmos<br>ets                    |
| 1 | 1.00 | 1 | 1 | -0.01 | -0.008 | -0.005 | -0.009 | -0.01  | t | 22247  | GRVVLSG<br>QPAVIPDR<br>EVLYQ | Homo<br>sapiens                  |
| 1 | 1.00 | 1 | 1 | -0.03 | -0.032 | -0.016 | -0.03  | -0.03  | t | 79935  | MQQRPLR<br>MFLGP             | Mus<br>musculu<br>s              |
| 1 | 1.00 | 1 | 1 | 0.03  | 0.032  | 0.027  | 0.031  | 0.032  | t | 57244  | SDLRSSSG                     | Homo<br>sapiens                  |
| 1 | 1.00 | 1 | 1 | 0.01  | 0.01   | 0.01   | 0.013  | 0.01   | t | 71427  | VTNDCPN<br>SSIVYEA<br>DAI    | Homo<br>sapiens                  |
| 1 | 1.00 | 1 | 1 | 0     | -0.002 | 0      | -0.003 | 0      | t | 35284  | LDRNAHG<br>QLLVR             | Mus<br>musculu<br>s              |
| 1 | 1.00 | 1 | 1 | 0.01  | 0.006  | 0.013  | 0.01   | 0.01   | t | 123562 | NSSSSQFQ<br>IHGPR            | Mus<br>musculu<br>s              |
| 1 | 1.00 | 1 | 1 | 0.03  | 0.028  | 0.024  | 0.027  | 0.033  | t | 48858  | PPPPNPN<br>DPPPPNP<br>ND     | Mus<br>musculu<br>s              |
| 1 | 1.00 | 1 | 1 | 0     | 0      | 0      | 0      | 0.002  | t | 151161 | EGGPSQIG<br>DALGFAVR         | Mus<br>musculu<br>s              |

|   |      |   |   |       |        |        |        |        |   |        |                             |                                     |
|---|------|---|---|-------|--------|--------|--------|--------|---|--------|-----------------------------|-------------------------------------|
| 1 | 1.00 | 1 | 1 | 0     | 0      | 0      | 0      | 0.002  | t | 104443 | DAEFRHDS<br>GYE             | Mus<br>musculu<br>s                 |
| 1 | 1.00 | 1 | 1 | 0     | 0      | 0      | 0      | 0.002  | t | 116286 | CGKGLSAT<br>VTGGQKG<br>RGSR | Oryctola<br>gus<br>cuniculu<br>s    |
| 1 | 1.00 | 1 | 1 | 0     | 0      | 0      | 0      | 0.002  | t | 105206 | GAIIGLMV<br>GGVV            | Mus<br>musculu<br>s                 |
| 1 | 1.00 | 1 | 1 | 0     | 0      | 0      | 0      | 0.002  | t | 28299  | IRGDTFAT<br>R               | Mus<br>musculu<br>s                 |
| 1 | 1.00 | 1 | 1 | 0.01  | 0.012  | 0.018  | 0.009  | 0.011  | t | 149522 | VTGVTTQ<br>GVK              | Homo<br>sapiens                     |
| 1 | 1.00 | 1 | 1 | -0.01 | -0.01  | 0      | -0.013 | -0.01  | t | 61212  | SSMGAYW<br>GG               | Homo<br>sapiens                     |
| 1 | 1.00 | 1 | 1 | 0.04  | 0.04   | 0.04   | 0.034  | 0.04   | t | 118458 | KKQSKPVT<br>TPEEI           | Homo<br>sapiens                     |
| 1 | 1.00 | 1 | 1 | -0.02 | -0.02  | -0.009 | -0.02  | -0.02  | t | 54918  | RMLNILN                     | Homo<br>sapiens                     |
| 1 | 1.00 | 1 | 1 | -0.01 | -0.01  | -0.01  | -0.01  | -0.01  | t | 112337 | STRESGV                     | Homo<br>sapiens                     |
| 1 | 1.00 | 1 | 1 | -0.02 | -0.02  | -0.02  | -0.02  | -0.018 | t | 144675 | GTHPFLSQ<br>W               | Mus<br>musculu<br>s                 |
| 1 | 1.00 | 1 | 1 | -0.03 | -0.028 | -0.026 | -0.029 | -0.029 | t | 22132  | GRLITV                      | Homo<br>sapiens                     |
| 1 | 1.00 | 1 | 1 | 0     | 0      | 0.002  | 0      | -0.001 | t | 151716 | RLASLSEKP<br>PAIDWAYY<br>RA | Mus<br>musculu<br>s                 |
| 1 | 1.00 | 1 | 1 | 0     | -0.008 | 0      | 0      | 0.002  | t | 136322 | GLFTPDKS<br>PAKT            | Mus<br>musculu<br>s                 |
| 1 | 1.00 | 1 | 1 | 0     | -0.002 | 0.011  | -0.001 | 0      | t | 10943  | DYQGMLP<br>VCP              | Mus<br>musculu<br>s                 |
| 1 | 1.00 | 1 | 1 | 0.01  | 0.001  | 0.024  | 0.01   | 0.01   | t | 73819  | YFGSAPTA<br>ATLEPKT         | Oncorhy<br>nchus<br>tshawyts<br>cha |
| 1 | 1.00 | 1 | 1 | 0.01  | 0.012  | 0.009  | 0.011  | 0.01   | t | 37641  | LLPAADM<br>DDFSRQL<br>QNSM  | Homo<br>sapiens                     |

|   |      |   |   |       |        |        |        |        |   |        |                            |                                  |
|---|------|---|---|-------|--------|--------|--------|--------|---|--------|----------------------------|----------------------------------|
| 1 | 1.00 | 1 | 1 | -0.07 | -0.068 | -0.074 | -0.073 | -0.072 | t | 114325 | ERERQRR<br>QGGRGRD<br>V    | Homo<br>sapiens                  |
| 1 | 1.00 | 1 | 1 | 0.03  | 0.034  | 0.022  | 0.027  | 0.03   | t | 137395 | EESEDEKR<br>RWGQRD<br>N    | Homo<br>sapiens                  |
| 1 | 1.00 | 1 | 1 | 0     | 0      | 0      | 0.003  | 0.004  | t | 44920  | NLVPMTA<br>TV              | Homo<br>sapiens                  |
| 1 | 1.00 | 1 | 1 | -0.03 | -0.027 | -0.03  | -0.03  | -0.028 | t | 144786 | SMNRGRG<br>THPSLIW<br>M    | Mus<br>musculu<br>s              |
| 1 | 1.00 | 1 | 1 | -0.01 | -0.01  | -0.01  | -0.01  | -0.01  | t | 72935  | WPGSNLT<br>PRTQT           | Homo<br>sapiens                  |
| 1 | 1.00 | 1 | 1 | -0.03 | -0.027 | -0.027 | -0.03  | -0.03  | t | 37316  | LLGCIGSTC<br>A             | Mus<br>musculu<br>s              |
| 1 | 1.00 | 1 | 1 | 0.01  | 0.021  | 0.011  | 0.01   | 0.012  | t | 19866  | GGGWGQ<br>GGGTHNQ<br>WNK   | Gallus<br>gallus                 |
| 1 | 1.00 | 1 | 1 | 0.01  | 0.01   | 0.022  | 0.01   | 0.01   | t | 139684 | AMRVMEP<br>KPSPFAEA<br>VCP | Ovis<br>aries                    |
| 1 | 1.00 | 1 | 1 | 0.01  | 0.004  | 0.022  | 0.01   | 0.01   | t | 139684 | AMRVMEP<br>KPSPFAEA<br>VCP | Oryctola<br>gus<br>cuniculu<br>s |
| 1 | 1.00 | 1 | 1 | 0     | -0.001 | 0      | 0      | 0.002  | t | 27987  | IPPTTTPV<br>PGYLI          | Anas<br>platyrhy<br>nchos        |
| 1 | 1.00 | 1 | 1 | 0.02  | 0.02   | 0.02   | 0.02   | 0.02   | t | 149333 | HHQEQQQ<br>QLQ             | Mus<br>musculu<br>s              |
| 1 | 1.00 | 1 | 1 | -0.04 | -0.04  | -0.04  | -0.04  | -0.04  | t | 145240 | HIDVSRP<br>WRVTG           | Homo<br>sapiens                  |
| 1 | 1.00 | 1 | 1 | -0.05 | -0.05  | -0.05  | -0.051 | -0.051 | t | 106942 | TWHHHV<br>WSPSPL           | Mus<br>musculu<br>s              |
| 1 | 1.00 | 1 | 1 | -0.04 | -0.04  | -0.039 | -0.04  | -0.04  | t | 145147 | DPSLKMA<br>DPNRR           | Mus<br>musculu<br>s              |
| 1 | 1.00 | 1 | 1 | 0     | 0      | 0      | 0      | 0.002  | t | 51370  | QLINSNGS<br>WHIN           | Rattus<br>norvegic<br>us         |

|   |      |   |   |       |        |        |        |        |   |        |                              |                                  |
|---|------|---|---|-------|--------|--------|--------|--------|---|--------|------------------------------|----------------------------------|
| 1 | 1.00 | 1 | 1 | 0     | 0      | 0      | 0      | 0.002  | t | 51370  | QLINSNGS<br>WHIN             | Mus<br>musculu<br>s              |
| 1 | 1.00 | 1 | 1 | 0     | -0.002 | 0.007  | -0.007 | -0.003 | t | 116284 | CAYSVAHL<br>C                | Mus<br>musculu<br>s              |
| 1 | 1.00 | 1 | 1 | -0.04 | -0.04  | -0.035 | -0.04  | -0.04  | t | 70351  | VPKPQGPL<br>P                | Homo<br>sapiens                  |
| 1 | 1.00 | 1 | 1 | -0.07 | -0.072 | -0.07  | -0.071 | -0.07  | t | 1671   | AGRRVGLS                     | Anas<br>platyrhy<br>nchos        |
| 1 | 1.00 | 1 | 1 | 0     | -0.002 | 0      | -0.001 | 0      | t | 102155 | TRQPDRS                      | Mus<br>musculu<br>s              |
| 1 | 1.00 | 1 | 1 | 0     | 0.002  | -0.001 | 0.003  | 0      | t | 3878   | APTTTPPT<br>STHATPRP<br>TTPG | Homo<br>sapiens                  |
| 1 | 1.00 | 1 | 1 | 0     | -0.011 | 0.007  | 0      | 0.002  | t | 146795 | CCELCCNP<br>QCAGCY           | Oryctola<br>gus<br>cuniculu<br>s |
| 1 | 1.00 | 1 | 1 | 0     | 0      | 0.007  | 0      | 0      | t | 125789 | CQGDGYR<br>VGFGQCA<br>G      | Mus<br>musculu<br>s              |
| 1 | 1.00 | 1 | 1 | -0.02 | -0.017 | -0.007 | -0.02  | -0.021 | t | 30092  | KCTNTDRP<br>PFCQ             | Mus<br>musculu<br>s              |
| 1 | 1.00 | 1 | 1 | 0.04  | 0.04   | 0.039  | 0.04   | 0.042  | t | 94485  | DELAKIAQ<br>TWANQCD<br>FNHDD | Mus<br>musculu<br>s              |
| 1 | 1.00 | 1 | 1 | 0     | 0      | 0.005  | 0      | 0.001  | t | 105228 | GLMVGGV<br>V                 | Mus<br>musculu<br>s              |
| 1 | 1.00 | 1 | 1 | 0     | 0.003  | 0.005  | 0      | 0.001  | t | 112739 | YTTGAVR<br>QIFGDYKT<br>TICGK | Mus<br>musculu<br>s              |
| 1 | 1.00 | 1 | 1 | 0     | 0      | 0.005  | 0      | 0.001  | t | 40332  | LVFFAEDV                     | Mus<br>musculu<br>s              |
| 1 | 1.00 | 1 | 1 | 0     | 0      | 0.005  | 0      | 0.001  | t | 10868  | DYEDRYR<br>E                 | Mus<br>musculu<br>s              |
| 1 | 1.00 | 1 | 1 | 0     | 0      | 0.005  | 0      | 0.001  | t | 10868  | DYEDRYR<br>E                 | Mus<br>musculu<br>s              |

|   |      |   |   |       |        |        |       |        |   |        |                             |                      |
|---|------|---|---|-------|--------|--------|-------|--------|---|--------|-----------------------------|----------------------|
| 1 | 1.00 | 1 | 0 | -0.02 | -0.017 | 0.003  | -0.02 | -0.008 | t | 4224   | ARQPDLI                     | Mus<br>musculus      |
| 1 | 1.00 | 1 | 1 | -0.06 | -0.06  | -0.047 | -0.06 | -0.06  | t | 110332 | LYRWR                       | Mus<br>musculus      |
| 1 | 1.00 | 1 | 1 | 0.01  | 0.01   | 0.016  | 0.01  | 0.011  | t | 63972  | TGTAYPVP<br>LELTPENA        | Mus<br>musculus      |
| 1 | 1.00 | 1 | 1 | 0     | 0.002  | 0      | 0     | 0.002  | t | 119443 | DLKLRRSS<br>SVGYIS          | Rattus<br>norvegicus |
| 1 | 1.00 | 1 | 1 | 0     | 0      | 0      | 0     | 0.002  | t | 119488 | LGIWTYDG<br>TKVSISPES       | Rattus<br>norvegicus |
| 1 | 1.00 | 1 | 1 | 0     | 0      | 0      | 0     | 0.002  | t | 119488 | LGIWTYDG<br>TKVSISPES       | Rattus<br>norvegicus |
| 1 | 1.00 | 1 | 1 | 0     | 0.002  | 0      | 0     | 0.002  | t | 119488 | LGIWTYDG<br>TKVSISPES       | Rattus<br>norvegicus |
| 1 | 1.00 | 1 | 1 | 0     | -0.003 | 0      | 0     | 0.002  | t | 44491  | NKFLNQCS<br>VSYLMNS<br>MIPY | Mus<br>musculus      |
| 1 | 1.00 | 1 | 1 | 0     | -0.002 | 0      | 0     | 0.002  | t | 44491  | NKFLNQCS<br>VSYLMNS<br>MIPY | Mus<br>musculus      |
| 1 | 1.00 | 1 | 1 | 0     | -0.003 | 0      | 0     | 0.002  | t | 45130  | NNIMFKLD<br>GCRDTHR<br>YIWI | Mus<br>musculus      |
| 1 | 1.00 | 1 | 1 | 0     | -0.008 | 0      | 0     | 0.002  | t | 45130  | NNIMFKLD<br>GCRDTHR<br>YIWI | Mus<br>musculus      |
| 1 | 1.00 | 1 | 1 | 0     | -0.002 | 0      | 0     | 0.002  | t | 34612  | KYTMFHYL<br>RAQFEH<br>GKSR  | Mus<br>musculus      |
| 1 | 1.00 | 1 | 1 | 0     | -0.008 | 0      | 0     | 0.002  | t | 34612  | KYTMFHYL<br>RAQFEH<br>GKSR  | Mus<br>musculus      |

|   |      |   |   |       |        |        |        |        |   |        |                             |                                  |
|---|------|---|---|-------|--------|--------|--------|--------|---|--------|-----------------------------|----------------------------------|
| 1 | 1.00 | 1 | 1 | 0.02  | 0.025  | 0.028  | 0.017  | 0.018  | t | 158291 | SQQGQRR<br>EFQQD            | Homo<br>sapiens                  |
| 1 | 1.00 | 1 | 1 | 0     | 0.002  | 0.005  | -0.006 | 0      | t | 117389 | TSHPAQLG<br>LKSL            | Homo<br>sapiens                  |
| 1 | 1.00 | 1 | 1 | -0.02 | -0.02  | -0.016 | -0.02  | -0.019 | t | 53866  | RGFRKEI                     | Homo<br>sapiens                  |
| 1 | 1.00 | 1 | 1 | -0.02 | -0.016 | -0.026 | -0.02  | -0.018 | t | 31104  | KHFNLT<br>PVGSQGIR          | Ovis<br>aries                    |
| 1 | 1.00 | 1 | 1 | 0     | 0.002  | 0.001  | 0.001  | 0.002  | t | 156371 | LRKVGDSV<br>KAASKE          | Homo<br>sapiens                  |
| 1 | 1.00 | 1 | 1 | 0.01  | 0.014  | 0.022  | 0.013  | 0.012  | t | 5127   | ATREEVKA<br>AIP             | Capra<br>hircus                  |
| 1 | 1.00 | 1 | 1 | 0     | 0.002  | 0.005  | 0.001  | 0      | t | 47068  | PDDDPQP<br>GPSREYRY<br>VL   | Homo<br>sapiens                  |
| 1 | 1.00 | 1 | 1 | -0.01 | -0.01  | -0.01  | -0.01  | -0.008 | t | 63755  | TFTNKLKA<br>KHTDLGK         | Mus<br>musculu<br>s              |
| 1 | 1.00 | 1 | 1 | 0.04  | 0.04   | 0.04   | 0.04   | 0.04   | t | 153622 | IEGVKYIAE<br>HMKSD<br>EES   | Mus<br>musculu<br>s              |
| 1 | 1.00 | 1 | 1 | 0.01  | 0.01   | 0.01   | 0.01   | 0.013  | t | 140582 | PWATLVA<br>ES               | Mus<br>musculu<br>s              |
| 1 | 1.00 | 1 | 1 | 0.01  | 0.01   | 0.01   | 0.01   | 0.013  | t | 97340  | GIFGAIAG<br>FIENGW          | Oryctola<br>gus<br>cuniculu<br>s |
| 1 | 1.00 | 1 | 1 | 0.01  | 0.01   | 0.01   | 0.01   | 0.012  | t | 136826 | CYSQVNPT<br>TL              | Mus<br>musculu<br>s              |
| 1 | 1.00 | 1 | 1 | 0     | 0      | 0      | 0      | 0.002  | t | 95048  | VIFQTPLIK<br>NPDVKSAI<br>EG | Mus<br>musculu<br>s              |
| 1 | 1.00 | 1 | 1 | 0.03  | 0.028  | 0.024  | 0.027  | 0.03   | t | 10168  | DSLPHQ<br>QATDDSG<br>H      | Mus<br>musculu<br>s              |

|   |      |   |   |       |        |        |        |        |   |        |                              |                                  |
|---|------|---|---|-------|--------|--------|--------|--------|---|--------|------------------------------|----------------------------------|
| 1 | 1.00 | 1 | 1 | 0.02  | 0.017  | 0.013  | 0.02   | 0.022  | t | 106344 | DIVMTQSP<br>NSLAVSLG<br>ERA  | Oryctola<br>gus<br>cuniculu<br>s |
| 1 | 1.00 | 1 | 1 | 0     | -0.002 | -0.004 | -0.001 | 0      | t | 10291  | DTAGLAGL<br>FNLGPKQT         | Mus<br>musculu<br>s              |
| 1 | 1.00 | 1 | 1 | -0.01 | -0.014 | -0.01  | -0.017 | -0.012 | t | 138559 | QFEFALTA<br>VAEE             | Oryctola<br>gus<br>cuniculu<br>s |
| 1 | 1.00 | 1 | 1 | -0.01 | -0.01  | -0.01  | -0.007 | -0.007 | t | 110798 | CPTGCQL<br>QEALLQQE<br>RPIRN | Mus<br>musculu<br>s              |
| 1 | 1.00 | 1 | 1 | -0.02 | -0.02  | -0.02  | -0.031 | -0.022 | t | 118440 | IVLGGGCA<br>LLRCI            | Homo<br>sapiens                  |
| 1 | 1.00 | 1 | 1 | 0     | 0.003  | 0.007  | 0      | 0      | t | 79322  | NMVIWD<br>WQWT               | Mus<br>musculu<br>s              |
| 1 | 1.00 | 1 | 1 | 0     | 0.003  | 0.007  | 0      | 0      | t | 79322  | NMVIWD<br>WQWT               | Mus<br>musculu<br>s              |
| 1 | 1.00 | 1 | 1 | 0.01  | 0.01   | 0.015  | 0.003  | 0.01   | t | 117960 | KLLTLVQLT<br>LQS             | Homo<br>sapiens                  |
| 1 | 1.00 | 1 | 1 | -0.03 | -0.028 | -0.03  | -0.029 | -0.03  | t | 139324 | TRLIDERA<br>AH               | Homo<br>sapiens                  |
| 1 | 1.00 | 1 | 1 | -0.03 | -0.026 | -0.028 | -0.033 | -0.03  | t | 95351  | EKNRLNFL<br>KK               | Homo<br>sapiens                  |
| 1 | 1.00 | 1 | 1 | -0.05 | -0.05  | -0.042 | -0.053 | -0.05  | t | 111013 | RTGYIPLG<br>TRPPT            | Homo<br>sapiens                  |
| 1 | 1.00 | 1 | 1 | -0.02 | -0.02  | -0.02  | -0.02  | -0.02  | t | 99547  | PSRRFSTR<br>YGNQNGR          | Homo<br>sapiens                  |
| 1 | 1.00 | 1 | 1 | 0.02  | 0.022  | 0.021  | 0.021  | 0.02   | t | 39405  | LSGSPAIVP<br>DREVLYQD<br>FDE | Homo<br>sapiens                  |
| 1 | 1.00 | 1 | 1 | 0.01  | 0.01   | 0.01   | 0.01   | 0.012  | t | 45541  | NQELAYFY<br>PELFRQF          | Homo<br>sapiens                  |

|   |      |   |   |       |        |        |        |        |   |        |                              |                                  |
|---|------|---|---|-------|--------|--------|--------|--------|---|--------|------------------------------|----------------------------------|
| 1 | 1.00 | 1 | 1 | 0.01  | 0.01   | 0.01   | 0.006  | 0.01   | t | 131250 | NHVQAW<br>EQFWDS             | Homo<br>sapiens                  |
| 1 | 1.00 | 1 | 1 | -0.04 | -0.037 | -0.028 | -0.04  | -0.038 | t | 104232 | SAMWDF                       | Mus<br>musculu<br>s              |
| 1 | 1.00 | 1 | 1 | -0.02 | -0.02  | -0.015 | -0.018 | -0.018 | t | 142447 | NKYRGTA<br>GNALMDG<br>ASQL   | Homo<br>sapiens                  |
| 1 | 1.00 | 1 | 1 | -0.03 | -0.027 | -0.037 | -0.03  | -0.028 | t | 18814  | GAVIIRGH<br>LRMAGHS<br>LGR   | Mus<br>musculu<br>s              |
| 1 | 1.00 | 1 | 1 | -0.04 | -0.038 | -0.042 | -0.041 | -0.041 | t | 78689  | ISGGLCSA<br>RLHRHALL<br>ATCP | Homo<br>sapiens                  |
| 1 | 1.00 | 1 | 1 | 0.01  | 0.017  | 0.01   | 0.01   | 0.015  | t | 48669  | PNLRGDL<br>QVLA              | Cavia<br>porcellu<br>s           |
| 1 | 1.00 | 1 | 1 | 0     | -0.006 | -0.003 | 0      | 0      | t | 141049 | LMAISLQ<br>VVHVETH<br>RCNI   | Oryctola<br>gus<br>cuniculu<br>s |
| 1 | 1.00 | 1 | 1 | 0     | -0.003 | 0.009  | 0      | 0      | t | 100101 | HFYDGFAC<br>VPLKTD           | Oryctola<br>gus<br>cuniculu<br>s |
| 1 | 1.00 | 1 | 1 | 0     | 0.002  | 0.009  | 0      | 0      | t | 100101 | HFYDGFAC<br>VPLKTD           | Homo<br>sapiens                  |
| 1 | 1.00 | 1 | 1 | 0.04  | 0.04   | 0.035  | 0.04   | 0.041  | t | 107207 | LLTTAEAV<br>VTEIPKE          | Rattus<br>norvegic<br>us         |
| 1 | 1.00 | 1 | 1 | 0.02  | 0.02   | 0.025  | 0.017  | 0.021  | t | 94646  | PPKVPPDL<br>MS               | Homo<br>sapiens                  |
| 1 | 1.00 | 1 | 1 | 0     | 0.005  | -0.004 | -0.003 | 0.002  | t | 13438  | ENANANN<br>AV                | Homo<br>sapiens                  |
| 1 | 1.00 | 1 | 1 | 0.02  | 0.024  | 0.02   | 0.02   | 0.02   | t | 65535  | TPDNNQT<br>SPARR             | Cavia<br>porcellu<br>s           |



|   |      |   |   |       |        |        |        |        |   |        |                              |                                  |
|---|------|---|---|-------|--------|--------|--------|--------|---|--------|------------------------------|----------------------------------|
| 1 | 1.00 | 1 | 1 | 0.02  | 0.021  | 0.02   | 0.02   | 0.02   | t | 65535  | TPDNNQT<br>SPARR             | Cavia<br>porcellu<br>s           |
| 1 | 1.00 | 1 | 1 | 0.02  | 0.017  | 0.02   | 0.02   | 0.02   | t | 65535  | TPDNNQT<br>SPARR             | Oryctola<br>gus<br>cuniculu<br>s |
| 1 | 1.00 | 1 | 1 | -0.08 | -0.076 | -0.08  | -0.073 | -0.078 | t | 134147 | LPKGVKHL<br>KDFPILPGE<br>IFK | Homo<br>sapiens                  |
| 1 | 1.00 | 1 | 1 | 0.01  | 0.01   | 0.01   | 0.01   | 0.011  | t | 153283 | PPASTNRQ<br>SGRQPTP          | Mus<br>musculu<br>s              |
| 1 | 1.00 | 1 | 1 | 0.02  | 0.02   | 0.023  | 0.02   | 0.02   | t | 14208  | ESLTTTSTA<br>LGKLQDVV        | Mus<br>musculu<br>s              |
| 1 | 1.00 | 1 | 1 | -0.03 | -0.028 | -0.035 | -0.023 | -0.028 | t | 156675 | GPRVVER<br>HQSACKD<br>S      | Homo<br>sapiens                  |
| 1 | 1.00 | 1 | 1 | -0.03 | -0.028 | -0.023 | -0.023 | -0.028 | t | 108217 | WWNMFQ<br>MGVV               | Homo<br>sapiens                  |
| 1 | 1.00 | 1 | 1 | -0.01 | -0.01  | -0.01  | -0.01  | -0.009 | t | 51827  | QFPQPQ<br>LPYPQPQ            | Mus<br>musculu<br>s              |
| 1 | 1.00 | 1 | 1 | 0.02  | 0.023  | 0.02   | 0.02   | 0.024  | t | 134187 | PMSTPSAT                     | Mus<br>musculu<br>s              |
| 1 | 1.00 | 1 | 1 | -0.02 | -0.02  | -0.018 | -0.02  | -0.018 | t | 72909  | WNSQPSL<br>PYIRP             | Mus<br>musculu<br>s              |
| 1 | 1.00 | 1 | 1 | -0.02 | -0.022 | -0.016 | -0.021 | -0.021 | t | 120869 | PGYRSISG<br>PDPRIRKT         | Mus<br>musculu<br>s              |
| 1 | 1.00 | 1 | 1 | -0.05 | -0.05  | -0.05  | -0.05  | -0.05  | t | 127689 | HWHRPTN                      | Homo<br>sapiens                  |
| 1 | 1.00 | 1 | 1 | -0.02 | -0.018 | -0.024 | -0.019 | -0.018 | t | 48905  | PPRRRAGR                     | Homo<br>sapiens                  |
| 1 | 1.00 | 1 | 1 | -0.02 | -0.02  | -0.028 | -0.02  | -0.017 | t | 7313   | CVTIMTVD<br>NPASTTNK<br>DK   | Oryctola<br>gus<br>cuniculu<br>s |

|   |      |   |   |       |        |        |        |        |   |        |                              |                              |
|---|------|---|---|-------|--------|--------|--------|--------|---|--------|------------------------------|------------------------------|
| 1 | 1.00 | 1 | 1 | 0     | -0.002 | -0.007 | -0.007 | 0      | t | 108174 | TWTRGF<br>VFTRHS             | Mus<br>musculus              |
| 1 | 1.00 | 1 | 1 | 0     | 0.008  | 0.003  | 0      | 0.001  | t | 97231  | CNTKCQTP                     | Gallus<br>gallus             |
| 1 | 1.00 | 1 | 1 | -0.01 | -0.006 | 0      | -0.01  | -0.01  | t | 30597  | KERSSLRY<br>GNVLDV           | Myodes<br>glareolus          |
| 1 | 1.00 | 1 | 1 | 0.02  | 0.02   | 0.028  | 0.02   | 0.02   | t | 106305 | CHTHEGG<br>QLH               | Homo<br>sapiens              |
| 1 | 1.00 | 1 | 1 | 0     | 0.002  | 0      | -0.001 | 0.001  | t | 72556  | WHTTTPP<br>ARAFG             | Rattus<br>norvegicus         |
| 1 | 1.00 | 1 | 1 | 0.02  | 0.024  | 0.027  | 0.021  | 0.022  | t | 5249   | AVAEAEG<br>G                 | Homo<br>sapiens              |
| 1 | 1.00 | 1 | 1 | -0.06 | -0.064 | -0.066 | -0.061 | -0.06  | t | 69513  | VLGQSKRV<br>DFCGKGY<br>HL    | Oryctola<br>gus<br>cuniculus |
| 1 | 1.00 | 1 | 1 | -0.01 | -0.007 | -0.017 | -0.01  | -0.007 | t | 8265   | DFFNLNQE<br>WRVYTYK<br>YFKK  | Equus<br>caballus            |
| 1 | 1.00 | 1 | 1 | -0.01 | -0.01  | -0.012 | -0.01  | -0.01  | t | 23315  | GYCKTHLK<br>ASSGYCA          | Mus<br>musculus              |
| 1 | 1.00 | 1 | 1 | -0.01 | -0.007 | -0.012 | -0.01  | -0.01  | t | 23315  | GYCKTHLK<br>ASSGYCA          | Equus<br>caballus            |
| 1 | 1.00 | 1 | 1 | 0.01  | 0.014  | 0.03   | 0.017  | 0.01   | t | 127982 | FSHFIRSG<br>NPNYPYEF<br>SRKV | Homo<br>sapiens              |
| 1 | 1.00 | 1 | 1 | -0.03 | -0.03  | -0.03  | -0.03  | -0.029 | t | 156904 | KPGDPRH                      | Mus<br>musculus              |
| 1 | 1.00 | 1 | 1 | -0.02 | -0.018 | -0.021 | -0.019 | -0.02  | t | 11420  | EDPVLAKK<br>VPETFPEL<br>KPGE | Homo<br>sapiens              |
| 1 | 1.00 | 1 | 1 | -0.04 | -0.04  | -0.03  | -0.034 | -0.041 | t | 25239  | IADAMEK<br>VGKDGIVIT<br>V    | Homo<br>sapiens              |

|   |      |   |   |       |        |        |        |        |   |        |                              |                                  |
|---|------|---|---|-------|--------|--------|--------|--------|---|--------|------------------------------|----------------------------------|
| 1 | 1.00 | 1 | 1 | -0.03 | -0.027 | -0.022 | -0.03  | -0.03  | t | 49273  | PRVRSKPV<br>V                | Mus<br>musculu<br>s              |
| 1 | 1.00 | 1 | 1 | -0.03 | -0.03  | -0.022 | -0.03  | -0.03  | t | 49273  | PRVRSKPV<br>V                | Oryctola<br>gus<br>cuniculu<br>s |
| 1 | 1.00 | 1 | 1 | -0.04 | -0.038 | -0.039 | -0.039 | -0.038 | t | 44140  | NHFVPQP<br>PSRTW             | Homo<br>sapiens                  |
| 1 | 1.00 | 1 | 1 | 0.05  | 0.05   | 0.05   | 0.04   | 0.048  | t | 96210  | EDKEEDEE<br>ED               | Homo<br>sapiens                  |
| 1 | 1.00 | 1 | 1 | -0.01 | -0.012 | -0.006 | -0.011 | -0.01  | t | 138035 | SDISGKQV<br>T                | Rattus<br>norvegic<br>us         |
| 1 | 1.00 | 1 | 1 | 0.03  | 0.03   | 0.03   | 0.03   | 0.03   | t | 147445 | YVGNRKD<br>SSEAIEFFR<br>RG   | Homo<br>sapiens                  |
| 1 | 1.00 | 1 | 1 | 0.04  | 0.044  | 0.046  | 0.037  | 0.042  | t | 32267  | KLYQAQY<br>DLSF              | Homo<br>sapiens                  |
| 1 | 1.00 | 1 | 1 | 0     | 0      | 0      | -0.001 | 0      | t | 80367  | ALNDNAG<br>RHNSE             | Homo<br>sapiens                  |
| 1 | 1.00 | 1 | 1 | -0.01 | -0.014 | -0.02  | -0.011 | -0.01  | t | 66099  | TRSIRKFNT<br>MQQCIDF<br>TFSD | Oryctola<br>gus<br>cuniculu<br>s |
| 1 | 1.00 | 1 | 1 | 0.01  | 0.007  | 0.005  | 0.01   | 0.012  | t | 97171  | ADVVISPN<br>D                | Oryctola<br>gus<br>cuniculu<br>s |
| 1 | 1.00 | 1 | 1 | -0.04 | -0.038 | -0.022 | -0.033 | -0.042 | t | 134679 | GGSGPQR<br>RGG               | Homo<br>sapiens                  |
| 1 | 1.00 | 1 | 1 | -0.03 | -0.032 | -0.021 | -0.027 | -0.03  | t | 113875 | SNRRPSTT                     | Mus<br>musculu<br>s              |
| 1 | 1.00 | 1 | 1 | -0.02 | -0.018 | 0.004  | -0.013 | -0.02  | t | 112857 | VDHQHPS                      | Homo<br>sapiens                  |
| 1 | 1.00 | 1 | 1 | -0.07 | -0.07  | -0.07  | -0.07  | -0.071 | t | 130777 | DVIGQVRR<br>PEMGDQA<br>HMPYT | Homo<br>sapiens                  |

|   |      |   |   |       |        |        |        |        |   |        |                              |                          |
|---|------|---|---|-------|--------|--------|--------|--------|---|--------|------------------------------|--------------------------|
| 1 | 1.00 | 1 | 1 | -0.02 | -0.02  | -0.01  | -0.02  | -0.019 | t | 73476  | YAYIDYNA<br>LKFK             | Mus<br>musculu<br>s      |
| 1 | 1.00 | 1 | 1 | -0.02 | -0.018 | -0.02  | -0.019 | -0.018 | t | 5675   | AWLVHRQ<br>WFLDLPLP<br>W     | Homo<br>sapiens          |
| 1 | 1.00 | 1 | 1 | -0.02 | -0.016 | -0.02  | -0.019 | -0.018 | t | 5675   | AWLVHRQ<br>WFLDLPLP<br>W     | Homo<br>sapiens          |
| 1 | 1.00 | 1 | 1 | -0.02 | -0.022 | -0.02  | -0.019 | -0.018 | t | 5675   | AWLVHRQ<br>WFLDLPLP<br>W     | Homo<br>sapiens          |
| 1 | 1.00 | 1 | 1 | 0     | 0.006  | 0.011  | 0      | 0      | t | 71178  | VSTVQQLT<br>KR               | Mus<br>musculu<br>s      |
| 1 | 1.00 | 1 | 1 | 0.01  | 0.01   | 0.015  | 0.007  | 0.01   | t | 72039  | VYHGAGS<br>KTL               | Homo<br>sapiens          |
| 1 | 1.00 | 1 | 1 | -0.01 | -0.006 | 0.011  | -0.007 | -0.011 | t | 71350  | VTGTDLELI<br>QILK            | Homo<br>sapiens          |
| 1 | 1.00 | 1 | 1 | -0.03 | -0.03  | -0.03  | -0.03  | -0.03  | t | 117373 | SPQRHHH<br>DDKH              | Homo<br>sapiens          |
| 1 | 1.00 | 1 | 1 | 0.08  | 0.078  | 0.08   | 0.073  | 0.079  | t | 133671 | QVLTANPS<br>SQSSP            | Rattus<br>norvegic<br>us |
| 1 | 1.00 | 1 | 1 | 0     | 0.002  | 0      | 0.003  | 0      | t | 43248  | NANPNAN<br>PNANPNA<br>NPNANP | Homo<br>sapiens          |
| 1 | 1.00 | 1 | 1 | 0.04  | 0.044  | 0.037  | 0.041  | 0.042  | t | 22505  | GSSGSSAV<br>DSGTATGP<br>PDQA | Homo<br>sapiens          |
| 1 | 1.00 | 1 | 1 | 0.01  | 0.008  | 0.01   | 0.003  | 0.008  | t | 107536 | PAPDTLKE                     | Rattus<br>norvegic<br>us |
| 1 | 1.00 | 1 | 1 | 0     | 0      | 0.002  | 0      | 0      | t | 54989  | RNFTTAPA<br>ICHEGKAY<br>F    | Homo<br>sapiens          |
| 1 | 1.00 | 1 | 1 | -0.03 | -0.03  | -0.032 | -0.03  | -0.03  | t | 110614 | GPRGLPGE<br>RGRTGPA<br>GAAG  | Rattus<br>norvegic<br>us |
| 1 | 1.00 | 1 | 1 | -0.04 | -0.04  | -0.04  | -0.04  | -0.039 | t | 138218 | PTPAPGPG<br>RR               | Homo<br>sapiens          |

|   |      |   |   |       |        |        |        |        |   |        |                              |                          |
|---|------|---|---|-------|--------|--------|--------|--------|---|--------|------------------------------|--------------------------|
| 1 | 1.00 | 1 | 1 | 0.05  | 0.052  | 0.043  | 0.056  | 0.056  | t | 131651 | SEGTGQAL<br>ASPGSCLE         | Rattus<br>norvegicus     |
| 1 | 1.00 | 1 | 1 | -0.01 | -0.007 | -0.012 | -0.01  | -0.009 | t | 120347 | YRGWKH<br>WVYYTCC<br>PDTPYLD | Mus<br>musculus          |
| 1 | 1.00 | 1 | 1 | 0     | -0.003 | 0.003  | 0      | 0.001  | t | 78353  | CPSVKNGI<br>EINCCTTD<br>RCNN | Oryctolagus<br>cuniculus |
| 1 | 1.00 | 1 | 1 | 0     | 0      | 0.002  | 0      | 0.002  | t | 108382 | GGVVIA                       | Mus<br>musculus          |
| 1 | 1.00 | 1 | 1 | 0     | -0.003 | 0      | 0      | 0.002  | t | 68401  | VEVPGSQ<br>HIDSQKKA          | Oryctolagus<br>cuniculus |
| 1 | 1.00 | 1 | 1 | 0.03  | 0.03   | 0.03   | 0.03   | 0.031  | t | 60641  | SREAKKQL<br>EAEQQKLE<br>EQ   | Mus<br>musculus          |
| 1 | 1.00 | 1 | 1 | 0.02  | 0.018  | 0.013  | 0.013  | 0.022  | t | 113228 | YKLAYKSA<br>EG               | Mus<br>musculus          |
| 1 | 1.00 | 1 | 1 | 0.03  | 0.032  | 0.02   | 0.031  | 0.034  | t | 145997 | SASDQPT<br>QYEEEMT<br>DYQK   | Homo<br>sapiens          |
| 1 | 1.00 | 1 | 1 | 0     | 0      | 0.001  | -0.001 | 0.002  | t | 53635  | RESQAYYQ<br>RGAS             | Oryctolagus<br>cuniculus |
| 1 | 1.00 | 1 | 1 | 0.01  | 0.01   | 0.01   | 0.013  | 0.012  | t | 15925  | FFTPKESE<br>QLKVIKTFE<br>GIL | Homo<br>sapiens          |
| 1 | 1.00 | 1 | 1 | 0.01  | 0.007  | 0.021  | 0.01   | 0.01   | t | 95136  | QPVGREKF                     | Oryctolagus<br>cuniculus |
| 1 | 1.00 | 1 | 1 | -0.02 | -0.022 | -0.029 | -0.027 | -0.02  | t | 108848 | DEIDGVN<br>H                 | Mus<br>musculus          |
| 1 | 1.00 | 1 | 1 | -0.02 | -0.02  | -0.02  | -0.02  | -0.02  | t | 120184 | RRRATQLA<br>HL               | Mus<br>musculus          |

|   |      |   |   |       |        |        |        |        |   |        |                              |                       |
|---|------|---|---|-------|--------|--------|--------|--------|---|--------|------------------------------|-----------------------|
| 1 | 1.00 | 1 | 1 | -0.09 | -0.088 | -0.093 | -0.089 | -0.093 | t | 103112 | DPRYNQLL<br>GPLPFRH          | Homo sapiens          |
| 1 | 1.00 | 1 | 1 | 0.01  | 0.008  | 0.003  | 0.003  | 0.01   | t | 142056 | VKHVEKKL<br>DMLDR            | Mus musculus          |
| 1 | 1.00 | 1 | 1 | -0.06 | -0.06  | -0.06  | -0.064 | -0.06  | t | 115601 | DPFYWVS<br>PGVLV             | Homo sapiens          |
| 1 | 1.00 | 1 | 1 | -0.06 | -0.062 | -0.06  | -0.06  | -0.06  | t | 119895 | GGVKKIHI<br>PSEKIWRP         | Oryctolagus cuniculus |
| 1 | 1.00 | 1 | 1 | -0.06 | -0.06  | -0.06  | -0.06  | -0.06  | t | 119895 | GGVKKIHI<br>PSEKIWRP         | Rattus norvegicus     |
| 1 | 1.00 | 1 | 1 | -0.06 | -0.06  | -0.06  | -0.06  | -0.06  | t | 119895 | GGVKKIHI<br>PSEKIWRP         | Rattus norvegicus     |
| 1 | 1.00 | 1 | 1 | -0.01 | -0.01  | 0      | -0.007 | -0.01  | t | 52678  | QVATISAN                     | Homo sapiens          |
| 1 | 1.00 | 1 | 1 | -0.07 | -0.073 | -0.061 | -0.07  | -0.073 | t | 11567  | EEDTNKDK<br>PS               | Oryctolagus cuniculus |
| 1 | 1.00 | 1 | 1 | 0     | -0.014 | 0      | -0.003 | 0.001  | t | 7491   | DAEFRHDS<br>GYEVHHQ<br>K     | Macaca mulatta        |
| 1 | 1.00 | 1 | 1 | -0.05 | -0.047 | -0.05  | -0.05  | -0.049 | t | 107084 | AKFRHD                       | Mus musculus          |
| 1 | 1.00 | 1 | 1 | 0.01  | 0.01   | 0.026  | 0.008  | 0.007  | t | 98887  | LQGFSRNT<br>LEAAFNA          | Homo sapiens          |
| 1 | 1.00 | 1 | 1 | 0.02  | 0.018  | 0.015  | 0.017  | 0.021  | t | 73784  | YEVRAELP<br>GVDPDKD<br>VDIMV | Mus musculus          |
| 1 | 1.00 | 1 | 1 | 0.01  | 0.014  | 0.01   | 0.017  | 0.012  | t | 122307 | DMSPYEA<br>YKRGIDR<br>GQYLQ  | Homo sapiens          |
| 1 | 1.00 | 1 | 1 | -0.03 | -0.026 | -0.026 | -0.029 | -0.028 | t | 53331  | RDDITFMV<br>GLHSYT           | Homo sapiens          |

|   |      |   |   |       |        |        |        |        |   |        |                              |                                  |
|---|------|---|---|-------|--------|--------|--------|--------|---|--------|------------------------------|----------------------------------|
| 1 | 1.00 | 1 | 1 | -0.06 | -0.06  | -0.06  | -0.056 | -0.061 | t | 134241 | TDVRPLYS<br>RRLPKGVK<br>HLKD | Homo<br>sapiens                  |
| 1 | 1.00 | 1 | 1 | -0.02 | -0.023 | -0.02  | -0.02  | -0.02  | t | 130908 | ITRTTLQSD<br>QEEIDY          | Oryctola<br>gus<br>cuniculu<br>s |
| 1 | 1.00 | 1 | 1 | 0     | 0      | -0.013 | 0      | 0.003  | t | 59387  | SLPGQTKIL<br>AKVIFYGEN       | Oryctola<br>gus<br>cuniculu<br>s |
| 1 | 1.00 | 1 | 1 | 0.02  | 0.019  | 0.027  | 0.02   | 0.02   | t | 72688  | WKLQPGD<br>D                 | Anas<br>platyrhy<br>nchos        |
| 1 | 1.00 | 1 | 1 | 0.02  | 0.017  | 0.02   | 0.02   | 0.018  | t | 104904 | MNVQNG<br>KWDS DPS<br>GTKTC  | Oryctola<br>gus<br>cuniculu<br>s |
| 1 | 1.00 | 1 | 1 | 0.01  | 0.01   | 0.003  | 0.014  | 0.014  | t | 44917  | NLVLNRDV<br>SFQDL            | Homo<br>sapiens                  |
| 1 | 1.00 | 1 | 1 | -0.01 | -0.01  | -0.01  | -0.01  | -0.01  | t | 103680 | TWQTKSG<br>GTRTGNV<br>T      | Homo<br>sapiens                  |
| 1 | 1.00 | 1 | 1 | -0.03 | -0.03  | -0.03  | -0.03  | -0.03  | t | 157740 | PHRAGETS<br>AAGL             | Canis<br>lupus                   |
| 1 | 1.00 | 1 | 1 | 0     | 0      | 0.007  | 0      | 0.001  | t | 41430  | MERVVEQ<br>MCITQYQ<br>RESQAY | Mus<br>musculu<br>s              |
| 1 | 1.00 | 1 | 1 | 0.02  | 0.016  | 0.02   | 0.013  | 0.02   | t | 113091 | MESALDQ<br>LKQFTTVV          | Oryctola<br>gus<br>cuniculu<br>s |
| 1 | 1.00 | 1 | 1 | -0.03 | -0.03  | -0.03  | -0.03  | -0.031 | t | 115495 | SQSKVLPV<br>PQKAVPYP<br>QRDM | Homo<br>sapiens                  |
| 1 | 1.00 | 1 | 1 | -0.03 | -0.029 | -0.022 | -0.029 | -0.03  | t | 47773  | PGVGTGC<br>TACGV             | Myodes<br>glareolu<br>s          |
| 1 | 1.00 | 1 | 1 | 0.01  | 0.01   | 0.019  | 0.016  | 0.012  | t | 39146  | LRNCEQDF<br>FTLN             | Homo<br>sapiens                  |
| 1 | 1.00 | 1 | 1 | 0.02  | 0.018  | 0.031  | 0.019  | 0.02   | t | 110599 | GIPGAKGS<br>AGAPGIA          | Mus<br>musculu<br>s              |

|   |      |   |   |       |        |        |        |        |   |        |                              |                                  |
|---|------|---|---|-------|--------|--------|--------|--------|---|--------|------------------------------|----------------------------------|
| 1 | 1.00 | 1 | 1 | -0.03 | -0.032 | -0.023 | -0.027 | -0.03  | t | 19626  | GFTDRAF<br>WVCPGVV<br>C      | Mus<br>musculu<br>s              |
| 1 | 1.00 | 1 | 1 | 0.02  | 0.021  | 0.018  | 0.017  | 0.018  | t | 49393  | PSGYCGRE<br>CGIKKGS          | Equus<br>caballus                |
| 1 | 1.00 | 1 | 1 | 0.04  | 0.04   | 0.039  | 0.04   | 0.04   | t | 25595  | IDKDNNEL<br>IDKQELTK<br>YCQQ | Mus<br>musculu<br>s              |
| 1 | 1.00 | 1 | 1 | 0.04  | 0.04   | 0.039  | 0.04   | 0.04   | t | 25595  | IDKDNNEL<br>IDKQELTK<br>YCQQ | Mus<br>musculu<br>s              |
| 1 | 1.00 | 1 | 1 | 0.01  | 0.01   | 0.019  | 0.01   | 0.013  | t | 50536  | QDVVVLG<br>S                 | Homo<br>sapiens                  |
| 1 | 1.00 | 1 | 1 | 0     | -0.003 | -0.003 | 0      | 0      | t | 122153 | NASGLSRP<br>SPSAH            | Oryctola<br>gus<br>cuniculu<br>s |
| 1 | 1.00 | 1 | 1 | 0     | -0.003 | 0.007  | 0      | -0.002 | t | 100621 | VPKPGVSD<br>DQLT             | Oryctola<br>gus<br>cuniculu<br>s |
| 1 | 1.00 | 1 | 1 | -0.02 | -0.008 | -0.024 | -0.02  | -0.02  | t | 110248 | GGLGIGTG<br>SGTGGRT<br>GYIPL | Mus<br>musculu<br>s              |
| 1 | 1.00 | 1 | 1 | -0.01 | -0.007 | -0.01  | -0.01  | -0.011 | t | 107428 | GRGDSVV<br>YGLR              | Mus<br>musculu<br>s              |
| 1 | 1.00 | 1 | 1 | 0.04  | 0.037  | 0.05   | 0.04   | 0.04   | t | 46021  | NSVDFEED<br>TL               | Oryctola<br>gus<br>cuniculu<br>s |
| 1 | 1.00 | 1 | 1 | 0.02  | 0.02   | 0.023  | 0.014  | 0.02   | t | 37327  | LLGEKTRN<br>QM               | Homo<br>sapiens                  |
| 1 | 1.00 | 1 | 1 | -0.02 | -0.018 | -0.011 | -0.023 | -0.02  | t | 33882  | KTTKKDHK<br>PQTT             | Homo<br>sapiens                  |
| 1 | 1.00 | 1 | 1 | -0.02 | -0.018 | -0.016 | -0.017 | -0.02  | t | 120699 | KMFPEVKE<br>KGMAALP<br>RL    | Homo<br>sapiens                  |
| 1 | 1.00 | 1 | 1 | -0.01 | -0.01  | -0.001 | -0.008 | -0.01  | t | 135934 | GWGSPKV<br>TKDGV             | Homo<br>sapiens                  |



|   |      |   |   |       |        |        |        |        |   |        |                              |                              |
|---|------|---|---|-------|--------|--------|--------|--------|---|--------|------------------------------|------------------------------|
| 1 | 1.00 | 1 | 1 | -0.01 | -0.012 | -0.01  | -0.017 | -0.01  | t | 108049 | NPVEIRRG<br>VMLAVDA          | Rattus<br>norvegicus         |
| 1 | 1.00 | 1 | 1 | -0.03 | -0.03  | -0.032 | -0.03  | -0.028 | t | 9586   | DPAFR                        | Mus<br>musculus              |
| 1 | 1.00 | 1 | 1 | 0     | 0      | 0      | -0.01  | -0.003 | t | 57631  | SESTEDQA<br>MEDIKQM<br>EAESI | Homo<br>sapiens              |
| 1 | 1.00 | 1 | 1 | -0.02 | -0.02  | -0.016 | -0.02  | -0.02  | t | 52088  | QQPFPQR<br>PQQ               | Mus<br>musculus              |
| 1 | 1.00 | 1 | 1 | 0.02  | 0.02   | 0.012  | 0.017  | 0.019  | t | 3779   | APRITFGG<br>PTDSTDN<br>NQN   | Homo<br>sapiens              |
| 1 | 1.00 | 1 | 1 | 0.11  | 0.11   | 0.122  | 0.108  | 0.108  | t | 96444  | KDEDEEDE<br>ED               | Homo<br>sapiens              |
| 1 | 1.00 | 1 | 1 | -0.02 | -0.023 | -0.019 | -0.02  | -0.018 | t | 73418  | YAPQPCGI<br>VPASEVCG<br>PVYC | Oryctola<br>gus<br>cuniculus |
| 1 | 1.00 | 1 | 1 | 0     | 0.003  | 0.005  | 0      | 0.001  | t | 112584 | LPWNAFP<br>GK                | Mus<br>musculus              |
| 1 | 1.00 | 1 | 1 | 0     | 0      | 0.005  | 0      | 0.001  | t | 112584 | LPWNAFP<br>GK                | Mus<br>musculus              |
| 1 | 1.00 | 1 | 1 | 0.01  | 0.01   | 0.011  | 0.01   | 0.012  | t | 57289  | SDSQITIN<br>PAYD             | Oryctola<br>gus<br>cuniculus |
| 1 | 1.00 | 1 | 1 | -0.03 | -0.028 | -0.018 | -0.033 | -0.032 | t | 60632  | SRDEKERE<br>RFSI             | Homo<br>sapiens              |
| 1 | 1.00 | 1 | 1 | 0.03  | 0.03   | 0.03   | 0.03   | 0.03   | t | 79146  | ACTSQLLS<br>VPSCCC           | Mus<br>musculus              |
| 1 | 1.00 | 1 | 1 | -0.05 | -0.05  | -0.048 | -0.047 | -0.05  | t | 7055   | CSPHHTAL<br>RQ               | Homo<br>sapiens              |
| 1 | 1.00 | 1 | 1 | -0.02 | -0.022 | -0.02  | -0.021 | -0.02  | t | 21918  | GQMRPD<br>NSKP               | Mus<br>musculus              |
| 1 | 1.00 | 1 | 1 | -0.01 | -0.01  | -0.01  | -0.01  | -0.009 | t | 107882 | HEHTFGR<br>QW                | Mus<br>musculus              |
| 1 | 1.00 | 1 | 1 | 0     | 0      | 0      | 0      | 0.003  | t | 136593 | RHYKQYQ<br>FHF               | Homo<br>sapiens              |

|   |      |   |   |       |        |        |        |        |   |        |                              |                                  |
|---|------|---|---|-------|--------|--------|--------|--------|---|--------|------------------------------|----------------------------------|
| 1 | 1.00 | 1 | 1 | -0.02 | -0.018 | -0.015 | -0.021 | -0.019 | t | 135793 | WGEECA<br>MK                 | Homo<br>sapiens                  |
| 1 | 1.00 | 1 | 1 | 0.01  | 0.004  | 0.013  | 0.01   | 0.011  | t | 35063  | LCKIARSQ<br>DACIEFV          | Oryctola<br>gus<br>cuniculu<br>s |
| 1 | 1.00 | 1 | 1 | -0.04 | -0.04  | -0.024 | -0.04  | -0.04  | t | 21704  | GPLYHTP                      | Mus<br>musculu<br>s              |
| 1 | 1.00 | 1 | 1 | 0     | 0      | -0.005 | 0      | 0.001  | t | 32808  | KPNLSSKR<br>SELSQLSM<br>YRVF | Mus<br>musculu<br>s              |
| 1 | 1.00 | 1 | 1 | -0.02 | -0.016 | -0.015 | -0.019 | -0.02  | t | 97685  | TGIEIVKRA<br>I               | Homo<br>sapiens                  |
| 1 | 1.00 | 1 | 1 | 0     | 0      | 0.016  | -0.002 | -0.003 | t | 98953  | QEPDDLK<br>QKA               | Homo<br>sapiens                  |
| 1 | 1.00 | 1 | 1 | -0.02 | -0.02  | -0.02  | -0.02  | -0.02  | t | 84229  | KEEGGKET<br>KDAVDVR<br>R     | Oryctola<br>gus<br>cuniculu<br>s |
| 1 | 1.00 | 1 | 1 | 0     | 0.002  | -0.003 | -0.003 | 0      | t | 36929  | LKKYKVPQ<br>LE               | Homo<br>sapiens                  |
| 1 | 1.00 | 1 | 1 | 0     | 0.002  | -0.003 | -0.003 | 0      | t | 36929  | LKKYKVPQ<br>LE               | Homo<br>sapiens                  |
| 1 | 1.00 | 1 | 1 | 0     | 0.002  | -0.003 | -0.003 | 0      | t | 36929  | LKKYKVPQ<br>LE               | Homo<br>sapiens                  |
| 1 | 1.00 | 1 | 1 | -0.03 | -0.027 | -0.027 | -0.03  | -0.03  | t | 570    | ACKRGPGS<br>GFFSRLN          | Mus<br>musculu<br>s              |
| 1 | 1.00 | 1 | 1 | -0.03 | -0.026 | -0.03  | -0.023 | -0.027 | t | 117345 | PRRRSRKP<br>EAPRRRS          | Homo<br>sapiens                  |
| 1 | 1.00 | 1 | 1 | 0     | 0      | 0.007  | 0      | 0.001  | t | 279    | AALGDSLY<br>GAASLNDF<br>GILA | Rattus<br>norvegic<br>us         |
| 1 | 1.00 | 1 | 1 | 0     | -0.003 | 0.007  | 0      | 0.001  | t | 279    | AALGDSLY<br>GAASLNDF<br>GILA | Oryctola<br>gus<br>cuniculu<br>s |

|   |      |   |   |       |        |        |        |        |   |        |                           |                     |
|---|------|---|---|-------|--------|--------|--------|--------|---|--------|---------------------------|---------------------|
| 1 | 1.00 | 1 | 1 | 0     | 0.004  | 0.006  | -0.003 | 0.001  | t | 49534  | PSTPGERV<br>RH            | Homo<br>sapiens     |
| 1 | 1.00 | 1 | 1 | -0.03 | -0.03  | -0.03  | -0.03  | -0.03  | t | 149436 | QQHHHH<br>QEQK            | Homo<br>sapiens     |
| 1 | 1.00 | 1 | 1 | -0.03 | -0.03  | -0.03  | -0.03  | -0.03  | t | 149436 | QQHHHH<br>QEQK            | Mus<br>musculu<br>s |
| 1 | 1.00 | 1 | 1 | -0.01 | -0.008 | -0.003 | -0.013 | -0.008 | t | 26844  | IKLPALF                   | Homo<br>sapiens     |
| 1 | 1.00 | 1 | 1 | -0.01 | -0.008 | -0.003 | -0.013 | -0.008 | t | 26844  | IKLPALF                   | Homo<br>sapiens     |
| 1 | 1.00 | 1 | 1 | -0.01 | -0.01  | -0.015 | -0.013 | -0.01  | t | 33747  | KTKRNTNR<br>RPQDVKF       | Homo<br>sapiens     |
| 1 | 1.00 | 1 | 1 | 0.01  | 0.01   | 0.01   | 0.01   | 0.016  | t | 127856 | TDVRYKD                   | Mus<br>musculu<br>s |
| 1 | 1.00 | 1 | 1 | -0.03 | -0.03  | -0.03  | -0.03  | -0.03  | t | 122385 | GRLEPLRK<br>WRDDHRL       | Mus<br>musculu<br>s |
| 1 | 1.00 | 1 | 1 | -0.01 | -0.01  | -0.012 | -0.01  | -0.008 | t | 66830  | TTSSGLASL<br>FNSGARQ<br>H | Mus<br>musculu<br>s |
| 1 | 1.00 | 1 | 1 | 0     | 0.002  | 0.003  | 0      | 0      | t | 65638  | TPLGPPDA<br>EYW           | Homo<br>sapiens     |
| 1 | 1.00 | 1 | 1 | -0.02 | -0.017 | -0.02  | -0.02  | -0.019 | t | 21930  | GQPGPSG<br>AAQGQVIS<br>N  | Mus<br>musculu<br>s |
| 1 | 1.00 | 1 | 1 | 0     | 0      | 0.009  | 0      | 0.003  | t | 79284  | LDAVPL                    | Mus<br>musculu<br>s |
| 1 | 1.00 | 1 | 1 | 0     | -0.002 | 0      | 0.001  | 0.003  | t | 61589  | STEQNVP<br>DPQVG          | Homo<br>sapiens     |
| 1 | 1.00 | 1 | 1 | -0.02 | -0.02  | -0.02  | -0.02  | -0.02  | t | 113774 | QQGQQP<br>GQGQPGY<br>Y    | Homo<br>sapiens     |
| 1 | 1.00 | 1 | 1 | 0.01  | 0.014  | 0.01   | 0.007  | 0.013  | t | 10040  | DRRCQSQ<br>LER            | Homo<br>sapiens     |

|   |      |   |   |       |        |        |        |        |   |        |                              |                                  |
|---|------|---|---|-------|--------|--------|--------|--------|---|--------|------------------------------|----------------------------------|
| 1 | 1.00 | 1 | 1 | -0.01 | -0.01  | -0.005 | -0.012 | -0.01  | t | 118146 | SNLDHILE<br>PSIP             | Homo<br>sapiens                  |
| 1 | 1.00 | 1 | 1 | 0.04  | 0.042  | 0.04   | 0.039  | 0.04   | t | 98397  | QQQQPSS<br>QVSFQQP<br>LQQY   | Homo<br>sapiens(<br>human)       |
| 1 | 1.00 | 1 | 1 | 0.01  | 0.007  | 0.009  | 0.01   | 0.012  | t | 22281  | GSAMSRP<br>LIHFGN            | Oryctola<br>gus<br>cuniculu<br>s |
| 1 | 1.00 | 1 | 1 | -0.03 | -0.03  | -0.023 | -0.03  | -0.03  | t | 44340  | NISGHVR<br>MGTMKIT           | Homo<br>sapiens                  |
| 1 | 1.00 | 1 | 1 | 0.01  | 0.008  | 0.015  | 0.009  | 0.011  | t | 65409  | TNRNPQ                       | Mus<br>musculu<br>s              |
| 1 | 1.00 | 1 | 1 | -0.03 | -0.03  | -0.021 | -0.028 | -0.03  | t | 135910 | DRRLCSHL<br>EVCI             | Homo<br>sapiens                  |
| 1 | 1.00 | 1 | 1 | -0.02 | -0.018 | -0.008 | -0.023 | -0.02  | t | 108345 | ENPKKYIP<br>GTK              | Homo<br>sapiens                  |
| 1 | 1.00 | 1 | 1 | -0.04 | -0.04  | -0.04  | -0.04  | -0.04  | t | 130823 | FDSH                         | Mus<br>musculu<br>s              |
| 1 | 1.00 | 1 | 1 | 0.03  | 0.032  | 0.033  | 0.033  | 0.032  | t | 122198 | TEADVNP<br>PIPSQMPT<br>SP    | Homo<br>sapiens                  |
| 1 | 1.00 | 1 | 1 | 0     | 0      | 0      | -0.004 | 0      | t | 136524 | NFREAMRI<br>GAEVYHN<br>LKN   | Homo<br>sapiens                  |
| 1 | 1.00 | 1 | 1 | -0.03 | -0.032 | -0.016 | -0.031 | -0.032 | t | 28337  | IRMARPT                      | Mus<br>musculu<br>s              |
| 1 | 1.00 | 1 | 1 | 0     | -0.021 | 0.008  | 0      | 0      | t | 12375  | EHWSYGL<br>RPG               | Canis<br>lupus                   |
| 1 | 1.00 | 1 | 1 | 0.05  | 0.047  | 0.052  | 0.05   | 0.05   | t | 10525  | DTYEEVLE<br>LAQE             | Oryctola<br>gus<br>cuniculu<br>s |
| 1 | 1.00 | 1 | 1 | 0.02  | 0.024  | 0.028  | 0.023  | 0.018  | t | 47304  | PEHRGGP<br>EEFEGAGD<br>GEPPE | Homo<br>sapiens                  |
| 1 | 1.00 | 1 | 1 | -0.07 | -0.07  | -0.065 | -0.07  | -0.07  | t | 35291  | LDSMHFPF<br>HSRSFWP          | Homo<br>sapiens                  |

|   |      |   |   |       |        |        |        |        |   |        |                              |                                  |
|---|------|---|---|-------|--------|--------|--------|--------|---|--------|------------------------------|----------------------------------|
| 1 | 1.00 | 1 | 1 | 0.01  | 0.004  | 0.009  | 0.009  | 0.012  | t | 99401  | KTNACHN<br>GGGFSEVI<br>FR    | Oryctola<br>gus<br>cuniculu<br>s |
| 1 | 1.00 | 1 | 1 | 0.01  | 0.01   | 0.012  | 0.01   | 0.01   | t | 142530 | ANDYTTEY<br>ASASVRGR<br>FIVS | Mus<br>musculu<br>s              |
| 1 | 1.00 | 1 | 1 | 0.01  | 0.01   | 0.012  | 0.01   | 0.01   | t | 142530 | ANDYTTEY<br>ASASVRGR<br>FIVS | Mus<br>musculu<br>s              |
| 1 | 1.00 | 1 | 1 | 0.04  | 0.037  | 0.049  | 0.04   | 0.04   | t | 100546 | TDANDQI<br>GDSLISA           | Oryctola<br>gus<br>cuniculu<br>s |
| 1 | 1.00 | 1 | 1 | -0.01 | -0.01  | -0.013 | -0.017 | -0.011 | t | 115652 | SSRISYWT<br>IVKP             | Homo<br>sapiens                  |
| 1 | 1.00 | 1 | 1 | -0.01 | -0.01  | 0.015  | -0.006 | -0.01  | t | 63056  | TCAMFT                       | Homo<br>sapiens                  |
| 1 | 1.00 | 1 | 1 | -0.02 | -0.017 | -0.018 | -0.02  | -0.017 | t | 51246  | QKRDPKT<br>N                 | Mus<br>musculu<br>s              |
| 1 | 1.00 | 1 | 1 | 0.02  | 0.018  | 0.025  | 0.019  | 0.02   | t | 57320  | SDYEDRY<br>REN               | Mus<br>musculu<br>s              |
| 1 | 1.00 | 1 | 1 | 0.01  | 0.006  | 0.013  | 0.009  | 0.011  | t | 103499 | PSRTWSP<br>FEEDSQK           | Oryctola<br>gus<br>cuniculu<br>s |
| 1 | 1.00 | 1 | 1 | -0.02 | -0.023 | -0.011 | -0.02  | -0.022 | t | 167    | AAGLPKGC<br>GVNVPYK          | Oryctola<br>gus<br>cuniculu<br>s |
| 1 | 1.00 | 1 | 1 | 0.01  | 0.008  | 0.014  | 0.013  | 0.01   | t | 49071  | PQPQQQL<br>PLQ               | Mus<br>musculu<br>s              |
| 1 | 1.00 | 1 | 1 | 0     | 0      | 0      | 0      | 0      | t | 48519  | PLVEHGLQ<br>LAEQFKQK<br>ALGL | Homo<br>sapiens                  |
| 1 | 1.00 | 1 | 1 | 0.01  | 0.01   | 0.012  | 0.011  | 0.01   | t | 40921  | LYREALESP<br>EHC             | Mus<br>musculu<br>s              |
| 1 | 1.00 | 1 | 1 | -0.01 | -0.01  | -0.01  | -0.01  | -0.01  | t | 79658  | THQRPAT                      | Oryctola<br>gus<br>cuniculu<br>s |

|   |      |   |   |       |        |        |        |        |   |        |                              |                                  |
|---|------|---|---|-------|--------|--------|--------|--------|---|--------|------------------------------|----------------------------------|
| 1 | 1.00 | 1 | 1 | -0.03 | -0.027 | -0.03  | -0.031 | -0.03  | t | 72560  | WHWNKPI<br>RPPLR             | Mus<br>musculu<br>s              |
| 1 | 1.00 | 1 | 1 | 0     | 0      | 0.002  | 0.003  | 0.002  | t | 2322   | AKWAVPT<br>TRTDDKLR          | Homo<br>sapiens                  |
| 1 | 1.00 | 1 | 1 | -0.01 | -0.01  | -0.003 | -0.01  | -0.01  | t | 96160  | DAEDKDE<br>DEE               | Homo<br>sapiens                  |
| 1 | 1.00 | 1 | 1 | 0     | 0.002  | 0.007  | 0      | 0.002  | t | 7557   | DAKDALEP<br>YWKSDS           | Anas<br>platyrhy<br>nchos        |
| 1 | 1.00 | 1 | 1 | -0.01 | -0.013 | -0.015 | -0.009 | -0.01  | t | 59749  | SMSHRTM<br>SIVNSYVN<br>DVMER | Canis<br>lupus                   |
| 1 | 1.00 | 1 | 1 | 0.01  | 0.014  | 0.022  | 0.011  | 0.01   | t | 63791  | TGATEI                       | Homo<br>sapiens                  |
| 1 | 1.00 | 1 | 1 | 0.01  | 0.01   | 0.01   | 0.012  | 0.01   | t | 18172  | FVGAGIAG<br>AAVGS            | Homo<br>sapiens                  |
| 1 | 1.00 | 1 | 1 | -0.02 | -0.02  | -0.02  | -0.02  | -0.018 | t | 153372 | DTELTQKA<br>LRLV             | Mus<br>musculu<br>s              |
| 1 | 1.00 | 1 | 1 | 0.01  | 0.014  | 0.01   | 0.01   | 0.01   | t | 110855 | FNRAGTV<br>GENVPDD<br>LYIKGS | Cavia<br>porcellu<br>s           |
| 1 | 1.00 | 1 | 1 | 0.01  | 0.01   | 0.01   | 0.01   | 0.01   | t | 111557 | MPLSQNV<br>APFRT             | Homo<br>sapiens                  |
| 1 | 1.00 | 1 | 1 | -0.01 | -0.013 | -0.01  | -0.01  | -0.01  | t | 135413 | AAAAKAA<br>KYGAA             | Oryctola<br>gus<br>cuniculu<br>s |
| 1 | 1.00 | 1 | 1 | -0.01 | -0.01  | -0.01  | -0.01  | -0.01  | t | 111557 | MPLSQNV<br>APFRT             | Homo<br>sapiens                  |
| 1 | 1.00 | 1 | 1 | -0.03 | -0.03  | -0.034 | -0.03  | -0.029 | t | 122860 | NADLCDS<br>VPKWDR<br>PCASS   | Oryctola<br>gus<br>cuniculu<br>s |
| 1 | 1.00 | 1 | 1 | 0     | 0.004  | 0      | -0.003 | 0.002  | t | 50171  | PYSPSQDP<br>YSPSPYD          | Homo<br>sapiens                  |
| 1 | 1.00 | 1 | 1 | 0.03  | 0.052  | 0.037  | 0.023  | 0.03   | t | 127801 | RGTVLYKN<br>EVGE             | Rattus                           |

|   |      |   |   |       |        |        |        |        |   |        |                              |                                  |
|---|------|---|---|-------|--------|--------|--------|--------|---|--------|------------------------------|----------------------------------|
| 1 | 1.00 | 1 | 1 | 0     | -0.004 | 0.012  | 0.003  | 0.001  | t | 105003 | TKSYWKAL<br>GI               | Oryctola<br>gus<br>cuniculu<br>s |
| 1 | 1.00 | 1 | 1 | -0.04 | -0.04  | -0.04  | -0.04  | -0.04  | t | 111570 | MRPDNAK                      | Homo<br>sapiens                  |
| 1 | 1.00 | 1 | 1 | -0.04 | -0.045 | -0.032 | -0.043 | -0.041 | t | 12554  | EIPSYRSLY<br>LRWVNA          | Bos<br>taurus                    |
| 1 | 1.00 | 1 | 1 | -0.01 | -0.012 | -0.01  | -0.017 | -0.01  | t | 119578 | FAIVKFTKV<br>LLQYTGH         | Mus<br>musculu<br>s              |
| 1 | 1.00 | 1 | 1 | -0.03 | -0.03  | -0.03  | -0.03  | -0.03  | t | 118077 | QEMPLTA<br>LLRNLGK<br>MT     | Homo<br>sapiens                  |
| 1 | 1.00 | 1 | 1 | 0.02  | 0.02   | 0.02   | 0.02   | 0.019  | t | 115345 | LGTQYTDA<br>PSFSDIPN<br>PIGS | Homo<br>sapiens                  |
| 1 | 1.00 | 1 | 1 | 0     | 0      | 0      | 0      | -0.001 | t | 115238 | EVDDEALE<br>KFDKALKA<br>LPMH | Homo<br>sapiens                  |
| 1 | 1.00 | 1 | 1 | 0     | 0.003  | 0      | 0      | 0.003  | t | 78939  | CINHRGY<br>WVC               | Mus<br>musculu<br>s              |
| 1 | 1.00 | 1 | 1 | -0.02 | -0.022 | -0.016 | -0.021 | -0.018 | t | 147220 | QIGYYRRA<br>TR               | Mus<br>musculu<br>s              |
| 1 | 1.00 | 1 | 1 | 0.01  | 0.007  | 0.013  | 0.01   | 0.01   | t | 56614  | RYPHYSLIK<br>PESSL           | Oryctola<br>gus<br>cuniculu<br>s |
| 1 | 1.00 | 1 | 1 | 0.01  | 0.014  | 0.003  | 0.011  | 0.011  | t | 39623  | LSRDLEAS<br>REAKKKE<br>AALE  | Homo<br>sapiens                  |
| 1 | 1.00 | 1 | 1 | 0.02  | 0.02   | 0.018  | 0.02   | 0.021  | t | 119803 | DLVLYNNA<br>DGDFAIHV         | Oryctola<br>gus<br>cuniculu<br>s |
| 1 | 1.00 | 1 | 1 | 0.02  | 0.02   | 0.018  | 0.02   | 0.021  | t | 119803 | DLVLYNNA<br>DGDFAIHV         | Mus<br>musculu<br>s              |
| 1 | 1.00 | 1 | 1 | 0.02  | 0.023  | 0.018  | 0.02   | 0.021  | t | 119803 | DLVLYNNA<br>DGDFAIHV         | Mus<br>musculu<br>s              |

|   |      |   |   |       |        |        |        |        |   |        |                              |                                  |
|---|------|---|---|-------|--------|--------|--------|--------|---|--------|------------------------------|----------------------------------|
| 1 | 1.00 | 1 | 1 | 0.02  | 0.02   | 0.018  | 0.02   | 0.021  | t | 119803 | DLVLYNNA<br>DGDFAIVH         | Mus<br>musculu<br>s              |
| 1 | 1.00 | 1 | 1 | -0.03 | -0.027 | -0.03  | -0.03  | -0.027 | t | 144677 | GTHPTLVV<br>HSREL            | Mus<br>musculu<br>s              |
| 1 | 1.00 | 1 | 1 | -0.02 | -0.022 | -0.02  | -0.027 | -0.02  | t | 107860 | GHSYYISPE<br>LKP             | Mus<br>musculu<br>s              |
| 1 | 1.00 | 1 | 1 | -0.02 | -0.02  | -0.013 | -0.02  | -0.02  | t | 105080 | AFNHFGGR<br>GLVQR            | Homo<br>sapiens                  |
| 1 | 1.00 | 1 | 1 | -0.02 | -0.021 | -0.026 | -0.02  | -0.018 | t | 13528  | ENNGGCD<br>AD                | Aotus<br>sp.                     |
| 1 | 1.00 | 1 | 1 | -0.01 | -0.01  | -0.01  | -0.01  | -0.009 | t | 144777 | SGTHMNL<br>YLHDTAFA          | Mus<br>musculu<br>s              |
| 1 | 1.00 | 1 | 1 | -0.04 | -0.04  | -0.04  | -0.04  | -0.04  | t | 111828 | THMQGW<br>WWSKPW             | Homo<br>sapiens                  |
| 1 | 1.00 | 1 | 1 | -0.01 | -0.012 | 0.007  | -0.011 | -0.01  | t | 52397  | QSPHLTYP<br>EPMS             | Mus<br>musculu<br>s              |
| 1 | 1.00 | 1 | 1 | -0.04 | -0.04  | -0.04  | -0.04  | -0.04  | t | 125667 | AFRFGHAT<br>IHPLVRR<br>DAS   | Oryctola<br>gus<br>cuniculu<br>s |
| 1 | 1.00 | 1 | 1 | -0.01 | -0.01  | -0.01  | -0.01  | -0.01  | t | 127723 | LHSDARD                      | Homo<br>sapiens                  |
| 1 | 1.00 | 1 | 1 | -0.02 | -0.02  | -0.018 | -0.02  | -0.02  | t | 29375  | IVNRRTSFF<br>NLGPSQR         | Mus<br>musculu<br>s              |
| 1 | 1.00 | 1 | 1 | -0.01 | -0.014 | -0.016 | -0.011 | -0.01  | t | 11723  | EEKKVPINL<br>WLDGKQN<br>TVPL | Oryctola<br>gus<br>cuniculu<br>s |
| 1 | 1.00 | 1 | 1 | -0.01 | -0.014 | -0.016 | -0.011 | -0.01  | t | 11723  | EEKKVPINL<br>WLDGKQN<br>TVPL | Oryctola<br>gus<br>cuniculu<br>s |
| 1 | 1.00 | 1 | 1 | -0.01 | -0.007 | 0.004  | -0.01  | -0.014 | t | 97288  | ETQLTTAG<br>LRL              | Mus<br>musculu<br>s              |
| 1 | 1.00 | 1 | 1 | 0     | 0      | -0.005 | -0.002 | 0      | t | 53135  | RAKRTLSS<br>ATQATIEID<br>ALF | Homo<br>sapiens                  |



|   |      |   |   |       |        |        |        |       |   |        |                              |                                  |
|---|------|---|---|-------|--------|--------|--------|-------|---|--------|------------------------------|----------------------------------|
| 1 | 1.00 | 1 | 1 | 0.03  | 0.032  | 0.03   | 0.023  | 0.03  | t | 123635 | PTTMKM<br>WSD                | Ovis<br>aries                    |
| 1 | 1.00 | 1 | 1 | 0     | 0.004  | 0.005  | 0.001  | 0     | t | 97186  | AGNKEGIA<br>SRITQIK          | Homo<br>sapiens                  |
| 1 | 1.00 | 1 | 1 | -0.03 | -0.03  | -0.02  | -0.03  | -0.03 | t | 48685  | PNPLGFFP                     | Mus<br>musculu<br>s              |
| 1 | 1.00 | 1 | 1 | -0.01 | -0.014 | -0.013 | -0.007 | -0.01 | t | 17457  | FQAEVGP<br>NNTRSIRK<br>FNTMQ | Oryctola<br>gus<br>cuniculu<br>s |
| 1 | 1.00 | 1 | 1 | -0.02 | -0.016 | -0.018 | -0.019 | -0.02 | t | 52280  | QSAAIRE<br>WARRNG<br>HNV     | Homo<br>sapiens                  |
| 1 | 1.00 | 1 | 1 | -0.03 | -0.028 | -0.03  | -0.033 | -0.03 | t | 142204 | KLEEQNKI<br>SEASRKGL<br>RRDL | Homo<br>sapiens                  |
| 1 | 1.00 | 1 | 1 | 0     | -0.003 | 0      | 0      | 0.001 | t | 156906 | KPGDPRS                      | Oryctola<br>gus<br>cuniculu<br>s |
| 1 | 1.00 | 1 | 1 | -0.03 | -0.034 | -0.031 | -0.037 | -0.03 | t | 127963 | EPKPKKAP<br>AKKGEKV          | Oryctola<br>gus<br>cuniculu<br>s |
| 1 | 1.00 | 1 | 1 | 0.02  | 0.022  | 0.021  | 0.021  | 0.02  | t | 65520  | TPCSAEEE<br>KLPISP           | Homo<br>sapiens                  |
| 1 | 1.00 | 1 | 1 | 0.08  | 0.08   | 0.088  | 0.081  | 0.08  | t | 26235  | IGGSQAQT<br>AS               | Homo<br>sapiens                  |
| 1 | 1.00 | 1 | 1 | 0.01  | 0.014  | 0.014  | 0.01   | 0.013 | t | 134335 | CTKPSDGN<br>CT               | Homo<br>sapiens                  |
| 1 | 1.00 | 1 | 1 | -0.03 | -0.032 | -0.032 | -0.037 | -0.03 | t | 122321 | DVVLYNN<br>ADGDFAI<br>VH     | Mus<br>musculu<br>s              |
| 1 | 1.00 | 1 | 1 | 0.01  | 0.01   | 0.032  | 0.01   | 0.01  | t | 144622 | EDVGSNK                      | Mus<br>musculu<br>s              |
| 1 | 1.00 | 1 | 1 | 0     | 0.003  | 0.006  | 0      | 0     | t | 15805  | FFEVAH                       | Equus<br>caballus                |

|   |      |   |   |       |        |        |        |        |   |        |                              |                                  |
|---|------|---|---|-------|--------|--------|--------|--------|---|--------|------------------------------|----------------------------------|
| 1 | 1.00 | 1 | 1 | 0     | 0      | 0.007  | 0.003  | 0      | t | 23392  | GYKVLVLN<br>PSVAATLGF<br>G   | Homo<br>sapiens                  |
| 1 | 1.00 | 1 | 1 | 0     | -0.006 | -0.007 | -0.003 | 0      | t | 57505  | SEKSEEINE<br>KDLRKKSE<br>LQG | Oryctola<br>gus<br>cuniculu<br>s |
| 1 | 1.00 | 1 | 1 | 0     | -0.004 | 0      | -0.007 | -0.001 | t | 122730 | DPAQPPR<br>D                 | Oryctola<br>gus<br>cuniculu<br>s |
| 1 | 1.00 | 1 | 1 | 0     | -0.002 | 0      | -0.007 | -0.001 | t | 113942 | TQDENPV<br>VHF               | Mus<br>musculu<br>s              |
| 1 | 1.00 | 1 | 1 | 0     | -0.002 | 0      | -0.007 | -0.001 | t | 113942 | TQDENPV<br>VHF               | Mus<br>musculu<br>s              |
| 1 | 1.00 | 1 | 1 | 0     | -0.004 | 0      | -0.007 | -0.001 | t | 47420  | PESDQPDL                     | Oryctola<br>gus<br>cuniculu<br>s |
| 1 | 1.00 | 1 | 1 | -0.03 | -0.03  | -0.03  | -0.03  | -0.03  | t | 47336  | PEKTPLPV<br>SATAMAP<br>SVDPS | Mus<br>musculu<br>s              |
| 1 | 1.00 | 1 | 1 | -0.03 | -0.027 | -0.03  | -0.03  | -0.03  | t | 47336  | PEKTPLPV<br>SATAMAP<br>SVDPS | Mus<br>musculu<br>s              |
| 1 | 1.00 | 1 | 1 | 0.01  | 0.012  | 0.013  | 0.011  | 0.012  | t | 52679  | QVATVSS<br>N                 | Homo<br>sapiens                  |
| 1 | 1.00 | 1 | 1 | -0.02 | -0.02  | -0.02  | -0.02  | -0.02  | t | 123131 | EHLYGRN<br>DR                | Ovis<br>aries                    |
| 1 | 1.00 | 1 | 1 | 0.03  | 0.028  | 0.025  | 0.027  | 0.03   | t | 40319  | LVEKPNLS<br>SKRSELS          | Mus<br>musculu<br>s              |
| 1 | 1.00 | 1 | 1 | 0     | 0      | 0      | 0      | 0.001  | t | 116684 | CNYYSNSY<br>SFWLASLD<br>PKR  | Oryctola<br>gus<br>cuniculu<br>s |
| 1 | 1.00 | 1 | 1 | 0.02  | 0.02   | 0.024  | 0.02   | 0.02   | t | 54601  | RLITVN                       | Homo<br>sapiens                  |
| 1 | 1.00 | 1 | 1 | 0.01  | 0.01   | 0.017  | 0.01   | 0.011  | t | 158837 | IHNDVEA<br>WIDRYKYY<br>P     | Mus<br>musculu<br>s              |
| 1 | 1.00 | 1 | 1 | 0.01  | 0.01   | 0.004  | 0.01   | 0.01   | t | 59120  | SLGADSSI<br>AYSNNITAI        | Homo<br>sapiens                  |

|   |      |   |   |       |        |        |        |        |   |        |                              |                                  |
|---|------|---|---|-------|--------|--------|--------|--------|---|--------|------------------------------|----------------------------------|
| 1 | 1.00 | 1 | 1 | 0.01  | 0.01   | 0.01   | 0.01   | 0.01   | t | 140873 | KGVDAGK<br>LGTVSYGE<br>EKPAV | Oryctola<br>gus<br>cuniculu<br>s |
| 1 | 1.00 | 1 | 1 | 0     | 0.002  | -0.002 | -0.003 | 0.001  | t | 28732  | ISSSEEIVP<br>N               | Homo<br>sapiens                  |
| 1 | 1.00 | 1 | 1 | -0.01 | -0.01  | -0.011 | -0.01  | -0.01  | t | 115062 | HNGQACK<br>GKIQALCE          | Mus<br>musculu<br>s              |
| 1 | 1.00 | 1 | 1 | -0.01 | -0.012 | -0.01  | -0.017 | -0.012 | t | 107428 | GRGDSVV<br>YGLR              | Mus<br>musculu<br>s              |
| 1 | 1.00 | 1 | 1 | -0.05 | -0.052 | -0.041 | -0.044 | -0.049 | t | 151048 | RHAYRSM<br>AEWGFLYS          | Rattus<br>norvegic<br>us         |
| 1 | 1.00 | 1 | 1 | -0.02 | -0.024 | -0.017 | -0.017 | -0.018 | t | 53681  | RFAKYQQ<br>QGRLEAR           | Oryctola<br>gus<br>cuniculu<br>s |
| 1 | 1.00 | 1 | 1 | 0.01  | 0.01   | 0.009  | 0.013  | 0.012  | t | 65099  | TLTLAMPK<br>TTYELKME<br>CPH  | Homo<br>sapiens                  |
| 1 | 1.00 | 1 | 1 | 0     | 0      | 0      | -0.003 | 0      | t | 38649  | LPQGVFYG<br>DA               | Homo<br>sapiens                  |
| 1 | 1.00 | 1 | 1 | -0.03 | -0.028 | -0.031 | -0.029 | -0.029 | t | 144940 | RHVLGRLI<br>TVNPIVT          | Homo<br>sapiens                  |
| 1 | 1.00 | 1 | 1 | 0.04  | 0.04   | 0.04   | 0.036  | 0.04   | t | 135944 | KEQFEFAL<br>TAVAEVC          | Homo<br>sapiens                  |
| 1 | 1.00 | 1 | 1 | 0     | 0.005  | 0.005  | 0      | 0      | t | 48125  | PKPQRKTK<br>RNTNRRP<br>QDVK  | Homo<br>sapiens                  |
| 1 | 1.00 | 1 | 1 | -0.01 | -0.01  | -0.01  | -0.016 | -0.01  | t | 158695 | ASKSADDV<br>KKAFKVI          | Homo<br>sapiens                  |
| 1 | 1.00 | 1 | 1 | -0.01 | -0.007 | -0.01  | -0.01  | -0.007 | t | 144678 | GTQPTLEV<br>VPMGRGS          | Mus<br>musculu<br>s              |
| 1 | 1.00 | 1 | 1 | 0     | 0      | 0      | 0      | 0.002  | t | 104362 | YNDDEPN<br>GAIRFTMG          | Oryctola<br>gus<br>cuniculu<br>s |
| 1 | 1.00 | 1 | 1 | 0.03  | 0.03   | 0.037  | 0.027  | 0.03   | t | 75662  | YRPPNAPI<br>LSTLPETT         | Homo<br>sapiens                  |
| 1 | 1.00 | 1 | 1 | 0     | 0      | 0      | 0      | 0      | t | 67730  | VARALAH<br>GVRVLED<br>GVNFAT | Homo<br>sapiens                  |

|   |      |   |   |       |        |        |        |        |   |        |                              |                              |
|---|------|---|---|-------|--------|--------|--------|--------|---|--------|------------------------------|------------------------------|
| 1 | 1.00 | 1 | 1 | -0.03 | -0.03  | -0.03  | -0.03  | -0.03  | t | 103007 | AAQAVQT<br>AAQNGVR<br>A      | Homo<br>sapiens              |
| 1 | 1.00 | 1 | 1 | -0.05 | -0.05  | -0.05  | -0.05  | -0.05  | t | 39487  | LSLNHARS<br>P                | Rattus<br>norvegicus         |
| 1 | 1.00 | 1 | 1 | -0.01 | -0.01  | -0.009 | -0.013 | -0.012 | t | 35763  | LEYDPRLV<br>YD               | Homo<br>sapiens              |
| 1 | 1.00 | 1 | 1 | -0.02 | -0.02  | -0.02  | -0.02  | -0.02  | t | 113780 | QQPGQG<br>QQGQQP<br>GQ       | Homo<br>sapiens              |
| 1 | 1.00 | 1 | 1 | -0.07 | -0.07  | -0.07  | -0.07  | -0.07  | t | 156942 | PWSKMHI                      | Gallus<br>gallus             |
| 1 | 1.00 | 1 | 1 | -0.04 | -0.036 | -0.038 | -0.039 | -0.038 | t | 49405  | PSIPSRAAT<br>L               | Homo<br>sapiens              |
| 1 | 1.00 | 1 | 1 | 0     | 0      | 0      | 0      | 0      | t | 123253 | GPPPPGM<br>MPVGPAP<br>GM     | Oryctola<br>gus<br>cuniculus |
| 1 | 1.00 | 1 | 1 | 0.03  | 0.027  | 0.039  | 0.03   | 0.03   | t | 100545 | TAVETGAT<br>NPLAPS           | Oryctola<br>gus<br>cuniculus |
| 1 | 1.00 | 1 | 1 | 0.02  | 0.021  | 0.018  | 0.019  | 0.021  | t | 44880  | NLSSDIIGQ<br>LELMPNIE<br>RF  | Equus<br>caballus            |
| 1 | 1.00 | 1 | 1 | 0.02  | 0.027  | 0.018  | 0.019  | 0.021  | t | 44880  | NLSSDIIGQ<br>LELMPNIE<br>RF  | Gallus<br>gallus             |
| 1 | 1.00 | 1 | 1 | -0.01 | -0.006 | -0.01  | -0.013 | -0.01  | t | 28074  | IPSTACTDI<br>AWVRLPC<br>HYG  | Homo<br>sapiens              |
| 1 | 1.00 | 1 | 1 | -0.02 | -0.02  | -0.016 | -0.02  | -0.02  | t | 7057   | CSPRTG                       | Homo<br>sapiens              |
| 1 | 1.00 | 1 | 1 | 0.02  | 0.027  | 0.025  | 0.019  | 0.021  | t | 52274  | QRVVFKEYS<br>QMINISDY<br>INR | Gallus<br>gallus             |
| 1 | 1.00 | 1 | 1 | 0.02  | 0.02   | 0.025  | 0.019  | 0.021  | t | 52274  | QRVVFKEYS<br>QMINISDY<br>INR | Homo<br>sapiens              |

|   |      |   |   |       |        |        |        |        |   |        |                              |                     |
|---|------|---|---|-------|--------|--------|--------|--------|---|--------|------------------------------|---------------------|
| 1 | 1.00 | 1 | 1 | 0.02  | 0.021  | 0.025  | 0.019  | 0.021  | t | 52274  | QRVVFKEYS<br>QMINISDY<br>INR | Equus<br>caballus   |
| 1 | 1.00 | 1 | 1 | 0.02  | 0.02   | 0.02   | 0.02   | 0.022  | t | 111264 | EYMLDLQ<br>PETTDLYC<br>YEQLN | Mus<br>musculu<br>s |
| 1 | 1.00 | 1 | 1 | 0     | 0      | 0      | -0.006 | 0      | t | 77841  | AYDFLYNY<br>L                | Homo<br>sapiens     |
| 1 | 1.00 | 1 | 1 | -0.05 | -0.047 | -0.047 | -0.05  | -0.049 | t | 65656  | TPLSPPLR<br>NTHP             | Mus<br>musculu<br>s |
| 1 | 1.00 | 1 | 1 | -0.05 | -0.05  | -0.047 | -0.05  | -0.049 | t | 65656  | TPLSPPLR<br>NTHP             | Mus<br>musculu<br>s |
| 1 | 1.00 | 1 | 1 | 0.01  | 0.008  | 0.018  | 0.009  | 0.01   | t | 47757  | PGSTTTST<br>GPCKTC           | Mus<br>musculu<br>s |
| 1 | 1.00 | 1 | 1 | -0.07 | -0.072 | -0.068 | -0.073 | -0.071 | t | 46899  | PAPRRKFQ<br>QVKRL            | Mus<br>musculu<br>s |
| 1 | 1.00 | 1 | 1 | 0     | 0      | 0      | 0      | 0      | t | 158614 | STEGRHN                      | Homo<br>sapiens     |
| 1 | 1.00 | 1 | 1 | 0.03  | 0.03   | 0.03   | 0.03   | 0.03   | t | 66219  | TSGITGDN<br>TTSSE            | Homo<br>sapiens     |
| 1 | 1.00 | 1 | 1 | 0.02  | 0.018  | 0.028  | 0.019  | 0.023  | t | 79040  | PGQNLCT<br>K                 | Mus<br>musculu<br>s |
| 1 | 1.00 | 1 | 1 | -0.05 | -0.058 | -0.05  | -0.05  | -0.048 | t | 156942 | PWSKMHI                      | Mus<br>musculu<br>s |
| 1 | 1.00 | 1 | 1 | -0.02 | -0.02  | -0.02  | -0.029 | -0.022 | t | 96240  | EKQMKDK<br>QDE               | Homo<br>sapiens     |
| 1 | 1.00 | 1 | 1 | 0     | 0.002  | 0.007  | 0.003  | 0.002  | t | 74871  | YLPVGGLR<br>RIGG             | Homo<br>sapiens     |
| 1 | 1.00 | 1 | 1 | -0.01 | -0.006 | -0.007 | -0.01  | -0.01  | t | 100540 | SYLQGFSR<br>NTLEAAFN<br>AEFN | Homo<br>sapiens     |
| 1 | 1.00 | 1 | 1 | 0     | 0      | 0.005  | 0      | 0.001  | t | 159042 | NTFVVDG<br>PETKECPT<br>A     | Mus<br>musculu<br>s |
| 1 | 1.00 | 1 | 1 | 0     | -0.014 | 0      | -0.003 | 0.001  | t | 7491   | DAEFRHDS<br>GYEVHHQ<br>K     | Macaca<br>mulatta   |
| 1 | 1.00 | 1 | 1 | -0.03 | -0.028 | -0.021 | -0.033 | -0.033 | t | 50328  | QAPKDVS<br>QQIKMAN<br>K      | Homo<br>sapiens     |

|   |      |   |   |       |        |        |        |        |   |        |                          |                       |
|---|------|---|---|-------|--------|--------|--------|--------|---|--------|--------------------------|-----------------------|
| 1 | 1.00 | 1 | 1 | 0.01  | 0.01   | 0.01   | 0.01   | 0.008  | t | 132108 | VDHLRDR<br>NSGSSSSL      | Homo sapiens          |
| 1 | 1.00 | 1 | 1 | -0.01 | -0.014 | 0.001  | -0.011 | -0.012 | t | 58316  | SGYCYWV<br>HILCYCYG      | Oryctolagus cuniculus |
| 1 | 1.00 | 1 | 1 | 0.01  | 0.006  | 0.02   | 0.01   | 0.01   | t | 82843  | GQPAADH<br>YYSKVT        | Oryctolagus cuniculus |
| 1 | 1.00 | 1 | 1 | 0.01  | 0.007  | 0.02   | 0.01   | 0.01   | t | 82843  | GQPAADH<br>YYSKVT        | Oryctolagus cuniculus |
| 1 | 1.00 | 1 | 1 | -0.05 | -0.052 | -0.052 | -0.049 | -0.047 | t | 96815  | RCQSQLER<br>A            | Mus musculus          |
| 1 | 1.00 | 1 | 1 | 0     | 0      | 0.003  | 0      | 0.003  | t | 133697 | SITTANPSS<br>FNKY        | Rattus norvegicus     |
| 1 | 1.00 | 1 | 1 | 0     | -0.002 | 0.005  | -0.001 | 0.001  | t | 75849  | YSPEVR                   | Mus musculus          |
| 1 | 1.00 | 1 | 1 | -0.01 | -0.006 | 0.006  | -0.009 | -0.011 | t | 66895  | TTVNAHQI<br>LPKVLHK      | Homo sapiens          |
| 1 | 1.00 | 1 | 1 | -0.03 | -0.03  | -0.026 | -0.03  | -0.029 | t | 44474  | NKDKLFAV<br>WK           | Oryctolagus cuniculus |
| 1 | 1.00 | 1 | 1 | -0.01 | -0.01  | -0.01  | -0.01  | -0.01  | t | 122906 | SRPSESNG                 | Oryctolagus cuniculus |
| 1 | 1.00 | 1 | 1 | -0.01 | -0.006 | -0.003 | -0.013 | -0.008 | t | 95555  | LLFCME                   | Homo sapiens          |
| 1 | 1.00 | 1 | 1 | 0     | 0      | 0.008  | 0      | 0      | t | 106304 | CDRSYTTR<br>RW           | Homo sapiens          |
| 1 | 1.00 | 1 | 1 | -0.02 | -0.019 | -0.014 | -0.019 | -0.02  | t | 4071   | AQSRNVR<br>TFTGLFTS<br>G | Homo sapiens          |
| 1 | 1.00 | 1 | 1 | -0.02 | -0.023 | -0.019 | -0.02  | -0.018 | t | 10431  | DTNKDKPS<br>YQ           | Oryctolagus cuniculus |

|   |      |   |   |       |        |        |        |        |   |        |                              |                                  |
|---|------|---|---|-------|--------|--------|--------|--------|---|--------|------------------------------|----------------------------------|
| 1 | 1.00 | 1 | 1 | 0.03  | 0.028  | 0.04   | 0.029  | 0.03   | t | 97596  | QTPLTMA<br>ALELL             | Mus<br>musculu<br>s              |
| 1 | 1.00 | 1 | 1 | 0.03  | 0.028  | 0.04   | 0.029  | 0.03   | t | 97596  | QTPLTMA<br>ALELL             | Mus<br>musculu<br>s              |
| 1 | 1.00 | 1 | 1 | -0.02 | -0.022 | -0.02  | -0.021 | -0.019 | t | 9278   | DLSLLGKA<br>RKVVVTKD         | Rattus<br>norvegic<br>us         |
| 1 | 1.00 | 1 | 1 | -0.01 | -0.012 | -0.003 | -0.007 | -0.01  | t | 18441  | FYNQKFKG<br>KATL             | Mus<br>musculu<br>s              |
| 1 | 1.00 | 1 | 1 | 0     | 0      | -0.001 | 0      | 0      | t | 59985  | SPAQDIW<br>GTSAAAYF<br>VG    | Homo<br>sapiens                  |
| 1 | 1.00 | 1 | 1 | 0     | 0      | 0.01   | 0.003  | 0.002  | t | 55402  | RQAQDIQ<br>PV                | Homo<br>sapiens                  |
| 1 | 1.00 | 1 | 1 | 0.01  | 0.013  | 0.011  | 0.01   | 0.006  | t | 39224  | LRTGKKLE<br>LDATNAPA<br>PANG | Mus<br>musculu<br>s              |
| 1 | 1.00 | 1 | 1 | 0.01  | 0.01   | 0.011  | 0.01   | 0.006  | t | 39224  | LRTGKKLE<br>LDATNAPA<br>PANG | Mus<br>musculu<br>s              |
| 1 | 1.00 | 1 | 1 | -0.01 | -0.008 | -0.005 | -0.01  | -0.01  | t | 104586 | NRVAPNV<br>RQ                | Homo<br>sapiens                  |
| 1 | 1.00 | 1 | 1 | -0.03 | -0.032 | -0.02  | -0.027 | -0.028 | t | 114290 | CYGNWFS<br>NC                | Mus<br>musculu<br>s              |
| 1 | 1.00 | 1 | 1 | 0.01  | 0.012  | 0.015  | 0.011  | 0.01   | t | 97368  | GTTYIRAIA<br>ALEGLK          | Homo<br>sapiens                  |
| 1 | 1.00 | 1 | 1 | 0     | 0      | 0      | -0.004 | 0      | t | 135942 | KDVKFGA<br>DARAL             | Homo<br>sapiens                  |
| 1 | 1.00 | 1 | 1 | 0     | -0.004 | -0.004 | -0.007 | 0      | t | 122941 | VVKLLRPDI<br>YVEV            | Oryctola<br>gus<br>cuniculu<br>s |
| 1 | 1.00 | 1 | 1 | 0     | 0      | 0      | 0      | 0.002  | t | 36959  | LKMADPN<br>RFRGKD            | Mus<br>musculu<br>s              |
| 1 | 1.00 | 1 | 1 | 0.02  | 0.02   | 0.013  | 0.019  | 0.021  | t | 138162 | EKKYSPCA<br>WEVVRAE          | Mus<br>musculu<br>s              |

|   |      |   |   |       |        |        |        |        |   |        |                             |                       |
|---|------|---|---|-------|--------|--------|--------|--------|---|--------|-----------------------------|-----------------------|
| 1 | 1.00 | 1 | 1 | -0.01 | -0.01  | -0.01  | -0.01  | -0.008 | t | 106936 | TTSEFRH                     | Mus musculus          |
| 1 | 1.00 | 1 | 1 | -0.01 | -0.01  | -0.007 | -0.007 | -0.008 | t | 48125  | PKPQRKTK<br>RNTNRRP<br>QDVK | Homo sapiens          |
| 1 | 1.00 | 1 | 1 | -0.03 | -0.033 | -0.03  | -0.03  | -0.03  | t | 137399 | FCGLPRLE                    | Oryctolagus cuniculus |
| 1 | 1.00 | 1 | 1 | 0     | 0      | 0      | 0      | 0.003  | t | 10040  | DRRCQSQ<br>LER              | Homo sapiens          |
| 1 | 1.00 | 1 | 1 | 0.06  | 0.06   | 0.065  | 0.06   | 0.062  | t | 126897 | QSQQFSVS<br>ENLLKEA         | Mus musculus          |
| 1 | 1.00 | 1 | 1 | -0.02 | -0.018 | -0.013 | -0.02  | -0.02  | t | 11560  | EEDQKARE                    | Anas platyrhynchos    |
| 1 | 1.00 | 1 | 1 | -0.01 | -0.01  | -0.01  | -0.01  | -0.01  | t | 103010 | ACGGGTN<br>SSSSGAGG         | Homo sapiens          |
| 1 | 1.00 | 1 | 1 | -0.03 | -0.03  | -0.03  | -0.03  | -0.03  | t | 149051 | GGQMRQ<br>G                 | Sus scrofa            |
| 1 | 1.00 | 1 | 1 | -0.03 | -0.03  | -0.03  | -0.03  | -0.03  | t | 100548 | TDNTKINR<br>GI              | Mus musculus          |
| 1 | 1.00 | 1 | 1 | -0.03 | -0.03  | -0.03  | -0.03  | -0.03  | t | 100548 | TDNTKINR<br>GI              | Mus musculus          |
| 1 | 1.00 | 1 | 1 | 0.02  | 0.023  | 0.023  | 0.02   | 0.022  | t | 7205   | CTSGFTGL<br>FSSGAKQT        | Mus musculus          |
| 1 | 1.00 | 1 | 1 | 0.01  | 0.007  | 0.018  | 0.01   | 0.013  | t | 24360  | HNAKYVS<br>AESWG            | Mus musculus          |
| 1 | 1.00 | 1 | 1 | -0.03 | -0.03  | -0.027 | -0.03  | -0.028 | t | 64994  | TLNWPPTL<br>WGMH            | Mus musculus          |
| 1 | 1.00 | 1 | 1 | -0.03 | -0.028 | -0.035 | -0.023 | -0.028 | t | 156697 | KIHAREIFD<br>SRGNPTVE       | Homo sapiens          |
| 1 | 1.00 | 1 | 1 | -0.01 | -0.006 | -0.01  | -0.013 | -0.009 | t | 9818   | DPYSPSPY<br>DRRGAGS         | Homo sapiens          |



|   |      |   |   |       |       |        |        |        |   |        |                           |                      |
|---|------|---|---|-------|-------|--------|--------|--------|---|--------|---------------------------|----------------------|
| 1 | 1.00 | 1 | 1 | 0.02  | 0.018 | 0.02   | 0.013  | 0.02   | t | 119620 | NPDDYGG<br>VK             | Rattus<br>norvegicus |
| 1 | 1.00 | 1 | 1 | 0.01  | 0.008 | 0.012  | 0.009  | 0.01   | t | 41066  | MAKTIAYD<br>EEARRGL       | Rattus<br>norvegicus |
| 1 | 1.00 | 1 | 1 | -0.05 | -0.05 | -0.05  | -0.05  | -0.05  | t | 95013  | GGIKKIRLP<br>SDDVWLP      | Rattus<br>norvegicus |
| 1 | 1.00 | 1 | 1 | -0.02 | -0.02 | -0.013 | -0.02  | -0.02  | t | 151679 | LAALTRTP<br>VVSP          | Mus<br>musculus      |
| 1 | 1.00 | 1 | 1 | 0.04  | 0.04  | 0.045  | 0.04   | 0.04   | t | 16053  | FGSDYEDR<br>YYREN         | Mus<br>musculus      |
| 1 | 1.00 | 1 | 1 | 0.04  | 0.043 | 0.045  | 0.04   | 0.04   | t | 16053  | FGSDYEDR<br>YYREN         | Mus<br>musculus      |
| 1 | 1.00 | 1 | 1 | 0     | 0     | 0      | -0.007 | -0.001 | t | 119823 | EDDDMGF<br>GLFD           | Homo<br>sapiens      |
| 1 | 1.00 | 1 | 1 | 0     | 0     | 0      | -0.007 | -0.001 | t | 118127 | SDDDMGF<br>GLFD           | Homo<br>sapiens      |
| 1 | 1.00 | 1 | 1 | 0     | 0     | 0      | -0.007 | -0.001 | t | 131344 | AIGDRSKT<br>DRENSVSI<br>G | Homo<br>sapiens      |
| 1 | 1.00 | 1 | 1 | 0     | 0     | 0      | -0.007 | -0.001 | t | 117773 | CNSRQTD<br>REDELI         | Homo<br>sapiens      |
| 1 | 1.00 | 1 | 1 | 0     | 0     | 0      | -0.007 | -0.001 | t | 117742 | AKAQTD<br>EDLRTLLRY       | Homo<br>sapiens      |
| 1 | 1.00 | 1 | 1 | 0     | 0     | 0      | -0.007 | -0.001 | t | 131344 | AIGDRSKT<br>DRENSVSI<br>G | Homo<br>sapiens      |
| 1 | 1.00 | 1 | 1 | 0     | 0     | 0      | -0.007 | -0.001 | t | 41571  | MGFGLFD                   | Homo<br>sapiens      |
| 1 | 1.00 | 1 | 1 | 0     | 0     | 0      | -0.007 | -0.001 | t | 41571  | MGFGLFD                   | Homo<br>sapiens      |
| 1 | 1.00 | 1 | 1 | 0     | 0     | 0      | -0.007 | -0.001 | t | 11872  | EESDDDM<br>GFGFLFD        | Homo<br>sapiens      |

|   |      |   |   |       |        |        |        |        |   |        |                              |                                  |
|---|------|---|---|-------|--------|--------|--------|--------|---|--------|------------------------------|----------------------------------|
| 1 | 1.00 | 1 | 1 | 0     | 0      | 0      | -0.007 | -0.001 | t | 7756   | DDDMGFG<br>LFD               | Homo<br>sapiens                  |
| 1 | 1.00 | 1 | 1 | -0.04 | -0.041 | -0.039 | -0.043 | -0.039 | t | 99619  | RLVLRRNA<br>LRRPFYS          | Homo<br>sapiens                  |
| 1 | 1.00 | 1 | 1 | 0.1   | 0.098  | 0.091  | 0.093  | 0.1    | t | 109905 | SEEEND                       | Mus<br>musculu<br>s              |
| 1 | 1.00 | 1 | 1 | 0.1   | 0.098  | 0.091  | 0.093  | 0.1    | t | 109905 | SEEEND                       | Mus<br>musculu<br>s              |
| 1 | 1.00 | 1 | 1 | 0.02  | 0.02   | 0.033  | 0.018  | 0.017  | t | 98696  | AMAASDIS<br>LL               | Homo<br>sapiens                  |
| 1 | 1.00 | 1 | 1 | -0.01 | -0.004 | -0.01  | -0.01  | -0.009 | t | 46081  | NTECTLKK<br>GSSGYCA          | Equus<br>caballus                |
| 1 | 1.00 | 1 | 1 | -0.01 | -0.004 | -0.01  | -0.01  | -0.009 | t | 46081  | NTECTLKK<br>GSSGYCA          | Ovis<br>aries                    |
| 1 | 1.00 | 1 | 1 | -0.01 | -0.01  | -0.01  | -0.01  | -0.009 | t | 46081  | NTECTLKK<br>GSSGYCA          | Oryctola<br>gus<br>cuniculu<br>s |
| 1 | 1.00 | 1 | 1 | -0.02 | -0.02  | -0.011 | -0.02  | -0.022 | t | 108088 | RAAPFGN<br>QW                | Mus<br>musculu<br>s              |
| 1 | 1.00 | 1 | 1 | 0     | -0.004 | 0      | -0.003 | 0.001  | t | 118490 | LKDKYKNI<br>GAKLV            | Oryctola<br>gus<br>cuniculu<br>s |
| 1 | 1.00 | 1 | 1 | 0     | 0      | 0.011  | 0      | 0      | t | 94616  | NPAC                         | Capra<br>hircus                  |
| 1 | 1.00 | 1 | 1 | 0.01  | 0.008  | 0.01   | 0.007  | 0.013  | t | 62347  | SVTEEIAEE<br>DK              | Mus<br>musculu<br>s              |
| 1 | 1.00 | 1 | 1 | 0.02  | 0.02   | 0.027  | 0.02   | 0.019  | t | 150970 | AVPADHG<br>AHLRLRGL<br>PVCAF | Mus<br>musculu<br>s              |
| 1 | 1.00 | 1 | 1 | 0     | -0.002 | 0      | -0.007 | 0.001  | t | 132276 | ERIYHFV                      | Mus<br>musculu<br>s              |

|   |      |   |   |       |        |        |        |        |   |        |                            |                          |
|---|------|---|---|-------|--------|--------|--------|--------|---|--------|----------------------------|--------------------------|
| 1 | 1.00 | 1 | 1 | 0.02  | 0.02   | 0.032  | 0.02   | 0.021  | t | 104569 | MASPGSG<br>FWSFGSE<br>DGS  | Mus<br>musculu<br>s      |
| 1 | 1.00 | 1 | 1 | -0.02 | -0.02  | -0.02  | -0.02  | -0.02  | t | 156926 | NSRTWLT                    | Gallus<br>gallus         |
| 1 | 1.00 | 1 | 1 | 0.01  | 0.01   | 0.014  | 0.01   | 0.012  | t | 152056 | QAAKQRL<br>EPGRN           | Sus<br>scrofa            |
| 1 | 1.00 | 1 | 1 | -0.01 | -0.01  | -0.01  | -0.01  | -0.01  | t | 110198 | CPPDIIPKV<br>EGKTIA        | Mus<br>musculu<br>s      |
| 1 | 1.00 | 1 | 1 | -0.03 | -0.027 | -0.018 | -0.03  | -0.03  | t | 125250 | SDEFNPCE<br>DIMGYK         | Mus<br>musculu<br>s      |
| 1 | 1.00 | 1 | 1 | -0.03 | -0.027 | -0.018 | -0.03  | -0.03  | t | 125250 | SDEFNPCE<br>DIMGYK         | Mus<br>musculu<br>s      |
| 1 | 1.00 | 1 | 1 | -0.04 | -0.04  | -0.04  | -0.04  | -0.04  | t | 142410 | EAPNSSRH<br>HLRNGF         | Homo<br>sapiens          |
| 1 | 1.00 | 1 | 1 | -0.02 | -0.02  | -0.02  | -0.02  | -0.018 | t | 106642 | MHLNTPP                    | Homo<br>sapiens          |
| 1 | 1.00 | 1 | 1 | -0.02 | -0.02  | -0.018 | -0.021 | -0.021 | t | 116080 | ATGGTLQ<br>QLFYSITV<br>GQV | Mus<br>musculu<br>s      |
| 1 | 1.00 | 1 | 1 | 0     | -0.002 | 0      | -0.003 | 0      | t | 132767 | YRDKSYPS<br>PFWCHRT        | Mus<br>musculu<br>s      |
| 1 | 1.00 | 1 | 1 | -0.07 | -0.072 | -0.071 | -0.071 | -0.07  | t | 26515  | IIHR                       | Mus<br>musculu<br>s      |
| 1 | 1.00 | 1 | 1 | -0.02 | -0.02  | -0.02  | -0.02  | -0.016 | t | 141760 | TAPPLLPH                   | Rattus<br>norvegic<br>us |
| 1 | 1.00 | 1 | 1 | 0     | 0      | 0      | 0      | 0      | t | 108072 | PPGPTGAS<br>G              | Homo<br>sapiens          |
| 1 | 1.00 | 1 | 1 | -0.01 | 0.004  | -0.001 | -0.01  | -0.01  | t | 27946  | IPLVGAPL<br>GG             | Pan<br>troglody<br>tes   |
| 1 | 1.00 | 1 | 1 | 0.01  | 0.014  | 0.001  | 0.007  | 0.013  | t | 156416 | QGRQQGR<br>QQQEGR<br>Q     | Homo<br>sapiens          |

|   |      |   |   |       |        |        |        |        |   |        |                              |                       |
|---|------|---|---|-------|--------|--------|--------|--------|---|--------|------------------------------|-----------------------|
| 1 | 1.00 | 1 | 1 | 0.01  | 0.01   | 0.021  | 0.007  | 0.011  | t | 8552   | DHLPSPW                      | Homo sapiens          |
| 1 | 1.00 | 1 | 1 | 0.01  | 0.008  | 0.005  | 0.007  | 0.012  | t | 134199 | PVQCSR<br>VVICPDS            | Mus musculus          |
| 1 | 1.00 | 1 | 1 | -0.02 | -0.016 | -0.016 | -0.019 | -0.019 | t | 22133  | GRLITVNP                     | MD                    |
| 1 | 1.00 | 1 | 1 | 0.02  | 0.02   | 0.015  | 0.02   | 0.023  | t | 59873  | SNNVQIVR<br>QQSYSI           | Mus musculus          |
| 1 | 1.00 | 1 | 1 | 0.02  | 0.016  | 0.015  | 0.02   | 0.023  | t | 59873  | SNNVQIVR<br>QQSYSI           | Bos taurus            |
| 1 | 1.00 | 1 | 1 | -0.01 | -0.01  | -0.003 | -0.01  | -0.01  | t | 48084  | PKINRSAP<br>EPSL             | Oryctolagus cuniculus |
| 1 | 1.00 | 1 | 1 | -0.01 | -0.012 | -0.001 | -0.011 | -0.012 | t | 64010  | TGYRYDSR<br>TGFFATN          | Mus musculus          |
| 1 | 1.00 | 1 | 1 | 0.04  | 0.041  | 0.043  | 0.04   | 0.041  | t | 12542  | EIPDPVEA<br>GEEV             | Mus musculus          |
| 1 | 1.00 | 1 | 1 | -0.03 | -0.032 | -0.032 | -0.029 | -0.027 | t | 96815  | RCQSQLER<br>A                | Mus musculus          |
| 1 | 1.00 | 1 | 1 | 0     | 0      | 0      | -0.003 | 0.002  | t | 47266  | PEEFEGAG<br>DGEPPED<br>DDS   | Homo sapiens          |
| 1 | 1.00 | 1 | 1 | 0.03  | 0.027  | 0.031  | 0.03   | 0.03   | t | 35860  | LFIQGYSIY<br>ENYGNIKE<br>FNA | Oryctolagus cuniculus |
| 1 | 1.00 | 1 | 1 | 0     | 0      | 0.012  | 0      | 0      | t | 28339  | IRMGTDK                      | Homo sapiens          |
| 1 | 1.00 | 1 | 1 | -0.01 | -0.01  | -0.01  | -0.01  | -0.009 | t | 51827  | QFPQPQ<br>LPYPQPQ            | Mus musculus          |
| 1 | 1.00 | 1 | 1 | 0.01  | 0.003  | 0.021  | 0.01   | 0.01   | t | 94469  | CNPACG                       | Oryctolagus cuniculus |
| 1 | 1.00 | 1 | 1 | 0.01  | 0.01   | 0.021  | 0.01   | 0.01   | t | 94469  | CNPACG                       | Capra hircus          |

|   |      |   |   |       |        |        |        |        |   |        |                             |                                  |
|---|------|---|---|-------|--------|--------|--------|--------|---|--------|-----------------------------|----------------------------------|
| 1 | 1.00 | 1 | 1 | 0.01  | 0.01   | 0.021  | 0.01   | 0.01   | t | 94469  | CNPACG                      | Oryctola<br>gus<br>cuniculu<br>s |
| 1 | 1.00 | 1 | 1 | 0     | 0      | 0.006  | -0.003 | 0.001  | t | 38305  | LNPKTNK<br>WEDKRY           | Homo<br>sapiens                  |
| 1 | 1.00 | 1 | 1 | -0.04 | -0.04  | -0.033 | -0.04  | -0.039 | t | 136216 | FAWKWQ<br>YIYD              | Homo<br>sapiens                  |
| 1 | 1.00 | 1 | 1 | 0.02  | 0.033  | 0.01   | 0.023  | 0.023  | t | 55818  | RSDYKFYE<br>DANGTRD<br>HKKG | Chinchill<br>a<br>lanigera       |
| 1 | 1.00 | 1 | 1 | 0     | -0.003 | 0.007  | 0      | -0.001 | t | 131956 | LPKSAKPV<br>SQMRMA<br>TPLL  | Oryctola<br>gus<br>cuniculu<br>s |
| 1 | 1.00 | 1 | 1 | 0.01  | 0.012  | 0.009  | 0.01   | 0.012  | t | 48348  | PLGPPAAE<br>YWN             | Homo<br>sapiens                  |
| 1 | 1.00 | 1 | 1 | -0.02 | -0.02  | -0.02  | -0.02  | -0.02  | t | 59927  | SNTLPRSN<br>TSSGASP         | Mus<br>musculu<br>s              |
| 1 | 1.00 | 1 | 1 | 0.02  | 0.022  | 0.009  | 0.017  | 0.023  | t | 30951  | KGGWFGK<br>HRGQGGs          | Homo<br>sapiens                  |
| 1 | 1.00 | 1 | 1 | 0.01  | 0.006  | 0.01   | 0.007  | 0.009  | t | 131687 | SYPDNSYQ<br>QPYGE           | Oryctola<br>gus<br>cuniculu<br>s |
| 1 | 1.00 | 1 | 1 | 0     | -0.002 | 0      | -0.001 | 0.002  | t | 37361  | LLGPYELW<br>ELSH            | Mus<br>musculu<br>s              |
| 1 | 1.00 | 1 | 1 | 0     | -0.003 | 0      | -0.001 | 0.002  | t | 10868  | DYEDRYR<br>E                | Oryctola<br>gus<br>cuniculu<br>s |
| 1 | 1.00 | 1 | 1 | 0.01  | 0.01   | 0.01   | -0.001 | 0.008  | t | 118646 | VAVTMGP<br>KGRTVI           | Homo<br>sapiens                  |
| 1 | 1.00 | 1 | 1 | 0     | -0.008 | 0      | 0      | 0.002  | t | 156933 | PLEKSHL                     | Mus<br>musculu<br>s              |
| 1 | 1.00 | 1 | 1 | 0.01  | 0.01   | 0.025  | 0.011  | 0.01   | t | 98098  | HKSGANA<br>ASS              | Homo<br>sapiens                  |
| 1 | 1.00 | 1 | 1 | -0.01 | -0.01  | -0.01  | -0.01  | -0.007 | t | 157811 | QRQCQQR<br>CER              | Homo<br>sapiens                  |

|   |      |   |   |       |        |        |        |        |   |        |                              |                                  |
|---|------|---|---|-------|--------|--------|--------|--------|---|--------|------------------------------|----------------------------------|
| 1 | 1.00 | 1 | 1 | -0.01 | -0.01  | -0.012 | -0.013 | -0.012 | t | 99016  | SSRDQSSY<br>LQGFSRN          | Homo<br>sapiens                  |
| 1 | 1.00 | 1 | 1 | -0.03 | -0.03  | -0.015 | -0.026 | -0.032 | t | 142433 | KNDSLPH<br>EPNNLE            | Homo<br>sapiens                  |
| 1 | 1.00 | 1 | 1 | 0.02  | 0.018  | 0.027  | 0.019  | 0.02   | t | 28023  | IPQSLDSW<br>WTSL             | Mus<br>musculu<br>s              |
| 1 | 1.00 | 1 | 1 | 0.03  | 0.028  | 0.035  | 0.029  | 0.031  | t | 55641  | RRLGRQTY<br>DNES             | Mus<br>musculu<br>s              |
| 1 | 1.00 | 1 | 1 | 0     | -0.004 | 0.011  | 0.003  | 0      | t | 70216  | VNVYPKIS<br>TSTNCAT          | Oryctola<br>gus<br>cuniculu<br>s |
| 1 | 1.00 | 1 | 1 | 0     | 0      | -0.002 | 0      | 0      | t | 56443  | RVVIQDYD<br>NQHEQDR<br>PTPSP | Homo<br>sapiens                  |
| 1 | 1.00 | 1 | 1 | -0.03 | -0.028 | -0.011 | -0.023 | -0.028 | t | 128078 | PPKPEPKP<br>KKAPAKK          | Homo<br>sapiens                  |
| 1 | 1.00 | 1 | 1 | -0.01 | -0.01  | -0.01  | 0      | 0      | t | 108596 | PYPFAQKR<br>L                | Homo<br>sapiens                  |
| 1 | 1.00 | 1 | 1 | -0.02 | -0.023 | -0.02  | -0.02  | -0.019 | t | 66749  | TTPAQGN<br>SMFPSC            | Oryctola<br>gus<br>cuniculu<br>s |
| 1 | 1.00 | 1 | 1 | -0.04 | -0.04  | -0.04  | -0.04  | -0.042 | t | 2558   | ALGGWGL<br>HQPPPQIF<br>LKILP | Homo<br>sapiens                  |
| 1 | 1.00 | 1 | 1 | -0.06 | -0.06  | -0.06  | -0.06  | -0.06  | t | 127689 | HWHRPTN                      | Homo<br>sapiens                  |
| 1 | 1.00 | 1 | 1 | 0     | -0.002 | 0.004  | 0      | 0      | t | 2276   | AKRLRSM<br>HVFILDYD          | Oryctola<br>gus<br>cuniculu<br>s |
| 1 | 1.00 | 1 | 1 | -0.03 | -0.032 | -0.013 | -0.031 | -0.032 | t | 151072 | YDDVNGIR<br>RP               | Mus<br>musculu<br>s              |
| 1 | 1.00 | 1 | 1 | 0.07  | 0.07   | 0.081  | 0.07   | 0.072  | t | 117235 | SS                           | Mus<br>musculu<br>s              |

|   |      |   |   |       |        |        |        |        |   |        |                              |                                  |
|---|------|---|---|-------|--------|--------|--------|--------|---|--------|------------------------------|----------------------------------|
| 1 | 1.00 | 1 | 1 | 0.04  | 0.038  | 0.034  | 0.039  | 0.04   | t | 24697  | HRMQEAV<br>EAERAGR<br>GTGH   | Mus<br>musculu<br>s              |
| 1 | 1.00 | 1 | 1 | -0.01 | -0.01  | -0.005 | -0.014 | -0.01  | t | 17465  | FQDHPLQ<br>KTY               | Homo<br>sapiens                  |
| 1 | 1.00 | 1 | 1 | 0     | -0.002 | -0.011 | -0.001 | 0      | t | 20719  | GKVSLEEF<br>CRGFGLKV<br>WEVR | Mus<br>musculu<br>s              |
| 1 | 1.00 | 1 | 1 | -0.01 | -0.01  | -0.01  | -0.01  | -0.008 | t | 119382 | VISCAKDAI<br>EDEEGSC         | Oryctola<br>gus<br>cuniculu<br>s |
| 1 | 1.00 | 1 | 1 | -0.01 | -0.013 | 0.007  | -0.01  | -0.01  | t | 138885 | NNQSPILK<br>LSIH             | Canis<br>lupus                   |
| 1 | 1.00 | 1 | 1 | -0.02 | -0.022 | -0.008 | -0.017 | -0.021 | t | 7398   | CYKKVWR<br>DHRGTI            | Mus<br>musculu<br>s              |
| 1 | 1.00 | 1 | 1 | -0.02 | -0.022 | -0.008 | -0.017 | -0.021 | t | 7401   | CYKKVWR<br>DHRGTI            | Mus<br>musculu<br>s              |
| 1 | 1.00 | 1 | 1 | 0     | 0      | 0.007  | 0      | 0      | t | 138255 | TTLTLRH                      | Homo<br>sapiens                  |
| 1 | 1.00 | 1 | 1 | -0.04 | -0.043 | -0.035 | -0.04  | -0.041 | t | 122875 | PRGWNPG<br>FLYNGFPL          | Oryctola<br>gus<br>cuniculu<br>s |
| 1 | 1.00 | 1 | 1 | 0.02  | 0.02   | 0.025  | 0.02   | 0.02   | t | 112453 | ASQKRPSQ<br>R                | Mus<br>musculu<br>s              |
| 1 | 1.00 | 1 | 1 | -0.04 | -0.04  | -0.035 | -0.04  | -0.039 | t | 14273  | ESSPNTQ<br>WELRAFM<br>A      | Mus<br>musculu<br>s              |
| 1 | 1.00 | 1 | 1 | 0     | 0      | 0      | 0      | 0.002  | t | 47013  | PAYYTKDT<br>NNNLT            | Mus<br>musculu<br>s              |
| 1 | 1.00 | 1 | 1 | -0.01 | -0.01  | -0.005 | -0.01  | -0.01  | t | 55272  | RPPRYMV<br>QS                | Mus<br>musculu<br>s              |
| 1 | 1.00 | 1 | 1 | -0.01 | -0.008 | -0.002 | -0.008 | -0.008 | t | 53689  | RFDKGYIS<br>GY               | Homo<br>sapiens                  |
| 1 | 1.00 | 1 | 1 | 0.02  | 0.02   | 0.02   | 0.016  | 0.02   | t | 48348  | PLGPPAAE<br>YWN              | Homo<br>sapiens                  |

|   |      |   |   |       |        |        |        |        |   |        |                              |                                  |
|---|------|---|---|-------|--------|--------|--------|--------|---|--------|------------------------------|----------------------------------|
| 1 | 1.00 | 1 | 1 | 0.03  | 0.03   | 0.039  | 0.03   | 0.03   | t | 283    | AALIEEGQ<br>R                | Homo<br>sapiens                  |
| 1 | 1.00 | 1 | 1 | -0.01 | -0.014 | -0.005 | -0.011 | -0.01  | t | 64978  | TLNKDQLL<br>SSSKYTIQR<br>STG | Oryctola<br>gus<br>cuniculu<br>s |
| 1 | 1.00 | 1 | 1 | -0.07 | -0.067 | -0.07  | -0.07  | -0.067 | t | 143678 | DRVNLRLN<br>RGYY             | Mus<br>musculu<br>s              |
| 1 | 1.00 | 1 | 1 | 0.03  | 0.028  | 0.037  | 0.029  | 0.03   | t | 98060  | GFMVPPG<br>LSSEGHLT          | Sus<br>scrofa                    |
| 1 | 1.00 | 1 | 1 | -0.02 | -0.02  | -0.02  | -0.02  | -0.02  | t | 118611 | SQALQELIS<br>ELDRRCHS        | Homo<br>sapiens                  |
| 1 | 1.00 | 1 | 1 | 0.01  | 0.01   | 0.021  | 0.01   | 0.01   | t | 94469  | CNPACG                       | Oryctola<br>gus<br>cuniculu<br>s |
| 1 | 1.00 | 1 | 1 | 0.01  | 0.017  | 0.021  | 0.01   | 0.01   | t | 94469  | CNPACG                       | Capra<br>hircus                  |
| 1 | 1.00 | 1 | 1 | 0.01  | 0.01   | 0.021  | 0.01   | 0.01   | t | 94469  | CNPACG                       | Capra<br>hircus                  |
| 1 | 1.00 | 1 | 1 | -0.02 | -0.017 | -0.007 | -0.02  | -0.02  | t | 73103  | WSSGYGT<br>GR                | Mus<br>musculu<br>s              |
| 1 | 1.00 | 1 | 1 | -0.05 | -0.045 | -0.057 | -0.049 | -0.044 | t | 20934  | GLIRACML<br>VR               | Homo<br>sapiens                  |
| 1 | 1.00 | 1 | 1 | -0.04 | -0.042 | -0.04  | -0.041 | -0.04  | t | 98798  | GGFGPGG<br>FGP               | Mus<br>musculu<br>s              |
| 1 | 1.00 | 1 | 1 | -0.01 | -0.01  | -0.01  | -0.01  | -0.01  | t | 123073 | DDREKW<br>MSE                | Ovis<br>aries                    |
| 1 | 1.00 | 1 | 1 | 0.01  | 0.01   | 0.026  | 0.01   | 0.01   | t | 9232   | DLPDYGDY<br>GEDLFDY          | Mus<br>musculu<br>s              |



|   |      |   |   |       |        |        |        |        |   |        |                              |                                  |
|---|------|---|---|-------|--------|--------|--------|--------|---|--------|------------------------------|----------------------------------|
| 1 | 1.00 | 1 | 1 | -0.01 | -0.01  | 0.007  | -0.01  | -0.01  | t | 15048  | EYLILSARD<br>V               | Mus<br>musculu<br>s              |
| 1 | 1.00 | 1 | 1 | -0.01 | -0.01  | 0.007  | -0.01  | -0.01  | t | 15048  | EYLILSARD<br>V               | Mus<br>musculu<br>s              |
| 1 | 1.00 | 1 | 1 | -0.03 | -0.033 | -0.023 | -0.03  | -0.03  | t | 138837 | CSSWYRG<br>AC                | Canis<br>lupus                   |
| 1 | 1.00 | 1 | 1 | -0.03 | -0.03  | -0.035 | -0.03  | -0.03  | t | 62852  | TAGHGAY<br>GITSLFTRG         | Homo<br>sapiens                  |
| 1 | 1.00 | 1 | 1 | -0.01 | -0.01  | -0.01  | -0.01  | -0.008 | t | 91100  | AFQTPVHS                     | Mus<br>musculu<br>s              |
| 1 | 1.00 | 1 | 1 | 0     | 0      | 0      | 0      | 0.002  | t | 122468 | LLDRKSGK<br>QYSIEAAL<br>RCRR | Homo<br>sapiens                  |
| 1 | 1.00 | 1 | 1 | -0.01 | -0.01  | -0.01  | -0.01  | -0.009 | t | 135473 | KDRHDFG<br>FPQ               | Mus<br>musculu<br>s              |
| 1 | 1.00 | 1 | 1 | 0     | 0      | 0.002  | 0      | 0.002  | t | 58388  | SHLVEALY<br>LVCGERG          | Mus<br>musculu<br>s              |
| 1 | 1.00 | 1 | 1 | -0.01 | -0.01  | 0.002  | -0.01  | -0.01  | t | 116164 | RTPPPSG                      | Gallus<br>gallus                 |
| 1 | 1.00 | 1 | 1 | -0.01 | 0.001  | 0.002  | -0.01  | -0.01  | t | 116164 | RTPPPSG                      | Gallus<br>gallus                 |
| 1 | 1.00 | 1 | 1 | -0.01 | -0.021 | 0.002  | -0.01  | -0.01  | t | 116164 | RTPPPSG                      | Oryctola<br>gus<br>cuniculu<br>s |
| 1 | 1.00 | 1 | 1 | -0.01 | -0.01  | 0.002  | -0.01  | -0.01  | t | 116164 | RTPPPSG                      | Oryctola<br>gus<br>cuniculu<br>s |
| 1 | 1.00 | 1 | 1 | -0.01 | -0.01  | -0.01  | -0.013 | -0.01  | t | 22238  | GRVILSGR<br>PAIVPDRE<br>VLYR | Homo<br>sapiens                  |
| 1 | 1.00 | 1 | 1 | 0.01  | 0.024  | 0.02   | 0.007  | 0.008  | t | 61478  | SSYAN                        | Homo<br>sapiens                  |
| 1 | 1.00 | 1 | 1 | 0.04  | 0.04   | 0.035  | 0.04   | 0.043  | t | 107149 | GIAGFKGE<br>QGPKGET          | Mus<br>musculu<br>s              |

|   |      |   |   |       |        |        |        |        |   |        |                           |                                  |
|---|------|---|---|-------|--------|--------|--------|--------|---|--------|---------------------------|----------------------------------|
| 1 | 1.00 | 1 | 1 | 0.01  | 0.009  | 0.019  | 0.011  | 0.01   | t | 4732   | ASRAALIEE<br>GQRIA        | Homo<br>sapiens                  |
| 1 | 1.00 | 1 | 1 | 0.03  | 0.03   | 0.03   | 0.03   | 0.031  | t | 119608 | LGTWTYD<br>GSVVAINP<br>ES | Homo<br>sapiens                  |
| 1 | 1.00 | 1 | 1 | 0     | 0      | 0.017  | 0      | -0.002 | t | 77925  | KACSNNST<br>CFNP          | Mus<br>musculu<br>s              |
| 1 | 1.00 | 1 | 1 | -0.03 | -0.027 | -0.008 | -0.03  | -0.03  | t | 104139 | MWNDFW                    | Mus<br>musculu<br>s              |
| 1 | 1.00 | 1 | 1 | 0.02  | 0.02   | 0.023  | 0.023  | 0.022  | t | 115626 | LKDAIGEG<br>KVTL          | Homo<br>sapiens                  |
| 1 | 1.00 | 1 | 1 | -0.04 | -0.042 | -0.049 | -0.047 | -0.041 | t | 109624 | NHQH                      | Mus<br>musculu<br>s              |
| 1 | 1.00 | 1 | 1 | 0.02  | 0.02   | 0.023  | 0.02   | 0.02   | t | 98855  | KTENPCA<br>QRCLQSC<br>Q   | Homo<br>sapiens                  |
| 1 | 1.00 | 1 | 1 | -0.01 | -0.013 | -0.005 | -0.01  | -0.012 | t | 6065   | CCNGIRTI<br>NGLARTT       | Oryctola<br>gus<br>cuniculu<br>s |
| 1 | 1.00 | 1 | 1 | 0     | 0      | 0      | -0.003 | 0.001  | t | 43242  | NANPNAN<br>PNANP          | Homo<br>sapiens                  |
| 1 | 1.00 | 1 | 1 | 0     | -0.003 | 0      | -0.003 | 0.001  | t | 11819  | EENVEHD<br>A              | Homo<br>sapiens                  |
| 1 | 1.00 | 1 | 1 | 0     | -0.004 | 0      | -0.003 | 0.001  | t | 118451 | KGIIDPTKV<br>VRTA         | Oryctola<br>gus<br>cuniculu<br>s |
| 1 | 1.00 | 1 | 1 | 0     | -0.004 | 0      | -0.003 | 0.001  | t | 118275 | ATVLARSI<br>AKEGF         | Oryctola<br>gus<br>cuniculu<br>s |
| 1 | 1.00 | 1 | 1 | 0     | -0.004 | 0      | -0.003 | 0.001  | t | 118490 | LKDKYKNI<br>GAKLV         | Oryctola<br>gus<br>cuniculu<br>s |
| 1 | 1.00 | 1 | 1 | 0     | -0.002 | 0      | -0.003 | 0.001  | t | 35252  | LDPHAFHL<br>LL            | Mus<br>musculu<br>s              |

|   |      |   |   |       |        |        |        |        |   |        |                              |                                  |
|---|------|---|---|-------|--------|--------|--------|--------|---|--------|------------------------------|----------------------------------|
| 1 | 1.00 | 1 | 1 | 0.01  | 0.01   | 0.01   | 0.01   | 0.01   | t | 132817 | FGQNRAN<br>PQLPP             | Homo<br>sapiens                  |
| 1 | 1.00 | 1 | 1 | 0.03  | 0.03   | 0.049  | 0.034  | 0.029  | t | 307    | AALVSGTA<br>TAGWTFG<br>AG    | Homo<br>sapiens                  |
| 1 | 1.00 | 1 | 1 | 0.04  | 0.036  | 0.052  | 0.043  | 0.041  | t | 104995 | SYSTTAVV<br>TN               | Oryctola<br>gus<br>cuniculu<br>s |
| 1 | 1.00 | 1 | 1 | 0     | 0.004  | 0.002  | 0      | 0.002  | t | 433    | AASGPKVV<br>IDGKDQN<br>VTGSV | Homo<br>sapiens                  |
| 1 | 1.00 | 1 | 1 | 0     | 0.007  | 0.004  | -0.001 | 0.001  | t | 31365  | KINIGSKV<br>NFDPIDKN<br>QIQ  | Gallus<br>gallus                 |
| 1 | 1.00 | 1 | 1 | 0     | 0.001  | 0.004  | -0.001 | 0.001  | t | 31365  | KINIGSKV<br>NFDPIDKN<br>QIQ  | Equus<br>caballus                |
| 1 | 1.00 | 1 | 1 | 0     | 0      | 0.002  | 0      | 0.002  | t | 70391  | VPNLRGDL<br>QVLAQKV<br>ARTLP | Cavia<br>porcellu<br>s           |
| 1 | 1.00 | 1 | 1 | 0     | 0      | 0      | 0.002  | 0.004  | t | 60473  | SQKIQLVN<br>TNGSWH           | Homo<br>sapiens                  |
| 1 | 1.00 | 1 | 1 | -0.02 | -0.02  | -0.018 | -0.021 | -0.021 | t | 116080 | ATGGTLQ<br>QLFYISIV<br>GQV   | Mus<br>musculu<br>s              |
| 1 | 1.00 | 1 | 1 | 0     | 0      | 0.008  | -0.003 | 0      | t | 69697  | VLPPALEIT<br>PLT             | Homo<br>sapiens                  |
| 1 | 1.00 | 1 | 1 | 0     | -0.002 | 0      | -0.003 | 0.001  | t | 118105 | RKGHFLLS<br>SKSGFWTI<br>WL   | Mus<br>musculu<br>s              |
| 1 | 1.00 | 1 | 1 | 0     | -0.004 | 0      | -0.003 | 0.001  | t | 120682 | KILPEVKEK<br>HEFLSRL         | Oryctola<br>gus<br>cuniculu<br>s |
| 1 | 1.00 | 1 | 1 | 0     | -0.004 | 0      | -0.003 | 0.001  | t | 117907 | HKAFKGS                      | Oryctola<br>gus<br>cuniculu<br>s |
| 1 | 1.00 | 1 | 1 | 0     | -0.004 | 0      | -0.003 | 0.001  | t | 122878 | PYEFSRKV<br>PTFATPW<br>PDFVP | Oryctola<br>gus<br>cuniculu<br>s |

|   |      |   |   |      |        |       |        |       |   |        |                             |                                  |
|---|------|---|---|------|--------|-------|--------|-------|---|--------|-----------------------------|----------------------------------|
| 1 | 1.00 | 1 | 1 | 0    | -0.004 | 0     | -0.003 | 0.001 | t | 120699 | KMFPEVKE<br>KGMAALP<br>RL   | Oryctola<br>gus<br>cuniculu<br>s |
| 1 | 1.00 | 1 | 1 | 0    | -0.002 | 0     | -0.003 | 0.001 | t | 117300 | GSGKGKV<br>QFQGKKT<br>KF    | Mus<br>musculu<br>s              |
| 1 | 1.00 | 1 | 1 | 0    | -0.004 | 0     | -0.003 | 0.001 | t | 105021 | VHHQKL<br>VFFAEDVGS<br>NK   | Oryctola<br>gus<br>cuniculu<br>s |
| 1 | 1.00 | 1 | 1 | 0    | -0.004 | 0     | -0.003 | 0.001 | t | 117300 | GSGKGKV<br>QFQGKKT<br>KF    | Oryctola<br>gus<br>cuniculu<br>s |
| 1 | 1.00 | 1 | 1 | 0    | -0.004 | 0     | -0.003 | 0.001 | t | 117246 | VTWEVLE<br>GEVEKEAL<br>KKI  | Oryctola<br>gus<br>cuniculu<br>s |
| 1 | 1.00 | 1 | 1 | 0    | -0.002 | 0     | -0.003 | 0.001 | t | 110733 | VGENVPD<br>DLYIKGSG         | Mus<br>musculu<br>s              |
| 1 | 1.00 | 1 | 1 | 0    | -0.002 | 0     | -0.003 | 0.001 | t | 65050  | TLRVYK                      | Mus<br>musculu<br>s              |
| 1 | 1.00 | 1 | 1 | 0    | -0.004 | 0     | -0.003 | 0.001 | t | 11081  | EAIPALTA<br>VETGHTSQ<br>V   | Oryctola<br>gus<br>cuniculu<br>s |
| 1 | 1.00 | 1 | 1 | 0.07 | 0.07   | 0.07  | 0.07   | 0.07  | t | 156947 | QTKSECTE<br>VCKNLT          | Gallus<br>gallus                 |
| 1 | 1.00 | 1 | 1 | 0.02 | 0.023  | 0.019 | 0.02   | 0.021 | t | 4528   | ASLKDALL<br>KYIYDNRG<br>TLI | Equus<br>caballus                |
| 1 | 1.00 | 1 | 1 | 0.02 | 0.022  | 0.019 | 0.02   | 0.021 | t | 4528   | ASLKDALL<br>KYIYDNRG<br>TLI | Homo<br>sapiens                  |
| 1 | 1.00 | 1 | 1 | 0.02 | 0.028  | 0.019 | 0.02   | 0.021 | t | 4528   | ASLKDALL<br>KYIYDNRG<br>TLI | Gallus<br>gallus                 |
| 1 | 1.00 | 1 | 1 | 0.04 | 0.043  | 0.045 | 0.04   | 0.041 | t | 134654 | DQQNQFQ<br>KAET             | Mus<br>musculu<br>s              |
| 1 | 1.00 | 1 | 1 | 0    | -0.001 | 0.003 | -0.003 | 0.001 | t | 15295  | FAVANGN<br>ELLLDLS          | Homo<br>sapiens                  |

|   |      |   |   |       |        |        |       |       |   |        |                         |                       |
|---|------|---|---|-------|--------|--------|-------|-------|---|--------|-------------------------|-----------------------|
| 1 | 1.00 | 1 | 1 | 0.04  | 0.038  | 0.04   | 0.033 | 0.04  | t | 107378 | GELP                    | Rattus norvegicus     |
| 1 | 1.00 | 1 | 1 | -0.05 | -0.05  | -0.043 | -0.05 | -0.05 | t | 137866 | GDTRPRFL                | Oryctolagus cuniculus |
| 1 | 1.00 | 1 | 1 | 0.03  | 0.03   | 0.025  | 0.03  | 0.034 | t | 6403   | CHQLGKQRC               | Homo sapiens          |
| 1 | 1.00 | 1 | 1 | 0.01  | 0.01   | 0.01   | 0.01  | 0.011 | t | 135836 | DLFGNVLLGQRLDQG         | Mus musculus          |
| 1 | 1.00 | 1 | 1 | 0.01  | 0.01   | 0.01   | 0.01  | 0.011 | t | 135836 | DLFGNVLLGQRLDQG         | Mus musculus          |
| 1 | 1.00 | 1 | 1 | 0     | 0.002  | 0      | 0     | 0.002 | t | 119443 | DLKLRRSSSVGYIS          | Rattus norvegicus     |
| 1 | 1.00 | 1 | 1 | 0.01  | 0.01   | 0.014  | 0.013 | 0.012 | t | 3983   | AQKFNGLT<br>VLPPLLTD    | Homo sapiens          |
| 1 | 1.00 | 1 | 1 | -0.01 | -0.01  | -0.01  | -0.01 | -0.01 | t | 117339 | PGALLRQDNAPN            | Homo sapiens          |
| 1 | 1.00 | 1 | 1 | -0.01 | -0.01  | -0.01  | -0.01 | -0.01 | t | 100583 | TVQTRHVVQRRSRS          | Homo sapiens          |
| 1 | 1.00 | 1 | 1 | 0     | 0.003  | 0      | 0     | 0.002 | t | 124588 | PQEETLQAFDSHYDYT        | Sus scrofa            |
| 1 | 1.00 | 1 | 1 | 0     | -0.003 | 0      | 0     | 0.002 | t | 103309 | KKNGRILTLPRSNPS         | Oryctolagus cuniculus |
| 1 | 1.00 | 1 | 1 | 0     | -0.003 | 0      | 0     | 0.002 | t | 106322 | DAEFRHDSG               | Oryctolagus cuniculus |
| 1 | 1.00 | 1 | 1 | 0     | 0      | 0      | 0     | 0.002 | t | 95048  | VIFQTPLIK<br>NPDVKSAIEG | Rattus norvegicus     |
| 1 | 1.00 | 1 | 1 | 0     | 0.006  | 0      | 0     | 0.002 | t | 54058  | RHKQKIVAPVKQTL          | Ovis aries            |

|   |      |   |   |       |        |        |        |        |   |        |                              |                                  |
|---|------|---|---|-------|--------|--------|--------|--------|---|--------|------------------------------|----------------------------------|
| 1 | 1.00 | 1 | 1 | -0.02 | -0.02  | -0.02  | -0.02  | -0.019 | t | 135545 | DVFYPYPY<br>ASGS             | Mus<br>musculu<br>s              |
| 1 | 1.00 | 1 | 1 | 0     | -0.003 | 0.007  | 0      | 0.002  | t | 49764  | PTRTIGGS<br>QA               | Oryctola<br>gus<br>cuniculu<br>s |
| 1 | 1.00 | 1 | 1 | -0.02 | -0.022 | -0.02  | -0.021 | -0.02  | t | 110869 | GQAEPDR<br>AHYNIVTF<br>CCKCD | Mus<br>musculu<br>s              |
| 1 | 1.00 | 1 | 1 | -0.02 | -0.02  | 0.003  | -0.013 | -0.02  | t | 119666 | VMHEALH<br>N                 | Homo<br>sapiens                  |
| 1 | 1.00 | 1 | 1 | -0.03 | -0.032 | -0.03  | -0.024 | -0.03  | t | 134692 | HSRRRQG<br>WLKEIRKL          | Homo<br>sapiens                  |
| 1 | 1.00 | 1 | 1 | 0.01  | 0.01   | 0.01   | 0.01   | 0.012  | t | 117537 | KALSVETE<br>KLLKYLEAV<br>EKV | Homo<br>sapiens                  |
| 1 | 1.00 | 1 | 1 | 0.03  | 0.026  | 0.032  | 0.027  | 0.03   | t | 34217  | KVTLADAG<br>FMKQYGE<br>CL    | Oryctola<br>gus<br>cuniculu<br>s |
| 1 | 1.00 | 1 | 1 | 0.03  | 0.028  | 0.024  | 0.033  | 0.032  | t | 73747  | YEQLNDSS<br>EEEDEIDG<br>PAGQ | Mus<br>musculu<br>s              |
| 1 | 1.00 | 1 | 1 | 0.03  | 0.028  | 0.024  | 0.033  | 0.032  | t | 73747  | YEQLNDSS<br>EEEDEIDG<br>PAGQ | Rattus<br>norvegic<br>us         |
| 1 | 1.00 | 1 | 1 | 0.01  | 0.01   | 0.011  | 0.01   | 0.013  | t | 118776 | EADYFEYH<br>QEGGPDG<br>EPDVP | Homo<br>sapiens                  |
| 1 | 1.00 | 1 | 1 | -0.01 | -0.012 | -0.003 | -0.013 | -0.014 | t | 135898 | ARDTQGL<br>GWGAS             | Mus<br>musculu<br>s              |
| 1 | 1.00 | 1 | 1 | 0.02  | 0.017  | 0.028  | 0.02   | 0.021  | t | 56734  | SADNNNS<br>EYSWT             | Mus<br>musculu<br>s              |
| 1 | 1.00 | 1 | 1 | -0.02 | -0.024 | -0.007 | -0.021 | -0.02  | t | 17580  | FRELADAL                     | Oryctola<br>gus<br>cuniculu<br>s |
| 1 | 1.00 | 1 | 1 | 0     | 0      | 0.009  | 0      | 0      | t | 12253  | EGQRMAE<br>ML                | Homo<br>sapiens                  |
| 1 | 1.00 | 1 | 1 | -0.06 | -0.057 | -0.048 | -0.06  | -0.062 | t | 137941 | PFRSYTK                      | Mus<br>musculu<br>s              |

|   |      |   |   |       |        |        |        |        |   |        |                      |                       |
|---|------|---|---|-------|--------|--------|--------|--------|---|--------|----------------------|-----------------------|
| 1 | 1.00 | 1 | 1 | -0.03 | -0.03  | -0.022 | -0.03  | -0.028 | t | 8918   | DKLADYKRRM           | Mus musculus          |
| 1 | 1.00 | 1 | 1 | 0.04  | 0.043  | 0.022  | 0.04   | 0.047  | t | 72886  | WNEKYAQ              | Mus musculus          |
| 1 | 1.00 | 1 | 1 | -0.04 | -0.038 | -0.021 | -0.037 | -0.04  | t | 33448  | KSMRSANKP            | Homo sapiens          |
| 1 | 1.00 | 1 | 1 | 0.04  | 0.04   | 0.022  | 0.04   | 0.047  | t | 72886  | WNEKYAQ              | Mus musculus          |
| 1 | 1.00 | 1 | 1 | 0.03  | 0.03   | 0.03   | 0.03   | 0.028  | t | 136083 | SEGAEYDDQTSQREKEDDK  | Oryctolagus cuniculus |
| 1 | 1.00 | 1 | 1 | 0.01  | 0.013  | 0.022  | 0.01   | 0.01   | t | 136827 | DFGSVGGVL            | Mus musculus          |
| 1 | 1.00 | 1 | 1 | 0.02  | 0.02   | 0.029  | 0.02   | 0.02   | t | 23934  | HGPDWASP             | Mus musculus          |
| 1 | 1.00 | 1 | 1 | 0     | 0      | 0      | 0      | 0      | t | 135758 | SKLTRAEA             | Homo sapiens          |
| 1 | 1.00 | 1 | 1 | -0.04 | -0.04  | -0.04  | -0.04  | -0.04  | t | 109443 | KSRWQEG              | Homo sapiens          |
| 1 | 1.00 | 1 | 1 | -0.03 | -0.038 | -0.03  | -0.03  | -0.028 | t | 156850 | APHNKWPHLNPP         | Mus musculus          |
| 1 | 1.00 | 1 | 1 | -0.03 | -0.028 | -0.03  | -0.029 | -0.03  | t | 102069 | SKSSITITNKRLTRKC     | Homo sapiens          |
| 1 | 1.00 | 1 | 1 | -0.03 | -0.028 | -0.021 | -0.03  | -0.03  | t | 99915  | CIFPLCLGRPIAASYPPKTR | Ovis aries            |
| 1 | 1.00 | 1 | 1 | 0.06  | 0.062  | 0.05   | 0.057  | 0.062  | t | 48684  | PNPIGSENSE           | Homo sapiens          |
| 1 | 1.00 | 1 | 1 | 0     | 0.004  | 0.018  | 0.001  | 0      | t | 74422  | YIYPYRYS             | Homo sapiens          |
| 1 | 1.00 | 1 | 1 | 0.03  | 0.03   | 0.035  | 0.03   | 0.031  | t | 72338  | WEADDKNQHGE          | Mus musculus          |
| 1 | 1.00 | 1 | 1 | -0.03 | -0.03  | -0.023 | -0.03  | -0.029 | t | 137436 | QHDRLLMLSYLV         | Mus musculus          |

|   |      |   |   |       |        |       |        |        |   |        |                           |                       |
|---|------|---|---|-------|--------|-------|--------|--------|---|--------|---------------------------|-----------------------|
| 1 | 1.00 | 1 | 1 | 0.02  | 0.022  | 0.02  | 0.021  | 0.026  | t | 29128  | ITVEELKQ                  | Homo sapiens          |
| 1 | 1.00 | 1 | 1 | 0     | -0.002 | 0     | -0.001 | 0.002  | t | 146906 | EVDHTNFK<br>YNYSVIEG      | Mus musculus          |
| 1 | 1.00 | 1 | 1 | 0.01  | 0.006  | 0.014 | 0.013  | 0.01   | t | 47341  | PELDSFKE<br>ELDKYFKN<br>H | Oryctolagus cuniculus |
| 1 | 1.00 | 1 | 1 | 0.01  | 0.008  | 0.014 | 0.013  | 0.01   | t | 47341  | PELDSFKE<br>ELDKYFKN<br>H | Mus musculus          |
| 1 | 1.00 | 1 | 1 | -0.02 | -0.018 | -0.02 | -0.023 | -0.019 | t | 125596 | VSVWSYQ<br>YWRFP          | Homo sapiens          |
| 1 | 1.00 | 1 | 1 | 0.01  | 0.008  | 0.002 | 0.003  | 0.01   | t | 133635 | LSRSTKEY<br>NKLK          | Mus musculus          |
| 1 | 1.00 | 1 | 1 | 0.01  | 0.012  | 0.01  | 0.017  | 0.011  | t | 135453 | CNAEVYV<br>VPWEKK         | Homo sapiens          |
| 1 | 1.00 | 1 | 1 | -0.03 | -0.016 | -0.03 | -0.03  | -0.03  | t | 30150  | KDGDTTN<br>R              | Mus musculus          |
| 1 | 1.00 | 1 | 1 | -0.03 | -0.013 | -0.03 | -0.03  | -0.03  | t | 30150  | KDGDTTN<br>R              | Equus caballus        |
| 1 | 1.00 | 1 | 1 | 0.01  | 0.008  | 0.012 | 0.011  | 0.01   | t | 15615  | FEPLRAET<br>DDVEPS        | Homo sapiens          |
| 1 | 1.00 | 1 | 1 | -0.02 | -0.017 | -0.02 | -0.02  | -0.017 | t | 106321 | DAEFRH                    | Mus musculus          |
| 1 | 1.00 | 1 | 1 | -0.02 | -0.02  | -0.02 | -0.02  | -0.017 | t | 106321 | DAEFRH                    | Mus musculus          |
| 1 | 1.00 | 1 | 1 | -0.02 | -0.02  | -0.02 | -0.02  | -0.018 | t | 52088  | QQPFPQR<br>PQQ            | Mus musculus          |
| 1 | 1.00 | 1 | 1 | 0.02  | 0.024  | 0.016 | 0.017  | 0.02   | t | 97327  | GEHQLLYL<br>QHQLDEL<br>N  | Homo sapiens          |



|   |      |   |   |       |        |        |        |        |   |        |                              |                           |
|---|------|---|---|-------|--------|--------|--------|--------|---|--------|------------------------------|---------------------------|
| 1 | 1.00 | 1 | 1 | -0.03 | -0.032 | -0.03  | -0.031 | -0.03  | t | 133655 | NIAHPDR<br>WDRLR             | Mus<br>musculu<br>s       |
| 1 | 1.00 | 1 | 1 | 0.01  | 0.013  | 0.008  | 0.01   | 0.01   | t | 78815  | RNTNRRP<br>QDVKFPG<br>GGQI   | Mus<br>musculu<br>s       |
| 1 | 1.00 | 1 | 1 | 0     | -0.002 | 0.005  | -0.001 | 0.003  | t | 24360  | HNAKYVS<br>AESWG             | Mus<br>musculu<br>s       |
| 1 | 1.00 | 1 | 1 | -0.02 | -0.018 | -0.02  | -0.021 | -0.02  | t | 130906 | IRGPGVLA<br>GGRSAGA<br>R     | Homo<br>sapiens           |
| 1 | 1.00 | 1 | 1 | -0.04 | -0.039 | -0.034 | -0.041 | -0.041 | t | 3073   | AMDHEGC<br>KFSCFIRP          | Equus<br>caballus         |
| 1 | 1.00 | 1 | 1 | 0     | 0.002  | 0      | 0.001  | 0.003  | t | 71353  | VTHESYQE<br>LVKKLEALE<br>DA  | Homo<br>sapiens           |
| 1 | 1.00 | 1 | 1 | 0.03  | 0.029  | 0.046  | 0.03   | 0.032  | t | 49153  | PQWTPEE<br>D                 | Anas<br>platyrhy<br>nchos |
| 1 | 1.00 | 1 | 1 | 0.05  | 0.048  | 0.05   | 0.043  | 0.053  | t | 134669 | FGFPQE                       | Mus<br>musculu<br>s       |
| 1 | 1.00 | 1 | 1 | 0.02  | 0.022  | 0.024  | 0.021  | 0.022  | t | 56061  | RTGLDFN                      | Homo<br>sapiens           |
| 1 | 1.00 | 1 | 1 | -0.02 | -0.016 | 0.002  | -0.02  | -0.02  | t | 95977  | VPNLRGDL                     | Cavia<br>porcellu<br>s    |
| 1 | 1.00 | 1 | 1 | -0.04 | -0.04  | -0.039 | -0.04  | -0.04  | t | 118970 | PPPGRRP                      | Homo<br>sapiens           |
| 1 | 1.00 | 1 | 1 | 0     | -0.004 | 0      | 0      | 0.002  | t | 75791  | YSLFQKEK<br>MVL              | Mus<br>musculu<br>s       |
| 1 | 1.00 | 1 | 1 | 0     | 0      | 0      | 0      | -0.002 | t | 139525 | ISSQTNDT<br>HKRDTYA<br>ATPRA | Mus<br>musculu<br>s       |
| 1 | 1.00 | 1 | 1 | 0.02  | 0.018  | 0.023  | 0.019  | 0.02   | t | 34084  | KVKYNCTC<br>GTGNVGT<br>TNSDM | Mus<br>musculu<br>s       |

|   |      |   |   |       |        |        |        |        |   |        |                      |                           |
|---|------|---|---|-------|--------|--------|--------|--------|---|--------|----------------------|---------------------------|
| 1 | 1.00 | 1 | 1 | -0.01 | -0.015 | 0.002  | -0.011 | -0.01  | t | 5507   | AVPNVRG<br>DLQ       | Bos<br>taurus             |
| 1 | 1.00 | 1 | 1 | -0.04 | -0.038 | -0.026 | -0.039 | -0.04  | t | 34124  | KVLVVLL              | Homo<br>sapiens           |
| 1 | 1.00 | 1 | 1 | -0.02 | -0.02  | -0.02  | -0.02  | -0.02  | t | 135771 | TRVVGGE<br>D         | Homo<br>sapiens           |
| 1 | 1.00 | 1 | 1 | -0.02 | -0.02  | -0.02  | -0.02  | -0.02  | t | 158601 | MQAHQTK              | Homo<br>sapiens           |
| 1 | 1.00 | 1 | 1 | -0.04 | -0.04  | -0.04  | -0.04  | -0.04  | t | 118443 | KAPGFGD<br>NRKNQL    | Homo<br>sapiens           |
| 1 | 1.00 | 1 | 1 | -0.03 | -0.026 | -0.021 | -0.027 | -0.03  | t | 37304  | LLFVGVL<br>FLLPAR    | Homo<br>sapiens           |
| 1 | 1.00 | 1 | 1 | -0.01 | -0.006 | -0.008 | -0.01  | -0.008 | t | 99863  | AAPARISV<br>PYVGLA   | Homo<br>sapiens           |
| 1 | 1.00 | 1 | 1 | -0.03 | -0.03  | -0.02  | -0.03  | -0.031 | t | 143032 | RIRKVKVE<br>FWPCSPI  | Sus<br>scrofa             |
| 1 | 1.00 | 1 | 1 | -0.03 | -0.031 | -0.013 | -0.03  | -0.03  | t | 61282  | SSPPQWK<br>L         | Anas<br>platyrhy<br>nchos |
| 1 | 1.00 | 1 | 1 | -0.03 | -0.032 | -0.026 | -0.031 | -0.029 | t | 53866  | RGFRKEI              | Mus<br>musculu<br>s       |
| 1 | 1.00 | 1 | 1 | 0.03  | 0.03   | 0.03   | 0.03   | 0.03   | t | 145804 | GPVGPSD<br>PSIVSLVEE | Mus<br>musculu<br>s       |
| 1 | 1.00 | 1 | 1 | -0.03 | -0.028 | -0.032 | -0.033 | -0.03  | t | 11860  | EERLHSMK<br>EG       | Homo<br>sapiens           |
| 1 | 1.00 | 1 | 1 | -0.02 | -0.017 | -0.02  | -0.02  | -0.017 | t | 107228 | REEFRHEA             | Mus<br>musculu<br>s       |
| 1 | 1.00 | 1 | 1 | -0.04 | -0.04  | -0.036 | -0.04  | -0.038 | t | 33328  | KSGRC                | Mus<br>musculu<br>s       |
| 1 | 1.00 | 1 | 1 | -0.02 | -0.022 | -0.025 | -0.021 | -0.02  | t | 12584  | EISTNIRQA<br>GVQYSR  | Mus<br>musculu<br>s       |

|   |      |   |   |       |        |        |        |        |   |        |                   |                       |
|---|------|---|---|-------|--------|--------|--------|--------|---|--------|-------------------|-----------------------|
| 1 | 1.00 | 1 | 1 | 0.01  | 0.008  | 0.02   | 0.009  | 0.01   | t | 50580  | QEERPPET          | Anas platyrhynchos    |
| 1 | 1.00 | 1 | 1 | 0.03  | 0.028  | 0.025  | 0.03   | 0.032  | t | 117598 | PEPAKSAPAPKKG     | Mus musculus          |
| 1 | 1.00 | 1 | 1 | -0.01 | -0.008 | -0.011 | -0.01  | -0.01  | t | 18951  | GDDMDPELRGLAQA    | Myodes glareolus      |
| 1 | 1.00 | 1 | 1 | -0.01 | -0.012 | -0.011 | -0.01  | -0.01  | t | 18951  | GDDMDPELRGLAQA    | Oryctolagus cuniculus |
| 1 | 1.00 | 1 | 1 | -0.02 | -0.024 | -0.021 | -0.021 | -0.022 | t | 32280  | KMADPNRFRGKDLPV   | Oryctolagus cuniculus |
| 1 | 1.00 | 1 | 1 | -0.04 | -0.036 | -0.033 | -0.039 | -0.04  | t | 99916  | CIPPLCKLR LHE     | Ovis aries            |
| 1 | 1.00 | 1 | 1 | -0.11 | -0.103 | -0.11  | -0.107 | -0.107 | t | 106621 | LRKRL             | Gallus gallus         |
| 1 | 1.00 | 1 | 1 | -0.02 | -0.018 | -0.02  | -0.019 | -0.021 | t | 68034  | VDPDDVNKNTLQAR    | Homo sapiens          |
| 1 | 1.00 | 1 | 1 | 0.01  | 0.008  | 0.011  | 0.003  | 0.01   | t | 144763 | RIEDPPFN SLL      | Mus musculus          |
| 1 | 1.00 | 1 | 1 | -0.05 | -0.05  | -0.037 | -0.048 | -0.051 | t | 142007 | SDWRFLRGYHQYA     | Homo sapiens          |
| 1 | 1.00 | 1 | 1 | -0.04 | -0.042 | -0.04  | -0.041 | -0.04  | t | 98799  | GGFGPVLDGW        | Mus musculus          |
| 1 | 1.00 | 1 | 1 | -0.03 | -0.027 | -0.02  | -0.03  | -0.032 | t | 12137  | EGCKLSCFIRPSGYC   | Equus caballus        |
| 1 | 1.00 | 1 | 1 | -0.03 | -0.024 | -0.02  | -0.03  | -0.032 | t | 12137  | EGCKLSCFIRPSGYC   | Equus caballus        |
| 1 | 1.00 | 1 | 1 | 0     | 0.014  | 0.005  | 0      | 0.001  | t | 60170  | SPNVSVPS SSSTPLLY | Homo sapiens          |
| 1 | 1.00 | 1 | 1 | -0.01 | -0.008 | -0.005 | -0.013 | -0.012 | t | 70153  | VNPNNAAAL         | Homo sapiens          |

|   |      |   |   |       |        |        |        |        |   |        |                              |                       |
|---|------|---|---|-------|--------|--------|--------|--------|---|--------|------------------------------|-----------------------|
| 1 | 1.00 | 1 | 1 | -0.02 | -0.02  | -0.03  | -0.027 | -0.021 | t | 122097 | FPGWQPG<br>MPTIPTAP<br>PTTPV | Homo sapiens          |
| 1 | 1.00 | 1 | 1 | 0.01  | 0.01   | 0.01   | 0.01   | 0.013  | t | 46774  | PAEEEEK                      | Mus musculus          |
| 1 | 1.00 | 1 | 1 | -0.06 | -0.06  | -0.052 | -0.06  | -0.06  | t | 106591 | LARHAKA<br>HIL               | Homo sapiens          |
| 1 | 1.00 | 1 | 1 | 0.01  | 0.008  | 0.018  | 0.009  | 0.01   | t | 72429  | WFRMGG<br>NAAIPITV<br>MEYTE  | Mus musculus          |
| 1 | 1.00 | 1 | 1 | 0     | 0.002  | 0.007  | -0.003 | 0      | t | 123013 | AIFSQFGQ<br>ILDILV           | Oryctolagus cuniculus |
| 1 | 1.00 | 1 | 1 | 0.01  | 0.008  | 0.012  | 0.009  | 0.01   | t | 69839  | VLVNANN<br>SSSSHQSI<br>YN    | Sus scrofa            |
| 1 | 1.00 | 1 | 1 | 0.01  | 0.01   | 0.01   | 0.01   | 0.014  | t | 74796  | YLLPRRGP                     | Homo sapiens          |
| 1 | 1.00 | 1 | 1 | -0.05 | -0.05  | -0.05  | -0.05  | -0.05  | t | 42790  | MTDVSRKI<br>RAWGRRL<br>MIGTA | Homo sapiens          |
| 1 | 1.00 | 1 | 1 | -0.01 | -0.01  | -0.008 | -0.01  | -0.01  | t | 110591 | GDPGRPG<br>EPGLPGAR          | Mus musculus          |
| 1 | 1.00 | 1 | 1 | -0.01 | -0.012 | -0.01  | -0.01  | -0.012 | t | 107375 | GDDNLAP<br>NTANVQ<br>MT      | Oryctolagus cuniculus |
| 1 | 1.00 | 1 | 1 | -0.04 | -0.04  | -0.04  | -0.04  | -0.04  | t | 78667  | GPKRIRTG<br>DR               | Oryctolagus cuniculus |
| 1 | 1.00 | 1 | 1 | -0.03 | -0.028 | -0.041 | -0.027 | -0.026 | t | 13670  | EPIRDALN<br>AMTQNIR          | Homo sapiens          |
| 1 | 1.00 | 1 | 1 | -0.02 | -0.02  | -0.02  | -0.02  | -0.021 | t | 115200 | DAYPSGA<br>WYYVPLG<br>TQYTDA | Homo sapiens          |
| 1 | 1.00 | 1 | 1 | -0.01 | -0.006 | -0.006 | -0.013 | -0.012 | t | 106093 | RSLPYSPYS<br>PQTQPK          | Homo sapiens          |

|   |      |   |   |       |        |        |        |        |   |        |                         |                                  |
|---|------|---|---|-------|--------|--------|--------|--------|---|--------|-------------------------|----------------------------------|
| 1 | 1.00 | 1 | 1 | 0.01  | 0.01   | 0.017  | 0.01   | 0.01   | t | 94885  | NAYANEE<br>ATK          | Oryctola<br>gus<br>cuniculu<br>s |
| 1 | 1.00 | 1 | 1 | -0.04 | -0.04  | -0.028 | -0.04  | -0.042 | t | 27678  | INKVVRFD                | Mus<br>musculu<br>s              |
| 1 | 1.00 | 1 | 1 | 0     | -0.002 | 0      | -0.001 | 0      | t | 98794  | GERQH                   | Mus<br>musculu<br>s              |
| 1 | 1.00 | 1 | 1 | 0     | -0.002 | 0      | 0      | 0      | t | 57736  | SFDADTIRI<br>A          | Oryctola<br>gus<br>cuniculu<br>s |
| 1 | 1.00 | 1 | 1 | 0     | 0      | 0      | 0      | 0.002  | t | 139841 | PAGRQAR<br>RPATVPEG     | Mus<br>musculu<br>s              |
| 1 | 1.00 | 1 | 1 | 0     | 0      | 0      | 0      | 0.002  | t | 135939 | IPVLDENG<br>LFAP        | Mus<br>musculu<br>s              |
| 1 | 1.00 | 1 | 1 | 0     | 0      | 0      | 0      | 0.002  | t | 141683 | KDWG                    | Mus<br>musculu<br>s              |
| 1 | 1.00 | 1 | 1 | 0     | 0      | 0      | 0      | 0.002  | t | 139860 | PVQRGAW<br>RWPVVTN<br>E | Mus<br>musculu<br>s              |
| 1 | 1.00 | 1 | 1 | 0     | 0      | 0      | 0      | 0.002  | t | 141693 | KTWG                    | Mus<br>musculu<br>s              |
| 1 | 1.00 | 1 | 1 | 0     | 0      | 0      | 0      | 0.002  | t | 107345 | EQRRAA                  | Homo<br>sapiens                  |
| 1 | 1.00 | 1 | 1 | 0     | 0      | 0      | 0      | 0.002  | t | 107345 | EQRRAA                  | Homo<br>sapiens                  |
| 1 | 1.00 | 1 | 1 | 0     | 0      | 0      | 0      | 0.002  | t | 100129 | HYKWLND<br>PLAAW        | Ovis<br>aries                    |
| 1 | 1.00 | 1 | 1 | 0     | 0      | 0      | 0      | 0.002  | t | 95032  | PAGTGDRL                | Oryctola<br>gus<br>cuniculu<br>s |
| 1 | 1.00 | 1 | 1 | 0     | 0      | 0      | 0      | 0.002  | t | 64541  | TKDTNNN<br>L            | Mus<br>musculu<br>s              |
| 1 | 1.00 | 1 | 1 | 0     | 0      | 0      | 0      | 0.002  | t | 69627  | VLLRRIGG                | Mus<br>musculu<br>s              |

|   |      |   |   |   |   |   |   |       |   |       |                            |                                  |
|---|------|---|---|---|---|---|---|-------|---|-------|----------------------------|----------------------------------|
| 1 | 1.00 | 1 | 1 | 0 | 0 | 0 | 0 | 0.002 | t | 65514 | TPAYYTKD<br>TNNNLTLV       | Mus<br>musculu<br>s              |
| 1 | 1.00 | 1 | 1 | 0 | 0 | 0 | 0 | 0.002 | t | 64541 | TKDTNNN<br>L               | Mus<br>musculu<br>s              |
| 1 | 1.00 | 1 | 1 | 0 | 0 | 0 | 0 | 0.002 | t | 95051 | YSQFEKSY                   | Oryctola<br>gus<br>cuniculu<br>s |
| 1 | 1.00 | 1 | 1 | 0 | 0 | 0 | 0 | 0.002 | t | 78695 | KDTNNNL<br>YNGK            | Mus<br>musculu<br>s              |
| 1 | 1.00 | 1 | 1 | 0 | 0 | 0 | 0 | 0.002 | t | 69627 | VLLRRIGG                   | Mus<br>musculu<br>s              |
| 1 | 1.00 | 1 | 1 | 0 | 0 | 0 | 0 | 0.002 | t | 64628 | TKNTNNN<br>LTL             | Oryctola<br>gus<br>cuniculu<br>s |
| 1 | 1.00 | 1 | 1 | 0 | 0 | 0 | 0 | 0.002 | t | 65698 | TPPRPAGD<br>NATVAAG<br>HAT | Mus<br>musculu<br>s              |
| 1 | 1.00 | 1 | 1 | 0 | 0 | 0 | 0 | 0.002 | t | 65698 | TPPRPAGD<br>NATVAAG<br>HAT | Mus<br>musculu<br>s              |
| 1 | 1.00 | 1 | 1 | 0 | 0 | 0 | 0 | 0.002 | t | 59326 | SLITYMK<br>M               | Mus<br>musculu<br>s              |
| 1 | 1.00 | 1 | 1 | 0 | 0 | 0 | 0 | 0.002 | t | 52891 | QYDSNGT<br>KLE             | Mus<br>musculu<br>s              |
| 1 | 1.00 | 1 | 1 | 0 | 0 | 0 | 0 | 0.002 | t | 47014 | PAYYTKDT<br>NNNLTL         | Mus<br>musculu<br>s              |
| 1 | 1.00 | 1 | 1 | 0 | 0 | 0 | 0 | 0.002 | t | 48779 | PPFSLSPV<br>PTLGSRSR<br>R  | Homo<br>sapiens                  |
| 1 | 1.00 | 1 | 1 | 0 | 0 | 0 | 0 | 0.002 | t | 19636 | GFTTNEER<br>YNVFAE         | Mus<br>musculu<br>s              |
| 1 | 1.00 | 1 | 1 | 0 | 0 | 0 | 0 | 0.002 | t | 24249 | HLLRLSEI                   | Mus<br>musculu<br>s              |

|   |      |   |   |       |        |        |        |        |   |        |                              |                                  |
|---|------|---|---|-------|--------|--------|--------|--------|---|--------|------------------------------|----------------------------------|
| 1 | 1.00 | 1 | 1 | 0     | 0      | 0      | 0      | 0.002  | t | 30262  | KDTNNN                       | Mus<br>musculu<br>s              |
| 1 | 1.00 | 1 | 1 | 0     | 0      | 0      | 0      | 0.002  | t | 19636  | GFTTNEER<br>YNVFAE           | Mus<br>musculu<br>s              |
| 1 | 1.00 | 1 | 1 | 0     | 0      | 0      | 0      | 0.002  | t | 3825   | APSSPGTP<br>GVAAATQ<br>AANGG | Mus<br>musculu<br>s              |
| 1 | 1.00 | 1 | 1 | 0     | 0      | 0      | 0      | 0.002  | t | 7673   | DAVTE                        | Mus<br>musculu<br>s              |
| 1 | 1.00 | 1 | 1 | 0     | 0      | 0      | 0      | 0.002  | t | 7674   | DAVTELDK<br>N                | Mus<br>musculu<br>s              |
| 1 | 1.00 | 1 | 1 | 0     | 0      | 0      | 0      | 0.002  | t | 7865   | DDQTYISP<br>SLFV             | Oryctola<br>gus<br>cuniculu<br>s |
| 1 | 1.00 | 1 | 1 | 0     | 0      | 0      | 0      | 0.002  | t | 1547   | AGHATLRE<br>HLRDIKAE<br>NTDA | Mus<br>musculu<br>s              |
| 1 | 1.00 | 1 | 1 | 0.03  | 0.03   | 0.038  | 0.03   | 0.03   | t | 106305 | CHTHEGG<br>QLH               | Homo<br>sapiens                  |
| 1 | 1.00 | 1 | 1 | 0.02  | 0.018  | 0.026  | 0.012  | 0.02   | t | 22445  | GSPLRQRS<br>L                | Mus<br>musculu<br>s              |
| 1 | 1.00 | 1 | 1 | -0.01 | -0.018 | -0.01  | -0.01  | -0.008 | t | 19862  | GGGTHNQ<br>WNKPSKP<br>KTNLKH | Mus<br>musculu<br>s              |
| 1 | 1.00 | 1 | 1 | 0     | 0      | -0.009 | -0.003 | 0      | t | 97210  | AQGALERE<br>LKRTDLNI         | Homo<br>sapiens                  |
| 1 | 1.00 | 1 | 1 | -0.01 | -0.014 | -0.007 | -0.011 | -0.01  | t | 7239   | CTTSGLAS<br>LFNSGARQ<br>H    | Mus<br>musculu<br>s              |
| 1 | 1.00 | 1 | 1 | 0.02  | 0.018  | 0.017  | 0.013  | 0.02   | t | 127965 | EQQSAVD<br>ADDSHFVS<br>IELE  | Mus<br>musculu<br>s              |
| 1 | 1.00 | 1 | 1 | 0.01  | 0.01   | 0.01   | 0.01   | 0.01   | t | 135663 | EGGRDSC<br>Q                 | Homo<br>sapiens                  |
| 1 | 1.00 | 1 | 1 | -0.02 | -0.018 | -0.02  | -0.017 | -0.017 | t | 131504 | KATLVCLIS<br>DFYPGAV         | Homo<br>sapiens                  |

|   |      |   |   |       |        |        |        |        |   |        |                              |                                  |
|---|------|---|---|-------|--------|--------|--------|--------|---|--------|------------------------------|----------------------------------|
| 1 | 1.00 | 1 | 1 | -0.02 | -0.02  | -0.022 | -0.02  | -0.018 | t | 151653 | HWYRATH<br>QEAINCYA<br>NETC  | Mus<br>musculu<br>s              |
| 1 | 1.00 | 1 | 1 | -0.01 | -0.022 | -0.01  | -0.01  | -0.008 | t | 4701   | ASQKIQLI                     | Mus<br>musculu<br>s              |
| 1 | 1.00 | 1 | 1 | -0.02 | -0.022 | -0.009 | -0.021 | -0.02  | t | 23975  | HHAEMQ<br>NPVYLIPET<br>VPYIK | Mus<br>musculu<br>s              |
| 1 | 1.00 | 1 | 1 | -0.02 | -0.024 | -0.009 | -0.021 | -0.02  | t | 23975  | HHAEMQ<br>NPVYLIPET<br>VPYIK | Oryctola<br>gus<br>cuniculu<br>s |
| 1 | 1.00 | 1 | 1 | -0.01 | -0.01  | -0.01  | -0.01  | -0.008 | t | 9597   | DPAPPNA<br>NDPAPPN<br>AN     | Mus<br>musculu<br>s              |
| 1 | 1.00 | 1 | 1 | -0.01 | -0.01  | -0.01  | -0.01  | -0.008 | t | 9597   | DPAPPNA<br>NDPAPPN<br>AN     | Mus<br>musculu<br>s              |
| 1 | 1.00 | 1 | 1 | -0.01 | -0.01  | -0.01  | -0.01  | -0.008 | t | 9597   | DPAPPNA<br>NDPAPPN<br>AN     | Mus<br>musculu<br>s              |
| 1 | 1.00 | 1 | 1 | -0.01 | -0.01  | -0.01  | -0.01  | -0.007 | t | 78077  | YPYSMWK<br>NLWPS             | Mus<br>musculu<br>s              |
| 1 | 1.00 | 1 | 1 | -0.03 | -0.028 | -0.03  | -0.028 | -0.027 | t | 138191 | HPTWSSL                      | Homo<br>sapiens                  |
| 1 | 1.00 | 1 | 1 | 0.01  | 0.01   | 0.024  | 0.01   | 0.01   | t | 57001  | SASTKNKD                     | Mus<br>musculu<br>s              |
| 1 | 1.00 | 1 | 1 | 0.04  | 0.044  | 0.055  | 0.041  | 0.042  | t | 20793  | GLDFNE                       | Homo<br>sapiens                  |
| 1 | 1.00 | 1 | 1 | 0     | -0.001 | -0.006 | -0.001 | 0      | t | 29578  | IYFMQRQ<br>DVLDKNH           | Myodes<br>glareolu<br>s          |
| 1 | 1.00 | 1 | 1 | -0.05 | -0.048 | -0.05  | -0.044 | -0.048 | t | 132612 | RKRREKIER<br>R               | Homo<br>sapiens                  |
| 1 | 1.00 | 1 | 1 | 0.03  | 0.027  | 0.026  | 0.03   | 0.032  | t | 122090 | ESPQEISK<br>HQALG            | Oryctola<br>gus<br>cuniculu<br>s |
| 1 | 1.00 | 1 | 1 | -0.03 | -0.032 | -0.03  | -0.033 | -0.03  | t | 49950  | PVRVAWS<br>SPVQNCEP<br>WIPP  | Mus<br>musculu<br>s              |



|   |      |   |   |       |        |        |        |        |   |        |                              |                                  |
|---|------|---|---|-------|--------|--------|--------|--------|---|--------|------------------------------|----------------------------------|
| 1 | 1.00 | 1 | 1 | -0.02 | -0.024 | -0.014 | -0.021 | -0.02  | t | 30409  | KEGRFKSQ                     | Oryctola<br>gus<br>cuniculu<br>s |
| 1 | 1.00 | 1 | 1 | 0     | 0.003  | 0.002  | 0      | 0.001  | t | 122290 | CSNSSSSQ<br>FQIHGPRQ         | Mus<br>musculu<br>s              |
| 1 | 1.00 | 1 | 1 | 0     | -0.002 | -0.005 | -0.007 | 0      | t | 126921 | RERRGIAL<br>D                | Mus<br>musculu<br>s              |
| 1 | 1.00 | 1 | 1 | -0.03 | -0.03  | -0.03  | -0.03  | -0.03  | t | 110965 | PNNNKILV<br>PKVSGLQY<br>RVFR | Homo<br>sapiens                  |
| 1 | 1.00 | 1 | 1 | -0.07 | -0.07  | -0.071 | -0.07  | -0.07  | t | 127963 | EPKPKKAP<br>AKKGEKV          | Oryctola<br>gus<br>cuniculu<br>s |
| 1 | 1.00 | 1 | 1 | -0.07 | -0.07  | -0.059 | -0.067 | -0.071 | t | 46856  | PALPVWA<br>R                 | Homo<br>sapiens                  |
| 1 | 1.00 | 1 | 1 | -0.04 | -0.037 | -0.035 | -0.04  | -0.038 | t | 2156   | AKAVAAW<br>TLKAAA            | Mus<br>musculu<br>s              |
| 1 | 1.00 | 1 | 1 | 0.08  | 0.078  | 0.08   | 0.073  | 0.083  | t | 134770 | QIFNLFSTK<br>DSSAA           | Mus<br>musculu<br>s              |
| 1 | 1.00 | 1 | 1 | 0.08  | 0.078  | 0.08   | 0.073  | 0.083  | t | 134770 | QIFNLFSTK<br>DSSAA           | Mus<br>musculu<br>s              |
| 1 | 1.00 | 1 | 1 | -0.01 | -0.014 | -0.022 | -0.011 | -0.01  | t | 39925  | LTGNSTLS<br>SDYAQAR<br>APAAG | Oryctola<br>gus<br>cuniculu<br>s |
| 1 | 1.00 | 1 | 1 | 0.01  | 0.01   | 0.004  | 0.01   | 0.016  | t | 37640  | LLPAAD                       | Homo<br>sapiens                  |
| 1 | 1.00 | 1 | 1 | 0     | 0.003  | 0.01   | 0      | 0      | t | 10320  | DTDSGYD<br>VPDY              | Mus<br>musculu<br>s              |
| 1 | 1.00 | 1 | 1 | -0.03 | -0.032 | -0.022 | -0.031 | -0.03  | t | 33215  | KRRLRPSR<br>VRIE             | Mus<br>musculu<br>s              |
| 1 | 1.00 | 1 | 1 | -0.02 | -0.022 | -0.025 | -0.027 | -0.02  | t | 117295 | GITKPAIRR<br>LARRGG          | Mus<br>musculu<br>s              |

|   |      |   |   |   |   |   |   |       |   |        |                              |                                  |
|---|------|---|---|---|---|---|---|-------|---|--------|------------------------------|----------------------------------|
| 1 | 1.00 | 1 | 1 | 0 | 0 | 0 | 0 | 0.004 | t | 133623 | KPGEMR                       | Mus<br>musculu<br>s              |
| 1 | 1.00 | 1 | 1 | 0 | 0 | 0 | 0 | 0.002 | t | 144623 | EEAEGTTD<br>AQIDANRK<br>RESE | Mus<br>musculu<br>s              |
| 1 | 1.00 | 1 | 1 | 0 | 0 | 0 | 0 | 0.002 | t | 137944 | PGTEYT                       | Oryctola<br>gus<br>cuniculu<br>s |
| 1 | 1.00 | 1 | 1 | 0 | 0 | 0 | 0 | 0.002 | t | 137944 | PGTEYT                       | Oryctola<br>gus<br>cuniculu<br>s |
| 1 | 1.00 | 1 | 1 | 0 | 0 | 0 | 0 | 0.002 | t | 137942 | PGSEYT                       | Oryctola<br>gus<br>cuniculu<br>s |
| 1 | 1.00 | 1 | 1 | 0 | 0 | 0 | 0 | 0.002 | t | 139029 | DLQVLT                       | Mus<br>musculu<br>s              |
| 1 | 1.00 | 1 | 1 | 0 | 0 | 0 | 0 | 0.002 | t | 137432 | NHNYPPLS<br>LLTF             | Mus<br>musculu<br>s              |
| 1 | 1.00 | 1 | 1 | 0 | 0 | 0 | 0 | 0.002 | t | 116677 | ASATQLYK<br>TCKQAGT<br>CPPD  | Mus<br>musculu<br>s              |
| 1 | 1.00 | 1 | 1 | 0 | 0 | 0 | 0 | 0.002 | t | 109917 | SHQESTRG<br>RSRGRSGR<br>SGS  | Mus<br>musculu<br>s              |
| 1 | 1.00 | 1 | 1 | 0 | 0 | 0 | 0 | 0.002 | t | 80002  | RKADLEKA<br>LEGAM            | Oryctola<br>gus<br>cuniculu<br>s |
| 1 | 1.00 | 1 | 1 | 0 | 0 | 0 | 0 | 0.002 | t | 63122  | TDAYNQKL<br>SERRAN           | Mus<br>musculu<br>s              |
| 1 | 1.00 | 1 | 1 | 0 | 0 | 0 | 0 | 0.002 | t | 70390  | VPNLRGDL<br>QVLAQKV<br>ART   | Ovis<br>aries                    |
| 1 | 1.00 | 1 | 1 | 0 | 0 | 0 | 0 | 0.002 | t | 74045  | YGLLAVDP<br>LFKP             | Gallus<br>gallus                 |

|   |      |   |   |       |       |        |       |        |   |        |                              |                                  |
|---|------|---|---|-------|-------|--------|-------|--------|---|--------|------------------------------|----------------------------------|
| 1 | 1.00 | 1 | 1 | 0     | 0     | 0      | 0     | 0.002  | t | 76290  | YVHDNC                       | Mus<br>musculu<br>s              |
| 1 | 1.00 | 1 | 1 | 0     | 0     | 0      | 0     | 0.002  | t | 16123  | FHLPYNHN<br>WFAL             | Mus<br>musculu<br>s              |
| 1 | 1.00 | 1 | 1 | 0     | 0     | 0      | 0     | 0.002  | t | 11208  | EAVEAERA<br>GRGTG            | Mus<br>musculu<br>s              |
| 1 | 1.00 | 1 | 1 | 0     | 0     | 0      | 0     | 0.002  | t | 11570  | EEEDDD                       | Mus<br>musculu<br>s              |
| 1 | 1.00 | 1 | 1 | 0     | 0     | 0      | 0     | 0.002  | t | 22793  | GTQFTFDS<br>WNYSFED<br>NYS   | Oryctola<br>gus<br>cuniculu<br>s |
| 1 | 1.00 | 1 | 1 | 0     | 0     | 0      | 0     | 0.002  | t | 6093   | CDCDRTA<br>A                 | Mus<br>musculu<br>s              |
| 1 | 1.00 | 1 | 1 | 0     | 0     | 0      | 0     | 0.002  | t | 4331   | ASARGDLA<br>HLTTTHAR<br>HLP  | Sus<br>scrofa                    |
| 1 | 1.00 | 1 | 1 | 0     | 0     | 0      | 0     | 0.002  | t | 6226   | CFGNSEY                      | Mus<br>musculu<br>s              |
| 1 | 1.00 | 1 | 1 | 0.01  | 0.01  | 0.01   | 0.01  | 0.012  | t | 144777 | SGTHMNL<br>YLHDTAFA          | Mus<br>musculu<br>s              |
| 1 | 1.00 | 1 | 1 | 0.01  | 0.009 | 0.011  | 0.007 | 0.011  | t | 99394  | KQAKDLAF<br>PGSGEQV          | Homo<br>sapiens                  |
| 1 | 1.00 | 1 | 1 | 0.02  | 0.02  | 0.025  | 0.023 | 0.02   | t | 59571  | SLVTCPAQ<br>GSLQSSPS<br>MEIK | Homo<br>sapiens                  |
| 1 | 1.00 | 1 | 1 | 0.01  | 0.008 | 0.006  | 0.009 | 0.01   | t | 22128  | GRLHLND<br>RVVVAPD<br>KEILYE | Homo<br>sapiens                  |
| 1 | 1.00 | 1 | 1 | -0.03 | -0.03 | -0.026 | -0.03 | -0.031 | t | 31018  | KGNCSGPT<br>TIR              | Oryctola<br>gus<br>cuniculu<br>s |

|   |      |   |   |       |        |        |        |        |   |        |                              |                                  |
|---|------|---|---|-------|--------|--------|--------|--------|---|--------|------------------------------|----------------------------------|
| 1 | 1.00 | 1 | 1 | 0     | 0.008  | 0      | 0      | 0.002  | t | 70390  | VPNLRGDL<br>QVLAQKV<br>ART   | Cavia<br>porcellu<br>s           |
| 1 | 1.00 | 1 | 1 | 0     | 0.008  | 0      | 0      | 0.002  | t | 70390  | VPNLRGDL<br>QVLAQKV<br>ART   | Cavia<br>porcellu<br>s           |
| 1 | 1.00 | 1 | 1 | 0.02  | 0.023  | 0.02   | 0.02   | 0.022  | t | 124202 | GPAQITCT<br>PRGWDSP          | Mus<br>musculu<br>s              |
| 1 | 1.00 | 1 | 1 | 0     | 0      | 0.009  | 0      | -0.001 | t | 102118 | THEDFRYD<br>DVFEQN           | Mus<br>musculu<br>s              |
| 1 | 1.00 | 1 | 1 | -0.02 | -0.017 | -0.013 | -0.02  | -0.02  | t | 17295  | FPGGGQIV<br>GGVYLL           | Mus<br>musculu<br>s              |
| 1 | 1.00 | 1 | 1 | -0.02 | -0.02  | -0.013 | -0.02  | -0.02  | t | 17295  | FPGGGQIV<br>GGVYLL           | Mus<br>musculu<br>s              |
| 1 | 1.00 | 1 | 1 | 0.05  | 0.052  | 0.047  | 0.047  | 0.052  | t | 46895  | PAPQAPY<br>QGYQEPP<br>APQAPY | Homo<br>sapiens                  |
| 1 | 1.00 | 1 | 1 | -0.04 | -0.04  | -0.04  | -0.04  | -0.04  | t | 132262 | ELNVTVV<br>TFFCRPHN          | Homo<br>sapiens                  |
| 1 | 1.00 | 1 | 1 | -0.02 | -0.016 | -0.014 | -0.017 | -0.018 | t | 94695  | SNNPTCW<br>AICKR             | Homo<br>sapiens                  |
| 1 | 1.00 | 1 | 1 | 0.01  | 0.01   | 0.01   | 0.01   | 0.014  | t | 133624 | KPGEMRG<br>AA                | Mus<br>musculu<br>s              |
| 1 | 1.00 | 1 | 1 | -0.03 | -0.03  | -0.03  | -0.03  | -0.03  | t | 78258  | RGNVLR                       | Equus<br>caballus                |
| 1 | 1.00 | 1 | 1 | 0     | 0      | -0.005 | 0.006  | 0.007  | t | 24786  | HSLGKWL<br>GHPDKF            | Mus<br>musculu<br>s              |
| 1 | 1.00 | 1 | 1 | 0.02  | 0.02   | 0.02   | 0.02   | 0.02   | t | 117594 | NWHQLH<br>GKKEAY             | Homo<br>sapiens                  |
| 1 | 1.00 | 1 | 1 | -0.03 | -0.034 | -0.03  | -0.027 | -0.028 | t | 106458 | GKDPNHF<br>RPAGLPEK<br>Y     | Oryctola<br>gus<br>cuniculu<br>s |
| 1 | 1.00 | 1 | 1 | -0.07 | -0.07  | -0.07  | -0.07  | -0.07  | t | 78488  | PRHQAPT                      | Mus<br>musculu<br>s              |

|   |      |   |   |       |        |        |        |        |   |        |                              |                                  |
|---|------|---|---|-------|--------|--------|--------|--------|---|--------|------------------------------|----------------------------------|
| 1 | 1.00 | 1 | 1 | 0.02  | 0.018  | 0.02   | 0.02   | 0.021  | t | 118581 | RDRDRDR<br>E                 | Mus<br>musculu<br>s              |
| 1 | 1.00 | 1 | 1 | -0.03 | -0.028 | -0.028 | -0.028 | -0.029 | t | 40323  | LVETWKKP                     | Homo<br>sapiens                  |
| 1 | 1.00 | 1 | 1 | -0.03 | -0.03  | -0.03  | -0.032 | -0.03  | t | 8408   | DGIMHTR<br>CHCGAEI           | Homo<br>sapiens                  |
| 1 | 1.00 | 1 | 1 | -0.01 | -0.01  | 0.001  | -0.01  | -0.012 | t | 7864   | DDQPSSH<br>QPLFY             | Oryctola<br>gus<br>cuniculu<br>s |
| 1 | 1.00 | 1 | 1 | 0.01  | 0.01   | 0.01   | 0.01   | 0.01   | t | 111546 | MHPSNSK<br>SPPRH             | Homo<br>sapiens                  |
| 1 | 1.00 | 1 | 1 | -0.01 | -0.007 | -0.01  | -0.01  | -0.01  | t | 58132  | SGLVGLFT<br>PGAKQNI          | Mus<br>musculu<br>s              |
| 1 | 1.00 | 1 | 1 | 0.04  | 0.036  | 0.029  | 0.039  | 0.043  | t | 41169  | MAVPAFS<br>DIAKSAND<br>LLNKD | Oryctola<br>gus<br>cuniculu<br>s |
| 1 | 1.00 | 1 | 1 | -0.02 | -0.018 | -0.012 | -0.023 | -0.02  | t | 59117  | SLGAAQV<br>VLPRT             | Homo<br>sapiens                  |
| 1 | 1.00 | 1 | 1 | 0.01  | 0.008  | 0.014  | 0.009  | 0.01   | t | 56202  | RTTTASGK<br>LIT              | Mus<br>musculu<br>s              |
| 1 | 1.00 | 1 | 1 | -0.03 | -0.026 | -0.023 | -0.023 | -0.03  | t | 131116 | TQSYPPPP<br>AWRAASR          | Homo<br>sapiens                  |
| 1 | 1.00 | 1 | 1 | 0     | -0.003 | 0      | 0      | 0.003  | t | 135492 | RAEIM                        | Oryctola<br>gus<br>cuniculu<br>s |
| 1 | 1.00 | 1 | 1 | -0.01 | -0.014 | -0.005 | -0.011 | -0.01  | t | 47690  | PGKKTTTK<br>PTKKPTL          | Oryctola<br>gus<br>cuniculu<br>s |
| 1 | 1.00 | 1 | 1 | -0.01 | -0.006 | -0.008 | -0.01  | -0.008 | t | 100029 | FAMWRIT<br>YKDTVQL           | Homo<br>sapiens                  |
| 1 | 1.00 | 1 | 1 | 0.03  | 0.034  | 0.036  | 0.027  | 0.033  | t | 49533  | PSTPGDNP<br>LV               | Homo<br>sapiens                  |

|   |      |   |   |       |        |        |        |        |   |        |                             |                                  |
|---|------|---|---|-------|--------|--------|--------|--------|---|--------|-----------------------------|----------------------------------|
| 1 | 1.00 | 1 | 1 | 0.01  | 0.006  | 0.013  | 0.009  | 0.011  | t | 103499 | PSRTWSPP<br>FESEDSQK        | Oryctola<br>gus<br>cuniculu<br>s |
| 1 | 1.00 | 1 | 1 | 0     | -0.002 | 0      | -0.003 | 0.001  | t | 11813  | EENVEENV                    | Mus<br>musculu<br>s              |
| 1 | 1.00 | 1 | 1 | 0     | 0.002  | 0      | 0      | 0.003  | t | 66976  | TVDNPAST<br>TNKDKLFA<br>VWK | Rattus<br>norvegic<br>us         |
| 1 | 1.00 | 1 | 1 | 0     | 0      | 0      | 0      | 0.003  | t | 66976  | TVDNPAST<br>TNKDKLFA<br>VWK | Rattus<br>norvegic<br>us         |
| 1 | 1.00 | 1 | 1 | 0     | 0      | 0      | 0      | 0.003  | t | 66976  | TVDNPAST<br>TNKDKLFA<br>VWK | Oryctola<br>gus<br>cuniculu<br>s |
| 1 | 1.00 | 1 | 1 | 0     | -0.002 | 0      | 0      | 0.003  | t | 66976  | TVDNPAST<br>TNKDKLFA<br>VWK | Oryctola<br>gus<br>cuniculu<br>s |
| 1 | 1.00 | 1 | 1 | 0     | 0      | 0      | 0      | 0.003  | t | 44474  | NKDKLFAV<br>WK              | Oryctola<br>gus<br>cuniculu<br>s |
| 1 | 1.00 | 1 | 1 | 0     | 0.002  | 0      | 0      | 0.003  | t | 44474  | NKDKLFAV<br>WK              | Rattus<br>norvegic<br>us         |
| 1 | 1.00 | 1 | 1 | 0     | -0.002 | 0      | 0      | 0.003  | t | 44474  | NKDKLFAV<br>WK              | Oryctola<br>gus<br>cuniculu<br>s |
| 1 | 1.00 | 1 | 1 | 0     | 0      | 0      | 0      | 0.003  | t | 44474  | NKDKLFAV<br>WK              | Rattus<br>norvegic<br>us         |
| 1 | 1.00 | 1 | 1 | -0.03 | -0.028 | -0.023 | -0.027 | -0.029 | t | 32827  | KPPNKPN<br>NDFHF            | Homo<br>sapiens                  |
| 1 | 1.00 | 1 | 1 | 0.02  | 0.023  | 0.026  | 0.02   | 0.02   | t | 58990  | SLAELLNA<br>GLGGS           | Mus<br>musculu<br>s              |
| 1 | 1.00 | 1 | 1 | 0     | 0      | 0      | 0      | 0      | t | 153435 | NTPAANN<br>RARREAP<br>QYM   | Mus<br>musculu<br>s              |

|   |      |   |   |       |        |        |        |        |   |        |                                |                                  |
|---|------|---|---|-------|--------|--------|--------|--------|---|--------|--------------------------------|----------------------------------|
| 1 | 1.00 | 1 | 1 | 0     | -0.004 | 0      | -0.001 | 0.002  | t | 71284  | VTEEI                          | Oryctola<br>gus<br>cuniculu<br>s |
| 1 | 1.00 | 1 | 1 | 0     | -0.004 | 0      | -0.001 | 0.002  | t | 38522  | LPHSNL                         | Oryctola<br>gus<br>cuniculu<br>s |
| 1 | 1.00 | 1 | 1 | 0     | -0.002 | 0      | -0.001 | 0.002  | t | 39183  | LRRDLAS<br>REAKKQVE<br>KALE    | Mus<br>musculu<br>s              |
| 1 | 1.00 | 1 | 1 | 0     | -0.002 | 0      | -0.001 | 0.002  | t | 14435  | ETIYNTTLK<br>Y                 | Mus<br>musculu<br>s              |
| 1 | 1.00 | 1 | 1 | -0.01 | -0.01  | -0.01  | -0.01  | -0.01  | t | 23269  | GWLAGLF<br>YQHKE               | Rattus<br>norvegic<br>us         |
| 1 | 1.00 | 1 | 1 | 0     | 0      | -0.001 | 0.003  | 0.002  | t | 11999  | EFGLDGV<br>T<br>YEIDLTNK<br>NA | Homo<br>sapiens                  |
| 1 | 1.00 | 1 | 1 | 0.02  | 0.02   | 0.02   | 0.014  | 0.02   | t | 118452 | KGVITVKD<br>GKTLN              | Homo<br>sapiens                  |
| 1 | 1.00 | 1 | 1 | 0.04  | 0.04   | 0.04   | 0.034  | 0.04   | t | 32596  | KNQLAGK<br>DEYEAKQK<br>EAE     | Homo<br>sapiens                  |
| 1 | 1.00 | 1 | 1 | -0.02 | -0.02  | -0.019 | -0.023 | -0.02  | t | 2005   | AILSSLTV<br>T<br>QLLRR         | Homo<br>sapiens                  |
| 1 | 1.00 | 1 | 1 | 0.01  | 0.014  | 0.013  | 0.013  | 0.01   | t | 48818  | PPLENRVL<br>TGWGLN             | MD                               |
| 1 | 1.00 | 1 | 1 | 0.01  | 0.014  | 0.013  | 0.013  | 0.01   | t | 48818  | PPLENRVL<br>TGWGLN             | MD                               |
| 1 | 1.00 | 1 | 1 | 0.01  | 0.01   | 0.01   | 0.01   | 0.01   | t | 98794  | GERQH                          | Mus<br>musculu<br>s              |
| 1 | 1.00 | 1 | 1 | -0.01 | -0.01  | -0.01  | -0.01  | -0.007 | t | 105651 | AEFRHDS                        | Mus<br>musculu<br>s              |

|   |      |   |   |       |        |        |        |        |   |        |                              |                                  |
|---|------|---|---|-------|--------|--------|--------|--------|---|--------|------------------------------|----------------------------------|
| 1 | 1.00 | 1 | 1 | 0     | 0      | 0.005  | -0.004 | 0      | t | 66683  | TTKQRQN<br>KPPNK             | Homo<br>sapiens                  |
| 1 | 1.00 | 1 | 1 | 0.02  | 0.016  | 0.017  | 0.019  | 0.02   | t | 19482  | GEYGGVIK<br>DGTPGGA          | Oryctola<br>gus<br>cuniculu<br>s |
| 1 | 1.00 | 1 | 1 | -0.03 | -0.03  | -0.03  | -0.03  | -0.031 | t | 115298 | IQAFLLYQ<br>EPVLGPVR<br>GPFP | Homo<br>sapiens                  |
| 1 | 1.00 | 1 | 1 | 0.02  | 0.024  | 0.014  | 0.021  | 0.022  | t | 70026  | VMTVEIRK<br>QNMTEF<br>MELWSQ | Homo<br>sapiens                  |
| 1 | 1.00 | 1 | 1 | 0.02  | 0.02   | 0.011  | 0.016  | 0.02   | t | 72294  | WEDGEK<br>RIPLDVAE           | Homo<br>sapiens                  |
| 1 | 1.00 | 1 | 1 | 0.01  | 0.007  | 0.03   | 0.01   | 0.01   | t | 123779 | TMELMLS<br>M                 | Oryctola<br>gus<br>cuniculu<br>s |
| 1 | 1.00 | 1 | 1 | -0.01 | -0.012 | -0.01  | -0.017 | -0.01  | t | 117437 | AIALREYRK<br>KMDIPA          | Mus<br>musculu<br>s              |
| 1 | 1.00 | 1 | 1 | 0.01  | 0.007  | 0.01   | 0.01   | 0.012  | t | 107229 | RHEVTEM<br>GQEV              | Oryctola<br>gus<br>cuniculu<br>s |
| 1 | 1.00 | 1 | 1 | 0.02  | 0.022  | 0.018  | 0.02   | 0.022  | t | 122508 | PCGEESVL<br>LDRKSGKQ<br>YSIE | Homo<br>sapiens                  |
| 1 | 1.00 | 1 | 1 | 0.02  | 0.02   | 0.025  | 0.02   | 0.02   | t | 25626  | IDLTKNA<br>AKLRD             | Homo<br>sapiens                  |
| 1 | 1.00 | 1 | 1 | -0.02 | -0.02  | -0.014 | -0.02  | -0.02  | t | 47333  | PEKPHFPL<br>AAEDDIRH<br>H    | Mus<br>musculu<br>s              |
| 1 | 1.00 | 1 | 1 | 0     | 0.002  | 0.016  | 0.001  | -0.005 | t | 60978  | SSEVAVLY<br>QDVNCTD<br>V     | Homo<br>sapiens                  |
| 1 | 1.00 | 1 | 1 | -0.01 | -0.01  | -0.011 | -0.01  | -0.008 | t | 50824  | QFYQLDAY<br>PSGAWYY<br>VPL   | Homo<br>sapiens                  |
| 1 | 1.00 | 1 | 1 | -0.01 | -0.01  | -0.008 | -0.01  | -0.008 | t | 100220 | KNNLDPLS<br>EKGLTT           | Oryctola<br>gus<br>cuniculu<br>s |



|   |      |   |   |       |        |        |        |        |   |        |                              |                       |
|---|------|---|---|-------|--------|--------|--------|--------|---|--------|------------------------------|-----------------------|
| 1 | 1.00 | 1 | 1 | 0     | 0      | 0      | -0.003 | 0      | t | 97069  | VQPQVNEIR                    | Homo sapiens(human)   |
| 1 | 1.00 | 1 | 1 | 0     | 0      | 0      | 0      | 0.002  | t | 122889 | RLDASFQEH<br>HPDLPG          | Oryctolagus cuniculus |
| 1 | 1.00 | 1 | 1 | 0     | 0      | 0.001  | -0.003 | 0      | t | 54786  | RLTENTEP<br>LL               | Homo sapiens          |
| 1 | 1.00 | 1 | 1 | -0.01 | -0.01  | -0.01  | -0.01  | -0.01  | t | 156889 | HNRKCDY<br>YIAECNVMP         | Gallus gallus         |
| 1 | 1.00 | 1 | 1 | 0     | 0.004  | 0.007  | 0.003  | 0      | t | 62003  | STWHVLYS<br>PNVSVPS<br>SSTP  | Homo sapiens          |
| 1 | 1.00 | 1 | 1 | -0.02 | -0.018 | -0.02  | -0.013 | -0.018 | t | 134235 | SMENPGL<br>WILGCHN<br>SDFRNR | Homo sapiens          |
| 1 | 1.00 | 1 | 1 | -0.04 | -0.04  | -0.04  | -0.04  | -0.04  | t | 60770  | SRPSWGP<br>TDP<br>RR         | Homo sapiens          |
| 1 | 1.00 | 1 | 1 | 0.05  | 0.05   | 0.066  | 0.05   | 0.05   | t | 136061 | ETQAE                        | Mus musculus          |
| 1 | 1.00 | 1 | 1 | -0.03 | -0.032 | -0.019 | -0.031 | -0.03  | t | 110619 | GPVGPAG<br>GPGFPGA<br>P      | Mus musculus          |
| 1 | 1.00 | 1 | 1 | -0.02 | -0.02  | -0.02  | -0.029 | -0.023 | t | 131066 | SGSRQVCK<br>LARSLQPF         | Homo sapiens          |
| 1 | 1.00 | 1 | 1 | 0.01  | 0.008  | 0.001  | 0.003  | 0.011  | t | 119514 | RGWKHW<br>VYYTCCPD<br>TPY    | Mus musculus          |
| 1 | 1.00 | 1 | 1 | -0.05 | -0.05  | -0.05  | -0.05  | -0.049 | t | 131050 | RRAEITHP<br>GMMLASG          | Mus musculus          |
| 1 | 1.00 | 1 | 1 | 0     | 0      | 0.002  | 0      | 0      | t | 110592 | GERGAPG<br>NRGFPGQ<br>D      | Mus musculus          |
| 1 | 1.00 | 1 | 1 | 0.01  | 0.01   | 0.01   | 0.01   | 0.012  | t | 58404  | SHRLHNT<br>MPSES             | Mus musculus          |
| 1 | 1.00 | 1 | 1 | 0.03  | 0.03   | 0.03   | 0.037  | 0.03   | t | 119483 | KTKFASDD<br>EHDEHDE<br>NGATG | Homo sapiens          |
| 1 | 1.00 | 1 | 1 | -0.05 | -0.05  | -0.046 | -0.05  | -0.05  | t | 60795  | SRSERR                       | Homo sapiens          |

|   |      |   |   |       |        |        |        |        |   |        |                              |                                  |
|---|------|---|---|-------|--------|--------|--------|--------|---|--------|------------------------------|----------------------------------|
| 1 | 1.00 | 1 | 1 | 0.01  | 0.01   | 0.005  | 0.01   | 0.011  | t | 120172 | RKIPKRPG<br>SVHRTPSR<br>Q    | Oryctola<br>gus<br>cuniculu<br>s |
| 1 | 1.00 | 1 | 1 | 0.01  | 0.007  | 0.005  | 0.01   | 0.011  | t | 120172 | RKIPKRPG<br>SVHRTPSR<br>Q    | Oryctola<br>gus<br>cuniculu<br>s |
| 1 | 1.00 | 1 | 1 | -0.01 | -0.003 | -0.003 | -0.007 | -0.009 | t | 24468  | HPLASSPL<br>FAAP             | Gallus<br>gallus                 |
| 1 | 1.00 | 1 | 1 | -0.02 | -0.022 | -0.015 | -0.021 | -0.02  | t | 141846 | AEKDHSRLR<br>GDN             | Mus<br>musculu<br>s              |
| 1 | 1.00 | 1 | 1 | 0     | 0      | 0.002  | 0      | 0.002  | t | 6479   | CKGKIQAL<br>CENPEWA          | Mus<br>musculu<br>s              |
| 1 | 1.00 | 1 | 1 | 0.01  | 0.01   | 0.005  | 0.009  | 0.01   | t | 50160  | PYQPVSNL<br>TATTQGQ          | Mus<br>musculu<br>s              |
| 1 | 1.00 | 1 | 1 | -0.05 | -0.05  | -0.043 | -0.05  | -0.05  | t | 48681  | PNNDFHF<br>EVFNF             | Homo<br>sapiens                  |
| 1 | 1.00 | 1 | 1 | -0.01 | -0.01  | 0.003  | -0.007 | -0.01  | t | 51844  | QPGPSREY<br>RYVLRTP<br>P     | Homo<br>sapiens                  |
| 1 | 1.00 | 1 | 1 | 0     | -0.003 | 0.003  | 0      | 0      | t | 52822  | QVYLNGD<br>KTKPVTLT          | Oryctola<br>gus<br>cuniculu<br>s |
| 1 | 1.00 | 1 | 1 | 0.01  | 0.013  | 0.02   | 0.01   | 0.009  | t | 97633  | SDISLELPL<br>SQETFSGL        | Mus<br>musculu<br>s              |
| 1 | 1.00 | 1 | 1 | 0.02  | 0.02   | 0.011  | 0.019  | 0.02   | t | 31320  | KILGCDWY<br>FVPTDEG<br>WTND  | Homo<br>sapiens                  |
| 1 | 1.00 | 1 | 1 | -0.01 | -0.01  | -0.01  | -0.014 | -0.01  | t | 122452 | KTTKQSFD<br>LSVKAQYK<br>KNKH | Homo<br>sapiens                  |
| 1 | 1.00 | 1 | 1 | -0.01 | -0.01  | -0.01  | -0.01  | -0.008 | t | 111380 | GTGSGTG<br>GRTGYIPL          | Oryctola<br>gus<br>cuniculu<br>s |
| 1 | 1.00 | 1 | 1 | -0.03 | -0.027 | -0.026 | -0.03  | -0.03  | t | 67436  | TYQRTRAL<br>V                | Mus<br>musculu<br>s              |

|   |      |   |   |       |        |        |        |        |   |        |                              |                                  |
|---|------|---|---|-------|--------|--------|--------|--------|---|--------|------------------------------|----------------------------------|
| 1 | 1.00 | 1 | 1 | 0.04  | 0.038  | 0.043  | 0.04   | 0.04   | t | 48562  | PMILTITLN<br>GTSEST          | Oryctola<br>gus<br>cuniculu<br>s |
| 1 | 1.00 | 1 | 1 | 0.02  | 0.016  | 0.02   | 0.013  | 0.019  | t | 127898 | YEENLGDS<br>IV               | Oryctola<br>gus<br>cuniculu<br>s |
| 1 | 1.00 | 1 | 1 | -0.01 | -0.008 | -0.01  | -0.013 | -0.01  | t | 48827  | PPLPHV                       | Cavia<br>porcellu<br>s           |
| 1 | 1.00 | 1 | 1 | 0.06  | 0.058  | 0.06   | 0.053  | 0.061  | t | 108155 | TDHGAE                       | Mus<br>musculu<br>s              |
| 1 | 1.00 | 1 | 1 | 0.06  | 0.058  | 0.06   | 0.053  | 0.061  | t | 108155 | TDHGAE                       | Mus<br>musculu<br>s              |
| 1 | 1.00 | 1 | 1 | 0.01  | 0.012  | 0.017  | 0.017  | 0.012  | t | 57632  | SESTEGDA<br>MEDIKQM<br>EAESI | Homo<br>sapiens                  |
| 1 | 1.00 | 1 | 1 | -0.01 | -0.01  | -0.01  | -0.01  | -0.01  | t | 142451 | QTGGNRE<br>RRNTSDTV<br>DDT   | Homo<br>sapiens                  |
| 1 | 1.00 | 1 | 1 | 0.01  | 0.01   | 0.013  | 0.01   | 0.01   | t | 45151  | NNKSQSVI<br>IINNSTNV<br>V    | Mus<br>musculu<br>s              |
| 1 | 1.00 | 1 | 1 | -0.02 | -0.02  | -0.013 | -0.02  | -0.021 | t | 125185 | NSSSSQFQ<br>IHG              | Mus<br>musculu<br>s              |
| 1 | 1.00 | 1 | 1 | 0     | -0.002 | 0      | -0.007 | -0.001 | t | 134804 | TIFILCCSK<br>EKRRKKQA<br>AT  | Mus<br>musculu<br>s              |
| 1 | 1.00 | 1 | 1 | 0.01  | 0.006  | -0.002 | 0.007  | 0.01   | t | 14592  | ETVKTNKK<br>NVTVQEL<br>DLQAR | Oryctola<br>gus<br>cuniculu<br>s |
| 1 | 1.00 | 1 | 1 | 0.01  | 0.006  | -0.002 | 0.007  | 0.01   | t | 14592  | ETVKTNKK<br>NVTVQEL<br>DLQAR | Oryctola<br>gus<br>cuniculu<br>s |
| 1 | 1.00 | 1 | 1 | -0.01 | -0.01  | -0.003 | -0.01  | -0.01  | t | 119477 | KKTKGLVT<br>T                | Homo<br>sapiens                  |
| 1 | 1.00 | 1 | 1 | 0.01  | 0.014  | 0.019  | 0.011  | 0.01   | t | 71887  | VVVTPDKE<br>I                | Homo<br>sapiens                  |
| 1 | 1.00 | 1 | 1 | 0.02  | 0.02   | 0.02   | 0.016  | 0.02   | t | 125386 | DVSQTSVT<br>ALPSKGLE<br>HLKE | Homo<br>sapiens                  |

|   |      |   |   |       |        |        |        |        |   |        |                              |                                  |
|---|------|---|---|-------|--------|--------|--------|--------|---|--------|------------------------------|----------------------------------|
| 1 | 1.00 | 1 | 1 | 0.01  | 0.01   | 0.01   | 0.01   | 0.012  | t | 140619 | YSDWDYS<br>EGL               | Mus<br>musculu<br>s              |
| 1 | 1.00 | 1 | 1 | 0     | 0      | 0      | 0      | 0.003  | t | 12632  | EKASVPGG<br>GDMGGM<br>DF     | Mus<br>musculu<br>s              |
| 1 | 1.00 | 1 | 1 | -0.05 | -0.05  | -0.038 | -0.05  | -0.052 | t | 121070 | WVYYTCC<br>PDTPYL            | Rattus<br>norvegic<br>us         |
| 1 | 1.00 | 1 | 1 | -0.04 | -0.042 | -0.04  | -0.041 | -0.04  | t | 58057  | SGGSVASG<br>GSGNSRR          | Mus<br>musculu<br>s              |
| 1 | 1.00 | 1 | 1 | 0.03  | 0.028  | 0.03   | 0.03   | 0.032  | t | 129829 | RSGVSLAA<br>LKKALAAA         | Homo<br>sapiens                  |
| 1 | 1.00 | 1 | 1 | 0.01  | 0.008  | 0.018  | 0.013  | 0.012  | t | 50845  | QGDRGVG<br>SSAVILDD          | Sus<br>scrofa                    |
| 1 | 1.00 | 1 | 1 | -0.04 | -0.04  | -0.04  | -0.04  | -0.042 | t | 119636 | RMARMA<br>RKAGNFYV<br>PAEPK  | Homo<br>sapiens                  |
| 1 | 1.00 | 1 | 1 | 0.04  | 0.042  | 0.036  | 0.041  | 0.042  | t | 21096  | GLRAQDD<br>YNGWDIN<br>TPAFEW | Homo<br>sapiens                  |
| 1 | 1.00 | 1 | 1 | -0.06 | -0.063 | -0.053 | -0.06  | -0.06  | t | 141953 | LTACKV                       | Oryctola<br>gus<br>cuniculu<br>s |
| 1 | 1.00 | 1 | 1 | 0     | 0      | 0.005  | 0.001  | 0.004  | t | 138198 | KPTSTLT                      | Mus<br>musculu<br>s              |
| 1 | 1.00 | 1 | 1 | -0.01 | -0.01  | -0.01  | -0.01  | -0.01  | t | 99559  | QEEREFSP<br>RGQHSRR          | Homo<br>sapiens                  |
| 1 | 1.00 | 1 | 1 | -0.04 | -0.044 | -0.037 | -0.041 | -0.039 | t | 103551 | RILTLPRSN<br>PS              | Oryctola<br>gus<br>cuniculu<br>s |
| 1 | 1.00 | 1 | 1 | 0.01  | 0.006  | 0.005  | 0.003  | 0.01   | t | 133775 | AETNRAPF<br>DLAEAE           | Oryctola<br>gus<br>cuniculu<br>s |
| 1 | 1.00 | 1 | 1 | -0.02 | -0.02  | -0.013 | -0.02  | -0.021 | t | 96790  | QQNIIDP<br>WIMN              | Mus<br>musculu<br>s              |
| 1 | 1.00 | 1 | 1 | -0.02 | -0.02  | -0.012 | -0.02  | -0.02  | t | 69292  | VKPPNPRP<br>TMSLW            | Homo<br>sapiens                  |

|   |      |   |   |       |        |        |        |        |   |        |                              |                                  |
|---|------|---|---|-------|--------|--------|--------|--------|---|--------|------------------------------|----------------------------------|
| 1 | 1.00 | 1 | 1 | 0.02  | 0.02   | 0.02   | 0.02   | 0.022  | t | 140603 | STEHSEAD<br>LW               | Mus<br>musculu<br>s              |
| 1 | 1.00 | 1 | 1 | -0.01 | -0.01  | -0.01  | -0.01  | -0.007 | t | 118763 | CYGSFARP<br>MN               | Mus<br>musculu<br>s              |
| 1 | 1.00 | 1 | 1 | 0.04  | 0.038  | 0.033  | 0.033  | 0.04   | t | 134133 | LGGAKQA<br>GDV               | Mus<br>musculu<br>s              |
| 1 | 1.00 | 1 | 1 | -0.04 | -0.036 | -0.038 | -0.037 | -0.039 | t | 1454   | AGASDIRD<br>QSRNWLP<br>GPCYR | Homo<br>sapiens                  |
| 1 | 1.00 | 1 | 1 | -0.05 | -0.054 | -0.045 | -0.047 | -0.05  | t | 49855  | PVEIRRGV<br>ML               | Oryctola<br>gus<br>cuniculu<br>s |
| 1 | 1.00 | 1 | 1 | 0     | 0.002  | 0.002  | -0.003 | -0.001 | t | 99225  | EREEDWR<br>QPREDWR<br>R      | Homo<br>sapiens                  |
| 1 | 1.00 | 1 | 1 | 0.05  | 0.052  | 0.054  | 0.051  | 0.05   | t | 145997 | SASDQPT<br>QYEEEMT<br>DYQK   | Homo<br>sapiens                  |
| 1 | 1.00 | 1 | 1 | 0.03  | 0.03   | 0.031  | 0.03   | 0.03   | t | 5066   | ATNGDTH<br>LGGEDFD<br>N      | Homo<br>sapiens                  |
| 1 | 1.00 | 1 | 1 | 0     | 0      | 0.012  | 0      | 0      | t | 120398 | AIEGVKYI                     | Rattus<br>norvegic<br>us         |
| 1 | 1.00 | 1 | 1 | 0.03  | 0.028  | 0.03   | 0.033  | 0.033  | t | 118538 | NNGNLQL<br>RKEVTWE<br>VLEG   | Mus<br>musculu<br>s              |
| 1 | 1.00 | 1 | 1 | -0.02 | -0.022 | -0.027 | -0.027 | -0.018 | t | 113183 | SYGAPATP<br>AA               | Mus<br>musculu<br>s              |
| 1 | 1.00 | 1 | 1 | 0     | 0      | 0      | 0      | 0      | t | 159080 | RSNHNRR<br>PGYKTQS<br>QG     | Mus<br>musculu<br>s              |
| 1 | 1.00 | 1 | 1 | 0.01  | 0.012  | 0.015  | 0.013  | 0.01   | t | 39164  | LRPGPVSQ<br>PYHHWDT<br>DK    | Homo<br>sapiens                  |
| 1 | 1.00 | 1 | 1 | -0.01 | -0.012 | 0.001  | -0.011 | -0.01  | t | 1464   | AGDDDLDD<br>GDLNGDD<br>RR    | Mus<br>musculu<br>s              |
| 1 | 1.00 | 1 | 1 | 0     | 0      | 0.002  | -0.004 | -0.006 | t | 18588  | GAGGGAG<br>GAGAGGG<br>AGGAGA | Homo<br>sapiens                  |

|   |      |   |   |       |        |        |        |        |   |        |                              |                                  |
|---|------|---|---|-------|--------|--------|--------|--------|---|--------|------------------------------|----------------------------------|
| 1 | 1.00 | 1 | 1 | 0     | 0.002  | 0.009  | 0      | 0      | t | 110868 | GNVSPGT<br>RREYHTEK<br>LVT   | Homo<br>sapiens                  |
| 1 | 1.00 | 1 | 1 | 0     | 0.002  | 0.009  | 0      | 0      | t | 110867 | GNVSPGT<br>RREYHTEK<br>LVT   | Homo<br>sapiens                  |
| 1 | 1.00 | 1 | 1 | 0     | 0.002  | 0.009  | 0      | 0      | t | 110866 | GNVSPGT<br>RREYHTEK<br>LVT   | Homo<br>sapiens                  |
| 1 | 1.00 | 1 | 1 | 0     | 0      | 0.006  | 0      | 0      | t | 73024  | WREDWG<br>QLSGTAVP<br>PQ     | Oryctola<br>gus<br>cuniculu<br>s |
| 1 | 1.00 | 1 | 1 | 0     | -0.003 | 0.006  | 0      | 0      | t | 73024  | WREDWG<br>QLSGTAVP<br>PQ     | Oryctola<br>gus<br>cuniculu<br>s |
| 1 | 1.00 | 1 | 1 | 0.04  | 0.04   | 0.04   | 0.04   | 0.04   | t | 108937 | EWGSNDG                      | Homo<br>sapiens                  |
| 1 | 1.00 | 1 | 1 | 0     | 0.01   | 0.009  | -0.001 | 0      | t | 27946  | IPLVGAPL<br>GG               | Pan<br>troglody<br>tes           |
| 1 | 1.00 | 1 | 1 | 0.02  | 0.02   | 0.02   | 0.018  | 0.02   | t | 21096  | GLRAQDD<br>YNGWDIN<br>TPAFEW | Homo<br>sapiens                  |
| 1 | 1.00 | 1 | 1 | -0.02 | -0.018 | -0.021 | -0.019 | -0.02  | t | 120550 | GDVQPAE<br>VVAAAR            | Homo<br>sapiens                  |
| 1 | 1.00 | 1 | 1 | 0     | 0      | 0.01   | 0      | 0      | t | 119573 | EWEDTYGI<br>VL               | Homo<br>sapiens                  |
| 1 | 1.00 | 1 | 1 | 0.01  | 0.012  | 0.02   | 0.013  | 0.01   | t | 45584  | NQLSCDLI<br>GQKLGLK          | Homo<br>sapiens                  |
| 1 | 1.00 | 1 | 1 | -0.01 | -0.012 | -0.004 | -0.013 | -0.009 | t | 21683  | GPLDRAFS<br>WRLNPRV          | Mus<br>musculu<br>s              |
| 1 | 1.00 | 1 | 1 | -0.01 | -0.01  | -0.01  | -0.01  | -0.01  | t | 107482 | KGEPGLPG<br>RGFPGFP          | Mus<br>musculu<br>s              |
| 1 | 1.00 | 1 | 1 | 0.01  | 0.01   | 0.017  | 0.004  | 0.011  | t | 108497 | KIGPELHG<br>L                | Homo<br>sapiens                  |
| 1 | 1.00 | 1 | 1 | -0.04 | -0.036 | -0.04  | -0.039 | -0.04  | t | 137887 | GSSHHETH<br>YGYA             | Homo<br>sapiens                  |

|   |      |   |   |       |        |        |        |        |   |        |                              |                    |
|---|------|---|---|-------|--------|--------|--------|--------|---|--------|------------------------------|--------------------|
| 1 | 1.00 | 1 | 1 | 0.01  | 0.008  | 0.017  | 0.013  | 0.01   | t | 11850  | EEQTQQIR<br>LQAEIFQAR        | Mus<br>musculus    |
| 1 | 1.00 | 1 | 1 | -0.01 | -0.01  | -0.001 | -0.01  | -0.01  | t | 11441  | EDSITIPYQ<br>GSGKGV          | Mus<br>musculus    |
| 1 | 1.00 | 1 | 1 | -0.02 | -0.02  | -0.016 | -0.02  | -0.021 | t | 120869 | PGYRSISG<br>PDPRIRKT         | Mus<br>musculus    |
| 1 | 1.00 | 1 | 1 | -0.01 | -0.012 | 0      | -0.007 | -0.008 | t | 3180   | AMQWNS<br>TAFH               | Mus<br>musculus    |
| 1 | 1.00 | 1 | 1 | -0.01 | -0.006 | -0.012 | -0.013 | -0.011 | t | 99358  | ITNPINLRE<br>GEPDLS          | Homo<br>sapiens    |
| 1 | 1.00 | 1 | 1 | -0.05 | -0.048 | -0.052 | -0.053 | -0.053 | t | 106118 | SPRGQHG<br>RRERAGQE          | Homo<br>sapiens    |
| 1 | 1.00 | 1 | 1 | 0     | 0      | -0.01  | 0      | 0.002  | t | 138886 | NVGGDNV<br>DIHSIVPV<br>GQDPH | Mus<br>musculus    |
| 1 | 1.00 | 1 | 1 | -0.03 | -0.026 | -0.031 | -0.03  | -0.029 | t | 18933  | GDAKKKK<br>DGKKAEPK<br>NPREN | Aotus<br>lemurinus |
| 1 | 1.00 | 1 | 1 | -0.08 | -0.076 | -0.063 | -0.073 | -0.081 | t | 115639 | QFRVIGPR<br>HPIR             | Homo<br>sapiens    |
| 1 | 1.00 | 1 | 1 | -0.08 | -0.066 | -0.063 | -0.073 | -0.081 | t | 115639 | QFRVIGPR<br>HPIR             | Homo<br>sapiens    |
| 1 | 1.00 | 1 | 1 | -0.02 | -0.018 | -0.024 | -0.019 | -0.02  | t | 32128  | KLRGDLRQ<br>WVSAGRR<br>VGG   | Homo<br>sapiens    |
| 1 | 1.00 | 1 | 1 | -0.05 | -0.05  | -0.05  | -0.05  | -0.05  | t | 111653 | PVPVSKVV<br>STDGYVA          | Mus<br>musculus    |
| 1 | 1.00 | 1 | 1 | 0.03  | 0.03   | 0.04   | 0.03   | 0.03   | t | 68719  | VGLLSVEE<br>LVPGGAA          | Mus<br>musculus    |
| 1 | 1.00 | 1 | 1 | -0.03 | -0.03  | -0.032 | -0.03  | -0.026 | t | 97479  | LTAWNPSL                     | Mus<br>musculus    |
| 1 | 1.00 | 1 | 1 | -0.01 | -0.012 | -0.005 | -0.011 | -0.012 | t | 632    | ADASLKM<br>ADPNRFR<br>GKDLP  | Mus<br>musculus    |

|   |      |   |   |       |        |        |        |        |   |        |                              |                                  |
|---|------|---|---|-------|--------|--------|--------|--------|---|--------|------------------------------|----------------------------------|
| 1 | 1.00 | 1 | 1 | 0     | -0.003 | 0.008  | 0      | 0.004  | t | 125211 | QHWSYGL<br>RPG               | Canis<br>lupus                   |
| 1 | 1.00 | 1 | 1 | -0.01 | -0.007 | -0.003 | -0.009 | -0.007 | t | 78695  | KDTNNNL<br>YNGK              | Mus<br>musculu<br>s              |
| 1 | 1.00 | 1 | 1 | 0     | -0.002 | 0      | -0.007 | -0.001 | t | 118060 | PPPGMRP<br>P                 | Mus<br>musculu<br>s              |
| 1 | 1.00 | 1 | 1 | 0.01  | 0.01   | 0.01   | 0.01   | 0.009  | t | 25105  | HVTNDCS<br>NSSIVFEA<br>ADLIM | Mus<br>musculu<br>s              |
| 1 | 1.00 | 1 | 1 | -0.05 | -0.046 | -0.05  | -0.049 | -0.05  | t | 138025 | RVPRISCGI<br>NYG             | Homo<br>sapiens                  |
| 1 | 1.00 | 1 | 1 | -0.06 | -0.062 | -0.065 | -0.057 | -0.06  | t | 95635  | NPTKQEH<br>GAPEDSIR<br>HVGD  | Mus<br>musculu<br>s              |
| 1 | 1.00 | 1 | 1 | 0     | 0      | 0      | 0      | 0      | t | 108061 | PGAKGLP<br>GPPGPPG<br>PY     | Mus<br>musculu<br>s              |
| 1 | 1.00 | 1 | 1 | 0     | -0.004 | 0.002  | -0.003 | 0      | t | 78638  | EKSLTSLSE<br>VVLQNR<br>GLD   | Oryctola<br>gus<br>cuniculu<br>s |
| 1 | 1.00 | 1 | 1 | 0     | 0.003  | -0.002 | 0      | 0.002  | t | 38268  | LNLPWSSA<br>GSTVWRN<br>RETL  | Equus<br>caballus                |
| 1 | 1.00 | 1 | 1 | -0.03 | -0.03  | -0.03  | -0.03  | -0.03  | t | 61166  | SSLKSSALH<br>RLL             | Mus<br>musculu<br>s              |
| 1 | 1.00 | 1 | 1 | -0.02 | -0.017 | -0.02  | -0.02  | -0.018 | t | 57303  | SDVAGLEK<br>DPVAN            | Mus<br>musculu<br>s              |
| 1 | 1.00 | 1 | 1 | -0.01 | 0      | -0.016 | -0.011 | -0.01  | t | 22423  | GSNDDLW<br>HQWKRM<br>YNKEYN  | Rattus<br>rattus                 |
| 1 | 1.00 | 1 | 1 | -0.05 | -0.046 | -0.046 | -0.049 | -0.049 | t | 58073  | SGHMAW<br>DMMNWS<br>PT       | Homo<br>sapiens                  |
| 1 | 1.00 | 1 | 1 | 0.04  | 0.039  | 0.041  | 0.037  | 0.04   | t | 99484  | NALRRPFY<br>SNAPQEI          | Homo<br>sapiens                  |
| 1 | 1.00 | 1 | 1 | -0.05 | -0.046 | -0.041 | -0.049 | -0.048 | t | 17876  | FSVPWPT<br>RPPHW             | Homo<br>sapiens                  |



|   |      |   |   |       |        |        |        |       |   |        |                       |                                |
|---|------|---|---|-------|--------|--------|--------|-------|---|--------|-----------------------|--------------------------------|
| 1 | 1.00 | 1 | 1 | -0.02 | -0.018 | -0.02  | -0.019 | -0.02 | t | 96059  | AANNAKN<br>AAL        | Homo<br>sapiens(<br>human)     |
| 1 | 1.00 | 1 | 1 | 0     | -0.003 | 0.001  | 0      | 0.004 | t | 6478   | CKFTLVLT<br>CGSQVL    | Oryctola<br>gus<br>cunicu<br>s |
| 1 | 1.00 | 1 | 1 | -0.04 | -0.036 | -0.038 | -0.037 | -0.04 | t | 121112 | AACDPRH<br>GRYLTVA    | Homo<br>sapiens                |
| 1 | 1.00 | 1 | 1 | 0.01  | 0.013  | 0.008  | 0.01   | 0.011 | t | 120123 | PDTPYLDIT<br>YHFIMQRI | Mus<br>musculu<br>s            |
| 1 | 1.00 | 1 | 1 | 0.01  | 0.013  | 0.008  | 0.01   | 0.011 | t | 120123 | PDTPYLDIT<br>YHFIMQRI | Mus<br>musculu<br>s            |
| 1 | 1.00 | 1 | 1 | 0.01  | 0.01   | 0.008  | 0.01   | 0.011 | t | 120123 | PDTPYLDIT<br>YHFIMQRI | Mus<br>musculu<br>s            |
| 1 | 1.00 | 1 | 1 | 0     | -0.008 | 0      | -0.003 | 0.001 | t | 110766 | AIKSEVSLT<br>GAL      | Macaca                         |
| 1 | 1.00 | 1 | 1 | 0     | -0.002 | 0      | -0.003 | 0.001 | t | 98822  | IEAGAIGFK<br>IHEDWG   | Mus<br>musculu<br>s            |
| 1 | 1.00 | 1 | 1 | 0     | -0.004 | 0      | -0.003 | 0.001 | t | 110818 | DSTNNNK<br>YTVTL      | Oryctola<br>gus<br>cunicu<br>s |
| 1 | 1.00 | 1 | 1 | 0     | -0.004 | 0      | -0.003 | 0.001 | t | 110949 | NAEKVLEK<br>LGYA      | Oryctola<br>gus<br>cunicu<br>s |
| 1 | 1.00 | 1 | 1 | 0     | -0.004 | 0      | -0.003 | 0.001 | t | 110839 | ETTSQMIV<br>KDIK      | Oryctola<br>gus<br>cunicu<br>s |
| 1 | 1.00 | 1 | 1 | 0     | -0.002 | 0      | -0.003 | 0.001 | t | 55641  | RRLGRQTY<br>DNES      | Mus<br>musculu<br>s            |
| 1 | 1.00 | 1 | 1 | 0     | -0.002 | 0      | -0.003 | 0.001 | t | 39146  | LRNCEQDF<br>FTLN      | Mus<br>musculu<br>s            |
| 1 | 1.00 | 1 | 1 | 0     | -0.008 | 0      | -0.003 | 0.001 | t | 20064  | GGVATY                | Macaca                         |

|   |      |   |   |       |        |        |        |        |   |        |                              |                                  |
|---|------|---|---|-------|--------|--------|--------|--------|---|--------|------------------------------|----------------------------------|
| 1 | 1.00 | 1 | 1 | 0     | -0.002 | 0      | -0.003 | 0.001  | t | 14223  | ESNPVDG<br>AHLSL             | Mus<br>musculu<br>s              |
| 1 | 1.00 | 1 | 1 | 0     | -0.004 | 0      | -0.003 | 0.001  | t | 19737  | GGGAGAG<br>GAGAGGG<br>GR     | Oryctola<br>gus<br>cuniculu<br>s |
| 1 | 1.00 | 1 | 1 | 0     | -0.002 | 0      | -0.003 | 0.001  | t | 1254   | AFAQAPT<br>HQLSL             | Mus<br>musculu<br>s              |
| 1 | 1.00 | 1 | 1 | -0.05 | -0.054 | -0.046 | -0.05  | -0.05  | t | 112507 | FAVLKLM<br>GRGTK             | Rattus<br>norvegic<br>us         |
| 1 | 1.00 | 1 | 1 | -0.02 | -0.016 | -0.015 | -0.02  | -0.02  | t | 49705  | PTLNGDD<br>RHKIVNVD<br>QRQYG | Cavia<br>porcellu<br>s           |
| 1 | 1.00 | 1 | 1 | 0     | -0.004 | 0.007  | -0.001 | 0      | t | 65899  | TQNGGSS<br>ACKRGPDS          | Oryctola<br>gus<br>cuniculu<br>s |
| 1 | 1.00 | 1 | 1 | 0.01  | 0.01   | 0.01   | 0.01   | 0.012  | t | 77975  | QACQNN<br>TCPRL              | Mus<br>musculu<br>s              |
| 1 | 1.00 | 1 | 1 | -0.02 | -0.02  | -0.028 | -0.02  | -0.02  | t | 102688 | NPVLPICV<br>RTNEEFDP<br>VDDG | Mus<br>musculu<br>s              |
| 1 | 1.00 | 1 | 1 | 0.02  | 0.017  | 0.02   | 0.012  | 0.02   | t | 110812 | DPVGPLDP<br>SIVSLVEES<br>SFI | Oryctola<br>gus<br>cuniculu<br>s |
| 1 | 1.00 | 1 | 1 | 0     | 0      | 0      | -0.009 | -0.002 | t | 123027 | APGMRPP<br>MGG               | Homo<br>sapiens                  |
| 1 | 1.00 | 1 | 1 | 0     | 0      | 0      | -0.009 | -0.002 | t | 118997 | RKTHCSGR<br>KH               | Homo<br>sapiens                  |
| 1 | 1.00 | 1 | 1 | 0     | 0      | 0      | -0.009 | -0.002 | t | 123636 | PVGPA<br>MRP                 | Homo<br>sapiens                  |
| 1 | 1.00 | 1 | 1 | 0     | 0      | 0      | -0.009 | -0.002 | t | 96828  | RLKEEED<br>KK                | Homo<br>sapiens                  |
| 1 | 1.00 | 1 | 1 | 0     | 0      | 0      | -0.009 | -0.002 | t | 96385  | IFDNFLITN<br>D               | Homo<br>sapiens                  |
| 1 | 1.00 | 1 | 1 | 0     | 0      | 0      | -0.009 | -0.002 | t | 96463  | KIKDPDAS<br>KP               | Homo<br>sapiens                  |
| 1 | 1.00 | 1 | 1 | 0     | 0      | 0      | -0.009 | -0.002 | t | 96455  | KGKNVLIN<br>KD               | Homo<br>sapiens                  |
| 1 | 1.00 | 1 | 1 | 0     | 0      | 0      | -0.009 | -0.002 | t | 96215  | EEEEAEDK<br>ED               | Homo<br>sapiens                  |
| 1 | 1.00 | 1 | 1 | 0     | 0      | 0      | -0.009 | -0.002 | t | 96503  | KSGTIFDN<br>FL               | Homo<br>sapiens                  |
| 1 | 1.00 | 1 | 1 | 0     | 0      | 0      | -0.009 | -0.002 | t | 96808  | QVKSGTIF<br>DN               | Homo<br>sapiens                  |

|   |      |   |   |       |        |        |        |        |   |        |                              |                                  |
|---|------|---|---|-------|--------|--------|--------|--------|---|--------|------------------------------|----------------------------------|
| 1 | 1.00 | 1 | 1 | 0     | 0      | 0      | -0.009 | -0.002 | t | 96328  | GLQTSQD<br>ARF               | Homo<br>sapiens                  |
| 1 | 1.00 | 1 | 1 | 0.01  | 0.014  | 0.01   | 0.002  | 0.008  | t | 110824 | EDEIDGPA<br>GQAEPDR<br>AHYNI | MD                               |
| 1 | 1.00 | 1 | 1 | -0.02 | -0.02  | -0.014 | -0.017 | -0.018 | t | 47333  | PEKPHFPL<br>AAEDDIRH<br>H    | Sus<br>scrofa                    |
| 1 | 1.00 | 1 | 1 | -0.01 | -0.002 | 0.007  | -0.01  | -0.012 | t | 136685 | TLFTPDKS<br>PAKT             | Gallus<br>gallus                 |
| 1 | 1.00 | 1 | 1 | -0.02 | -0.018 | -0.021 | -0.017 | -0.021 | t | 69166  | VIYHKPLA<br>GVYRALKK<br>QIG  | Aotus<br>nancyma<br>ae           |
| 1 | 1.00 | 1 | 1 | 0.02  | 0.022  | 0.018  | 0.02   | 0.021  | t | 58381  | SHLPYIEQ<br>GMQLAEQ<br>F     | Homo<br>sapiens                  |
| 1 | 1.00 | 1 | 1 | 0.01  | 0.011  | 0.017  | 0.01   | 0.01   | t | 41608  | MGPNLVL<br>PDQKPPS           | Mus<br>musculu<br>s              |
| 1 | 1.00 | 1 | 1 | -0.03 | -0.027 | -0.023 | -0.03  | -0.027 | t | 102860 | TPYTSLYT<br>W                | Mus<br>musculu<br>s              |
| 1 | 1.00 | 1 | 1 | 0.01  | 0.014  | 0.007  | 0.013  | 0.012  | t | 7173   | CTKPTDG<br>NCTCIPIPS<br>SWAF | Homo<br>sapiens                  |
| 1 | 1.00 | 1 | 1 | 0     | -0.003 | 0.005  | 0      | -0.001 | t | 141566 | SSIVIPAAV<br>GIKLNVT<br>DA   | Oryctola<br>gus<br>cuniculu<br>s |
| 1 | 1.00 | 1 | 1 | -0.03 | -0.028 | -0.028 | -0.027 | -0.028 | t | 40323  | LVETWKKP                     | Homo<br>sapiens                  |
| 1 | 1.00 | 1 | 1 | 0.03  | 0.03   | 0.035  | 0.03   | 0.031  | t | 136542 | PDGSESPT<br>DQET             | Mus<br>musculu<br>s              |
| 1 | 1.00 | 1 | 1 | 0.01  | 0.007  | 0.021  | 0.01   | 0.01   | t | 94549  | ICCNPACG<br>PK               | Oryctola<br>gus<br>cuniculu<br>s |
| 1 | 1.00 | 1 | 1 | 0     | -0.002 | 0.012  | -0.001 | 0      | t | 20089  | GGWNTG<br>GSR                | Mus<br>musculu<br>s              |
| 1 | 1.00 | 1 | 1 | 0     | 0      | 0      | -0.002 | 0      | t | 56713  | SAARSTGS<br>FAKLFMP<br>G     | Homo<br>sapiens                  |

|   |      |   |   |       |        |        |        |        |   |        |                          |                                  |
|---|------|---|---|-------|--------|--------|--------|--------|---|--------|--------------------------|----------------------------------|
| 1 | 1.00 | 1 | 1 | 0     | 0.001  | 0.004  | -0.001 | 0.002  | t | 50636  | QELDCWH<br>YHQYCITS      | Capra<br>hircus                  |
| 1 | 1.00 | 1 | 1 | 0     | 0.001  | 0.004  | -0.001 | 0.002  | t | 50636  | QELDCWH<br>YHQYCITS      | Capra<br>hircus                  |
| 1 | 1.00 | 1 | 1 | -0.05 | -0.05  | -0.05  | -0.05  | -0.05  | t | 127688 | HWHRPSE                  | Homo<br>sapiens                  |
| 1 | 1.00 | 1 | 1 | 0.02  | 0.02   | 0.04   | 0.028  | 0.019  | t | 96215  | EEEEAEDK<br>ED           | Homo<br>sapiens                  |
| 1 | 1.00 | 1 | 1 | -0.02 | -0.022 | -0.009 | -0.017 | -0.02  | t | 158837 | IHNDVEA<br>WIDRYKYY<br>P | Mus<br>musculu<br>s              |
| 1 | 1.00 | 1 | 1 | -0.01 | -0.014 | -0.005 | -0.013 | -0.012 | t | 23077  | GVNPNNA<br>AGLPGKC<br>G  | Oryctola<br>gus<br>cuniculu<br>s |
| 1 | 1.00 | 1 | 1 | 0.03  | 0.03   | 0.035  | 0.03   | 0.029  | t | 24167  | HKYSSDLL<br>QQR          | Mus<br>musculu<br>s              |
| 1 | 1.00 | 1 | 1 | -0.02 | -0.013 | -0.013 | -0.027 | -0.022 | t | 136138 | APYDTPW<br>PSPSL         | Gallus<br>gallus                 |
| 1 | 1.00 | 1 | 1 | -0.04 | -0.038 | -0.038 | -0.037 | -0.04  | t | 120506 | EPGLTWQ<br>SCSCRANG      | Homo<br>sapiens                  |
| 1 | 1.00 | 1 | 1 | -0.01 | -0.008 | -0.012 | -0.007 | -0.008 | t | 74494  | YKPWCEM<br>NKCKPLA       | Homo<br>sapiens                  |
| 1 | 1.00 | 1 | 1 | -0.02 | -0.017 | -0.014 | -0.02  | -0.02  | t | 95137  | RGLSLGM<br>RLEN          | Mus<br>musculu<br>s              |
| 1 | 1.00 | 1 | 1 | 0.02  | 0.02   | 0.02   | 0.02   | 0.023  | t | 130581 | QAFDSH                   | Mus<br>musculu<br>s              |
| 1 | 1.00 | 1 | 1 | -0.06 | -0.06  | -0.051 | -0.06  | -0.061 | t | 96771  | QFFRRMD<br>Y             | Mus<br>musculu<br>s              |
| 1 | 1.00 | 1 | 1 | -0.04 | -0.042 | -0.037 | -0.041 | -0.038 | t | 52006  | QQDAKLT<br>WR            | Mus<br>musculu<br>s              |

|   |      |   |   |       |        |        |        |        |   |        |                              |                                  |
|---|------|---|---|-------|--------|--------|--------|--------|---|--------|------------------------------|----------------------------------|
| 1 | 1.00 | 1 | 1 | -0.06 | -0.064 | -0.05  | -0.061 | -0.06  | t | 66914  | TTWNPTLL                     | Oryctola<br>gus<br>cuniculu<br>s |
| 1 | 1.00 | 1 | 1 | 0.01  | 0.01   | 0.019  | 0.01   | 0.012  | t | 6127   | CDPPIDLD<br>C                | Mus<br>musculu<br>s              |
| 1 | 1.00 | 1 | 1 | 0.05  | 0.046  | 0.049  | 0.043  | 0.052  | t | 134685 | GVSSYMK<br>VSICLPMD<br>VE    | Oryctola<br>gus<br>cuniculu<br>s |
| 1 | 1.00 | 1 | 1 | -0.02 | -0.017 | -0.02  | -0.02  | -0.017 | t | 144793 | SYGGRKGT<br>HPGLEMP          | Mus<br>musculu<br>s              |
| 1 | 1.00 | 1 | 1 | -0.02 | -0.018 | -0.015 | -0.019 | -0.02  | t | 47626  | PGCIVPAS<br>QV               | Homo<br>sapiens                  |
| 1 | 1.00 | 1 | 1 | 0.04  | 0.043  | 0.049  | 0.043  | 0.039  | t | 110999 | REEAENTL<br>QSFRQDV<br>NTLQS | Mus<br>musculu<br>s              |
| 1 | 1.00 | 1 | 1 | -0.02 | -0.024 | -0.016 | -0.023 | -0.02  | t | 54509  | RLDLAML<br>AAIRRVYG          | Oryctola<br>gus<br>cuniculu<br>s |
| 1 | 1.00 | 1 | 1 | -0.03 | -0.027 | -0.037 | -0.033 | -0.027 | t | 141267 | FEGWFN                       | Capra<br>hircus                  |
| 1 | 1.00 | 1 | 1 | 0.04  | 0.04   | 0.036  | 0.04   | 0.042  | t | 64490  | TITGSPIT<br>YSTYGK           | Homo<br>sapiens                  |
| 1 | 1.00 | 1 | 1 | -0.02 | -0.02  | -0.02  | -0.02  | -0.018 | t | 140254 | KYEHGGNI<br>ID               | Mus<br>musculu<br>s              |
| 1 | 1.00 | 1 | 1 | -0.02 | -0.02  | -0.02  | -0.02  | -0.018 | t | 140254 | KYEHGGNI<br>ID               | Mus<br>musculu<br>s              |
| 1 | 1.00 | 1 | 1 | 0     | 0.004  | 0.01   | 0.001  | 0      | t | 19974  | GGPTRTIG<br>GS               | Homo<br>sapiens                  |
| 1 | 1.00 | 1 | 1 | 0     | 0.003  | 0.009  | 0      | 0      | t | 62908  | TALGKLQD<br>VVNQNAQ<br>AL    | Mus<br>musculu<br>s              |
| 1 | 1.00 | 1 | 1 | 0     | 0.003  | 0.009  | 0      | 0      | t | 62908  | TALGKLQD<br>VVNQNAQ<br>AL    | Mus<br>musculu<br>s              |

|   |      |   |   |       |        |        |        |        |   |        |                              |                                  |
|---|------|---|---|-------|--------|--------|--------|--------|---|--------|------------------------------|----------------------------------|
| 1 | 1.00 | 1 | 1 | -0.01 | -0.014 | -0.01  | -0.017 | -0.011 | t | 103830 | CHAVKVG<br>NPSC              | Oryctola<br>gus<br>cuniculu<br>s |
| 1 | 1.00 | 1 | 1 | -0.02 | -0.022 | -0.021 | -0.018 | -0.018 | t | 107010 | YESPPKFW<br>FISP             | Mus<br>musculu<br>s              |
| 1 | 1.00 | 1 | 1 | 0.03  | 0.028  | 0.03   | 0.023  | 0.03   | t | 107030 | YTPSPDDL<br>VSP              | Mus<br>musculu<br>s              |
| 1 | 1.00 | 1 | 1 | -0.05 | -0.053 | -0.05  | -0.049 | -0.05  | t | 70402  | VPNTNIKL<br>YVRRVFIT<br>DEFR | Canis<br>lupus                   |
| 1 | 1.00 | 1 | 1 | 0.01  | 0.01   | 0.018  | 0.01   | 0.01   | t | 106304 | CDRSYTTR<br>RW               | Homo<br>sapiens                  |
| 1 | 1.00 | 1 | 1 | 0     | 0.005  | 0.008  | -0.003 | -0.002 | t | 157770 | QEYEQHR<br>RQQQH             | Homo<br>sapiens                  |
| 1 | 1.00 | 1 | 1 | -0.01 | -0.013 | -0.017 | -0.01  | -0.01  | t | 6517   | CKRGPDS<br>GFFSRLN<br>WLY    | Oryctola<br>gus<br>cuniculu<br>s |
| 1 | 1.00 | 1 | 1 | -0.02 | -0.022 | -0.002 | -0.019 | -0.021 | t | 98939  | PQPGP                        | Mus<br>musculu<br>s              |
| 1 | 1.00 | 1 | 1 | -0.05 | -0.05  | -0.043 | -0.05  | -0.049 | t | 119520 | RRKLRTNA<br>G                | Homo<br>sapiens                  |
| 1 | 1.00 | 1 | 1 | 0     | 0      | 0      | -0.001 | 0.002  | t | 105497 | RHDSGYE                      | Mus<br>musculu<br>s              |
| 1 | 1.00 | 1 | 1 | 0     | 0      | 0      | -0.001 | 0.002  | t | 105164 | EFRHDSG                      | Mus<br>musculu<br>s              |
| 1 | 1.00 | 1 | 1 | -0.01 | -0.009 | -0.006 | -0.01  | -0.01  | t | 52059  | QQLIVARQ<br>KLKDAE           | Myodes<br>glareolu<br>s          |
| 1 | 1.00 | 1 | 1 | -0.04 | -0.04  | -0.034 | -0.04  | -0.038 | t | 1165   | AESPKKP                      | Homo<br>sapiens                  |
| 1 | 1.00 | 1 | 1 | 0.05  | 0.05   | 0.05   | 0.046  | 0.05   | t | 119011 | SGPEGSG<br>GSGPQRR<br>GGDNHG | Homo<br>sapiens                  |
| 1 | 1.00 | 1 | 1 | 0.05  | 0.05   | 0.05   | 0.046  | 0.05   | t | 115600 | DHSYQEEA<br>AMEL             | Homo<br>sapiens                  |

|   |      |   |   |       |        |        |        |        |   |        |                              |                       |
|---|------|---|---|-------|--------|--------|--------|--------|---|--------|------------------------------|-----------------------|
| 1 | 1.00 | 1 | 1 | -0.01 | -0.01  | 0.005  | -0.01  | -0.012 | t | 132893 | SDELRQRL                     | Mus musculus          |
| 1 | 1.00 | 1 | 1 | 0     | 0      | 0      | 0      | 0.003  | t | 5582   | AVTRGTIN<br>DPQRAKE          | Mus musculus          |
| 1 | 1.00 | 1 | 1 | -0.01 | -0.01  | 0.005  | -0.01  | -0.01  | t | 21365  | GMYGGTY<br>LVEKP             | Oryctolagus cuniculus |
| 1 | 1.00 | 1 | 1 | 0.02  | 0.018  | 0.02   | 0.013  | 0.018  | t | 130916 | KEDFDIYD<br>EDE              | Mus musculus          |
| 1 | 1.00 | 1 | 1 | 0.05  | 0.05   | 0.05   | 0.05   | 0.048  | t | 40495  | LVNSVSTK<br>EGDSSNTG<br>AGKA | Homo sapiens          |
| 1 | 1.00 | 1 | 1 | -0.02 | -0.02  | -0.013 | -0.02  | -0.021 | t | 125185 | NSSSSQFQ<br>IHG              | Mus musculus          |
| 1 | 1.00 | 1 | 1 | 0.01  | 0.008  | 0.018  | 0.007  | 0.008  | t | 48332  | PLGFFPDH<br>QLDPAFG          | Mus musculus          |
| 1 | 1.00 | 1 | 1 | 0.02  | 0.018  | 0.02   | 0.013  | 0.018  | t | 106487 | GTSTEVWL<br>APDP             | Mus musculus          |
| 1 | 1.00 | 1 | 1 | 0.02  | 0.018  | 0.016  | 0.019  | 0.021  | t | 6480   | CKGLNGLF<br>DLGPKQKI         | Mus musculus          |
| 1 | 1.00 | 1 | 1 | -0.02 | -0.02  | -0.008 | -0.017 | -0.02  | t | 57045  | SAWDVRP<br>LTETRDL           | Homo sapiens          |
| 1 | 1.00 | 1 | 1 | -0.02 | -0.018 | -0.008 | -0.017 | -0.02  | t | 57045  | SAWDVRP<br>LTETRDL           | Homo sapiens          |
| 1 | 1.00 | 1 | 1 | 0.02  | 0.02   | 0.027  | 0.017  | 0.02   | t | 117346 | PSALLRQF<br>TTAL             | Homo sapiens          |
| 1 | 1.00 | 1 | 1 | -0.03 | -0.03  | -0.03  | -0.03  | -0.03  | t | 156893 | IPHPKLGD<br>PRPM             | Oryctolagus cuniculus |
| 1 | 1.00 | 1 | 1 | 0.02  | 0.022  | 0.02   | 0.023  | 0.022  | t | 108989 | FRCQVQFY<br>GLSENDE<br>W     | Homo sapiens          |
| 1 | 1.00 | 1 | 1 | 0.04  | 0.032  | 0.047  | 0.039  | 0.042  | t | 106618 | LPWYQIA                      | Mus musculus          |
| 1 | 1.00 | 1 | 1 | -0.02 | -0.02  | -0.02  | -0.02  | -0.02  | t | 156851 | AQMIIRLS<br>SPGN             | Gallus gallus         |

|   |      |   |   |       |        |        |        |        |   |        |                             |                                  |
|---|------|---|---|-------|--------|--------|--------|--------|---|--------|-----------------------------|----------------------------------|
| 1 | 1.00 | 1 | 1 | -0.01 | -0.01  | -0.01  | -0.01  | -0.008 | t | 122202 | TSPPLLWD<br>SVHL            | Mus<br>musculu<br>s              |
| 1 | 1.00 | 1 | 1 | 0.03  | 0.028  | 0.025  | 0.023  | 0.03   | t | 107853 | GFBGADGI<br>AGPKGPB<br>GER  | Mus<br>musculu<br>s              |
| 1 | 1.00 | 1 | 1 | 0.05  | 0.052  | 0.058  | 0.047  | 0.051  | t | 18809  | GAVDSILG<br>GVATYGA<br>AC   | Homo<br>sapiens                  |
| 1 | 1.00 | 1 | 1 | 0.04  | 0.04   | 0.044  | 0.04   | 0.04   | t | 5274   | AVASPPAT<br>ASVSSPL<br>PAAA | Homo<br>sapiens                  |
| 1 | 1.00 | 1 | 1 | 0.02  | 0.02   | 0.02   | 0.011  | 0.018  | t | 96823  | RKEEEEAE<br>DK              | Homo<br>sapiens                  |
| 1 | 1.00 | 1 | 1 | -0.04 | -0.04  | -0.038 | -0.047 | -0.04  | t | 117947 | KFKGKATL                    | Mus<br>musculu<br>s              |
| 1 | 1.00 | 1 | 1 | -0.04 | -0.042 | -0.038 | -0.047 | -0.04  | t | 117947 | KFKGKATL                    | Mus<br>musculu<br>s              |
| 1 | 1.00 | 1 | 1 | -0.03 | -0.03  | -0.03  | -0.03  | -0.03  | t | 105070 | AEFDLDIT<br>AGTEAA          | Oryctola<br>gus<br>cuniculu<br>s |
| 1 | 1.00 | 1 | 1 | 0.05  | 0.046  | 0.05   | 0.043  | 0.051  | t | 134043 | EITRTTLQS<br>DQEEID         | Oryctola<br>gus<br>cuniculu<br>s |
| 1 | 1.00 | 1 | 1 | -0.01 | -0.008 | -0.01  | -0.009 | -0.007 | t | 58409  | SHSAFNM<br>FDFGVGPP         | Homo<br>sapiens                  |
| 1 | 1.00 | 1 | 1 | 0.03  | 0.03   | 0.037  | 0.03   | 0.03   | t | 105702 | CVYDQYG<br>TEFEDYSY<br>ES   | Mus<br>musculu<br>s              |
| 1 | 1.00 | 1 | 1 | -0.01 | -0.007 | -0.01  | -0.01  | -0.01  | t | 43568  | NEDEQIGA<br>RIVLKALSA       | Mus<br>musculu<br>s              |
| 1 | 1.00 | 1 | 1 | 0     | -0.008 | 0.014  | 0      | 0      | t | 60116  | SPLLGCIGS<br>TCAE           | Mus<br>musculu<br>s              |
| 1 | 1.00 | 1 | 1 | -0.01 | -0.01  | 0.003  | -0.012 | -0.013 | t | 99061  | WYSLAMA<br>ASD              | Homo<br>sapiens                  |
| 1 | 1.00 | 1 | 1 | -0.01 | -0.012 | -0.023 | -0.017 | -0.01  | t | 141671 | IAESKQLT<br>VKQKTEQI<br>K   | Mus<br>musculu<br>s              |



|   |      |   |   |       |        |        |        |        |   |        |                              |                                  |
|---|------|---|---|-------|--------|--------|--------|--------|---|--------|------------------------------|----------------------------------|
| 1 | 1.00 | 1 | 1 | -0.03 | -0.032 | -0.037 | -0.037 | -0.028 | t | 145539 | SSTLCFWF<br>PLAH             | Mus<br>musculu<br>s              |
| 1 | 1.00 | 1 | 1 | -0.03 | -0.03  | -0.03  | -0.026 | -0.03  | t | 131367 | ATWSPSK<br>ARLHLQGR<br>SNAWR | Homo<br>sapiens                  |
| 1 | 1.00 | 1 | 1 | 0.06  | 0.082  | 0.067  | 0.053  | 0.06   | t | 127801 | RGTVLYKN<br>EVGE             | Rattus                           |
| 1 | 1.00 | 1 | 1 | 0     | 0      | -0.005 | 0      | 0.002  | t | 140506 | THYGSLPQ<br>KSQH             | Mus<br>musculu<br>s              |
| 1 | 1.00 | 1 | 1 | -0.01 | -0.01  | -0.01  | -0.01  | -0.008 | t | 21729  | GPPLGCLS<br>LSCYDVA          | Homo<br>sapiens                  |
| 1 | 1.00 | 1 | 1 | 0     | 0.002  | 0.016  | 0.002  | 0      | t | 17279  | FPELTCWT<br>CLASS            | Homo<br>sapiens                  |
| 1 | 1.00 | 1 | 1 | 0     | 0      | 0      | 0      | 0      | t | 39825  | LTCGFADL<br>MGYIP            | Homo<br>sapiens                  |
| 1 | 1.00 | 1 | 1 | 0.03  | 0.03   | 0.03   | 0.03   | 0.029  | t | 115235 | EQQQTED<br>ELQDKIHP<br>FAQTQ | Homo<br>sapiens                  |
| 1 | 1.00 | 1 | 1 | -0.05 | -0.05  | -0.053 | -0.05  | -0.049 | t | 115271 | GQKGRGS<br>RG                | Oryctola<br>gus<br>cuniculu<br>s |
| 1 | 1.00 | 1 | 1 | -0.01 | -0.01  | -0.011 | -0.012 | -0.011 | t | 34210  | KVTAFQH<br>QNSKKTTK          | Homo<br>sapiens                  |
| 1 | 1.00 | 1 | 1 | -0.01 | -0.01  | -0.004 | -0.01  | -0.008 | t | 22639  | GTEKF                        | Mus<br>musculu<br>s              |
| 1 | 1.00 | 1 | 1 | 0.01  | 0.01   | 0.01   | 0.01   | 0.012  | t | 135580 | MDIPPPTG<br>PT               | Oryctola<br>gus<br>cuniculu<br>s |
| 1 | 1.00 | 1 | 1 | -0.01 | -0.01  | -0.01  | -0.01  | -0.007 | t | 136593 | RHYKQYQ<br>FHF               | Homo<br>sapiens                  |
| 1 | 1.00 | 1 | 1 | 0.02  | 0.02   | 0.02   | 0.02   | 0.022  | t | 140549 | DGEWPRE<br>GWS               | Mus<br>musculu<br>s              |
| 1 | 1.00 | 1 | 1 | -0.04 | -0.04  | -0.038 | -0.04  | -0.04  | t | 41004  | MAARLCC<br>QLDPARD<br>V      | Homo<br>sapiens                  |
| 1 | 1.00 | 1 | 1 | 0.02  | 0.02   | 0.02   | 0.02   | 0.02   | t | 96761  | PTPPVKPT<br>APTPTYE<br>TEK   | Homo<br>sapiens(<br>human)       |

|   |      |   |   |       |        |        |        |        |   |        |                            |                                  |
|---|------|---|---|-------|--------|--------|--------|--------|---|--------|----------------------------|----------------------------------|
| 1 | 1.00 | 1 | 1 | 0     | -0.004 | -0.005 | -0.007 | 0      | t | 138203 | MGEFFMP<br>YPGTRIN         | Oryctola<br>gus<br>cuniculu<br>s |
| 1 | 1.00 | 1 | 1 | 0.01  | 0.01   | 0.017  | 0.01   | 0.011  | t | 1406   | AFTPDWM<br>MEVAIDN<br>E    | Mus<br>musculu<br>s              |
| 1 | 1.00 | 1 | 1 | 0.01  | 0.008  | 0.017  | 0.01   | 0.011  | t | 1406   | AFTPDWM<br>MEVAIDN<br>E    | Mus<br>musculu<br>s              |
| 1 | 1.00 | 1 | 1 | -0.03 | -0.03  | -0.03  | -0.032 | -0.03  | t | 70421  | VPPLRVW<br>RHRARSV         | Homo<br>sapiens                  |
| 1 | 1.00 | 1 | 1 | -0.01 | -0.01  | -0.004 | -0.01  | -0.01  | t | 7004   | CSGLVGLF<br>TPGAKQNI       | Mus<br>musculu<br>s              |
| 1 | 1.00 | 1 | 1 | -0.02 | -0.017 | -0.01  | -0.02  | -0.02  | t | 13972  | ERDPANIP<br>WDKD           | Mus<br>musculu<br>s              |
| 1 | 1.00 | 1 | 1 | 0.04  | 0.043  | 0.045  | 0.04   | 0.041  | t | 135915 | EEVGSILYG<br>LGG           | Mus<br>musculu<br>s              |
| 1 | 1.00 | 1 | 1 | -0.03 | -0.028 | -0.031 | -0.033 | -0.03  | t | 52031  | QQGNGIF<br>GMIFPGCP        | Homo<br>sapiens                  |
| 1 | 1.00 | 1 | 1 | 0.01  | 0.01   | 0.01   | 0.01   | 0.012  | t | 77975  | QACQNN<br>D<br>TCPRL       | Mus<br>musculu<br>s              |
| 1 | 1.00 | 1 | 1 | -0.01 | -0.01  | -0.003 | -0.01  | -0.011 | t | 106119 | SQNSAEG<br>AW              | Mus<br>musculu<br>s              |
| 1 | 1.00 | 1 | 1 | -0.03 | -0.03  | -0.015 | -0.026 | -0.03  | t | 142434 | KSTEDLSV<br>AKDK           | Homo<br>sapiens                  |
| 1 | 1.00 | 1 | 1 | -0.06 | -0.058 | -0.059 | -0.063 | -0.058 | t | 114997 | YTNDCLLC<br>AY             | Homo<br>sapiens                  |
| 1 | 1.00 | 1 | 1 | 0.02  | 0.02   | 0.023  | 0.023  | 0.022  | t | 111821 | TEETQTTI<br>QRPRSEP        | Homo<br>sapiens                  |
| 1 | 1.00 | 1 | 1 | 0     | -0.004 | 0      | 0      | 0.003  | t | 124588 | PQEETLQA<br>FDSHYDYT       | Sus<br>scrofa                    |
| 1 | 1.00 | 1 | 1 | 0     | -0.003 | 0      | 0      | 0.003  | t | 119649 | SYCEIIVTH<br>FPFDQQN<br>CT | Oryctola<br>gus<br>cuniculu<br>s |

|   |      |   |   |   |        |   |   |       |   |        |                              |                                  |
|---|------|---|---|---|--------|---|---|-------|---|--------|------------------------------|----------------------------------|
| 1 | 1.00 | 1 | 1 | 0 | -0.003 | 0 | 0 | 0.003 | t | 122932 | VCTPKSDE<br>FNPCEDIM<br>GYK  | Oryctola<br>gus<br>cuniculu<br>s |
| 1 | 1.00 | 1 | 1 | 0 | -0.003 | 0 | 0 | 0.003 | t | 118877 | LDVEQLGI<br>PEQEYSC          | Oryctola<br>gus<br>cuniculu<br>s |
| 1 | 1.00 | 1 | 1 | 0 | -0.003 | 0 | 0 | 0.003 | t | 119642 | SEHETRLV<br>ANLLENYN<br>KVIR | Oryctola<br>gus<br>cuniculu<br>s |
| 1 | 1.00 | 1 | 1 | 0 | 0      | 0 | 0 | 0.003 | t | 126761 | NLASSTIIE                    | Rattus<br>norvegicus             |
| 1 | 1.00 | 1 | 1 | 0 | -0.003 | 0 | 0 | 0.003 | t | 110385 | QLYKTCKQ<br>AGTCPPDII<br>PKV | Oryctola<br>gus<br>cuniculu<br>s |
| 1 | 1.00 | 1 | 1 | 0 | -0.003 | 0 | 0 | 0.003 | t | 106322 | DAEFRHDS<br>G                | Oryctola<br>gus<br>cuniculu<br>s |
| 1 | 1.00 | 1 | 1 | 0 | -0.003 | 0 | 0 | 0.003 | t | 63037  | TAVSPTTL<br>R                | Oryctola<br>gus<br>cuniculu<br>s |
| 1 | 1.00 | 1 | 1 | 0 | 0.002  | 0 | 0 | 0.003 | t | 70656  | VQTRHVV<br>QHRSRSES<br>SIESF | Rattus<br>norvegicus             |
| 1 | 1.00 | 1 | 1 | 0 | -0.003 | 0 | 0 | 0.003 | t | 95524  | KRQIYTDIE<br>MNRLGK          | Oryctola<br>gus<br>cuniculu<br>s |
| 1 | 1.00 | 1 | 1 | 0 | 0.002  | 0 | 0 | 0.003 | t | 66976  | TVDNPAST<br>TNKDKLFA<br>VWK  | Rattus<br>norvegicus             |
| 1 | 1.00 | 1 | 1 | 0 | 0.003  | 0 | 0 | 0.003 | t | 63037  | TAVSPTTL<br>R                | Sus<br>scrofa                    |
| 1 | 1.00 | 1 | 1 | 0 | 0.002  | 0 | 0 | 0.003 | t | 74436  | YKDGTLTP<br>LSTKDLTTY        | Rattus<br>norvegicus             |
| 1 | 1.00 | 1 | 1 | 0 | 0      | 0 | 0 | 0.003 | t | 97339  | GIFGAIAG<br>FIEGGW           | Oryctola<br>gus<br>cuniculu<br>s |

|   |      |   |   |   |        |   |   |       |   |       |                              |                                  |
|---|------|---|---|---|--------|---|---|-------|---|-------|------------------------------|----------------------------------|
| 1 | 1.00 | 1 | 1 | 0 | -0.003 | 0 | 0 | 0.003 | t | 63037 | TAVSPTTL<br>R                | Oryctola<br>gus<br>cuniculu<br>s |
| 1 | 1.00 | 1 | 1 | 0 | -0.004 | 0 | 0 | 0.003 | t | 44221 | NIETVIEFQ<br>QKNNRLE         | Mus<br>musculu<br>s              |
| 1 | 1.00 | 1 | 1 | 0 | 0      | 0 | 0 | 0.003 | t | 43946 | NFVPTSVT<br>EGRTDITT<br>M    | Sus<br>scrofa                    |
| 1 | 1.00 | 1 | 1 | 0 | -0.004 | 0 | 0 | 0.003 | t | 39092 | LRGDLQVL<br>AQKVARTL         | Mus<br>musculu<br>s              |
| 1 | 1.00 | 1 | 1 | 0 | 0.002  | 0 | 0 | 0.003 | t | 58511 | SIFYTYGTA<br>PARISVPY<br>VGI | Rattus<br>norvegic<br>us         |
| 1 | 1.00 | 1 | 1 | 0 | 0.002  | 0 | 0 | 0.003 | t | 53326 | RDALPNTE<br>ASGPTHSK<br>E    | Rattus<br>norvegic<br>us         |
| 1 | 1.00 | 1 | 1 | 0 | -0.003 | 0 | 0 | 0.003 | t | 43242 | NANPNAN<br>PNANP             | Oryctola<br>gus<br>cuniculu<br>s |
| 1 | 1.00 | 1 | 1 | 0 | -0.013 | 0 | 0 | 0.003 | t | 59967 | SNYYSDNE<br>IEQHTAKQ<br>PKL  | Mustela<br>vison                 |
| 1 | 1.00 | 1 | 1 | 0 | -0.003 | 0 | 0 | 0.003 | t | 53018 | QYPALT                       | Oryctola<br>gus<br>cuniculu<br>s |
| 1 | 1.00 | 1 | 1 | 0 | 0.002  | 0 | 0 | 0.003 | t | 44474 | NKDKLFAV<br>WK               | Rattus<br>norvegic<br>us         |
| 1 | 1.00 | 1 | 1 | 0 | 0.006  | 0 | 0 | 0.003 | t | 54058 | RHKQKIVA<br>PVKQTL           | Ovis<br>aries                    |
| 1 | 1.00 | 1 | 1 | 0 | -0.003 | 0 | 0 | 0.003 | t | 37056 | LKVIRKNIV<br>KKMIE           | Oryctola<br>gus<br>cuniculu<br>s |

|   |      |   |   |       |        |        |        |        |   |       |                              |                       |
|---|------|---|---|-------|--------|--------|--------|--------|---|-------|------------------------------|-----------------------|
| 1 | 1.00 | 1 | 1 | 0     | 0.004  | 0      | 0      | 0.003  | t | 53018 | QYPALT                       | Ovis aries            |
| 1 | 1.00 | 1 | 1 | 0     | -0.004 | 0      | 0      | 0.003  | t | 29290 | IVGPKASK                     | Mus musculus          |
| 1 | 1.00 | 1 | 1 | 0     | 0      | 0      | 0      | 0.003  | t | 14808 | EVLYLKPLA<br>GVYRSLKK<br>QLE | Mus musculus          |
| 1 | 1.00 | 1 | 1 | 0     | 0      | 0      | 0      | 0.003  | t | 34806 | LAHLTTTH<br>ARHLP            | Sus scrofa            |
| 1 | 1.00 | 1 | 1 | 0     | 0.002  | 0      | 0      | 0.003  | t | 6832  | CPRPPRAV<br>AAYGPGV<br>DYK   | Rattus norvegicus     |
| 1 | 1.00 | 1 | 1 | 0     | 0.002  | 0      | 0      | 0.003  | t | 279   | AALGDSLY<br>GAASLNDF<br>GILA | Rattus norvegicus     |
| 1 | 1.00 | 1 | 1 | 0     | -0.003 | 0      | 0      | 0.003  | t | 10227 | DSSAHGTP<br>STPA             | Oryctolagus cuniculus |
| 1 | 1.00 | 1 | 1 | 0     | 0      | 0      | 0      | 0.003  | t | 4331  | ASARGDLA<br>HLTTTHAR<br>HLP  | Sus scrofa            |
| 1 | 1.00 | 1 | 1 | -0.01 | -0.015 | -0.009 | -0.009 | -0.01  | t | 65204 | TMGEAHN<br>DKRADPA<br>FVCR   | Equus caballus        |
| 1 | 1.00 | 1 | 1 | -0.01 | -0.007 | -0.009 | -0.009 | -0.01  | t | 65204 | TMGEAHN<br>DKRADPA<br>FVCR   | Equus caballus        |
| 1 | 1.00 | 1 | 1 | -0.01 | -0.007 | -0.009 | -0.009 | -0.01  | t | 65204 | TMGEAHN<br>DKRADPA<br>FVCR   | Equus caballus        |
| 1 | 1.00 | 1 | 1 | -0.02 | -0.02  | -0.03  | -0.02  | -0.019 | t | 95130 | PGIFKSSCY<br>IDVRWFPP<br>DVQ | Rattus norvegicus     |
| 1 | 1.00 | 1 | 1 | 0.01  | 0.01   | 0.013  | 0.01   | 0.01   | t | 70277 | VPEDTLNK                     | Homo sapiens          |

|   |      |   |   |       |        |        |        |        |   |        |                              |                       |
|---|------|---|---|-------|--------|--------|--------|--------|---|--------|------------------------------|-----------------------|
| 1 | 1.00 | 1 | 1 | -0.03 | -0.028 | -0.029 | -0.027 | -0.028 | t | 48752  | PPAVGPP<br>AAGPPAA<br>GPPAAG | Homo sapiens          |
| 1 | 1.00 | 1 | 1 | -0.03 | -0.03  | -0.023 | -0.03  | -0.029 | t | 137436 | QHDRLLM<br>LSYLV             | Mus musculus          |
| 1 | 1.00 | 1 | 1 | 0.01  | 0.005  | 0.003  | 0.008  | 0.013  | t | 157447 | KDVTKEEY<br>AAFYKA           | Canis lupus           |
| 1 | 1.00 | 1 | 1 | -0.02 | -0.019 | -0.02  | -0.02  | -0.02  | t | 68723  | VGLRTPQR<br>FTDLVKF          | Mus musculus          |
| 1 | 1.00 | 1 | 1 | -0.04 | -0.04  | -0.04  | -0.041 | -0.04  | t | 62049  | SVARHKLP<br>THTLRR           | Mus musculus          |
| 1 | 1.00 | 1 | 1 | 0.01  | 0.01   | 0.01   | 0.01   | 0.013  | t | 132860 | LKKLKPG<br>L EKDF            | Rattus norvegicus     |
| 1 | 1.00 | 1 | 1 | 0.04  | 0.038  | 0.042  | 0.033  | 0.039  | t | 114193 | AEYYNKQY<br>LEQTRAEL<br>DT   | Mus musculus          |
| 1 | 1.00 | 1 | 1 | 0.01  | 0.005  | 0.017  | 0.014  | 0.01   | t | 10996  | EAARCIDG<br>AFTPKNRT<br>AADG | Canis lupus           |
| 1 | 1.00 | 1 | 1 | 0.02  | 0.018  | 0.02   | 0.013  | 0.02   | t | 119775 | AVDNDGK<br>TINKIDID          | Rattus norvegicus     |
| 1 | 1.00 | 1 | 1 | -0.01 | -0.008 | -0.01  | -0.007 | -0.008 | t | 110113 | WYRQTM<br>MRGLELLI<br>YF     | Homo sapiens          |
| 1 | 1.00 | 1 | 1 | 0     | -0.003 | 0.001  | 0      | 0.003  | t | 133674 | RHRY                         | Oryctolagus cuniculus |
| 1 | 1.00 | 1 | 1 | -0.04 | -0.04  | -0.04  | -0.04  | -0.04  | t | 66284  | TSKLFPKM<br>PGLPFI           | Homo sapiens          |
| 1 | 1.00 | 1 | 1 | 0     | 0      | 0.007  | 0      | 0.001  | t | 159025 | NLAIHSDL<br>SYWIESRF         | Mus musculus          |
| 1 | 1.00 | 1 | 1 | 0     | 0.003  | 0.004  | 0      | 0.001  | t | 58382  | SHLQLIYNL                    | Sus scrofa            |
| 1 | 1.00 | 1 | 1 | -0.03 | -0.027 | -0.021 | -0.03  | -0.03  | t | 53407  | RDPVFYAF<br>FGGVNYP          | Mus musculus          |

|   |      |   |   |       |        |        |        |        |   |        |                              |                     |
|---|------|---|---|-------|--------|--------|--------|--------|---|--------|------------------------------|---------------------|
| 1 | 1.00 | 1 | 1 | 0     | 0.004  | 0.018  | -0.003 | 0      | t | 2103   | AITFGGLL<br>GE               | Homo<br>sapiens     |
| 1 | 1.00 | 1 | 1 | -0.05 | -0.052 | -0.038 | -0.051 | -0.051 | t | 141935 | KKPGGPG                      | Mus<br>musculu<br>s |
| 1 | 1.00 | 1 | 1 | -0.01 | -0.01  | -0.024 | -0.014 | -0.01  | t | 1975   | AIKKRNAD<br>AKADYEAK<br>LAK  | Homo<br>sapiens     |
| 1 | 1.00 | 1 | 1 | -0.04 | -0.04  | -0.032 | -0.04  | -0.04  | t | 106553 | KAHILRW<br>GNE               | Homo<br>sapiens     |
| 1 | 1.00 | 1 | 1 | -0.01 | -0.012 | -0.013 | -0.013 | -0.01  | t | 142167 | GLRRDLDA<br>SREAKKQV<br>EKAL | Mus<br>musculu<br>s |
| 1 | 1.00 | 1 | 1 | -0.04 | -0.038 | -0.04  | -0.041 | -0.039 | t | 152005 | MASHPVS<br>LHAV              | Homo<br>sapiens     |
| 1 | 1.00 | 1 | 1 | -0.03 | -0.03  | -0.03  | -0.031 | -0.03  | t | 81856  | ETSRSVFH<br>QNGQ             | Homo<br>sapiens     |
| 1 | 1.00 | 1 | 1 | -0.01 | -0.008 | 0.005  | -0.009 | -0.01  | t | 70622  | VQPEKG                       | Homo<br>sapiens     |
| 1 | 1.00 | 1 | 1 | -0.01 | -0.01  | -0.01  | -0.01  | -0.01  | t | 135845 | WTEIHDW<br>EAAME             | Mus<br>musculu<br>s |
| 1 | 1.00 | 1 | 1 | 0.01  | 0.01   | 0.02   | 0.01   | 0.009  | t | 119574 | EWESNGQ<br>P                 | Homo<br>sapiens     |
| 1 | 1.00 | 1 | 1 | -0.03 | -0.025 | -0.026 | -0.027 | -0.03  | t | 48472  | PLSAGPPA<br>AGPHIVTP<br>PSAR | Homo<br>sapiens     |
| 1 | 1.00 | 1 | 1 | -0.05 | -0.044 | -0.053 | -0.05  | -0.049 | t | 48076  | PKHVKA<br>WIPRPPRLC          | Equus<br>caballus   |
| 1 | 1.00 | 1 | 1 | -0.02 | -0.018 | -0.011 | -0.02  | -0.016 | t | 39219  | LRTAPGPG                     | Homo<br>sapiens     |
| 1 | 1.00 | 1 | 1 | -0.01 | -0.01  | 0.001  | -0.008 | -0.01  | t | 55490  | RQTEPCNL<br>WFCPQV           | Homo<br>sapiens     |
| 1 | 1.00 | 1 | 1 | -0.04 | -0.04  | -0.034 | -0.04  | -0.04  | t | 68027  | VDMVAGA<br>HWGVLAG<br>LA     | Homo<br>sapiens     |

|   |      |   |   |       |        |        |        |        |   |        |                               |                                  |
|---|------|---|---|-------|--------|--------|--------|--------|---|--------|-------------------------------|----------------------------------|
| 1 | 1.00 | 1 | 1 | 0     | 0      | 0      | -0.002 | -0.002 | t | 56712  | SAARIHDF<br>RYSQLAKL<br>GINP  | Homo<br>sapiens                  |
| 1 | 1.00 | 1 | 1 | 0.01  | 0.012  | 0.005  | 0.009  | 0.012  | t | 5467   | AVLTSMILT<br>DPSHITAE<br>TAKR | Homo<br>sapiens                  |
| 1 | 1.00 | 1 | 1 | 0     | -0.002 | -0.003 | -0.001 | 0      | t | 36953  | LKLYDDKN<br>ASL               | Mus<br>musculu<br>s              |
| 1 | 1.00 | 1 | 1 | -0.04 | -0.044 | -0.038 | -0.041 | -0.04  | t | 73607  | YDWRAD<br>WVKGFP              | Oryctola<br>gus<br>cuniculu<br>s |
| 1 | 1.00 | 1 | 1 | -0.04 | -0.042 | -0.038 | -0.041 | -0.04  | t | 73607  | YDWRAD<br>WVKGFP              | Mus<br>musculu<br>s              |
| 1 | 1.00 | 1 | 1 | -0.02 | -0.02  | -0.014 | -0.019 | -0.02  | t | 19696  | GGDDPDH<br>DPDHPHD<br>L       | Mus<br>musculu<br>s              |
| 1 | 1.00 | 1 | 1 | 0.02  | 0.022  | 0.022  | 0.015  | 0.019  | t | 3508   | APDKEVLY<br>EAFDEM            | Homo<br>sapiens                  |
| 1 | 1.00 | 1 | 1 | -0.02 | -0.023 | -0.025 | -0.02  | -0.02  | t | 63250  | TDTRKDIN<br>TVTTVAQS          | Oryctola<br>gus<br>cuniculu<br>s |
| 1 | 1.00 | 1 | 1 | 0.01  | 0.01   | 0.01   | 0.001  | 0.012  | t | 131891 | GLLETNFT<br>A                 | Homo<br>sapiens                  |
| 1 | 1.00 | 1 | 1 | 0     | -0.003 | 0      | 0      | 0.003  | t | 106374 | EDHAGTY<br>GLGDRK             | Oryctola<br>gus<br>cuniculu<br>s |
| 1 | 1.00 | 1 | 1 | 0     | -0.002 | 0      | 0      | 0.003  | t | 100070 | GLMVGGV<br>VIA                | Oryctola<br>gus<br>cuniculu<br>s |
| 1 | 1.00 | 1 | 1 | 0     | -0.003 | 0      | 0      | 0.003  | t | 68401  | VEVPGSQ<br>HIDSQKKA           | Oryctola<br>gus<br>cuniculu<br>s |
| 1 | 1.00 | 1 | 1 | -0.06 | -0.056 | -0.055 | -0.059 | -0.06  | t | 97432  | KVTLGPKV<br>RN                | Homo<br>sapiens                  |
| 1 | 1.00 | 1 | 1 | -0.03 | -0.028 | -0.035 | -0.03  | -0.028 | t | 146333 | ILVAYAPP<br>GAQPPT            | Homo<br>sapiens                  |



|   |      |   |   |       |        |        |        |        |   |        |                              |                                  |
|---|------|---|---|-------|--------|--------|--------|--------|---|--------|------------------------------|----------------------------------|
| 1 | 1.00 | 1 | 1 | -0.02 | -0.02  | -0.015 | -0.024 | -0.02  | t | 17464  | FQDHPLQ<br>K                 | Homo<br>sapiens                  |
| 1 | 1.00 | 1 | 1 | -0.02 | -0.018 | -0.03  | -0.023 | -0.02  | t | 95657  | PKVTKEKP<br>TPPVKPTA<br>PTKP | Homo<br>sapiens                  |
| 1 | 1.00 | 1 | 1 | -0.02 | -0.018 | -0.013 | -0.02  | -0.02  | t | 54906  | RMIPKGT<br>L                 | Anas<br>platyrhy<br>nchos        |
| 1 | 1.00 | 1 | 1 | 0.01  | 0.01   | 0.01   | 0.01   | 0.011  | t | 151731 | SAQSQRA<br>PDR               | Mus<br>musculu<br>s              |
| 1 | 1.00 | 1 | 1 | 0     | 0.002  | 0.003  | 0      | 0.002  | t | 2772   | ALNDLCIK<br>VNNWDLF<br>FSPS  | Homo<br>sapiens                  |
| 1 | 1.00 | 1 | 1 | -0.02 | -0.02  | -0.005 | -0.018 | -0.02  | t | 98340  | PNPATAA<br>GKI               | Homo<br>sapiens                  |
| 1 | 1.00 | 1 | 1 | -0.02 | -0.022 | -0.009 | -0.021 | -0.02  | t | 54918  | RMLNILN                      | Mus<br>musculu<br>s              |
| 1 | 1.00 | 1 | 1 | 0     | 0      | 0.016  | 0      | -0.002 | t | 110812 | DPVGPLDP<br>SIVSLVEES<br>SFI | Oryctola<br>gus<br>cuniculu<br>s |
| 1 | 1.00 | 1 | 1 | 0.03  | 0.03   | 0.04   | 0.03   | 0.03   | t | 8900   | DKILVQAN<br>EAETTTA          | Homo<br>sapiens                  |
| 1 | 1.00 | 1 | 1 | -0.01 | -0.006 | -0.01  | -0.013 | -0.01  | t | 118487 | LEIANAHR<br>KPLVI            | Homo<br>sapiens                  |
| 1 | 1.00 | 1 | 1 | 0     | -0.002 | 0      | -0.003 | 0.001  | t | 105206 | GAIIGLMV<br>GGVV             | Mus<br>musculu<br>s              |
| 1 | 1.00 | 1 | 1 | 0.01  | 0.006  | 0.016  | 0.01   | 0.01   | t | 40214  | LTTTERQH<br>NAYRDP           | Mus<br>musculu<br>s              |
| 1 | 1.00 | 1 | 1 | 0.03  | 0.032  | 0.033  | 0.037  | 0.032  | t | 125607 | YVSIDVTL<br>QQLESHSF<br>YNLS | Homo<br>sapiens                  |
| 1 | 1.00 | 1 | 1 | -0.03 | -0.03  | -0.025 | -0.03  | -0.03  | t | 107124 | GAPGLRG<br>GAG               | Mus<br>musculu<br>s              |

|   |      |   |   |       |        |        |        |        |   |        |                             |                                  |
|---|------|---|---|-------|--------|--------|--------|--------|---|--------|-----------------------------|----------------------------------|
| 1 | 1.00 | 1 | 1 | -0.03 | -0.028 | -0.03  | -0.033 | -0.03  | t | 24414  | HNTVPSL<br>WYHNR            | Homo<br>sapiens                  |
| 1 | 1.00 | 1 | 1 | -0.02 | -0.018 | -0.008 | -0.013 | -0.019 | t | 131020 | QLSPESDY<br>DDHGMRY         | Homo<br>sapiens                  |
| 1 | 1.00 | 1 | 1 | -0.02 | -0.016 | -0.004 | -0.019 | -0.021 | t | 66895  | TTVNAHQI<br>LPKVLHK         | Homo<br>sapiens                  |
| 1 | 1.00 | 1 | 1 | 0     | 0      | 0      | 0      | 0      | t | 114754 | CAHKVEQ<br>GAS              | Homo<br>sapiens                  |
| 1 | 1.00 | 1 | 1 | -0.04 | -0.04  | -0.04  | -0.04  | -0.04  | t | 7512   | DAGDHRA<br>AA               | Mus<br>musculu<br>s              |
| 1 | 1.00 | 1 | 1 | 0.01  | 0.014  | 0.007  | 0.011  | 0.012  | t | 61840  | STPSTPAD<br>SSAHSTPS<br>TPV | Homo<br>sapiens                  |
| 1 | 1.00 | 1 | 1 | 0.02  | 0.017  | 0.021  | 0.02   | 0.022  | t | 44978  | NMGLIAG<br>AVG              | Oryctola<br>gus<br>cuniculu<br>s |
| 1 | 1.00 | 1 | 1 | -0.02 | -0.018 | -0.02  | -0.017 | -0.019 | t | 110733 | VGENVPD<br>DLYIKGSG         | Homo<br>sapiens                  |
| 1 | 1.00 | 1 | 1 | -0.05 | -0.05  | -0.046 | -0.05  | -0.05  | t | 157951 | SKRYAKA<br>MAKMGLK          | Canis<br>lupus                   |
| 1 | 1.00 | 1 | 1 | -0.04 | -0.04  | -0.04  | -0.04  | -0.041 | t | 115305 | KDERFFSD<br>KIAKYIPQ<br>YVL | Homo<br>sapiens                  |
| 1 | 1.00 | 1 | 1 | 0.02  | 0.016  | 0.023  | 0.02   | 0.02   | t | 123400 | KTKVLYHD<br>VQMDKSN<br>R    | Mus<br>musculu<br>s              |
| 1 | 1.00 | 1 | 1 | 0     | -0.004 | 0      | -0.007 | -0.001 | t | 54393  | RKLWCHH<br>FC               | Mus<br>musculu<br>s              |
| 1 | 1.00 | 1 | 1 | 0.03  | 0.03   | 0.048  | 0.03   | 0.03   | t | 13650  | EPG                         | Mus<br>musculu<br>s              |
| 1 | 1.00 | 1 | 1 | -0.02 | -0.02  | -0.02  | -0.02  | -0.017 | t | 140546 | CNLWEVM<br>HGTC             | Mus<br>musculu<br>s              |
| 1 | 1.00 | 1 | 1 | 0     | -0.002 | 0      | 0.001  | 0.003  | t | 50180  | PYVEPTAP<br>QVL             | Mus<br>musculu<br>s              |

|   |      |   |   |       |        |        |        |        |   |        |                              |                       |
|---|------|---|---|-------|--------|--------|--------|--------|---|--------|------------------------------|-----------------------|
| 1 | 1.00 | 1 | 1 | 0.01  | 0.01   | 0.01   | 0.008  | 0.01   | t | 48519  | PLVEHGLQ<br>LAEQFKQK<br>ALGL | Homo sapiens          |
| 1 | 1.00 | 1 | 1 | -0.04 | -0.037 | -0.036 | -0.04  | -0.04  | t | 60978  | SSEVAVLY<br>QDVNCTD<br>V     | Mus musculus          |
| 1 | 1.00 | 1 | 1 | -0.04 | -0.029 | -0.036 | -0.04  | -0.04  | t | 60978  | SSEVAVLY<br>QDVNCTD<br>V     | Gallus gallus         |
| 1 | 1.00 | 1 | 1 | 0.02  | 0.018  | 0.027  | 0.017  | 0.021  | t | 135939 | IPVLDENG<br>LFAP             | Mus musculus          |
| 1 | 1.00 | 1 | 1 | -0.02 | -0.016 | -0.006 | -0.013 | -0.02  | t | 115057 | GLSLSRFS<br>WGAEGQR<br>PGFG  | Homo sapiens          |
| 1 | 1.00 | 1 | 1 | 0.01  | 0.006  | 0.016  | 0.009  | 0.01   | t | 65401  | TNQALKKE                     | Oryctolagus cuniculus |
| 1 | 1.00 | 1 | 1 | -0.03 | -0.028 | -0.02  | -0.033 | -0.033 | t | 45561  | NQGQFEH<br>FREC              | Homo sapiens          |
| 1 | 1.00 | 1 | 1 | -0.01 | -0.008 | -0.005 | -0.007 | -0.008 | t | 428    | AASEALDP<br>HAFHLLN<br>TYGR  | Homo sapiens          |
| 1 | 1.00 | 1 | 1 | -0.02 | -0.022 | -0.016 | -0.021 | -0.019 | t | 53866  | RGFRKEI                      | Mus musculus          |
| 1 | 1.00 | 1 | 1 | -0.01 | -0.006 | -0.016 | -0.007 | -0.008 | t | 48472  | PLSAGPPA<br>AGPHIVTP<br>PSAR | Homo sapiens          |
| 1 | 1.00 | 1 | 1 | 0.01  | 0.01   | 0.025  | 0.01   | 0.009  | t | 137288 | SDLSVIGH<br>PIDSE            | Mus musculus          |
| 1 | 1.00 | 1 | 1 | -0.01 | -0.012 | 0.009  | -0.007 | -0.011 | t | 59377  | SLNWSDR<br>TI                | Rattus norvegicus     |
| 1 | 1.00 | 1 | 1 | -0.02 | -0.018 | -0.024 | -0.023 | -0.02  | t | 43705  | NENLLRFF<br>VAPFPEVF<br>GKEK | Homo sapiens          |
| 1 | 1.00 | 1 | 1 | 0.05  | 0.05   | 0.05   | 0.05   | 0.053  | t | 104850 | KEGILQYC<br>QEVYPELQ         | Mus musculus          |

|   |      |   |   |       |        |        |        |        |   |        |                               |                                  |
|---|------|---|---|-------|--------|--------|--------|--------|---|--------|-------------------------------|----------------------------------|
| 1 | 1.00 | 1 | 1 | 0     | 0.003  | 0.001  | 0      | 0.002  | t | 144785 | SKSIGWAD<br>EEGR TKRY<br>ALVI | Mus<br>musculu<br>s              |
| 1 | 1.00 | 1 | 1 | -0.01 | -0.006 | -0.002 | -0.007 | -0.008 | t | 31903  | KLIAQGGK<br>AKICGL            | Homo<br>sapiens                  |
| 1 | 1.00 | 1 | 1 | -0.04 | -0.036 | -0.026 | -0.037 | -0.04  | t | 14580  | ETTVVRRR<br>GRSP              | Homo<br>sapiens                  |
| 1 | 1.00 | 1 | 1 | 0.03  | 0.028  | 0.03   | 0.023  | 0.03   | t | 107668 | VSETLK                        | Rattus<br>norvegic<br>us         |
| 1 | 1.00 | 1 | 1 | -0.02 | -0.024 | -0.008 | -0.017 | -0.019 | t | 105003 | TKSYWKAL<br>GI                | Oryctola<br>gus<br>cuniculu<br>s |
| 1 | 1.00 | 1 | 1 | 0     | 0      | 0      | 0      | -0.003 | t | 3693   | APPPPEHR<br>GGPEEFEG<br>AGDG  | Mus<br>musculu<br>s              |
| 1 | 1.00 | 1 | 1 | 0.03  | 0.03   | 0.024  | 0.03   | 0.032  | t | 15509  | FEDVKGTG<br>GESRDLPS<br>GQG   | Mus<br>musculu<br>s              |
| 1 | 1.00 | 1 | 1 | -0.03 | -0.027 | -0.032 | -0.03  | -0.03  | t | 31554  | KKGSSGYC<br>AWPACYC           | Equus<br>caballus                |
| 1 | 1.00 | 1 | 1 | -0.03 | -0.026 | -0.032 | -0.03  | -0.03  | t | 31554  | KKGSSGYC<br>AWPACYC           | Ovis<br>aries                    |
| 1 | 1.00 | 1 | 1 | -0.03 | -0.033 | -0.032 | -0.03  | -0.03  | t | 31554  | KKGSSGYC<br>AWPACYC           | Oryctola<br>gus<br>cuniculu<br>s |
| 1 | 1.00 | 1 | 1 | -0.05 | -0.052 | -0.042 | -0.053 | -0.05  | t | 111013 | RTGYIPLG<br>TRPPT             | Mus<br>musculu<br>s              |
| 1 | 1.00 | 1 | 1 | -0.02 | -0.02  | -0.013 | -0.02  | -0.02  | t | 96212  | EEAEDKED<br>DA                | Homo<br>sapiens                  |
| 1 | 1.00 | 1 | 1 | 0     | -0.002 | 0.002  | -0.007 | -0.002 | t | 117745 | ALLRNLGK<br>MTA               | Mus<br>musculu<br>s              |
| 1 | 1.00 | 1 | 1 | -0.03 | -0.03  | -0.035 | -0.03  | -0.028 | t | 57314  | SDWDCCD<br>VCCNPAC<br>AGC     | Mus<br>musculu<br>s              |
| 1 | 1.00 | 1 | 1 | -0.04 | -0.036 | -0.034 | -0.039 | -0.04  | t | 70661  | VQVRI                         | Homo<br>sapiens                  |

|   |      |   |   |       |        |        |        |        |   |        |                              |                                  |
|---|------|---|---|-------|--------|--------|--------|--------|---|--------|------------------------------|----------------------------------|
| 1 | 1.00 | 1 | 1 | 0.04  | 0.038  | 0.044  | 0.039  | 0.04   | t | 44142  | NHGNYS<br>A QVGASQ           | Mus<br>musculu<br>s              |
| 1 | 1.00 | 1 | 1 | 0.04  | 0.038  | 0.044  | 0.039  | 0.04   | t | 44142  | NHGNYS<br>A QVGASQ           | Mus<br>musculu<br>s              |
| 1 | 1.00 | 1 | 1 | 0.01  | 0.008  | 0.015  | 0.013  | 0.013  | t | 43160  | NAGVLTCS<br>LSKR             | Mus<br>musculu<br>s              |
| 1 | 1.00 | 1 | 1 | -0.05 | -0.054 | -0.047 | -0.051 | -0.05  | t | 80893  | DALRRLLY<br>MIYMSG           | Oryctola<br>gus<br>cuniculu<br>s |
| 1 | 1.00 | 1 | 1 | 0.04  | 0.044  | 0.038  | 0.041  | 0.042  | t | 53766  | RFQPFQQ<br>FGRDVSD<br>FTD    | Homo<br>sapiens                  |
| 1 | 1.00 | 1 | 1 | -0.03 | -0.03  | -0.03  | -0.034 | -0.03  | t | 136703 | VDLFTSKG<br>LFRAAVPS<br>G    | Homo<br>sapiens                  |
| 1 | 1.00 | 1 | 1 | -0.08 | -0.075 | -0.075 | -0.083 | -0.082 | t | 157158 | DDQCQRQ<br>LQR               | Homo<br>sapiens                  |
| 1 | 1.00 | 1 | 1 | 0.04  | 0.038  | 0.047  | 0.037  | 0.038  | t | 77923  | ISPTQLYA<br>QVRA             | Mus<br>musculu<br>s              |
| 1 | 1.00 | 1 | 1 | -0.01 | -0.012 | -0.004 | -0.011 | -0.01  | t | 53689  | RFDKGYIS<br>GY               | Mus<br>musculu<br>s              |
| 1 | 1.00 | 1 | 1 | 0.02  | 0.021  | 0.025  | 0.023  | 0.02   | t | 60315  | SPVKSTTG<br>MKTVAFD<br>LSSPQ | Homo<br>sapiens                  |
| 1 | 1.00 | 1 | 1 | -0.01 | -0.008 | -0.015 | -0.009 | -0.004 | t | 3176   | AMQMAY<br>RF                 | Homo<br>sapiens                  |
| 1 | 1.00 | 1 | 1 | 0     | -0.005 | -0.009 | 0      | 0      | t | 41053  | MAKGKRS<br>TDAKGSQ<br>RRQKKV | Canis<br>lupus                   |
| 1 | 1.00 | 1 | 1 | 0     | 0.007  | 0.007  | -0.007 | -0.002 | t | 136521 | NAWLQEP<br>NHRNL             | Gallus<br>gallus                 |

|   |      |   |   |       |        |        |        |       |   |        |                             |                                  |
|---|------|---|---|-------|--------|--------|--------|-------|---|--------|-----------------------------|----------------------------------|
| 1 | 1.00 | 1 | 1 | 0.01  | 0.01   | 0.018  | 0.01   | 0.008 | t | 47358  | PELVPEDP<br>EDSALL          | Oryctola<br>gus<br>cuniculu<br>s |
| 1 | 1.00 | 1 | 1 | -0.01 | -0.011 | -0.001 | -0.01  | -0.01 | t | 53839  | RGDLQVL<br>AQK              | Bos<br>taurus                    |
| 1 | 1.00 | 1 | 1 | -0.02 | -0.02  | -0.02  | -0.017 | -0.02 | t | 29937  | KARRPEGR<br>TWAQPGY         | Homo<br>sapiens                  |
| 1 | 1.00 | 1 | 1 | 0     | 0.002  | 0      | -0.003 | 0.001 | t | 71353  | VTHESYQE<br>LVKKLEALE<br>DA | Homo<br>sapiens                  |
| 1 | 1.00 | 1 | 1 | 0     | -0.002 | 0.011  | -0.001 | 0     | t | 110620 | GQAGEPGI<br>AGFKGDQ         | Mus<br>musculu<br>s              |
| 1 | 1.00 | 1 | 1 | -0.06 | -0.062 | -0.058 | -0.067 | -0.06 | t | 122536 | QAQIHGP<br>R                | Mus<br>musculu<br>s              |
| 1 | 1.00 | 1 | 1 | 0     | 0      | 0      | 0      | 0.003 | t | 151813 | CGADSYE<br>MEEDGVR<br>KC    | Mus<br>musculu<br>s              |
| 1 | 1.00 | 1 | 1 | 0     | 0      | 0      | 0      | 0.003 | t | 119943 | IGLMVGG<br>VV               | Mus<br>musculu<br>s              |
| 1 | 1.00 | 1 | 1 | 0     | 0      | 0      | 0      | 0.003 | t | 102384 | EFRH                        | Mus<br>musculu<br>s              |
| 1 | 1.00 | 1 | 1 | 0     | 0      | 0      | 0      | 0.003 | t | 100378 | PGSGFWS<br>FGSEDGSG<br>DSEN | Mus<br>musculu<br>s              |
| 1 | 1.00 | 1 | 1 | 0     | 0      | 0      | 0      | 0.003 | t | 103496 | PRGYPGQ<br>V                | Mus<br>musculu<br>s              |
| 1 | 1.00 | 1 | 1 | 0     | 0      | 0      | 0      | 0.003 | t | 40332  | LVFFAEDV                    | Mus<br>musculu<br>s              |
| 1 | 1.00 | 1 | 1 | 0     | 0      | 0      | 0      | 0.003 | t | 14435  | ETIYNTTLK<br>Y              | Homo<br>sapiens                  |
| 1 | 1.00 | 1 | 1 | 0     | 0      | 0      | 0      | 0.003 | t | 7491   | DAEFRHDS<br>GYEVHHQ<br>K    | Mus<br>musculu<br>s              |
| 1 | 1.00 | 1 | 1 | 0.02  | 0.02   | 0.026  | 0.02   | 0.02  | t | 33234  | KRVLEPLG<br>L               | Mus<br>musculu<br>s              |

|   |      |   |   |       |        |        |        |        |   |        |                              |                                  |
|---|------|---|---|-------|--------|--------|--------|--------|---|--------|------------------------------|----------------------------------|
| 1 | 1.00 | 1 | 1 | -0.04 | -0.04  | -0.039 | -0.037 | -0.04  | t | 67299  | TWVAGVF<br>VYGGSKTS<br>LYNLR | Homo<br>sapiens                  |
| 1 | 1.00 | 1 | 1 | -0.01 | -0.01  | -0.016 | -0.013 | -0.009 | t | 11253  | ECKETVP<br>MNCSSYA           | Homo<br>sapiens                  |
| 1 | 1.00 | 1 | 1 | 0     | -0.004 | 0.009  | -0.001 | 0      | t | 100810 | EAALSN                       | Oryctola<br>gus<br>cuniculu<br>s |
| 1 | 1.00 | 1 | 1 | 0.01  | 0.01   | 0.01   | 0.01   | 0.012  | t | 130612 | SPNTAHIT<br>SKSL             | Camelus<br>dromed<br>arius       |
| 1 | 1.00 | 1 | 1 | -0.01 | -0.01  | -0.007 | -0.01  | -0.01  | t | 66406  | TSRSASLR<br>QKKVTFDR<br>LQVL | Homo<br>sapiens                  |
| 1 | 1.00 | 1 | 1 | 0     | 0      | 0      | 0      | 0.002  | t | 135562 | IHAMDIPP<br>PTG              | Oryctola<br>gus<br>cuniculu<br>s |
| 1 | 1.00 | 1 | 1 | 0.01  | 0.01   | 0.02   | 0.01   | 0.013  | t | 140665 | DTAAQI                       | Mus<br>musculu<br>s              |
| 1 | 1.00 | 1 | 1 | -0.05 | -0.05  | -0.041 | -0.05  | -0.05  | t | 135955 | LRLLLCLLL<br>LSS             | Homo<br>sapiens                  |
| 1 | 1.00 | 1 | 1 | -0.02 | -0.017 | -0.009 | -0.02  | -0.018 | t | 4224   | ARQPDLI                      | Mus<br>musculu<br>s              |
| 1 | 1.00 | 1 | 1 | 0.03  | 0.026  | 0.037  | 0.023  | 0.031  | t | 139602 | SDSMLSW                      | Oryctola<br>gus<br>cuniculu<br>s |
| 1 | 1.00 | 1 | 1 | -0.02 | -0.02  | -0.02  | -0.02  | -0.02  | t | 156852 | AYQLGYSP<br>PPLPNPH          | Gallus<br>gallus                 |
| 1 | 1.00 | 1 | 1 | -0.01 | -0.011 | -0.009 | -0.013 | -0.009 | t | 99619  | RLVLRRNA<br>LRRPFYS          | Homo<br>sapiens                  |
| 1 | 1.00 | 1 | 1 | 0.02  | 0.018  | 0.017  | 0.02   | 0.022  | t | 132907 | TCYDDM<br>KIGFPEDL           | Trichosu<br>rus<br>vulpecul<br>a |
| 1 | 1.00 | 1 | 1 | 0     | 0      | 0      | 0      | 0.003  | t | 149298 | ELDKWAS                      | Homo<br>sapiens                  |

|   |      |   |   |       |        |        |        |        |   |        |                              |                              |
|---|------|---|---|-------|--------|--------|--------|--------|---|--------|------------------------------|------------------------------|
| 1 | 1.00 | 1 | 1 | 0.01  | 0.008  | 0.017  | 0.009  | 0.01   | t | 98339  | PMTPLSEP<br>ALMPALQ          | Sus<br>scrofa                |
| 1 | 1.00 | 1 | 1 | -0.05 | -0.05  | -0.054 | -0.049 | -0.05  | t | 69701  | VLPPPRK<br>MKGLFSQ<br>AKISLF | Homo<br>sapiens              |
| 1 | 1.00 | 1 | 1 | -0.04 | -0.04  | -0.029 | -0.04  | -0.04  | t | 141918 | IARGVRR<br>LQA               | Mus<br>musculus              |
| 1 | 1.00 | 1 | 1 | 0.02  | 0.017  | 0.021  | 0.02   | 0.022  | t | 89658  | TQEENTER<br>HTTEDVSP<br>S    | Oryctola<br>gus<br>cuniculus |
| 1 | 1.00 | 1 | 1 | -0.12 | -0.115 | -0.115 | -0.123 | -0.122 | t | 157172 | DRQMVQ<br>HFKR               | Homo<br>sapiens              |
| 1 | 1.00 | 1 | 1 | -0.04 | -0.04  | -0.04  | -0.04  | -0.04  | t | 156943 | QFTPDKH<br>MLMLP             | Gallus<br>gallus             |
| 1 | 1.00 | 1 | 1 | -0.02 | -0.022 | -0.01  | -0.021 | -0.019 | t | 73476  | YAYIDYNA<br>LKFK             | Mus<br>musculus              |
| 1 | 1.00 | 1 | 1 | -0.02 | -0.018 | -0.025 | -0.017 | -0.018 | t | 144382 | KIQTSFHC<br>CGVKGPD<br>DYKG  | Homo<br>sapiens              |
| 1 | 1.00 | 1 | 1 | 0.01  | 0.01   | 0.01   | 0.01   | 0.01   | t | 107647 | TVLHQNW                      | Homo<br>sapiens              |
| 1 | 1.00 | 1 | 1 | -0.03 | -0.026 | -0.024 | -0.029 | -0.028 | t | 133499 | AHSSPRSV<br>WYEW             | Homo<br>sapiens              |
| 1 | 1.00 | 1 | 1 | -0.04 | -0.039 | -0.03  | -0.037 | -0.042 | t | 3073   | AMDHEGC<br>KFSCFIRP          | Equus<br>caballus            |
| 1 | 1.00 | 1 | 1 | -0.02 | -0.02  | -0.016 | -0.02  | -0.019 | t | 53866  | RGFRKEI                      | Homo<br>sapiens              |
| 1 | 1.00 | 1 | 1 | 0     | 0      | 0      | 0      | 0.003  | t | 141738 | REDL                         | Mus<br>musculus              |
| 1 | 1.00 | 1 | 1 | 0     | 0      | 0      | 0      | 0.003  | t | 136062 | FGISETQA<br>EAILE            | Mus<br>musculus              |
| 1 | 1.00 | 1 | 1 | 0     | 0      | 0      | 0      | 0.003  | t | 122892 | RSILPYGDS<br>MDRIE           | Homo<br>sapiens              |
| 1 | 1.00 | 1 | 1 | 0     | 0      | 0      | 0      | 0.003  | t | 73385  | YALADASL<br>KMADPNR<br>FRGKD | Oryctola<br>gus<br>cuniculus |



|   |      |   |   |       |        |        |       |        |   |        |                             |                                  |
|---|------|---|---|-------|--------|--------|-------|--------|---|--------|-----------------------------|----------------------------------|
| 1 | 1.00 | 1 | 1 | 0     | 0      | 0      | 0     | 0.003  | t | 64884  | TLKREIEKD<br>G              | Mus<br>musculu<br>s              |
| 1 | 1.00 | 1 | 1 | 0     | 0      | 0      | 0     | 0.003  | t | 66108  | TRTNPWP<br>ALAEGEF          | Oryctola<br>gus<br>cuniculu<br>s |
| 1 | 1.00 | 1 | 1 | 0     | 0      | 0      | 0     | 0.003  | t | 48933  | PPTAPPLL<br>PHSNL           | Homo<br>sapiens                  |
| 1 | 1.00 | 1 | 1 | 0     | 0      | 0      | 0     | 0.003  | t | 49015  | PQIPPNW<br>HIP              | Oryctola<br>gus<br>cuniculu<br>s |
| 1 | 1.00 | 1 | 1 | 0     | 0      | 0      | 0     | 0.003  | t | 44021  | NGKVNNK<br>VAY              | Mus<br>musculu<br>s              |
| 1 | 1.00 | 1 | 1 | 0     | 0      | 0      | 0     | 0.003  | t | 19636  | GFTTNEER<br>YNVFAE          | Mus<br>musculu<br>s              |
| 1 | 1.00 | 1 | 1 | 0     | 0      | 0      | 0     | 0.003  | t | 19636  | GFTTNEER<br>YNVFAE          | Mus<br>musculu<br>s              |
| 1 | 1.00 | 1 | 1 | 0     | 0      | 0      | 0     | 0.003  | t | 12951  | ELAPEDPE<br>DS              | Oryctola<br>gus<br>cuniculu<br>s |
| 1 | 1.00 | 1 | 1 | 0     | 0      | 0      | 0     | 0.003  | t | 5109   | ATPYHPPA<br>TP              | Oryctola<br>gus<br>cuniculu<br>s |
| 1 | 1.00 | 1 | 1 | 0     | 0      | 0      | 0     | 0.003  | t | 6361   | CGVVNNK<br>VAT              | Mus<br>musculu<br>s              |
| 1 | 1.00 | 1 | 1 | 0.03  | 0.03   | 0.028  | 0.027 | 0.032  | t | 65474  | TNVDQDL<br>VGWPAPQ          | Homo<br>sapiens                  |
| 1 | 1.00 | 1 | 1 | 0     | 0.002  | 0.011  | 0.001 | 0      | t | 21812  | GPTRTIGG<br>SQ              | Homo<br>sapiens                  |
| 1 | 1.00 | 1 | 1 | -0.06 | -0.054 | -0.056 | -0.06 | -0.062 | t | 53466  | RECGIKKG<br>SSGYCAW         | Equus<br>caballus                |
| 1 | 1.00 | 1 | 1 | 0.02  | 0.013  | 0.009  | 0.02  | 0.024  | t | 141056 | MSDGAVQ<br>PDGGQPA<br>VRNER | Canis<br>lupus                   |

|   |      |   |   |       |        |        |        |        |   |        |                              |                                  |
|---|------|---|---|-------|--------|--------|--------|--------|---|--------|------------------------------|----------------------------------|
| 1 | 1.00 | 1 | 1 | -0.02 | -0.021 | -0.019 | -0.023 | -0.019 | t | 99097  | AGVALSRL<br>VLRRNAL          | Homo sapiens                     |
| 1 | 1.00 | 1 | 1 | 0.03  | 0.032  | 0.021  | 0.023  | 0.028  | t | 114011 | VTTVTTHN<br>NPTFTDPS<br>VLQP | Cavia porcellu<br>s              |
| 1 | 1.00 | 1 | 1 | 0.01  | 0.014  | 0.015  | 0.013  | 0.01   | t | 133841 | GRGNGDP<br>GGGMEKD<br>G      | Homo sapiens                     |
| 1 | 1.00 | 1 | 1 | -0.02 | -0.02  | -0.022 | -0.023 | -0.02  | t | 50514  | QDRPTPSP<br>APSRPFSL<br>LRA  | Homo sapiens                     |
| 1 | 1.00 | 1 | 1 | -0.02 | -0.02  | -0.022 | -0.023 | -0.02  | t | 50514  | QDRPTPSP<br>APSRPFSL<br>LRA  | Homo sapiens                     |
| 1 | 1.00 | 1 | 1 | 0.02  | 0.02   | 0.02   | 0.02   | 0.02   | t | 21756  | GPRLGVRA<br>IRKTSERSQ<br>PRG | Homo sapiens                     |
| 1 | 1.00 | 1 | 1 | -0.01 | -0.005 | -0.002 | -0.013 | -0.012 | t | 157340 | GQRREFQ<br>QDRHQ             | Homo sapiens                     |
| 1 | 1.00 | 1 | 1 | 0     | -0.004 | 0.002  | -0.001 | 0      | t | 54989  | RNFTTAPA<br>ICHEGKAY<br>F    | Oryctola<br>gus<br>cuniculu<br>s |
| 1 | 1.00 | 1 | 1 | 0     | 0.004  | 0.005  | -0.003 | 0      | t | 69659  | VLNENLLR<br>FF               | Homo sapiens                     |
| 1 | 1.00 | 1 | 1 | -0.01 | -0.01  | -0.01  | -0.01  | -0.01  | t | 153498 | WSPSKLYS<br>ARDHGGG<br>S     | Mus musculu<br>s                 |
| 1 | 1.00 | 1 | 1 | -0.01 | -0.011 | 0.006  | -0.007 | -0.01  | t | 78839  | SRNLGKVI<br>DTLTCGFA         | Homo sapiens                     |
| 1 | 1.00 | 1 | 1 | -0.01 | -0.006 | -0.004 | -0.01  | -0.012 | t | 21553  | GNYNKY<br>RYLRHGKL<br>RPFER  | Cavia porcellu<br>s              |
| 1 | 1.00 | 1 | 1 | 0.01  | 0.012  | 0.017  | 0.011  | 0.01   | t | 52000  | QQACKGKI<br>QALCENP          | Homo sapiens                     |
| 1 | 1.00 | 1 | 1 | 0.01  | 0.012  | 0.015  | 0.004  | 0.01   | t | 117386 | TRPINTAQ<br>CGDC             | Homo sapiens                     |
| 1 | 1.00 | 1 | 1 | 0.03  | 0.028  | 0.04   | 0.029  | 0.031  | t | 155856 | SSWSDH                       | Mus musculu<br>s                 |

|   |      |   |   |       |        |        |        |        |   |        |                            |                          |
|---|------|---|---|-------|--------|--------|--------|--------|---|--------|----------------------------|--------------------------|
| 1 | 1.00 | 1 | 1 | 0.01  | 0.012  | 0.01   | 0.011  | 0.01   | t | 48344  | PLGLQGCA<br>FQSTVAEL<br>QR | Homo<br>sapiens          |
| 1 | 1.00 | 1 | 1 | -0.04 | -0.038 | -0.031 | -0.039 | -0.038 | t | 21713  | GPNHTKV                    | Homo<br>sapiens          |
| 1 | 1.00 | 1 | 1 | 0.02  | 0.018  | 0.02   | 0.013  | 0.02   | t | 133178 | KNFVKPNE<br>TKTYFWK        | Mus<br>musculu<br>s      |
| 1 | 1.00 | 1 | 1 | 0.01  | 0.013  | 0.022  | 0.01   | 0.012  | t | 110761 | AENPTNY                    | Mus<br>musculu<br>s      |
| 1 | 1.00 | 1 | 1 | -0.02 | -0.02  | -0.013 | -0.02  | -0.018 | t | 112860 | YAQPSE                     | Homo<br>sapiens          |
| 1 | 1.00 | 1 | 1 | 0.04  | 0.04   | 0.051  | 0.034  | 0.038  | t | 55575  | RRGMEPH<br>MSECCEQ         | Homo<br>sapiens          |
| 1 | 1.00 | 1 | 1 | 0.04  | 0.04   | 0.051  | 0.034  | 0.038  | t | 55575  | RRGMEPH<br>MSECCEQ         | Homo<br>sapiens          |
| 1 | 1.00 | 1 | 1 | 0.02  | 0.023  | 0.032  | 0.02   | 0.022  | t | 115268 | GLQYTPS<br>WLVG            | Mus<br>musculu<br>s      |
| 1 | 1.00 | 1 | 1 | -0.02 | -0.022 | -0.02  | -0.017 | -0.018 | t | 115870 | NKVTLKGG<br>KVT            | Mus<br>musculu<br>s      |
| 1 | 1.00 | 1 | 1 | 0     | 0      | 0      | 0      | 0.003  | t | 120849 | NSQPEILE<br>RTRAELD        | Mus<br>musculu<br>s      |
| 1 | 1.00 | 1 | 1 | 0     | 0      | 0      | 0      | 0.003  | t | 120849 | NSQPEILE<br>RTRAELD        | Mus<br>musculu<br>s      |
| 1 | 1.00 | 1 | 1 | 0     | 0.002  | 0      | 0      | 0.003  | t | 28676  | ISQAVHAA<br>HAEINEAG<br>R  | Rattus<br>norvegic<br>us |
| 1 | 1.00 | 1 | 1 | 0     | 0      | 0      | 0      | 0.003  | t | 107214 | MVGGVV                     | Mus<br>musculu<br>s      |
| 1 | 1.00 | 1 | 1 | 0     | 0      | 0      | 0      | 0.003  | t | 104906 | MVGGVVI<br>A               | Mus<br>musculu<br>s      |
| 1 | 1.00 | 1 | 1 | 0     | 0      | 0      | 0      | 0.003  | t | 7491   | DAEFRHDS<br>GYEVHHQ<br>K   | Mus<br>musculu<br>s      |

|   |      |   |   |       |        |        |        |        |   |        |                              |                                  |
|---|------|---|---|-------|--------|--------|--------|--------|---|--------|------------------------------|----------------------------------|
| 1 | 1.00 | 1 | 1 | -0.03 | -0.034 | -0.033 | -0.031 | -0.031 | t | 10779  | DVVRDLPS<br>GFNTLKPI         | Oryctola<br>gus<br>cuniculu<br>s |
| 1 | 1.00 | 1 | 1 | 0.02  | 0.02   | 0.035  | 0.02   | 0.02   | t | 9621   | DPEDSALL                     | Mus<br>musculu<br>s              |
| 1 | 1.00 | 1 | 1 | 0.03  | 0.026  | 0.038  | 0.029  | 0.026  | t | 10888  | DYGGDSTT<br>PRPRYNAT<br>TYLP | Oryctola<br>gus<br>cuniculu<br>s |
| 1 | 1.00 | 1 | 1 | 0.02  | 0.02   | 0.022  | 0.02   | 0.023  | t | 10320  | DTDSGYD<br>VPDY              | Mus<br>musculu<br>s              |
| 1 | 1.00 | 1 | 1 | 0     | 0.001  | 0.019  | 0.006  | 0.002  | t | 78123  | DSSPSV                       | Equus<br>caballus                |
| 1 | 1.00 | 1 | 1 | 0     | 0.003  | 0      | 0      | -0.002 | t | 135466 | GSDYEDRY<br>YRENMHR<br>YPN   | Mus<br>musculu<br>s              |
| 1 | 1.00 | 1 | 1 | -0.01 | -0.01  | -0.002 | -0.01  | -0.01  | t | 102945 | YGCYCGR<br>GG                | Mus<br>musculu<br>s              |
| 1 | 1.00 | 1 | 1 | 0.01  | 0.01   | 0.017  | 0.014  | 0.01   | t | 131227 | KHYPEVGP<br>NGFI             | Homo<br>sapiens                  |
| 1 | 1.00 | 1 | 1 | -0.04 | -0.038 | -0.033 | -0.039 | -0.04  | t | 63749  | TFSPRRH<br>WTTQGCN<br>C      | Homo<br>sapiens                  |
| 1 | 1.00 | 1 | 1 | -0.01 | -0.01  | -0.024 | -0.014 | -0.01  | t | 75455  | YQAKLTAY<br>QTELARVQ<br>KAN  | Homo<br>sapiens                  |
| 1 | 1.00 | 1 | 1 | 0.01  | 0.008  | 0.006  | 0.009  | 0.013  | t | 65698  | TPPRPAGD<br>NATVAAG<br>HAT   | Mus<br>musculu<br>s              |
| 1 | 1.00 | 1 | 1 | 0.01  | 0.013  | 0.014  | 0.01   | 0.011  | t | 55261  | RPPNAPIL                     | Mus<br>musculu<br>s              |
| 1 | 1.00 | 1 | 1 | 0     | 0.003  | 0.01   | 0      | 0      | t | 34806  | LAHLTTTH<br>ARHLP            | Mus<br>musculu<br>s              |
| 1 | 1.00 | 1 | 1 | -0.05 | -0.036 | -0.046 | -0.049 | -0.05  | t | 49024  | PQLGPRR                      | Homo<br>sapiens                  |

|   |      |   |   |       |        |        |        |        |   |        |                              |                                  |
|---|------|---|---|-------|--------|--------|--------|--------|---|--------|------------------------------|----------------------------------|
| 1 | 1.00 | 1 | 1 | 0.02  | 0.027  | 0.02   | 0.02   | 0.02   | t | 114011 | VTTVTTHN<br>NPTFTDPS<br>VLQP | Cavia<br>porcellu<br>s           |
| 1 | 1.00 | 1 | 1 | 0.02  | 0.02   | 0.02   | 0.02   | 0.02   | t | 114011 | VTTVTTHN<br>NPTFTDPS<br>VLQP | Oryctola<br>gus<br>cuniculu<br>s |
| 1 | 1.00 | 1 | 1 | -0.01 | -0.012 | -0.01  | -0.006 | -0.007 | t | 118581 | RDRDRDR<br>E                 | Mus<br>musculu<br>s              |
| 1 | 1.00 | 1 | 1 | 0.03  | 0.028  | 0.03   | 0.023  | 0.03   | t | 108168 | TRSFQIQA<br>T                | Mus<br>musculu<br>s              |
| 1 | 1.00 | 1 | 1 | 0.03  | 0.028  | 0.03   | 0.023  | 0.03   | t | 108168 | TRSFQIQA<br>T                | Mus<br>musculu<br>s              |
| 1 | 1.00 | 1 | 1 | -0.03 | -0.032 | -0.021 | -0.031 | -0.032 | t | 30263  | KDTNNNL                      | Mus<br>musculu<br>s              |
| 1 | 1.00 | 1 | 1 | -0.01 | -0.012 | -0.004 | -0.013 | -0.011 | t | 6925   | CRGFTSFK<br>KPPTPPPE<br>PET  | Mus<br>musculu<br>s              |
| 1 | 1.00 | 1 | 1 | 0.01  | 0.01   | 0.017  | 0.01   | 0.013  | t | 106225 | ADIWLTPD<br>PTTP             | Mus<br>musculu<br>s              |
| 1 | 1.00 | 1 | 1 | -0.02 | -0.018 | -0.017 | -0.023 | -0.022 | t | 36948  | LKLSAQYG<br>SLRKNAM          | Homo<br>sapiens                  |
| 1 | 1.00 | 1 | 1 | -0.03 | -0.03  | -0.03  | -0.03  | -0.028 | t | 138626 | SQKDILER<br>KRAAVDR<br>VC    | Oryctola<br>gus<br>cuniculu<br>s |
| 1 | 1.00 | 1 | 1 | -0.01 | -0.016 | 0      | -0.01  | -0.009 | t | 13743  | EPRCPYVG<br>ADHFDPC          | Oryctola<br>gus<br>cuniculu<br>s |
| 1 | 1.00 | 1 | 1 | -0.02 | -0.02  | -0.017 | -0.02  | -0.019 | t | 122896 | RWNPADY<br>GGIK              | Rattus<br>norvegic<br>us         |
| 1 | 1.00 | 1 | 1 | -0.02 | -0.026 | -0.021 | -0.021 | -0.017 | t | 99210  | ELFTNRW<br>NLQSLL            | Oryctola<br>gus<br>cuniculu<br>s |
| 1 | 1.00 | 1 | 1 | -0.04 | -0.04  | -0.04  | -0.044 | -0.04  | t | 115599 | DEGGFTCF<br>FRDH             | Homo<br>sapiens                  |
| 1 | 1.00 | 1 | 1 | 0     | 0      | 0      | 0      | 0.003  | t | 55726  | RRRSQSPR<br>RRR              | Mus<br>musculu<br>s              |

|   |      |   |   |       |        |        |        |        |   |        |                              |                     |
|---|------|---|---|-------|--------|--------|--------|--------|---|--------|------------------------------|---------------------|
| 1 | 1.00 | 1 | 1 | 0     | 0      | 0.016  | 0.001  | 0      | t | 89282  | SWYGAG                       | Homo sapiens        |
| 1 | 1.00 | 1 | 1 | 0     | 0.002  | 0.016  | 0.001  | 0      | t | 89282  | SWYGAG                       | Homo sapiens        |
| 1 | 1.00 | 1 | 1 | -0.02 | -0.02  | -0.009 | -0.02  | -0.02  | t | 46857  | PALSTGLI                     | Homo sapiens        |
| 1 | 1.00 | 1 | 1 | -0.02 | -0.018 | -0.02  | -0.021 | -0.021 | t | 130543 | LLKGKGDK<br>AQIEKRI          | Homo sapiens        |
| 1 | 1.00 | 1 | 1 | 0.04  | 0.044  | 0.036  | 0.04   | 0.042  | t | 112581 | LKKYTFWE<br>VNLKEKFS<br>ADLD | Cavia porcellu<br>s |
| 1 | 1.00 | 1 | 1 | 0.01  | 0.003  | 0.017  | 0.007  | 0.01   | t | 106492 | GWVDHFA<br>DGY               | Homo sapiens        |
| 1 | 1.00 | 1 | 1 | 0     | 0.012  | 0      | -0.001 | 0.002  | t | 146185 | DAEFGH                       | Mus musculu<br>s    |
| 1 | 1.00 | 1 | 1 | 0     | 0      | 0      | -0.001 | 0.002  | t | 102384 | EFRH                         | Mus musculu<br>s    |
| 1 | 1.00 | 1 | 1 | 0     | 0      | 0      | -0.001 | 0.002  | t | 56657  | RYSRNAVP<br>NV               | Bos taurus          |
| 1 | 1.00 | 1 | 1 | 0     | 0      | 0      | -0.001 | 0.002  | t | 56657  | RYSRNAVP<br>NV               | Bos taurus          |
| 1 | 1.00 | 1 | 1 | 0.01  | 0.01   | 0.027  | 0.01   | 0.006  | t | 145923 | NPPIPVGEL                    | Mus musculu<br>s    |
| 1 | 1.00 | 1 | 1 | -0.01 | -0.012 | -0.021 | -0.011 | -0.01  | t | 71863  | VVTVRAER<br>PGVDPDR<br>EMLAA | Mus musculu<br>s    |
| 1 | 1.00 | 1 | 1 | 0.04  | 0.043  | 0.04   | 0.04   | 0.042  | t | 95622  | NKPVEPTY<br>EVIPTPPT<br>DPVY | Mus musculu<br>s    |
| 1 | 1.00 | 1 | 1 | -0.05 | -0.05  | -0.043 | -0.05  | -0.05  | t | 121814 | RRRR                         | Homo sapiens        |

|   |      |   |   |       |        |        |        |        |   |        |                              |                                  |
|---|------|---|---|-------|--------|--------|--------|--------|---|--------|------------------------------|----------------------------------|
| 1 | 1.00 | 1 | 1 | -0.04 | -0.037 | -0.024 | -0.04  | -0.039 | t | 30337  | KEDYRY                       | Sus<br>scrofa                    |
| 1 | 1.00 | 1 | 1 | -0.02 | -0.02  | -0.026 | -0.02  | -0.02  | t | 8322   | DFSRQLQ<br>NSMSGAS<br>A      | Homo<br>sapiens                  |
| 1 | 1.00 | 1 | 1 | -0.01 | -0.01  | -0.018 | -0.01  | -0.008 | t | 30696  | KFAELLEQ<br>QKNAQFP<br>GK    | Homo<br>sapiens                  |
| 1 | 1.00 | 1 | 1 | 0.01  | 0.01   | 0.009  | 0.01   | 0.013  | t | 953    | AEGRAINR<br>RVE              | Mus<br>musculu<br>s              |
| 1 | 1.00 | 1 | 1 | -0.06 | -0.058 | -0.05  | -0.063 | -0.061 | t | 69311  | VKRVKTW<br>R                 | Homo<br>sapiens                  |
| 1 | 1.00 | 1 | 1 | -0.01 | -0.014 | -0.011 | -0.017 | -0.011 | t | 121474 | KKAPAKKG<br>EKVPKGGK         | Oryctola<br>gus<br>cuniculu<br>s |
| 1 | 1.00 | 1 | 1 | -0.02 | -0.018 | -0.017 | -0.019 | -0.021 | t | 18982  | GDGAAGQ<br>PAGDGAA<br>GQPA   | Homo<br>sapiens                  |
| 1 | 1.00 | 1 | 1 | -0.02 | -0.018 | -0.01  | -0.023 | -0.019 | t | 74506  | YKSDNIR                      | Homo<br>sapiens                  |
| 1 | 1.00 | 1 | 1 | -0.03 | -0.032 | -0.022 | -0.031 | -0.031 | t | 46804  | PAGFCDG<br>YCKTHLKA          | Mus<br>musculu<br>s              |
| 1 | 1.00 | 1 | 1 | -0.02 | -0.017 | -0.016 | -0.02  | -0.02  | t | 48557  | PMIHFGN<br>DWEDRYR<br>REN    | Mus<br>musculu<br>s              |
| 1 | 1.00 | 1 | 1 | -0.04 | -0.038 | -0.041 | -0.037 | -0.041 | t | 79600  | LKFKTVRP<br>VALPRALA<br>PPRN | Homo<br>sapiens                  |
| 1 | 1.00 | 1 | 1 | -0.02 | -0.02  | -0.018 | -0.02  | -0.02  | t | 140695 | KGRFTISR<br>DNAKSTLY<br>L    | Mus<br>musculu<br>s              |
| 1 | 1.00 | 1 | 1 | -0.03 | -0.032 | -0.03  | -0.033 | -0.028 | t | 113535 | IGGRVHFF<br>KDISPIA          | Homo<br>sapiens                  |
| 1 | 1.00 | 1 | 1 | 0.03  | 0.03   | 0.034  | 0.03   | 0.031  | t | 95031  | NAYANEE<br>ATKL              | Oryctola<br>gus<br>cuniculu<br>s |

|   |      |   |   |       |        |        |        |        |   |        |                              |                       |
|---|------|---|---|-------|--------|--------|--------|--------|---|--------|------------------------------|-----------------------|
| 1 | 1.00 | 1 | 1 | -0.07 | -0.066 | -0.063 | -0.071 | -0.073 | t | 130906 | IRGPGVLA<br>GGRSAGAR         | Homo sapiens          |
| 1 | 1.00 | 1 | 1 | 0     | 0      | 0.008  | 0      | 0      | t | 47895  | PIFKDGRG<br>CGSCFEIK         | Homo sapiens          |
| 1 | 1.00 | 1 | 1 | -0.03 | -0.028 | -0.028 | -0.033 | -0.034 | t | 21851  | GQCKWV<br>NGREICND<br>RDRPTA | Homo sapiens          |
| 1 | 1.00 | 1 | 1 | -0.02 | -0.02  | -0.016 | -0.023 | -0.02  | t | 67266  | TWIGMN                       | Homo sapiens          |
| 1 | 1.00 | 1 | 1 | 0.01  | 0.01   | 0.009  | 0.01   | 0.012  | t | 41869  | MKNQTFH<br>LQGFVDGL          | Mus musculus          |
| 1 | 1.00 | 1 | 1 | 0.01  | 0.01   | 0.009  | 0.01   | 0.012  | t | 41869  | MKNQTFH<br>LQGFVDGL          | Mus musculus          |
| 1 | 1.00 | 1 | 1 | 0.01  | 0.01   | 0.015  | 0.01   | 0.011  | t | 122291 | CTYILDPEK<br>LTLRATYDN       | Oryctolagus cuniculus |
| 1 | 1.00 | 1 | 1 | -0.05 | -0.046 | -0.048 | -0.049 | -0.05  | t | 69746  | VLRTSPPH<br>RPGVRMR<br>RV    | Homo sapiens          |
| 1 | 1.00 | 1 | 1 | -0.02 | -0.02  | -0.02  | -0.02  | -0.018 | t | 140254 | KYEHGGNI<br>ID               | Mus musculus          |
| 1 | 1.00 | 1 | 1 | -0.01 | -0.012 | -0.01  | -0.017 | -0.009 | t | 117506 | GGAHFSVS<br>SLAEG            | Mus musculus          |
| 1 | 1.00 | 1 | 1 | 0     | 0      | 0      | 0      | 0.001  | t | 119633 | QYTGHIT<br>WTPPAIFKS         | Homo sapiens          |
| 1 | 1.00 | 1 | 1 | 0.05  | 0.047  | 0.043  | 0.05   | 0.053  | t | 130485 | EVVTGSPR<br>GDSQSS           | Oryctolagus cuniculus |
| 1 | 1.00 | 1 | 1 | 0.05  | 0.05   | 0.043  | 0.05   | 0.053  | t | 130485 | EVVTGSPR<br>GDSQSS           | Mus musculus          |
| 1 | 1.00 | 1 | 1 | 0.02  | 0.024  | 0.026  | 0.023  | 0.023  | t | 52420  | QSRGEAR                      | Homo sapiens          |



|   |      |   |   |       |        |        |        |        |   |        |                              |                                  |
|---|------|---|---|-------|--------|--------|--------|--------|---|--------|------------------------------|----------------------------------|
| 1 | 1.00 | 1 | 1 | 0.05  | 0.048  | 0.055  | 0.049  | 0.051  | t | 38673  | LPRETHFG<br>SHSN             | Mus<br>musculu<br>s              |
| 1 | 1.00 | 1 | 1 | 0.02  | 0.016  | 0.026  | 0.02   | 0.021  | t | 22793  | GTQFTFDS<br>WNYSFED<br>NYS   | Oryctola<br>gus<br>cuniculu<br>s |
| 1 | 1.00 | 1 | 1 | -0.02 | -0.018 | -0.014 | -0.021 | -0.02  | t | 47694  | PGLGAPVF<br>HMTNYLE          | Homo<br>sapiens                  |
| 1 | 1.00 | 1 | 1 | -0.05 | -0.047 | -0.043 | -0.05  | -0.049 | t | 117544 | KFRFLALKL<br>YFSFTRP         | Mus<br>musculu<br>s              |
| 1 | 1.00 | 1 | 1 | -0.05 | -0.05  | -0.043 | -0.05  | -0.049 | t | 117544 | KFRFLALKL<br>YFSFTRP         | Oryctola<br>gus<br>cuniculu<br>s |
| 1 | 1.00 | 1 | 1 | -0.02 | -0.02  | -0.02  | -0.02  | -0.02  | t | 101706 | HEQPHWL<br>LWQPP             | Homo<br>sapiens                  |
| 1 | 1.00 | 1 | 1 | -0.02 | -0.018 | -0.013 | -0.013 | -0.019 | t | 122136 | LGRGGSK                      | Homo<br>sapiens                  |
| 1 | 1.00 | 1 | 1 | -0.01 | -0.01  | -0.007 | -0.01  | -0.012 | t | 107799 | DSGHRGY<br>SGSQASD<br>NEGH   | Homo<br>sapiens                  |
| 1 | 1.00 | 1 | 1 | -0.02 | -0.018 | -0.02  | -0.017 | -0.022 | t | 136073 | LSKNNAIE<br>PRSFSQNS<br>RHPS | Homo<br>sapiens                  |
| 1 | 1.00 | 1 | 1 | 0.01  | 0.012  | 0.015  | 0.013  | 0.01   | t | 39164  | LRPGPVSQ<br>PYHHWDT<br>DK    | Homo<br>sapiens                  |
| 1 | 1.00 | 1 | 1 | -0.01 | -0.01  | -0.01  | -0.014 | -0.01  | t | 115600 | DHSYQEEA<br>AMEL             | Homo<br>sapiens                  |
| 1 | 1.00 | 1 | 1 | -0.01 | -0.01  | -0.012 | -0.01  | -0.008 | t | 60526  | SQPNTEQS<br>PAIVLPF          | Mus<br>musculu<br>s              |
| 1 | 1.00 | 1 | 1 | -0.04 | -0.042 | -0.034 | -0.041 | -0.039 | t | 133539 | CYKPGEW<br>AC                | Mus<br>musculu<br>s              |
| 1 | 1.00 | 1 | 1 | -0.03 | -0.026 | -0.018 | -0.033 | -0.033 | t | 106775 | RHAKAHIL<br>RW               | Homo<br>sapiens                  |

|   |      |   |   |       |        |        |        |        |   |        |                              |                                  |
|---|------|---|---|-------|--------|--------|--------|--------|---|--------|------------------------------|----------------------------------|
| 1 | 1.00 | 1 | 1 | -0.03 | -0.03  | -0.02  | -0.031 | -0.03  | t | 36312  | LGRWKAV<br>EKSVMK<br>H       | Homo<br>sapiens                  |
| 1 | 1.00 | 1 | 1 | 0.01  | 0.012  | 0.022  | 0.013  | 0.01   | t | 95252  | APVKQTL                      | Cavia<br>porcellu<br>s           |
| 1 | 1.00 | 1 | 1 | 0.01  | 0.01   | 0.009  | 0.01   | 0.012  | t | 70133  | VNNKN                        | Mus<br>musculu<br>s              |
| 1 | 1.00 | 1 | 1 | 0     | -0.002 | 0.002  | 0.003  | 0.002  | t | 2322   | AKWAVPT<br>TRTDDKLR          | Mus<br>musculu<br>s              |
| 1 | 1.00 | 1 | 1 | 0     | 0      | 0.005  | 0      | 0      | t | 63848  | TGHRMA<br>WMMMM<br>NW        | Homo<br>sapiens                  |
| 1 | 1.00 | 1 | 1 | 0.01  | 0.007  | 0.01   | 0.01   | 0.011  | t | 59190  | SLINDMPI<br>TNDQKKL<br>MSNNV | Oryctola<br>gus<br>cuniculu<br>s |
| 1 | 1.00 | 1 | 1 | 0.01  | 0.008  | 0.01   | 0.01   | 0.011  | t | 59190  | SLINDMPI<br>TNDQKKL<br>MSNNV | Oryctola<br>gus<br>cuniculu<br>s |
| 1 | 1.00 | 1 | 1 | -0.01 | -0.008 | -0.005 | -0.016 | -0.01  | t | 117388 | TRPNSHM<br>HTTPY             | Homo<br>sapiens                  |
| 1 | 1.00 | 1 | 1 | -0.01 | -0.01  | -0.01  | -0.01  | -0.01  | t | 159002 | MACAHL<br>KEADIKTA<br>LEA    | Homo<br>sapiens                  |
| 1 | 1.00 | 1 | 1 | -0.01 | -0.007 | -0.01  | -0.01  | -0.01  | t | 126151 | GMGCSSP<br>PCECHQEE          | Mus<br>musculu<br>s              |
| 1 | 1.00 | 1 | 1 | -0.04 | -0.042 | -0.031 | -0.037 | -0.04  | t | 52750  | QVMYVPP<br>GAP               | Mus<br>musculu<br>s              |
| 1 | 1.00 | 1 | 1 | 0.03  | 0.028  | 0.028  | 0.027  | 0.03   | t | 3385   | ANPPAST<br>NRQSGRQ           | Mus<br>musculu<br>s              |
| 1 | 1.00 | 1 | 1 | 0     | -0.002 | 0      | 0.001  | 0.003  | t | 136567 | PYWKWQ<br>YKYD               | Mus<br>musculu<br>s              |
| 1 | 1.00 | 1 | 1 | -0.02 | -0.022 | -0.015 | -0.017 | -0.018 | t | 98698  | APKPAPQP<br>GP               | Mus<br>musculu<br>s              |

|   |      |   |   |       |        |        |        |        |   |        |                              |                                  |
|---|------|---|---|-------|--------|--------|--------|--------|---|--------|------------------------------|----------------------------------|
| 1 | 1.00 | 1 | 1 | -0.02 | -0.02  | -0.029 | -0.023 | -0.02  | t | 60374  | SQAQKAA<br>KPAAAAT<br>GTATAA | Homo<br>sapiens                  |
| 1 | 1.00 | 1 | 1 | -0.04 | -0.042 | -0.04  | -0.043 | -0.039 | t | 118141 | SKGRRFKG                     | Mus<br>musculu<br>s              |
| 1 | 1.00 | 1 | 1 | 0.01  | 0.01   | 0.017  | 0.01   | 0.01   | t | 130583 | QCQTFGK<br>TMLCT             | Mus<br>musculu<br>s              |
| 1 | 1.00 | 1 | 1 | 0.01  | 0.008  | -0.006 | 0.003  | 0.012  | t | 120956 | SMNSRGE<br>KVP               | Mus<br>musculu<br>s              |
| 1 | 1.00 | 1 | 1 | 0.02  | 0.02   | 0.02   | 0.02   | 0.022  | t | 140489 | MSQDGHT                      | Mus<br>musculu<br>s              |
| 1 | 1.00 | 1 | 1 | 0.03  | 0.03   | 0.03   | 0.03   | 0.032  | t | 48928  | PPSSPTH<br>PPDSDPQI          | Homo<br>sapiens                  |
| 1 | 1.00 | 1 | 1 | 0.01  | 0.01   | 0.01   | 0.01   | 0.012  | t | 74485  | YKNTHLDL<br>IYNA             | Sus<br>scrofa                    |
| 1 | 1.00 | 1 | 1 | -0.03 | -0.026 | -0.023 | -0.023 | -0.03  | t | 131116 | TQSYPPPP<br>AWRAASR          | Homo<br>sapiens                  |
| 1 | 1.00 | 1 | 1 | -0.04 | -0.042 | -0.038 | -0.04  | -0.04  | t | 122875 | PRGWNPG<br>FLYNGFPL          | Oryctola<br>gus<br>cuniculu<br>s |
| 1 | 1.00 | 1 | 1 | -0.01 | -0.01  | -0.01  | -0.01  | -0.009 | t | 61158  | SSLGSDHN<br>ARWVKRF          | Mus<br>musculu<br>s              |
| 1 | 1.00 | 1 | 1 | 0.04  | 0.038  | 0.028  | 0.043  | 0.049  | t | 53022  | QYPTLL                       | Mus<br>musculu<br>s              |
| 1 | 1.00 | 1 | 1 | -0.02 | -0.02  | -0.02  | -0.02  | -0.02  | t | 156925 | NLVADFPR<br>PLLS             | Gallus<br>gallus                 |
| 1 | 1.00 | 1 | 1 | -0.04 | -0.036 | -0.028 | -0.043 | -0.042 | t | 13911  | EQQRFRN<br>CQRYV             | Homo<br>sapiens                  |
| 1 | 1.00 | 1 | 1 | -0.04 | -0.038 | -0.028 | -0.043 | -0.042 | t | 13911  | EQQRFRN<br>CQRYV             | Homo<br>sapiens                  |
| 1 | 1.00 | 1 | 1 | -0.01 | -0.015 | -0.017 | -0.008 | -0.007 | t | 157277 | FRAISTPRT<br>GTMP            | Canis<br>lupus                   |

|   |      |   |   |       |        |        |        |        |   |        |                              |                    |
|---|------|---|---|-------|--------|--------|--------|--------|---|--------|------------------------------|--------------------|
| 1 | 1.00 | 1 | 1 | 0     | 0.007  | 0.007  | -0.007 | -0.002 | t | 136631 | SHDGASSK<br>IRPA             | Gallus<br>gallus   |
| 1 | 1.00 | 1 | 1 | 0     | 0      | 0.007  | 0      | 0.001  | t | 159041 | NTFVIDGP<br>ETKECPTQ         | Mus<br>musculus    |
| 1 | 1.00 | 1 | 1 | -0.02 | -0.02  | -0.015 | -0.02  | -0.018 | t | 40610  | LVTFKN                       | Homo<br>sapiens    |
| 1 | 1.00 | 1 | 1 | -0.05 | -0.048 | -0.047 | -0.051 | -0.048 | t | 28509  | ISGHRMA<br>WMMMM<br>NWS      | Homo<br>sapiens    |
| 1 | 1.00 | 1 | 1 | 0.01  | 0.013  | 0.021  | 0.01   | 0.009  | t | 24019  | HHSHSILQ<br>SDWF             | Mus<br>musculus    |
| 1 | 1.00 | 1 | 1 | -0.01 | -0.008 | -0.014 | -0.009 | -0.008 | t | 52026  | QQFIYAGS<br>LSALLDPS<br>QGMG | Homo<br>sapiens    |
| 1 | 1.00 | 1 | 1 | 0.01  | 0.012  | 0.01   | 0.007  | 0.01   | t | 49368  | PSFSDIPN<br>PI               | Homo<br>sapiens    |
| 1 | 1.00 | 1 | 1 | 0     | 0.002  | 0      | 0      | 0.001  | t | 108295 | CKRDSTW<br>C                 | Homo<br>sapiens    |
| 1 | 1.00 | 1 | 1 | -0.05 | -0.052 | -0.042 | -0.047 | -0.047 | t | 114280 | CKWSVAH<br>LC                | Mus<br>musculus    |
| 1 | 1.00 | 1 | 1 | 0     | 0.007  | 0.011  | 0      | -0.002 | t | 48670  | PNLRGDL<br>QVLAQKV<br>ARTLP  | Cavia<br>porcellus |
| 1 | 1.00 | 1 | 1 | 0     | 0.003  | 0.011  | 0      | -0.002 | t | 48670  | PNLRGDL<br>QVLAQKV<br>ARTLP  | Mus<br>musculus    |
| 1 | 1.00 | 1 | 1 | 0.03  | 0.03   | 0.029  | 0.03   | 0.03   | t | 53963  | RGRGRGE<br>KRPRSPSS<br>QSSSS | Homo<br>sapiens    |
| 1 | 1.00 | 1 | 1 | 0.03  | 0.032  | 0.044  | 0.031  | 0.03   | t | 64306  | TIGGSQAQ<br>TA               | Homo<br>sapiens    |
| 1 | 1.00 | 1 | 1 | 0     | 0      | 0.007  | 0      | -0.001 | t | 47228  | PDWDFNP<br>VKDDWP            | Mus<br>musculus    |

|   |      |   |   |       |        |        |        |        |   |        |                              |                                  |
|---|------|---|---|-------|--------|--------|--------|--------|---|--------|------------------------------|----------------------------------|
| 1 | 1.00 | 1 | 1 | 0     | 0      | 0.007  | 0      | -0.001 | t | 47228  | PDWDFNP<br>VKDDWP            | Mus<br>musculu<br>s              |
| 1 | 1.00 | 1 | 1 | 0     | 0      | 0.007  | 0      | -0.001 | t | 47228  | PDWDFNP<br>VKDDWP            | Mus<br>musculu<br>s              |
| 1 | 1.00 | 1 | 1 | -0.05 | -0.05  | -0.05  | -0.051 | -0.049 | t | 106942 | TWHHHV<br>WSPSPL             | Mus<br>musculu<br>s              |
| 1 | 1.00 | 1 | 1 | -0.01 | -0.007 | -0.006 | -0.01  | -0.008 | t | 31154  | KHSMVDR<br>GWGNCG            | Mus<br>musculu<br>s              |
| 1 | 1.00 | 1 | 1 | -0.01 | -0.013 | -0.026 | -0.01  | -0.002 | t | 31067  | KGTAPEGV<br>AFGNS            | Oryctola<br>gus<br>cuniculu<br>s |
| 1 | 1.00 | 1 | 1 | 0     | 0.002  | 0      | 0      | 0.003  | t | 105206 | GAIIGLMV<br>GGVV             | Homo<br>sapiens                  |
| 1 | 1.00 | 1 | 1 | -0.03 | -0.03  | -0.03  | -0.034 | -0.03  | t | 142204 | KLEEQNKI<br>SEASRKGL<br>RRDL | Homo<br>sapiens                  |
| 1 | 1.00 | 1 | 1 | 0     | 0.002  | 0.005  | 0.001  | 0      | t | 59239  | SLLAPGAK<br>QN               | Homo<br>sapiens                  |
| 1 | 1.00 | 1 | 1 | -0.03 | -0.038 | -0.037 | -0.03  | -0.03  | t | 123809 | VAVESRN<br>GSRLHFNK          | Trichosu<br>rus<br>vulpecul<br>a |
| 1 | 1.00 | 1 | 1 | 0.01  | 0.005  | 0.01   | 0.009  | 0.01   | t | 55965  | RSSRPLSEE<br>NGEREYN         | Mesocric<br>etus<br>auratus      |
| 1 | 1.00 | 1 | 1 | 0.01  | 0.01   | 0.01   | 0.011  | 0.01   | t | 106597 | LDLKRTTT<br>THTSGGG<br>C     | Mus<br>musculu<br>s              |
| 1 | 1.00 | 1 | 1 | 0     | 0      | 0      | 0      | 0.003  | t | 57299  | SDTRGDP<br>VFNLPEQ           | Mus<br>musculu<br>s              |
| 1 | 1.00 | 1 | 1 | 0.04  | 0.042  | 0.052  | 0.041  | 0.04   | t | 52003  | QQATRQA<br>QD                | Homo<br>sapiens                  |
| 1 | 1.00 | 1 | 1 | 0     | -0.003 | 0.011  | 0      | -0.002 | t | 111603 | NVAVVVS<br>ESGWPSA<br>G      | Oryctola<br>gus<br>cuniculu<br>s |

|   |      |   |   |       |        |        |        |        |   |        |                              |                       |
|---|------|---|---|-------|--------|--------|--------|--------|---|--------|------------------------------|-----------------------|
| 1 | 1.00 | 1 | 1 | 0.01  | 0.013  | 0.03   | 0.01   | 0.009  | t | 32865  | KPRPQPTP                     | Mus musculus          |
| 1 | 1.00 | 1 | 1 | -0.02 | -0.02  | -0.02  | -0.018 | -0.02  | t | 29938  | KARRSEGR<br>SWAQ             | Homo sapiens          |
| 1 | 1.00 | 1 | 1 | -0.04 | -0.036 | -0.031 | -0.039 | -0.04  | t | 589    | ACRAAK                       | Homo sapiens          |
| 1 | 1.00 | 1 | 0 | -0.03 | -0.026 | -0.008 | -0.033 | -0.018 | t | 103932 | GKLPPPI                      | Homo sapiens          |
| 1 | 1.00 | 1 | 1 | 0.01  | 0.008  | 0.004  | 0.009  | 0.01   | t | 59120  | SLGADSSI<br>AYSNTTIAI        | Mus musculus          |
| 1 | 1.00 | 1 | 1 | -0.01 | -0.01  | -0.003 | -0.01  | -0.011 | t | 136728 | VNYNGKE<br>HLLIP             | Mus musculus          |
| 1 | 1.00 | 1 | 1 | 0     | -0.004 | -0.004 | 0.003  | 0.002  | t | 14592  | ETVKTNKK<br>NVTVQEL<br>DLQAR | Oryctolagus cuniculus |
| 1 | 1.00 | 1 | 1 | 0     | 0      | 0.005  | 0      | 0.001  | t | 67170  | TVSTEQNV<br>PDPQVGI          | Homo sapiens          |
| 1 | 1.00 | 1 | 1 | 0     | 0      | 0.005  | 0      | 0.001  | t | 21026  | GLLRYHTY<br>ARFG             | Homo sapiens          |
| 1 | 1.00 | 1 | 1 | 0     | 0      | 0.005  | 0      | 0.001  | t | 18363  | FWRGDLV<br>FDFQV             | Homo sapiens          |
| 1 | 1.00 | 1 | 1 | 0     | 0      | 0.002  | -0.004 | 0      | t | 75152  | YNGEYLIL<br>SARDVL           | Homo sapiens          |
| 1 | 1.00 | 1 | 1 | 0     | 0      | 0.002  | -0.004 | 0      | t | 22882  | GTVVAVG<br>PGRWDE<br>G       | Homo sapiens          |
| 1 | 1.00 | 1 | 1 | 0     | 0      | 0.002  | -0.004 | 0      | t | 4132   | ARDVLAV<br>VSK               | Homo sapiens          |
| 1 | 1.00 | 1 | 1 | 0.01  | 0.012  | 0.015  | 0.013  | 0.014  | t | 48555  | PMHECLS<br>APSVCAD<br>NY     | Homo sapiens          |
| 1 | 1.00 | 1 | 1 | 0     | 0      | 0      | 0      | 0      | t | 117746 | ALREYRKK<br>MDIPAK           | Homo sapiens          |

|   |      |   |   |       |        |        |        |        |   |        |                              |                       |
|---|------|---|---|-------|--------|--------|--------|--------|---|--------|------------------------------|-----------------------|
| 1 | 1.00 | 1 | 1 | 0.02  | 0.02   | 0.043  | 0.027  | 0.02   | t | 119569 | ESNGQPEN                     | Homo sapiens          |
| 1 | 1.00 | 1 | 1 | 0.01  | 0.013  | 0.013  | 0.01   | 0.009  | t | 26179  | IFVHGPTT<br>VESHGNYS<br>TQVG | Equus caballus        |
| 1 | 1.00 | 1 | 1 | -0.03 | -0.03  | -0.03  | -0.03  | -0.03  | t | 112845 | SWYARHT                      | Homo sapiens          |
| 1 | 1.00 | 1 | 1 | -0.03 | -0.03  | -0.031 | -0.03  | -0.029 | t | 144940 | RHVLGRLI<br>TVNPIVT          | Mus musculus          |
| 1 | 1.00 | 1 | 1 | 0     | -0.002 | 0      | -0.007 | 0      | t | 156693 | IYVNVEPT<br>FQRTLHKT<br>K    | Mus musculus          |
| 1 | 1.00 | 1 | 1 | 0.02  | 0.02   | 0.02   | 0.02   | 0.02   | t | 145951 | PVGPSDPS<br>IVSLVEE          | Mus musculus          |
| 1 | 1.00 | 1 | 1 | -0.01 | -0.012 | -0.01  | -0.011 | -0.009 | t | 133542 | DGRRDVV<br>VRSATFYL          | Mus musculus          |
| 1 | 1.00 | 1 | 1 | 0     | -0.001 | 0      | 0      | 0.002  | t | 27987  | IPPTTTPVP<br>PGYLI           | Anas platyrhynchos    |
| 1 | 1.00 | 1 | 1 | 0     | -0.001 | 0      | 0      | 0.002  | t | 27987  | IPPTTTPVP<br>PGYLI           | Anas platyrhynchos    |
| 1 | 1.00 | 1 | 1 | 0.02  | 0.016  | 0.018  | 0.017  | 0.019  | t | 53681  | RFAKYQQ<br>QGRLEAR           | Oryctolagus cuniculus |
| 1 | 1.00 | 1 | 1 | -0.06 | -0.068 | -0.06  | -0.06  | -0.059 | t | 136358 | HMRKRTKI<br>KKIR             | Mus musculus          |
| 1 | 1.00 | 1 | 1 | -0.01 | -0.01  | -0.007 | -0.01  | -0.009 | t | 48125  | PKPQRKTK<br>RNTNRRP<br>QDVK  | Homo sapiens          |
| 1 | 1.00 | 1 | 1 | -0.03 | -0.03  | -0.02  | -0.03  | -0.03  | t | 48688  | PNPLGFLP                     | Mus musculus          |
| 1 | 1.00 | 1 | 1 | 0     | -0.002 | 0.005  | 0      | 0      | t | 122897 | RYSDLLMA<br>WGQYIDH<br>DIA   | Oryctolagus cuniculus |
| 1 | 1.00 | 1 | 1 | -0.09 | -0.088 | -0.085 | -0.086 | -0.09  | t | 133062 | EAPRRRSP<br>SP               | Homo sapiens          |
| 1 | 1.00 | 1 | 1 | 0.02  | 0.02   | 0.02   | 0.02   | 0.02   | t | 47185  | PDREVLQ<br>EFDEMEEC<br>GSHL  | Homo sapiens          |

|   |      |   |   |       |        |        |        |        |   |        |                            |                                  |
|---|------|---|---|-------|--------|--------|--------|--------|---|--------|----------------------------|----------------------------------|
| 1 | 1.00 | 1 | 1 | -0.03 | -0.03  | -0.03  | -0.03  | -0.028 | t | 5568   | AVTMGPK<br>GRT             | Oryctola<br>gus<br>cuniculu<br>s |
| 1 | 1.00 | 1 | 1 | -0.01 | -0.01  | -0.01  | -0.017 | -0.01  | t | 101719 | HSHQVFN<br>LLSLL           | Homo<br>sapiens                  |
| 1 | 1.00 | 1 | 1 | 0     | -0.003 | 0      | 0      | 0.002  | t | 135566 | KCSRLYTA<br>CVY            | Oryctola<br>gus<br>cuniculu<br>s |
| 1 | 1.00 | 1 | 1 | -0.04 | -0.04  | -0.043 | -0.039 | -0.039 | t | 67615  | VAGRKKLE<br>ELERDLRK<br>TK | Homo<br>sapiens                  |
| 1 | 1.00 | 1 | 1 | 0.01  | 0.01   | 0.01   | 0.007  | 0.01   | t | 68379  | VETLDIVTR<br>SPTFS         | Homo<br>sapiens                  |
| 1 | 1.00 | 1 | 1 | 0     | -0.003 | 0.007  | 0      | 0.001  | t | 140053 | MEDDYNL<br>KDMFSRA<br>VTM  | Oryctola<br>gus<br>cuniculu<br>s |
| 1 | 1.00 | 1 | 1 | -0.02 | -0.016 | -0.026 | -0.02  | -0.018 | t | 31104  | KHFNLT<br>PV<br>GSQGIR     | Ovis<br>aries                    |
| 1 | 1.00 | 1 | 1 | 0.02  | 0.018  | 0.022  | 0.017  | 0.022  | t | 118429 | IRYFILPDSL<br>PLDTL        | Mus<br>musculu<br>s              |
| 1 | 1.00 | 1 | 1 | 0.02  | 0.018  | 0.022  | 0.017  | 0.022  | t | 118428 | IRYFILPDSL<br>PLDTL        | Mus<br>musculu<br>s              |
| 1 | 1.00 | 1 | 1 | -0.01 | -0.013 | 0.001  | -0.01  | -0.01  | t | 2270   | AKQPATLR                   | Oryctola<br>gus<br>cuniculu<br>s |
| 1 | 1.00 | 1 | 1 | -0.01 | -0.013 | 0.001  | -0.01  | -0.01  | t | 2270   | AKQPATLR                   | Oryctola<br>gus<br>cuniculu<br>s |
| 1 | 1.00 | 1 | 1 | 0.02  | 0.024  | 0.029  | 0.021  | 0.02   | t | 94936  | SVFHQNG<br>QVTEV           | Homo<br>sapiens                  |
| 1 | 1.00 | 1 | 1 | -0.01 | -0.01  | -0.01  | -0.019 | -0.008 | t | 132067 | SLVLTNLEL                  | Homo<br>sapiens                  |
| 1 | 1.00 | 1 | 1 | 0     | 0.002  | 0.005  | 0.003  | 0      | t | 44221  | NIETVIEFQ<br>QKNRLLLE      | Cavia<br>porcellu<br>s           |
| 1 | 1.00 | 1 | 1 | -0.03 | -0.032 | -0.032 | -0.037 | -0.03  | t | 119562 | DYTGKIM<br>WTPPAIFK<br>S   | Mus<br>musculu<br>s              |



|   |      |   |   |       |        |        |        |        |   |        |                              |                                  |
|---|------|---|---|-------|--------|--------|--------|--------|---|--------|------------------------------|----------------------------------|
| 1 | 1.00 | 1 | 1 | -0.03 | -0.032 | -0.032 | -0.037 | -0.03  | t | 119562 | DYTGKIM<br>WTPPAIFK<br>S     | Mus<br>musculu<br>s              |
| 1 | 1.00 | 1 | 1 | -0.03 | -0.032 | -0.032 | -0.037 | -0.03  | t | 119562 | DYTGKIM<br>WTPPAIFK<br>S     | Mus<br>musculu<br>s              |
| 1 | 1.00 | 1 | 1 | -0.01 | -0.012 | -0.006 | -0.007 | -0.01  | t | 5773   | AYFPREGV<br>FVFNGTS<br>WF    | Mus<br>musculu<br>s              |
| 1 | 1.00 | 1 | 1 | 0     | 0.003  | 0      | 0      | 0.003  | t | 99921  | DAEFRHDS                     | Mus<br>musculu<br>s              |
| 1 | 1.00 | 1 | 1 | -0.05 | -0.05  | -0.05  | -0.05  | -0.049 | t | 159287 | KTQGHSY<br>HLRRKNG<br>VKHPVY | Aotus                            |
| 1 | 1.00 | 1 | 1 | 0     | -0.004 | 0.004  | -0.001 | 0      | t | 48562  | PMILTITLN<br>GTSEST          | Oryctola<br>gus<br>cuniculu<br>s |
| 1 | 1.00 | 1 | 1 | -0.04 | -0.04  | -0.029 | -0.04  | -0.04  | t | 42053  | MLRTWL<br>MKTQGIES<br>W      | Homo<br>sapiens                  |
| 1 | 1.00 | 1 | 1 | 0     | 0.002  | 0      | -0.001 | -0.002 | t | 110980 | QPLGVGIS<br>GHPLLNLK<br>DDTE | Cavia<br>porcellu<br>s           |
| 1 | 1.00 | 1 | 1 | 0.01  | 0.008  | 0.018  | 0.007  | 0.009  | t | 48332  | PLGFFPDH<br>QLDPAFG          | Mus<br>musculu<br>s              |
| 1 | 1.00 | 1 | 1 | -0.02 | -0.022 | -0.013 | -0.023 | -0.02  | t | 142576 | DGASYSW<br>MYEA              | Mus<br>musculu<br>s              |
| 1 | 1.00 | 1 | 1 | 0.01  | 0.01   | 0.01   | 0.01   | 0.01   | t | 25095  | HVSPTHYV<br>PESDAAAK<br>VTAL | Homo<br>sapiens                  |
| 1 | 1.00 | 1 | 1 | 0.04  | 0.043  | 0.036  | 0.04   | 0.042  | t | 78701  | KKFNSSAG<br>DKQGNISI<br>EKL  | Mus<br>musculu<br>s              |
| 1 | 1.00 | 1 | 1 | -0.03 | -0.028 | -0.023 | -0.023 | -0.027 | t | 108217 | WWNMFQ<br>MGVV               | Homo<br>sapiens                  |
| 1 | 1.00 | 1 | 1 | -0.01 | -0.01  | -0.01  | -0.01  | -0.011 | t | 61393  | SSTKNLIKN<br>LTLCELN         | Sus<br>scrofa                    |

|   |      |   |   |       |        |        |        |        |   |        |                              |                     |
|---|------|---|---|-------|--------|--------|--------|--------|---|--------|------------------------------|---------------------|
| 1 | 1.00 | 1 | 1 | -0.01 | -0.01  | -0.01  | -0.01  | -0.011 | t | 61393  | SSTKNLIKN<br>LTLCELNV        | Sus<br>scrofa       |
| 1 | 1.00 | 1 | 1 | -0.01 | -0.01  | -0.01  | -0.01  | -0.011 | t | 61393  | SSTKNLIKN<br>LTLCELNV        | Sus<br>scrofa       |
| 1 | 1.00 | 1 | 1 | -0.03 | -0.028 | -0.025 | -0.027 | -0.031 | t | 122874 | PPARALKR<br>SLWVEVD<br>LLIGS | Homo<br>sapiens     |
| 1 | 1.00 | 1 | 1 | -0.04 | -0.037 | -0.038 | -0.04  | -0.039 | t | 28277  | IRECTGLA<br>WEWWRT<br>V      | Mus<br>musculu<br>s |
| 1 | 1.00 | 1 | 1 | -0.04 | -0.04  | -0.038 | -0.04  | -0.039 | t | 28277  | IRECTGLA<br>WEWWRT<br>V      | Mus<br>musculu<br>s |
| 1 | 1.00 | 1 | 1 | -0.01 | -0.01  | -0.005 | -0.01  | -0.01  | t | 117331 | MKLVRFL<br>MKLSHETV<br>TIELK | Homo<br>sapiens     |
| 1 | 1.00 | 1 | 1 | 0.01  | 0.008  | 0.01   | 0.009  | 0.01   | t | 3562   | APGEKDG<br>KIVPA             | Mus<br>musculu<br>s |
| 1 | 1.00 | 1 | 1 | -0.01 | -0.012 | -0.005 | -0.011 | -0.01  | t | 41454  | METTVKA<br>QPFLPKVL<br>HKRT  | Mus<br>musculu<br>s |
| 1 | 1.00 | 1 | 1 | 0     | 0      | -0.002 | 0      | 0.003  | t | 78233  | PHSNLDHI                     | Homo<br>sapiens     |
| 1 | 1.00 | 1 | 1 | -0.02 | -0.018 | -0.018 | -0.023 | -0.021 | t | 99454  | LRYQQQS<br>RQSRRLSL          | Homo<br>sapiens     |
| 1 | 1.00 | 1 | 1 | -0.02 | -0.022 | -0.02  | -0.027 | -0.019 | t | 134100 | IPPWEAPK<br>EHKYKA           | Mus<br>musculu<br>s |
| 1 | 1.00 | 1 | 1 | -0.04 | -0.044 | -0.025 | -0.04  | -0.04  | t | 79009  | KTWCD<br>WCG                 | Mus<br>musculu<br>s |

|   |      |   |   |       |        |        |        |        |   |        |                              |                                  |
|---|------|---|---|-------|--------|--------|--------|--------|---|--------|------------------------------|----------------------------------|
| 1 | 1.00 | 1 | 1 | -0.02 | -0.016 | -0.008 | -0.017 | -0.018 | t | 85686  | LPNDVFRE<br>AQRS             | Homo<br>sapiens                  |
| 1 | 1.00 | 1 | 1 | 0     | -0.001 | -0.003 | 0      | 0.004  | t | 55783  | RRYQEERP                     | Anas<br>platyrhy<br>nchos        |
| 1 | 1.00 | 1 | 1 | -0.03 | -0.03  | -0.03  | -0.03  | -0.03  | t | 132707 | TTQDRRK<br>QEIIAPEK<br>QTL   | Oryctola<br>gus<br>cuniculu<br>s |
| 1 | 1.00 | 1 | 1 | -0.01 | -0.012 | -0.01  | -0.013 | -0.01  | t | 23156  | GVSTANA<br>TVYMIDSV<br>LMPPA | Mus<br>musculu<br>s              |
| 1 | 1.00 | 1 | 1 | 0.02  | 0.018  | 0.02   | 0.02   | 0.021  | t | 141758 | SWRNNILR<br>TQES             | Oryctola<br>gus<br>cuniculu<br>s |
| 1 | 1.00 | 1 | 1 | 0     | 0      | 0      | 0      | 0      | t | 157220 | ERRQSRRG<br>GRDD             | Homo<br>sapiens                  |
| 1 | 1.00 | 1 | 1 | -0.08 | -0.08  | -0.08  | -0.08  | -0.08  | t | 142470 | RRGRRALR<br>GTAG             | Mus<br>musculu<br>s              |
| 1 | 1.00 | 1 | 1 | 0     | 0.003  | 0      | 0      | 0.003  | t | 78939  | CINHRGY<br>WVC               | Mus<br>musculu<br>s              |
| 1 | 1.00 | 1 | 1 | 0.01  | 0.007  | 0.006  | 0.01   | 0.01   | t | 58938  | SKSIGGTP<br>ALDRRVQ<br>DVNDT | Oryctola<br>gus<br>cuniculu<br>s |
| 1 | 1.00 | 1 | 1 | 0     | 0.002  | 0.003  | 0.004  | 0.003  | t | 50637  | QELDCWH<br>YQHVCVTS<br>TKS   | MD                               |
| 1 | 1.00 | 1 | 1 | 0     | -0.004 | -0.001 | -0.001 | 0      | t | 59985  | SPAQDIW<br>GTSAAAYF<br>VG    | Oryctola<br>gus<br>cuniculu<br>s |
| 1 | 1.00 | 1 | 1 | -0.01 | -0.01  | -0.008 | -0.017 | -0.01  | t | 128068 | PDYEPPVV<br>HGCPLPPP         | Homo<br>sapiens                  |
| 1 | 1.00 | 1 | 1 | -0.01 | -0.014 | -0.021 | -0.017 | -0.011 | t | 122115 | IKGANDLA<br>KFHQMLM<br>KIIMK | Oryctola<br>gus<br>cuniculu<br>s |

|   |      |   |   |       |        |        |        |        |   |        |                              |                                  |
|---|------|---|---|-------|--------|--------|--------|--------|---|--------|------------------------------|----------------------------------|
| 1 | 1.00 | 1 | 1 | -0.01 | -0.013 | -0.005 | -0.01  | -0.011 | t | 68813  | VGVIKSIAP<br>ASKNL           | Oryctola<br>gus<br>cuniculu<br>s |
| 1 | 1.00 | 1 | 1 | -0.01 | -0.008 | -0.006 | -0.007 | -0.009 | t | 54299  | RITQTTNR<br>AA               | Homo<br>sapiens                  |
| 1 | 1.00 | 1 | 1 | 0.01  | 0.01   | 0.016  | 0.01   | 0.01   | t | 41445  | METIKSIA<br>DMATGV           | Oryctola<br>gus<br>cuniculu<br>s |
| 1 | 1.00 | 1 | 1 | -0.01 | -0.01  | -0.004 | -0.004 | -0.008 | t | 47838  | PHIVTPPS<br>ARPRIMAP<br>PVVR | Homo<br>sapiens                  |
| 1 | 1.00 | 1 | 1 | 0.02  | 0.02   | 0.035  | 0.02   | 0.02   | t | 27507  | IMKAQ                        | Homo<br>sapiens                  |
| 1 | 1.00 | 1 | 1 | -0.02 | -0.02  | -0.02  | -0.02  | -0.019 | t | 119624 | PDTPYLDIT<br>YHFVMQR<br>L    | Homo<br>sapiens                  |
| 1 | 1.00 | 1 | 1 | 0.03  | 0.03   | 0.037  | 0.03   | 0.029  | t | 130734 | AQTTANPS<br>CPEGT            | Rattus<br>norvegic<br>us         |
| 1 | 1.00 | 1 | 1 | -0.01 | -0.01  | -0.011 | -0.004 | -0.008 | t | 114941 | RQDENYEE<br>AIVHLKVA<br>ALGS | Homo<br>sapiens                  |
| 1 | 1.00 | 1 | 1 | -0.04 | -0.043 | -0.042 | -0.04  | -0.04  | t | 11216  | EAVRRHA<br>RAYNATVI          | Oryctola<br>gus<br>cuniculu<br>s |
| 1 | 1.00 | 1 | 1 | 0.02  | 0.022  | 0.027  | 0.017  | 0.019  | t | 107110 | EKERRPSPI<br>GTATLL          | Homo<br>sapiens                  |
| 1 | 1.00 | 1 | 1 | -0.02 | -0.022 | -0.003 | -0.02  | -0.023 | t | 113010 | GRVSTEVD<br>ARLSFDK          | Oryctola<br>gus<br>cuniculu<br>s |
| 1 | 1.00 | 1 | 1 | 0.01  | 0.012  | 0.01   | 0.011  | 0.012  | t | 58418  | SHSSESHR<br>VKSAGPP          | Homo<br>sapiens                  |
| 1 | 1.00 | 1 | 1 | 0.05  | 0.05   | 0.048  | 0.047  | 0.048  | t | 60470  | SQKGKQQ<br>EEEENEGS          | Homo<br>sapiens                  |
| 1 | 1.00 | 1 | 1 | -0.05 | -0.048 | -0.047 | -0.053 | -0.049 | t | 55822  | RSEFPIW<br>MMF               | Homo<br>sapiens                  |
| 1 | 1.00 | 1 | 1 | 0     | -0.002 | 0.007  | -0.001 | 0      | t | 151033 | MAARVCC<br>QLDPARD<br>VLCL   | Mus<br>musculu<br>s              |

|   |      |   |   |       |        |        |        |        |   |        |                              |                           |
|---|------|---|---|-------|--------|--------|--------|--------|---|--------|------------------------------|---------------------------|
| 1 | 1.00 | 1 | 1 | 0     | -0.002 | -0.001 | -0.007 | 0      | t | 122269 | ARQNLKD<br>AGE               | Mus<br>musculu<br>s       |
| 1 | 1.00 | 1 | 1 | -0.01 | -0.011 | -0.02  | -0.01  | -0.003 | t | 73074  | WSGKFPTL                     | Anas<br>platyrhy<br>nchos |
| 1 | 1.00 | 1 | 1 | 0     | 0      | 0      | 0      | 0.003  | t | 139830 | MKKISSVI<br>AIALFGTIA        | Homo<br>sapiens           |
| 1 | 1.00 | 1 | 1 | 0     | 0      | 0      | 0      | 0.003  | t | 143853 | DTVGA                        | Homo<br>sapiens           |
| 1 | 1.00 | 1 | 1 | 0     | 0      | 0      | 0      | 0.003  | t | 139935 | VIAIALFGT<br>IATANAAD        | Homo<br>sapiens           |
| 1 | 1.00 | 1 | 1 | 0     | 0      | 0      | 0      | 0.003  | t | 117520 | GSFSDADL<br>AD               | Mus<br>musculu<br>s       |
| 1 | 1.00 | 1 | 1 | 0     | 0      | 0      | 0      | 0.003  | t | 117506 | GGAHFSVS<br>SLAEG            | Mus<br>musculu<br>s       |
| 1 | 1.00 | 1 | 1 | 0     | 0      | 0      | 0      | 0.003  | t | 100508 | SGYEVHH<br>QKL               | Mus<br>musculu<br>s       |
| 1 | 1.00 | 1 | 1 | 0     | 0      | 0      | 0      | 0.003  | t | 107233 | RSFTLASSE<br>TG              | Mus<br>musculu<br>s       |
| 1 | 1.00 | 1 | 1 | 0     | 0      | 0      | 0      | 0.003  | t | 108600 | QLINTNGS                     | Capra<br>hircus           |
| 1 | 1.00 | 1 | 1 | 0     | 0      | 0      | 0      | 0.003  | t | 98557  | TWFGAYA                      | Mus<br>musculu<br>s       |
| 1 | 1.00 | 1 | 1 | 0     | 0      | 0      | 0      | 0.003  | t | 75441  | YPYDVPDY<br>A                | Mus<br>musculu<br>s       |
| 1 | 1.00 | 1 | 1 | 0     | 0      | 0      | 0      | 0.003  | t | 74794  | YLLPAIVHI                    | Mus<br>musculu<br>s       |
| 1 | 1.00 | 1 | 1 | 0     | 0      | 0      | 0      | 0.003  | t | 41826  | MKHM                         | Mus<br>musculu<br>s       |
| 1 | 1.00 | 1 | 1 | 0     | 0      | 0      | 0      | 0.003  | t | 37660  | LLPHSNLD<br>HILEPSIPW<br>KSK | Mus<br>musculu<br>s       |
| 1 | 1.00 | 1 | 1 | 0     | 0      | 0      | 0      | 0.003  | t | 16755  | FLLTRILTI                    | Mus<br>musculu<br>s       |
| 1 | 1.00 | 1 | 1 | 0     | 0      | 0      | 0      | 0.003  | t | 4397   | ASFEAQG<br>ALANIAVD<br>KA    | Mus<br>musculu<br>s       |

|   |      |   |   |       |        |        |        |        |   |        |                              |                       |
|---|------|---|---|-------|--------|--------|--------|--------|---|--------|------------------------------|-----------------------|
| 1 | 1.00 | 1 | 1 | 0.03  | 0.032  | 0.029  | 0.027  | 0.031  | t | 57739  | SFDEDGFY                     | Homo sapiens          |
| 1 | 1.00 | 1 | 1 | 0.01  | 0.01   | 0.01   | 0.013  | 0.01   | t | 15925  | FFTPKESE<br>QLKVIKTFE<br>GIL | Homo sapiens          |
| 1 | 1.00 | 1 | 1 | 0.02  | 0.02   | 0.025  | 0.02   | 0.02   | t | 3565   | APGEVTAF<br>CS               | Homo sapiens          |
| 1 | 1.00 | 1 | 1 | 0.01  | 0.002  | 0.01   | 0.007  | 0.01   | t | 111043 | TLAEADRT<br>NAEK             | Macaca                |
| 1 | 1.00 | 1 | 1 | -0.02 | -0.013 | -0.012 | -0.02  | -0.021 | t | 110948 | MVTSDAQ<br>IFNKPYWL          | Mus musculus          |
| 1 | 1.00 | 1 | 1 | 0.01  | 0.014  | 0.02   | 0.01   | 0.009  | t | 31353  | KIMSKYSN<br>TFEVNAYN<br>MSDF | Aotus nancymae        |
| 1 | 1.00 | 1 | 1 | -0.06 | -0.064 | -0.059 | -0.063 | -0.061 | t | 124384 | KRSRHF                       | Oryctolagus cuniculus |
| 1 | 1.00 | 1 | 1 | -0.03 | -0.026 | -0.038 | -0.033 | -0.03  | t | 137395 | EESEDEKR<br>RWGQRDN          | Homo sapiens          |
| 1 | 1.00 | 1 | 1 | -0.05 | -0.05  | -0.045 | -0.048 | -0.05  | t | 809    | AEAAGRRL<br>AR               | Homo sapiens          |
| 1 | 1.00 | 1 | 1 | -0.04 | -0.04  | -0.033 | -0.034 | -0.038 | t | 68347  | VESMETT<br>MRSPVFT           | Homo sapiens          |
| 1 | 1.00 | 1 | 1 | 0     | -0.004 | 0      | -0.007 | -0.001 | t | 138304 | ATVQLPQ                      | Oryctolagus cuniculus |
| 1 | 1.00 | 1 | 1 | 0     | -0.002 | 0      | -0.007 | -0.001 | t | 134804 | TIFILCCSK<br>EKRRKKQA<br>AT  | Mus musculus          |
| 1 | 1.00 | 1 | 1 | 0     | -0.002 | 0      | -0.007 | -0.001 | t | 138218 | PTPAPGPG<br>RR               | Mus musculus          |
| 1 | 1.00 | 1 | 1 | 0     | -0.002 | 0      | -0.007 | -0.001 | t | 149867 | PESFDGDP<br>ASNTAPLQ<br>PE   | Mus musculus          |

|   |      |   |   |   |        |   |        |        |   |        |                             |                       |
|---|------|---|---|---|--------|---|--------|--------|---|--------|-----------------------------|-----------------------|
| 1 | 1.00 | 1 | 1 | 0 | -0.002 | 0 | -0.007 | -0.001 | t | 135546 | DWEYS                       | Mus musculus          |
| 1 | 1.00 | 1 | 1 | 0 | -0.004 | 0 | -0.007 | -0.001 | t | 138608 | RVGAHDP                     | Oryctolagus cuniculus |
| 1 | 1.00 | 1 | 1 | 0 | -0.004 | 0 | -0.007 | -0.001 | t | 136420 | KIHAREIFD<br>SRGNPTVE       | Oryctolagus cuniculus |
| 1 | 1.00 | 1 | 1 | 0 | -0.002 | 0 | -0.007 | -0.001 | t | 125297 | VFFEEQED<br>EIIGFG          | Mus musculus          |
| 1 | 1.00 | 1 | 1 | 0 | -0.002 | 0 | -0.007 | -0.001 | t | 133372 | SPSPTPTP<br>GPSRRG          | Mus musculus          |
| 1 | 1.00 | 1 | 1 | 0 | -0.002 | 0 | -0.007 | -0.001 | t | 122377 | GLPRLETP<br>ADLSTAIA<br>SRS | Mus musculus          |
| 1 | 1.00 | 1 | 1 | 0 | -0.004 | 0 | -0.007 | -0.001 | t | 117742 | AKAQTD<br>EDLRTLLRY         | Oryctolagus cuniculus |
| 1 | 1.00 | 1 | 1 | 0 | -0.002 | 0 | -0.007 | -0.001 | t | 131762 | YAASSYL                     | Mus musculus          |
| 1 | 1.00 | 1 | 1 | 0 | -0.002 | 0 | -0.007 | -0.001 | t | 120716 | KSAIEGVK                    | Rattus norvegicus     |
| 1 | 1.00 | 1 | 1 | 0 | -0.004 | 0 | -0.007 | -0.001 | t | 117907 | HKAFKGSI                    | Oryctolagus cuniculus |
| 1 | 1.00 | 1 | 1 | 0 | -0.004 | 0 | -0.007 | -0.001 | t | 117773 | CNSRQTD<br>REDELI           | Oryctolagus cuniculus |
| 1 | 1.00 | 1 | 1 | 0 | -0.002 | 0 | -0.007 | -0.001 | t | 132690 | TCSADGGT<br>LFYNLCL         | Mus musculus          |
| 1 | 1.00 | 1 | 1 | 0 | -0.004 | 0 | -0.007 | -0.001 | t | 124588 | PQEETLQA<br>FDSHYDYT        | Oryctolagus cuniculus |
| 1 | 1.00 | 1 | 1 | 0 | -0.004 | 0 | -0.007 | -0.001 | t | 107784 | DGSFFLY                     | Oryctolagus cuniculus |

|   |      |   |   |      |        |       |        |        |   |        |                              |                                  |
|---|------|---|---|------|--------|-------|--------|--------|---|--------|------------------------------|----------------------------------|
| 1 | 1.00 | 1 | 1 | 0    | -0.004 | 0     | -0.007 | -0.001 | t | 108074 | PQVYTLP                      | Oryctola<br>gus<br>cuniculu<br>s |
| 1 | 1.00 | 1 | 1 | 0    | -0.002 | 0     | -0.007 | -0.001 | t | 108630 | SHQESTRG<br>RSRGRSGR<br>SGS  | Mus<br>musculu<br>s              |
| 1 | 1.00 | 1 | 1 | 0    | -0.002 | 0     | -0.007 | -0.001 | t | 117260 | ANNGNLQ<br>LRNKEVT<br>WEVLEG | Mus<br>musculu<br>s              |
| 1 | 1.00 | 1 | 1 | 0    | -0.004 | 0     | -0.007 | -0.001 | t | 107773 | CSVMHEG                      | Oryctola<br>gus<br>cuniculu<br>s |
| 1 | 1.00 | 1 | 1 | 0    | -0.002 | 0     | -0.007 | -0.001 | t | 108630 | SHQESTRG<br>RSRGRSGR<br>SGS  | Mus<br>musculu<br>s              |
| 1 | 1.00 | 1 | 1 | 0    | -0.002 | 0     | -0.007 | -0.001 | t | 107784 | DGSFFLY                      | Mus<br>musculu<br>s              |
| 1 | 1.00 | 1 | 1 | 0    | -0.004 | 0     | -0.007 | -0.001 | t | 117383 | TLHKAFKG<br>SIFVVFDSI<br>ESA | Oryctola<br>gus<br>cuniculu<br>s |
| 1 | 1.00 | 1 | 1 | 0    | -0.002 | 0     | -0.007 | -0.001 | t | 107949 | KSLSLSP                      | Mus<br>musculu<br>s              |
| 1 | 1.00 | 1 | 1 | 0    | -0.002 | 0     | -0.007 | -0.001 | t | 107814 | EGLHNHY                      | Mus<br>musculu<br>s              |
| 1 | 1.00 | 1 | 1 | 0    | -0.004 | 0     | -0.007 | -0.001 | t | 117246 | VTWEVLE<br>GEVEKEAL<br>KKI   | Oryctola<br>gus<br>cuniculu<br>s |
| 1 | 1.00 | 1 | 1 | 0    | -0.002 | 0     | -0.007 | -0.001 | t | 108074 | PQVYTLP                      | Mus<br>musculu<br>s              |
| 1 | 1.00 | 1 | 1 | 0    | -0.002 | 0     | -0.007 | -0.001 | t | 104569 | MASPGSG<br>FWSFGSE<br>DGS    | Mus<br>musculu<br>s              |
| 1 | 1.00 | 1 | 1 | 0    | -0.002 | 0     | -0.007 | -0.001 | t | 20097  | GGYGDGG<br>AHGGGYG<br>G      | Mus<br>musculu<br>s              |
| 1 | 1.00 | 1 | 1 | 0.02 | 0.023  | 0.019 | 0.02   | 0.022  | t | 91093  | AEFYQEVL<br>FKGFE            | Equus<br>caballus                |
| 1 | 1.00 | 1 | 1 | 0    | 0.002  | 0     | -0.001 | 0      | t | 134160 | MGGPPM<br>MPMMGP<br>PPPGM    | Homo<br>sapiens                  |



|   |      |   |   |       |        |        |        |        |   |        |                              |                                  |
|---|------|---|---|-------|--------|--------|--------|--------|---|--------|------------------------------|----------------------------------|
| 1 | 1.00 | 1 | 1 | -0.01 | -0.008 | -0.004 | -0.009 | -0.008 | t | 10226  | DSSAATKK<br>TAAW             | Homo<br>sapiens                  |
| 1 | 1.00 | 1 | 1 | 0.01  | 0.01   | 0.012  | 0.013  | 0.012  | t | 16449  | FKQKARGL<br>LQTATKQA<br>EAAA | Homo<br>sapiens                  |
| 1 | 1.00 | 1 | 1 | 0.01  | 0.011  | 0.015  | 0.01   | 0.01   | t | 55757  | RRVASFLIR<br>GSAQKI          | Mus<br>musculu<br>s              |
| 1 | 1.00 | 1 | 1 | 0.02  | 0.022  | 0.02   | 0.019  | 0.019  | t | 130623 | TSDVEVNE<br>KKERVTEA         | Homo<br>sapiens                  |
| 1 | 1.00 | 1 | 1 | 0.01  | 0.013  | 0.02   | 0.01   | 0.009  | t | 1578   | AGKNQSQ<br>KKKK              | Mus<br>musculu<br>s              |
| 1 | 1.00 | 1 | 1 | -0.02 | -0.02  | -0.02  | -0.02  | -0.019 | t | 144654 | GPHPTLEV<br>VPMGRGS          | Mus<br>musculu<br>s              |
| 1 | 1.00 | 1 | 1 | -0.01 | -0.01  | -0.01  | -0.01  | -0.01  | t | 140826 | AHAAYLN<br>ATPAAKVL<br>VEGNT | Oryctola<br>gus<br>cuniculu<br>s |
| 1 | 1.00 | 1 | 1 | -0.01 | -0.014 | -0.002 | -0.011 | -0.01  | t | 47063  | PDCAICWE<br>PSPWPAP<br>E     | Oryctola<br>gus<br>cuniculu<br>s |
| 1 | 1.00 | 1 | 1 | 0.05  | 0.05   | 0.066  | 0.048  | 0.047  | t | 99013  | SPSSPEKES<br>PEKEDQ          | Homo<br>sapiens                  |
| 1 | 1.00 | 1 | 1 | 0     | 0      | -0.007 | 0      | 0.001  | t | 54688  | RLNNSKIYI<br>NGRLIDQK<br>PI  | Mus<br>musculu<br>s              |
| 1 | 1.00 | 1 | 1 | 0     | 0      | 0      | 0      | 0.001  | t | 118105 | RKGHFLLS<br>SKSGFWTI<br>WL   | Homo<br>sapiens                  |
| 1 | 1.00 | 1 | 1 | -0.02 | -0.018 | -0.013 | -0.02  | -0.02  | t | 132849 | KKVLGEKT<br>ENPKKFK          | Oryctola<br>gus<br>cuniculu<br>s |
| 1 | 1.00 | 1 | 1 | 0.02  | 0.02   | 0.015  | 0.02   | 0.02   | t | 94501  | EKQISDAS<br>RQGLRRD          | Mus<br>musculu<br>s              |
| 1 | 1.00 | 1 | 1 | -0.01 | -0.012 | -0.005 | -0.007 | -0.008 | t | 31557  | KKGSSIGK<br>M                | Mus<br>musculu<br>s              |

|   |      |   |   |       |        |        |        |        |   |        |                               |                       |
|---|------|---|---|-------|--------|--------|--------|--------|---|--------|-------------------------------|-----------------------|
| 1 | 1.00 | 1 | 1 | -0.05 | -0.048 | -0.052 | -0.053 | -0.05  | t | 69856  | VLWVVKSTPA                    | Homo sapiens          |
| 1 | 1.00 | 1 | 1 | -0.01 | -0.01  | -0.008 | -0.01  | -0.01  | t | 71938  | VWIRTPPAYR                    | Homo sapiens          |
| 1 | 1.00 | 1 | 1 | -0.01 | -0.008 | -0.006 | -0.013 | -0.012 | t | 48680  | PNNAAGLPGKCGVNV               | Homo sapiens          |
| 1 | 1.00 | 1 | 1 | -0.05 | -0.044 | -0.053 | -0.05  | -0.048 | t | 48076  | PKHVKAWIPRPRLC                | Equus caballus        |
| 1 | 1.00 | 1 | 1 | 0.01  | 0.01   | 0.012  | 0.01   | 0.01   | t | 114618 | SRSSSERKRRSESEG               | Homo sapiens          |
| 1 | 1.00 | 1 | 1 | 0.03  | 0.03   | 0.039  | 0.03   | 0.03   | t | 66845  | TTTDSSTDQTI                   | Oryctolagus cuniculus |
| 1 | 1.00 | 1 | 1 | 0.02  | 0.016  | 0.02   | 0.013  | 0.019  | t | 107656 | VGGVV                         | Oryctolagus cuniculus |
| 1 | 1.00 | 1 | 1 | 0.02  | 0.018  | 0.036  | 0.019  | 0.02   | t | 139338 | VEDILY                        | Mus musculus          |
| 1 | 1.00 | 1 | 1 | -0.03 | -0.032 | -0.035 | -0.031 | -0.03  | t | 20719  | GKVSLEEF<br>CRGFGCLKV<br>WEVR | Mus musculus          |
| 1 | 1.00 | 1 | 1 | 0     | 0      | 0      | 0      | 0.003  | t | 99922  | DAEFRHDSGY                    | Mus musculus          |
| 1 | 1.00 | 1 | 1 | -0.01 | -0.012 | -0.008 | -0.013 | -0.01  | t | 73739  | YEPGRSLW                      | Mus musculus          |
| 1 | 1.00 | 1 | 1 | -0.01 | -0.008 | 0      | -0.013 | -0.013 | t | 76385  | YVPLGTQY<br>TDAPSFSD<br>IPNP  | Homo sapiens          |
| 1 | 1.00 | 1 | 1 | -0.01 | -0.01  | -0.01  | -0.01  | -0.007 | t | 156941 | PTEKKHV                       | Gallus gallus         |
| 1 | 1.00 | 1 | 1 | 0.02  | 0.02   | 0.025  | 0.02   | 0.02   | t | 107127 | GEPGDDA<br>PSGAEGPP<br>GPQG   | Mus musculus          |
| 1 | 1.00 | 1 | 1 | -0.01 | -0.01  | -0.014 | -0.01  | -0.007 | t | 134002 | AKLVTILQ<br>AHPLQQSYD         | Homo sapiens          |
| 1 | 1.00 | 1 | 1 | -0.04 | -0.04  | -0.04  | -0.04  | -0.04  | t | 3518   | APDYVPPT<br>VHGALPP<br>R      | Homo sapiens          |

|   |      |   |   |       |        |        |        |        |   |        |                              |                       |
|---|------|---|---|-------|--------|--------|--------|--------|---|--------|------------------------------|-----------------------|
| 1 | 1.00 | 1 | 1 | -0.01 | -0.003 | 0.004  | -0.01  | -0.01  | t | 149979 | TKLSHKN                      | Capra hircus          |
| 1 | 1.00 | 1 | 1 | -0.01 | -0.003 | 0.004  | -0.01  | -0.01  | t | 149979 | TKLSHKN                      | Capra hircus          |
| 1 | 1.00 | 1 | 1 | 0     | 0      | 0      | -0.003 | 0.001  | t | 39164  | LRPGPVSQ<br>PYHHWDT<br>DK    | Homo sapiens          |
| 1 | 1.00 | 1 | 1 | -0.07 | -0.074 | -0.07  | -0.073 | -0.068 | t | 19943  | GGNRYPP<br>QGGGGW            | Oryctolagus cuniculus |
| 1 | 1.00 | 1 | 1 | 0.01  | 0.01   | 0.024  | 0.007  | 0.008  | t | 8994   | DKTEIPTIN<br>T               | Homo sapiens          |
| 1 | 1.00 | 1 | 1 | 0     | 0      | 0.005  | 0.002  | 0      | t | 73588  | YDSYICIMN<br>FCGHAA          | Homo sapiens          |
| 1 | 1.00 | 1 | 1 | 0.02  | 0.018  | 0.02   | 0.017  | 0.02   | t | 118192 | VAFSDEM<br>VPCPVTTD<br>M     | Mus musculus          |
| 1 | 1.00 | 1 | 1 | 0     | 0.003  | 0.009  | 0      | 0.002  | t | 79286  | LDWLWE<br>WAEQ               | Mus musculus          |
| 1 | 1.00 | 1 | 1 | 0.05  | 0.054  | 0.061  | 0.051  | 0.052  | t | 81704  | ENATKVED<br>IK               | Homo sapiens          |
| 1 | 1.00 | 1 | 1 | 0.02  | 0.023  | 0.02   | 0.02   | 0.021  | t | 5853   | AYKSAEGA<br>TPEAKYDD<br>YVAT | Mus musculus          |
| 1 | 1.00 | 1 | 1 | 0     | 0.002  | 0.006  | 0.001  | 0.001  | t | 39183  | LRRDLAS<br>REAKKQVE<br>KALE  | Homo sapiens          |
| 1 | 1.00 | 1 | 1 | 0.02  | 0.023  | 0.024  | 0.02   | 0.023  | t | 106771 | RERMS                        | Mus musculus          |
| 1 | 1.00 | 1 | 1 | -0.02 | -0.019 | -0.013 | -0.02  | -0.02  | t | 72183  | VYVIGFTLP<br>IILKA           | Myodes glareolus      |
| 1 | 1.00 | 1 | 1 | -0.01 | -0.013 | -0.017 | -0.013 | -0.01  | t | 78118  | DKVTIDGY<br>ETLIMSDE<br>ST   | Mus musculus          |
| 1 | 1.00 | 1 | 1 | 0.01  | 0.01   | 0.017  | 0.01   | 0.011  | t | 107744 | APVDSRTY<br>TRVADHI          | Homo sapiens          |

|   |      |   |   |       |        |        |        |        |   |        |                              |                                  |
|---|------|---|---|-------|--------|--------|--------|--------|---|--------|------------------------------|----------------------------------|
| 1 | 1.00 | 1 | 1 | -0.01 | -0.01  | -0.004 | -0.01  | -0.01  | t | 7004   | CSGLVGLF<br>TPGAKQNI         | Mus<br>musculu<br>s              |
| 1 | 1.00 | 1 | 1 | 0     | -0.002 | 0.017  | -0.001 | 0.001  | t | 79278  | KSAVGY                       | Mus<br>musculu<br>s              |
| 1 | 1.00 | 1 | 1 | 0.01  | 0.007  | 0      | 0.01   | 0.012  | t | 79743  | AALAARKA<br>DLEKALEG<br>AM   | Oryctola<br>gus<br>cuniculu<br>s |
| 1 | 1.00 | 1 | 1 | -0.02 | -0.02  | -0.02  | -0.02  | -0.02  | t | 133622 | KPGDPSAL<br>HVVRCWI<br>C     | Mus<br>musculu<br>s              |
| 1 | 1.00 | 1 | 1 | -0.06 | -0.06  | -0.06  | -0.06  | -0.06  | t | 132206 | CTFVPRRK<br>AGICFGDS         | Homo<br>sapiens                  |
| 1 | 1.00 | 1 | 1 | -0.01 | -0.012 | -0.01  | -0.009 | -0.007 | t | 96457  | KGTVNLT<br>WSR               | Mus<br>musculu<br>s              |
| 1 | 1.00 | 1 | 1 | 0     | 0      | 0.001  | 0      | 0      | t | 41431  | MERVVEQ<br>MCVTQYQ<br>KESQAY | Oryctola<br>gus<br>cuniculu<br>s |
| 1 | 1.00 | 1 | 1 | -0.02 | -0.018 | -0.021 | -0.013 | -0.017 | t | 48751  | PPATVYRY<br>DSRPPE           | Homo<br>sapiens                  |
| 1 | 1.00 | 1 | 1 | -0.02 | -0.015 | -0.013 | -0.02  | -0.019 | t | 132802 | ESTLHLVLR<br>LR              | Mus<br>musculu<br>s              |
| 1 | 1.00 | 1 | 1 | -0.03 | -0.03  | -0.025 | -0.03  | -0.028 | t | 140672 | EQIYRVDL<br>RTLRL            | Rattus<br>norvegic<br>us         |
| 1 | 1.00 | 1 | 1 | -0.02 | -0.02  | -0.013 | -0.02  | -0.021 | t | 47492  | PFFTAAL<br>TVMATAG<br>VAAVV  | Homo<br>sapiens                  |
| 1 | 1.00 | 1 | 1 | 0     | 0      | 0      | 0      | 0      | t | 32649  | KPAIIPDRE<br>VLYREFDE<br>M   | Homo<br>sapiens                  |
| 1 | 1.00 | 1 | 1 | -0.03 | -0.03  | -0.021 | -0.028 | -0.03  | t | 135983 | RLRPPEPR<br>PRDR             | Homo<br>sapiens                  |
| 1 | 1.00 | 1 | 1 | -0.02 | -0.022 | -0.015 | -0.021 | -0.02  | t | 76189  | YTTQCGYG<br>GCMNFE           | Mus<br>musculu<br>s              |

|   |      |   |   |       |        |        |        |        |   |        |                              |                                  |
|---|------|---|---|-------|--------|--------|--------|--------|---|--------|------------------------------|----------------------------------|
| 1 | 1.00 | 1 | 1 | 0.01  | 0.013  | 0.015  | 0.01   | 0.01   | t | 9302   | DLTLNDLE<br>TDVCTMD<br>KCAGI | Mus<br>musculu<br>s              |
| 1 | 1.00 | 1 | 1 | -0.06 | -0.06  | -0.06  | -0.06  | -0.06  | t | 112845 | SWYARHT                      | Homo<br>sapiens                  |
| 1 | 1.00 | 1 | 1 | 0.04  | 0.04   | 0.04   | 0.029  | 0.038  | t | 118276 | AVEEGIVL<br>GGGCA            | Homo<br>sapiens                  |
| 1 | 1.00 | 1 | 1 | 0.04  | 0.042  | 0.04   | 0.047  | 0.047  | t | 119670 | WESNGQP<br>E                 | Homo<br>sapiens                  |
| 1 | 1.00 | 1 | 1 | 0.04  | 0.042  | 0.045  | 0.037  | 0.041  | t | 113580 | KPQQQSP<br>QQQFPQQ<br>QIPQQQ | Homo<br>sapiens                  |
| 1 | 1.00 | 1 | 1 | 0.02  | 0.02   | 0.013  | 0.019  | 0.021  | t | 138162 | EKKYSPCA<br>WEVVRAE          | Mus<br>musculu<br>s              |
| 1 | 1.00 | 1 | 1 | 0.03  | 0.026  | 0.049  | 0.033  | 0.029  | t | 307    | AALVSGTA<br>TAGWTFG<br>AG    | Oryctola<br>gus<br>cuniculu<br>s |
| 1 | 1.00 | 1 | 1 | 0.04  | 0.047  | 0.05   | 0.043  | 0.04   | t | 47730  | PGQAEP<br>QAFIDEV            | Gallus<br>gallus                 |
| 1 | 1.00 | 1 | 1 | 0.02  | 0.023  | 0.032  | 0.02   | 0.022  | t | 115268 | GLQYTPS<br>WLVG              | Mus<br>musculu<br>s              |
| 1 | 1.00 | 1 | 1 | 0.01  | 0.006  | 0.006  | 0.003  | 0.01   | t | 144615 | DNTSIYYG<br>GLVSPAI          | Oryctola<br>gus<br>cuniculu<br>s |
| 1 | 1.00 | 1 | 1 | 0.01  | 0.01   | 0.009  | 0.008  | 0.009  | t | 54296  | RITFGGPT<br>DSTDNNQ<br>NGGR  | Homo<br>sapiens                  |
| 1 | 1.00 | 1 | 1 | -0.03 | -0.028 | -0.031 | -0.027 | -0.031 | t | 79599  | LHIRAGPY<br>GHATVEM<br>PEWIH | Homo<br>sapiens                  |
| 1 | 1.00 | 1 | 1 | -0.05 | -0.042 | -0.042 | -0.049 | -0.051 | t | 111065 | YMLRKRRK<br>RLPYFF           | Homo<br>sapiens                  |
| 1 | 1.00 | 1 | 1 | 0.01  | 0.008  | 0.004  | 0.009  | 0.01   | t | 14457  | ETLGALAS<br>AIKETFEEG<br>TC  | Mus<br>musculu<br>s              |
| 1 | 1.00 | 1 | 1 | -0.02 | -0.018 | -0.02  | -0.024 | -0.021 | t | 16092  | FHAEWPT<br>PSPWP             | Homo<br>sapiens                  |

|   |      |   |   |       |        |        |        |        |   |        |                              |                                  |
|---|------|---|---|-------|--------|--------|--------|--------|---|--------|------------------------------|----------------------------------|
| 1 | 1.00 | 1 | 1 | 0.01  | 0.017  | 0.01   | 0.01   | 0.011  | t | 153838 | HQKRTAM<br>FQDPQER           | Cavia<br>porcellu<br>s           |
| 1 | 1.00 | 1 | 1 | -0.02 | -0.018 | -0.016 | -0.023 | -0.022 | t | 106032 | QEFLRYQQ<br>QSRRLSL          | Homo<br>sapiens                  |
| 1 | 1.00 | 1 | 1 | -0.01 | -0.014 | 0.012  | -0.01  | -0.01  | t | 95462  | IIAPAKQL                     | Bos<br>taurus                    |
| 1 | 1.00 | 1 | 1 | -0.03 | -0.027 | -0.02  | -0.03  | -0.028 | t | 12836  | EKPHFP                       | Mus<br>musculu<br>s              |
| 1 | 1.00 | 1 | 1 | -0.05 | -0.054 | -0.043 | -0.051 | -0.05  | t | 137866 | GDTRPRFL                     | Oryctola<br>gus<br>cuniculu<br>s |
| 1 | 1.00 | 1 | 1 | -0.02 | -0.022 | -0.013 | -0.021 | -0.02  | t | 151033 | MAARVCC<br>QLDPARD<br>VLCL   | Mus<br>musculu<br>s              |
| 1 | 1.00 | 1 | 1 | -0.05 | -0.05  | -0.035 | -0.053 | -0.052 | t | 33732  | KTKIPAVFK<br>I               | Homo<br>sapiens                  |
| 1 | 1.00 | 1 | 1 | 0.03  | 0.032  | 0.033  | 0.033  | 0.032  | t | 122198 | TEADVNP<br>KPIPSQMPT<br>SP   | Homo<br>sapiens                  |
| 1 | 1.00 | 1 | 1 | 0.01  | 0.005  | 0.01   | 0.012  | 0.012  | t | 15925  | FFTPKESE<br>QLKVIKTFE<br>GIL | Mus                              |
| 1 | 1.00 | 1 | 1 | -0.03 | -0.026 | -0.025 | -0.023 | -0.028 | t | 131010 | PSTRWTEL<br>DDVKRLK<br>GSRS  | Homo<br>sapiens                  |
| 1 | 1.00 | 1 | 1 | -0.02 | -0.02  | -0.027 | -0.014 | -0.011 | t | 23599  | HCLGKWL<br>GHPDKF            | Mus<br>musculu<br>s              |
| 1 | 1.00 | 1 | 1 | -0.03 | -0.027 | -0.026 | -0.03  | -0.03  | t | 67436  | TYQRTRAL<br>V                | Mus<br>musculu<br>s              |
| 1 | 1.00 | 1 | 1 | -0.04 | -0.042 | -0.027 | -0.041 | -0.04  | t | 138892 | REQAPNL<br>VY                | Mus<br>musculu<br>s              |

|   |      |   |   |       |        |        |        |        |   |        |                              |                     |
|---|------|---|---|-------|--------|--------|--------|--------|---|--------|------------------------------|---------------------|
| 1 | 1.00 | 1 | 1 | -0.01 | -0.01  | -0.01  | -0.008 | -0.01  | t | 53895  | RGKGEGLP<br>GMCGGAL<br>VSSNQ | Homo<br>sapiens     |
| 1 | 1.00 | 1 | 1 | 0.02  | 0.018  | 0.031  | 0.013  | 0.014  | t | 14260  | ESRPRGVY<br>PTEQ             | Mus<br>musculu<br>s |
| 1 | 1.00 | 1 | 1 | -0.05 | -0.047 | -0.05  | -0.05  | -0.05  | t | 111955 | YDDVENS<br>GGYGGNP<br>GQDNRV | Mus<br>musculu<br>s |
| 1 | 1.00 | 1 | 1 | 0.04  | 0.04   | 0.047  | 0.043  | 0.04   | t | 35974  | LFSGDEDS<br>DSSDGYPP<br>NRQ  | Homo<br>sapiens     |
| 1 | 1.00 | 1 | 1 | -0.03 | -0.028 | -0.015 | -0.027 | -0.03  | t | 43541  | NDVRCKL<br>WLCMPMPD          | Homo<br>sapiens     |
| 1 | 1.00 | 1 | 1 | -0.03 | -0.03  | -0.035 | -0.03  | -0.027 | t | 57314  | SDWDCCD<br>VCCNPAC<br>AGC    | Mus<br>musculu<br>s |
| 1 | 1.00 | 1 | 1 | 0.04  | 0.038  | 0.048  | 0.037  | 0.041  | t | 30386  | KEFSEVEG<br>RIQDLEKY<br>V    | Mus<br>musculu<br>s |
| 1 | 1.00 | 1 | 1 | 0.04  | 0.038  | 0.048  | 0.037  | 0.041  | t | 30386  | KEFSEVEG<br>RIQDLEKY<br>V    | Mus<br>musculu<br>s |
| 1 | 1.00 | 1 | 1 | 0.02  | 0.024  | 0.026  | 0.017  | 0.022  | t | 49535  | PSTPGSRQ<br>NM               | Homo<br>sapiens     |
| 1 | 1.00 | 1 | 1 | 0     | 0      | 0      | -0.006 | 0      | t | 158753 | FIEVEELKL<br>FLQNFC          | Homo<br>sapiens     |
| 1 | 1.00 | 1 | 1 | 0     | 0      | 0      | -0.006 | 0      | t | 159048 | PKARELTD<br>AETKAFL          | Homo<br>sapiens     |
| 1 | 1.00 | 1 | 1 | 0     | 0      | 0      | -0.006 | 0      | t | 158669 | ADIKTALE<br>ARKAADT          | Homo<br>sapiens     |
| 1 | 1.00 | 1 | 1 | 0     | 0      | 0      | -0.006 | 0      | t | 159002 | MACAHLCL<br>KEADIKTA<br>LEA  | Homo<br>sapiens     |
| 1 | 1.00 | 1 | 1 | 0     | 0      | 0      | -0.006 | 0      | t | 158695 | ASKSADDV<br>KKAFKVI          | Homo<br>sapiens     |
| 1 | 1.00 | 1 | 1 | 0     | 0      | 0      | -0.006 | 0      | t | 158948 | LEARKAAD<br>TFNFKTF          | Homo<br>sapiens     |
| 1 | 1.00 | 1 | 1 | 0     | 0      | 0      | -0.006 | 0      | t | 158672 | AFLKAGDA<br>DGDGMIG          | Homo<br>sapiens     |
| 1 | 1.00 | 1 | 1 | 0     | 0      | 0      | -0.006 | 0      | t | 159019 | NFCPKARE<br>LTDAETK          | Homo<br>sapiens     |
| 1 | 1.00 | 1 | 1 | 0     | 0      | 0      | -0.006 | 0      | t | 159063 | RKAADTFN<br>FKTFFHT          | Homo<br>sapiens     |

|   |      |   |   |       |        |        |        |        |   |        |                              |                     |
|---|------|---|---|-------|--------|--------|--------|--------|---|--------|------------------------------|---------------------|
| 1 | 1.00 | 1 | 1 | 0     | 0      | 0      | -0.006 | 0      | t | 158670 | ADTFNFKT<br>FFHTIGF          | Homo<br>sapiens     |
| 1 | 1.00 | 1 | 1 | 0     | 0      | 0      | -0.006 | 0      | t | 158746 | ETKAFLKA<br>GDADGDG          | Homo<br>sapiens     |
| 1 | 1.00 | 1 | 1 | 0     | 0      | 0      | -0.006 | 0      | t | 158874 | KAGDADG<br>DGMIGIDE          | Homo<br>sapiens     |
| 1 | 1.00 | 1 | 1 | 0     | 0      | 0      | -0.006 | 0      | t | 77929  | KFHRVIKD<br>F                | Homo<br>sapiens     |
| 1 | 1.00 | 1 | 1 | 0     | 0      | 0      | -0.006 | 0      | t | 78068  | VYDYNCH<br>VDL               | Homo<br>sapiens     |
| 1 | 1.00 | 1 | 1 | 0     | 0      | 0      | -0.006 | 0      | t | 77842  | AYIDFEMK<br>I                | Homo<br>sapiens     |
| 1 | 1.00 | 1 | 1 | 0     | 0      | 0      | -0.006 | 0      | t | 77841  | AYDFLYNY<br>L                | Homo<br>sapiens     |
| 1 | 1.00 | 1 | 1 | 0     | 0      | 0      | -0.006 | 0      | t | 77848  | DFMIQGG<br>DF                | Homo<br>sapiens     |
| 1 | 1.00 | 1 | 1 | 0     | 0      | 0      | -0.006 | 0      | t | 77858  | DYPSLSAT<br>DI               | Homo<br>sapiens     |
| 1 | 1.00 | 1 | 1 | -0.02 | -0.017 | -0.018 | -0.02  | -0.02  | t | 120347 | YRGWKH<br>WVYYTCC<br>PDTPLYD | Mus<br>musculu<br>s |
| 1 | 1.00 | 1 | 1 | 0.01  | 0.01   | 0.01   | 0.009  | 0.013  | t | 105497 | RHDSGYE                      | Mus<br>musculu<br>s |
| 1 | 1.00 | 1 | 1 | 0.01  | 0.01   | 0.01   | 0.01   | 0.01   | t | 115148 | KAVSEKKA<br>KGLGESRK<br>DKK  | Homo<br>sapiens     |
| 1 | 1.00 | 1 | 1 | 0.01  | 0.01   | 0.01   | 0.01   | 0.01   | t | 115148 | KAVSEKKA<br>KGLGESRK<br>DKK  | Homo<br>sapiens     |
| 1 | 1.00 | 1 | 1 | 0.01  | 0.008  | 0.01   | 0.004  | 0.01   | t | 138166 | FHEFWPT                      | Mus<br>musculu<br>s |
| 1 | 1.00 | 1 | 1 | -0.04 | -0.04  | -0.04  | -0.04  | -0.04  | t | 78749  | MPKTRRR<br>PRRSQRKR<br>PPTPW | Homo<br>sapiens     |
| 1 | 1.00 | 1 | 1 | 0.01  | 0.002  | 0.01   | 0.01   | 0.012  | t | 136301 | GALHQEPS<br>SNLF             | Mus<br>musculu<br>s |
| 1 | 1.00 | 1 | 1 | -0.03 | -0.032 | -0.023 | -0.027 | -0.028 | t | 106498 | HAIYPRH                      | Mus<br>musculu<br>s |
| 1 | 1.00 | 1 | 1 | -0.02 | -0.02  | -0.011 | -0.02  | -0.017 | t | 15998  | FGKGGI                       | Homo<br>sapiens     |



|   |      |   |   |       |        |        |        |        |   |        |                              |                                  |
|---|------|---|---|-------|--------|--------|--------|--------|---|--------|------------------------------|----------------------------------|
| 1 | 1.00 | 1 | 1 | 0.02  | 0.022  | 0.02   | 0.02   | 0.022  | t | 130636 | WPQIWFD<br>DEEDV             | Homo<br>sapiens                  |
| 1 | 1.00 | 1 | 1 | 0.03  | 0.026  | 0.044  | 0.029  | 0.03   | t | 19023  | GDLGSIA                      | Oryctola<br>gus<br>cuniculu<br>s |
| 1 | 1.00 | 1 | 1 | -0.02 | -0.018 | -0.016 | -0.017 | -0.019 | t | 79623  | PDCSRLVG<br>ATPERPRL<br>RLVD | Homo<br>sapiens                  |
| 1 | 1.00 | 1 | 1 | 0.05  | 0.05   | 0.042  | 0.05   | 0.052  | t | 102783 | RVTPGKP<br>NDPDNPN<br>NNYIK  | Mus<br>musculu<br>s              |
| 1 | 1.00 | 1 | 1 | 0.01  | 0.01   | 0.011  | 0.004  | 0.008  | t | 53687  | RFDEGDLI<br>AVPTGVA          | Homo<br>sapiens                  |
| 1 | 1.00 | 1 | 1 | -0.02 | -0.02  | -0.015 | -0.014 | -0.017 | t | 115674 | ADARM                        | Homo<br>sapiens                  |
| 1 | 1.00 | 1 | 1 | 0.01  | 0.01   | 0.017  | 0.01   | 0.011  | t | 159166 | TRLEHQM<br>WESVRDE<br>LN     | Mus<br>musculu<br>s              |
| 1 | 1.00 | 1 | 1 | -0.01 | -0.006 | 0.001  | -0.007 | -0.006 | t | 138166 | FHEFWPT                      | Homo<br>sapiens                  |
| 1 | 1.00 | 1 | 1 | 0.03  | 0.032  | 0.035  | 0.033  | 0.032  | t | 60915  | SSAVDSGT<br>ATAPPD           | Homo<br>sapiens                  |
| 1 | 1.00 | 1 | 1 | -0.01 | -0.013 | -0.007 | -0.01  | -0.012 | t | 78843  | TAAQITAG<br>IALHQS<br>NLN    | Canis<br>lupus                   |
| 1 | 1.00 | 1 | 1 | -0.01 | -0.006 | -0.007 | -0.01  | -0.012 | t | 78843  | TAAQITAG<br>IALHQS<br>NLN    | Cavia<br>porcellu<br>s           |
| 1 | 1.00 | 1 | 1 | 0.03  | 0.034  | 0.042  | 0.03   | 0.03   | t | 7480   | DADDPLLR                     | Homo<br>sapiens                  |
| 1 | 1.00 | 1 | 1 | 0     | 0      | 0      | 0      | 0.003  | t | 46054  | NTANPDW                      | Mus<br>musculu<br>s              |
| 1 | 1.00 | 1 | 1 | 0.02  | 0.018  | 0.034  | 0.023  | 0.019  | t | 78380  | FERIDTTLT<br>CETHRIN<br>WTAD | Mus<br>musculu<br>s              |

|   |      |   |   |       |        |        |        |        |   |        |                              |                                  |
|---|------|---|---|-------|--------|--------|--------|--------|---|--------|------------------------------|----------------------------------|
| 1 | 1.00 | 1 | 1 | 0.02  | 0.022  | 0.027  | 0.023  | 0.019  | t | 131261 | SHMPLAN<br>QYQWA             | Homo<br>sapiens                  |
| 1 | 1.00 | 1 | 1 | 0     | 0.012  | 0      | -0.003 | 0      | t | 156916 | LNEKQCTR<br>PCLHLT           | Gallus<br>gallus                 |
| 1 | 1.00 | 1 | 1 | 0     | 0      | 0.009  | 0      | 0      | t | 48085  | PKINRSAS<br>EPSL             | Oryctola<br>gus<br>cuniculu<br>s |
| 1 | 1.00 | 1 | 1 | 0     | -0.002 | 0      | -0.008 | -0.001 | t | 110385 | QLYKTCKQ<br>AGTCPPDII<br>PKV | Mus<br>musculu<br>s              |
| 1 | 1.00 | 1 | 1 | 0     | 0      | 0      | -0.004 | -0.002 | t | 134115 | KENVKDYY<br>QKWMEE<br>QAQS   | Homo<br>sapiens                  |
| 1 | 1.00 | 1 | 1 | 0.01  | 0.01   | 0.01   | 0.01   | 0.017  | t | 23223  | GVYLLPRR<br>GP               | Homo<br>sapiens                  |
| 1 | 1.00 | 1 | 1 | 0.01  | 0.012  | -0.002 | 0.007  | 0.013  | t | 6532   | CKVQRQY<br>DEQQKEQ<br>C      | Homo<br>sapiens                  |
| 1 | 1.00 | 1 | 1 | -0.03 | -0.028 | -0.023 | -0.023 | -0.028 | t | 130868 | GQSYPPRP<br>DTSLHVT          | Homo<br>sapiens                  |
| 1 | 1.00 | 1 | 1 | -0.03 | -0.029 | -0.03  | -0.031 | -0.03  | t | 30150  | KDGDTTN<br>R                 | Equus<br>caballus                |
| 1 | 1.00 | 1 | 1 | -0.08 | -0.082 | -0.085 | -0.077 | -0.08  | t | 95366  | ETDNGPV<br>HVHAEFSG<br>LKAGK | Mus<br>musculu<br>s              |
| 1 | 1.00 | 1 | 1 | 0     | -0.004 | 0      | -0.007 | -0.001 | t | 141777 | VVDSEDL<br>LN                | Oryctola<br>gus<br>cuniculu<br>s |
| 1 | 1.00 | 1 | 1 | 0     | -0.002 | 0      | -0.007 | -0.001 | t | 138886 | NVGGDNV<br>DIHSIVPV<br>GQDPH | Mus<br>musculu<br>s              |
| 1 | 1.00 | 1 | 1 | 0     | -0.002 | 0      | -0.007 | -0.001 | t | 121858 | SKLIKIFQD<br>HPLQKTYN        | Mus<br>musculu<br>s              |
| 1 | 1.00 | 1 | 1 | 0     | -0.004 | 0      | -0.007 | -0.001 | t | 103830 | CHAVKVG<br>NPSC              | Oryctola<br>gus<br>cuniculu<br>s |

|   |      |   |   |       |        |        |        |        |   |        |                              |                                  |
|---|------|---|---|-------|--------|--------|--------|--------|---|--------|------------------------------|----------------------------------|
| 1 | 1.00 | 1 | 1 | 0     | -0.004 | 0      | -0.007 | -0.001 | t | 104586 | NRVAPNV<br>RQ                | Oryctola<br>gus<br>cuniculu<br>s |
| 1 | 1.00 | 1 | 1 | 0.01  | 0.01   | 0.009  | 0.003  | 0.01   | t | 140657 | ATRLNNEV<br>L                | Mus<br>musculu<br>s              |
| 1 | 1.00 | 1 | 1 | -0.04 | -0.04  | -0.057 | -0.044 | -0.04  | t | 112319 | SKIFKLGGR<br>DSRSGSP<br>MARR | Homo<br>sapiens                  |
| 1 | 1.00 | 1 | 1 | -0.02 | -0.02  | -0.014 | -0.02  | -0.02  | t | 159131 | SRLEHQM<br>WEAVKDE<br>LN     | Mus<br>musculu<br>s              |
| 1 | 1.00 | 1 | 1 | 0     | 0      | 0.011  | 0      | 0      | t | 101412 | WIRNNF                       | Mus<br>musculu<br>s              |
| 1 | 1.00 | 1 | 1 | -0.05 | -0.052 | -0.038 | -0.047 | -0.051 | t | 115062 | HNGQACK<br>GKIQALCE          | Mus<br>musculu<br>s              |
| 1 | 1.00 | 1 | 1 | 0.04  | 0.038  | 0.04   | 0.033  | 0.04   | t | 117227 | RGNNIRYF<br>ILPDSLP          | Mus<br>musculu<br>s              |
| 1 | 1.00 | 1 | 1 | 0     | -0.004 | 0.005  | -0.007 | 0      | t | 37657  | LLPHSNLD<br>HI               | Oryctola<br>gus<br>cuniculu<br>s |
| 1 | 1.00 | 1 | 1 | 0     | 0.003  | 0.011  | 0      | 0.001  | t | 10943  | DYQGMLP<br>VCP               | Mus<br>musculu<br>s              |
| 1 | 1.00 | 1 | 1 | 0.01  | 0.015  | 0.015  | 0.009  | 0.01   | t | 100097 | HDSGYEV<br>HHQ               | Homo<br>sapiens(<br>human)       |
| 1 | 1.00 | 1 | 1 | 0.01  | 0.01   | 0.015  | 0.009  | 0.01   | t | 100097 | HDSGYEV<br>HHQ               | Homo<br>sapiens(<br>human)       |
| 1 | 1.00 | 1 | 1 | -0.01 | -0.01  | -0.008 | -0.01  | -0.01  | t | 52090  | QQPFSQP<br>QQP               | Mus<br>musculu<br>s              |
| 1 | 1.00 | 1 | 1 | -0.01 | -0.006 | -0.003 | -0.013 | -0.008 | t | 26844  | IKLPALF                      | Homo<br>sapiens                  |

|   |      |   |   |       |        |        |        |        |   |        |                              |                       |
|---|------|---|---|-------|--------|--------|--------|--------|---|--------|------------------------------|-----------------------|
| 1 | 1.00 | 1 | 1 | 0     | -0.002 | 0      | -0.001 | 0      | t | 102155 | TRQPDRS                      | Mus musculus          |
| 1 | 1.00 | 1 | 1 | -0.01 | -0.01  | -0.009 | -0.02  | -0.012 | t | 107028 | YRKYFGNRP                    | Homo sapiens          |
| 1 | 1.00 | 1 | 1 | 0     | 0      | 0      | 0      | 0.001  | t | 119582 | GLQLIQLIN<br>VDEVNQI         | Homo sapiens          |
| 1 | 1.00 | 1 | 1 | -0.01 | -0.01  | -0.006 | -0.01  | -0.01  | t | 158331 | TGNSWDK<br>VSSVVGQ           | Canis lupus           |
| 1 | 1.00 | 1 | 1 | 0.01  | 0.01   | 0.011  | 0.01   | 0.011  | t | 122083 | DPNIKLVL<br>DDCWATS          | Mus musculus          |
| 1 | 1.00 | 1 | 1 | -0.02 | -0.016 | -0.015 | -0.019 | -0.02  | t | 97407  | KAGLLVSD<br>GGPNLY           | Homo sapiens          |
| 1 | 1.00 | 1 | 1 | 0     | 0.004  | 0      | 0      | 0.001  | t | 113797 | QYGSMGV<br>FFGGLGIG<br>TGSGT | Cavia porcellus       |
| 1 | 1.00 | 1 | 1 | -0.05 | -0.048 | -0.036 | -0.049 | -0.051 | t | 22575  | GSWHINR<br>T                 | Homo sapiens          |
| 1 | 1.00 | 1 | 1 | 0.02  | 0.02   | 0.02   | 0.02   | 0.024  | t | 56862  | SALLED                       | Mus musculus          |
| 1 | 1.00 | 1 | 1 | -0.01 | -0.01  | -0.01  | -0.01  | -0.009 | t | 133372 | SPSPTPTP<br>GPSRRG           | Homo sapiens          |
| 1 | 1.00 | 1 | 1 | -0.03 | -0.032 | -0.031 | -0.029 | -0.029 | t | 11532  | EECQLPSL<br>KIFIAGNSA<br>Y   | Mus musculus          |
| 1 | 1.00 | 1 | 1 | 0.05  | 0.05   | 0.061  | 0.051  | 0.05   | t | 57880  | SFRGSAQG<br>IEGS             | Homo sapiens          |
| 1 | 1.00 | 1 | 1 | -0.05 | -0.05  | -0.05  | -0.05  | -0.05  | t | 111590 | NLIRHVGG<br>GTPRRPG          | Oryctolagus cuniculus |
| 1 | 1.00 | 1 | 1 | -0.03 | -0.034 | -0.021 | -0.03  | -0.03  | t | 67325  | TYEAALKQ<br>YEADL            | Mus musculus          |

|   |      |   |   |       |        |        |        |        |   |        |                              |                                  |
|---|------|---|---|-------|--------|--------|--------|--------|---|--------|------------------------------|----------------------------------|
| 1 | 1.00 | 1 | 1 | -0.03 | -0.034 | -0.021 | -0.03  | -0.03  | t | 67325  | TYEAALKQ<br>YEADL            | Mus<br>musculu<br>s              |
| 1 | 1.00 | 1 | 1 | 0.01  | 0.012  | 0.019  | 0.011  | 0.012  | t | 43145  | NAFNCTFE<br>YISDAFSLD        | Homo<br>sapiens                  |
| 1 | 1.00 | 1 | 1 | -0.01 | -0.008 | -0.01  | -0.01  | -0.011 | t | 117172 | TSSEVATE<br>VPFRLMH<br>PQPED | Rattus<br>norvegic<br>us         |
| 1 | 1.00 | 1 | 1 | -0.01 | -0.01  | 0.002  | -0.01  | -0.01  | t | 116164 | RTPPPSG                      | Gallus<br>gallus                 |
| 1 | 1.00 | 1 | 1 | 0.01  | 0.01   | 0.01   | 0.01   | 0.012  | t | 135560 | IEQAIGRV<br>TPIF             | Oryctola<br>gus<br>cuniculu<br>s |
| 1 | 1.00 | 1 | 1 | 0     | 0      | 0.019  | 0      | -0.003 | t | 41826  | MKHM                         | Mus<br>musculu<br>s              |
| 1 | 1.00 | 1 | 1 | -0.01 | -0.008 | -0.006 | -0.007 | -0.01  | t | 22195  | GRRRYAH<br>PSVRYVCL<br>PPERD | Homo<br>sapiens                  |
| 1 | 1.00 | 1 | 1 | 0     | 0      | -0.005 | 0.003  | 0.006  | t | 69060  | VIPDREVL<br>YR               | Homo<br>sapiens                  |
| 1 | 1.00 | 1 | 1 | 0.02  | 0.022  | 0.02   | 0.019  | 0.021  | t | 59685  | SMIPYGVK<br>RLEDFDAS<br>LKD  | Homo<br>sapiens                  |
| 1 | 1.00 | 1 | 1 | 0.01  | 0.01   | 0.01   | 0.01   | 0.009  | t | 134767 | QDPYVKE<br>AENLKKYF<br>NAG   | Mus<br>musculu<br>s              |
| 1 | 1.00 | 1 | 1 | 0.01  | 0.012  | 0.016  | 0.011  | 0.01   | t | 384    | AAQAALG<br>LLQTASR           | Homo<br>sapiens                  |
| 1 | 1.00 | 1 | 1 | 0.01  | 0.014  | 0.016  | 0.011  | 0.01   | t | 384    | AAQAALG<br>LLQTASR           | Homo<br>sapiens                  |
| 1 | 1.00 | 1 | 1 | 0     | 0      | 0.007  | 0      | 0.001  | t | 32990  | KQHTVTTT<br>TKGE             | Mus<br>musculu<br>s              |
| 1 | 1.00 | 1 | 1 | 0     | 0.003  | 0.011  | 0      | 0.001  | t | 18801  | GATVELLS<br>FLP              | Mus<br>musculu<br>s              |

|   |      |   |   |       |        |        |        |        |   |        |                              |                                  |
|---|------|---|---|-------|--------|--------|--------|--------|---|--------|------------------------------|----------------------------------|
| 1 | 1.00 | 1 | 1 | 0     | -0.003 | 0      | 0      | 0.003  | t | 119468 | ISGKQVTG<br>EVIFQTPLI<br>K   | Oryctola<br>gus<br>cuniculu<br>s |
| 1 | 1.00 | 1 | 1 | -0.06 | -0.052 | -0.06  | -0.06  | -0.058 | t | 125246 | RRQPHVM<br>S                 | Macaca<br>fascicula<br>ris       |
| 1 | 1.00 | 1 | 1 | 0.04  | 0.043  | 0.045  | 0.04   | 0.041  | t | 134654 | DQQNQFQ<br>KAET              | Mus<br>musculu<br>s              |
| 1 | 1.00 | 1 | 1 | -0.02 | -0.02  | -0.02  | -0.024 | -0.02  | t | 131412 | ERGLRYL                      | Homo<br>sapiens                  |
| 1 | 1.00 | 1 | 1 | -0.02 | -0.02  | -0.021 | -0.024 | -0.019 | t | 26404  | IHRFYESGI<br>VFEEYKDY<br>FC  | Homo<br>sapiens                  |
| 1 | 1.00 | 1 | 1 | -0.01 | -0.006 | -0.008 | -0.009 | -0.008 | t | 6964   | CSALYRFN<br>RE               | Homo<br>sapiens                  |
| 1 | 1.00 | 1 | 1 | 0.01  | 0.005  | 0.012  | 0.013  | 0.01   | t | 45532  | NQEAAKE<br>EYEHKQKE<br>LESVC | Canis<br>lupus                   |
| 1 | 1.00 | 1 | 1 | 0.01  | 0.01   | 0.01   | 0.01   | 0.01   | t | 79247  | HCPQDPR<br>SYNAFCI           | Mus<br>musculu<br>s              |
| 1 | 1.00 | 1 | 1 | -0.02 | -0.02  | -0.02  | -0.02  | -0.02  | t | 156857 | DKSKKCEK<br>NCAPMV           | Gallus<br>gallus                 |
| 1 | 1.00 | 1 | 1 | 0     | 0      | 0      | 0      | 0.003  | t | 130590 | RCKTFGKT<br>TLCS             | Mus<br>musculu<br>s              |
| 1 | 1.00 | 1 | 1 | 0.02  | 0.022  | 0.025  | 0.021  | 0.02   | t | 47989  | PISYANGS<br>GPDQRPY<br>CWHY  | Homo<br>sapiens                  |
| 1 | 1.00 | 1 | 1 | -0.04 | -0.036 | -0.037 | -0.041 | -0.04  | t | 33795  | KTNMKH<br>MAGA               | Mus<br>musculu<br>s              |
| 1 | 1.00 | 1 | 1 | 0     | -0.001 | 0.003  | -0.003 | 0.001  | t | 15295  | FAVANGN<br>ELLDLS            | Homo<br>sapiens                  |
| 1 | 1.00 | 1 | 1 | -0.01 | -0.012 | -0.004 | -0.017 | -0.011 | t | 118798 | GAGFGHG<br>SGYGVGH<br>GK     | Mus<br>musculu<br>s              |
| 1 | 1.00 | 1 | 1 | 0     | -0.002 | -0.003 | 0      | 0.002  | t | 132910 | TLIPEFPG<br>ALTAIS           | Trichosu<br>rus<br>vulpecul<br>a |

|   |      |   |   |       |        |        |        |        |   |        |                              |                                  |
|---|------|---|---|-------|--------|--------|--------|--------|---|--------|------------------------------|----------------------------------|
| 1 | 1.00 | 1 | 1 | 0.01  | 0.01   | 0.012  | 0.01   | 0.01   | t | 78380  | FERIDTTLT<br>CETHRIN<br>WTAD | Mus<br>musculu<br>s              |
| 1 | 1.00 | 1 | 1 | -0.01 | -0.01  | -0.005 | -0.017 | -0.012 | t | 118146 | SNLDHILE<br>PSIP             | Homo<br>sapiens                  |
| 1 | 1.00 | 1 | 1 | 0     | 0      | 0.001  | 0      | 0.002  | t | 65327  | TNGLTALF<br>TPGAKQN          | Mus<br>musculu<br>s              |
| 1 | 1.00 | 1 | 1 | 0     | 0      | 0.001  | 0      | 0.002  | t | 65327  | TNGLTALF<br>TPGAKQN          | Mus<br>musculu<br>s              |
| 1 | 1.00 | 1 | 1 | 0     | 0.003  | 0.001  | 0      | 0.002  | t | 65327  | TNGLTALF<br>TPGAKQN          | Mus<br>musculu<br>s              |
| 1 | 1.00 | 1 | 1 | 0.02  | 0.022  | 0.032  | 0.019  | 0.018  | t | 96490  | KQDEEQRL<br>KE               | Homo<br>sapiens                  |
| 1 | 1.00 | 1 | 1 | 0.03  | 0.028  | 0.036  | 0.023  | 0.029  | t | 118826 | GSGKGAGI<br>GLGVGGG<br>VGA   | Mus<br>musculu<br>s              |
| 1 | 1.00 | 1 | 1 | -0.05 | -0.058 | -0.052 | -0.053 | -0.05  | t | 53800  | RFVKTPSK<br>KTKSR            | Bos<br>taurus                    |
| 1 | 1.00 | 1 | 1 | 0.02  | 0.024  | 0.015  | 0.021  | 0.022  | t | 22732  | GTKSLEPC<br>TCGAVD           | Homo<br>sapiens                  |
| 1 | 1.00 | 1 | 1 | 0     | 0      | 0      | 0      | 0.003  | t | 139732 | ERETQKAK<br>G                | Mus<br>musculu<br>s              |
| 1 | 1.00 | 1 | 1 | 0     | 0      | 0      | 0      | 0.003  | t | 137127 | DAASPREE<br>PRAP             | Oryctola<br>gus<br>cuniculu<br>s |
| 1 | 1.00 | 1 | 1 | 0     | 0      | 0      | 0      | 0.003  | t | 120498 | ELMFEEQK<br>DRHGLKR<br>VNKMT | Rattus<br>norvegic<br>us         |
| 1 | 1.00 | 1 | 1 | 0     | 0      | 0      | 0      | 0.003  | t | 120412 | ASKEKQEN<br>KIFADDIDI<br>SD  | Rattus<br>norvegic<br>us         |

|   |      |   |   |   |   |   |   |       |   |        |                               |                          |
|---|------|---|---|---|---|---|---|-------|---|--------|-------------------------------|--------------------------|
| 1 | 1.00 | 1 | 1 | 0 | 0 | 0 | 0 | 0.003 | t | 120629 | IMIKAE EYI<br>LKKPRSEL<br>MFE | Rattus<br>norvegicus     |
| 1 | 1.00 | 1 | 1 | 0 | 0 | 0 | 0 | 0.003 | t | 120694 | KLLLDYTG<br>KI                | Rattus<br>norvegicus     |
| 1 | 1.00 | 1 | 1 | 0 | 0 | 0 | 0 | 0.003 | t | 120172 | RKIPKRPG<br>SVHRTPSR<br>Q     | Oryctolagus<br>cuniculus |
| 1 | 1.00 | 1 | 1 | 0 | 0 | 0 | 0 | 0.003 | t | 121045 | VNKMTSDI<br>DIGTTVDL<br>YKDL  | Rattus<br>norvegicus     |
| 1 | 1.00 | 1 | 1 | 0 | 0 | 0 | 0 | 0.003 | t | 118480 | KWNPDDY<br>GGVK               | Rattus<br>norvegicus     |
| 1 | 1.00 | 1 | 1 | 0 | 0 | 0 | 0 | 0.003 | t | 119052 | WNPADYG<br>GIK                | Rattus<br>norvegicus     |
| 1 | 1.00 | 1 | 1 | 0 | 0 | 0 | 0 | 0.003 | t | 100777 | DIDFLIEIE<br>RLGQDL           | Oryctolagus<br>cuniculus |
| 1 | 1.00 | 1 | 1 | 0 | 0 | 0 | 0 | 0.003 | t | 101219 | SALLVREE<br>GLMQNC            | Oryctolagus<br>cuniculus |
| 1 | 1.00 | 1 | 1 | 0 | 0 | 0 | 0 | 0.003 | t | 100378 | PGSGFWS<br>FGSEDGSG<br>DSEN   | Mus<br>musculus          |
| 1 | 1.00 | 1 | 1 | 0 | 0 | 0 | 0 | 0.003 | t | 63604  | TEYYLNHG<br>KWPEN             | Oryctolagus<br>cuniculus |
| 1 | 1.00 | 1 | 1 | 0 | 0 | 0 | 0 | 0.003 | t | 41610  | MGQHPAK<br>SMDVRR             | Oryctolagus<br>cuniculus |
| 1 | 1.00 | 1 | 1 | 0 | 0 | 0 | 0 | 0.003 | t | 42885  | MTTAQGT<br>SMYPSC             | Oryctolagus<br>cuniculus |
| 1 | 1.00 | 1 | 1 | 0 | 0 | 0 | 0 | 0.003 | t | 48912  | PPSDIKGK<br>YVKEVEVK          | Oryctolagus<br>cuniculus |



|   |      |   |   |       |        |        |        |        |   |        |                              |                                  |
|---|------|---|---|-------|--------|--------|--------|--------|---|--------|------------------------------|----------------------------------|
| 1 | 1.00 | 1 | 1 | 0     | 0      | 0      | 0      | 0.003  | t | 3158   | AMMIARF<br>KMFPEVKE<br>KGMAA | Oryctola<br>gus<br>cuniculu<br>s |
| 1 | 1.00 | 1 | 1 | 0     | 0      | 0.009  | -0.001 | 0.003  | t | 134909 | EEKLVF                       | Mus<br>musculu<br>s              |
| 1 | 1.00 | 1 | 1 | 0     | -0.002 | 0      | -0.001 | 0.002  | t | 37660  | LLPHSNLD<br>HILEPSIPW<br>KSK | Mus<br>musculu<br>s              |
| 1 | 1.00 | 1 | 1 | 0     | -0.002 | 0      | -0.001 | 0.002  | t | 37660  | LLPHSNLD<br>HILEPSIPW<br>KSK | Mus<br>musculu<br>s              |
| 1 | 1.00 | 1 | 1 | -0.03 | -0.03  | -0.03  | -0.03  | -0.03  | t | 100583 | TVQTRHV<br>VQRRSRS           | Homo<br>sapiens                  |
| 1 | 1.00 | 1 | 1 | -0.03 | -0.03  | -0.03  | -0.03  | -0.031 | t | 115514 | TLEDSPEVI<br>ESPPEINTV<br>QV | Homo<br>sapiens                  |
| 1 | 1.00 | 1 | 1 | -0.03 | -0.019 | -0.025 | -0.03  | -0.03  | t | 134128 | LASAHRPQ<br>GPAD             | Rattus<br>rattus                 |
| 1 | 1.00 | 1 | 1 | -0.03 | -0.03  | -0.03  | -0.034 | -0.03  | t | 135952 | LLLLSSRPG<br>GCS             | Homo<br>sapiens                  |
| 1 | 1.00 | 1 | 1 | 0.03  | 0.027  | 0.038  | 0.031  | 0.032  | t | 49287  | PSAAAKEE<br>PEESEDDE<br>FGMG | Canis<br>lupus                   |
| 1 | 1.00 | 1 | 1 | -0.01 | -0.01  | -0.01  | -0.014 | -0.01  | t | 135710 | LAKEQKSK<br>QNIGALKQ<br>ELAK | Homo<br>sapiens                  |
| 1 | 1.00 | 1 | 1 | -0.01 | -0.008 | -0.007 | -0.013 | -0.007 | t | 65355  | TNKWEDK                      | Homo<br>sapiens                  |
| 1 | 1.00 | 1 | 1 | -0.01 | -0.012 | -0.012 | -0.011 | -0.01  | t | 4968   | ATGFKQSS<br>KALQRPVA<br>S    | Mus<br>musculu<br>s              |
| 1 | 1.00 | 1 | 1 | 0.01  | 0.013  | 0.015  | 0.01   | 0.01   | t | 97480  | LTEVETPIR<br>N               | Mus<br>musculu<br>s              |

|   |      |   |   |       |        |        |        |        |   |        |                              |                                  |
|---|------|---|---|-------|--------|--------|--------|--------|---|--------|------------------------------|----------------------------------|
| 1 | 1.00 | 1 | 1 | 0.03  | 0.026  | 0.028  | 0.031  | 0.032  | t | 10067  | DRYFTYEE<br>PNDG             | Bos<br>taurus                    |
| 1 | 1.00 | 1 | 1 | 0.02  | 0.02   | 0.021  | 0.02   | 0.02   | t | 65520  | TPCSAEEE<br>KLPISP           | Homo<br>sapiens                  |
| 1 | 1.00 | 1 | 1 | 0     | 0.002  | 0.007  | 0.003  | 0.002  | t | 74871  | YLPVGGLR<br>RIGG             | Homo<br>sapiens                  |
| 1 | 1.00 | 1 | 1 | 0     | -0.004 | 0      | -0.007 | -0.002 | t | 134117 | KHKENVK<br>DYYQKW<br>MEEQA   | Oryctola<br>gus<br>cuniculu<br>s |
| 1 | 1.00 | 1 | 1 | -0.01 | -0.014 | 0.005  | -0.01  | -0.01  | t | 41419  | MEPDTAP<br>GLPWALQ<br>G      | Bos<br>taurus                    |
| 1 | 1.00 | 1 | 1 | -0.01 | -0.014 | 0.005  | -0.01  | -0.01  | t | 41419  | MEPDTAP<br>GLPWALQ<br>G      | Bos<br>taurus                    |
| 1 | 1.00 | 1 | 1 | 0.01  | 0.01   | 0.011  | 0.003  | 0.01   | t | 125428 | GSDDYVW<br>LSRLDLAP<br>NYRQ  | Homo<br>sapiens                  |
| 1 | 1.00 | 1 | 1 | 0.02  | 0.022  | 0.036  | 0.02   | 0.02   | t | 24973  | HTSLGHED<br>T                | Rattus<br>norvegic<br>us         |
| 1 | 1.00 | 1 | 1 | 0     | 0      | 0.01   | 0      | 0      | t | 21918  | GQMRPD<br>NSKP               | Mus<br>musculu<br>s              |
| 1 | 1.00 | 1 | 1 | -0.02 | -0.024 | -0.021 | -0.017 | -0.021 | t | 12958  | ELAWGIAS<br>DGGALKH<br>GFKTT | Oryctola<br>gus<br>cuniculu<br>s |
| 1 | 1.00 | 1 | 1 | 0.01  | 0.013  | 0.011  | 0.01   | 0.013  | t | 9524   | DNPASTT<br>NKDK              | Mus<br>musculu<br>s              |
| 1 | 1.00 | 1 | 1 | 0     | 0.003  | 0      | 0      | 0      | t | 99661  | SERRAQSV                     | Mus<br>musculu<br>s              |
| 1 | 1.00 | 1 | 1 | 0     | 0      | 0      | 0      | 0.003  | t | 19728  | GGFSSDPG<br>FLLRPRG          | Mus<br>musculu<br>s              |

|   |      |   |   |       |        |        |        |        |   |        |                              |                       |
|---|------|---|---|-------|--------|--------|--------|--------|---|--------|------------------------------|-----------------------|
| 1 | 1.00 | 1 | 1 | -0.03 | -0.03  | -0.028 | -0.026 | -0.03  | t | 48124  | PKPQRKTK<br>RNTNRRP          | Homo sapiens          |
| 1 | 1.00 | 1 | 1 | 0     | 0.004  | 0.005  | 0.003  | 0      | t | 133841 | GRGNGDP<br>GGGMEKD<br>G      | Homo sapiens          |
| 1 | 1.00 | 1 | 1 | 0.03  | 0.027  | 0.032  | 0.03   | 0.03   | t | 107267 | WYFDVW<br>GAGTTVT<br>VSS     | Oryctolagus cuniculus |
| 1 | 1.00 | 1 | 1 | 0.02  | 0.018  | 0.021  | 0.019  | 0.02   | t | 63053  | TAYQYATV<br>APPQ             | Mus musculus          |
| 1 | 1.00 | 1 | 1 | 0     | 0      | 0.003  | 0.003  | 0.002  | t | 115628 | LPCRISPGK<br>NAT             | Homo sapiens          |
| 1 | 1.00 | 1 | 1 | -0.01 | -0.01  | -0.01  | -0.012 | -0.01  | t | 32599  | KNQVEGE<br>VQIVSTAT<br>QTFLA | Homo sapiens          |
| 1 | 1.00 | 1 | 1 | 0     | 0.002  | 0.005  | 0.001  | 0.002  | t | 46488  | NVSVSPSPS<br>STPLLY          | Homo sapiens          |
| 1 | 1.00 | 1 | 1 | 0     | 0.004  | 0.02   | 0.007  | 0      | t | 127981 | FRRAVLM<br>GGSALSPA<br>AVISH | Homo sapiens          |
| 1 | 1.00 | 1 | 1 | 0.01  | 0.008  | 0.011  | 0.009  | 0.011  | t | 62489  | SWPLYDA<br>SGLG              | Mus musculus          |
| 1 | 1.00 | 1 | 1 | 0     | -0.002 | -0.006 | -0.007 | 0.002  | t | 122924 | TQPRREK                      | Rattus norvegicus     |
| 1 | 1.00 | 1 | 1 | 0     | -0.002 | 0      | -0.001 | 0.002  | t | 16123  | FHLPYNHN<br>WFAL             | Mus musculus          |
| 1 | 1.00 | 1 | 1 | 0.02  | 0.016  | 0.025  | 0.023  | 0.02   | t | 59571  | SLVTCPAQ<br>GSLQSSPS<br>MEIK | Oryctolagus cuniculus |
| 1 | 1.00 | 1 | 1 | -0.02 | -0.018 | -0.017 | -0.023 | -0.018 | t | 40150  | LTRGSPVT<br>GPFA             | Homo sapiens          |
| 1 | 1.00 | 1 | 1 | -0.02 | -0.02  | -0.02  | -0.02  | -0.02  | t | 16957  | FLVNAWK<br>SKKCP             | Homo sapiens          |
| 1 | 1.00 | 1 | 1 | 0.02  | 0.018  | 0.02   | 0.013  | 0.02   | t | 103887 | EQWSLPW                      | Mus musculus          |

|   |      |   |   |       |        |        |        |        |   |        |                              |                                  |
|---|------|---|---|-------|--------|--------|--------|--------|---|--------|------------------------------|----------------------------------|
| 1 | 1.00 | 1 | 1 | -0.01 | -0.008 | -0.01  | -0.009 | -0.011 | t | 9940   | DRAAGQP<br>AGNGAGG<br>QAAGGN | Homo<br>sapiens                  |
| 1 | 1.00 | 1 | 1 | -0.01 | -0.008 | -0.01  | -0.009 | -0.011 | t | 9940   | DRAAGQP<br>AGNGAGG<br>QAAGGN | Homo<br>sapiens                  |
| 1 | 1.00 | 1 | 1 | 0.01  | 0.01   | 0.01   | 0.01   | 0.009  | t | 115373 | LSSSEESIT<br>RINKKIEKF<br>QS | Homo<br>sapiens                  |
| 1 | 1.00 | 1 | 1 | -0.01 | -0.01  | -0.014 | -0.007 | -0.01  | t | 47636  | PGEGPSTG<br>PRGQGDG<br>GRRKK | Homo<br>sapiens                  |
| 1 | 1.00 | 1 | 1 | 0     | 0      | 0.012  | 0      | 0      | t | 63791  | TGATEI                       | Homo<br>sapiens                  |
| 1 | 1.00 | 1 | 1 | -0.04 | -0.036 | -0.031 | -0.039 | -0.04  | t | 36025  | LFYHHKFN<br>S                | Homo<br>sapiens                  |
| 1 | 1.00 | 1 | 1 | -0.01 | -0.012 | -0.003 | -0.007 | -0.007 | t | 141581 | YVYRWVE<br>AECVA             | Mus<br>musculu<br>s              |
| 1 | 1.00 | 1 | 1 | -0.01 | -0.012 | -0.011 | -0.013 | -0.007 | t | 59982  | SPAPERRG<br>YSGYDVPD<br>Y    | Mus<br>musculu<br>s              |
| 1 | 1.00 | 1 | 1 | -0.02 | -0.022 | -0.009 | -0.017 | -0.02  | t | 158939 | KTQNQGP<br>WDENGIV<br>LD     | Mus<br>musculu<br>s              |
| 1 | 1.00 | 1 | 1 | 0.01  | 0.008  | 0.015  | 0.01   | 0.012  | t | 57257  | SDPDTSFL<br>EGLDLGVD<br>VRTY | Oryctola<br>gus<br>cuniculu<br>s |
| 1 | 1.00 | 1 | 1 | -0.03 | -0.028 | -0.029 | -0.029 | -0.028 | t | 10167  | DSLNTGW<br>LAGLFYHH<br>KFNSS | Homo<br>sapiens                  |
| 1 | 1.00 | 1 | 1 | -0.01 | -0.007 | -0.007 | -0.01  | -0.008 | t | 78636  | EKKIAKME<br>KASSVFNV<br>VN   | Mus<br>musculu<br>s              |
| 1 | 1.00 | 1 | 1 | -0.01 | -0.01  | -0.005 | -0.01  | -0.009 | t | 159170 | TTASGKLV<br>TDWCCRS<br>C     | Mus<br>musculu<br>s              |
| 1 | 1.00 | 1 | 1 | 0.08  | 0.084  | 0.09   | 0.081  | 0.082  | t | 23976  | HHAERNNG<br>SQSTTSQS<br>N    | Homo<br>sapiens                  |

|   |      |   |   |       |        |        |        |        |   |        |                              |                                  |
|---|------|---|---|-------|--------|--------|--------|--------|---|--------|------------------------------|----------------------------------|
| 1 | 1.00 | 1 | 1 | -0.04 | -0.039 | -0.03  | -0.04  | -0.042 | t | 59876  | SNPPGMA<br>LSAPP             | Mus<br>musculu<br>s              |
| 1 | 1.00 | 1 | 1 | 0.01  | 0.01   | 0.009  | 0.013  | 0.012  | t | 67330  | TYEIDLTNK<br>NAAKLRG<br>D    | Homo<br>sapiens                  |
| 1 | 1.00 | 1 | 1 | -0.01 | -0.008 | -0.002 | -0.009 | -0.01  | t | 98438  | SAVGKTVK<br>VY               | Homo<br>sapiens                  |
| 1 | 1.00 | 1 | 1 | 0     | 0      | 0      | 0      | 0      | t | 117993 | LNYLDPRIT<br>VAWCKK<br>WGVPI | Homo<br>sapiens                  |
| 1 | 1.00 | 1 | 1 | 0     | 0.002  | 0.019  | 0.003  | 0      | t | 75452  | YQADCLM<br>NRCPTAE           | Homo<br>sapiens                  |
| 1 | 1.00 | 1 | 1 | -0.05 | -0.05  | -0.05  | -0.05  | -0.05  | t | 157127 | CFNLFLNS<br>QEKHY            | Homo<br>sapiens                  |
| 1 | 1.00 | 1 | 1 | -0.05 | -0.05  | -0.05  | -0.05  | -0.05  | t | 157127 | CFNLFLNS<br>QEKHY            | Homo<br>sapiens                  |
| 1 | 1.00 | 1 | 1 | -0.01 | -0.012 | -0.01  | -0.011 | -0.01  | t | 58132  | SGLVGLFT<br>PGAKQNI          | Mus<br>musculu<br>s              |
| 1 | 1.00 | 1 | 1 | -0.03 | -0.034 | -0.034 | -0.031 | -0.03  | t | 42345  | MPVHYKV<br>LKALPRAD<br>IHFPV | Oryctola<br>gus<br>cuniculu<br>s |
| 1 | 1.00 | 1 | 1 | -0.02 | -0.02  | -0.012 | -0.023 | -0.02  | t | 59117  | SLGAAQV<br>VLPRT             | Homo<br>sapiens                  |
| 1 | 1.00 | 1 | 1 | -0.01 | -0.01  | -0.013 | -0.01  | -0.008 | t | 124068 | ELMALHT<br>GQSLEQIE<br>R     | Oryctola<br>gus<br>cuniculu<br>s |
| 1 | 1.00 | 1 | 1 | -0.01 | -0.006 | -0.014 | -0.013 | -0.007 | t | 125035 | EQSLITVE<br>GDKASM           | Homo<br>sapiens                  |
| 1 | 1.00 | 1 | 1 | -0.04 | -0.037 | -0.035 | -0.04  | -0.041 | t | 7492   | DAEFRHDS<br>GYEVHHQ<br>KL    | Mus<br>musculu<br>s              |
| 1 | 1.00 | 1 | 1 | -0.04 | -0.037 | -0.035 | -0.04  | -0.041 | t | 7492   | DAEFRHDS<br>GYEVHHQ<br>KL    | Mus<br>musculu<br>s              |
| 1 | 1.00 | 1 | 1 | 0.01  | 0.006  | 0.01   | 0.003  | 0.01   | t | 134714 | KTGKRKRS<br>QMLFQ            | Oryctola<br>gus<br>cuniculu<br>s |

|   |      |   |   |       |        |        |        |        |   |        |                              |                                  |
|---|------|---|---|-------|--------|--------|--------|--------|---|--------|------------------------------|----------------------------------|
| 1 | 1.00 | 1 | 1 | 0.01  | 0.01   | 0.02   | 0.014  | 0.01   | t | 67220  | TVYDPLQP<br>ELDSFKEEL        | Homo<br>sapiens                  |
| 1 | 1.00 | 1 | 1 | -0.04 | -0.038 | -0.045 | -0.041 | -0.038 | t | 142340 | YRPNWTV<br>PEFTLDIFN<br>ATYL | Felis<br>catus                   |
| 1 | 1.00 | 1 | 1 | -0.05 | -0.052 | -0.037 | -0.051 | -0.051 | t | 138893 | RHDSGYEV<br>H                | Mus<br>musculu<br>s              |
| 1 | 1.00 | 1 | 1 | 0.01  | 0.008  | 0.012  | 0.013  | 0.01   | t | 38323  | LNQTARAF<br>PDCAICWE<br>PSPF | Mus<br>musculu<br>s              |
| 1 | 1.00 | 1 | 1 | 0     | 0.001  | 0.005  | 0      | 0      | t | 55757  | RRVASFLIR<br>GSAQKI          | Mus<br>musculu<br>s              |
| 1 | 1.00 | 1 | 1 | -0.01 | -0.012 | -0.01  | -0.017 | -0.01  | t | 134784 | RKRSQML<br>FRGRRASQ          | Mus<br>musculu<br>s              |
| 1 | 1.00 | 1 | 1 | 0     | 0      | 0.002  | 0      | 0.002  | t | 99950  | DNEQPTT<br>RAQKLFA           | Oryctola<br>gus<br>cuniculu<br>s |
| 1 | 1.00 | 1 | 1 | 0.03  | 0.03   | 0.03   | 0.03   | 0.029  | t | 115192 | CKEVVRN<br>ANEEEYSI<br>GSSSE | Homo<br>sapiens                  |
| 1 | 1.00 | 1 | 1 | -0.03 | -0.03  | -0.03  | -0.03  | -0.031 | t | 115185 | AQKKIIAEK<br>TKIPAVFKI<br>DA | Homo<br>sapiens                  |
| 1 | 1.00 | 1 | 1 | 0     | 0      | 0      | 0      | 0.003  | t | 45317  | NPDKAREL<br>LNK              | Oryctola<br>gus<br>cuniculu<br>s |
| 1 | 1.00 | 1 | 1 | 0     | -0.003 | 0      | 0      | 0.003  | t | 56290  | RVFPRGTV<br>ENPDKARE<br>LLNK | Oryctola<br>gus<br>cuniculu<br>s |
| 1 | 1.00 | 1 | 1 | 0     | 0      | 0      | 0      | 0.003  | t | 56290  | RVFPRGTV<br>ENPDKARE<br>LLNK | Oryctola<br>gus<br>cuniculu<br>s |
| 1 | 1.00 | 1 | 1 | 0     | 0      | 0      | 0      | 0.003  | t | 8841   | DKARELLN<br>KYDVENS<br>MLQAN | Oryctola<br>gus<br>cuniculu<br>s |
| 1 | 1.00 | 1 | 1 | -0.05 | -0.05  | -0.05  | -0.054 | -0.05  | t | 115598 | ATGMEVG<br>WYRPP             | Homo<br>sapiens                  |

|   |      |   |   |       |        |        |        |        |   |        |                              |                                  |
|---|------|---|---|-------|--------|--------|--------|--------|---|--------|------------------------------|----------------------------------|
| 1 | 1.00 | 1 | 1 | -0.03 | -0.028 | -0.03  | -0.031 | -0.03  | t | 149436 | QQHHHH<br>QEQK               | Homo<br>sapiens                  |
| 1 | 1.00 | 1 | 1 | -0.02 | -0.022 | -0.008 | -0.017 | -0.018 | t | 104906 | MVGGVVI<br>A                 | Mus<br>musculu<br>s              |
| 1 | 1.00 | 1 | 1 | -0.02 | -0.022 | -0.008 | -0.017 | -0.018 | t | 104906 | MVGGVVI<br>A                 | Mus<br>musculu<br>s              |
| 1 | 1.00 | 1 | 1 | -0.01 | -0.003 | -0.016 | -0.011 | -0.009 | t | 43525  | NDRVYINV<br>VVKNKEYR<br>LAT  | Gallus<br>gallus                 |
| 1 | 1.00 | 1 | 1 | 0.01  | 0.014  | 0.017  | 0.007  | 0.01   | t | 106787 | RRQIEAGL<br>NE               | Homo<br>sapiens                  |
| 1 | 1.00 | 1 | 1 | 0     | 0.004  | 0      | 0.001  | 0.003  | t | 56657  | RYSRNAV<br>NV                | Mus<br>musculu<br>s              |
| 1 | 1.00 | 1 | 1 | -0.06 | -0.056 | -0.051 | -0.057 | -0.058 | t | 49400  | PSHYVPRI<br>Y                | Homo<br>sapiens                  |
| 1 | 1.00 | 1 | 1 | 0.02  | 0.019  | 0.02   | 0.021  | 0.022  | t | 3069   | AMDAWN<br>QPSGISSP<br>PSPSLN | Homo<br>sapiens                  |
| 1 | 1.00 | 1 | 1 | -0.01 | -0.01  | -0.01  | -0.01  | -0.009 | t | 47257  | PEDPEDSA<br>LLEDVPG          | Mus<br>musculu<br>s              |
| 1 | 1.00 | 1 | 1 | 0     | -0.003 | 0      | 0      | 0      | t | 13975  | EREDERTL<br>TKEYEDIVL<br>K   | Oryctola<br>gus<br>cuniculu<br>s |
| 1 | 1.00 | 1 | 1 | 0     | 0      | 0      | 0      | 0      | t | 13975  | EREDERTL<br>TKEYEDIVL<br>K   | Mus<br>musculu<br>s              |
| 1 | 1.00 | 1 | 1 | 0.03  | 0.03   | 0.037  | 0.03   | 0.032  | t | 95036  | RTCMTTA<br>QGTSMP<br>SC      | Mus<br>musculu<br>s              |
| 1 | 1.00 | 1 | 1 | 0.03  | 0.03   | 0.037  | 0.03   | 0.032  | t | 95036  | RTCMTTA<br>QGTSMP<br>SC      | Mus<br>musculu<br>s              |

|   |      |   |   |       |        |        |        |        |   |        |                        |                       |
|---|------|---|---|-------|--------|--------|--------|--------|---|--------|------------------------|-----------------------|
| 1 | 1.00 | 1 | 1 | 0.02  | 0.02   | 0.036  | 0.02   | 0.02   | t | 139338 | VEDILY                 | Mus musculus          |
| 1 | 1.00 | 1 | 1 | -0.02 | -0.023 | -0.02  | -0.02  | -0.019 | t | 119939 | IFAQRLMR YW            | Oryctolagus cuniculus |
| 1 | 1.00 | 1 | 1 | -0.02 | -0.02  | -0.02  | -0.02  | -0.019 | t | 119939 | IFAQRLMR YW            | Mus musculus          |
| 1 | 1.00 | 1 | 1 | -0.01 | -0.012 | -0.001 | -0.011 | -0.012 | t | 64010  | TGYRYDSR TGFFATN       | Mus musculus          |
| 1 | 1.00 | 1 | 1 | -0.03 | -0.032 | -0.018 | -0.027 | -0.029 | t | 17683  | FSDALRF                | Mus musculus          |
| 1 | 1.00 | 1 | 1 | 0.02  | 0.02   | 0.02   | 0.02   | 0.019  | t | 115386 | NANEEEYS IGSSEESA EVA  | Homo sapiens          |
| 1 | 1.00 | 1 | 1 | 0     | -0.002 | 0.013  | 0      | 0      | t | 78568  | YATNPQT QLS            | Mus musculus          |
| 1 | 1.00 | 1 | 1 | 0     | -0.002 | 0.013  | 0      | 0      | t | 78568  | YATNPQT QLS            | Mus musculus          |
| 1 | 1.00 | 1 | 1 | -0.01 | -0.01  | -0.011 | -0.004 | -0.008 | t | 114941 | RQDENYEE AIVHLKVA ALGS | Homo sapiens          |
| 1 | 1.00 | 1 | 1 | 0.01  | 0.01   | 0.01   | 0.01   | 0.01   | t | 108498 | KIHAREIFD SRGNPTV      | Homo sapiens          |
| 1 | 1.00 | 1 | 1 | -0.02 | -0.018 | -0.015 | -0.021 | -0.02  | t | 107087 | ARGLTGRP GDA           | Homo sapiens          |
| 1 | 1.00 | 1 | 1 | 0     | -0.003 | 0      | -0.001 | 0.002  | t | 40110  | LTPLEELY               | Oryctolagus cuniculus |
| 1 | 1.00 | 1 | 1 | -0.02 | -0.017 | -0.007 | -0.02  | -0.018 | t | 110390 | QWGRL                  | Mus musculus          |
| 1 | 1.00 | 1 | 1 | -0.02 | -0.02  | -0.03  | -0.02  | -0.019 | t | 95127  | PDITFTVT MRRRTLYY GLNL | Rattus norvegicus     |



|   |      |   |   |       |        |        |        |        |   |        |                              |                                  |
|---|------|---|---|-------|--------|--------|--------|--------|---|--------|------------------------------|----------------------------------|
| 1 | 1.00 | 1 | 1 | 0.01  | 0.006  | 0.01   | 0.003  | 0.01   | t | 131579 | PDIITGFSS                    | Oryctola<br>gus<br>cuniculu<br>s |
| 1 | 1.00 | 1 | 1 | 0.02  | 0.02   | 0.02   | 0.011  | 0.02   | t | 135645 | CSCTEGYR                     | Homo<br>sapiens                  |
| 1 | 1.00 | 1 | 1 | -0.04 | -0.036 | -0.037 | -0.041 | -0.04  | t | 39914  | LTGHRMA<br>WMMMM<br>NWS      | Homo<br>sapiens                  |
| 1 | 1.00 | 1 | 1 | -0.03 | -0.032 | -0.03  | -0.031 | -0.029 | t | 76185  | YTTGGAQS<br>HTLR             | Mus<br>musculu<br>s              |
| 1 | 1.00 | 1 | 1 | 0     | 0.002  | 0.006  | 0.003  | 0.001  | t | 21085  | GLQPRAD<br>MAAPPTL<br>PQ     | Homo<br>sapiens                  |
| 1 | 1.00 | 1 | 1 | 0     | 0.004  | 0      | 0.003  | 0.004  | t | 23973  | HGYEKPEE<br>LWTAKSR<br>VHPL  | Homo<br>sapiens                  |
| 1 | 1.00 | 1 | 1 | -0.06 | -0.065 | -0.046 | -0.057 | -0.06  | t | 56657  | RYSRNAV<br>NV                | Bos<br>taurus                    |
| 1 | 1.00 | 1 | 1 | 0.03  | 0.028  | 0.045  | 0.029  | 0.03   | t | 24209  | HLGDDMD<br>PEL               | Mus<br>musculu<br>s              |
| 1 | 1.00 | 1 | 1 | 0.01  | 0.007  | 0.021  | 0.01   | 0.008  | t | 111784 | SLASNPSA<br>AGDWIRR          | Oryctola<br>gus<br>cuniculu<br>s |
| 1 | 1.00 | 1 | 1 | -0.01 | -0.012 | -0.015 | -0.017 | -0.012 | t | 129732 | RERRGIAL<br>DGKI             | Mus<br>musculu<br>s              |
| 1 | 1.00 | 1 | 1 | 0.05  | 0.05   | 0.05   | 0.05   | 0.05   | t | 108937 | EWGSNDG                      | Homo<br>sapiens                  |
| 1 | 1.00 | 1 | 1 | 0.01  | 0.01   | 0.013  | 0.01   | 0.01   | t | 16183  | FIEDLLFNK<br>VTLADAGF        | Homo<br>sapiens                  |
| 1 | 1.00 | 1 | 1 | -0.04 | -0.039 | -0.029 | -0.043 | -0.04  | t | 124603 | QHWSYPL<br>RPG               | Canis<br>familiari<br>s          |
| 1 | 1.00 | 1 | 1 | -0.04 | -0.042 | -0.029 | -0.043 | -0.04  | t | 124603 | QHWSYPL<br>RPG               | Rattus<br>norvegic<br>us         |
| 1 | 1.00 | 1 | 1 | 0     | 0      | 0      | -0.003 | 0.002  | t | 25308  | IAHQFKEKI<br>LGLLQRAT<br>QQQ | Homo<br>sapiens                  |

|   |      |   |   |       |        |        |        |        |   |        |                              |                                  |
|---|------|---|---|-------|--------|--------|--------|--------|---|--------|------------------------------|----------------------------------|
| 1 | 1.00 | 1 | 1 | -0.02 | -0.018 | 0      | -0.017 | -0.02  | t | 141780 | WSKAHPP<br>E                 | Homo<br>sapiens                  |
| 1 | 1.00 | 1 | 1 | 0     | 0      | 0      | 0      | 0      | t | 79364  | RCVDSFVI<br>NNHMCD           | Mus<br>musculu<br>s              |
| 1 | 1.00 | 1 | 1 | 0.03  | 0.026  | 0.045  | 0.033  | 0.03   | t | 111344 | GIEQNFG<br>L FYPNKQP         | Oryctola<br>gus<br>cuniculu<br>s |
| 1 | 1.00 | 1 | 1 | -0.04 | -0.042 | -0.033 | -0.041 | -0.039 | t | 47805  | PHDGNRA<br>FPRTKVT<br>M      | Mus<br>musculu<br>s              |
| 1 | 1.00 | 1 | 1 | -0.06 | -0.062 | -0.056 | -0.057 | -0.058 | t | 114950 | SLSRFSWG<br>AE               | Rattus<br>norvegic<br>us         |
| 1 | 1.00 | 1 | 1 | 0     | 0      | 0      | 0      | 0      | t | 95147  | SGHPSEGD<br>PDLAKILEE<br>VRY | Rattus<br>norvegic<br>us         |
| 1 | 1.00 | 1 | 1 | 0.02  | 0.02   | 0.02   | 0.02   | 0.022  | t | 144673 | GTFCGGEE<br>CMRG             | Mus<br>musculu<br>s              |
| 1 | 1.00 | 1 | 1 | 0     | 0      | 0.011  | 0      | 0      | t | 94451  | CCNPACG                      | Capra<br>hircus                  |
| 1 | 1.00 | 1 | 1 | 0     | -0.007 | 0.011  | 0      | 0      | t | 94451  | CCNPACG                      | Oryctola<br>gus<br>cuniculu<br>s |
| 1 | 1.00 | 1 | 1 | 0.02  | 0.02   | 0.02   | 0.018  | 0.02   | t | 135895 | ALLRCIPAL<br>DSLTPANE<br>DC  | Homo<br>sapiens                  |
| 1 | 1.00 | 1 | 1 | 0.01  | 0.014  | 0.002  | 0.017  | 0.02   | t | 124027 | DPPYVCLP<br>GA               | Homo<br>sapiens                  |
| 1 | 1.00 | 1 | 1 | 0     | -0.002 | 0      | -0.007 | -0.001 | t | 65050  | TLRVYK                       | Mus<br>musculu<br>s              |
| 1 | 1.00 | 1 | 1 | -0.04 | -0.04  | -0.032 | -0.04  | -0.04  | t | 82705  | GKIRAV                       | Homo<br>sapiens                  |
| 1 | 1.00 | 1 | 1 | -0.02 | -0.02  | -0.02  | -0.027 | -0.017 | t | 119457 | GLELPE                       | Homo<br>sapiens                  |
| 1 | 1.00 | 1 | 1 | 0     | 0.003  | 0.006  | 0      | 0.002  | t | 63735  | TFQVEVPG<br>SQ               | Mus<br>musculu<br>s              |

|   |      |   |   |       |        |        |        |        |   |        |                              |                       |
|---|------|---|---|-------|--------|--------|--------|--------|---|--------|------------------------------|-----------------------|
| 1 | 1.00 | 1 | 1 | 0.02  | 0.022  | 0.016  | 0.017  | 0.02   | t | 50172  | PYSPSQDP<br>YSPSQDP          | Homo sapiens          |
| 1 | 1.00 | 1 | 1 | 0.02  | 0.02   | 0.02   | 0.02   | 0.019  | t | 115373 | LSSSEESIT<br>RINKKIEKF<br>QS | Homo sapiens          |
| 1 | 1.00 | 1 | 1 | -0.01 | -0.01  | 0      | -0.008 | -0.009 | t | 70002  | VMPECLSR<br>LCDFDM           | Homo sapiens          |
| 1 | 1.00 | 1 | 1 | 0.02  | 0.018  | 0.018  | 0.013  | 0.021  | t | 119488 | LGIWTYDG<br>TKVSISPES        | Mus musculus          |
| 1 | 1.00 | 1 | 1 | 0.01  | 0.01   | 0.01   | -0.001 | 0.01   | t | 118284 | DAYVLLSE<br>KKISS            | Homo sapiens          |
| 1 | 1.00 | 1 | 1 | 0     | 0      | 0      | -0.006 | 0      | t | 130837 | FTRHSQTT<br>ANPSCPE          | Rattus norvegicus     |
| 1 | 1.00 | 1 | 1 | 0     | 0      | 0.012  | 0      | 0      | t | 43176  | NAINPRLT                     | Homo sapiens          |
| 1 | 1.00 | 1 | 1 | -0.01 | -0.01  | -0.012 | -0.011 | -0.008 | t | 153287 | RQSGRQP<br>TPLSPPLR          | Mus musculus          |
| 1 | 1.00 | 1 | 1 | -0.03 | -0.026 | -0.03  | -0.033 | -0.031 | t | 141775 | VKELAFPG<br>SSREVDR          | Homo sapiens          |
| 1 | 1.00 | 1 | 1 | 0.01  | 0.01   | 0.019  | 0.01   | 0.01   | t | 71887  | VVVTPDKE<br>I                | Homo sapiens          |
| 1 | 1.00 | 1 | 1 | -0.01 | -0.015 | -0.003 | -0.01  | -0.009 | t | 31916  | KLILAYTP<br>GARGPQD          | Oryctolagus cuniculus |
| 1 | 1.00 | 1 | 1 | 0.01  | 0.008  | 0.003  | 0.003  | 0.01   | t | 108049 | NPVEIRRG<br>VMLAVDA          | Rattus norvegicus     |
| 1 | 1.00 | 1 | 1 | -0.02 | -0.022 | -0.013 | -0.023 | -0.019 | t | 67076  | TVLRDPVF<br>YQ               | Homo sapiens          |
| 1 | 1.00 | 1 | 1 | -0.06 | -0.058 | -0.055 | -0.063 | -0.06  | t | 123729 | SDFLGDRQ<br>Y                | Ovis aries            |
| 1 | 1.00 | 1 | 1 | 0.01  | 0.01   | 0.027  | 0.01   | 0.006  | t | 145923 | NPPIPVGEI                    | Mus musculus          |

|   |      |   |   |       |        |        |        |        |   |        |                              |                                  |
|---|------|---|---|-------|--------|--------|--------|--------|---|--------|------------------------------|----------------------------------|
| 1 | 1.00 | 1 | 1 | 0     | 0      | 0      | 0.003  | 0.002  | t | 70817  | VRRRVNA<br>ANKKPEDL<br>TLNDL | Aotus<br>lemurinu<br>s           |
| 1 | 1.00 | 1 | 1 | -0.01 | -0.01  | -0.009 | -0.01  | -0.01  | t | 126280 | IITGHCQG<br>DGYRVGF          | Mus<br>musculu<br>s              |
| 1 | 1.00 | 1 | 1 | -0.03 | -0.03  | -0.03  | -0.03  | -0.03  | t | 105851 | GTAPFEIH<br>ANRIVGFF<br>SKII | Oryctola<br>gus<br>cuniculu<br>s |
| 1 | 1.00 | 1 | 1 | 0     | 0      | 0      | 0      | 0      | t | 156924 | NLNHWYK<br>SWLLP             | Gallus<br>gallus                 |
| 1 | 1.00 | 1 | 1 | -0.01 | -0.007 | -0.007 | -0.01  | -0.008 | t | 52148  | QQSFPQQ<br>PQR               | Mus<br>musculu<br>s              |
| 1 | 1.00 | 1 | 1 | -0.03 | -0.028 | -0.018 | -0.023 | -0.029 | t | 144639 | FAQAYAR<br>GIS               | Homo<br>sapiens                  |
| 1 | 1.00 | 1 | 1 | 0     | -0.002 | 0.007  | 0      | 0      | t | 140596 | SLDELDW<br>DSM               | Mus<br>musculu<br>s              |
| 1 | 1.00 | 1 | 1 | 0     | -0.002 | -0.005 | 0.003  | 0      | t | 95459  | IHENEDDL<br>GRGGHEL<br>KVTG  | Mus<br>musculu<br>s              |
| 1 | 1.00 | 1 | 1 | 0.03  | 0.03   | 0.032  | 0.033  | 0.032  | t | 98852  | KMVAPVL<br>EEIATERAT<br>DLTV | Homo<br>sapiens                  |
| 1 | 1.00 | 1 | 1 | -0.01 | -0.01  | -0.01  | -0.01  | -0.008 | t | 106770 | RER                          | Mus<br>musculu<br>s              |
| 1 | 1.00 | 1 | 1 | 0.02  | 0.016  | 0.014  | 0.013  | 0.02   | t | 109755 | QKSGSHE<br>NQNILTNG<br>SNQ   | Oryctola<br>gus<br>cuniculu<br>s |
| 1 | 1.00 | 1 | 1 | 0.02  | 0.018  | 0.031  | 0.019  | 0.022  | t | 61179  | SSLNFADV<br>Y                | Rattus<br>norvegic<br>us         |
| 1 | 1.00 | 1 | 1 | -0.02 | -0.016 | -0.008 | -0.019 | -0.02  | t | 10476  | DTRCFD                       | Homo<br>sapiens                  |
| 1 | 1.00 | 1 | 1 | -0.01 | -0.01  | -0.005 | -0.01  | -0.009 | t | 158721 | DSGCAIDL<br>QRRELKCG         | Mus<br>musculu<br>s              |
| 1 | 1.00 | 1 | 1 | 0.01  | 0.01   | 0.019  | 0.01   | 0.012  | t | 6128   | CDPQPDFS<br>C                | Mus<br>musculu<br>s              |

|   |      |   |   |       |        |        |        |        |   |        |                              |                            |
|---|------|---|---|-------|--------|--------|--------|--------|---|--------|------------------------------|----------------------------|
| 1 | 1.00 | 1 | 1 | 0.01  | 0.01   | 0.019  | 0.01   | 0.012  | t | 6128   | CDPQPDFS<br>C                | Mus<br>musculu<br>s        |
| 1 | 1.00 | 1 | 1 | 0.01  | 0.01   | 0.012  | 0.01   | 0.012  | t | 79781  | DLKRPGSS<br>PMEV             | Mus<br>musculu<br>s        |
| 1 | 1.00 | 1 | 1 | -0.01 | -0.007 | 0.007  | -0.01  | -0.01  | t | 145777 | FDTGA FDP<br>DWPYD           | Mus<br>musculu<br>s        |
| 1 | 1.00 | 1 | 1 | 0.01  | 0.01   | 0.014  | 0.01   | 0.012  | t | 49071  | PQPQQQL<br>PLQ               | Mus<br>musculu<br>s        |
| 1 | 1.00 | 1 | 1 | -0.01 | -0.01  | -0.007 | -0.009 | -0.01  | t | 60880  | SSAEGDLV<br>GWPSPP           | Homo<br>sapiens            |
| 1 | 1.00 | 1 | 1 | 0.01  | 0.01   | 0.022  | 0.01   | 0.01   | t | 153434 | NSPFMLH<br>SALSGGGS          | Mus<br>musculu<br>s        |
| 1 | 1.00 | 1 | 1 | -0.05 | -0.048 | -0.057 | -0.051 | -0.05  | t | 79031  | NSNGCVYS<br>ESFGLGGI<br>GVLT | Homo<br>sapiens            |
| 1 | 1.00 | 1 | 1 | -0.02 | -0.003 | -0.024 | -0.02  | -0.02  | t | 75571  | YQWLTRV<br>GKYRPQD<br>KPNT   | Chinchill<br>a<br>lanigera |
| 1 | 1.00 | 1 | 1 | 0.03  | 0.028  | 0.03   | 0.023  | 0.03   | t | 107517 | LSTNEVA<br>M                 | Mus<br>musculu<br>s        |
| 1 | 1.00 | 1 | 1 | -0.03 | -0.032 | -0.03  | -0.024 | -0.03  | t | 134692 | HSRRRQG<br>WLKEIRKL          | Homo<br>sapiens            |
| 1 | 1.00 | 1 | 1 | 0.01  | 0.012  | 0.008  | 0.01   | 0.011  | t | 99920  | DADNILVI<br>QQGQATV<br>TVANG | Homo<br>sapiens            |
| 1 | 1.00 | 1 | 1 | -0.03 | -0.03  | -0.028 | -0.03  | -0.028 | t | 126111 | GHCQGDG<br>YRVGFGQ<br>C      | Mus<br>musculu<br>s        |
| 1 | 1.00 | 1 | 1 | 0.02  | 0.022  | 0.018  | 0.02   | 0.022  | t | 117742 | AKAQTDR<br>EDLRTLRY          | Homo<br>sapiens            |
| 1 | 1.00 | 1 | 1 | -0.05 | -0.05  | -0.05  | -0.05  | -0.05  | t | 110375 | PSGSMVT<br>SDAQIFNK          | Mus<br>musculu<br>s        |
| 1 | 1.00 | 1 | 1 | -0.05 | -0.047 | -0.042 | -0.05  | -0.05  | t | 121292 | FATFVYAK                     | Mus<br>musculu<br>s        |

|   |      |   |   |       |        |        |        |        |   |        |                              |                          |
|---|------|---|---|-------|--------|--------|--------|--------|---|--------|------------------------------|--------------------------|
| 1 | 1.00 | 1 | 1 | 0     | -0.002 | 0      | -0.007 | 0      | t | 117240 | TLKNREPV<br>QLETLSI          | Mus<br>musculu<br>s      |
| 1 | 1.00 | 1 | 1 | 0.01  | 0.01   | 0.009  | 0.01   | 0.012  | t | 95167  | YHTMENP<br>CCPQNN<br>LGSKSG  | Rattus<br>norvegic<br>us |
| 1 | 1.00 | 1 | 1 | -0.04 | -0.04  | -0.04  | -0.04  | -0.04  | t | 137887 | GSSHHETH<br>YGYA             | Homo<br>sapiens          |
| 1 | 1.00 | 1 | 1 | -0.03 | -0.027 | -0.033 | -0.03  | -0.027 | t | 111125 | ASQKRPSQ<br>R                | Mus<br>musculu<br>s      |
| 1 | 1.00 | 1 | 1 | -0.03 | -0.03  | -0.027 | -0.032 | -0.03  | t | 22490  | GSRSRRA                      | Homo<br>sapiens          |
| 1 | 1.00 | 1 | 1 | -0.02 | -0.022 | -0.018 | -0.023 | -0.02  | t | 131037 | RHWTTQG<br>CNC               | Mus<br>musculu<br>s      |
| 1 | 1.00 | 1 | 1 | -0.02 | -0.02  | -0.023 | -0.023 | -0.016 | t | 115630 | NFDKLYIW<br>G                | Homo<br>sapiens          |
| 1 | 1.00 | 1 | 1 | -0.06 | -0.06  | -0.059 | -0.063 | -0.058 | t | 3687   | APPLRTW<br>KSRARAV           | Homo<br>sapiens          |
| 1 | 1.00 | 1 | 1 | 0     | 0      | 0      | 0      | 0.003  | t | 139935 | VIAIALFGT<br>IATANAAD        | Homo<br>sapiens          |
| 1 | 1.00 | 1 | 1 | 0     | 0      | 0      | 0      | 0.003  | t | 97726  | VETPIRN                      | Mus<br>musculu<br>s      |
| 1 | 1.00 | 1 | 1 | 0     | 0      | 0      | 0      | 0.003  | t | 97650  | SLLTEVET                     | Mus<br>musculu<br>s      |
| 1 | 1.00 | 1 | 1 | 0     | 0      | 0      | 0      | 0.003  | t | 97480  | LTEVETPIR<br>N               | Mus<br>musculu<br>s      |
| 1 | 1.00 | 1 | 1 | 0     | 0      | 0      | 0      | 0.003  | t | 57812  | SFKVTALN<br>VVSRRYLA<br>SLHK | Sus<br>scrofa            |
| 1 | 1.00 | 1 | 1 | 0     | 0      | 0      | 0      | 0.003  | t | 14686  | EVETPIRN                     | Mus<br>musculu<br>s      |
| 1 | 1.00 | 1 | 1 | 0     | 0      | 0      | 0      | 0.003  | t | 6925   | CRGFTSFK<br>KPPTPPPE<br>PET  | Mus<br>musculu<br>s      |

|   |      |   |   |       |        |        |        |        |   |        |                            |                                  |
|---|------|---|---|-------|--------|--------|--------|--------|---|--------|----------------------------|----------------------------------|
| 1 | 1.00 | 1 | 1 | -0.02 | -0.022 | -0.005 | -0.023 | -0.02  | t | 97776  | YKGVAFPL                   | Mus<br>musculu<br>s              |
| 1 | 1.00 | 1 | 1 | -0.02 | -0.022 | -0.005 | -0.023 | -0.02  | t | 97776  | YKGVAFPL                   | Mus<br>musculu<br>s              |
| 1 | 1.00 | 1 | 1 | 0.01  | 0.011  | 0.013  | 0.007  | 0.008  | t | 6229   | CFIRPSGYC<br>GRECGI        | Equus<br>caballus                |
| 1 | 1.00 | 1 | 1 | 0.02  | 0.02   | 0.023  | 0.02   | 0.021  | t | 125004 | DAPDTDW<br>CDSIP           | Mus<br>musculu<br>s              |
| 1 | 1.00 | 1 | 1 | -0.04 | -0.04  | -0.04  | -0.04  | -0.038 | t | 141621 | DNWHGS<br>NRP              | Oryctola<br>gus<br>cuniculu<br>s |
| 1 | 1.00 | 1 | 1 | -0.04 | -0.04  | -0.028 | -0.04  | -0.044 | t | 133632 | LRCYSHCT<br>FYFASST        | Mus<br>musculu<br>s              |
| 1 | 1.00 | 1 | 1 | -0.05 | -0.05  | -0.043 | -0.044 | -0.048 | t | 74871  | YLPVGGLR<br>RIGG           | Homo<br>sapiens                  |
| 1 | 1.00 | 1 | 1 | 0     | -0.002 | 0      | -0.007 | 0      | t | 145655 | YQYIYNLTI<br>CEL           | Mus<br>musculu<br>s              |
| 1 | 1.00 | 1 | 1 | 0.02  | 0.022  | 0.026  | 0.017  | 0.02   | t | 73051  | WRSTRDA<br>FINGAY          | Homo<br>sapiens                  |
| 1 | 1.00 | 1 | 1 | 0.02  | 0.022  | 0.026  | 0.017  | 0.02   | t | 73051  | WRSTRDA<br>FINGAY          | Homo<br>sapiens                  |
| 1 | 1.00 | 1 | 1 | 0.02  | 0.018  | 0.02   | 0.019  | 0.022  | t | 5641   | AVYYCTRG<br>YHGSSLY        | Mus<br>musculu<br>s              |
| 1 | 1.00 | 1 | 1 | 0     | 0      | 0      | 0      | 0.003  | t | 105127 | DAEFRHD                    | Mus<br>musculu<br>s              |
| 1 | 1.00 | 1 | 1 | 0.01  | 0.01   | 0.013  | 0.013  | 0.01   | t | 39253  | LRYHNKVY<br>CTTSKSA        | Homo<br>sapiens                  |
| 1 | 1.00 | 1 | 1 | -0.05 | -0.05  | -0.05  | -0.05  | -0.05  | t | 138025 | RVPRISCGI<br>NYG           | Homo<br>sapiens                  |
| 1 | 1.00 | 1 | 1 | 0.03  | 0.024  | 0.033  | 0.03   | 0.03   | t | 139856 | PSPFAEAV<br>CPKLTPEK<br>MA | Oryctola<br>gus<br>cuniculu<br>s |

|   |      |   |   |       |        |        |        |        |   |        |                              |                            |
|---|------|---|---|-------|--------|--------|--------|--------|---|--------|------------------------------|----------------------------|
| 1 | 1.00 | 1 | 1 | 0     | 0.004  | 0      | 0.001  | 0.002  | t | 19014  | GDKPSLFG<br>QAAAGDK<br>PSLF  | Homo<br>sapiens            |
| 1 | 1.00 | 1 | 1 | -0.03 | -0.03  | -0.03  | -0.03  | -0.028 | t | 140545 | CGVDGRW<br>PRW               | Mus<br>musculu<br>s        |
| 1 | 1.00 | 1 | 1 | -0.01 | -0.008 | -0.01  | -0.011 | -0.01  | t | 10108  | DSERLIGD<br>AAKNQVA<br>MNPHN | Homo<br>sapiens            |
| 1 | 1.00 | 1 | 1 | 0.01  | 0.01   | 0.01   | 0.004  | 0.01   | t | 118471 | KNAGVEG<br>SLIVEK            | Homo<br>sapiens            |
| 1 | 1.00 | 1 | 1 | -0.01 | -0.009 | 0      | -0.01  | -0.01  | t | 73245  | WWHLPR<br>DSPLPI             | Mus<br>musculu<br>s        |
| 1 | 1.00 | 1 | 1 | 0.01  | 0.009  | 0.022  | 0.01   | 0.01   | t | 41244  | MDINASR<br>ALANVYD           | Anas<br>platyrhy<br>nchos  |
| 1 | 1.00 | 1 | 1 | -0.02 | -0.02  | -0.02  | -0.02  | -0.02  | t | 96059  | AANNAKN<br>AAL               | Homo<br>sapiens(<br>human) |
| 1 | 1.00 | 1 | 1 | 0     | 0      | 0      | 0      | 0.003  | t | 55260  | RPPNAP                       | Mus<br>musculu<br>s        |
| 1 | 1.00 | 1 | 1 | -0.05 | -0.047 | -0.041 | -0.05  | -0.05  | t | 66298  | TSLHRGPH<br>GFPL             | Mus<br>musculu<br>s        |
| 1 | 1.00 | 1 | 1 | 0     | 0.002  | 0      | 0.006  | 0.006  | t | 113879 | SQRSQDE<br>N                 | Rattus<br>norvegic<br>us   |
| 1 | 1.00 | 1 | 1 | -0.02 | -0.02  | -0.011 | -0.02  | -0.02  | t | 59374  | SLNTGWL<br>AGLFY             | Mus<br>musculu<br>s        |
| 1 | 1.00 | 1 | 1 | -0.02 | -0.02  | -0.011 | -0.02  | -0.02  | t | 59374  | SLNTGWL<br>AGLFY             | Mus<br>musculu<br>s        |
| 1 | 1.00 | 1 | 1 | 0.02  | 0.02   | 0.016  | 0.02   | 0.02   | t | 22130  | GRLHVNQ<br>RAVVAPD<br>KEVLYE | Homo<br>sapiens            |
| 1 | 1.00 | 1 | 1 | -0.03 | -0.03  | -0.03  | -0.03  | -0.03  | t | 118231 | YKTGHGLR<br>GKLKWRP          | Homo<br>sapiens            |
| 1 | 1.00 | 1 | 1 | -0.05 | -0.046 | -0.043 | -0.053 | -0.051 | t | 106600 | LEGWGGH<br>WRG               | Homo<br>sapiens            |



|   |      |   |   |       |        |        |        |        |   |        |                              |                                  |
|---|------|---|---|-------|--------|--------|--------|--------|---|--------|------------------------------|----------------------------------|
| 1 | 1.00 | 1 | 1 | 0     | 0.002  | 0.01   | -0.003 | -0.002 | t | 72482  | WGLSRISS<br>K                | Homo<br>sapiens                  |
| 1 | 1.00 | 1 | 1 | -0.03 | -0.028 | -0.035 | -0.029 | -0.031 | t | 61410  | SSTRGGSR<br>VEGIFAGL<br>FMNA | Homo<br>sapiens                  |
| 1 | 1.00 | 1 | 1 | 0     | -0.004 | -0.002 | -0.003 | 0.001  | t | 279    | AALGDSLY<br>GAASLNDF<br>GILA | Oryctola<br>gus<br>cuniculu<br>s |
| 1 | 1.00 | 1 | 1 | -0.05 | -0.052 | -0.038 | -0.047 | -0.047 | t | 17683  | FSDALRF                      | Mus<br>musculu<br>s              |
| 1 | 1.00 | 1 | 1 | -0.02 | -0.016 | -0.013 | -0.02  | -0.02  | t | 149242 | AALILSKHP<br>NWTNTQ          | Cavia<br>porcellu<br>s           |
| 1 | 1.00 | 1 | 1 | -0.03 | -0.03  | -0.032 | -0.033 | -0.032 | t | 44665  | NLDFRDLY<br>DPRDKAKL<br>LYNN | Homo<br>sapiens                  |
| 1 | 1.00 | 1 | 1 | 0.01  | 0.01   | 0.005  | 0.01   | 0.011  | t | 120172 | RKIPKRPG<br>SVHRTPSR<br>Q    | Oryctola<br>gus<br>cuniculu<br>s |
| 1 | 1.00 | 1 | 1 | -0.08 | -0.077 | -0.074 | -0.08  | -0.079 | t | 153693 | RKIFIDTIP<br>N               | Mus<br>musculu<br>s              |
| 1 | 1.00 | 1 | 1 | -0.02 | -0.013 | -0.017 | -0.021 | -0.02  | t | 16551  | FLDLMRA<br>VA                | Gallus<br>gallus                 |
| 1 | 1.00 | 1 | 1 | -0.02 | -0.023 | -0.017 | -0.021 | -0.017 | t | 99155  | DREDLRTL<br>LR               | Mus<br>musculu<br>s              |
| 1 | 1.00 | 1 | 1 | -0.01 | -0.009 | -0.002 | -0.01  | -0.01  | t | 8760   | DIQEDITR<br>HE               | Myodes<br>glareolu<br>s          |
| 1 | 1.00 | 1 | 1 | 0     | 0      | 0      | -0.004 | 0.001  | t | 122406 | IEIGLEGKG<br>FEPTLEALF<br>GK | Homo<br>sapiens                  |
| 1 | 1.00 | 1 | 1 | 0     | -0.002 | 0      | -0.004 | 0.001  | t | 122452 | KTTKQSFD<br>LSVKAQYK<br>KNKH | Mus<br>musculu<br>s              |
| 1 | 1.00 | 1 | 1 | 0     | 0      | 0      | -0.004 | 0.001  | t | 122452 | KTTKQSFD<br>LSVKAQYK<br>KNKH | Homo<br>sapiens                  |

|   |      |   |   |       |        |        |        |        |   |        |                              |                                  |
|---|------|---|---|-------|--------|--------|--------|--------|---|--------|------------------------------|----------------------------------|
| 1 | 1.00 | 1 | 1 | 0     | 0      | 0      | -0.004 | 0.001  | t | 7491   | DAEFRHDS<br>GYEVHHQ<br>K     | Homo<br>sapiens                  |
| 1 | 1.00 | 1 | 1 | -0.01 | -0.014 | 0.002  | -0.007 | -0.009 | t | 105037 | WEPFASG<br>KTS               | Oryctola<br>gus<br>cuniculu<br>s |
| 1 | 1.00 | 1 | 1 | 0     | -0.002 | -0.007 | -0.003 | 0.005  | t | 55932  | RSQQTII                      | Mus<br>musculu<br>s              |
| 1 | 1.00 | 1 | 1 | 0.01  | 0.01   | 0.01   | 0.01   | 0.009  | t | 115496 | SSEEIVPNS<br>VEQKHIQK<br>EDV | Homo<br>sapiens                  |
| 1 | 1.00 | 1 | 1 | -0.05 | -0.05  | -0.05  | -0.054 | -0.05  | t | 144811 | VSWLSKE<br>WAK               | Homo<br>sapiens                  |
| 1 | 1.00 | 1 | 1 | -0.02 | -0.018 | -0.016 | -0.02  | -0.02  | t | 138068 | VIFQTPLIK<br>NP              | Rattus<br>norvegic<br>us         |
| 1 | 1.00 | 1 | 1 | 0.01  | 0.006  | 0.009  | 0.003  | 0.01   | t | 133860 | KKAVTKA<br>QKQD              | Oryctola<br>gus<br>cuniculu<br>s |
| 1 | 1.00 | 1 | 1 | -0.01 | -0.007 | 0.001  | -0.01  | -0.011 | t | 18971  | GDEYDDA<br>ADAAGDR<br>AP     | Mus<br>musculu<br>s              |
| 1 | 1.00 | 1 | 1 | -0.03 | -0.03  | -0.028 | -0.033 | -0.03  | t | 19100  | GDRAGV                       | Homo<br>sapiens                  |
| 1 | 1.00 | 1 | 1 | -0.01 | -0.006 | 0.011  | -0.007 | -0.011 | t | 71350  | VTGTDLELI<br>QILK            | Homo<br>sapiens                  |
| 1 | 1.00 | 1 | 1 | 0     | 0      | -0.001 | -0.003 | 0      | t | 38648  | LPQGTTLP<br>KG               | Homo<br>sapiens                  |
| 1 | 1.00 | 1 | 1 | 0.01  | 0.012  | 0.017  | 0.01   | 0.01   | t | 130339 | WRPWSE<br>Q                  | MD                               |
| 1 | 1.00 | 1 | 1 | -0.04 | -0.042 | -0.035 | -0.043 | -0.04  | t | 158838 | IHNDVEA<br>WMDRYKY<br>YP     | Mus<br>musculu<br>s              |
| 1 | 1.00 | 1 | 1 | 0.01  | 0.01   | 0.018  | 0.01   | 0.013  | t | 137394 | EDHRQVV<br>E                 | Rattus<br>norvegic<br>us         |
| 1 | 1.00 | 1 | 1 | -0.04 | -0.04  | -0.036 | -0.04  | -0.04  | t | 7057   | CSPRTG                       | Homo<br>sapiens                  |

|   |      |   |   |       |        |        |        |        |   |        |                              |                                  |
|---|------|---|---|-------|--------|--------|--------|--------|---|--------|------------------------------|----------------------------------|
| 1 | 1.00 | 1 | 1 | 0.01  | 0.01   | 0.008  | 0.007  | 0.008  | t | 98795  | GERTRGR<br>QPGDYDD<br>D      | Homo<br>sapiens                  |
| 1 | 1.00 | 1 | 1 | -0.01 | -0.013 | -0.01  | -0.01  | -0.01  | t | 75659  | YRPLGPGT<br>PPMRARL<br>PA    | Oryctola<br>gus<br>cuniculu<br>s |
| 1 | 1.00 | 1 | 1 | -0.02 | -0.016 | -0.016 | -0.019 | -0.02  | t | 5148   | ATSRSTSQ<br>LTSLSFG          | Homo<br>sapiens                  |
| 1 | 1.00 | 1 | 1 | -0.03 | -0.03  | -0.02  | -0.03  | -0.028 | t | 34286  | KWDLFVE<br>RSK               | Mus<br>musculu<br>s              |
| 1 | 1.00 | 1 | 1 | -0.01 | -0.012 | -0.015 | -0.017 | -0.009 | t | 141672 | IAKEWE                       | Rattus<br>norvegic<br>us         |
| 1 | 1.00 | 1 | 1 | -0.01 | -0.008 | -0.007 | -0.01  | -0.01  | t | 65639  | TPLGRLDA<br>EYW              | Homo<br>sapiens                  |
| 1 | 1.00 | 1 | 1 | 0.03  | 0.016  | 0.028  | 0.024  | 0.03   | t | 55765  | RRVNAAN<br>KKPEDLTL<br>NDLET | Aotus<br>griseime<br>mbra        |
| 1 | 1.00 | 1 | 1 | 0.01  | 0.01   | 0.017  | 0.01   | 0.01   | t | 63975  | TGTEKLIET<br>YFSKNYQD<br>YEY | Mus<br>musculu<br>s              |
| 1 | 1.00 | 1 | 1 | 0.01  | 0.01   | 0.017  | 0.01   | 0.01   | t | 63975  | TGTEKLIET<br>YFSKNYQD<br>YEY | Mus<br>musculu<br>s              |
| 1 | 1.00 | 1 | 1 | 0.01  | 0.01   | 0.017  | 0.01   | 0.01   | t | 63975  | TGTEKLIET<br>YFSKNYQD<br>YEY | Mus<br>musculu<br>s              |
| 1 | 1.00 | 1 | 1 | 0.02  | 0.018  | 0.016  | 0.019  | 0.02   | t | 72571  | WIARFDT<br>DKDGKVSL<br>EEFCR | Mus<br>musculu<br>s              |
| 1 | 1.00 | 1 | 1 | 0.02  | 0.018  | 0.016  | 0.019  | 0.02   | t | 72571  | WIARFDT<br>DKDGKVSL<br>EEFCR | Mus<br>musculu<br>s              |
| 1 | 1.00 | 1 | 1 | 0.02  | 0.018  | 0.016  | 0.019  | 0.02   | t | 72571  | WIARFDT<br>DKDGKVSL<br>EEFCR | Mus<br>musculu<br>s              |
| 1 | 1.00 | 1 | 1 | 0.04  | 0.04   | 0.045  | 0.036  | 0.038  | t | 117594 | NWHQLH<br>GKKEAY             | Homo<br>sapiens                  |
| 1 | 1.00 | 1 | 1 | 0.01  | 0.008  | 0.012  | 0.013  | 0.012  | t | 32972  | KQELTKYC<br>QQNQMD<br>MKQIDP | Mus<br>musculu<br>s              |

|   |      |   |   |       |        |        |        |        |   |        |                              |                                  |
|---|------|---|---|-------|--------|--------|--------|--------|---|--------|------------------------------|----------------------------------|
| 1 | 1.00 | 1 | 1 | -0.04 | -0.04  | -0.032 | -0.04  | -0.04  | t | 80795  | CSAGQRTL<br>VV               | Homo<br>sapiens                  |
| 1 | 1.00 | 1 | 1 | -0.03 | -0.026 | -0.026 | -0.029 | -0.03  | t | 5147   | ATSRSTM<br>QLASFFTP<br>G     | Homo<br>sapiens                  |
| 1 | 1.00 | 1 | 1 | -0.01 | -0.012 | -0.01  | -0.011 | -0.008 | t | 111801 | SSILEDWN<br>FGVPPPPT<br>TSLV | Mus<br>musculu<br>s              |
| 1 | 1.00 | 1 | 1 | -0.05 | -0.053 | -0.05  | -0.05  | -0.05  | t | 70402  | VPNTNIKL<br>YVRRVFIT<br>DEFR | Mesocric<br>etus<br>auratus      |
| 1 | 1.00 | 1 | 1 | 0     | 0      | 0      | -0.003 | 0.002  | t | 60360  | SQAAPYIE<br>QAQVIAH<br>QFKEK | Homo<br>sapiens                  |
| 1 | 1.00 | 1 | 1 | 0     | 0      | 0      | -0.003 | 0.002  | t | 36124  | LGGKPAIV<br>PDKEVLYQ<br>QYDE | Homo<br>sapiens                  |
| 1 | 1.00 | 1 | 1 | 0     | 0      | 0      | -0.003 | 0.002  | t | 35252  | LDPHAFHL<br>LL               | Homo<br>sapiens                  |
| 1 | 1.00 | 1 | 1 | 0     | -0.014 | 0      | -0.003 | 0.002  | t | 21571  | GPARRGA<br>PY                | Macaca<br>mulatta                |
| 1 | 1.00 | 1 | 1 | 0     | 0      | 0      | -0.003 | 0.002  | t | 25309  | IAHQFKEK<br>VLGLLQRA<br>TQQQ | Homo<br>sapiens                  |
| 1 | 1.00 | 1 | 1 | 0.01  | 0.014  | 0.014  | 0.011  | 0.01   | t | 5907   | AYQVRNS<br>TGLYHVTN<br>DCPNS | Homo<br>sapiens                  |
| 1 | 1.00 | 1 | 1 | -0.08 | -0.08  | -0.08  | -0.08  | -0.078 | t | 128193 | AAKPKTAK<br>PKAAKPKK         | Homo<br>sapiens                  |
| 1 | 1.00 | 1 | 1 | 0     | -0.002 | 0.008  | -0.003 | 0.001  | t | 68877  | VHPQDGD<br>A                 | Mus<br>musculu<br>s              |
| 1 | 1.00 | 1 | 1 | 0     | -0.003 | 0.004  | 0      | 0.002  | t | 136056 | DGKKWQT<br>YRGNSTG           | Oryctola<br>gus<br>cuniculu<br>s |
| 1 | 1.00 | 1 | 1 | 0     | 0.002  | 0.001  | -0.003 | 0      | t | 38505  | LPGKCGV<br>NVPYKIST          | Homo<br>sapiens                  |

|   |      |   |   |       |        |        |        |        |   |        |                               |                                  |
|---|------|---|---|-------|--------|--------|--------|--------|---|--------|-------------------------------|----------------------------------|
| 1 | 1.00 | 1 | 1 | -0.02 | -0.02  | -0.017 | -0.02  | -0.022 | t | 91911  | RRQQRLQ<br>EIERRRNA           | Oryctola<br>gus<br>cuniculu<br>s |
| 1 | 1.00 | 1 | 1 | 0     | 0.002  | 0      | 0.002  | 0.004  | t | 138198 | KPTSTLT                       | Homo<br>sapiens                  |
| 1 | 1.00 | 1 | 1 | 0     | 0.002  | -0.006 | -0.003 | 0.002  | t | 97572  | QEHKPKK<br>DDFRNEF<br>DH      | Homo<br>sapiens                  |
| 1 | 1.00 | 1 | 1 | 0     | 0.002  | -0.006 | -0.003 | 0.002  | t | 97572  | QEHKPKK<br>DDFRNEF<br>DH      | Homo<br>sapiens                  |
| 1 | 1.00 | 1 | 1 | -0.02 | -0.024 | -0.025 | -0.017 | -0.017 | t | 66976  | TVDNPAST<br>TNKDKLFA<br>VWK   | Oryctola<br>gus<br>cuniculu<br>s |
| 1 | 1.00 | 1 | 1 | -0.04 | -0.04  | -0.031 | -0.037 | -0.043 | t | 110760 | ACKDSDW<br>PFCSDDED<br>WDWPFC | Mus<br>musculu<br>s              |
| 1 | 1.00 | 1 | 1 | 0     | 0      | 0      | 0      | 0.004  | t | 108384 | GIAGFKGE<br>QGPKGEP           | Mus<br>musculu<br>s              |
| 1 | 1.00 | 1 | 1 | 0     | -0.002 | 0.001  | -0.001 | 0      | t | 67264  | TWHLPSH<br>TQTQG              | Mus<br>musculu<br>s              |
| 1 | 1.00 | 1 | 1 | 0.01  | 0.016  | 0.017  | 0.01   | 0.009  | t | 94790  | CAADKEIL<br>DESLKWK<br>QR     | Felis<br>catus                   |
| 1 | 1.00 | 1 | 1 | 0     | 0      | 0.011  | 0      | 0      | t | 12209  | EGKVVL                        | Homo<br>sapiens                  |
| 1 | 1.00 | 1 | 1 | 0.02  | 0.02   | 0.02   | 0.016  | 0.02   | t | 115657 | TLRIRNVR<br>FSDE              | Homo<br>sapiens                  |
| 1 | 1.00 | 1 | 1 | -0.05 | -0.05  | -0.035 | -0.046 | -0.05  | t | 142431 | KKAEEAKK<br>IVDKI             | Homo<br>sapiens                  |
| 1 | 1.00 | 1 | 1 | 0.04  | 0.042  | 0.062  | 0.041  | 0.04   | t | 25933  | IEQAQVIA<br>E                 | Homo<br>sapiens                  |
| 1 | 1.00 | 1 | 1 | -0.03 | -0.028 | -0.031 | -0.033 | -0.028 | t | 74398  | YIVGRVWI<br>GF                | Homo<br>sapiens                  |
| 1 | 1.00 | 1 | 1 | 0.01  | 0.012  | 0.01   | 0.011  | 0.01   | t | 110388 | QSQTPETP<br>ATPLSCCT<br>ETQW  | Homo<br>sapiens                  |

|   |      |   |   |       |        |        |        |        |   |        |                              |                                  |
|---|------|---|---|-------|--------|--------|--------|--------|---|--------|------------------------------|----------------------------------|
| 1 | 1.00 | 1 | 1 | -0.04 | -0.032 | -0.033 | -0.04  | -0.038 | t | 14346  | ETDIKMM<br>KRV               | Gallus<br>gallus                 |
| 1 | 1.00 | 1 | 1 | 0     | 0      | 0.004  | -0.006 | -0.002 | t | 47024  | PCIGYVRS<br>GGAVPPA          | Homo<br>sapiens                  |
| 1 | 1.00 | 1 | 1 | 0     | 0      | 0.006  | 0      | 0      | t | 118760 | CRTCTTPA<br>Q                | Mus<br>musculu<br>s              |
| 1 | 1.00 | 1 | 1 | -0.03 | -0.03  | -0.021 | -0.03  | -0.032 | t | 108089 | RAGRFGY<br>QR                | Mus<br>musculu<br>s              |
| 1 | 1.00 | 1 | 1 | -0.01 | -0.01  | -0.01  | -0.01  | -0.008 | t | 101546 | DLNPLDPL<br>AQQS             | Mus<br>musculu<br>s              |
| 1 | 1.00 | 1 | 1 | 0.01  | 0.006  | -0.002 | 0.003  | 0.01   | t | 112739 | YTTGAVR<br>QIFGDYKT<br>TICGK | Oryctola<br>gus<br>cuniculu<br>s |
| 1 | 1.00 | 1 | 1 | 0     | -0.002 | 0      | -0.006 | 0      | t | 117320 | KPKAAKPK<br>KAAAKKK          | Mus<br>musculu<br>s              |
| 1 | 1.00 | 1 | 1 | 0     | -0.002 | 0      | -0.006 | 0      | t | 117331 | MKLVRFL<br>MKLSHETV<br>TIELK | Mus<br>musculu<br>s              |
| 1 | 1.00 | 1 | 1 | -0.04 | -0.038 | -0.023 | -0.033 | -0.042 | t | 134682 | GPSRRGPS<br>LGASSHQ          | Homo<br>sapiens                  |
| 1 | 1.00 | 1 | 1 | 0.01  | 0.01   | 0.02   | 0.01   | 0.009  | t | 142806 | KATALTYD<br>PYVNYSS          | Sus<br>scrofa                    |
| 1 | 1.00 | 1 | 1 | -0.03 | -0.03  | -0.03  | -0.03  | -0.028 | t | 41205  | MCRPGIPT<br>HHCA             | Mus<br>musculu<br>s              |
| 1 | 1.00 | 1 | 1 | -0.02 | -0.022 | -0.02  | -0.027 | -0.02  | t | 107326 | DVSDMFS<br>K                 | Rattus<br>norvegic<br>us         |
| 1 | 1.00 | 1 | 1 | 0.01  | 0.009  | 0.029  | 0.017  | 0.011  | t | 121072 | YANETCCD<br>FFTNQ            | Homo<br>sapiens                  |
| 1 | 1.00 | 1 | 1 | -0.01 | -0.01  | -0.015 | -0.01  | -0.007 | t | 103173 | FKADEKKF<br>WGKLYEI<br>ARR   | Oryctola<br>gus<br>cuniculu<br>s |
| 1 | 1.00 | 1 | 1 | -0.04 | -0.038 | -0.033 | -0.041 | -0.039 | t | 136216 | FAWKWQ<br>YIYD               | Homo<br>sapiens                  |
| 1 | 1.00 | 1 | 1 | 0.04  | 0.04   | 0.041  | 0.04   | 0.042  | t | 5423   | AVLEDPYIL<br>LVSSKVS         | Rattus<br>norvegic<br>us         |

|   |      |   |   |       |        |        |        |        |   |        |                             |                              |
|---|------|---|---|-------|--------|--------|--------|--------|---|--------|-----------------------------|------------------------------|
| 1 | 1.00 | 1 | 1 | 0     | 0      | 0      | 0      | 0.002  | t | 144793 | SYGGRKGT<br>HPGLEMP         | Mus<br>musculus              |
| 1 | 1.00 | 1 | 1 | 0     | 0.004  | 0      | -0.003 | 0      | t | 33045  | KQNSQIPS<br>LDLKEPT         | Homo<br>sapiens              |
| 1 | 1.00 | 1 | 1 | -0.06 | -0.056 | -0.06  | -0.059 | -0.059 | t | 153447 | QPAIWNP<br>FPAWGGGS         | Homo<br>sapiens              |
| 1 | 1.00 | 1 | 1 | 0     | -0.014 | 0      | -0.003 | 0.001  | t | 20064  | GGVATY                      | Macaca<br>mulatta            |
| 1 | 1.00 | 1 | 1 | 0.05  | 0.048  | 0.05   | 0.043  | 0.05   | t | 107358 | FGEL                        | Rattus<br>norvegicus         |
| 1 | 1.00 | 1 | 1 | -0.05 | -0.05  | -0.045 | -0.048 | -0.047 | t | 652    | ADDVILHT<br>PGCVPC          | Homo<br>sapiens              |
| 1 | 1.00 | 1 | 1 | 0.03  | 0.03   | 0.03   | 0.03   | 0.032  | t | 119569 | ESNGQPE<br>N                | Homo<br>sapiens              |
| 1 | 1.00 | 1 | 1 | 0     | 0.004  | 0.016  | 0.007  | 0.002  | t | 11081  | EAIPALTA<br>VETGHTSQ<br>V   | Homo<br>sapiens              |
| 1 | 1.00 | 1 | 1 | 0     | 0      | 0.002  | 0      | 0      | t | 151716 | RLASLSEKP<br>PAIDWAYY<br>RA | Mus<br>musculus              |
| 1 | 1.00 | 1 | 1 | 0.03  | 0.032  | 0.023  | 0.037  | 0.037  | t | 6015   | CAPESIEFP<br>VSEARVLE<br>D  | Homo<br>sapiens              |
| 1 | 1.00 | 1 | 1 | -0.03 | -0.034 | -0.035 | -0.031 | -0.032 | t | 6171   | CEKAKRAV<br>RGRQDRP<br>KEFP | Oryctola<br>gus<br>cuniculus |
| 1 | 1.00 | 1 | 1 | 0.01  | 0.01   | 0.01   | 0.01   | 0.01   | t | 120135 | PSEKIWRP<br>DLVLYNNA        | Rattus<br>norvegicus         |
| 1 | 1.00 | 1 | 1 | -0.02 | -0.017 | -0.019 | -0.02  | -0.02  | t | 71009  | VSKGNCS<br>GPTTIRGQ         | Mus<br>musculus              |
| 1 | 1.00 | 1 | 1 | 0     | 0      | 0.014  | 0      | 0      | t | 31002  | KGLNGLFD<br>LGPKQKI         | Mus<br>musculus              |

|   |      |   |   |       |        |        |        |        |   |        |                              |                                  |
|---|------|---|---|-------|--------|--------|--------|--------|---|--------|------------------------------|----------------------------------|
| 1 | 1.00 | 1 | 1 | -0.01 | -0.014 | -0.007 | -0.007 | -0.008 | t | 98738  | DSKLTILT<br>KCGSQI           | Oryctola<br>gus<br>cuniculu<br>s |
| 1 | 1.00 | 1 | 1 | 0.03  | 0.034  | 0.03   | 0.031  | 0.037  | t | 30987  | KGIYQTSN                     | Homo<br>sapiens                  |
| 1 | 1.00 | 1 | 1 | -0.01 | -0.013 | -0.003 | -0.01  | -0.007 | t | 18013  | FTMGGAG<br>PK                | Oryctola<br>gus<br>cuniculu<br>s |
| 1 | 1.00 | 1 | 1 | -0.02 | -0.016 | -0.013 | -0.023 | -0.022 | t | 106312 | CNATQRR<br>QIE               | Homo<br>sapiens                  |
| 1 | 1.00 | 1 | 1 | -0.01 | -0.01  | -0.001 | -0.01  | -0.01  | t | 140568 | KGAWLDS<br>TKAT              | Mus<br>musculu<br>s              |
| 1 | 1.00 | 1 | 1 | -0.01 | -0.01  | -0.008 | -0.01  | -0.01  | t | 55149  | RPFERDIS<br>NVPFSPDG<br>K    | Homo<br>sapiens                  |
| 1 | 1.00 | 1 | 1 | -0.02 | -0.024 | -0.021 | -0.027 | -0.02  | t | 133909 | PEPAKKVP<br>APK              | Oryctola<br>gus<br>cuniculu<br>s |
| 1 | 1.00 | 1 | 1 | -0.04 | -0.036 | -0.046 | -0.043 | -0.038 | t | 1925   | AIGSANFH<br>SYKKMSQF<br>IDKK | Homo<br>sapiens                  |
| 1 | 1.00 | 1 | 1 | -0.04 | -0.038 | -0.039 | -0.043 | -0.038 | t | 114992 | YKPDCTA<br>ED                | Homo<br>sapiens                  |
| 1 | 1.00 | 1 | 1 | -0.02 | -0.023 | -0.019 | -0.02  | -0.018 | t | 123837 | VVGAVQG<br>P                 | Oryctola<br>gus<br>cuniculu<br>s |
| 1 | 1.00 | 1 | 1 | 0.02  | 0.022  | 0.018  | 0.017  | 0.018  | t | 98795  | GERTRGR<br>QPGDYDD<br>D      | Homo<br>sapiens                  |
| 1 | 1.00 | 1 | 1 | 0     | -0.004 | 0      | -0.003 | 0.001  | t | 118431 | ISDAMKKV<br>GRKGVITV<br>KD   | Oryctola<br>gus<br>cuniculu<br>s |
| 1 | 1.00 | 1 | 1 | 0.02  | 0.023  | 0.015  | 0.02   | 0.023  | t | 6952   | CRTLTMGF<br>SLGARQKI         | Mus<br>musculu<br>s              |



|   |      |   |   |       |        |       |        |        |   |        |                       |                                  |
|---|------|---|---|-------|--------|-------|--------|--------|---|--------|-----------------------|----------------------------------|
| 1 | 1.00 | 1 | 1 | 0     | -0.004 | 0     | -0.001 | 0.003  | t | 50180  | PYVEPTAP<br>QVL       | Oryctola<br>gus<br>cuniculu<br>s |
| 1 | 1.00 | 1 | 1 | 0     | -0.004 | 0     | -0.001 | 0.003  | t | 50180  | PYVEPTAP<br>QVL       | Oryctola<br>gus<br>cuniculu<br>s |
| 1 | 1.00 | 1 | 1 | 0     | -0.002 | 0     | -0.001 | 0.003  | t | 38522  | LPHSNL                | Rattus<br>norvegic<br>us         |
| 1 | 1.00 | 1 | 1 | 0     | -0.004 | 0     | -0.001 | 0.003  | t | 38522  | LPHSNL                | Oryctola<br>gus<br>cuniculu<br>s |
| 1 | 1.00 | 1 | 1 | 0     | -0.002 | 0     | -0.001 | 0.003  | t | 43242  | NANPNAN<br>PNANP      | Mus<br>musculu<br>s              |
| 1 | 1.00 | 1 | 1 | 0     | -0.002 | 0     | -0.001 | 0.003  | t | 11571  | EEEDDDM<br>GFGFLD     | Mus<br>musculu<br>s              |
| 1 | 1.00 | 1 | 1 | 0     | -0.002 | 0     | -0.001 | 0.003  | t | 12307  | EGVQQEG<br>AQQPA      | Mus<br>musculu<br>s              |
| 1 | 1.00 | 1 | 1 | 0     | -0.002 | 0     | -0.001 | 0.003  | t | 11571  | EEEDDDM<br>GFGFLD     | Mus<br>musculu<br>s              |
| 1 | 1.00 | 1 | 1 | 0     | -0.002 | 0     | -0.001 | 0.003  | t | 11815  | EENVEENV<br>EENVEENV  | Mus<br>musculu<br>s              |
| 1 | 1.00 | 1 | 1 | -0.01 | -0.012 | 0     | -0.011 | -0.008 | t | 103643 | TGALQERS<br>K         | Mus<br>musculu<br>s              |
| 1 | 1.00 | 1 | 1 | -0.01 | 0.002  | -0.01 | -0.01  | -0.01  | t | 58085  | SGIIESGVQ<br>NIDDNYFY | Mus<br>musculu<br>s              |
| 1 | 1.00 | 1 | 1 | -0.01 | -0.008 | -0.01 | -0.009 | -0.009 | t | 109332 | IHSMNSTI<br>L         | Homo<br>sapiens                  |
| 1 | 1.00 | 1 | 1 | -0.02 | -0.018 | -0.02 | -0.019 | -0.018 | t | 22491  | GSRTLGA<br>KHPALQ     | Homo<br>sapiens                  |

|   |      |   |   |       |        |        |        |        |   |        |                              |                                  |
|---|------|---|---|-------|--------|--------|--------|--------|---|--------|------------------------------|----------------------------------|
| 1 | 1.00 | 1 | 1 | -0.02 | -0.02  | -0.01  | -0.02  | -0.022 | t | 79953  | NSDWVPS<br>VRSWAL            | Mus<br>musculu<br>s              |
| 1 | 1.00 | 1 | 1 | -0.03 | -0.032 | -0.025 | -0.027 | -0.031 | t | 39788  | LTAELKIYS<br>VIQAEINK<br>HL  | Mus<br>musculu<br>s              |
| 1 | 1.00 | 1 | 1 | -0.02 | -0.018 | -0.001 | -0.02  | -0.02  | t | 32418  | KMVFYATN                     | Homo<br>sapiens                  |
| 1 | 1.00 | 1 | 1 | -0.02 | -0.018 | -0.016 | -0.017 | -0.018 | t | 79623  | PDCSRLVG<br>ATPERPRL<br>RLVD | Homo<br>sapiens                  |
| 1 | 1.00 | 1 | 1 | -0.02 | -0.024 | -0.022 | -0.027 | -0.019 | t | 119443 | DLKLRRSS<br>SVGYIS           | Oryctola<br>gus<br>cuniculu<br>s |
| 1 | 1.00 | 1 | 1 | -0.01 | -0.01  | 0.005  | -0.01  | -0.01  | t | 70622  | VQPEKG                       | Homo<br>sapiens                  |
| 1 | 1.00 | 1 | 1 | 0     | 0      | 0.005  | 0      | 0      | t | 12331  | EHFWEQR<br>PR                | Mus<br>musculu<br>s              |
| 1 | 1.00 | 1 | 1 | 0     | 0      | 0.01   | 0.003  | 0.002  | t | 10789  | DVVVLG                       | Homo<br>sapiens                  |
| 1 | 1.00 | 1 | 1 | 0.02  | 0.02   | 0.016  | 0.02   | 0.02   | t | 22129  | GRLHVNE<br>RAVVAPD<br>KEVLYE | Homo<br>sapiens                  |
| 1 | 1.00 | 1 | 1 | -0.07 | -0.067 | -0.06  | -0.07  | -0.071 | t | 125256 | SLRGRGNT<br>LGLD             | Mus<br>musculu<br>s              |
| 1 | 1.00 | 1 | 1 | -0.02 | -0.023 | -0.01  | -0.019 | -0.02  | t | 4740   | ASREAKKQ<br>VEKALE           | Homo<br>sapiens                  |
| 1 | 1.00 | 1 | 1 | -0.02 | -0.017 | -0.011 | -0.02  | -0.018 | t | 79212  | FDWLWL<br>WDT                | Mus<br>musculu<br>s              |
| 1 | 1.00 | 1 | 1 | 0.01  | 0.013  | 0.024  | 0.01   | 0.011  | t | 68811  | VGVAPG                       | Mus<br>musculu<br>s              |
| 1 | 1.00 | 1 | 1 | 0     | 0      | 0      | 0      | 0.003  | t | 122889 | RLDASFQE<br>HPDLPG           | Oryctola<br>gus<br>cuniculu<br>s |

|   |      |   |   |       |        |        |        |        |   |        |                              |                                  |
|---|------|---|---|-------|--------|--------|--------|--------|---|--------|------------------------------|----------------------------------|
| 1 | 1.00 | 1 | 1 | -0.03 | -0.025 | -0.03  | -0.031 | -0.028 | t | 100024 | EVKMDAE<br>FRH               | Homo<br>sapiens(<br>human)       |
| 1 | 1.00 | 1 | 1 | -0.01 | -0.007 | -0.01  | -0.01  | -0.01  | t | 51438  | QLSSSKYT<br>IQRSTGDN<br>IDT  | Mus<br>musculu<br>s              |
| 1 | 1.00 | 1 | 1 | -0.04 | -0.04  | -0.04  | -0.04  | -0.041 | t | 115036 | AVLPVLLL<br>QITVGLVF<br>LCLQ | Mus<br>musculu<br>s              |
| 1 | 1.00 | 1 | 1 | 0.04  | 0.04   | 0.05   | 0.04   | 0.041  | t | 97113  | YERDPYSP<br>S                | Mus<br>musculu<br>s              |
| 1 | 1.00 | 1 | 1 | 0     | -0.004 | -0.008 | -0.001 | 0.001  | t | 111052 | VKSEKDST<br>NNNKYTV<br>TLK   | Oryctola<br>gus<br>cuniculu<br>s |
| 1 | 1.00 | 1 | 1 | 0     | 0      | 0      | -0.004 | 0.001  | t | 131978 | MLVGGST<br>LCV               | Homo<br>sapiens                  |
| 1 | 1.00 | 1 | 1 | 0     | 0      | 0      | -0.004 | 0.001  | t | 131878 | FLMLVGG<br>STL               | Homo<br>sapiens                  |
| 1 | 1.00 | 1 | 1 | 0     | 0      | 0      | -0.004 | 0.001  | t | 130987 | NPVENM<br>MDRDSQ             | Homo<br>sapiens                  |
| 1 | 1.00 | 1 | 1 | 0     | 0      | 0      | -0.004 | 0.001  | t | 132098 | TLLLEGVM<br>AA               | Homo<br>sapiens                  |
| 1 | 1.00 | 1 | 1 | 0.04  | 0.043  | 0.04   | 0.04   | 0.043  | t | 132848 | KKEDFDIY<br>DEDENQS<br>PR    | Mus<br>musculu<br>s              |
| 1 | 1.00 | 1 | 1 | -0.01 | -0.012 | -0.005 | -0.011 | -0.01  | t | 5586   | AVTRGTIN<br>DPQRAKE<br>ALDYE | Mus<br>musculu<br>s              |
| 1 | 1.00 | 1 | 1 | 0     | -0.004 | 0      | 0.003  | 0.004  | t | 45627  | NQSLDLAE<br>QELVDCAS<br>QHGC | Oryctola<br>gus<br>cuniculu<br>s |
| 1 | 1.00 | 1 | 1 | 0     | -0.004 | 0      | 0.003  | 0.004  | t | 6883   | CQIYPPNA<br>NKIREALA<br>Q    | Oryctola<br>gus<br>cuniculu<br>s |
| 1 | 1.00 | 1 | 1 | 0.03  | 0.03   | 0.049  | 0.04   | 0.033  | t | 104938 | PSRLVNQ                      | Homo<br>sapiens                  |
| 1 | 1.00 | 1 | 1 | 0.03  | 0.032  | 0.047  | 0.037  | 0.03   | t | 118148 | SQEGRTTK<br>Q                | Homo<br>sapiens                  |

|   |      |   |   |       |        |        |        |        |   |        |                              |                                  |
|---|------|---|---|-------|--------|--------|--------|--------|---|--------|------------------------------|----------------------------------|
| 1 | 1.00 | 1 | 1 | 0     | -0.002 | 0      | -0.001 | 0.003  | t | 655    | ADEEQQQ<br>ALSSQMG<br>F      | Mus<br>musculu<br>s              |
| 1 | 1.00 | 1 | 1 | -0.01 | -0.012 | -0.01  | -0.013 | -0.007 | t | 56150  | RTPPAYR                      | Mus<br>musculu<br>s              |
| 1 | 1.00 | 1 | 1 | -0.03 | -0.03  | -0.023 | -0.03  | -0.03  | t | 105764 | EVLSHAGA<br>H                | Mus<br>musculu<br>s              |
| 1 | 1.00 | 1 | 1 | 0.01  | 0.008  | 0.022  | 0.019  | 0.012  | t | 115797 | IQDTRNAV<br>RASRIQY          | Mus<br>musculu<br>s              |
| 1 | 1.00 | 1 | 1 | -0.04 | -0.042 | -0.04  | -0.041 | -0.04  | t | 66390  | TSQPRWH<br>QKPAT             | Mus<br>musculu<br>s              |
| 1 | 1.00 | 1 | 1 | 0.01  | 0.012  | 0.01   | 0.01   | 0.01   | t | 41554  | MGAQVST<br>QKTGAHE<br>TSLSAS | Homo<br>sapiens                  |
| 1 | 1.00 | 1 | 1 | 0     | -0.002 | -0.003 | -0.001 | 0      | t | 4213   | ARPKQRR<br>PQGLPNN<br>T      | Mus<br>musculu<br>s              |
| 1 | 1.00 | 1 | 1 | -0.01 | -0.006 | -0.003 | -0.009 | -0.01  | t | 61613  | STGADTG<br>GDIVQQP           | Homo<br>sapiens                  |
| 1 | 1.00 | 1 | 1 | -0.02 | -0.02  | -0.021 | -0.02  | -0.018 | t | 28265  | IRAWVAW<br>RAHCQNR<br>D      | Mus<br>musculu<br>s              |
| 1 | 1.00 | 1 | 1 | -0.02 | -0.021 | -0.019 | -0.023 | -0.019 | t | 99326  | ICTASAKK<br>NIGRNRS          | Homo<br>sapiens                  |
| 1 | 1.00 | 1 | 1 | 0.01  | 0.01   | 0.015  | 0.01   | 0.011  | t | 153434 | NSPFMLH<br>SALSGGGS          | Mus<br>musculu<br>s              |
| 1 | 1.00 | 1 | 1 | 0     | -0.004 | 0.006  | -0.001 | -0.002 | t | 39465  | LSKSFLEA<br>GGVSK            | Oryctola<br>gus<br>cuniculu<br>s |
| 1 | 1.00 | 1 | 1 | 0.01  | 0.013  | 0.023  | 0.01   | 0.01   | t | 105890 | IVYVGDTV<br>C                | Mus<br>musculu<br>s              |
| 1 | 1.00 | 1 | 1 | 0     | -0.003 | 0.006  | -0.003 | 0.002  | t | 28076  | IPSTAFTDI<br>AWVRLPN<br>HYG  | Homo<br>sapiens                  |
| 1 | 1.00 | 1 | 1 | 0.04  | 0.038  | 0.047  | 0.033  | 0.039  | t | 140619 | YSDWDYS<br>EGL               | Mus<br>musculu<br>s              |

|   |      |   |   |       |        |        |        |        |   |        |                              |                                  |
|---|------|---|---|-------|--------|--------|--------|--------|---|--------|------------------------------|----------------------------------|
| 1 | 1.00 | 1 | 1 | 0     | -0.004 | 0.006  | 0      | 0      | t | 92794  | GENKRPN<br>DKAGEV            | Mus<br>musculu<br>s              |
| 1 | 1.00 | 1 | 1 | -0.01 | -0.007 | -0.009 | -0.01  | -0.008 | t | 21406  | GNDWEDR<br>YYREMY<br>RYPNQV  | Mus<br>musculu<br>s              |
| 1 | 1.00 | 1 | 1 | 0.01  | 0.008  | 0.01   | 0.007  | 0.01   | t | 94687  | SKPTTKQR<br>QNKPPNK<br>P     | Mus<br>musculu<br>s              |
| 1 | 1.00 | 1 | 1 | -0.03 | -0.032 | -0.02  | -0.027 | -0.028 | t | 114287 | CSISTHSW<br>C                | Mus<br>musculu<br>s              |
| 1 | 1.00 | 1 | 1 | -0.01 | -0.008 | -0.005 | -0.009 | -0.009 | t | 73595  | YDTRCFDS<br>T                | Homo<br>sapiens                  |
| 1 | 1.00 | 1 | 1 | -0.02 | -0.015 | -0.013 | -0.019 | -0.02  | t | 96062  | ADTIQKGF<br>YY               | Homo<br>sapiens(<br>human)       |
| 1 | 1.00 | 1 | 1 | -0.02 | -0.018 | -0.013 | -0.019 | -0.02  | t | 96062  | ADTIQKGF<br>YY               | Homo<br>sapiens(<br>human)       |
| 1 | 1.00 | 1 | 1 | -0.05 | -0.05  | -0.042 | -0.05  | -0.05  | t | 106889 | SYTTRRWL<br>VS               | Homo<br>sapiens                  |
| 1 | 1.00 | 1 | 1 | -0.01 | -0.012 | 0.002  | -0.011 | -0.012 | t | 43177  | NAINPRLT<br>PWTYRN           | Mus<br>musculu<br>s              |
| 1 | 1.00 | 1 | 1 | 0     | 0      | 0      | 0      | 0      | t | 40772  | LYGNEGC<br>GWA               | Homo<br>sapiens                  |
| 1 | 1.00 | 1 | 1 | 0.01  | 0.01   | 0.01   | 0.01   | 0.01   | t | 47188  | PDREVLYQ<br>QFDEMEE<br>CSKHL | Homo<br>sapiens                  |
| 1 | 1.00 | 1 | 1 | -0.01 | -0.012 | -0.015 | -0.013 | -0.008 | t | 121346 | GPGHPIRA<br>LVGDEAEL<br>PC   | Rattus<br>norvegic<br>us         |
| 1 | 1.00 | 1 | 1 | -0.02 | -0.016 | -0.011 | -0.019 | -0.018 | t | 71637  | VVDLPQLG<br>PR               | Homo<br>sapiens                  |
| 1 | 1.00 | 1 | 1 | 0     | -0.004 | -0.008 | -0.003 | -0.001 | t | 51379  | QLIRAAEIR<br>ASANLAAT        | Oryctola<br>gus<br>cuniculu<br>s |

|   |      |   |   |       |        |        |        |        |   |        |                               |              |
|---|------|---|---|-------|--------|--------|--------|--------|---|--------|-------------------------------|--------------|
| 1 | 1.00 | 1 | 1 | -0.02 | -0.02  | -0.013 | -0.02  | -0.02  | t | 130461 | CWNYCLP                       | Mus musculus |
| 1 | 1.00 | 1 | 1 | -0.02 | -0.016 | -0.011 | -0.017 | -0.02  | t | 8061   | DELDVVEG<br>MQFDRGYLS         | Homo sapiens |
| 1 | 1.00 | 1 | 1 | -0.06 | -0.062 | -0.061 | -0.061 | -0.059 | t | 36317  | LGSGAFGT<br>IYKG              | Mus musculus |
| 1 | 1.00 | 1 | 1 | -0.03 | -0.03  | -0.03  | -0.03  | -0.031 | t | 115338 | LAMAASDI<br>SLLDQAQSA<br>PLRV | Homo sapiens |
| 1 | 1.00 | 1 | 1 | -0.03 | -0.03  | -0.025 | -0.033 | -0.03  | t | 16963  | FLVQAWK<br>SKKTP              | Homo sapiens |
| 1 | 1.00 | 1 | 1 | 0     | 0.002  | 0.004  | 0.003  | -0.001 | t | 48870  | PPPPSSPT<br>HDPPDSD<br>PQIPP  | Homo sapiens |
| 1 | 1.00 | 1 | 1 | 0     | -0.002 | 0.006  | -0.003 | 0.001  | t | 3872   | APTQCSQT<br>WPCPSHL           | Mus musculus |
| 1 | 1.00 | 1 | 1 | 0     | 0      | 0      | 0      | 0      | t | 122885 | QVAALTW<br>VQTHIRGF<br>GGDPR  | Mus musculus |
| 1 | 1.00 | 1 | 1 | 0     | 0      | 0      | 0      | 0      | t | 122885 | QVAALTW<br>VQTHIRGF<br>GGDPR  | Mus musculus |
| 1 | 1.00 | 1 | 1 | -0.04 | -0.042 | -0.042 | -0.041 | -0.04  | t | 56899  | SAMSRPM<br>IHFGNDW<br>EDRYR   | Mus musculus |
| 1 | 1.00 | 1 | 1 | -0.04 | -0.042 | -0.042 | -0.041 | -0.04  | t | 56899  | SAMSRPM<br>IHFGNDW<br>EDRYR   | Mus musculus |
| 1 | 1.00 | 1 | 1 | -0.01 | -0.01  | -0.006 | -0.013 | -0.01  | t | 67269  | TWKIEKAS<br>F                 | Homo sapiens |
| 1 | 1.00 | 1 | 1 | 0.02  | 0.023  | 0.03   | 0.02   | 0.02   | t | 140886 | LQEKLSP<br>L GEE              | Mus musculus |
| 1 | 1.00 | 1 | 1 | -0.02 | -0.02  | -0.02  | -0.02  | -0.02  | t | 133622 | KPGDPSAL<br>HVVRCW<br>IC      | Mus musculus |
| 1 | 1.00 | 1 | 1 | -0.02 | -0.02  | -0.02  | -0.02  | -0.02  | t | 133622 | KPGDPSAL<br>HVVRCW<br>IC      | Mus musculus |

|   |      |   |   |       |        |        |        |        |   |        |                              |                                  |
|---|------|---|---|-------|--------|--------|--------|--------|---|--------|------------------------------|----------------------------------|
| 1 | 1.00 | 1 | 1 | -0.02 | -0.02  | -0.02  | -0.02  | -0.02  | t | 133622 | KPGDPSAL<br>HVVRWCW<br>C     | Mus<br>musculu<br>s              |
| 1 | 1.00 | 1 | 1 | -0.02 | -0.02  | -0.02  | -0.02  | -0.02  | t | 133622 | KPGDPSAL<br>HVVRWCW<br>C     | Mus<br>musculu<br>s              |
| 1 | 1.00 | 1 | 1 | 0     | 0.002  | 0.01   | 0.003  | 0      | t | 18961  | GDESDSS<br>DGYPPNR<br>QDPRF  | Homo<br>sapiens                  |
| 1 | 1.00 | 1 | 1 | 0.03  | 0.033  | 0.036  | 0.029  | 0.03   | t | 49223  | PRNNNRT<br>RVHGDKA<br>T      | Capra<br>hircus                  |
| 1 | 1.00 | 1 | 1 | 0.03  | 0.028  | 0.036  | 0.029  | 0.03   | t | 49223  | PRNNNRT<br>RVHGDKA<br>T      | Sus<br>scrofa                    |
| 1 | 1.00 | 1 | 1 | 0.05  | 0.05   | 0.048  | 0.05   | 0.053  | t | 22755  | GTLVKTIT<br>DDQIEV           | Mus<br>musculu<br>s              |
| 1 | 1.00 | 1 | 1 | -0.01 | -0.01  | -0.013 | -0.01  | -0.01  | t | 26610  | IINNSTNV<br>VIRACNFE<br>L    | Homo<br>sapiens                  |
| 1 | 1.00 | 1 | 1 | -0.04 | -0.038 | -0.042 | -0.039 | -0.038 | t | 122162 | PIPVPIIPP<br>FPGWQPG<br>MPT  | Homo<br>sapiens                  |
| 1 | 1.00 | 1 | 1 | -0.03 | -0.03  | -0.019 | -0.03  | -0.032 | t | 36045  | LGAARGYT<br>FGAC             | Oryctola<br>gus<br>cuniculu<br>s |
| 1 | 1.00 | 1 | 1 | -0.03 | -0.027 | -0.019 | -0.03  | -0.032 | t | 36045  | LGAARGYT<br>FGAC             | Mus<br>musculu<br>s              |
| 1 | 1.00 | 1 | 1 | 0.01  | 0.01   | 0.022  | 0.01   | 0.01   | t | 131575 | NSDGSHT                      | Mus<br>musculu<br>s              |
| 1 | 1.00 | 1 | 1 | 0     | 0      | 0      | 0      | 0      | t | 120841 | NNADGDF<br>AIVHMTKL<br>LLDYT | Mus<br>musculu<br>s              |
| 1 | 1.00 | 1 | 1 | -0.01 | -0.01  | -0.003 | -0.012 | -0.01  | t | 96207  | EDDAEDK<br>DED               | Homo<br>sapiens                  |
| 1 | 1.00 | 1 | 1 | 0.01  | 0.007  | 0.01   | 0.011  | 0.012  | t | 105861 | HDSGYEV<br>HHQKLVFF<br>AEDVG | Oryctola<br>gus<br>cuniculu<br>s |
| 1 | 1.00 | 1 | 1 | -0.01 | -0.01  | -0.012 | -0.014 | -0.008 | t | 118514 | MASAARL<br>TMMWEE            | Homo<br>sapiens                  |

|   |      |   |   |       |        |       |       |        |   |        |                              |                                  |
|---|------|---|---|-------|--------|-------|-------|--------|---|--------|------------------------------|----------------------------------|
| 1 | 1.00 | 1 | 1 | -0.04 | -0.04  | -0.04 | -0.04 | -0.04  | t | 115863 | MARHPHP<br>HLS               | Homo<br>sapiens                  |
| 1 | 1.00 | 1 | 1 | -0.04 | -0.04  | -0.04 | -0.04 | -0.04  | t | 106490 | GWGGHW<br>RGAN               | Homo<br>sapiens                  |
| 1 | 1.00 | 1 | 1 | -0.06 | -0.06  | -0.06 | -0.06 | -0.06  | t | 112381 | VGWIRQR                      | Homo<br>sapiens                  |
| 1 | 1.00 | 1 | 1 | 0.01  | 0.012  | 0.007 | 0.011 | 0.012  | t | 18364  | FWRGDLV<br>FDFQVFPT<br>KYHSG | Homo<br>sapiens                  |
| 1 | 1.00 | 1 | 1 | 0     | -0.003 | 0     | 0     | 0.003  | t | 119649 | SYCEIIVTH<br>FPFDQQN<br>CT   | Oryctola<br>gus<br>cuniculu<br>s |
| 1 | 1.00 | 1 | 1 | 0     | -0.003 | 0     | 0     | 0.003  | t | 119642 | SEHETRLV<br>ANLLENYN<br>KVIR | Oryctola<br>gus<br>cuniculu<br>s |
| 1 | 1.00 | 1 | 1 | 0     | -0.003 | 0     | 0     | 0.003  | t | 119468 | ISGKQVTG<br>EVIFQTPLI<br>K   | Oryctola<br>gus<br>cuniculu<br>s |
| 1 | 1.00 | 1 | 1 | 0     | -0.003 | 0     | 0     | 0.003  | t | 55621  | RRKAHAG<br>NKKAEDLT<br>MDDLE | Oryctola<br>gus<br>cuniculu<br>s |
| 1 | 1.00 | 1 | 1 | 0     | -0.003 | 0     | 0     | 0.003  | t | 48093  | PKKPENK<br>LKQPNE            | Oryctola<br>gus<br>cuniculu<br>s |
| 1 | 1.00 | 1 | 1 | 0     | 0.002  | 0     | 0     | 0.003  | t | 53326  | RDALPNT<br>E                 | Rattus<br>norvegic<br>us         |
| 1 | 1.00 | 1 | 1 | 0     | -0.003 | 0     | 0     | 0.003  | t | 55621  | RRKAHAG<br>NKKAEDLT<br>MDDLE | Oryctola<br>gus<br>cuniculu<br>s |
| 1 | 1.00 | 1 | 1 | 0     | -0.003 | 0     | 0     | 0.003  | t | 48093  | PKKPENK<br>LKQPNE            | Oryctola<br>gus<br>cuniculu<br>s |
| 1 | 1.00 | 1 | 1 | 0     | -0.003 | 0     | 0     | 0.003  | t | 24786  | HSLGKWL<br>GHPDKF            | Oryctola<br>gus<br>cuniculu<br>s |
| 1 | 1.00 | 1 | 1 | -0.01 | -0.01  | -0.01 | -0.01 | -0.008 | t | 45438  | NPNPNPN                      | Mus<br>musculu<br>s              |



|   |      |   |   |       |        |        |        |        |   |        |                              |                       |
|---|------|---|---|-------|--------|--------|--------|--------|---|--------|------------------------------|-----------------------|
| 1 | 1.00 | 1 | 1 | 0.04  | 0.04   | 0.043  | 0.04   | 0.047  | t | 61485  | SSYGFAQ                      | Homo sapiens          |
| 1 | 1.00 | 1 | 1 | 0     | -0.01  | -0.003 | 0.001  | 0      | t | 38014  | LMESELVI<br>GAVIIRGH<br>LR   | Homo sapiens          |
| 1 | 1.00 | 1 | 1 | -0.01 | -0.015 | -0.012 | -0.01  | -0.011 | t | 131313 | SQWSRSA<br>SRNRRHVT<br>EEADV | Callithrix pygmaea    |
| 1 | 1.00 | 1 | 1 | 0.02  | 0.022  | 0.02   | 0.017  | 0.021  | t | 125358 | AETVESCL<br>AKSH             | Homo sapiens          |
| 1 | 1.00 | 1 | 1 | 0     | 0      | 0.007  | 0      | 0      | t | 13568  | ENPVVHFF<br>ANIVTPRT<br>P    | Mus musculus          |
| 1 | 1.00 | 1 | 1 | 0.01  | 0.01   | 0.01   | 0.01   | 0.01   | t | 47122  | PDKEVLYE<br>AFDEMEE<br>CASKA | Homo sapiens          |
| 1 | 1.00 | 1 | 1 | -0.01 | -0.008 | -0.003 | -0.013 | -0.011 | t | 106787 | RRQIEAGL<br>NE               | Homo sapiens          |
| 1 | 1.00 | 1 | 1 | -0.04 | -0.036 | -0.034 | -0.04  | -0.04  | t | 70661  | VQVRI                        | Homo sapiens          |
| 1 | 1.00 | 1 | 1 | 0     | -0.002 | 0.007  | -0.001 | 0.002  | t | 58334  | SGYWAIR                      | Mus musculus          |
| 1 | 1.00 | 1 | 1 | 0.04  | 0.043  | 0.038  | 0.04   | 0.042  | t | 53766  | RFQPFQQ<br>FGRDVSD<br>FDT    | Mus musculus          |
| 1 | 1.00 | 1 | 1 | 0.04  | 0.04   | 0.038  | 0.04   | 0.042  | t | 53766  | RFQPFQQ<br>FGRDVSD<br>FDT    | Oryctolagus cuniculus |
| 1 | 1.00 | 1 | 1 | -0.01 | -0.012 | -0.004 | -0.011 | -0.01  | t | 30236  | KDRTLIEQ<br>K                | Mus musculus          |
| 1 | 1.00 | 1 | 1 | -0.02 | -0.023 | -0.01  | -0.02  | -0.02  | t | 139203 | QIYKAQA<br>QTDRESLR<br>NLR   | Mus musculus          |
| 1 | 1.00 | 1 | 1 | -0.03 | -0.03  | -0.03  | -0.03  | -0.028 | t | 156904 | KPGDPRH                      | Mus musculus          |
| 1 | 1.00 | 1 | 1 | 0.01  | 0.009  | 0.017  | 0.013  | 0.01   | t | 130622 | TGLVAQG<br>TDSIG             | Camelus dromedarius   |

|   |      |   |   |       |        |        |        |        |   |        |                              |                                  |
|---|------|---|---|-------|--------|--------|--------|--------|---|--------|------------------------------|----------------------------------|
| 1 | 1.00 | 1 | 1 | -0.02 | -0.025 | -0.013 | -0.023 | -0.02  | t | 71422  | VTMTDLV<br>PGILEKQR          | Bos<br>taurus                    |
| 1 | 1.00 | 1 | 1 | 0.06  | 0.057  | 0.074  | 0.06   | 0.062  | t | 79647  | SLTTDEL                      | Oryctola<br>gus<br>cuniculu<br>s |
| 1 | 1.00 | 1 | 1 | 0.06  | 0.06   | 0.06   | 0.049  | 0.058  | t | 118521 | MLLKGGK<br>DKAQIE            | Homo<br>sapiens                  |
| 1 | 1.00 | 1 | 1 | -0.04 | -0.036 | -0.03  | -0.04  | -0.04  | t | 73744  | YEPYYHSD<br>HAESSWV<br>NRGES | Cavia<br>porcellu<br>s           |
| 1 | 1.00 | 1 | 1 | -0.01 | -0.01  | -0.01  | -0.01  | -0.007 | t | 51853  | QPHGGG<br>W                  | Mus<br>musculu<br>s              |
| 1 | 1.00 | 1 | 1 | -0.01 | -0.01  | -0.01  | -0.01  | -0.008 | t | 28074  | IPSTACTDI<br>AWVRLPC<br>HYG  | Homo<br>sapiens                  |
| 1 | 1.00 | 1 | 1 | -0.01 | -0.008 | -0.01  | -0.01  | -0.008 | t | 28074  | IPSTACTDI<br>AWVRLPC<br>HYG  | Rattus<br>norvegic<br>us         |
| 1 | 1.00 | 1 | 1 | 0.03  | 0.03   | 0.042  | 0.03   | 0.031  | t | 121098 | YTCCPD                       | Rattus<br>norvegic<br>us         |
| 1 | 1.00 | 1 | 1 | -0.04 | -0.04  | -0.033 | -0.04  | -0.04  | t | 108486 | IRRSETPRA                    | Homo<br>sapiens                  |
| 1 | 1.00 | 1 | 1 | -0.02 | -0.02  | -0.011 | -0.02  | -0.019 | t | 134492 | QIQRPS<br>M                  | Mus<br>musculu<br>s              |
| 1 | 1.00 | 1 | 1 | -0.02 | -0.02  | -0.011 | -0.02  | -0.019 | t | 134492 | QIQRPS<br>M                  | Mus<br>musculu<br>s              |
| 1 | 1.00 | 1 | 1 | -0.02 | -0.021 | -0.019 | -0.023 | -0.019 | t | 99420  | LHLLGFGI<br>NAENNHR          | Homo<br>sapiens                  |
| 1 | 1.00 | 1 | 1 | 0.02  | 0.02   | 0.016  | 0.02   | 0.02   | t | 71866  | VVVAPDKE<br>ILYAFDE<br>MEEC  | Homo<br>sapiens                  |
| 1 | 1.00 | 1 | 1 | -0.01 | -0.013 | -0.01  | -0.01  | -0.01  | t | 3367   | ANNSANN<br>GKKNNAE<br>E      | Oryctola<br>gus<br>cuniculu<br>s |
| 1 | 1.00 | 1 | 1 | -0.02 | -0.016 | -0.015 | -0.019 | -0.02  | t | 78689  | ISGGLCSA<br>RLHRHALL<br>ATCP | Homo<br>sapiens                  |

|   |      |   |   |       |        |        |        |        |   |        |                              |                                  |
|---|------|---|---|-------|--------|--------|--------|--------|---|--------|------------------------------|----------------------------------|
| 1 | 1.00 | 1 | 1 | -0.02 | -0.018 | -0.015 | -0.019 | -0.02  | t | 78689  | ISGGLCSA<br>RLHRHALL<br>ATCP | Homo<br>sapiens                  |
| 1 | 1.00 | 1 | 1 | -0.01 | -0.008 | -0.012 | -0.013 | -0.009 | t | 34335  | KWVNGRE<br>I                 | Homo<br>sapiens                  |
| 1 | 1.00 | 1 | 1 | -0.02 | -0.022 | -0.013 | -0.021 | -0.022 | t | 138034 | SDHSRNG<br>FDTDS             | Mus<br>musculu<br>s              |
| 1 | 1.00 | 1 | 1 | 0.03  | 0.027  | 0.04   | 0.03   | 0.032  | t | 68052  | VDQYSNQ<br>NNF               | Oryctola<br>gus<br>cuniculu<br>s |
| 1 | 1.00 | 1 | 1 | 0     | 0      | -0.005 | -0.003 | 0.002  | t | 40905  | LYQDVNC<br>TDVSTAIH<br>AD    | Homo<br>sapiens                  |
| 1 | 1.00 | 1 | 1 | 0.03  | 0.03   | 0.042  | 0.03   | 0.03   | t | 133531 | CDTLKPGE<br>C                | Mus<br>musculu<br>s              |
| 1 | 1.00 | 1 | 1 | -0.04 | -0.044 | -0.036 | -0.043 | -0.042 | t | 18816  | GAVPPAC<br>CNGIRTIN          | Oryctola<br>gus<br>cuniculu<br>s |
| 1 | 1.00 | 1 | 1 | 0     | 0      | 0.01   | 0      | 0      | t | 68811  | VGVAPG                       | Mus<br>musculu<br>s              |
| 1 | 1.00 | 1 | 1 | -0.02 | -0.016 | -0.01  | -0.019 | -0.02  | t | 4856   | ASYVKKPK<br>EDVD             | Homo<br>sapiens                  |
| 1 | 1.00 | 1 | 1 | 0     | 0      | -0.002 | -0.002 | 0      | t | 7822   | DDLPTTM<br>FQPVRAPC<br>IQTAW | Homo<br>sapiens                  |
| 1 | 1.00 | 1 | 1 | -0.03 | -0.028 | -0.025 | -0.023 | -0.027 | t | 122262 | ALRCRRISK<br>EEYHLYKD<br>GHL | Homo<br>sapiens                  |
| 1 | 1.00 | 1 | 1 | -0.03 | -0.028 | -0.025 | -0.023 | -0.027 | t | 122262 | ALRCRRISK<br>EEYHLYKD<br>GHL | Homo<br>sapiens                  |
| 1 | 1.00 | 1 | 1 | -0.05 | -0.046 | -0.041 | -0.049 | -0.048 | t | 17876  | FSVPWPT<br>RPPHW             | Homo<br>sapiens                  |

|   |      |   |   |       |        |        |        |        |   |        |                              |                                  |
|---|------|---|---|-------|--------|--------|--------|--------|---|--------|------------------------------|----------------------------------|
| 1 | 1.00 | 1 | 1 | -0.04 | -0.043 | -0.039 | -0.04  | -0.04  | t | 11372  | EDKRDGN<br>N                 | Oryctola<br>gus<br>cuniculu<br>s |
| 1 | 1.00 | 1 | 1 | -0.03 | -0.03  | -0.03  | -0.03  | -0.028 | t | 125472 | LDAVYLNK<br>NKYLTVID<br>KDAF | Homo<br>sapiens                  |
| 1 | 1.00 | 1 | 1 | 0.07  | 0.068  | 0.07   | 0.063  | 0.07   | t | 133668 | QEGPEYW<br>DRNT              | Mus<br>musculu<br>s              |
| 1 | 1.00 | 1 | 1 | -0.05 | -0.052 | -0.05  | -0.046 | -0.048 | t | 118012 | MAPPPG<br>MRPP               | Mus<br>musculu<br>s              |
| 1 | 1.00 | 1 | 1 | -0.03 | -0.03  | -0.023 | -0.03  | -0.029 | t | 133705 | SSKTRSG<br>VHLVGPY           | Mus<br>musculu<br>s              |
| 1 | 1.00 | 1 | 1 | -0.04 | -0.054 | -0.033 | -0.037 | -0.038 | t | 34476  | KYKDKPLY                     | Macaca<br>mulatta                |
| 1 | 1.00 | 1 | 1 | -0.01 | -0.01  | -0.008 | -0.01  | -0.011 | t | 11772  | EELTPGRF<br>RT               | Mus<br>musculu<br>s              |
| 1 | 1.00 | 1 | 1 | -0.01 | -0.006 | -0.002 | -0.009 | -0.01  | t | 52417  | QSQQQGN<br>SRRGPRVV<br>P     | Capra<br>hircus                  |
| 1 | 1.00 | 1 | 1 | -0.02 | -0.02  | -0.015 | -0.02  | -0.02  | t | 120404 | AMMIARF<br>KMFPEVKE<br>K     | Oryctola<br>gus<br>cuniculu<br>s |
| 1 | 1.00 | 1 | 1 | 0     | -0.002 | 0.008  | -0.003 | 0.001  | t | 36317  | LGSGAFGT<br>IYKG             | Mus<br>musculu<br>s              |
| 1 | 1.00 | 1 | 1 | -0.04 | -0.036 | -0.036 | -0.043 | -0.041 | t | 43990  | NGGPCVFI<br>KRVS             | Homo<br>sapiens                  |
| 1 | 1.00 | 1 | 1 | 0.03  | 0.033  | 0.03   | 0.03   | 0.037  | t | 14951  | EWSPCSVT<br>CGK              | Mus<br>musculu<br>s              |
| 1 | 1.00 | 1 | 1 | -0.02 | -0.022 | -0.016 | -0.021 | -0.019 | t | 53866  | RGFRKEI                      | Mus<br>musculu<br>s              |
| 1 | 1.00 | 1 | 1 | -0.02 | -0.018 | -0.024 | -0.023 | -0.018 | t | 150853 | HIGGLSILD<br>PIFGVL          | Homo<br>sapiens                  |

|   |      |   |   |       |        |        |        |        |   |        |                         |                                  |
|---|------|---|---|-------|--------|--------|--------|--------|---|--------|-------------------------|----------------------------------|
| 1 | 1.00 | 1 | 1 | -0.07 | -0.077 | -0.062 | -0.07  | -0.069 | t | 56937  | SAPPTRVR<br>R           | Oryctola<br>gus<br>cuniculu<br>s |
| 1 | 1.00 | 1 | 1 | -0.07 | -0.073 | -0.062 | -0.07  | -0.069 | t | 56937  | SAPPTRVR<br>R           | Oryctola<br>gus<br>cuniculu<br>s |
| 1 | 1.00 | 1 | 1 | -0.04 | -0.04  | -0.039 | -0.04  | -0.04  | t | 67262  | TWHLPAH<br>APVVR        | Mus<br>musculu<br>s              |
| 1 | 1.00 | 1 | 1 | -0.04 | -0.04  | -0.027 | -0.04  | -0.043 | t | 4424   | ASGLTSLFS<br>PGSKQH     | Mus<br>musculu<br>s              |
| 1 | 1.00 | 1 | 1 | 0.01  | 0.006  | 0.006  | 0.003  | 0.01   | t | 144615 | DNTSIYYG<br>GLVSPAI     | Oryctola<br>gus<br>cuniculu<br>s |
| 1 | 1.00 | 1 | 1 | 0.02  | 0.018  | 0.031  | 0.023  | 0.022  | t | 106843 | SKDHEYPF<br>FPEPSCI     | Mus<br>musculu<br>s              |
| 1 | 1.00 | 1 | 1 | 0     | -0.001 | 0.008  | -0.001 | 0      | t | 51751  | QNQGAW<br>PA            | Anas<br>platyrhy<br>nchos        |
| 1 | 1.00 | 1 | 1 | -0.01 | -0.01  | 0.003  | -0.01  | -0.01  | t | 159025 | NLAIHSDL<br>SYWIESRF    | Mus<br>musculu<br>s              |
| 1 | 1.00 | 1 | 1 | -0.04 | -0.04  | -0.04  | -0.04  | -0.04  | t | 103425 | MTAHTHD<br>GTRTWRT<br>G | Homo<br>sapiens                  |
| 1 | 1.00 | 1 | 1 | 0.01  | 0.01   | 0.026  | 0.01   | 0.008  | t | 52745  | QVMFDFA<br>S            | Mus<br>musculu<br>s              |
| 1 | 1.00 | 1 | 1 | 0.02  | 0.02   | 0.02   | 0.01   | 0.021  | t | 98379  | QNTK                    | Homo<br>sapiens                  |
| 1 | 1.00 | 1 | 1 | 0.03  | 0.03   | 0.03   | 0.03   | 0.03   | t | 74201  | YIEQGMQ<br>LAEQFKQ      | Homo<br>sapiens                  |
| 1 | 1.00 | 1 | 1 | -0.03 | -0.03  | -0.03  | -0.03  | -0.029 | t | 112153 | HIWWND<br>N             | Homo<br>sapiens                  |
| 1 | 1.00 | 1 | 1 | -0.04 | -0.044 | -0.04  | -0.041 | -0.042 | t | 20770  | GLARTTAD<br>RQTACNC     | Oryctola<br>gus<br>cuniculu<br>s |

|   |      |   |   |       |        |        |        |        |   |        |                              |                                  |
|---|------|---|---|-------|--------|--------|--------|--------|---|--------|------------------------------|----------------------------------|
| 1 | 1.00 | 1 | 1 | -0.02 | -0.017 | -0.013 | -0.02  | -0.02  | t | 10860  | DYDGYGW<br>RE                | Mus<br>musculu<br>s              |
| 1 | 1.00 | 1 | 1 | -0.01 | -0.006 | -0.003 | -0.013 | -0.012 | t | 53810  | RFYLAGN<br>QEQLFLKY          | Homo<br>sapiens                  |
| 1 | 1.00 | 1 | 1 | 0     | 0      | -0.002 | 0      | 0.001  | t | 120174 | RLRQQWI<br>DVRLRWN<br>PADYGG | Rattus<br>norvegic<br>us         |
| 1 | 1.00 | 1 | 1 | -0.01 | -0.01  | -0.003 | -0.01  | -0.009 | t | 159084 | RYKYPET<br>PRSLAKIV          | Mus<br>musculu<br>s              |
| 1 | 1.00 | 1 | 1 | 0     | 0      | 0      | 0      | 0      | t | 78932  | ATRKTSER<br>SQPRGRR<br>QPI   | Homo<br>sapiens                  |
| 1 | 1.00 | 1 | 1 | 0     | -0.002 | -0.005 | -0.007 | 0      | t | 113220 | YAPWKPT<br>VNGTVVA<br>V      | Mus<br>musculu<br>s              |
| 1 | 1.00 | 1 | 1 | 0.03  | 0.028  | 0.031  | 0.029  | 0.03   | t | 6925   | CRGFTSFK<br>KPPTPPPE<br>PET  | Mus<br>musculu<br>s              |
| 1 | 1.00 | 1 | 1 | -0.01 | -0.013 | 0      | -0.01  | -0.01  | t | 44477  | NKDKPSY<br>QFG               | Oryctola<br>gus<br>cuniculu<br>s |
| 1 | 1.00 | 1 | 1 | 0.01  | 0.007  | 0.018  | 0.007  | 0.01   | t | 67054  | TVKTKNTT<br>TTQT             | Homo<br>sapiens                  |
| 1 | 1.00 | 1 | 1 | -0.03 | -0.03  | -0.018 | -0.028 | -0.031 | t | 105041 | YEVHHQKL<br>VFF              | Homo<br>sapiens                  |
| 1 | 1.00 | 1 | 1 | 0     | 0.007  | 0.005  | -0.001 | 0      | t | 147288 | SKFQDTH<br>NNAHYV<br>FFEE    | Gallus<br>gallus                 |
| 1 | 1.00 | 1 | 1 | -0.04 | -0.036 | -0.038 | -0.04  | -0.038 | t | 100492 | SAMTVDD<br>FGVLAVR           | Homo<br>sapiens                  |
| 1 | 1.00 | 1 | 1 | 0.02  | 0.016  | 0.023  | 0.019  | 0.021  | t | 103499 | PSRTWSPP<br>FESEDSQK         | Oryctola<br>gus<br>cuniculu<br>s |

|   |      |   |   |       |        |        |        |        |   |        |                              |                                  |
|---|------|---|---|-------|--------|--------|--------|--------|---|--------|------------------------------|----------------------------------|
| 1 | 1.00 | 1 | 1 | 0.01  | 0.015  | 0.001  | 0.009  | 0.013  | t | 56557  | RYIWIKYF<br>NLFDKELN<br>EKE  | Homo<br>sapiens                  |
| 1 | 1.00 | 1 | 1 | 0     | -0.002 | -0.003 | 0.003  | 0.002  | t | 72476  | WGILSRAA<br>TNSGWVG<br>LIPHK | Rattus<br>norvegic<br>us         |
| 1 | 1.00 | 1 | 1 | -0.05 | -0.05  | -0.05  | -0.05  | -0.05  | t | 78291  | VHRNPWH<br>L                 | Homo<br>sapiens                  |
| 1 | 1.00 | 1 | 1 | -0.01 | -0.01  | -0.01  | -0.01  | -0.01  | t | 8942   | DKNEKGQ<br>HEIVEVEEI<br>LPE  | Homo<br>sapiens                  |
| 1 | 1.00 | 1 | 1 | 0     | 0      | 0      | 0.004  | 0.005  | t | 135449 | CATLRVYK<br>GG               | Homo<br>sapiens                  |
| 1 | 1.00 | 1 | 1 | 0     | 0      | 0      | 0      | 0.002  | t | 95048  | VIFQTPLIK<br>NPDVKSAI<br>EG  | Rattus<br>norvegic<br>us         |
| 1 | 1.00 | 1 | 1 | -0.01 | -0.01  | -0.008 | -0.01  | -0.01  | t | 48832  | PPLSQRR<br>L                 | Mus<br>musculu<br>s              |
| 1 | 1.00 | 1 | 1 | -0.03 | -0.028 | -0.028 | -0.027 | -0.03  | t | 122874 | PPARALKR<br>SLWVEVD<br>LLIGS | Homo<br>sapiens                  |
| 1 | 1.00 | 1 | 1 | 0.04  | 0.04   | 0.054  | 0.04   | 0.039  | t | 75274  | YPEEVVEE<br>VVPEEVVE<br>EVVP | Mus<br>musculu<br>s              |
| 1 | 1.00 | 1 | 1 | -0.03 | -0.034 | -0.031 | -0.037 | -0.03  | t | 127960 | EKVPKGKK<br>GKADAGK          | Oryctola<br>gus<br>cuniculu<br>s |
| 1 | 1.00 | 1 | 1 | 0.02  | 0.02   | 0.02   | 0.02   | 0.02   | t | 46823  | PAIIPDREA<br>LYQEFDE<br>MEEC | Homo<br>sapiens                  |
| 1 | 1.00 | 1 | 1 | -0.03 | -0.03  | -0.021 | -0.028 | -0.03  | t | 135957 | LSSRPGGC<br>SAVS             | Homo<br>sapiens                  |
| 1 | 1.00 | 1 | 1 | -0.02 | -0.02  | -0.02  | -0.02  | -0.02  | t | 110385 | QLYKTCKQ<br>AGTCPPDII<br>PKV | Mus<br>musculu<br>s              |
| 1 | 1.00 | 1 | 1 | -0.05 | -0.05  | -0.046 | -0.05  | -0.051 | t | 13514  | ENLLKEAIR<br>AIFPSR          | Mus<br>musculu<br>s              |
| 1 | 1.00 | 1 | 1 | 0     | -0.002 | 0.009  | -0.003 | 0      | t | 56201  | RTTTASGK<br>L                | Mus<br>musculu<br>s              |

|   |      |   |   |       |        |        |        |        |   |        |                              |                                         |
|---|------|---|---|-------|--------|--------|--------|--------|---|--------|------------------------------|-----------------------------------------|
| 1 | 1.00 | 1 | 1 | 0.03  | 0.03   | 0.048  | 0.032  | 0.029  | t | 99020  | TELPSIPG                     | Homo sapiens                            |
| 1 | 1.00 | 1 | 1 | 0     | 0.002  | 0.016  | 0.003  | 0.002  | t | 21085  | GLQPRAD<br>MAAPPTL<br>PQ     | Homo sapiens                            |
| 1 | 1.00 | 1 | 1 | 0.03  | 0.03   | 0.031  | 0.03   | 0.028  | t | 3676   | APPGSPAP<br>PPPEHRG<br>GPEEF | Homo sapiens                            |
| 1 | 1.00 | 1 | 1 | -0.04 | -0.048 | -0.04  | -0.04  | -0.037 | t | 136509 | MMKKTRK<br>RTKRR             | Mus musculus                            |
| 1 | 1.00 | 1 | 1 | -0.01 | -0.01  | -0.004 | -0.007 | -0.011 | t | 22367  | GSHLPYIE<br>QGMQLAE<br>QFKQK | Homo sapiens                            |
| 1 | 1.00 | 1 | 1 | -0.02 | -0.008 | -0.006 | -0.021 | -0.022 | t | 156981 | YTSLPAPM<br>QRLP             | Gallus gallus                           |
| 1 | 1.00 | 1 | 1 | -0.05 | -0.023 | -0.046 | -0.044 | -0.048 | t | 106906 | THWQGVY<br>WVGATPK<br>A      | Maccullo<br>chella<br>macquar<br>iensis |
| 1 | 1.00 | 1 | 1 | -0.01 | -0.01  | -0.01  | -0.01  | -0.01  | t | 78398  | GLKNSA<br>VLVYLVGS           | Mus musculus                            |
| 1 | 1.00 | 1 | 1 | -0.02 | -0.018 | -0.021 | -0.019 | -0.02  | t | 120550 | GDVQPAE<br>VVAAAR            | Homo sapiens                            |
| 1 | 1.00 | 1 | 1 | -0.01 | -0.006 | 0.001  | -0.009 | -0.011 | t | 21804  | GPSYGFQY<br>SPGQRVEF<br>LVNT | Homo sapiens                            |
| 1 | 1.00 | 1 | 1 | 0.01  | 0.005  | 0.017  | 0.009  | 0.01   | t | 54058  | RHKQKIVA<br>PVKQTL           | Bos taurus                              |
| 1 | 1.00 | 1 | 1 | 0     | 0      | -0.005 | -0.004 | 0.001  | t | 102564 | KKRPKPGG<br>GWNT             | Homo sapiens                            |
| 1 | 1.00 | 1 | 1 | -0.03 | -0.028 | -0.018 | -0.029 | -0.031 | t | 15110  | EYVLLFLL                     | Homo sapiens                            |
| 1 | 1.00 | 1 | 1 | 0.02  | 0.017  | 0.025  | 0.02   | 0.02   | t | 125772 | CAPEPGIP<br>GETRG            | Oryctola<br>gus<br>cuniculu<br>s        |



|   |      |   |   |       |        |        |        |        |   |        |                              |                                  |
|---|------|---|---|-------|--------|--------|--------|--------|---|--------|------------------------------|----------------------------------|
| 1 | 1.00 | 1 | 1 | 0     | -0.002 | 0.005  | -0.001 | -0.002 | t | 133684 | RRIASQVK<br>YAGSQVA<br>STSE  | Mus<br>musculu<br>s              |
| 1 | 1.00 | 1 | 1 | -0.03 | -0.034 | -0.024 | -0.03  | -0.032 | t | 123439 | LLARDAPD<br>TDWCDSIP         | Mus<br>musculu<br>s              |
| 1 | 1.00 | 1 | 1 | -0.02 | -0.015 | 0.003  | -0.013 | -0.019 | t | 119596 | IHIPSEKIW<br>RPDLVLY         | Homo<br>sapiens                  |
| 1 | 1.00 | 1 | 1 | -0.03 | -0.03  | -0.014 | -0.02  | -0.028 | t | 116697 | DVCNFASR<br>NDYSYWL<br>STP   | Homo<br>sapiens                  |
| 1 | 1.00 | 1 | 1 | 0.02  | 0.02   | 0.02   | 0.02   | 0.021  | t | 130599 | RQGEEVY<br>MWRDSM<br>PA      | Mus<br>musculu<br>s              |
| 1 | 1.00 | 1 | 1 | 0.04  | 0.036  | 0.036  | 0.033  | 0.04   | t | 144611 | DFNGSFD<br>MNGTITA           | Oryctola<br>gus<br>cuniculu<br>s |
| 1 | 1.00 | 1 | 1 | -0.02 | -0.02  | -0.02  | -0.02  | -0.019 | t | 139841 | PAGRQAR<br>RPATVPEG          | Mus<br>musculu<br>s              |
| 1 | 1.00 | 1 | 1 | -0.04 | -0.04  | -0.04  | -0.04  | -0.039 | t | 140595 | RHEDGDW<br>PRV               | Mus<br>musculu<br>s              |
| 1 | 1.00 | 1 | 1 | 0.02  | 0.018  | 0.031  | 0.019  | 0.02   | t | 110622 | GRPGDAG<br>PQGKVG<br>PS      | Mus<br>musculu<br>s              |
| 1 | 1.00 | 1 | 1 | -0.05 | -0.044 | -0.036 | -0.043 | -0.049 | t | 132783 | CHAWSNR<br>RTC               | Homo<br>sapiens                  |
| 1 | 1.00 | 1 | 1 | -0.01 | 0.004  | 0.016  | -0.009 | -0.01  | t | 73974  | YGAAFS                       | Homo<br>sapiens                  |
| 1 | 1.00 | 1 | 1 | -0.01 | -0.01  | -0.01  | -0.01  | -0.007 | t | 149296 | ELDKWAG                      | Homo<br>sapiens                  |
| 1 | 1.00 | 1 | 1 | 0.02  | 0.02   | 0.026  | 0.023  | 0.021  | t | 30665  | KEVTQND<br>GTTTIANN<br>LTSTV | Homo<br>sapiens                  |
| 1 | 1.00 | 1 | 1 | -0.03 | -0.028 | -0.035 | -0.031 | -0.028 | t | 142340 | YRPNWTV<br>PEFTLDIFN<br>ATYL | Felis<br>catus                   |

|   |      |   |   |       |        |        |        |        |   |        |                             |                     |
|---|------|---|---|-------|--------|--------|--------|--------|---|--------|-----------------------------|---------------------|
| 1 | 1.00 | 1 | 1 | -0.01 | -0.008 | -0.002 | -0.009 | -0.01  | t | 98065  | GKVN SAV<br>GK              | Homo<br>sapiens     |
| 1 | 1.00 | 1 | 1 | 0     | -0.002 | 0.002  | -0.001 | 0      | t | 4129   | ARDLICAQ<br>KFNGLT<br>VLP   | Mus<br>musculu<br>s |
| 1 | 1.00 | 1 | 1 | 0.01  | 0.014  | 0.011  | 0.011  | 0.01   | t | 78833  | SLDSPSP<br>PREPLRPS<br>RSLP | Homo<br>sapiens     |
| 1 | 1.00 | 1 | 1 | 0.01  | 0.01   | 0.01   | 0.004  | 0.01   | t | 94480  | CSICSNNP<br>TCWA            | Homo<br>sapiens     |
| 1 | 1.00 | 1 | 1 | -0.01 | -0.01  | -0.01  | -0.014 | -0.009 | t | 134202 | QKLSVPDG<br>FKVSNSAR<br>GW  | Homo<br>sapiens     |
| 1 | 1.00 | 1 | 1 | 0     | 0      | 0      | -0.004 | 0      | t | 135940 | ISQEMERI<br>PRLR            | Homo<br>sapiens     |
| 1 | 1.00 | 1 | 1 | -0.04 | -0.04  | -0.04  | -0.044 | -0.04  | t | 115784 | HRTFE                       | Homo<br>sapiens     |
| 1 | 1.00 | 1 | 1 | -0.05 | -0.05  | -0.05  | -0.05  | -0.05  | t | 79388  | SCTYSGRA<br>DAVVCR          | Mus<br>musculu<br>s |
| 1 | 1.00 | 1 | 1 | -0.01 | -0.01  | -0.01  | -0.01  | -0.007 | t | 57541  | SELSQL                      | Mus<br>musculu<br>s |
| 1 | 1.00 | 1 | 1 | 0.02  | 0.024  | 0.031  | 0.017  | 0.018  | t | 73051  | WRSTRDA<br>FINGAY           | Homo<br>sapiens     |
| 1 | 1.00 | 1 | 1 | 0.02  | 0.024  | 0.031  | 0.017  | 0.018  | t | 73051  | WRSTRDA<br>FINGAY           | Homo<br>sapiens     |
| 1 | 1.00 | 1 | 1 | -0.01 | -0.01  | -0.004 | -0.01  | -0.008 | t | 22639  | GTEKF                       | Mus<br>musculu<br>s |
| 1 | 1.00 | 1 | 1 | -0.01 | -0.012 | -0.008 | -0.003 | -0.003 | t | 130752 | CLAVLWV<br>VKSTPAS          | Mus<br>musculu<br>s |
| 1 | 1.00 | 1 | 1 | 0.04  | 0.038  | 0.047  | 0.037  | 0.038  | t | 77925  | KACSNNST<br>CFNP            | Mus<br>musculu<br>s |
| 1 | 1.00 | 1 | 1 | -0.01 | -0.006 | 0.006  | -0.009 | -0.01  | t | 26338  | IGVIIT                      | Homo<br>sapiens     |

|   |      |   |   |       |        |        |        |        |   |        |                              |                       |
|---|------|---|---|-------|--------|--------|--------|--------|---|--------|------------------------------|-----------------------|
| 1 | 1.00 | 1 | 1 | 0     | 0      | 0      | 0      | 0.004  | t | 146019 | TCPDPIIP                     | Mus musculus          |
| 1 | 1.00 | 1 | 1 | -0.04 | -0.04  | -0.04  | -0.044 | -0.041 | t | 131685 | SYAIAWH                      | Homo sapiens          |
| 1 | 1.00 | 1 | 1 | 0.02  | 0.016  | 0.026  | 0.019  | 0.021  | t | 22793  | GTQFTFDS<br>WNYSFED<br>NYS   | Oryctolagus cuniculus |
| 1 | 1.00 | 1 | 1 | -0.01 | -0.008 | -0.01  | -0.01  | -0.011 | t | 117172 | TSSEVATE<br>VPFRLMH<br>PQPED | Rattus norvegicus     |
| 1 | 1.00 | 1 | 1 | 0.01  | 0.014  | 0.018  | 0.007  | 0.01   | t | 125366 | ASPASHG<br>NNNIS             | Homo sapiens          |
| 1 | 1.00 | 1 | 1 | 0.04  | 0.043  | 0.056  | 0.04   | 0.042  | t | 110421 | SFVSLVEET<br>AFID            | Mus musculus          |
| 1 | 1.00 | 1 | 1 | -0.02 | -0.014 | -0.005 | -0.02  | -0.02  | t | 139809 | LPLTPRS                      | Ovis aries            |
| 1 | 1.00 | 1 | 1 | 0.03  | 0.028  | 0.03   | 0.023  | 0.033  | t | 134702 | KEKKYS                       | Mus musculus          |
| 1 | 1.00 | 1 | 1 | 0     | 0      | 0      | -0.003 | 0.002  | t | 60359  | SQAAPYIE<br>QAQAIAH<br>QFKEK | Homo sapiens          |
| 1 | 1.00 | 1 | 1 | -0.01 | -0.01  | -0.01  | -0.014 | -0.01  | t | 135952 | LLLLSSRPG<br>GCS             | Homo sapiens          |
| 1 | 1.00 | 1 | 1 | -0.05 | -0.05  | -0.05  | -0.054 | -0.05  | t | 135910 | DRRLCSHL<br>EVC              | Homo sapiens          |
| 1 | 1.00 | 1 | 1 | -0.02 | -0.02  | -0.003 | -0.02  | -0.02  | t | 97252  | DTPLTTAA<br>LRLV             | Mus musculus          |
| 1 | 1.00 | 1 | 1 | -0.02 | -0.02  | -0.003 | -0.02  | -0.02  | t | 97252  | DTPLTTAA<br>LRLV             | Mus musculus          |
| 1 | 1.00 | 1 | 1 | 0.02  | 0.024  | 0.032  | 0.02   | 0.02   | t | 7480   | DADDPLLR                     | Homo sapiens          |
| 1 | 1.00 | 1 | 1 | 0     | -0.002 | 0.007  | -0.007 | -0.001 | t | 122650 | YELNP DPR<br>FLGCSTN         | Mus musculus          |

|   |      |   |   |       |        |        |        |        |   |        |                              |                                  |
|---|------|---|---|-------|--------|--------|--------|--------|---|--------|------------------------------|----------------------------------|
| 1 | 1.00 | 1 | 1 | -0.04 | -0.04  | -0.04  | -0.04  | -0.038 | t | 107788 | DHEGTHST<br>KRGHAKSR<br>PVRG | Homo<br>sapiens                  |
| 1 | 1.00 | 1 | 1 | -0.01 | -0.006 | -0.003 | -0.007 | -0.01  | t | 68684  | VGIGSASY<br>KVMTRSS          | Homo<br>sapiens                  |
| 1 | 1.00 | 1 | 1 | 0     | 0.004  | 0      | 0      | 0.003  | t | 134702 | KEKKYS                       | Ovis<br>aries                    |
| 1 | 1.00 | 1 | 1 | 0     | 0.003  | 0      | 0      | 0.003  | t | 124588 | PQEETLQA<br>FDSHYDYT         | Sus<br>scrofa                    |
| 1 | 1.00 | 1 | 1 | 0     | -0.003 | 0      | 0      | 0.003  | t | 119187 | GNAEVHA<br>SFFDIGG           | Oryctola<br>gus<br>cuniculu<br>s |
| 1 | 1.00 | 1 | 1 | 0     | -0.003 | 0      | 0      | 0.003  | t | 118877 | LDVEQLGI<br>PEQEYSC          | Oryctola<br>gus<br>cuniculu<br>s |
| 1 | 1.00 | 1 | 1 | 0     | -0.003 | 0      | 0      | 0.003  | t | 110385 | QLYKTCKQ<br>AGTCPPDII<br>PKV | Oryctola<br>gus<br>cuniculu<br>s |
| 1 | 1.00 | 1 | 1 | 0     | -0.003 | 0      | 0      | 0.003  | t | 106322 | DAEFRHDS<br>G                | Oryctola<br>gus<br>cuniculu<br>s |
| 1 | 1.00 | 1 | 1 | 0     | -0.003 | 0      | 0      | 0.003  | t | 95524  | KRQIYTDIE<br>MNRLGK          | Oryctola<br>gus<br>cuniculu<br>s |
| 1 | 1.00 | 1 | 1 | 0     | 0      | 0      | 0      | 0.003  | t | 70390  | VPNLRGDL<br>QVLAQKV<br>ART   | Ovis<br>aries                    |
| 1 | 1.00 | 1 | 1 | 0     | -0.004 | 0      | 0      | 0.003  | t | 69178  | VKAETRLN<br>PDLQPT           | Mus<br>musculu<br>s              |
| 1 | 1.00 | 1 | 1 | 0     | -0.002 | 0      | 0      | 0.003  | t | 69178  | VKAETRLN<br>PDLQPT           | Mus<br>musculu<br>s              |
| 1 | 1.00 | 1 | 1 | 0     | -0.004 | 0      | 0      | 0.003  | t | 70391  | VPNLRGDL<br>QVLAQKV<br>ARTLP | Mus<br>musculu<br>s              |

|   |      |   |   |   |        |   |   |       |   |       |                              |                                  |
|---|------|---|---|---|--------|---|---|-------|---|-------|------------------------------|----------------------------------|
| 1 | 1.00 | 1 | 1 | 0 | -0.003 | 0 | 0 | 0.003 | t | 74008 | YGGL                         | Oryctola<br>gus<br>cuniculu<br>s |
| 1 | 1.00 | 1 | 1 | 0 | -0.004 | 0 | 0 | 0.003 | t | 70391 | VPNLRGDL<br>QVLAQKV<br>ARTLP | Mus<br>musculu<br>s              |
| 1 | 1.00 | 1 | 1 | 0 | -0.004 | 0 | 0 | 0.003 | t | 70391 | VPNLRGDL<br>QVLAQKV<br>ARTLP | Mus<br>musculu<br>s              |
| 1 | 1.00 | 1 | 1 | 0 | 0      | 0 | 0 | 0.003 | t | 61394 | SSTKNLIY                     | Sus<br>scrofa                    |
| 1 | 1.00 | 1 | 1 | 0 | 0.002  | 0 | 0 | 0.003 | t | 70656 | VQTRHVV<br>QHRSRSES<br>SIESF | Rattus<br>norvegic<br>us         |
| 1 | 1.00 | 1 | 1 | 0 | 0.003  | 0 | 0 | 0.003 | t | 63037 | TAVSP TTL<br>R               | Sus<br>scrofa                    |
| 1 | 1.00 | 1 | 1 | 0 | -0.003 | 0 | 0 | 0.003 | t | 39689 | LSSY                         | Oryctola<br>gus<br>cuniculu<br>s |
| 1 | 1.00 | 1 | 1 | 0 | -0.003 | 0 | 0 | 0.003 | t | 53447 | REACR                        | Oryctola<br>gus<br>cuniculu<br>s |
| 1 | 1.00 | 1 | 1 | 0 | 0.002  | 0 | 0 | 0.003 | t | 58511 | SIFYTYGTA<br>PARISVPY<br>VGI | Rattus<br>norvegic<br>us         |
| 1 | 1.00 | 1 | 1 | 0 | 0      | 0 | 0 | 0.003 | t | 51371 | QLINTNGS<br>WHIN             | Rattus<br>norvegic<br>us         |
| 1 | 1.00 | 1 | 1 | 0 | -0.003 | 0 | 0 | 0.003 | t | 54057 | RHKQKIVA<br>PVK              | Oryctola<br>gus<br>cuniculu<br>s |
| 1 | 1.00 | 1 | 1 | 0 | 0      | 0 | 0 | 0.003 | t | 51371 | QLINTNGS<br>WHIN             | Rattus<br>norvegic<br>us         |

|   |      |   |   |       |        |        |        |        |   |        |                              |                          |
|---|------|---|---|-------|--------|--------|--------|--------|---|--------|------------------------------|--------------------------|
| 1 | 1.00 | 1 | 1 | 0     | 0      | 0      | 0      | 0.003  | t | 34806  | LAHLTTTH<br>ARHLP            | Sus<br>scrofa            |
| 1 | 1.00 | 1 | 1 | 0     | 0      | 0      | 0      | 0.003  | t | 4331   | ASARGDLA<br>HLTTTHAR<br>HLP  | Sus<br>scrofa            |
| 1 | 1.00 | 1 | 1 | 0     | 0.002  | 0      | 0      | 0.003  | t | 7313   | CVTIMTVD<br>NPASTTNK<br>DK   | Rattus<br>norvegicus     |
| 1 | 1.00 | 1 | 1 | 0     | 0.002  | 0      | 0      | 0.003  | t | 6832   | CPRPPRAV<br>AAYGPGV<br>DYK   | Rattus<br>norvegicus     |
| 1 | 1.00 | 1 | 1 | 0     | 0.003  | 0.001  | 0      | 0.002  | t | 19862  | GGGTHNQ<br>WNKPSKP<br>KTNLKH | Mus<br>musculus          |
| 1 | 1.00 | 1 | 1 | -0.05 | -0.05  | -0.057 | -0.05  | -0.049 | t | 133527 | AYIGLKDR<br>KRPSLRRI<br>AS   | Mus<br>musculus          |
| 1 | 1.00 | 1 | 1 | 0.03  | 0.03   | 0.03   | 0.03   | 0.028  | t | 136083 | SEGAEYDD<br>QTSQREKE<br>DDK  | Oryctolagus<br>cuniculus |
| 1 | 1.00 | 1 | 1 | 0.01  | 0.014  | 0.018  | 0.011  | 0.01   | t | 98059  | GEWAGKD<br>KIE               | Homo<br>sapiens          |
| 1 | 1.00 | 1 | 1 | 0     | -0.002 | 0.012  | 0.003  | -0.001 | t | 157917 | RTVKKNIE<br>EN               | Chlorocebus<br>aethiops  |
| 1 | 1.00 | 1 | 1 | 0.03  | 0.028  | 0.03   | 0.023  | 0.03   | t | 131073 | SQATANPS<br>CPEGT            | Rattus<br>norvegicus     |
| 1 | 1.00 | 1 | 1 | -0.01 | -0.006 | -0.001 | -0.009 | -0.01  | t | 29957  | KATAACRA<br>AKLQDCT<br>MLVN  | Homo<br>sapiens          |
| 1 | 1.00 | 1 | 1 | -0.08 | -0.08  | -0.08  | -0.08  | -0.081 | t | 130777 | DVIGQVRR<br>PEMGDQA<br>HMPYT | Homo<br>sapiens          |
| 1 | 1.00 | 1 | 1 | 0     | 0      | 0.005  | 0      | 0.002  | t | 114148 | WGAEGQK<br>PGFGYGG           | Mus<br>musculus          |

|   |      |   |   |       |        |        |        |        |   |        |                              |                                  |
|---|------|---|---|-------|--------|--------|--------|--------|---|--------|------------------------------|----------------------------------|
| 1 | 1.00 | 1 | 1 | 0     | 0      | 0.005  | 0      | 0.002  | t | 10868  | DYEDRYR<br>E                 | Mus<br>musculu<br>s              |
| 1 | 1.00 | 1 | 1 | 0     | 0      | 0.005  | 0      | 0.002  | t | 10868  | DYEDRYR<br>E                 | Mus<br>musculu<br>s              |
| 1 | 1.00 | 1 | 1 | -0.01 | -0.012 | -0.011 | -0.013 | -0.007 | t | 59982  | SPAPERRG<br>YSGYDVDP<br>Y    | Mus<br>musculu<br>s              |
| 1 | 1.00 | 1 | 1 | 0.05  | 0.048  | 0.05   | 0.044  | 0.05   | t | 138244 | SSTIANT                      | Mus<br>musculu<br>s              |
| 1 | 1.00 | 1 | 1 | -0.01 | -0.012 | -0.01  | -0.011 | -0.01  | t | 34295  | KWFKTNA<br>PNGVDEKI<br>RI    | Mus<br>musculu<br>s              |
| 1 | 1.00 | 1 | 1 | -0.01 | -0.012 | -0.01  | -0.011 | -0.01  | t | 34295  | KWFKTNA<br>PNGVDEKI<br>RI    | Mus<br>musculu<br>s              |
| 1 | 1.00 | 1 | 1 | -0.02 | -0.018 | -0.02  | -0.024 | -0.02  | t | 118021 | MKCGMW<br>GRA                | Homo<br>sapiens                  |
| 1 | 1.00 | 1 | 1 | 0.03  | 0.03   | 0.031  | 0.03   | 0.03   | t | 54408  | RKPLVSFK<br>EDTPSDN<br>PFSK  | Homo<br>sapiens                  |
| 1 | 1.00 | 1 | 1 | 0.01  | 0.006  | 0.01   | 0.009  | 0.011  | t | 59190  | SLINDMPI<br>TNDQKKL<br>MSNNV | Oryctola<br>gus<br>cuniculu<br>s |
| 1 | 1.00 | 1 | 1 | 0     | 0      | 0      | 0      | 0.001  | t | 140459 | EHWSHD<br>MFSPGD             | Mus<br>musculu<br>s              |
| 1 | 1.00 | 1 | 1 | 0     | 0      | 0      | 0      | -0.001 | t | 115199 | DAPSFSDI<br>PNPIGSEN<br>SEKT | Homo<br>sapiens                  |
| 1 | 1.00 | 1 | 1 | -0.05 | -0.05  | -0.041 | -0.05  | -0.05  | t | 57005  | SASVRIRYK<br>KMKVFC          | Mus<br>musculu<br>s              |
| 1 | 1.00 | 1 | 1 | -0.01 | -0.01  | -0.005 | -0.01  | -0.01  | t | 61399  | SSTKNLTS<br>NLTLCELN<br>V    | Sus<br>scrofa                    |
| 1 | 1.00 | 1 | 1 | 0     | 0.005  | 0      | -0.001 | 0.003  | t | 99921  | DAEFRHDS                     | Homo<br>sapiens(<br>human)       |

|   |      |   |   |       |        |        |        |        |   |        |                             |                      |
|---|------|---|---|-------|--------|--------|--------|--------|---|--------|-----------------------------|----------------------|
| 1 | 1.00 | 1 | 1 | 0     | 0.005  | 0      | -0.001 | 0.003  | t | 99921  | DAEFRHDS                    | Homo sapiens( human) |
| 1 | 1.00 | 1 | 1 | 0     | 0.003  | 0.009  | 0      | 0.002  | t | 39104  | LRGMAKD<br>GQFALKD          | Mus musculus         |
| 1 | 1.00 | 1 | 1 | 0     | 0      | 0      | -0.009 | -0.001 | t | 99134  | DAEFRHDS<br>GYEVHHQ         | Mus musculus         |
| 1 | 1.00 | 1 | 1 | 0     | 0      | 0      | -0.009 | -0.001 | t | 99134  | DAEFRHDS<br>GYEVHHQ         | Mus musculus         |
| 1 | 1.00 | 1 | 1 | 0.01  | 0.008  | 0.016  | 0.009  | 0.01   | t | 54425  | RKSITKGP<br>GRVIYAT         | Mus musculus         |
| 1 | 1.00 | 1 | 1 | -0.01 | -0.008 | -0.008 | -0.009 | -0.01  | t | 3236   | ANCASILC<br>KCYTTGT         | Homo sapiens         |
| 1 | 1.00 | 1 | 1 | -0.04 | -0.04  | -0.035 | -0.04  | -0.04  | t | 70352  | VPKPQGPN                    | Homo sapiens         |
| 1 | 1.00 | 1 | 1 | -0.02 | -0.02  | -0.02  | -0.02  | -0.02  | t | 132817 | FGQNRAN<br>PQLPP            | Homo sapiens         |
| 1 | 1.00 | 1 | 1 | -0.04 | -0.04  | -0.04  | -0.044 | -0.04  | t | 142116 | ASRKGLRR<br>DLASREA<br>KKQV | Homo sapiens         |
| 1 | 1.00 | 1 | 1 | -0.01 | -0.012 | -0.01  | -0.011 | -0.008 | t | 111801 | SSILEDWN<br>FGVPPPT<br>TSLV | Mus musculus         |
| 1 | 1.00 | 1 | 1 | 0.05  | 0.05   | 0.045  | 0.05   | 0.052  | t | 125015 | DNESSYSR<br>GFDMTYT<br>E    | Mus musculus         |
| 1 | 1.00 | 1 | 1 | -0.04 | -0.038 | -0.04  | -0.043 | -0.04  | t | 30984  | KGITTKW<br>MA               | Homo sapiens         |
| 1 | 1.00 | 1 | 1 | 0.01  | 0.008  | 0.023  | 0.009  | 0.011  | t | 74497  | YKQKIIAP                    | Mus musculus         |
| 1 | 1.00 | 1 | 1 | -0.09 | -0.09  | -0.09  | -0.09  | -0.09  | t | 116008 | TTMARHP<br>HPH              | Homo sapiens         |
| 1 | 1.00 | 1 | 1 | 0     | 0      | 0.004  | 0      | 0.002  | t | 52083  | QQPFPLQ<br>PQQ              | Mus musculus         |



|   |      |   |   |       |        |        |        |        |   |        |                              |                                  |
|---|------|---|---|-------|--------|--------|--------|--------|---|--------|------------------------------|----------------------------------|
| 1 | 1.00 | 1 | 1 | 0     | -0.003 | -0.001 | 0      | 0      | t | 30715  | KFDTKGSA<br>KTIEATLHC<br>YGA | Oryctola<br>gus<br>cuniculu<br>s |
| 1 | 1.00 | 1 | 1 | 0     | 0.002  | 0.002  | -0.003 | 0.001  | t | 56195  | RTTPDRQ<br>AA                | Homo<br>sapiens                  |
| 1 | 1.00 | 1 | 1 | 0.07  | 0.066  | 0.085  | 0.069  | 0.068  | t | 61549  | STDEPAGE<br>SA               | Oryctola<br>gus<br>cuniculu<br>s |
| 1 | 1.00 | 1 | 1 | 0.07  | 0.066  | 0.085  | 0.069  | 0.068  | t | 61549  | STDEPAGE<br>SA               | Oryctola<br>gus<br>cuniculu<br>s |
| 1 | 1.00 | 1 | 1 | 0     | 0      | 0      | 0      | 0.003  | t | 133551 | EAPPPTLP<br>PDMAQVT<br>VGPG  | Mus<br>musculu<br>s              |
| 1 | 1.00 | 1 | 1 | 0     | 0      | 0      | 0      | 0.003  | t | 133611 | IVSYLCDLA<br>PEAPPPTL<br>PP  | Mus<br>musculu<br>s              |
| 1 | 1.00 | 1 | 1 | 0     | 0      | 0      | 0      | 0.003  | t | 126424 | KLF                          | Mus<br>musculu<br>s              |
| 1 | 1.00 | 1 | 1 | 0     | 0      | 0      | 0      | 0.003  | t | 125472 | LDAVYLNK<br>NKYLTVID<br>KDAF | Homo<br>sapiens                  |
| 1 | 1.00 | 1 | 1 | 0     | 0      | 0      | 0      | 0.003  | t | 126595 | LPK                          | Mus<br>musculu<br>s              |
| 1 | 1.00 | 1 | 1 | 0.02  | 0.018  | 0.033  | 0.023  | 0.02   | t | 115069 | KEVDRLM<br>S                 | Mus<br>musculu<br>s              |
| 1 | 1.00 | 1 | 1 | -0.07 | -0.07  | -0.07  | -0.07  | -0.067 | t | 142441 | LFSPWLRV<br>QNHF             | Mus<br>musculu<br>s              |
| 1 | 1.00 | 1 | 1 | 0.04  | 0.042  | 0.04   | 0.047  | 0.049  | t | 131048 | RQSDGQY<br>QM                | Homo<br>sapiens                  |
| 1 | 1.00 | 1 | 1 | -0.03 | -0.03  | -0.03  | -0.034 | -0.03  | t | 33063  | KQRQNKP<br>PNKPN             | Homo<br>sapiens                  |
| 1 | 1.00 | 1 | 1 | 0     | 0.003  | 0.011  | 0      | 0      | t | 36838  | LKENIKYEV<br>AIFVHGPT<br>TVE | Equus<br>caballus                |
| 1 | 1.00 | 1 | 1 | 0.01  | 0.008  | 0.006  | 0.003  | 0.009  | t | 119611 | LLQAAPTL<br>DELKLEG          | Rattus<br>norvegic<br>us         |

|   |      |   |   |       |        |        |        |        |   |        |                              |                       |
|---|------|---|---|-------|--------|--------|--------|--------|---|--------|------------------------------|-----------------------|
| 1 | 1.00 | 1 | 1 | 0.06  | 0.062  | 0.065  | 0.057  | 0.062  | t | 123441 | LLEYLGEEY                    | Ovis aries            |
| 1 | 1.00 | 1 | 1 | -0.03 | -0.023 | -0.03  | -0.03  | -0.029 | t | 153841 | KCLKFYSKI<br>SEYRHY          | Cavia porcellus       |
| 1 | 1.00 | 1 | 1 | -0.02 | -0.016 | -0.008 | -0.013 | -0.018 | t | 119533 | TKLSNTPS<br>P                | Homo sapiens          |
| 1 | 1.00 | 1 | 1 | 0.01  | 0.01   | 0.015  | 0.006  | 0.01   | t | 127748 | NGFTSVQ<br>GYAFNGT<br>KLDAPV | Homo sapiens          |
| 1 | 1.00 | 1 | 1 | 0.03  | 0.027  | 0.044  | 0.03   | 0.03   | t | 64306  | TIGGSQAQ<br>TA               | Oryctolagus cuniculus |
| 1 | 1.00 | 1 | 1 | -0.01 | -0.01  | -0.003 | -0.012 | -0.01  | t | 96207  | EDDAEDK<br>DED               | Homo sapiens          |
| 1 | 1.00 | 1 | 1 | -0.05 | -0.05  | -0.05  | -0.05  | -0.05  | t | 117779 | CVSYRNPA<br>E                | Homo sapiens          |
| 1 | 1.00 | 1 | 1 | -0.02 | -0.02  | -0.02  | -0.02  | -0.02  | t | 79309  | MNVGAH                       | Mus musculus          |
| 1 | 1.00 | 1 | 1 | -0.04 | -0.04  | -0.04  | -0.04  | -0.04  | t | 112151 | GWIRQRS                      | Homo sapiens          |
| 1 | 1.00 | 1 | 1 | 0     | 0      | 0      | -0.011 | -0.002 | t | 118327 | EKKDRVTD<br>ALNAT            | Homo sapiens          |
| 1 | 1.00 | 1 | 1 | 0     | 0      | 0.007  | 0      | 0.001  | t | 65050  | TLRVYK                       | Homo sapiens          |
| 1 | 1.00 | 1 | 1 | 0.04  | 0.038  | 0.042  | 0.037  | 0.041  | t | 132727 | VTNEVHT<br>WTEQYKF<br>Q      | Mus musculus          |
| 1 | 1.00 | 1 | 1 | -0.01 | -0.016 | 0.006  | -0.01  | -0.01  | t | 70249  | VPANIKSM<br>ALSG             | Oryctolagus cuniculus |
| 1 | 1.00 | 1 | 1 | 0.01  | 0.011  | 0.015  | 0.01   | 0.01   | t | 51016  | QHLPYIEQ<br>GMMLAE<br>QF     | Mus musculus          |
| 1 | 1.00 | 1 | 1 | -0.03 | -0.03  | -0.03  | -0.03  | -0.029 | t | 112408 | YGIGVGW                      | Homo sapiens          |
| 1 | 1.00 | 1 | 1 | -0.02 | -0.02  | -0.03  | -0.02  | -0.019 | t | 95128  | PFDVQKC<br>NLKFGSW<br>TYGGWS | Rattus norvegicus     |

|   |      |   |   |       |        |        |        |        |   |        |                              |                                  |
|---|------|---|---|-------|--------|--------|--------|--------|---|--------|------------------------------|----------------------------------|
| 1 | 1.00 | 1 | 1 | -0.01 | -0.014 | -0.008 | -0.011 | -0.01  | t | 70851  | VRVRSRV<br>NAANKKP<br>ED     | Saimiri<br>sciureus              |
| 1 | 1.00 | 1 | 1 | -0.01 | -0.01  | -0.01  | -0.006 | -0.01  | t | 117697 | YKQRNGW<br>SHKDLLRL<br>SHLKP | Homo<br>sapiens                  |
| 1 | 1.00 | 1 | 1 | -0.02 | -0.02  | -0.013 | -0.02  | -0.02  | t | 53009  | QYNLAFSD<br>RQSAQ            | Mus<br>musculu<br>s              |
| 1 | 1.00 | 1 | 1 | -0.03 | -0.03  | -0.022 | -0.03  | -0.03  | t | 28389  | IRRPKHLY<br>VS               | Mus<br>musculu<br>s              |
| 1 | 1.00 | 1 | 1 | 0     | 0.004  | -0.013 | -0.003 | 0.002  | t | 59387  | SLPGQTKIL<br>AKVfyGEN        | Homo<br>sapiens                  |
| 1 | 1.00 | 1 | 1 | -0.03 | -0.03  | -0.022 | -0.031 | -0.03  | t | 68631  | VGATPERP                     | Homo<br>sapiens                  |
| 1 | 1.00 | 1 | 1 | 0     | 0      | 0      | -0.007 | 0      | t | 1263   | AFASRGN<br>HVSPRHVY<br>PESE  | Homo<br>sapiens                  |
| 1 | 1.00 | 1 | 1 | -0.01 | -0.003 | 0      | -0.013 | -0.012 | t | 133802 | DSPAPIIKL<br>GG              | Gallus<br>gallus                 |
| 1 | 1.00 | 1 | 1 | -0.04 | -0.04  | -0.04  | -0.04  | -0.04  | t | 40636  | LVVNRLRG<br>SL               | Homo<br>sapiens                  |
| 1 | 1.00 | 1 | 1 | -0.04 | -0.04  | -0.04  | -0.04  | -0.04  | t | 40636  | LVVNRLRG<br>SL               | Homo<br>sapiens                  |
| 1 | 1.00 | 1 | 1 | -0.04 | -0.037 | -0.034 | -0.04  | -0.038 | t | 133539 | CYKPGEW<br>AC                | Mus<br>musculu<br>s              |
| 1 | 1.00 | 1 | 1 | -0.01 | -0.01  | 0      | -0.01  | -0.009 | t | 111308 | GDTGPR                       | Oryctola<br>gus<br>cuniculu<br>s |

|   |      |   |   |       |        |        |        |       |   |        |                              |                                  |
|---|------|---|---|-------|--------|--------|--------|-------|---|--------|------------------------------|----------------------------------|
| 1 | 1.00 | 1 | 1 | 0.01  | 0.01   | 0.015  | 0.01   | 0.011 | t | 122291 | CTYILDPEK<br>LTLRATYD<br>N   | Oryctola<br>gus<br>cuniculu<br>s |
| 1 | 1.00 | 1 | 1 | 0.03  | 0.03   | 0.037  | 0.03   | 0.03  | t | 63754  | TFTMDGD<br>TMTMLTE<br>STFKNL | Mus<br>musculu<br>s              |
| 1 | 1.00 | 1 | 1 | 0.03  | 0.03   | 0.037  | 0.03   | 0.03  | t | 63754  | TFTMDGD<br>TMTMLTE<br>STFKNL | Mus<br>musculu<br>s              |
| 1 | 1.00 | 1 | 1 | 0.03  | 0.03   | 0.037  | 0.03   | 0.03  | t | 63754  | TFTMDGD<br>TMTMLTE<br>STFKNL | Mus<br>musculu<br>s              |
| 1 | 1.00 | 1 | 1 | 0     | 0      | 0.001  | 0      | 0.003 | t | 137944 | PGTEYT                       | Oryctola<br>gus<br>cuniculu<br>s |
| 1 | 1.00 | 1 | 1 | 0.02  | 0.018  | 0.028  | 0.013  | 0.02  | t | 112316 | SIKNPTNA<br>K                | Mus<br>musculu<br>s              |
| 1 | 1.00 | 1 | 1 | 0.02  | 0.02   | 0.031  | 0.02   | 0.02  | t | 53691  | RFDLELTF<br>VIT              | Homo<br>sapiens                  |
| 1 | 1.00 | 1 | 1 | 0.03  | 0.032  | 0.03   | 0.031  | 0.034 | t | 133661 | NYSPLHNS<br>DITV             | Homo<br>sapiens                  |
| 1 | 1.00 | 1 | 1 | -0.01 | -0.008 | -0.012 | -0.009 | -0.01 | t | 1670   | AGR RVGG<br>RRRGRSNS<br>G    | Homo<br>sapiens                  |
| 1 | 1.00 | 1 | 1 | 0     | -0.002 | 0      | -0.001 | 0     | t | 4424   | ASGLTSLFS<br>PGSKQH          | Mus<br>musculu<br>s              |
| 1 | 1.00 | 1 | 1 | -0.01 | -0.012 | -0.007 | -0.013 | -0.01 | t | 17524  | FQQFGRD<br>VSDFTDSV<br>RDPKT | Mus<br>musculu<br>s              |
| 1 | 1.00 | 1 | 1 | -0.01 | -0.003 | -0.007 | -0.013 | -0.01 | t | 17524  | FQQFGRD<br>VSDFTDSV<br>RDPKT | Gallus<br>gallus                 |
| 1 | 1.00 | 1 | 1 | 0     | 0.004  | -0.004 | -0.003 | 0     | t | 97327  | GEHQLLYL<br>QHQLDEL<br>N     | Homo<br>sapiens                  |
| 1 | 1.00 | 1 | 1 | 0.01  | 0.008  | 0.015  | 0.009  | 0.012 | t | 25146  | HWYISKPQ                     | Mus<br>musculu<br>s              |
| 1 | 1.00 | 1 | 1 | 0.03  | 0.032  | 0.034  | 0.027  | 0.03  | t | 158943 | KVIDQDAS<br>GFIEVEE          | Homo<br>sapiens                  |

|   |      |   |   |       |        |        |        |        |   |        |                              |                                  |
|---|------|---|---|-------|--------|--------|--------|--------|---|--------|------------------------------|----------------------------------|
| 1 | 1.00 | 1 | 1 | 0.01  | 0.01   | 0.014  | 0.013  | 0.012  | t | 307    | AALVSGTA<br>TAGWTFG<br>AG    | Homo<br>sapiens                  |
| 1 | 1.00 | 1 | 1 | 0.01  | 0.014  | 0.03   | 0.017  | 0.008  | t | 120515 | EVVRAEIM<br>RSFSL            | Homo<br>sapiens                  |
| 1 | 1.00 | 1 | 1 | -0.01 | -0.01  | -0.005 | -0.01  | -0.008 | t | 45557  | NQGDRL<br>CSH                | Homo<br>sapiens                  |
| 1 | 1.00 | 1 | 1 | -0.03 | -0.032 | -0.021 | -0.027 | -0.029 | t | 113875 | SNRRPSTT                     | Mus<br>musculu<br>s              |
| 1 | 1.00 | 1 | 1 | -0.02 | -0.024 | -0.017 | -0.021 | -0.019 | t | 103460 | PATVINGQ<br>FVERCWT<br>H     | Oryctola<br>gus<br>cuniculu<br>s |
| 1 | 1.00 | 1 | 1 | 0.03  | 0.027  | 0.04   | 0.029  | 0.033  | t | 135350 | VGVTTETPL                    | Oryctola<br>gus<br>cuniculu<br>s |
| 1 | 1.00 | 1 | 1 | -0.02 | -0.02  | -0.02  | -0.02  | -0.02  | t | 67558  | VAEAEKQK<br>AAEATK           | Homo<br>sapiens                  |
| 1 | 1.00 | 1 | 1 | 0.02  | 0.018  | 0.02   | 0.014  | 0.021  | t | 138189 | HILGSTA                      | Mus<br>musculu<br>s              |
| 1 | 1.00 | 1 | 1 | 0     | 0      | -0.002 | 0      | 0      | t | 27035  | ILFGWERT<br>REDGVQE<br>YIKVE | Oryctola<br>gus<br>cuniculu<br>s |
| 1 | 1.00 | 1 | 1 | -0.01 | -0.009 | -0.005 | -0.013 | -0.01  | t | 32680  | KPDSMP                       | Equus<br>caballus                |
| 1 | 1.00 | 1 | 1 | -0.05 | -0.054 | -0.047 | -0.051 | -0.05  | t | 80893  | DALRRLLY<br>MIYMSG           | Oryctola<br>gus<br>cuniculu<br>s |
| 1 | 1.00 | 1 | 1 | 0.03  | 0.028  | 0.039  | 0.029  | 0.03   | t | 110433 | TGGKPGIA<br>GFKGEQG<br>PKGEP | Mus<br>musculu<br>s              |
| 1 | 1.00 | 1 | 1 | -0.03 | -0.023 | -0.029 | -0.031 | -0.029 | t | 44930  | NLYAVDM<br>LVLAR             | Gallus<br>gallus                 |
| 1 | 1.00 | 1 | 1 | -0.06 | -0.06  | -0.06  | -0.06  | -0.06  | t | 58770  | SIYQGHIT<br>GHRMAW           | Homo<br>sapiens                  |

|   |      |   |   |       |        |        |        |        |   |        |                               |                                  |
|---|------|---|---|-------|--------|--------|--------|--------|---|--------|-------------------------------|----------------------------------|
| 1 | 1.00 | 1 | 1 | -0.01 | -0.006 | -0.002 | -0.007 | -0.008 | t | 31903  | KLIAQGGK<br>AKICGL            | Homo<br>sapiens                  |
| 1 | 1.00 | 1 | 1 | -0.01 | -0.012 | -0.012 | -0.011 | -0.01  | t | 69206  | VKEFLESSP<br>NTQWELR<br>AFMA  | Mus<br>musculu<br>s              |
| 1 | 1.00 | 1 | 1 | 0     | 0      | 0      | -0.006 | 0      | t | 118490 | LKDKYKNI<br>GAKLV             | Homo<br>sapiens                  |
| 1 | 1.00 | 1 | 1 | 0     | 0      | 0      | 0      | 0.002  | t | 78657  | FVHAKKKE<br>EGEDDTA<br>RQEI   | Mus<br>musculu<br>s              |
| 1 | 1.00 | 1 | 1 | -0.04 | -0.04  | -0.04  | -0.038 | -0.04  | t | 110434 | TKYPLLKLL<br>GSTWPTT<br>PPRP  | Homo<br>sapiens                  |
| 1 | 1.00 | 1 | 1 | -0.01 | -0.01  | -0.012 | -0.012 | -0.01  | t | 10746  | DVTAAAG<br>AGP                | Homo<br>sapiens                  |
| 1 | 1.00 | 1 | 1 | 0     | 0      | 0.004  | 0      | 0.002  | t | 49099  | PQQPQQS<br>FPQ                | Mus<br>musculu<br>s              |
| 1 | 1.00 | 1 | 1 | 0.04  | 0.039  | 0.051  | 0.041  | 0.042  | t | 141563 | SPKLQGEE<br>ATLAPT            | Bos<br>taurus                    |
| 1 | 1.00 | 1 | 1 | 0.01  | 0.01   | 0.01   | 0.01   | 0.009  | t | 115193 | CMENSAE<br>PEQSLACQ<br>CLVRT  | Homo<br>sapiens                  |
| 1 | 1.00 | 1 | 1 | -0.01 | -0.012 | -0.016 | -0.011 | -0.007 | t | 102972 | YVLSSLHIY<br>WGKEDDY<br>GSNH  | Mus<br>musculu<br>s              |
| 1 | 1.00 | 1 | 1 | -0.02 | -0.02  | -0.02  | -0.02  | -0.02  | t | 140870 | IALGQRRRA<br>DAVKGYLA<br>GKGV | Oryctola<br>gus<br>cuniculu<br>s |
| 1 | 1.00 | 1 | 1 | 0.01  | 0.01   | 0.01   | 0.004  | 0.012  | t | 3274   | ANETIYNT<br>TLKYGDV           | Homo<br>sapiens                  |
| 1 | 1.00 | 1 | 1 | 0.01  | 0.008  | 0.021  | 0.007  | 0.01   | t | 159000 | LWGDGVL<br>ESDLIIPIT          | Mus<br>musculu<br>s              |
| 1 | 1.00 | 1 | 1 | 0     | -0.002 | 0      | -0.004 | 0.001  | t | 121542 | LFKPPKYH<br>PDVPYVKR          | Mus<br>musculu<br>s              |
| 1 | 1.00 | 1 | 1 | 0     | -0.002 | 0      | -0.004 | 0.001  | t | 121858 | SKLIKIFQD<br>HPLQKTYN         | Mus<br>musculu<br>s              |
| 1 | 1.00 | 1 | 1 | -0.01 | -0.01  | -0.016 | -0.01  | -0.01  | t | 2226   | AKKVPETF<br>PELKPGES<br>RHTS  | Homo<br>sapiens                  |

|   |      |   |   |       |        |        |        |        |   |        |                              |                                  |
|---|------|---|---|-------|--------|--------|--------|--------|---|--------|------------------------------|----------------------------------|
| 1 | 1.00 | 1 | 1 | 0.01  | 0.008  | 0.01   | 0.009  | 0.01   | t | 44135  | NHDYTKIR<br>YADGHAIE<br>NAVR | Mus<br>musculu<br>s              |
| 1 | 1.00 | 1 | 1 | -0.03 | -0.03  | -0.019 | -0.03  | -0.03  | t | 3228   | ANANNAV<br>KN                | Oryctola<br>gus<br>cuniculu<br>s |
| 1 | 1.00 | 1 | 1 | 0.01  | 0.01   | 0.026  | 0.008  | 0.008  | t | 98887  | LQGFSRNT<br>LEAAFNA          | Homo<br>sapiens                  |
| 1 | 1.00 | 1 | 1 | 0     | 0.002  | 0.007  | 0.001  | 0      | t | 41238  | MDIDPYKE<br>FGATVELL<br>SFLP | Homo<br>sapiens                  |
| 1 | 1.00 | 1 | 1 | 0     | 0      | 0      | 0      | 0.003  | t | 110833 | EQFNWVS<br>RLANLTQG<br>EDQYY | Mus<br>musculu<br>s              |
| 1 | 1.00 | 1 | 1 | -0.03 | -0.028 | -0.033 | -0.033 | -0.03  | t | 44571  | NKPPNKP<br>NNDFH             | Homo<br>sapiens                  |
| 1 | 1.00 | 1 | 1 | -0.01 | -0.013 | -0.004 | -0.01  | -0.008 | t | 30710  | KFDRGYIS<br>PY               | Oryctola<br>gus<br>cuniculu<br>s |
| 1 | 1.00 | 1 | 1 | -0.07 | -0.07  | -0.059 | -0.067 | -0.07  | t | 65562  | TPERPRLR                     | Homo<br>sapiens                  |
| 1 | 1.00 | 1 | 1 | 0     | 0      | 0.01   | 0      | 0.002  | t | 140837 | DEPPQSP<br>WDRVKDL<br>A      | Mus<br>musculu<br>s              |
| 1 | 1.00 | 1 | 1 | 0     | -0.003 | 0.01   | 0      | 0      | t | 35312  | LDTSNKFA                     | Oryctola<br>gus<br>cuniculu<br>s |
| 1 | 1.00 | 1 | 1 | -0.01 | -0.012 | -0.01  | -0.017 | -0.009 | t | 131656 | SGKLEEFV<br>Q                | Mus<br>musculu<br>s              |
| 1 | 1.00 | 1 | 1 | 0.05  | 0.046  | 0.053  | 0.049  | 0.05   | t | 53859  | RGETPGQL<br>LPEIMQ           | Oryctola<br>gus<br>cuniculu<br>s |
| 1 | 1.00 | 1 | 1 | 0     | -0.002 | 0      | -0.001 | 0      | t | 47288  | PEGRAWA<br>QPGYPWP<br>LYGNEG | Mus<br>musculu<br>s              |
| 1 | 1.00 | 1 | 1 | -0.11 | -0.107 | -0.119 | -0.11  | -0.111 | t | 94884  | MRRAHHR<br>RRRASHRR<br>MRGG  | Mus<br>musculu<br>s              |

|   |      |   |   |       |        |        |        |        |   |        |                              |                       |
|---|------|---|---|-------|--------|--------|--------|--------|---|--------|------------------------------|-----------------------|
| 1 | 1.00 | 1 | 1 | 0     | 0      | 0.004  | 0.003  | 0.002  | t | 3983   | AQKFNGLT<br>VLPPLTDD         | Homo sapiens          |
| 1 | 1.00 | 1 | 1 | 0.01  | 0.01   | 0.026  | 0.008  | 0.007  | t | 98859  | LAFPGSGE<br>QVEKLIK          | Homo sapiens          |
| 1 | 1.00 | 1 | 1 | -0.03 | -0.032 | -0.03  | -0.037 | -0.028 | t | 121889 | SYMVHWK<br>NQF               | Mus musculus          |
| 1 | 1.00 | 1 | 1 | 0     | 0      | 0.007  | 0      | 0.002  | t | 41430  | MERVVEQ<br>MCITQYQ<br>RESQAY | Mus musculus          |
| 1 | 1.00 | 1 | 1 | 0     | -0.003 | 0.007  | 0      | 0.002  | t | 41430  | MERVVEQ<br>MCITQYQ<br>RESQAY | Oryctolagus cuniculus |
| 1 | 1.00 | 1 | 1 | -0.01 | -0.01  | -0.01  | -0.01  | -0.01  | t | 113777 | QQPAQGQ<br>QGQQPGQ           | Homo sapiens          |
| 1 | 1.00 | 1 | 1 | -0.03 | -0.026 | -0.014 | -0.023 | -0.03  | t | 98373  | QLKKFLKIA<br>LETPARI         | Homo sapiens          |
| 1 | 1.00 | 1 | 1 | -0.02 | -0.02  | -0.02  | -0.02  | -0.02  | t | 130447 | AVKIQAAF<br>RGHIAREE         | Homo sapiens          |
| 1 | 1.00 | 1 | 1 | 0     | 0.003  | 0.001  | 0      | 0.002  | t | 60818  | SRTLGCSSW<br>EFIPVDDG<br>WGE | Mus musculus          |
| 1 | 1.00 | 1 | 1 | -0.03 | -0.022 | -0.032 | -0.03  | -0.03  | t | 40075  | LTPAWRIY<br>STGNNVFQ         | Gallus gallus         |
| 1 | 1.00 | 1 | 1 | 0.01  | 0.008  | 0.006  | 0.009  | 0.01   | t | 5999   | CALGLTSLF<br>SPGPIQH         | Mus musculus          |
| 1 | 1.00 | 1 | 1 | 0.01  | 0.01   | 0.008  | 0.01   | 0.012  | t | 67979  | VDHVGLG<br>TAFENSIY          | Sus scrofa            |
| 1 | 1.00 | 1 | 1 | -0.03 | -0.03  | -0.023 | -0.03  | -0.03  | t | 127814 | SAPWPPT                      | Homo sapiens          |
| 1 | 1.00 | 1 | 1 | 0     | 0      | 0.007  | -0.004 | 0      | t | 63096  | TCRNMWS<br>GT                | Homo sapiens          |
| 1 | 1.00 | 1 | 1 | 0     | 0      | 0.01   | 0      | 0      | t | 105340 | MPRCRHG<br>Y                 | Homo sapiens          |



|   |      |   |   |       |        |        |        |        |   |        |                              |                                  |
|---|------|---|---|-------|--------|--------|--------|--------|---|--------|------------------------------|----------------------------------|
| 1 | 1.00 | 1 | 1 | 0     | 0      | -0.008 | -0.001 | 0      | t | 45588  | NQMDMK<br>QIDPWIAR<br>FDTDKD | Mus<br>musculu<br>s              |
| 1 | 1.00 | 1 | 1 | 0     | 0      | -0.008 | -0.001 | 0      | t | 45588  | NQMDMK<br>QIDPWIAR<br>FDTDKD | Mus<br>musculu<br>s              |
| 1 | 1.00 | 1 | 1 | -0.01 | -0.01  | -0.01  | -0.01  | -0.01  | t | 50241  | QAEPDRA<br>HYNIVTFC<br>CKCD  | Mus<br>musculu<br>s              |
| 1 | 1.00 | 1 | 1 | -0.03 | -0.03  | -0.03  | -0.03  | -0.031 | t | 115226 | EKNRLNFL<br>KKISQRYQ<br>KFAL | Homo<br>sapiens                  |
| 1 | 1.00 | 1 | 1 | 0.01  | 0.01   | 0.01   | 0.01   | 0.012  | t | 58418  | SHSSESHR<br>VKSAGPP          | Mus<br>musculu<br>s              |
| 1 | 1.00 | 1 | 1 | -0.05 | -0.051 | -0.049 | -0.053 | -0.05  | t | 99738  | TVRGGLRI<br>LSPDRKR          | Homo<br>sapiens                  |
| 1 | 1.00 | 1 | 1 | 0.04  | 0.038  | 0.04   | 0.033  | 0.04   | t | 107618 | SKPQSETL                     | Rattus<br>norvegic<br>us         |
| 1 | 1.00 | 1 | 1 | -0.01 | -0.014 | 0.011  | -0.007 | -0.011 | t | 153827 | EQQYNKPL<br>CDL              | Oryctola<br>gus<br>cuniculu<br>s |
| 1 | 1.00 | 1 | 1 | -0.01 | -0.008 | 0.011  | -0.007 | -0.011 | t | 153827 | EQQYNKPL<br>CDL              | Cavia<br>porcellu<br>s           |
| 1 | 1.00 | 1 | 1 | 0     | 0.007  | 0.007  | -0.007 | -0.002 | t | 136521 | NAWLQEP<br>NHRNL             | Gallus<br>gallus                 |
| 1 | 1.00 | 1 | 1 | 0     | -0.005 | 0.013  | 0.003  | 0.002  | t | 157810 | QRELKMV<br>VAQS              | Canis<br>lupus                   |
| 1 | 1.00 | 1 | 1 | 0.05  | 0.052  | 0.055  | 0.051  | 0.05   | t | 48921  | PPSPGGES<br>DSESCS           | Homo<br>sapiens                  |
| 1 | 1.00 | 1 | 1 | 0.01  | 0.013  | 0.014  | 0.01   | 0.01   | t | 76157  | YTPVEEKQ<br>NGRMIVIV<br>AKKY | Mus<br>musculu<br>s              |
| 1 | 1.00 | 1 | 1 | 0.04  | 0.04   | 0.041  | 0.039  | 0.04   | t | 25084  | HVRVRPYK<br>EKPIQNQA<br>KSVD | Homo<br>sapiens                  |

|   |      |   |   |       |        |        |        |        |   |        |                              |                                  |
|---|------|---|---|-------|--------|--------|--------|--------|---|--------|------------------------------|----------------------------------|
| 1 | 1.00 | 1 | 1 | 0     | -0.002 | -0.003 | 0      | 0      | t | 123734 | SFSKASNS<br>WFPVEGP<br>ADICQ | marmos<br>ets                    |
| 1 | 1.00 | 1 | 1 | -0.03 | -0.034 | -0.03  | -0.031 | -0.03  | t | 19943  | GGNRYPP<br>QGGGGW            | Oryctola<br>gus<br>cuniculu<br>s |
| 1 | 1.00 | 1 | 1 | -0.01 | -0.008 | -0.001 | -0.013 | -0.012 | t | 58941  | SKSRGATG<br>K                | Homo<br>sapiens                  |
| 1 | 1.00 | 1 | 1 | 0.04  | 0.04   | 0.06   | 0.04   | 0.041  | t | 9654   | DPISRD                       | Mus<br>musculu<br>s              |
| 1 | 1.00 | 1 | 1 | 0.01  | 0.01   | 0.014  | 0.01   | 0.012  | t | 49092  | PQQPFSQ<br>QPQ               | Mus<br>musculu<br>s              |
| 1 | 1.00 | 1 | 1 | 0     | -0.007 | 0      | -0.006 | 0      | t | 147854 | KDYQRNR<br>GPSKFTGL<br>QPSVL | Oryctola<br>gus<br>cuniculu<br>s |
| 1 | 1.00 | 1 | 1 | 0     | -0.007 | 0      | -0.006 | 0      | t | 148404 | VPVRHTPV<br>RDNRLVGF<br>RSSS | Oryctola<br>gus<br>cuniculu<br>s |
| 1 | 1.00 | 1 | 1 | 0     | -0.007 | 0      | -0.006 | 0      | t | 148483 | YVPIVTFYS<br>EISMHSSR<br>AIP | Oryctola<br>gus<br>cuniculu<br>s |
| 1 | 1.00 | 1 | 1 | 0     | 0      | 0      | -0.006 | 0      | t | 131879 | FLVAHTRA<br>RAPSAGER<br>ARRS | Mus<br>musculu<br>s              |
| 1 | 1.00 | 1 | 1 | 0     | 0      | 0      | -0.006 | 0      | t | 118970 | PPPGRRP                      | Oryctola<br>gus<br>cuniculu<br>s |
| 1 | 1.00 | 1 | 1 | 0     | 0      | 0      | -0.006 | 0      | t | 104816 | GREKFTIR<br>PHYGKEI          | Mus<br>musculu<br>s              |
| 1 | 1.00 | 1 | 1 | 0     | 0      | 0      | -0.006 | 0      | t | 112841 | SSKRGRQT<br>PVLAMLDH         | Rattus<br>norvegic<br>us         |
| 1 | 1.00 | 1 | 1 | 0     | 0      | 0      | -0.006 | 0      | t | 112472 | DEGGYTFCF<br>FRDHSYQ         | Mus<br>musculu<br>s              |
| 1 | 1.00 | 1 | 1 | 0     | 0      | 0      | -0.006 | 0      | t | 107064 | AGAPGFG                      | Rattus<br>norvegic<br>us         |

|   |      |   |   |       |        |        |        |       |   |        |                             |                          |
|---|------|---|---|-------|--------|--------|--------|-------|---|--------|-----------------------------|--------------------------|
| 1 | 1.00 | 1 | 1 | 0     | 0      | 0      | -0.006 | 0     | t | 107218 | PAGGPGF<br>P                | Rattus<br>norvegicus     |
| 1 | 1.00 | 1 | 1 | 0     | -0.027 | 0      | -0.006 | 0     | t | 106906 | THWQGVY<br>WVGATPK<br>A     | Mus<br>musculus          |
| 1 | 1.00 | 1 | 1 | 0     | 0      | 0      | -0.006 | 0     | t | 104816 | GREKFTIR<br>PHYGKEI         | Mus<br>musculus          |
| 1 | 1.00 | 1 | 1 | 0     | 0      | 0      | -0.006 | 0     | t | 38304  | LNPKTNK<br>WEDK             | Mus<br>musculus          |
| 1 | 1.00 | 1 | 1 | 0     | 0      | 0      | -0.006 | 0     | t | 23599  | HCLGKWL<br>GHPDKF           | Mus<br>musculus          |
| 1 | 1.00 | 1 | 1 | 0     | 0      | 0      | -0.006 | 0     | t | 21254  | GMDGTQL<br>DRW              | Mus<br>musculus          |
| 1 | 1.00 | 1 | 1 | 0     | 0      | 0      | -0.006 | 0     | t | 27728  | INQQLNPK<br>TNKWEDK         | Mus<br>musculus          |
| 1 | 1.00 | 1 | 1 | 0     | 0      | 0      | -0.006 | 0     | t | 27727  | INQQLNPK                    | Mus<br>musculus          |
| 1 | 1.00 | 1 | 1 | 0.02  | 0.02   | 0.02   | 0.02   | 0.022 | t | 117553 | KRTKDELE<br>VIHLIEHR<br>LVR | Homo<br>sapiens          |
| 1 | 1.00 | 1 | 1 | 0     | 0.002  | 0.005  | 0.007  | 0.01  | t | 130901 | IPFPTLFAP                   | Homo<br>sapiens          |
| 1 | 1.00 | 1 | 1 | -0.03 | -0.03  | -0.023 | -0.03  | -0.03 | t | 3388   | ANPVCRL<br>WMCPIIV          | Homo<br>sapiens          |
| 1 | 1.00 | 1 | 1 | 0.01  | 0.01   | 0.015  | 0.006  | 0.01  | t | 16480  | FKVSNSSA<br>RG              | Homo<br>sapiens          |
| 1 | 1.00 | 1 | 1 | 0.02  | 0.02   | 0.02   | 0.02   | 0.022 | t | 145810 | GTGGRTG<br>Y                | Mus<br>musculus          |
| 1 | 1.00 | 1 | 1 | 0.01  | 0.016  | 0.017  | 0.01   | 0.01  | t | 67187  | TVTTTTKG<br>ENFTETDI<br>KI  | Mus<br>musculus          |
| 1 | 1.00 | 1 | 1 | 0.01  | 0.013  | 0.017  | 0.01   | 0.01  | t | 67187  | TVTTTTKG<br>ENFTETDI<br>KI  | Oryctolagus<br>cuniculus |

|   |      |   |   |       |        |        |        |        |   |        |                           |                                  |
|---|------|---|---|-------|--------|--------|--------|--------|---|--------|---------------------------|----------------------------------|
| 1 | 1.00 | 1 | 1 | 0     | 0      | 0      | 0      | 0.003  | t | 110124 | YGGFLRKY<br>PK            | Oryctola<br>gus<br>cuniculu<br>s |
| 1 | 1.00 | 1 | 1 | 0     | 0      | 0      | 0      | 0.003  | t | 104443 | DAEFRHDS<br>GYE           | Mus<br>musculu<br>s              |
| 1 | 1.00 | 1 | 1 | 0     | 0      | 0      | 0      | 0.003  | t | 104443 | DAEFRHDS<br>GYE           | Mus<br>musculu<br>s              |
| 1 | 1.00 | 1 | 1 | 0     | 0      | 0      | 0      | 0.003  | t | 104443 | DAEFRHDS<br>GYE           | Mus<br>musculu<br>s              |
| 1 | 1.00 | 1 | 1 | 0     | -0.005 | 0      | 0      | 0.003  | t | 40332  | LVFFAEDV                  | unidentif<br>ied                 |
| 1 | 1.00 | 1 | 1 | 0.01  | 0.008  | 0.025  | 0.007  | 0.01   | t | 13763  | EPGQTA<br>DWY             | Mus<br>musculu<br>s              |
| 1 | 1.00 | 1 | 1 | -0.05 | -0.048 | -0.046 | -0.053 | -0.05  | t | 123850 | WSDFLGK<br>NP             | Ovis<br>aries                    |
| 1 | 1.00 | 1 | 1 | -0.07 | -0.07  | -0.075 | -0.08  | -0.073 | t | 115911 | PYYAKPAA<br>VR            | Homo<br>sapiens                  |
| 1 | 1.00 | 1 | 1 | -0.03 | -0.03  | -0.03  | -0.03  | -0.03  | t | 112846 | SWYARHY                   | Homo<br>sapiens                  |
| 1 | 1.00 | 1 | 1 | -0.01 | -0.01  | -0.006 | -0.01  | -0.01  | t | 105863 | HHQKLVFF<br>AEDVGSN       | Mus<br>musculu<br>s              |
| 1 | 1.00 | 1 | 1 | -0.02 | -0.02  | -0.02  | -0.02  | -0.02  | t | 141919 | IENLRQRN<br>TYTHKDLE<br>N | Mus<br>musculu<br>s              |
| 1 | 1.00 | 1 | 1 | 0.01  | 0.01   | 0.01   | 0.006  | 0.01   | t | 135952 | LLLLSSRPG<br>GCS          | Homo<br>sapiens                  |
| 1 | 1.00 | 1 | 1 | -0.01 | -0.007 | -0.008 | -0.011 | -0.007 | t | 103507 | PYEDFAAR<br>LLEAIDAE      | Capra<br>hircus                  |
| 1 | 1.00 | 1 | 1 | -0.02 | -0.016 | -0.024 | -0.023 | -0.02  | t | 97240  | DFRNEFD<br>HLLIEQAN<br>H  | Homo<br>sapiens                  |
| 1 | 1.00 | 1 | 1 | -0.05 | -0.05  | -0.057 | -0.056 | -0.05  | t | 2891   | ALSRCTLN<br>RNALRRP       | Homo<br>sapiens                  |
| 1 | 1.00 | 1 | 1 | -0.03 | -0.03  | -0.016 | -0.024 | -0.028 | t | 848    | AEDAAEIS<br>VPAEIL        | Homo<br>sapiens                  |
| 1 | 1.00 | 1 | 1 | -0.04 | -0.04  | -0.038 | -0.04  | -0.04  | t | 9600   | DPARDCV<br>HNICIFAG       | Mus<br>musculu<br>s              |

|   |      |   |   |       |        |        |        |        |   |        |                              |                                  |
|---|------|---|---|-------|--------|--------|--------|--------|---|--------|------------------------------|----------------------------------|
| 1 | 1.00 | 1 | 1 | 0.03  | 0.028  | 0.032  | 0.023  | 0.029  | t | 114192 | AEYWNSQ<br>PEILERTRA<br>E    | Mus<br>musculu<br>s              |
| 1 | 1.00 | 1 | 1 | -0.02 | -0.024 | -0.022 | -0.027 | -0.019 | t | 119443 | DLKLRRSS<br>SVGYIS           | Oryctola<br>gus<br>cuniculu<br>s |
| 1 | 1.00 | 1 | 1 | -0.05 | -0.053 | -0.043 | -0.05  | -0.05  | t | 131654 | SGFGVVKK<br>PNY              | Oryctola<br>gus<br>cuniculu<br>s |
| 1 | 1.00 | 1 | 1 | 0.02  | 0.02   | 0.035  | 0.02   | 0.02   | t | 9621   | DPEDSALL                     | Mus<br>musculu<br>s              |
| 1 | 1.00 | 1 | 1 | -0.02 | -0.02  | -0.014 | -0.023 | -0.02  | t | 57209  | SDGYDHP<br>PRTRV             | Homo<br>sapiens                  |
| 1 | 1.00 | 1 | 1 | -0.01 | -0.012 | 0.007  | -0.007 | -0.01  | t | 45556  | NQGAWP<br>AG                 | Anas<br>platyrhy<br>nchos        |
| 1 | 1.00 | 1 | 1 | -0.03 | -0.024 | -0.026 | -0.03  | -0.03  | t | 71365  | VTIMSKDK<br>PTIDVKM<br>MNMEA | Equus<br>caballus                |
| 1 | 1.00 | 1 | 1 | -0.03 | -0.027 | -0.026 | -0.03  | -0.03  | t | 71365  | VTIMSKDK<br>PTIDVKM<br>MNMEA | Equus<br>caballus                |
| 1 | 1.00 | 1 | 1 | 0.01  | 0.024  | 0.029  | 0.011  | 0.01   | t | 48418  | PLLYPS                       | Homo<br>sapiens                  |
| 1 | 1.00 | 1 | 1 | 0     | 0      | 0.005  | 0      | 0.001  | t | 24391  | HNNQRLM<br>LYGMH             | Mus<br>musculu<br>s              |
| 1 | 1.00 | 1 | 1 | -0.03 | -0.032 | -0.019 | -0.031 | -0.03  | t | 110585 | GAPGIAGA<br>PGFPGPR          | Mus<br>musculu<br>s              |
| 1 | 1.00 | 1 | 1 | 0.02  | 0.02   | 0.012  | 0.02   | 0.03   | t | 45630  | NQSTVKT                      | Mus<br>musculu<br>s              |
| 1 | 1.00 | 1 | 1 | 0     | 0      | 0      | -0.001 | 0.003  | t | 99134  | DAEFRHDS<br>GYEVHHQ          | Mus<br>musculu<br>s              |
| 1 | 1.00 | 1 | 1 | 0     | 0      | 0      | -0.001 | 0.003  | t | 99134  | DAEFRHDS<br>GYEVHHQ          | Mus<br>musculu<br>s              |

|   |      |   |   |       |        |        |        |        |   |        |                              |                       |
|---|------|---|---|-------|--------|--------|--------|--------|---|--------|------------------------------|-----------------------|
| 1 | 1.00 | 1 | 1 | -0.04 | -0.04  | -0.031 | -0.04  | -0.04  | t | 55523  | RRAGRCPP                     | Homo sapiens          |
| 1 | 1.00 | 1 | 1 | 0.01  | 0.008  | 0.015  | 0.009  | 0.008  | t | 47786  | PGWFADP<br>GFHINSSF          | Mus musculus          |
| 1 | 1.00 | 1 | 1 | 0     | 0      | 0.012  | 0      | 0      | t | 153449 | QQPPGAP<br>RLPQL             | Mus musculus          |
| 1 | 1.00 | 1 | 1 | -0.03 | -0.034 | -0.023 | -0.031 | -0.03  | t | 9018   | DLAHLTA                      | Oryctolagus cuniculus |
| 1 | 1.00 | 1 | 1 | 0     | 0.003  | 0.011  | 0      | 0      | t | 48094  | PKKS                         | Mus musculus          |
| 1 | 1.00 | 1 | 1 | 0.04  | 0.04   | 0.043  | 0.04   | 0.041  | t | 98850  | KKGSEEEG<br>DITNPIN          | Homo sapiens          |
| 1 | 1.00 | 1 | 1 | 0.01  | 0.014  | 0.01   | 0.01   | 0.011  | t | 110855 | FNAGTV<br>GENVPDD<br>LYIKGS  | Cavia porcellus       |
| 1 | 1.00 | 1 | 1 | 0.07  | 0.066  | 0.07   | 0.067  | 0.073  | t | 142006 | SDSAQGS<br>DVSLTA            | Oryctolagus cuniculus |
| 1 | 1.00 | 1 | 1 | 0.02  | 0.02   | 0.015  | 0.02   | 0.024  | t | 122771 | GELTSSEV<br>ATEVPFRL<br>MHPQ | Rattus norvegicus     |
| 1 | 1.00 | 1 | 1 | 0     | 0      | 0      | 0      | 0      | t | 140842 | EGNTDER<br>GTPEYNIA<br>LGQRR | Oryctolagus cuniculus |
| 1 | 1.00 | 1 | 1 | -0.01 | -0.007 | 0.002  | -0.01  | -0.012 | t | 51854  | QPHGGSW                      | Mus musculus          |
| 1 | 1.00 | 1 | 1 | 0     | -0.003 | 0      | 0      | 0      | t | 78411  | GTKPTFHV<br>EKGSNPNY<br>LA   | Oryctolagus cuniculus |
| 1 | 1.00 | 1 | 1 | -0.02 | -0.02  | -0.02  | -0.02  | -0.02  | t | 78498  | QSSDSPPG<br>GLQNDFP          | Mus musculus          |
| 1 | 1.00 | 1 | 1 | -0.03 | -0.026 | -0.018 | -0.027 | -0.03  | t | 68391  | VETWKKP<br>D                 | Homo sapiens          |

|   |      |   |   |       |        |        |        |        |   |        |                              |                                  |
|---|------|---|---|-------|--------|--------|--------|--------|---|--------|------------------------------|----------------------------------|
| 1 | 1.00 | 1 | 1 | 0.01  | 0.01   | 0.017  | 0.01   | 0.008  | t | 35413  | LEDSTQA<br>SLEEAILR          | Mus<br>musculu<br>s              |
| 1 | 1.00 | 1 | 1 | -0.06 | -0.063 | -0.047 | -0.06  | -0.059 | t | 78431  | KKRW                         | Oryctola<br>gus<br>cuniculu<br>s |
| 1 | 1.00 | 1 | 1 | -0.04 | -0.042 | -0.037 | -0.041 | -0.038 | t | 52007  | QQDAKLT<br>WRN               | Mus<br>musculu<br>s              |
| 1 | 1.00 | 1 | 1 | 0     | 0.004  | 0.003  | 0      | 0      | t | 100478 | RNNPFYFP<br>SRRFSTRY<br>GNQN | Homo<br>sapiens                  |
| 1 | 1.00 | 1 | 1 | -0.02 | -0.02  | -0.019 | -0.017 | -0.02  | t | 34686  | LAAQLWR<br>GRAGRRR<br>YAHPVS | Homo<br>sapiens                  |
| 1 | 1.00 | 1 | 1 | 0     | -0.003 | 0      | 0.006  | 0.006  | t | 118060 | PPPGMRP<br>P                 | Oryctola<br>gus<br>cuniculu<br>s |
| 1 | 1.00 | 1 | 1 | 0     | 0.012  | 0      | 0.006  | 0.006  | t | 113879 | SQRSQDE<br>N                 | Rattus<br>norvegic<br>us         |
| 1 | 1.00 | 1 | 1 | 0     | 0.002  | 0      | 0.006  | 0.006  | t | 113879 | SQRSQDE<br>N                 | Rattus<br>norvegic<br>us         |
| 1 | 1.00 | 1 | 1 | -0.01 | -0.003 | -0.01  | -0.01  | -0.01  | t | 49705  | PTLNGDD<br>RHKIVNVD<br>QRQYG | Cavia<br>porcellu<br>s           |
| 1 | 1.00 | 1 | 1 | -0.03 | -0.03  | -0.028 | -0.03  | -0.031 | t | 130476 | EDSDARIL<br>AAAVWYY<br>SL    | Mus<br>musculu<br>s              |
| 1 | 1.00 | 1 | 1 | -0.03 | -0.03  | -0.028 | -0.03  | -0.031 | t | 130475 | EDSDARIL<br>AAAVWYY<br>SL    | Mus<br>musculu<br>s              |
| 1 | 1.00 | 1 | 1 | 0.03  | 0.032  | 0.035  | 0.03   | 0.033  | t | 130751 | CIGSPSTN<br>C                | Homo<br>sapiens                  |
| 1 | 1.00 | 1 | 1 | -0.01 | -0.008 | -0.011 | -0.011 | -0.01  | t | 32408  | KMTVEAV<br>KAKKTIL           | Ovis<br>aries                    |
| 1 | 1.00 | 1 | 1 | -0.08 | -0.084 | -0.086 | -0.081 | -0.079 | t | 19722  | GGERRRPP<br>LGVREGR<br>GRT   | Oryctola<br>gus<br>cuniculu<br>s |

|   |      |   |   |       |        |        |        |        |   |        |                              |                                  |
|---|------|---|---|-------|--------|--------|--------|--------|---|--------|------------------------------|----------------------------------|
| 1 | 1.00 | 1 | 1 | -0.01 | -0.01  | -0.01  | -0.01  | -0.01  | t | 135503 | VGIPGGVV<br>GAGP             | Oryctola<br>gus<br>cuniculu<br>s |
| 1 | 1.00 | 1 | 1 | -0.04 | -0.037 | -0.024 | -0.04  | -0.039 | t | 30337  | KEDYRY                       | Sus<br>scrofa                    |
| 1 | 1.00 | 1 | 1 | -0.04 | -0.043 | -0.041 | -0.04  | -0.039 | t | 124232 | GSITRDSIF<br>RLR             | Oryctola<br>gus<br>cuniculu<br>s |
| 1 | 1.00 | 1 | 1 | 0.03  | 0.03   | 0.033  | 0.03   | 0.031  | t | 113129 | QLELPAVT<br>PEDDGE           | Mus<br>musculu<br>s              |
| 1 | 1.00 | 1 | 1 | 0.01  | 0.01   | 0.017  | 0.01   | 0.01   | t | 130805 | ELNPEPDT<br>EVFPMTF          | Homo<br>sapiens                  |
| 1 | 1.00 | 1 | 1 | -0.05 | -0.05  | -0.05  | -0.05  | -0.049 | t | 135838 | DSFGNWR<br>LWAPIG            | Mus<br>musculu<br>s              |
| 1 | 1.00 | 1 | 1 | -0.05 | -0.05  | -0.05  | -0.05  | -0.049 | t | 135838 | DSFGNWR<br>LWAPIG            | Mus<br>musculu<br>s              |
| 1 | 1.00 | 1 | 1 | -0.03 | -0.03  | -0.03  | -0.031 | -0.03  | t | 78749  | MPKTRRR<br>PRRSQRKR<br>PPTPW | Homo<br>sapiens                  |
| 1 | 1.00 | 1 | 1 | 0     | 0      | 0.012  | 0      | 0      | t | 105600 | WRSKRDA<br>FTNG              | Homo<br>sapiens                  |
| 1 | 1.00 | 1 | 1 | 0     | -0.002 | 0.01   | -0.001 | 0.001  | t | 96548  | LFLLAH                       | Mus<br>musculu<br>s              |
| 1 | 1.00 | 1 | 1 | 0     | 0.003  | 0.014  | 0      | -0.001 | t | 21814  | GPVEDAIT<br>AAIGRV           | Mus<br>musculu<br>s              |
| 1 | 1.00 | 1 | 1 | -0.05 | -0.05  | -0.043 | -0.05  | -0.05  | t | 121814 | RRRR                         | Homo<br>sapiens                  |
| 1 | 1.00 | 1 | 1 | -0.06 | -0.06  | -0.06  | -0.067 | -0.06  | t | 125267 | TCSMFVY<br>GGC               | Mus<br>musculu<br>s              |
| 1 | 1.00 | 1 | 1 | -0.05 | -0.05  | -0.05  | -0.047 | -0.05  | t | 7472   | DAATAQTL<br>QAFLHWA<br>ITDGN | Homo<br>sapiens                  |



|   |      |   |   |       |        |        |        |        |   |        |                              |                                  |
|---|------|---|---|-------|--------|--------|--------|--------|---|--------|------------------------------|----------------------------------|
| 1 | 1.00 | 1 | 1 | 0     | -0.002 | 0.005  | -0.001 | 0      | t | 141928 | IRHQRSQT<br>ECG              | Mus<br>musculu<br>s              |
| 1 | 1.00 | 1 | 1 | -0.03 | -0.034 | -0.024 | -0.03  | -0.032 | t | 123439 | LLARDAPD<br>TDWCDSIP         | Mus<br>musculu<br>s              |
| 1 | 1.00 | 1 | 1 | -0.02 | -0.02  | -0.007 | -0.02  | -0.018 | t | 75382  | YPPP                         | Mus<br>musculu<br>s              |
| 1 | 1.00 | 1 | 1 | -0.02 | -0.02  | -0.007 | -0.02  | -0.018 | t | 75382  | YPPP                         | Mus<br>musculu<br>s              |
| 1 | 1.00 | 1 | 1 | -0.07 | -0.07  | -0.07  | -0.07  | -0.07  | t | 127689 | HWHRPTN                      | Homo<br>sapiens                  |
| 1 | 1.00 | 1 | 1 | -0.01 | -0.01  | -0.006 | -0.01  | -0.01  | t | 32587  | KNPHAK                       | Homo<br>sapiens                  |
| 1 | 1.00 | 1 | 1 | 0.01  | 0.01   | 0.032  | 0.01   | 0.011  | t | 144622 | EDVGSNK                      | Mus<br>musculu<br>s              |
| 1 | 1.00 | 1 | 1 | -0.03 | -0.03  | -0.034 | -0.029 | -0.03  | t | 36950  | LKLSIPVAE<br>RAKPRK          | Homo<br>sapiens                  |
| 1 | 1.00 | 1 | 1 | -0.03 | -0.03  | -0.03  | -0.034 | -0.03  | t | 115606 | GEGKVTLR<br>IRNV             | Homo<br>sapiens                  |
| 1 | 1.00 | 1 | 1 | 0.04  | 0.042  | 0.045  | 0.041  | 0.04   | t | 47128  | PDKEVLYQ<br>QYDEMEE<br>CSQAR | Homo<br>sapiens                  |
| 1 | 1.00 | 1 | 1 | 0     | -0.004 | -0.012 | -0.001 | 0.002  | t | 111051 | VGPLEVIP<br>EAVDPAG<br>SSIV  | Oryctola<br>gus<br>cuniculu<br>s |
| 1 | 1.00 | 1 | 1 | 0     | 0.002  | 0.003  | -0.001 | 0.002  | t | 2772   | ALNDLCIK<br>VNNWDLF<br>FSPS  | Homo<br>sapiens                  |
| 1 | 1.00 | 1 | 1 | -0.02 | -0.018 | -0.018 | -0.019 | -0.019 | t | 137869 | GGVSTGLI<br>QDDWTFQ          | Homo<br>sapiens                  |
| 1 | 1.00 | 1 | 1 | -0.03 | -0.032 | -0.026 | -0.031 | -0.03  | t | 67436  | TYQRTRAL<br>V                | Mus<br>musculu<br>s              |
| 1 | 1.00 | 1 | 1 | -0.01 | -0.01  | 0.001  | -0.003 | -0.009 | t | 30302  | KEALISLT<br>RGKLYTQ<br>Q     | Homo<br>sapiens                  |

|   |      |   |   |       |        |        |        |        |   |        |                              |                        |
|---|------|---|---|-------|--------|--------|--------|--------|---|--------|------------------------------|------------------------|
| 1 | 1.00 | 1 | 1 | 0     | 0.002  | 0      | -0.001 | 0      | t | 86807  | NIYTFVPEK<br>IYGLIAKKQ<br>SN | Cavia<br>porcellu<br>s |
| 1 | 1.00 | 1 | 1 | 0.01  | 0.008  | 0.01   | 0.003  | 0.01   | t | 119579 | FKDYSSVV<br>RPVEDHR<br>Q     | Mus<br>musculu<br>s    |
| 1 | 1.00 | 1 | 1 | -0.03 | -0.028 | -0.025 | -0.029 | -0.03  | t | 74705  | YLIKRRKFP<br>PALPP           | Homo<br>sapiens        |
| 1 | 1.00 | 1 | 1 | -0.02 | -0.022 | -0.008 | -0.017 | -0.021 | t | 20095  | GGWYSFD<br>SPYLMSITE<br>MRLR | Mus<br>musculu<br>s    |
| 1 | 1.00 | 1 | 1 | -0.02 | -0.018 | -0.006 | -0.019 | -0.02  | t | 4217   | ARQAIK                       | Homo<br>sapiens        |
| 1 | 1.00 | 1 | 1 | 0.01  | 0.008  | 0.01   | 0.003  | 0.009  | t | 118734 | AEFRHDSG<br>Y                | Mus<br>musculu<br>s    |
| 1 | 1.00 | 1 | 1 | 0     | 0.002  | -0.001 | 0.001  | 0      | t | 34135  | KVNFPHG<br>MLDLEEIA<br>ANSKD | Homo<br>sapiens        |
| 1 | 1.00 | 1 | 1 | -0.03 | -0.028 | -0.03  | -0.03  | -0.026 | t | 113321 | DENPVVH<br>FFKNIVTP<br>RT    | Homo<br>sapiens        |
| 1 | 1.00 | 1 | 1 | -0.03 | -0.028 | -0.03  | -0.03  | -0.026 | t | 113321 | DENPVVH<br>FFKNIVTP<br>RT    | Homo<br>sapiens        |
| 1 | 1.00 | 1 | 1 | 0.02  | 0.023  | 0.029  | 0.02   | 0.02   | t | 6709   | CNNKPSN<br>RC                | Mus<br>musculu<br>s    |
| 1 | 1.00 | 1 | 1 | -0.03 | -0.031 | -0.03  | -0.033 | -0.03  | t | 72515  | WGRRLMI<br>GTAAAVVL<br>PGLVG | Homo<br>sapiens        |
| 1 | 1.00 | 1 | 1 | -0.01 | -0.01  | -0.008 | -0.01  | -0.008 | t | 72909  | WNSQPSL<br>PYIRP             | Mus<br>musculu<br>s    |
| 1 | 1.00 | 1 | 1 | 0     | 0.002  | 0      | -0.001 | 0.001  | t | 130452 | CGVKSLLT<br>SMYCAAC          | Homo<br>sapiens        |
| 1 | 1.00 | 1 | 1 | 0     | 0      | 0.001  | 0      | 0      | t | 71427  | VTNDCPN<br>SSIVYEAA<br>DAI   | Homo<br>sapiens        |

|   |      |   |   |       |        |        |        |        |   |        |                              |                                  |
|---|------|---|---|-------|--------|--------|--------|--------|---|--------|------------------------------|----------------------------------|
| 1 | 1.00 | 1 | 1 | 0.01  | 0.01   | 0.007  | 0.01   | 0.013  | t | 6458   | CITQYQRE<br>SQAYYQR<br>GASVI | Oryctola<br>gus<br>cuniculu<br>s |
| 1 | 1.00 | 1 | 1 | -0.02 | -0.02  | -0.02  | -0.02  | -0.019 | t | 119624 | PDTPYLDIT<br>YHFVMQR<br>L    | Homo<br>sapiens                  |
| 1 | 1.00 | 1 | 1 | 0.04  | 0.04   | 0.047  | 0.04   | 0.045  | t | 151612 | DPLLTGNY<br>KEAS             | Mus<br>musculu<br>s              |
| 1 | 1.00 | 1 | 1 | -0.01 | -0.006 | 0.01   | -0.003 | -0.01  | t | 141664 | GSFTVRAD<br>HGEP             | Homo<br>sapiens                  |
| 1 | 1.00 | 1 | 1 | -0.01 | -0.008 | 0.01   | -0.003 | -0.01  | t | 141664 | GSFTVRAD<br>HGEP             | Homo<br>sapiens                  |
| 1 | 1.00 | 1 | 1 | -0.01 | -0.01  | -0.01  | -0.01  | -0.008 | t | 70672  | VQWMNR<br>LIAFASRG<br>NHVSPA | Homo<br>sapiens                  |
| 1 | 1.00 | 1 | 1 | -0.02 | -0.018 | -0.014 | -0.019 | -0.018 | t | 19902  | GGKPALVP<br>D                | Homo<br>sapiens                  |
| 1 | 1.00 | 1 | 1 | -0.03 | -0.034 | -0.008 | -0.03  | -0.03  | t | 95499  | KIVAPVKQ                     | Bos<br>taurus                    |
| 1 | 1.00 | 1 | 1 | 0.03  | 0.03   | 0.042  | 0.029  | 0.03   | t | 7480   | DADDPLLR                     | Homo<br>sapiens                  |
| 1 | 1.00 | 1 | 1 | -0.05 | -0.05  | -0.05  | -0.05  | -0.05  | t | 99160  | DRRQPRR<br>EEGGRWG<br>P      | Homo<br>sapiens                  |
| 1 | 1.00 | 1 | 1 | -0.01 | -0.01  | -0.007 | -0.01  | -0.009 | t | 5865   | AYLSPIDLN<br>QLAK            | Oryctola<br>gus<br>cuniculu<br>s |
| 1 | 1.00 | 1 | 1 | -0.03 | -0.03  | -0.021 | -0.03  | -0.032 | t | 70029  | VMVHDPH<br>SLA               | Oryctola<br>gus<br>cuniculu<br>s |
| 1 | 1.00 | 1 | 1 | 0     | 0.003  | 0      | 0      | 0.003  | t | 9106   | DLGSIA                       | Mus<br>musculu<br>s              |

|   |      |   |   |       |        |        |        |       |   |        |                     |                       |
|---|------|---|---|-------|--------|--------|--------|-------|---|--------|---------------------|-----------------------|
| 1 | 1.00 | 1 | 1 | -0.02 | -0.021 | -0.009 | -0.02  | -0.02 | t | 27997  | IPQPQWTP            | Anas platyrhynchos    |
| 1 | 1.00 | 1 | 1 | 0.02  | 0.016  | 0.017  | 0.017  | 0.02  | t | 72154  | VYRYDSRP PEDV       | Oryctolagus cuniculus |
| 1 | 1.00 | 1 | 1 | 0.02  | 0.016  | 0.017  | 0.017  | 0.02  | t | 72154  | VYRYDSRP PEDV       | Oryctolagus cuniculus |
| 1 | 1.00 | 1 | 1 | 0     | 0      | 0      | 0      | 0     | t | 77791  | NKVSARGCTFYGCWKGLVG | Homo sapiens          |
| 1 | 1.00 | 1 | 1 | 0.01  | 0.014  | 0.022  | 0.013  | 0.01  | t | 140868 | HLINTNGSWHINSTA     | Homo sapiens          |
| 1 | 1.00 | 1 | 1 | 0.01  | 0.012  | 0.008  | 0.011  | 0.01  | t | 60749  | SRNSTPGSSRGNSPARMA  | Homo sapiens          |
| 1 | 1.00 | 1 | 1 | -0.04 | -0.04  | -0.033 | -0.04  | -0.04 | t | 156408 | QDHQWTLR            | Homo sapiens          |
| 1 | 1.00 | 1 | 1 | 0     | -0.004 | 0      | -0.003 | 0.002 | t | 136064 | HQIALRMEVLGCEAQDLY  | Oryctolagus cuniculus |
| 1 | 1.00 | 1 | 1 | 0     | -0.004 | 0      | -0.003 | 0.002 | t | 134220 | RQGAEPKKNFVKPNETKTY | Oryctolagus cuniculus |
| 1 | 1.00 | 1 | 1 | 0     | -0.004 | 0      | -0.003 | 0.002 | t | 134200 | PVVNSLDPPLLTRY      | Oryctolagus cuniculus |
| 1 | 1.00 | 1 | 1 | 0     | -0.004 | 0      | -0.003 | 0.002 | t | 136083 | SEGAEYDDQTSQREKEDDK | Oryctolagus cuniculus |
| 1 | 1.00 | 1 | 1 | 0     | -0.004 | 0      | -0.003 | 0.002 | t | 136092 | YKSQYLNNGPQRIGRKYKK | Oryctolagus cuniculus |
| 1 | 1.00 | 1 | 1 | 0     | -0.004 | 0      | -0.003 | 0.002 | t | 136082 | SDDPSPGIDSNNNS      | Oryctolagus cuniculus |

|   |      |   |   |       |        |       |        |        |   |        |                              |                                  |
|---|------|---|---|-------|--------|-------|--------|--------|---|--------|------------------------------|----------------------------------|
| 1 | 1.00 | 1 | 1 | 0     | -0.002 | 0     | -0.003 | 0.002  | t | 147564 | CYGTKPW<br>MC                | Mus<br>musculu<br>s              |
| 1 | 1.00 | 1 | 1 | 0     | -0.004 | 0     | -0.003 | 0.002  | t | 134220 | RQGAEP<br>KNFVKPNE<br>TKTY   | Oryctola<br>gus<br>cuniculu<br>s |
| 1 | 1.00 | 1 | 1 | 0     | -0.002 | 0     | -0.003 | 0.002  | t | 131010 | PSTRWTEL<br>DDVKRLK<br>GSRS  | Mus<br>musculu<br>s              |
| 1 | 1.00 | 1 | 1 | 0     | -0.004 | 0     | -0.003 | 0.002  | t | 134015 | CDKNTGD<br>YYEDSYED          | Oryctola<br>gus<br>cuniculu<br>s |
| 1 | 1.00 | 1 | 1 | 0     | -0.004 | 0     | -0.003 | 0.002  | t | 134015 | CDKNTGD<br>YYEDSYED          | Oryctola<br>gus<br>cuniculu<br>s |
| 1 | 1.00 | 1 | 1 | 0     | -0.004 | 0     | -0.003 | 0.002  | t | 134020 | CPEEPQLR<br>MKNNEEA<br>EDYDD | Oryctola<br>gus<br>cuniculu<br>s |
| 1 | 1.00 | 1 | 1 | 0     | -0.004 | 0     | -0.003 | 0.002  | t | 134020 | CPEEPQLR<br>MKNNEEA<br>EDYDD | Oryctola<br>gus<br>cuniculu<br>s |
| 1 | 1.00 | 1 | 1 | 0     | -0.014 | 0     | -0.003 | 0.002  | t | 7491   | DAEFRHDS<br>GYEVHHQ<br>K     | Macaca<br>mulatta                |
| 1 | 1.00 | 1 | 1 | -0.04 | -0.04  | -0.04 | -0.04  | -0.04  | t | 106089 | RRHQSQR<br>PPRRFQG<br>Q      | Homo<br>sapiens                  |
| 1 | 1.00 | 1 | 1 | -0.02 | -0.02  | -0.02 | -0.029 | -0.021 | t | 135639 | AVPFPCGR                     | Homo<br>sapiens                  |
| 1 | 1.00 | 1 | 1 | 0.03  | 0.028  | 0.034 | 0.027  | 0.03   | t | 76633  | YYVNKQE<br>GKSLYVKG          | Mus<br>musculu<br>s              |
| 1 | 1.00 | 1 | 1 | 0.01  | 0.008  | 0.01  | 0.007  | 0.01   | t | 48448  | PLPNTALL<br>SL               | Homo<br>sapiens                  |
| 1 | 1.00 | 1 | 1 | 0.03  | 0.031  | 0.031 | 0.029  | 0.031  | t | 15900  | FFSPSEDN<br>FTNDLNKG<br>EEI  | Equus<br>caballus                |
| 1 | 1.00 | 1 | 1 | 0.01  | 0.01   | 0.026 | 0.01   | 0.01   | t | 9588   | DPAFSL                       | Mus<br>musculu<br>s              |
| 1 | 1.00 | 1 | 1 | 0.01  | 0.01   | 0.026 | 0.01   | 0.01   | t | 9588   | DPAFSL                       | Mus<br>musculu<br>s              |

|   |      |   |   |       |        |        |        |        |   |        |                               |                     |
|---|------|---|---|-------|--------|--------|--------|--------|---|--------|-------------------------------|---------------------|
| 1 | 1.00 | 1 | 1 | -0.01 | -0.004 | -0.003 | -0.01  | -0.009 | t | 57250  | SDMYGLIV<br>AQWLSTV<br>NTQF   | Equus<br>caballus   |
| 1 | 1.00 | 1 | 1 | -0.01 | -0.006 | -0.003 | -0.01  | -0.009 | t | 57250  | SDMYGLIV<br>AQWLSTV<br>NTQF   | Homo<br>sapiens     |
| 1 | 1.00 | 1 | 1 | -0.03 | -0.032 | -0.026 | -0.037 | -0.03  | t | 125109 | KKDNTCS<br>MFV                | Mus<br>musculu<br>s |
| 1 | 1.00 | 1 | 1 | 0     | -0.002 | 0.011  | -0.001 | 0.001  | t | 10943  | DYQGMLP<br>VCP                | Mus<br>musculu<br>s |
| 1 | 1.00 | 1 | 1 | 0.01  | 0.01   | 0.01   | 0.001  | 0.012  | t | 132100 | TLPTPVVQ<br>L                 | Homo<br>sapiens     |
| 1 | 1.00 | 1 | 1 | -0.06 | -0.06  | -0.05  | -0.06  | -0.06  | t | 17350  | FPPRP                         | Mus<br>musculu<br>s |
| 1 | 1.00 | 1 | 1 | -0.06 | -0.06  | -0.05  | -0.06  | -0.06  | t | 17350  | FPPRP                         | Mus<br>musculu<br>s |
| 1 | 1.00 | 1 | 1 | 0     | -0.002 | 0.01   | -0.001 | 0.001  | t | 96793  | QRCDLDV                       | Mus<br>musculu<br>s |
| 1 | 1.00 | 1 | 1 | -0.02 | -0.022 | -0.027 | -0.027 | -0.02  | t | 145369 | MWCKIGH<br>DRCEE              | Mus<br>musculu<br>s |
| 1 | 1.00 | 1 | 1 | -0.03 | -0.027 | -0.03  | -0.03  | -0.027 | t | 144786 | SMNRGRG<br>THPSLIW<br>M       | Mus<br>musculu<br>s |
| 1 | 1.00 | 1 | 1 | 0.01  | 0.012  | 0.006  | 0.011  | 0.012  | t | 22129  | GRLHVNE<br>RAVVAPD<br>KEVLYE  | Homo<br>sapiens     |
| 1 | 1.00 | 1 | 1 | 0     | 0      | 0.01   | 0.003  | -0.002 | t | 14230  | ESPEHCSP<br>HHTA              | Homo<br>sapiens     |
| 1 | 1.00 | 1 | 1 | -0.01 | -0.01  | -0.009 | -0.01  | -0.009 | t | 16017  | FGNDWED<br>RYYRENM<br>Y       | Mus<br>musculu<br>s |
| 1 | 1.00 | 1 | 1 | 0.01  | 0.01   | 0.015  | 0.01   | 0.01   | t | 145704 | AEGLT<br>TTT<br>WKDYDHN<br>LQ | Sus<br>scrofa       |
| 1 | 1.00 | 1 | 1 | 0.04  | 0.035  | 0.044  | 0.037  | 0.041  | t | 77802  | TEYSASVK<br>GRFI              | Mus                 |

|   |      |   |   |      |       |      |        |      |   |        |                              |                       |
|---|------|---|---|------|-------|------|--------|------|---|--------|------------------------------|-----------------------|
| 1 | 1.00 | 1 | 1 | 0.06 | 0.056 | 0.06 | 0.053  | 0.06 | t | 137398 | ETPADLST                     | Oryctolagus cuniculus |
| 1 | 1.00 | 1 | 1 | 0    | 0     | 0    | -0.006 | 0    | t | 98728  | DFWATW<br>CGPCKMV<br>APVLEEI | Homo sapiens          |
| 1 | 1.00 | 1 | 1 | 0    | 0     | 0    | -0.006 | 0    | t | 98784  | GAKGKAA<br>LLRELSDV<br>VPNLN | Homo sapiens          |
| 1 | 1.00 | 1 | 1 | 0    | 0     | 0    | -0.006 | 0    | t | 72515  | WGRRLMI<br>GTAAAVVL<br>PGLVG | Homo sapiens          |
| 1 | 1.00 | 1 | 1 | 0    | 0     | 0    | -0.006 | 0    | t | 76065  | YTGPVSSP<br>SWKFHSD<br>V     | Homo sapiens          |
| 1 | 1.00 | 1 | 1 | 0    | 0     | 0    | -0.006 | 0    | t | 66693  | TTLGMHC<br>GSFGSAPS<br>NG    | Homo sapiens          |
| 1 | 1.00 | 1 | 1 | 0    | 0     | 0    | -0.006 | 0    | t | 41948  | MLGNAPS<br>VVPNTTLG<br>M     | Homo sapiens          |
| 1 | 1.00 | 1 | 1 | 0    | 0     | 0    | -0.006 | 0    | t | 41952  | MLGTGTP<br>NRARINFN<br>C     | Homo sapiens          |
| 1 | 1.00 | 1 | 1 | 0    | 0     | 0    | -0.006 | 0    | t | 48928  | PPSSPTHD<br>PPDSDPQI         | Homo sapiens          |
| 1 | 1.00 | 1 | 1 | 0    | 0     | 0    | -0.006 | 0    | t | 48751  | PPATVYRY<br>DSRPPE           | Homo sapiens          |
| 1 | 1.00 | 1 | 1 | 0    | 0     | 0    | -0.006 | 0    | t | 10594  | DVFQNGF<br>TAWGNN<br>D       | Homo sapiens          |
| 1 | 1.00 | 1 | 1 | 0    | 0     | 0    | -0.006 | 0    | t | 3053   | AMAAWSE<br>RAGEA             | Homo sapiens          |

|   |      |   |   |       |        |        |        |        |   |        |                              |                                  |
|---|------|---|---|-------|--------|--------|--------|--------|---|--------|------------------------------|----------------------------------|
| 1 | 1.00 | 1 | 1 | 0     | 0      | 0      | -0.006 | 0      | t | 6429   | CILRQLRHL<br>PSRVRYPH<br>YS  | Homo<br>sapiens                  |
| 1 | 1.00 | 1 | 1 | -0.01 | -0.008 | -0.01  | -0.01  | -0.008 | t | 130471 | DWPAVIFE<br>DTRA             | Homo<br>sapiens                  |
| 1 | 1.00 | 1 | 1 | -0.01 | -0.01  | -0.01  | -0.021 | -0.012 | t | 118622 | TKDDAML<br>LKGKGD            | Homo<br>sapiens                  |
| 1 | 1.00 | 1 | 1 | -0.03 | -0.026 | -0.021 | -0.031 | -0.03  | t | 67325  | TYEAALKQ<br>YEADL            | Mus<br>musculu<br>s              |
| 1 | 1.00 | 1 | 1 | -0.02 | -0.016 | -0.014 | -0.019 | -0.018 | t | 49498  | PSRSLPLPP<br>LLSPPRFH<br>PPS | Homo<br>sapiens                  |
| 1 | 1.00 | 1 | 1 | 0     | -0.005 | 0      | 0.001  | 0.004  | t | 40332  | LVFFAEDV                     | unidentif<br>ied                 |
| 1 | 1.00 | 1 | 1 | 0     | -0.005 | 0      | 0.001  | 0.004  | t | 40332  | LVFFAEDV                     | unidentif<br>ied                 |
| 1 | 1.00 | 1 | 1 | 0     | 0      | 0      | 0.001  | 0.004  | t | 7492   | DAEFRHDS<br>GYEVHHQ<br>KL    | Mus<br>musculu<br>s              |
| 1 | 1.00 | 1 | 1 | 0.03  | 0.026  | 0.03   | 0.023  | 0.029  | t | 107521 | LVFFAEDV<br>GSNKGAI          | Oryctola<br>gus<br>cuniculu<br>s |
| 1 | 1.00 | 1 | 1 | -0.02 | -0.017 | -0.014 | -0.02  | -0.019 | t | 95137  | RGLSLGM<br>RLEN              | Mus<br>musculu<br>s              |
| 1 | 1.00 | 1 | 1 | -0.03 | -0.028 | -0.025 | -0.036 | -0.03  | t | 117387 | TRPIPSHM<br>HDKW             | Homo<br>sapiens                  |
| 1 | 1.00 | 1 | 1 | 0.06  | 0.062  | 0.065  | 0.057  | 0.062  | t | 123440 | LLEYGEKYE                    | Ovis<br>aries                    |
| 1 | 1.00 | 1 | 1 | -0.03 | -0.03  | -0.042 | -0.03  | -0.026 | t | 145845 | KHKVRNE<br>VMVHWF<br>GD      | Sus<br>scrofa                    |
| 1 | 1.00 | 1 | 1 | 0     | -0.002 | 0      | 0      | 0      | t | 41754  | MINVQAK<br>PAAAAS            | Oryctola<br>gus<br>cuniculu<br>s |



|   |      |   |   |       |        |        |        |        |   |        |                              |                                  |
|---|------|---|---|-------|--------|--------|--------|--------|---|--------|------------------------------|----------------------------------|
| 1 | 1.00 | 1 | 1 | -0.02 | -0.02  | -0.018 | -0.02  | -0.018 | t | 43578  | NEDQKIGI<br>EIIKRALKI        | Mus<br>musculu<br>s              |
| 1 | 1.00 | 1 | 1 | -0.02 | -0.02  | -0.018 | -0.02  | -0.018 | t | 43578  | NEDQKIGI<br>EIIKRALKI        | Mus<br>musculu<br>s              |
| 1 | 1.00 | 1 | 1 | -0.02 | -0.02  | -0.018 | -0.02  | -0.018 | t | 43578  | NEDQKIGI<br>EIIKRALKI        | Mus<br>musculu<br>s              |
| 1 | 1.00 | 1 | 1 | -0.06 | -0.062 | -0.06  | -0.057 | -0.058 | t | 106565 | KKVAVVRT<br>PPKSPSSA<br>K    | Mus<br>musculu<br>s              |
| 1 | 1.00 | 1 | 1 | -0.01 | -0.006 | -0.005 | -0.009 | -0.01  | t | 60710  | SRKAYDH<br>NSPYIWPR<br>NDYDG | Homo<br>sapiens                  |
| 1 | 1.00 | 1 | 1 | 0     | -0.002 | -0.003 | 0      | 0.002  | t | 132834 | GTRAKFEG<br>GQAIYEN          | Trichosu<br>rus<br>vulpecul<br>a |
| 1 | 1.00 | 1 | 1 | 0.04  | 0.042  | 0.059  | 0.041  | 0.04   | t | 11264  | ECSQAAPY<br>I                | Homo<br>sapiens                  |
| 1 | 1.00 | 1 | 1 | -0.03 | -0.03  | -0.023 | -0.03  | -0.03  | t | 133554 | EGLYSPW<br>WPRSLPVL          | Mus<br>musculu<br>s              |
| 1 | 1.00 | 1 | 1 | 0.01  | 0.008  | 0.011  | 0.007  | 0.012  | t | 151679 | LAALTRTP<br>VVSP             | Mus<br>musculu<br>s              |
| 1 | 1.00 | 1 | 1 | 0     | -0.002 | 0.01   | 0.003  | 0.002  | t | 38628  | LPPTAPPLL                    | Mus<br>musculu<br>s              |
| 1 | 1.00 | 1 | 1 | 0.01  | 0.011  | 0.017  | 0.01   | 0.01   | t | 64411  | TIPAQGTS<br>M                | Mus<br>musculu<br>s              |
| 1 | 1.00 | 1 | 1 | 0.01  | 0.014  | 0.015  | 0.011  | 0.013  | t | 58416  | SHSQLGPP<br>VGGPP            | Homo<br>sapiens                  |
| 1 | 1.00 | 1 | 1 | 0     | 0      | 0.006  | 0      | 0      | t | 102941 | YGCYCGA<br>GG                | Mus<br>musculu<br>s              |
| 1 | 1.00 | 1 | 1 | -0.02 | -0.023 | -0.019 | -0.02  | -0.018 | t | 98154  | KDTNNNL<br>TLV               | Oryctola<br>gus<br>cuniculu<br>s |

|   |      |   |   |       |        |        |        |        |   |        |                               |                       |
|---|------|---|---|-------|--------|--------|--------|--------|---|--------|-------------------------------|-----------------------|
| 1 | 1.00 | 1 | 1 | -0.03 | -0.016 | -0.014 | -0.029 | -0.03  | t | 57894  | SFSIFLLALL                    | Homo sapiens          |
| 1 | 1.00 | 1 | 1 | 0.04  | 0.033  | 0.035  | 0.037  | 0.04   | t | 55187  | RPKHPIKH<br>QGLPQEV<br>L NENL | Homo sapiens          |
| 1 | 1.00 | 1 | 1 | -0.03 | -0.03  | -0.02  | -0.03  | -0.03  | t | 48688  | PNPLGFLP                      | Mus musculus          |
| 1 | 1.00 | 1 | 1 | -0.07 | -0.07  | -0.063 | -0.07  | -0.068 | t | 133605 | HWWHKK<br>P                   | Mus musculus          |
| 1 | 1.00 | 1 | 1 | -0.04 | -0.04  | -0.049 | -0.042 | -0.037 | t | 96373  | IATHAKIR<br>D                 | Homo sapiens          |
| 1 | 1.00 | 1 | 1 | 0.01  | 0.008  | 0.017  | 0.009  | 0.01   | t | 98336  | PLTPLQN<br>MGILEV<br>G        | Sus scrofa            |
| 1 | 1.00 | 1 | 1 | 0     | 0      | 0.006  | 0      | 0      | t | 21360  | GMVQTHV<br>TTPGSIPT           | Oryctolagus cuniculus |
| 1 | 1.00 | 1 | 1 | 0.02  | 0.02   | 0.02   | 0.016  | 0.022  | t | 135965 | NIISDAMK<br>KVGR              | Homo sapiens          |
| 1 | 1.00 | 1 | 1 | 0.01  | 0.014  | 0.028  | 0.011  | 0.01   | t | 39748  | LSVSLV                        | Homo sapiens          |
| 1 | 1.00 | 1 | 1 | 0.02  | 0.015  | 0.017  | 0.022  | 0.023  | t | 157276 | FQSQPPP<br>GVPQG              | Canis lupus           |
| 1 | 1.00 | 1 | 1 | -0.01 | -0.008 | 0      | -0.009 | -0.008 | t | 72142  | VYQTEKFV                      | Homo sapiens          |
| 1 | 1.00 | 1 | 1 | 0     | 0      | 0.022  | 0      | 0      | t | 38031  | LMGYIPLV<br>GA                | Homo sapiens          |
| 1 | 1.00 | 1 | 1 | 0     | 0      | 0.022  | 0      | 0      | t | 38031  | LMGYIPLV<br>GA                | Homo sapiens          |
| 1 | 1.00 | 1 | 1 | -0.02 | -0.02  | -0.016 | -0.02  | -0.018 | t | 52105  | QQPQQPF<br>PLQ                | Mus musculus          |

|   |      |   |   |       |        |        |        |        |   |        |                              |                                  |
|---|------|---|---|-------|--------|--------|--------|--------|---|--------|------------------------------|----------------------------------|
| 1 | 1.00 | 1 | 1 | 0.02  | 0.02   | 0.032  | 0.018  | 0.018  | t | 96490  | KQDEEQRL<br>KE               | Homo<br>sapiens                  |
| 1 | 1.00 | 1 | 1 | 0.03  | 0.03   | 0.03   | 0.03   | 0.029  | t | 115199 | DAPSFSDI<br>PNPIGSEN<br>SEKT | Homo<br>sapiens                  |
| 1 | 1.00 | 1 | 1 | 0     | 0      | 0.017  | 0.003  | 0      | t | 39187  | LRRGMFR<br>PSQCN             | Homo<br>sapiens                  |
| 1 | 1.00 | 1 | 1 | 0     | -0.003 | 0      | 0      | 0      | t | 143709 | KNGLSEEIE<br>KEVGQAE<br>G    | Oryctola<br>gus<br>cuniculu<br>s |
| 1 | 1.00 | 1 | 1 | 0     | 0.008  | -0.001 | 0      | 0      | t | 45631  | NQTARDEI<br>RRA              | Gallus<br>gallus                 |
| 1 | 1.00 | 1 | 1 | -0.01 | -0.012 | -0.015 | -0.013 | -0.01  | t | 45390  | NPLGLKRG<br>IEKAVEK          | Rattus<br>norvegic<br>us         |
| 1 | 1.00 | 1 | 1 | -0.01 | -0.014 | 0.001  | -0.01  | -0.011 | t | 93373  | MDKVLNR<br>EESL              | Mus<br>musculu<br>s              |
| 1 | 1.00 | 1 | 1 | 0.03  | 0.026  | 0.028  | 0.03   | 0.032  | t | 10067  | DRYFTYEE<br>PNDG             | Bos<br>taurus                    |
| 1 | 1.00 | 1 | 1 | 0.03  | 0.034  | 0.028  | 0.03   | 0.032  | t | 10067  | DRYFTYEE<br>PNDG             | Capra<br>hircus                  |
| 1 | 1.00 | 1 | 1 | -0.02 | -0.017 | -0.013 | -0.02  | -0.02  | t | 79233  | GLYVIWSR<br>DW               | Mus<br>musculu<br>s              |
| 1 | 1.00 | 1 | 1 | 0.03  | 0.03   | 0.038  | 0.033  | 0.028  | t | 47304  | PEHRGGP<br>EEFEGAGD<br>GEPPE | Homo<br>sapiens                  |
| 1 | 1.00 | 1 | 1 | 0.01  | 0.008  | 0.007  | 0.003  | 0.011  | t | 129610 | PLTKGILGF<br>VFT             | Mus<br>musculu<br>s              |
| 1 | 1.00 | 1 | 1 | -0.03 | -0.032 | -0.013 | -0.031 | -0.032 | t | 151072 | YDDVNGIR<br>RP               | Mus<br>musculu<br>s              |
| 1 | 1.00 | 1 | 1 | -0.02 | -0.02  | -0.012 | -0.02  | -0.019 | t | 102335 | CKMWAD<br>AFTSSRGK<br>VVEC   | Mus<br>musculu<br>s              |

|   |      |   |   |       |        |        |        |        |   |        |                              |                                  |
|---|------|---|---|-------|--------|--------|--------|--------|---|--------|------------------------------|----------------------------------|
| 1 | 1.00 | 1 | 1 | -0.02 | -0.02  | -0.012 | -0.02  | -0.019 | t | 102335 | CKMWAD<br>AFTSSRGK<br>VVEC   | Mus<br>musculu<br>s              |
| 1 | 1.00 | 1 | 1 | -0.03 | -0.03  | -0.01  | -0.023 | -0.03  | t | 37794  | LLSHSNLD<br>HILEPSIPW<br>K   | Homo<br>sapiens                  |
| 1 | 1.00 | 1 | 1 | -0.03 | -0.028 | -0.023 | -0.023 | -0.027 | t | 108217 | WWNMFQ<br>MGVV               | Homo<br>sapiens                  |
| 1 | 1.00 | 1 | 1 | 0.03  | 0.033  | 0.038  | 0.03   | 0.033  | t | 94954  | TTAETLDA<br>TC               | Mus<br>musculu<br>s              |
| 1 | 1.00 | 1 | 1 | 0.03  | 0.033  | 0.038  | 0.03   | 0.033  | t | 94954  | TTAETLDA<br>TC               | Mus<br>musculu<br>s              |
| 1 | 1.00 | 1 | 1 | -0.01 | -0.007 | -0.003 | -0.01  | -0.01  | t | 120416 | AVALREYR<br>KKMDIPA          | Mus<br>musculu<br>s              |
| 1 | 1.00 | 1 | 1 | -0.05 | -0.047 | -0.042 | -0.05  | -0.053 | t | 110910 | KAKPKFTL<br>GKRKATP          | Mus<br>musculu<br>s              |
| 1 | 1.00 | 1 | 1 | -0.02 | -0.019 | -0.02  | -0.02  | -0.02  | t | 37335  | LLGILESRG<br>IKARIT          | Mus<br>musculu<br>s              |
| 1 | 1.00 | 1 | 1 | 0.03  | 0.034  | 0.035  | 0.027  | 0.03   | t | 95312  | DKENGDV<br>TFTEV             | Homo<br>sapiens                  |
| 1 | 1.00 | 1 | 1 | -0.03 | -0.023 | -0.023 | -0.037 | -0.032 | t | 136123 | AGLPNHN<br>AMLLT             | Gallus<br>gallus                 |
| 1 | 1.00 | 1 | 1 | 0.04  | 0.04   | 0.027  | 0.04   | 0.042  | t | 26924  | IKVELTGN<br>STLSSDYA<br>QARA | Oryctola<br>gus<br>cuniculu<br>s |
| 1 | 1.00 | 1 | 1 | -0.01 | -0.01  | -0.01  | -0.01  | -0.008 | t | 70673  | VQWMNR<br>LIAFASRG<br>NHVSPT | Homo<br>sapiens                  |
| 1 | 1.00 | 1 | 1 | 0     | 0.002  | 0      | -0.001 | 0.003  | t | 28910  | ITGHRMA<br>WDMMLN<br>WS      | Homo<br>sapiens                  |
| 1 | 1.00 | 1 | 1 | -0.06 | -0.057 | -0.06  | -0.06  | -0.057 | t | 135569 | KTNMK                        | Mus<br>musculu<br>s              |

|   |      |   |   |       |        |        |        |        |   |        |                              |                                  |
|---|------|---|---|-------|--------|--------|--------|--------|---|--------|------------------------------|----------------------------------|
| 1 | 1.00 | 1 | 1 | 0.02  | 0.02   | 0.02   | 0.026  | 0.027  | t | 117223 | NTWTTCD<br>SIAFPSK           | Mus<br>musculu<br>s              |
| 1 | 1.00 | 1 | 1 | -0.01 | -0.012 | -0.013 | -0.01  | -0.01  | t | 123734 | SFSKASNS<br>WFPVEGP<br>ADICQ | marmos<br>ets                    |
| 1 | 1.00 | 1 | 1 | -0.05 | -0.048 | -0.052 | -0.053 | -0.05  | t | 106122 | SRRRSLPYS<br>PYSPQT          | Homo<br>sapiens                  |
| 1 | 1.00 | 1 | 1 | 0.01  | 0.012  | 0.009  | 0.007  | 0.01   | t | 142304 | SVTLVEAY<br>TDVFDDT<br>QVEMI | Felis<br>catus                   |
| 1 | 1.00 | 1 | 1 | 0     | 0      | 0.004  | 0      | 0.002  | t | 60527  | SQPQQPF<br>PQQ               | Mus<br>musculu<br>s              |
| 1 | 1.00 | 1 | 1 | -0.02 | -0.02  | -0.018 | -0.027 | -0.02  | t | 128068 | PDYEPPVV<br>HGCPLPPP         | Homo<br>sapiens                  |
| 1 | 1.00 | 1 | 1 | 0     | 0      | 0      | 0      | 0      | t | 147371 | VIKMIRIQ<br>GSYVGNR<br>KDSS  | Homo<br>sapiens                  |
| 1 | 1.00 | 1 | 1 | -0.02 | -0.02  | -0.02  | -0.02  | -0.02  | t | 140839 | DERGTPEY<br>NIALGQRR<br>ADAV | Oryctola<br>gus<br>cuniculu<br>s |
| 1 | 1.00 | 1 | 1 | 0     | 0.002  | -0.004 | -0.001 | 0      | t | 36072  | LGDDTGIH<br>VIPTLNGD<br>DRHK | Cavia<br>porcellu<br>s           |
| 1 | 1.00 | 1 | 1 | 0     | -0.002 | -0.004 | -0.001 | 0      | t | 36072  | LGDDTGIH<br>VIPTLNGD<br>DRHK | Mus<br>musculu<br>s              |
| 1 | 1.00 | 1 | 1 | -0.02 | -0.022 | -0.015 | -0.023 | -0.021 | t | 142941 | PCSPITQG<br>DRGVGSS          | Sus<br>scrofa                    |
| 1 | 1.00 | 1 | 1 | -0.01 | -0.01  | -0.01  | -0.01  | -0.011 | t | 9940   | DRAAGQP<br>AGNGAGG<br>QAAGGN | Mus<br>musculu<br>s              |
| 1 | 1.00 | 1 | 1 | -0.01 | -0.006 | -0.002 | -0.01  | -0.011 | t | 32031  | KLMSKYSN<br>TFEVNAYN<br>MSIR | Aotus<br>nancyma<br>ae           |
| 1 | 1.00 | 1 | 1 | -0.04 | -0.04  | -0.031 | -0.04  | -0.04  | t | 36025  | LFYHHKFN<br>S                | Homo<br>sapiens                  |
| 1 | 1.00 | 1 | 1 | -0.01 | -0.013 | -0.01  | -0.01  | -0.009 | t | 135413 | AAAAKAA<br>KYGAA             | Oryctola<br>gus<br>cuniculu<br>s |

|   |      |   |   |       |        |        |        |        |   |        |                              |                                  |
|---|------|---|---|-------|--------|--------|--------|--------|---|--------|------------------------------|----------------------------------|
| 1 | 1.00 | 1 | 1 | 0     | 0      | 0.003  | 0      | 0.002  | t | 57864  | SFPMNEES<br>PLGFSPE          | Mus<br>musculu<br>s              |
| 1 | 1.00 | 1 | 1 | -0.02 | -0.018 | -0.024 | -0.023 | -0.018 | t | 150853 | HIGGLSILD<br>PIFGVL          | Homo<br>sapiens                  |
| 1 | 1.00 | 1 | 1 | -0.02 | -0.02  | -0.007 | -0.022 | -0.02  | t | 17580  | FRELADAL                     | Homo<br>sapiens                  |
| 1 | 1.00 | 1 | 1 | -0.05 | -0.05  | -0.056 | -0.053 | -0.049 | t | 10254  | DSTRTQIN<br>K                | Homo<br>sapiens                  |
| 1 | 1.00 | 1 | 1 | -0.03 | -0.032 | -0.018 | -0.027 | -0.03  | t | 24786  | HSLGKWL<br>GHPDKF            | Mus<br>musculu<br>s              |
| 1 | 1.00 | 1 | 1 | 0     | -0.002 | 0      | -0.007 | 0      | t | 134048 | EQFRRMR<br>AAEDP             | Mus<br>musculu<br>s              |
| 1 | 1.00 | 1 | 1 | -0.02 | -0.02  | -0.02  | -0.02  | -0.018 | t | 117777 | CSLPMIW<br>AQKTNT            | Homo<br>sapiens                  |
| 1 | 1.00 | 1 | 1 | 0.01  | 0.006  | 0.013  | 0.013  | 0.01   | t | 43701  | NENKLCIK<br>LGQGLTFN<br>SNNI | Oryctola<br>gus<br>cuniculu<br>s |
| 1 | 1.00 | 1 | 1 | 0.02  | 0.02   | 0.02   | 0.014  | 0.02   | t | 159060 | RELDAET<br>KAFLKAG           | Homo<br>sapiens                  |
| 1 | 1.00 | 1 | 1 | -0.01 | -0.003 | -0.009 | -0.013 | -0.008 | t | 48846  | PPNSGGV<br>NTIQLYQT<br>KTAQ  | Gallus<br>gallus                 |
| 1 | 1.00 | 1 | 1 | 0     | -0.004 | 0      | -0.007 | 0      | t | 122892 | RSILPYGDS<br>MDRIE           | Oryctola<br>gus<br>cuniculu<br>s |
| 1 | 1.00 | 1 | 1 | 0     | -0.004 | 0      | -0.007 | 0      | t | 125472 | LDAVYLNK<br>NKYLTVID<br>KDAF | Oryctola<br>gus<br>cuniculu<br>s |
| 1 | 1.00 | 1 | 1 | -0.01 | -0.01  | -0.01  | -0.01  | -0.007 | t | 153372 | DTELTQQA<br>LRLV             | Mus<br>musculu<br>s              |
| 1 | 1.00 | 1 | 1 | -0.01 | -0.01  | -0.01  | -0.01  | -0.007 | t | 51853  | QPHGGG<br>W                  | Mus<br>musculu<br>s              |
| 1 | 1.00 | 1 | 1 | -0.02 | -0.021 | -0.015 | -0.022 | -0.022 | t | 48543  | PMCSNRM<br>ADDIWSV<br>PWYCVR | Myodes<br>glareolu<br>s          |
| 1 | 1.00 | 1 | 1 | 0     | -0.002 | 0.004  | -0.003 | 0      | t | 46434  | NVNELRFN<br>IGQFLPP          | Sus<br>scrofa                    |

|   |      |   |   |       |        |        |        |        |   |        |                              |                        |
|---|------|---|---|-------|--------|--------|--------|--------|---|--------|------------------------------|------------------------|
| 1 | 1.00 | 1 | 1 | 0     | 0      | 0.006  | -0.004 | -0.001 | t | 11821  | EENVEHD<br>AEENVEH<br>DA     | Homo<br>sapiens        |
| 1 | 1.00 | 1 | 1 | -0.03 | -0.032 | -0.036 | -0.031 | -0.03  | t | 55968  | RSSRSRG<br>NSRNSTP           | Mus<br>musculu<br>s    |
| 1 | 1.00 | 1 | 1 | 0.04  | 0.038  | 0.047  | 0.033  | 0.04   | t | 117640 | SFEYFPSHF<br>FVPELEVTI<br>IC | Mus<br>musculu<br>s    |
| 1 | 1.00 | 1 | 1 | 0     | 0      | 0.017  | 0      | 0      | t | 70113  | VNKSFEI                      | Mus<br>musculu<br>s    |
| 1 | 1.00 | 1 | 1 | -0.04 | -0.042 | -0.038 | -0.041 | -0.038 | t | 96335  | GRRLPVVI                     | Mus<br>musculu<br>s    |
| 1 | 1.00 | 1 | 1 | -0.01 | -0.01  | -0.01  | -0.01  | -0.008 | t | 144777 | SGTHMNL<br>YLHDTAFA          | Mus<br>musculu<br>s    |
| 1 | 1.00 | 1 | 1 | 0.04  | 0.042  | 0.044  | 0.041  | 0.04   | t | 145997 | SASDQPT<br>QYEEEMT<br>DYQK   | Homo<br>sapiens        |
| 1 | 1.00 | 1 | 1 | 0     | 0.003  | 0.002  | 0      | 0.003  | t | 125052 | FSLRLMEE<br>NW               | Mus<br>musculu<br>s    |
| 1 | 1.00 | 1 | 1 | -0.04 | -0.04  | -0.035 | -0.043 | -0.042 | t | 35160  | LDFPALWL<br>LKLSAQY          | Homo<br>sapiens        |
| 1 | 1.00 | 1 | 1 | 0.02  | 0.02   | 0.015  | 0.02   | 0.021  | t | 94501  | EKQISDAS<br>RQGLRRD          | Mus<br>musculu<br>s    |
| 1 | 1.00 | 1 | 1 | 0     | -0.002 | 0      | -0.007 | 0      | t | 118538 | NNGNLQL<br>RKEVTWE<br>VLEG   | Mus<br>musculu<br>s    |
| 1 | 1.00 | 1 | 1 | 0.02  | 0.023  | 0.019  | 0.02   | 0.022  | t | 91093  | AEFYQEV<br>LFGFE             | Equus<br>caballus      |
| 1 | 1.00 | 1 | 1 | -0.03 | -0.032 | -0.026 | -0.037 | -0.03  | t | 141706 | MLEPFQIL                     | Mus<br>musculu<br>s    |
| 1 | 1.00 | 1 | 1 | -0.01 | -0.004 | -0.002 | -0.01  | -0.01  | t | 11283  | EDAEVAG<br>TQWFTPS<br>GKSGC  | Aotus<br>nancyma<br>ae |

|   |      |   |   |       |        |        |        |        |   |        |                      |                       |
|---|------|---|---|-------|--------|--------|--------|--------|---|--------|----------------------|-----------------------|
| 1 | 1.00 | 1 | 1 | -0.04 | -0.04  | -0.023 | -0.04  | -0.04  | t | 247    | AAKGTPW              | Homo sapiens          |
| 1 | 1.00 | 1 | 1 | -0.01 | -0.012 | 0.004  | -0.013 | -0.012 | t | 15517  | FEEINGIRKP           | Mus musculus          |
| 1 | 1.00 | 1 | 1 | 0.01  | 0.014  | 0.019  | 0.01   | 0.01   | t | 63721  | TFNSNNKEY            | Cavia porcellus       |
| 1 | 1.00 | 1 | 1 | 0     | 0.004  | 0.007  | 0.003  | 0.001  | t | 135449 | CATLRVYKGG           | Homo sapiens          |
| 1 | 1.00 | 1 | 1 | 0.02  | 0.02   | 0.02   | 0.011  | 0.02   | t | 133795 | DFTYDQVAFNGLPQF      | Homo sapiens          |
| 1 | 1.00 | 1 | 1 | -0.02 | -0.022 | -0.008 | -0.017 | -0.021 | t | 115062 | HNGQACKGKIQALCE      | Mus musculus          |
| 1 | 1.00 | 1 | 1 | -0.01 | -0.008 | 0.005  | -0.009 | -0.01  | t | 71589  | VTYVPSQERNFTTAPAI    | Homo sapiens          |
| 1 | 1.00 | 1 | 1 | 0.01  | 0.01   | 0.01   | 0.01   | 0.009  | t | 134767 | QDPYVKEAENLKKYFNAG   | Mus musculus          |
| 1 | 1.00 | 1 | 1 | -0.02 | -0.024 | -0.024 | -0.021 | -0.02  | t | 52495  | QTDIAGTGLTFDIAFKFASN | Oryctolagus cuniculus |
| 1 | 1.00 | 1 | 1 | -0.04 | -0.043 | -0.029 | -0.04  | -0.042 | t | 111729 | RHVGGGTPRRPGKEI      | Oryctolagus cuniculus |
| 1 | 1.00 | 1 | 1 | -0.04 | -0.036 | -0.029 | -0.039 | -0.04  | t | 84160  | KAGKNYIGYS           | Homo sapiens          |
| 1 | 1.00 | 1 | 1 | -0.02 | -0.016 | -0.008 | -0.013 | -0.018 | t | 119535 | TQDLGYSRV            | Homo sapiens          |
| 1 | 1.00 | 1 | 1 | -0.02 | -0.02  | 0.002  | -0.017 | -0.022 | t | 63340  | TEEEREVYSY           | Homo sapiens          |
| 1 | 1.00 | 1 | 1 | -0.04 | -0.043 | -0.036 | -0.04  | -0.043 | t | 73385  | YALADASLKMADPNRFRGKD | Oryctolagus cuniculus |



|   |      |   |   |       |        |        |        |        |   |        |                     |                                  |
|---|------|---|---|-------|--------|--------|--------|--------|---|--------|---------------------|----------------------------------|
| 1 | 1.00 | 1 | 1 | -0.02 | -0.024 | -0.02  | -0.023 | -0.021 | t | 132066 | SLRNSPEF<br>QKLLGI  | Oryctola<br>gus<br>cuniculu<br>s |
| 1 | 1.00 | 1 | 1 | -0.01 | -0.012 | -0.007 | -0.017 | -0.01  | t | 105964 | MGSRTDR             | Mus<br>musculu<br>s              |
| 1 | 1.00 | 1 | 1 | 0     | -0.002 | -0.005 | 0      | 0.002  | t | 94644  | PNKKPGKK<br>TTTKPTK | Mus<br>musculu<br>s              |
| 1 | 1.00 | 1 | 1 | 0     | 0      | 0.009  | 0      | 0      | t | 153500 | WSWQPPL<br>FPTNP    | Mus<br>musculu<br>s              |
| 1 | 1.00 | 1 | 1 | -0.04 | -0.039 | -0.032 | -0.043 | -0.042 | t | 11273  | ECTLKKS<br>SGYCAWP  | Equus<br>caballus                |
| 1 | 1.00 | 1 | 1 | 0.03  | 0.029  | 0.047  | 0.03   | 0.03   | t | 73151  | WTPEEDQ<br>K        | Anas<br>platyrhy<br>nchos        |
| 1 | 1.00 | 1 | 1 | 0.02  | 0.02   | 0.027  | 0.024  | 0.02   | t | 70499  | VPVDAPH<br>AGTKPHSA | Homo<br>sapiens                  |
| 1 | 1.00 | 1 | 1 | -0.01 | -0.01  | -0.002 | -0.01  | -0.01  | t | 106304 | CDRSYTTR<br>RW      | Homo<br>sapiens                  |
| 1 | 1.00 | 1 | 1 | -0.04 | -0.043 | -0.035 | -0.047 | -0.041 | t | 120163 | QWKAEFH<br>RWS      | Oryctola<br>gus<br>cuniculu<br>s |
| 1 | 1.00 | 1 | 1 | -0.01 | -0.014 | -0.004 | -0.011 | -0.01  | t | 56195  | RTTPDRQ<br>AA       | Oryctola<br>gus<br>cuniculu<br>s |
| 1 | 1.00 | 1 | 1 | -0.05 | -0.046 | -0.042 | -0.05  | -0.05  | t | 12184  | EGHRMA<br>WDMMNWS   | Cavia<br>porcellu<br>s           |
| 1 | 1.00 | 1 | 1 | -0.01 | -0.011 | 0.007  | -0.01  | -0.01  | t | 49513  | PSSPPQW<br>K        | Anas<br>platyrhy<br>nchos        |
| 1 | 1.00 | 1 | 1 | 0.03  | 0.032  | 0.037  | 0.03   | 0.031  | t | 120155 | QPSPYNG<br>WRMEI    | Rattus<br>norvegic<br>us         |

|   |      |   |   |       |        |        |        |        |   |        |                              |                          |
|---|------|---|---|-------|--------|--------|--------|--------|---|--------|------------------------------|--------------------------|
| 1 | 1.00 | 1 | 1 | 0.03  | 0.03   | 0.037  | 0.03   | 0.031  | t | 120155 | QPSPYNG<br>WRMEI             | Rattus<br>norvegicus     |
| 1 | 1.00 | 1 | 1 | -0.01 | -0.007 | -0.007 | -0.01  | -0.01  | t | 53572  | RELQKRLY<br>SN               | Mus<br>musculus          |
| 1 | 1.00 | 1 | 1 | 0.02  | 0.02   | 0.025  | 0.02   | 0.019  | t | 134020 | CPEEPQLR<br>MKNNEEA<br>EDYDD | Oryctolagus<br>cuniculus |
| 1 | 1.00 | 1 | 1 | 0.02  | 0.02   | 0.025  | 0.02   | 0.019  | t | 134020 | CPEEPQLR<br>MKNNEEA<br>EDYDD | Oryctolagus<br>cuniculus |
| 1 | 1.00 | 1 | 1 | -0.02 | -0.02  | -0.004 | -0.02  | -0.021 | t | 10168  | DSLPHPQ<br>QATDDSG<br>H      | Mus<br>musculus          |
| 1 | 1.00 | 1 | 1 | -0.03 | -0.03  | -0.023 | -0.039 | -0.032 | t | 136217 | FAYRTFYK<br>YD               | Homo<br>sapiens          |
| 1 | 1.00 | 1 | 1 | -0.03 | -0.03  | -0.032 | -0.03  | -0.027 | t | 9586   | DPAFR                        | Mus<br>musculus          |
| 1 | 1.00 | 1 | 1 | -0.05 | -0.05  | -0.034 | -0.05  | -0.05  | t | 881    | AEEKLKKK<br>SSFYQS           | Homo<br>sapiens          |
| 1 | 1.00 | 1 | 1 | 0.01  | 0.012  | 0.008  | 0.011  | 0.011  | t | 74479  | YKMFLHT<br>GAVIVLPE<br>DDLPT | Homo<br>sapiens          |
| 1 | 1.00 | 1 | 1 | -0.02 | -0.02  | -0.02  | -0.02  | -0.02  | t | 7895   | DDYNYWT<br>PINKKEFL          | Mus<br>musculus          |
| 1 | 1.00 | 1 | 1 | 0     | 0      | 0.027  | 0      | -0.005 | t | 75418  | YPTFGEHK<br>QEKDLEY          | Mus<br>musculus          |
| 1 | 1.00 | 1 | 1 | 0.01  | 0.008  | 0.011  | 0.009  | 0.01   | t | 67264  | TWHLPSH<br>TQTQG             | Mus<br>musculus          |
| 1 | 1.00 | 1 | 1 | -0.01 | -0.008 | -0.007 | -0.013 | -0.01  | t | 63658  | TFGGLLGE<br>KT               | Homo<br>sapiens          |

|   |      |   |   |       |        |        |        |        |   |        |                             |                                  |
|---|------|---|---|-------|--------|--------|--------|--------|---|--------|-----------------------------|----------------------------------|
| 1 | 1.00 | 1 | 1 | 0     | -0.004 | 0.002  | -0.007 | -0.005 | t | 116286 | CGKGLSAT<br>VTGGQKG<br>RGSR | Oryctola<br>gus<br>cuniculu<br>s |
| 1 | 1.00 | 1 | 1 | -0.01 | -0.008 | -0.001 | -0.01  | -0.01  | t | 99963  | DTVQLRRK<br>LEFFTY          | Homo<br>sapiens                  |
| 1 | 1.00 | 1 | 1 | -0.02 | -0.01  | -0.019 | -0.028 | -0.02  | t | 55668  | RRPEGRT<br>WAQ              | Pan<br>troglody<br>tes           |
| 1 | 1.00 | 1 | 1 | -0.04 | -0.04  | -0.038 | -0.041 | -0.04  | t | 144786 | SMNRGRG<br>THPSLIW<br>M     | Mus<br>musculu<br>s              |
| 1 | 1.00 | 1 | 1 | -0.01 | -0.01  | -0.008 | -0.01  | -0.007 | t | 45673  | NRFAGMF<br>SLGARQKI         | Mus<br>musculu<br>s              |
| 1 | 1.00 | 1 | 1 | -0.07 | -0.072 | -0.068 | -0.073 | -0.07  | t | 46899  | PAPRRKFQ<br>QVKRL           | Mus<br>musculu<br>s              |
| 1 | 1.00 | 1 | 1 | 0.02  | 0.02   | 0.036  | 0.02   | 0.02   | t | 11704  | EEIVPNSV<br>EQ              | Homo<br>sapiens                  |
| 1 | 1.00 | 1 | 1 | -0.04 | -0.038 | -0.037 | -0.043 | -0.04  | t | 21113  | GLRSEFPI<br>WM              | Homo<br>sapiens                  |
| 1 | 1.00 | 1 | 1 | 0.05  | 0.048  | 0.07   | 0.05   | 0.049  | t | 141777 | VVDSEDL<br>LN               | Oryctola<br>gus<br>cuniculu<br>s |
| 1 | 1.00 | 1 | 1 | 0.01  | 0.012  | 0.017  | 0.011  | 0.01   | t | 52000  | QQACKGKI<br>QALCENP         | Homo<br>sapiens                  |
| 1 | 1.00 | 1 | 1 | -0.01 | -0.013 | -0.007 | -0.01  | -0.009 | t | 52821  | QVYLHGD<br>KTKPMILT         | Oryctola<br>gus<br>cuniculu<br>s |
| 1 | 1.00 | 1 | 1 | 0.02  | 0.018  | 0.02   | 0.013  | 0.02   | t | 119663 | VIVELIPST<br>SSAV           | Mus<br>musculu<br>s              |
| 1 | 1.00 | 1 | 1 | 0     | 0      | 0      | -0.004 | 0.001  | t | 38345  | LNTEPSQL<br>PPTAPP          | Homo<br>sapiens                  |
| 1 | 1.00 | 1 | 1 | 0     | 0      | 0      | -0.004 | 0.001  | t | 48779  | PPFSLSPV<br>PTLGSRSR<br>R   | Homo<br>sapiens                  |

|   |      |   |   |       |        |        |        |        |   |        |                              |                       |
|---|------|---|---|-------|--------|--------|--------|--------|---|--------|------------------------------|-----------------------|
| 1 | 1.00 | 1 | 1 | 0     | 0      | 0      | -0.004 | 0.001  | t | 6918   | CRFPNITN<br>SHVPILQE         | Homo sapiens          |
| 1 | 1.00 | 1 | 1 | 0.01  | 0.01   | 0.01   | 0.01   | 0.01   | t | 156916 | LNEKQCTR<br>PCLHLT           | Gallus gallus         |
| 1 | 1.00 | 1 | 1 | 0     | 0      | 0      | 0      | 0.003  | t | 136567 | PYWKWQ<br>YKYD               | Homo sapiens          |
| 1 | 1.00 | 1 | 1 | -0.01 | -0.01  | -0.01  | -0.01  | -0.01  | t | 113775 | QQGQQP<br>GQGQQPG<br>Q       | Homo sapiens          |
| 1 | 1.00 | 1 | 1 | -0.04 | -0.044 | -0.041 | -0.041 | -0.04  | t | 18500  | GAAALRA<br>HVSGRRA           | Oryctolagus cuniculus |
| 1 | 1.00 | 1 | 1 | 0     | 0.002  | 0.008  | 0.001  | 0.002  | t | 27757  | INTTGNPE<br>H                | Homo sapiens          |
| 1 | 1.00 | 1 | 1 | -0.01 | -0.01  | -0.015 | -0.007 | -0.004 | t | 59511  | SLTITQLLK<br>R               | Homo sapiens          |
| 1 | 1.00 | 1 | 1 | 0.01  | 0.012  | 0.01   | 0.007  | 0.012  | t | 52152  | QQSPQQQ                      | Homo sapiens          |
| 1 | 1.00 | 1 | 1 | -0.01 | -0.012 | -0.009 | -0.007 | -0.01  | t | 8557   | DHNSPYI<br>WPRNDYD<br>GFLENA | Mus musculus          |
| 1 | 1.00 | 1 | 1 | -0.02 | -0.017 | -0.008 | -0.02  | -0.022 | t | 43214  | NALSSLVD<br>RAFFNSF          | Mus musculus          |
| 1 | 1.00 | 1 | 1 | -0.02 | -0.02  | -0.008 | -0.02  | -0.022 | t | 43214  | NALSSLVD<br>RAFFNSF          | Mus musculus          |
| 1 | 1.00 | 1 | 1 | -0.02 | -0.02  | -0.008 | -0.02  | -0.022 | t | 43214  | NALSSLVD<br>RAFFNSF          | Mus musculus          |
| 1 | 1.00 | 1 | 1 | -0.01 | -0.01  | -0.01  | -0.01  | -0.007 | t | 115399 | NMAINPS<br>KENLCSTF<br>CKEVV | Homo sapiens          |
| 1 | 1.00 | 1 | 1 | 0.01  | 0.005  | 0.01   | 0.012  | 0.01   | t | 15925  | FFTPKESE<br>QLKVIKTFE<br>GIL | Mus                   |
| 1 | 1.00 | 1 | 1 | -0.03 | -0.03  | -0.03  | -0.03  | -0.03  | t | 105718 | DPSIMAKF<br>TQFAGKDL<br>ESIK | Oryctolagus cuniculus |

|   |      |   |   |       |        |        |        |        |   |        |                              |                                  |
|---|------|---|---|-------|--------|--------|--------|--------|---|--------|------------------------------|----------------------------------|
| 1 | 1.00 | 1 | 1 | 0.02  | 0.022  | 0.02   | 0.021  | 0.023  | t | 108198 | VQFKESNR<br>LNSPLAL          | Homo<br>sapiens                  |
| 1 | 1.00 | 1 | 1 | 0.01  | 0.006  | 0.013  | 0.01   | 0.01   | t | 123400 | KTKVLYHD<br>VQMDKSN<br>R     | Mus<br>musculu<br>s              |
| 1 | 1.00 | 1 | 1 | -0.01 | -0.008 | -0.01  | -0.011 | -0.009 | t | 130453 | CLFFQNGK<br>VKCAAC           | Homo<br>sapiens                  |
| 1 | 1.00 | 1 | 1 | 0     | 0      | 0      | 0.003  | 0.003  | t | 110833 | EQFNWVS<br>RLANLTQG<br>EDQYY | Mus<br>musculu<br>s              |
| 1 | 1.00 | 1 | 1 | 0.02  | 0.016  | 0.02   | 0.017  | 0.022  | t | 105037 | WEPFASG<br>KTS               | Oryctola<br>gus<br>cuniculu<br>s |
| 1 | 1.00 | 1 | 1 | 0     | -0.015 | 0.008  | 0      | 0.001  | t | 12375  | EHWSYGL<br>RPG               | Canis<br>familiari<br>s          |
| 1 | 1.00 | 1 | 1 | 0.01  | 0.006  | 0.01   | 0.007  | 0.01   | t | 131035 | RHQREITR<br>TTLQSDQ          | Oryctola<br>gus<br>cuniculu<br>s |
| 1 | 1.00 | 1 | 1 | 0.01  | 0.004  | 0.009  | 0.009  | 0.013  | t | 99401  | KTNACHN<br>GGGFSEVI<br>FR    | Oryctola<br>gus<br>cuniculu<br>s |
| 1 | 1.00 | 1 | 1 | 0.02  | 0.022  | 0.022  | 0.023  | 0.022  | t | 46000  | NSTGADA<br>ADSGGRT           | Homo<br>sapiens                  |
| 1 | 1.00 | 1 | 1 | 0.02  | 0.022  | 0.017  | 0.021  | 0.02   | t | 35244  | LDNPLENP<br>SSFLDLVA<br>RIKN | Homo<br>sapiens                  |
| 1 | 1.00 | 1 | 1 | 0.01  | 0.016  | 0.025  | 0.01   | 0.01   | t | 139761 | GLGGTAQ                      | Ovis<br>aries                    |
| 1 | 1.00 | 1 | 1 | -0.04 | -0.036 | -0.035 | -0.033 | -0.038 | t | 122904 | SNTRVFPN<br>PNNKQAL<br>Y     | Homo<br>sapiens                  |
| 1 | 1.00 | 1 | 1 | 0.03  | 0.026  | 0.03   | 0.023  | 0.03   | t | 116681 | CFEGQEKA<br>HNQDLGL          | Oryctola<br>gus<br>cuniculu<br>s |
| 1 | 1.00 | 1 | 1 | 0.01  | 0.008  | 0.01   | 0.003  | 0.01   | t | 138220 | PTPGKGPA<br>DR               | Mus<br>musculu<br>s              |

|   |      |   |   |       |        |        |        |        |   |        |                              |                     |
|---|------|---|---|-------|--------|--------|--------|--------|---|--------|------------------------------|---------------------|
| 1 | 1.00 | 1 | 1 | -0.02 | -0.018 | -0.009 | -0.013 | -0.02  | t | 98092  | HEVDKDIS<br>QLTQAIVK<br>NH   | Homo<br>sapiens     |
| 1 | 1.00 | 1 | 1 | -0.03 | -0.028 | -0.008 | -0.027 | -0.028 | t | 144619 | DYIWNTL<br>NSG               | Homo<br>sapiens     |
| 1 | 1.00 | 1 | 1 | 0.01  | 0.01   | 0.01   | 0.01   | 0.01   | t | 106597 | LDLKRTTT<br>THTSGGG<br>C     | Mus<br>musculu<br>s |
| 1 | 1.00 | 1 | 1 | -0.01 | -0.01  | -0.007 | -0.01  | -0.01  | t | 60880  | SSAEGDLV<br>GWPSPP           | Homo<br>sapiens     |
| 1 | 1.00 | 1 | 1 | 0.01  | 0.01   | 0.008  | 0.01   | 0.01   | t | 98793  | GEQFMQ<br>WFLQEQIE<br>EVALMA | Homo<br>sapiens     |
| 1 | 1.00 | 1 | 1 | 0     | -0.003 | 0      | 0.001  | 0.004  | t | 108600 | QLINTNGS                     | Homo<br>sapiens     |
| 1 | 1.00 | 1 | 1 | 0     | -0.002 | 0.003  | -0.006 | 0      | t | 118380 | GKPIP NPL<br>LGLDST          | Mus<br>musculu<br>s |
| 1 | 1.00 | 1 | 1 | 0.04  | 0.044  | 0.042  | 0.041  | 0.041  | t | 122140 | LQDSGVH<br>DVAVISEA<br>QAATA | Homo<br>sapiens     |
| 1 | 1.00 | 1 | 1 | -0.05 | -0.05  | -0.055 | -0.06  | -0.053 | t | 115909 | PYPQRDM<br>PIQ               | Homo<br>sapiens     |
| 1 | 1.00 | 1 | 1 | 0     | 0      | 0.011  | 0      | 0      | t | 44221  | NIETVIEFQ<br>QKNRLL          | Bos<br>taurus       |
| 1 | 1.00 | 1 | 1 | -0.01 | -0.01  | -0.01  | -0.01  | -0.008 | t | 118011 | LYKEKALS                     | Homo<br>sapiens     |
| 1 | 1.00 | 1 | 1 | 0     | 0.002  | 0.007  | 0.001  | 0      | t | 67248  | TWAQPGY<br>P                 | Homo<br>sapiens     |
| 1 | 1.00 | 1 | 1 | -0.03 | -0.03  | -0.035 | -0.03  | -0.027 | t | 57314  | SDWDCCD<br>VCCNPAC<br>AGC    | Mus<br>musculu<br>s |
| 1 | 1.00 | 1 | 1 | -0.02 | -0.032 | -0.02  | -0.02  | -0.018 | t | 136727 | VNWNSW<br>HKT NLS            | Bos<br>taurus       |
| 1 | 1.00 | 1 | 1 | -0.02 | -0.02  | -0.02  | -0.02  | -0.018 | t | 136727 | VNWNSW<br>HKT NLS            | Gallus<br>gallus    |
| 1 | 1.00 | 1 | 1 | -0.03 | -0.03  | -0.025 | -0.027 | -0.029 | t | 4907   | ATCDKLFG<br>YYERGIPLP<br>CAL | Homo<br>sapiens     |
| 1 | 1.00 | 1 | 1 | -0.02 | -0.023 | -0.013 | -0.02  | -0.018 | t | 138835 | CLNSFLRS<br>C                | Canis<br>lupus      |

|   |      |   |   |       |        |        |        |        |   |        |                             |                     |
|---|------|---|---|-------|--------|--------|--------|--------|---|--------|-----------------------------|---------------------|
| 1 | 1.00 | 1 | 1 | 0.02  | 0.023  | 0.027  | 0.02   | 0.023  | t | 41608  | MGPNLVL<br>PDQKPPS          | Mus<br>musculu<br>s |
| 1 | 1.00 | 1 | 1 | 0     | 0.003  | 0      | 0      | 0.002  | t | 80000  | RGTGSYNR<br>SSFES           | Mus<br>musculu<br>s |
| 1 | 1.00 | 1 | 1 | -0.01 | -0.011 | -0.009 | -0.013 | -0.01  | t | 99331  | IGRNRSPD<br>IYNPQAG         | Homo<br>sapiens     |
| 1 | 1.00 | 1 | 1 | 0     | -0.01  | -0.01  | 0      | 0.003  | t | 59967  | SNYYSDNE<br>IEQHTAKQ<br>PKL | Mustela<br>vison    |
| 1 | 1.00 | 1 | 1 | -0.02 | -0.018 | -0.013 | -0.013 | -0.017 | t | 108216 | WWATFFE<br>ATR              | Homo<br>sapiens     |
| 1 | 1.00 | 1 | 1 | -0.03 | -0.026 | -0.023 | -0.027 | -0.03  | t | 20916  | GLIGIPALI<br>CCCRGR         | Homo<br>sapiens     |
| 1 | 1.00 | 1 | 1 | 0.03  | 0.03   | 0.037  | 0.03   | 0.033  | t | 95036  | RTCMTTA<br>QGTSMPY<br>SC    | Mus<br>musculu<br>s |
| 1 | 1.00 | 1 | 1 | 0.02  | 0.024  | 0.02   | 0.017  | 0.022  | t | 58251  | SGTEEILEK<br>VSASQEI        | Homo<br>sapiens     |
| 1 | 1.00 | 1 | 1 | 0.02  | 0.022  | 0.02   | 0.017  | 0.022  | t | 58251  | SGTEEILEK<br>VSASQEI        | Homo<br>sapiens     |
| 1 | 1.00 | 1 | 1 | -0.01 | -0.01  | -0.01  | -0.01  | -0.007 | t | 149297 | ELDKWAN                     | Homo<br>sapiens     |
| 1 | 1.00 | 1 | 1 | 0.03  | 0.032  | 0.032  | 0.027  | 0.031  | t | 41204  | MCQCVQK<br>YGTEFCKK<br>RLA  | Homo<br>sapiens     |
| 1 | 1.00 | 1 | 1 | -0.01 | -0.008 | 0.007  | -0.007 | -0.011 | t | 109938 | SPRSGDLS<br>VY              | Homo<br>sapiens     |
| 1 | 1.00 | 1 | 1 | -0.06 | -0.058 | -0.062 | -0.063 | -0.061 | t | 99031  | TSRNNPFY<br>FPSRRFS         | Homo<br>sapiens     |

|   |      |   |   |       |        |        |        |        |   |        |                             |                                  |
|---|------|---|---|-------|--------|--------|--------|--------|---|--------|-----------------------------|----------------------------------|
| 1 | 1.00 | 1 | 1 | 0     | 0      | 0.001  | 0      | 0.002  | t | 137942 | PGSEYT                      | Oryctola<br>gus<br>cuniculu<br>s |
| 1 | 1.00 | 1 | 1 | 0     | 0.014  | 0.012  | 0      | 0      | t | 140868 | HLINTNGS<br>WHINSTA         | Pan<br>troglody<br>tes           |
| 1 | 1.00 | 1 | 1 | 0.03  | 0.03   | 0.03   | 0.024  | 0.03   | t | 118450 | KGDKAQIE<br>KRIQE           | Homo<br>sapiens                  |
| 1 | 1.00 | 1 | 1 | 0     | -0.002 | -0.003 | -0.001 | 0      | t | 55389  | RQAESSEA<br>MAAWSER<br>AGEA | Mus<br>musculu<br>s              |
| 1 | 1.00 | 1 | 1 | -0.02 | -0.022 | -0.02  | -0.017 | -0.018 | t | 106565 | KKVAVVRT<br>PPKSPSSA<br>K   | Mus<br>musculu<br>s              |
| 1 | 1.00 | 1 | 1 | -0.02 | -0.022 | -0.02  | -0.017 | -0.018 | t | 106564 | KKVAVVRT<br>PPKSPSSA<br>K   | Mus<br>musculu<br>s              |
| 1 | 1.00 | 1 | 1 | -0.03 | -0.026 | -0.024 | -0.023 | -0.029 | t | 105887 | ISRCQVCM<br>KKRH            | Homo<br>sapiens                  |
| 1 | 1.00 | 1 | 1 | 0.01  | 0.01   | 0.013  | 0.012  | 0.01   | t | 39253  | LRYHNKVY<br>CTTSKSA         | Homo<br>sapiens                  |
| 1 | 1.00 | 1 | 1 | 0.02  | 0.018  | 0.02   | 0.023  | 0.027  | t | 25795  | IEEVALSTT<br>GEIPF          | Homo<br>sapiens                  |
| 1 | 1.00 | 1 | 1 | 0     | 0      | 0      | 0      | 0.003  | t | 150874 | NWFDISK<br>WLWYI            | Homo<br>sapiens                  |
| 1 | 1.00 | 1 | 1 | 0     | 0      | 0      | 0      | 0.003  | t | 137759 | NQEDAEAI<br>THLF            | Mus<br>musculu<br>s              |
| 1 | 1.00 | 1 | 1 | 0     | 0      | 0      | 0      | 0.003  | t | 151601 | ADLSLEKA<br>ANVQWD<br>E     | Homo<br>sapiens                  |
| 1 | 1.00 | 1 | 1 | 0     | 0      | 0      | 0      | 0.003  | t | 137947 | PNTMKTQ                     | Mus<br>musculu<br>s              |
| 1 | 1.00 | 1 | 1 | 0     | 0      | 0      | 0      | 0.003  | t | 151713 | RGEARK                      | Homo<br>sapiens                  |
| 1 | 1.00 | 1 | 1 | 0     | 0      | 0      | 0      | 0.003  | t | 138047 | SSKPVSY                     | Mus<br>musculu<br>s              |



|   |      |   |   |   |   |   |   |       |   |        |                   |              |
|---|------|---|---|---|---|---|---|-------|---|--------|-------------------|--------------|
| 1 | 1.00 | 1 | 1 | 0 | 0 | 0 | 0 | 0.003 | t | 138097 | YPYPLIS           | Mus musculus |
| 1 | 1.00 | 1 | 1 | 0 | 0 | 0 | 0 | 0.003 | t | 134335 | CTKPSDGNCT        | Homo sapiens |
| 1 | 1.00 | 1 | 1 | 0 | 0 | 0 | 0 | 0.003 | t | 150858 | ISSLYNLVKSS       | Mus musculus |
| 1 | 1.00 | 1 | 1 | 0 | 0 | 0 | 0 | 0.003 | t | 156903 | KNRGIKTF SN       | Mus musculus |
| 1 | 1.00 | 1 | 1 | 0 | 0 | 0 | 0 | 0.003 | t | 151609 | DETPMRGETRKV      | Homo sapiens |
| 1 | 1.00 | 1 | 1 | 0 | 0 | 0 | 0 | 0.003 | t | 134478 | PSCCCTKPSD        | Homo sapiens |
| 1 | 1.00 | 1 | 1 | 0 | 0 | 0 | 0 | 0.003 | t | 134557 | TCTIPAQGTSMFPSC   | Homo sapiens |
| 1 | 1.00 | 1 | 1 | 0 | 0 | 0 | 0 | 0.003 | t | 134472 | PLLPGTSTTSTGPCKT  | Homo sapiens |
| 1 | 1.00 | 1 | 1 | 0 | 0 | 0 | 0 | 0.003 | t | 138088 | WLDLSKT           | Mus musculus |
| 1 | 1.00 | 1 | 1 | 0 | 0 | 0 | 0 | 0.003 | t | 134462 | PCKTCTIPAQGTSMFPS | Homo sapiens |
| 1 | 1.00 | 1 | 1 | 0 | 0 | 0 | 0 | 0.003 | t | 149247 | AEQQWALYADGSIRPQ  | Mus musculus |
| 1 | 1.00 | 1 | 1 | 0 | 0 | 0 | 0 | 0.003 | t | 137941 | PFRSYTK           | Mus musculus |
| 1 | 1.00 | 1 | 1 | 0 | 0 | 0 | 0 | 0.003 | t | 137770 | TLARSFIICIQM      | Mus musculus |
| 1 | 1.00 | 1 | 1 | 0 | 0 | 0 | 0 | 0.003 | t | 118963 | PNYKVNYYAVTK      | Mus musculus |
| 1 | 1.00 | 1 | 1 | 0 | 0 | 0 | 0 | 0.003 | t | 131274 | VVRF              | Mus musculus |
| 1 | 1.00 | 1 | 1 | 0 | 0 | 0 | 0 | 0.003 | t | 125415 | FSPDGKPCTPPALNCYW | Mus musculus |
| 1 | 1.00 | 1 | 1 | 0 | 0 | 0 | 0 | 0.003 | t | 131217 | EDISAYLL          | Mus musculus |
| 1 | 1.00 | 1 | 1 | 0 | 0 | 0 | 0 | 0.003 | t | 108832 | CGDRGFYFNKPTG     | Mus musculus |

|   |      |   |   |   |   |   |   |       |   |        |                    |                 |
|---|------|---|---|---|---|---|---|-------|---|--------|--------------------|-----------------|
| 1 | 1.00 | 1 | 1 | 0 | 0 | 0 | 0 | 0.003 | t | 105651 | AEFRHDS            | Mus<br>musculus |
| 1 | 1.00 | 1 | 1 | 0 | 0 | 0 | 0 | 0.003 | t | 107427 | GRGDSVAYGLR        | Mus<br>musculus |
| 1 | 1.00 | 1 | 1 | 0 | 0 | 0 | 0 | 0.003 | t | 107428 | GRGDSVVYGLR        | Mus<br>musculus |
| 1 | 1.00 | 1 | 1 | 0 | 0 | 0 | 0 | 0.003 | t | 102384 | EFRH               | Mus<br>musculus |
| 1 | 1.00 | 1 | 1 | 0 | 0 | 0 | 0 | 0.003 | t | 102384 | EFRH               | Mus<br>musculus |
| 1 | 1.00 | 1 | 1 | 0 | 0 | 0 | 0 | 0.003 | t | 104443 | DAEFRHDSGYE        | Mus<br>musculus |
| 1 | 1.00 | 1 | 1 | 0 | 0 | 0 | 0 | 0.003 | t | 105319 | LVFFAEDVGSNK       | Homo<br>sapiens |
| 1 | 1.00 | 1 | 1 | 0 | 0 | 0 | 0 | 0.003 | t | 63839  | TGGSTDGKQG         | Mus<br>musculus |
| 1 | 1.00 | 1 | 1 | 0 | 0 | 0 | 0 | 0.003 | t | 60917  | SSAVVDNKLKI        | Mus<br>musculus |
| 1 | 1.00 | 1 | 1 | 0 | 0 | 0 | 0 | 0.003 | t | 71506  | VTSTLTSLFRPGASQKIQ | Mus<br>musculus |
| 1 | 1.00 | 1 | 1 | 0 | 0 | 0 | 0 | 0.003 | t | 51371  | QLINTNGSWHIN       | Mus<br>musculus |
| 1 | 1.00 | 1 | 1 | 0 | 0 | 0 | 0 | 0.003 | t | 43242  | NANPNANPNANP       | Mus<br>musculus |
| 1 | 1.00 | 1 | 1 | 0 | 0 | 0 | 0 | 0.003 | t | 51371  | QLINTNGSWHIN       | Mus<br>musculus |
| 1 | 1.00 | 1 | 1 | 0 | 0 | 0 | 0 | 0.003 | t | 40332  | LVFFAEDV           | Mus<br>musculus |
| 1 | 1.00 | 1 | 1 | 0 | 0 | 0 | 0 | 0.003 | t | 43242  | NANPNANPNANP       | Mus<br>musculus |
| 1 | 1.00 | 1 | 1 | 0 | 0 | 0 | 0 | 0.003 | t | 51371  | QLINTNGSWHIN       | Mus<br>musculus |

|   |      |   |   |   |   |   |   |       |   |       |                              |                            |
|---|------|---|---|---|---|---|---|-------|---|-------|------------------------------|----------------------------|
| 1 | 1.00 | 1 | 1 | 0 | 0 | 0 | 0 | 0.003 | t | 51371 | QLINTNGS<br>WHIN             | Mus<br>musculu<br>s        |
| 1 | 1.00 | 1 | 1 | 0 | 0 | 0 | 0 | 0.003 | t | 48536 | PLYISNPN<br>Y                | Macaca<br>fascicula<br>ris |
| 1 | 1.00 | 1 | 1 | 0 | 0 | 0 | 0 | 0.003 | t | 45932 | NSNNPDW<br>DF                | Mus<br>musculu<br>s        |
| 1 | 1.00 | 1 | 1 | 0 | 0 | 0 | 0 | 0.003 | t | 31772 | KLCGVL                       | Homo<br>sapiens            |
| 1 | 1.00 | 1 | 1 | 0 | 0 | 0 | 0 | 0.003 | t | 28299 | IRGDTFAT<br>R                | Mus<br>musculu<br>s        |
| 1 | 1.00 | 1 | 1 | 0 | 0 | 0 | 0 | 0.003 | t | 24564 | HPYISKPQ                     | Mus<br>musculu<br>s        |
| 1 | 1.00 | 1 | 1 | 0 | 0 | 0 | 0 | 0.003 | t | 24970 | HTRVTGG<br>VQG               | Mus<br>musculu<br>s        |
| 1 | 1.00 | 1 | 1 | 0 | 0 | 0 | 0 | 0.003 | t | 25146 | HWYISKPQ                     | Mus<br>musculu<br>s        |
| 1 | 1.00 | 1 | 1 | 0 | 0 | 0 | 0 | 0.003 | t | 14435 | ETIYNTTLK<br>Y               | Homo<br>sapiens            |
| 1 | 1.00 | 1 | 1 | 0 | 0 | 0 | 0 | 0.003 | t | 32808 | KPNLSSKR<br>SELSQLSM<br>YRVF | Mus<br>musculu<br>s        |
| 1 | 1.00 | 1 | 1 | 0 | 0 | 0 | 0 | 0.003 | t | 10433 | DTNNN                        | Mus<br>musculu<br>s        |
| 1 | 1.00 | 1 | 1 | 0 | 0 | 0 | 0 | 0.003 | t | 4401  | ASFFD                        | Mus<br>musculu<br>s        |
| 1 | 1.00 | 1 | 1 | 0 | 0 | 0 | 0 | 0.003 | t | 3275  | ANETIYNT<br>TLKYGDVV<br>GVNT | Homo<br>sapiens            |
| 1 | 1.00 | 1 | 1 | 0 | 0 | 0 | 0 | 0.003 | t | 7492  | DAEFRHDS<br>GYEVHHQ<br>KL    | Mus<br>musculu<br>s        |
| 1 | 1.00 | 1 | 1 | 0 | 0 | 0 | 0 | 0.003 | t | 10171 | DSLSEEEKE<br>LLNRIQVD<br>S   | Mus<br>musculu<br>s        |
| 1 | 1.00 | 1 | 1 | 0 | 0 | 0 | 0 | 0.003 | t | 7491  | DAEFRHDS<br>GYEVHHQ<br>K     | Mus<br>musculu<br>s        |
| 1 | 1.00 | 1 | 1 | 0 | 0 | 0 | 0 | 0.003 | t | 7491  | DAEFRHDS<br>GYEVHHQ<br>K     | Mus<br>musculu<br>s        |

|   |      |   |   |       |        |        |        |        |   |        |                              |                                  |
|---|------|---|---|-------|--------|--------|--------|--------|---|--------|------------------------------|----------------------------------|
| 1 | 1.00 | 1 | 1 | 0     | 0      | 0      | 0      | 0.003  | t | 7491   | DAEFRHDS<br>GYEVHHQ<br>K     | Mus<br>musculu<br>s              |
| 1 | 1.00 | 1 | 1 | 0     | 0      | 0      | 0      | 0.003  | t | 7491   | DAEFRHDS<br>GYEVHHQ<br>K     | Mus<br>musculu<br>s              |
| 1 | 1.00 | 1 | 1 | 0     | 0.004  | 0.002  | -0.003 | 0      | t | 68087  | VDVSEGDI<br>VIYSKYG          | Homo<br>sapiens                  |
| 1 | 1.00 | 1 | 1 | -0.03 | -0.032 | -0.027 | -0.027 | -0.028 | t | 114866 | KAQHGRP                      | Mus<br>musculu<br>s              |
| 1 | 1.00 | 1 | 1 | -0.01 | -0.01  | -0.008 | -0.01  | -0.01  | t | 78470  | NCLSSDEP<br>LHIRWCQ          | Mus<br>musculu<br>s              |
| 1 | 1.00 | 1 | 1 | 0     | 0      | 0      | 0      | 0.001  | t | 119560 | DLVLYNNA<br>DGDFAIVK         | Homo<br>sapiens                  |
| 1 | 1.00 | 1 | 1 | -0.01 | -0.01  | -0.01  | -0.01  | -0.01  | t | 134153 | LRRVLLPLI<br>FRNVEL          | Homo<br>sapiens                  |
| 1 | 1.00 | 1 | 1 | -0.03 | -0.032 | -0.024 | -0.033 | -0.031 | t | 118805 | GGNGGGI<br>GGGMGG<br>GVGIG   | Mus<br>musculu<br>s              |
| 1 | 1.00 | 1 | 1 | -0.05 | -0.05  | -0.05  | -0.05  | -0.048 | t | 153458 | SELSPAML<br>HFMFGGG<br>S     | Mus<br>musculu<br>s              |
| 1 | 1.00 | 1 | 1 | 0     | 0      | 0      | -0.007 | 0      | t | 1262   | AFASRGN<br>HVSPAHYV<br>PESDA | Homo<br>sapiens                  |
| 1 | 1.00 | 1 | 1 | -0.01 | -0.012 | -0.01  | -0.017 | -0.009 | t | 107773 | CSVMHEG                      | Mus<br>musculu<br>s              |
| 1 | 1.00 | 1 | 1 | -0.03 | -0.033 | -0.035 | -0.03  | -0.031 | t | 61410  | SSTRGGSR<br>VEGIFAGL<br>FMNA | Oryctola<br>gus<br>cuniculu<br>s |
| 1 | 1.00 | 1 | 1 | 0.01  | 0.006  | 0.01   | 0.007  | 0.01   | t | 131687 | SYPDNSYQ<br>QPYGE            | Oryctola<br>gus<br>cuniculu<br>s |
| 1 | 1.00 | 1 | 1 | -0.04 | -0.044 | -0.039 | -0.041 | -0.038 | t | 6712   | CNNPHRIL                     | Oryctola<br>gus<br>cuniculu<br>s |
| 1 | 1.00 | 1 | 1 | -0.03 | -0.029 | -0.026 | -0.03  | -0.032 | t | 65698  | TPPRPAGD<br>NATVAAG<br>HAT   | Mus<br>musculu<br>s              |

|   |      |   |   |       |        |        |        |        |   |        |                              |                                  |
|---|------|---|---|-------|--------|--------|--------|--------|---|--------|------------------------------|----------------------------------|
| 1 | 1.00 | 1 | 1 | -0.01 | -0.006 | -0.001 | -0.009 | -0.01  | t | 46871  | PANKEESIS<br>FHFQ            | Homo<br>sapiens                  |
| 1 | 1.00 | 1 | 1 | -0.03 | -0.027 | -0.03  | -0.03  | -0.03  | t | 119757 | ARRRATQL<br>AH               | Mus<br>musculu<br>s              |
| 1 | 1.00 | 1 | 1 | -0.01 | -0.012 | -0.012 | -0.017 | -0.01  | t | 125462 | KLPLSLSFL<br>HLTRADLS<br>YPS | Mus<br>musculu<br>s              |
| 1 | 1.00 | 1 | 1 | -0.03 | -0.032 | -0.032 | -0.037 | -0.029 | t | 122321 | DVVLYNN<br>ADGDFAI<br>VH     | Mus<br>musculu<br>s              |
| 1 | 1.00 | 1 | 1 | -0.03 | -0.03  | -0.015 | -0.026 | -0.031 | t | 142433 | KNDSLPH<br>EPNNLE            | Homo<br>sapiens                  |
| 1 | 1.00 | 1 | 1 | 0     | -0.004 | 0      | -0.007 | 0      | t | 129973 | SPRSFQKK<br>T                | Oryctola<br>gus<br>cuniculu<br>s |
| 1 | 1.00 | 1 | 1 | 0     | -0.002 | 0      | -0.007 | 0      | t | 13572  | ENPVVHFF<br>KNIVTPR          | Mus<br>musculu<br>s              |
| 1 | 1.00 | 1 | 1 | 0.04  | 0.036  | 0.053  | 0.039  | 0.038  | t | 53859  | RGETPGQL<br>LPEIMQ           | Oryctola<br>gus<br>cuniculu<br>s |
| 1 | 1.00 | 1 | 1 | -0.03 | -0.027 | -0.024 | -0.031 | -0.031 | t | 105863 | HHQKL<br>VFFAEDVGSN          | Mus<br>musculu<br>s              |
| 1 | 1.00 | 1 | 1 | 0.04  | 0.044  | 0.052  | 0.041  | 0.039  | t | 116958 | DSMNTDT<br>STRPR             | Homo<br>sapiens                  |
| 1 | 1.00 | 1 | 1 | -0.03 | -0.03  | -0.025 | -0.03  | -0.031 | t | 140718 | NKWERAR<br>YAER              | Rattus<br>norvegic<br>us         |
| 1 | 1.00 | 1 | 1 | 0     | -0.003 | 0.001  | 0      | 0      | t | 122108 | GVGVELE<br>NSMGGLN<br>F      | Oryctola<br>gus<br>cuniculu<br>s |
| 1 | 1.00 | 1 | 1 | 0     | 0.003  | 0.003  | 0      | 0      | t | 53572  | RELQKR<br>LYSN               | Mus<br>musculu<br>s              |

|   |      |   |   |       |        |        |        |        |   |        |                              |                                  |
|---|------|---|---|-------|--------|--------|--------|--------|---|--------|------------------------------|----------------------------------|
| 1 | 1.00 | 1 | 1 | -0.03 | -0.032 | -0.031 | -0.033 | -0.029 | t | 78472  | NPDWDFN<br>P                 | Mus<br>musculu<br>s              |
| 1 | 1.00 | 1 | 1 | -0.03 | -0.032 | -0.031 | -0.033 | -0.029 | t | 78472  | NPDWDFN<br>P                 | Mus<br>musculu<br>s              |
| 1 | 1.00 | 1 | 1 | -0.05 | -0.046 | -0.051 | -0.047 | -0.05  | t | 79626  | PRNVRVT<br>GCYQCGT<br>PALVEG | Homo<br>sapiens                  |
| 1 | 1.00 | 1 | 1 | -0.03 | -0.03  | -0.024 | -0.027 | -0.028 | t | 61473  | SSWPKLEQ<br>F                | Homo<br>sapiens                  |
| 1 | 1.00 | 1 | 1 | -0.01 | -0.009 | 0.009  | -0.004 | -0.008 | t | 78123  | DSSPSV                       | Equus<br>caballus                |
| 1 | 1.00 | 1 | 1 | -0.01 | -0.013 | 0.007  | -0.01  | -0.009 | t | 138885 | NNQSPILK<br>LSIH             | Canis<br>lupus                   |
| 1 | 1.00 | 1 | 1 | -0.03 | -0.03  | -0.028 | -0.03  | -0.028 | t | 79889  | KQLTFEGK<br>PALE             | Mus<br>musculu<br>s              |
| 1 | 1.00 | 1 | 1 | 0.01  | 0.011  | 0.013  | 0.009  | 0.01   | t | 32633  | KNVNFQP<br>SGVTTRQ           | Equus<br>caballus                |
| 1 | 1.00 | 1 | 1 | -0.01 | -0.01  | -0.005 | -0.007 | -0.008 | t | 60170  | SPNVSVPS<br>SSSTPLLY         | Homo<br>sapiens                  |
| 1 | 1.00 | 1 | 1 | -0.01 | -0.01  | -0.004 | -0.013 | -0.009 | t | 27728  | INQQLNPK<br>TNKWEDK          | Homo<br>sapiens                  |
| 1 | 1.00 | 1 | 1 | 0     | 0.015  | 0      | 0.007  | 0.007  | t | 125605 | YKEKSKFQ<br>DTHNNAH<br>YYVFF | Homo<br>sapiens                  |
| 1 | 1.00 | 1 | 1 | 0.03  | 0.03   | 0.03   | 0.03   | 0.033  | t | 134710 | KNWKEES<br>DRKIMQS           | Oryctola<br>gus<br>cuniculu<br>s |
| 1 | 1.00 | 1 | 1 | 0     | 0      | 0.001  | 0.003  | 0      | t | 57508  | SEKTIWSLI<br>AWQRSNA<br>EFEQ | Homo<br>sapiens                  |
| 1 | 1.00 | 1 | 1 | -0.04 | -0.036 | -0.039 | -0.043 | -0.039 | t | 76326  | YVKRVKT<br>WRM               | Homo<br>sapiens                  |

|   |      |   |   |       |        |        |        |        |   |        |                      |                   |
|---|------|---|---|-------|--------|--------|--------|--------|---|--------|----------------------|-------------------|
| 1 | 1.00 | 1 | 1 | 0     | 0.004  | 0.012  | -0.003 | 0      | t | 70352  | VPKPQGPN             | Homo sapiens      |
| 1 | 1.00 | 1 | 1 | -0.01 | -0.012 | -0.015 | -0.017 | -0.008 | t | 132033 | QQRKESKKPPAKLQPR     | Rattus norvegicus |
| 1 | 1.00 | 1 | 1 | -0.05 | -0.047 | -0.048 | -0.05  | -0.05  | t | 131939 | KVLTSFTNKELQAYAK     | Mus musculus      |
| 1 | 1.00 | 1 | 1 | 0.01  | 0.008  | 0.016  | 0.01   | 0.012  | t | 44575  | NKPTLDLELI           | Mus musculus      |
| 1 | 1.00 | 1 | 1 | -0.01 | -0.012 | -0.01  | -0.011 | -0.009 | t | 36004  | LFTPGAKQN            | Mus musculus      |
| 1 | 1.00 | 1 | 1 | 0     | 0      | 0.004  | 0      | 0.002  | t | 52086  | QQPFPQQPQQ           | Mus musculus      |
| 1 | 1.00 | 1 | 1 | 0     | 0      | 0.022  | 0      | -0.003 | t | 50931  | QGGAPQGGAPQGGAP      | Mus musculus      |
| 1 | 1.00 | 1 | 1 | -0.01 | -0.01  | -0.01  | -0.01  | -0.011 | t | 115387 | NAVPIPTLNREQLISTSEEN | Homo sapiens      |
| 1 | 1.00 | 1 | 1 | 0.02  | 0.02   | 0.035  | 0.026  | 0.02   | t | 59693  | SMKGLSSTSIVYILI      | Homo sapiens      |
| 1 | 1.00 | 1 | 1 | 0     | 0      | 0      | 0      | 0.003  | t | 134418 | KGAIIGLMVGGVV        | Homo sapiens      |
| 1 | 1.00 | 1 | 1 | 0     | 0      | 0      | 0      | 0.003  | t | 119601 | KGNNVHGFQKQIIRSFY    | Rattus norvegicus |
| 1 | 1.00 | 1 | 1 | 0     | 0      | 0      | 0      | 0.003  | t | 131582 | PEEDDITWTSDQRHGVIGS  | Mus musculus      |
| 1 | 1.00 | 1 | 1 | 0     | 0      | 0      | 0      | 0.003  | t | 131710 | TPDAPGETV            | Mus musculus      |
| 1 | 1.00 | 1 | 1 | 0     | 0      | 0      | 0      | 0.003  | t | 102510 | HHQKLVFFAEDVGSNK     | Mus musculus      |
| 1 | 1.00 | 1 | 1 | 0     | 0      | 0      | 0      | 0.003  | t | 102384 | EFRH                 | Mus musculus      |

|   |      |   |   |   |   |   |   |       |   |        |                            |                     |
|---|------|---|---|---|---|---|---|-------|---|--------|----------------------------|---------------------|
| 1 | 1.00 | 1 | 1 | 0 | 0 | 0 | 0 | 0.003 | t | 106225 | ADIWLTPD<br>PTTP           | Mus<br>musculu<br>s |
| 1 | 1.00 | 1 | 1 | 0 | 0 | 0 | 0 | 0.003 | t | 105163 | EFRHD                      | Mus<br>musculu<br>s |
| 1 | 1.00 | 1 | 1 | 0 | 0 | 0 | 0 | 0.003 | t | 104443 | DAEFRHDS<br>GYE            | Mus<br>musculu<br>s |
| 1 | 1.00 | 1 | 1 | 0 | 0 | 0 | 0 | 0.003 | t | 106515 | HLPSFLRP<br>DPPL           | Mus<br>musculu<br>s |
| 1 | 1.00 | 1 | 1 | 0 | 0 | 0 | 0 | 0.003 | t | 104443 | DAEFRHDS<br>GYE            | Mus<br>musculu<br>s |
| 1 | 1.00 | 1 | 1 | 0 | 0 | 0 | 0 | 0.003 | t | 102384 | EFRH                       | Mus<br>musculu<br>s |
| 1 | 1.00 | 1 | 1 | 0 | 0 | 0 | 0 | 0.003 | t | 107428 | GRGDSVV<br>YGLR            | Mus<br>musculu<br>s |
| 1 | 1.00 | 1 | 1 | 0 | 0 | 0 | 0 | 0.003 | t | 104443 | DAEFRHDS<br>GYE            | Homo<br>sapiens     |
| 1 | 1.00 | 1 | 1 | 0 | 0 | 0 | 0 | 0.003 | t | 102344 | DAEFR                      | Mus<br>musculu<br>s |
| 1 | 1.00 | 1 | 1 | 0 | 0 | 0 | 0 | 0.003 | t | 116080 | ATGGTLQ<br>QLFYSITV<br>GQV | Mus<br>musculu<br>s |
| 1 | 1.00 | 1 | 1 | 0 | 0 | 0 | 0 | 0.003 | t | 116080 | ATGGTLQ<br>QLFYSITV<br>GQV | Mus<br>musculu<br>s |
| 1 | 1.00 | 1 | 1 | 0 | 0 | 0 | 0 | 0.003 | t | 106535 | IFPSFLRPD<br>PPL           | Mus<br>musculu<br>s |
| 1 | 1.00 | 1 | 1 | 0 | 0 | 0 | 0 | 0.003 | t | 102344 | DAEFR                      | Mus<br>musculu<br>s |
| 1 | 1.00 | 1 | 1 | 0 | 0 | 0 | 0 | 0.003 | t | 106487 | GTSTEVWL<br>APDP           | Mus<br>musculu<br>s |
| 1 | 1.00 | 1 | 1 | 0 | 0 | 0 | 0 | 0.003 | t | 64587  | TKINADNP<br>VPILELE        | Mus<br>musculu<br>s |
| 1 | 1.00 | 1 | 1 | 0 | 0 | 0 | 0 | 0.003 | t | 7491   | DAEFRHDS<br>GYEVHHQ<br>K   | Mus<br>musculu<br>s |



|   |      |   |   |       |        |        |        |        |   |        |                              |                          |
|---|------|---|---|-------|--------|--------|--------|--------|---|--------|------------------------------|--------------------------|
| 1 | 1.00 | 1 | 1 | 0     | 0      | 0      | 0      | 0.003  | t | 7491   | DAEFRHDS<br>GYEVHHQ<br>K     | Mus<br>musculu<br>s      |
| 1 | 1.00 | 1 | 1 | -0.07 | -0.067 | -0.071 | -0.07  | -0.07  | t | 38199  | LNEEAER<br>WVRQNPP<br>GPN    | Capra<br>hircus          |
| 1 | 1.00 | 1 | 1 | 0     | 0      | 0.002  | 0      | 0.002  | t | 55255  | RPPKWVS<br>AQ                | Mus<br>musculu<br>s      |
| 1 | 1.00 | 1 | 1 | 0     | -0.012 | -0.002 | 0      | 0.002  | t | 156977 | YGAPEITK<br>DGYKVIKSI<br>K   | Canis<br>lupus           |
| 1 | 1.00 | 1 | 1 | 0     | 0      | 0.025  | 0      | -0.004 | t | 141761 | TAPPLPH<br>SNLD              | Rattus<br>norvegic<br>us |
| 1 | 1.00 | 1 | 1 | -0.04 | -0.042 | -0.049 | -0.047 | -0.04  | t | 109624 | NHQH                         | Mus<br>musculu<br>s      |
| 1 | 1.00 | 1 | 1 | -0.04 | -0.04  | -0.04  | -0.041 | -0.04  | t | 78749  | MPKTRRR<br>PRRSQRKR<br>PPTPW | Homo<br>sapiens          |
| 1 | 1.00 | 1 | 1 | 0     | 0.004  | 0      | -0.003 | 0.002  | t | 156872 | FSKSSSWE<br>SWLP             | Mus<br>musculu<br>s      |
| 1 | 1.00 | 1 | 1 | 0     | 0.004  | 0      | -0.003 | 0.002  | t | 156965 | SVQERYYA<br>FWST             | Mus<br>musculu<br>s      |
| 1 | 1.00 | 1 | 1 | 0     | 0.004  | 0      | -0.003 | 0.002  | t | 156850 | APHNKWP<br>HLNPP             | Mus<br>musculu<br>s      |
| 1 | 1.00 | 1 | 1 | 0     | 0.004  | 0      | -0.003 | 0.002  | t | 156911 | LGMSTNP<br>GPRIL             | Mus<br>musculu<br>s      |
| 1 | 1.00 | 1 | 1 | 0     | 0.004  | 0      | -0.003 | 0.002  | t | 156843 | AHSEMG<br>T RATMT            | Mus<br>musculu<br>s      |
| 1 | 1.00 | 1 | 1 | 0     | 0.004  | 0      | -0.003 | 0.002  | t | 156871 | FQNIASM<br>PHLYV             | Mus<br>musculu<br>s      |
| 1 | 1.00 | 1 | 1 | 0     | -0.002 | 0      | -0.003 | 0.002  | t | 47045  | PCSICSNN<br>PTCWAICK         | Mus<br>musculu<br>s      |
| 1 | 1.00 | 1 | 1 | 0     | -0.001 | 0      | -0.003 | 0.002  | t | 17262  | FPCDRLSG<br>YWERGIPS<br>PCVR | Myodes<br>glareolu<br>s  |

|   |      |   |   |       |        |        |        |        |   |        |                              |                                  |
|---|------|---|---|-------|--------|--------|--------|--------|---|--------|------------------------------|----------------------------------|
| 1 | 1.00 | 1 | 1 | 0     | -0.004 | 0.005  | -0.001 | 0.001  | t | 4467   | ASICQMFC<br>FWRGDLV<br>FDFQV | Oryctola<br>gus<br>cuniculu<br>s |
| 1 | 1.00 | 1 | 1 | 0.04  | 0.036  | 0.052  | 0.043  | 0.042  | t | 104995 | SYSTTAVV<br>TN               | Oryctola<br>gus<br>cuniculu<br>s |
| 1 | 1.00 | 1 | 1 | 0.01  | 0.01   | 0.016  | 0.01   | 0.01   | t | 35310  | LDTNGGT<br>GTAIV             | Oryctola<br>gus<br>cuniculu<br>s |
| 1 | 1.00 | 1 | 1 | 0.01  | 0.013  | 0.016  | 0.01   | 0.01   | t | 35310  | LDTNGGT<br>GTAIV             | Mus<br>musculu<br>s              |
| 1 | 1.00 | 1 | 1 | -0.01 | -0.007 | -0.013 | -0.01  | -0.008 | t | 72913  | WNTGGSR<br>YPGQGSP<br>GGNRYP | Mus<br>musculu<br>s              |
| 1 | 1.00 | 1 | 1 | 0.01  | 0.007  | 0.028  | 0.01   | 0.008  | t | 22813  | GTSESTET<br>SEVSTYSM<br>S    | Oryctola<br>gus<br>cuniculu<br>s |
| 1 | 1.00 | 1 | 1 | -0.02 | -0.02  | -0.02  | -0.016 | -0.02  | t | 131759 | WTLFFQN<br>GKVKVFQ<br>GNQDSF | Homo<br>sapiens                  |
| 1 | 1.00 | 1 | 1 | 0     | -0.002 | 0      | -0.003 | 0.002  | t | 104443 | DAEFRHDS<br>GYE              | Mus<br>musculu<br>s              |
| 1 | 1.00 | 1 | 1 | 0.03  | 0.032  | 0.042  | 0.03   | 0.033  | t | 68100  | VDYLKEKT<br>KDQDL            | Homo<br>sapiens                  |
| 1 | 1.00 | 1 | 1 | -0.04 | -0.04  | -0.04  | -0.04  | -0.04  | t | 113815 | RLHRPALT<br>SR               | Oryctola<br>gus<br>cuniculu<br>s |
| 1 | 1.00 | 1 | 1 | 0     | 0      | 0      | -0.009 | -0.001 | t | 133900 | NEHPVFAY<br>LKDKLP           | Homo<br>sapiens                  |
| 1 | 1.00 | 1 | 1 | 0     | 0      | 0      | -0.009 | -0.001 | t | 133776 | AGDLSKVD<br>AKQPGDY          | Homo<br>sapiens                  |
| 1 | 1.00 | 1 | 1 | 0     | 0      | 0      | -0.009 | -0.001 | t | 117015 | KEQFLDGD<br>GWTSRWI<br>ESK   | Homo<br>sapiens                  |
| 1 | 1.00 | 1 | 1 | 0     | 0      | 0      | -0.009 | -0.001 | t | 63098  | TCRRMLAF<br>LKDKENR          | Homo<br>sapiens                  |

|   |      |   |   |       |        |        |        |        |   |        |                              |                           |
|---|------|---|---|-------|--------|--------|--------|--------|---|--------|------------------------------|---------------------------|
| 1 | 1.00 | 1 | 1 | -0.05 | -0.048 | -0.041 | -0.05  | -0.05  | t | 99915  | CIFPLCLGR<br>PIAASYPP<br>KTR | Ovis<br>aries             |
| 1 | 1.00 | 1 | 1 | 0.02  | 0.02   | 0.022  | 0.02   | 0.022  | t | 78006  | SIPYLSAAD<br>YAYTASDV<br>AET | Mus<br>musculu<br>s       |
| 1 | 1.00 | 1 | 1 | -0.02 | -0.022 | -0.024 | -0.021 | -0.013 | t | 62335  | SVSSFERFE<br>IFPK            | Mus<br>musculu<br>s       |
| 1 | 1.00 | 1 | 1 | 0.04  | 0.042  | 0.052  | 0.041  | 0.04   | t | 52003  | QQATRQA<br>QD                | Homo<br>sapiens           |
| 1 | 1.00 | 1 | 1 | -0.03 | -0.03  | -0.03  | -0.03  | -0.03  | t | 53269  | RCESALHV<br>WVPPLLA          | Homo<br>sapiens           |
| 1 | 1.00 | 1 | 1 | -0.03 | -0.026 | -0.025 | -0.027 | -0.03  | t | 131010 | PSTRWTEL<br>DDVKRLLK<br>GSRS | Homo<br>sapiens           |
| 1 | 1.00 | 1 | 1 | -0.02 | -0.019 | -0.014 | -0.019 | -0.019 | t | 4071   | AQSRNVR<br>TFTGLFTS<br>G     | Homo<br>sapiens           |
| 1 | 1.00 | 1 | 1 | 0.03  | 0.028  | 0.04   | 0.033  | 0.03   | t | 97029  | VDLSYLAP<br>KNPGTGP<br>AFTII | Mus<br>musculu<br>s       |
| 1 | 1.00 | 1 | 1 | -0.03 | -0.03  | -0.014 | -0.026 | -0.03  | t | 11354  | EDINGIRR<br>PKHLYV           | Homo<br>sapiens           |
| 1 | 1.00 | 1 | 1 | -0.02 | -0.021 | -0.004 | -0.02  | -0.018 | t | 49151  | PQWKLQP<br>G                 | Anas<br>platyrhy<br>nchos |
| 1 | 1.00 | 1 | 1 | 0.04  | 0.04   | 0.04   | 0.033  | 0.038  | t | 118546 | PAGGAVA<br>VSAAPGSA          | Homo<br>sapiens           |
| 1 | 1.00 | 1 | 1 | 0.01  | 0.01   | 0.017  | 0.01   | 0.01   | t | 98378  | QNSKSAYT<br>PA               | Mus<br>musculu<br>s       |
| 1 | 1.00 | 1 | 1 | 0.03  | 0.028  | 0.04   | 0.029  | 0.031  | t | 97596  | QTPLTMA<br>ALELL             | Mus<br>musculu<br>s       |
| 1 | 1.00 | 1 | 1 | -0.01 | -0.012 | -0.003 | -0.007 | -0.009 | t | 18441  | FYNQKFKG<br>KATL             | Mus<br>musculu<br>s       |

|   |      |   |   |       |        |        |        |        |   |        |                              |              |
|---|------|---|---|-------|--------|--------|--------|--------|---|--------|------------------------------|--------------|
| 1 | 1.00 | 1 | 1 | -0.04 | -0.042 | -0.04  | -0.043 | -0.04  | t | 131685 | SYAIAWH                      | Mus musculus |
| 1 | 1.00 | 1 | 1 | 0     | 0.002  | -0.005 | 0.001  | 0      | t | 8602   | DIDLGESR<br>VVIQDYDN<br>QHEQ | Homo sapiens |
| 1 | 1.00 | 1 | 1 | -0.02 | -0.02  | -0.019 | -0.02  | -0.02  | t | 21406  | GNDWEDR<br>YYRENMY<br>RYPNQV | Mus musculus |
| 1 | 1.00 | 1 | 1 | -0.02 | -0.02  | -0.017 | -0.026 | -0.022 | t | 45574  | NQLDQMP<br>RRFYLAGN          | Homo sapiens |
| 1 | 1.00 | 1 | 1 | -0.01 | -0.012 | -0.011 | -0.008 | -0.008 | t | 106596 | LDLKRTTT<br>THTS             | Mus musculus |
| 1 | 1.00 | 1 | 1 | -0.03 | -0.027 | -0.031 | -0.03  | -0.028 | t | 22784  | GTPNPNP<br>NPNPNPN<br>PGTT   | Mus musculus |
| 1 | 1.00 | 1 | 1 | 0.02  | 0.022  | 0.02   | 0.027  | 0.029  | t | 101258 | SQNALPK                      | Homo sapiens |
| 1 | 1.00 | 1 | 1 | 0.01  | 0.012  | 0.01   | 0.007  | 0.012  | t | 11820  | EENVEHD<br>AEENVEEN<br>V     | Homo sapiens |
| 1 | 1.00 | 1 | 1 | 0.01  | 0.012  | 0.01   | 0.007  | 0.012  | t | 11820  | EENVEHD<br>AEENVEEN<br>V     | Homo sapiens |
| 1 | 1.00 | 1 | 1 | 0     | 0      | 0.003  | 0.003  | 0.002  | t | 115628 | LPCRISPGK<br>NAT             | Homo sapiens |
| 1 | 1.00 | 1 | 1 | -0.07 | -0.07  | -0.07  | -0.07  | -0.07  | t | 147033 | IILHQQHH                     | Homo sapiens |
| 1 | 1.00 | 1 | 1 | 0     | 0.002  | 0.005  | 0.001  | 0.002  | t | 37656  | LLPHSNLD                     | Homo sapiens |
| 1 | 1.00 | 1 | 1 | 0.01  | 0.005  | 0.024  | 0.013  | 0.012  | t | 63132  | TDDKTLDE<br>AEKSPL           | Bos taurus   |
| 1 | 1.00 | 1 | 1 | 0     | 0      | 0      | 0      | 0.003  | t | 55260  | RPPNAP                       | Mus musculus |

|   |      |   |   |       |        |        |        |        |   |        |                              |                       |
|---|------|---|---|-------|--------|--------|--------|--------|---|--------|------------------------------|-----------------------|
| 1 | 1.00 | 1 | 1 | 0     | 0      | 0      | 0      | 0.003  | t | 9753   | DPRVRGLY                     | Mus musculus          |
| 1 | 1.00 | 1 | 1 | 0.03  | 0.028  | 0.039  | 0.027  | 0.028  | t | 18994  | GDGRQTITNPAYDE               | Mus musculus          |
| 1 | 1.00 | 1 | 1 | -0.04 | -0.04  | -0.04  | -0.04  | -0.041 | t | 115518 | TPEGDLEILQQKWENG<br>ECAQ     | Homo sapiens          |
| 1 | 1.00 | 1 | 1 | 0     | 0      | -0.004 | 0      | -0.002 | t | 19119  | GDSSNTGAGKALTGL<br>STGTS     | Homo sapiens          |
| 1 | 1.00 | 1 | 1 | -0.03 | -0.032 | -0.025 | -0.033 | -0.031 | t | 142941 | PCSPITQGD<br>RGVGS           | Sus scrofa            |
| 1 | 1.00 | 1 | 1 | 0.02  | 0.023  | 0.02   | 0.02   | 0.022  | t | 135490 | QIFNLFTTK<br>DSSAA           | Mus musculus          |
| 1 | 1.00 | 1 | 1 | -0.01 | -0.014 | -0.013 | -0.01  | -0.008 | t | 132857 | LHFNKRILK<br>SKMSES          | Trichosurus vulpecula |
| 1 | 1.00 | 1 | 1 | 0.04  | 0.04   | 0.045  | 0.033  | 0.041  | t | 140665 | DTAAQI                       | Mus musculus          |
| 1 | 1.00 | 1 | 1 | 0.02  | 0.017  | 0.018  | 0.02   | 0.02   | t | 17973  | FTIDYFQPN<br>NKRNL           | Sus scrofa            |
| 1 | 1.00 | 1 | 1 | 0.03  | 0.03   | 0.037  | 0.02   | 0.03   | t | 117410 | YLQTPMT<br>VHPH              | Homo sapiens          |
| 1 | 1.00 | 1 | 1 | 0.01  | 0.01   | 0.01   | 0.01   | 0.01   | t | 71866  | VVVAPDKE<br>ILYAEFDE<br>MEEC | Homo sapiens          |
| 1 | 1.00 | 1 | 1 | 0     | 0      | 0      | -0.007 | 0      | t | 136011 | VPALTAVE<br>TGHT             | Homo sapiens          |
| 1 | 1.00 | 1 | 1 | 0     | 0      | 0      | -0.007 | 0      | t | 135958 | LTAVETGHT<br>TSQV            | Homo sapiens          |
| 1 | 1.00 | 1 | 1 | 0     | 0      | 0      | -0.007 | 0      | t | 136006 | VETGHTSQ<br>VTPS             | Homo sapiens          |
| 1 | 1.00 | 1 | 1 | 0     | 0      | 0      | -0.007 | 0      | t | 135944 | KEQFEFALT<br>AVAEVC          | Homo sapiens          |
| 1 | 1.00 | 1 | 1 | 0     | 0      | 0      | -0.007 | 0      | t | 135895 | ALLRCIPAL<br>DSLTPANE<br>DC  | Homo sapiens          |

|   |      |   |   |   |   |   |        |   |   |        |                              |                 |
|---|------|---|---|---|---|---|--------|---|---|--------|------------------------------|-----------------|
| 1 | 1.00 | 1 | 1 | 0 | 0 | 0 | -0.007 | 0 | t | 136010 | VMIKSLPA<br>LNSPTVEE<br>C    | Homo<br>sapiens |
| 1 | 1.00 | 1 | 1 | 0 | 0 | 0 | -0.007 | 0 | t | 135990 | SASVPALT<br>AVET             | Homo<br>sapiens |
| 1 | 1.00 | 1 | 1 | 0 | 0 | 0 | -0.007 | 0 | t | 119823 | EDDDMGF<br>GLFD              | Homo<br>sapiens |
| 1 | 1.00 | 1 | 1 | 0 | 0 | 0 | -0.007 | 0 | t | 119823 | EDDDMGF<br>GLFD              | Homo<br>sapiens |
| 1 | 1.00 | 1 | 1 | 0 | 0 | 0 | -0.007 | 0 | t | 122748 | EHRMTW<br>DPAQPPR            | Homo<br>sapiens |
| 1 | 1.00 | 1 | 1 | 0 | 0 | 0 | -0.007 | 0 | t | 118338 | ESEESDDD<br>MGFGLFD          | Homo<br>sapiens |
| 1 | 1.00 | 1 | 1 | 0 | 0 | 0 | -0.007 | 0 | t | 120699 | KMFPEVKE<br>KGMAALP<br>RL    | Homo<br>sapiens |
| 1 | 1.00 | 1 | 1 | 0 | 0 | 0 | -0.007 | 0 | t | 123443 | LLTEHRMT<br>WDPAQPP<br>RDLTE | Homo<br>sapiens |
| 1 | 1.00 | 1 | 1 | 0 | 0 | 0 | -0.007 | 0 | t | 122748 | EHRMTW<br>DPAQPPR            | Homo<br>sapiens |
| 1 | 1.00 | 1 | 1 | 0 | 0 | 0 | -0.007 | 0 | t | 119478 | KNDK                         | Homo<br>sapiens |
| 1 | 1.00 | 1 | 1 | 0 | 0 | 0 | -0.007 | 0 | t | 118446 | KDIKKILDS<br>VGIEAD          | Homo<br>sapiens |
| 1 | 1.00 | 1 | 1 | 0 | 0 | 0 | -0.007 | 0 | t | 118497 | LNGKNIED<br>VIAQGIG          | Homo<br>sapiens |
| 1 | 1.00 | 1 | 1 | 0 | 0 | 0 | -0.007 | 0 | t | 125552 | RRFEYDDP<br>RFLRLDLA<br>QEG  | Homo<br>sapiens |
| 1 | 1.00 | 1 | 1 | 0 | 0 | 0 | -0.007 | 0 | t | 118546 | PAGGAVA<br>VSAAPGSA          | Homo<br>sapiens |
| 1 | 1.00 | 1 | 1 | 0 | 0 | 0 | -0.007 | 0 | t | 125552 | RRFEYDDP<br>RFLRLDLA<br>QEG  | Homo<br>sapiens |
| 1 | 1.00 | 1 | 1 | 0 | 0 | 0 | -0.007 | 0 | t | 117742 | AKAQTD<br>EDLRTLLRY          | Homo<br>sapiens |
| 1 | 1.00 | 1 | 1 | 0 | 0 | 0 | -0.007 | 0 | t | 120682 | KILPEVKEK<br>HEFLSRL         | Homo<br>sapiens |
| 1 | 1.00 | 1 | 1 | 0 | 0 | 0 | -0.007 | 0 | t | 118127 | SDDDMGF<br>GLFD              | Homo<br>sapiens |
| 1 | 1.00 | 1 | 1 | 0 | 0 | 0 | -0.007 | 0 | t | 119475 | KKIK                         | Homo<br>sapiens |

|   |      |   |   |   |   |   |        |   |   |        |                              |                 |
|---|------|---|---|---|---|---|--------|---|---|--------|------------------------------|-----------------|
| 1 | 1.00 | 1 | 1 | 0 | 0 | 0 | -0.007 | 0 | t | 117773 | CNSRQTD<br>REDELI            | Homo<br>sapiens |
| 1 | 1.00 | 1 | 1 | 0 | 0 | 0 | -0.007 | 0 | t | 125428 | GSDDYVW<br>LSRLDLAP<br>NYRQ  | Homo<br>sapiens |
| 1 | 1.00 | 1 | 1 | 0 | 0 | 0 | -0.007 | 0 | t | 122781 | GQVRRPE<br>MGDQA             | Homo<br>sapiens |
| 1 | 1.00 | 1 | 1 | 0 | 0 | 0 | -0.007 | 0 | t | 119457 | GLELPE                       | Homo<br>sapiens |
| 1 | 1.00 | 1 | 1 | 0 | 0 | 0 | -0.007 | 0 | t | 131344 | AIGDRSKT<br>DRENSVSI<br>G    | Homo<br>sapiens |
| 1 | 1.00 | 1 | 1 | 0 | 0 | 0 | -0.007 | 0 | t | 119508 | QFIGYPI                      | Homo<br>sapiens |
| 1 | 1.00 | 1 | 1 | 0 | 0 | 0 | -0.007 | 0 | t | 122486 | MILHPDV<br>QRRVQQEI<br>DDVI  | Homo<br>sapiens |
| 1 | 1.00 | 1 | 1 | 0 | 0 | 0 | -0.007 | 0 | t | 118645 | VAVSAAP<br>GSAAPAA<br>G      | Homo<br>sapiens |
| 1 | 1.00 | 1 | 1 | 0 | 0 | 0 | -0.007 | 0 | t | 117348 | PTRAPSGP<br>RPP              | Homo<br>sapiens |
| 1 | 1.00 | 1 | 1 | 0 | 0 | 0 | -0.007 | 0 | t | 117366 | RRREGPDR<br>SPR              | Homo<br>sapiens |
| 1 | 1.00 | 1 | 1 | 0 | 0 | 0 | -0.007 | 0 | t | 101722 | HTQPYAYE<br>ARDH             | Homo<br>sapiens |
| 1 | 1.00 | 1 | 1 | 0 | 0 | 0 | -0.007 | 0 | t | 67730  | VARALAH<br>GVRVLED<br>GVNFAT | Homo<br>sapiens |
| 1 | 1.00 | 1 | 1 | 0 | 0 | 0 | -0.007 | 0 | t | 65423  | TNSHVPIL<br>QERPPLE          | Homo<br>sapiens |
| 1 | 1.00 | 1 | 1 | 0 | 0 | 0 | -0.007 | 0 | t | 73975  | YGAGVAG<br>ALVAFKIM<br>SGEVP | Homo<br>sapiens |
| 1 | 1.00 | 1 | 1 | 0 | 0 | 0 | -0.007 | 0 | t | 55838  | RSFQNKKS<br>LVAFKIMP<br>LEDM | Homo<br>sapiens |
| 1 | 1.00 | 1 | 1 | 0 | 0 | 0 | -0.007 | 0 | t | 37425  | LLISQAEA<br>ALENLVIL<br>NAAS | Homo<br>sapiens |
| 1 | 1.00 | 1 | 1 | 0 | 0 | 0 | -0.007 | 0 | t | 54747  | RLRSSVPG<br>VRLLQDSV<br>DFSL | Homo<br>sapiens |
| 1 | 1.00 | 1 | 1 | 0 | 0 | 0 | -0.007 | 0 | t | 20512  | GKAKTKAV<br>SRSQRAGL<br>QFPV | Homo<br>sapiens |
| 1 | 1.00 | 1 | 1 | 0 | 0 | 0 | -0.007 | 0 | t | 28982  | ITLPQDAV<br>SRTQRRGR<br>TGRG | Homo<br>sapiens |

|   |      |   |   |       |        |        |        |        |   |       |                              |                 |
|---|------|---|---|-------|--------|--------|--------|--------|---|-------|------------------------------|-----------------|
| 1 | 1.00 | 1 | 1 | 0     | 0      | 0      | -0.007 | 0      | t | 11571 | EEEDDDM<br>GFGFLD            | Homo<br>sapiens |
| 1 | 1.00 | 1 | 1 | 0     | 0      | 0      | -0.007 | 0      | t | 11571 | EEEDDDM<br>GFGFLD            | Homo<br>sapiens |
| 1 | 1.00 | 1 | 1 | 0     | 0      | 0      | -0.007 | 0      | t | 11571 | EEEDDDM<br>GFGFLD            | Homo<br>sapiens |
| 1 | 1.00 | 1 | 1 | 0     | 0      | 0      | -0.007 | 0      | t | 22545 | GSTMMQ<br>TKTFSSSS<br>SKKMG  | Homo<br>sapiens |
| 1 | 1.00 | 1 | 1 | 0     | 0      | 0      | -0.007 | 0      | t | 30661 | KEVPALTA<br>VETGAT           | Homo<br>sapiens |
| 1 | 1.00 | 1 | 1 | 0     | 0      | 0      | -0.007 | 0      | t | 12994 | ELDQENEA<br>ALENGIKN<br>EENT | Homo<br>sapiens |
| 1 | 1.00 | 1 | 1 | 0     | 0      | 0      | -0.007 | 0      | t | 1433  | AGAGGGA<br>GGAGAGG<br>GAGGAG | Homo<br>sapiens |
| 1 | 1.00 | 1 | 1 | 0     | 0      | 0      | -0.007 | 0      | t | 2677  | ALKTELED<br>TLDSTATQ<br>QELR | Homo<br>sapiens |
| 1 | 1.00 | 1 | 1 | 0     | 0      | 0      | -0.007 | 0      | t | 876   | AEEEEDD<br>MGFGLD            | Homo<br>sapiens |
| 1 | 1.00 | 1 | 1 | 0     | 0      | 0      | -0.007 | 0      | t | 6015  | CAPESIEFP<br>VSEARVLE<br>D   | Homo<br>sapiens |
| 1 | 1.00 | 1 | 1 | 0     | 0      | 0      | -0.007 | 0      | t | 2379  | ALAELATK<br>TFGSSGSS<br>AVDS | Homo<br>sapiens |
| 1 | 1.00 | 1 | 1 | 0     | 0      | 0      | -0.007 | 0      | t | 7756  | DDDMGFG<br>LFD               | Homo<br>sapiens |
| 1 | 1.00 | 1 | 1 | 0     | 0      | 0      | -0.007 | 0      | t | 1265  | AFASRGN<br>HVSPTHYV<br>PESDA | Homo<br>sapiens |
| 1 | 1.00 | 1 | 1 | 0     | 0      | 0      | -0.007 | 0      | t | 7756  | DDDMGFG<br>LFD               | Homo<br>sapiens |
| 1 | 1.00 | 1 | 1 | -0.03 | -0.028 | -0.026 | -0.029 | -0.028 | t | 10125 | DSGCVVS<br>WKNKELK<br>C      | Homo<br>sapiens |
| 1 | 1.00 | 1 | 1 | -0.04 | -0.04  | -0.035 | -0.044 | -0.042 | t | 34965 | LASLRKAF<br>ADTVVPRP<br>PSNY | Homo<br>sapiens |



|   |      |   |   |       |        |        |        |        |   |        |                              |                                         |
|---|------|---|---|-------|--------|--------|--------|--------|---|--------|------------------------------|-----------------------------------------|
| 1 | 1.00 | 1 | 1 | -0.03 | -0.027 | -0.02  | -0.031 | -0.03  | t | 59729  | SMNRGRG<br>THPSLIW<br>MC     | Mus<br>musculu<br>s                     |
| 1 | 1.00 | 1 | 1 | -0.02 | -0.02  | -0.018 | -0.027 | -0.02  | t | 130994 | PDQRPYC<br>WHYPPKP<br>C      | Homo<br>sapiens                         |
| 1 | 1.00 | 1 | 1 | -0.01 | -0.008 | 0.011  | -0.009 | -0.008 | t | 49150  | PQVVMG                       | Homo<br>sapiens                         |
| 1 | 1.00 | 1 | 1 | 0.01  | 0.008  | 0.022  | 0.013  | 0.012  | t | 104695 | YLLYYTEFT<br>PTEK            | Mus<br>musculu<br>s                     |
| 1 | 1.00 | 1 | 1 | 0.01  | 0.008  | 0.008  | 0.009  | 0.01   | t | 46293  | NTTVIVREI<br>VGDTMKT<br>TVTV | Mus<br>musculu<br>s                     |
| 1 | 1.00 | 1 | 1 | 0.01  | 0.008  | 0.008  | 0.009  | 0.01   | t | 46293  | NTTVIVREI<br>VGDTMKT<br>TVTV | Mus<br>musculu<br>s                     |
| 1 | 1.00 | 1 | 1 | 0.01  | 0.012  | 0.019  | 0.013  | 0.01   | t | 42060  | MLSKYSLPI<br>VEEPEDYK<br>EAS | Homo<br>sapiens                         |
| 1 | 1.00 | 1 | 1 | -0.02 | -0.018 | -0.016 | -0.02  | -0.02  | t | 64601  | TKKPGGP<br>GKNRAIN<br>M      | Homo<br>sapiens                         |
| 1 | 1.00 | 1 | 1 | 0     | 0      | 0.005  | 0      | 0.002  | t | 156900 | KLGDPRIA<br>TTLF             | Mus<br>musculu<br>s                     |
| 1 | 1.00 | 1 | 1 | 0     | 0.002  | 0.005  | -0.003 | -0.001 | t | 130834 | FPDLGQEV<br>ALNANTK<br>NQKIR | Homo<br>sapiens                         |
| 1 | 1.00 | 1 | 1 | 0     | -0.002 | -0.002 | -0.007 | 0      | t | 119837 | ELIPSTSSA<br>VPLIGK          | Mus<br>musculu<br>s                     |
| 1 | 1.00 | 1 | 1 | -0.05 | -0.046 | -0.042 | -0.049 | -0.048 | t | 30025  | KAWLVH                       | Homo<br>sapiens                         |
| 1 | 1.00 | 1 | 1 | -0.01 | 0.016  | -0.006 | -0.007 | -0.008 | t | 106526 | HYLHRVTY<br>RVTCSTS          | Maccullo<br>chella<br>macquar<br>iensis |
| 1 | 1.00 | 1 | 1 | -0.01 | -0.012 | -0.006 | -0.007 | -0.008 | t | 106526 | HYLHRVTY<br>RVTCSTS          | Mus<br>musculu<br>s                     |

|   |      |   |   |       |        |        |        |        |   |        |                              |                                  |
|---|------|---|---|-------|--------|--------|--------|--------|---|--------|------------------------------|----------------------------------|
| 1 | 1.00 | 1 | 1 | 0     | 0      | 0      | 0      | -0.001 | t | 139525 | ISSQTNDT<br>HKRDTYA<br>ATPRA | Mus<br>musculu<br>s              |
| 1 | 1.00 | 1 | 1 | 0.01  | 0.006  | 0.016  | 0.007  | 0.01   | t | 18051  | FTPSPVVV<br>GTTDRSGV<br>PTYR | Oryctola<br>gus<br>cuniculu<br>s |
| 1 | 1.00 | 1 | 1 | 0     | -0.002 | 0.007  | 0.003  | 0.001  | t | 24438  | HPDSIHFP<br>LASP             | Mus<br>musculu<br>s              |
| 1 | 1.00 | 1 | 1 | -0.02 | -0.02  | -0.005 | -0.02  | -0.021 | t | 137749 | DTQLTYAG<br>LKL V            | Mus<br>musculu<br>s              |
| 1 | 1.00 | 1 | 1 | 0.02  | 0.02   | 0.031  | 0.017  | 0.018  | t | 66935  | TVAFNQF<br>GPNAGQ            | Homo<br>sapiens                  |
| 1 | 1.00 | 1 | 1 | 0.02  | 0.02   | 0.031  | 0.017  | 0.018  | t | 66935  | TVAFNQF<br>GPNAGQ            | Homo<br>sapiens                  |
| 1 | 1.00 | 1 | 1 | 0     | -0.002 | 0.012  | 0.009  | 0.002  | t | 115797 | IQDTRNAV<br>RASRIQY          | Mus<br>musculu<br>s              |
| 1 | 1.00 | 1 | 1 | -0.02 | -0.016 | -0.026 | -0.02  | -0.017 | t | 21723  | GPPAAGP<br>PAAGPPA<br>A      | Homo<br>sapiens                  |
| 1 | 1.00 | 1 | 1 | -0.03 | -0.03  | -0.023 | -0.03  | -0.029 | t | 108144 | SRLAFGDQ<br>L                | Mus<br>musculu<br>s              |
| 1 | 1.00 | 1 | 1 | -0.03 | -0.028 | -0.021 | -0.029 | -0.031 | t | 38249  | LNKHIDAY<br>KTFPTEP<br>K     | Homo<br>sapiens                  |
| 1 | 1.00 | 1 | 1 | 0     | 0      | 0.007  | -0.007 | -0.001 | t | 63096  | TCRNMWS<br>GT                | Homo<br>sapiens                  |
| 1 | 1.00 | 1 | 1 | -0.03 | -0.03  | -0.03  | -0.03  | -0.028 | t | 107324 | DTLKAGLI<br>R                | Rattus<br>norvegic<br>us         |
| 1 | 1.00 | 1 | 1 | 0.03  | 0.03   | 0.03   | 0.03   | 0.033  | t | 122458 | LEPETGKD<br>MSPYEAYK<br>RGII | Homo<br>sapiens                  |
| 1 | 1.00 | 1 | 1 | 0.02  | 0.02   | 0.02   | 0.02   | 0.021  | t | 108897 | EIDGPAGQ<br>AEP              | Mus<br>musculu<br>s              |
| 1 | 1.00 | 1 | 1 | 0     | -0.002 | 0.009  | -0.003 | 0      | t | 56202  | RTTTASGK<br>LIT              | Mus<br>musculu<br>s              |
| 1 | 1.00 | 1 | 1 | 0     | -0.006 | 0      | -0.001 | 0.003  | t | 79926  | MASMTG<br>GQQMG              | Oryctola<br>gus<br>cuniculu<br>s |

|   |      |   |   |       |        |        |        |        |   |        |                           |                                  |
|---|------|---|---|-------|--------|--------|--------|--------|---|--------|---------------------------|----------------------------------|
| 1 | 1.00 | 1 | 1 | 0     | 0.002  | -0.002 | -0.003 | 0.001  | t | 30333  | KEDVPSE<br>RYL            | Homo<br>sapiens                  |
| 1 | 1.00 | 1 | 1 | -0.02 | -0.022 | -0.013 | -0.027 | -0.02  | t | 142441 | LFSPWLRV<br>QNHF          | Mus<br>musculu<br>s              |
| 1 | 1.00 | 1 | 1 | -0.01 | -0.01  | -0.01  | -0.01  | -0.007 | t | 120316 | WNPADYG<br>GIKKIRLPS      | Mus<br>musculu<br>s              |
| 1 | 1.00 | 1 | 1 | -0.01 | -0.01  | -0.01  | -0.01  | -0.007 | t | 120316 | WNPADYG<br>GIKKIRLPS      | Mus<br>musculu<br>s              |
| 1 | 1.00 | 1 | 1 | -0.01 | -0.008 | -0.004 | -0.009 | -0.01  | t | 47138  | PDLGVR                    | Homo<br>sapiens                  |
| 1 | 1.00 | 1 | 1 | -0.01 | -0.006 | -0.004 | -0.009 | -0.01  | t | 47138  | PDLGVR                    | Homo<br>sapiens                  |
| 1 | 1.00 | 1 | 1 | -0.02 | -0.023 | -0.02  | -0.02  | -0.02  | t | 40074  | LTPANLIR<br>GDNA          | Oryctola<br>gus<br>cuniculu<br>s |
| 1 | 1.00 | 1 | 1 | 0.04  | 0.038  | 0.05   | 0.039  | 0.041  | t | 97113  | YERDPYSP<br>S             | Mus<br>musculu<br>s              |
| 1 | 1.00 | 1 | 1 | -0.03 | -0.03  | -0.007 | -0.03  | -0.036 | t | 40022  | LTLNWSKT<br>L             | Rattus<br>norvegic<br>us         |
| 1 | 1.00 | 1 | 1 | 0.02  | 0.017  | 0.029  | 0.02   | 0.022  | t | 78629  | DQKPPSR<br>QSQIESR        | Oryctola<br>gus<br>cuniculu<br>s |
| 1 | 1.00 | 1 | 1 | 0.04  | 0.037  | 0.06   | 0.04   | 0.04   | t | 139317 | TLLELPAAE                 | Oryctola<br>gus<br>cuniculu<br>s |
| 1 | 1.00 | 1 | 1 | -0.02 | -0.02  | -0.007 | -0.02  | -0.019 | t | 102930 | WPYFKTYS<br>Y             | Mus<br>musculu<br>s              |
| 1 | 1.00 | 1 | 1 | 0     | 0      | 0.009  | 0.004  | 0      | t | 71189  | VSVITPGT<br>NASSEVAV<br>L | Homo<br>sapiens                  |
| 1 | 1.00 | 1 | 1 | -0.04 | -0.038 | -0.031 | -0.043 | -0.039 | t | 47719  | PGPARVIY<br>TY            | Homo<br>sapiens                  |

|   |      |   |   |       |        |        |        |        |   |        |                              |                                  |
|---|------|---|---|-------|--------|--------|--------|--------|---|--------|------------------------------|----------------------------------|
| 1 | 1.00 | 1 | 1 | 0.03  | 0.028  | 0.027  | 0.029  | 0.03   | t | 55389  | RQAESSEA<br>MAAWSER<br>AGEA  | Mus<br>musculu<br>s              |
| 1 | 1.00 | 1 | 1 | -0.02 | -0.02  | -0.02  | -0.02  | -0.02  | t | 77782  | GRVSARG<br>CTFVACW<br>KGVVG  | Homo<br>sapiens                  |
| 1 | 1.00 | 1 | 1 | 0.03  | 0.034  | 0.035  | 0.031  | 0.029  | t | 133733 | VKTLLPYG<br>SVINYGY<br>VKPG  | Homo<br>sapiens                  |
| 1 | 1.00 | 1 | 1 | 0     | 0      | 0.007  | 0      | 0.001  | t | 138255 | TTLTLRH                      | Homo<br>sapiens                  |
| 1 | 1.00 | 1 | 1 | 0     | -0.003 | 0.01   | 0      | 0      | t | 85174  | LFTQQGG<br>AYGRC             | Oryctola<br>gus<br>cuniculu<br>s |
| 1 | 1.00 | 1 | 1 | 0.02  | 0.02   | 0.025  | 0.02   | 0.021  | t | 112453 | ASQKRPSQ<br>R                | Mus<br>musculu<br>s              |
| 1 | 1.00 | 1 | 1 | 0.02  | 0.02   | 0.025  | 0.02   | 0.021  | t | 112453 | ASQKRPSQ<br>R                | Mus<br>musculu<br>s              |
| 1 | 1.00 | 1 | 1 | -0.03 | -0.027 | -0.018 | -0.03  | -0.028 | t | 105945 | LTHCGSGA<br>S                | Mus<br>musculu<br>s              |
| 1 | 1.00 | 1 | 1 | 0.02  | 0.02   | 0.02   | 0.02   | 0.023  | t | 115399 | NMAINPS<br>KENLCSTF<br>CKEVV | Homo<br>sapiens                  |
| 1 | 1.00 | 1 | 1 | -0.02 | -0.006 | 0.002  | -0.013 | -0.02  | t | 73975  | YGAGVAG<br>ALVAFKIM<br>SGEVP | Homo<br>sapiens                  |
| 1 | 1.00 | 1 | 1 | -0.02 | -0.022 | -0.022 | -0.019 | -0.017 | t | 96497  | KRELRLNP<br>Q                | Mus<br>musculu<br>s              |
| 1 | 1.00 | 1 | 1 | -0.03 | -0.034 | -0.019 | -0.03  | -0.031 | t | 93373  | MDKVLNR<br>EESL              | Mus<br>musculu<br>s              |
| 1 | 1.00 | 1 | 1 | -0.01 | -0.01  | 0      | -0.01  | -0.01  | t | 15518  | FEEINGIRR<br>P               | Mus<br>musculu<br>s              |
| 1 | 1.00 | 1 | 1 | -0.01 | -0.01  | 0      | -0.01  | -0.01  | t | 15511  | FEDVNGIR<br>RP               | Mus<br>musculu<br>s              |
| 1 | 1.00 | 1 | 1 | -0.04 | -0.04  | -0.042 | -0.043 | -0.038 | t | 55930  | RSQPRGR<br>RQPIP             | Homo<br>sapiens                  |

|   |      |   |   |       |        |        |        |        |   |        |                              |                                  |
|---|------|---|---|-------|--------|--------|--------|--------|---|--------|------------------------------|----------------------------------|
| 1 | 1.00 | 1 | 1 | -0.01 | -0.01  | -0.006 | -0.01  | -0.008 | t | 49099  | PQQPQQS<br>FPQ               | Mus<br>musculu<br>s              |
| 1 | 1.00 | 1 | 1 | 0.01  | 0.01   | 0.022  | 0.006  | 0.008  | t | 96503  | KSGTIFDN<br>FL               | Homo<br>sapiens                  |
| 1 | 1.00 | 1 | 1 | 0     | -0.001 | 0.008  | 0.001  | 0      | t | 65667  | TPNISIPQ<br>QTSSRTILF        | Homo<br>sapiens                  |
| 1 | 1.00 | 1 | 1 | -0.01 | -0.01  | -0.01  | -0.01  | -0.01  | t | 128340 | ATPKKSAK<br>KTPKKAKK         | Homo<br>sapiens                  |
| 1 | 1.00 | 1 | 1 | 0.01  | 0.01   | 0.026  | 0.01   | 0.011  | t | 9232   | DLPDYGDY<br>GEDLFDY          | Mus<br>musculu<br>s              |
| 1 | 1.00 | 1 | 1 | 0     | 0      | 0.007  | 0      | 0      | t | 153435 | NTPAANN<br>RARREAP<br>QYM    | Mus<br>musculu<br>s              |
| 1 | 1.00 | 1 | 1 | -0.02 | -0.024 | -0.01  | -0.021 | -0.02  | t | 11552  | EEDKPKYE<br>QG               | Oryctola<br>gus<br>cuniculu<br>s |
| 1 | 1.00 | 1 | 1 | -0.03 | -0.03  | -0.035 | -0.03  | -0.029 | t | 62852  | TAGHGAY<br>GITSLFTRG         | Homo<br>sapiens                  |
| 1 | 1.00 | 1 | 1 | -0.02 | -0.017 | -0.007 | -0.02  | -0.02  | t | 137947 | PNTMKTQ                      | Mus<br>musculu<br>s              |
| 1 | 1.00 | 1 | 1 | 0.02  | 0.02   | 0.027  | 0.01   | 0.018  | t | 106673 | NCHTHEG<br>GQL               | Homo<br>sapiens                  |
| 1 | 1.00 | 1 | 1 | 0     | 0      | 0.008  | -0.003 | 0      | t | 29129  | ITVEELKQL<br>LEQWNLVI        | Homo<br>sapiens                  |
| 1 | 1.00 | 1 | 1 | -0.02 | -0.017 | -0.013 | -0.02  | -0.02  | t | 96062  | ADTIQKGF<br>YY               | Mus<br>musculu<br>s              |
| 1 | 1.00 | 1 | 1 | 0     | 0      | 0.004  | 0      | 0.002  | t | 56329  | RVKMEKLK<br>LKGTTYG<br>MC    | Mus<br>musculu<br>s              |
| 1 | 1.00 | 1 | 1 | 0     | 0      | 0      | 0      | 0.003  | t | 122468 | LLDRKSGK<br>QYSIEAAL<br>RCRR | Homo<br>sapiens                  |

|   |      |   |   |       |        |        |        |        |   |        |                              |                                  |
|---|------|---|---|-------|--------|--------|--------|--------|---|--------|------------------------------|----------------------------------|
| 1 | 1.00 | 1 | 1 | 0.02  | 0.014  | 0.013  | 0.013  | 0.02   | t | 127673 | GPLVLSEA<br>ENGP             | Trichosu<br>rus<br>vulpecul<br>a |
| 1 | 1.00 | 1 | 1 | 0     | 0.002  | 0.017  | 0.003  | 0      | t | 4482   | ASILCKCYT<br>TGTIIN          | Homo<br>sapiens                  |
| 1 | 1.00 | 1 | 1 | -0.03 | -0.041 | -0.03  | -0.03  | -0.028 | t | 156893 | IPHPKLGD<br>PRPM             | Oryctola<br>gus<br>cuniculu<br>s |
| 1 | 1.00 | 1 | 1 | 0     | 0      | -0.012 | 0      | 0.004  | t | 104660 | TVKDKIAK<br>EQENKETI<br>GTLK | Rattus<br>norvegic<br>us         |
| 1 | 1.00 | 1 | 1 | 0.03  | 0.027  | 0.028  | 0.03   | 0.033  | t | 131035 | RHQREITR<br>TTLQSDQ          | Oryctola<br>gus<br>cuniculu<br>s |
| 1 | 1.00 | 1 | 1 | 0.01  | 0.008  | 0.007  | 0.009  | 0.01   | t | 55389  | RQAESSEA<br>MAAWSER<br>AGEA  | Mus<br>musculu<br>s              |
| 1 | 1.00 | 1 | 1 | -0.01 | -0.008 | -0.002 | -0.007 | -0.009 | t | 56614  | RYPHYSLIK<br>PESSL           | Homo<br>sapiens                  |
| 1 | 1.00 | 1 | 1 | -0.02 | -0.024 | -0.02  | -0.027 | -0.02  | t | 123512 | MPPPGMI<br>P                 | Oryctola<br>gus<br>cuniculu<br>s |
| 1 | 1.00 | 1 | 1 | -0.06 | -0.062 | -0.059 | -0.057 | -0.058 | t | 20823  | GLEPRRRK<br>VKTTVV           | Anas<br>platyrhy<br>nchos        |
| 1 | 1.00 | 1 | 1 | 0.01  | 0.01   | 0.01   | 0.01   | 0.01   | t | 58788  | SKARPYIE<br>QAQVIAH<br>QFKEK | Homo<br>sapiens                  |
| 1 | 1.00 | 1 | 1 | 0.01  | 0.014  | 0.016  | 0.011  | 0.01   | t | 36648  | LINTNGSW<br>HI               | Homo<br>sapiens                  |
| 1 | 1.00 | 1 | 1 | 0.01  | 0.008  | 0.007  | 0.007  | 0.01   | t | 142217 | LDASREAK<br>KQLEAEQ<br>QKLEE | Mus<br>musculu<br>s              |
| 1 | 1.00 | 1 | 1 | 0     | 0      | 0      | 0      | 0      | t | 110082 | VYFCASSF<br>STCSANYG         | Homo<br>sapiens                  |

|   |      |   |   |       |        |        |        |        |   |        |                              |                                  |
|---|------|---|---|-------|--------|--------|--------|--------|---|--------|------------------------------|----------------------------------|
| 1 | 1.00 | 1 | 1 | -0.02 | -0.02  | -0.02  | -0.02  | -0.02  | t | 156865 | EQATCDH<br>TNEWCAK<br>MM     | Gallus<br>gallus                 |
| 1 | 1.00 | 1 | 1 | 0     | 0.004  | 0.007  | 0.007  | 0.004  | t | 130868 | GQSYPPRP<br>DTSLHVT          | Homo<br>sapiens                  |
| 1 | 1.00 | 1 | 1 | 0.03  | 0.034  | 0.03   | 0.027  | 0.031  | t | 115379 | MAIPPKKN<br>QDKTEIPTI<br>NTI | Homo<br>sapiens                  |
| 1 | 1.00 | 1 | 1 | -0.04 | -0.047 | -0.033 | -0.04  | -0.039 | t | 61708  | STLAKHAP<br>AGYR             | Oryctola<br>gus<br>cuniculu<br>s |
| 1 | 1.00 | 1 | 1 | -0.01 | -0.012 | -0.006 | -0.013 | -0.01  | t | 67269  | TWKIEKAS<br>F                | Mus<br>musculu<br>s              |
| 1 | 1.00 | 1 | 1 | 0.04  | 0.04   | 0.044  | 0.04   | 0.04   | t | 42614  | MSNFKVR<br>DPVIQERL<br>DHDYA | Homo<br>sapiens                  |
| 1 | 1.00 | 1 | 1 | 0     | 0.002  | 0.006  | 0.001  | 0.002  | t | 65044  | TLRKYC                       | Homo<br>sapiens                  |
| 1 | 1.00 | 1 | 1 | -0.04 | -0.037 | -0.037 | -0.04  | -0.039 | t | 153435 | NTPAANN<br>RARREAP<br>QYM    | Mus<br>musculu<br>s              |
| 1 | 1.00 | 1 | 1 | -0.05 | -0.05  | -0.043 | -0.05  | -0.049 | t | 137866 | GDTRPRFL                     | Oryctola<br>gus<br>cuniculu<br>s |
| 1 | 1.00 | 1 | 1 | -0.04 | -0.042 | -0.035 | -0.041 | -0.041 | t | 7492   | DAEFRHDS<br>GYEVHHQ<br>KL    | Mus<br>musculu<br>s              |
| 1 | 1.00 | 1 | 1 | -0.01 | -0.006 | -0.005 | -0.011 | -0.01  | t | 79023  | MDGTASV<br>NIPAGTYD<br>FAIAA | Homo<br>sapiens                  |
| 1 | 1.00 | 1 | 1 | -0.01 | -0.012 | -0.005 | -0.011 | -0.01  | t | 79023  | MDGTASV<br>NIPAGTYD<br>FAIAA | Homo<br>sapiens                  |
| 1 | 1.00 | 1 | 1 | -0.01 | -0.012 | -0.013 | -0.011 | -0.01  | t | 26610  | IINNSTNV<br>VIRACNFE<br>L    | Mus<br>musculu<br>s              |
| 1 | 1.00 | 1 | 1 | -0.01 | -0.012 | 0.001  | -0.011 | -0.01  | t | 110586 | GAPGNRG<br>FPGQDGL<br>A      | Mus<br>musculu<br>s              |

|   |      |   |   |       |        |        |        |        |   |        |                          |                                  |
|---|------|---|---|-------|--------|--------|--------|--------|---|--------|--------------------------|----------------------------------|
| 1 | 1.00 | 1 | 1 | -0.03 | -0.032 | -0.019 | -0.031 | -0.032 | t | 36045  | LGAARGYT<br>FGAC         | Mus<br>musculu<br>s              |
| 1 | 1.00 | 1 | 1 | 0     | 0.002  | 0.001  | -0.003 | 0.001  | t | 47669  | PGGPDRFT<br>LLTPGSH      | Homo<br>sapiens                  |
| 1 | 1.00 | 1 | 1 | -0.02 | -0.024 | -0.02  | -0.023 | -0.019 | t | 131701 | THHINNM<br>KPSFTREN<br>T | Oryctola<br>gus<br>cuniculu<br>s |
| 1 | 1.00 | 1 | 1 | 0     | 0      | 0.019  | 0      | 0      | t | 56929  | SAPLGV                   | Homo<br>sapiens                  |
| 1 | 1.00 | 1 | 1 | -0.03 | -0.03  | -0.026 | -0.03  | -0.03  | t | 31018  | KGNCSGPT<br>TIR          | Oryctola<br>gus<br>cuniculu<br>s |
| 1 | 1.00 | 1 | 1 | 0.01  | 0.014  | 0.017  | 0.007  | 0.011  | t | 39789  | LTAENTAI                 | Homo<br>sapiens                  |
| 1 | 1.00 | 1 | 1 | 0     | 0      | -0.005 | -0.001 | 0.001  | t | 138199 | KQYLERTR<br>AEVDTV       | Mus<br>musculu<br>s              |
| 1 | 1.00 | 1 | 1 | -0.03 | -0.03  | -0.03  | -0.03  | -0.03  | t | 78997  | IGCHFPCS<br>FGPVWPS      | Mus<br>musculu<br>s              |
| 1 | 1.00 | 1 | 1 | 0     | -0.002 | 0      | -0.001 | 0.003  | t | 11815  | EENVEENV<br>EENVEENV     | Mus<br>musculu<br>s              |
| 1 | 1.00 | 1 | 1 | 0.02  | 0.02   | 0.02   | 0.017  | 0.02   | t | 117742 | AKAQTD<br>EDLRTLLRY      | Homo<br>sapiens                  |
| 1 | 1.00 | 1 | 1 | 0.01  | 0.01   | 0.017  | 0.01   | 0.01   | t | 130805 | ELNPEPDT<br>EVFPMTF      | Homo<br>sapiens                  |
| 1 | 1.00 | 1 | 1 | -0.03 | -0.03  | -0.03  | -0.03  | -0.03  | t | 79642  | SGTSHIR                  | Oryctola<br>gus<br>cuniculu<br>s |
| 1 | 1.00 | 1 | 1 | 0     | 0      | 0.004  | 0      | 0.002  | t | 51933  | QPQQSFP<br>QQP           | Mus<br>musculu<br>s              |



|   |      |   |   |       |        |        |        |        |   |        |                             |                                  |
|---|------|---|---|-------|--------|--------|--------|--------|---|--------|-----------------------------|----------------------------------|
| 1 | 1.00 | 1 | 1 | 0.03  | 0.026  | 0.03   | 0.023  | 0.031  | t | 122871 | PETQPGPL<br>TLELQIAK<br>DK  | Oryctola<br>gus<br>cuniculu<br>s |
| 1 | 1.00 | 1 | 1 | 0     | 0.003  | 0.012  | 0      | -0.001 | t | 59900  | SNSDKPK                     | Mus<br>musculu<br>s              |
| 1 | 1.00 | 1 | 1 | 0     | 0      | 0.012  | 0      | -0.001 | t | 59900  | SNSDKPK                     | Mus<br>musculu<br>s              |
| 1 | 1.00 | 1 | 1 | 0     | 0      | 0.012  | 0      | 0.002  | t | 6222   | CFDYAPYV<br>SAVDDIC         | Homo<br>sapiens                  |
| 1 | 1.00 | 1 | 1 | -0.02 | -0.02  | -0.018 | -0.014 | -0.019 | t | 48125  | PKPQRKTK<br>RNTNRRP<br>QDVK | Homo<br>sapiens                  |
| 1 | 1.00 | 1 | 1 | -0.04 | -0.035 | -0.033 | -0.04  | -0.039 | t | 132802 | ESTLHLVLR<br>LR             | Mus<br>musculu<br>s              |
| 1 | 1.00 | 1 | 1 | -0.04 | -0.04  | -0.034 | -0.041 | -0.04  | t | 70661  | VQVRI                       | Homo<br>sapiens                  |
| 1 | 1.00 | 1 | 1 | 0     | 0.002  | 0.007  | 0.007  | 0.004  | t | 138225 | QH NKSPN<br>LYWRS           | Homo<br>sapiens                  |
| 1 | 1.00 | 1 | 1 | -0.06 | -0.064 | -0.054 | -0.06  | -0.06  | t | 92303  | AKR FKINAI                  | Mus<br>musculu<br>s              |
| 1 | 1.00 | 1 | 1 | -0.02 | -0.016 | -0.015 | -0.019 | -0.02  | t | 97391  | IAEAMRKV<br>KKEGVIT         | Homo<br>sapiens                  |
| 1 | 1.00 | 1 | 1 | -0.01 | -0.006 | -0.008 | -0.013 | -0.009 | t | 40150  | LTRGSPVT<br>GPFA            | Homo<br>sapiens                  |
| 1 | 1.00 | 1 | 1 | -0.02 | -0.02  | -0.015 | -0.02  | -0.02  | t | 38397  | LPAHGPSL<br>S               | Homo<br>sapiens                  |
| 1 | 1.00 | 1 | 1 | -0.03 | -0.032 | -0.026 | -0.027 | -0.027 | t | 114764 | DENPVVH<br>FFK              | Mus<br>musculu<br>s              |
| 1 | 1.00 | 1 | 1 | -0.02 | -0.022 | -0.02  | -0.02  | -0.02  | t | 14407  | ETHVTGG<br>NAGRTTA<br>GLVG  | Oryctola<br>gus<br>cuniculu<br>s |

|   |      |   |   |       |        |        |        |        |   |        |                              |                   |
|---|------|---|---|-------|--------|--------|--------|--------|---|--------|------------------------------|-------------------|
| 1 | 1.00 | 1 | 1 | -0.04 | -0.036 | -0.042 | -0.043 | -0.041 | t | 99420  | LHLLGFGI<br>NAENNHR          | Homo sapiens      |
| 1 | 1.00 | 1 | 1 | 0.03  | 0.034  | 0.049  | 0.03   | 0.03   | t | 50254  | QAGDQSY<br>F                 | Mus musculus      |
| 1 | 1.00 | 1 | 1 | 0     | -0.002 | 0.01   | -0.001 | 0      | t | 22329  | GSFSAEHF<br>LDDFAIW          | Mus musculus      |
| 1 | 1.00 | 1 | 1 | -0.07 | -0.072 | -0.067 | -0.067 | -0.07  | t | 7734   | DCTLIDALL<br>GDPH            | Mus musculus      |
| 1 | 1.00 | 1 | 1 | -0.04 | -0.04  | -0.04  | -0.043 | -0.04  | t | 149120 | TFTRVVTD<br>VYRPRLS          | Rattus norvegicus |
| 1 | 1.00 | 1 | 1 | 0     | 0      | 0      | -0.007 | 0      | t | 110965 | PNNNKILV<br>PKVSGLQY<br>RVFR | Homo sapiens      |
| 1 | 1.00 | 1 | 1 | 0     | 0      | 0      | -0.007 | 0      | t | 110938 | LYIKGSGST<br>ANLASSNY<br>FPT | Homo sapiens      |
| 1 | 1.00 | 1 | 1 | 0     | 0      | 0      | -0.007 | 0      | t | 38810  | LQAMRKY<br>SPFRNGY<br>MEPTLG | Homo sapiens      |
| 1 | 1.00 | 1 | 1 | 0     | 0      | 0      | -0.007 | 0      | t | 60062  | SPGGLEPP<br>SEKHFRET<br>EV   | Homo sapiens      |
| 1 | 1.00 | 1 | 1 | 0     | 0      | 0      | -0.007 | 0      | t | 47984  | PISLLFNEK<br>EADDNDH<br>EPQI | Homo sapiens      |
| 1 | 1.00 | 1 | 1 | 0     | 0      | 0      | -0.007 | 0      | t | 1433   | AGAGGGA<br>GGAGAGG<br>GAGGAG | Homo sapiens      |
| 1 | 1.00 | 1 | 1 | -0.01 | -0.008 | 0.004  | -0.007 | -0.008 | t | 95695  | PVKQTLPP                     | Cavia porcellus   |
| 1 | 1.00 | 1 | 1 | 0.01  | 0.013  | 0.013  | 0.01   | 0.012  | t | 7201   | CTQSLAGL<br>FRPGASQ<br>N     | Mus musculus      |

|   |      |   |   |       |        |        |        |        |   |        |                              |                                  |
|---|------|---|---|-------|--------|--------|--------|--------|---|--------|------------------------------|----------------------------------|
| 1 | 1.00 | 1 | 1 | 0.02  | 0.016  | 0.02   | 0.013  | 0.02   | t | 134704 | KFFNSNKK<br>KRDDFEKL         | Oryctola<br>gus<br>cuniculu<br>s |
| 1 | 1.00 | 1 | 1 | -0.01 | -0.003 | -0.002 | -0.01  | -0.01  | t | 56602  | RYNRNAV<br>PNLRGDL<br>QVLAQK | Cavia<br>porcellu<br>s           |
| 1 | 1.00 | 1 | 1 | 0.01  | 0.008  | 0.02   | 0.013  | 0.012  | t | 16832  | FLPSDFFPS<br>I               | Mus<br>musculu<br>s              |
| 1 | 1.00 | 1 | 1 | -0.01 | -0.01  | -0.01  | -0.01  | -0.01  | t | 79248  | HCRMYEK<br>LHHTACL           | Mus<br>musculu<br>s              |
| 1 | 1.00 | 1 | 1 | 0     | 0.012  | 0      | -0.001 | 0.003  | t | 146185 | DAEFGH                       | Mus<br>musculu<br>s              |
| 1 | 1.00 | 1 | 1 | 0     | 0      | 0      | -0.001 | 0.003  | t | 102344 | DAEFR                        | Mus<br>musculu<br>s              |
| 1 | 1.00 | 1 | 1 | 0     | 0.002  | 0.007  | -0.003 | -0.001 | t | 107226 | QQPVSSW<br>VVFSSDAI          | Homo<br>sapiens                  |
| 1 | 1.00 | 1 | 1 | 0     | 0.003  | 0.007  | 0      | 0      | t | 121064 | WKHWVY<br>YTCCPDTP<br>YLDITY | Mus<br>musculu<br>s              |
| 1 | 1.00 | 1 | 1 | 0     | 0.002  | 0.009  | 0      | 0      | t | 99901  | ARISVPYV<br>GLANAY           | Homo<br>sapiens                  |
| 1 | 1.00 | 1 | 1 | -0.01 | -0.012 | 0      | -0.011 | -0.011 | t | 97547  | PFVPRADE<br>PARKGKV<br>H     | Mus<br>musculu<br>s              |
| 1 | 1.00 | 1 | 1 | 0.01  | 0.004  | 0.003  | 0.003  | 0.012  | t | 127666 | GIQPTWV<br>PFHSTLSR<br>EQ    | Trichosu<br>rus<br>vulpecul<br>a |
| 1 | 1.00 | 1 | 1 | -0.03 | -0.03  | -0.024 | -0.024 | -0.028 | t | 70440  | VPPVPAG<br>RPWRSVP<br>PVWYSA | Homo<br>sapiens                  |
| 1 | 1.00 | 1 | 1 | -0.02 | -0.016 | -0.01  | -0.02  | -0.02  | t | 4856   | ASYVKKPK<br>EDVD             | Homo<br>sapiens                  |
| 1 | 1.00 | 1 | 1 | 0.02  | 0.022  | 0.012  | 0.015  | 0.022  | t | 138910 | SEGGDEYV<br>TKGEVVET<br>D    | Homo<br>sapiens                  |

|   |      |   |   |       |        |        |        |        |   |        |                              |                                  |
|---|------|---|---|-------|--------|--------|--------|--------|---|--------|------------------------------|----------------------------------|
| 1 | 1.00 | 1 | 1 | 0     | 0.002  | 0.005  | -0.003 | 0      | t | 125561 | SSATMTQ<br>DSRLI             | Homo<br>sapiens                  |
| 1 | 1.00 | 1 | 1 | -0.03 | -0.025 | -0.022 | -0.029 | -0.03  | t | 71163  | VSTQSAKN<br>PPGATVP          | Homo<br>sapiens                  |
| 1 | 1.00 | 1 | 1 | 0     | 0.001  | 0.01   | 0      | -0.002 | t | 31072  | KGTHSLYS<br>QIAGC            | Mus<br>musculu<br>s              |
| 1 | 1.00 | 1 | 1 | -0.01 | -0.01  | -0.01  | -0.01  | -0.01  | t | 106742 | QRRQIEAG<br>LN               | Homo<br>sapiens                  |
| 1 | 1.00 | 1 | 1 | -0.03 | -0.03  | -0.007 | -0.022 | -0.03  | t | 98387  | QPPCPNLV<br>SYSSYHAT<br>YS   | Homo<br>sapiens                  |
| 1 | 1.00 | 1 | 1 | -0.01 | -0.007 | -0.001 | -0.01  | -0.012 | t | 43152  | NAGGNAG<br>GNAGGNA<br>GGNAGG | Mus<br>musculu<br>s              |
| 1 | 1.00 | 1 | 1 | 0.03  | 0.027  | 0.03   | 0.03   | 0.032  | t | 137398 | ETPADLST                     | Oryctola<br>gus<br>cuniculu<br>s |
| 1 | 1.00 | 1 | 1 | -0.03 | -0.03  | -0.03  | -0.034 | -0.03  | t | 119580 | FMESGEW<br>VIKESRGW<br>KH    | Homo<br>sapiens                  |
| 1 | 1.00 | 1 | 1 | 0.01  | 0.01   | 0.01   | 0.017  | 0.019  | t | 158605 | QFGTFLW                      | Homo<br>sapiens                  |
| 1 | 1.00 | 1 | 1 | 0.01  | 0.01   | 0.03   | 0.014  | 0.01   | t | 75881  | YSRPVVSA<br>NGEPTVKL<br>YT   | Homo<br>sapiens                  |
| 1 | 1.00 | 1 | 1 | 0.01  | 0.008  | 0.015  | 0.009  | 0.01   | t | 38523  | LPHSNLDH<br>ILEPSIPWK<br>SK  | Mus<br>musculu<br>s              |
| 1 | 1.00 | 1 | 1 | 0.01  | 0.008  | 0.015  | 0.009  | 0.01   | t | 38523  | LPHSNLDH<br>ILEPSIPWK<br>SK  | Mus<br>musculu<br>s              |
| 1 | 1.00 | 1 | 1 | -0.01 | -0.01  | -0.01  | -0.01  | -0.008 | t | 119656 | TVDKSRW<br>Q                 | Homo<br>sapiens                  |

|   |      |   |   |       |        |        |        |        |   |        |                              |                              |
|---|------|---|---|-------|--------|--------|--------|--------|---|--------|------------------------------|------------------------------|
| 1 | 1.00 | 1 | 1 | 0.03  | 0.028  | 0.025  | 0.03   | 0.033  | t | 117598 | PEPAKSAP<br>APKKG            | Mus<br>musculus              |
| 1 | 1.00 | 1 | 1 | 0.02  | 0.018  | 0.021  | 0.019  | 0.021  | t | 68875  | VHNSHAS<br>WRYTG             | Mus<br>musculus              |
| 1 | 1.00 | 1 | 1 | 0.05  | 0.054  | 0.061  | 0.051  | 0.051  | t | 57880  | SFRGSAQG<br>IEGS             | Homo<br>sapiens              |
| 1 | 1.00 | 1 | 1 | -0.02 | -0.018 | -0.02  | -0.019 | -0.02  | t | 68034  | VDPDDVN<br>KNTLQAR           | Homo<br>sapiens              |
| 1 | 1.00 | 1 | 1 | -0.06 | -0.06  | -0.044 | -0.056 | -0.06  | t | 58954  | SKTVGTAE<br>EKLKKK           | Homo<br>sapiens              |
| 1 | 1.00 | 1 | 1 | -0.02 | -0.02  | -0.02  | -0.02  | -0.019 | t | 49961  | PVSGPFGP<br>LPSLAFSA<br>VPAD | Mus<br>musculus              |
| 1 | 1.00 | 1 | 1 | -0.06 | -0.06  | -0.058 | -0.06  | -0.059 | t | 79619  | NHPPKRQ<br>PG                | Mus<br>musculus              |
| 1 | 1.00 | 1 | 1 | -0.06 | -0.06  | -0.058 | -0.06  | -0.059 | t | 79619  | NHPPKRQ<br>PG                | Mus<br>musculus              |
| 1 | 1.00 | 1 | 1 | -0.04 | -0.038 | -0.035 | -0.039 | -0.04  | t | 63273  | TDWDVKG<br>GGSPLYRH<br>GD    | Homo<br>sapiens              |
| 1 | 1.00 | 1 | 1 | 0.03  | 0.03   | 0.03   | 0.03   | 0.032  | t | 143328 | DEGDTDLY<br>DYYPEE           | Mus<br>musculus              |
| 1 | 1.00 | 1 | 1 | -0.01 | -0.008 | 0      | -0.011 | -0.011 | t | 42791  | MTDVVFY<br>RYSNNYEG<br>QPHIS | Aotus<br>nancymae            |
| 1 | 1.00 | 1 | 1 | -0.01 | -0.008 | -0.012 | -0.013 | -0.008 | t | 27961  | IPNKKPGK<br>KTTT             | Homo<br>sapiens              |
| 1 | 1.00 | 1 | 1 | 0     | -0.004 | 0.007  | -0.001 | 0      | t | 47986  | PISLVNLST<br>ASSAPPTR<br>VRR | Oryctola<br>gus<br>cuniculus |
| 1 | 1.00 | 1 | 1 | 0     | -0.002 | 0.007  | -0.001 | 0      | t | 47986  | PISLVNLST<br>ASSAPPTR<br>VRR | Mus<br>musculus              |
| 1 | 1.00 | 1 | 1 | 0.01  | 0.012  | 0.018  | 0.009  | 0.012  | t | 149522 | VTGVTTQ<br>GVK               | Homo<br>sapiens              |

|   |      |   |   |       |        |        |        |        |   |        |                              |                                  |
|---|------|---|---|-------|--------|--------|--------|--------|---|--------|------------------------------|----------------------------------|
| 1 | 1.00 | 1 | 1 | -0.01 | -0.008 | -0.002 | -0.011 | -0.008 | t | 149481 | SVCLHEVA<br>YW               | Homo<br>sapiens                  |
| 1 | 1.00 | 1 | 1 | -0.02 | -0.016 | -0.008 | -0.019 | -0.02  | t | 37301  | LLFTGH                       | Homo<br>sapiens                  |
| 1 | 1.00 | 1 | 1 | 0.02  | 0.022  | 0.028  | 0.017  | 0.022  | t | 33294  | KSDNNVT                      | Homo<br>sapiens                  |
| 1 | 1.00 | 1 | 1 | -0.01 | -0.032 | 0.012  | -0.003 | -0.01  | t | 127627 | DRGEGNM<br>LWIDWLS<br>K      | Homo<br>sapiens                  |
| 1 | 1.00 | 1 | 1 | -0.03 | -0.026 | -0.018 | -0.027 | -0.03  | t | 92     | AADMIMH<br>TPGCVPC           | Homo<br>sapiens                  |
| 1 | 1.00 | 1 | 1 | -0.01 | -0.01  | -0.01  | -0.01  | -0.007 | t | 136216 | FAWKWQ<br>YIYD               | Homo<br>sapiens                  |
| 1 | 1.00 | 1 | 1 | -0.03 | -0.033 | -0.016 | -0.03  | -0.032 | t | 99876  | AEFRHDSG<br>YE               | Oryctola<br>gus<br>cuniculu<br>s |
| 1 | 1.00 | 1 | 1 | 0.02  | 0.018  | 0.02   | 0.02   | 0.022  | t | 141758 | SWRNNILR<br>TQES             | Oryctola<br>gus<br>cuniculu<br>s |
| 1 | 1.00 | 1 | 1 | -0.01 | -0.012 | -0.004 | -0.013 | -0.01  | t | 6925   | CRGFTSFK<br>KPPTPPPE<br>PET  | Mus<br>musculu<br>s              |
| 1 | 1.00 | 1 | 1 | 0.05  | 0.054  | 0.061  | 0.051  | 0.051  | t | 57880  | SFRGSAQG<br>IEGS             | Homo<br>sapiens                  |
| 1 | 1.00 | 1 | 1 | -0.02 | -0.02  | -0.015 | -0.021 | -0.018 | t | 138840 | DREQAPN<br>LVYM              | Mus<br>musculu<br>s              |
| 1 | 1.00 | 1 | 1 | -0.03 | -0.03  | -0.03  | -0.034 | -0.03  | t | 18587  | GAGGGAG<br>AGGAGAG<br>GGGRGR | Homo<br>sapiens                  |
| 1 | 1.00 | 1 | 1 | 0.02  | 0.015  | 0.027  | 0.019  | 0.02   | t | 33754  | KTLEAILSF<br>ARRGTI          | Bos<br>taurus                    |
| 1 | 1.00 | 1 | 1 | 0     | -0.002 | 0.004  | -0.007 | 0      | t | 123849 | WQDE                         | Mus<br>musculu<br>s              |

|   |      |   |   |       |        |        |        |        |   |        |                              |                       |
|---|------|---|---|-------|--------|--------|--------|--------|---|--------|------------------------------|-----------------------|
| 1 | 1.00 | 1 | 1 | -0.06 | -0.06  | -0.047 | -0.06  | -0.06  | t | 52321  | QSFRRLLGA                    | Homo sapiens          |
| 1 | 1.00 | 1 | 1 | 0.05  | 0.05   | 0.061  | 0.047  | 0.048  | t | 55575  | RRGMEPH<br>MSECCEQ           | Homo sapiens          |
| 1 | 1.00 | 1 | 1 | 0     | 0      | 0.001  | 0      | 0.001  | t | 16017  | FGNDWED<br>RYYRENMY          | Mus musculus          |
| 1 | 1.00 | 1 | 1 | -0.02 | -0.02  | -0.009 | -0.017 | -0.019 | t | 17262  | FPCDRLSG<br>YWERGIPSPCVR     | Homo sapiens          |
| 1 | 1.00 | 1 | 1 | 0     | 0      | 0      | -0.003 | 0.002  | t | 51372  | QLINTNGS<br>WHINSTA          | Homo sapiens          |
| 1 | 1.00 | 1 | 1 | 0     | 0      | 0      | -0.003 | 0.002  | t | 39164  | LRPGPVSQ<br>PYHHWDTDK        | Homo sapiens          |
| 1 | 1.00 | 1 | 1 | 0     | 0      | 0      | -0.003 | 0.002  | t | 51372  | QLINTNGS<br>WHINSTA          | Homo sapiens          |
| 1 | 1.00 | 1 | 1 | 0     | 0      | 0      | -0.003 | 0.002  | t | 14435  | ETIYNTTLKY                   | Homo sapiens          |
| 1 | 1.00 | 1 | 1 | 0.02  | 0.012  | 0.02   | 0.02   | 0.022  | t | 156947 | QTKSECTE<br>VCKNLT           | Mus musculus          |
| 1 | 1.00 | 1 | 1 | -0.01 | -0.013 | 0.001  | -0.01  | -0.012 | t | 111736 | RLYDPNQ<br>AALQALRN          | Oryctolagus cuniculus |
| 1 | 1.00 | 1 | 1 | 0.01  | 0.008  | 0.021  | 0.013  | 0.012  | t | 6979   | CSDTIDAG<br>KD               | Mus musculus          |
| 1 | 1.00 | 1 | 1 | 0.01  | 0.012  | 0.021  | 0.013  | 0.012  | t | 6979   | CSDTIDAG<br>KD               | MD                    |
| 1 | 1.00 | 1 | 1 | -0.02 | -0.017 | -0.007 | -0.02  | -0.02  | t | 30092  | KCTNTDRP<br>PFCQ             | Mus musculus          |
| 1 | 1.00 | 1 | 1 | -0.01 | -0.01  | -0.004 | -0.01  | -0.01  | t | 1367   | AFNQFGP<br>NAGQR             | Homo sapiens          |
| 1 | 1.00 | 1 | 1 | -0.02 | -0.022 | -0.009 | -0.021 | -0.019 | t | 23975  | HHAEMQ<br>NPVYLIPET<br>VPYIK | Mus musculus          |
| 1 | 1.00 | 1 | 1 | -0.01 | -0.01  | -0.01  | -0.021 | -0.01  | t | 104047 | LNKTFYY                      | Homo sapiens          |

|   |      |   |   |       |        |        |        |        |   |        |                             |                       |
|---|------|---|---|-------|--------|--------|--------|--------|---|--------|-----------------------------|-----------------------|
| 1 | 1.00 | 1 | 1 | -0.03 | -0.028 | -0.03  | -0.028 | -0.026 | t | 138191 | HPTWSSL                     | Homo sapiens          |
| 1 | 1.00 | 1 | 1 | 0     | 0.003  | 0.002  | 0      | 0.002  | t | 29378  | IVNTLNEIY<br>RYLYVR         | Mus musculus          |
| 1 | 1.00 | 1 | 1 | -0.01 | -0.012 | -0.008 | -0.013 | -0.009 | t | 24168  | HKYSWK                      | Mus musculus          |
| 1 | 1.00 | 1 | 1 | 0     | 0.002  | 0.001  | -0.003 | 0      | t | 38505  | LPGKCGV<br>NVPYKIST         | Homo sapiens          |
| 1 | 1.00 | 1 | 1 | -0.04 | -0.04  | -0.04  | -0.04  | -0.04  | t | 156924 | NLNHWYK<br>SWLLP            | Gallus gallus         |
| 1 | 1.00 | 1 | 1 | -0.02 | -0.017 | -0.025 | -0.02  | -0.02  | t | 95048  | VIFQTPLIK<br>NPDVKSAI<br>EG | Mus musculus          |
| 1 | 1.00 | 1 | 1 | 0.01  | 0.006  | 0.001  | 0.009  | 0.013  | t | 63038  | TAVSPTTL<br>RTEVVK          | Oryctolagus cuniculus |
| 1 | 1.00 | 1 | 1 | 0.04  | 0.043  | 0.046  | 0.04   | 0.042  | t | 12076  | EFSSSEFLE<br>NKSSVD         | Mus musculus          |
| 1 | 1.00 | 1 | 1 | -0.05 | -0.048 | -0.05  | -0.05  | -0.049 | t | 65408  | TNRHNP<br>HLHHV             | Rattus norvegicus     |
| 1 | 1.00 | 1 | 1 | -0.02 | -0.02  | -0.016 | -0.02  | -0.02  | t | 94447  | CCHPACG<br>KNY              | Capra hircus          |
| 1 | 1.00 | 1 | 1 | -0.01 | -0.01  | -0.01  | -0.01  | -0.012 | t | 21912  | GQLSDHP<br>HALSSSS<br>HAEPR | Homo sapiens          |
| 1 | 1.00 | 1 | 1 | -0.02 | -0.018 | -0.018 | -0.023 | -0.021 | t | 99634  | RQPREDW<br>RRPSHQQ<br>P     | Homo sapiens          |
| 1 | 1.00 | 1 | 1 | 0     | 0.003  | 0.01   | 0      | 0.001  | t | 10320  | DTDSGYD<br>VPDY             | Mus musculus          |
| 1 | 1.00 | 1 | 1 | 0.02  | 0.02   | 0.02   | 0.029  | 0.03   | t | 122401 | HSEAETGP<br>P               | Homo sapiens          |



|   |      |   |   |      |       |       |       |       |   |        |                              |                     |
|---|------|---|---|------|-------|-------|-------|-------|---|--------|------------------------------|---------------------|
| 1 | 1.00 | 1 | 1 | 0.01 | 0.008 | 0.016 | 0.002 | 0.01  | t | 22444  | GSPLRQRR<br>S                | Mus<br>musculu<br>s |
| 1 | 1.00 | 1 | 1 | 0    | 0     | 0     | 0     | 0.003 | t | 144664 | GREGYP<br>DGGGLPD<br>SVKI    | Mus<br>musculu<br>s |
| 1 | 1.00 | 1 | 1 | 0    | 0     | 0     | 0     | 0.003 | t | 141581 | YVYRWVE<br>AECVA             | Mus<br>musculu<br>s |
| 1 | 1.00 | 1 | 1 | 0    | 0     | 0     | 0     | 0.003 | t | 156977 | YGAPEITK<br>DGYKVIKSI<br>K   | Mus<br>musculu<br>s |
| 1 | 1.00 | 1 | 1 | 0    | 0     | 0     | 0     | 0.003 | t | 136818 | ANFIIFRPV<br>V               | Mus<br>musculu<br>s |
| 1 | 1.00 | 1 | 1 | 0    | 0     | 0     | 0     | 0.003 | t | 137759 | NQEDAEAI<br>THLF             | Mus<br>musculu<br>s |
| 1 | 1.00 | 1 | 1 | 0    | 0.003 | 0     | 0     | 0.003 | t | 156977 | YGAPEITK<br>DGYKVIKSI<br>K   | Mus<br>musculu<br>s |
| 1 | 1.00 | 1 | 1 | 0    | 0     | 0     | 0     | 0.003 | t | 150155 | CKAFSNSY<br>PYDVPDYA<br>SL   | Mus<br>musculu<br>s |
| 1 | 1.00 | 1 | 1 | 0    | 0     | 0     | 0     | 0.003 | t | 145841 | KEDFRYAIS<br>STNEIGLLG<br>A  | Sus<br>scrofa       |
| 1 | 1.00 | 1 | 1 | 0    | 0     | 0     | 0     | 0.003 | t | 139725 | EMRTRIRY<br>NRRS             | Mus<br>musculu<br>s |
| 1 | 1.00 | 1 | 1 | 0    | 0     | 0     | 0     | 0.003 | t | 137432 | NHNYPPLS<br>LLTF             | Mus<br>musculu<br>s |
| 1 | 1.00 | 1 | 1 | 0    | 0     | 0     | 0     | 0.003 | t | 134494 | QLYKTCKQ<br>AGTCPPD          | Mus<br>musculu<br>s |
| 1 | 1.00 | 1 | 1 | 0    | 0     | 0     | 0     | 0.003 | t | 136118 | AEFPLDIT                     | Mus<br>musculu<br>s |
| 1 | 1.00 | 1 | 1 | 0    | 0     | 0     | 0     | 0.003 | t | 141963 | MVDRGW<br>G                  | Mus<br>musculu<br>s |
| 1 | 1.00 | 1 | 1 | 0    | 0     | 0     | 0     | 0.003 | t | 150406 | LSAYDPVD<br>YPYSNSFA<br>KC   | Mus<br>musculu<br>s |
| 1 | 1.00 | 1 | 1 | 0    | 0     | 0     | 0     | 0.003 | t | 144623 | EEAEGTTD<br>AQIDANRK<br>RESE | Mus<br>musculu<br>s |

|   |      |   |   |   |        |   |   |       |   |        |                              |                                  |
|---|------|---|---|---|--------|---|---|-------|---|--------|------------------------------|----------------------------------|
| 1 | 1.00 | 1 | 1 | 0 | 0      | 0 | 0 | 0.003 | t | 134494 | QLYKTCKQ<br>AGTCPPD          | Mus<br>musculu<br>s              |
| 1 | 1.00 | 1 | 1 | 0 | 0      | 0 | 0 | 0.003 | t | 137944 | PGTEYT                       | Oryctola<br>gus<br>cuniculu<br>s |
| 1 | 1.00 | 1 | 1 | 0 | 0      | 0 | 0 | 0.003 | t | 139881 | RGDKSRPP<br>VWYVEGE          | Mus<br>musculu<br>s              |
| 1 | 1.00 | 1 | 1 | 0 | 0      | 0 | 0 | 0.003 | t | 120109 | NIHPKAPI<br>WGIITSNF         | Rattus<br>norvegic<br>us         |
| 1 | 1.00 | 1 | 1 | 0 | 0      | 0 | 0 | 0.003 | t | 133698 | SLLTEVETP<br>IRNEWG          | Mus<br>musculu<br>s              |
| 1 | 1.00 | 1 | 1 | 0 | 0      | 0 | 0 | 0.003 | t | 120109 | NIHPKAPI<br>WGIITSNF         | Rattus<br>norvegic<br>us         |
| 1 | 1.00 | 1 | 1 | 0 | 0      | 0 | 0 | 0.003 | t | 133469 | YYNETKL<br>KESYKVKD          | Mus<br>musculu<br>s              |
| 1 | 1.00 | 1 | 1 | 0 | 0      | 0 | 0 | 0.003 | t | 98049  | FVPRAD                       | Mus<br>musculu<br>s              |
| 1 | 1.00 | 1 | 1 | 0 | -0.003 | 0 | 0 | 0.003 | t | 111050 | VGPLDIVP<br>EVADPGG<br>PTLV  | Oryctola<br>gus<br>cuniculu<br>s |
| 1 | 1.00 | 1 | 1 | 0 | 0      | 0 | 0 | 0.003 | t | 104895 | LVEALYLV<br>CGERG            | Mus<br>musculu<br>s              |
| 1 | 1.00 | 1 | 1 | 0 | 0      | 0 | 0 | 0.003 | t | 111039 | TGVPIDPA<br>VPDSSIVPL<br>LES | Bos<br>taurus                    |
| 1 | 1.00 | 1 | 1 | 0 | 0      | 0 | 0 | 0.003 | t | 111051 | VGPLEVIP<br>EAVDPAG<br>SSIV  | Oryctola<br>gus<br>cuniculu<br>s |
| 1 | 1.00 | 1 | 1 | 0 | 0      | 0 | 0 | 0.003 | t | 110840 | EVTIGDIEE<br>PPILEVVPE<br>TH | Bos<br>taurus                    |
| 1 | 1.00 | 1 | 1 | 0 | 0      | 0 | 0 | 0.003 | t | 116677 | ASATQLYK<br>TCKQAGT<br>CPPD  | Mus<br>musculu<br>s              |
| 1 | 1.00 | 1 | 1 | 0 | 0      | 0 | 0 | 0.003 | t | 111050 | VGPLDIVP<br>EVADPGG<br>PTLV  | Oryctola<br>gus<br>cuniculu<br>s |

|   |      |   |   |   |   |   |   |       |   |       |                             |                   |
|---|------|---|---|---|---|---|---|-------|---|-------|-----------------------------|-------------------|
| 1 | 1.00 | 1 | 1 | 0 | 0 | 0 | 0 | 0.003 | t | 64541 | TKDTNNNL                    | Mus musculus      |
| 1 | 1.00 | 1 | 1 | 0 | 0 | 0 | 0 | 0.003 | t | 95040 | SHRPREAK                    | Mus musculus      |
| 1 | 1.00 | 1 | 1 | 0 | 0 | 0 | 0 | 0.003 | t | 63122 | TDAYNQKL<br>SERRAN          | Mus musculus      |
| 1 | 1.00 | 1 | 1 | 0 | 0 | 0 | 0 | 0.003 | t | 63122 | TDAYNQKL<br>SERRAN          | Mus musculus      |
| 1 | 1.00 | 1 | 1 | 0 | 0 | 0 | 0 | 0.003 | t | 82657 | GGYEFLLA<br>NDVDNSN<br>PVVQ | Rattus norvegicus |
| 1 | 1.00 | 1 | 1 | 0 | 0 | 0 | 0 | 0.003 | t | 62440 | SWFDNFL<br>YPTH             | Mus musculus      |
| 1 | 1.00 | 1 | 1 | 0 | 0 | 0 | 0 | 0.003 | t | 62831 | TAEGRIN<br>RRVE             | Mus musculus      |
| 1 | 1.00 | 1 | 1 | 0 | 0 | 0 | 0 | 0.003 | t | 95032 | PAGTGDR                     | Mus musculus      |
| 1 | 1.00 | 1 | 1 | 0 | 0 | 0 | 0 | 0.003 | t | 78938 | CAPGQNL<br>CY               | Mus musculus      |
| 1 | 1.00 | 1 | 1 | 0 | 0 | 0 | 0 | 0.003 | t | 84423 | KKGLQQL<br>QEWDW<br>VGWIGN  | Felis catus       |
| 1 | 1.00 | 1 | 1 | 0 | 0 | 0 | 0 | 0.003 | t | 61536 | STCEGNLA<br>CLSLSK          | Bos taurus        |
| 1 | 1.00 | 1 | 1 | 0 | 0 | 0 | 0 | 0.003 | t | 71693 | VVIANNV<br>DKFVSWG<br>TDFEM | Rattus norvegicus |
| 1 | 1.00 | 1 | 1 | 0 | 0 | 0 | 0 | 0.003 | t | 71693 | VVIANNV<br>DKFVSWG<br>TDFEM | Rattus norvegicus |
| 1 | 1.00 | 1 | 1 | 0 | 0 | 0 | 0 | 0.003 | t | 68200 | VEGMQFD<br>RGYLSPYF         | Mus musculus      |

|   |      |   |   |   |       |   |   |       |   |       |                            |                        |
|---|------|---|---|---|-------|---|---|-------|---|-------|----------------------------|------------------------|
| 1 | 1.00 | 1 | 1 | 0 | 0     | 0 | 0 | 0.003 | t | 63122 | TDAYNQKL<br>SERRAN         | Mus<br>musculu<br>s    |
| 1 | 1.00 | 1 | 1 | 0 | 0.004 | 0 | 0 | 0.003 | t | 61536 | STCEGNLA<br>CLSLSK         | Mus<br>musculu<br>s    |
| 1 | 1.00 | 1 | 1 | 0 | 0     | 0 | 0 | 0.003 | t | 94539 | HFEVFNFV<br>PCSIC          | Mus<br>musculu<br>s    |
| 1 | 1.00 | 1 | 1 | 0 | 0     | 0 | 0 | 0.003 | t | 68200 | VEGMQFD<br>RGYLSPYF        | Mus<br>musculu<br>s    |
| 1 | 1.00 | 1 | 1 | 0 | 0     | 0 | 0 | 0.003 | t | 70259 | VPCSICSN<br>NPTCWAI<br>CK  | Mus<br>musculu<br>s    |
| 1 | 1.00 | 1 | 1 | 0 | 0     | 0 | 0 | 0.003 | t | 70390 | VPNLRGDL<br>QVLAQKV<br>ART | Bos<br>taurus          |
| 1 | 1.00 | 1 | 1 | 0 | 0     | 0 | 0 | 0.003 | t | 76290 | YVHDNC                     | Mus<br>musculu<br>s    |
| 1 | 1.00 | 1 | 1 | 0 | 0     | 0 | 0 | 0.003 | t | 70390 | VPNLRGDL<br>QVLAQKV<br>ART | Bos<br>taurus          |
| 1 | 1.00 | 1 | 1 | 0 | 0     | 0 | 0 | 0.003 | t | 70390 | VPNLRGDL<br>QVLAQKV<br>ART | Cavia<br>porcellu<br>s |
| 1 | 1.00 | 1 | 1 | 0 | 0     | 0 | 0 | 0.003 | t | 65698 | TPPRPAGD<br>NATVAAG<br>HAT | Mus<br>musculu<br>s    |
| 1 | 1.00 | 1 | 1 | 0 | 0     | 0 | 0 | 0.003 | t | 63122 | TDAYNQKL<br>SERRAN         | Mus<br>musculu<br>s    |
| 1 | 1.00 | 1 | 1 | 0 | 0     | 0 | 0 | 0.003 | t | 73132 | WTGVTQN                    | Mus<br>musculu<br>s    |
| 1 | 1.00 | 1 | 1 | 0 | 0     | 0 | 0 | 0.003 | t | 73132 | WTGVTQN                    | Mus<br>musculu<br>s    |
| 1 | 1.00 | 1 | 1 | 0 | 0     | 0 | 0 | 0.003 | t | 91165 | CCELCCNP<br>ACAGCY         | Sus<br>scrofa          |

|   |      |   |   |   |   |   |   |       |   |       |                              |                                  |
|---|------|---|---|---|---|---|---|-------|---|-------|------------------------------|----------------------------------|
| 1 | 1.00 | 1 | 1 | 0 | 0 | 0 | 0 | 0.003 | t | 63038 | TAVSPTTL<br>RTEVVK           | Sus<br>scrofa                    |
| 1 | 1.00 | 1 | 1 | 0 | 0 | 0 | 0 | 0.003 | t | 80002 | RKADLEKA<br>LEGAM            | Oryctola<br>gus<br>cuniculu<br>s |
| 1 | 1.00 | 1 | 1 | 0 | 0 | 0 | 0 | 0.003 | t | 94687 | SKPTTKQR<br>QNKPPNK<br>P     | Mus<br>musculu<br>s              |
| 1 | 1.00 | 1 | 1 | 0 | 0 | 0 | 0 | 0.003 | t | 64396 | TINKPKG<br>YVGKE             | Mus<br>musculu<br>s              |
| 1 | 1.00 | 1 | 1 | 0 | 0 | 0 | 0 | 0.003 | t | 79009 | KTWCD<br>AWCG                | Mus<br>musculu<br>s              |
| 1 | 1.00 | 1 | 1 | 0 | 0 | 0 | 0 | 0.003 | t | 63122 | TDAYNQKL<br>SERRAN           | Mus<br>musculu<br>s              |
| 1 | 1.00 | 1 | 1 | 0 | 0 | 0 | 0 | 0.003 | t | 75571 | YQWLTRV<br>GKYRPQD<br>KPNT   | Chinchill<br>a<br>lanigera       |
| 1 | 1.00 | 1 | 1 | 0 | 0 | 0 | 0 | 0.003 | t | 74045 | YGLLAVDP<br>LFKP             | Gallus<br>gallus                 |
| 1 | 1.00 | 1 | 1 | 0 | 0 | 0 | 0 | 0.003 | t | 64541 | TKDTNNN<br>L                 | Mus<br>musculu<br>s              |
| 1 | 1.00 | 1 | 1 | 0 | 0 | 0 | 0 | 0.003 | t | 76157 | YTPVEEKQ<br>NGRMIVIV<br>AKKY | Mus<br>musculu<br>s              |
| 1 | 1.00 | 1 | 1 | 0 | 0 | 0 | 0 | 0.003 | t | 62830 | TAEGRIN                      | Mus<br>musculu<br>s              |
| 1 | 1.00 | 1 | 1 | 0 | 0 | 0 | 0 | 0.003 | t | 63808 | TGDPKPKK<br>NKKPKNPT<br>PPRP | Mus<br>musculu<br>s              |
| 1 | 1.00 | 1 | 1 | 0 | 0 | 0 | 0 | 0.003 | t | 63808 | TGDPKPKK<br>NKKPKNPT<br>PPRP | Mus<br>musculu<br>s              |
| 1 | 1.00 | 1 | 1 | 0 | 0 | 0 | 0 | 0.003 | t | 66442 | TSSRRRYTE<br>VYL             | Mus<br>musculu<br>s              |

|   |      |   |   |   |   |   |   |       |   |       |                              |                                  |
|---|------|---|---|---|---|---|---|-------|---|-------|------------------------------|----------------------------------|
| 1 | 1.00 | 1 | 1 | 0 | 0 | 0 | 0 | 0.003 | t | 63038 | TAVSPTTL<br>RTEVVK           | Oryctola<br>gus<br>cuniculu<br>s |
| 1 | 1.00 | 1 | 1 | 0 | 0 | 0 | 0 | 0.003 | t | 71212 | VSVTDHKK<br>WQFNSPF<br>VP    | Mus<br>musculu<br>s              |
| 1 | 1.00 | 1 | 1 | 0 | 0 | 0 | 0 | 0.003 | t | 78946 | DAWCGSR<br>GK                | Mus<br>musculu<br>s              |
| 1 | 1.00 | 1 | 1 | 0 | 0 | 0 | 0 | 0.003 | t | 63038 | TAVSPTTL<br>RTEVVK           | Sus<br>scrofa                    |
| 1 | 1.00 | 1 | 1 | 0 | 0 | 0 | 0 | 0.003 | t | 60170 | SPNVSVPS<br>SSSTPLLY         | Oryctola<br>gus<br>cuniculu<br>s |
| 1 | 1.00 | 1 | 1 | 0 | 0 | 0 | 0 | 0.003 | t | 60170 | SPNVSVPS<br>SSSTPLLY         | Oryctola<br>gus<br>cuniculu<br>s |
| 1 | 1.00 | 1 | 1 | 0 | 0 | 0 | 0 | 0.003 | t | 58783 | SKAFSNCY<br>PYDVPDYA<br>SL   | Mus<br>musculu<br>s              |
| 1 | 1.00 | 1 | 1 | 0 | 0 | 0 | 0 | 0.003 | t | 57864 | SFPMNEES<br>PLGFSPE          | Mus<br>musculu<br>s              |
| 1 | 1.00 | 1 | 1 | 0 | 0 | 0 | 0 | 0.003 | t | 56657 | RYSRNAV<br>NV                | Mus<br>musculu<br>s              |
| 1 | 1.00 | 1 | 1 | 0 | 0 | 0 | 0 | 0.003 | t | 43578 | NEDQKIGI<br>EIIKRALKI        | Mus<br>musculu<br>s              |
| 1 | 1.00 | 1 | 1 | 0 | 0 | 0 | 0 | 0.003 | t | 56657 | RYSRNAV<br>NV                | Mus<br>musculu<br>s              |
| 1 | 1.00 | 1 | 1 | 0 | 0 | 0 | 0 | 0.003 | t | 56602 | RYNRNAV<br>PNLRGDL<br>QVLAQK | Cavia<br>porcellu<br>s           |
| 1 | 1.00 | 1 | 1 | 0 | 0 | 0 | 0 | 0.003 | t | 49006 | PQGQGKV<br>T                 | Mus<br>musculu<br>s              |

|   |      |   |   |   |        |   |   |       |   |       |                              |                                  |
|---|------|---|---|---|--------|---|---|-------|---|-------|------------------------------|----------------------------------|
| 1 | 1.00 | 1 | 1 | 0 | 0      | 0 | 0 | 0.003 | t | 49772 | PTSGDKID<br>MTPRAGV<br>LMLE  | Mus<br>musculu<br>s              |
| 1 | 1.00 | 1 | 1 | 0 | -0.003 | 0 | 0 | 0.003 | t | 60170 | SPNVSVPS<br>SSSTPLLY         | Oryctola<br>gus<br>cuniculu<br>s |
| 1 | 1.00 | 1 | 1 | 0 | 0      | 0 | 0 | 0.003 | t | 57864 | SFPMNEES<br>PLGFSPE          | Mus<br>musculu<br>s              |
| 1 | 1.00 | 1 | 1 | 0 | 0      | 0 | 0 | 0.003 | t | 48858 | PPPPNPN<br>DPPPPNP<br>ND     | Mus<br>musculu<br>s              |
| 1 | 1.00 | 1 | 1 | 0 | 0      | 0 | 0 | 0.003 | t | 48858 | PPPPNPN<br>DPPPPNP<br>ND     | Mus<br>musculu<br>s              |
| 1 | 1.00 | 1 | 1 | 0 | -0.004 | 0 | 0 | 0.003 | t | 56602 | RYNRNAV<br>PNLRGDL<br>QVLAQK | Sus<br>scrofa                    |
| 1 | 1.00 | 1 | 1 | 0 | -0.003 | 0 | 0 | 0.003 | t | 45005 | NMMNYI<br>MDPRTH             | Oryctola<br>gus<br>cuniculu<br>s |
| 1 | 1.00 | 1 | 1 | 0 | 0      | 0 | 0 | 0.003 | t | 57864 | SFPMNEES<br>PLGFSPE          | Mus<br>musculu<br>s              |
| 1 | 1.00 | 1 | 1 | 0 | 0      | 0 | 0 | 0.003 | t | 43317 | NATAEGR<br>AINRRVE           | Mus<br>musculu<br>s              |
| 1 | 1.00 | 1 | 1 | 0 | 0      | 0 | 0 | 0.003 | t | 44174 | NHVRPIG<br>YWAV              | Mus<br>musculu<br>s              |
| 1 | 1.00 | 1 | 1 | 0 | 0      | 0 | 0 | 0.003 | t | 36959 | LKMADPN<br>RFRGKD            | Mus<br>musculu<br>s              |
| 1 | 1.00 | 1 | 1 | 0 | 0      | 0 | 0 | 0.003 | t | 43317 | NATAEGR<br>AINRRVE           | Mus<br>musculu<br>s              |
| 1 | 1.00 | 1 | 1 | 0 | 0      | 0 | 0 | 0.003 | t | 56657 | RYSRNAV<br>NV                | Mus<br>musculu<br>s              |

|   |      |   |   |   |       |   |   |       |   |       |                             |                            |
|---|------|---|---|---|-------|---|---|-------|---|-------|-----------------------------|----------------------------|
| 1 | 1.00 | 1 | 1 | 0 | 0     | 0 | 0 | 0.003 | t | 48846 | PPNSGGV<br>NTIQLYQT<br>KTAQ | Gallus<br>gallus           |
| 1 | 1.00 | 1 | 1 | 0 | 0     | 0 | 0 | 0.003 | t | 57864 | SFPMNEES<br>PLGFSPE         | Mus<br>musculu<br>s        |
| 1 | 1.00 | 1 | 1 | 0 | 0     | 0 | 0 | 0.003 | t | 55818 | RSDYKFYE<br>DANGTRD<br>HKKG | Chinchill<br>a<br>lanigera |
| 1 | 1.00 | 1 | 1 | 0 | 0     | 0 | 0 | 0.003 | t | 59807 | SNDVSWH<br>EWKRMYN<br>KEYNG | Rattus<br>rattus           |
| 1 | 1.00 | 1 | 1 | 0 | 0     | 0 | 0 | 0.003 | t | 43578 | NEDQKIGI<br>EIIKRALKI       | Mus<br>musculu<br>s        |
| 1 | 1.00 | 1 | 1 | 0 | 0.015 | 0 | 0 | 0.003 | t | 45221 | NNRAVPD<br>KIDWRESG<br>YVTE | Rattus<br>rattus           |
| 1 | 1.00 | 1 | 1 | 0 | 0     | 0 | 0 | 0.003 | t | 58466 | SICSNNPT<br>CWAISK          | Mus<br>musculu<br>s        |
| 1 | 1.00 | 1 | 1 | 0 | 0     | 0 | 0 | 0.003 | t | 58466 | SICSNNPT<br>CWAISK          | Mus<br>musculu<br>s        |
| 1 | 1.00 | 1 | 1 | 0 | 0     | 0 | 0 | 0.003 | t | 58783 | SKAFSNCY<br>PYDVPDYA<br>SL  | Mus<br>musculu<br>s        |
| 1 | 1.00 | 1 | 1 | 0 | 0     | 0 | 0 | 0.003 | t | 37315 | LLGCIGSTC                   | Mus<br>musculu<br>s        |
| 1 | 1.00 | 1 | 1 | 0 | 0     | 0 | 0 | 0.003 | t | 37315 | LLGCIGSTC                   | Mus<br>musculu<br>s        |
| 1 | 1.00 | 1 | 1 | 0 | 0     | 0 | 0 | 0.003 | t | 54058 | RHKQKIVA<br>PVKQTL          | Bos<br>taurus              |
| 1 | 1.00 | 1 | 1 | 0 | 0     | 0 | 0 | 0.003 | t | 43317 | NATAEGR<br>AINRRVE          | Mus<br>musculu<br>s        |
| 1 | 1.00 | 1 | 1 | 0 | 0     | 0 | 0 | 0.003 | t | 58906 | SKNLAPI                     | Mus<br>musculu<br>s        |
| 1 | 1.00 | 1 | 1 | 0 | 0     | 0 | 0 | 0.003 | t | 54058 | RHKQKIVA<br>PVKQTL          | Cavia<br>porcellu<br>s     |



|   |      |   |   |   |   |   |   |       |   |       |                              |                          |
|---|------|---|---|---|---|---|---|-------|---|-------|------------------------------|--------------------------|
| 1 | 1.00 | 1 | 1 | 0 | 0 | 0 | 0 | 0.003 | t | 58466 | SICSNNPT<br>CWAISK           | Mus<br>musculus          |
| 1 | 1.00 | 1 | 1 | 0 | 0 | 0 | 0 | 0.003 | t | 58783 | SKAFSNCY<br>PYDVDPDYA<br>SL  | Mus<br>musculus          |
| 1 | 1.00 | 1 | 1 | 0 | 0 | 0 | 0 | 0.003 | t | 55818 | RSDYKFYE<br>DANGTRD<br>HKKG  | Chinchilla<br>lanigera   |
| 1 | 1.00 | 1 | 1 | 0 | 0 | 0 | 0 | 0.003 | t | 50931 | QGP GAPQ<br>GPGAPQG<br>PGAP  | Mus<br>musculus          |
| 1 | 1.00 | 1 | 1 | 0 | 0 | 0 | 0 | 0.003 | t | 45005 | NMMNYI<br>MDPRTH             | Oryctolagus<br>cuniculus |
| 1 | 1.00 | 1 | 1 | 0 | 0 | 0 | 0 | 0.003 | t | 45221 | NNRAVPD<br>KIDWRESG<br>YVTE  | Rattus<br>rattus         |
| 1 | 1.00 | 1 | 1 | 0 | 0 | 0 | 0 | 0.003 | t | 56862 | SALLED                       | Mus<br>musculus          |
| 1 | 1.00 | 1 | 1 | 0 | 0 | 0 | 0 | 0.003 | t | 56862 | SALLED                       | Mus<br>musculus          |
| 1 | 1.00 | 1 | 1 | 0 | 0 | 0 | 0 | 0.003 | t | 46841 | PAKLLKER<br>GFFGAIA<br>G FLE | Mus<br>musculus          |
| 1 | 1.00 | 1 | 1 | 0 | 0 | 0 | 0 | 0.003 | t | 56104 | RTLGEDPQ<br>YHEEWV           | Mus<br>musculus          |
| 1 | 1.00 | 1 | 1 | 0 | 0 | 0 | 0 | 0.003 | t | 48858 | PPPPNPN<br>DPPPPNP<br>ND     | Mus<br>musculus          |
| 1 | 1.00 | 1 | 1 | 0 | 0 | 0 | 0 | 0.003 | t | 47131 | PDKILTYIA<br>ADHC            | Mus<br>musculus          |
| 1 | 1.00 | 1 | 1 | 0 | 0 | 0 | 0 | 0.003 | t | 43317 | NATAEGR<br>AINRRVE           | Mus<br>musculus          |
| 1 | 1.00 | 1 | 1 | 0 | 0 | 0 | 0 | 0.003 | t | 56862 | SALLED                       | Mus<br>musculus          |
| 1 | 1.00 | 1 | 1 | 0 | 0 | 0 | 0 | 0.003 | t | 59922 | SNTFINNA                     | Mus<br>musculus          |

|   |      |   |   |   |        |   |   |       |   |       |                              |                       |
|---|------|---|---|---|--------|---|---|-------|---|-------|------------------------------|-----------------------|
| 1 | 1.00 | 1 | 1 | 0 | 0      | 0 | 0 | 0.003 | t | 59922 | SNTFINNA                     | Mus musculus          |
| 1 | 1.00 | 1 | 1 | 0 | 0      | 0 | 0 | 0.003 | t | 56862 | SALLED                       | Mus musculus          |
| 1 | 1.00 | 1 | 1 | 0 | 0      | 0 | 0 | 0.003 | t | 47045 | PCSICSNN<br>PTCWAICK         | Mus musculus          |
| 1 | 1.00 | 1 | 1 | 0 | 0      | 0 | 0 | 0.003 | t | 43383 | NCPYVSYG<br>KFCIKPDG<br>SIST | Gallus gallus         |
| 1 | 1.00 | 1 | 1 | 0 | 0      | 0 | 0 | 0.003 | t | 58049 | SGGKLVGI<br>LTSRNET          | Gallus gallus         |
| 1 | 1.00 | 1 | 1 | 0 | 0      | 0 | 0 | 0.003 | t | 41019 | MADPNRFRG                    | Mus musculus          |
| 1 | 1.00 | 1 | 1 | 0 | 0      | 0 | 0 | 0.003 | t | 59922 | SNTFINNA                     | Mus musculus          |
| 1 | 1.00 | 1 | 1 | 0 | 0      | 0 | 0 | 0.003 | t | 37657 | LLPHSNLDHI                   | Oryctolagus cuniculus |
| 1 | 1.00 | 1 | 1 | 0 | -0.003 | 0 | 0 | 0.003 | t | 45004 | NMMKYISPPIFL                 | Oryctolagus cuniculus |
| 1 | 1.00 | 1 | 1 | 0 | 0      | 0 | 0 | 0.003 | t | 58783 | SKAFSNCY<br>PYDVDPDYASL      | Mus musculus          |
| 1 | 1.00 | 1 | 1 | 0 | 0      | 0 | 0 | 0.003 | t | 40453 | LVLNRLKV<br>GLQVVAV<br>KAPGF | Mus musculus          |
| 1 | 1.00 | 1 | 1 | 0 | 0      | 0 | 0 | 0.003 | t | 50929 | QGPGAP                       | Mus musculus          |
| 1 | 1.00 | 1 | 1 | 0 | 0      | 0 | 0 | 0.003 | t | 59326 | SLTYMKM                      | Mus musculus          |
| 1 | 1.00 | 1 | 1 | 0 | 0      | 0 | 0 | 0.003 | t | 45013 | NMPASMK<br>RVRIE             | Mus musculus          |
| 1 | 1.00 | 1 | 1 | 0 | 0      | 0 | 0 | 0.003 | t | 47045 | PCSICSNN<br>PTCWAICK         | Mus musculus          |

|   |      |   |   |   |        |   |   |       |   |       |                               |                                  |
|---|------|---|---|---|--------|---|---|-------|---|-------|-------------------------------|----------------------------------|
| 1 | 1.00 | 1 | 1 | 0 | 0      | 0 | 0 | 0.003 | t | 59326 | SLLTYMK<br>M                  | Mus<br>musculu<br>s              |
| 1 | 1.00 | 1 | 1 | 0 | 0      | 0 | 0 | 0.003 | t | 43317 | NATAEGR<br>AINRRVE            | Mus<br>musculu<br>s              |
| 1 | 1.00 | 1 | 1 | 0 | 0      | 0 | 0 | 0.003 | t | 50932 | QGP GAPQ<br>GPGAPQG<br>PGAPQG | Mus<br>musculu<br>s              |
| 1 | 1.00 | 1 | 1 | 0 | 0      | 0 | 0 | 0.003 | t | 50930 | QGP GAPQ<br>GPGAP             | Mus<br>musculu<br>s              |
| 1 | 1.00 | 1 | 1 | 0 | 0      | 0 | 0 | 0.003 | t | 50931 | QGP GAPQ<br>GPGAPQG<br>PGAP   | Mus<br>musculu<br>s              |
| 1 | 1.00 | 1 | 1 | 0 | 0      | 0 | 0 | 0.003 | t | 45006 | NMMRFTE<br>LSTPS              | Oryctola<br>gus<br>cuniculu<br>s |
| 1 | 1.00 | 1 | 1 | 0 | 0      | 0 | 0 | 0.003 | t | 45004 | NMMKYIS<br>PPIFL              | Oryctola<br>gus<br>cuniculu<br>s |
| 1 | 1.00 | 1 | 1 | 0 | 0      | 0 | 0 | 0.003 | t | 19636 | GFTTNEER<br>YNVFAE            | Mus<br>musculu<br>s              |
| 1 | 1.00 | 1 | 1 | 0 | 0      | 0 | 0 | 0.003 | t | 30262 | KDTNNN                        | Mus<br>musculu<br>s              |
| 1 | 1.00 | 1 | 1 | 0 | -0.002 | 0 | 0 | 0.003 | t | 18527 | GAASSYFE<br>YVD TYG           | Mus<br>musculu<br>s              |
| 1 | 1.00 | 1 | 1 | 0 | 0      | 0 | 0 | 0.003 | t | 18527 | GAASSYFE<br>YVD TYG           | Mus<br>musculu<br>s              |
| 1 | 1.00 | 1 | 1 | 0 | 0      | 0 | 0 | 0.003 | t | 33215 | KRRLRPSR<br>VR IE             | Mus<br>musculu<br>s              |
| 1 | 1.00 | 1 | 1 | 0 | 0      | 0 | 0 | 0.003 | t | 27725 | INQDPDKI<br>LT Y              | Mus<br>musculu<br>s              |
| 1 | 1.00 | 1 | 1 | 0 | 0      | 0 | 0 | 0.003 | t | 19620 | GFSPEEME<br>AVASKFR           | Mus<br>musculu<br>s              |

|   |      |   |   |   |   |   |   |       |   |       |                              |                          |
|---|------|---|---|---|---|---|---|-------|---|-------|------------------------------|--------------------------|
| 1 | 1.00 | 1 | 1 | 0 | 0 | 0 | 0 | 0.003 | t | 27725 | INQDPDKI<br>LTY              | Mus<br>musculu<br>s      |
| 1 | 1.00 | 1 | 1 | 0 | 0 | 0 | 0 | 0.003 | t | 28331 | IRLRHENK<br>DLKARLEN<br>AMEV | Mus<br>musculu<br>s      |
| 1 | 1.00 | 1 | 1 | 0 | 0 | 0 | 0 | 0.003 | t | 33450 | KSNAATSY<br>INAIINSKS<br>VSD | Rattus<br>norvegic<br>us |
| 1 | 1.00 | 1 | 1 | 0 | 0 | 0 | 0 | 0.003 | t | 28265 | IRAWVAW<br>RAHCQNR<br>D      | Mus<br>musculu<br>s      |
| 1 | 1.00 | 1 | 1 | 0 | 0 | 0 | 0 | 0.003 | t | 22756 | GTLVRMA<br>PVIG              | Mus<br>musculu<br>s      |
| 1 | 1.00 | 1 | 1 | 0 | 0 | 0 | 0 | 0.003 | t | 16123 | FHLPYNHN<br>WFAL             | Mus<br>musculu<br>s      |
| 1 | 1.00 | 1 | 1 | 0 | 0 | 0 | 0 | 0.003 | t | 35402 | LEDPVG                       | Mus<br>musculu<br>s      |
| 1 | 1.00 | 1 | 1 | 0 | 0 | 0 | 0 | 0.003 | t | 13972 | ERDPANIP<br>WDKD             | Mus<br>musculu<br>s      |
| 1 | 1.00 | 1 | 1 | 0 | 0 | 0 | 0 | 0.003 | t | 30262 | KDTNNN                       | Mus<br>musculu<br>s      |
| 1 | 1.00 | 1 | 1 | 0 | 0 | 0 | 0 | 0.003 | t | 27725 | INQDPDKI<br>LTY              | Mus<br>musculu<br>s      |
| 1 | 1.00 | 1 | 1 | 0 | 0 | 0 | 0 | 0.003 | t | 22360 | GSGVRGD<br>FGSLAPRV<br>ARQL  | Cavia<br>porcellu<br>s   |
| 1 | 1.00 | 1 | 1 | 0 | 0 | 0 | 0 | 0.003 | t | 35402 | LEDPVG                       | Mus<br>musculu<br>s      |
| 1 | 1.00 | 1 | 1 | 0 | 0 | 0 | 0 | 0.003 | t | 19637 | GFTTNEPR<br>YNVFAE           | Mus<br>musculu<br>s      |
| 1 | 1.00 | 1 | 1 | 0 | 0 | 0 | 0 | 0.003 | t | 22359 | GSGVRGD<br>FGSLAPRV<br>ARQL  | Sus<br>scrofa            |

|   |      |   |   |   |        |   |   |       |   |       |                              |                          |
|---|------|---|---|---|--------|---|---|-------|---|-------|------------------------------|--------------------------|
| 1 | 1.00 | 1 | 1 | 0 | -0.002 | 0 | 0 | 0.003 | t | 22756 | GTLVRMA<br>PVIG              | Mus<br>musculu<br>s      |
| 1 | 1.00 | 1 | 1 | 0 | 0      | 0 | 0 | 0.003 | t | 19636 | GFTTNEER<br>YNVFAE           | Mus<br>musculu<br>s      |
| 1 | 1.00 | 1 | 1 | 0 | 0      | 0 | 0 | 0.003 | t | 35402 | LEDPVG                       | Mus<br>musculu<br>s      |
| 1 | 1.00 | 1 | 1 | 0 | 0      | 0 | 0 | 0.003 | t | 29985 | KAVSAAG<br>VHFKAGG<br>PI     | Gallus<br>gallus         |
| 1 | 1.00 | 1 | 1 | 0 | 0      | 0 | 0 | 0.003 | t | 22456 | GSQAIENQ<br>FYIKLTNGS        | Gallus<br>gallus         |
| 1 | 1.00 | 1 | 1 | 0 | 0      | 0 | 0 | 0.003 | t | 31740 | KKYRYYLK<br>PLCKK            | Mus<br>musculu<br>s      |
| 1 | 1.00 | 1 | 1 | 0 | 0      | 0 | 0 | 0.003 | t | 25139 | HWSISKPQ                     | Mus<br>musculu<br>s      |
| 1 | 1.00 | 1 | 1 | 0 | 0      | 0 | 0 | 0.003 | t | 11208 | EAVEAERA<br>GRGTG            | Mus<br>musculu<br>s      |
| 1 | 1.00 | 1 | 1 | 0 | 0      | 0 | 0 | 0.003 | t | 19266 | GEFPRHVK<br>LKNEIENLL<br>DQV | Mus<br>musculu<br>s      |
| 1 | 1.00 | 1 | 1 | 0 | 0      | 0 | 0 | 0.003 | t | 33450 | KSNAATSY<br>INAIINSKS<br>VSD | Rattus<br>norvegic<br>us |
| 1 | 1.00 | 1 | 1 | 0 | 0      | 0 | 0 | 0.003 | t | 24375 | HNGRFSD<br>ALRFT             | Mus<br>musculu<br>s      |
| 1 | 1.00 | 1 | 1 | 0 | 0      | 0 | 0 | 0.003 | t | 11208 | EAVEAERA<br>GRGTG            | Mus<br>musculu<br>s      |
| 1 | 1.00 | 1 | 1 | 0 | 0      | 0 | 0 | 0.003 | t | 30263 | KDTNNNL                      | Mus<br>musculu<br>s      |
| 1 | 1.00 | 1 | 1 | 0 | 0      | 0 | 0 | 0.003 | t | 22423 | GSNDDLW<br>HQWKRM<br>YNKEYN  | Rattus<br>rattus         |
| 1 | 1.00 | 1 | 1 | 0 | 0      | 0 | 0 | 0.003 | t | 632   | ADASLKM<br>ADPNRFR<br>GKDLP  | Mus<br>musculu<br>s      |

|   |      |   |   |   |   |   |   |       |   |      |                              |                        |
|---|------|---|---|---|---|---|---|-------|---|------|------------------------------|------------------------|
| 1 | 1.00 | 1 | 1 | 0 | 0 | 0 | 0 | 0.003 | t | 1547 | AGHATLRE<br>HLRDIKAE<br>NTDA | Mus<br>musculu<br>s    |
| 1 | 1.00 | 1 | 1 | 0 | 0 | 0 | 0 | 0.003 | t | 6093 | CDCDRTA<br>A                 | Mus<br>musculu<br>s    |
| 1 | 1.00 | 1 | 1 | 0 | 0 | 0 | 0 | 0.003 | t | 2040 | AINRRVE                      | Mus<br>musculu<br>s    |
| 1 | 1.00 | 1 | 1 | 0 | 0 | 0 | 0 | 0.003 | t | 4530 | ASLKMAD<br>PNRFR             | Mus<br>musculu<br>s    |
| 1 | 1.00 | 1 | 1 | 0 | 0 | 0 | 0 | 0.003 | t | 9597 | DPAPPNA<br>NDPAPPN<br>AN     | Mus<br>musculu<br>s    |
| 1 | 1.00 | 1 | 1 | 0 | 0 | 0 | 0 | 0.003 | t | 5582 | AVTRGTIN<br>DPQRAKE          | Mus<br>musculu<br>s    |
| 1 | 1.00 | 1 | 1 | 0 | 0 | 0 | 0 | 0.003 | t | 563  | ACHPLFDA<br>RCGGKS           | Mus<br>musculu<br>s    |
| 1 | 1.00 | 1 | 1 | 0 | 0 | 0 | 0 | 0.003 | t | 953  | AEGRAINR<br>RVE              | Mus<br>musculu<br>s    |
| 1 | 1.00 | 1 | 1 | 0 | 0 | 0 | 0 | 0.003 | t | 1330 | AFKGGNG<br>AKKG              | Mus<br>musculu<br>s    |
| 1 | 1.00 | 1 | 1 | 0 | 0 | 0 | 0 | 0.003 | t | 9597 | DPAPPNA<br>NDPAPPN<br>AN     | Mus<br>musculu<br>s    |
| 1 | 1.00 | 1 | 1 | 0 | 0 | 0 | 0 | 0.003 | t | 7277 | CVKSQTTR<br>IN               | Mus<br>musculu<br>s    |
| 1 | 1.00 | 1 | 1 | 0 | 0 | 0 | 0 | 0.003 | t | 6226 | CFGNSEY                      | Mus<br>musculu<br>s    |
| 1 | 1.00 | 1 | 1 | 0 | 0 | 0 | 0 | 0.003 | t | 9722 | DPPPPNP<br>NDPPPPN<br>PN     | Mus<br>musculu<br>s    |
| 1 | 1.00 | 1 | 1 | 0 | 0 | 0 | 0 | 0.003 | t | 9722 | DPPPPNP<br>NDPPPPN<br>PN     | Mus<br>musculu<br>s    |
| 1 | 1.00 | 1 | 1 | 0 | 0 | 0 | 0 | 0.003 | t | 9757 | DPRVRGLY<br>FPAGGSSS<br>GTV  | Pan<br>troglody<br>tes |

|   |      |   |   |       |        |        |        |        |   |        |                              |                     |
|---|------|---|---|-------|--------|--------|--------|--------|---|--------|------------------------------|---------------------|
| 1 | 1.00 | 1 | 1 | 0     | 0      | 0      | 0      | 0.003  | t | 4429   | ASGQ                         | Mus<br>musculu<br>s |
| 1 | 1.00 | 1 | 1 | 0     | 0      | 0      | 0      | 0.003  | t | 7009   | CSICSNNP<br>TCWAICK          | Mus<br>musculu<br>s |
| 1 | 1.00 | 1 | 1 | -0.01 | -0.01  | -0.01  | -0.01  | -0.01  | t | 106981 | VRWTTSP<br>NLLFV             | Mus<br>musculu<br>s |
| 1 | 1.00 | 1 | 1 | -0.03 | -0.028 | -0.03  | -0.023 | -0.028 | t | 132324 | GERGSE<br>RG RD              | Homo<br>sapiens     |
| 1 | 1.00 | 1 | 1 | -0.07 | -0.073 | -0.07  | -0.069 | -0.07  | t | 4444   | ASHAHKS<br>HRKPKRS<br>WNVYVG | Canis<br>lupus      |
| 1 | 1.00 | 1 | 1 | 0.03  | 0.028  | 0.049  | 0.034  | 0.028  | t | 51806  | QPELAPED<br>PED              | Mus<br>musculu<br>s |
| 1 | 1.00 | 1 | 1 | 0.05  | 0.05   | 0.045  | 0.05   | 0.052  | t | 125015 | DNESSYSR<br>GFDMTYT<br>E     | Mus<br>musculu<br>s |
| 1 | 1.00 | 1 | 1 | 0.02  | 0.022  | 0.02   | 0.017  | 0.022  | t | 58863  | SKKHKDNE<br>DAESVK           | Homo<br>sapiens     |
| 1 | 1.00 | 1 | 1 | 0     | -0.002 | 0.009  | -0.003 | -0.001 | t | 142146 | EQKLISEED<br>L               | Mus<br>musculu<br>s |
| 1 | 1.00 | 1 | 1 | 0.01  | 0.01   | 0.01   | 0.01   | 0.014  | t | 133624 | KPGEMRG<br>AA                | Mus<br>musculu<br>s |
| 1 | 1.00 | 1 | 1 | -0.04 | -0.041 | -0.033 | -0.039 | -0.04  | t | 9899   | DQRPYCW<br>HYPPKPCG<br>IVPA  | Homo<br>sapiens     |
| 1 | 1.00 | 1 | 1 | -0.02 | -0.02  | -0.014 | -0.023 | -0.022 | t | 27080  | ILGPRWNL<br>NAHS             | Homo<br>sapiens     |
| 1 | 1.00 | 1 | 1 | 0.02  | 0.02   | 0.027  | 0.018  | 0.02   | t | 116917 | AESDDSST<br>RRH              | Homo<br>sapiens     |
| 1 | 1.00 | 1 | 1 | 0.02  | 0.02   | 0.02   | 0.01   | 0.02   | t | 115935 | QYVLSRYP<br>SY               | Homo<br>sapiens     |
| 1 | 1.00 | 1 | 1 | 0.01  | 0.008  | 0.012  | 0.003  | 0.01   | t | 118236 | YYCARDSP                     | Mus<br>musculu<br>s |

|   |      |   |   |       |        |        |        |        |   |        |                              |                              |
|---|------|---|---|-------|--------|--------|--------|--------|---|--------|------------------------------|------------------------------|
| 1 | 1.00 | 1 | 1 | -0.05 | -0.052 | -0.048 | -0.053 | -0.05  | t | 115614 | HCLGKWL<br>GHPDKF            | Mus<br>musculus              |
| 1 | 1.00 | 1 | 1 | -0.02 | -0.018 | -0.015 | -0.019 | -0.022 | t | 45480  | NPSSLFDL<br>VARIKNNL<br>KNSP | Homo<br>sapiens              |
| 1 | 1.00 | 1 | 1 | -0.02 | -0.02  | -0.027 | -0.02  | -0.02  | t | 138041 | SPLTVEWR<br>ARSESAQS<br>KM   | Mus<br>musculus              |
| 1 | 1.00 | 1 | 1 | -0.01 | -0.012 | -0.008 | -0.017 | -0.009 | t | 131317 | VEALYLVC<br>GERG             | Mus<br>musculus              |
| 1 | 1.00 | 1 | 1 | -0.01 | -0.01  | -0.007 | -0.014 | -0.01  | t | 136420 | KIHAREIFD<br>SRGNPTVE        | Homo<br>sapiens              |
| 1 | 1.00 | 1 | 1 | -0.01 | -0.01  | -0.007 | -0.014 | -0.01  | t | 136421 | KIHAREIFD<br>SRGNPTVE        | Homo<br>sapiens              |
| 1 | 1.00 | 1 | 1 | -0.01 | -0.01  | 0      | -0.01  | -0.01  | t | 51861  | QPKLAAAV                     | Oryctola<br>gus<br>cuniculus |
| 1 | 1.00 | 1 | 1 | -0.02 | -0.02  | -0.015 | -0.02  | -0.017 | t | 125004 | DAPDTDW<br>CDSIP             | Mus<br>musculus              |
| 1 | 1.00 | 1 | 1 | -0.02 | -0.023 | -0.003 | -0.02  | -0.022 | t | 12069  | EFSDCSKD<br>YYQM             | Oryctola<br>gus<br>cuniculus |
| 1 | 1.00 | 1 | 1 | -0.03 | -0.034 | -0.035 | -0.031 | -0.032 | t | 6171   | CEKAKRAV<br>RGRQDRP<br>KEFP  | Oryctola<br>gus<br>cuniculus |
| 1 | 1.00 | 1 | 1 | 0.02  | 0.022  | 0.015  | 0.017  | 0.022  | t | 700    | ADLAAVQ<br>KTNAANQ<br>AAYQK  | Homo<br>sapiens              |
| 1 | 1.00 | 1 | 1 | -0.02 | -0.022 | -0.009 | -0.017 | -0.02  | t | 158940 | KTQSQGP<br>WDEGRVE<br>ID     | Mus<br>musculus              |
| 1 | 1.00 | 1 | 1 | -0.01 | -0.01  | -0.001 | -0.01  | -0.011 | t | 42477  | MRLQVSP<br>ETLFWME<br>CS     | Mus<br>musculus              |
| 1 | 1.00 | 1 | 1 | -0.01 | -0.01  | -0.001 | -0.01  | -0.011 | t | 42477  | MRLQVSP<br>ETLFWME<br>CS     | Mus<br>musculus              |
| 1 | 1.00 | 1 | 1 | 0.01  | 0.01   | 0.01   | 0.006  | 0.01   | t | 135957 | LSSRPGGC<br>SAVS             | Homo<br>sapiens              |



|   |      |   |   |       |        |        |        |        |   |        |                              |                              |
|---|------|---|---|-------|--------|--------|--------|--------|---|--------|------------------------------|------------------------------|
| 1 | 1.00 | 1 | 1 | -0.02 | -0.022 | -0.025 | -0.027 | -0.019 | t | 118036 | NIVTPRTP<br>PP               | Rattus<br>norvegicus         |
| 1 | 1.00 | 1 | 1 | -0.02 | -0.02  | -0.02  | -0.02  | -0.018 | t | 140612 | VPVCDWE<br>LNC               | Mus<br>musculus              |
| 1 | 1.00 | 1 | 1 | -0.02 | -0.022 | -0.02  | -0.027 | -0.02  | t | 107487 | KKPTPSTL                     | Rattus<br>norvegicus         |
| 1 | 1.00 | 1 | 1 | 0     | 0.002  | 0.012  | 0.001  | 0      | t | 133594 | GPLYQMN<br>DALLL             | Homo<br>sapiens              |
| 1 | 1.00 | 1 | 1 | -0.04 | -0.037 | -0.03  | -0.04  | -0.04  | t | 79841  | GKPALELIR<br>MVE             | Mus<br>musculus              |
| 1 | 1.00 | 1 | 1 | -0.04 | -0.037 | -0.03  | -0.04  | -0.04  | t | 79841  | GKPALELIR<br>MVE             | Mus<br>musculus              |
| 1 | 1.00 | 1 | 1 | 0.02  | 0.014  | 0.023  | 0.019  | 0.023  | t | 99084  | AEDVGSN<br>KGAIIGL           | Canis<br>lupus               |
| 1 | 1.00 | 1 | 1 | 0.03  | 0.032  | 0.035  | 0.031  | 0.03   | t | 48894  | PPQGGVV<br>TPGSGSG           | Homo<br>sapiens              |
| 1 | 1.00 | 1 | 1 | 0     | 0      | 0      | 0      | 0      | t | 2566   | ALGLLQQA<br>SKQAEAA<br>APVV  | Homo<br>sapiens              |
| 1 | 1.00 | 1 | 1 | -0.03 | -0.03  | -0.03  | -0.027 | -0.028 | t | 21096  | GLRAQDD<br>YNGWDIN<br>TPAFEW | Homo<br>sapiens              |
| 1 | 1.00 | 1 | 1 | 0     | -0.004 | 0      | -0.001 | 0.003  | t | 38522  | LPHSNL                       | Oryctola<br>gus<br>cuniculus |
| 1 | 1.00 | 1 | 1 | -0.01 | -0.015 | -0.013 | -0.008 | -0.007 | t | 157177 | EAPSKQDK<br>PVEN             | Canis<br>lupus               |
| 1 | 1.00 | 1 | 1 | 0.04  | 0.044  | 0.048  | 0.041  | 0.042  | t | 153382 | FAENKKD<br>HFSPGGG<br>GS     | Homo<br>sapiens              |
| 1 | 1.00 | 1 | 1 | -0.02 | -0.022 | -0.014 | -0.023 | -0.02  | t | 51973  | QPSYTVPI<br>PRHA             | Mus<br>musculus              |

|   |      |   |   |       |        |        |        |        |   |        |                              |                                  |
|---|------|---|---|-------|--------|--------|--------|--------|---|--------|------------------------------|----------------------------------|
| 1 | 1.00 | 1 | 1 | 0.04  | 0.04   | 0.04   | 0.04   | 0.043  | t | 145841 | KEDFRYAIS<br>STNEIGLLG<br>A  | Sus<br>scrofa                    |
| 1 | 1.00 | 1 | 1 | 0.02  | 0.022  | 0.015  | 0.017  | 0.022  | t | 63695  | TFKTTKKD<br>HKPQ             | Homo<br>sapiens                  |
| 1 | 1.00 | 1 | 1 | 0.01  | 0.01   | 0.017  | 0.013  | 0.01   | t | 55780  | RRYPDAVY<br>LHRIDL           | Homo<br>sapiens                  |
| 1 | 1.00 | 1 | 1 | 0     | 0      | 0.005  | 0.003  | 0.002  | t | 41048  | MAHFPGF<br>GQSLLYGY<br>PVYVF | Homo<br>sapiens                  |
| 1 | 1.00 | 1 | 1 | -0.03 | -0.032 | -0.025 | -0.031 | -0.03  | t | 141924 | IKKQIPRCK<br>DAFNKIES        | Sus<br>scrofa                    |
| 1 | 1.00 | 1 | 1 | 0     | 0.003  | 0.017  | 0      | -0.003 | t | 110837 | ERSLSLLNC<br>EEIKSQF         | Mus<br>musculu<br>s              |
| 1 | 1.00 | 1 | 1 | -0.03 | -0.03  | -0.03  | -0.03  | -0.03  | t | 113913 | TCKQAGT<br>CPP               | Mus<br>musculu<br>s              |
| 1 | 1.00 | 1 | 1 | 0     | 0      | 0.012  | 0      | 0.002  | t | 78117  | DIQKVAGT<br>WYSLAMA<br>A     | Mus<br>musculu<br>s              |
| 1 | 1.00 | 1 | 1 | 0.02  | 0.015  | 0.028  | 0.02   | 0.02   | t | 78573  | YTTEGGTK<br>SEVEDVIP<br>EG   | Oryctola<br>gus<br>cuniculu<br>s |
| 1 | 1.00 | 1 | 1 | -0.01 | 0.019  | 0.004  | -0.01  | -0.012 | t | 127630 | DSISVPYKR<br>REG             | Rattus                           |
| 1 | 1.00 | 1 | 1 | 0.06  | 0.064  | 0.071  | 0.061  | 0.062  | t | 81709  | ENDYSAN<br>GGT               | Homo<br>sapiens                  |
| 1 | 1.00 | 1 | 1 | 0.04  | 0.04   | 0.037  | 0.04   | 0.04   | t | 54599  | RLITGR LQS<br>LQTYVTQ<br>Q   | Homo<br>sapiens                  |
| 1 | 1.00 | 1 | 1 | 0.01  | 0.013  | 0.008  | 0.01   | 0.011  | t | 41519  | MFNAGNK<br>NSYIKLKK<br>DSPV  | Equus<br>caballus                |

|   |      |   |   |       |        |        |        |        |   |        |                              |                                  |
|---|------|---|---|-------|--------|--------|--------|--------|---|--------|------------------------------|----------------------------------|
| 1 | 1.00 | 1 | 1 | 0.01  | 0.01   | 0.037  | 0.016  | 0.01   | t | 75878  | YSREQLSK<br>LFGIEPM          | Homo<br>sapiens                  |
| 1 | 1.00 | 1 | 1 | 0     | 0      | 0      | 0      | 0.003  | t | 122889 | RLDASFQE<br>HPDLPG           | Oryctola<br>gus<br>cuniculu<br>s |
| 1 | 1.00 | 1 | 1 | -0.01 | -0.012 | -0.009 | -0.011 | -0.01  | t | 62328  | SVSLPYAN<br>LATH             | Mus<br>musculu<br>s              |
| 1 | 1.00 | 1 | 1 | 0     | 0      | 0.001  | -0.003 | 0.001  | t | 54786  | RLTENTEP<br>LL               | Homo<br>sapiens                  |
| 1 | 1.00 | 1 | 1 | 0     | 0      | 0.002  | -0.003 | 0.001  | t | 56195  | RTTPDRQ<br>AA                | Homo<br>sapiens                  |
| 1 | 1.00 | 1 | 1 | 0     | 0.002  | 0      | 0.001  | 0      | t | 43248  | NANPNAN<br>PNANPNA<br>NPNANP | Homo<br>sapiens                  |
| 1 | 1.00 | 1 | 1 | 0     | 0.002  | 0      | 0.001  | 0      | t | 43248  | NANPNAN<br>PNANPNA<br>NPNANP | Homo<br>sapiens                  |
| 1 | 1.00 | 1 | 1 | 0.03  | 0.03   | 0.017  | 0.03   | 0.032  | t | 26925  | IKVELTGN<br>STLSSGYA<br>TARA | Oryctola<br>gus<br>cuniculu<br>s |
| 1 | 1.00 | 1 | 1 | 0.05  | 0.05   | 0.066  | 0.05   | 0.051  | t | 136061 | ETQAE                        | Mus<br>musculu<br>s              |
| 1 | 1.00 | 1 | 1 | -0.03 | -0.026 | -0.018 | -0.029 | -0.03  | t | 71844  | VVSWKNK<br>EL                | Homo<br>sapiens                  |
| 1 | 1.00 | 1 | 1 | 0     | 0.001  | 0.011  | -0.001 | 0      | t | 36838  | LKENIKYEV<br>AIFVHGPT<br>TVE | Equus<br>caballus                |
| 1 | 1.00 | 1 | 1 | -0.02 | -0.031 | -0.021 | -0.02  | -0.02  | t | 27608  | INDISHTQ<br>SVSSKQRV<br>TGLD | Oryctola<br>gus<br>cuniculu<br>s |
| 1 | 1.00 | 1 | 1 | -0.03 | -0.03  | -0.032 | -0.03  | -0.027 | t | 6386   | CHGSEPCII<br>HRGKPF          | Mus<br>musculu<br>s              |

|   |      |   |   |       |        |        |        |        |   |        |                               |                           |
|---|------|---|---|-------|--------|--------|--------|--------|---|--------|-------------------------------|---------------------------|
| 1 | 1.00 | 1 | 1 | 0.01  | 0.008  | 0.008  | 0.009  | 0.01   | t | 26341  | IGVQNQELA<br>YFYPELFR<br>QFYQ | Mus<br>musculu<br>s       |
| 1 | 1.00 | 1 | 1 | -0.01 | -0.008 | -0.01  | -0.009 | -0.007 | t | 39180  | LRRDLAS<br>RDVKKHV<br>GNALE   | Homo<br>sapiens           |
| 1 | 1.00 | 1 | 1 | 0.03  | 0.029  | 0.038  | 0.03   | 0.032  | t | 65541  | TPEEDQKA                      | Anas<br>platyrhy<br>nchos |
| 1 | 1.00 | 1 | 1 | -0.07 | -0.072 | -0.065 | -0.071 | -0.07  | t | 35284  | LDRNAHG<br>QLLVR              | Mus<br>musculu<br>s       |
| 1 | 1.00 | 1 | 1 | 0.02  | 0.023  | 0.034  | 0.019  | 0.02   | t | 39092  | LRGDLQVL<br>AQKVARTL          | Capra<br>hircus           |
| 1 | 1.00 | 1 | 1 | -0.01 | -0.01  | -0.006 | -0.01  | -0.009 | t | 53014  | QYNTGNF<br>SDGFYPFI<br>N      | Gallus<br>gallus          |
| 1 | 1.00 | 1 | 1 | -0.04 | -0.026 | -0.031 | -0.039 | -0.041 | t | 20060  | GGTWRIG<br>Y                  | Homo<br>sapiens           |
| 1 | 1.00 | 1 | 1 | -0.01 | -0.01  | -0.01  | -0.01  | -0.007 | t | 140459 | EHWSHD<br>MFSPGD              | Mus<br>musculu<br>s       |
| 1 | 1.00 | 1 | 1 | -0.02 | -0.02  | -0.019 | -0.02  | -0.015 | t | 79578  | IVCHTTATI<br>PSSAVTC          | Mus<br>musculu<br>s       |
| 1 | 1.00 | 1 | 1 | 0     | 0      | 0.005  | -0.006 | 0      | t | 107214 | MVGGVV                        | Mus<br>musculu<br>s       |
| 1 | 1.00 | 1 | 1 | -0.01 | -0.006 | -0.001 | -0.009 | -0.01  | t | 10783  | DVVSTLPQ<br>AVMG              | Homo<br>sapiens           |
| 1 | 1.00 | 1 | 1 | -0.06 | -0.06  | -0.06  | -0.056 | -0.057 | t | 118200 | VGRATPPP<br>GIMA              | Homo<br>sapiens           |
| 1 | 1.00 | 1 | 1 | 0.01  | 0.025  | 0.013  | 0.017  | 0.01   | t | 8688   | DIKVQFQS<br>GGNNSPA<br>VYLLD  | Homo<br>sapiens           |
| 1 | 1.00 | 1 | 1 | 0     | -0.002 | 0.015  | 0.003  | 0.003  | t | 137470 | YSVKPPLP<br>YLPP              | Mus<br>musculu<br>s       |

|   |      |   |   |       |        |        |        |        |   |        |                              |                                  |
|---|------|---|---|-------|--------|--------|--------|--------|---|--------|------------------------------|----------------------------------|
| 1 | 1.00 | 1 | 1 | 0.01  | 0.016  | 0.019  | 0.01   | 0.009  | t | 45236  | NNSAFNN<br>NLSSKNA<br>MGLVLN | Aotus<br>nancyma<br>ae           |
| 1 | 1.00 | 1 | 1 | -0.01 | -0.006 | -0.013 | -0.013 | -0.01  | t | 115261 | GDLEILLQ<br>KWENGEC<br>AQKKI | Homo<br>sapiens                  |
| 1 | 1.00 | 1 | 1 | -0.01 | -0.01  | 0      | -0.01  | -0.01  | t | 133041 | DHVKDYK<br>ESNETKLK          | Mus<br>musculu<br>s              |
| 1 | 1.00 | 1 | 1 | -0.02 | -0.02  | -0.013 | -0.02  | -0.02  | t | 125185 | NSSSSQFQ<br>IHG              | Mus<br>musculu<br>s              |
| 1 | 1.00 | 1 | 1 | 0     | -0.002 | 0      | -0.007 | 0      | t | 134804 | TIFILCCSK<br>EKRRKKQA<br>AT  | Mus<br>musculu<br>s              |
| 1 | 1.00 | 1 | 1 | -0.04 | -0.043 | -0.035 | -0.047 | -0.041 | t | 120163 | QWKAEFH<br>RWS               | Oryctola<br>gus<br>cuniculu<br>s |
| 1 | 1.00 | 1 | 1 | 0.02  | 0.022  | 0.022  | 0.021  | 0.02   | t | 31166  | KHWPQIA<br>QFAPSASA<br>FF    | Homo<br>sapiens                  |
| 1 | 1.00 | 1 | 1 | 0.03  | 0.032  | 0.037  | 0.03   | 0.031  | t | 120155 | QPSPYNG<br>WRMEI             | Rattus<br>norvegic<br>us         |
| 1 | 1.00 | 1 | 1 | -0.04 | -0.04  | -0.031 | -0.04  | -0.04  | t | 153498 | WSPSKLYS<br>ARDHGGG<br>S     | Mus<br>musculu<br>s              |
| 1 | 1.00 | 1 | 1 | 0.02  | 0.018  | 0.027  | 0.019  | 0.02   | t | 98506  | TDLPPSDG<br>LDADEWG          | Sus<br>scrofa                    |
| 1 | 1.00 | 1 | 1 | 0.01  | 0.012  | 0.011  | 0.011  | 0.012  | t | 6067   | CCNLEPEA<br>RKVISS           | Homo<br>sapiens                  |
| 1 | 1.00 | 1 | 1 | -0.01 | -0.012 | -0.008 | -0.007 | -0.009 | t | 106092 | RSGYSSPG<br>SPGTPGSR<br>SR   | Mus<br>musculu<br>s              |
| 1 | 1.00 | 1 | 1 | 0.01  | 0.012  | 0.015  | 0.011  | 0.011  | t | 153362 | APWSLRD<br>HLAVTGG<br>GS     | Homo<br>sapiens                  |
| 1 | 1.00 | 1 | 1 | -0.03 | -0.03  | -0.019 | -0.03  | -0.032 | t | 144584 | ADSKGCKI<br>GGGLPDS<br>VKI   | Oryctola<br>gus<br>cuniculu<br>s |

|   |      |   |   |       |        |        |        |        |   |        |                              |                                  |
|---|------|---|---|-------|--------|--------|--------|--------|---|--------|------------------------------|----------------------------------|
| 1 | 1.00 | 1 | 1 | -0.01 | -0.01  | -0.001 | -0.007 | -0.01  | t | 27685  | INLRTNNS<br>ATIV             | Homo<br>sapiens                  |
| 1 | 1.00 | 1 | 1 | 0.02  | 0.017  | 0.024  | 0.02   | 0.023  | t | 94886  | NAYCNEEC<br>TK               | Oryctola<br>gus<br>cuniculu<br>s |
| 1 | 1.00 | 1 | 1 | 0.03  | 0.029  | 0.031  | 0.027  | 0.031  | t | 99483  | NALFVAHY<br>NTNAHSI          | Homo<br>sapiens                  |
| 1 | 1.00 | 1 | 1 | 0.01  | 0.006  | 0.014  | 0.013  | 0.012  | t | 307    | AALVSGTA<br>TAGWTFG<br>AG    | Oryctola<br>gus<br>cuniculu<br>s |
| 1 | 1.00 | 1 | 1 | 0.01  | 0.008  | 0.014  | 0.013  | 0.012  | t | 307    | AALVSGTA<br>TAGWTFG<br>AG    | Mus<br>musculu<br>s              |
| 1 | 1.00 | 1 | 1 | 0     | -0.002 | 0.012  | 0.009  | 0.002  | t | 115702 | DEAELPSRI<br>SPGKNA          | Mus<br>musculu<br>s              |
| 1 | 1.00 | 1 | 0 | -0.05 | -0.052 | -0.022 | -0.047 | -0.038 | t | 51222  | QKLPGYGR<br>FWLG             | Mus<br>musculu<br>s              |
| 1 | 1.00 | 1 | 1 | 0     | 0      | 0.014  | 0      | 0.001  | t | 60116  | SPLLGCIGS<br>TCAE            | Mus<br>musculu<br>s              |
| 1 | 1.00 | 1 | 1 | -0.01 | -0.012 | -0.014 | -0.017 | -0.01  | t | 116677 | ASATQLYK<br>TCKQAGT<br>CPPD  | Mus<br>musculu<br>s              |
| 1 | 1.00 | 1 | 1 | -0.02 | -0.018 | -0.016 | -0.019 | -0.02  | t | 120699 | KMFPEVKE<br>KGMAALP<br>RL    | Homo<br>sapiens                  |
| 1 | 1.00 | 1 | 1 | 0.01  | 0.006  | 0.005  | 0.003  | 0.011  | t | 133775 | AETNRAPF<br>DLAEAE           | Oryctola<br>gus<br>cuniculu<br>s |
| 1 | 1.00 | 1 | 1 | 0.02  | 0.02   | 0.014  | 0.02   | 0.02   | t | 32589  | KNPHNDM<br>LNVNLAKT<br>NDAIK | Homo<br>sapiens                  |
| 1 | 1.00 | 1 | 1 | 0.02  | 0.02   | 0.028  | 0.02   | 0.021  | t | 119657 | TWNDTYG<br>SNN               | Homo<br>sapiens                  |
| 1 | 1.00 | 1 | 1 | 0.04  | 0.036  | 0.036  | 0.033  | 0.04   | t | 144586 | AFSDYEGK<br>GVALQSS          | Oryctola<br>gus<br>cuniculu<br>s |

|   |      |   |   |       |        |        |        |        |   |        |                              |                                  |
|---|------|---|---|-------|--------|--------|--------|--------|---|--------|------------------------------|----------------------------------|
| 1 | 1.00 | 1 | 1 | 0.03  | 0.026  | 0.03   | 0.023  | 0.032  | t | 131968 | LSELQVEQ<br>TSLEP            | Oryctola<br>gus<br>cuniculu<br>s |
| 1 | 1.00 | 1 | 1 | -0.02 | -0.018 | -0.027 | -0.019 | -0.019 | t | 49872  | PVGGQSSF<br>YSDWYSP<br>ACGKA | Homo<br>sapiens                  |
| 1 | 1.00 | 1 | 1 | -0.07 | -0.068 | -0.07  | -0.067 | -0.07  | t | 70648  | VQSVASSR<br>RHKRFAG          | Homo<br>sapiens                  |
| 1 | 1.00 | 1 | 1 | 0.04  | 0.038  | 0.042  | 0.033  | 0.039  | t | 132727 | VTNEVHT<br>WTEQYKF<br>Q      | Mus<br>musculu<br>s              |
| 1 | 1.00 | 1 | 1 | 0     | 0      | 0.013  | 0      | 0      | t | 158724 | DTGCAIDI<br>TRKEMRC<br>G     | Mus<br>musculu<br>s              |
| 1 | 1.00 | 1 | 1 | 0.01  | 0.008  | 0.01   | 0.003  | 0.013  | t | 134699 | KDRHDFG<br>F                 | Mus<br>musculu<br>s              |
| 1 | 1.00 | 1 | 1 | 0     | 0      | 0      | 0      | 0.003  | t | 134770 | QIFNLFSTK<br>DSSAA           | Mus<br>musculu<br>s              |
| 1 | 1.00 | 1 | 1 | 0     | 0      | 0      | 0      | 0.003  | t | 134704 | KFFNSNKK<br>KRDDFEKL         | Oryctola<br>gus<br>cuniculu<br>s |
| 1 | 1.00 | 1 | 1 | 0     | 0      | 0      | 0      | 0.003  | t | 134148 | LQSDQEEI<br>DY               | Oryctola<br>gus<br>cuniculu<br>s |
| 1 | 1.00 | 1 | 1 | 0     | 0      | 0      | 0      | 0.003  | t | 134654 | DQQNQFQ<br>KAET              | Mus<br>musculu<br>s              |
| 1 | 1.00 | 1 | 1 | 0     | 0      | 0      | 0      | 0.003  | t | 138162 | EKKYSPCA<br>WEVVRAE          | Mus<br>musculu<br>s              |
| 1 | 1.00 | 1 | 1 | 0     | 0      | 0      | 0      | 0.003  | t | 134831 | YVKEAENL<br>KKYFN            | Oryctola<br>gus<br>cuniculu<br>s |
| 1 | 1.00 | 1 | 1 | 0     | 0      | 0      | 0      | 0.003  | t | 134685 | GVSSYMK<br>VSICLPMD<br>VE    | Oryctola<br>gus<br>cuniculu<br>s |
| 1 | 1.00 | 1 | 1 | 0     | 0      | 0      | 0      | 0.003  | t | 134699 | KDRHDFG<br>F                 | Mus<br>musculu<br>s              |

|   |      |   |   |   |        |   |   |       |   |        |                     |                                  |
|---|------|---|---|---|--------|---|---|-------|---|--------|---------------------|----------------------------------|
| 1 | 1.00 | 1 | 1 | 0 | 0      | 0 | 0 | 0.003 | t | 134714 | KTGKRKRS<br>QMLFQ   | Oryctola<br>gus<br>cuniculu<br>s |
| 1 | 1.00 | 1 | 1 | 0 | -0.003 | 0 | 0 | 0.003 | t | 131128 | VEMKKED<br>FDIYDEDE | Oryctola<br>gus<br>cuniculu<br>s |
| 1 | 1.00 | 1 | 1 | 0 | 0      | 0 | 0 | 0.003 | t | 130908 | ITRTTLQSD<br>QEEIDY | Oryctola<br>gus<br>cuniculu<br>s |
| 1 | 1.00 | 1 | 1 | 0 | 0      | 0 | 0 | 0.003 | t | 131656 | SGKLEEFV<br>Q       | Mus<br>musculu<br>s              |
| 1 | 1.00 | 1 | 1 | 0 | 0      | 0 | 0 | 0.003 | t | 126424 | KLF                 | Mus<br>musculu<br>s              |
| 1 | 1.00 | 1 | 1 | 0 | 0      | 0 | 0 | 0.003 | t | 126595 | LPK                 | Mus<br>musculu<br>s              |
| 1 | 1.00 | 1 | 1 | 0 | 0      | 0 | 0 | 0.003 | t | 126828 | PKYA                | Mus<br>musculu<br>s              |
| 1 | 1.00 | 1 | 1 | 0 | 0      | 0 | 0 | 0.003 | t | 134037 | DYDDTIS             | Oryctola<br>gus<br>cuniculu<br>s |
| 1 | 1.00 | 1 | 1 | 0 | 0      | 0 | 0 | 0.003 | t | 131128 | VEMKKED<br>FDIYDEDE | Oryctola<br>gus<br>cuniculu<br>s |
| 1 | 1.00 | 1 | 1 | 0 | 0      | 0 | 0 | 0.003 | t | 125297 | VFFEEQED<br>EIIGFG  | Mus<br>musculu<br>s              |
| 1 | 1.00 | 1 | 1 | 0 | 0      | 0 | 0 | 0.003 | t | 131155 | YDEDENQ<br>SPRSFQKK | Oryctola<br>gus<br>cuniculu<br>s |
| 1 | 1.00 | 1 | 1 | 0 | 0      | 0 | 0 | 0.003 | t | 109095 | GFYFNKPT<br>GYGS    | Mus<br>musculu<br>s              |
| 1 | 1.00 | 1 | 1 | 0 | 0      | 0 | 0 | 0.003 | t | 102344 | DAEFR               | Mus<br>musculu<br>s              |
| 1 | 1.00 | 1 | 1 | 0 | 0      | 0 | 0 | 0.003 | t | 108998 | FVCGDRG<br>FYFNK    | Mus<br>musculu<br>s              |
| 1 | 1.00 | 1 | 1 | 0 | 0      | 0 | 0 | 0.003 | t | 108846 | DALQFVC<br>GDRGFY   | Mus<br>musculu<br>s              |



|   |      |   |   |   |        |   |   |       |   |        |                             |                                  |
|---|------|---|---|---|--------|---|---|-------|---|--------|-----------------------------|----------------------------------|
| 1 | 1.00 | 1 | 1 | 0 | 0      | 0 | 0 | 0.003 | t | 102510 | HHQKLVFF<br>AEDVGSN<br>K    | Mus<br>musculu<br>s              |
| 1 | 1.00 | 1 | 1 | 0 | 0      | 0 | 0 | 0.003 | t | 109177 | GPETLCGA<br>ELVD            | Mus<br>musculu<br>s              |
| 1 | 1.00 | 1 | 1 | 0 | 0      | 0 | 0 | 0.003 | t | 100777 | DIDFLIEEIE<br>RLGQDL        | Oryctola<br>gus<br>cuniculu<br>s |
| 1 | 1.00 | 1 | 1 | 0 | 0      | 0 | 0 | 0.003 | t | 110116 | YCAPLKPA<br>KSA             | Mus<br>musculu<br>s              |
| 1 | 1.00 | 1 | 1 | 0 | 0      | 0 | 0 | 0.003 | t | 94580  | LDNKYAGK<br>GY              | Mus<br>musculu<br>s              |
| 1 | 1.00 | 1 | 1 | 0 | 0      | 0 | 0 | 0.003 | t | 61317  | SSRGKVVE                    | Mus<br>musculu<br>s              |
| 1 | 1.00 | 1 | 1 | 0 | 0      | 0 | 0 | 0.003 | t | 48912  | PPSDIKGK<br>YVKEVEVK        | Oryctola<br>gus<br>cuniculu<br>s |
| 1 | 1.00 | 1 | 1 | 0 | 0      | 0 | 0 | 0.003 | t | 43242  | NANPNAN<br>PNANP            | Oryctola<br>gus<br>cuniculu<br>s |
| 1 | 1.00 | 1 | 1 | 0 | -0.004 | 0 | 0 | 0.003 | t | 48670  | PNLRGDL<br>QVLAQKV<br>ARTLP | Mus<br>musculu<br>s              |
| 1 | 1.00 | 1 | 1 | 0 | 0      | 0 | 0 | 0.003 | t | 43242  | NANPNAN<br>PNANP            | Homo<br>sapiens                  |
| 1 | 1.00 | 1 | 1 | 0 | 0      | 0 | 0 | 0.003 | t | 43242  | NANPNAN<br>PNANP            | Mus<br>musculu<br>s              |
| 1 | 1.00 | 1 | 1 | 0 | 0      | 0 | 0 | 0.003 | t | 48670  | PNLRGDL<br>QVLAQKV<br>ARTLP | Mus<br>musculu<br>s              |
| 1 | 1.00 | 1 | 1 | 0 | 0.002  | 0 | 0 | 0.003 | t | 53326  | RDALPNTE<br>ASGPTHSK<br>E   | Rattus<br>norvegic<br>us         |

|   |      |   |   |       |        |        |        |        |   |        |                              |                                  |
|---|------|---|---|-------|--------|--------|--------|--------|---|--------|------------------------------|----------------------------------|
| 1 | 1.00 | 1 | 1 | 0     | -0.004 | 0      | 0      | 0.003  | t | 48670  | PNLRGDL<br>QVLAQKV<br>ARTLP  | Mus<br>musculu<br>s              |
| 1 | 1.00 | 1 | 1 | 0     | 0      | 0      | 0      | 0.003  | t | 58783  | SKAFSNCY<br>PYDVDPDYA<br>SL  | Oryctola<br>gus<br>cuniculu<br>s |
| 1 | 1.00 | 1 | 1 | 0     | 0      | 0      | 0      | 0.003  | t | 12248  | EGQKSAVT<br>EY               | Oryctola<br>gus<br>cuniculu<br>s |
| 1 | 1.00 | 1 | 1 | 0     | 0      | 0      | 0      | 0.003  | t | 9723   | DPPPPNP<br>NDPPPPN<br>PND    | Mus<br>musculu<br>s              |
| 1 | 1.00 | 1 | 1 | 0     | 0      | 0      | 0      | 0.003  | t | 9753   | DPRVRGLY                     | Mus<br>musculu<br>s              |
| 1 | 1.00 | 1 | 1 | 0     | 0      | 0      | 0      | 0.003  | t | 9753   | DPRVRGLY                     | Mus<br>musculu<br>s              |
| 1 | 1.00 | 1 | 1 | 0     | 0      | 0      | 0      | 0.003  | t | 9106   | DLGSIA                       | Mus<br>musculu<br>s              |
| 1 | 1.00 | 1 | 1 | 0     | 0      | 0      | 0      | 0.003  | t | 9723   | DPPPPNP<br>NDPPPPN<br>PND    | Mus<br>musculu<br>s              |
| 1 | 1.00 | 1 | 1 | 0     | 0.002  | 0      | 0      | 0.003  | t | 7313   | CVTIMTVD<br>NPASTTNK<br>DK   | Rattus<br>norvegic<br>us         |
| 1 | 1.00 | 1 | 1 | 0     | 0      | 0      | 0      | 0.003  | t | 1190   | AETIHELLV<br>RM              | Mus<br>musculu<br>s              |
| 1 | 1.00 | 1 | 1 | -0.02 | -0.018 | -0.02  | -0.019 | -0.018 | t | 128004 | GMIEVQS<br>NYGFVWD<br>VSLKKV | Homo<br>sapiens                  |
| 1 | 1.00 | 1 | 1 | 0     | -0.003 | -0.005 | 0      | 0.002  | t | 132039 | QYFVGKRT<br>VPPGECFI<br>QFLS | Oryctola<br>gus<br>cuniculu<br>s |
| 1 | 1.00 | 1 | 1 | -0.01 | -0.01  | -0.01  | -0.01  | -0.009 | t | 107482 | KGEPGLPG<br>RGFPGFP          | Mus<br>musculu<br>s              |

|   |      |   |   |       |        |        |        |        |   |        |                              |                                  |
|---|------|---|---|-------|--------|--------|--------|--------|---|--------|------------------------------|----------------------------------|
| 1 | 1.00 | 1 | 1 | 0.04  | 0.036  | 0.036  | 0.033  | 0.041  | t | 144748 | QAVNPNA<br>GN                | Oryctola<br>gus<br>cuniculu<br>s |
| 1 | 1.00 | 1 | 1 | 0.01  | 0.008  | 0.015  | 0.009  | 0.01   | t | 20077  | GGVSAVPF<br>MDYFPSW          | Mus<br>musculu<br>s              |
| 1 | 1.00 | 1 | 1 | 0.02  | 0.02   | 0.022  | 0.02   | 0.02   | t | 114865 | IVERETRG<br>QSENPLW<br>HALRR | Rattus<br>norvegic<br>us         |
| 1 | 1.00 | 1 | 1 | 0     | 0      | -0.003 | -0.007 | 0.002  | t | 120421 | AVVRFQE<br>AANKQK            | Homo<br>sapiens                  |
| 1 | 1.00 | 1 | 1 | -0.03 | -0.029 | -0.03  | -0.029 | -0.03  | t | 69287  | VKPASFFK<br>NPHNDML<br>NVNLA | Homo<br>sapiens                  |
| 1 | 1.00 | 1 | 1 | -0.01 | -0.006 | -0.008 | -0.013 | -0.008 | t | 34505  | KYLIDGYEE<br>INELLYK         | Homo<br>sapiens                  |
| 1 | 1.00 | 1 | 1 | 0     | -0.002 | 0.011  | -0.007 | 0      | t | 4544   | ASLREAPP<br>A                | Mus<br>musculu<br>s              |
| 1 | 1.00 | 1 | 1 | 0.02  | 0.023  | 0.02   | 0.016  | 0.023  | t | 130551 | LTDSEMD<br>VVRFDAA<br>C      | Homo<br>sapiens                  |
| 1 | 1.00 | 1 | 1 | -0.01 | -0.007 | -0.009 | -0.009 | -0.009 | t | 65204  | TMGEAHN<br>DKRADPA<br>FVCR   | Equus<br>caballus                |
| 1 | 1.00 | 1 | 1 | -0.01 | -0.014 | -0.01  | -0.017 | -0.01  | t | 113001 | GIRKFAAD<br>AVKLERM          | Oryctola<br>gus<br>cuniculu<br>s |
| 1 | 1.00 | 1 | 1 | 0     | 0.002  | -0.001 | 0.002  | 0      | t | 67299  | TWVAGVF<br>VYGGSKTS<br>LYNLR | Homo<br>sapiens                  |
| 1 | 1.00 | 1 | 1 | 0     | 0      | 0      | -0.004 | 0      | t | 115645 | RNGKDQD<br>GDQAP             | Homo<br>sapiens                  |
| 1 | 1.00 | 1 | 1 | 0.02  | 0.018  | 0.008  | 0.013  | 0.02   | t | 112842 | SSKRGRQT<br>PVLAYML<br>DHSRS | Mus<br>musculu<br>s              |
| 1 | 1.00 | 1 | 1 | -0.01 | -0.015 | -0.013 | -0.007 | -0.008 | t | 41053  | MAKGKRS<br>TDAKGSQ<br>RRQKKV | Canis<br>lupus                   |
| 1 | 1.00 | 1 | 1 | -0.01 | -0.008 | 0.016  | -0.014 | -0.019 | t | 56807  | SAHGTSTG<br>VRGP             | Homo<br>sapiens                  |

|   |      |   |   |       |        |        |        |        |   |        |                             |                                  |
|---|------|---|---|-------|--------|--------|--------|--------|---|--------|-----------------------------|----------------------------------|
| 1 | 1.00 | 1 | 1 | -0.03 | -0.03  | -0.021 | -0.03  | -0.03  | t | 135993 | SGGLRLLL<br>CLLL            | Homo<br>sapiens                  |
| 1 | 1.00 | 1 | 1 | 0     | -0.004 | 0      | -0.007 | 0      | t | 119143 | EPTITFGTA<br>I              | Oryctola<br>gus<br>cuniculu<br>s |
| 1 | 1.00 | 1 | 1 | 0     | -0.002 | 0      | -0.007 | 0      | t | 118060 | PPPGMRP<br>P                | Mus<br>musculu<br>s              |
| 1 | 1.00 | 1 | 1 | -0.02 | -0.02  | -0.018 | -0.02  | -0.021 | t | 7745   | DDASVDF<br>VAEPVKLP         | Mus<br>musculu<br>s              |
| 1 | 1.00 | 1 | 1 | -0.02 | -0.02  | -0.018 | -0.02  | -0.021 | t | 7745   | DDASVDF<br>VAEPVKLP         | Mus<br>musculu<br>s              |
| 1 | 1.00 | 1 | 1 | 0.01  | 0.01   | 0.019  | 0.01   | 0.01   | t | 30826  | KFQDAYN<br>A                | Mus<br>musculu<br>s              |
| 1 | 1.00 | 1 | 1 | 0.03  | 0.034  | 0.032  | 0.027  | 0.029  | t | 99235  | EYDEDEYE<br>YDEEDRR         | Homo<br>sapiens                  |
| 1 | 1.00 | 1 | 1 | 0.02  | 0.024  | 0.03   | 0.021  | 0.019  | t | 94978  | YBKDQQLL<br>GIWGCSCG<br>KL  | Homo<br>sapiens                  |
| 1 | 1.00 | 1 | 1 | -0.03 | -0.028 | -0.029 | -0.029 | -0.03  | t | 22882  | GTVVAVG<br>PGRWDED<br>G     | Homo<br>sapiens                  |
| 1 | 1.00 | 1 | 1 | 0     | -0.002 | 0.001  | -0.001 | 0.002  | t | 60818  | SRTLGCWS<br>EFIPVDDG<br>WGE | Mus<br>musculu<br>s              |
| 1 | 1.00 | 1 | 1 | 0     | -0.002 | 0.001  | -0.001 | 0.002  | t | 60818  | SRTLGCWS<br>EFIPVDDG<br>WGE | Mus<br>musculu<br>s              |
| 1 | 1.00 | 1 | 1 | 0     | 0      | 0.007  | 0      | 0.003  | t | 135847 | YPAIVETGL                   | Mus<br>musculu<br>s              |
| 1 | 1.00 | 1 | 1 | 0     | 0      | 0.007  | 0      | 0.003  | t | 135847 | YPAIVETGL                   | Mus<br>musculu<br>s              |

|   |      |   |   |       |        |        |        |        |   |        |                              |                                  |
|---|------|---|---|-------|--------|--------|--------|--------|---|--------|------------------------------|----------------------------------|
| 1 | 1.00 | 1 | 1 | -0.03 | -0.033 | -0.021 | -0.029 | -0.03  | t | 64428  | TIPTKKSQI<br>FSTYADNQ<br>PGV | Canis<br>lupus                   |
| 1 | 1.00 | 1 | 1 | -0.02 | -0.017 | -0.005 | -0.013 | -0.018 | t | 104354 | YGAFDPLL<br>AVADICKK<br>YKIW | Mus<br>musculu<br>s              |
| 1 | 1.00 | 1 | 1 | -0.04 | -0.04  | -0.043 | -0.04  | -0.04  | t | 6110   | CDIPIGAGI<br>CASYHTVS        | Homo<br>sapiens                  |
| 1 | 1.00 | 1 | 1 | 0.01  | 0.006  | 0.015  | 0.003  | 0.01   | t | 136162 | DAWKMRL<br>SQMYD             | Bos<br>taurus                    |
| 1 | 1.00 | 1 | 1 | 0.01  | 0.01   | 0.01   | 0.01   | 0.013  | t | 77975  | QACQNNQ<br>TCPRL             | Mus<br>musculu<br>s              |
| 1 | 1.00 | 1 | 1 | 0.01  | 0.01   | 0.01   | 0.01   | 0.012  | t | 135576 | LRYSTGTV<br>SG               | Oryctola<br>gus<br>cuniculu<br>s |
| 1 | 1.00 | 1 | 1 | 0.03  | 0.03   | 0.03   | 0.03   | 0.033  | t | 48927  | PPSSPTHD<br>PPSDP            | Homo<br>sapiens                  |
| 1 | 1.00 | 1 | 1 | -0.02 | -0.022 | -0.019 | -0.023 | -0.02  | t | 53989  | RGSRPSW<br>GPTDPRRR<br>SRNLG | Mus<br>musculu<br>s              |
| 1 | 1.00 | 1 | 1 | 0.01  | 0.01   | 0.01   | 0.01   | 0.011  | t | 53884  | RGIDSGER<br>LMQPTQ<br>MSAQED | Mus<br>musculu<br>s              |
| 1 | 1.00 | 1 | 1 | -0.02 | -0.02  | -0.027 | -0.02  | -0.02  | t | 134105 | IRSVAKKH<br>PKTWVHYI<br>AAEE | Homo<br>sapiens                  |
| 1 | 1.00 | 1 | 1 | 0.01  | 0.011  | 0.017  | 0.01   | 0.011  | t | 41608  | MGPNLVL<br>PDQKPPS           | Mus<br>musculu<br>s              |
| 1 | 1.00 | 1 | 1 | 0.03  | 0.032  | 0.035  | 0.031  | 0.032  | t | 60915  | SSAVDSGT<br>ATAPPD           | Homo<br>sapiens                  |
| 1 | 1.00 | 1 | 1 | 0.03  | 0.03   | 0.035  | 0.03   | 0.032  | t | 59367  | SLNREDGL<br>L                | Rattus<br>norvegic<br>us         |
| 1 | 1.00 | 1 | 1 | 0.02  | 0.02   | 0.027  | 0.014  | 0.02   | t | 117327 | LQWSASFT<br>TS               | Homo<br>sapiens                  |
| 1 | 1.00 | 1 | 1 | 0.05  | 0.046  | 0.05   | 0.043  | 0.05   | t | 127898 | YEENLGDS<br>IV               | Oryctola<br>gus<br>cuniculu<br>s |

|   |      |   |   |       |        |        |        |        |   |        |                              |                                  |
|---|------|---|---|-------|--------|--------|--------|--------|---|--------|------------------------------|----------------------------------|
| 1 | 1.00 | 1 | 1 | -0.06 | -0.063 | -0.061 | -0.063 | -0.06  | t | 78294  | VVSWKNK<br>ELKC              | Mus<br>musculu<br>s              |
| 1 | 1.00 | 1 | 1 | 0.01  | 0.01   | 0.01   | 0.01   | 0.01   | t | 18173  | FVGAGLA<br>GAAIGSV           | Homo<br>sapiens                  |
| 1 | 1.00 | 1 | 1 | 0.01  | 0.01   | 0.01   | 0.01   | 0.013  | t | 58073  | SGHMAW<br>DMMNWS<br>PT       | Homo<br>sapiens                  |
| 1 | 1.00 | 1 | 1 | 0     | -0.007 | 0.002  | 0.001  | 0      | t | 14331  | ETAGGVM<br>TALIKRNTT<br>IPTK | Homo<br>sapiens                  |
| 1 | 1.00 | 1 | 1 | -0.03 | -0.03  | -0.03  | -0.03  | -0.029 | t | 119520 | RRKLRTNA<br>G                | Homo<br>sapiens                  |
| 1 | 1.00 | 1 | 1 | 0     | -0.014 | -0.005 | -0.007 | 0      | t | 109750 | QGPKGEP<br>G                 | Macaca<br>mulatta                |
| 1 | 1.00 | 1 | 1 | -0.01 | -0.006 | -0.014 | -0.01  | -0.008 | t | 20292  | GIHVIPTLN<br>GDDRHKIV<br>NVD | Cavia<br>porcellu<br>s           |
| 1 | 1.00 | 1 | 1 | -0.07 | -0.067 | -0.063 | -0.07  | -0.071 | t | 130487 | FCQPHLSC<br>YILP             | Mus<br>musculu<br>s              |
| 1 | 1.00 | 1 | 1 | 0     | 0      | 0      | -0.001 | 0.007  | t | 69125  | VITGTI                       | Homo<br>sapiens                  |
| 1 | 1.00 | 1 | 1 | -0.01 | -0.01  | -0.01  | -0.01  | -0.01  | t | 105168 | ENHA                         | Oryctola<br>gus<br>cuniculu<br>s |
| 1 | 1.00 | 1 | 1 | -0.03 | -0.03  | -0.03  | -0.03  | -0.03  | t | 118393 | GVGRAAG<br>R                 | Homo<br>sapiens                  |
| 1 | 1.00 | 1 | 1 | 0.01  | 0.01   | 0.025  | 0.017  | 0.01   | t | 103840 | DAEKPAES<br>GGSQPPR<br>AAARK | Mus<br>musculu<br>s              |
| 1 | 1.00 | 1 | 1 | 0.04  | 0.043  | 0.036  | 0.04   | 0.042  | t | 78702  | KKKEEGED<br>DTARQEIR<br>KAW  | Mus<br>musculu<br>s              |
| 1 | 1.00 | 1 | 1 | -0.03 | -0.032 | -0.023 | -0.033 | -0.027 | t | 107890 | HRLAFGQ<br>NT                | Mus<br>musculu<br>s              |
| 1 | 1.00 | 1 | 1 | -0.03 | -0.032 | -0.03  | -0.033 | -0.03  | t | 49650  | PTHYISSR<br>H                | Mus<br>musculu<br>s              |
| 1 | 1.00 | 1 | 1 | -0.02 | -0.023 | -0.024 | -0.02  | -0.017 | t | 123836 | VTEIPTDLP<br>RN              | Oryctola<br>gus<br>cuniculu<br>s |

|   |      |   |   |       |        |        |        |        |   |        |                             |                                  |
|---|------|---|---|-------|--------|--------|--------|--------|---|--------|-----------------------------|----------------------------------|
| 1 | 1.00 | 1 | 1 | -0.02 | -0.022 | -0.009 | -0.021 | -0.02  | t | 110622 | GRPGDAG<br>PQGVKVP<br>S     | Mus<br>musculu<br>s              |
| 1 | 1.00 | 1 | 1 | 0.01  | 0.004  | 0.02   | 0.01   | 0.01   | t | 91288  | FDATGHIL<br>PDSSSLKT<br>D   | Oryctola<br>gus<br>cuniculu<br>s |
| 1 | 1.00 | 1 | 1 | 0     | 0      | 0      | -0.007 | 0.002  | t | 118127 | SDDDMGF<br>GLFD             | Homo<br>sapiens                  |
| 1 | 1.00 | 1 | 1 | 0.02  | 0.022  | 0.034  | 0.019  | 0.02   | t | 100426 | QKLVFFAE<br>DV              | Homo<br>sapiens(<br>human)       |
| 1 | 1.00 | 1 | 1 | 0     | -0.003 | 0.007  | 0      | 0      | t | 131956 | LPKSAKPV<br>SQMRMA<br>TPLL  | Oryctola<br>gus<br>cuniculu<br>s |
| 1 | 1.00 | 1 | 1 | -0.02 | -0.018 | -0.011 | -0.023 | -0.023 | t | 115482 | SERYLGYLE<br>QLRLKKY<br>KVP | Homo<br>sapiens                  |
| 1 | 1.00 | 1 | 1 | 0.01  | 0.012  | 0.013  | 0.011  | 0.011  | t | 56614  | RYPHYSLIK<br>PESSL          | Homo<br>sapiens                  |
| 1 | 1.00 | 1 | 1 | 0     | 0.002  | 0.006  | 0.001  | 0.002  | t | 39183  | LRRDLAS<br>REAKKQVE<br>KALE | Homo<br>sapiens                  |
| 1 | 1.00 | 1 | 1 | -0.05 | -0.048 | -0.047 | -0.047 | -0.05  | t | 118827 | GSGPRHR<br>DGVRPQ<br>KRPSCI | Homo<br>sapiens                  |
| 1 | 1.00 | 1 | 1 | 0     | -0.004 | 0.005  | -0.007 | 0.001  | t | 124925 | YYVFFEEQ<br>EDEIIGF         | Oryctola<br>gus<br>cuniculu<br>s |
| 1 | 1.00 | 1 | 1 | 0.03  | 0.03   | 0.031  | 0.03   | 0.029  | t | 72248  | WANLMEK<br>IQASVATN<br>PI   | Mus<br>musculu<br>s              |
| 1 | 1.00 | 1 | 1 | -0.04 | -0.044 | -0.035 | -0.037 | -0.037 | t | 116001 | TQDQDPV<br>VHF              | Oryctola<br>gus<br>cuniculu<br>s |
| 1 | 1.00 | 1 | 1 | -0.01 | -0.007 | 0.001  | -0.01  | -0.01  | t | 37753  | LLRQARER<br>P               | Mus<br>musculu<br>s              |
| 1 | 1.00 | 1 | 1 | 0.01  | 0.01   | 0.004  | 0.004  | 0.013  | t | 426    | AASDISLLD<br>AQSAPLR        | Homo<br>sapiens                  |

|   |      |   |   |       |        |        |        |        |   |        |                              |                                  |
|---|------|---|---|-------|--------|--------|--------|--------|---|--------|------------------------------|----------------------------------|
| 1 | 1.00 | 1 | 1 | 0.03  | 0.03   | 0.028  | 0.019  | 0.03   | t | 118552 | PKVTKDGV<br>TVAKS            | Homo<br>sapiens                  |
| 1 | 1.00 | 1 | 1 | 0.02  | 0.018  | 0.027  | 0.017  | 0.021  | t | 135939 | IPVLDENG<br>LFAP             | Mus<br>musculu<br>s              |
| 1 | 1.00 | 1 | 1 | 0     | -0.002 | -0.001 | -0.001 | 0      | t | 2609   | ALHQALQ<br>DPRVRGL           | Mus<br>musculu<br>s              |
| 1 | 1.00 | 1 | 1 | -0.01 | -0.01  | -0.01  | -0.007 | -0.007 | t | 70817  | VRRRVNA<br>ANKKPEDL<br>TLNDL | Aotus<br>lemurinu<br>s           |
| 1 | 1.00 | 1 | 1 | 0.01  | 0.006  | 0.019  | 0.009  | 0.011  | t | 94886  | NAYCNEEC<br>TK               | Oryctola<br>gus<br>cuniculu<br>s |
| 1 | 1.00 | 1 | 1 | 0.01  | 0.01   | 0.024  | 0.01   | 0.009  | t | 120525 | FDEQNCS<br>MKLG              | Rattus<br>norvegic<br>us         |
| 1 | 1.00 | 1 | 1 | 0.01  | 0.006  | 0.011  | 0.009  | 0.012  | t | 30036  | KAYSNCYP<br>YDVPDY           | Oryctola<br>gus<br>cuniculu<br>s |
| 1 | 1.00 | 1 | 1 | 0.01  | 0.006  | 0.011  | 0.009  | 0.012  | t | 30036  | KAYSNCYP<br>YDVPDY           | Oryctola<br>gus<br>cuniculu<br>s |
| 1 | 1.00 | 1 | 1 | -0.01 | -0.012 | -0.003 | -0.007 | -0.01  | t | 76633  | YYV NKQE<br>GKSLYVKG         | Mus<br>musculu<br>s              |
| 1 | 1.00 | 1 | 1 | 0.01  | 0.01   | 0.014  | 0.014  | 0.009  | t | 134140 | LLIIFKNQA<br>SRPYNIYP<br>HGI | Homo<br>sapiens                  |
| 1 | 1.00 | 1 | 1 | -0.02 | -0.02  | -0.016 | -0.02  | -0.018 | t | 51924  | QPQQPFP<br>QRP               | Mus<br>musculu<br>s              |
| 1 | 1.00 | 1 | 1 | -0.05 | -0.05  | -0.043 | -0.051 | -0.052 | t | 142441 | LFSPWLRV<br>QNHF             | Oryctola<br>gus<br>cuniculu<br>s |
| 1 | 1.00 | 1 | 1 | -0.05 | -0.048 | -0.05  | -0.043 | -0.046 | t | 140648 | ALREYRKK<br>MDIPA            | Homo<br>sapiens                  |
| 1 | 1.00 | 1 | 1 | -0.06 | -0.06  | -0.06  | -0.06  | -0.06  | t | 140940 | YRQKVEPL<br>RAEL             | Mus<br>musculu<br>s              |
| 1 | 1.00 | 1 | 1 | 0.04  | 0.04   | 0.04   | 0.033  | 0.04   | t | 135944 | KEQFEFAL<br>TAVAEVC          | Homo<br>sapiens                  |



|   |      |   |   |       |        |        |        |        |   |        |                              |                                  |
|---|------|---|---|-------|--------|--------|--------|--------|---|--------|------------------------------|----------------------------------|
| 1 | 1.00 | 1 | 1 | -0.06 | -0.06  | -0.06  | -0.07  | -0.063 | t | 141654 | GDVLVIPA<br>GHPVAIN          | Homo<br>sapiens                  |
| 1 | 1.00 | 1 | 1 | -0.02 | -0.022 | -0.02  | -0.027 | -0.018 | t | 131274 | VVRF                         | Mus<br>musculu<br>s              |
| 1 | 1.00 | 1 | 1 | 0     | -0.003 | 0.005  | 0      | 0.002  | t | 78624  | DMNEKQK<br>PYFEFEYD<br>DFKP  | Oryctola<br>gus<br>cuniculu<br>s |
| 1 | 1.00 | 1 | 1 | 0     | 0.003  | 0.005  | 0      | 0.002  | t | 78624  | DMNEKQK<br>PYFEFEYD<br>DFKP  | Equus<br>caballus                |
| 1 | 1.00 | 1 | 1 | 0.02  | 0.024  | 0.035  | 0.021  | 0.02   | t | 42669  | MSSGNL                       | Homo<br>sapiens                  |
| 1 | 1.00 | 1 | 1 | -0.08 | -0.08  | -0.073 | -0.081 | -0.081 | t | 106507 | HFHHTIW                      | Mus<br>musculu<br>s              |
| 1 | 1.00 | 1 | 1 | 0.03  | 0.03   | 0.025  | 0.031  | 0.032  | t | 72314  | WDINTPA<br>FEWYYQS<br>GLSIVM | Homo<br>sapiens                  |
| 1 | 1.00 | 1 | 1 | 0     | 0      | 0      | -0.004 | 0      | t | 135917 | EIRRGVML<br>AVDA             | Homo<br>sapiens                  |
| 1 | 1.00 | 1 | 1 | 0.01  | 0.012  | 0.012  | 0.011  | 0.01   | t | 74367  | YISDAFSLD<br>VSEKSGNF        | Homo<br>sapiens                  |
| 1 | 1.00 | 1 | 1 | 0     | 0.002  | 0.004  | -0.003 | 0.001  | t | 70620  | VQNTVED<br>LKLNTLGR          | Homo<br>sapiens                  |
| 1 | 1.00 | 1 | 1 | 0     | 0      | 0.004  | 0      | 0.002  | t | 106070 | RGQGDGG<br>RRKKGG            | Homo<br>sapiens                  |
| 1 | 1.00 | 1 | 1 | -0.01 | -0.01  | 0.013  | -0.003 | -0.01  | t | 98387  | QPPCPNLV<br>SYSSYHAT<br>YS   | Homo<br>sapiens                  |
| 1 | 1.00 | 1 | 1 | 0.03  | 0.027  | 0.037  | 0.024  | 0.03   | t | 76161  | YTQKLSVP<br>DG               | Homo<br>sapiens                  |
| 1 | 1.00 | 1 | 1 | 0.02  | 0.02   | 0.013  | 0.02   | 0.024  | t | 133551 | EAPPPTLP<br>PDMAQVT<br>VGPG  | Mus<br>musculu<br>s              |

|   |      |   |   |       |        |        |        |        |   |        |                              |                     |
|---|------|---|---|-------|--------|--------|--------|--------|---|--------|------------------------------|---------------------|
| 1 | 1.00 | 1 | 1 | -0.05 | -0.048 | -0.041 | -0.049 | -0.05  | t | 98217  | LKPKKGIK<br>VN               | Homo<br>sapiens     |
| 1 | 1.00 | 1 | 1 | -0.06 | -0.06  | -0.057 | -0.063 | -0.06  | t | 9673   | DPLLRTAP                     | Homo<br>sapiens     |
| 1 | 1.00 | 1 | 1 | 0.01  | 0.015  | 0.02   | 0.01   | 0.01   | t | 132830 | GGIITQTP<br>KFLIGQEG<br>QKLT | Mus<br>musculu<br>s |
| 1 | 1.00 | 1 | 1 | -0.01 | -0.012 | -0.01  | -0.017 | -0.011 | t | 132689 | TCSADGGT<br>LFYNLCH          | Mus<br>musculu<br>s |
| 1 | 1.00 | 1 | 1 | 0     | 0.008  | 0.008  | 0.001  | 0      | t | 110967 | PRKLPQLC<br>TELQTTI          | Homo<br>sapiens     |
| 1 | 1.00 | 1 | 1 | 0.01  | 0.014  | 0.01   | 0.011  | 0.012  | t | 11815  | EENVEENV<br>EENVEENV         | Homo<br>sapiens     |
| 1 | 1.00 | 1 | 1 | -0.02 | -0.02  | -0.016 | -0.02  | -0.018 | t | 51924  | QPQQPFP<br>QRP               | Mus<br>musculu<br>s |
| 1 | 1.00 | 1 | 1 | -0.02 | -0.02  | -0.02  | -0.02  | -0.017 | t | 130605 | SCRLFCKT<br>YLCH             | Mus<br>musculu<br>s |
| 1 | 1.00 | 1 | 1 | -0.03 | -0.03  | -0.034 | -0.03  | -0.03  | t | 36950  | LKLSIPVAE<br>RAKPRK          | Homo<br>sapiens     |
| 1 | 1.00 | 1 | 1 | 0.01  | 0.01   | 0.018  | 0.01   | 0.008  | t | 133684 | RRIASQVK<br>YAGSQVA<br>STSE  | Mus<br>musculu<br>s |
| 1 | 1.00 | 1 | 1 | -0.01 | -0.012 | -0.011 | -0.011 | -0.008 | t | 78294  | VVSWKNK<br>ELKC              | Mus<br>musculu<br>s |
| 1 | 1.00 | 1 | 1 | -0.03 | -0.032 | -0.027 | -0.037 | -0.03  | t | 102313 | APYWTLYS<br>W                | Mus<br>musculu<br>s |
| 1 | 1.00 | 1 | 1 | -0.03 | -0.034 | -0.02  | -0.03  | -0.032 | t | 93172  | KTSLWKE<br>MQYNRDI           | Mus<br>musculu<br>s |
| 1 | 1.00 | 1 | 1 | 0.01  | 0.01   | 0.01   | 0.01   | 0.01   | t | 78512  | SCDSSQKK<br>QGRCS            | Mus<br>musculu<br>s |

|   |      |   |   |       |        |        |        |        |   |        |                      |                   |
|---|------|---|---|-------|--------|--------|--------|--------|---|--------|----------------------|-------------------|
| 1 | 1.00 | 1 | 1 | 0.02  | 0.022  | 0.036  | 0.021  | 0.018  | t | 70048  | VNAKNLNEL            | Homo sapiens      |
| 1 | 1.00 | 1 | 1 | -0.01 | -0.01  | -0.014 | -0.01  | -0.01  | t | 21460  | GNKTLAGSRGPVTQ       | Homo sapiens      |
| 1 | 1.00 | 1 | 1 | -0.01 | -0.007 | -0.006 | -0.01  | -0.012 | t | 18509  | GAAILVAGLSGCSSNKSTTG | Mus musculus      |
| 1 | 1.00 | 1 | 1 | 0     | 0.002  | 0.009  | 0      | 0.001  | t | 120677 | KHPEVKSAIEGIKYI      | Rattus norvegicus |
| 1 | 1.00 | 1 | 1 | -0.01 | -0.014 | -0.001 | -0.01  | -0.011 | t | 26314  | IGRFCAQMHSNNGPQ      | Bos taurus        |
| 1 | 1.00 | 1 | 1 | -0.02 | -0.022 | -0.02  | -0.027 | -0.022 | t | 117949 | KGHFLLSSKSGFWT       | Mus musculus      |
| 1 | 1.00 | 1 | 1 | 0.02  | 0.015  | 0.027  | 0.019  | 0.02   | t | 26314  | IGRFCAQMHSNNGPQ      | Bos taurus        |
| 1 | 1.00 | 1 | 1 | 0     | 0.003  | 0.007  | 0      | 0.002  | t | 103172 | FHDHKTANQ            | Mus musculus      |
| 1 | 1.00 | 1 | 1 | 0.01  | 0.012  | 0.018  | 0.009  | 0.012  | t | 149485 | SWYLTENIQR           | Homo sapiens      |
| 1 | 1.00 | 1 | 1 | -0.01 | -0.01  | -0.003 | -0.007 | -0.008 | t | 15918  | FFTEVDGVR LHRYA      | Homo sapiens      |
| 1 | 1.00 | 1 | 1 | -0.03 | -0.03  | -0.021 | -0.028 | -0.03  | t | 37304  | LLFVGVGFLFLLPAR      | Homo sapiens      |
| 1 | 1.00 | 1 | 1 | 0.03  | 0.03   | 0.036  | 0.03   | 0.031  | t | 66736  | TTNIMEILRGDFSS       | Mus musculus      |
| 1 | 1.00 | 1 | 1 | 0.03  | 0.027  | 0.036  | 0.03   | 0.031  | t | 66736  | TTNIMEILRGDFSS       | Mus musculus      |

|   |      |   |   |       |        |        |        |        |   |        |                              |                                  |
|---|------|---|---|-------|--------|--------|--------|--------|---|--------|------------------------------|----------------------------------|
| 1 | 1.00 | 1 | 1 | -0.01 | -0.01  | -0.01  | -0.01  | -0.009 | t | 135845 | WTEIHDW<br>EAAME             | Mus<br>musculu<br>s              |
| 1 | 1.00 | 1 | 1 | 0.02  | 0.02   | 0.02   | 0.02   | 0.022  | t | 145803 | GPVGPSD<br>PSIVS             | Mus<br>musculu<br>s              |
| 1 | 1.00 | 1 | 1 | -0.03 | -0.031 | -0.028 | -0.03  | -0.031 | t | 35034  | LCAACSKQ<br>VFCNRRPE<br>RNGP | Bos<br>taurus                    |
| 1 | 1.00 | 1 | 1 | 0.02  | 0.019  | 0.031  | 0.021  | 0.022  | t | 141563 | SPKLQGEE<br>ATLAPT           | Bos<br>taurus                    |
| 1 | 1.00 | 1 | 1 | -0.04 | -0.035 | -0.035 | -0.043 | -0.04  | t | 49786  | PTTKQRQ<br>NKPPN             | Homo<br>sapiens                  |
| 1 | 1.00 | 1 | 1 | -0.01 | 0.005  | -0.015 | -0.01  | -0.01  | t | 66312  | TSLNLQKD<br>EPNGRAS<br>DTAGQ | Equus<br>caballus                |
| 1 | 1.00 | 1 | 1 | 0.03  | 0.026  | 0.021  | 0.023  | 0.029  | t | 114011 | VTTVTTHN<br>NPTFTDPS<br>VLQP | Oryctola<br>gus<br>cuniculu<br>s |
| 1 | 1.00 | 1 | 1 | 0.03  | 0.032  | 0.021  | 0.023  | 0.029  | t | 114011 | VTTVTTHN<br>NPTFTDPS<br>VLQP | Cavia<br>porcellu<br>s           |
| 1 | 1.00 | 1 | 1 | -0.06 | -0.06  | -0.06  | -0.06  | -0.06  | t | 56259  | RVEAQLH<br>VWIPPLN           | Homo<br>sapiens                  |
| 1 | 1.00 | 1 | 1 | -0.02 | -0.02  | -0.02  | -0.02  | -0.019 | t | 139398 | YGCDVGP<br>DGRLLRGH<br>DQYAY | Mus<br>musculu<br>s              |
| 1 | 1.00 | 1 | 1 | 0     | 0      | 0      | 0      | 0.002  | t | 118611 | SQALQELIS<br>ELDRRCHS        | Homo<br>sapiens                  |
| 1 | 1.00 | 1 | 1 | 0     | 0.002  | 0.006  | 0.003  | 0.001  | t | 3290   | ANGAGNQ<br>PGANGAG<br>NQPG   | Homo<br>sapiens                  |
| 1 | 1.00 | 1 | 1 | -0.01 | -0.014 | -0.01  | -0.017 | -0.01  | t | 116682 | CHGRGTC<br>NYANAYS           | Oryctola<br>gus<br>cuniculu<br>s |
| 1 | 1.00 | 1 | 1 | 0     | 0      | 0      | 0      | 0.003  | t | 130473 | ECIVYGKT<br>ALCT             | Mus<br>musculu<br>s              |
| 1 | 1.00 | 1 | 1 | 0.02  | 0.02   | 0.027  | 0.023  | 0.02   | t | 50820  | QFVEFYEK<br>VTGTDLELI<br>QIL | Homo<br>sapiens                  |

|   |      |   |   |       |        |        |        |        |   |        |                              |                       |
|---|------|---|---|-------|--------|--------|--------|--------|---|--------|------------------------------|-----------------------|
| 1 | 1.00 | 1 | 1 | 0     | -0.001 | 0.001  | -0.003 | 0.001  | t | 99174  | EDEYED<br>EDRRRGR            | Homo sapiens          |
| 1 | 1.00 | 1 | 1 | -0.01 | -0.008 | -0.01  | -0.009 | -0.004 | t | 29127  | ITVATSRT                     | Homo sapiens          |
| 1 | 1.00 | 1 | 1 | -0.06 | -0.062 | -0.061 | -0.067 | -0.059 | t | 125356 | ADQLTPA<br>WR                | Mus musculus          |
| 1 | 1.00 | 1 | 1 | 0.01  | 0.01   | 0.025  | 0.01   | 0.01   | t | 41665  | MHLPATIG<br>DY               | Mus musculus          |
| 1 | 1.00 | 1 | 1 | 0     | -0.002 | 0      | 0      | 0.003  | t | 100070 | GLMVGGV<br>VIA               | Oryctolagus cuniculus |
| 1 | 1.00 | 1 | 1 | 0     | -0.002 | 0      | 0      | 0.003  | t | 100070 | GLMVGGV<br>VIA               | Oryctolagus cuniculus |
| 1 | 1.00 | 1 | 1 | 0     | 0      | 0      | 0      | 0.003  | t | 110946 | MSTRSVSS<br>SSYRRMFG<br>GPGT | Mus musculus          |
| 1 | 1.00 | 1 | 1 | 0     | 0      | 0      | 0      | 0.003  | t | 110820 | DVRQQYE<br>SVAAKNL<br>QEAEW  | Mus musculus          |
| 1 | 1.00 | 1 | 1 | 0     | 0      | 0.014  | 0      | 0      | t | 102943 | YGCYCGLG<br>G                | Mus musculus          |
| 1 | 1.00 | 1 | 1 | -0.02 | -0.02  | -0.023 | -0.02  | -0.019 | t | 133926 | RSSYWVYS<br>PWRFISR          | Mus musculus          |
| 1 | 1.00 | 1 | 1 | -0.03 | -0.03  | -0.033 | -0.03  | -0.028 | t | 68048  | VDQHNAT<br>EICRLIKLC         | Oryctolagus cuniculus |
| 1 | 1.00 | 1 | 1 | -0.02 | -0.022 | -0.012 | -0.016 | -0.02  | t | 110817 | DSTLRLCV<br>QSTHVDIR<br>TLE  | Mus musculus          |
| 1 | 1.00 | 1 | 1 | -0.06 | -0.06  | -0.06  | -0.06  | -0.059 | t | 95301  | DALNENK<br>VLVLD             | Homo sapiens          |
| 1 | 1.00 | 1 | 1 | -0.05 | -0.052 | -0.047 | -0.047 | -0.048 | t | 114866 | KAQHGRP                      | Mus musculus          |
| 1 | 1.00 | 1 | 1 | -0.03 | -0.029 | -0.03  | -0.033 | -0.027 | t | 130610 | SMCMHG<br>GAYCFP             | Mus musculus          |

|   |      |   |   |       |        |        |        |       |   |        |                              |                                  |
|---|------|---|---|-------|--------|--------|--------|-------|---|--------|------------------------------|----------------------------------|
| 1 | 1.00 | 1 | 1 | 0     | 0      | 0      | 0      | 0.003 | t | 133611 | IVSYLCDLA<br>PEAPPPTL<br>PP  | Mus<br>musculu<br>s              |
| 1 | 1.00 | 1 | 1 | 0     | 0      | 0      | 0      | 0.003 | t | 123323 | ILNKPLITV<br>SNSKIL          | Oryctola<br>gus<br>cuniculu<br>s |
| 1 | 1.00 | 1 | 1 | 0     | 0      | 0      | 0      | 0.003 | t | 123296 | HSEYYNHA<br>IDWQTGP<br>GCNTA | Oryctola<br>gus<br>cuniculu<br>s |
| 1 | 1.00 | 1 | 1 | 0     | 0      | 0      | 0      | 0.003 | t | 133551 | EAPPPTLP<br>PDMAQVT<br>VGPG  | Mus<br>musculu<br>s              |
| 1 | 1.00 | 1 | 1 | 0     | 0      | 0      | 0      | 0.003 | t | 125472 | LDAVYLNK<br>NKYLTVID<br>KDAF | Homo<br>sapiens                  |
| 1 | 1.00 | 1 | 1 | 0     | 0      | 0      | 0      | 0.003 | t | 123760 | SSYAKVSIC<br>LPMDTETP<br>LAL | Oryctola<br>gus<br>cuniculu<br>s |
| 1 | 1.00 | 1 | 1 | -0.03 | -0.03  | -0.025 | -0.03  | -0.03 | t | 70621  | VQPDGGQ<br>PAVRNER<br>A      | Mus<br>musculu<br>s              |
| 1 | 1.00 | 1 | 1 | 0.02  | 0.024  | 0.018  | 0.02   | 0.024 | t | 98556  | TVNNLK                       | Ovis<br>aries                    |
| 1 | 1.00 | 1 | 1 | 0     | 0      | 0.009  | 0.003  | 0.003 | t | 110821 | DVRQQYE<br>SVAAKNL<br>QEAEW  | Mus<br>musculu<br>s              |
| 1 | 1.00 | 1 | 1 | 0     | 0      | 0.009  | 0.003  | 0.003 | t | 110820 | DVRQQYE<br>SVAAKNL<br>QEAEW  | Mus<br>musculu<br>s              |
| 1 | 1.00 | 1 | 1 | -0.02 | -0.02  | -0.017 | -0.021 | -0.02 | t | 68632  | VGATPERP<br>RL               | Homo<br>sapiens                  |
| 1 | 1.00 | 1 | 1 | -0.02 | -0.022 | -0.018 | -0.02  | -0.02 | t | 120391 | AARYKYFP<br>EVKTKGM<br>A     | Oryctola<br>gus<br>cuniculu<br>s |
| 1 | 1.00 | 1 | 1 | 0.03  | 0.027  | 0.033  | 0.03   | 0.03  | t | 39082  | LRFDQNG<br>VLMENSSL          | Oryctola<br>gus<br>cuniculu<br>s |
| 1 | 1.00 | 1 | 1 | 0     | -0.004 | 0      | -0.001 | 0.003 | t | 36959  | LKMADPN<br>RFRGKD            | Mus<br>musculu<br>s              |
| 1 | 1.00 | 1 | 1 | 0.02  | 0.02   | 0.027  | 0.02   | 0.02  | t | 16053  | FGSDYEDR<br>YYREN            | Mus<br>musculu<br>s              |

|   |      |   |   |       |        |        |        |        |   |        |                               |                       |
|---|------|---|---|-------|--------|--------|--------|--------|---|--------|-------------------------------|-----------------------|
| 1 | 1.00 | 1 | 1 | -0.04 | -0.036 | -0.036 | -0.043 | -0.042 | t | 105977 | NHEQEFLR<br>YQQQSRR           | Homo sapiens          |
| 1 | 1.00 | 1 | 1 | -0.04 | -0.036 | -0.033 | -0.039 | -0.04  | t | 9899   | DQRPYCW<br>HYPPKPCG<br>IVPA   | Homo sapiens          |
| 1 | 1.00 | 1 | 1 | 0.02  | 0.02   | 0.027  | 0.02   | 0.02   | t | 112835 | RTTHYGSL<br>PQKSQHG<br>RTQDE  | Mus musculus          |
| 1 | 1.00 | 1 | 1 | 0.01  | 0.01   | 0.03   | 0.011  | 0.009  | t | 68816  | VGVVTL                        | Homo sapiens          |
| 1 | 1.00 | 1 | 1 | 0     | -0.004 | 0      | -0.007 | 0      | t | 54393  | RKLWCHH<br>FC                 | Mus musculus          |
| 1 | 1.00 | 1 | 1 | 0     | -0.002 | 0      | -0.007 | 0      | t | 38208  | LNENLLRF<br>FVAPFPQV<br>FGKE  | Mus musculus          |
| 1 | 1.00 | 1 | 1 | 0     | -0.002 | 0      | -0.007 | 0      | t | 60170  | SPNVSVPS<br>SSSTPLLY          | Mus musculus          |
| 1 | 1.00 | 1 | 1 | 0     | -0.002 | 0      | -0.007 | 0      | t | 55187  | RPKHPIKH<br>QGLPQEV<br>L NENL | Mus musculus          |
| 1 | 1.00 | 1 | 1 | -0.01 | -0.01  | -0.01  | -0.01  | -0.008 | t | 140381 | TKTVNENK<br>QNVDKVK<br>KA     | Oryctolagus cuniculus |
| 1 | 1.00 | 1 | 1 | 0.03  | 0.027  | 0.033  | 0.03   | 0.03   | t | 136071 | LLYGEVGD<br>TLLIIFK           | Oryctolagus cuniculus |
| 1 | 1.00 | 1 | 1 | -0.07 | -0.073 | -0.064 | -0.07  | -0.07  | t | 78431  | KKRW                          | Oryctolagus cuniculus |
| 1 | 1.00 | 1 | 1 | 0.02  | 0.02   | 0.02   | 0.02   | 0.022  | t | 104213 | QQFNQQA<br>PLNLENTN<br>NGTL   | Oryctolagus cuniculus |
| 1 | 1.00 | 1 | 1 | -0.02 | -0.023 | -0.02  | -0.02  | -0.018 | t | 121020 | TYDGTKVS<br>ISPESDR           | Oryctolagus cuniculus |
| 1 | 1.00 | 1 | 1 | 0     | -0.002 | -0.005 | -0.007 | 0      | t | 113804 | RDTGILDSI<br>GRFFSGDR<br>GAP  | Mus musculus          |

|   |      |   |   |       |        |        |        |        |   |        |                              |                                  |
|---|------|---|---|-------|--------|--------|--------|--------|---|--------|------------------------------|----------------------------------|
| 1 | 1.00 | 1 | 1 | 0     | 0      | 0.012  | 0      | 0      | t | 25626  | IDLTKNA<br>AKLRD             | Homo<br>sapiens                  |
| 1 | 1.00 | 1 | 1 | 0.01  | 0.007  | 0.012  | 0.01   | 0.01   | t | 79894  | KVLVEGNT<br>DERGTPEY<br>NIAL | Oryctola<br>gus<br>cuniculu<br>s |
| 1 | 1.00 | 1 | 1 | -0.01 | -0.012 | 0.006  | -0.011 | -0.01  | t | 25749  | IEDFWQTT<br>QGMHEI           | Anas<br>platyrhy<br>nchos        |
| 1 | 1.00 | 1 | 1 | -0.08 | -0.08  | -0.073 | -0.08  | -0.078 | t | 133665 | PVLLFCFLA<br>GRCVSV          | Mus<br>musculu<br>s              |
| 1 | 1.00 | 1 | 1 | -0.02 | -0.02  | -0.02  | -0.02  | -0.021 | t | 115306 | KEGIHAQ<br>QKEPMIG<br>VNQELA | Homo<br>sapiens                  |
| 1 | 1.00 | 1 | 1 | 0.03  | 0.028  | 0.035  | 0.027  | 0.031  | t | 55641  | RRLGRQTY<br>DNES             | Mus<br>musculu<br>s              |
| 1 | 1.00 | 1 | 1 | -0.02 | -0.021 | -0.021 | -0.021 | -0.018 | t | 23240  | GWAGYW<br>RGSNHS             | Mus<br>musculu<br>s              |
| 1 | 1.00 | 1 | 1 | -0.01 | -0.003 | -0.005 | -0.01  | -0.01  | t | 60710  | SRKAYDH<br>NSPIYWPR<br>NDYDG | Cavia<br>porcellu<br>s           |
| 1 | 1.00 | 1 | 1 | 0     | 0      | -0.002 | -0.002 | 0      | t | 56443  | RVVIQDYD<br>NQHEQDR<br>PTPSP | Homo<br>sapiens                  |
| 1 | 1.00 | 1 | 1 | -0.04 | -0.04  | -0.025 | -0.043 | -0.042 | t | 33733  | KTKIPAVFK<br>IDA             | Homo<br>sapiens                  |
| 1 | 1.00 | 1 | 1 | 0.03  | 0.034  | 0.041  | 0.033  | 0.034  | t | 138202 | LPTITNT                      | Homo<br>sapiens                  |
| 1 | 1.00 | 1 | 1 | -0.03 | -0.028 | -0.02  | -0.033 | -0.032 | t | 45561  | NQGQFEH<br>FREC              | Homo<br>sapiens                  |
| 1 | 1.00 | 1 | 1 | -0.03 | -0.026 | -0.014 | -0.029 | -0.03  | t | 23004  | GVIITW                       | Homo<br>sapiens                  |
| 1 | 1.00 | 1 | 1 | -0.01 | -0.012 | 0.009  | -0.007 | -0.01  | t | 59377  | SLNWSDR<br>TI                | Rattus<br>norvegic<br>us         |



|   |      |   |   |       |        |        |        |       |   |        |                             |                                  |
|---|------|---|---|-------|--------|--------|--------|-------|---|--------|-----------------------------|----------------------------------|
| 1 | 1.00 | 1 | 1 | 0.01  | 0.012  | 0.013  | 0.013  | 0.013 | t | 56614  | RYPHYSLIK<br>PESSL          | Homo<br>sapiens                  |
| 1 | 1.00 | 1 | 1 | -0.02 | -0.02  | -0.013 | -0.022 | -0.02 | t | 96212  | EEAEDKED<br>DA              | Homo<br>sapiens                  |
| 1 | 1.00 | 1 | 1 | 0     | -0.005 | 0.014  | 0.003  | 0.002 | t | 95499  | KIVAPVKQ                    | Bos<br>taurus                    |
| 1 | 1.00 | 1 | 1 | 0.02  | 0.016  | 0.02   | 0.013  | 0.02  | t | 113189 | TDKKSYP<br>LEDPGVK          | Oryctola<br>gus<br>cuniculu<br>s |
| 1 | 1.00 | 1 | 1 | 0     | -0.002 | 0      | -0.007 | 0     | t | 117514 | GRGRGRG<br>RGRGGPR<br>R     | Mus<br>musculu<br>s              |
| 1 | 1.00 | 1 | 1 | 0     | -0.004 | -0.002 | 0      | 0.003 | t | 8271   | DFGPLFSD<br>PGFRSAS         | Mus<br>musculu<br>s              |
| 1 | 1.00 | 1 | 1 | -0.04 | -0.038 | -0.03  | -0.037 | -0.04 | t | 72052  | VYILIAVCL<br>GGLIGI         | Homo<br>sapiens                  |
| 1 | 1.00 | 1 | 1 | -0.04 | -0.036 | -0.036 | -0.039 | -0.04 | t | 17572  | FRDLTWCI<br>NPPERIK         | Homo<br>sapiens                  |
| 1 | 1.00 | 1 | 1 | -0.01 | -0.013 | 0      | -0.01  | -0.01 | t | 25395  | IAQPKLAA                    | Oryctola<br>gus<br>cuniculu<br>s |
| 1 | 1.00 | 1 | 1 | 0.01  | 0.012  | 0.02   | 0.011  | 0.009 | t | 56366  | RVNAANK<br>KPEDLTN<br>DLETD | Homo<br>sapiens                  |
| 1 | 1.00 | 1 | 1 | 0     | 0.002  | 0.018  | 0.001  | 0     | t | 12988  | ELDKWA                      | Homo<br>sapiens                  |
| 1 | 1.00 | 1 | 1 | 0     | 0.015  | 0      | 0      | 0.003 | t | 45221  | NNRAVPD<br>KIDWRESG<br>YVTE | Rattus<br>rattus                 |
| 1 | 1.00 | 1 | 1 | 0.01  | 0.012  | 0.019  | 0.013  | 0.012 | t | 113912 | TCFFRDHS<br>YQEE            | Homo<br>sapiens                  |

|   |      |   |   |       |        |        |        |        |   |        |                               |                                  |
|---|------|---|---|-------|--------|--------|--------|--------|---|--------|-------------------------------|----------------------------------|
| 1 | 1.00 | 1 | 1 | -0.01 | -0.01  | -0.01  | -0.01  | -0.006 | t | 133536 | CKPVENRA<br>C                 | Mus<br>musculu<br>s              |
| 1 | 1.00 | 1 | 1 | 0.01  | 0.008  | 0.017  | 0.009  | 0.01   | t | 43191  | NAKATYEA<br>ALKQYEAD<br>LAA   | Mus<br>musculu<br>s              |
| 1 | 1.00 | 1 | 1 | 0.02  | 0.02   | 0.02   | 0.02   | 0.024  | t | 143675 | DRVDLGTL<br>RGYY              | Mus<br>musculu<br>s              |
| 1 | 1.00 | 1 | 1 | 0.01  | 0.01   | 0.01   | 0.01   | 0.012  | t | 140603 | STEHSEAD<br>LW                | Mus<br>musculu<br>s              |
| 1 | 1.00 | 1 | 1 | 0     | 0      | 0.015  | 0      | 0.002  | t | 59851  | SNIVFSDEI<br>PA               | Oryctola<br>gus<br>cuniculu<br>s |
| 1 | 1.00 | 1 | 1 | -0.01 | -0.013 | 0.006  | -0.01  | -0.009 | t | 78459  | LTRAIARA<br>AYV               | Oryctola<br>gus<br>cuniculu<br>s |
| 1 | 1.00 | 1 | 1 | 0     | -0.002 | 0.005  | -0.001 | 0      | t | 44189  | NIASHISSI<br>SARTGDPV<br>TN   | Mus<br>musculu<br>s              |
| 1 | 1.00 | 1 | 1 | 0     | -0.003 | 0      | 0.001  | 0      | t | 46048  | NSYVNDV<br>MERICME<br>AASIVR  | Canis<br>lupus                   |
| 1 | 1.00 | 1 | 1 | -0.03 | -0.03  | -0.022 | -0.03  | -0.03  | t | 106300 | CALEGWG<br>GHW                | Homo<br>sapiens                  |
| 1 | 1.00 | 1 | 1 | 0     | 0      | 0.005  | 0.006  | 0.003  | t | 115677 | AHRET                         | Homo<br>sapiens                  |
| 1 | 1.00 | 1 | 1 | 0.04  | 0.032  | 0.04   | 0.04   | 0.042  | t | 156865 | EQATCDH<br>TNEWCAK<br>MM      | Mus<br>musculu<br>s              |
| 1 | 1.00 | 1 | 1 | 0.04  | 0.032  | 0.035  | 0.04   | 0.042  | t | 55187  | RPKHPIKH<br>QGLPQEV<br>L NENL | Mus<br>musculu<br>s              |
| 1 | 1.00 | 1 | 1 | -0.04 | -0.043 | -0.04  | -0.041 | -0.04  | t | 138232 | RLTSSLRY<br>NP                | Oryctola<br>gus<br>cuniculu<br>s |
| 1 | 1.00 | 1 | 1 | -0.01 | -0.013 | -0.005 | -0.01  | -0.008 | t | 18951  | GDDMDPE<br>LRGLAQA            | Oryctola<br>gus<br>cuniculu<br>s |
| 1 | 1.00 | 1 | 1 | -0.01 | -0.009 | -0.005 | -0.01  | -0.008 | t | 18951  | GDDMDPE<br>LRGLAQA            | Myodes<br>glareolu<br>s          |

|   |      |   |   |       |        |        |        |        |   |        |                              |                                  |
|---|------|---|---|-------|--------|--------|--------|--------|---|--------|------------------------------|----------------------------------|
| 1 | 1.00 | 1 | 1 | 0.03  | 0.032  | 0.034  | 0.033  | 0.03   | t | 48768  | PPEHRGG<br>PEEFEGAG<br>DGEPP | Homo<br>sapiens                  |
| 1 | 1.00 | 1 | 1 | 0     | 0      | 0.01   | -0.001 | 0      | t | 31131  | KHLTSFKR<br>ELGTLID          | Homo<br>sapiens                  |
| 1 | 1.00 | 1 | 1 | -0.01 | -0.01  | 0.002  | -0.01  | -0.011 | t | 140077 | VQIINKKL<br>DLSNVQSK<br>C    | Mus<br>musculu<br>s              |
| 1 | 1.00 | 1 | 1 | -0.03 | -0.032 | -0.021 | -0.027 | -0.028 | t | 33112  | KRAVQKW<br>AP                | Mus<br>musculu<br>s              |
| 1 | 1.00 | 1 | 1 | 0.01  | 0.01   | 0.013  | 0.01   | 0.011  | t | 158944 | KVQVQGP<br>WDEEDIKL<br>D     | Mus<br>musculu<br>s              |
| 1 | 1.00 | 1 | 1 | -0.02 | -0.011 | -0.011 | -0.02  | -0.022 | t | 54975  | RNCKKLGP<br>RENV A           | Oryctola<br>gus<br>cuniculu<br>s |
| 1 | 1.00 | 1 | 1 | -0.01 | -0.012 | -0.013 | -0.01  | -0.008 | t | 132879 | PAFKNPSQ<br>DMVRFHI          | Trichosu<br>rus<br>vulpecul<br>a |
| 1 | 1.00 | 1 | 1 | 0.03  | 0.034  | 0.034  | 0.031  | 0.031  | t | 30386  | KEFSEVEG<br>RIQDLEKY<br>V    | Homo<br>sapiens                  |
| 1 | 1.00 | 1 | 1 | 0.02  | 0.023  | 0.02   | 0.02   | 0.022  | t | 5853   | AYKSAEGA<br>TPEAKYDD<br>YVAT | Mus<br>musculu<br>s              |
| 1 | 1.00 | 1 | 1 | 0.02  | 0.023  | 0.02   | 0.02   | 0.022  | t | 5853   | AYKSAEGA<br>TPEAKYDD<br>YVAT | Mus<br>musculu<br>s              |
| 1 | 1.00 | 1 | 1 | -0.03 | -0.03  | -0.03  | -0.039 | -0.032 | t | 123509 | MPMMGP<br>PPPG               | Homo<br>sapiens                  |
| 1 | 1.00 | 1 | 1 | 0.02  | 0.024  | 0.023  | 0.023  | 0.023  | t | 48817  | PPLENRVL<br>TG               | MD                               |
| 1 | 1.00 | 1 | 1 | -0.01 | -0.008 | -0.002 | -0.011 | -0.011 | t | 32031  | KLMSKYSN<br>TFEVNAYN<br>MSIR | Aotus<br>nancyma<br>ae           |
| 1 | 1.00 | 1 | 1 | 0.03  | 0.028  | 0.03   | 0.027  | 0.03   | t | 5283   | AVAVSPPA<br>AAGDLVG<br>PGCAE | Mus<br>musculu<br>s              |

|   |      |   |   |       |        |        |        |        |   |        |                              |                                  |
|---|------|---|---|-------|--------|--------|--------|--------|---|--------|------------------------------|----------------------------------|
| 1 | 1.00 | 1 | 1 | -0.02 | -0.024 | -0.017 | -0.021 | -0.021 | t | 19971  | GGPRRSRP<br>RLSSSKDS<br>K    | Oryctola<br>gus<br>cuniculu<br>s |
| 1 | 1.00 | 1 | 1 | 0     | 0      | -0.002 | 0      | 0.002  | t | 6883   | CQIYPPNA<br>NKIREALA<br>Q    | Oryctola<br>gus<br>cuniculu<br>s |
| 1 | 1.00 | 1 | 1 | 0.02  | 0.022  | 0.029  | 0.017  | 0.018  | t | 53810  | RFYLAGN<br>QEQEFLKY          | Homo<br>sapiens                  |
| 1 | 1.00 | 1 | 1 | 0.01  | 0.012  | 0.018  | 0.009  | 0.012  | t | 149482 | SVFDENRS<br>W                | Homo<br>sapiens                  |
| 1 | 1.00 | 1 | 1 | 0.01  | 0.006  | 0.01   | 0.003  | 0.008  | t | 108078 | PTSPSGVE<br>EWIVTQV<br>VPGVA | Oryctola<br>gus<br>cuniculu<br>s |
| 1 | 1.00 | 1 | 1 | 0     | 0.003  | 0.017  | 0.003  | -0.003 | t | 110834 | EQLKGQG<br>KSRLGDLY<br>EEEMR | Mus<br>musculu<br>s              |
| 1 | 1.00 | 1 | 1 | 0     | 0      | 0      | 0      | 0.004  | t | 122892 | RSILPYGDS<br>MDRIE           | Homo<br>sapiens                  |
| 1 | 1.00 | 1 | 1 | 0     | 0      | 0      | 0      | 0.004  | t | 66108  | TRTNPWP<br>ALAEGEF           | Oryctola<br>gus<br>cuniculu<br>s |
| 1 | 1.00 | 1 | 1 | 0     | 0      | 0      | 0      | 0.004  | t | 57618  | SERVQLLH<br>SQNTSLIN<br>QK   | Homo<br>sapiens                  |
| 1 | 1.00 | 1 | 1 | 0     | 0      | 0      | 0      | 0.004  | t | 44559  | NKNLQEEI<br>SDLTEQLG<br>SS   | Homo<br>sapiens                  |
| 1 | 1.00 | 1 | 1 | 0     | 0      | 0      | 0      | 0.004  | t | 48933  | PPTAPPLL<br>PHSNL            | Homo<br>sapiens                  |
| 1 | 1.00 | 1 | 1 | 0     | 0      | 0      | 0      | 0.004  | t | 30302  | KEALISLT<br>RGKLTYTQ<br>Q    | Homo<br>sapiens                  |
| 1 | 1.00 | 1 | 1 | 0     | 0      | 0      | 0      | 0.004  | t | 6763   | CPFLKQNE<br>PEDIDCW          | Mus<br>musculu<br>s              |
| 1 | 1.00 | 1 | 1 | -0.01 | -0.011 | -0.009 | -0.013 | -0.009 | t | 99528  | PGERTRGR<br>QPGDYDD          | Homo<br>sapiens                  |

|   |      |   |   |       |        |        |        |        |   |        |                              |                                  |
|---|------|---|---|-------|--------|--------|--------|--------|---|--------|------------------------------|----------------------------------|
| 1 | 1.00 | 1 | 1 | 0     | -0.002 | 0      | 0.003  | 0.002  | t | 106227 | AEIVYKSP<br>VVSGDTSP<br>RHL  | Mus<br>musculu<br>s              |
| 1 | 1.00 | 1 | 1 | -0.02 | -0.022 | -0.01  | -0.021 | -0.022 | t | 8593   | DIAYNLM<br>NPFLGKLF<br>NDYNH | Mus<br>musculu<br>s              |
| 1 | 1.00 | 1 | 1 | -0.01 | -0.008 | -0.007 | -0.009 | -0.008 | t | 97573  | QERLAKLA<br>GGVAVLY          | Homo<br>sapiens                  |
| 1 | 1.00 | 1 | 1 | -0.01 | -0.008 | -0.007 | -0.009 | -0.008 | t | 97573  | QERLAKLA<br>GGVAVLY          | Homo<br>sapiens                  |
| 1 | 1.00 | 1 | 1 | -0.01 | -0.01  | -0.01  | -0.01  | -0.009 | t | 153498 | WSPSKLYS<br>ARDHGGG<br>S     | Mus<br>musculu<br>s              |
| 1 | 1.00 | 1 | 1 | -0.01 | -0.011 | 0.006  | -0.01  | -0.01  | t | 70934  | VSFQPDYP<br>ITARIH           | Anas<br>platyrhy<br>nchos        |
| 1 | 1.00 | 1 | 1 | 0.03  | 0.028  | 0.023  | 0.023  | 0.032  | t | 40332  | LVFFAEDV                     | Mus<br>musculu<br>s              |
| 1 | 1.00 | 1 | 1 | -0.02 | -0.02  | -0.024 | -0.02  | -0.02  | t | 45309  | NPCVVPNI<br>NNAECQF<br>LKSVL | Oryctola<br>gus<br>cuniculu<br>s |
| 1 | 1.00 | 1 | 1 | 0.01  | 0.012  | 0.018  | 0.011  | 0.008  | t | 60186  | SPPLVHDS<br>DLEHVLTP<br>S    | Homo<br>sapiens                  |
| 1 | 1.00 | 1 | 1 | -0.01 | -0.01  | -0.008 | -0.007 | -0.008 | t | 98728  | DFWATW<br>CGPCKMV<br>APVLEEI | Homo<br>sapiens                  |
| 1 | 1.00 | 1 | 1 | 0.02  | 0.023  | 0.032  | 0.02   | 0.023  | t | 115268 | GLQYTPS<br>WLVG              | Mus<br>musculu<br>s              |
| 1 | 1.00 | 1 | 1 | -0.01 | -0.014 | -0.01  | -0.013 | -0.01  | t | 3381   | ANPNPYTS<br>RRSV             | Oryctola<br>gus<br>cuniculu<br>s |
| 1 | 1.00 | 1 | 1 | 0.02  | 0.022  | 0.02   | 0.026  | 0.026  | t | 131651 | SEGTGQAL<br>ASPGSCLE         | Rattus<br>norvegic<br>us         |

|   |      |   |   |       |        |        |        |        |   |        |                              |                          |
|---|------|---|---|-------|--------|--------|--------|--------|---|--------|------------------------------|--------------------------|
| 1 | 1.00 | 1 | 1 | 0.04  | 0.04   | 0.048  | 0.043  | 0.042  | t | 25653  | IDQKVKEIS<br>NQEPL           | Homo<br>sapiens          |
| 1 | 1.00 | 1 | 1 | 0     | 0      | 0.005  | 0      | 0.002  | t | 105228 | GLMVGGV<br>V                 | Mus<br>musculu<br>s      |
| 1 | 1.00 | 1 | 1 | 0     | 0      | 0      | 0      | -0.001 | t | 139525 | ISSQTNDT<br>HKRDTYA<br>ATPRA | Mus<br>musculu<br>s      |
| 1 | 1.00 | 1 | 1 | 0     | 0      | 0      | 0      | 0.004  | t | 123562 | NSSSSQFQ<br>IHGPR            | Mus<br>musculu<br>s      |
| 1 | 1.00 | 1 | 1 | 0     | 0      | 0      | 0      | 0.004  | t | 123562 | NSSSSQFQ<br>IHGPR            | Mus<br>musculu<br>s      |
| 1 | 1.00 | 1 | 1 | 0     | 0      | 0      | 0      | 0.004  | t | 114125 | HYGSLPQK<br>SQRSQDE<br>NPV   | Rattus<br>norvegic<br>us |
| 1 | 1.00 | 1 | 1 | 0     | 0      | 0      | 0      | 0.004  | t | 101437 | YRSPFSRV<br>VHLYRNG<br>K     | Mus<br>musculu<br>s      |
| 1 | 1.00 | 1 | 1 | 0     | 0      | 0      | 0      | 0.004  | t | 24786  | HSLGKWL<br>GHPDKF            | Mus<br>musculu<br>s      |
| 1 | 1.00 | 1 | 1 | 0     | 0      | 0      | 0      | 0.004  | t | 24786  | HSLGKWL<br>GHPDKF            | Mus<br>musculu<br>s      |
| 1 | 1.00 | 1 | 1 | 0     | 0      | 0      | 0      | 0.004  | t | 35375  | LEDARRLK<br>AIYEKKK          | Mus<br>musculu<br>s      |
| 1 | 1.00 | 1 | 1 | 0     | 0      | 0      | 0      | 0.004  | t | 28676  | ISQAVHAA<br>HAEINEAG<br>R    | Rattus<br>norvegic<br>us |
| 1 | 1.00 | 1 | 1 | 0     | 0      | 0      | 0      | 0.004  | t | 6386   | CHGSEPCI<br>HRGKPF           | Mus<br>musculu<br>s      |
| 1 | 1.00 | 1 | 1 | 0.02  | 0.022  | 0.018  | 0.021  | 0.022  | t | 26329  | IGTRNPNN<br>NAATVLQL         | Homo<br>sapiens          |
| 1 | 1.00 | 1 | 1 | -0.01 | -0.008 | -0.014 | -0.013 | -0.008 | t | 51930  | QPQQPQQ<br>SFPQQQR<br>PF     | Homo<br>sapiens          |
| 1 | 1.00 | 1 | 1 | 0.04  | 0.038  | 0.045  | 0.04   | 0.04   | t | 146338 | IPEEIKQLQ<br>QFQKEDA<br>A    | Mus<br>musculu<br>s      |

|   |      |   |   |       |        |        |        |        |   |        |                              |                                  |
|---|------|---|---|-------|--------|--------|--------|--------|---|--------|------------------------------|----------------------------------|
| 1 | 1.00 | 1 | 1 | 0     | 0      | -0.003 | 0.002  | 0      | t | 29116  | ITTIEDPVL<br>AKKVPETF<br>PEL | Homo<br>sapiens                  |
| 1 | 1.00 | 1 | 1 | -0.06 | -0.063 | -0.051 | -0.059 | -0.061 | t | 41132  | MASSRSA<br>PRKASHA<br>HKSHRK | Canis<br>lupus                   |
| 1 | 1.00 | 1 | 1 | -0.05 | -0.05  | -0.05  | -0.047 | -0.048 | t | 135571 | LFRGRRAS<br>Q                | Oryctola<br>gus<br>cuniculu<br>s |
| 1 | 1.00 | 1 | 1 | -0.01 | -0.006 | -0.004 | -0.009 | -0.008 | t | 35304  | LDTEVAAS<br>CGGVVL           | Homo<br>sapiens                  |
| 1 | 1.00 | 1 | 1 | 0.03  | 0.03   | 0.028  | 0.03   | 0.032  | t | 22280  | GSAMSRPI<br>IHFGSDYE<br>DRYY | Mus<br>musculu<br>s              |
| 1 | 1.00 | 1 | 1 | 0     | 0.002  | 0.017  | 0.007  | -0.001 | t | 122538 | QELECDW<br>EEVTTSGP<br>CGEES | Homo<br>sapiens                  |
| 1 | 1.00 | 1 | 1 | 0.01  | 0.01   | 0.026  | 0.01   | 0.01   | t | 44294  | NINDTDT<br>WIP               | Mus<br>musculu<br>s              |
| 1 | 1.00 | 1 | 1 | 0.05  | 0.046  | 0.056  | 0.043  | 0.053  | t | 134758 | PESPSKLAS<br>A               | Oryctola<br>gus<br>cuniculu<br>s |
| 1 | 1.00 | 1 | 1 | 0.01  | 0.006  | 0.016  | 0.007  | 0.013  | t | 65788  | TPTPTPTP<br>SPTP             | Oryctola<br>gus<br>cuniculu<br>s |
| 1 | 1.00 | 1 | 1 | 0     | 0      | 0.004  | 0      | 0.001  | t | 119852 | EVNQIVTT<br>NVRLKQQ<br>W     | Homo<br>sapiens                  |
| 1 | 1.00 | 1 | 1 | 0.01  | 0.004  | 0.024  | 0.01   | 0.01   | t | 142325 | VIIKRGKV<br>EVEGLID          | Oryctola<br>gus<br>cuniculu<br>s |
| 1 | 1.00 | 1 | 1 | 0.02  | 0.016  | 0.018  | 0.017  | 0.02   | t | 53681  | RFAKYQQ<br>QGRLEAR           | Oryctola<br>gus<br>cuniculu<br>s |
| 1 | 1.00 | 1 | 1 | 0.05  | 0.052  | 0.031  | 0.051  | 0.061  | t | 23671  | HEEDNNT<br>G                 | Homo<br>sapiens                  |

|   |      |   |   |       |        |        |        |        |   |        |                              |                                  |
|---|------|---|---|-------|--------|--------|--------|--------|---|--------|------------------------------|----------------------------------|
| 1 | 1.00 | 1 | 1 | 0     | -0.003 | 0.012  | 0      | -0.001 | t | 120705 | KNQFDHY<br>SRHESCAE<br>L     | Oryctola<br>gus<br>cuniculu<br>s |
| 1 | 1.00 | 1 | 1 | 0.02  | 0.018  | 0.02   | 0.013  | 0.02   | t | 104342 | VSAAQYL                      | Mus<br>musculu<br>s              |
| 1 | 1.00 | 1 | 1 | 0.01  | 0.008  | 0.022  | 0.013  | 0.009  | t | 36595  | LILDSSSLH<br>GWR             | Mus<br>musculu<br>s              |
| 1 | 1.00 | 1 | 1 | 0     | 0      | 0      | 0      | 0      | t | 153472 | TGLRNGIT<br>NKVNSVIE<br>KAA  | Mus<br>musculu<br>s              |
| 1 | 1.00 | 1 | 1 | -0.01 | -0.01  | -0.01  | -0.01  | -0.011 | t | 115195 | CQAQPTT<br>MARHPHP<br>HLSFMA | Homo<br>sapiens                  |
| 1 | 1.00 | 1 | 1 | -0.01 | -0.011 | 0.007  | -0.01  | -0.01  | t | 66304  | TSLNDRQ<br>GNATK             | Homo<br>sapiens                  |
| 1 | 1.00 | 1 | 1 | 0     | 0      | 0      | 0      | 0      | t | 78556  | VPKLIAGSS<br>SLAPLG          | Mus<br>musculu<br>s              |
| 1 | 1.00 | 1 | 1 | -0.04 | -0.04  | -0.034 | -0.043 | -0.04  | t | 9235   | DLPLPW                       | Homo<br>sapiens                  |
| 1 | 1.00 | 1 | 1 | 0.03  | 0.03   | 0.023  | 0.03   | 0.035  | t | 124588 | PQEETLQA<br>FDSHYDYT         | Homo<br>sapiens                  |
| 1 | 1.00 | 1 | 1 | -0.03 | -0.03  | -0.021 | -0.03  | -0.03  | t | 122033 | WKKKLGA<br>SP                | Mus<br>musculu<br>s              |
| 1 | 1.00 | 1 | 1 | -0.08 | -0.08  | -0.08  | -0.08  | -0.077 | t | 132835 | HFRWG                        | Oryctola<br>gus<br>cuniculu<br>s |
| 1 | 1.00 | 1 | 1 | 0     | 0.002  | 0      | 0.003  | 0      | t | 3693   | APPPPEHR<br>GGPEEFEG<br>AGDG | Homo<br>sapiens                  |
| 1 | 1.00 | 1 | 1 | 0.03  | 0.032  | 0.042  | 0.03   | 0.033  | t | 68099  | VDYLKEKE<br>KDQDL            | Homo<br>sapiens                  |
| 1 | 1.00 | 1 | 1 | -0.02 | -0.018 | -0.025 | -0.02  | -0.019 | t | 95050  | YCEIIVTHF<br>PFDQQNC<br>T    | Rattus<br>norvegic<br>us         |
| 1 | 1.00 | 1 | 1 | -0.05 | -0.052 | -0.05  | -0.057 | -0.05  | t | 107566 | PQVKFNW                      | Mus<br>musculu<br>s              |



|   |      |   |   |       |        |        |        |        |   |        |                              |                                  |
|---|------|---|---|-------|--------|--------|--------|--------|---|--------|------------------------------|----------------------------------|
| 1 | 1.00 | 1 | 1 | 0.01  | 0.01   | 0.017  | 0.01   | 0.01   | t | 52000  | QQACKGKI<br>QALCENP          | Mus<br>musculu<br>s              |
| 1 | 1.00 | 1 | 1 | -0.02 | -0.022 | -0.017 | -0.017 | -0.018 | t | 10555  | DVDKPPF<br>DGMTACG<br>NEPIF  | Mus<br>musculu<br>s              |
| 1 | 1.00 | 1 | 1 | -0.01 | -0.01  | -0.01  | -0.01  | -0.01  | t | 140831 | AVLGHDE<br>AAYSKNRR<br>AVLAY | Oryctola<br>gus<br>cuniculu<br>s |
| 1 | 1.00 | 1 | 1 | -0.03 | -0.03  | -0.013 | -0.03  | -0.032 | t | 114120 | GILDSIGRF<br>FGGDRG          | Rattus<br>norvegic<br>us         |
| 1 | 1.00 | 1 | 1 | -0.02 | -0.02  | -0.02  | -0.02  | -0.019 | t | 119674 | WNPDDYG<br>GVKKIHIPS         | Homo<br>sapiens                  |
| 1 | 1.00 | 1 | 1 | -0.01 | -0.01  | 0.001  | -0.01  | -0.01  | t | 38373  | LNWGRIS<br>NVLPEYRC<br>EAGV  | Mus<br>musculu<br>s              |
| 1 | 1.00 | 1 | 1 | 0     | 0      | 0      | 0      | 0.004  | t | 116085 | EPANPSEK                     | Mus<br>musculu<br>s              |
| 1 | 1.00 | 1 | 1 | 0     | -0.002 | 0      | -0.001 | -0.001 | t | 110980 | QPLGVGIS<br>GHPLLNLK<br>DDTE | Mus<br>musculu<br>s              |
| 1 | 1.00 | 1 | 1 | 0     | 0.002  | 0      | -0.001 | -0.001 | t | 110980 | QPLGVGIS<br>GHPLLNLK<br>DDTE | Cavia<br>porcellu<br>s           |
| 1 | 1.00 | 1 | 1 | 0     | 0.004  | 0.016  | 0      | 0      | t | 49631  | PTGIEPDD<br>HL               | Mus<br>musculu<br>s              |
| 1 | 1.00 | 1 | 1 | -0.02 | -0.026 | -0.017 | -0.02  | -0.02  | t | 139753 | FTYDQIQR<br>RYEAAPSY<br>LS   | Oryctola<br>gus<br>cuniculu<br>s |
| 1 | 1.00 | 1 | 1 | -0.02 | -0.02  | -0.009 | -0.017 | -0.019 | t | 17262  | FPCDRLSG<br>YWERGIPS<br>PCVR | Homo<br>sapiens                  |
| 1 | 1.00 | 1 | 1 | -0.04 | -0.04  | -0.04  | -0.046 | -0.04  | t | 118532 | NATRAAV<br>EEGIVL            | Homo<br>sapiens                  |
| 1 | 1.00 | 1 | 1 | 0     | 0.002  | 0.005  | 0.003  | 0.007  | t | 138238 | SMLDTPT                      | Homo<br>sapiens                  |
| 1 | 1.00 | 1 | 1 | -0.01 | -0.022 | -0.01  | -0.01  | -0.007 | t | 4701   | ASQKIQLI                     | Mus<br>musculu<br>s              |
| 1 | 1.00 | 1 | 1 | -0.04 | -0.04  | -0.04  | -0.04  | -0.04  | t | 79362  | RCRKVLIC<br>RRICP            | Mus<br>musculu<br>s              |

|   |      |   |   |       |        |        |        |        |   |        |                              |                              |
|---|------|---|---|-------|--------|--------|--------|--------|---|--------|------------------------------|------------------------------|
| 1 | 1.00 | 1 | 1 | 0     | 0      | 0.002  | 0      | 0      | t | 10799  | DWDFNPN<br>KDTWPDAN          | Mus<br>musculus              |
| 1 | 1.00 | 1 | 1 | -0.01 | -0.013 | -0.01  | -0.01  | -0.01  | t | 50660  | QENSTYAV<br>RNSN             | Oryctola<br>gus<br>cuniculus |
| 1 | 1.00 | 1 | 1 | -0.01 | -0.01  | -0.01  | -0.01  | -0.01  | t | 50660  | QENSTYAV<br>RNSN             | Mus<br>musculus              |
| 1 | 1.00 | 1 | 1 | 0.01  | 0.01   | 0.025  | 0.01   | 0.009  | t | 103839 | DAEFRHDS<br>GYEVH            | Mus<br>musculus              |
| 1 | 1.00 | 1 | 1 | -0.02 | -0.016 | -0.024 | -0.023 | -0.02  | t | 97210  | AQGALERE<br>LKRTDLNI         | Homo<br>sapiens              |
| 1 | 1.00 | 1 | 1 | -0.02 | -0.024 | -0.016 | -0.021 | -0.022 | t | 58298  | SGVRGDF<br>GSLAPRVA<br>RQLP  | Oryctola<br>gus<br>cuniculus |
| 1 | 1.00 | 1 | 1 | -0.02 | -0.018 | -0.016 | -0.021 | -0.022 | t | 58298  | SGVRGDF<br>GSLAPRVA<br>RQLP  | Cavia<br>porcellus           |
| 1 | 1.00 | 1 | 1 | -0.01 | -0.01  | -0.01  | -0.01  | -0.012 | t | 108898 | EIDGPAGQ<br>AEPDRAH<br>YN    | Mus<br>musculus              |
| 1 | 1.00 | 1 | 1 | -0.02 | -0.018 | -0.015 | -0.019 | -0.02  | t | 27980  | IPPPRRKR<br>TVVLTE           | Homo<br>sapiens              |
| 1 | 1.00 | 1 | 1 | -0.04 | -0.037 | -0.04  | -0.04  | -0.04  | t | 125793 | CSFWSKYI<br>SSLKTSAD<br>GAK  | Mus<br>musculus              |
| 1 | 1.00 | 1 | 1 | -0.03 | -0.034 | -0.029 | -0.037 | -0.03  | t | 128073 | PKKSAKKT<br>PKKAKKP          | Oryctola<br>gus<br>cuniculus |
| 1 | 1.00 | 1 | 1 | -0.01 | -0.008 | -0.012 | -0.013 | -0.012 | t | 98932  | PGDYDDD<br>RRQPRREE          | Homo<br>sapiens              |
| 1 | 1.00 | 1 | 1 | 0.03  | 0.032  | 0.023  | 0.031  | 0.037  | t | 76485  | YYALDVYA<br>YDVT             | Homo<br>sapiens              |
| 1 | 1.00 | 1 | 1 | 0.01  | 0.012  | 0.018  | 0.009  | 0.009  | t | 41175  | MAYGSDD<br>NDDKNKS<br>LDHKHN | Aotus<br>nancymae            |

|   |      |   |   |       |        |        |        |        |   |        |                              |                                  |
|---|------|---|---|-------|--------|--------|--------|--------|---|--------|------------------------------|----------------------------------|
| 1 | 1.00 | 1 | 1 | -0.02 | -0.023 | -0.022 | -0.02  | -0.02  | t | 127242 | TRVPMDA<br>FQVGKFPE<br>DFESC | Oryctola<br>gus<br>cuniculu<br>s |
| 1 | 1.00 | 1 | 1 | 0     | 0      | 0.019  | 0      | -0.002 | t | 45561  | NQQQFEH<br>FREC              | Homo<br>sapiens                  |
| 1 | 1.00 | 1 | 1 | -0.04 | -0.038 | -0.035 | -0.04  | -0.04  | t | 115032 | ALGQGPQ<br>FIFQYEEER         | Homo<br>sapiens                  |
| 1 | 1.00 | 1 | 1 | -0.03 | -0.028 | -0.03  | -0.033 | -0.028 | t | 75411  | YPSGAWY<br>YVPLGTQY<br>T     | Homo<br>sapiens                  |
| 1 | 1.00 | 1 | 1 | 0     | 0.004  | 0      | 0      | 0.002  | t | 113797 | QYGSMGV<br>FFGGLGIG<br>TGSGT | Cavia<br>porcellu<br>s           |
| 1 | 1.00 | 1 | 1 | -0.01 | -0.014 | -0.007 | -0.01  | -0.009 | t | 7239   | CTTSGLAS<br>LFNSGARQ<br>H    | Mus<br>musculu<br>s              |
| 1 | 1.00 | 1 | 1 | -0.04 | -0.037 | -0.031 | -0.04  | -0.04  | t | 121268 | ESAQRPF<br>G                 | Mus<br>musculu<br>s              |
| 1 | 1.00 | 1 | 1 | 0.04  | 0.043  | 0.035  | 0.04   | 0.045  | t | 49006  | PQGQGV<br>T                  | Mus<br>musculu<br>s              |
| 1 | 1.00 | 1 | 1 | 0.04  | 0.043  | 0.035  | 0.04   | 0.045  | t | 49006  | PQGQGV<br>T                  | Mus<br>musculu<br>s              |
| 1 | 1.00 | 1 | 1 | -0.01 | -0.01  | -0.003 | -0.01  | -0.009 | t | 119493 | LSRKTLTT                     | Homo<br>sapiens                  |
| 1 | 1.00 | 1 | 1 | -0.01 | -0.01  | -0.012 | -0.01  | -0.007 | t | 60526  | SQPNTES<br>QSPAILPF          | Mus<br>musculu<br>s              |
| 1 | 1.00 | 1 | 1 | -0.01 | -0.01  | 0.004  | -0.01  | -0.01  | t | 133950 | WIFANF                       | Mus<br>musculu<br>s              |
| 1 | 1.00 | 1 | 1 | -0.02 | -0.02  | -0.005 | -0.02  | -0.023 | t | 29218  | IVCIDRAS<br>LST              | Oryctola<br>gus<br>cuniculu<br>s |
| 1 | 1.00 | 1 | 1 | -0.02 | -0.017 | -0.013 | -0.02  | -0.019 | t | 17295  | FPGGGQV<br>GGVYLL            | Mus<br>musculu<br>s              |

|   |      |   |   |       |        |        |        |        |   |        |                              |                              |
|---|------|---|---|-------|--------|--------|--------|--------|---|--------|------------------------------|------------------------------|
| 1 | 1.00 | 1 | 1 | -0.02 | -0.02  | -0.013 | -0.02  | -0.019 | t | 17295  | FPGGGQIV<br>GGVYLL           | Mus<br>musculus              |
| 1 | 1.00 | 1 | 1 | 0     | 0      | 0.019  | 0      | -0.002 | t | 41826  | MKHM                         | Mus<br>musculus              |
| 1 | 1.00 | 1 | 1 | 0     | -0.003 | 0      | 0      | 0.004  | t | 125478 | LHQEYEEN<br>LGDSIVGY<br>KEKS | Oryctola<br>gus<br>cuniculus |
| 1 | 1.00 | 1 | 1 | 0     | 0.002  | 0      | 0      | 0.004  | t | 113628 | LRLIHYSYD<br>VN              | Rattus<br>norvegicus         |
| 1 | 1.00 | 1 | 1 | 0     | 0.003  | 0      | 0      | 0.004  | t | 66841  | TTTCFRDT<br>DTGK             | Sus<br>scrofa                |
| 1 | 1.00 | 1 | 1 | 0     | -0.003 | 0      | 0      | 0.004  | t | 21408  | GNDYEDR<br>YYRENMY<br>RYPNQ  | Oryctola<br>gus<br>cuniculus |
| 1 | 1.00 | 1 | 1 | -0.07 | -0.068 | -0.061 | -0.073 | -0.072 | t | 21776  | GPRWNLN<br>AHSAL             | Homo<br>sapiens              |
| 1 | 1.00 | 1 | 1 | 0     | 0.003  | 0.009  | 0      | 0.002  | t | 31015  | KGMSYSM<br>CTGKFK            | Mus<br>musculus              |
| 1 | 1.00 | 1 | 1 | -0.02 | -0.017 | -0.012 | -0.02  | -0.02  | t | 110948 | MVTSDAQ<br>IFNKPYWL          | Mus<br>musculus              |
| 1 | 1.00 | 1 | 1 | 0.04  | 0.044  | 0.045  | 0.041  | 0.042  | t | 60259  | SPSLNLAS<br>VPKTSTPP<br>GEKP | Homo<br>sapiens              |
| 1 | 1.00 | 1 | 1 | -0.02 | -0.018 | -0.013 | -0.017 | -0.018 | t | 49637  | PTGQIHW<br>GNLSKIGV          | Homo<br>sapiens              |
| 1 | 1.00 | 1 | 1 | -0.02 | -0.02  | -0.02  | -0.02  | -0.018 | t | 140614 | WCEADYG<br>RCP               | Mus<br>musculus              |
| 1 | 1.00 | 1 | 1 | -0.02 | -0.02  | -0.02  | -0.02  | -0.02  | t | 79328  | PCSRAETN<br>PTMQCP           | Mus<br>musculus              |

|   |      |   |   |       |        |        |        |        |   |        |                              |                                  |
|---|------|---|---|-------|--------|--------|--------|--------|---|--------|------------------------------|----------------------------------|
| 1 | 1.00 | 1 | 1 | 0     | 0      | 0.016  | -0.002 | -0.003 | t | 98955  | QFEDFFPA<br>SSRDQSS          | Homo<br>sapiens                  |
| 1 | 1.00 | 1 | 1 | 0     | -0.002 | 0      | -0.007 | 0      | t | 57631  | SESTEDQA<br>MEDIKQM<br>EAESI | Mus<br>musculu<br>s              |
| 1 | 1.00 | 1 | 1 | -0.01 | -0.01  | -0.008 | -0.01  | -0.008 | t | 72909  | WNSQPSL<br>PYIRP             | Mus<br>musculu<br>s              |
| 1 | 1.00 | 1 | 1 | 0     | -0.002 | -0.009 | -0.007 | 0.001  | t | 119514 | RGWKHW<br>VYYTCCPD<br>TPY    | Mus<br>musculu<br>s              |
| 1 | 1.00 | 1 | 1 | 0     | -0.002 | -0.009 | -0.007 | 0.001  | t | 119514 | RGWKHW<br>VYYTCCPD<br>TPY    | Mus<br>musculu<br>s              |
| 1 | 1.00 | 1 | 1 | 0     | -0.002 | -0.009 | -0.007 | 0.001  | t | 119514 | RGWKHW<br>VYYTCCPD<br>TPY    | Mus<br>musculu<br>s              |
| 1 | 1.00 | 1 | 1 | 0     | 0.002  | 0.014  | -0.003 | 0      | t | 69172  | VIYTYPNK<br>VF               | Homo<br>sapiens                  |
| 1 | 1.00 | 1 | 1 | -0.01 | -0.01  | -0.015 | -0.011 | -0.009 | t | 138242 | SQPEILERT<br>RAEVDTA         | Mus<br>musculu<br>s              |
| 1 | 1.00 | 1 | 1 | 0     | 0      | 0.016  | 0.001  | 0      | t | 51083  | QIINTY                       | Mus<br>musculu<br>s              |
| 1 | 1.00 | 1 | 1 | 0.02  | 0.02   | 0.02   | 0.016  | 0.022  | t | 58251  | SGTEEILEK<br>VSASQEI         | Homo<br>sapiens                  |
| 1 | 1.00 | 1 | 1 | -0.04 | -0.042 | -0.038 | -0.04  | -0.039 | t | 122875 | PRGWNPG<br>FLYNGFPL          | Oryctola<br>gus<br>cuniculu<br>s |
| 1 | 1.00 | 1 | 1 | 0.01  | 0.006  | 0.009  | 0.003  | 0.01   | t | 113095 | MSSSPVKR<br>QRMESAL          | Oryctola<br>gus<br>cuniculu<br>s |
| 1 | 1.00 | 1 | 1 | 0.04  | 0.038  | 0.028  | 0.043  | 0.05   | t | 53022  | QYPTLL                       | Mus<br>musculu<br>s              |
| 1 | 1.00 | 1 | 1 | 0.02  | 0.023  | 0.033  | 0.02   | 0.021  | t | 106002 | PPTNVGS<br>NTY               | Mus<br>musculu<br>s              |

|   |      |   |   |       |        |        |        |        |   |        |                              |                                  |
|---|------|---|---|-------|--------|--------|--------|--------|---|--------|------------------------------|----------------------------------|
| 1 | 1.00 | 1 | 1 | 0.02  | 0.023  | 0.03   | 0.02   | 0.02   | t | 140837 | DEPPQSP<br>WDRVKDL<br>A      | Mus<br>musculu<br>s              |
| 1 | 1.00 | 1 | 1 | -0.06 | -0.06  | -0.062 | -0.063 | -0.061 | t | 99031  | TSRNNPFY<br>FPSRRFS          | Homo<br>sapiens                  |
| 1 | 1.00 | 1 | 1 | 0     | -0.002 | -0.001 | -0.007 | -0.001 | t | 118609 | SNVYADSF<br>VVKGDDV<br>RQIAP | Mus<br>musculu<br>s              |
| 1 | 1.00 | 1 | 1 | 0.05  | 0.05   | 0.055  | 0.05   | 0.051  | t | 115612 | GSLPQKA<br>QRPQDEN<br>G      | Rattus<br>norvegic<br>us         |
| 1 | 1.00 | 1 | 1 | -0.06 | -0.06  | -0.044 | -0.062 | -0.063 | t | 98966  | QPRKIRPE<br>GR               | Homo<br>sapiens                  |
| 1 | 1.00 | 1 | 1 | -0.03 | -0.03  | -0.021 | -0.03  | -0.032 | t | 60563  | SQTAKNN<br>YVSQVYLH<br>GDK   | Oryctola<br>gus<br>cuniculu<br>s |
| 1 | 1.00 | 1 | 1 | 0.03  | 0.032  | 0.037  | 0.03   | 0.031  | t | 120155 | QPSPYNG<br>WRMEI             | Rattus<br>norvegic<br>us         |
| 1 | 1.00 | 1 | 1 | 0.03  | 0.03   | 0.037  | 0.03   | 0.031  | t | 120155 | QPSPYNG<br>WRMEI             | Rattus<br>norvegic<br>us         |
| 1 | 1.00 | 1 | 1 | -0.02 | -0.013 | -0.014 | -0.02  | -0.02  | t | 55631  | RRKRELSH<br>TRKKR            | Capra<br>hircus                  |
| 1 | 1.00 | 1 | 1 | 0.01  | 0.013  | 0.014  | 0.01   | 0.011  | t | 6559   | CLFKDWEE<br>LGEEIRLKV        | Mus<br>musculu<br>s              |
| 1 | 1.00 | 1 | 1 | -0.03 | -0.029 | -0.032 | -0.033 | -0.028 | t | 11982  | EFEPPHAT<br>KQSVIALG<br>SQEG | Equus<br>caballus                |
| 1 | 1.00 | 1 | 1 | 0.04  | 0.04   | 0.04   | 0.04   | 0.042  | t | 140462 | FNTKHDM<br>QGDS              | Mus<br>musculu<br>s              |
| 1 | 1.00 | 1 | 1 | 0     | -0.004 | 0      | -0.003 | 0.002  | t | 134088 | IHGIKTQG<br>ARQKFSS          | Oryctola<br>gus<br>cuniculu<br>s |
| 1 | 1.00 | 1 | 1 | 0     | -0.004 | 0      | -0.003 | 0.002  | t | 134220 | RQGAEP<br>KNFVKPNE<br>TKTY   | Oryctola<br>gus<br>cuniculu<br>s |

|   |      |   |   |       |        |        |        |       |   |        |                              |                                  |
|---|------|---|---|-------|--------|--------|--------|-------|---|--------|------------------------------|----------------------------------|
| 1 | 1.00 | 1 | 1 | 0     | -0.004 | 0      | -0.003 | 0.002 | t | 134220 | RQGAEP<br>KNFVKPNE<br>TKTY   | Oryctola<br>gus<br>cuniculu<br>s |
| 1 | 1.00 | 1 | 1 | 0     | -0.004 | 0      | -0.003 | 0.002 | t | 134200 | PVVNSLDP<br>PLLTRY           | Oryctola<br>gus<br>cuniculu<br>s |
| 1 | 1.00 | 1 | 1 | 0     | -0.004 | 0      | -0.003 | 0.002 | t | 134200 | PVVNSLDP<br>PLLTRY           | Oryctola<br>gus<br>cuniculu<br>s |
| 1 | 1.00 | 1 | 1 | 0     | -0.004 | 0      | -0.003 | 0.002 | t | 134020 | CPEEPQLR<br>MKNNEEA<br>EDYDD | Oryctola<br>gus<br>cuniculu<br>s |
| 1 | 1.00 | 1 | 1 | 0     | -0.004 | 0      | -0.003 | 0.002 | t | 134020 | CPEEPQLR<br>MKNNEEA<br>EDYDD | Oryctola<br>gus<br>cuniculu<br>s |
| 1 | 1.00 | 1 | 1 | 0     | -0.004 | 0      | -0.003 | 0.002 | t | 134006 | ALRMEVL<br>GCEAQDLY          | Oryctola<br>gus<br>cuniculu<br>s |
| 1 | 1.00 | 1 | 1 | 0     | -0.004 | 0      | -0.003 | 0.002 | t | 134015 | CDKNTGD<br>YYEDSYED          | Oryctola<br>gus<br>cuniculu<br>s |
| 1 | 1.00 | 1 | 1 | 0     | -0.004 | 0      | -0.003 | 0.002 | t | 134029 | DEDENQS<br>PRSFQKKT<br>R     | Oryctola<br>gus<br>cuniculu<br>s |
| 1 | 1.00 | 1 | 1 | 0     | -0.002 | 0      | -0.003 | 0.002 | t | 105319 | LVFFAEDV<br>GSNK             | Mus<br>musculu<br>s              |
| 1 | 1.00 | 1 | 1 | 0     | -0.004 | 0      | -0.003 | 0.002 | t | 105021 | VHHQKL<br>VFFAEDVGS<br>NK    | Oryctola<br>gus<br>cuniculu<br>s |
| 1 | 1.00 | 1 | 1 | 0     | -0.002 | 0      | -0.003 | 0.002 | t | 105021 | VHHQKL<br>VFFAEDVGS<br>NK    | Mus<br>musculu<br>s              |
| 1 | 1.00 | 1 | 1 | 0     | -0.004 | 0      | -0.003 | 0.002 | t | 3274   | ANETIYNT<br>TLKYGDV          | Mus<br>musculu<br>s              |
| 1 | 1.00 | 1 | 1 | 0.1   | 0.1    | 0.112  | 0.096  | 0.098 | t | 96444  | KDEDEEDE<br>ED               | Homo<br>sapiens                  |
| 1 | 1.00 | 1 | 1 | -0.01 | -0.012 | -0.005 | -0.013 | -0.01 | t | 49912  | PVLVYSNI<br>GVCKSGSI         | Mus<br>musculu<br>s              |

|   |      |   |   |       |        |        |        |        |   |        |                              |                          |
|---|------|---|---|-------|--------|--------|--------|--------|---|--------|------------------------------|--------------------------|
| 1 | 1.00 | 1 | 1 | -0.03 | -0.031 | -0.032 | -0.03  | -0.03  | t | 78153  | FDPQIQAI<br>VSSPCHNS         | Homo<br>sapiens          |
| 1 | 1.00 | 1 | 1 | 0     | -0.002 | 0.001  | -0.001 | 0      | t | 72476  | WGILSRAA<br>TNSGWVG<br>LIPHK | Rattus<br>norvegicus     |
| 1 | 1.00 | 1 | 1 | 0     | 0      | 0      | 0      | 0      | t | 47123  | PDKEVLYE<br>AFDEMEE<br>CASRA | Homo<br>sapiens          |
| 1 | 1.00 | 1 | 1 | -0.02 | -0.02  | -0.018 | -0.02  | -0.02  | t | 15356  | FCVQPEKG<br>GRKPAR           | Homo<br>sapiens          |
| 1 | 1.00 | 1 | 1 | -0.02 | -0.02  | -0.018 | -0.02  | -0.02  | t | 15356  | FCVQPEKG<br>GRKPAR           | Homo<br>sapiens          |
| 1 | 1.00 | 1 | 1 | -0.04 | -0.042 | -0.033 | -0.037 | -0.04  | t | 29375  | IVNRRTSFF<br>NLGPSQR         | Mus<br>musculus          |
| 1 | 1.00 | 1 | 1 | -0.02 | -0.022 | -0.025 | -0.023 | -0.018 | t | 47229  | PDYASLR                      | Mus<br>musculus          |
| 1 | 1.00 | 1 | 1 | -0.02 | -0.022 | -0.025 | -0.023 | -0.018 | t | 47229  | PDYASLR                      | Mus<br>musculus          |
| 1 | 1.00 | 1 | 1 | -0.02 | -0.022 | -0.025 | -0.023 | -0.018 | t | 47229  | PDYASLR                      | Mus<br>musculus          |
| 1 | 1.00 | 1 | 1 | -0.06 | -0.071 | -0.056 | -0.06  | -0.062 | t | 64563  | TKFPSVYA<br>WERKKISN<br>CVAD | Oryctolagus<br>cuniculus |
| 1 | 1.00 | 1 | 1 | -0.02 | -0.013 | -0.02  | -0.02  | -0.019 | t | 153818 | DSTLRLCV<br>QSTHVDIR         | Cavia<br>porcellus       |
| 1 | 1.00 | 1 | 1 | -0.01 | -0.009 | -0.01  | -0.013 | -0.007 | t | 130606 | SCTVYGKT<br>PLCG             | Mus<br>musculus          |
| 1 | 1.00 | 1 | 1 | 0     | 0.004  | -0.005 | -0.003 | 0.002  | t | 95694  | PVKPTAPT<br>KPTYETEK<br>PLKP | Homo<br>sapiens          |
| 1 | 1.00 | 1 | 1 | -0.02 | -0.02  | -0.02  | -0.029 | -0.022 | t | 131066 | SGSRQVCK<br>LARSLQPF         | Homo<br>sapiens          |
| 1 | 1.00 | 1 | 1 | -0.02 | -0.02  | -0.006 | -0.02  | -0.021 | t | 43942  | NFVHDCV<br>NITIKQHT<br>VT    | Mus<br>musculus          |



|   |      |   |   |       |        |        |        |        |   |        |                              |                                  |
|---|------|---|---|-------|--------|--------|--------|--------|---|--------|------------------------------|----------------------------------|
| 1 | 1.00 | 1 | 1 | 0.01  | 0.003  | 0.012  | 0.011  | 0.01   | t | 1827   | AHWGVLA<br>GIAYFSMV<br>GNWAK | Homo<br>sapiens                  |
| 1 | 1.00 | 1 | 1 | 0.01  | 0.01   | 0.015  | 0.013  | 0.02   | t | 16340  | FIYLDD                       | Homo<br>sapiens                  |
| 1 | 1.00 | 1 | 1 | -0.03 | -0.034 | -0.012 | -0.027 | -0.033 | t | 57733  | SFCIMPPSI<br>SEG             | Oryctola<br>gus<br>cuniculu<br>s |
| 1 | 1.00 | 1 | 1 | 0.01  | 0.011  | 0.01   | 0.007  | 0.012  | t | 130613 | SSYCLRSV<br>CLSD             | Mus<br>musculu<br>s              |
| 1 | 1.00 | 1 | 1 | 0.01  | 0.01   | 0.022  | 0.007  | 0.008  | t | 67089  | TVNGTTRT<br>VNPL             | Homo<br>sapiens                  |
| 1 | 1.00 | 1 | 1 | 0.07  | 0.073  | 0.077  | 0.07   | 0.069  | t | 132830 | GGIITQTP<br>KFLIGQEG<br>QKLT | Mus<br>musculu<br>s              |
| 1 | 1.00 | 1 | 1 | -0.03 | -0.032 | -0.03  | -0.029 | -0.027 | t | 96457  | KGTVNLT<br>WSR               | Mus<br>musculu<br>s              |
| 1 | 1.00 | 1 | 1 | -0.04 | -0.038 | -0.038 | -0.039 | -0.038 | t | 57351  | SEAFMSTN<br>KMYFL            | Homo<br>sapiens                  |
| 1 | 1.00 | 1 | 1 | 0.03  | 0.028  | 0.032  | 0.023  | 0.029  | t | 126111 | GHCQGDG<br>YRVGFGQ<br>C      | Mus<br>musculu<br>s              |
| 1 | 1.00 | 1 | 1 | -0.03 | -0.034 | -0.027 | -0.03  | -0.03  | t | 123118 | EEVRKLKA<br>RVEELEKT         | Mus<br>musculu<br>s              |
| 1 | 1.00 | 1 | 1 | -0.03 | -0.028 | -0.026 | -0.029 | -0.031 | t | 35995  | LFTGHLKC<br>RLRMDKL<br>QLKGM | Homo<br>sapiens                  |
| 1 | 1.00 | 1 | 1 | -0.04 | -0.038 | -0.035 | -0.043 | -0.04  | t | 58378  | SHLLKPQT<br>RTRT             | Homo<br>sapiens                  |
| 1 | 1.00 | 1 | 1 | -0.03 | -0.03  | -0.018 | -0.03  | -0.03  | t | 108168 | TRSGIQA<br>T                 | Mus<br>musculu<br>s              |
| 1 | 1.00 | 1 | 1 | -0.07 | -0.07  | -0.063 | -0.07  | -0.068 | t | 133605 | HWWHKK<br>P                  | Mus<br>musculu<br>s              |

|   |      |   |   |       |        |        |        |        |   |        |                              |                                  |
|---|------|---|---|-------|--------|--------|--------|--------|---|--------|------------------------------|----------------------------------|
| 1 | 1.00 | 1 | 1 | -0.02 | -0.018 | -0.004 | -0.017 | -0.021 | t | 25541  | IDAVNKRG<br>RKQNKRG          | Homo<br>sapiens                  |
| 1 | 1.00 | 1 | 1 | 0     | 0.007  | 0.009  | 0      | 0      | t | 60544  | SQRTDIIYI<br>SR              | Cavia<br>porcellu<br>s           |
| 1 | 1.00 | 1 | 1 | 0     | 0      | 0.009  | 0      | 0      | t | 60544  | SQRTDIIYI<br>SR              | Oryctola<br>gus<br>cuniculu<br>s |
| 1 | 1.00 | 1 | 1 | 0     | -0.002 | 0.002  | -0.001 | -0.001 | t | 115774 | GSGKDSHT<br>RTTHYGS          | Mus<br>musculu<br>s              |
| 1 | 1.00 | 1 | 1 | -0.04 | -0.042 | -0.041 | -0.041 | -0.041 | t | 31046  | KGQKPPLL<br>DRLRHRK<br>NGYRH | Mus<br>musculu<br>s              |
| 1 | 1.00 | 1 | 1 | 0.01  | 0.01   | 0.027  | 0.01   | 0.01   | t | 21867  | GQGGGTH<br>NQWNKP            | Oryctola<br>gus<br>cuniculu<br>s |
| 1 | 1.00 | 1 | 1 | -0.04 | -0.037 | -0.03  | -0.04  | -0.039 | t | 95044  | SSRGK                        | Mus<br>musculu<br>s              |
| 1 | 1.00 | 1 | 1 | 0     | -0.002 | 0      | -0.001 | 0.002  | t | 111845 | TPTLHEYM<br>LDLQPETT<br>DLYC | Mus<br>musculu<br>s              |
| 1 | 1.00 | 1 | 1 | -0.01 | -0.01  | -0.01  | -0.01  | -0.01  | t | 140905 | TPAAKVLV<br>EGNTDER<br>GTPEY | Oryctola<br>gus<br>cuniculu<br>s |
| 1 | 1.00 | 1 | 1 | -0.01 | -0.006 | 0.009  | -0.01  | -0.01  | t | 123780 | TMKMWS<br>DFL                | Ovis<br>aries                    |
| 1 | 1.00 | 1 | 1 | 0.01  | 0.01   | 0.012  | 0.01   | 0.012  | t | 141757 | SVVPSKAT<br>WGFA             | Mus<br>musculu<br>s              |
| 1 | 1.00 | 1 | 1 | -0.01 | -0.012 | -0.008 | -0.01  | -0.009 | t | 69411  | VLDGDKLL<br>PKVAPQAL         | Oryctola<br>gus<br>cuniculu<br>s |
| 1 | 1.00 | 1 | 1 | -0.02 | -0.024 | -0.02  | -0.027 | -0.022 | t | 107309 | DAGPYVSP<br>TFFAH            | Oryctola<br>gus<br>cuniculu<br>s |

|   |      |   |   |       |        |        |        |        |   |        |                              |                       |
|---|------|---|---|-------|--------|--------|--------|--------|---|--------|------------------------------|-----------------------|
| 1 | 1.00 | 1 | 1 | -0.05 | -0.05  | -0.05  | -0.05  | -0.05  | t | 112062 | CARMRDG                      | Homo sapiens          |
| 1 | 1.00 | 1 | 1 | -0.03 | -0.031 | -0.014 | -0.027 | -0.03  | t | 11354  | EDINGIRR<br>PKHLYV           | Myodes glareolus      |
| 1 | 1.00 | 1 | 1 | 0     | 0.002  | 0.01   | 0.001  | 0      | t | 78680  | HPPSSRPC<br>ANTPPSE<br>MDTWN | Homo sapiens          |
| 1 | 1.00 | 1 | 1 | 0.05  | 0.058  | 0.069  | 0.05   | 0.05   | t | 13894  | EQNVPD                       | Cavia porcellus       |
| 1 | 1.00 | 1 | 1 | 0.01  | 0.01   | 0.009  | 0.01   | 0.01   | t | 13391  | EMLAER<br>PRGVFNR<br>QLVLGE  | Mus musculus          |
| 1 | 1.00 | 1 | 1 | 0.01  | 0.006  | 0.015  | 0.013  | 0.013  | t | 116001 | TQDQDPV<br>VHF               | Oryctolagus cuniculus |
| 1 | 1.00 | 1 | 1 | -0.03 | -0.028 | -0.025 | -0.031 | -0.028 | t | 136567 | PYWKWQ<br>YKYD               | Homo sapiens          |
| 1 | 1.00 | 1 | 1 | 0.06  | 0.067  | 0.051  | 0.053  | 0.06   | t | 108873 | DLYCYEQL<br>NDSSEED<br>EIDG  | Gallus gallus         |
| 1 | 1.00 | 1 | 1 | 0     | 0      | 0      | 0      | 0      | t | 105069 | AEFDLDIL<br>AGTEAA           | Oryctolagus cuniculus |
| 1 | 1.00 | 1 | 1 | -0.06 | -0.06  | -0.045 | -0.056 | -0.06  | t | 142429 | KAYAVEAH<br>LAKTKN           | Homo sapiens          |
| 1 | 1.00 | 1 | 1 | -0.09 | -0.094 | -0.088 | -0.089 | -0.088 | t | 96409  | INDMPITN<br>DQKKL            | Oryctolagus cuniculus |
| 1 | 1.00 | 1 | 1 | -0.04 | -0.04  | -0.036 | -0.04  | -0.04  | t | 71301  | VTFHYQN<br>KYKVPAN           | Oryctolagus cuniculus |
| 1 | 1.00 | 1 | 1 | -0.01 | -0.008 | 0.007  | -0.007 | -0.011 | t | 109938 | SPRSGDLS<br>VY               | Homo sapiens          |
| 1 | 1.00 | 1 | 1 | 0     | -0.004 | -0.005 | -0.007 | 0      | t | 138146 | ASHLDYGS<br>ALLSKV           | Oryctolagus cuniculus |

|   |      |   |   |       |        |        |        |        |   |        |                              |                                  |
|---|------|---|---|-------|--------|--------|--------|--------|---|--------|------------------------------|----------------------------------|
| 1 | 1.00 | 1 | 1 | -0.04 | -0.04  | -0.04  | -0.04  | -0.038 | t | 107662 | VLTVLHQN<br>WL               | Mus<br>musculu<br>s              |
| 1 | 1.00 | 1 | 1 | -0.04 | -0.042 | -0.04  | -0.04  | -0.038 | t | 107662 | VLTVLHQN<br>WL               | Oryctola<br>gus<br>cuniculu<br>s |
| 1 | 1.00 | 1 | 1 | -0.03 | -0.027 | -0.025 | -0.03  | -0.03  | t | 132893 | SDELRLQRL                    | Mus<br>musculu<br>s              |
| 1 | 1.00 | 1 | 1 | -0.04 | -0.04  | -0.033 | -0.04  | -0.038 | t | 133665 | PVLLFCFLA<br>GRCVSV          | Mus<br>musculu<br>s              |
| 1 | 1.00 | 1 | 1 | 0     | 0.004  | 0.004  | 0      | 0.002  | t | 5076   | ATPERPRL                     | Homo<br>sapiens                  |
| 1 | 1.00 | 1 | 1 | 0.01  | 0.012  | 0.01   | 0.011  | 0.013  | t | 58418  | SHSSESHR<br>VKSAGPP          | Homo<br>sapiens                  |
| 1 | 1.00 | 1 | 1 | -0.01 | -0.012 | -0.015 | -0.017 | -0.011 | t | 129732 | RERRGIAL<br>DGKI             | Mus<br>musculu<br>s              |
| 1 | 1.00 | 1 | 1 | -0.02 | -0.017 | -0.003 | -0.02  | -0.019 | t | 145776 | FDTGAFDP<br>DWPY             | Mus<br>musculu<br>s              |
| 1 | 1.00 | 1 | 1 | 0.01  | 0.008  | 0.02   | 0.009  | 0.01   | t | 39213  | LRSPNGFL<br>LTDQ             | Mus<br>musculu<br>s              |
| 1 | 1.00 | 1 | 1 | 0.01  | 0.008  | 0.023  | 0.009  | 0.008  | t | 60032  | SPEKPHFP<br>LA               | Sus<br>crofa                     |
| 1 | 1.00 | 1 | 1 | 0     | -0.002 | -0.001 | -0.007 | 0.001  | t | 122269 | ARQNLKD<br>AGE               | Mus<br>musculu<br>s              |
| 1 | 1.00 | 1 | 1 | -0.01 | -0.006 | -0.013 | -0.009 | -0.008 | t | 61840  | STPSTPAD<br>SSAHSTPS<br>TPV  | Homo<br>sapiens                  |
| 1 | 1.00 | 1 | 1 | -0.01 | -0.012 | 0.001  | -0.013 | -0.01  | t | 1464   | AGDDDL<br>GDLNGDD<br>RR      | Mus<br>musculu<br>s              |
| 1 | 1.00 | 1 | 1 | -0.03 | -0.03  | -0.026 | -0.023 | -0.03  | t | 53881  | RGGSRERA<br>RGRGRGR<br>GEKRP | Homo<br>sapiens                  |

|   |      |   |   |       |        |        |        |        |   |        |                              |                                  |
|---|------|---|---|-------|--------|--------|--------|--------|---|--------|------------------------------|----------------------------------|
| 1 | 1.00 | 1 | 1 | 0     | 0      | 0.008  | 0      | 0.003  | t | 32580  | KNPEKPHF<br>PL               | Mus<br>musculu<br>s              |
| 1 | 1.00 | 1 | 1 | -0.01 | -0.006 | -0.004 | -0.013 | -0.012 | t | 70663  | VQVVGDE<br>GRSVF             | Homo<br>sapiens                  |
| 1 | 1.00 | 1 | 1 | 0     | -0.002 | 0      | -0.007 | 0      | t | 140546 | CNLWEVM<br>HGTC              | Mus<br>musculu<br>s              |
| 1 | 1.00 | 1 | 1 | 0     | -0.002 | 0      | -0.007 | 0      | t | 135546 | DWEYS                        | Mus<br>musculu<br>s              |
| 1 | 1.00 | 1 | 1 | 0     | -0.004 | 0      | -0.007 | 0      | t | 136420 | KIHAREIFD<br>SRGNPTVE        | Oryctola<br>gus<br>cuniculu<br>s |
| 1 | 1.00 | 1 | 1 | 0     | -0.002 | 0      | -0.007 | 0      | t | 136590 | RDYFEEYG<br>KIDTIEIT         | Mus<br>musculu<br>s              |
| 1 | 1.00 | 1 | 1 | 0     | -0.002 | 0      | -0.007 | 0      | t | 136087 | VETDKATV<br>GF               | Rattus<br>norvegic<br>us         |
| 1 | 1.00 | 1 | 1 | 0     | -0.002 | 0      | -0.007 | 0      | t | 140582 | PWATLVA<br>ES                | Mus<br>musculu<br>s              |
| 1 | 1.00 | 1 | 1 | 0     | -0.002 | 0      | -0.007 | 0      | t | 149867 | PESFDGDP<br>ASNTAPLQ<br>PE   | Mus<br>musculu<br>s              |
| 1 | 1.00 | 1 | 1 | 0     | -0.004 | 0      | -0.007 | 0      | t | 136087 | VETDKATV<br>GF               | Oryctola<br>gus<br>cuniculu<br>s |
| 1 | 1.00 | 1 | 1 | 0     | -0.002 | 0      | -0.007 | 0      | t | 138886 | NVGGDNV<br>DIHSIVPV<br>GQDPH | Mus<br>musculu<br>s              |
| 1 | 1.00 | 1 | 1 | 0     | -0.004 | 0      | -0.007 | 0      | t | 137399 | FCGLPRLE                     | Oryctola<br>gus<br>cuniculu<br>s |
| 1 | 1.00 | 1 | 1 | 0     | -0.002 | 0      | -0.007 | 0      | t | 135546 | DWEYS                        | Mus<br>musculu<br>s              |
| 1 | 1.00 | 1 | 1 | 0     | -0.002 | 0      | -0.007 | 0      | t | 149867 | PESFDGDP<br>ASNTAPLQ<br>PE   | Mus<br>musculu<br>s              |
| 1 | 1.00 | 1 | 1 | 0     | -0.002 | 0      | -0.007 | 0      | t | 138219 | PTPETGPL<br>QR               | Mus<br>musculu<br>s              |

|   |      |   |   |   |        |   |        |   |   |        |                              |                                  |
|---|------|---|---|---|--------|---|--------|---|---|--------|------------------------------|----------------------------------|
| 1 | 1.00 | 1 | 1 | 0 | -0.002 | 0 | -0.007 | 0 | t | 134804 | TIFILCCSK<br>EKRRKKQA<br>AT  | Mus<br>musculu<br>s              |
| 1 | 1.00 | 1 | 1 | 0 | -0.002 | 0 | -0.007 | 0 | t | 140606 | TMWDALE<br>AP                | Mus<br>musculu<br>s              |
| 1 | 1.00 | 1 | 1 | 0 | -0.004 | 0 | -0.007 | 0 | t | 138304 | ATVQLPQ                      | Oryctola<br>gus<br>cuniculu<br>s |
| 1 | 1.00 | 1 | 1 | 0 | -0.004 | 0 | -0.007 | 0 | t | 138608 | RVGAHDP                      | Oryctola<br>gus<br>cuniculu<br>s |
| 1 | 1.00 | 1 | 1 | 0 | -0.002 | 0 | -0.007 | 0 | t | 140547 | CSIGEALS<br>HGC              | Mus<br>musculu<br>s              |
| 1 | 1.00 | 1 | 1 | 0 | -0.004 | 0 | -0.007 | 0 | t | 138232 | RLTSSLRY<br>NP               | Oryctola<br>gus<br>cuniculu<br>s |
| 1 | 1.00 | 1 | 1 | 0 | -0.002 | 0 | -0.007 | 0 | t | 136303 | GARGLTG<br>RPGDA             | Mus<br>musculu<br>s              |
| 1 | 1.00 | 1 | 1 | 0 | -0.002 | 0 | -0.007 | 0 | t | 119563 | EDHRQVV<br>EVTVGLQL<br>I     | Mus<br>musculu<br>s              |
| 1 | 1.00 | 1 | 1 | 0 | -0.004 | 0 | -0.007 | 0 | t | 120930 | RYRPGTVA<br>LREIRRYQ         | Oryctola<br>gus<br>cuniculu<br>s |
| 1 | 1.00 | 1 | 1 | 0 | -0.002 | 0 | -0.007 | 0 | t | 125377 | DKDAFGG<br>VYSGPSLL<br>DVSQT | Mus<br>musculu<br>s              |
| 1 | 1.00 | 1 | 1 | 0 | -0.004 | 0 | -0.007 | 0 | t | 124604 | QIERDTER<br>DRFLSAPE<br>AV   | Oryctola<br>gus<br>cuniculu<br>s |
| 1 | 1.00 | 1 | 1 | 0 | -0.004 | 0 | -0.007 | 0 | t | 123511 | MPPMTQ<br>AP                 | Oryctola<br>gus<br>cuniculu<br>s |
| 1 | 1.00 | 1 | 1 | 0 | -0.002 | 0 | -0.007 | 0 | t | 125413 | FRVTCKDI<br>QRIPSLPPS<br>TQT | Mus<br>musculu<br>s              |
| 1 | 1.00 | 1 | 1 | 0 | -0.004 | 0 | -0.007 | 0 | t | 127963 | EPKPKKAP<br>AKKGEKV          | Oryctola<br>gus<br>cuniculu<br>s |

|   |      |   |   |   |        |   |        |   |   |        |                              |                                  |
|---|------|---|---|---|--------|---|--------|---|---|--------|------------------------------|----------------------------------|
| 1 | 1.00 | 1 | 1 | 0 | -0.002 | 0 | -0.007 | 0 | t | 119411 | YKYFPEVK<br>TKGMA            | Mus<br>musculu<br>s              |
| 1 | 1.00 | 1 | 1 | 0 | -0.004 | 0 | -0.007 | 0 | t | 119411 | YKYFPEVK<br>TKGMA            | Oryctola<br>gus<br>cuniculu<br>s |
| 1 | 1.00 | 1 | 1 | 0 | -0.004 | 0 | -0.007 | 0 | t | 125377 | DKDAFGG<br>VYSGPSLL<br>DVSQT | Oryctola<br>gus<br>cuniculu<br>s |
| 1 | 1.00 | 1 | 1 | 0 | -0.004 | 0 | -0.007 | 0 | t | 123513 | MPPQQL<br>MP                 | Oryctola<br>gus<br>cuniculu<br>s |
| 1 | 1.00 | 1 | 1 | 0 | -0.004 | 0 | -0.007 | 0 | t | 122780 | GQELKNP<br>QEETLQAF<br>DSHYD | Oryctola<br>gus<br>cuniculu<br>s |
| 1 | 1.00 | 1 | 1 | 0 | -0.004 | 0 | -0.007 | 0 | t | 123626 | PPYMPPP<br>G                 | Oryctola<br>gus<br>cuniculu<br>s |
| 1 | 1.00 | 1 | 1 | 0 | -0.002 | 0 | -0.007 | 0 | t | 122780 | GQELKNP<br>QEETLQAF<br>DSHYD | Mus<br>musculu<br>s              |
| 1 | 1.00 | 1 | 1 | 0 | -0.004 | 0 | -0.007 | 0 | t | 127960 | EKVPKGKK<br>GKADAGK          | Oryctola<br>gus<br>cuniculu<br>s |
| 1 | 1.00 | 1 | 1 | 0 | -0.002 | 0 | -0.007 | 0 | t | 131010 | PSTRWTEL<br>DDVKRLLK<br>GSRS | Mus<br>musculu<br>s              |
| 1 | 1.00 | 1 | 1 | 0 | -0.002 | 0 | -0.007 | 0 | t | 122932 | VCTPKSDE<br>FNPCEDIM<br>GYK  | Mus<br>musculu<br>s              |
| 1 | 1.00 | 1 | 1 | 0 | -0.002 | 0 | -0.007 | 0 | t | 118346 | FEYFPSHFF<br>VPELEVTTII<br>C | Mus<br>musculu<br>s              |
| 1 | 1.00 | 1 | 1 | 0 | -0.004 | 0 | -0.007 | 0 | t | 122749 | EIIGFGQEL<br>KNPQEE          | Oryctola<br>gus<br>cuniculu<br>s |
| 1 | 1.00 | 1 | 1 | 0 | -0.004 | 0 | -0.007 | 0 | t | 128297 | APKSPA<br>KAVKPKAA           | Oryctola<br>gus<br>cuniculu<br>s |
| 1 | 1.00 | 1 | 1 | 0 | -0.002 | 0 | -0.007 | 0 | t | 122377 | GLPRLETP<br>ADLSTAIA<br>SRS  | Mus<br>musculu<br>s              |

|   |      |   |   |   |        |   |        |   |   |        |                             |                                  |
|---|------|---|---|---|--------|---|--------|---|---|--------|-----------------------------|----------------------------------|
| 1 | 1.00 | 1 | 1 | 0 | -0.004 | 0 | -0.007 | 0 | t | 124925 | YYVFFEEQ<br>EDEIIGF         | Oryctola<br>gus<br>cuniculu<br>s |
| 1 | 1.00 | 1 | 1 | 0 | -0.002 | 0 | -0.007 | 0 | t | 117495 | ERDRKREK<br>RKPKS           | Mus<br>musculu<br>s              |
| 1 | 1.00 | 1 | 1 | 0 | -0.004 | 0 | -0.007 | 0 | t | 122377 | GLPRLETP<br>ADLSTAIA<br>SRS | Oryctola<br>gus<br>cuniculu<br>s |
| 1 | 1.00 | 1 | 1 | 0 | -0.004 | 0 | -0.007 | 0 | t | 123331 | IPPPGLAP                    | Oryctola<br>gus<br>cuniculu<br>s |
| 1 | 1.00 | 1 | 1 | 0 | -0.004 | 0 | -0.007 | 0 | t | 123329 | IPPGAMPP                    | Oryctola<br>gus<br>cuniculu<br>s |
| 1 | 1.00 | 1 | 1 | 0 | -0.004 | 0 | -0.007 | 0 | t | 128032 | KDEPQRRS<br>ARLSAKP         | Oryctola<br>gus<br>cuniculu<br>s |
| 1 | 1.00 | 1 | 1 | 0 | -0.002 | 0 | -0.007 | 0 | t | 117514 | GRGRGRG<br>RGRGGPR<br>R     | Mus<br>musculu<br>s              |
| 1 | 1.00 | 1 | 1 | 0 | -0.002 | 0 | -0.007 | 0 | t | 121785 | REWVKFA<br>KPCRE            | Mus<br>musculu<br>s              |
| 1 | 1.00 | 1 | 1 | 0 | -0.004 | 0 | -0.007 | 0 | t | 122790 | HQEEDFR<br>VTCKDIQR         | Oryctola<br>gus<br>cuniculu<br>s |
| 1 | 1.00 | 1 | 1 | 0 | -0.002 | 0 | -0.007 | 0 | t | 119852 | EVNQIVTT<br>NVRLKQQ<br>W    | Mus<br>musculu<br>s              |
| 1 | 1.00 | 1 | 1 | 0 | -0.004 | 0 | -0.007 | 0 | t | 129931 | SKPRAKSG<br>ARKSPKKK        | Oryctola<br>gus<br>cuniculu<br>s |
| 1 | 1.00 | 1 | 1 | 0 | -0.004 | 0 | -0.007 | 0 | t | 123522 | MTQAPRI<br>M                | Oryctola<br>gus<br>cuniculu<br>s |
| 1 | 1.00 | 1 | 1 | 0 | -0.004 | 0 | -0.007 | 0 | t | 123314 | IGTFKAFD                    | Oryctola<br>gus<br>cuniculu<br>s |



|   |      |   |   |   |        |   |        |   |   |        |                              |                                  |
|---|------|---|---|---|--------|---|--------|---|---|--------|------------------------------|----------------------------------|
| 1 | 1.00 | 1 | 1 | 0 | -0.004 | 0 | -0.007 | 0 | t | 117765 | CAQTDRH<br>SLS               | Oryctola<br>gus<br>cuniculu<br>s |
| 1 | 1.00 | 1 | 1 | 0 | -0.004 | 0 | -0.007 | 0 | t | 123643 | PYMPPPG<br>M                 | Oryctola<br>gus<br>cuniculu<br>s |
| 1 | 1.00 | 1 | 1 | 0 | -0.002 | 0 | -0.007 | 0 | t | 117614 | QGFPPFYDK<br>PMRI            | Mus<br>musculu<br>s              |
| 1 | 1.00 | 1 | 1 | 0 | -0.004 | 0 | -0.007 | 0 | t | 122892 | RSILPYGDS<br>MDRIE           | Oryctola<br>gus<br>cuniculu<br>s |
| 1 | 1.00 | 1 | 1 | 0 | -0.004 | 0 | -0.007 | 0 | t | 125540 | QSLRQRKS<br>VNALNSPL<br>HQEY | Oryctola<br>gus<br>cuniculu<br>s |
| 1 | 1.00 | 1 | 1 | 0 | -0.002 | 0 | -0.007 | 0 | t | 122943 | WDPAQPP<br>RD                | Mus<br>musculu<br>s              |
| 1 | 1.00 | 1 | 1 | 0 | -0.004 | 0 | -0.007 | 0 | t | 128340 | ATPKKSAK<br>KTPKKAKK         | Oryctola<br>gus<br>cuniculu<br>s |
| 1 | 1.00 | 1 | 1 | 0 | -0.003 | 0 | -0.007 | 0 | t | 118058 | PPPGIRGP                     | Oryctola<br>gus<br>cuniculu<br>s |
| 1 | 1.00 | 1 | 1 | 0 | -0.004 | 0 | -0.007 | 0 | t | 122746 | EEQEDEIIG<br>FGQELKN         | Oryctola<br>gus<br>cuniculu<br>s |
| 1 | 1.00 | 1 | 1 | 0 | -0.003 | 0 | -0.007 | 0 | t | 118060 | PPPGMRP<br>P                 | Oryctola<br>gus<br>cuniculu<br>s |
| 1 | 1.00 | 1 | 1 | 0 | -0.002 | 0 | -0.007 | 0 | t | 119624 | PDTPYLDIT<br>YHFVMQR<br>L    | Mus<br>musculu<br>s              |
| 1 | 1.00 | 1 | 1 | 0 | -0.002 | 0 | -0.007 | 0 | t | 122885 | QVAALTW<br>VQTHIRGF<br>GGDPR | Mus<br>musculu<br>s              |
| 1 | 1.00 | 1 | 1 | 0 | -0.002 | 0 | -0.007 | 0 | t | 131457 | GSHTRGD                      | Mus<br>musculu<br>s              |
| 1 | 1.00 | 1 | 1 | 0 | -0.004 | 0 | -0.007 | 0 | t | 128038 | KSPKKAKA<br>AKPKKAP          | Oryctola<br>gus<br>cuniculu<br>s |

|   |      |   |   |   |        |   |        |   |   |        |                              |                                  |
|---|------|---|---|---|--------|---|--------|---|---|--------|------------------------------|----------------------------------|
| 1 | 1.00 | 1 | 1 | 0 | -0.004 | 0 | -0.007 | 0 | t | 123602 | PMTQAPRI                     | Oryctola<br>gus<br>cuniculu<br>s |
| 1 | 1.00 | 1 | 1 | 0 | -0.002 | 0 | -0.007 | 0 | t | 122885 | QVAALTW<br>VQTHIRGF<br>GGDPR | Mus<br>musculu<br>s              |
| 1 | 1.00 | 1 | 1 | 0 | -0.004 | 0 | -0.007 | 0 | t | 122947 | WTQEPQP<br>LEEKWQH<br>RVVE   | Oryctola<br>gus<br>cuniculu<br>s |
| 1 | 1.00 | 1 | 1 | 0 | -0.003 | 0 | -0.007 | 0 | t | 118060 | PPPGMRP<br>P                 | Oryctola<br>gus<br>cuniculu<br>s |
| 1 | 1.00 | 1 | 1 | 0 | -0.004 | 0 | -0.007 | 0 | t | 124588 | PQEETLQA<br>FDSHYDYT         | Oryctola<br>gus<br>cuniculu<br>s |
| 1 | 1.00 | 1 | 1 | 0 | -0.004 | 0 | -0.007 | 0 | t | 128039 | KTPKKAKK<br>PKTPKKA          | Oryctola<br>gus<br>cuniculu<br>s |
| 1 | 1.00 | 1 | 1 | 0 | -0.002 | 0 | -0.007 | 0 | t | 125384 | DSHYDYTI<br>CGDSEDM<br>VCTPK | Mus<br>musculu<br>s              |
| 1 | 1.00 | 1 | 1 | 0 | -0.004 | 0 | -0.007 | 0 | t | 124588 | PQEETLQA<br>FDSHYDYT         | Oryctola<br>gus<br>cuniculu<br>s |
| 1 | 1.00 | 1 | 1 | 0 | -0.004 | 0 | -0.007 | 0 | t | 128024 | IKKVATPK<br>KASPKK           | Oryctola<br>gus<br>cuniculu<br>s |
| 1 | 1.00 | 1 | 1 | 0 | -0.002 | 0 | -0.007 | 0 | t | 119578 | FAIVKFTKV<br>LLQYTGH         | Mus<br>musculu<br>s              |
| 1 | 1.00 | 1 | 1 | 0 | -0.004 | 0 | -0.007 | 0 | t | 122956 | YYVFEEQ<br>EDEIIGFG          | Oryctola<br>gus<br>cuniculu<br>s |
| 1 | 1.00 | 1 | 1 | 0 | -0.002 | 0 | -0.007 | 0 | t | 131545 | LMKINS                       | Mus<br>musculu<br>s              |
| 1 | 1.00 | 1 | 1 | 0 | -0.004 | 0 | -0.007 | 0 | t | 130492 | FKEQFLDG<br>DGWTSR           | Oryctola<br>gus<br>cuniculu<br>s |

|   |      |   |   |   |        |   |        |   |   |        |                               |                                  |
|---|------|---|---|---|--------|---|--------|---|---|--------|-------------------------------|----------------------------------|
| 1 | 1.00 | 1 | 1 | 0 | -0.004 | 0 | -0.007 | 0 | t | 123259 | GQPPYMP<br>P                  | Oryctola<br>gus<br>cuniculu<br>s |
| 1 | 1.00 | 1 | 1 | 0 | -0.004 | 0 | -0.007 | 0 | t | 132201 | CLAMGW<br>GRVGAHD<br>PP       | Oryctola<br>gus<br>cuniculu<br>s |
| 1 | 1.00 | 1 | 1 | 0 | -0.004 | 0 | -0.007 | 0 | t | 122878 | PYEF SRKV<br>PTFATPW<br>PDFVP | Oryctola<br>gus<br>cuniculu<br>s |
| 1 | 1.00 | 1 | 1 | 0 | -0.004 | 0 | -0.007 | 0 | t | 128225 | AGAAKRK<br>ASGPPVSE<br>L      | Oryctola<br>gus<br>cuniculu<br>s |
| 1 | 1.00 | 1 | 1 | 0 | -0.002 | 0 | -0.007 | 0 | t | 125384 | DSHYDYTI<br>CGDSEDM<br>VCTPK  | Mus<br>musculu<br>s              |
| 1 | 1.00 | 1 | 1 | 0 | -0.004 | 0 | -0.007 | 0 | t | 123386 | KPKSQETP                      | Oryctola<br>gus<br>cuniculu<br>s |
| 1 | 1.00 | 1 | 1 | 0 | -0.002 | 0 | -0.007 | 0 | t | 119579 | FKDYSSVV<br>RPVEDHR<br>Q      | Mus<br>musculu<br>s              |
| 1 | 1.00 | 1 | 1 | 0 | -0.002 | 0 | -0.007 | 0 | t | 120066 | LKQQWVD<br>YNLKWNP<br>DD      | Mus<br>musculu<br>s              |
| 1 | 1.00 | 1 | 1 | 0 | -0.004 | 0 | -0.007 | 0 | t | 128078 | PPKPEPKP<br>KKAPAKK           | Oryctola<br>gus<br>cuniculu<br>s |
| 1 | 1.00 | 1 | 1 | 0 | -0.004 | 0 | -0.007 | 0 | t | 119410 | YKMFPEVK<br>EKGMA             | Oryctola<br>gus<br>cuniculu<br>s |
| 1 | 1.00 | 1 | 1 | 0 | -0.004 | 0 | -0.007 | 0 | t | 118556 | PPPGMIPP                      | Oryctola<br>gus<br>cuniculu<br>s |
| 1 | 1.00 | 1 | 1 | 0 | -0.002 | 0 | -0.007 | 0 | t | 119410 | YKMFPEVK<br>EKGMA             | Mus<br>musculu<br>s              |
| 1 | 1.00 | 1 | 1 | 0 | -0.002 | 0 | -0.007 | 0 | t | 125524 | PSTQTLKLI<br>ETHLRTIPS<br>HA  | Mus<br>musculu<br>s              |
| 1 | 1.00 | 1 | 1 | 0 | -0.004 | 0 | -0.007 | 0 | t | 131141 | VRR LAME<br>NNIKLSEV<br>VGSG  | Oryctola<br>gus<br>cuniculu<br>s |

|   |      |   |   |   |        |   |        |   |   |        |                             |                       |
|---|------|---|---|---|--------|---|--------|---|---|--------|-----------------------------|-----------------------|
| 1 | 1.00 | 1 | 1 | 0 | -0.002 | 0 | -0.007 | 0 | t | 131412 | ERGLRYL                     | Mus musculus          |
| 1 | 1.00 | 1 | 1 | 0 | -0.002 | 0 | -0.007 | 0 | t | 131413 | ERILTIS                     | Mus musculus          |
| 1 | 1.00 | 1 | 1 | 0 | -0.002 | 0 | -0.007 | 0 | t | 117509 | GQIPPGAM                    | Mus musculus          |
| 1 | 1.00 | 1 | 1 | 0 | -0.004 | 0 | -0.007 | 0 | t | 125551 | RNLTYIDP<br>DALKEPLL<br>KFL | Oryctolagus cuniculus |
| 1 | 1.00 | 1 | 1 | 0 | -0.004 | 0 | -0.007 | 0 | t | 119466 | IRGERA                      | Oryctolagus cuniculus |
| 1 | 1.00 | 1 | 1 | 0 | -0.004 | 0 | -0.007 | 0 | t | 127935 | ARLSAKPA<br>PPKPEPK         | Oryctolagus cuniculus |
| 1 | 1.00 | 1 | 1 | 0 | -0.004 | 0 | -0.007 | 0 | t | 128193 | AAKPKTAK<br>PKAAKPKK        | Oryctolagus cuniculus |
| 1 | 1.00 | 1 | 1 | 0 | -0.004 | 0 | -0.007 | 0 | t | 121765 | QRRSARLS<br>AKPAPPK         | Oryctolagus cuniculus |
| 1 | 1.00 | 1 | 1 | 0 | -0.002 | 0 | -0.007 | 0 | t | 119925 | HFPFDEQ<br>NGSMKLG<br>TWT   | Mus musculus          |
| 1 | 1.00 | 1 | 1 | 0 | -0.004 | 0 | -0.007 | 0 | t | 129159 | KSPKKAKA<br>AKPKKAPK        | Oryctolagus cuniculus |
| 1 | 1.00 | 1 | 1 | 0 | -0.002 | 0 | -0.007 | 0 | t | 118970 | PPPGRRP                     | Mus musculus          |
| 1 | 1.00 | 1 | 1 | 0 | -0.004 | 0 | -0.007 | 0 | t | 118970 | PPPGRRP                     | Oryctolagus cuniculus |
| 1 | 1.00 | 1 | 1 | 0 | -0.002 | 0 | -0.007 | 0 | t | 117773 | CNSRQTD<br>REDELI           | Rattus norvegicus     |
| 1 | 1.00 | 1 | 1 | 0 | -0.002 | 0 | -0.007 | 0 | t | 133372 | SPSPTPTP<br>GPSRRG          | Mus musculus          |

|   |      |   |   |   |        |   |        |   |   |        |                              |                                  |
|---|------|---|---|---|--------|---|--------|---|---|--------|------------------------------|----------------------------------|
| 1 | 1.00 | 1 | 1 | 0 | -0.004 | 0 | -0.007 | 0 | t | 123207 | GAMPPQ<br>QL                 | Oryctola<br>gus<br>cuniculu<br>s |
| 1 | 1.00 | 1 | 1 | 0 | -0.004 | 0 | -0.007 | 0 | t | 123025 | AMPPQQL<br>M                 | Oryctola<br>gus<br>cuniculu<br>s |
| 1 | 1.00 | 1 | 1 | 0 | -0.002 | 0 | -0.007 | 0 | t | 125462 | KLPLSLSFL<br>HLTRADLS<br>YPS | Mus<br>musculu<br>s              |
| 1 | 1.00 | 1 | 1 | 0 | -0.002 | 0 | -0.007 | 0 | t | 119560 | DLVLYNNA<br>DGDFAIVK         | Mus<br>musculu<br>s              |
| 1 | 1.00 | 1 | 1 | 0 | -0.002 | 0 | -0.007 | 0 | t | 119633 | QYTGHIT<br>WTPPAIFK<br>S     | Mus<br>musculu<br>s              |
| 1 | 1.00 | 1 | 1 | 0 | -0.002 | 0 | -0.007 | 0 | t | 125396 | EITDNPYM<br>TSIPVNAF<br>QGLC | Mus<br>musculu<br>s              |
| 1 | 1.00 | 1 | 1 | 0 | -0.002 | 0 | -0.007 | 0 | t | 119673 | WNPDDYG<br>GVK               | Rattus<br>norvegic<br>us         |
| 1 | 1.00 | 1 | 1 | 0 | -0.004 | 0 | -0.007 | 0 | t | 123616 | PPMTQAP<br>R                 | Oryctola<br>gus<br>cuniculu<br>s |
| 1 | 1.00 | 1 | 1 | 0 | -0.004 | 0 | -0.007 | 0 | t | 125386 | DVSQTSVT<br>ALPSKGLE<br>HLKE | Oryctola<br>gus<br>cuniculu<br>s |
| 1 | 1.00 | 1 | 1 | 0 | -0.004 | 0 | -0.007 | 0 | t | 120699 | KMFPEVKE<br>KGMAALP<br>RL    | Oryctola<br>gus<br>cuniculu<br>s |
| 1 | 1.00 | 1 | 1 | 0 | -0.002 | 0 | -0.007 | 0 | t | 117437 | AIALREYRK<br>KMDIPA          | Mus<br>musculu<br>s              |
| 1 | 1.00 | 1 | 1 | 0 | -0.004 | 0 | -0.007 | 0 | t | 129829 | RSGVSLAA<br>LKKALAAA         | Oryctola<br>gus<br>cuniculu<br>s |
| 1 | 1.00 | 1 | 1 | 0 | -0.004 | 0 | -0.007 | 0 | t | 127926 | AKKGEKVP<br>KGKKGKA          | Oryctola<br>gus<br>cuniculu<br>s |
| 1 | 1.00 | 1 | 1 | 0 | -0.004 | 0 | -0.007 | 0 | t | 124068 | ELMALHT<br>GQSLEQIE<br>R     | Oryctola<br>gus<br>cuniculu<br>s |

|   |      |   |   |   |        |   |        |   |   |        |                              |                                  |
|---|------|---|---|---|--------|---|--------|---|---|--------|------------------------------|----------------------------------|
| 1 | 1.00 | 1 | 1 | 0 | -0.002 | 0 | -0.007 | 0 | t | 118105 | RKGHFLLS<br>SKSGFWTI<br>WL   | Mus<br>musculu<br>s              |
| 1 | 1.00 | 1 | 1 | 0 | -0.002 | 0 | -0.007 | 0 | t | 119608 | LGTWTYD<br>GSVVAINP<br>ES    | Mus<br>musculu<br>s              |
| 1 | 1.00 | 1 | 1 | 0 | -0.004 | 0 | -0.007 | 0 | t | 125506 | NGFTSVQ<br>GYAFNGT<br>KLDVY  | Oryctola<br>gus<br>cuniculu<br>s |
| 1 | 1.00 | 1 | 1 | 0 | -0.004 | 0 | -0.007 | 0 | t | 123048 | ATKKAVQ<br>G                 | Oryctola<br>gus<br>cuniculu<br>s |
| 1 | 1.00 | 1 | 1 | 0 | -0.004 | 0 | -0.007 | 0 | t | 118217 | VTKYITKG<br>WKEVH            | Oryctola<br>gus<br>cuniculu<br>s |
| 1 | 1.00 | 1 | 1 | 0 | -0.004 | 0 | -0.007 | 0 | t | 117742 | AKAQTD<br>EDLRTLRY           | Oryctola<br>gus<br>cuniculu<br>s |
| 1 | 1.00 | 1 | 1 | 0 | -0.004 | 0 | -0.007 | 0 | t | 125472 | LDAVYLNK<br>NKYLTVID<br>KDAF | Oryctola<br>gus<br>cuniculu<br>s |
| 1 | 1.00 | 1 | 1 | 0 | -0.004 | 0 | -0.007 | 0 | t | 125472 | LDAVYLNK<br>NKYLTVID<br>KDAF | Oryctola<br>gus<br>cuniculu<br>s |
| 1 | 1.00 | 1 | 1 | 0 | -0.004 | 0 | -0.007 | 0 | t | 123512 | MPPPGMI<br>P                 | Oryctola<br>gus<br>cuniculu<br>s |
| 1 | 1.00 | 1 | 1 | 0 | -0.002 | 0 | -0.007 | 0 | t | 125472 | LDAVYLNK<br>NKYLTVID<br>KDAF | Mus<br>musculu<br>s              |
| 1 | 1.00 | 1 | 1 | 0 | -0.004 | 0 | -0.007 | 0 | t | 117569 | LKYLLAPKI<br>EDEEGS          | Oryctola<br>gus<br>cuniculu<br>s |
| 1 | 1.00 | 1 | 1 | 0 | -0.004 | 0 | -0.007 | 0 | t | 120641 | IQTAVRLLL<br>PGELAKHA<br>VSE | Oryctola<br>gus<br>cuniculu<br>s |
| 1 | 1.00 | 1 | 1 | 0 | -0.002 | 0 | -0.007 | 0 | t | 125605 | YKEKSKFQ<br>DTHNNAH<br>YYVFF | Mus<br>musculu<br>s              |

|   |      |   |   |   |        |   |        |   |   |        |                              |                                  |
|---|------|---|---|---|--------|---|--------|---|---|--------|------------------------------|----------------------------------|
| 1 | 1.00 | 1 | 1 | 0 | -0.004 | 0 | -0.007 | 0 | t | 123787 | TPATKKAV                     | Oryctola<br>gus<br>cuniculu<br>s |
| 1 | 1.00 | 1 | 1 | 0 | -0.004 | 0 | -0.007 | 0 | t | 123676 | QPPYMPP<br>P                 | Oryctola<br>gus<br>cuniculu<br>s |
| 1 | 1.00 | 1 | 1 | 0 | -0.004 | 0 | -0.007 | 0 | t | 128539 | EKTPVKKK<br>ARKSAGA<br>A     | Oryctola<br>gus<br>cuniculu<br>s |
| 1 | 1.00 | 1 | 1 | 0 | -0.004 | 0 | -0.007 | 0 | t | 117907 | HKAFKGSI                     | Oryctola<br>gus<br>cuniculu<br>s |
| 1 | 1.00 | 1 | 1 | 0 | -0.002 | 0 | -0.007 | 0 | t | 119596 | IHIPSEKIW<br>RPDLVLY         | Mus<br>musculu<br>s              |
| 1 | 1.00 | 1 | 1 | 0 | -0.002 | 0 | -0.007 | 0 | t | 131087 | SSPPCE                       | Mus<br>musculu<br>s              |
| 1 | 1.00 | 1 | 1 | 0 | -0.004 | 0 | -0.007 | 0 | t | 131874 | EVFISAPR                     | Oryctola<br>gus<br>cuniculu<br>s |
| 1 | 1.00 | 1 | 1 | 0 | -0.004 | 0 | -0.007 | 0 | t | 128259 | AKKAGAA<br>KAKKPAG<br>AA     | Oryctola<br>gus<br>cuniculu<br>s |
| 1 | 1.00 | 1 | 1 | 0 | -0.004 | 0 | -0.007 | 0 | t | 130291 | VSELITKAV<br>AASKERS         | Oryctola<br>gus<br>cuniculu<br>s |
| 1 | 1.00 | 1 | 1 | 0 | -0.002 | 0 | -0.007 | 0 | t | 131769 | YDSYAIA                      | Mus<br>musculu<br>s              |
| 1 | 1.00 | 1 | 1 | 0 | -0.002 | 0 | -0.007 | 0 | t | 125498 | MGCSSPP<br>CECHQEE<br>DFRVTC | Mus<br>musculu<br>s              |
| 1 | 1.00 | 1 | 1 | 0 | -0.004 | 0 | -0.007 | 0 | t | 124198 | GLLFGLIAL<br>AEEVRKLK<br>AR  | Oryctola<br>gus<br>cuniculu<br>s |
| 1 | 1.00 | 1 | 1 | 0 | -0.002 | 0 | -0.007 | 0 | t | 131766 | YCQTWGS                      | Mus<br>musculu<br>s              |
| 1 | 1.00 | 1 | 1 | 0 | -0.002 | 0 | -0.007 | 0 | t | 125498 | MGCSSPP<br>CECHQEE<br>DFRVTC | Mus<br>musculu<br>s              |

|   |      |   |   |   |        |   |        |   |   |        |                              |                                  |
|---|------|---|---|---|--------|---|--------|---|---|--------|------------------------------|----------------------------------|
| 1 | 1.00 | 1 | 1 | 0 | -0.004 | 0 | -0.007 | 0 | t | 125498 | MGCSSPP<br>CECHQEE<br>DFRVTC | Oryctola<br>gus<br>cuniculu<br>s |
| 1 | 1.00 | 1 | 1 | 0 | -0.002 | 0 | -0.007 | 0 | t | 131087 | SSPPCE                       | Mus<br>musculu<br>s              |
| 1 | 1.00 | 1 | 1 | 0 | -0.002 | 0 | -0.007 | 0 | t | 125610 | YYVFFEEQ<br>EDEIIGFG<br>QELK | Mus<br>musculu<br>s              |
| 1 | 1.00 | 1 | 1 | 0 | -0.004 | 0 | -0.007 | 0 | t | 126201 | GYKEKSKF<br>QDTHNNA          | Oryctola<br>gus<br>cuniculu<br>s |
| 1 | 1.00 | 1 | 1 | 0 | -0.004 | 0 | -0.007 | 0 | t | 122842 | LLDLPRDL<br>GGMGCSS<br>PPCE  | Oryctola<br>gus<br>cuniculu<br>s |
| 1 | 1.00 | 1 | 1 | 0 | -0.004 | 0 | -0.007 | 0 | t | 123701 | RGVGGPS<br>Q                 | Oryctola<br>gus<br>cuniculu<br>s |
| 1 | 1.00 | 1 | 1 | 0 | -0.002 | 0 | -0.007 | 0 | t | 125610 | YYVFFEEQ<br>EDEIIGFG<br>QELK | Mus<br>musculu<br>s              |
| 1 | 1.00 | 1 | 1 | 0 | -0.004 | 0 | -0.007 | 0 | t | 117907 | HKAFKGSI                     | Oryctola<br>gus<br>cuniculu<br>s |
| 1 | 1.00 | 1 | 1 | 0 | -0.004 | 0 | -0.007 | 0 | t | 128073 | PKKSAKKT<br>PKKAKKP          | Oryctola<br>gus<br>cuniculu<br>s |
| 1 | 1.00 | 1 | 1 | 0 | -0.002 | 0 | -0.007 | 0 | t | 118780 | EEASGSSV<br>TAEEAKKF<br>LAPK | Mus<br>musculu<br>s              |
| 1 | 1.00 | 1 | 1 | 0 | -0.002 | 0 | -0.007 | 0 | t | 120168 | RGWKHSV<br>TYSGGPDT<br>PY    | Mus<br>musculu<br>s              |
| 1 | 1.00 | 1 | 1 | 0 | -0.004 | 0 | -0.007 | 0 | t | 129164 | KSRKASKA<br>KKVKRSK          | Oryctola<br>gus<br>cuniculu<br>s |
| 1 | 1.00 | 1 | 1 | 0 | -0.004 | 0 | -0.007 | 0 | t | 124367 | KLKARVDE<br>LERIRRS          | Oryctola<br>gus<br>cuniculu<br>s |



|   |      |   |   |   |        |   |        |   |   |        |                              |                                  |
|---|------|---|---|---|--------|---|--------|---|---|--------|------------------------------|----------------------------------|
| 1 | 1.00 | 1 | 1 | 0 | -0.004 | 0 | -0.007 | 0 | t | 125478 | LHQEYEEN<br>LGDSIVGY<br>KEKS | Oryctola<br>gus<br>cuniculu<br>s |
| 1 | 1.00 | 1 | 1 | 0 | -0.002 | 0 | -0.007 | 0 | t | 125478 | LHQEYEEN<br>LGDSIVGY<br>KEKS | Mus<br>musculu<br>s              |
| 1 | 1.00 | 1 | 1 | 0 | -0.002 | 0 | -0.007 | 0 | t | 125600 | WESYPFRV<br>GTSL             | Mus<br>musculu<br>s              |
| 1 | 1.00 | 1 | 1 | 0 | -0.002 | 0 | -0.007 | 0 | t | 131628 | RGYDSYA                      | Mus<br>musculu<br>s              |
| 1 | 1.00 | 1 | 1 | 0 | -0.004 | 0 | -0.007 | 0 | t | 123244 | GMIPPPGL                     | Oryctola<br>gus<br>cuniculu<br>s |
| 1 | 1.00 | 1 | 1 | 0 | -0.004 | 0 | -0.007 | 0 | t | 132336 | GHEAQPH<br>SRPYMASL          | Oryctola<br>gus<br>cuniculu<br>s |
| 1 | 1.00 | 1 | 1 | 0 | -0.004 | 0 | -0.007 | 0 | t | 117509 | GQIPPGA<br>M                 | Oryctola<br>gus<br>cuniculu<br>s |
| 1 | 1.00 | 1 | 1 | 0 | -0.002 | 0 | -0.007 | 0 | t | 119674 | WNPDDYG<br>GVKKIHIPS         | Mus<br>musculu<br>s              |
| 1 | 1.00 | 1 | 1 | 0 | -0.002 | 0 | -0.007 | 0 | t | 125492 | LSYPSHCC<br>AFKNQKKI<br>RGIL | Mus<br>musculu<br>s              |
| 1 | 1.00 | 1 | 1 | 0 | -0.004 | 0 | -0.007 | 0 | t | 129060 | KEIKKVAT<br>PKKASKPK<br>K    | Oryctola<br>gus<br>cuniculu<br>s |
| 1 | 1.00 | 1 | 1 | 0 | -0.004 | 0 | -0.007 | 0 | t | 125448 | IRGILESLM<br>CNESSMQ<br>SLRQ | Oryctola<br>gus<br>cuniculu<br>s |
| 1 | 1.00 | 1 | 1 | 0 | -0.002 | 0 | -0.007 | 0 | t | 125610 | YYVFEEQ<br>EDEIIGFG<br>QELK  | Mus<br>musculu<br>s              |
| 1 | 1.00 | 1 | 1 | 0 | -0.002 | 0 | -0.007 | 0 | t | 131762 | YAASSYL                      | Mus<br>musculu<br>s              |
| 1 | 1.00 | 1 | 1 | 0 | -0.002 | 0 | -0.007 | 0 | t | 131437 | GASVKVT                      | Mus<br>musculu<br>s              |
| 1 | 1.00 | 1 | 1 | 0 | -0.002 | 0 | -0.007 | 0 | t | 119582 | GLQLIQLIN<br>VDEVNQI         | Mus<br>musculu<br>s              |

|   |      |   |   |   |        |   |        |   |   |        |                           |                                  |
|---|------|---|---|---|--------|---|--------|---|---|--------|---------------------------|----------------------------------|
| 1 | 1.00 | 1 | 1 | 0 | -0.002 | 0 | -0.007 | 0 | t | 119580 | FMESGEW<br>VIKESRGW<br>KH | Mus<br>musculu<br>s              |
| 1 | 1.00 | 1 | 1 | 0 | -0.002 | 0 | -0.007 | 0 | t | 131580 | PDRFSGS                   | Mus<br>musculu<br>s              |
| 1 | 1.00 | 1 | 1 | 0 | -0.004 | 0 | -0.007 | 0 | t | 132014 | PQIVPEPM                  | Oryctola<br>gus<br>cuniculu<br>s |
| 1 | 1.00 | 1 | 1 | 0 | -0.004 | 0 | -0.007 | 0 | t | 120727 | KYFPEVKT<br>KGMAAVP<br>KL | Oryctola<br>gus<br>cuniculu<br>s |
| 1 | 1.00 | 1 | 1 | 0 | -0.004 | 0 | -0.007 | 0 | t | 120682 | KILPEVKEK<br>HEFLSRL      | Oryctola<br>gus<br>cuniculu<br>s |
| 1 | 1.00 | 1 | 1 | 0 | -0.004 | 0 | -0.007 | 0 | t | 121474 | KKAPAKKG<br>EKVPKGK       | Oryctola<br>gus<br>cuniculu<br>s |
| 1 | 1.00 | 1 | 1 | 0 | -0.004 | 0 | -0.007 | 0 | t | 123579 | PGMIPPP<br>G              | Oryctola<br>gus<br>cuniculu<br>s |
| 1 | 1.00 | 1 | 1 | 0 | -0.004 | 0 | -0.007 | 0 | t | 117300 | GSGKGKV<br>QFQGKKT<br>KF  | Oryctola<br>gus<br>cuniculu<br>s |
| 1 | 1.00 | 1 | 1 | 0 | -0.004 | 0 | -0.007 | 0 | t | 113189 | TDKKSYP<br>LEDPGVK        | Oryctola<br>gus<br>cuniculu<br>s |
| 1 | 1.00 | 1 | 1 | 0 | -0.004 | 0 | -0.007 | 0 | t | 107949 | KSLSLSP                   | Oryctola<br>gus<br>cuniculu<br>s |
| 1 | 1.00 | 1 | 1 | 0 | -0.002 | 0 | -0.007 | 0 | t | 108075 | PREPQVY                   | Mus<br>musculu<br>s              |
| 1 | 1.00 | 1 | 1 | 0 | -0.002 | 0 | -0.007 | 0 | t | 108075 | PREPQVY                   | Mus<br>musculu<br>s              |
| 1 | 1.00 | 1 | 1 | 0 | -0.004 | 0 | -0.007 | 0 | t | 108075 | PREPQVY                   | Oryctola<br>gus<br>cuniculu<br>s |

|   |      |   |   |   |        |   |        |   |   |        |                              |                                  |
|---|------|---|---|---|--------|---|--------|---|---|--------|------------------------------|----------------------------------|
| 1 | 1.00 | 1 | 1 | 0 | -0.004 | 0 | -0.007 | 0 | t | 117331 | MKLVRFL<br>MKLSHETV<br>TIELK | Oryctola<br>gus<br>cuniculu<br>s |
| 1 | 1.00 | 1 | 1 | 0 | -0.002 | 0 | -0.007 | 0 | t | 107773 | CSVMHEG                      | Mus<br>musculu<br>s              |
| 1 | 1.00 | 1 | 1 | 0 | -0.004 | 0 | -0.007 | 0 | t | 117300 | GSGKGKV<br>QFQGKKT<br>KF     | Oryctola<br>gus<br>cuniculu<br>s |
| 1 | 1.00 | 1 | 1 | 0 | -0.002 | 0 | -0.007 | 0 | t | 117300 | GSGKGKV<br>QFQGKKT<br>KF     | Mus<br>musculu<br>s              |
| 1 | 1.00 | 1 | 1 | 0 | -0.002 | 0 | -0.007 | 0 | t | 106634 | LVGPRGER<br>GFP              | Mus<br>musculu<br>s              |
| 1 | 1.00 | 1 | 1 | 0 | -0.004 | 0 | -0.007 | 0 | t | 117344 | PPGMRPP                      | Oryctola<br>gus<br>cuniculu<br>s |
| 1 | 1.00 | 1 | 1 | 0 | -0.004 | 0 | -0.007 | 0 | t | 116688 | CYYASRND<br>KSYWLS           | Oryctola<br>gus<br>cuniculu<br>s |
| 1 | 1.00 | 1 | 1 | 0 | -0.004 | 0 | -0.007 | 0 | t | 107784 | DGSFFLY                      | Oryctola<br>gus<br>cuniculu<br>s |
| 1 | 1.00 | 1 | 1 | 0 | -0.002 | 0 | -0.007 | 0 | t | 108074 | PQVYTLP                      | Mus<br>musculu<br>s              |
| 1 | 1.00 | 1 | 1 | 0 | -0.004 | 0 | -0.007 | 0 | t | 106642 | MHLNTPP                      | Oryctola<br>gus<br>cuniculu<br>s |
| 1 | 1.00 | 1 | 1 | 0 | -0.002 | 0 | -0.007 | 0 | t | 117214 | KGEQGEP<br>GA                | Mus<br>musculu<br>s              |
| 1 | 1.00 | 1 | 1 | 0 | -0.004 | 0 | -0.007 | 0 | t | 113229 | YNYKKFS<br>YKTIVMG           | Oryctola<br>gus<br>cuniculu<br>s |
| 1 | 1.00 | 1 | 1 | 0 | -0.004 | 0 | -0.007 | 0 | t | 112931 | DATTNPSL<br>ILAAAQM          | Oryctola<br>gus<br>cuniculu<br>s |
| 1 | 1.00 | 1 | 1 | 0 | -0.003 | 0 | -0.007 | 0 | t | 117344 | PPGMRPP                      | Oryctola<br>gus<br>cuniculu<br>s |

|   |      |   |   |   |        |   |        |   |   |        |                              |                                  |
|---|------|---|---|---|--------|---|--------|---|---|--------|------------------------------|----------------------------------|
| 1 | 1.00 | 1 | 1 | 0 | -0.004 | 0 | -0.007 | 0 | t | 113212 | VPVLSAKA<br>AQASDLE          | Oryctola<br>gus<br>cuniculu<br>s |
| 1 | 1.00 | 1 | 1 | 0 | -0.004 | 0 | -0.007 | 0 | t | 112935 | DFLTISPKL<br>LGELLQ          | Oryctola<br>gus<br>cuniculu<br>s |
| 1 | 1.00 | 1 | 1 | 0 | -0.004 | 0 | -0.007 | 0 | t | 107479 | KFNWYVD                      | Oryctola<br>gus<br>cuniculu<br>s |
| 1 | 1.00 | 1 | 1 | 0 | -0.002 | 0 | -0.007 | 0 | t | 107479 | KFNWYVD                      | Mus<br>musculu<br>s              |
| 1 | 1.00 | 1 | 1 | 0 | -0.002 | 0 | -0.007 | 0 | t | 100378 | PGSGFWS<br>FGSEDGSG<br>DSEN  | Mus<br>musculu<br>s              |
| 1 | 1.00 | 1 | 1 | 0 | -0.004 | 0 | -0.007 | 0 | t | 117260 | ANNGNLQ<br>LRNKEVT<br>WEVLEG | Oryctola<br>gus<br>cuniculu<br>s |
| 1 | 1.00 | 1 | 1 | 0 | -0.004 | 0 | -0.007 | 0 | t | 116757 | KFDVPCG<br>GRDCSGG<br>CQCY   | Oryctola<br>gus<br>cuniculu<br>s |
| 1 | 1.00 | 1 | 1 | 0 | -0.004 | 0 | -0.007 | 0 | t | 117260 | ANNGNLQ<br>LRNKEVT<br>WEVLEG | Oryctola<br>gus<br>cuniculu<br>s |
| 1 | 1.00 | 1 | 1 | 0 | -0.004 | 0 | -0.007 | 0 | t | 112971 | FGAEILKKI<br>PGRVST          | Oryctola<br>gus<br>cuniculu<br>s |
| 1 | 1.00 | 1 | 1 | 0 | -0.004 | 0 | -0.007 | 0 | t | 113095 | MSSSPVKR<br>QRMESAL          | Oryctola<br>gus<br>cuniculu<br>s |
| 1 | 1.00 | 1 | 1 | 0 | -0.004 | 0 | -0.007 | 0 | t | 112982 | FTTVVADT<br>GDFHAID          | Oryctola<br>gus<br>cuniculu<br>s |
| 1 | 1.00 | 1 | 1 | 0 | -0.004 | 0 | -0.007 | 0 | t | 107814 | EGLHNHY                      | Oryctola<br>gus<br>cuniculu<br>s |
| 1 | 1.00 | 1 | 1 | 0 | -0.002 | 0 | -0.007 | 0 | t | 107814 | EGLHNHY                      | Mus<br>musculu<br>s              |

|   |      |   |   |   |        |   |        |   |   |        |                              |                                  |
|---|------|---|---|---|--------|---|--------|---|---|--------|------------------------------|----------------------------------|
| 1 | 1.00 | 1 | 1 | 0 | -0.004 | 0 | -0.007 | 0 | t | 113196 | TIVMGASF<br>RNTGEIK          | Oryctola<br>gus<br>cuniculu<br>s |
| 1 | 1.00 | 1 | 1 | 0 | -0.004 | 0 | -0.007 | 0 | t | 117383 | TLHKAFKG<br>SIFVVFSI<br>ESA  | Oryctola<br>gus<br>cuniculu<br>s |
| 1 | 1.00 | 1 | 1 | 0 | -0.004 | 0 | -0.007 | 0 | t | 117246 | VTWEVLE<br>GEVEKEAL<br>KKI   | Oryctola<br>gus<br>cuniculu<br>s |
| 1 | 1.00 | 1 | 1 | 0 | -0.002 | 0 | -0.007 | 0 | t | 107087 | ARGLTGRP<br>GDA              | Mus<br>musculu<br>s              |
| 1 | 1.00 | 1 | 1 | 0 | -0.002 | 0 | -0.007 | 0 | t | 107087 | ARGLTGRP<br>GDA              | Rattus<br>norvegic<br>us         |
| 1 | 1.00 | 1 | 1 | 0 | -0.002 | 0 | -0.007 | 0 | t | 117260 | ANNGNLQ<br>LRNKEVT<br>WEVLEG | Mus<br>musculu<br>s              |
| 1 | 1.00 | 1 | 1 | 0 | -0.002 | 0 | -0.007 | 0 | t | 107503 | LFPPKPK                      | Mus<br>musculu<br>s              |
| 1 | 1.00 | 1 | 1 | 0 | -0.004 | 0 | -0.007 | 0 | t | 113091 | MESALDQ<br>LKQFTTVV          | Oryctola<br>gus<br>cuniculu<br>s |
| 1 | 1.00 | 1 | 1 | 0 | -0.002 | 0 | -0.007 | 0 | t | 104569 | MASPGSG<br>FWSFGSE<br>DGS    | Mus<br>musculu<br>s              |
| 1 | 1.00 | 1 | 1 | 0 | -0.002 | 0 | -0.007 | 0 | t | 108104 | RRLPFGSQ<br>M                | Mus<br>musculu<br>s              |
| 1 | 1.00 | 1 | 1 | 0 | -0.002 | 0 | -0.007 | 0 | t | 117331 | MKLVRFL<br>MKLSHETV<br>TIELK | Mus<br>musculu<br>s              |
| 1 | 1.00 | 1 | 1 | 0 | -0.002 | 0 | -0.007 | 0 | t | 107566 | PQVKFNW                      | Mus<br>musculu<br>s              |
| 1 | 1.00 | 1 | 1 | 0 | -0.002 | 0 | -0.007 | 0 | t | 113942 | TQDENPV<br>VHF               | Mus<br>musculu<br>s              |
| 1 | 1.00 | 1 | 1 | 0 | -0.004 | 0 | -0.007 | 0 | t | 116682 | CHGRGTC<br>NYYANAYS          | Oryctola<br>gus<br>cuniculu<br>s |
| 1 | 1.00 | 1 | 1 | 0 | -0.004 | 0 | -0.007 | 0 | t | 117348 | PTRAPSGP<br>RPP              | Oryctola<br>gus<br>cuniculu<br>s |

|   |      |   |   |   |        |   |        |   |   |        |                              |                                  |
|---|------|---|---|---|--------|---|--------|---|---|--------|------------------------------|----------------------------------|
| 1 | 1.00 | 1 | 1 | 0 | -0.002 | 0 | -0.007 | 0 | t | 103104 | DFLIEEIERL<br>GQDL           | Mus<br>musculu<br>s              |
| 1 | 1.00 | 1 | 1 | 0 | -0.004 | 0 | -0.007 | 0 | t | 109406 | KIQPSEPR<br>DSAVYFCA         | Oryctola<br>gus<br>cuniculu<br>s |
| 1 | 1.00 | 1 | 1 | 0 | -0.004 | 0 | -0.007 | 0 | t | 113010 | GRVSTEVD<br>ARLSFDK          | Oryctola<br>gus<br>cuniculu<br>s |
| 1 | 1.00 | 1 | 1 | 0 | -0.004 | 0 | -0.007 | 0 | t | 117320 | KPKAAKPK<br>KAAAKKK          | Oryctola<br>gus<br>cuniculu<br>s |
| 1 | 1.00 | 1 | 1 | 0 | -0.004 | 0 | -0.007 | 0 | t | 104586 | NRVAPNV<br>RQ                | Oryctola<br>gus<br>cuniculu<br>s |
| 1 | 1.00 | 1 | 1 | 0 | -0.004 | 0 | -0.007 | 0 | t | 104586 | NRVAPNV<br>RQ                | Oryctola<br>gus<br>cuniculu<br>s |
| 1 | 1.00 | 1 | 1 | 0 | -0.004 | 0 | -0.007 | 0 | t | 116681 | CFEGQEKA<br>HNQDLGL          | Oryctola<br>gus<br>cuniculu<br>s |
| 1 | 1.00 | 1 | 1 | 0 | -0.004 | 0 | -0.007 | 0 | t | 107773 | CSVMHEG                      | Oryctola<br>gus<br>cuniculu<br>s |
| 1 | 1.00 | 1 | 1 | 0 | -0.002 | 0 | -0.007 | 0 | t | 71346  | VTGSVVCT<br>TAAGNVNI<br>AIGG | Mus<br>musculu<br>s              |
| 1 | 1.00 | 1 | 1 | 0 | -0.002 | 0 | -0.007 | 0 | t | 71346  | VTGSVVCT<br>TAAGNVNI<br>AIGG | Mus<br>musculu<br>s              |
| 1 | 1.00 | 1 | 1 | 0 | -0.002 | 0 | -0.007 | 0 | t | 65050  | TLRVYK                       | Mus<br>musculu<br>s              |
| 1 | 1.00 | 1 | 1 | 0 | -0.002 | 0 | -0.007 | 0 | t | 74871  | YLPVGGLR<br>RIGG             | Mus<br>musculu<br>s              |
| 1 | 1.00 | 1 | 1 | 0 | -0.002 | 0 | -0.007 | 0 | t | 74871  | YLPVGGLR<br>RIGG             | Mus<br>musculu<br>s              |
| 1 | 1.00 | 1 | 1 | 0 | -0.002 | 0 | -0.007 | 0 | t | 62340  | SVSVGMP<br>PSPRP             | Mus<br>musculu<br>s              |

|   |      |   |   |       |        |       |        |       |   |        |                              |                                  |
|---|------|---|---|-------|--------|-------|--------|-------|---|--------|------------------------------|----------------------------------|
| 1 | 1.00 | 1 | 1 | 0     | -0.002 | 0     | -0.007 | 0     | t | 58022  | SGETTTAA<br>GTTASPGA<br>ASGP | Mus<br>musculu<br>s              |
| 1 | 1.00 | 1 | 1 | 0     | -0.002 | 0     | -0.007 | 0     | t | 51252  | QKSKQNIG<br>ALKQEL           | Mus<br>musculu<br>s              |
| 1 | 1.00 | 1 | 1 | 0     | -0.002 | 0     | -0.007 | 0     | t | 51852  | QPHDLGK<br>VGEVIVTK<br>D     | Rattus<br>norvegic<br>us         |
| 1 | 1.00 | 1 | 1 | 0     | -0.002 | 0     | -0.007 | 0     | t | 42633  | MSPVNKS<br>FEIEVTCS          | Mus<br>musculu<br>s              |
| 1 | 1.00 | 1 | 1 | 0     | -0.002 | 0     | -0.007 | 0     | t | 31330  | KILPEVKEK<br>HEF             | Mus<br>musculu<br>s              |
| 1 | 1.00 | 1 | 1 | 0     | -0.004 | 0     | -0.007 | 0     | t | 29342  | IVLGGGCA<br>LL               | Oryctola<br>gus<br>cuniculu<br>s |
| 1 | 1.00 | 1 | 1 | 0     | -0.004 | 0     | -0.007 | 0     | t | 11081  | EAIPALTA<br>VETGHTSQ<br>V    | Oryctola<br>gus<br>cuniculu<br>s |
| 1 | 1.00 | 1 | 1 | 0     | -0.004 | 0     | -0.007 | 0     | t | 31330  | KILPEVKEK<br>HEF             | Oryctola<br>gus<br>cuniculu<br>s |
| 1 | 1.00 | 1 | 1 | 0     | -0.002 | 0     | -0.007 | 0     | t | 20097  | GGYGDGG<br>AHGGGYG<br>G      | Mus<br>musculu<br>s              |
| 1 | 1.00 | 1 | 1 | 0     | -0.004 | 0     | -0.007 | 0     | t | 22742  | GTLKV                        | Oryctola<br>gus<br>cuniculu<br>s |
| 1 | 1.00 | 1 | 1 | 0     | -0.004 | 0     | -0.007 | 0     | t | 11081  | EAIPALTA<br>VETGHTSQ<br>V    | Oryctola<br>gus<br>cuniculu<br>s |
| 1 | 1.00 | 1 | 1 | 0     | -0.004 | 0     | -0.007 | 0     | t | 8508   | DGVAVLK<br>VGG               | Oryctola<br>gus<br>cuniculu<br>s |
| 1 | 1.00 | 1 | 1 | 0     | -0.002 | 0     | -0.007 | 0     | t | 8464   | DGNPPEV<br>KSVGLGN<br>VNGVTL | Mus<br>musculu<br>s              |
| 1 | 1.00 | 1 | 1 | -0.05 | -0.05  | -0.05 | -0.054 | -0.05 | t | 115607 | GPRHPIRA<br>LVGD             | Homo<br>sapiens                  |

|   |      |   |   |       |        |        |        |        |   |        |                              |                                  |
|---|------|---|---|-------|--------|--------|--------|--------|---|--------|------------------------------|----------------------------------|
| 1 | 1.00 | 1 | 1 | 0.01  | 0.006  | 0.016  | 0.009  | 0.008  | t | 65996  | TRAPRREE<br>LEWDDDED<br>H    | Oryctola<br>gus<br>cuniculu<br>s |
| 1 | 1.00 | 1 | 1 | 0.02  | 0.02   | 0.02   | 0.02   | 0.02   | t | 78513  | SEELLVESS<br>AIRSRE          | Mus<br>musculu<br>s              |
| 1 | 1.00 | 1 | 1 | 0.01  | 0.01   | 0.017  | 0.01   | 0.01   | t | 121928 | TPRLPGAL<br>E                | Mus<br>musculu<br>s              |
| 1 | 1.00 | 1 | 1 | 0     | 0      | 0.016  | 0      | 0      | t | 22686  | GTHNQW<br>NKPSKP             | Mus<br>musculu<br>s              |
| 1 | 1.00 | 1 | 1 | -0.03 | -0.032 | -0.029 | -0.031 | -0.03  | t | 67262  | TWHLPAH<br>APVVR             | Mus<br>musculu<br>s              |
| 1 | 1.00 | 1 | 1 | -0.02 | -0.02  | -0.02  | -0.02  | -0.018 | t | 144654 | GPHPTLEV<br>VPMGRGS          | Mus<br>musculu<br>s              |
| 1 | 1.00 | 1 | 1 | -0.03 | -0.028 | -0.026 | -0.029 | -0.031 | t | 49505  | PSSKRFQP<br>FQQFGRD          | Homo<br>sapiens                  |
| 1 | 1.00 | 1 | 1 | -0.03 | -0.03  | -0.03  | -0.03  | -0.029 | t | 119624 | PDTPYLDIT<br>YHFVMQR<br>L    | Homo<br>sapiens                  |
| 1 | 1.00 | 1 | 1 | 0.01  | 0.01   | 0.019  | 0.012  | 0.01   | t | 42060  | MLSKYSLPI<br>VEEPEDYK<br>EAS | Homo<br>sapiens                  |
| 1 | 1.00 | 1 | 1 | -0.04 | -0.042 | -0.038 | -0.041 | -0.038 | t | 96335  | GRRLPVVI                     | Mus<br>musculu<br>s              |
| 1 | 1.00 | 1 | 1 | 0     | 0.004  | 0.02   | 0.007  | 0      | t | 128001 | GLINRAKA<br>VKQFEESR<br>GRTS | Homo<br>sapiens                  |
| 1 | 1.00 | 1 | 1 | 0.02  | 0.017  | 0.008  | 0.02   | 0.028  | t | 32     | AAAETGV<br>GVIKSIAP          | Oryctola<br>gus<br>cuniculu<br>s |
| 1 | 1.00 | 1 | 1 | 0     | 0      | 0      | 0      | 0.004  | t | 138194 | IIPKSSWS                     | Homo<br>sapiens                  |
| 1 | 1.00 | 1 | 1 | 0     | 0      | 0      | 0      | 0.004  | t | 105127 | DAEFRHD                      | Mus<br>musculu<br>s              |
| 1 | 1.00 | 1 | 1 | 0     | 0      | 0      | 0      | 0.004  | t | 105127 | DAEFRHD                      | Mus<br>musculu<br>s              |



|   |      |   |   |       |        |        |        |        |   |        |                           |                                  |
|---|------|---|---|-------|--------|--------|--------|--------|---|--------|---------------------------|----------------------------------|
| 1 | 1.00 | 1 | 1 | 0     | 0      | 0      | 0      | 0.004  | t | 105127 | DAEFRHD                   | Mus<br>musculu<br>s              |
| 1 | 1.00 | 1 | 1 | 0     | 0      | 0      | 0      | 0.004  | t | 99922  | DAEFRHDS<br>GY            | Mus<br>musculu<br>s              |
| 1 | 1.00 | 1 | 1 | 0     | 0      | 0      | 0      | 0.004  | t | 89665  | TQQGGAY<br>GRCPNGT<br>RA  | Oryctola<br>gus<br>cuniculu<br>s |
| 1 | 1.00 | 1 | 1 | 0     | 0      | 0      | 0      | 0.004  | t | 67436  | TYQRTRAL<br>V             | Mus<br>musculu<br>s              |
| 1 | 1.00 | 1 | 1 | 0     | 0      | 0      | 0      | 0.004  | t | 85174  | LFTQQGG<br>AYGRC          | Oryctola<br>gus<br>cuniculu<br>s |
| 1 | 1.00 | 1 | 1 | 0     | 0      | 0      | 0      | 0.004  | t | 89868  | VAPGIVIPP<br>KAL          | Oryctola<br>gus<br>cuniculu<br>s |
| 1 | 1.00 | 1 | 1 | 0     | 0      | 0      | 0      | 0.004  | t | 46006  | NSTLGVKS<br>AREF          | Mus<br>musculu<br>s              |
| 1 | 1.00 | 1 | 1 | 0     | 0      | 0      | 0      | 0.004  | t | 10125  | DSGCVVS<br>WKNKELK<br>C   | Homo<br>sapiens                  |
| 1 | 1.00 | 1 | 1 | 0     | 0      | 0      | 0      | 0.004  | t | 6479   | CKGKIQAL<br>CENPEWA       | Mus<br>musculu<br>s              |
| 1 | 1.00 | 1 | 1 | 0.01  | 0.008  | 0.023  | 0.013  | 0.012  | t | 69383  | VLAQKVA<br>RTLTP          | Mus<br>musculu<br>s              |
| 1 | 1.00 | 1 | 1 | 0.01  | 0.005  | 0.023  | 0.013  | 0.012  | t | 69383  | VLAQKVA<br>RTLTP          | Bos<br>taurus                    |
| 1 | 1.00 | 1 | 1 | -0.03 | -0.028 | -0.018 | -0.023 | -0.028 | t | 144639 | FAQAYAR<br>GIS            | Homo<br>sapiens                  |
| 1 | 1.00 | 1 | 1 | -0.07 | -0.07  | -0.069 | -0.07  | -0.07  | t | 142005 | SDFRRQN<br>RRGGTNK<br>RTT | Oryctola<br>gus<br>cuniculu<br>s |
| 1 | 1.00 | 1 | 1 | -0.05 | -0.05  | -0.052 | -0.05  | -0.05  | t | 120415 | AVAGRGR<br>GRGRGRG<br>R   | Mus<br>musculu<br>s              |

|   |      |   |   |       |        |        |        |        |   |        |                              |                                  |
|---|------|---|---|-------|--------|--------|--------|--------|---|--------|------------------------------|----------------------------------|
| 1 | 1.00 | 1 | 1 | -0.02 | -0.02  | -0.015 | -0.02  | -0.02  | t | 139806 | LLSPVRRD<br>QPLFTFRQ<br>VG   | Oryctola<br>gus<br>cuniculu<br>s |
| 1 | 1.00 | 1 | 1 | 0     | -0.003 | 0.002  | 0      | 0.001  | t | 97349  | GLFGAIAG<br>FIENGW           | Oryctola<br>gus<br>cuniculu<br>s |
| 1 | 1.00 | 1 | 1 | 0.02  | 0.022  | 0.023  | 0.021  | 0.022  | t | 151071 | YAADLKST<br>QNAIDEI          | Homo<br>sapiens                  |
| 1 | 1.00 | 1 | 1 | -0.01 | -0.01  | -0.009 | -0.01  | -0.01  | t | 47651  | PGFMRGS<br>RPSDPAFA          | Mus<br>musculu<br>s              |
| 1 | 1.00 | 1 | 1 | -0.01 | -0.01  | 0      | -0.01  | -0.01  | t | 104171 | PGSGFWS<br>FGSEDGSG<br>DPE   | Oryctola<br>gus<br>cuniculu<br>s |
| 1 | 1.00 | 1 | 1 | 0     | 0      | 0      | -0.003 | 0.002  | t | 39164  | LRPGPVSQ<br>PYHHWDT<br>DK    | Homo<br>sapiens                  |
| 1 | 1.00 | 1 | 1 | 0.03  | 0.03   | 0.03   | 0.03   | 0.034  | t | 133535 | CKPGEVQ<br>QC                | Mus<br>musculu<br>s              |
| 1 | 1.00 | 1 | 1 | -0.03 | -0.027 | -0.023 | -0.03  | -0.032 | t | 50884  | QGILFLQW<br>VRDIIDDF         | Mus<br>musculu<br>s              |
| 1 | 1.00 | 1 | 1 | -0.04 | -0.04  | -0.031 | -0.036 | -0.04  | t | 135971 | PRPRDRSG<br>LAPK             | Homo<br>sapiens                  |
| 1 | 1.00 | 1 | 1 | 0     | 0      | 0.002  | -0.007 | 0.002  | t | 57612  | SERSQPRG                     | Homo<br>sapiens                  |
| 1 | 1.00 | 1 | 1 | -0.04 | -0.043 | -0.036 | -0.04  | -0.04  | t | 65905  | TQNRQIDR                     | Oryctola<br>gus<br>cuniculu<br>s |
| 1 | 1.00 | 1 | 1 | -0.03 | -0.03  | -0.032 | -0.03  | -0.027 | t | 103545 | RGIHVDIII<br>DRSHSKLT<br>FKQ | Homo<br>sapiens                  |
| 1 | 1.00 | 1 | 1 | 0.03  | 0.028  | 0.031  | 0.029  | 0.031  | t | 35061  | LCKGPDAL<br>CLSNLTPM<br>L    | Mus<br>musculu<br>s              |
| 1 | 1.00 | 1 | 1 | 0.01  | 0.008  | 0.007  | 0.01   | 0.012  | t | 132913 | VPVNLSKT<br>SGVAVES          | Trichosu<br>rus<br>vulpecul<br>a |

|   |      |   |   |       |        |        |        |        |   |        |                              |                     |
|---|------|---|---|-------|--------|--------|--------|--------|---|--------|------------------------------|---------------------|
| 1 | 1.00 | 1 | 1 | -0.01 | -0.012 | -0.002 | -0.013 | -0.012 | t | 110856 | FSADLDQF<br>PLGRKFL          | Mus<br>musculu<br>s |
| 1 | 1.00 | 1 | 1 | -0.02 | -0.016 | -0.013 | -0.019 | -0.019 | t | 137893 | HHNLLVGS<br>VSGFYPG          | Homo<br>sapiens     |
| 1 | 1.00 | 1 | 1 | -0.02 | -0.02  | -0.018 | -0.016 | -0.02  | t | 48125  | PKPQRKTK<br>RNTNRRP<br>QDVK  | Homo<br>sapiens     |
| 1 | 1.00 | 1 | 1 | 0.03  | 0.028  | 0.035  | 0.029  | 0.032  | t | 20173  | GHPRTAEL<br>LGML             | Mus<br>musculu<br>s |
| 1 | 1.00 | 1 | 1 | 0.03  | 0.03   | 0.042  | 0.026  | 0.028  | t | 96476  | KLFPNSLD<br>QT               | Homo<br>sapiens     |
| 1 | 1.00 | 1 | 1 | 0     | 0.004  | 0.007  | 0.003  | 0      | t | 60     | AAASAIQG<br>NVTSIHSL         | Homo<br>sapiens     |
| 1 | 1.00 | 1 | 1 | 0.01  | 0.01   | 0.01   | 0.01   | 0.012  | t | 140557 | EDLEGEW<br>PMR               | Mus<br>musculu<br>s |
| 1 | 1.00 | 1 | 1 | -0.01 | -0.006 | 0.007  | -0.007 | -0.009 | t | 76453  | YWERGIPL<br>P                | Homo<br>sapiens     |
| 1 | 1.00 | 1 | 1 | 0.01  | 0.01   | 0      | 0.01   | 0.013  | t | 79743  | AALAARKA<br>DLEKALEG<br>AM   | Mus<br>musculu<br>s |
| 1 | 1.00 | 1 | 1 | -0.04 | -0.037 | -0.025 | -0.033 | -0.038 | t | 104054 | LSGVERAN<br>SVTWNPH<br>KMMGV | Mus<br>musculu<br>s |
| 1 | 1.00 | 1 | 1 | 0.01  | 0.01   | 0.017  | 0.01   | 0.011  | t | 133469 | YYNETKL<br>KESYKVKD          | Mus<br>musculu<br>s |
| 1 | 1.00 | 1 | 1 | -0.01 | -0.01  | -0.007 | -0.02  | -0.012 | t | 116695 | DRRDPYSP<br>SPYDRRG          | Homo<br>sapiens     |
| 1 | 1.00 | 1 | 1 | 0     | 0      | 0.027  | 0      | -0.005 | t | 75418  | YPTFGEHK<br>QEKDLEY          | Mus<br>musculu<br>s |

|   |      |   |   |       |        |        |        |        |   |        |                          |                                  |
|---|------|---|---|-------|--------|--------|--------|--------|---|--------|--------------------------|----------------------------------|
| 1 | 1.00 | 1 | 1 | 0     | 0      | 0.013  | 0      | 0      | t | 150852 | HIGGLSILD<br>PIFAVL      | Homo<br>sapiens                  |
| 1 | 1.00 | 1 | 1 | -0.06 | -0.062 | -0.055 | -0.061 | -0.06  | t | 51798  | QPCHRDM<br>FGFCK         | Mus<br>musculu<br>s              |
| 1 | 1.00 | 1 | 1 | -0.03 | -0.028 | -0.016 | -0.023 | -0.029 | t | 119037 | TRPGMTR<br>PDR           | Homo<br>sapiens                  |
| 1 | 1.00 | 1 | 1 | -0.01 | -0.007 | -0.001 | -0.01  | -0.01  | t | 73486  | YCAWPAC<br>YCYGVDP<br>H  | Equus<br>caballus                |
| 1 | 1.00 | 1 | 1 | -0.03 | -0.026 | -0.021 | -0.029 | -0.03  | t | 12927  | ELAAKLVA<br>LGINAV       | Homo<br>sapiens                  |
| 1 | 1.00 | 1 | 1 | -0.01 | -0.01  | -0.01  | -0.01  | -0.009 | t | 159079 | RSNHNRR<br>PGYKTQN<br>QG | Mus<br>musculu<br>s              |
| 1 | 1.00 | 1 | 1 | -0.02 | -0.022 | -0.007 | -0.021 | -0.02  | t | 137947 | PNTMKTQ                  | Mus<br>musculu<br>s              |
| 1 | 1.00 | 1 | 1 | 0     | -0.002 | 0.008  | -0.003 | 0      | t | 29129  | ITVEELKQL<br>LEQWNLVI    | Mus<br>musculu<br>s              |
| 1 | 1.00 | 1 | 1 | 0     | 0.002  | 0.005  | 0.003  | 0.007  | t | 138238 | SMLDTPT                  | Homo<br>sapiens                  |
| 1 | 1.00 | 1 | 1 | -0.02 | -0.02  | -0.016 | -0.02  | -0.019 | t | 22134  | GRLITVNPI<br>VT          | Mus<br>musculu<br>s              |
| 1 | 1.00 | 1 | 1 | 0     | -0.002 | 0.007  | -0.003 | 0      | t | 117140 | DWEYSVW<br>LSN           | Mus<br>musculu<br>s              |
| 1 | 1.00 | 1 | 1 | 0.03  | 0.028  | 0.027  | 0.023  | 0.03   | t | 119655 | TTEAVVAD<br>KPEKEKA      | Rattus<br>norvegic<br>us         |
| 1 | 1.00 | 1 | 1 | -0.03 | -0.033 | -0.021 | -0.03  | -0.03  | t | 100321 | NDQIGDSL<br>YSAMTV       | Oryctola<br>gus<br>cuniculu<br>s |
| 1 | 1.00 | 1 | 1 | 0.01  | 0.012  | 0.01   | 0.005  | 0.012  | t | 40110  | LTPLEELY                 | Homo<br>sapiens                  |

|   |      |   |   |       |        |        |        |        |   |        |                              |                                  |
|---|------|---|---|-------|--------|--------|--------|--------|---|--------|------------------------------|----------------------------------|
| 1 | 1.00 | 1 | 1 | -0.03 | -0.028 | -0.031 | -0.027 | -0.03  | t | 79599  | LHIRAGPY<br>GHATVEM<br>PEWIH | Homo<br>sapiens                  |
| 1 | 1.00 | 1 | 1 | 0.01  | 0.012  | 0.02   | 0.011  | 0.009  | t | 23068  | GVNLEDP<br>ASRDL             | Homo<br>sapiens                  |
| 1 | 1.00 | 1 | 1 | -0.04 | -0.036 | -0.033 | -0.039 | -0.038 | t | 37684  | LLPRRGPR                     | Homo<br>sapiens                  |
| 1 | 1.00 | 1 | 1 | 0.02  | 0.02   | 0.03   | 0.02   | 0.02   | t | 73430  | YAQYMSR<br>AYAEFLGE<br>DPGSG | Mus<br>musculu<br>s              |
| 1 | 1.00 | 1 | 1 | -0.02 | -0.018 | -0.02  | -0.024 | -0.02  | t | 16092  | FHAEWPT<br>PSPWP             | Homo<br>sapiens                  |
| 1 | 1.00 | 1 | 1 | -0.03 | -0.032 | -0.025 | -0.031 | -0.03  | t | 141928 | IRHQRSQT<br>ECG              | Sus<br>scrofa                    |
| 1 | 1.00 | 1 | 1 | 0.01  | 0.006  | 0.01   | 0.003  | 0.011  | t | 118285 | DAYVLLSE<br>KKISSIQSIV       | Oryctola<br>gus<br>cuniculu<br>s |
| 1 | 1.00 | 1 | 1 | -0.02 | -0.022 | -0.029 | -0.027 | -0.02  | t | 112316 | SIKNPTNA<br>K                | Mus<br>musculu<br>s              |
| 1 | 1.00 | 1 | 1 | 0.03  | 0.027  | 0.032  | 0.03   | 0.031  | t | 107267 | WYFDVW<br>GAGTTVT<br>VSS     | Oryctola<br>gus<br>cuniculu<br>s |
| 1 | 1.00 | 1 | 1 | 0.01  | 0.006  | 0.01   | 0.003  | 0.012  | t | 136068 | KATV                         | Oryctola<br>gus<br>cuniculu<br>s |
| 1 | 1.00 | 1 | 1 | 0     | 0      | 0      | -0.004 | 0.002  | t | 7491   | DAEFRHDS<br>GYEVHHQ<br>K     | Homo<br>sapiens                  |
| 1 | 1.00 | 1 | 1 | -0.05 | -0.054 | -0.043 | -0.051 | -0.049 | t | 137866 | GDTRPRFL                     | Oryctola<br>gus<br>cuniculu<br>s |
| 1 | 1.00 | 1 | 1 | -0.01 | -0.007 | -0.002 | -0.013 | -0.011 | t | 52417  | QSQQQGN<br>SRRGPRVV<br>P     | Capra<br>hircus                  |
| 1 | 1.00 | 1 | 1 | 0     | -0.002 | 0.005  | 0.003  | 0      | t | 41852  | MKKNDQI<br>AAAIVLR           | Mus<br>musculu<br>s              |
| 1 | 1.00 | 1 | 1 | -0.03 | -0.031 | -0.03  | -0.031 | -0.028 | t | 56852  | SALEDKLA<br>DYKRRM           | Myodes<br>glareolu<br>s          |

|   |      |   |   |       |        |        |        |        |   |        |                              |                   |
|---|------|---|---|-------|--------|--------|--------|--------|---|--------|------------------------------|-------------------|
| 1 | 1.00 | 1 | 1 | -0.01 | -0.012 | -0.013 | -0.013 | -0.009 | t | 23169  | GVTHDQL<br>NNFR              | Mus<br>musculus   |
| 1 | 1.00 | 1 | 1 | -0.04 | -0.044 | -0.03  | -0.04  | -0.042 | t | 93007  | INNGLPPI<br>QNTRNI           | Mus<br>musculus   |
| 1 | 1.00 | 1 | 1 | 0.01  | 0.01   | 0.01   | 0.01   | 0.008  | t | 40495  | LVNSVSTK<br>EGDSSNTG<br>AGKA | Homo<br>sapiens   |
| 1 | 1.00 | 1 | 1 | -0.05 | -0.048 | -0.043 | -0.053 | -0.05  | t | 94702  | TCWAICKR<br>IPNK             | Homo<br>sapiens   |
| 1 | 1.00 | 1 | 1 | -0.02 | -0.02  | -0.014 | -0.014 | -0.019 | t | 30332  | KEDTSFGG<br>NLGRAVF<br>QAKKR | Homo<br>sapiens   |
| 1 | 1.00 | 1 | 1 | -0.05 | -0.05  | -0.05  | -0.05  | -0.05  | t | 108575 | PLTNRRLR<br>G                | Homo<br>sapiens   |
| 1 | 1.00 | 1 | 1 | 0.01  | 0.008  | 0.01   | 0.004  | 0.011  | t | 138166 | FHEFWPT                      | Mus<br>musculus   |
| 1 | 1.00 | 1 | 1 | 0.04  | 0.043  | 0.038  | 0.04   | 0.042  | t | 41017  | MADNGTI<br>TVEELKQL<br>LEQWN | Mus<br>musculus   |
| 1 | 1.00 | 1 | 1 | 0.04  | 0.04   | 0.038  | 0.04   | 0.042  | t | 41017  | MADNGTI<br>TVEELKQL<br>LEQWN | Mus<br>musculus   |
| 1 | 1.00 | 1 | 1 | 0.04  | 0.04   | 0.038  | 0.04   | 0.042  | t | 41017  | MADNGTI<br>TVEELKQL<br>LEQWN | Mus<br>musculus   |
| 1 | 1.00 | 1 | 1 | 0     | 0      | 0.011  | 0      | 0      | t | 777    | ADTDGPP<br>AQF               | Mus<br>musculus   |
| 1 | 1.00 | 1 | 1 | -0.03 | -0.029 | -0.031 | -0.031 | -0.03  | t | 61574  | STEELFKEY<br>KLTRPYMA<br>RC  | Equus<br>caballus |
| 1 | 1.00 | 1 | 1 | -0.03 | -0.032 | -0.031 | -0.031 | -0.03  | t | 61574  | STEELFKEY<br>KLTRPYMA<br>RC  | Mus<br>musculus   |
| 1 | 1.00 | 1 | 1 | -0.03 | -0.032 | -0.031 | -0.031 | -0.03  | t | 61574  | STEELFKEY<br>KLTRPYMA<br>RC  | Mus<br>musculus   |
| 1 | 1.00 | 1 | 1 | 0.01  | 0.01   | 0.017  | 0.013  | 0.011  | t | 51499  | QLQLTEAQ<br>AANGGAS<br>GQV   | Homo<br>sapiens   |

|   |      |   |   |       |        |        |        |        |   |        |                               |                                  |
|---|------|---|---|-------|--------|--------|--------|--------|---|--------|-------------------------------|----------------------------------|
| 1 | 1.00 | 1 | 1 | 0     | -0.002 | -0.002 | -0.007 | 0      | t | 119851 | EVNQIVET<br>NVRLRQQ<br>W      | Mus<br>musculu<br>s              |
| 1 | 1.00 | 1 | 1 | -0.01 | -0.01  | 0.006  | -0.011 | -0.012 | t | 46095  | NTFYCCEL<br>CCYPACAG<br>CN    | Homo<br>sapiens                  |
| 1 | 1.00 | 1 | 1 | -0.01 | -0.006 | -0.001 | -0.01  | -0.01  | t | 48408  | PLLRTAPG                      | Homo<br>sapiens                  |
| 1 | 1.00 | 1 | 1 | -0.01 | -0.008 | -0.001 | -0.01  | -0.01  | t | 48408  | PLLRTAPG                      | Homo<br>sapiens                  |
| 1 | 1.00 | 1 | 1 | -0.02 | -0.017 | -0.023 | -0.02  | -0.017 | t | 6462   | CIVNRRTS<br>FFNLGPSQ<br>R     | Mus<br>musculu<br>s              |
| 1 | 1.00 | 1 | 1 | -0.03 | -0.026 | -0.021 | -0.033 | -0.03  | t | 12961  | ELAYFYPEL<br>F                | Homo<br>sapiens                  |
| 1 | 1.00 | 1 | 1 | -0.05 | -0.05  | -0.05  | -0.053 | -0.05  | t | 42790  | MTDVSRI<br>RAWGRR<br>MIGTA    | Homo<br>sapiens                  |
| 1 | 1.00 | 1 | 1 | -0.01 | -0.01  | -0.012 | -0.01  | -0.01  | t | 110614 | GPRGLPGE<br>RGRTGPA<br>GAAG   | Rattus<br>norvegic<br>us         |
| 1 | 1.00 | 1 | 1 | 0.05  | 0.05   | 0.05   | 0.04   | 0.051  | t | 108612 | RNDLITFLE<br>QETK             | Homo<br>sapiens                  |
| 1 | 1.00 | 1 | 1 | 0     | 0      | 0.001  | 0      | 0      | t | 267    | AALASLFLS<br>GPQQK            | Mus<br>musculu<br>s              |
| 1 | 1.00 | 1 | 1 | -0.02 | -0.005 | -0.019 | -0.02  | -0.022 | t | 45311  | NPDDDFR<br>PGLKDTKL<br>LKTALA | Homo<br>sapiens                  |
| 1 | 1.00 | 1 | 1 | -0.02 | -0.02  | -0.011 | -0.022 | -0.02  | t | 135995 | SIQSIVPAL<br>EIA              | Homo<br>sapiens                  |
| 1 | 1.00 | 1 | 1 | 0     | 0      | 0      | -0.008 | 0      | t | 41660  | MHGDTPT<br>LHEYMLDL<br>QPETT  | Rattus<br>norvegic<br>us         |
| 1 | 1.00 | 1 | 1 | 0     | -0.003 | 0      | -0.008 | 0      | t | 41660  | MHGDTPT<br>LHEYMLDL<br>QPETT  | Oryctola<br>gus<br>cuniculu<br>s |

|   |      |   |   |       |        |        |        |        |   |        |                              |                                  |
|---|------|---|---|-------|--------|--------|--------|--------|---|--------|------------------------------|----------------------------------|
| 1 | 1.00 | 1 | 1 | 0     | 0      | 0      | -0.008 | 0      | t | 23179  | GVTSAPDT<br>RPAPGSTA         | Mus<br>musculu<br>s              |
| 1 | 1.00 | 1 | 1 | 0     | -0.004 | 0      | -0.008 | 0      | t | 1433   | AGAGGGA<br>GGAGAGG<br>GAGGAG | Oryctola<br>gus<br>cuniculu<br>s |
| 1 | 1.00 | 1 | 1 | -0.01 | -0.008 | -0.01  | -0.013 | -0.008 | t | 62339  | SVSVGCKP<br>VPRP             | Homo<br>sapiens                  |
| 1 | 1.00 | 1 | 1 | 0     | 0      | 0      | 0      | -0.001 | t | 115334 | KYKVPQLE<br>IVPNSAEE<br>RLHS | Homo<br>sapiens                  |
| 1 | 1.00 | 1 | 1 | -0.04 | -0.037 | -0.035 | -0.04  | -0.04  | t | 7492   | DAEFRHDS<br>GYEVHHQ<br>KL    | Mus<br>musculu<br>s              |
| 1 | 1.00 | 1 | 1 | -0.02 | -0.018 | -0.002 | -0.02  | -0.02  | t | 65799  | TPVIGSQA<br>RK               | Homo<br>sapiens                  |
| 1 | 1.00 | 1 | 1 | -0.03 | -0.028 | -0.023 | -0.023 | -0.027 | t | 130868 | GQSYPPRP<br>DTSLHVT          | Homo<br>sapiens                  |
| 1 | 1.00 | 1 | 1 | 0.03  | 0.026  | 0.03   | 0.023  | 0.03   | t | 117545 | KIQRTQQE<br>DSAVYLCA         | Oryctola<br>gus<br>cuniculu<br>s |
| 1 | 1.00 | 1 | 0 | 0.02  | 0.025  | 0.055  | 0.021  | 0.03   | t | 76118  | YTLPRSSN<br>S                | Homo<br>sapiens                  |
| 1 | 1.00 | 1 | 1 | -0.02 | -0.023 | -0.016 | -0.02  | -0.018 | t | 102261 | YREKFDAL<br>KEAIE            | Oryctola<br>gus<br>cuniculu<br>s |
| 1 | 1.00 | 1 | 1 | 0.01  | 0.006  | 0.015  | 0.01   | 0.008  | t | 20770  | GLARTTAD<br>RQTACNC          | Oryctola<br>gus<br>cuniculu<br>s |
| 1 | 1.00 | 1 | 1 | -0.05 | -0.052 | -0.037 | -0.051 | -0.05  | t | 138893 | RHDSGYEV<br>H                | Mus<br>musculu<br>s              |
| 1 | 1.00 | 1 | 1 | 0.01  | 0.007  | 0.016  | 0.01   | 0.01   | t | 50358  | QASNVFQ<br>GVFLTTPM<br>QKDDC | Oryctola<br>gus<br>cuniculu<br>s |
| 1 | 1.00 | 1 | 1 | -0.04 | -0.038 | -0.035 | -0.039 | -0.039 | t | 153362 | APWSLRD<br>HLAVTGG<br>GS     | Homo<br>sapiens                  |



|   |      |   |   |       |        |        |        |        |   |        |                           |                                  |
|---|------|---|---|-------|--------|--------|--------|--------|---|--------|---------------------------|----------------------------------|
| 1 | 1.00 | 1 | 1 | 0.01  | 0.012  | 0.01   | 0.013  | 0.016  | t | 96455  | KGKNVLIN<br>KD            | Homo<br>sapiens                  |
| 1 | 1.00 | 1 | 1 | -0.03 | -0.03  | -0.025 | -0.03  | -0.03  | t | 22396  | GSKTLAGP<br>KGPITQ        | Homo<br>sapiens                  |
| 1 | 1.00 | 1 | 1 | -0.01 | -0.012 | -0.015 | -0.013 | -0.008 | t | 47229  | PDYASLR                   | Mus<br>musculu<br>s              |
| 1 | 1.00 | 1 | 1 | -0.01 | -0.012 | -0.015 | -0.013 | -0.008 | t | 47229  | PDYASLR                   | Mus<br>musculu<br>s              |
| 1 | 1.00 | 1 | 1 | 0.01  | 0.002  | 0.01   | 0.01   | 0.012  | t | 156918 | MAITDHP<br>GSAMV          | Mus<br>musculu<br>s              |
| 1 | 1.00 | 1 | 1 | 0     | 0.001  | 0.01   | -0.003 | -0.002 | t | 52463  | QTACNCLK<br>NLAGSIS       | Homo<br>sapiens                  |
| 1 | 1.00 | 1 | 1 | -0.03 | -0.03  | -0.021 | -0.027 | -0.028 | t | 98525  | TKAQSYEI<br>KA            | Homo<br>sapiens                  |
| 1 | 1.00 | 1 | 1 | -0.03 | -0.032 | -0.011 | -0.027 | -0.03  | t | 59381  | SLPEFRLH<br>ALLM          | Mus<br>musculu<br>s              |
| 1 | 1.00 | 1 | 1 | -0.03 | -0.026 | -0.022 | -0.03  | -0.03  | t | 71163  | VSTQSAKN<br>PPGATVP       | Mus<br>musculu<br>s              |
| 1 | 1.00 | 1 | 1 | -0.01 | -0.013 | -0.001 | -0.01  | -0.01  | t | 8508   | DGVAVLK<br>VGG            | Oryctola<br>gus<br>cuniculu<br>s |
| 1 | 1.00 | 1 | 1 | 0.04  | 0.044  | 0.039  | 0.037  | 0.041  | t | 6532   | CKVQRQY<br>DEQQKEQ<br>C   | Homo<br>sapiens                  |
| 1 | 1.00 | 1 | 1 | 0.03  | 0.03   | 0.042  | 0.021  | 0.03   | t | 135706 | KQYVDGD<br>Q              | Homo<br>sapiens                  |
| 1 | 1.00 | 1 | 1 | 0.02  | 0.018  | 0.011  | 0.013  | 0.021  | t | 119514 | RGWKHW<br>VYYTCCPD<br>TPY | Mus<br>musculu<br>s              |
| 1 | 1.00 | 1 | 1 | 0.02  | 0.018  | 0.011  | 0.013  | 0.021  | t | 119514 | RGWKHW<br>VYYTCCPD<br>TPY | Mus<br>musculu<br>s              |

|   |      |   |   |       |        |        |        |        |   |        |                              |                                  |
|---|------|---|---|-------|--------|--------|--------|--------|---|--------|------------------------------|----------------------------------|
| 1 | 1.00 | 1 | 1 | 0     | 0.003  | 0      | 0      | 0.002  | t | 73497  | YCIEAKLTN<br>TTTESRCP<br>TQG | Mus<br>musculu<br>s              |
| 1 | 1.00 | 1 | 1 | 0     | -0.004 | 0      | 0      | 0.002  | t | 73497  | YCIEAKLTN<br>TTTESRCP<br>TQG | Mus<br>musculu<br>s              |
| 1 | 1.00 | 1 | 1 | 0     | -0.003 | 0      | 0      | 0.002  | t | 73497  | YCIEAKLTN<br>TTTESRCP<br>TQG | Mus<br>musculu<br>s              |
| 1 | 1.00 | 1 | 1 | -0.01 | -0.006 | -0.003 | -0.013 | -0.007 | t | 26844  | IKLPALF                      | Homo<br>sapiens                  |
| 1 | 1.00 | 1 | 1 | 0.04  | 0.04   | 0.055  | 0.043  | 0.04   | t | 34154  | KVPEDTLN                     | Homo<br>sapiens                  |
| 1 | 1.00 | 1 | 1 | -0.01 | -0.01  | 0.011  | -0.003 | -0.01  | t | 18588  | GAGGGAG<br>GAGAGGG<br>AGGAGA | Homo<br>sapiens                  |
| 1 | 1.00 | 1 | 1 | 0     | 0      | 0      | 0      | 0      | t | 38257  | LNKSINPD<br>EAVAYGA<br>AVQAF | Homo<br>sapiens                  |
| 1 | 1.00 | 1 | 1 | -0.01 | -0.01  | -0.01  | -0.01  | -0.006 | t | 146020 | TCPPDIIPK                    | Mus<br>musculu<br>s              |
| 1 | 1.00 | 1 | 1 | -0.02 | -0.022 | -0.023 | -0.02  | -0.018 | t | 132837 | HQTKPAL<br>NLDTLQVR          | Trichosu<br>rus<br>vulpecul<br>a |
| 1 | 1.00 | 1 | 1 | 0     | -0.002 | 0      | -0.001 | 0.002  | t | 111845 | TPTLHEYM<br>LDLQPETT<br>DLYC | Mus<br>musculu<br>s              |
| 1 | 1.00 | 1 | 1 | 0     | -0.002 | 0      | -0.001 | 0.002  | t | 111845 | TPTLHEYM<br>LDLQPETT<br>DLYC | Mus<br>musculu<br>s              |
| 1 | 1.00 | 1 | 1 | 0     | 0.002  | 0.011  | -0.004 | -0.002 | t | 23875  | HFVLLVGY<br>GSADGVD          | Homo<br>sapiens                  |
| 1 | 1.00 | 1 | 1 | 0.02  | 0.023  | 0.021  | 0.02   | 0.021  | t | 48093  | PKKPNENK<br>LKQPNE           | Mus<br>musculu<br>s              |
| 1 | 1.00 | 1 | 1 | 0     | 0.002  | -0.005 | 0.001  | 0.006  | t | 2992   | ALVVSQLL<br>R                | Homo<br>sapiens                  |

|   |      |   |   |       |        |        |        |        |   |        |                              |                                  |
|---|------|---|---|-------|--------|--------|--------|--------|---|--------|------------------------------|----------------------------------|
| 1 | 1.00 | 1 | 1 | 0.01  | 0.006  | 0.013  | 0.013  | 0.012  | t | 43701  | NENKLCIK<br>LGQGLTFN<br>SNNI | Oryctola<br>gus<br>cuniculu<br>s |
| 1 | 1.00 | 1 | 1 | -0.03 | -0.034 | -0.021 | -0.03  | -0.029 | t | 67325  | TYEAALKQ<br>YEADL            | Mus<br>musculu<br>s              |
| 1 | 1.00 | 1 | 1 | -0.03 | -0.026 | -0.021 | -0.03  | -0.029 | t | 67325  | TYEAALKQ<br>YEADL            | Mus<br>musculu<br>s              |
| 1 | 1.00 | 1 | 1 | -0.03 | -0.026 | -0.021 | -0.03  | -0.029 | t | 67325  | TYEAALKQ<br>YEADL            | Mus<br>musculu<br>s              |
| 1 | 1.00 | 1 | 1 | 0     | -0.003 | 0.001  | 0      | 0.001  | t | 122108 | GVGVELE<br>NSMGGLN<br>F      | Oryctola<br>gus<br>cuniculu<br>s |
| 1 | 1.00 | 1 | 1 | -0.03 | -0.026 | -0.017 | -0.033 | -0.032 | t | 50761  | QFGPNAG<br>QRMPRA            | Homo<br>sapiens                  |
| 1 | 1.00 | 1 | 1 | -0.03 | -0.026 | -0.017 | -0.033 | -0.032 | t | 50761  | QFGPNAG<br>QRMPRA            | Homo<br>sapiens                  |
| 1 | 1.00 | 1 | 1 | 0.02  | 0.02   | 0.02   | 0.026  | 0.027  | t | 107242 | SQTTANPS<br>CPEGT            | Rattus<br>norvegic<br>us         |
| 1 | 1.00 | 1 | 1 | 0.04  | 0.038  | 0.042  | 0.033  | 0.041  | t | 132397 | KEENLVKS<br>LVSAGSG          | Mus<br>musculu<br>s              |
| 1 | 1.00 | 1 | 1 | 0     | 0.002  | 0.002  | -0.003 | -0.001 | t | 33123  | KRELRLNP<br>QQCGLRA          | Homo<br>sapiens                  |
| 1 | 1.00 | 1 | 1 | -0.03 | -0.03  | -0.034 | -0.03  | -0.029 | t | 120002 | KSRSDLMF<br>EKQSERHG<br>LARR | Rattus<br>norvegic<br>us         |
| 1 | 1.00 | 1 | 1 | 0.01  | 0.01   | 0.01   | 0.01   | 0.01   | t | 134767 | QDPYVKE<br>AENLKKYF<br>NAG   | Mus<br>musculu<br>s              |
| 1 | 1.00 | 1 | 1 | 0.02  | 0.015  | 0.022  | 0.017  | 0.021  | t | 77810  | YSASVKGR<br>FIVS             | Mus                              |
| 1 | 1.00 | 1 | 1 | -0.02 | -0.02  | -0.02  | -0.02  | -0.02  | t | 99330  | IGKPKAQN<br>IRQGAKE          | Equus<br>caballus                |

|   |      |   |   |       |        |        |        |        |   |        |                              |                                  |
|---|------|---|---|-------|--------|--------|--------|--------|---|--------|------------------------------|----------------------------------|
| 1 | 1.00 | 1 | 1 | 0     | 0.003  | 0.002  | 0.006  | 0.006  | t | 122721 | CSNSSSSQ<br>FQIHGPR          | Mus<br>musculu<br>s              |
| 1 | 1.00 | 1 | 1 | -0.02 | -0.017 | -0.012 | -0.02  | -0.018 | t | 79923  | LVCGIAAK<br>LGAA             | Mus<br>musculu<br>s              |
| 1 | 1.00 | 1 | 1 | -0.02 | -0.02  | -0.023 | -0.027 | -0.02  | t | 122143 | LSVVGD<br>PDAPPTMVA<br>VAPVA | Homo<br>sapiens                  |
| 1 | 1.00 | 1 | 1 | 0     | -0.002 | 0      | -0.003 | 0.002  | t | 105206 | GAIIGLMV<br>GGVV             | Mus<br>musculu<br>s              |
| 1 | 1.00 | 1 | 1 | 0.04  | 0.038  | 0.042  | 0.033  | 0.04   | t | 114193 | AEYYNKQY<br>LEQTRAE<br>LDT   | Mus<br>musculu<br>s              |
| 1 | 1.00 | 1 | 1 | -0.01 | -0.012 | -0.004 | -0.017 | -0.01  | t | 118798 | GAGFGHG<br>SGYGVGH<br>GK     | Mus<br>musculu<br>s              |
| 1 | 1.00 | 1 | 1 | -0.01 | -0.01  | -0.014 | -0.01  | -0.008 | t | 73114  | WTANGDY<br>KSKGDKPV<br>YEPGF | Oryctola<br>gus<br>cuniculu<br>s |
| 1 | 1.00 | 1 | 1 | -0.05 | -0.05  | -0.048 | -0.05  | -0.048 | t | 120070 | LLDQRLAL<br>QW               | Mus<br>musculu<br>s              |
| 1 | 1.00 | 1 | 1 | -0.02 | -0.02  | -0.02  | -0.016 | -0.017 | t | 117830 | ELDGQEYV<br>VEFDLFGK<br>DSIR | Homo<br>sapiens                  |
| 1 | 1.00 | 1 | 1 | 0.03  | 0.028  | 0.036  | 0.023  | 0.03   | t | 118826 | GSGKGAGI<br>GLGVGGG<br>VGA   | Mus<br>musculu<br>s              |
| 1 | 1.00 | 1 | 1 | -0.01 | -0.012 | -0.008 | -0.017 | -0.01  | t | 117524 | GVDVSMN<br>THLKAVK<br>M      | Mus<br>musculu<br>s              |
| 1 | 1.00 | 1 | 1 | -0.03 | -0.03  | -0.03  | -0.034 | -0.029 | t | 8347   | DGAHHDG<br>AHH               | Homo<br>sapiens                  |
| 1 | 1.00 | 1 | 1 | 0     | -0.004 | 0      | -0.001 | 0.003  | t | 48779  | PPFSLSPV<br>PTLGSRSR<br>R    | Oryctola<br>gus<br>cuniculu<br>s |

|   |      |   |   |       |        |        |        |        |   |        |                               |                                     |
|---|------|---|---|-------|--------|--------|--------|--------|---|--------|-------------------------------|-------------------------------------|
| 1 | 1.00 | 1 | 1 | 0     | -0.002 | 0      | -0.001 | 0.003  | t | 37660  | LLPHSNLD<br>HILEPSIPW<br>KSK  | Mus<br>musculu<br>s                 |
| 1 | 1.00 | 1 | 1 | 0.01  | 0.006  | 0.029  | 0.013  | 0.012  | t | 35662  | LEQPVSND<br>LS                | Oryctola<br>gus<br>cuniculu<br>s    |
| 1 | 1.00 | 1 | 1 | 0     | -0.002 | -0.003 | 0      | 0.002  | t | 132891 | QVSCPAIQ<br>ADEVLGE           | Trichosu<br>rus<br>vulpecul<br>a    |
| 1 | 1.00 | 1 | 1 | -0.01 | -0.01  | -0.01  | -0.01  | -0.01  | t | 79305  | MCEYSHW<br>SGFAFCK            | Mus<br>musculu<br>s                 |
| 1 | 1.00 | 1 | 1 | 0.02  | 0.02   | 0.02   | 0.02   | 0.022  | t | 78519  | SHPGGLYN<br>DPPRSTL           | Mus<br>musculu<br>s                 |
| 1 | 1.00 | 1 | 1 | -0.01 | -0.008 | -0.012 | -0.01  | -0.009 | t | 99919  | CVYDPRG<br>HTGTTNQ<br>RSPPGGE | Homo<br>sapiens                     |
| 1 | 1.00 | 1 | 1 | -0.05 | -0.052 | -0.043 | -0.047 | -0.048 | t | 106442 | GDLKRTTG<br>GGC               | Mus<br>musculu<br>s                 |
| 1 | 1.00 | 1 | 1 | 0     | 0      | 0      | 0      | 0.004  | t | 106764 | QYTSIHGG<br>VVE               | Oryctola<br>gus<br>cuniculu<br>s    |
| 1 | 1.00 | 1 | 1 | 0.03  | 0.023  | 0.025  | 0.027  | 0.034  | t | 68790  | VGSDQHP<br>DIHAPDGA           | Oncorhy<br>nchus<br>tshawyts<br>cha |
| 1 | 1.00 | 1 | 1 | -0.01 | -0.01  | 0.012  | -0.01  | -0.01  | t | 104139 | MWNDFW                        | Mus<br>musculu<br>s                 |
| 1 | 1.00 | 1 | 1 | -0.01 | -0.01  | -0.01  | -0.01  | -0.01  | t | 77791  | NKVSARG<br>CTFYGCW<br>KGLVG   | Homo<br>sapiens                     |
| 1 | 1.00 | 1 | 1 | -0.03 | -0.03  | -0.016 | -0.03  | -0.029 | t | 9684   | DPMFTPK                       | Mus<br>musculu<br>s                 |
| 1 | 1.00 | 1 | 1 | -0.01 | -0.007 | -0.001 | -0.01  | -0.01  | t | 73485  | YCAWPAC<br>YCYGLPDS           | Equus<br>caballus                   |
| 1 | 1.00 | 1 | 1 | 0     | 0.01   | 0      | -0.003 | 0.002  | t | 51372  | QLINTNGS<br>WHINSTA           | Pan<br>troglody<br>tes              |

|   |      |   |   |       |        |        |        |        |   |        |                              |                                  |
|---|------|---|---|-------|--------|--------|--------|--------|---|--------|------------------------------|----------------------------------|
| 1 | 1.00 | 1 | 1 | 0     | 0.01   | 0      | -0.003 | 0.002  | t | 51372  | QLINTNGS<br>WHINSTA          | Pan<br>troglody<br>tes           |
| 1 | 1.00 | 1 | 1 | -0.01 | -0.01  | -0.005 | -0.013 | -0.01  | t | 14697  | EVFTKKTK<br>LT               | Homo<br>sapiens                  |
| 1 | 1.00 | 1 | 1 | 0.02  | 0.02   | 0.02   | 0.02   | 0.022  | t | 130599 | RQGEEVY<br>MWRDSM<br>PA      | Mus<br>musculu<br>s              |
| 1 | 1.00 | 1 | 1 | -0.04 | -0.043 | -0.029 | -0.043 | -0.04  | t | 32731  | KPHFPLA                      | Mus<br>musculu<br>s              |
| 1 | 1.00 | 1 | 1 | 0     | 0      | 0.009  | -0.003 | -0.002 | t | 114462 | LTIPQNFA<br>VVKRARN          | Homo<br>sapiens                  |
| 1 | 1.00 | 1 | 1 | -0.01 | -0.008 | -0.011 | -0.013 | -0.01  | t | 142304 | SVTLVEAY<br>TDVFDDT<br>QVEMI | Felis<br>catus                   |
| 1 | 1.00 | 1 | 1 | -0.02 | -0.024 | -0.021 | -0.017 | -0.02  | t | 12958  | ELAWGIAS<br>DGGALKH<br>GFKTT | Oryctola<br>gus<br>cuniculu<br>s |
| 1 | 1.00 | 1 | 1 | 0.01  | 0.006  | 0.022  | 0.01   | 0.01   | t | 57389  | SEEKFVTM<br>TDLVPGI          | Bos<br>taurus                    |
| 1 | 1.00 | 1 | 1 | 0.01  | 0.006  | 0.022  | 0.01   | 0.01   | t | 57389  | SEEKFVTM<br>TDLVPGI          | Bos<br>taurus                    |
| 1 | 1.00 | 1 | 1 | -0.02 | -0.018 | -0.025 | -0.02  | -0.019 | t | 95050  | YCEIIVTHF<br>PFDQQNC<br>T    | Rattus<br>norvegic<br>us         |
| 1 | 1.00 | 1 | 1 | -0.01 | -0.006 | 0.005  | -0.01  | -0.008 | t | 3578   | APGPGEV<br>W                 | Homo<br>sapiens                  |
| 1 | 1.00 | 1 | 1 | 0     | 0      | 0      | 0      | 0      | t | 96743  | PNSWYGA<br>GAIKMSG<br>PNNHV  | Homo<br>sapiens(<br>human)       |
| 1 | 1.00 | 1 | 1 | 0.01  | 0.017  | 0.027  | 0.009  | 0.008  | t | 60953  | SSDPAWE<br>RNDPT             | Gallus<br>gallus                 |

|   |      |   |   |       |        |        |        |        |   |        |                             |                           |
|---|------|---|---|-------|--------|--------|--------|--------|---|--------|-----------------------------|---------------------------|
| 1 | 1.00 | 1 | 1 | -0.02 | -0.021 | -0.001 | -0.02  | -0.02  | t | 56565  | RYKQKIIAP<br>AKQLL          | Bos<br>taurus             |
| 1 | 1.00 | 1 | 1 | 0     | 0.003  | -0.005 | 0      | 0.001  | t | 64843  | TLIDINGKT<br>KSVFFEYNI<br>R | Equus<br>caballus         |
| 1 | 1.00 | 1 | 1 | 0     | 0.002  | -0.005 | 0      | 0.001  | t | 64843  | TLIDINGKT<br>KSVFFEYNI<br>R | Homo<br>sapiens           |
| 1 | 1.00 | 1 | 1 | -0.03 | -0.03  | -0.028 | -0.026 | -0.029 | t | 48124  | PKPQRKTK<br>RNTNRRP         | Homo<br>sapiens           |
| 1 | 1.00 | 1 | 1 | -0.04 | -0.04  | -0.039 | -0.04  | -0.04  | t | 67263  | TWHLPSH<br>HSRRK            | Mus<br>musculu<br>s       |
| 1 | 1.00 | 1 | 1 | 0     | -0.002 | 0.003  | -0.001 | 0      | t | 60651  | SRERRAPT<br>PQRAGS          | Anas<br>platyrhy<br>nchos |
| 1 | 1.00 | 1 | 1 | -0.01 | -0.007 | -0.01  | -0.01  | -0.009 | t | 51438  | QLSSSKYT<br>IQRSTGDN<br>IDT | Mus<br>musculu<br>s       |
| 1 | 1.00 | 1 | 1 | -0.02 | -0.02  | -0.02  | -0.02  | -0.022 | t | 127672 | GPGAGDR<br>RREGPDRS         | Homo<br>sapiens           |
| 1 | 1.00 | 1 | 1 | 0.02  | 0.022  | 0.018  | 0.017  | 0.019  | t | 98982  | REREREED<br>WRQPRED         | Homo<br>sapiens           |
| 1 | 1.00 | 1 | 1 | -0.04 | -0.04  | -0.033 | -0.04  | -0.04  | t | 133554 | EGLYSPW<br>WPRSLPVL         | Mus<br>musculu<br>s       |
| 1 | 1.00 | 1 | 1 | 0.04  | 0.043  | 0.047  | 0.04   | 0.04   | t | 56104  | RTLGEDPQ<br>YHEEWV          | Mus<br>musculu<br>s       |
| 1 | 1.00 | 1 | 1 | 0     | -0.002 | 0.004  | -0.007 | -0.001 | t | 144885 | EPGQLKLN<br>WFKKGSS         | Mus<br>musculu<br>s       |
| 1 | 1.00 | 1 | 1 | -0.03 | -0.027 | -0.018 | -0.03  | -0.03  | t | 41183  | MCAVRDP<br>AFSRSRLS         | Mus<br>musculu<br>s       |
| 1 | 1.00 | 1 | 1 | -0.06 | -0.058 | -0.06  | -0.06  | -0.06  | t | 117515 | GRGRGRG<br>RGRGRG           | Homo<br>sapiens           |

|   |      |   |   |       |        |        |        |        |   |        |                              |                                  |
|---|------|---|---|-------|--------|--------|--------|--------|---|--------|------------------------------|----------------------------------|
| 1 | 1.00 | 1 | 1 | 0     | -0.002 | 0      | -0.001 | 0.003  | t | 19637  | GFTTNEPR<br>YNVFAE           | Mus<br>musculu<br>s              |
| 1 | 1.00 | 1 | 1 | 0     | 0      | 0.002  | 0.006  | 0.006  | t | 23599  | HCLGKWL<br>GHPDKF            | Mus<br>musculu<br>s              |
| 1 | 1.00 | 1 | 1 | 0.04  | 0.045  | 0.05   | 0.04   | 0.04   | t | 127645 | EVDNGNF<br>VHCEESGK<br>LVLVY | Mus<br>musculu<br>s              |
| 1 | 1.00 | 1 | 1 | 0.01  | 0.01   | 0.01   | 0.007  | 0.012  | t | 70240  | VPAAYAA<br>QGYK              | Homo<br>sapiens                  |
| 1 | 1.00 | 1 | 1 | -0.01 | -0.006 | -0.002 | -0.009 | -0.008 | t | 31903  | KLIAQGGK<br>AKICGL           | Homo<br>sapiens                  |
| 1 | 1.00 | 1 | 1 | -0.02 | -0.02  | -0.02  | -0.02  | -0.018 | t | 79287  | LEVTVML<br>NKRLPDSR<br>TS    | Oryctola<br>gus<br>cuniculu<br>s |
| 1 | 1.00 | 1 | 1 | -0.02 | -0.018 | -0.012 | -0.019 | -0.022 | t | 17535  | FQSMRKH<br>TPYRNGCL<br>EPTLG | Homo<br>sapiens                  |
| 1 | 1.00 | 1 | 1 | -0.02 | -0.018 | -0.012 | -0.019 | -0.022 | t | 17535  | FQSMRKH<br>TPYRNGCL<br>EPTLG | Homo<br>sapiens                  |
| 1 | 1.00 | 1 | 1 | -0.03 | -0.032 | -0.03  | -0.031 | -0.028 | t | 111846 | TQRLVWA<br>CVGVEVG<br>R      | Mus<br>musculu<br>s              |
| 1 | 1.00 | 1 | 1 | 0.01  | 0.01   | 0.035  | 0.01   | 0.009  | t | 47494  | PFGDSY                       | Homo<br>sapiens                  |
| 1 | 1.00 | 1 | 1 | 0.03  | 0.033  | 0.045  | 0.03   | 0.03   | t | 45303  | NPASTTNK<br>DK               | Mus<br>musculu<br>s              |
| 1 | 1.00 | 1 | 1 | -0.01 | -0.007 | 0      | -0.01  | -0.011 | t | 110859 | GEESRISLP<br>LPNFSSLN<br>LRE | Mus<br>musculu<br>s              |
| 1 | 1.00 | 1 | 1 | 0     | -0.002 | 0      | -0.007 | 0.001  | t | 133999 | AGWILTEL<br>EQSATVM<br>KS    | Mus<br>musculu<br>s              |



|   |      |   |   |       |        |        |        |        |   |        |                              |                                  |
|---|------|---|---|-------|--------|--------|--------|--------|---|--------|------------------------------|----------------------------------|
| 1 | 1.00 | 1 | 1 | 0     | 0.004  | 0.007  | 0.001  | 0      | t | 62003  | STWHVLYS<br>PNVSVPS<br>SSTP  | Homo<br>sapiens                  |
| 1 | 1.00 | 1 | 1 | -0.02 | -0.02  | -0.01  | -0.02  | -0.021 | t | 74009  | YGGPANK<br>KNAG              | Mus<br>musculu<br>s              |
| 1 | 1.00 | 1 | 1 | 0.02  | 0.018  | 0.027  | 0.017  | 0.02   | t | 116917 | AESDDST<br>RRH               | Mus<br>musculu<br>s              |
| 1 | 1.00 | 1 | 1 | 0.04  | 0.04   | 0.04   | 0.04   | 0.041  | t | 153622 | IEGVKYIAE<br>HMKSD<br>EES    | Mus<br>musculu<br>s              |
| 1 | 1.00 | 1 | 1 | -0.02 | -0.016 | -0.01  | -0.023 | -0.02  | t | 19632  | GFTLEFLE<br>HAFSV            | Homo<br>sapiens                  |
| 1 | 1.00 | 1 | 1 | -0.03 | -0.03  | -0.03  | -0.03  | -0.03  | t | 112845 | SWYARHT                      | Homo<br>sapiens                  |
| 1 | 1.00 | 1 | 1 | -0.04 | -0.036 | -0.037 | -0.04  | -0.04  | t | 141064 | NSIGLTW<br>QR                | Ovis<br>aries                    |
| 1 | 1.00 | 1 | 1 | 0     | -0.003 | -0.005 | 0      | 0.003  | t | 6357   | CGSVFLVS<br>QLFTLS<br>PRRHET | Oryctola<br>gus<br>cuniculu<br>s |
| 1 | 1.00 | 1 | 1 | 0     | 0      | 0.003  | 0      | 0      | t | 751    | ADPVTTEG<br>DYVVKISEF<br>YGR | Mus<br>musculu<br>s              |
| 1 | 1.00 | 1 | 1 | 0     | 0      | 0.003  | 0      | 0      | t | 100438 | QPREDWR<br>RPSHQQP<br>RKIRPE | Homo<br>sapiens                  |
| 1 | 1.00 | 1 | 1 | -0.07 | -0.07  | -0.065 | -0.07  | -0.072 | t | 78946  | DAWCGR<br>GK                 | Mus<br>musculu<br>s              |
| 1 | 1.00 | 1 | 1 | 0.03  | 0.03   | 0.049  | 0.033  | 0.028  | t | 51806  | QPELAPED<br>PED              | Homo<br>sapiens                  |
| 1 | 1.00 | 1 | 1 | 0     | 0      | 0.005  | 0.002  | 0.002  | t | 100445 | QRSRQFQ<br>NLQNRHIV<br>QIEAK | Homo<br>sapiens                  |
| 1 | 1.00 | 1 | 1 | -0.07 | -0.07  | -0.073 | -0.07  | -0.07  | t | 18814  | GAVIIRGH<br>LRMAGHS<br>LGR   | Homo<br>sapiens                  |

|   |      |   |   |       |        |        |        |        |   |        |                              |                                  |
|---|------|---|---|-------|--------|--------|--------|--------|---|--------|------------------------------|----------------------------------|
| 1 | 1.00 | 1 | 1 | -0.02 | -0.02  | -0.018 | -0.016 | -0.02  | t | 17960  | FTFSPRRH<br>WTTQGCN<br>CSIYP | Homo<br>sapiens                  |
| 1 | 1.00 | 1 | 1 | 0.01  | 0.006  | 0.012  | 0.013  | 0.011  | t | 38323  | LNQTARAF<br>PDCAICWE<br>PSPP | Oryctola<br>gus<br>cuniculu<br>s |
| 1 | 1.00 | 1 | 1 | -0.05 | -0.05  | -0.041 | -0.05  | -0.05  | t | 135945 | KFGADAR<br>ALMLQ             | Homo<br>sapiens                  |
| 1 | 1.00 | 1 | 1 | 0.04  | 0.043  | 0.048  | 0.04   | 0.042  | t | 153382 | FAENKKD<br>HFSPGGG<br>GS     | Mus<br>musculu<br>s              |
| 1 | 1.00 | 1 | 1 | 0.01  | 0.009  | 0.019  | 0.011  | 0.01   | t | 4733   | ASRAALIEE<br>GQRIAEM<br>LKSK | Homo<br>sapiens                  |
| 1 | 1.00 | 1 | 0 | -0.05 | -0.046 | -0.028 | -0.053 | -0.038 | t | 103933 | GKLPWPK                      | Homo<br>sapiens                  |
| 1 | 1.00 | 1 | 1 | -0.03 | -0.028 | -0.03  | -0.029 | -0.029 | t | 65971  | TQWQVLP<br>CSFTTLPAL<br>STGL | Homo<br>sapiens                  |
| 1 | 1.00 | 1 | 1 | -0.02 | -0.022 | -0.013 | -0.023 | -0.022 | t | 78059  | VLDWKTR<br>GKDLP             | Mus<br>musculu<br>s              |
| 1 | 1.00 | 1 | 1 | -0.02 | -0.02  | -0.02  | -0.029 | -0.017 | t | 119457 | GLELPE                       | Homo<br>sapiens                  |
| 1 | 1.00 | 1 | 1 | -0.04 | -0.037 | -0.027 | -0.04  | -0.04  | t | 105825 | GGFRIFGIV                    | Mus<br>musculu<br>s              |
| 1 | 1.00 | 1 | 1 | 0.01  | 0.014  | 0.007  | 0.01   | 0.013  | t | 110762 | AGSSIVPLE<br>EYPAEIP         | Oryctola<br>gus<br>cuniculu<br>s |
| 1 | 1.00 | 1 | 1 | -0.02 | -0.022 | -0.008 | -0.017 | -0.017 | t | 104906 | MVGGVVI<br>A                 | Mus<br>musculu<br>s              |
| 1 | 1.00 | 1 | 1 | 0.02  | 0.018  | 0.011  | 0.013  | 0.02   | t | 102825 | STKADKKP<br>EAKREAIV<br>KADE | Mus<br>musculu<br>s              |
| 1 | 1.00 | 1 | 1 | 0.04  | 0.04   | 0.052  | 0.038  | 0.038  | t | 96447  | KEEEEDKK<br>RK               | Homo<br>sapiens                  |
| 1 | 1.00 | 1 | 1 | 0.01  | 0.01   | 0.01   | 0.01   | 0.009  | t | 115563 | WYSLAMA<br>ASDISLLDA<br>QSAP | Homo<br>sapiens                  |

|   |      |   |   |       |        |        |        |        |   |        |                              |                              |
|---|------|---|---|-------|--------|--------|--------|--------|---|--------|------------------------------|------------------------------|
| 1 | 1.00 | 1 | 1 | 0     | 0      | 0      | 0      | 0.004  | t | 116085 | EPANPSEK                     | Mus<br>musculus              |
| 1 | 1.00 | 1 | 1 | 0     | -0.002 | 0.007  | -0.001 | 0      | t | 361    | AAPKELRIT<br>MAS             | Mus<br>musculus              |
| 1 | 1.00 | 1 | 1 | 0.03  | 0.03   | 0.037  | 0.02   | 0.03   | t | 108497 | KIGPELHGL                    | Homo<br>sapiens              |
| 1 | 1.00 | 1 | 1 | -0.01 | -0.008 | 0      | -0.009 | -0.01  | t | 32070  | KLPDDFM<br>GCVLAWN<br>TRN    | Homo<br>sapiens              |
| 1 | 1.00 | 1 | 1 | -0.01 | -0.008 | -0.011 | -0.009 | -0.01  | t | 70109  | VNKNTLQ<br>ARQQT<br>VSA      | Homo<br>sapiens              |
| 1 | 1.00 | 1 | 1 | -0.01 | -0.013 | -0.001 | -0.01  | -0.01  | t | 100405 | PYYGPGV<br>DYKNNLD           | Oryctola<br>gus<br>cuniculus |
| 1 | 1.00 | 1 | 1 | -0.04 | -0.04  | -0.041 | -0.04  | -0.04  | t | 70950  | VSGGLCST<br>RLHRHALL<br>ATCP | Homo<br>sapiens              |
| 1 | 1.00 | 1 | 1 | 0.04  | 0.038  | 0.037  | 0.039  | 0.04   | t | 54599  | RLITGRLQS<br>LQTYVTQ<br>Q    | Mus<br>musculus              |
| 1 | 1.00 | 1 | 1 | -0.04 | -0.044 | -0.024 | -0.041 | -0.04  | t | 142224 | LLDTKGGL<br>YRWSPV           | Oryctola<br>gus<br>cuniculus |
| 1 | 1.00 | 1 | 1 | -0.01 | -0.008 | 0.002  | -0.003 | -0.007 | t | 122101 | GKGAGDL                      | Homo<br>sapiens              |
| 1 | 1.00 | 1 | 1 | 0     | -0.004 | 0.007  | 0      | 0.005  | t | 10853  | DYAWDQT<br>HQ                | Mus<br>musculus              |
| 1 | 1.00 | 1 | 1 | 0     | 0      | 0      | 0      | 0.004  | t | 69627  | VLLRRIGG                     | Mus<br>musculus              |
| 1 | 1.00 | 1 | 1 | 0     | 0      | 0      | 0      | 0.004  | t | 59326  | SLITYMK<br>M                 | Mus<br>musculus              |
| 1 | 1.00 | 1 | 1 | 0     | 0      | 0      | 0      | 0.004  | t | 24249  | HLLRLSEI                     | Mus<br>musculus              |

|   |      |   |   |       |        |        |        |        |   |        |                              |                                  |
|---|------|---|---|-------|--------|--------|--------|--------|---|--------|------------------------------|----------------------------------|
| 1 | 1.00 | 1 | 1 | -0.02 | -0.017 | -0.003 | -0.02  | -0.021 | t | 94638  | PACGRHYS<br>CG               | Capra<br>hircus                  |
| 1 | 1.00 | 1 | 1 | -0.01 | -0.007 | 0.001  | -0.01  | -0.011 | t | 38271  | LNLTTASV<br>PMLRWYA<br>ERFCF | Mus<br>musculu<br>s              |
| 1 | 1.00 | 1 | 1 | 0     | -0.003 | -0.004 | 0.001  | 0.002  | t | 33223  | KRTITSKKS<br>KKAPSGAS<br>GVK | Canis<br>lupus                   |
| 1 | 1.00 | 1 | 1 | -0.11 | -0.112 | -0.105 | -0.107 | -0.11  | t | 96175  | DFRWYGP<br>KYITHSIRS<br>FTPS | Mus<br>musculu<br>s              |
| 1 | 1.00 | 1 | 1 | -0.04 | -0.041 | -0.032 | -0.04  | -0.042 | t | 1453   | AGARRGD<br>LAHLAAAH<br>ARHLP | Bos<br>taurus                    |
| 1 | 1.00 | 1 | 1 | -0.04 | -0.041 | -0.032 | -0.04  | -0.042 | t | 1453   | AGARRGD<br>LAHLAAAH<br>ARHLP | Bos<br>taurus                    |
| 1 | 1.00 | 1 | 1 | 0     | 0      | -0.001 | 0.003  | 0.002  | t | 65099  | TLTLAMPK<br>TTYELKME<br>CPH  | Homo<br>sapiens                  |
| 1 | 1.00 | 1 | 1 | -0.06 | -0.064 | -0.058 | -0.063 | -0.061 | t | 56937  | SAPPTRVR<br>R                | Oryctola<br>gus<br>cuniculu<br>s |
| 1 | 1.00 | 1 | 1 | 0.03  | 0.027  | 0.033  | 0.03   | 0.031  | t | 136071 | LLYGEVGD<br>TLLIIFK          | Oryctola<br>gus<br>cuniculu<br>s |
| 1 | 1.00 | 1 | 1 | 0     | 0      | 0      | 0      | 0.004  | t | 60722  | SRLGRSSA<br>WV               | Mus<br>musculu<br>s              |
| 1 | 1.00 | 1 | 1 | -0.02 | -0.02  | -0.014 | -0.017 | -0.018 | t | 10787  | DVVTKLPL<br>AVMG             | Homo<br>sapiens                  |
| 1 | 1.00 | 1 | 1 | 0.04  | 0.042  | 0.057  | 0.041  | 0.04   | t | 35419  | LEDTVT                       | Homo<br>sapiens                  |
| 1 | 1.00 | 1 | 1 | 0.03  | 0.033  | 0.035  | 0.03   | 0.032  | t | 20173  | GHPRTAEL<br>LGML             | Mus<br>musculu<br>s              |

|   |      |   |   |       |        |        |        |        |   |        |                              |                     |
|---|------|---|---|-------|--------|--------|--------|--------|---|--------|------------------------------|---------------------|
| 1 | 1.00 | 1 | 1 | 0.03  | 0.032  | 0.037  | 0.031  | 0.031  | t | 133661 | NYSPLHNS<br>DITV             | Homo<br>sapiens     |
| 1 | 1.00 | 1 | 1 | 0.01  | 0.01   | 0.01   | 0.01   | 0.01   | t | 131543 | LLTSMYVK<br>EFLISSSQD<br>GHQ | Homo<br>sapiens     |
| 1 | 1.00 | 1 | 1 | 0     | 0.002  | 0.005  | 0.001  | 0.002  | t | 24909  | HTFDDFCP<br>ECRPLGLQ<br>GC   | Homo<br>sapiens     |
| 1 | 1.00 | 1 | 1 | -0.01 | -0.012 | 0.002  | -0.011 | -0.01  | t | 142422 | GAILVDFW<br>AEWC             | Mus<br>musculu<br>s |
| 1 | 1.00 | 1 | 1 | 0.05  | 0.053  | 0.053  | 0.05   | 0.055  | t | 78938  | CAPGQNL<br>CY                | Mus<br>musculu<br>s |
| 1 | 1.00 | 1 | 1 | 0.02  | 0.02   | 0.037  | 0.02   | 0.02   | t | 39024  | LQYTPSW<br>MLV               | Mus<br>musculu<br>s |
| 1 | 1.00 | 1 | 1 | 0     | -0.002 | 0.007  | -0.003 | -0.003 | t | 142473 | SEAKDGSH<br>GEGK             | Mus<br>musculu<br>s |
| 1 | 1.00 | 1 | 1 | 0.04  | 0.043  | 0.034  | 0.04   | 0.042  | t | 139034 | EIDQLEQR<br>ADNLTTIA<br>HELQ | Felis<br>catus      |
| 1 | 1.00 | 1 | 1 | -0.04 | -0.036 | -0.042 | -0.043 | -0.041 | t | 99363  | IYRLRGRA<br>HVQVVDs          | Homo<br>sapiens     |
| 1 | 1.00 | 1 | 1 | -0.01 | -0.01  | -0.01  | -0.01  | -0.01  | t | 130459 | CSKARLHL<br>QGRSNAC<br>AAC   | Homo<br>sapiens     |
| 1 | 1.00 | 1 | 1 | 0     | 0      | 0.016  | 0      | 0      | t | 10800  | DWEDRYy                      | Mus<br>musculu<br>s |
| 1 | 1.00 | 1 | 1 | -0.02 | -0.02  | -0.017 | -0.02  | -0.019 | t | 35401  | LEDPIsRDL                    | Mus<br>musculu<br>s |
| 1 | 1.00 | 1 | 1 | -0.01 | -0.01  | -0.003 | -0.01  | -0.01  | t | 107765 | CESAQRPF<br>GCC              | Mus<br>musculu<br>s |
| 1 | 1.00 | 1 | 1 | -0.01 | -0.007 | -0.003 | -0.01  | -0.01  | t | 107765 | CESAQRPF<br>GCC              | Mus<br>musculu<br>s |
| 1 | 1.00 | 1 | 1 | -0.01 | -0.006 | 0.003  | -0.009 | -0.01  | t | 51844  | QPGPSREY<br>RYVLRTP<br>P     | Homo<br>sapiens     |

|   |      |   |   |       |        |        |        |        |   |        |                              |                                  |
|---|------|---|---|-------|--------|--------|--------|--------|---|--------|------------------------------|----------------------------------|
| 1 | 1.00 | 1 | 1 | 0     | 0      | 0      | 0.003  | 0.003  | t | 70817  | VRRRVNA<br>ANKKPEDL<br>TLNDL | Aotus<br>lemurinu<br>s           |
| 1 | 1.00 | 1 | 1 | 0.03  | 0.027  | 0.028  | 0.03   | 0.033  | t | 131035 | RHQREITR<br>TTLQSDQ          | Oryctola<br>gus<br>cuniculu<br>s |
| 1 | 1.00 | 1 | 1 | 0     | 0      | 0.004  | 0.003  | 0.002  | t | 74684  | YLGTGPEA<br>SLPYGANK         | Homo<br>sapiens                  |
| 1 | 1.00 | 1 | 1 | 0     | -0.002 | -0.001 | -0.001 | 0      | t | 50767  | QFGRDVS<br>DFTDSVRD<br>PK    | Mus<br>musculu<br>s              |
| 1 | 1.00 | 1 | 1 | 0     | -0.004 | -0.001 | -0.001 | 0      | t | 50767  | QFGRDVS<br>DFTDSVRD<br>PK    | Oryctola<br>gus<br>cuniculu<br>s |
| 1 | 1.00 | 1 | 1 | -0.02 | -0.02  | -0.015 | -0.02  | -0.02  | t | 18736  | GAQAVAR<br>SLDWTKV<br>TLDGR  | Homo<br>sapiens                  |
| 1 | 1.00 | 1 | 1 | 0.04  | 0.038  | 0.04   | 0.033  | 0.039  | t | 105964 | MGSRTDR                      | Mus<br>musculu<br>s              |
| 1 | 1.00 | 1 | 1 | -0.02 | -0.02  | -0.02  | -0.02  | -0.019 | t | 119674 | WNPDDYG<br>GVKKIHIPS         | Homo<br>sapiens                  |
| 1 | 1.00 | 1 | 1 | 0.01  | 0.014  | 0.01   | 0.011  | 0.012  | t | 55055  | RNRSPERC<br>DLGDDLHL<br>Q    | Homo<br>sapiens                  |
| 1 | 1.00 | 1 | 1 | 0.01  | 0.012  | 0.02   | 0.011  | 0.01   | t | 21429  | GNGAGGQ<br>PAGNGAG<br>GQPA   | Homo<br>sapiens                  |
| 1 | 1.00 | 1 | 1 | 0.01  | 0.012  | 0.015  | 0.017  | 0.02   | t | 127644 | ESMPALS                      | Homo<br>sapiens                  |
| 1 | 1.00 | 1 | 1 | -0.01 | -0.008 | -0.005 | -0.011 | -0.01  | t | 17278  | FPELKPGE<br>SRHTSDH<br>MSIYK | Homo<br>sapiens                  |
| 1 | 1.00 | 1 | 1 | -0.04 | -0.036 | -0.036 | -0.043 | -0.04  | t | 43990  | NGGPCVFI<br>KRVS             | Homo<br>sapiens                  |
| 1 | 1.00 | 1 | 1 | -0.02 | -0.018 | -0.024 | -0.023 | -0.017 | t | 150853 | HIGGLSILD<br>PIFGVL          | Homo<br>sapiens                  |
| 1 | 1.00 | 1 | 1 | -0.03 | -0.032 | -0.018 | -0.021 | -0.028 | t | 115702 | DEAELPSRI<br>SPGKNA          | Mus<br>musculu<br>s              |

|   |      |   |   |       |        |        |        |        |   |        |                              |                                  |
|---|------|---|---|-------|--------|--------|--------|--------|---|--------|------------------------------|----------------------------------|
| 1 | 1.00 | 1 | 1 | -0.01 | -0.015 | 0.009  | -0.007 | -0.011 | t | 70457  | VPQVRKET<br>RASSR            | Bos<br>taurus                    |
| 1 | 1.00 | 1 | 1 | -0.01 | -0.008 | 0.009  | -0.007 | -0.011 | t | 70457  | VPQVRKET<br>RASSR            | Cavia<br>porcellu<br>s           |
| 1 | 1.00 | 1 | 1 | -0.02 | -0.017 | -0.02  | -0.02  | -0.02  | t | 131101 | TDSEMDV<br>VRFDDDN<br>S      | Mus<br>musculu<br>s              |
| 1 | 1.00 | 1 | 1 | -0.01 | -0.008 | -0.01  | -0.009 | -0.008 | t | 62852  | TAGHGAY<br>GITSLFTRG         | Homo<br>sapiens                  |
| 1 | 1.00 | 1 | 1 | 0.01  | 0.01   | 0.022  | 0.01   | 0.011  | t | 153434 | NSPFMLH<br>SALSGGGS          | Mus<br>musculu<br>s              |
| 1 | 1.00 | 1 | 1 | 0.01  | 0.013  | 0.018  | 0.01   | 0.012  | t | 50845  | QGDRGVG<br>SSAVILDD          | Sus<br>scrofa                    |
| 1 | 1.00 | 1 | 1 | -0.02 | -0.02  | -0.02  | -0.02  | -0.018 | t | 128004 | GMIEVQS<br>NYGFVWD<br>VSLKKV | Mus<br>musculu<br>s              |
| 1 | 1.00 | 1 | 1 | -0.02 | -0.024 | -0.022 | -0.023 | -0.019 | t | 94675  | RKMWCD<br>AFCSSRGK<br>VVE    | Oryctola<br>gus<br>cuniculu<br>s |
| 1 | 1.00 | 1 | 1 | 0.02  | 0.02   | 0.02   | 0.02   | 0.022  | t | 95004  | DEESSNAA<br>EEWKYVA<br>MVIDH | Rattus<br>norvegic<br>us         |
| 1 | 1.00 | 1 | 1 | 0.02  | 0.02   | 0.02   | 0.02   | 0.022  | t | 95004  | DEESSNAA<br>EEWKYVA<br>MVIDH | Rattus<br>norvegic<br>us         |
| 1 | 1.00 | 1 | 1 | -0.01 | -0.01  | -0.01  | -0.014 | -0.013 | t | 134255 | VGPAPGM<br>RPPMGGH<br>MPMM   | Homo<br>sapiens                  |
| 1 | 1.00 | 1 | 1 | -0.01 | -0.009 | -0.007 | -0.013 | -0.01  | t | 32633  | KNVNFQP<br>SGVTTRQ           | Equus<br>caballus                |
| 1 | 1.00 | 1 | 1 | 0.03  | 0.028  | 0.032  | 0.031  | 0.03   | t | 48823  | PPLLESWK<br>DPDYVPPV<br>VHG  | Homo<br>sapiens                  |
| 1 | 1.00 | 1 | 1 | -0.01 | -0.01  | -0.01  | -0.01  | -0.006 | t | 97595  | QTPLTMA<br>ALELF             | Mus<br>musculu<br>s              |

|   |      |   |   |       |        |        |        |        |   |        |                             |               |
|---|------|---|---|-------|--------|--------|--------|--------|---|--------|-----------------------------|---------------|
| 1 | 1.00 | 1 | 1 | -0.05 | -0.044 | -0.035 | -0.05  | -0.05  | t | 139810 | LPSWHRF                     | Ovis aries    |
| 1 | 1.00 | 1 | 1 | -0.02 | -0.017 | -0.004 | -0.02  | -0.02  | t | 49302  | PSAVKL                      | Mus musculus  |
| 1 | 1.00 | 1 | 1 | 0.01  | 0.01   | 0.01   | 0.01   | 0.011  | t | 131318 | VPSTPPTP<br>SPSTPPTPS<br>PS | Homo sapiens  |
| 1 | 1.00 | 1 | 1 | 0.01  | 0.01   | 0.022  | 0.01   | 0.011  | t | 133835 | GDCFFGFL<br>NSPWRVC         | Mus musculus  |
| 1 | 1.00 | 1 | 1 | -0.05 | -0.048 | -0.045 | -0.047 | -0.048 | t | 132262 | ELNVTVVT<br>FFCRPHN         | Homo sapiens  |
| 1 | 1.00 | 1 | 1 | 0.04  | 0.042  | 0.04   | 0.033  | 0.04   | t | 123246 | GMLGTTP<br>EE               | Ovis aries    |
| 1 | 1.00 | 1 | 1 | -0.04 | -0.038 | -0.041 | -0.039 | -0.04  | t | 68035  | VDPDREM<br>LAAERPRG         | Homo sapiens  |
| 1 | 1.00 | 1 | 1 | -0.01 | -0.01  | -0.005 | -0.008 | -0.008 | t | 100433 | QNLRVAKI<br>SMPVNT<br>GQFED | Homo sapiens  |
| 1 | 1.00 | 1 | 1 | 0.01  | 0.008  | 0.009  | 0.013  | 0.015  | t | 106515 | HLPSFLRP<br>DPPL            | Mus musculus  |
| 1 | 1.00 | 1 | 1 | -0.01 | -0.012 | -0.004 | -0.011 | -0.01  | t | 28693  | ISQQPFPL<br>QP              | Mus musculus  |
| 1 | 1.00 | 1 | 1 | 0.02  | 0.018  | 0.027  | 0.023  | 0.023  | t | 106978 | VQYSSPE<br>ALRV             | Mus musculus  |
| 1 | 1.00 | 1 | 1 | 0     | 0.012  | 0      | -0.001 | 0.003  | t | 146185 | DAEFGH                      | Mus musculus  |
| 1 | 1.00 | 1 | 1 | 0     | 0      | 0      | -0.001 | 0.003  | t | 102384 | EFRH                        | Mus musculus  |
| 1 | 1.00 | 1 | 1 | -0.01 | -0.003 | -0.01  | -0.011 | -0.01  | t | 50281  | QAIKAKKL<br>NVPQPKFE<br>G   | Gallus gallus |
| 1 | 1.00 | 1 | 1 | 0     | 0      | 0      | -0.006 | 0.001  | t | 21254  | GMDGTQL<br>DRW              | Mus musculus  |
| 1 | 1.00 | 1 | 1 | 0     | 0      | 0      | -0.006 | 0.001  | t | 3236   | ANCASILC<br>KCYTTGT         | Mus musculus  |



|   |      |   |   |       |        |        |        |        |   |       |                              |                                  |
|---|------|---|---|-------|--------|--------|--------|--------|---|-------|------------------------------|----------------------------------|
| 1 | 1.00 | 1 | 1 | 0     | 0      | 0      | -0.006 | 0.001  | t | 3236  | ANCASILC<br>KCYTTGT          | Mus<br>musculu<br>s              |
| 1 | 1.00 | 1 | 1 | 0     | 0      | 0      | -0.006 | 0.001  | t | 3236  | ANCASILC<br>KCYTTGT          | Mus<br>musculu<br>s              |
| 1 | 1.00 | 1 | 1 | 0     | 0      | 0      | -0.006 | 0.001  | t | 3236  | ANCASILC<br>KCYTTGT          | Mus<br>musculu<br>s              |
| 1 | 1.00 | 1 | 1 | -0.06 | -0.056 | -0.051 | -0.057 | -0.06  | t | 58077 | SGHRMA<br>WMMMM<br>NW        | Homo<br>sapiens                  |
| 1 | 1.00 | 1 | 1 | -0.03 | -0.031 | -0.029 | -0.033 | -0.029 | t | 99276 | GGKGPLLS<br>ILKAFN           | Homo<br>sapiens                  |
| 1 | 1.00 | 1 | 1 | -0.02 | -0.024 | 0.002  | -0.02  | -0.02  | t | 95319 | DMGSLAA<br>R                 | Bos<br>taurus                    |
| 1 | 1.00 | 1 | 1 | -0.05 | -0.047 | -0.043 | -0.05  | -0.05  | t | 18116 | FVAMWSD<br>VGLCKKRP<br>KPGG  | Mus<br>musculu<br>s              |
| 1 | 1.00 | 1 | 1 | -0.05 | -0.05  | -0.043 | -0.05  | -0.05  | t | 18116 | FVAMWSD<br>VGLCKKRP<br>KPGG  | Mus<br>musculu<br>s              |
| 1 | 1.00 | 1 | 1 | -0.02 | -0.02  | -0.02  | -0.02  | -0.018 | t | 51930 | QPQQPQQ<br>SFPQQQR<br>PF     | Homo<br>sapiens                  |
| 1 | 1.00 | 1 | 1 | 0.05  | 0.047  | 0.052  | 0.05   | 0.051  | t | 10525 | DTYEEVLE<br>LAQE             | Oryctola<br>gus<br>cuniculu<br>s |
| 1 | 1.00 | 1 | 1 | -0.02 | -0.02  | -0.02  | -0.014 | -0.013 | t | 46317 | NTWTTCC<br>SIAFPSK           | Mus<br>musculu<br>s              |
| 1 | 1.00 | 1 | 1 | 0.01  | 0.006  | 0.013  | 0.013  | 0.012  | t | 99060 | WTTPDTS<br>PNCRIDQD          | Oryctola<br>gus<br>cuniculu<br>s |
| 1 | 1.00 | 1 | 1 | 0.02  | 0.022  | 0.015  | 0.019  | 0.021  | t | 40925 | LYREFDEM<br>EECSQHLP<br>YIEQ | Homo<br>sapiens                  |
| 1 | 1.00 | 1 | 1 | -0.02 | -0.017 | -0.004 | -0.02  | -0.02  | t | 46756 | PACYCYGL<br>PDSVKIWW         | Equus<br>caballus                |

|   |      |   |   |       |        |        |        |        |   |        |                              |                                  |
|---|------|---|---|-------|--------|--------|--------|--------|---|--------|------------------------------|----------------------------------|
| 1 | 1.00 | 1 | 1 | -0.03 | -0.026 | -0.018 | -0.027 | -0.028 | t | 41115  | MASCRPID<br>KFDQGW           | Homo<br>sapiens                  |
| 1 | 1.00 | 1 | 1 | -0.03 | -0.028 | -0.012 | -0.027 | -0.03  | t | 49055  | PQPGLR                       | Homo<br>sapiens                  |
| 1 | 1.00 | 1 | 1 | 0     | 0      | 0.01   | 0      | 0.002  | t | 140838 | DEPPQSP<br>WDRVKDL<br>ATVYV  | Mus<br>musculu<br>s              |
| 1 | 1.00 | 1 | 1 | -0.01 | -0.008 | 0.004  | -0.009 | -0.01  | t | 57635  | SESTIGDVL<br>QQMAI           | Homo<br>sapiens                  |
| 1 | 1.00 | 1 | 1 | -0.01 | -0.014 | -0.011 | -0.011 | -0.01  | t | 52792  | QVSLESVD<br>VYFQDVF<br>GTMWC | Oryctola<br>gus<br>cuniculu<br>s |
| 1 | 1.00 | 1 | 1 | 0.06  | 0.06   | 0.076  | 0.058  | 0.058  | t | 99010  | SPEKEDQE<br>EENQGGK          | Homo<br>sapiens                  |
| 1 | 1.00 | 1 | 1 | -0.01 | -0.006 | -0.002 | -0.007 | -0.01  | t | 17839  | FSRQFLIPY<br>DPEHHYK<br>VFSP | Homo<br>sapiens                  |
| 1 | 1.00 | 1 | 1 | 0.02  | 0.02   | 0.027  | 0.02   | 0.022  | t | 94511  | FEVFNFP                      | Mus<br>musculu<br>s              |
| 1 | 1.00 | 1 | 1 | -0.02 | -0.022 | -0.015 | -0.021 | -0.019 | t | 563    | ACHPLFDA<br>RCGGKS           | Mus<br>musculu<br>s              |
| 1 | 1.00 | 1 | 1 | -0.01 | -0.013 | -0.015 | -0.009 | -0.009 | t | 59749  | SMSHRTM<br>SIVNSYVN<br>DVMER | Canis<br>lupus                   |
| 1 | 1.00 | 1 | 1 | 0     | 0.002  | -0.005 | 0.001  | 0.002  | t | 45702  | NRLIAFAS<br>RGNHVSP<br>RHYV  | Homo<br>sapiens                  |
| 1 | 1.00 | 1 | 1 | -0.01 | -0.01  | 0.01   | -0.004 | -0.01  | t | 7969   | DEEMEQA<br>KRNHLRVV<br>DSL   | Homo<br>sapiens                  |
| 1 | 1.00 | 1 | 1 | 0.05  | 0.05   | 0.05   | 0.04   | 0.05   | t | 98883  | LNENKVLV<br>LD               | Homo<br>sapiens                  |

|   |      |   |   |       |        |        |        |        |   |        |                              |                                  |
|---|------|---|---|-------|--------|--------|--------|--------|---|--------|------------------------------|----------------------------------|
| 1 | 1.00 | 1 | 1 | 0.02  | 0.017  | 0.025  | 0.02   | 0.022  | t | 126918 | RDYIPRILG<br>PEAFQQY<br>VGP  | Oryctola<br>gus<br>cuniculu<br>s |
| 1 | 1.00 | 1 | 1 | -0.01 | -0.01  | -0.012 | -0.01  | -0.007 | t | 34335  | KWVNGRE<br>I                 | Mus<br>musculu<br>s              |
| 1 | 1.00 | 1 | 1 | 0.05  | 0.054  | 0.052  | 0.047  | 0.053  | t | 7902   | DEAEEEDE<br>NPYVFED          | Homo<br>sapiens                  |
| 1 | 1.00 | 1 | 1 | -0.05 | -0.052 | -0.043 | -0.049 | -0.048 | t | 96335  | GRRLPVVI                     | Mus<br>musculu<br>s              |
| 1 | 1.00 | 1 | 1 | 0.01  | 0.013  | 0.023  | 0.01   | 0.01   | t | 3222   | ANAEALN<br>NLL               | Mus<br>musculu<br>s              |
| 1 | 1.00 | 1 | 1 | -0.04 | -0.036 | -0.021 | -0.04  | -0.04  | t | 95687  | PSVPNLRG                     | Cavia<br>porcellu<br>s           |
| 1 | 1.00 | 1 | 1 | 0.03  | 0.03   | 0.03   | 0.03   | 0.032  | t | 140461 | EVSLHDM<br>NLATH             | Mus<br>musculu<br>s              |
| 1 | 1.00 | 1 | 1 | 0     | -0.002 | 0.009  | 0.003  | 0.001  | t | 17360  | FPQFKPEE                     | Mus<br>musculu<br>s              |
| 1 | 1.00 | 1 | 1 | -0.01 | -0.01  | -0.005 | -0.016 | -0.012 | t | 23077  | GVNPNNNA<br>AGLPKGC<br>G     | Homo<br>sapiens                  |
| 1 | 1.00 | 1 | 1 | 0     | 0      | 0      | 0      | 0      | t | 127852 | TCTIKVVG<br>GYQVNIRV<br>GDTT | Mus<br>musculu<br>s              |
| 1 | 1.00 | 1 | 1 | 0     | 0      | 0      | 0      | 0      | t | 127852 | TCTIKVVG<br>GYQVNIRV<br>GDTT | Mus<br>musculu<br>s              |
| 1 | 1.00 | 1 | 1 | 0.01  | 0.01   | 0.018  | 0.01   | 0.01   | t | 50427  | QDAATPY<br>HPPATPN<br>N      | Oryctola<br>gus<br>cuniculu<br>s |
| 1 | 1.00 | 1 | 1 | -0.03 | -0.026 | -0.026 | -0.029 | -0.029 | t | 5147   | ATSRSTM<br>QLASFFTP<br>G     | Homo<br>sapiens                  |
| 1 | 1.00 | 1 | 1 | -0.01 | -0.012 | -0.01  | -0.017 | -0.01  | t | 107326 | DVSDMFS<br>K                 | Rattus<br>norvegic<br>us         |
| 1 | 1.00 | 1 | 1 | 0.01  | 0.01   | 0.01   | 0.01   | 0.01   | t | 79306  | MCNTDAS<br>YPHVPCD           | Mus<br>musculu<br>s              |

|   |      |   |   |       |        |        |        |        |   |        |                              |                                  |
|---|------|---|---|-------|--------|--------|--------|--------|---|--------|------------------------------|----------------------------------|
| 1 | 1.00 | 1 | 1 | 0.01  | 0.01   | 0.023  | 0.01   | 0.01   | t | 159166 | TRLEHQM<br>WESVRDE<br>LN     | Mus<br>musculu<br>s              |
| 1 | 1.00 | 1 | 1 | -0.03 | -0.03  | -0.03  | -0.03  | -0.03  | t | 140906 | TPEYNIAL<br>GQRRADA<br>VKGYL | Oryctola<br>gus<br>cuniculu<br>s |
| 1 | 1.00 | 1 | 1 | -0.01 | -0.012 | 0      | -0.011 | -0.01  | t | 41840  | MKIRLHTL<br>LAVLTAAP<br>LLA  | Mus<br>musculu<br>s              |
| 1 | 1.00 | 1 | 1 | -0.02 | -0.022 | -0.02  | -0.021 | -0.02  | t | 5244   | AVAASNN<br>PELTTLTA<br>ALSGQ | Mus<br>musculu<br>s              |
| 1 | 1.00 | 1 | 1 | -0.01 | -0.01  | 0      | -0.01  | -0.01  | t | 104171 | PGSGFWS<br>FGSEDGSG<br>DPE   | Oryctola<br>gus<br>cuniculu<br>s |
| 1 | 1.00 | 1 | 1 | -0.03 | -0.027 | -0.026 | -0.03  | -0.03  | t | 18970  | GDEVRALA<br>NDLKAFLD<br>SEYG | Mus<br>musculu<br>s              |
| 1 | 1.00 | 1 | 1 | -0.03 | -0.032 | -0.03  | -0.031 | -0.028 | t | 111846 | TQRLVWA<br>CVGVEVG<br>R      | Mus<br>musculu<br>s              |
| 1 | 1.00 | 1 | 1 | 0.04  | 0.042  | 0.046  | 0.043  | 0.042  | t | 21019  | GLLQTASR<br>QAEVIAPA<br>VQ   | Homo<br>sapiens                  |
| 1 | 1.00 | 1 | 1 | -0.03 | -0.031 | -0.029 | -0.033 | -0.029 | t | 99454  | LRYQQQS<br>RQSRRLSL          | Homo<br>sapiens                  |
| 1 | 1.00 | 1 | 1 | 0.01  | 0.008  | 0.017  | 0.003  | 0.009  | t | 108144 | SRLAFGDQ<br>L                | Mus<br>musculu<br>s              |
| 1 | 1.00 | 1 | 1 | -0.01 | -0.008 | -0.01  | -0.009 | -0.01  | t | 69888  | VLYQEFDE<br>MEECSQH<br>LPYIE | Homo<br>sapiens                  |
| 1 | 1.00 | 1 | 1 | 0.05  | 0.05   | 0.05   | 0.05   | 0.052  | t | 145804 | GPVGPSD<br>PSIVSLVEE         | Mus<br>musculu<br>s              |
| 1 | 1.00 | 1 | 1 | -0.01 | -0.012 | -0.003 | -0.011 | -0.01  | t | 98220  | LKSLVLGG<br>RKAVKQG          | Sus<br>scrofa                    |
| 1 | 1.00 | 1 | 1 | -0.02 | -0.024 | -0.016 | -0.027 | -0.02  | t | 54546  | RLGAALLQ<br>SA               | Oryctola<br>gus<br>cuniculu<br>s |

|   |      |   |   |       |        |        |        |        |   |        |                                |                                  |
|---|------|---|---|-------|--------|--------|--------|--------|---|--------|--------------------------------|----------------------------------|
| 1 | 1.00 | 1 | 1 | -0.06 | -0.06  | -0.052 | -0.06  | -0.06  | t | 84685  | KRVHARM<br>AFT                 | Homo<br>sapiens                  |
| 1 | 1.00 | 1 | 1 | 0.01  | 0.012  | 0.021  | 0.013  | 0.01   | t | 31886  | KLGLKLLRY<br>YTEILS            | Homo<br>sapiens                  |
| 1 | 1.00 | 1 | 1 | 0.04  | 0.039  | 0.041  | 0.037  | 0.041  | t | 99129  | CQQEPDD<br>LKQKACES            | Homo<br>sapiens                  |
| 1 | 1.00 | 1 | 1 | -0.02 | -0.02  | -0.02  | -0.02  | -0.02  | t | 29938  | KARRSEGR<br>SWAQ               | Homo<br>sapiens                  |
| 1 | 1.00 | 1 | 1 | -0.05 | -0.038 | -0.05  | -0.051 | -0.05  | t | 50164  | PYRLWHY<br>PCTIN               | Pan<br>troglody<br>tes           |
| 1 | 1.00 | 1 | 1 | 0.02  | 0.016  | 0.026  | 0.019  | 0.019  | t | 78169  | GKHGKEIKI<br>T                 | Mus<br>musculu<br>s              |
| 1 | 1.00 | 1 | 1 | 0.01  | 0.008  | 0.01   | 0.003  | 0.013  | t | 134699 | KDRHDFG<br>F                   | Mus<br>musculu<br>s              |
| 1 | 1.00 | 1 | 1 | -0.01 | -0.012 | -0.003 | -0.007 | -0.007 | t | 141602 | AHFNGSLR<br>SLTQ               | Mus<br>musculu<br>s              |
| 1 | 1.00 | 1 | 1 | 0     | -0.003 | 0.01   | 0      | 0      | t | 27932  | IPLLRTQ                        | Oryctola<br>gus<br>cuniculu<br>s |
| 1 | 1.00 | 1 | 1 | 0     | 0      | 0.01   | 0      | 0      | t | 27932  | IPLLRTQ                        | Mus<br>musculu<br>s              |
| 1 | 1.00 | 1 | 1 | -0.01 | -0.007 | -0.002 | -0.01  | -0.009 | t | 48154  | PKTHNSGR<br>SNVD               | Mus<br>musculu<br>s              |
| 1 | 1.00 | 1 | 1 | 0.02  | 0.02   | 0.021  | 0.016  | 0.022  | t | 45246  | NNSNLFD<br>T<br>IESLQGR<br>IID | Homo<br>sapiens                  |
| 1 | 1.00 | 1 | 1 | -0.01 | -0.008 | -0.001 | -0.009 | -0.01  | t | 40104  | LTPKELD                        | Homo<br>sapiens                  |
| 1 | 1.00 | 1 | 1 | -0.01 | -0.006 | -0.001 | -0.009 | -0.01  | t | 40104  | LTPKELD                        | Homo<br>sapiens                  |
| 1 | 1.00 | 1 | 1 | 0     | 0.003  | 0.006  | 0      | 0.001  | t | 15805  | FFEVAH                         | Equus<br>caballus                |

|   |      |   |   |       |        |        |        |        |   |        |                          |                          |
|---|------|---|---|-------|--------|--------|--------|--------|---|--------|--------------------------|--------------------------|
| 1 | 1.00 | 1 | 1 | -0.04 | -0.042 | -0.042 | -0.04  | -0.038 | t | 120433 | DFAVTHLT<br>KAHLFYDGRV   | Oryctolagus<br>cuniculus |
| 1 | 1.00 | 1 | 1 | 0.01  | 0.01   | 0.022  | 0.01   | 0.011  | t | 131575 | NSDGSHT                  | Mus<br>musculus          |
| 1 | 1.00 | 1 | 1 | -0.01 | -0.01  | -0.01  | -0.01  | -0.006 | t | 97287  | ETPLTETALKWH             | Mus<br>musculus          |
| 1 | 1.00 | 1 | 1 | -0.01 | -0.01  | -0.01  | -0.01  | -0.008 | t | 118383 | GLKKMLRT<br>CAVHITLD     | Homo<br>sapiens          |
| 1 | 1.00 | 1 | 1 | -0.04 | -0.04  | -0.04  | -0.04  | -0.038 | t | 135571 | LFRGRRAS<br>Q            | Oryctolagus<br>cuniculus |
| 1 | 1.00 | 1 | 1 | -0.01 | -0.009 | -0.01  | -0.01  | -0.01  | t | 49716  | PTNAAFSK<br>LPASTIDELKTN | Mus<br>musculus          |
| 1 | 1.00 | 1 | 1 | -0.02 | -0.023 | -0.019 | -0.02  | -0.016 | t | 10431  | DTNKDKPS<br>YQ           | Oryctolagus<br>cuniculus |
| 1 | 1.00 | 1 | 1 | -0.04 | -0.036 | -0.035 | -0.039 | -0.04  | t | 78749  | MPKTRRR<br>PRRSQRKRPPTPW | Homo<br>sapiens          |
| 1 | 1.00 | 1 | 1 | -0.04 | -0.038 | -0.035 | -0.039 | -0.04  | t | 78749  | MPKTRRR<br>PRRSQRKRPPTPW | Homo<br>sapiens          |
| 1 | 1.00 | 1 | 1 | -0.02 | -0.024 | 0.001  | -0.017 | -0.021 | t | 153820 | DTPTLHEY<br>MLDLQP       | Oryctolagus<br>cuniculus |
| 1 | 1.00 | 1 | 1 | -0.01 | -0.01  | 0.004  | -0.01  | -0.01  | t | 9103   | DLGPLAAR                 | Mus<br>musculus          |
| 1 | 1.00 | 1 | 1 | -0.05 | -0.058 | -0.05  | -0.05  | -0.049 | t | 136649 | SPQRRKRT<br>RQIR         | Mus<br>musculus          |
| 1 | 1.00 | 1 | 1 | -0.02 | -0.02  | -0.022 | -0.02  | -0.02  | t | 102408 | ETEKPLKP<br>APVAPNYEKEPT | Mus<br>musculus          |

|   |      |   |   |       |        |        |        |        |   |        |                              |                                  |
|---|------|---|---|-------|--------|--------|--------|--------|---|--------|------------------------------|----------------------------------|
| 1 | 1.00 | 1 | 1 | -0.03 | -0.03  | -0.02  | -0.033 | -0.032 | t | 50584  | QEFECAGV<br>ALSRLVL          | Homo<br>sapiens                  |
| 1 | 1.00 | 1 | 1 | -0.01 | -0.014 | -0.017 | -0.017 | -0.012 | t | 124198 | GLLFGLIAL<br>AEEVRKLK<br>AR  | Oryctola<br>gus<br>cuniculu<br>s |
| 1 | 1.00 | 1 | 1 | -0.01 | -0.013 | 0.005  | -0.01  | -0.01  | t | 102789 | SANLNFFS<br>PDFGLYTP<br>NASA | Oryctola<br>gus<br>cuniculu<br>s |
| 1 | 1.00 | 1 | 1 | 0     | 0      | -0.007 | 0      | 0.003  | t | 302    | AALTAENT<br>AIKQRNEN<br>AKA  | Homo<br>sapiens                  |
| 1 | 1.00 | 1 | 1 | -0.02 | -0.024 | -0.014 | -0.021 | -0.02  | t | 7675   | DAVTPLRI<br>FIVPPPA<br>EYEQ  | Oryctola<br>gus<br>cuniculu<br>s |
| 1 | 1.00 | 1 | 1 | 0     | 0.003  | 0.002  | 0      | 0.004  | t | 122375 | GLINRAKA<br>VKQFEESQ<br>G    | Mus<br>musculu<br>s              |
| 1 | 1.00 | 1 | 1 | 0     | 0.003  | 0.002  | 0      | 0.004  | t | 122375 | GLINRAKA<br>VKQFEESQ<br>G    | Mus<br>musculu<br>s              |
| 1 | 1.00 | 1 | 1 | -0.02 | -0.016 | -0.014 | -0.019 | -0.019 | t | 49498  | PSRSLPLPP<br>LLSPPRFH<br>PPS | Homo<br>sapiens                  |
| 1 | 1.00 | 1 | 1 | 0     | 0.004  | 0.012  | 0.003  | -0.001 | t | 133841 | GRGNQDP<br>GGGMEKD<br>G      | Homo<br>sapiens                  |
| 1 | 1.00 | 1 | 1 | 0.04  | 0.04   | 0.029  | 0.04   | 0.047  | t | 72886  | WNEKYAQ                      | Mus<br>musculu<br>s              |
| 1 | 1.00 | 1 | 1 | 0.02  | 0.02   | 0.03   | 0.02   | 0.021  | t | 73430  | YAYMSR<br>AYAEFLGE<br>DPGSG  | Mus<br>musculu<br>s              |
| 1 | 1.00 | 1 | 1 | 0.02  | 0.02   | 0.03   | 0.02   | 0.021  | t | 73430  | YAYMSR<br>AYAEFLGE<br>DPGSG  | Mus<br>musculu<br>s              |
| 1 | 1.00 | 1 | 1 | 0     | 0      | 0.013  | 0      | 0      | t | 158939 | KTQNNQGP<br>WDENGIV<br>LD    | Mus<br>musculu<br>s              |

|   |      |   |   |       |        |        |        |        |   |        |                             |                                  |
|---|------|---|---|-------|--------|--------|--------|--------|---|--------|-----------------------------|----------------------------------|
| 1 | 1.00 | 1 | 1 | 0.01  | 0.017  | 0.01   | 0.01   | 0.012  | t | 11815  | EENVEENV<br>EENVEENV        | Aotus                            |
| 1 | 1.00 | 1 | 1 | 0.01  | 0.017  | 0.01   | 0.01   | 0.012  | t | 11815  | EENVEENV<br>EENVEENV        | Aotus                            |
| 1 | 1.00 | 1 | 1 | 0     | 0      | 0.014  | 0      | 0.001  | t | 31002  | KGLNGLFD<br>LGPKQKI         | Mus<br>musculu<br>s              |
| 1 | 1.00 | 1 | 1 | -0.03 | -0.033 | -0.03  | -0.03  | -0.028 | t | 137399 | FCGLPRLE                    | Oryctola<br>gus<br>cuniculu<br>s |
| 1 | 1.00 | 1 | 1 | 0     | 0      | 0.007  | 0      | 0.002  | t | 74871  | YLPVGGLR<br>RIGG            | Mus<br>musculu<br>s              |
| 1 | 1.00 | 1 | 1 | 0     | 0      | 0.007  | 0      | 0.002  | t | 74871  | YLPVGGLR<br>RIGG            | Mus<br>musculu<br>s              |
| 1 | 1.00 | 1 | 1 | -0.03 | -0.032 | -0.03  | -0.037 | -0.03  | t | 107881 | HDKPPDLS<br>MQRL            | Mus<br>musculu<br>s              |
| 1 | 1.00 | 1 | 1 | -0.03 | -0.033 | -0.03  | -0.033 | -0.029 | t | 78077  | YPYSMWK<br>NLWPS            | Mus<br>musculu<br>s              |
| 1 | 1.00 | 1 | 1 | 0     | 0.003  | 0.008  | -0.001 | 0      | t | 79115  | VVQEALD<br>KAREGRT          | Mus<br>musculu<br>s              |
| 1 | 1.00 | 1 | 1 | -0.02 | -0.016 | -0.006 | -0.017 | -0.021 | t | 115057 | GLSLSRFS<br>WGAEGQR<br>PGFG | Homo<br>sapiens                  |
| 1 | 1.00 | 1 | 1 | 0.03  | 0.022  | 0.03   | 0.03   | 0.037  | t | 125055 | FVYGGCQ<br>GNN              | Mus<br>musculu<br>s              |
| 1 | 1.00 | 1 | 1 | -0.02 | -0.02  | -0.015 | -0.02  | -0.017 | t | 125004 | DAPDTDW<br>CDSIP            | Mus<br>musculu<br>s              |
| 1 | 1.00 | 1 | 1 | 0.04  | 0.04   | 0.051  | 0.043  | 0.04   | t | 21019  | GLLQTASR<br>QAEVIAPA<br>VQ  | Homo<br>sapiens                  |
| 1 | 1.00 | 1 | 1 | 0.02  | 0.02   | 0.02   | 0.02   | 0.023  | t | 94644  | PNKKPGKK<br>TTTKPTK         | Mus<br>musculu<br>s              |
| 1 | 1.00 | 1 | 1 | -0.01 | -0.01  | -0.01  | -0.01  | -0.01  | t | 80615  | CASPYEGR<br>YRDMYDA<br>LR   | Oryctola<br>gus<br>cuniculu<br>s |



|   |      |   |   |       |        |        |        |        |   |        |                              |                                  |
|---|------|---|---|-------|--------|--------|--------|--------|---|--------|------------------------------|----------------------------------|
| 1 | 1.00 | 1 | 1 | -0.01 | -0.01  | 0.001  | -0.01  | -0.01  | t | 777    | ADTDGPP<br>AQF               | Mus<br>musculu<br>s              |
| 1 | 1.00 | 1 | 1 | -0.02 | -0.02  | -0.013 | -0.02  | -0.02  | t | 127814 | SAPWPPT                      | Homo<br>sapiens                  |
| 1 | 1.00 | 1 | 1 | -0.02 | -0.022 | -0.017 | -0.023 | -0.02  | t | 59691  | SMIWSVP<br>EAPRLFMV<br>GT    | Mus<br>musculu<br>s              |
| 1 | 1.00 | 1 | 1 | -0.01 | -0.011 | 0.007  | -0.01  | -0.01  | t | 22199  | GRRVGLS<br>N                 | Anas<br>platyrhy<br>nchos        |
| 1 | 1.00 | 1 | 1 | -0.03 | -0.032 | -0.025 | -0.027 | -0.03  | t | 39788  | LTAELKIYS<br>VIQAEINK<br>HL  | Mus<br>musculu<br>s              |
| 1 | 1.00 | 1 | 1 | -0.03 | -0.034 | -0.025 | -0.027 | -0.03  | t | 39788  | LTAELKIYS<br>VIQAEINK<br>HL  | Oryctola<br>gus<br>cuniculu<br>s |
| 1 | 1.00 | 1 | 1 | 0     | 0.002  | -0.012 | -0.003 | 0      | t | 78553  | VGHDGSV<br>WAQSSSF<br>PQFKPQ | Homo<br>sapiens                  |
| 1 | 1.00 | 1 | 1 | 0     | -0.006 | 0.01   | 0      | 0      | t | 91288  | FDATGHIL<br>PDSSSLKT<br>D    | Oryctola<br>gus<br>cuniculu<br>s |
| 1 | 1.00 | 1 | 1 | -0.02 | -0.018 | -0.011 | -0.023 | -0.02  | t | 38582  | LPLPLLQS<br>WM               | Homo<br>sapiens                  |
| 1 | 1.00 | 1 | 1 | -0.01 | -0.012 | -0.006 | -0.011 | -0.012 | t | 18509  | GAAILVAG<br>LSGCSSNK<br>STTG | Mus<br>musculu<br>s              |
| 1 | 1.00 | 1 | 1 | -0.02 | -0.02  | -0.008 | -0.02  | -0.02  | t | 108167 | TRAFGNEA<br>T                | Mus<br>musculu<br>s              |
| 1 | 1.00 | 1 | 1 | -0.01 | -0.008 | -0.009 | -0.01  | -0.009 | t | 95084  | GEFQRKLY<br>KELLKNYN<br>PLER | Rattus<br>norvegic<br>us         |
| 1 | 1.00 | 1 | 1 | 0     | -0.003 | 0.009  | 0      | -0.002 | t | 120592 | HYLFDTYD<br>PGRRPVQ<br>EPEDT | Oryctola<br>gus<br>cuniculu<br>s |
| 1 | 1.00 | 1 | 1 | 0.01  | 0.012  | 0.012  | 0.007  | 0.013  | t | 38948  | LQPGVDIIE<br>G               | Homo<br>sapiens                  |

|   |      |   |   |       |        |        |        |        |   |        |                              |                                  |
|---|------|---|---|-------|--------|--------|--------|--------|---|--------|------------------------------|----------------------------------|
| 1 | 1.00 | 1 | 1 | 0.01  | 0.01   | 0.01   | 0.01   | 0.01   | t | 27422  | ILYEFDE<br>MEECASK<br>AALIE  | Homo<br>sapiens                  |
| 1 | 1.00 | 1 | 1 | -0.02 | -0.018 | -0.014 | -0.019 | -0.02  | t | 35094  | LCSALYVG<br>DLCGSVFL<br>VGQL | Homo<br>sapiens                  |
| 1 | 1.00 | 1 | 1 | -0.03 | -0.03  | -0.028 | -0.027 | -0.028 | t | 50538  | QDYDNQH<br>EQDRPTPS<br>PAPSR | Homo<br>sapiens                  |
| 1 | 1.00 | 1 | 1 | -0.01 | -0.008 | -0.01  | -0.011 | -0.009 | t | 130456 | CRPQVNN<br>PKEWSCA<br>AC     | Homo<br>sapiens                  |
| 1 | 1.00 | 1 | 1 | 0     | -0.002 | 0      | -0.007 | 0      | t | 117495 | ERDRKREK<br>RKPKS            | Mus<br>musculu<br>s              |
| 1 | 1.00 | 1 | 1 | -0.01 | -0.01  | -0.015 | -0.01  | -0.004 | t | 125055 | FVYGGCQ<br>GNN               | Mus<br>musculu<br>s              |
| 1 | 1.00 | 1 | 1 | -0.04 | -0.04  | -0.04  | -0.04  | -0.04  | t | 115036 | AVLPVLLL<br>QITVGLVF<br>LCLQ | Mus<br>musculu<br>s              |
| 1 | 1.00 | 1 | 1 | -0.01 | -0.01  | -0.01  | -0.01  | -0.004 | t | 29127  | ITVATSRT                     | Homo<br>sapiens                  |
| 1 | 1.00 | 1 | 1 | 0     | -0.004 | 0.009  | -0.001 | 0      | t | 47160  | PDPPQPD<br>FPQLN             | Oryctola<br>gus<br>cuniculu<br>s |
| 1 | 1.00 | 1 | 1 | -0.01 | -0.007 | -0.006 | -0.01  | -0.009 | t | 68246  | VEKLLDFD<br>NTLKKNNL<br>NYI  | Equus<br>caballus                |
| 1 | 1.00 | 1 | 1 | -0.02 | -0.02  | -0.018 | -0.02  | -0.019 | t | 137869 | GGVSTGLI<br>QDDWTFQ          | Mus<br>musculu<br>s              |
| 1 | 1.00 | 1 | 1 | -0.02 | -0.008 | -0.018 | -0.02  | -0.019 | t | 137869 | GGVSTGLI<br>QDDWTFQ          | Pan<br>troglody<br>tes           |
| 1 | 1.00 | 1 | 1 | 0.01  | 0.008  | 0.025  | 0.009  | 0.01   | t | 41665  | MHLPATIG<br>DY               | Mus<br>musculu<br>s              |
| 1 | 1.00 | 1 | 1 | -0.04 | -0.042 | -0.044 | -0.04  | -0.037 | t | 134334 | CRVNHVTL<br>SQPKIVK          | Mus<br>musculu<br>s              |
| 1 | 1.00 | 1 | 1 | -0.05 | -0.05  | -0.045 | -0.05  | -0.05  | t | 809    | AEAAGRRL<br>AR               | Homo<br>sapiens                  |

|   |      |   |   |       |        |        |        |        |   |        |                              |                              |
|---|------|---|---|-------|--------|--------|--------|--------|---|--------|------------------------------|------------------------------|
| 1 | 1.00 | 1 | 1 | 0     | 0.003  | 0.003  | -0.001 | 0.002  | t | 70570  | VQHLSDLK<br>GTDISL           | Ovis<br>aries                |
| 1 | 1.00 | 1 | 1 | 0.01  | 0.01   | 0.012  | 0.01   | 0.012  | t | 141602 | AHFNGSLR<br>SLTQ             | Mus<br>musculus              |
| 1 | 1.00 | 1 | 1 | 0.02  | 0.02   | 0.02   | 0.016  | 0.02   | t | 117742 | AKAQTDR<br>EDLRTLRY          | Homo<br>sapiens              |
| 1 | 1.00 | 1 | 1 | 0.02  | 0.02   | 0.021  | 0.013  | 0.02   | t | 144712 | KSLSTEFI<br>PN               | Homo<br>sapiens              |
| 1 | 1.00 | 1 | 1 | -0.03 | -0.03  | -0.016 | -0.03  | -0.029 | t | 9684   | DPMFTP                       | Mus<br>musculus              |
| 1 | 1.00 | 1 | 1 | 0.02  | 0.02   | 0.02   | 0.02   | 0.02   | t | 104253 | SNVECDGL<br>NCDWII           | Homo<br>sapiens              |
| 1 | 1.00 | 1 | 1 | -0.02 | -0.02  | -0.022 | -0.023 | -0.022 | t | 98933  | PGSHVREE<br>TSRNNPF          | Homo<br>sapiens              |
| 1 | 1.00 | 1 | 1 | 0.02  | 0.023  | 0.026  | 0.02   | 0.02   | t | 52421  | QSRGEARE<br>SYRETGPS<br>RA   | Mus<br>musculus              |
| 1 | 1.00 | 1 | 1 | -0.01 | -0.013 | 0.011  | -0.01  | -0.013 | t | 79998  | REARSGRL<br>SQLRE            | Oryctola<br>gus<br>cuniculus |
| 1 | 1.00 | 1 | 1 | -0.02 | -0.031 | -0.021 | -0.02  | -0.02  | t | 27608  | INDISHTQ<br>SVSSKQRV<br>TGLD | Oryctola<br>gus<br>cuniculus |
| 1 | 1.00 | 1 | 1 | -0.01 | -0.01  | -0.009 | -0.01  | -0.008 | t | 52245  | QRQNKPP<br>NKPNN             | Mus<br>musculus              |
| 1 | 1.00 | 1 | 1 | -0.03 | -0.03  | -0.018 | -0.03  | -0.032 | t | 78521  | SLTILRR                      | Mus<br>musculus              |
| 1 | 1.00 | 1 | 1 | -0.03 | -0.028 | -0.023 | -0.028 | -0.028 | t | 103834 | CPRDLNGK<br>SGC              | Homo<br>sapiens              |
| 1 | 1.00 | 1 | 1 | -0.04 | -0.04  | -0.028 | -0.04  | -0.042 | t | 136060 | EKPKLRKD<br>MYKKMIE<br>VDPL  | Mus<br>musculus              |

|   |      |   |   |       |        |        |        |        |   |        |                              |                                  |
|---|------|---|---|-------|--------|--------|--------|--------|---|--------|------------------------------|----------------------------------|
| 1 | 1.00 | 1 | 1 | 0     | 0      | 0.012  | 0      | 0      | t | 78455  | LPTNLTQ                      | Mus<br>musculu<br>s              |
| 1 | 1.00 | 1 | 1 | -0.01 | -0.01  | 0.002  | -0.01  | -0.01  | t | 159170 | TTASGKLV<br>TDWCCRS<br>C     | Mus<br>musculu<br>s              |
| 1 | 1.00 | 1 | 1 | -0.04 | -0.039 | -0.043 | -0.041 | -0.04  | t | 29745  | KAACTPM<br>GEAHNDK<br>RADPAF | Equus<br>caballus                |
| 1 | 1.00 | 1 | 1 | -0.02 | -0.021 | -0.014 | -0.023 | -0.022 | t | 1656   | AGQRMPR<br>ARYGLV            | Homo<br>sapiens                  |
| 1 | 1.00 | 1 | 1 | -0.04 | -0.04  | -0.033 | -0.04  | -0.041 | t | 107768 | CIAPKRHN<br>SAC              | Mus<br>musculu<br>s              |
| 1 | 1.00 | 1 | 1 | 0     | -0.002 | 0.004  | -0.001 | 0      | t | 4129   | ARDLICAQ<br>KFNGTLVL<br>P    | Mus<br>musculu<br>s              |
| 1 | 1.00 | 1 | 1 | -0.01 | -0.01  | -0.01  | -0.01  | -0.006 | t | 91100  | AFQTPVHS                     | Mus<br>musculu<br>s              |
| 1 | 1.00 | 1 | 1 | 0     | 0.002  | 0.004  | -0.003 | 0.001  | t | 70620  | VQNTVED<br>LKLNTLGR          | Homo<br>sapiens                  |
| 1 | 1.00 | 1 | 1 | -0.05 | -0.05  | -0.05  | -0.053 | -0.049 | t | 28405  | IRSWFGLP                     | Homo<br>sapiens                  |
| 1 | 1.00 | 1 | 1 | -0.04 | -0.038 | -0.034 | -0.043 | -0.041 | t | 94573  | KRIPNKKP<br>GKKT             | Homo<br>sapiens                  |
| 1 | 1.00 | 1 | 1 | -0.02 | -0.02  | -0.02  | -0.024 | -0.02  | t | 131766 | YCQTWGS                      | Homo<br>sapiens                  |
| 1 | 1.00 | 1 | 1 | 0.02  | 0.02   | 0.021  | 0.02   | 0.02   | t | 72248  | WANLMEK<br>IQASVATN<br>PI    | Mus<br>musculu<br>s              |
| 1 | 1.00 | 1 | 1 | -0.02 | -0.02  | -0.01  | -0.02  | -0.016 | t | 32800  | KPMKTLQ<br>FFPGL             | Mus<br>musculu<br>s              |
| 1 | 1.00 | 1 | 1 | -0.08 | -0.078 | -0.07  | -0.073 | -0.08  | t | 118028 | MWGRAL<br>RKAIA              | Homo<br>sapiens                  |
| 1 | 1.00 | 1 | 1 | 0     | -0.003 | 0      | 0      | 0      | t | 79213  | FGMLPVP<br>QQPMGP<br>Q       | Oryctola<br>gus<br>cuniculu<br>s |

|   |      |   |   |       |        |        |        |        |   |        |                              |                                  |
|---|------|---|---|-------|--------|--------|--------|--------|---|--------|------------------------------|----------------------------------|
| 1 | 1.00 | 1 | 1 | 0     | 0.002  | 0.004  | 0.003  | 0      | t | 48870  | PPPPSSPT<br>HDPDSD<br>PQIPP  | Homo<br>sapiens                  |
| 1 | 1.00 | 1 | 1 | -0.05 | -0.051 | -0.049 | -0.053 | -0.049 | t | 99738  | TVRGGLRI<br>LSPDRKR          | Homo<br>sapiens                  |
| 1 | 1.00 | 1 | 1 | -0.01 | -0.008 | -0.005 | -0.011 | -0.01  | t | 60710  | SRKAYDH<br>NSPYIWPR<br>NDYDG | Cavia<br>porcellu<br>s           |
| 1 | 1.00 | 1 | 1 | -0.02 | -0.023 | -0.015 | -0.02  | -0.018 | t | 28288  | IRFDENG<br>VLLNNSFL          | Oryctola<br>gus<br>cuniculu<br>s |
| 1 | 1.00 | 1 | 1 | 0.02  | 0.022  | 0.022  | 0.019  | 0.019  | t | 9582   | DNYWSFS<br>DSTYWTLR<br>YSSG  | Homo<br>sapiens                  |
| 1 | 1.00 | 1 | 1 | -0.01 | -0.01  | -0.004 | -0.01  | -0.009 | t | 7004   | CSGLVGLF<br>TPGAKQNI         | Mus<br>musculu<br>s              |
| 1 | 1.00 | 1 | 1 | -0.02 | -0.02  | -0.02  | -0.02  | -0.02  | t | 71335  | VTGLRNIP<br>SIQSR            | Mus<br>musculu<br>s              |
| 1 | 1.00 | 1 | 1 | -0.02 | -0.019 | -0.004 | -0.02  | -0.02  | t | 44293  | NIMSPVM<br>GVIGFSF           | Myodes<br>glareolu<br>s          |
| 1 | 1.00 | 1 | 1 | -0.02 | -0.02  | -0.022 | -0.026 | -0.02  | t | 105306 | LPQQCGLR<br>APQR             | Homo<br>sapiens                  |
| 1 | 1.00 | 1 | 1 | 0.01  | 0.008  | 0.025  | 0.009  | 0.01   | t | 137288 | SDLSVIGH<br>PIDSE            | Mus<br>musculu<br>s              |
| 1 | 1.00 | 1 | 1 | 0.02  | 0.018  | 0.041  | 0.019  | 0.018  | t | 14003  | ERILEVSD                     | Mus<br>musculu<br>s              |
| 1 | 1.00 | 1 | 1 | -0.04 | -0.04  | -0.04  | -0.043 | -0.04  | t | 149030 | DFRFESSLS<br>INDHA           | Rattus<br>norvegic<br>us         |
| 1 | 1.00 | 1 | 1 | -0.04 | -0.037 | -0.036 | -0.04  | -0.04  | t | 17572  | FRDLTWCI<br>NPPERIK          | Mus<br>musculu<br>s              |
| 1 | 1.00 | 1 | 1 | 0.01  | 0.01   | 0.015  | 0.008  | 0.01   | t | 71323  | VTGHRMA<br>WDMMM<br>NWS      | Homo<br>sapiens                  |

|   |      |   |   |       |        |        |        |        |   |        |                              |                                  |
|---|------|---|---|-------|--------|--------|--------|--------|---|--------|------------------------------|----------------------------------|
| 1 | 1.00 | 1 | 1 | -0.03 | -0.028 | -0.018 | -0.023 | -0.028 | t | 144639 | FAQAYAR<br>GIS               | Homo<br>sapiens                  |
| 1 | 1.00 | 1 | 1 | 0     | 0      | 0      | -0.004 | 0      | t | 132099 | TLNELPNR<br>T                | Homo<br>sapiens                  |
| 1 | 1.00 | 1 | 1 | -0.01 | -0.006 | -0.003 | -0.009 | -0.01  | t | 23226  | GVYLLPRR<br>GPRLGVRA<br>TRKT | Homo<br>sapiens                  |
| 1 | 1.00 | 1 | 1 | -0.01 | -0.014 | -0.003 | -0.011 | -0.01  | t | 18750  | GARAMVT<br>YDCEPRCP<br>YVGAD | Oryctola<br>gus<br>cuniculu<br>s |
| 1 | 1.00 | 1 | 1 | 0.03  | 0.034  | 0.037  | 0.03   | 0.03   | t | 153885 | SEEEDEID<br>GPAGQAE<br>PDRAH | Cavia<br>porcellu<br>s           |
| 1 | 1.00 | 1 | 1 | -0.01 | -0.006 | -0.015 | -0.01  | -0.007 | t | 58312  | SGWKISIR<br>GNRIIWTLI<br>DI  | Homo<br>sapiens                  |
| 1 | 1.00 | 1 | 1 | 0.01  | 0.005  | 0.023  | 0.013  | 0.012  | t | 157832 | RDDPHKV<br>TPSDM             | Canis<br>lupus                   |
| 1 | 1.00 | 1 | 1 | -0.03 | -0.03  | -0.03  | -0.033 | -0.03  | t | 149057 | GWHTRIF<br>VSDWYHT<br>P      | Rattus<br>norvegic<br>us         |
| 1 | 1.00 | 1 | 1 | 0.01  | 0.012  | 0.025  | 0.007  | 0.012  | t | 12961  | ELAYFYPEL<br>F               | Homo<br>sapiens                  |
| 1 | 1.00 | 1 | 1 | -0.01 | -0.012 | 0.004  | -0.013 | -0.014 | t | 14414  | ETHVTGGS<br>AGRT             | Rattus<br>norvegic<br>us         |
| 1 | 1.00 | 1 | 1 | 0     | 0.006  | 0.008  | 0      | 0      | t | 8536   | DHEGCKLS<br>CFIRPSG          | Equus<br>caballus                |
| 1 | 1.00 | 1 | 1 | -0.11 | -0.11  | -0.11  | -0.11  | -0.11  | t | 99177  | EDWRQPR<br>EDWRRPS<br>H      | Homo<br>sapiens                  |
| 1 | 1.00 | 1 | 1 | -0.03 | -0.033 | -0.018 | -0.03  | -0.032 | t | 95924  | TRAEGLYS<br>MLVE             | Oryctola<br>gus<br>cuniculu<br>s |
| 1 | 1.00 | 1 | 1 | -0.04 | -0.036 | -0.04  | -0.033 | -0.038 | t | 134034 | DSYEDISA<br>YLLSKNNAI<br>EPR | Homo<br>sapiens                  |

|   |      |   |   |       |        |        |       |        |   |        |                         |                                  |
|---|------|---|---|-------|--------|--------|-------|--------|---|--------|-------------------------|----------------------------------|
| 1 | 1.00 | 1 | 1 | -0.04 | -0.037 | -0.038 | -0.04 | -0.04  | t | 126111 | GHCQGDG<br>YRVGFGQ<br>C | Mus<br>musculu<br>s              |
| 1 | 1.00 | 1 | 1 | 0.02  | 0.023  | 0.02   | 0.016 | 0.023  | t | 130551 | LTDSEMD<br>VVRFDAA<br>C | Homo<br>sapiens                  |
| 1 | 1.00 | 1 | 1 | 0     | 0      | 0      | 0     | 0.006  | t | 72866  | WMNSTGF<br>TK           | Homo<br>sapiens                  |
| 1 | 1.00 | 1 | 1 | 0.02  | 0.02   | 0.035  | 0.02  | 0.021  | t | 9621   | DPEDSALL                | Mus<br>musculu<br>s              |
| 1 | 1.00 | 1 | 1 | -0.02 | -0.02  | -0.008 | -0.02 | -0.02  | t | 78364  | DQHGWD                  | Mus<br>musculu<br>s              |
| 1 | 1.00 | 1 | 1 | 0     | 0      | 0.016  | 0     | -0.002 | t | 64543  | TKDTQTG<br>MSGQTTP<br>Q | Mus<br>musculu<br>s              |
| 1 | 1.00 | 1 | 1 | 0     | 0      | 0.005  | 0     | 0.002  | t | 67170  | TVSTEQNV<br>PDPQVGI     | Mus<br>musculu<br>s              |
| 1 | 1.00 | 1 | 1 | 0     | 0.004  | 0.005  | 0     | 0.002  | t | 61589  | STEQNVP<br>DPQVG        | Cavia<br>porcellu<br>s           |
| 1 | 1.00 | 1 | 1 | 0     | 0.007  | 0.005  | 0     | 0.002  | t | 61589  | STEQNVP<br>DPQVG        | Cavia<br>porcellu<br>s           |
| 1 | 1.00 | 1 | 1 | 0     | 0      | 0.017  | 0     | -0.002 | t | 57733  | SFCIMPPSI<br>SEG        | Oryctola<br>gus<br>cuniculu<br>s |
| 1 | 1.00 | 1 | 1 | 0.03  | 0.03   | 0.042  | 0.03  | 0.031  | t | 133531 | CDTLKPGE<br>C           | Mus<br>musculu<br>s              |
| 1 | 1.00 | 1 | 1 | 0     | 0      | 0      | 0     | 0.004  | t | 68401  | VEVPGSQ<br>HIDSQKKA     | Mus<br>musculu<br>s              |
| 1 | 1.00 | 1 | 1 | 0.01  | 0.008  | 0.019  | 0.013 | 0.012  | t | 39146  | LRNCEQDF<br>FTLN        | Mus<br>musculu<br>s              |
| 1 | 1.00 | 1 | 1 | 0     | 0      | 0.005  | 0.001 | 0.003  | t | 105904 | KLVFFAED<br>V           | Mus<br>musculu<br>s              |
| 1 | 1.00 | 1 | 1 | -0.02 | -0.02  | -0.02  | -0.02 | -0.019 | t | 41183  | MCAVRDP<br>AFSRRLS      | Mus<br>musculu<br>s              |

|   |      |   |   |       |        |        |        |        |   |        |                               |                                  |
|---|------|---|---|-------|--------|--------|--------|--------|---|--------|-------------------------------|----------------------------------|
| 1 | 1.00 | 1 | 1 | -0.01 | -0.008 | 0.005  | -0.007 | -0.01  | t | 43543  | NDWPCLS<br>HTTVCNG<br>TQ      | Homo<br>sapiens                  |
| 1 | 1.00 | 1 | 1 | 0.01  | 0.005  | 0.023  | 0.012  | 0.01   | t | 13080  | ELGLISIEA<br>ASDI             | Mus                              |
| 1 | 1.00 | 1 | 1 | -0.01 | -0.008 | -0.008 | -0.009 | -0.009 | t | 3236   | ANCASILC<br>KCYTTGT           | Homo<br>sapiens                  |
| 1 | 1.00 | 1 | 1 | -0.01 | -0.01  | -0.01  | -0.01  | -0.01  | t | 53895  | RGKGEGLP<br>GMC GGAL<br>VSSNQ | Homo<br>sapiens                  |
| 1 | 1.00 | 1 | 1 | 0.03  | 0.031  | 0.034  | 0.03   | 0.03   | t | 21715  | GPNNSEAI<br>PALTAAE           | Equus<br>caballus                |
| 1 | 1.00 | 1 | 1 | 0.03  | 0.016  | 0.025  | 0.023  | 0.031  | t | 115593 | AQGHRPQ<br>DEN                | Macaca<br>mulatta                |
| 1 | 1.00 | 1 | 1 | 0.03  | 0.026  | 0.025  | 0.023  | 0.031  | t | 115593 | AQGHRPQ<br>DEN                | Oryctola<br>gus<br>cuniculu<br>s |
| 1 | 1.00 | 1 | 1 | 0     | -0.004 | 0.012  | -0.003 | -0.002 | t | 64058  | THNQWN<br>KPSKPKTN<br>MK      | Oryctola<br>gus<br>cuniculu<br>s |
| 1 | 1.00 | 1 | 1 | -0.01 | -0.006 | -0.01  | -0.009 | -0.008 | t | 125438 | HGVFAFLV<br>SPSPYELC<br>AVPR  | Homo<br>sapiens                  |
| 1 | 1.00 | 1 | 1 | 0.01  | 0.01   | 0.005  | 0.01   | 0.014  | t | 140681 | GPEYWEQ<br>QTRIAKEW<br>EQ     | Rattus<br>norvegic<br>us         |
| 1 | 1.00 | 1 | 1 | 0.01  | 0.012  | 0.017  | 0.007  | 0.012  | t | 63325  | TEDQAME<br>DIK                | Homo<br>sapiens                  |
| 1 | 1.00 | 1 | 1 | 0     | 0      | 0.012  | 0      | 0      | t | 158721 | DSGCAIDL<br>QRRELKCG          | Mus<br>musculu<br>s              |
| 1 | 1.00 | 1 | 1 | -0.03 | -0.026 | -0.026 | -0.029 | -0.03  | t | 17572  | FRDLTWCI<br>NPPERIK           | Homo<br>sapiens                  |
| 1 | 1.00 | 1 | 1 | 0.03  | 0.03   | 0.031  | 0.03   | 0.03   | t | 60753  | SRPGSTTP<br>SGNSARYG<br>NNT   | Mus<br>musculu<br>s              |
| 1 | 1.00 | 1 | 1 | 0     | 0.002  | 0.003  | 0.001  | 0.002  | t | 17466  | FQDLSNPN<br>CKVDL             | Homo<br>sapiens                  |



|   |      |   |   |       |        |        |        |        |   |        |                             |                                  |
|---|------|---|---|-------|--------|--------|--------|--------|---|--------|-----------------------------|----------------------------------|
| 1 | 1.00 | 1 | 1 | -0.04 | -0.038 | -0.026 | -0.039 | -0.041 | t | 65104  | TLTPAAPL<br>PP              | Homo<br>sapiens                  |
| 1 | 1.00 | 1 | 1 | -0.01 | -0.013 | 0      | -0.01  | -0.01  | t | 120920 | RLVEHLLD<br>PSRYNKLIR       | Oryctola<br>gus<br>cuniculu<br>s |
| 1 | 1.00 | 1 | 1 | 0.03  | 0.034  | 0.037  | 0.027  | 0.03   | t | 117343 | PGSLLRFD<br>NYTL            | Homo<br>sapiens                  |
| 1 | 1.00 | 1 | 1 | 0.02  | 0.02   | 0.024  | 0.013  | 0.02   | t | 55275  | RPPTPWPI<br>SQSDRAS<br>YMDT | Homo<br>sapiens                  |
| 1 | 1.00 | 1 | 1 | 0.05  | 0.05   | 0.059  | 0.053  | 0.052  | t | 50674  | QEQQEQEL<br>EEVEEQEQ<br>E   | Homo<br>sapiens                  |
| 1 | 1.00 | 1 | 1 | -0.03 | -0.03  | -0.024 | -0.03  | -0.029 | t | 1448   | AGAPDRA<br>RGQYP            | Mus<br>musculu<br>s              |
| 1 | 1.00 | 1 | 1 | -0.01 | -0.012 | -0.005 | -0.009 | -0.008 | t | 96593  | LPHSNLDH<br>IL              | Rattus<br>norvegic<br>us         |
| 1 | 1.00 | 1 | 1 | 0     | 0.007  | 0.003  | 0      | 0.002  | t | 48670  | PNLRGDL<br>QVLAQKV<br>ARTLP | Cavia<br>porcellu<br>s           |
| 1 | 1.00 | 1 | 1 | -0.04 | -0.04  | -0.037 | -0.04  | -0.039 | t | 122394 | HFPFDQQ<br>NGTMKLG<br>IWT   | Mus<br>musculu<br>s              |
| 1 | 1.00 | 1 | 1 | -0.02 | -0.014 | -0.015 | -0.02  | -0.02  | t | 32408  | KMTVEAV<br>KAKKTIL          | Ovis<br>aries                    |
| 1 | 1.00 | 1 | 1 | -0.04 | -0.042 | -0.029 | -0.043 | -0.042 | t | 119378 | VDYNLKW<br>NPDDYGG<br>VK    | Rattus<br>norvegic<br>us         |
| 1 | 1.00 | 1 | 1 | -0.04 | -0.042 | -0.029 | -0.043 | -0.042 | t | 119378 | VDYNLKW<br>NPDDYGG<br>VK    | Rattus<br>norvegic<br>us         |
| 1 | 1.00 | 1 | 1 | -0.01 | -0.014 | 0.006  | -0.011 | -0.01  | t | 70934  | VSFQPDYP<br>ITARIH          | Anas<br>platyrhy<br>nchos        |

|   |      |   |   |       |        |        |        |        |   |        |                               |                       |
|---|------|---|---|-------|--------|--------|--------|--------|---|--------|-------------------------------|-----------------------|
| 1 | 1.00 | 1 | 1 | -0.05 | -0.048 | -0.03  | -0.047 | -0.05  | t | 24176  | HLAPLG                        | Homo sapiens          |
| 1 | 1.00 | 1 | 1 | 0.01  | 0.008  | 0.003  | 0.007  | 0.012  | t | 39169  | LRPTFDTR<br>LMRLEDE<br>MKEGR  | Mus musculus          |
| 1 | 1.00 | 1 | 1 | -0.08 | -0.078 | -0.068 | -0.073 | -0.08  | t | 134789 | RRQGWLK<br>EIRKLQKS           | Homo sapiens          |
| 1 | 1.00 | 1 | 1 | 0.02  | 0.018  | 0.022  | 0.02   | 0.021  | t | 122861 | NALNSPLH<br>QEYEENL           | Oryctolagus cuniculus |
| 1 | 1.00 | 1 | 1 | -0.01 | -0.01  | -0.01  | -0.01  | -0.008 | t | 140458 | EHNDFPM<br>YTWRP              | Mus musculus          |
| 1 | 1.00 | 1 | 1 | 0     | 0      | 0      | -0.006 | 0.001  | t | 48927  | PPSSPTH<br>PPSDP              | Homo sapiens          |
| 1 | 1.00 | 1 | 1 | -0.02 | -0.022 | -0.017 | -0.021 | -0.02  | t | 4213   | ARPKQRR<br>PQGLPNN<br>T       | Mus musculus          |
| 1 | 1.00 | 1 | 1 | -0.03 | -0.026 | -0.028 | -0.03  | -0.028 | t | 100644 | WRITYKDT<br>VQLRRK            | Homo sapiens          |
| 1 | 1.00 | 1 | 1 | -0.03 | -0.03  | -0.03  | -0.03  | -0.03  | t | 125540 | QSLRQRKS<br>VNALNSPL<br>HQEY  | Homo sapiens          |
| 1 | 1.00 | 1 | 1 | 0.02  | 0.02   | 0.018  | 0.02   | 0.022  | t | 26329  | IGTRNPNN<br>NAATVLQL          | Mus musculus          |
| 1 | 1.00 | 1 | 1 | -0.03 | -0.029 | -0.025 | -0.031 | -0.03  | t | 54752  | RLSAACN<br>WTRGERC<br>NLED RD | Oryctolagus cuniculus |
| 1 | 1.00 | 1 | 1 | 0.03  | 0.032  | 0.036  | 0.027  | 0.031  | t | 43938  | NFTTGEDS<br>VAEVWRE           | Homo sapiens          |
| 1 | 1.00 | 1 | 1 | 0     | 0      | 0.014  | 0      | 0      | t | 22921  | GVATKGL<br>GVHAKSS<br>DWG     | Oryctolagus cuniculus |

|   |      |   |   |       |        |        |        |        |   |        |                              |                                  |
|---|------|---|---|-------|--------|--------|--------|--------|---|--------|------------------------------|----------------------------------|
| 1 | 1.00 | 1 | 1 | 0     | 0      | 0      | -0.004 | 0      | t | 117745 | ALLRNLGK<br>MTA              | Homo sapiens                     |
| 1 | 1.00 | 1 | 1 | -0.03 | -0.031 | -0.029 | -0.033 | -0.029 | t | 99448  | LRNLPQQC<br>GLRAPQR          | Homo sapiens                     |
| 1 | 1.00 | 1 | 1 | 0.02  | 0.02   | 0.018  | 0.019  | 0.021  | t | 70203  | VNTQFYTI<br>KEGMYKA<br>LNYQ  | Homo sapiens                     |
| 1 | 1.00 | 1 | 1 | 0.01  | 0.01   | 0.007  | 0.003  | 0.01   | t | 122140 | LQDSGVH<br>DVAVISEA<br>QAATA | Homo sapiens                     |
| 1 | 1.00 | 1 | 1 | 0.01  | 0.01   | 0.015  | 0.01   | 0.012  | t | 122291 | CTYILDPEK<br>LTLRATYD<br>N   | Oryctola<br>gus<br>cuniculu<br>s |
| 1 | 1.00 | 1 | 1 | 0.03  | 0.028  | 0.035  | 0.033  | 0.033  | t | 38203  | LNEKEIKDL<br>YDNQSNS<br>GIL  | Mus<br>musculu<br>s              |
| 1 | 1.00 | 1 | 1 | -0.02 | -0.02  | -0.013 | -0.02  | -0.018 | t | 140620 | YSLYQALT<br>A                | Mus<br>musculu<br>s              |
| 1 | 1.00 | 1 | 1 | 0.04  | 0.042  | 0.045  | 0.041  | 0.04   | t | 73072  | WSGEDSA<br>TLGAGGVL          | Homo sapiens                     |
| 1 | 1.00 | 1 | 1 | -0.02 | -0.02  | -0.02  | -0.027 | -0.02  | t | 135985 | RRGDMST<br>LNTHG             | Homo sapiens                     |
| 1 | 1.00 | 1 | 1 | -0.06 | -0.058 | -0.046 | -0.059 | -0.061 | t | 47989  | PISYANGS<br>GPDQRPY<br>CWHY  | Homo sapiens                     |
| 1 | 1.00 | 1 | 1 | -0.05 | -0.05  | -0.046 | -0.05  | -0.05  | t | 13514  | ENLLKEAIR<br>AIFPSR          | Mus<br>musculu<br>s              |
| 1 | 1.00 | 1 | 1 | -0.01 | -0.014 | 0.003  | -0.013 | -0.01  | t | 17581  | FRELADAL<br>LE               | Oryctola<br>gus<br>cuniculu<br>s |
| 1 | 1.00 | 1 | 1 | 0     | 0.001  | 0.01   | 0      | 0      | t | 20563  | GKFPGSKP<br>S                | Mus<br>musculu<br>s              |
| 1 | 1.00 | 1 | 1 | 0     | 0      | 0.008  | 0      | 0      | t | 50427  | QDAATPY<br>HPPATPN<br>N      | Oryctola<br>gus<br>cuniculu<br>s |
| 1 | 1.00 | 1 | 1 | -0.03 | -0.03  | -0.027 | -0.03  | -0.03  | t | 48282  | PLCNTRKS<br>RQSGI            | Homo sapiens                     |

|   |      |   |   |       |        |        |        |        |   |        |                              |                                  |
|---|------|---|---|-------|--------|--------|--------|--------|---|--------|------------------------------|----------------------------------|
| 1 | 1.00 | 1 | 1 | -0.02 | -0.02  | -0.012 | -0.02  | -0.02  | t | 106300 | CALEGWG<br>GHW               | Homo<br>sapiens                  |
| 1 | 1.00 | 1 | 1 | -0.04 | -0.04  | -0.04  | -0.04  | -0.038 | t | 153382 | FAENKKD<br>HFSPGGG<br>GS     | Mus<br>musculu<br>s              |
| 1 | 1.00 | 1 | 1 | -0.02 | -0.023 | -0.023 | -0.02  | -0.018 | t | 57307  | SDVININIY<br>NPCVVPNI<br>NNA | Oryctola<br>gus<br>cuniculu<br>s |
| 1 | 1.00 | 1 | 1 | -0.01 | -0.008 | 0.001  | -0.009 | -0.01  | t | 21804  | GPSYGFQY<br>SPGQRVEF<br>LVNT | Homo<br>sapiens                  |
| 1 | 1.00 | 1 | 1 | 0.03  | 0.033  | 0.037  | 0.03   | 0.031  | t | 132878 | NSSSSQFQ<br>IH               | Mus<br>musculu<br>s              |
| 1 | 1.00 | 1 | 1 | -0.02 | -0.022 | -0.004 | -0.023 | -0.022 | t | 135939 | IPVLDENG<br>LFAP             | Mus<br>musculu<br>s              |
| 1 | 1.00 | 1 | 1 | 0.01  | 0.01   | 0.02   | 0.01   | 0.013  | t | 136740 | WDETLLD<br>KF                | Mus<br>musculu<br>s              |
| 1 | 1.00 | 1 | 1 | 0.02  | 0.022  | 0.027  | 0.017  | 0.019  | t | 106872 | SSSSSGSG<br>SG               | Homo<br>sapiens                  |
| 1 | 1.00 | 1 | 1 | -0.03 | -0.03  | -0.013 | -0.03  | -0.033 | t | 114132 | KSHGRTQ<br>DENPVVH<br>F      | Mus<br>musculu<br>s              |
| 1 | 1.00 | 1 | 1 | 0.01  | 0.008  | 0.01   | 0.003  | 0.01   | t | 107536 | PAPDTLKE                     | Rattus<br>norvegic<br>us         |
| 1 | 1.00 | 1 | 1 | -0.03 | -0.03  | -0.03  | -0.03  | -0.03  | t | 116286 | CGKGLSAT<br>VTGGQKG<br>RGSR  | Oryctola<br>gus<br>cuniculu<br>s |
| 1 | 1.00 | 1 | 1 | -0.01 | -0.008 | -0.001 | -0.01  | -0.01  | t | 8464   | DGNPPEV<br>KSVGLGN<br>VNGVTL | Homo<br>sapiens                  |
| 1 | 1.00 | 1 | 1 | -0.02 | -0.02  | -0.021 | -0.02  | -0.02  | t | 41048  | MAHFPGF<br>GQSLLYGY<br>PVYVF | Homo<br>sapiens                  |
| 1 | 1.00 | 1 | 1 | 0.01  | 0.008  | 0.017  | 0.007  | 0.01   | t | 144592 | AMTDPKL<br>DHMRH             | Mus<br>musculu<br>s              |

|   |      |   |   |       |        |        |        |        |   |        |                              |                                  |
|---|------|---|---|-------|--------|--------|--------|--------|---|--------|------------------------------|----------------------------------|
| 1 | 1.00 | 1 | 1 | -0.03 | -0.03  | -0.029 | -0.03  | -0.029 | t | 44135  | NHDYTKIR<br>YADGHAIE<br>NAVR | Mus<br>musculu<br>s              |
| 1 | 1.00 | 1 | 1 | -0.07 | -0.07  | -0.069 | -0.07  | -0.072 | t | 127811 | RVPRIPRD<br>PRPPRPP          | Homo<br>sapiens                  |
| 1 | 1.00 | 1 | 1 | -0.01 | -0.01  | -0.008 | -0.012 | -0.01  | t | 48383  | PLKPTKRS<br>FIEDLLFNK        | Homo<br>sapiens                  |
| 1 | 1.00 | 1 | 1 | 0.02  | 0.016  | 0.026  | 0.019  | 0.019  | t | 78170  | GKHGKEV<br>KIT               | Mus<br>musculu<br>s              |
| 1 | 1.00 | 1 | 1 | -0.02 | -0.022 | -0.018 | -0.027 | -0.02  | t | 130928 | KQKFVLKT<br>PKGTRDYS<br>PR   | Mus<br>musculu<br>s              |
| 1 | 1.00 | 1 | 1 | -0.01 | -0.012 | 0.003  | -0.011 | -0.01  | t | 35810  | LFDGRDN<br>GAL               | Mus<br>musculu<br>s              |
| 1 | 1.00 | 1 | 1 | -0.02 | -0.02  | -0.004 | -0.022 | -0.023 | t | 99053  | VVNKGTG<br>NLELVAVR          | Homo<br>sapiens                  |
| 1 | 1.00 | 1 | 1 | -0.01 | -0.008 | 0.001  | -0.009 | -0.01  | t | 10789  | DVVVLG                       | Homo<br>sapiens                  |
| 1 | 1.00 | 1 | 1 | 0.03  | 0.03   | 0.038  | 0.03   | 0.028  | t | 10888  | DYGGDSTT<br>PRPRYNAT<br>TYLP | Oryctola<br>gus<br>cuniculu<br>s |
| 1 | 1.00 | 1 | 1 | 0     | 0.003  | 0.022  | 0      | 0      | t | 104312 | TNMWDF                       | Mus<br>musculu<br>s              |
| 1 | 1.00 | 1 | 1 | 0.01  | 0.007  | 0.029  | 0.01   | 0.01   | t | 45643  | NQWKNKPS<br>KPKTN            | Oryctola<br>gus<br>cuniculu<br>s |
| 1 | 1.00 | 1 | 1 | 0.01  | 0.01   | 0.024  | 0.01   | 0.01   | t | 146012 | SSPSTPLLY                    | Mus<br>musculu<br>s              |
| 1 | 1.00 | 1 | 1 | -0.02 | -0.022 | -0.009 | -0.017 | -0.018 | t | 114985 | WVLLLGH<br>QVK               | Mus<br>musculu<br>s              |
| 1 | 1.00 | 1 | 1 | 0.01  | 0.01   | 0.01   | 0.01   | 0.014  | t | 133528 | CADQKPG<br>EC                | Mus<br>musculu<br>s              |

|   |      |   |   |       |        |        |       |        |   |        |                              |                       |
|---|------|---|---|-------|--------|--------|-------|--------|---|--------|------------------------------|-----------------------|
| 1 | 1.00 | 1 | 1 | 0.04  | 0.044  | 0.042  | 0.041 | 0.047  | t | 15972  | FGEVFNAT                     | Homo sapiens          |
| 1 | 1.00 | 1 | 1 | 0     | 0      | 0.008  | 0.003 | 0.002  | t | 23096  | GVPIELQV<br>ECFTWDQ          | Homo sapiens          |
| 1 | 1.00 | 1 | 1 | 0.01  | 0.013  | 0.015  | 0.01  | 0.009  | t | 113625 | LQVVRLD<br>GNEIKRSA<br>MPADA | Mus musculus          |
| 1 | 1.00 | 1 | 1 | 0.01  | 0.01   | 0.015  | 0.01  | 0.009  | t | 113625 | LQVVRLD<br>GNEIKRSA<br>MPADA | Mus musculus          |
| 1 | 1.00 | 1 | 1 | 0.01  | 0.01   | 0.015  | 0.01  | 0.009  | t | 113625 | LQVVRLD<br>GNEIKRSA<br>MPADA | Mus musculus          |
| 1 | 1.00 | 1 | 1 | 0.01  | 0.015  | 0.015  | 0.011 | 0.01   | t | 53758  | RFPRGQG<br>VPINTNSG<br>PDDQI | Homo sapiens          |
| 1 | 1.00 | 1 | 1 | -0.01 | -0.01  | -0.012 | -0.01 | -0.009 | t | 119803 | DLVLYNNA<br>DGDFAIVH         | Mus musculus          |
| 1 | 1.00 | 1 | 1 | 0.01  | 0.008  | 0.015  | 0.009 | 0.01   | t | 71285  | VTEEIVTEE<br>IVTEEI          | Mus musculus          |
| 1 | 1.00 | 1 | 1 | 0.02  | 0.02   | 0.031  | 0.02  | 0.022  | t | 6763   | CPFLKQNE<br>PEDIDCW          | Mus musculus          |
| 1 | 1.00 | 1 | 1 | 0.02  | 0.02   | 0.021  | 0.017 | 0.02   | t | 65520  | TPCSAEEE<br>KLPISP           | Homo sapiens          |
| 1 | 1.00 | 1 | 1 | -0.01 | -0.01  | -0.01  | -0.01 | -0.008 | t | 118574 | RADWKKT<br>VETQKSRI<br>HA    | Homo sapiens          |
| 1 | 1.00 | 1 | 1 | -0.01 | -0.007 | -0.014 | -0.01 | -0.008 | t | 78708  | KLVEYCDF<br>LTTFVHAK<br>KKE  | Mus musculus          |
| 1 | 1.00 | 1 | 1 | -0.01 | -0.01  | -0.014 | -0.01 | -0.008 | t | 78708  | KLVEYCDF<br>LTTFVHAK<br>KKE  | Oryctolagus cuniculus |
| 1 | 1.00 | 1 | 1 | -0.03 | -0.03  | -0.024 | -0.03 | -0.03  | t | 53107  | RAGRCPPR                     | Homo sapiens          |

|   |      |   |   |       |        |        |        |        |   |        |                              |                     |
|---|------|---|---|-------|--------|--------|--------|--------|---|--------|------------------------------|---------------------|
| 1 | 1.00 | 1 | 1 | -0.01 | -0.01  | -0.003 | -0.007 | -0.01  | t | 15918  | FFTEVDGV<br>RLHRYA           | Homo<br>sapiens     |
| 1 | 1.00 | 1 | 1 | 0     | -0.002 | 0.007  | -0.007 | 0      | t | 133786 | CMTSPWR<br>C                 | Mus<br>musculu<br>s |
| 1 | 1.00 | 1 | 1 | 0.04  | 0.043  | 0.043  | 0.04   | 0.042  | t | 111819 | TDLYCYEQ<br>LNDSEEE<br>DEID  | Mus<br>musculu<br>s |
| 1 | 1.00 | 1 | 1 | 0.04  | 0.043  | 0.043  | 0.04   | 0.042  | t | 111819 | TDLYCYEQ<br>LNDSEEE<br>DEID  | Mus<br>musculu<br>s |
| 1 | 1.00 | 1 | 1 | 0.04  | 0.042  | 0.04   | 0.033  | 0.04   | t | 123875 | YMESEKFI<br>K                | Ovis<br>aries       |
| 1 | 1.00 | 1 | 1 | 0.02  | 0.02   | 0.022  | 0.02   | 0.02   | t | 46927  | PARDVLCL<br>RPVGAES          | Homo<br>sapiens     |
| 1 | 1.00 | 1 | 1 | 0     | -0.002 | 0.007  | -0.007 | 0      | t | 122650 | YELNPDP<br>RFLGCSTN          | Mus<br>musculu<br>s |
| 1 | 1.00 | 1 | 1 | 0.02  | 0.02   | 0.025  | 0.018  | 0.02   | t | 71324  | VTGHRMA<br>WDMMQ<br>NWS      | Homo<br>sapiens     |
| 1 | 1.00 | 1 | 1 | -0.04 | -0.037 | -0.04  | -0.04  | -0.037 | t | 122741 | DWRDAEK<br>CDIC              | Mus<br>musculu<br>s |
| 1 | 1.00 | 1 | 1 | -0.01 | -0.006 | 0      | -0.013 | -0.01  | t | 69656  | VLMVPKQ<br>G                 | Homo<br>sapiens     |
| 1 | 1.00 | 1 | 1 | -0.02 | -0.022 | -0.01  | -0.019 | -0.02  | t | 79053  | QLVNTNG<br>SWHINRT<br>ALNC   | Homo<br>sapiens     |
| 1 | 1.00 | 1 | 1 | -0.02 | -0.016 | -0.01  | -0.019 | -0.02  | t | 79053  | QLVNTNG<br>SWHINRT<br>ALNC   | Homo<br>sapiens     |
| 1 | 1.00 | 1 | 1 | -0.04 | -0.04  | -0.05  | -0.04  | -0.038 | t | 140938 | YLNATPAA<br>KVLVEGNT<br>DERG | Mus<br>musculu<br>s |
| 1 | 1.00 | 1 | 1 | -0.02 | -0.018 | -0.025 | -0.021 | -0.018 | t | 142340 | YRPNWTV<br>PEFTLDIFN<br>ATYL | Felis<br>catus      |
| 1 | 1.00 | 1 | 1 | -0.02 | -0.02  | -0.016 | -0.02  | -0.018 | t | 52088  | QQPFPQR<br>PQQ               | Mus<br>musculu<br>s |

|   |      |   |   |       |        |        |        |        |   |        |                              |                                  |
|---|------|---|---|-------|--------|--------|--------|--------|---|--------|------------------------------|----------------------------------|
| 1 | 1.00 | 1 | 1 | 0.06  | 0.06   | 0.05   | 0.053  | 0.061  | t | 37040  | LKTQIDQV<br>ESTAG            | Homo<br>sapiens                  |
| 1 | 1.00 | 1 | 1 | 0.01  | 0.01   | 0.024  | 0.01   | 0.01   | t | 120953 | SLPLDTLLV<br>DVEPKV          | Mus<br>musculu<br>s              |
| 1 | 1.00 | 1 | 1 | 0     | 0      | 0.005  | 0      | 0.003  | t | 112584 | LPWNAFP<br>GK                | Mus<br>musculu<br>s              |
| 1 | 1.00 | 1 | 1 | 0.05  | 0.048  | 0.05   | 0.044  | 0.051  | t | 138244 | SSTIANT                      | Mus<br>musculu<br>s              |
| 1 | 1.00 | 1 | 1 | 0.04  | 0.036  | 0.044  | 0.039  | 0.04   | t | 73024  | WREDWG<br>QLSGTAVP<br>PQ     | Oryctola<br>gus<br>cuniculu<br>s |
| 1 | 1.00 | 1 | 1 | -0.02 | -0.018 | -0.02  | -0.019 | -0.02  | t | 69880  | VLYQAFDE<br>MEECASH<br>LPYIE | Homo<br>sapiens                  |
| 1 | 1.00 | 1 | 1 | -0.03 | -0.03  | -0.014 | -0.03  | -0.032 | t | 139248 | SFAGTVIE                     | Mus<br>musculu<br>s              |
| 1 | 1.00 | 1 | 1 | 0     | 0      | 0      | -0.009 | 0      | t | 99134  | DAEFRHDS<br>GYEVHHQ          | Mus<br>musculu<br>s              |
| 1 | 1.00 | 1 | 1 | 0     | 0      | 0      | 0      | 0.004  | t | 24401  | HNQWNK                       | Mus<br>musculu<br>s              |
| 1 | 1.00 | 1 | 1 | 0.01  | 0.005  | 0.024  | 0.013  | 0.012  | t | 95318  | DLQVLAQ<br>K                 | Bos<br>taurus                    |
| 1 | 1.00 | 1 | 1 | 0.03  | 0.026  | 0.029  | 0.023  | 0.032  | t | 134685 | GVSSYMK<br>VSICLPMD<br>VE    | Oryctola<br>gus<br>cuniculu<br>s |
| 1 | 1.00 | 1 | 1 | -0.05 | -0.05  | -0.055 | -0.05  | -0.05  | t | 65848  | TQGCNCSI<br>YPGHITGH<br>RMAW | Homo<br>sapiens                  |
| 1 | 1.00 | 1 | 1 | 0.02  | 0.02   | 0.02   | 0.014  | 0.02   | t | 158669 | ADIKTALE<br>ARKAADT          | Homo<br>sapiens                  |
| 1 | 1.00 | 1 | 1 | 0.02  | 0.02   | 0.025  | 0.017  | 0.021  | t | 134188 | PMSTPSAT<br>SVR              | Oryctola<br>gus<br>cuniculu<br>s |



|   |      |   |   |       |        |        |        |        |   |        |                              |                                  |
|---|------|---|---|-------|--------|--------|--------|--------|---|--------|------------------------------|----------------------------------|
| 1 | 1.00 | 1 | 1 | 0.01  | 0.007  | 0.01   | 0.01   | 0.014  | t | 107229 | RHEVTEM<br>GQEV              | Oryctola<br>gus<br>cuniculu<br>s |
| 1 | 1.00 | 1 | 1 | -0.02 | -0.02  | -0.019 | -0.02  | -0.018 | t | 97494  | MGAKPTG<br>S                 | Mus<br>musculu<br>s              |
| 1 | 1.00 | 1 | 1 | -0.01 | -0.01  | -0.001 | -0.01  | -0.012 | t | 110947 | MSTRSVSS<br>SSYRRMFG<br>GPGT | Mus<br>musculu<br>s              |
| 1 | 1.00 | 1 | 1 | 0.02  | 0.022  | 0.011  | 0.013  | 0.021  | t | 113993 | VHTGFGA<br>MDFTTLQ           | Cavia<br>porcellu<br>s           |
| 1 | 1.00 | 1 | 1 | 0     | 0.002  | 0.017  | 0.007  | -0.001 | t | 122538 | QELECDW<br>EEVTTSGP<br>CGEES | Homo<br>sapiens                  |
| 1 | 1.00 | 1 | 1 | 0     | 0.012  | 0.014  | -0.001 | -0.002 | t | 156981 | YTSLPAPM<br>QRLP             | Gallus<br>gallus                 |
| 1 | 1.00 | 1 | 1 | 0     | -0.002 | 0.003  | -0.007 | 0      | t | 118380 | GKPIPNPL<br>LGLDST           | Mus<br>musculu<br>s              |
| 1 | 1.00 | 1 | 1 | -0.04 | -0.038 | -0.041 | -0.043 | -0.038 | t | 33232  | KRVKTWR<br>M                 | Homo<br>sapiens                  |
| 1 | 1.00 | 1 | 1 | -0.05 | -0.046 | -0.048 | -0.053 | -0.051 | t | 99488  | NAPQEIFI<br>QQGRGYF          | Homo<br>sapiens                  |
| 1 | 1.00 | 1 | 1 | -0.04 | -0.036 | -0.05  | -0.043 | -0.037 | t | 75884  | YSRQYSNR<br>AAENFKAI<br>RE   | Homo<br>sapiens                  |
| 1 | 1.00 | 1 | 1 | -0.01 | -0.014 | 0.001  | -0.011 | -0.012 | t | 38271  | LNLTTASV<br>PMLRWYA<br>ERFCF | Mus<br>musculu<br>s              |
| 1 | 1.00 | 1 | 1 | -0.03 | -0.028 | -0.031 | -0.029 | -0.027 | t | 144940 | RHVLGRLI<br>TVNPIVT          | Homo<br>sapiens                  |
| 1 | 1.00 | 1 | 1 | 0     | 0.002  | 0.012  | 0.001  | 0.002  | t | 63309  | TECANLLL<br>QYGSFCTQ<br>L    | Homo<br>sapiens                  |
| 1 | 1.00 | 1 | 1 | -0.04 | -0.04  | -0.045 | -0.04  | -0.034 | t | 74138  | YHSSVVHD                     | Homo<br>sapiens                  |

|   |      |   |   |       |        |        |        |        |   |        |                              |                                  |
|---|------|---|---|-------|--------|--------|--------|--------|---|--------|------------------------------|----------------------------------|
| 1 | 1.00 | 1 | 1 | 0     | 0      | 0.007  | 0      | 0      | t | 36999  | LKQKALGL<br>LQTATKQA<br>EAAA | Homo<br>sapiens                  |
| 1 | 1.00 | 1 | 1 | 0     | 0.002  | 0.006  | 0.001  | 0.002  | t | 78659  | GEAPLSAC<br>TSTSFPPPS<br>PGP | Homo<br>sapiens                  |
| 1 | 1.00 | 1 | 1 | 0     | 0.002  | 0.007  | -0.003 | 0      | t | 125561 | SSATMTQ<br>DSRLI             | Homo<br>sapiens                  |
| 1 | 1.00 | 1 | 1 | 0.01  | 0.01   | 0.015  | 0.012  | 0.01   | t | 12813  | EKMACLST<br>LDVCMEN<br>P     | Homo<br>sapiens                  |
| 1 | 1.00 | 1 | 1 | -0.02 | -0.006 | -0.004 | -0.019 | -0.024 | t | 60474  | SQKIQLVN<br>TNGSWHI          | Homo<br>sapiens                  |
| 1 | 1.00 | 1 | 1 | 0.05  | 0.047  | 0.052  | 0.05   | 0.052  | t | 10525  | DTYEEVLE<br>LAQE             | Oryctola<br>gus<br>cuniculu<br>s |
| 1 | 1.00 | 1 | 1 | -0.03 | -0.027 | -0.013 | -0.03  | -0.03  | t | 43396  | NCTLIDALL<br>GDPH            | Mus<br>musculu<br>s              |
| 1 | 1.00 | 1 | 1 | 0     | 0      | 0.002  | 0      | 0.004  | t | 6479   | CKGKIQAL<br>CENPEWA          | Mus<br>musculu<br>s              |
| 1 | 1.00 | 1 | 1 | 0     | 0.004  | -0.013 | -0.003 | 0.003  | t | 59387  | SLPGQTKIL<br>AKVfyGEN        | Homo<br>sapiens                  |
| 1 | 1.00 | 1 | 1 | -0.01 | -0.013 | -0.008 | -0.01  | -0.009 | t | 97348  | GLFGAIAAG<br>FIEGGW          | Oryctola<br>gus<br>cuniculu<br>s |
| 1 | 1.00 | 1 | 1 | -0.03 | -0.027 | -0.022 | -0.037 | -0.032 | t | 12137  | EGCKLSCFI<br>RPSGYC          | Equus<br>caballus                |
| 1 | 1.00 | 1 | 1 | -0.04 | -0.037 | -0.034 | -0.04  | -0.037 | t | 133539 | CYKPGEW<br>AC                | Mus<br>musculu<br>s              |
| 1 | 1.00 | 1 | 1 | -0.03 | -0.03  | -0.027 | -0.03  | -0.029 | t | 98835  | IRVLQRFD<br>QRSRQFQ          | Homo<br>sapiens                  |
| 1 | 1.00 | 1 | 1 | -0.05 | -0.052 | -0.043 | -0.051 | -0.05  | t | 151033 | MAARVCC<br>QLDPARD<br>VLCL   | Mus<br>musculu<br>s              |

|   |      |   |   |       |        |        |        |        |   |        |                              |                       |
|---|------|---|---|-------|--------|--------|--------|--------|---|--------|------------------------------|-----------------------|
| 1 | 1.00 | 1 | 1 | -0.02 | -0.016 | -0.009 | -0.017 | -0.018 | t | 4059   | AQRVEFLL<br>KAWAEK           | Homo sapiens          |
| 1 | 1.00 | 1 | 1 | 0.03  | 0.028  | 0.032  | 0.023  | 0.029  | t | 112406 | YEYLINVIH<br>AFQYV           | Mus musculus          |
| 1 | 1.00 | 1 | 1 | 0     | 0      | 0.007  | -0.003 | -0.002 | t | 53687  | RFDEGDLI<br>AVPTGVA          | Homo sapiens          |
| 1 | 1.00 | 1 | 1 | 0.02  | 0.02   | 0.02   | 0.02   | 0.022  | t | 130457 | CRQPGNN<br>YC                | Mus musculus          |
| 1 | 1.00 | 1 | 1 | -0.04 | -0.038 | -0.031 | -0.04  | -0.04  | t | 100628 | VRIYMKPK<br>HVRVWC           | Homo sapiens          |
| 1 | 1.00 | 1 | 1 | -0.04 | -0.042 | -0.031 | -0.041 | -0.04  | t | 72281  | WCRIGHD<br>RCGED             | Mus musculus          |
| 1 | 1.00 | 1 | 1 | 0     | 0      | 0.023  | 0.003  | 0.002  | t | 14035  | ERLYIG                       | Homo sapiens          |
| 1 | 1.00 | 1 | 1 | -0.01 | -0.01  | 0.012  | -0.008 | -0.01  | t | 67732  | VARDDKG<br>RRYYLT            | Homo sapiens          |
| 1 | 1.00 | 1 | 1 | 0.01  | 0.014  | 0.01   | 0.01   | 0.012  | t | 110855 | FNragtV<br>GENVPDD<br>LYIKGS | Cavia porcellus       |
| 1 | 1.00 | 1 | 1 | 0     | 0      | 0.001  | 0.004  | 0      | t | 22162  | GRPGAPG<br>GSGSGPR<br>HRDGVR | Homo sapiens          |
| 1 | 1.00 | 1 | 1 | -0.02 | -0.018 | -0.024 | -0.023 | -0.017 | t | 150853 | HIGGLSILD<br>PIFGVL          | Homo sapiens          |
| 1 | 1.00 | 1 | 1 | 0     | 0      | 0      | 0      | 0.006  | t | 37757  | LLRSTSQK                     | Homo sapiens          |
| 1 | 1.00 | 1 | 1 | -0.03 | -0.033 | -0.03  | -0.03  | -0.029 | t | 134130 | LCSQNPPV<br>LKRHQRE          | Oryctolagus cuniculus |
| 1 | 1.00 | 1 | 1 | 0.02  | 0.016  | 0.02   | 0.013  | 0.02   | t | 123511 | MPPMTQ<br>AP                 | Oryctolagus cuniculus |
| 1 | 1.00 | 1 | 1 | 0.03  | 0.028  | 0.05   | 0.029  | 0.03   | t | 29758  | KAAQIYSE<br>P                | Mus musculus          |

|   |      |   |   |       |        |        |        |        |   |        |                              |                                  |
|---|------|---|---|-------|--------|--------|--------|--------|---|--------|------------------------------|----------------------------------|
| 1 | 1.00 | 1 | 1 | 0.03  | 0.028  | 0.05   | 0.029  | 0.03   | t | 29758  | KAAQIYSE<br>P                | Mus<br>musculu<br>s              |
| 1 | 1.00 | 1 | 1 | 0     | 0      | 0      | 0      | 0      | t | 105070 | AEFDLDIT<br>AGTEAA           | Oryctola<br>gus<br>cuniculu<br>s |
| 1 | 1.00 | 1 | 1 | 0.01  | 0.008  | 0.01   | 0.003  | 0.01   | t | 131455 | GSCLEEFR<br>ASPFLECH         | Rattus<br>norvegic<br>us         |
| 1 | 1.00 | 1 | 1 | -0.02 | -0.021 | -0.019 | -0.023 | -0.019 | t | 99447  | LRGRAHV<br>QVVSNG<br>N       | Homo<br>sapiens                  |
| 1 | 1.00 | 1 | 1 | -0.01 | -0.01  | 0.004  | -0.01  | -0.01  | t | 57708  | SEYPSQPS<br>S                | Homo<br>sapiens                  |
| 1 | 1.00 | 1 | 1 | -0.04 | -0.043 | -0.041 | -0.04  | -0.038 | t | 124232 | GSITRDSIF<br>RLR             | Oryctola<br>gus<br>cuniculu<br>s |
| 1 | 1.00 | 1 | 1 | 0     | 0      | 0      | 0      | 0      | t | 50099  | PYIEQAQV<br>IAHQFKEKI<br>LGL | Homo<br>sapiens                  |
| 1 | 1.00 | 1 | 1 | -0.01 | -0.009 | 0.008  | -0.01  | -0.01  | t | 31023  | KGNQSFEEDT                   | Oryctola<br>gus<br>cuniculu<br>s |
| 1 | 1.00 | 1 | 1 | -0.02 | -0.02  | -0.012 | -0.023 | -0.019 | t | 26996  | ILDGDNLF<br>PKVAPQAI         | Homo<br>sapiens                  |
| 1 | 1.00 | 1 | 1 | 0     | 0      | 0.007  | 0      | 0.005  | t | 141539 | FSPAYLRD<br>AALK             | Mus<br>musculu<br>s              |
| 1 | 1.00 | 1 | 1 | -0.01 | -0.014 | -0.01  | -0.017 | -0.01  | t | 123329 | IPPGAMPP                     | Oryctola<br>gus<br>cuniculu<br>s |
| 1 | 1.00 | 1 | 1 | 0     | -0.004 | 0.009  | -0.001 | 0      | t | 60544  | SQRTRDIYI<br>SR              | Oryctola<br>gus<br>cuniculu<br>s |
| 1 | 1.00 | 1 | 1 | 0     | 0.002  | 0.009  | -0.001 | 0      | t | 60544  | SQRTRDIYI<br>SR              | Cavia<br>porcellu<br>s           |
| 1 | 1.00 | 1 | 1 | 0.02  | 0.02   | 0.023  | 0.01   | 0.018  | t | 116802 | PSQDPYSP<br>SQDPDRR          | Homo<br>sapiens                  |

|   |      |   |   |       |        |        |        |        |   |        |                                  |                              |
|---|------|---|---|-------|--------|--------|--------|--------|---|--------|----------------------------------|------------------------------|
| 1 | 1.00 | 1 | 1 | 0.04  | 0.032  | 0.04   | 0.04   | 0.042  | t | 156947 | QTKSECTE<br>VCKNLT               | Mus<br>musculus              |
| 1 | 1.00 | 1 | 1 | 0.04  | 0.042  | 0.04   | 0.033  | 0.04   | t | 123245 | GMLGSTP<br>EE                    | Ovis<br>aries                |
| 1 | 1.00 | 1 | 1 | -0.01 | -0.007 | -0.016 | -0.01  | -0.008 | t | 139180 | NLNKTLVD<br>LDWLNRIE<br>TYVK     | Felis<br>catus               |
| 1 | 1.00 | 1 | 1 | 0.01  | 0.013  | 0.014  | 0.01   | 0.01   | t | 22884  | GTVVAVG<br>PGRWDE<br>GE          | Mus<br>musculus              |
| 1 | 1.00 | 1 | 1 | -0.06 | -0.064 | -0.047 | -0.061 | -0.06  | t | 52322  | QSFRRLGA<br>AL                   | Oryctola<br>gus<br>cuniculus |
| 1 | 1.00 | 1 | 1 | 0.01  | 0.012  | 0.011  | 0.011  | 0.011  | t | 39404  | LSGRPVIV<br>PDREVL<br>YR<br>EFDE | Homo<br>sapiens              |
| 1 | 1.00 | 1 | 1 | 0.01  | 0.01   | 0.032  | 0.01   | 0.012  | t | 144622 | EDVGSNK                          | Mus<br>musculus              |
| 1 | 1.00 | 1 | 1 | -0.03 | -0.033 | -0.035 | -0.03  | -0.028 | t | 134656 | DSDMGR<br>MGPI                   | Oryctola<br>gus<br>cuniculus |
| 1 | 1.00 | 1 | 1 | 0     | -0.004 | -0.012 | -0.001 | 0.003  | t | 111051 | VGPLEVIP<br>EAVDPAG<br>SSIV      | Oryctola<br>gus<br>cuniculus |
| 1 | 1.00 | 1 | 1 | -0.01 | -0.012 | -0.015 | -0.017 | -0.008 | t | 107853 | GFBGADGI<br>AGPKGPB<br>GER       | Mus<br>musculus              |
| 1 | 1.00 | 1 | 1 | 0.02  | 0.016  | 0.02   | 0.013  | 0.02   | t | 127898 | YEENLGDS<br>IV                   | Oryctola<br>gus<br>cuniculus |
| 1 | 1.00 | 1 | 1 | -0.02 | -0.02  | -0.002 | -0.027 | -0.03  | t | 103946 | GQKAKSN<br>PNRPLVP<br>RNPCR      | Homo<br>sapiens              |
| 1 | 1.00 | 1 | 1 | 0     | 0      | 0.013  | 0      | 0      | t | 159077 | RSKHNRRE<br>GYKTQNG<br>G         | Mus<br>musculus              |
| 1 | 1.00 | 1 | 1 | 0.01  | 0.01   | 0.01   | 0.01   | 0.011  | t | 119582 | GLQLIQLIN<br>VDEVNQI             | Homo<br>sapiens              |

|   |      |   |   |       |        |        |        |        |   |        |                              |                                  |
|---|------|---|---|-------|--------|--------|--------|--------|---|--------|------------------------------|----------------------------------|
| 1 | 1.00 | 1 | 1 | -0.02 | -0.021 | -0.011 | -0.019 | -0.02  | t | 58788  | SKARPYIE<br>QAQVIAH<br>QFKEK | Homo<br>sapiens                  |
| 1 | 1.00 | 1 | 1 | 0     | 0.002  | 0      | 0.003  | 0.002  | t | 132763 | YMASLQM<br>RGNPGSH<br>F      | Homo<br>sapiens                  |
| 1 | 1.00 | 1 | 1 | 0.01  | 0.025  | 0.013  | 0.01   | 0.013  | t | 45221  | NNRAVPD<br>KIDWRESG<br>YVTE  | Rattus<br>rattus                 |
| 1 | 1.00 | 1 | 1 | -0.02 | -0.022 | -0.006 | -0.017 | -0.02  | t | 52061  | QQLIVKDA<br>ER               | Mus<br>musculu<br>s              |
| 1 | 1.00 | 1 | 1 | 0     | -0.002 | -0.007 | 0.001  | 0.002  | t | 136751 | YCWLRRQ<br>AALQRRLS<br>AMEKG | Rattus<br>norvegic<br>us         |
| 1 | 1.00 | 1 | 1 | 0.06  | 0.057  | 0.058  | 0.06   | 0.063  | t | 131155 | YDEDENQ<br>SPRSFQKK          | Oryctola<br>gus<br>cuniculu<br>s |
| 1 | 1.00 | 1 | 1 | 0     | -0.002 | 0.006  | -0.001 | 0      | t | 28694  | ISQQPQQ<br>PFP               | Mus<br>musculu<br>s              |
| 1 | 1.00 | 1 | 1 | -0.04 | -0.04  | -0.045 | -0.039 | -0.04  | t | 156664 | GGTHSQW<br>NKPSKPKT<br>NM    | Mus<br>musculu<br>s              |
| 1 | 1.00 | 1 | 1 | -0.07 | -0.078 | -0.07  | -0.07  | -0.068 | t | 156942 | PWSKMHI                      | Mus<br>musculu<br>s              |
| 1 | 1.00 | 1 | 1 | 0.02  | 0.023  | 0.03   | 0.02   | 0.02   | t | 140877 | KVQPYLDD<br>FQKKWQE<br>E     | Mus<br>musculu<br>s              |
| 1 | 1.00 | 1 | 1 | -0.01 | -0.008 | 0.01   | -0.003 | -0.008 | t | 128070 | PGVSEDCL<br>YLNVFIPQ<br>NVAP | Homo<br>sapiens                  |
| 1 | 1.00 | 1 | 1 | 0     | 0      | -0.009 | -0.007 | 0      | t | 151074 | YHHQNEQ<br>GSGYAADL          | Homo<br>sapiens                  |
| 1 | 1.00 | 1 | 1 | 0     | 0      | 0      | -0.01  | 0      | t | 115938 | RDMP IQA<br>FLL              | Homo<br>sapiens                  |
| 1 | 1.00 | 1 | 1 | -0.03 | -0.03  | -0.029 | -0.03  | -0.03  | t | 127204 | TGH CQGD<br>GYRVGFG<br>Q     | Mus<br>musculu<br>s              |

|   |      |   |   |       |        |        |        |        |   |        |                              |                                  |
|---|------|---|---|-------|--------|--------|--------|--------|---|--------|------------------------------|----------------------------------|
| 1 | 1.00 | 1 | 1 | 0.01  | 0.012  | 0.008  | 0.011  | 0.012  | t | 74479  | YKMFLHT<br>GAVIVLPE<br>DDLPT | Homo<br>sapiens                  |
| 1 | 1.00 | 1 | 1 | -0.01 | -0.007 | -0.013 | -0.01  | -0.008 | t | 61840  | STPSTPAD<br>SSAHSTPS<br>TPV  | Mus<br>musculu<br>s              |
| 1 | 1.00 | 1 | 1 | -0.01 | -0.01  | 0      | -0.01  | -0.01  | t | 24592  | HQLDPAF<br>GANSTNP<br>DWDFNP | Mus<br>musculu<br>s              |
| 1 | 1.00 | 1 | 1 | -0.07 | -0.072 | -0.065 | -0.071 | -0.07  | t | 16139  | FHRSPSIRV<br>VHH             | Mus<br>musculu<br>s              |
| 1 | 1.00 | 1 | 1 | 0     | -0.004 | 0.002  | -0.007 | 0      | t | 135921 | EVGWYRS<br>PF                | Oryctola<br>gus<br>cuniculu<br>s |
| 1 | 1.00 | 1 | 1 | -0.03 | -0.03  | -0.035 | -0.03  | -0.026 | t | 140657 | ATRLNNEV<br>L                | Mus<br>musculu<br>s              |
| 1 | 1.00 | 1 | 1 | -0.01 | -0.013 | -0.007 | -0.01  | -0.008 | t | 52821  | QVYLHGD<br>KTKPMILT          | Oryctola<br>gus<br>cuniculu<br>s |
| 1 | 1.00 | 1 | 1 | 0.02  | 0.02   | 0.014  | 0.021  | 0.026  | t | 37757  | LLRSTSQK                     | Homo<br>sapiens                  |
| 1 | 1.00 | 1 | 1 | 0     | -0.002 | -0.003 | 0      | 0.001  | t | 123734 | SFSKASNS<br>WFPVEGP<br>ADICQ | marmos<br>ets                    |
| 1 | 1.00 | 1 | 1 | 0.03  | 0.03   | 0.03   | 0.036  | 0.037  | t | 122956 | YYVFFEEQ<br>EDEIIGFG         | Oryctola<br>gus<br>cuniculu<br>s |
| 1 | 1.00 | 1 | 1 | 0.02  | 0.018  | 0.015  | 0.013  | 0.02   | t | 112406 | YEYLINVIH<br>AFQYV           | Rattus<br>norvegic<br>us         |
| 1 | 1.00 | 1 | 1 | 0.03  | 0.034  | 0.036  | 0.033  | 0.03   | t | 60441  | SQGISDDD<br>NDSAVAEF<br>FQSF | Homo<br>sapiens                  |
| 1 | 1.00 | 1 | 1 | -0.04 | -0.04  | -0.027 | -0.04  | -0.039 | t | 36961  | LKMADPN<br>RFRGKDL           | Mus<br>musculu<br>s              |

|   |      |   |   |       |        |        |        |        |   |        |                              |                              |
|---|------|---|---|-------|--------|--------|--------|--------|---|--------|------------------------------|------------------------------|
| 1 | 1.00 | 1 | 1 | 0.03  | 0.028  | 0.032  | 0.023  | 0.03   | t | 132200 | CGNRGPSL<br>RTTTVTG          | Mus<br>musculus              |
| 1 | 1.00 | 1 | 1 | -0.04 | -0.038 | -0.026 | -0.039 | -0.038 | t | 52476  | QTASGLVS<br>MF               | Homo<br>sapiens              |
| 1 | 1.00 | 1 | 1 | -0.03 | -0.03  | -0.011 | -0.03  | -0.032 | t | 13912  | EQQRYLN<br>NFRFIELV          | Mus<br>musculus              |
| 1 | 1.00 | 1 | 1 | 0.01  | 0.008  | 0.012  | 0.003  | 0.01   | t | 122903 | SMAQDFC<br>LQQCSRH<br>Q      | Mus<br>musculus              |
| 1 | 1.00 | 1 | 1 | -0.05 | -0.043 | -0.036 | -0.05  | -0.05  | t | 4504   | ASKLCLG<br>WLWG              | Cavia<br>porcellus           |
| 1 | 1.00 | 1 | 1 | -0.03 | -0.03  | -0.02  | -0.03  | -0.03  | t | 9982   | DRHFLN                       | Homo<br>sapiens              |
| 1 | 1.00 | 1 | 1 | -0.01 | -0.01  | -0.003 | -0.01  | -0.009 | t | 138255 | TTLTLRH                      | Homo<br>sapiens              |
| 1 | 1.00 | 1 | 1 | -0.03 | -0.033 | -0.025 | -0.03  | -0.029 | t | 16385  | FKIVFPIVA<br>KKDFKYRG<br>EGN | Oryctola<br>gus<br>cuniculus |
| 1 | 1.00 | 1 | 1 | 0.05  | 0.052  | 0.061  | 0.051  | 0.05   | t | 41660  | MHGDTPT<br>LHEYMLDL<br>QPETT | Homo<br>sapiens              |
| 1 | 1.00 | 1 | 1 | 0     | 0.003  | 0.003  | 0      | 0.002  | t | 66871  | TTTRQSITT<br>MTNTGA          | Equus<br>caballus            |
| 1 | 1.00 | 1 | 1 | -0.04 | -0.04  | -0.052 | -0.04  | -0.036 | t | 145845 | KHKVRNE<br>VMVHWF<br>GD      | Sus<br>scrofa                |
| 1 | 1.00 | 1 | 1 | -0.03 | -0.031 | -0.027 | -0.029 | -0.03  | t | 4763   | ASSAAEFL<br>AAFNVFSE<br>AARC | Canis<br>lupus               |
| 1 | 1.00 | 1 | 1 | 0.01  | 0.012  | 0.029  | 0.007  | 0.008  | t | 27758  | INTVDSNN<br>LPIL             | Homo<br>sapiens              |
| 1 | 1.00 | 1 | 1 | 0.01  | 0.012  | 0.015  | 0.011  | 0.012  | t | 97368  | GTTYIRAIA<br>ALEGLK          | Homo<br>sapiens              |



|   |      |   |   |       |        |        |        |        |   |        |                                  |                                  |
|---|------|---|---|-------|--------|--------|--------|--------|---|--------|----------------------------------|----------------------------------|
| 1 | 1.00 | 1 | 1 | 0.01  | 0.008  | 0      | 0.003  | 0.012  | t | 120624 | IKSGVATK<br>GL                   | Mus<br>musculu<br>s              |
| 1 | 1.00 | 1 | 1 | 0     | -0.004 | -0.004 | -0.007 | 0.002  | t | 122941 | VVKLLRDPI<br>YVEV                | Oryctola<br>gus<br>cuniculu<br>s |
| 1 | 1.00 | 1 | 1 | -0.03 | -0.032 | -0.017 | -0.031 | -0.03  | t | 138840 | DREQAPN<br>LVYM                  | Mus<br>musculu<br>s              |
| 1 | 1.00 | 1 | 1 | 0.03  | 0.028  | 0.044  | 0.029  | 0.032  | t | 66060  | TRLNPD                           | Mus<br>musculu<br>s              |
| 1 | 1.00 | 1 | 1 | -0.01 | -0.007 | -0.006 | -0.01  | -0.01  | t | 4736   | ASRDKAFA<br>VSKDLADK<br>L        | Equus<br>caballus                |
| 1 | 1.00 | 1 | 1 | 0     | 0      | 0.021  | 0.002  | 0      | t | 33107  | KRAASKVS<br>ARLLTV               | Homo<br>sapiens                  |
| 1 | 1.00 | 1 | 1 | 0.07  | 0.07   | 0.071  | 0.07   | 0.071  | t | 118817 | GNGLGEK<br>GDTSGPE<br>GSGGSG     | Homo<br>sapiens                  |
| 1 | 1.00 | 1 | 1 | -0.02 | -0.02  | -0.013 | -0.019 | -0.019 | t | 137893 | HHNLLVGS<br>VSGFYPG              | Homo<br>sapiens                  |
| 1 | 1.00 | 1 | 1 | 0.04  | 0.033  | 0.035  | 0.037  | 0.041  | t | 55187  | RPKHPIKH<br>QGLPQEV<br>L<br>NENL | Homo<br>sapiens                  |
| 1 | 1.00 | 1 | 1 | -0.02 | -0.022 | -0.015 | -0.023 | -0.02  | t | 563    | ACHPLFDA<br>RCGGKS               | Mus<br>musculu<br>s              |
| 1 | 1.00 | 1 | 1 | -0.02 | -0.018 | -0.006 | -0.019 | -0.02  | t | 12847  | EKPTINITK<br>PNI                 | Homo<br>sapiens                  |
| 1 | 1.00 | 1 | 1 | -0.04 | -0.038 | -0.032 | -0.043 | -0.042 | t | 111260 | ESDERGPI<br>VKARKNM<br>RQMVT     | Homo<br>sapiens                  |
| 1 | 1.00 | 1 | 1 | -0.04 | -0.038 | -0.032 | -0.043 | -0.042 | t | 111260 | ESDERGPI<br>VKARKNM<br>RQMVT     | Homo<br>sapiens                  |
| 1 | 1.00 | 1 | 1 | 0.01  | 0.008  | 0.01   | 0.01   | 0.011  | t | 45598  | NQNSKYIN<br>YRDLYIGE<br>KFI      | Homo<br>sapiens                  |

|   |      |   |   |       |        |        |        |        |   |        |                              |                                  |
|---|------|---|---|-------|--------|--------|--------|--------|---|--------|------------------------------|----------------------------------|
| 1 | 1.00 | 1 | 1 | 0.01  | 0.008  | 0.015  | 0.009  | 0.01   | t | 27805  | IPCTTYQQ<br>TTAETVEEI<br>DMH | Mus<br>musculu<br>s              |
| 1 | 1.00 | 1 | 1 | 0.03  | 0.03   | 0.03   | 0.019  | 0.028  | t | 118552 | PKVTKDGV<br>TVAKS            | Homo<br>sapiens                  |
| 1 | 1.00 | 1 | 1 | 0     | 0      | -0.001 | 0      | 0.004  | t | 6456   | CITQYERES<br>QAYYQRG<br>S    | Mus<br>musculu<br>s              |
| 1 | 1.00 | 1 | 1 | -0.01 | -0.013 | -0.002 | -0.01  | -0.009 | t | 67324  | TYDNECLL<br>CAHKVE           | Oryctola<br>gus<br>cuniculu<br>s |
| 1 | 1.00 | 1 | 1 | -0.01 | -0.013 | -0.002 | -0.01  | -0.009 | t | 67324  | TYDNECLL<br>CAHKVE           | Oryctola<br>gus<br>cuniculu<br>s |
| 1 | 1.00 | 1 | 1 | 0     | 0.014  | 0.016  | 0.001  | 0      | t | 61485  | SSYGFQ                       | Homo<br>sapiens                  |
| 1 | 1.00 | 1 | 1 | -0.05 | -0.052 | -0.048 | -0.051 | -0.048 | t | 118337 | ERADLIAYL<br>KKATNE          | Mus<br>musculu<br>s              |
| 1 | 1.00 | 1 | 1 | -0.01 | -0.005 | 0      | -0.01  | -0.01  | t | 132830 | GGIITQTP<br>KFLIGQEG<br>QKLT | Mus<br>musculu<br>s              |
| 1 | 1.00 | 1 | 1 | 0     | -0.002 | 0.009  | -0.008 | -0.003 | t | 110933 | LQGNRINE<br>FSISSFCTV<br>VDV | Mus<br>musculu<br>s              |
| 1 | 1.00 | 1 | 1 | -0.02 | -0.017 | -0.025 | -0.02  | -0.018 | t | 134035 | DTSLEEAK<br>TQGPYDV          | Mus<br>musculu<br>s              |
| 1 | 1.00 | 1 | 1 | 0     | 0.004  | 0.007  | -0.003 | 0      | t | 74129  | YHPDVPYV<br>KR               | Homo<br>sapiens                  |
| 1 | 1.00 | 1 | 1 | 0     | 0      | 0      | 0.006  | 0.007  | t | 115613 | HCLGKWL<br>GHPDKF            | Mus<br>musculu<br>s              |
| 1 | 1.00 | 1 | 1 | -0.01 | -0.018 | -0.01  | -0.01  | -0.008 | t | 71212  | VSVTDHKK<br>WQFNSPF<br>VP    | Mus<br>musculu<br>s              |
| 1 | 1.00 | 1 | 1 | -0.05 | -0.052 | -0.045 | -0.051 | -0.05  | t | 76190  | YTTRRWLV<br>SMCSQGY          | Mus<br>musculu<br>s              |
| 1 | 1.00 | 1 | 1 | 0     | -0.002 | 0.01   | 0.001  | -0.002 | t | 14230  | ESPEHCSP<br>HHTA             | Mus<br>musculu<br>s              |

|   |      |   |   |       |        |        |        |        |   |        |                              |                                  |
|---|------|---|---|-------|--------|--------|--------|--------|---|--------|------------------------------|----------------------------------|
| 1 | 1.00 | 1 | 1 | -0.06 | -0.063 | -0.06  | -0.06  | -0.058 | t | 135452 | CLKDRHDF                     | Oryctola<br>gus<br>cuniculu<br>s |
| 1 | 1.00 | 1 | 1 | 0     | 0      | -0.012 | 0      | 0.004  | t | 145841 | KEDFRYAIS<br>STNEIGLLG<br>A  | Sus<br>scrofa                    |
| 1 | 1.00 | 1 | 1 | -0.01 | 0.005  | -0.015 | -0.011 | -0.01  | t | 66312  | TSLNLQKD<br>EPNGRAS<br>DTAGQ | Equus<br>caballus                |
| 1 | 1.00 | 1 | 1 | 0.05  | 0.057  | 0.058  | 0.05   | 0.049  | t | 111062 | YEQLNDSS<br>EEEDEIDG<br>PAG  | Mus<br>musculu<br>s              |
| 1 | 1.00 | 1 | 1 | 0     | 0      | 0      | 0      | 0      | t | 50100  | PYIEQAQV<br>IAHQFKEK<br>VLGL | Homo<br>sapiens                  |
| 1 | 1.00 | 1 | 1 | -0.01 | -0.01  | -0.01  | -0.014 | -0.01  | t | 133372 | SPSPTPTP<br>GPSRRG           | Homo<br>sapiens                  |
| 1 | 1.00 | 1 | 1 | -0.02 | -0.022 | -0.003 | -0.02  | -0.022 | t | 113010 | GRVSTEVD<br>ARLSFDK          | Oryctola<br>gus<br>cuniculu<br>s |
| 1 | 1.00 | 1 | 1 | -0.03 | -0.034 | -0.026 | -0.027 | -0.032 | t | 22922  | GVATKGL<br>NVHGKSS<br>DWG    | Oryctola<br>gus<br>cuniculu<br>s |
| 1 | 1.00 | 1 | 1 | -0.01 | -0.01  | -0.01  | -0.01  | -0.007 | t | 51827  | QFPQPQ<br>LPYPQPQ            | Mus<br>musculu<br>s              |
| 1 | 1.00 | 1 | 1 | -0.02 | -0.017 | -0.011 | -0.017 | -0.021 | t | 139945 | VSNVRGD<br>LQVLAQK<br>AERALP | Sus<br>scrofa                    |
| 1 | 1.00 | 1 | 1 | 0     | 0      | 0.014  | 0      | 0      | t | 21814  | GPVEDAIT<br>AAIGRV           | Mus<br>musculu<br>s              |
| 1 | 1.00 | 1 | 1 | -0.02 | -0.022 | -0.016 | -0.021 | -0.019 | t | 120869 | PGYRSISG<br>PDPRIRKT         | Mus<br>musculu<br>s              |
| 1 | 1.00 | 1 | 1 | 0.01  | 0.006  | 0.01   | 0.003  | 0.01   | t | 112931 | DATTNPSL<br>ILAAAQM          | Oryctola<br>gus<br>cuniculu<br>s |

|   |      |   |   |       |        |        |        |        |   |        |                              |                  |
|---|------|---|---|-------|--------|--------|--------|--------|---|--------|------------------------------|------------------|
| 1 | 1.00 | 1 | 1 | -0.01 | -0.008 | -0.01  | -0.009 | -0.008 | t | 49529  | PSTLQTPG<br>SSSGASL          | Homo sapiens     |
| 1 | 1.00 | 1 | 1 | -0.05 | -0.046 | -0.046 | -0.053 | -0.052 | t | 105872 | ICTASFKK<br>NIGRNRS          | Homo sapiens     |
| 1 | 1.00 | 1 | 1 | 0     | 0.002  | 0.007  | -0.003 | 0      | t | 73542  | YDEPLTPG<br>QC               | Homo sapiens     |
| 1 | 1.00 | 1 | 1 | 0.01  | 0.009  | 0.026  | 0.009  | 0.01   | t | 49388  | PSGQTAD<br>WYTIGVY           | Myodes glareolus |
| 1 | 1.00 | 1 | 1 | -0.01 | -0.01  | 0      | -0.01  | -0.008 | t | 149403 | PCKSNT                       | Mus musculus     |
| 1 | 1.00 | 1 | 1 | 0.02  | 0.018  | 0.027  | 0.017  | 0.021  | t | 135915 | EEVGSILY<br>LGG              | Mus musculus     |
| 1 | 1.00 | 1 | 1 | 0.01  | 0.008  | 0.017  | 0.003  | 0.009  | t | 140614 | WCEADY<br>RCP                | Mus musculus     |
| 1 | 1.00 | 1 | 1 | -0.02 | -0.018 | -0.013 | -0.017 | -0.014 | t | 58999  | SLAGTHGL<br>VSFLVF           | Homo sapiens     |
| 1 | 1.00 | 1 | 1 | 0.04  | 0.043  | 0.05   | 0.039  | 0.038  | t | 81131  | DLFHVNG<br>RDTMNNI<br>VDENKY | Aotus            |
| 1 | 1.00 | 1 | 1 | -0.03 | -0.03  | -0.021 | -0.03  | -0.029 | t | 108846 | DALQFVC<br>GDRGFY            | Mus musculus     |
| 1 | 1.00 | 1 | 1 | 0.03  | 0.028  | 0.034  | 0.033  | 0.033  | t | 50502  | QDPDNTD<br>DNGPQDP<br>DNTD   | Mus musculus     |
| 1 | 1.00 | 1 | 1 | -0.03 | -0.022 | -0.032 | -0.03  | -0.03  | t | 40075  | LTPAWRIY<br>STGNNVF<br>Q     | Gallus gallus    |
| 1 | 1.00 | 1 | 1 | 0     | -0.002 | 0      | -0.007 | 0      | t | 101324 | TSI                          | Mus musculus     |
| 1 | 1.00 | 1 | 1 | -0.04 | -0.042 | -0.04  | -0.047 | -0.04  | t | 118141 | SKGRRFKG                     | Mus musculus     |
| 1 | 1.00 | 1 | 1 | -0.03 | -0.028 | -0.03  | -0.033 | -0.028 | t | 75411  | YPSGAWY<br>YVPLGTQY<br>T     | Homo sapiens     |

|   |      |   |   |       |        |        |        |        |   |        |                              |                                  |
|---|------|---|---|-------|--------|--------|--------|--------|---|--------|------------------------------|----------------------------------|
| 1 | 1.00 | 1 | 1 | -0.02 | -0.02  | -0.02  | -0.02  | -0.02  | t | 56259  | RVEAQLH<br>VWIPPLN           | Homo<br>sapiens                  |
| 1 | 1.00 | 1 | 1 | -0.02 | -0.026 | -0.01  | -0.02  | -0.02  | t | 139398 | YGCDVGP<br>DGRLLRGH<br>DQYAY | Oryctola<br>gus<br>cuniculu<br>s |
| 1 | 1.00 | 1 | 1 | -0.02 | -0.023 | -0.01  | -0.02  | -0.02  | t | 139398 | YGCDVGP<br>DGRLLRGH<br>DQYAY | Mus<br>musculu<br>s              |
| 1 | 1.00 | 1 | 1 | 0.02  | 0.02   | 0.027  | 0.02   | 0.021  | t | 63754  | TFTMDGD<br>TMTMLTE<br>STFKNL | Mus<br>musculu<br>s              |
| 1 | 1.00 | 1 | 1 | -0.01 | -0.01  | 0.006  | -0.009 | -0.008 | t | 51083  | QIINTY                       | Mus<br>musculu<br>s              |
| 1 | 1.00 | 1 | 1 | -0.03 | -0.03  | -0.017 | -0.03  | -0.03  | t | 110251 | GKVEVEG<br>HLIDLKRV<br>VL    | Sus<br>scrofa                    |
| 1 | 1.00 | 1 | 1 | 0     | 0      | 0.014  | 0      | 0.001  | t | 31002  | KGLNGLFD<br>LGPKQKI          | Mus<br>musculu<br>s              |
| 1 | 1.00 | 1 | 1 | 0.04  | 0.04   | 0.054  | 0.04   | 0.041  | t | 9520   | DNNQTSP                      | Mus<br>musculu<br>s              |
| 1 | 1.00 | 1 | 1 | -0.05 | -0.05  | -0.05  | -0.05  | -0.049 | t | 105894 | KCNTATCA<br>TQRLANFL         | Mus<br>musculu<br>s              |
| 1 | 1.00 | 1 | 1 | -0.03 | -0.033 | -0.023 | -0.03  | -0.028 | t | 138837 | CSSWYRG<br>AC                | Canis<br>lupus                   |
| 1 | 1.00 | 1 | 1 | -0.02 | -0.018 | -0.008 | -0.023 | -0.021 | t | 107016 | YHVPAVG<br>QGW               | Homo<br>sapiens                  |
| 1 | 1.00 | 1 | 1 | -0.02 | -0.016 | -0.008 | -0.023 | -0.021 | t | 107016 | YHVPAVG<br>QGW               | Homo<br>sapiens                  |
| 1 | 1.00 | 1 | 1 | -0.01 | -0.012 | 0      | -0.011 | -0.01  | t | 97547  | PFVPRADE<br>PARKGKV<br>H     | Mus<br>musculu<br>s              |
| 1 | 1.00 | 1 | 1 | -0.05 | -0.05  | -0.045 | -0.05  | -0.047 | t | 652    | ADDVILHT<br>PGCVPC           | Homo<br>sapiens                  |

|   |      |   |   |       |        |        |        |        |   |        |                              |                     |
|---|------|---|---|-------|--------|--------|--------|--------|---|--------|------------------------------|---------------------|
| 1 | 1.00 | 1 | 1 | -0.02 | -0.018 | -0.013 | -0.017 | -0.018 | t | 49637  | PTGQIHW<br>GNLSKIGV          | Homo<br>sapiens     |
| 1 | 1.00 | 1 | 1 | 0.01  | 0.012  | 0.017  | 0.011  | 0.011  | t | 28374  | IRQLDTSV<br>ERRALGEI<br>QNV  | Homo<br>sapiens     |
| 1 | 1.00 | 1 | 1 | 0.01  | 0.014  | 0.017  | 0.011  | 0.011  | t | 28374  | IRQLDTSV<br>ERRALGEI<br>QNV  | Homo<br>sapiens     |
| 1 | 1.00 | 1 | 1 | 0.01  | 0.01   | 0.017  | 0.013  | 0.012  | t | 44043  | NGPADSG<br>DALLERNY<br>PTGAE | Homo<br>sapiens     |
| 1 | 1.00 | 1 | 1 | -0.03 | -0.026 | -0.018 | -0.023 | -0.028 | t | 119537 | TRKALTQN<br>T                | Homo<br>sapiens     |
| 1 | 1.00 | 1 | 1 | -0.08 | -0.08  | -0.078 | -0.08  | -0.078 | t | 120077 | LMRYWAN<br>FAR               | Mus<br>musculu<br>s |
| 1 | 1.00 | 1 | 1 | -0.03 | -0.03  | -0.02  | -0.027 | -0.028 | t | 38956  | LQQATRQ<br>AQ                | Homo<br>sapiens     |
| 1 | 1.00 | 1 | 1 | -0.04 | -0.039 | -0.04  | -0.043 | -0.04  | t | 130509 | HKKDFAR<br>GPGWS             | Mus<br>musculu<br>s |
| 1 | 1.00 | 1 | 1 | -0.04 | -0.039 | -0.04  | -0.043 | -0.04  | t | 130509 | HKKDFAR<br>GPGWS             | Mus<br>musculu<br>s |
| 1 | 1.00 | 1 | 1 | -0.02 | -0.022 | -0.014 | -0.021 | -0.022 | t | 94929  | SRASDARA<br>AHLPTGTP<br>LDID | Mus<br>musculu<br>s |
| 1 | 1.00 | 1 | 1 | -0.04 | -0.04  | -0.035 | -0.04  | -0.039 | t | 153362 | APWSLRD<br>HLAVTGG<br>GS     | Mus<br>musculu<br>s |
| 1 | 1.00 | 1 | 1 | -0.02 | -0.02  | -0.013 | -0.014 | -0.018 | t | 55846  | RSGGCVG<br>GQYCLTPT<br>H     | Homo<br>sapiens     |
| 1 | 1.00 | 1 | 1 | -0.01 | -0.01  | -0.003 | -0.017 | -0.01  | t | 117010 | IRTDESTKR<br>LPP             | Homo<br>sapiens     |
| 1 | 1.00 | 1 | 1 | 0.01  | 0.01   | 0.01   | 0.01   | 0.012  | t | 151731 | SAQSQRA<br>PDR               | Mus<br>musculu<br>s |
| 1 | 1.00 | 1 | 1 | 0     | -0.002 | 0      | -0.003 | 0.003  | t | 7491   | DAEFRHDS<br>GYEVHHQ<br>K     | Mus<br>musculu<br>s |

|   |      |   |   |       |        |        |        |        |   |        |                              |                  |
|---|------|---|---|-------|--------|--------|--------|--------|---|--------|------------------------------|------------------|
| 1 | 1.00 | 1 | 1 | 0.07  | 0.062  | 0.07   | 0.07   | 0.072  | t | 156947 | QTKSECTE<br>VCKNLT           | Mus<br>musculus  |
| 1 | 1.00 | 1 | 1 | 0.02  | 0.018  | 0.023  | 0.019  | 0.02   | t | 35248  | LDPAFRAN<br>TANPDWD          | Mus<br>musculus  |
| 1 | 1.00 | 1 | 1 | -0.02 | -0.02  | -0.02  | -0.029 | -0.02  | t | 135639 | AVPFPCGR                     | Homo<br>sapiens  |
| 1 | 1.00 | 1 | 1 | 0     | 0      | 0.015  | 0      | 0      | t | 107427 | GRGDSVA<br>YGLR              | Mus<br>musculus  |
| 1 | 1.00 | 1 | 1 | 0     | 0.002  | 0.013  | 0.001  | 0.002  | t | 45272  | NNTTGNP<br>KL                | Homo<br>sapiens  |
| 1 | 1.00 | 1 | 1 | 0     | -0.002 | 0.005  | -0.007 | -0.001 | t | 119466 | IRGERA                       | Mus<br>musculus  |
| 1 | 1.00 | 1 | 1 | 0.01  | 0.01   | 0.03   | 0.013  | 0.01   | t | 72255  | WAQPGYP<br>W                 | Homo<br>sapiens  |
| 1 | 1.00 | 1 | 1 | -0.05 | -0.043 | -0.043 | -0.057 | -0.052 | t | 156950 | RGPMFF                       | Gallus<br>gallus |
| 1 | 1.00 | 1 | 1 | -0.02 | -0.02  | -0.018 | -0.02  | -0.014 | t | 51346  | QLFTFSR<br>R                 | Homo<br>sapiens  |
| 1 | 1.00 | 1 | 1 | -0.01 | -0.01  | -0.013 | -0.016 | -0.01  | t | 142167 | GLRRDLDA<br>SREAKKQV<br>EKAL | Homo<br>sapiens  |
| 1 | 1.00 | 1 | 1 | -0.02 | -0.025 | -0.016 | -0.017 | -0.018 | t | 157724 | NNIKSSICD<br>IPPKG           | Canis<br>lupus   |
| 1 | 1.00 | 1 | 1 | -0.02 | -0.018 | -0.027 | -0.023 | -0.02  | t | 70725  | VRGGLRIL<br>SPDRKRR          | Homo<br>sapiens  |
| 1 | 1.00 | 1 | 1 | 0.01  | 0.01   | 0.024  | 0.016  | 0.01   | t | 75203  | YNPLYGSR<br>LGVPDTLG<br>GDPK | Homo<br>sapiens  |
| 1 | 1.00 | 1 | 1 | 0     | 0.004  | 0.007  | -0.003 | 0      | t | 106742 | QRRQIEAG<br>LN               | Homo<br>sapiens  |
| 1 | 1.00 | 1 | 1 | 0.03  | 0.03   | 0.022  | 0.03   | 0.032  | t | 31295  | KIKNGDLT<br>KELNKTRQ<br>EL   | Mus<br>musculus  |

|   |      |   |   |       |        |        |        |        |   |        |                              |                                  |
|---|------|---|---|-------|--------|--------|--------|--------|---|--------|------------------------------|----------------------------------|
| 1 | 1.00 | 1 | 1 | -0.03 | -0.034 | -0.03  | -0.037 | -0.03  | t | 112971 | FGAEILKKI<br>PGRVST          | Oryctola<br>gus<br>cuniculu<br>s |
| 1 | 1.00 | 1 | 1 | -0.05 | -0.05  | -0.05  | -0.061 | -0.05  | t | 118284 | DAYVLLSE<br>KKISS            | Homo<br>sapiens                  |
| 1 | 1.00 | 1 | 1 | 0     | 0.002  | 0.009  | -0.003 | 0.001  | t | 125573 | TFRSNDSY<br>FHQK             | Homo<br>sapiens                  |
| 1 | 1.00 | 1 | 1 | 0     | 0      | 0      | -0.006 | 0.001  | t | 60170  | SPNVSVPS<br>SSSTPLLY         | Homo<br>sapiens                  |
| 1 | 1.00 | 1 | 1 | -0.03 | -0.03  | -0.024 | -0.03  | -0.028 | t | 1448   | AGAPDRA<br>RGQYP             | Mus<br>musculu<br>s              |
| 1 | 1.00 | 1 | 1 | -0.04 | -0.042 | -0.039 | -0.043 | -0.038 | t | 47294  | PEGRTWA<br>QPGYPWP<br>LYGNEG | Mus<br>musculu<br>s              |
| 1 | 1.00 | 1 | 1 | -0.03 | -0.032 | -0.021 | -0.027 | -0.03  | t | 63058  | TCDQVKG<br>RKALIACLA<br>PDRR | Rattus<br>norvegic<br>us         |
| 1 | 1.00 | 1 | 1 | 0.01  | 0.006  | 0.01   | 0.003  | 0.011  | t | 131830 | AVAEELPH<br>RP               | Oryctola<br>gus<br>cuniculu<br>s |
| 1 | 1.00 | 1 | 1 | -0.03 | -0.026 | -0.021 | -0.031 | -0.029 | t | 67325  | TYEAALKQ<br>YEADL            | Mus<br>musculu<br>s              |
| 1 | 1.00 | 1 | 1 | -0.03 | -0.026 | -0.021 | -0.031 | -0.029 | t | 67325  | TYEAALKQ<br>YEADL            | Mus<br>musculu<br>s              |
| 1 | 1.00 | 1 | 1 | -0.03 | -0.03  | -0.03  | -0.033 | -0.03  | t | 149041 | FLHTRLFV<br>SDWYNTP          | Rattus<br>norvegic<br>us         |
| 1 | 1.00 | 1 | 1 | -0.02 | -0.006 | -0.003 | -0.017 | -0.021 | t | 115638 | QDGDQAP<br>EYRGR             | Homo<br>sapiens                  |
| 1 | 1.00 | 1 | 1 | -0.02 | -0.016 | -0.003 | -0.017 | -0.021 | t | 115638 | QDGDQAP<br>EYRGR             | Homo<br>sapiens                  |
| 1 | 1.00 | 1 | 1 | 0.01  | 0.012  | 0.01   | 0.009  | 0.014  | t | 96455  | KGKNVLIN<br>KD               | Homo<br>sapiens                  |



|   |      |   |   |       |        |        |        |        |   |        |                              |                     |
|---|------|---|---|-------|--------|--------|--------|--------|---|--------|------------------------------|---------------------|
| 1 | 1.00 | 1 | 1 | -0.03 | -0.032 | -0.03  | -0.031 | -0.03  | t | 66811  | TTSDVAGL<br>EKDPVAN          | Mus<br>musculu<br>s |
| 1 | 1.00 | 1 | 1 | 0.03  | 0.028  | 0.04   | 0.029  | 0.031  | t | 61317  | SSRGKVVE                     | Mus<br>musculu<br>s |
| 1 | 1.00 | 1 | 1 | -0.01 | -0.008 | 0.002  | -0.003 | -0.009 | t | 144609 | DEKLRDYI<br>WN               | Homo<br>sapiens     |
| 1 | 1.00 | 1 | 1 | -0.01 | -0.006 | 0.01   | -0.003 | -0.01  | t | 127918 | AERHFQA<br>PEPLNWT<br>GSWDAS | Homo<br>sapiens     |
| 1 | 1.00 | 1 | 1 | 0     | 0      | 0      | -0.009 | 0      | t | 130986 | NPIENMM<br>DRDSQ             | Homo<br>sapiens     |
| 1 | 1.00 | 1 | 1 | -0.01 | -0.009 | -0.01  | -0.013 | -0.007 | t | 130606 | SCTVYGKT<br>PLCG             | Mus<br>musculu<br>s |
| 1 | 1.00 | 1 | 1 | 0     | 0.004  | 0.018  | 0.001  | 0.002  | t | 74422  | YIYPYRYS                     | Homo<br>sapiens     |
| 1 | 1.00 | 1 | 1 | -0.01 | -0.01  | -0.01  | -0.014 | -0.01  | t | 118611 | SQALQELIS<br>ELDRRCHS        | Homo<br>sapiens     |
| 1 | 1.00 | 1 | 1 | 0.03  | 0.03   | 0.028  | 0.03   | 0.031  | t | 120197 | SEHETRLV<br>ANLLENYN         | Mus<br>musculu<br>s |
| 1 | 1.00 | 1 | 1 | 0.03  | 0.03   | 0.028  | 0.03   | 0.031  | t | 120197 | SEHETRLV<br>ANLLENYN         | Mus<br>musculu<br>s |
| 1 | 1.00 | 1 | 1 | 0.03  | 0.03   | 0.028  | 0.03   | 0.031  | t | 120197 | SEHETRLV<br>ANLLENYN         | Mus<br>musculu<br>s |
| 1 | 1.00 | 1 | 1 | 0.01  | 0.011  | 0.017  | 0.01   | 0.011  | t | 64411  | TIPAQGTS<br>M                | Mus<br>musculu<br>s |
| 1 | 1.00 | 1 | 1 | -0.04 | -0.04  | -0.032 | -0.04  | -0.04  | t | 106453 | GHWRGA<br>NATS               | Homo<br>sapiens     |
| 1 | 1.00 | 1 | 1 | -0.01 | -0.008 | -0.014 | -0.009 | -0.01  | t | 21760  | GPRLGVRA<br>TRKTSERS<br>QPRG | Homo<br>sapiens     |
| 1 | 1.00 | 1 | 1 | -0.02 | -0.022 | -0.013 | -0.027 | -0.022 | t | 110081 | VWTRAELI<br>GAFG             | Mus<br>musculu<br>s |

|   |      |   |   |       |        |        |        |        |   |        |                              |                                  |
|---|------|---|---|-------|--------|--------|--------|--------|---|--------|------------------------------|----------------------------------|
| 1 | 1.00 | 1 | 1 | 0.01  | 0.011  | 0.01   | 0.007  | 0.012  | t | 130613 | SSYCLRSV<br>CLSD             | Mus<br>musculu<br>s              |
| 1 | 1.00 | 1 | 1 | -0.01 | -0.012 | -0.008 | -0.017 | -0.01  | t | 130964 | MADRAAL<br>EELVRLQG<br>AHV   | Mus<br>musculu<br>s              |
| 1 | 1.00 | 1 | 1 | -0.1  | -0.1   | -0.1   | -0.1   | -0.101 | t | 115517 | TMARHPH<br>PHLSFMAI<br>PPKKN | Homo<br>sapiens                  |
| 1 | 1.00 | 1 | 1 | 0.02  | 0.018  | 0.008  | 0.013  | 0.02   | t | 112842 | SSKRGRQT<br>PVLYAML<br>DHSRS | Mus<br>musculu<br>s              |
| 1 | 1.00 | 1 | 1 | -0.02 | -0.018 | -0.012 | -0.019 | -0.02  | t | 13481  | ENHSPVNI<br>AHKL             | Homo<br>sapiens                  |
| 1 | 1.00 | 1 | 1 | -0.03 | -0.034 | -0.03  | -0.031 | -0.03  | t | 53474  | REDNSSRC<br>WVALTPTL<br>AARN | Oryctola<br>gus<br>cuniculu<br>s |
| 1 | 1.00 | 1 | 1 | 0     | 0      | 0.014  | 0      | 0      | t | 40152  | LTRILTIPQ<br>SLDSW           | Oryctola<br>gus<br>cuniculu<br>s |
| 1 | 1.00 | 1 | 1 | 0.02  | 0.018  | 0.013  | 0.02   | 0.025  | t | 123016 | AIYENEIHA<br>LWADLP          | Trichosu<br>rus<br>vulpecul<br>a |
| 1 | 1.00 | 1 | 1 | 0     | 0      | 0.015  | 0      | 0      | t | 107427 | GRGDSVA<br>YGLR              | Mus<br>musculu<br>s              |
| 1 | 1.00 | 1 | 1 | 0     | 0      | 0.015  | 0      | 0      | t | 107427 | GRGDSVA<br>YGLR              | Mus<br>musculu<br>s              |
| 1 | 1.00 | 1 | 1 | -0.01 | -0.01  | 0.001  | -0.01  | -0.009 | t | 111050 | VGPLDIVP<br>EVADPGG<br>PTLV  | Oryctola<br>gus<br>cuniculu<br>s |
| 1 | 1.00 | 1 | 1 | 0.01  | 0.006  | 0.008  | 0.003  | 0.01   | t | 118431 | ISDAMKKV<br>GRKGVITV<br>KD   | Oryctola<br>gus<br>cuniculu<br>s |
| 1 | 1.00 | 1 | 1 | 0.04  | 0.034  | 0.043  | 0.04   | 0.04   | t | 139900 | SNAPNSPS<br>SSAIAAAA<br>AA   | Oryctola<br>gus<br>cuniculu<br>s |
| 1 | 1.00 | 1 | 1 | 0     | 0.004  | 0.005  | 0.001  | 0.003  | t | 61589  | STEQNVP<br>DPQVG             | Homo<br>sapiens                  |

|   |      |   |   |       |        |        |        |        |   |        |                              |                                  |
|---|------|---|---|-------|--------|--------|--------|--------|---|--------|------------------------------|----------------------------------|
| 1 | 1.00 | 1 | 1 | -0.03 | -0.03  | -0.022 | -0.031 | -0.031 | t | 46434  | NVNELRFN<br>IGQFLPP          | Sus<br>scrofa                    |
| 1 | 1.00 | 1 | 1 | -0.03 | -0.03  | -0.033 | -0.032 | -0.03  | t | 142226 | LRRDLAS<br>REAKKQLE<br>AEQQ  | Homo<br>sapiens                  |
| 1 | 1.00 | 1 | 1 | 0     | 0      | 0.008  | 0      | 0.001  | t | 78971  | FGANST                       | Mus<br>musculu<br>s              |
| 1 | 1.00 | 1 | 1 | -0.01 | -0.012 | -0.015 | -0.013 | -0.009 | t | 45390  | NPLGLKRG<br>IEKAVEK          | Rattus<br>norvegic<br>us         |
| 1 | 1.00 | 1 | 1 | 0     | 0      | 0      | 0.004  | 0.003  | t | 121997 | VPKGKKGK<br>ADAGKEG          | Homo<br>sapiens                  |
| 1 | 1.00 | 1 | 1 | -0.02 | -0.02  | 0.001  | -0.02  | -0.021 | t | 1478   | AGDRAGD<br>R                 | Mus<br>musculu<br>s              |
| 1 | 1.00 | 1 | 1 | 0.01  | 0.01   | 0.01   | 0.006  | 0.014  | t | 138254 | TPTIM                        | Homo<br>sapiens                  |
| 1 | 1.00 | 1 | 1 | 0     | 0      | 0      | 0      | 0.004  | t | 63122  | TDAYNQKL<br>SERRAN           | Rattus<br>norvegic<br>us         |
| 1 | 1.00 | 1 | 1 | 0     | 0      | 0      | 0      | 0.004  | t | 43317  | NATAEGR<br>AINRRVE           | Rattus<br>norvegic<br>us         |
| 1 | 1.00 | 1 | 1 | -0.06 | -0.06  | -0.058 | -0.06  | -0.059 | t | 79890  | KRPGSSP<br>MEVML             | Mus<br>musculu<br>s              |
| 1 | 1.00 | 1 | 1 | -0.06 | -0.06  | -0.058 | -0.06  | -0.059 | t | 79890  | KRPGSSP<br>MEVML             | Mus<br>musculu<br>s              |
| 1 | 1.00 | 1 | 1 | -0.03 | -0.034 | -0.022 | -0.031 | -0.028 | t | 48878  | PPPQGRR<br>RFGA              | Oryctola<br>gus<br>cuniculu<br>s |
| 1 | 1.00 | 1 | 1 | -0.02 | -0.022 | -0.015 | -0.021 | -0.02  | t | 2975   | ALVNIPI<br>SNLA              | Sus<br>scrofa                    |
| 1 | 1.00 | 1 | 1 | -0.01 | -0.012 | -0.013 | -0.01  | -0.009 | t | 123734 | SFSKASNS<br>WFPVEGP<br>ADICQ | marmos<br>ets                    |

|   |      |   |   |       |        |        |        |        |   |        |                           |                                  |
|---|------|---|---|-------|--------|--------|--------|--------|---|--------|---------------------------|----------------------------------|
| 1 | 1.00 | 1 | 1 | -0.02 | -0.022 | -0.014 | -0.023 | -0.02  | t | 47333  | PEKPHFPL<br>AAEDDIRH<br>H | Mus<br>musculu<br>s              |
| 1 | 1.00 | 1 | 1 | 0.01  | 0.01   | 0.016  | 0.01   | 0.013  | t | 38948  | LQPGVDIIE<br>G            | Homo<br>sapiens                  |
| 1 | 1.00 | 1 | 1 | -0.04 | -0.037 | -0.029 | -0.04  | -0.039 | t | 18801  | GATVELLS<br>FLP           | Mus<br>musculu<br>s              |
| 1 | 1.00 | 1 | 1 | 0.01  | 0.01   | 0.015  | 0.01   | 0.011  | t | 122712 | ADPEGPLP<br>FPYFERQ       | Mus<br>musculu<br>s              |
| 1 | 1.00 | 1 | 1 | -0.02 | -0.02  | -0.007 | -0.02  | -0.018 | t | 102930 | WPYFKTYS<br>Y             | Mus<br>musculu<br>s              |
| 1 | 1.00 | 1 | 0 | -0.03 | -0.03  | 0.013  | -0.03  | -0.02  | t | 75429  | YPWH                      | Mus<br>musculu<br>s              |
| 1 | 1.00 | 1 | 1 | -0.05 | -0.048 | -0.042 | -0.049 | -0.048 | t | 78246  | PPLLPH                    | Homo<br>sapiens                  |
| 1 | 1.00 | 1 | 1 | 0.02  | 0.02   | 0.039  | 0.014  | 0.018  | t | 96114  | ASFAEAPF<br>SN            | Homo<br>sapiens                  |
| 1 | 1.00 | 1 | 1 | -0.03 | -0.03  | -0.03  | -0.033 | -0.03  | t | 149120 | TFTRVVTD<br>VYRPRLS       | Rattus<br>norvegic<br>us         |
| 1 | 1.00 | 1 | 1 | -0.01 | -0.012 | -0.01  | -0.01  | -0.01  | t | 107375 | GDDNLAP<br>NTANVQ<br>MT   | Oryctola<br>gus<br>cuniculu<br>s |
| 1 | 1.00 | 1 | 1 | -0.03 | -0.03  | -0.03  | -0.03  | -0.029 | t | 127643 | ERPLELRV<br>RVLDI         | Homo<br>sapiens                  |
| 1 | 1.00 | 1 | 1 | -0.04 | -0.045 | -0.026 | -0.037 | -0.038 | t | 95499  | KIVAPVKQ                  | Bos<br>taurus                    |
| 1 | 1.00 | 1 | 1 | -0.01 | -0.014 | -0.004 | -0.01  | -0.01  | t | 92794  | GENKRPN<br>DKAGEV         | Mus<br>musculu<br>s              |
| 1 | 1.00 | 1 | 1 | 0     | -0.004 | 0      | -0.007 | 0      | t | 127926 | AKKGEKVP<br>KGKKGKA       | Oryctola<br>gus<br>cuniculu<br>s |

|   |      |   |   |       |        |        |        |        |   |        |                      |                       |
|---|------|---|---|-------|--------|--------|--------|--------|---|--------|----------------------|-----------------------|
| 1 | 1.00 | 1 | 1 | -0.03 | -0.03  | -0.019 | -0.03  | -0.03  | t | 53822  | RGAKRM               | Homo sapiens          |
| 1 | 1.00 | 1 | 1 | -0.01 | -0.008 | 0.007  | -0.01  | -0.01  | t | 51834  | QPGDDPLL             | Anas platyrhynchos    |
| 1 | 1.00 | 1 | 1 | -0.01 | -0.01  | 0.004  | -0.01  | -0.01  | t | 57709  | SEYQSQPPS            | Homo sapiens          |
| 1 | 1.00 | 1 | 1 | 0.04  | 0.052  | 0.049  | 0.04   | 0.04   | t | 58397  | SHQHTDSNPSAT         | Mus musculus          |
| 1 | 1.00 | 1 | 1 | 0.04  | 0.04   | 0.049  | 0.04   | 0.04   | t | 58397  | SHQHTDSNPSAT         | Mus musculus          |
| 1 | 1.00 | 1 | 1 | 0     | 0      | 0      | 0      | 0      | t | 50101  | PYIEQGMHLAEQFKQKALGL | Homo sapiens          |
| 1 | 1.00 | 1 | 1 | 0.03  | 0.026  | 0.034  | 0.027  | 0.03   | t | 139829 | MKERESQIRDEYDHVLSA   | Oryctolagus cuniculus |
| 1 | 1.00 | 1 | 1 | -0.01 | -0.012 | -0.005 | -0.007 | -0.008 | t | 98699  | APKPAPQPGPQPQP       | Mus musculus          |
| 1 | 1.00 | 1 | 1 | -0.02 | -0.02  | -0.02  | -0.02  | -0.016 | t | 20836  | GLFGAIAGF            | Mus musculus          |
| 1 | 1.00 | 1 | 1 | -0.01 | -0.014 | -0.004 | -0.013 | -0.01  | t | 158749 | FAEDVGSNKGAIIGLM     | Oryctolagus cuniculus |
| 1 | 1.00 | 1 | 1 | 0.03  | 0.026  | 0.049  | 0.033  | 0.028  | t | 51806  | QPELAPEDPED          | Oryctolagus cuniculus |
| 1 | 1.00 | 1 | 1 | -0.06 | -0.062 | -0.053 | -0.063 | -0.06  | t | 133789 | CYRSPWRC             | Mus musculus          |
| 1 | 1.00 | 1 | 1 | 0     | -0.002 | 0      | -0.007 | 0.001  | t | 118538 | NNGNLQLRKEVTWEVLEG   | Mus musculus          |
| 1 | 1.00 | 1 | 1 | 0.03  | 0.03   | 0.042  | 0.03   | 0.031  | t | 133531 | CDTLKPGE C           | Mus musculus          |
| 1 | 1.00 | 1 | 1 | -0.02 | -0.02  | -0.018 | -0.022 | -0.02  | t | 10983  | EAAAPVVE SKWRAL      | Homo sapiens          |

|   |      |   |   |       |        |        |        |        |   |        |                              |                                  |
|---|------|---|---|-------|--------|--------|--------|--------|---|--------|------------------------------|----------------------------------|
| 1 | 1.00 | 1 | 1 | -0.05 | -0.05  | -0.041 | -0.05  | -0.05  | t | 135947 | KTGHPRYF<br>NQLS             | Homo<br>sapiens                  |
| 1 | 1.00 | 1 | 1 | 0     | -0.002 | 0      | -0.007 | -0.001 | t | 113570 | KKAVTKA<br>QKKDGKS<br>AAHRKE | Mus<br>musculu<br>s              |
| 1 | 1.00 | 1 | 1 | -0.04 | -0.04  | -0.023 | -0.04  | -0.039 | t | 247    | AAKGTPW                      | Homo<br>sapiens                  |
| 1 | 1.00 | 1 | 1 | 0     | 0.002  | 0.01   | 0.007  | 0.002  | t | 136745 | WGPCGQ<br>GAILLVNC<br>DRDNLE | Homo<br>sapiens                  |
| 1 | 1.00 | 1 | 1 | 0     | 0.002  | 0.01   | 0.007  | 0.002  | t | 136745 | WGPCGQ<br>GAILLVNC<br>DRDNLE | Homo<br>sapiens                  |
| 1 | 1.00 | 1 | 1 | -0.05 | -0.046 | -0.048 | -0.053 | -0.05  | t | 53195  | RARGRGR<br>GRGEKRP           | Homo<br>sapiens                  |
| 1 | 1.00 | 1 | 1 | 0.01  | 0.01   | 0.025  | 0.01   | 0.008  | t | 104305 | THQDIDFLI<br>EEIERLGQ        | Oryctola<br>gus<br>cuniculu<br>s |
| 1 | 1.00 | 1 | 1 | -0.01 | -0.01  | 0.009  | -0.01  | -0.01  | t | 100279 | LNP                          | Mus<br>musculu<br>s              |
| 1 | 1.00 | 1 | 1 | 0.01  | 0.01   | 0.01   | 0.01   | 0.01   | t | 134767 | QDPYVKE<br>AENLKKYF<br>NAG   | Mus<br>musculu<br>s              |
| 1 | 1.00 | 1 | 1 | -0.04 | -0.042 | -0.033 | -0.04  | -0.04  | t | 140598 | SLISDEWP<br>RW               | Mus<br>musculu<br>s              |
| 1 | 1.00 | 1 | 1 | 0     | -0.002 | 0.006  | -0.003 | 0      | t | 54425  | RKSITKGP<br>GRVIYAT          | Mus<br>musculu<br>s              |
| 1 | 1.00 | 1 | 1 | -0.02 | -0.017 | -0.008 | -0.02  | -0.02  | t | 78416  | HPWWTW<br>VSDPNAT<br>QP      | Mus<br>musculu<br>s              |
| 1 | 1.00 | 1 | 1 | 0     | 0.001  | 0.006  | -0.001 | 0.002  | t | 52478  | QTASRQA<br>EV                | Homo<br>sapiens                  |
| 1 | 1.00 | 1 | 1 | -0.01 | -0.013 | 0      | -0.01  | -0.01  | t | 32070  | KLPDDFM<br>GCVLAWN<br>TRN    | Oryctola<br>gus<br>cuniculu<br>s |

|   |      |   |   |       |        |        |        |        |   |        |                              |                                  |
|---|------|---|---|-------|--------|--------|--------|--------|---|--------|------------------------------|----------------------------------|
| 1 | 1.00 | 1 | 1 | -0.03 | -0.032 | -0.023 | -0.029 | -0.028 | t | 96370  | IAAQKPKV                     | Mus<br>musculu<br>s              |
| 1 | 1.00 | 1 | 1 | -0.01 | -0.012 | -0.005 | -0.011 | -0.012 | t | 25335  | IALDGKIKH<br>EDTNLASS<br>TII | Mus<br>musculu<br>s              |
| 1 | 1.00 | 1 | 1 | -0.02 | -0.022 | -0.013 | -0.023 | -0.02  | t | 2609   | ALHQALQ<br>DPRVRGL           | Mus<br>musculu<br>s              |
| 1 | 1.00 | 1 | 1 | -0.02 | -0.022 | -0.013 | -0.023 | -0.02  | t | 2609   | ALHQALQ<br>DPRVRGL           | Mus<br>musculu<br>s              |
| 1 | 1.00 | 1 | 1 | -0.01 | -0.014 | -0.004 | -0.011 | -0.009 | t | 56195  | RTTPDRQ<br>AA                | Oryctola<br>gus<br>cuniculu<br>s |
| 1 | 1.00 | 1 | 1 | -0.03 | -0.032 | -0.03  | -0.03  | -0.03  | t | 136056 | DGKKWQT<br>YRGNSTG           | Oryctola<br>gus<br>cuniculu<br>s |
| 1 | 1.00 | 1 | 1 | 0     | 0      | -0.005 | 0.006  | 0.009  | t | 24786  | HSLGKWL<br>GHPDKF            | Mus<br>musculu<br>s              |
| 1 | 1.00 | 1 | 1 | 0     | 0      | -0.005 | 0.006  | 0.009  | t | 24786  | HSLGKWL<br>GHPDKF            | Mus<br>musculu<br>s              |
| 1 | 1.00 | 1 | 1 | -0.01 | -0.014 | 0.001  | -0.011 | -0.011 | t | 38271  | LNLTTASV<br>PMLRWYA<br>ERFCF | Mus<br>musculu<br>s              |
| 1 | 1.00 | 1 | 1 | 0     | 0      | 0.012  | 0      | 0      | t | 4225   | ARQPYGFF<br>LETEEVYQ<br>PG   | Oryctola<br>gus<br>cuniculu<br>s |
| 1 | 1.00 | 1 | 1 | 0.03  | 0.034  | 0.036  | 0.031  | 0.029  | t | 133733 | VKTLLPYG<br>SVINYGY<br>VKPG  | Homo<br>sapiens                  |
| 1 | 1.00 | 1 | 1 | -0.02 | -0.02  | -0.016 | -0.021 | -0.02  | t | 20650  | GKNRAIN<br>MLKRGLP<br>R      | Homo<br>sapiens                  |
| 1 | 1.00 | 1 | 1 | 0.01  | 0.01   | 0.019  | 0.006  | 0.01   | t | 136004 | TTPEEIAQ<br>VATI             | Homo<br>sapiens                  |
| 1 | 1.00 | 1 | 1 | 0.02  | 0.017  | 0.029  | 0.02   | 0.02   | t | 100384 | PKQQDSL<br>PDTKASG           | Oryctola<br>gus<br>cuniculu<br>s |

|   |      |   |   |       |        |        |        |        |   |        |                              |                         |
|---|------|---|---|-------|--------|--------|--------|--------|---|--------|------------------------------|-------------------------|
| 1 | 1.00 | 1 | 1 | 0     | 0.012  | 0.002  | 0      | 0      | t | 31522  | KKEHEAEN<br>DKLKQQR<br>DTL   | Mus<br>musculu<br>s     |
| 1 | 1.00 | 1 | 1 | -0.04 | -0.04  | -0.038 | -0.041 | -0.039 | t | 144786 | SMNRGRG<br>THPSLIW<br>M      | Mus<br>musculu<br>s     |
| 1 | 1.00 | 1 | 1 | -0.06 | -0.06  | -0.053 | -0.06  | -0.06  | t | 119522 | RSLKTKLPS                    | Homo<br>sapiens         |
| 1 | 1.00 | 1 | 1 | -0.01 | -0.008 | -0.016 | -0.013 | -0.009 | t | 35331  | LDVVCAMI<br>EGAQGAL<br>ER    | Homo<br>sapiens         |
| 1 | 1.00 | 1 | 1 | 0     | -0.002 | 0.006  | -0.003 | 0.002  | t | 1464   | AGDDDL<br>GDLNGDD<br>RR      | Mus<br>musculu<br>s     |
| 1 | 1.00 | 1 | 1 | -0.02 | -0.021 | 0      | -0.02  | -0.02  | t | 37793  | LLSHSNLD<br>HI               | Mus<br>musculu<br>s     |
| 1 | 1.00 | 1 | 1 | 0     | 0      | 0      | 0      | 0.004  | t | 30636  | KETNNAIS<br>FMSNAGS<br>LEKK  | Aotus<br>nancyma<br>ae  |
| 1 | 1.00 | 1 | 1 | -0.03 | -0.029 | -0.014 | -0.029 | -0.032 | t | 30041  | KCAFATTP<br>VCQF             | Myodes<br>glareolu<br>s |
| 1 | 1.00 | 1 | 1 | -0.02 | -0.02  | -0.02  | -0.02  | -0.02  | t | 50084  | PYFEQGM<br>QLAEQFK<br>QKALGL | Homo<br>sapiens         |
| 1 | 1.00 | 1 | 1 | -0.06 | -0.062 | -0.049 | -0.057 | -0.058 | t | 114985 | WVLLLGH<br>QVK               | Mus<br>musculu<br>s     |
| 1 | 1.00 | 1 | 1 | 0.05  | 0.052  | 0.059  | 0.047  | 0.049  | t | 115538 | VESLSSEE<br>SITRINKKIE<br>K  | Homo<br>sapiens         |
| 1 | 1.00 | 1 | 1 | -0.06 | -0.048 | -0.055 | -0.06  | -0.061 | t | 73433  | YARFMDT<br>DPDRYGIL<br>PSNF  | Mus<br>musculu<br>s     |
| 1 | 1.00 | 1 | 1 | -0.07 | -0.068 | -0.07  | -0.069 | -0.07  | t | 46354  | NVDPNAN<br>PNANPNA<br>NP     | Homo<br>sapiens         |
| 1 | 1.00 | 1 | 1 | -0.01 | -0.01  | -0.005 | -0.01  | -0.009 | t | 61398  | SSTKNLIYT<br>STLCELNV<br>TGF | Sus<br>scrofa           |



|   |      |   |   |       |        |        |        |        |   |        |                              |                                  |
|---|------|---|---|-------|--------|--------|--------|--------|---|--------|------------------------------|----------------------------------|
| 1 | 1.00 | 1 | 1 | 0.01  | 0.008  | 0.017  | 0.009  | 0.012  | t | 146813 | DAEFGHD<br>SGFEVRH<br>QK     | Mus<br>musculu<br>s              |
| 1 | 1.00 | 1 | 1 | 0     | 0.008  | 0.011  | 0      | 0      | t | 24215  | HLGLMAM<br>DHLPW             | Gallus<br>gallus                 |
| 1 | 1.00 | 1 | 1 | -0.01 | -0.013 | 0      | -0.01  | -0.01  | t | 120418 | AVGTYNTR<br>KYDC             | Oryctola<br>gus<br>cuniculu<br>s |
| 1 | 1.00 | 1 | 1 | 0.02  | 0.018  | 0.022  | 0.02   | 0.027  | t | 112123 | GERGAAGI<br>AGPK             | Mus<br>musculu<br>s              |
| 1 | 1.00 | 1 | 1 | -0.03 | -0.03  | -0.03  | -0.041 | -0.03  | t | 118491 | LKVGLQVV<br>AVKAP            | Homo<br>sapiens                  |
| 1 | 1.00 | 1 | 1 | -0.03 | -0.03  | -0.021 | -0.03  | -0.03  | t | 135957 | LSSRPGGC<br>SAVS             | Homo<br>sapiens                  |
| 1 | 1.00 | 1 | 1 | 0.01  | 0.01   | 0.024  | 0.013  | 0.01   | t | 70878  | VSALEDKL<br>AD               | Homo<br>sapiens                  |
| 1 | 1.00 | 1 | 1 | 0     | 0      | -0.009 | 0      | 0.012  | t | 134343 | DLYIK                        | Mus<br>musculu<br>s              |
| 1 | 1.00 | 1 | 1 | 0     | 0      | 0.005  | -0.002 | 0      | t | 7059   | CSQHCPYI<br>EQGMML<br>AEQFKQ | Homo<br>sapiens                  |
| 1 | 1.00 | 1 | 1 | 0.01  | 0.008  | 0.012  | 0.003  | 0.009  | t | 132365 | HKYSWKS<br>WGKAKIIG          | Mus<br>musculu<br>s              |
| 1 | 1.00 | 1 | 1 | -0.02 | -0.013 | -0.013 | -0.027 | -0.022 | t | 156951 | RLLYGS                       | Gallus<br>gallus                 |
| 1 | 1.00 | 1 | 1 | 0.04  | 0.044  | 0.049  | 0.041  | 0.04   | t | 60545  | SQSAPYIE<br>QAQIAAQ<br>QFKDK | Homo<br>sapiens                  |
| 1 | 1.00 | 1 | 1 | 0.04  | 0.04   | 0.041  | 0.04   | 0.04   | t | 1470   | AGDLESSV<br>DDPRSEED<br>KRFE | Homo<br>sapiens                  |
| 1 | 1.00 | 1 | 1 | -0.05 | -0.047 | -0.047 | -0.05  | -0.049 | t | 66553  | TTCSDKSR<br>PLNDLVS          | Mus<br>musculu<br>s              |
| 1 | 1.00 | 1 | 1 | 0.03  | 0.03   | 0.046  | 0.034  | 0.031  | t | 27451  | IMASKTVG<br>TAEKEL           | Homo<br>sapiens                  |

|   |      |   |   |       |        |        |        |        |   |        |                              |                                  |
|---|------|---|---|-------|--------|--------|--------|--------|---|--------|------------------------------|----------------------------------|
| 1 | 1.00 | 1 | 1 | 0.01  | 0.012  | 0.017  | 0.007  | 0.009  | t | 106871 | SSSSGSGS<br>GA               | Homo<br>sapiens                  |
| 1 | 1.00 | 1 | 1 | -0.02 | -0.02  | -0.013 | -0.02  | -0.019 | t | 112958 | ELRPELSW<br>LGHE             | Mus<br>musculu<br>s              |
| 1 | 1.00 | 1 | 1 | -0.01 | -0.008 | -0.016 | -0.007 | -0.008 | t | 21685  | GPLGSAD<br>AGRQDLP<br>RRVVRH | Homo<br>sapiens                  |
| 1 | 1.00 | 1 | 1 | -0.03 | -0.03  | -0.023 | -0.03  | -0.028 | t | 30261  | KDTLRITYL<br>T               | Mus<br>musculu<br>s              |
| 1 | 1.00 | 1 | 1 | -0.02 | -0.024 | -0.019 | -0.021 | -0.018 | t | 6713   | CNNPHRIL<br>DGINC            | Oryctola<br>gus<br>cuniculu<br>s |
| 1 | 1.00 | 1 | 1 | -0.02 | -0.016 | -0.018 | -0.023 | -0.021 | t | 99262  | FYSNAPQE<br>IFIQQGR          | Homo<br>sapiens                  |
| 1 | 1.00 | 1 | 1 | -0.02 | -0.027 | -0.008 | -0.02  | -0.02  | t | 63604  | TEYYLNHG<br>KWPEN            | Oryctola<br>gus<br>cuniculu<br>s |
| 1 | 1.00 | 1 | 1 | -0.03 | -0.026 | -0.03  | -0.033 | -0.03  | t | 105851 | GTAPFEIH<br>ANRIVGFF<br>SKII | Homo<br>sapiens                  |
| 1 | 1.00 | 1 | 1 | 0.01  | 0.012  | 0.011  | 0.011  | 0.012  | t | 39404  | LSGRPVIV<br>PDREVLRY<br>EFDE | Homo<br>sapiens                  |
| 1 | 1.00 | 1 | 1 | 0     | -0.003 | 0.003  | 0      | 0.002  | t | 52822  | QVYLNGD<br>KTKPVTLT          | Oryctola<br>gus<br>cuniculu<br>s |
| 1 | 1.00 | 1 | 1 | 0.03  | 0.026  | 0.032  | 0.03   | 0.03   | t | 48823  | PPLLESWK<br>DPDYVPPV<br>VHG  | Mus<br>musculu<br>s              |
| 1 | 1.00 | 1 | 1 | 0.02  | 0.027  | 0.027  | 0.02   | 0.021  | t | 159288 | LLHYSTISQ<br>DNLDISFG<br>ELQ | Aotus                            |
| 1 | 1.00 | 1 | 1 | 0     | -0.003 | 0.009  | 0      | 0      | t | 100408 | QDSLPTDK<br>ASGPAH           | Oryctola<br>gus<br>cuniculu<br>s |

|   |      |   |   |       |        |        |        |        |   |        |                              |                                  |
|---|------|---|---|-------|--------|--------|--------|--------|---|--------|------------------------------|----------------------------------|
| 1 | 1.00 | 1 | 1 | -0.01 | -0.008 | -0.013 | -0.01  | -0.009 | t | 105967 | MKRGLTV<br>AVAGAAIL<br>VAGLS | Homo<br>sapiens                  |
| 1 | 1.00 | 1 | 1 | -0.07 | -0.07  | -0.07  | -0.066 | -0.07  | t | 139482 | DSPGSGN<br>ARPNNPD<br>W      | Homo<br>sapiens                  |
| 1 | 1.00 | 1 | 1 | -0.03 | -0.03  | -0.025 | -0.03  | -0.029 | t | 4907   | ATCDKLFG<br>YYERGIPLP<br>CAL | Homo<br>sapiens                  |
| 1 | 1.00 | 1 | 1 | -0.02 | -0.023 | -0.01  | -0.023 | -0.02  | t | 73245  | WWHLPR<br>DSPLPI             | Mus<br>musculu<br>s              |
| 1 | 1.00 | 1 | 1 | -0.03 | -0.02  | -0.03  | -0.033 | -0.031 | t | 134172 | NHTVGVL<br>ASAHR             | Rattus<br>rattus                 |
| 1 | 1.00 | 1 | 1 | 0     | 0      | 0.001  | 0      | 0.003  | t | 137942 | PGSEYT                       | Oryctola<br>gus<br>cuniculu<br>s |
| 1 | 1.00 | 1 | 1 | 0     | -0.002 | -0.003 | -0.001 | 0.001  | t | 55389  | RQAESSEA<br>MAAWSER<br>AGEA  | Mus<br>musculu<br>s              |
| 1 | 1.00 | 1 | 1 | -0.04 | -0.038 | -0.037 | -0.04  | -0.04  | t | 1437   | AGAGRRV<br>G                 | Anas<br>platyrhy<br>nchos        |
| 1 | 1.00 | 1 | 1 | -0.02 | -0.02  | -0.011 | -0.02  | -0.02  | t | 125175 | NNNNFQS<br>KAN               | Mus<br>musculu<br>s              |
| 1 | 1.00 | 1 | 1 | -0.01 | -0.01  | -0.01  | -0.014 | -0.01  | t | 118164 | STKQAAFK<br>AV               | Homo<br>sapiens                  |
| 1 | 1.00 | 1 | 1 | -0.05 | -0.052 | -0.043 | -0.053 | -0.049 | t | 117544 | KFRFLALKL<br>YFSFTRP         | Mus<br>musculu<br>s              |
| 1 | 1.00 | 1 | 1 | -0.05 | -0.054 | -0.043 | -0.053 | -0.049 | t | 117544 | KFRFLALKL<br>YFSFTRP         | Oryctola<br>gus<br>cuniculu<br>s |
| 1 | 1.00 | 1 | 1 | -0.01 | -0.008 | -0.01  | -0.009 | -0.008 | t | 62852  | TAGHGAY<br>GITSLFTRG         | Homo<br>sapiens                  |
| 1 | 1.00 | 1 | 1 | -0.03 | -0.03  | -0.013 | -0.03  | -0.028 | t | 79299  | LRYVVWA<br>DDW               | Mus<br>musculu<br>s              |

|   |      |   |   |       |        |        |        |        |   |        |                              |                                  |
|---|------|---|---|-------|--------|--------|--------|--------|---|--------|------------------------------|----------------------------------|
| 1 | 1.00 | 1 | 1 | 0.01  | 0.009  | 0.019  | 0.01   | 0.011  | t | 47449  | PEVEAALK<br>LMEKREY          | Bos<br>taurus                    |
| 1 | 1.00 | 1 | 1 | -0.04 | -0.042 | -0.03  | -0.043 | -0.042 | t | 22693  | GTHSWDH<br>PHHSYC            | Mus<br>musculu<br>s              |
| 1 | 1.00 | 1 | 1 | -0.03 | -0.032 | -0.024 | -0.033 | -0.03  | t | 118805 | GGNGGGI<br>GGGMGG<br>GVGIG   | Mus<br>musculu<br>s              |
| 1 | 1.00 | 1 | 1 | 0.02  | 0.02   | 0.042  | 0.023  | 0.02   | t | 49137  | PQTTKPKE<br>VPTT             | Homo<br>sapiens                  |
| 1 | 1.00 | 1 | 1 | -0.01 | -0.01  | 0.006  | -0.01  | -0.01  | t | 4459   | ASHPLGRC<br>LSHT             | Homo<br>sapiens                  |
| 1 | 1.00 | 1 | 1 | 0.01  | 0.012  | 0.022  | 0.017  | 0.013  | t | 122408 | IHDRKSGK<br>KFSIEEALQ<br>SGR | Homo<br>sapiens                  |
| 1 | 1.00 | 1 | 1 | -0.02 | -0.016 | -0.011 | -0.019 | -0.018 | t | 72088  | VYLLPRRG                     | Homo<br>sapiens                  |
| 1 | 1.00 | 1 | 1 | -0.01 | 0.008  | 0.004  | -0.011 | -0.01  | t | 111130 | AVDTGVL<br>GTSYPPSA          | Oryctola<br>gus<br>cuniculu<br>s |
| 1 | 1.00 | 1 | 1 | 0     | 0      | 0      | 0      | 0.004  | t | 130787 | EDFDIYDE<br>DE               | Mus<br>musculu<br>s              |
| 1 | 1.00 | 1 | 1 | -0.01 | -0.01  | -0.01  | -0.021 | -0.01  | t | 104126 | MNKTFWF                      | Homo<br>sapiens                  |
| 1 | 1.00 | 1 | 1 | 0.01  | 0.006  | 0.008  | 0.003  | 0.01   | t | 118431 | ISDAMKKV<br>GRKGVITV<br>KD   | Oryctola<br>gus<br>cuniculu<br>s |
| 1 | 1.00 | 1 | 1 | -0.03 | -0.02  | -0.018 | -0.031 | -0.03  | t | 72524  | WGVLAGI<br>AYF               | Pan<br>troglody<br>tes           |
| 1 | 1.00 | 1 | 1 | -0.01 | -0.01  | -0.004 | -0.01  | -0.011 | t | 94832  | GLFGNNE<br>NQTKV             | Oryctola<br>gus<br>cuniculu<br>s |
| 1 | 1.00 | 1 | 1 | -0.04 | -0.04  | -0.031 | -0.038 | -0.04  | t | 135972 | PRRPGGLG<br>GSGG             | Homo<br>sapiens                  |

|   |      |   |   |       |        |        |        |        |   |        |                              |                     |
|---|------|---|---|-------|--------|--------|--------|--------|---|--------|------------------------------|---------------------|
| 1 | 1.00 | 1 | 1 | 0.01  | 0.012  | 0.015  | 0.013  | 0.012  | t | 39164  | LRPGPVSQ<br>PYHHWDT<br>DK    | Homo<br>sapiens     |
| 1 | 1.00 | 1 | 1 | -0.03 | -0.026 | -0.016 | -0.029 | -0.03  | t | 39697  | LSTGLIHL                     | Homo<br>sapiens     |
| 1 | 1.00 | 1 | 1 | -0.04 | -0.04  | -0.033 | -0.04  | -0.04  | t | 48758  | PPAYSCLC<br>PWAHM            | Homo<br>sapiens     |
| 1 | 1.00 | 1 | 1 | -0.04 | -0.036 | -0.036 | -0.043 | -0.042 | t | 105826 | GGLRILSP<br>DRKRRQQ          | Homo<br>sapiens     |
| 1 | 1.00 | 1 | 1 | -0.01 | -0.01  | 0.002  | -0.01  | -0.011 | t | 15383  | FDFASGLD                     | Mus<br>musculu<br>s |
| 1 | 1.00 | 1 | 1 | -0.01 | -0.006 | 0.002  | -0.01  | -0.011 | t | 15383  | FDFASGLD                     | MD                  |
| 1 | 1.00 | 1 | 1 | 0.02  | 0.024  | 0.027  | 0.02   | 0.022  | t | 38627  | LPPSRDEL                     | Capra<br>hircus     |
| 1 | 1.00 | 1 | 1 | -0.05 | -0.048 | -0.04  | -0.049 | -0.05  | t | 1790   | AHKWYSQ<br>WLPHR             | Homo<br>sapiens     |
| 1 | 1.00 | 1 | 1 | -0.03 | -0.034 | -0.02  | -0.03  | -0.032 | t | 93007  | INNGLPPI<br>QNTRNI           | Mus<br>musculu<br>s |
| 1 | 1.00 | 1 | 1 | -0.03 | -0.032 | -0.016 | -0.031 | -0.032 | t | 83200  | HPPSYVYS<br>QFEKSYRH<br>KR   | Mus<br>musculu<br>s |
| 1 | 1.00 | 1 | 1 | 0     | 0.007  | -0.004 | -0.001 | 0.001  | t | 40281  | LVASNWW<br>NRQIERSS<br>RTLGL | Gallus<br>gallus    |
| 1 | 1.00 | 1 | 1 | 0     | -0.002 | -0.004 | -0.001 | 0.001  | t | 40281  | LVASNWW<br>NRQIERSS<br>RTLGL | Mus<br>musculu<br>s |
| 1 | 1.00 | 1 | 1 | 0     | 0      | -0.004 | -0.001 | 0.001  | t | 40281  | LVASNWW<br>NRQIERSS<br>RTLGL | Homo<br>sapiens     |
| 1 | 1.00 | 1 | 1 | 0     | -0.005 | -0.007 | 0.002  | 0.003  | t | 157283 | FTNRRCD<br>S<br>NATNAR       | Canis<br>lupus      |

|   |      |   |   |       |        |        |        |        |   |        |                              |                                  |
|---|------|---|---|-------|--------|--------|--------|--------|---|--------|------------------------------|----------------------------------|
| 1 | 1.00 | 1 | 1 | 0.01  | 0.008  | 0.016  | 0.013  | 0.012  | t | 114746 | ASQKRPSQ<br>RSKYLATA<br>STMD | Mus<br>musculu<br>s              |
| 1 | 1.00 | 1 | 1 | -0.02 | -0.02  | -0.008 | -0.02  | -0.02  | t | 159130 | SRLEHLM<br>WESIQKEL<br>N     | Mus<br>musculu<br>s              |
| 1 | 1.00 | 1 | 1 | 0.05  | 0.061  | 0.057  | 0.051  | 0.055  | t | 136550 | PIMTQGSL<br>YNDS             | Dicentra<br>rchus<br>labrax      |
| 1 | 1.00 | 1 | 1 | -0.04 | -0.037 | -0.034 | -0.04  | -0.037 | t | 133539 | CYKPGEW<br>AC                | Mus<br>musculu<br>s              |
| 1 | 1.00 | 1 | 1 | -0.04 | -0.04  | -0.045 | -0.044 | -0.039 | t | 102564 | KKRPKPGG<br>GWNT             | Homo<br>sapiens                  |
| 1 | 1.00 | 1 | 1 | 0     | 0      | 0      | 0      | 0.002  | t | 130599 | RQGEEVY<br>MWRDSTM<br>PA     | Mus<br>musculu<br>s              |
| 1 | 1.00 | 1 | 1 | -0.04 | -0.04  | -0.035 | -0.043 | -0.04  | t | 247    | AAKGTPW                      | Homo<br>sapiens                  |
| 1 | 1.00 | 1 | 1 | 0     | 0      | -0.007 | -0.003 | 0      | t | 53676  | REWARRN<br>GHNVSTR<br>GRI    | Homo<br>sapiens                  |
| 1 | 1.00 | 1 | 1 | 0     | -0.002 | 0      | -0.003 | 0.003  | t | 3693   | APPPPEHR<br>GGPEEFEG<br>AGDG | Mus<br>musculu<br>s              |
| 1 | 1.00 | 1 | 1 | -0.02 | -0.02  | -0.018 | -0.02  | -0.02  | t | 78450  | LILNQMA<br>NFSLLPSF<br>DTLLV | Mus<br>musculu<br>s              |
| 1 | 1.00 | 1 | 1 | -0.01 | -0.01  | -0.014 | -0.01  | -0.008 | t | 73114  | WTANGDY<br>KSKGDKPV<br>YEPGF | Oryctola<br>gus<br>cuniculu<br>s |
| 1 | 1.00 | 1 | 1 | -0.01 | -0.002 | 0.002  | -0.01  | -0.009 | t | 64328  | TIIPYIGPA<br>LNIGNMLY<br>K   | Gallus<br>gallus                 |
| 1 | 1.00 | 1 | 1 | -0.01 | -0.008 | 0.002  | -0.01  | -0.009 | t | 64328  | TIIPYIGPA<br>LNIGNMLY<br>K   | Homo<br>sapiens                  |
| 1 | 1.00 | 1 | 1 | -0.01 | -0.007 | 0.002  | -0.01  | -0.009 | t | 64328  | TIIPYIGPA<br>LNIGNMLY<br>K   | Equus<br>caballus                |
| 1 | 1.00 | 1 | 1 | -0.01 | -0.012 | 0.002  | -0.011 | -0.01  | t | 142449 | NNQNLSV<br>VQALL             | Mus<br>musculu<br>s              |

|   |      |   |   |      |      |       |        |       |   |        |                    |                       |
|---|------|---|---|------|------|-------|--------|-------|---|--------|--------------------|-----------------------|
| 1 | 1.00 | 1 | 1 | 0.06 | 0.06 | 0.073 | 0.06   | 0.063 | t | 111235 | EEEGQQE            | Oryctolagus cuniculus |
| 1 | 1.00 | 1 | 1 | 0    | 0    | 0     | -0.009 | 0     | t | 156480 | YKEQDFTP VV        | Homo sapiens          |
| 1 | 1.00 | 1 | 1 | 0    | 0    | 0     | -0.009 | 0     | t | 156411 | QGNQDSF TPVV       | Homo sapiens          |
| 1 | 1.00 | 1 | 1 | 0    | 0    | 0     | -0.009 | 0     | t | 136304 | GARGLTG RPGDA      | Homo sapiens          |
| 1 | 1.00 | 1 | 1 | 0    | 0    | 0     | -0.009 | 0     | t | 152051 | PVVNSLDP PLL       | Homo sapiens          |
| 1 | 1.00 | 1 | 1 | 0    | 0    | 0     | -0.009 | 0     | t | 136219 | FEEYGKIDT IEIIT    | Homo sapiens          |
| 1 | 1.00 | 1 | 1 | 0    | 0    | 0     | -0.009 | 0     | t | 136303 | GARGLTG RPGDA      | Homo sapiens          |
| 1 | 1.00 | 1 | 1 | 0    | 0    | 0     | -0.009 | 0     | t | 132067 | SLVLTNLNEL         | Homo sapiens          |
| 1 | 1.00 | 1 | 1 | 0    | 0    | 0     | -0.009 | 0     | t | 131903 | GVMAARG QL         | Homo sapiens          |
| 1 | 1.00 | 1 | 1 | 0    | 0    | 0     | -0.009 | 0     | t | 122127 | KRSRLDV            | Homo sapiens          |
| 1 | 1.00 | 1 | 1 | 0    | 0    | 0     | -0.009 | 0     | t | 133787 | CQALVRM LAKKPGW K  | Homo sapiens          |
| 1 | 1.00 | 1 | 1 | 0    | 0    | 0     | -0.009 | 0     | t | 133776 | AGDLSKVD AKQPGDY   | Homo sapiens          |
| 1 | 1.00 | 1 | 1 | 0    | 0    | 0     | -0.009 | 0     | t | 133822 | ERPLKQIA FNGGLEP   | Homo sapiens          |
| 1 | 1.00 | 1 | 1 | 0    | 0    | 0     | -0.009 | 0     | t | 130987 | NPVENM MDRDSQ      | Homo sapiens          |
| 1 | 1.00 | 1 | 1 | 0    | 0    | 0     | -0.009 | 0     | t | 132064 | SLLGQLSG QV        | Homo sapiens          |
| 1 | 1.00 | 1 | 1 | 0    | 0    | 0     | -0.009 | 0     | t | 133841 | GRGN GDP GGGMEKD G | Homo sapiens          |
| 1 | 1.00 | 1 | 1 | 0    | 0    | 0     | -0.009 | 0     | t | 119475 | KKIK               | Homo sapiens          |
| 1 | 1.00 | 1 | 1 | 0    | 0    | 0     | -0.009 | 0     | t | 119508 | QFIGYPI            | Homo sapiens          |
| 1 | 1.00 | 1 | 1 | 0    | 0    | 0     | -0.009 | 0     | t | 133900 | NEHPVFAY LKDKLP    | Homo sapiens          |

|   |      |   |   |      |      |      |        |      |   |        |                              |                     |
|---|------|---|---|------|------|------|--------|------|---|--------|------------------------------|---------------------|
| 1 | 1.00 | 1 | 1 | 0    | 0    | 0    | -0.009 | 0    | t | 133921 | QLELTEG<br>MRFDKGYI          | Homo<br>sapiens     |
| 1 | 1.00 | 1 | 1 | 0    | 0    | 0    | -0.009 | 0    | t | 132029 | QLGPTCLS<br>SL               | Homo<br>sapiens     |
| 1 | 1.00 | 1 | 1 | 0    | 0    | 0    | -0.009 | 0    | t | 133795 | DFTYDQV<br>AFNGLPQF          | Homo<br>sapiens     |
| 1 | 1.00 | 1 | 1 | 0    | 0    | 0    | -0.009 | 0    | t | 132100 | TLPTPVVQ<br>L                | Homo<br>sapiens     |
| 1 | 1.00 | 1 | 1 | 0    | 0    | 0    | -0.009 | 0    | t | 131878 | FLMLVGG<br>STL               | Homo<br>sapiens     |
| 1 | 1.00 | 1 | 1 | 0    | 0    | 0    | -0.009 | 0    | t | 131952 | LLPDPSAP<br>T                | Homo<br>sapiens     |
| 1 | 1.00 | 1 | 1 | 0    | 0    | 0    | -0.009 | 0    | t | 132099 | TLNELPNR<br>T                | Homo<br>sapiens     |
| 1 | 1.00 | 1 | 1 | 0    | 0    | 0    | -0.009 | 0    | t | 131978 | MLVGGST<br>LCV               | Homo<br>sapiens     |
| 1 | 1.00 | 1 | 1 | 0    | 0    | 0    | -0.009 | 0    | t | 119457 | GLELPE                       | Homo<br>sapiens     |
| 1 | 1.00 | 1 | 1 | 0    | 0    | 0    | -0.009 | 0    | t | 119506 | PIVET                        | Homo<br>sapiens     |
| 1 | 1.00 | 1 | 1 | 0    | 0    | 0    | -0.009 | 0    | t | 133798 | DKIRGEG<br>MRYIIILD          | Homo<br>sapiens     |
| 1 | 1.00 | 1 | 1 | 0    | 0    | 0    | -0.009 | 0    | t | 131891 | GLETNFT<br>A                 | Homo<br>sapiens     |
| 1 | 1.00 | 1 | 1 | 0    | 0    | 0    | -0.009 | 0    | t | 119478 | KNDK                         | Homo<br>sapiens     |
| 1 | 1.00 | 1 | 1 | 0    | 0    | 0    | -0.009 | 0    | t | 119474 | KIRY                         | Homo<br>sapiens     |
| 1 | 1.00 | 1 | 1 | 0    | 0    | 0    | -0.009 | 0    | t | 101054 | MASPGSG<br>FWSFGSE<br>DGSGDS | Homo<br>sapiens     |
| 1 | 1.00 | 1 | 1 | 0    | 0    | 0    | -0.009 | 0    | t | 117015 | KEQFLDGD<br>GWTSRWI<br>ESK   | Homo<br>sapiens     |
| 1 | 1.00 | 1 | 1 | 0    | 0    | 0    | -0.009 | 0    | t | 107745 | ARGAQGP<br>PGATGFP           | Homo<br>sapiens     |
| 1 | 1.00 | 1 | 1 | 0    | 0    | 0    | -0.009 | 0    | t | 107828 | ERGLKGHR<br>GFT              | Homo<br>sapiens     |
| 1 | 1.00 | 1 | 1 | 0    | 0    | 0    | -0.009 | 0    | t | 63098  | TCRRMLAF<br>LKDKENR          | Homo<br>sapiens     |
| 1 | 1.00 | 1 | 1 | 0.01 | 0.01 | 0.01 | 0.002  | 0.01 | t | 110824 | EDEIDGPA<br>GQAEPDR<br>AHYNI | Mus<br>musculu<br>s |



|   |      |   |   |       |        |        |        |        |   |        |                              |                     |
|---|------|---|---|-------|--------|--------|--------|--------|---|--------|------------------------------|---------------------|
| 1 | 1.00 | 1 | 1 | -0.01 | -0.002 | 0.007  | -0.01  | -0.01  | t | 136685 | TLFTPDKS<br>PAKT             | Gallus<br>gallus    |
| 1 | 1.00 | 1 | 1 | -0.01 | -0.002 | 0.007  | -0.01  | -0.01  | t | 136685 | TLFTPDKS<br>PAKT             | Gallus<br>gallus    |
| 1 | 1.00 | 1 | 1 | 0     | 0.002  | 0.004  | 0.001  | 0      | t | 31165  | KHWIGRL<br>MWWNQ<br>YT       | Homo<br>sapiens     |
| 1 | 1.00 | 1 | 1 | 0     | 0      | 0.004  | -0.003 | 0.001  | t | 58382  | SHLQLIYNL                    | Sus<br>scrofa       |
| 1 | 1.00 | 1 | 1 | 0.03  | 0.032  | 0.047  | 0.033  | 0.029  | t | 118148 | SQEGRTTK<br>Q                | Homo<br>sapiens     |
| 1 | 1.00 | 1 | 1 | 0     | 0.004  | 0.006  | -0.003 | 0      | t | 95086  | GMLEASE<br>GLDGWIH<br>Q      | Homo<br>sapiens     |
| 1 | 1.00 | 1 | 1 | 0.03  | 0.032  | 0.042  | 0.033  | 0.03   | t | 122497 | NGSSESRR<br>ALQDSQR          | Homo<br>sapiens     |
| 1 | 1.00 | 1 | 1 | -0.03 | -0.032 | -0.023 | -0.033 | -0.032 | t | 77843  | AYSPTGLV<br>WHPG             | Mus<br>musculu<br>s |
| 1 | 1.00 | 1 | 1 | 0.04  | 0.042  | 0.041  | 0.043  | 0.042  | t | 1470   | AGDLESSV<br>DDPRSEED<br>KRFE | Homo<br>sapiens     |
| 1 | 1.00 | 1 | 1 | 0     | 0      | 0      | -0.004 | 0.001  | t | 119274 | MNRWAL<br>GNLACDL<br>W       | Homo<br>sapiens     |
| 1 | 1.00 | 1 | 1 | -0.04 | -0.042 | -0.035 | -0.041 | -0.04  | t | 7492   | DAEFRHDS<br>GYEVHHQ<br>KL    | Mus<br>musculu<br>s |
| 1 | 1.00 | 1 | 1 | -0.01 | -0.01  | -0.01  | -0.01  | -0.008 | t | 128079 | PSPDITSTT<br>KTRNFDLV<br>NCN | Mus<br>musculu<br>s |
| 1 | 1.00 | 1 | 1 | 0.02  | 0.018  | 0.019  | 0.023  | 0.025  | t | 106690 | NSDHFLQP<br>DPPL             | Mus<br>musculu<br>s |
| 1 | 1.00 | 1 | 1 | 0.02  | 0.024  | 0.047  | 0.021  | 0.02   | t | 30151  | KDGEGA                       | Homo<br>sapiens     |

|   |      |   |   |       |        |        |        |        |   |        |                              |                                  |
|---|------|---|---|-------|--------|--------|--------|--------|---|--------|------------------------------|----------------------------------|
| 1 | 1.00 | 1 | 1 | -0.03 | -0.03  | -0.023 | -0.03  | -0.028 | t | 133705 | SSKTRSGF<br>VHLVGPY          | Mus<br>musculu<br>s              |
| 1 | 1.00 | 1 | 1 | 0.03  | 0.028  | 0.037  | 0.031  | 0.033  | t | 131050 | RRAEITHP<br>GMMLASG          | Mus<br>musculu<br>s              |
| 1 | 1.00 | 1 | 1 | -0.01 | -0.012 | -0.011 | -0.017 | -0.01  | t | 97852  | ADEWGPL<br>RTVRKKAE          | Sus<br>scrofa                    |
| 1 | 1.00 | 1 | 1 | -0.02 | -0.013 | -0.013 | -0.027 | -0.02  | t | 136138 | APYDTPW<br>PSPSL             | Gallus<br>gallus                 |
| 1 | 1.00 | 1 | 1 | -0.07 | -0.073 | -0.075 | -0.07  | -0.067 | t | 117173 | TYFSKNYQ<br>DYEY             | Oryctola<br>gus<br>cuniculu<br>s |
| 1 | 1.00 | 1 | 1 | -0.07 | -0.068 | -0.058 | -0.069 | -0.07  | t | 62065  | SVCGPVYC<br>FT               | Homo<br>sapiens                  |
| 1 | 1.00 | 1 | 1 | 0     | 0.002  | -0.007 | -0.001 | 0.003  | t | 130600 | RRLPKGVK<br>HLKDFPILP<br>GEI | Homo<br>sapiens                  |
| 1 | 1.00 | 1 | 1 | 0     | 0.003  | 0.015  | 0      | 0      | t | 127983 | FTNFKFKIR<br>KITNFDRV<br>N   | Mus<br>musculu<br>s              |
| 1 | 1.00 | 1 | 1 | 0     | 0      | 0.015  | 0      | 0      | t | 127983 | FTNFKFKIR<br>KITNFDRV<br>N   | Mus<br>musculu<br>s              |
| 1 | 1.00 | 1 | 1 | -0.02 | -0.017 | -0.023 | -0.02  | -0.018 | t | 95366  | ETDNGPV<br>HVHAEFSG<br>LKAGK | Mus<br>musculu<br>s              |
| 1 | 1.00 | 1 | 1 | 0.01  | 0.01   | 0.013  | 0.01   | 0.012  | t | 481    | AAVDSSKA<br>ALTSKLDA<br>AYKL | Mus<br>musculu<br>s              |
| 1 | 1.00 | 1 | 1 | 0     | 0.006  | 0.007  | 0      | 0.001  | t | 2720   | ALLNPSRV<br>YTFFSSDY<br>VKK  | Equus<br>caballus                |
| 1 | 1.00 | 1 | 1 | 0.03  | 0.028  | 0.045  | 0.029  | 0.031  | t | 9520   | DNNQTSP                      | Mus<br>musculu<br>s              |
| 1 | 1.00 | 1 | 1 | -0.02 | -0.016 | -0.028 | -0.02  | -0.019 | t | 141056 | MSDGAVQ<br>PDGGQPA<br>VRNER  | Cavia<br>porcellu<br>s           |

|   |      |   |   |       |        |        |        |       |   |        |                              |                                  |
|---|------|---|---|-------|--------|--------|--------|-------|---|--------|------------------------------|----------------------------------|
| 1 | 1.00 | 1 | 1 | 0     | -0.004 | 0      | -0.007 | 0     | t | 117531 | IELKNGTQ<br>VHGTITGV<br>DVS  | Oryctola<br>gus<br>cuniculu<br>s |
| 1 | 1.00 | 1 | 1 | -0.02 | -0.02  | -0.017 | -0.016 | -0.02 | t | 133263 | NSSPEYPR<br>KEFASST<br>RGRS  | Homo<br>sapiens                  |
| 1 | 1.00 | 1 | 1 | 0     | -0.004 | 0.009  | 0      | 0.001 | t | 113534 | IDVDVSKP<br>DLTAALRD<br>VRQQ | Mus<br>musculu<br>s              |
| 1 | 1.00 | 1 | 1 | 0     | -0.004 | 0.009  | 0      | 0.001 | t | 113534 | IDVDVSKP<br>DLTAALRD<br>VRQQ | Mus<br>musculu<br>s              |
| 1 | 1.00 | 1 | 1 | -0.03 | -0.03  | -0.029 | -0.03  | -0.03 | t | 69203  | VKEAIDRR<br>LHFKVEVK<br>PASF | Homo<br>sapiens                  |
| 1 | 1.00 | 1 | 1 | 0     | 0      | 0      | 0      | 0.004 | t | 123282 | HACQKKLL<br>KFEALQQE<br>EGEE | Oryctola<br>gus<br>cuniculu<br>s |
| 1 | 1.00 | 1 | 1 | 0     | 0      | 0      | 0      | 0.004 | t | 125209 | QFQIHGPR                     | Mus<br>musculu<br>s              |
| 1 | 1.00 | 1 | 1 | 0     | 0      | 0      | 0      | 0.004 | t | 122915 | THKANPSP<br>EPNMHEC          | Oryctola<br>gus<br>cuniculu<br>s |
| 1 | 1.00 | 1 | 1 | 0     | 0      | 0      | 0      | 0.004 | t | 122562 | RRQPHVV<br>SQW               | Mus<br>musculu<br>s              |
| 1 | 1.00 | 1 | 1 | 0     | 0      | 0      | 0      | 0.004 | t | 127857 | TDVRYKD<br>DMYHFFC<br>PAIQAQ | Mus<br>musculu<br>s              |
| 1 | 1.00 | 1 | 1 | 0     | 0      | 0      | 0      | 0.004 | t | 127856 | TDVRYKD                      | Mus<br>musculu<br>s              |
| 1 | 1.00 | 1 | 1 | 0     | -0.002 | 0      | 0      | 0.004 | t | 12375  | EHWSYGL<br>RPG               | Mus<br>musculu<br>s              |
| 1 | 1.00 | 1 | 1 | 0     | -0.005 | 0.017  | 0.003  | 0.002 | t | 157810 | QRELKMV<br>VAQS              | Canis<br>lupus                   |
| 1 | 1.00 | 1 | 1 | 0.01  | 0.01   | 0.01   | 0.01   | 0.014 | t | 143673 | DRANLGT<br>L RGY             | Mus<br>musculu<br>s              |
| 1 | 1.00 | 1 | 1 | 0.03  | 0.028  | 0.039  | 0.027  | 0.03  | t | 110433 | TGGKPGIA<br>GFKGEQG<br>PKGEP | Mus<br>musculu<br>s              |

|   |      |   |   |       |        |        |        |        |   |        |                              |                                  |
|---|------|---|---|-------|--------|--------|--------|--------|---|--------|------------------------------|----------------------------------|
| 1 | 1.00 | 1 | 1 | 0     | 0.002  | 0.016  | 0.007  | 0      | t | 98443  | SEAETRGIT<br>GYNPLA          | Homo<br>sapiens                  |
| 1 | 1.00 | 1 | 1 | 0     | 0.004  | 0.016  | 0.007  | 0      | t | 98443  | SEAETRGIT<br>GYNPLA          | Homo<br>sapiens                  |
| 1 | 1.00 | 1 | 1 | -0.02 | -0.02  | -0.014 | -0.02  | -0.019 | t | 49498  | PSRSLPLPP<br>LLSPPRFH<br>PPS | Homo<br>sapiens                  |
| 1 | 1.00 | 1 | 1 | 0.03  | 0.034  | 0.046  | 0.031  | 0.032  | t | 67557  | VAEAEGG<br>T                 | Homo<br>sapiens                  |
| 1 | 1.00 | 1 | 1 | -0.01 | -0.014 | 0.015  | -0.007 | -0.012 | t | 38437  | LPDSEPTK<br>TNGKCKS          | Oryctola<br>gus<br>cuniculu<br>s |
| 1 | 1.00 | 1 | 1 | -0.04 | -0.04  | -0.04  | -0.04  | -0.04  | t | 110434 | TKYPLLKLL<br>GSTWPTT<br>PPRP | Homo<br>sapiens                  |
| 1 | 1.00 | 1 | 1 | -0.02 | -0.022 | -0.013 | -0.02  | -0.022 | t | 19713  | GGEGERGG<br>KGGRGAA<br>K     | Oryctola<br>gus<br>cuniculu<br>s |
| 1 | 1.00 | 1 | 1 | 0     | 0      | 0      | -0.007 | 0.001  | t | 119823 | EDDDMGF<br>GLFD              | Homo<br>sapiens                  |
| 1 | 1.00 | 1 | 1 | 0     | 0      | 0      | -0.007 | 0.001  | t | 118127 | SDDDMGF<br>GLFD              | Homo<br>sapiens                  |
| 1 | 1.00 | 1 | 1 | 0     | 0      | 0      | -0.007 | 0.001  | t | 116757 | KFDVPCG<br>GRDCSGG<br>CQCY   | Homo<br>sapiens                  |
| 1 | 1.00 | 1 | 1 | 0     | 0      | 0      | -0.007 | 0.001  | t | 41571  | MGFGLFD                      | Homo<br>sapiens                  |
| 1 | 1.00 | 1 | 1 | 0     | 0      | 0      | -0.007 | 0.001  | t | 11571  | EEEDDDM<br>GFGFLFD           | Homo<br>sapiens                  |
| 1 | 1.00 | 1 | 1 | 0     | 0      | 0      | -0.007 | 0.001  | t | 11872  | EESDDDM<br>GFGFLFD           | Homo<br>sapiens                  |
| 1 | 1.00 | 1 | 1 | 0     | 0      | 0      | -0.007 | 0.001  | t | 11872  | EESDDDM<br>GFGFLFD           | Homo<br>sapiens                  |
| 1 | 1.00 | 1 | 1 | 0     | 0      | 0      | -0.007 | 0.001  | t | 7756   | DDDMGFG<br>LFD               | Homo<br>sapiens                  |

|   |      |   |   |       |        |        |        |        |   |        |                              |              |
|---|------|---|---|-------|--------|--------|--------|--------|---|--------|------------------------------|--------------|
| 1 | 1.00 | 1 | 1 | -0.02 | -0.018 | -0.003 | -0.019 | -0.02  | t | 63082  | TCKKNM                       | Homo sapiens |
| 1 | 1.00 | 1 | 1 | 0.02  | 0.022  | 0.027  | 0.021  | 0.021  | t | 68808  | VGTTDRSG<br>APTY             | Homo sapiens |
| 1 | 1.00 | 1 | 1 | 0     | -0.002 | 0.011  | -0.001 | 0      | t | 11417  | EDPQYHEE<br>WVTAAVE<br>RTIPV | Mus musculus |
| 1 | 1.00 | 1 | 1 | 0.01  | 0.01   | 0.008  | -0.001 | 0.01   | t | 118276 | AVEEGIVL<br>GGGCA            | Homo sapiens |
| 1 | 1.00 | 1 | 1 | -0.02 | -0.017 | -0.018 | -0.02  | -0.02  | t | 40579  | LVSFGVWI<br>RTPPAYRP<br>PN   | Mus musculus |
| 1 | 1.00 | 1 | 1 | 0     | 0      | 0.01   | 0      | 0      | t | 36595  | LILDSSSLH<br>GWR             | Mus musculus |
| 1 | 1.00 | 1 | 1 | -0.02 | -0.02  | -0.013 | -0.02  | -0.019 | t | 125185 | NSSSSQFQ<br>IHG              | Mus musculus |
| 1 | 1.00 | 1 | 1 | 0.01  | 0.01   | 0.003  | 0.01   | 0.013  | t | 124730 | SMDRIEKD<br>RLQGMAP<br>AA    | Homo sapiens |
| 1 | 1.00 | 1 | 1 | 0.02  | 0.022  | 0.02   | 0.023  | 0.023  | t | 130623 | TSDVEVNE<br>KKERVTEA         | Homo sapiens |
| 1 | 1.00 | 1 | 1 | -0.01 | -0.006 | -0.001 | -0.01  | -0.01  | t | 89966  | VGAEYDFS<br>KRTS             | Homo sapiens |
| 1 | 1.00 | 1 | 1 | -0.01 | -0.008 | -0.001 | -0.01  | -0.01  | t | 89966  | VGAEYDFS<br>KRTS             | Homo sapiens |
| 1 | 1.00 | 1 | 1 | 0.02  | 0.018  | 0.015  | 0.019  | 0.024  | t | 133545 | DRGDQST<br>DYGIFQIN<br>SR    | Mus musculus |
| 1 | 1.00 | 1 | 1 | -0.04 | -0.036 | -0.028 | -0.043 | -0.039 | t | 38325  | LNRADIL                      | Homo sapiens |
| 1 | 1.00 | 1 | 1 | -0.01 | -0.01  | 0.003  | -0.013 | -0.012 | t | 43171  | NAILGPR<br>WNLNA             | Homo sapiens |
| 1 | 1.00 | 1 | 1 | -0.02 | -0.02  | -0.013 | -0.02  | -0.02  | t | 94738  | WAICKRIP<br>NKKP             | Mus musculus |

|   |      |   |   |       |        |        |        |        |   |        |                              |                                  |
|---|------|---|---|-------|--------|--------|--------|--------|---|--------|------------------------------|----------------------------------|
| 1 | 1.00 | 1 | 1 | -0.02 | -0.023 | -0.009 | -0.02  | -0.019 | t | 32072  | KLPDHVRT<br>KG               | Oryctola<br>gus<br>cuniculu<br>s |
| 1 | 1.00 | 1 | 1 | -0.02 | -0.022 | -0.009 | -0.021 | -0.02  | t | 110587 | GARGLTG<br>RPGDAGP<br>Q      | Mus<br>musculu<br>s              |
| 1 | 1.00 | 1 | 1 | -0.04 | -0.04  | -0.04  | -0.04  | -0.04  | t | 58768  | SIYPGTITG<br>HRMAW           | Homo<br>sapiens                  |
| 1 | 1.00 | 1 | 1 | 0     | 0.002  | 0.004  | 0.001  | -0.001 | t | 48870  | PPPPSSPT<br>HDPPDSD<br>PQIPP | Homo<br>sapiens                  |
| 1 | 1.00 | 1 | 1 | 0     | 0      | 0.007  | -0.007 | 0      | t | 63096  | TCRNMWS<br>GT                | Homo<br>sapiens                  |
| 1 | 1.00 | 1 | 1 | -0.02 | -0.021 | -0.019 | -0.023 | -0.019 | t | 99225  | EREEDWR<br>QPREDWR<br>R      | Homo<br>sapiens                  |
| 1 | 1.00 | 1 | 1 | -0.05 | -0.05  | -0.036 | -0.05  | -0.048 | t | 108285 | ARGLTG<br>GRP                | Mus<br>musculu<br>s              |
| 1 | 1.00 | 1 | 1 | -0.04 | -0.04  | -0.04  | -0.043 | -0.04  | t | 149120 | TFTRVVTD<br>VYRPRLS          | Rattus<br>norvegic<br>us         |
| 1 | 1.00 | 1 | 1 | -0.02 | -0.022 | -0.013 | -0.027 | -0.019 | t | 142441 | LFSPWLRV<br>QNHF             | Mus<br>musculu<br>s              |
| 1 | 1.00 | 1 | 1 | 0.02  | 0.024  | 0.028  | 0.021  | 0.022  | t | 153382 | FAENKGD<br>HFSPGGG<br>GS     | Homo<br>sapiens                  |
| 1 | 1.00 | 1 | 1 | -0.01 | -0.008 | -0.015 | -0.009 | -0.004 | t | 52817  | QVWIPPL<br>NVR               | Homo<br>sapiens                  |
| 1 | 1.00 | 1 | 1 | 0     | 0.002  | 0.01   | -0.003 | 0      | t | 38937  | LQPFQPE                      | Homo<br>sapiens                  |
| 1 | 1.00 | 1 | 1 | 0     | 0.004  | 0.011  | 0.003  | -0.002 | t | 47750  | PGSPAPPP<br>PEHRGGP<br>EEFEG | Homo<br>sapiens                  |
| 1 | 1.00 | 1 | 1 | -0.03 | -0.03  | -0.021 | -0.03  | -0.03  | t | 135988 | RTALLDAA<br>GVAS             | Homo<br>sapiens                  |

|   |      |   |   |       |        |        |        |        |   |        |                             |                 |
|---|------|---|---|-------|--------|--------|--------|--------|---|--------|-----------------------------|-----------------|
| 1 | 1.00 | 1 | 1 | 0.01  | 0.012  | 0.017  | 0.007  | 0.011  | t | 9915   | DQVDVKD<br>CANHEIKK         | Homo sapiens    |
| 1 | 1.00 | 1 | 1 | 0     | 0      | 0.012  | -0.003 | -0.002 | t | 60632  | SRDEKERE<br>RFSI            | Homo sapiens    |
| 1 | 1.00 | 1 | 1 | 0.01  | 0.017  | 0.012  | 0.009  | 0.01   | t | 48846  | PPNSGGV<br>NTIQLYQT<br>KTAQ | Gallus gallus   |
| 1 | 1.00 | 1 | 1 | 0.03  | 0.028  | 0.027  | 0.029  | 0.031  | t | 55389  | RQAESSEA<br>MAAWSER<br>AGEA | Mus musculus    |
| 1 | 1.00 | 1 | 1 | -0.01 | -0.008 | -0.001 | -0.009 | -0.008 | t | 11441  | EDSITIPYQ<br>GSGKGV         | Homo sapiens    |
| 1 | 1.00 | 1 | 1 | 0.01  | 0.013  | 0.02   | 0.01   | 0.01   | t | 1578   | AGKNQSQ<br>KKKK             | Mus musculus    |
| 1 | 1.00 | 1 | 1 | 0.07  | 0.07   | 0.094  | 0.073  | 0.07   | t | 38490  | LPGADT                      | Homo sapiens    |
| 1 | 1.00 | 1 | 1 | 0     | 0      | 0.011  | -0.003 | 0      | t | 24315  | HLVEKGY                     | Homo sapiens    |
| 1 | 1.00 | 1 | 1 | 0     | 0      | 0      | 0      | 0      | t | 134141 | LLMPPKYH<br>PKEPYVTR        | Homo sapiens    |
| 1 | 1.00 | 1 | 1 | 0     | -0.002 | 0      | 0      | 0      | t | 134141 | LLMPPKYH<br>PKEPYVTR        | Mus musculus    |
| 1 | 1.00 | 1 | 1 | -0.06 | -0.046 | -0.056 | -0.06  | -0.058 | t | 50164  | PYRLWHY<br>PCTIN            | Pan troglodytes |
| 1 | 1.00 | 1 | 1 | 0     | 0      | 0      | 0      | 0.004  | t | 96457  | KGTVNLT<br>WSR              | Mus musculus    |
| 1 | 1.00 | 1 | 1 | -0.02 | -0.018 | -0.007 | -0.023 | -0.022 | t | 107035 | YTTRRWLV<br>SM              | Homo sapiens    |

|   |      |   |   |       |        |        |        |        |   |        |                              |                                  |
|---|------|---|---|-------|--------|--------|--------|--------|---|--------|------------------------------|----------------------------------|
| 1 | 1.00 | 1 | 1 | 0.05  | 0.046  | 0.063  | 0.049  | 0.05   | t | 141859 | ASSNSAQ<br>GSDESLIA          | Oryctola<br>gus<br>cuniculu<br>s |
| 1 | 1.00 | 1 | 1 | -0.03 | -0.03  | -0.016 | -0.027 | -0.028 | t | 848    | AEDAAEIS<br>VP AEIL          | Homo<br>sapiens                  |
| 1 | 1.00 | 1 | 1 | 0.01  | 0.008  | 0.007  | 0.009  | 0.011  | t | 55389  | RQAESSEA<br>MAAWSER<br>AGEA  | Mus<br>musculu<br>s              |
| 1 | 1.00 | 1 | 1 | 0.02  | 0.016  | 0.035  | 0.023  | 0.02   | t | 111341 | GGGTPRR<br>PGKEIEAY          | Oryctola<br>gus<br>cuniculu<br>s |
| 1 | 1.00 | 1 | 1 | -0.05 | -0.048 | -0.04  | -0.053 | -0.052 | t | 65102  | TLTSHFG<br>KC                | Homo<br>sapiens                  |
| 1 | 1.00 | 1 | 1 | -0.01 | -0.01  | -0.012 | -0.021 | -0.01  | t | 118275 | ATVLARSI<br>AKEGF            | Homo<br>sapiens                  |
| 1 | 1.00 | 1 | 1 | 0.01  | 0.014  | 0.01   | 0.01   | 0.014  | t | 9477   | DNIHVKM<br>FKVIENND<br>KSELI | Aotus<br>nancyma<br>ae           |
| 1 | 1.00 | 1 | 1 | -0.02 | -0.02  | -0.015 | -0.02  | -0.02  | t | 19093  | GDRAAGQ<br>PAGDRAA<br>GQPA   | Mus<br>musculu<br>s              |
| 1 | 1.00 | 1 | 1 | -0.02 | -0.02  | -0.015 | -0.02  | -0.02  | t | 19093  | GDRAAGQ<br>PAGDRAA<br>GQPA   | Mus<br>musculu<br>s              |
| 1 | 1.00 | 1 | 1 | -0.04 | -0.036 | -0.027 | -0.04  | -0.038 | t | 140033 | HDFR                         | Homo<br>sapiens                  |
| 1 | 1.00 | 1 | 1 | -0.07 | -0.07  | -0.07  | -0.073 | -0.07  | t | 149107 | SLAPRFPW<br>LNPLDGW          | Rattus<br>norvegic<br>us         |
| 1 | 1.00 | 1 | 1 | -0.01 | -0.012 | -0.015 | -0.017 | -0.01  | t | 113805 | RFFSGDRG<br>APKRGSGK<br>DSHT | Mus<br>musculu<br>s              |
| 1 | 1.00 | 1 | 1 | 0.01  | 0.012  | 0.017  | 0.01   | 0.011  | t | 120696 | KLLLDYTG<br>KINPGGYT<br>CCPD | Rattus<br>norvegic<br>us         |
| 1 | 1.00 | 1 | 1 | 0     | 0      | 0      | 0      | 0.002  | t | 140459 | EHWSHD<br>MFSPGD             | Mus<br>musculu<br>s              |
| 1 | 1.00 | 1 | 1 | -0.05 | -0.048 | -0.05  | -0.05  | -0.048 | t | 65408  | TNRHNP<br>HLHHV              | Rattus<br>norvegic<br>us         |



|   |      |   |   |       |        |        |        |        |   |        |                             |                                  |
|---|------|---|---|-------|--------|--------|--------|--------|---|--------|-----------------------------|----------------------------------|
| 1 | 1.00 | 1 | 1 | -0.02 | -0.019 | -0.003 | -0.019 | -0.022 | t | 13969  | ERCKMMP<br>GMTGSAA<br>LVCPM | Myodes<br>glareolu<br>s          |
| 1 | 1.00 | 1 | 1 | -0.03 | -0.032 | -0.021 | -0.031 | -0.03  | t | 22401  | GSLAAR                      | Mus<br>musculu<br>s              |
| 1 | 1.00 | 1 | 1 | 0.05  | 0.05   | 0.074  | 0.053  | 0.05   | t | 2925   | ALTGAT                      | Homo<br>sapiens                  |
| 1 | 1.00 | 1 | 1 | 0     | 0      | 0      | 0      | 0.004  | t | 138194 | IIPKSSWS                    | Homo<br>sapiens                  |
| 1 | 1.00 | 1 | 1 | 0     | 0      | 0      | 0      | 0.004  | t | 139029 | DLQVLT                      | Mus<br>musculu<br>s              |
| 1 | 1.00 | 1 | 1 | 0     | 0      | 0      | 0      | 0.004  | t | 141963 | MVDRGW<br>G                 | Mus<br>musculu<br>s              |
| 1 | 1.00 | 1 | 1 | 0     | 0      | 0      | 0      | 0.004  | t | 144742 | PFYGYRE                     | Mus<br>musculu<br>s              |
| 1 | 1.00 | 1 | 1 | 0     | 0      | 0      | 0      | 0.004  | t | 111050 | VGPLDIVP<br>EVADPGG<br>PTLV | Oryctola<br>gus<br>cuniculu<br>s |
| 1 | 1.00 | 1 | 1 | 0     | 0      | 0      | 0      | 0.004  | t | 111051 | VGPLEVIP<br>EAVDPAG<br>SSIV | Oryctola<br>gus<br>cuniculu<br>s |
| 1 | 1.00 | 1 | 1 | 0     | 0      | 0      | 0      | 0.004  | t | 110762 | AGSSIVPLE<br>EYPAEIP        | Oryctola<br>gus<br>cuniculu<br>s |
| 1 | 1.00 | 1 | 1 | 0     | 0      | 0      | 0      | 0.004  | t | 110862 | GGPTLVSL<br>HELPAETP        | Oryctola<br>gus<br>cuniculu<br>s |
| 1 | 1.00 | 1 | 1 | 0     | 0      | 0      | 0      | 0.004  | t | 75723  | YSEMKRAS<br>LTPVLKEK<br>PYY | Aotus<br>nancyma<br>ae           |
| 1 | 1.00 | 1 | 1 | 0     | 0      | 0      | 0      | 0.004  | t | 48093  | PKKPNE<br>LKPNE             | Oryctola<br>gus<br>cuniculu<br>s |

|   |      |   |   |   |   |   |   |       |   |       |                              |                        |
|---|------|---|---|---|---|---|---|-------|---|-------|------------------------------|------------------------|
| 1 | 1.00 | 1 | 1 | 0 | 0 | 0 | 0 | 0.004 | t | 56771 | SAFDDNLT<br>AANAMGL<br>ILNKR | Aotus<br>nancyma<br>ae |
| 1 | 1.00 | 1 | 1 | 0 | 0 | 0 | 0 | 0.004 | t | 42014 | MLNISML<br>QTVMMM<br>TPQK    | Aotus<br>nancyma<br>ae |
| 1 | 1.00 | 1 | 1 | 0 | 0 | 0 | 0 | 0.004 | t | 41019 | MADPNRF<br>RG                | Mus<br>musculu<br>s    |
| 1 | 1.00 | 1 | 1 | 0 | 0 | 0 | 0 | 0.004 | t | 58975 | SKYSNTFNI<br>NAYNMVI<br>RRSM | Aotus<br>nancyma<br>ae |
| 1 | 1.00 | 1 | 1 | 0 | 0 | 0 | 0 | 0.004 | t | 50932 | QGPGAPQ<br>GPGAPQG<br>PGAPQG | Mus<br>musculu<br>s    |
| 1 | 1.00 | 1 | 1 | 0 | 0 | 0 | 0 | 0.004 | t | 50930 | QGPGAPQ<br>GPGAP             | Mus<br>musculu<br>s    |
| 1 | 1.00 | 1 | 1 | 0 | 0 | 0 | 0 | 0.004 | t | 50931 | QGPGAPQ<br>GPGAPQG<br>PGAP   | Mus<br>musculu<br>s    |
| 1 | 1.00 | 1 | 1 | 0 | 0 | 0 | 0 | 0.004 | t | 42761 | MTDVIRYR<br>YSNNYEAS<br>DHIS | Aotus<br>nancyma<br>ae |
| 1 | 1.00 | 1 | 1 | 0 | 0 | 0 | 0 | 0.004 | t | 51125 | QIPYNLKIR<br>AGGLDGG<br>KKLV | Aotus<br>nancyma<br>ae |
| 1 | 1.00 | 1 | 1 | 0 | 0 | 0 | 0 | 0.004 | t | 48858 | PPPPNPN<br>DPPPPNP<br>ND     | Mus<br>musculu<br>s    |
| 1 | 1.00 | 1 | 1 | 0 | 0 | 0 | 0 | 0.004 | t | 41727 | MIKAAFLP<br>TGAFMAD<br>RYKSH | Aotus<br>nancyma<br>ae |
| 1 | 1.00 | 1 | 1 | 0 | 0 | 0 | 0 | 0.004 | t | 42758 | MTDVIRYR<br>YSNNYEAI<br>DHIS | Aotus<br>nancyma<br>ae |
| 1 | 1.00 | 1 | 1 | 0 | 0 | 0 | 0 | 0.004 | t | 58975 | SKYSNTFNI<br>NAYNMVI<br>RRSM | Aotus                  |
| 1 | 1.00 | 1 | 1 | 0 | 0 | 0 | 0 | 0.004 | t | 42776 | MTDVNR<br>WRYVNNY<br>ESNPHKS | Aotus<br>nancyma<br>ae |
| 1 | 1.00 | 1 | 1 | 0 | 0 | 0 | 0 | 0.004 | t | 41175 | MAYGSDD<br>NDDKNKS<br>LDHKHN | Aotus<br>nancyma<br>ae |
| 1 | 1.00 | 1 | 1 | 0 | 0 | 0 | 0 | 0.004 | t | 30636 | KETNNAIS<br>FMSNAGS<br>LEKK  | Aotus<br>nancyma<br>ae |
| 1 | 1.00 | 1 | 1 | 0 | 0 | 0 | 0 | 0.004 | t | 14819 | EVLYLLDLA<br>GVYRSLKK<br>QLE | Aotus<br>nancyma<br>ae |

|   |      |   |   |       |        |        |       |        |   |        |                              |                          |
|---|------|---|---|-------|--------|--------|-------|--------|---|--------|------------------------------|--------------------------|
| 1 | 1.00 | 1 | 1 | 0     | 0      | 0      | 0     | 0.004  | t | 17210  | FNNIPSRY<br>NLYDKML<br>PLDD  | Aotus<br>nancyma<br>ae   |
| 1 | 1.00 | 1 | 1 | 0     | 0      | 0      | 0     | 0.004  | t | 23465  | GYSLFQKE<br>MKTLNEG<br>TSGTA | Aotus<br>nancyma<br>ae   |
| 1 | 1.00 | 1 | 1 | 0     | 0      | 0      | 0     | 0.004  | t | 32370  | KMNMHLE<br>NVPWIMN<br>KQNLFK | Aotus<br>nancyma<br>ae   |
| 1 | 1.00 | 1 | 1 | 0     | 0      | 0      | 0     | 0.004  | t | 9757   | DPRVRGLY<br>FPAGGSSS<br>GTV  | Pan<br>troglody<br>tes   |
| 1 | 1.00 | 1 | 1 | 0     | 0      | 0      | 0     | 0.004  | t | 9516   | DNNLVSG<br>P                 | Mus<br>musculu<br>s      |
| 1 | 1.00 | 1 | 1 | 0     | 0      | 0      | 0     | 0.004  | t | 9516   | DNNLVSG<br>P                 | Mus<br>musculu<br>s      |
| 1 | 1.00 | 1 | 1 | 0     | 0      | 0      | 0     | 0.004  | t | 7503   | DAEVAGT<br>QYFHPSGK<br>SPVFG | Aotus<br>nancyma<br>ae   |
| 1 | 1.00 | 1 | 1 | 0     | 0      | 0      | 0     | 0.004  | t | 9722   | DPPPPNP<br>NDPPPPN<br>PN     | Mus<br>musculu<br>s      |
| 1 | 1.00 | 1 | 1 | 0     | 0      | 0      | 0     | 0.004  | t | 9722   | DPPPPNP<br>NDPPPPN<br>PN     | Mus<br>musculu<br>s      |
| 1 | 1.00 | 1 | 1 | 0     | 0      | 0      | 0     | 0.004  | t | 9722   | DPPPPNP<br>NDPPPPN<br>PN     | Mus<br>musculu<br>s      |
| 1 | 1.00 | 1 | 1 | -0.01 | -0.008 | -0.001 | -0.01 | -0.01  | t | 37759  | LLRTAPGP                     | Homo<br>sapiens          |
| 1 | 1.00 | 1 | 1 | -0.01 | -0.006 | -0.001 | -0.01 | -0.01  | t | 37759  | LLRTAPGP                     | Homo<br>sapiens          |
| 1 | 1.00 | 1 | 1 | -0.04 | -0.04  | -0.04  | -0.04 | -0.038 | t | 117829 | EKVKRTKD<br>ELEVIH           | Homo<br>sapiens          |
| 1 | 1.00 | 1 | 1 | -0.02 | -0.02  | -0.018 | -0.02 | -0.019 | t | 120677 | KHPEVKSA<br>IEGIKYI          | Rattus<br>norvegic<br>us |
| 1 | 1.00 | 1 | 1 | 0.05  | 0.05   | 0.063  | 0.05  | 0.05   | t | 8916   | DKKTEETT<br>LLEDRL           | Mus<br>musculu<br>s      |

|   |      |   |   |       |        |        |        |        |   |        |                              |                     |
|---|------|---|---|-------|--------|--------|--------|--------|---|--------|------------------------------|---------------------|
| 1 | 1.00 | 1 | 1 | 0.02  | 0.024  | 0.026  | 0.017  | 0.024  | t | 49535  | PSTPGSRQ<br>NM               | Homo<br>sapiens     |
| 1 | 1.00 | 1 | 1 | -0.02 | -0.02  | -0.015 | -0.023 | -0.02  | t | 66947  | TVARATM<br>QFTGLFTR<br>G     | Homo<br>sapiens     |
| 1 | 1.00 | 1 | 1 | -0.05 | -0.05  | -0.042 | -0.051 | -0.05  | t | 68632  | VGATPERP<br>RL               | Homo<br>sapiens     |
| 1 | 1.00 | 1 | 1 | 0.01  | 0.01   | 0.027  | 0.012  | 0.01   | t | 53689  | RFDKGYIS<br>GY               | Homo<br>sapiens     |
| 1 | 1.00 | 1 | 1 | 0.04  | 0.04   | 0.04   | 0.043  | 0.043  | t | 6650   | CMENNSG<br>WKVSLNY<br>GEIIW  | Homo<br>sapiens     |
| 1 | 1.00 | 1 | 1 | 0.04  | 0.047  | 0.04   | 0.043  | 0.043  | t | 6650   | CMENNSG<br>WKVSLNY<br>GEIIW  | Gallus<br>gallus    |
| 1 | 1.00 | 1 | 1 | -0.04 | -0.038 | -0.038 | -0.039 | -0.04  | t | 65971  | TQWQVLP<br>CSFTTLPAL<br>STGL | Homo<br>sapiens     |
| 1 | 1.00 | 1 | 1 | -0.06 | -0.06  | -0.058 | -0.06  | -0.058 | t | 79890  | KRPGSSP<br>MEVML             | Mus<br>musculu<br>s |
| 1 | 1.00 | 1 | 1 | -0.06 | -0.06  | -0.058 | -0.06  | -0.058 | t | 79890  | KRPGSSP<br>MEVML             | Mus<br>musculu<br>s |
| 1 | 1.00 | 1 | 1 | 0     | 0      | 0      | -0.007 | 0.001  | t | 38810  | LQAMRKY<br>SPFRNGY<br>MEPTLG | Homo<br>sapiens     |
| 1 | 1.00 | 1 | 1 | 0     | 0      | 0      | -0.007 | 0.001  | t | 47984  | PISLLFNEK<br>EADDNDH<br>EPQI | Homo<br>sapiens     |
| 1 | 1.00 | 1 | 1 | -0.03 | -0.027 | -0.014 | -0.03  | -0.03  | t | 46757  | PACYCYGV<br>PDHIKVVW         | Equus<br>caballus   |
| 1 | 1.00 | 1 | 1 | -0.02 | -0.02  | -0.008 | -0.02  | -0.02  | t | 105079 | AFNHFGK<br>RLIQR             | Homo<br>sapiens     |

|   |      |   |   |       |        |        |        |        |   |        |                      |                       |
|---|------|---|---|-------|--------|--------|--------|--------|---|--------|----------------------|-----------------------|
| 1 | 1.00 | 1 | 1 | 0.02  | 0.02   | 0.022  | 0.018  | 0.02   | t | 19511  | GFDEMEECASHLPYIEQGMQ | Homo sapiens          |
| 1 | 1.00 | 1 | 1 | 0.02  | 0.02   | 0.02   | 0.02   | 0.02   | t | 79449  | VCPTSEILAGATCR       | Mus musculus          |
| 1 | 1.00 | 1 | 1 | -0.03 | -0.03  | -0.025 | -0.03  | -0.03  | t | 79009  | KTWCDAWCG            | Mus musculus          |
| 1 | 1.00 | 1 | 1 | 0.01  | 0.008  | 0.017  | 0.007  | 0.011  | t | 135906 | DALAVDQMGRFG         | Mus musculus          |
| 1 | 1.00 | 1 | 1 | -0.04 | -0.04  | -0.04  | -0.043 | -0.04  | t | 149042 | FLHTRLLFRIVSYSG      | Rattus norvegicus     |
| 1 | 1.00 | 1 | 1 | 0     | 0.003  | 0.007  | 0      | 0.001  | t | 121064 | WKHWVYYTCCPDTPYLDITY | Mus musculus          |
| 1 | 1.00 | 1 | 1 | -0.01 | 0.001  | -0.011 | -0.01  | -0.01  | t | 12122  | EGAGGKLGKQTDIAGTGLT  | Oryctolagus cuniculus |
| 1 | 1.00 | 1 | 1 | 0     | 0      | 0      | 0      | -0.001 | t | 129881 | SETAAPAAPAPAEK       | Homo sapiens          |
| 1 | 1.00 | 1 | 1 | -0.01 | -0.006 | -0.003 | -0.009 | -0.01  | t | 48168  | PKVQSLVSDFFGGKELNCSI | Homo sapiens          |
| 1 | 1.00 | 1 | 1 | -0.01 | -0.011 | -0.003 | -0.009 | -0.01  | t | 48168  | PKVQSLVSDFFGGKELNCSI | Canis lupus           |
| 1 | 1.00 | 1 | 1 | -0.01 | -0.01  | -0.01  | -0.014 | -0.01  | t | 109767 | QPLKEQPALNDSRYCL     | Homo sapiens          |
| 1 | 1.00 | 1 | 1 | -0.05 | -0.052 | -0.043 | -0.048 | -0.048 | t | 106442 | GDLKRTTGGGC          | Mus musculus          |
| 1 | 1.00 | 1 | 1 | -0.01 | -0.01  | -0.008 | -0.013 | -0.009 | t | 70305  | VPGIDPNAHYMKC        | Homo sapiens          |
| 1 | 1.00 | 1 | 1 | 0.05  | 0.05   | 0.049  | 0.05   | 0.051  | t | 156546 | STEDSGLTGKVDSSS      | Mus musculus          |

|   |      |   |   |       |        |        |        |        |   |        |                              |                          |
|---|------|---|---|-------|--------|--------|--------|--------|---|--------|------------------------------|--------------------------|
| 1 | 1.00 | 1 | 1 | -0.03 | -0.027 | -0.026 | -0.03  | -0.03  | t | 17572  | FRDLTWCI<br>NPPERIK          | Mus<br>musculu<br>s      |
| 1 | 1.00 | 1 | 1 | -0.03 | -0.026 | -0.021 | -0.029 | -0.03  | t | 37304  | LLFVGVL<br>FLLPAR            | Homo<br>sapiens          |
| 1 | 1.00 | 1 | 1 | -0.02 | -0.015 | -0.008 | -0.02  | -0.022 | t | 89849  | VAFNRFH<br>VGTHPAP<br>GKTNLY | Aotus                    |
| 1 | 1.00 | 1 | 1 | 0.04  | 0.04   | 0.043  | 0.04   | 0.041  | t | 98867  | LEENAGGE<br>QEERGQR          | Homo<br>sapiens          |
| 1 | 1.00 | 1 | 1 | -0.04 | -0.038 | -0.024 | -0.04  | -0.04  | t | 113989 | VFILGPLRL<br>LG              | Rattus<br>norvegic<br>us |
| 1 | 1.00 | 1 | 1 | -0.04 | -0.044 | -0.024 | -0.04  | -0.04  | t | 113989 | VFILGPLRL<br>LG              | Rattus<br>norvegic<br>us |
| 1 | 1.00 | 1 | 1 | 0.02  | 0.018  | 0.022  | 0.013  | 0.02   | t | 132080 | SRDDDME<br>TKRQEN            | Mus<br>musculu<br>s      |
| 1 | 1.00 | 1 | 1 | 0.01  | 0.013  | 0.012  | 0.01   | 0.012  | t | 50931  | QGPAPQ<br>GPGAPQG<br>PGAP    | Mus<br>musculu<br>s      |
| 1 | 1.00 | 1 | 1 | 0.01  | 0.008  | 0.037  | 0.013  | 0.01   | t | 58752  | SIYAAEK                      | Sus<br>scrofa            |
| 1 | 1.00 | 1 | 1 | 0     | 0.002  | 0      | 0      | 0.004  | t | 114125 | HYGSLPQK<br>SQRSQDE<br>NPV   | Rattus<br>norvegic<br>us |
| 1 | 1.00 | 1 | 1 | 0.03  | 0.03   | 0.03   | 0.03   | 0.033  | t | 143328 | DEGDTDLY<br>DYYPEE           | Mus<br>musculu<br>s      |
| 1 | 1.00 | 1 | 1 | 0.03  | 0.028  | 0.014  | 0.029  | 0.039  | t | 136062 | FGISETQA<br>EAILE            | Mus<br>musculu<br>s      |
| 1 | 1.00 | 1 | 1 | -0.02 | -0.02  | -0.008 | -0.02  | -0.02  | t | 133665 | PVLLFCFLA<br>GRCVSV          | Mus<br>musculu<br>s      |
| 1 | 1.00 | 1 | 1 | 0.03  | 0.03   | 0.029  | 0.03   | 0.03   | t | 68167  | VEEQEQE<br>QEEQEEQ<br>ELE    | Homo<br>sapiens          |
| 1 | 1.00 | 1 | 1 | 0     | -0.002 | 0.007  | -0.001 | 0.001  | t | 47986  | PISLVNLST<br>ASSAPPTR<br>VRR | Mus<br>musculu<br>s      |

|   |      |   |   |       |        |        |        |        |   |        |                              |                                   |
|---|------|---|---|-------|--------|--------|--------|--------|---|--------|------------------------------|-----------------------------------|
| 1 | 1.00 | 1 | 1 | 0     | 0.002  | -0.005 | -0.001 | 0.001  | t | 64843  | TLIDINGKT<br>KSVFFEYNI<br>R  | Homo<br>sapiens                   |
| 1 | 1.00 | 1 | 1 | -0.01 | -0.008 | 0.01   | -0.003 | -0.01  | t | 96385  | IFDNFLITN<br>D               | Homo<br>sapiens                   |
| 1 | 1.00 | 1 | 1 | -0.01 | -0.006 | 0.01   | -0.003 | -0.01  | t | 96385  | IFDNFLITN<br>D               | Homo<br>sapiens                   |
| 1 | 1.00 | 1 | 1 | 0     | 0      | 0.008  | 0      | 0.002  | t | 60023  | SPDVDLG<br>DISAINAS          | Mus<br>musculu<br>s               |
| 1 | 1.00 | 1 | 1 | 0     | 0      | 0.008  | 0      | 0.002  | t | 60023  | SPDVDLG<br>DISAINAS          | Mus<br>musculu<br>s               |
| 1 | 1.00 | 1 | 1 | 0     | 0      | 0.008  | 0      | 0.002  | t | 60023  | SPDVDLG<br>DISAINAS          | Mus<br>musculu<br>s               |
| 1 | 1.00 | 1 | 1 | -0.05 | -0.052 | -0.043 | -0.047 | -0.05  | t | 57512  | SELCIGSVC<br>TFWTRMR         | Mus<br>musculu<br>s               |
| 1 | 1.00 | 1 | 1 | 0     | -0.015 | 0      | -0.007 | -0.002 | t | 130223 | VGYKEKSK<br>FQDTHNN<br>AHYYV | Cricetulu<br>s<br>migrator<br>ius |
| 1 | 1.00 | 1 | 1 | 0.02  | 0.023  | 0.03   | 0.019  | 0.019  | t | 82528  | GAATPYSG<br>EDSPFDM<br>TLGEE | Aotus                             |
| 1 | 1.00 | 1 | 1 | 0.01  | 0.014  | 0.026  | 0.017  | 0.01   | t | 97918  | AYSNANKE<br>CQKLLQA          | Homo<br>sapiens                   |
| 1 | 1.00 | 1 | 1 | 0     | -0.003 | 0.003  | -0.001 | 0      | t | 67445  | TYRATYQD<br>FD               | Oryctola<br>gus<br>cuniculu<br>s  |
| 1 | 1.00 | 1 | 1 | 0.02  | 0.022  | 0.028  | 0.017  | 0.023  | t | 33294  | KSDNNVT                      | Homo<br>sapiens                   |
| 1 | 1.00 | 1 | 1 | 0     | 0.002  | 0      | -0.003 | 0.003  | t | 71353  | VTHESYQE<br>LVKKLEALE<br>DA  | Homo<br>sapiens                   |
| 1 | 1.00 | 1 | 1 | 0.04  | 0.041  | 0.039  | 0.037  | 0.041  | t | 72178  | VYVEELKP<br>TPEGDLAIL<br>LQK | Homo<br>sapiens                   |

|   |      |   |   |       |        |        |        |        |   |        |                              |                       |
|---|------|---|---|-------|--------|--------|--------|--------|---|--------|------------------------------|-----------------------|
| 1 | 1.00 | 1 | 1 | 0.02  | 0.023  | 0.033  | 0.02   | 0.02   | t | 105879 | IISCDEGVG                    | Mus musculus          |
| 1 | 1.00 | 1 | 1 | -0.04 | -0.04  | -0.038 | -0.04  | -0.042 | t | 25647  | IDPSFYWA<br>PCRFSHC          | Mus musculus          |
| 1 | 1.00 | 1 | 1 | -0.05 | -0.047 | -0.05  | -0.05  | -0.051 | t | 63808  | TGDPKPKK<br>NKKPKNPT<br>PPRP | Mus musculus          |
| 1 | 1.00 | 1 | 1 | 0     | -0.004 | 0      | -0.007 | 0.001  | t | 117569 | LKYYLAPKI<br>EDEEGS          | Oryctolagus cuniculus |
| 1 | 1.00 | 1 | 1 | -0.02 | -0.024 | -0.02  | -0.027 | -0.02  | t | 123615 | PPMGRGA<br>P                 | Oryctolagus cuniculus |
| 1 | 1.00 | 1 | 1 | -0.02 | -0.02  | -0.011 | -0.02  | -0.02  | t | 52689  | QVESTAGS<br>LQGQWR<br>G      | Mus musculus          |
| 1 | 1.00 | 1 | 1 | -0.02 | -0.02  | -0.011 | -0.02  | -0.02  | t | 52689  | QVESTAGS<br>LQGQWR<br>G      | Mus musculus          |
| 1 | 1.00 | 1 | 1 | -0.04 | -0.04  | -0.04  | -0.043 | -0.042 | t | 20770  | GLARTTAD<br>RQTACNC          | Homo sapiens          |
| 1 | 1.00 | 1 | 1 | -0.01 | -0.01  | -0.01  | -0.01  | -0.009 | t | 57089  | SCESPSWI<br>VQYWLRC<br>WV    | Mus musculus          |
| 1 | 1.00 | 1 | 1 | 0     | 0      | 0      | 0      | 0.004  | t | 75723  | YSEMKRAS<br>LTPVLKEK<br>PYY  | Aotus nancymae        |
| 1 | 1.00 | 1 | 1 | -0.01 | -0.01  | 0      | -0.01  | -0.009 | t | 104171 | PGSGFWS<br>FGSEDGSG<br>DPE   | Oryctolagus cuniculus |
| 1 | 1.00 | 1 | 1 | 0     | 0      | 0      | -0.003 | 0.003  | t | 39164  | LRPGPVSQ<br>PYHHWDT<br>DK    | Homo sapiens          |
| 1 | 1.00 | 1 | 1 | 0     | 0      | 0      | 0      | 0.004  | t | 133663 | PNKHQRS                      | Mus musculus          |
| 1 | 1.00 | 1 | 1 | -0.01 | -0.01  | -0.004 | -0.01  | -0.009 | t | 1367   | AFNQFGP<br>NAGQR             | Homo sapiens          |



|   |      |   |   |       |        |        |        |        |   |        |                              |                                  |
|---|------|---|---|-------|--------|--------|--------|--------|---|--------|------------------------------|----------------------------------|
| 1 | 1.00 | 1 | 1 | 0     | -0.004 | 0.008  | -0.001 | 0      | t | 50427  | QDAATPY<br>HPPATPN<br>N      | Oryctola<br>gus<br>cuniculu<br>s |
| 1 | 1.00 | 1 | 1 | -0.02 | -0.022 | -0.013 | -0.023 | -0.021 | t | 138785 | LPQNVWL<br>HGWHT             | Mus<br>musculu<br>s              |
| 1 | 1.00 | 1 | 1 | 0.03  | 0.032  | 0.031  | 0.033  | 0.033  | t | 118776 | EADYFEYH<br>QEGGPDG<br>EPDVP | Homo<br>sapiens                  |
| 1 | 1.00 | 1 | 1 | 0.03  | 0.03   | 0.035  | 0.023  | 0.031  | t | 140701 | LNEDLRS<br>WTA               | Mus<br>musculu<br>s              |
| 1 | 1.00 | 1 | 1 | -0.04 | -0.032 | -0.034 | -0.04  | -0.04  | t | 61516  | STAIHADQ<br>LTPAWRIY         | Gallus<br>gallus                 |
| 1 | 1.00 | 1 | 1 | -0.04 | -0.032 | -0.034 | -0.04  | -0.04  | t | 61516  | STAIHADQ<br>LTPAWRIY         | Gallus<br>gallus                 |
| 1 | 1.00 | 1 | 1 | 0     | -0.004 | -0.004 | -0.007 | 0.001  | t | 144648 | GDSKLLTIT<br>QSEPA           | Oryctola<br>gus<br>cuniculu<br>s |
| 1 | 1.00 | 1 | 1 | -0.01 | -0.01  | -0.001 | -0.014 | -0.01  | t | 135905 | CLFDRRLC<br>SHLE             | Homo<br>sapiens                  |
| 1 | 1.00 | 1 | 1 | 0     | 0.002  | 0.016  | -0.003 | -0.002 | t | 28349  | IRNVNNLA<br>RT               | Homo<br>sapiens                  |
| 1 | 1.00 | 1 | 1 | -0.04 | -0.03  | -0.04  | -0.043 | -0.041 | t | 134268 | WRRLLGRP<br>VFPTA            | Rattus<br>rattus                 |
| 1 | 1.00 | 1 | 1 | -0.03 | -0.026 | -0.027 | -0.03  | -0.03  | t | 100319 | NASSELHL<br>LGFGINAE<br>NNHR | Homo<br>sapiens                  |
| 1 | 1.00 | 1 | 1 | -0.02 | -0.02  | -0.011 | -0.014 | -0.018 | t | 75203  | YNPLYGSR<br>LGVPDTLG<br>GDPK | Homo<br>sapiens                  |
| 1 | 1.00 | 1 | 1 | 0.03  | 0.03   | 0.028  | 0.027  | 0.031  | t | 73893  | YFSIFNTEL<br>SQSNIEER<br>YK  | Homo<br>sapiens                  |
| 1 | 1.00 | 1 | 1 | 0.03  | 0.031  | 0.028  | 0.027  | 0.031  | t | 73893  | YFSIFNTEL<br>SQSNIEER<br>YK  | Equus<br>caballus                |

|   |      |   |   |       |        |        |        |        |   |        |                              |                                  |
|---|------|---|---|-------|--------|--------|--------|--------|---|--------|------------------------------|----------------------------------|
| 1 | 1.00 | 1 | 1 | 0.01  | 0.007  | 0.013  | 0.01   | 0.011  | t | 78353  | CPSVKNGI<br>EINCCTTD<br>RCNN | Oryctola<br>gus<br>cuniculu<br>s |
| 1 | 1.00 | 1 | 1 | 0.02  | 0.018  | 0.02   | 0.013  | 0.022  | t | 133178 | KNFVKPNE<br>TKTYFWK          | Mus<br>musculu<br>s              |
| 1 | 1.00 | 1 | 1 | 0.04  | 0.038  | 0.042  | 0.033  | 0.04   | t | 132727 | VTNEVHT<br>WTEQYKF<br>Q      | Mus<br>musculu<br>s              |
| 1 | 1.00 | 1 | 1 | -0.05 | -0.05  | -0.043 | -0.046 | -0.05  | t | 29757  | KAAPKRAA<br>PKRAAPKK<br>AAPK | Homo<br>sapiens                  |
| 1 | 1.00 | 1 | 1 | -0.02 | -0.022 | -0.02  | -0.027 | -0.02  | t | 131412 | ERGLRYL                      | Mus<br>musculu<br>s              |
| 1 | 1.00 | 1 | 1 | -0.01 | -0.01  | -0.003 | -0.009 | -0.009 | t | 137829 | DWTFQTL<br>VMLETVP<br>R      | Homo<br>sapiens                  |
| 1 | 1.00 | 1 | 1 | 0.04  | 0.04   | 0.056  | 0.044  | 0.04   | t | 27451  | IMASKTVG<br>TAEKL            | Homo<br>sapiens                  |
| 1 | 1.00 | 1 | 1 | -0.05 | -0.054 | -0.05  | -0.053 | -0.05  | t | 18500  | GAAALRA<br>HVSGRRA           | Oryctola<br>gus<br>cuniculu<br>s |
| 1 | 1.00 | 1 | 1 | 0.05  | 0.05   | 0.045  | 0.05   | 0.053  | t | 125015 | DNESSYSR<br>GFDMTYT<br>E     | Mus<br>musculu<br>s              |
| 1 | 1.00 | 1 | 1 | -0.01 | -0.014 | -0.008 | -0.013 | -0.01  | t | 48383  | PLKPTKRS<br>FIEDLLFNK        | Oryctola<br>gus<br>cuniculu<br>s |
| 1 | 1.00 | 1 | 1 | 0.01  | 0.01   | 0.01   | 0      | 0.01   | t | 114946 | SEYPKPCD<br>TA               | Homo<br>sapiens                  |
| 1 | 1.00 | 1 | 1 | -0.04 | -0.036 | -0.031 | -0.039 | -0.04  | t | 58077  | SGHRMA<br>WDMMM<br>NW        | Homo<br>sapiens                  |
| 1 | 1.00 | 1 | 1 | -0.01 | -0.012 | 0.005  | -0.013 | -0.01  | t | 136079 | QVLLP                        | Rattus<br>norvegic<br>us         |
| 1 | 1.00 | 1 | 1 | -0.02 | -0.02  | -0.016 | -0.02  | -0.019 | t | 120869 | PGYRSISG<br>PDPRIKKT         | Mus<br>musculu<br>s              |

|   |      |   |   |       |        |        |        |       |   |        |                              |                                  |
|---|------|---|---|-------|--------|--------|--------|-------|---|--------|------------------------------|----------------------------------|
| 1 | 1.00 | 1 | 1 | 0     | 0.003  | 0.004  | 0      | 0     | t | 42667  | MSSFLGK<br>WKLSESH<br>NFDAVM | Mus<br>musculu<br>s              |
| 1 | 1.00 | 1 | 1 | 0     | 0      | 0      | 0      | 0.004 | t | 156547 | TAPENEQT<br>SAPSKTTLL        | Mus<br>musculu<br>s              |
| 1 | 1.00 | 1 | 1 | 0     | 0      | 0      | 0      | 0.004 | t | 156545 | PTTTVPNT<br>TNKYSTSP<br>S    | Mus<br>musculu<br>s              |
| 1 | 1.00 | 1 | 1 | 0.01  | 0.008  | 0.003  | 0.003  | 0.01  | t | 112739 | YTTGAVR<br>QIFGDYKT<br>TICGK | Mus<br>musculu<br>s              |
| 1 | 1.00 | 1 | 1 | 0.01  | 0.01   | 0.011  | 0.01   | 0.008 | t | 39224  | LRTGKKLE<br>LDATNAPA<br>PANG | Mus<br>musculu<br>s              |
| 1 | 1.00 | 1 | 1 | 0.01  | 0.013  | 0.011  | 0.01   | 0.008 | t | 39224  | LRTGKKLE<br>LDATNAPA<br>PANG | Mus<br>musculu<br>s              |
| 1 | 1.00 | 1 | 1 | -0.05 | -0.048 | -0.05  | -0.052 | -0.05 | t | 110880 | GYRGRSSI<br>RTGVKRPA<br>VSKA | Homo<br>sapiens                  |
| 1 | 1.00 | 1 | 1 | -0.05 | -0.05  | -0.05  | -0.056 | -0.05 | t | 118562 | PTKVVRTA<br>LLDAA            | Homo<br>sapiens                  |
| 1 | 1.00 | 1 | 1 | -0.01 | -0.014 | -0.01  | -0.017 | -0.01 | t | 113082 | LVEEAIA<br>YGRKLGG           | Oryctola<br>gus<br>cuniculu<br>s |
| 1 | 1.00 | 1 | 1 | -0.01 | -0.01  | -0.01  | -0.01  | -0.01 | t | 122933 | VEGTDAA<br>GRRVTNTK<br>VLRCP | Oryctola<br>gus<br>cuniculu<br>s |
| 1 | 1.00 | 1 | 1 | 0.01  | 0.013  | 0.015  | 0.01   | 0.01  | t | 53758  | RFPRGQG<br>VPINTNSG<br>PDDQI | Mus<br>musculu<br>s              |
| 1 | 1.00 | 1 | 1 | 0.08  | 0.08   | 0.08   | 0.07   | 0.08  | t | 98902  | MENSAEP<br>EQS               | Homo<br>sapiens                  |
| 1 | 1.00 | 1 | 1 | -0.05 | -0.048 | -0.033 | -0.047 | -0.05 | t | 27391  | ILTYIAADH<br>CPVVEV          | Homo<br>sapiens                  |
| 1 | 1.00 | 1 | 1 | -0.05 | -0.046 | -0.033 | -0.047 | -0.05 | t | 27391  | ILTYIAADH<br>CPVVEV          | Homo<br>sapiens                  |

|   |      |   |   |       |        |        |        |        |   |        |                                  |                     |
|---|------|---|---|-------|--------|--------|--------|--------|---|--------|----------------------------------|---------------------|
| 1 | 1.00 | 1 | 1 | 0.01  | 0.017  | 0.01   | 0.01   | 0.012  | t | 11815  | EENVEENV<br>EENVEENV             | Aotus               |
| 1 | 1.00 | 1 | 1 | -0.03 | -0.029 | -0.01  | -0.03  | -0.032 | t | 69001  | VIKAIN                           | Mus<br>musculu<br>s |
| 1 | 1.00 | 1 | 1 | -0.03 | -0.03  | -0.028 | -0.03  | -0.03  | t | 102680 | NMYAMLI<br>ARYKMFP<br>EVKEKG     | Mus<br>musculu<br>s |
| 1 | 1.00 | 1 | 1 | -0.02 | -0.019 | -0.014 | -0.023 | -0.02  | t | 66412  | TSSANGG<br>GIFNSVFG<br>GMKNN     | Equus<br>caballus   |
| 1 | 1.00 | 1 | 1 | -0.04 | -0.042 | -0.038 | -0.047 | -0.042 | t | 117212 | HGTITGVD<br>VSMNTHL              | Mus<br>musculu<br>s |
| 1 | 1.00 | 1 | 1 | 0.03  | 0.03   | 0.033  | 0.03   | 0.037  | t | 40070  | LTNSKG                           | Homo<br>sapiens     |
| 1 | 1.00 | 1 | 1 | 0     | 0.002  | 0.01   | -0.003 | 0      | t | 44314  | NIPYKISAS<br>TNCATVK             | Homo<br>sapiens     |
| 1 | 1.00 | 1 | 1 | 0.02  | 0.018  | 0.035  | 0.019  | 0.02   | t | 16874  | FLRFLTIPP<br>T                   | Mus<br>musculu<br>s |
| 1 | 1.00 | 1 | 1 | 0     | 0      | 0.016  | 0      | 0      | t | 35530  | LEIVPNSAE<br>ERL                 | Homo<br>sapiens     |
| 1 | 1.00 | 1 | 1 | 0     | -0.003 | -0.001 | -0.003 | 0      | t | 78169  | GKHGKEIKI<br>T                   | Mus<br>musculu<br>s |
| 1 | 1.00 | 1 | 1 | 0     | 0.003  | 0.011  | 0      | 0      | t | 44904  | NLTQHPSA<br>PTMP                 | Mus<br>musculu<br>s |
| 1 | 1.00 | 1 | 1 | 0     | 0.007  | 0.017  | 0      | -0.003 | t | 110837 | ERSLSLLNC<br>EEIKSQF             | Mus<br>musculu<br>s |
| 1 | 1.00 | 1 | 1 | 0.01  | 0.012  | 0.011  | 0.011  | 0.012  | t | 39403  | LSGRPAVV<br>PDREVL<br>YR<br>EFDE | Homo<br>sapiens     |
| 1 | 1.00 | 1 | 1 | -0.03 | -0.032 | -0.03  | -0.037 | -0.032 | t | 118077 | QEMPLTA<br>LLRNLGK<br>MT         | Mus<br>musculu<br>s |

|   |      |   |   |       |        |        |        |        |   |        |                             |                                  |
|---|------|---|---|-------|--------|--------|--------|--------|---|--------|-----------------------------|----------------------------------|
| 1 | 1.00 | 1 | 1 | -0.02 | -0.016 | -0.012 | -0.019 | -0.021 | t | 110817 | DSTLRLCV<br>QSTHVDIR<br>TLE | Homo<br>sapiens                  |
| 1 | 1.00 | 1 | 1 | -0.01 | -0.012 | -0.011 | -0.007 | -0.001 | t | 106905 | THTYSPAP<br>FTLI            | Mus<br>musculu<br>s              |
| 1 | 1.00 | 1 | 1 | -0.03 | -0.03  | -0.032 | -0.041 | -0.03  | t | 118313 | EALSTLVL<br>NRLKV           | Homo<br>sapiens                  |
| 1 | 1.00 | 1 | 1 | 0.03  | 0.031  | 0.035  | 0.033  | 0.034  | t | 38203  | LNEKEIKDL<br>YDNQSNS<br>GIL | Equus<br>caballus                |
| 1 | 1.00 | 1 | 1 | 0     | 0      | 0.007  | 0      | -0.001 | t | 126331 | ISLRPG                      | Mus<br>musculu<br>s              |
| 1 | 1.00 | 1 | 1 | -0.04 | -0.04  | -0.035 | -0.046 | -0.041 | t | 58378  | SHLLKPQT<br>RTRT            | Homo<br>sapiens                  |
| 1 | 1.00 | 1 | 1 | -0.01 | -0.012 | -0.009 | -0.011 | -0.009 | t | 62328  | SVSLPYAN<br>LATH            | Mus<br>musculu<br>s              |
| 1 | 1.00 | 1 | 1 | 0     | 0      | 0.019  | -0.001 | -0.002 | t | 41826  | MKHM                        | Mus<br>musculu<br>s              |
| 1 | 1.00 | 1 | 1 | 0.03  | 0.03   | 0.03   | 0.024  | 0.031  | t | 157280 | FSGFDAEF<br>LADA            | Homo<br>sapiens                  |
| 1 | 1.00 | 1 | 1 | -0.01 | -0.012 | -0.015 | -0.017 | -0.01  | t | 121116 | AAVELKVE<br>DPFYWINP<br>GV  | Rattus<br>norvegic<br>us         |
| 1 | 1.00 | 1 | 1 | 0     | 0      | 0.005  | 0      | -0.001 | t | 134220 | RQGAEPR<br>KNFVKPNE<br>TKTY | Oryctola<br>gus<br>cuniculu<br>s |
| 1 | 1.00 | 1 | 1 | 0     | 0      | 0.005  | 0      | -0.001 | t | 134220 | RQGAEPR<br>KNFVKPNE<br>TKTY | Oryctola<br>gus<br>cuniculu<br>s |
| 1 | 1.00 | 1 | 1 | -0.03 | -0.03  | -0.031 | -0.03  | -0.027 | t | 144940 | RHVLGRLI<br>TVNPIVT         | Mus<br>musculu<br>s              |
| 1 | 1.00 | 1 | 1 | -0.01 | -0.014 | -0.01  | -0.017 | -0.009 | t | 103830 | CHAVKVG<br>NPSC             | Oryctola<br>gus<br>cuniculu<br>s |

|   |      |   |   |       |        |        |        |        |   |        |                              |                     |
|---|------|---|---|-------|--------|--------|--------|--------|---|--------|------------------------------|---------------------|
| 1 | 1.00 | 1 | 1 | -0.02 | -0.016 | -0.02  | -0.021 | -0.02  | t | 131101 | TDSEMDV<br>VRFDDDN<br>S      | Homo<br>sapiens     |
| 1 | 1.00 | 1 | 1 | 0.02  | 0.018  | 0.027  | 0.019  | 0.02   | t | 98436  | SAGTGGA<br>DLPTDLPP          | Sus<br>scrofa       |
| 1 | 1.00 | 1 | 1 | -0.04 | -0.036 | -0.035 | -0.04  | -0.04  | t | 78749  | MPKTRRR<br>PRRSQRKR<br>PPTPW | Homo<br>sapiens     |
| 1 | 1.00 | 1 | 1 | -0.04 | -0.04  | -0.04  | -0.04  | -0.036 | t | 133701 | SRNKHKR                      | Mus<br>musculu<br>s |
| 1 | 1.00 | 1 | 1 | 0.02  | 0.018  | 0.034  | 0.019  | 0.021  | t | 39092  | LRGDLQVL<br>AQKVARTL         | Mus<br>musculu<br>s |
| 1 | 1.00 | 1 | 1 | 0.02  | 0.018  | 0.034  | 0.019  | 0.021  | t | 39092  | LRGDLQVL<br>AQKVARTL         | Mus<br>musculu<br>s |
| 1 | 1.00 | 1 | 1 | -0.01 | -0.012 | -0.012 | -0.017 | -0.01  | t | 125318 | WWYDKK<br>DNTC               | Mus<br>musculu<br>s |
| 1 | 1.00 | 1 | 1 | -0.02 | -0.018 | -0.013 | -0.013 | -0.017 | t | 122136 | LGRGGSK                      | Homo<br>sapiens     |
| 1 | 1.00 | 1 | 1 | -0.03 | -0.027 | -0.013 | -0.03  | -0.033 | t | 114132 | KSHGRTQ<br>DENPVVH<br>F      | Mus<br>musculu<br>s |
| 1 | 1.00 | 1 | 1 | -0.03 | -0.018 | -0.013 | -0.03  | -0.033 | t | 114132 | KSHGRTQ<br>DENPVVH<br>F      | Mus<br>musculu<br>s |
| 1 | 1.00 | 1 | 1 | -0.01 | -0.01  | 0.001  | -0.01  | -0.01  | t | 38826  | LQDPRVR<br>GLYLP             | Mus<br>musculu<br>s |
| 1 | 1.00 | 1 | 1 | 0.02  | 0.02   | 0.011  | 0.02   | 0.028  | t | 62335  | SVSSFERFE<br>IFPK            | Mus<br>musculu<br>s |
| 1 | 1.00 | 1 | 1 | -0.01 | -0.012 | -0.005 | -0.011 | -0.006 | t | 54689  | RLNPVY                       | Mus<br>musculu<br>s |
| 1 | 1.00 | 1 | 1 | 0.01  | 0.01   | 0.024  | 0.01   | 0.01   | t | 10869  | DYEDRYR<br>EN                | Mus<br>musculu<br>s |

|   |      |   |   |       |        |        |        |        |   |        |                              |                                  |
|---|------|---|---|-------|--------|--------|--------|--------|---|--------|------------------------------|----------------------------------|
| 1 | 1.00 | 1 | 1 | 0.04  | 0.04   | 0.05   | 0.04   | 0.042  | t | 21249  | GMAGQTT<br>PQVETEDT<br>K     | Mus<br>musculu<br>s              |
| 1 | 1.00 | 1 | 1 | 0.02  | 0.023  | 0.03   | 0.02   | 0.02   | t | 140838 | DEPPQSP<br>WDRVKDL<br>ATVYV  | Mus<br>musculu<br>s              |
| 1 | 1.00 | 1 | 1 | 0.01  | 0.01   | 0.013  | 0.01   | 0.011  | t | 793    | ADVTITVN<br>GKVVAKP<br>C     | Oryctola<br>gus<br>cuniculu<br>s |
| 1 | 1.00 | 1 | 1 | -0.07 | -0.067 | -0.063 | -0.07  | -0.069 | t | 137452 | SHTFPPSW<br>LLVR             | Mus<br>musculu<br>s              |
| 1 | 1.00 | 1 | 1 | -0.03 | -0.03  | -0.011 | -0.024 | -0.03  | t | 75539  | YQQQGRL                      | Homo<br>sapiens                  |
| 1 | 1.00 | 1 | 1 | 0.01  | 0.01   | 0.016  | 0.01   | 0.012  | t | 76287  | YVGPLTQT<br>LYGM             | Mus<br>musculu<br>s              |
| 1 | 1.00 | 1 | 1 | -0.02 | -0.02  | 0      | -0.017 | -0.018 | t | 3815   | APSLPAGY<br>L                | Homo<br>sapiens                  |
| 1 | 1.00 | 1 | 1 | -0.05 | -0.052 | -0.033 | -0.047 | -0.052 | t | 62264  | SVNPKMV<br>R                 | Mus<br>musculu<br>s              |
| 1 | 1.00 | 1 | 1 | -0.03 | -0.038 | -0.03  | -0.03  | -0.027 | t | 136392 | IPKSRKRRI<br>PQR             | Mus<br>musculu<br>s              |
| 1 | 1.00 | 1 | 1 | -0.01 | -0.012 | -0.014 | -0.017 | -0.009 | t | 116677 | ASATQLYK<br>TCKQAGT<br>CPPD  | Mus<br>musculu<br>s              |
| 1 | 1.00 | 1 | 1 | -0.03 | -0.032 | -0.021 | -0.031 | -0.03  | t | 24657  | HQVFGAIIY<br>GAAFSGVs        | Mus<br>musculu<br>s              |
| 1 | 1.00 | 1 | 1 | 0.03  | 0.033  | 0.039  | 0.03   | 0.032  | t | 117214 | KGEQGEP<br>GA                | Mus<br>musculu<br>s              |
| 1 | 1.00 | 1 | 1 | 0.01  | 0.006  | 0.017  | 0.01   | 0.01   | t | 123283 | HAEQKKLL<br>KFEALEQE<br>KGKE | Rattus<br>norvegic<br>us         |
| 1 | 1.00 | 1 | 1 | -0.04 | -0.04  | -0.041 | -0.04  | -0.04  | t | 134784 | RKRSQML<br>FRGRRASQ          | Mus<br>musculu<br>s              |

|   |      |   |   |       |        |        |        |        |   |        |                               |                                  |
|---|------|---|---|-------|--------|--------|--------|--------|---|--------|-------------------------------|----------------------------------|
| 1 | 1.00 | 1 | 1 | -0.02 | -0.022 | -0.012 | -0.023 | -0.021 | t | 110948 | MVTSDAQ<br>IFNKPYWL           | Mus<br>musculu<br>s              |
| 1 | 1.00 | 1 | 1 | -0.01 | -0.012 | -0.003 | -0.017 | -0.01  | t | 118653 | VHFFANIV<br>TARTP             | Mus<br>musculu<br>s              |
| 1 | 1.00 | 1 | 1 | -0.1  | -0.1   | -0.1   | -0.1   | -0.099 | t | 117232 | SAPDTRPA<br>P                 | Mus<br>musculu<br>s              |
| 1 | 1.00 | 1 | 1 | -0.02 | -0.02  | -0.03  | -0.02  | -0.017 | t | 95127  | PDITFTVT<br>MRRRTLYY<br>GLNL  | Rattus<br>norvegic<br>us         |
| 1 | 1.00 | 1 | 1 | 0.02  | 0.02   | 0.022  | 0.018  | 0.02   | t | 48067  | PKGFYAEG<br>SRGGSQAS<br>SR    | Homo<br>sapiens                  |
| 1 | 1.00 | 1 | 1 | 0     | -0.002 | 0.007  | -0.007 | 0      | t | 136631 | SHDGASSK<br>IRPA              | Mus<br>musculu<br>s              |
| 1 | 1.00 | 1 | 1 | 0.03  | 0.034  | 0.052  | 0.031  | 0.03   | t | 53336  | RDEVDFCV<br>GLNSFV            | Homo<br>sapiens                  |
| 1 | 1.00 | 1 | 1 | 0.05  | 0.048  | 0.05   | 0.043  | 0.053  | t | 134770 | QIFNLFSTK<br>DSSAA            | Mus<br>musculu<br>s              |
| 1 | 1.00 | 1 | 1 | -0.05 | -0.05  | -0.053 | -0.05  | -0.047 | t | 115271 | GQKGRGS<br>RG                 | Oryctola<br>gus<br>cuniculu<br>s |
| 1 | 1.00 | 1 | 1 | 0.01  | 0.01   | 0.023  | 0.01   | 0.01   | t | 65631  | TPLDDTNP<br>MENYFH<br>WG      | Sus<br>scrofa                    |
| 1 | 1.00 | 1 | 1 | 0.02  | 0.018  | 0.018  | 0.02   | 0.02   | t | 20329  | GILESRLGIK<br>ARITHVDT<br>ESY | Mus<br>musculu<br>s              |
| 1 | 1.00 | 1 | 1 | -0.04 | -0.042 | -0.046 | -0.041 | -0.04  | t | 21950  | GQRTKTN<br>ARTRKGPR<br>KPIKK  | Mus<br>musculu<br>s              |
| 1 | 1.00 | 1 | 1 | -0.02 | -0.022 | -0.015 | -0.023 | -0.02  | t | 38628  | LPPTAPPLL                     | Mus<br>musculu<br>s              |
| 1 | 1.00 | 1 | 1 | -0.03 | -0.031 | -0.021 | -0.031 | -0.028 | t | 52466  | QTADWYT<br>IGVYVIG            | Myodes<br>glareolu<br>s          |
| 1 | 1.00 | 1 | 1 | -0.05 | -0.05  | -0.05  | -0.061 | -0.05  | t | 103932 | GKLPPPI                       | Homo<br>sapiens                  |



|   |      |   |   |       |        |        |        |        |   |        |                              |                   |
|---|------|---|---|-------|--------|--------|--------|--------|---|--------|------------------------------|-------------------|
| 1 | 1.00 | 1 | 1 | 0.01  | 0.008  | 0.014  | 0.009  | 0.01   | t | 22884  | GTVVAVG<br>PGRWDEDE<br>GE    | Mus<br>musculus   |
| 1 | 1.00 | 1 | 1 | -0.06 | -0.053 | -0.052 | -0.06  | -0.061 | t | 110920 | KPSPWAP<br>KKHRRLS           | Mus<br>musculus   |
| 1 | 1.00 | 1 | 1 | -0.04 | -0.042 | -0.033 | -0.041 | -0.04  | t | 150970 | AVPADHG<br>AHLSLRGL<br>PVCAF | Mus<br>musculus   |
| 1 | 1.00 | 1 | 1 | 0     | -0.002 | 0.012  | -0.001 | -0.001 | t | 60786  | SRRNP                        | Mus<br>musculus   |
| 1 | 1.00 | 1 | 1 | 0.01  | 0.012  | 0.009  | 0.011  | 0.012  | t | 37641  | LLPAADM<br>DDFSRQL<br>QNSM   | Homo<br>sapiens   |
| 1 | 1.00 | 1 | 1 | 0     | 0      | 0      | 0      | 0.004  | t | 23465  | GYSLFQKE<br>MKTLNEG<br>TSGTA | Aotus<br>nancymae |
| 1 | 1.00 | 1 | 1 | 0     | 0      | 0      | -0.007 | 0      | t | 136010 | VMIKSLPA<br>LNSPTVEE<br>C    | Homo<br>sapiens   |
| 1 | 1.00 | 1 | 1 | -0.03 | -0.028 | -0.021 | -0.027 | -0.03  | t | 121034 | VHPDTGIS<br>SKAMGIM<br>N     | Homo<br>sapiens   |
| 1 | 1.00 | 1 | 1 | 0.01  | 0.009  | 0.011  | 0.007  | 0.011  | t | 99609  | RFSTRYGN<br>QNGRIRV          | Homo<br>sapiens   |
| 1 | 1.00 | 1 | 1 | 0.02  | 0.023  | 0.03   | 0.019  | 0.019  | t | 82529  | GAATPYSG<br>EPSPFDEV<br>LGEE | Aotus             |
| 1 | 1.00 | 1 | 1 | -0.01 | -0.01  | -0.01  | -0.011 | -0.009 | t | 3568   | APGICIDV<br>DNEDLFFI<br>ADK  | Homo<br>sapiens   |
| 1 | 1.00 | 1 | 1 | -0.04 | -0.042 | -0.035 | -0.037 | -0.038 | t | 11208  | EAVEAERA<br>GRGTG            | Mus<br>musculus   |
| 1 | 1.00 | 1 | 1 | -0.04 | -0.04  | -0.035 | -0.037 | -0.038 | t | 11208  | EAVEAERA<br>GRGTG            | Homo<br>sapiens   |
| 1 | 1.00 | 1 | 1 | 0.01  | 0.01   | 0.017  | 0.01   | 0.01   | t | 125789 | CQGDGYR<br>VGFGQCA<br>G      | Mus<br>musculus   |
| 1 | 1.00 | 1 | 1 | -0.02 | -0.021 | -0.02  | -0.023 | -0.02  | t | 78238  | PHTNRSH<br>Q                 | Homo<br>sapiens   |

|   |      |   |   |       |        |        |        |       |   |        |                              |                                  |
|---|------|---|---|-------|--------|--------|--------|-------|---|--------|------------------------------|----------------------------------|
| 1 | 1.00 | 1 | 1 | 0     | 0      | 0      | 0      | 0.002 | t | 117525 | GVPIEKIYN<br>KTQREKFA        | Homo<br>sapiens                  |
| 1 | 1.00 | 1 | 1 | 0.01  | 0.008  | 0.01   | 0.01   | 0.01  | t | 136078 | QQKKEGPI<br>PPDAQNP          | Oryctola<br>gus<br>cuniculu<br>s |
| 1 | 1.00 | 1 | 1 | -0.01 | -0.01  | 0.007  | -0.007 | -0.01 | t | 47533  | PFNQWPD<br>Y                 | Homo<br>sapiens                  |
| 1 | 1.00 | 1 | 1 | -0.02 | -0.02  | -0.012 | -0.02  | -0.02 | t | 4037   | AQPREPGS<br>YTNVFDHL<br>DWIK | Oryctola<br>gus<br>cuniculu<br>s |
| 1 | 1.00 | 1 | 1 | -0.07 | -0.068 | -0.059 | -0.07  | -0.07 | t | 65562  | TPERPRLR                     | Homo<br>sapiens                  |
| 1 | 1.00 | 1 | 1 | 0.02  | 0.022  | 0.008  | 0.017  | 0.03  | t | 78505  | RLGDYLID<br>QGL              | Homo<br>sapiens                  |
| 1 | 1.00 | 1 | 1 | -0.01 | -0.012 | 0.002  | -0.011 | -0.01 | t | 142409 | DTRIAQQI<br>WLRR             | Mus<br>musculu<br>s              |
| 1 | 1.00 | 1 | 1 | 0.01  | 0.01   | 0.01   | 0.01   | 0.011 | t | 9613   | DPDKDVDI<br>MVRDGQL<br>TIKAE | Mus<br>musculu<br>s              |
| 1 | 1.00 | 1 | 1 | 0     | 0      | 0      | -0.001 | 0.002 | t | 106533 | IEFRHGLN<br>RTNA             | Mus<br>musculu<br>s              |
| 1 | 1.00 | 1 | 1 | 0.02  | 0.024  | 0.029  | 0.021  | 0.022 | t | 94936  | SVFHQNG<br>QVTEV             | Homo<br>sapiens                  |
| 1 | 1.00 | 1 | 1 | -0.01 | -0.006 | 0.007  | -0.007 | -0.01 | t | 43219  | NALYPMS<br>PLLQECLR          | Homo<br>sapiens                  |
| 1 | 1.00 | 1 | 1 | 0     | 0.002  | 0.003  | 0.001  | 0.002 | t | 17466  | FQDLSDNP<br>CKVDL            | Homo<br>sapiens                  |
| 1 | 1.00 | 1 | 1 | -0.07 | -0.07  | -0.063 | -0.07  | -0.07 | t | 130487 | FCQPHLSC<br>YILP             | Mus<br>musculu<br>s              |
| 1 | 1.00 | 1 | 1 | -0.01 | -0.012 | -0.01  | -0.017 | -0.01 | t | 96457  | KGTVNLT<br>WSR               | Mus<br>musculu<br>s              |

|   |      |   |   |       |        |        |        |        |   |        |                              |                       |
|---|------|---|---|-------|--------|--------|--------|--------|---|--------|------------------------------|-----------------------|
| 1 | 1.00 | 1 | 1 | -0.03 | -0.032 | -0.03  | -0.037 | -0.03  | t | 131764 | YAIAWHQ                      | Mus musculus          |
| 1 | 1.00 | 1 | 1 | -0.02 | -0.018 | -0.027 | -0.023 | -0.02  | t | 70725  | VRGGLRIL<br>SPDRKRR          | Homo sapiens          |
| 1 | 1.00 | 1 | 1 | 0.01  | 0.018  | 0.008  | 0.01   | 0.011  | t | 19297  | GEIIWTLQ<br>DTQEIKQR<br>VVF  | Gallus gallus         |
| 1 | 1.00 | 1 | 1 | -0.04 | -0.043 | -0.026 | -0.04  | -0.038 | t | 52476  | QTASGLVS<br>MF               | Oryctolagus cuniculus |
| 1 | 1.00 | 1 | 1 | -0.01 | -0.001 | -0.014 | -0.016 | -0.01  | t | 109649 | PAGQAEP<br>DRAHYNIV<br>TFCK  | Gallus gallus         |
| 1 | 1.00 | 1 | 1 | -0.03 | -0.032 | -0.031 | -0.027 | -0.021 | t | 53244  | RAWAYM                       | Mus musculus          |
| 1 | 1.00 | 1 | 1 | -0.02 | -0.017 | -0.007 | -0.02  | -0.02  | t | 105749 | EGFGSGG<br>AI                | Mus musculus          |
| 1 | 1.00 | 1 | 1 | 0.02  | 0.018  | 0.02   | 0.021  | 0.027  | t | 25795  | IEEVALSTT<br>GEIPF           | Homo sapiens          |
| 1 | 1.00 | 1 | 1 | -0.05 | -0.05  | -0.05  | -0.053 | -0.05  | t | 149119 | TFMRVVT<br>DVYRPRLS          | Rattus norvegicus     |
| 1 | 1.00 | 1 | 1 | -0.01 | -0.01  | -0.012 | -0.01  | -0.003 | t | 38657  | LPQRQKK<br>Q                 | Homo sapiens          |
| 1 | 1.00 | 1 | 1 | 0     | -0.004 | 0      | -0.003 | 0.002  | t | 121877 | SSEESGLP<br>KLPVPPLQ<br>QTLA | Oryctolagus cuniculus |
| 1 | 1.00 | 1 | 1 | -0.01 | -0.01  | -0.01  | -0.01  | -0.011 | t | 108898 | EIDGPAGQ<br>AEPDRAH<br>YN    | Mus musculus          |
| 1 | 1.00 | 1 | 1 | 0     | 0      | 0      | -0.007 | 0.003  | t | 118127 | SDDDMGF<br>GLFD              | Homo sapiens          |
| 1 | 1.00 | 1 | 1 | 0     | -0.005 | 0.014  | 0.003  | 0      | t | 47449  | PEVEAALK<br>LMEKREY          | Bos taurus            |
| 1 | 1.00 | 1 | 1 | -0.04 | -0.042 | -0.033 | -0.047 | -0.04  | t | 60274  | SPSYDIRVP<br>RGW             | Mus musculus          |

|   |      |   |   |       |        |        |        |        |   |        |                              |                                  |
|---|------|---|---|-------|--------|--------|--------|--------|---|--------|------------------------------|----------------------------------|
| 1 | 1.00 | 1 | 1 | 0.05  | 0.05   | 0.061  | 0.05   | 0.05   | t | 41660  | MHGDTPT<br>LHEYMLDL<br>QPETT | Mus<br>musculu<br>s              |
| 1 | 1.00 | 1 | 1 | 0.05  | 0.05   | 0.061  | 0.05   | 0.05   | t | 41660  | MHGDTPT<br>LHEYMLDL<br>QPETT | Mus<br>musculu<br>s              |
| 1 | 1.00 | 1 | 1 | -0.03 | -0.035 | -0.027 | -0.03  | -0.03  | t | 4763   | ASSAAEFL<br>AAFNVFSE<br>AARC | Canis<br>lupus                   |
| 1 | 1.00 | 1 | 1 | -0.02 | -0.02  | -0.015 | -0.017 | -0.018 | t | 17535  | FQSMRKH<br>TPYRNGCL<br>EPTLG | Homo<br>sapiens                  |
| 1 | 1.00 | 1 | 1 | 0.02  | 0.021  | 0.023  | 0.019  | 0.02   | t | 67214  | TVWRNRE<br>TLMEFEFP<br>HATKQ | Equus<br>caballus                |
| 1 | 1.00 | 1 | 1 | -0.05 | -0.048 | -0.047 | -0.047 | -0.049 | t | 118827 | GSGPRHR<br>DGVRPQ<br>KRPSCI  | Homo<br>sapiens                  |
| 1 | 1.00 | 1 | 1 | -0.09 | -0.085 | -0.067 | -0.083 | -0.089 | t | 108640 | SRCQVCM<br>RRT               | Homo<br>sapiens                  |
| 1 | 1.00 | 1 | 1 | -0.03 | -0.028 | -0.02  | -0.029 | -0.03  | t | 12862  | EKRFAKCP<br>LCNTPA           | Homo<br>sapiens                  |
| 1 | 1.00 | 1 | 1 | 0     | 0.004  | 0.012  | 0.001  | 0      | t | 11543  | EEDEREISV<br>PAEIL           | Homo<br>sapiens                  |
| 1 | 1.00 | 1 | 1 | 0.01  | 0.012  | 0.03   | 0.017  | 0.012  | t | 127982 | FSHFIRSG<br>NPYPYEF<br>SRKV  | Homo<br>sapiens                  |
| 1 | 1.00 | 1 | 1 | -0.03 | -0.026 | -0.01  | -0.023 | -0.03  | t | 128083 | QFLGVPYA<br>APPLAERH<br>FQAP | Homo<br>sapiens                  |
| 1 | 1.00 | 1 | 1 | -0.03 | -0.028 | -0.01  | -0.023 | -0.03  | t | 128083 | QFLGVPYA<br>APPLAERH<br>FQAP | Homo<br>sapiens                  |
| 1 | 1.00 | 1 | 1 | -0.05 | -0.052 | -0.04  | -0.05  | -0.05  | t | 1792   | AHLHIPR<br>WNLMS             | Oryctola<br>gus<br>cuniculu<br>s |

|   |      |   |   |       |        |        |        |        |   |        |                              |                                  |
|---|------|---|---|-------|--------|--------|--------|--------|---|--------|------------------------------|----------------------------------|
| 1 | 1.00 | 1 | 1 | -0.03 | -0.025 | -0.016 | -0.03  | -0.03  | t | 132767 | YRDKSYPS<br>PFWCHRT          | Mus<br>musculu<br>s              |
| 1 | 1.00 | 1 | 1 | -0.04 | -0.038 | -0.031 | -0.033 | -0.038 | t | 113514 | HHPARTA<br>HYGSLPQK          | Homo<br>sapiens                  |
| 1 | 1.00 | 1 | 1 | -0.03 | -0.032 | -0.039 | -0.037 | -0.029 | t | 122553 | RGWKHW<br>VYYTGGPT<br>TPY    | Mus<br>musculu<br>s              |
| 1 | 1.00 | 1 | 1 | 0.01  | 0.005  | 0.027  | 0.013  | 0.012  | t | 157810 | QRELKMV<br>VAQS              | Canis<br>lupus                   |
| 1 | 1.00 | 1 | 1 | -0.01 | -0.006 | -0.01  | -0.009 | -0.01  | t | 45512  | NPVRASVL<br>RYDDFHT<br>DEDKL | Homo<br>sapiens                  |
| 1 | 1.00 | 1 | 1 | 0.05  | 0.046  | 0.056  | 0.043  | 0.051  | t | 134758 | PESPSKLAS<br>A               | Oryctola<br>gus<br>cuniculu<br>s |
| 1 | 1.00 | 1 | 1 | -0.01 | -0.008 | 0.012  | -0.007 | -0.01  | t | 43435  | NDFHFEVF<br>NFVP             | Homo<br>sapiens                  |
| 1 | 1.00 | 1 | 1 | -0.01 | -0.014 | -0.005 | -0.013 | -0.01  | t | 6697   | CNIGGLGN<br>NTLICPTD<br>CFRK | Oryctola<br>gus<br>cuniculu<br>s |
| 1 | 1.00 | 1 | 1 | -0.02 | -0.023 | -0.023 | -0.02  | -0.018 | t | 57307  | SDVININIY<br>NPCVVPNI<br>NNA | Oryctola<br>gus<br>cuniculu<br>s |
| 1 | 1.00 | 1 | 1 | -0.03 | -0.03  | -0.027 | -0.03  | -0.03  | t | 16132  | FHPPSSNQ<br>CESTPIIA<br>MDAW | Homo<br>sapiens                  |
| 1 | 1.00 | 1 | 1 | 0.01  | 0.013  | 0.022  | 0.01   | 0.011  | t | 28322  | IRIPKYKND<br>GIQNYIHN<br>EY  | Equus<br>caballus                |
| 1 | 1.00 | 1 | 1 | 0.03  | 0.032  | 0.037  | 0.027  | 0.03   | t | 107154 | GKRPSCTG<br>CSYELAQ          | Homo<br>sapiens                  |
| 1 | 1.00 | 1 | 1 | -0.02 | -0.018 | 0.002  | -0.019 | -0.02  | t | 71710  | VVIVGHIEL                    | Homo<br>sapiens                  |

|   |      |   |   |       |        |        |        |        |   |        |                              |                                  |
|---|------|---|---|-------|--------|--------|--------|--------|---|--------|------------------------------|----------------------------------|
| 1 | 1.00 | 1 | 1 | 0     | 0      | 0.007  | -0.004 | 0      | t | 74129  | YHPDVPYV<br>KR               | Homo<br>sapiens                  |
| 1 | 1.00 | 1 | 1 | -0.03 | -0.032 | -0.029 | -0.031 | -0.03  | t | 67263  | TWHLPSH<br>HSRRK             | Mus<br>musculu<br>s              |
| 1 | 1.00 | 1 | 1 | -0.02 | -0.017 | -0.013 | -0.02  | -0.019 | t | 137893 | HHNLLVGS<br>VSGFYPG          | Mus<br>musculu<br>s              |
| 1 | 1.00 | 1 | 1 | -0.02 | -0.02  | -0.013 | -0.017 | -0.018 | t | 60259  | SPSLNLAS<br>VPKTSTPP<br>GEKP | Homo<br>sapiens                  |
| 1 | 1.00 | 1 | 1 | -0.07 | -0.066 | -0.052 | -0.069 | -0.071 | t | 71325  | VTGHWRC<br>P                 | Homo<br>sapiens                  |
| 1 | 1.00 | 1 | 1 | 0.01  | 0.01   | 0.015  | 0.01   | 0.008  | t | 29879  | KALTGLST<br>GTSQNTRI<br>SLRP | Homo<br>sapiens                  |
| 1 | 1.00 | 1 | 1 | 0     | -0.004 | 0.012  | -0.003 | 0      | t | 135921 | EVGWYRS<br>PF                | Oryctola<br>gus<br>cuniculu<br>s |
| 1 | 1.00 | 1 | 1 | -0.01 | -0.008 | -0.002 | -0.013 | -0.01  | t | 67324  | TYDNECLL<br>CAHKVE           | Homo<br>sapiens                  |
| 1 | 1.00 | 1 | 1 | 0     | -0.002 | 0.007  | -0.001 | 0.003  | t | 71212  | VSVTDHKK<br>WQFNSPF<br>VP    | Mus<br>musculu<br>s              |
| 1 | 1.00 | 1 | 1 | -0.02 | -0.024 | -0.008 | -0.019 | -0.021 | t | 141558 | RTLQNYK<br>ATHGNTV           | Bos<br>taurus                    |
| 1 | 1.00 | 1 | 1 | -0.02 | -0.024 | -0.02  | -0.027 | -0.018 | t | 131982 | NHLQGK                       | Oryctola<br>gus<br>cuniculu<br>s |
| 1 | 1.00 | 1 | 1 | -0.03 | -0.026 | -0.023 | -0.033 | -0.032 | t | 75579  | YRAKEGRC<br>KA               | Homo<br>sapiens                  |
| 1 | 1.00 | 1 | 1 | -0.03 | -0.03  | -0.035 | -0.026 | -0.03  | t | 103891 | ERSQPRGR<br>RQPIPKAR<br>RPEG | Homo<br>sapiens                  |
| 1 | 1.00 | 1 | 1 | -0.04 | -0.04  | -0.031 | -0.04  | -0.04  | t | 589    | ACRAAK                       | Homo<br>sapiens                  |

|   |      |   |   |       |        |        |        |        |   |        |                              |                                  |
|---|------|---|---|-------|--------|--------|--------|--------|---|--------|------------------------------|----------------------------------|
| 1 | 1.00 | 1 | 1 | 0     | -0.004 | 0.01   | 0      | 0      | t | 93172  | KTSLWKE<br>MQYNRDI           | Mus<br>musculu<br>s              |
| 1 | 1.00 | 1 | 1 | -0.01 | -0.006 | 0.012  | -0.009 | -0.01  | t | 52478  | QTASRQA<br>EV                | Homo<br>sapiens                  |
| 1 | 1.00 | 1 | 1 | -0.02 | -0.02  | -0.026 | -0.023 | -0.019 | t | 70620  | VQNTVED<br>LKLNTLGR          | Homo<br>sapiens                  |
| 1 | 1.00 | 1 | 0 | -0.04 | -0.042 | -0.012 | -0.037 | -0.028 | t | 68870  | VHMIKPP<br>WVGRLLS<br>G      | Mus<br>musculu<br>s              |
| 1 | 1.00 | 1 | 1 | -0.04 | -0.04  | -0.031 | -0.037 | -0.041 | t | 110760 | ACKDSDW<br>PFCSEDE<br>WDWPFC | Mus<br>musculu<br>s              |
| 1 | 1.00 | 1 | 1 | -0.01 | -0.007 | -0.004 | -0.01  | -0.005 | t | 94566  | KKTTTKPT<br>K                | Mus<br>musculu<br>s              |
| 1 | 1.00 | 1 | 1 | 0.02  | 0.017  | 0.033  | 0.02   | 0.02   | t | 58688  | SIRGRASS<br>DIY              | Oryctola<br>gus<br>cuniculu<br>s |
| 1 | 1.00 | 1 | 1 | 0     | 0      | 0.007  | -0.004 | 0      | t | 122497 | NGSSESRR<br>ALQDSQR          | Homo<br>sapiens                  |
| 1 | 1.00 | 1 | 1 | -0.01 | -0.014 | -0.001 | -0.01  | -0.01  | t | 26314  | IGRFCAQ<br>MHSNNGP<br>Q      | Bos<br>taurus                    |
| 1 | 1.00 | 1 | 1 | 0     | 0.002  | 0.007  | 0.007  | 0.001  | t | 108066 | PGRNNSPL<br>GADSVQS          | Homo<br>sapiens                  |
| 1 | 1.00 | 1 | 1 | 0     | 0.004  | 0.007  | 0.007  | 0.001  | t | 108066 | PGRNNSPL<br>GADSVQS          | Homo<br>sapiens                  |
| 1 | 1.00 | 1 | 1 | 0     | 0      | 0.018  | 0.003  | 0.002  | t | 65158  | TLYLGA                       | Homo<br>sapiens                  |
| 1 | 1.00 | 1 | 1 | -0.05 | -0.047 | -0.036 | -0.05  | -0.052 | t | 87807  | RDATAYPS<br>AKTPSS           | Mus<br>musculu<br>s              |
| 1 | 1.00 | 1 | 1 | -0.09 | -0.088 | -0.079 | -0.089 | -0.09  | t | 120810 | MVNKSR<br>MMPAV              | Homo<br>sapiens                  |

|   |      |   |   |       |        |        |        |        |   |        |                              |                                  |
|---|------|---|---|-------|--------|--------|--------|--------|---|--------|------------------------------|----------------------------------|
| 1 | 1.00 | 1 | 1 | 0.02  | 0.016  | 0.033  | 0.019  | 0.02   | t | 142006 | SDSAQGS<br>DVSLTA            | Oryctola<br>gus<br>cuniculu<br>s |
| 1 | 1.00 | 1 | 1 | -0.01 | -0.006 | -0.012 | -0.013 | -0.009 | t | 99757  | VIVKVSKE<br>HVEELTK          | Homo<br>sapiens                  |
| 1 | 1.00 | 1 | 1 | -0.02 | -0.02  | -0.013 | -0.017 | -0.018 | t | 59425  | SLQTYVTQ<br>QLIRAAEIR        | Homo<br>sapiens                  |
| 1 | 1.00 | 1 | 1 | -0.01 | -0.01  | -0.01  | -0.01  | -0.007 | t | 115399 | NMAINPS<br>KENLCSTF<br>CKEVV | Homo<br>sapiens                  |
| 1 | 1.00 | 1 | 1 | -0.02 | -0.02  | -0.013 | -0.02  | -0.018 | t | 95036  | RTCMTTA<br>QGTSMPY<br>SC     | Mus<br>musculu<br>s              |
| 1 | 1.00 | 1 | 1 | -0.02 | -0.02  | -0.013 | -0.02  | -0.018 | t | 95036  | RTCMTTA<br>QGTSMPY<br>SC     | Mus<br>musculu<br>s              |
| 1 | 1.00 | 1 | 1 | 0.01  | 0.008  | 0.008  | 0.003  | 0.008  | t | 119649 | SYCEIIVTH<br>FPFDQQN<br>CT   | Mus<br>musculu<br>s              |
| 1 | 1.00 | 1 | 1 | -0.01 | -0.008 | -0.004 | -0.009 | -0.009 | t | 78936  | AWDMM<br>MNWSPTT<br>ALV      | Homo<br>sapiens                  |
| 1 | 1.00 | 1 | 1 | 0.02  | 0.02   | 0.034  | 0.017  | 0.017  | t | 68322  | VEQKHIQK<br>EDVPSERY<br>LGYL | Homo<br>sapiens                  |
| 1 | 1.00 | 1 | 1 | 0.01  | 0.01   | 0.023  | 0.01   | 0.01   | t | 66058  | TRLNFEDA<br>G                | Rattus<br>norvegic<br>us         |
| 1 | 1.00 | 1 | 1 | 0     | -0.004 | 0.007  | -0.003 | -0.002 | t | 144680 | GYPADSK<br>GGGGLPD<br>SVKI   | Oryctola<br>gus<br>cuniculu<br>s |
| 1 | 1.00 | 1 | 1 | 0.03  | 0.032  | 0.03   | 0.023  | 0.03   | t | 123243 | GLSRISYDP                    | Ovis<br>aries                    |
| 1 | 1.00 | 1 | 1 | 0     | 0      | 0      | 0      | 0      | t | 139525 | ISSQTNDT<br>HKRDTYA<br>ATPRA | Mus<br>musculu<br>s              |
| 1 | 1.00 | 1 | 1 | 0     | 0      | 0      | 0      | 0      | t | 139525 | ISSQTNDT<br>HKRDTYA<br>ATPRA | Mus<br>musculu<br>s              |
| 1 | 1.00 | 1 | 1 | 0     | 0      | 0      | 0      | 0.004  | t | 123562 | NSSSSQFQ<br>IHGPR            | Mus<br>musculu<br>s              |



|   |      |   |   |       |        |        |        |        |   |        |                              |                                  |
|---|------|---|---|-------|--------|--------|--------|--------|---|--------|------------------------------|----------------------------------|
| 1 | 1.00 | 1 | 1 | -0.02 | -0.017 | -0.005 | -0.02  | -0.02  | t | 137749 | DTQLTYAG<br>LKL              | Mus<br>musculu<br>s              |
| 1 | 1.00 | 1 | 1 | 0.01  | 0.012  | 0.019  | 0.011  | 0.01   | t | 42060  | MLSKYSLPI<br>VEEPEDYK<br>EAS | Homo<br>sapiens                  |
| 1 | 1.00 | 1 | 1 | -0.01 | -0.014 | -0.008 | -0.007 | -0.008 | t | 19630  | GFTKTCGG<br>PPCNIGGL<br>GNNT | Oryctola<br>gus<br>cuniculu<br>s |
| 1 | 1.00 | 1 | 1 | 0     | 0      | 0.007  | 0      | -0.001 | t | 74762  | YLLARGHD<br>PAFVHMS          | Mus<br>musculu<br>s              |
| 1 | 1.00 | 1 | 1 | 0.01  | 0.005  | 0.027  | 0.013  | 0.012  | t | 95747  | QVLAQKV<br>A                 | Bos<br>taurus                    |
| 1 | 1.00 | 1 | 1 | 0.01  | 0.012  | 0.027  | 0.013  | 0.012  | t | 95747  | QVLAQKV<br>A                 | Cavia<br>porcellu<br>s           |
| 1 | 1.00 | 1 | 1 | 0     | -0.003 | -0.001 | -0.003 | 0      | t | 78170  | GKHGKEV<br>KIT               | Mus<br>musculu<br>s              |
| 1 | 1.00 | 1 | 1 | 0.01  | 0.01   | 0.017  | 0      | 0.01   | t | 125576 | THPVT DPI<br>AHPP            | Homo<br>sapiens                  |
| 1 | 1.00 | 1 | 1 | -0.05 | -0.052 | -0.04  | -0.051 | -0.05  | t | 20173  | GHPRTAEL<br>LGML             | Mus<br>musculu<br>s              |
| 1 | 1.00 | 1 | 1 | 0     | 0      | -0.003 | 0      | 0.005  | t | 111051 | VGP LEVIP<br>EAVDPAG<br>SSIV | Oryctola<br>gus<br>cuniculu<br>s |
| 1 | 1.00 | 1 | 1 | 0.03  | 0.028  | 0.02   | 0.033  | 0.043  | t | 78256  | QYPALTA                      | Mus<br>musculu<br>s              |
| 1 | 1.00 | 1 | 1 | 0     | -0.003 | 0.001  | -0.001 | 0.003  | t | 47669  | PGGPDRFT<br>LLTPGSH          | Oryctola<br>gus<br>cuniculu<br>s |
| 1 | 1.00 | 1 | 1 | 0     | 0      | 0.001  | -0.001 | 0.003  | t | 47669  | PGGPDRFT<br>LLTPGSH          | Mus<br>musculu<br>s              |

|   |      |   |   |       |        |        |        |        |   |        |                              |                                  |
|---|------|---|---|-------|--------|--------|--------|--------|---|--------|------------------------------|----------------------------------|
| 1 | 1.00 | 1 | 1 | 0     | 0      | 0.001  | -0.001 | 0.003  | t | 47669  | PGGPDRFT<br>LLTPGSH          | Mus<br>musculu<br>s              |
| 1 | 1.00 | 1 | 1 | 0.02  | 0.017  | 0.032  | 0.02   | 0.02   | t | 121020 | TYDGTKVS<br>ISPESDR          | Oryctola<br>gus<br>cuniculu<br>s |
| 1 | 1.00 | 1 | 1 | 0.02  | 0.02   | 0.032  | 0.02   | 0.02   | t | 121020 | TYDGTKVS<br>ISPESDR          | Rattus<br>norvegic<br>us         |
| 1 | 1.00 | 1 | 1 | -0.01 | -0.014 | -0.005 | -0.017 | -0.01  | t | 141715 | NLDHI                        | Oryctola<br>gus<br>cuniculu<br>s |
| 1 | 1.00 | 1 | 1 | -0.03 | -0.027 | -0.018 | -0.03  | -0.03  | t | 46381  | NVGIMFR<br>GKE               | Mus<br>musculu<br>s              |
| 1 | 1.00 | 1 | 1 | 0     | -0.002 | 0.007  | -0.003 | 0.001  | t | 19512  | GFDHGLTP<br>FDNY             | Rattus<br>norvegic<br>us         |
| 1 | 1.00 | 1 | 1 | -0.01 | -0.015 | -0.003 | -0.017 | -0.01  | t | 136727 | VNWNSW<br>HKTNLS             | Bos<br>taurus                    |
| 1 | 1.00 | 1 | 1 | 0.02  | 0.02   | 0.017  | 0.02   | 0.03   | t | 11882  | EESPLGFS<br>PE               | Mus<br>musculu<br>s              |
| 1 | 1.00 | 1 | 1 | 0.01  | 0.01   | 0.015  | 0.01   | 0.01   | t | 53758  | RFPRGQG<br>VPINTNSG<br>PDDQI | Homo<br>sapiens                  |
| 1 | 1.00 | 1 | 1 | -0.01 | -0.013 | -0.015 | -0.009 | -0.008 | t | 59749  | SMSHRTM<br>SIVNSYVN<br>DVMER | Canis<br>lupus                   |
| 1 | 1.00 | 1 | 1 | 0.07  | 0.07   | 0.086  | 0.068  | 0.068  | t | 98747  | EEEEDEDE<br>EEEGSNR          | Homo<br>sapiens                  |
| 1 | 1.00 | 1 | 1 | -0.08 | -0.078 | -0.068 | -0.073 | -0.08  | t | 134792 | RSPSPTPT<br>PGPSRRG          | Homo<br>sapiens                  |
| 1 | 1.00 | 1 | 1 | -0.13 | -0.128 | -0.12  | -0.123 | -0.128 | t | 144823 | YWEGSGI<br>GAI               | Homo<br>sapiens                  |

|   |      |   |   |       |        |        |        |        |   |        |                             |                                  |
|---|------|---|---|-------|--------|--------|--------|--------|---|--------|-----------------------------|----------------------------------|
| 1 | 1.00 | 1 | 1 | -0.08 | -0.082 | -0.075 | -0.081 | -0.08  | t | 16139  | FHRSPSIRV<br>VHH            | Mus<br>musculu<br>s              |
| 1 | 1.00 | 1 | 1 | -0.04 | -0.037 | -0.026 | -0.04  | -0.039 | t | 100554 | THARHLP                     | Sus<br>scrofa                    |
| 1 | 1.00 | 1 | 1 | -0.04 | -0.038 | -0.033 | -0.037 | -0.038 | t | 94651  | PTCWAICK<br>RIPN            | Homo<br>sapiens                  |
| 1 | 1.00 | 1 | 1 | 0.01  | 0.01   | 0.02   | 0.01   | 0.008  | t | 73430  | YAQYMSR<br>AYAFLGE<br>DPGSG | Mus<br>musculu<br>s              |
| 1 | 1.00 | 1 | 1 | 0     | 0.001  | 0      | 0.003  | 0.001  | t | 73763  | YESNHLIDL<br>SRYASKINI<br>G | Equus<br>caballus                |
| 1 | 1.00 | 1 | 1 | 0     | 0.007  | 0      | 0.003  | 0.001  | t | 73763  | YESNHLIDL<br>SRYASKINI<br>G | Gallus<br>gallus                 |
| 1 | 1.00 | 1 | 1 | 0.02  | 0.024  | 0.034  | 0.023  | 0.019  | t | 66219  | TSGITGDN<br>TTTSSE          | Homo<br>sapiens                  |
| 1 | 1.00 | 1 | 1 | 0.03  | 0.03   | 0.04   | 0.026  | 0.03   | t | 8900   | DKILVQAN<br>EAETTTA         | Homo<br>sapiens                  |
| 1 | 1.00 | 1 | 1 | -0.04 | -0.038 | -0.031 | -0.037 | -0.038 | t | 113838 | SADLDQFP<br>LGRKFLQ<br>AGLK | Cavia<br>porcellu<br>s           |
| 1 | 1.00 | 1 | 1 | -0.05 | -0.053 | -0.05  | -0.05  | -0.05  | t | 131701 | THHINNM<br>KPSFTREN<br>T    | Oryctola<br>gus<br>cuniculu<br>s |
| 1 | 1.00 | 1 | 1 | -0.01 | -0.006 | -0.001 | -0.009 | -0.01  | t | 49557  | PSVYawe<br>RKKISNCV<br>AD   | Homo<br>sapiens                  |
| 1 | 1.00 | 1 | 1 | -0.02 | -0.024 | -0.02  | -0.026 | -0.019 | t | 107510 | LMVGGVV<br>IA               | Oryctola<br>gus<br>cuniculu<br>s |
| 1 | 1.00 | 1 | 1 | -0.06 | -0.058 | -0.062 | -0.059 | -0.061 | t | 9826   | DQAQRPA<br>VASRRRPT<br>TAG  | Homo<br>sapiens                  |

|   |      |   |   |       |        |        |        |        |   |        |                             |                       |
|---|------|---|---|-------|--------|--------|--------|--------|---|--------|-----------------------------|-----------------------|
| 1 | 1.00 | 1 | 1 | 0     | 0      | 0.011  | 0      | 0.002  | t | 101412 | WIRNNF                      | Mus musculus          |
| 1 | 1.00 | 1 | 1 | -0.02 | -0.024 | -0.018 | -0.027 | -0.022 | t | 107201 | LIVPEGAR<br>TSLN            | Oryctolagus cuniculus |
| 1 | 1.00 | 1 | 1 | -0.01 | -0.012 | 0.002  | -0.011 | -0.01  | t | 142390 | CGRLRSEL<br>PRL             | Mus musculus          |
| 1 | 1.00 | 1 | 1 | 0.01  | 0.012  | 0.016  | 0.011  | 0.011  | t | 3295   | ANGAGNQ<br>PPGEDGA<br>GNQPG | Homo sapiens          |
| 1 | 1.00 | 1 | 1 | 0     | 0.002  | -0.003 | -0.001 | 0.001  | t | 40319  | LVEKPNLS<br>SKRSELS         | Homo sapiens          |
| 1 | 1.00 | 1 | 1 | -0.01 | -0.01  | -0.01  | -0.01  | -0.006 | t | 133536 | CKPVENRA<br>C               | Mus musculus          |
| 1 | 1.00 | 1 | 1 | -0.02 | -0.02  | -0.018 | -0.02  | -0.018 | t | 29375  | IVNRRTSFF<br>NLGPSQR        | Mus musculus          |
| 1 | 1.00 | 1 | 1 | 0.01  | 0.008  | 0.017  | 0.009  | 0.011  | t | 43191  | NAKATYEA<br>ALKQYEAD<br>LAA | Mus musculus          |
| 1 | 1.00 | 1 | 1 | -0.01 | -0.01  | -0.01  | -0.01  | -0.011 | t | 108898 | EIDGPAGQ<br>AEPDRAH<br>YN   | Mus musculus          |
| 1 | 1.00 | 1 | 1 | -0.01 | -0.012 | -0.009 | -0.017 | -0.013 | t | 144324 | GVSTITAD<br>EIR             | Mus musculus          |
| 1 | 1.00 | 1 | 1 | 0.01  | 0.01   | 0.01   | 0.017  | 0.019  | t | 158604 | PVGPWTN                     | Homo sapiens          |
| 1 | 1.00 | 1 | 1 | -0.02 | -0.024 | -0.012 | -0.021 | -0.018 | t | 79923  | LVCGIAAK<br>LGAA            | Mus musculus          |
| 1 | 1.00 | 1 | 1 | -0.04 | -0.04  | -0.04  | -0.043 | -0.04  | t | 149042 | FLHTRLLFR<br>IVSYSG         | Rattus norvegicus     |
| 1 | 1.00 | 1 | 1 | -0.04 | -0.043 | -0.04  | -0.041 | -0.039 | t | 138232 | RLTSSLRY<br>NP              | Oryctolagus cuniculus |

|   |      |   |   |       |        |        |        |        |   |        |                              |                       |
|---|------|---|---|-------|--------|--------|--------|--------|---|--------|------------------------------|-----------------------|
| 1 | 1.00 | 1 | 1 | 0.01  | 0.012  | 0.008  | 0.007  | 0.012  | t | 48681  | PNNDFHF<br>EVFNF             | Homo sapiens          |
| 1 | 1.00 | 1 | 1 | -0.05 | -0.047 | -0.033 | -0.047 | -0.053 | t | 111033 | STYDRDN<br>DGWLTSD<br>PRKQCS | Mus musculus          |
| 1 | 1.00 | 1 | 1 | 0     | 0.002  | 0.005  | 0.001  | 0.003  | t | 67170  | TVSTEQNV<br>PDPQVGI          | Homo sapiens          |
| 1 | 1.00 | 1 | 1 | 0.01  | 0.013  | 0.012  | 0.016  | 0.017  | t | 122721 | CSNSSSQ<br>FQIHGPR           | Mus musculus          |
| 1 | 1.00 | 1 | 1 | 0.02  | 0.024  | 0.03   | 0.021  | 0.02   | t | 10677  | DVNAIDIE<br>EPSGQT           | Homo sapiens          |
| 1 | 1.00 | 1 | 1 | -0.04 | -0.04  | -0.025 | -0.04  | -0.042 | t | 22507  | GSSGYCA<br>WPACYCY<br>G      | Oryctolagus cuniculus |
| 1 | 1.00 | 1 | 1 | -0.04 | -0.034 | -0.025 | -0.04  | -0.042 | t | 22507  | GSSGYCA<br>WPACYCY<br>G      | Equus caballus        |
| 1 | 1.00 | 1 | 1 | 0.02  | 0.018  | 0.017  | 0.013  | 0.019  | t | 119655 | TTEAVVAD<br>KPEKEKA          | Rattus norvegicus     |
| 1 | 1.00 | 1 | 1 | 0.05  | 0.046  | 0.056  | 0.043  | 0.053  | t | 134758 | PESPSKLAS<br>A               | Oryctolagus cuniculus |
| 1 | 1.00 | 1 | 1 | 0.02  | 0.02   | 0.02   | 0.02   | 0.021  | t | 119495 | MAENGD<br>NEKMAAL<br>EAKICHQ | Homo sapiens          |
| 1 | 1.00 | 1 | 1 | 0.02  | 0.02   | 0.025  | 0.022  | 0.021  | t | 57988  | SGAVILLEF<br>IPEIAIPVL<br>G  | Homo sapiens          |
| 1 | 1.00 | 1 | 1 | 0.01  | 0.011  | 0.02   | 0.01   | 0.01   | t | 24419  | HNYYNKIQ<br>TAAH             | Mus musculus          |
| 1 | 1.00 | 1 | 1 | 0.01  | 0.014  | 0.03   | 0.007  | 0.008  | t | 31559  | KKGVITQV<br>KY               | Homo sapiens          |

|   |      |   |   |       |        |        |        |        |   |        |                              |                                  |
|---|------|---|---|-------|--------|--------|--------|--------|---|--------|------------------------------|----------------------------------|
| 1 | 1.00 | 1 | 1 | 0.01  | 0.012  | 0.03   | 0.007  | 0.008  | t | 31559  | KKGVITQV<br>KY               | Homo<br>sapiens                  |
| 1 | 1.00 | 1 | 1 | 0     | 0      | 0      | 0      | 0.001  | t | 122885 | QVAALTW<br>VQTHIRGF<br>GGDPR | Mus<br>musculu<br>s              |
| 1 | 1.00 | 1 | 1 | 0.01  | 0.008  | 0.017  | 0.013  | 0.012  | t | 115702 | DEAELPSRI<br>SPGKNA          | Mus<br>musculu<br>s              |
| 1 | 1.00 | 1 | 1 | -0.02 | -0.022 | -0.016 | -0.021 | -0.017 | t | 1536   | AGGSGRP                      | Mus<br>musculu<br>s              |
| 1 | 1.00 | 1 | 1 | 0.02  | 0.02   | 0.032  | 0.016  | 0.018  | t | 96964  | TKAAEKQ<br>MKD               | Homo<br>sapiens                  |
| 1 | 1.00 | 1 | 1 | 0     | -0.002 | 0.012  | 0.003  | 0.002  | t | 13659  | EPHSNPA<br>DLLPR             | Mus<br>musculu<br>s              |
| 1 | 1.00 | 1 | 1 | 0.06  | 0.06   | 0.068  | 0.057  | 0.061  | t | 98094  | HGSEP                        | Homo<br>sapiens                  |
| 1 | 1.00 | 1 | 1 | -0.04 | -0.037 | -0.03  | -0.04  | -0.04  | t | 79840  | GKDLKRP<br>GSSPME            | Mus<br>musculu<br>s              |
| 1 | 1.00 | 1 | 1 | 0     | 0      | -0.002 | 0      | 0.003  | t | 6883   | CQIYPPNA<br>NKIREALA<br>Q    | Oryctola<br>gus<br>cuniculu<br>s |
| 1 | 1.00 | 1 | 1 | -0.01 | -0.01  | -0.005 | -0.017 | -0.01  | t | 118146 | SNLDHILE<br>PSIP             | Homo<br>sapiens                  |
| 1 | 1.00 | 1 | 1 | -0.02 | -0.018 | -0.011 | -0.019 | -0.02  | t | 9733   | DPQARVAI<br>KSLT             | Homo<br>sapiens                  |
| 1 | 1.00 | 1 | 1 | 0     | 0.007  | 0.017  | 0.003  | -0.003 | t | 110834 | EQLKGQG<br>KSRLGDLY<br>EEEMR | Mus<br>musculu<br>s              |
| 1 | 1.00 | 1 | 1 | -0.01 | -0.006 | -0.01  | -0.013 | -0.008 | t | 28074  | IPSTACTDI<br>AWVRLPC<br>HYG  | Homo<br>sapiens                  |

|   |      |   |   |       |        |        |        |        |   |        |                              |                                  |
|---|------|---|---|-------|--------|--------|--------|--------|---|--------|------------------------------|----------------------------------|
| 1 | 1.00 | 1 | 1 | -0.01 | -0.012 | 0.002  | -0.007 | -0.01  | t | 34040  | KVIDTLTC<br>GFADLMG<br>YIPLV | Mus<br>musculu<br>s              |
| 1 | 1.00 | 1 | 1 | 0.03  | 0.032  | 0.023  | 0.033  | 0.041  | t | 78286  | TTAETLDA<br>TR               | Cavia<br>porcellu<br>s           |
| 1 | 1.00 | 1 | 1 | 0     | -0.008 | 0.014  | 0      | 0      | t | 18583  | GAGDVK                       | Mus<br>musculu<br>s              |
| 1 | 1.00 | 1 | 1 | -0.02 | -0.02  | -0.013 | -0.02  | -0.02  | t | 78183  | ITDNHGH<br>VKW               | Mus<br>musculu<br>s              |
| 1 | 1.00 | 1 | 1 | 0     | 0      | 0.008  | 0      | -0.002 | t | 14353  | ETEDTKEP<br>GVLMGGQ          | Mus<br>musculu<br>s              |
| 1 | 1.00 | 1 | 1 | -0.01 | -0.01  | 0.002  | -0.01  | -0.01  | t | 31072  | KGTHSLYS<br>QIAGC            | Mus<br>musculu<br>s              |
| 1 | 1.00 | 1 | 1 | -0.02 | -0.022 | -0.013 | -0.027 | -0.017 | t | 107891 | HRLAFGQY<br>T                | Mus<br>musculu<br>s              |
| 1 | 1.00 | 1 | 1 | 0.03  | 0.032  | 0.025  | 0.031  | 0.031  | t | 76584  | YYQSGLSI<br>VMPVGG<br>QSSFYS | Homo<br>sapiens                  |
| 1 | 1.00 | 1 | 1 | 0.02  | 0.022  | 0.02   | 0.026  | 0.027  | t | 131651 | SEGTGQAL<br>ASPGSCLE         | Rattus<br>norvegic<br>us         |
| 1 | 1.00 | 1 | 1 | -0.02 | -0.02  | -0.021 | -0.017 | -0.02  | t | 58121  | SGLPGTRG<br>GSGVPGPI<br>NPPN | Homo<br>sapiens                  |
| 1 | 1.00 | 1 | 1 | -0.03 | -0.032 | -0.023 | -0.029 | -0.028 | t | 96228  | EGLLKLL<br>DTLENML<br>K      | Mus<br>musculu<br>s              |
| 1 | 1.00 | 1 | 1 | 0.01  | -0.002 | 0.008  | 0.01   | 0.012  | t | 156977 | YGAPEITK<br>DGYKVIKSI<br>K   | Canis<br>lupus                   |
| 1 | 1.00 | 1 | 1 | 0.01  | 0.002  | 0.008  | 0.01   | 0.012  | t | 156977 | YGAPEITK<br>DGYKVIKSI<br>K   | Mus<br>musculu<br>s              |
| 1 | 1.00 | 1 | 1 | 0.02  | 0.017  | 0.019  | 0.019  | 0.022  | t | 140248 | KAGETIYDI<br>DEDGTITK<br>KD  | Oryctola<br>gus<br>cuniculu<br>s |

|   |      |   |   |       |        |        |        |        |   |        |                              |                                  |
|---|------|---|---|-------|--------|--------|--------|--------|---|--------|------------------------------|----------------------------------|
| 1 | 1.00 | 1 | 1 | 0.03  | 0.03   | 0.03   | 0.02   | 0.03   | t | 114961 | TDGVTYD<br>NEC               | Homo<br>sapiens                  |
| 1 | 1.00 | 1 | 1 | -0.07 | -0.073 | -0.08  | -0.07  | -0.066 | t | 140939 | YNIALGQR<br>RADA             | Oryctola<br>gus<br>cuniculu<br>s |
| 1 | 1.00 | 1 | 1 | 0     | 0.002  | 0.02   | 0.007  | 0.002  | t | 127981 | FRRAVLM<br>GGGALSPA<br>AVISH | Homo<br>sapiens                  |
| 1 | 1.00 | 1 | 1 | 0     | 0.002  | 0.017  | 0.007  | 0      | t | 122538 | QELECDW<br>EEVTTSGP<br>CGEES | Homo<br>sapiens                  |
| 1 | 1.00 | 1 | 1 | -0.01 | -0.008 | 0.005  | -0.013 | -0.01  | t | 9446   | DNEEPIAP<br>YHF              | Homo<br>sapiens                  |
| 1 | 1.00 | 1 | 1 | 0.04  | 0.036  | 0.047  | 0.037  | 0.041  | t | 115594 | AQRPQDE<br>N                 | Oryctola<br>gus<br>cuniculu<br>s |
| 1 | 1.00 | 1 | 1 | 0.04  | 0.026  | 0.047  | 0.037  | 0.041  | t | 115594 | AQRPQDE<br>N                 | Macaca<br>mulatta                |
| 1 | 1.00 | 1 | 1 | -0.02 | -0.024 | -0.02  | -0.027 | -0.019 | t | 116685 | CPAGWISL<br>WKGFS            | Oryctola<br>gus<br>cuniculu<br>s |
| 1 | 1.00 | 1 | 1 | 0     | 0      | 0      | 0      | 0      | t | 71216  | VSWFAST<br>GGRDSKID<br>VWSLV | Homo<br>sapiens                  |
| 1 | 1.00 | 1 | 1 | -0.03 | -0.026 | -0.022 | -0.029 | -0.03  | t | 1439   | AGAHWG<br>VLG                | Homo<br>sapiens                  |
| 1 | 1.00 | 1 | 1 | -0.06 | -0.068 | -0.06  | -0.06  | -0.057 | t | 136358 | HMRKRTKI<br>KKIR             | Mus<br>musculu<br>s              |
| 1 | 1.00 | 1 | 1 | -0.04 | -0.038 | -0.04  | -0.039 | -0.037 | t | 153382 | FAENKGD<br>HFSPGGG<br>GS     | Homo<br>sapiens                  |
| 1 | 1.00 | 1 | 1 | -0.04 | -0.043 | -0.039 | -0.04  | -0.039 | t | 11372  | EDKRDGN<br>N                 | Oryctola<br>gus<br>cuniculu<br>s |
| 1 | 1.00 | 1 | 1 | 0.03  | 0.03   | 0.023  | 0.03   | 0.036  | t | 124588 | PQEETLQA<br>FDSHYDYT         | Homo<br>sapiens                  |



|   |      |   |   |       |        |        |        |        |   |        |                              |                   |
|---|------|---|---|-------|--------|--------|--------|--------|---|--------|------------------------------|-------------------|
| 1 | 1.00 | 1 | 1 | 0     | 0.004  | -0.013 | -0.003 | 0.004  | t | 59387  | SLPGQTKIL<br>AKVfyGEN        | Homo sapiens      |
| 1 | 1.00 | 1 | 1 | -0.01 | -0.01  | -0.005 | -0.004 | -0.007 | t | 8785   | DISQLTQAI<br>VKNHKNLL<br>K   | Homo sapiens      |
| 1 | 1.00 | 1 | 1 | -0.03 | -0.027 | -0.013 | -0.03  | -0.033 | t | 111030 | SRGSEGFF<br>SPMLGEFV<br>SETE | Mus musculus      |
| 1 | 1.00 | 1 | 1 | -0.04 | -0.038 | -0.035 | -0.039 | -0.041 | t | 57540  | SELSPLLLT<br>TTQWQVL<br>PCSF | Homo sapiens      |
| 1 | 1.00 | 1 | 1 | 0.02  | 0.026  | 0.027  | 0.02   | 0.021  | t | 2720   | ALLNPSRV<br>YTFFSSDY<br>VKK  | Equus caballus    |
| 1 | 1.00 | 1 | 1 | 0.02  | 0.031  | 0.027  | 0.02   | 0.021  | t | 2720   | ALLNPSRV<br>YTFFSSDY<br>VKK  | Gallus gallus     |
| 1 | 1.00 | 1 | 1 | 0.02  | 0.024  | 0.027  | 0.02   | 0.021  | t | 2720   | ALLNPSRV<br>YTFFSSDY<br>VKK  | Homo sapiens      |
| 1 | 1.00 | 1 | 1 | -0.03 | -0.03  | -0.03  | -0.03  | -0.028 | t | 100548 | TDNTKINR<br>GI               | Mus musculus      |
| 1 | 1.00 | 1 | 1 | 0.02  | 0.018  | 0.02   | 0.013  | 0.02   | t | 119620 | NPDDYGG<br>VK                | Rattus norvegicus |
| 1 | 1.00 | 1 | 1 | -0.01 | -0.012 | -0.01  | -0.011 | -0.01  | t | 12208  | EGKVSTLP<br>LDIQIIAAT<br>MSK | Mus musculus      |
| 1 | 1.00 | 1 | 1 | -0.01 | -0.012 | -0.01  | -0.011 | -0.01  | t | 12208  | EGKVSTLP<br>LDIQIIAAT<br>MSK | Mus musculus      |
| 1 | 1.00 | 1 | 1 | -0.04 | -0.038 | -0.035 | -0.043 | -0.039 | t | 58378  | SHLLKPQT<br>RTRT             | Homo sapiens      |
| 1 | 1.00 | 1 | 1 | -0.01 | -0.008 | -0.01  | -0.003 | -0.008 | t | 122135 | LDSRRSYR<br>VRESGLNG<br>VVKH | Homo sapiens      |
| 1 | 1.00 | 1 | 1 | 0     | 0.002  | 0.005  | 0.003  | 0.007  | t | 138198 | KPTSTLT                      | Homo sapiens      |

|   |      |   |   |       |        |        |        |        |   |        |                              |                                  |
|---|------|---|---|-------|--------|--------|--------|--------|---|--------|------------------------------|----------------------------------|
| 1 | 1.00 | 1 | 1 | 0     | 0      | 0      | 0      | 0.004  | t | 56771  | SAFDDNLT<br>AANAMGL<br>ILNKR | Aotus<br>nancyma<br>ae           |
| 1 | 1.00 | 1 | 1 | 0.01  | 0.005  | 0.024  | 0.013  | 0.01   | t | 95497  | KIIAPAKQ                     | Bos<br>taurus                    |
| 1 | 1.00 | 1 | 1 | -0.04 | -0.042 | -0.041 | -0.041 | -0.04  | t | 31046  | KGQKPNLL<br>DRLRHRK<br>NGYRH | Mus<br>musculu<br>s              |
| 1 | 1.00 | 1 | 1 | -0.05 | -0.048 | -0.05  | -0.057 | -0.05  | t | 123383 | KMWSDFL<br>GK                | Ovis<br>aries                    |
| 1 | 1.00 | 1 | 1 | -0.02 | -0.017 | 0.006  | -0.02  | -0.022 | t | 52745  | QVMFDFA<br>S                 | Mus<br>musculu<br>s              |
| 1 | 1.00 | 1 | 1 | 0     | 0      | -0.003 | 0      | 0.002  | t | 72476  | WGILSRAA<br>TNSGWVG<br>LIPHK | Homo<br>sapiens                  |
| 1 | 1.00 | 1 | 1 | -0.04 | -0.038 | -0.032 | -0.039 | -0.038 | t | 63895  | TGMQSW<br>VPLSTDDP<br>V      | Homo<br>sapiens                  |
| 1 | 1.00 | 1 | 1 | 0.02  | 0.02   | 0.02   | 0.02   | 0.02   | t | 105942 | LSADQIST<br>VQASFDK<br>VKGD  | Oryctola<br>gus<br>cuniculu<br>s |
| 1 | 1.00 | 1 | 1 | 0.03  | 0.028  | 0.044  | 0.029  | 0.032  | t | 66061  | TRLNPDLQ                     | Mus<br>musculu<br>s              |
| 1 | 1.00 | 1 | 1 | 0.03  | 0.033  | 0.049  | 0.03   | 0.033  | t | 62641  | SYLPQLG                      | Mus<br>musculu<br>s              |
| 1 | 1.00 | 1 | 1 | 0.04  | 0.042  | 0.054  | 0.037  | 0.039  | t | 75274  | YPEEVVEE<br>VVPEEVVE<br>EVVP | Homo<br>sapiens                  |
| 1 | 1.00 | 1 | 1 | -0.01 | -0.008 | 0.005  | -0.009 | -0.01  | t | 10495  | DTTIMA                       | Homo<br>sapiens                  |
| 1 | 1.00 | 1 | 1 | 0     | 0.004  | 0.002  | -0.003 | 0      | t | 22882  | GTVVAVG<br>PGRWDED<br>G      | Homo<br>sapiens                  |
| 1 | 1.00 | 1 | 1 | 0.02  | 0.016  | 0.02   | 0.013  | 0.021  | t | 131141 | VRRLAME<br>NNIKLSEV<br>VGSG  | Oryctola<br>gus<br>cuniculu<br>s |

|   |      |   |   |       |        |        |        |        |   |        |                      |                       |
|---|------|---|---|-------|--------|--------|--------|--------|---|--------|----------------------|-----------------------|
| 1 | 1.00 | 1 | 1 | 0.05  | 0.047  | 0.05   | 0.05   | 0.06   | t | 59717  | SMMTELL              | Oryctolagus cuniculus |
| 1 | 1.00 | 1 | 1 | 0.02  | 0.015  | 0.027  | 0.017  | 0.02   | t | 33754  | KTLEAILSFARRGTI      | Bos taurus            |
| 1 | 1.00 | 1 | 1 | -0.02 | -0.02  | -0.018 | -0.021 | -0.019 | t | 116080 | ATGGTLQQLFYISIVGQV   | Mus musculus          |
| 1 | 1.00 | 1 | 1 | -0.02 | -0.022 | -0.02  | -0.021 | -0.02  | t | 6487   | CKIPFEIMDLEKRHVLRGL  | Mus musculus          |
| 1 | 1.00 | 1 | 1 | -0.07 | -0.07  | -0.07  | -0.07  | -0.072 | t | 127602 | ATARRKRRWATRGPA      | Homo sapiens          |
| 1 | 1.00 | 1 | 1 | -0.02 | -0.02  | -0.009 | -0.02  | -0.019 | t | 17262  | FPCDRLSGYWERGIPSPCVR | Homo sapiens          |
| 1 | 1.00 | 1 | 1 | -0.01 | -0.012 | -0.001 | -0.011 | -0.01  | t | 64010  | TGYRYDSRTGFFATN      | Mus musculus          |
| 1 | 1.00 | 1 | 1 | 0.02  | 0.022  | 0.023  | 0.023  | 0.019  | t | 136073 | LSKNNAIEPRSFQNSRHPS  | Homo sapiens          |
| 1 | 1.00 | 1 | 1 | -0.04 | -0.038 | -0.041 | -0.043 | -0.038 | t | 33233  | KRVKTWRMHL           | Homo sapiens          |
| 1 | 1.00 | 1 | 1 | -0.01 | -0.01  | -0.01  | -0.01  | -0.006 | t | 57541  | SELSQL               | Mus musculus          |
| 1 | 1.00 | 1 | 1 | -0.02 | -0.018 | -0.015 | -0.019 | -0.015 | t | 39977  | LTITQLLKR            | Homo sapiens          |
| 1 | 1.00 | 1 | 1 | 0.02  | 0.018  | 0.011  | 0.013  | 0.02   | t | 102323 | ATTSPARENYFMRWLSDLRE | Mus musculus          |
| 1 | 1.00 | 1 | 1 | -0.02 | -0.02  | -0.022 | -0.02  | -0.019 | t | 127242 | TRVPMDAFQVGKFPEDFESC | Mus musculus          |
| 1 | 1.00 | 1 | 1 | 0.01  | 0.01   | 0.01   | 0.01   | 0.014  | t | 143677 | DRVNLRKLRGYY         | Mus musculus          |

|   |      |   |   |       |        |        |        |        |   |        |                              |                                  |
|---|------|---|---|-------|--------|--------|--------|--------|---|--------|------------------------------|----------------------------------|
| 1 | 1.00 | 1 | 1 | 0.04  | 0.04   | 0.049  | 0.04   | 0.04   | t | 60545  | SQSAPYIE<br>QAQAIAQ<br>QFKDK | Homo<br>sapiens                  |
| 1 | 1.00 | 1 | 1 | -0.03 | -0.03  | -0.037 | -0.03  | -0.025 | t | 25140  | HWSYGLR<br>PG                | Mus<br>musculu<br>s              |
| 1 | 1.00 | 1 | 1 | -0.01 | -0.006 | 0.001  | -0.013 | -0.008 | t | 32847  | KPQGPLP<br>NTA               | Homo<br>sapiens                  |
| 1 | 1.00 | 1 | 1 | 0     | 0      | -0.002 | -0.011 | 0      | t | 118430 | ISDAMKKV<br>GRKGV            | Homo<br>sapiens                  |
| 1 | 1.00 | 1 | 1 | 0.01  | 0.008  | 0.017  | 0.01   | 0.011  | t | 122626 | VDVPNGR<br>GDSLAYGL<br>RS    | Oryctola<br>gus<br>cuniculu<br>s |
| 1 | 1.00 | 1 | 1 | -0.04 | -0.036 | -0.037 | -0.041 | -0.038 | t | 39914  | LTGHRMA<br>WDMMM<br>NWS      | Homo<br>sapiens                  |
| 1 | 1.00 | 1 | 1 | 0     | -0.002 | -0.005 | -0.007 | 0.001  | t | 102564 | KKRPKPGG<br>GWNT             | Mus<br>musculu<br>s              |
| 1 | 1.00 | 1 | 1 | 0.01  | 0.008  | 0.026  | 0.009  | 0.011  | t | 136009 | VLVGEKGL<br>FEGG             | Mus<br>musculu<br>s              |
| 1 | 1.00 | 1 | 1 | 0.01  | 0.015  | 0.006  | 0.006  | 0.012  | t | 30289  | KEAESVCA<br>PIMSKIYQ         | Homo<br>sapiens                  |
| 1 | 1.00 | 1 | 1 | -0.02 | -0.024 | -0.023 | -0.021 | -0.02  | t | 73983  | YGDNAGRI<br>LAGALAT          | Oryctola<br>gus<br>cuniculu<br>s |
| 1 | 1.00 | 1 | 1 | -0.03 | -0.026 | -0.03  | -0.033 | -0.03  | t | 105718 | DPSIMAKF<br>TQFAGKDL<br>ESIK | Homo<br>sapiens                  |
| 1 | 1.00 | 1 | 1 | 0.01  | 0.008  | 0.017  | 0.003  | 0.01   | t | 135847 | YPAIVETGL                    | Mus<br>musculu<br>s              |
| 1 | 1.00 | 1 | 1 | -0.02 | -0.019 | -0.023 | -0.021 | -0.021 | t | 40167  | LTSGHLKC<br>RVKMEKL<br>QLKGT | Equus<br>caballus                |
| 1 | 1.00 | 1 | 1 | -0.02 | -0.019 | -0.008 | -0.021 | -0.02  | t | 63604  | TEYYLNHG<br>KWPEN            | Oryctola<br>gus<br>cuniculu<br>s |

|   |      |   |   |       |        |        |        |        |   |        |                              |                                  |
|---|------|---|---|-------|--------|--------|--------|--------|---|--------|------------------------------|----------------------------------|
| 1 | 1.00 | 1 | 1 | -0.05 | -0.05  | -0.05  | -0.05  | -0.05  | t | 15352  | FCVDPTKG<br>GKKAAR           | Homo<br>sapiens                  |
| 1 | 1.00 | 1 | 1 | 0.04  | 0.04   | 0.04   | 0.03   | 0.04   | t | 115939 | RELEELNV<br>PG               | Homo<br>sapiens                  |
| 1 | 1.00 | 1 | 1 | -0.01 | -0.01  | -0.015 | -0.004 | -0.003 | t | 46317  | NTWTTCQ<br>SIAFPSK           | Mus<br>musculu<br>s              |
| 1 | 1.00 | 1 | 1 | -0.02 | -0.013 | -0.012 | -0.02  | -0.019 | t | 110948 | MVTSDAQ<br>IFNKPYWL          | Mus<br>musculu<br>s              |
| 1 | 1.00 | 1 | 1 | -0.11 | -0.112 | -0.105 | -0.109 | -0.11  | t | 96175  | DFRWYGP<br>KYITHSIRS<br>FTPS | Mus<br>musculu<br>s              |
| 1 | 1.00 | 1 | 1 | 0     | -0.004 | 0.016  | -0.003 | 0.001  | t | 110286 | HSLGKLLG<br>RPDKF            | Oryctola<br>gus<br>cuniculu<br>s |
| 1 | 1.00 | 1 | 1 | 0.03  | 0.026  | 0.029  | 0.023  | 0.032  | t | 123979 | CGTAKRVT<br>GNQAV            | Oryctola<br>gus<br>cuniculu<br>s |
| 1 | 1.00 | 1 | 1 | -0.03 | -0.03  | -0.026 | -0.03  | -0.031 | t | 10323  | DTDVLLLN<br>NTRPPQG<br>NWFGC | Mus<br>musculu<br>s              |
| 1 | 1.00 | 1 | 1 | -0.02 | -0.02  | -0.02  | -0.02  | -0.021 | t | 131759 | WTLFFQN<br>GKVKVFQ<br>GNQDSF | Homo<br>sapiens                  |
| 1 | 1.00 | 1 | 1 | 0     | -0.004 | 0      | -0.007 | 0.001  | t | 122947 | WTQEPQP<br>LEEKWQH<br>RVVE   | Oryctola<br>gus<br>cuniculu<br>s |
| 1 | 1.00 | 1 | 1 | 0     | -0.002 | 0      | -0.007 | 0.001  | t | 65050  | TLRVYK                       | Mus<br>musculu<br>s              |
| 1 | 1.00 | 1 | 1 | -0.03 | -0.035 | -0.026 | -0.03  | -0.03  | t | 3574   | APGLPWA<br>LQGKRRG<br>A      | Bos<br>taurus                    |
| 1 | 1.00 | 1 | 1 | -0.03 | -0.033 | -0.023 | -0.03  | -0.028 | t | 138837 | CSSWYRG<br>AC                | Canis<br>lupus                   |
| 1 | 1.00 | 1 | 1 | -0.02 | -0.018 | -0.015 | -0.023 | -0.02  | t | 49683  | PTKKPTFK<br>TTKK             | Homo<br>sapiens                  |
| 1 | 1.00 | 1 | 1 | -0.06 | -0.06  | -0.051 | -0.06  | -0.06  | t | 135989 | RVLAPHLT<br>RAYA             | Homo<br>sapiens                  |

|   |      |   |   |       |        |        |        |        |   |        |                            |                       |
|---|------|---|---|-------|--------|--------|--------|--------|---|--------|----------------------------|-----------------------|
| 1 | 1.00 | 1 | 1 | -0.04 | -0.04  | -0.04  | -0.04  | -0.04  | t | 102069 | SKSSITITN<br>KRLTRKC       | Homo sapiens          |
| 1 | 1.00 | 1 | 1 | -0.03 | -0.03  | -0.048 | -0.03  | -0.021 | t | 73199  | WVIKPR                     | Mus musculus          |
| 1 | 1.00 | 1 | 1 | 0.03  | 0.03   | 0.035  | 0.03   | 0.031  | t | 132856 | LEDGRTLS<br>DYNIQKES       | Mus musculus          |
| 1 | 1.00 | 1 | 1 | -0.06 | -0.06  | -0.052 | -0.06  | -0.06  | t | 34925  | LAPVPPPA<br>TRRRRAVP<br>I  | Homo sapiens          |
| 1 | 1.00 | 1 | 1 | -0.03 | -0.03  | -0.013 | -0.03  | -0.028 | t | 79298  | LQWLWE<br>WPRT             | Mus musculus          |
| 1 | 1.00 | 1 | 1 | 0.01  | 0.01   | 0.018  | 0.01   | 0.01   | t | 119657 | TWNDTYG<br>SNN             | Homo sapiens          |
| 1 | 1.00 | 1 | 1 | 0     | 0      | 0      | -0.003 | 0.003  | t | 43242  | NANPNAN<br>PNANP           | Homo sapiens          |
| 1 | 1.00 | 1 | 1 | 0.01  | 0.01   | 0.011  | 0.01   | 0.01   | t | 21429  | GNGAGGQ<br>PAGNGAG<br>GQPA | Homo sapiens          |
| 1 | 1.00 | 1 | 1 | 0.03  | 0.028  | 0.032  | 0.023  | 0.029  | t | 117334 | NANNGNL<br>QLRNKEVT        | Mus musculus          |
| 1 | 1.00 | 1 | 1 | -0.03 | -0.026 | -0.028 | -0.029 | -0.028 | t | 49557  | PSVYawe<br>RKKISNCV<br>AD  | Homo sapiens          |
| 1 | 1.00 | 1 | 1 | -0.01 | -0.008 | -0.005 | -0.014 | -0.01  | t | 104586 | NRVAPNV<br>RQ              | Homo sapiens          |
| 1 | 1.00 | 1 | 1 | -0.04 | -0.039 | -0.019 | -0.04  | -0.04  | t | 31021  | KGNPEMV<br>D               | Oryctolagus cuniculus |
| 1 | 1.00 | 1 | 1 | -0.05 | -0.05  | -0.041 | -0.05  | -0.05  | t | 135983 | RLRPPEPR<br>PRDR           | Homo sapiens          |
| 1 | 1.00 | 1 | 1 | 0     | -0.002 | 0      | -0.003 | 0.003  | t | 104443 | DAEFRHDS<br>GYE            | Mus musculus          |

|   |      |   |   |       |        |        |        |        |   |        |                              |                                  |
|---|------|---|---|-------|--------|--------|--------|--------|---|--------|------------------------------|----------------------------------|
| 1 | 1.00 | 1 | 1 | 0     | -0.002 | 0      | -0.003 | 0.003  | t | 104443 | DAEFRHDS<br>GYE              | Mus<br>musculu<br>s              |
| 1 | 1.00 | 1 | 1 | 0     | -0.004 | 0      | -0.003 | 0.003  | t | 105021 | VHHQKL<br>VFFAEDVGS<br>NK    | Oryctola<br>gus<br>cuniculu<br>s |
| 1 | 1.00 | 1 | 1 | -0.03 | -0.03  | -0.03  | -0.03  | -0.03  | t | 136056 | DGKKWQT<br>YRGNSTG           | Oryctola<br>gus<br>cuniculu<br>s |
| 1 | 1.00 | 1 | 1 | -0.03 | -0.034 | -0.034 | -0.031 | -0.03  | t | 75802  | YSLRLTPRP<br>VSRFLGNN<br>SIL | Oryctola<br>gus<br>cuniculu<br>s |
| 1 | 1.00 | 1 | 1 | -0.01 | -0.008 | -0.002 | -0.009 | -0.009 | t | 47910  | PIGVPSQV<br>VYVPPAYI<br>DMPS | Homo<br>sapiens                  |
| 1 | 1.00 | 1 | 1 | 0.01  | 0.01   | 0.019  | 0.01   | 0.011  | t | 153499 | WSWQPPL<br>FPTDS             | Mus<br>musculu<br>s              |
| 1 | 1.00 | 1 | 1 | 0.02  | 0.018  | 0.02   | 0.013  | 0.021  | t | 119663 | VIVELIPST<br>SSAV            | Mus<br>musculu<br>s              |
| 1 | 1.00 | 1 | 1 | -0.02 | -0.019 | -0.01  | -0.021 | -0.02  | t | 33797  | KTNNSYIP<br>PLTW             | Oryctola<br>gus<br>cuniculu<br>s |
| 1 | 1.00 | 1 | 1 | -0.02 | -0.018 | -0.027 | -0.023 | -0.02  | t | 70725  | VRGGLRIL<br>SPDRKRR          | Homo<br>sapiens                  |
| 1 | 1.00 | 1 | 1 | -0.01 | -0.01  | -0.01  | -0.01  | -0.01  | t | 27431  | ILYQQFDE<br>MEECSRHI<br>PYLA | Homo<br>sapiens                  |
| 1 | 1.00 | 1 | 1 | 0     | 0.004  | 0      | -0.003 | 0      | t | 700    | ADLAAVQ<br>KTNAANQ<br>AAYQK  | Homo<br>sapiens                  |
| 1 | 1.00 | 1 | 1 | -0.03 | -0.019 | -0.027 | -0.03  | -0.028 | t | 59807  | SNDVSWH<br>EWKRMYN<br>KEYNG  | Rattus<br>rattus                 |
| 1 | 1.00 | 1 | 1 | 0     | -0.011 | 0.023  | 0      | 0      | t | 133961 | WIYQNF                       | Mus<br>musculu<br>s              |

|   |      |   |   |       |        |        |        |        |   |        |                              |                     |
|---|------|---|---|-------|--------|--------|--------|--------|---|--------|------------------------------|---------------------|
| 1 | 1.00 | 1 | 1 | -0.07 | -0.072 | -0.061 | -0.067 | -0.068 | t | 99012  | SPNQHTP<br>PWMLK             | Mus<br>musculu<br>s |
| 1 | 1.00 | 1 | 1 | -0.05 | -0.049 | -0.04  | -0.05  | -0.05  | t | 1790   | AHKWYSQ<br>WLPHR             | Mus<br>musculu<br>s |
| 1 | 1.00 | 1 | 1 | 0     | 0      | 0      | 0      | 0.005  | t | 138241 | SQPEILED<br>ARASVDY          | Mus<br>musculu<br>s |
| 1 | 1.00 | 1 | 1 | 0.05  | 0.05   | 0.057  | 0.043  | 0.05   | t | 117288 | FGDFNLPR<br>DKFLKEQI<br>KLDE | Mus<br>musculu<br>s |
| 1 | 1.00 | 1 | 1 | 0.01  | 0.01   | 0.015  | 0.01   | 0.012  | t | 126900 | QVAALTW<br>VQTHIRGF<br>GGD   | Mus<br>musculu<br>s |
| 1 | 1.00 | 1 | 1 | -0.04 | -0.042 | -0.042 | -0.047 | -0.042 | t | 119642 | SEHETRLV<br>ANLLENYN<br>KVIR | Mus<br>musculu<br>s |
| 1 | 1.00 | 1 | 1 | -0.04 | -0.038 | -0.031 | -0.041 | -0.038 | t | 48390  | PLDRWK<br>APDYVPP            | Homo<br>sapiens     |
| 1 | 1.00 | 1 | 1 | -0.02 | -0.018 | 0.001  | -0.017 | -0.019 | t | 23032  | GVLAQDV<br>RFSQV             | Homo<br>sapiens     |
| 1 | 1.00 | 1 | 1 | 0     | -0.002 | 0.013  | 0.003  | 0      | t | 116677 | ASATQLYK<br>TCKQAGT<br>CPPD  | Mus<br>musculu<br>s |
| 1 | 1.00 | 1 | 1 | 0     | 0.003  | 0      | 0      | 0.005  | t | 144664 | GREGYPA<br>DGGGLPD<br>SVKI   | Mus<br>musculu<br>s |
| 1 | 1.00 | 1 | 1 | -0.02 | -0.018 | -0.003 | -0.017 | -0.02  | t | 43219  | NALYPMS<br>PLLQECLR          | Homo<br>sapiens     |
| 1 | 1.00 | 1 | 1 | -0.01 | -0.003 | -0.003 | -0.017 | -0.01  | t | 116164 | RTPPPSG                      | Gallus<br>gallus    |
| 1 | 1.00 | 1 | 1 | -0.03 | -0.03  | -0.018 | -0.03  | -0.029 | t | 108168 | TRSFQIQA<br>T                | Mus<br>musculu<br>s |
| 1 | 1.00 | 1 | 1 | 0.03  | 0.034  | 0.024  | 0.031  | 0.031  | t | 76584  | YYQSGLSI<br>VMPVGG<br>QSSFYS | Homo<br>sapiens     |
| 1 | 1.00 | 1 | 1 | 0.03  | 0.032  | 0.024  | 0.031  | 0.031  | t | 76584  | YYQSGLSI<br>VMPVGG<br>QSSFYS | Homo<br>sapiens     |



|   |      |   |   |       |        |        |        |        |   |        |                              |                                  |
|---|------|---|---|-------|--------|--------|--------|--------|---|--------|------------------------------|----------------------------------|
| 1 | 1.00 | 1 | 1 | 0.01  | 0.01   | 0.007  | 0.01   | 0.013  | t | 7173   | CTKPTDG<br>NCTCIPIPS<br>SWAF | Oryctola<br>gus<br>cuniculu<br>s |
| 1 | 1.00 | 1 | 1 | -0.04 | -0.042 | -0.033 | -0.041 | -0.04  | t | 151033 | MAARVCC<br>QLDPARD<br>VLCL   | Mus<br>musculu<br>s              |
| 1 | 1.00 | 1 | 1 | 0     | 0      | 0      | -0.006 | 0.002  | t | 108019 | LSQPKIVK<br>WDR              | Mus<br>musculu<br>s              |
| 1 | 1.00 | 1 | 1 | -0.01 | -0.01  | -0.008 | -0.01  | -0.008 | t | 78004  | SGLETRVV<br>QAERFFKT<br>HLFD | Mus<br>musculu<br>s              |
| 1 | 1.00 | 1 | 1 | 0.01  | 0.006  | 0.01   | 0.003  | 0.009  | t | 131687 | SYPDNSYQ<br>QPYGE            | Oryctola<br>gus<br>cuniculu<br>s |
| 1 | 1.00 | 1 | 1 | -0.02 | -0.02  | -0.013 | -0.02  | -0.02  | t | 18742  | GAQITGH<br>VKNGSMR<br>IVGPKT | Homo<br>sapiens                  |
| 1 | 1.00 | 1 | 1 | 0     | -0.002 | 0.012  | -0.001 | 0      | t | 142389 | AVGNSRG<br>ACLAC             | Mus<br>musculu<br>s              |
| 1 | 1.00 | 1 | 1 | -0.02 | -0.02  | -0.03  | -0.02  | -0.017 | t | 95128  | PFDVQKC<br>NLKFGSW<br>TYGGWS | Rattus<br>norvegic<br>us         |
| 1 | 1.00 | 1 | 1 | 0.01  | 0.008  | 0.012  | 0.003  | 0.011  | t | 122945 | WELTE LDS<br>VGTHLPQE<br>RC  | Mus<br>musculu<br>s              |
| 1 | 1.00 | 1 | 1 | 0.02  | 0.009  | 0.047  | 0.02   | 0.02   | t | 30151  | KDGE GA                      | Marmot<br>a monax                |
| 1 | 1.00 | 1 | 1 | 0.03  | 0.027  | 0.033  | 0.03   | 0.031  | t | 136071 | LLYGEVGD<br>TLLIIFK          | Oryctola<br>gus<br>cuniculu<br>s |
| 1 | 1.00 | 1 | 1 | -0.06 | -0.057 | -0.051 | -0.06  | -0.061 | t | 58077  | SGHRMA<br>WDM MM<br>NW       | Mus<br>musculu<br>s              |
| 1 | 1.00 | 1 | 1 | -0.03 | -0.034 | -0.039 | -0.037 | -0.029 | t | 119454 | GGIKKIRLP<br>SDDVWLP<br>D    | Oryctola<br>gus<br>cuniculu<br>s |

|   |      |   |   |       |        |        |        |        |   |        |                              |                                  |
|---|------|---|---|-------|--------|--------|--------|--------|---|--------|------------------------------|----------------------------------|
| 1 | 1.00 | 1 | 1 | -0.03 | -0.026 | -0.027 | -0.031 | -0.028 | t | 39915  | LTGHRMA<br>WDMMQ<br>NWS      | Homo<br>sapiens                  |
| 1 | 1.00 | 1 | 1 | -0.01 | -0.013 | 0      | -0.01  | -0.008 | t | 111308 | GDTGPR                       | Oryctola<br>gus<br>cuniculu<br>s |
| 1 | 1.00 | 1 | 1 | -0.01 | -0.01  | -0.01  | -0.019 | -0.012 | t | 131045 | RPFDV LAP<br>GPES SGAS<br>T  | Homo<br>sapiens                  |
| 1 | 1.00 | 1 | 1 | -0.03 | -0.03  | -0.023 | -0.03  | -0.03  | t | 108200 | VSLGKWL<br>GHPDKF            | Mus<br>musculu<br>s              |
| 1 | 1.00 | 1 | 1 | -0.01 | -0.012 | -0.013 | -0.011 | -0.01  | t | 40453  | LVLNRLKV<br>GLQVVAV<br>KAPGF | Mus<br>musculu<br>s              |
| 1 | 1.00 | 1 | 1 | -0.02 | -0.024 | -0.021 | -0.021 | -0.02  | t | 32280  | KMADPNR<br>FRGKDLPV          | Oryctola<br>gus<br>cuniculu<br>s |
| 1 | 1.00 | 1 | 1 | 0.01  | 0.006  | 0.013  | 0.009  | 0.013  | t | 103174 | FKRSYEEHI<br>PYTHM           | Oryctola<br>gus<br>cuniculu<br>s |
| 1 | 1.00 | 1 | 1 | -0.01 | -0.01  | -0.002 | -0.01  | -0.008 | t | 20674  | GKREMVII<br>TF               | Mus<br>musculu<br>s              |
| 1 | 1.00 | 1 | 1 | -0.01 | -0.01  | -0.002 | -0.01  | -0.008 | t | 20674  | GKREMVII<br>TF               | Mus<br>musculu<br>s              |
| 1 | 1.00 | 1 | 1 | -0.01 | -0.014 | -0.011 | -0.017 | -0.007 | t | 114962 | THYGSL                       | Oryctola<br>gus<br>cuniculu<br>s |
| 1 | 1.00 | 1 | 1 | 0     | -0.003 | -0.003 | 0      | 0      | t | 36116  | LGGDILFG<br>WERTRED<br>GVQEY | Oryctola<br>gus<br>cuniculu<br>s |
| 1 | 1.00 | 1 | 1 | -0.02 | -0.02  | -0.02  | -0.027 | -0.02  | t | 119505 | NSTMGY                       | Homo<br>sapiens                  |
| 1 | 1.00 | 1 | 1 | -0.02 | -0.02  | -0.02  | -0.024 | -0.02  | t | 118611 | SQALQELIS<br>ELDRRCHS        | Homo<br>sapiens                  |
| 1 | 1.00 | 1 | 1 | -0.04 | -0.04  | -0.033 | -0.04  | -0.037 | t | 133665 | PVLLFCFLA<br>GRCVSV          | Mus<br>musculu<br>s              |

|   |      |   |   |       |        |        |        |        |   |        |                              |                                  |
|---|------|---|---|-------|--------|--------|--------|--------|---|--------|------------------------------|----------------------------------|
| 1 | 1.00 | 1 | 1 | 0.03  | 0.03   | 0.035  | 0.03   | 0.03   | t | 145704 | A EGLTTT<br>WKDYDHN<br>LQ    | Sus<br>scrofa                    |
| 1 | 1.00 | 1 | 1 | -0.06 | -0.06  | -0.051 | -0.06  | -0.06  | t | 135994 | SGLAPKRP<br>GPAG             | Homo<br>sapiens                  |
| 1 | 1.00 | 1 | 1 | -0.01 | -0.008 | -0.001 | -0.011 | -0.01  | t | 40104  | LTPKELD                      | Homo<br>sapiens                  |
| 1 | 1.00 | 1 | 1 | -0.03 | -0.03  | -0.021 | -0.03  | -0.03  | t | 70858  | VRYPHYSLI<br>KPESSL          | Homo<br>sapiens                  |
| 1 | 1.00 | 1 | 1 | -0.01 | -0.008 | 0.006  | -0.01  | -0.011 | t | 65725  | TPQRAGSP<br>LPRSSS           | Anas<br>platyrhy<br>nchos        |
| 1 | 1.00 | 1 | 1 | 0.03  | 0.03   | 0.03   | 0.026  | 0.031  | t | 119608 | LGTWTYD<br>GSVVAINP<br>ES    | Homo<br>sapiens                  |
| 1 | 1.00 | 1 | 1 | -0.02 | -0.018 | -0.017 | -0.024 | -0.02  | t | 119741 | AIFKSYGEII<br>VTHFPFD        | Homo<br>sapiens                  |
| 1 | 1.00 | 1 | 1 | -0.05 | -0.036 | -0.035 | -0.047 | -0.049 | t | 56501  | RYAHPS                       | Homo<br>sapiens                  |
| 1 | 1.00 | 1 | 1 | -0.02 | -0.02  | -0.022 | -0.021 | -0.02  | t | 56977  | SASAEPHK<br>AAVDVGP<br>LS    | Mus<br>musculu<br>s              |
| 1 | 1.00 | 1 | 1 | -0.06 | -0.063 | -0.048 | -0.06  | -0.062 | t | 95932  | TTRTVNPL<br>GFFK             | Oryctola<br>gus<br>cuniculu<br>s |
| 1 | 1.00 | 1 | 1 | -0.03 | -0.036 | -0.026 | -0.03  | -0.032 | t | 49506  | PSSKRFPQ<br>FQQFGRD<br>VSDFT | Oryctola<br>gus<br>cuniculu<br>s |
| 1 | 1.00 | 1 | 1 | 0     | 0.002  | 0.017  | 0.001  | 0      | t | 47533  | PFNQWPD<br>Y                 | Homo<br>sapiens                  |
| 1 | 1.00 | 1 | 1 | -0.01 | -0.01  | -0.008 | -0.01  | -0.009 | t | 9723   | DPPPPNP<br>NDPPPPN<br>PND    | Mus<br>musculu<br>s              |
| 1 | 1.00 | 1 | 1 | -0.05 | -0.05  | -0.037 | -0.053 | -0.052 | t | 76396  | YVRGGGA<br>VP                | Homo<br>sapiens                  |

|   |      |   |   |   |        |   |        |       |   |        |                              |                                  |
|---|------|---|---|---|--------|---|--------|-------|---|--------|------------------------------|----------------------------------|
| 1 | 1.00 | 1 | 1 | 0 | -0.004 | 0 | -0.007 | 0.001 | t | 138232 | RLTSSLRY<br>NP               | Oryctola<br>gus<br>cuniculu<br>s |
| 1 | 1.00 | 1 | 1 | 0 | -0.002 | 0 | -0.007 | 0.001 | t | 149867 | PESFDGDP<br>ASNTAPLQ<br>PE   | Mus<br>musculu<br>s              |
| 1 | 1.00 | 1 | 1 | 0 | -0.004 | 0 | -0.007 | 0.001 | t | 122790 | HQEEDFR<br>VTCKDIQR          | Oryctola<br>gus<br>cuniculu<br>s |
| 1 | 1.00 | 1 | 1 | 0 | -0.004 | 0 | -0.007 | 0.001 | t | 122861 | NALNSPLH<br>QEYEENL          | Oryctola<br>gus<br>cuniculu<br>s |
| 1 | 1.00 | 1 | 1 | 0 | -0.004 | 0 | -0.007 | 0.001 | t | 120699 | KMFPEVKE<br>KGMAALP<br>RL    | Oryctola<br>gus<br>cuniculu<br>s |
| 1 | 1.00 | 1 | 1 | 0 | -0.004 | 0 | -0.007 | 0.001 | t | 117909 | HKGFKGV<br>D                 | Oryctola<br>gus<br>cuniculu<br>s |
| 1 | 1.00 | 1 | 1 | 0 | -0.004 | 0 | -0.007 | 0.001 | t | 125384 | DSHYDYTI<br>CGDSEDM<br>VCTPK | Oryctola<br>gus<br>cuniculu<br>s |
| 1 | 1.00 | 1 | 1 | 0 | -0.004 | 0 | -0.007 | 0.001 | t | 124588 | PQEETLQA<br>FDSHYDYT         | Oryctola<br>gus<br>cuniculu<br>s |
| 1 | 1.00 | 1 | 1 | 0 | -0.004 | 0 | -0.007 | 0.001 | t | 122749 | EIIGFGQEL<br>KNPQEE          | Oryctola<br>gus<br>cuniculu<br>s |
| 1 | 1.00 | 1 | 1 | 0 | -0.004 | 0 | -0.007 | 0.001 | t | 122842 | LLDLPRDL<br>GGMGCSS<br>PPCE  | Oryctola<br>gus<br>cuniculu<br>s |
| 1 | 1.00 | 1 | 1 | 0 | -0.004 | 0 | -0.007 | 0.001 | t | 130492 | FKEQFLDG<br>DGWTSR           | Oryctola<br>gus<br>cuniculu<br>s |
| 1 | 1.00 | 1 | 1 | 0 | -0.004 | 0 | -0.007 | 0.001 | t | 122746 | EEQEDEIIG<br>FGQELKN         | Oryctola<br>gus<br>cuniculu<br>s |
| 1 | 1.00 | 1 | 1 | 0 | -0.004 | 0 | -0.007 | 0.001 | t | 120682 | KILPEVKEK<br>HEFLSRL         | Oryctola<br>gus<br>cuniculu<br>s |

|   |      |   |   |   |        |   |        |       |   |        |                              |                                  |
|---|------|---|---|---|--------|---|--------|-------|---|--------|------------------------------|----------------------------------|
| 1 | 1.00 | 1 | 1 | 0 | -0.004 | 0 | -0.007 | 0.001 | t | 126201 | GYKEKSKF<br>QDTHNNA          | Oryctola<br>gus<br>cuniculu<br>s |
| 1 | 1.00 | 1 | 1 | 0 | -0.004 | 0 | -0.007 | 0.001 | t | 122878 | PYEFSRKV<br>PTFATPW<br>PDFVP | Oryctola<br>gus<br>cuniculu<br>s |
| 1 | 1.00 | 1 | 1 | 0 | -0.002 | 0 | -0.007 | 0.001 | t | 118346 | FEYFPSHFF<br>VPELEVTII<br>C  | Mus<br>musculu<br>s              |
| 1 | 1.00 | 1 | 1 | 0 | -0.002 | 0 | -0.007 | 0.001 | t | 118105 | RKGHFLLS<br>SKSGFWTI<br>WL   | Mus<br>musculu<br>s              |
| 1 | 1.00 | 1 | 1 | 0 | -0.004 | 0 | -0.007 | 0.001 | t | 126227 | HNNAHY<br>VFEEQED            | Oryctola<br>gus<br>cuniculu<br>s |
| 1 | 1.00 | 1 | 1 | 0 | -0.002 | 0 | -0.007 | 0.001 | t | 117614 | QGFPFYDK<br>PMRI             | Mus<br>musculu<br>s              |
| 1 | 1.00 | 1 | 1 | 0 | -0.004 | 0 | -0.007 | 0.001 | t | 125610 | YYVFEEQ<br>EDEIIGFG<br>QELK  | Oryctola<br>gus<br>cuniculu<br>s |
| 1 | 1.00 | 1 | 1 | 0 | -0.004 | 0 | -0.007 | 0.001 | t | 122780 | GQELKNP<br>QEETLQAF<br>DSHYD | Oryctola<br>gus<br>cuniculu<br>s |
| 1 | 1.00 | 1 | 1 | 0 | -0.002 | 0 | -0.007 | 0.001 | t | 117300 | GSGKGKV<br>QFQGKKT<br>KF     | Mus<br>musculu<br>s              |
| 1 | 1.00 | 1 | 1 | 0 | -0.004 | 0 | -0.007 | 0.001 | t | 116768 | LEPYISRCT<br>VCEGP           | Oryctola<br>gus<br>cuniculu<br>s |
| 1 | 1.00 | 1 | 1 | 0 | -0.004 | 0 | -0.007 | 0.001 | t | 117246 | VTWEVLE<br>GEVEKEAL<br>KKI   | Oryctola<br>gus<br>cuniculu<br>s |
| 1 | 1.00 | 1 | 1 | 0 | -0.004 | 0 | -0.007 | 0.001 | t | 117260 | ANNGNLQ<br>LRNKEVT<br>WEVLEG | Oryctola<br>gus<br>cuniculu<br>s |
| 1 | 1.00 | 1 | 1 | 0 | -0.002 | 0 | -0.007 | 0.001 | t | 107479 | KFNWYVD                      | Mus<br>musculu<br>s              |
| 1 | 1.00 | 1 | 1 | 0 | -0.002 | 0 | -0.007 | 0.001 | t | 107773 | CSVMHEG                      | Mus<br>musculu<br>s              |

|   |      |   |   |   |        |   |        |       |   |        |                              |                                  |
|---|------|---|---|---|--------|---|--------|-------|---|--------|------------------------------|----------------------------------|
| 1 | 1.00 | 1 | 1 | 0 | -0.002 | 0 | -0.007 | 0.001 | t | 108075 | PREPQVY                      | Mus<br>musculu<br>s              |
| 1 | 1.00 | 1 | 1 | 0 | -0.004 | 0 | -0.007 | 0.001 | t | 116684 | CNYYSNSY<br>SFWLASLD<br>PKR  | Oryctola<br>gus<br>cuniculu<br>s |
| 1 | 1.00 | 1 | 1 | 0 | -0.004 | 0 | -0.007 | 0.001 | t | 107814 | EGLHNHY                      | Oryctola<br>gus<br>cuniculu<br>s |
| 1 | 1.00 | 1 | 1 | 0 | -0.002 | 0 | -0.007 | 0.001 | t | 107814 | EGLHNHY                      | Mus<br>musculu<br>s              |
| 1 | 1.00 | 1 | 1 | 0 | -0.004 | 0 | -0.007 | 0.001 | t | 116697 | DVCNFASTR<br>NDYSYWL<br>STP  | Oryctola<br>gus<br>cuniculu<br>s |
| 1 | 1.00 | 1 | 1 | 0 | -0.004 | 0 | -0.007 | 0.001 | t | 108302 | CNFASRN<br>DYSYWLST<br>PEPMP | Oryctola<br>gus<br>cuniculu<br>s |
| 1 | 1.00 | 1 | 1 | 0 | -0.004 | 0 | -0.007 | 0.001 | t | 107479 | KFNWYVD                      | Oryctola<br>gus<br>cuniculu<br>s |
| 1 | 1.00 | 1 | 1 | 0 | -0.002 | 0 | -0.007 | 0.001 | t | 109917 | SHQESTRG<br>RSRGRSGR<br>SGS  | Mus<br>musculu<br>s              |
| 1 | 1.00 | 1 | 1 | 0 | -0.002 | 0 | -0.007 | 0.001 | t | 117260 | ANNGNLQ<br>LRNKEVT<br>WEVLEG | Mus<br>musculu<br>s              |
| 1 | 1.00 | 1 | 1 | 0 | -0.004 | 0 | -0.007 | 0.001 | t | 103830 | CHAVKVG<br>NPSC              | Oryctola<br>gus<br>cuniculu<br>s |
| 1 | 1.00 | 1 | 1 | 0 | -0.004 | 0 | -0.007 | 0.001 | t | 117300 | GSGKGKV<br>QFQGKKT<br>KF     | Oryctola<br>gus<br>cuniculu<br>s |
| 1 | 1.00 | 1 | 1 | 0 | -0.002 | 0 | -0.007 | 0.001 | t | 65050  | TLRVYK                       | Mus<br>musculu<br>s              |
| 1 | 1.00 | 1 | 1 | 0 | -0.004 | 0 | -0.007 | 0.001 | t | 30661  | KEVPALTA<br>VETGAT           | Oryctola<br>gus<br>cuniculu<br>s |
| 1 | 1.00 | 1 | 1 | 0 | -0.004 | 0 | -0.007 | 0.001 | t | 11081  | EAIPALTA<br>VETGHTSQ<br>V    | Oryctola<br>gus<br>cuniculu<br>s |

|   |      |   |   |       |        |        |        |        |   |        |                              |                                  |
|---|------|---|---|-------|--------|--------|--------|--------|---|--------|------------------------------|----------------------------------|
| 1 | 1.00 | 1 | 1 | 0     | -0.004 | 0      | -0.007 | 0.001  | t | 1433   | AGAGGGA<br>GGAGAGG<br>GAGGAG | Oryctola<br>gus<br>cuniculu<br>s |
| 1 | 1.00 | 1 | 1 | -0.01 | -0.01  | -0.01  | -0.021 | -0.01  | t | 104364 | YNKSFFP                      | Homo<br>sapiens                  |
| 1 | 1.00 | 1 | 1 | 0.02  | 0.018  | 0.027  | 0.017  | 0.021  | t | 136014 | WGLDYER<br>GNYEE             | Mus<br>musculu<br>s              |
| 1 | 1.00 | 1 | 1 | -0.02 | -0.015 | -0.012 | -0.023 | -0.02  | t | 71162  | VSTQSAKN<br>PPGATV           | Homo<br>sapiens                  |
| 1 | 1.00 | 1 | 1 | 0.02  | 0.02   | 0.023  | 0.02   | 0.021  | t | 35248  | LDPAFRAN<br>TANPDWD          | Mus<br>musculu<br>s              |
| 1 | 1.00 | 1 | 1 | -0.02 | -0.02  | -0.02  | -0.016 | -0.018 | t | 117972 | LAVTKYKQ<br>RNGWSHK          | Homo<br>sapiens                  |
| 1 | 1.00 | 1 | 1 | -0.02 | -0.02  | -0.004 | -0.02  | -0.02  | t | 47965  | PIQNLPG<br>VF                | Mus<br>musculu<br>s              |
| 1 | 1.00 | 1 | 1 | -0.04 | -0.04  | -0.04  | -0.04  | -0.038 | t | 117495 | ERDRKREK<br>RKPXS            | Mus<br>musculu<br>s              |
| 1 | 1.00 | 1 | 1 | -0.01 | -0.007 | 0.001  | -0.01  | -0.012 | t | 38271  | LNLTASV<br>PMLRWYA<br>ERFCF  | Mus<br>musculu<br>s              |
| 1 | 1.00 | 1 | 1 | -0.04 | -0.033 | -0.032 | -0.04  | -0.04  | t | 110910 | KAKPKFTL<br>GKRKATP          | Mus<br>musculu<br>s              |
| 1 | 1.00 | 1 | 1 | -0.05 | -0.055 | -0.05  | -0.053 | -0.05  | t | 65863  | TQGVVKE<br>RRWTLVN<br>ENRPIW | Canis<br>lupus                   |
| 1 | 1.00 | 1 | 1 | 0.01  | 0.01   | 0.011  | 0.006  | 0.013  | t | 118776 | EADYFEYH<br>QEGGPDG<br>EPDVP | Homo<br>sapiens                  |
| 1 | 1.00 | 1 | 1 | 0     | 0.002  | 0.02   | 0.007  | 0.002  | t | 128112 | SPAAVISH<br>ERAQQQA<br>IALAK | Homo<br>sapiens                  |
| 1 | 1.00 | 1 | 1 | 0.01  | 0.01   | 0.013  | 0.01   | 0.01   | t | 139854 | PPSMVKH<br>PEKALFTF<br>KQV   | Ovis<br>aries                    |
| 1 | 1.00 | 1 | 1 | 0     | 0.002  | 0.012  | -0.003 | -0.001 | t | 60632  | SRDEKERE<br>RFSI             | Homo<br>sapiens                  |

|   |      |   |   |       |        |        |        |        |   |        |                              |                                  |
|---|------|---|---|-------|--------|--------|--------|--------|---|--------|------------------------------|----------------------------------|
| 1 | 1.00 | 1 | 1 | -0.01 | -0.013 | -0.01  | -0.01  | -0.01  | t | 135452 | CLKDRHDF                     | Oryctola<br>gus<br>cuniculu<br>s |
| 1 | 1.00 | 1 | 1 | 0     | 0      | 0.006  | 0      | 0.002  | t | 118760 | CRTCTTPA<br>Q                | Mus<br>musculu<br>s              |
| 1 | 1.00 | 1 | 1 | -0.05 | -0.048 | -0.031 | -0.053 | -0.05  | t | 62885  | TAIHAVW                      | Homo<br>sapiens                  |
| 1 | 1.00 | 1 | 1 | 0.01  | 0.012  | 0.016  | 0.011  | 0.01   | t | 63543  | TESTVSSAL<br>AELATKTF<br>GS  | Homo<br>sapiens                  |
| 1 | 1.00 | 1 | 1 | 0     | -0.002 | 0      | 0      | 0      | t | 129974 | SPSAKDIK<br>KILDSVG          | Homo<br>sapiens                  |
| 1 | 1.00 | 1 | 1 | 0     | 0.022  | 0      | -0.007 | 0.001  | t | 101634 | FKADEKKF<br>WGKLYEI<br>AR    | Rattus                           |
| 1 | 1.00 | 1 | 1 | -0.07 | -0.07  | -0.07  | -0.07  | -0.07  | t | 114226 | QKSHGRT<br>QDENPVV<br>HF     | Mus<br>musculu<br>s              |
| 1 | 1.00 | 1 | 1 | 0     | 0      | 0      | 0      | 0.002  | t | 159296 | SFSKPSNS<br>WFPVEGP          | Oryctola<br>gus<br>cuniculu<br>s |
| 1 | 1.00 | 1 | 1 | 0     | 0      | 0.003  | 0      | 0.001  | t | 125396 | EITDNPYM<br>TSIPVNAF<br>QGLC | Mus<br>musculu<br>s              |
| 1 | 1.00 | 1 | 1 | -0.02 | -0.016 | -0.013 | -0.023 | -0.02  | t | 106312 | CNATQRR<br>QIE               | Homo<br>sapiens                  |
| 1 | 1.00 | 1 | 1 | 0.01  | 0.014  | 0.024  | 0.011  | 0.012  | t | 63474  | TENDIR                       | Homo<br>sapiens                  |
| 1 | 1.00 | 1 | 1 | -0.02 | -0.02  | -0.027 | -0.02  | -0.021 | t | 108125 | SHQESTRG<br>RSRGRSGR<br>SGS  | Homo<br>sapiens                  |
| 1 | 1.00 | 1 | 1 | -0.02 | -0.017 | -0.005 | -0.02  | -0.018 | t | 51161  | QIYTINDKI<br>L               | Mus<br>musculu<br>s              |
| 1 | 1.00 | 1 | 1 | 0     | 0.002  | 0.007  | -0.003 | 0.002  | t | 125509 | NLYSNRSA<br>VTSL             | Homo<br>sapiens                  |
| 1 | 1.00 | 1 | 1 | -0.01 | -0.01  | 0.012  | 0      | -0.008 | t | 116757 | KFDVPCG<br>GRDCSGG<br>CQCY   | Homo<br>sapiens                  |



|   |      |   |   |       |        |        |        |        |   |        |                              |                                  |
|---|------|---|---|-------|--------|--------|--------|--------|---|--------|------------------------------|----------------------------------|
| 1 | 1.00 | 1 | 1 | -0.02 | -0.02  | -0.007 | -0.02  | -0.02  | t | 7689   | DAYPSGA<br>WYY               | Homo<br>sapiens                  |
| 1 | 1.00 | 1 | 1 | 0.02  | 0.018  | 0.03   | 0.02   | 0.018  | t | 39070  | LREGVTLG<br>VGASFDT<br>QKL   | Oryctola<br>gus<br>cuniculu<br>s |
| 1 | 1.00 | 1 | 1 | -0.11 | -0.112 | -0.105 | -0.109 | -0.11  | t | 96175  | DFRWYGP<br>KYITHSIRS<br>FTPS | Mus<br>musculu<br>s              |
| 1 | 1.00 | 1 | 1 | -0.05 | -0.05  | -0.05  | -0.061 | -0.05  | t | 103931 | GKLPKMT                      | Homo<br>sapiens                  |
| 1 | 1.00 | 1 | 1 | 0     | -0.002 | 0.007  | -0.003 | 0.001  | t | 117140 | DWEYSVW<br>LSN               | Mus<br>musculu<br>s              |
| 1 | 1.00 | 1 | 1 | -0.02 | -0.018 | -0.022 | -0.013 | -0.011 | t | 132389 | IRLPNPDT<br>DLYWFTLY         | Homo<br>sapiens                  |
| 1 | 1.00 | 1 | 1 | -0.02 | -0.022 | -0.015 | -0.021 | -0.02  | t | 19093  | GDRAAGQ<br>PAGDRAA<br>GQPA   | Mus<br>musculu<br>s              |
| 1 | 1.00 | 1 | 1 | -0.02 | -0.022 | -0.015 | -0.021 | -0.02  | t | 19093  | GDRAAGQ<br>PAGDRAA<br>GQPA   | Mus<br>musculu<br>s              |
| 1 | 1.00 | 1 | 1 | 0.01  | 0.013  | 0.029  | 0.01   | 0.009  | t | 97015  | TVHTQQN<br>Y                 | Mus<br>musculu<br>s              |
| 1 | 1.00 | 1 | 1 | -0.02 | -0.018 | -0.008 | -0.023 | -0.021 | t | 107144 | GGRHPSP<br>MGTFDTQ<br>T      | Homo<br>sapiens                  |
| 1 | 1.00 | 1 | 1 | -0.05 | -0.046 | -0.038 | -0.043 | -0.048 | t | 119536 | TRGLKGAP<br>Q                | Homo<br>sapiens                  |
| 1 | 1.00 | 1 | 1 | 0.05  | 0.052  | 0.059  | 0.047  | 0.05   | t | 115538 | VESLSSEE<br>SITRINKKIE<br>K  | Homo<br>sapiens                  |
| 1 | 1.00 | 1 | 1 | -0.02 | -0.019 | -0.025 | -0.02  | -0.019 | t | 40281  | LVASNWY<br>NRQIERSS<br>RTLQ  | Equus<br>caballus                |
| 1 | 1.00 | 1 | 1 | -0.02 | -0.022 | -0.023 | -0.017 | -0.017 | t | 76157  | YTPVEEKQ<br>NGRMIVIV<br>AKKY | Mus<br>musculu<br>s              |

|   |      |   |   |       |        |        |        |        |   |        |                              |                       |
|---|------|---|---|-------|--------|--------|--------|--------|---|--------|------------------------------|-----------------------|
| 1 | 1.00 | 1 | 1 | -0.01 | -0.006 | -0.003 | -0.009 | -0.01  | t | 15328  | FCIDPTKG<br>GKKPAR           | Homo sapiens          |
| 1 | 1.00 | 1 | 1 | 0.01  | 0.01   | 0.02   | 0.01   | 0.009  | t | 73430  | YAQYMSR<br>AYAEFLGE<br>DPGSG | Mus musculus          |
| 1 | 1.00 | 1 | 1 | 0     | 0.003  | 0.003  | 0      | 0      | t | 481    | AAVDSSKA<br>ALTSKLD<br>AYKL  | Mus musculus          |
| 1 | 1.00 | 1 | 1 | -0.01 | -0.007 | -0.01  | -0.01  | -0.008 | t | 51438  | QLSSSKYT<br>IQRSTGDN<br>IDT  | Mus musculus          |
| 1 | 1.00 | 1 | 1 | -0.01 | -0.007 | -0.001 | -0.01  | -0.011 | t | 43152  | NAGGNAG<br>GNAGGNA<br>GGNAGG | Mus musculus          |
| 1 | 1.00 | 1 | 1 | 0.03  | 0.032  | 0.037  | 0.027  | 0.029  | t | 107080 | AGPDCSSL<br>PNSMRCS          | Homo sapiens          |
| 1 | 1.00 | 1 | 1 | 0     | -0.002 | 0      | 0.003  | 0.006  | t | 21851  | GQCKWV<br>NGREICND<br>RDRPTA | Mus musculus          |
| 1 | 1.00 | 1 | 1 | 0.02  | 0.016  | 0.026  | 0.017  | 0.021  | t | 80014  | RNYPTGAE<br>FLGEG            | Oryctolagus cuniculus |
| 1 | 1.00 | 1 | 1 | 0.03  | 0.03   | 0.036  | 0.041  | 0.04   | t | 158592 | GPVNMNL                      | Homo sapiens          |
| 1 | 1.00 | 1 | 1 | 0     | 0      | 0      | -0.007 | 0.001  | t | 122748 | EHRMTW<br>DPAQPPR            | Homo sapiens          |
| 1 | 1.00 | 1 | 1 | 0.02  | 0.02   | 0.025  | 0.018  | 0.02   | t | 29171  | ITYNESHSS<br>DQRPY           | Homo sapiens          |
| 1 | 1.00 | 1 | 1 | 0.03  | 0.026  | 0.03   | 0.023  | 0.03   | t | 123641 | PVVGAVQ<br>G                 | Oryctolagus cuniculus |
| 1 | 1.00 | 1 | 1 | 0.01  | 0.006  | 0.021  | 0.009  | 0.01   | t | 44904  | NLTQHPSA<br>PTMP             | Oryctolagus cuniculus |
| 1 | 1.00 | 1 | 1 | 0.01  | 0.008  | 0.021  | 0.009  | 0.01   | t | 44904  | NLTQHPSA<br>PTMP             | Mus musculus          |

|   |      |   |   |       |        |        |        |        |   |        |                              |                                  |
|---|------|---|---|-------|--------|--------|--------|--------|---|--------|------------------------------|----------------------------------|
| 1 | 1.00 | 1 | 1 | 0.02  | 0.02   | 0.044  | 0.02   | 0.018  | t | 20157  | GHLTSVYA<br>WLAFLS           | Sus<br>scrofa                    |
| 1 | 1.00 | 1 | 1 | 0     | 0      | 0      | 0      | 0.002  | t | 79782  | DNDGPVA<br>AGEARPVP<br>EEYLQ | Mus<br>musculu<br>s              |
| 1 | 1.00 | 1 | 1 | -0.06 | -0.064 | -0.052 | -0.06  | -0.06  | t | 140598 | SLISDEWP<br>RW               | Mus<br>musculu<br>s              |
| 1 | 1.00 | 1 | 1 | -0.02 | -0.02  | -0.01  | -0.02  | -0.02  | t | 74009  | YGGPANK<br>KNAG              | Mus<br>musculu<br>s              |
| 1 | 1.00 | 1 | 1 | -0.05 | -0.052 | -0.043 | -0.05  | -0.051 | t | 142483 | WRMAGQ<br>KRTSGG             | Mus<br>musculu<br>s              |
| 1 | 1.00 | 1 | 1 | -0.03 | -0.027 | -0.014 | -0.03  | -0.03  | t | 39062  | LRDPVFNI<br>AAGVALR          | Mus<br>musculu<br>s              |
| 1 | 1.00 | 1 | 1 | -0.02 | -0.023 | -0.015 | -0.02  | -0.02  | t | 55824  | RSELSPLL<br>STTEWQIL<br>PCS  | Oryctola<br>gus<br>cuniculu<br>s |
| 1 | 1.00 | 1 | 1 | -0.01 | -0.008 | 0      | -0.013 | -0.011 | t | 42791  | MTDVVFY<br>RYSNNYEG<br>QPHIS | Aotus<br>nancyma<br>ae           |
| 1 | 1.00 | 1 | 1 | -0.02 | -0.018 | -0.02  | -0.023 | -0.018 | t | 16092  | FHAEWPT<br>PSPWP             | Homo<br>sapiens                  |
| 1 | 1.00 | 1 | 1 | 0.05  | 0.048  | 0.063  | 0.049  | 0.05   | t | 8916   | DKKTEETT<br>LLEDRL           | Mus<br>musculu<br>s              |
| 1 | 1.00 | 1 | 1 | 0.05  | 0.048  | 0.063  | 0.049  | 0.05   | t | 8916   | DKKTEETT<br>LLEDRL           | Mus<br>musculu<br>s              |
| 1 | 1.00 | 1 | 1 | -0.04 | -0.044 | -0.03  | -0.041 | -0.04  | t | 66914  | TTWNPTLL                     | Oryctola<br>gus<br>cuniculu<br>s |

|   |      |   |   |       |        |        |        |        |   |        |                              |                                  |
|---|------|---|---|-------|--------|--------|--------|--------|---|--------|------------------------------|----------------------------------|
| 1 | 1.00 | 1 | 1 | 0.02  | 0.018  | 0.02   | 0.013  | 0.023  | t | 119633 | QYTGHIT<br>WTPPAIFK<br>S     | Mus<br>musculu<br>s              |
| 1 | 1.00 | 1 | 1 | 0.01  | 0.013  | 0.015  | 0.01   | 0.012  | t | 6948   | CRTCTTPA<br>QGTSMY           | Mus<br>musculu<br>s              |
| 1 | 1.00 | 1 | 1 | -0.04 | -0.038 | -0.022 | -0.043 | -0.042 | t | 102169 | VATATLPN<br>YC               | Homo<br>sapiens                  |
| 1 | 1.00 | 1 | 1 | -0.03 | -0.026 | -0.021 | -0.033 | -0.029 | t | 12961  | ELAYFYPEL<br>F               | Homo<br>sapiens                  |
| 1 | 1.00 | 1 | 1 | -0.01 | -0.01  | -0.01  | -0.01  | -0.011 | t | 115564 | YAKPAAVR<br>SPAQILQ<br>WQVLS | Homo<br>sapiens                  |
| 1 | 1.00 | 1 | 1 | 0     | 0.003  | 0.007  | 0      | 0.002  | t | 121153 | ARRRAEP<br>ML                | Mus<br>musculu<br>s              |
| 1 | 1.00 | 1 | 1 | 0.01  | 0.01   | 0.012  | 0.01   | 0.012  | t | 78054  | VAETTNV<br>QGWWCLF<br>QITHGK | Mus<br>musculu<br>s              |
| 1 | 1.00 | 1 | 1 | -0.01 | -0.013 | -0.001 | -0.01  | -0.01  | t | 100281 | LPDTKASG<br>PAHSKE           | Oryctola<br>gus<br>cuniculu<br>s |
| 1 | 1.00 | 1 | 1 | 0     | 0      | 0.005  | 0      | 0.001  | t | 122728 | DLSTAIASR<br>SVADKILD<br>LY  | Oryctola<br>gus<br>cuniculu<br>s |
| 1 | 1.00 | 1 | 1 | -0.04 | -0.036 | -0.03  | -0.043 | -0.039 | t | 27650  | INHFEVLLV<br>GY              | Homo<br>sapiens                  |
| 1 | 1.00 | 1 | 1 | 0.02  | 0.022  | 0.02   | 0.017  | 0.02   | t | 30896  | KGAIRSPG<br>AANPSDD          | Homo<br>sapiens                  |
| 1 | 1.00 | 1 | 1 | 0     | 0.002  | 0.012  | 0.003  | 0.002  | t | 52678  | QVATISAN                     | Homo<br>sapiens                  |
| 1 | 1.00 | 1 | 1 | -0.02 | -0.02  | -0.004 | -0.02  | -0.023 | t | 9589   | DPAFSLNS<br>RAFPAPF          | Mus<br>musculu<br>s              |

|   |      |   |   |       |        |        |        |        |   |        |                              |                                  |
|---|------|---|---|-------|--------|--------|--------|--------|---|--------|------------------------------|----------------------------------|
| 1 | 1.00 | 1 | 1 | 0.01  | 0.01   | 0.015  | 0.01   | 0.013  | t | 134188 | PMSTPSAT<br>SVR              | Mus<br>musculu<br>s              |
| 1 | 1.00 | 1 | 1 | -0.03 | -0.032 | -0.011 | -0.027 | -0.029 | t | 59381  | SLPEFRLH<br>ALLM             | Mus<br>musculu<br>s              |
| 1 | 1.00 | 1 | 1 | 0     | 0.004  | 0.006  | 0.001  | 0      | t | 8960   | DKPGSKKT<br>QGEKFFLI<br>HSAD | Homo<br>sapiens                  |
| 1 | 1.00 | 1 | 1 | 0     | 0      | 0      | -0.003 | 0.003  | t | 146906 | EVDHTNFK<br>YNYSVIEG         | Homo<br>sapiens                  |
| 1 | 1.00 | 1 | 1 | 0.01  | 0.012  | 0.017  | 0.009  | 0.01   | t | 130551 | LTDSEMD<br>VVRFDAA<br>C      | Homo<br>sapiens                  |
| 1 | 1.00 | 1 | 1 | -0.04 | -0.038 | -0.035 | -0.043 | -0.041 | t | 106716 | PSNCHTHE<br>GG               | Homo<br>sapiens                  |
| 1 | 1.00 | 1 | 1 | -0.01 | -0.003 | 0.004  | -0.01  | -0.008 | t | 95695  | PVKQTLPP                     | Cavia<br>porcellu<br>s           |
| 1 | 1.00 | 1 | 1 | -0.01 | -0.011 | 0.004  | -0.01  | -0.008 | t | 95695  | PVKQTLPP                     | Bos<br>taurus                    |
| 1 | 1.00 | 1 | 1 | 0.01  | 0.008  | 0.02   | 0.01   | 0.009  | t | 100437 | QPNNKRN<br>QLWLRLQ<br>TAGN   | Mus<br>musculu<br>s              |
| 1 | 1.00 | 1 | 1 | 0.04  | 0.03   | 0.039  | 0.037  | 0.04   | t | 1433   | AGAGGGA<br>GGAGAGG<br>GAGGAG | Homo<br>sapiens                  |
| 1 | 1.00 | 1 | 1 | 0     | 0      | 0      | -0.007 | 0      | t | 123675 | QPLWLLQ<br>G                 | marmos<br>ets                    |
| 1 | 1.00 | 1 | 1 | 0.02  | -0.004 | 0.02   | 0.026  | 0.031  | t | 142810 | KEWEQIYR                     | Rattus<br>norvegic<br>us         |
| 1 | 1.00 | 1 | 1 | -0.03 | -0.034 | -0.028 | -0.037 | -0.028 | t | 132045 | RMATPLL<br>MRPMSM            | Oryctola<br>gus<br>cuniculu<br>s |
| 1 | 1.00 | 1 | 1 | 0.01  | 0.008  | 0.01   | 0.003  | 0.008  | t | 116731 | GLGESRK                      | Mus<br>musculu<br>s              |
| 1 | 1.00 | 1 | 1 | 0.02  | 0.02   | 0.02   | 0.016  | 0.02   | t | 117594 | NWHQLH<br>GKKEAY             | Homo<br>sapiens                  |

|   |      |   |   |       |        |        |        |        |   |        |                           |                                  |
|---|------|---|---|-------|--------|--------|--------|--------|---|--------|---------------------------|----------------------------------|
| 1 | 1.00 | 1 | 1 | -0.07 | -0.074 | -0.063 | -0.071 | -0.07  | t | 61995  | STVSSAPP<br>TRVRR         | Oryctola<br>gus<br>cuniculu<br>s |
| 1 | 1.00 | 1 | 1 | -0.03 | -0.032 | -0.026 | -0.031 | -0.03  | t | 17572  | FRDLTWCI<br>NPPERIK       | Mus<br>musculu<br>s              |
| 1 | 1.00 | 1 | 1 | -0.03 | -0.03  | -0.021 | -0.03  | -0.03  | t | 37304  | LLFVGVGL<br>FLLPAR        | Homo<br>sapiens                  |
| 1 | 1.00 | 1 | 1 | -0.04 | -0.04  | -0.036 | -0.04  | -0.04  | t | 60797  | SRSESRKN<br>RGGREEIL      | Homo<br>sapiens                  |
| 1 | 1.00 | 1 | 1 | 0     | 0      | 0.006  | -0.003 | 0.003  | t | 14906  | EVWREEA<br>YHACDIKD       | Homo<br>sapiens                  |
| 1 | 1.00 | 1 | 1 | 0.04  | 0.042  | 0.045  | 0.043  | 0.042  | t | 72885  | WNDYCT<br>MNQCDT<br>HN    | Homo<br>sapiens                  |
| 1 | 1.00 | 1 | 1 | 0     | -0.003 | -0.001 | 0      | 0.005  | t | 9526   | DNPASTT<br>NKDKL          | Oryctola<br>gus<br>cuniculu<br>s |
| 1 | 1.00 | 1 | 1 | 0.03  | 0.028  | 0.039  | 0.031  | 0.033  | t | 138192 | HQTPLST                   | Mus<br>musculu<br>s              |
| 1 | 1.00 | 1 | 0 | 0.03  | 0.029  | 0.059  | 0.031  | 0.042  | t | 46371  | NVESQPG<br>GQPNT          | Bos<br>taurus                    |
| 1 | 1.00 | 1 | 0 | 0.03  | 0.029  | 0.059  | 0.031  | 0.042  | t | 46371  | NVESQPG<br>GQPNT          | Bos<br>taurus                    |
| 1 | 1.00 | 1 | 1 | -0.01 | -0.009 | 0.002  | -0.011 | -0.01  | t | 56742  | SAEASRDK<br>AFAVSKDL<br>A | Equus<br>caballus                |
| 1 | 1.00 | 1 | 1 | 0     | 0      | 0.001  | 0      | 0      | t | 266    | AALANSLS<br>LGPQQKV       | Mus<br>musculu<br>s              |
| 1 | 1.00 | 1 | 1 | -0.04 | -0.044 | -0.026 | -0.04  | -0.038 | t | 37008  | LKRHFHM<br>DYGTGFYK       | Bos<br>taurus                    |
| 1 | 1.00 | 1 | 1 | 0.02  | 0.022  | 0.022  | 0.013  | 0.02   | t | 3508   | APDKEVLY<br>EAFDEM        | Homo<br>sapiens                  |

|   |      |   |   |       |        |        |        |        |   |        |                              |                       |
|---|------|---|---|-------|--------|--------|--------|--------|---|--------|------------------------------|-----------------------|
| 1 | 1.00 | 1 | 1 | 0.01  | 0.012  | 0.003  | 0.013  | 0.02   | t | 986    | AEIERMVR<br>EAAKYEA          | Homo sapiens          |
| 1 | 1.00 | 1 | 1 | 0.04  | 0.043  | 0.053  | 0.04   | 0.04   | t | 105879 | IISCDEGVG                    | Mus musculus          |
| 1 | 1.00 | 1 | 1 | 0.01  | 0.017  | 0.01   | 0.007  | 0.008  | t | 32716  | KPGGGW<br>NTGGSRYP<br>GQGS   | Gallus gallus         |
| 1 | 1.00 | 1 | 1 | -0.03 | -0.03  | -0.011 | -0.03  | -0.031 | t | 109247 | GSAGAPGI<br>AGAPGFP          | Mus musculus          |
| 1 | 1.00 | 1 | 1 | -0.01 | -0.012 | -0.005 | -0.011 | -0.01  | t | 632    | ADASLKM<br>ADPNRFR<br>GKDLP  | Mus musculus          |
| 1 | 1.00 | 1 | 1 | 0.01  | 0.008  | 0.01   | 0.003  | 0.012  | t | 125384 | DSHYDYTI<br>CGDSEDM<br>VCTPK | Mus musculus          |
| 1 | 1.00 | 1 | 1 | 0.04  | 0.038  | 0.045  | 0.039  | 0.04   | t | 60024  | SPDVDLG<br>DISGINAS          | Mus musculus          |
| 1 | 1.00 | 1 | 1 | -0.05 | -0.048 | -0.046 | -0.049 | -0.05  | t | 31692  | KKSAAEAS<br>KKPRQKRT<br>A    | Homo sapiens          |
| 1 | 1.00 | 1 | 1 | -0.04 | -0.038 | -0.031 | -0.039 | -0.039 | t | 65391  | TNPMTGA<br>LLRAS             | Homo sapiens          |
| 1 | 1.00 | 1 | 1 | 0.01  | 0.012  | 0.008  | 0.011  | 0.011  | t | 60749  | SRNSTPGS<br>SRGNSPAR<br>MA   | Homo sapiens          |
| 1 | 1.00 | 1 | 1 | -0.02 | -0.02  | -0.008 | -0.02  | -0.02  | t | 71844  | VVSWKNK<br>EL                | Homo sapiens          |
| 1 | 1.00 | 1 | 1 | -0.02 | -0.02  | -0.008 | -0.02  | -0.02  | t | 71844  | VVSWKNK<br>EL                | Oryctolagus cuniculus |
| 1 | 1.00 | 1 | 1 | 0     | -0.002 | 0.027  | 0.003  | -0.001 | t | 59784  | SMYGSYN                      | Mus musculus          |
| 1 | 1.00 | 1 | 1 | -0.01 | -0.007 | -0.003 | -0.01  | -0.01  | t | 137906 | KGLRKSNA<br>AERRGPL          | Mus musculus          |
| 1 | 1.00 | 1 | 1 | -0.07 | -0.07  | -0.064 | -0.067 | -0.07  | t | 46851  | PALICCCR<br>GRCNKKG          | Homo sapiens          |

|   |      |   |   |       |        |        |        |        |   |        |                              |                                  |
|---|------|---|---|-------|--------|--------|--------|--------|---|--------|------------------------------|----------------------------------|
| 1 | 1.00 | 1 | 1 | -0.03 | -0.028 | -0.035 | -0.033 | -0.03  | t | 58745  | SIVYEAAD<br>AILHTPGC<br>VPCV | Homo<br>sapiens                  |
| 1 | 1.00 | 1 | 1 | 0     | -0.002 | 0      | -0.003 | 0.003  | t | 39164  | LRPGPVSQ<br>PYHHWDT<br>DK    | Mus<br>musculu<br>s              |
| 1 | 1.00 | 1 | 1 | -0.01 | -0.008 | -0.002 | -0.009 | -0.01  | t | 35174  | LDHILEPSI<br>PWKSK           | Homo<br>sapiens                  |
| 1 | 1.00 | 1 | 1 | -0.01 | -0.01  | -0.015 | -0.013 | -0.009 | t | 71346  | VTGSVVCT<br>TAAGNVNI<br>AIGG | Homo<br>sapiens                  |
| 1 | 1.00 | 1 | 1 | -0.01 | -0.012 | -0.015 | -0.013 | -0.009 | t | 71346  | VTGSVVCT<br>TAAGNVNI<br>AIGG | Mus<br>musculu<br>s              |
| 1 | 1.00 | 1 | 1 | -0.03 | -0.028 | -0.027 | -0.029 | -0.028 | t | 97500  | MLGTAEK<br>VRV               | Homo<br>sapiens                  |
| 1 | 1.00 | 1 | 1 | -0.01 | -0.01  | -0.003 | -0.01  | -0.01  | t | 159080 | RSNHNRR<br>PGYKTQS<br>QG     | Mus<br>musculu<br>s              |
| 1 | 1.00 | 1 | 1 | -0.03 | -0.03  | -0.021 | -0.03  | -0.03  | t | 60562  | SQTAKNN<br>YVSQVYLH          | Oryctola<br>gus<br>cuniculu<br>s |
| 1 | 1.00 | 1 | 1 | 0     | -0.002 | 0      | -0.007 | 0.002  | t | 122775 | GIFNTGLK<br>MFPDLTK<br>VYST  | Mus<br>musculu<br>s              |
| 1 | 1.00 | 1 | 1 | 0.01  | 0.007  | 0.02   | 0.01   | 0.009  | t | 23069  | GVNLEDP<br>ASRDLVVS          | Oryctola<br>gus<br>cuniculu<br>s |
| 1 | 1.00 | 1 | 1 | -0.01 | -0.01  | -0.001 | -0.014 | -0.01  | t | 135910 | DRRLCSHL<br>EVCI             | Homo<br>sapiens                  |
| 1 | 1.00 | 1 | 1 | -0.01 | -0.002 | 0.007  | -0.01  | -0.01  | t | 136685 | TLFTPKDS<br>PAKT             | Gallus<br>gallus                 |
| 1 | 1.00 | 1 | 1 | 0     | -0.002 | 0.011  | 0      | 0.002  | t | 21812  | GPTRTIGG<br>SQ               | Oryctola<br>gus<br>cuniculu<br>s |
| 1 | 1.00 | 1 | 1 | -0.02 | -0.018 | -0.027 | -0.021 | -0.017 | t | 130600 | RRLPKGVK<br>HLKDFILP<br>GEI  | Homo<br>sapiens                  |



|   |      |   |   |       |        |        |        |        |   |        |                              |                                  |
|---|------|---|---|-------|--------|--------|--------|--------|---|--------|------------------------------|----------------------------------|
| 1 | 1.00 | 1 | 1 | -0.02 | -0.02  | -0.02  | -0.023 | -0.021 | t | 69880  | VLYQAFDE<br>MEECASH<br>LPYIE | Homo<br>sapiens                  |
| 1 | 1.00 | 1 | 1 | 0.01  | 0.01   | 0.017  | 0.01   | 0.01   | t | 121827 | RVVPLLVA<br>DPLVDPF          | Mus<br>musculu<br>s              |
| 1 | 1.00 | 1 | 1 | -0.03 | -0.027 | -0.018 | -0.03  | -0.029 | t | 41183  | MCAVRDP<br>AFSR SRLS         | Mus<br>musculu<br>s              |
| 1 | 1.00 | 1 | 1 | -0.06 | -0.058 | -0.062 | -0.059 | -0.061 | t | 9826   | DQAQRPA<br>VASRRRPT<br>TAG   | Homo<br>sapiens                  |
| 1 | 1.00 | 1 | 1 | -0.07 | -0.073 | -0.075 | -0.07  | -0.067 | t | 117173 | TYFSKNYQ<br>DYEY             | Oryctola<br>gus<br>cuniculu<br>s |
| 1 | 1.00 | 1 | 1 | -0.05 | -0.048 | -0.041 | -0.043 | -0.05  | t | 110900 | IAKDLLPSR<br>DRQHLPLI<br>K   | Homo<br>sapiens                  |
| 1 | 1.00 | 1 | 1 | 0     | 0.003  | 0.002  | 0.006  | 0.007  | t | 46317  | NTWTTCCQ<br>SIAFPSK          | Mus<br>musculu<br>s              |
| 1 | 1.00 | 1 | 1 | 0     | 0      | 0.002  | 0.006  | 0.007  | t | 23599  | HCLGKWL<br>GHPDKF            | Mus<br>musculu<br>s              |
| 1 | 1.00 | 1 | 1 | 0.02  | 0.034  | 0.031  | 0.023  | 0.02   | t | 66740  | TTNQAIEA<br>IRQAGQE          | Homo<br>sapiens                  |
| 1 | 1.00 | 1 | 1 | -0.02 | -0.028 | -0.01  | -0.02  | -0.02  | t | 38609  | LPNWVKV<br>WDRATNK<br>C      | Mus<br>musculu<br>s              |
| 1 | 1.00 | 1 | 1 | -0.02 | -0.025 | -0.01  | -0.02  | -0.02  | t | 38609  | LPNWVKV<br>WDRATNK<br>C      | Equus<br>caballus                |
| 1 | 1.00 | 1 | 1 | -0.02 | -0.028 | -0.01  | -0.02  | -0.02  | t | 38609  | LPNWVKV<br>WDRATNK<br>C      | Mus<br>musculu<br>s              |
| 1 | 1.00 | 1 | 1 | -0.01 | -0.012 | -0.006 | -0.017 | -0.01  | t | 120028 | LFNNYDPG<br>SRPVREP          | Rattus<br>norvegic<br>us         |
| 1 | 1.00 | 1 | 1 | 0.02  | 0.012  | 0.034  | 0.02   | 0.02   | t | 1430   | AGAGDV                       | Mus<br>musculu<br>s              |
| 1 | 1.00 | 1 | 1 | -0.01 | -0.006 | 0.009  | -0.009 | -0.011 | t | 66223  | TSGLASL                      | Homo<br>sapiens                  |

|   |      |   |   |       |        |        |        |        |   |        |                              |                                  |
|---|------|---|---|-------|--------|--------|--------|--------|---|--------|------------------------------|----------------------------------|
| 1 | 1.00 | 1 | 1 | 0.01  | 0.01   | 0.013  | 0.01   | 0.012  | t | 481    | AAVDSSKA<br>ALTSKLDA<br>AYKL | Mus<br>musculu<br>s              |
| 1 | 1.00 | 1 | 1 | 0.01  | 0.006  | 0.005  | 0.01   | 0.011  | t | 70656  | VQTRHVV<br>QHRSRSES<br>SIESF | Oryctola<br>gus<br>cuniculu<br>s |
| 1 | 1.00 | 1 | 1 | -0.05 | -0.05  | -0.05  | -0.05  | -0.05  | t | 58765  | SIYPGHITG<br>HRMAW           | Homo<br>sapiens                  |
| 1 | 1.00 | 1 | 1 | 0.02  | 0.02   | 0.023  | 0.02   | 0.023  | t | 125004 | DAPDTDW<br>CDSIP             | Mus<br>musculu<br>s              |
| 1 | 1.00 | 1 | 1 | 0     | 0.002  | 0.01   | 0.001  | 0.002  | t | 19974  | GGPTRTIG<br>GS               | Homo<br>sapiens                  |
| 1 | 1.00 | 1 | 1 | 0     | 0.004  | 0.01   | 0.001  | 0.002  | t | 19974  | GGPTRTIG<br>GS               | Homo<br>sapiens                  |
| 1 | 1.00 | 1 | 1 | 0     | -0.001 | 0.011  | 0      | 0      | t | 41643  | MGVICMN<br>MECDRN<br>M       | Mus<br>musculu<br>s              |
| 1 | 1.00 | 1 | 1 | -0.02 | -0.02  | -0.007 | -0.02  | -0.02  | t | 94575  | KVLTTGLP<br>ALISW            | Mus<br>musculu<br>s              |
| 1 | 1.00 | 1 | 1 | -0.03 | -0.03  | -0.03  | -0.033 | -0.03  | t | 149057 | GWHTRIF<br>VSDWYHT<br>P      | Rattus<br>norvegic<br>us         |
| 1 | 1.00 | 1 | 1 | 0.01  | 0.008  | 0.011  | 0.003  | 0.01   | t | 145147 | DPSLKMA<br>DPNRFR            | Mus<br>musculu<br>s              |
| 1 | 1.00 | 1 | 1 | 0.03  | 0.016  | 0.037  | 0.027  | 0.031  | t | 115594 | AQRPQDE<br>N                 | Macaca<br>mulatta                |
| 1 | 1.00 | 1 | 1 | -0.02 | -0.02  | -0.018 | -0.02  | -0.018 | t | 8982   | DKRFLCKH<br>SMVDRG           | Mus<br>musculu<br>s              |
| 1 | 1.00 | 1 | 1 | -0.02 | -0.023 | -0.01  | -0.02  | -0.02  | t | 120634 | IPGKRNEK<br>FYEC             | Oryctola<br>gus<br>cuniculu<br>s |
| 1 | 1.00 | 1 | 1 | 0     | 0      | -0.006 | 0      | 0.01   | t | 1366   | AFNPAY                       | Mus<br>musculu<br>s              |
| 1 | 1.00 | 1 | 1 | 0.03  | 0.028  | 0.037  | 0.023  | 0.029  | t | 121701 | PDSPQRV<br>AEAEAVSF          | Mus<br>musculu<br>s              |
| 1 | 1.00 | 1 | 1 | 0     | 0.002  | 0.017  | 0.001  | 0      | t | 48894  | PPQGGVV<br>TPGSGSG           | Homo<br>sapiens                  |

|   |      |   |   |       |        |        |        |        |   |        |                              |                       |
|---|------|---|---|-------|--------|--------|--------|--------|---|--------|------------------------------|-----------------------|
| 1 | 1.00 | 1 | 1 | -0.04 | -0.042 | -0.013 | -0.041 | -0.042 | t | 44625  | NKVVPPS                      | Mus musculus          |
| 1 | 1.00 | 1 | 1 | -0.04 | -0.045 | -0.045 | -0.04  | -0.04  | t | 41053  | MAKGKRS<br>TDAKGSQ<br>RRQKKV | Canis lupus           |
| 1 | 1.00 | 1 | 1 | -0.05 | -0.046 | -0.028 | -0.05  | -0.049 | t | 11781  | EEMFIPK                      | Mus musculus          |
| 1 | 1.00 | 1 | 1 | 0.03  | 0.032  | 0.045  | 0.027  | 0.028  | t | 11704  | EEIVPNSV<br>EQ               | Homo sapiens          |
| 1 | 1.00 | 1 | 1 | 0.02  | 0.023  | 0.019  | 0.02   | 0.024  | t | 91093  | AEFYQEVL<br>FKGFE            | Equus caballus        |
| 1 | 1.00 | 1 | 1 | -0.03 | -0.032 | -0.028 | -0.033 | -0.026 | t | 135921 | EVGWYRS<br>PF                | Mus musculus          |
| 1 | 1.00 | 1 | 1 | -0.04 | -0.04  | -0.04  | -0.043 | -0.04  | t | 149057 | GWHTRIF<br>VSDWYHT<br>P      | Rattus norvegicus     |
| 1 | 1.00 | 1 | 1 | 0.02  | 0.02   | 0.02   | 0.013  | 0.02   | t | 135895 | ALLRCIPAL<br>DSLTPANE<br>DC  | Homo sapiens          |
| 1 | 1.00 | 1 | 1 | -0.03 | -0.036 | -0.024 | -0.03  | -0.03  | t | 123439 | LLARDAPD<br>TDWCDSIP         | Oryctolagus cuniculus |
| 1 | 1.00 | 1 | 1 | 0     | 0.002  | 0.014  | 0.001  | 0      | t | 10200  | DSPDADLI<br>EANLLWR<br>QEMG  | Homo sapiens          |
| 1 | 1.00 | 1 | 1 | 0.02  | 0.015  | 0.023  | 0.017  | 0.02   | t | 4471   | ASIDWREY<br>GYVTEVKD<br>QGNC | Bos taurus            |
| 1 | 1.00 | 1 | 1 | 0.02  | 0.023  | 0.03   | 0.019  | 0.019  | t | 82528  | GAATPYSG<br>EDSPFDM<br>TLGEE | Aotus                 |
| 1 | 1.00 | 1 | 1 | 0.01  | 0.01   | 0.017  | 0.01   | 0.01   | t | 131227 | KHYPEVGP<br>NGFI             | Homo sapiens          |
| 1 | 1.00 | 1 | 1 | -0.01 | -0.01  | -0.01  | -0.021 | -0.012 | t | 118257 | AKSIDLKD<br>KYKNI            | Homo sapiens          |
| 1 | 1.00 | 1 | 1 | 0.01  | 0.013  | 0.032  | 0.013  | 0.01   | t | 94625  | NPACGRH<br>YSC               | Capra hircus          |

|   |      |   |   |       |        |        |        |        |   |        |                              |                                  |
|---|------|---|---|-------|--------|--------|--------|--------|---|--------|------------------------------|----------------------------------|
| 1 | 1.00 | 1 | 1 | 0.01  | 0.01   | 0.017  | 0      | 0.011  | t | 108497 | KIGPELHG<br>L                | Homo<br>sapiens                  |
| 1 | 1.00 | 1 | 1 | 0.08  | 0.084  | 0.09   | 0.077  | 0.082  | t | 23976  | HHAERNG<br>SQSTTSQS<br>N     | Homo<br>sapiens                  |
| 1 | 1.00 | 1 | 1 | 0     | 0.002  | 0.011  | -0.004 | -0.001 | t | 23875  | HFVLLVGY<br>GSADGVD          | Homo<br>sapiens                  |
| 1 | 1.00 | 1 | 1 | -0.01 | -0.01  | -0.01  | -0.01  | -0.01  | t | 135568 | KPSKPKTN<br>MKHMAG<br>AAAAG  | Mus<br>musculu<br>s              |
| 1 | 1.00 | 1 | 1 | -0.01 | -0.01  | -0.013 | -0.013 | -0.006 | t | 115652 | SSRISYWT<br>IVKP             | Homo<br>sapiens                  |
| 1 | 1.00 | 1 | 1 | -0.03 | -0.03  | -0.021 | -0.03  | -0.029 | t | 108846 | DALQFVC<br>GDRGFY            | Mus<br>musculu<br>s              |
| 1 | 1.00 | 1 | 1 | -0.02 | -0.022 | -0.025 | -0.027 | -0.019 | t | 112418 | YNFAVLKL<br>MGRGTKF          | Rattus<br>norvegic<br>us         |
| 1 | 1.00 | 1 | 1 | -0.08 | -0.066 | -0.063 | -0.077 | -0.081 | t | 115639 | QFRVIGPR<br>HPIR             | Homo<br>sapiens                  |
| 1 | 1.00 | 1 | 1 | 0     | -0.002 | 0.011  | -0.003 | 0      | t | 106988 | VTSVSAVA<br>SGHYLHR          | Mus<br>musculu<br>s              |
| 1 | 1.00 | 1 | 1 | 0     | -0.002 | 0      | -0.007 | 0.002  | t | 125551 | RNLTYIDP<br>DALKEPLL<br>KFL  | Mus<br>musculu<br>s              |
| 1 | 1.00 | 1 | 1 | -0.04 | -0.04  | -0.04  | -0.04  | -0.04  | t | 78401  | GLPNDWP<br>CRQASGT<br>R      | Mus<br>musculu<br>s              |
| 1 | 1.00 | 1 | 1 | -0.06 | -0.064 | -0.058 | -0.063 | -0.06  | t | 56937  | SAPPTRVR<br>R                | Oryctola<br>gus<br>cuniculu<br>s |
| 1 | 1.00 | 1 | 1 | -0.02 | -0.017 | -0.009 | -0.02  | -0.02  | t | 7092   | CSTKAIGR<br>TILKENIKY<br>EVA | Equus<br>caballus                |
| 1 | 1.00 | 1 | 1 | -0.03 | -0.03  | -0.023 | -0.03  | -0.03  | t | 133455 | YFQWAPY<br>GYYYNEIKL<br>K    | Oryctola<br>gus<br>cuniculu<br>s |
| 1 | 1.00 | 1 | 1 | -0.02 | -0.02  | -0.02  | -0.02  | -0.016 | t | 156545 | PTTTVPNT<br>TNKYSTSP<br>S    | Mus<br>musculu<br>s              |

|   |      |   |   |       |        |        |        |        |   |        |                             |                                  |
|---|------|---|---|-------|--------|--------|--------|--------|---|--------|-----------------------------|----------------------------------|
| 1 | 1.00 | 1 | 1 | -0.05 | -0.023 | -0.034 | -0.05  | -0.052 | t | 113257 | ADNKAPQ<br>GLLC             | Rattus                           |
| 1 | 1.00 | 1 | 1 | -0.01 | -0.012 | -0.008 | -0.017 | -0.011 | t | 104785 | GAEIVYKS<br>PVVSGD          | Mus<br>musculu<br>s              |
| 1 | 1.00 | 1 | 1 | -0.01 | -0.012 | -0.008 | -0.017 | -0.011 | t | 104786 | GAEIVYKS<br>PVVSGD          | Mus<br>musculu<br>s              |
| 1 | 1.00 | 1 | 1 | 0.01  | 0.011  | 0.01   | 0.009  | 0.011  | t | 74849  | YLNSSLYR<br>GTKFIIKKY<br>AS | Equus<br>caballus                |
| 1 | 1.00 | 1 | 1 | 0.01  | 0.017  | 0.01   | 0.009  | 0.011  | t | 74849  | YLNSSLYR<br>GTKFIIKKY<br>AS | Gallus<br>gallus                 |
| 1 | 1.00 | 1 | 1 | 0.01  | 0.01   | 0.01   | 0.009  | 0.011  | t | 74849  | YLNSSLYR<br>GTKFIIKKY<br>AS | Homo<br>sapiens                  |
| 1 | 1.00 | 1 | 1 | -0.02 | -0.018 | -0.006 | -0.017 | -0.018 | t | 68347  | VESMETT<br>MRSPVFT          | Homo<br>sapiens                  |
| 1 | 1.00 | 1 | 1 | 0.02  | 0.018  | 0.032  | 0.019  | 0.02   | t | 142384 | AGVLRQE<br>QANSV            | Mus<br>musculu<br>s              |
| 1 | 1.00 | 1 | 1 | -0.02 | -0.02  | -0.003 | -0.02  | -0.018 | t | 97252  | DTPLTTAA<br>LRLV            | Mus<br>musculu<br>s              |
| 1 | 1.00 | 1 | 1 | -0.03 | -0.034 | -0.018 | -0.027 | -0.028 | t | 104780 | FRHDSGY                     | Oryctola<br>gus<br>cuniculu<br>s |
| 1 | 1.00 | 1 | 1 | -0.03 | -0.032 | -0.018 | -0.027 | -0.028 | t | 104780 | FRHDSGY                     | Mus<br>musculu<br>s              |
| 1 | 1.00 | 1 | 1 | -0.03 | -0.032 | -0.018 | -0.027 | -0.028 | t | 104780 | FRHDSGY                     | Mus<br>musculu<br>s              |
| 1 | 1.00 | 1 | 1 | -0.02 | -0.016 | 0.002  | -0.02  | -0.022 | t | 63340  | TEEEREVY<br>SY              | Homo<br>sapiens                  |
| 1 | 1.00 | 1 | 1 | -0.02 | -0.018 | 0.002  | -0.02  | -0.022 | t | 63340  | TEEEREVY<br>SY              | Homo<br>sapiens                  |

|   |      |   |   |       |        |        |        |       |   |        |                              |                       |
|---|------|---|---|-------|--------|--------|--------|-------|---|--------|------------------------------|-----------------------|
| 1 | 1.00 | 1 | 1 | -0.01 | -0.01  | -0.01  | -0.017 | -0.01 | t | 119473 | KILKVIRK                     | Homo sapiens          |
| 1 | 1.00 | 1 | 1 | 0.02  | 0.02   | 0.02   | 0.01   | 0.02  | t | 115194 | CNISCDKFLD                   | Homo sapiens          |
| 1 | 1.00 | 1 | 1 | -0.05 | -0.052 | -0.045 | -0.053 | -0.05 | t | 72538  | WHHRHQ<br>PAPGGR             | Mus musculus          |
| 1 | 1.00 | 1 | 1 | 0.01  | 0.01   | 0.024  | 0.016  | 0.01  | t | 75203  | YNPLYGSR<br>LGVPDTLG<br>GDPK | Homo sapiens          |
| 1 | 1.00 | 1 | 1 | 0.02  | 0.016  | 0.046  | 0.02   | 0.02  | t | 2128   | AIVVEYSSS<br>VKLT            | Mus musculus          |
| 1 | 1.00 | 1 | 1 | 0     | -0.002 | -0.001 | -0.001 | 0.001 | t | 24654  | HQTLQDP<br>RVRGLYLP<br>AGG   | Mus musculus          |
| 1 | 1.00 | 1 | 1 | 0.03  | 0.03   | 0.03   | 0.03   | 0.03  | t | 136083 | SEGAEYDD<br>QTSQREKE<br>DDK  | Oryctolagus cuniculus |
| 1 | 1.00 | 1 | 1 | 0.04  | 0.04   | 0.046  | 0.051  | 0.05  | t | 158593 | GRQAQYY                      | Homo sapiens          |
| 1 | 1.00 | 1 | 1 | 0.03  | 0.03   | 0.03   | 0.036  | 0.037 | t | 122627 | VEQVTNV<br>GLYSSDYI<br>KTVA  | Rattus norvegicus     |
| 1 | 1.00 | 1 | 1 | 0.01  | 0.007  | 0.01   | 0.01   | 0.016 | t | 122289 | CSNSSSSQ<br>FQIHGP           | Oryctolagus cuniculus |
| 1 | 1.00 | 1 | 1 | 0.02  | 0.02   | 0.037  | 0.02   | 0.021 | t | 39024  | LQYTPSW<br>MLV               | Mus musculus          |
| 1 | 1.00 | 1 | 1 | -0.01 | -0.008 | 0.004  | -0.013 | -0.01 | t | 106    | AAEGATPE<br>AKYD             | Homo sapiens          |
| 1 | 1.00 | 1 | 1 | 0.05  | 0.05   | 0.062  | 0.05   | 0.05  | t | 63542  | TESTVSSAL<br>AELAT           | Homo sapiens          |
| 1 | 1.00 | 1 | 1 | -0.04 | -0.044 | -0.024 | -0.041 | -0.04 | t | 51168  | QKAREAFR                     | Anas platyrhynchos    |
| 1 | 1.00 | 1 | 1 | -0.01 | -0.012 | 0.002  | -0.011 | -0.01 | t | 142422 | GAILVDFW<br>AEWC             | Mus musculus          |

|   |      |   |   |       |        |        |        |        |   |        |                              |                                  |
|---|------|---|---|-------|--------|--------|--------|--------|---|--------|------------------------------|----------------------------------|
| 1 | 1.00 | 1 | 1 | 0     | -0.001 | 0.011  | 0.001  | 0.002  | t | 141562 | SIVQRSEN<br>NGVRPDV          | Bos<br>taurus                    |
| 1 | 1.00 | 1 | 1 | 0.01  | 0.01   | 0.008  | 0.007  | 0.01   | t | 26341  | IGVNQELA<br>YFYPELFR<br>QFYQ | Homo<br>sapiens                  |
| 1 | 1.00 | 1 | 1 | -0.03 | -0.023 | -0.032 | -0.033 | -0.03  | t | 40075  | LTPAWRIY<br>STGNNVF<br>Q     | Gallus<br>gallus                 |
| 1 | 1.00 | 1 | 1 | 0.03  | 0.028  | 0.03   | 0.027  | 0.032  | t | 118538 | NNGNLQL<br>RKEVTWE<br>VLEG   | Mus<br>musculu<br>s              |
| 1 | 1.00 | 1 | 1 | -0.01 | -0.01  | -0.008 | -0.01  | -0.008 | t | 78057  | VGVNRYD<br>QYKVHKP<br>WTLVVM | Mus<br>musculu<br>s              |
| 1 | 1.00 | 1 | 1 | -0.01 | -0.007 | -0.003 | -0.01  | -0.009 | t | 107765 | CESAQRPF<br>GCC              | Mus<br>musculu<br>s              |
| 1 | 1.00 | 1 | 1 | -0.03 | -0.032 | -0.026 | -0.03  | -0.032 | t | 49506  | PSSKRFQP<br>FQQFGRD<br>VSDFT | Oryctola<br>gus<br>cuniculu<br>s |
| 1 | 1.00 | 1 | 1 | -0.03 | -0.03  | -0.026 | -0.03  | -0.032 | t | 49506  | PSSKRFQP<br>FQQFGRD<br>VSDFT | Oryctola<br>gus<br>cuniculu<br>s |
| 1 | 1.00 | 1 | 1 | -0.04 | -0.04  | -0.031 | -0.04  | -0.04  | t | 135940 | ISQEMERI<br>PRLR             | Homo<br>sapiens                  |
| 1 | 1.00 | 1 | 1 | -0.01 | -0.008 | -0.008 | -0.009 | -0.008 | t | 3236   | ANCASILC<br>KCYTTGT          | Homo<br>sapiens                  |
| 1 | 1.00 | 1 | 1 | 0     | 0      | 0.017  | 0      | -0.002 | t | 63758  | TFTNPVVS<br>TTQWSAP          | Oryctola<br>gus<br>cuniculu<br>s |
| 1 | 1.00 | 1 | 1 | 0     | 0.004  | 0.012  | -0.003 | 0.001  | t | 13908  | EQQKEQC<br>VKECEKYY          | Homo<br>sapiens                  |
| 1 | 1.00 | 1 | 1 | 0.04  | 0.038  | 0.04   | 0.033  | 0.04   | t | 134133 | LGGAKQA<br>GDV               | Mus<br>musculu<br>s              |

|   |      |   |   |       |        |        |        |        |   |        |                              |                                  |
|---|------|---|---|-------|--------|--------|--------|--------|---|--------|------------------------------|----------------------------------|
| 1 | 1.00 | 1 | 1 | -0.02 | -0.022 | -0.016 | -0.02  | -0.019 | t | 120699 | KMFPEVKE<br>KGMAALP<br>RL    | Oryctola<br>gus<br>cuniculu<br>s |
| 1 | 1.00 | 1 | 1 | 0.02  | 0.022  | 0.029  | 0.021  | 0.02   | t | 73036  | WRIYSTGN<br>NVFQTQA<br>GC    | Homo<br>sapiens                  |
| 1 | 1.00 | 1 | 1 | -0.02 | -0.02  | -0.017 | -0.02  | -0.022 | t | 133263 | NSSPEYPR<br>KEFASST<br>RGRS  | Homo<br>sapiens                  |
| 1 | 1.00 | 1 | 1 | 0     | -0.003 | -0.001 | 0      | 0.002  | t | 30715  | KFDTKGSA<br>KTIEATLHC<br>YGA | Oryctola<br>gus<br>cuniculu<br>s |
| 1 | 1.00 | 1 | 1 | 0.01  | 0.01   | 0.007  | 0.01   | 0.013  | t | 7173   | CTKPTDG<br>NCTCIPIPS<br>SWAF | Oryctola<br>gus<br>cuniculu<br>s |
| 1 | 1.00 | 1 | 1 | -0.06 | -0.06  | -0.059 | -0.06  | -0.062 | t | 127811 | RVPRIPRD<br>PRPPRPP          | Homo<br>sapiens                  |
| 1 | 1.00 | 1 | 1 | -0.01 | -0.008 | 0.009  | -0.007 | -0.01  | t | 70457  | VPQVRKET<br>RASSR            | Cavia<br>porcellu<br>s           |
| 1 | 1.00 | 1 | 1 | -0.01 | -0.015 | 0.009  | -0.007 | -0.01  | t | 70457  | VPQVRKET<br>RASSR            | Bos<br>taurus                    |
| 1 | 1.00 | 1 | 1 | -0.04 | -0.044 | -0.035 | -0.039 | -0.04  | t | 17553  | FQWSWYT<br>PPRPS             | Oryctola<br>gus<br>cuniculu<br>s |
| 1 | 1.00 | 1 | 1 | -0.02 | -0.022 | -0.014 | -0.021 | -0.02  | t | 57976  | SGALRFYN<br>LKGQLVTG<br>SGWY | Rattus<br>norvegic<br>us         |
| 1 | 1.00 | 1 | 1 | -0.02 | -0.023 | -0.025 | -0.02  | -0.018 | t | 63250  | TDTRKDIN<br>TVTTVAQS         | Oryctola<br>gus<br>cuniculu<br>s |
| 1 | 1.00 | 1 | 1 | 0.01  | 0.01   | 0.015  | 0.01   | 0.01   | t | 39094  | LRGDLRQ<br>WVSAGR<br>VG      | Homo<br>sapiens                  |
| 1 | 1.00 | 1 | 1 | -0.05 | -0.05  | -0.05  | -0.053 | -0.05  | t | 149101 | SFTRVVD<br>VYRPLS            | Rattus<br>norvegic<br>us         |



|   |      |   |   |       |        |        |        |        |   |        |                              |                                  |
|---|------|---|---|-------|--------|--------|--------|--------|---|--------|------------------------------|----------------------------------|
| 1 | 1.00 | 1 | 1 | -0.01 | -0.008 | -0.01  | -0.009 | -0.007 | t | 62852  | TAGHGAY<br>GITSLFTRG         | Homo<br>sapiens                  |
| 1 | 1.00 | 1 | 1 | -0.01 | -0.008 | -0.01  | -0.009 | -0.007 | t | 62852  | TAGHGAY<br>GITSLFTRG         | Homo<br>sapiens                  |
| 1 | 1.00 | 1 | 1 | 0.01  | 0.006  | 0.025  | 0.013  | 0.01   | t | 44117  | NGWGAPT<br>KEESTYN<br>WLP    | Oryctola<br>gus<br>cuniculu<br>s |
| 1 | 1.00 | 1 | 1 | 0.01  | 0.011  | 0.025  | 0.013  | 0.01   | t | 44117  | NGWGAPT<br>KEESTYN<br>WLP    | Equus<br>caballus                |
| 1 | 1.00 | 1 | 1 | 0     | 0.002  | 0.012  | 0.001  | 0      | t | 34661  | LAAEFKQK<br>ALGLLQTA<br>TKQA | Homo<br>sapiens                  |
| 1 | 1.00 | 1 | 1 | -0.01 | -0.01  | -0.01  | -0.01  | -0.006 | t | 97595  | QTPLTMA<br>ALELF             | Mus<br>musculu<br>s              |
| 1 | 1.00 | 1 | 1 | -0.06 | -0.06  | -0.055 | -0.06  | -0.062 | t | 5298   | AVDSAARI<br>HDFRYSQL<br>AKLG | Homo<br>sapiens                  |
| 1 | 1.00 | 1 | 1 | 0.02  | 0.02   | 0.025  | 0.027  | 0.03   | t | 103934 | GKVQAQS                      | Homo<br>sapiens                  |
| 1 | 1.00 | 1 | 1 | 0.04  | 0.038  | 0.048  | 0.039  | 0.042  | t | 58779  | SKAALIEEG                    | Homo<br>sapiens                  |
| 1 | 1.00 | 1 | 1 | -0.04 | -0.037 | -0.034 | -0.04  | -0.035 | t | 141539 | FSPAYLRD<br>AALK             | Mus<br>musculu<br>s              |
| 1 | 1.00 | 1 | 1 | 0.02  | 0.022  | 0.029  | 0.021  | 0.02   | t | 54747  | RLRSSVPG<br>VRLQDSV<br>DFSL  | Homo<br>sapiens                  |
| 1 | 1.00 | 1 | 1 | 0.01  | 0.007  | 0.019  | 0.01   | 0.01   | t | 99891  | AKVPLKTD<br>ANDQIG           | Oryctola<br>gus<br>cuniculu<br>s |
| 1 | 1.00 | 1 | 1 | 0     | 0      | 0.016  | 0      | 0      | t | 110812 | DPVGPLDP<br>SIVSLVEES<br>SFI | Oryctola<br>gus<br>cuniculu<br>s |
| 1 | 1.00 | 1 | 1 | 0     | 0      | 0.016  | 0      | 0      | t | 110812 | DPVGPLDP<br>SIVSLVEES<br>SFI | Oryctola<br>gus<br>cuniculu<br>s |
| 1 | 1.00 | 1 | 1 | -0.01 | -0.012 | 0.007  | -0.007 | -0.01  | t | 52021  | QQFGRDV<br>SDF               | Mus<br>musculu<br>s              |

|   |      |   |   |       |        |        |        |        |   |        |                            |                                  |
|---|------|---|---|-------|--------|--------|--------|--------|---|--------|----------------------------|----------------------------------|
| 1 | 1.00 | 1 | 1 | -0.04 | -0.043 | -0.03  | -0.04  | -0.04  | t | 45239  | NNSFLDPE<br>YWNFRNG        | Oryctola<br>gus<br>cuniculu<br>s |
| 1 | 1.00 | 1 | 1 | 0.01  | 0.01   | 0.009  | 0.01   | 0.012  | t | 37641  | LLPAADM<br>DDFSRQL<br>QNSM | Mus<br>musculu<br>s              |
| 1 | 1.00 | 1 | 1 | -0.03 | -0.033 | -0.029 | -0.03  | -0.028 | t | 123835 | VSSATNAL<br>RSM            | Oryctola<br>gus<br>cuniculu<br>s |
| 1 | 1.00 | 1 | 1 | 0.04  | 0.044  | 0.039  | 0.037  | 0.041  | t | 6532   | CKVQRQY<br>DEQQKEQ<br>C    | Homo<br>sapiens                  |
| 1 | 1.00 | 1 | 1 | 0.01  | 0.01   | 0.01   | 0.01   | 0.014  | t | 133538 | CNKPGERT<br>C              | Mus<br>musculu<br>s              |
| 1 | 1.00 | 1 | 1 | 0     | 0      | 0.008  | 0      | 0.002  | t | 60022  | SPDVDLG<br>DASGINAS        | Mus<br>musculu<br>s              |
| 1 | 1.00 | 1 | 1 | 0     | 0      | 0.008  | 0      | 0.002  | t | 60022  | SPDVDLG<br>DASGINAS        | Mus<br>musculu<br>s              |
| 1 | 1.00 | 1 | 1 | 0     | 0      | 0.008  | 0      | 0.002  | t | 60022  | SPDVDLG<br>DASGINAS        | Mus<br>musculu<br>s              |
| 1 | 1.00 | 1 | 1 | -0.04 | -0.04  | -0.031 | -0.042 | -0.04  | t | 135996 | SIVPALEIA<br>NAH           | Homo<br>sapiens                  |
| 1 | 1.00 | 1 | 1 | -0.03 | -0.026 | -0.014 | -0.033 | -0.029 | t | 20586  | GKIGMYP                    | Homo<br>sapiens                  |
| 1 | 1.00 | 1 | 1 | 0.03  | 0.028  | 0.03   | 0.023  | 0.031  | t | 119663 | VIVELIPST<br>SSAV          | Mus<br>musculu<br>s              |
| 1 | 1.00 | 1 | 1 | 0.03  | 0.028  | 0.03   | 0.023  | 0.031  | t | 119663 | VIVELIPST<br>SSAV          | Mus<br>musculu<br>s              |
| 1 | 1.00 | 1 | 1 | -0.06 | -0.057 | -0.053 | -0.06  | -0.058 | t | 97782  | YTTAVDRP                   | Mus<br>musculu<br>s              |
| 1 | 1.00 | 1 | 1 | -0.06 | -0.057 | -0.053 | -0.06  | -0.058 | t | 97782  | YTTAVDRP                   | Mus<br>musculu<br>s              |

|   |      |   |   |       |        |        |        |        |   |        |                              |                                  |
|---|------|---|---|-------|--------|--------|--------|--------|---|--------|------------------------------|----------------------------------|
| 1 | 1.00 | 1 | 1 | 0.03  | 0.03   | 0.034  | 0.03   | 0.033  | t | 95031  | NAYANEE<br>ATKL              | Oryctola<br>gus<br>cuniculu<br>s |
| 1 | 1.00 | 1 | 1 | 0     | 0.006  | 0.006  | 0      | 0      | t | 22885  | GTVVLELQ<br>YTGTGDC<br>KVPI  | Equus<br>caballus                |
| 1 | 1.00 | 1 | 1 | -0.02 | -0.028 | -0.02  | -0.02  | -0.017 | t | 136393 | IPSRKRRN<br>RIQQ             | Mus<br>musculu<br>s              |
| 1 | 1.00 | 1 | 1 | 0.02  | 0.02   | 0.03   | 0.02   | 0.021  | t | 73430  | YAYQMSR<br>AYAEFLGE<br>DPGSG | Mus<br>musculu<br>s              |
| 1 | 1.00 | 1 | 1 | 0     | 0.002  | 0.004  | 0.003  | 0      | t | 48768  | PPEHRGG<br>PEEFEGAG<br>DGEPP | Homo<br>sapiens                  |
| 1 | 1.00 | 1 | 1 | -0.05 | -0.05  | -0.04  | -0.053 | -0.05  | t | 28603  | ISLTEWSM<br>WYRH             | Homo<br>sapiens                  |
| 1 | 1.00 | 1 | 1 | -0.03 | -0.035 | -0.021 | -0.031 | -0.03  | t | 76167  | YTRMMIG<br>RFCAQMH<br>S      | Bos<br>taurus                    |
| 1 | 1.00 | 1 | 1 | -0.06 | -0.06  | -0.067 | -0.06  | -0.059 | t | 10902  | DYINRWIF<br>VTITNNRL<br>NNS  | Mus<br>musculu<br>s              |
| 1 | 1.00 | 1 | 1 | -0.06 | -0.06  | -0.067 | -0.06  | -0.059 | t | 10902  | DYINRWIF<br>VTITNNRL<br>NNS  | Mus<br>musculu<br>s              |
| 1 | 1.00 | 1 | 1 | -0.06 | -0.052 | -0.067 | -0.06  | -0.059 | t | 10902  | DYINRWIF<br>VTITNNRL<br>NNS  | Gallus<br>gallus                 |
| 1 | 1.00 | 1 | 1 | -0.03 | -0.034 | -0.039 | -0.037 | -0.029 | t | 119454 | GGIKKIRLP<br>SDDVWL<br>PD    | Oryctola<br>gus<br>cuniculu<br>s |
| 1 | 1.00 | 1 | 1 | 0     | 0.003  | 0      | 0      | 0.005  | t | 144664 | GREGYP<br>DGGGLPD<br>SVKI    | Mus<br>musculu<br>s              |
| 1 | 1.00 | 1 | 1 | 0     | 0      | 0      | 0      | 0.005  | t | 151813 | CGADSYE<br>MEEDGVR<br>KC     | Mus<br>musculu<br>s              |
| 1 | 1.00 | 1 | 1 | 0     | 0      | 0      | 0      | 0.005  | t | 151763 | WYRATHQ<br>E                 | Mus<br>musculu<br>s              |

|   |      |   |   |   |   |   |   |       |   |        |                     |                     |
|---|------|---|---|---|---|---|---|-------|---|--------|---------------------|---------------------|
| 1 | 1.00 | 1 | 1 | 0 | 0 | 0 | 0 | 0.005 | t | 133535 | CKPGEVQ<br>QC       | Mus<br>musculu<br>s |
| 1 | 1.00 | 1 | 1 | 0 | 0 | 0 | 0 | 0.005 | t | 133538 | CNKPGERT<br>C       | Mus<br>musculu<br>s |
| 1 | 1.00 | 1 | 1 | 0 | 0 | 0 | 0 | 0.005 | t | 133536 | CKPVENRA<br>C       | Mus<br>musculu<br>s |
| 1 | 1.00 | 1 | 1 | 0 | 0 | 0 | 0 | 0.005 | t | 133554 | EGLYSPW<br>WPRSLPVL | Mus<br>musculu<br>s |
| 1 | 1.00 | 1 | 1 | 0 | 0 | 0 | 0 | 0.005 | t | 133539 | CYKPGEW<br>AC       | Mus<br>musculu<br>s |
| 1 | 1.00 | 1 | 1 | 0 | 0 | 0 | 0 | 0.005 | t | 133528 | CADQKPG<br>EC       | Mus<br>musculu<br>s |
| 1 | 1.00 | 1 | 1 | 0 | 0 | 0 | 0 | 0.005 | t | 133542 | DGRRDVV<br>VRSATFYL | Mus<br>musculu<br>s |
| 1 | 1.00 | 1 | 1 | 0 | 0 | 0 | 0 | 0.005 | t | 133630 | LPPGLHVF<br>PLASNRS | Mus<br>musculu<br>s |
| 1 | 1.00 | 1 | 1 | 0 | 0 | 0 | 0 | 0.005 | t | 133531 | CDTLKPGE<br>C       | Mus<br>musculu<br>s |
| 1 | 1.00 | 1 | 1 | 0 | 0 | 0 | 0 | 0.005 | t | 133580 | GFLSSCNF<br>RFCELR  | Mus<br>musculu<br>s |
| 1 | 1.00 | 1 | 1 | 0 | 0 | 0 | 0 | 0.005 | t | 75441  | YPYDVPDY<br>A       | Mus<br>musculu<br>s |
| 1 | 1.00 | 1 | 1 | 0 | 0 | 0 | 0 | 0.005 | t | 97252  | DTPLTTAA<br>LRLV    | Mus<br>musculu<br>s |
| 1 | 1.00 | 1 | 1 | 0 | 0 | 0 | 0 | 0.005 | t | 44920  | NLVPMVA<br>TV       | Homo<br>sapiens     |
| 1 | 1.00 | 1 | 1 | 0 | 0 | 0 | 0 | 0.005 | t | 11571  | EEEDDDM<br>GFGLFD   | Mus<br>musculu<br>s |
| 1 | 1.00 | 1 | 1 | 0 | 0 | 0 | 0 | 0.005 | t | 10433  | DTNNN               | Mus<br>musculu<br>s |
| 1 | 1.00 | 1 | 1 | 0 | 0 | 0 | 0 | 0.005 | t | 14435  | ETIYNTTLK<br>Y      | Homo<br>sapiens     |

|   |      |   |   |       |        |        |        |        |   |        |                               |                     |
|---|------|---|---|-------|--------|--------|--------|--------|---|--------|-------------------------------|---------------------|
| 1 | 1.00 | 1 | 1 | 0     | 0      | 0      | 0      | 0.005  | t | 17814  | FSPSLEHPI<br>VVSGSWD          | Mus<br>musculu<br>s |
| 1 | 1.00 | 1 | 1 | 0     | 0      | 0      | -0.006 | 0.002  | t | 21254  | GMDGTQL<br>DRW                | Mus<br>musculu<br>s |
| 1 | 1.00 | 1 | 1 | 0.01  | 0.01   | 0.025  | 0.01   | 0.009  | t | 53010  | QYNLTFSD<br>RQSAQ             | Mus<br>musculu<br>s |
| 1 | 1.00 | 1 | 1 | -0.03 | -0.03  | -0.03  | -0.03  | -0.03  | t | 131367 | ATWSPSK<br>ARLHLQGR<br>SNAWR  | Homo<br>sapiens     |
| 1 | 1.00 | 1 | 1 | -0.02 | -0.016 | -0.006 | -0.013 | -0.018 | t | 115057 | GLSLSRFS<br>WGAEGQR<br>PGFG   | Homo<br>sapiens     |
| 1 | 1.00 | 1 | 1 | -0.01 | -0.008 | -0.002 | -0.007 | -0.01  | t | 53895  | RGKGEGLP<br>GMC GGAL<br>VSSNQ | Homo<br>sapiens     |
| 1 | 1.00 | 1 | 1 | 0.05  | 0.048  | 0.057  | 0.047  | 0.05   | t | 135963 | NGQEEKA<br>GVVSTGLI<br>GGG    | Mus<br>musculu<br>s |
| 1 | 1.00 | 1 | 1 | -0.01 | -0.006 | 0.001  | -0.009 | -0.01  | t | 38271  | LNLTTASV<br>PMLRWYA<br>ERFCF  | Mus<br>musculu<br>s |
| 1 | 1.00 | 1 | 1 | -0.02 | -0.02  | -0.015 | -0.016 | -0.017 | t | 123825 | VPQLPHSS<br>SHW               | Homo<br>sapiens     |
| 1 | 1.00 | 1 | 1 | 0.01  | 0.01   | 0.01   | 0.01   | 0.013  | t | 94687  | SKPTTKQR<br>QNKPPNK<br>P      | Mus<br>musculu<br>s |
| 1 | 1.00 | 1 | 1 | -0.02 | -0.028 | -0.011 | -0.02  | -0.02  | t | 85615  | LNIEKYQIH<br>RLV              | Mus<br>musculu<br>s |
| 1 | 1.00 | 1 | 1 | -0.02 | -0.02  | -0.011 | -0.02  | -0.02  | t | 85615  | LNIEKYQIH<br>RLV              | Mus<br>musculu<br>s |
| 1 | 1.00 | 1 | 1 | -0.02 | -0.018 | -0.011 | -0.02  | -0.02  | t | 85615  | LNIEKYQIH<br>RLV              | Homo<br>sapiens     |
| 1 | 1.00 | 1 | 1 | -0.02 | -0.026 | -0.011 | -0.02  | -0.02  | t | 85615  | LNIEKYQIH<br>RLV              | Homo<br>sapiens     |

|   |      |   |   |       |        |        |        |        |   |        |                              |                          |
|---|------|---|---|-------|--------|--------|--------|--------|---|--------|------------------------------|--------------------------|
| 1 | 1.00 | 1 | 1 | -0.03 | -0.03  | -0.013 | -0.03  | -0.032 | t | 114132 | KSHGRTQ<br>DENPVVH<br>F      | Mus<br>musculu<br>s      |
| 1 | 1.00 | 1 | 1 | -0.01 | -0.012 | 0.002  | -0.011 | -0.008 | t | 66275  | TSITHWRI<br>DF               | Mus<br>musculu<br>s      |
| 1 | 1.00 | 1 | 1 | -0.04 | -0.032 | -0.031 | -0.039 | -0.04  | t | 20060  | GGTWRIG<br>Y                 | Homo<br>sapiens          |
| 1 | 1.00 | 1 | 1 | -0.04 | -0.04  | -0.04  | -0.043 | -0.04  | t | 149042 | FLHTRLLFR<br>IVSYSG          | Rattus<br>norvegic<br>us |
| 1 | 1.00 | 1 | 1 | -0.02 | -0.018 | -0.024 | -0.023 | -0.018 | t | 43705  | NENLLRFF<br>VAPFPEVF<br>GKEK | Homo<br>sapiens          |
| 1 | 1.00 | 1 | 1 | -0.02 | -0.02  | -0.008 | -0.02  | -0.02  | t | 119784 | CKAKAQT<br>DREDLRTL<br>L     | Homo<br>sapiens          |
| 1 | 1.00 | 1 | 1 | -0.01 | -0.01  | -0.003 | -0.01  | -0.012 | t | 27498  | IMGYSTP<br>WRYLDFN<br>ALNLFF | Homo<br>sapiens          |
| 1 | 1.00 | 1 | 1 | -0.04 | -0.037 | -0.037 | -0.04  | -0.04  | t | 78636  | EKKIAKME<br>KASSVFNV<br>VN   | Mus<br>musculu<br>s      |
| 1 | 1.00 | 1 | 1 | 0.02  | 0.02   | 0.027  | 0.02   | 0.023  | t | 94511  | FEVFNFP                      | Mus<br>musculu<br>s      |
| 1 | 1.00 | 1 | 1 | -0.05 | -0.048 | -0.034 | -0.043 | -0.047 | t | 134515 | RPNHT                        | Homo<br>sapiens          |
| 1 | 1.00 | 1 | 1 | -0.06 | -0.056 | -0.06  | -0.059 | -0.056 | t | 122748 | EHRMTW<br>DPAQPPR            | Homo<br>sapiens          |
| 1 | 1.00 | 1 | 1 | 0     | -0.002 | -0.008 | -0.007 | 0      | t | 124202 | GPAQITCT<br>PRGWDSP          | Mus<br>musculu<br>s      |
| 1 | 1.00 | 1 | 1 | -0.01 | -0.007 | 0.001  | -0.01  | -0.011 | t | 38271  | LNLTASV<br>PMLRWYA<br>ERFCF  | Mus<br>musculu<br>s      |
| 1 | 1.00 | 1 | 1 | -0.03 | -0.03  | -0.03  | -0.03  | -0.03  | t | 78402  | GLPNDWS<br>GRQASGT<br>R      | Mus<br>musculu<br>s      |

|   |      |   |   |       |        |        |        |        |   |        |                              |                                  |
|---|------|---|---|-------|--------|--------|--------|--------|---|--------|------------------------------|----------------------------------|
| 1 | 1.00 | 1 | 1 | -0.03 | -0.034 | -0.028 | -0.03  | -0.028 | t | 44572  | NKPSKPKT<br>NLKH             | Oryctola<br>gus<br>cuniculu<br>s |
| 1 | 1.00 | 1 | 1 | -0.05 | -0.05  | -0.037 | -0.053 | -0.052 | t | 76397  | YVRGGGA<br>VPP               | Homo<br>sapiens                  |
| 1 | 1.00 | 1 | 1 | 0.02  | 0.02   | 0.026  | 0.014  | 0.02   | t | 67054  | TVKTKNTT<br>TTQT             | Homo<br>sapiens                  |
| 1 | 1.00 | 1 | 1 | 0     | -0.002 | 0.007  | -0.007 | -0.002 | t | 119601 | KGNNVHG<br>FQKQIIRSF<br>Y    | Rattus<br>norvegic<br>us         |
| 1 | 1.00 | 1 | 1 | 0.01  | 0.01   | 0.021  | 0.007  | 0.01   | t | 3650   | APLTAVAP<br>AHDTPPV<br>PDV   | Homo<br>sapiens                  |
| 1 | 1.00 | 1 | 1 | 0.02  | 0.02   | 0.02   | 0.017  | 0.023  | t | 110794 | CDDDDDN<br>DGVPSDR<br>DNCRLV | Mus<br>musculu<br>s              |
| 1 | 1.00 | 1 | 1 | 0.04  | 0.038  | 0.021  | 0.033  | 0.042  | t | 20969  | GLKTENEG<br>LKTENEGL<br>KTE  | Mus<br>musculu<br>s              |
| 1 | 1.00 | 1 | 1 | 0.01  | 0.006  | 0.01   | 0.003  | 0.011  | t | 122519 | PIECRYPR<br>QGNVSS           | Oryctola<br>gus<br>cuniculu<br>s |
| 1 | 1.00 | 1 | 1 | 0.03  | 0.028  | 0.035  | 0.03   | 0.032  | t | 127185 | TCDDPRF<br>QDSS              | Oryctola<br>gus<br>cuniculu<br>s |
| 1 | 1.00 | 1 | 1 | -0.03 | -0.032 | -0.023 | -0.037 | -0.027 | t | 107891 | HRLAFGQY<br>T                | Mus<br>musculu<br>s              |
| 1 | 1.00 | 1 | 1 | 0.02  | 0.02   | 0.031  | 0.02   | 0.023  | t | 6763   | CPFLKQNE<br>PEDICW           | Mus<br>musculu<br>s              |
| 1 | 1.00 | 1 | 1 | 0     | 0      | 0.015  | 0.003  | 0      | t | 39216  | LRSSGCV                      | Homo<br>sapiens                  |
| 1 | 1.00 | 1 | 1 | 0     | -0.002 | 0.002  | -0.007 | 0      | t | 115623 | KTTICGKG<br>LSATVT           | Mus<br>musculu<br>s              |
| 1 | 1.00 | 1 | 1 | 0.01  | 0.008  | 0.017  | 0.003  | 0.01   | t | 108144 | SRLAFGDQ<br>L                | Mus<br>musculu<br>s              |
| 1 | 1.00 | 1 | 1 | 0     | 0      | 0      | 0      | 0.005  | t | 151731 | SAQSQRA<br>PDR               | Mus<br>musculu<br>s              |

|   |      |   |   |       |        |        |        |        |   |        |                              |                          |
|---|------|---|---|-------|--------|--------|--------|--------|---|--------|------------------------------|--------------------------|
| 1 | 1.00 | 1 | 1 | 0     | 0.002  | 0      | 0      | 0.005  | t | 113628 | LRLIHYSYD<br>VN              | Rattus<br>norvegicus     |
| 1 | 1.00 | 1 | 1 | 0     | 0      | 0      | 0      | 0.005  | t | 113628 | LRLIHYSYD<br>VN              | Oryctolagus<br>cuniculus |
| 1 | 1.00 | 1 | 1 | -0.02 | -0.022 | -0.013 | -0.023 | -0.02  | t | 141581 | YVYRWVE<br>AECVA             | Mus<br>musculus          |
| 1 | 1.00 | 1 | 1 | 0     | 0      | 0.005  | 0      | 0.006  | t | 124925 | YYVFFEEQ<br>EDEIIGF          | Homo<br>sapiens          |
| 1 | 1.00 | 1 | 1 | -0.07 | -0.073 | -0.061 | -0.07  | -0.071 | t | 11567  | EEDTNKDK<br>PS               | Oryctolagus<br>cuniculus |
| 1 | 1.00 | 1 | 1 | -0.01 | -0.01  | -0.006 | -0.007 | -0.01  | t | 72133  | VYPPSSTA<br>KSSVSNAP<br>PVAS | Homo<br>sapiens          |
| 1 | 1.00 | 1 | 1 | 0     | -0.004 | 0.008  | 0.003  | 0.002  | t | 67908  | VDASSGSN<br>RFAALPAF         | Oryctolagus<br>cuniculus |
| 1 | 1.00 | 1 | 1 | 0     | 0.007  | 0.008  | 0.003  | 0.002  | t | 67908  | VDASSGSN<br>RFAALPAF         | Gallus<br>gallus         |
| 1 | 1.00 | 1 | 1 | -0.02 | -0.016 | -0.02  | -0.013 | -0.01  | t | 143845 | DLFVTAW                      | Homo<br>sapiens          |
| 1 | 1.00 | 1 | 1 | -0.05 | -0.052 | -0.041 | -0.051 | -0.05  | t | 61045  | SSGPQKTK<br>APVQWR<br>W      | Mus<br>musculus          |
| 1 | 1.00 | 1 | 1 | -0.02 | -0.023 | -0.003 | -0.02  | -0.02  | t | 8832   | DKAAAICF<br>RNSMDT           | Mus<br>musculus          |
| 1 | 1.00 | 1 | 1 | -0.01 | -0.01  | -0.01  | -0.01  | -0.006 | t | 97287  | ETPLTETAL<br>KWH             | Mus<br>musculus          |
| 1 | 1.00 | 1 | 1 | 0     | -0.003 | 0.001  | 0      | 0.002  | t | 122108 | GVGVELE<br>NSMGGLN<br>F      | Oryctolagus<br>cuniculus |
| 1 | 1.00 | 1 | 1 | -0.03 | -0.032 | -0.018 | -0.027 | -0.03  | t | 73588  | YDSY CIMN<br>FCGHAA          | Homo<br>sapiens          |



|   |      |   |   |       |        |        |        |        |   |        |                              |                                  |
|---|------|---|---|-------|--------|--------|--------|--------|---|--------|------------------------------|----------------------------------|
| 1 | 1.00 | 1 | 1 | 0.01  | 0.014  | 0.032  | 0.011  | 0.009  | t | 53436  | RDVSRITFF<br>Q               | Homo<br>sapiens                  |
| 1 | 1.00 | 1 | 1 | 0     | 0      | 0      | 0.004  | 0.002  | t | 117968 | KVTWLVS<br>WTENIQG<br>SIKYIM | Homo<br>sapiens                  |
| 1 | 1.00 | 1 | 1 | 0.03  | 0.03   | 0.037  | 0.03   | 0.031  | t | 136014 | WGLDYER<br>GNYEE             | Mus<br>musculu<br>s              |
| 1 | 1.00 | 1 | 1 | -0.01 | -0.01  | -0.001 | -0.01  | -0.011 | t | 110947 | MSTRSVSS<br>SSYRRMFG<br>GPGT | Mus<br>musculu<br>s              |
| 1 | 1.00 | 1 | 1 | -0.03 | -0.027 | -0.015 | -0.03  | -0.03  | t | 62470  | SWKQRNR<br>WEW               | Felis<br>catus                   |
| 1 | 1.00 | 1 | 1 | -0.01 | -0.006 | -0.004 | -0.01  | -0.01  | t | 21553  | GNYNKY<br>RYLRHGKL<br>RPFER  | Cavia<br>porcellu<br>s           |
| 1 | 1.00 | 1 | 1 | -0.01 | -0.01  | -0.004 | -0.01  | -0.01  | t | 21553  | GNYNKY<br>RYLRHGKL<br>RPFER  | Mus<br>musculu<br>s              |
| 1 | 1.00 | 1 | 1 | -0.01 | -0.014 | -0.005 | -0.013 | -0.012 | t | 61410  | SSTRGGS<br>VEGIFAGL<br>FMNA  | Oryctola<br>gus<br>cuniculu<br>s |
| 1 | 1.00 | 1 | 1 | 0     | 0.007  | -0.009 | -0.007 | 0      | t | 109956 | STHVDIRT<br>LEDLLMGT<br>LGIV | Gallus<br>gallus                 |
| 1 | 1.00 | 1 | 1 | 0.02  | 0.023  | 0.03   | 0.019  | 0.019  | t | 82529  | GAATPYSG<br>EPSPFDEV<br>LGEE | Aotus                            |
| 1 | 1.00 | 1 | 1 | 0     | 0      | 0.007  | 0.001  | 0.001  | t | 137842 | ETVPRSGE<br>VYTSQVE          | Homo<br>sapiens                  |
| 1 | 1.00 | 1 | 1 | -0.03 | -0.03  | -0.03  | -0.03  | -0.027 | t | 106672 | NCALEGW<br>GGHWRG<br>AN      | Homo<br>sapiens                  |
| 1 | 1.00 | 1 | 1 | 0     | 0.003  | 0.002  | 0      | 0.004  | t | 122375 | GLINRAKA<br>VKQFEESQ<br>G    | Mus<br>musculu<br>s              |
| 1 | 1.00 | 1 | 1 | -0.01 | -0.008 | -0.005 | -0.009 | -0.011 | t | 62003  | STWHVLYS<br>PNVSVPS<br>SSTP  | Homo<br>sapiens                  |

|   |      |   |   |       |        |        |        |        |   |        |                              |                                  |
|---|------|---|---|-------|--------|--------|--------|--------|---|--------|------------------------------|----------------------------------|
| 1 | 1.00 | 1 | 1 | 0     | 0.002  | 0.005  | 0.001  | 0.004  | t | 46488  | NVSVSPSPS<br>STPLLY          | Homo<br>sapiens                  |
| 1 | 1.00 | 1 | 1 | 0     | 0.002  | 0.005  | 0.001  | 0.004  | t | 37656  | LLPHSNLD                     | Homo<br>sapiens                  |
| 1 | 1.00 | 1 | 1 | -0.04 | -0.04  | -0.04  | -0.04  | -0.04  | t | 50241  | QAEPDRA<br>HYNIVTFC<br>CKCD  | Mus<br>musculu<br>s              |
| 1 | 1.00 | 1 | 1 | 0     | 0      | 0.023  | 0      | -0.003 | t | 149298 | ELDKWAS                      | Homo<br>sapiens                  |
| 1 | 1.00 | 1 | 1 | -0.07 | -0.063 | -0.07  | -0.07  | -0.07  | t | 113890 | SSTPIPGSR<br>PVARLGLY<br>SRT | Cavia<br>porcellu<br>s           |
| 1 | 1.00 | 1 | 1 | 0.01  | 0.01   | 0.01   | 0.004  | 0.01   | t | 48448  | PLPNTALL<br>SL               | Homo<br>sapiens                  |
| 1 | 1.00 | 1 | 1 | 0.04  | 0.04   | 0.052  | 0.031  | 0.04   | t | 135664 | EHNIEETE                     | Homo<br>sapiens                  |
| 1 | 1.00 | 1 | 1 | 0.01  | 0.012  | 0.013  | 0.011  | 0.01   | t | 55275  | RPPTPWPI<br>SQSDRAS<br>YMDT  | Homo<br>sapiens                  |
| 1 | 1.00 | 1 | 1 | -0.02 | -0.018 | -0.008 | -0.017 | -0.018 | t | 95678  | PPSVPNLR                     | Cavia<br>porcellu<br>s           |
| 1 | 1.00 | 1 | 1 | -0.02 | -0.025 | -0.008 | -0.017 | -0.018 | t | 95678  | PPSVPNLR                     | Bos<br>taurus                    |
| 1 | 1.00 | 1 | 1 | -0.02 | -0.016 | -0.006 | -0.017 | -0.02  | t | 115057 | GLSLSRFS<br>WGAEGQR<br>PGFG  | Homo<br>sapiens                  |
| 1 | 1.00 | 1 | 1 | 0.04  | 0.037  | 0.06   | 0.04   | 0.04   | t | 139322 | TPQGRPD<br>AE                | Oryctola<br>gus<br>cuniculu<br>s |
| 1 | 1.00 | 1 | 1 | -0.01 | -0.007 | -0.006 | -0.01  | -0.008 | t | 64551  | TKELADKL<br>SNAEASRD<br>K    | Equus<br>caballus                |

|   |      |   |   |       |        |        |        |        |   |        |                              |                       |
|---|------|---|---|-------|--------|--------|--------|--------|---|--------|------------------------------|-----------------------|
| 1 | 1.00 | 1 | 1 | 0     | 0.004  | 0.016  | 0.007  | 0      | t | 97918  | AYSNNANKE<br>CQKLLQA         | Homo sapiens          |
| 1 | 1.00 | 1 | 1 | 0     | 0.002  | 0.016  | 0.007  | 0      | t | 97918  | AYSNNANKE<br>CQKLLQA         | Homo sapiens          |
| 1 | 1.00 | 1 | 1 | 0.04  | 0.043  | 0.045  | 0.04   | 0.043  | t | 131101 | TDSEMDV<br>VRFDDDN<br>S      | Mus musculus          |
| 1 | 1.00 | 1 | 1 | 0     | 0.002  | 0      | -0.003 | 0.001  | t | 78412  | GYKDVDK<br>APFNGMT<br>GCG    | Homo sapiens          |
| 1 | 1.00 | 1 | 1 | 0.03  | 0.03   | 0.035  | 0.03   | 0.031  | t | 133556 | EGPEYWD<br>RNT               | Mus musculus          |
| 1 | 1.00 | 1 | 1 | 0.05  | 0.048  | 0.059  | 0.052  | 0.052  | t | 30222  | KDNTDEG<br>DEGDDS            | Homo sapiens          |
| 1 | 1.00 | 1 | 1 | 0     | 0.002  | 0.002  | -0.007 | 0      | t | 104017 | KTKRNTNR<br>RPQDVKFP<br>GGGQ | Homo sapiens          |
| 1 | 1.00 | 1 | 1 | -0.02 | -0.02  | -0.008 | -0.02  | -0.019 | t | 108167 | TRAFGNEA<br>T                | Mus musculus          |
| 1 | 1.00 | 1 | 1 | -0.03 | -0.03  | -0.025 | -0.03  | -0.032 | t | 70275  | VPDTLGG<br>DPKFRSLT<br>HEDHA | Homo sapiens          |
| 1 | 1.00 | 1 | 1 | -0.01 | -0.01  | -0.001 | -0.018 | -0.013 | t | 110968 | PSTSRSLYA<br>SSPGGVYA<br>TRS | Mus musculus          |
| 1 | 1.00 | 1 | 1 | -0.04 | -0.033 | -0.028 | -0.037 | -0.037 | t | 24089  | HIRLQAID<br>PMPP             | Gallus gallus         |
| 1 | 1.00 | 1 | 1 | -0.01 | -0.01  | -0.01  | 0.001  | 0      | t | 104115 | MILSLQM                      | Homo sapiens          |
| 1 | 1.00 | 1 | 1 | -0.03 | -0.033 | -0.035 | -0.033 | -0.03  | t | 58746  | SIVYETAD<br>MIMHTPG<br>CVPCV | Oryctolagus cuniculus |
| 1 | 1.00 | 1 | 1 | -0.02 | -0.018 | -0.02  | -0.019 | -0.018 | t | 47989  | PISYANGS<br>GPDQRPY<br>CWHY  | Homo sapiens          |

|   |      |   |   |       |        |        |        |        |   |        |                              |                                  |
|---|------|---|---|-------|--------|--------|--------|--------|---|--------|------------------------------|----------------------------------|
| 1 | 1.00 | 1 | 1 | 0     | 0.007  | 0      | 0      | 0.001  | t | 153839 | HQKRTAM<br>FQDPQER<br>PRKLPQ | Cavia<br>porcellu<br>s           |
| 1 | 1.00 | 1 | 1 | 0.01  | 0.01   | 0.017  | 0.01   | 0.01   | t | 35413  | LEDRSTQA<br>SLEEAILR         | Mus<br>musculu<br>s              |
| 1 | 1.00 | 1 | 1 | 0.01  | 0.01   | 0.017  | 0.01   | 0.01   | t | 35413  | LEDRSTQA<br>SLEEAILR         | Mus<br>musculu<br>s              |
| 1 | 1.00 | 1 | 1 | -0.01 | -0.01  | -0.003 | -0.007 | -0.008 | t | 3200   | AMTPTVA<br>TRDGKLPA<br>TQLRR | Homo<br>sapiens                  |
| 1 | 1.00 | 1 | 1 | 0.03  | 0.03   | 0.042  | 0.027  | 0.032  | t | 147140 | MSNIPQE<br>QW                | Homo<br>sapiens                  |
| 1 | 1.00 | 1 | 1 | 0     | -0.002 | 0      | -0.007 | 0.001  | t | 117614 | QGFPFYDK<br>PMRI             | Mus<br>musculu<br>s              |
| 1 | 1.00 | 1 | 1 | 0.01  | 0.008  | 0.005  | 0.003  | 0.012  | t | 113159 | SDEGGYTC<br>FFRDHSYQ<br>EE   | Rattus<br>norvegic<br>us         |
| 1 | 1.00 | 1 | 1 | 0.01  | 0.008  | 0.005  | 0.003  | 0.012  | t | 113159 | SDEGGYTC<br>FFRDHSYQ<br>EE   | Rattus<br>norvegic<br>us         |
| 1 | 1.00 | 1 | 1 | 0     | 0.002  | 0.013  | 0.001  | 0      | t | 47068  | PDDDPQP<br>GPSREYRY<br>VL    | Homo<br>sapiens                  |
| 1 | 1.00 | 1 | 1 | 0.02  | 0.018  | 0.014  | 0.017  | 0.03   | t | 104293 | SYPNTWP                      | Mus<br>musculu<br>s              |
| 1 | 1.00 | 1 | 1 | -0.02 | -0.02  | -0.02  | -0.027 | -0.018 | t | 118127 | SDDDMGF<br>GLFD              | Homo<br>sapiens                  |
| 1 | 1.00 | 1 | 1 | -0.01 | -0.01  | -0.005 | -0.01  | -0.01  | t | 52265  | QRSECSTS<br>KCFVRK           | Homo<br>sapiens                  |
| 1 | 1.00 | 1 | 1 | 0.01  | 0.006  | 0.01   | 0.01   | 0.011  | t | 139860 | PVQRGAW<br>RWPVVTN<br>E      | Mus<br>musculu<br>s              |
| 1 | 1.00 | 1 | 1 | 0.01  | 0.01   | 0.003  | 0.01   | 0.017  | t | 141534 | DRMNLQT<br>LRGY              | Mus<br>musculu<br>s              |
| 1 | 1.00 | 1 | 1 | -0.01 | -0.01  | -0.01  | -0.01  | -0.008 | t | 78701  | KKFNSSAG<br>DKQGNISI<br>EKL  | Mus<br>musculu<br>s              |
| 1 | 1.00 | 1 | 1 | -0.01 | -0.013 | -0.01  | -0.01  | -0.008 | t | 78701  | KKFNSSAG<br>DKQGNISI<br>EKL  | Oryctola<br>gus<br>cuniculu<br>s |

|   |      |   |   |       |        |        |        |        |   |        |                                  |                                  |
|---|------|---|---|-------|--------|--------|--------|--------|---|--------|----------------------------------|----------------------------------|
| 1 | 1.00 | 1 | 1 | -0.03 | -0.036 | -0.024 | -0.03  | -0.03  | t | 123439 | LLARDAPD<br>TDWCDSIP             | Oryctola<br>gus<br>cuniculu<br>s |
| 1 | 1.00 | 1 | 1 | 0.01  | 0.01   | 0.016  | 0.01   | 0.01   | t | 27431  | ILYQQFDE<br>MEECSRHI<br>PYLA     | Homo<br>sapiens                  |
| 1 | 1.00 | 1 | 1 | -0.01 | -0.006 | -0.01  | -0.01  | -0.007 | t | 116505 | SGKVPWL<br>KPGR                  | Ovis<br>aries                    |
| 1 | 1.00 | 1 | 1 | -0.04 | -0.036 | -0.034 | -0.043 | -0.042 | t | 16452  | FKQNVNR<br>PSRAD                 | Homo<br>sapiens                  |
| 1 | 1.00 | 1 | 1 | 0.01  | 0.01   | 0.019  | 0.01   | 0.01   | t | 42060  | MLSKYSLPI<br>VEEPEDYK<br>EAS     | Homo<br>sapiens                  |
| 1 | 1.00 | 1 | 1 | 0.02  | 0.02   | 0.02   | 0.016  | 0.021  | t | 117742 | AKAQTDR<br>EDLRTLRY              | Homo<br>sapiens                  |
| 1 | 1.00 | 1 | 1 | -0.04 | -0.036 | -0.028 | -0.039 | -0.04  | t | 17888  | FSYDTR                           | Homo<br>sapiens                  |
| 1 | 1.00 | 1 | 1 | -0.02 | -0.02  | -0.017 | -0.02  | -0.02  | t | 22884  | GTVVAVG<br>PGRWDEDE<br>GE        | Mus<br>musculu<br>s              |
| 1 | 1.00 | 1 | 1 | -0.01 | -0.007 | 0.012  | -0.007 | -0.01  | t | 78270  | SIPIGS                           | Equus<br>caballus                |
| 1 | 1.00 | 1 | 1 | -0.05 | -0.053 | -0.041 | -0.049 | -0.05  | t | 41575  | MGGAAG<br>GMPGGM<br>PGMSGMS<br>G | Canis<br>lupus                   |
| 1 | 1.00 | 1 | 1 | -0.04 | -0.044 | -0.031 | -0.037 | -0.038 | t | 55889  | RSLPPIVKD<br>ASIQVSAI<br>R       | Oryctola<br>gus<br>cuniculu<br>s |
| 1 | 1.00 | 1 | 1 | 0     | 0      | 0.007  | 0      | 0      | t | 78565  | WSESDVA<br>GLQNDPT<br>TIYN       | Mus<br>musculu<br>s              |
| 1 | 1.00 | 1 | 1 | -0.02 | -0.019 | -0.008 | -0.019 | -0.022 | t | 54494  | RLCSVSY<br>EPSLLWTS<br>SCFD      | Myodes<br>glareolu<br>s          |
| 1 | 1.00 | 1 | 1 | 0     | 0.002  | 0.02   | -0.001 | -0.002 | t | 58873  | SKKTGIDP                         | MD                               |
| 1 | 1.00 | 1 | 1 | -0.01 | -0.01  | -0.005 | -0.01  | -0.01  | t | 62554  | SYGDFTQF<br>TRHT                 | Homo<br>sapiens                  |

|   |      |   |   |       |        |        |       |        |   |        |                              |                                  |
|---|------|---|---|-------|--------|--------|-------|--------|---|--------|------------------------------|----------------------------------|
| 1 | 1.00 | 1 | 1 | 0.04  | 0.04   | 0.04   | 0.042 | 0.043  | t | 6650   | CMENNSG<br>WKVSLNY<br>GEIIW  | Homo<br>sapiens                  |
| 1 | 1.00 | 1 | 1 | 0     | 0      | 0      | 0     | 0.005  | t | 134669 | FGFPQE                       | Mus<br>musculu<br>s              |
| 1 | 1.00 | 1 | 1 | 0     | 0      | 0      | 0     | 0.005  | t | 134240 | SVTAAAS                      | Mus<br>musculu<br>s              |
| 1 | 1.00 | 1 | 1 | 0     | 0      | 0      | 0     | 0.005  | t | 118963 | PNYKVVN<br>YAVTK             | Mus<br>musculu<br>s              |
| 1 | 1.00 | 1 | 1 | 0     | 0      | 0      | 0     | 0.005  | t | 119038 | TSTNGIKK<br>LIF              | Mus<br>musculu<br>s              |
| 1 | 1.00 | 1 | 1 | 0     | 0      | 0      | 0     | 0.005  | t | 39183  | LRRDLAS<br>REAKKQVE<br>KALE  | Homo<br>sapiens                  |
| 1 | 1.00 | 1 | 1 | 0     | 0      | 0      | 0     | 0.005  | t | 11819  | EENVEHD<br>A                 | Oryctola<br>gus<br>cuniculu<br>s |
| 1 | 1.00 | 1 | 1 | 0     | 0      | 0      | 0     | 0.005  | t | 11813  | EENVEENV                     | Oryctola<br>gus<br>cuniculu<br>s |
| 1 | 1.00 | 1 | 1 | 0     | 0      | 0      | 0     | 0.005  | t | 30299  | KEALDKYE<br>LENHD            | Oryctola<br>gus<br>cuniculu<br>s |
| 1 | 1.00 | 1 | 1 | 0     | 0      | 0      | 0     | 0.005  | t | 9526   | DNPASTT<br>NKDKL             | Mus<br>musculu<br>s              |
| 1 | 1.00 | 1 | 1 | -0.04 | -0.04  | -0.035 | -0.04 | -0.039 | t | 136551 | PIQRKRRQ<br>MPLS             | Mus<br>musculu<br>s              |
| 1 | 1.00 | 1 | 1 | 0.04  | 0.036  | 0.046  | 0.033 | 0.043  | t | 134758 | PESPSKLAS<br>A               | Oryctola<br>gus<br>cuniculu<br>s |
| 1 | 1.00 | 1 | 1 | 0.01  | 0.008  | 0.015  | 0.009 | 0.01   | t | 53758  | RFPRGQG<br>VPINTNSG<br>PDDQI | Mus<br>musculu<br>s              |
| 1 | 1.00 | 1 | 1 | -0.02 | -0.017 | -0.004 | -0.02 | -0.02  | t | 54748  | RLRVKN                       | Equus<br>caballus                |

|   |      |   |   |       |        |        |       |        |   |        |                              |                                  |
|---|------|---|---|-------|--------|--------|-------|--------|---|--------|------------------------------|----------------------------------|
| 1 | 1.00 | 1 | 1 | 0.01  | 0.008  | 0.016  | 0.007 | 0.011  | t | 36407  | LHPDHPTL<br>FSYRTLGE<br>DPQY | Mus<br>musculu<br>s              |
| 1 | 1.00 | 1 | 1 | -0.03 | -0.03  | -0.021 | -0.03 | -0.03  | t | 70029  | VMVHDPH<br>SLA               | Oryctola<br>gus<br>cuniculu<br>s |
| 1 | 1.00 | 1 | 1 | 0.01  | 0.008  | 0.006  | 0.009 | 0.01   | t | 48412  | PLLSNTLA<br>ELYVREHL<br>REQS | Mus<br>musculu<br>s              |
| 1 | 1.00 | 1 | 1 | -0.03 | -0.027 | -0.02  | -0.03 | -0.03  | t | 13972  | ERDPANIP<br>WDKD             | Mus<br>musculu<br>s              |
| 1 | 1.00 | 1 | 1 | -0.02 | -0.02  | -0.009 | -0.02 | -0.018 | t | 27997  | IPQPQWT<br>P                 | Mus<br>musculu<br>s              |
| 1 | 1.00 | 1 | 1 | 0     | 0      | 0      | -0.01 | 0      | t | 98858  | LACQCLVR<br>TP               | Homo<br>sapiens                  |
| 1 | 1.00 | 1 | 1 | 0     | 0      | 0      | -0.01 | 0      | t | 98903  | MHIRLSFN<br>PT               | Homo<br>sapiens                  |
| 1 | 1.00 | 1 | 1 | 0     | 0      | 0      | -0.01 | 0      | t | 115943 | RINKKIEKF<br>Q               | Homo<br>sapiens                  |
| 1 | 1.00 | 1 | 1 | 0     | 0      | 0      | -0.01 | 0      | t | 98681  | AEKTKIPA<br>VF               | Homo<br>sapiens                  |
| 1 | 1.00 | 1 | 1 | 0     | 0      | 0      | -0.01 | 0      | t | 98851  | KKIIAEKTKI                   | Homo<br>sapiens                  |
| 1 | 1.00 | 1 | 1 | 0     | 0      | 0      | -0.01 | 0      | t | 114757 | CLLCAYSIE<br>F               | Homo<br>sapiens                  |
| 1 | 1.00 | 1 | 1 | 0     | 0      | 0      | -0.01 | 0      | t | 115291 | ILDKVGINY<br>W               | Homo<br>sapiens                  |
| 1 | 1.00 | 1 | 1 | 0     | 0      | 0      | -0.01 | 0      | t | 114885 | LCAYSIEFG<br>T               | Homo<br>sapiens                  |
| 1 | 1.00 | 1 | 1 | 0     | 0      | 0      | -0.01 | 0      | t | 98700  | APLRVYVE<br>EL               | Homo<br>sapiens                  |
| 1 | 1.00 | 1 | 1 | 0     | 0      | 0      | -0.01 | 0      | t | 114752 | AYSIEFGT<br>NI               | Homo<br>sapiens                  |

|   |      |   |   |   |   |   |       |   |   |        |                |                 |
|---|------|---|---|---|---|---|-------|---|---|--------|----------------|-----------------|
| 1 | 1.00 | 1 | 1 | 0 | 0 | 0 | -0.01 | 0 | t | 98973  | QSLACQCL<br>VR | Homo<br>sapiens |
| 1 | 1.00 | 1 | 1 | 0 | 0 | 0 | -0.01 | 0 | t | 98725  | DDEALEKF<br>DK | Homo<br>sapiens |
| 1 | 1.00 | 1 | 1 | 0 | 0 | 0 | -0.01 | 0 | t | 98691  | ALKALPM<br>HIR | Homo<br>sapiens |
| 1 | 1.00 | 1 | 1 | 0 | 0 | 0 | -0.01 | 0 | t | 114843 | GSDNKTY<br>GNK | Homo<br>sapiens |
| 1 | 1.00 | 1 | 1 | 0 | 0 | 0 | -0.01 | 0 | t | 98972  | QSAPLRVY<br>VE | Homo<br>sapiens |
| 1 | 1.00 | 1 | 1 | 0 | 0 | 0 | -0.01 | 0 | t | 115317 | KKILDKVGI<br>N | Homo<br>sapiens |
| 1 | 1.00 | 1 | 1 | 0 | 0 | 0 | -0.01 | 0 | t | 115209 | DKVGINY<br>WLA | Homo<br>sapiens |
| 1 | 1.00 | 1 | 1 | 0 | 0 | 0 | -0.01 | 0 | t | 98869  | LEKFDKAL<br>KA | Homo<br>sapiens |
| 1 | 1.00 | 1 | 1 | 0 | 0 | 0 | -0.01 | 0 | t | 114987 | YANTTSED<br>GK | Homo<br>sapiens |
| 1 | 1.00 | 1 | 1 | 0 | 0 | 0 | -0.01 | 0 | t | 115293 | IMCVKKIL<br>DK | Homo<br>sapiens |
| 1 | 1.00 | 1 | 1 | 0 | 0 | 0 | -0.01 | 0 | t | 98740  | EALEKFDK<br>AL | Homo<br>sapiens |
| 1 | 1.00 | 1 | 1 | 0 | 0 | 0 | -0.01 | 0 | t | 114965 | TSEDGKV<br>MVL | Homo<br>sapiens |
| 1 | 1.00 | 1 | 1 | 0 | 0 | 0 | -0.01 | 0 | t | 98845  | KFDKALKALP     | Homo<br>sapiens |
| 1 | 1.00 | 1 | 1 | 0 | 0 | 0 | -0.01 | 0 | t | 115197 | CVKKILDK<br>VG | Homo<br>sapiens |
| 1 | 1.00 | 1 | 1 | 0 | 0 | 0 | -0.01 | 0 | t | 114948 | SIEFGTNIS<br>K | Homo<br>sapiens |
| 1 | 1.00 | 1 | 1 | 0 | 0 | 0 | -0.01 | 0 | t | 115256 | FRELKDLK<br>GY | Homo<br>sapiens |
| 1 | 1.00 | 1 | 1 | 0 | 0 | 0 | -0.01 | 0 | t | 98834  | IRLSFNPT<br>QL | Homo<br>sapiens |



|   |      |   |   |       |        |        |        |        |   |        |                                  |                                  |
|---|------|---|---|-------|--------|--------|--------|--------|---|--------|----------------------------------|----------------------------------|
| 1 | 1.00 | 1 | 1 | 0     | 0      | 0      | -0.01  | 0      | t | 114910 | NTTSEDGK<br>VM                   | Homo<br>sapiens                  |
| 1 | 1.00 | 1 | 1 | 0     | 0      | 0      | -0.01  | 0      | t | 98923  | PAVFKIDA<br>LN                   | Homo<br>sapiens                  |
| 1 | 1.00 | 1 | 1 | 0     | 0      | 0      | -0.01  | 0      | t | 97035  | VGINYWL<br>AHK                   | Homo<br>sapiens                  |
| 1 | 1.00 | 1 | 1 | 0     | 0      | 0      | -0.01  | 0      | t | 38208  | LNENLLRF<br>FVAPFPQV<br>FGKE     | Homo<br>sapiens                  |
| 1 | 1.00 | 1 | 1 | 0     | 0      | 0      | -0.01  | 0      | t | 57632  | SESTEGDA<br>MEDIKQM<br>EAESI     | Homo<br>sapiens                  |
| 1 | 1.00 | 1 | 1 | 0     | 0      | 0      | -0.01  | 0      | t | 55187  | RPKHPIKH<br>QGLPQEV<br>L NENL    | Homo<br>sapiens                  |
| 1 | 1.00 | 1 | 1 | 0     | 0      | 0      | -0.01  | 0      | t | 38582  | LPLPLLQS<br>WM                   | Homo<br>sapiens                  |
| 1 | 1.00 | 1 | 1 | 0     | 0      | 0      | -0.01  | 0      | t | 33732  | KTKIPAVFK<br>I                   | Homo<br>sapiens                  |
| 1 | 1.00 | 1 | 1 | 0     | 0      | 0      | -0.01  | 0      | t | 3985   | AQKKIIAEK<br>T                   | Homo<br>sapiens                  |
| 1 | 1.00 | 1 | 1 | 0.01  | 0.014  | -0.005 | 0.007  | 0.019  | t | 78351  | AQSSSFPQ<br>FKPQEITGI            | Homo<br>sapiens                  |
| 1 | 1.00 | 1 | 1 | -0.02 | -0.017 | -0.008 | -0.02  | -0.02  | t | 95040  | SHRPREAK                         | Mus<br>musculu<br>s              |
| 1 | 1.00 | 1 | 1 | -0.02 | -0.02  | -0.008 | -0.02  | -0.02  | t | 95040  | SHRPREAK                         | Oryctola<br>gus<br>cuniculu<br>s |
| 1 | 1.00 | 1 | 1 | 0.01  | 0.012  | 0.023  | 0.011  | 0.012  | t | 33541  | KSVCGPVY<br>CFTSPVV<br>VGTT      | Homo<br>sapiens                  |
| 1 | 1.00 | 1 | 1 | 0.02  | 0.02   | 0.02   | 0.02   | 0.02   | t | 20329  | GILES<br>RGIK<br>ARITHVDT<br>ESY | Mus<br>musculu<br>s              |
| 1 | 1.00 | 1 | 1 | 0.02  | 0.023  | 0.02   | 0.02   | 0.02   | t | 20329  | GILES<br>RGIK<br>ARITHVDT<br>ESY | Mus<br>musculu<br>s              |
| 1 | 1.00 | 1 | 1 | -0.01 | -0.01  | -0.01  | -0.013 | -0.009 | t | 158948 | LEARKAAD<br>TFNFKTF              | Homo<br>sapiens                  |

|   |      |   |   |       |        |        |        |        |   |        |                              |                                  |
|---|------|---|---|-------|--------|--------|--------|--------|---|--------|------------------------------|----------------------------------|
| 1 | 1.00 | 1 | 1 | -0.04 | -0.042 | -0.04  | -0.043 | -0.04  | t | 134170 | MVRHENR<br>CVA               | Mus<br>musculu<br>s              |
| 1 | 1.00 | 1 | 1 | -0.1  | -0.1   | -0.1   | -0.1   | -0.099 | t | 117232 | SAPDTRPA<br>P                | Mus<br>musculu<br>s              |
| 1 | 1.00 | 1 | 1 | -0.07 | -0.066 | -0.063 | -0.07  | -0.07  | t | 108551 | NDSLNTGF<br>LAFLFYTKK        | Capra<br>hircus                  |
| 1 | 1.00 | 1 | 1 | -0.02 | -0.02  | -0.026 | -0.023 | -0.019 | t | 70620  | VQNTVED<br>LKLNTLGR          | Homo<br>sapiens                  |
| 1 | 1.00 | 1 | 1 | 0.01  | 0.01   | 0.02   | 0.013  | 0.012  | t | 33146  | KRGRKQN<br>KRGNEG<br>S       | Homo<br>sapiens                  |
| 1 | 1.00 | 1 | 1 | -0.08 | -0.082 | -0.073 | -0.08  | -0.081 | t | 142483 | WRMAGQ<br>KRTSGG             | Mus<br>musculu<br>s              |
| 1 | 1.00 | 1 | 1 | 0     | 0.007  | 0.011  | 0      | 0      | t | 48670  | PNLRGDL<br>QVLAQKV<br>ARTLP  | Cavia<br>porcellu<br>s           |
| 1 | 1.00 | 1 | 1 | 0.03  | 0.034  | 0.022  | 0.027  | 0.033  | t | 137395 | EESEDEKR<br>RWGQRD<br>N      | Homo<br>sapiens                  |
| 1 | 1.00 | 1 | 1 | 0.01  | 0.01   | 0.007  | 0.004  | 0.01   | t | 142217 | LDASREAK<br>KQLEAEQ<br>QKLEE | Homo<br>sapiens                  |
| 1 | 1.00 | 1 | 1 | 0.03  | 0.03   | 0.037  | 0.034  | 0.04   | t | 127747 | MVPELTE                      | Homo<br>sapiens                  |
| 1 | 1.00 | 1 | 1 | -0.03 | -0.031 | -0.028 | -0.03  | -0.03  | t | 35034  | LCAACSKQ<br>VFCNRRPE<br>RNGP | Bos<br>taurus                    |
| 1 | 1.00 | 1 | 1 | -0.03 | -0.031 | -0.028 | -0.03  | -0.03  | t | 35034  | LCAACSKQ<br>VFCNRRPE<br>RNGP | Bos<br>taurus                    |
| 1 | 1.00 | 1 | 1 | -0.03 | -0.033 | -0.025 | -0.03  | -0.028 | t | 16385  | FKIVFPIVA<br>KKDFKYRG<br>EGN | Oryctola<br>gus<br>cuniculu<br>s |
| 1 | 1.00 | 1 | 1 | 0     | 0      | 0      | 0      | 0.005  | t | 138240 | SQPEFLEQ<br>KRAELDTV         | Mus<br>musculu<br>s              |

|   |      |   |   |       |        |        |        |        |   |        |                               |                                  |
|---|------|---|---|-------|--------|--------|--------|--------|---|--------|-------------------------------|----------------------------------|
| 1 | 1.00 | 1 | 1 | -0.03 | -0.031 | -0.026 | -0.031 | -0.028 | t | 56852  | SALEDKLA<br>DYKRRM            | Myodes<br>glareolu<br>s          |
| 1 | 1.00 | 1 | 1 | -0.02 | -0.023 | -0.011 | -0.02  | -0.02  | t | 99950  | DNEQPTT<br>RAQKLFA            | Oryctola<br>gus<br>cuniculu<br>s |
| 1 | 1.00 | 1 | 1 | -0.02 | -0.023 | -0.022 | -0.02  | -0.019 | t | 135846 | YIQHNGV<br>VQESYYRY<br>VAR    | Oryctola<br>gus<br>cuniculu<br>s |
| 1 | 1.00 | 1 | 1 | -0.03 | -0.028 | -0.025 | -0.031 | -0.031 | t | 14819  | EVLYLLDLA<br>GVYRSLKK<br>QLE  | Aotus<br>nancyma<br>ae           |
| 1 | 1.00 | 1 | 1 | -0.02 | -0.02  | -0.013 | -0.02  | -0.017 | t | 95036  | RTCMTTA<br>QGTSMPY<br>SC      | Mus<br>musculu<br>s              |
| 1 | 1.00 | 1 | 1 | 0.01  | 0.006  | 0.037  | 0.013  | 0.009  | t | 55036  | RNNHPQN<br>TSDSQKEA<br>TD     | Oryctola<br>gus<br>cuniculu<br>s |
| 1 | 1.00 | 1 | 1 | 0.02  | 0.02   | 0.03   | 0.02   | 0.02   | t | 10677  | DVNAIDIE<br>EPSGQT            | Oryctola<br>gus<br>cuniculu<br>s |
| 1 | 1.00 | 1 | 1 | 0.01  | 0.01   | 0.01   | 0.01   | 0.016  | t | 16956  | FLVNAWK<br>SKK                | Homo<br>sapiens                  |
| 1 | 1.00 | 1 | 1 | 0.02  | 0.02   | 0.02   | 0.018  | 0.024  | t | 101066 | NERLAKLS<br>DG                | Homo<br>sapiens                  |
| 1 | 1.00 | 1 | 1 | -0.03 | -0.03  | -0.025 | -0.028 | -0.03  | t | 65011  | TLPPPCLSS<br>PSRCVN           | Homo<br>sapiens                  |
| 1 | 1.00 | 1 | 1 | -0.03 | -0.03  | -0.023 | -0.03  | -0.028 | t | 133554 | EGLYSPW<br>WPRSLPVL           | Mus<br>musculu<br>s              |
| 1 | 1.00 | 1 | 1 | -0.02 | -0.021 | -0.019 | -0.02  | -0.018 | t | 13528  | ENNGGCD<br>AD                 | Aotus<br>sp.                     |
| 1 | 1.00 | 1 | 1 | -0.02 | -0.018 | -0.02  | -0.019 | -0.019 | t | 69880  | VLYQAFDE<br>MEECASH<br>LPYIE  | Homo<br>sapiens                  |
| 1 | 1.00 | 1 | 1 | 0.04  | 0.033  | 0.035  | 0.037  | 0.042  | t | 55187  | RPKHPIKH<br>QGLPQEV<br>L NENL | Homo<br>sapiens                  |
| 1 | 1.00 | 1 | 1 | 0     | 0      | 0.002  | 0      | 0.004  | t | 25140  | HWSYGLR<br>PG                 | Mus<br>musculu<br>s              |

|   |      |   |   |       |        |        |        |        |   |        |                      |                       |
|---|------|---|---|-------|--------|--------|--------|--------|---|--------|----------------------|-----------------------|
| 1 | 1.00 | 1 | 1 | 0     | -0.002 | 0.022  | 0.001  | 0      | t | 72869  | WMNSTGFTKVCGAPPC     | Homo sapiens          |
| 1 | 1.00 | 1 | 1 | -0.03 | -0.033 | -0.021 | -0.03  | -0.03  | t | 100408 | QDSLPTDKASGPAH       | Oryctolagus cuniculus |
| 1 | 1.00 | 1 | 1 | 0     | 0      | 0.001  | 0      | 0.001  | t | 267    | AALASLFLSGPQQK       | Mus musculus          |
| 1 | 1.00 | 1 | 1 | -0.01 | -0.007 | 0.01   | -0.01  | -0.009 | t | 141683 | KDWG                 | Mus musculus          |
| 1 | 1.00 | 1 | 1 | -0.04 | -0.04  | -0.037 | -0.04  | -0.04  | t | 16132  | FHPPSSNQCESTPPIAMDAW | Homo sapiens          |
| 1 | 1.00 | 1 | 1 | -0.04 | -0.038 | -0.026 | -0.039 | -0.04  | t | 65104  | TLTPAAPLPP           | Homo sapiens          |
| 1 | 1.00 | 1 | 1 | -0.05 | -0.052 | -0.043 | -0.051 | -0.05  | t | 150970 | AVPADHGAHLSLRGLPVCAF | Mus musculus          |
| 1 | 1.00 | 1 | 1 | 0     | 0      | 0      | -0.004 | 0.001  | t | 119633 | QYTGHITWTPPAIFKS     | Homo sapiens          |
| 1 | 1.00 | 1 | 1 | 0     | -0.002 | -0.005 | -0.007 | 0.001  | t | 112406 | YEYLINVIHAFQYV       | Rattus norvegicus     |
| 1 | 1.00 | 1 | 1 | 0     | 0      | 0.007  | 0      | -0.001 | t | 102434 | FMRWLSDLRETCSYQKYI   | Mus musculus          |
| 1 | 1.00 | 1 | 1 | 0.02  | 0.02   | 0.036  | 0.02   | 0.022  | t | 35529  | LEIVPNSAE            | Homo sapiens          |
| 1 | 1.00 | 1 | 1 | 0.01  | 0.008  | 0.003  | 0.007  | 0.013  | t | 39169  | LRPTFDTRLMRLEDEMKEGR | Mus musculus          |
| 1 | 1.00 | 1 | 1 | -0.01 | -0.01  | -0.007 | -0.014 | -0.012 | t | 107799 | DSGHRGYSQSASDNEGH    | Homo sapiens          |
| 1 | 1.00 | 1 | 1 | -0.03 | -0.03  | -0.03  | -0.034 | -0.031 | t | 115661 | VVHLYRNGKDQD         | Homo sapiens          |

|   |      |   |   |       |        |        |        |        |   |        |                              |                                     |
|---|------|---|---|-------|--------|--------|--------|--------|---|--------|------------------------------|-------------------------------------|
| 1 | 1.00 | 1 | 1 | -0.06 | -0.06  | -0.055 | -0.06  | -0.06  | t | 38769  | LPWGVAA<br>RR                | Homo<br>sapiens                     |
| 1 | 1.00 | 1 | 1 | -0.05 | -0.047 | -0.042 | -0.05  | -0.051 | t | 110910 | KAKPKFTL<br>GKRKATP          | Mus<br>musculu<br>s                 |
| 1 | 1.00 | 1 | 1 | -0.02 | -0.02  | -0.008 | -0.02  | -0.02  | t | 114579 | RKVVTDF<br>KNIPQRI           | Homo<br>sapiens                     |
| 1 | 1.00 | 1 | 1 | 0.03  | 0.028  | 0.03   | 0.023  | 0.031  | t | 119663 | VIVELIPST<br>SSAV            | Mus<br>musculu<br>s                 |
| 1 | 1.00 | 1 | 1 | 0.03  | 0.028  | 0.03   | 0.023  | 0.031  | t | 119663 | VIVELIPST<br>SSAV            | Mus<br>musculu<br>s                 |
| 1 | 1.00 | 1 | 1 | 0.04  | 0.043  | 0.05   | 0.039  | 0.039  | t | 81131  | DLFHVNG<br>RDTMNNI<br>VDENKY | Aotus                               |
| 1 | 1.00 | 1 | 1 | 0     | -0.002 | 0.008  | 0      | -0.002 | t | 45627  | NQSLDLAE<br>QELVDCAS<br>QHGC | Oryctola<br>gus<br>cuniculu<br>s    |
| 1 | 1.00 | 1 | 1 | -0.01 | -0.01  | 0.004  | -0.01  | -0.01  | t | 133632 | LRCYSHCT<br>FYFASST          | Mus<br>musculu<br>s                 |
| 1 | 1.00 | 1 | 1 | 0.07  | 0.07   | 0.09   | 0.07   | 0.07   | t | 38214  | LNFGQTG<br>DADSV             | Mus<br>musculu<br>s                 |
| 1 | 1.00 | 1 | 1 | 0.07  | 0.073  | 0.09   | 0.07   | 0.07   | t | 38214  | LNFGQTG<br>DADSV             | Mus<br>musculu<br>s                 |
| 1 | 1.00 | 1 | 1 | -0.03 | -0.039 | -0.016 | -0.031 | -0.03  | t | 68790  | VGSDQHP<br>DIHAPDGA          | Oncorhy<br>nchus<br>tshawyts<br>cha |
| 1 | 1.00 | 1 | 1 | -0.04 | -0.042 | -0.04  | -0.047 | -0.039 | t | 118141 | SKGRRFKG                     | Mus<br>musculu<br>s                 |
| 1 | 1.00 | 1 | 1 | -0.01 | -0.01  | -0.007 | -0.01  | -0.01  | t | 56043  | RTEQKDFD<br>GRSEFAYG<br>SFVR | Homo<br>sapiens                     |
| 1 | 1.00 | 1 | 1 | -0.02 | -0.02  | -0.01  | -0.02  | -0.019 | t | 113365 | EHPVTGC<br>GERTEGRC<br>LHYTV | Mus<br>musculu<br>s                 |

|   |      |   |   |       |        |        |        |        |   |        |                              |                                  |
|---|------|---|---|-------|--------|--------|--------|--------|---|--------|------------------------------|----------------------------------|
| 1 | 1.00 | 1 | 1 | -0.02 | -0.02  | -0.01  | -0.02  | -0.019 | t | 113365 | EHPVTGC<br>GERTEGRC<br>LHYTV | Mus<br>musculu<br>s              |
| 1 | 1.00 | 1 | 1 | -0.06 | -0.058 | -0.044 | -0.059 | -0.06  | t | 58954  | SKTVGTAE<br>EKLKKK           | Homo<br>sapiens                  |
| 1 | 1.00 | 1 | 1 | -0.02 | -0.023 | -0.011 | -0.02  | -0.02  | t | 100290 | LSLPKQQD<br>SLPDTK           | Oryctola<br>gus<br>cuniculu<br>s |
| 1 | 1.00 | 1 | 1 | 0     | 0.004  | 0.007  | 0      | 0.002  | t | 38971  | LQRAVRLA<br>LSGSDGRV<br>GSG  | Cavia<br>porcellu<br>s           |
| 1 | 1.00 | 1 | 1 | -0.03 | -0.016 | -0.022 | -0.03  | -0.03  | t | 1439   | AGAHWG<br>VLG                | Pan<br>troglody<br>tes           |
| 1 | 1.00 | 1 | 1 | -0.02 | -0.02  | -0.017 | -0.026 | -0.022 | t | 51031  | QHTFNLKS<br>QQARQVK          | Homo<br>sapiens                  |
| 1 | 1.00 | 1 | 1 | -0.02 | -0.017 | 0      | -0.02  | -0.02  | t | 140915 | VSAKDGKY<br>INNKL            | Sus<br>scrofa                    |
| 1 | 1.00 | 1 | 1 | -0.03 | -0.028 | -0.014 | -0.023 | -0.027 | t | 134515 | RPNHT                        | Homo<br>sapiens                  |
| 1 | 1.00 | 1 | 1 | 0.02  | 0.02   | 0.027  | 0.02   | 0.022  | t | 63754  | TFTMDGD<br>TMTMLTE<br>STFKNL | Mus<br>musculu<br>s              |
| 1 | 1.00 | 1 | 1 | 0.02  | 0.02   | 0.027  | 0.02   | 0.022  | t | 63754  | TFTMDGD<br>TMTMLTE<br>STFKNL | Mus<br>musculu<br>s              |
| 1 | 1.00 | 1 | 1 | 0.02  | 0.02   | 0.027  | 0.02   | 0.022  | t | 63754  | TFTMDGD<br>TMTMLTE<br>STFKNL | Mus<br>musculu<br>s              |
| 1 | 1.00 | 1 | 1 | 0.01  | 0.008  | 0.003  | 0.003  | 0.01   | t | 112783 | GSLPQKSH<br>GRTQDEN          | Rattus<br>norvegic<br>us         |
| 1 | 1.00 | 1 | 1 | -0.06 | -0.063 | -0.038 | -0.06  | -0.06  | t | 100980 | KIVAPV                       | Oryctola<br>gus<br>cuniculu<br>s |

|   |      |   |   |       |        |        |        |        |   |        |                              |                          |
|---|------|---|---|-------|--------|--------|--------|--------|---|--------|------------------------------|--------------------------|
| 1 | 1.00 | 1 | 1 | -0.05 | -0.047 | -0.04  | -0.05  | -0.05  | t | 57743  | SFDVPSKQ<br>PTIDIDL          | Mus<br>musculu<br>s      |
| 1 | 1.00 | 1 | 1 | -0.05 | -0.047 | -0.04  | -0.05  | -0.05  | t | 57743  | SFDVPSKQ<br>PTIDIDL          | Mus<br>musculu<br>s      |
| 1 | 1.00 | 1 | 1 | -0.02 | -0.016 | -0.003 | -0.017 | -0.02  | t | 55490  | RQTEPCNL<br>WFCPQV           | Homo<br>sapiens          |
| 1 | 1.00 | 1 | 1 | 0     | 0.004  | 0.022  | 0.001  | 0      | t | 68179  | VEFLVN                       | Homo<br>sapiens          |
| 1 | 1.00 | 1 | 1 | 0.01  | 0.017  | 0.017  | 0.009  | 0.011  | t | 71244  | VTADMAS<br>DMLHH             | Gallus<br>gallus         |
| 1 | 1.00 | 1 | 1 | -0.01 | -0.008 | 0.004  | -0.013 | -0.01  | t | 16032  | FGPNAGQ<br>R                 | Homo<br>sapiens          |
| 1 | 1.00 | 1 | 1 | -0.04 | -0.039 | -0.038 | -0.041 | -0.039 | t | 52042  | QQINHHW<br>HKSGSSIG<br>KAFTT | Equus<br>caballus        |
| 1 | 1.00 | 1 | 1 | 0.02  | 0.021  | 0.027  | 0.019  | 0.021  | t | 2720   | ALLNPSRV<br>YTFFSSDY<br>VKK  | Equus<br>caballus        |
| 1 | 1.00 | 1 | 1 | 0.02  | 0.027  | 0.027  | 0.019  | 0.021  | t | 2720   | ALLNPSRV<br>YTFFSSDY<br>VKK  | Gallus<br>gallus         |
| 1 | 1.00 | 1 | 1 | 0.02  | 0.02   | 0.027  | 0.019  | 0.021  | t | 2720   | ALLNPSRV<br>YTFFSSDY<br>VKK  | Homo<br>sapiens          |
| 1 | 1.00 | 1 | 1 | 0     | 0.004  | 0.005  | -0.001 | 0      | t | 133841 | GRGNGDP<br>GGGMEKD<br>G      | Homo<br>sapiens          |
| 1 | 1.00 | 1 | 1 | -0.02 | -0.022 | -0.027 | -0.019 | -0.018 | t | 136751 | YCWLRQ<br>AALQRRS<br>AMEKG   | Rattus<br>norvegic<br>us |
| 1 | 1.00 | 1 | 1 | -0.01 | -0.01  | -0.01  | -0.014 | -0.01  | t | 8942   | DKNEKGQ<br>HEIVEVEEI<br>LPE  | Homo<br>sapiens          |
| 1 | 1.00 | 1 | 1 | -0.01 | -0.012 | -0.01  | -0.017 | -0.01  | t | 107527 | NAKTKPR                      | Mus<br>musculu<br>s      |

|   |      |   |   |       |        |        |        |        |   |        |                              |                                  |
|---|------|---|---|-------|--------|--------|--------|--------|---|--------|------------------------------|----------------------------------|
| 1 | 1.00 | 1 | 1 | 0     | -0.002 | 0.012  | -0.001 | 0      | t | 142389 | AVGNSRG<br>ACLAC             | Mus<br>musculu<br>s              |
| 1 | 1.00 | 1 | 1 | 0.02  | 0.016  | 0.026  | 0.019  | 0.02   | t | 78170  | GKHGKEV<br>KIT               | Mus<br>musculu<br>s              |
| 1 | 1.00 | 1 | 1 | -0.03 | -0.03  | -0.03  | -0.04  | -0.033 | t | 141775 | VKELAFPG<br>SSREVDR          | Homo<br>sapiens                  |
| 1 | 1.00 | 1 | 1 | -0.03 | -0.03  | -0.014 | -0.03  | -0.03  | t | 9589   | DPAFSLNS<br>RAFPAPF          | Mus<br>musculu<br>s              |
| 1 | 1.00 | 1 | 1 | -0.01 | -0.005 | -0.007 | -0.01  | -0.01  | t | 62290  | SVPSSSSTP<br>LLYPSLALP<br>AP | Homo<br>sapiens                  |
| 1 | 1.00 | 1 | 1 | -0.06 | -0.052 | -0.052 | -0.059 | -0.06  | t | 110920 | KPSPWAP<br>KKHRRLS           | Homo<br>sapiens                  |
| 1 | 1.00 | 1 | 1 | -0.01 | -0.013 | -0.011 | -0.013 | -0.01  | t | 78288  | VDRGWG<br>NGC                | Mus<br>musculu<br>s              |
| 1 | 1.00 | 1 | 1 | -0.04 | -0.036 | -0.028 | -0.039 | -0.04  | t | 42928  | MVDRGW                       | Homo<br>sapiens                  |
| 1 | 1.00 | 1 | 1 | -0.03 | -0.03  | -0.019 | -0.03  | -0.029 | t | 10820  | DWPAIWR<br>KQ                | Mus<br>musculu<br>s              |
| 1 | 1.00 | 1 | 1 | -0.01 | -0.01  | 0.002  | -0.01  | -0.01  | t | 31779  | KLCVWNN<br>KTP               | Mus<br>musculu<br>s              |
| 1 | 1.00 | 1 | 1 | 0     | 0      | 0      | -0.004 | 0      | t | 117746 | ALREYRKK<br>MDIPAK           | Homo<br>sapiens                  |
| 1 | 1.00 | 1 | 1 | -0.02 | -0.02  | 0.002  | -0.014 | -0.02  | t | 33043  | KQNIQLIN<br>TNGSWH           | Homo<br>sapiens                  |
| 1 | 1.00 | 1 | 1 | -0.07 | -0.068 | -0.071 | -0.073 | -0.07  | t | 142128 | DSKSRDTT<br>PKNANKH<br>TWKKT | Felis<br>catus                   |
| 1 | 1.00 | 1 | 1 | 0.01  | 0.01   | 0.01   | 0.01   | 0.014  | t | 133528 | CADQKPG<br>EC                | Mus<br>musculu<br>s              |
| 1 | 1.00 | 1 | 1 | 0.03  | 0.03   | 0.039  | 0.03   | 0.032  | t | 66845  | TTTDSSSD<br>SQT1             | Oryctola<br>gus<br>cuniculu<br>s |



|   |      |   |   |       |        |        |        |        |   |        |                              |                                  |
|---|------|---|---|-------|--------|--------|--------|--------|---|--------|------------------------------|----------------------------------|
| 1 | 1.00 | 1 | 1 | -0.01 | -0.008 | -0.009 | -0.009 | -0.01  | t | 66693  | TTLGMHC<br>GSFGSAPS<br>NG    | Homo<br>sapiens                  |
| 1 | 1.00 | 1 | 1 | -0.02 | -0.017 | -0.002 | -0.02  | -0.02  | t | 98333  | PHYGKEI                      | Mus<br>musculu<br>s              |
| 1 | 1.00 | 1 | 1 | 0     | 0      | 0.009  | -0.006 | -0.002 | t | 114462 | LTIPQNFA<br>VVKRARN          | Homo<br>sapiens                  |
| 1 | 1.00 | 1 | 1 | 0.03  | 0.033  | 0.037  | 0.03   | 0.03   | t | 3379   | ANPNENP<br>NANPNAN<br>PNANPN | Mus<br>musculu<br>s              |
| 1 | 1.00 | 1 | 1 | -0.03 | -0.03  | -0.023 | -0.03  | -0.031 | t | 78197  | LNPWDQV<br>KRNAVPI<br>PTLNR  | Homo<br>sapiens                  |
| 1 | 1.00 | 1 | 1 | 0.01  | 0.014  | 0.016  | 0.011  | 0.01   | t | 60441  | SQGISDDD<br>NDSAVAEF<br>FQSF | Homo<br>sapiens                  |
| 1 | 1.00 | 1 | 1 | -0.03 | -0.031 | -0.032 | -0.033 | -0.03  | t | 78153  | FDPQIQAI<br>VSSPCHNS         | Homo<br>sapiens                  |
| 1 | 1.00 | 1 | 1 | -0.02 | -0.017 | -0.005 | -0.02  | -0.016 | t | 97776  | YKGVAFPL                     | Mus<br>musculu<br>s              |
| 1 | 1.00 | 1 | 1 | -0.02 | -0.017 | -0.005 | -0.02  | -0.016 | t | 97776  | YKGVAFPL                     | Mus<br>musculu<br>s              |
| 1 | 1.00 | 1 | 1 | -0.05 | -0.04  | -0.05  | -0.057 | -0.05  | t | 133994 | AASPALRL<br>GGPG             | Rattus<br>rattus                 |
| 1 | 1.00 | 1 | 1 | -0.01 | -0.01  | 0.004  | -0.01  | -0.014 | t | 133542 | DGRRDVV<br>VRSATFY           | Mus<br>musculu<br>s              |
| 1 | 1.00 | 1 | 1 | 0     | -0.004 | 0.002  | -0.007 | -0.004 | t | 116286 | CGKGLSAT<br>VTGGQKG<br>RGSR  | Oryctola<br>gus<br>cuniculu<br>s |
| 1 | 1.00 | 1 | 1 | -0.03 | -0.03  | -0.017 | -0.03  | -0.032 | t | 136818 | ANFIIFRPV<br>V               | Mus<br>musculu<br>s              |

|   |      |   |   |       |        |        |        |        |   |        |                              |                                  |
|---|------|---|---|-------|--------|--------|--------|--------|---|--------|------------------------------|----------------------------------|
| 1 | 1.00 | 1 | 1 | 0.01  | 0.004  | 0.003  | 0.003  | 0.01   | t | 127666 | GIQPTWV<br>PFHSTLSR<br>EQ    | Trichosu<br>rus<br>vulpecul<br>a |
| 1 | 1.00 | 1 | 1 | -0.01 | -0.008 | 0.002  | -0.003 | -0.008 | t | 144609 | DEKLRDYI<br>WN               | Homo<br>sapiens                  |
| 1 | 1.00 | 1 | 1 | -0.06 | -0.06  | -0.044 | -0.062 | -0.063 | t | 98942  | PRREEGGR<br>WG               | Homo<br>sapiens                  |
| 1 | 1.00 | 1 | 1 | 0.01  | 0.006  | 0.012  | 0.009  | 0.015  | t | 40074  | LTPANLIR<br>GDNA             | Oryctola<br>gus<br>cuniculu<br>s |
| 1 | 1.00 | 1 | 1 | 0     | -0.002 | 0      | -0.003 | 0.003  | t | 68200  | VEGMQFD<br>RGYLSPYF          | Mus<br>musculu<br>s              |
| 1 | 1.00 | 1 | 1 | 0.02  | 0.02   | 0.036  | 0.02   | 0.022  | t | 11704  | EEIVPNSV<br>EQ               | Homo<br>sapiens                  |
| 1 | 1.00 | 1 | 1 | -0.05 | -0.047 | -0.046 | -0.05  | -0.048 | t | 41454  | METTVKA<br>QPFLPKVL<br>HKRT  | Mus<br>musculu<br>s              |
| 1 | 1.00 | 1 | 1 | -0.01 | -0.003 | 0.007  | -0.007 | -0.013 | t | 110955 | NQNPGSP<br>RPGSTGT<br>WNPSS  | Mus<br>musculu<br>s              |
| 1 | 1.00 | 1 | 1 | -0.03 | -0.03  | -0.029 | -0.033 | -0.03  | t | 40129  | LTPTLAAR<br>NATIPTTTI<br>RHH | Homo<br>sapiens                  |
| 1 | 1.00 | 1 | 1 | -0.02 | -0.018 | -0.015 | -0.021 | -0.02  | t | 123378 | KLGYWKLR<br>G                | Ovis<br>aries                    |
| 1 | 1.00 | 1 | 1 | 0     | 0.002  | -0.002 | 0.001  | 0.002  | t | 9751   | DPRRRSRN<br>LGKVIDTLT<br>CGL | Homo<br>sapiens                  |
| 1 | 1.00 | 1 | 1 | 0.02  | 0.018  | 0.02   | 0.013  | 0.023  | t | 134784 | RKRSQML<br>FRGRRASQ          | Mus<br>musculu<br>s              |
| 1 | 1.00 | 1 | 1 | 0     | 0      | 0      | 0      | 0.005  | t | 151813 | CGADSYE<br>MEEDGVR<br>KC     | Mus<br>musculu<br>s              |
| 1 | 1.00 | 1 | 1 | 0     | 0      | 0      | 0      | 0.005  | t | 84423  | KKGLQQL<br>QEWEDW<br>VGWIGN  | Felis<br>catus                   |

|   |      |   |   |       |        |        |        |        |   |        |                              |                                  |
|---|------|---|---|-------|--------|--------|--------|--------|---|--------|------------------------------|----------------------------------|
| 1 | 1.00 | 1 | 1 | -0.01 | -0.01  | -0.005 | -0.014 | -0.01  | t | 117331 | MKLVRFL<br>MKLSHETV<br>TIELK | Homo<br>sapiens                  |
| 1 | 1.00 | 1 | 1 | -0.01 | -0.009 | -0.002 | -0.011 | -0.01  | t | 49213  | PRLKHEQS<br>V                | Equus<br>caballus                |
| 1 | 1.00 | 1 | 1 | -0.02 | -0.013 | -0.008 | -0.02  | -0.018 | t | 45602  | NQPGHL                       | Cavia<br>porcellu<br>s           |
| 1 | 1.00 | 1 | 1 | -0.03 | -0.028 | -0.021 | -0.03  | -0.03  | t | 100430 | QLRRKLEF<br>FTYSRF           | Homo<br>sapiens                  |
| 1 | 1.00 | 1 | 1 | -0.04 | -0.042 | -0.033 | -0.04  | -0.04  | t | 21501  | GNQHVDD<br>RPS               | Oryctola<br>gus<br>cuniculu<br>s |
| 1 | 1.00 | 1 | 1 | -0.02 | -0.018 | -0.004 | -0.019 | -0.021 | t | 25541  | IDAVNKRG<br>RKQNKRG          | Homo<br>sapiens                  |
| 1 | 1.00 | 1 | 1 | 0.01  | 0.006  | 0.008  | 0.003  | 0.011  | t | 118431 | ISDAMKKV<br>GRKGVITV<br>KD   | Oryctola<br>gus<br>cuniculu<br>s |
| 1 | 1.00 | 1 | 1 | 0     | 0      | 0      | 0      | 0.006  | t | 16956  | FLVNAWK<br>SKK               | Homo<br>sapiens                  |
| 1 | 1.00 | 1 | 1 | -0.01 | -0.01  | -0.011 | 0      | 0.002  | t | 106235 | AGFNVPW                      | Homo<br>sapiens                  |
| 1 | 1.00 | 1 | 1 | 0.02  | 0.02   | 0.02   | 0.016  | 0.022  | t | 122452 | KTTKQSF<br>LSVKAQYK<br>KNKH  | Homo<br>sapiens                  |
| 1 | 1.00 | 1 | 1 | -0.02 | -0.018 | -0.006 | -0.019 | -0.02  | t | 12848  | EKPTINTTR<br>TNI             | Homo<br>sapiens                  |
| 1 | 1.00 | 1 | 1 | -0.05 | -0.05  | -0.046 | -0.05  | -0.05  | t | 60796  | SRSERRKD<br>RGGREDIL         | Homo<br>sapiens                  |
| 1 | 1.00 | 1 | 1 | -0.04 | -0.04  | -0.027 | -0.04  | -0.04  | t | 136818 | ANFIIFRPV<br>V               | Mus<br>musculu<br>s              |
| 1 | 1.00 | 1 | 1 | 0.01  | 0.01   | 0.01   | 0.01   | 0.015  | t | 124736 | SPWSIGA                      | Homo<br>sapiens                  |

|   |      |   |   |       |        |        |        |        |   |        |                              |                          |
|---|------|---|---|-------|--------|--------|--------|--------|---|--------|------------------------------|--------------------------|
| 1 | 1.00 | 1 | 1 | -0.05 | -0.05  | -0.05  | -0.053 | -0.05  | t | 149107 | SLAPRFPW<br>LNPLDGW          | Rattus<br>norvegicus     |
| 1 | 1.00 | 1 | 1 | 0     | 0      | 0.023  | 0.003  | 0.002  | t | 11187  | EARQAI                       | Homo<br>sapiens          |
| 1 | 1.00 | 1 | 1 | 0     | 0.002  | 0      | 0      | 0.001  | t | 118046 | PGHKWKE<br>VRHDNKV<br>TWLVSW | Homo<br>sapiens          |
| 1 | 1.00 | 1 | 1 | -0.01 | -0.007 | -0.006 | -0.01  | -0.009 | t | 4736   | ASRDKAFA<br>VSKDLADK<br>L    | Equus<br>caballus        |
| 1 | 1.00 | 1 | 1 | -0.04 | -0.026 | -0.031 | -0.039 | -0.04  | t | 33860  | KTSKRQAV<br>PVTL             | Homo<br>sapiens          |
| 1 | 1.00 | 1 | 1 | -0.02 | -0.02  | -0.022 | -0.024 | -0.018 | t | 118574 | RADWKKT<br>VETQKSRI<br>HA    | Homo<br>sapiens          |
| 1 | 1.00 | 1 | 1 | 0     | -0.002 | 0.003  | -0.006 | 0.002  | t | 118380 | GKPIPNNL<br>LGLDST           | Mus<br>musculus          |
| 1 | 1.00 | 1 | 1 | 0.01  | 0.01   | 0.023  | 0.01   | 0.01   | t | 66058  | TRLNFEDAG                    | Rattus<br>norvegicus     |
| 1 | 1.00 | 1 | 1 | -0.01 | -0.006 | -0.002 | -0.009 | -0.008 | t | 50781  | QFKDNVIL<br>LNKHIDAY<br>K    | Homo<br>sapiens          |
| 1 | 1.00 | 1 | 1 | 0     | -0.004 | 0.003  | -0.001 | 0.003  | t | 103715 | VPLDRSSH<br>CQREEA           | Oryctolagus<br>cuniculus |
| 1 | 1.00 | 1 | 1 | -0.02 | -0.022 | -0.008 | -0.017 | -0.019 | t | 24438  | HPDSIHPL<br>LASP             | Mus<br>musculus          |
| 1 | 1.00 | 1 | 1 | -0.05 | -0.054 | -0.05  | -0.057 | -0.049 | t | 118285 | DAYVLLSE<br>KKISSIQSIV       | Oryctolagus<br>cuniculus |
| 1 | 1.00 | 1 | 1 | 0     | 0.002  | 0.007  | 0.001  | 0.002  | t | 67248  | TWAQPGYP                     | Homo<br>sapiens          |
| 1 | 1.00 | 1 | 1 | 0     | 0.002  | 0.007  | 0.001  | 0.002  | t | 67248  | TWAQPGYP                     | Homo<br>sapiens          |
| 1 | 1.00 | 1 | 1 | 0     | -0.002 | -0.005 | -0.007 | 0.002  | t | 121774 | RALVGDEA<br>ELPCRISPG<br>K   | Rattus<br>norvegicus     |

|   |      |   |   |       |        |        |        |        |   |        |                              |                                  |
|---|------|---|---|-------|--------|--------|--------|--------|---|--------|------------------------------|----------------------------------|
| 1 | 1.00 | 1 | 1 | 0.02  | 0.024  | 0.038  | 0.02   | 0.019  | t | 100073 | GNGQGLN<br>MNNPPNF<br>NVDENA | Aotus<br>nancyma<br>ae           |
| 1 | 1.00 | 1 | 1 | 0.05  | 0.047  | 0.064  | 0.05   | 0.052  | t | 80092  | VTTSGGGK<br>QG               | Oryctola<br>gus<br>cuniculu<br>s |
| 1 | 1.00 | 1 | 1 | 0     | 0.002  | 0.004  | 0.003  | 0.001  | t | 66852  | TTTIANNL<br>TSTVQVFT<br>DSEY | Homo<br>sapiens                  |
| 1 | 1.00 | 1 | 1 | 0.01  | 0.008  | 0.027  | 0.009  | 0.01   | t | 66658  | TTIPPSSP                     | Anas<br>platyrhy<br>nchos        |
| 1 | 1.00 | 1 | 1 | -0.02 | -0.018 | -0.011 | -0.019 | -0.02  | t | 59375  | SLNTGWL<br>AGLFYQHK<br>FNS   | Homo<br>sapiens                  |
| 1 | 1.00 | 1 | 1 | -0.01 | -0.008 | -0.007 | -0.01  | -0.01  | t | 78843  | TAAQITAG<br>IALHQS<br>NLN    | Canis<br>familiari<br>s          |
| 1 | 1.00 | 1 | 1 | 0.02  | 0.02   | 0.032  | 0.02   | 0.021  | t | 120436 | DGTKVSIS                     | Rattus<br>norvegic<br>us         |
| 1 | 1.00 | 1 | 1 | 0     | 0.002  | 0.01   | -0.003 | -0.001 | t | 42018  | MLNISQM<br>QSVKKQS<br>DQNS   | Aotus<br>nancyma<br>ae           |
| 1 | 1.00 | 1 | 1 | 0.01  | 0.008  | 0.008  | 0.003  | 0.011  | t | 119551 | AIFKSYCEII<br>VTHFPFD        | Mus<br>musculu<br>s              |
| 1 | 1.00 | 1 | 1 | 0.01  | 0.008  | 0.008  | 0.003  | 0.011  | t | 119551 | AIFKSYCEII<br>VTHFPFD        | Mus<br>musculu<br>s              |
| 1 | 1.00 | 1 | 1 | 0.03  | 0.033  | 0.024  | 0.03   | 0.031  | t | 76584  | YYQSGLSI<br>VMPVGG<br>QSSFYS | Mus<br>musculu<br>s              |
| 1 | 1.00 | 1 | 1 | 0.03  | 0.03   | 0.024  | 0.03   | 0.031  | t | 76584  | YYQSGLSI<br>VMPVGG<br>QSSFYS | Mus<br>musculu<br>s              |
| 1 | 1.00 | 1 | 1 | 0.01  | 0.01   | 0.01   | 0      | 0.01   | t | 114750 | AVSVCSE<br>YP                | Homo<br>sapiens                  |
| 1 | 1.00 | 1 | 1 | -0.03 | -0.034 | -0.014 | -0.027 | -0.028 | t | 116688 | CYYASRND<br>KSYWLS           | Oryctola<br>gus<br>cuniculu<br>s |
| 1 | 1.00 | 1 | 1 | 0.01  | 0.007  | 0.024  | 0.01   | 0.01   | t | 99971  | EDVGSNK<br>GAI               | Oryctola<br>gus<br>cuniculu<br>s |

|   |      |   |   |       |        |        |        |        |   |        |                              |                      |
|---|------|---|---|-------|--------|--------|--------|--------|---|--------|------------------------------|----------------------|
| 1 | 1.00 | 1 | 1 | -0.02 | -0.017 | -0.011 | -0.02  | -0.02  | t | 53858  | RGERC<br>DLEDRDR             | Mus<br>musculus      |
| 1 | 1.00 | 1 | 1 | -0.01 | -0.01  | 0.006  | -0.012 | -0.012 | t | 98957  | QIEKQAKD<br>LAFPGSG          | Homo<br>sapiens      |
| 1 | 1.00 | 1 | 1 | -0.07 | -0.072 | -0.058 | -0.067 | -0.07  | t | 64994  | TLNWPPTL<br>WGMH             | Mus<br>musculus      |
| 1 | 1.00 | 1 | 1 | 0.01  | 0.008  | 0.022  | 0.009  | 0.013  | t | 18983  | GDGANAG<br>Q                 | Mus<br>musculus      |
| 1 | 1.00 | 1 | 1 | 0     | 0      | 0      | 0      | 0.005  | t | 138242 | SQPEILERT<br>RAEVDTA         | Mus<br>musculus      |
| 1 | 1.00 | 1 | 1 | 0     | 0      | 0      | 0      | 0.005  | t | 138240 | SQPEFLEQ<br>KRAELDTV         | Mus<br>musculus      |
| 1 | 1.00 | 1 | 1 | 0     | 0      | 0      | 0      | 0.005  | t | 138241 | SQPEILED<br>ARASVDTY         | Mus<br>musculus      |
| 1 | 1.00 | 1 | 1 | 0     | 0      | 0      | 0      | 0.005  | t | 138199 | KQYLERT<br>RAEVDTV           | Mus<br>musculus      |
| 1 | 1.00 | 1 | 1 | -0.05 | -0.048 | -0.047 | -0.049 | -0.05  | t | 70651  | VQTGGTS<br>RTVTMRYL<br>AS    | Homo<br>sapiens      |
| 1 | 1.00 | 1 | 1 | 0.02  | 0.018  | 0.02   | 0.013  | 0.02   | t | 118192 | VAFSDEM<br>VPCPVTTD<br>M     | Mus<br>musculus      |
| 1 | 1.00 | 1 | 1 | -0.04 | -0.042 | -0.023 | -0.04  | -0.043 | t | 110798 | CPTGCQL<br>QEALLQQE<br>RPIRN | Mus<br>musculus      |
| 1 | 1.00 | 1 | 1 | 0.05  | 0.052  | 0.062  | 0.057  | 0.06   | t | 108259 | AAFSELPL<br>G                | Homo<br>sapiens      |
| 1 | 1.00 | 1 | 1 | -0.01 | -0.008 | -0.001 | -0.01  | -0.01  | t | 95196  | AAGLIMTA<br>EPKTIVLKA<br>G   | Rattus<br>norvegicus |
| 1 | 1.00 | 1 | 1 | -0.02 | -0.017 | -0.009 | -0.02  | -0.02  | t | 15523  | FEEVNGIR<br>KP               | Mus<br>musculus      |

|   |      |   |   |       |        |        |        |        |   |        |                             |                              |
|---|------|---|---|-------|--------|--------|--------|--------|---|--------|-----------------------------|------------------------------|
| 1 | 1.00 | 1 | 1 | -0.12 | -0.12  | -0.104 | -0.12  | -0.124 | t | 144873 | ATWVDLV<br>LEGDSLCTI        | Mus<br>musculus              |
| 1 | 1.00 | 1 | 1 | -0.03 | -0.03  | -0.02  | -0.03  | -0.03  | t | 9983   | DRHFLNN<br>VC               | Homo<br>sapiens              |
| 1 | 1.00 | 1 | 1 | -0.04 | -0.04  | -0.032 | -0.04  | -0.04  | t | 106451 | GGHWRG<br>ANAT              | Homo<br>sapiens              |
| 1 | 1.00 | 1 | 1 | -0.05 | -0.046 | -0.058 | -0.049 | -0.048 | t | 61559  | STDNNQN<br>GGRNGAR<br>PKQR  | Homo<br>sapiens              |
| 1 | 1.00 | 1 | 1 | 0.03  | 0.03   | 0.046  | 0.03   | 0.029  | t | 79843  | GPKQLTFE<br>GKPA            | Mus<br>musculus              |
| 1 | 1.00 | 1 | 1 | 0     | 0      | 0      | -0.003 | 0.003  | t | 43242  | NANPNAN<br>PNANP            | Homo<br>sapiens              |
| 1 | 1.00 | 1 | 1 | 0.02  | 0.022  | 0.035  | 0.017  | 0.02   | t | 60966  | SSEEIVPNS<br>V              | Homo<br>sapiens              |
| 1 | 1.00 | 1 | 1 | 0.03  | 0.03   | 0.035  | 0.03   | 0.031  | t | 107127 | GEPGDDA<br>PSGAEGPP<br>GPQG | Mus<br>musculus              |
| 1 | 1.00 | 1 | 1 | -0.04 | -0.038 | -0.037 | -0.039 | -0.04  | t | 65701  | TPPVPDVD<br>SRGAILRR<br>QY  | Homo<br>sapiens              |
| 1 | 1.00 | 1 | 1 | -0.04 | -0.037 | -0.024 | -0.04  | -0.041 | t | 49692  | PTLDVRMI<br>NI              | Mus<br>musculus              |
| 1 | 1.00 | 1 | 1 | -0.01 | -0.01  | 0.001  | -0.01  | -0.009 | t | 7864   | DDQPSSH<br>QPLFY            | Oryctola<br>gus<br>cuniculus |
| 1 | 1.00 | 1 | 1 | 0.02  | 0.016  | 0.027  | 0.013  | 0.022  | t | 132089 | SSYDGIPLS<br>YLSYL          | Oryctola<br>gus<br>cuniculus |

|   |      |   |   |       |        |        |        |        |   |        |                              |                      |
|---|------|---|---|-------|--------|--------|--------|--------|---|--------|------------------------------|----------------------|
| 1 | 1.00 | 1 | 1 | -0.03 | -0.026 | -0.022 | -0.033 | -0.028 | t | 6914   | CRCEGLR<br>MMMMR<br>MQ       | Homo<br>sapiens      |
| 1 | 1.00 | 1 | 1 | -0.02 | -0.023 | -0.003 | -0.021 | -0.02  | t | 121070 | WVYYTCC<br>PDTPYL            | Rattus<br>norvegicus |
| 1 | 1.00 | 1 | 1 | 0.02  | 0.018  | 0.02   | 0.017  | 0.019  | t | 134048 | EQFRRMR<br>AAEDP             | Mus<br>musculus      |
| 1 | 1.00 | 1 | 1 | -0.03 | -0.026 | -0.028 | -0.033 | -0.031 | t | 99750  | VEIKEGAL<br>MLPHFNS          | Homo<br>sapiens      |
| 1 | 1.00 | 1 | 1 | -0.05 | -0.05  | -0.05  | -0.04  | -0.041 | t | 108610 | RKALRLSA<br>S                | Homo<br>sapiens      |
| 1 | 1.00 | 1 | 1 | 0     | 0      | 0      | 0      | 0.005  | t | 119673 | WNPDDYG<br>GVK               | Homo<br>sapiens      |
| 1 | 1.00 | 1 | 1 | 0     | 0      | 0      | 0      | 0.005  | t | 130787 | EDFDIYDE<br>DE               | Mus<br>musculus      |
| 1 | 1.00 | 1 | 1 | 0     | 0      | 0      | 0      | 0.005  | t | 23178  | GVTSAPDT<br>RPAGSTA          | Mus<br>musculus      |
| 1 | 1.00 | 1 | 1 | 0     | 0      | 0      | 0      | 0.005  | t | 23178  | GVTSAPDT<br>RPAGSTA          | Mus<br>musculus      |
| 1 | 1.00 | 1 | 1 | 0     | 0      | 0      | 0      | 0.005  | t | 23179  | GVTSAPDT<br>RPAGSTA          | Mus<br>musculus      |
| 1 | 1.00 | 1 | 1 | 0.01  | 0.013  | 0.02   | 0.009  | 0.009  | t | 82527  | GAATPYA<br>GEPARPPE<br>TLGEE | Aotus                |
| 1 | 1.00 | 1 | 1 | 0.01  | 0.01   | 0.01   | 0.01   | 0.014  | t | 143678 | DRVNLRNL<br>RGYY             | Mus<br>musculus      |
| 1 | 1.00 | 1 | 1 | 0.03  | 0.028  | 0.035  | 0.029  | 0.03   | t | 27805  | IPCTTYQQ<br>TTAETVEEI<br>DMH | Mus<br>musculus      |
| 1 | 1.00 | 1 | 1 | 0.03  | 0.028  | 0.032  | 0.023  | 0.031  | t | 132200 | CGNRGPSL<br>RTTTVTG          | Mus<br>musculus      |
| 1 | 1.00 | 1 | 1 | 0.01  | 0.01   | 0.017  | 0.01   | 0.013  | t | 135847 | YPAIVETGL                    | Mus<br>musculus      |



|   |      |   |   |       |        |        |        |        |   |        |                              |                             |
|---|------|---|---|-------|--------|--------|--------|--------|---|--------|------------------------------|-----------------------------|
| 1 | 1.00 | 1 | 1 | 0.04  | 0.042  | 0.047  | 0.037  | 0.04   | t | 105086 | AGESHGP<br>DQGHD             | Homo<br>sapiens             |
| 1 | 1.00 | 1 | 1 | 0     | 0      | -0.007 | 0      | 0.003  | t | 124730 | SMDRIEKD<br>RLQGMAP<br>AA    | Homo<br>sapiens             |
| 1 | 1.00 | 1 | 1 | 0.03  | 0.03   | 0.028  | 0.03   | 0.031  | t | 114211 | GSLPQKSH<br>GRTQDEN<br>PVVHF | Mus<br>musculu<br>s         |
| 1 | 1.00 | 1 | 1 | -0.05 | -0.05  | -0.05  | -0.05  | -0.051 | t | 117697 | YKQRNGW<br>SHKDLLRL<br>SHLKP | Homo<br>sapiens             |
| 1 | 1.00 | 1 | 1 | -0.05 | -0.055 | -0.05  | -0.053 | -0.05  | t | 65863  | TQGVVKE<br>RRWTLVN<br>ENRPIW | Mesocric<br>etus<br>auratus |
| 1 | 1.00 | 1 | 1 | 0     | -0.002 | 0      | -0.007 | 0.001  | t | 119673 | WNPDDYG<br>GVK               | Rattus<br>norvegic<br>us    |
| 1 | 1.00 | 1 | 1 | 0     | 0      | 0      | -0.01  | 0      | t | 20097  | GGYGDGG<br>AHGGGYG<br>G      | Homo<br>sapiens             |
| 1 | 1.00 | 1 | 1 | 0     | 0.002  | -0.005 | 0.001  | 0.002  | t | 8602   | DIDLGESR<br>VVIQDYDN<br>QHEQ | Homo<br>sapiens             |
| 1 | 1.00 | 1 | 0 | -0.06 | -0.062 | -0.035 | -0.063 | -0.049 | t | 102102 | SYSMCTGK<br>FKVV             | Mus<br>musculu<br>s         |
| 1 | 1.00 | 1 | 1 | 0     | -0.004 | 0.014  | 0      | 0      | t | 47489  | PFFFS DVR<br>SNFSKLV         | Bos<br>taurus               |
| 1 | 1.00 | 1 | 1 | 0     | -0.001 | 0.014  | 0      | 0      | t | 47489  | PFFFS DVR<br>SNFSKLV         | Bos<br>taurus               |
| 1 | 1.00 | 1 | 1 | 0     | -0.001 | 0.014  | 0      | 0      | t | 47489  | PFFFS DVR<br>SNFSKLV         | Bos<br>taurus               |
| 1 | 1.00 | 1 | 1 | 0.01  | 0.01   | 0.01   | 0.006  | 0.01   | t | 115148 | KAVSEKKA<br>KGLGESRK<br>DKK  | Homo<br>sapiens             |
| 1 | 1.00 | 1 | 1 | -0.02 | -0.022 | -0.02  | -0.027 | -0.02  | t | 135545 | DVFYPYPY<br>ASGS             | Mus<br>musculu<br>s         |

|   |      |   |   |       |        |        |        |        |   |        |                              |                       |
|---|------|---|---|-------|--------|--------|--------|--------|---|--------|------------------------------|-----------------------|
| 1 | 1.00 | 1 | 1 | 0.1   | 0.1    | 0.113  | 0.1    | 0.103  | t | 1157   | AESEE                        | Homo sapiens          |
| 1 | 1.00 | 1 | 1 | 0     | 0.002  | 0.01   | 0.003  | -0.002 | t | 1465   | AGDGEPP<br>EDDDSAT<br>GLAFRT | Homo sapiens          |
| 1 | 1.00 | 1 | 1 | -0.02 | -0.005 | -0.008 | -0.017 | -0.02  | t | 42652  | MSRLWL<br>MKAHGISS<br>E      | Homo sapiens          |
| 1 | 1.00 | 1 | 1 | 0.02  | 0.017  | 0.017  | 0.02   | 0.024  | t | 37782  | LLSDTDNA<br>AFPQMTK<br>SYKNT | Oryctolagus cuniculus |
| 1 | 1.00 | 1 | 1 | 0.03  | 0.032  | 0.047  | 0.031  | 0.03   | t | 80221  | AFGVGDD<br>ESK               | Homo sapiens          |
| 1 | 1.00 | 1 | 1 | 0.03  | 0.028  | 0.039  | 0.027  | 0.03   | t | 18994  | GDGRQTIT<br>NPAYDE           | Mus musculus          |
| 1 | 1.00 | 1 | 1 | 0.02  | 0.02   | 0.04   | 0.02   | 0.02   | t | 54468  | RLAKLSDG<br>VAVLKVG          | Homo sapiens          |
| 1 | 1.00 | 1 | 1 | 0.02  | 0.02   | 0.033  | 0.023  | 0.02   | t | 19098  | GDRADGQ<br>PAGDRAD<br>GQPA   | Homo sapiens          |
| 1 | 1.00 | 1 | 1 | -0.04 | -0.038 | -0.02  | -0.037 | -0.045 | t | 136092 | YKSQYLNN<br>GPQRIGRK<br>YKK  | Homo sapiens          |
| 1 | 1.00 | 1 | 1 | -0.03 | -0.032 | -0.031 | -0.033 | -0.03  | t | 61574  | STEEFKEY<br>KLTRPYMA<br>RC   | Mus musculus          |
| 1 | 1.00 | 1 | 1 | -0.03 | -0.029 | -0.031 | -0.033 | -0.03  | t | 61574  | STEEFKEY<br>KLTRPYMA<br>RC   | Equus caballus        |
| 1 | 1.00 | 1 | 1 | -0.03 | -0.032 | -0.031 | -0.033 | -0.03  | t | 61574  | STEEFKEY<br>KLTRPYMA<br>RC   | Mus musculus          |
| 1 | 1.00 | 1 | 1 | -0.01 | -0.007 | -0.001 | -0.01  | -0.008 | t | 63757  | TFTNKLKS<br>KHTDLGK          | Mus musculus          |

|   |      |   |   |       |        |        |        |        |   |        |                               |                                  |
|---|------|---|---|-------|--------|--------|--------|--------|---|--------|-------------------------------|----------------------------------|
| 1 | 1.00 | 1 | 1 | 0     | 0.002  | 0.01   | 0.003  | 0      | t | 1179   | AETFEYQIE<br>LGGEHLVGV<br>LLW | Homo<br>sapiens                  |
| 1 | 1.00 | 1 | 1 | -0.02 | -0.022 | -0.015 | -0.023 | -0.019 | t | 563    | ACHPLFDA<br>RCGGKS            | Mus<br>musculu<br>s              |
| 1 | 1.00 | 1 | 1 | 0.03  | 0.026  | 0.037  | 0.03   | 0.031  | t | 60783  | SRRGDLGS<br>LATRVATQ          | Bos<br>taurus                    |
| 1 | 1.00 | 1 | 1 | -0.01 | -0.006 | -0.001 | -0.01  | -0.01  | t | 39219  | LRTAPGPG                      | Homo<br>sapiens                  |
| 1 | 1.00 | 1 | 1 | -0.04 | -0.043 | -0.015 | -0.04  | -0.04  | t | 94476  | CNPACGR<br>HY                 | Oryctola<br>gus<br>cuniculu<br>s |
| 1 | 1.00 | 1 | 1 | -0.04 | -0.036 | -0.015 | -0.04  | -0.04  | t | 94476  | CNPACGR<br>HY                 | Capra<br>hircus                  |
| 1 | 1.00 | 1 | 1 | -0.01 | -0.013 | -0.003 | -0.01  | -0.011 | t | 97104  | WVGVNLE<br>DPASRDV<br>VSYVN   | Oryctola<br>gus<br>cuniculu<br>s |
| 1 | 1.00 | 1 | 1 | 0     | 0      | 0      | -0.007 | 0.002  | t | 122748 | EHRMTW<br>DPAQPPR             | Homo<br>sapiens                  |
| 1 | 1.00 | 1 | 1 | 0     | 0      | 0      | -0.007 | 0.002  | t | 122486 | MILHPDV<br>QRRVQQEI<br>DDVI   | Homo<br>sapiens                  |
| 1 | 1.00 | 1 | 1 | 0     | 0      | 0      | -0.007 | 0.002  | t | 11571  | EEEDDDM<br>GGLFD              | Homo<br>sapiens                  |
| 1 | 1.00 | 1 | 1 | 0     | 0      | 0      | -0.007 | 0.002  | t | 18588  | GAGGGAG<br>GAGAGGG<br>AGGAGA  | Homo<br>sapiens                  |
| 1 | 1.00 | 1 | 1 | 0     | 0      | 0      | -0.007 | 0.002  | t | 6015   | CAPESEIFP<br>VSEARVLE<br>D    | Homo<br>sapiens                  |
| 1 | 1.00 | 1 | 1 | -0.01 | -0.008 | -0.013 | -0.01  | -0.008 | t | 105967 | MKRGLTV<br>AVAGAAIL<br>VAGLS  | Homo<br>sapiens                  |
| 1 | 1.00 | 1 | 1 | -0.05 | -0.052 | -0.048 | -0.051 | -0.047 | t | 118336 | ERADLIAYL<br>KKATNE           | Mus<br>musculu<br>s              |
| 1 | 1.00 | 1 | 1 | 0     | -0.002 | 0.007  | 0.003  | 0.002  | t | 115702 | DEAELPSRI<br>SPGKNA           | Mus<br>musculu<br>s              |

|   |      |   |   |       |        |        |        |        |   |        |                              |                       |
|---|------|---|---|-------|--------|--------|--------|--------|---|--------|------------------------------|-----------------------|
| 1 | 1.00 | 1 | 1 | 0     | -0.012 | -0.019 | 0      | 0.012  | t | 66831  | TTSSHPVS                     | Macaca mulatta        |
| 1 | 1.00 | 1 | 1 | -0.03 | -0.03  | -0.014 | -0.033 | -0.032 | t | 63164  | TDGVITYTN<br>DCL             | Homo sapiens          |
| 1 | 1.00 | 1 | 1 | -0.01 | -0.01  | 0.001  | -0.01  | -0.008 | t | 111050 | VGPLDIVP<br>EVADPGG<br>PTLV  | Oryctolagus cuniculus |
| 1 | 1.00 | 1 | 1 | -0.01 | -0.007 | 0.001  | -0.01  | -0.008 | t | 111050 | VGPLDIVP<br>EVADPGG<br>PTLV  | Mus musculus          |
| 1 | 1.00 | 1 | 1 | 0     | 0      | 0.017  | 0      | -0.001 | t | 21867  | GQGGGTH<br>NQWNKP            | Oryctolagus cuniculus |
| 1 | 1.00 | 1 | 1 | -0.04 | -0.036 | -0.028 | -0.043 | -0.04  | t | 106391 | ELARHAKA<br>HI               | Homo sapiens          |
| 1 | 1.00 | 1 | 1 | 0.04  | 0.042  | 0.051  | 0.047  | 0.049  | t | 108376 | GASGDIAK<br>Q                | Homo sapiens          |
| 1 | 1.00 | 1 | 1 | 0.01  | 0.01   | 0.01   | 0.006  | 0.01   | t | 118574 | RADWKKT<br>VETQKSRI<br>HA    | Homo sapiens          |
| 1 | 1.00 | 1 | 1 | -0.04 | -0.042 | -0.033 | -0.037 | -0.039 | t | 15820  | FFHNGRFS<br>DALRFTL          | Mus musculus          |
| 1 | 1.00 | 1 | 1 | 0.01  | 0.012  | 0.024  | 0.013  | 0.013  | t | 151198 | GGAAA                        | Homo sapiens          |
| 1 | 1.00 | 1 | 1 | -0.01 | -0.017 | -0.003 | -0.01  | -0.009 | t | 102297 | AITCAHTLS<br>IKSRRCQY<br>VFK | Oryctolagus cuniculus |
| 1 | 1.00 | 1 | 1 | -0.02 | -0.02  | -0.02  | -0.02  | -0.019 | t | 107376 | GDRSGYSS<br>PGSPG            | Mus musculus          |
| 1 | 1.00 | 1 | 1 | -0.03 | -0.03  | -0.023 | -0.033 | -0.03  | t | 97035  | VGINYWL<br>AHK               | Homo sapiens          |
| 1 | 1.00 | 1 | 1 | -0.02 | -0.02  | 0.001  | -0.02  | -0.02  | t | 1478   | AGDRAGD<br>R                 | Mus musculus          |

|   |      |   |   |       |        |        |        |        |   |        |                              |                                  |
|---|------|---|---|-------|--------|--------|--------|--------|---|--------|------------------------------|----------------------------------|
| 1 | 1.00 | 1 | 1 | 0.03  | 0.034  | 0.036  | 0.031  | 0.03   | t | 66906  | TTVSTEQN<br>VPDPQVGI<br>TTMK | Homo<br>sapiens                  |
| 1 | 1.00 | 1 | 1 | -0.02 | -0.02  | -0.008 | -0.02  | -0.02  | t | 133536 | CKPVENRA<br>C                | Mus<br>musculu<br>s              |
| 1 | 1.00 | 1 | 1 | -0.03 | -0.016 | -0.016 | -0.033 | -0.032 | t | 8789   | DISTKEAFR<br>LKN             | Homo<br>sapiens                  |
| 1 | 1.00 | 1 | 1 | -0.01 | -0.012 | -0.01  | -0.017 | -0.008 | t | 134784 | RKRSQML<br>FRGRRASQ          | Mus<br>musculu<br>s              |
| 1 | 1.00 | 1 | 1 | 0     | -0.003 | 0.007  | 0      | 0.002  | t | 131956 | LPKSAKPV<br>SQMRMA<br>TPLL   | Oryctola<br>gus<br>cuniculu<br>s |
| 1 | 1.00 | 1 | 1 | -0.03 | -0.027 | -0.042 | -0.03  | -0.02  | t | 78983  | GPLWLHY<br>AGAFLHP           | Mus<br>musculu<br>s              |
| 1 | 1.00 | 1 | 1 | -0.02 | -0.02  | -0.02  | -0.02  | -0.018 | t | 140996 | EEIDYDDTI<br>SVEMKK          | Mus<br>musculu<br>s              |
| 1 | 1.00 | 1 | 1 | -0.02 | -0.02  | -0.016 | -0.02  | -0.019 | t | 85672  | LPHSLNDH<br>ILEPSIPWK<br>SK  | Homo<br>sapiens                  |
| 1 | 1.00 | 1 | 1 | -0.06 | -0.06  | -0.06  | -0.06  | -0.057 | t | 139725 | EMRTRIRY<br>NRRS             | Mus<br>musculu<br>s              |
| 1 | 1.00 | 1 | 1 | 0     | 0.002  | 0.012  | 0.001  | 0.002  | t | 35947  | LFPTQIQV<br>RNIMSP           | Homo<br>sapiens                  |
| 1 | 1.00 | 1 | 1 | 0.01  | 0.006  | 0.008  | 0.003  | 0.011  | t | 118431 | ISDAMKKV<br>GRKGVITV<br>KD   | Oryctola<br>gus<br>cuniculu<br>s |
| 1 | 1.00 | 1 | 1 | -0.01 | -0.012 | -0.01  | -0.017 | -0.01  | t | 107455 | KAKGQPR                      | Mus<br>musculu<br>s              |
| 1 | 1.00 | 1 | 1 | 0     | -0.002 | 0.01   | 0.001  | 0      | t | 131876 | FAKANKQ<br>VCTDI             | Mus<br>musculu<br>s              |
| 1 | 1.00 | 1 | 1 | 0     | -0.004 | 0      | -0.007 | 0.001  | t | 113670 | NPVVHFFK<br>NIVTP            | Oryctola<br>gus<br>cuniculu<br>s |

|   |      |   |   |       |        |        |        |        |   |        |                              |                              |
|---|------|---|---|-------|--------|--------|--------|--------|---|--------|------------------------------|------------------------------|
| 1 | 1.00 | 1 | 1 | -0.06 | -0.054 | -0.055 | -0.06  | -0.058 | t | 48076  | PKHVKA<br>WIPRPPRLC          | Equus<br>caballus            |
| 1 | 1.00 | 1 | 1 | -0.03 | -0.03  | -0.021 | -0.03  | -0.03  | t | 135994 | SGLAPKRP<br>GPAG             | Homo<br>sapiens              |
| 1 | 1.00 | 1 | 1 | 0     | 0      | 0.007  | 0      | 0.005  | t | 151630 | FSTNWM<br>NQHRPS             | Mus<br>musculus              |
| 1 | 1.00 | 1 | 1 | -0.06 | -0.065 | -0.046 | -0.057 | -0.058 | t | 56657  | RYSRNAV<br>P NV              | Bos<br>taurus                |
| 1 | 1.00 | 1 | 1 | -0.06 | -0.065 | -0.046 | -0.057 | -0.058 | t | 56657  | RYSRNAV<br>P NV              | Bos<br>taurus                |
| 1 | 1.00 | 1 | 1 | -0.01 | -0.012 | -0.01  | -0.017 | -0.01  | t | 125318 | WWYDKK<br>DNTC               | Mus<br>musculus              |
| 1 | 1.00 | 1 | 1 | -0.04 | -0.042 | -0.033 | -0.04  | -0.04  | t | 140595 | RHEDGDW<br>PRV               | Mus<br>musculus              |
| 1 | 1.00 | 1 | 1 | 0     | 0.014  | 0.022  | 0.003  | 0      | t | 10131  | DSGSRT<br>PPDELALS           | Homo<br>sapiens              |
| 1 | 1.00 | 1 | 1 | -0.06 | -0.06  | -0.062 | -0.06  | -0.06  | t | 98784  | GAKGKAA<br>LLRELS<br>DVVPNLN | Homo<br>sapiens              |
| 1 | 1.00 | 1 | 1 | 0.03  | 0.026  | 0.034  | 0.027  | 0.031  | t | 139829 | MKERESQI<br>RDEYDH<br>VLSA   | Oryctola<br>gus<br>cuniculus |
| 1 | 1.00 | 1 | 1 | -0.01 | -0.012 | 0      | -0.011 | -0.009 | t | 97547  | PFVPRAD<br>EPARKGKV<br>H     | Mus<br>musculus              |
| 1 | 1.00 | 1 | 1 | -0.01 | -0.01  | -0.013 | -0.016 | -0.009 | t | 23169  | GVTHDQL<br>NNFR              | Homo<br>sapiens              |
| 1 | 1.00 | 1 | 1 | 0     | -0.002 | 0.016  | -0.001 | -0.001 | t | 39169  | LRPTFDTR<br>LMRLEDE<br>MKEGR | Mus<br>musculus              |

|   |      |   |   |       |        |        |        |        |   |        |                              |              |
|---|------|---|---|-------|--------|--------|--------|--------|---|--------|------------------------------|--------------|
| 1 | 1.00 | 1 | 1 | -0.03 | -0.026 | -0.023 | -0.033 | -0.03  | t | 42980  | MVPKQGPL                     | Homo sapiens |
| 1 | 1.00 | 1 | 1 | -0.02 | -0.018 | -0.008 | -0.019 | -0.02  | t | 20095  | GGWYSFD<br>SPYLMSITE<br>MRLR | Homo sapiens |
| 1 | 1.00 | 1 | 1 | -0.02 | -0.018 | -0.013 | -0.019 | -0.02  | t | 63831  | TGGAAAR                      | Homo sapiens |
| 1 | 1.00 | 1 | 1 | -0.02 | -0.021 | -0.013 | -0.019 | -0.02  | t | 63831  | TGGAAAR                      | Homo sapiens |
| 1 | 1.00 | 1 | 1 | -0.06 | -0.06  | -0.065 | -0.06  | -0.058 | t | 127751 | NQAQVQR<br>YVACHTEG<br>KAKL  | Homo sapiens |
| 1 | 1.00 | 1 | 1 | -0.09 | -0.09  | -0.09  | -0.083 | -0.089 | t | 144901 | GRGRGRG<br>RGRGGGR<br>G      | Homo sapiens |
| 1 | 1.00 | 1 | 1 | 0.02  | 0.02   | 0.04   | 0.023  | 0.02   | t | 8335   | DFWGNPL<br>MYNKEYY<br>MFNAG  | Homo sapiens |
| 1 | 1.00 | 1 | 1 | -0.01 | -0.01  | -0.004 | -0.016 | -0.008 | t | 65784  | TPTGVHIA<br>PVQT             | Homo sapiens |
| 1 | 1.00 | 1 | 1 | -0.02 | -0.028 | -0.02  | -0.02  | -0.018 | t | 156865 | EQATCDH<br>TNEWCAK<br>MM     | Mus musculus |
| 1 | 1.00 | 1 | 1 | 0     | 0.004  | 0.006  | -0.003 | 0.004  | t | 49534  | PSTPGERV<br>RH               | Homo sapiens |
| 1 | 1.00 | 1 | 1 | 0     | 0.004  | 0.01   | -0.003 | -0.002 | t | 99016  | SSRDQSSY<br>LQGFSRN          | Homo sapiens |
| 1 | 1.00 | 1 | 1 | 0     | 0.004  | 0.009  | 0.001  | 0      | t | 46379  | NVFQTQA<br>GCLIGAEH<br>VD    | Homo sapiens |
| 1 | 1.00 | 1 | 1 | -0.02 | -0.031 | -0.005 | -0.02  | -0.021 | t | 125211 | QHWSYGL<br>RPG               | Canis lupus  |

|   |      |   |   |       |        |        |        |        |   |        |                              |                       |
|---|------|---|---|-------|--------|--------|--------|--------|---|--------|------------------------------|-----------------------|
| 1 | 1.00 | 1 | 1 | -0.03 | -0.026 | -0.022 | -0.027 | -0.03  | t | 17839  | FSRQFLIPY<br>DPEHHYK<br>VFSP | Homo sapiens          |
| 1 | 1.00 | 1 | 1 | 0.01  | 0.014  | 0.037  | 0.013  | 0.011  | t | 14949  | EWRRYMS<br>DIHGY             | Homo sapiens          |
| 1 | 1.00 | 1 | 1 | -0.01 | -0.008 | -0.003 | -0.009 | -0.005 | t | 133548 | DSSWYTW<br>QPPTW             | Homo sapiens          |
| 1 | 1.00 | 1 | 1 | -0.02 | -0.02  | -0.005 | -0.02  | -0.018 | t | 25964  | IERMKDTL<br>RI               | Mus musculus          |
| 1 | 1.00 | 1 | 1 | -0.06 | -0.058 | -0.049 | -0.059 | -0.06  | t | 120810 | MVNKSR<br>MMPAV              | Homo sapiens          |
| 1 | 1.00 | 1 | 1 | -0.03 | -0.028 | -0.021 | -0.03  | -0.03  | t | 100672 | YVGLANAY<br>SHFYDG           | Homo sapiens          |
| 1 | 1.00 | 1 | 1 | 0     | 0      | 0.01   | 0.003  | 0      | t | 939    | AEGEFRLG<br>VRALRKAP<br>DPAK | Homo sapiens          |
| 1 | 1.00 | 1 | 1 | 0     | -0.002 | 0      | -0.003 | 0.003  | t | 47045  | PCSICSNN<br>PTCWAICK         | Mus musculus          |
| 1 | 1.00 | 1 | 1 | -0.01 | -0.008 | -0.01  | -0.007 | -0.01  | t | 122135 | LDSRRSYR<br>VRESGLNG<br>VVKH | Homo sapiens          |
| 1 | 1.00 | 1 | 1 | 0     | 0.002  | 0.006  | 0.001  | 0      | t | 133733 | VKTLLPYG<br>SVINYGY<br>VKPG  | Homo sapiens          |
| 1 | 1.00 | 1 | 1 | -0.03 | -0.019 | -0.027 | -0.03  | -0.028 | t | 59807  | SNDVSWH<br>EWKRMYN<br>KEYNG  | Rattus rattus         |
| 1 | 1.00 | 1 | 1 | 0.01  | 0.006  | 0.027  | 0.009  | 0.01   | t | 66659  | TTIPPSSPP                    | Oryctolagus cuniculus |
| 1 | 1.00 | 1 | 1 | -0.02 | -0.017 | -0.009 | -0.02  | -0.019 | t | 36045  | LGAARGYT<br>FGAC             | Mus musculus          |
| 1 | 1.00 | 1 | 1 | -0.01 | -0.013 | 0.011  | -0.01  | -0.012 | t | 79998  | REARSGRL<br>SQLRE            | Oryctolagus cuniculus |



|   |      |   |   |       |        |        |        |        |   |        |                              |                                  |
|---|------|---|---|-------|--------|--------|--------|--------|---|--------|------------------------------|----------------------------------|
| 1 | 1.00 | 1 | 1 | -0.01 | -0.01  | -0.01  | -0.01  | -0.006 | t | 143674 | DRVALRNL<br>LRRY             | Mus<br>musculu<br>s              |
| 1 | 1.00 | 1 | 1 | -0.04 | -0.037 | -0.045 | -0.04  | -0.039 | t | 49876  | PVGRLVTV<br>NPFVSMA<br>TANAK | Equus<br>caballus                |
| 1 | 1.00 | 1 | 1 | 0     | 0      | 0.007  | 0      | 0.002  | t | 121064 | WKHWVY<br>YTCCPDTP<br>YLDITY | Oryctola<br>gus<br>cuniculu<br>s |
| 1 | 1.00 | 1 | 1 | -0.02 | -0.017 | -0.008 | -0.023 | -0.02  | t | 14386  | ETGERSVL<br>TVPSTDIEK<br>EIL | Oryctola<br>gus<br>cuniculu<br>s |
| 1 | 1.00 | 1 | 1 | 0     | 0      | 0.007  | 0      | 0.001  | t | 133663 | PNKHQRS                      | Mus<br>musculu<br>s              |
| 1 | 1.00 | 1 | 1 | -0.01 | -0.015 | 0.004  | -0.007 | -0.008 | t | 95319  | DMGSLAA<br>R                 | Bos<br>taurus                    |
| 1 | 1.00 | 1 | 1 | 0.01  | 0.012  | 0.01   | 0.009  | 0.013  | t | 130455 | CQGNQDS<br>FTPVVCAA<br>C     | Homo<br>sapiens                  |
| 1 | 1.00 | 1 | 1 | 0     | 0.002  | 0.01   | 0.003  | 0      | t | 1179   | AETFEYQIE<br>LGELHVG<br>LLW  | Homo<br>sapiens                  |
| 1 | 1.00 | 1 | 1 | -0.02 | -0.022 | -0.008 | -0.021 | -0.02  | t | 71844  | VVSWKNK<br>EL                | Mus<br>musculu<br>s              |
| 1 | 1.00 | 1 | 1 | -0.02 | -0.024 | -0.008 | -0.021 | -0.02  | t | 71844  | VVSWKNK<br>EL                | Oryctola<br>gus<br>cuniculu<br>s |
| 1 | 1.00 | 1 | 1 | 0.02  | 0.02   | 0.037  | 0.02   | 0.02   | t | 42413  | MQSWVPL<br>STDDPVID          | Homo<br>sapiens                  |
| 1 | 1.00 | 1 | 1 | -0.01 | -0.012 | -0.003 | -0.011 | -0.01  | t | 137906 | KGLRKSNA<br>AERRGPL          | Mus<br>musculu<br>s              |
| 1 | 1.00 | 1 | 1 | -0.01 | -0.01  | 0.006  | -0.01  | -0.01  | t | 48084  | PKINRSAP<br>EPSL             | Oryctola<br>gus<br>cuniculu<br>s |

|   |      |   |   |       |        |        |        |        |   |        |                      |                                  |
|---|------|---|---|-------|--------|--------|--------|--------|---|--------|----------------------|----------------------------------|
| 1 | 1.00 | 1 | 1 | -0.05 | -0.047 | -0.041 | -0.05  | -0.048 | t | 66298  | TSLHRGPH<br>GFPL     | Mus<br>musculu<br>s              |
| 1 | 1.00 | 1 | 1 | -0.05 | -0.05  | -0.041 | -0.05  | -0.05  | t | 135971 | PRPRDRSG<br>LAPK     | Homo<br>sapiens                  |
| 1 | 1.00 | 1 | 1 | -0.04 | -0.039 | -0.04  | -0.043 | -0.039 | t | 130509 | HKKDFAR<br>GPGWS     | Mus<br>musculu<br>s              |
| 1 | 1.00 | 1 | 1 | 0.01  | 0.01   | 0.01   | 0.006  | 0.01   | t | 108498 | KIHAREIFD<br>SRGNPTV | Homo<br>sapiens                  |
| 1 | 1.00 | 1 | 1 | 0.01  | 0.008  | 0.012  | 0.003  | 0.01   | t | 132365 | HKYSWKS<br>WKGAKIIG  | Mus<br>musculu<br>s              |
| 1 | 1.00 | 1 | 1 | -0.02 | -0.016 | -0.013 | -0.02  | -0.018 | t | 149242 | AALILSKHP<br>NWTNTQ  | Cavia<br>porcellu<br>s           |
| 1 | 1.00 | 1 | 1 | 0.02  | 0.022  | 0.038  | 0.019  | 0.018  | t | 99824  | ITQSTQSF<br>N        | Homo<br>sapiens                  |
| 1 | 1.00 | 1 | 1 | -0.04 | -0.042 | -0.029 | -0.047 | -0.04  | t | 124603 | QHWSYPL<br>RPG       | Rattus<br>norvegic<br>us         |
| 1 | 1.00 | 1 | 1 | -0.04 | -0.039 | -0.029 | -0.047 | -0.04  | t | 124603 | QHWSYPL<br>RPG       | Canis<br>familiari<br>s          |
| 1 | 1.00 | 1 | 1 | -0.03 | -0.033 | -0.032 | -0.03  | -0.028 | t | 105905 | KPRGVTH<br>D         | Oryctola<br>gus<br>cuniculu<br>s |
| 1 | 1.00 | 1 | 1 | -0.04 | -0.04  | -0.034 | -0.04  | -0.04  | t | 34986  | LATRLMKK<br>FKAIRDF  | Mus<br>musculu<br>s              |
| 1 | 1.00 | 1 | 1 | -0.06 | -0.062 | -0.053 | -0.06  | -0.061 | t | 142484 | WRMAGQ<br>KRTSGR     | Mus<br>musculu<br>s              |
| 1 | 1.00 | 1 | 1 | -0.01 | -0.014 | -0.01  | -0.017 | -0.007 | t | 129973 | SPRSFQKK<br>T        | Oryctola<br>gus<br>cuniculu<br>s |
| 1 | 1.00 | 1 | 1 | -0.05 | -0.052 | -0.04  | -0.051 | -0.047 | t | 103251 | HDHRIWP<br>LDVTA     | Mus<br>musculu<br>s              |

|   |      |   |   |       |        |        |        |        |   |        |                              |                              |
|---|------|---|---|-------|--------|--------|--------|--------|---|--------|------------------------------|------------------------------|
| 1 | 1.00 | 1 | 1 | -0.08 | -0.08  | -0.08  | -0.083 | -0.08  | t | 149110 | SRAPRFP<br>WLNPLDG<br>W      | Rattus<br>norvegicus         |
| 1 | 1.00 | 1 | 1 | -0.01 | -0.009 | -0.007 | -0.011 | -0.01  | t | 52042  | QQINHHW<br>HKSGSSIG<br>KAFTT | Equus<br>caballus            |
| 1 | 1.00 | 1 | 1 | -0.01 | -0.014 | -0.01  | -0.017 | -0.01  | t | 123326 | IMHHMPG<br>Q                 | Oryctola<br>gus<br>cuniculus |
| 1 | 1.00 | 1 | 1 | -0.02 | -0.013 | -0.011 | -0.021 | -0.02  | t | 47134  | PDKQDYQI<br>RMAKSS           | Gallus<br>gallus             |
| 1 | 1.00 | 1 | 1 | 0.02  | 0.027  | 0.027  | 0.02   | 0.022  | t | 159288 | LLHYSTISQ<br>DNLDISFG<br>ELQ | Aotus                        |
| 1 | 1.00 | 1 | 1 | 0.02  | 0.02   | 0.02   | 0.02   | 0.02   | t | 136083 | SEGAEYDD<br>QTSQREKE<br>DDK  | Oryctola<br>gus<br>cuniculus |
| 1 | 1.00 | 1 | 1 | -0.04 | -0.037 | -0.03  | -0.04  | -0.04  | t | 57743  | SFDVPSKQ<br>PTIDIDL          | Mus<br>musculus              |
| 1 | 1.00 | 1 | 1 | -0.03 | -0.03  | -0.025 | -0.033 | -0.03  | t | 60283  | SPTHRINA<br>Q                | Homo<br>sapiens              |
| 1 | 1.00 | 1 | 1 | 0.02  | 0.024  | 0.023  | 0.023  | 0.024  | t | 48817  | PPLENRVL<br>TG               | MD                           |
| 1 | 1.00 | 1 | 1 | 0     | 0.003  | 0.008  | 0      | -0.002 | t | 8388   | DGGGGHS<br>HDSGHGG<br>GD     | Mus<br>musculus              |
| 1 | 1.00 | 1 | 1 | 0     | -0.002 | 0.017  | 0.003  | -0.001 | t | 20680  | GKSKRDAK<br>NNAAKLA<br>VDKLL | Mus<br>musculus              |
| 1 | 1.00 | 1 | 1 | -0.01 | -0.008 | -0.001 | -0.011 | -0.01  | t | 40104  | LTPKELD                      | Homo<br>sapiens              |
| 1 | 1.00 | 1 | 1 | 0     | 0.006  | 0.006  | 0      | 0      | t | 22885  | GTVVLELQ<br>YTGTGKPC<br>KVPI | Equus<br>caballus            |

|   |      |   |   |       |        |        |        |        |   |        |                              |                                  |
|---|------|---|---|-------|--------|--------|--------|--------|---|--------|------------------------------|----------------------------------|
| 1 | 1.00 | 1 | 1 | -0.03 | -0.03  | -0.03  | -0.034 | -0.028 | t | 18587  | GAGGGAG<br>AGGAGAG<br>GGGRGR | Homo<br>sapiens                  |
| 1 | 1.00 | 1 | 1 | -0.06 | -0.058 | -0.055 | -0.067 | -0.06  | t | 123729 | SDFLGDRQ<br>Y                | Ovis<br>aries                    |
| 1 | 1.00 | 1 | 1 | -0.07 | -0.074 | -0.067 | -0.071 | -0.07  | t | 89665  | TQQGGAY<br>GRCPNGT<br>RA     | Oryctola<br>gus<br>cuniculu<br>s |
| 1 | 1.00 | 1 | 1 | -0.04 | -0.038 | -0.03  | -0.037 | -0.039 | t | 72052  | VYILIAVCL<br>GGLIGI          | Homo<br>sapiens                  |
| 1 | 1.00 | 1 | 1 | -0.01 | 0      | -0.003 | -0.011 | -0.009 | t | 137829 | DWTFQTL<br>VMLETVP<br>R      | Pan<br>troglody<br>tes           |
| 1 | 1.00 | 1 | 1 | 0     | 0.004  | 0.007  | 0.001  | 0.002  | t | 17929  | FTDSVRDP<br>KTSEILDIS        | Homo<br>sapiens                  |
| 1 | 1.00 | 1 | 1 | -0.02 | -0.016 | -0.009 | -0.023 | -0.02  | t | 70259  | VPCSICSN<br>NPTCWAI<br>CK    | Mus<br>musculu<br>s              |
| 1 | 1.00 | 1 | 1 | -0.03 | -0.028 | -0.018 | -0.027 | -0.029 | t | 144639 | FAQAYAR<br>GIS               | Homo<br>sapiens                  |
| 1 | 1.00 | 1 | 1 | -0.03 | -0.032 | -0.023 | -0.03  | -0.029 | t | 142480 | VAAVTEKL<br>RAGT             | Mus<br>musculu<br>s              |
| 1 | 1.00 | 1 | 1 | 0.02  | 0.022  | 0.034  | 0.017  | 0.02   | t | 95922  | TPEVDD                       | Homo<br>sapiens                  |
| 1 | 1.00 | 1 | 1 | -0.02 | -0.017 | -0.007 | -0.02  | -0.018 | t | 30092  | KCTNTDRP<br>PFCQ             | Mus<br>musculu<br>s              |
| 1 | 1.00 | 1 | 1 | 0.02  | 0.02   | 0.019  | 0.018  | 0.025  | t | 56330  | RVKN                         | Homo<br>sapiens                  |
| 1 | 1.00 | 1 | 1 | 0     | 0      | 0.011  | -0.003 | 0      | t | 3650   | APLTAVAP<br>AHDTPPV<br>PDV   | Homo<br>sapiens                  |
| 1 | 1.00 | 1 | 1 | 0.01  | 0.012  | 0.021  | 0.007  | 0.01   | t | 17418  | FPTFPDGH<br>DY               | Homo<br>sapiens                  |

|   |      |   |   |       |        |        |        |        |   |        |                              |                                  |
|---|------|---|---|-------|--------|--------|--------|--------|---|--------|------------------------------|----------------------------------|
| 1 | 1.00 | 1 | 1 | -0.02 | -0.02  | 0.002  | -0.018 | -0.02  | t | 22806  | GTRTIASP<br>KGPVIQ           | Homo<br>sapiens                  |
| 1 | 1.00 | 1 | 1 | -0.02 | -0.019 | -0.01  | -0.02  | -0.02  | t | 51012  | QHLLSPNV<br>RPPH             | Mus<br>musculu<br>s              |
| 1 | 1.00 | 1 | 1 | -0.04 | -0.04  | -0.04  | -0.04  | -0.04  | t | 119523 | SDYKSAHK<br>GFKGVDA<br>QGTL  | Homo<br>sapiens                  |
| 1 | 1.00 | 1 | 1 | -0.01 | -0.014 | -0.01  | -0.017 | -0.011 | t | 122790 | HQEEDFR<br>VTCKDIQR          | Oryctola<br>gus<br>cuniculu<br>s |
| 1 | 1.00 | 1 | 1 | 0     | 0.002  | 0.003  | -0.003 | 0      | t | 751    | ADPVTTEG<br>DYVVKISEF<br>YGR | Homo<br>sapiens                  |
| 1 | 1.00 | 1 | 1 | 0.05  | 0.048  | 0.058  | 0.049  | 0.052  | t | 29751  | KAALIEEG<br>Q                | Homo<br>sapiens                  |
| 1 | 1.00 | 1 | 1 | -0.03 | -0.03  | -0.011 | -0.03  | -0.031 | t | 109247 | GSAGAPGI<br>AGAPGFP          | Mus<br>musculu<br>s              |
| 1 | 1.00 | 1 | 1 | -0.01 | -0.01  | -0.006 | -0.01  | -0.01  | t | 66099  | TRSIRKFNT<br>MQQCIDF<br>TFSD | Oryctola<br>gus<br>cuniculu<br>s |
| 1 | 1.00 | 1 | 1 | 0     | 0      | 0      | 0      | 0.005  | t | 63122  | TDAYNQKL<br>SERRAN           | Rattus<br>norvegic<br>us         |
| 1 | 1.00 | 1 | 1 | 0     | 0      | 0      | 0      | 0.005  | t | 43317  | NATAEGR<br>AINRRVE           | Rattus<br>norvegic<br>us         |
| 1 | 1.00 | 1 | 1 | 0     | -0.003 | 0      | 0      | 0.005  | t | 37657  | LLPHSNLD<br>HI               | Oryctola<br>gus<br>cuniculu<br>s |
| 1 | 1.00 | 1 | 1 | 0     | -0.003 | 0      | 0      | 0.005  | t | 48093  | PKKPENK<br>LKQPNE            | Oryctola<br>gus<br>cuniculu<br>s |
| 1 | 1.00 | 1 | 1 | 0     | 0.002  | 0      | 0      | 0.005  | t | 9722   | DPPPPNP<br>NDPPPPN<br>PN     | Rattus<br>norvegic<br>us         |

|   |      |   |   |       |        |        |        |        |   |        |                              |                                  |
|---|------|---|---|-------|--------|--------|--------|--------|---|--------|------------------------------|----------------------------------|
| 1 | 1.00 | 1 | 1 | 0     | 0      | 0      | 0      | 0.005  | t | 4331   | ASARGDLA<br>HLTTTHAR<br>HLP  | Sus<br>scrofa                    |
| 1 | 1.00 | 1 | 1 | -0.01 | -0.007 | 0.016  | -0.01  | -0.012 | t | 56917  | SANMPTN                      | Mus<br>musculu<br>s              |
| 1 | 1.00 | 1 | 1 | -0.02 | -0.022 | 0.004  | -0.02  | -0.022 | t | 141622 | DPNGWTG<br>TDNNFSI           | Oryctola<br>gus<br>cuniculu<br>s |
| 1 | 1.00 | 1 | 1 | 0     | 0      | -0.005 | 0.006  | 0.01   | t | 24786  | HSLGKWL<br>GHPDKF            | Mus<br>musculu<br>s              |
| 1 | 1.00 | 1 | 1 | 0.03  | 0.032  | 0.03   | 0.027  | 0.03   | t | 18859  | GCDADAT<br>CTEEDSGS<br>SRKK  | Homo<br>sapiens                  |
| 1 | 1.00 | 1 | 1 | -0.02 | -0.02  | -0.023 | -0.027 | -0.016 | t | 115630 | NFDKLYIW<br>G                | Homo<br>sapiens                  |
| 1 | 1.00 | 1 | 1 | 0     | -0.002 | -0.006 | 0.003  | 0.012  | t | 1366   | AFNPAY                       | Mus<br>musculu<br>s              |
| 1 | 1.00 | 1 | 1 | 0.03  | 0.03   | 0.04   | 0.03   | 0.031  | t | 63231  | TDSGDGR<br>QTITN             | Oryctola<br>gus<br>cuniculu<br>s |
| 1 | 1.00 | 1 | 1 | 0.01  | 0.011  | 0.026  | 0.01   | 0.01   | t | 68248  | VEKNITVT<br>ASVDPVI          | Mus<br>musculu<br>s              |
| 1 | 1.00 | 1 | 1 | -0.04 | -0.04  | -0.014 | -0.04  | -0.043 | t | 53164  | RAMAGRC<br>RLLLSIGS          | Mus<br>musculu<br>s              |
| 1 | 1.00 | 1 | 1 | 0     | 0.002  | 0.002  | -0.007 | 0      | t | 104017 | KTKRNTNR<br>RPQDVKEP<br>GGGQ | Homo<br>sapiens                  |
| 1 | 1.00 | 1 | 1 | -0.01 | -0.016 | 0.002  | -0.01  | -0.01  | t | 139900 | SNAPNSPS<br>SSAIAAAA<br>AA   | Oryctola<br>gus<br>cuniculu<br>s |
| 1 | 1.00 | 1 | 1 | -0.05 | -0.048 | -0.049 | -0.049 | -0.048 | t | 9619   | DPDYVPPV<br>VHGCP LPP<br>T   | Homo<br>sapiens                  |
| 1 | 1.00 | 1 | 1 | -0.01 | -0.006 | 0.006  | -0.009 | -0.01  | t | 38194  | LNDRVVVT<br>P                | Homo<br>sapiens                  |

|   |      |   |   |       |        |        |        |        |   |        |                              |                                  |
|---|------|---|---|-------|--------|--------|--------|--------|---|--------|------------------------------|----------------------------------|
| 1 | 1.00 | 1 | 1 | -0.04 | -0.038 | -0.03  | -0.039 | -0.042 | t | 25073  | HVNGRTT<br>ALVGLLTP<br>AKN   | Homo<br>sapiens                  |
| 1 | 1.00 | 1 | 1 | 0.02  | 0.02   | 0.022  | 0.026  | 0.027  | t | 107951 | KTTICGKG<br>LSATVT           | Mus<br>musculu<br>s              |
| 1 | 1.00 | 1 | 1 | -0.02 | -0.016 | -0.006 | -0.019 | -0.02  | t | 59375  | SLNTGWL<br>AGLFYQHK<br>FNS   | Homo<br>sapiens                  |
| 1 | 1.00 | 1 | 1 | 0     | -0.001 | 0.017  | 0      | 0      | t | 45628  | NQSLLETH                     | Anas<br>platyrhy<br>nchos        |
| 1 | 1.00 | 1 | 1 | 0.01  | 0.008  | 0.017  | 0.009  | 0.01   | t | 98437  | SAPRHKFQ<br>QVEEANL          | Sus<br>scrofa                    |
| 1 | 1.00 | 1 | 1 | -0.02 | -0.019 | -0.008 | -0.019 | -0.022 | t | 54489  | RLCAGGAS<br>LIEPVYALR<br>CAE | Myodes<br>glareolu<br>s          |
| 1 | 1.00 | 1 | 1 | 0.02  | 0.02   | 0.02   | 0.016  | 0.024  | t | 138189 | HILGSTA                      | Homo<br>sapiens                  |
| 1 | 1.00 | 1 | 1 | -0.05 | -0.053 | -0.04  | -0.05  | -0.05  | t | 21471  | GNLNTIRT<br>RVHE             | Oryctola<br>gus<br>cuniculu<br>s |
| 1 | 1.00 | 1 | 1 | -0.03 | -0.026 | -0.005 | -0.03  | -0.03  | t | 94477  | CNPACGR<br>HYS               | Capra<br>hircus                  |
| 1 | 1.00 | 1 | 1 | -0.03 | -0.033 | -0.005 | -0.03  | -0.03  | t | 94477  | CNPACGR<br>HYS               | Oryctola<br>gus<br>cuniculu<br>s |
| 1 | 1.00 | 1 | 1 | -0.05 | -0.05  | -0.05  | -0.05  | -0.048 | t | 135571 | LFRGRRAS<br>Q                | Oryctola<br>gus<br>cuniculu<br>s |
| 1 | 1.00 | 1 | 1 | 0     | -0.002 | 0.015  | 0.003  | 0      | t | 49072  | PQPQWTP<br>E                 | Anas<br>platyrhy<br>nchos        |
| 1 | 1.00 | 1 | 1 | -0.02 | -0.024 | -0.035 | -0.021 | -0.014 | t | 68813  | VGVIKSIAP<br>ASKNL           | Oryctola<br>gus<br>cuniculu<br>s |
| 1 | 1.00 | 1 | 1 | 0.01  | 0.008  | 0.017  | 0.009  | 0.013  | t | 146813 | DAEFGHD<br>SGFEVRH<br>QK     | Mus<br>musculu<br>s              |

|   |      |   |   |       |        |        |        |        |   |        |                              |                                  |
|---|------|---|---|-------|--------|--------|--------|--------|---|--------|------------------------------|----------------------------------|
| 1 | 1.00 | 1 | 1 | 0.04  | 0.038  | 0.047  | 0.037  | 0.041  | t | 144756 | QVGTHPG<br>LANDYEYT          | Mus<br>musculu<br>s              |
| 1 | 1.00 | 1 | 1 | 0     | 0.002  | 0      | 0      | 0.005  | t | 28676  | ISQAVHAA<br>HAEINEAG<br>R    | Rattus<br>norvegic<br>us         |
| 1 | 1.00 | 1 | 1 | 0.01  | 0.01   | 0.015  | 0.01   | 0.01   | t | 64662  | TKRNTNRR<br>PQDVKFP<br>GGGQI | Mus<br>musculu<br>s              |
| 1 | 1.00 | 1 | 1 | -0.02 | -0.02  | -0.019 | -0.03  | -0.022 | t | 106649 | MHRLYHV<br>PAV               | Homo<br>sapiens                  |
| 1 | 1.00 | 1 | 1 | -0.03 | -0.034 | -0.03  | -0.033 | -0.031 | t | 134029 | DEDENQS<br>PRSFQKKT<br>R     | Oryctola<br>gus<br>cuniculu<br>s |
| 1 | 1.00 | 1 | 1 | 0     | 0      | -0.003 | 0.001  | 0.006  | t | 54726  | RLQVLDD<br>HYR               | Homo<br>sapiens                  |
| 1 | 1.00 | 1 | 1 | -0.03 | -0.028 | -0.009 | -0.029 | -0.03  | t | 30937  | KGGIVT                       | Homo<br>sapiens                  |
| 1 | 1.00 | 1 | 1 | -0.02 | -0.022 | -0.008 | -0.021 | -0.02  | t | 142409 | DTRIAQQI<br>WLRR             | Mus<br>musculu<br>s              |
| 1 | 1.00 | 1 | 1 | -0.02 | -0.015 | -0.008 | -0.02  | -0.021 | t | 89849  | VAFNRFH<br>VGTHPAP<br>GKTNLY | Aotus                            |
| 1 | 1.00 | 1 | 1 | -0.05 | -0.05  | -0.039 | -0.051 | -0.05  | t | 135954 | LNTGWLA<br>GLFYQHKE          | Homo<br>sapiens                  |
| 1 | 1.00 | 1 | 1 | 0     | 0.002  | 0      | 0      | 0.005  | t | 114125 | HYGSLPQK<br>SQRSQDE<br>NPV   | Rattus<br>norvegic<br>us         |
| 1 | 1.00 | 1 | 1 | -0.05 | -0.054 | -0.047 | -0.051 | -0.046 | t | 89868  | VAPGIVIPP<br>KAL             | Oryctola<br>gus<br>cuniculu<br>s |
| 1 | 1.00 | 1 | 1 | 0.01  | 0.01   | 0.012  | 0.01   | 0.019  | t | 46885  | PAPNASL                      | Oryctola<br>gus<br>cuniculu<br>s |
| 1 | 1.00 | 1 | 1 | -0.01 | -0.01  | -0.01  | -0.01  | -0.01  | t | 129060 | KEIKKVAT<br>PKKASKPK<br>K    | Homo<br>sapiens                  |



|   |      |   |   |       |        |        |        |        |   |        |                              |                                  |
|---|------|---|---|-------|--------|--------|--------|--------|---|--------|------------------------------|----------------------------------|
| 1 | 1.00 | 1 | 1 | -0.02 | -0.031 | -0.021 | -0.02  | -0.018 | t | 27608  | INDISHTQ<br>SVSSKQRV<br>TGLD | Oryctola<br>gus<br>cuniculu<br>s |
| 1 | 1.00 | 1 | 1 | -0.04 | -0.04  | -0.04  | -0.043 | -0.04  | t | 149111 | SRSRFPW<br>LNPLDGW           | Rattus<br>norvegic<br>us         |
| 1 | 1.00 | 1 | 1 | -0.02 | -0.022 | -0.018 | -0.017 | -0.018 | t | 7971   | DEENRKRI<br>EARNLEN          | Mus<br>musculu<br>s              |
| 1 | 1.00 | 1 | 1 | -0.05 | -0.048 | -0.043 | -0.053 | -0.05  | t | 94738  | WAICKRIP<br>NKKP             | Homo<br>sapiens                  |
| 1 | 1.00 | 1 | 1 | 0.01  | 0.005  | 0.025  | 0.009  | 0.008  | t | 96888  | SKVLHLEG<br>EVNKIKS          | Oryctola<br>gus<br>cuniculu<br>s |
| 1 | 1.00 | 1 | 1 | 0.02  | 0.02   | 0.036  | 0.017  | 0.018  | t | 26239  | IGHADFGG<br>R                | Homo<br>sapiens                  |
| 1 | 1.00 | 1 | 1 | 0.01  | 0.01   | 0.016  | 0.01   | 0.011  | t | 2806   | ALNYQAQ<br>ALEEIIKYR<br>YNI  | Homo<br>sapiens                  |
| 1 | 1.00 | 1 | 1 | -0.02 | -0.018 | -0.015 | -0.021 | -0.02  | t | 32408  | KMTVEAV<br>KAKKTIL           | Ovis<br>aries                    |
| 1 | 1.00 | 1 | 1 | -0.01 | -0.012 | 0.003  | -0.007 | -0.008 | t | 51871  | QPLNLSLA<br>AWP              | Sus<br>scrofa                    |
| 1 | 1.00 | 1 | 1 | 0.03  | 0.03   | 0.042  | 0.026  | 0.028  | t | 96447  | KEEEEDKK<br>RK               | Homo<br>sapiens                  |
| 1 | 1.00 | 1 | 1 | 0.02  | 0.018  | 0.027  | 0.013  | 0.02   | t | 144708 | KLSDSALD<br>TMWR             | Mus<br>musculu<br>s              |
| 1 | 1.00 | 1 | 1 | -0.02 | -0.02  | -0.013 | -0.02  | -0.018 | t | 125185 | NSSSSQFQ<br>IHG              | Mus<br>musculu<br>s              |
| 1 | 1.00 | 1 | 1 | -0.03 | -0.03  | -0.035 | -0.03  | -0.028 | t | 156693 | IYVNVEPT<br>FQRTLHKT<br>K    | Mus<br>musculu<br>s              |
| 1 | 1.00 | 1 | 1 | -0.01 | -0.008 | 0.001  | -0.009 | -0.01  | t | 96862  | SDFFPSVR<br>DLLDTASA<br>LYRE | Homo<br>sapiens                  |
| 1 | 1.00 | 1 | 1 | -0.04 | -0.04  | -0.04  | -0.047 | -0.04  | t | 136005 | TVAQSRRR<br>GDMS             | Homo<br>sapiens                  |

|   |      |   |   |       |        |        |        |        |   |        |                              |                                  |
|---|------|---|---|-------|--------|--------|--------|--------|---|--------|------------------------------|----------------------------------|
| 1 | 1.00 | 1 | 1 | -0.05 | -0.052 | -0.04  | -0.053 | -0.05  | t | 28603  | ISLTEWSM<br>WYRH             | Mus<br>musculu<br>s              |
| 1 | 1.00 | 1 | 1 | 0.01  | 0.01   | 0.01   | 0.007  | 0.01   | t | 25092  | HVSPAHYV<br>PESDAAAR<br>VTAL | Homo<br>sapiens                  |
| 1 | 1.00 | 1 | 1 | -0.01 | -0.006 | 0.002  | -0.009 | -0.01  | t | 50746  | QFDEMEE<br>CSRHIPYLA<br>EGQQ | Homo<br>sapiens                  |
| 1 | 1.00 | 1 | 1 | 0     | -0.004 | 0.007  | -0.007 | 0.002  | t | 124189 | GHPLAPP<br>QA                | Oryctola<br>gus<br>cuniculu<br>s |
| 1 | 1.00 | 1 | 1 | 0.01  | 0.01   | 0.01   | 0.01   | 0.015  | t | 70398  | VPNLRGDS<br>QVLAQKV<br>ARTLP | Cavia<br>porcellu<br>s           |
| 1 | 1.00 | 1 | 1 | -0.03 | -0.032 | -0.023 | -0.033 | -0.03  | t | 45990  | NSSSFNTT<br>QGWHHP<br>SQRLLF | Mus<br>musculu<br>s              |
| 1 | 1.00 | 1 | 1 | 0     | 0.002  | 0.014  | 0.003  | 0.002  | t | 95747  | QVLAQKV<br>A                 | Cavia<br>porcellu<br>s           |
| 1 | 1.00 | 1 | 1 | 0     | -0.005 | 0.014  | 0.003  | 0.002  | t | 95747  | QVLAQKV<br>A                 | Bos<br>taurus                    |
| 1 | 1.00 | 1 | 1 | -0.04 | -0.036 | -0.03  | -0.041 | -0.04  | t | 45456  | NPPRPRM<br>MVLTD             | Mus<br>musculu<br>s              |
| 1 | 1.00 | 1 | 1 | -0.05 | -0.046 | -0.032 | -0.047 | -0.05  | t | 7788   | DDGPYAPF<br>PPRPRFRR<br>ALRT | Homo<br>sapiens                  |
| 1 | 1.00 | 1 | 1 | -0.03 | -0.028 | -0.013 | -0.03  | -0.03  | t | 114120 | GILDSIGRF<br>FGGDRG          | Rattus<br>norvegic<br>us         |
| 1 | 1.00 | 1 | 1 | -0.02 | -0.02  | -0.013 | -0.02  | -0.017 | t | 130461 | CWNYCLP                      | Mus<br>musculu<br>s              |
| 1 | 1.00 | 1 | 1 | -0.03 | -0.028 | -0.016 | -0.023 | -0.028 | t | 119037 | TRPGMTR<br>PDR               | Homo<br>sapiens                  |
| 1 | 1.00 | 1 | 1 | -0.03 | -0.034 | -0.021 | -0.027 | -0.03  | t | 15315  | FCAKSPRY<br>TLDSVNGY<br>PKIY | Oryctola<br>gus<br>cuniculu<br>s |

|   |      |   |   |       |        |        |        |        |   |        |                              |                                  |
|---|------|---|---|-------|--------|--------|--------|--------|---|--------|------------------------------|----------------------------------|
| 1 | 1.00 | 1 | 1 | -0.04 | -0.044 | -0.037 | -0.041 | -0.037 | t | 103551 | RILTLPRSN<br>PS              | Oryctola<br>gus<br>cuniculu<br>s |
| 1 | 1.00 | 1 | 1 | -0.01 | -0.012 | -0.009 | -0.017 | -0.012 | t | 144324 | GVSTITAD<br>EIR              | Mus<br>musculu<br>s              |
| 1 | 1.00 | 1 | 1 | 0.01  | 0.01   | 0.01   | 0.01   | 0.01   | t | 140475 | IQDTRNAV<br>RASRIQYH<br>HDP  | Mus<br>musculu<br>s              |
| 1 | 1.00 | 1 | 1 | 0.01  | 0.01   | 0.01   | 0.01   | 0.01   | t | 140475 | IQDTRNAV<br>RASRIQYH<br>HDP  | Mus<br>musculu<br>s              |
| 1 | 1.00 | 1 | 1 | -0.03 | -0.028 | -0.013 | -0.027 | -0.03  | t | 43219  | NALYPMS<br>PLLQECLR          | Homo<br>sapiens                  |
| 1 | 1.00 | 1 | 1 | -0.01 | -0.01  | -0.007 | -0.013 | -0.009 | t | 8544   | DHILEPSIP<br>WKSLLTL<br>VQL  | Homo<br>sapiens                  |
| 1 | 1.00 | 1 | 1 | 0     | 0.004  | 0.016  | 0.003  | 0.002  | t | 11081  | EAIPALTA<br>VETGHTSQ<br>V    | Homo<br>sapiens                  |
| 1 | 1.00 | 1 | 1 | -0.04 | -0.042 | -0.04  | -0.047 | -0.04  | t | 132376 | IEPRSFSQ<br>NPPVLKR          | Mus<br>musculu<br>s              |
| 1 | 1.00 | 1 | 1 | -0.01 | -0.01  | -0.01  | -0.01  | -0.007 | t | 107482 | KGEPGLPG<br>RGFPGFP          | Mus<br>musculu<br>s              |
| 1 | 1.00 | 1 | 1 | 0     | 0      | 0      | 0      | 0.001  | t | 120002 | KSRSDLMF<br>EKQSERHG<br>LARR | Rattus<br>norvegic<br>us         |
| 1 | 1.00 | 1 | 1 | -0.03 | -0.034 | -0.019 | -0.03  | -0.029 | t | 93373  | MDKVLNR<br>EESL              | Mus<br>musculu<br>s              |
| 1 | 1.00 | 1 | 1 | 0.01  | 0.01   | 0.015  | 0.01   | 0.01   | t | 113625 | LQVVRD<br>GNEIKRSA<br>MPADA  | Mus<br>musculu<br>s              |
| 1 | 1.00 | 1 | 1 | 0.01  | 0.01   | 0.015  | 0.01   | 0.01   | t | 113625 | LQVVRD<br>GNEIKRSA<br>MPADA  | Mus<br>musculu<br>s              |
| 1 | 1.00 | 1 | 1 | -0.02 | -0.02  | -0.006 | -0.02  | -0.02  | t | 57707  | SEYPSQPP<br>SPSN             | Homo<br>sapiens                  |

|   |      |   |   |       |        |        |        |        |   |        |                              |                        |
|---|------|---|---|-------|--------|--------|--------|--------|---|--------|------------------------------|------------------------|
| 1 | 1.00 | 1 | 1 | 0.02  | 0.018  | 0.022  | 0.013  | 0.019  | t | 112406 | YEYLVNVIH<br>AFQYV           | Mus<br>musculus        |
| 1 | 1.00 | 1 | 1 | 0     | 0      | 0.008  | -0.003 | 0      | t | 110967 | PRKLPQLC<br>TELQTTI          | Homo<br>sapiens        |
| 1 | 1.00 | 1 | 1 | -0.05 | -0.047 | -0.041 | -0.05  | -0.05  | t | 45190  | NNNLTLVP<br>AVVGKPG<br>SDV   | Mus<br>musculus        |
| 1 | 1.00 | 1 | 1 | 0     | 0.002  | 0      | 0.001  | 0.006  | t | 52020  | QQFGRD                       | Homo<br>sapiens        |
| 1 | 1.00 | 1 | 1 | 0.01  | 0.009  | 0.017  | 0.013  | 0.013  | t | 130622 | TGLVAQG<br>TDSIG             | Camelus<br>dromedarius |
| 1 | 1.00 | 1 | 1 | 0     | 0.002  | 0.014  | -0.003 | 0.001  | t | 69172  | VIYTPNKF<br>VF               | Homo<br>sapiens        |
| 1 | 1.00 | 1 | 1 | -0.02 | -0.022 | -0.018 | -0.027 | -0.02  | t | 126209 | HCQGDGY<br>RVGFGQC<br>A      | Mus<br>musculus        |
| 1 | 1.00 | 1 | 1 | 0.02  | 0.02   | 0.033  | 0.019  | 0.021  | t | 16635  | FLGWVEQ<br>LVYDFTDE<br>TSEV  | Homo<br>sapiens        |
| 1 | 1.00 | 1 | 1 | -0.02 | -0.007 | -0.015 | -0.02  | -0.019 | t | 19093  | GDRAAGQ<br>PAGDRAA<br>GQPA   | Mus<br>musculus        |
| 1 | 1.00 | 1 | 1 | 0     | 0      | 0.001  | -0.004 | 0      | t | 72476  | WGILSRAA<br>TNSGWVG<br>LIPHK | Homo<br>sapiens        |
| 1 | 1.00 | 1 | 1 | 0     | 0      | 0.001  | 0      | 0.003  | t | 47650  | PGFMFSR<br>PSDPAFAA          | Mus<br>musculus        |
| 1 | 1.00 | 1 | 1 | -0.01 | 0.011  | -0.012 | -0.013 | -0.007 | t | 34335  | KWVNGRE<br>I                 | Macaca<br>fuscata      |
| 1 | 1.00 | 1 | 1 | -0.01 | -0.008 | -0.012 | -0.013 | -0.007 | t | 34335  | KWVNGRE<br>I                 | Homo<br>sapiens        |
| 1 | 1.00 | 1 | 1 | -0.02 | -0.018 | -0.004 | -0.023 | -0.023 | t | 42476  | MRLAENIP<br>SRCNLS           | Homo<br>sapiens        |
| 1 | 1.00 | 1 | 1 | -0.03 | -0.032 | -0.021 | -0.031 | -0.03  | t | 30263  | KDTNNNL                      | Mus<br>musculus        |

|   |      |   |   |       |        |        |        |        |   |        |                               |                                  |
|---|------|---|---|-------|--------|--------|--------|--------|---|--------|-------------------------------|----------------------------------|
| 1 | 1.00 | 1 | 1 | 0.01  | 0.015  | 0.03   | 0.007  | 0.008  | t | 59430  | SLRECCQE<br>LQEV              | Homo<br>sapiens                  |
| 1 | 1.00 | 1 | 1 | -0.04 | -0.042 | -0.031 | -0.039 | -0.04  | t | 96955  | TGVRRGD<br>LAHLAAA            | Mus<br>musculu<br>s              |
| 1 | 1.00 | 1 | 1 | 0     | 0      | 0      | -0.009 | 0.001  | t | 130987 | NPVENM<br>MDRDSQ              | Homo<br>sapiens                  |
| 1 | 1.00 | 1 | 1 | 0     | 0      | 0      | -0.009 | 0.001  | t | 101054 | MASPGSG<br>FWSFGSE<br>DGS GDS | Homo<br>sapiens                  |
| 1 | 1.00 | 1 | 1 | -0.02 | -0.016 | -0.009 | -0.019 | -0.018 | t | 4059   | AQRVEFLL<br>KAWAEK            | Homo<br>sapiens                  |
| 1 | 1.00 | 1 | 1 | -0.01 | -0.012 | 0      | -0.013 | -0.01  | t | 25126  | HWGNHSH<br>SHPQR              | Mus<br>musculu<br>s              |
| 1 | 1.00 | 1 | 1 | -0.02 | -0.017 | -0.008 | -0.02  | -0.02  | t | 5558   | AVTFASFD<br>VPSKQPT           | Mus<br>musculu<br>s              |
| 1 | 1.00 | 1 | 1 | 0.02  | 0.018  | 0.018  | 0.013  | 0.024  | t | 119488 | LGIWTYDG<br>TKVSISPES         | Mus<br>musculu<br>s              |
| 1 | 1.00 | 1 | 1 | 0.03  | 0.03   | 0.049  | 0.036  | 0.033  | t | 104938 | PSRLVNQ                       | Homo<br>sapiens                  |
| 1 | 1.00 | 1 | 1 | -0.01 | -0.008 | 0.001  | -0.009 | -0.01  | t | 120481 | EHLKLNGK<br>VLAAMYQ           | Homo<br>sapiens                  |
| 1 | 1.00 | 1 | 1 | -0.04 | -0.042 | -0.035 | -0.041 | -0.039 | t | 7492   | DAEFRHDS<br>GYEVHHQ<br>KL     | Mus<br>musculu<br>s              |
| 1 | 1.00 | 1 | 1 | 0     | -0.002 | 0.015  | 0.003  | 0      | t | 75475  | YQEERPPE                      | Anas<br>platyrhy<br>nchos        |
| 1 | 1.00 | 1 | 1 | -0.02 | -0.024 | -0.016 | -0.02  | -0.02  | t | 74895  | YLRHGKLR<br>PFERDISN<br>V     | Mus<br>musculu<br>s              |
| 1 | 1.00 | 1 | 1 | -0.06 | -0.064 | -0.033 | -0.057 | -0.062 | t | 34192  | KVRNWRE<br>SM                 | Oryctola<br>gus<br>cuniculu<br>s |

|   |      |   |   |       |        |        |        |        |   |        |                       |                       |
|---|------|---|---|-------|--------|--------|--------|--------|---|--------|-----------------------|-----------------------|
| 1 | 1.00 | 1 | 1 | -0.02 | -0.02  | -0.02  | -0.013 | -0.01  | t | 143845 | DLFVTAW               | Homo sapiens          |
| 1 | 1.00 | 1 | 1 | 0.03  | 0.03   | 0.035  | 0.03   | 0.032  | t | 24167  | HKYSSDLLQQR           | Mus musculus          |
| 1 | 1.00 | 1 | 1 | -0.05 | -0.05  | -0.034 | -0.052 | -0.053 | t | 98942  | PRREEGGRWG            | Homo sapiens          |
| 1 | 1.00 | 1 | 1 | 0.01  | 0.01   | 0.017  | 0.01   | 0.01   | t | 45588  | NQMDMKQIDPWIA RFDTDKD | Mus musculus          |
| 1 | 1.00 | 1 | 1 | 0.02  | 0.016  | 0.02   | 0.013  | 0.018  | t | 107303 | AWKYENGNDKHYADSVNG    | Oryctolagus cuniculus |
| 1 | 1.00 | 1 | 1 | -0.04 | -0.037 | -0.027 | -0.04  | -0.04  | t | 138089 | WLRPPTS               | Mus musculus          |
| 1 | 1.00 | 1 | 1 | -0.03 | -0.023 | -0.03  | -0.03  | -0.027 | t | 47860  | PHWIKKP NRQGLGYS      | Capra hircus          |
| 1 | 1.00 | 1 | 1 | 0.03  | 0.03   | 0.034  | 0.03   | 0.034  | t | 95031  | NAYANEEATKL           | Oryctolagus cuniculus |
| 1 | 1.00 | 1 | 1 | -0.02 | -0.019 | -0.004 | -0.02  | -0.02  | t | 68996  | VIITFKSGA T           | Mus musculus          |
| 1 | 1.00 | 1 | 1 | -0.03 | -0.03  | -0.03  | -0.041 | -0.03  | t | 118540 | NPVEIRRGVMLAV         | Homo sapiens          |
| 1 | 1.00 | 1 | 1 | -0.03 | -0.032 | -0.022 | -0.033 | -0.03  | t | 110873 | GSGTGGR TGYIPL        | Mus musculus          |
| 1 | 1.00 | 1 | 1 | 0.03  | 0.026  | 0.047  | 0.029  | 0.03   | t | 45006  | NMMRFTE LSTPS         | Oryctolagus cuniculus |
| 1 | 1.00 | 1 | 1 | 0.03  | 0.028  | 0.047  | 0.029  | 0.03   | t | 45006  | NMMRFTE LSTPS         | Mus musculus          |

|   |      |   |   |       |        |       |       |       |   |        |                              |                          |
|---|------|---|---|-------|--------|-------|-------|-------|---|--------|------------------------------|--------------------------|
| 1 | 1.00 | 1 | 1 | -0.06 | -0.06  | -0.06 | -0.06 | -0.06 | t | 111359 | GPAGQAE<br>PDRAHYNI<br>VTFCC | Rattus<br>norvegicus     |
| 1 | 1.00 | 1 | 1 | -0.06 | -0.06  | -0.06 | -0.06 | -0.06 | t | 111359 | GPAGQAE<br>PDRAHYNI<br>VTFCC | Mus<br>musculus          |
| 1 | 1.00 | 1 | 1 | -0.06 | -0.06  | -0.06 | -0.06 | -0.06 | t | 111359 | GPAGQAE<br>PDRAHYNI<br>VTFCC | Mus<br>musculus          |
| 1 | 1.00 | 1 | 1 | 0     | 0      | 0     | 0     | 0.005 | t | 150204 | FHSVVHTL<br>LEWLMEK<br>ELMV  | Mus<br>musculus          |
| 1 | 1.00 | 1 | 1 | 0     | 0      | 0     | 0     | 0.005 | t | 123282 | HACQKKLL<br>KFEALQQE<br>EGEE | Oryctolagus<br>cuniculus |
| 1 | 1.00 | 1 | 1 | 0     | 0      | 0     | 0     | 0.005 | t | 125211 | QHWSYGL<br>RPG               | Canis<br>lupus           |
| 1 | 1.00 | 1 | 1 | 0     | 0      | 0     | 0     | 0.005 | t | 122536 | QAQIHGPR                     | Mus<br>musculus          |
| 1 | 1.00 | 1 | 1 | 0     | 0      | 0     | 0     | 0.005 | t | 122293 | CTYVLDPE<br>NLTLKAPY<br>EA   | Oryctolagus<br>cuniculus |
| 1 | 1.00 | 1 | 1 | 0     | 0      | 0     | 0     | 0.005 | t | 122293 | CTYVLDPE<br>NLTLKAPY<br>EA   | Mus<br>musculus          |
| 1 | 1.00 | 1 | 1 | 0     | 0      | 0     | 0     | 0.005 | t | 123282 | HACQKKLL<br>KFEALQQE<br>EGEE | Rattus<br>norvegicus     |
| 1 | 1.00 | 1 | 1 | 0     | 0      | 0     | 0     | 0.005 | t | 123058 | CEDFTKKIE<br>AFYRASPH<br>AAR | Oryctolagus<br>cuniculus |
| 1 | 1.00 | 1 | 1 | 0     | 0      | 0     | 0     | 0.005 | t | 125209 | QFQIHGPR                     | Mus<br>musculus          |
| 1 | 1.00 | 1 | 1 | 0     | 0      | 0     | 0     | 0.005 | t | 125209 | QFQIHGPR                     | Mus<br>musculus          |
| 1 | 1.00 | 1 | 1 | 0     | -0.003 | 0     | 0     | 0.005 | t | 123282 | HACQKKLL<br>KFEALQQE<br>EGEE | Oryctolagus<br>cuniculus |
| 1 | 1.00 | 1 | 1 | 0     | 0      | 0     | 0     | 0.005 | t | 131313 | SQWSRSA<br>SRNRRHVT<br>EEADV | Callithrix<br>pygmaea    |

|   |      |   |   |   |       |   |   |       |   |        |                              |                                  |
|---|------|---|---|---|-------|---|---|-------|---|--------|------------------------------|----------------------------------|
| 1 | 1.00 | 1 | 1 | 0 | 0     | 0 | 0 | 0.005 | t | 125055 | FVYGGCQ<br>GNN               | Mus<br>musculu<br>s              |
| 1 | 1.00 | 1 | 1 | 0 | 0     | 0 | 0 | 0.005 | t | 122536 | QAQIHGP<br>R                 | Mus<br>musculu<br>s              |
| 1 | 1.00 | 1 | 1 | 0 | 0     | 0 | 0 | 0.005 | t | 123058 | CEDFTKKIE<br>AFYRASPH<br>AAR | Rattus<br>norvegic<br>us         |
| 1 | 1.00 | 1 | 1 | 0 | 0.002 | 0 | 0 | 0.005 | t | 123282 | HACQKKLL<br>KFEALQQE<br>EGEE | Rattus<br>norvegic<br>us         |
| 1 | 1.00 | 1 | 1 | 0 | 0.002 | 0 | 0 | 0.005 | t | 123221 | GENHAKS<br>KAVPYSE<br>MYAN   | Rattus<br>norvegic<br>us         |
| 1 | 1.00 | 1 | 1 | 0 | 0     | 0 | 0 | 0.005 | t | 123221 | GENHAKS<br>KAVPYSE<br>MYAN   | Oryctola<br>gus<br>cuniculu<br>s |
| 1 | 1.00 | 1 | 1 | 0 | 0     | 0 | 0 | 0.005 | t | 123221 | GENHAKS<br>KAVPYSE<br>MYAN   | Rattus<br>norvegic<br>us         |
| 1 | 1.00 | 1 | 1 | 0 | 0     | 0 | 0 | 0.005 | t | 122915 | THKANPSP<br>EPNMHEC          | Oryctola<br>gus<br>cuniculu<br>s |
| 1 | 1.00 | 1 | 1 | 0 | 0     | 0 | 0 | 0.005 | t | 123016 | AIYENEIHA<br>LWADLP          | Trichosu<br>rus<br>vulpecul<br>a |
| 1 | 1.00 | 1 | 1 | 0 | 0     | 0 | 0 | 0.005 | t | 122516 | PGGGTLPP<br>SG               | Mus<br>musculu<br>s              |
| 1 | 1.00 | 1 | 1 | 0 | 0     | 0 | 0 | 0.005 | t | 122915 | THKANPSP<br>EPNMHEC          | Oryctola<br>gus<br>cuniculu<br>s |
| 1 | 1.00 | 1 | 1 | 0 | 0     | 0 | 0 | 0.005 | t | 131296 | EVGLHECG<br>NSMQVTD<br>DAL   | Callithrix<br>pygmae<br>a        |
| 1 | 1.00 | 1 | 1 | 0 | 0.002 | 0 | 0 | 0.005 | t | 122933 | VEGTDAA<br>GRRVTNTK<br>VLRCP | Rattus<br>norvegic<br>us         |



|   |      |   |   |       |        |        |        |        |   |        |                              |                       |
|---|------|---|---|-------|--------|--------|--------|--------|---|--------|------------------------------|-----------------------|
| 1 | 1.00 | 1 | 1 | 0     | 0      | 0      | 0      | 0.005  | t | 131295 | ECQEATL<br>MVMVSK<br>DLFGTGK | Callithrix<br>pygmaea |
| 1 | 1.00 | 1 | 1 | 0     | 0.002  | 0      | 0      | 0.005  | t | 123058 | CEDFTKKIE<br>AFYRASPH<br>AAR | Rattus<br>norvegicus  |
| 1 | 1.00 | 1 | 1 | 0     | 0      | 0      | 0      | 0.005  | t | 122290 | CSNSSSSQ<br>FQIHGPRQ         | Mus<br>musculus       |
| 1 | 1.00 | 1 | 1 | 0     | 0      | 0      | 0      | 0.005  | t | 74871  | YLPVGGLR<br>RIGG             | Mus<br>musculus       |
| 1 | 1.00 | 1 | 1 | 0     | 0.003  | 0      | 0      | 0.005  | t | 12375  | EHWSYGL<br>RPG               | Mus<br>musculus       |
| 1 | 1.00 | 1 | 1 | 0     | 0      | 0      | 0      | 0.005  | t | 25140  | HWSYGLR<br>PG                | Mus<br>musculus       |
| 1 | 1.00 | 1 | 1 | 0     | 0      | 0      | 0      | 0.005  | t | 25140  | HWSYGLR<br>PG                | Mus<br>musculus       |
| 1 | 1.00 | 1 | 1 | 0     | 0      | 0      | 0      | 0.005  | t | 12375  | EHWSYGL<br>RPG               | Mus<br>musculus       |
| 1 | 1.00 | 1 | 1 | 0     | -0.037 | 0      | 0      | 0.005  | t | 12794  | EKLIEDDE<br>NSQC             | Papio<br>cynocephalus |
| 1 | 1.00 | 1 | 1 | 0     | 0      | 0      | 0      | 0.005  | t | 13871  | EQLIEKLIE<br>DDKNSQ          | Papio<br>cynocephalus |
| 1 | 1.00 | 1 | 1 | 0     | -0.037 | 0      | 0      | 0.005  | t | 12794  | EKLIEDDE<br>NSQC             | Papio<br>cynocephalus |
| 1 | 1.00 | 1 | 1 | 0     | 0      | 0      | 0      | 0.005  | t | 12794  | EKLIEDDE<br>NSQC             | Papio<br>cynocephalus |
| 1 | 1.00 | 1 | 1 | 0     | -0.037 | 0      | 0      | 0.005  | t | 13871  | EQLIEKLIE<br>DDKNSQ          | Papio<br>cynocephalus |
| 1 | 1.00 | 1 | 1 | -0.03 | -0.03  | -0.021 | -0.034 | -0.03  | t | 135905 | CLFDRRLC<br>SHLE             | Homo<br>sapiens       |
| 1 | 1.00 | 1 | 1 | -0.02 | -0.02  | -0.017 | -0.02  | -0.017 | t | 133534 | CKLTANPS<br>LAAVV            | Rattus<br>norvegicus  |

|   |      |   |   |       |        |        |        |        |   |        |                              |                          |
|---|------|---|---|-------|--------|--------|--------|--------|---|--------|------------------------------|--------------------------|
| 1 | 1.00 | 1 | 1 | -0.03 | -0.03  | -0.014 | -0.03  | -0.03  | t | 12412  | EIDAPRVF<br>DARFSRHY<br>SVQL | Rattus<br>norvegicus     |
| 1 | 1.00 | 1 | 1 | -0.03 | -0.03  | -0.014 | -0.03  | -0.03  | t | 12412  | EIDAPRVF<br>DARFSRHY<br>SVQL | Rattus<br>norvegicus     |
| 1 | 1.00 | 1 | 1 | -0.03 | -0.033 | -0.015 | -0.03  | -0.03  | t | 102823 | SSSIKIWN<br>KLGWNTVI<br>AGTR | Oryctolagus<br>cuniculus |
| 1 | 1.00 | 1 | 1 | -0.01 | -0.012 | 0.004  | -0.007 | -0.009 | t | 75954  | YTASTRGD<br>LAHLTAT          | Mus<br>musculus          |
| 1 | 1.00 | 1 | 1 | -0.02 | -0.028 | -0.01  | -0.02  | -0.02  | t | 38609  | LPNWVKV<br>WDRATNK<br>C      | Mus<br>musculus          |
| 1 | 1.00 | 1 | 1 | -0.02 | -0.025 | -0.01  | -0.02  | -0.02  | t | 38609  | LPNWVKV<br>WDRATNK<br>C      | Equus<br>caballus        |
| 1 | 1.00 | 1 | 1 | -0.02 | -0.018 | -0.011 | -0.023 | -0.021 | t | 115482 | SERYLGYLE<br>QLRLKKY<br>KVP  | Homo<br>sapiens          |
| 1 | 1.00 | 1 | 1 | -0.01 | -0.01  | 0.007  | -0.007 | -0.01  | t | 26801  | IKGVIVHRL<br>EGVSYN          | Homo<br>sapiens          |
| 1 | 1.00 | 1 | 1 | 0     | 0      | 0.005  | 0      | 0      | t | 7059   | CSQHCPYI<br>EQGMML<br>AEQFKQ | Homo<br>sapiens          |
| 1 | 1.00 | 1 | 1 | -0.01 | -0.012 | -0.015 | -0.017 | -0.008 | t | 121346 | GPGHPIRA<br>LVGDEAEL<br>PC   | Rattus<br>norvegicus     |
| 1 | 1.00 | 1 | 1 | -0.01 | -0.01  | -0.002 | -0.007 | -0.01  | t | 42277  | MPHKLEK<br>ADLLKAIQ<br>EQLIA | Homo<br>sapiens          |
| 1 | 1.00 | 1 | 1 | -0.01 | -0.01  | 0.004  | -0.01  | -0.01  | t | 121077 | YFILPDSLP<br>LDTLLV          | Mus<br>musculus          |
| 1 | 1.00 | 1 | 1 | 0.01  | 0.01   | 0.013  | 0.01   | 0.01   | t | 55275  | RPPTPWPI<br>SQSDRAS<br>YMDT  | Homo<br>sapiens          |
| 1 | 1.00 | 1 | 1 | -0.01 | -0.007 | 0.001  | -0.01  | -0.008 | t | 37753  | LLRQARER<br>P                | Mus<br>musculus          |

|   |      |   |   |       |        |        |        |        |   |        |                              |                            |
|---|------|---|---|-------|--------|--------|--------|--------|---|--------|------------------------------|----------------------------|
| 1 | 1.00 | 1 | 1 | -0.01 | -0.012 | 0.003  | -0.011 | -0.01  | t | 20267  | GIGAVLKV<br>LTTGLPALI<br>SW  | Mus<br>musculu<br>s        |
| 1 | 1.00 | 1 | 1 | -0.03 | -0.018 | -0.013 | -0.03  | -0.032 | t | 114132 | KSHGRTQ<br>DENPVVH<br>F      | Mus<br>musculu<br>s        |
| 1 | 1.00 | 1 | 1 | -0.03 | -0.027 | -0.013 | -0.03  | -0.032 | t | 114132 | KSHGRTQ<br>DENPVVH<br>F      | Mus<br>musculu<br>s        |
| 1 | 1.00 | 1 | 1 | 0     | 0.003  | 0.007  | 0      | 0.002  | t | 121064 | WKHWVY<br>YTCCPDTP<br>YLDITY | Mus<br>musculu<br>s        |
| 1 | 1.00 | 1 | 1 | 0     | 0.002  | 0.012  | 0.001  | 0      | t | 133548 | DSSWYTW<br>QPPTW             | Homo<br>sapiens            |
| 1 | 1.00 | 1 | 1 | 0.05  | 0.05   | 0.066  | 0.05   | 0.053  | t | 136061 | ETQAE                        | Mus<br>musculu<br>s        |
| 1 | 1.00 | 1 | 1 | 0.01  | 0.008  | 0.01   | 0.003  | 0.011  | t | 118734 | AEFRHDSG<br>Y                | Mus<br>musculu<br>s        |
| 1 | 1.00 | 1 | 1 | 0     | -0.002 | 0.005  | -0.001 | 0.001  | t | 20059  | GGTWGQ<br>PHGGGW             | Mus<br>musculu<br>s        |
| 1 | 1.00 | 1 | 1 | 0     | 0.002  | 0.004  | 0.001  | 0      | t | 48870  | PPPPSSPT<br>HDPPDSD<br>PQIPP | Homo<br>sapiens            |
| 1 | 1.00 | 1 | 1 | 0.01  | 0.01   | 0.02   | 0.013  | 0.012  | t | 50746  | QFDEMEE<br>CSRHIPYLA<br>EGQQ | Homo<br>sapiens            |
| 1 | 1.00 | 1 | 1 | -0.01 | -0.008 | 0.004  | -0.011 | -0.01  | t | 100046 | FRHDSGYE<br>VH               | Homo<br>sapiens(<br>human) |
| 1 | 1.00 | 1 | 1 | 0.07  | 0.07   | 0.07   | 0.073  | 0.079  | t | 149035 | EGSGTTK                      | Sus<br>scrofa              |
| 1 | 1.00 | 1 | 1 | 0.03  | 0.037  | 0.037  | 0.023  | 0.028  | t | 156878 | GQKKKCV<br>RDCLPAT           | Gallus<br>gallus           |
| 1 | 1.00 | 1 | 1 | -0.04 | -0.038 | -0.032 | -0.039 | -0.04  | t | 35174  | LDHILEPSI<br>PWKSK           | Homo<br>sapiens            |

|   |      |   |   |       |        |        |        |        |   |        |                              |                                  |
|---|------|---|---|-------|--------|--------|--------|--------|---|--------|------------------------------|----------------------------------|
| 1 | 1.00 | 1 | 1 | 0.02  | 0.016  | 0.026  | 0.02   | 0.023  | t | 22793  | GTQFTFDS<br>WNYSFED<br>NYS   | Oryctola<br>gus<br>cuniculu<br>s |
| 1 | 1.00 | 1 | 1 | 0.01  | 0.014  | 0.017  | 0.007  | 0.01   | t | 107243 | STKPSSIGT<br>LHTSPS          | Homo<br>sapiens                  |
| 1 | 1.00 | 1 | 1 | 0.02  | 0.02   | 0.032  | 0.02   | 0.019  | t | 120412 | ASKEKQEN<br>KIFADDIDI<br>SD  | Mus<br>musculu<br>s              |
| 1 | 1.00 | 1 | 1 | 0     | -0.004 | 0.008  | -0.007 | 0      | t | 8927   | DKLIDYAA<br>SGDPTS           | Oryctola<br>gus<br>cuniculu<br>s |
| 1 | 1.00 | 1 | 1 | 0.01  | 0.012  | 0.023  | 0.007  | 0.01   | t | 47537  | PFPEVFGK<br>EK               | Homo<br>sapiens                  |
| 1 | 1.00 | 1 | 1 | -0.02 | -0.024 | -0.008 | -0.019 | -0.02  | t | 141558 | RTLQNYK<br>ATHGNTV           | Bos<br>taurus                    |
| 1 | 1.00 | 1 | 1 | -0.03 | -0.03  | -0.013 | -0.03  | -0.027 | t | 79299  | LRVYVWA<br>DDW               | Mus<br>musculu<br>s              |
| 1 | 1.00 | 1 | 1 | -0.02 | -0.022 | -0.013 | -0.027 | -0.019 | t | 131050 | RRAEITHP<br>GMMLASG          | Mus<br>musculu<br>s              |
| 1 | 1.00 | 1 | 1 | 0.03  | 0.034  | 0.036  | 0.031  | 0.03   | t | 60441  | SQGISDDD<br>NDSAVAEF<br>FQSF | Homo<br>sapiens                  |
| 1 | 1.00 | 1 | 1 | 0     | 0      | 0.012  | -0.003 | 0.002  | t | 147380 | VNIKFSGV<br>CHT              | Homo<br>sapiens                  |
| 1 | 1.00 | 1 | 1 | 0.01  | 0.014  | 0.011  | 0.011  | 0.012  | t | 78833  | SLDSPSP<br>PREPLRPS<br>RSLP  | Homo<br>sapiens                  |
| 1 | 1.00 | 1 | 1 | 0     | 0      | 0.008  | 0      | 0.001  | t | 80041  | SVAMKPY<br>EVTPT             | Mus<br>musculu<br>s              |
| 1 | 1.00 | 1 | 1 | 0     | 0      | 0.008  | 0      | 0.001  | t | 80041  | SVAMKPY<br>EVTPT             | Mus<br>musculu<br>s              |

|   |      |   |   |       |        |        |        |        |   |        |                              |                                  |
|---|------|---|---|-------|--------|--------|--------|--------|---|--------|------------------------------|----------------------------------|
| 1 | 1.00 | 1 | 1 | -0.01 | -0.01  | -0.002 | -0.01  | -0.008 | t | 93108  | KLGLRQVT<br>GVTRVTI          | Mus<br>musculu<br>s              |
| 1 | 1.00 | 1 | 1 | -0.06 | -0.064 | -0.059 | -0.063 | -0.059 | t | 124384 | KRSRHF                       | Oryctola<br>gus<br>cuniculu<br>s |
| 1 | 1.00 | 1 | 1 | -0.02 | -0.016 | -0.013 | -0.019 | -0.018 | t | 22786  | GTPSMDA<br>LSALLSNTL<br>SLAS | Homo<br>sapiens                  |
| 1 | 1.00 | 1 | 1 | -0.04 | -0.037 | -0.032 | -0.04  | -0.042 | t | 24706  | HRRTKAP<br>KRIRLPHIR         | Mus<br>musculu<br>s              |
| 1 | 1.00 | 1 | 1 | -0.01 | -0.021 | 0.013  | -0.01  | -0.01  | t | 133960 | WIVNNF                       | Mus<br>musculu<br>s              |
| 1 | 1.00 | 1 | 1 | 0     | 0      | 0.011  | -0.003 | 0.001  | t | 24315  | HLVEKGY                      | Homo<br>sapiens                  |
| 1 | 1.00 | 1 | 1 | 0.01  | 0.012  | 0.026  | 0.013  | 0.011  | t | 63086  | TCMTTAQ<br>GTSMYPSC          | Homo<br>sapiens                  |
| 1 | 1.00 | 1 | 1 | 0     | -0.004 | 0      | -0.007 | 0.001  | t | 122947 | WTQEPQP<br>LEEKWQH<br>RVVE   | Oryctola<br>gus<br>cuniculu<br>s |
| 1 | 1.00 | 1 | 1 | 0     | -0.004 | 0      | -0.007 | 0.001  | t | 117569 | LKYYLAPKI<br>EDEEGS          | Oryctola<br>gus<br>cuniculu<br>s |
| 1 | 1.00 | 1 | 1 | 0.01  | 0.01   | 0.027  | 0.016  | 0.011  | t | 116096 | GFGYGGR<br>ASDYKSAH<br>K     | Rattus<br>norvegic<br>us         |
| 1 | 1.00 | 1 | 1 | -0.08 | -0.08  | -0.08  | -0.08  | -0.077 | t | 143687 | FRVNLRTL<br>RRYY             | Mus<br>musculu<br>s              |
| 1 | 1.00 | 1 | 1 | 0.02  | 0.017  | 0.042  | 0.02   | 0.02   | t | 100832 | ESADPV                       | Oryctola<br>gus<br>cuniculu<br>s |
| 1 | 1.00 | 1 | 1 | -0.05 | -0.052 | -0.05  | -0.05  | -0.048 | t | 118012 | MAPPPG<br>MRPP               | Mus<br>musculu<br>s              |
| 1 | 1.00 | 1 | 1 | -0.01 | -0.01  | 0.002  | -0.01  | -0.01  | t | 120872 | PLIKNPDV<br>KSAI             | Rattus<br>norvegic<br>us         |

|   |      |   |   |       |        |        |        |        |   |        |                              |                          |
|---|------|---|---|-------|--------|--------|--------|--------|---|--------|------------------------------|--------------------------|
| 1 | 1.00 | 1 | 1 | 0.01  | 0.013  | 0.02   | 0.01   | 0.011  | t | 96835  | RQQWELQ<br>GDRR              | Mus<br>musculu<br>s      |
| 1 | 1.00 | 1 | 1 | -0.01 | -0.007 | -0.006 | -0.01  | -0.01  | t | 18509  | GAAILVAG<br>LSGCSSNK<br>STTG | Mus<br>musculu<br>s      |
| 1 | 1.00 | 1 | 1 | 0.04  | 0.038  | 0.054  | 0.039  | 0.042  | t | 66062  | TRLNPDLQ<br>PTE              | Mus<br>musculu<br>s      |
| 1 | 1.00 | 1 | 1 | 0     | -0.002 | 0      | -0.001 | 0.005  | t | 17524  | FQQFGRD<br>VSDFTDSV<br>RDPKT | Mus<br>musculu<br>s      |
| 1 | 1.00 | 1 | 1 | -0.08 | -0.08  | -0.08  | -0.083 | -0.08  | t | 149111 | SRSRFPW<br>LNPLDGW           | Rattus<br>norvegic<br>us |
| 1 | 1.00 | 1 | 1 | -0.03 | -0.032 | -0.023 | -0.037 | -0.029 | t | 133835 | GDCFFGFL<br>NSPWRVC          | Mus<br>musculu<br>s      |
| 1 | 1.00 | 1 | 1 | 0     | -0.002 | 0.017  | -0.001 | -0.002 | t | 59810  | SNEFAPVQ<br>NLTGSSVG         | Mus<br>musculu<br>s      |
| 1 | 1.00 | 1 | 1 | -0.03 | -0.032 | -0.021 | -0.031 | -0.031 | t | 110804 | DIMRLREK<br>LQEEMLQ<br>REEAE | Mus<br>musculu<br>s      |
| 1 | 1.00 | 1 | 1 | 0     | 0      | 0      | 0      | 0.003  | t | 140459 | EHWSHD<br>MFSPGD             | Mus<br>musculu<br>s      |
| 1 | 1.00 | 1 | 1 | -0.04 | -0.042 | -0.028 | -0.037 | -0.041 | t | 14974  | EYANFRLT<br>ASLV             | Mus<br>musculu<br>s      |
| 1 | 1.00 | 1 | 1 | -0.02 | -0.022 | -0.006 | -0.02  | -0.019 | t | 100579 | TTTHARHL<br>P                | Sus<br>scrofa            |
| 1 | 1.00 | 1 | 1 | -0.03 | -0.032 | -0.021 | -0.031 | -0.029 | t | 22401  | GSLAAR                       | Mus<br>musculu<br>s      |
| 1 | 1.00 | 1 | 1 | 0     | 0      | 0.021  | 0      | 0      | t | 33107  | KRAASKVS<br>ARLLTV           | Homo<br>sapiens          |
| 1 | 1.00 | 1 | 1 | 0     | 0      | 0.021  | 0      | 0      | t | 33107  | KRAASKVS<br>ARLLTV           | Homo<br>sapiens          |

|   |      |   |   |       |        |        |        |        |   |        |                              |                                  |
|---|------|---|---|-------|--------|--------|--------|--------|---|--------|------------------------------|----------------------------------|
| 1 | 1.00 | 1 | 1 | -0.05 | -0.05  | -0.037 | -0.053 | -0.052 | t | 5247   | AVADVTP<br>KQLKAAL           | Homo<br>sapiens                  |
| 1 | 1.00 | 1 | 1 | -0.02 | -0.022 | -0.021 | -0.018 | -0.018 | t | 106597 | LDLKRTTT<br>THTSGGG<br>C     | Mus<br>musculu<br>s              |
| 1 | 1.00 | 1 | 1 | -0.01 | 0.002  | 0.006  | -0.01  | -0.01  | t | 33892  | KTTTKPTK<br>KPTF             | Mus<br>musculu<br>s              |
| 1 | 1.00 | 1 | 1 | -0.02 | -0.02  | -0.004 | -0.02  | -0.02  | t | 112754 | ASQYRPSQ<br>R                | Mus<br>musculu<br>s              |
| 1 | 1.00 | 1 | 1 | 0     | -0.003 | -0.001 | 0      | 0.002  | t | 30715  | KFDTKGSA<br>KTIEATLHC<br>YGA | Oryctola<br>gus<br>cuniculu<br>s |
| 1 | 1.00 | 1 | 1 | 0.03  | 0.028  | 0.03   | 0.027  | 0.03   | t | 50009  | PVVVGTT<br>DRLGNPTY<br>SWGEM | Mus<br>musculu<br>s              |
| 1 | 1.00 | 1 | 1 | 0     | 0      | 0      | 0      | 0.005  | t | 151711 | RATHQE                       | Mus<br>musculu<br>s              |
| 1 | 1.00 | 1 | 1 | 0     | 0      | 0      | 0      | 0.005  | t | 151652 | HWWRAE<br>SDEARRCY<br>NDPKC  | Mus<br>musculu<br>s              |
| 1 | 1.00 | 1 | 1 | 0     | 0      | 0      | 0      | 0.005  | t | 151763 | WYRATHQ<br>E                 | Mus<br>musculu<br>s              |
| 1 | 1.00 | 1 | 1 | 0     | 0      | 0      | 0      | 0.005  | t | 135449 | CATLRVYK<br>GG               | Homo<br>sapiens                  |
| 1 | 1.00 | 1 | 1 | 0     | 0      | 0      | 0      | 0.005  | t | 124739 | SQFNHSY                      | Homo<br>sapiens                  |
| 1 | 1.00 | 1 | 1 | 0     | 0      | 0      | 0      | 0.005  | t | 124205 | GPLQLGM                      | Homo<br>sapiens                  |
| 1 | 1.00 | 1 | 1 | 0     | 0      | 0      | 0      | 0.005  | t | 122775 | GIFNTGLK<br>MFPDLTK<br>VYST  | Mus<br>musculu<br>s              |
| 1 | 1.00 | 1 | 1 | 0     | 0      | 0      | 0      | 0.005  | t | 125297 | VFFEEQED<br>EIIGFG           | Mus<br>musculu<br>s              |
| 1 | 1.00 | 1 | 1 | 0     | 0      | 0      | 0      | 0.005  | t | 122917 | TKVYSTDIF<br>FILEITDNP<br>Y  | Mus<br>musculu<br>s              |
| 1 | 1.00 | 1 | 1 | 0     | 0      | 0      | 0      | 0.005  | t | 124736 | SPWSIGA                      | Homo<br>sapiens                  |
| 1 | 1.00 | 1 | 1 | 0     | 0      | 0      | 0      | 0.005  | t | 126757 | NKPLITVT<br>NSKY             | Homo<br>sapiens                  |

|   |      |   |   |       |        |        |        |        |   |        |                              |                                  |
|---|------|---|---|-------|--------|--------|--------|--------|---|--------|------------------------------|----------------------------------|
| 1 | 1.00 | 1 | 1 | 0     | 0      | 0      | 0      | 0.005  | t | 122766 | FQGLCNET<br>LTLKLYN          | Mus<br>musculu<br>s              |
| 1 | 1.00 | 1 | 1 | 0     | 0      | 0      | 0      | 0.005  | t | 124590 | PSPRSQT                      | Homo<br>sapiens                  |
| 1 | 1.00 | 1 | 1 | 0     | 0      | 0      | 0      | 0.005  | t | 125472 | LDAVYLNK<br>NKYLTVID<br>KDAF | Homo<br>sapiens                  |
| 1 | 1.00 | 1 | 1 | 0     | 0      | 0      | 0      | 0.005  | t | 11571  | EEEDDDM<br>GFGFLFD           | Mus<br>musculu<br>s              |
| 1 | 1.00 | 1 | 1 | 0     | 0      | 0      | 0      | 0.005  | t | 11571  | EEEDDDM<br>GFGFLFD           | Mus<br>musculu<br>s              |
| 1 | 1.00 | 1 | 1 | -0.01 | -0.01  | 0.006  | -0.01  | -0.01  | t | 48084  | PKINRSAP<br>EPSL             | Oryctola<br>gus<br>cuniculu<br>s |
| 1 | 1.00 | 1 | 1 | 0.02  | 0.022  | 0.02   | 0.017  | 0.021  | t | 78410  | GSCFEIKCT<br>KPESCSGE<br>AV  | Homo<br>sapiens                  |
| 1 | 1.00 | 1 | 1 | -0.01 | -0.007 | -0.001 | -0.01  | -0.01  | t | 38599  | LPNNTAS<br>WFTALTQ<br>H      | Mus<br>musculu<br>s              |
| 1 | 1.00 | 1 | 1 | -0.01 | -0.015 | -0.003 | -0.011 | -0.01  | t | 36803  | LKARDIND<br>IFAILKN          | Bos<br>taurus                    |
| 1 | 1.00 | 1 | 1 | -0.01 | -0.015 | -0.003 | -0.011 | -0.01  | t | 36803  | LKARDIND<br>IFAILKN          | Bos<br>taurus                    |
| 1 | 1.00 | 1 | 1 | -0.04 | -0.038 | -0.023 | -0.039 | -0.04  | t | 84138  | IYGLIAKKQ<br>S               | Homo<br>sapiens                  |
| 1 | 1.00 | 1 | 1 | -0.03 | -0.03  | -0.027 | -0.03  | -0.029 | t | 48869  | PPPPRVQP<br>RKTKSV           | Sus<br>scrofa                    |
| 1 | 1.00 | 1 | 1 | 0     | 0      | 0.001  | 0      | 0.002  | t | 76590  | YYRENMY<br>RYPNQVYY          | Mus<br>musculu<br>s              |
| 1 | 1.00 | 1 | 1 | -0.02 | -0.022 | -0.013 | -0.02  | -0.018 | t | 277    | AALFYAHK<br>FNSSGCPE<br>RMAS | Oryctola<br>gus<br>cuniculu<br>s |



|   |      |   |   |       |        |        |        |        |   |        |                              |                                  |
|---|------|---|---|-------|--------|--------|--------|--------|---|--------|------------------------------|----------------------------------|
| 1 | 1.00 | 1 | 1 | 0.02  | 0.023  | 0.034  | 0.02   | 0.02   | t | 97288  | ETQLTTAG<br>LRL              | Mus<br>musculu<br>s              |
| 1 | 1.00 | 1 | 1 | -0.07 | -0.07  | -0.063 | -0.074 | -0.07  | t | 32145  | KLRRSTN<br>WG                | Homo<br>sapiens                  |
| 1 | 1.00 | 1 | 1 | 0     | -0.003 | 0.017  | -0.003 | 0      | t | 13714  | EPMIGVN<br>QEL               | Homo<br>sapiens                  |
| 1 | 1.00 | 1 | 1 | 0     | 0.002  | 0.001  | -0.003 | 0      | t | 72476  | WGILSRAA<br>TNSGWVG<br>LIPHK | Homo<br>sapiens                  |
| 1 | 1.00 | 1 | 1 | -0.04 | -0.038 | -0.031 | -0.033 | -0.037 | t | 113514 | HHPARTA<br>HYGSLPQK          | Homo<br>sapiens                  |
| 1 | 1.00 | 1 | 1 | 0.02  | 0.022  | 0.027  | 0.017  | 0.019  | t | 107211 | LTTEPDTT<br>KFWPAPS          | Homo<br>sapiens                  |
| 1 | 1.00 | 1 | 1 | 0.01  | 0.01   | 0.025  | 0.01   | 0.012  | t | 137288 | SDLSVIGH<br>PIDSE            | Mus<br>musculu<br>s              |
| 1 | 1.00 | 1 | 1 | 0     | -0.004 | 0      | -0.007 | 0      | t | 117463 | DTIRVDVE<br>PKVKSKKR<br>EAVA | Oryctola<br>gus<br>cuniculu<br>s |
| 1 | 1.00 | 1 | 1 | 0     | -0.004 | 0      | -0.007 | 0      | t | 117463 | DTIRVDVE<br>PKVKSKKR<br>EAVA | Oryctola<br>gus<br>cuniculu<br>s |
| 1 | 1.00 | 1 | 1 | -0.03 | -0.028 | -0.018 | -0.033 | -0.032 | t | 95924  | TRAEGLYS<br>MLVE             | Homo<br>sapiens                  |
| 1 | 1.00 | 1 | 1 | 0.01  | 0.008  | 0.012  | 0.003  | 0.011  | t | 122945 | WELTE LDS<br>VGTHLPQE<br>RC  | Mus<br>musculu<br>s              |
| 1 | 1.00 | 1 | 1 | -0.02 | -0.022 | -0.008 | -0.021 | -0.02  | t | 142436 | KVAATSLE<br>RWQQ             | Mus<br>musculu<br>s              |
| 1 | 1.00 | 1 | 1 | -0.04 | -0.042 | -0.028 | -0.041 | -0.04  | t | 142422 | GAILVDFW<br>AEWC             | Mus<br>musculu<br>s              |
| 1 | 1.00 | 1 | 1 | 0     | 0      | 0.002  | 0      | 0.003  | t | 151676 | KVDFPQD<br>QLATLTGR<br>I     | Mus<br>musculu<br>s              |
| 1 | 1.00 | 1 | 1 | 0     | 0      | 0      | 0      | 0      | t | 3693   | APPPPEHR<br>GGPEEFEG<br>AGDG | Mus<br>musculu<br>s              |

|   |      |   |   |       |        |        |        |        |   |        |                              |                     |
|---|------|---|---|-------|--------|--------|--------|--------|---|--------|------------------------------|---------------------|
| 1 | 1.00 | 1 | 1 | 0     | 0      | 0      | 0      | 0      | t | 3693   | APPPPEHR<br>GGPEEFEG<br>AGDG | Mus<br>musculu<br>s |
| 1 | 1.00 | 1 | 1 | -0.01 | -0.01  | -0.01  | -0.01  | -0.007 | t | 107482 | KGEPGLPG<br>RGFPGFP          | Mus<br>musculu<br>s |
| 1 | 1.00 | 1 | 1 | -0.01 | -0.012 | -0.003 | -0.007 | -0.008 | t | 50009  | PVVVGTT<br>DRLGNPTY<br>SWGEM | Mus<br>musculu<br>s |
| 1 | 1.00 | 1 | 1 | -0.02 | -0.022 | -0.01  | -0.021 | -0.017 | t | 103196 | GCMGYDH<br>RSGCV             | Mus<br>musculu<br>s |
| 1 | 1.00 | 1 | 1 | 0     | 0.002  | 0.012  | -0.003 | -0.002 | t | 95924  | TRAEGLYS<br>MLVE             | Homo<br>sapiens     |
| 1 | 1.00 | 1 | 1 | 0.02  | 0.024  | 0.04   | 0.021  | 0.02   | t | 43530  | NDTGKH                       | Homo<br>sapiens     |
| 1 | 1.00 | 1 | 1 | 0     | -0.003 | 0.017  | 0      | 0      | t | 8832   | DKAAAICF<br>RNSMDT           | Mus<br>musculu<br>s |
| 1 | 1.00 | 1 | 1 | -0.02 | -0.02  | -0.008 | -0.02  | -0.019 | t | 133665 | PVLLFCFLA<br>GRCVSV          | Mus<br>musculu<br>s |
| 1 | 1.00 | 1 | 1 | -0.04 | -0.038 | -0.035 | -0.043 | -0.039 | t | 125509 | NLYSNRSA<br>VTSL             | Homo<br>sapiens     |
| 1 | 1.00 | 1 | 1 | -0.03 | -0.03  | -0.025 | -0.027 | -0.032 | t | 17262  | FPCDRLSG<br>YWERGIPS<br>PCVR | Homo<br>sapiens     |
| 1 | 1.00 | 1 | 1 | -0.01 | -0.012 | 0.003  | -0.013 | -0.01  | t | 35810  | LFDGRDN<br>GAL               | Mus<br>musculu<br>s |
| 1 | 1.00 | 1 | 1 | 0.02  | 0.024  | 0.03   | 0.017  | 0.019  | t | 98982  | REREREED<br>WRQPRED          | Homo<br>sapiens     |
| 1 | 1.00 | 1 | 1 | 0     | 0      | 0.001  | 0      | 0.001  | t | 267    | AALASLFLS<br>GPQQK           | Mus<br>musculu<br>s |
| 1 | 1.00 | 1 | 1 | -0.02 | -0.02  | -0.011 | -0.02  | -0.021 | t | 75440  | YPYCGHAL<br>CPGLYADA<br>S    | Mus<br>musculu<br>s |
| 1 | 1.00 | 1 | 1 | -0.03 | -0.028 | -0.018 | -0.029 | -0.029 | t | 14190  | ESKLTPPPL<br>NPIRVV          | Homo<br>sapiens     |

|   |      |   |   |       |        |        |        |        |   |        |                              |                                  |
|---|------|---|---|-------|--------|--------|--------|--------|---|--------|------------------------------|----------------------------------|
| 1 | 1.00 | 1 | 1 | -0.02 | -0.016 | -0.008 | -0.019 | -0.02  | t | 50745  | QFDEMEE<br>CSKHLPLV<br>EHGLQ | Homo<br>sapiens                  |
| 1 | 1.00 | 1 | 1 | -0.04 | -0.04  | -0.035 | -0.04  | -0.04  | t | 78946  | DAWCGR<br>GK                 | Mus<br>musculu<br>s              |
| 1 | 1.00 | 1 | 1 | -0.04 | -0.04  | -0.029 | -0.04  | -0.041 | t | 141979 | PKKRVV<br>PNFERKG            | Mus<br>musculu<br>s              |
| 1 | 1.00 | 1 | 1 | 0.03  | 0.028  | 0.032  | 0.027  | 0.03   | t | 30709  | KFDQGW<br>GPITYAEPTK<br>DPDQ | Mus<br>musculu<br>s              |
| 1 | 1.00 | 1 | 1 | -0.04 | -0.034 | -0.025 | -0.04  | -0.042 | t | 31063  | KGSSGY<br>CAWPACYCY          | Equus<br>caballus                |
| 1 | 1.00 | 1 | 1 | -0.02 | -0.022 | -0.008 | -0.021 | -0.02  | t | 73257  | WYAMEIR<br>PVHDQGG<br>LVRS   | Mus<br>musculu<br>s              |
| 1 | 1.00 | 1 | 1 | -0.03 | -0.034 | -0.028 | -0.03  | -0.027 | t | 44572  | NKPSKPK<br>TNLKH             | Oryctola<br>gus<br>cuniculu<br>s |
| 1 | 1.00 | 1 | 1 | 0.01  | 0.01   | 0.026  | 0.01   | 0.01   | t | 79420  | THDWLWE<br>WAS               | Mus<br>musculu<br>s              |
| 1 | 1.00 | 1 | 1 | -0.01 | -0.012 | -0.008 | -0.007 | -0.007 | t | 106092 | RSGYSS<br>PGSPGTPGSR<br>SR   | Mus<br>musculu<br>s              |
| 1 | 1.00 | 1 | 1 | 0.01  | 0.01   | 0.018  | 0.01   | 0.01   | t | 10888  | DYGGDST<br>TPRPRYNAT<br>TYLP | Oryctola<br>gus<br>cuniculu<br>s |
| 1 | 1.00 | 1 | 1 | 0.04  | 0.038  | 0.047  | 0.033  | 0.039  | t | 144756 | QVGTHPG<br>LANDYEYT          | Mus<br>musculu<br>s              |
| 1 | 1.00 | 1 | 1 | 0.04  | 0.042  | 0.054  | 0.041  | 0.04   | t | 73843  | YFKDCL<br>FKDWEELGE<br>E     | Homo<br>sapiens                  |
| 1 | 1.00 | 1 | 1 | -0.03 | -0.028 | -0.016 | -0.033 | -0.03  | t | 52638  | QTTKPKE<br>VPTTK             | Homo<br>sapiens                  |
| 1 | 1.00 | 1 | 1 | 0     | 0      | 0.005  | 0      | 0.004  | t | 24391  | HNNQRL<br>MLYGMH             | Mus<br>musculu<br>s              |

|   |      |   |   |       |        |        |        |        |   |        |                              |                                  |
|---|------|---|---|-------|--------|--------|--------|--------|---|--------|------------------------------|----------------------------------|
| 1 | 1.00 | 1 | 1 | 0.02  | 0.022  | 0.04   | 0.027  | 0.022  | t | 127967 | EVDLLIGSS<br>QDDGLINR<br>AKA | Homo<br>sapiens                  |
| 1 | 1.00 | 1 | 1 | 0     | -0.006 | 0.011  | 0      | 0      | t | 92900  | HEALREPR<br>KLERTISK         | Oryctola<br>gus<br>cuniculu<br>s |
| 1 | 1.00 | 1 | 1 | -0.01 | -0.008 | -0.001 | -0.01  | -0.01  | t | 100613 | VLAVRVV<br>NDHNPTK           | Homo<br>sapiens                  |
| 1 | 1.00 | 1 | 1 | 0.01  | 0.012  | 0.015  | 0.018  | 0.016  | t | 144355 | IICKESISVS<br>SEQLAQF        | Homo<br>sapiens                  |
| 1 | 1.00 | 1 | 1 | -0.05 | -0.05  | -0.05  | -0.054 | -0.05  | t | 117779 | CVSYRNPA<br>E                | Homo<br>sapiens                  |
| 1 | 1.00 | 1 | 1 | 0.01  | 0.01   | 0.025  | 0.01   | 0.01   | t | 29899  | KANGNGS<br>GDNGDTT<br>W      | Oryctola<br>gus<br>cuniculu<br>s |
| 1 | 1.00 | 1 | 1 | 0.04  | 0.038  | 0.042  | 0.033  | 0.041  | t | 132727 | VTNEVHT<br>WTEQYKF<br>Q      | Mus<br>musculu<br>s              |
| 1 | 1.00 | 1 | 1 | -0.01 | -0.011 | 0.006  | -0.01  | -0.008 | t | 70934  | VSFQPDYP<br>ITARIH           | Anas<br>platyrhy<br>nchos        |
| 1 | 1.00 | 1 | 1 | -0.01 | -0.01  | 0      | -0.013 | -0.01  | t | 11055  | EAGKHSG                      | Homo<br>sapiens                  |
| 1 | 1.00 | 1 | 1 | -0.01 | -0.01  | -0.016 | -0.01  | -0.008 | t | 108378 | GFAGQAG<br>PAGATGA<br>PGRP   | Mus<br>musculu<br>s              |
| 1 | 1.00 | 1 | 1 | 0     | -0.003 | 0.001  | 0      | 0.002  | t | 122108 | GVGVELE<br>NSMGGLN<br>F      | Oryctola<br>gus<br>cuniculu<br>s |
| 1 | 1.00 | 1 | 1 | 0     | 0      | 0.014  | 0      | -0.002 | t | 14191  | ESKVQDII<br>DLIDH            | Mus<br>musculu<br>s              |
| 1 | 1.00 | 1 | 1 | -0.03 | -0.026 | -0.03  | -0.033 | -0.028 | t | 146786 | AVNGDW<br>PLPTKLPLV<br>GGH   | Homo<br>sapiens                  |
| 1 | 1.00 | 1 | 1 | 0.02  | 0.018  | 0.027  | 0.023  | 0.021  | t | 27640  | INGKTKSV<br>FFEGNGRE<br>D    | Mus<br>musculu<br>s              |

|   |      |   |   |       |        |        |        |        |   |        |                               |                                  |
|---|------|---|---|-------|--------|--------|--------|--------|---|--------|-------------------------------|----------------------------------|
| 1 | 1.00 | 1 | 1 | -0.01 | -0.003 | 0      | -0.017 | -0.012 | t | 133802 | DSPAPIIKL<br>GG               | Gallus<br>gallus                 |
| 1 | 1.00 | 1 | 1 | -0.01 | -0.012 | 0      | -0.017 | -0.012 | t | 133802 | DSPAPIIKL<br>GG               | Mus<br>musculu<br>s              |
| 1 | 1.00 | 1 | 1 | -0.01 | -0.007 | 0.005  | -0.01  | -0.01  | t | 103839 | DAEFRHDS<br>GYEVH             | Mus<br>musculu<br>s              |
| 1 | 1.00 | 1 | 1 | -0.06 | -0.053 | -0.052 | -0.06  | -0.06  | t | 110920 | KPSPWAP<br>KKHRRLS            | Mus<br>musculu<br>s              |
| 1 | 1.00 | 1 | 1 | -0.01 | -0.01  | -0.012 | -0.011 | -0.009 | t | 44880  | NLSSDIIGQ<br>LELMPNIE<br>RF   | Homo<br>sapiens                  |
| 1 | 1.00 | 1 | 1 | -0.01 | -0.003 | -0.012 | -0.011 | -0.009 | t | 44880  | NLSSDIIGQ<br>LELMPNIE<br>RF   | Gallus<br>gallus                 |
| 1 | 1.00 | 1 | 1 | 0     | -0.002 | 0      | -0.007 | 0.002  | t | 131087 | SSPPCE                        | Mus<br>musculu<br>s              |
| 1 | 1.00 | 1 | 1 | 0     | 0      | 0.004  | 0      | -0.001 | t | 48993  | PQEQTQH<br>GSPYGRCA<br>NK     | Mus<br>musculu<br>s              |
| 1 | 1.00 | 1 | 1 | 0     | -0.003 | 0.004  | 0      | -0.001 | t | 48993  | PQEQTQH<br>GSPYGRCA<br>NK     | Oryctola<br>gus<br>cuniculu<br>s |
| 1 | 1.00 | 1 | 1 | 0     | 0      | 0      | 0      | 0.006  | t | 16956  | FLVNAWK<br>SKK                | Homo<br>sapiens                  |
| 1 | 1.00 | 1 | 1 | 0     | -0.002 | 0.005  | -0.003 | 0      | t | 8050   | DEKTS DGR<br>SVKSVVTK<br>DSES | Mus<br>musculu<br>s              |
| 1 | 1.00 | 1 | 1 | 0     | -0.002 | 0.005  | -0.003 | 0      | t | 8050   | DEKTS DGR<br>SVKSVVTK<br>DSES | Mus<br>musculu<br>s              |
| 1 | 1.00 | 1 | 1 | 0     | -0.002 | 0.005  | -0.003 | 0      | t | 8050   | DEKTS DGR<br>SVKSVVTK<br>DSES | Mus<br>musculu<br>s              |

|   |      |   |   |       |        |        |        |        |   |        |                               |                                  |
|---|------|---|---|-------|--------|--------|--------|--------|---|--------|-------------------------------|----------------------------------|
| 1 | 1.00 | 1 | 1 | 0.01  | 0.01   | 0.01   | 0.008  | 0.011  | t | 74849  | YLNSSLYR<br>GTKFIIKKY<br>AS   | Homo<br>sapiens                  |
| 1 | 1.00 | 1 | 1 | 0.03  | 0.028  | 0.035  | 0.029  | 0.03   | t | 72178  | VYVEELKP<br>TPEGDL<br>EIL LQK | Mus<br>musculu<br>s              |
| 1 | 1.00 | 1 | 1 | -0.03 | -0.03  | -0.026 | -0.03  | -0.03  | t | 153904 | VVEQLGH<br>ETQIH<br>IQIP      | Mus<br>musculu<br>s              |
| 1 | 1.00 | 1 | 1 | 0     | 0      | 0.016  | -0.002 | -0.002 | t | 98887  | LQGFSRNT<br>LEAAFNA           | Homo<br>sapiens                  |
| 1 | 1.00 | 1 | 1 | -0.04 | -0.036 | -0.031 | -0.039 | -0.04  | t | 64888  | TLKYFGGF<br>NFSQILPD<br>P     | Homo<br>sapiens                  |
| 1 | 1.00 | 1 | 1 | -0.01 | -0.01  | -0.01  | -0.02  | -0.01  | t | 62339  | SVSVGCKP<br>VPRP              | Homo<br>sapiens                  |
| 1 | 1.00 | 1 | 1 | -0.04 | -0.042 | -0.033 | -0.041 | -0.042 | t | 742    | ADPNRFR<br>GKNLP              | Mus<br>musculu<br>s              |
| 1 | 1.00 | 1 | 1 | -0.04 | -0.044 | -0.033 | -0.041 | -0.042 | t | 742    | ADPNRFR<br>GKNLP              | Oryctola<br>gus<br>cuniculu<br>s |
| 1 | 1.00 | 1 | 1 | -0.03 | -0.027 | -0.018 | -0.03  | -0.03  | t | 144583 | ACGIPINY<br>NASKEWA<br>DKKVI  | Mus<br>musculu<br>s              |
| 1 | 1.00 | 1 | 1 | -0.02 | -0.016 | -0.018 | -0.023 | -0.021 | t | 99572  | QGRQQEQ<br>QFKRELRN           | Homo<br>sapiens                  |
| 1 | 1.00 | 1 | 1 | -0.02 | -0.022 | -0.017 | -0.021 | -0.02  | t | 38639  | LPQDAVSR<br>TQRRGRT<br>G      | Mus<br>musculu<br>s              |
| 1 | 1.00 | 1 | 1 | -0.02 | -0.022 | -0.017 | -0.021 | -0.02  | t | 38639  | LPQDAVSR<br>TQRRGRT<br>G      | Mus<br>musculu<br>s              |
| 1 | 1.00 | 1 | 1 | -0.02 | -0.022 | -0.02  | -0.017 | -0.009 | t | 46469  | NVRYSW                        | Homo<br>sapiens                  |
| 1 | 1.00 | 1 | 1 | 0     | -0.006 | 0.007  | -0.001 | 0.002  | t | 134829 | YSHVHALS<br>TYAR              | Oryctola<br>gus<br>cuniculu<br>s |

|   |      |   |   |       |        |        |        |        |   |        |                              |                                  |
|---|------|---|---|-------|--------|--------|--------|--------|---|--------|------------------------------|----------------------------------|
| 1 | 1.00 | 1 | 1 | 0     | 0.002  | 0.003  | -0.003 | 0      | t | 751    | ADPVTTEG<br>DYVVKISEF<br>YGR | Homo<br>sapiens                  |
| 1 | 1.00 | 1 | 1 | 0.03  | 0.028  | 0.03   | 0.023  | 0.03   | t | 104059 | LTSSSQH                      | Mus<br>musculu<br>s              |
| 1 | 1.00 | 1 | 1 | -0.02 | -0.018 | -0.004 | -0.02  | -0.021 | t | 25541  | IDAVNKRG<br>RKQNKRG          | Homo<br>sapiens                  |
| 1 | 1.00 | 1 | 1 | 0     | 0      | 0.002  | 0      | 0.002  | t | 10799  | DWDFNPN<br>KDTWPDA<br>N      | Mus<br>musculu<br>s              |
| 1 | 1.00 | 1 | 1 | 0.02  | 0.018  | 0.031  | 0.023  | 0.022  | t | 106692 | NTWKSWK<br>RVDNNTD<br>G      | Mus<br>musculu<br>s              |
| 1 | 1.00 | 1 | 1 | -0.03 | -0.03  | -0.019 | -0.03  | -0.032 | t | 23077  | GVNPNNA<br>AGLPGKC<br>G      | Homo<br>sapiens                  |
| 1 | 1.00 | 1 | 1 | -0.02 | -0.018 | -0.005 | -0.02  | -0.022 | t | 142881 | LRGYNQS<br>EGGSHTI           | Rattus<br>norvegic<br>us         |
| 1 | 1.00 | 1 | 1 | -0.01 | -0.01  | -0.01  | -0.01  | -0.01  | t | 108898 | EIDGPAGQ<br>AEPDRAH<br>YN    | Mus<br>musculu<br>s              |
| 1 | 1.00 | 1 | 1 | -0.01 | -0.01  | -0.01  | -0.01  | -0.01  | t | 108898 | EIDGPAGQ<br>AEPDRAH<br>YN    | Mus<br>musculu<br>s              |
| 1 | 1.00 | 1 | 1 | -0.03 | -0.028 | -0.022 | -0.029 | -0.028 | t | 63895  | TGMQSW<br>VPLSTDDP<br>V      | Homo<br>sapiens                  |
| 1 | 1.00 | 1 | 1 | 0.03  | 0.03   | 0.042  | 0.03   | 0.029  | t | 121045 | VNKMTSDI<br>DIGTTVDL<br>YKDL | Rattus<br>norvegic<br>us         |
| 1 | 1.00 | 1 | 1 | -0.06 | -0.063 | -0.045 | -0.061 | -0.061 | t | 78895  | YTHFAKAA<br>RFRR             | Oryctola<br>gus<br>cuniculu<br>s |
| 1 | 1.00 | 1 | 1 | -0.02 | -0.02  | -0.02  | -0.024 | -0.02  | t | 130447 | AVKIQAAF<br>RGHIAREE         | Homo<br>sapiens                  |
| 1 | 1.00 | 1 | 1 | -0.03 | -0.026 | -0.023 | -0.033 | -0.031 | t | 99372  | KEGALMLP<br>HFNSKAM          | Homo<br>sapiens                  |

|   |      |   |   |       |        |        |        |        |   |        |                              |                                   |
|---|------|---|---|-------|--------|--------|--------|--------|---|--------|------------------------------|-----------------------------------|
| 1 | 1.00 | 1 | 1 | -0.01 | -0.01  | 0.003  | -0.01  | -0.01  | t | 47345  | PELFRQFY<br>QL               | Homo<br>sapiens                   |
| 1 | 1.00 | 1 | 1 | 0     | 0.002  | 0.003  | -0.001 | 0.003  | t | 3396   | ANQPGHL<br>APLGEIRPS<br>APPL | Cavia<br>porcellu<br>s            |
| 1 | 1.00 | 1 | 1 | -0.04 | -0.029 | -0.029 | -0.04  | -0.042 | t | 95144  | SCPYVTYG<br>KFCIKPDG<br>L    | Gallus<br>gallus                  |
| 1 | 1.00 | 1 | 1 | -0.05 | -0.057 | -0.022 | -0.043 | -0.052 | t | 98681  | AEKTKIPA<br>VF               | Homo<br>sapiens                   |
| 1 | 1.00 | 1 | 1 | 0     | 0      | 0.01   | 0.003  | 0.002  | t | 50745  | QFDEMEE<br>CSKHLPLV<br>EHGLQ | Homo<br>sapiens                   |
| 1 | 1.00 | 1 | 1 | -0.03 | -0.026 | -0.018 | -0.033 | -0.03  | t | 106775 | RHAKAHIL<br>RW               | Homo<br>sapiens                   |
| 1 | 1.00 | 1 | 1 | 0.02  | 0.022  | 0.023  | 0.021  | 0.02   | t | 31664  | KKPNRQG<br>LGYSPSY<br>NDP    | Homo<br>sapiens                   |
| 1 | 1.00 | 1 | 1 | -0.01 | -0.013 | -0.014 | -0.009 | -0.008 | t | 55987  | RSVHDVVL<br>VGGSTRIP<br>KVQS | Canis<br>lupus                    |
| 1 | 1.00 | 1 | 1 | -0.05 | -0.047 | -0.043 | -0.051 | -0.05  | t | 142441 | LFSPWLRV<br>QNHF             | Mus<br>musculu<br>s               |
| 1 | 1.00 | 1 | 1 | -0.04 | -0.043 | -0.028 | -0.04  | -0.04  | t | 27745  | INTILNNIY<br>VLYALR          | Bos<br>taurus                     |
| 1 | 1.00 | 1 | 1 | 0     | 0      | 0      | 0      | 0.005  | t | 125605 | YKEKSKFQ<br>DTHNNAH<br>YYVFF | Cricetulu<br>s<br>migrator<br>ius |
| 1 | 1.00 | 1 | 1 | 0     | 0      | 0      | 0      | 0.005  | t | 10227  | DSSAHGTP<br>STPA             | Mus<br>musculu<br>s               |
| 1 | 1.00 | 1 | 1 | 0     | 0      | 0      | 0      | 0.005  | t | 7491   | DAEFRHDS<br>GYEVHHQ<br>K     | Homo<br>sapiens                   |



|   |      |   |   |       |        |        |        |        |   |        |                              |                       |
|---|------|---|---|-------|--------|--------|--------|--------|---|--------|------------------------------|-----------------------|
| 1 | 1.00 | 1 | 1 | 0     | 0.002  | 0      | -0.003 | 0      | t | 43248  | NANPNAN<br>PNANPNA<br>NPNANP | Homo sapiens          |
| 1 | 1.00 | 1 | 1 | -0.01 | -0.01  | -0.014 | -0.01  | 0      | t | 106984 | VSIFPPR                      | Mus musculus          |
| 1 | 1.00 | 1 | 1 | 0     | 0.002  | 0      | -0.001 | 0.003  | t | 130452 | CGVKSLLT<br>SMYCAAC          | Homo sapiens          |
| 1 | 1.00 | 1 | 1 | 0     | 0      | 0.016  | 0.001  | 0.002  | t | 51083  | QIINTY                       | Mus musculus          |
| 1 | 1.00 | 1 | 1 | -0.02 | -0.023 | -0.02  | -0.02  | -0.017 | t | 130908 | ITRTTLQSD<br>QEEIDY          | Oryctolagus cuniculus |
| 1 | 1.00 | 1 | 1 | 0.01  | 0.01   | 0.02   | 0.007  | 0.011  | t | 51258  | QKTAASY                      | Homo sapiens          |
| 1 | 1.00 | 1 | 1 | 0.01  | 0.004  | 0.017  | 0.01   | 0.011  | t | 123283 | HAEQKKLL<br>KFEALEQE<br>KGKE | Oryctolagus cuniculus |
| 1 | 1.00 | 1 | 1 | -0.02 | -0.016 | -0.012 | -0.021 | -0.019 | t | 1225   | AEVSYVHV<br>NGAK             | Mus musculus          |
| 1 | 1.00 | 1 | 1 | -0.01 | -0.01  | 0.004  | -0.01  | -0.01  | t | 121077 | YFILPDSLP<br>LDTLLV          | Mus musculus          |
| 1 | 1.00 | 1 | 1 | 0.01  | 0.013  | 0.015  | 0.01   | 0.011  | t | 130936 | KWNEANR                      | Mus musculus          |
| 1 | 1.00 | 1 | 1 | 0.01  | 0.006  | 0.012  | 0.007  | 0.01   | t | 74367  | YISDAFSLD<br>VSEKSGNF        | Oryctolagus cuniculus |
| 1 | 1.00 | 1 | 1 | -0.01 | -0.008 | 0      | -0.009 | -0.01  | t | 27685  | INLRTNNS<br>ATIV             | Homo sapiens          |
| 1 | 1.00 | 1 | 1 | -0.01 | -0.007 | 0.001  | -0.01  | -0.01  | t | 38271  | LNLTTASV<br>PMLRWYA<br>ERFCF | Mus musculus          |
| 1 | 1.00 | 1 | 1 | -0.05 | -0.053 | -0.045 | -0.05  | -0.048 | t | 78615  | CPGHANR<br>KQCGG             | Oryctolagus cuniculus |

|   |      |   |   |       |        |        |        |        |   |        |                              |                                  |
|---|------|---|---|-------|--------|--------|--------|--------|---|--------|------------------------------|----------------------------------|
| 1 | 1.00 | 1 | 1 | 0.01  | 0.008  | 0.011  | 0.003  | 0.012  | t | 118337 | ERADLIAYL<br>KKATNE          | Mus<br>musculu<br>s              |
| 1 | 1.00 | 1 | 1 | -0.01 | -0.01  | -0.005 | -0.017 | -0.011 | t | 119745 | AKLFKDYS<br>SVVRPVED         | Mus<br>musculu<br>s              |
| 1 | 1.00 | 1 | 1 | -0.06 | -0.06  | -0.055 | -0.063 | -0.059 | t | 53023  | QYPWRLA                      | Homo<br>sapiens                  |
| 1 | 1.00 | 1 | 1 | -0.04 | -0.038 | -0.026 | -0.037 | -0.04  | t | 67667  | VALGPQG<br>RRRYILT           | Homo<br>sapiens                  |
| 1 | 1.00 | 1 | 1 | 0.04  | 0.037  | 0.052  | 0.04   | 0.043  | t | 94496  | EEEEYMP<br>MEDLYLDI<br>LPEE  | Oryctola<br>gus<br>cuniculu<br>s |
| 1 | 1.00 | 1 | 1 | -0.05 | -0.048 | -0.047 | -0.05  | -0.05  | t | 70651  | VQTGGTS<br>RTVTMRYL<br>AS    | Homo<br>sapiens                  |
| 1 | 1.00 | 1 | 1 | -0.07 | -0.066 | -0.063 | -0.07  | -0.07  | t | 108551 | NDSLNTGF<br>LAFLFYTKK        | Capra<br>hircus                  |
| 1 | 1.00 | 1 | 1 | -0.01 | -0.012 | -0.015 | -0.013 | -0.008 | t | 71346  | VTGSVVCT<br>TAAGNVNI<br>AIGG | Mus<br>musculu<br>s              |
| 1 | 1.00 | 1 | 1 | -0.01 | -0.01  | -0.015 | -0.013 | -0.008 | t | 71346  | VTGSVVCT<br>TAAGNVNI<br>AIGG | Homo<br>sapiens                  |
| 1 | 1.00 | 1 | 1 | -0.02 | -0.022 | -0.01  | -0.021 | -0.017 | t | 103196 | GCMGYDH<br>RSGCV             | Mus<br>musculu<br>s              |
| 1 | 1.00 | 1 | 1 | 0     | 0.003  | 0.015  | 0      | -0.002 | t | 11273  | ECTLKKG<br>SGYCAWP           | Equus<br>caballus                |
| 1 | 1.00 | 1 | 1 | -0.03 | -0.034 | -0.01  | -0.027 | -0.03  | t | 33797  | KTNNSYIP<br>PLTW             | Oryctola<br>gus<br>cuniculu<br>s |
| 1 | 1.00 | 1 | 1 | 0.03  | 0.026  | 0.029  | 0.023  | 0.033  | t | 134685 | GVSSYMK<br>VSICLPMD<br>VE    | Oryctola<br>gus<br>cuniculu<br>s |
| 1 | 1.00 | 1 | 1 | -0.02 | -0.016 | -0.001 | -0.023 | -0.022 | t | 49559  | PSWGLSRI<br>S                | Homo<br>sapiens                  |

|   |      |   |   |       |        |        |        |        |   |        |                         |                                  |
|---|------|---|---|-------|--------|--------|--------|--------|---|--------|-------------------------|----------------------------------|
| 1 | 1.00 | 1 | 1 | 0.01  | 0.006  | 0.02   | 0.013  | 0.014  | t | 26989  | ILCYCYGLP<br>DSEPTK     | Oryctola<br>gus<br>cuniculu<br>s |
| 1 | 1.00 | 1 | 1 | 0.01  | 0.011  | 0.02   | 0.013  | 0.014  | t | 26989  | ILCYCYGLP<br>DSEPTK     | Equus<br>caballus                |
| 1 | 1.00 | 1 | 1 | 0.01  | 0.01   | 0.01   | 0.003  | 0.011  | t | 104594 | PHLVEALY<br>LVCGERG     | Mus<br>musculu<br>s              |
| 1 | 1.00 | 1 | 1 | 0.02  | 0.018  | 0.03   | 0.019  | 0.023  | t | 103147 | EQKLISEED<br>LN         | Mus<br>musculu<br>s              |
| 1 | 1.00 | 1 | 1 | 0     | 0      | 0      | -0.003 | 0.006  | t | 72754  | WLLSPRGS<br>R           | Homo<br>sapiens                  |
| 1 | 1.00 | 1 | 1 | -0.04 | -0.042 | -0.035 | -0.037 | -0.037 | t | 11208  | EAVEAERA<br>GRGTG       | Mus<br>musculu<br>s              |
| 1 | 1.00 | 1 | 1 | -0.04 | -0.043 | -0.035 | -0.04  | -0.039 | t | 134130 | LCSQNPPV<br>LKRHQRE     | Oryctola<br>gus<br>cuniculu<br>s |
| 1 | 1.00 | 1 | 1 | -0.06 | -0.06  | -0.053 | -0.06  | -0.059 | t | 125248 | RVPPRYHA<br>KISPMVN     | Mus<br>musculu<br>s              |
| 1 | 1.00 | 1 | 1 | 0     | 0.003  | 0.006  | 0      | 0.001  | t | 105893 | KCNTATCA<br>TQR         | Mus<br>musculu<br>s              |
| 1 | 1.00 | 1 | 1 | -0.04 | -0.04  | -0.024 | -0.04  | -0.04  | t | 79163  | AVWQW<br>MWVEY          | Mus<br>musculu<br>s              |
| 1 | 1.00 | 1 | 1 | -0.03 | -0.03  | -0.01  | -0.027 | -0.031 | t | 16487  | FKYSNYVC<br>LLWRTPS     | Homo<br>sapiens                  |
| 1 | 1.00 | 1 | 1 | -0.01 | -0.006 | 0.019  | -0.01  | -0.01  | t | 31772  | KLCGVL                  | Homo<br>sapiens                  |
| 1 | 1.00 | 1 | 1 | -0.07 | -0.07  | -0.07  | -0.073 | -0.07  | t | 149110 | SRAPRFP<br>WLNPLDG<br>W | Rattus<br>norvegic<br>us         |
| 1 | 1.00 | 1 | 1 | -0.05 | -0.051 | -0.044 | -0.051 | -0.05  | t | 40099  | LTPGRFRTI<br>VCGLF      | Myodes<br>glareolu<br>s          |

|   |      |   |   |       |        |        |        |        |   |        |                              |                                  |
|---|------|---|---|-------|--------|--------|--------|--------|---|--------|------------------------------|----------------------------------|
| 1 | 1.00 | 1 | 1 | 0     | -0.002 | 0.005  | 0.003  | 0.003  | t | 44221  | NIETVIEFQ<br>QKNNRLLE        | Mus<br>musculus                  |
| 1 | 1.00 | 1 | 1 | 0     | -0.005 | 0.005  | 0.003  | 0.003  | t | 44221  | NIETVIEFQ<br>QKNNRLLE        | Bos<br>taurus                    |
| 1 | 1.00 | 1 | 1 | 0.02  | 0.019  | 0.021  | 0.017  | 0.021  | t | 99385  | KLEYDPRC<br>VYDPRGH          | Homo<br>sapiens                  |
| 1 | 1.00 | 1 | 1 | 0     | 0      | 0.003  | 0      | 0.003  | t | 50538  | QDYDNQH<br>EQDRPTPS<br>PAPSR | Homo<br>sapiens                  |
| 1 | 1.00 | 1 | 1 | 0.02  | 0.022  | 0.023  | 0.023  | 0.019  | t | 136073 | LSKNNAIE<br>PRSFQNS<br>RHPS  | Homo<br>sapiens                  |
| 1 | 1.00 | 1 | 1 | 0.01  | 0.012  | 0.014  | 0.011  | 0.012  | t | 41120  | MASGGGE<br>TALALLLD<br>RL    | Homo<br>sapiens                  |
| 1 | 1.00 | 1 | 1 | -0.01 | -0.012 | -0.01  | -0.017 | -0.009 | t | 96457  | KGTVNLT<br>WSR               | Mus<br>musculus                  |
| 1 | 1.00 | 1 | 1 | -0.03 | -0.028 | -0.029 | -0.033 | -0.03  | t | 22882  | GTVVAVG<br>PGRWDED<br>G      | Homo<br>sapiens                  |
| 1 | 1.00 | 1 | 1 | -0.04 | -0.038 | -0.031 | -0.04  | -0.04  | t | 100631 | VRVWCPR<br>PPRAVPY           | Homo<br>sapiens                  |
| 1 | 1.00 | 1 | 1 | -0.04 | -0.04  | -0.036 | -0.04  | -0.038 | t | 71301  | VTFHYQN<br>KYKVPAN           | Oryctola<br>gus<br>cuniculu<br>s |
| 1 | 1.00 | 1 | 1 | -0.02 | -0.02  | -0.02  | -0.024 | -0.019 | t | 119624 | PDTPYLDIT<br>YHFVMQR<br>L    | Homo<br>sapiens                  |
| 1 | 1.00 | 1 | 1 | 0     | -0.002 | 0.019  | 0.003  | 0      | t | 73257  | WYAMEIR<br>PVHDQGG<br>LVRS   | Mus<br>musculus                  |
| 1 | 1.00 | 1 | 1 | -0.05 | -0.05  | -0.043 | -0.053 | -0.052 | t | 71559  | VTVRGGLR<br>ILSPDRK          | Homo<br>sapiens                  |
| 1 | 1.00 | 1 | 1 | 0.03  | 0.03   | 0.037  | 0.03   | 0.032  | t | 130734 | AQTTANPS<br>CPEGT            | Rattus<br>norvegic<br>us         |

|   |      |   |   |       |        |        |        |        |   |        |                             |                   |
|---|------|---|---|-------|--------|--------|--------|--------|---|--------|-----------------------------|-------------------|
| 1 | 1.00 | 1 | 1 | -0.04 | -0.04  | -0.042 | -0.04  | -0.037 | t | 11216  | EAVRRHARAYNATVI             | Mus musculus      |
| 1 | 1.00 | 1 | 1 | 0.04  | 0.042  | 0.052  | 0.047  | 0.05   | t | 108261 | ADASVPVMP                   | Homo sapiens      |
| 1 | 1.00 | 1 | 1 | -0.05 | -0.048 | -0.045 | -0.047 | -0.05  | t | 68913  | VICGIVYW<br>MHRRTK          | Homo sapiens      |
| 1 | 1.00 | 1 | 1 | -0.03 | -0.023 | -0.032 | -0.031 | -0.029 | t | 65481  | TNWLAKV<br>NTQIDLIRK<br>KMK | Gallus gallus     |
| 1 | 1.00 | 1 | 1 | -0.03 | -0.029 | -0.032 | -0.031 | -0.029 | t | 65481  | TNWLAKV<br>NTQIDLIRK<br>KMK | Equus caballus    |
| 1 | 1.00 | 1 | 1 | 0     | 0.002  | 0.009  | 0      | 0.001  | t | 120677 | KHPEVKSA<br>IEGIKYI         | Rattus norvegicus |
| 1 | 1.00 | 1 | 1 | 0     | -0.002 | 0.007  | -0.007 | 0      | t | 121813 | RRHKSAPSS                   | Mus musculus      |
| 1 | 1.00 | 1 | 1 | -0.01 | -0.01  | 0.012  | -0.01  | -0.01  | t | 6175   | CEKMAL                      | Homo sapiens      |
| 1 | 1.00 | 1 | 1 | 0.02  | 0.018  | 0.033  | 0.023  | 0.02   | t | 19098  | GDRADGQ<br>PAGDRAD<br>GQPA  | Mus musculus      |
| 1 | 1.00 | 1 | 1 | 0.02  | 0.018  | 0.033  | 0.023  | 0.02   | t | 19098  | GDRADGQ<br>PAGDRAD<br>GQPA  | Mus musculus      |
| 1 | 1.00 | 1 | 1 | 0.04  | 0.044  | 0.045  | 0.039  | 0.043  | t | 131101 | TDSEMDV<br>VRFDDDN<br>S     | Homo sapiens      |
| 1 | 1.00 | 1 | 1 | 0     | 0      | 0.008  | 0      | 0.002  | t | 80041  | SVAMKPY<br>EVTPT            | Mus musculus      |
| 1 | 1.00 | 1 | 1 | 0     | 0      | 0.008  | 0      | 0.002  | t | 80041  | SVAMKPY<br>EVTPT            | Mus musculus      |

|   |      |   |   |       |        |        |        |        |   |        |                      |                       |
|---|------|---|---|-------|--------|--------|--------|--------|---|--------|----------------------|-----------------------|
| 1 | 1.00 | 1 | 1 | -0.01 | -0.008 | 0.01   | -0.007 | -0.01  | t | 7969   | DEEMEQAKRNHLRVVDSL   | Homo sapiens          |
| 1 | 1.00 | 1 | 1 | -0.03 | -0.026 | -0.038 | -0.033 | -0.027 | t | 137395 | EESEDEKRRWGQRDN      | Homo sapiens          |
| 1 | 1.00 | 1 | 1 | -0.02 | -0.018 | -0.008 | -0.023 | -0.02  | t | 107093 | AVSGIGTQTSIPYPS      | Homo sapiens          |
| 1 | 1.00 | 1 | 1 | 0.02  | 0.02   | 0.027  | 0.02   | 0.022  | t | 63754  | TFTMDGDTMTMLTESTFKNL | Mus musculus          |
| 1 | 1.00 | 1 | 1 | 0.05  | 0.05   | 0.053  | 0.047  | 0.05   | t | 73509  | YCTSASACQNQRSAVQIQDV | Homo sapiens          |
| 1 | 1.00 | 1 | 1 | 0     | -0.002 | 0      | -0.007 | 0.002  | t | 122943 | WDPAQPPRD            | Mus musculus          |
| 1 | 1.00 | 1 | 1 | 0     | -0.002 | 0      | -0.007 | 0.002  | t | 118060 | PPPGMRPP             | Mus musculus          |
| 1 | 1.00 | 1 | 1 | 0     | -0.002 | 0      | -0.007 | 0.002  | t | 122932 | VCTPKSDEFNPCEDIMGYK  | Mus musculus          |
| 1 | 1.00 | 1 | 1 | 0     | -0.002 | 0      | -0.007 | 0.002  | t | 131010 | PSTRWTELDVVKRLKGSRS  | Mus musculus          |
| 1 | 1.00 | 1 | 1 | 0     | -0.002 | 0      | -0.007 | 0.002  | t | 125472 | LDAVYLNKNKYLTVIDKDAF | Mus musculus          |
| 1 | 1.00 | 1 | 1 | 0     | -0.004 | 0      | -0.007 | 0.002  | t | 125472 | LDAVYLNKNKYLTVIDKDAF | Oryctolagus cuniculus |
| 1 | 1.00 | 1 | 1 | 0     | -0.004 | 0      | -0.007 | 0.002  | t | 117383 | TLHKAFKGSIFVVFDSIESA | Oryctolagus cuniculus |
| 1 | 1.00 | 1 | 1 | 0     | -0.004 | 0      | -0.007 | 0.002  | t | 117246 | VTWEVLEGEVEKEALKKI   | Oryctolagus cuniculus |
| 1 | 1.00 | 1 | 1 | 0     | -0.004 | 0      | -0.007 | 0.002  | t | 6015   | CAPESIEFPVSEARVLED   | Oryctolagus cuniculus |

|   |      |   |   |       |        |        |        |        |   |        |                              |                                  |
|---|------|---|---|-------|--------|--------|--------|--------|---|--------|------------------------------|----------------------------------|
| 1 | 1.00 | 1 | 1 | 0.04  | 0.038  | 0.047  | 0.037  | 0.04   | t | 135963 | NGQEEKA<br>GVVSTGLI<br>GGG   | Mus<br>musculu<br>s              |
| 1 | 1.00 | 1 | 1 | -0.05 | -0.052 | -0.043 | -0.051 | -0.05  | t | 150976 | DVLCLRPV<br>GAESRRRP<br>VSGP | Mus<br>musculu<br>s              |
| 1 | 1.00 | 1 | 1 | 0     | 0.002  | 0      | -0.007 | 0      | t | 123206 | GAAVDLR<br>QG                | Ovis<br>aries                    |
| 1 | 1.00 | 1 | 1 | 0     | -0.002 | 0.007  | -0.007 | -0.001 | t | 13568  | ENPVVHFF<br>ANIVTPRT<br>P    | Mus<br>musculu<br>s              |
| 1 | 1.00 | 1 | 1 | 0     | -0.001 | 0.017  | 0      | 0      | t | 45628  | NQSLLETH                     | Anas<br>platyrhy<br>nchos        |
| 1 | 1.00 | 1 | 1 | -0.04 | -0.036 | -0.018 | -0.039 | -0.04  | t | 13458  | ENDIRV                       | Homo<br>sapiens                  |
| 1 | 1.00 | 1 | 1 | -0.04 | -0.036 | -0.015 | -0.04  | -0.042 | t | 65027  | TLQNQGA<br>WP                | Mus<br>musculu<br>s              |
| 1 | 1.00 | 1 | 1 | 0.02  | 0.022  | 0.04   | 0.027  | 0.02   | t | 96263  | EQRLKEEE<br>ED               | Homo<br>sapiens                  |
| 1 | 1.00 | 1 | 1 | 0.02  | 0.022  | 0.04   | 0.027  | 0.02   | t | 96263  | EQRLKEEE<br>ED               | Homo<br>sapiens                  |
| 1 | 1.00 | 1 | 1 | 0.02  | 0.024  | 0.04   | 0.027  | 0.02   | t | 96263  | EQRLKEEE<br>ED               | Homo<br>sapiens                  |
| 1 | 1.00 | 1 | 1 | 0     | 0.001  | 0.01   | 0.003  | 0.001  | t | 11729  | EEKNNINF<br>NIDDLSSKL<br>NE  | Equus<br>caballus                |
| 1 | 1.00 | 1 | 1 | -0.02 | -0.017 | -0.017 | -0.02  | -0.018 | t | 6952   | CRTLTMGF<br>SLGARQKI         | Mus<br>musculu<br>s              |
| 1 | 1.00 | 1 | 1 | 0.02  | 0.02   | 0.015  | 0.02   | 0.023  | t | 94501  | EKQISDAS<br>RQGLRRD          | Mus<br>musculu<br>s              |
| 1 | 1.00 | 1 | 1 | -0.02 | -0.023 | -0.016 | -0.02  | -0.018 | t | 123987 | CPYTGDN<br>YQTKLI            | Oryctola<br>gus<br>cuniculu<br>s |

|   |      |   |   |       |        |        |        |        |   |        |                              |                   |
|---|------|---|---|-------|--------|--------|--------|--------|---|--------|------------------------------|-------------------|
| 1 | 1.00 | 1 | 1 | 0     | 0.004  | 0.025  | 0.001  | 0      | t | 5047   | ATLRKY                       | Homo sapiens      |
| 1 | 1.00 | 1 | 1 | 0     | 0.002  | 0.02   | 0.007  | 0.002  | t | 128001 | GLINRAKA<br>VKQFEESR<br>GRTS | Homo sapiens      |
| 1 | 1.00 | 1 | 1 | 0.01  | 0.011  | 0.032  | 0.01   | 0.009  | t | 18833  | GAVVGGL<br>GGYML             | Mus musculus      |
| 1 | 1.00 | 1 | 1 | 0.01  | 0.012  | 0.017  | 0.007  | 0.01   | t | 35780  | LEYVNSGT<br>KYLP             | Homo sapiens      |
| 1 | 1.00 | 1 | 1 | 0.02  | 0.02   | 0.017  | 0.014  | 0.023  | t | 55585  | RRGRGRE<br>RARGGSRE          | Homo sapiens      |
| 1 | 1.00 | 1 | 1 | -0.01 | -0.012 | 0.003  | -0.011 | -0.01  | t | 20268  | GIGAVLKV<br>LTTGLPALI<br>SWI | Mus musculus      |
| 1 | 1.00 | 1 | 1 | -0.01 | -0.008 | -0.002 | -0.013 | -0.009 | t | 67324  | TYDNECLL<br>CAHKVE           | Homo sapiens      |
| 1 | 1.00 | 1 | 1 | -0.05 | -0.05  | -0.052 | -0.05  | -0.048 | t | 120415 | AVAGRGR<br>GRGRGRG<br>R      | Mus musculus      |
| 1 | 1.00 | 1 | 1 | -0.04 | -0.04  | -0.04  | -0.04  | -0.04  | t | 153864 | PDRAHYNI<br>VTFCKCD<br>STLR  | Cavia porcellus   |
| 1 | 1.00 | 1 | 1 | -0.02 | -0.024 | -0.008 | -0.019 | -0.02  | t | 141558 | RTLTQNYK<br>ATHGNTV          | Bos taurus        |
| 1 | 1.00 | 1 | 1 | -0.02 | -0.02  | -0.022 | -0.024 | -0.018 | t | 118377 | GKEAWDL<br>GVCARDSV<br>RRKG  | Homo sapiens      |
| 1 | 1.00 | 1 | 1 | -0.04 | -0.042 | -0.045 | -0.047 | -0.041 | t | 122190 | SGIPYVISY<br>LHPGNTV<br>MHVD | Mus musculus      |
| 1 | 1.00 | 1 | 1 | 0.06  | 0.072  | 0.062  | 0.06   | 0.061  | t | 64555  | TKETETEA<br>PAAPAEGE<br>KPAE | Mus musculus      |
| 1 | 1.00 | 1 | 1 | -0.03 | -0.03  | -0.023 | -0.03  | -0.027 | t | 133705 | SSKTRSG<br>VHLVGPY           | Mus musculus      |
| 1 | 1.00 | 1 | 1 | 0     | -0.002 | -0.007 | -0.007 | 0      | t | 112783 | GSLPQKSH<br>GRTQDEN          | Rattus norvegicus |



|   |      |   |   |       |        |        |        |        |   |        |                     |                                  |
|---|------|---|---|-------|--------|--------|--------|--------|---|--------|---------------------|----------------------------------|
| 1 | 1.00 | 1 | 1 | 0.02  | 0.018  | 0.032  | 0.019  | 0.02   | t | 51967  | QPSKPTTK<br>QRQN    | Mus<br>musculu<br>s              |
| 1 | 1.00 | 1 | 1 | -0.02 | -0.022 | -0.008 | -0.021 | -0.02  | t | 142390 | CGRLRSEL<br>PRL     | Mus<br>musculu<br>s              |
| 1 | 1.00 | 1 | 1 | 0     | -0.006 | 0.016  | 0.003  | 0      | t | 48521  | PLVETWKK<br>PDYEPP  | Homo<br>sapiens                  |
| 1 | 1.00 | 1 | 1 | 0.01  | 0.006  | 0.019  | 0.009  | 0.011  | t | 47161  | PDPQPDP<br>FPQLNSD  | Oryctola<br>gus<br>cuniculu<br>s |
| 1 | 1.00 | 1 | 1 | 0.04  | 0.036  | 0.06   | 0.039  | 0.042  | t | 139317 | TLLELPAAE           | Oryctola<br>gus<br>cuniculu<br>s |
| 1 | 1.00 | 1 | 1 | -0.01 | -0.012 | -0.002 | -0.013 | -0.01  | t | 110856 | FSADLDQF<br>PLGRKFL | Mus<br>musculu<br>s              |
| 1 | 1.00 | 1 | 1 | -0.02 | -0.006 | 0      | -0.019 | -0.02  | t | 36415  | LHQVFG              | Homo<br>sapiens                  |
| 1 | 1.00 | 1 | 1 | 0     | -0.006 | 0.016  | 0.001  | -0.001 | t | 48521  | PLVETWKK<br>PDYEPP  | Homo<br>sapiens                  |
| 1 | 1.00 | 1 | 1 | -0.02 | -0.017 | 0.007  | -0.02  | -0.022 | t | 44250  | NIIRTKKQ            | Mus<br>musculu<br>s              |
| 1 | 1.00 | 1 | 1 | -0.06 | -0.062 | -0.042 | -0.061 | -0.061 | t | 141963 | MVDRGW<br>G         | Mus<br>musculu<br>s              |
| 1 | 1.00 | 1 | 1 | 0     | 0      | 0.014  | 0      | 0.002  | t | 21814  | GPVEDAIT<br>AAIGRV  | Mus<br>musculu<br>s              |
| 1 | 1.00 | 1 | 1 | -0.01 | -0.006 | 0.007  | -0.007 | -0.007 | t | 76453  | YWERGIPL<br>P       | Homo<br>sapiens                  |
| 1 | 1.00 | 1 | 1 | -0.01 | -0.012 | 0.004  | -0.007 | -0.009 | t | 75954  | YTASTRGD<br>LAHLTAT | Mus<br>musculu<br>s              |
| 1 | 1.00 | 1 | 1 | 0.01  | 0.01   | 0.01   | 0      | 0.01   | t | 114749 | ATDKEGK<br>DVL      | Homo<br>sapiens                  |

|   |      |   |   |       |        |        |        |        |   |        |                           |                                  |
|---|------|---|---|-------|--------|--------|--------|--------|---|--------|---------------------------|----------------------------------|
| 1 | 1.00 | 1 | 1 | -0.05 | -0.05  | -0.05  | -0.06  | -0.05  | t | 114837 | GKVMVLC<br>NRA            | Homo<br>sapiens                  |
| 1 | 1.00 | 1 | 1 | 0     | 0      | 0.027  | 0      | -0.003 | t | 75418  | YPTFGEHK<br>QEKDLEY       | Mus<br>musculu<br>s              |
| 1 | 1.00 | 1 | 1 | -0.03 | -0.03  | -0.018 | -0.03  | -0.03  | t | 133712 | TKHRRRQ                   | Mus<br>musculu<br>s              |
| 1 | 1.00 | 1 | 1 | -0.02 | -0.02  | -0.008 | -0.02  | -0.02  | t | 76200  | YTVEAHM<br>HTLRR          | Mus<br>musculu<br>s              |
| 1 | 1.00 | 1 | 1 | -0.02 | -0.017 | -0.008 | -0.02  | -0.02  | t | 76200  | YTVEAHM<br>HTLRR          | Mus<br>musculu<br>s              |
| 1 | 1.00 | 1 | 1 | 0.02  | 0.018  | 0.02   | 0.013  | 0.02   | t | 120234 | TEAYTENG<br>EWAIDFC       | Rattus<br>norvegic<br>us         |
| 1 | 1.00 | 1 | 1 | -0.03 | -0.03  | -0.03  | -0.034 | -0.029 | t | 119624 | PDTPYLDIT<br>YHFVMQR<br>L | Homo<br>sapiens                  |
| 1 | 1.00 | 1 | 1 | 0.01  | 0.014  | 0.01   | 0.007  | 0.012  | t | 11815  | EENVEENV<br>EENVEENV      | Homo<br>sapiens                  |
| 1 | 1.00 | 1 | 1 | 0.01  | 0.014  | 0.01   | 0.007  | 0.012  | t | 11815  | EENVEENV<br>EENVEENV      | Homo<br>sapiens                  |
| 1 | 1.00 | 1 | 1 | 0.01  | 0.014  | 0.01   | 0.007  | 0.012  | t | 11815  | EENVEENV<br>EENVEENV      | Homo<br>sapiens                  |
| 1 | 1.00 | 1 | 1 | 0.01  | 0.014  | 0.01   | 0.007  | 0.012  | t | 11815  | EENVEENV<br>EENVEENV      | Homo<br>sapiens                  |
| 1 | 1.00 | 1 | 1 | -0.04 | -0.043 | -0.03  | -0.04  | -0.04  | t | 120918 | RLFKHLFG<br>GYNRWAR<br>PV | Oryctola<br>gus<br>cuniculu<br>s |
| 1 | 1.00 | 1 | 1 | 0     | -0.002 | 0.01   | -0.007 | 0.001  | t | 66687  | TTLDTHPL<br>RTLL          | Mus<br>musculu<br>s              |

|   |      |   |   |       |        |        |        |        |   |        |                                  |                       |
|---|------|---|---|-------|--------|--------|--------|--------|---|--------|----------------------------------|-----------------------|
| 1 | 1.00 | 1 | 1 | -0.03 | -0.03  | -0.023 | -0.034 | -0.03  | t | 42980  | MVPKQGPL                         | Homo sapiens          |
| 1 | 1.00 | 1 | 1 | -0.02 | -0.02  | -0.008 | -0.02  | -0.02  | t | 20095  | GGWYSFD<br>SPYLMSITE<br>MRLR     | Mus musculus          |
| 1 | 1.00 | 1 | 1 | 0.01  | 0.01   | 0.019  | 0.007  | 0.011  | t | 6109   | CDIKDPIRL<br>EPGGPD              | Homo sapiens          |
| 1 | 1.00 | 1 | 1 | -0.01 | -0.01  | 0.007  | -0.01  | -0.012 | t | 62882  | TAIDLADN<br>TIGI                 | Oryctolagus cuniculus |
| 1 | 1.00 | 1 | 1 | -0.02 | -0.017 | -0.014 | -0.02  | -0.019 | t | 105894 | KCNTATCA<br>TQRLANFL             | Mus musculus          |
| 1 | 1.00 | 1 | 1 | -0.02 | -0.017 | -0.01  | -0.02  | -0.02  | t | 140838 | DEPPQSP<br>WDRVKDL<br>ATVYV      | Mus musculus          |
| 1 | 1.00 | 1 | 1 | 0     | 0.001  | -0.001 | 0.003  | 0.002  | t | 16949  | FLVHREW<br>FMDLNL<br>WSSAGS      | Equus caballus        |
| 1 | 1.00 | 1 | 1 | 0.02  | 0.02   | 0.03   | 0.02   | 0.022  | t | 73430  | YAQYMSR<br>AYAEFLGE<br>DPGSG     | Mus musculus          |
| 1 | 1.00 | 1 | 1 | 0.02  | 0.02   | 0.03   | 0.02   | 0.022  | t | 73430  | YAQYMSR<br>AYAEFLGE<br>DPGSG     | Mus musculus          |
| 1 | 1.00 | 1 | 1 | 0     | -0.002 | 0.011  | -0.003 | 0      | t | 11417  | EDPQYHEE<br>WVTA<br>AVE<br>RTIPV | Mus musculus          |
| 1 | 1.00 | 1 | 1 | 0     | 0      | 0.009  | 0      | 0      | t | 46379  | NVFQTQA<br>GCLIGAEH<br>VD        | Oryctolagus cuniculus |
| 1 | 1.00 | 1 | 1 | -0.03 | -0.03  | -0.029 | -0.03  | -0.028 | t | 44135  | NHDYTKIR<br>YADGHAIE<br>NAVR     | Mus musculus          |
| 1 | 1.00 | 1 | 1 | -0.01 | -0.008 | -0.001 | -0.013 | -0.009 | t | 125572 | TARNETPA<br>MRMN                 | Homo sapiens          |
| 1 | 1.00 | 1 | 1 | -0.03 | -0.03  | -0.022 | -0.027 | -0.03  | t | 17839  | FSRQFLIPY<br>DPEHHYK<br>VFSP     | Homo sapiens          |

|   |      |   |   |       |        |        |        |        |   |        |                              |                                  |
|---|------|---|---|-------|--------|--------|--------|--------|---|--------|------------------------------|----------------------------------|
| 1 | 1.00 | 1 | 1 | 0.01  | 0.008  | 0.023  | 0.007  | 0.01   | t | 18999  | GDHCEGL<br>GVL               | Mus<br>musculu<br>s              |
| 1 | 1.00 | 1 | 1 | 0.01  | 0.01   | 0.023  | 0.013  | 0.011  | t | 24108  | HITQQHRP<br>VSDT             | Homo<br>sapiens                  |
| 1 | 1.00 | 1 | 1 | 0     | 0.002  | 0.01   | 0.001  | 0.002  | t | 64444  | TIRGQFSN<br>MSLSLLD          | Homo<br>sapiens                  |
| 1 | 1.00 | 1 | 1 | 0.02  | 0.018  | 0.019  | 0.023  | 0.023  | t | 132021 | PTMTRVL<br>QGVLPALP<br>QVVCN | Mus<br>musculu<br>s              |
| 1 | 1.00 | 1 | 1 | -0.01 | -0.008 | -0.01  | -0.011 | -0.007 | t | 130453 | CLFFQNGK<br>VKCAAC           | Homo<br>sapiens                  |
| 1 | 1.00 | 1 | 1 | 0.02  | 0.016  | 0.022  | 0.013  | 0.021  | t | 119557 | DIYPGGGY<br>TDYNEKFK<br>G    | Oryctola<br>gus<br>cuniculu<br>s |
| 1 | 1.00 | 1 | 1 | -0.02 | -0.016 | -0.009 | -0.013 | -0.018 | t | 98092  | HEVDKDIS<br>QLTQAIVK<br>NH   | Homo<br>sapiens                  |
| 1 | 1.00 | 1 | 1 | -0.02 | -0.022 | -0.022 | -0.027 | -0.016 | t | 119443 | DLKLRRSS<br>SVGYIS           | Rattus<br>norvegic<br>us         |
| 1 | 1.00 | 1 | 1 | -0.04 | -0.036 | -0.028 | -0.043 | -0.04  | t | 49559  | PSWGLSRI<br>S                | Homo<br>sapiens                  |
| 1 | 1.00 | 1 | 1 | -0.02 | -0.018 | 0.002  | -0.019 | -0.02  | t | 11656  | EEGQRMA<br>EM                | Homo<br>sapiens                  |
| 1 | 1.00 | 1 | 1 | -0.02 | -0.018 | 0.002  | -0.019 | -0.02  | t | 11656  | EEGQRMA<br>EM                | Homo<br>sapiens                  |
| 1 | 1.00 | 1 | 1 | -0.02 | -0.016 | 0.002  | -0.019 | -0.02  | t | 11656  | EEGQRMA<br>EM                | Homo<br>sapiens                  |
| 1 | 1.00 | 1 | 1 | -0.02 | -0.02  | -0.01  | -0.02  | -0.021 | t | 46955  | PASTNRQS<br>GRQPTPI          | Mus<br>musculu<br>s              |

|   |      |   |   |       |        |        |        |        |   |        |                              |                                  |
|---|------|---|---|-------|--------|--------|--------|--------|---|--------|------------------------------|----------------------------------|
| 1 | 1.00 | 1 | 1 | -0.01 | -0.014 | -0.006 | -0.013 | -0.009 | t | 139932 | VGLICERM<br>MKERESQI<br>RD   | Oryctola<br>gus<br>cuniculu<br>s |
| 1 | 1.00 | 1 | 1 | -0.05 | -0.053 | -0.05  | -0.05  | -0.049 | t | 131701 | THHINNM<br>KPSFTREN<br>T     | Oryctola<br>gus<br>cuniculu<br>s |
| 1 | 1.00 | 1 | 1 | -0.01 | -0.008 | 0.005  | -0.009 | -0.009 | t | 10495  | DTTIMA                       | Homo<br>sapiens                  |
| 1 | 1.00 | 1 | 1 | -0.01 | -0.008 | -0.009 | -0.013 | -0.008 | t | 52245  | QRQNKPP<br>NKPNN             | Homo<br>sapiens                  |
| 1 | 1.00 | 1 | 1 | -0.04 | -0.04  | -0.034 | -0.04  | -0.038 | t | 94573  | KRIPNKPP<br>GKKT             | Mus<br>musculu<br>s              |
| 1 | 1.00 | 1 | 1 | -0.02 | -0.016 | -0.02  | -0.02  | -0.018 | t | 43547  | NDYDGFLE<br>NAHEHHG<br>VYNQG | Cavia<br>porcellu<br>s           |
| 1 | 1.00 | 1 | 1 | 0.02  | 0.02   | 0.023  | 0.02   | 0.022  | t | 35248  | LDPAFRAN<br>TANPDWD          | Mus<br>musculu<br>s              |
| 1 | 1.00 | 1 | 1 | -0.02 | -0.024 | -0.02  | -0.027 | -0.021 | t | 132066 | SLRNSPEF<br>QKLLGI           | Oryctola<br>gus<br>cuniculu<br>s |
| 1 | 1.00 | 1 | 1 | -0.01 | -0.013 | 0.001  | -0.01  | -0.01  | t | 38825  | LQDPRVR<br>GLYFPAGG          | Oryctola<br>gus<br>cuniculu<br>s |
| 1 | 1.00 | 1 | 1 | -0.02 | -0.025 | -0.003 | -0.02  | -0.021 | t | 62776  | TAADGYG<br>AGLCANV<br>RCDTAT | Canis<br>lupus                   |
| 1 | 1.00 | 1 | 1 | -0.01 | -0.01  | -0.01  | -0.01  | -0.006 | t | 133630 | LPPGLHVF<br>PLASNRS          | Mus<br>musculu<br>s              |
| 1 | 1.00 | 1 | 1 | -0.01 | -0.012 | 0.004  | -0.013 | -0.012 | t | 14414  | ETHVTGGS<br>AGRT             | Rattus<br>norvegic<br>us         |
| 1 | 1.00 | 1 | 1 | -0.02 | -0.02  | -0.014 | -0.026 | -0.02  | t | 47598  | PFWVRGT<br>TW                | Homo<br>sapiens                  |
| 1 | 1.00 | 1 | 1 | 0     | -0.004 | 0.009  | -0.007 | 0.001  | t | 101207 | RSGDLG                       | Oryctola<br>gus<br>cuniculu<br>s |

|   |      |   |   |       |        |        |        |        |   |        |                              |                                  |
|---|------|---|---|-------|--------|--------|--------|--------|---|--------|------------------------------|----------------------------------|
| 1 | 1.00 | 1 | 1 | -0.02 | -0.019 | -0.023 | -0.021 | -0.02  | t | 40167  | LTSGHLKC<br>RVKMEKL<br>QLKGT | Equus<br>caballus                |
| 1 | 1.00 | 1 | 1 | -0.01 | -0.012 | 0      | -0.011 | -0.009 | t | 96497  | KRELRLNP<br>Q                | Mus<br>musculu<br>s              |
| 1 | 1.00 | 1 | 1 | 0.02  | 0.02   | 0.021  | 0.02   | 0.021  | t | 72248  | WANLMEK<br>IQASVATN<br>PI    | Mus<br>musculu<br>s              |
| 1 | 1.00 | 1 | 1 | -0.04 | -0.04  | -0.02  | -0.04  | -0.04  | t | 141670 | HVTTTFAP<br>PPPR             | Mus<br>musculu<br>s              |
| 1 | 1.00 | 1 | 1 | 0.04  | 0.038  | 0.04   | 0.033  | 0.043  | t | 134770 | QIFNLFSTK<br>DSSAA           | Mus<br>musculu<br>s              |
| 1 | 1.00 | 1 | 1 | 0.04  | 0.038  | 0.04   | 0.033  | 0.043  | t | 134770 | QIFNLFSTK<br>DSSAA           | Mus<br>musculu<br>s              |
| 1 | 1.00 | 1 | 1 | -0.02 | -0.022 | -0.012 | -0.021 | -0.02  | t | 48557  | PMIHFGN<br>DWEDRYR<br>REN    | Mus<br>musculu<br>s              |
| 1 | 1.00 | 1 | 1 | -0.03 | -0.028 | -0.016 | -0.033 | -0.031 | t | 137134 | DQFCPED<br>AKCERGKL          | Homo<br>sapiens                  |
| 1 | 1.00 | 1 | 1 | -0.02 | -0.018 | -0.015 | -0.019 | -0.02  | t | 63545  | TETAAPAV<br>ADARKPPS<br>GKKK | Homo<br>sapiens                  |
| 1 | 1.00 | 1 | 1 | -0.03 | -0.03  | -0.023 | -0.03  | -0.029 | t | 108200 | VSLGKWL<br>GHPDKF            | Mus<br>musculu<br>s              |
| 1 | 1.00 | 1 | 1 | 0     | 0      | 0.017  | 0      | -0.005 | t | 4397   | ASFEAQG<br>ALANIAVD<br>KA    | Mus<br>musculu<br>s              |
| 1 | 1.00 | 1 | 1 | 0     | -0.002 | 0.009  | 0.003  | 0.002  | t | 114828 | GCYGSLPQ<br>SHIIQKIKE<br>CFR | Rattus<br>norvegic<br>us         |
| 1 | 1.00 | 1 | 1 | 0.02  | 0.017  | 0.024  | 0.02   | 0.021  | t | 41121  | MASGGGE<br>TALALLLD<br>RLNQ  | Oryctola<br>gus<br>cuniculu<br>s |
| 1 | 1.00 | 1 | 1 | -0.02 | -0.02  | -0.01  | -0.02  | -0.019 | t | 74009  | YGGPANK<br>KNAG              | Mus<br>musculu<br>s              |

|   |      |   |   |       |        |        |        |        |   |        |                              |                                  |
|---|------|---|---|-------|--------|--------|--------|--------|---|--------|------------------------------|----------------------------------|
| 1 | 1.00 | 1 | 1 | -0.01 | -0.011 | 0.009  | -0.009 | -0.01  | t | 78825  | SFPPSPG<br>PSCPT             | Homo<br>sapiens                  |
| 1 | 1.00 | 1 | 1 | -0.05 | -0.052 | -0.038 | -0.051 | -0.05  | t | 142422 | GAILVDFW<br>AEWC             | Mus<br>musculu<br>s              |
| 1 | 1.00 | 1 | 1 | -0.03 | -0.03  | -0.022 | -0.03  | -0.029 | t | 66625  | TTGLPALIS<br>WIKRKRQ<br>Q    | Mus<br>musculu<br>s              |
| 1 | 1.00 | 1 | 1 | -0.05 | -0.046 | -0.038 | -0.043 | -0.047 | t | 132890 | QSPWQT<br>WFTRAL             | Homo<br>sapiens                  |
| 1 | 1.00 | 1 | 1 | -0.01 | -0.01  | -0.011 | 0      | 0.002  | t | 106429 | FVLPWRI                      | Homo<br>sapiens                  |
| 1 | 1.00 | 1 | 1 | 0.01  | 0.007  | 0.028  | 0.01   | 0.01   | t | 22813  | GTSESTET<br>SEVSTYSM<br>S    | Oryctola<br>gus<br>cuniculu<br>s |
| 1 | 1.00 | 1 | 1 | -0.05 | -0.05  | -0.048 | -0.054 | -0.049 | t | 53195  | RARGRGR<br>GRGEKRP           | Homo<br>sapiens                  |
| 1 | 1.00 | 1 | 1 | 0.05  | 0.048  | 0.064  | 0.05   | 0.051  | t | 118877 | LDVEQLGI<br>PEQEYSC          | Mus<br>musculu<br>s              |
| 1 | 1.00 | 1 | 1 | 0.03  | 0.034  | 0.037  | 0.03   | 0.032  | t | 153885 | SEEEDEID<br>GPAGQAE<br>PDRAH | Cavia<br>porcellu<br>s           |
| 1 | 1.00 | 1 | 1 | -0.03 | -0.034 | -0.023 | -0.029 | -0.027 | t | 96228  | EGLLKLL<br>DTLENML<br>K      | Oryctola<br>gus<br>cuniculu<br>s |
| 1 | 1.00 | 1 | 1 | -0.02 | -0.02  | -0.02  | -0.02  | -0.019 | t | 119580 | FMESGEW<br>VIKESRGW<br>KH    | Homo<br>sapiens                  |
| 1 | 1.00 | 1 | 1 | -0.02 | -0.02  | -0.018 | -0.023 | -0.02  | t | 47673  | PGHITGHR<br>MAWDM<br>MM      | Homo<br>sapiens                  |
| 1 | 1.00 | 1 | 1 | 0     | 0      | 0.003  | -0.003 | 0      | t | 751    | ADPVTTEG<br>DYVVKISEF<br>YGR | Homo<br>sapiens                  |
| 1 | 1.00 | 1 | 1 | -0.01 | -0.01  | -0.01  | -0.014 | -0.008 | t | 118011 | LYKEKALS                     | Homo<br>sapiens                  |

|   |      |   |   |       |        |        |        |        |   |        |                              |                                  |
|---|------|---|---|-------|--------|--------|--------|--------|---|--------|------------------------------|----------------------------------|
| 1 | 1.00 | 1 | 1 | -0.01 | -0.012 | 0.001  | -0.011 | -0.008 | t | 61166  | SSLKSSALH<br>RLL             | Mus<br>musculu<br>s              |
| 1 | 1.00 | 1 | 1 | 0     | -0.002 | 0      | -0.007 | 0.002  | t | 125297 | VFFEEQED<br>EIIGFG           | Mus<br>musculu<br>s              |
| 1 | 1.00 | 1 | 1 | 0.03  | 0.028  | 0.05   | 0.029  | 0.03   | t | 20204  | GIADLNDA<br>S                | Rattus<br>norvegic<br>us         |
| 1 | 1.00 | 1 | 1 | -0.03 | -0.034 | -0.021 | -0.03  | -0.03  | t | 112508 | FFKNIVTP<br>RTPPPSQQ<br>K    | Mus<br>musculu<br>s              |
| 1 | 1.00 | 1 | 1 | -0.06 | -0.058 | -0.07  | -0.063 | -0.057 | t | 13644  | EPERTAM<br>KKIQDCY           | Homo<br>sapiens                  |
| 1 | 1.00 | 1 | 1 | -0.03 | -0.03  | -0.03  | -0.03  | -0.024 | t | 150803 | KLIE                         | Homo<br>sapiens                  |
| 1 | 1.00 | 1 | 1 | -0.01 | -0.014 | -0.01  | -0.01  | -0.009 | t | 139860 | PVQRGAW<br>RWPVVTN<br>E      | Mus<br>musculu<br>s              |
| 1 | 1.00 | 1 | 1 | 0.03  | 0.03   | 0.046  | 0.034  | 0.032  | t | 27451  | IMASKTVG<br>TAEKL            | Homo<br>sapiens                  |
| 1 | 1.00 | 1 | 1 | 0.03  | 0.037  | 0.047  | 0.03   | 0.027  | t | 110794 | CDDDDDN<br>DGVPDSR<br>DNCRLV | Mus<br>musculu<br>s              |
| 1 | 1.00 | 1 | 1 | -0.02 | -0.016 | -0.018 | -0.023 | -0.021 | t | 99234  | EWGTPGS<br>HVREETSR          | Homo<br>sapiens                  |
| 1 | 1.00 | 1 | 1 | -0.01 | -0.006 | 0.012  | -0.009 | -0.01  | t | 80899  | DANYLTGS<br>LT               | Homo<br>sapiens                  |
| 1 | 1.00 | 1 | 1 | -0.02 | -0.02  | -0.006 | -0.017 | -0.018 | t | 5484   | AVNHIH                       | Homo<br>sapiens                  |
| 1 | 1.00 | 1 | 1 | -0.03 | -0.03  | -0.03  | -0.03  | -0.029 | t | 139305 | TAAQITQR<br>KWEAARE<br>AEQRR | Oryctola<br>gus<br>cuniculu<br>s |
| 1 | 1.00 | 1 | 1 | 0.01  | 0.01   | 0.013  | 0.01   | 0.012  | t | 70950  | VSGGLCST<br>RLHRHALL<br>ATCP | Homo<br>sapiens                  |



|   |      |   |   |       |        |        |        |        |   |        |                              |                       |
|---|------|---|---|-------|--------|--------|--------|--------|---|--------|------------------------------|-----------------------|
| 1 | 1.00 | 1 | 1 | -0.04 | -0.038 | -0.023 | -0.039 | -0.038 | t | 21469  | GNLLLSCL                     | Homo sapiens          |
| 1 | 1.00 | 1 | 1 | -0.07 | -0.07  | -0.07  | -0.081 | -0.07  | t | 103933 | GKLPWPK                      | Homo sapiens          |
| 1 | 1.00 | 1 | 1 | 0.01  | 0.008  | 0.017  | 0.003  | 0.011  | t | 104242 | SFIWDF                       | Mus musculus          |
| 1 | 1.00 | 1 | 1 | 0     | 0      | 0      | 0      | 0.002  | t | 127761 | PGEQTMG<br>VLPTSAAG<br>CTNDS | Homo sapiens          |
| 1 | 1.00 | 1 | 1 | -0.03 | -0.032 | -0.024 | -0.037 | -0.031 | t | 118805 | GGNGGGI<br>GGGMGG<br>GVGIG   | Mus musculus          |
| 1 | 1.00 | 1 | 1 | -0.04 | -0.038 | -0.015 | -0.039 | -0.04  | t | 73147  | WTMKIL                       | Homo sapiens          |
| 1 | 1.00 | 1 | 1 | 0     | 0      | 0      | -0.007 | 0.002  | t | 6015   | CAPESIEFP<br>VSEARVLE<br>D   | Homo sapiens          |
| 1 | 1.00 | 1 | 1 | -0.01 | -0.01  | -0.004 | -0.013 | -0.009 | t | 56195  | RTTPDRQ<br>AA                | Homo sapiens          |
| 1 | 1.00 | 1 | 1 | 0.01  | 0.006  | 0.01   | 0.003  | 0.01   | t | 131687 | SYPDNSYQ<br>QPYGE            | Oryctolagus cuniculus |
| 1 | 1.00 | 1 | 1 | -0.07 | -0.07  | -0.063 | -0.07  | -0.07  | t | 78564  | WRRWFY<br>QFPTRAW<br>AS      | Mus musculus          |
| 1 | 1.00 | 1 | 1 | 0.02  | 0.02   | 0.032  | 0.02   | 0.018  | t | 126422 | KLASIPTHT<br>SPL             | Mus musculus          |
| 1 | 1.00 | 1 | 1 | -0.05 | -0.05  | -0.041 | -0.05  | -0.05  | t | 12927  | ELAAKLVA<br>LGINAV           | Homo sapiens          |
| 1 | 1.00 | 1 | 1 | 0.02  | 0.017  | 0.035  | 0.02   | 0.02   | t | 78318  | YDSRPPED<br>V                | Oryctolagus cuniculus |
| 1 | 1.00 | 1 | 1 | 0.04  | 0.042  | 0.057  | 0.041  | 0.04   | t | 33831  | KTQIDQVE<br>STAGSLQ          | Homo sapiens          |
| 1 | 1.00 | 1 | 1 | -0.01 | -0.006 | -0.001 | -0.003 | -0.008 | t | 133871 | LAKLGGAG<br>QAARAGT          | Homo sapiens          |

|   |      |   |   |       |        |        |        |        |   |        |                             |                                  |
|---|------|---|---|-------|--------|--------|--------|--------|---|--------|-----------------------------|----------------------------------|
| 1 | 1.00 | 1 | 1 | 0.01  | 0.006  | 0.005  | 0.009  | 0.014  | t | 87884  | RGNAELQ<br>TYLRQITP<br>G    | Oryctola<br>gus<br>cuniculu<br>s |
| 1 | 1.00 | 1 | 1 | -0.03 | -0.027 | -0.003 | -0.03  | -0.032 | t | 43218  | NALWMPT                     | Mus<br>musculu<br>s              |
| 1 | 1.00 | 1 | 1 | 0.02  | 0.018  | 0.022  | 0.02   | 0.022  | t | 122861 | NALNSPLH<br>QEYEENL         | Oryctola<br>gus<br>cuniculu<br>s |
| 1 | 1.00 | 1 | 1 | 0     | 0.002  | 0.013  | 0      | -0.002 | t | 51986  | QPVQEFL<br>SGHVRVR<br>PYKEK | Homo<br>sapiens                  |
| 1 | 1.00 | 1 | 1 | 0     | 0      | 0      | 0      | 0.005  | t | 118131 | SEESDDD<br>MGFGLFD          | Homo<br>sapiens                  |
| 1 | 1.00 | 1 | 1 | 0     | 0      | 0      | 0      | 0.005  | t | 11813  | EENVEENV                    | Oryctola<br>gus<br>cuniculu<br>s |
| 1 | 1.00 | 1 | 1 | 0     | 0      | 0      | 0      | 0.005  | t | 9526   | DNPASTT<br>NKDKL            | Mus<br>musculu<br>s              |
| 1 | 1.00 | 1 | 1 | -0.03 | -0.03  | -0.028 | -0.027 | -0.023 | t | 39977  | LTITQLLKR                   | Homo<br>sapiens                  |
| 1 | 1.00 | 1 | 1 | -0.03 | -0.032 | -0.032 | -0.037 | -0.029 | t | 122562 | RRQPHVV<br>SQW              | Mus<br>musculu<br>s              |
| 1 | 1.00 | 1 | 1 | -0.07 | -0.071 | -0.069 | -0.073 | -0.069 | t | 99576  | QKKTENPC<br>AQRCLQS         | Homo<br>sapiens                  |
| 1 | 1.00 | 1 | 1 | 0.03  | 0.03   | 0.029  | 0.04   | 0.042  | t | 106647 | MHLTTNI                     | Homo<br>sapiens                  |
| 1 | 1.00 | 1 | 1 | -0.04 | -0.038 | -0.034 | -0.043 | -0.038 | t | 14000  | ERHLTFT                     | Homo<br>sapiens                  |
| 1 | 1.00 | 1 | 1 | 0.01  | 0.014  | 0.019  | 0.007  | 0.012  | t | 13961  | ERAGAME<br>RAN              | Homo<br>sapiens                  |
| 1 | 1.00 | 1 | 1 | -0.04 | -0.041 | -0.016 | -0.04  | -0.04  | t | 10278  | DSYIII                      | Homo<br>sapiens                  |
| 1 | 1.00 | 1 | 1 | 0.01  | 0.008  | 0.01   | 0.003  | 0.009  | t | 116731 | GLGESRK                     | Mus<br>musculu<br>s              |

|   |      |   |   |       |        |        |        |        |   |        |                              |                                  |
|---|------|---|---|-------|--------|--------|--------|--------|---|--------|------------------------------|----------------------------------|
| 1 | 1.00 | 1 | 1 | 0.04  | 0.04   | 0.054  | 0.04   | 0.041  | t | 75274  | YPEEVVEE<br>VVPEEVVE<br>EVVP | Mus<br>musculu<br>s              |
| 1 | 1.00 | 1 | 1 | 0.04  | 0.04   | 0.054  | 0.04   | 0.041  | t | 75274  | YPEEVVEE<br>VVPEEVVE<br>EVVP | Mus<br>musculu<br>s              |
| 1 | 1.00 | 1 | 1 | 0     | -0.003 | 0.007  | 0      | 0.002  | t | 131956 | LPKSAKPV<br>SQMRMA<br>TPLL   | Oryctola<br>gus<br>cuniculu<br>s |
| 1 | 1.00 | 1 | 1 | 0.01  | 0.008  | 0.011  | 0.009  | 0.01   | t | 15990  | FGGVSD<br>DVPSFHK<br>PPSSR   | Rattus<br>norvegic<br>us         |
| 1 | 1.00 | 1 | 1 | -0.07 | -0.07  | -0.07  | -0.073 | -0.07  | t | 149111 | SRSPRFPW<br>LNPLDGW          | Rattus<br>norvegic<br>us         |
| 1 | 1.00 | 1 | 1 | -0.04 | -0.038 | -0.033 | -0.043 | -0.04  | t | 94651  | PTCWAICK<br>RIPN             | Homo<br>sapiens                  |
| 1 | 1.00 | 1 | 1 | -0.01 | -0.01  | -0.015 | -0.01  | -0.003 | t | 12339  | EHIFGMVL<br>MN               | Mus<br>musculu<br>s              |
| 1 | 1.00 | 1 | 1 | -0.01 | -0.007 | -0.015 | -0.01  | -0.003 | t | 12339  | EHIFGMVL<br>MN               | Mus<br>musculu<br>s              |
| 1 | 1.00 | 1 | 1 | -0.01 | -0.015 | -0.013 | -0.012 | -0.007 | t | 157177 | EAPSKQDK<br>PVEN             | Canis<br>lupus                   |
| 1 | 1.00 | 1 | 1 | -0.01 | -0.012 | -0.015 | -0.017 | -0.009 | t | 129732 | RERRGIAL<br>DGKI             | Mus<br>musculu<br>s              |
| 1 | 1.00 | 1 | 1 | 0.01  | 0.012  | 0.015  | 0.013  | 0.01   | t | 1470   | AGDLESSV<br>DDPRSEED<br>KRFE | Homo<br>sapiens                  |
| 1 | 1.00 | 1 | 1 | -0.01 | -0.012 | 0.002  | -0.011 | -0.01  | t | 142389 | AVGNSRG<br>ACLAC             | Mus<br>musculu<br>s              |
| 1 | 1.00 | 1 | 1 | 0.01  | 0.008  | 0.017  | 0.003  | 0.01   | t | 144591 | AMDRLSRI<br>PFPT             | Mus<br>musculu<br>s              |
| 1 | 1.00 | 1 | 1 | 0.01  | 0.008  | 0.017  | 0.003  | 0.011  | t | 135847 | YPAIVETGL                    | Mus<br>musculu<br>s              |
| 1 | 1.00 | 1 | 1 | 0.04  | 0.037  | 0.06   | 0.04   | 0.042  | t | 139317 | TLLELPAAE                    | Oryctola<br>gus<br>cuniculu<br>s |

|   |      |   |   |       |        |        |        |        |   |        |                          |                          |
|---|------|---|---|-------|--------|--------|--------|--------|---|--------|--------------------------|--------------------------|
| 1 | 1.00 | 1 | 1 | -0.01 | -0.01  | -0.015 | -0.004 | -0.002 | t | 46317  | NTWTTCCQ<br>SIAFPSK      | Mus<br>musculus          |
| 1 | 1.00 | 1 | 1 | 0     | 0      | 0.009  | -0.004 | 0      | t | 135914 | EEIAQVATISAN             | Homo<br>sapiens          |
| 1 | 1.00 | 1 | 1 | -0.06 | -0.046 | -0.045 | -0.057 | -0.059 | t | 65345  | TNIPPPLALLR              | Homo<br>sapiens          |
| 1 | 1.00 | 1 | 1 | 0     | -0.004 | 0.003  | -0.001 | 0.003  | t | 103715 | VPLDRSSH<br>CQREEA       | Oryctolagus<br>cuniculus |
| 1 | 1.00 | 1 | 1 | -0.06 | -0.062 | -0.056 | -0.057 | -0.058 | t | 114773 | DHARHGFLPRHRD            | Mus<br>musculus          |
| 1 | 1.00 | 1 | 1 | -0.05 | -0.053 | -0.024 | -0.051 | -0.052 | t | 68792  | VGSFFALGDRAFLGL          | Mus<br>musculus          |
| 1 | 1.00 | 1 | 1 | -0.02 | -0.02  | -0.02  | -0.02  | -0.02  | t | 131759 | WTLFFQNGKVKVFQ<br>GNQDSF | Homo<br>sapiens          |
| 1 | 1.00 | 1 | 1 | 0     | -0.002 | 0      | -0.007 | 0.002  | t | 65050  | TLRVYK                   | Mus<br>musculus          |
| 1 | 1.00 | 1 | 1 | 0.01  | 0.008  | 0.017  | 0.009  | 0.01   | t | 119279 | MSKTEWNASQSRFG<br>WFENKE | Rattus<br>norvegicus     |
| 1 | 1.00 | 1 | 1 | -0.04 | -0.038 | -0.027 | -0.039 | -0.038 | t | 4427   | ASGLVSMFSV               | Homo<br>sapiens          |
| 1 | 1.00 | 1 | 1 | 0.01  | 0.01   | 0.015  | 0.006  | 0.01   | t | 71285  | VTEEIVTEEIVTEEI          | Homo<br>sapiens          |
| 1 | 1.00 | 1 | 1 | -0.04 | -0.04  | -0.038 | -0.047 | -0.04  | t | 135954 | LNTGWLAGLFYQHKF          | Homo<br>sapiens          |
| 1 | 1.00 | 1 | 1 | 0     | 0.002  | 0.007  | -0.003 | 0.001  | t | 107226 | QQPVSSWVFVSSDAI          | Homo<br>sapiens          |
| 1 | 1.00 | 1 | 1 | -0.04 | -0.04  | -0.029 | -0.04  | -0.04  | t | 133686 | RTLDSHWIRVGG             | Homo<br>sapiens          |
| 1 | 1.00 | 1 | 1 | -0.04 | -0.042 | -0.035 | -0.041 | -0.039 | t | 136551 | PIQRKRRQMPLS             | Mus<br>musculus          |
| 1 | 1.00 | 1 | 1 | 0.01  | 0.008  | 0.017  | 0.013  | 0.012  | t | 56479  | RWGSYAI<br>GGASAPWILTQTN | Mus<br>musculus          |

|   |      |   |   |       |        |        |        |        |   |        |                              |                                  |
|---|------|---|---|-------|--------|--------|--------|--------|---|--------|------------------------------|----------------------------------|
| 1 | 1.00 | 1 | 1 | -0.01 | -0.012 | -0.008 | -0.017 | -0.011 | t | 113507 | HARHGFLP<br>RHRDTGIL<br>DSIG | Mus<br>musculu<br>s              |
| 1 | 1.00 | 1 | 1 | -0.01 | -0.006 | -0.005 | -0.011 | -0.008 | t | 79023  | MDGTASV<br>NIPAGTYD<br>FAIAA | Homo<br>sapiens                  |
| 1 | 1.00 | 1 | 1 | -0.02 | -0.006 | -0.017 | -0.02  | -0.022 | t | 35923  | LFNLWGP<br>AFHERYPN<br>VTITA | Mus<br>musculu<br>s              |
| 1 | 1.00 | 1 | 1 | -0.03 | -0.03  | -0.021 | -0.034 | -0.03  | t | 135916 | EIGNIISDA<br>MKK             | Homo<br>sapiens                  |
| 1 | 1.00 | 1 | 1 | -0.03 | -0.03  | -0.009 | -0.03  | -0.03  | t | 22686  | GTHNQW<br>NKPSKP             | Mus<br>musculu<br>s              |
| 1 | 1.00 | 1 | 1 | -0.01 | -0.01  | -0.002 | -0.01  | -0.008 | t | 80035  | SSPMEVM<br>LRAVF             | Mus<br>musculu<br>s              |
| 1 | 1.00 | 1 | 1 | -0.05 | -0.052 | -0.043 | -0.053 | -0.05  | t | 114203 | ENPVVHFF<br>FNIVTPRT<br>P    | Mus<br>musculu<br>s              |
| 1 | 1.00 | 1 | 1 | -0.03 | -0.028 | -0.018 | -0.023 | -0.027 | t | 122105 | GRTSRTV                      | Homo<br>sapiens                  |
| 1 | 1.00 | 1 | 1 | -0.01 | -0.012 | -0.005 | -0.017 | -0.011 | t | 117331 | MKLVRFL<br>MKLSHETV<br>TIELK | Mus<br>musculu<br>s              |
| 1 | 1.00 | 1 | 1 | 0     | -0.004 | -0.004 | -0.007 | 0.001  | t | 125136 | LGSISESR<br>ALQDSQR          | Oryctola<br>gus<br>cuniculu<br>s |
| 1 | 1.00 | 1 | 1 | 0.02  | 0.017  | 0.04   | 0.02   | 0.018  | t | 60968  | SSEERETEI<br>SLKDST          | Oryctola<br>gus<br>cuniculu<br>s |
| 1 | 1.00 | 1 | 1 | -0.02 | -0.02  | -0.02  | -0.029 | -0.02  | t | 119505 | NSTMGY                       | Homo<br>sapiens                  |
| 1 | 1.00 | 1 | 1 | -0.02 | -0.023 | -0.01  | -0.02  | -0.02  | t | 120393 | AEERLLKRL<br>FSGYNK          | Oryctola<br>gus<br>cuniculu<br>s |
| 1 | 1.00 | 1 | 1 | -0.06 | -0.06  | -0.06  | -0.063 | -0.06  | t | 149043 | FLHTRLLFR<br>NGIILR          | Rattus<br>norvegic<br>us         |
| 1 | 1.00 | 1 | 1 | -0.01 | -0.012 | 0.002  | -0.01  | -0.01  | t | 136894 | VIPMVTQI<br>AMTDTTP          | Mus<br>musculu<br>s              |

|   |      |   |   |       |        |        |        |        |   |        |                              |                 |
|---|------|---|---|-------|--------|--------|--------|--------|---|--------|------------------------------|-----------------|
| 1 | 1.00 | 1 | 1 | 0.05  | 0.05   | 0.057  | 0.053  | 0.05   | t | 46982  | PATVPDRE<br>VLYQEFDE<br>MEEC | Homo sapiens    |
| 1 | 1.00 | 1 | 1 | 0     | -0.002 | 0.007  | -0.007 | 0.001  | t | 117140 | DWEYSVW<br>LSN               | Mus musculus    |
| 1 | 1.00 | 1 | 1 | -0.02 | -0.017 | -0.018 | -0.021 | -0.017 | t | 103144 | EMPENYA<br>KTRIINRKK         | Capra hircus    |
| 1 | 1.00 | 1 | 1 | -0.02 | -0.016 | -0.016 | -0.023 | -0.02  | t | 70991  | VSILIIFILVS<br>GLSMFVD<br>QL | Homo sapiens    |
| 1 | 1.00 | 1 | 1 | -0.01 | -0.003 | -0.002 | -0.01  | -0.008 | t | 56602  | RYNRNAV<br>PNLRGDL<br>QVLAQK | Cavia porcellus |
| 1 | 1.00 | 1 | 1 | -0.03 | -0.028 | -0.032 | -0.023 | -0.019 | t | 132392 | ISYINIIMPS<br>VFGT           | Homo sapiens    |
| 1 | 1.00 | 1 | 1 | 0.04  | 0.038  | 0.043  | 0.039  | 0.041  | t | 44619  | NKVLTVQT<br>IDNALS<br>NEK    | Mus musculus    |
| 1 | 1.00 | 1 | 1 | 0.04  | 0.04   | 0.043  | 0.039  | 0.041  | t | 44619  | NKVLTVQT<br>IDNALS<br>NEK    | Homo sapiens    |
| 1 | 1.00 | 1 | 1 | 0.04  | 0.041  | 0.043  | 0.039  | 0.041  | t | 44619  | NKVLTVQT<br>IDNALS<br>NEK    | Equus caballus  |
| 1 | 1.00 | 1 | 1 | 0.01  | 0.014  | 0.01   | 0.017  | 0.02   | t | 124274 | HPLAPAGT<br>F                | Homo sapiens    |
| 1 | 1.00 | 1 | 1 | -0.02 | -0.016 | -0.012 | -0.023 | -0.02  | t | 12412  | EIDAPRVF<br>DARFSRHY<br>SVQL | Homo sapiens    |
| 1 | 1.00 | 1 | 1 | 0.02  | 0.022  | 0.025  | 0.017  | 0.02   | t | 69554  | VLKAGNE<br>GLEWV             | Homo sapiens    |
| 1 | 1.00 | 1 | 1 | -0.02 | -0.018 | -0.01  | -0.023 | -0.021 | t | 11283  | EDAEVAG<br>TQWFTPS<br>GKSGC  | Aotus nancymae  |

|   |      |   |   |       |        |        |        |        |   |        |                               |                                  |
|---|------|---|---|-------|--------|--------|--------|--------|---|--------|-------------------------------|----------------------------------|
| 1 | 1.00 | 1 | 1 | 0.04  | 0.04   | 0.04   | 0.04   | 0.049  | t | 140593 | PYQFFTAS<br>E                 | Mus<br>musculu<br>s              |
| 1 | 1.00 | 1 | 1 | -0.01 | -0.007 | -0.001 | -0.01  | -0.01  | t | 43152  | NAGGNAG<br>GNAGGNA<br>GGNAGG  | Mus<br>musculu<br>s              |
| 1 | 1.00 | 1 | 1 | -0.03 | -0.028 | -0.012 | -0.027 | -0.028 | t | 49055  | PQPGLR                        | Homo<br>sapiens                  |
| 1 | 1.00 | 1 | 1 | 0.02  | 0.015  | 0.035  | 0.019  | 0.02   | t | 96701  | NQSLAFIR<br>KSDDEL            | Oryctola<br>gus<br>cuniculu<br>s |
| 1 | 1.00 | 1 | 1 | 0.04  | 0.04   | 0.05   | 0.037  | 0.046  | t | 1390   | AFRPSSSS                      | Homo<br>sapiens                  |
| 1 | 1.00 | 1 | 1 | 0     | 0.002  | 0      | -0.003 | 0      | t | 115831 | KSGHRTQ<br>DENP               | Ovis<br>aries                    |
| 1 | 1.00 | 1 | 1 | -0.05 | -0.05  | -0.038 | -0.05  | -0.049 | t | 78457  | LRLPPAP                       | Mus<br>musculu<br>s              |
| 1 | 1.00 | 1 | 1 | -0.01 | -0.01  | 0      | -0.01  | -0.008 | t | 142827 | KVEFWPC<br>SPITQGDR           | Sus<br>scrofa                    |
| 1 | 1.00 | 1 | 1 | -0.02 | -0.02  | -0.02  | -0.02  | -0.017 | t | 139841 | PAGRQAR<br>RPATVPEG           | Mus<br>musculu<br>s              |
| 1 | 1.00 | 1 | 1 | 0     | 0.001  | 0.002  | -0.003 | 0      | t | 58797  | SKDLADKL<br>AAKTAEAE<br>K     | Equus<br>caballus                |
| 1 | 1.00 | 1 | 1 | 0.01  | 0.008  | 0.017  | 0.009  | 0.01   | t | 45588  | NQMMDMK<br>QIDPWIAR<br>FDTDKD | Mus<br>musculu<br>s              |
| 1 | 1.00 | 1 | 1 | 0.01  | 0.008  | 0.017  | 0.009  | 0.01   | t | 45588  | NQMMDMK<br>QIDPWIAR<br>FDTDKD | Mus<br>musculu<br>s              |
| 1 | 1.00 | 1 | 1 | 0.01  | 0.008  | 0.017  | 0.009  | 0.01   | t | 45588  | NQMMDMK<br>QIDPWIAR<br>FDTDKD | Mus<br>musculu<br>s              |
| 1 | 1.00 | 1 | 1 | 0.03  | 0.03   | 0.04   | 0.032  | 0.03   | t | 25320  | IAIVERRN<br>NLLQAELE<br>EL    | Homo<br>sapiens                  |

|   |      |   |   |       |        |        |        |        |   |        |                              |                                  |
|---|------|---|---|-------|--------|--------|--------|--------|---|--------|------------------------------|----------------------------------|
| 1 | 1.00 | 1 | 1 | -0.04 | -0.042 | -0.027 | -0.041 | -0.04  | t | 138089 | WLRPPTS                      | Mus<br>musculu<br>s              |
| 1 | 1.00 | 1 | 1 | 0.01  | 0.01   | 0.02   | 0.01   | 0.008  | t | 35311  | LDTNYEVS<br>DETVSDN<br>NKWAV | Mus<br>musculu<br>s              |
| 1 | 1.00 | 1 | 1 | -0.01 | -0.008 | 0.003  | -0.009 | -0.01  | t | 4412   | ASGAKEEA<br>EKKAEEQR<br>ALL  | Homo<br>sapiens                  |
| 1 | 1.00 | 1 | 1 | -0.02 | -0.024 | -0.02  | -0.02  | -0.019 | t | 139860 | PVQRGAW<br>RWPVVTN<br>E      | Mus<br>musculu<br>s              |
| 1 | 1.00 | 1 | 1 | -0.04 | -0.038 | -0.036 | -0.039 | -0.04  | t | 73385  | YALADASL<br>KMADPNR<br>FRGKD | Homo<br>sapiens                  |
| 1 | 1.00 | 1 | 1 | 0     | -0.004 | 0.005  | 0.003  | 0.003  | t | 116035 | YGSLPQKS<br>GHRTQD           | Oryctola<br>gus<br>cuniculu<br>s |
| 1 | 1.00 | 1 | 1 | 0     | 0.002  | 0.005  | 0.003  | 0.003  | t | 116035 | YGSLPQKS<br>GHRTQD           | Ovis<br>aries                    |
| 1 | 1.00 | 1 | 1 | -0.01 | -0.012 | -0.01  | -0.017 | -0.01  | t | 106424 | FPFTPHPE<br>EYFL             | Mus<br>musculu<br>s              |
| 1 | 1.00 | 1 | 1 | -0.01 | -0.01  | -0.002 | -0.013 | -0.01  | t | 111804 | SSTMRRAR<br>QCRLDQLT<br>SSQ  | Homo<br>sapiens                  |
| 1 | 1.00 | 1 | 1 | -0.01 | -0.008 | 0.006  | -0.009 | -0.01  | t | 66598  | TTESRC                       | Homo<br>sapiens                  |
| 1 | 1.00 | 1 | 1 | -0.03 | -0.03  | -0.03  | -0.034 | -0.03  | t | 135972 | PRRPGGLG<br>GSGG             | Homo<br>sapiens                  |
| 1 | 1.00 | 1 | 1 | -0.04 | -0.038 | -0.03  | -0.043 | -0.041 | t | 41737  | MIKVGFLP<br>TGAFKSPR<br>YKSH | Aotus<br>nancyma<br>ae           |
| 1 | 1.00 | 1 | 1 | -0.04 | -0.013 | -0.025 | -0.04  | -0.042 | t | 142844 | LDSLGRFF<br>GSDRGAP          | Rattus                           |
| 1 | 1.00 | 1 | 1 | 0.03  | 0.034  | 0.066  | 0.03   | 0.026  | t | 13675  | EPIVGAET<br>F                | Mus<br>musculu<br>s              |



|   |      |   |   |       |        |        |        |        |   |        |                             |                     |
|---|------|---|---|-------|--------|--------|--------|--------|---|--------|-----------------------------|---------------------|
| 1 | 1.00 | 1 | 1 | 0.03  | 0.032  | 0.044  | 0.027  | 0.03   | t | 18529  | GAATAAA<br>GGYKA            | Homo<br>sapiens     |
| 1 | 1.00 | 1 | 1 | -0.03 | -0.03  | -0.031 | -0.03  | -0.028 | t | 6225   | CFGKDLKR<br>PGSSPME<br>V    | Mus<br>musculu<br>s |
| 1 | 1.00 | 1 | 1 | 0.02  | 0.018  | 0.025  | 0.019  | 0.03   | t | 104000 | KALSSPY                     | Mus<br>musculu<br>s |
| 1 | 1.00 | 1 | 1 | 0.01  | 0.012  | 0.032  | 0.011  | 0.01   | t | 27757  | INTTGNPE<br>H               | Homo<br>sapiens     |
| 1 | 1.00 | 1 | 1 | -0.03 | -0.03  | -0.027 | -0.03  | -0.03  | t | 57644  | SETFTNKL<br>KEKHTDLG<br>KEG | Mus<br>musculu<br>s |
| 1 | 1.00 | 1 | 1 | -0.01 | -0.01  | -0.013 | -0.01  | -0.003 | t | 78943  | CTRLHTGY<br>WVC             | Mus<br>musculu<br>s |
| 1 | 1.00 | 1 | 1 | 0.03  | 0.034  | 0.037  | 0.027  | 0.029  | t | 99371  | KEDQEEEN<br>QGGKGPL         | Homo<br>sapiens     |
| 1 | 1.00 | 1 | 1 | -0.08 | -0.08  | -0.048 | -0.08  | -0.084 | t | 80095  | VVHFFKNI<br>VTPRT           | Mus<br>musculu<br>s |
| 1 | 1.00 | 1 | 1 | 0.02  | 0.02   | 0.02   | 0.012  | 0.02   | t | 117742 | AKAQTD<br>EDLRTLLRY         | Homo<br>sapiens     |
| 1 | 1.00 | 1 | 1 | -0.05 | -0.048 | -0.031 | -0.053 | -0.049 | t | 62885  | TAIHAVW                     | Homo<br>sapiens     |
| 1 | 1.00 | 1 | 1 | -0.03 | -0.032 | -0.022 | -0.031 | -0.028 | t | 66709  | TTLPKKQIK<br>HKVRRS         | Sus<br>scrofa       |
| 1 | 1.00 | 1 | 1 | 0     | 0      | 0.021  | -0.002 | 0      | t | 27903  | IPKPFFRDE<br>VSFCV          | Homo<br>sapiens     |
| 1 | 1.00 | 1 | 1 | -0.01 | -0.008 | 0.002  | -0.009 | -0.008 | t | 70311  | VPGPFFRD<br>EVTFTV          | Homo<br>sapiens     |
| 1 | 1.00 | 1 | 1 | -0.03 | -0.032 | -0.018 | -0.027 | -0.028 | t | 104851 | KGAIIGLM<br>VGGVVI          | Mus<br>musculu<br>s |
| 1 | 1.00 | 1 | 1 | 0.01  | 0.01   | 0.035  | 0.01   | 0.009  | t | 47495  | PFGDSYIII<br>GVE            | Homo<br>sapiens     |

|   |      |   |   |       |        |        |        |        |   |        |                               |                       |
|---|------|---|---|-------|--------|--------|--------|--------|---|--------|-------------------------------|-----------------------|
| 1 | 1.00 | 1 | 1 | -0.03 | -0.028 | -0.012 | -0.027 | -0.028 | t | 49055  | PQPGLR                        | Homo sapiens          |
| 1 | 1.00 | 1 | 1 | 0.01  | 0.005  | 0.025  | 0.007  | 0.008  | t | 96701  | NQSLAFIR<br>KSDDEL            | Oryctolagus cuniculus |
| 1 | 1.00 | 1 | 1 | 0     | 0      | 0      | 0      | 0.005  | t | 139725 | EMRTRIRY<br>NRRS              | Mus musculus          |
| 1 | 1.00 | 1 | 1 | 0     | 0      | 0      | 0      | 0.005  | t | 141963 | MVDRGW<br>G                   | Mus musculus          |
| 1 | 1.00 | 1 | 1 | 0     | 0      | 0      | 0      | 0.005  | t | 144742 | PFYGYRE                       | Mus musculus          |
| 1 | 1.00 | 1 | 1 | 0     | 0      | 0      | 0      | 0.005  | t | 138194 | IIPKSSWS                      | Homo sapiens          |
| 1 | 1.00 | 1 | 1 | 0     | 0      | 0      | 0      | 0.005  | t | 137770 | TLARSFII<br>CIQM              | Mus musculus          |
| 1 | 1.00 | 1 | 1 | 0     | 0      | 0      | 0      | 0.005  | t | 139029 | DLQVLT                        | Mus musculus          |
| 1 | 1.00 | 1 | 1 | 0     | 0      | 0      | 0      | 0.005  | t | 139881 | RGDKSRPP<br>VWYVEGE           | Mus musculus          |
| 1 | 1.00 | 1 | 1 | 0     | 0      | 0      | 0      | 0.005  | t | 137759 | NQEDAEAI<br>THLF              | Mus musculus          |
| 1 | 1.00 | 1 | 1 | 0     | 0      | 0      | 0      | 0.005  | t | 145704 | AEGLT<br>TTT<br>WKDYDHN<br>LQ | Sus scrofa            |
| 1 | 1.00 | 1 | 1 | 0     | 0      | 0      | 0      | 0.005  | t | 145841 | KEDFRYAIS<br>STNEIGLLG<br>A   | Sus scrofa            |
| 1 | 1.00 | 1 | 1 | 0     | 0      | 0      | 0      | 0.005  | t | 120109 | NIHPKAPI<br>WGIITSNF          | Rattus norvegicus     |
| 1 | 1.00 | 1 | 1 | 0     | 0      | 0      | 0      | 0.005  | t | 106487 | GTSTEVWL<br>APDP              | Mus musculus          |
| 1 | 1.00 | 1 | 1 | 0     | 0      | 0      | 0      | 0.005  | t | 106535 | IFPSFLRPD<br>PPL              | Mus musculus          |

|   |      |   |   |   |   |   |   |       |   |        |                              |                          |
|---|------|---|---|---|---|---|---|-------|---|--------|------------------------------|--------------------------|
| 1 | 1.00 | 1 | 1 | 0 | 0 | 0 | 0 | 0.005 | t | 116677 | ASATQLYK<br>TCKQAGT<br>CPPD  | Mus<br>musculu<br>s      |
| 1 | 1.00 | 1 | 1 | 0 | 0 | 0 | 0 | 0.005 | t | 106225 | ADIWLTPD<br>PTTP             | Mus<br>musculu<br>s      |
| 1 | 1.00 | 1 | 1 | 0 | 0 | 0 | 0 | 0.005 | t | 106690 | NSDHFLQP<br>DPPL             | Mus<br>musculu<br>s      |
| 1 | 1.00 | 1 | 1 | 0 | 0 | 0 | 0 | 0.005 | t | 110385 | QLYKTCKQ<br>AGTCPPDII<br>PKV | Mus<br>musculu<br>s      |
| 1 | 1.00 | 1 | 1 | 0 | 0 | 0 | 0 | 0.005 | t | 106515 | HLPSFLRP<br>DPPL             | Mus<br>musculu<br>s      |
| 1 | 1.00 | 1 | 1 | 0 | 0 | 0 | 0 | 0.005 | t | 91165  | CCELCCNP<br>ACAGCY           | Sus<br>scrofa            |
| 1 | 1.00 | 1 | 1 | 0 | 0 | 0 | 0 | 0.005 | t | 70391  | VPNLRGDL<br>QVLAQKV<br>ARTLP | Cavia<br>porcellu<br>s   |
| 1 | 1.00 | 1 | 1 | 0 | 0 | 0 | 0 | 0.005 | t | 70391  | VPNLRGDL<br>QVLAQKV<br>ARTLP | Cavia<br>porcellu<br>s   |
| 1 | 1.00 | 1 | 1 | 0 | 0 | 0 | 0 | 0.005 | t | 70390  | VPNLRGDL<br>QVLAQKV<br>ART   | Bos<br>taurus            |
| 1 | 1.00 | 1 | 1 | 0 | 0 | 0 | 0 | 0.005 | t | 78946  | DAWCGSR<br>GK                | Mus<br>musculu<br>s      |
| 1 | 1.00 | 1 | 1 | 0 | 0 | 0 | 0 | 0.005 | t | 70398  | VPNLRGDS<br>QVLAQKV<br>ARTLP | Cavia<br>porcellu<br>s   |
| 1 | 1.00 | 1 | 1 | 0 | 0 | 0 | 0 | 0.005 | t | 70390  | VPNLRGDL<br>QVLAQKV<br>ART   | Cavia<br>porcellu<br>s   |
| 1 | 1.00 | 1 | 1 | 0 | 0 | 0 | 0 | 0.005 | t | 82657  | GGYEFLLA<br>NDVDNSN<br>PVVQ  | Rattus<br>norvegic<br>us |

|   |      |   |   |   |       |   |   |       |   |       |                              |                                  |
|---|------|---|---|---|-------|---|---|-------|---|-------|------------------------------|----------------------------------|
| 1 | 1.00 | 1 | 1 | 0 | 0     | 0 | 0 | 0.005 | t | 70391 | VPNLRGDL<br>QVLAQKV<br>ARTLP | Cavia<br>porcellu<br>s           |
| 1 | 1.00 | 1 | 1 | 0 | 0.004 | 0 | 0 | 0.005 | t | 91165 | CCELCCNP<br>ACAGCY           | Sus<br>scrofa                    |
| 1 | 1.00 | 1 | 1 | 0 | 0     | 0 | 0 | 0.005 | t | 62440 | SWFDNFL<br>YPTH              | Mus<br>musculu<br>s              |
| 1 | 1.00 | 1 | 1 | 0 | 0     | 0 | 0 | 0.005 | t | 80002 | RKADLEKA<br>LEGAM            | Oryctola<br>gus<br>cuniculu<br>s |
| 1 | 1.00 | 1 | 1 | 0 | 0     | 0 | 0 | 0.005 | t | 73132 | WTGVTQN                      | Mus<br>musculu<br>s              |
| 1 | 1.00 | 1 | 1 | 0 | 0     | 0 | 0 | 0.005 | t | 73132 | WTGVTQN                      | Mus<br>musculu<br>s              |
| 1 | 1.00 | 1 | 1 | 0 | 0     | 0 | 0 | 0.005 | t | 76290 | YVHDNC                       | Mus<br>musculu<br>s              |
| 1 | 1.00 | 1 | 1 | 0 | 0     | 0 | 0 | 0.005 | t | 79009 | KTWCD<br>WCG                 | Mus<br>musculu<br>s              |
| 1 | 1.00 | 1 | 1 | 0 | 0     | 0 | 0 | 0.005 | t | 70390 | VPNLRGDL<br>QVLAQKV<br>ART   | Bos<br>taurus                    |
| 1 | 1.00 | 1 | 1 | 0 | 0     | 0 | 0 | 0.005 | t | 71693 | VVIANNV<br>DKFVSWGI<br>TDFEM | Rattus<br>norvegic<br>us         |
| 1 | 1.00 | 1 | 1 | 0 | 0     | 0 | 0 | 0.005 | t | 91165 | CCELCCNP<br>ACAGCY           | Bos<br>taurus                    |
| 1 | 1.00 | 1 | 1 | 0 | 0     | 0 | 0 | 0.005 | t | 73132 | WTGVTQN                      | Mus<br>musculu<br>s              |
| 1 | 1.00 | 1 | 1 | 0 | 0     | 0 | 0 | 0.005 | t | 79040 | PGQNLCYT<br>K                | Mus<br>musculu<br>s              |
| 1 | 1.00 | 1 | 1 | 0 | 0     | 0 | 0 | 0.005 | t | 73132 | WTGVTQN                      | Mus<br>musculu<br>s              |
| 1 | 1.00 | 1 | 1 | 0 | 0     | 0 | 0 | 0.005 | t | 63038 | TAVSPTTL<br>RTEVVK           | Sus<br>scrofa                    |

|   |      |   |   |   |        |   |   |       |   |       |                              |                     |
|---|------|---|---|---|--------|---|---|-------|---|-------|------------------------------|---------------------|
| 1 | 1.00 | 1 | 1 | 0 | 0      | 0 | 0 | 0.005 | t | 70390 | VPNLRGDL<br>QVLAQKV<br>ART   | Ovis<br>aries       |
| 1 | 1.00 | 1 | 1 | 0 | -0.004 | 0 | 0 | 0.005 | t | 49772 | PTSGDKID<br>MTPRAGV<br>LMLE  | Mus<br>musculu<br>s |
| 1 | 1.00 | 1 | 1 | 0 | 0      | 0 | 0 | 0.005 | t | 41019 | MADPNRF<br>RG                | Mus<br>musculu<br>s |
| 1 | 1.00 | 1 | 1 | 0 | 0      | 0 | 0 | 0.005 | t | 56602 | RYNRNAV<br>PNLRGDL<br>QVLAQK | Sus<br>scrofa       |
| 1 | 1.00 | 1 | 1 | 0 | 0      | 0 | 0 | 0.005 | t | 57864 | SFPMNEES<br>PLGFSPE          | Mus<br>musculu<br>s |
| 1 | 1.00 | 1 | 1 | 0 | 0      | 0 | 0 | 0.005 | t | 57864 | SFPMNEES<br>PLGFSPE          | Mus<br>musculu<br>s |
| 1 | 1.00 | 1 | 1 | 0 | -0.004 | 0 | 0 | 0.005 | t | 56602 | RYNRNAV<br>PNLRGDL<br>QVLAQK | Sus<br>scrofa       |
| 1 | 1.00 | 1 | 1 | 0 | 0      | 0 | 0 | 0.005 | t | 49772 | PTSGDKID<br>MTPRAGV<br>LMLE  | Mus<br>musculu<br>s |
| 1 | 1.00 | 1 | 1 | 0 | 0      | 0 | 0 | 0.005 | t | 50929 | QGPGAP                       | Mus<br>musculu<br>s |
| 1 | 1.00 | 1 | 1 | 0 | 0      | 0 | 0 | 0.005 | t | 56657 | RYSRNAV<br>P<br>NV           | Mus<br>musculu<br>s |
| 1 | 1.00 | 1 | 1 | 0 | 0      | 0 | 0 | 0.005 | t | 50931 | QGPGAPQ<br>GPGAPQG<br>PGAP   | Mus<br>musculu<br>s |
| 1 | 1.00 | 1 | 1 | 0 | 0      | 0 | 0 | 0.005 | t | 58906 | SKNLAPI                      | Mus<br>musculu<br>s |
| 1 | 1.00 | 1 | 1 | 0 | -0.005 | 0 | 0 | 0.005 | t | 46094 | NTFYCCCL<br>CCNPACA<br>GCY   | Bos<br>taurus       |

|   |      |   |   |   |       |   |   |       |   |       |                              |                                |
|---|------|---|---|---|-------|---|---|-------|---|-------|------------------------------|--------------------------------|
| 1 | 1.00 | 1 | 1 | 0 | 0     | 0 | 0 | 0.005 | t | 37657 | LLPHSNLD<br>HI               | Oryctola<br>gus<br>cunicu<br>s |
| 1 | 1.00 | 1 | 1 | 0 | 0     | 0 | 0 | 0.005 | t | 46094 | NTFYCCEL<br>CCNPACA<br>GCY   | Bos<br>taurus                  |
| 1 | 1.00 | 1 | 1 | 0 | 0     | 0 | 0 | 0.005 | t | 54058 | RHKQKIVA<br>PVKQTL           | Cavia<br>porcellu<br>s         |
| 1 | 1.00 | 1 | 1 | 0 | 0.003 | 0 | 0 | 0.005 | t | 46094 | NTFYCCEL<br>CCNPACA<br>GCY   | Sus<br>scrofa                  |
| 1 | 1.00 | 1 | 1 | 0 | 0     | 0 | 0 | 0.005 | t | 54058 | RHKQKIVA<br>PVKQTL           | Cavia<br>porcellu<br>s         |
| 1 | 1.00 | 1 | 1 | 0 | 0     | 0 | 0 | 0.005 | t | 54058 | RHKQKIVA<br>PVKQTL           | Bos<br>taurus                  |
| 1 | 1.00 | 1 | 1 | 0 | 0     | 0 | 0 | 0.005 | t | 46094 | NTFYCCEL<br>CCNPACA<br>GCY   | Sus<br>scrofa                  |
| 1 | 1.00 | 1 | 1 | 0 | 0     | 0 | 0 | 0.005 | t | 59876 | SNPPGMA<br>LSAPP             | Mus<br>musculu<br>s            |
| 1 | 1.00 | 1 | 1 | 0 | 0     | 0 | 0 | 0.005 | t | 54058 | RHKQKIVA<br>PVKQTL           | Bos<br>taurus                  |
| 1 | 1.00 | 1 | 1 | 0 | 0     | 0 | 0 | 0.005 | t | 19266 | GEFPRHVK<br>LKNEIENLL<br>DQV | Mus<br>musculu<br>s            |
| 1 | 1.00 | 1 | 1 | 0 | 0     | 0 | 0 | 0.005 | t | 19623 | GFSYYRPP<br>WIL              | Mus<br>musculu<br>s            |
| 1 | 1.00 | 1 | 1 | 0 | 0     | 0 | 0 | 0.005 | t | 22360 | GSGVRGD<br>FGSLAPRV<br>ARQL  | Cavia<br>porcellu<br>s         |

|   |      |   |   |   |   |   |   |       |   |       |                              |                        |
|---|------|---|---|---|---|---|---|-------|---|-------|------------------------------|------------------------|
| 1 | 1.00 | 1 | 1 | 0 | 0 | 0 | 0 | 0.005 | t | 29088 | ITSHTGYL<br>QLRL             | Mus<br>musculu<br>s    |
| 1 | 1.00 | 1 | 1 | 0 | 0 | 0 | 0 | 0.005 | t | 28331 | IRLRHENK<br>DLKARLEN<br>AMEV | Mus<br>musculu<br>s    |
| 1 | 1.00 | 1 | 1 | 0 | 0 | 0 | 0 | 0.005 | t | 11208 | EAVEAERA<br>GRGTG            | Mus<br>musculu<br>s    |
| 1 | 1.00 | 1 | 1 | 0 | 0 | 0 | 0 | 0.005 | t | 19620 | GFSPEEME<br>AVASKFR          | Mus<br>musculu<br>s    |
| 1 | 1.00 | 1 | 1 | 0 | 0 | 0 | 0 | 0.005 | t | 22359 | GSGVRGD<br>FGSLAPRV<br>ARQL  | Sus<br>scrofa          |
| 1 | 1.00 | 1 | 1 | 0 | 0 | 0 | 0 | 0.005 | t | 22360 | GSGVRGD<br>FGSLAPRV<br>ARQL  | Cavia<br>porcellu<br>s |
| 1 | 1.00 | 1 | 1 | 0 | 0 | 0 | 0 | 0.005 | t | 19620 | GFSPEEME<br>AVASKFR          | Mus<br>musculu<br>s    |
| 1 | 1.00 | 1 | 1 | 0 | 0 | 0 | 0 | 0.005 | t | 22756 | GTLVRMA<br>PVIG              | Mus<br>musculu<br>s    |
| 1 | 1.00 | 1 | 1 | 0 | 0 | 0 | 0 | 0.005 | t | 4331  | ASARGDLA<br>HLTTTHAR<br>HLP  | Sus<br>scrofa          |
| 1 | 1.00 | 1 | 1 | 0 | 0 | 0 | 0 | 0.005 | t | 7277  | CVKSQTR<br>IN                | Mus<br>musculu<br>s    |
| 1 | 1.00 | 1 | 1 | 0 | 0 | 0 | 0 | 0.005 | t | 1547  | AGHATLRE<br>HLRDIKAE<br>NTDA | Mus<br>musculu<br>s    |
| 1 | 1.00 | 1 | 1 | 0 | 0 | 0 | 0 | 0.005 | t | 6479  | CKGKIQAL<br>CENPEWA          | Mus<br>musculu<br>s    |
| 1 | 1.00 | 1 | 1 | 0 | 0 | 0 | 0 | 0.005 | t | 1722  | AGVRRGD<br>LAHLAAAH<br>ARHLP | Bos<br>taurus          |

|   |      |   |   |   |   |   |   |       |   |      |                      |                   |
|---|------|---|---|---|---|---|---|-------|---|------|----------------------|-------------------|
| 1 | 1.00 | 1 | 1 | 0 | 0 | 0 | 0 | 0.005 | t | 9516 | DNNLVSGP             | Mus musculus      |
| 1 | 1.00 | 1 | 1 | 0 | 0 | 0 | 0 | 0.005 | t | 7492 | DAEFRHDSGYEVHHQKL    | Mus musculus      |
| 1 | 1.00 | 1 | 1 | 0 | 0 | 0 | 0 | 0.005 | t | 4429 | ASGQ                 | Mus musculus      |
| 1 | 1.00 | 1 | 1 | 0 | 0 | 0 | 0 | 0.005 | t | 3245 | ANDVDNSNPVVQAEQLNWL  | Rattus norvegicus |
| 1 | 1.00 | 1 | 1 | 0 | 0 | 0 | 0 | 0.005 | t | 7492 | DAEFRHDSGYEVHHQKL    | Mus musculus      |
| 1 | 1.00 | 1 | 1 | 0 | 0 | 0 | 0 | 0.005 | t | 632  | ADASLKMADPNRFRGKDLP  | Mus musculus      |
| 1 | 1.00 | 1 | 1 | 0 | 0 | 0 | 0 | 0.005 | t | 6226 | CFGNSEY              | Mus musculus      |
| 1 | 1.00 | 1 | 1 | 0 | 0 | 0 | 0 | 0.005 | t | 868  | AEFAFDLWNECAKACV     | Homo sapiens      |
| 1 | 1.00 | 1 | 1 | 0 | 0 | 0 | 0 | 0.005 | t | 3245 | ANDVDNSNPVVQAEQLNWL  | Rattus norvegicus |
| 1 | 1.00 | 1 | 1 | 0 | 0 | 0 | 0 | 0.005 | t | 1453 | AGARRGDLAHLAAAHARHLP | Bos taurus        |
| 1 | 1.00 | 1 | 1 | 0 | 0 | 0 | 0 | 0.005 | t | 1453 | AGARRGDLAHLAAAHARHLP | Bos taurus        |
| 1 | 1.00 | 1 | 1 | 0 | 0 | 0 | 0 | 0.005 | t | 1536 | AGGSGRP              | Mus musculus      |
| 1 | 1.00 | 1 | 1 | 0 | 0 | 0 | 0 | 0.005 | t | 1453 | AGARRGDLAHLAAAHARHLP | Bos taurus        |



|   |      |   |   |       |        |        |        |        |   |        |                               |                                  |
|---|------|---|---|-------|--------|--------|--------|--------|---|--------|-------------------------------|----------------------------------|
| 1 | 1.00 | 1 | 1 | 0     | 0.004  | 0.008  | 0.001  | -0.001 | t | 17997  | FTKVC GAP<br>PCVIGGAG<br>NNTL | Homo<br>sapiens                  |
| 1 | 1.00 | 1 | 1 | -0.06 | -0.06  | -0.049 | -0.057 | -0.06  | t | 13267  | ELRYSWKT<br>W GKAKML<br>STELH | Homo<br>sapiens                  |
| 1 | 1.00 | 1 | 1 | 0.01  | 0.017  | 0.01   | 0.007  | 0.009  | t | 32716  | KPGGGW<br>NTGGS RYP<br>GQGS   | Gallus<br>gallus                 |
| 1 | 1.00 | 1 | 1 | 0     | 0.003  | 0      | 0      | 0.005  | t | 144664 | GREGYP A<br>DGGGLPD<br>SVKI   | Mus<br>musculu<br>s              |
| 1 | 1.00 | 1 | 1 | 0     | -0.002 | 0.007  | -0.001 | 0      | t | 71212  | VSVTDHKK<br>WQFN SPF<br>VP    | Mus<br>musculu<br>s              |
| 1 | 1.00 | 1 | 1 | 0.02  | 0.018  | 0.026  | 0.017  | 0.02   | t | 58085  | SGIIESGVQ<br>NIDDNYFY         | Mus<br>musculu<br>s              |
| 1 | 1.00 | 1 | 1 | -0.01 | -0.01  | 0.002  | -0.01  | -0.009 | t | 31072  | KGTHSLYS<br>QIAGC             | Mus<br>musculu<br>s              |
| 1 | 1.00 | 1 | 1 | -0.02 | -0.02  | -0.027 | -0.02  | -0.02  | t | 108125 | SHQESTRG<br>RSRGRSGR<br>SGS   | Homo<br>sapiens                  |
| 1 | 1.00 | 1 | 1 | -0.04 | -0.038 | -0.018 | -0.037 | -0.04  | t | 33504  | KSRYGF GA<br>KEVRSL           | Homo<br>sapiens                  |
| 1 | 1.00 | 1 | 1 | -0.01 | -0.012 | -0.006 | -0.011 | -0.01  | t | 18509  | GAAILVAG<br>LSGCCSNK<br>STTG  | Mus<br>musculu<br>s              |
| 1 | 1.00 | 1 | 1 | 0.02  | 0.022  | 0.02   | 0.026  | 0.031  | t | 122401 | HSEAETGP<br>P                 | Homo<br>sapiens                  |
| 1 | 1.00 | 1 | 1 | -0.02 | -0.02  | -0.02  | -0.02  | -0.02  | t | 30144  | KDFKYRGE<br>GNVYAEIN<br>VKAL  | Oryctola<br>gus<br>cuniculu<br>s |
| 1 | 1.00 | 1 | 1 | -0.02 | -0.018 | -0.022 | -0.013 | -0.01  | t | 132389 | IRLPNPDT<br>DLYWFTLY          | Homo<br>sapiens                  |
| 1 | 1.00 | 1 | 1 | -0.01 | -0.014 | 0.003  | -0.011 | -0.01  | t | 47063  | PDCAICWE<br>PSPPWAP<br>E      | Oryctola<br>gus<br>cuniculu<br>s |

|   |      |   |   |       |        |        |        |        |   |        |                               |                                  |
|---|------|---|---|-------|--------|--------|--------|--------|---|--------|-------------------------------|----------------------------------|
| 1 | 1.00 | 1 | 1 | -0.03 | -0.028 | -0.021 | -0.033 | -0.03  | t | 29868  | KALPMHIR<br>LSFN              | Homo<br>sapiens                  |
| 1 | 1.00 | 1 | 1 | 0.01  | 0.013  | 0.029  | 0.01   | 0.01   | t | 97015  | TVHTQQN<br>Y                  | Mus<br>musculu<br>s              |
| 1 | 1.00 | 1 | 1 | 0.02  | 0.02   | 0.025  | 0.02   | 0.022  | t | 145704 | AEGLT<br>TTT<br>WKDYDHN<br>LQ | Sus<br>scrofa                    |
| 1 | 1.00 | 1 | 1 | 0.01  | 0.013  | 0.018  | 0.01   | 0.012  | t | 122290 | CSNSSSQ<br>FQIHGPRQ           | Mus<br>musculu<br>s              |
| 1 | 1.00 | 1 | 1 | -0.03 | -0.03  | -0.03  | -0.03  | -0.028 | t | 113913 | TCKQAGT<br>CPP                | Mus<br>musculu<br>s              |
| 1 | 1.00 | 1 | 1 | 0     | -0.004 | 0      | 0.003  | 0.007  | t | 45627  | NQSLDLAE<br>QELVDCAS<br>QHGC  | Oryctola<br>gus<br>cuniculu<br>s |
| 1 | 1.00 | 1 | 1 | 0     | -0.004 | 0      | 0.003  | 0.007  | t | 6883   | CQIYPPNA<br>NKIREALA<br>Q     | Oryctola<br>gus<br>cuniculu<br>s |
| 1 | 1.00 | 1 | 1 | 0     | 0      | 0.002  | 0.006  | 0.008  | t | 23599  | HCLGKWL<br>GHPDKF             | Mus<br>musculu<br>s              |
| 1 | 1.00 | 1 | 1 | 0.01  | 0.01   | 0.019  | 0.01   | 0.012  | t | 66844  | TTDSDGDG<br>RQTI              | Oryctola<br>gus<br>cuniculu<br>s |
| 1 | 1.00 | 1 | 1 | 0.01  | 0.008  | 0.015  | 0.009  | 0.01   | t | 59986  | SPAQNTVS<br>AISSILSKT<br>GDP  | Mus<br>musculu<br>s              |
| 1 | 1.00 | 1 | 1 | -0.04 | -0.037 | -0.013 | -0.04  | -0.039 | t | 78558  | VSIFPPA                       | Mus<br>musculu<br>s              |
| 1 | 1.00 | 1 | 1 | -0.03 | -0.027 | -0.024 | -0.03  | -0.029 | t | 105863 | HHQKLVSF<br>AEDVGSN           | Mus<br>musculu<br>s              |
| 1 | 1.00 | 1 | 1 | -0.05 | -0.05  | -0.05  | -0.06  | -0.05  | t | 114905 | NKCNFCN<br>AVV                | Homo<br>sapiens                  |

|   |      |   |   |       |        |        |        |        |   |        |                              |                                  |
|---|------|---|---|-------|--------|--------|--------|--------|---|--------|------------------------------|----------------------------------|
| 1 | 1.00 | 1 | 1 | 0.01  | 0.013  | 0.017  | 0.01   | 0.011  | t | 136014 | WGLDYER<br>GNYEE             | Mus<br>musculu<br>s              |
| 1 | 1.00 | 1 | 1 | -0.01 | -0.014 | -0.01  | -0.01  | 0.001  | t | 17202  | FNMVYL                       | Mus<br>musculu<br>s              |
| 1 | 1.00 | 1 | 1 | 0.01  | 0.012  | 0.013  | 0.01   | 0.011  | t | 19318  | GEKFIIRRK<br>SNSQSIND<br>DI  | Homo<br>sapiens                  |
| 1 | 1.00 | 1 | 1 | 0.01  | 0.01   | 0.013  | 0.01   | 0.011  | t | 19318  | GEKFIIRRK<br>SNSQSIND<br>DI  | Mus<br>musculu<br>s              |
| 1 | 1.00 | 1 | 1 | 0     | 0      | 0.011  | 0      | 0      | t | 19894  | GGIYYPYDI<br>YYPYDIYYP<br>YD | Mus<br>musculu<br>s              |
| 1 | 1.00 | 1 | 1 | -0.02 | -0.018 | -0.015 | -0.019 | -0.02  | t | 41343  | MEECSQH<br>LPYIEQGM<br>MLAEQ | Homo<br>sapiens                  |
| 1 | 1.00 | 1 | 1 | -0.03 | -0.027 | -0.02  | -0.03  | -0.03  | t | 39980  | LTIVSGGP<br>TLFS             | Mus<br>musculu<br>s              |
| 1 | 1.00 | 1 | 1 | -0.01 | -0.008 | -0.015 | -0.009 | -0.01  | t | 103891 | ERSQPRGR<br>RQPIPKAR<br>RPEG | Homo<br>sapiens                  |
| 1 | 1.00 | 1 | 1 | -0.02 | -0.016 | -0.001 | -0.023 | -0.02  | t | 5559   | AVTFSKG                      | Homo<br>sapiens                  |
| 1 | 1.00 | 1 | 1 | -0.02 | -0.02  | -0.01  | -0.02  | -0.019 | t | 74009  | YGGPANK<br>KNAG              | Mus<br>musculu<br>s              |
| 1 | 1.00 | 1 | 1 | -0.01 | -0.01  | -0.01  | -0.01  | -0.008 | t | 78702  | KKKEEGED<br>DTARQEIR<br>KAW  | Mus<br>musculu<br>s              |
| 1 | 1.00 | 1 | 1 | -0.01 | -0.013 | -0.01  | -0.01  | -0.008 | t | 78702  | KKKEEGED<br>DTARQEIR<br>KAW  | Oryctola<br>gus<br>cuniculu<br>s |
| 1 | 1.00 | 1 | 1 | -0.03 | -0.03  | -0.016 | -0.03  | -0.027 | t | 9684   | DPMFTPK                      | Mus<br>musculu<br>s              |
| 1 | 1.00 | 1 | 1 | -0.01 | -0.008 | 0.017  | -0.011 | -0.012 | t | 29290  | IVGPKASK                     | MD                               |

|   |      |   |   |       |        |        |        |        |   |        |                              |                                  |
|---|------|---|---|-------|--------|--------|--------|--------|---|--------|------------------------------|----------------------------------|
| 1 | 1.00 | 1 | 1 | 0     | 0.002  | 0.012  | 0.001  | 0.001  | t | 153420 | MDWINPF<br>PNFNSGG<br>GS     | Homo<br>sapiens                  |
| 1 | 1.00 | 1 | 1 | -0.02 | -0.031 | -0.021 | -0.02  | -0.018 | t | 27608  | INDISHTQ<br>SVSSKQRV<br>TGLD | Oryctola<br>gus<br>cuniculu<br>s |
| 1 | 1.00 | 1 | 1 | -0.1  | -0.097 | -0.102 | -0.1   | -0.101 | t | 94884  | MRRAHHR<br>RRRASHRR<br>MRGG  | Mus<br>musculu<br>s              |
| 1 | 1.00 | 1 | 1 | 0.01  | 0.012  | 0.025  | 0.007  | 0.01   | t | 57990  | SGAWYYV<br>PLG               | Homo<br>sapiens                  |
| 1 | 1.00 | 1 | 1 | -0.04 | -0.04  | -0.04  | -0.04  | -0.04  | t | 109899 | SATFWQN<br>PRNHFR<br>CQV     | Homo<br>sapiens                  |
| 1 | 1.00 | 1 | 1 | 0     | 0.004  | 0.025  | 0.001  | 0      | t | 5048   | ATLRKYCI                     | Homo<br>sapiens                  |
| 1 | 1.00 | 1 | 1 | 0.01  | 0.012  | 0.035  | 0.007  | 0.005  | t | 64391  | TINGLART<br>TADRQTA          | Homo<br>sapiens                  |
| 1 | 1.00 | 1 | 1 | 0.02  | 0.02   | 0.02   | 0.024  | 0.03   | t | 122401 | HSEAETGP<br>P                | Homo<br>sapiens                  |
| 1 | 1.00 | 1 | 1 | 0     | 0      | 0.023  | 0      | 0      | t | 8235   | DFAQGW<br>GP                 | Mus<br>musculu<br>s              |
| 1 | 1.00 | 1 | 1 | 0     | 0      | 0.023  | 0      | 0      | t | 8235   | DFAQGW<br>GP                 | Mus<br>musculu<br>s              |
| 1 | 1.00 | 1 | 1 | 0.03  | 0.026  | 0.035  | 0.029  | 0.031  | t | 24051  | HIHLDFG<br>WGLPLDL<br>RDDVF  | Oryctola<br>gus<br>cuniculu<br>s |
| 1 | 1.00 | 1 | 1 | -0.03 | -0.027 | -0.019 | -0.03  | -0.029 | t | 36045  | LGAARGYT<br>FGAC             | Mus<br>musculu<br>s              |
| 1 | 1.00 | 1 | 1 | -0.02 | -0.02  | 0.005  | -0.02  | -0.02  | t | 36274  | LGPYSLN<br>W                 | Rattus<br>norvegic<br>us         |
| 1 | 1.00 | 1 | 1 | -0.02 | -0.018 | -0.004 | -0.017 | -0.02  | t | 45160  | NNLEDPAS<br>RDLVVNYV         | Homo<br>sapiens                  |

|   |      |   |   |       |        |        |        |        |   |        |                              |                                  |
|---|------|---|---|-------|--------|--------|--------|--------|---|--------|------------------------------|----------------------------------|
| 1 | 1.00 | 1 | 1 | -0.01 | -0.008 | -0.003 | -0.01  | -0.009 | t | 70203  | VNTQFYTI<br>KEGMYKA<br>LNYQ  | Homo<br>sapiens                  |
| 1 | 1.00 | 1 | 1 | -0.01 | -0.007 | -0.003 | -0.01  | -0.009 | t | 70203  | VNTQFYTI<br>KEGMYKA<br>LNYQ  | Equus<br>caballus                |
| 1 | 1.00 | 1 | 1 | 0.02  | 0.02   | 0.04   | 0.023  | 0.02   | t | 47239  | PEARQA                       | Homo<br>sapiens                  |
| 1 | 1.00 | 1 | 1 | 0.02  | 0.02   | 0.027  | 0.013  | 0.02   | t | 116917 | AESDDSS<br>T R RH            | Homo<br>sapiens                  |
| 1 | 1.00 | 1 | 1 | -0.02 | -0.02  | -0.007 | -0.02  | -0.02  | t | 110213 | EGHLIDLK<br>RV               | Mus<br>musculu<br>s              |
| 1 | 1.00 | 1 | 1 | -0.05 | -0.052 | -0.048 | -0.057 | -0.05  | t | 115614 | HCLGKWL<br>GHPDKF            | Mus<br>musculu<br>s              |
| 1 | 1.00 | 1 | 1 | -0.04 | -0.04  | -0.036 | -0.04  | -0.039 | t | 60797  | SRSES RKN<br>RGGREEIL        | Homo<br>sapiens                  |
| 1 | 1.00 | 1 | 1 | 0.05  | 0.052  | 0.062  | 0.051  | 0.052  | t | 116957 | DSMNTDD<br>STRPR             | Homo<br>sapiens                  |
| 1 | 1.00 | 1 | 1 | 0.01  | 0.013  | 0.025  | 0.01   | 0.01   | t | 8130   | DEQDYQIR                     | Mus<br>musculu<br>s              |
| 1 | 1.00 | 1 | 1 | 0.01  | 0.021  | 0.025  | 0.01   | 0.01   | t | 8130   | DEQDYQIR                     | Gallus<br>gallus                 |
| 1 | 1.00 | 1 | 1 | 0     | 0      | 0      | 0      | 0.001  | t | 139525 | ISSQTNDT<br>HKRDTYA<br>ATPRA | Mus<br>musculu<br>s              |
| 1 | 1.00 | 1 | 1 | -0.06 | -0.063 | -0.059 | -0.06  | -0.06  | t | 112910 | ARVAEHP<br>DARLAWA<br>R      | Oryctola<br>gus<br>cuniculu<br>s |
| 1 | 1.00 | 1 | 1 | 0     | 0.002  | 0.007  | -0.001 | 0.001  | t | 8265   | DDFNLNQE<br>WRVYTYK<br>YFKK  | Homo<br>sapiens                  |
| 1 | 1.00 | 1 | 1 | 0.02  | 0.02   | 0.034  | 0.014  | 0.017  | t | 68322  | VEQKHIQK<br>EDVPSERY<br>LGYL | Homo<br>sapiens                  |

|   |      |   |   |       |        |        |        |        |   |        |                              |                                  |
|---|------|---|---|-------|--------|--------|--------|--------|---|--------|------------------------------|----------------------------------|
| 1 | 1.00 | 1 | 1 | -0.05 | -0.053 | -0.042 | -0.05  | -0.05  | t | 13593  | ENSSLKHH<br>YWNFRNG          | Oryctola<br>gus<br>cuniculu<br>s |
| 1 | 1.00 | 1 | 1 | -0.05 | -0.046 | -0.043 | -0.047 | -0.05  | t | 51709  | QNIRPVQS<br>VASSRRH          | Homo<br>sapiens                  |
| 1 | 1.00 | 1 | 1 | -0.01 | -0.01  | 0.009  | -0.006 | -0.01  | t | 13680  | EPKKDKKK<br>KTDEAQPL         | Homo<br>sapiens                  |
| 1 | 1.00 | 1 | 1 | -0.01 | -0.008 | -0.015 | -0.01  | -0.005 | t | 119405 | YAIVHMTK<br>LLLDYTGKI        | Rattus<br>norvegic<br>us         |
| 1 | 1.00 | 1 | 1 | -0.03 | -0.028 | -0.016 | -0.031 | -0.03  | t | 99876  | AEFRHDSG<br>YE               | Homo<br>sapiens(<br>human)       |
| 1 | 1.00 | 1 | 1 | 0.01  | 0.01   | 0.01   | 0.01   | 0.012  | t | 25105  | HVTNDCS<br>NSSIVFEA<br>ADLIM | Mus<br>musculu<br>s              |
| 1 | 1.00 | 1 | 1 | -0.05 | -0.048 | -0.043 | -0.047 | -0.048 | t | 53971  | RGRRQPIP<br>KA               | Homo<br>sapiens                  |
| 1 | 1.00 | 1 | 1 | 0.01  | 0.015  | 0.006  | 0.01   | 0.012  | t | 71536  | VTTSTPGS<br>SGSVASG          | Homo<br>sapiens                  |
| 1 | 1.00 | 1 | 1 | -0.03 | -0.03  | -0.03  | -0.04  | -0.03  | t | 98724  | DAQSAPLR<br>VY               | Homo<br>sapiens                  |
| 1 | 1.00 | 1 | 1 | 0.02  | 0.022  | 0.027  | 0.023  | 0.022  | t | 131261 | SHMPLAN<br>QYQWA             | Homo<br>sapiens                  |
| 1 | 1.00 | 1 | 1 | 0.01  | 0.007  | 0.02   | 0.01   | 0.01   | t | 23069  | GVNLEDP<br>ASRDLVVS          | Oryctola<br>gus<br>cuniculu<br>s |
| 1 | 1.00 | 1 | 1 | -0.02 | -0.016 | -0.014 | -0.023 | -0.018 | t | 94695  | SNNPTCW<br>AICKR             | Homo<br>sapiens                  |
| 1 | 1.00 | 1 | 1 | 0     | 0.004  | 0.015  | 0.001  | 0      | t | 68174  | VEFDLPGI<br>KADSLDI          | Homo<br>sapiens                  |
| 1 | 1.00 | 1 | 1 | 0     | 0.002  | 0.015  | 0.001  | 0      | t | 68174  | VEFDLPGI<br>KADSLDI          | Homo<br>sapiens                  |

|   |      |   |   |       |        |        |        |        |   |        |                              |                          |
|---|------|---|---|-------|--------|--------|--------|--------|---|--------|------------------------------|--------------------------|
| 1 | 1.00 | 1 | 1 | -0.02 | -0.017 | -0.012 | -0.02  | -0.02  | t | 9463   | DNGKAIYE<br>RARERALQ<br>ELGP | Mus<br>musculu<br>s      |
| 1 | 1.00 | 1 | 1 | -0.02 | -0.017 | -0.012 | -0.02  | -0.02  | t | 9463   | DNGKAIYE<br>RARERALQ<br>ELGP | Mus<br>musculu<br>s      |
| 1 | 1.00 | 1 | 1 | -0.04 | -0.04  | -0.037 | -0.04  | -0.037 | t | 122394 | HFPFDQQ<br>NGTMKLG<br>IWT    | Mus<br>musculu<br>s      |
| 1 | 1.00 | 1 | 1 | 0     | 0.003  | 0.002  | 0.006  | 0.008  | t | 46317  | NTWTTCQ<br>SIAFPSK           | Mus<br>musculu<br>s      |
| 1 | 1.00 | 1 | 1 | -0.04 | -0.042 | -0.029 | -0.043 | -0.04  | t | 119378 | VDYNLKW<br>NPDDYGG<br>VK     | Rattus<br>norvegic<br>us |
| 1 | 1.00 | 1 | 1 | -0.04 | -0.042 | -0.029 | -0.043 | -0.04  | t | 119378 | VDYNLKW<br>NPDDYGG<br>VK     | Rattus<br>norvegic<br>us |
| 1 | 1.00 | 1 | 1 | -0.05 | -0.046 | -0.045 | -0.049 | -0.05  | t | 97170  | ADQELGD<br>APFLDRLR<br>RDQKS | Homo<br>sapiens          |
| 1 | 1.00 | 1 | 1 | -0.05 | -0.046 | -0.045 | -0.049 | -0.05  | t | 97170  | ADQELGD<br>APFLDRLR<br>RDQKS | Homo<br>sapiens          |
| 1 | 1.00 | 1 | 1 | 0.02  | 0.024  | 0.034  | 0.021  | 0.019  | t | 66219  | TSGITGDN<br>TTTSSE           | Homo<br>sapiens          |
| 1 | 1.00 | 1 | 1 | -0.06 | -0.06  | -0.06  | -0.06  | -0.057 | t | 118200 | VGRATPPP<br>GIMA             | Homo<br>sapiens          |
| 1 | 1.00 | 1 | 1 | -0.03 | -0.022 | -0.022 | -0.029 | -0.03  | t | 110965 | PNNNKILV<br>PKVSGLQY<br>RVFR | Homo<br>sapiens          |
| 1 | 1.00 | 1 | 1 | -0.02 | -0.007 | -0.01  | -0.02  | -0.02  | t | 65210  | TMKAEELT<br>PGRFRT           | Myodes<br>glareolu<br>s  |
| 1 | 1.00 | 1 | 1 | 0     | 0      | 0.009  | 0      | 0      | t | 57261  | SDPSQGG<br>GIKITHFTT<br>WTSI | Homo<br>sapiens          |
| 1 | 1.00 | 1 | 1 | -0.03 | -0.028 | -0.023 | -0.033 | -0.029 | t | 32827  | KPPNKPN<br>NDFHF             | Homo<br>sapiens          |
| 1 | 1.00 | 1 | 1 | -0.03 | -0.03  | -0.025 | -0.034 | -0.03  | t | 54     | AAAQHGH<br>MHGS              | Homo<br>sapiens          |

|   |      |   |   |       |        |        |        |        |   |        |                             |                                  |
|---|------|---|---|-------|--------|--------|--------|--------|---|--------|-----------------------------|----------------------------------|
| 1 | 1.00 | 1 | 1 | 0.04  | 0.035  | 0.054  | 0.04   | 0.04   | t | 11240  | ECEVVPGA<br>EDDFVCK         | Bos<br>indicus                   |
| 1 | 1.00 | 1 | 1 | 0.04  | 0.038  | 0.054  | 0.04   | 0.04   | t | 11240  | ECEVVPGA<br>EDDFVCK         | Bos<br>indicus                   |
| 1 | 1.00 | 1 | 1 | -0.05 | -0.048 | -0.036 | -0.049 | -0.048 | t | 22575  | GSWHINR<br>T                | Homo<br>sapiens                  |
| 1 | 1.00 | 1 | 1 | 0     | -0.006 | 0.007  | -0.001 | 0.002  | t | 134634 | AAPLGTHP<br>SMHP            | Oryctola<br>gus<br>cuniculu<br>s |
| 1 | 1.00 | 1 | 1 | -0.03 | -0.028 | -0.014 | -0.029 | -0.03  | t | 10125  | DSGCVVS<br>WKNKELK<br>C     | Homo<br>sapiens                  |
| 1 | 1.00 | 1 | 1 | -0.06 | -0.06  | -0.067 | -0.06  | -0.058 | t | 10902  | DYINRWIF<br>VTITNNRL<br>NNS | Mus<br>musculu<br>s              |
| 1 | 1.00 | 1 | 1 | -0.06 | -0.052 | -0.067 | -0.06  | -0.058 | t | 10902  | DYINRWIF<br>VTITNNRL<br>NNS | Gallus<br>gallus                 |
| 1 | 1.00 | 1 | 1 | 0     | -0.002 | 0      | -0.007 | 0      | t | 119560 | DLVLYNNA<br>DGDFAIK         | Rattus<br>norvegic<br>us         |
| 1 | 1.00 | 1 | 1 | -0.04 | -0.04  | -0.035 | -0.043 | -0.04  | t | 108599 | QGDAKKG<br>ANLFKTRC         | Homo<br>sapiens                  |
| 1 | 1.00 | 1 | 1 | 0     | 0.006  | 0.016  | 0.003  | 0      | t | 32734  | KPIISVIMY<br>ETNQ           | Equus<br>caballus                |
| 1 | 1.00 | 1 | 1 | 0     | 0.003  | 0.016  | 0.003  | 0      | t | 32734  | KPIISVIMY<br>ETNQ           | Equus<br>caballus                |
| 1 | 1.00 | 1 | 1 | 0.04  | 0.026  | 0.049  | 0.04   | 0.042  | t | 115650 | SQGHRSD<br>DEN              | Macaca<br>mulatta                |
| 1 | 1.00 | 1 | 1 | 0.04  | 0.036  | 0.049  | 0.04   | 0.042  | t | 115650 | SQGHRSD<br>DEN              | Oryctola<br>gus<br>cuniculu<br>s |



|   |      |   |   |       |        |        |        |        |   |        |                              |                                  |
|---|------|---|---|-------|--------|--------|--------|--------|---|--------|------------------------------|----------------------------------|
| 1 | 1.00 | 1 | 1 | 0.02  | 0.018  | 0.02   | 0.013  | 0.021  | t | 130916 | KEDFDIYD<br>EDE              | Mus<br>musculu<br>s              |
| 1 | 1.00 | 1 | 1 | -0.01 | -0.01  | -0.01  | -0.019 | -0.01  | t | 119473 | KILKVIRK                     | Homo<br>sapiens                  |
| 1 | 1.00 | 1 | 1 | -0.03 | -0.03  | -0.012 | -0.02  | -0.028 | t | 117320 | KPKAAKPK<br>KAAAKKK          | Homo<br>sapiens                  |
| 1 | 1.00 | 1 | 1 | 0.01  | 0.012  | -0.002 | 0.011  | 0.022  | t | 11481  | EDYPSP                       | Homo<br>sapiens                  |
| 1 | 1.00 | 1 | 1 | 0.02  | 0.027  | 0.038  | 0.019  | 0.02   | t | 971    | AEHVDTSY<br>ECDIPIGA         | Gallus<br>gallus                 |
| 1 | 1.00 | 1 | 1 | -0.01 | -0.006 | 0      | -0.013 | -0.01  | t | 54900  | RMHLFTGI<br>QI               | Homo<br>sapiens                  |
| 1 | 1.00 | 1 | 1 | 0.02  | 0.024  | 0.035  | 0.021  | 0.022  | t | 42669  | MSSGNL                       | Homo<br>sapiens                  |
| 1 | 1.00 | 1 | 1 | -0.02 | -0.025 | 0.001  | -0.017 | -0.018 | t | 95484  | IVAPVKQT                     | Bos<br>taurus                    |
| 1 | 1.00 | 1 | 1 | 0.01  | 0.01   | 0.025  | 0.01   | 0.011  | t | 103839 | DAEFRHDS<br>GYEVH            | Mus<br>musculu<br>s              |
| 1 | 1.00 | 1 | 1 | 0     | 0      | 0.003  | -0.004 | 0      | t | 751    | ADPVTTEG<br>DYVVKISEF<br>YGR | Homo<br>sapiens                  |
| 1 | 1.00 | 1 | 1 | -0.07 | -0.07  | -0.069 | -0.07  | -0.069 | t | 142005 | SDFRRQN<br>RRGGTNK<br>RTT    | Oryctola<br>gus<br>cuniculu<br>s |
| 1 | 1.00 | 1 | 1 | 0.03  | 0.03   | 0.048  | 0.03   | 0.03   | t | 158388 | TRQTSQEP<br>TPVS             | Canis<br>lupus                   |
| 1 | 1.00 | 1 | 1 | 0.01  | 0.007  | 0.029  | 0.01   | 0.012  | t | 45643  | NQWNKPS<br>KPKTN             | Oryctola<br>gus<br>cuniculu<br>s |
| 1 | 1.00 | 1 | 1 | -0.01 | -0.008 | 0.002  | -0.013 | -0.01  | t | 107243 | STKPSSIGT<br>LHTSPS          | Homo<br>sapiens                  |

|   |      |   |   |       |        |        |        |        |   |        |                              |                                  |
|---|------|---|---|-------|--------|--------|--------|--------|---|--------|------------------------------|----------------------------------|
| 1 | 1.00 | 1 | 1 | -0.06 | -0.058 | -0.07  | -0.063 | -0.057 | t | 13644  | EPERTAM<br>KKIQDCY           | Homo<br>sapiens                  |
| 1 | 1.00 | 1 | 1 | 0     | 0      | 0      | 0      | 0.002  | t | 127852 | TCTIKVVG<br>GYQVNIRV<br>GDTT | Mus<br>musculu<br>s              |
| 1 | 1.00 | 1 | 1 | 0.05  | 0.046  | 0.051  | 0.047  | 0.06   | t | 79603  | LLTTDEL                      | Oryctola<br>gus<br>cuniculu<br>s |
| 1 | 1.00 | 1 | 1 | 0     | 0      | 0.007  | 0.003  | 0.002  | t | 45701  | NRLIAFAS<br>RGNHVSP<br>AHYVP | Homo<br>sapiens                  |
| 1 | 1.00 | 1 | 1 | 0.07  | 0.068  | 0.075  | 0.069  | 0.08   | t | 104180 | PNAPDAS                      | Mus<br>musculu<br>s              |
| 1 | 1.00 | 1 | 1 | -0.01 | -0.006 | 0.004  | -0.013 | -0.012 | t | 26239  | IGHADFGG<br>R                | Homo<br>sapiens                  |
| 1 | 1.00 | 1 | 1 | -0.04 | -0.04  | -0.033 | -0.037 | -0.038 | t | 103    | AAEESKLPI<br>NPLSNSLL<br>RH  | Homo<br>sapiens                  |
| 1 | 1.00 | 1 | 1 | 0     | 0      | 0      | 0      | 0.005  | t | 124734 | SPLSLGR                      | Homo<br>sapiens                  |
| 1 | 1.00 | 1 | 1 | -0.02 | -0.02  | -0.003 | -0.02  | -0.017 | t | 97252  | DTPLTTAA<br>LRLV             | Mus<br>musculu<br>s              |
| 1 | 1.00 | 1 | 1 | 0     | -0.004 | 0.002  | -0.007 | 0      | t | 116286 | CGKGLSAT<br>VTGGQKG<br>RGSR  | Oryctola<br>gus<br>cuniculu<br>s |
| 1 | 1.00 | 1 | 1 | -0.01 | -0.012 | -0.017 | -0.003 | -0.004 | t | 136751 | YCWLRQ<br>AALQRRLS<br>AMEKG  | Rattus<br>norvegic<br>us         |
| 1 | 1.00 | 1 | 1 | -0.01 | -0.012 | -0.01  | -0.017 | -0.009 | t | 107428 | GRGDSVV<br>YGLR              | Mus<br>musculu<br>s              |
| 1 | 1.00 | 1 | 1 | -0.02 | -0.02  | -0.013 | -0.022 | -0.019 | t | 143851 | DPEQPAPL<br>FLVS             | Homo<br>sapiens                  |
| 1 | 1.00 | 1 | 1 | -0.04 | -0.043 | -0.03  | -0.04  | -0.038 | t | 5967   | CADARMY<br>GVLPWNA<br>FPGKVC | Oryctola<br>gus<br>cuniculu<br>s |
| 1 | 1.00 | 1 | 1 | -0.04 | -0.04  | -0.04  | -0.04  | -0.04  | t | 131542 | LLTRYLRH<br>PQSWVHQ<br>IALR  | Homo<br>sapiens                  |

|   |      |   |   |       |        |        |        |        |   |        |                              |                                  |
|---|------|---|---|-------|--------|--------|--------|--------|---|--------|------------------------------|----------------------------------|
| 1 | 1.00 | 1 | 1 | -0.03 | -0.034 | -0.02  | -0.03  | -0.03  | t | 93172  | KTSLWKE<br>MQYNRDI           | Mus<br>musculu<br>s              |
| 1 | 1.00 | 1 | 1 | 0.01  | 0.01   | 0.016  | 0.009  | 0.011  | t | 2806   | ALNYQAQ<br>ALEEIIKYR<br>YNI  | Homo<br>sapiens                  |
| 1 | 1.00 | 1 | 1 | 0.02  | 0.02   | 0.027  | 0.01   | 0.02   | t | 117327 | LQWSASFT<br>TS               | Homo<br>sapiens                  |
| 1 | 1.00 | 1 | 1 | 0.02  | 0.022  | 0.036  | 0.021  | 0.02   | t | 70048  | VNAKNLN<br>EL                | Homo<br>sapiens                  |
| 1 | 1.00 | 1 | 1 | 0     | -0.001 | 0.015  | 0      | 0.002  | t | 49072  | PQPQWTP<br>E                 | Anas<br>platyrhy<br>nchos        |
| 1 | 1.00 | 1 | 1 | 0.03  | 0.028  | 0.03   | 0.027  | 0.033  | t | 118538 | NNGNLQL<br>RKEVTWE<br>VLEG   | Mus<br>musculu<br>s              |
| 1 | 1.00 | 1 | 1 | -0.02 | -0.015 | -0.002 | -0.017 | -0.018 | t | 49137  | PQTTKPKE<br>VPTT             | Homo<br>sapiens                  |
| 1 | 1.00 | 1 | 1 | -0.01 | -0.01  | -0.002 | -0.013 | -0.01  | t | 111804 | SSTMRRAR<br>QCRLDQLT<br>SSQ  | Homo<br>sapiens                  |
| 1 | 1.00 | 1 | 1 | 0     | 0      | 0.016  | 0.002  | 0      | t | 67647  | VAKLVTQE<br>MFQNIDK<br>KIESQ | Homo<br>sapiens                  |
| 1 | 1.00 | 1 | 1 | 0     | -0.001 | 0.01   | -0.003 | 0      | t | 52660  | QTVSALED<br>KLADYK           | Myodes<br>glareolu<br>s          |
| 1 | 1.00 | 1 | 1 | -0.05 | -0.058 | -0.05  | -0.05  | -0.047 | t | 136649 | SPQRRKRT<br>RQIR             | Mus<br>musculu<br>s              |
| 1 | 1.00 | 1 | 1 | -0.03 | -0.032 | -0.023 | -0.037 | -0.027 | t | 107890 | HRLAFGQ<br>NT                | Mus<br>musculu<br>s              |
| 1 | 1.00 | 1 | 1 | 0.07  | 0.066  | 0.085  | 0.069  | 0.071  | t | 61549  | STDEPAGE<br>SA               | Oryctola<br>gus<br>cuniculu<br>s |
| 1 | 1.00 | 1 | 1 | 0     | -0.002 | 0.003  | -0.007 | 0.002  | t | 118380 | GKPIPNPL<br>LGLDST           | Mus<br>musculu<br>s              |

|   |      |   |   |       |        |        |        |        |   |        |                              |                                  |
|---|------|---|---|-------|--------|--------|--------|--------|---|--------|------------------------------|----------------------------------|
| 1 | 1.00 | 1 | 1 | -0.05 | -0.053 | -0.043 | -0.05  | -0.048 | t | 131654 | SGFGVVKK<br>PNY              | Oryctola<br>gus<br>cuniculu<br>s |
| 1 | 1.00 | 1 | 1 | -0.01 | -0.014 | 0.001  | -0.011 | -0.01  | t | 38271  | LNLTTASV<br>PMLRWYA<br>ERFCF | Mus<br>musculu<br>s              |
| 1 | 1.00 | 1 | 1 | 0     | 0.001  | 0.005  | 0.001  | 0.001  | t | 65003  | TLPFNWT<br>HCFDPQIQ<br>AIVS  | Homo<br>sapiens                  |
| 1 | 1.00 | 1 | 1 | 0.02  | 0.022  | 0.008  | 0.017  | 0.03   | t | 78393  | GDYLIDQG<br>L                | Homo<br>sapiens                  |
| 1 | 1.00 | 1 | 1 | -0.02 | -0.02  | -0.02  | -0.024 | -0.019 | t | 119633 | QYTGHIT<br>WTPPAIFK<br>S     | Homo<br>sapiens                  |
| 1 | 1.00 | 1 | 1 | 0.02  | 0.018  | 0.027  | 0.013  | 0.021  | t | 135939 | IPVLDENG<br>LFAP             | Mus<br>musculu<br>s              |
| 1 | 1.00 | 1 | 1 | 0.04  | 0.034  | 0.043  | 0.039  | 0.043  | t | 99387  | KLVFFAED<br>VGSNKG           | Canis<br>lupus                   |
| 1 | 1.00 | 1 | 1 | -0.03 | -0.03  | -0.03  | -0.03  | -0.024 | t | 54568  | RLGVRATR<br>K                | Homo<br>sapiens                  |
| 1 | 1.00 | 1 | 1 | 0.03  | 0.03   | 0.037  | 0.03   | 0.035  | t | 136357 | HLKKFAGN<br>AGTP             | Mus<br>musculu<br>s              |
| 1 | 1.00 | 1 | 1 | 0.01  | 0.01   | 0.01   | 0.01   | 0.014  | t | 133538 | CNKPGERT<br>C                | Mus<br>musculu<br>s              |
| 1 | 1.00 | 1 | 1 | -0.06 | -0.046 | -0.044 | -0.059 | -0.06  | t | 56502  | RYAPACKP<br>L                | Homo<br>sapiens                  |
| 1 | 1.00 | 1 | 1 | 0     | 0.012  | 0.011  | 0      | -0.002 | t | 45777  | NSDDEDYF<br>SGETRSP<br>EAVYT | Mus<br>musculu<br>s              |
| 1 | 1.00 | 1 | 1 | -0.06 | -0.048 | -0.055 | -0.06  | -0.06  | t | 73433  | YARFMDT<br>DPDRYGIL<br>PSNF  | Mus<br>musculu<br>s              |
| 1 | 1.00 | 1 | 1 | -0.06 | -0.048 | -0.055 | -0.06  | -0.06  | t | 73433  | YARFMDT<br>DPDRYGIL<br>PSNF  | Mus<br>musculu<br>s              |
| 1 | 1.00 | 1 | 1 | -0.04 | -0.037 | -0.024 | -0.04  | -0.04  | t | 49692  | PTLDVRMI<br>NI               | Mus<br>musculu<br>s              |

|   |      |   |   |       |        |        |        |        |   |        |                              |                           |
|---|------|---|---|-------|--------|--------|--------|--------|---|--------|------------------------------|---------------------------|
| 1 | 1.00 | 1 | 1 | -0.04 | -0.037 | -0.024 | -0.04  | -0.04  | t | 49692  | PTLDVRMI<br>NI               | Mus<br>musculu<br>s       |
| 1 | 1.00 | 1 | 1 | 0.02  | 0.021  | 0.023  | 0.019  | 0.021  | t | 67214  | TVWRNRE<br>TLMEFEEP<br>HATKQ | Equus<br>caballus         |
| 1 | 1.00 | 1 | 1 | 0     | -0.005 | 0.015  | -0.001 | 0      | t | 8888   | DKIDWRES<br>GYVTEVKD<br>QGNC | Bos<br>taurus             |
| 1 | 1.00 | 1 | 1 | 0     | -0.005 | 0.015  | -0.001 | 0      | t | 8888   | DKIDWRES<br>GYVTEVKD<br>QGNC | Bos<br>taurus             |
| 1 | 1.00 | 1 | 1 | -0.03 | -0.031 | -0.029 | -0.033 | -0.029 | t | 99142  | DEGHALRI<br>PSGFISY          | Homo<br>sapiens           |
| 1 | 1.00 | 1 | 1 | -0.02 | -0.022 | -0.02  | -0.027 | -0.015 | t | 128093 | RNAIELRF<br>VL               | Mus<br>musculu<br>s       |
| 1 | 1.00 | 1 | 1 | 0.01  | 0.014  | 0.032  | 0.01   | 0.01   | t | 53342  | RDFSIRES                     | Mus<br>musculu<br>s       |
| 1 | 1.00 | 1 | 1 | 0.01  | 0.017  | 0.032  | 0.01   | 0.01   | t | 53342  | RDFSIRES                     | Equus<br>caballus         |
| 1 | 1.00 | 1 | 1 | -0.02 | -0.017 | -0.005 | -0.02  | -0.02  | t | 97913  | AVKQGVV<br>NLVKYAK           | Sus<br>scrofa             |
| 1 | 1.00 | 1 | 1 | 0     | 0      | 0.005  | -0.01  | 0      | t | 66683  | TTKQRQN<br>KPPNK             | Homo<br>sapiens           |
| 1 | 1.00 | 1 | 1 | 0.01  | 0.008  | 0.027  | 0.009  | 0.01   | t | 11423  | EDQKARE<br>A                 | Anas<br>platyrhy<br>nchos |
| 1 | 1.00 | 1 | 1 | 0.01  | 0.008  | 0.008  | 0.003  | 0.01   | t | 119642 | SEHETRLV<br>ANLLENYN<br>KVIR | Mus<br>musculu<br>s       |
| 1 | 1.00 | 1 | 1 | 0     | -0.002 | 0      | -0.007 | 0.002  | t | 117514 | GRGRGRG<br>RGRGGPR<br>R      | Mus<br>musculu<br>s       |
| 1 | 1.00 | 1 | 1 | 0     | 0      | 0      | 0      | 0.006  | t | 119673 | WNPDDYG<br>GVK               | Rattus<br>norvegic<br>us  |

|   |      |   |   |       |        |        |        |        |   |        |                              |                          |
|---|------|---|---|-------|--------|--------|--------|--------|---|--------|------------------------------|--------------------------|
| 1 | 1.00 | 1 | 1 | -0.01 | -0.01  | -0.005 | -0.017 | -0.008 | t | 118139 | SIPWWSKL<br>LTLV             | Homo<br>sapiens          |
| 1 | 1.00 | 1 | 1 | -0.03 | -0.03  | -0.018 | -0.03  | -0.031 | t | 120629 | IMIKAEYI<br>LKKPRSEL<br>MFE  | Rattus<br>norvegicus     |
| 1 | 1.00 | 1 | 1 | -0.08 | -0.076 | -0.073 | -0.08  | -0.078 | t | 139961 | YPWGQD<br>H                  | Ovis<br>aries            |
| 1 | 1.00 | 1 | 1 | 0     | 0.004  | 0.011  | -0.003 | 0.002  | t | 48026  | PKAFDEKL<br>FT               | Homo<br>sapiens          |
| 1 | 1.00 | 1 | 1 | 0.03  | 0.03   | 0.029  | 0.03   | 0.032  | t | 96088  | ALESPEHC<br>SPHHTALR<br>QAIL | Homo<br>sapiens          |
| 1 | 1.00 | 1 | 1 | -0.04 | -0.045 | -0.028 | -0.037 | -0.038 | t | 95678  | PPSVPNLR                     | Bos<br>taurus            |
| 1 | 1.00 | 1 | 1 | -0.04 | -0.038 | -0.028 | -0.037 | -0.038 | t | 95678  | PPSVPNLR                     | Cavia<br>porcellus       |
| 1 | 1.00 | 1 | 1 | -0.01 | -0.01  | -0.01  | -0.018 | -0.011 | t | 66155  | TSAHLER<br>MKKNME<br>QTIKDL  | Mus<br>musculus          |
| 1 | 1.00 | 1 | 1 | 0     | 0      | 0.007  | 0.003  | 0.002  | t | 45704  | NRLIAFAS<br>RGNHVSP<br>THYVP | Homo<br>sapiens          |
| 1 | 1.00 | 1 | 1 | -0.04 | -0.038 | -0.03  | -0.037 | -0.038 | t | 72052  | VYILIAVCL<br>GGLIGI          | Homo<br>sapiens          |
| 1 | 1.00 | 1 | 1 | 0.01  | 0.01   | 0.01   | 0.01   | 0.016  | t | 148127 | QEQQNLR<br>QCQEYIK           | Homo<br>sapiens          |
| 1 | 1.00 | 1 | 1 | 0.03  | 0.032  | 0.04   | 0.031  | 0.036  | t | 4256   | ARSATTTT                     | Homo<br>sapiens          |
| 1 | 1.00 | 1 | 1 | -0.02 | -0.016 | -0.018 | -0.023 | -0.016 | t | 30163  | KDHKPQT<br>TKPKE             | Homo<br>sapiens          |
| 1 | 1.00 | 1 | 1 | -0.02 | -0.024 | -0.02  | -0.027 | -0.018 | t | 129829 | RSGVSLAA<br>LKKALAAA         | Oryctolagus<br>cuniculus |

|   |      |   |   |       |        |        |        |        |   |        |                              |                       |
|---|------|---|---|-------|--------|--------|--------|--------|---|--------|------------------------------|-----------------------|
| 1 | 1.00 | 1 | 1 | 0.02  | 0.02   | 0.033  | 0.026  | 0.022  | t | 50989  | QGYQEPP<br>PPQAPYQ<br>GYQEPP | Homo sapiens          |
| 1 | 1.00 | 1 | 1 | 0.03  | 0.028  | 0.035  | 0.03   | 0.033  | t | 127185 | TCDDPRF<br>QDSS              | Oryctolagus cuniculus |
| 1 | 1.00 | 1 | 1 | -0.02 | -0.022 | -0.015 | -0.017 | -0.018 | t | 65583  | TPGPSQRI<br>QLINTNGS<br>WHIN | Mus musculus          |
| 1 | 1.00 | 1 | 1 | 0.01  | 0.012  | 0.027  | 0.011  | 0.01   | t | 30877  | KFVKEQRE                     | Homo sapiens          |
| 1 | 1.00 | 1 | 1 | 0     | -0.005 | 0.021  | -0.001 | 0      | t | 47489  | PFFFSQVR<br>SNFSKLV          | Bos taurus            |
| 1 | 1.00 | 1 | 1 | -0.1  | -0.102 | -0.087 | -0.1   | -0.1   | t | 142224 | LLDTKGGL<br>YRWRSVPV         | Sus scrofa            |
| 1 | 1.00 | 1 | 1 | -0.02 | -0.022 | -0.01  | -0.023 | -0.021 | t | 80013  | RNSAPRR<br>GANFSL            | Mus musculus          |
| 1 | 1.00 | 1 | 1 | -0.03 | -0.03  | -0.031 | -0.03  | -0.021 | t | 53244  | RAWAYM                       | Mus musculus          |
| 1 | 1.00 | 1 | 1 | -0.03 | -0.027 | -0.031 | -0.03  | -0.021 | t | 53244  | RAWAYM                       | Mus musculus          |
| 1 | 1.00 | 1 | 1 | -0.03 | -0.03  | -0.031 | -0.03  | -0.021 | t | 53244  | RAWAYM                       | Mus musculus          |
| 1 | 1.00 | 1 | 1 | 0.05  | 0.048  | 0.053  | 0.049  | 0.051  | t | 60036  | SPESDRPD<br>LSTFMESG<br>E    | Mus musculus          |
| 1 | 1.00 | 1 | 1 | 0     | 0      | 0.007  | 0      | 0      | t | 121826 | RVVGPYST<br>STWFRVK          | Mus musculus          |
| 1 | 1.00 | 1 | 1 | 0.02  | 0.022  | 0.036  | 0.017  | 0.02   | t | 75761  | YSIEF                        | Homo sapiens          |
| 1 | 1.00 | 1 | 1 | 0.02  | 0.022  | 0.008  | 0.017  | 0.03   | t | 78393  | GDYLIDQG<br>L                | Homo sapiens          |

|   |      |   |   |       |        |        |        |        |   |        |                              |                                  |
|---|------|---|---|-------|--------|--------|--------|--------|---|--------|------------------------------|----------------------------------|
| 1 | 1.00 | 1 | 1 | -0.02 | -0.024 | -0.01  | -0.02  | -0.02  | t | 93172  | KTSLWKE<br>MQYNRDI           | Mus<br>musculu<br>s              |
| 1 | 1.00 | 1 | 1 | 0     | -0.002 | 0      | -0.007 | 0      | t | 107455 | KAKGQPR                      | Mus<br>musculu<br>s              |
| 1 | 1.00 | 1 | 1 | -0.04 | -0.04  | -0.018 | -0.04  | -0.04  | t | 13458  | ENDIRV                       | Homo<br>sapiens                  |
| 1 | 1.00 | 1 | 1 | 0.02  | 0.018  | 0.015  | 0.013  | 0.02   | t | 112842 | SSKRGRQT<br>PVLAYML<br>DHSRS | Mus<br>musculu<br>s              |
| 1 | 1.00 | 1 | 1 | -0.04 | -0.044 | -0.039 | -0.047 | -0.04  | t | 112910 | ARVAEHP<br>DARLAWA<br>R      | Oryctola<br>gus<br>cuniculu<br>s |
| 1 | 1.00 | 1 | 1 | -0.05 | -0.043 | -0.036 | -0.05  | -0.048 | t | 4504   | ASKLCLG<br>WLWG              | Cavia<br>porcellu<br>s           |
| 1 | 1.00 | 1 | 1 | 0     | 0      | 0.005  | -0.003 | 0      | t | 25022  | HVAPTHY<br>VVESDASQ<br>RVTQV | Homo<br>sapiens                  |
| 1 | 1.00 | 1 | 1 | 0     | 0      | 0.01   | -0.003 | 0      | t | 25219  | IAAEQDRN<br>TREVFAQV<br>K    | Homo<br>sapiens                  |
| 1 | 1.00 | 1 | 1 | 0     | -0.002 | 0.007  | 0.003  | 0.005  | t | 106363 | DVYWLMP<br>DPPTS             | Mus<br>musculu<br>s              |
| 1 | 1.00 | 1 | 1 | -0.04 | -0.042 | -0.045 | -0.047 | -0.039 | t | 102564 | KKRPPKGG<br>GWNT             | Mus<br>musculu<br>s              |
| 1 | 1.00 | 1 | 1 | -0.03 | -0.026 | -0.03  | -0.033 | -0.028 | t | 146786 | AVNGDW<br>PLPTKLPLV<br>GGH   | Homo<br>sapiens                  |
| 1 | 1.00 | 1 | 1 | -0.05 | -0.05  | -0.038 | -0.059 | -0.05  | t | 135707 | KRNVIRII                     | Homo<br>sapiens                  |
| 1 | 1.00 | 1 | 1 | 0.01  | 0.01   | 0.01   | 0.006  | 0.014  | t | 138166 | FHEFWPT                      | Homo<br>sapiens                  |
| 1 | 1.00 | 1 | 1 | -0.02 | -0.016 | -0.018 | -0.023 | -0.021 | t | 99253  | FPGCPRHY<br>EEPHTQG          | Homo<br>sapiens                  |



|   |      |   |   |       |        |        |        |        |   |        |                              |                                  |
|---|------|---|---|-------|--------|--------|--------|--------|---|--------|------------------------------|----------------------------------|
| 1 | 1.00 | 1 | 1 | -0.03 | -0.032 | -0.021 | -0.027 | -0.03  | t | 78057  | VGVNRYD<br>QYKVHKP<br>WTLVVM | Mus<br>musculu<br>s              |
| 1 | 1.00 | 1 | 1 | -0.01 | -0.013 | 0      | -0.01  | -0.01  | t | 120403 | AMGSKGN<br>RTDSC             | Oryctola<br>gus<br>cuniculu<br>s |
| 1 | 1.00 | 1 | 1 | -0.01 | -0.01  | 0      | -0.01  | -0.01  | t | 120403 | AMGSKGN<br>RTDSC             | Mus<br>musculu<br>s              |
| 1 | 1.00 | 1 | 1 | 0.02  | 0.016  | 0.021  | 0.017  | 0.03   | t | 79610  | LTMTSPI                      | Oryctola<br>gus<br>cuniculu<br>s |
| 1 | 1.00 | 1 | 1 | 0     | -0.004 | 0      | -0.007 | 0.002  | t | 122889 | RLDASFQE<br>HPDLPG           | Oryctola<br>gus<br>cuniculu<br>s |
| 1 | 1.00 | 1 | 1 | 0.02  | 0.018  | 0.02   | 0.013  | 0.022  | t | 120769 | LLVDVEPK<br>VKSKKRE          | Mus<br>musculu<br>s              |
| 1 | 1.00 | 1 | 1 | -0.03 | -0.032 | -0.018 | -0.033 | -0.032 | t | 87356  | PNCHGPD<br>WASPVCQ<br>RHS    | Mus<br>musculu<br>s              |
| 1 | 1.00 | 1 | 1 | -0.02 | -0.018 | -0.011 | -0.02  | -0.02  | t | 100613 | VLAVRVV<br>NDHNPTK           | Homo<br>sapiens                  |
| 1 | 1.00 | 1 | 1 | -0.01 | -0.01  | -0.01  | -0.021 | -0.01  | t | 104129 | MNKYHNP                      | Homo<br>sapiens                  |
| 1 | 1.00 | 1 | 1 | 0     | 0      | 0.007  | 0      | 0.001  | t | 108066 | PGRNNSPL<br>GADSVQS          | Homo<br>sapiens                  |
| 1 | 1.00 | 1 | 1 | -0.01 | 0.002  | -0.009 | -0.01  | -0.01  | t | 8777   | DISEATQV<br>EQHHRRT<br>DND   | Mus<br>musculu<br>s              |
| 1 | 1.00 | 1 | 1 | -0.02 | -0.016 | -0.013 | -0.019 | -0.018 | t | 60259  | SPSLNLAS<br>VPKTSTPP<br>GEKP | Homo<br>sapiens                  |
| 1 | 1.00 | 1 | 1 | 0.03  | 0.032  | 0.023  | 0.031  | 0.039  | t | 76485  | YYALDVYA<br>YDVT             | Homo<br>sapiens                  |
| 1 | 1.00 | 1 | 1 | -0.01 | -0.01  | -0.001 | -0.01  | -0.01  | t | 110947 | MSTRSVSS<br>SSYRRMFG<br>GPGT | Mus<br>musculu<br>s              |

|   |      |   |   |       |        |        |        |        |   |        |                              |                       |
|---|------|---|---|-------|--------|--------|--------|--------|---|--------|------------------------------|-----------------------|
| 1 | 1.00 | 1 | 1 | 0.02  | 0.022  | 0.037  | 0.021  | 0.02   | t | 58963  | SKVPEDTL                     | Homo sapiens          |
| 1 | 1.00 | 1 | 1 | -0.04 | -0.04  | -0.019 | -0.04  | -0.04  | t | 5057   | ATMILAYA<br>MRVPEVI          | Homo sapiens          |
| 1 | 1.00 | 1 | 1 | 0.03  | 0.03   | 0.047  | 0.03   | 0.03   | t | 79197  | EENLTYTE<br>GCVSVFGA         | Mus musculus          |
| 1 | 1.00 | 1 | 1 | 0.02  | 0.016  | 0.028  | 0.013  | 0.02   | t | 113000 | GIKQLQAR<br>VLAVERY          | Oryctolagus cuniculus |
| 1 | 1.00 | 1 | 1 | 0.02  | 0.02   | 0.012  | 0.02   | 0.03   | t | 9886   | DQPKQYE<br>QHLLDYEK<br>IKEG  | Mus musculus          |
| 1 | 1.00 | 1 | 1 | -0.01 | -0.013 | -0.007 | -0.01  | -0.01  | t | 46886  | PAPNIASHI<br>SSISARTG<br>DP  | Oryctolagus cuniculus |
| 1 | 1.00 | 1 | 1 | -0.04 | -0.04  | -0.029 | -0.04  | -0.039 | t | 48906  | PPRRVS                       | Mus musculus          |
| 1 | 1.00 | 1 | 1 | -0.04 | -0.04  | -0.049 | -0.05  | -0.039 | t | 96373  | IATHAKIR<br>D                | Homo sapiens          |
| 1 | 1.00 | 1 | 1 | 0     | -0.006 | 0.007  | -0.001 | 0.002  | t | 134829 | YSHVHALS<br>TYAR             | Oryctolagus cuniculus |
| 1 | 1.00 | 1 | 1 | 0     | 0      | 0.014  | 0      | 0.002  | t | 21814  | GPVEDAIT<br>AAIGRV           | Mus musculus          |
| 1 | 1.00 | 1 | 1 | -0.01 | -0.014 | -0.01  | -0.017 | -0.008 | t | 128539 | EKTPVKKK<br>ARKSAGAA         | Oryctolagus cuniculus |
| 1 | 1.00 | 1 | 1 | -0.03 | -0.03  | -0.03  | -0.03  | -0.026 | t | 135906 | DALAVDQ<br>MGRFG             | Mus musculus          |
| 1 | 1.00 | 1 | 1 | 0     | 0      | 0.006  | 0      | 0      | t | 26927  | IKVIPVDPY<br>FFQMTNT<br>NPDQ | Homo sapiens          |

|   |      |   |   |       |        |        |        |        |   |        |                               |                                  |
|---|------|---|---|-------|--------|--------|--------|--------|---|--------|-------------------------------|----------------------------------|
| 1 | 1.00 | 1 | 1 | -0.01 | -0.01  | -0.01  | -0.02  | -0.01  | t | 114904 | NISKEHDG<br>EC                | Homo<br>sapiens                  |
| 1 | 1.00 | 1 | 1 | -0.01 | -0.013 | -0.01  | -0.01  | -0.008 | t | 50660  | QENSTYAV<br>RNSN              | Oryctola<br>gus<br>cuniculu<br>s |
| 1 | 1.00 | 1 | 1 | -0.01 | -0.01  | -0.01  | -0.01  | -0.008 | t | 50660  | QENSTYAV<br>RNSN              | Mus<br>musculu<br>s              |
| 1 | 1.00 | 1 | 1 | -0.05 | -0.05  | -0.043 | -0.05  | -0.048 | t | 94738  | WAICKRIP<br>NKKP              | Mus<br>musculu<br>s              |
| 1 | 1.00 | 1 | 1 | -0.02 | -0.018 | -0.013 | -0.023 | -0.02  | t | 94738  | WAICKRIP<br>NKKP              | Homo<br>sapiens                  |
| 1 | 1.00 | 1 | 1 | 0.01  | 0.008  | 0.011  | 0.003  | 0.012  | t | 118337 | ERADLIAYL<br>KKATNE           | Mus<br>musculu<br>s              |
| 1 | 1.00 | 1 | 1 | 0     | 0      | 0.017  | 0      | -0.002 | t | 141769 | TVPGGGT<br>TYIRAI AAL<br>EGLK | Mus<br>musculu<br>s              |
| 1 | 1.00 | 1 | 1 | -0.02 | -0.017 | -0.016 | -0.02  | -0.018 | t | 29375  | IVNRRTSFF<br>NLGPSQR          | Mus<br>musculu<br>s              |
| 1 | 1.00 | 1 | 1 | 0.05  | 0.046  | 0.063  | 0.049  | 0.05   | t | 141859 | ASSNSAQ<br>GSDESLIA           | Oryctola<br>gus<br>cuniculu<br>s |
| 1 | 1.00 | 1 | 1 | 0.01  | 0.01   | 0.026  | 0.012  | 0.01   | t | 67647  | VAKLVTQE<br>MFQNIK<br>KIESQ   | Homo<br>sapiens                  |
| 1 | 1.00 | 1 | 1 | -0.04 | -0.042 | -0.04  | -0.047 | -0.038 | t | 118141 | SKGRRFKG                      | Mus<br>musculu<br>s              |
| 1 | 1.00 | 1 | 1 | -0.05 | -0.05  | -0.047 | -0.05  | -0.05  | t | 107788 | DHEGTHST<br>KRGHAKSR<br>PVRG  | Homo<br>sapiens                  |
| 1 | 1.00 | 1 | 1 | 0.01  | 0.01   | 0.012  | 0.01   | 0.013  | t | 132660 | SKAVHAD<br>MGYWIES<br>E       | Mus<br>musculu<br>s              |
| 1 | 1.00 | 1 | 1 | 0     | 0.007  | 0.017  | 0      | -0.003 | t | 110968 | PSTSRSLYA<br>SSPGGVYA<br>TRS  | Mus<br>musculu<br>s              |

|   |      |   |   |       |        |        |        |        |   |        |                              |                                  |
|---|------|---|---|-------|--------|--------|--------|--------|---|--------|------------------------------|----------------------------------|
| 1 | 1.00 | 1 | 1 | 0.01  | 0.009  | 0.027  | 0.01   | 0.012  | t | 95747  | QVLAQKV<br>A                 | Bos<br>taurus                    |
| 1 | 1.00 | 1 | 1 | 0     | -0.001 | 0.001  | -0.003 | 0.001  | t | 99141  | DEELQEGH<br>VLVVPQN          | Homo<br>sapiens                  |
| 1 | 1.00 | 1 | 1 | 0     | 0.002  | 0.009  | 0      | 0      | t | 112315 | SHGRTQD<br>ENPVVHFF<br>KNIVT | Homo<br>sapiens                  |
| 1 | 1.00 | 1 | 1 | 0.04  | 0.044  | 0.049  | 0.043  | 0.04   | t | 1523   | AGGGQG<br>QNNEGAN<br>APNEDSV | Homo<br>sapiens                  |
| 1 | 1.00 | 1 | 1 | -0.02 | -0.022 | -0.009 | -0.013 | -0.018 | t | 28982  | ITLPQDAV<br>SRTQRRGR<br>TGRG | Homo<br>sapiens                  |
| 1 | 1.00 | 1 | 1 | 0.01  | 0.01   | 0.017  | 0.01   | 0.013  | t | 130583 | QCQTFGK<br>TMLCT             | Mus<br>musculu<br>s              |
| 1 | 1.00 | 1 | 1 | -0.01 | -0.012 | 0.012  | -0.009 | -0.01  | t | 98391  | QPVKDSW<br>MSSRGFD<br>E      | Sus<br>scrofa                    |
| 1 | 1.00 | 1 | 1 | -0.05 | -0.05  | -0.05  | -0.053 | -0.047 | t | 110997 | RCHAANP<br>NGRYYWG<br>GQYTWD | Mus<br>musculu<br>s              |
| 1 | 1.00 | 1 | 1 | 0     | 0.002  | 0.014  | -0.003 | 0.002  | t | 69172  | VIYTYPNK<br>VF               | Homo<br>sapiens                  |
| 1 | 1.00 | 1 | 1 | -0.02 | -0.02  | -0.017 | -0.02  | -0.018 | t | 33215  | KRRLRPSR<br>VRIE             | Mus<br>musculu<br>s              |
| 1 | 1.00 | 1 | 1 | -0.03 | -0.031 | -0.029 | -0.033 | -0.029 | t | 99261  | FYFPSRRFS<br>TRYGNQ          | Homo<br>sapiens                  |
| 1 | 1.00 | 1 | 1 | -0.02 | -0.02  | -0.008 | -0.02  | -0.019 | t | 95040  | SHRPREAK                     | Oryctola<br>gus<br>cuniculu<br>s |
| 1 | 1.00 | 1 | 1 | -0.02 | -0.02  | -0.008 | -0.02  | -0.019 | t | 95040  | SHRPREAK                     | Oryctola<br>gus<br>cuniculu<br>s |

|   |      |   |   |       |        |        |        |        |   |        |                              |                                  |
|---|------|---|---|-------|--------|--------|--------|--------|---|--------|------------------------------|----------------------------------|
| 1 | 1.00 | 1 | 1 | 0.03  | 0.03   | 0.029  | 0.04   | 0.042  | t | 106648 | MHNPSM<br>T                  | Homo<br>sapiens                  |
| 1 | 1.00 | 1 | 1 | -0.05 | -0.048 | -0.038 | -0.053 | -0.053 | t | 100323 | NEGVIVKV<br>SKEHVEEL<br>TKHA | Homo<br>sapiens                  |
| 1 | 1.00 | 1 | 1 | 0     | 0      | 0.002  | -0.007 | 0      | t | 135954 | LNTGWLA<br>GLFYQHKE          | Homo<br>sapiens                  |
| 1 | 1.00 | 1 | 1 | 0.01  | 0.01   | 0.026  | 0.01   | 0.013  | t | 9588   | DPAFSL                       | Mus<br>musculu<br>s              |
| 1 | 1.00 | 1 | 1 | 0.02  | 0.018  | 0.034  | 0.019  | 0.02   | t | 68322  | VEQKHIQK<br>EDVPSERY<br>LGYL | Mus<br>musculu<br>s              |
| 1 | 1.00 | 1 | 1 | 0.01  | 0.011  | 0.015  | 0.01   | 0.01   | t | 22147  | GRMASCR<br>SIDKFDQG<br>WGPIT | Mus<br>musculu<br>s              |
| 1 | 1.00 | 1 | 1 | -0.01 | -0.006 | -0.012 | -0.003 | 0      | t | 101258 | SQNALPK                      | Homo<br>sapiens                  |
| 1 | 1.00 | 1 | 1 | -0.06 | -0.06  | -0.05  | -0.06  | -0.057 | t | 17350  | FPPRP                        | Mus<br>musculu<br>s              |
| 1 | 1.00 | 1 | 1 | -0.06 | -0.06  | -0.047 | -0.06  | -0.06  | t | 97359  | GPGR                         | Mus<br>musculu<br>s              |
| 1 | 1.00 | 1 | 1 | -0.06 | -0.06  | -0.047 | -0.06  | -0.06  | t | 97359  | GPGR                         | Mus<br>musculu<br>s              |
| 1 | 1.00 | 1 | 1 | -0.02 | -0.025 | -0.004 | -0.017 | -0.018 | t | 157832 | RDDPHKV<br>TPSDM             | Canis<br>lupus                   |
| 1 | 1.00 | 1 | 1 | -0.01 | -0.012 | -0.005 | -0.011 | -0.007 | t | 33531  | KSTQRSTR<br>RNLS             | Mus<br>musculu<br>s              |
| 1 | 1.00 | 1 | 1 | 0.04  | 0.037  | 0.054  | 0.04   | 0.042  | t | 80093  | VTTSGGGR<br>QG               | Oryctola<br>gus<br>cuniculu<br>s |
| 1 | 1.00 | 1 | 1 | -0.05 | -0.05  | -0.034 | -0.05  | -0.05  | t | 59626  | SMAGKRE<br>MVI               | Mus<br>musculu<br>s              |

|   |      |   |   |       |        |        |        |        |   |        |                              |                          |
|---|------|---|---|-------|--------|--------|--------|--------|---|--------|------------------------------|--------------------------|
| 1 | 1.00 | 1 | 1 | -0.06 | -0.06  | -0.06  | -0.063 | -0.06  | t | 149043 | FLHTRLLFR<br>NGIILR          | Rattus<br>norvegicus     |
| 1 | 1.00 | 1 | 1 | -0.06 | -0.06  | -0.049 | -0.06  | -0.06  | t | 141918 | IARGVRRRL<br>QA              | Mus<br>musculus          |
| 1 | 1.00 | 1 | 1 | -0.03 | -0.03  | -0.017 | -0.03  | -0.03  | t | 139227 | RGDLQVLT<br>PK               | Sus<br>scrofa            |
| 1 | 1.00 | 1 | 1 | -0.02 | -0.018 | -0.008 | -0.017 | -0.018 | t | 45283  | NNWPCLN<br>ETCPTKG           | Homo<br>sapiens          |
| 1 | 1.00 | 1 | 1 | -0.03 | -0.03  | -0.026 | -0.027 | -0.03  | t | 53881  | RGGSRERA<br>RGRGRGR<br>GEKRP | Homo<br>sapiens          |
| 1 | 1.00 | 1 | 1 | -0.05 | -0.046 | -0.034 | -0.047 | -0.05  | t | 29744  | KAAASKVK<br>ANLLSV           | Homo<br>sapiens          |
| 1 | 1.00 | 1 | 1 | -0.03 | -0.028 | -0.015 | -0.029 | -0.027 | t | 62737  | SYVK                         | Homo<br>sapiens          |
| 1 | 1.00 | 1 | 1 | -0.04 | -0.042 | -0.02  | -0.041 | -0.04  | t | 141670 | HVTTTFAP<br>PPPR             | Mus<br>musculus          |
| 1 | 1.00 | 1 | 1 | 0.03  | 0.026  | 0.048  | 0.029  | 0.03   | t | 22813  | GTSESTET<br>SEVSTYSMS        | Oryctolagus<br>cuniculus |
| 1 | 1.00 | 1 | 1 | 0.03  | 0.034  | 0.03   | 0.03   | 0.033  | t | 64525  | TKAIINYQY<br>NQYTEEEK<br>NN  | Homo<br>sapiens          |
| 1 | 1.00 | 1 | 1 | 0.03  | 0.041  | 0.03   | 0.03   | 0.033  | t | 64525  | TKAIINYQY<br>NQYTEEEK<br>NN  | Gallus<br>gallus         |
| 1 | 1.00 | 1 | 1 | 0.03  | 0.036  | 0.03   | 0.03   | 0.033  | t | 64525  | TKAIINYQY<br>NQYTEEEK<br>NN  | Equus<br>caballus        |
| 1 | 1.00 | 1 | 1 | -0.03 | -0.03  | -0.023 | -0.03  | -0.027 | t | 133554 | EGLYSPW<br>WPRSLPVL          | Mus<br>musculus          |

|   |      |   |   |       |        |        |        |        |   |        |                              |                                  |
|---|------|---|---|-------|--------|--------|--------|--------|---|--------|------------------------------|----------------------------------|
| 1 | 1.00 | 1 | 1 | 0     | 0      | 0.002  | 0      | 0.005  | t | 122083 | DPNIKLVLD<br>DCWATS          | Oryctola<br>gus<br>cuniculu<br>s |
| 1 | 1.00 | 1 | 1 | 0     | 0      | 0.002  | 0      | 0.005  | t | 25140  | HWSYGLR<br>PG                | Mus<br>musculu<br>s              |
| 1 | 1.00 | 1 | 1 | 0     | -0.002 | 0.022  | -0.003 | 0      | t | 8303   | DFPIQNLP<br>YG               | Mus<br>musculu<br>s              |
| 1 | 1.00 | 1 | 1 | -0.01 | -0.01  | -0.005 | -0.007 | -0.007 | t | 8785   | DISQLTQAI<br>VKNHKNNL<br>K   | Homo<br>sapiens                  |
| 1 | 1.00 | 1 | 1 | 0.01  | 0.01   | 0.015  | 0.004  | 0.011  | t | 107062 | AEFRHD                       | Mus<br>musculu<br>s              |
| 1 | 1.00 | 1 | 1 | -0.01 | -0.006 | 0.019  | -0.01  | -0.01  | t | 31772  | KLCGVL                       | Homo<br>sapiens                  |
| 1 | 1.00 | 1 | 1 | 0.01  | 0.01   | 0.024  | 0.01   | 0.01   | t | 4268   | ARTGEG                       | Homo<br>sapiens                  |
| 1 | 1.00 | 1 | 1 | 0.01  | 0.012  | 0.009  | 0.011  | 0.018  | t | 37640  | LLPAAD                       | Homo<br>sapiens                  |
| 1 | 1.00 | 1 | 1 | 0     | 0      | 0.007  | 0      | 0      | t | 102434 | FMRWLSD<br>LRETCFSYY<br>QKYI | Mus<br>musculu<br>s              |
| 1 | 1.00 | 1 | 1 | 0     | 0      | 0      | 0      | 0.006  | t | 74797  | YLLPRRGP<br>R                | Homo<br>sapiens                  |
| 1 | 1.00 | 1 | 1 | -0.03 | -0.026 | -0.019 | -0.029 | -0.028 | t | 24046  | HIFYRRFLG<br>KDGRDP<br>K     | Homo<br>sapiens                  |
| 1 | 1.00 | 1 | 1 | 0     | -0.002 | 0.022  | -0.003 | -0.002 | t | 96119  | ASTRGDLA<br>HLTAT            | Mus<br>musculu<br>s              |
| 1 | 1.00 | 1 | 1 | 0     | 0.004  | 0.01   | -0.003 | -0.002 | t | 74125  | YHNHEEEA<br>KRLEIFK          | Homo<br>sapiens                  |
| 1 | 1.00 | 1 | 1 | -0.01 | -0.01  | 0.011  | -0.007 | -0.01  | t | 18588  | GAGGGAG<br>GAGAGGG<br>AGGAGA | Homo<br>sapiens                  |

|   |      |   |   |       |        |        |        |        |   |        |                              |                                  |
|---|------|---|---|-------|--------|--------|--------|--------|---|--------|------------------------------|----------------------------------|
| 1 | 1.00 | 1 | 1 | 0.01  | 0.006  | 0.028  | 0.009  | 0.01   | t | 22813  | GTSESTET<br>SEVSTYSM<br>S    | Oryctola<br>gus<br>cuniculu<br>s |
| 1 | 1.00 | 1 | 1 | -0.02 | -0.022 | -0.002 | -0.019 | -0.021 | t | 98940  | PQPGPQP<br>PQPPQPQ<br>P      | Mus<br>musculu<br>s              |
| 1 | 1.00 | 1 | 1 | 0.06  | 0.06   | 0.06   | 0.06   | 0.066  | t | 150801 | EDDF                         | Homo<br>sapiens                  |
| 1 | 1.00 | 1 | 1 | -0.03 | -0.033 | -0.03  | -0.03  | -0.03  | t | 105562 | VAVVRTPP<br>KSPSSAK          | Oryctola<br>gus<br>cuniculu<br>s |
| 1 | 1.00 | 1 | 1 | -0.01 | -0.01  | -0.01  | -0.01  | -0.008 | t | 61393  | SSTKNLIKN<br>LTLCELNV        | Sus<br>scrofa                    |
| 1 | 1.00 | 1 | 1 | -0.04 | -0.02  | -0.024 | -0.04  | -0.042 | t | 24842  | HSQWNKP<br>SKPKTNM<br>K      | Gallus<br>gallus                 |
| 1 | 1.00 | 1 | 1 | -0.05 | -0.05  | -0.05  | -0.04  | -0.041 | t | 108608 | RGGIRRQS<br>L                | Homo<br>sapiens                  |
| 1 | 1.00 | 1 | 1 | -0.01 | -0.01  | -0.01  | -0.01  | -0.006 | t | 97594  | QTPLTETA<br>LKWH             | Mus<br>musculu<br>s              |
| 1 | 1.00 | 1 | 1 | 0     | 0.002  | 0.01   | 0.001  | 0.002  | t | 78680  | HPPSSRPC<br>ANTPPSE<br>MDTWN | Homo<br>sapiens                  |
| 1 | 1.00 | 1 | 1 | 0.02  | 0.02   | 0.035  | 0.02   | 0.02   | t | 70444  | VPQLEIVP<br>NSAEERLH<br>SMKE | Homo<br>sapiens                  |
| 1 | 1.00 | 1 | 1 | -0.03 | -0.032 | -0.012 | -0.029 | -0.031 | t | 98940  | PQPGPQP<br>PQPPQPQ<br>P      | Mus<br>musculu<br>s              |
| 1 | 1.00 | 1 | 1 | -0.01 | -0.008 | -0.01  | -0.01  | -0.009 | t | 118046 | PGHKWKE<br>VRHDNKV<br>TWLVSW | Homo<br>sapiens                  |
| 1 | 1.00 | 1 | 1 | -0.02 | -0.018 | 0      | -0.017 | -0.02  | t | 53159  | RALRTDPE<br>GVDPDVR<br>APRTG | Homo<br>sapiens                  |



|   |      |   |   |       |        |        |        |        |   |        |                              |                       |
|---|------|---|---|-------|--------|--------|--------|--------|---|--------|------------------------------|-----------------------|
| 1 | 1.00 | 1 | 1 | 0.01  | 0.014  | 0.017  | 0.017  | 0.019  | t | 105019 | VGERGSK                      | Homo sapiens          |
| 1 | 1.00 | 1 | 1 | 0.01  | 0.008  | 0.009  | 0.007  | 0.01   | t | 48412  | PLLSNTLA<br>ELYVREHL<br>REQS | Mus musculus          |
| 1 | 1.00 | 1 | 1 | -0.01 | -0.009 | 0.002  | -0.013 | -0.01  | t | 56742  | SAEASRDK<br>AFAVSKDL<br>A    | Equus caballus        |
| 1 | 1.00 | 1 | 1 | -0.04 | -0.038 | -0.031 | -0.04  | -0.04  | t | 100644 | WRITYKDT<br>VQLRRK           | Homo sapiens          |
| 1 | 1.00 | 1 | 1 | -0.05 | -0.05  | -0.04  | -0.05  | -0.049 | t | 57743  | SFDVPSKQ<br>PTIDIDL          | Oryctolagus cuniculus |
| 1 | 1.00 | 1 | 1 | 0.03  | 0.028  | 0.032  | 0.027  | 0.03   | t | 48823  | PPLLESWK<br>DPDYVPPV<br>VHG  | Mus musculus          |
| 1 | 1.00 | 1 | 1 | 0.04  | 0.04   | 0.049  | 0.04   | 0.042  | t | 58397  | SHQHTDS<br>NPSAT             | Mus musculus          |
| 1 | 1.00 | 1 | 1 | 0     | 0      | 0.008  | 0      | 0.002  | t | 80041  | SVAMKPY<br>EVTPT             | Mus musculus          |
| 1 | 1.00 | 1 | 1 | 0.03  | 0.027  | 0.03   | 0.03   | 0.04   | t | 39608  | LSQNASV                      | Oryctolagus cuniculus |
| 1 | 1.00 | 1 | 1 | 0.03  | 0.027  | 0.039  | 0.03   | 0.032  | t | 132764 | YQNSMDT<br>QLGDN             | Oryctolagus cuniculus |
| 1 | 1.00 | 1 | 1 | 0.04  | 0.044  | 0.052  | 0.037  | 0.04   | t | 107154 | GKRPSCTG<br>CSYELAQ          | Homo sapiens          |
| 1 | 1.00 | 1 | 1 | -0.02 | -0.02  | -0.032 | -0.02  | -0.011 | t | 109534 | LVGPRGER<br>GFP              | Mus musculus          |
| 1 | 1.00 | 1 | 1 | 0.04  | 0.04   | 0.063  | 0.04   | 0.042  | t | 11456  | EDTVTP                       | Homo sapiens          |
| 1 | 1.00 | 1 | 1 | 0     | -0.004 | 0      | -0.007 | 0.002  | t | 125478 | LHQEYEEN<br>LGDSIVGY<br>KEKS | Oryctolagus cuniculus |

|   |      |   |   |       |        |        |        |        |   |        |                              |                                  |
|---|------|---|---|-------|--------|--------|--------|--------|---|--------|------------------------------|----------------------------------|
| 1 | 1.00 | 1 | 1 | 0     | -0.004 | 0      | -0.007 | 0.002  | t | 125384 | DSHYDYTI<br>CGDSEDM<br>VCTPK | Oryctola<br>gus<br>cuniculu<br>s |
| 1 | 1.00 | 1 | 1 | 0     | -0.004 | 0      | -0.007 | 0.002  | t | 125472 | LDAVYLNK<br>NKYLTVID<br>KDAF | Oryctola<br>gus<br>cuniculu<br>s |
| 1 | 1.00 | 1 | 1 | 0     | -0.002 | 0      | -0.007 | 0.002  | t | 125384 | DSHYDYTI<br>CGDSEDM<br>VCTPK | Mus<br>musculu<br>s              |
| 1 | 1.00 | 1 | 1 | 0     | -0.002 | 0      | -0.007 | 0.002  | t | 125472 | LDAVYLNK<br>NKYLTVID<br>KDAF | Mus<br>musculu<br>s              |
| 1 | 1.00 | 1 | 1 | 0     | -0.002 | 0      | -0.007 | 0.002  | t | 125478 | LHQEYEEN<br>LGDSIVGY<br>KEKS | Mus<br>musculu<br>s              |
| 1 | 1.00 | 1 | 1 | 0     | -0.002 | 0      | -0.007 | 0.002  | t | 6015   | CAPESIEFP<br>VSEARVLE<br>D   | Mus<br>musculu<br>s              |
| 1 | 1.00 | 1 | 1 | -0.03 | -0.033 | -0.026 | -0.03  | -0.028 | t | 139239 | RWPEFSKF<br>GGFDPQG          | Oryctola<br>gus<br>cuniculu<br>s |
| 1 | 1.00 | 1 | 1 | 0     | 0      | 0.005  | -0.003 | 0      | t | 25021  | HVAPTHY<br>VTESDASQ<br>RVTQL | Homo<br>sapiens                  |
| 1 | 1.00 | 1 | 1 | 0     | 0      | 0.016  | 0      | 0.002  | t | 22686  | GTHNQW<br>NKPSKP             | Mus<br>musculu<br>s              |
| 1 | 1.00 | 1 | 1 | 0     | -0.002 | 0.027  | 0.003  | 0      | t | 59784  | SMYGSYN                      | Mus<br>musculu<br>s              |
| 1 | 1.00 | 1 | 1 | 0.04  | 0.04   | 0.057  | 0.04   | 0.04   | t | 33831  | KTQIDQVE<br>STAGSLQ          | Mus<br>musculu<br>s              |
| 1 | 1.00 | 1 | 1 | -0.04 | -0.033 | -0.023 | -0.037 | -0.043 | t | 111033 | STYDRDN<br>DGWLTSD<br>PRKQCS | Mus<br>musculu<br>s              |
| 1 | 1.00 | 1 | 1 | -0.12 | -0.12  | -0.104 | -0.12  | -0.123 | t | 144873 | ATWVDLV<br>LEGDSCLTI         | Mus<br>musculu<br>s              |
| 1 | 1.00 | 1 | 1 | 0     | 0.002  | 0.02   | 0.007  | 0.002  | t | 128001 | GLINRAKA<br>VKQFEESR<br>GRTS | Homo<br>sapiens                  |

|   |      |   |   |       |        |        |        |        |   |        |                             |                                  |
|---|------|---|---|-------|--------|--------|--------|--------|---|--------|-----------------------------|----------------------------------|
| 1 | 1.00 | 1 | 1 | -0.06 | -0.062 | -0.051 | -0.061 | -0.06  | t | 58077  | SGHRMA<br>WMMMM<br>NW       | Mus<br>musculu<br>s              |
| 1 | 1.00 | 1 | 1 | 0.02  | 0.018  | 0.042  | 0.019  | 0.02   | t | 49137  | PQTTKPKE<br>VPTT            | Mus<br>musculu<br>s              |
| 1 | 1.00 | 1 | 1 | 0.02  | 0.024  | 0.02   | 0.017  | 0.02   | t | 105942 | LSADQIST<br>VQASFDK<br>VKGD | Homo<br>sapiens                  |
| 1 | 1.00 | 1 | 1 | -0.01 | -0.01  | 0.013  | -0.01  | -0.01  | t | 41536  | MFRGKEN<br>ALL              | Mus<br>musculu<br>s              |
| 1 | 1.00 | 1 | 1 | -0.03 | -0.028 | -0.021 | -0.03  | -0.03  | t | 82573  | GAYKRHH<br>QVQEG            | Homo<br>sapiens                  |
| 1 | 1.00 | 1 | 1 | -0.03 | -0.03  | -0.021 | -0.03  | -0.03  | t | 82573  | GAYKRHH<br>QVQEG            | Mus<br>musculu<br>s              |
| 1 | 1.00 | 1 | 1 | -0.02 | -0.016 | -0.013 | -0.023 | -0.018 | t | 107226 | QQPVSSW<br>VVFSSDAI         | Homo<br>sapiens                  |
| 1 | 1.00 | 1 | 1 | -0.05 | -0.047 | -0.044 | -0.05  | -0.049 | t | 105748 | EFRHDSGY<br>EVHHQK          | Mus<br>musculu<br>s              |
| 1 | 1.00 | 1 | 1 | -0.03 | -0.027 | -0.023 | -0.03  | -0.03  | t | 50884  | QGILFLQW<br>VRDIIDDF        | Mus<br>musculu<br>s              |
| 1 | 1.00 | 1 | 1 | 0     | -0.003 | 0.017  | 0      | 0      | t | 35199  | LDKNHVA<br>DIDKLID          | Oryctola<br>gus<br>cuniculu<br>s |
| 1 | 1.00 | 1 | 1 | 0     | 0.004  | 0.007  | -0.003 | -0.001 | t | 33123  | KRELRLNP<br>QQCGLRA         | Homo<br>sapiens                  |
| 1 | 1.00 | 1 | 1 | -0.02 | -0.022 | -0.001 | -0.021 | -0.02  | t | 119810 | DTPILPQ                     | Mus<br>musculu<br>s              |
| 1 | 1.00 | 1 | 1 | -0.11 | -0.11  | -0.11  | -0.11  | -0.111 | t | 117234 | SRGQHQA<br>HSLERVCH<br>CL   | Mus<br>musculu<br>s              |

|   |      |   |   |       |        |        |        |        |   |        |                              |                                  |
|---|------|---|---|-------|--------|--------|--------|--------|---|--------|------------------------------|----------------------------------|
| 1 | 1.00 | 1 | 1 | 0     | 0.007  | 0.009  | 0      | 0      | t | 25667  | IDSGIDSSH<br>PDLKVA          | Cavia<br>porcellu<br>s           |
| 1 | 1.00 | 1 | 1 | 0     | 0      | 0.013  | 0      | 0.002  | t | 33799  | KTNSSLLT                     | Bos<br>taurus                    |
| 1 | 1.00 | 1 | 1 | -0.02 | -0.02  | -0.015 | -0.02  | -0.02  | t | 114211 | GSLPQKSH<br>GRTQDEN<br>PVVHF | Mus<br>musculu<br>s              |
| 1 | 1.00 | 1 | 1 | -0.01 | -0.012 | -0.003 | -0.017 | -0.01  | t | 141675 | IINTGSLLS<br>LAH             | Mus<br>musculu<br>s              |
| 1 | 1.00 | 1 | 1 | -0.03 | -0.037 | -0.018 | -0.027 | -0.03  | t | 32096  | KLQACEHP<br>IGEWCMM          | Bos<br>indicus                   |
| 1 | 1.00 | 1 | 1 | -0.02 | -0.018 | 0.001  | -0.019 | -0.019 | t | 23032  | GVLAQDV<br>RFSQV             | Homo<br>sapiens                  |
| 1 | 1.00 | 1 | 1 | -0.04 | -0.04  | -0.043 | -0.04  | -0.033 | t | 79037  | PFWLRD                       | Mus<br>musculu<br>s              |
| 1 | 1.00 | 1 | 1 | -0.04 | -0.043 | -0.027 | -0.04  | -0.038 | t | 4427   | ASGLVSMF<br>SV               | Oryctola<br>gus<br>cuniculu<br>s |
| 1 | 1.00 | 1 | 1 | -0.02 | -0.018 | -0.006 | -0.017 | -0.02  | t | 72133  | VYPPSSTA<br>KSSVSNAP<br>PVAS | Homo<br>sapiens                  |
| 1 | 1.00 | 1 | 1 | 0.01  | 0.012  | -0.002 | 0.007  | 0.02   | t | 78372  | ELAASAI<br>VG                | Homo<br>sapiens                  |
| 1 | 1.00 | 1 | 1 | 0.01  | 0.006  | 0.037  | 0.009  | 0.008  | t | 55036  | RNNHPQN<br>TSDSQKEA<br>TD    | Oryctola<br>gus<br>cuniculu<br>s |
| 1 | 1.00 | 1 | 1 | 0     | 0.004  | -0.001 | 0.001  | 0.008  | t | 26842  | IKLNG                        | Homo<br>sapiens                  |
| 1 | 1.00 | 1 | 1 | -0.03 | -0.033 | -0.025 | -0.03  | -0.031 | t | 126819 | PGLWLHQ<br>AFFSPWTL<br>LR    | Oryctola<br>gus<br>cuniculu<br>s |
| 1 | 1.00 | 1 | 1 | -0.04 | -0.028 | -0.019 | -0.04  | -0.042 | t | 29088  | ITSHTGYL<br>QLRL             | Mus<br>musculu<br>s              |
| 1 | 1.00 | 1 | 1 | -0.05 | -0.048 | -0.043 | -0.053 | -0.048 | t | 94702  | TCWAICKR<br>IPNK             | Homo<br>sapiens                  |

|   |      |   |   |       |        |        |        |        |   |        |                              |                       |
|---|------|---|---|-------|--------|--------|--------|--------|---|--------|------------------------------|-----------------------|
| 1 | 1.00 | 1 | 1 | 0.02  | 0.02   | 0.042  | 0.017  | 0.02   | t | 32098  | KLQDCT                       | Homo sapiens          |
| 1 | 1.00 | 1 | 1 | -0.02 | -0.024 | -0.011 | -0.02  | -0.019 | t | 53247  | RAYALWS<br>ARQQFKTT          | Mus musculus          |
| 1 | 1.00 | 1 | 1 | -0.02 | -0.024 | -0.011 | -0.02  | -0.019 | t | 53247  | RAYALWS<br>ARQQFKTT          | Mus musculus          |
| 1 | 1.00 | 1 | 1 | -0.03 | -0.033 | -0.016 | -0.03  | -0.03  | t | 120598 | IARFKMFP<br>EVKEKGMA         | Oryctolagus cuniculus |
| 1 | 1.00 | 1 | 1 | -0.04 | -0.04  | -0.031 | -0.044 | -0.04  | t | 135902 | AVSAHGCL<br>FDRR             | Homo sapiens          |
| 1 | 1.00 | 1 | 1 | -0.01 | -0.008 | 0.012  | -0.003 | -0.01  | t | 119496 | MFPEVKEK<br>GMAAL            | Homo sapiens          |
| 1 | 1.00 | 1 | 1 | -0.03 | -0.03  | -0.03  | -0.034 | -0.029 | t | 119624 | PDTPYLDIT<br>YHFVMQRL        | Homo sapiens          |
| 1 | 1.00 | 1 | 1 | -0.01 | -0.01  | 0.006  | -0.011 | -0.01  | t | 46095  | NTFYCCCL<br>CCYPACAGCN       | Homo sapiens          |
| 1 | 1.00 | 1 | 1 | 0     | 0      | 0.015  | 0      | 0.002  | t | 52003  | QQATRQA<br>QD                | Homo sapiens          |
| 1 | 1.00 | 1 | 1 | -0.02 | -0.02  | -0.003 | -0.02  | -0.017 | t | 97252  | DTPLTTAA<br>LRLV             | Mus musculus          |
| 1 | 1.00 | 1 | 1 | 0.03  | 0.03   | 0.048  | 0.04   | 0.032  | t | 117260 | ANNGNLQ<br>LRNKEVT<br>WEVLEG | Homo sapiens          |
| 1 | 1.00 | 1 | 1 | -0.02 | -0.02  | -0.02  | -0.02  | -0.015 | t | 118129 | SEELKTHI<br>SKG              | Homo sapiens          |
| 1 | 1.00 | 1 | 1 | 0     | 0      | 0.017  | 0      | 0      | t | 21867  | GQGGGTH<br>NQWNKP            | Oryctolagus cuniculus |
| 1 | 1.00 | 1 | 1 | 0     | 0      | 0.017  | 0      | 0      | t | 21867  | GQGGGTH<br>NQWNKP            | Oryctolagus cuniculus |

|   |      |   |   |       |        |        |        |        |   |        |                               |                                  |
|---|------|---|---|-------|--------|--------|--------|--------|---|--------|-------------------------------|----------------------------------|
| 1 | 1.00 | 1 | 1 | -0.05 | -0.048 | -0.05  | -0.053 | -0.049 | t | 141735 | RARLSPGD<br>VLVIPAG           | Homo<br>sapiens                  |
| 1 | 1.00 | 1 | 1 | -0.03 | -0.027 | -0.025 | -0.03  | -0.03  | t | 22885  | GTVVLELQ<br>YTGTGPGC<br>KVPI  | Equus<br>caballus                |
| 1 | 1.00 | 1 | 1 | -0.02 | -0.02  | -0.015 | -0.02  | -0.02  | t | 145845 | KHKVRNE<br>VMVHWF<br>GD       | Sus<br>scrofa                    |
| 1 | 1.00 | 1 | 1 | 0     | 0.004  | 0.003  | 0.001  | 0.002  | t | 94962  | VPTIAHGD<br>GRRPSKQR<br>TFI   | Homo<br>sapiens                  |
| 1 | 1.00 | 1 | 1 | 0.01  | 0.013  | 0.005  | 0.009  | 0.017  | t | 66107  | TRTIGGSQ<br>AQ                | Oryctola<br>gus<br>cuniculu<br>s |
| 1 | 1.00 | 1 | 1 | 0.02  | 0.028  | 0.035  | 0.02   | 0.022  | t | 43383  | NCPYVSYG<br>KFCIKPDG<br>SIST  | Gallus<br>gallus                 |
| 1 | 1.00 | 1 | 1 | 0     | 0      | 0.013  | 0      | 0      | t | 159077 | RSKHNRRE<br>GYKTQNG<br>G      | Mus<br>musculu<br>s              |
| 1 | 1.00 | 1 | 1 | -0.03 | -0.03  | -0.03  | -0.03  | -0.024 | t | 36488  | LIEANLLW<br>R                 | Homo<br>sapiens                  |
| 1 | 1.00 | 1 | 1 | -0.05 | -0.05  | -0.05  | -0.05  | -0.047 | t | 7009   | CSICSNNP<br>TCWAICK           | Mus<br>musculu<br>s              |
| 1 | 1.00 | 1 | 1 | 0.03  | 0.03   | 0.03   | 0.02   | 0.03   | t | 114756 | CGTDGVT<br>YDN                | Homo<br>sapiens                  |
| 1 | 1.00 | 1 | 1 | 0     | -0.001 | -0.002 | 0.001  | 0.007  | t | 7761   | DDEADRYF<br>TYEE              | Bos<br>taurus                    |
| 1 | 1.00 | 1 | 1 | 0     | 0      | 0      | 0      | 0.006  | t | 40673  | LWHYPCTI<br>NYTIFK            | Homo<br>sapiens                  |
| 1 | 1.00 | 1 | 1 | -0.02 | -0.022 | -0.027 | -0.027 | -0.018 | t | 113349 | EAE EWYKS<br>KFADLSEA<br>ANRN | Mus<br>musculu<br>s              |
| 1 | 1.00 | 1 | 1 | -0.02 | -0.022 | -0.027 | -0.027 | -0.018 | t | 113349 | EAE EWYKS<br>KFADLSEA<br>ANRN | Mus<br>musculu<br>s              |
| 1 | 1.00 | 1 | 1 | -0.02 | -0.022 | -0.027 | -0.027 | -0.018 | t | 113350 | EAE EWYKS<br>KFADLSEA<br>ANRN | Mus<br>musculu<br>s              |

|   |      |   |   |       |        |        |        |        |   |        |                              |                                  |
|---|------|---|---|-------|--------|--------|--------|--------|---|--------|------------------------------|----------------------------------|
| 1 | 1.00 | 1 | 1 | -0.02 | -0.022 | -0.027 | -0.027 | -0.018 | t | 113350 | EAEWYKS<br>KFADLSEA<br>ANRN  | Mus<br>musculu<br>s              |
| 1 | 1.00 | 1 | 1 | -0.01 | -0.01  | -0.004 | -0.01  | -0.009 | t | 55458  | RQNKPPSK<br>PNNDFH           | Mus<br>musculu<br>s              |
| 1 | 1.00 | 1 | 1 | -0.01 | -0.007 | -0.004 | -0.01  | -0.009 | t | 55458  | RQNKPPSK<br>PNNDFH           | Mus<br>musculu<br>s              |
| 1 | 1.00 | 1 | 1 | 0.04  | 0.042  | 0.052  | 0.041  | 0.042  | t | 116958 | DSMNTDT<br>STRPR             | Homo<br>sapiens                  |
| 1 | 1.00 | 1 | 1 | -0.02 | -0.018 | -0.014 | -0.017 | -0.02  | t | 104309 | TLPQPPCA<br>HGQHYGH<br>HHHQL | Homo<br>sapiens                  |
| 1 | 1.00 | 1 | 1 | 0     | -0.001 | 0.017  | 0      | 0.002  | t | 95747  | QVLAQKV<br>A                 | Bos<br>taurus                    |
| 1 | 1.00 | 1 | 1 | -0.05 | -0.05  | -0.042 | -0.05  | -0.05  | t | 96846  | RVFPRGTV<br>ENP              | Oryctola<br>gus<br>cuniculu<br>s |
| 1 | 1.00 | 1 | 1 | 0.01  | 0.012  | 0.009  | 0.011  | 0.014  | t | 37641  | LLPAADM<br>DDFSRQL<br>QNSM   | Homo<br>sapiens                  |
| 1 | 1.00 | 1 | 1 | 0     | 0      | 0      | 0      | 0.006  | t | 139881 | RGDKSRPP<br>VWYVEGE          | Mus<br>musculu<br>s              |
| 1 | 1.00 | 1 | 1 | 0     | 0      | 0      | 0      | 0.006  | t | 63808  | TGDPKPKK<br>NKKPKNPT<br>PPRP | Mus<br>musculu<br>s              |
| 1 | 1.00 | 1 | 1 | 0     | 0      | 0      | 0      | 0.006  | t | 59326  | SLLTYMK<br>M                 | Mus<br>musculu<br>s              |
| 1 | 1.00 | 1 | 1 | 0     | 0      | 0      | 0      | 0.006  | t | 19636  | GFTTNEER<br>YNVFAE           | Mus<br>musculu<br>s              |
| 1 | 1.00 | 1 | 1 | 0     | 0      | 0      | 0      | 0.006  | t | 19636  | GFTTNEER<br>YNVFAE           | Mus<br>musculu<br>s              |
| 1 | 1.00 | 1 | 1 | 0     | 0      | 0      | 0      | 0.006  | t | 30263  | KDTNNNL                      | Mus<br>musculu<br>s              |

|   |      |   |   |       |        |        |        |        |   |        |                              |                                  |
|---|------|---|---|-------|--------|--------|--------|--------|---|--------|------------------------------|----------------------------------|
| 1 | 1.00 | 1 | 1 | 0     | 0      | 0      | 0      | 0.006  | t | 1547   | AGHATLRE<br>HLRDIKAE<br>NTDA | Mus<br>musculu<br>s              |
| 1 | 1.00 | 1 | 1 | 0.03  | 0.032  | 0.03   | 0.037  | 0.039  | t | 107887 | HKTTTSPD<br>YTTAVGT          | Homo<br>sapiens                  |
| 1 | 1.00 | 1 | 1 | -0.01 | -0.016 | 0.002  | -0.011 | -0.01  | t | 48641  | PNGNVPA<br>GVTPSKYG<br>LGGD  | Oryctola<br>gus<br>cuniculu<br>s |
| 1 | 1.00 | 1 | 1 | -0.01 | -0.016 | 0.002  | -0.011 | -0.01  | t | 48641  | PNGNVPA<br>GVTPSKYG<br>LGGD  | Oryctola<br>gus<br>cuniculu<br>s |
| 1 | 1.00 | 1 | 1 | 0.01  | 0.012  | 0.022  | 0.017  | 0.02   | t | 130859 | GLLAQQM<br>DY                | Homo<br>sapiens                  |
| 1 | 1.00 | 1 | 1 | 0     | -0.004 | 0      | -0.007 | 0      | t | 129060 | KEIKKVAT<br>PKKASKPK<br>K    | Oryctola<br>gus<br>cuniculu<br>s |
| 1 | 1.00 | 1 | 1 | -0.03 | -0.023 | -0.03  | -0.03  | -0.029 | t | 153850 | LIRCINCQK<br>PLCPEEKQ<br>RHL | Cavia<br>porcellu<br>s           |
| 1 | 1.00 | 1 | 1 | -0.03 | -0.033 | -0.015 | -0.03  | -0.03  | t | 22507  | GSSGYCA<br>WPACYCY<br>G      | Oryctola<br>gus<br>cuniculu<br>s |
| 1 | 1.00 | 1 | 1 | -0.03 | -0.027 | -0.015 | -0.03  | -0.03  | t | 22507  | GSSGYCA<br>WPACYCY<br>G      | Equus<br>caballus                |
| 1 | 1.00 | 1 | 1 | -0.01 | -0.01  | 0.003  | -0.01  | -0.01  | t | 4412   | ASGAKEEA<br>EKKAEEQR<br>ALL  | Homo<br>sapiens                  |
| 1 | 1.00 | 1 | 1 | 0.03  | 0.03   | 0.046  | 0.03   | 0.03   | t | 79843  | GPKQLTFE<br>GKPA             | Mus<br>musculu<br>s              |
| 1 | 1.00 | 1 | 1 | 0.03  | 0.03   | 0.046  | 0.03   | 0.03   | t | 79843  | GPKQLTFE<br>GKPA             | Mus<br>musculu<br>s              |
| 1 | 1.00 | 1 | 1 | -0.04 | -0.043 | -0.036 | -0.04  | -0.04  | t | 73385  | YALADASL<br>KMADPNR<br>FRGKD | Oryctola<br>gus<br>cuniculu<br>s |
| 1 | 1.00 | 1 | 1 | -0.02 | -0.02  | -0.013 | -0.023 | -0.02  | t | 70045  | VNAGFKT<br>AVAAAAAN<br>V     | Homo<br>sapiens                  |



|   |      |   |   |       |        |        |        |        |   |        |                              |                           |
|---|------|---|---|-------|--------|--------|--------|--------|---|--------|------------------------------|---------------------------|
| 1 | 1.00 | 1 | 1 | -0.01 | -0.012 | 0.006  | -0.011 | -0.01  | t | 65725  | TPQRAGSP<br>LPRSSS           | Anas<br>platyrhy<br>nchos |
| 1 | 1.00 | 1 | 1 | 0     | 0.004  | 0.005  | -0.001 | 0.002  | t | 79016  | LMKKMGS<br>GDGTELT<br>ISEGGG | Homo<br>sapiens           |
| 1 | 1.00 | 1 | 1 | 0     | -0.002 | 0.007  | -0.007 | 0      | t | 117140 | DWEYSVW<br>LSN               | Mus<br>musculu<br>s       |
| 1 | 1.00 | 1 | 1 | 0     | -0.002 | 0.007  | -0.007 | 0      | t | 117140 | DWEYSVW<br>LSN               | Mus<br>musculu<br>s       |
| 1 | 1.00 | 1 | 1 | 0.01  | 0.014  | 0.016  | 0.01   | 0.011  | t | 2806   | ALNYQAQ<br>ALEEIIKYR<br>YNI  | Homo<br>sapiens           |
| 1 | 1.00 | 1 | 1 | 0.01  | 0.013  | 0.023  | 0.01   | 0.01   | t | 105945 | LTHCGSGA<br>S                | Mus<br>musculu<br>s       |
| 1 | 1.00 | 1 | 1 | 0.02  | 0.018  | 0.027  | 0.013  | 0.02   | t | 122386 | GRLERPSE<br>PRLPLLA          | Mus<br>musculu<br>s       |
| 1 | 1.00 | 1 | 1 | 0.01  | 0.013  | 0.034  | 0.01   | 0.01   | t | 36364  | LHDFRSDE                     | Mus<br>musculu<br>s       |
| 1 | 1.00 | 1 | 1 | -0.02 | -0.022 | -0.022 | -0.027 | -0.019 | t | 96497  | KRELRLNP<br>Q                | Mus<br>musculu<br>s       |
| 1 | 1.00 | 1 | 1 | -0.01 | -0.008 | -0.009 | -0.01  | -0.009 | t | 95109  | KNVRFPD<br>GLIWKPDI<br>LLYNS | Rattus<br>norvegic<br>us  |
| 1 | 1.00 | 1 | 1 | 0     | 0      | 0      | 0      | 0.006  | t | 124925 | YYVFFEEQ<br>EDEIIGF          | Homo<br>sapiens           |
| 1 | 1.00 | 1 | 1 | 0     | 0      | 0      | 0      | 0.006  | t | 130787 | EDFDIYDE<br>DE               | Mus<br>musculu<br>s       |
| 1 | 1.00 | 1 | 1 | 0     | 0      | 0      | 0      | 0.006  | t | 105207 | GAIIGLMV<br>GGVVIA           | Mus<br>musculu<br>s       |
| 1 | 1.00 | 1 | 1 | 0     | 0      | 0      | 0      | 0.006  | t | 105207 | GAIIGLMV<br>GGVVIA           | Mus<br>musculu<br>s       |
| 1 | 1.00 | 1 | 1 | 0     | 0      | 0      | 0      | 0.006  | t | 107307 | DAEFGHD<br>SGF               | Mus<br>musculu<br>s       |

|   |      |   |   |   |   |   |   |       |   |        |                            |                                  |
|---|------|---|---|---|---|---|---|-------|---|--------|----------------------------|----------------------------------|
| 1 | 1.00 | 1 | 1 | 0 | 0 | 0 | 0 | 0.006 | t | 107307 | DAEFGHD<br>SGF             | Mus<br>musculu<br>s              |
| 1 | 1.00 | 1 | 1 | 0 | 0 | 0 | 0 | 0.006 | t | 99922  | DAEFRHDS<br>GY             | Mus<br>musculu<br>s              |
| 1 | 1.00 | 1 | 1 | 0 | 0 | 0 | 0 | 0.006 | t | 105207 | GAIIGLMV<br>GGVVIA         | Mus<br>musculu<br>s              |
| 1 | 1.00 | 1 | 1 | 0 | 0 | 0 | 0 | 0.006 | t | 70390  | VPNLRGDL<br>QVLAQKV<br>ART | Bos<br>taurus                    |
| 1 | 1.00 | 1 | 1 | 0 | 0 | 0 | 0 | 0.006 | t | 75441  | YPYDVPDY<br>A              | Mus<br>musculu<br>s              |
| 1 | 1.00 | 1 | 1 | 0 | 0 | 0 | 0 | 0.006 | t | 70390  | VPNLRGDL<br>QVLAQKV<br>ART | Cavia<br>porcellu<br>s           |
| 1 | 1.00 | 1 | 1 | 0 | 0 | 0 | 0 | 0.006 | t | 75441  | YPYDVPDY<br>A              | Mus<br>musculu<br>s              |
| 1 | 1.00 | 1 | 1 | 0 | 0 | 0 | 0 | 0.006 | t | 68813  | VGVIKSIAP<br>ASKNL         | Oryctola<br>gus<br>cuniculu<br>s |
| 1 | 1.00 | 1 | 1 | 0 | 0 | 0 | 0 | 0.006 | t | 54058  | RHKQKIVA<br>PVKQTL         | Cavia<br>porcellu<br>s           |
| 1 | 1.00 | 1 | 1 | 0 | 0 | 0 | 0 | 0.006 | t | 31067  | KGTAPEGV<br>AFGNS          | Oryctola<br>gus<br>cuniculu<br>s |
| 1 | 1.00 | 1 | 1 | 0 | 0 | 0 | 0 | 0.006 | t | 14261  | ESRRAL                     | Homo<br>sapiens                  |
| 1 | 1.00 | 1 | 1 | 0 | 0 | 0 | 0 | 0.006 | t | 31773  | KLCKGTAP<br>FGVAFGNS       | Oryctola<br>gus<br>cuniculu<br>s |
| 1 | 1.00 | 1 | 1 | 0 | 0 | 0 | 0 | 0.006 | t | 11815  | EENVEENV<br>EENVEENV       | Homo<br>sapiens                  |

|   |      |   |   |       |        |        |        |        |   |        |                             |                                |
|---|------|---|---|-------|--------|--------|--------|--------|---|--------|-----------------------------|--------------------------------|
| 1 | 1.00 | 1 | 1 | 0     | 0      | 0      | 0      | 0.006  | t | 11815  | EENVEENV<br>EENVEENV        | Homo sapiens                   |
| 1 | 1.00 | 1 | 1 | 0     | 0      | 0      | 0      | 0.006  | t | 14261  | ESRRAL                      | Homo sapiens                   |
| 1 | 1.00 | 1 | 1 | 0     | 0      | 0      | 0      | 0.006  | t | 11815  | EENVEENV<br>EENVEENV        | Homo sapiens                   |
| 1 | 1.00 | 1 | 1 | 0     | 0      | 0      | 0      | 0.006  | t | 14261  | ESRRAL                      | Homo sapiens                   |
| 1 | 1.00 | 1 | 1 | 0     | 0      | 0      | 0      | 0.006  | t | 32     | AAAETGV<br>GVIKSIAP         | Oryctola<br>gus<br>cunicu<br>s |
| 1 | 1.00 | 1 | 1 | 0     | 0      | 0      | 0      | 0.006  | t | 5261   | AVALADLG<br>DFENSA          | Oryctola<br>gus<br>cunicu<br>s |
| 1 | 1.00 | 1 | 1 | 0.02  | 0.017  | 0.024  | 0.02   | 0.021  | t | 41121  | MASGGGE<br>TALALLLD<br>RLNQ | Oryctola<br>gus<br>cunicu<br>s |
| 1 | 1.00 | 1 | 1 | -0.07 | -0.072 | -0.057 | -0.07  | -0.07  | t | 142325 | VIIEKRGKV<br>EVEGHLID       | Sus<br>scrofa                  |
| 1 | 1.00 | 1 | 1 | 0.02  | 0.02   | 0.027  | 0.01   | 0.02   | t | 117346 | PSALLRQF<br>TTAL            | Homo sapiens                   |
| 1 | 1.00 | 1 | 1 | -0.03 | -0.03  | -0.016 | -0.03  | -0.027 | t | 9684   | DPMFTPK                     | Mus<br>musculu<br>s            |
| 1 | 1.00 | 1 | 1 | 0.02  | 0.022  | 0.03   | 0.021  | 0.02   | t | 67220  | TVYDPLQP<br>ELDSFKEEL       | Homo sapiens                   |
| 1 | 1.00 | 1 | 1 | -0.01 | -0.012 | -0.013 | -0.017 | -0.009 | t | 23169  | GVTHDQL<br>NNFR             | Mus<br>musculu<br>s            |
| 1 | 1.00 | 1 | 1 | -0.01 | -0.014 | -0.013 | -0.017 | -0.009 | t | 23169  | GVTHDQL<br>NNFR             | Oryctola<br>gus<br>cunicu<br>s |
| 1 | 1.00 | 1 | 1 | 0     | 0      | 0      | -0.01  | 0.001  | t | 20097  | GGYGDGG<br>AHGGGYG<br>G     | Homo sapiens                   |

|   |      |   |   |       |        |        |        |        |   |        |                              |                     |
|---|------|---|---|-------|--------|--------|--------|--------|---|--------|------------------------------|---------------------|
| 1 | 1.00 | 1 | 1 | 0.01  | 0.01   | 0.017  | 0.007  | 0.01   | t | 125789 | CQGDGYR<br>VGFGQCA<br>G      | Mus<br>musculu<br>s |
| 1 | 1.00 | 1 | 1 | -0.06 | -0.058 | -0.06  | -0.06  | -0.058 | t | 117516 | GRGRGRG<br>RGRGRGG<br>P      | Homo<br>sapiens     |
| 1 | 1.00 | 1 | 1 | -0.02 | -0.016 | -0.015 | -0.019 | -0.02  | t | 97170  | ADQELGD<br>APFLDRLR<br>RDQKS | Homo<br>sapiens     |
| 1 | 1.00 | 1 | 1 | -0.02 | -0.016 | -0.015 | -0.019 | -0.02  | t | 97170  | ADQELGD<br>APFLDRLR<br>RDQKS | Homo<br>sapiens     |
| 1 | 1.00 | 1 | 1 | -0.01 | -0.008 | 0.004  | -0.009 | -0.008 | t | 57635  | SESTIGDVL<br>QQMAI           | Homo<br>sapiens     |
| 1 | 1.00 | 1 | 1 | 0.02  | 0.018  | 0.027  | 0.023  | 0.023  | t | 100378 | PGSGFWS<br>FGSEDGSG<br>DSEN  | Mus<br>musculu<br>s |
| 1 | 1.00 | 1 | 1 | -0.02 | -0.021 | -0.001 | -0.02  | -0.018 | t | 56565  | RYKQKIIAP<br>AKQLL           | Bos<br>taurus       |
| 1 | 1.00 | 1 | 1 | 0     | 0      | 0.015  | 0      | 0.002  | t | 127983 | FTNFKFKIR<br>KITNFDRV<br>N   | Mus<br>musculu<br>s |
| 1 | 1.00 | 1 | 1 | -0.01 | -0.006 | 0.012  | -0.009 | -0.01  | t | 80920  | DDESKVAK<br>LT               | Homo<br>sapiens     |
| 1 | 1.00 | 1 | 1 | -0.05 | -0.044 | -0.045 | -0.05  | -0.05  | t | 139686 | ANIREEMR<br>RLQRRKQL<br>CF   | Ovis<br>aries       |
| 1 | 1.00 | 1 | 1 | 0.02  | 0.024  | 0.03   | 0.021  | 0.021  | t | 94978  | YLKDQQLL<br>GIWGCSG<br>KL    | Homo<br>sapiens     |
| 1 | 1.00 | 1 | 1 | 0     | 0.004  | 0.003  | 0      | 0.001  | t | 31663  | KKPNRNG<br>GG                | Capra<br>hircus     |
| 1 | 1.00 | 1 | 1 | -0.02 | -0.02  | -0.011 | -0.027 | -0.02  | t | 135995 | SIQSIVPAL<br>EIA             | Homo<br>sapiens     |

|   |      |   |   |       |        |        |        |        |   |        |                      |                       |
|---|------|---|---|-------|--------|--------|--------|--------|---|--------|----------------------|-----------------------|
| 1 | 1.00 | 1 | 1 | -0.06 | -0.06  | -0.053 | -0.06  | -0.059 | t | 125248 | RVPPRYHAKISPMVN      | Mus musculus          |
| 1 | 1.00 | 1 | 1 | 0.03  | 0.032  | 0.034  | 0.03   | 0.032  | t | 34243  | KVVQLPKISKNALKANG    | Homo sapiens          |
| 1 | 1.00 | 1 | 1 | 0     | -0.015 | 0.02   | 0      | 0      | t | 12375  | EHWSYGLRPG           | Canis familiaris      |
| 1 | 1.00 | 1 | 1 | -0.03 | -0.031 | -0.026 | -0.029 | -0.03  | t | 49506  | PSSKRFQPFQQFGRDVSDFT | Homo sapiens          |
| 1 | 1.00 | 1 | 1 | 0     | 0      | 0      | -0.007 | 0.003  | t | 11571  | EEEDDDMGFGLFD        | Homo sapiens          |
| 1 | 1.00 | 1 | 1 | 0     | 0      | 0      | -0.007 | 0.003  | t | 11571  | EEEDDDMGFGLFD        | Homo sapiens          |
| 1 | 1.00 | 1 | 1 | 0.01  | 0.008  | 0.017  | 0.003  | 0.01   | t | 144592 | AMTDPKLDHMRH         | Mus musculus          |
| 1 | 1.00 | 1 | 1 | -0.01 | -0.009 | 0.009  | -0.007 | -0.01  | t | 36838  | LKENIKYEV AIFVHGPTVE | Equus caballus        |
| 1 | 1.00 | 1 | 1 | -0.04 | -0.04  | -0.021 | -0.04  | -0.038 | t | 21469  | GNLLLSCL             | Sus scrofa            |
| 1 | 1.00 | 1 | 1 | -0.04 | -0.036 | -0.018 | -0.039 | -0.04  | t | 127939 | CPLPPPRSPPVPPPRK     | Homo sapiens          |
| 1 | 1.00 | 1 | 1 | 0     | 0.002  | 0.004  | -0.004 | 0.003  | t | 70620  | VQNTVEDLKLNTLGR      | Homo sapiens          |
| 1 | 1.00 | 1 | 1 | 0     | 0.003  | 0.01   | 0      | 0      | t | 110840 | EVTIGDIEEPPILEVPE TH | Bos taurus            |
| 1 | 1.00 | 1 | 1 | -0.07 | -0.07  | -0.065 | -0.07  | -0.07  | t | 78946  | DAWCGSRGK            | Mus musculus          |
| 1 | 1.00 | 1 | 1 | 0.03  | 0.027  | 0.041  | 0.03   | 0.033  | t | 94885  | NAYANEEATK           | Oryctolagus cuniculus |

|   |      |   |   |       |        |        |        |        |   |        |                              |                                  |
|---|------|---|---|-------|--------|--------|--------|--------|---|--------|------------------------------|----------------------------------|
| 1 | 1.00 | 1 | 1 | -0.01 | -0.004 | 0.004  | -0.01  | -0.009 | t | 100222 | KNSFSLGE<br>NPNANP           | Aotus<br>nancyma<br>ae           |
| 1 | 1.00 | 1 | 1 | 0.01  | 0.008  | 0.017  | 0.003  | 0.011  | t | 118346 | FEYFPSHFF<br>VPELEVTTII<br>C | Mus<br>musculu<br>s              |
| 1 | 1.00 | 1 | 1 | 0.02  | 0.02   | 0.035  | 0.02   | 0.022  | t | 70478  | VPSLEDIRS<br>AEVV            | Homo<br>sapiens                  |
| 1 | 1.00 | 1 | 1 | -0.01 | -0.012 | -0.01  | -0.017 | -0.007 | t | 134784 | RKRSQML<br>FRGRRASQ          | Mus<br>musculu<br>s              |
| 1 | 1.00 | 1 | 1 | -0.01 | -0.008 | -0.005 | -0.009 | -0.01  | t | 41344  | MEECSQS<br>APYIEQAQ<br>AIAQQ | Homo<br>sapiens                  |
| 1 | 1.00 | 1 | 1 | -0.04 | -0.042 | -0.035 | -0.04  | -0.04  | t | 64057  | THNQWN<br>KPSKPKTN<br>LK     | Oryctola<br>gus<br>cuniculu<br>s |
| 1 | 1.00 | 1 | 1 | -0.03 | -0.03  | -0.017 | -0.027 | -0.03  | t | 147410 | WQAKHQ<br>GAQYVW<br>N        | Homo<br>sapiens                  |
| 1 | 1.00 | 1 | 1 | 0.01  | 0.008  | 0.017  | 0.003  | 0.01   | t | 114042 | YGSLPQKA<br>QRPQDEN<br>G     | Rattus<br>norvegic<br>us         |
| 1 | 1.00 | 1 | 1 | 0.01  | 0.008  | 0.017  | 0.003  | 0.01   | t | 114042 | YGSLPQKA<br>QRPQDEN<br>G     | Rattus<br>norvegic<br>us         |
| 1 | 1.00 | 1 | 1 | 0.02  | 0.024  | 0.028  | 0.021  | 0.022  | t | 58954  | SKTVGTAE<br>EKLKKK           | Homo<br>sapiens                  |
| 1 | 1.00 | 1 | 1 | 0.03  | 0.028  | 0.038  | 0.032  | 0.032  | t | 29752  | KAALIEEG<br>QRMAEM           | Homo<br>sapiens                  |
| 1 | 1.00 | 1 | 1 | 0.06  | 0.059  | 0.061  | 0.057  | 0.061  | t | 99205  | EKESPEKE<br>DQEEENQ          | Homo<br>sapiens                  |
| 1 | 1.00 | 1 | 1 | 0     | 0.003  | 0.012  | 0      | 0.003  | t | 132843 | ITPWPHW<br>LERSS             | Mus<br>musculu<br>s              |
| 1 | 1.00 | 1 | 1 | -0.01 | -0.006 | 0.006  | -0.009 | -0.01  | t | 17801  | FSPGPSQK<br>IQLVNT           | Homo<br>sapiens                  |

|   |      |   |   |       |        |        |        |        |   |        |                              |                                  |
|---|------|---|---|-------|--------|--------|--------|--------|---|--------|------------------------------|----------------------------------|
| 1 | 1.00 | 1 | 1 | 0.03  | 0.03   | 0.038  | 0.03   | 0.03   | t | 10888  | DYGGDSTT<br>PRPRYNAT<br>TYLP | Oryctola<br>gus<br>cuniculu<br>s |
| 1 | 1.00 | 1 | 1 | -0.01 | -0.012 | -0.005 | -0.013 | -0.01  | t | 67264  | TWHLPSH<br>TQTQG             | Mus<br>musculu<br>s              |
| 1 | 1.00 | 1 | 1 | 0.02  | 0.02   | 0.039  | 0.02   | 0.02   | t | 116740 | GRDPYSPS<br>QDPYSPS          | Homo<br>sapiens                  |
| 1 | 1.00 | 1 | 1 | -0.06 | -0.06  | -0.037 | -0.06  | -0.061 | t | 94494  | ECCNPAC<br>GRH               | Oryctola<br>gus<br>cuniculu<br>s |
| 1 | 1.00 | 1 | 1 | -0.06 | -0.053 | -0.037 | -0.06  | -0.061 | t | 94494  | ECCNPAC<br>GRH               | Capra<br>hircus                  |
| 1 | 1.00 | 1 | 1 | -0.02 | -0.016 | -0.02  | -0.02  | -0.018 | t | 43547  | NDYDGFLE<br>NAHEHHG<br>VYNQG | Cavia<br>porcellu<br>s           |
| 1 | 1.00 | 1 | 1 | -0.02 | -0.02  | -0.006 | -0.02  | -0.02  | t | 120478 | EGNRPTNS<br>IVFTKLT          | Mus<br>musculu<br>s              |
| 1 | 1.00 | 1 | 1 | 0     | 0.004  | 0.003  | -0.003 | 0      | t | 481    | AAVDSSKA<br>ALTSKLDA<br>AYKL | Homo<br>sapiens                  |
| 1 | 1.00 | 1 | 1 | -0.01 | -0.01  | 0.006  | -0.012 | -0.013 | t | 99063  | YDPRGHT<br>GTTNQRS<br>P      | Homo<br>sapiens                  |
| 1 | 1.00 | 1 | 1 | -0.04 | -0.042 | -0.038 | -0.043 | -0.038 | t | 118204 | VKQSHGK<br>SL                | Mus<br>musculu<br>s              |
| 1 | 1.00 | 1 | 1 | -0.01 | -0.01  | -0.01  | -0.01  | -0.005 | t | 124734 | SPLSLGR                      | Homo<br>sapiens                  |
| 1 | 1.00 | 1 | 1 | -0.04 | -0.042 | -0.033 | -0.04  | -0.039 | t | 140595 | RHEDGDW<br>PRV               | Mus<br>musculu<br>s              |
| 1 | 1.00 | 1 | 1 | 0     | 0.019  | 0      | 0      | 0.006  | t | 21851  | GQCKWV<br>NGREICND<br>RDRPTA | Macaca<br>fuscata                |
| 1 | 1.00 | 1 | 1 | -0.03 | -0.026 | -0.013 | -0.03  | -0.03  | t | 94763  | AAPAKKA<br>APAKKAA<br>A      | Homo<br>sapiens                  |

|   |      |   |   |       |        |        |        |        |   |        |                              |                                  |
|---|------|---|---|-------|--------|--------|--------|--------|---|--------|------------------------------|----------------------------------|
| 1 | 1.00 | 1 | 1 | -0.03 | -0.028 | -0.031 | -0.033 | -0.03  | t | 142128 | DSKSRDTT<br>PKNANKH<br>TWKKT | Felis<br>catus                   |
| 1 | 1.00 | 1 | 1 | 0.02  | 0.017  | 0.015  | 0.02   | 0.026  | t | 60721  | SRKSYKKM<br>LKEMGEV<br>APEYR | Oryctola<br>gus<br>cuniculu<br>s |
| 1 | 1.00 | 1 | 1 | 0     | -0.002 | 0.016  | -0.001 | 0      | t | 39169  | LRPTFDTR<br>LMRLEDE<br>MKEGR | Mus<br>musculu<br>s              |
| 1 | 1.00 | 1 | 1 | -0.01 | -0.008 | -0.009 | -0.01  | -0.01  | t | 16577  | FLENAHEH<br>HGVYNQG<br>RGIDS | Cavia<br>porcellu<br>s           |
| 1 | 1.00 | 1 | 1 | -0.04 | -0.039 | -0.045 | -0.04  | -0.039 | t | 40281  | LVASNWY<br>NRQIERSS<br>RTLK  | Equus<br>caballus                |
| 1 | 1.00 | 1 | 1 | 0     | 0.004  | 0.006  | -0.003 | 0.004  | t | 49534  | PSTPGERV<br>RH               | Homo<br>sapiens                  |
| 1 | 1.00 | 1 | 1 | 0     | 0.002  | 0.005  | -0.001 | -0.001 | t | 32484  | KNESKYSN<br>TFQMNAV<br>NMSIR | Aotus<br>nancyma<br>ae           |
| 1 | 1.00 | 1 | 1 | -0.01 | -0.01  | -0.003 | -0.007 | -0.008 | t | 45702  | NRLIAFAS<br>RGNHVSP<br>RHYV  | Homo<br>sapiens                  |
| 1 | 1.00 | 1 | 1 | -0.01 | -0.012 | 0.012  | -0.011 | -0.009 | t | 35813  | LFDLGPQK<br>K                | Mus<br>musculu<br>s              |
| 1 | 1.00 | 1 | 1 | -0.01 | -0.007 | 0.002  | -0.01  | -0.009 | t | 51854  | QPHGGSW                      | Mus<br>musculu<br>s              |
| 1 | 1.00 | 1 | 1 | -0.03 | -0.032 | -0.019 | -0.031 | -0.029 | t | 36045  | LGAARGYT<br>FGAC             | Mus<br>musculu<br>s              |
| 1 | 1.00 | 1 | 1 | 0.02  | 0.018  | 0.027  | 0.013  | 0.02   | t | 116917 | AESDDSS<br>TTRH              | Mus<br>musculu<br>s              |
| 1 | 1.00 | 1 | 1 | -0.03 | -0.03  | -0.023 | -0.03  | -0.027 | t | 119530 | SRKVALQG<br>G                | Homo<br>sapiens                  |
| 1 | 1.00 | 1 | 1 | -0.03 | -0.026 | -0.026 | -0.029 | -0.028 | t | 49398  | PSHLPYIE<br>QGMQLAE<br>QFKQK | Homo<br>sapiens                  |



|   |      |   |   |       |        |        |        |        |   |        |                              |                                  |
|---|------|---|---|-------|--------|--------|--------|--------|---|--------|------------------------------|----------------------------------|
| 1 | 1.00 | 1 | 1 | -0.03 | -0.029 | -0.027 | -0.027 | -0.028 | t | 22619  | GTDGPCK<br>VPISSVASL<br>NDLT | Equus<br>caballus                |
| 1 | 1.00 | 1 | 1 | -0.02 | -0.017 | -0.008 | -0.021 | -0.021 | t | 88470  | SEDREVFD<br>HGRNNMI<br>FVYNR | Aotus                            |
| 1 | 1.00 | 1 | 1 | 0     | 0      | 0.01   | 0.003  | 0.001  | t | 939    | AEGEFRLG<br>VRALRKAP<br>DPAK | Homo<br>sapiens                  |
| 1 | 1.00 | 1 | 1 | -0.03 | -0.03  | -0.03  | -0.03  | -0.028 | t | 95939  | TVHFHYFK<br>LAVQPQV<br>NKEIR | Homo<br>sapiens                  |
| 1 | 1.00 | 1 | 1 | 0.01  | 0.014  | 0.028  | 0.011  | 0.012  | t | 16060  | FGSLGG                       | Homo<br>sapiens                  |
| 1 | 1.00 | 1 | 1 | -0.04 | -0.043 | -0.021 | -0.04  | -0.04  | t | 38584  | LPLPWLP                      | Oryctola<br>gus<br>cuniculu<br>s |
| 1 | 1.00 | 1 | 1 | -0.03 | -0.028 | -0.016 | -0.029 | -0.03  | t | 133686 | RTLDSHWI<br>RVGG             | Homo<br>sapiens                  |
| 1 | 1.00 | 1 | 1 | 0.02  | 0.022  | 0.023  | 0.023  | 0.02   | t | 136073 | LSKNNAIE<br>PRSFQNS<br>RHPS  | Homo<br>sapiens                  |
| 1 | 1.00 | 1 | 1 | -0.05 | -0.05  | -0.041 | -0.05  | -0.051 | t | 110759 | AAHRKESY<br>SIYVYKVLK<br>QVH | Mus<br>musculu<br>s              |
| 1 | 1.00 | 1 | 1 | -0.05 | -0.046 | -0.035 | -0.053 | -0.05  | t | 29403  | IVPNSVEQ<br>KH               | Homo<br>sapiens                  |
| 1 | 1.00 | 1 | 1 | -0.05 | -0.048 | -0.035 | -0.053 | -0.05  | t | 29403  | IVPNSVEQ<br>KH               | Homo<br>sapiens                  |
| 1 | 1.00 | 1 | 1 | -0.05 | -0.048 | -0.035 | -0.053 | -0.05  | t | 29403  | IVPNSVEQ<br>KH               | Homo<br>sapiens                  |
| 1 | 1.00 | 1 | 1 | -0.04 | -0.038 | -0.038 | -0.039 | -0.038 | t | 65971  | TQWQVLP<br>CSFTTLPAL<br>STGL | Homo<br>sapiens                  |
| 1 | 1.00 | 1 | 1 | -0.02 | -0.018 | -0.021 | -0.019 | -0.017 | t | 48751  | PPATVYRY<br>DSRPPE           | Homo<br>sapiens                  |

|   |      |   |   |       |        |        |        |        |   |        |                              |                                  |
|---|------|---|---|-------|--------|--------|--------|--------|---|--------|------------------------------|----------------------------------|
| 1 | 1.00 | 1 | 1 | -0.05 | -0.05  | -0.041 | -0.054 | -0.05  | t | 135945 | KFGADAR<br>ALMLQ             | Homo<br>sapiens                  |
| 1 | 1.00 | 1 | 1 | 0     | -0.002 | 0.002  | -0.007 | 0      | t | 112406 | YEYLINVIH<br>AFQYV           | Mus<br>musculu<br>s              |
| 1 | 1.00 | 1 | 1 | 0     | 0.003  | 0.014  | 0      | 0.002  | t | 16062  | FGSMLELS<br>WK               | Mus<br>musculu<br>s              |
| 1 | 1.00 | 1 | 1 | 0.03  | 0.039  | 0.046  | 0.03   | 0.03   | t | 64306  | TIGGSQAQ<br>TA               | Oryctola<br>gus<br>cuniculu<br>s |
| 1 | 1.00 | 1 | 1 | 0     | 0.003  | 0.007  | 0      | 0.003  | t | 121064 | WKHWVY<br>YTCCPDTP<br>YLDITY | Mus<br>musculu<br>s              |
| 1 | 1.00 | 1 | 1 | 0.02  | 0.016  | 0.036  | 0.019  | 0.021  | t | 94885  | NAYANEE<br>ATK               | Oryctola<br>gus<br>cuniculu<br>s |
| 1 | 1.00 | 1 | 1 | -0.02 | -0.018 | -0.014 | -0.019 | -0.02  | t | 16449  | FKQKARGL<br>LQTATKQA<br>EAAA | Homo<br>sapiens                  |
| 1 | 1.00 | 1 | 1 | -0.01 | -0.014 | -0.006 | -0.007 | -0.008 | t | 25421  | IASGLSQE<br>RNFVDSI          | Oryctola<br>gus<br>cuniculu<br>s |
| 1 | 1.00 | 1 | 1 | -0.04 | -0.043 | -0.041 | -0.04  | -0.036 | t | 124232 | GSITRDSIF<br>RLR             | Oryctola<br>gus<br>cuniculu<br>s |
| 1 | 1.00 | 1 | 1 | 0.01  | 0.008  | 0.012  | 0.003  | 0.011  | t | 132365 | HKYSWKS<br>WGKAKIIG          | Mus<br>musculu<br>s              |
| 1 | 1.00 | 1 | 1 | 0.01  | 0.006  | 0.015  | 0.013  | 0.013  | t | 116035 | YGSLPQKS<br>GHRTQD           | Oryctola<br>gus<br>cuniculu<br>s |
| 1 | 1.00 | 1 | 1 | 0.01  | 0.012  | 0.015  | 0.013  | 0.013  | t | 116035 | YGSLPQKS<br>GHRTQD           | Ovis<br>aries                    |
| 1 | 1.00 | 1 | 1 | -0.04 | -0.042 | -0.04  | -0.047 | -0.04  | t | 108877 | DRGFYFNK<br>PTGY             | Mus<br>musculu<br>s              |
| 1 | 1.00 | 1 | 1 | 0.01  | 0.01   | 0.018  | 0.01   | 0.011  | t | 78923  | AFGANS                       | Mus<br>musculu<br>s              |

|   |      |   |   |       |        |        |        |        |   |        |                             |                                  |
|---|------|---|---|-------|--------|--------|--------|--------|---|--------|-----------------------------|----------------------------------|
| 1 | 1.00 | 1 | 1 | 0     | -0.002 | 0.017  | -0.003 | -0.003 | t | 110837 | ERSLSLLNC<br>EEIKSQF        | Mus<br>musculu<br>s              |
| 1 | 1.00 | 1 | 1 | 0     | 0.003  | 0.006  | 0      | 0.001  | t | 105894 | KCNTATCA<br>TQRLANFL        | Mus<br>musculu<br>s              |
| 1 | 1.00 | 1 | 1 | 0.06  | 0.057  | 0.079  | 0.06   | 0.059  | t | 66072  | TRNTGQP<br>ATDHYYSN<br>V    | Oryctola<br>gus<br>cuniculu<br>s |
| 1 | 1.00 | 1 | 1 | 0.02  | 0.019  | 0.021  | 0.017  | 0.021  | t | 99775  | WELQGDR<br>RCQSQLER         | Homo<br>sapiens                  |
| 1 | 1.00 | 1 | 1 | -0.01 | -0.007 | 0.008  | -0.01  | -0.008 | t | 43724  | NEQSLGLR                    | Mus<br>musculu<br>s              |
| 1 | 1.00 | 1 | 1 | -0.09 | -0.09  | -0.089 | -0.09  | -0.091 | t | 138856 | GRGRGRG<br>R                | Mus<br>musculu<br>s              |
| 1 | 1.00 | 1 | 1 | -0.03 | -0.03  | -0.019 | -0.024 | -0.03  | t | 48779  | PPFSLSPV<br>PTLGSRSR<br>R   | Homo<br>sapiens                  |
| 1 | 1.00 | 1 | 1 | -0.03 | -0.03  | -0.024 | -0.03  | -0.03  | t | 79525  | CKMWAD<br>AFTSSRGK<br>VVECG | Mus<br>musculu<br>s              |
| 1 | 1.00 | 1 | 1 | -0.03 | -0.027 | -0.024 | -0.03  | -0.03  | t | 79525  | CKMWAD<br>AFTSSRGK<br>VVECG | Mus<br>musculu<br>s              |
| 1 | 1.00 | 1 | 1 | -0.01 | -0.01  | -0.01  | -0.01  | -0.009 | t | 122871 | PETQPGPL<br>TLELQIAK<br>DK  | Oryctola<br>gus<br>cuniculu<br>s |
| 1 | 1.00 | 1 | 1 | 0     | 0.001  | 0.007  | 0      | 0      | t | 46841  | PAKLLKER<br>GFFGAIAG<br>FLE | Mus<br>musculu<br>s              |
| 1 | 1.00 | 1 | 1 | 0.04  | 0.037  | 0.047  | 0.04   | 0.042  | t | 60985  | SSFEDSDS<br>GSDS            | Oryctola<br>gus<br>cuniculu<br>s |
| 1 | 1.00 | 1 | 1 | -0.02 | -0.02  | -0.018 | -0.021 | -0.02  | t | 66544  | TTASPLSSI<br>FSRIGDPA<br>LN | Mus<br>musculu<br>s              |
| 1 | 1.00 | 1 | 1 | 0.06  | 0.046  | 0.067  | 0.053  | 0.061  | t | 115634 | PQKAQRP<br>QDEN             | Macaca<br>mulatta                |

|   |      |   |   |       |        |        |        |        |   |        |                               |                          |
|---|------|---|---|-------|--------|--------|--------|--------|---|--------|-------------------------------|--------------------------|
| 1 | 1.00 | 1 | 1 | 0     | -0.002 | -0.005 | -0.007 | 0.001  | t | 112406 | YEYLVNVIH<br>AFQYV            | Rattus<br>norvegicus     |
| 1 | 1.00 | 1 | 1 | -0.03 | -0.032 | -0.023 | -0.03  | -0.028 | t | 142480 | VAAVTEKL<br>RAGT              | Mus<br>musculus          |
| 1 | 1.00 | 1 | 1 | -0.05 | -0.05  | -0.029 | -0.039 | -0.05  | t | 20011  | GGSGGGRG<br>RGGSGGR<br>GRGGSG | Homo<br>sapiens          |
| 1 | 1.00 | 1 | 1 | -0.03 | -0.027 | -0.03  | -0.03  | -0.03  | t | 139305 | TAAQITQR<br>KWEAARE<br>AEQRR  | Mus<br>musculus          |
| 1 | 1.00 | 1 | 1 | -0.03 | -0.03  | -0.03  | -0.03  | -0.03  | t | 139305 | TAAQITQR<br>KWEAARE<br>AEQRR  | Oryctolagus<br>cuniculus |
| 1 | 1.00 | 1 | 1 | 0.01  | 0.012  | 0.013  | 0.007  | 0.012  | t | 481    | AAVDSSKA<br>ALTSKLDA<br>AYKL  | Homo<br>sapiens          |
| 1 | 1.00 | 1 | 1 | -0.02 | -0.027 | -0.002 | -0.02  | -0.018 | t | 78836  | SPKRIGTG<br>DR                | Oryctolagus<br>cuniculus |
| 1 | 1.00 | 1 | 1 | -0.02 | -0.019 | -0.002 | -0.02  | -0.018 | t | 78836  | SPKRIGTG<br>DR                | Oryctolagus<br>cuniculus |
| 1 | 1.00 | 1 | 1 | 0.01  | 0.01   | 0.017  | 0.01   | 0.01   | t | 95689  | PTPTPDQP<br>EPNKPVEP<br>TYEV  | Mus<br>musculus          |
| 1 | 1.00 | 1 | 1 | 0.01  | 0.01   | 0.017  | 0      | 0.011  | t | 108649 | TDANKQK<br>GIEWNHDT           | Homo<br>sapiens          |
| 1 | 1.00 | 1 | 1 | 0.01  | 0.01   | 0.017  | 0      | 0.011  | t | 108649 | TDANKQK<br>GIEWNHDT           | Homo<br>sapiens          |
| 1 | 1.00 | 1 | 1 | -0.03 | -0.03  | -0.031 | -0.03  | -0.028 | t | 6225   | CFGKDLKR<br>PGSSPME<br>V      | Mus<br>musculus          |
| 1 | 1.00 | 1 | 1 | -0.03 | -0.032 | -0.011 | -0.027 | -0.03  | t | 75539  | YQQQGRL                       | Mus<br>musculus          |

|   |      |   |   |       |        |        |        |        |   |        |                              |                                  |
|---|------|---|---|-------|--------|--------|--------|--------|---|--------|------------------------------|----------------------------------|
| 1 | 1.00 | 1 | 1 | -0.02 | -0.017 | -0.01  | -0.02  | -0.017 | t | 13972  | ERDPANIP<br>WDKD             | Mus<br>musculu<br>s              |
| 1 | 1.00 | 1 | 1 | 0     | 0.004  | 0.022  | 0      | 0      | t | 94624  | NPACGRH<br>Y                 | Capra<br>hircus                  |
| 1 | 1.00 | 1 | 1 | -0.03 | -0.03  | -0.027 | -0.03  | -0.03  | t | 57644  | SETFTNKL<br>KEKHTDLG<br>KEG  | Mus<br>musculu<br>s              |
| 1 | 1.00 | 1 | 1 | -0.01 | -0.014 | -0.01  | -0.017 | -0.01  | t | 122790 | HQEEDFR<br>VTCKDIQR          | Oryctola<br>gus<br>cuniculu<br>s |
| 1 | 1.00 | 1 | 1 | -0.01 | -0.01  | -0.004 | -0.01  | -0.009 | t | 94832  | GLFGNNE<br>NQTKV             | Oryctola<br>gus<br>cuniculu<br>s |
| 1 | 1.00 | 1 | 1 | 0.01  | 0.01   | -0.002 | 0.01   | 0.022  | t | 11481  | EDYPSP                       | Homo<br>sapiens                  |
| 1 | 1.00 | 1 | 1 | 0.03  | 0.028  | 0.028  | 0.023  | 0.03   | t | 119599 | KAEEYILKK<br>PRSELMFE<br>E   | Mus<br>musculu<br>s              |
| 1 | 1.00 | 1 | 1 | -0.07 | -0.07  | -0.063 | -0.07  | -0.07  | t | 130912 | KADILPEM<br>NSMRADR<br>M     | Mus<br>musculu<br>s              |
| 1 | 1.00 | 1 | 1 | -0.07 | -0.07  | -0.063 | -0.07  | -0.07  | t | 130912 | KADILPEM<br>NSMRADR<br>M     | Mus<br>musculu<br>s              |
| 1 | 1.00 | 1 | 1 | 0.01  | 0.01   | 0.01   | 0.006  | 0.011  | t | 131318 | VPSTPPTP<br>SPSTPPTPS<br>PS  | Homo<br>sapiens                  |
| 1 | 1.00 | 1 | 1 | -0.01 | -0.01  | 0.004  | -0.01  | -0.008 | t | 9103   | DLGPLAAR                     | Mus<br>musculu<br>s              |
| 1 | 1.00 | 1 | 1 | -0.02 | -0.018 | -0.005 | -0.019 | -0.02  | t | 57784  | SFGVWIRT<br>PPAYRPPN<br>APIL | Homo<br>sapiens                  |
| 1 | 1.00 | 1 | 1 | -0.11 | -0.108 | -0.098 | -0.103 | -0.11  | t | 134791 | RRRSRKPE<br>APRRRSP          | Homo<br>sapiens                  |
| 1 | 1.00 | 1 | 1 | -0.05 | -0.05  | -0.05  | -0.053 | -0.05  | t | 149111 | SRSRFPW<br>LNPLDGW           | Rattus<br>norvegic<br>us         |

|   |      |   |   |       |        |        |        |        |   |        |                              |                                  |
|---|------|---|---|-------|--------|--------|--------|--------|---|--------|------------------------------|----------------------------------|
| 1 | 1.00 | 1 | 1 | -0.04 | -0.04  | -0.014 | -0.04  | -0.042 | t | 53164  | RAMAGRC<br>RLLLSIGS          | Mus<br>musculu<br>s              |
| 1 | 1.00 | 1 | 1 | -0.04 | -0.036 | -0.029 | -0.043 | -0.039 | t | 111682 | QNFGLFYP<br>NKQPVYQ          | Homo<br>sapiens                  |
| 1 | 1.00 | 1 | 1 | -0.01 | -0.014 | -0.009 | -0.013 | 0      | t | 79606  | LPYTMWV                      | Oryctola<br>gus<br>cuniculu<br>s |
| 1 | 1.00 | 1 | 1 | -0.03 | -0.032 | -0.003 | -0.029 | -0.032 | t | 62050  | SVARTRGL<br>YDDG             | Mus<br>musculu<br>s              |
| 1 | 1.00 | 1 | 1 | 0.05  | 0.061  | 0.057  | 0.051  | 0.057  | t | 136550 | PIMTQGS<br>L YNDS            | Dicentra<br>rchus<br>labrax      |
| 1 | 1.00 | 1 | 1 | -0.02 | -0.02  | -0.02  | -0.02  | -0.015 | t | 73080  | WSLDPHR                      | Mus<br>musculu<br>s              |
| 1 | 1.00 | 1 | 1 | -0.01 | -0.014 | 0.003  | -0.013 | -0.01  | t | 58083  | SGIGPEKA<br>FR               | Oryctola<br>gus<br>cuniculu<br>s |
| 1 | 1.00 | 1 | 1 | 0.03  | 0.028  | 0.03   | 0.023  | 0.032  | t | 126897 | QSQQFSVS<br>ENLLKEA          | Mus<br>musculu<br>s              |
| 1 | 1.00 | 1 | 1 | 0     | 0      | 0      | 0      | 0.006  | t | 109917 | SHQESTRG<br>RSRGRSGR<br>SGS  | Mus<br>musculu<br>s              |
| 1 | 1.00 | 1 | 1 | 0     | 0      | 0      | 0      | 0.006  | t | 64541  | TKDTNNN<br>L                 | Mus<br>musculu<br>s              |
| 1 | 1.00 | 1 | 1 | 0     | -0.001 | 0.011  | 0      | 0      | t | 56086  | RTIPVPVD<br>GMEYHW<br>GNNDPV | Mus<br>musculu<br>s              |
| 1 | 1.00 | 1 | 1 | -0.04 | -0.037 | -0.038 | -0.04  | -0.04  | t | 102535 | INLVHWN<br>KKKYSSYEE<br>AKKH | Mus<br>musculu<br>s              |
| 1 | 1.00 | 1 | 1 | -0.02 | -0.021 | -0.003 | -0.02  | -0.02  | t | 30821  | KFPTLDHV                     | Anas<br>platyrhy<br>nchos        |
| 1 | 1.00 | 1 | 1 | -0.01 | -0.01  | 0.006  | -0.01  | -0.01  | t | 12050  | EFMEKECP<br>FIKPEV           | Oryctola<br>gus<br>cuniculu<br>s |

|   |      |   |   |       |        |       |        |        |   |        |                             |                                  |
|---|------|---|---|-------|--------|-------|--------|--------|---|--------|-----------------------------|----------------------------------|
| 1 | 1.00 | 1 | 1 | 0     | 0      | 0.019 | 0      | 0      | t | 58931  | SKQPTIDID<br>LCDICT         | Mus<br>musculu<br>s              |
| 1 | 1.00 | 1 | 1 | 0.06  | 0.058  | 0.06  | 0.059  | 0.067  | t | 117223 | NTWTTCD<br>SIAFPSK          | Mus<br>musculu<br>s              |
| 1 | 1.00 | 1 | 1 | -0.01 | -0.008 | 0.012 | -0.003 | -0.01  | t | 119496 | MFPEVKEK<br>GMAAL           | Homo<br>sapiens                  |
| 1 | 1.00 | 1 | 1 | 0.01  | 0.012  | 0.02  | 0.013  | 0.01   | t | 8731   | DINKVLEK<br>LGYSGGD         | Homo<br>sapiens                  |
| 1 | 1.00 | 1 | 1 | 0     | 0      | 0.013 | 0      | -0.002 | t | 3201   | AMTQAQK<br>AGKPA            | Homo<br>sapiens                  |
| 1 | 1.00 | 1 | 1 | -0.03 | -0.032 | -0.03 | -0.037 | -0.03  | t | 118077 | QEMPLTA<br>LLRNLGK<br>MT    | Mus<br>musculu<br>s              |
| 1 | 1.00 | 1 | 1 | 0     | 0.003  | 0.011 | 0      | 0.003  | t | 57250  | SDMYGLIV<br>AQWLSTV<br>NTQF | Equus<br>caballus                |
| 1 | 1.00 | 1 | 1 | -0.01 | -0.005 | 0.011 | -0.007 | -0.008 | t | 48955  | PPYVEPTA<br>PQVL            | Homo<br>sapiens                  |
| 1 | 1.00 | 1 | 1 | -0.04 | -0.04  | -0.02 | -0.04  | -0.04  | t | 141669 | HNHGSISA<br>LMHL            | Mus<br>musculu<br>s              |
| 1 | 1.00 | 1 | 1 | 0     | -0.003 | 0.012 | 0      | 0.001  | t | 120705 | KNQFDHY<br>SRHESCAE<br>L    | Oryctola<br>gus<br>cuniculu<br>s |
| 1 | 1.00 | 1 | 1 | 0     | 0      | 0     | 0      | 0.006  | t | 150204 | FHSVHTL<br>LEWLMEK<br>ELMV  | Mus<br>musculu<br>s              |
| 1 | 1.00 | 1 | 1 | 0     | 0      | 0     | 0      | 0.006  | t | 122290 | CSNSSSQ<br>FQIHGPRQ         | Mus<br>musculu<br>s              |
| 1 | 1.00 | 1 | 1 | 0     | 0      | 0     | 0      | 0.006  | t | 131297 | FSLRLMEE<br>NWNAEKR<br>SPTF | Callithrix<br>pygmae<br>a        |
| 1 | 1.00 | 1 | 1 | 0     | 0      | 0     | 0      | 0.006  | t | 122293 | CTYVLDPE<br>NLTLKAPY<br>EA  | Oryctola<br>gus<br>cuniculu<br>s |

|   |      |   |   |       |        |        |        |        |   |        |                              |                                  |
|---|------|---|---|-------|--------|--------|--------|--------|---|--------|------------------------------|----------------------------------|
| 1 | 1.00 | 1 | 1 | 0     | 0      | 0      | 0      | 0.006  | t | 122293 | CTYVLDPE<br>NLTLKAPY<br>EA   | Oryctola<br>gus<br>cuniculu<br>s |
| 1 | 1.00 | 1 | 1 | 0     | 0      | 0      | 0      | 0.006  | t | 123016 | AIYENEIHA<br>LWADLP          | Trichosu<br>rus<br>vulpecul<br>a |
| 1 | 1.00 | 1 | 1 | 0     | 0      | 0      | 0      | 0.006  | t | 127857 | TDVRYKD<br>DMYHFFC<br>PAIQAQ | Mus<br>musculu<br>s              |
| 1 | 1.00 | 1 | 1 | 0     | 0      | 0      | 0      | 0.006  | t | 125185 | NSSSSQFQ<br>IHG              | Mus<br>musculu<br>s              |
| 1 | 1.00 | 1 | 1 | 0     | 0      | 0      | 0      | 0.006  | t | 122293 | CTYVLDPE<br>NLTLKAPY<br>EA   | Mus<br>musculu<br>s              |
| 1 | 1.00 | 1 | 1 | 0     | 0      | 0      | 0      | 0.006  | t | 122289 | CSNSSSSQ<br>FQIHGP           | Oryctola<br>gus<br>cuniculu<br>s |
| 1 | 1.00 | 1 | 1 | 0     | 0      | 0      | 0      | 0.006  | t | 127856 | TDVRYKD                      | Mus<br>musculu<br>s              |
| 1 | 1.00 | 1 | 1 | 0.02  | 0.02   | 0.047  | 0.02   | 0.018  | t | 31069  | KGTFDPLQ<br>EPRT             | Mus<br>musculu<br>s              |
| 1 | 1.00 | 1 | 1 | -0.01 | -0.007 | 0.018  | -0.01  | -0.014 | t | 24403  | HNQWNK<br>PSKP               | Mus<br>musculu<br>s              |
| 1 | 1.00 | 1 | 1 | 0.01  | 0.012  | 0.022  | 0.007  | 0.01   | t | 107080 | AGPDCSSL<br>PNSMRCS          | Homo<br>sapiens                  |
| 1 | 1.00 | 1 | 1 | -0.05 | -0.05  | -0.037 | -0.047 | -0.05  | t | 147038 | ILYGNGPG<br>YALGG            | Homo<br>sapiens                  |
| 1 | 1.00 | 1 | 1 | -0.02 | -0.02  | -0.02  | -0.02  | -0.013 | t | 118127 | SDDDMGF<br>GLFD              | Homo<br>sapiens                  |
| 1 | 1.00 | 1 | 1 | -0.03 | -0.028 | -0.018 | -0.029 | -0.028 | t | 14190  | ESKLTPPPL<br>NPIRVV          | Homo<br>sapiens                  |
| 1 | 1.00 | 1 | 1 | -0.03 | -0.03  | -0.016 | -0.03  | -0.027 | t | 9684   | DPMFTPK                      | Mus<br>musculu<br>s              |



|   |      |   |   |       |        |        |        |        |   |        |                              |                            |
|---|------|---|---|-------|--------|--------|--------|--------|---|--------|------------------------------|----------------------------|
| 1 | 1.00 | 1 | 1 | 0.02  | 0.023  | 0.026  | 0.02   | 0.022  | t | 52421  | QSRGEARE<br>SYRETGPS<br>RA   | Mus<br>musculu<br>s        |
| 1 | 1.00 | 1 | 1 | -0.02 | -0.02  | 0.002  | -0.016 | -0.02  | t | 33043  | KQNIQLIN<br>TNGSWH           | Homo<br>sapiens            |
| 1 | 1.00 | 1 | 1 | -0.03 | -0.032 | -0.008 | -0.029 | -0.03  | t | 98391  | QPVKDSW<br>MSSRGFD<br>E      | Sus<br>scrofa              |
| 1 | 1.00 | 1 | 1 | 0     | 0      | 0.009  | 0      | 0.001  | t | 121769 | QVRLAIDC<br>PNHDAPS          | Mus<br>musculu<br>s        |
| 1 | 1.00 | 1 | 1 | -0.03 | -0.028 | -0.026 | -0.029 | -0.03  | t | 49506  | PSSKRFQP<br>FQQFGRD<br>VSDFT | Homo<br>sapiens            |
| 1 | 1.00 | 1 | 1 | -0.03 | -0.026 | -0.026 | -0.029 | -0.03  | t | 49506  | PSSKRFQP<br>FQQFGRD<br>VSDFT | Homo<br>sapiens            |
| 1 | 1.00 | 1 | 1 | -0.03 | -0.032 | -0.023 | -0.033 | -0.029 | t | 45990  | NSSSFNTT<br>QGWHHP<br>SQRLLF | Mus<br>musculu<br>s        |
| 1 | 1.00 | 1 | 1 | -0.02 | -0.022 | -0.002 | -0.019 | -0.021 | t | 98940  | PQPGPQP<br>PQPPQP<br>P       | Mus<br>musculu<br>s        |
| 1 | 1.00 | 1 | 1 | -0.02 | -0.018 | -0.032 | -0.023 | -0.01  | t | 78505  | RLGDYLID<br>QGL              | Homo<br>sapiens            |
| 1 | 1.00 | 1 | 1 | -0.01 | -0.01  | -0.003 | -0.01  | -0.01  | t | 33859  | KTSERSQP<br>RGRQPIP<br>KARR  | Homo<br>sapiens            |
| 1 | 1.00 | 1 | 1 | -0.01 | -0.01  | -0.003 | -0.01  | -0.01  | t | 33859  | KTSERSQP<br>RGRQPIP<br>KARR  | Homo<br>sapiens            |
| 1 | 1.00 | 1 | 1 | -0.03 | -0.031 | -0.023 | -0.027 | -0.027 | t | 130555 | MHNRTQA<br>LEDSR             | Camelus<br>dromed<br>arius |
| 1 | 1.00 | 1 | 1 | -0.01 | -0.012 | -0.01  | -0.017 | -0.008 | t | 134784 | RKRSQML<br>FRGRRASQ          | Mus<br>musculu<br>s        |
| 1 | 1.00 | 1 | 1 | -0.01 | -0.01  | 0.012  | -0.01  | -0.01  | t | 43435  | NDFHFEVF<br>NFVP             | Mus<br>musculu<br>s        |

|   |      |   |   |       |        |        |        |        |   |        |                              |                                  |
|---|------|---|---|-------|--------|--------|--------|--------|---|--------|------------------------------|----------------------------------|
| 1 | 1.00 | 1 | 1 | -0.05 | -0.05  | -0.05  | -0.06  | -0.05  | t | 114906 | NKDLRPIC<br>GT               | Homo<br>sapiens                  |
| 1 | 1.00 | 1 | 1 | -0.02 | -0.02  | -0.01  | -0.02  | -0.02  | t | 63231  | TDSGDGR<br>QTITN             | Oryctola<br>gus<br>cuniculu<br>s |
| 1 | 1.00 | 1 | 1 | -0.03 | -0.025 | -0.026 | -0.03  | -0.03  | t | 99134  | DAEFRHDS<br>GYEVHHQ          | Canis<br>familiari<br>s          |
| 1 | 1.00 | 1 | 1 | -0.02 | -0.02  | -0.019 | -0.03  | -0.022 | t | 106425 | FPIHSSCN<br>AT               | Homo<br>sapiens                  |
| 1 | 1.00 | 1 | 1 | 0     | 0      | 0.014  | 0      | -0.001 | t | 14191  | ESKVQDII<br>DLIDH            | Mus<br>musculu<br>s              |
| 1 | 1.00 | 1 | 1 | -0.03 | -0.018 | -0.025 | -0.03  | -0.03  | t | 8773   | DIRTLEDLL<br>MGTLGIVC<br>PIC | Mus<br>musculu<br>s              |
| 1 | 1.00 | 1 | 1 | -0.03 | -0.028 | -0.01  | -0.027 | -0.03  | t | 42053  | MLRTWL<br>MKTQGIES<br>W      | Homo<br>sapiens                  |
| 1 | 1.00 | 1 | 1 | 0     | 0.002  | 0.005  | -0.001 | -0.001 | t | 32485  | KNESKYSN<br>TFQVNAY<br>NMSIR | Aotus<br>nancyma<br>ae           |
| 1 | 1.00 | 1 | 1 | 0.02  | 0.02   | 0.045  | 0.017  | 0.02   | t | 45279  | NNVDQI                       | Homo<br>sapiens                  |
| 1 | 1.00 | 1 | 1 | -0.03 | -0.03  | -0.023 | -0.03  | -0.029 | t | 79843  | GPKQLTFE<br>GKPA             | Mus<br>musculu<br>s              |
| 1 | 1.00 | 1 | 1 | -0.03 | -0.03  | -0.023 | -0.03  | -0.029 | t | 79843  | GPKQLTFE<br>GKPA             | Mus<br>musculu<br>s              |
| 1 | 1.00 | 1 | 1 | -0.03 | -0.028 | -0.01  | -0.029 | -0.03  | t | 470    | AATRFMK<br>DLY               | Homo<br>sapiens                  |
| 1 | 1.00 | 1 | 1 | 0     | 0      | 0.015  | 0      | 0      | t | 746    | ADPSIMAK                     | Oryctola<br>gus<br>cuniculu<br>s |
| 1 | 1.00 | 1 | 1 | 0.02  | 0.02   | 0.032  | 0.02   | 0.02   | t | 114203 | ENPVVHFF<br>FNIVTPRT<br>P    | Mus<br>musculu<br>s              |

|   |      |   |   |       |        |        |        |        |   |        |                           |                   |
|---|------|---|---|-------|--------|--------|--------|--------|---|--------|---------------------------|-------------------|
| 1 | 1.00 | 1 | 1 | 0.01  | 0.012  | 0.024  | 0.007  | 0.01   | t | 95610  | NDECAQ                    | Homo sapiens      |
| 1 | 1.00 | 1 | 1 | 0     | 0      | 0      | 0      | 0.006  | t | 142810 | KEWEQIYR                  | Rattus norvegicus |
| 1 | 1.00 | 1 | 1 | 0     | 0      | 0      | 0      | 0.006  | t | 142695 | GSHSLRYF<br>YTAVSRP       | Rattus norvegicus |
| 1 | 1.00 | 1 | 1 | 0.02  | 0.018  | 0.036  | 0.019  | 0.019  | t | 109326 | IEESDDRR<br>YDLVGP        | Mus musculus      |
| 1 | 1.00 | 1 | 1 | 0.04  | 0.044  | 0.045  | 0.047  | 0.049  | t | 124373 | KPSARFSG<br>L             | Homo sapiens      |
| 1 | 1.00 | 1 | 0 | -0.04 | -0.04  | -0.014 | -0.04  | -0.028 | t | 24849  | HSSWYIQ<br>HFPPL          | Mus musculus      |
| 1 | 1.00 | 1 | 0 | -0.04 | -0.037 | -0.014 | -0.04  | -0.028 | t | 24849  | HSSWYIQ<br>HFPPL          | Mus musculus      |
| 1 | 1.00 | 1 | 1 | -0.03 | -0.03  | -0.016 | -0.027 | -0.027 | t | 68054  | VDREGRD<br>NVRSGKV        | Homo sapiens      |
| 1 | 1.00 | 1 | 1 | 0.02  | 0.022  | 0.022  | 0.021  | 0.029  | t | 55723  | RRRPFYHS<br>P             | Homo sapiens      |
| 1 | 1.00 | 1 | 1 | 0     | 0      | 0      | 0      | 0.006  | t | 151731 | SAQSQRA<br>PDR            | Mus musculus      |
| 1 | 1.00 | 1 | 1 | 0     | 0      | 0.013  | 0      | 0      | t | 159080 | RSNHNRR<br>PGYKTQS<br>QG  | Mus musculus      |
| 1 | 1.00 | 1 | 1 | -0.03 | -0.03  | -0.01  | -0.03  | -0.03  | t | 133667 | QDVCTYR<br>DFMYK          | Mus musculus      |
| 1 | 1.00 | 1 | 1 | 0.02  | 0.024  | 0.03   | 0.021  | 0.022  | t | 94978  | YLKDQQLL<br>GIWGCSG<br>KL | Homo sapiens      |
| 1 | 1.00 | 1 | 1 | -0.06 | -0.06  | -0.053 | -0.06  | -0.058 | t | 125248 | RVPPRYHA<br>KISPMVN       | Mus musculus      |
| 1 | 1.00 | 1 | 1 | 0     | 0      | 0.016  | 0      | 0      | t | 64543  | TKDTQTG<br>MSGQTTP<br>Q   | Mus musculus      |

|   |      |   |   |       |        |        |        |        |   |        |                              |                                  |
|---|------|---|---|-------|--------|--------|--------|--------|---|--------|------------------------------|----------------------------------|
| 1 | 1.00 | 1 | 1 | -0.02 | -0.02  | -0.012 | -0.02  | -0.018 | t | 4037   | AQPREPGS<br>YTNVFDHL<br>DWIK | Oryctola<br>gus<br>cuniculu<br>s |
| 1 | 1.00 | 1 | 1 | -0.02 | -0.022 | -0.02  | -0.013 | -0.013 | t | 130980 | NCAYKTTQ<br>ANKQAQI<br>HGPR  | Mus<br>musculu<br>s              |
| 1 | 1.00 | 1 | 1 | 0.02  | 0.024  | 0.027  | 0.017  | 0.02   | t | 3221   | ANAANE<br>DYQAKLTA<br>YQTE   | Homo<br>sapiens                  |
| 1 | 1.00 | 1 | 1 | 0.02  | 0.022  | 0.035  | 0.017  | 0.017  | t | 70444  | VPQLEIVP<br>NSAEERLH<br>SMKE | Homo<br>sapiens                  |
| 1 | 1.00 | 1 | 1 | -0.03 | -0.028 | -0.021 | -0.033 | -0.03  | t | 17964  | FTGIQIICL<br>A               | Homo<br>sapiens                  |
| 1 | 1.00 | 1 | 1 | 0.01  | 0.01   | 0.022  | 0.01   | 0.01   | t | 120601 | IDISDISGK<br>QVTGEVIF<br>QT  | Mus<br>musculu<br>s              |
| 1 | 1.00 | 1 | 1 | -0.02 | -0.02  | -0.015 | -0.02  | -0.02  | t | 145845 | KHKVRNE<br>VMVHWF<br>GD      | Sus<br>scrofa                    |
| 1 | 1.00 | 1 | 1 | -0.01 | -0.008 | -0.003 | -0.013 | -0.008 | t | 51258  | QKTAASY                      | Homo<br>sapiens                  |
| 1 | 1.00 | 1 | 1 | -0.06 | -0.058 | -0.051 | -0.06  | -0.06  | t | 100382 | PKHVRVW<br>CPRPPRA           | Homo<br>sapiens                  |
| 1 | 1.00 | 1 | 1 | -0.02 | -0.02  | -0.004 | -0.02  | -0.02  | t | 63529  | TESMAGK<br>REM               | Mus<br>musculu<br>s              |
| 1 | 1.00 | 1 | 1 | -0.06 | -0.058 | -0.049 | -0.059 | -0.06  | t | 120441 | DKVLPLVA<br>IVVSVGLA<br>VSYD | Homo<br>sapiens                  |
| 1 | 1.00 | 1 | 1 | 0.02  | 0.022  | 0.027  | 0.023  | 0.022  | t | 131261 | SHMPLAN<br>QYQWA             | Homo<br>sapiens                  |
| 1 | 1.00 | 1 | 1 | -0.01 | -0.005 | 0      | -0.012 | -0.009 | t | 25182  | HYMKCPL<br>VKGQQYD           | Homo<br>sapiens                  |
| 1 | 1.00 | 1 | 1 | -0.06 | -0.057 | -0.045 | -0.06  | -0.058 | t | 19983  | GGQPAVR<br>NER               | Mus<br>musculu<br>s              |

|   |      |   |   |       |        |        |        |        |   |        |                              |                                  |
|---|------|---|---|-------|--------|--------|--------|--------|---|--------|------------------------------|----------------------------------|
| 1 | 1.00 | 1 | 1 | 0.01  | 0.013  | 0.021  | 0.01   | 0.01   | t | 40214  | LTTTERQH<br>NAYRDP           | Mus<br>musculu<br>s              |
| 1 | 1.00 | 1 | 1 | -0.04 | -0.04  | -0.023 | -0.043 | -0.042 | t | 11582  | EEEGAIVT<br>VRGGLRI          | Homo<br>sapiens                  |
| 1 | 1.00 | 1 | 1 | 0.02  | 0.016  | 0.036  | 0.021  | 0.021  | t | 141563 | SPKLQGE<br>ATLAPT            | Bos<br>taurus                    |
| 1 | 1.00 | 1 | 1 | 0     | -0.004 | 0.01   | -0.003 | 0      | t | 25219  | IAAEQDRN<br>TREVFAQV<br>K    | Oryctola<br>gus<br>cuniculu<br>s |
| 1 | 1.00 | 1 | 1 | 0.04  | 0.042  | 0.057  | 0.041  | 0.04   | t | 89745  | TTELTAE<br>NQE               | Homo<br>sapiens                  |
| 1 | 1.00 | 1 | 1 | 0.02  | 0.018  | 0.025  | 0.019  | 0.03   | t | 103887 | EQWSLPW                      | Mus<br>musculu<br>s              |
| 1 | 1.00 | 1 | 1 | -0.03 | -0.03  | -0.025 | -0.03  | -0.028 | t | 140718 | NKWERAR<br>YAER              | Rattus<br>norvegic<br>us         |
| 1 | 1.00 | 1 | 1 | 0.03  | 0.03   | 0.031  | 0.03   | 0.032  | t | 72248  | WANLMEK<br>IQASVATN<br>PI    | Mus<br>musculu<br>s              |
| 1 | 1.00 | 1 | 1 | -0.05 | -0.05  | -0.038 | -0.05  | -0.05  | t | 122576 | SHRLRERT<br>HHPRLPD          | Mus<br>musculu<br>s              |
| 1 | 1.00 | 1 | 1 | -0.07 | -0.072 | -0.07  | -0.07  | -0.07  | t | 136056 | DGKKWQT<br>YRGNSTG           | Oryctola<br>gus<br>cuniculu<br>s |
| 1 | 1.00 | 1 | 1 | -0.03 | -0.028 | -0.01  | -0.023 | -0.028 | t | 128083 | QFLGVPYA<br>APPLAERH<br>FQAP | Homo<br>sapiens                  |
| 1 | 1.00 | 1 | 1 | 0.04  | 0.04   | 0.054  | 0.04   | 0.042  | t | 75274  | YPEEVVE<br>VPEEVVE<br>EVVP   | Mus<br>musculu<br>s              |
| 1 | 1.00 | 1 | 1 | 0.04  | 0.04   | 0.054  | 0.04   | 0.042  | t | 75274  | YPEEVVE<br>VPEEVVE<br>EVVP   | Mus<br>musculu<br>s              |
| 1 | 1.00 | 1 | 1 | -0.05 | -0.054 | -0.043 | -0.051 | -0.05  | t | 60362  | SQADQGS<br>FYVNHQIL<br>FLHLK | Oryctola<br>gus<br>cuniculu<br>s |

|   |      |   |   |       |        |        |        |        |   |        |                              |                                  |
|---|------|---|---|-------|--------|--------|--------|--------|---|--------|------------------------------|----------------------------------|
| 1 | 1.00 | 1 | 1 | 0.05  | 0.05   | 0.066  | 0.05   | 0.054  | t | 136061 | ETQAE                        | Mus<br>musculu<br>s              |
| 1 | 1.00 | 1 | 1 | -0.02 | -0.016 | -0.007 | -0.02  | -0.018 | t | 52466  | QTADWYT<br>IGVYVIG           | Myodes<br>glareolu<br>s          |
| 1 | 1.00 | 1 | 1 | 0.02  | 0.02   | 0.025  | 0.02   | 0.02   | t | 145841 | KEDFRYAIS<br>STNEIGLLG<br>A  | Sus<br>scrofa                    |
| 1 | 1.00 | 1 | 1 | -0.07 | -0.07  | -0.061 | -0.07  | -0.07  | t | 121932 | TRGYLERR<br>L                | Mus<br>musculu<br>s              |
| 1 | 1.00 | 1 | 1 | 0     | 0.004  | 0.006  | -0.003 | 0      | t | 55457  | RQNKPPN<br>KPNND             | Homo<br>sapiens                  |
| 1 | 1.00 | 1 | 1 | 0.04  | 0.043  | 0.049  | 0.043  | 0.043  | t | 110999 | REEAENTL<br>QSFRQDV<br>NTLQS | Mus<br>musculu<br>s              |
| 1 | 1.00 | 1 | 1 | 0     | 0      | 0      | 0      | 0.006  | t | 125870 | EEEEEEEE                     | Mus<br>musculu<br>s              |
| 1 | 1.00 | 1 | 1 | 0     | 0      | 0      | 0      | 0.006  | t | 125085 | GTPSHSRR<br>QPHVMS           | Macaca<br>fascicula<br>ris       |
| 1 | 1.00 | 1 | 1 | 0     | 0      | 0      | 0      | 0.006  | t | 11813  | EENVEENV                     | Oryctola<br>gus<br>cuniculu<br>s |
| 1 | 1.00 | 1 | 1 | 0     | 0      | 0      | 0      | 0.006  | t | 14952  | EWSPCSVT<br>CGKGTRSR<br>KR   | Oryctola<br>gus<br>cuniculu<br>s |
| 1 | 1.00 | 1 | 1 | 0     | 0      | 0      | 0      | 0.006  | t | 11819  | EENVEHD<br>A                 | Oryctola<br>gus<br>cuniculu<br>s |
| 1 | 1.00 | 1 | 1 | 0     | 0      | 0      | 0      | 0.006  | t | 7491   | DAEFRHDS<br>GYEVHHQ<br>K     | Homo<br>sapiens                  |
| 1 | 1.00 | 1 | 1 | 0     | 0      | 0      | 0      | 0.006  | t | 10227  | DSSAHGTP<br>STPA             | Mus<br>musculu<br>s              |
| 1 | 1.00 | 1 | 1 | 0.02  | 0.016  | 0.037  | 0.019  | 0.02   | t | 78985  | GQGGGTH<br>NQWNKPS<br>K      | Oryctola<br>gus<br>cuniculu<br>s |

|   |      |   |   |       |        |        |        |        |   |        |                              |                                  |
|---|------|---|---|-------|--------|--------|--------|--------|---|--------|------------------------------|----------------------------------|
| 1 | 1.00 | 1 | 1 | -0.03 | -0.033 | -0.026 | -0.03  | -0.028 | t | 139225 | REAEQRR                      | Oryctola<br>gus<br>cuniculu<br>s |
| 1 | 1.00 | 1 | 1 | -0.05 | -0.047 | -0.05  | -0.05  | -0.048 | t | 113738 | PVEVSRKN<br>PKFMETV<br>AEKAL | Mus<br>musculu<br>s              |
| 1 | 1.00 | 1 | 1 | -0.07 | -0.068 | -0.07  | -0.071 | -0.07  | t | 134022 | CSGRKHKE<br>NVKDYYQ<br>K     | Homo<br>sapiens                  |
| 1 | 1.00 | 1 | 1 | -0.05 | -0.05  | -0.039 | -0.05  | -0.051 | t | 141955 | LTYLRGIST<br>KVTVGNI         | Mus<br>musculu<br>s              |
| 1 | 1.00 | 1 | 1 | 0     | 0      | 0.005  | 0.007  | 0.01   | t | 104144 | NDSQCWK<br>LGCIAEK           | Homo<br>sapiens                  |
| 1 | 1.00 | 1 | 1 | -0.05 | -0.05  | -0.033 | -0.053 | -0.052 | t | 76396  | YVRGGGA<br>VP                | Homo<br>sapiens                  |
| 1 | 1.00 | 1 | 1 | -0.03 | -0.03  | -0.021 | -0.034 | -0.03  | t | 135984 | RPGGCSA<br>VSAHG             | Homo<br>sapiens                  |
| 1 | 1.00 | 1 | 1 | -0.01 | -0.01  | -0.005 | -0.013 | -0.01  | t | 61410  | SSTRGGSR<br>VEGIFAGL<br>FMNA | Homo<br>sapiens                  |
| 1 | 1.00 | 1 | 1 | 0.03  | 0.028  | 0.03   | 0.023  | 0.031  | t | 119608 | LGTWTYD<br>GSVVAINP<br>ES    | Mus<br>musculu<br>s              |
| 1 | 1.00 | 1 | 1 | 0.03  | 0.026  | 0.037  | 0.023  | 0.032  | t | 134801 | SSATPNRL<br>TWLL             | Oryctola<br>gus<br>cuniculu<br>s |
| 1 | 1.00 | 1 | 1 | -0.01 | -0.008 | 0.007  | -0.009 | -0.01  | t | 84003  | ITGPGTNN<br>PE               | Homo<br>sapiens                  |
| 1 | 1.00 | 1 | 1 | -0.01 | -0.008 | 0.007  | -0.009 | -0.01  | t | 84003  | ITGPGTNN<br>PE               | Homo<br>sapiens                  |
| 1 | 1.00 | 1 | 1 | 0     | 0.002  | 0.019  | 0.001  | 0      | t | 55304  | RPQPTEL<br>RY                | Homo<br>sapiens                  |
| 1 | 1.00 | 1 | 1 | -0.02 | -0.02  | -0.013 | -0.03  | -0.022 | t | 96212  | EEAEDKED<br>DA               | Homo<br>sapiens                  |
| 1 | 1.00 | 1 | 1 | -0.01 | -0.007 | -0.005 | -0.01  | -0.008 | t | 51438  | QLSSSKYT<br>IQRSTGDN<br>IDT  | Mus<br>musculu<br>s              |

|   |      |   |   |       |        |        |        |        |   |        |                              |                         |
|---|------|---|---|-------|--------|--------|--------|--------|---|--------|------------------------------|-------------------------|
| 1 | 1.00 | 1 | 1 | -0.05 | -0.045 | -0.046 | -0.05  | -0.05  | t | 99134  | DAEFRHDS<br>GYEVHHQ          | Canis<br>familiari<br>s |
| 1 | 1.00 | 1 | 1 | -0.01 | -0.007 | 0      | -0.011 | -0.012 | t | 89849  | VAFNRFH<br>VGTHPAP<br>GKTNLY | Aotus                   |
| 1 | 1.00 | 1 | 1 | -0.01 | -0.01  | 0.005  | -0.01  | -0.008 | t | 6895   | CQQTLSVR<br>ALC              | Homo<br>sapiens         |
| 1 | 1.00 | 1 | 1 | -0.03 | -0.026 | -0.021 | -0.029 | -0.028 | t | 72091  | VYLLPRRG<br>PRLG             | Homo<br>sapiens         |
| 1 | 1.00 | 1 | 1 | -0.05 | -0.052 | -0.043 | -0.057 | -0.052 | t | 110028 | VESVRAYP<br>IWAR             | Mus<br>musculu<br>s     |
| 1 | 1.00 | 1 | 1 | -0.01 | -0.01  | -0.001 | -0.01  | -0.01  | t | 110116 | YCAPLKPA<br>KSA              | Mus<br>musculu<br>s     |
| 1 | 1.00 | 1 | 1 | -0.01 | -0.01  | 0.011  | -0.007 | -0.01  | t | 72335  | WDVRPLT<br>ETRGLFS           | Homo<br>sapiens         |
| 1 | 1.00 | 1 | 1 | -0.03 | -0.016 | -0.008 | -0.027 | -0.03  | t | 33504  | KSRYGFGA<br>KEVRSL           | Homo<br>sapiens         |
| 1 | 1.00 | 1 | 1 | 0     | 0      | 0.012  | 0      | 0      | t | 24596  | HQNITNIN<br>SDSQGRQ          | Mus<br>musculu<br>s     |
| 1 | 1.00 | 1 | 1 | -0.04 | -0.038 | -0.031 | -0.04  | -0.04  | t | 100644 | WRITYKDT<br>VQLRRK           | Homo<br>sapiens         |
| 1 | 1.00 | 1 | 1 | -0.02 | -0.015 | -0.017 | -0.02  | -0.019 | t | 43107  | NAAAAAL<br>DKKQRNF<br>D      | Homo<br>sapiens         |
| 1 | 1.00 | 1 | 1 | -0.02 | -0.02  | 0      | -0.02  | -0.02  | t | 79528  | CPSKKPYE<br>EVTC             | Mus<br>musculu<br>s     |
| 1 | 1.00 | 1 | 1 | 0.04  | 0.038  | 0.047  | 0.033  | 0.04   | t | 144756 | QVGTHPG<br>LANDYEY           | Mus<br>musculu<br>s     |
| 1 | 1.00 | 1 | 1 | -0.02 | -0.016 | -0.01  | -0.019 | -0.018 | t | 79053  | QLVNTNG<br>SWHINRT<br>ALNC   | Homo<br>sapiens         |



|   |      |   |   |       |        |        |        |        |   |        |                              |                                  |
|---|------|---|---|-------|--------|--------|--------|--------|---|--------|------------------------------|----------------------------------|
| 1 | 1.00 | 1 | 1 | -0.02 | -0.014 | -0.004 | -0.017 | -0.02  | t | 32734  | KPIISVIMY<br>ETNQ            | Equus<br>caballus                |
| 1 | 1.00 | 1 | 1 | 0.02  | 0.02   | 0.03   | 0.02   | 0.019  | t | 137769 | SHQESTKG<br>KSKGKSGK<br>SGS  | Mus<br>musculu<br>s              |
| 1 | 1.00 | 1 | 1 | -0.01 | -0.01  | -0.01  | -0.01  | -0.007 | t | 50103  | PYIEQGM<br>MLAEQFK<br>QKALGL | Homo<br>sapiens                  |
| 1 | 1.00 | 1 | 1 | 0.02  | 0.016  | 0.02   | 0.013  | 0.021  | t | 116684 | CNYYSNSY<br>SFWLASLD<br>PKR  | Oryctola<br>gus<br>cuniculu<br>s |
| 1 | 1.00 | 1 | 1 | -0.02 | -0.022 | -0.001 | -0.021 | -0.021 | t | 39613  | LSQQSGN<br>VKITVGGK<br>KVKYN | Mus<br>musculu<br>s              |
| 1 | 1.00 | 1 | 1 | -0.02 | -0.018 | -0.026 | -0.023 | -0.02  | t | 105854 | GVTHDQL<br>NNFRAGF<br>VSYMKA | Homo<br>sapiens                  |
| 1 | 1.00 | 1 | 1 | 0.01  | 0.01   | 0.013  | 0.01   | 0.011  | t | 19639  | GFTWTGV<br>TQNG              | Homo<br>sapiens                  |
| 1 | 1.00 | 1 | 1 | -0.03 | -0.03  | -0.03  | -0.034 | -0.03  | t | 125540 | QSLRQRKS<br>VNALNSPL<br>HQEY | Homo<br>sapiens                  |
| 1 | 1.00 | 1 | 1 | 0.01  | 0.01   | 0.02   | 0.01   | 0.01   | t | 16298  | FISEPSIPSR                   | Homo<br>sapiens                  |
| 1 | 1.00 | 1 | 1 | 0.04  | 0.042  | 0.04   | 0.047  | 0.052  | t | 131048 | RQSDGQY<br>QM                | Homo<br>sapiens                  |
| 1 | 1.00 | 1 | 1 | -0.02 | -0.02  | -0.008 | -0.02  | -0.019 | t | 133536 | CKPVENRA<br>C                | Mus<br>musculu<br>s              |
| 1 | 1.00 | 1 | 1 | 0     | 0      | 0.002  | 0      | 0      | t | 104759 | EALYLVCG<br>ERG              | Mus<br>musculu<br>s              |
| 1 | 1.00 | 1 | 1 | 0.01  | 0.01   | 0.024  | 0.01   | 0.01   | t | 121035 | VKMTLKN<br>REPVQLET          | Mus<br>musculu<br>s              |
| 1 | 1.00 | 1 | 1 | -0.03 | -0.03  | -0.018 | -0.03  | -0.032 | t | 120812 | NCTMKLGI<br>WTYDGTK<br>VSISP | Mus<br>musculu<br>s              |
| 1 | 1.00 | 1 | 1 | -0.07 | -0.065 | -0.047 | -0.063 | -0.07  | t | 108659 | TIHAHPGS<br>RRGGRHG<br>YHH   | Homo<br>sapiens                  |
| 1 | 1.00 | 1 | 1 | 0.03  | 0.03   | 0.037  | 0.026  | 0.034  | t | 138202 | LPTITNT                      | Homo<br>sapiens                  |

|   |      |   |   |       |        |        |        |        |   |        |                              |                                  |
|---|------|---|---|-------|--------|--------|--------|--------|---|--------|------------------------------|----------------------------------|
| 1 | 1.00 | 1 | 1 | 0.03  | 0.032  | 0.03   | 0.037  | 0.039  | t | 108082 | QKTTTRPY<br>PNLQIDP          | Homo<br>sapiens                  |
| 1 | 1.00 | 1 | 1 | -0.05 | -0.048 | -0.04  | -0.053 | -0.051 | t | 41736  | MIKVGFP<br>TGAFMSP<br>RWKSH  | Aotus<br>nancyma<br>ae           |
| 1 | 1.00 | 1 | 1 | 0.02  | 0.023  | 0.034  | 0.02   | 0.021  | t | 97288  | ETQLTTAG<br>LRL              | Mus<br>musculu<br>s              |
| 1 | 1.00 | 1 | 1 | 0.02  | 0.02   | 0.016  | 0.02   | 0.03   | t | 106905 | THTYSPAP<br>FTLI             | Mus<br>musculu<br>s              |
| 1 | 1.00 | 1 | 1 | -0.01 | -0.007 | 0.003  | -0.01  | -0.01  | t | 30420  | KEGYLMD<br>HEGCKLSC          | Equus<br>caballus                |
| 1 | 1.00 | 1 | 1 | -0.02 | -0.017 | 0.002  | -0.02  | -0.02  | t | 97601  | RGRRQP                       | Mus<br>musculu<br>s              |
| 1 | 1.00 | 1 | 1 | -0.04 | -0.042 | -0.029 | -0.037 | -0.038 | t | 114810 | ENPVVHFF<br>RNIVTART<br>P    | Mus<br>musculu<br>s              |
| 1 | 1.00 | 1 | 1 | 0.01  | 0.012  | 0.028  | 0.009  | 0.01   | t | 99824  | ITQSTQSF<br>N                | Homo<br>sapiens                  |
| 1 | 1.00 | 1 | 1 | -0.07 | -0.066 | -0.063 | -0.071 | -0.07  | t | 130906 | IRGPGVLA<br>GGRSAGA<br>R     | Homo<br>sapiens                  |
| 1 | 1.00 | 1 | 1 | 0.01  | 0.01   | 0.02   | 0.01   | 0.01   | t | 73430  | YAQYMSR<br>AYAEFLGE<br>DPGSG | Mus<br>musculu<br>s              |
| 1 | 1.00 | 1 | 1 | -0.03 | -0.033 | -0.03  | -0.03  | -0.027 | t | 134130 | LCSQNPPV<br>LKRHQRE          | Oryctola<br>gus<br>cuniculu<br>s |
| 1 | 1.00 | 1 | 1 | -0.05 | -0.052 | -0.038 | -0.051 | -0.05  | t | 142439 | LARLARLG<br>EACG             | Mus<br>musculu<br>s              |
| 1 | 1.00 | 1 | 1 | 0.02  | 0.02   | 0.028  | 0.017  | 0.026  | t | 29128  | ITVEELKQ                     | Homo<br>sapiens                  |
| 1 | 1.00 | 1 | 1 | -0.01 | -0.01  | -0.01  | -0.014 | -0.009 | t | 119563 | EDHRQVV<br>EVTVGLQL<br>I     | Homo<br>sapiens                  |
| 1 | 1.00 | 1 | 1 | -0.05 | -0.052 | -0.045 | -0.051 | -0.05  | t | 50401  | QCAPAWR<br>GRNCG             | Mus<br>musculu<br>s              |

|   |      |   |   |       |        |        |        |        |   |        |                              |                                  |
|---|------|---|---|-------|--------|--------|--------|--------|---|--------|------------------------------|----------------------------------|
| 1 | 1.00 | 1 | 1 | -0.01 | -0.013 | 0.011  | -0.01  | -0.012 | t | 42583  | MSKKSGK<br>WWESDD<br>KFAKAVY | Oryctola<br>gus<br>cuniculu<br>s |
| 1 | 1.00 | 1 | 1 | -0.01 | -0.01  | 0.006  | -0.01  | -0.008 | t | 11860  | EERLHSMK<br>EG               | Homo<br>sapiens                  |
| 1 | 1.00 | 1 | 1 | -0.03 | -0.028 | -0.029 | -0.027 | -0.028 | t | 48752  | PPAVGPP<br>AAGPPAA<br>GPPAAG | Homo<br>sapiens                  |
| 1 | 1.00 | 1 | 1 | -0.04 | -0.036 | -0.03  | -0.04  | -0.041 | t | 69166  | VIYHKPLA<br>GVYRALKK<br>QIG  | Aotus<br>nancyma<br>ae           |
| 1 | 1.00 | 1 | 1 | 0.01  | 0.012  | 0.02   | 0.011  | 0.012  | t | 56366  | RVNAANK<br>KPEDLTN<br>DLETD  | Homo<br>sapiens                  |
| 1 | 1.00 | 1 | 1 | -0.02 | -0.022 | 0.006  | -0.023 | -0.022 | t | 52745  | QVMFDFA<br>S                 | Mus<br>musculu<br>s              |
| 1 | 1.00 | 1 | 1 | -0.03 | -0.03  | -0.01  | -0.024 | -0.028 | t | 58832  | SKGANPVE<br>IR               | Homo<br>sapiens                  |
| 1 | 1.00 | 1 | 1 | -0.02 | -0.024 | -0.018 | -0.027 | -0.02  | t | 107201 | LIVPEGAR<br>TSLN             | Oryctola<br>gus<br>cuniculu<br>s |
| 1 | 1.00 | 1 | 1 | 0.06  | 0.062  | 0.067  | 0.067  | 0.07   | t | 108282 | AQAYDLSP<br>S                | Homo<br>sapiens                  |
| 1 | 1.00 | 1 | 1 | -0.05 | -0.05  | -0.046 | -0.05  | -0.048 | t | 106906 | THWQGVY<br>WVGATPK<br>A      | Mus<br>musculu<br>s              |
| 1 | 1.00 | 1 | 1 | 0.04  | 0.038  | 0.045  | 0.039  | 0.05   | t | 79051  | QKSSPY                       | Mus<br>musculu<br>s              |
| 1 | 1.00 | 1 | 1 | 0.01  | 0.012  | 0.018  | 0.011  | 0.01   | t | 65774  | TPSPVVVG<br>TTDRSGAP<br>TYSW | Homo<br>sapiens                  |
| 1 | 1.00 | 1 | 1 | -0.01 | -0.01  | -0.01  | -0.014 | -0.01  | t | 108906 | ENDEWTQ<br>DRAKPVT<br>QI     | Homo<br>sapiens                  |
| 1 | 1.00 | 1 | 1 | -0.07 | -0.072 | -0.057 | -0.07  | -0.07  | t | 142292 | SHLQLIYNL<br>TLCELNGT<br>DW  | Sus<br>scrofa                    |

|   |      |   |   |       |        |        |        |        |   |        |                              |                                  |
|---|------|---|---|-------|--------|--------|--------|--------|---|--------|------------------------------|----------------------------------|
| 1 | 1.00 | 1 | 1 | -0.05 | -0.048 | -0.045 | -0.049 | -0.049 | t | 57540  | SELSPLLLT<br>TTQWQVL<br>PCSF | Homo<br>sapiens                  |
| 1 | 1.00 | 1 | 1 | -0.03 | -0.029 | -0.025 | -0.03  | -0.03  | t | 21500  | GNPTYSW<br>GENDTDV<br>LLNNT  | Mus<br>musculu<br>s              |
| 1 | 1.00 | 1 | 1 | -0.05 | -0.047 | -0.045 | -0.05  | -0.05  | t | 115133 | YRLRGKLR<br>AEIENLHR<br>TFDP | Mus<br>musculu<br>s              |
| 1 | 1.00 | 1 | 1 | -0.05 | -0.047 | -0.045 | -0.05  | -0.05  | t | 115133 | YRLRGKLR<br>AEIENLHR<br>TFDP | Mus<br>musculu<br>s              |
| 1 | 1.00 | 1 | 1 | 0     | 0.002  | 0.012  | 0.007  | 0.01   | t | 108259 | AAFSELPL<br>G                | Homo<br>sapiens                  |
| 1 | 1.00 | 1 | 1 | 0.03  | 0.028  | 0.037  | 0.024  | 0.031  | t | 138244 | SSTIANT                      | Mus<br>musculu<br>s              |
| 1 | 1.00 | 1 | 1 | -0.06 | -0.06  | -0.06  | -0.06  | -0.057 | t | 119444 | EALKKIID<br>QQESLNK<br>WKSK  | Homo<br>sapiens                  |
| 1 | 1.00 | 1 | 1 | -0.01 | -0.014 | 0.012  | -0.009 | -0.01  | t | 78985  | GQGGGTH<br>NQWNKPS<br>K      | Oryctola<br>gus<br>cuniculu<br>s |
| 1 | 1.00 | 1 | 1 | -0.02 | -0.02  | -0.005 | -0.016 | -0.02  | t | 10159  | DSLIDIER<br>NVVTVR           | Homo<br>sapiens                  |
| 1 | 1.00 | 1 | 1 | -0.02 | -0.018 | 0.002  | -0.019 | -0.02  | t | 66295  | TSLFTPG                      | Homo<br>sapiens                  |
| 1 | 1.00 | 1 | 1 | -0.02 | -0.02  | -0.008 | -0.02  | -0.02  | t | 141105 | WEISQASH<br>YFERHLE          | Mus<br>musculu<br>s              |
| 1 | 1.00 | 1 | 1 | -0.02 | -0.022 | -0.008 | -0.02  | -0.02  | t | 141105 | WEISQASH<br>YFERHLE          | Oryctola<br>gus<br>cuniculu<br>s |
| 1 | 1.00 | 1 | 1 | -0.03 | -0.03  | -0.021 | -0.03  | -0.03  | t | 135972 | PRRPGGLG<br>GSGG             | Homo<br>sapiens                  |
| 1 | 1.00 | 1 | 1 | 0     | -0.006 | 0.011  | 0      | 0.001  | t | 92900  | HEALREPR<br>KLERTISK         | Oryctola<br>gus<br>cuniculu<br>s |

|   |      |   |   |       |        |        |        |        |   |        |                              |                                  |
|---|------|---|---|-------|--------|--------|--------|--------|---|--------|------------------------------|----------------------------------|
| 1 | 1.00 | 1 | 1 | 0.01  | 0.006  | 0.01   | 0.003  | 0.011  | t | 108078 | PTSPSGVE<br>EWIVTQV<br>VPGVA | Oryctola<br>gus<br>cuniculu<br>s |
| 1 | 1.00 | 1 | 1 | -0.04 | -0.042 | -0.039 | -0.047 | -0.04  | t | 145228 | GRTDRPSA                     | Mus<br>musculu<br>s              |
| 1 | 1.00 | 1 | 1 | -0.02 | -0.022 | -0.012 | -0.023 | -0.019 | t | 110948 | MVTSDAQ<br>IFNKPYWL          | Mus<br>musculu<br>s              |
| 1 | 1.00 | 1 | 1 | 0     | 0.003  | 0.005  | 0      | 0      | t | 1480   | AGDSSTKN<br>LIYTSTLCE<br>LNV | Mus<br>musculu<br>s              |
| 1 | 1.00 | 1 | 1 | -0.02 | -0.022 | -0.002 | -0.019 | -0.021 | t | 78437  | KVTNGSKS<br>YTLRYLASV<br>VK  | Mus<br>musculu<br>s              |
| 1 | 1.00 | 1 | 1 | -0.1  | -0.1   | -0.1   | -0.1   | -0.097 | t | 143677 | DRVNLRKL<br>RGYY             | Mus<br>musculu<br>s              |
| 1 | 1.00 | 1 | 1 | -0.01 | -0.01  | 0      | -0.019 | -0.01  | t | 131817 | AIFLSFQHL<br>L               | Homo<br>sapiens                  |
| 1 | 1.00 | 1 | 0 | -0.01 | -0.01  | 0.017  | -0.01  | 0.002  | t | 43232  | NANNPD<br>WDF                | Mus<br>musculu<br>s              |
| 1 | 1.00 | 1 | 1 | -0.01 | -0.01  | 0.002  | -0.01  | -0.008 | t | 31072  | KGTHSLYS<br>QIAGC            | Mus<br>musculu<br>s              |
| 1 | 1.00 | 1 | 1 | -0.01 | -0.01  | 0      | -0.013 | -0.009 | t | 11055  | EAGKHSG                      | Homo<br>sapiens                  |
| 1 | 1.00 | 1 | 1 | 0.06  | 0.06   | 0.06   | 0.06   | 0.07   | t | 156756 | SGPSYTT                      | Mus<br>musculu<br>s              |
| 1 | 1.00 | 1 | 1 | 0     | 0      | 0.001  | 0      | 0.001  | t | 266    | AALANSLS<br>LGPQQKV          | Mus<br>musculu<br>s              |
| 1 | 1.00 | 1 | 1 | -0.01 | -0.014 | 0.006  | -0.013 | -0.011 | t | 119304 | PNQEKVS<br>GIPEQEYS<br>C     | Oryctola<br>gus<br>cuniculu<br>s |
| 1 | 1.00 | 1 | 1 | -0.03 | -0.027 | -0.011 | -0.03  | -0.03  | t | 13912  | EQQRYLN<br>NFRFIELV          | Mus<br>musculu<br>s              |

|   |      |   |   |       |        |        |        |        |   |        |                               |              |
|---|------|---|---|-------|--------|--------|--------|--------|---|--------|-------------------------------|--------------|
| 1 | 1.00 | 1 | 1 | -0.03 | -0.026 | -0.018 | -0.029 | -0.03  | t | 42929  | MVDRGW<br>GNGCGL              | Homo sapiens |
| 1 | 1.00 | 1 | 1 | 0.04  | 0.044  | 0.061  | 0.041  | 0.038  | t | 53435  | RDVSDFTD<br>SVRDPKTS<br>EI    | Homo sapiens |
| 1 | 1.00 | 1 | 1 | 0     | 0.002  | 0.001  | -0.001 | 0.001  | t | 78934  | AVGQKVT<br>LKWDAPN<br>GTPNPN  | Homo sapiens |
| 1 | 1.00 | 1 | 1 | 0     | 0      | 0.004  | 0      | 0      | t | 48993  | PQEQITQH<br>GSPYGRCA<br>NK    | Mus musculus |
| 1 | 1.00 | 1 | 1 | 0.01  | 0.01   | 0.034  | 0.013  | 0.01   | t | 64004  | TGYGTV                        | Homo sapiens |
| 1 | 1.00 | 1 | 1 | 0     | 0      | 0      | 0      | 0.007  | t | 10852  | DYAWDDF<br>YAMGD              | Mus musculus |
| 1 | 1.00 | 1 | 1 | 0.03  | 0.028  | 0.035  | 0.029  | 0.031  | t | 72178  | VYVEELKP<br>TPEGDLLEIL<br>LQK | Mus musculus |
| 1 | 1.00 | 1 | 1 | 0     | -0.002 | 0.011  | 0.003  | 0.002  | t | 106403 | ETLEGHLF<br>TRTHDHR           | Mus musculus |
| 1 | 1.00 | 1 | 1 | -0.01 | -0.01  | 0.003  | -0.012 | -0.01  | t | 99040  | VLDTDYKK<br>YLLFCMEN<br>SAEP  | Homo sapiens |
| 1 | 1.00 | 1 | 1 | -0.01 | -0.006 | -0.007 | -0.007 | -0.008 | t | 70026  | VMTVEIRK<br>QNMTEF<br>MELWSQ  | Homo sapiens |
| 1 | 1.00 | 1 | 1 | 0.01  | 0.012  | 0.025  | 0.011  | 0.01   | t | 22204  | GRSNSGR<br>GRGAIDRE<br>QSA    | Homo sapiens |
| 1 | 1.00 | 1 | 1 | -0.01 | -0.014 | -0.001 | -0.01  | -0.01  | t | 93546  | PDMAEEIA<br>ALVLAKLG<br>KDA   | Mus musculus |
| 1 | 1.00 | 1 | 1 | 0.04  | 0.042  | 0.028  | 0.037  | 0.05   | t | 78552  | VERLG DYLI<br>DQGL            | Homo sapiens |

|   |      |   |   |       |        |        |        |        |   |        |                              |                                  |
|---|------|---|---|-------|--------|--------|--------|--------|---|--------|------------------------------|----------------------------------|
| 1 | 1.00 | 1 | 1 | -0.01 | -0.009 | 0.002  | -0.011 | -0.012 | t | 6530   | CKTHLKAS<br>SGYCAWP          | Equus<br>caballus                |
| 1 | 1.00 | 1 | 1 | 0     | 0.009  | -0.004 | -0.006 | 0      | t | 109306 | HYNIVTFC<br>CKCDSTLR<br>LCVQ | Gallus<br>gallus                 |
| 1 | 1.00 | 1 | 1 | 0     | 0      | 0      | 0      | 0.006  | t | 10433  | DTNNN                        | Mus<br>musculu<br>s              |
| 1 | 1.00 | 1 | 1 | -0.01 | -0.008 | -0.022 | -0.013 | 0      | t | 78505  | RLGDYLID<br>QGL              | Homo<br>sapiens                  |
| 1 | 1.00 | 1 | 1 | -0.03 | -0.026 | -0.026 | -0.029 | -0.024 | t | 52817  | QVWIPPL<br>NVR               | Homo<br>sapiens                  |
| 1 | 1.00 | 1 | 1 | 0.02  | 0.021  | 0.04   | 0.023  | 0.021  | t | 75629  | YRLATNAS<br>QAGVEKIL<br>SAL  | Equus<br>caballus                |
| 1 | 1.00 | 1 | 1 | 0.02  | 0.02   | 0.04   | 0.023  | 0.021  | t | 75629  | YRLATNAS<br>QAGVEKIL<br>SAL  | Homo<br>sapiens                  |
| 1 | 1.00 | 1 | 0 | -0.04 | -0.042 | -0.015 | -0.043 | -0.029 | t | 102102 | SYSMCTGK<br>FKVV             | Mus<br>musculu<br>s              |
| 1 | 1.00 | 1 | 1 | -0.01 | -0.006 | 0.001  | -0.009 | -0.01  | t | 73744  | YEPYYHSD<br>HAESSWV<br>NRGES | Homo<br>sapiens                  |
| 1 | 1.00 | 1 | 1 | 0.02  | 0.02   | 0.039  | 0.02   | 0.022  | t | 34498  | KYLEEPV                      | Homo<br>sapiens                  |
| 1 | 1.00 | 1 | 1 | 0     | -0.002 | 0      | -0.008 | 0.002  | t | 110385 | QLYKTCKQ<br>AGTCPPDII<br>PKV | Mus<br>musculu<br>s              |
| 1 | 1.00 | 1 | 1 | 0.01  | 0.014  | 0.032  | 0.01   | 0.01   | t | 94625  | NPACGRH<br>YSC               | Capra<br>hircus                  |
| 1 | 1.00 | 1 | 1 | -0.02 | -0.023 | -0.024 | -0.02  | -0.014 | t | 122915 | THKANPSP<br>EPNMHEC          | Oryctola<br>gus<br>cuniculu<br>s |
| 1 | 1.00 | 1 | 1 | -0.03 | -0.03  | -0.03  | -0.03  | -0.028 | t | 116286 | CGKGLSAT<br>VTGGQKG<br>RGSR  | Oryctola<br>gus<br>cuniculu<br>s |

|   |      |   |   |       |        |        |        |        |   |        |                              |                                  |
|---|------|---|---|-------|--------|--------|--------|--------|---|--------|------------------------------|----------------------------------|
| 1 | 1.00 | 1 | 1 | 0     | -0.004 | -0.006 | -0.007 | 0      | t | 109755 | QKSGSHE<br>NQNILTNG<br>SNQ   | Oryctola<br>gus<br>cuniculu<br>s |
| 1 | 1.00 | 1 | 1 | 0.02  | 0.02   | 0.02   | 0.02   | 0.027  | t | 106514 | HKMTNFP<br>DSLLT             | Mus<br>musculu<br>s              |
| 1 | 1.00 | 1 | 1 | -0.03 | -0.032 | -0.023 | -0.03  | -0.03  | t | 4853   | ASYNKSLG<br>AAPIRTQP<br>RWNY | Mus<br>musculu<br>s              |
| 1 | 1.00 | 1 | 1 | -0.04 | -0.042 | -0.04  | -0.047 | -0.035 | t | 128093 | RNAIELRF<br>VL               | Mus<br>musculu<br>s              |
| 1 | 1.00 | 1 | 1 | -0.01 | -0.01  | -0.005 | -0.013 | -0.01  | t | 56496  | RWWQHR<br>PSHTPS             | Homo<br>sapiens                  |
| 1 | 1.00 | 1 | 1 | 0.01  | -0.014 | 0.02   | 0.01   | 0.014  | t | 142827 | KVEFWPC<br>SPITQGDR          | Sus<br>scrofa                    |
| 1 | 1.00 | 1 | 1 | -0.02 | -0.02  | -0.036 | -0.02  | -0.008 | t | 145729 | CPPDIIPK                     | Mus<br>musculu<br>s              |
| 1 | 1.00 | 1 | 1 | -0.05 | -0.048 | -0.028 | -0.047 | -0.05  | t | 33504  | KSRYGFGA<br>KEVRSL           | Homo<br>sapiens                  |
| 1 | 1.00 | 1 | 1 | -0.01 | -0.01  | 0      | -0.019 | -0.01  | t | 131817 | AIFLSFQHL<br>L               | Homo<br>sapiens                  |
| 1 | 1.00 | 1 | 1 | -0.01 | -0.01  | 0.007  | -0.013 | -0.01  | t | 11453  | EDTQAMP<br>FRV               | Homo<br>sapiens                  |
| 1 | 1.00 | 1 | 1 | 0.03  | 0.028  | 0.04   | 0.027  | 0.03   | t | 123439 | LLARDAPD<br>TDWCDSIP         | Mus<br>musculu<br>s              |
| 1 | 1.00 | 1 | 1 | -0.06 | -0.058 | -0.057 | -0.057 | -0.058 | t | 58193  | SGPRHRD<br>GVRRPQK<br>RPSCIG | Homo<br>sapiens                  |
| 1 | 1.00 | 1 | 1 | -0.02 | -0.018 | -0.008 | -0.017 | -0.018 | t | 95677  | PPSGSGRR                     | Cavia<br>porcellu<br>s           |
| 1 | 1.00 | 1 | 1 | 0.01  | 0.011  | 0.032  | 0.01   | 0.01   | t | 18833  | GAVVGGL<br>GGYML             | Mus<br>musculu<br>s              |
| 1 | 1.00 | 1 | 1 | -0.03 | -0.032 | -0.017 | -0.031 | -0.03  | t | 4764   | ASSAVDD<br>APWAVITF          | Mus<br>musculu<br>s              |
| 1 | 1.00 | 1 | 1 | -0.04 | -0.039 | -0.04  | -0.043 | -0.038 | t | 130509 | HKKDFAR<br>GPGWS             | Mus<br>musculu<br>s              |



|   |      |   |   |       |        |        |        |        |   |        |                               |                                  |
|---|------|---|---|-------|--------|--------|--------|--------|---|--------|-------------------------------|----------------------------------|
| 1 | 1.00 | 1 | 1 | -0.03 | -0.029 | -0.005 | -0.031 | -0.032 | t | 58834  | SKGCKITCF<br>LTAAGY           | Equus<br>caballus                |
| 1 | 1.00 | 1 | 1 | -0.01 | -0.012 | -0.003 | -0.013 | -0.008 | t | 121717 | PRRPVDV<br>GNYWNIP<br>S       | Mus<br>musculu<br>s              |
| 1 | 1.00 | 1 | 1 | 0.01  | 0.012  | 0.014  | 0.011  | 0.016  | t | 74138  | YHSSVVHD                      | Homo<br>sapiens                  |
| 1 | 1.00 | 1 | 1 | 0.01  | 0.01   | 0.022  | 0.001  | 0.01   | t | 135663 | EGGRDSC<br>Q                  | Homo<br>sapiens                  |
| 1 | 1.00 | 1 | 1 | 0     | -0.001 | -0.002 | 0      | 0.007  | t | 7761   | DDEADRYF<br>TYEE              | Bos<br>taurus                    |
| 1 | 1.00 | 1 | 1 | -0.04 | -0.038 | -0.021 | -0.039 | -0.038 | t | 38583  | LPLPWL                        | Homo<br>sapiens                  |
| 1 | 1.00 | 1 | 1 | -0.02 | -0.018 | -0.005 | -0.02  | -0.021 | t | 142881 | LRGYYNQS<br>EGGSHTI           | Rattus<br>norvegic<br>us         |
| 1 | 1.00 | 1 | 1 | -0.06 | -0.064 | -0.053 | -0.067 | -0.059 | t | 131654 | SGFGVVKK<br>PNY               | Oryctola<br>gus<br>cuniculu<br>s |
| 1 | 1.00 | 1 | 1 | -0.04 | -0.039 | -0.028 | -0.04  | -0.04  | t | 42532  | MSDLTDIQ<br>EDITRH            | Myodes<br>glareolu<br>s          |
| 1 | 1.00 | 1 | 1 | -0.02 | -0.017 | -0.015 | -0.02  | -0.02  | t | 115134 | YRNGKDQ<br>DGDQAPE<br>YRGRTE  | Mus<br>musculu<br>s              |
| 1 | 1.00 | 1 | 1 | -0.02 | -0.017 | -0.015 | -0.02  | -0.02  | t | 115134 | YRNGKDQ<br>DGDQAPE<br>YRGRTE  | Mus<br>musculu<br>s              |
| 1 | 1.00 | 1 | 1 | 0.04  | 0.04   | 0.052  | 0.04   | 0.042  | t | 116958 | DSMNTDT<br>STRPR              | Mus<br>musculu<br>s              |
| 1 | 1.00 | 1 | 1 | -0.06 | -0.06  | -0.041 | -0.06  | -0.061 | t | 122536 | QAQIHGP<br>R                  | Mus<br>musculu<br>s              |
| 1 | 1.00 | 1 | 1 | 0.07  | 0.07   | 0.071  | 0.066  | 0.071  | t | 118817 | GNGLG EK<br>GDTSGPE<br>GSGGSG | Homo<br>sapiens                  |

|   |      |   |   |       |        |        |        |        |   |        |                              |                                  |
|---|------|---|---|-------|--------|--------|--------|--------|---|--------|------------------------------|----------------------------------|
| 1 | 1.00 | 1 | 1 | -0.04 | -0.033 | -0.033 | -0.047 | -0.039 | t | 32151  | KLSATDPL<br>AHYK             | Gallus<br>gallus                 |
| 1 | 1.00 | 1 | 1 | -0.04 | -0.033 | -0.033 | -0.047 | -0.039 | t | 32151  | KLSATDPL<br>AHYK             | Gallus<br>gallus                 |
| 1 | 1.00 | 1 | 1 | -0.02 | -0.02  | -0.015 | -0.02  | -0.02  | t | 114211 | GSLPQKSH<br>GRTQDEN<br>PVVHF | Mus<br>musculu<br>s              |
| 1 | 1.00 | 1 | 1 | 0.01  | 0.01   | 0.009  | 0.01   | 0.014  | t | 37641  | LLPAADM<br>DDFSRQL<br>QNSM   | Mus<br>musculu<br>s              |
| 1 | 1.00 | 1 | 1 | -0.06 | -0.062 | -0.042 | -0.061 | -0.06  | t | 141963 | MVDRGW<br>G                  | Mus<br>musculu<br>s              |
| 1 | 1.00 | 1 | 1 | -0.03 | -0.033 | -0.011 | -0.03  | -0.03  | t | 102767 | RLRGDYN<br>VGPIRFG<br>WPVAPN | Oryctola<br>gus<br>cuniculu<br>s |
| 1 | 1.00 | 1 | 1 | 0     | 0      | 0      | 0      | 0.006  | t | 151731 | SAQSQRA<br>PDR               | Mus<br>musculu<br>s              |
| 1 | 1.00 | 1 | 1 | 0     | 0      | 0      | 0      | 0.006  | t | 119038 | TSTNGIKKI<br>LIF             | Mus<br>musculu<br>s              |
| 1 | 1.00 | 1 | 1 | -0.01 | -0.008 | -0.014 | -0.009 | -0.008 | t | 21760  | GPRLGVRA<br>TRKTSERS<br>QPRG | Homo<br>sapiens                  |
| 1 | 1.00 | 1 | 1 | -0.01 | -0.008 | -0.014 | -0.009 | -0.008 | t | 21760  | GPRLGVRA<br>TRKTSERS<br>QPRG | Homo<br>sapiens                  |
| 1 | 1.00 | 1 | 1 | -0.01 | -0.008 | -0.014 | -0.009 | -0.008 | t | 21760  | GPRLGVRA<br>TRKTSERS<br>QPRG | Homo<br>sapiens                  |
| 1 | 1.00 | 1 | 1 | -0.01 | -0.008 | -0.014 | -0.009 | -0.008 | t | 21760  | GPRLGVRA<br>TRKTSERS<br>QPRG | Homo<br>sapiens                  |
| 1 | 1.00 | 1 | 1 | 0.06  | 0.063  | 0.081  | 0.06   | 0.063  | t | 23975  | HHAEMQ<br>NPVYLIPET<br>VPYIK | Mus<br>musculu<br>s              |
| 1 | 1.00 | 1 | 1 | -0.06 | -0.058 | -0.051 | -0.06  | -0.06  | t | 99933  | DFGVLA VR<br>VVNDHN          | Homo<br>sapiens                  |
| 1 | 1.00 | 1 | 1 | -0.03 | -0.03  | -0.007 | -0.023 | -0.029 | t | 119563 | EDHRQVV<br>EVTVGLQL<br>I     | Homo<br>sapiens                  |
| 1 | 1.00 | 1 | 1 | -0.03 | -0.025 | -0.007 | -0.023 | -0.029 | t | 119563 | EDHRQVV<br>EVTVGLQL<br>I     | Homo<br>sapiens                  |

|   |      |   |   |       |        |        |        |        |   |        |                              |                                  |
|---|------|---|---|-------|--------|--------|--------|--------|---|--------|------------------------------|----------------------------------|
| 1 | 1.00 | 1 | 1 | -0.03 | -0.028 | -0.021 | -0.03  | -0.03  | t | 89292  | SYHAGFNY<br>KNGG             | Homo<br>sapiens                  |
| 1 | 1.00 | 1 | 1 | -0.06 | -0.058 | -0.055 | -0.059 | -0.06  | t | 13103  | ELISSCLV<br>WSARGCL<br>FGGGI | Homo<br>sapiens                  |
| 1 | 1.00 | 1 | 1 | -0.01 | -0.008 | -0.008 | -0.009 | -0.01  | t | 9582   | DNYWSFS<br>DSTYWTLR<br>YSSG  | Homo<br>sapiens                  |
| 1 | 1.00 | 1 | 1 | 0.02  | 0.02   | 0.037  | 0.02   | 0.022  | t | 58052  | SGGNTNQ<br>QR                | Mus<br>musculu<br>s              |
| 1 | 1.00 | 1 | 1 | 0.02  | 0.02   | 0.037  | 0.02   | 0.022  | t | 58052  | SGGNTNQ<br>QR                | Mus<br>musculu<br>s              |
| 1 | 1.00 | 1 | 1 | -0.05 | -0.054 | -0.05  | -0.057 | -0.048 | t | 128297 | APKSPAKA<br>KAVKPKAA         | Oryctola<br>gus<br>cuniculu<br>s |
| 1 | 1.00 | 1 | 1 | 0     | -0.005 | -0.007 | -0.002 | 0.003  | t | 157283 | FTNRRCDs<br>NATNAR           | Canis<br>lupus                   |
| 1 | 1.00 | 1 | 1 | 0.04  | 0.04   | 0.068  | 0.04   | 0.039  | t | 102004 | QPD                          | Mus<br>musculu<br>s              |
| 1 | 1.00 | 1 | 1 | -0.03 | -0.03  | -0.012 | -0.027 | -0.028 | t | 50688  | QERLAKLA<br>GG               | Homo<br>sapiens                  |
| 1 | 1.00 | 1 | 1 | 0     | 0      | 0      | 0      | 0.006  | t | 135471 | KDKATFGC<br>HDGC             | Homo<br>sapiens                  |
| 1 | 1.00 | 1 | 1 | 0     | 0      | 0      | 0      | 0.006  | t | 135449 | CATLRVYK<br>GG               | Homo<br>sapiens                  |
| 1 | 1.00 | 1 | 1 | 0     | 0      | 0      | 0      | 0.006  | t | 123562 | NSSSSQFQ<br>IHGPR            | Mus<br>musculu<br>s              |
| 1 | 1.00 | 1 | 1 | 0     | 0      | 0      | 0      | 0.006  | t | 119673 | WNPDDYG<br>GVK               | Rattus<br>norvegic<br>us         |
| 1 | 1.00 | 1 | 1 | 0     | 0      | 0      | 0      | 0.006  | t | 117921 | IGIIDLIEKR<br>KFNQ           | Mus<br>musculu<br>s              |
| 1 | 1.00 | 1 | 1 | 0     | 0      | 0      | 0      | 0.006  | t | 119673 | WNPDDYG<br>GVK               | Rattus<br>norvegic<br>us         |

|   |      |   |   |       |        |        |        |        |   |        |                              |                              |
|---|------|---|---|-------|--------|--------|--------|--------|---|--------|------------------------------|------------------------------|
| 1 | 1.00 | 1 | 1 | 0     | 0      | 0      | 0      | 0.006  | t | 108200 | VSLGKWL<br>GHPDKF            | Mus<br>musculus              |
| 1 | 1.00 | 1 | 1 | 0     | 0      | 0      | 0      | 0.006  | t | 107951 | KTTICGKG<br>LSATVT           | Mus<br>musculus              |
| 1 | 1.00 | 1 | 1 | 0     | 0      | 0      | 0      | 0.006  | t | 46317  | NTWTTCQ<br>SIAFPSK           | Mus<br>musculus              |
| 1 | 1.00 | 1 | 1 | -0.01 | -0.008 | -0.001 | -0.01  | -0.009 | t | 28105  | IPVLGTFAL<br>VSYIANKV<br>LT  | Homo<br>sapiens              |
| 1 | 1.00 | 1 | 1 | -0.01 | -0.01  | -0.001 | -0.01  | -0.009 | t | 28105  | IPVLGTFAL<br>VSYIANKV<br>LT  | Mus<br>musculus              |
| 1 | 1.00 | 1 | 1 | -0.01 | -0.002 | -0.001 | -0.01  | -0.009 | t | 28105  | IPVLGTFAL<br>VSYIANKV<br>LT  | Gallus<br>gallus             |
| 1 | 1.00 | 1 | 1 | 0     | -0.003 | -0.003 | 0      | 0.002  | t | 36116  | LGGDILFG<br>WERTRED<br>GVQEY | Oryctola<br>gus<br>cuniculus |
| 1 | 1.00 | 1 | 1 | -0.04 | -0.04  | -0.04  | -0.04  | -0.037 | t | 119453 | FSNHGEIK<br>WIDFVRG<br>AKEGI | Homo<br>sapiens              |
| 1 | 1.00 | 1 | 1 | -0.01 | -0.012 | -0.001 | -0.013 | -0.011 | t | 43152  | NAGGNAG<br>GNAGGNA<br>GGNAGG | Mus<br>musculus              |
| 1 | 1.00 | 1 | 1 | -0.04 | -0.037 | -0.029 | -0.04  | -0.04  | t | 51798  | QPCHRDM<br>FGFCK             | Mus<br>musculus              |
| 1 | 1.00 | 1 | 1 | -0.04 | -0.04  | -0.029 | -0.04  | -0.04  | t | 51798  | QPCHRDM<br>FGFCK             | Mus<br>musculus              |
| 1 | 1.00 | 1 | 1 | 0.01  | 0.024  | 0.022  | 0.007  | 0.008  | t | 24844  | HSRRERAG<br>QEEENEG          | Homo<br>sapiens              |
| 1 | 1.00 | 1 | 1 | -0.01 | -0.012 | -0.01  | -0.017 | -0.005 | t | 128093 | RNAIELRF<br>VL               | Mus<br>musculus              |
| 1 | 1.00 | 1 | 1 | -0.03 | -0.028 | -0.025 | -0.033 | -0.03  | t | 60327  | SPVTKRAS<br>LKIDSKK          | Homo<br>sapiens              |

|   |      |   |   |       |        |        |        |        |   |        |                              |                                  |
|---|------|---|---|-------|--------|--------|--------|--------|---|--------|------------------------------|----------------------------------|
| 1 | 1.00 | 1 | 1 | 0     | 0.002  | 0.017  | 0.001  | 0.002  | t | 47533  | PFNQWPD<br>Y                 | Homo<br>sapiens                  |
| 1 | 1.00 | 1 | 1 | -0.02 | -0.02  | -0.014 | -0.02  | -0.019 | t | 105861 | HDSGYEV<br>HHQKLVFF<br>AEDVG | Oryctola<br>gus<br>cuniculu<br>s |
| 1 | 1.00 | 1 | 1 | 0     | -0.002 | 0      | -0.007 | 0.003  | t | 118060 | PPPGMRP<br>P                 | Mus<br>musculu<br>s              |
| 1 | 1.00 | 1 | 1 | 0     | -0.004 | 0      | -0.007 | 0.003  | t | 122932 | VCTPKSDE<br>FNPCEDIM<br>GYK  | Oryctola<br>gus<br>cuniculu<br>s |
| 1 | 1.00 | 1 | 1 | 0     | -0.004 | 0      | -0.007 | 0.003  | t | 117383 | TLHKAFKG<br>SIFVVFDSI<br>ESA | Oryctola<br>gus<br>cuniculu<br>s |
| 1 | 1.00 | 1 | 1 | 0     | -0.004 | 0      | -0.007 | 0.003  | t | 117246 | VTWEVLE<br>GEVEKEAL<br>KKI   | Oryctola<br>gus<br>cuniculu<br>s |
| 1 | 1.00 | 1 | 1 | 0.01  | 0.006  | 0.016  | 0.009  | 0.011  | t | 65996  | TRAPRREE<br>LEWDDDED<br>H    | Oryctola<br>gus<br>cuniculu<br>s |
| 1 | 1.00 | 1 | 1 | 0     | 0      | 0.021  | 0.004  | 0      | t | 2158   | AKAVYQQ<br>FYEFYEKV          | Homo<br>sapiens                  |
| 1 | 1.00 | 1 | 1 | -0.02 | -0.02  | -0.004 | -0.02  | -0.018 | t | 47965  | PIQNLPG<br>VF                | Mus<br>musculu<br>s              |
| 1 | 1.00 | 1 | 0 | -0.08 | -0.082 | -0.055 | -0.083 | -0.069 | t | 102102 | SYSMCTGK<br>FKVV             | Mus<br>musculu<br>s              |
| 1 | 1.00 | 1 | 1 | 0.02  | 0.022  | 0.035  | 0.021  | 0.02   | t | 31780  | KLDDKDP<br>QFKDNVIL<br>L     | Homo<br>sapiens                  |
| 1 | 1.00 | 1 | 1 | -0.01 | -0.007 | 0.001  | -0.01  | -0.01  | t | 38271  | LNLTTASV<br>PMLRWYA<br>ERFCF | Mus<br>musculu<br>s              |
| 1 | 1.00 | 1 | 1 | -0.04 | -0.036 | -0.038 | -0.039 | -0.038 | t | 104148 | NHVSPTHY<br>VPESDAAA<br>RVTQ | Homo<br>sapiens                  |

|   |      |   |   |       |        |        |        |        |   |        |                               |                                  |
|---|------|---|---|-------|--------|--------|--------|--------|---|--------|-------------------------------|----------------------------------|
| 1 | 1.00 | 1 | 1 | -0.01 | -0.008 | 0.007  | -0.003 | -0.007 | t | 134878 | CHWDPFS<br>LSAYFPGG<br>GSC    | Homo<br>sapiens                  |
| 1 | 1.00 | 1 | 1 | -0.03 | -0.028 | -0.021 | -0.03  | -0.028 | t | 60730  | SRLVGATP                      | Homo<br>sapiens                  |
| 1 | 1.00 | 1 | 1 | -0.01 | -0.013 | 0.009  | -0.01  | -0.01  | t | 9107   | DLGSIAA                       | Oryctola<br>gus<br>cuniculu<br>s |
| 1 | 1.00 | 1 | 1 | 0.03  | 0.033  | 0.059  | 0.03   | 0.028  | t | 141685 | KKTEETLL<br>EDR               | Mus<br>musculu<br>s              |
| 1 | 1.00 | 1 | 1 | 0     | 0      | 0.023  | 0      | -0.001 | t | 149298 | ELDKWAS                       | Homo<br>sapiens                  |
| 1 | 1.00 | 1 | 1 | 0.01  | 0.01   | 0.01   | 0.01   | 0.012  | t | 134767 | QDPYVKE<br>AENLKKYF<br>NAG    | Mus<br>musculu<br>s              |
| 1 | 1.00 | 1 | 1 | 0     | -0.002 | 0      | -0.007 | 0.003  | t | 133372 | SPSPTPTP<br>GPSRRG            | Mus<br>musculu<br>s              |
| 1 | 1.00 | 1 | 1 | 0.03  | 0.026  | 0.038  | 0.029  | 0.03   | t | 10888  | DYGGDSTT<br>PRPRYNAT<br>TYLP  | Oryctola<br>gus<br>cuniculu<br>s |
| 1 | 1.00 | 1 | 1 | -0.01 | -0.007 | 0      | -0.011 | -0.012 | t | 81131  | DLFHVNG<br>RDTMNNI<br>VDENKY  | Aotus                            |
| 1 | 1.00 | 1 | 1 | -0.01 | -0.01  | -0.008 | -0.01  | -0.008 | t | 54752  | RLSAACN<br>WTRGERC<br>NLED RD | Oryctola<br>gus<br>cuniculu<br>s |
| 1 | 1.00 | 1 | 1 | 0.02  | 0.022  | 0.02   | 0.019  | 0.023  | t | 130623 | TSDVEVNE<br>KKERVTEA          | Homo<br>sapiens                  |
| 1 | 1.00 | 1 | 1 | -0.02 | -0.016 | -0.006 | -0.017 | -0.02  | t | 13898  | EQPTLTFG<br>AGVNVPA<br>GAGAA  | Homo<br>sapiens                  |
| 1 | 1.00 | 1 | 1 | -0.02 | -0.022 | -0.006 | -0.017 | -0.02  | t | 13898  | EQPTLTFG<br>AGVNVPA<br>GAGAA  | Homo<br>sapiens                  |

|   |      |   |   |       |        |        |        |        |   |        |                              |                                  |
|---|------|---|---|-------|--------|--------|--------|--------|---|--------|------------------------------|----------------------------------|
| 1 | 1.00 | 1 | 1 | -0.04 | -0.038 | -0.023 | -0.039 | -0.04  | t | 41071  | MAKVNLIK<br>PLEDKILV         | Homo<br>sapiens                  |
| 1 | 1.00 | 1 | 1 | 0     | -0.002 | 0.011  | 0.003  | 0      | t | 112835 | RTTHYGSL<br>PQKSQHG<br>RTQDE | Mus<br>musculu<br>s              |
| 1 | 1.00 | 1 | 1 | 0     | -0.002 | 0.004  | -0.001 | 0      | t | 40457  | LVLRKHIH<br>TPLDDTNP         | Sus<br>scrofa                    |
| 1 | 1.00 | 1 | 1 | -0.04 | -0.038 | -0.027 | -0.039 | -0.04  | t | 30186  | KDKKKKTD<br>EAQPLPQR<br>QKKQ | Homo<br>sapiens                  |
| 1 | 1.00 | 1 | 1 | -0.04 | -0.037 | -0.031 | -0.04  | -0.04  | t | 113342 | DSYFRGAP<br>KLLYVRLS<br>HNSL | Mus<br>musculu<br>s              |
| 1 | 1.00 | 1 | 1 | 0     | 0      | 0      | 0      | 0.006  | t | 115652 | SSRISYWT<br>IVKP             | Homo<br>sapiens                  |
| 1 | 1.00 | 1 | 1 | 0     | 0      | 0      | 0      | 0.006  | t | 115630 | NFDKLYIW<br>G                | Homo<br>sapiens                  |
| 1 | 1.00 | 1 | 1 | -0.01 | -0.012 | 0.009  | -0.01  | -0.01  | t | 140053 | MEDDYNL<br>KDMFSRA<br>VTM    | Oryctola<br>gus<br>cuniculu<br>s |
| 1 | 1.00 | 1 | 1 | 0     | 0      | 0.01   | 0      | 0      | t | 4027   | AQPHEPG<br>SYTNVFDH<br>LDWIK | Oryctola<br>gus<br>cuniculu<br>s |
| 1 | 1.00 | 1 | 1 | -0.03 | -0.03  | -0.018 | -0.03  | -0.032 | t | 120745 | LDYTGKIM<br>WTPPAIFK<br>SYCE | Mus<br>musculu<br>s              |
| 1 | 1.00 | 1 | 1 | -0.02 | -0.016 | -0.013 | -0.023 | -0.02  | t | 106070 | RGQGDGG<br>RRKKGG            | Homo<br>sapiens                  |
| 1 | 1.00 | 1 | 1 | 0.02  | 0.018  | 0.03   | 0.02   | 0.02   | t | 39070  | LREGVTLG<br>VGASFDT<br>QKL   | Oryctola<br>gus<br>cuniculu<br>s |
| 1 | 1.00 | 1 | 1 | -0.03 | -0.032 | -0.023 | -0.037 | -0.032 | t | 118678 | WPLHDGG<br>AVNRR             | Mus<br>musculu<br>s              |
| 1 | 1.00 | 1 | 1 | -0.02 | -0.003 | -0.024 | -0.02  | -0.017 | t | 75571  | YQWLTRV<br>GKYRPQD<br>KPNT   | Chinchill<br>a<br>lanigera       |

|   |      |   |   |       |        |        |        |        |   |        |                              |                         |
|---|------|---|---|-------|--------|--------|--------|--------|---|--------|------------------------------|-------------------------|
| 1 | 1.00 | 1 | 1 | 0.02  | 0.02   | 0.037  | 0.017  | 0.02   | t | 42413  | MQSWVPL<br>STDDPVID          | Homo sapiens            |
| 1 | 1.00 | 1 | 1 | -0.02 | -0.02  | -0.018 | -0.02  | -0.016 | t | 140695 | KGRFTISR<br>DNAKSTLY<br>L    | Mus musculus            |
| 1 | 1.00 | 1 | 1 | -0.01 | -0.008 | 0.004  | -0.011 | -0.01  | t | 100611 | VKMDAEF<br>RHD               | Homo sapiens(<br>human) |
| 1 | 1.00 | 1 | 1 | 0.04  | 0.042  | 0.035  | 0.037  | 0.042  | t | 26341  | IGVNQELA<br>YFYPELFR<br>QFYQ | Homo sapiens            |
| 1 | 1.00 | 1 | 1 | 0     | 0      | 0      | -0.007 | 0.003  | t | 122748 | EHRMTW<br>DPAQPPR            | Homo sapiens            |
| 1 | 1.00 | 1 | 1 | 0.01  | 0.01   | 0.019  | 0.003  | 0.01   | t | 135995 | SIQSIVPAL<br>EIA             | Homo sapiens            |
| 1 | 1.00 | 1 | 1 | 0     | 0.002  | 0.004  | -0.004 | 0.003  | t | 70620  | VQNTVED<br>LKLNTLGR          | Homo sapiens            |
| 1 | 1.00 | 1 | 1 | 0.02  | 0.024  | 0.044  | 0.023  | 0.019  | t | 10131  | DSGSRTTP<br>DELALS           | Homo sapiens            |
| 1 | 1.00 | 1 | 0 | -0.01 | -0.01  | 0.003  | -0.01  | 0.01   | t | 57276  | SDSDKPK                      | Mus musculus            |
| 1 | 1.00 | 1 | 1 | -0.02 | -0.017 | -0.007 | -0.02  | -0.02  | t | 39788  | LTAELKIYS<br>VIQAEINK<br>HL  | Mus musculus            |
| 1 | 1.00 | 1 | 1 | -0.02 | -0.017 | -0.007 | -0.02  | -0.02  | t | 39788  | LTAELKIYS<br>VIQAEINK<br>HL  | Mus musculus            |
| 1 | 1.00 | 1 | 1 | -0.03 | -0.03  | -0.009 | -0.03  | -0.03  | t | 54577  | RLHLNDRV<br>V                | Homo sapiens            |
| 1 | 1.00 | 1 | 1 | 0.01  | 0.006  | 0.013  | 0.016  | 0.017  | t | 123562 | NSSSSQFQ<br>IHGPR            | Mus musculus            |
| 1 | 1.00 | 1 | 1 | 0.01  | 0.006  | 0.013  | 0.016  | 0.017  | t | 123562 | NSSSSQFQ<br>IHGPR            | Mus musculus            |
| 1 | 1.00 | 1 | 1 | -0.01 | -0.012 | 0.001  | -0.011 | -0.01  | t | 112816 | PGKVCGS<br>NLLSICKTA<br>EF   | Mus musculus            |



|   |      |   |   |       |        |        |        |        |   |        |                              |                                  |
|---|------|---|---|-------|--------|--------|--------|--------|---|--------|------------------------------|----------------------------------|
| 1 | 1.00 | 1 | 1 | -0.02 | -0.02  | -0.003 | -0.016 | -0.02  | t | 111020 | SGIGTLDG<br>FRHRHPDE<br>AA   | Homo<br>sapiens                  |
| 1 | 1.00 | 1 | 1 | -0.06 | -0.062 | -0.053 | -0.067 | -0.06  | t | 133789 | CYRSPWR<br>C                 | Mus<br>musculu<br>s              |
| 1 | 1.00 | 1 | 1 | 0.03  | 0.032  | 0.034  | 0.03   | 0.032  | t | 34244  | KVVQLPKI<br>SKNALRND<br>G    | Homo<br>sapiens                  |
| 1 | 1.00 | 1 | 1 | 0.01  | 0.01   | 0.01   | 0.011  | 0.02   | t | 106440 | GDKLTLL                      | Mus<br>musculu<br>s              |
| 1 | 1.00 | 1 | 1 | 0     | 0      | 0      | 0      | 0.007  | t | 23225  | GVYLLPRR<br>GPRLGVRA<br>TR   | Homo<br>sapiens                  |
| 1 | 1.00 | 1 | 1 | 0.02  | 0.016  | 0.02   | 0.013  | 0.022  | t | 126918 | RDYIPRILG<br>PEAFQQY<br>VGP  | Oryctola<br>gus<br>cuniculu<br>s |
| 1 | 1.00 | 1 | 1 | 0.04  | 0.026  | 0.058  | 0.04   | 0.042  | t | 60645  | SREEEE                       | Marmot<br>a monax                |
| 1 | 1.00 | 1 | 1 | -0.03 | -0.026 | -0.003 | -0.029 | -0.03  | t | 30152  | KDGEGAP<br>PAKKL             | Homo<br>sapiens                  |
| 1 | 1.00 | 1 | 1 | -0.04 | -0.042 | -0.03  | -0.043 | -0.04  | t | 22693  | GTHSWDH<br>PHHSYC            | Mus<br>musculu<br>s              |
| 1 | 1.00 | 1 | 1 | -0.01 | -0.008 | 0.006  | -0.011 | -0.011 | t | 78892  | YKISLTTGA<br>LIILPEDCL<br>PT | Homo<br>sapiens                  |
| 1 | 1.00 | 1 | 1 | -0.03 | -0.028 | -0.015 | -0.027 | -0.03  | t | 47957  | PIPTRFPPP<br>PMPLQDS<br>MAVG | Homo<br>sapiens                  |
| 1 | 1.00 | 1 | 1 | -0.02 | -0.02  | -0.014 | -0.026 | -0.019 | t | 47598  | PFWVRGT<br>TW                | Homo<br>sapiens                  |
| 1 | 1.00 | 1 | 1 | -0.03 | -0.026 | -0.014 | -0.03  | -0.03  | t | 11370  | EDKLADYK<br>RRMADA           | Myodes<br>glareolu<br>s          |
| 1 | 1.00 | 1 | 1 | 0.02  | 0.034  | 0.03   | 0.021  | 0.02   | t | 48431  | PLNSNAM<br>LSTESMM<br>SRIAAG | Homo<br>sapiens                  |

|   |      |   |   |       |        |        |        |        |   |        |                             |                                  |
|---|------|---|---|-------|--------|--------|--------|--------|---|--------|-----------------------------|----------------------------------|
| 1 | 1.00 | 1 | 1 | 0     | 0      | 0.021  | -0.002 | 0      | t | 33107  | KRAASKVS<br>ARLLTV          | Homo<br>sapiens                  |
| 1 | 1.00 | 1 | 1 | 0     | 0      | 0      | 0      | 0.006  | t | 151763 | WYRATHQ<br>E                | Mus<br>musculu<br>s              |
| 1 | 1.00 | 1 | 1 | 0     | 0      | 0.017  | 0      | 0      | t | 66833  | TTSTGPCK<br>TCTTPAQ         | Mus<br>musculu<br>s              |
| 1 | 1.00 | 1 | 1 | 0.04  | 0.04   | 0.068  | 0.04   | 0.039  | t | 102004 | QPD                         | Mus<br>musculu<br>s              |
| 1 | 1.00 | 1 | 1 | 0.01  | 0.008  | 0.01   | 0.007  | 0.01   | t | 32716  | KPGGGW<br>NTGGSRYP<br>GQGS  | Mus<br>musculu<br>s              |
| 1 | 1.00 | 1 | 1 | -0.02 | -0.017 | 0      | -0.02  | -0.02  | t | 105164 | EFRHDSG                     | Mus<br>musculu<br>s              |
| 1 | 1.00 | 1 | 1 | -0.04 | -0.038 | -0.025 | -0.039 | -0.04  | t | 32452  | KNAAKLR<br>GDLRQWV<br>SAG   | Homo<br>sapiens                  |
| 1 | 1.00 | 1 | 1 | -0.03 | -0.033 | -0.015 | -0.03  | -0.03  | t | 22507  | GSSGYCA<br>WPACYCY<br>G     | Oryctola<br>gus<br>cuniculu<br>s |
| 1 | 1.00 | 1 | 1 | 0.01  | 0.014  | 0.016  | 0.007  | 0.01   | t | 65902  | TQNISGTQ<br>VYQDPAIV<br>QPK | Homo<br>sapiens                  |
| 1 | 1.00 | 1 | 1 | -0.03 | -0.03  | -0.023 | -0.03  | -0.028 | t | 108200 | VSLGKWL<br>GHPDKF           | Mus<br>musculu<br>s              |
| 1 | 1.00 | 1 | 1 | 0.02  | 0.022  | 0.045  | 0.021  | 0.02   | t | 35777  | LEYTIV                      | Homo<br>sapiens                  |
| 1 | 1.00 | 1 | 1 | -0.03 | -0.034 | -0.02  | -0.03  | -0.03  | t | 93007  | INNGLPPI<br>QNTRNI          | Mus<br>musculu<br>s              |
| 1 | 1.00 | 1 | 1 | 0.04  | 0.038  | 0.047  | 0.033  | 0.04   | t | 144756 | QVGTHPG<br>LANDYEY          | Mus<br>musculu<br>s              |
| 1 | 1.00 | 1 | 1 | -0.05 | -0.052 | -0.038 | -0.047 | -0.05  | t | 78253  | QGGCGRG<br>WAFSATG<br>AIEA  | Mus<br>musculu<br>s              |

|   |      |   |   |       |        |        |        |        |   |        |                            |                                  |
|---|------|---|---|-------|--------|--------|--------|--------|---|--------|----------------------------|----------------------------------|
| 1 | 1.00 | 1 | 1 | 0     | 0      | 0.005  | 0      | 0.004  | t | 24778  | HSLGKWA<br>GHPDKF          | Mus<br>musculu<br>s              |
| 1 | 1.00 | 1 | 1 | -0.01 | -0.008 | 0.005  | -0.013 | -0.012 | t | 47842  | PHLSFMAI<br>PPKKNQ         | Homo<br>sapiens                  |
| 1 | 1.00 | 1 | 1 | -0.03 | -0.029 | -0.025 | -0.03  | -0.03  | t | 25807  | IEFQQKNN<br>RLLEITREF      | Mus<br>musculu<br>s              |
| 1 | 1.00 | 1 | 1 | 0     | 0.002  | 0.011  | -0.004 | 0.001  | t | 23875  | HFVLLVGY<br>GSADGVD        | Homo<br>sapiens                  |
| 1 | 1.00 | 1 | 1 | 0.02  | 0.02   | 0.04   | 0.017  | 0.018  | t | 59438  | SLRKNAME<br>FVPHYTLN       | Homo<br>sapiens                  |
| 1 | 1.00 | 1 | 1 | -0.05 | -0.054 | -0.036 | -0.05  | -0.048 | t | 51283  | QLAGRMI<br>P               | Anas<br>platyrhy<br>nchos        |
| 1 | 1.00 | 1 | 1 | 0     | 0      | 0.008  | 0      | 0.001  | t | 134547 | SRSNVLLF<br>KEEMQRA<br>NKD | Oryctola<br>gus<br>cuniculu<br>s |
| 1 | 1.00 | 1 | 1 | 0     | 0      | 0.015  | 0      | 0      | t | 9978   | DRGWGN                     | Homo<br>sapiens                  |
| 1 | 1.00 | 1 | 1 | -0.01 | -0.01  | 0.007  | -0.01  | -0.008 | t | 136685 | TLFTPDKS<br>PAKT           | Mus<br>musculu<br>s              |
| 1 | 1.00 | 1 | 1 | -0.01 | -0.002 | 0.007  | -0.01  | -0.008 | t | 136685 | TLFTPDKS<br>PAKT           | Gallus<br>gallus                 |
| 1 | 1.00 | 1 | 1 | -0.01 | -0.002 | 0.007  | -0.01  | -0.008 | t | 136685 | TLFTPDKS<br>PAKT           | Gallus<br>gallus                 |
| 1 | 1.00 | 1 | 1 | -0.01 | -0.01  | 0.007  | -0.01  | -0.008 | t | 136685 | TLFTPDKS<br>PAKT           | Mus<br>musculu<br>s              |
| 1 | 1.00 | 1 | 1 | 0.02  | 0.022  | 0.026  | 0.017  | 0.021  | t | 55994  | RSVSKEEP<br>GM             | Homo<br>sapiens                  |
| 1 | 1.00 | 1 | 1 | 0     | 0.002  | 0.022  | 0.001  | 0      | t | 128065 | NPPLVET<br>WKKPDYE<br>PP   | Homo<br>sapiens                  |

|   |      |   |   |       |        |        |        |        |   |        |                              |                     |
|---|------|---|---|-------|--------|--------|--------|--------|---|--------|------------------------------|---------------------|
| 1 | 1.00 | 1 | 1 | -0.05 | -0.048 | -0.041 | -0.043 | -0.048 | t | 110902 | IAKDLLPSR<br>DRQHLPLI<br>K   | Homo<br>sapiens     |
| 1 | 1.00 | 1 | 1 | -0.05 | -0.048 | -0.041 | -0.043 | -0.048 | t | 110899 | IAKDLLPSR<br>DRQHLPLI<br>K   | Homo<br>sapiens     |
| 1 | 1.00 | 1 | 1 | -0.05 | -0.048 | -0.041 | -0.043 | -0.048 | t | 110900 | IAKDLLPSR<br>DRQHLPLI<br>K   | Homo<br>sapiens     |
| 1 | 1.00 | 1 | 1 | -0.05 | -0.048 | -0.041 | -0.043 | -0.048 | t | 110901 | IAKDLLPSR<br>DRQHLPLI<br>K   | Homo<br>sapiens     |
| 1 | 1.00 | 1 | 1 | 0     | 0      | 0      | 0      | 0.006  | t | 135471 | KDKATFGC<br>HDGC             | Homo<br>sapiens     |
| 1 | 1.00 | 1 | 1 | 0     | 0      | 0      | 0      | 0.006  | t | 135449 | CATLRVYK<br>GG               | Homo<br>sapiens     |
| 1 | 1.00 | 1 | 1 | 0     | 0      | 0      | 0      | 0.006  | t | 135191 | NTLKTPRV<br>GGC              | Homo<br>sapiens     |
| 1 | 1.00 | 1 | 1 | -0.03 | -0.034 | -0.021 | -0.03  | -0.029 | t | 112508 | FFKNIVTP<br>RTPPPSQQ<br>K    | Mus<br>musculu<br>s |
| 1 | 1.00 | 1 | 1 | 0     | 0      | 0.015  | 0      | 0.002  | t | 127983 | FTNFKFKIR<br>KITNFDRV<br>N   | Mus<br>musculu<br>s |
| 1 | 1.00 | 1 | 1 | 0.02  | 0.018  | 0.015  | 0.013  | 0.02   | t | 112842 | SSKRGRQT<br>PVLYAML<br>DHSRS | Mus<br>musculu<br>s |
| 1 | 1.00 | 1 | 1 | 0     | 0.002  | 0.007  | 0.007  | 0.004  | t | 130817 | ESVMQSY<br>PPHLQIPG          | Homo<br>sapiens     |
| 1 | 1.00 | 1 | 1 | 0.02  | 0.018  | 0.032  | 0.017  | 0.021  | t | 77776  | CNCKAPET<br>ALCARRCQ<br>QH   | Mus<br>musculu<br>s |
| 1 | 1.00 | 1 | 1 | 0.01  | 0.01   | 0.012  | 0.01   | 0.015  | t | 122561 | RRFDEPRL<br>STPALLR          | Mus<br>musculu<br>s |
| 1 | 1.00 | 1 | 1 | -0.02 | -0.023 | -0.003 | -0.019 | -0.02  | t | 62776  | TAADGYG<br>AGLCANV<br>RCDTAT | Canis<br>lupus      |
| 1 | 1.00 | 1 | 1 | 0     | 0      | 0.019  | 0      | 0.001  | t | 41826  | MKHM                         | Mus<br>musculu<br>s |
| 1 | 1.00 | 1 | 1 | 0.02  | 0.018  | 0.022  | 0.019  | 0.03   | t | 62641  | SYLPQLG                      | Mus<br>musculu<br>s |

|   |      |   |   |       |        |        |        |        |   |        |                              |                                  |
|---|------|---|---|-------|--------|--------|--------|--------|---|--------|------------------------------|----------------------------------|
| 1 | 1.00 | 1 | 1 | -0.02 | -0.016 | -0.014 | -0.019 | -0.02  | t | 20462  | GITLKQAT<br>TAPCAVM<br>DITGV | Homo<br>sapiens                  |
| 1 | 1.00 | 1 | 1 | 0.01  | 0.007  | 0.03   | 0.01   | 0.01   | t | 41238  | MDIDPYKE<br>FGATVELL<br>SFLP | Oryctola<br>gus<br>cuniculu<br>s |
| 1 | 1.00 | 1 | 1 | -0.03 | -0.032 | -0.024 | -0.037 | -0.03  | t | 118805 | GGNGGGI<br>GGGMGG<br>GVGIG   | Mus<br>musculu<br>s              |
| 1 | 1.00 | 1 | 1 | -0.02 | -0.021 | -0.006 | -0.02  | -0.02  | t | 66013  | TRDVEERV<br>HVMRKTk          | Bos<br>taurus                    |
| 1 | 1.00 | 1 | 1 | -0.02 | -0.024 | -0.006 | -0.02  | -0.02  | t | 66013  | TRDVEERV<br>HVMRKTk          | Bos<br>taurus                    |
| 1 | 1.00 | 1 | 1 | 0     | 0      | -0.006 | 0      | 0.012  | t | 1366   | AFNPAY                       | Mus<br>musculu<br>s              |
| 1 | 1.00 | 1 | 1 | -0.02 | -0.02  | -0.011 | -0.02  | -0.018 | t | 52689  | QVESTAGS<br>LQGQWR<br>G      | Mus<br>musculu<br>s              |
| 1 | 1.00 | 1 | 1 | -0.04 | -0.04  | -0.035 | -0.044 | -0.039 | t | 34965  | LASLRKAF<br>ADTVPVRP<br>PSNY | Homo<br>sapiens                  |
| 1 | 1.00 | 1 | 1 | -0.04 | -0.036 | -0.034 | -0.039 | -0.04  | t | 66094  | TRRVRGG<br>DGKMKEL<br>SPRW   | Homo<br>sapiens                  |
| 1 | 1.00 | 1 | 1 | 0.03  | 0.032  | 0.052  | 0.033  | 0.032  | t | 9679   | DPLVAEED                     | Homo<br>sapiens                  |
| 1 | 1.00 | 1 | 1 | 0.03  | 0.032  | 0.045  | 0.027  | 0.03   | t | 11704  | EEIVPNSV<br>EQ               | Homo<br>sapiens                  |
| 1 | 1.00 | 1 | 1 | 0.02  | 0.022  | 0.027  | 0.017  | 0.02   | t | 107211 | LTTEPDTT<br>KFWPAPS          | Homo<br>sapiens                  |
| 1 | 1.00 | 1 | 1 | -0.04 | -0.042 | -0.022 | -0.037 | -0.038 | t | 78140  | EIMDLN<br>RHV                | Mus<br>musculu<br>s              |

|   |      |   |   |       |        |        |        |        |   |        |                              |                     |
|---|------|---|---|-------|--------|--------|--------|--------|---|--------|------------------------------|---------------------|
| 1 | 1.00 | 1 | 1 | 0     | 0.004  | 0.015  | 0      | 0.002  | t | 100349 | NPSIFYTYG<br>AAPAR           | Homo<br>sapiens     |
| 1 | 1.00 | 1 | 1 | -0.02 | -0.02  | -0.013 | -0.02  | -0.018 | t | 94738  | WAICKRIP<br>NKKP             | Mus<br>musculu<br>s |
| 1 | 1.00 | 1 | 1 | -0.01 | -0.01  | -0.01  | -0.021 | -0.01  | t | 118257 | AKSIDLKD<br>KYKNI            | Homo<br>sapiens     |
| 1 | 1.00 | 1 | 1 | -0.04 | -0.038 | -0.034 | -0.043 | -0.037 | t | 14000  | ERHLTFT                      | Homo<br>sapiens     |
| 1 | 1.00 | 1 | 1 | 0.01  | 0.01   | 0.022  | 0.01   | 0.01   | t | 78456  | LQLISGLLN<br>DTSSSN          | Mus<br>musculu<br>s |
| 1 | 1.00 | 1 | 1 | -0.05 | -0.046 | -0.039 | -0.047 | -0.05  | t | 20458  | GITGRTFIR<br>MARPTED<br>VGVL | Homo<br>sapiens     |
| 1 | 1.00 | 1 | 1 | 0.01  | 0.014  | 0.019  | 0.007  | 0.013  | t | 13961  | ERAGAME<br>RAN               | Homo<br>sapiens     |
| 1 | 1.00 | 1 | 1 | -0.02 | -0.02  | -0.01  | -0.02  | -0.02  | t | 46954  | PASTNRQS<br>GRQP             | Mus<br>musculu<br>s |
| 1 | 1.00 | 1 | 1 | -0.01 | -0.008 | -0.008 | -0.011 | -0.008 | t | 79106  | VDLPAGTK<br>YVAFRHFQ<br>STDM | Homo<br>sapiens     |
| 1 | 1.00 | 1 | 1 | -0.01 | -0.01  | -0.015 | -0.013 | -0.006 | t | 62502  | SWWNLP<br>QIG                | Homo<br>sapiens     |
| 1 | 1.00 | 1 | 1 | 0.02  | 0.023  | 0.031  | 0.02   | 0.02   | t | 133624 | KPGEMRG<br>AA                | Mus<br>musculu<br>s |
| 1 | 1.00 | 1 | 0 | -0.01 | -0.01  | 0.003  | -0.01  | 0.01   | t | 51222  | QKLPYGPR<br>FWLG             | Mus<br>musculu<br>s |
| 1 | 1.00 | 1 | 1 | 0     | 0.002  | 0.01   | -0.003 | 0.002  | t | 38937  | LQFPQPE                      | Homo<br>sapiens     |
| 1 | 1.00 | 1 | 1 | -0.01 | -0.01  | -0.001 | -0.014 | -0.01  | t | 135897 | APKRPGPA<br>GELL             | Homo<br>sapiens     |

|   |      |   |   |       |        |        |        |        |   |        |                              |                 |
|---|------|---|---|-------|--------|--------|--------|--------|---|--------|------------------------------|-----------------|
| 1 | 1.00 | 1 | 1 | -0.04 | -0.04  | -0.021 | -0.04  | -0.041 | t | 78536  | TPLCDYAA<br>ARVGACG          | Mus<br>musculus |
| 1 | 1.00 | 1 | 1 | -0.01 | -0.012 | -0.01  | -0.01  | -0.007 | t | 129973 | SPRSFQKK<br>T                | Homo<br>sapiens |
| 1 | 1.00 | 1 | 1 | 0.02  | 0.022  | 0.02   | 0.027  | 0.029  | t | 108198 | VQFKESNR<br>LNSPLAL          | Homo<br>sapiens |
| 1 | 1.00 | 1 | 1 | -0.03 | -0.032 | -0.023 | -0.021 | -0.023 | t | 18441  | FYNQKFKG<br>KATL             | Mus<br>musculus |
| 1 | 1.00 | 1 | 1 | -0.02 | -0.02  | -0.018 | -0.023 | -0.018 | t | 44571  | NKPPNKP<br>NNDFH             | Homo<br>sapiens |
| 1 | 1.00 | 1 | 1 | -0.03 | -0.026 | -0.032 | -0.023 | -0.02  | t | 101350 | TYYNLRS                      | Homo<br>sapiens |
| 1 | 1.00 | 1 | 1 | -0.01 | -0.01  | -0.01  | -0.003 | 0      | t | 144101 | TMMQTM<br>SFLRGF             | Homo<br>sapiens |
| 1 | 1.00 | 1 | 1 | 0     | 0      | 0.013  | 0      | 0      | t | 20216  | GIAIPHDID<br>LGESRVVI<br>QDY | Homo<br>sapiens |
| 1 | 1.00 | 1 | 1 | -0.01 | -0.01  | -0.01  | -0.01  | -0.004 | t | 54568  | RLGVRATR<br>K                | Homo<br>sapiens |
| 1 | 1.00 | 1 | 1 | -0.08 | -0.075 | -0.051 | -0.073 | -0.08  | t | 108616 | RRRVRNS<br>DT                | Homo<br>sapiens |
| 1 | 1.00 | 1 | 1 | -0.01 | -0.01  | 0.007  | -0.01  | -0.009 | t | 78465  | MQWNST<br>A                  | Mus<br>musculus |
| 1 | 1.00 | 1 | 1 | -0.01 | -0.01  | 0.007  | -0.01  | -0.009 | t | 78465  | MQWNST<br>A                  | Mus<br>musculus |
| 1 | 1.00 | 1 | 1 | 0.04  | 0.035  | 0.047  | 0.04   | 0.047  | t | 136717 | VGTVCTRV<br>DSEN             | Mus<br>musculus |
| 1 | 1.00 | 1 | 1 | 0.01  | 0.01   | 0.026  | 0.01   | 0.01   | t | 35310  | LDTNGGT<br>GTAIV             | Mus<br>musculus |
| 1 | 1.00 | 1 | 1 | -0.01 | -0.01  | 0.01   | -0.014 | -0.01  | t | 26806  | IKIFQDHP                     | Homo<br>sapiens |
| 1 | 1.00 | 1 | 1 | 0.01  | 0.012  | 0.036  | 0.011  | 0.011  | t | 149301 | ELEKWAS                      | Homo<br>sapiens |

|   |      |   |   |       |        |        |        |        |   |        |                              |                       |
|---|------|---|---|-------|--------|--------|--------|--------|---|--------|------------------------------|-----------------------|
| 1 | 1.00 | 1 | 1 | 0.01  | 0.012  | 0.015  | 0.011  | 0.012  | t | 64662  | TKRNTNRR<br>PQDVKFP<br>GGGQI | Homo sapiens          |
| 1 | 1.00 | 1 | 1 | 0.01  | 0.014  | 0.015  | 0.011  | 0.012  | t | 64662  | TKRNTNRR<br>PQDVKFP<br>GGGQI | Homo sapiens          |
| 1 | 1.00 | 1 | 1 | -0.05 | -0.047 | -0.03  | -0.05  | -0.05  | t | 105570 | VGGVVIA                      | Mus musculus          |
| 1 | 1.00 | 1 | 1 | 0     | 0      | 0.017  | 0      | 0      | t | 63758  | TFTNPVVS<br>TTQWSAP          | Oryctolagus cuniculus |
| 1 | 1.00 | 1 | 1 | 0     | 0      | 0.017  | 0      | 0      | t | 63758  | TFTNPVVS<br>TTQWSAP          | Oryctolagus cuniculus |
| 1 | 1.00 | 1 | 1 | -0.04 | -0.038 | -0.03  | -0.041 | -0.038 | t | 136304 | GARGLTG<br>RPGDA             | Homo sapiens          |
| 1 | 1.00 | 1 | 1 | 0.01  | 0.01   | 0.01   | 0.016  | 0.02   | t | 142636 | EQIYRVDL<br>RTLRYGY          | Rattus norvegicus     |
| 1 | 1.00 | 1 | 1 | 0.01  | 0.01   | 0.025  | 0.01   | 0.012  | t | 127999 | GLIEVQSD<br>YGIVWGLS<br>LQKV | Mus musculus          |
| 1 | 1.00 | 1 | 1 | -0.01 | -0.012 | -0.003 | -0.011 | -0.01  | t | 33859  | KTSERSQP<br>RGRRQPIP<br>KARR | Mus musculus          |
| 1 | 1.00 | 1 | 1 | -0.01 | -0.012 | -0.003 | -0.011 | -0.01  | t | 33859  | KTSERSQP<br>RGRRQPIP<br>KARR | Mus musculus          |
| 1 | 1.00 | 1 | 1 | -0.01 | -0.01  | 0.011  | -0.007 | -0.008 | t | 11189  | EASLPYGA<br>NKEGIVW<br>VA    | Homo sapiens          |
| 1 | 1.00 | 1 | 1 | -0.07 | -0.066 | -0.048 | -0.067 | -0.07  | t | 104056 | LSVPWVLI<br>FMVSRRR<br>CRRR  | Homo sapiens          |
| 1 | 1.00 | 1 | 1 | -0.02 | -0.02  | -0.01  | -0.023 | -0.022 | t | 11472  | EDWGEDG<br>YIWIQRNT          | Homo sapiens          |
| 1 | 1.00 | 1 | 1 | -0.04 | -0.038 | -0.024 | -0.039 | -0.04  | t | 96630  | LWFHISCL<br>TFGRETVE<br>YLV  | Homo sapiens          |



|   |      |   |   |       |        |        |        |        |   |        |                              |                                  |
|---|------|---|---|-------|--------|--------|--------|--------|---|--------|------------------------------|----------------------------------|
| 1 | 1.00 | 1 | 1 | -0.02 | -0.02  | -0.007 | -0.022 | -0.021 | t | 99040  | VLDTDYKK<br>YLLFCMEN<br>SAEP | Homo<br>sapiens                  |
| 1 | 1.00 | 1 | 1 | -0.01 | -0.012 | -0.005 | -0.017 | -0.01  | t | 117331 | MKLVRFL<br>MKLSHETV<br>TIELK | Mus<br>musculu<br>s              |
| 1 | 1.00 | 1 | 1 | -0.05 | -0.05  | -0.04  | -0.05  | -0.05  | t | 63231  | TDSGDGR<br>QTITN             | Oryctola<br>gus<br>cuniculu<br>s |
| 1 | 1.00 | 1 | 1 | -0.02 | -0.022 | -0.013 | -0.027 | -0.019 | t | 117544 | KFRFLALKL<br>YFSFTRP         | Mus<br>musculu<br>s              |
| 1 | 1.00 | 1 | 1 | -0.02 | -0.006 | -0.004 | -0.017 | -0.02  | t | 60473  | SQKIQLVN<br>TNGSWH           | Homo<br>sapiens                  |
| 1 | 1.00 | 1 | 1 | 0.03  | 0.028  | 0.047  | 0.029  | 0.03   | t | 65403  | TNQEQTSL<br>YV               | Mus<br>musculu<br>s              |
| 1 | 1.00 | 1 | 1 | -0.02 | -0.018 | -0.022 | -0.013 | -0.009 | t | 132389 | IRLPNPD<br>DLYWFTLY          | Homo<br>sapiens                  |
| 1 | 1.00 | 1 | 1 | -0.02 | -0.022 | -0.005 | -0.017 | -0.017 | t | 58207  | SGQARVLY<br>SEFINAL          | Mus<br>musculu<br>s              |
| 1 | 1.00 | 1 | 1 | -0.01 | -0.007 | 0.006  | -0.011 | -0.011 | t | 88988  | SQDVNGP<br>RHVPNAE<br>PRET   | Aotus                            |
| 1 | 1.00 | 1 | 1 | 0.01  | 0.014  | 0.016  | 0.009  | 0.011  | t | 2806   | ALNYQAQ<br>ALEEIIKYR<br>YNI  | Homo<br>sapiens                  |
| 1 | 1.00 | 1 | 1 | -0.01 | -0.006 | 0.008  | -0.007 | -0.01  | t | 65790  | TPTPVNPS<br>TAPAPAPT<br>PTFA | Homo<br>sapiens                  |
| 1 | 1.00 | 1 | 1 | -0.01 | -0.007 | 0.005  | -0.011 | -0.01  | t | 34137  | KVNGGNL<br>FDVSRVTF          | Capra<br>hircus                  |
| 1 | 1.00 | 1 | 1 | -0.04 | -0.042 | -0.028 | -0.041 | -0.04  | t | 142471 | SAAGAKRS<br>GRSS             | Mus<br>musculu<br>s              |
| 1 | 1.00 | 1 | 1 | -0.04 | -0.028 | -0.019 | -0.04  | -0.042 | t | 58088  | SGILPTPQ<br>TRPV             | Mus<br>musculu<br>s              |

|   |      |   |   |       |        |        |        |        |   |        |                              |                                  |
|---|------|---|---|-------|--------|--------|--------|--------|---|--------|------------------------------|----------------------------------|
| 1 | 1.00 | 1 | 1 | 0     | 0      | 0.015  | 0      | 0.001  | t | 34645  | KYYGNGV<br>TC                | Oryctola<br>gus<br>cuniculu<br>s |
| 1 | 1.00 | 1 | 1 | 0.03  | 0.03   | 0.046  | 0.027  | 0.03   | t | 27451  | IMASKTVG<br>TAEKEL           | Homo<br>sapiens                  |
| 1 | 1.00 | 1 | 1 | -0.04 | -0.04  | -0.04  | -0.033 | -0.031 | t | 158586 | APSHPPP                      | Homo<br>sapiens                  |
| 1 | 1.00 | 1 | 1 | 0.01  | 0.01   | 0.026  | 0.01   | 0.01   | t | 67647  | VAKLVTQE<br>MFQNIDK<br>KIESQ | Homo<br>sapiens                  |
| 1 | 1.00 | 1 | 1 | 0.04  | 0.04   | 0.04   | 0.04   | 0.05   | t | 140593 | PYQFFTAS<br>E                | Mus<br>musculu<br>s              |
| 1 | 1.00 | 1 | 1 | -0.03 | -0.028 | -0.013 | -0.029 | -0.03  | t | 89991  | VGQNAT<br>W                  | Homo<br>sapiens                  |
| 1 | 1.00 | 1 | 1 | -0.03 | -0.026 | -0.013 | -0.029 | -0.03  | t | 89991  | VGQNAT<br>W                  | Homo<br>sapiens                  |
| 1 | 1.00 | 1 | 1 | -0.02 | -0.022 | -0.004 | -0.023 | -0.02  | t | 135939 | IPVLDENG<br>LFAP             | Mus<br>musculu<br>s              |
| 1 | 1.00 | 1 | 1 | -0.02 | -0.023 | -0.028 | -0.02  | -0.016 | t | 141056 | MSDGA VQ<br>PDGGQPA<br>VRNER | Canis<br>lupus                   |
| 1 | 1.00 | 1 | 1 | -0.05 | -0.05  | -0.033 | -0.05  | -0.049 | t | 8939   | DKLYIWGV<br>HHPSTN           | Homo<br>sapiens                  |
| 1 | 1.00 | 1 | 1 | 0.01  | 0.01   | 0.011  | 0.007  | 0.011  | t | 14905  | EVWREEA<br>YHAADIKD          | Homo<br>sapiens                  |
| 1 | 1.00 | 1 | 1 | -0.01 | -0.012 | -0.009 | -0.017 | -0.011 | t | 144324 | GVSTITAD<br>EIR              | Mus<br>musculu<br>s              |
| 1 | 1.00 | 1 | 1 | -0.1  | -0.1   | -0.1   | -0.1   | -0.097 | t | 143676 | DRVGLRNL<br>RGYY             | Mus<br>musculu<br>s              |
| 1 | 1.00 | 1 | 1 | 0.01  | 0.01   | 0.023  | 0.01   | 0.011  | t | 66058  | TRLNFEDA<br>G                | Rattus<br>norvegic<br>us         |

|   |      |   |   |       |        |        |        |        |   |        |                           |                                  |
|---|------|---|---|-------|--------|--------|--------|--------|---|--------|---------------------------|----------------------------------|
| 1 | 1.00 | 1 | 1 | -0.01 | -0.01  | 0.006  | -0.01  | -0.01  | t | 48027  | PKALFTQQ<br>GGAYGRC       | Oryctola<br>gus<br>cuniculu<br>s |
| 1 | 1.00 | 1 | 1 | -0.02 | -0.016 | -0.011 | -0.023 | -0.022 | t | 17536  | FQSRDEKE<br>RERF          | Homo<br>sapiens                  |
| 1 | 1.00 | 1 | 1 | -0.02 | -0.018 | -0.012 | -0.021 | -0.019 | t | 149390 | NIYPHGIT<br>DVRPLY        | Homo<br>sapiens                  |
| 1 | 1.00 | 1 | 1 | 0.01  | 0.006  | 0.017  | 0.003  | 0.012  | t | 134810 | VASPERTS<br>PAFP          | Oryctola<br>gus<br>cuniculu<br>s |
| 1 | 1.00 | 1 | 1 | -0.04 | -0.04  | -0.038 | -0.04  | -0.04  | t | 25646  | IDPSFRLGF<br>VPVSRG       | Mus<br>musculu<br>s              |
| 1 | 1.00 | 1 | 1 | 0.02  | 0.02   | 0.027  | 0.02   | 0.019  | t | 126341 | ITGHCQG<br>DGYRVGF<br>G   | Mus<br>musculu<br>s              |
| 1 | 1.00 | 1 | 1 | 0.01  | 0.012  | 0.014  | 0.01   | 0.012  | t | 34243  | KVVQLPKI<br>SKNALKAN<br>G | Homo<br>sapiens                  |
| 1 | 1.00 | 1 | 1 | 0     | 0      | 0.019  | 0      | 0.001  | t | 41826  | MKHM                      | Mus<br>musculu<br>s              |
| 1 | 1.00 | 1 | 1 | 0.02  | 0.02   | 0.004  | 0.02   | 0.032  | t | 145747 | DPVGPSD<br>P              | Mus<br>musculu<br>s              |
| 1 | 1.00 | 1 | 1 | -0.05 | -0.05  | -0.041 | -0.054 | -0.05  | t | 135917 | EIRRGVML<br>AVDA          | Homo<br>sapiens                  |
| 1 | 1.00 | 1 | 1 | -0.01 | -0.012 | -0.003 | -0.001 | -0.003 | t | 18441  | FYNQKFKG<br>KATL          | Mus<br>musculu<br>s              |
| 1 | 1.00 | 1 | 1 | -0.05 | -0.05  | -0.033 | -0.053 | -0.052 | t | 11582  | EEEGAIVT<br>VRGGLRI       | Homo<br>sapiens                  |
| 1 | 1.00 | 1 | 1 | -0.02 | -0.02  | -0.02  | -0.02  | -0.014 | t | 124737 | SPWTLGA                   | Homo<br>sapiens                  |
| 1 | 1.00 | 1 | 1 | 0.01  | 0.01   | 0.01   | 0.013  | 0.02   | t | 60284  | SPTHYVPE<br>S             | Homo<br>sapiens                  |
| 1 | 1.00 | 1 | 1 | 0.01  | 0.01   | 0.01   | 0.013  | 0.02   | t | 60284  | SPTHYVPE<br>S             | Homo<br>sapiens                  |
| 1 | 1.00 | 1 | 1 | -0.04 | -0.038 | -0.026 | -0.039 | -0.04  | t | 67667  | VALGPQG<br>RRYYLT         | Homo<br>sapiens                  |

|   |      |   |   |       |        |        |        |        |   |        |                                  |                                  |
|---|------|---|---|-------|--------|--------|--------|--------|---|--------|----------------------------------|----------------------------------|
| 1 | 1.00 | 1 | 1 | 0.05  | 0.052  | 0.062  | 0.057  | 0.06   | t | 130859 | GLLAQQM<br>DY                    | Homo<br>sapiens                  |
| 1 | 1.00 | 1 | 1 | -0.02 | -0.018 | -0.006 | -0.017 | -0.019 | t | 66835  | TTSTRTWA<br>LPTYNNHL<br>YKQI     | Homo<br>sapiens                  |
| 1 | 1.00 | 1 | 1 | -0.02 | -0.016 | -0.006 | -0.017 | -0.019 | t | 66835  | TTSTRTWA<br>LPTYNNHL<br>YKQI     | Homo<br>sapiens                  |
| 1 | 1.00 | 1 | 1 | -0.05 | -0.052 | -0.04  | -0.051 | -0.05  | t | 32465  | KNDS DGR<br>LVAAIN               | Mus<br>musculu<br>s              |
| 1 | 1.00 | 1 | 1 | 0     | -0.002 | 0      | -0.001 | 0.006  | t | 17524  | FQQFGRD<br>VSDFTDSV<br>RDPKT     | Mus<br>musculu<br>s              |
| 1 | 1.00 | 1 | 1 | 0.05  | 0.05   | 0.05   | 0.05   | 0.059  | t | 105030 | VPQQSIP                          | Homo<br>sapiens                  |
| 1 | 1.00 | 1 | 1 | 0     | -0.004 | 0      | -0.001 | 0.01   | t | 116846 | TPSYVSK                          | Oryctola<br>gus<br>cuniculu<br>s |
| 1 | 1.00 | 1 | 1 | 0.01  | 0.012  | 0.021  | 0.011  | 0.012  | t | 32811  | KPNRNGG<br>GYASAYS               | Homo<br>sapiens                  |
| 1 | 1.00 | 1 | 1 | 0     | 0      | 0.019  | 0      | 0      | t | 55304  | RPQPTEL<br>RY                    | Mus<br>musculu<br>s              |
| 1 | 1.00 | 1 | 1 | 0     | 0      | 0.019  | 0      | 0      | t | 55304  | RPQPTEL<br>RY                    | Mus<br>musculu<br>s              |
| 1 | 1.00 | 1 | 1 | 0     | 0.002  | 0.011  | 0.001  | 0      | t | 40982  | LYVGGPM<br>TNSKGQS               | Homo<br>sapiens                  |
| 1 | 1.00 | 1 | 1 | -0.04 | -0.04  | -0.031 | -0.037 | -0.039 | t | 110760 | ACKDSDW<br>PFCSD<br>EDWDW<br>PFC | Mus<br>musculu<br>s              |
| 1 | 1.00 | 1 | 1 | 0     | -0.002 | 0.007  | 0.003  | 0.007  | t | 117140 | DWEYSVW<br>LSN                   | Mus<br>musculu<br>s              |
| 1 | 1.00 | 1 | 1 | -0.02 | -0.02  | -0.008 | -0.02  | -0.02  | t | 122340 | ERVTRLEW<br>PKNDPRI              | Mus<br>musculu<br>s              |
| 1 | 1.00 | 1 | 1 | 0     | 0.003  | 0.004  | 0      | 0.002  | t | 42667  | MSSFLGK<br>WKLSESH<br>NFDVAVM    | Mus<br>musculu<br>s              |

|   |      |   |   |       |        |        |        |        |   |        |                               |                   |
|---|------|---|---|-------|--------|--------|--------|--------|---|--------|-------------------------------|-------------------|
| 1 | 1.00 | 1 | 1 | -0.01 | -0.012 | 0.01   | -0.013 | -0.01  | t | 8832   | DKAAAICF<br>RNSMDT            | Mus<br>musculus   |
| 1 | 1.00 | 1 | 1 | -0.01 | -0.012 | 0.01   | -0.013 | -0.01  | t | 8832   | DKAAAICF<br>RNSMDT            | Mus<br>musculus   |
| 1 | 1.00 | 1 | 1 | -0.01 | -0.008 | 0      | -0.013 | -0.013 | t | 78269  | SIISQETYS<br>QEKNNMAI<br>NPSK | Homo<br>sapiens   |
| 1 | 1.00 | 1 | 1 | -0.07 | -0.07  | -0.063 | -0.07  | -0.07  | t | 130912 | KADILPEM<br>NSMRADRM          | Mus<br>musculus   |
| 1 | 1.00 | 1 | 1 | -0.05 | -0.05  | -0.039 | -0.05  | -0.048 | t | 43177  | NAINPRLT<br>PWTYRN            | Mus<br>musculus   |
| 1 | 1.00 | 1 | 1 | -0.01 | -0.003 | -0.003 | -0.017 | -0.012 | t | 156967 | SWRPWSD<br>SPQCGNPI           | Gallus<br>gallus  |
| 1 | 1.00 | 1 | 1 | -0.04 | -0.038 | -0.026 | -0.043 | -0.04  | t | 51079  | QIICLAVL<br>WV                | Homo<br>sapiens   |
| 1 | 1.00 | 1 | 1 | -0.03 | -0.026 | -0.018 | -0.033 | -0.03  | t | 30290  | KEAFRLKN<br>GRQE              | Homo<br>sapiens   |
| 1 | 1.00 | 1 | 1 | -0.07 | -0.072 | -0.065 | -0.073 | -0.07  | t | 9677   | DPLTSLHA<br>MQRR              | Mus<br>musculus   |
| 1 | 1.00 | 1 | 1 | -0.02 | 0.007  | -0.004 | -0.02  | -0.02  | t | 113257 | ADNKAPQ<br>GLLC               | Rattus            |
| 1 | 1.00 | 1 | 1 | -0.03 | -0.032 | -0.029 | -0.037 | -0.03  | t | 118970 | PPPGRRP                       | Mus<br>musculus   |
| 1 | 1.00 | 1 | 1 | -0.03 | -0.029 | -0.032 | -0.033 | -0.029 | t | 65481  | TNWLAKV<br>NTQIDLIRK<br>KMK   | Equus<br>caballus |
| 1 | 1.00 | 1 | 1 | -0.03 | -0.023 | -0.032 | -0.033 | -0.029 | t | 65481  | TNWLAKV<br>NTQIDLIRK<br>KMK   | Gallus<br>gallus  |
| 1 | 1.00 | 1 | 1 | -0.03 | -0.027 | -0.026 | -0.03  | -0.026 | t | 67436  | TYQRTRAL<br>V                 | Mus<br>musculus   |

|   |      |   |   |       |        |        |        |        |   |        |                      |              |
|---|------|---|---|-------|--------|--------|--------|--------|---|--------|----------------------|--------------|
| 1 | 1.00 | 1 | 1 | -0.02 | -0.017 | -0.017 | -0.02  | -0.017 | t | 6952   | CRTLTMGMSLGARQKI     | Mus musculus |
| 1 | 1.00 | 1 | 1 | 0.02  | 0.02   | 0.02   | 0.02   | 0.029  | t | 122401 | HSEAETGPP            | Homo sapiens |
| 1 | 1.00 | 1 | 1 | 0.01  | 0.01   | 0.01   | 0.01   | 0.02   | t | 79483  | YLGFFK               | Mus musculus |
| 1 | 1.00 | 1 | 1 | 0.04  | 0.035  | 0.054  | 0.04   | 0.041  | t | 11240  | ECEVVPGAEDDFVCK      | Bos indicus  |
| 1 | 1.00 | 1 | 1 | 0.01  | 0.022  | 0.024  | 0.01   | 0.011  | t | 66736  | TTNIMEILRGDFSS       | Mus musculus |
| 1 | 1.00 | 1 | 1 | 0.01  | 0.012  | 0.014  | 0.011  | 0.012  | t | 34244  | KVVQLPKISKNALRNDG    | Homo sapiens |
| 1 | 1.00 | 1 | 1 | 0     | 0.002  | 0.008  | -0.001 | 0.001  | t | 149393 | NMERDLASGLIGPL       | Homo sapiens |
| 1 | 1.00 | 1 | 1 | -0.01 | -0.008 | 0.015  | -0.009 | -0.01  | t | 45965  | NSRSTS               | Homo sapiens |
| 1 | 1.00 | 1 | 1 | -0.03 | -0.028 | -0.018 | -0.029 | -0.029 | t | 66051  | TRLENLMWK            | Homo sapiens |
| 1 | 1.00 | 1 | 1 | 0     | 0.004  | 0.016  | 0.001  | 0.002  | t | 65486  | TNYLEQPVSNDSLNC      | Homo sapiens |
| 1 | 1.00 | 1 | 1 | 0     | 0.002  | 0.016  | 0.001  | 0.002  | t | 65486  | TNYLEQPVSNDSLNC      | Homo sapiens |
| 1 | 1.00 | 1 | 1 | -0.01 | -0.008 | 0.01   | -0.013 | -0.01  | t | 64882  | TLKQAPA              | Homo sapiens |
| 1 | 1.00 | 1 | 1 | -0.01 | -0.01  | 0.01   | -0.008 | -0.01  | t | 74374  | YISPYFINTS           | Homo sapiens |
| 1 | 1.00 | 1 | 1 | -0.01 | -0.01  | -0.004 | -0.01  | -0.008 | t | 17997  | FTKVCGAPPCVIGGAGNNTL | Homo sapiens |
| 1 | 1.00 | 1 | 1 | 0     | 0.004  | 0.009  | 0.001  | 0.002  | t | 71189  | VSVITPGTNASSEVAVL    | Homo sapiens |

|   |      |   |   |       |        |        |        |        |   |        |                              |                                  |
|---|------|---|---|-------|--------|--------|--------|--------|---|--------|------------------------------|----------------------------------|
| 1 | 1.00 | 1 | 1 | -0.03 | -0.032 | -0.018 | -0.031 | -0.03  | t | 142409 | DTRIAQQI<br>WLRR             | Mus<br>musculu<br>s              |
| 1 | 1.00 | 1 | 1 | 0     | 0      | 0      | -0.01  | 0.002  | t | 97035  | VGINYWL<br>AHK               | Homo<br>sapiens                  |
| 1 | 1.00 | 1 | 1 | -0.02 | -0.016 | -0.02  | -0.013 | -0.008 | t | 132345 | GNGVW                        | Homo<br>sapiens                  |
| 1 | 1.00 | 1 | 1 | -0.01 | -0.012 | 0.005  | -0.017 | -0.01  | t | 136079 | QVLLP                        | Rattus<br>norvegic<br>us         |
| 1 | 1.00 | 1 | 1 | -0.04 | -0.037 | -0.031 | -0.04  | -0.037 | t | 62878  | TAHPAYPP<br>PSRA             | Mus<br>musculu<br>s              |
| 1 | 1.00 | 1 | 1 | -0.01 | -0.01  | -0.01  | -0.01  | -0.004 | t | 46184  | NTNGSWH<br>INR               | Homo<br>sapiens                  |
| 1 | 1.00 | 1 | 1 | 0     | 0.002  | 0.014  | 0.001  | 0      | t | 64547  | TKEGDSSN<br>TGAGKALT<br>GLST | Homo<br>sapiens                  |
| 1 | 1.00 | 1 | 1 | 0.03  | 0.032  | 0.049  | 0.029  | 0.028  | t | 39092  | LRGDLQVL<br>AQKVARTL         | Cavia<br>porcellu<br>s           |
| 1 | 1.00 | 1 | 1 | -0.04 | -0.04  | -0.041 | -0.04  | -0.038 | t | 134784 | RKRSQML<br>FRGRRASQ          | Mus<br>musculu<br>s              |
| 1 | 1.00 | 1 | 1 | 0.05  | 0.05   | 0.062  | 0.05   | 0.052  | t | 60985  | SSFEDSDS<br>GSDS             | Oryctola<br>gus<br>cuniculu<br>s |
| 1 | 1.00 | 1 | 1 | 0.01  | 0.007  | 0.019  | 0.01   | 0.008  | t | 120791 | LVRAALEK<br>LEKGPESG<br>QSPE | Oryctola<br>gus<br>cuniculu<br>s |
| 1 | 1.00 | 1 | 1 | 0.01  | 0.007  | 0.017  | 0.01   | 0.019  | t | 139521 | HSSPTLS                      | Oryctola<br>gus<br>cuniculu<br>s |
| 1 | 1.00 | 1 | 1 | -0.02 | -0.024 | -0.007 | -0.021 | -0.02  | t | 50202  | QAAAAVP<br>ATKWKAE<br>YCGYY  | Oryctola<br>gus<br>cuniculu<br>s |

|   |      |   |   |       |        |        |        |        |   |        |                              |                                  |
|---|------|---|---|-------|--------|--------|--------|--------|---|--------|------------------------------|----------------------------------|
| 1 | 1.00 | 1 | 1 | -0.02 | -0.024 | -0.007 | -0.021 | -0.02  | t | 50202  | QAAAAVP<br>ATKWKAE<br>YCGYY  | Oryctola<br>gus<br>cuniculu<br>s |
| 1 | 1.00 | 1 | 1 | -0.04 | -0.04  | -0.042 | -0.05  | -0.04  | t | 105988 | NNNPFKFF<br>VPPSEQS          | Homo<br>sapiens                  |
| 1 | 1.00 | 1 | 1 | -0.02 | -0.02  | 0.007  | -0.018 | -0.02  | t | 45283  | NNWPCLN<br>ETCPTKG           | Homo<br>sapiens                  |
| 1 | 1.00 | 1 | 1 | -0.02 | -0.02  | -0.014 | -0.02  | -0.02  | t | 57976  | SGALRFYN<br>LKGQLVTG<br>SGWY | Rattus<br>norvegic<br>us         |
| 1 | 1.00 | 1 | 1 | -0.02 | -0.016 | -0.016 | -0.02  | -0.02  | t | 49298  | PSAPPLPP<br>VADLPQP<br>GLRR  | Cavia<br>porcellu<br>s           |
| 1 | 1.00 | 1 | 1 | -0.06 | -0.06  | -0.052 | -0.063 | -0.06  | t | 110920 | KPSPWAP<br>KKHRRLS           | Homo<br>sapiens                  |
| 1 | 1.00 | 1 | 1 | 0     | 0      | 0      | 0.003  | 0.008  | t | 99922  | DAEFRHDS<br>GY               | Mus<br>musculu<br>s              |
| 1 | 1.00 | 1 | 1 | 0     | 0      | 0      | 0.003  | 0.008  | t | 107307 | DAEFGHD<br>SGF               | Mus<br>musculu<br>s              |
| 1 | 1.00 | 1 | 1 | -0.02 | -0.017 | -0.012 | -0.02  | -0.019 | t | 66625  | TTGLPALIS<br>WIKRKRQ<br>Q    | Mus<br>musculu<br>s              |
| 1 | 1.00 | 1 | 1 | -0.01 | -0.01  | -0.008 | -0.01  | -0.006 | t | 97771  | WYGYHHS<br>N                 | Mus<br>musculu<br>s              |
| 1 | 1.00 | 1 | 1 | -0.01 | -0.01  | -0.008 | -0.01  | -0.006 | t | 97771  | WYGYHHS<br>N                 | Mus<br>musculu<br>s              |
| 1 | 1.00 | 1 | 1 | -0.04 | -0.04  | -0.028 | -0.04  | -0.04  | t | 133632 | LRCYSHCT<br>FYFASST          | Mus<br>musculu<br>s              |
| 1 | 1.00 | 1 | 1 | 0     | 0      | 0      | 0      | 0.006  | t | 150801 | EDDF                         | Homo<br>sapiens                  |
| 1 | 1.00 | 1 | 1 | 0     | 0      | 0      | 0      | 0.006  | t | 150803 | KLIE                         | Homo<br>sapiens                  |
| 1 | 1.00 | 1 | 1 | 0     | 0      | 0      | 0      | 0.006  | t | 150805 | PSTQT                        | Homo<br>sapiens                  |



|   |      |   |   |       |        |        |        |        |   |        |                              |                                  |
|---|------|---|---|-------|--------|--------|--------|--------|---|--------|------------------------------|----------------------------------|
| 1 | 1.00 | 1 | 1 | 0     | 0      | 0      | 0      | 0.006  | t | 125297 | VFFEEQED<br>EIIGFG           | Mus<br>musculu<br>s              |
| 1 | 1.00 | 1 | 1 | 0     | 0      | 0      | 0      | 0.006  | t | 126595 | LPK                          | Mus<br>musculu<br>s              |
| 1 | 1.00 | 1 | 1 | 0     | 0      | 0      | 0      | 0.006  | t | 126424 | KLF                          | Mus<br>musculu<br>s              |
| 1 | 1.00 | 1 | 1 | -0.05 | -0.05  | -0.032 | -0.05  | -0.05  | t | 45719  | NRPRWVK<br>EA                | Mus<br>musculu<br>s              |
| 1 | 1.00 | 1 | 1 | -0.02 | -0.02  | -0.012 | -0.02  | -0.018 | t | 4037   | AQPREPGS<br>YTNVFDHL<br>DWIK | Oryctola<br>gus<br>cuniculu<br>s |
| 1 | 1.00 | 1 | 1 | 0     | 0.002  | 0.005  | 0.001  | 0      | t | 15196  | FAIPYIHPT<br>NPFAPDVT<br>A   | Homo<br>sapiens                  |
| 1 | 1.00 | 1 | 1 | -0.01 | -0.012 | 0.007  | -0.01  | -0.013 | t | 110955 | NQNPGSP<br>RPGSTGT<br>WNPSS  | Mus<br>musculu<br>s              |
| 1 | 1.00 | 1 | 1 | -0.05 | -0.052 | -0.043 | -0.05  | -0.049 | t | 142483 | WRMAGQ<br>KRTSGG             | Mus<br>musculu<br>s              |
| 1 | 1.00 | 1 | 1 | 0     | 0.005  | 0.004  | 0.003  | 0.001  | t | 75031  | YLYLSRT<br>NTPSGTTT<br>QSRL  | Homo<br>sapiens                  |
| 1 | 1.00 | 1 | 1 | 0.03  | 0.03   | 0.03   | 0.02   | 0.029  | t | 115207 | DISLLDAQ<br>SAPLRVYV<br>EELK | Homo<br>sapiens                  |
| 1 | 1.00 | 1 | 1 | -0.06 | -0.048 | -0.046 | -0.06  | -0.062 | t | 47108  | PDHVRTK<br>GPGRCH            | Mus<br>musculu<br>s              |
| 1 | 1.00 | 1 | 1 | -0.05 | -0.049 | -0.031 | -0.044 | -0.048 | t | 78139  | EGPRAG                       | Equus<br>caballus                |
| 1 | 1.00 | 1 | 1 | 0.01  | 0.012  | 0.023  | 0.013  | 0.011  | t | 10817  | DWLEDTLS<br>EGIRQWW<br>KLKPG | Homo<br>sapiens                  |
| 1 | 1.00 | 1 | 1 | 0.02  | 0.02   | 0      | 0.02   | 0.032  | t | 134452 | NDKGRLS<br>QDEIDRM<br>VNDAEK | Mus<br>musculu<br>s              |

|   |      |   |   |       |        |        |        |        |   |        |                              |                                  |
|---|------|---|---|-------|--------|--------|--------|--------|---|--------|------------------------------|----------------------------------|
| 1 | 1.00 | 1 | 1 | 0.01  | 0.01   | 0.008  | 0.01   | 0.02   | t | 77952  | LQSPTGLT<br>NYFL             | Mus<br>musculu<br>s              |
| 1 | 1.00 | 1 | 1 | -0.04 | -0.038 | -0.032 | -0.043 | -0.035 | t | 97924  | CHYMKC                       | Homo<br>sapiens                  |
| 1 | 1.00 | 1 | 1 | -0.03 | -0.032 | -0.011 | -0.031 | -0.03  | t | 13912  | EQQRYLN<br>NFRFIELV          | Mus<br>musculu<br>s              |
| 1 | 1.00 | 1 | 1 | -0.01 | -0.008 | 0.007  | -0.009 | -0.009 | t | 10349  | DTHLGGE<br>DFDNRLVT<br>FFTEE | Homo<br>sapiens                  |
| 1 | 1.00 | 1 | 1 | 0     | 0.002  | 0.011  | 0.001  | 0      | t | 21313  | GMMLAE<br>QFKQKAL<br>GLLQTAS | Homo<br>sapiens                  |
| 1 | 1.00 | 1 | 1 | -0.04 | -0.026 | -0.025 | -0.037 | -0.04  | t | 65086  | TLTFGAGV<br>NVPAGAG          | Homo<br>sapiens                  |
| 1 | 1.00 | 1 | 1 | -0.06 | -0.063 | -0.038 | -0.06  | -0.06  | t | 101439 | YTAPHR                       | Oryctola<br>gus<br>cuniculu<br>s |
| 1 | 1.00 | 1 | 1 | 0.02  | 0.022  | 0.042  | 0.021  | 0.019  | t | 118146 | SNLDHILE<br>PSIP             | Homo<br>sapiens                  |
| 1 | 1.00 | 1 | 1 | 0.03  | 0.032  | 0.037  | 0.037  | 0.04   | t | 108259 | AAFSELPL<br>G                | Homo<br>sapiens                  |
| 1 | 1.00 | 1 | 1 | -0.03 | -0.035 | -0.03  | -0.037 | -0.029 | t | 144319 | GSADDVV<br>DAEVVDD           | Bos<br>taurus                    |
| 1 | 1.00 | 1 | 1 | 0.02  | 0.021  | 0.023  | 0.019  | 0.022  | t | 67214  | TVWRNRE<br>TLMEFEEP<br>HATKQ | Equus<br>caballus                |
| 1 | 1.00 | 1 | 1 | 0.05  | 0.046  | 0.052  | 0.043  | 0.052  | t | 97025  | VDDALIDS<br>TKIYSYFPS<br>V   | Oryctola<br>gus<br>cuniculu<br>s |
| 1 | 1.00 | 1 | 1 | -0.03 | -0.034 | -0.014 | -0.03  | -0.032 | t | 10064  | DRVVKEM<br>RRQLEMID<br>KLTT  | Mus<br>musculu<br>s              |

|   |      |   |   |       |        |        |        |        |   |        |                              |                                  |
|---|------|---|---|-------|--------|--------|--------|--------|---|--------|------------------------------|----------------------------------|
| 1 | 1.00 | 1 | 1 | -0.04 | -0.04  | -0.035 | -0.043 | -0.039 | t | 108599 | QGDAKKG<br>ANLFKTRC          | Homo<br>sapiens                  |
| 1 | 1.00 | 1 | 1 | -0.02 | -0.02  | 0      | -0.02  | -0.018 | t | 140915 | VSAKDGYK<br>INNKL            | Sus<br>scrofa                    |
| 1 | 1.00 | 1 | 1 | -0.02 | -0.016 | 0.001  | -0.017 | -0.018 | t | 16031  | FGPLWILQ<br>ASLLKV           | Homo<br>sapiens                  |
| 1 | 1.00 | 1 | 1 | -0.03 | -0.028 | -0.01  | -0.023 | -0.028 | t | 128083 | QFLGVPYA<br>APPLAERH<br>FQAP | Homo<br>sapiens                  |
| 1 | 1.00 | 1 | 1 | -0.04 | -0.04  | -0.028 | -0.04  | -0.039 | t | 136060 | EKPKLRKD<br>MYKKMIE<br>VDPL  | Mus<br>musculu<br>s              |
| 1 | 1.00 | 1 | 1 | -0.02 | -0.02  | -0.024 | -0.02  | -0.014 | t | 72754  | WLLSPRGS<br>R                | Homo<br>sapiens                  |
| 1 | 1.00 | 1 | 1 | 0.01  | 0.008  | 0.01   | 0.01   | 0.01   | t | 131313 | SQWSRSA<br>SRNRRHVT<br>EEADV | Callithrix<br>pygmae<br>a        |
| 1 | 1.00 | 1 | 1 | -0.02 | -0.022 | 0.004  | -0.023 | -0.022 | t | 15518  | FEEINGIRR<br>P               | Mus<br>musculu<br>s              |
| 1 | 1.00 | 1 | 1 | 0.01  | 0.012  | 0.022  | 0.01   | 0.013  | t | 28322  | IRIPKYKND<br>GIQNYIHN<br>EY  | Homo<br>sapiens                  |
| 1 | 1.00 | 1 | 1 | 0.01  | 0.013  | 0.022  | 0.01   | 0.013  | t | 28322  | IRIPKYKND<br>GIQNYIHN<br>EY  | Equus<br>caballus                |
| 1 | 1.00 | 1 | 1 | -0.02 | -0.024 | -0.013 | -0.021 | -0.02  | t | 52252  | QRRQHTD<br>VSFIMDRF<br>VK    | Oryctola<br>gus<br>cuniculu<br>s |
| 1 | 1.00 | 1 | 1 | 0.01  | 0.008  | 0.008  | 0.003  | 0.011  | t | 119677 | WVYYTCC<br>PDTPYLDIT<br>YHF  | Rattus<br>norvegic<br>us         |
| 1 | 1.00 | 1 | 1 | -0.02 | -0.011 | -0.011 | -0.02  | -0.019 | t | 54975  | RNCKKLGP<br>RENVA            | Oryctola<br>gus<br>cuniculu<br>s |

|   |      |   |   |       |        |        |        |        |   |        |                              |                       |
|---|------|---|---|-------|--------|--------|--------|--------|---|--------|------------------------------|-----------------------|
| 1 | 1.00 | 1 | 1 | -0.07 | -0.067 | -0.07  | -0.07  | -0.067 | t | 131844 | CRRSTTDC                     | Mus musculus          |
| 1 | 1.00 | 1 | 1 | -0.05 | -0.051 | -0.049 | -0.053 | -0.049 | t | 99277  | GGLRILSP<br>DRKRRAD          | Homo sapiens          |
| 1 | 1.00 | 1 | 1 | -0.03 | -0.03  | -0.023 | -0.033 | -0.03  | t | 51539  | QLSGMLE<br>WQNL              | Homo sapiens          |
| 1 | 1.00 | 1 | 1 | 0     | 0.003  | 0.017  | 0      | 0.003  | t | 155291 | NNAYP                        | Mus musculus          |
| 1 | 1.00 | 1 | 1 | -0.03 | -0.03  | -0.011 | -0.03  | -0.03  | t | 24923  | HTINHTFG<br>NPVIPFKD<br>G    | Homo sapiens          |
| 1 | 1.00 | 1 | 1 | -0.02 | -0.018 | -0.015 | -0.012 | -0.014 | t | 144331 | HDTSLKPIS<br>VSYNPATA<br>K   | Homo sapiens          |
| 1 | 1.00 | 1 | 1 | 0.02  | 0.018  | 0.033  | 0.023  | 0.022  | t | 9602   | DPASRE                       | Mus musculus          |
| 1 | 1.00 | 1 | 1 | -0.01 | -0.007 | 0.001  | -0.01  | -0.01  | t | 73744  | YEPYYHSD<br>HAESSWV<br>NRGES | Mus musculus          |
| 1 | 1.00 | 1 | 1 | -0.01 | -0.003 | 0.001  | -0.01  | -0.01  | t | 73744  | YEPYYHSD<br>HAESSWV<br>NRGES | Cavia porcellus       |
| 1 | 1.00 | 1 | 1 | -0.04 | -0.042 | -0.024 | -0.037 | -0.038 | t | 13573  | ENPVVHFF<br>KNIVTPRT<br>P    | Mus musculus          |
| 1 | 1.00 | 1 | 1 | -0.04 | -0.044 | -0.011 | -0.041 | -0.042 | t | 34933  | LAQKVART<br>LP               | Oryctolagus cuniculus |
| 1 | 1.00 | 1 | 1 | -0.07 | -0.07  | -0.053 | -0.07  | -0.07  | t | 30220  | KDNRIPSY<br>GVLSVDL          | Homo sapiens          |
| 1 | 1.00 | 1 | 1 | 0.03  | 0.03   | 0.035  | 0.037  | 0.04   | t | 108407 | GRTPEDNT<br>L                | Homo sapiens          |

|   |      |   |   |       |        |        |        |        |   |        |                              |                       |
|---|------|---|---|-------|--------|--------|--------|--------|---|--------|------------------------------|-----------------------|
| 1 | 1.00 | 1 | 1 | 0.01  | 0.01   | 0.01   | 0.01   | 0.019  | t | 57556  | SEMPQLP                      | Mus musculus          |
| 1 | 1.00 | 1 | 1 | -0.03 | -0.03  | -0.017 | -0.03  | -0.03  | t | 136818 | ANFIIFRPV<br>V               | Mus musculus          |
| 1 | 1.00 | 1 | 1 | 0.04  | 0.035  | 0.047  | 0.04   | 0.047  | t | 136717 | VGTVCTRV<br>DSEN             | Mus musculus          |
| 1 | 1.00 | 1 | 1 | -0.03 | -0.026 | -0.025 | -0.03  | -0.028 | t | 100319 | NASSELHL<br>LGFGINAE<br>NNHR | Homo sapiens          |
| 1 | 1.00 | 1 | 1 | 0.01  | 0.006  | 0.012  | 0.009  | 0.017  | t | 40074  | LTPANLIR<br>GDNA             | Oryctolagus cuniculus |
| 1 | 1.00 | 1 | 1 | -0.04 | -0.038 | -0.031 | -0.04  | -0.04  | t | 80506  | ATAASVGL<br>RHKF             | Homo sapiens          |
| 1 | 1.00 | 1 | 1 | -0.01 | -0.008 | 0.001  | -0.009 | -0.01  | t | 120441 | DKVLPLVA<br>IVSVGLA<br>VSYD  | Homo sapiens          |
| 1 | 1.00 | 1 | 1 | -0.03 | -0.032 | -0.023 | -0.031 | -0.03  | t | 4853   | ASYNKSLG<br>AAPIRTQP<br>RWNY | Mus musculus          |
| 1 | 1.00 | 1 | 1 | -0.03 | -0.032 | -0.012 | -0.027 | -0.028 | t | 78275  | TELKYSWK<br>T                | Mus musculus          |
| 1 | 1.00 | 1 | 1 | -0.02 | -0.018 | -0.015 | -0.021 | -0.018 | t | 123378 | KLGYWKLR<br>G                | Ovis aries            |
| 1 | 1.00 | 1 | 1 | 0     | 0      | 0.01   | 0      | 0.002  | t | 74173  | YICGDSTE<br>CANLLLQY<br>G    | Mus musculus          |
| 1 | 1.00 | 1 | 1 | 0.01  | 0.012  | 0.032  | 0.011  | 0.011  | t | 53436  | RDVSRITFF<br>Q               | Homo sapiens          |
| 1 | 1.00 | 1 | 1 | -0.1  | -0.1   | -0.1   | -0.1   | -0.097 | t | 117231 | RQIFGDYK<br>TTICGK           | Mus musculus          |
| 1 | 1.00 | 1 | 1 | -0.01 | -0.01  | 0.003  | -0.01  | -0.008 | t | 22020  | GREKFTIR<br>PHYGKEIC         | Mus musculus          |

|   |      |   |   |       |        |        |        |        |   |        |                              |                                  |
|---|------|---|---|-------|--------|--------|--------|--------|---|--------|------------------------------|----------------------------------|
| 1 | 1.00 | 1 | 1 | 0     | -0.004 | 0      | -0.007 | 0.002  | t | 121877 | SSEESGLP<br>KLPVPPLQ<br>QTLA | Oryctola<br>gus<br>cuniculu<br>s |
| 1 | 1.00 | 1 | 1 | -0.02 | -0.02  | -0.013 | -0.014 | -0.014 | t | 125185 | NSSSSQFQ<br>IHG              | Mus<br>musculu<br>s              |
| 1 | 1.00 | 1 | 1 | 0.01  | 0.014  | 0.019  | 0.011  | 0.01   | t | 387    | AAQGESST<br>QKVRPSHT<br>NNPK | Homo<br>sapiens                  |
| 1 | 1.00 | 1 | 1 | -0.02 | -0.018 | -0.013 | -0.02  | -0.021 | t | 69108  | VIRYRYSN<br>NYEANDHI<br>S    | Aotus<br>nancyma<br>ae           |
| 1 | 1.00 | 1 | 1 | 0     | 0      | 0      | 0.004  | 0.009  | t | 104929 | PGTRLQP                      | Homo<br>sapiens                  |
| 1 | 1.00 | 1 | 1 | 0     | -0.004 | 0.007  | -0.007 | 0.001  | t | 115634 | PQKAQRP<br>QDEN              | Oryctola<br>gus<br>cuniculu<br>s |
| 1 | 1.00 | 1 | 1 | 0     | -0.014 | 0.007  | -0.007 | 0.001  | t | 115634 | PQKAQRP<br>QDEN              | Macaca<br>mulatta                |
| 1 | 1.00 | 1 | 1 | -0.03 | -0.026 | -0.03  | -0.023 | -0.02  | t | 143850 | DLTIMPW<br>SLYPP             | Homo<br>sapiens                  |
| 1 | 1.00 | 1 | 1 | -0.02 | -0.018 | -0.008 | -0.02  | -0.02  | t | 100671 | YVALQGS<br>MFDRVRV<br>FWMARG | Ovis<br>aries                    |
| 1 | 1.00 | 1 | 1 | 0.02  | 0.023  | 0.031  | 0.02   | 0.02   | t | 133624 | KPGEMRG<br>AA                | Mus<br>musculu<br>s              |
| 1 | 1.00 | 1 | 1 | -0.02 | -0.023 | -0.013 | -0.02  | -0.02  | t | 8004   | DEHLMCDI<br>EGTGQH           | Oryctola<br>gus<br>cuniculu<br>s |
| 1 | 1.00 | 1 | 1 | -0.01 | -0.012 | 0.001  | -0.011 | -0.01  | t | 77955  | MCSPTALR<br>CQAH             | Mus<br>musculu<br>s              |
| 1 | 1.00 | 1 | 1 | -0.01 | -0.01  | -0.002 | -0.01  | -0.01  | t | 30794  | KFNKKMH<br>EHSEHFKH<br>KFAEL | Homo<br>sapiens                  |
| 1 | 1.00 | 1 | 1 | 0     | 0      | 0.003  | -0.01  | 0      | t | 98844  | KESHFVSA<br>RP               | Homo<br>sapiens                  |

|   |      |   |   |       |        |        |        |        |   |        |                              |                                  |
|---|------|---|---|-------|--------|--------|--------|--------|---|--------|------------------------------|----------------------------------|
| 1 | 1.00 | 1 | 1 | -0.1  | -0.1   | -0.1   | -0.1   | -0.097 | t | 143678 | DRVNLRNL<br>RGYY             | Mus<br>musculu<br>s              |
| 1 | 1.00 | 1 | 1 | 0.01  | 0.015  | 0.038  | 0.011  | 0.01   | t | 53346  | RDGAAAY<br>TLT               | Homo<br>sapiens                  |
| 1 | 1.00 | 1 | 1 | -0.04 | -0.04  | -0.021 | -0.036 | -0.04  | t | 70527  | VQAPNYT<br>QHTSSMR<br>GVY    | Homo<br>sapiens                  |
| 1 | 1.00 | 1 | 1 | 0     | 0      | -0.01  | 0.006  | 0.009  | t | 138886 | NVGGDNV<br>DIHSIVPV<br>GQDPH | Mus<br>musculu<br>s              |
| 1 | 1.00 | 1 | 1 | 0     | -0.002 | 0      | 0.003  | 0.008  | t | 751    | ADPVTTEG<br>DYVVKISEF<br>YGR | Mus<br>musculu<br>s              |
| 1 | 1.00 | 1 | 1 | 0     | 0.002  | 0.021  | 0.003  | 0.002  | t | 95673  | PNLRGDL<br>Q                 | Cavia<br>porcellu<br>s           |
| 1 | 1.00 | 1 | 1 | 0.01  | 0.012  | 0.015  | 0.011  | 0.01   | t | 1470   | AGDLESSV<br>DDPRSEED<br>KRFE | Homo<br>sapiens                  |
| 1 | 1.00 | 1 | 1 | 0     | 0      | 0.011  | 0.003  | 0      | t | 55769  | RRVVRHEP<br>LGRSFLTG<br>GLVL | Homo<br>sapiens                  |
| 1 | 1.00 | 1 | 1 | -0.02 | -0.02  | -0.018 | -0.02  | -0.018 | t | 7971   | DEENRKRI<br>EARNLEN          | Homo<br>sapiens                  |
| 1 | 1.00 | 1 | 1 | -0.08 | -0.084 | -0.08  | -0.087 | -0.078 | t | 128193 | AAKPKTAK<br>PKAAKPKK         | Oryctola<br>gus<br>cuniculu<br>s |
| 1 | 1.00 | 1 | 1 | -0.02 | -0.02  | -0.02  | -0.02  | -0.016 | t | 133622 | KPGDPSAL<br>HVVRCWI<br>C     | Mus<br>musculu<br>s              |
| 1 | 1.00 | 1 | 1 | -0.02 | -0.017 | -0.011 | -0.02  | -0.018 | t | 53858  | RGERCdle<br>DRDR             | Mus<br>musculu<br>s              |
| 1 | 1.00 | 1 | 1 | -0.03 | -0.028 | -0.008 | -0.029 | -0.03  | t | 62773  | TAACRAAK<br>LQDCTM           | Homo<br>sapiens                  |

|   |      |   |   |       |        |        |        |        |   |        |                              |                                  |
|---|------|---|---|-------|--------|--------|--------|--------|---|--------|------------------------------|----------------------------------|
| 1 | 1.00 | 1 | 1 | -0.02 | -0.02  | -0.012 | -0.02  | -0.018 | t | 13481  | ENHSPVNI<br>AHKL             | Mus<br>musculu<br>s              |
| 1 | 1.00 | 1 | 1 | -0.02 | -0.022 | -0.015 | -0.013 | -0.014 | t | 23180  | GVTAPDT<br>RPAPGSTA          | Mus<br>musculu<br>s              |
| 1 | 1.00 | 1 | 1 | 0.01  | 0.012  | 0.02   | 0.011  | 0.012  | t | 56366  | RVNAANK<br>KPEDLTN<br>DLETD  | Homo<br>sapiens                  |
| 1 | 1.00 | 1 | 1 | 0.01  | 0.012  | 0.02   | 0.011  | 0.012  | t | 56366  | RVNAANK<br>KPEDLTN<br>DLETD  | Homo<br>sapiens                  |
| 1 | 1.00 | 1 | 1 | -0.06 | -0.06  | -0.055 | -0.06  | -0.06  | t | 13103  | ELISSCLV<br>WSARGCL<br>FGGGI | Mus<br>musculu<br>s              |
| 1 | 1.00 | 1 | 1 | -0.02 | -0.024 | -0.018 | -0.027 | -0.02  | t | 107201 | LIVPEGAR<br>TSLN             | Oryctola<br>gus<br>cuniculu<br>s |
| 1 | 1.00 | 1 | 1 | -0.01 | -0.01  | -0.008 | -0.01  | -0.01  | t | 9582   | DNYWSFS<br>DSTYWTLR<br>YSSG  | Mus<br>musculu<br>s              |
| 1 | 1.00 | 1 | 1 | 0.02  | 0.018  | 0.037  | 0.019  | 0.022  | t | 58052  | SGGNTNQ<br>QR                | Mus<br>musculu<br>s              |
| 1 | 1.00 | 1 | 1 | 0.02  | 0.018  | 0.037  | 0.019  | 0.022  | t | 58052  | SGGNTNQ<br>QR                | Mus<br>musculu<br>s              |
| 1 | 1.00 | 1 | 1 | -0.01 | -0.003 | -0.009 | -0.013 | -0.005 | t | 48846  | PPNSGGV<br>NTIQLYQT<br>KTAQ  | Gallus<br>gallus                 |
| 1 | 1.00 | 1 | 1 | -0.03 | -0.033 | -0.021 | -0.03  | -0.03  | t | 15315  | FCAKSPRY<br>TLDSVNGY<br>PKIY | Oryctola<br>gus<br>cuniculu<br>s |
| 1 | 1.00 | 1 | 1 | 0.01  | 0.025  | 0.013  | 0.011  | 0.01   | t | 8688   | DIKVQFQS<br>GGNNSPA<br>VYLLD | Homo<br>sapiens                  |
| 1 | 1.00 | 1 | 1 | -0.11 | -0.11  | -0.11  | -0.117 | -0.111 | t | 133686 | RTLDSHWI<br>RVGG             | Homo<br>sapiens                  |
| 1 | 1.00 | 1 | 1 | 0.01  | 0.014  | 0.01   | 0.017  | 0.019  | t | 138231 | RDGQRLTS<br>SKTMLPY          | Homo<br>sapiens                  |



|   |      |   |   |       |        |        |        |        |   |        |                              |                                  |
|---|------|---|---|-------|--------|--------|--------|--------|---|--------|------------------------------|----------------------------------|
| 1 | 1.00 | 1 | 1 | -0.01 | -0.012 | 0.012  | -0.009 | -0.01  | t | 98229  | LPSLAGW<br>WSSASDW<br>F      | Sus<br>scrofa                    |
| 1 | 1.00 | 1 | 1 | 0.01  | 0.006  | 0.021  | 0.01   | 0.01   | t | 112472 | DEGGYTCF<br>FRDHSYQ          | Mus<br>musculu<br>s              |
| 1 | 1.00 | 1 | 1 | 0.01  | 0.013  | 0.021  | 0.01   | 0.01   | t | 112472 | DEGGYTCF<br>FRDHSYQ          | Mus<br>musculu<br>s              |
| 1 | 1.00 | 1 | 1 | 0.05  | 0.052  | 0.038  | 0.047  | 0.06   | t | 78561  | VWAQSSS<br>FPQFKPQE          | Homo<br>sapiens                  |
| 1 | 1.00 | 1 | 1 | 0     | 0.003  | 0.018  | 0      | 0      | t | 7782   | DDGKGDR<br>SHKNEDES<br>ALASK | Mus<br>musculu<br>s              |
| 1 | 1.00 | 1 | 1 | -0.04 | -0.04  | -0.035 | -0.04  | -0.038 | t | 136551 | PIQRKRRQ<br>MPLS             | Mus<br>musculu<br>s              |
| 1 | 1.00 | 1 | 1 | 0     | 0.002  | 0.009  | 0      | 0.001  | t | 112315 | SHGRTQD<br>ENPVVHFF<br>KNIVT | Homo<br>sapiens                  |
| 1 | 1.00 | 1 | 1 | -0.04 | -0.037 | -0.02  | -0.04  | -0.042 | t | 105570 | VGGVVIA                      | Mus<br>musculu<br>s              |
| 1 | 1.00 | 1 | 1 | 0.01  | 0.01   | 0.033  | 0.013  | 0.012  | t | 32809  | KPNNDFH<br>FEVFN             | Homo<br>sapiens                  |
| 1 | 1.00 | 1 | 1 | 0     | -0.002 | 0.01   | -0.007 | -0.003 | t | 131876 | FAKANKQ<br>VCTDI             | Mus<br>musculu<br>s              |
| 1 | 1.00 | 1 | 1 | 0.02  | 0.022  | 0.02   | 0.027  | 0.029  | t | 108086 | QTRGFPSC<br>ERGYLSP          | Homo<br>sapiens                  |
| 1 | 1.00 | 1 | 1 | 0.01  | 0.008  | 0.015  | 0.009  | 0.02   | t | 79050  | QKSKPF                       | Mus<br>musculu<br>s              |
| 1 | 1.00 | 1 | 1 | -0.03 | -0.03  | -0.011 | -0.03  | -0.029 | t | 34847  | LALFLAA<br>HASARQQ           | Homo<br>sapiens                  |
| 1 | 1.00 | 1 | 1 | -0.01 | -0.01  | -0.004 | -0.01  | -0.009 | t | 94832  | GLFGNNE<br>NQTKV             | Oryctola<br>gus<br>cuniculu<br>s |

|   |      |   |   |       |        |        |        |        |   |        |                             |                                  |
|---|------|---|---|-------|--------|--------|--------|--------|---|--------|-----------------------------|----------------------------------|
| 1 | 1.00 | 1 | 1 | -0.03 | -0.026 | -0.02  | -0.03  | -0.03  | t | 41979  | MLKRNKIY<br>FMQRQD          | Myodes<br>glareolu<br>s          |
| 1 | 1.00 | 1 | 1 | 0.01  | 0.01   | 0.01   | 0.01   | 0.017  | t | 102187 | VKEIAETQ<br>HG              | Mus<br>musculu<br>s              |
| 1 | 1.00 | 1 | 1 | 0.01  | 0.012  | 0.01   | 0.017  | 0.02   | t | 104233 | SAVPSPP                     | Homo<br>sapiens                  |
| 1 | 1.00 | 1 | 1 | 0.02  | 0.023  | 0.021  | 0.023  | 0.03   | t | 78163  | GERLFT                      | Equus<br>caballus                |
| 1 | 1.00 | 1 | 1 | 0.01  | 0.01   | 0.032  | 0.014  | 0.01   | t | 34942  | LARGSPPS<br>LASSSASQ<br>LSA | Homo<br>sapiens                  |
| 1 | 1.00 | 1 | 1 | 0     | -0.004 | 0      | -0.007 | 0.003  | t | 122889 | RLDASFQE<br>HPDLPG          | Oryctola<br>gus<br>cuniculu<br>s |
| 1 | 1.00 | 1 | 1 | 0.02  | 0.018  | 0.02   | 0.013  | 0.023  | t | 120769 | LLVDVEPK<br>VKSKKRE         | Mus<br>musculu<br>s              |
| 1 | 1.00 | 1 | 1 | -0.06 | -0.06  | -0.033 | -0.06  | -0.062 | t | 34192  | KVRNWRE<br>SM               | Oryctola<br>gus<br>cuniculu<br>s |
| 1 | 1.00 | 1 | 1 | -0.04 | -0.04  | -0.011 | -0.043 | -0.042 | t | 58258  | SGTIAGKK<br>F               | Homo<br>sapiens                  |
| 1 | 1.00 | 1 | 1 | -0.01 | -0.007 | 0.006  | -0.011 | -0.011 | t | 88987  | SQDINGN<br>RHVPNAE<br>PRET  | Aotus                            |
| 1 | 1.00 | 1 | 1 | -0.13 | -0.128 | -0.12  | -0.127 | -0.128 | t | 144823 | YWEGSGI<br>GAI              | Homo<br>sapiens                  |
| 1 | 1.00 | 1 | 1 | 0.06  | 0.056  | 0.067  | 0.063  | 0.07   | t | 149134 | YTHNETE                     | Sus<br>scrofa                    |
| 1 | 1.00 | 1 | 1 | -0.02 | -0.02  | -0.009 | -0.02  | -0.02  | t | 111970 | YNQNLIRH<br>VGGGTPR         | Oryctola<br>gus<br>cuniculu<br>s |
| 1 | 1.00 | 1 | 1 | -0.03 | -0.034 | -0.013 | -0.031 | -0.028 | t | 12115  | EGAARQP                     | Oryctola<br>gus<br>cuniculu<br>s |

|   |      |   |   |       |        |        |        |        |   |        |                              |                                  |
|---|------|---|---|-------|--------|--------|--------|--------|---|--------|------------------------------|----------------------------------|
| 1 | 1.00 | 1 | 1 | 0     | 0      | 0.002  | 0      | 0.006  | t | 122083 | DPNIKLVL<br>DDCWATS          | Oryctola<br>gus<br>cuniculu<br>s |
| 1 | 1.00 | 1 | 1 | -0.02 | -0.006 | 0.002  | -0.019 | -0.02  | t | 73975  | YGAGVAG<br>ALVAFKIM<br>SGEVP | Homo<br>sapiens                  |
| 1 | 1.00 | 1 | 1 | -0.02 | -0.032 | -0.014 | -0.02  | -0.02  | t | 19720  | GGEQPPS<br>APNGTAT<br>G      | Bos<br>taurus                    |
| 1 | 1.00 | 1 | 1 | -0.03 | -0.028 | -0.014 | -0.033 | -0.03  | t | 12412  | EIDAPRVF<br>DARFSRHY<br>SVQL | Homo<br>sapiens                  |
| 1 | 1.00 | 1 | 1 | -0.03 | -0.028 | -0.014 | -0.033 | -0.03  | t | 12412  | EIDAPRVF<br>DARFSRHY<br>SVQL | Homo<br>sapiens                  |
| 1 | 1.00 | 1 | 1 | 0     | -0.002 | 0.007  | -0.007 | 0      | t | 121153 | ARRRAEP<br>ML                | Mus<br>musculu<br>s              |
| 1 | 1.00 | 1 | 1 | 0     | 0      | 0.017  | 0      | 0.001  | t | 21867  | GQGGGTH<br>NQWNKP            | Oryctola<br>gus<br>cuniculu<br>s |
| 1 | 1.00 | 1 | 1 | -0.01 | -0.008 | -0.005 | -0.007 | -0.007 | t | 116035 | YGSLPQKS<br>GHRTQD           | Ovis<br>aries                    |
| 1 | 1.00 | 1 | 1 | -0.01 | -0.014 | -0.005 | -0.007 | -0.007 | t | 116035 | YGSLPQKS<br>GHRTQD           | Oryctola<br>gus<br>cuniculu<br>s |
| 1 | 1.00 | 1 | 1 | -0.02 | -0.02  | -0.02  | -0.02  | -0.017 | t | 107376 | GDRSGYSS<br>PGSPG            | Mus<br>musculu<br>s              |
| 1 | 1.00 | 1 | 1 | -0.01 | -0.013 | -0.007 | -0.01  | -0.009 | t | 46886  | PAPNIASHI<br>SSISARTG<br>DP  | Oryctola<br>gus<br>cuniculu<br>s |
| 1 | 1.00 | 1 | 1 | -0.02 | -0.02  | -0.02  | -0.013 | -0.01  | t | 143932 | HNIWSAP<br>RLIFN             | Homo<br>sapiens                  |
| 1 | 1.00 | 1 | 1 | 0.03  | 0.03   | 0.039  | 0.032  | 0.035  | t | 138192 | HQTPLST                      | Homo<br>sapiens                  |
| 1 | 1.00 | 1 | 1 | -0.02 | -0.023 | -0.007 | -0.02  | -0.018 | t | 30560  | KEPGGEVV<br>DVEKRG           | Oryctola<br>gus<br>cuniculu<br>s |
| 1 | 1.00 | 1 | 1 | 0     | -0.002 | 0.002  | 0.003  | 0.007  | t | 115623 | KTTICGKG<br>LSATVT           | Mus<br>musculu<br>s              |
| 1 | 1.00 | 1 | 0 | -0.03 | -0.026 | 0.005  | -0.03  | -0.02  | t | 68870  | VHMIKPP<br>WVGRLLSS<br>G     | Mus<br>musculu<br>s              |

|   |      |   |   |       |        |        |        |        |   |        |                              |                                  |
|---|------|---|---|-------|--------|--------|--------|--------|---|--------|------------------------------|----------------------------------|
| 1 | 1.00 | 1 | 1 | -0.04 | -0.038 | -0.034 | -0.039 | -0.038 | t | 78618  | DCLPTTLF<br>QPARAPV<br>TLTAW | Homo<br>sapiens                  |
| 1 | 1.00 | 1 | 1 | -0.03 | -0.03  | -0.028 | -0.03  | -0.027 | t | 130476 | EDSDARIL<br>AAAVWYY<br>SL    | Mus<br>musculu<br>s              |
| 1 | 1.00 | 1 | 1 | -0.03 | -0.03  | -0.028 | -0.03  | -0.027 | t | 130475 | EDSDARIL<br>AAAVWYY<br>SL    | Mus<br>musculu<br>s              |
| 1 | 1.00 | 1 | 1 | 0.01  | 0.013  | 0.026  | 0.01   | 0.01   | t | 57569  | SENHGNY<br>SAQVGAS<br>Q      | Mus<br>musculu<br>s              |
| 1 | 1.00 | 1 | 1 | -0.01 | -0.008 | 0.008  | -0.007 | -0.012 | t | 59210  | SLKAVNPS<br>DPLVYKRQ<br>TAKF | Ovis<br>aries                    |
| 1 | 1.00 | 1 | 1 | 0     | 0.002  | 0.004  | 0.001  | 0.001  | t | 48870  | PPPPSSPT<br>HDPDSD<br>PQIPP  | Homo<br>sapiens                  |
| 1 | 1.00 | 1 | 1 | -0.02 | -0.017 | -0.009 | -0.02  | -0.02  | t | 13747  | EPRSGIDT<br>NAYVMT<br>VGTKT  | Equus<br>caballus                |
| 1 | 1.00 | 1 | 1 | -0.05 | -0.05  | -0.057 | -0.05  | -0.046 | t | 133527 | AYIGLKDR<br>KRPELRRI<br>AS   | Mus<br>musculu<br>s              |
| 1 | 1.00 | 1 | 1 | 0.02  | 0.022  | 0.02   | 0.023  | 0.029  | t | 132839 | HSISLGATP<br>TLP             | Homo<br>sapiens                  |
| 1 | 1.00 | 1 | 1 | 0     | -0.004 | 0      | -0.007 | 0.007  | t | 125370 | CDDPRFQ                      | Oryctola<br>gus<br>cuniculu<br>s |
| 1 | 1.00 | 1 | 1 | 0.01  | 0.008  | 0.028  | 0.009  | 0.01   | t | 36579  | LIKNQCVN<br>FNFNGLTG<br>T    | Mus<br>musculu<br>s              |
| 1 | 1.00 | 1 | 1 | -0.01 | -0.01  | 0.01   | -0.008 | -0.01  | t | 12393  | EIAQVATIS<br>A               | Homo<br>sapiens                  |
| 1 | 1.00 | 1 | 1 | -0.03 | -0.026 | -0.023 | -0.033 | -0.028 | t | 42980  | MVPKQGP<br>L                 | Homo<br>sapiens                  |

|   |      |   |   |   |        |   |   |       |   |        |                         |                                  |
|---|------|---|---|---|--------|---|---|-------|---|--------|-------------------------|----------------------------------|
| 1 | 1.00 | 1 | 1 | 0 | 0      | 0 | 0 | 0.007 | t | 139029 | DLQVLT                  | Mus<br>musculu<br>s              |
| 1 | 1.00 | 1 | 1 | 0 | 0      | 0 | 0 | 0.007 | t | 141963 | MVDRGW<br>G             | Mus<br>musculu<br>s              |
| 1 | 1.00 | 1 | 1 | 0 | 0      | 0 | 0 | 0.007 | t | 106487 | GTSTEVWL<br>APDP        | Mus<br>musculu<br>s              |
| 1 | 1.00 | 1 | 1 | 0 | 0      | 0 | 0 | 0.007 | t | 106363 | DVYWLMP<br>DPPTS        | Mus<br>musculu<br>s              |
| 1 | 1.00 | 1 | 1 | 0 | 0      | 0 | 0 | 0.007 | t | 98216  | LKPIRKKV<br>GIVFQFP     | Homo<br>sapiens                  |
| 1 | 1.00 | 1 | 1 | 0 | 0      | 0 | 0 | 0.007 | t | 98255  | MRRVAIA<br>GVLAMRP<br>E | Homo<br>sapiens                  |
| 1 | 1.00 | 1 | 1 | 0 | 0      | 0 | 0 | 0.007 | t | 106515 | HLPSFLRP<br>DPPL        | Mus<br>musculu<br>s              |
| 1 | 1.00 | 1 | 1 | 0 | 0      | 0 | 0 | 0.007 | t | 106535 | IFPSFLRPD<br>PPL        | Mus<br>musculu<br>s              |
| 1 | 1.00 | 1 | 1 | 0 | -0.003 | 0 | 0 | 0.007 | t | 62440  | SWFDNFL<br>YPTH         | Oryctola<br>gus<br>cuniculu<br>s |
| 1 | 1.00 | 1 | 1 | 0 | 0      | 0 | 0 | 0.007 | t | 67164  | TVSRVPW<br>TAWAFHG<br>Y | Mus<br>musculu<br>s              |
| 1 | 1.00 | 1 | 1 | 0 | 0      | 0 | 0 | 0.007 | t | 90720  | YEVEKPLE<br>PAPVAPS     | Homo<br>sapiens                  |
| 1 | 1.00 | 1 | 1 | 0 | 0      | 0 | 0 | 0.007 | t | 45005  | NMMNYI<br>MDPRTH        | Oryctola<br>gus<br>cuniculu<br>s |
| 1 | 1.00 | 1 | 1 | 0 | 0      | 0 | 0 | 0.007 | t | 45006  | NMMRFTE<br>LSTPS        | Oryctola<br>gus<br>cuniculu<br>s |
| 1 | 1.00 | 1 | 1 | 0 | 0      | 0 | 0 | 0.007 | t | 45004  | NMMKYIS<br>PPIFL        | Oryctola<br>gus<br>cuniculu<br>s |

|   |      |   |   |       |        |        |        |        |   |        |                              |                                  |
|---|------|---|---|-------|--------|--------|--------|--------|---|--------|------------------------------|----------------------------------|
| 1 | 1.00 | 1 | 1 | 0     | -0.003 | 0      | 0      | 0.007  | t | 33531  | KSTQRSTR<br>RNLS             | Oryctola<br>gus<br>cuniculu<br>s |
| 1 | 1.00 | 1 | 1 | 0     | 0      | 0      | 0      | 0.007  | t | 563    | ACHPLFDA<br>RCGGKS           | Mus<br>musculu<br>s              |
| 1 | 1.00 | 1 | 1 | 0     | -0.003 | 0      | 0      | 0.007  | t | 2193   | AKGHS�PR<br>LVTS             | Oryctola<br>gus<br>cuniculu<br>s |
| 1 | 1.00 | 1 | 1 | 0     | 0      | 0.019  | 0      | 0      | t | 68846  | VHFFKNIV<br>TPRTP            | Mus<br>musculu<br>s              |
| 1 | 1.00 | 1 | 1 | 0.02  | 0.02   | 0.032  | 0.02   | 0.02   | t | 120412 | ASKEKQEN<br>KIFADDIDI<br>SD  | Mus<br>musculu<br>s              |
| 1 | 1.00 | 1 | 1 | -0.01 | -0.01  | 0.005  | -0.01  | -0.01  | t | 98060  | GFMVPPG<br>LSSEGLT           | Sus<br>scrofa                    |
| 1 | 1.00 | 1 | 1 | -0.07 | -0.063 | -0.053 | -0.07  | -0.073 | t | 111042 | TIHAHPGS<br>RRGGRHG<br>YHH   | Mus<br>musculu<br>s              |
| 1 | 1.00 | 1 | 1 | -0.02 | -0.02  | -0.005 | -0.017 | -0.02  | t | 52026  | QQFIYAGS<br>LSALLDPS<br>QGMG | Homo<br>sapiens                  |
| 1 | 1.00 | 1 | 1 | -0.03 | -0.028 | -0.03  | -0.023 | -0.021 | t | 107831 | EVLNRP<br>DKTKAIS            | Homo<br>sapiens                  |
| 1 | 1.00 | 1 | 1 | 0     | 0      | 0      | 0      | 0.003  | t | 133378 | SRKPEAPR<br>RRSPSP           | Homo<br>sapiens                  |
| 1 | 1.00 | 1 | 0 | -0.07 | -0.07  | -0.043 | -0.076 | -0.061 | t | 101459 | AACNCLK<br>QLS               | Homo<br>sapiens                  |
| 1 | 1.00 | 1 | 1 | -0.01 | -0.01  | 0.003  | -0.01  | -0.008 | t | 114236 | VGWYRSP<br>FSR               | Rattus<br>norvegic<br>us         |
| 1 | 1.00 | 1 | 1 | 0.04  | 0.026  | 0.047  | 0.033  | 0.041  | t | 115594 | AQRPQDE<br>N                 | Macaca<br>mulatta                |
| 1 | 1.00 | 1 | 1 | 0.04  | 0.036  | 0.047  | 0.033  | 0.041  | t | 115594 | AQRPQDE<br>N                 | Oryctola<br>gus<br>cuniculu<br>s |

|   |      |   |   |       |        |        |        |        |   |        |                              |                                  |
|---|------|---|---|-------|--------|--------|--------|--------|---|--------|------------------------------|----------------------------------|
| 1 | 1.00 | 1 | 1 | -0.02 | -0.02  | -0.013 | -0.02  | -0.02  | t | 95322  | DPLPSGYQ<br>FNPEATKA<br>ASPG | Mus<br>musculu<br>s              |
| 1 | 1.00 | 1 | 1 | 0.03  | 0.032  | 0.024  | 0.031  | 0.034  | t | 76584  | YYQSGLSI<br>VMPVGG<br>QSSFYS | Homo<br>sapiens                  |
| 1 | 1.00 | 1 | 1 | -0.03 | -0.032 | -0.018 | -0.027 | -0.028 | t | 4853   | ASYNKSLG<br>AAPIRTQP<br>RWNY | Mus<br>musculu<br>s              |
| 1 | 1.00 | 1 | 1 | -0.03 | -0.03  | -0.019 | -0.03  | -0.032 | t | 48779  | PPFSLSPV<br>PTLGSRSR<br>R    | Homo<br>sapiens                  |
| 1 | 1.00 | 1 | 1 | -0.01 | -0.01  | 0.015  | -0.01  | -0.012 | t | 133668 | QEGPEYW<br>DRNT              | Mus<br>musculu<br>s              |
| 1 | 1.00 | 1 | 1 | 0     | -0.004 | 0.007  | -0.007 | 0.002  | t | 134809 | VASPERPS<br>PAFP             | Oryctola<br>gus<br>cuniculu<br>s |
| 1 | 1.00 | 1 | 1 | -0.04 | -0.038 | -0.024 | -0.04  | -0.038 | t | 65485  | TNYISRLRT<br>WLSTP           | Anas<br>platyrhy<br>nchos        |
| 1 | 1.00 | 1 | 1 | -0.02 | -0.008 | -0.006 | -0.02  | -0.021 | t | 20063  | GGVAGLF<br>KMGSQQK<br>L      | Mus<br>musculu<br>s              |
| 1 | 1.00 | 1 | 1 | 0.01  | 0.008  | 0.029  | 0.009  | 0.01   | t | 97015  | TVHTQQN<br>Y                 | Mus<br>musculu<br>s              |
| 1 | 1.00 | 1 | 1 | 0     | 0      | 0.022  | 0      | 0      | t | 50931  | QGPGAPQ<br>GPGAPQG<br>PGAP   | Mus<br>musculu<br>s              |
| 1 | 1.00 | 1 | 1 | 0.01  | 0.01   | 0.017  | 0.013  | 0.011  | t | 51499  | QLQLTEAQ<br>AANGGAS<br>GQV   | Homo<br>sapiens                  |
| 1 | 1.00 | 1 | 1 | 0     | -0.002 | 0      | -0.003 | 0.005  | t | 47045  | PCSICSNN<br>PTCWAICK         | Mus<br>musculu<br>s              |
| 1 | 1.00 | 1 | 1 | -0.01 | -0.008 | -0.007 | -0.011 | -0.01  | t | 73787  | YEVARNVSG<br>IYHVTNDC<br>SNS | MD                               |
| 1 | 1.00 | 1 | 1 | -0.03 | -0.03  | -0.013 | -0.026 | -0.03  | t | 75863  | YSPSRFSY<br>FYPFRL           | Homo<br>sapiens                  |

|   |      |   |   |       |        |        |        |        |   |        |                              |                       |
|---|------|---|---|-------|--------|--------|--------|--------|---|--------|------------------------------|-----------------------|
| 1 | 1.00 | 1 | 1 | -0.01 | -0.008 | -0.01  | -0.007 | -0.008 | t | 122135 | LDSRRSYR<br>VRESGLNG<br>VVKH | Homo sapiens          |
| 1 | 1.00 | 1 | 1 | -0.02 | -0.018 | 0.006  | -0.013 | -0.018 | t | 128039 | KTPKKAKK<br>PKTPKKA          | Homo sapiens          |
| 1 | 1.00 | 1 | 1 | -0.01 | 0.004  | 0.006  | -0.013 | -0.01  | t | 33892  | KTTTKPTK<br>KPTF             | Homo sapiens          |
| 1 | 1.00 | 1 | 1 | -0.01 | -0.01  | 0.014  | -0.01  | -0.01  | t | 45557  | NQGDRL<br>CSH                | Homo sapiens          |
| 1 | 1.00 | 1 | 1 | -0.02 | -0.018 | 0.001  | -0.017 | -0.02  | t | 22195  | GRRRYAH<br>PSVRYVCL<br>PPERD | Homo sapiens          |
| 1 | 1.00 | 1 | 1 | -0.03 | -0.032 | -0.023 | -0.037 | -0.03  | t | 96370  | IAAQKPKV                     | Mus musculus          |
| 1 | 1.00 | 1 | 1 | 0.03  | 0.034  | 0.05   | 0.03   | 0.032  | t | 6979   | CSDTIDAG<br>KD               | MD                    |
| 1 | 1.00 | 1 | 1 | -0.08 | -0.08  | -0.08  | -0.076 | -0.078 | t | 117667 | VAGRGRG<br>RGRGRGR<br>G      | Homo sapiens          |
| 1 | 1.00 | 1 | 1 | 0.06  | 0.06   | 0.06   | 0.05   | 0.059  | t | 115206 | DIGSESTE<br>DQAMEDI<br>KQMEA | Homo sapiens          |
| 1 | 1.00 | 1 | 1 | -0.06 | -0.06  | -0.039 | -0.053 | -0.06  | t | 58193  | SGPRHRD<br>GVRRPQK<br>RPSCIG | Homo sapiens          |
| 1 | 1.00 | 1 | 1 | 0     | -0.002 | 0.013  | 0.003  | 0.002  | t | 116677 | ASATQLYK<br>TCKQAGT<br>CPPD  | Mus musculus          |
| 1 | 1.00 | 1 | 1 | -0.02 | -0.018 | -0.013 | -0.013 | -0.01  | t | 108272 | ALARLMP<br>GS                | Homo sapiens          |
| 1 | 1.00 | 1 | 1 | 0.05  | 0.047  | 0.059  | 0.05   | 0.052  | t | 132764 | YQNSMDT<br>QLGDN             | Oryctolagus cuniculus |
| 1 | 1.00 | 1 | 1 | 0.01  | 0.006  | 0.037  | 0.009  | 0.009  | t | 55036  | RNNHPQN<br>TSDSQKEA<br>TD    | Oryctolagus cuniculus |



|   |      |   |   |       |        |        |        |        |   |        |                  |                       |
|---|------|---|---|-------|--------|--------|--------|--------|---|--------|------------------|-----------------------|
| 1 | 1.00 | 1 | 1 | -0.09 | -0.086 | -0.074 | -0.093 | -0.092 | t | 105502 | RPNATYSL         | Homo sapiens          |
| 1 | 1.00 | 1 | 1 | -0.09 | -0.086 | -0.074 | -0.093 | -0.092 | t | 105502 | RPNATYSL         | Homo sapiens          |
| 1 | 1.00 | 1 | 1 | -0.09 | -0.086 | -0.074 | -0.093 | -0.092 | t | 105502 | RPNATYSL         | Homo sapiens          |
| 1 | 1.00 | 1 | 1 | -0.01 | -0.01  | -0.008 | -0.007 | -0.003 | t | 32202  | KLTPPHSAK        | Homo sapiens          |
| 1 | 1.00 | 1 | 1 | -0.03 | -0.022 | -0.009 | -0.03  | -0.032 | t | 27720  | INPSPFAQTR       | Gallus gallus         |
| 1 | 1.00 | 1 | 1 | -0.02 | -0.017 | 0.003  | -0.021 | -0.019 | t | 119596 | IHIPSEKIWRPDLVLY | Mus musculus          |
| 1 | 1.00 | 1 | 1 | -0.02 | -0.022 | 0.003  | -0.021 | -0.019 | t | 119596 | IHIPSEKIWRPDLVLY | Mus musculus          |
| 1 | 1.00 | 1 | 1 | -0.04 | -0.04  | -0.028 | -0.04  | -0.039 | t | 133580 | GFLSSCNFRFCELV   | Mus musculus          |
| 1 | 1.00 | 1 | 1 | -0.02 | -0.018 | -0.011 | -0.023 | -0.018 | t | 150852 | HIGGLSILDPFAVL   | Homo sapiens          |
| 1 | 1.00 | 1 | 1 | 0.02  | 0.022  | 0.038  | 0.019  | 0.02   | t | 99824  | ITQSTQSFN        | Homo sapiens          |
| 1 | 1.00 | 1 | 1 | 0.04  | 0.034  | 0.058  | 0.04   | 0.041  | t | 92586  | ENPSQFYERL       | Oryctolagus cuniculus |
| 1 | 1.00 | 1 | 1 | 0     | 0      | 0.013  | 0      | 0      | t | 20548  | GKEKVNELSK       | Homo sapiens          |
| 1 | 1.00 | 1 | 1 | -0.09 | -0.093 | -0.085 | -0.097 | -0.091 | t | 120166 | RCCRPRYRPRCRRH   | Oryctolagus cuniculus |

|   |      |   |   |       |        |        |        |        |   |        |                              |                          |
|---|------|---|---|-------|--------|--------|--------|--------|---|--------|------------------------------|--------------------------|
| 1 | 1.00 | 1 | 1 | -0.05 | -0.046 | -0.067 | -0.053 | -0.039 | t | 20683  | GKSMANT<br>WPYFGYY<br>MGGNML | Homo<br>sapiens          |
| 1 | 1.00 | 1 | 1 | -0.04 | -0.036 | -0.035 | -0.04  | -0.038 | t | 100086 | GTGNLELV<br>AVRKEQQ<br>QRGRR | Homo<br>sapiens          |
| 1 | 1.00 | 1 | 1 | -0.02 | -0.017 | -0.004 | -0.02  | -0.02  | t | 30513  | KELRQRAF<br>TS               | Mus<br>musculu<br>s      |
| 1 | 1.00 | 1 | 1 | -0.03 | -0.028 | -0.018 | -0.03  | -0.03  | t | 100400 | PVNTPGQ<br>FEDFFPAS<br>SRDQS | Homo<br>sapiens          |
| 1 | 1.00 | 1 | 1 | 0.01  | 0.012  | 0.017  | 0.017  | 0.02   | t | 105019 | VGERGSK                      | Homo<br>sapiens          |
| 1 | 1.00 | 1 | 1 | 0.01  | 0.014  | 0.017  | 0.017  | 0.02   | t | 105019 | VGERGSK                      | Homo<br>sapiens          |
| 1 | 1.00 | 1 | 1 | -0.06 | -0.06  | -0.051 | -0.064 | -0.06  | t | 135989 | RVLAPHLT<br>RAYA             | Homo<br>sapiens          |
| 1 | 1.00 | 1 | 1 | 0     | 0.003  | 0.008  | 0      | 0      | t | 8388   | DGGGGHS<br>HDSGHGG<br>GD     | Mus<br>musculu<br>s      |
| 1 | 1.00 | 1 | 1 | -0.02 | -0.022 | -0.025 | -0.017 | -0.011 | t | 106656 | MPGERGA<br>AGIAGPK           | Mus<br>musculu<br>s      |
| 1 | 1.00 | 1 | 1 | -0.01 | -0.008 | -0.001 | -0.011 | -0.008 | t | 40104  | LTPKELD                      | Homo<br>sapiens          |
| 1 | 1.00 | 1 | 1 | 0.03  | 0.03   | 0.042  | 0.03   | 0.03   | t | 63543  | TESTVSSAL<br>AELATKTF<br>GS  | Homo<br>sapiens          |
| 1 | 1.00 | 1 | 1 | -0.01 | -0.012 | -0.005 | -0.007 | -0.008 | t | 114865 | IVERETRG<br>QSENPLW<br>HALRR | Rattus<br>norvegic<br>us |
| 1 | 1.00 | 1 | 1 | 0.01  | 0.013  | 0.022  | 0.01   | 0.01   | t | 133877 | LEAKICHQI<br>EYYFGDFN<br>L   | Mus<br>musculu<br>s      |

|   |      |   |   |       |        |        |        |        |   |        |                             |                                  |
|---|------|---|---|-------|--------|--------|--------|--------|---|--------|-----------------------------|----------------------------------|
| 1 | 1.00 | 1 | 1 | -0.02 | -0.022 | -0.006 | -0.017 | -0.019 | t | 75954  | YTASTRGD<br>LAHLTAT         | Mus<br>musculu<br>s              |
| 1 | 1.00 | 1 | 1 | 0.05  | 0.05   | 0.053  | 0.04   | 0.051  | t | 98688  | AKSSPYQK<br>KTENPCA         | Homo<br>sapiens                  |
| 1 | 1.00 | 1 | 1 | -0.05 | -0.047 | -0.03  | -0.05  | -0.05  | t | 157189 | EFRHDSGY                    | Mus<br>musculu<br>s              |
| 1 | 1.00 | 1 | 1 | -0.05 | -0.05  | -0.041 | -0.054 | -0.05  | t | 135983 | RLRPPEPR<br>PRDR            | Homo<br>sapiens                  |
| 1 | 1.00 | 1 | 1 | 0.02  | 0.023  | 0.029  | 0.02   | 0.02   | t | 113302 | CDDDDDN<br>DGVPSR<br>DNCRLV | Mus<br>musculu<br>s              |
| 1 | 1.00 | 1 | 1 | 0.02  | 0.023  | 0.029  | 0.02   | 0.02   | t | 113302 | CDDDDDN<br>DGVPSR<br>DNCRLV | Mus<br>musculu<br>s              |
| 1 | 1.00 | 1 | 1 | 0.01  | 0.01   | 0.02   | 0.01   | 0.012  | t | 142806 | KATALTYD<br>PYVNYSS         | Sus<br>scrofa                    |
| 1 | 1.00 | 1 | 1 | -0.01 | -0.006 | 0.019  | -0.01  | -0.009 | t | 31772  | KLCGVL                      | Homo<br>sapiens                  |
| 1 | 1.00 | 1 | 1 | -0.02 | -0.02  | -0.011 | -0.02  | -0.02  | t | 66337  | TSNFRVVP<br>SGDVVRFP<br>N   | Oryctola<br>gus<br>cuniculu<br>s |
| 1 | 1.00 | 1 | 1 | -0.04 | -0.038 | -0.048 | -0.039 | -0.03  | t | 12531  | EINHVQD<br>HALPKENI         | Homo<br>sapiens                  |
| 1 | 1.00 | 1 | 1 | -0.04 | -0.04  | -0.021 | -0.04  | -0.04  | t | 116695 | DRRDPYSP<br>SPYDRRG         | Homo<br>sapiens                  |
| 1 | 1.00 | 1 | 1 | -0.02 | -0.02  | -0.001 | -0.02  | -0.019 | t | 101311 | TPLDRGT<br>WLFTK            | Mus<br>musculu<br>s              |
| 1 | 1.00 | 1 | 1 | 0.03  | 0.032  | 0.037  | 0.027  | 0.031  | t | 107080 | AGPDCSSL<br>PNSMRCS         | Homo<br>sapiens                  |
| 1 | 1.00 | 1 | 1 | -0.02 | -0.02  | -0.013 | -0.029 | -0.022 | t | 130716 | AAIRGPGV<br>LAGGRSA<br>GAR  | Homo<br>sapiens                  |

|   |      |   |   |       |        |        |        |        |   |        |                      |                       |
|---|------|---|---|-------|--------|--------|--------|--------|---|--------|----------------------|-----------------------|
| 1 | 1.00 | 1 | 1 | 0.03  | 0.03   | 0.035  | 0.03   | 0.033  | t | 132856 | LEDGRTLSDYNIQKES     | Mus musculus          |
| 1 | 1.00 | 1 | 1 | 0.05  | 0.036  | 0.055  | 0.046  | 0.05   | t | 55765  | RRVNAANKKPEDLTNDLET  | Aotus griseimembra    |
| 1 | 1.00 | 1 | 1 | 0     | 0.003  | 0.012  | 0      | 0.003  | t | 4225   | ARQPYGFFLETEEVYQPG   | Mus musculus          |
| 1 | 1.00 | 1 | 1 | 0     | 0.002  | -0.012 | -0.003 | 0.01   | t | 78505  | RLGDYLIDQGL          | Homo sapiens          |
| 1 | 1.00 | 1 | 1 | -0.03 | -0.026 | -0.018 | -0.029 | -0.03  | t | 42929  | MVDRGWGNGCGL         | Homo sapiens          |
| 1 | 1.00 | 1 | 1 | -0.02 | -0.023 | -0.012 | -0.02  | -0.02  | t | 21869  | GQGGSHSQWNKPSKPKTNMK | Oryctolagus cuniculus |
| 1 | 1.00 | 1 | 1 | 0.02  | 0.023  | 0.021  | 0.023  | 0.03   | t | 78163  | GERLFT               | Equus caballus        |
| 1 | 1.00 | 1 | 1 | 0     | -0.002 | 0.007  | -0.007 | -0.001 | t | 144809 | VLAPGGTHSRGLLEMM     | Mus musculus          |
| 1 | 1.00 | 1 | 1 | -0.01 | -0.007 | 0      | -0.011 | -0.011 | t | 81130  | DLFHVNGRDTMNIIVDENKY | Aotus                 |
| 1 | 1.00 | 1 | 1 | -0.01 | -0.012 | 0.003  | -0.007 | -0.008 | t | 33531  | KSTQRSTRRNLS         | Mus musculus          |
| 1 | 1.00 | 1 | 1 | 0.01  | 0.01   | 0.018  | 0.007  | 0.01   | t | 41359  | MEESTYQTMPPRRGME     | Homo sapiens          |
| 1 | 1.00 | 1 | 1 | -0.03 | -0.03  | -0.008 | -0.03  | -0.03  | t | 10495  | DTTIMA               | Homo sapiens          |
| 1 | 1.00 | 1 | 1 | 0     | 0      | 0      | 0      | 0.007  | t | 105207 | GAIIGLMVGGVIA        | Mus musculus          |
| 1 | 1.00 | 1 | 1 | 0     | 0      | 0      | 0      | 0.007  | t | 99922  | DAEFRHDSGY           | Mus musculus          |
| 1 | 1.00 | 1 | 1 | 0     | 0      | 0      | 0      | 0.007  | t | 75441  | YPYDVDPDYA           | Mus musculus          |

|   |      |   |   |       |        |        |        |        |   |        |                              |                        |
|---|------|---|---|-------|--------|--------|--------|--------|---|--------|------------------------------|------------------------|
| 1 | 1.00 | 1 | 1 | 0     | 0      | 0      | 0      | 0.007  | t | 4397   | ASFEAQQ<br>ALANIAVD<br>KA    | Mus<br>musculu<br>s    |
| 1 | 1.00 | 1 | 1 | 0     | 0      | 0      | 0      | 0.007  | t | 4397   | ASFEAQQ<br>ALANIAVD<br>KA    | Mus<br>musculu<br>s    |
| 1 | 1.00 | 1 | 1 | -0.03 | -0.028 | -0.023 | -0.027 | -0.029 | t | 74061  | YGNEGCG<br>WAGWLLS<br>P      | Homo<br>sapiens        |
| 1 | 1.00 | 1 | 1 | 0     | 0.002  | 0.012  | 0      | 0      | t | 100400 | PVNTPGQ<br>FEDFFPAS<br>SRDQS | Homo<br>sapiens        |
| 1 | 1.00 | 1 | 1 | -0.03 | -0.023 | -0.024 | -0.029 | -0.03  | t | 32387  | KMQQGN<br>GRRGIRVV<br>PS     | Capra<br>hircus        |
| 1 | 1.00 | 1 | 1 | 0.03  | 0.032  | 0.03   | 0.037  | 0.039  | t | 107887 | HKTTTSPD<br>YTAVGT           | Homo<br>sapiens        |
| 1 | 1.00 | 1 | 1 | 0.01  | 0.008  | 0.03   | 0.016  | 0.012  | t | 117390 | TTESKLRR<br>FEVYGPIK<br>RI   | Mus<br>musculu<br>s    |
| 1 | 1.00 | 1 | 1 | -0.03 | -0.03  | -0.021 | -0.034 | -0.03  | t | 135984 | RPGGCSA<br>VSAHG             | Homo<br>sapiens        |
| 1 | 1.00 | 1 | 1 | -0.01 | -0.011 | 0.007  | -0.01  | -0.01  | t | 66304  | TSLNDRQ<br>GNATK             | Homo<br>sapiens        |
| 1 | 1.00 | 1 | 1 | -0.03 | -0.028 | -0.009 | -0.027 | -0.031 | t | 153850 | LIRCINCQK<br>PLCPEEKQ<br>RHL | Cavia<br>porcellu<br>s |
| 1 | 1.00 | 1 | 1 | 0.01  | 0.013  | 0.015  | 0.01   | 0.012  | t | 64662  | TKRNTNRR<br>PQDVKFP<br>GGGQI | Mus<br>musculu<br>s    |
| 1 | 1.00 | 1 | 1 | 0.01  | 0.01   | 0.015  | 0.01   | 0.012  | t | 64662  | TKRNTNRR<br>PQDVKFP<br>GGGQI | Mus<br>musculu<br>s    |
| 1 | 1.00 | 1 | 1 | 0.01  | 0.01   | 0.015  | 0.01   | 0.012  | t | 64662  | TKRNTNRR<br>PQDVKFP<br>GGGQI | Mus<br>musculu<br>s    |
| 1 | 1.00 | 1 | 1 | 0.01  | 0.013  | 0.01   | 0.01   | 0.02   | t | 6362   | CGVVVLQ<br>C                 | Mus<br>musculu<br>s    |
| 1 | 1.00 | 1 | 1 | 0     | 0      | 0.022  | 0      | 0      | t | 105340 | MPRCRHG<br>Y                 | Homo<br>sapiens        |

|   |      |   |   |       |        |        |        |        |   |        |                              |                                  |
|---|------|---|---|-------|--------|--------|--------|--------|---|--------|------------------------------|----------------------------------|
| 1 | 1.00 | 1 | 1 | 0.01  | 0.006  | 0.017  | 0.013  | 0.02   | t | 149130 | YALHSTP                      | Sus<br>scrofa                    |
| 1 | 1.00 | 1 | 1 | -0.03 | -0.032 | -0.018 | -0.031 | -0.03  | t | 53173  | RANPNPYT<br>SRRSV            | Mus<br>musculu<br>s              |
| 1 | 1.00 | 1 | 1 | 0.04  | 0.05   | 0.047  | 0.042  | 0.045  | t | 136561 | PTDNDHT<br>FDALQ             | Dicentra<br>rchus<br>labrax      |
| 1 | 1.00 | 1 | 1 | -0.04 | -0.044 | -0.023 | -0.043 | -0.042 | t | 49795  | PTTRTDDK<br>LR               | Oryctola<br>gus<br>cuniculu<br>s |
| 1 | 1.00 | 1 | 1 | 0.01  | 0.014  | 0.027  | 0.01   | 0.01   | t | 17388  | FPRPGGG<br>GNGDFEEI<br>PEEYL | Homo<br>sapiens                  |
| 1 | 1.00 | 1 | 1 | 0     | -0.002 | 0.002  | -0.001 | 0      | t | 74416  | YIWPRND<br>YDGFLANA<br>HEHHG | Mus<br>musculu<br>s              |
| 1 | 1.00 | 1 | 1 | 0.06  | 0.057  | 0.079  | 0.06   | 0.06   | t | 66072  | TRNTGQP<br>ATDHYYSN<br>V     | Oryctola<br>gus<br>cuniculu<br>s |
| 1 | 1.00 | 1 | 1 | 0.02  | 0.02   | 0.035  | 0.02   | 0.02   | t | 7840   | DDPAKAA<br>FDSLQASA          | Mus<br>musculu<br>s              |
| 1 | 1.00 | 1 | 1 | 0.02  | 0.027  | 0.038  | 0.017  | 0.02   | t | 971    | AEHVDTSY<br>ECDIPIGA         | Gallus<br>gallus                 |
| 1 | 1.00 | 1 | 1 | -0.04 | -0.04  | -0.015 | -0.04  | -0.04  | t | 1402   | AFSVAAPV<br>TVTR             | Oryctola<br>gus<br>cuniculu<br>s |
| 1 | 1.00 | 1 | 1 | -0.04 | -0.037 | -0.015 | -0.04  | -0.04  | t | 1402   | AFSVAAPV<br>TVTR             | Mus<br>musculu<br>s              |
| 1 | 1.00 | 1 | 1 | 0     | -0.002 | 0.008  | 0      | 0.001  | t | 75223  | YNSTLDPLI<br>TALLNSFD<br>TR  | Oryctola<br>gus<br>cuniculu<br>s |
| 1 | 1.00 | 1 | 1 | -0.02 | -0.023 | -0.015 | -0.02  | -0.018 | t | 55824  | RSELSPLLL<br>STTEWQIL<br>PCS | Oryctola<br>gus<br>cuniculu<br>s |

|   |      |   |   |       |        |        |        |        |   |        |                              |                                  |
|---|------|---|---|-------|--------|--------|--------|--------|---|--------|------------------------------|----------------------------------|
| 1 | 1.00 | 1 | 1 | 0     | 0.002  | 0.017  | 0.003  | 0      | t | 4482   | ASILCKCYT<br>TGTIIN          | Homo<br>sapiens                  |
| 1 | 1.00 | 1 | 1 | 0.01  | 0.005  | 0.025  | 0.009  | 0.01   | t | 96888  | SKVLHLEG<br>EVNKIKS          | Oryctola<br>gus<br>cuniculu<br>s |
| 1 | 1.00 | 1 | 1 | -0.02 | -0.02  | -0.02  | -0.02  | -0.018 | t | 117972 | LAVTKYKQ<br>RNGWSHK          | Homo<br>sapiens                  |
| 1 | 1.00 | 1 | 1 | -0.02 | -0.02  | -0.014 | -0.014 | -0.014 | t | 10432  | DTNLASSTI<br>IKEGIDKTV       | Rattus<br>norvegic<br>us         |
| 1 | 1.00 | 1 | 1 | 0.09  | 0.09   | 0.108  | 0.09   | 0.093  | t | 114234 | TQDENP                       | Mus<br>musculu<br>s              |
| 1 | 1.00 | 1 | 1 | -0.03 | -0.03  | -0.008 | -0.03  | -0.03  | t | 18753  | GARSLTPC<br>TCGSSD           | Homo<br>sapiens                  |
| 1 | 1.00 | 1 | 1 | 0.01  | 0.01   | 0.02   | 0.01   | 0.008  | t | 64815  | TLGGDPKF<br>RSLTHEDH<br>AIQP | Homo<br>sapiens                  |
| 1 | 1.00 | 1 | 1 | 0.04  | 0.042  | 0.051  | 0.047  | 0.051  | t | 108376 | GASGDIAK<br>Q                | Homo<br>sapiens                  |
| 1 | 1.00 | 1 | 1 | -0.05 | -0.047 | -0.05  | -0.05  | -0.048 | t | 63808  | TGDPKPKK<br>NKKPKNPT<br>PPRP | Mus<br>musculu<br>s              |
| 1 | 1.00 | 1 | 1 | 0     | 0.002  | 0.013  | -0.003 | 0.002  | t | 47537  | PFPEVFGK<br>EK               | Homo<br>sapiens                  |
| 1 | 1.00 | 1 | 1 | 0.02  | 0.018  | 0.012  | 0.017  | 0.03   | t | 101962 | PEPVQEP                      | Mus<br>musculu<br>s              |
| 1 | 1.00 | 1 | 1 | -0.04 | -0.038 | -0.014 | -0.04  | -0.041 | t | 59892  | SNRDFV                       | Homo<br>sapiens                  |
| 1 | 1.00 | 1 | 1 | -0.04 | -0.04  | -0.014 | -0.04  | -0.041 | t | 59892  | SNRDFV                       | Homo<br>sapiens                  |
| 1 | 1.00 | 1 | 1 | 0     | 0.004  | 0.015  | -0.003 | 0      | t | 20770  | GLARTTAD<br>RQTACNC          | Homo<br>sapiens                  |

|   |      |   |   |       |        |        |        |        |   |        |                                  |                                  |
|---|------|---|---|-------|--------|--------|--------|--------|---|--------|----------------------------------|----------------------------------|
| 1 | 1.00 | 1 | 1 | 0     | 0.012  | 0.021  | 0      | 0      | t | 24080  | HIPAYATH<br>V                    | Mus<br>musculu<br>s              |
| 1 | 1.00 | 1 | 1 | 0.03  | 0.032  | 0.037  | 0.037  | 0.04   | t | 108036 | MSVPQTT<br>YSKITELI              | Homo<br>sapiens                  |
| 1 | 1.00 | 1 | 1 | 0     | 0.002  | 0.014  | 0.001  | 0      | t | 17466  | FQDLSDNP<br>CKVDL                | Homo<br>sapiens                  |
| 1 | 1.00 | 1 | 1 | 0.01  | 0.006  | 0.011  | 0.007  | 0.02   | t | 79567  | HSYTLMF                          | Oryctola<br>gus<br>cuniculu<br>s |
| 1 | 1.00 | 1 | 1 | -0.05 | -0.052 | -0.033 | -0.051 | -0.049 | t | 8939   | DKLYIWGV<br>HHPSTN               | Mus<br>musculu<br>s              |
| 1 | 1.00 | 1 | 1 | -0.05 | -0.05  | -0.042 | -0.05  | -0.049 | t | 96846  | RVFPRGTV<br>ENP                  | Oryctola<br>gus<br>cuniculu<br>s |
| 1 | 1.00 | 1 | 1 | 0.02  | 0.024  | 0.037  | 0.021  | 0.02   | t | 104148 | NHVSPTHY<br>VPESDAAA<br>RVTQ     | Homo<br>sapiens                  |
| 1 | 1.00 | 1 | 1 | 0     | 0      | 0.016  | 0      | 0      | t | 67647  | VAKLVTQE<br>MFQNI<br>DK<br>KIESQ | Homo<br>sapiens                  |
| 1 | 1.00 | 1 | 1 | -0.02 | -0.02  | -0.027 | -0.024 | -0.021 | t | 108125 | SHQESTRG<br>RSRGRSGR<br>SGS      | Homo<br>sapiens                  |
| 1 | 1.00 | 1 | 1 | 0.04  | 0.042  | 0.045  | 0.041  | 0.046  | t | 51281  | QLAEQFK<br>QK                    | Homo<br>sapiens                  |
| 1 | 1.00 | 1 | 1 | -0.02 | -0.017 | 0.003  | -0.02  | -0.018 | t | 4224   | ARQPDLI                          | Mus<br>musculu<br>s              |
| 1 | 1.00 | 1 | 1 | 0     | -0.002 | 0.007  | -0.007 | 0.001  | t | 117140 | DWEYSVW<br>LSN                   | Mus<br>musculu<br>s              |
| 1 | 1.00 | 1 | 1 | 0.02  | 0.02   | 0.048  | 0.02   | 0.02   | t | 127619 | DEYKRFM<br>NYWTASN<br>E          | Homo<br>sapiens                  |
| 1 | 1.00 | 1 | 1 | 0     | -0.002 | 0      | 0.003  | 0.008  | t | 751    | ADPVTTEG<br>DYVVKISEF<br>YGR     | Mus<br>musculu<br>s              |



|   |      |   |   |       |        |        |        |        |   |        |                                  |                       |
|---|------|---|---|-------|--------|--------|--------|--------|---|--------|----------------------------------|-----------------------|
| 1 | 1.00 | 1 | 1 | 0     | 0      | 0      | 0.004  | 0.009  | t | 104928 | PGSRLQP                          | Homo sapiens          |
| 1 | 1.00 | 1 | 1 | -0.05 | -0.048 | -0.041 | -0.049 | -0.048 | t | 41575  | MGGAAG<br>GMPGGM<br>PGMSGMS<br>G | Homo sapiens          |
| 1 | 1.00 | 1 | 1 | -0.05 | -0.053 | -0.041 | -0.049 | -0.048 | t | 41575  | MGGAAG<br>GMPGGM<br>PGMSGMS<br>G | Canis lupus           |
| 1 | 1.00 | 1 | 1 | -0.04 | -0.042 | -0.037 | -0.041 | -0.04  | t | 21541  | GNVQAAK<br>DGGNTAA<br>GR         | Mus musculus          |
| 1 | 1.00 | 1 | 1 | -0.02 | -0.025 | -0.003 | -0.021 | -0.02  | t | 96103  | APPLLPHS<br>NLDHI                | Oryctolagus cuniculus |
| 1 | 1.00 | 1 | 0 | -0.04 | -0.036 | -0.011 | -0.04  | -0.027 | t | 48906  | PPRRVS                           | Mus musculus          |
| 1 | 1.00 | 1 | 1 | -0.04 | -0.036 | -0.019 | -0.039 | -0.038 | t | 62990  | TASGLVS<br>MFS                   | Homo sapiens          |
| 1 | 1.00 | 1 | 1 | 0.02  | 0.02   | 0.043  | 0.02   | 0.02   | t | 12069  | EFSDCSKD<br>YYQM                 | Oryctolagus cuniculus |
| 1 | 1.00 | 1 | 1 | 0.02  | 0.02   | 0.025  | 0.013  | 0.02   | t | 29171  | ITYNESHSS<br>DQRPY               | Homo sapiens          |
| 1 | 1.00 | 1 | 1 | -0.03 | -0.032 | -0.008 | -0.031 | -0.033 | t | 33     | AAAGAVV<br>GGLGGYM<br>LG         | Mus musculus          |
| 1 | 1.00 | 1 | 1 | 0.02  | 0.02   | 0.004  | 0.02   | 0.032  | t | 145747 | DPVGPSP<br>P                     | Mus musculus          |
| 1 | 1.00 | 1 | 1 | -0.03 | -0.032 | -0.023 | -0.037 | -0.029 | t | 136393 | IPSRKRRN<br>RIQQ                 | Mus musculus          |
| 1 | 1.00 | 1 | 1 | -0.02 | -0.026 | -0.009 | -0.02  | -0.019 | t | 92900  | HEALREPR<br>KLERTISK             | Oryctolagus cuniculus |
| 1 | 1.00 | 1 | 1 | 0.02  | 0.016  | 0.02   | 0.013  | 0.02   | t | 107303 | AWKYENG<br>NDKHYAD<br>SVNG       | Oryctolagus cuniculus |

|   |      |   |   |       |        |        |        |        |   |        |                              |                       |
|---|------|---|---|-------|--------|--------|--------|--------|---|--------|------------------------------|-----------------------|
| 1 | 1.00 | 1 | 1 | 0.02  | 0.023  | 0.021  | 0.023  | 0.03   | t | 78161  | GDDRLF                       | Equus caballus        |
| 1 | 1.00 | 1 | 1 | -0.02 | -0.02  | -0.015 | -0.02  | -0.02  | t | 33548  | KSVIIGCTG<br>GSPEKHHHC       | Rattus norvegicus     |
| 1 | 1.00 | 1 | 1 | -0.01 | -0.012 | -0.003 | -0.017 | -0.01  | t | 144599 | CNGTHPSL<br>RLC              | Mus musculus          |
| 1 | 1.00 | 1 | 1 | 0.02  | 0.016  | 0.02   | 0.013  | 0.023  | t | 134704 | KFFNSNKK<br>KRDDFEKL         | Oryctolagus cuniculus |
| 1 | 1.00 | 1 | 1 | -0.01 | -0.01  | 0.006  | -0.008 | -0.01  | t | 11420  | EDPVLAKK<br>VPETFPEL<br>KPGE | Homo sapiens          |
| 1 | 1.00 | 1 | 1 | -0.06 | -0.06  | -0.053 | -0.06  | -0.058 | t | 125248 | RVPPRYHA<br>KISPMVN          | Mus musculus          |
| 1 | 1.00 | 1 | 1 | 0.01  | 0.013  | 0.037  | 0.01   | 0.009  | t | 42264  | MPDHALR<br>PQYSI             | Mus musculus          |
| 1 | 1.00 | 1 | 1 | -0.01 | -0.012 | 0.004  | -0.007 | -0.007 | t | 75954  | YTASTRGD<br>LAHLTAT          | Mus musculus          |
| 1 | 1.00 | 1 | 1 | 0.02  | 0.02   | 0.025  | 0.02   | 0.023  | t | 145704 | AEGLT<br>TTWKDYD<br>HNLQ     | Sus scrofa            |
| 1 | 1.00 | 1 | 1 | 0.01  | 0.021  | 0.023  | 0.01   | 0.01   | t | 47134  | PDKQDYQI<br>RMAKSS           | Gallus gallus         |
| 1 | 1.00 | 1 | 1 | 0.01  | 0.012  | 0.012  | 0.013  | 0.015  | t | 23466  | GYSLFQM<br>EMKTLNE<br>GTSGTA | Aotus nancyma<br>ae   |
| 1 | 1.00 | 1 | 1 | 0.05  | 0.05   | 0.071  | 0.05   | 0.05   | t | 8916   | DKKTEETT<br>LLEDRL           | Mus musculus          |
| 1 | 1.00 | 1 | 1 | -0.02 | -0.02  | 0.002  | -0.02  | -0.02  | t | 18753  | GARSLTPC<br>TCGSSD           | Homo sapiens          |

|   |      |   |   |       |        |        |        |        |   |        |                              |                                  |
|---|------|---|---|-------|--------|--------|--------|--------|---|--------|------------------------------|----------------------------------|
| 1 | 1.00 | 1 | 1 | -0.01 | -0.01  | 0.006  | -0.01  | -0.01  | t | 11603  | EEERTFTEL<br>PYEARYKA<br>WKS | Mus<br>musculu<br>s              |
| 1 | 1.00 | 1 | 1 | 0.04  | 0.036  | 0.06   | 0.039  | 0.042  | t | 139322 | TPQGRPD<br>AE                | Oryctola<br>gus<br>cuniculu<br>s |
| 1 | 1.00 | 1 | 1 | -0.02 | -0.022 | -0.009 | -0.017 | -0.018 | t | 114810 | ENPVVHFF<br>RNIVTART<br>P    | Mus<br>musculu<br>s              |
| 1 | 1.00 | 1 | 1 | -0.01 | -0.01  | 0.008  | -0.01  | -0.013 | t | 7932   | DEDEYEYD<br>EEDRRRG          | Homo<br>sapiens                  |
| 1 | 1.00 | 1 | 1 | 0.04  | 0.044  | 0.062  | 0.041  | 0.042  | t | 7528   | DAHFLSQT<br>KQSGENLP<br>YLVA | Homo<br>sapiens                  |
| 1 | 1.00 | 1 | 1 | -0.03 | -0.03  | -0.008 | -0.03  | -0.03  | t | 12814  | EKMALY                       | Homo<br>sapiens                  |
| 1 | 1.00 | 1 | 1 | -0.07 | -0.066 | -0.065 | -0.07  | -0.07  | t | 69871  | VLYHKPLA<br>GVYRALKK<br>QLG  | Aotus<br>nancyma<br>ae           |
| 1 | 1.00 | 1 | 1 | 0     | 0      | 0.023  | 0      | 0      | t | 105340 | MPRCRHG<br>Y                 | Homo<br>sapiens                  |
| 1 | 1.00 | 1 | 1 | -0.03 | -0.032 | -0.026 | -0.031 | -0.026 | t | 67436  | TYQRTRAL<br>V                | Mus<br>musculu<br>s              |
| 1 | 1.00 | 1 | 1 | 0.01  | 0.012  | 0.023  | 0.007  | 0.012  | t | 47537  | PFPEVFGK<br>EK               | Homo<br>sapiens                  |
| 1 | 1.00 | 1 | 1 | 0     | 0.003  | 0.009  | 0      | 0      | t | 113994 | VIISINGQS<br>VVSANDV<br>SDVI | Mus<br>musculu<br>s              |
| 1 | 1.00 | 1 | 1 | 0     | 0.003  | 0.009  | 0      | 0      | t | 113994 | VIISINGQS<br>VVSANDV<br>SDVI | Mus<br>musculu<br>s              |
| 1 | 1.00 | 1 | 1 | -0.05 | -0.052 | -0.04  | -0.051 | -0.047 | t | 103739 | WTLAVFD<br>HKAQT             | Mus<br>musculu<br>s              |
| 1 | 1.00 | 1 | 1 | 0.01  | 0.012  | 0.025  | 0.011  | 0.01   | t | 27730  | INQRTVVA<br>PDKEVLYE<br>AFDE | Homo<br>sapiens                  |

|   |      |   |   |       |        |        |        |        |   |        |                             |                                  |
|---|------|---|---|-------|--------|--------|--------|--------|---|--------|-----------------------------|----------------------------------|
| 1 | 1.00 | 1 | 1 | -0.05 | -0.05  | -0.042 | -0.05  | -0.049 | t | 50508  | QDPRVRG<br>LYFPAGG          | Mus<br>musculu<br>s              |
| 1 | 1.00 | 1 | 1 | 0.01  | 0.012  | 0.014  | 0.01   | 0.012  | t | 34244  | KVVQLPKI<br>SKNALRND<br>G   | Homo<br>sapiens                  |
| 1 | 1.00 | 1 | 1 | 0     | -0.004 | 0.001  | -0.003 | 0.01   | t | 79608  | LRPDSIF                     | Oryctola<br>gus<br>cuniculu<br>s |
| 1 | 1.00 | 1 | 1 | -0.03 | -0.028 | -0.015 | -0.033 | -0.03  | t | 29861  | KALKALPM<br>HI              | Homo<br>sapiens                  |
| 1 | 1.00 | 1 | 1 | -0.03 | -0.028 | -0.015 | -0.033 | -0.03  | t | 29861  | KALKALPM<br>HI              | Homo<br>sapiens                  |
| 1 | 1.00 | 1 | 1 | 0.04  | 0.044  | 0.056  | 0.037  | 0.041  | t | 20667  | GKQPASD                     | Homo<br>sapiens                  |
| 1 | 1.00 | 1 | 1 | -0.03 | -0.03  | -0.018 | -0.03  | -0.029 | t | 66051  | TRLENLM<br>WK               | Mus<br>musculu<br>s              |
| 1 | 1.00 | 1 | 1 | -0.01 | -0.006 | 0.01   | -0.011 | -0.012 | t | 96385  | IFDNFLITN<br>D              | Homo<br>sapiens                  |
| 1 | 1.00 | 1 | 1 | -0.01 | -0.012 | -0.017 | -0.013 | 0.001  | t | 113204 | VDAAFKV<br>AAT              | Mus<br>musculu<br>s              |
| 1 | 1.00 | 1 | 1 | 0.02  | 0.02   | 0.022  | 0.02   | 0.025  | t | 122555 | RITNRDPRI<br>SSGSLS         | Mus<br>musculu<br>s              |
| 1 | 1.00 | 1 | 1 | 0.01  | 0.014  | 0.017  | 0.017  | 0.017  | t | 135471 | KDKATFGC<br>HDGC            | Homo<br>sapiens                  |
| 1 | 1.00 | 1 | 1 | -0.06 | -0.06  | -0.041 | -0.06  | -0.06  | t | 18515  | GAALQIPF<br>AMQMAY<br>RFN   | Homo<br>sapiens                  |
| 1 | 1.00 | 1 | 1 | -0.01 | -0.01  | -0.008 | -0.01  | 0      | t | 73873  | YFNPAY                      | Mus<br>musculu<br>s              |
| 1 | 1.00 | 1 | 1 | -0.04 | -0.037 | -0.039 | -0.04  | -0.037 | t | 4531   | ASLKMA<br>D<br>PNRFRGK<br>D | Mus<br>musculu<br>s              |

|   |      |   |   |       |        |        |        |        |   |        |                             |                                  |
|---|------|---|---|-------|--------|--------|--------|--------|---|--------|-----------------------------|----------------------------------|
| 1 | 1.00 | 1 | 1 | 0.02  | 0.02   | 0.032  | 0.016  | 0.02   | t | 51967  | QPSKPTTK<br>QRQN            | Homo<br>sapiens                  |
| 1 | 1.00 | 1 | 1 | 0.03  | 0.03   | 0.028  | 0.03   | 0.04   | t | 77934  | KSDYDSPT<br>QTFAL           | Mus<br>musculu<br>s              |
| 1 | 1.00 | 1 | 1 | -0.04 | -0.037 | -0.019 | -0.041 | -0.039 | t | 119551 | AIFKSYCEII<br>VTHFPFD       | Mus<br>musculu<br>s              |
| 1 | 1.00 | 1 | 1 | -0.04 | -0.042 | -0.019 | -0.041 | -0.039 | t | 119551 | AIFKSYCEII<br>VTHFPFD       | Mus<br>musculu<br>s              |
| 1 | 1.00 | 1 | 1 | -0.04 | -0.037 | -0.019 | -0.041 | -0.039 | t | 119551 | AIFKSYCEII<br>VTHFPFD       | Mus<br>musculu<br>s              |
| 1 | 1.00 | 1 | 1 | -0.04 | -0.042 | -0.019 | -0.041 | -0.039 | t | 119551 | AIFKSYCEII<br>VTHFPFD       | Mus<br>musculu<br>s              |
| 1 | 1.00 | 1 | 1 | -0.04 | -0.042 | -0.019 | -0.041 | -0.039 | t | 119551 | AIFKSYCEII<br>VTHFPFD       | Mus<br>musculu<br>s              |
| 1 | 1.00 | 1 | 1 | 0     | 0.003  | 0.009  | 0      | 0.002  | t | 71189  | VSVITPGT<br>NASSEVAV<br>L   | Mus<br>musculu<br>s              |
| 1 | 1.00 | 1 | 1 | 0.01  | 0.01   | 0.01   | 0.01   | 0.02   | t | 106440 | GDKLTLL                     | Mus<br>musculu<br>s              |
| 1 | 1.00 | 1 | 1 | -0.02 | -0.022 | -0.022 | -0.027 | -0.018 | t | 120650 | ITVVVINT<br>HHRSPSTH<br>TM  | Mus<br>musculu<br>s              |
| 1 | 1.00 | 1 | 1 | -0.03 | -0.032 | -0.018 | -0.03  | -0.03  | t | 141104 | VVHVETH<br>RCNISWEI<br>S    | Oryctola<br>gus<br>cuniculu<br>s |
| 1 | 1.00 | 1 | 1 | -0.04 | -0.04  | -0.04  | -0.04  | -0.039 | t | 153864 | PDRAHYNI<br>VTFCKCD<br>STLR | Cavia<br>porcellu<br>s           |
| 1 | 1.00 | 1 | 1 | -0.06 | -0.06  | -0.041 | -0.06  | -0.06  | t | 38009  | LMDPVFG<br>FDRRVPFV         | Mus<br>musculu<br>s              |

|   |      |   |   |       |        |        |        |        |   |        |                              |                                  |
|---|------|---|---|-------|--------|--------|--------|--------|---|--------|------------------------------|----------------------------------|
| 1 | 1.00 | 1 | 1 | -0.02 | -0.022 | -0.005 | -0.021 | -0.02  | t | 16296  | FISEAIIHVL<br>HSR            | Mus<br>musculu<br>s              |
| 1 | 1.00 | 1 | 1 | -0.03 | -0.034 | -0.017 | -0.031 | -0.03  | t | 45643  | NQWNKPS<br>KPKTN             | Oryctola<br>gus<br>cuniculu<br>s |
| 1 | 1.00 | 1 | 1 | -0.02 | -0.022 | -0.013 | -0.023 | -0.018 | t | 118678 | WPLHDGG<br>AVNRR             | Mus<br>musculu<br>s              |
| 1 | 1.00 | 1 | 1 | 0.01  | 0.01   | 0.025  | 0.01   | 0.012  | t | 127999 | GLIEVQSD<br>YGIVWGLS<br>LQKV | Mus<br>musculu<br>s              |
| 1 | 1.00 | 1 | 1 | -0.04 | -0.04  | -0.019 | -0.042 | -0.04  | t | 5057   | ATMILAYA<br>MRVPEVI          | Homo<br>sapiens                  |
| 1 | 1.00 | 1 | 1 | -0.02 | -0.02  | -0.011 | -0.02  | -0.018 | t | 79212  | FDWLWL<br>WDT                | Mus<br>musculu<br>s              |
| 1 | 1.00 | 1 | 1 | 0.03  | 0.016  | 0.037  | 0.023  | 0.031  | t | 115594 | AQRPQDE<br>N                 | Macaca<br>mulatta                |
| 1 | 1.00 | 1 | 1 | 0.03  | 0.026  | 0.037  | 0.023  | 0.031  | t | 115594 | AQRPQDE<br>N                 | Oryctola<br>gus<br>cuniculu<br>s |
| 1 | 1.00 | 1 | 1 | 0.01  | 0.01   | 0.016  | 0.01   | 0.012  | t | 144738 | NVGEACH<br>SLHEC             | Mus<br>musculu<br>s              |
| 1 | 1.00 | 1 | 1 | -0.03 | -0.034 | -0.021 | -0.031 | -0.03  | t | 58273  | SGTVQSA<br>HLIIRFDE          | Oryctola<br>gus<br>cuniculu<br>s |
| 1 | 1.00 | 1 | 1 | -0.05 | -0.05  | -0.033 | -0.05  | -0.05  | t | 69308  | VKRGLTVA<br>VAGAAILV<br>AGLS | Mus<br>musculu<br>s              |
| 1 | 1.00 | 1 | 1 | -0.06 | -0.062 | -0.052 | -0.063 | -0.06  | t | 110920 | KPSPWAP<br>KKHRRLS           | Mus<br>musculu<br>s              |
| 1 | 1.00 | 1 | 1 | 0     | 0      | 0.016  | 0      | 0.002  | t | 110812 | DPVGPLDP<br>SIVSLVEES<br>SFI | Oryctola<br>gus<br>cuniculu<br>s |
| 1 | 1.00 | 1 | 1 | -0.01 | -0.006 | -0.001 | -0.009 | -0.01  | t | 51456  | QLNRALSG<br>IAAEQDRN<br>T    | Homo<br>sapiens                  |

|   |      |   |   |       |        |        |        |        |   |        |                              |                                  |
|---|------|---|---|-------|--------|--------|--------|--------|---|--------|------------------------------|----------------------------------|
| 1 | 1.00 | 1 | 1 | -0.02 | -0.016 | 0      | -0.02  | -0.018 | t | 48966  | PQAMQW<br>NSTAF              | Mus<br>musculu<br>s              |
| 1 | 1.00 | 1 | 1 | -0.02 | -0.017 | 0      | -0.021 | -0.02  | t | 105164 | EFRHDSG                      | Mus<br>musculu<br>s              |
| 1 | 1.00 | 1 | 1 | 0     | 0.003  | 0.016  | 0      | 0      | t | 45489  | NPTGPASV                     | Mus<br>musculu<br>s              |
| 1 | 1.00 | 1 | 1 | 0     | 0.003  | 0.016  | 0      | 0      | t | 45489  | NPTGPASV                     | Mus<br>musculu<br>s              |
| 1 | 1.00 | 1 | 1 | 0     | 0.003  | 0.016  | 0      | 0      | t | 45489  | NPTGPASV                     | Mus<br>musculu<br>s              |
| 1 | 1.00 | 1 | 1 | 0     | 0.003  | 0.016  | 0      | 0      | t | 45489  | NPTGPASV                     | Mus<br>musculu<br>s              |
| 1 | 1.00 | 1 | 1 | -0.03 | -0.019 | -0.013 | -0.03  | -0.029 | t | 52546  | QTIHAHP<br>VKMR              | Gallus<br>gallus                 |
| 1 | 1.00 | 1 | 1 | -0.02 | -0.02  | -0.01  | -0.02  | -0.02  | t | 154400 | DPVGPSD<br>PSIVSLVEE<br>TSFI | Oryctola<br>gus<br>cuniculu<br>s |
| 1 | 1.00 | 1 | 1 | -0.02 | -0.023 | -0.015 | -0.023 | -0.02  | t | 125667 | AFRFGHAT<br>IHPLVRR<br>DAS   | Oryctola<br>gus<br>cuniculu<br>s |
| 1 | 1.00 | 1 | 1 | 0     | -0.003 | 0.009  | 0      | 0.002  | t | 100545 | TAVETGAT<br>NPLAPS           | Oryctola<br>gus<br>cuniculu<br>s |
| 1 | 1.00 | 1 | 1 | -0.01 | -0.01  | -0.013 | -0.017 | -0.006 | t | 115652 | SSRISIYWT<br>IVKP            | Homo<br>sapiens                  |
| 1 | 1.00 | 1 | 1 | -0.06 | -0.057 | -0.055 | -0.06  | -0.06  | t | 120415 | AVAGRGR<br>GRGRGRG<br>R      | Mus<br>musculu<br>s              |
| 1 | 1.00 | 1 | 1 | 0.01  | 0.01   | 0.029  | 0.004  | 0.008  | t | 96114  | ASFAEAPF<br>SN               | Homo<br>sapiens                  |

|   |      |   |   |       |        |        |        |        |   |        |                              |                                  |
|---|------|---|---|-------|--------|--------|--------|--------|---|--------|------------------------------|----------------------------------|
| 1 | 1.00 | 1 | 1 | 0     | -0.002 | 0.011  | -0.007 | 0      | t | 106988 | VTSVSAVA<br>SGHYLHR          | Mus<br>musculu<br>s              |
| 1 | 1.00 | 1 | 1 | 0.04  | 0.036  | 0.049  | 0.04   | 0.043  | t | 115650 | SQGHRSD<br>DEN               | Oryctola<br>gus<br>cuniculu<br>s |
| 1 | 1.00 | 1 | 1 | 0.04  | 0.026  | 0.049  | 0.04   | 0.043  | t | 115650 | SQGHRSD<br>DEN               | Macaca<br>mulatta                |
| 1 | 1.00 | 1 | 1 | -0.01 | -0.007 | 0.004  | -0.01  | -0.009 | t | 97288  | ETQLTTAG<br>LRLL             | Mus<br>musculu<br>s              |
| 1 | 1.00 | 1 | 1 | -0.02 | -0.018 | -0.011 | -0.023 | -0.018 | t | 20469  | GIVAHQR<br>GNQ               | Homo<br>sapiens                  |
| 1 | 1.00 | 1 | 1 | 0.04  | 0.044  | 0.049  | 0.041  | 0.04   | t | 1523   | AGGGQG<br>QNNEGAN<br>APNEDSV | Homo<br>sapiens                  |
| 1 | 1.00 | 1 | 1 | -0.02 | -0.02  | -0.012 | -0.023 | -0.02  | t | 110817 | DSTLRLCV<br>QSTHVDIR<br>TLE  | Homo<br>sapiens                  |
| 1 | 1.00 | 1 | 1 | 0     | 0.004  | 0.021  | 0      | 0      | t | 100247 | LDKRND<br>PFHLP              | Ovis<br>aries                    |
| 1 | 1.00 | 1 | 1 | 0.01  | 0.006  | 0.012  | 0.012  | 0.02   | t | 23717  | HELRSQIIS<br>TTS             | Oryctola<br>gus<br>cuniculu<br>s |
| 1 | 1.00 | 1 | 1 | -0.07 | -0.068 | -0.054 | -0.073 | -0.07  | t | 12220  | EGLRMM<br>MRMMQ<br>QK        | Homo<br>sapiens                  |
| 1 | 1.00 | 1 | 1 | -0.02 | -0.017 | -0.005 | -0.02  | -0.02  | t | 98605  | VTPLSEPIF<br>VSAPRH          | Sus<br>scrofa                    |
| 1 | 1.00 | 1 | 1 | -0.02 | -0.02  | -0.005 | -0.02  | -0.02  | t | 98605  | VTPLSEPIF<br>VSAPRH          | Sus<br>scrofa                    |
| 1 | 1.00 | 1 | 1 | -0.04 | -0.038 | -0.034 | -0.043 | -0.038 | t | 94573  | KRIPNKKP<br>GKKT             | Homo<br>sapiens                  |



|   |      |   |   |       |        |        |        |        |   |        |                              |                   |
|---|------|---|---|-------|--------|--------|--------|--------|---|--------|------------------------------|-------------------|
| 1 | 1.00 | 1 | 1 | 0.02  | 0.02   | 0.027  | 0.02   | 0.025  | t | 94511  | FEVFNFPV                     | Mus musculus      |
| 1 | 1.00 | 1 | 1 | 0.02  | 0.022  | 0.032  | 0.021  | 0.02   | t | 10584  | DVESYSSM<br>PPLEGEPG<br>DPDL | Homo sapiens      |
| 1 | 1.00 | 1 | 1 | 0.04  | 0.04   | 0.047  | 0.049  | 0.052  | t | 130850 | GGIYQDLV<br>S                | Homo sapiens      |
| 1 | 1.00 | 1 | 1 | 0     | 0.004  | 0.01   | 0.003  | 0.003  | t | 52424  | QSRNWLP<br>GPCYRQQ<br>RVSKTS | Homo sapiens      |
| 1 | 1.00 | 1 | 1 | -0.06 | -0.06  | -0.047 | -0.06  | -0.059 | t | 97359  | GPGR                         | Mus musculus      |
| 1 | 1.00 | 1 | 1 | 0.01  | 0.012  | 0.01   | 0.017  | 0.02   | t | 104130 | MPLQRTL                      | Homo sapiens      |
| 1 | 1.00 | 1 | 1 | 0     | -0.002 | 0.007  | -0.007 | 0      | t | 119601 | KGNNVHG<br>FQKQIIRSF<br>Y    | Rattus norvegicus |
| 1 | 1.00 | 1 | 1 | -0.05 | -0.05  | -0.043 | -0.05  | -0.048 | t | 150976 | DVLCRPV<br>GAESRRRP<br>VSGP  | Mus musculus      |
| 1 | 1.00 | 1 | 1 | -0.04 | -0.04  | -0.038 | -0.04  | -0.039 | t | 25647  | IDPSFYWA<br>PCRFSHC          | Mus musculus      |
| 1 | 1.00 | 1 | 1 | -0.01 | -0.012 | 0.002  | -0.007 | -0.01  | t | 69935  | VMDECVF<br>SSISVLFCN<br>HMLH | Mus musculus      |
| 1 | 1.00 | 1 | 1 | -0.02 | -0.02  | -0.011 | -0.02  | -0.02  | t | 69593  | VLLFLLAD<br>ARVCSC<br>WMML   | Homo sapiens      |
| 1 | 1.00 | 1 | 1 | 0.02  | 0.018  | 0.034  | 0.017  | 0.02   | t | 68322  | VEQKHIQK<br>EDVPSERY<br>LGYL | Mus musculus      |
| 1 | 1.00 | 1 | 1 | -0.05 | -0.052 | -0.039 | -0.047 | -0.048 | t | 43387  | NCRPRLEL<br>MPCV             | Mus musculus      |
| 1 | 1.00 | 1 | 1 | 0.06  | 0.06   | 0.085  | 0.06   | 0.062  | t | 117327 | LQWSASFT<br>TS               | Homo sapiens      |
| 1 | 1.00 | 1 | 1 | -0.02 | -0.021 | -0.013 | -0.02  | -0.019 | t | 139695 | AVQKRVK<br>EVGTPKPA<br>FML   | Canis lupus       |

|   |      |   |   |       |        |        |        |        |   |        |                              |                                  |
|---|------|---|---|-------|--------|--------|--------|--------|---|--------|------------------------------|----------------------------------|
| 1 | 1.00 | 1 | 1 | -0.03 | -0.03  | -0.03  | -0.03  | -0.029 | t | 139305 | TAAQITQR<br>KWEAARE<br>AEQRR | Oryctola<br>gus<br>cuniculu<br>s |
| 1 | 1.00 | 1 | 1 | 0     | 0      | 0.02   | 0      | 0      | t | 15358  | FDAASFV<br>MRD               | Homo<br>sapiens                  |
| 1 | 1.00 | 1 | 1 | -0.03 | -0.028 | -0.014 | -0.027 | -0.03  | t | 118800 | GCKGTHG<br>GTGAGAG<br>AGGAGA | Homo<br>sapiens                  |
| 1 | 1.00 | 1 | 1 | 0     | 0.002  | 0.025  | 0      | 0      | t | 141761 | TAPPLLPH<br>SNLD             | Rattus<br>norvegic<br>us         |
| 1 | 1.00 | 1 | 1 | 0     | 0      | 0.025  | 0      | 0      | t | 141761 | TAPPLLPH<br>SNLD             | Rattus<br>norvegic<br>us         |
| 1 | 1.00 | 1 | 1 | -0.01 | -0.01  | 0      | -0.007 | -0.008 | t | 49366  | PSFPTQRT<br>SKTLKVLTP<br>PTT | Homo<br>sapiens                  |
| 1 | 1.00 | 1 | 1 | 0.01  | 0.008  | 0.025  | 0.003  | 0.009  | t | 108357 | EVVPHKK<br>MHKDFLE<br>KIGGL  | Mus<br>musculu<br>s              |
| 1 | 1.00 | 1 | 1 | -0.05 | -0.046 | -0.034 | -0.049 | -0.05  | t | 29744  | KAAASKVK<br>ANLLSV           | Homo<br>sapiens                  |
| 1 | 1.00 | 1 | 1 | -0.01 | -0.014 | 0.015  | -0.011 | -0.01  | t | 35628  | LENLMWK<br>QI                | Oryctola<br>gus<br>cuniculu<br>s |
| 1 | 1.00 | 1 | 1 | -0.04 | -0.038 | -0.024 | -0.041 | -0.041 | t | 78884  | VVCMYLY<br>QLSPPIW<br>PLLPH  | Homo<br>sapiens                  |
| 1 | 1.00 | 1 | 1 | -0.03 | -0.033 | -0.016 | -0.03  | -0.03  | t | 120391 | AARYKYFP<br>EVKTKGM<br>A     | Oryctola<br>gus<br>cuniculu<br>s |
| 1 | 1.00 | 1 | 1 | -0.01 | -0.008 | 0.003  | -0.009 | -0.011 | t | 9677   | DPLTSLHA<br>MQRR             | Homo<br>sapiens                  |

|   |      |   |   |       |        |        |        |        |   |        |                              |                                  |
|---|------|---|---|-------|--------|--------|--------|--------|---|--------|------------------------------|----------------------------------|
| 1 | 1.00 | 1 | 1 | 0.03  | 0.028  | 0.028  | 0.023  | 0.031  | t | 119599 | KAEEYILKK<br>PRSELMFE<br>E   | Mus<br>musculu<br>s              |
| 1 | 1.00 | 1 | 1 | -0.03 | -0.028 | -0.023 | -0.027 | -0.028 | t | 74061  | YGNCGCG<br>WAGWLLS<br>P      | Homo<br>sapiens                  |
| 1 | 1.00 | 1 | 1 | 0.01  | 0.01   | 0.012  | 0.011  | 0.021  | t | 19958  | GGPIPTIPR<br>PTL             | Oryctola<br>gus<br>cuniculu<br>s |
| 1 | 1.00 | 1 | 1 | 0.03  | 0.03   | 0.027  | 0.03   | 0.04   | t | 79005  | KQSPYL                       | Mus<br>musculu<br>s              |
| 1 | 1.00 | 1 | 1 | -0.03 | -0.03  | -0.013 | -0.03  | -0.032 | t | 95196  | AAGLIMTA<br>EPKTIVLKA<br>G   | Rattus<br>norvegic<br>us         |
| 1 | 1.00 | 1 | 1 | -0.02 | -0.017 | -0.006 | -0.02  | -0.022 | t | 60831  | SRVPHLD<br>NPVELVD           | Mus<br>musculu<br>s              |
| 1 | 1.00 | 1 | 1 | 0     | -0.002 | 0.01   | -0.001 | 0.002  | t | 1164   | AESLRAVIP<br>PTTTP           | Anas<br>platyrhy<br>nchos        |
| 1 | 1.00 | 1 | 1 | -0.01 | -0.007 | 0.008  | -0.01  | -0.01  | t | 55487  | RQSTPIGL<br>GQALYTT          | Mus<br>musculu<br>s              |
| 1 | 1.00 | 1 | 1 | -0.02 | -0.02  | -0.019 | -0.02  | -0.016 | t | 21406  | GNDWEDR<br>YYRENMY<br>RYPNQV | Mus<br>musculu<br>s              |
| 1 | 1.00 | 1 | 1 | 0.1   | 0.1    | 0.113  | 0.1    | 0.104  | t | 1157   | AESEE                        | Homo<br>sapiens                  |
| 1 | 1.00 | 1 | 1 | -0.03 | -0.03  | -0.02  | -0.036 | -0.029 | t | 31885  | KLKFGAA<br>RV                | Homo<br>sapiens                  |
| 1 | 1.00 | 1 | 1 | -0.09 | -0.093 | -0.085 | -0.097 | -0.091 | t | 120166 | RCCRPRYR<br>PRCRRH           | Oryctola<br>gus<br>cuniculu<br>s |
| 1 | 1.00 | 1 | 1 | 0.02  | 0.02   | 0.02   | 0.013  | 0.02   | t | 112289 | RHRDTGIL<br>DSIGRFFG<br>GDRG | Homo<br>sapiens                  |
| 1 | 1.00 | 1 | 1 | -0.03 | -0.026 | -0.023 | -0.033 | -0.03  | t | 107256 | TSPHRPSA<br>IGVLPPL          | Homo<br>sapiens                  |

|   |      |   |   |       |        |        |        |        |   |        |                              |                                  |
|---|------|---|---|-------|--------|--------|--------|--------|---|--------|------------------------------|----------------------------------|
| 1 | 1.00 | 1 | 1 | -0.02 | -0.016 | -0.006 | -0.017 | -0.018 | t | 115057 | GLSLSRFS<br>WGAEGQR<br>PGFG  | Homo<br>sapiens                  |
| 1 | 1.00 | 1 | 1 | 0.04  | 0.037  | 0.06   | 0.04   | 0.042  | t | 139322 | TPQGRPD<br>AE                | Oryctola<br>gus<br>cuniculu<br>s |
| 1 | 1.00 | 1 | 1 | -0.01 | -0.008 | 0.011  | -0.007 | -0.01  | t | 18578  | GAGAAILT<br>PTPVNPS          | Homo<br>sapiens                  |
| 1 | 1.00 | 1 | 1 | -0.02 | -0.027 | -0.008 | -0.023 | -0.02  | t | 32096  | KLQACEHP<br>IGEWCMM          | Bos<br>indicus                   |
| 1 | 1.00 | 1 | 1 | -0.02 | -0.016 | -0.004 | -0.02  | -0.019 | t | 71421  | VTMRPTSL<br>AQRNEMF<br>F     | Mus<br>musculu<br>s              |
| 1 | 1.00 | 1 | 1 | -0.02 | -0.016 | -0.004 | -0.02  | -0.019 | t | 71421  | VTMRPTSL<br>AQRNEMF<br>F     | Mus<br>musculu<br>s              |
| 1 | 1.00 | 1 | 1 | -0.02 | -0.016 | -0.004 | -0.02  | -0.019 | t | 71421  | VTMRPTSL<br>AQRNEMF<br>F     | Mus<br>musculu<br>s              |
| 1 | 1.00 | 1 | 1 | -0.01 | -0.008 | 0.003  | -0.009 | -0.008 | t | 39998  | LTKSGSTY<br>PVLNVT           | Homo<br>sapiens                  |
| 1 | 1.00 | 1 | 1 | 0.02  | 0.022  | 0.04   | 0.021  | 0.02   | t | 7833   | DDNGDRP<br>PEPAAQG<br>ESSTQK | Homo<br>sapiens                  |
| 1 | 1.00 | 1 | 1 | 0.02  | 0.022  | 0.04   | 0.021  | 0.02   | t | 7833   | DDNGDRP<br>PEPAAQG<br>ESSTQK | Homo<br>sapiens                  |
| 1 | 1.00 | 1 | 1 | -0.02 | -0.017 | 0      | -0.02  | -0.02  | t | 105232 | GSNKGAI<br>GLM               | Mus<br>musculu<br>s              |

|   |      |   |   |       |        |        |        |        |   |        |                              |                        |
|---|------|---|---|-------|--------|--------|--------|--------|---|--------|------------------------------|------------------------|
| 1 | 1.00 | 1 | 1 | -0.01 | -0.007 | -0.001 | -0.01  | -0.01  | t | 47294  | PEGRTWA<br>QPGYPWP<br>LYGNEG | Mus<br>musculu<br>s    |
| 1 | 1.00 | 1 | 1 | 0.01  | 0.012  | 0.012  | 0.013  | 0.015  | t | 23465  | GYSLFQKE<br>MKTLNEG<br>TSGTA | Aotus<br>nancyma<br>ae |
| 1 | 1.00 | 1 | 1 | -0.06 | -0.062 | -0.053 | -0.067 | -0.06  | t | 133788 | CRTSPWR<br>C                 | Mus<br>musculu<br>s    |
| 1 | 1.00 | 1 | 1 | -0.01 | -0.006 | -0.001 | -0.009 | -0.008 | t | 45603  | NQPGVHI<br>QVFEGERA<br>MTKDC | Homo<br>sapiens        |
| 1 | 1.00 | 1 | 1 | -0.02 | -0.022 | -0.006 | -0.017 | -0.019 | t | 75954  | YTASTRGD<br>LAHLTAT          | Mus<br>musculu<br>s    |
| 1 | 1.00 | 1 | 1 | 0     | -0.002 | 0      | -0.007 | 0.001  | t | 119560 | DLVLYNNA<br>DGDFAIVK         | Mus<br>musculu<br>s    |
| 1 | 1.00 | 1 | 1 | -0.02 | -0.016 | -0.011 | -0.02  | -0.018 | t | 60374  | SQAQKAA<br>KPAAAAT<br>GTATAA | Mus<br>musculu<br>s    |
| 1 | 1.00 | 1 | 1 | -0.02 | -0.016 | -0.011 | -0.02  | -0.018 | t | 60374  | SQAQKAA<br>KPAAAAT<br>GTATAA | Mus<br>musculu<br>s    |
| 1 | 1.00 | 1 | 1 | -0.02 | -0.016 | -0.011 | -0.02  | -0.018 | t | 60374  | SQAQKAA<br>KPAAAAT<br>GTATAA | Mus<br>musculu<br>s    |
| 1 | 1.00 | 1 | 1 | -0.02 | -0.018 | -0.013 | -0.021 | -0.021 | t | 69108  | VIRYRYSN<br>NYEANDHI<br>S    | Aotus<br>nancyma<br>ae |
| 1 | 1.00 | 1 | 1 | 0.03  | 0.025  | 0.056  | 0.029  | 0.03   | t | 47233  | PEADTDPL                     | Bos<br>taurus          |
| 1 | 1.00 | 1 | 1 | 0.03  | 0.032  | 0.056  | 0.029  | 0.03   | t | 47233  | PEADTDPL                     | Cavia<br>porcellu<br>s |
| 1 | 1.00 | 1 | 1 | 0.04  | 0.04   | 0.045  | 0.04   | 0.05   | t | 66391  | TSQPHT                       | Homo<br>sapiens        |

|   |      |   |   |       |        |        |        |        |   |        |                              |                             |
|---|------|---|---|-------|--------|--------|--------|--------|---|--------|------------------------------|-----------------------------|
| 1 | 1.00 | 1 | 1 | -0.04 | -0.038 | -0.018 | -0.039 | -0.04  | t | 18753  | GARSLTPC<br>TCGSSD           | Homo<br>sapiens             |
| 1 | 1.00 | 1 | 1 | -0.02 | -0.022 | -0.013 | -0.027 | -0.02  | t | 141581 | YVYRWVE<br>AECVA             | Mus<br>musculu<br>s         |
| 1 | 1.00 | 1 | 1 | -0.02 | -0.02  | -0.02  | -0.02  | -0.012 | t | 118127 | SDDDMGF<br>GLFD              | Homo<br>sapiens             |
| 1 | 1.00 | 1 | 1 | 0.01  | 0.015  | 0.027  | 0.01   | 0.011  | t | 88988  | SQDVNGP<br>RHVPNAE<br>PRET   | Aotus                       |
| 1 | 1.00 | 1 | 1 | 0     | 0.011  | 0.007  | 0.001  | 0.006  | t | 136317 | GGYVAGFL<br>PDPT             | Dicentra<br>rchus<br>labrax |
| 1 | 1.00 | 1 | 1 | -0.01 | -0.01  | 0.004  | -0.007 | -0.01  | t | 53178  | RAPRTGRR<br>LMALTEDT<br>SSDS | Homo<br>sapiens             |
| 1 | 1.00 | 1 | 1 | -0.03 | -0.03  | -0.03  | -0.023 | -0.02  | t | 143850 | DLTIMPW<br>SLYPP             | Homo<br>sapiens             |
| 1 | 1.00 | 1 | 1 | 0.01  | 0.01   | 0.011  | 0.006  | 0.01   | t | 15990  | FGGVSDE<br>DVPSFHFK<br>PPSSR | Homo<br>sapiens             |
| 1 | 1.00 | 1 | 1 | 0     | 0      | 0.017  | 0      | 0      | t | 96088  | ALESPEHC<br>SPHHTALR<br>QAIL | Homo<br>sapiens             |
| 1 | 1.00 | 1 | 1 | 0     | -0.004 | 0      | 0      | 0.007  | t | 61833  | STPPVPPP<br>SVSRRKP          | Mus<br>musculu<br>s         |
| 1 | 1.00 | 1 | 1 | 0     | -0.004 | 0      | 0      | 0.007  | t | 25806  | IEFQQKNN<br>RLLEITRE         | Mus<br>musculu<br>s         |
| 1 | 1.00 | 1 | 1 | 0     | 0.002  | 0.021  | 0.003  | -0.001 | t | 153885 | SEEEDEID<br>GPAGQAE<br>PDRAH | Cavia<br>porcellu<br>s      |
| 1 | 1.00 | 1 | 1 | 0     | 0      | 0      | 0      | 0.002  | t | 117968 | KVTWLVS<br>WTENIQG<br>SIKYIM | Homo<br>sapiens             |
| 1 | 1.00 | 1 | 1 | -0.02 | -0.02  | 0      | -0.017 | -0.02  | t | 53269  | RCESALHV<br>WVPPLLA          | Homo<br>sapiens             |
| 1 | 1.00 | 1 | 1 | -0.04 | -0.042 | -0.021 | -0.037 | -0.04  | t | 70527  | VQAPNYT<br>QHTSSMR<br>GVY    | Mus<br>musculu<br>s         |
| 1 | 1.00 | 1 | 1 | -0.05 | -0.05  | -0.039 | -0.05  | -0.05  | t | 141955 | LTYLRGIST<br>KVTVGNIIV       | Mus<br>musculu<br>s         |

|   |      |   |   |       |        |        |        |        |   |        |                              |                                  |
|---|------|---|---|-------|--------|--------|--------|--------|---|--------|------------------------------|----------------------------------|
| 1 | 1.00 | 1 | 1 | 0     | -0.002 | 0.009  | -0.007 | -0.002 | t | 141786 | YGEESRR<br>GDLAALAR<br>RV    | Mus<br>musculu<br>s              |
| 1 | 1.00 | 1 | 1 | -0.02 | -0.026 | 0.001  | -0.02  | -0.02  | t | 93665  | RANVVNLL                     | Oryctola<br>gus<br>cuniculu<br>s |
| 1 | 1.00 | 1 | 1 | -0.02 | -0.02  | -0.002 | -0.02  | -0.019 | t | 133642 | MCPEMSF<br>VAVHSCA<br>R      | Mus<br>musculu<br>s              |
| 1 | 1.00 | 1 | 1 | -0.04 | -0.042 | -0.018 | -0.039 | -0.04  | t | 98343  | PPPPRVQ<br>PRKTKSV           | Sus<br>scrofa                    |
| 1 | 1.00 | 1 | 1 | -0.06 | -0.057 | -0.051 | -0.06  | -0.06  | t | 113342 | DSYFRGAP<br>KLLYVRLS<br>HNSL | Mus<br>musculu<br>s              |
| 1 | 1.00 | 1 | 1 | 0.02  | 0.018  | 0.027  | 0.017  | 0.021  | t | 78021  | SVLFDKNR<br>GQEI             | Mus<br>musculu<br>s              |
| 1 | 1.00 | 1 | 1 | -0.04 | -0.04  | -0.03  | -0.04  | -0.04  | t | 914    | AEGCVGR<br>VCDSRAM<br>AVM    | Mus<br>musculu<br>s              |
| 1 | 1.00 | 1 | 1 | -0.01 | -0.01  | -0.001 | -0.01  | -0.008 | t | 133580 | GFLSSCNF<br>RFCELVR          | Mus<br>musculu<br>s              |
| 1 | 1.00 | 1 | 1 | -0.07 | -0.066 | -0.063 | -0.07  | -0.068 | t | 108551 | NDSLNTGF<br>LAFLFYTKK        | Capra<br>hircus                  |
| 1 | 1.00 | 1 | 1 | 0.02  | 0.02   | 0.045  | 0.017  | 0.021  | t | 45279  | NNVDQI                       | Homo<br>sapiens                  |
| 1 | 1.00 | 1 | 1 | 0     | 0.008  | 0.007  | 0      | -0.002 | t | 75372  | YPNQVYYR<br>PVDRYSN<br>QNNFV | Gallus<br>gallus                 |
| 1 | 1.00 | 1 | 1 | -0.02 | -0.015 | 0.003  | -0.023 | -0.022 | t | 70236  | VPAAKIPT<br>GELQI            | Homo<br>sapiens                  |
| 1 | 1.00 | 1 | 1 | 0     | -0.002 | 0.007  | -0.007 | -0.001 | t | 144809 | VLAPGGT<br>HSRGLLE<br>M      | Mus<br>musculu<br>s              |
| 1 | 1.00 | 1 | 1 | -0.03 | -0.024 | -0.023 | -0.031 | -0.025 | t | 131276 | WHEAQPS<br>PGLLR             | Homo<br>sapiens                  |

|   |      |   |   |       |        |        |        |        |   |        |                              |                                  |
|---|------|---|---|-------|--------|--------|--------|--------|---|--------|------------------------------|----------------------------------|
| 1 | 1.00 | 1 | 1 | -0.06 | -0.06  | -0.053 | -0.06  | -0.057 | t | 125248 | RVPPRYHA<br>KISPMVN          | Mus<br>musculu<br>s              |
| 1 | 1.00 | 1 | 1 | -0.02 | -0.021 | -0.019 | -0.023 | -0.019 | t | 99778  | WRRPSHQ<br>QPRKIRPE          | Homo<br>sapiens                  |
| 1 | 1.00 | 1 | 1 | -0.04 | -0.04  | -0.029 | -0.04  | -0.041 | t | 141980 | PLDRRIEA<br>QRLDRKHI         | Mus<br>musculu<br>s              |
| 1 | 1.00 | 1 | 1 | 0.01  | 0.013  | 0.018  | 0.01   | 0.012  | t | 38374  | LNWGRIS<br>NVLPEYRG<br>EAGV  | Mus<br>musculu<br>s              |
| 1 | 1.00 | 1 | 1 | -0.04 | -0.044 | -0.023 | -0.037 | -0.038 | t | 12900  | EKVSRRSN<br>FEF              | Oryctola<br>gus<br>cuniculu<br>s |
| 1 | 1.00 | 1 | 1 | -0.02 | -0.016 | 0      | -0.023 | -0.022 | t | 157228 | FAVVKRAR<br>DEGF             | Homo<br>sapiens                  |
| 1 | 1.00 | 1 | 1 | -0.01 | -0.008 | -0.003 | -0.013 | -0.007 | t | 51258  | QKTAASY                      | Homo<br>sapiens                  |
| 1 | 1.00 | 1 | 1 | 0.03  | 0.028  | 0.037  | 0.023  | 0.033  | t | 117640 | SFEYFPSHF<br>FVPELEVTI<br>IC | Mus<br>musculu<br>s              |
| 1 | 1.00 | 1 | 1 | -0.04 | -0.038 | -0.028 | -0.043 | -0.039 | t | 107239 | SPPLQCSQ<br>YPNSLRC          | Homo<br>sapiens                  |
| 1 | 1.00 | 1 | 1 | -0.02 | -0.02  | 0      | -0.02  | -0.02  | t | 151072 | YDDVNGIR<br>RP               | Mus<br>musculu<br>s              |
| 1 | 1.00 | 1 | 1 | -0.04 | -0.042 | -0.055 | -0.047 | -0.039 | t | 103842 | DEPNGAIR<br>FTMGYQH          | Sus<br>scrofa                    |
| 1 | 1.00 | 1 | 1 | 0     | -0.006 | 0.006  | -0.001 | 0.003  | t | 134637 | AIKDNRAV<br>HA               | Oryctola<br>gus<br>cuniculu<br>s |
| 1 | 1.00 | 1 | 1 | -0.01 | -0.01  | -0.005 | -0.01  | -0.009 | t | 133551 | EAPPPTLP<br>PDMAQVT<br>VGPG  | Mus<br>musculu<br>s              |
| 1 | 1.00 | 1 | 1 | -0.03 | -0.03  | -0.03  | -0.03  | -0.03  | t | 109917 | SHQESTRG<br>RSRGRSGR<br>SGS  | Homo<br>sapiens                  |
| 1 | 1.00 | 1 | 1 | 0.05  | 0.05   | 0.055  | 0.047  | 0.055  | t | 23530  | HAFCHEEG                     | Homo<br>sapiens                  |



|   |      |   |   |       |        |        |        |        |   |        |                              |                                  |
|---|------|---|---|-------|--------|--------|--------|--------|---|--------|------------------------------|----------------------------------|
| 1 | 1.00 | 1 | 1 | -0.03 | -0.033 | -0.016 | -0.03  | -0.03  | t | 120404 | AMMIARF<br>KMFPEVKE<br>K     | Oryctola<br>gus<br>cuniculu<br>s |
| 1 | 1.00 | 1 | 1 | 0.01  | 0.01   | 0.021  | 0.013  | 0.01   | t | 55769  | RRVVRHEP<br>LGRSFLTG<br>GLVL | Homo<br>sapiens                  |
| 1 | 1.00 | 1 | 1 | 0.03  | 0.032  | 0.03   | 0.037  | 0.04   | t | 108086 | QTRGFPSC<br>ERGYLSP          | Homo<br>sapiens                  |
| 1 | 1.00 | 1 | 1 | -0.04 | -0.037 | -0.015 | -0.04  | -0.04  | t | 65026  | TLQNQGA<br>W                 | Anas<br>platyrhy<br>nchos        |
| 1 | 1.00 | 1 | 1 | 0.01  | 0.01   | 0.017  | 0.003  | 0.011  | t | 140695 | KGRFTISR<br>DNAKSTLY<br>L    | Mus<br>musculu<br>s              |
| 1 | 1.00 | 1 | 1 | -0.01 | -0.008 | 0.006  | -0.009 | -0.01  | t | 70109  | VNKNTLQ<br>ARQQTVS<br>A      | Homo<br>sapiens                  |
| 1 | 1.00 | 1 | 1 | -0.01 | -0.006 | 0.015  | -0.003 | -0.01  | t | 130808 | ENEPPVW<br>TTESKLQS          | Homo<br>sapiens                  |
| 1 | 1.00 | 1 | 1 | 0     | 0      | 0.023  | 0.003  | 0.002  | t | 53478  | REDVTFQV<br>GLNQYL           | Homo<br>sapiens                  |
| 1 | 1.00 | 1 | 1 | -0.01 | -0.012 | 0.008  | -0.007 | -0.008 | t | 113373 | EQFNWVS<br>RLANLTQG<br>EDQYY | Mus<br>musculu<br>s              |
| 1 | 1.00 | 1 | 1 | -0.01 | -0.012 | 0.008  | -0.007 | -0.008 | t | 113373 | EQFNWVS<br>RLANLTQG<br>EDQYY | Mus<br>musculu<br>s              |
| 1 | 1.00 | 1 | 1 | 0.01  | 0.013  | 0.023  | 0.01   | 0.011  | t | 19894  | GGIYYPYDI<br>YYPYDIYYP<br>YD | Mus<br>musculu<br>s              |
| 1 | 1.00 | 1 | 1 | -0.01 | -0.014 | -0.01  | -0.017 | -0.01  | t | 128340 | ATPKKSAK<br>KTPKKAKK         | Oryctola<br>gus<br>cuniculu<br>s |
| 1 | 1.00 | 1 | 1 | -0.07 | -0.067 | -0.048 | -0.07  | -0.07  | t | 30953  | KGHVILRK<br>RV               | Mus<br>musculu<br>s              |

|   |      |   |   |       |        |        |        |        |   |        |                              |                      |
|---|------|---|---|-------|--------|--------|--------|--------|---|--------|------------------------------|----------------------|
| 1 | 1.00 | 1 | 1 | 0.02  | 0.022  | 0.032  | 0.023  | 0.03   | t | 12198  | EGIIYKT                      | Homo sapiens         |
| 1 | 1.00 | 1 | 1 | -0.04 | -0.036 | -0.018 | -0.039 | -0.038 | t | 13458  | ENDIRV                       | Homo sapiens         |
| 1 | 1.00 | 1 | 1 | 0.01  | 0.011  | 0.026  | 0.01   | 0.01   | t | 7885   | DDVNKNT<br>LQARQQT           | Myodes glareolu<br>s |
| 1 | 1.00 | 1 | 1 | 0.02  | 0.022  | 0.038  | 0.019  | 0.02   | t | 99824  | ITQSTQSF<br>N                | Homo sapiens         |
| 1 | 1.00 | 1 | 1 | -0.05 | -0.05  | -0.037 | -0.05  | -0.05  | t | 63967  | TGSQDFFV<br>RSIG             | Mus musculu<br>s     |
| 1 | 1.00 | 1 | 1 | -0.05 | -0.05  | -0.037 | -0.05  | -0.05  | t | 63967  | TGSQDFFV<br>RSIG             | Mus musculu<br>s     |
| 1 | 1.00 | 1 | 1 | 0     | 0      | 0.016  | 0.002  | 0      | t | 34135  | KVNFPHG<br>MLDLEEIA<br>ANSKD | Homo sapiens         |
| 1 | 1.00 | 1 | 1 | 0     | 0      | 0      | 0      | 0.007  | t | 151731 | SAQSQRA<br>PDR               | Mus musculu<br>s     |
| 1 | 1.00 | 1 | 1 | 0     | 0      | 0      | 0      | 0.007  | t | 134471 | PKPEQ                        | Mus musculu<br>s     |
| 1 | 1.00 | 1 | 1 | 0     | 0      | 0      | 0      | 0.007  | t | 151813 | CGADSYE<br>MEEDGVR<br>KC     | Mus musculu<br>s     |
| 1 | 1.00 | 1 | 1 | 0     | 0      | 0      | 0      | 0.007  | t | 133698 | SLLTEVETP<br>IRNEWG          | Mus musculu<br>s     |
| 1 | 1.00 | 1 | 1 | 0     | 0      | 0      | 0      | 0.007  | t | 6479   | CKGKIQAL<br>CENPEWA          | Mus musculu<br>s     |
| 1 | 1.00 | 1 | 1 | 0     | 0      | 0      | 0      | 0.007  | t | 4429   | ASGQ                         | Mus musculu<br>s     |
| 1 | 1.00 | 1 | 1 | -0.05 | -0.051 | -0.046 | -0.05  | -0.049 | t | 99134  | DAEFRHDS<br>GYEVHHQ          | Canis lupus          |

|   |      |   |   |       |        |        |        |        |   |        |                              |                                  |
|---|------|---|---|-------|--------|--------|--------|--------|---|--------|------------------------------|----------------------------------|
| 1 | 1.00 | 1 | 1 | -0.02 | -0.017 | 0.002  | -0.02  | -0.02  | t | 66862  | TTTKPTKK<br>PTFK             | Mus<br>musculu<br>s              |
| 1 | 1.00 | 1 | 1 | -0.01 | -0.012 | 0.012  | -0.01  | -0.01  | t | 98229  | LPSLAGW<br>WSSASDW<br>F      | Sus<br>scrofa                    |
| 1 | 1.00 | 1 | 1 | -0.02 | -0.02  | -0.017 | -0.02  | -0.018 | t | 73790  | YEVNRVSG<br>VYHVTN           | Homo<br>sapiens                  |
| 1 | 1.00 | 1 | 1 | -0.03 | -0.028 | -0.011 | -0.027 | -0.027 | t | 23032  | GVLAKDV<br>RFSQV             | Homo<br>sapiens                  |
| 1 | 1.00 | 1 | 1 | 0     | 0      | 0.016  | 0      | 0.001  | t | 13523  | ENMNRYP<br>NQVYY             | Mus<br>musculu<br>s              |
| 1 | 1.00 | 1 | 1 | -0.02 | -0.02  | 0      | -0.02  | -0.019 | t | 79528  | CPSKKPYE<br>EVTC             | Mus<br>musculu<br>s              |
| 1 | 1.00 | 1 | 1 | 0.04  | 0.038  | 0.047  | 0.033  | 0.041  | t | 144756 | QVGTHPG<br>LANDYEYT          | Mus<br>musculu<br>s              |
| 1 | 1.00 | 1 | 1 | -0.02 | -0.016 | 0.003  | -0.02  | -0.02  | t | 48947  | PPWDFDA<br>GEGIH             | Mus<br>musculu<br>s              |
| 1 | 1.00 | 1 | 1 | -0.03 | -0.027 | -0.018 | -0.031 | -0.031 | t | 88469  | SEDRETRP<br>HGRNNM<br>NFVYNR | Aotus                            |
| 1 | 1.00 | 1 | 1 | -0.01 | -0.012 | 0.004  | -0.007 | -0.007 | t | 75954  | YTASTRGD<br>LAHLTAT          | Mus<br>musculu<br>s              |
| 1 | 1.00 | 1 | 1 | -0.03 | -0.03  | -0.023 | -0.03  | -0.027 | t | 108200 | VSLGKWL<br>GHPDKF            | Mus<br>musculu<br>s              |
| 1 | 1.00 | 1 | 1 | 0     | 0.004  | 0.027  | 0      | -0.002 | t | 14778  | EVLYHMPL<br>AGVYRALK<br>KQLE | Aotus<br>nancyma<br>ae           |
| 1 | 1.00 | 1 | 1 | 0.01  | 0.006  | 0.008  | 0.003  | 0.011  | t | 119649 | SYCEIIVTH<br>FPFDQQN<br>CT   | Oryctola<br>gus<br>cuniculu<br>s |

|   |      |   |   |       |        |        |        |        |   |        |                              |                                  |
|---|------|---|---|-------|--------|--------|--------|--------|---|--------|------------------------------|----------------------------------|
| 1 | 1.00 | 1 | 1 | -0.02 | -0.018 | -0.016 | -0.017 | -0.018 | t | 30332  | KEDTSFGG<br>NLGRAVF<br>QAKKR | Homo<br>sapiens                  |
| 1 | 1.00 | 1 | 1 | -0.1  | -0.1   | -0.1   | -0.1   | -0.097 | t | 117231 | RQIFGDYK<br>TTICGK           | Mus<br>musculu<br>s              |
| 1 | 1.00 | 1 | 1 | 0.01  | 0.008  | 0.01   | 0.003  | 0.012  | t | 126900 | QVAALTW<br>VQTHIRGF<br>GGD   | Mus<br>musculu<br>s              |
| 1 | 1.00 | 1 | 1 | 0.02  | 0.017  | 0.045  | 0.02   | 0.017  | t | 46084  | NTEPSQLP<br>PTA              | Oryctola<br>gus<br>cuniculu<br>s |
| 1 | 1.00 | 1 | 1 | 0.06  | 0.064  | 0.073  | 0.057  | 0.06   | t | 71285  | VTEEIVTEE<br>IVTEEI          | Homo<br>sapiens                  |
| 1 | 1.00 | 1 | 1 | -0.02 | -0.024 | -0.017 | -0.027 | -0.02  | t | 34809  | LAHRRIPP<br>ENIR             | Oryctola<br>gus<br>cuniculu<br>s |
| 1 | 1.00 | 1 | 1 | -0.03 | -0.032 | -0.014 | -0.029 | -0.029 | t | 75047  | YMDTQTT<br>LPIMW             | Homo<br>sapiens                  |
| 1 | 1.00 | 1 | 1 | 0.03  | 0.03   | 0.024  | 0.03   | 0.034  | t | 76584  | YYQSGLSI<br>VMPVGG<br>QSSFYS | Mus<br>musculu<br>s              |
| 1 | 1.00 | 1 | 1 | -0.01 | -0.008 | 0.018  | -0.008 | -0.01  | t | 48479  | PLSLRSK                      | Homo<br>sapiens                  |
| 1 | 1.00 | 1 | 1 | -0.03 | -0.034 | -0.013 | -0.033 | -0.032 | t | 49795  | PTTRTDDK<br>LR               | Oryctola<br>gus<br>cuniculu<br>s |
| 1 | 1.00 | 1 | 1 | -0.02 | -0.017 | -0.003 | -0.02  | -0.018 | t | 62957  | TAPSSISLI<br>HAR             | Mus<br>musculu<br>s              |
| 1 | 1.00 | 1 | 1 | 0.04  | 0.04   | 0.068  | 0.04   | 0.04   | t | 102004 | QPD                          | Mus<br>musculu<br>s              |
| 1 | 1.00 | 1 | 1 | -0.04 | -0.043 | -0.035 | -0.043 | -0.038 | t | 108599 | QGDAKKG<br>ANLFKTRC          | Homo<br>sapiens                  |
| 1 | 1.00 | 1 | 1 | -0.01 | -0.008 | -0.006 | -0.01  | -0.008 | t | 27724  | INQAIDNI<br>NNFINGCS<br>VSY  | Homo<br>sapiens                  |

|   |      |   |   |       |        |        |        |        |   |        |                              |                                  |
|---|------|---|---|-------|--------|--------|--------|--------|---|--------|------------------------------|----------------------------------|
| 1 | 1.00 | 1 | 1 | -0.03 | -0.027 | 0      | -0.03  | -0.031 | t | 63832  | TGGAGYFY                     | Equus<br>caballus                |
| 1 | 1.00 | 1 | 1 | 0.03  | 0.028  | 0.038  | 0.029  | 0.032  | t | 29752  | KAALIEEG<br>QRMAEM           | Homo<br>sapiens                  |
| 1 | 1.00 | 1 | 1 | -0.02 | -0.02  | -0.006 | -0.02  | -0.022 | t | 46795  | PAFLGCCS<br>RFSGSFSG<br>VEP  | Mus<br>musculu<br>s              |
| 1 | 1.00 | 1 | 1 | 0.03  | 0.032  | 0.03   | 0.037  | 0.04   | t | 108082 | QKTTTRPY<br>PNLQIDP          | Homo<br>sapiens                  |
| 1 | 1.00 | 1 | 1 | -0.03 | -0.032 | -0.013 | -0.027 | -0.03  | t | 75863  | YSPSRFSFY<br>FYPFRL          | Mus<br>musculu<br>s              |
| 1 | 1.00 | 1 | 1 | 0.02  | 0.02   | 0.034  | 0.017  | 0.02   | t | 68322  | VEQKHIQK<br>EDVPSERY<br>LGYL | Homo<br>sapiens                  |
| 1 | 1.00 | 1 | 1 | -0.01 | -0.008 | 0.003  | -0.009 | -0.011 | t | 9677   | DPLTSLHA<br>MQRR             | Homo<br>sapiens                  |
| 1 | 1.00 | 1 | 1 | -0.06 | -0.062 | -0.053 | -0.061 | -0.06  | t | 19049  | GDLVGPG<br>CAEYAAA<br>NPTGPA | Mus<br>musculu<br>s              |
| 1 | 1.00 | 1 | 1 | 0     | -0.004 | 0.015  | -0.001 | 0      | t | 9979   | DRGWGN<br>GC                 | Oryctola<br>gus<br>cuniculu<br>s |
| 1 | 1.00 | 1 | 1 | 0.03  | 0.028  | 0.047  | 0.027  | 0.027  | t | 110794 | CDDDDDN<br>DGVPSDR<br>DNCRLV | Mus<br>musculu<br>s              |
| 1 | 1.00 | 1 | 1 | 0.01  | 0.012  | 0.017  | 0.017  | 0.02   | t | 108269 | AKYSNQR<br>AQ                | Homo<br>sapiens                  |
| 1 | 1.00 | 1 | 1 | 0.03  | 0.028  | 0.05   | 0.029  | 0.032  | t | 6979   | CSDTIDAG<br>KD               | Mus<br>musculu<br>s              |
| 1 | 1.00 | 1 | 1 | 0.03  | 0.032  | 0.05   | 0.029  | 0.032  | t | 6979   | CSDTIDAG<br>KD               | MD                               |
| 1 | 1.00 | 1 | 1 | 0     | -0.002 | 0.01   | 0.001  | 0.002  | t | 149530 | YDCNTAAT<br>DATRWQI          | Mus<br>musculu<br>s              |

|   |      |   |   |       |        |        |        |        |   |        |                              |                     |
|---|------|---|---|-------|--------|--------|--------|--------|---|--------|------------------------------|---------------------|
| 1 | 1.00 | 1 | 1 | 0.03  | 0.03   | 0.047  | 0.03   | 0.031  | t | 120849 | NSQPEILE<br>RTRAELD          | Mus<br>musculu<br>s |
| 1 | 1.00 | 1 | 1 | 0     | 0      | -0.01  | 0.006  | 0.009  | t | 138886 | NVGGDNV<br>DIHSIVPV<br>GQDPH | Mus<br>musculu<br>s |
| 1 | 1.00 | 1 | 1 | -0.02 | -0.016 | -0.013 | -0.02  | -0.019 | t | 52813  | QVVVMKS<br>KNDQGIT<br>NKCKM  | Homo<br>sapiens     |
| 1 | 1.00 | 1 | 1 | 0.01  | 0.006  | 0.028  | 0.01   | 0.01   | t | 93568  | PGEATETV<br>PATEQEL          | Mus<br>musculu<br>s |
| 1 | 1.00 | 1 | 1 | -0.05 | -0.05  | -0.024 | -0.048 | -0.05  | t | 5059   | ATMPCLS<br>HPSVCKHL<br>Y     | Homo<br>sapiens     |
| 1 | 1.00 | 1 | 1 | -0.02 | -0.02  | -0.006 | -0.02  | -0.02  | t | 133542 | DGRRDVV<br>VRSATFYL          | Mus<br>musculu<br>s |
| 1 | 1.00 | 1 | 1 | 0.01  | 0.012  | 0.019  | 0.007  | 0.01   | t | 67924  | VDDRQIV<br>QNLRGETE          | Homo<br>sapiens     |
| 1 | 1.00 | 1 | 1 | -0.07 | -0.064 | -0.063 | -0.07  | -0.068 | t | 99869  | ACSDRFLR<br>RPMCLPP<br>HVVFL | Ovis<br>aries       |
| 1 | 1.00 | 1 | 1 | -0.02 | -0.02  | -0.006 | -0.02  | -0.02  | t | 120744 | LDTLLVDV<br>EPKVKSK          | Mus<br>musculu<br>s |
| 1 | 1.00 | 1 | 1 | 0     | 0      | 0      | 0      | 0.009  | t | 40858  | LYMPQLS                      | Mus<br>musculu<br>s |
| 1 | 1.00 | 1 | 1 | 0.03  | 0.033  | 0.059  | 0.03   | 0.029  | t | 141685 | KKTEETTLL<br>EDR             | Mus<br>musculu<br>s |
| 1 | 1.00 | 1 | 1 | 0     | 0.005  | 0.023  | -0.003 | -0.002 | t | 13661  | EPIAPYHF<br>DLSGH            | Homo<br>sapiens     |
| 1 | 1.00 | 1 | 1 | -0.02 | -0.017 | -0.013 | -0.02  | -0.018 | t | 17539  | FQTAAQR                      | Mus<br>musculu<br>s |
| 1 | 1.00 | 1 | 1 | -0.02 | -0.017 | -0.013 | -0.02  | -0.018 | t | 17539  | FQTAAQR                      | Mus<br>musculu<br>s |

|   |      |   |   |       |        |        |        |        |   |        |                             |                                  |
|---|------|---|---|-------|--------|--------|--------|--------|---|--------|-----------------------------|----------------------------------|
| 1 | 1.00 | 1 | 1 | -0.01 | -0.011 | -0.01  | -0.01  | 0      | t | 17256  | FPAHPLPR<br>LPSL            | Mus<br>musculu<br>s              |
| 1 | 1.00 | 1 | 1 | -0.02 | -0.02  | -0.009 | -0.02  | -0.021 | t | 46444  | NVPEKQT<br>RGIFGAIA<br>GFIE | Mus<br>musculu<br>s              |
| 1 | 1.00 | 1 | 1 | -0.02 | -0.017 | -0.02  | -0.02  | -0.011 | t | 131151 | WTELDDV<br>KR               | Mus<br>musculu<br>s              |
| 1 | 1.00 | 1 | 1 | 0     | -0.002 | 0      | -0.007 | 0.003  | t | 109917 | SHQESTRG<br>RSRGRSGR<br>SGS | Mus<br>musculu<br>s              |
| 1 | 1.00 | 1 | 1 | 0.02  | 0.018  | 0.017  | 0.013  | 0.022  | t | 119655 | TTEAVVAD<br>KPEKEKA         | Rattus<br>norvegic<br>us         |
| 1 | 1.00 | 1 | 1 | -0.01 | -0.006 | 0.017  | -0.007 | -0.011 | t | 62353  | SVTEEIAEE<br>DKSVTEEI<br>AV | Homo<br>sapiens                  |
| 1 | 1.00 | 1 | 1 | 0     | -0.004 | 0.024  | 0.003  | 0      | t | 45160  | NNLEDPAS<br>RDLVVNYV        | Oryctola<br>gus<br>cuniculu<br>s |
| 1 | 1.00 | 1 | 1 | -0.02 | -0.02  | 0.005  | -0.02  | -0.02  | t | 105078 | AFNHFGIQ<br>LVQR            | Homo<br>sapiens                  |
| 1 | 1.00 | 1 | 1 | -0.02 | -0.022 | -0.008 | -0.02  | -0.019 | t | 141105 | WEISQASH<br>YFERHLE         | Oryctola<br>gus<br>cuniculu<br>s |
| 1 | 1.00 | 1 | 1 | -0.01 | -0.01  | -0.01  | -0.014 | -0.009 | t | 119579 | FKDYSSVV<br>RPVEDHR<br>Q    | Homo<br>sapiens                  |
| 1 | 1.00 | 1 | 1 | -0.05 | -0.05  | -0.038 | -0.05  | -0.048 | t | 58001  | SGDVVRFP<br>NITNLCPF<br>G   | Homo<br>sapiens                  |
| 1 | 1.00 | 1 | 1 | 0.02  | 0.023  | 0.045  | 0.02   | 0.02   | t | 31558  | KKGSSIGQ<br>M               | Mus<br>musculu<br>s              |
| 1 | 1.00 | 1 | 1 | -0.03 | -0.03  | -0.004 | -0.03  | -0.028 | t | 128145 | WRLGPYV                     | Mus<br>musculu<br>s              |
| 1 | 1.00 | 1 | 1 | -0.01 | -0.01  | -0.005 | -0.013 | -0.009 | t | 56496  | RWWQHR<br>PSHTPS            | Homo<br>sapiens                  |

|   |      |   |   |       |        |        |        |        |   |        |                                  |                                  |
|---|------|---|---|-------|--------|--------|--------|--------|---|--------|----------------------------------|----------------------------------|
| 1 | 1.00 | 1 | 1 | 0     | -0.002 | 0.008  | -0.001 | 0      | t | 8388   | DGGGGHS<br>HDSGHGG<br>GD         | Mus<br>musculu<br>s              |
| 1 | 1.00 | 1 | 1 | -0.02 | -0.013 | -0.006 | -0.02  | -0.021 | t | 20063  | GGVAGLF<br>KMGSQQK<br>L          | Mus<br>musculu<br>s              |
| 1 | 1.00 | 1 | 1 | 0     | 0      | 0      | 0      | 0.009  | t | 132929 | WGNNY<br>M                       | Homo<br>sapiens                  |
| 1 | 1.00 | 1 | 1 | -0.03 | -0.032 | -0.023 | -0.037 | -0.031 | t | 118678 | WPLHDGG<br>AVNRR                 | Mus<br>musculu<br>s              |
| 1 | 1.00 | 1 | 1 | -0.01 | -0.006 | 0.002  | -0.009 | -0.008 | t | 50744  | QFDEMEE<br>CSASLPYM<br>DETRA     | Homo<br>sapiens                  |
| 1 | 1.00 | 1 | 1 | -0.01 | -0.012 | 0.004  | -0.011 | -0.01  | t | 61400  | SSTKSSSPS<br>NVKSAS              | Mus<br>musculu<br>s              |
| 1 | 1.00 | 1 | 1 | -0.05 | -0.048 | -0.038 | -0.05  | -0.05  | t | 100332 | NHRIVQIE<br>AKPNTLV<br>L<br>PKHA | Homo<br>sapiens                  |
| 1 | 1.00 | 1 | 1 | -0.01 | -0.014 | -0.001 | -0.011 | -0.01  | t | 48672  | PNLSAYPK<br>SHGKTAK              | Oryctola<br>gus<br>cuniculu<br>s |
| 1 | 1.00 | 1 | 1 | 0.03  | 0.03   | 0.051  | 0.03   | 0.03   | t | 21313  | GMMLAE<br>QFKQKAL<br>GLLQTAS     | Homo<br>sapiens                  |
| 1 | 1.00 | 1 | 1 | 0.01  | 0.008  | 0.03   | 0.009  | 0.011  | t | 56734  | SADNNNS<br>EYSWT                 | Mus<br>musculu<br>s              |
| 1 | 1.00 | 1 | 1 | -0.01 | -0.014 | -0.016 | -0.017 | -0.01  | t | 59231  | SLKMADP<br>NRFRGKNL<br>P         | Oryctola<br>gus<br>cuniculu<br>s |
| 1 | 1.00 | 1 | 1 | -0.01 | -0.012 | -0.016 | -0.017 | -0.01  | t | 59231  | SLKMADP<br>NRFRGKNL<br>P         | Mus<br>musculu<br>s              |
| 1 | 1.00 | 1 | 1 | -0.01 | -0.01  | -0.002 | -0.01  | -0.008 | t | 17408  | FPSPYYSP<br>AFTKGEKV<br>DL       | Mus<br>musculu<br>s              |
| 1 | 1.00 | 1 | 1 | 0     | 0      | 0.019  | -0.001 | 0.001  | t | 41826  | MKHM                             | Mus<br>musculu<br>s              |



|   |      |   |   |       |        |        |        |        |   |        |                      |                   |
|---|------|---|---|-------|--------|--------|--------|--------|---|--------|----------------------|-------------------|
| 1 | 1.00 | 1 | 1 | 0.01  | 0.01   | 0      | 0.01   | 0.022  | t | 78323  | YSFRD                | Mus musculus      |
| 1 | 1.00 | 1 | 1 | -0.04 | -0.042 | -0.038 | -0.047 | -0.04  | t | 117609 | PVQLETLSIRGNNIR      | Mus musculus      |
| 1 | 1.00 | 1 | 1 | 0     | 0.003  | 0.017  | 0.003  | 0      | t | 110834 | EQLKGQGKSRLGDLYEEEMR | Mus musculus      |
| 1 | 1.00 | 1 | 1 | 0     | 0.002  | 0.015  | -0.003 | 0      | t | 43326  | NATPQLTKNAGV         | Homo sapiens      |
| 1 | 1.00 | 1 | 1 | -0.01 | -0.01  | 0.01   | -0.01  | -0.01  | t | 51264  | QKTYNYNVLM           | Homo sapiens      |
| 1 | 1.00 | 1 | 1 | -0.02 | -0.018 | -0.01  | -0.023 | -0.02  | t | 24414  | HNTVPSLWYHNR         | Homo sapiens      |
| 1 | 1.00 | 1 | 1 | -0.01 | -0.002 | 0.008  | -0.01  | -0.01  | t | 47134  | PDKQDYQIRMAKSS       | Gallus gallus     |
| 1 | 1.00 | 1 | 1 | -0.03 | -0.03  | -0.018 | -0.03  | -0.03  | t | 42929  | MVDRGWGNGCGL         | Homo sapiens      |
| 1 | 1.00 | 1 | 1 | 0.01  | 0.01   | 0.01   | 0.01   | 0.02   | t | 132469 | LYWFTLYQFFLA         | Homo sapiens      |
| 1 | 1.00 | 1 | 1 | -0.06 | -0.06  | -0.041 | -0.06  | -0.06  | t | 38010  | LMDPVFGFDRRVPVV      | Mus musculus      |
| 1 | 1.00 | 1 | 1 | -0.05 | -0.048 | -0.048 | -0.05  | -0.049 | t | 137774 | YRNKQKEFMERRRATVDTYC | Rattus norvegicus |
| 1 | 1.00 | 1 | 1 | -0.01 | -0.01  | -0.008 | -0.013 | -0.009 | t | 69953  | VMGDDGVLACAIAT       | Homo sapiens      |
| 1 | 1.00 | 1 | 1 | -0.03 | -0.026 | -0.012 | -0.027 | -0.028 | t | 49756  | PTPVNPSTAPAPAPT      | Homo sapiens      |

|   |      |   |   |       |        |        |        |        |   |        |                              |                 |
|---|------|---|---|-------|--------|--------|--------|--------|---|--------|------------------------------|-----------------|
| 1 | 1.00 | 1 | 1 | -0.06 | -0.06  | -0.06  | -0.06  | -0.056 | t | 140940 | YRQKVEPL<br>RAEL             | Mus<br>musculus |
| 1 | 1.00 | 1 | 1 | 0.03  | 0.034  | 0.052  | 0.031  | 0.03   | t | 81709  | ENDYSAN<br>GGT               | Homo<br>sapiens |
| 1 | 1.00 | 1 | 1 | -0.03 | -0.028 | -0.018 | -0.029 | -0.028 | t | 66051  | TRLENLM<br>WK                | Homo<br>sapiens |
| 1 | 1.00 | 1 | 1 | -0.01 | -0.01  | -0.012 | -0.01  | 0      | t | 77882  | GFKETSPT<br>GLRW             | Mus<br>musculus |
| 1 | 1.00 | 1 | 1 | 0.01  | 0.012  | 0.012  | 0.011  | 0.012  | t | 46999  | PAVVPDRE<br>VLYQEFDE<br>MEEC | Homo<br>sapiens |
| 1 | 1.00 | 1 | 1 | 0.01  | 0.01   | 0.024  | 0.01   | 0.011  | t | 76195  | YTTSTRGD<br>LAHVTAT          | Mus<br>musculus |
| 1 | 1.00 | 1 | 1 | 0.03  | 0.03   | 0.039  | 0.032  | 0.036  | t | 138192 | HQTPLST                      | Homo<br>sapiens |
| 1 | 1.00 | 1 | 1 | -0.01 | -0.006 | 0.002  | -0.009 | -0.008 | t | 4498   | ASKAALIEE<br>GQRMAE<br>MLKSK | Homo<br>sapiens |
| 1 | 1.00 | 1 | 1 | 0     | -0.002 | 0.007  | -0.007 | 0.001  | t | 144820 | YLEDWIKY<br>NNQK             | Mus<br>musculus |
| 1 | 1.00 | 1 | 1 | -0.03 | -0.026 | -0.008 | -0.029 | -0.03  | t | 66029  | TRGLASL                      | Homo<br>sapiens |
| 1 | 1.00 | 1 | 1 | 0.01  | 0.01   | 0.005  | 0.01   | 0.014  | t | 36746  | LIVKVMN<br>NEEIPNTK<br>ATIDQ | Mus<br>musculus |
| 1 | 1.00 | 1 | 1 | -0.02 | -0.02  | 0.002  | -0.02  | -0.02  | t | 32486  | KNEVFC                       | Homo<br>sapiens |
| 1 | 1.00 | 1 | 1 | -0.04 | -0.04  | -0.035 | -0.04  | -0.035 | t | 105207 | GAIIGLMV<br>GGVIA            | Mus<br>musculus |
| 1 | 1.00 | 1 | 1 | -0.02 | -0.018 | -0.002 | -0.023 | -0.02  | t | 50938  | QGPLPNT<br>ALL               | Homo<br>sapiens |

|   |      |   |   |       |        |        |        |        |   |        |                           |                                  |
|---|------|---|---|-------|--------|--------|--------|--------|---|--------|---------------------------|----------------------------------|
| 1 | 1.00 | 1 | 1 | 0.02  | 0.02   | 0.03   | 0.02   | 0.02   | t | 71189  | VSVITPGT<br>NASSEVAV<br>L | Homo<br>sapiens                  |
| 1 | 1.00 | 1 | 1 | -0.09 | -0.092 | -0.083 | -0.09  | -0.089 | t | 142484 | WRMAGQ<br>KRTSGR          | Mus<br>musculu<br>s              |
| 1 | 1.00 | 1 | 1 | -0.02 | -0.017 | -0.02  | -0.02  | -0.01  | t | 6276   | CGAVIDDC                  | Mus<br>musculu<br>s              |
| 1 | 1.00 | 1 | 1 | -0.04 | -0.036 | -0.021 | -0.039 | -0.04  | t | 33414  | KSLKNINR<br>P             | Homo<br>sapiens                  |
| 1 | 1.00 | 1 | 1 | 0.01  | 0.01   | 0.023  | 0.01   | 0.012  | t | 73877  | YFPAGGSS<br>SGTLNPV       | Mus<br>musculu<br>s              |
| 1 | 1.00 | 1 | 1 | 0.01  | 0.01   | 0.017  | 0      | 0.011  | t | 108649 | TDANKQK<br>GIEWNH<br>D T  | Homo<br>sapiens                  |
| 1 | 1.00 | 1 | 1 | -0.03 | -0.033 | -0.011 | -0.03  | -0.03  | t | 64526  | TKAPTQAA<br>KP            | Oryctola<br>gus<br>cuniculu<br>s |
| 1 | 1.00 | 1 | 1 | 0.02  | 0.015  | 0.034  | 0.023  | 0.022  | t | 15891  | FFRSTPED<br>LERA EK       | Bos<br>taurus                    |
| 1 | 1.00 | 1 | 1 | 0.02  | 0.015  | 0.034  | 0.023  | 0.022  | t | 15891  | FFRSTPED<br>LERA EK       | Bos<br>taurus                    |
| 1 | 1.00 | 1 | 1 | -0.01 | -0.008 | 0.002  | -0.003 | 0      | t | 108303 | CTRHPDC<br>QA             | Homo<br>sapiens                  |
| 1 | 1.00 | 1 | 1 | 0.01  | 0.01   | 0.018  | 0.01   | 0.013  | t | 119657 | TWNDTYG<br>SNN            | Homo<br>sapiens                  |
| 1 | 1.00 | 1 | 1 | -0.02 | -0.023 | -0.011 | -0.023 | -0.019 | t | 53247  | RAYALWS<br>ARQQFKTT       | Homo<br>sapiens                  |
| 1 | 1.00 | 1 | 1 | 0.01  | 0.024  | 0.031  | 0.007  | 0.01   | t | 51258  | QKTAASY                   | Homo<br>sapiens                  |

|   |      |   |   |       |        |        |        |        |   |        |                              |                                  |
|---|------|---|---|-------|--------|--------|--------|--------|---|--------|------------------------------|----------------------------------|
| 1 | 1.00 | 1 | 1 | -0.01 | -0.004 | -0.001 | -0.01  | -0.01  | t | 38268  | LNLPWSSA<br>GSTVWRN<br>RETLM | Equus<br>caballus                |
| 1 | 1.00 | 1 | 1 | -0.04 | -0.037 | -0.039 | -0.037 | -0.03  | t | 78219  | NKQWYL                       | Equus<br>caballus                |
| 1 | 1.00 | 1 | 1 | -0.01 | -0.009 | 0.01   | -0.007 | -0.009 | t | 22949  | GVELNDK<br>NQFKLTSS<br>ANSK  | Equus<br>caballus                |
| 1 | 1.00 | 1 | 1 | 0.03  | 0.032  | 0.037  | 0.037  | 0.04   | t | 108283 | AQSAITAC<br>W                | Homo<br>sapiens                  |
| 1 | 1.00 | 1 | 1 | 0     | -0.004 | 0.002  | -0.007 | -0.001 | t | 116286 | CGKGLSAT<br>VTGGQKG<br>RGSR  | Oryctola<br>gus<br>cuniculu<br>s |
| 1 | 1.00 | 1 | 1 | 0.01  | 0.01   | 0.028  | 0.01   | 0.009  | t | 118829 | GVLGQA<br>SQLNA              | Mus<br>musculu<br>s              |
| 1 | 1.00 | 1 | 1 | 0     | 0      | 0      | 0.003  | 0.009  | t | 5977   | CAGFEKIP<br>C                | Homo<br>sapiens                  |
| 1 | 1.00 | 1 | 1 | -0.02 | -0.018 | -0.008 | -0.02  | -0.02  | t | 100455 | RCTKLEYD<br>PRCVYDPR<br>GHTG | Homo<br>sapiens                  |
| 1 | 1.00 | 1 | 1 | 0.01  | 0.01   | 0.015  | 0.01   | 0.014  | t | 144257 | ESISVSSEQ<br>LAQFR           | Homo<br>sapiens                  |
| 1 | 1.00 | 1 | 1 | -0.01 | -0.008 | 0.003  | -0.009 | -0.007 | t | 47565  | PFSPDGKP<br>CTPP             | Homo<br>sapiens                  |
| 1 | 1.00 | 1 | 1 | -0.08 | -0.084 | -0.08  | -0.087 | -0.081 | t | 150739 | YLFKANPN<br>YAGNSIK          | Oryctola<br>gus<br>cuniculu<br>s |
| 1 | 1.00 | 1 | 1 | -0.01 | -0.012 | -0.01  | -0.017 | -0.009 | t | 119582 | GLQLIQLIN<br>VDEVNQI         | Mus<br>musculu<br>s              |
| 1 | 1.00 | 1 | 1 | -0.04 | -0.04  | -0.033 | -0.04  | -0.039 | t | 116721 | FSWGGRD<br>SRSGSPM<br>ARR    | Mus<br>musculu<br>s              |
| 1 | 1.00 | 1 | 1 | -0.02 | -0.017 | 0      | -0.02  | -0.017 | t | 2212   | AKKKKPEK<br>PH               | Sus<br>scrofa                    |

|   |      |   |   |       |        |        |        |        |   |        |                              |                                  |
|---|------|---|---|-------|--------|--------|--------|--------|---|--------|------------------------------|----------------------------------|
| 1 | 1.00 | 1 | 1 | -0.03 | -0.03  | -0.005 | -0.03  | -0.03  | t | 20852  | GLFGKGGI<br>VTCAMFT<br>C     | Mus<br>musculu<br>s              |
| 1 | 1.00 | 1 | 1 | 0.03  | 0.03   | 0.037  | 0.03   | 0.035  | t | 79040  | PGQNLCYT<br>K                | Mus<br>musculu<br>s              |
| 1 | 1.00 | 1 | 1 | -0.08 | -0.076 | -0.073 | -0.08  | -0.076 | t | 139961 | YPWGQD<br>H                  | Ovis<br>aries                    |
| 1 | 1.00 | 1 | 1 | -0.04 | -0.04  | -0.037 | -0.041 | -0.04  | t | 38810  | LQAMRKY<br>SPFRNGY<br>MEPTLG | Homo<br>sapiens                  |
| 1 | 1.00 | 1 | 1 | 0.01  | 0.008  | 0.017  | 0.009  | 0.01   | t | 19641  | GFVDGLR<br>DLTTTER           | Mus<br>musculu<br>s              |
| 1 | 1.00 | 1 | 1 | 0     | 0      | 0.014  | 0      | 0      | t | 78450  | LILNQMA<br>NFSLLPSF<br>DTLLV | Mus<br>musculu<br>s              |
| 1 | 1.00 | 1 | 1 | 0     | -0.005 | 0.015  | -0.004 | 0      | t | 8888   | DKIDWRES<br>GYVTEVKD<br>QGNC | Bos<br>taurus                    |
| 1 | 1.00 | 1 | 1 | 0     | -0.005 | 0.015  | -0.004 | 0      | t | 8888   | DKIDWRES<br>GYVTEVKD<br>QGNC | Bos<br>taurus                    |
| 1 | 1.00 | 1 | 1 | -0.04 | -0.04  | -0.019 | -0.04  | -0.038 | t | 62990  | TASGLVS<br>MFS               | Oryctola<br>gus<br>cuniculu<br>s |
| 1 | 1.00 | 1 | 1 | -0.04 | -0.043 | -0.019 | -0.04  | -0.038 | t | 62990  | TASGLVS<br>MFS               | Oryctola<br>gus<br>cuniculu<br>s |
| 1 | 1.00 | 1 | 1 | 0     | 0      | 0      | -0.01  | -0.001 | t | 115238 | EVDDEALE<br>KFDKALK<br>LPMH  | Homo<br>sapiens                  |
| 1 | 1.00 | 1 | 1 | 0     | 0      | 0.012  | 0      | 0      | t | 78429  | KEQLPTSY<br>PPERAGW          | Mus<br>musculu<br>s              |
| 1 | 1.00 | 1 | 1 | 0     | 0      | 0      | 0      | 0.007  | t | 108666 | TRCAQCH<br>TLK               | Homo<br>sapiens                  |
| 1 | 1.00 | 1 | 1 | 0     | 0      | 0      | 0      | 0.007  | t | 108612 | RNDLITFLE<br>QETK            | Homo<br>sapiens                  |

|   |      |   |   |       |        |        |        |        |   |        |                             |                                  |
|---|------|---|---|-------|--------|--------|--------|--------|---|--------|-----------------------------|----------------------------------|
| 1 | 1.00 | 1 | 1 | 0     | 0      | 0      | 0      | 0.007  | t | 68707  | VGLDAFSA<br>DELKKLKF        | Homo<br>sapiens                  |
| 1 | 1.00 | 1 | 1 | 0     | 0      | 0      | 0      | 0.007  | t | 26996  | ILDGDNLF<br>PKVAPQAI        | Homo<br>sapiens                  |
| 1 | 1.00 | 1 | 1 | -0.09 | -0.094 | -0.073 | -0.091 | -0.09  | t | 30219  | KDNPHPK<br>GSR              | Oryctola<br>gus<br>cuniculu<br>s |
| 1 | 1.00 | 1 | 1 | 0     | 0.001  | 0.002  | -0.003 | 0.002  | t | 58797  | SKDLADKL<br>AAKTAEAE<br>K   | Equus<br>caballus                |
| 1 | 1.00 | 1 | 1 | 0.02  | 0.02   | 0.037  | 0.023  | 0.02   | t | 38925  | LQNSMSG<br>ASADSTQ<br>A     | Homo<br>sapiens                  |
| 1 | 1.00 | 1 | 1 | 0     | 0      | 0      | 0      | 0.007  | t | 134988 | GPPGARG<br>LTGRPGDA<br>GPP  | Mus<br>musculu<br>s              |
| 1 | 1.00 | 1 | 1 | 0.02  | 0.022  | 0.038  | 0.019  | 0.02   | t | 99824  | ITQSTQSF<br>N               | Homo<br>sapiens                  |
| 1 | 1.00 | 1 | 1 | -0.03 | -0.035 | -0.03  | -0.037 | -0.029 | t | 144319 | GSADDVV<br>DAEVVDD          | Bos<br>taurus                    |
| 1 | 1.00 | 1 | 1 | -0.03 | -0.03  | -0.024 | -0.03  | -0.028 | t | 144797 | TGGCTHG<br>CLAVP            | Mus<br>musculu<br>s              |
| 1 | 1.00 | 1 | 1 | -0.06 | -0.056 | -0.039 | -0.059 | -0.058 | t | 32658  | KPARLI                      | Homo<br>sapiens                  |
| 1 | 1.00 | 1 | 1 | -0.06 | -0.058 | -0.039 | -0.059 | -0.058 | t | 32658  | KPARLI                      | Homo<br>sapiens                  |
| 1 | 1.00 | 1 | 1 | -0.02 | -0.016 | -0.017 | -0.02  | -0.019 | t | 19297  | GEIIWTLQ<br>DTQEIKQR<br>VVF | Equus<br>caballus                |
| 1 | 1.00 | 1 | 1 | -0.02 | -0.018 | -0.017 | -0.02  | -0.019 | t | 19297  | GEIIWTLQ<br>DTQEIKQR<br>VVF | Homo<br>sapiens                  |
| 1 | 1.00 | 1 | 1 | -0.02 | -0.011 | -0.017 | -0.02  | -0.019 | t | 19297  | GEIIWTLQ<br>DTQEIKQR<br>VVF | Gallus<br>gallus                 |

|   |      |   |   |       |        |        |        |        |   |        |                              |                                  |
|---|------|---|---|-------|--------|--------|--------|--------|---|--------|------------------------------|----------------------------------|
| 1 | 1.00 | 1 | 1 | -0.03 | -0.034 | -0.001 | -0.031 | -0.032 | t | 71531  | VTTSGGRR<br>Q                | Oryctola<br>gus<br>cuniculu<br>s |
| 1 | 1.00 | 1 | 1 | -0.01 | -0.01  | -0.013 | -0.02  | -0.009 | t | 23169  | GVTHDQL<br>NNFR              | Homo<br>sapiens                  |
| 1 | 1.00 | 1 | 1 | 0.01  | 0.014  | 0.017  | 0.007  | 0.012  | t | 117342 | PGSALLRQ<br>SMHK             | Homo<br>sapiens                  |
| 1 | 1.00 | 1 | 1 | 0.01  | 0.01   | 0.01   | 0.01   | 0.017  | t | 125552 | RRFEYDDP<br>RFLRLDLA<br>QEG  | Homo<br>sapiens                  |
| 1 | 1.00 | 1 | 1 | 0     | 0      | 0.019  | 0      | 0.001  | t | 13838  | EQHLMQK<br>IQRDEDSY          | Homo<br>sapiens                  |
| 1 | 1.00 | 1 | 1 | 0     | -0.003 | 0.017  | 0      | -0.001 | t | 50490  | QDLPGND<br>NNSTATLC          | Oryctola<br>gus<br>cuniculu<br>s |
| 1 | 1.00 | 1 | 1 | 0.04  | 0.035  | 0.047  | 0.04   | 0.047  | t | 136717 | VGTVCTRV<br>DSEN             | Mus<br>musculu<br>s              |
| 1 | 1.00 | 1 | 1 | -0.02 | -0.024 | -0.013 | -0.027 | -0.02  | t | 126926 | RGWNPGE<br>LYNGFP            | Oryctola<br>gus<br>cuniculu<br>s |
| 1 | 1.00 | 1 | 1 | 0     | -0.004 | 0.021  | -0.001 | -0.002 | t | 65238  | TMPFSPDF<br>SNVD             | Oryctola<br>gus<br>cuniculu<br>s |
| 1 | 1.00 | 1 | 1 | -0.03 | -0.03  | -0.03  | -0.03  | -0.02  | t | 69989  | VMLPWL                       | Homo<br>sapiens                  |
| 1 | 1.00 | 1 | 1 | -0.01 | -0.008 | 0.011  | -0.007 | -0.01  | t | 74543  | YKYPYVLG<br>QGQDTLA<br>PELPI | Homo<br>sapiens                  |
| 1 | 1.00 | 1 | 1 | -0.03 | -0.028 | -0.013 | -0.031 | -0.03  | t | 67449  | TYRFVSL                      | Homo<br>sapiens                  |
| 1 | 1.00 | 1 | 1 | -0.02 | -0.018 | 0      | -0.017 | -0.018 | t | 14379  | ETFTCISAP<br>WTCVTWL         | Homo<br>sapiens                  |
| 1 | 1.00 | 1 | 1 | 0     | 0      | 0.015  | 0      | 0.002  | t | 22719  | GTKAIDVG<br>QG               | Mus<br>musculu<br>s              |

|   |      |   |   |       |        |        |        |        |   |        |                              |                                  |
|---|------|---|---|-------|--------|--------|--------|--------|---|--------|------------------------------|----------------------------------|
| 1 | 1.00 | 1 | 1 | 0.01  | 0.008  | 0.013  | 0.003  | 0.01   | t | 125063 | GDRVYE<br>NELVA              | Mus<br>musculu<br>s              |
| 1 | 1.00 | 1 | 1 | -0.02 | -0.021 | -0.001 | -0.019 | -0.02  | t | 78840  | SRSLPRQS<br>LIQPPTFH<br>PPSS | Homo<br>sapiens                  |
| 1 | 1.00 | 1 | 1 | -0.01 | -0.006 | 0.013  | -0.009 | -0.01  | t | 19965  | GGPLTN                       | Homo<br>sapiens                  |
| 1 | 1.00 | 1 | 1 | -0.02 | -0.016 | 0      | -0.02  | -0.018 | t | 48967  | PQAMQW<br>NSTAFH             | Mus<br>musculu<br>s              |
| 1 | 1.00 | 1 | 1 | -0.04 | -0.04  | -0.019 | -0.04  | -0.04  | t | 158387 | TRGVKSSS<br>KLPA             | Canis<br>lupus                   |
| 1 | 1.00 | 1 | 1 | -0.03 | -0.032 | -0.035 | -0.037 | -0.029 | t | 112059 | CADARMY<br>GVLPWNA<br>FPGKV  | Rattus<br>norvegic<br>us         |
| 1 | 1.00 | 1 | 1 | 0.03  | 0.03   | 0.03   | 0.03   | 0.039  | t | 77952  | LQSPTGLT<br>NYFL             | Mus<br>musculu<br>s              |
| 1 | 1.00 | 1 | 1 | 0     | 0      | 0      | 0      | 0.007  | t | 151731 | SAQSQRA<br>PDR               | Mus<br>musculu<br>s              |
| 1 | 1.00 | 1 | 1 | 0.01  | 0.01   | 0.026  | 0.01   | 0.011  | t | 63087  | TCMTTAQ<br>GTSMYPSC          | Mus<br>musculu<br>s              |
| 1 | 1.00 | 1 | 1 | 0     | 0      | 0.007  | 0      | 0.002  | t | 74762  | YLLARGHD<br>PAFVHMS          | Mus<br>musculu<br>s              |
| 1 | 1.00 | 1 | 1 | 0.04  | 0.037  | 0.052  | 0.04   | 0.042  | t | 60985  | SSFEDSDS<br>GSDS             | Oryctola<br>gus<br>cuniculu<br>s |
| 1 | 1.00 | 1 | 1 | -0.02 | -0.022 | 0.004  | -0.02  | -0.02  | t | 141622 | DPNGWTG<br>TDNNFSI           | Oryctola<br>gus<br>cuniculu<br>s |
| 1 | 1.00 | 1 | 1 | 0.04  | 0.04   | 0.068  | 0.04   | 0.04   | t | 102004 | QPD                          | Mus<br>musculu<br>s              |
| 1 | 1.00 | 1 | 1 | -0.07 | -0.072 | -0.063 | -0.073 | -0.07  | t | 122400 | HSAHRGP<br>TYDPRVLH          | Mus<br>musculu<br>s              |



|   |      |   |   |       |        |        |        |        |   |        |                              |                                  |
|---|------|---|---|-------|--------|--------|--------|--------|---|--------|------------------------------|----------------------------------|
| 1 | 1.00 | 1 | 1 | 0.01  | 0.013  | 0.025  | 0.01   | 0.01   | t | 98436  | SAGTGGA<br>DLPTDLPP          | Sus<br>scrofa                    |
| 1 | 1.00 | 1 | 1 | -0.06 | -0.06  | -0.049 | -0.057 | -0.058 | t | 13267  | ELRYSWKT<br>WGWAKML<br>STELH | Homo<br>sapiens                  |
| 1 | 1.00 | 1 | 1 | 0     | -0.002 | 0      | -0.007 | 0.003  | t | 122932 | VCTPKSDE<br>FNPCEDIM<br>GYK  | Mus<br>musculu<br>s              |
| 1 | 1.00 | 1 | 1 | 0.01  | 0.006  | 0.01   | 0.007  | 0.011  | t | 32716  | KPGGGW<br>NTGGSRYP<br>GQGS   | Oryctola<br>gus<br>cuniculu<br>s |
| 1 | 1.00 | 1 | 1 | 0.01  | 0.008  | 0.01   | 0.007  | 0.011  | t | 32716  | KPGGGW<br>NTGGSRYP<br>GQGS   | Mus<br>musculu<br>s              |
| 1 | 1.00 | 1 | 1 | -0.01 | -0.01  | -0.003 | -0.01  | -0.008 | t | 57240  | SDLMHRLY<br>HVPVAVGQ         | Mus<br>musculu<br>s              |
| 1 | 1.00 | 1 | 1 | 0.02  | 0.016  | 0.018  | 0.013  | 0.021  | t | 119649 | SYCEIIVTH<br>FPFDQQN<br>CT   | Oryctola<br>gus<br>cuniculu<br>s |
| 1 | 1.00 | 1 | 1 | -0.01 | -0.01  | -0.01  | -0.01  | 0      | t | 142505 | ADWADW<br>LDYPG              | Mus<br>musculu<br>s              |
| 1 | 1.00 | 1 | 1 | -0.04 | -0.038 | -0.035 | -0.033 | -0.031 | t | 138234 | RRTPDPAV<br>SPWQLTY          | Homo<br>sapiens                  |
| 1 | 1.00 | 1 | 1 | 0.03  | 0.03   | 0.035  | 0.03   | 0.031  | t | 114211 | GSLPQKSH<br>GRTQDEN<br>PVVHF | Mus<br>musculu<br>s              |
| 1 | 1.00 | 1 | 1 | -0.04 | -0.038 | -0.033 | -0.039 | -0.034 | t | 29270  | IVFPDLGV<br>R                | Homo<br>sapiens                  |
| 1 | 1.00 | 1 | 1 | -0.04 | -0.041 | -0.033 | -0.039 | -0.034 | t | 29270  | IVFPDLGV<br>R                | Homo<br>sapiens                  |
| 1 | 1.00 | 1 | 1 | 0     | -0.001 | 0.017  | 0      | 0.002  | t | 45628  | NQSLLETH                     | Anas<br>platyrhy<br>nchos        |

|   |      |   |   |       |        |        |        |        |   |        |                              |                                  |
|---|------|---|---|-------|--------|--------|--------|--------|---|--------|------------------------------|----------------------------------|
| 1 | 1.00 | 1 | 1 | 0.02  | 0.018  | 0.03   | 0.02   | 0.021  | t | 39070  | LREGVTLG<br>VGASFDT<br>QKL   | Oryctola<br>gus<br>cuniculu<br>s |
| 1 | 1.00 | 1 | 1 | -0.04 | -0.037 | -0.034 | -0.04  | -0.039 | t | 106092 | RSGYSSPG<br>SPGTPGSR<br>SR   | Mus<br>musculu<br>s              |
| 1 | 1.00 | 1 | 1 | -0.02 | -0.014 | -0.005 | -0.027 | -0.019 | t | 125217 | QPHVMS                       | Macaca<br>fascicula<br>ris       |
| 1 | 1.00 | 1 | 1 | -0.05 | -0.054 | -0.043 | -0.053 | -0.05  | t | 60362  | SQADQGS<br>FYVNHQIL<br>FLHLK | Oryctola<br>gus<br>cuniculu<br>s |
| 1 | 1.00 | 1 | 1 | -0.02 | -0.02  | -0.018 | -0.02  | -0.016 | t | 140695 | KGRFTISR<br>DNAKSTLY<br>L    | Mus<br>musculu<br>s              |
| 1 | 1.00 | 1 | 1 | 0     | 0.002  | 0.002  | 0.001  | 0.002  | t | 47000  | PAVVPDRE<br>VLYREFDE<br>MEAC | Homo<br>sapiens                  |
| 1 | 1.00 | 1 | 1 | -0.02 | -0.02  | -0.02  | -0.016 | -0.011 | t | 112940 | DQMAVEK<br>LSDGIRKF          | Homo<br>sapiens                  |
| 1 | 1.00 | 1 | 1 | -0.02 | -0.016 | -0.014 | -0.02  | -0.018 | t | 6080   | CCRHKQKI<br>VGDVKQT<br>LPPS  | Ovis<br>aries                    |
| 1 | 1.00 | 1 | 1 | -0.06 | -0.058 | -0.051 | -0.06  | -0.058 | t | 100631 | VRVWCPR<br>PPRAVPY           | Homo<br>sapiens                  |
| 1 | 1.00 | 1 | 1 | 0     | -0.002 | 0.002  | -0.007 | 0.002  | t | 131317 | VEALYLVC<br>GERG             | Mus<br>musculu<br>s              |
| 1 | 1.00 | 1 | 1 | -0.02 | -0.017 | -0.007 | -0.02  | -0.019 | t | 39788  | LTAELKIYS<br>VIQAEINK<br>HL  | Mus<br>musculu<br>s              |
| 1 | 1.00 | 1 | 1 | -0.01 | -0.014 | 0.01   | -0.011 | -0.012 | t | 60596  | SQWNKPS<br>KPKTN             | Oryctola<br>gus<br>cuniculu<br>s |
| 1 | 1.00 | 1 | 1 | -0.04 | -0.038 | -0.035 | -0.04  | -0.036 | t | 115032 | ALGQGPPQ<br>FIFQYEEEE<br>ER  | Homo<br>sapiens                  |
| 1 | 1.00 | 1 | 1 | -0.01 | -0.011 | 0.007  | -0.01  | -0.008 | t | 95806  | RRGDMGS<br>L                 | Bos<br>taurus                    |

|   |      |   |   |       |        |        |        |        |   |        |                               |                          |
|---|------|---|---|-------|--------|--------|--------|--------|---|--------|-------------------------------|--------------------------|
| 1 | 1.00 | 1 | 1 | -0.01 | -0.01  | -0.002 | -0.013 | -0.011 | t | 16280  | FIQQGRGY<br>FGLIFPG           | Homo<br>sapiens          |
| 1 | 1.00 | 1 | 1 | -0.03 | -0.03  | -0.022 | -0.032 | -0.03  | t | 110965 | PNNNKILV<br>PKVSGQLQY<br>RVFR | Homo<br>sapiens          |
| 1 | 1.00 | 1 | 1 | -0.02 | -0.023 | -0.003 | -0.019 | -0.019 | t | 62776  | TAADGYG<br>AGLCANV<br>RCDTAT  | Canis<br>lupus           |
| 1 | 1.00 | 1 | 1 | 0     | 0      | 0.019  | 0      | 0.002  | t | 41826  | MKHM                          | Mus<br>musculu<br>s      |
| 1 | 1.00 | 1 | 1 | 0     | -0.002 | 0.016  | -0.007 | -0.004 | t | 135898 | ARDTQGL<br>GWGAS              | Mus<br>musculu<br>s      |
| 1 | 1.00 | 1 | 1 | -0.03 | -0.032 | -0.031 | -0.037 | -0.031 | t | 119613 | LSLSRFSW<br>GAEGQRP<br>GFGYG  | Rattus<br>norvegic<br>us |
| 1 | 1.00 | 1 | 1 | 0.01  | 0.03   | 0.013  | 0.009  | 0.012  | t | 111515 | LQPETDL<br>YCYEQLND<br>SSEE   | Mus<br>musculu<br>s      |
| 1 | 1.00 | 1 | 1 | -0.02 | -0.02  | -0.004 | -0.02  | -0.02  | t | 9589   | DPAFSLNS<br>RAFPAPF           | Mus<br>musculu<br>s      |
| 1 | 1.00 | 1 | 1 | -0.02 | -0.02  | -0.004 | -0.02  | -0.02  | t | 9589   | DPAFSLNS<br>RAFPAPF           | Mus<br>musculu<br>s      |
| 1 | 1.00 | 1 | 1 | -0.02 | -0.018 | -0.032 | -0.023 | -0.01  | t | 78561  | VWAQSSS<br>FPQFKPQE           | Homo<br>sapiens          |
| 1 | 1.00 | 1 | 1 | -0.01 | -0.01  | 0.018  | -0.01  | -0.011 | t | 102879 | VDDL                          | Mus<br>musculu<br>s      |
| 1 | 1.00 | 1 | 1 | -0.01 | -0.002 | 0.008  | -0.01  | -0.01  | t | 47133  | PDQDYQI<br>RKAKSS             | Gallus<br>gallus         |
| 1 | 1.00 | 1 | 1 | 0.01  | 0.008  | 0.015  | 0.009  | 0.02   | t | 11129  | EALYGMS                       | Mus<br>musculu<br>s      |
| 1 | 1.00 | 1 | 1 | 0     | -0.003 | 0.017  | -0.001 | 0      | t | 120649 | ITVGLQLIQ<br>LISVDEVN<br>QIV  | Mus<br>musculu<br>s      |
| 1 | 1.00 | 1 | 1 | 0.01  | 0.01   | 0.01   | 0.01   | 0.012  | t | 140475 | IQDTRNAV<br>RASRIQYH<br>HDP   | Mus<br>musculu<br>s      |

|   |      |   |   |       |        |        |        |        |   |        |                              |                            |
|---|------|---|---|-------|--------|--------|--------|--------|---|--------|------------------------------|----------------------------|
| 1 | 1.00 | 1 | 1 | 0.01  | 0.01   | 0.01   | 0.01   | 0.012  | t | 140475 | IQDTRNAV<br>RASRIQYH<br>HDP  | Mus<br>musculu<br>s        |
| 1 | 1.00 | 1 | 1 | -0.03 | -0.03  | -0.027 | -0.03  | -0.029 | t | 57644  | SETFTNKL<br>KEKHTDLG<br>KEG  | Mus<br>musculu<br>s        |
| 1 | 1.00 | 1 | 1 | 0.02  | 0.02   | 0.023  | 0.01   | 0.02   | t | 98855  | KTENPCA<br>QRCLQSC<br>Q      | Homo<br>sapiens            |
| 1 | 1.00 | 1 | 1 | 0     | 0.002  | 0.024  | -0.003 | -0.006 | t | 45627  | NQSLDLAE<br>QELVDCAS<br>QHGC | Homo<br>sapiens            |
| 1 | 1.00 | 1 | 1 | -0.01 | -0.006 | 0.013  | -0.009 | -0.008 | t | 71321  | VTGGAAA                      | Homo<br>sapiens            |
| 1 | 1.00 | 1 | 1 | -0.03 | -0.03  | -0.03  | -0.026 | -0.024 | t | 138197 | KLTSRLRY<br>NSPPLCF          | Homo<br>sapiens            |
| 1 | 1.00 | 1 | 1 | 0.01  | 0.014  | 0.025  | 0.011  | 0.01   | t | 67283  | TWNLDLN<br>SLTTDQRL<br>H     | Homo<br>sapiens            |
| 1 | 1.00 | 1 | 1 | -0.03 | -0.018 | -0.017 | -0.03  | -0.03  | t | 49127  | PQSNQRS<br>APRITFGG          | Mus<br>musculu<br>s        |
| 1 | 1.00 | 1 | 1 | -0.02 | -0.022 | -0.008 | -0.021 | -0.02  | t | 65253  | TMRDSNG<br>FFIEP             | Mus<br>musculu<br>s        |
| 1 | 1.00 | 1 | 1 | -0.02 | -0.022 | -0.02  | -0.027 | -0.02  | t | 112754 | ASQYRPSQ<br>R                | Mus<br>musculu<br>s        |
| 1 | 1.00 | 1 | 1 | -0.02 | -0.02  | -0.02  | -0.02  | -0.013 | t | 125462 | KLPLSLSFL<br>HLTRADLS<br>YPS | Homo<br>sapiens            |
| 1 | 1.00 | 1 | 1 | -0.03 | -0.029 | -0.025 | -0.03  | -0.029 | t | 25807  | IEFQQKNN<br>RLLEITREF        | Mus<br>musculu<br>s        |
| 1 | 1.00 | 1 | 1 | -0.03 | -0.033 | -0.025 | -0.03  | -0.029 | t | 25807  | IEFQQKNN<br>RLLEITREF        | Bos<br>taurus              |
| 1 | 1.00 | 1 | 1 | -0.04 | -0.026 | -0.034 | -0.043 | -0.039 | t | 61072  | SSHPSYKK<br>LRARIRK          | Homo<br>sapiens            |
| 1 | 1.00 | 1 | 1 | -0.03 | -0.024 | -0.032 | -0.037 | -0.031 | t | 125085 | GTPSHSRR<br>QPHVMS           | Macaca<br>fascicula<br>ris |

|   |      |   |   |       |        |        |        |        |   |        |                              |                                  |
|---|------|---|---|-------|--------|--------|--------|--------|---|--------|------------------------------|----------------------------------|
| 1 | 1.00 | 1 | 1 | 0     | 0.003  | 0.022  | 0      | 0      | t | 28313  | IRHQMVL<br>QL                | Mus<br>musculu<br>s              |
| 1 | 1.00 | 1 | 1 | 0.02  | 0.022  | 0.026  | 0.017  | 0.022  | t | 55994  | RSVSKEE<br>GM                | Homo<br>sapiens                  |
| 1 | 1.00 | 1 | 1 | -0.05 | -0.052 | -0.039 | -0.051 | -0.049 | t | 24348  | HMPRDAN<br>RHHQHPS<br>T      | Mus<br>musculu<br>s              |
| 1 | 1.00 | 1 | 1 | 0.01  | 0.007  | 0.015  | 0.01   | 0.009  | t | 126374 | KALRDGD<br>WFWWEN<br>SHVFTD  | Oryctola<br>gus<br>cuniculu<br>s |
| 1 | 1.00 | 1 | 1 | -0.05 | -0.05  | -0.05  | -0.05  | -0.048 | t | 117443 | ARGRGRG<br>MGRGNIF<br>Q      | Homo<br>sapiens                  |
| 1 | 1.00 | 1 | 1 | -0.02 | -0.022 | -0.02  | -0.027 | -0.019 | t | 119674 | WNPDDYG<br>GVKKIHIPS         | Mus<br>musculu<br>s              |
| 1 | 1.00 | 1 | 1 | 0     | -0.004 | 0.016  | 0.001  | 0.001  | t | 141562 | SIVQRSEN<br>NGVRPDV          | Bos<br>taurus                    |
| 1 | 1.00 | 1 | 1 | -0.04 | -0.036 | -0.023 | -0.039 | -0.04  | t | 58434  | SHVPLATS<br>RTLA             | Homo<br>sapiens                  |
| 1 | 1.00 | 1 | 1 | 0.01  | 0.013  | 0.011  | 0.013  | 0.02   | t | 78164  | GERLIV                       | Equus<br>caballus                |
| 1 | 1.00 | 1 | 1 | -0.02 | -0.02  | -0.015 | -0.02  | -0.02  | t | 33548  | KSVIIGCTG<br>GSPEKHHC        | Rattus<br>norvegic<br>us         |
| 1 | 1.00 | 1 | 1 | -0.01 | -0.009 | 0      | -0.01  | -0.01  | t | 56291  | RVFPRGTV<br>ENPDKARE<br>LNKY | Mus<br>musculu<br>s              |
| 1 | 1.00 | 1 | 1 | -0.05 | -0.046 | -0.031 | -0.049 | -0.048 | t | 51790  | QPACRKA<br>GCQTYKW<br>E      | Homo<br>sapiens                  |
| 1 | 1.00 | 1 | 1 | 0     | 0      | 0      | 0      | 0.007  | t | 150204 | FHSVVHTL<br>LEWLMEK<br>ELMV  | Mus<br>musculu<br>s              |
| 1 | 1.00 | 1 | 1 | 0     | 0      | 0      | 0      | 0.007  | t | 125055 | FVYGGCQ<br>GNN               | Mus<br>musculu<br>s              |
| 1 | 1.00 | 1 | 1 | 0.04  | 0.035  | 0.054  | 0.04   | 0.042  | t | 11240  | ECEVVPGA<br>EDDFVCK          | Bos<br>indicus                   |

|   |      |   |   |       |        |        |        |        |   |        |                              |                              |
|---|------|---|---|-------|--------|--------|--------|--------|---|--------|------------------------------|------------------------------|
| 1 | 1.00 | 1 | 1 | -0.04 | -0.042 | -0.04  | -0.047 | -0.039 | t | 108877 | DRGFYFNK<br>PTGY             | Mus<br>musculus              |
| 1 | 1.00 | 1 | 1 | -0.01 | -0.007 | -0.01  | -0.01  | -0.007 | t | 132021 | PTMTRVL<br>QGVLPALP<br>QVVCN | Mus<br>musculus              |
| 1 | 1.00 | 1 | 1 | -0.02 | -0.02  | -0.014 | -0.026 | -0.021 | t | 56496  | RWWQHR<br>PSHTPS             | Homo<br>sapiens              |
| 1 | 1.00 | 1 | 1 | -0.03 | -0.029 | -0.01  | -0.027 | -0.029 | t | 32595  | KNQIQLFN<br>LESSKIEVIL<br>K  | Equus<br>caballus            |
| 1 | 1.00 | 1 | 1 | 0.03  | 0.028  | 0.032  | 0.031  | 0.04   | t | 70946  | VSGDPRG<br>RYEDI             | Mus<br>musculus              |
| 1 | 1.00 | 1 | 1 | 0.01  | 0.012  | 0.015  | 0.017  | 0.021  | t | 108603 | QSPRLYPG<br>S                | Homo<br>sapiens              |
| 1 | 1.00 | 1 | 1 | -0.01 | -0.01  | 0.003  | -0.01  | -0.008 | t | 39998  | LTKSGSTY<br>PVLNVT           | Mus<br>musculus              |
| 1 | 1.00 | 1 | 1 | -0.01 | -0.01  | -0.016 | -0.021 | -0.008 | t | 158594 | GRRPFFHP<br>VGE              | Homo<br>sapiens              |
| 1 | 1.00 | 1 | 1 | -0.02 | -0.022 | -0.01  | -0.019 | -0.01  | t | 79038  | PFWLSD                       | Mus<br>musculus              |
| 1 | 1.00 | 1 | 1 | -0.03 | -0.03  | -0.023 | -0.033 | -0.03  | t | 51540  | QLSGTLER<br>QWQR             | Homo<br>sapiens              |
| 1 | 1.00 | 1 | 1 | -0.01 | -0.012 | -0.001 | -0.011 | -0.01  | t | 47294  | PEGRTWA<br>QPGYPWP<br>LYGNEG | Mus<br>musculus              |
| 1 | 1.00 | 1 | 1 | 0.01  | 0.005  | 0.025  | 0.007  | 0.01   | t | 96409  | INDMPITN<br>DQKKL            | Oryctola<br>gus<br>cuniculus |
| 1 | 1.00 | 1 | 1 | 0     | 0.003  | 0.009  | 0      | 0      | t | 113738 | PVEVSRKN<br>PKFMETV<br>AEKAL | Mus<br>musculus              |

|   |      |   |   |       |        |        |        |        |   |        |                              |                             |
|---|------|---|---|-------|--------|--------|--------|--------|---|--------|------------------------------|-----------------------------|
| 1 | 1.00 | 1 | 1 | 0     | 0.003  | 0.009  | 0      | 0      | t | 113738 | PVEVSRKN<br>PKFMETV<br>AEKAL | Mus<br>musculu<br>s         |
| 1 | 1.00 | 1 | 1 | -0.02 | -0.017 | -0.01  | -0.02  | -0.019 | t | 46954  | PASTNRQS<br>GRQP             | Mus<br>musculu<br>s         |
| 1 | 1.00 | 1 | 1 | -0.02 | -0.017 | -0.01  | -0.02  | -0.019 | t | 46954  | PASTNRQS<br>GRQP             | Mus<br>musculu<br>s         |
| 1 | 1.00 | 1 | 1 | 0     | 0      | 0      | 0      | 0.007  | t | 6479   | CKGKIQAL<br>CENPEWA          | Mus<br>musculu<br>s         |
| 1 | 1.00 | 1 | 1 | 0     | 0.002  | 0.02   | 0.001  | 0.001  | t | 5344   | AVGGYAIS<br>IS               | Homo<br>sapiens             |
| 1 | 1.00 | 1 | 1 | -0.02 | -0.013 | -0.003 | -0.017 | -0.019 | t | 111041 | TIGRLQDEI<br>QNMKEE<br>MARHL | Mus<br>musculu<br>s         |
| 1 | 1.00 | 1 | 1 | 0     | 0      | 0.001  | 0      | 0.003  | t | 266    | AALANSLS<br>LGPQQKV          | Mus<br>musculu<br>s         |
| 1 | 1.00 | 1 | 1 | -0.04 | -0.04  | -0.021 | -0.04  | -0.04  | t | 78536  | TPLCDYAA<br>ARVGACG          | Mus<br>musculu<br>s         |
| 1 | 1.00 | 1 | 1 | -0.04 | -0.04  | -0.021 | -0.04  | -0.04  | t | 78536  | TPLCDYAA<br>ARVGACG          | Mus<br>musculu<br>s         |
| 1 | 1.00 | 1 | 1 | 0.04  | 0.051  | 0.047  | 0.041  | 0.045  | t | 136561 | PTDNDHT<br>FDALQ             | Dicentra<br>rchus<br>labrax |
| 1 | 1.00 | 1 | 1 | -0.05 | -0.05  | -0.041 | -0.05  | -0.048 | t | 67959  | VDGIIAAY<br>QNPASWK          | Mus<br>musculu<br>s         |
| 1 | 1.00 | 1 | 1 | 0.02  | 0.022  | 0.02   | 0.027  | 0.03   | t | 108198 | VQFKESNR<br>LNSPLAL          | Homo<br>sapiens             |
| 1 | 1.00 | 1 | 1 | 0     | -0.001 | 0.012  | 0.003  | 0.002  | t | 130614 | STLPYLPTY<br>SKH             | Camelus<br>dromed<br>arius  |
| 1 | 1.00 | 1 | 1 | 0     | -0.002 | 0.007  | -0.007 | 0      | t | 133632 | LRCYSHCT<br>FYFASST          | Mus<br>musculu<br>s         |
| 1 | 1.00 | 1 | 1 | -0.02 | -0.014 | -0.009 | -0.019 | -0.02  | t | 39702  | LSTKAACP<br>TMGEAHN<br>DKR   | Equus<br>caballus           |

|   |      |   |   |       |        |        |        |        |   |        |                              |                                  |
|---|------|---|---|-------|--------|--------|--------|--------|---|--------|------------------------------|----------------------------------|
| 1 | 1.00 | 1 | 1 | 0.02  | 0.02   | 0.042  | 0.016  | 0.02   | t | 49137  | PQTTKPKE<br>VPTT             | Homo<br>sapiens                  |
| 1 | 1.00 | 1 | 1 | -0.01 | -0.006 | -0.01  | -0.013 | -0.001 | t | 78393  | GDYLIDQG<br>L                | Homo<br>sapiens                  |
| 1 | 1.00 | 1 | 1 | 0.01  | 0.014  | 0.027  | 0.011  | 0.012  | t | 62650  | SYMDTPST<br>CLAIVRPI<br>GVP  | Homo<br>sapiens                  |
| 1 | 1.00 | 1 | 1 | -0.04 | -0.042 | -0.02  | -0.041 | -0.038 | t | 47157  | PDPLKPTK<br>R                | Mus<br>musculu<br>s              |
| 1 | 1.00 | 1 | 1 | -0.04 | -0.043 | -0.027 | -0.04  | -0.036 | t | 4427   | ASGLVSMF<br>SV               | Oryctola<br>gus<br>cuniculu<br>s |
| 1 | 1.00 | 1 | 1 | -0.01 | -0.012 | -0.005 | -0.011 | -0.006 | t | 2978   | ALVNWHG<br>VYNYR             | Sus<br>scrofa                    |
| 1 | 1.00 | 1 | 1 | -0.1  | -0.104 | -0.087 | -0.103 | -0.1   | t | 142224 | LLDTKGGL<br>YRWRSVP          | Oryctola<br>gus<br>cuniculu<br>s |
| 1 | 1.00 | 1 | 1 | -0.05 | -0.047 | -0.03  | -0.05  | -0.049 | t | 105570 | VGGVVIA                      | Mus<br>musculu<br>s              |
| 1 | 1.00 | 1 | 1 | 0     | 0.002  | 0.012  | 0.007  | 0.01   | t | 108030 | MAYVPPY<br>EMIVRELK          | Homo<br>sapiens                  |
| 1 | 1.00 | 1 | 1 | 0     | -0.002 | 0      | -0.001 | 0.007  | t | 61516  | STAIHADQ<br>LTPAWRIY         | Mus<br>musculu<br>s              |
| 1 | 1.00 | 1 | 1 | 0     | -0.002 | 0      | -0.001 | 0.007  | t | 69129  | VITPGTNA<br>SSEVAVLY         | Mus<br>musculu<br>s              |
| 1 | 1.00 | 1 | 1 | 0     | -0.002 | 0      | -0.001 | 0.007  | t | 60978  | SSEVAVLY<br>QDVNCTD<br>V     | Mus<br>musculu<br>s              |
| 1 | 1.00 | 1 | 1 | 0     | -0.002 | 0      | -0.001 | 0.007  | t | 17524  | FQQFGRD<br>VSDFTDSV<br>RDPKT | Mus<br>musculu<br>s              |
| 1 | 1.00 | 1 | 1 | 0     | -0.002 | 0      | -0.001 | 0.007  | t | 12345  | EHKYSWK<br>S                 | Mus<br>musculu<br>s              |
| 1 | 1.00 | 1 | 1 | 0     | -0.002 | 0      | -0.001 | 0.007  | t | 17524  | FQQFGRD<br>VSDFTDSV<br>RDPKT | Mus<br>musculu<br>s              |



|   |      |   |   |       |        |        |        |        |   |        |                              |                     |
|---|------|---|---|-------|--------|--------|--------|--------|---|--------|------------------------------|---------------------|
| 1 | 1.00 | 1 | 1 | -0.08 | -0.08  | -0.048 | -0.08  | -0.083 | t | 80095  | VVHFFKNI<br>VTPRT            | Mus<br>musculu<br>s |
| 1 | 1.00 | 1 | 1 | 0     | 0.002  | 0.017  | 0.001  | 0      | t | 88363  | SAHLNVQ<br>CTV               | Homo<br>sapiens     |
| 1 | 1.00 | 1 | 1 | 0     | 0.002  | 0.017  | 0.001  | 0      | t | 88363  | SAHLNVQ<br>CTV               | Homo<br>sapiens     |
| 1 | 1.00 | 1 | 1 | 0.03  | 0.034  | 0.046  | 0.027  | 0.027  | t | 113731 | PTSPQQSG<br>QGQQPG<br>QGQQ   | Homo<br>sapiens     |
| 1 | 1.00 | 1 | 1 | -0.01 | -0.01  | -0.012 | -0.01  | 0      | t | 78003  | SFFDKNSA<br>HWSP             | Mus<br>musculu<br>s |
| 1 | 1.00 | 1 | 1 | 0.03  | 0.033  | 0.031  | 0.03   | 0.04   | t | 140607 | TMYQAIT<br>QT                | Mus<br>musculu<br>s |
| 1 | 1.00 | 1 | 1 | 0.02  | 0.022  | 0.027  | 0.02   | 0.03   | t | 104115 | MILSLQM                      | Homo<br>sapiens     |
| 1 | 1.00 | 1 | 1 | -0.01 | -0.01  | -0.001 | -0.017 | -0.01  | t | 135996 | SIVPALEIA<br>NAH             | Homo<br>sapiens     |
| 1 | 1.00 | 1 | 1 | -0.01 | -0.006 | -0.007 | -0.009 | -0.008 | t | 70026  | VMTVEIRK<br>QNMTEF<br>MELWSQ | Homo<br>sapiens     |
| 1 | 1.00 | 1 | 1 | -0.02 | -0.017 | -0.011 | -0.021 | -0.02  | t | 2308   | AKTRIINRR<br>KRELS           | Capra<br>hircus     |
| 1 | 1.00 | 1 | 1 | -0.02 | -0.02  | -0.007 | -0.022 | -0.02  | t | 99040  | VLDTDYKK<br>YLLFCMEN<br>SAEP | Homo<br>sapiens     |
| 1 | 1.00 | 1 | 1 | 0     | 0.004  | 0.017  | 0.001  | 0      | t | 42187  | MNALVNS<br>TLLETRTT          | Homo<br>sapiens     |

|   |      |   |   |       |        |        |        |        |   |        |                              |                                  |
|---|------|---|---|-------|--------|--------|--------|--------|---|--------|------------------------------|----------------------------------|
| 1 | 1.00 | 1 | 1 | -0.01 | -0.008 | 0.007  | -0.009 | -0.008 | t | 10349  | DTHLGGE<br>DFDNRLVT<br>FFTEE | Homo<br>sapiens                  |
| 1 | 1.00 | 1 | 1 | -0.02 | -0.02  | 0.001  | -0.017 | -0.02  | t | 57997  | SGDESDS<br>SDGYPPN           | Homo<br>sapiens                  |
| 1 | 1.00 | 1 | 1 | -0.06 | -0.056 | -0.043 | -0.057 | -0.06  | t | 19211  | GEASGLCC<br>RWSSLKG<br>C     | Homo<br>sapiens                  |
| 1 | 1.00 | 1 | 1 | 0.03  | 0.03   | 0.049  | 0.03   | 0.031  | t | 144601 | CSGTHPSIS<br>SC              | Mus<br>musculu<br>s              |
| 1 | 1.00 | 1 | 1 | -0.04 | -0.04  | -0.033 | -0.043 | -0.042 | t | 13856  | EQKLRSAG<br>ELELQFRR<br>VKC  | Homo<br>sapiens                  |
| 1 | 1.00 | 1 | 1 | 0     | 0.003  | 0.009  | 0      | 0      | t | 30504  | KELLDKTS<br>RTGDEVR<br>ALAND | Mus<br>musculu<br>s              |
| 1 | 1.00 | 1 | 1 | -0.03 | -0.028 | -0.015 | -0.027 | -0.028 | t | 60333  | SPWAPTA<br>PLPGDMN<br>P      | Homo<br>sapiens                  |
| 1 | 1.00 | 1 | 1 | 0     | 0      | 0.027  | 0      | 0      | t | 141624 | DTGSLVW<br>LSQRS             | Mus<br>musculu<br>s              |
| 1 | 1.00 | 1 | 1 | 0     | 0.003  | 0.027  | 0      | 0      | t | 141624 | DTGSLVW<br>LSQRS             | Mus<br>musculu<br>s              |
| 1 | 1.00 | 1 | 1 | 0.02  | 0.014  | 0.041  | 0.02   | 0.02   | t | 92778  | GALRNYIG<br>ESSPA            | Oryctola<br>gus<br>cuniculu<br>s |
| 1 | 1.00 | 1 | 1 | -0.05 | -0.056 | -0.029 | -0.05  | -0.05  | t | 93665  | RANVVNLL                     | Oryctola<br>gus<br>cuniculu<br>s |
| 1 | 1.00 | 1 | 1 | -0.05 | -0.05  | -0.05  | -0.05  | -0.048 | t | 117910 | HLLTNHLK<br>SKEVWKA<br>L     | Homo<br>sapiens                  |
| 1 | 1.00 | 1 | 1 | -0.03 | -0.03  | -0.034 | -0.03  | -0.024 | t | 23199  | GVVCAAIL<br>R                | Homo<br>sapiens                  |
| 1 | 1.00 | 1 | 1 | -0.02 | -0.02  | -0.008 | -0.023 | -0.02  | t | 3652   | APLTRGSC<br>RKRNRSPE<br>R    | Homo<br>sapiens                  |

|   |      |   |   |       |        |        |        |        |   |        |                              |                     |
|---|------|---|---|-------|--------|--------|--------|--------|---|--------|------------------------------|---------------------|
| 1 | 1.00 | 1 | 1 | 0.02  | 0.02   | 0.037  | 0.023  | 0.02   | t | 72205  | VYYPDEIFR<br>SDTLYLTQ<br>D   | Homo<br>sapiens     |
| 1 | 1.00 | 1 | 1 | -0.09 | -0.088 | -0.07  | -0.093 | -0.09  | t | 69311  | VKRVKTR                      | Homo<br>sapiens     |
| 1 | 1.00 | 1 | 1 | -0.02 | -0.022 | -0.004 | -0.023 | -0.019 | t | 135939 | IPVLDENG<br>LFAP             | Mus<br>musculu<br>s |
| 1 | 1.00 | 1 | 1 | 0     | 0      | 0      | 0      | 0.007  | t | 4429   | ASGQ                         | Mus<br>musculu<br>s |
| 1 | 1.00 | 1 | 1 | 0.03  | 0.032  | 0.03   | 0.029  | 0.033  | t | 130460 | CSSSQDG<br>HQWTLCA<br>AC     | Homo<br>sapiens     |
| 1 | 1.00 | 1 | 1 | 0.01  | 0.008  | 0.017  | 0.003  | 0.009  | t | 121706 | PGHPDDV<br>GNYWAIP<br>S      | Mus<br>musculu<br>s |
| 1 | 1.00 | 1 | 1 | -0.08 | -0.077 | -0.06  | -0.08  | -0.081 | t | 105498 | RHDSGYEV                     | Mus<br>musculu<br>s |
| 1 | 1.00 | 1 | 1 | -0.08 | -0.077 | -0.06  | -0.08  | -0.081 | t | 105498 | RHDSGYEV                     | Mus<br>musculu<br>s |
| 1 | 1.00 | 1 | 1 | -0.08 | -0.077 | -0.06  | -0.08  | -0.081 | t | 105498 | RHDSGYEV                     | Mus<br>musculu<br>s |
| 1 | 1.00 | 1 | 1 | -0.05 | -0.052 | -0.042 | -0.053 | -0.051 | t | 14300  | ESVLQAQ<br>MAAQQLP<br>VIGGIA | Mus<br>musculu<br>s |
| 1 | 1.00 | 1 | 1 | 0     | 0      | 0.012  | -0.003 | 0      | t | 837    | AEALSTEP<br>KGAAVDSS<br>KAAL | Homo<br>sapiens     |
| 1 | 1.00 | 1 | 1 | 0     | -0.002 | 0.007  | -0.007 | 0.001  | t | 144820 | YLEDWIKY<br>NNQK             | Mus<br>musculu<br>s |
| 1 | 1.00 | 1 | 1 | -0.04 | -0.04  | -0.017 | -0.04  | -0.041 | t | 13523  | ENMNRYP<br>NQVYY             | Mus<br>musculu<br>s |
| 1 | 1.00 | 1 | 1 | 0     | 0.003  | 0.029  | 0      | -0.001 | t | 141685 | KKTEETLL<br>EDR              | Mus<br>musculu<br>s |

|   |      |   |   |       |        |        |        |        |   |        |                              |                                  |
|---|------|---|---|-------|--------|--------|--------|--------|---|--------|------------------------------|----------------------------------|
| 1 | 1.00 | 1 | 1 | -0.01 | -0.01  | -0.01  | -0.01  | -0.004 | t | 29270  | IVFPDLGV<br>R                | Homo<br>sapiens                  |
| 1 | 1.00 | 1 | 1 | -0.06 | -0.058 | -0.044 | -0.059 | -0.058 | t | 21764  | GPRLTHSG<br>DLHL             | Homo<br>sapiens                  |
| 1 | 1.00 | 1 | 1 | 0.04  | 0.04   | 0.047  | 0.043  | 0.052  | t | 111690 | QTATLTY                      | Homo<br>sapiens                  |
| 1 | 1.00 | 1 | 1 | -0.03 | -0.028 | -0.018 | -0.029 | -0.023 | t | 36742  | LIVFPDLG<br>VR               | Homo<br>sapiens                  |
| 1 | 1.00 | 1 | 1 | -0.02 | -0.02  | -0.008 | -0.02  | -0.018 | t | 21845  | GQAAWKE<br>ARA               | Mus<br>musculu<br>s              |
| 1 | 1.00 | 1 | 1 | -0.02 | -0.02  | -0.013 | -0.029 | -0.02  | t | 130729 | APHKHKAS<br>LSIY             | Homo<br>sapiens                  |
| 1 | 1.00 | 1 | 1 | -0.04 | -0.046 | -0.019 | -0.04  | -0.04  | t | 93665  | RANVVNLL                     | Oryctola<br>gus<br>cuniculu<br>s |
| 1 | 1.00 | 1 | 1 | -0.02 | -0.02  | -0.003 | -0.02  | -0.02  | t | 120416 | AVALREYR<br>KKMDIPA          | Mus<br>musculu<br>s              |
| 1 | 1.00 | 1 | 1 | 0     | 0.002  | 0.021  | 0.001  | 0      | t | 41845  | MKKDDQI<br>AAAMVLR<br>GMA    | Homo<br>sapiens                  |
| 1 | 1.00 | 1 | 1 | -0.05 | -0.047 | -0.03  | -0.05  | -0.051 | t | 105570 | VGGVVIA                      | Mus<br>musculu<br>s              |
| 1 | 1.00 | 1 | 1 | -0.01 | -0.008 | -0.01  | -0.003 | 0      | t | 107753 | ATNMKMS<br>NMHTLIG<br>A      | Homo<br>sapiens                  |
| 1 | 1.00 | 1 | 1 | -0.05 | -0.052 | -0.048 | -0.057 | -0.048 | t | 118337 | ERADLIAYL<br>KKATNE          | Mus<br>musculu<br>s              |
| 1 | 1.00 | 1 | 1 | -0.02 | -0.02  | -0.002 | -0.014 | -0.018 | t | 117366 | RRREGPDR<br>SPR              | Homo<br>sapiens                  |
| 1 | 1.00 | 1 | 1 | 0     | -0.004 | 0.018  | -0.001 | 0      | t | 43195  | NAKGFMP<br>STTAYPFN<br>DNSRE | Oryctola<br>gus<br>cuniculu<br>s |
| 1 | 1.00 | 1 | 1 | -0.04 | -0.042 | -0.018 | -0.04  | -0.04  | t | 98343  | PPPPPRVQ<br>PRKTKSV          | Sus<br>scrofa                    |

|   |      |   |   |       |        |        |        |        |   |        |                        |                       |
|---|------|---|---|-------|--------|--------|--------|--------|---|--------|------------------------|-----------------------|
| 1 | 1.00 | 1 | 1 | -0.04 | -0.04  | -0.04  | -0.04  | -0.033 | t | 137420 | HSPRYHM                | Mus musculus          |
| 1 | 1.00 | 1 | 1 | 0.01  | 0.01   | 0.01   | 0.01   | 0.02   | t | 5562   | AVTKGTIN DPEA          | Oryctolagus cuniculus |
| 1 | 1.00 | 1 | 1 | 0.01  | 0.007  | 0.015  | 0.01   | 0.021  | t | 52040  | QQIGKR                 | Mus musculus          |
| 1 | 1.00 | 1 | 1 | 0.05  | 0.052  | 0.057  | 0.057  | 0.06   | t | 108281 | APSSLAGNG              | Homo sapiens          |
| 1 | 1.00 | 1 | 1 | 0.02  | 0.02   | 0.025  | 0.02   | 0.03   | t | 32872  | KPSDFPP                | Oryctolagus cuniculus |
| 1 | 1.00 | 1 | 1 | 0.01  | 0.01   | 0.022  | 0.01   | 0.011  | t | 120601 | IDISDISGK QVTGEVIF QT  | Rattus norvegicus     |
| 1 | 1.00 | 1 | 1 | 0.01  | 0.006  | 0.012  | 0.011  | 0.02   | t | 23717  | HELRSQIIS TTS          | Oryctolagus cuniculus |
| 1 | 1.00 | 1 | 1 | 0     | 0      | 0.019  | 0.006  | 0.002  | t | 74631  | YLEHCTM NECLNAR        | Homo sapiens          |
| 1 | 1.00 | 1 | 1 | 0     | 0      | 0      | 0      | 0.007  | t | 11819  | EENVEHDA               | Oryctolagus cuniculus |
| 1 | 1.00 | 1 | 1 | 0     | 0      | 0      | 0      | 0.007  | t | 4397   | ASFEAQG ALANIAVD KA    | Mus musculus          |
| 1 | 1.00 | 1 | 1 | -0.03 | -0.03  | -0.007 | -0.02  | -0.03  | t | 38810  | LQAMRKY SPFRNGY MEPTLG | Homo sapiens          |
| 1 | 1.00 | 1 | 1 | -0.04 | -0.043 | -0.035 | -0.043 | -0.038 | t | 108599 | QGDAKKG ANLFKTRC       | Homo sapiens          |
| 1 | 1.00 | 1 | 1 | -0.05 | -0.05  | -0.041 | -0.054 | -0.05  | t | 135983 | RLRPPEPR PRDR          | Homo sapiens          |
| 1 | 1.00 | 1 | 1 | 0.01  | 0.01   | 0.008  | 0.01   | 0.02   | t | 78026  | TAQWLSR TQMDS          | Mus musculus          |

|   |      |   |   |       |        |        |        |        |   |        |                              |                      |
|---|------|---|---|-------|--------|--------|--------|--------|---|--------|------------------------------|----------------------|
| 1 | 1.00 | 1 | 1 | -0.05 | -0.046 | -0.028 | -0.047 | -0.05  | t | 70428  | VPPRRRRR<br>AKVLTQ           | Homo<br>sapiens      |
| 1 | 1.00 | 1 | 1 | -0.02 | -0.022 | -0.008 | -0.027 | -0.02  | t | 120175 | RLYHHLFN<br>NYDPGSR          | Rattus<br>norvegicus |
| 1 | 1.00 | 1 | 1 | -0.02 | -0.022 | -0.018 | -0.027 | -0.016 | t | 135921 | EVGWYRS<br>PF                | Mus<br>musculus      |
| 1 | 1.00 | 1 | 1 | 0.03  | 0.037  | 0.037  | 0.03   | 0.031  | t | 159288 | LLHYSTISQ<br>DNLDISFG<br>ELQ | Aotus                |
| 1 | 1.00 | 1 | 1 | 0.01  | 0.01   | 0.02   | 0.01   | 0.012  | t | 142705 | GVGSSAVI<br>LNDNFVT          | Sus<br>scrofa        |
| 1 | 1.00 | 1 | 1 | 0     | 0.004  | 0.028  | 0.003  | -0.002 | t | 21738  | GPPVDPTS<br>G                | Homo<br>sapiens      |
| 1 | 1.00 | 1 | 1 | 0     | 0.002  | 0.005  | 0.001  | 0.001  | t | 15196  | FAIPYIHPT<br>NPFAPDVT<br>A   | Homo<br>sapiens      |
| 1 | 1.00 | 1 | 1 | 0.04  | 0.04   | 0.047  | 0.04   | 0.049  | t | 108619 | SESTIQNLR                    | Homo<br>sapiens      |
| 1 | 1.00 | 1 | 1 | 0     | 0      | 0.027  | 0      | 0      | t | 141675 | IINTGSLLS<br>LAH             | Mus<br>musculus      |
| 1 | 1.00 | 1 | 1 | 0     | 0.003  | 0.027  | 0      | 0      | t | 141675 | IINTGSLLS<br>LAH             | Mus<br>musculus      |
| 1 | 1.00 | 1 | 1 | 0.01  | 0.012  | 0.019  | 0.007  | 0.01   | t | 67924  | VDDRQIV<br>QNLRGETE          | Homo<br>sapiens      |
| 1 | 1.00 | 1 | 1 | -0.04 | -0.037 | -0.033 | -0.04  | -0.038 | t | 122912 | TDVRYKD<br>DMYHFFC<br>PAIQA  | Mus<br>musculus      |
| 1 | 1.00 | 1 | 1 | 0.01  | 0.01   | 0.038  | 0.01   | 0.008  | t | 72270  | WAVKDSK<br>SR                | Homo<br>sapiens      |

|   |      |   |   |       |        |        |        |        |   |        |                              |                                  |
|---|------|---|---|-------|--------|--------|--------|--------|---|--------|------------------------------|----------------------------------|
| 1 | 1.00 | 1 | 1 | -0.03 | -0.006 | -0.03  | -0.03  | -0.023 | t | 141579 | WKVRKSFF<br>KLQG             | Rattus                           |
| 1 | 1.00 | 1 | 1 | 0.01  | 0.015  | 0.045  | 0.011  | 0.008  | t | 61560  | STDPAATD                     | Homo<br>sapiens                  |
| 1 | 1.00 | 1 | 1 | 0.03  | 0.03   | 0.049  | 0.03   | 0.031  | t | 144601 | CSGTHPSIS<br>SC              | Mus<br>musculu<br>s              |
| 1 | 1.00 | 1 | 1 | -0.02 | -0.024 | -0.021 | -0.027 | -0.02  | t | 125022 | EAERAGR<br>GTG               | Oryctola<br>gus<br>cuniculu<br>s |
| 1 | 1.00 | 1 | 1 | 0.02  | 0.025  | 0.053  | 0.021  | 0.02   | t | 53343  | RDFVEG                       | Homo<br>sapiens                  |
| 1 | 1.00 | 1 | 1 | 0     | 0      | 0.013  | 0      | 0      | t | 12423  | EIDMHMP<br>PDTPDRTL<br>LSQQS | Mus<br>musculu<br>s              |
| 1 | 1.00 | 1 | 1 | -0.01 | -0.008 | 0.01   | -0.013 | -0.009 | t | 64882  | TLKQAPA                      | Homo<br>sapiens                  |
| 1 | 1.00 | 1 | 1 | -0.01 | -0.006 | 0.019  | -0.01  | -0.01  | t | 34933  | LAQKVART<br>LP               | Cavia<br>porcellu<br>s           |
| 1 | 1.00 | 1 | 1 | -0.04 | -0.038 | -0.024 | -0.039 | -0.04  | t | 49116  | PQRKTKR<br>NTNRR             | Homo<br>sapiens                  |
| 1 | 1.00 | 1 | 1 | -0.09 | -0.086 | -0.075 | -0.089 | -0.09  | t | 45616  | NQRKKAR<br>N                 | Homo<br>sapiens                  |
| 1 | 1.00 | 1 | 1 | 0.01  | 0.006  | 0.017  | 0.003  | 0.012  | t | 134744 | LPPLGTHP<br>SMHP             | Oryctola<br>gus<br>cuniculu<br>s |
| 1 | 1.00 | 1 | 1 | -0.01 | -0.01  | 0.003  | -0.01  | -0.011 | t | 9677   | DPLTSLHA<br>MQRR             | Mus<br>musculu<br>s              |
| 1 | 1.00 | 1 | 1 | 0     | 0.006  | 0.007  | 0.003  | 0.01   | t | 78109  | AVPTKA                       | Equus<br>caballus                |
| 1 | 1.00 | 1 | 1 | -0.04 | -0.037 | -0.02  | -0.04  | -0.041 | t | 105570 | VGGVVIA                      | Mus<br>musculu<br>s              |

|   |      |   |   |       |        |        |        |        |   |        |                              |                                  |
|---|------|---|---|-------|--------|--------|--------|--------|---|--------|------------------------------|----------------------------------|
| 1 | 1.00 | 1 | 1 | -0.01 | -0.01  | -0.012 | -0.01  | 0      | t | 78050  | TWWDKN<br>SATVAW             | Mus<br>musculu<br>s              |
| 1 | 1.00 | 1 | 1 | -0.01 | -0.007 | -0.005 | -0.01  | -0.007 | t | 51438  | QLSSSKYT<br>IQRSTGDN<br>IDT  | Mus<br>musculu<br>s              |
| 1 | 1.00 | 1 | 1 | 0     | -0.004 | -0.012 | -0.001 | 0.006  | t | 111051 | VGPLEVIP<br>EAVDPAG<br>SSIV  | Oryctola<br>gus<br>cuniculu<br>s |
| 1 | 1.00 | 1 | 1 | -0.01 | -0.004 | -0.007 | -0.01  | -0.008 | t | 42977  | MVNINDT<br>DTWIPKG<br>CNE    | Equus<br>caballus                |
| 1 | 1.00 | 1 | 1 | -0.04 | -0.04  | -0.041 | -0.04  | -0.037 | t | 134784 | RKRSQML<br>FRGRRASQ          | Mus<br>musculu<br>s              |
| 1 | 1.00 | 1 | 1 | -0.03 | -0.026 | -0.013 | -0.033 | -0.032 | t | 105306 | LPQQCGLR<br>APQR             | Homo<br>sapiens                  |
| 1 | 1.00 | 1 | 1 | -0.04 | -0.041 | -0.022 | -0.04  | -0.04  | t | 53202  | RASANLAA<br>TKMSECVL<br>G    | Homo<br>sapiens                  |
| 1 | 1.00 | 1 | 1 | 0.02  | 0.018  | 0.02   | 0.013  | 0.025  | t | 119635 | RGWKHSV<br>TYSCCPDT<br>PY    | Mus<br>musculu<br>s              |
| 1 | 1.00 | 1 | 1 | 0     | 0.004  | 0.012  | 0.001  | 0.001  | t | 95104  | ITGAGPKY<br>VKQNTLK          | Homo<br>sapiens                  |
| 1 | 1.00 | 1 | 1 | -0.01 | -0.01  | -0.002 | -0.01  | -0.007 | t | 90720  | YEVEKPLE<br>PAPVAPS          | Homo<br>sapiens                  |
| 1 | 1.00 | 1 | 1 | 0     | 0.002  | 0.008  | -0.003 | 0      | t | 72476  | WGILSRAA<br>TNSGWVG<br>LIPHK | Homo<br>sapiens                  |
| 1 | 1.00 | 1 | 1 | -0.04 | -0.042 | -0.023 | -0.04  | -0.043 | t | 111033 | STYDRDN<br>DGWLTSD<br>PRKQCS | Mus<br>musculu<br>s              |
| 1 | 1.00 | 1 | 1 | -0.02 | -0.026 | 0      | -0.02  | -0.02  | t | 32879  | KPSKPKTN<br>MKHMAG<br>AA     | Oryctola<br>gus<br>cuniculu<br>s |



|   |      |   |   |       |        |        |        |        |   |        |                              |                                  |
|---|------|---|---|-------|--------|--------|--------|--------|---|--------|------------------------------|----------------------------------|
| 1 | 1.00 | 1 | 1 | -0.02 | -0.023 | -0.01  | -0.02  | -0.02  | t | 154400 | DPVGPSD<br>PSIVSLVEE<br>TSFI | Oryctola<br>gus<br>cuniculu<br>s |
| 1 | 1.00 | 1 | 1 | -0.06 | -0.059 | -0.051 | -0.061 | -0.06  | t | 33051  | KQPQRLR<br>VKTPPPVT<br>VP    | Equus<br>caballus                |
| 1 | 1.00 | 1 | 1 | 0.03  | 0.03   | 0.054  | 0.027  | 0.03   | t | 53955  | RGQKAKS<br>NPNRPLPV<br>PRN   | Homo<br>sapiens                  |
| 1 | 1.00 | 1 | 1 | -0.01 | -0.01  | -0.001 | -0.01  | -0.009 | t | 110116 | YCAPLKPA<br>KSA              | Mus<br>musculu<br>s              |
| 1 | 1.00 | 1 | 1 | 0.04  | 0.04   | 0.05   | 0.043  | 0.05   | t | 35127  | LDDSYS                       | Homo<br>sapiens                  |
| 1 | 1.00 | 1 | 1 | 0.03  | 0.026  | 0.048  | 0.03   | 0.03   | t | 93568  | PGEATETV<br>PATEQEL          | Mus<br>musculu<br>s              |
| 1 | 1.00 | 1 | 1 | 0.01  | 0.006  | 0.008  | 0.003  | 0.011  | t | 119649 | SYCEIIVTH<br>FPFDQQN<br>CT   | Oryctola<br>gus<br>cuniculu<br>s |
| 1 | 1.00 | 1 | 1 | -0.01 | -0.012 | -0.005 | -0.007 | -0.008 | t | 115902 | PRSPRSE<br>RQPRSPPR<br>SERQ  | Mus<br>musculu<br>s              |
| 1 | 1.00 | 1 | 1 | -0.03 | -0.031 | -0.029 | -0.033 | -0.029 | t | 99247  | FLAAHAS<br>ARQQWEL           | Homo<br>sapiens                  |
| 1 | 1.00 | 1 | 1 | -0.06 | -0.06  | -0.053 | -0.06  | -0.057 | t | 125248 | RVPPRYHA<br>KISPMVN          | Mus<br>musculu<br>s              |
| 1 | 1.00 | 1 | 1 | 0     | -0.001 | 0.008  | -0.001 | 0      | t | 17915  | FTCDRLSG<br>YWERGIPL<br>PCGL | Myodes<br>glareolu<br>s          |
| 1 | 1.00 | 1 | 1 | -0.03 | -0.03  | -0.009 | -0.032 | -0.03  | t | 54577  | RLHLNDRV<br>V                | Homo<br>sapiens                  |
| 1 | 1.00 | 1 | 1 | -0.01 | -0.008 | 0.002  | -0.003 | 0      | t | 108303 | CTRHPDC<br>QA                | Homo<br>sapiens                  |
| 1 | 1.00 | 1 | 1 | 0     | 0      | 0      | -0.01  | 0      | t | 114754 | CAHKVEQ<br>GAS               | Homo<br>sapiens                  |

|   |      |   |   |       |        |        |        |        |   |        |                              |                                  |
|---|------|---|---|-------|--------|--------|--------|--------|---|--------|------------------------------|----------------------------------|
| 1 | 1.00 | 1 | 1 | 0.04  | 0.043  | 0.062  | 0.04   | 0.041  | t | 43527  | NDSSSHLQ                     | Sus<br>scrofa                    |
| 1 | 1.00 | 1 | 1 | 0.03  | 0.027  | 0.025  | 0.03   | 0.039  | t | 4938   | ATEINDNS<br>WKDTLS           | Oryctola<br>gus<br>cuniculu<br>s |
| 1 | 1.00 | 1 | 1 | -0.01 | -0.006 | 0.019  | -0.01  | -0.008 | t | 31772  | KLCGVL                       | Homo<br>sapiens                  |
| 1 | 1.00 | 1 | 1 | 0.01  | 0.01   | 0.028  | 0.008  | 0.01   | t | 36579  | LIKNCQVN<br>FNFNGLTG<br>T    | Homo<br>sapiens                  |
| 1 | 1.00 | 1 | 1 | 0     | 0      | 0      | 0      | 0.01   | t | 132469 | LYWFTLYQ<br>FFLA             | Homo<br>sapiens                  |
| 1 | 1.00 | 1 | 1 | 0.01  | 0.01   | 0.024  | 0.013  | 0.012  | t | 5387   | AVIRRANN<br>VLKNEMK<br>RYKGL | Homo<br>sapiens                  |
| 1 | 1.00 | 1 | 1 | -0.03 | -0.027 | -0.006 | -0.03  | -0.03  | t | 64655  | TKQYNVT<br>QAFGRRG<br>P      | Macaca<br>cyclopis               |
| 1 | 1.00 | 1 | 1 | -0.06 | -0.038 | -0.057 | -0.06  | -0.058 | t | 111521 | LSKLLCVSP<br>MCMMEIP<br>PKLR | Homo<br>sapiens                  |
| 1 | 1.00 | 1 | 1 | -0.02 | -0.016 | -0.011 | -0.023 | -0.02  | t | 8147   | DERGTPEY<br>NIALGQR          | Homo<br>sapiens                  |
| 1 | 1.00 | 1 | 1 | -0.04 | -0.04  | -0.015 | -0.04  | -0.04  | t | 105084 | AFNRFEGG<br>LVQR             | Homo<br>sapiens                  |
| 1 | 1.00 | 1 | 1 | -0.05 | -0.052 | -0.031 | -0.051 | -0.05  | t | 119806 | DPKAPQW<br>PPY               | Mus<br>musculu<br>s              |
| 1 | 1.00 | 1 | 1 | -0.02 | -0.02  | -0.001 | -0.02  | -0.019 | t | 10820  | DWPAlWR<br>KQ                | Mus<br>musculu<br>s              |
| 1 | 1.00 | 1 | 1 | -0.01 | -0.008 | -0.003 | -0.003 | -0.001 | t | 138159 | DTWPTAR<br>LTSSMQYI          | Homo<br>sapiens                  |
| 1 | 1.00 | 1 | 1 | 0.03  | 0.03   | 0.037  | 0.03   | 0.037  | t | 136357 | HLKKFAGN<br>AGTP             | Mus<br>musculu<br>s              |

|   |      |   |   |       |        |        |        |        |   |        |                              |                       |
|---|------|---|---|-------|--------|--------|--------|--------|---|--------|------------------------------|-----------------------|
| 1 | 1.00 | 1 | 1 | -0.05 | -0.046 | -0.028 | -0.053 | -0.048 | t | 104127 | MNKTWYP                      | Homo sapiens          |
| 1 | 1.00 | 1 | 1 | -0.04 | -0.031 | -0.024 | -0.04  | -0.04  | t | 24842  | HSQWNKP<br>SKPKTNM<br>K      | Oryctolagus cuniculus |
| 1 | 1.00 | 1 | 1 | 0.04  | 0.044  | 0.062  | 0.041  | 0.042  | t | 7528   | DAHFLSQT<br>KQSGENLP<br>YLVA | Homo sapiens          |
| 1 | 1.00 | 1 | 1 | 0.07  | 0.07   | 0.09   | 0.07   | 0.073  | t | 38214  | LNFGQTG<br>DADSV             | Mus musculus          |
| 1 | 1.00 | 1 | 1 | 0.07  | 0.073  | 0.09   | 0.07   | 0.073  | t | 38214  | LNFGQTG<br>DADSV             | Mus musculus          |
| 1 | 1.00 | 1 | 1 | -0.03 | -0.026 | -0.01  | -0.03  | -0.03  | t | 11370  | EDKLADYK<br>RRMADA           | Myodes glareolus      |
| 1 | 1.00 | 1 | 1 | 0.04  | 0.042  | 0.031  | 0.037  | 0.049  | t | 78463  | MCDIDGQ<br>GEEL              | Homo sapiens          |
| 1 | 1.00 | 1 | 1 | -0.02 | -0.022 | -0.004 | -0.021 | -0.02  | t | 32617  | KNTLQAR<br>QQT               | Mus musculus          |
| 1 | 1.00 | 1 | 1 | 0     | 0      | -0.012 | 0      | 0.007  | t | 145841 | KEDFRYAIS<br>STNEIGLLG<br>A  | Sus scrofa            |
| 1 | 1.00 | 1 | 1 | 0     | 0.014  | 0.012  | 0.001  | 0      | t | 19095  | GDRADGQ<br>AAGDRAD<br>GQAA   | Homo sapiens          |
| 1 | 1.00 | 1 | 1 | -0.06 | -0.058 | -0.046 | -0.06  | -0.06  | t | 40268  | LVALYLAA<br>RLSWNQV<br>DQVIR | Homo sapiens          |
| 1 | 1.00 | 1 | 1 | -0.05 | -0.046 | -0.045 | -0.053 | -0.05  | t | 97170  | ADQELGD<br>APFLDRLR<br>RDQKS | Homo sapiens          |
| 1 | 1.00 | 1 | 1 | 0.01  | 0.01   | 0.01   | 0.01   | 0.02   | t | 62328  | SVSLPYAN<br>LATH             | Mus musculus          |

|   |      |   |   |       |        |        |        |        |   |        |                              |                   |
|---|------|---|---|-------|--------|--------|--------|--------|---|--------|------------------------------|-------------------|
| 1 | 1.00 | 1 | 1 | -0.01 | -0.008 | -0.004 | -0.009 | -0.009 | t | 78932  | ATRKTSER<br>SQPRGRR<br>QPI   | Homo sapiens      |
| 1 | 1.00 | 1 | 1 | 0.02  | 0.02   | 0.033  | 0.023  | 0.02   | t | 146910 | EYPDDASV<br>NGVRK            | Homo sapiens      |
| 1 | 1.00 | 1 | 1 | -0.01 | -0.006 | 0.006  | -0.013 | -0.008 | t | 40150  | LTRGSPVT<br>GPFA             | Homo sapiens      |
| 1 | 1.00 | 1 | 1 | -0.05 | -0.052 | -0.048 | -0.051 | -0.049 | t | 137774 | YRNKQKEF<br>MERRRAT<br>VDTYC | Rattus norvegicus |
| 1 | 1.00 | 1 | 1 | -0.01 | -0.005 | -0.005 | -0.01  | -0.004 | t | 21330  | GMQLAEQ<br>FK                | Homo sapiens      |
| 1 | 1.00 | 1 | 1 | -0.03 | -0.028 | -0.008 | -0.029 | -0.029 | t | 62773  | TAACRAAK<br>LQDCTM           | Homo sapiens      |
| 1 | 1.00 | 1 | 1 | -0.02 | -0.02  | -0.003 | -0.02  | -0.018 | t | 64542  | TKDTNNN<br>LTL               | Mus musculus      |
| 1 | 1.00 | 1 | 1 | 0.03  | 0.033  | 0.047  | 0.03   | 0.032  | t | 1765   | AHGSETA<br>WAD               | Mus musculus      |
| 1 | 1.00 | 1 | 1 | 0.03  | 0.03   | 0.035  | 0.027  | 0.031  | t | 72178  | VYVEELKP<br>TPEGDLIL<br>LQK  | Homo sapiens      |
| 1 | 1.00 | 1 | 1 | -0.03 | -0.03  | -0.018 | -0.03  | -0.028 | t | 66051  | TRLENLM<br>WK                | Mus musculus      |
| 1 | 1.00 | 1 | 1 | -0.04 | -0.036 | -0.018 | -0.039 | -0.038 | t | 13458  | ENDIRV                       | Homo sapiens      |
| 1 | 1.00 | 1 | 1 | -0.03 | -0.027 | -0.009 | -0.03  | -0.031 | t | 15524  | FEEVNGIR<br>RP               | Mus musculus      |
| 1 | 1.00 | 1 | 1 | -0.03 | -0.027 | -0.01  | -0.03  | -0.03  | t | 140915 | VSAKDGYK<br>INNKL            | Sus scrofa        |

|   |      |   |   |       |        |        |        |        |   |        |                              |              |
|---|------|---|---|-------|--------|--------|--------|--------|---|--------|------------------------------|--------------|
| 1 | 1.00 | 1 | 1 | -0.05 | -0.048 | -0.029 | -0.042 | -0.05  | t | 20011  | GGSGGRG<br>RGGSGGR<br>GRGGSG | Homo sapiens |
| 1 | 1.00 | 1 | 1 | -0.07 | -0.066 | -0.052 | -0.069 | -0.068 | t | 71325  | VTGHWRC<br>P                 | Homo sapiens |
| 1 | 1.00 | 1 | 1 | 0.02  | 0.022  | 0.029  | 0.027  | 0.032  | t | 109780 | QVYTLPP                      | Homo sapiens |
| 1 | 1.00 | 1 | 1 | -0.02 | -0.022 | -0.02  | -0.027 | -0.019 | t | 119674 | WNPDDYG<br>GVKKIHIPS         | Mus musculus |
| 1 | 1.00 | 1 | 1 | -0.05 | -0.048 | -0.039 | -0.049 | -0.048 | t | 38014  | LMESELVI<br>GAVIIRGH<br>LR   | Homo sapiens |
| 1 | 1.00 | 1 | 1 | -0.01 | -0.008 | 0.019  | -0.003 | -0.011 | t | 119498 | MRKSTGT<br>AS                | Homo sapiens |
| 1 | 1.00 | 1 | 1 | 0.02  | 0.022  | 0.027  | 0.027  | 0.03   | t | 108037 | MTQMPT<br>NHAMQLI<br>LE      | Homo sapiens |
| 1 | 1.00 | 1 | 1 | 0.03  | 0.03   | 0.059  | 0.03   | 0.03   | t | 127609 | AVLRAPQ<br>NPPPPGP<br>Q      | Homo sapiens |
| 1 | 1.00 | 1 | 1 | -0.02 | -0.016 | -0.013 | -0.023 | -0.017 | t | 30292  | KEAIPMAV<br>EMAKSQ           | Homo sapiens |
| 1 | 1.00 | 1 | 1 | 0.01  | 0.01   | 0.01   | 0.01   | 0.02   | t | 57556  | SEMPQLP                      | Mus musculus |
| 1 | 1.00 | 1 | 1 | -0.03 | -0.03  | -0.023 | -0.03  | -0.03  | t | 95690  | PTRTPDQA<br>EPKKPTPP<br>TYET | Mus musculus |
| 1 | 1.00 | 1 | 1 | -0.02 | -0.017 | 0.007  | -0.02  | -0.02  | t | 44250  | NIIRTKKQ                     | Mus musculus |
| 1 | 1.00 | 1 | 1 | -0.02 | -0.017 | 0.007  | -0.02  | -0.02  | t | 44250  | NIIRTKKQ                     | Mus musculus |
| 1 | 1.00 | 1 | 1 | 0.02  | 0.02   | 0.043  | 0.02   | 0.022  | t | 38997  | LQTASRQA<br>E                | Homo sapiens |

|   |      |   |   |       |        |        |        |        |   |        |                              |                                  |
|---|------|---|---|-------|--------|--------|--------|--------|---|--------|------------------------------|----------------------------------|
| 1 | 1.00 | 1 | 1 | -0.04 | -0.042 | -0.026 | -0.041 | -0.039 | t | 50508  | QDPRVRG<br>LYFPAGG           | Mus<br>musculu<br>s              |
| 1 | 1.00 | 1 | 1 | -0.04 | -0.042 | -0.026 | -0.041 | -0.039 | t | 50508  | QDPRVRG<br>LYFPAGG           | Mus<br>musculu<br>s              |
| 1 | 1.00 | 1 | 1 | 0.02  | 0.016  | 0.03   | 0.019  | 0.02   | t | 71189  | VSVITPGT<br>NASSEVAV<br>L    | Oryctola<br>gus<br>cuniculu<br>s |
| 1 | 1.00 | 1 | 1 | -0.04 | -0.037 | -0.026 | -0.04  | -0.04  | t | 66910  | TTVVRRRG<br>R                | Mus<br>musculu<br>s              |
| 1 | 1.00 | 1 | 1 | 0     | 0.002  | 0.014  | -0.003 | 0      | t | 60532  | SQQIKMA<br>NKKMKKE<br>Q      | Homo<br>sapiens                  |
| 1 | 1.00 | 1 | 1 | -0.03 | -0.028 | -0.014 | -0.027 | -0.029 | t | 64642  | TKPTDGN<br>CTCIPISS<br>WAF   | Homo<br>sapiens                  |
| 1 | 1.00 | 1 | 1 | -0.02 | -0.02  | -0.013 | -0.014 | -0.013 | t | 125185 | NSSSSQFQ<br>IHG              | Mus<br>musculu<br>s              |
| 1 | 1.00 | 1 | 1 | 0.01  | 0.01   | 0.031  | 0.01   | 0.008  | t | 27498  | IMGYSTP<br>WRYLDFN<br>ALNLFF | Homo<br>sapiens                  |
| 1 | 1.00 | 1 | 1 | -0.05 | -0.05  | -0.033 | -0.05  | -0.05  | t | 8530   | DHCPVVE<br>VNGVTIQV          | Homo<br>sapiens                  |
| 1 | 1.00 | 1 | 1 | 0     | 0.003  | 0.027  | 0      | 0.001  | t | 74006  | YGGIYMN<br>G                 | Mus<br>musculu<br>s              |
| 1 | 1.00 | 1 | 1 | -0.06 | -0.06  | -0.055 | -0.057 | -0.05  | t | 69989  | VMLPWL                       | Homo<br>sapiens                  |
| 1 | 1.00 | 1 | 1 | -0.07 | -0.074 | -0.057 | -0.073 | -0.07  | t | 142325 | VIIKRGKV<br>EVEGLID          | Oryctola<br>gus<br>cuniculu<br>s |
| 1 | 1.00 | 1 | 1 | -0.04 | -0.04  | -0.018 | -0.039 | -0.042 | t | 5476   | AVMRERG<br>VYDTV             | Mus<br>musculu<br>s              |
| 1 | 1.00 | 1 | 1 | -0.03 | -0.026 | -0.01  | -0.03  | -0.028 | t | 48966  | PQAMQW<br>NSTAF              | Mus<br>musculu<br>s              |

|   |      |   |   |       |        |        |        |        |   |        |                              |                       |
|---|------|---|---|-------|--------|--------|--------|--------|---|--------|------------------------------|-----------------------|
| 1 | 1.00 | 1 | 1 | -0.04 | -0.036 | -0.023 | -0.039 | -0.04  | t | 104227 | RQPIPKAR<br>RPEGRTW<br>AQPGY | Homo sapiens          |
| 1 | 1.00 | 1 | 1 | -0.02 | -0.018 | -0.011 | -0.023 | -0.017 | t | 150852 | HIGGLSILD<br>PIFAVL          | Homo sapiens          |
| 1 | 1.00 | 1 | 1 | -0.04 | -0.04  | -0.031 | -0.044 | -0.04  | t | 135972 | PRRPGGLG<br>GSGG             | Homo sapiens          |
| 1 | 1.00 | 1 | 1 | -0.01 | -0.01  | -0.01  | -0.01  | -0.007 | t | 135568 | KPSKPKTN<br>MKHMAG<br>AAAAG  | Mus musculus          |
| 1 | 1.00 | 1 | 1 | -0.01 | -0.01  | -0.01  | -0.01  | -0.007 | t | 135568 | KPSKPKTN<br>MKHMAG<br>AAAAG  | Mus musculus          |
| 1 | 1.00 | 1 | 1 | 0     | 0      | 0      | -0.004 | 0.007  | t | 125482 | LLKFLGIFN<br>TGLKMFP<br>DLTK | Homo sapiens          |
| 1 | 1.00 | 1 | 1 | 0.03  | 0.03   | 0.03   | 0.03   | 0.039  | t | 138088 | WLDLSKT                      | Mus musculus          |
| 1 | 1.00 | 1 | 1 | -0.01 | -0.008 | 0.017  | -0.009 | -0.01  | t | 66435  | TSSLASL                      | Homo sapiens          |
| 1 | 1.00 | 1 | 1 | 0.03  | 0.027  | 0.036  | 0.03   | 0.039  | t | 79610  | LTMTSPI                      | Oryctolagus cuniculus |
| 1 | 1.00 | 1 | 1 | 0.03  | 0.03   | 0.036  | 0.03   | 0.039  | t | 79610  | LTMTSPI                      | Oryctolagus cuniculus |
| 1 | 1.00 | 1 | 1 | 0.03  | 0.027  | 0.036  | 0.03   | 0.039  | t | 79610  | LTMTSPI                      | Oryctolagus cuniculus |
| 1 | 1.00 | 1 | 1 | -0.01 | -0.012 | 0.001  | -0.011 | -0.009 | t | 77955  | MCSPTALR<br>CQAH             | Mus musculus          |
| 1 | 1.00 | 1 | 1 | 0.02  | 0.018  | 0.037  | 0.019  | 0.018  | t | 96558  | LIGTGLQV<br>KMPKSHK<br>AIQAD | Mus musculus          |
| 1 | 1.00 | 1 | 1 | -0.02 | -0.022 | -0.013 | -0.027 | -0.02  | t | 156966 | SVTKLGDP<br>RAPR             | Mus musculus          |

|   |      |   |   |       |        |        |        |        |   |        |                              |                                  |
|---|------|---|---|-------|--------|--------|--------|--------|---|--------|------------------------------|----------------------------------|
| 1 | 1.00 | 1 | 1 | 0.01  | 0.014  | 0.018  | 0.01   | 0.013  | t | 41175  | MAYGSDD<br>NDDKNKS<br>LDHKHN | Aotus<br>nancyma<br>ae           |
| 1 | 1.00 | 1 | 1 | -0.04 | -0.04  | -0.03  | -0.04  | -0.041 | t | 137755 | HQCHQES<br>TGRSRGRC<br>GRSGS | Mus<br>musculu<br>s              |
| 1 | 1.00 | 1 | 1 | 0     | 0      | 0.017  | 0      | 0.002  | t | 21867  | GQGGGTH<br>NQWNKP            | Oryctola<br>gus<br>cuniculu<br>s |
| 1 | 1.00 | 1 | 1 | -0.04 | -0.047 | -0.03  | -0.04  | -0.04  | t | 13893  | EQNQEQK<br>RAAQRAA<br>G      | Oryctola<br>gus<br>cuniculu<br>s |
| 1 | 1.00 | 1 | 1 | -0.01 | -0.01  | -0.01  | -0.006 | 0      | t | 144101 | TMMQTM<br>SFLRGF             | Homo<br>sapiens                  |
| 1 | 1.00 | 1 | 1 | 0     | 0      | 0.011  | 0      | 0      | t | 63545  | TETAAPAV<br>ADARKPPS<br>GKKK | Homo<br>sapiens                  |
| 1 | 1.00 | 1 | 1 | 0.01  | 0.01   | 0.025  | 0.01   | 0.01   | t | 17308  | FPIDSSCN<br>ATQY             | Mus<br>musculu<br>s              |
| 1 | 1.00 | 1 | 1 | 0.01  | 0.007  | 0.025  | 0.01   | 0.01   | t | 17308  | FPIDSSCN<br>ATQY             | Oryctola<br>gus<br>cuniculu<br>s |
| 1 | 1.00 | 1 | 1 | 0.01  | 0.01   | 0.025  | 0.01   | 0.01   | t | 17308  | FPIDSSCN<br>ATQY             | Mus<br>musculu<br>s              |
| 1 | 1.00 | 1 | 1 | 0     | -0.005 | 0.01   | -0.003 | 0      | t | 110840 | EVTIGDIEE<br>PPILEVVPE<br>TH | Bos<br>taurus                    |
| 1 | 1.00 | 1 | 1 | -0.02 | -0.022 | -0.015 | -0.027 | -0.018 | t | 98698  | APKPAPQP<br>GP               | Mus<br>musculu<br>s              |
| 1 | 1.00 | 1 | 1 | 0     | 0      | 0      | -0.002 | 0.006  | t | 16101  | FHENWPS                      | Homo<br>sapiens                  |
| 1 | 1.00 | 1 | 1 | 0     | 0      | 0.01   | 0      | 0.003  | t | 139044 | EYWYCGM<br>NRTGC             | Mus<br>musculu<br>s              |
| 1 | 1.00 | 1 | 1 | -0.03 | -0.035 | -0.022 | -0.033 | -0.028 | t | 1453   | AGARRGD<br>LAHLAAAH<br>ARHLP | Bos<br>taurus                    |



|   |      |   |   |       |        |        |        |        |   |        |                              |                                  |
|---|------|---|---|-------|--------|--------|--------|--------|---|--------|------------------------------|----------------------------------|
| 1 | 1.00 | 1 | 1 | -0.01 | -0.008 | 0.012  | -0.013 | -0.01  | t | 43435  | NDFHFEVF<br>NFVP             | Homo<br>sapiens                  |
| 1 | 1.00 | 1 | 1 | 0     | -0.002 | 0.017  | 0.003  | 0      | t | 62403  | SVYAWER<br>KKISNCVA<br>DY    | Mus<br>musculu<br>s              |
| 1 | 1.00 | 1 | 1 | -0.06 | -0.06  | -0.039 | -0.06  | -0.058 | t | 32658  | KPARLI                       | Homo<br>sapiens                  |
| 1 | 1.00 | 1 | 1 | -0.01 | -0.008 | 0.004  | -0.009 | -0.01  | t | 50809  | QFPFNASD<br>SVGQQIKV<br>IPVD | Homo<br>sapiens                  |
| 1 | 1.00 | 1 | 1 | 0     | 0      | 0.016  | 0      | 0.003  | t | 11081  | EAIPALTA<br>VETGHTSQ<br>V    | Oryctola<br>gus<br>cuniculu<br>s |
| 1 | 1.00 | 1 | 1 | 0     | 0      | 0.017  | 0      | 0      | t | 5350   | AVGPGRW<br>DED               | Mus<br>musculu<br>s              |
| 1 | 1.00 | 1 | 1 | 0.02  | 0.022  | 0.02   | 0.027  | 0.03   | t | 108086 | QTRGFPSC<br>ERGYLSP          | Homo<br>sapiens                  |
| 1 | 1.00 | 1 | 1 | -0.01 | -0.006 | 0.012  | -0.01  | -0.011 | t | 100222 | KNSFSLGE<br>NPNANP           | Aotus<br>nancyma<br>ae           |
| 1 | 1.00 | 1 | 1 | 0.01  | 0.014  | 0.032  | 0.01   | 0.012  | t | 62942  | TAPGPGEV                     | Homo<br>sapiens                  |
| 1 | 1.00 | 1 | 1 | -0.02 | -0.016 | 0.001  | -0.019 | -0.02  | t | 65391  | TNPMTGA<br>LLRAS             | Homo<br>sapiens                  |
| 1 | 1.00 | 1 | 1 | 0     | 0      | 0.017  | -0.003 | 0      | t | 112319 | SKIFKLGGR<br>DSRSGSP<br>MARR | Homo<br>sapiens                  |
| 1 | 1.00 | 1 | 1 | 0     | 0.003  | 0.017  | 0      | 0      | t | 15982  | FGGETFTP<br>DWMMEV<br>AIDNE  | Mus<br>musculu<br>s              |
| 1 | 1.00 | 1 | 1 | 0.01  | 0.013  | 0.023  | 0.01   | 0.014  | t | 7909   | DEALNNR                      | Mus<br>musculu<br>s              |
| 1 | 1.00 | 1 | 1 | 0     | 0      | 0.022  | 0      | 0.001  | t | 50931  | QGPGAPQ<br>GPGAPQG<br>PGAP   | Mus<br>musculu<br>s              |

|   |      |   |   |       |        |        |        |        |   |        |                               |                                  |
|---|------|---|---|-------|--------|--------|--------|--------|---|--------|-------------------------------|----------------------------------|
| 1 | 1.00 | 1 | 1 | -0.02 | -0.02  | -0.027 | -0.026 | -0.021 | t | 108125 | SHQESTRG<br>RSRGRSGR<br>SGS   | Homo<br>sapiens                  |
| 1 | 1.00 | 1 | 1 | -0.06 | -0.057 | -0.047 | -0.06  | -0.058 | t | 100087 | GTNPLPLP<br>FQYYRIRK<br>AK    | Mus<br>musculu<br>s              |
| 1 | 1.00 | 1 | 1 | -0.05 | -0.048 | -0.045 | -0.049 | -0.048 | t | 57540  | SELSPLLLT<br>TTQWQVL<br>PCSF  | Homo<br>sapiens                  |
| 1 | 1.00 | 1 | 1 | -0.03 | -0.026 | -0.021 | -0.029 | -0.03  | t | 16449  | FKQKARGL<br>LQTATKQA<br>EAAA  | Homo<br>sapiens                  |
| 1 | 1.00 | 1 | 1 | -0.02 | -0.016 | 0.006  | -0.017 | -0.02  | t | 1497   | AGEPYVIE<br>QGMMDP<br>AK      | Homo<br>sapiens                  |
| 1 | 1.00 | 1 | 1 | -0.01 | -0.01  | -0.012 | -0.01  | 0      | t | 77951  | LPTMLSPT<br>GLSR              | Mus<br>musculu<br>s              |
| 1 | 1.00 | 1 | 1 | -0.08 | -0.08  | -0.051 | -0.08  | -0.082 | t | 80049  | TGELTMYW<br>WV                | Mus<br>musculu<br>s              |
| 1 | 1.00 | 1 | 1 | -0.04 | -0.036 | -0.023 | -0.039 | -0.04  | t | 104187 | PRRGPRLG<br>VRATRKT<br>ERSQ   | Homo<br>sapiens                  |
| 1 | 1.00 | 1 | 1 | 0.04  | 0.042  | 0.054  | 0.037  | 0.042  | t | 75274  | YP EEVVEE<br>VVPEEVVE<br>EVVP | Homo<br>sapiens                  |
| 1 | 1.00 | 1 | 1 | -0.03 | -0.033 | -0.03  | -0.03  | -0.028 | t | 105562 | VAVVRTPP<br>KSPSSAK           | Oryctola<br>gus<br>cuniculu<br>s |
| 1 | 1.00 | 1 | 1 | -0.03 | -0.03  | -0.03  | -0.03  | -0.028 | t | 105561 | VAVVRTPP<br>KSPSSAK           | Mus<br>musculu<br>s              |
| 1 | 1.00 | 1 | 1 | -0.01 | -0.012 | 0.004  | -0.017 | -0.012 | t | 14414  | ETHVTGGS<br>AGRT              | Rattus<br>norvegic<br>us         |
| 1 | 1.00 | 1 | 1 | -0.06 | -0.058 | -0.053 | -0.053 | -0.051 | t | 130754 | CLKRSKLR<br>C                 | Homo<br>sapiens                  |
| 1 | 1.00 | 1 | 1 | 0.03  | 0.032  | 0.047  | 0.031  | 0.03   | t | 97104  | WVGVNLE<br>DPASRDLV<br>VSYVN  | Homo<br>sapiens                  |

|   |      |   |   |       |        |        |        |        |   |        |                              |                                  |
|---|------|---|---|-------|--------|--------|--------|--------|---|--------|------------------------------|----------------------------------|
| 1 | 1.00 | 1 | 1 | 0.05  | 0.05   | 0.057  | 0.05   | 0.06   | t | 130850 | GGIYQDLV<br>S                | Homo<br>sapiens                  |
| 1 | 1.00 | 1 | 1 | 0.03  | 0.03   | 0.038  | 0.03   | 0.032  | t | 10888  | DYGGDSTT<br>PRPRYNAT<br>TYLP | Oryctola<br>gus<br>cuniculu<br>s |
| 1 | 1.00 | 1 | 1 | -0.02 | -0.02  | -0.013 | -0.02  | -0.015 | t | 151679 | LAALTRTP<br>VVSP             | Mus<br>musculu<br>s              |
| 1 | 1.00 | 1 | 1 | 0.02  | 0.02   | 0.046  | 0.017  | 0.02   | t | 10990  | EAAKQGE                      | Homo<br>sapiens                  |
| 1 | 1.00 | 1 | 1 | 0.03  | 0.03   | 0.037  | 0.039  | 0.04   | t | 107815 | EIDGYNN<br>QFKKSPLP          | Homo<br>sapiens                  |
| 1 | 1.00 | 1 | 1 | -0.02 | -0.016 | -0.003 | -0.02  | -0.019 | t | 71346  | VTGSVVCT<br>TAAGNVNI<br>AIGG | Homo<br>sapiens                  |
| 1 | 1.00 | 1 | 1 | -0.01 | -0.008 | -0.006 | -0.011 | -0.008 | t | 27724  | INQAIDNI<br>NNFINGCS<br>VSY  | Homo<br>sapiens                  |
| 1 | 1.00 | 1 | 1 | -0.01 | -0.008 | -0.005 | -0.009 | 0      | t | 7188   | CTPATLLLC                    | Homo<br>sapiens                  |
| 1 | 1.00 | 1 | 1 | -0.06 | -0.065 | -0.039 | -0.057 | -0.058 | t | 95431  | GSLAARVV                     | Bos<br>taurus                    |
| 1 | 1.00 | 1 | 1 | 0.02  | 0.022  | 0.02   | 0.023  | 0.03   | t | 132839 | HSISLGATP<br>TLP             | Homo<br>sapiens                  |
| 1 | 1.00 | 1 | 1 | 0.01  | 0.008  | 0.015  | 0.009  | 0.02   | t | 79118  | WKSLPF                       | Mus<br>musculu<br>s              |
| 1 | 1.00 | 1 | 1 | 0     | 0      | 0.019  | 0      | 0      | t | 13680  | EPKKDKKK<br>KTDEAQPL         | Homo<br>sapiens                  |
| 1 | 1.00 | 1 | 1 | 0.02  | 0.02   | 0.041  | 0.02   | 0.021  | t | 53467  | REDDQPSS                     | Oryctola<br>gus<br>cuniculu<br>s |
| 1 | 1.00 | 1 | 1 | -0.02 | -0.018 | 0.007  | -0.017 | -0.02  | t | 45013  | NMPASMK<br>RVRIE             | Rattus<br>norvegic<br>us         |

|   |      |   |   |       |        |        |        |        |   |        |                              |                                  |
|---|------|---|---|-------|--------|--------|--------|--------|---|--------|------------------------------|----------------------------------|
| 1 | 1.00 | 1 | 1 | -0.03 | -0.032 | -0.023 | -0.037 | -0.031 | t | 118391 | GVDQHDN<br>GSRAR             | Mus<br>musculu<br>s              |
| 1 | 1.00 | 1 | 1 | -0.01 | -0.013 | 0.009  | -0.01  | -0.01  | t | 70457  | VPQVRKET<br>RASSR            | Bos<br>taurus                    |
| 1 | 1.00 | 1 | 1 | -0.01 | -0.006 | 0.009  | -0.01  | -0.01  | t | 70457  | VPQVRKET<br>RASSR            | Cavia<br>porcellu<br>s           |
| 1 | 1.00 | 1 | 1 | -0.07 | -0.068 | -0.063 | -0.069 | -0.07  | t | 29757  | KAAPKRAA<br>PKRAAPKK<br>AAPK | Homo<br>sapiens                  |
| 1 | 1.00 | 1 | 1 | -0.07 | -0.068 | -0.063 | -0.069 | -0.07  | t | 29757  | KAAPKRAA<br>PKRAAPKK<br>AAPK | Homo<br>sapiens                  |
| 1 | 1.00 | 1 | 1 | -0.07 | -0.068 | -0.063 | -0.069 | -0.07  | t | 29757  | KAAPKRAA<br>PKRAAPKK<br>AAPK | Homo<br>sapiens                  |
| 1 | 1.00 | 1 | 1 | -0.07 | -0.068 | -0.063 | -0.069 | -0.07  | t | 29757  | KAAPKRAA<br>PKRAAPKK<br>AAPK | Homo<br>sapiens                  |
| 1 | 1.00 | 1 | 1 | -0.07 | -0.068 | -0.063 | -0.069 | -0.07  | t | 29757  | KAAPKRAA<br>PKRAAPKK<br>AAPK | Homo<br>sapiens                  |
| 1 | 1.00 | 1 | 1 | 0     | -0.005 | 0      | -0.007 | 0.001  | t | 144208 | AQAGGPD<br>GAAAGGG           | Bos<br>taurus                    |
| 1 | 1.00 | 1 | 1 | -0.01 | -0.008 | 0.009  | -0.003 | 0      | t | 104368 | YSPANK                       | Homo<br>sapiens                  |
| 1 | 1.00 | 1 | 1 | -0.01 | -0.009 | 0.013  | -0.007 | -0.012 | t | 7349   | CYCYGVDP<br>HIKVWDY          | Equus<br>caballus                |
| 1 | 1.00 | 1 | 1 | -0.04 | -0.043 | -0.021 | -0.04  | -0.038 | t | 38584  | LPLPWLPG                     | Oryctola<br>gus<br>cuniculu<br>s |
| 1 | 1.00 | 1 | 1 | -0.02 | -0.017 | -0.001 | -0.02  | -0.018 | t | 56519  | RYDSRPPE<br>DVF              | Mus<br>musculu<br>s              |
| 1 | 1.00 | 1 | 1 | 0     | -0.002 | 0.007  | -0.007 | 0      | t | 144809 | VLAPGGT<br>HSRGLLE<br>M      | Mus<br>musculu<br>s              |

|   |      |   |   |       |        |        |        |        |   |        |                              |                                   |
|---|------|---|---|-------|--------|--------|--------|--------|---|--------|------------------------------|-----------------------------------|
| 1 | 1.00 | 1 | 1 | 0     | -0.002 | 0.002  | -0.007 | 0.004  | t | 135921 | EVGWYRS<br>PF                | Mus<br>musculu<br>s               |
| 1 | 1.00 | 1 | 1 | -0.01 | -0.006 | -0.004 | -0.01  | -0.009 | t | 56772  | SAFDDNLT<br>AMNAMG<br>LILNKR | Aotus<br>nancyma<br>ae            |
| 1 | 1.00 | 1 | 1 | -0.01 | -0.01  | 0.006  | -0.01  | -0.008 | t | 18982  | GDGAAGQ<br>PAGDGAA<br>GQPA   | Homo<br>sapiens                   |
| 1 | 1.00 | 1 | 1 | 0.01  | 0.006  | 0.011  | 0.007  | 0.02   | t | 79547  | FHQMPDA                      | Oryctola<br>gus<br>cuniculu<br>s  |
| 1 | 1.00 | 1 | 1 | -0.03 | -0.034 | -0.03  | -0.037 | -0.03  | t | 125540 | QSLRQRKS<br>VNALNSPL<br>HQEY | Oryctola<br>gus<br>cuniculu<br>s  |
| 1 | 1.00 | 1 | 1 | -0.03 | -0.045 | -0.03  | -0.037 | -0.03  | t | 125540 | QSLRQRKS<br>VNALNSPL<br>HQEY | Cricetulu<br>s<br>migrator<br>ius |
| 1 | 1.00 | 1 | 1 | -0.01 | -0.008 | 0.009  | -0.009 | -0.008 | t | 55304  | RPQPTELR<br>Y                | Homo<br>sapiens                   |
| 1 | 1.00 | 1 | 1 | 0.01  | 0.006  | 0.021  | 0.009  | 0.01   | t | 76275  | YVFYSGNG<br>PKASGGD<br>YCIQS | Oryctola<br>gus<br>cuniculu<br>s  |
| 1 | 1.00 | 1 | 1 | 0.01  | 0.008  | 0.021  | 0.009  | 0.01   | t | 76275  | YVFYSGNG<br>PKASGGD<br>YCIQS | Mus<br>musculu<br>s               |
| 1 | 1.00 | 1 | 1 | -0.01 | -0.006 | -0.001 | -0.007 | -0.008 | t | 133871 | LAKLGGAG<br>QAARAGT          | Homo<br>sapiens                   |
| 1 | 1.00 | 1 | 1 | 0     | -0.002 | 0.013  | 0.003  | 0.003  | t | 116677 | ASATQLYK<br>TCKQAGT<br>CPPD  | Mus<br>musculu<br>s               |
| 1 | 1.00 | 1 | 1 | -0.04 | -0.04  | -0.024 | -0.04  | -0.04  | t | 22642  | GTERVRL<br>ELFIYN            | Mus<br>musculu<br>s               |
| 1 | 1.00 | 1 | 1 | -0.02 | -0.028 | -0.013 | -0.02  | -0.02  | t | 125212 | QHWSYGL<br>RPGQHWS<br>YGLRPG | Sus<br>scrofa                     |
| 1 | 1.00 | 1 | 1 | 0     | 0      | 0.006  | 0      | 0.003  | t | 63931  | TGPGTNN<br>PENPITES<br>AHLNV | Oryctola<br>gus<br>cuniculu<br>s  |

|   |      |   |   |       |        |        |        |        |   |        |                              |                       |
|---|------|---|---|-------|--------|--------|--------|--------|---|--------|------------------------------|-----------------------|
| 1 | 1.00 | 1 | 1 | -0.01 | -0.008 | -0.004 | -0.009 | -0.008 | t | 78932  | ATRKTSER<br>SQPRGRR<br>QPI   | Homo sapiens          |
| 1 | 1.00 | 1 | 1 | 0     | 0.004  | 0.02   | -0.003 | -0.001 | t | 13815  | EQEFLKYQ<br>QQQQGGS          | Homo sapiens          |
| 1 | 1.00 | 1 | 1 | -0.03 | -0.034 | -0.014 | -0.027 | -0.027 | t | 116697 | DVCNFASR<br>NDYSYWL<br>STP   | Oryctolagus cuniculus |
| 1 | 1.00 | 1 | 1 | -0.04 | -0.044 | -0.023 | -0.043 | -0.041 | t | 49795  | PTTRTDDK<br>LR               | Oryctolagus cuniculus |
| 1 | 1.00 | 1 | 1 | 0.06  | 0.057  | 0.079  | 0.06   | 0.061  | t | 66072  | TRNTGQP<br>ATDHYYSN<br>V     | Oryctolagus cuniculus |
| 1 | 1.00 | 1 | 1 | 0.03  | 0.028  | 0.029  | 0.033  | 0.042  | t | 106450 | GFSPYPFQ<br>LWTS             | Mus musculus          |
| 1 | 1.00 | 1 | 1 | 0.01  | 0.01   | 0.013  | 0      | 0.011  | t | 98843  | KEGDVFIM<br>PAAHPVA          | Homo sapiens          |
| 1 | 1.00 | 1 | 1 | 0     | 0.004  | 0.012  | -0.003 | 0      | t | 47708  | PGNKKFVV<br>NNLFFNGP<br>CQPH | Homo sapiens          |
| 1 | 1.00 | 1 | 1 | -0.03 | -0.03  | -0.018 | -0.033 | -0.03  | t | 3652   | APLTRGSC<br>RKRNRSP<br>ER    | Homo sapiens          |
| 1 | 1.00 | 1 | 1 | -0.05 | -0.052 | -0.043 | -0.05  | -0.047 | t | 118371 | GGGRDRD<br>RDRGGG            | Mus musculus          |
| 1 | 1.00 | 1 | 1 | 0.02  | 0.018  | 0.012  | 0.017  | 0.031  | t | 101962 | PEPVQEP                      | Mus musculus          |
| 1 | 1.00 | 1 | 1 | -0.04 | -0.04  | -0.02  | -0.042 | -0.039 | t | 156451 | SDATSWR                      | Homo sapiens          |
| 1 | 1.00 | 1 | 1 | 0     | 0.003  | 0.014  | 0      | 0.002  | t | 10600  | DVGCAVD<br>TERMELRC<br>GEG   | Mus musculus          |

|   |      |   |   |       |        |        |        |        |   |        |                              |                       |
|---|------|---|---|-------|--------|--------|--------|--------|---|--------|------------------------------|-----------------------|
| 1 | 1.00 | 1 | 1 | 0.02  | 0.022  | 0.027  | 0.021  | 0.03   | t | 78248  | PQSNLAKT                     | Homo sapiens          |
| 1 | 1.00 | 1 | 1 | 0.04  | 0.036  | 0.058  | 0.04   | 0.04   | t | 93493  | NIQENTQT<br>PTVQEEs          | Mus musculus          |
| 1 | 1.00 | 1 | 1 | -0.02 | -0.02  | -0.011 | -0.02  | -0.017 | t | 118826 | GSGKGAGI<br>GLGVGGG<br>VGA   | Mus musculus          |
| 1 | 1.00 | 1 | 1 | -0.02 | -0.023 | -0.003 | -0.02  | -0.02  | t | 30036  | KAYSNCYP<br>YDVPDY           | Oryctolagus cuniculus |
| 1 | 1.00 | 1 | 1 | -0.03 | -0.03  | -0.027 | -0.03  | -0.028 | t | 57644  | SETFTNKL<br>KEKHTDLG<br>KEG  | Mus musculus          |
| 1 | 1.00 | 1 | 1 | -0.03 | -0.028 | -0.01  | -0.029 | -0.03  | t | 47806  | PHDIDLGE<br>SRVVIQDY<br>DNQH | Homo sapiens          |
| 1 | 1.00 | 1 | 0 | -0.04 | -0.04  | -0.01  | -0.042 | -0.03  | t | 97997  | ELSGGQM<br>RRVAIAGV          | Homo sapiens          |
| 1 | 1.00 | 1 | 1 | -0.05 | -0.052 | -0.043 | -0.057 | -0.05  | t | 114203 | ENPVVHFF<br>FNIVTPRT<br>P    | Mus musculus          |
| 1 | 1.00 | 1 | 1 | 0     | -0.002 | 0      | 0.003  | 0.009  | t | 67164  | TVSRVPW<br>TAWAFHG<br>Y      | Mus musculus          |
| 1 | 1.00 | 1 | 1 | 0     | 0.003  | 0      | 0      | 0.004  | t | 127952 | DYMTQAR<br>GQRSSLA<br>ED     | Mus musculus          |
| 1 | 1.00 | 1 | 1 | -0.01 | -0.007 | 0.002  | -0.01  | -0.008 | t | 34040  | KVIDTLTC<br>GFADLMG<br>YIPLV | Mus musculus          |
| 1 | 1.00 | 1 | 1 | -0.03 | -0.03  | -0.03  | -0.019 | -0.02  | t | 103892 | ERYWLRS                      | Homo sapiens          |
| 1 | 1.00 | 1 | 1 | -0.03 | -0.03  | -0.012 | -0.03  | -0.026 | t | 149323 | GLLGPY                       | Homo sapiens          |
| 1 | 1.00 | 1 | 1 | -0.02 | -0.02  | -0.013 | -0.02  | -0.01  | t | 127904 | YPMSWRG                      | Homo sapiens          |
| 1 | 1.00 | 1 | 1 | -0.02 | -0.02  | -0.011 | -0.02  | -0.019 | t | 113342 | DSYFRGAP<br>KLLYVRLS<br>HNSL | Mus musculus          |

|   |      |   |   |       |        |        |        |        |   |        |                              |                                  |
|---|------|---|---|-------|--------|--------|--------|--------|---|--------|------------------------------|----------------------------------|
| 1 | 1.00 | 1 | 1 | 0.02  | 0.02   | 0.022  | 0.017  | 0.029  | t | 55723  | RRRPFYHS<br>P                | Homo<br>sapiens                  |
| 1 | 1.00 | 1 | 1 | 0.03  | 0.032  | 0.03   | 0.037  | 0.04   | t | 107887 | HKTTTSPD<br>YTTAVGT          | Homo<br>sapiens                  |
| 1 | 1.00 | 1 | 1 | -0.02 | -0.022 | 0.007  | -0.023 | -0.022 | t | 73580  | YDRNMYL<br>N                 | Mus<br>musculu<br>s              |
| 1 | 1.00 | 1 | 1 | 0     | 0.002  | 0      | -0.007 | 0      | t | 115831 | KSGHRTQ<br>DENP              | Ovis<br>aries                    |
| 1 | 1.00 | 1 | 1 | 0     | -0.004 | 0      | -0.007 | 0      | t | 115831 | KSGHRTQ<br>DENP              | Oryctola<br>gus<br>cuniculu<br>s |
| 1 | 1.00 | 1 | 1 | -0.08 | -0.078 | -0.063 | -0.079 | -0.08  | t | 81211  | DPLKIKRV<br>HA               | Homo<br>sapiens                  |
| 1 | 1.00 | 1 | 1 | -0.05 | -0.052 | -0.032 | -0.047 | -0.048 | t | 78140  | EIMDLDN<br>RHV               | Mus<br>musculu<br>s              |
| 1 | 1.00 | 1 | 1 | -0.01 | -0.014 | 0.003  | -0.011 | -0.008 | t | 47063  | PDCAICWE<br>PSPPWAP<br>E     | Oryctola<br>gus<br>cuniculu<br>s |
| 1 | 1.00 | 1 | 1 | -0.08 | -0.082 | -0.068 | -0.081 | -0.08  | t | 142470 | RRGRRALR<br>GTAG             | Mus<br>musculu<br>s              |
| 1 | 1.00 | 1 | 1 | 0.02  | 0.018  | 0.025  | 0.019  | 0.03   | t | 104183 | PQQMRN<br>N                  | Mus<br>musculu<br>s              |
| 1 | 1.00 | 1 | 1 | 0     | 0      | 0      | 0      | 0.008  | t | 80002  | RKADLEKA<br>LEGAM            | Oryctola<br>gus<br>cuniculu<br>s |
| 1 | 1.00 | 1 | 1 | 0     | 0      | 0      | 0      | 0.008  | t | 10433  | DTNNN                        | Mus<br>musculu<br>s              |
| 1 | 1.00 | 1 | 1 | 0     | 0      | 0      | 0      | 0.008  | t | 7629   | DARSVNG<br>EFPRHVKL<br>KNEIE | Mus<br>musculu<br>s              |
| 1 | 1.00 | 1 | 1 | 0.01  | 0.01   | 0.035  | 0.01   | 0.008  | t | 64391  | TINGLART<br>TADRQTA          | Oryctola<br>gus<br>cuniculu<br>s |



|   |      |   |   |       |        |        |        |        |   |        |                              |                                  |
|---|------|---|---|-------|--------|--------|--------|--------|---|--------|------------------------------|----------------------------------|
| 1 | 1.00 | 1 | 1 | -0.02 | -0.02  | -0.007 | -0.02  | -0.017 | t | 94575  | KVLTTGLP<br>ALISW            | Mus<br>musculu<br>s              |
| 1 | 1.00 | 1 | 1 | 0.01  | 0.01   | 0.022  | 0.01   | 0.009  | t | 31816  | KLEGGGK<br>DIREGGDG<br>DIDRT | Mus<br>musculu<br>s              |
| 1 | 1.00 | 1 | 1 | -0.01 | -0.01  | 0.01   | -0.008 | -0.009 | t | 22949  | GVELNDK<br>NQFKLTSS<br>ANSK  | Homo<br>sapiens                  |
| 1 | 1.00 | 1 | 1 | 0.02  | 0.02   | 0.038  | 0.017  | 0.02   | t | 53409  | RDPYSPSQ<br>DPYSPSQ          | Homo<br>sapiens                  |
| 1 | 1.00 | 1 | 1 | -0.01 | -0.01  | -0.01  | -0.01  | -0.004 | t | 16956  | FLVNAWK<br>SKK               | Homo<br>sapiens                  |
| 1 | 1.00 | 1 | 1 | -0.01 | -0.012 | -0.002 | -0.011 | -0.01  | t | 7629   | DARSVNG<br>EFPRHVKL<br>KNEIE | Mus<br>musculu<br>s              |
| 1 | 1.00 | 1 | 1 | -0.02 | -0.023 | -0.02  | -0.02  | -0.017 | t | 131194 | ALGAQKE<br>AISPPDAA<br>SAAP  | Oryctola<br>gus<br>cuniculu<br>s |
| 1 | 1.00 | 1 | 1 | -0.02 | -0.024 | -0.019 | -0.023 | -0.01  | t | 79566  | HGLHLPV                      | Oryctola<br>gus<br>cuniculu<br>s |
| 1 | 1.00 | 1 | 1 | 0     | 0.003  | 0.017  | 0      | 0      | t | 42187  | MNALVNS<br>TLLETRTT          | Mus<br>musculu<br>s              |
| 1 | 1.00 | 1 | 1 | -0.03 | -0.036 | -0.009 | -0.03  | -0.03  | t | 92778  | GALRNYIG<br>ESSPA            | Oryctola<br>gus<br>cuniculu<br>s |
| 1 | 1.00 | 1 | 1 | 0.01  | 0.008  | 0.01   | 0.003  | 0.011  | t | 119582 | GLQLIQLIN<br>VDEVNQI         | Mus<br>musculu<br>s              |
| 1 | 1.00 | 1 | 1 | -0.02 | -0.018 | -0.01  | -0.019 | -0.014 | t | 56330  | RVKN                         | Homo<br>sapiens                  |
| 1 | 1.00 | 1 | 1 | -0.03 | -0.03  | -0.023 | -0.03  | -0.029 | t | 116729 | GKGRGLSL<br>SRFSWGG<br>RDSRS | Mus<br>musculu<br>s              |
| 1 | 1.00 | 1 | 1 | -0.01 | -0.012 | -0.003 | -0.01  | -0.007 | t | 2193   | AKGHSLPR<br>LVTS             | Mus<br>musculu<br>s              |

|   |      |   |   |       |        |        |        |        |   |        |                              |                                  |
|---|------|---|---|-------|--------|--------|--------|--------|---|--------|------------------------------|----------------------------------|
| 1 | 1.00 | 1 | 1 | 0.01  | 0.01   | 0.028  | 0.01   | 0.009  | t | 31383  | KIPDPPQP<br>DFPQLNSD<br>WVPS | Mus<br>musculu<br>s              |
| 1 | 1.00 | 1 | 1 | -0.01 | -0.014 | -0.009 | -0.013 | 0      | t | 79568  | HWSPPSL                      | Oryctola<br>gus<br>cuniculu<br>s |
| 1 | 1.00 | 1 | 1 | -0.02 | -0.02  | -0.027 | -0.024 | -0.02  | t | 108125 | SHQESTRG<br>RSRGRSGR<br>SGS  | Homo<br>sapiens                  |
| 1 | 1.00 | 1 | 1 | 0     | -0.004 | 0.017  | 0.003  | 0      | t | 47341  | PELDSFKE<br>ELDKYFKN<br>H    | Oryctola<br>gus<br>cuniculu<br>s |
| 1 | 1.00 | 1 | 1 | 0     | -0.002 | 0.017  | 0.003  | 0      | t | 47341  | PELDSFKE<br>ELDKYFKN<br>H    | Mus<br>musculu<br>s              |
| 1 | 1.00 | 1 | 1 | 0.01  | 0.01   | 0.035  | 0.01   | 0.01   | t | 51822  | QPFQPQPEL<br>PYPQPQ          | Mus<br>musculu<br>s              |
| 1 | 1.00 | 1 | 1 | 0.02  | 0.022  | 0.02   | 0.022  | 0.031  | t | 122401 | HSEAETGP<br>P                | Homo<br>sapiens                  |
| 1 | 1.00 | 1 | 1 | 0.01  | 0.009  | 0.035  | 0.01   | 0.01   | t | 38945  | LQPGDDPL                     | Anas<br>platyrhy<br>nchos        |
| 1 | 1.00 | 1 | 1 | -0.02 | -0.018 | -0.017 | -0.021 | -0.019 | t | 19297  | GEIIWTLQ<br>DTQEIKQR<br>VVF  | Homo<br>sapiens                  |
| 1 | 1.00 | 1 | 1 | -0.01 | -0.01  | 0.012  | -0.01  | -0.01  | t | 4079   | AQTASGLV<br>SM               | Homo<br>sapiens                  |
| 1 | 1.00 | 1 | 1 | -0.03 | -0.03  | -0.023 | -0.024 | -0.024 | t | 108200 | VSLGKWL<br>GHPDKF            | Mus<br>musculu<br>s              |
| 1 | 1.00 | 1 | 1 | -0.01 | -0.008 | 0.003  | -0.009 | -0.007 | t | 39998  | LTKSGSTY<br>PVLNVT           | Homo<br>sapiens                  |
| 1 | 1.00 | 1 | 1 | -0.03 | -0.027 | -0.024 | -0.03  | -0.027 | t | 59381  | SLPEFRLH<br>ALLM             | Mus<br>musculu<br>s              |
| 1 | 1.00 | 1 | 1 | -0.06 | -0.058 | -0.04  | -0.063 | -0.06  | t | 45967  | NSSARGW<br>VIH               | Homo<br>sapiens                  |

|   |      |   |   |       |        |        |        |        |   |        |                              |                                  |
|---|------|---|---|-------|--------|--------|--------|--------|---|--------|------------------------------|----------------------------------|
| 1 | 1.00 | 1 | 1 | -0.05 | -0.046 | -0.033 | -0.049 | -0.047 | t | 8939   | DKLYIWGV<br>HHPSTN           | Homo<br>sapiens                  |
| 1 | 1.00 | 1 | 1 | -0.04 | -0.038 | -0.024 | -0.039 | -0.04  | t | 49116  | PQRKTKR<br>NTNRR             | Homo<br>sapiens                  |
| 1 | 1.00 | 1 | 1 | -0.03 | -0.03  | -0.016 | -0.027 | -0.028 | t | 58829  | SKFTEPVK<br>DVMIKSLP<br>ALN  | Homo<br>sapiens                  |
| 1 | 1.00 | 1 | 1 | -0.04 | -0.037 | -0.031 | -0.04  | -0.038 | t | 7424   | CYPKLGAL<br>THC              | Mus<br>musculu<br>s              |
| 1 | 1.00 | 1 | 1 | -0.11 | -0.106 | -0.095 | -0.109 | -0.11  | t | 45616  | NQRKKAR<br>N                 | Homo<br>sapiens                  |
| 1 | 1.00 | 1 | 1 | -0.03 | -0.028 | -0.023 | -0.027 | -0.021 | t | 132943 | WQNVSHS                      | Homo<br>sapiens                  |
| 1 | 1.00 | 1 | 1 | 0.03  | 0.03   | 0.055  | 0.03   | 0.029  | t | 133669 | QQQQQQ<br>QQQQQ              | Mus<br>musculu<br>s              |
| 1 | 1.00 | 1 | 1 | 0     | -0.002 | 0      | -0.001 | 0.007  | t | 138886 | NVGGDNV<br>DIHSIVPV<br>GQDPH | Mus<br>musculu<br>s              |
| 1 | 1.00 | 1 | 1 | 0     | -0.004 | 0      | -0.001 | 0.007  | t | 118058 | PPPGIRGP                     | Oryctola<br>gus<br>cuniculu<br>s |
| 1 | 1.00 | 1 | 1 | 0     | -0.003 | 0      | -0.001 | 0.007  | t | 118058 | PPPGIRGP                     | Oryctola<br>gus<br>cuniculu<br>s |
| 1 | 1.00 | 1 | 1 | 0     | -0.003 | 0      | -0.001 | 0.007  | t | 118060 | PPPGMRP<br>P                 | Oryctola<br>gus<br>cuniculu<br>s |
| 1 | 1.00 | 1 | 1 | 0     | -0.003 | 0      | -0.001 | 0.007  | t | 117344 | PPGMRPP                      | Oryctola<br>gus<br>cuniculu<br>s |
| 1 | 1.00 | 1 | 1 | 0     | -0.004 | 0      | -0.001 | 0.007  | t | 117344 | PPGMRPP                      | Oryctola<br>gus<br>cuniculu<br>s |

|   |      |   |   |       |        |        |        |        |   |        |                              |                                  |
|---|------|---|---|-------|--------|--------|--------|--------|---|--------|------------------------------|----------------------------------|
| 1 | 1.00 | 1 | 1 | -0.01 | -0.012 | -0.003 | -0.017 | -0.009 | t | 144599 | CNGTHPSL<br>RLC              | Mus<br>musculu<br>s              |
| 1 | 1.00 | 1 | 1 | -0.05 | -0.047 | -0.032 | -0.05  | -0.051 | t | 122044 | WSSYMVH<br>WKN               | Mus<br>musculu<br>s              |
| 1 | 1.00 | 1 | 1 | -0.04 | -0.04  | -0.005 | -0.038 | -0.043 | t | 149350 | KRIHIGPG<br>RAFYTT           | Homo<br>sapiens                  |
| 1 | 1.00 | 1 | 1 | 0.01  | 0.01   | 0.01   | 0.011  | 0.02   | t | 106440 | GDKLTLL                      | Mus<br>musculu<br>s              |
| 1 | 1.00 | 1 | 1 | 0.02  | 0.022  | 0.032  | 0.027  | 0.03   | t | 108031 | MGTVLLP<br>NGEFSIEN          | Homo<br>sapiens                  |
| 1 | 1.00 | 1 | 1 | -0.02 | -0.02  | 0.002  | -0.02  | -0.02  | t | 11543  | EEDEREISV<br>PAEIL           | Homo<br>sapiens                  |
| 1 | 1.00 | 1 | 1 | -0.05 | -0.052 | -0.05  | -0.057 | -0.05  | t | 119613 | LSLSRFSW<br>GAEGQRP<br>GFGYG | Rattus<br>norvegic<br>us         |
| 1 | 1.00 | 1 | 1 | -0.06 | -0.058 | -0.042 | -0.057 | -0.06  | t | 65563  | TPERPRLR<br>LVDADDPL<br>LRTA | Homo<br>sapiens                  |
| 1 | 1.00 | 1 | 1 | -0.02 | -0.017 | -0.006 | -0.02  | -0.019 | t | 105209 | GDRSGYSS                     | Mus<br>musculu<br>s              |
| 1 | 1.00 | 1 | 1 | -0.02 | -0.016 | -0.015 | -0.023 | -0.02  | t | 97170  | ADQELGD<br>APFLDRLR<br>RDQKS | Homo<br>sapiens                  |
| 1 | 1.00 | 1 | 1 | -0.02 | -0.022 | 0.012  | -0.021 | -0.022 | t | 26167  | IFSQNMNI<br>KLKMP            | Mus<br>musculu<br>s              |
| 1 | 1.00 | 1 | 1 | -0.02 | -0.022 | 0      | -0.017 | -0.02  | t | 20552  | GKENALLP<br>NW               | Mus<br>musculu<br>s              |
| 1 | 1.00 | 1 | 1 | 0.01  | 0.013  | 0.02   | 0.01   | 0.013  | t | 134078 | GYYPSPDP<br>NTFYAPPY<br>Q    | Mus<br>musculu<br>s              |
| 1 | 1.00 | 1 | 1 | 0.03  | 0.026  | 0.034  | 0.027  | 0.034  | t | 139829 | MKERESQI<br>RDEYDHVL<br>SA   | Oryctola<br>gus<br>cuniculu<br>s |
| 1 | 1.00 | 1 | 1 | -0.01 | -0.007 | -0.003 | -0.009 | -0.003 | t | 136518 | MVRKGEK<br>KLAKP             | Dicentra<br>rchus<br>labrax      |

|   |      |   |   |       |        |        |        |        |   |        |                              |                                  |
|---|------|---|---|-------|--------|--------|--------|--------|---|--------|------------------------------|----------------------------------|
| 1 | 1.00 | 1 | 1 | 0     | 0      | 0      | 0      | 0.008  | t | 122562 | RRQPHVV<br>SQW               | Mus<br>musculu<br>s              |
| 1 | 1.00 | 1 | 1 | -0.02 | -0.02  | -0.018 | -0.022 | -0.016 | t | 10983  | EEAAPVVE<br>SKWRAL           | Homo<br>sapiens                  |
| 1 | 1.00 | 1 | 1 | -0.05 | -0.051 | -0.034 | -0.049 | -0.05  | t | 157193 | EGEWQDG<br>KMHGKGT           | Canis<br>lupus                   |
| 1 | 1.00 | 1 | 1 | -0.03 | -0.026 | -0.016 | -0.03  | -0.03  | t | 41979  | MLKRNKIY<br>FMQRQD           | Myodes<br>glareolu<br>s          |
| 1 | 1.00 | 1 | 1 | 0.01  | 0.014  | 0.026  | 0.011  | 0.01   | t | 38193  | LNDRVVV<br>APDKEILYE<br>AFDE | Homo<br>sapiens                  |
| 1 | 1.00 | 1 | 1 | 0.01  | 0.008  | 0.033  | 0.007  | 0.008  | t | 5969   | CADGYTAE<br>TINEAIKIC<br>G   | Mus<br>musculu<br>s              |
| 1 | 1.00 | 1 | 1 | 0     | 0.002  | 0.019  | 0.001  | 0.002  | t | 55304  | RPQPTELR<br>Y                | Homo<br>sapiens                  |
| 1 | 1.00 | 1 | 1 | 0     | -0.002 | 0.007  | 0.003  | 0.007  | t | 117140 | DWEYSVW<br>LSN               | Mus<br>musculu<br>s              |
| 1 | 1.00 | 1 | 1 | -0.02 | -0.018 | -0.004 | -0.017 | -0.02  | t | 33776  | KTMIRFGD<br>VGLDLDFS<br>AFDA | Homo<br>sapiens                  |
| 1 | 1.00 | 1 | 1 | 0     | -0.002 | 0.007  | 0      | 0.001  | t | 118371 | GGGRDRD<br>RDRGGG            | Mus<br>musculu<br>s              |
| 1 | 1.00 | 1 | 1 | -0.03 | -0.028 | -0.014 | -0.029 | -0.03  | t | 57162  | SDANDKA<br>KKPAGKGS          | Homo<br>sapiens                  |
| 1 | 1.00 | 1 | 1 | 0.01  | 0.011  | 0.045  | 0.01   | 0.008  | t | 61560  | STDPAATD                     | Oryctola<br>gus<br>cuniculu<br>s |
| 1 | 1.00 | 1 | 1 | 0.01  | 0.014  | 0.045  | 0.01   | 0.008  | t | 61560  | STDPAATD                     | Mus<br>musculu<br>s              |
| 1 | 1.00 | 1 | 1 | -0.05 | -0.05  | -0.04  | -0.051 | -0.048 | t | 50360  | QASRNTSK<br>AI               | Mus<br>musculu<br>s              |

|   |      |   |   |       |        |        |        |        |   |        |                              |                                  |
|---|------|---|---|-------|--------|--------|--------|--------|---|--------|------------------------------|----------------------------------|
| 1 | 1.00 | 1 | 1 | 0.06  | 0.062  | 0.067  | 0.061  | 0.062  | t | 8131   | DEQEQQE<br>EQEQQEE<br>QEQ    | Homo<br>sapiens                  |
| 1 | 1.00 | 1 | 1 | -0.01 | -0.01  | -0.01  | -0.01  | -0.007 | t | 122871 | PETQPGPL<br>TLELQIAK<br>DK   | Oryctola<br>gus<br>cuniculu<br>s |
| 1 | 1.00 | 1 | 1 | -0.07 | -0.074 | -0.057 | -0.073 | -0.07  | t | 142292 | SHLQLIYNL<br>TLCELNGT<br>DW  | Oryctola<br>gus<br>cuniculu<br>s |
| 1 | 1.00 | 1 | 1 | -0.02 | -0.02  | 0.005  | -0.017 | -0.02  | t | 134237 | SQWN                         | Mus<br>musculu<br>s              |
| 1 | 1.00 | 1 | 1 | -0.04 | -0.038 | -0.026 | -0.037 | -0.04  | t | 75951  | YTASARGD<br>LAHLTTTH<br>AR   | Cavia<br>porcellu<br>s           |
| 1 | 1.00 | 1 | 1 | 0.03  | 0.03   | 0.03   | 0.03   | 0.04   | t | 121843 | SGLGLFPY<br>SSFIWSC          | Mus<br>musculu<br>s              |
| 1 | 1.00 | 1 | 1 | 0.03  | 0.03   | 0.03   | 0.03   | 0.04   | t | 116846 | TPSYVSK                      | Oryctola<br>gus<br>cuniculu<br>s |
| 1 | 1.00 | 1 | 1 | -0.04 | -0.028 | -0.024 | -0.04  | -0.04  | t | 49116  | PQRKTKR<br>NTNRR             | Pan<br>troglody<br>tes           |
| 1 | 1.00 | 1 | 1 | 0     | -0.002 | 0.017  | -0.003 | -0.002 | t | 96969  | TLKYFETRY<br>IRVDIAAPI<br>LS | Mus<br>musculu<br>s              |
| 1 | 1.00 | 1 | 1 | 0.01  | 0.01   | 0.009  | 0.02   | 0.022  | t | 107031 | YTQKHKH<br>QA                | Homo<br>sapiens                  |
| 1 | 1.00 | 1 | 1 | -0.09 | -0.092 | -0.09  | -0.097 | -0.088 | t | 120156 | QRLMRYW<br>ANF               | Mus<br>musculu<br>s              |
| 1 | 1.00 | 1 | 1 | 0.01  | 0.017  | 0.031  | 0.01   | 0.012  | t | 95759  | RGDLQVL<br>A                 | Cavia<br>porcellu<br>s           |
| 1 | 1.00 | 1 | 1 | -0.03 | -0.033 | -0.014 | -0.03  | -0.028 | t | 62091  | SVDWTKA<br>TVDGVQV<br>KT     | Oryctola<br>gus<br>cuniculu<br>s |

|   |      |   |   |       |        |        |        |        |   |        |                              |                                  |
|---|------|---|---|-------|--------|--------|--------|--------|---|--------|------------------------------|----------------------------------|
| 1 | 1.00 | 1 | 1 | 0     | 0      | 0.001  | 0      | 0.008  | t | 145746 | DPEIVMHS<br>F                | Mus<br>musculu<br>s              |
| 1 | 1.00 | 1 | 1 | -0.03 | -0.028 | -0.01  | -0.033 | -0.029 | t | 70542  | VQDLMKS<br>SGV               | Homo<br>sapiens                  |
| 1 | 1.00 | 1 | 1 | -0.03 | -0.026 | -0.005 | -0.033 | -0.033 | t | 105114 | AYNHFGK<br>RLDQR             | Homo<br>sapiens                  |
| 1 | 1.00 | 1 | 1 | -0.04 | -0.046 | -0.022 | -0.041 | -0.04  | t | 53202  | RASANLAA<br>TKMSECVL<br>G    | Oryctola<br>gus<br>cuniculu<br>s |
| 1 | 1.00 | 1 | 1 | -0.03 | -0.033 | -0.023 | -0.03  | -0.03  | t | 42546  | MSESHVKI<br>SRTIIRGTS<br>PST | Oryctola<br>gus<br>cuniculu<br>s |
| 1 | 1.00 | 1 | 1 | -0.06 | -0.062 | -0.058 | -0.067 | -0.055 | t | 122536 | QAQIHGP<br>R                 | Mus<br>musculu<br>s              |
| 1 | 1.00 | 1 | 1 | -0.02 | -0.023 | -0.01  | -0.02  | -0.018 | t | 67972  | VDHFHLG<br>DDMDPEL           | Oryctola<br>gus<br>cuniculu<br>s |
| 1 | 1.00 | 1 | 1 | -0.02 | -0.022 | -0.013 | -0.027 | -0.02  | t | 119601 | KGNNVHG<br>FQKQIIRSF<br>Y    | Rattus<br>norvegic<br>us         |
| 1 | 1.00 | 1 | 1 | 0     | 0.003  | 0.007  | 0      | 0.01   | t | 137415 | HAPRYHY                      | Mus<br>musculu<br>s              |
| 1 | 1.00 | 1 | 1 | 0     | 0      | 0.006  | 0      | 0.009  | t | 79606  | LPYTMWV                      | Oryctola<br>gus<br>cuniculu<br>s |
| 1 | 1.00 | 1 | 1 | 0.05  | 0.046  | 0.068  | 0.05   | 0.05   | t | 93493  | NIQENTQT<br>PTVQEEs          | Mus<br>musculu<br>s              |
| 1 | 1.00 | 1 | 1 | 0.02  | 0.022  | 0.04   | 0.021  | 0.02   | t | 57737  | SFDASQST<br>MA               | Homo<br>sapiens                  |
| 1 | 1.00 | 1 | 1 | 0     | 0      | 0.002  | 0      | 0.007  | t | 108607 | RGAQGPP<br>GATGF             | Mus<br>musculu<br>s              |
| 1 | 1.00 | 1 | 1 | 0     | 0      | 0.002  | 0      | 0.007  | t | 106656 | MPGERGA<br>AGIAGPK           | Mus<br>musculu<br>s              |

|   |      |   |   |       |        |        |        |        |   |        |                              |                                  |
|---|------|---|---|-------|--------|--------|--------|--------|---|--------|------------------------------|----------------------------------|
| 1 | 1.00 | 1 | 1 | 0     | 0.003  | 0.002  | 0      | 0.007  | t | 46317  | NTWTTCCQ<br>SIAFPSK          | Mus<br>musculu<br>s              |
| 1 | 1.00 | 1 | 1 | 0     | 0      | 0.002  | 0      | 0.007  | t | 23599  | HCLGKWL<br>GHPDKF            | Mus<br>musculu<br>s              |
| 1 | 1.00 | 1 | 1 | -0.01 | -0.008 | -0.012 | -0.013 | -0.008 | t | 30334  | KEDVPSER<br>YLGYLEQL<br>LRLK | Homo<br>sapiens                  |
| 1 | 1.00 | 1 | 1 | 0.01  | 0.007  | 0.03   | 0.01   | 0.012  | t | 30853  | KFSISIDQ                     | Oryctola<br>gus<br>cuniculu<br>s |
| 1 | 1.00 | 1 | 1 | 0.03  | 0.03   | 0.03   | 0.023  | 0.033  | t | 158588 | FERVPGEV<br>T                | Homo<br>sapiens                  |
| 1 | 1.00 | 1 | 1 | 0     | 0.002  | 0      | 0.007  | 0.012  | t | 119671 | WLNGKEY<br>K                 | Homo<br>sapiens                  |
| 1 | 1.00 | 1 | 1 | 0     | 0      | 0      | 0      | 0.003  | t | 3693   | APPPPEHR<br>GGPEEFEG<br>AGDG | Mus<br>musculu<br>s              |
| 1 | 1.00 | 1 | 1 | 0.01  | 0.009  | 0.019  | 0.011  | 0.012  | t | 51867  | QPKVDAN<br>ADEEAEAV<br>GEDDL | Canis<br>lupus                   |
| 1 | 1.00 | 1 | 1 | 0.01  | 0.008  | 0.028  | 0.007  | 0.01   | t | 36579  | LIKNQCVN<br>FNFNGLTG<br>T    | Mus<br>musculu<br>s              |
| 1 | 1.00 | 1 | 1 | 0.01  | 0.006  | 0.028  | 0.007  | 0.01   | t | 36579  | LIKNQCVN<br>FNFNGLTG<br>T    | Oryctola<br>gus<br>cuniculu<br>s |
| 1 | 1.00 | 1 | 1 | 0.01  | 0.006  | 0.024  | 0.013  | 0.012  | t | 5387   | AVIRRANN<br>VLKNEMK<br>RYKGL | Oryctola<br>gus<br>cuniculu<br>s |
| 1 | 1.00 | 1 | 1 | 0.01  | 0.012  | 0.018  | 0.011  | 0.012  | t | 65774  | TPSPVVVG<br>TTDRSGAP<br>TYSW | Homo<br>sapiens                  |
| 1 | 1.00 | 1 | 1 | -0.05 | -0.051 | -0.034 | -0.051 | -0.05  | t | 883    | AEELTPGR<br>FRTIVC           | Myodes<br>glareolu<br>s          |
| 1 | 1.00 | 1 | 1 | -0.03 | -0.03  | -0.025 | -0.027 | -0.029 | t | 17262  | FPCDRLSG<br>YWERGIPS<br>PCVR | Homo<br>sapiens                  |



|   |      |   |   |       |        |        |        |        |   |        |                              |                                  |
|---|------|---|---|-------|--------|--------|--------|--------|---|--------|------------------------------|----------------------------------|
| 1 | 1.00 | 1 | 1 | -0.01 | -0.013 | -0.007 | -0.01  | 0      | t | 19527  | GFFSRLN<br>WLTKS             | Oryctola<br>gus<br>cuniculu<br>s |
| 1 | 1.00 | 1 | 1 | -0.01 | -0.006 | 0.007  | -0.009 | -0.01  | t | 104017 | KTKRNTNR<br>RPQDVKEP<br>GGGQ | Homo<br>sapiens                  |
| 1 | 1.00 | 1 | 1 | 0     | 0      | -0.005 | -0.007 | 0.002  | t | 62141  | SVGHMTG<br>RFTSLFSV<br>G     | Homo<br>sapiens                  |
| 1 | 1.00 | 1 | 1 | 0.07  | 0.068  | 0.09   | 0.069  | 0.073  | t | 38214  | LNFGQTG<br>DADSV             | Mus<br>musculu<br>s              |
| 1 | 1.00 | 1 | 1 | 0     | 0.004  | 0.025  | 0      | 0      | t | 22361  | GSGVRGD<br>SGSLALRV<br>ARQL  | Cavia<br>porcellu<br>s           |
| 1 | 1.00 | 1 | 1 | -0.02 | -0.025 | -0.005 | -0.023 | -0.022 | t | 97075  | VSCYGKTK<br>CTASNKNR         | Oryctola<br>gus<br>cuniculu<br>s |
| 1 | 1.00 | 1 | 1 | -0.05 | -0.05  | -0.034 | -0.05  | -0.05  | t | 57812  | SFKVTALN<br>VVSRRYLA<br>SLHK | Sus<br>scrofa                    |
| 1 | 1.00 | 1 | 1 | 0.02  | 0.023  | 0.029  | 0.02   | 0.02   | t | 745    | ADPQKQN<br>SVSNDSTV<br>INVYN | Mus<br>musculu<br>s              |
| 1 | 1.00 | 1 | 1 | -0.03 | -0.026 | -0.01  | -0.03  | -0.028 | t | 48967  | PQAMQW<br>NSTAFH             | Mus<br>musculu<br>s              |
| 1 | 1.00 | 1 | 1 | 0.01  | 0.013  | 0.032  | 0.007  | 0.01   | t | 94625  | NPACGRH<br>YSC               | Capra<br>hircus                  |
| 1 | 1.00 | 1 | 1 | 0.01  | 0.012  | 0.017  | 0.011  | 0.019  | t | 133525 | ATWYEW<br>NPPWVS             | Homo<br>sapiens                  |
| 1 | 1.00 | 1 | 1 | -0.02 | -0.018 | -0.002 | -0.019 | -0.018 | t | 149511 | VLGVAPSA<br>SLYAVKV          | Cavia<br>porcellu<br>s           |
| 1 | 1.00 | 1 | 1 | 0     | 0      | 0.012  | 0      | 0      | t | 19095  | GDRADGQ<br>AAGDRAD<br>GQAA   | Homo<br>sapiens                  |

|   |      |   |   |       |        |        |        |        |   |        |                              |                                  |
|---|------|---|---|-------|--------|--------|--------|--------|---|--------|------------------------------|----------------------------------|
| 1 | 1.00 | 1 | 1 | 0     | 0.002  | 0.014  | 0.001  | 0      | t | 4733   | ASRAALIEE<br>GQRIAEM<br>LKSK | Homo<br>sapiens                  |
| 1 | 1.00 | 1 | 1 | -0.04 | -0.042 | -0.02  | -0.041 | -0.042 | t | 43589  | NEECTKLK<br>GESGYCQ          | Mus<br>musculu<br>s              |
| 1 | 1.00 | 1 | 1 | -0.02 | -0.022 | -0.012 | -0.021 | -0.018 | t | 58770  | SIYQGHIT<br>GHRMAW           | Homo<br>sapiens                  |
| 1 | 1.00 | 1 | 1 | -0.02 | -0.016 | 0.002  | -0.017 | -0.02  | t | 33043  | KQNIQLIN<br>TNGSWH           | Homo<br>sapiens                  |
| 1 | 1.00 | 1 | 1 | 0     | 0.003  | 0      | 0      | 0.012  | t | 79366  | RDAVMI                       | Mus<br>musculu<br>s              |
| 1 | 1.00 | 1 | 1 | 0.06  | 0.052  | 0.06   | 0.06   | 0.072  | t | 156756 | SGPSYTT                      | Mus<br>musculu<br>s              |
| 1 | 1.00 | 1 | 1 | 0.01  | 0.012  | 0.032  | 0.011  | 0.012  | t | 53436  | RDVSRITFF<br>Q               | Homo<br>sapiens                  |
| 1 | 1.00 | 1 | 1 | -0.06 | -0.064 | -0.045 | -0.061 | -0.06  | t | 70544  | VQECNCSI<br>YPGHVTG<br>HRMAW | Oryctola<br>gus<br>cuniculu<br>s |
| 1 | 1.00 | 1 | 1 | -0.06 | -0.064 | -0.045 | -0.061 | -0.06  | t | 70544  | VQECNCSI<br>YPGHVTG<br>HRMAW | Oryctola<br>gus<br>cuniculu<br>s |
| 1 | 1.00 | 1 | 1 | 0.01  | 0.012  | 0.031  | 0.013  | 0.01   | t | 88362  | SAGTGALA<br>SSAP             | Homo<br>sapiens                  |
| 1 | 1.00 | 1 | 1 | -0.03 | -0.027 | -0.012 | -0.03  | -0.03  | t | 64876  | TLKKGSSG<br>YCAWPAC          | Equus<br>caballus                |
| 1 | 1.00 | 1 | 1 | -0.01 | -0.01  | -0.013 | -0.01  | 0      | t | 79038  | PFWLSD                       | Mus<br>musculu<br>s              |
| 1 | 1.00 | 1 | 1 | -0.05 | -0.05  | -0.029 | -0.043 | -0.05  | t | 20011  | GGSGGRG<br>RGGSGGR<br>GRGGSG | Homo<br>sapiens                  |
| 1 | 1.00 | 1 | 1 | -0.05 | -0.05  | -0.043 | -0.05  | -0.048 | t | 132640 | RTDDKMR<br>MHSHLSH<br>H      | Mus<br>musculu<br>s              |

|   |      |   |   |       |        |        |        |        |   |        |                             |                                  |
|---|------|---|---|-------|--------|--------|--------|--------|---|--------|-----------------------------|----------------------------------|
| 1 | 1.00 | 1 | 1 | 0     | -0.003 | 0.004  | 0      | 0.002  | t | 48993  | PQEQTQH<br>GSPYGRCA<br>NK   | Oryctola<br>gus<br>cuniculu<br>s |
| 1 | 1.00 | 1 | 1 | 0     | -0.002 | 0.007  | -0.007 | 0      | t | 144809 | VLAPGGT<br>HSRGLLE<br>M     | Mus<br>musculu<br>s              |
| 1 | 1.00 | 1 | 1 | 0.01  | 0.008  | 0.026  | 0.003  | 0.011  | t | 136009 | VLVGEKGL<br>FEGG            | Mus<br>musculu<br>s              |
| 1 | 1.00 | 1 | 1 | -0.03 | -0.033 | -0.013 | -0.031 | -0.03  | t | 120650 | ITVVVINT<br>HHRSPSTH<br>TM  | Mus<br>musculu<br>s              |
| 1 | 1.00 | 1 | 1 | -0.03 | -0.032 | -0.018 | -0.033 | -0.03  | t | 87356  | PNCHGPD<br>WASPVQC<br>RHS   | Mus<br>musculu<br>s              |
| 1 | 1.00 | 1 | 1 | -0.01 | -0.012 | 0.015  | -0.007 | -0.008 | t | 36940  | LKLKSIVS<br>WAKKVL          | Mus<br>musculu<br>s              |
| 1 | 1.00 | 1 | 1 | -0.01 | -0.012 | 0.015  | -0.007 | -0.008 | t | 36940  | LKLKSIVS<br>WAKKVL          | Mus<br>musculu<br>s              |
| 1 | 1.00 | 1 | 1 | -0.04 | -0.04  | -0.04  | -0.036 | -0.034 | t | 138196 | KLTSSLRC<br>NCPPLRF         | Homo<br>sapiens                  |
| 1 | 1.00 | 1 | 1 | -0.02 | -0.022 | 0.007  | -0.021 | -0.02  | t | 44250  | NIIRTKKQ                    | Mus<br>musculu<br>s              |
| 1 | 1.00 | 1 | 1 | 0     | 0.004  | 0.015  | 0      | 0.004  | t | 100349 | NPSIFYTYG<br>AAPAR          | Homo<br>sapiens                  |
| 1 | 1.00 | 1 | 1 | -0.01 | -0.008 | -0.003 | -0.003 | -0.001 | t | 138159 | DTWPTAR<br>LTSSMQYI         | Homo<br>sapiens                  |
| 1 | 1.00 | 1 | 1 | 0.01  | 0.01   | 0.01   | 0.006  | 0.019  | t | 132887 | PYGLLTP                     | Homo<br>sapiens                  |
| 1 | 1.00 | 1 | 1 | -0.03 | -0.032 | -0.03  | -0.037 | -0.028 | t | 103998 | IVKWDRD<br>M                | Mus<br>musculu<br>s              |
| 1 | 1.00 | 1 | 1 | -0.02 | -0.023 | -0.004 | -0.02  | -0.018 | t | 53595  | RENMYRY<br>PNQ              | Oryctola<br>gus<br>cuniculu<br>s |
| 1 | 1.00 | 1 | 1 | -0.05 | -0.052 | -0.045 | -0.051 | -0.048 | t | 122599 | SVRLALRN<br>DSACNPV<br>MA   | Mus<br>musculu<br>s              |
| 1 | 1.00 | 1 | 1 | -0.02 | -0.022 | -0.005 | -0.027 | -0.022 | t | 108357 | EVVPHKK<br>MHKDFLE<br>KIGGL | Mus<br>musculu<br>s              |

|   |      |   |   |       |        |        |        |        |   |        |                              |                                  |
|---|------|---|---|-------|--------|--------|--------|--------|---|--------|------------------------------|----------------------------------|
| 1 | 1.00 | 1 | 1 | -0.01 | -0.012 | -0.005 | -0.007 | -0.008 | t | 115902 | PRSPPRSE<br>RQPRSPPR<br>SERQ | Mus<br>musculu<br>s              |
| 1 | 1.00 | 1 | 1 | -0.03 | -0.032 | -0.023 | -0.03  | -0.027 | t | 142480 | VAAVTEKL<br>RAGT             | Mus<br>musculu<br>s              |
| 1 | 1.00 | 1 | 1 | -0.02 | -0.018 | -0.013 | -0.023 | -0.018 | t | 94738  | WAICKRIP<br>NKKP             | Homo<br>sapiens                  |
| 1 | 1.00 | 1 | 1 | -0.05 | -0.047 | -0.038 | -0.05  | -0.05  | t | 10323  | DTDVLLLN<br>NTRPPQG<br>NWFGC | Mus<br>musculu<br>s              |
| 1 | 1.00 | 1 | 1 | 0.06  | 0.06   | 0.06   | 0.06   | 0.07   | t | 79403  | SVGDYG                       | Mus<br>musculu<br>s              |
| 1 | 1.00 | 1 | 1 | 0.08  | 0.078  | 0.086  | 0.073  | 0.089  | t | 144888 | FLPTLEEN<br>KGFA             | Mus<br>musculu<br>s              |
| 1 | 1.00 | 1 | 1 | 0     | -0.003 | 0      | 0      | 0.008  | t | 10227  | DSSAHGTP<br>STPA             | Oryctola<br>gus<br>cuniculu<br>s |
| 1 | 1.00 | 1 | 1 | 0     | 0.002  | 0.009  | 0      | 0.002  | t | 112315 | SHGRTQD<br>ENPVVHFF<br>KNIVT | Homo<br>sapiens                  |
| 1 | 1.00 | 1 | 1 | 0.01  | 0.012  | 0.018  | 0.009  | 0.013  | t | 41175  | MAYGSDD<br>NDDKNKS<br>LDHKHN | Aotus<br>nancyma<br>ae           |
| 1 | 1.00 | 1 | 1 | -0.07 | -0.067 | -0.054 | -0.07  | -0.07  | t | 60443  | SQGRWPP<br>WR                | Mus<br>musculu<br>s              |
| 1 | 1.00 | 1 | 1 | -0.03 | -0.028 | -0.012 | -0.033 | -0.032 | t | 60532  | SQQIKMA<br>NKKMKKE<br>Q      | Homo<br>sapiens                  |
| 1 | 1.00 | 1 | 1 | -0.04 | -0.036 | -0.031 | -0.039 | -0.04  | t | 51074  | QIGYYRRA<br>TRRVGG<br>DGK    | Homo<br>sapiens                  |
| 1 | 1.00 | 1 | 1 | 0.04  | 0.04   | 0.061  | 0.04   | 0.039  | t | 46833  | PAIVPDKE<br>VLYQQYDE<br>MEEC | Homo<br>sapiens                  |
| 1 | 1.00 | 1 | 1 | 0     | 0      | 0.01   | 0.006  | 0.007  | t | 113167 | SIAFPSKTS<br>ASIGSL          | Mus<br>musculu<br>s              |

|   |      |   |   |       |        |        |        |        |   |        |                              |                     |
|---|------|---|---|-------|--------|--------|--------|--------|---|--------|------------------------------|---------------------|
| 1 | 1.00 | 1 | 1 | -0.06 | -0.056 | -0.035 | -0.061 | -0.062 | t | 130810 | EPWWSM<br>H                  | Homo<br>sapiens     |
| 1 | 1.00 | 1 | 1 | 0.03  | 0.03   | 0.037  | 0.03   | 0.04   | t | 127695 | IISGKDS                      | Homo<br>sapiens     |
| 1 | 1.00 | 1 | 1 | -0.03 | -0.03  | -0.023 | -0.03  | -0.03  | t | 22662  | GTGKRNQI<br>TITNDKGR<br>LSKD | Homo<br>sapiens     |
| 1 | 1.00 | 1 | 1 | -0.03 | -0.028 | -0.004 | -0.029 | -0.028 | t | 9633   | DPFFPWP<br>RTTFD             | Homo<br>sapiens     |
| 1 | 1.00 | 1 | 1 | -0.03 | -0.026 | -0.023 | -0.033 | -0.03  | t | 3614   | APKATTDE<br>QKMIEKIN<br>VGFK | Homo<br>sapiens     |
| 1 | 1.00 | 1 | 1 | -0.02 | -0.022 | -0.018 | -0.027 | -0.021 | t | 112123 | GERGAAGI<br>AGPK             | Mus<br>musculu<br>s |
| 1 | 1.00 | 1 | 1 | -0.01 | -0.01  | 0.005  | -0.01  | -0.01  | t | 19098  | GDRADGQ<br>PAGDRAD<br>GQPA   | Homo<br>sapiens     |
| 1 | 1.00 | 1 | 1 | -0.01 | -0.01  | -0.001 | -0.01  | -0.007 | t | 133580 | GFLSSCNF<br>RFCELVR          | Mus<br>musculu<br>s |
| 1 | 1.00 | 1 | 1 | -0.03 | -0.023 | -0.023 | -0.03  | -0.029 | t | 159288 | LLHYSTISQ<br>DNLDISFG<br>ELQ | Aotus               |
| 1 | 1.00 | 1 | 1 | 0.02  | 0.022  | 0.04   | 0.019  | 0.018  | t | 96263  | EQRLKEEE<br>ED               | Homo<br>sapiens     |
| 1 | 1.00 | 1 | 1 | 0.02  | 0.024  | 0.04   | 0.019  | 0.018  | t | 96263  | EQRLKEEE<br>ED               | Homo<br>sapiens     |
| 1 | 1.00 | 1 | 1 | 0.02  | 0.018  | 0.022  | 0.013  | 0.02   | t | 112191 | KYLATAST<br>MDHARH<br>GFLPRH | Mus<br>musculu<br>s |
| 1 | 1.00 | 1 | 1 | -0.01 | -0.012 | -0.016 | -0.011 | 0      | t | 39182  | LRRDLAS<br>REAKKQVE<br>KAL   | Mus<br>musculu<br>s |
| 1 | 1.00 | 1 | 1 | -0.03 | -0.03  | -0.01  | -0.027 | -0.028 | t | 16487  | FKYSNYVC<br>LLWRTPS          | Homo<br>sapiens     |

|   |      |   |   |       |        |        |        |        |   |        |                              |                                  |
|---|------|---|---|-------|--------|--------|--------|--------|---|--------|------------------------------|----------------------------------|
| 1 | 1.00 | 1 | 1 | 0.01  | 0.002  | 0.008  | 0.01   | 0.015  | t | 156977 | YGAPEITK<br>DGYKVIKSI<br>K   | Mus<br>musculu<br>s              |
| 1 | 1.00 | 1 | 1 | 0.02  | 0.022  | 0.045  | 0.019  | 0.019  | t | 84423  | KKGLQQL<br>QEWEDW<br>VGWIGN  | Felis<br>catus                   |
| 1 | 1.00 | 1 | 1 | 0.02  | 0.023  | 0.03   | 0.02   | 0.025  | t | 55932  | RSQQTII                      | Mus<br>musculu<br>s              |
| 1 | 1.00 | 1 | 1 | 0     | 0      | 0.002  | 0      | 0.007  | t | 122083 | DPNIKLV<br>DDCWATS           | Oryctola<br>gus<br>cuniculu<br>s |
| 1 | 1.00 | 1 | 1 | 0.04  | 0.04   | 0.061  | 0.04   | 0.039  | t | 46835  | PAIVPDRE<br>VLYQDFDE<br>MEEC | Homo<br>sapiens                  |
| 1 | 1.00 | 1 | 1 | 0     | -0.002 | 0.01   | 0.001  | 0.01   | t | 79012  | LDWLQD                       | Mus<br>musculu<br>s              |
| 1 | 1.00 | 1 | 1 | -0.01 | -0.01  | 0.002  | -0.007 | -0.003 | t | 62514  | SYAPCSLK                     | Homo<br>sapiens                  |
| 1 | 1.00 | 1 | 1 | 0.02  | 0.018  | 0.038  | 0.019  | 0.02   | t | 29138  | ITVNPIVTE<br>KDSPVNIE        | Mus<br>musculu<br>s              |
| 1 | 1.00 | 1 | 1 | 0.02  | 0.018  | 0.038  | 0.019  | 0.02   | t | 29138  | ITVNPIVTE<br>KDSPVNIE        | Mus<br>musculu<br>s              |
| 1 | 1.00 | 1 | 1 | -0.01 | -0.006 | 0.015  | -0.003 | -0.009 | t | 130808 | ENEPPVW<br>TTESKLQS          | Homo<br>sapiens                  |
| 1 | 1.00 | 1 | 1 | -0.05 | -0.047 | -0.023 | -0.051 | -0.05  | t | 61833  | STPPVPPP<br>SVSRRKP          | Capra<br>hircus                  |
| 1 | 1.00 | 1 | 1 | -0.04 | -0.036 | -0.021 | -0.039 | -0.04  | t | 70527  | VQAPNYT<br>QHTSSMR<br>GVY    | Homo<br>sapiens                  |
| 1 | 1.00 | 1 | 1 | -0.01 | -0.008 | 0.003  | -0.009 | -0.008 | t | 75528  | YQPIDVVR<br>DLPSGFNT<br>L    | Homo<br>sapiens                  |
| 1 | 1.00 | 1 | 1 | -0.04 | -0.044 | -0.041 | -0.047 | -0.034 | t | 125529 | PVEGPAVI<br>CRCC             | Oryctola<br>gus<br>cuniculu<br>s |

|   |      |   |   |       |        |        |        |        |   |        |                              |                                  |
|---|------|---|---|-------|--------|--------|--------|--------|---|--------|------------------------------|----------------------------------|
| 1 | 1.00 | 1 | 1 | 0     | 0      | 0.015  | 0      | 0      | t | 98437  | SAPRHKFQ<br>QVEEANL          | Sus<br>scrofa                    |
| 1 | 1.00 | 1 | 1 | -0.04 | -0.037 | -0.025 | -0.04  | -0.04  | t | 98329  | PGKKIKNK<br>NPEKPHF          | Sus<br>scrofa                    |
| 1 | 1.00 | 1 | 1 | 0     | -0.002 | 0.027  | -0.003 | 0.001  | t | 18100  | FTWGGLR<br>DKS               | Homo<br>sapiens                  |
| 1 | 1.00 | 1 | 1 | -0.02 | -0.018 | -0.019 | -0.023 | -0.017 | t | 106908 | TIDVPSNC<br>HTHEGGQ<br>LHCT  | Homo<br>sapiens                  |
| 1 | 1.00 | 1 | 1 | -0.01 | -0.005 | 0.008  | -0.013 | -0.008 | t | 49137  | PQTTKPKE<br>VPTT             | Homo<br>sapiens                  |
| 1 | 1.00 | 1 | 1 | 0     | 0      | 0.004  | -0.006 | 0.002  | t | 3983   | AQKFNGLT<br>VLPLLTD<br>D     | Homo<br>sapiens                  |
| 1 | 1.00 | 1 | 1 | -0.04 | -0.038 | -0.024 | -0.039 | -0.04  | t | 12218  | EGLLLDV<br>TPLTLGIET<br>AGG  | Homo<br>sapiens                  |
| 1 | 1.00 | 1 | 1 | -0.04 | -0.037 | -0.03  | -0.04  | -0.04  | t | 50867  | QGGGTHS<br>QWNKPSK<br>PKTNMK | Mus<br>musculu<br>s              |
| 1 | 1.00 | 1 | 1 | 0.04  | 0.04   | 0.061  | 0.04   | 0.039  | t | 46834  | PAIVPDRE<br>LLYQEFDE<br>MEEC | Homo<br>sapiens                  |
| 1 | 1.00 | 1 | 1 | -0.04 | -0.038 | -0.035 | -0.037 | -0.038 | t | 61476  | SSWVNRG<br>ESSRKAYD<br>HNSPY | Cavia<br>porcellu<br>s           |
| 1 | 1.00 | 1 | 1 | -0.01 | -0.012 | 0      | -0.009 | 0      | t | 78942  | CTLSVFGY<br>WVC              | Mus<br>musculu<br>s              |
| 1 | 1.00 | 1 | 1 | 0.04  | 0.037  | 0.052  | 0.041  | 0.04   | t | 15176  | FAGDSDSS<br>SSADDAA<br>GKATV | Canis<br>lupus                   |
| 1 | 1.00 | 1 | 1 | 0.03  | 0.027  | 0.047  | 0.03   | 0.03   | t | 97104  | WVGVNLE<br>DPASRDLV<br>VSYVN | Oryctola<br>gus<br>cuniculu<br>s |

|   |      |   |   |       |        |        |        |        |   |        |                             |                             |
|---|------|---|---|-------|--------|--------|--------|--------|---|--------|-----------------------------|-----------------------------|
| 1 | 1.00 | 1 | 1 | -0.02 | -0.02  | -0.02  | -0.02  | -0.016 | t | 146031 | TLAPVRPP<br>LTVGPVGP<br>SDP | Mus<br>musculu<br>s         |
| 1 | 1.00 | 1 | 1 | -0.01 | -0.008 | 0.017  | -0.007 | -0.01  | t | 62353  | SVTEEIAEE<br>DKSVTEEI<br>AV | Homo<br>sapiens             |
| 1 | 1.00 | 1 | 1 | -0.01 | -0.006 | 0.017  | -0.007 | -0.01  | t | 62353  | SVTEEIAEE<br>DKSVTEEI<br>AV | Homo<br>sapiens             |
| 1 | 1.00 | 1 | 1 | 0     | 0.003  | 0.007  | 0.001  | 0.006  | t | 136136 | APDGAVF<br>QLDRP            | Dicentra<br>rchus<br>labrax |
| 1 | 1.00 | 1 | 1 | -0.01 | -0.008 | -0.003 | -0.007 | 0      | t | 132942 | WGTNSEV                     | Homo<br>sapiens             |
| 1 | 1.00 | 1 | 1 | -0.02 | -0.016 | -0.013 | -0.02  | -0.019 | t | 52813  | QVVMKS<br>KNDQGIT<br>NKCKM  | Homo<br>sapiens             |
| 1 | 1.00 | 1 | 1 | 0.01  | 0.012  | 0.032  | 0.007  | 0.012  | t | 13624  | EPDKSII                     | Homo<br>sapiens             |
| 1 | 1.00 | 1 | 1 | -0.01 | -0.011 | 0.01   | -0.011 | -0.01  | t | 52660  | QTVSALED<br>KLADYK          | Myodes<br>glareolu<br>s     |
| 1 | 1.00 | 1 | 1 | -0.01 | -0.007 | 0.017  | -0.01  | -0.011 | t | 43232  | NANNPD<br>WDF               | Mus<br>musculu<br>s         |
| 1 | 1.00 | 1 | 1 | 0.02  | 0.023  | 0.02   | 0.02   | 0.03   | t | 34963  | LASLCNPK<br>PSDAPVT         | Mus<br>musculu<br>s         |
| 1 | 1.00 | 1 | 1 | 0.02  | 0.02   | 0.02   | 0.02   | 0.03   | t | 34963  | LASLCNPK<br>PSDAPVT         | Mus<br>musculu<br>s         |
| 1 | 1.00 | 1 | 1 | -0.02 | -0.022 | -0.013 | -0.027 | -0.02  | t | 141602 | AHFNGSLR<br>SLTQ            | Mus<br>musculu<br>s         |
| 1 | 1.00 | 1 | 1 | 0     | -0.002 | 0.019  | -0.001 | 0      | t | 13680  | EPKKDKKK<br>KTDEAQPL        | Mus<br>musculu<br>s         |
| 1 | 1.00 | 1 | 1 | 0     | -0.002 | 0.019  | -0.001 | 0      | t | 13680  | EPKKDKKK<br>KTDEAQPL        | Mus<br>musculu<br>s         |



|   |      |   |   |       |        |        |        |        |   |        |                               |                  |
|---|------|---|---|-------|--------|--------|--------|--------|---|--------|-------------------------------|------------------|
| 1 | 1.00 | 1 | 1 | 0     | -0.002 | 0.01   | -0.003 | 0.001  | t | 131876 | FAKANKQ<br>VCTDI              | Mus<br>musculus  |
| 1 | 1.00 | 1 | 1 | -0.03 | -0.026 | -0.004 | -0.029 | -0.03  | t | 44844  | NLPSTETR<br>HVTR              | Homo<br>sapiens  |
| 1 | 1.00 | 1 | 1 | 0     | -0.002 | 0.007  | -0.007 | 0.001  | t | 144656 | GPTHAMF<br>DSSGP              | Mus<br>musculus  |
| 1 | 1.00 | 1 | 1 | -0.03 | -0.019 | -0.027 | -0.03  | -0.025 | t | 59807  | SNDVSWH<br>EWKRMYN<br>KEYNG   | Rattus<br>rattus |
| 1 | 1.00 | 1 | 1 | 0.01  | 0.012  | 0.01   | 0.011  | 0.022  | t | 53162  | RALSMPP                       | Homo<br>sapiens  |
| 1 | 1.00 | 1 | 1 | -0.04 | -0.04  | -0.031 | -0.037 | -0.038 | t | 110760 | ACKDSDW<br>PFCSDDED<br>WDWPFC | Mus<br>musculus  |
| 1 | 1.00 | 1 | 1 | 0.01  | 0.012  | 0.01   | 0.011  | 0.02   | t | 49649  | PTHYFGSP<br>M                 | Homo<br>sapiens  |
| 1 | 1.00 | 1 | 1 | 0.04  | 0.04   | 0.043  | 0.03   | 0.041  | t | 98850  | KKGSEEEG<br>DITNPIN           | Homo<br>sapiens  |
| 1 | 1.00 | 1 | 1 | -0.02 | -0.018 | -0.006 | -0.017 | -0.018 | t | 72133  | VYPPSSTA<br>KSSVSNAP<br>PVAS  | Homo<br>sapiens  |
| 1 | 1.00 | 1 | 1 | 0.04  | 0.042  | 0.061  | 0.041  | 0.04   | t | 53435  | RDVSDFTD<br>SVRDPKTS<br>EI    | Homo<br>sapiens  |
| 1 | 1.00 | 1 | 1 | 0     | 0      | 0.019  | -0.001 | 0.002  | t | 41826  | MKHM                          | Mus<br>musculus  |
| 1 | 1.00 | 1 | 1 | -0.01 | -0.012 | -0.003 | -0.017 | -0.009 | t | 144599 | CNGTHPSL<br>RLC               | Mus<br>musculus  |
| 1 | 1.00 | 1 | 1 | -0.03 | -0.027 | -0.013 | -0.03  | -0.027 | t | 155291 | NNAYP                         | Mus<br>musculus  |
| 1 | 1.00 | 1 | 1 | -0.03 | -0.028 | -0.015 | -0.029 | -0.028 | t | 72039  | VYHGAGS<br>KTL                | Homo<br>sapiens  |
| 1 | 1.00 | 1 | 1 | 0.02  | 0.02   | 0.055  | 0.02   | 0.022  | t | 99055  | WQDCC                         | Homo<br>sapiens  |

|   |      |   |   |       |        |        |        |        |   |        |                              |                                  |
|---|------|---|---|-------|--------|--------|--------|--------|---|--------|------------------------------|----------------------------------|
| 1 | 1.00 | 1 | 1 | 0.02  | 0.02   | 0.022  | 0.02   | 0.03   | t | 34972  | LASSVKSA<br>EVGCAGY          | Homo<br>sapiens                  |
| 1 | 1.00 | 1 | 1 | 0.02  | 0.016  | 0.028  | 0.02   | 0.022  | t | 72241  | WALQGKR<br>RGALIDFE          | Bos<br>taurus                    |
| 1 | 1.00 | 1 | 1 | 0     | -0.002 | 0.005  | 0      | 0.002  | t | 127187 | TDAQRREL<br>EKHLSRVIC        | Oryctola<br>gus<br>cuniculu<br>s |
| 1 | 1.00 | 1 | 1 | 0.06  | 0.06   | 0.073  | 0.06   | 0.061  | t | 104472 | ELLEKTVK<br>DKIAKEQE<br>NKET | Rattus<br>norvegic<br>us         |
| 1 | 1.00 | 1 | 1 | 0     | 0.005  | 0.025  | 0.003  | 0      | t | 13670  | EPIRDALN<br>AMTQ NIR         | Homo<br>sapiens                  |
| 1 | 1.00 | 1 | 1 | -0.02 | -0.016 | -0.02  | -0.019 | -0.01  | t | 70847  | VRVLWGG<br>FSRLSLF           | Homo<br>sapiens                  |
| 1 | 1.00 | 1 | 1 | -0.02 | -0.016 | -0.02  | -0.019 | -0.01  | t | 70847  | VRVLWGG<br>FSRLSLF           | Homo<br>sapiens                  |
| 1 | 1.00 | 1 | 1 | 0     | -0.004 | 0.001  | -0.003 | 0.01   | t | 79565  | HFTTRLL                      | Oryctola<br>gus<br>cuniculu<br>s |
| 1 | 1.00 | 1 | 1 | 0     | 0      | 0      | 0      | 0.009  | t | 137450 | SHRLPLK                      | Mus<br>musculu<br>s              |
| 1 | 1.00 | 1 | 1 | -0.04 | -0.043 | -0.034 | -0.043 | -0.04  | t | 66094  | TRRVRGG<br>DGKMKEL<br>SPRW   | Homo<br>sapiens                  |
| 1 | 1.00 | 1 | 1 | -0.01 | -0.012 | 0.012  | -0.011 | -0.01  | t | 72342  | WEDRYR<br>ENMYRYP<br>N       | Mus<br>musculu<br>s              |
| 1 | 1.00 | 1 | 1 | -0.04 | -0.04  | -0.021 | -0.037 | -0.041 | t | 25219  | IAAEQDRN<br>TREVFAQV<br>K    | Homo<br>sapiens                  |

|   |      |   |   |       |        |        |        |        |   |        |                              |                                  |
|---|------|---|---|-------|--------|--------|--------|--------|---|--------|------------------------------|----------------------------------|
| 1 | 1.00 | 1 | 1 | -0.01 | -0.014 | 0.01   | -0.011 | -0.01  | t | 74374  | YISPYFINT<br>S               | Oryctola<br>gus<br>cuniculu<br>s |
| 1 | 1.00 | 1 | 1 | -0.01 | -0.012 | 0.01   | -0.011 | -0.01  | t | 74374  | YISPYFINT<br>S               | Mus<br>musculu<br>s              |
| 1 | 1.00 | 1 | 1 | 0     | -0.004 | 0      | -0.007 | 0.008  | t | 125370 | CDDPRFQ                      | Oryctola<br>gus<br>cuniculu<br>s |
| 1 | 1.00 | 1 | 1 | 0     | 0.002  | -0.012 | -0.003 | 0.01   | t | 78393  | GDYLIDQGG<br>L               | Homo<br>sapiens                  |
| 1 | 1.00 | 1 | 1 | -0.01 | -0.012 | -0.01  | -0.006 | -0.001 | t | 70541  | VQDKYGR<br>VCYGD             | Mus<br>musculu<br>s              |
| 1 | 1.00 | 1 | 1 | 0     | 0.003  | 0.026  | 0      | 0      | t | 61971  | STVGMTPT<br>KYCGT            | Mus<br>musculu<br>s              |
| 1 | 1.00 | 1 | 1 | 0     | -0.002 | 0.027  | -0.001 | 0      | t | 4810   | ASTTNCIG<br>SQCLMTN          | Mus<br>musculu<br>s              |
| 1 | 1.00 | 1 | 1 | 0.01  | 0.01   | 0.026  | 0.01   | 0.011  | t | 158940 | KTQSQGP<br>WDEGRVE<br>ID     | Mus<br>musculu<br>s              |
| 1 | 1.00 | 1 | 1 | 0.02  | 0.02   | 0.032  | 0.02   | 0.021  | t | 120412 | ASKEKQEN<br>KIFADDIDI<br>SD  | Rattus<br>norvegic<br>us         |
| 1 | 1.00 | 1 | 1 | 0.04  | 0.04   | 0.068  | 0.04   | 0.041  | t | 102004 | QPD                          | Mus<br>musculu<br>s              |
| 1 | 1.00 | 1 | 1 | -0.02 | -0.02  | -0.02  | -0.02  | -0.011 | t | 132927 | WGANVPS                      | Homo<br>sapiens                  |
| 1 | 1.00 | 1 | 1 | 0.01  | 0.008  | 0.017  | 0.003  | 0.01   | t | 144613 | DKKVILFAL<br>PGAFTPVC<br>SAR | Mus<br>musculu<br>s              |
| 1 | 1.00 | 1 | 1 | 0     | 0      | 0      | 0      | 0.007  | t | 137421 | HSPRYHSE<br>PQFG             | Mus<br>musculu<br>s              |
| 1 | 1.00 | 1 | 1 | -0.05 | -0.052 | -0.038 | -0.047 | -0.048 | t | 78253  | QGCGGRG<br>WAFSATG<br>AIEA   | Mus<br>musculu<br>s              |
| 1 | 1.00 | 1 | 1 | 0.01  | 0.01   | 0.001  | 0.01   | 0.02   | t | 79285  | LDPEYWN<br>FRNGDLT           | Mus<br>musculu<br>s              |

|   |      |   |   |       |        |        |        |        |   |        |                              |                                  |
|---|------|---|---|-------|--------|--------|--------|--------|---|--------|------------------------------|----------------------------------|
| 1 | 1.00 | 1 | 1 | -0.05 | -0.047 | -0.033 | -0.047 | -0.05  | t | 111033 | STYDRDN<br>DGWLTSD<br>PRKQCS | Mus<br>musculu<br>s              |
| 1 | 1.00 | 1 | 1 | -0.01 | -0.012 | -0.011 | -0.007 | 0.002  | t | 106855 | SMFTKYPT<br>QLLY             | Mus<br>musculu<br>s              |
| 1 | 1.00 | 1 | 1 | -0.01 | -0.01  | -0.005 | -0.011 | -0.007 | t | 138928 | VTELGRPD<br>AEYWNSQ<br>KDL   | Mus<br>musculu<br>s              |
| 1 | 1.00 | 1 | 1 | -0.02 | -0.013 | -0.006 | -0.02  | -0.02  | t | 20063  | GGVAGLF<br>KMGSQQK<br>L      | Mus<br>musculu<br>s              |
| 1 | 1.00 | 1 | 1 | 0     | -0.002 | 0.012  | -0.003 | 0.004  | t | 135921 | EVGWYRS<br>PF                | Mus<br>musculu<br>s              |
| 1 | 1.00 | 1 | 1 | -0.01 | -0.006 | 0.006  | -0.009 | -0.01  | t | 29817  | KAHPPLLL<br>NSPRDVPL         | Homo<br>sapiens                  |
| 1 | 1.00 | 1 | 1 | -0.03 | -0.034 | -0.012 | -0.027 | -0.032 | t | 22921  | GVATKGL<br>GVHAKSS<br>DWG    | Oryctola<br>gus<br>cuniculu<br>s |
| 1 | 1.00 | 1 | 1 | 0     | 0      | 0.016  | 0      | 0.001  | t | 66257  | TSHHDSH<br>GLHRV             | Mus<br>musculu<br>s              |
| 1 | 1.00 | 1 | 1 | 0     | 0      | 0      | 0      | 0.008  | t | 130787 | EDFDIYDE<br>DE               | Mus<br>musculu<br>s              |
| 1 | 1.00 | 1 | 1 | 0     | 0      | 0      | 0      | 0.008  | t | 99922  | DAEFRHDS<br>GY               | Mus<br>musculu<br>s              |
| 1 | 1.00 | 1 | 1 | 0     | 0      | 0      | 0      | 0.008  | t | 105207 | GAIIGLMV<br>GGVVIA           | Mus<br>musculu<br>s              |
| 1 | 1.00 | 1 | 1 | 0     | 0      | 0      | 0      | 0.008  | t | 107307 | DAEFGHD<br>SGF               | Mus<br>musculu<br>s              |
| 1 | 1.00 | 1 | 1 | 0     | 0      | 0      | 0      | 0.008  | t | 65121  | TLVERW                       | Mus<br>musculu<br>s              |
| 1 | 1.00 | 1 | 1 | 0     | 0      | 0      | 0      | 0.008  | t | 70390  | VPNLRGDL<br>QVLAQKV<br>ART   | Bos<br>taurus                    |

|   |      |   |   |       |        |        |        |        |   |        |                              |                                  |
|---|------|---|---|-------|--------|--------|--------|--------|---|--------|------------------------------|----------------------------------|
| 1 | 1.00 | 1 | 1 | 0     | 0      | 0      | 0      | 0.008  | t | 70390  | VPNLRGDL<br>QVLAQKV<br>ART   | Cavia<br>porcellu<br>s           |
| 1 | 1.00 | 1 | 1 | 0     | 0      | 0      | 0      | 0.008  | t | 54058  | RHKQKIVA<br>PVKQTL           | Bos<br>taurus                    |
| 1 | 1.00 | 1 | 1 | 0     | 0      | 0      | 0      | 0.008  | t | 40029  | LTLSDLP                      | Mus<br>musculu<br>s              |
| 1 | 1.00 | 1 | 1 | 0     | 0      | 0      | 0      | 0.008  | t | 54058  | RHKQKIVA<br>PVKQTL           | Cavia<br>porcellu<br>s           |
| 1 | 1.00 | 1 | 1 | 0     | 0      | 0      | 0      | 0.008  | t | 11819  | EENVEHD<br>A                 | Oryctola<br>gus<br>cuniculu<br>s |
| 1 | 1.00 | 1 | 1 | 0     | 0      | 0      | 0      | 0.008  | t | 11819  | EENVEHD<br>A                 | Oryctola<br>gus<br>cuniculu<br>s |
| 1 | 1.00 | 1 | 1 | 0     | 0      | 0      | 0      | 0.008  | t | 8010   | DEIDKYIQ                     | Mus<br>musculu<br>s              |
| 1 | 1.00 | 1 | 1 | -0.05 | -0.05  | -0.033 | -0.047 | -0.05  | t | 52389  | QSNQRSA<br>PRITFGGP<br>TDS   | Homo<br>sapiens                  |
| 1 | 1.00 | 1 | 1 | 0     | 0      | 0.025  | 0      | 0      | t | 45659  | NRDFVE                       | Homo<br>sapiens                  |
| 1 | 1.00 | 1 | 1 | 0     | -0.004 | 0.027  | -0.001 | -0.001 | t | 55037  | RNNHPQN<br>TSDSQKEA<br>TDGNK | Oryctola<br>gus<br>cuniculu<br>s |
| 1 | 1.00 | 1 | 1 | 0.01  | 0.01   | 0.032  | 0.02   | 0.012  | t | 12994  | ELDQENEA<br>ALENGIKN<br>EENT | Homo<br>sapiens                  |
| 1 | 1.00 | 1 | 1 | 0.02  | 0.02   | 0.02   | 0.013  | 0.02   | t | 112152 | HHPARTA<br>HYGSLPQK<br>SHGRT | Homo<br>sapiens                  |
| 1 | 1.00 | 1 | 1 | -0.02 | -0.02  | -0.001 | -0.02  | -0.02  | t | 49454  | PSPAPSRP<br>FSVLRAND<br>V    | Homo<br>sapiens                  |

|   |      |   |   |       |        |        |        |        |   |        |                              |                                  |
|---|------|---|---|-------|--------|--------|--------|--------|---|--------|------------------------------|----------------------------------|
| 1 | 1.00 | 1 | 1 | 0     | 0.002  | 0.022  | 0.001  | 0.002  | t | 128065 | NPPLVET<br>WKKPDYE<br>PP     | Homo<br>sapiens                  |
| 1 | 1.00 | 1 | 1 | 0     | 0.007  | 0.017  | 0.003  | 0.001  | t | 110834 | EQLKGQG<br>KSRLGDLY<br>EEEMR | Mus<br>musculu<br>s              |
| 1 | 1.00 | 1 | 1 | 0     | 0      | 0.009  | 0.007  | 0.007  | t | 138193 | HTYTSHLR<br>YVPPISL          | Homo<br>sapiens                  |
| 1 | 1.00 | 1 | 1 | -0.01 | -0.014 | 0.01   | -0.011 | -0.011 | t | 60596  | SQWNKPS<br>KPKTN             | Oryctola<br>gus<br>cuniculu<br>s |
| 1 | 1.00 | 1 | 1 | -0.03 | -0.03  | -0.025 | -0.027 | -0.029 | t | 17262  | FPCDRLSG<br>YWERGIPS<br>PCVR | Homo<br>sapiens                  |
| 1 | 1.00 | 1 | 1 | -0.02 | -0.02  | -0.011 | -0.02  | -0.018 | t | 75440  | YPYCGHAL<br>CPGLYADA<br>S    | Mus<br>musculu<br>s              |
| 1 | 1.00 | 1 | 1 | 0.03  | 0.03   | 0.037  | 0.03   | 0.04   | t | 108355 | EVAHPSVP<br>L                | Homo<br>sapiens                  |
| 1 | 1.00 | 1 | 1 | 0.01  | 0.01   | 0.034  | 0.01   | 0.011  | t | 156546 | STEDSGLT<br>GVKDSSS          | Mus<br>musculu<br>s              |
| 1 | 1.00 | 1 | 1 | -0.06 | -0.058 | -0.043 | -0.059 | -0.06  | t | 223    | AAIGLSMA<br>GSSAMILA<br>AYHP | Homo<br>sapiens                  |
| 1 | 1.00 | 1 | 1 | -0.03 | -0.03  | -0.003 | -0.03  | -0.03  | t | 62050  | SVARTRGL<br>YDDG             | Mus<br>musculu<br>s              |
| 1 | 1.00 | 1 | 1 | -0.01 | -0.01  | -0.01  | -0.017 | -0.007 | t | 158606 | RRALPPVS<br>S                | Homo<br>sapiens                  |
| 1 | 1.00 | 1 | 1 | -0.05 | -0.054 | -0.024 | -0.051 | -0.052 | t | 48739  | PPACCNGI<br>RTINGLA          | Oryctola<br>gus<br>cuniculu<br>s |
| 1 | 1.00 | 1 | 1 | 0.02  | 0.016  | 0.039  | 0.02   | 0.02   | t | 4471   | ASIDWREY<br>GYVTEVKD<br>QGNC | Bos<br>taurus                    |
| 1 | 1.00 | 1 | 1 | 0.03  | 0.03   | 0.03   | 0.03   | 0.04   | t | 79291  | LIPFNS                       | Mus<br>musculu<br>s              |

|   |      |   |   |       |        |        |        |        |   |        |                             |                   |
|---|------|---|---|-------|--------|--------|--------|--------|---|--------|-----------------------------|-------------------|
| 1 | 1.00 | 1 | 1 | -0.02 | -0.019 | -0.011 | -0.023 | -0.019 | t | 34612  | KYTMFHYL<br>RAQEFEH<br>GKSR | Equus<br>caballus |
| 1 | 1.00 | 1 | 1 | -0.02 | -0.013 | -0.011 | -0.023 | -0.019 | t | 34612  | KYTMFHYL<br>RAQEFEH<br>GKSR | Gallus<br>gallus  |
| 1 | 1.00 | 1 | 1 | -0.02 | -0.02  | -0.011 | -0.023 | -0.019 | t | 34612  | KYTMFHYL<br>RAQEFEH<br>GKSR | Homo<br>sapiens   |
| 1 | 1.00 | 1 | 1 | 0     | 0      | 0.026  | 0      | 0.002  | t | 15468  | FDTGAFDP<br>DWPA            | Mus<br>musculus   |
| 1 | 1.00 | 1 | 1 | 0     | 0      | 0.026  | 0      | 0.002  | t | 15468  | FDTGAFDP<br>DWPA            | Mus<br>musculus   |
| 1 | 1.00 | 1 | 1 | -0.01 | -0.007 | -0.009 | -0.007 | 0      | t | 78274  | TDLRYL                      | Equus<br>caballus |
| 1 | 1.00 | 1 | 1 | -0.02 | -0.018 | 0.002  | -0.019 | -0.019 | t | 48437  | PLPEARLL<br>DLSSWF          | Homo<br>sapiens   |
| 1 | 1.00 | 1 | 1 | -0.03 | -0.03  | -0.008 | -0.03  | -0.03  | t | 31668  | KKPTFKTT<br>KKDH            | Mus<br>musculus   |
| 1 | 1.00 | 1 | 1 | -0.03 | -0.028 | -0.015 | -0.033 | -0.03  | t | 29868  | KALPMHIR<br>LSFN            | Homo<br>sapiens   |
| 1 | 1.00 | 1 | 1 | -0.03 | -0.028 | -0.015 | -0.033 | -0.03  | t | 29868  | KALPMHIR<br>LSFN            | Homo<br>sapiens   |
| 1 | 1.00 | 1 | 1 | -0.03 | -0.002 | -0.036 | -0.031 | -0.02  | t | 141557 | PTTRKWW<br>LKLDG            | Rattus            |
| 1 | 1.00 | 1 | 1 | -0.03 | -0.03  | -0.024 | -0.03  | -0.028 | t | 79525  | CKMWAD<br>AFTSSRGK<br>VVECG | Mus<br>musculus   |
| 1 | 1.00 | 1 | 1 | -0.03 | -0.027 | -0.024 | -0.03  | -0.028 | t | 79525  | CKMWAD<br>AFTSSRGK<br>VVECG | Mus<br>musculus   |

|   |      |   |   |       |        |        |        |        |   |        |                              |                                  |
|---|------|---|---|-------|--------|--------|--------|--------|---|--------|------------------------------|----------------------------------|
| 1 | 1.00 | 1 | 1 | -0.03 | -0.03  | -0.024 | -0.03  | -0.028 | t | 79525  | CKMWAD<br>AFTSSRGK<br>VVECG  | Mus<br>musculu<br>s              |
| 1 | 1.00 | 1 | 1 | 0     | 0      | 0      | 0      | 0.01   | t | 106651 | MHSPLPI                      | Homo<br>sapiens                  |
| 1 | 1.00 | 1 | 1 | 0.02  | 0.018  | 0.019  | 0.023  | 0.032  | t | 106450 | GFSPYPFQ<br>LWTS             | Mus<br>musculu<br>s              |
| 1 | 1.00 | 1 | 1 | -0.05 | -0.047 | -0.031 | -0.05  | -0.048 | t | 22230  | GRVCLR                       | Mus<br>musculu<br>s              |
| 1 | 1.00 | 1 | 1 | -0.02 | -0.016 | -0.006 | -0.019 | -0.022 | t | 68567  | VFSPAASS<br>CHNASGK<br>EAKVC | Homo<br>sapiens                  |
| 1 | 1.00 | 1 | 1 | 0.01  | 0.022  | 0.031  | 0.01   | 0.011  | t | 56189  | RTTDFKRE<br>MSTS             | Mus<br>musculu<br>s              |
| 1 | 1.00 | 1 | 1 | 0     | 0      | 0.017  | 0      | 0.002  | t | 63758  | TFTNPVVS<br>TTQWSAP          | Oryctola<br>gus<br>cuniculu<br>s |
| 1 | 1.00 | 1 | 1 | -0.02 | -0.02  | -0.015 | -0.021 | -0.02  | t | 17388  | FPRPGGG<br>GNGDFEEI<br>PEEYL | Homo<br>sapiens                  |
| 1 | 1.00 | 1 | 1 | 0     | 0.006  | 0.004  | 0      | 0.007  | t | 8839   | DKAKADA<br>ELAAANDT<br>IA    | Equus<br>caballus                |
| 1 | 1.00 | 1 | 1 | -0.07 | -0.066 | -0.048 | -0.067 | -0.068 | t | 104056 | LSVPWVLI<br>FMVSRRR<br>CRRR  | Homo<br>sapiens                  |
| 1 | 1.00 | 1 | 1 | -0.02 | -0.017 | -0.002 | -0.02  | -0.021 | t | 90527  | VWDEWS<br>PVSTAVA<br>MGTRSRK | Aotus                            |
| 1 | 1.00 | 1 | 1 | -0.01 | -0.01  | 0.017  | -0.007 | -0.01  | t | 62353  | SVTEEIAEE<br>DKSVTEEI<br>AV  | Homo<br>sapiens                  |
| 1 | 1.00 | 1 | 1 | -0.01 | -0.01  | 0.017  | -0.007 | -0.01  | t | 62353  | SVTEEIAEE<br>DKSVTEEI<br>AV  | Homo<br>sapiens                  |
| 1 | 1.00 | 1 | 1 | 0.02  | 0.023  | 0.021  | 0.023  | 0.03   | t | 78272  | STLSKS                       | Equus<br>caballus                |



|   |      |   |   |       |        |        |        |        |   |        |                              |                                  |
|---|------|---|---|-------|--------|--------|--------|--------|---|--------|------------------------------|----------------------------------|
| 1 | 1.00 | 1 | 1 | -0.01 | -0.012 | -0.003 | -0.011 | -0.007 | t | 2193   | AKGHSLPR<br>LVTS             | Mus<br>musculu<br>s              |
| 1 | 1.00 | 1 | 1 | -0.02 | -0.022 | -0.002 | -0.021 | -0.018 | t | 48238  | PKYVKQNT<br>LKLATG           | Mus<br>musculu<br>s              |
| 1 | 1.00 | 1 | 1 | 0.02  | 0.018  | 0.032  | 0.023  | 0.023  | t | 115664 | YGSLPQKA<br>QGHRPQD<br>ENG   | Rattus<br>norvegic<br>us         |
| 1 | 1.00 | 1 | 1 | -0.05 | -0.052 | -0.034 | -0.051 | -0.049 | t | 69271  | VKMAETC<br>PIFYDVF           | Mus<br>musculu<br>s              |
| 1 | 1.00 | 1 | 1 | 0.01  | 0.008  | 0.014  | 0.003  | 0.012  | t | 114947 | SHGRTQD<br>EN                | Rattus<br>norvegic<br>us         |
| 1 | 1.00 | 1 | 1 | -0.02 | -0.023 | -0.004 | -0.02  | -0.018 | t | 62091  | SVDWTKA<br>TVDGVQV<br>KT     | Oryctola<br>gus<br>cuniculu<br>s |
| 1 | 1.00 | 1 | 1 | -0.02 | -0.022 | -0.02  | -0.027 | -0.02  | t | 119613 | LSLSRFSW<br>GAEGQRP<br>GFGYG | Rattus<br>norvegic<br>us         |
| 1 | 1.00 | 1 | 1 | 0     | -0.002 | -0.007 | 0.007  | 0.009  | t | 136751 | YCWLRQ<br>AALQRRLS<br>AMEKG  | Rattus<br>norvegic<br>us         |
| 1 | 1.00 | 1 | 1 | -0.01 | -0.01  | 0.003  | -0.01  | -0.007 | t | 39998  | LTKSGSTY<br>PVLNVT           | Mus<br>musculu<br>s              |
| 1 | 1.00 | 1 | 1 | 0     | 0      | 0      | 0      | 0.008  | t | 118963 | PNYKVVV<br>YAVTK             | Mus<br>musculu<br>s              |
| 1 | 1.00 | 1 | 1 | -0.02 | -0.018 | 0.007  | -0.017 | -0.02  | t | 14949  | EWRRYMS<br>DIHGY             | Homo<br>sapiens                  |
| 1 | 1.00 | 1 | 1 | -0.04 | -0.04  | -0.024 | -0.04  | -0.04  | t | 22642  | GTERVRL<br>ELFIYN            | Mus<br>musculu<br>s              |
| 1 | 1.00 | 1 | 1 | 0     | 0      | 0      | 0      | 0.008  | t | 131194 | ALGAQKE<br>AISPPDAA<br>SAAP  | Oryctola<br>gus<br>cuniculu<br>s |
| 1 | 1.00 | 1 | 1 | 0     | 0      | 0      | 0      | 0.008  | t | 65996  | TRAPRREE<br>LEWDDDED<br>H    | Oryctola<br>gus<br>cuniculu<br>s |
| 1 | 1.00 | 1 | 1 | 0     | 0      | 0      | 0      | 0.008  | t | 24224  | HLHRFFSS                     | Mus<br>musculu<br>s              |

|   |      |   |   |       |        |        |        |        |   |        |                              |                                  |
|---|------|---|---|-------|--------|--------|--------|--------|---|--------|------------------------------|----------------------------------|
| 1 | 1.00 | 1 | 1 | -0.05 | -0.047 | -0.033 | -0.05  | -0.047 | t | 8939   | DKLYIWGV<br>HHPSTN           | Mus<br>musculu<br>s              |
| 1 | 1.00 | 1 | 1 | 0     | -0.002 | 0      | 0      | 0.008  | t | 130635 | WGPRVIFE<br>DVTV             | Mus<br>musculu<br>s              |
| 1 | 1.00 | 1 | 1 | 0     | 0      | 0      | 0      | 0.008  | t | 130635 | WGPRVIFE<br>DVTV             | Mus<br>musculu<br>s              |
| 1 | 1.00 | 1 | 1 | 0     | 0      | 0      | 0      | 0.008  | t | 130634 | WEWDWP<br>RIELNI             | Mus<br>musculu<br>s              |
| 1 | 1.00 | 1 | 1 | 0     | -0.002 | 0      | 0      | 0.008  | t | 130471 | DWPAVIFE<br>DTRA             | Mus<br>musculu<br>s              |
| 1 | 1.00 | 1 | 1 | 0     | -0.002 | 0      | 0      | 0.008  | t | 130636 | WPQIWFD<br>DEEDV             | Mus<br>musculu<br>s              |
| 1 | 1.00 | 1 | 1 | 0     | 0      | 0      | 0      | 0.008  | t | 108345 | ENPKKYIP<br>GTK              | Homo<br>sapiens                  |
| 1 | 1.00 | 1 | 1 | 0     | 0      | 0      | 0      | 0.008  | t | 108666 | TRCAQCH<br>TLK               | Homo<br>sapiens                  |
| 1 | 1.00 | 1 | 1 | 0     | 0      | 0      | 0      | 0.008  | t | 21851  | GQCKWV<br>NGREICND<br>RDRPTA | Macaca<br>fuscata                |
| 1 | 1.00 | 1 | 1 | 0     | 0.019  | 0      | 0      | 0.008  | t | 21851  | GQCKWV<br>NGREICND<br>RDRPTA | Macaca<br>fuscata                |
| 1 | 1.00 | 1 | 1 | 0     | 0      | 0      | 0      | 0.008  | t | 751    | ADPVTTEG<br>DYVVKISEF<br>YGR | Mus<br>musculu<br>s              |
| 1 | 1.00 | 1 | 1 | 0     | 0      | 0      | 0      | 0.008  | t | 6249   | CFPYCYP<br>ESA               | Mus<br>musculu<br>s              |
| 1 | 1.00 | 1 | 1 | -0.04 | -0.042 | -0.038 | -0.047 | -0.038 | t | 118204 | VKQSHGK<br>SL                | Mus<br>musculu<br>s              |
| 1 | 1.00 | 1 | 1 | -0.04 | -0.04  | -0.015 | -0.04  | -0.043 | t | 38973  | LQRFNQRS<br>PQLQNLR          | Sus<br>scrofa                    |
| 1 | 1.00 | 1 | 1 | 0.01  | 0.01   | 0.019  | 0.01   | 0.01   | t | 25219  | IAAEQDRN<br>TREVFAQV<br>K    | Oryctola<br>gus<br>cuniculu<br>s |

|   |      |   |   |       |        |        |        |        |   |        |                              |                          |
|---|------|---|---|-------|--------|--------|--------|--------|---|--------|------------------------------|--------------------------|
| 1 | 1.00 | 1 | 1 | -0.03 | -0.03  | -0.023 | -0.03  | -0.029 | t | 122035 | WNPADYG<br>GIKWNP<br>DYGGIK  | Rattus<br>norvegicus     |
| 1 | 1.00 | 1 | 1 | -0.02 | -0.022 | -0.02  | -0.017 | -0.013 | t | 130980 | NCAYKTTQ<br>ANKQAQI<br>HGPR  | Mus<br>musculus          |
| 1 | 1.00 | 1 | 1 | -0.02 | -0.019 | 0.001  | -0.02  | -0.02  | t | 48641  | PNGNVPA<br>GVTPSKYG<br>LGGD  | Oryctolagus<br>cuniculus |
| 1 | 1.00 | 1 | 1 | -0.02 | -0.019 | 0.001  | -0.02  | -0.02  | t | 48641  | PNGNVPA<br>GVTPSKYG<br>LGGD  | Oryctolagus<br>cuniculus |
| 1 | 1.00 | 1 | 1 | -0.06 | -0.058 | -0.047 | -0.057 | -0.057 | t | 19614  | GFRPKRLN<br>FKLFNIQV<br>KEVT | Homo<br>sapiens          |
| 1 | 1.00 | 1 | 1 | 0     | -0.002 | 0.005  | -0.001 | 0.009  | t | 3936   | AQAFDYV<br>PAWVV             | Mus<br>musculus          |
| 1 | 1.00 | 1 | 1 | 0.06  | 0.06   | 0.06   | 0.06   | 0.07   | t | 106428 | FVEIYSP                      | Homo<br>sapiens          |
| 1 | 1.00 | 1 | 1 | -0.01 | -0.011 | 0.001  | -0.009 | -0.01  | t | 58629  | SIMRGQS<br>MSLANQQ<br>MTAERV | Canis<br>lupus           |
| 1 | 1.00 | 1 | 1 | -0.08 | -0.08  | -0.048 | -0.08  | -0.082 | t | 80095  | VVHFFKNI<br>VTPRT            | Mus<br>musculus          |
| 1 | 1.00 | 1 | 1 | 0.03  | 0.032  | 0.047  | 0.031  | 0.03   | t | 33831  | KTQIDQVE<br>STAGSLQ          | Homo<br>sapiens          |
| 1 | 1.00 | 1 | 1 | 0.02  | 0.019  | 0.041  | 0.02   | 0.02   | t | 27627  | INEYTTGP<br>STPCPS           | Homo<br>sapiens          |
| 1 | 1.00 | 1 | 1 | 0.03  | 0.03   | 0.03   | 0.03   | 0.04   | t | 77952  | LQSPTGLT<br>NYFL             | Mus<br>musculus          |
| 1 | 1.00 | 1 | 1 | -0.01 | -0.014 | -0.008 | -0.01  | -0.008 | t | 110840 | EVTIGDIEE<br>PPILEVVPE<br>TH | Bos<br>taurus            |
| 1 | 1.00 | 1 | 1 | -0.04 | -0.04  | -0.024 | -0.04  | -0.041 | t | 53498  | REFSPRGQ<br>HSRRERA          | Homo<br>sapiens          |
| 1 | 1.00 | 1 | 1 | 0.01  | 0.01   | 0.01   | 0.01   | 0.019  | t | 140605 | TLYDALGA<br>V                | Mus<br>musculus          |

|   |      |   |   |       |        |        |        |        |   |        |                              |                                  |
|---|------|---|---|-------|--------|--------|--------|--------|---|--------|------------------------------|----------------------------------|
| 1 | 1.00 | 1 | 1 | -0.02 | -0.017 | -0.002 | -0.02  | -0.021 | t | 90528  | VWDEWS<br>PVSTAVG<br>MGTRSRK | Aotus                            |
| 1 | 1.00 | 1 | 1 | -0.06 | -0.062 | -0.055 | -0.057 | -0.058 | t | 115902 | PRSPPRSE<br>RQPRSPPR<br>SERQ | Mus<br>musculu<br>s              |
| 1 | 1.00 | 1 | 1 | 0     | 0      | 0.019  | 0      | 0.002  | t | 55304  | RPQPTELRY                    | Mus<br>musculu<br>s              |
| 1 | 1.00 | 1 | 1 | 0     | 0      | 0.019  | 0      | 0.002  | t | 55304  | RPQPTELRY                    | Mus<br>musculu<br>s              |
| 1 | 1.00 | 1 | 1 | 0     | -0.002 | 0      | -0.001 | 0.007  | t | 108200 | VSLGKWL<br>GHPDKF            | Mus<br>musculu<br>s              |
| 1 | 1.00 | 1 | 1 | 0     | 0      | 0      | 0      | 0.009  | t | 137451 | SHRLPVK                      | Mus<br>musculu<br>s              |
| 1 | 1.00 | 1 | 1 | 0.01  | 0.006  | 0.012  | 0.009  | 0.02   | t | 79671  | VLPDSVW                      | Oryctola<br>gus<br>cuniculu<br>s |
| 1 | 1.00 | 1 | 1 | 0.03  | 0.028  | 0.04   | 0.023  | 0.03   | t | 97029  | VDLSYLAP<br>KNPGTGP<br>AFTII | Mus<br>musculu<br>s              |
| 1 | 1.00 | 1 | 1 | -0.03 | -0.026 | -0.013 | -0.029 | -0.028 | t | 103977 | HSYSPGEI<br>NRVASCLR<br>KLGV | Homo<br>sapiens                  |
| 1 | 1.00 | 1 | 1 | -0.01 | -0.008 | -0.025 | -0.009 | 0.001  | t | 32862  | KPRDTLPP<br>PLNRPPP          | Homo<br>sapiens                  |
| 1 | 1.00 | 1 | 1 | -0.02 | -0.022 | 0.001  | -0.021 | -0.02  | t | 119642 | SEHETRLV<br>ANLLENYN<br>KVIR | Mus<br>musculu<br>s              |
| 1 | 1.00 | 1 | 1 | -0.04 | -0.038 | -0.026 | -0.043 | -0.038 | t | 51079  | QIICLAVL<br>WV               | Homo<br>sapiens                  |
| 1 | 1.00 | 1 | 1 | 0.03  | 0.027  | 0.037  | 0.03   | 0.04   | t | 59688  | SMITDLL                      | Oryctola<br>gus<br>cuniculu<br>s |
| 1 | 1.00 | 1 | 1 | -0.02 | -0.021 | -0.009 | -0.021 | -0.018 | t | 52484  | QTAVDDA<br>EAAAKCR<br>HCI    | Mus<br>musculu<br>s              |

|   |      |   |   |       |        |        |        |        |   |        |                              |                                  |
|---|------|---|---|-------|--------|--------|--------|--------|---|--------|------------------------------|----------------------------------|
| 1 | 1.00 | 1 | 1 | 0     | -0.002 | 0.011  | -0.001 | 0      | t | 112835 | RTTHYGSL<br>PQKSQHG<br>RTQDE | Mus<br>musculu<br>s              |
| 1 | 1.00 | 1 | 1 | -0.04 | -0.043 | -0.02  | -0.04  | -0.043 | t | 136092 | YKSQYLNN<br>GPQRIGRK<br>YKK  | Oryctola<br>gus<br>cuniculu<br>s |
| 1 | 1.00 | 1 | 1 | 0.01  | 0.011  | 0.03   | 0.01   | 0.01   | t | 7885   | DDVNKNT<br>LQARQQT           | Myodes<br>glareolu<br>s          |
| 1 | 1.00 | 1 | 1 | 0     | 0      | 0      | 0      | 0.008  | t | 134988 | GPPGARG<br>LTGRPGDA<br>GPP   | Mus<br>musculu<br>s              |
| 1 | 1.00 | 1 | 1 | 0     | -0.002 | 0      | -0.007 | 0.003  | t | 62147  | SVGPPH                       | Mus<br>musculu<br>s              |
| 1 | 1.00 | 1 | 1 | 0     | 0      | 0      | 0      | 0.008  | t | 142435 | KTDGKGEE<br>SE               | Homo<br>sapiens                  |
| 1 | 1.00 | 1 | 1 | 0     | 0      | 0      | 0      | 0.008  | t | 44852  | NLQKDEP<br>NGRASDT           | Oryctola<br>gus<br>cuniculu<br>s |
| 1 | 1.00 | 1 | 1 | -0.01 | -0.01  | 0.018  | -0.006 | -0.01  | t | 67651  | VAKQHVR<br>DGRKDSLD<br>GF    | Homo<br>sapiens                  |
| 1 | 1.00 | 1 | 1 | -0.02 | -0.02  | -0.007 | -0.02  | -0.017 | t | 94575  | KVLTTGLP<br>ALISW            | Mus<br>musculu<br>s              |
| 1 | 1.00 | 1 | 1 | 0.01  | 0.008  | 0.012  | 0.003  | 0.01   | t | 127645 | EVDNGNF<br>VHCEESGK<br>LVLVY | Mus<br>musculu<br>s              |
| 1 | 1.00 | 1 | 1 | -0.02 | -0.025 | 0.009  | -0.017 | -0.02  | t | 48311  | PLERQKPL<br>KVRACL           | Bos<br>taurus                    |
| 1 | 1.00 | 1 | 1 | -0.01 | -0.008 | -0.003 | -0.011 | -0.007 | t | 130462 | CYFTNMF<br>ATWCAAC           | Homo<br>sapiens                  |
| 1 | 1.00 | 1 | 1 | 0.02  | 0.034  | 0.036  | 0.021  | 0.02   | t | 36126  | LGGKPALV<br>PDKEVLYQ<br>QYDE | Homo<br>sapiens                  |
| 1 | 1.00 | 1 | 1 | 0.02  | 0.02   | 0.039  | 0.02   | 0.02   | t | 22481  | GSRGGSQ<br>ASSRSSR           | Macaca<br>cyclopis               |

|   |      |   |   |       |        |        |        |        |   |        |                              |                       |
|---|------|---|---|-------|--------|--------|--------|--------|---|--------|------------------------------|-----------------------|
| 1 | 1.00 | 1 | 1 | -0.01 | -0.008 | 0.01   | -0.013 | -0.008 | t | 64882  | TLKQAPA                      | Homo sapiens          |
| 1 | 1.00 | 1 | 1 | -0.02 | -0.02  | 0.003  | -0.017 | -0.02  | t | 12901  | EKVTGTDL<br>ELIQILKDH<br>YNI | Homo sapiens          |
| 1 | 1.00 | 1 | 1 | 0.01  | 0.01   | 0.029  | 0.01   | 0.01   | t | 11038  | EAEVQIDR<br>LITGRLQSL        | Homo sapiens          |
| 1 | 1.00 | 1 | 1 | 0.02  | 0.018  | 0.013  | 0.013  | 0.031  | t | 113062 | KYDDYVAT<br>LS               | Mus musculus          |
| 1 | 1.00 | 1 | 1 | -0.01 | -0.013 | -0.007 | -0.01  | -0.007 | t | 46886  | PAPNIASHI<br>SSISARTG<br>DP  | Oryctolagus cuniculus |
| 1 | 1.00 | 1 | 1 | 0.01  | 0.01   | 0.01   | 0.01   | 0.016  | t | 59106  | SLFSSGAQ<br>QK               | Homo sapiens          |
| 1 | 1.00 | 1 | 1 | -0.01 | -0.01  | 0.018  | -0.01  | -0.01  | t | 102879 | VDDL                         | Mus musculus          |
| 1 | 1.00 | 1 | 1 | -0.03 | -0.026 | -0.017 | -0.033 | -0.029 | t | 67164  | TVSRVPW<br>TAWAFHG<br>Y      | Homo sapiens          |
| 1 | 1.00 | 1 | 1 | -0.05 | -0.046 | -0.033 | -0.047 | -0.047 | t | 75885  | YRSWLM<br>KAHGLELG           | Homo sapiens          |
| 1 | 1.00 | 1 | 1 | 0.01  | 0.01   | 0      | 0.01   | 0.022  | t | 120406 | APDMFEY<br>MNK               | Mus musculus          |
| 1 | 1.00 | 1 | 1 | -0.03 | -0.028 | -0.005 | -0.032 | -0.032 | t | 105114 | AYNHFGK<br>RLDQR             | Homo sapiens          |
| 1 | 1.00 | 1 | 1 | 0.03  | 0.033  | 0.049  | 0.029  | 0.03   | t | 39092  | LRGDLQVL<br>AQKVARTL         | Capra hircus          |
| 1 | 1.00 | 1 | 1 | -0.01 | -0.011 | -0.01  | -0.01  | 0      | t | 17886  | FSYAHMK<br>KPRPMSSF          | Mus musculus          |
| 1 | 1.00 | 1 | 1 | -0.01 | -0.004 | 0.017  | -0.01  | -0.011 | t | 41726  | MIKAAFLP<br>TGAFKADR<br>YKSH | Aotus nancymae        |

|   |      |   |   |       |        |        |        |        |   |        |                              |                                  |
|---|------|---|---|-------|--------|--------|--------|--------|---|--------|------------------------------|----------------------------------|
| 1 | 1.00 | 1 | 1 | 0.01  | 0.009  | 0.019  | 0.01   | 0.012  | t | 51867  | QPKVDAN<br>ADEEAEAV<br>GEDDL | Mesocric<br>etus<br>auratus      |
| 1 | 1.00 | 1 | 1 | 0.03  | 0.032  | 0.037  | 0.037  | 0.039  | t | 104950 | QGERSGP                      | Homo<br>sapiens                  |
| 1 | 1.00 | 1 | 1 | -0.04 | -0.035 | -0.017 | -0.039 | -0.04  | t | 71165  | VSTRGRIP<br>ADVIDA           | Homo<br>sapiens                  |
| 1 | 1.00 | 1 | 1 | -0.04 | -0.042 | -0.038 | -0.047 | -0.039 | t | 132233 | DSGCVIN<br>WKGRELK<br>C      | Mus<br>musculu<br>s              |
| 1 | 1.00 | 1 | 1 | 0     | -0.002 | 0.003  | -0.007 | 0.001  | t | 113365 | EHPVTGC<br>GERTEGRC<br>LHYTV | Mus<br>musculu<br>s              |
| 1 | 1.00 | 1 | 1 | 0     | -0.002 | 0.003  | -0.007 | 0.001  | t | 113365 | EHPVTGC<br>GERTEGRC<br>LHYTV | Mus<br>musculu<br>s              |
| 1 | 1.00 | 1 | 1 | -0.02 | -0.02  | -0.02  | -0.02  | -0.01  | t | 111794 | SPIAPPR                      | Homo<br>sapiens                  |
| 1 | 1.00 | 1 | 1 | 0     | 0      | 0      | 0.002  | 0.009  | t | 50637  | QELDCWH<br>YQHCVTS<br>TKS    | MD                               |
| 1 | 1.00 | 1 | 1 | 0     | 0.004  | 0.013  | 0.001  | 0      | t | 49968  | PVSMAKT<br>SVDCNMYI<br>CGDS  | Homo<br>sapiens                  |
| 1 | 1.00 | 1 | 1 | 0     | -0.004 | 0      | -0.001 | 0.01   | t | 75044  | YMDLGМК                      | Oryctola<br>gus<br>cuniculu<br>s |
| 1 | 1.00 | 1 | 1 | -0.02 | -0.022 | 0.01   | -0.023 | -0.02  | t | 95421  | GPGRGPG                      | Mus<br>musculu<br>s              |
| 1 | 1.00 | 1 | 1 | 0.01  | 0.008  | 0.023  | 0.009  | 0.01   | t | 77954  | LVVMVVA<br>PLTVNTEG<br>APQIK | Mus<br>musculu<br>s              |
| 1 | 1.00 | 1 | 1 | -0.05 | -0.052 | -0.033 | -0.051 | -0.05  | t | 96103  | APPLLPHS<br>NLDHI            | Rattus<br>norvegic<br>us         |
| 1 | 1.00 | 1 | 1 | 0.01  | 0.01   | 0.017  | 0.01   | 0.02   | t | 108650 | TFRDLHQ<br>QQ                | Homo<br>sapiens                  |

|   |      |   |   |       |        |        |        |        |   |        |                              |                                  |
|---|------|---|---|-------|--------|--------|--------|--------|---|--------|------------------------------|----------------------------------|
| 1 | 1.00 | 1 | 1 | 0.06  | 0.058  | 0.059  | 0.063  | 0.072  | t | 106487 | GTSTEVWL<br>APDP             | Mus<br>musculu<br>s              |
| 1 | 1.00 | 1 | 1 | -0.02 | -0.02  | 0      | -0.02  | -0.018 | t | 79528  | CPSKKPYE<br>EVTC             | Mus<br>musculu<br>s              |
| 1 | 1.00 | 1 | 1 | -0.02 | -0.02  | 0      | -0.02  | -0.018 | t | 79528  | CPSKKPYE<br>EVTC             | Mus<br>musculu<br>s              |
| 1 | 1.00 | 1 | 1 | -0.02 | -0.015 | 0.009  | -0.017 | -0.02  | t | 49756  | PTPVNPST<br>APAPAPT          | Homo<br>sapiens                  |
| 1 | 1.00 | 1 | 1 | -0.01 | -0.01  | -0.01  | -0.02  | -0.011 | t | 115236 | ERLHSMKE<br>GIHAQQK<br>EPMIG | Homo<br>sapiens                  |
| 1 | 1.00 | 1 | 1 | -0.05 | -0.05  | -0.032 | -0.05  | -0.048 | t | 45719  | NRPRWVK<br>EA                | Mus<br>musculu<br>s              |
| 1 | 1.00 | 1 | 1 | 0.02  | 0.02   | 0.034  | 0.014  | 0.02   | t | 68322  | VEQKHIQK<br>EDVPSERY<br>LGYL | Homo<br>sapiens                  |
| 1 | 1.00 | 1 | 1 | 0     | -0.002 | 0.01   | 0.001  | 0.003  | t | 149530 | YDCNTAAT<br>DATRWQI          | Mus<br>musculu<br>s              |
| 1 | 1.00 | 1 | 1 | -0.03 | -0.03  | -0.007 | -0.03  | -0.03  | t | 51296  | QLCQLL                       | Mus<br>musculu<br>s              |
| 1 | 1.00 | 1 | 1 | 0.03  | 0.03   | 0.049  | 0.03   | 0.032  | t | 144601 | CSGTHPSIS<br>SC              | Mus<br>musculu<br>s              |
| 1 | 1.00 | 1 | 1 | 0.02  | 0.02   | 0.027  | 0.023  | 0.032  | t | 111182 | CYETGPW<br>AC                | Homo<br>sapiens                  |
| 1 | 1.00 | 1 | 1 | 0     | -0.003 | 0.019  | 0      | -0.001 | t | 45433  | NPNNNAA<br>TVLQLPQG<br>TTLPK | Oryctola<br>gus<br>cuniculu<br>s |
| 1 | 1.00 | 1 | 1 | -0.03 | -0.034 | -0.014 | -0.03  | -0.03  | t | 10064  | DRVVKEM<br>RRQLEMID<br>KLTT  | Mus<br>musculu<br>s              |



|   |      |   |   |       |        |        |        |        |   |        |                        |                       |
|---|------|---|---|-------|--------|--------|--------|--------|---|--------|------------------------|-----------------------|
| 1 | 1.00 | 1 | 1 | -0.03 | -0.028 | -0.012 | -0.031 | -0.026 | t | 149323 | GLLGPY                 | Homo sapiens          |
| 1 | 1.00 | 1 | 1 | -0.05 | -0.048 | -0.036 | -0.053 | -0.05  | t | 56749  | SAEERLHS MK            | Homo sapiens          |
| 1 | 1.00 | 1 | 1 | -0.05 | -0.048 | -0.036 | -0.053 | -0.05  | t | 56749  | SAEERLHS MK            | Homo sapiens          |
| 1 | 1.00 | 1 | 1 | 0.01  | 0.006  | 0.011  | 0.007  | 0.02   | t | 79592  | KSFNSPH                | Oryctolagus cuniculus |
| 1 | 1.00 | 1 | 1 | 0     | -0.002 | 0.015  | -0.008 | 0      | t | 38718  | LPSPFHPY GTSK          | Mus musculus          |
| 1 | 1.00 | 1 | 1 | 0.01  | 0.01   | 0.003  | 0.01   | 0.02   | t | 141534 | DRMNLQT LRGY           | Mus musculus          |
| 1 | 1.00 | 1 | 1 | 0     | 0      | 0.017  | 0      | -0.002 | t | 4397   | ASFEAQQ ALANIAVD KA    | Mus musculus          |
| 1 | 1.00 | 1 | 1 | 0.03  | 0.032  | 0.035  | 0.03   | 0.033  | t | 44468  | NKCKMNL QDNNGN DIGFIG  | Homo sapiens          |
| 1 | 1.00 | 1 | 1 | 0.04  | 0.038  | 0.062  | 0.039  | 0.04   | t | 31009  | KGLTNLFS LGSQQKV       | Mus musculus          |
| 1 | 1.00 | 1 | 1 | 0     | 0.002  | 0.008  | 0.001  | 0.01   | t | 14205  | ESLPTFA                | Homo sapiens          |
| 1 | 1.00 | 1 | 1 | 0     | -0.002 | 0.009  | -0.007 | -0.001 | t | 141786 | YGEESRR GDLAALAR RV    | Mus musculus          |
| 1 | 1.00 | 1 | 1 | 0     | 0.003  | 0.005  | 0      | 0.009  | t | 24749  | HSYHKF                 | Mus musculus          |
| 1 | 1.00 | 1 | 1 | -0.02 | -0.018 | -0.003 | -0.019 | -0.02  | t | 45250  | NNSPAVYL LDGLRAQ DDYNG | Homo sapiens          |

|   |      |   |   |       |        |        |        |        |   |        |                              |                                |
|---|------|---|---|-------|--------|--------|--------|--------|---|--------|------------------------------|--------------------------------|
| 1 | 1.00 | 1 | 1 | -0.04 | -0.037 | -0.013 | -0.04  | -0.04  | t | 78556  | VPKLIAGSS<br>SLAPLG          | Mus<br>musculu<br>s            |
| 1 | 1.00 | 1 | 1 | 0.02  | 0.02   | 0.02   | 0.02   | 0.029  | t | 108298 | CKYSMSKC                     | Homo<br>sapiens                |
| 1 | 1.00 | 1 | 1 | -0.02 | -0.018 | 0.007  | -0.017 | -0.02  | t | 45013  | NMPASMK<br>RVRIE             | Rattus<br>norvegic<br>us       |
| 1 | 1.00 | 1 | 1 | -0.02 | -0.024 | -0.013 | -0.021 | -0.02  | t | 66649  | TTIHELLVR<br>MKRAELYC<br>PRP | Oryctola<br>gus<br>cunicu<br>s |
| 1 | 1.00 | 1 | 1 | -0.02 | -0.022 | -0.013 | -0.021 | -0.02  | t | 66649  | TTIHELLVR<br>MKRAELYC<br>PRP | Mus<br>musculu<br>s            |
| 1 | 1.00 | 1 | 1 | -0.02 | -0.018 | -0.013 | -0.021 | -0.02  | t | 66649  | TTIHELLVR<br>MKRAELYC<br>PRP | Cavia<br>porcellu<br>s         |
| 1 | 1.00 | 1 | 1 | -0.03 | -0.027 | -0.02  | -0.03  | -0.027 | t | 13972  | ERDPANIP<br>WDKD             | Mus<br>musculu<br>s            |
| 1 | 1.00 | 1 | 1 | -0.02 | -0.02  | -0.013 | -0.029 | -0.018 | t | 131306 | REKAKW                       | Homo<br>sapiens                |
| 1 | 1.00 | 1 | 1 | -0.07 | -0.07  | -0.07  | -0.077 | -0.07  | t | 112144 | GRGLSLSR<br>FSWGAEG<br>QRPGF | Homo<br>sapiens                |
| 1 | 1.00 | 1 | 1 | -0.02 | -0.02  | -0.009 | -0.02  | -0.019 | t | 122038 | WNPDDYG<br>GVKWNPD<br>DYGGVK | Rattus<br>norvegic<br>us       |
| 1 | 1.00 | 1 | 1 | -0.02 | -0.017 | -0.008 | -0.02  | -0.017 | t | 95040  | SHRPREAK                     | Mus<br>musculu<br>s            |
| 1 | 1.00 | 1 | 1 | -0.02 | -0.015 | -0.011 | -0.023 | -0.018 | t | 60374  | SQAQKAA<br>KPAAAAT<br>GTATAA | Homo<br>sapiens                |
| 1 | 1.00 | 1 | 1 | -0.01 | -0.01  | -0.001 | -0.01  | -0.008 | t | 110116 | YCAPLKPA<br>KSA              | Mus<br>musculu<br>s            |

|   |      |   |   |       |        |        |        |        |   |        |                              |                       |
|---|------|---|---|-------|--------|--------|--------|--------|---|--------|------------------------------|-----------------------|
| 1 | 1.00 | 1 | 1 | -0.05 | -0.047 | -0.03  | -0.05  | -0.05  | t | 105570 | VGGVVIA                      | Mus musculus          |
| 1 | 1.00 | 1 | 1 | -0.01 | -0.01  | 0.006  | -0.01  | -0.01  | t | 73535  | YDEEARRG<br>LERGLNA          | Homo sapiens          |
| 1 | 1.00 | 1 | 1 | 0     | -0.002 | 0      | -0.001 | 0.008  | t | 12345  | EHKYSWK<br>S                 | Mus musculus          |
| 1 | 1.00 | 1 | 1 | -0.01 | -0.008 | -0.003 | -0.007 | -0.008 | t | 67922  | VDDPRSEE<br>DKRFESHI<br>ECLK | Homo sapiens          |
| 1 | 1.00 | 1 | 1 | 0     | -0.002 | 0.017  | -0.001 | 0.001  | t | 59810  | SNEFAPVQ<br>NLTGSSVG         | Mus musculus          |
| 1 | 1.00 | 1 | 1 | -0.01 | -0.007 | 0.006  | -0.01  | -0.008 | t | 97899  | ASSQTEYE<br>ASPLTPL          | Sus scrofa            |
| 1 | 1.00 | 1 | 1 | -0.07 | -0.068 | -0.053 | -0.067 | -0.07  | t | 62074  | SVDDCRW<br>NLNCEPPP          | Homo sapiens          |
| 1 | 1.00 | 1 | 1 | 0     | 0.003  | 0      | -0.007 | 0.001  | t | 144208 | AQAGGPD<br>GAAAGGG           | Capra hircus          |
| 1 | 1.00 | 1 | 1 | 0.01  | 0.012  | 0.017  | 0.01   | 0.02   | t | 104343 | VSGGPFI                      | Homo sapiens          |
| 1 | 1.00 | 1 | 1 | 0     | 0.006  | 0.014  | 0      | 0.001  | t | 100073 | GNGQGLN<br>MNNPPNF<br>NVDENA | Aotus nancymae        |
| 1 | 1.00 | 1 | 1 | 0     | -0.004 | 0.001  | -0.003 | 0.01   | t | 79671  | VLPDSVW                      | Oryctolagus cuniculus |
| 1 | 1.00 | 1 | 1 | -0.07 | -0.067 | -0.06  | -0.07  | -0.067 | t | 131836 | CAPGSCFP<br>GV               | Mus musculus          |
| 1 | 1.00 | 1 | 1 | -0.01 | -0.006 | 0.007  | -0.013 | -0.007 | t | 32083  | KLPLTKG                      | Homo sapiens          |

|   |      |   |   |       |        |        |        |        |   |        |                          |              |
|---|------|---|---|-------|--------|--------|--------|--------|---|--------|--------------------------|--------------|
| 1 | 1.00 | 1 | 1 | 0     | 0.003  | 0.009  | 0      | 0.007  | t | 56283  | RVFEVGVIRNPGLGA          | Mus musculus |
| 1 | 1.00 | 1 | 1 | 0     | -0.001 | 0.019  | 0      | 0      | t | 30689  | KFACQTFLKDEIRPM          | Bos taurus   |
| 1 | 1.00 | 1 | 1 | -0.04 | -0.042 | -0.013 | -0.041 | -0.042 | t | 38687  | LPRLRPQRSPQ              | Mus musculus |
| 1 | 1.00 | 1 | 1 | 0.01  | 0.012  | 0.031  | 0.017  | 0.02   | t | 108289 | ATNIFIEGT                | Homo sapiens |
| 1 | 1.00 | 1 | 1 | -0.01 | -0.012 | 0.005  | -0.011 | -0.01  | t | 19098  | GDRADGQPAGDRADGQPA       | Mus musculus |
| 1 | 1.00 | 1 | 1 | 0.02  | 0.023  | 0.025  | 0.017  | 0.025  | t | 134188 | PMSTPSATSVR              | Mus musculus |
| 1 | 1.00 | 1 | 1 | 0.04  | 0.042  | 0.04   | 0.037  | 0.05   | t | 24741  | HSGAEF                   | Homo sapiens |
| 1 | 1.00 | 1 | 1 | -0.04 | -0.04  | -0.04  | -0.04  | -0.036 | t | 146031 | TLAPVRPPLTVGPVGP<br>SDP  | Mus musculus |
| 1 | 1.00 | 1 | 1 | 0.03  | 0.037  | 0.037  | 0.03   | 0.032  | t | 159288 | LLHYSTISQDNLDISFGE<br>LQ | Aotus        |
| 1 | 1.00 | 1 | 1 | -0.02 | -0.02  | -0.033 | -0.02  | -0.008 | t | 26075  | IFGFNALVDR               | Mus musculus |
| 1 | 1.00 | 1 | 1 | -0.02 | -0.015 | -0.033 | -0.02  | -0.008 | t | 26075  | IFGFNALVDR               | Mus musculus |
| 1 | 1.00 | 1 | 1 | -0.01 | -0.008 | -0.005 | -0.007 | 0.001  | t | 4396   | ASFDRS                   | Homo sapiens |
| 1 | 1.00 | 1 | 1 | -0.01 | -0.008 | -0.005 | -0.007 | 0.001  | t | 4396   | ASFDRS                   | Homo sapiens |
| 1 | 1.00 | 1 | 1 | -0.05 | -0.051 | -0.031 | -0.05  | -0.048 | t | 95715  | QKVARTPC                 | Bos taurus   |

|   |      |   |   |       |        |        |        |        |   |        |                              |                                  |
|---|------|---|---|-------|--------|--------|--------|--------|---|--------|------------------------------|----------------------------------|
| 1 | 1.00 | 1 | 1 | -0.05 | -0.043 | -0.031 | -0.05  | -0.048 | t | 95715  | QKVARTPC                     | Cavia porcellu<br>s              |
| 1 | 1.00 | 1 | 1 | 0     | 0.004  | 0.025  | 0      | 0.001  | t | 22360  | GSGVRGD<br>FGSLAPRV<br>ARQL  | Cavia porcellu<br>s              |
| 1 | 1.00 | 1 | 1 | -0.02 | -0.024 | -0.018 | -0.027 | -0.018 | t | 107201 | LIVPEGAR<br>TSLN             | Oryctola<br>gus<br>cuniculu<br>s |
| 1 | 1.00 | 1 | 1 | -0.03 | -0.027 | -0.009 | -0.03  | -0.03  | t | 15524  | FEEVNGIR<br>RP               | Mus<br>musculu<br>s              |
| 1 | 1.00 | 1 | 1 | -0.04 | -0.04  | -0.017 | -0.04  | -0.04  | t | 13523  | ENMNRYP<br>NQVYY             | Mus<br>musculu<br>s              |
| 1 | 1.00 | 1 | 1 | -0.01 | -0.01  | -0.008 | -0.01  | -0.008 | t | 9582   | DNYWSFS<br>DSTYWTLR<br>YSSG  | Mus<br>musculu<br>s              |
| 1 | 1.00 | 1 | 1 | -0.05 | -0.048 | -0.025 | -0.049 | -0.05  | t | 65754  | TPRYNRIG<br>SH               | Homo<br>sapiens                  |
| 1 | 1.00 | 1 | 1 | -0.02 | -0.018 | -0.012 | -0.021 | -0.017 | t | 149390 | NIYPHGIT<br>DVRPLY           | Homo<br>sapiens                  |
| 1 | 1.00 | 1 | 1 | -0.03 | -0.03  | -0.019 | -0.03  | -0.029 | t | 122035 | WNPADYG<br>GIKWNPA<br>DYGGIK | Rattus<br>norvegic<br>us         |
| 1 | 1.00 | 1 | 1 | -0.03 | -0.028 | -0.013 | -0.027 | -0.03  | t | 9043   | DLDFSADF<br>ASLSPFMI<br>REAG | Homo<br>sapiens                  |
| 1 | 1.00 | 1 | 1 | 0.01  | 0.01   | 0.032  | 0.01   | 0.011  | t | 75834  | YSNQNNF                      | Mus<br>musculu<br>s              |
| 1 | 1.00 | 1 | 1 | -0.03 | -0.028 | -0.011 | -0.029 | -0.027 | t | 23032  | GVLAKDV<br>RFSQV             | Homo<br>sapiens                  |
| 1 | 1.00 | 1 | 1 | -0.02 | -0.02  | -0.021 | -0.02  | -0.01  | t | 49444  | PSMTGFH<br>NWLIG             | Mus<br>musculu<br>s              |
| 1 | 1.00 | 1 | 1 | -0.02 | -0.018 | 0.009  | -0.013 | -0.02  | t | 119497 | MRKANSP<br>PT                | Homo<br>sapiens                  |

|   |      |   |   |       |        |        |        |        |   |        |                              |                                  |
|---|------|---|---|-------|--------|--------|--------|--------|---|--------|------------------------------|----------------------------------|
| 1 | 1.00 | 1 | 1 | -0.05 | -0.054 | -0.025 | -0.051 | -0.052 | t | 8526   | DGYPVEYD<br>NCAYICW          | Oryctola<br>gus<br>cuniculu<br>s |
| 1 | 1.00 | 1 | 1 | 0     | -0.002 | 0.004  | -0.007 | 0.002  | t | 3983   | AQKFNGLT<br>VLPPLTDD         | Mus<br>musculu<br>s              |
| 1 | 1.00 | 1 | 1 | 0     | 0.003  | 0      | 0      | 0.012  | t | 79366  | RDAVMI                       | Mus<br>musculu<br>s              |
| 1 | 1.00 | 1 | 1 | 0.01  | 0.008  | 0.013  | 0.003  | 0.012  | t | 113365 | EHPVTGC<br>GERTEGRC<br>LHYTV | Mus<br>musculu<br>s              |
| 1 | 1.00 | 1 | 1 | 0.01  | 0.008  | 0.013  | 0.003  | 0.012  | t | 113365 | EHPVTGC<br>GERTEGRC<br>LHYTV | Mus<br>musculu<br>s              |
| 1 | 1.00 | 1 | 1 | 0     | 0.002  | 0.042  | 0.007  | 0.002  | t | 156480 | YKEQDFTP<br>VV               | Homo<br>sapiens                  |
| 1 | 1.00 | 1 | 1 | -0.07 | -0.072 | -0.053 | -0.073 | -0.073 | t | 111042 | TIHAHPGS<br>RRGGRHG<br>YHH   | Mus<br>musculu<br>s              |
| 1 | 1.00 | 1 | 1 | 0.02  | 0.016  | 0.021  | 0.017  | 0.03   | t | 79596  | LERTPGK                      | Oryctola<br>gus<br>cuniculu<br>s |
| 1 | 1.00 | 1 | 1 | -0.02 | -0.016 | -0.007 | -0.02  | -0.019 | t | 69166  | VIYHKPLA<br>GVYRALKK<br>QIG  | Aotus<br>nancyma<br>ae           |
| 1 | 1.00 | 1 | 1 | -0.01 | -0.012 | 0.007  | -0.011 | -0.008 | t | 58052  | SGGNTNQ<br>QR                | Mus<br>musculu<br>s              |
| 1 | 1.00 | 1 | 1 | 0     | -0.004 | 0.005  | -0.001 | 0.01   | t | 79568  | HWSPPSL                      | Oryctola<br>gus<br>cuniculu<br>s |
| 1 | 1.00 | 1 | 1 | -0.06 | -0.063 | -0.045 | -0.06  | -0.06  | t | 70544  | VQECNCIS<br>YPGHVTG<br>HRMAW | Oryctola<br>gus<br>cuniculu<br>s |
| 1 | 1.00 | 1 | 1 | 0.05  | 0.05   | 0.05   | 0.05   | 0.06   | t | 79330  | PDVAPS                       | Mus<br>musculu<br>s              |
| 1 | 1.00 | 1 | 1 | -0.08 | -0.075 | -0.057 | -0.073 | -0.08  | t | 108659 | TIHAHPGS<br>RRGGRHG<br>YHH   | Homo<br>sapiens                  |

|   |      |   |   |       |        |        |        |        |   |        |                              |                                  |
|---|------|---|---|-------|--------|--------|--------|--------|---|--------|------------------------------|----------------------------------|
| 1 | 1.00 | 1 | 1 | -0.05 | -0.05  | -0.029 | -0.047 | -0.05  | t | 58193  | SGPRHRD<br>GVRRPQK<br>RPSCIG | Homo<br>sapiens                  |
| 1 | 1.00 | 1 | 1 | 0     | 0.002  | -0.012 | -0.003 | 0.01   | t | 78561  | VWAQSSS<br>FPQFKPQE          | Homo<br>sapiens                  |
| 1 | 1.00 | 1 | 1 | -0.01 | -0.01  | -0.001 | -0.01  | -0.007 | t | 110947 | MSTRSVSS<br>SSYRRMFG<br>GPGT | Mus<br>musculu<br>s              |
| 1 | 1.00 | 1 | 1 | -0.01 | -0.01  | -0.001 | -0.01  | -0.007 | t | 110946 | MSTRSVSS<br>SSYRRMFG<br>GPGT | Mus<br>musculu<br>s              |
| 1 | 1.00 | 1 | 1 | -0.02 | -0.02  | -0.013 | -0.021 | -0.019 | t | 52813  | QVVVMKS<br>KNDQGIT<br>NKCKM  | Homo<br>sapiens                  |
| 1 | 1.00 | 1 | 1 | 0.01  | 0.008  | 0.015  | 0.009  | 0.02   | t | 7518   | DAGEVYP<br>GP                | Mus<br>musculu<br>s              |
| 1 | 1.00 | 1 | 1 | -0.04 | -0.043 | -0.035 | -0.043 | -0.037 | t | 108599 | QGDAKKG<br>ANLFKTRC          | Homo<br>sapiens                  |
| 1 | 1.00 | 1 | 1 | 0.03  | 0.03   | 0.045  | 0.033  | 0.039  | t | 149132 | YLENATQ                      | Sus<br>scrofa                    |
| 1 | 1.00 | 1 | 1 | 0.01  | 0.013  | 0.037  | 0.01   | 0.011  | t | 42264  | MPDHALR<br>PQYSI             | Mus<br>musculu<br>s              |
| 1 | 1.00 | 1 | 1 | -0.03 | -0.029 | -0.018 | -0.024 | -0.017 | t | 78281  | TKLPAA                       | Equus<br>caballus                |
| 1 | 1.00 | 1 | 1 | 0.02  | 0.016  | 0.021  | 0.017  | 0.03   | t | 79592  | KSFNSPH                      | Oryctola<br>gus<br>cuniculu<br>s |
| 1 | 1.00 | 1 | 1 | 0     | 0      | 0.007  | 0      | 0.004  | t | 131083 | SQTTANPS<br>CPEAT            | Rattus<br>norvegic<br>us         |
| 1 | 1.00 | 1 | 1 | 0     | 0      | 0.007  | 0      | 0.004  | t | 131083 | SQTTANPS<br>CPEAT            | Rattus<br>norvegic<br>us         |
| 1 | 1.00 | 1 | 1 | -0.03 | -0.03  | -0.002 | -0.03  | -0.028 | t | 59907  | SNSLIYYAL<br>DVY             | Oryctola<br>gus<br>cuniculu<br>s |
| 1 | 1.00 | 1 | 1 | -0.03 | -0.027 | -0.002 | -0.03  | -0.028 | t | 59907  | SNSLIYYAL<br>DVY             | Mus<br>musculu<br>s              |

|   |      |   |   |       |        |        |        |        |   |        |                              |                          |
|---|------|---|---|-------|--------|--------|--------|--------|---|--------|------------------------------|--------------------------|
| 1 | 1.00 | 1 | 1 | 0     | 0      | 0.01   | 0      | 0.002  | t | 149491 | TDATRWWQ<br>IWDNGTII         | Mus<br>musculu<br>s      |
| 1 | 1.00 | 1 | 1 | 0.02  | 0.018  | 0.015  | 0.013  | 0.024  | t | 107384 | GEPGIAGF<br>KGEQGPK          | Mus<br>musculu<br>s      |
| 1 | 1.00 | 1 | 1 | 0.04  | 0.042  | 0.058  | 0.043  | 0.042  | t | 65119  | TLVDITDTE<br>TSAKPPVT<br>TAY | Homo<br>sapiens          |
| 1 | 1.00 | 1 | 1 | -0.02 | -0.016 | -0.006 | -0.019 | -0.018 | t | 55930  | RSQPRGR<br>RQPIP             | Homo<br>sapiens          |
| 1 | 1.00 | 1 | 1 | 0.03  | 0.03   | 0.049  | 0.03   | 0.032  | t | 144601 | CSGTHPSIS<br>SC              | Mus<br>musculu<br>s      |
| 1 | 1.00 | 1 | 1 | 0.02  | 0.02   | 0.015  | 0.02   | 0.029  | t | 122771 | GELTSSEV<br>ATEVPFRL<br>MHPQ | Rattus<br>norvegic<br>us |
| 1 | 1.00 | 1 | 1 | -0.05 | -0.052 | -0.032 | -0.047 | -0.048 | t | 113957 | TSSKAKEL<br>KDRHRDF<br>PDVIS | Mus<br>musculu<br>s      |
| 1 | 1.00 | 1 | 1 | -0.05 | -0.052 | -0.032 | -0.047 | -0.048 | t | 113957 | TSSKAKEL<br>KDRHRDF<br>PDVIS | Mus<br>musculu<br>s      |
| 1 | 1.00 | 1 | 1 | -0.05 | -0.047 | -0.03  | -0.05  | -0.05  | t | 11647  | EEGKILRA<br>QLEFNQIK<br>AE   | Mus<br>musculu<br>s      |
| 1 | 1.00 | 1 | 1 | 0.03  | 0.03   | 0.051  | 0.03   | 0.029  | t | 46836  | PAIVPDRE<br>VLYREFDE<br>MEEC | Homo<br>sapiens          |
| 1 | 1.00 | 1 | 1 | 0     | 0.014  | 0.012  | 0.001  | 0.001  | t | 19095  | GDRADGQ<br>AAGDRAD<br>GQAA   | Homo<br>sapiens          |
| 1 | 1.00 | 1 | 1 | -0.02 | -0.022 | -0.02  | -0.027 | -0.02  | t | 119613 | LSLSRFSW<br>GAEGQRP<br>GFGYG | Rattus<br>norvegic<br>us |
| 1 | 1.00 | 1 | 1 | -0.04 | -0.04  | -0.013 | -0.04  | -0.04  | t | 12071  | EFSIKPKTS<br>VTP             | Mus<br>musculu<br>s      |
| 1 | 1.00 | 1 | 1 | 0     | -0.002 | 0      | -0.007 | 0.005  | t | 128018 | IELRFVLTK<br>LRVI            | Mus<br>musculu<br>s      |



|   |      |   |   |       |        |        |        |        |   |        |                              |                                  |
|---|------|---|---|-------|--------|--------|--------|--------|---|--------|------------------------------|----------------------------------|
| 1 | 1.00 | 1 | 1 | -0.03 | -0.034 | -0.009 | -0.03  | -0.028 | t | 21963  | GQTITPAD<br>KSDKGFV          | Bos<br>taurus                    |
| 1 | 1.00 | 1 | 1 | -0.01 | -0.01  | 0      | -0.014 | -0.01  | t | 15990  | FGGVSDE<br>DVPSFHF<br>KPPSSR | Homo<br>sapiens                  |
| 1 | 1.00 | 1 | 1 | 0.02  | 0.02   | 0.02   | 0.02   | 0.03   | t | 79375  | RNYTLT                       | Mus<br>musculu<br>s              |
| 1 | 1.00 | 1 | 1 | 0.02  | 0.02   | 0.02   | 0.021  | 0.03   | t | 106827 | SESPYPSL<br>MMVS             | Mus<br>musculu<br>s              |
| 1 | 1.00 | 1 | 1 | -0.04 | -0.044 | -0.023 | -0.041 | -0.04  | t | 49795  | PTTRTDDK<br>LR               | Oryctola<br>gus<br>cuniculu<br>s |
| 1 | 1.00 | 1 | 1 | 0.04  | 0.042  | 0.04   | 0.047  | 0.051  | t | 139616 | SYNRGDST<br>FESKSYK          | Homo<br>sapiens                  |
| 1 | 1.00 | 1 | 1 | -0.06 | -0.06  | -0.037 | -0.06  | -0.059 | t | 94494  | ECCNPAC<br>GRH               | Oryctola<br>gus<br>cuniculu<br>s |
| 1 | 1.00 | 1 | 1 | 0.01  | 0.007  | 0.009  | 0.01   | 0.02   | t | 51870  | QPLHSPL                      | Oryctola<br>gus<br>cuniculu<br>s |
| 1 | 1.00 | 1 | 1 | -0.01 | -0.014 | 0.008  | -0.01  | -0.01  | t | 93094  | KFKVQGE<br>AVSNIQEN          | Mus<br>musculu<br>s              |
| 1 | 1.00 | 1 | 1 | -0.01 | -0.008 | 0.006  | -0.013 | -0.01  | t | 65916  | TQPSKPTT<br>KQRQ             | Homo<br>sapiens                  |
| 1 | 1.00 | 1 | 1 | -0.01 | -0.01  | -0.003 | 0      | 0.002  | t | 106651 | MHSPLPI                      | Homo<br>sapiens                  |
| 1 | 1.00 | 1 | 1 | 0.01  | 0.01   | 0.017  | 0.01   | 0.019  | t | 108503 | KMPIEADP<br>L                | Homo<br>sapiens                  |
| 1 | 1.00 | 1 | 1 | -0.03 | -0.03  | -0.008 | -0.03  | -0.03  | t | 12111  | EFYEKVTG<br>TDLELIQIL<br>KDH | Homo<br>sapiens                  |
| 1 | 1.00 | 1 | 1 | -0.07 | -0.07  | -0.06  | -0.07  | -0.067 | t | 122562 | RRQPHVV<br>SQW               | Mus<br>musculu<br>s              |

|   |      |   |   |       |        |        |        |        |   |        |                              |                                  |
|---|------|---|---|-------|--------|--------|--------|--------|---|--------|------------------------------|----------------------------------|
| 1 | 1.00 | 1 | 1 | -0.02 | -0.02  | -0.02  | -0.02  | -0.011 | t | 106976 | VPTQLYNL<br>YPPL             | Mus<br>musculu<br>s              |
| 1 | 1.00 | 1 | 1 | -0.02 | -0.022 | 0.005  | -0.021 | -0.021 | t | 64762  | TLDVRMIN<br>IE               | Mus<br>musculu<br>s              |
| 1 | 1.00 | 1 | 1 | -0.02 | -0.016 | -0.002 | -0.02  | -0.018 | t | 149511 | VLGVAPSA<br>SLYAVKV          | Cavia<br>porcellu<br>s           |
| 1 | 1.00 | 1 | 1 | -0.02 | -0.016 | -0.003 | -0.019 | -0.017 | t | 104226 | RPQDVKEP<br>GGGQIVG<br>GVYLL | Homo<br>sapiens                  |
| 1 | 1.00 | 1 | 1 | 0.03  | 0.03   | 0.054  | 0.034  | 0.03   | t | 41238  | MDIDPYKE<br>FGATVELL<br>SFLP | Homo<br>sapiens                  |
| 1 | 1.00 | 1 | 1 | 0.01  | 0.01   | 0.01   | 0.01   | 0.019  | t | 132847 | KKEDFDIY<br>DEDENQS<br>P     | Mus<br>musculu<br>s              |
| 1 | 1.00 | 1 | 1 | -0.01 | -0.01  | 0.019  | -0.01  | -0.012 | t | 77985  | QTCCDKN<br>QGIFM             | Mus<br>musculu<br>s              |
| 1 | 1.00 | 1 | 1 | 0.02  | 0.015  | 0.02   | 0.013  | 0.021  | t | 144538 | VVDAEVV<br>DDDRESK           | Bos<br>taurus                    |
| 1 | 1.00 | 1 | 1 | 0.02  | 0.023  | 0.02   | 0.013  | 0.021  | t | 144538 | VVDAEVV<br>DDDRESK           | Capra<br>hircus                  |
| 1 | 1.00 | 1 | 1 | -0.04 | -0.038 | -0.02  | -0.037 | -0.042 | t | 136092 | YKSQYLNN<br>GPQRIGRK<br>YKK  | Homo<br>sapiens                  |
| 1 | 1.00 | 1 | 1 | -0.01 | -0.008 | -0.008 | -0.009 | -0.008 | t | 9582   | DNYWSFS<br>DSTYWTLR<br>YSSG  | Homo<br>sapiens                  |
| 1 | 1.00 | 1 | 1 | 0     | 0      | 0.012  | -0.003 | 0.002  | t | 147371 | VIKMIRIQ<br>GSYVGNR<br>KDSS  | Homo<br>sapiens                  |
| 1 | 1.00 | 1 | 1 | 0     | -0.003 | 0.016  | 0      | 0      | t | 71017  | VSKPMDL<br>DIELVN            | Oryctola<br>gus<br>cuniculu<br>s |
| 1 | 1.00 | 1 | 1 | 0     | 0.015  | 0.019  | 0      | 0      | t | 66871  | TTTRQSITT<br>MTNTGA          | Equus<br>caballus                |

|   |      |   |   |       |        |        |        |        |   |        |                              |                     |
|---|------|---|---|-------|--------|--------|--------|--------|---|--------|------------------------------|---------------------|
| 1 | 1.00 | 1 | 1 | -0.02 | -0.018 | -0.001 | -0.019 | -0.019 | t | 64888  | TLKYFGGF<br>NFSQILPD<br>P    | Homo<br>sapiens     |
| 1 | 1.00 | 1 | 1 | -0.04 | -0.04  | -0.019 | -0.037 | -0.038 | t | 54216  | RIPPENIRR<br>VT              | Homo<br>sapiens     |
| 1 | 1.00 | 1 | 1 | -0.03 | -0.028 | -0.012 | -0.029 | -0.031 | t | 70499  | VPVDAPH<br>AGTKPHSA          | Homo<br>sapiens     |
| 1 | 1.00 | 1 | 1 | 0     | 0.002  | 0.007  | 0.007  | 0.01   | t | 107861 | GLEGQDT<br>KTITFDVS          | Homo<br>sapiens     |
| 1 | 1.00 | 1 | 1 | -0.03 | -0.027 | -0.017 | -0.03  | -0.031 | t | 98456  | SICSNNPT<br>CWAICKRI<br>PNKK | Mus<br>musculu<br>s |
| 1 | 1.00 | 1 | 1 | -0.02 | -0.02  | -0.013 | -0.022 | -0.016 | t | 143851 | DPEQPAPL<br>FLVS             | Homo<br>sapiens     |
| 1 | 1.00 | 1 | 1 | -0.05 | -0.046 | -0.035 | -0.049 | -0.05  | t | 14865  | EVRRVGDF<br>HYITGA           | Homo<br>sapiens     |
| 1 | 1.00 | 1 | 1 | 0.01  | 0.013  | 0.022  | 0.01   | 0.012  | t | 133877 | LEAKICHQI<br>EYYFGDFN<br>L   | Mus<br>musculu<br>s |
| 1 | 1.00 | 1 | 1 | -0.03 | -0.028 | -0.009 | -0.029 | -0.032 | t | 45398  | NPLYGSRL<br>GVPDTLG<br>GDPKF | Homo<br>sapiens     |
| 1 | 1.00 | 1 | 1 | -0.01 | -0.012 | -0.003 | -0.017 | -0.008 | t | 121717 | PRRPVDV<br>GNYWNIP<br>S      | Mus<br>musculu<br>s |
| 1 | 1.00 | 1 | 1 | -0.02 | -0.018 | -0.019 | -0.023 | -0.017 | t | 106908 | TIDVPSNC<br>HTHEGGQ<br>LHCT  | Homo<br>sapiens     |
| 1 | 1.00 | 1 | 1 | -0.01 | -0.008 | -0.005 | -0.007 | 0      | t | 65578  | TPGNHWG<br>ETTFPALR          | Homo<br>sapiens     |
| 1 | 1.00 | 1 | 1 | -0.01 | -0.006 | 0.024  | -0.013 | -0.01  | t | 99055  | WQDCC                        | Homo<br>sapiens     |
| 1 | 1.00 | 1 | 1 | 0.01  | 0.01   | 0.029  | 0.01   | 0.01   | t | 116111 | KGQGQKA<br>KMRCIPEK<br>GH    | Mus<br>musculu<br>s |

|   |      |   |   |       |        |        |        |        |   |        |                              |                                  |
|---|------|---|---|-------|--------|--------|--------|--------|---|--------|------------------------------|----------------------------------|
| 1 | 1.00 | 1 | 1 | -0.05 | -0.046 | -0.027 | -0.051 | -0.051 | t | 71324  | VTGHRMA<br>WDMMQ<br>NWS      | Homo<br>sapiens                  |
| 1 | 1.00 | 1 | 1 | -0.03 | -0.032 | -0.003 | -0.031 | -0.03  | t | 62050  | SVARTRGL<br>YDDG             | Mus<br>musculu<br>s              |
| 1 | 1.00 | 1 | 1 | 0.01  | 0.013  | 0.022  | 0.01   | 0.01   | t | 31816  | KLEGGGK<br>DIREGGDG<br>DIDRT | Equus<br>caballus                |
| 1 | 1.00 | 1 | 1 | 0.01  | 0.01   | 0.022  | 0.01   | 0.01   | t | 31816  | KLEGGGK<br>DIREGGDG<br>DIDRT | Equus<br>caballus                |
| 1 | 1.00 | 1 | 1 | 0.01  | 0.01   | 0.006  | 0.01   | 0.017  | t | 144439 | QALTGTNT<br>GGAIDGVS<br>TTD  | Mus<br>musculu<br>s              |
| 1 | 1.00 | 1 | 1 | 0     | -0.002 | 0.002  | -0.007 | 0      | t | 127645 | EVDNGNF<br>VHCEESGK<br>LVLVY | Mus<br>musculu<br>s              |
| 1 | 1.00 | 1 | 1 | -0.01 | -0.008 | -0.009 | -0.011 | -0.009 | t | 78925  | AGTYDFAI<br>AAPQANA<br>KIWIA | Homo<br>sapiens                  |
| 1 | 1.00 | 1 | 1 | -0.01 | -0.008 | 0.019  | -0.003 | -0.01  | t | 119498 | MRKSTGT<br>AS                | Homo<br>sapiens                  |
| 1 | 1.00 | 1 | 1 | -0.02 | -0.026 | 0.001  | -0.02  | -0.02  | t | 92778  | GALRNYIG<br>ESSPA            | Oryctola<br>gus<br>cuniculu<br>s |
| 1 | 1.00 | 1 | 1 | -0.04 | -0.038 | -0.022 | -0.039 | -0.038 | t | 149418 | PSASLYAV<br>KVLGADG          | Cavia<br>porcellu<br>s           |
| 1 | 1.00 | 1 | 1 | -0.01 | -0.01  | -0.005 | -0.01  | -0.001 | t | 39160  | LRPFHQILY<br>GMS             | Mus<br>musculu<br>s              |
| 1 | 1.00 | 1 | 1 | -0.02 | -0.016 | -0.006 | -0.017 | -0.018 | t | 13898  | EQPTLTFG<br>AGVNVPA<br>GAGAA | Homo<br>sapiens                  |
| 1 | 1.00 | 1 | 1 | 0     | 0      | 0.017  | 0      | 0.001  | t | 5350   | AVGPGRW<br>DED               | Mus<br>musculu<br>s              |

|   |      |   |   |       |        |        |        |        |   |        |                              |                              |
|---|------|---|---|-------|--------|--------|--------|--------|---|--------|------------------------------|------------------------------|
| 1 | 1.00 | 1 | 1 | 0     | 0.002  | 0.008  | -0.003 | 0.001  | t | 63196  | TDLNILERF<br>NYEEAQT         | Homo<br>sapiens              |
| 1 | 1.00 | 1 | 1 | 0     | 0      | 0.007  | 0      | 0.004  | t | 131084 | SQTTANPS<br>CPEGA            | Rattus<br>norvegicus         |
| 1 | 1.00 | 1 | 1 | 0.05  | 0.05   | 0.051  | 0.05   | 0.06   | t | 144903 | HDFHDPTL<br>EEQK             | Mus<br>musculus              |
| 1 | 1.00 | 1 | 1 | -0.11 | -0.11  | -0.11  | -0.11  | -0.108 | t | 117234 | SRGQHQA<br>HSLERVCH<br>CL    | Mus<br>musculus              |
| 1 | 1.00 | 1 | 1 | 0     | 0      | 0      | 0      | 0.009  | t | 137415 | HAPRYHY                      | Mus<br>musculus              |
| 1 | 1.00 | 1 | 1 | -0.03 | -0.025 | -0.007 | -0.028 | -0.029 | t | 119563 | EDHRQVV<br>EVTVGLQL<br>I     | Homo<br>sapiens              |
| 1 | 1.00 | 1 | 1 | -0.03 | -0.03  | -0.007 | -0.028 | -0.029 | t | 119563 | EDHRQVV<br>EVTVGLQL<br>I     | Homo<br>sapiens              |
| 1 | 1.00 | 1 | 1 | 0.04  | 0.04   | 0.055  | 0.043  | 0.049  | t | 149134 | YTHNETE                      | Sus<br>scrofa                |
| 1 | 1.00 | 1 | 1 | -0.01 | -0.012 | -0.008 | -0.017 | -0.008 | t | 117655 | TLKNREP<br>VQLETLSIRG<br>NNI | Mus<br>musculus              |
| 1 | 1.00 | 1 | 1 | -0.02 | -0.022 | -0.02  | -0.027 | -0.015 | t | 127952 | DYMTQAR<br>GQRSSLA<br>ED     | Mus<br>musculus              |
| 1 | 1.00 | 1 | 1 | -0.01 | -0.01  | -0.004 | -0.01  | -0.001 | t | 79515  | ALSIIGK                      | Oryctola<br>gus<br>cuniculus |
| 1 | 1.00 | 1 | 1 | -0.01 | -0.01  | -0.01  | -0.02  | -0.011 | t | 115195 | CQAQPTT<br>MARHPPH<br>HLSFMA | Homo<br>sapiens              |
| 1 | 1.00 | 1 | 1 | -0.05 | -0.05  | -0.03  | -0.05  | -0.049 | t | 3886   | APVDSVFD<br>RAFSAYL          | Mus<br>musculus              |
| 1 | 1.00 | 1 | 1 | 0.02  | 0.022  | 0.02   | 0.023  | 0.03   | t | 147563 | CYGTEPW<br>MC                | Homo<br>sapiens              |
| 1 | 1.00 | 1 | 1 | -0.01 | -0.012 | -0.015 | -0.017 | -0.01  | t | 112842 | SSKRGRQT<br>PVLYAML<br>DHSRS | Mus<br>musculus              |

|   |      |   |   |       |        |        |        |        |   |        |                              |                     |
|---|------|---|---|-------|--------|--------|--------|--------|---|--------|------------------------------|---------------------|
| 1 | 1.00 | 1 | 1 | -0.03 | -0.03  | -0.003 | -0.03  | -0.03  | t | 52484  | QTAVDDA<br>EAAAKCR<br>HCI    | Mus<br>musculu<br>s |
| 1 | 1.00 | 1 | 1 | -0.03 | -0.027 | -0.003 | -0.03  | -0.03  | t | 52484  | QTAVDDA<br>EAAAKCR<br>HCI    | Mus<br>musculu<br>s |
| 1 | 1.00 | 1 | 1 | -0.02 | -0.018 | -0.009 | -0.019 | -0.021 | t | 42699  | MSTNPKP<br>QRKTKRNT<br>NRRPQ | Homo<br>sapiens     |
| 1 | 1.00 | 1 | 1 | 0.01  | 0.01   | 0.01   | 0.01   | 0.019  | t | 125374 | DHTFMQR<br>YHTHQ             | Mus<br>musculu<br>s |
| 1 | 1.00 | 1 | 1 | -0.01 | -0.003 | 0.007  | -0.007 | -0.009 | t | 110955 | NQNPGSP<br>RPGSTGT<br>WNPSS  | Mus<br>musculu<br>s |
| 1 | 1.00 | 1 | 1 | 0.02  | 0.022  | 0.04   | 0.021  | 0.02   | t | 50998  | QHEQDRP<br>TPSPAPSR<br>PFSVL | Homo<br>sapiens     |
| 1 | 1.00 | 1 | 1 | -0.01 | -0.008 | 0.011  | -0.007 | -0.01  | t | 80251  | AGTGALAS<br>SAPS             | Homo<br>sapiens     |
| 1 | 1.00 | 1 | 1 | 0.02  | 0.02   | 0.021  | 0.02   | 0.028  | t | 145737 | DARAYDTE<br>V                | Mus<br>musculu<br>s |
| 1 | 1.00 | 1 | 1 | 0.01  | 0.008  | 0.035  | 0.013  | 0.01   | t | 39213  | LRSPNGFL<br>LTDQ             | Mus<br>musculu<br>s |
| 1 | 1.00 | 1 | 1 | -0.01 | -0.01  | -0.003 | -0.01  | -0.008 | t | 117690 | WGVPIEKI<br>YNKTSGRS<br>LPW  | Homo<br>sapiens     |
| 1 | 1.00 | 1 | 1 | -0.01 | -0.01  | -0.003 | -0.01  | -0.008 | t | 117690 | WGVPIEKI<br>YNKTSGRS<br>LPW  | Homo<br>sapiens     |
| 1 | 1.00 | 1 | 1 | -0.03 | -0.03  | -0.011 | -0.033 | -0.032 | t | 27080  | ILGPRWNL<br>NAHS             | Homo<br>sapiens     |
| 1 | 1.00 | 1 | 1 | 0     | 0      | 0.018  | 0      | 0      | t | 68117  | VEAGEAT<br>GLAWDP<br>WWTVIN  | Mus<br>musculu<br>s |

|   |      |   |   |       |        |        |        |        |   |        |                              |                     |
|---|------|---|---|-------|--------|--------|--------|--------|---|--------|------------------------------|---------------------|
| 1 | 1.00 | 1 | 1 | -0.03 | -0.026 | -0.013 | -0.029 | -0.03  | t | 104050 | LPRRGPRL<br>GVRATRKT<br>SERS | Homo<br>sapiens     |
| 1 | 1.00 | 1 | 1 | 0     | 0      | 0      | 0      | 0.009  | t | 137449 | SHRLPAK                      | Mus<br>musculu<br>s |
| 1 | 1.00 | 1 | 1 | -0.02 | -0.017 | -0.01  | -0.02  | -0.018 | t | 46955  | PASTNRQS<br>GRQPTPI          | Mus<br>musculu<br>s |
| 1 | 1.00 | 1 | 1 | -0.02 | -0.02  | 0      | -0.017 | -0.019 | t | 2772   | ALNDLCIK<br>VNNWDLF<br>FSPS  | Homo<br>sapiens     |
| 1 | 1.00 | 1 | 1 | -0.02 | -0.022 | 0      | -0.017 | -0.019 | t | 2772   | ALNDLCIK<br>VNNWDLF<br>FSPS  | Mus<br>musculu<br>s |
| 1 | 1.00 | 1 | 1 | -0.06 | -0.058 | -0.041 | -0.059 | -0.06  | t | 59944  | SNVPFSPD<br>GKPCTPPA<br>L    | Homo<br>sapiens     |
| 1 | 1.00 | 1 | 1 | -0.04 | -0.04  | -0.04  | -0.036 | -0.034 | t | 138234 | RRTDPDAV<br>SPWQLTY          | Homo<br>sapiens     |
| 1 | 1.00 | 1 | 1 | 0.03  | 0.032  | 0.03   | 0.031  | 0.04   | t | 117096 | TLSQDQSE<br>TLNY             | Homo<br>sapiens     |
| 1 | 1.00 | 1 | 1 | -0.04 | -0.04  | -0.021 | -0.04  | -0.04  | t | 63165  | TDHAGSN<br>DNIALLVQ          | Homo<br>sapiens     |
| 1 | 1.00 | 1 | 1 | 0.02  | 0.02   | 0.02   | 0.02   | 0.029  | t | 106514 | HKMTNFP<br>DSLLT             | Mus<br>musculu<br>s |
| 1 | 1.00 | 1 | 1 | -0.03 | -0.032 | -0.013 | -0.031 | -0.03  | t | 40579  | LVSFGVWI<br>RTPPAYRP<br>PN   | Mus<br>musculu<br>s |
| 1 | 1.00 | 1 | 1 | -0.02 | -0.016 | -0.009 | -0.023 | -0.017 | t | 70259  | VPCSICSN<br>NPTCWA<br>CK     | Mus<br>musculu<br>s |
| 1 | 1.00 | 1 | 1 | 0.01  | 0.012  | 0.026  | 0.011  | 0.011  | t | 24012  | HHPSTNQ<br>EQTSLYVQ<br>AS    | Homo<br>sapiens     |
| 1 | 1.00 | 1 | 1 | 0.01  | 0.01   | 0.006  | 0.01   | 0.023  | t | 48279  | PLATQPPV<br>LAL              | Mus<br>musculu<br>s |

|   |      |   |   |       |        |        |        |        |   |        |                              |                     |
|---|------|---|---|-------|--------|--------|--------|--------|---|--------|------------------------------|---------------------|
| 1 | 1.00 | 1 | 1 | 0     | 0      | 0.028  | 0      | -0.001 | t | 102941 | YGCYCGA<br>GG                | Mus<br>musculu<br>s |
| 1 | 1.00 | 1 | 1 | -0.02 | -0.017 | -0.01  | -0.02  | -0.02  | t | 102537 | IPPSLRLE<br>DNEERMS<br>RLSK  | Mus<br>musculu<br>s |
| 1 | 1.00 | 1 | 1 | 0.03  | 0.028  | 0.035  | 0.029  | 0.04   | t | 79012  | LDWLQD                       | Mus<br>musculu<br>s |
| 1 | 1.00 | 1 | 1 | -0.04 | -0.042 | -0.023 | -0.04  | -0.039 | t | 110798 | CPTGCQL<br>QEALLQQE<br>RPIRN | Mus<br>musculu<br>s |
| 1 | 1.00 | 1 | 1 | -0.02 | -0.016 | 0.001  | -0.019 | -0.019 | t | 65391  | TNPMTGA<br>LLRAS             | Homo<br>sapiens     |
| 1 | 1.00 | 1 | 1 | 0     | -0.002 | 0      | 0.003  | 0.01   | t | 6249   | CFPYCYPS<br>ESA              | Mus<br>musculu<br>s |
| 1 | 1.00 | 1 | 1 | -0.02 | -0.02  | -0.011 | -0.02  | -0.018 | t | 113342 | DSYFRGAP<br>KLLYVRLS<br>HNSL | Mus<br>musculu<br>s |
| 1 | 1.00 | 1 | 1 | 0.01  | 0.01   | 0.04   | 0.01   | 0.01   | t | 98555  | TVNDLK                       | Ovis<br>aries       |
| 1 | 1.00 | 1 | 1 | 0.01  | 0.013  | 0.011  | 0.01   | 0.02   | t | 140610 | TQWQGF<br>SVA                | Mus<br>musculu<br>s |
| 1 | 1.00 | 1 | 1 | -0.03 | -0.032 | -0.023 | -0.037 | -0.03  | t | 118391 | GVDQHDN<br>GSRAR             | Mus<br>musculu<br>s |
| 1 | 1.00 | 1 | 1 | 0.04  | 0.044  | 0.045  | 0.047  | 0.051  | t | 124373 | KPSARFSG<br>L                | Homo<br>sapiens     |
| 1 | 1.00 | 1 | 1 | 0.01  | 0.014  | 0.03   | 0.007  | 0.011  | t | 141607 | ASSDLNLI<br>GFGINAK          | Homo<br>sapiens     |
| 1 | 1.00 | 1 | 1 | 0.03  | 0.03   | 0.047  | 0.03   | 0.03   | t | 33831  | KTQIDQVE<br>STAGSLQ          | Mus<br>musculu<br>s |



|   |      |   |   |       |        |        |        |        |   |        |                              |                                  |
|---|------|---|---|-------|--------|--------|--------|--------|---|--------|------------------------------|----------------------------------|
| 1 | 1.00 | 1 | 1 | -0.04 | -0.043 | -0.03  | -0.04  | -0.04  | t | 81967  | FDFYEVTS<br>RTPVRARE<br>A    | Oryctola<br>gus<br>cuniculu<br>s |
| 1 | 1.00 | 1 | 1 | -0.02 | -0.02  | -0.027 | -0.026 | -0.02  | t | 108125 | SHQESTRG<br>RSRGRSGR<br>SGS  | Homo<br>sapiens                  |
| 1 | 1.00 | 1 | 1 | -0.04 | -0.034 | -0.027 | -0.04  | -0.04  | t | 29745  | KAACPTM<br>GEAHNDK<br>RADPAF | Equus<br>caballus                |
| 1 | 1.00 | 1 | 1 | -0.03 | -0.03  | -0.009 | -0.034 | -0.028 | t | 48180  | PKYHPDVP<br>YV               | Homo<br>sapiens                  |
| 1 | 1.00 | 1 | 1 | -0.02 | -0.026 | -0.02  | -0.027 | -0.019 | t | 131297 | FSLRLMEE<br>NWNAEKR<br>SPTF  | Callithrix<br>pygmae<br>a        |
| 1 | 1.00 | 1 | 1 | 0.04  | 0.042  | 0.047  | 0.047  | 0.05   | t | 108420 | HELGDIAI<br>A                | Homo<br>sapiens                  |
| 1 | 1.00 | 1 | 1 | -0.01 | -0.011 | 0.009  | -0.009 | -0.01  | t | 78833  | SLDSPSP<br>PREPLRPS<br>RSLP  | Homo<br>sapiens                  |
| 1 | 1.00 | 1 | 1 | -0.02 | -0.016 | 0.006  | -0.017 | -0.019 | t | 1497   | AGEPYVIE<br>QGMMDP<br>AK     | Homo<br>sapiens                  |
| 1 | 1.00 | 1 | 1 | -0.02 | -0.022 | -0.004 | -0.018 | -0.018 | t | 8906   | DKKAINLD<br>KAQQKLD          | Homo<br>sapiens                  |
| 1 | 1.00 | 1 | 1 | 0.02  | 0.022  | 0.027  | 0.027  | 0.03   | t | 108048 | NPQPNISL<br>SQRGYPQ          | Homo<br>sapiens                  |
| 1 | 1.00 | 1 | 1 | -0.04 | -0.042 | -0.033 | -0.047 | -0.04  | t | 144782 | SHDAMRH<br>MIRMR             | Mus<br>musculu<br>s              |
| 1 | 1.00 | 1 | 1 | 0     | -0.003 | 0      | -0.001 | 0.007  | t | 118058 | PPPGIRGP                     | Oryctola<br>gus<br>cuniculu<br>s |
| 1 | 1.00 | 1 | 1 | 0     | -0.002 | 0      | -0.007 | 0.005  | t | 125297 | VFFEEQED<br>EIIGFG           | Mus<br>musculu<br>s              |
| 1 | 1.00 | 1 | 1 | 0.04  | 0.038  | 0.052  | 0.037  | 0.041  | t | 77776  | CNCKAPET<br>ALCARRCQ<br>QH   | Mus<br>musculu<br>s              |

|   |      |   |   |       |        |        |        |        |   |        |                              |                                  |
|---|------|---|---|-------|--------|--------|--------|--------|---|--------|------------------------------|----------------------------------|
| 1 | 1.00 | 1 | 1 | -0.03 | -0.028 | -0.013 | -0.029 | -0.031 | t | 9043   | DLDFSAFD<br>ASLSPFMI<br>REAG | Homo<br>sapiens                  |
| 1 | 1.00 | 1 | 1 | -0.04 | -0.042 | -0.021 | -0.041 | -0.038 | t | 66442  | TSSRRRYTE<br>VYL             | Mus<br>musculu<br>s              |
| 1 | 1.00 | 1 | 1 | 0.02  | 0.017  | 0.039  | 0.02   | 0.02   | t | 144603 | CTLKKGSS<br>GGGLPDS<br>VKI   | Oryctola<br>gus<br>cuniculu<br>s |
| 1 | 1.00 | 1 | 1 | -0.01 | -0.007 | 0.01   | -0.01  | -0.011 | t | 105072 | AEPRQEFE<br>V                | Mus<br>musculu<br>s              |
| 1 | 1.00 | 1 | 1 | -0.05 | -0.048 | -0.05  | -0.053 | -0.046 | t | 141735 | RARLSPGD<br>VLVIPAG          | Homo<br>sapiens                  |
| 1 | 1.00 | 1 | 1 | -0.01 | -0.006 | -0.01  | -0.009 | -0.003 | t | 7763   | DDEDLDEF<br>KPIVQYDN<br>FQD  | Homo<br>sapiens                  |
| 1 | 1.00 | 1 | 1 | -0.03 | -0.016 | -0.008 | -0.033 | -0.032 | t | 44654  | NLARTTPD<br>RQ               | Homo<br>sapiens                  |
| 1 | 1.00 | 1 | 1 | 0.01  | 0.012  | 0.013  | 0.01   | 0.02   | t | 73189  | WVEWA                        | Equus<br>caballus                |
| 1 | 1.00 | 1 | 1 | -0.02 | -0.016 | 0.002  | -0.019 | -0.02  | t | 8095   | DEMEECS<br>QHLPYIEQ<br>GMMLA | Homo<br>sapiens                  |
| 1 | 1.00 | 1 | 1 | 0.02  | 0.02   | 0.02   | 0.02   | 0.029  | t | 108085 | QTATYLTP<br>HLKV             | Mus<br>musculu<br>s              |
| 1 | 1.00 | 1 | 1 | 0.02  | 0.02   | 0.046  | 0.017  | 0.021  | t | 10990  | EAAKQGE                      | Homo<br>sapiens                  |
| 1 | 1.00 | 1 | 1 | -0.01 | -0.01  | 0.002  | -0.013 | -0.008 | t | 147371 | VIKMIRIQ<br>GSYVGNR<br>KDSS  | Homo<br>sapiens                  |
| 1 | 1.00 | 1 | 1 | -0.02 | -0.02  | -0.002 | -0.017 | -0.018 | t | 117366 | RRREGPDR<br>SPR              | Homo<br>sapiens                  |
| 1 | 1.00 | 1 | 1 | -0.06 | -0.058 | -0.043 | -0.059 | -0.06  | t | 66137  | TRYNDALS<br>HDRL             | Homo<br>sapiens                  |

|   |      |   |   |       |        |        |        |        |   |        |                              |                                  |
|---|------|---|---|-------|--------|--------|--------|--------|---|--------|------------------------------|----------------------------------|
| 1 | 1.00 | 1 | 1 | -0.06 | -0.062 | -0.044 | -0.063 | -0.061 | t | 11772  | EELTPGRF<br>RT               | Mus<br>musculu<br>s              |
| 1 | 1.00 | 1 | 1 | -0.01 | -0.01  | 0.004  | -0.01  | -0.01  | t | 133542 | DGRRDVV<br>VRSATFYL          | Mus<br>musculu<br>s              |
| 1 | 1.00 | 1 | 1 | 0     | 0      | 0.024  | 0.003  | 0      | t | 49455  | PSPEAHVP<br>PPYVEPTT<br>TQCF | Homo<br>sapiens                  |
| 1 | 1.00 | 1 | 1 | -0.01 | -0.014 | -0.009 | -0.013 | 0      | t | 79566  | HGLHLPV                      | Oryctola<br>gus<br>cuniculu<br>s |
| 1 | 1.00 | 1 | 1 | 0.01  | 0.01   | 0.01   | 0.01   | 0.02   | t | 140592 | PYHQLTH<br>GS                | Mus<br>musculu<br>s              |
| 1 | 1.00 | 1 | 1 | 0.01  | 0.008  | 0.029  | 0.009  | 0.01   | t | 11038  | EAEVQIDR<br>LITGRLQSL        | Mus<br>musculu<br>s              |
| 1 | 1.00 | 1 | 1 | -0.03 | -0.03  | -0.013 | -0.03  | -0.027 | t | 155291 | NNAYP                        | Mus<br>musculu<br>s              |
| 1 | 1.00 | 1 | 1 | -0.01 | -0.01  | 0.006  | -0.01  | -0.008 | t | 65916  | TQPSKPTT<br>KQRQ             | Mus<br>musculu<br>s              |
| 1 | 1.00 | 1 | 1 | 0     | 0.002  | 0      | 0.001  | 0.01   | t | 117085 | SQMPEYLL<br>KADN             | Homo<br>sapiens                  |
| 1 | 1.00 | 1 | 1 | 0.01  | 0.01   | 0.027  | 0.01   | 0.01   | t | 4028   | AQPHEPG<br>SYTNVFDH<br>LDWIQ | Oryctola<br>gus<br>cuniculu<br>s |
| 1 | 1.00 | 1 | 1 | 0     | 0.008  | 0.027  | 0      | 0.001  | t | 32781  | KPLASDPL<br>GAMP             | Gallus<br>gallus                 |
| 1 | 1.00 | 1 | 1 | -0.02 | -0.017 | 0.004  | -0.02  | -0.018 | t | 59952  | SNYCQIYP<br>PNANKIR          | Mus<br>musculu<br>s              |
| 1 | 1.00 | 1 | 1 | -0.02 | -0.016 | -0.013 | -0.013 | -0.009 | t | 106491 | GWGQLFQ                      | Homo<br>sapiens                  |

|   |      |   |   |       |        |        |        |        |   |        |                              |                                  |
|---|------|---|---|-------|--------|--------|--------|--------|---|--------|------------------------------|----------------------------------|
| 1 | 1.00 | 1 | 1 | -0.02 | -0.027 | -0.007 | -0.023 | -0.021 | t | 99225  | EREEDWR<br>QPREDWR<br>R      | Homo<br>sapiens                  |
| 1 | 1.00 | 1 | 1 | -0.03 | -0.034 | -0.008 | -0.027 | -0.028 | t | 42399  | MQQCIDF<br>TFSDVININ<br>IYNP | Oryctola<br>gus<br>cuniculu<br>s |
| 1 | 1.00 | 1 | 1 | -0.05 | -0.046 | -0.028 | -0.049 | -0.05  | t | 70428  | VPPPRRRR<br>AKVLTQ           | Homo<br>sapiens                  |
| 1 | 1.00 | 1 | 1 | 0     | -0.002 | 0.007  | -0.007 | 0.001  | t | 144809 | VLAPGGT<br>HSRGLLE<br>M      | Mus<br>musculu<br>s              |
| 1 | 1.00 | 1 | 1 | 0     | -0.004 | 0.001  | -0.003 | 0.01   | t | 79568  | HWSPPSL                      | Oryctola<br>gus<br>cuniculu<br>s |
| 1 | 1.00 | 1 | 1 | -0.03 | -0.032 | -0.021 | -0.031 | -0.027 | t | 30263  | KDTNNNL                      | Mus<br>musculu<br>s              |
| 1 | 1.00 | 1 | 1 | -0.07 | -0.067 | -0.05  | -0.07  | -0.069 | t | 105127 | DAEFRHD                      | Mus<br>musculu<br>s              |
| 1 | 1.00 | 1 | 1 | -0.07 | -0.067 | -0.05  | -0.07  | -0.069 | t | 105127 | DAEFRHD                      | Mus<br>musculu<br>s              |
| 1 | 1.00 | 1 | 1 | 0     | 0      | 0      | 0      | 0.01   | t | 140593 | PYQFFTAS<br>E                | Mus<br>musculu<br>s              |
| 1 | 1.00 | 1 | 1 | -0.01 | -0.012 | 0.012  | -0.013 | -0.012 | t | 96119  | ASTRGDLA<br>HLTAT            | Mus<br>musculu<br>s              |
| 1 | 1.00 | 1 | 1 | 0     | 0.003  | 0.013  | 0      | 0      | t | 49968  | PVSMAKT<br>SVDCNMYI<br>CGDS  | Mus<br>musculu<br>s              |
| 1 | 1.00 | 1 | 1 | -0.01 | -0.01  | 0.014  | -0.01  | -0.01  | t | 63668  | TFHQALLD<br>P                | Mus<br>musculu<br>s              |
| 1 | 1.00 | 1 | 1 | 0.02  | 0.02   | 0.02   | 0.02   | 0.029  | t | 108298 | CKYSMSKC                     | Homo<br>sapiens                  |

|   |      |   |   |       |        |        |        |        |   |        |                              |                       |
|---|------|---|---|-------|--------|--------|--------|--------|---|--------|------------------------------|-----------------------|
| 1 | 1.00 | 1 | 1 | -0.01 | -0.01  | 0.018  | -0.011 | -0.01  | t | 48479  | PLSLRSK                      | Mus musculus          |
| 1 | 1.00 | 1 | 1 | -0.01 | -0.013 | 0.018  | -0.011 | -0.01  | t | 48479  | PLSLRSK                      | Oryctolagus cuniculus |
| 1 | 1.00 | 1 | 1 | 0     | 0.002  | 0      | 0.003  | 0.01   | t | 147562 | CYGSLPWMC                    | Homo sapiens          |
| 1 | 1.00 | 1 | 1 | 0.01  | 0.014  | 0.024  | 0.01   | 0.011  | t | 18615  | GAHETSLS<br>ASGNSIIHY<br>TNI | Homo sapiens          |
| 1 | 1.00 | 1 | 1 | 0     | 0      | 0.008  | 0.003  | 0.01   | t | 38114  | LMRVGS                       | Homo sapiens          |
| 1 | 1.00 | 1 | 1 | 0     | 0      | 0.018  | 0.003  | 0      | t | 9652   | DPILRSLAY<br>SNANKEC<br>QKLL | Homo sapiens          |
| 1 | 1.00 | 1 | 1 | -0.03 | -0.032 | -0.019 | -0.033 | -0.03  | t | 41648  | MGWAG<br>WLLSPRGS<br>RPSWGPT | Mus musculus          |
| 1 | 1.00 | 1 | 1 | -0.05 | -0.046 | -0.028 | -0.049 | -0.05  | t | 66144  | TSAEGDLV<br>GWPSPP           | Homo sapiens          |
| 1 | 1.00 | 1 | 1 | -0.03 | -0.028 | -0.009 | -0.029 | -0.028 | t | 75527  | YQPGAGW<br>LA                | Homo sapiens          |
| 1 | 1.00 | 1 | 1 | 0     | 0.007  | 0.019  | -0.001 | 0.001  | t | 33198  | KRNEKWD<br>EVYKYIVT<br>NWLA  | Gallus gallus         |
| 1 | 1.00 | 1 | 1 | -0.02 | -0.02  | 0.001  | -0.017 | -0.02  | t | 57210  | SDGYPPNR<br>QDPRFTD          | Homo sapiens          |
| 1 | 1.00 | 1 | 1 | -0.03 | -0.026 | -0.014 | -0.031 | -0.03  | t | 10064  | DRVVKEM<br>RRQLEMID<br>KLTT  | Mus musculus          |
| 1 | 1.00 | 1 | 1 | -0.01 | -0.01  | -0.003 | -0.01  | -0.006 | t | 131082 | SQTTANPS<br>CPAGT            | Rattus norvegicus     |
| 1 | 1.00 | 1 | 1 | -0.01 | -0.01  | -0.003 | -0.01  | -0.006 | t | 131082 | SQTTANPS<br>CPAGT            | Rattus norvegicus     |

|   |      |   |   |       |        |        |        |        |   |        |                                 |                                  |
|---|------|---|---|-------|--------|--------|--------|--------|---|--------|---------------------------------|----------------------------------|
| 1 | 1.00 | 1 | 1 | -0.01 | -0.01  | -0.004 | -0.01  | -0.001 | t | 79518  | APWELPL                         | Oryctola<br>gus<br>cuniculu<br>s |
| 1 | 1.00 | 1 | 1 | -0.01 | -0.013 | -0.004 | -0.01  | -0.001 | t | 79518  | APWELPL                         | Oryctola<br>gus<br>cuniculu<br>s |
| 1 | 1.00 | 1 | 1 | -0.04 | -0.042 | -0.026 | -0.041 | -0.04  | t | 874    | AEEDRKRR<br>EEADV<br>RNQAE      | Mus<br>musculu<br>s              |
| 1 | 1.00 | 1 | 1 | -0.04 | -0.044 | -0.026 | -0.041 | -0.04  | t | 874    | AEEDRKRR<br>EEADV<br>RNQAE      | Oryctola<br>gus<br>cuniculu<br>s |
| 1 | 1.00 | 1 | 1 | -0.04 | -0.042 | -0.026 | -0.041 | -0.04  | t | 874    | AEEDRKRR<br>EEADV<br>RNQAE      | Mus<br>musculu<br>s              |
| 1 | 1.00 | 1 | 1 | -0.07 | -0.07  | -0.063 | -0.07  | -0.067 | t | 130912 | KADILPEM<br>NSMRADR<br>M        | Mus<br>musculu<br>s              |
| 1 | 1.00 | 1 | 1 | -0.04 | -0.044 | -0.011 | -0.04  | -0.042 | t | 54058  | RHKQKIVA<br>PVKQTL              | Bos<br>taurus                    |
| 1 | 1.00 | 1 | 1 | -0.01 | -0.01  | 0.008  | -0.01  | -0.006 | t | 149507 | VFDSLQL                         | Homo<br>sapiens                  |
| 1 | 1.00 | 1 | 1 | -0.03 | -0.03  | -0.01  | -0.03  | -0.028 | t | 46006  | NSTLGVKS<br>AREF                | Mus<br>musculu<br>s              |
| 1 | 1.00 | 1 | 1 | 0     | 0      | 0.008  | 0      | 0.01   | t | 14205  | ESLPTFA                         | Homo<br>sapiens                  |
| 1 | 1.00 | 1 | 1 | -0.02 | -0.02  | 0.017  | -0.02  | -0.021 | t | 79781  | DLKRP<br>GSSPMEV                | Mus<br>musculu<br>s              |
| 1 | 1.00 | 1 | 1 | -0.03 | -0.03  | -0.01  | -0.027 | -0.03  | t | 22469  | GSQLPCEP<br>EPDVA<br>VLT<br>SML | Homo<br>sapiens                  |
| 1 | 1.00 | 1 | 1 | 0.02  | 0.02   | 0.02   | 0.02   | 0.029  | t | 153361 | APQNAKD<br>HLPGYGG<br>GS        | Mus<br>musculu<br>s              |

|   |      |   |   |       |        |        |        |        |   |        |                              |                |
|---|------|---|---|-------|--------|--------|--------|--------|---|--------|------------------------------|----------------|
| 1 | 1.00 | 1 | 1 | 0     | 0.002  | 0.02   | -0.003 | 0.001  | t | 24471  | HPLQKTYN                     | Homo sapiens   |
| 1 | 1.00 | 1 | 1 | -0.02 | -0.02  | -0.011 | -0.024 | -0.019 | t | 34612  | KYTMFHYL<br>RAQFEH<br>GKSR   | Homo sapiens   |
| 1 | 1.00 | 1 | 1 | -0.02 | -0.009 | -0.01  | -0.02  | -0.019 | t | 9863   | DQKPISNL<br>GNIHASN<br>NIMF  | Gallus gallus  |
| 1 | 1.00 | 1 | 1 | -0.04 | -0.038 | -0.048 | -0.043 | -0.03  | t | 12531  | EINHVQD<br>HALPKENI          | Homo sapiens   |
| 1 | 1.00 | 1 | 1 | -0.03 | -0.03  | -0.009 | -0.03  | -0.03  | t | 78271  | SSGNLLFT<br>GH               | Mus musculus   |
| 1 | 1.00 | 1 | 1 | 0.01  | 0.01   | 0.01   | 0.01   | 0.021  | t | 130598 | RQFECYTT<br>CVG              | Mus musculus   |
| 1 | 1.00 | 1 | 1 | 0.01  | 0.012  | 0.01   | 0.017  | 0.02   | t | 103892 | ERYWLRS                      | Homo sapiens   |
| 1 | 1.00 | 1 | 1 | 0     | 0.003  | 0.005  | 0      | 0.007  | t | 24778  | HSLGKWA<br>GHPDKF            | Mus musculus   |
| 1 | 1.00 | 1 | 1 | 0.02  | 0.024  | 0.041  | 0.02   | 0.02   | t | 100056 | GFGKDITT<br>GHSFTHKS<br>NNDP | Ovis aries     |
| 1 | 1.00 | 1 | 1 | -0.01 | -0.01  | -0.01  | -0.01  | -0.001 | t | 78407  | GQCNMV<br>VERLGDYLI<br>D     | Homo sapiens   |
| 1 | 1.00 | 1 | 1 | -0.03 | -0.028 | -0.015 | -0.027 | -0.028 | t | 60334  | SPWAPTA<br>PLPGDMN<br>PANWP  | Homo sapiens   |
| 1 | 1.00 | 1 | 1 | 0.01  | 0.01   | 0.011  | 0.01   | 0.02   | t | 43411  | NDDASVD<br>FVAEPVK           | Mus musculus   |
| 1 | 1.00 | 1 | 1 | -0.02 | -0.017 | -0.009 | -0.02  | -0.017 | t | 40281  | LVASNWW<br>NRQIERSS<br>RTLK  | Equus caballus |
| 1 | 1.00 | 1 | 1 | -0.02 | -0.018 | -0.009 | -0.02  | -0.017 | t | 40281  | LVASNWW<br>NRQIERSS<br>RTLK  | Homo sapiens   |

|   |      |   |   |       |        |        |        |        |   |        |                              |                                  |
|---|------|---|---|-------|--------|--------|--------|--------|---|--------|------------------------------|----------------------------------|
| 1 | 1.00 | 1 | 1 | -0.03 | -0.028 | -0.028 | -0.033 | -0.028 | t | 21851  | GQCKWV<br>NGREICND<br>RDRPTA | Homo<br>sapiens                  |
| 1 | 1.00 | 1 | 1 | 0     | 0.002  | 0.021  | 0.003  | 0      | t | 49791  | PTTPGPQT<br>TPPGPATP<br>GPVG | Homo<br>sapiens                  |
| 1 | 1.00 | 1 | 1 | -0.02 | -0.018 | -0.006 | -0.019 | -0.02  | t | 83234  | HSKEIPALT<br>AVETGA          | Homo<br>sapiens                  |
| 1 | 1.00 | 1 | 1 | 0.01  | 0.014  | 0.032  | 0.013  | 0.01   | t | 9511   | DNNDSGH<br>STGADTG           | Homo<br>sapiens                  |
| 1 | 1.00 | 1 | 1 | 0     | 0.003  | 0.007  | 0.001  | 0.007  | t | 136317 | GGYVAGFL<br>PDPT             | Dicentra<br>rchus<br>labrax      |
| 1 | 1.00 | 1 | 1 | -0.01 | -0.01  | -0.024 | -0.01  | 0.003  | t | 78424  | IPRSRQIDL<br>QIG             | Mus<br>musculu<br>s              |
| 1 | 1.00 | 1 | 1 | -0.01 | -0.012 | 0.012  | -0.007 | -0.008 | t | 116745 | GSNKGAI<br>GLMVGGV<br>VIA    | Mus<br>musculu<br>s              |
| 1 | 1.00 | 1 | 1 | 0.02  | 0.02   | 0.027  | 0.02   | 0.03   | t | 127698 | IPNSTHT                      | Homo<br>sapiens                  |
| 1 | 1.00 | 1 | 1 | -0.01 | -0.01  | -0.005 | -0.01  | -0.007 | t | 144252 | EIINVGH<br>SFHVNFE<br>DNDNR  | Homo<br>sapiens                  |
| 1 | 1.00 | 1 | 1 | 0     | -0.006 | 0.016  | 0.001  | 0.002  | t | 48521  | PLVETWKK<br>PDYEPP           | Homo<br>sapiens                  |
| 1 | 1.00 | 1 | 1 | -0.04 | -0.038 | -0.03  | -0.039 | -0.04  | t | 83266  | HTSQVVP<br>SDTMQTRH          | Homo<br>sapiens                  |
| 1 | 1.00 | 1 | 1 | -0.01 | -0.01  | 0.002  | -0.011 | -0.01  | t | 67460  | TYSFVSLLS<br>PGAKQN          | Mus<br>musculu<br>s              |
| 1 | 1.00 | 1 | 1 | 0     | -0.002 | 0.007  | -0.001 | 0.007  | t | 117140 | DWEYSVW<br>LSN               | Mus<br>musculu<br>s              |
| 1 | 1.00 | 1 | 1 | 0.01  | 0.007  | 0.028  | 0.01   | 0.01   | t | 31383  | KIPDPPQP<br>DFPQLNSD<br>WVPS | Oryctola<br>gus<br>cuniculu<br>s |



|   |      |   |   |       |        |        |        |        |   |        |                              |                                  |
|---|------|---|---|-------|--------|--------|--------|--------|---|--------|------------------------------|----------------------------------|
| 1 | 1.00 | 1 | 1 | -0.03 | -0.027 | -0.012 | -0.03  | -0.03  | t | 61068  | SSHLQLIY<br>NLTLCELN<br>G    | Sus<br>scrofa                    |
| 1 | 1.00 | 1 | 1 | 0     | 0      | 0.007  | 0      | 0      | t | 75372  | YPNQVYYR<br>PVDRYSN<br>QNNFV | Mus<br>musculu<br>s              |
| 1 | 1.00 | 1 | 1 | -0.04 | -0.037 | -0.02  | -0.04  | -0.039 | t | 105127 | DAEFRHD                      | Mus<br>musculu<br>s              |
| 1 | 1.00 | 1 | 1 | -0.04 | -0.037 | -0.02  | -0.04  | -0.039 | t | 105127 | DAEFRHD                      | Mus<br>musculu<br>s              |
| 1 | 1.00 | 1 | 1 | -0.04 | -0.037 | -0.02  | -0.04  | -0.039 | t | 105127 | DAEFRHD                      | Mus<br>musculu<br>s              |
| 1 | 1.00 | 1 | 1 | -0.01 | -0.013 | 0.009  | -0.01  | -0.009 | t | 63586  | TEVYLEHR<br>MQEAVE           | Oryctola<br>gus<br>cuniculu<br>s |
| 1 | 1.00 | 1 | 1 | 0     | 0      | 0.01   | 0.003  | 0.01   | t | 35128  | LDDWGV                       | Homo<br>sapiens                  |
| 1 | 1.00 | 1 | 1 | -0.06 | -0.06  | -0.055 | -0.06  | -0.05  | t | 69989  | VMLPWL                       | Homo<br>sapiens                  |
| 1 | 1.00 | 1 | 1 | -0.01 | -0.008 | -0.01  | -0.009 | 0      | t | 116978 | FPSHYWLY<br>PPPT             | Homo<br>sapiens                  |
| 1 | 1.00 | 1 | 1 | -0.05 | -0.05  | -0.025 | -0.05  | -0.05  | t | 65754  | TPRYNRIG<br>SH               | Mus<br>musculu<br>s              |
| 1 | 1.00 | 1 | 1 | 0.01  | 0.014  | 0.037  | 0.013  | 0.011  | t | 11923  | EEVVEEVV<br>PEEVVEEV<br>VP   | Homo<br>sapiens                  |
| 1 | 1.00 | 1 | 1 | 0.01  | 0.012  | 0.037  | 0.013  | 0.011  | t | 11923  | EEVVEEVV<br>PEEVVEEV<br>VP   | Homo<br>sapiens                  |
| 1 | 1.00 | 1 | 0 | -0.03 | -0.03  | 0      | -0.032 | -0.02  | t | 98255  | MRRVAIA<br>GVLAMRP<br>E      | Homo<br>sapiens                  |

|   |      |   |   |       |        |        |        |        |   |        |                              |                                  |
|---|------|---|---|-------|--------|--------|--------|--------|---|--------|------------------------------|----------------------------------|
| 1 | 1.00 | 1 | 1 | 0.01  | 0.007  | 0.016  | 0.01   | 0.019  | t | 79608  | LRPDSIF                      | Oryctola<br>gus<br>cuniculu<br>s |
| 1 | 1.00 | 1 | 1 | 0.01  | 0.01   | 0.016  | 0.01   | 0.019  | t | 79608  | LRPDSIF                      | Oryctola<br>gus<br>cuniculu<br>s |
| 1 | 1.00 | 1 | 1 | -0.04 | -0.026 | -0.019 | -0.039 | -0.04  | t | 28603  | ISLTEWSM<br>WYRH             | Homo<br>sapiens                  |
| 1 | 1.00 | 1 | 1 | 0.01  | 0.008  | 0.03   | 0.009  | 0.009  | t | 32657  | KPAPKPTP<br>PKPAPKPA<br>P    | Mus<br>musculu<br>s              |
| 1 | 1.00 | 1 | 1 | -0.04 | -0.037 | -0.03  | -0.04  | -0.04  | t | 137755 | HQCHQES<br>TGRSRGRC<br>GRSGS | Mus<br>musculu<br>s              |
| 1 | 1.00 | 1 | 1 | 0.04  | 0.037  | 0.047  | 0.04   | 0.05   | t | 79685  | YLTDEF                       | Oryctola<br>gus<br>cuniculu<br>s |
| 1 | 1.00 | 1 | 1 | 0.02  | 0.021  | 0.022  | 0.023  | 0.03   | t | 78244  | PMWPME                       | Equus<br>caballus                |
| 1 | 1.00 | 1 | 1 | 0     | 0.004  | 0.012  | -0.003 | 0.002  | t | 837    | AEALSTEP<br>KGAAVDSS<br>KAAL | Homo<br>sapiens                  |
| 1 | 1.00 | 1 | 1 | -0.03 | -0.028 | -0.007 | -0.027 | -0.028 | t | 77826  | AFLRHAAL                     | Homo<br>sapiens                  |
| 1 | 1.00 | 1 | 1 | -0.06 | -0.048 | -0.046 | -0.06  | -0.06  | t | 47108  | PDHVRTK<br>GPGRCH            | Mus<br>musculu<br>s              |
| 1 | 1.00 | 1 | 1 | -0.05 | -0.05  | -0.032 | -0.05  | -0.05  | t | 122044 | WSSYMVH<br>WKN               | Mus<br>musculu<br>s              |
| 1 | 1.00 | 1 | 1 | -0.01 | -0.012 | 0.001  | -0.011 | 0      | t | 23785  | HFHYFSP                      | Mus<br>musculu<br>s              |
| 1 | 1.00 | 1 | 1 | 0     | 0      | 0.002  | 0      | 0.008  | t | 23599  | HCLGKWL<br>GHPDKF            | Mus<br>musculu<br>s              |
| 1 | 1.00 | 1 | 1 | 0     | 0      | 0.024  | 0      | 0      | t | 1403   | AFSVPQA<br>NARSSENA<br>ESSA  | Oryctola<br>gus<br>cuniculu<br>s |

|   |      |   |   |       |        |        |        |        |   |        |                              |                       |
|---|------|---|---|-------|--------|--------|--------|--------|---|--------|------------------------------|-----------------------|
| 1 | 1.00 | 1 | 1 | -0.01 | -0.006 | -0.008 | -0.009 | 0.001  | t | 61986  | STVMTRP                      | Homo sapiens          |
| 1 | 1.00 | 1 | 1 | -0.02 | -0.02  | -0.011 | -0.02  | -0.019 | t | 9039   | DLASREA<br>KKQLEAEH<br>QK    | Mus musculus          |
| 1 | 1.00 | 1 | 1 | -0.05 | -0.052 | -0.04  | -0.049 | -0.04  | t | 79037  | PFWLRD                       | Mus musculus          |
| 1 | 1.00 | 1 | 1 | 0.01  | 0.01   | 0.028  | 0.01   | 0.014  | t | 149522 | VTGVTTQ<br>GVK               | Homo sapiens          |
| 1 | 1.00 | 1 | 1 | -0.03 | -0.032 | -0.025 | -0.031 | -0.02  | t | 103975 | HRDLLRF                      | Mus musculus          |
| 1 | 1.00 | 1 | 1 | 0     | 0.002  | 0      | 0.001  | 0.009  | t | 117122 | YTYTDYST<br>RPHY             | Homo sapiens          |
| 1 | 1.00 | 1 | 1 | -0.06 | -0.06  | -0.044 | -0.06  | -0.061 | t | 19064  | GDNNTYG<br>GWFKDGQ<br>W      | Mus musculus          |
| 1 | 1.00 | 1 | 1 | 0.03  | 0.028  | 0.03   | 0.023  | 0.03   | t | 112255 | PIRALVGD<br>EVELPCRIS<br>PGK | Mus musculus          |
| 1 | 1.00 | 1 | 1 | -0.02 | -0.006 | -0.006 | -0.02  | -0.018 | t | 55930  | RSQPRGR<br>RQPIP             | Pan troglodytes       |
| 1 | 1.00 | 1 | 1 | 0     | 0      | 0.007  | 0      | 0.004  | t | 131081 | SQTTANPS<br>CAEGT            | Rattus norvegicus     |
| 1 | 1.00 | 1 | 1 | 0     | -0.003 | 0.017  | 0      | 0      | t | 50490  | QDLPGND<br>NNSTATLC          | Oryctolagus cuniculus |
| 1 | 1.00 | 1 | 1 | -0.04 | -0.038 | -0.011 | -0.041 | -0.04  | t | 34933  | LAQKVART<br>LP               | Cavia porcellus       |
| 1 | 1.00 | 1 | 1 | -0.04 | -0.044 | -0.011 | -0.041 | -0.04  | t | 34933  | LAQKVART<br>LP               | Oryctolagus cuniculus |

|   |      |   |   |       |        |        |        |        |   |        |                              |                   |
|---|------|---|---|-------|--------|--------|--------|--------|---|--------|------------------------------|-------------------|
| 1 | 1.00 | 1 | 1 | 0.04  | 0.04   | 0.05   | 0.04   | 0.05   | t | 35127  | LDDSYS                       | Homo sapiens      |
| 1 | 1.00 | 1 | 1 | 0     | 0.002  | 0.014  | 0.001  | 0.001  | t | 4733   | ASRAALIEE<br>GQRIAEM<br>LKSK | Homo sapiens      |
| 1 | 1.00 | 1 | 1 | 0     | 0.002  | 0.014  | 0.001  | 0.001  | t | 4734   | ASRAALLE<br>EGQRIAE<br>MLKSK | Homo sapiens      |
| 1 | 1.00 | 1 | 1 | 0     | -0.002 | 0.021  | 0.003  | 0      | t | 33166  | KRIRLPHIR<br>EDDQPS          | Mus musculus      |
| 1 | 1.00 | 1 | 1 | -0.05 | -0.05  | -0.026 | -0.05  | -0.051 | t | 18706  | GANSNNP<br>DWDFNP            | Mus musculus      |
| 1 | 1.00 | 1 | 1 | 0.03  | 0.03   | 0.037  | 0.03   | 0.039  | t | 131304 | PVVWKN                       | Homo sapiens      |
| 1 | 1.00 | 1 | 1 | -0.03 | -0.032 | -0.001 | -0.033 | -0.03  | t | 44174  | NHVRIPIG<br>YWAV             | Mus musculus      |
| 1 | 1.00 | 1 | 1 | -0.04 | -0.038 | -0.022 | -0.039 | -0.038 | t | 149418 | PSASLYAV<br>KVLGADG          | Cavia porcellus   |
| 1 | 1.00 | 1 | 1 | -0.04 | -0.04  | -0.038 | -0.04  | -0.03  | t | 60256  | SPSHYLAR<br>R                | Homo sapiens      |
| 1 | 1.00 | 1 | 1 | 0.01  | 0.012  | 0.015  | 0.01   | 0.011  | t | 26220  | IGFIGFHQ<br>FNNAIKLV<br>ASN  | Homo sapiens      |
| 1 | 1.00 | 1 | 1 | -0.02 | -0.022 | -0.013 | -0.027 | -0.019 | t | 119601 | KGNNVHG<br>FQKQIIRSF<br>Y    | Rattus norvegicus |
| 1 | 1.00 | 1 | 1 | -0.02 | -0.02  | -0.006 | -0.02  | -0.02  | t | 46795  | PAFLGCCS<br>RFSGSFSG<br>VEP  | Mus musculus      |
| 1 | 1.00 | 1 | 1 | -0.03 | -0.026 | -0.008 | -0.027 | -0.028 | t | 70427  | VPPPRRKR<br>TIQLDG           | Homo sapiens      |

|   |      |   |   |       |        |        |        |        |   |        |                               |                                  |
|---|------|---|---|-------|--------|--------|--------|--------|---|--------|-------------------------------|----------------------------------|
| 1 | 1.00 | 1 | 1 | -0.01 | -0.003 | -0.005 | -0.017 | -0.01  | t | 29165  | ITYKVMRE<br>VRALAYFV<br>NGTA  | Gallus<br>gallus                 |
| 1 | 1.00 | 1 | 1 | -0.02 | -0.022 | 0.002  | -0.017 | -0.02  | t | 67460  | TYSFVSLLS<br>PGAKQN           | Mus<br>musculu<br>s              |
| 1 | 1.00 | 1 | 1 | 0.02  | 0.022  | 0.02   | 0.021  | 0.03   | t | 133659 | NPWYN DL<br>SLLTA             | Homo<br>sapiens                  |
| 1 | 1.00 | 1 | 1 | -0.03 | -0.028 | -0.014 | -0.029 | -0.028 | t | 30235  | KDRRSTGK<br>SWGK              | Homo<br>sapiens                  |
| 1 | 1.00 | 1 | 1 | -0.01 | -0.01  | 0.018  | -0.01  | -0.012 | t | 21737  | GPPVAPTS<br>A                 | Oryctola<br>gus<br>cuniculu<br>s |
| 1 | 1.00 | 1 | 1 | -0.07 | -0.074 | -0.067 | -0.071 | -0.066 | t | 89665  | TQQGGAY<br>GRCPNGT<br>RA      | Oryctola<br>gus<br>cuniculu<br>s |
| 1 | 1.00 | 1 | 1 | -0.08 | -0.08  | -0.051 | -0.08  | -0.081 | t | 80049  | TGELTMY<br>WV                 | Mus<br>musculu<br>s              |
| 1 | 1.00 | 1 | 1 | 0     | 0      | -0.005 | -0.007 | 0.003  | t | 62141  | SVGHMTG<br>RFTSLFSV<br>G      | Homo<br>sapiens                  |
| 1 | 1.00 | 1 | 1 | 0.01  | 0.009  | 0.029  | 0.01   | 0.01   | t | 44480  | NKDPR LNE<br>GVVLDEV          | Bos<br>taurus                    |
| 1 | 1.00 | 1 | 1 | -0.04 | -0.04  | -0.032 | -0.043 | -0.036 | t | 30984  | KGITTKW<br>MA                 | Homo<br>sapiens                  |
| 1 | 1.00 | 1 | 1 | -0.05 | -0.048 | -0.034 | -0.047 | -0.047 | t | 44731  | NLGRAVF<br>QAKKR VLE<br>PLGLV | Homo<br>sapiens                  |
| 1 | 1.00 | 1 | 1 | -0.01 | -0.01  | -0.008 | -0.01  | -0.008 | t | 9582   | DNYWSFS<br>DSTYWTLR<br>YSSG   | Mus<br>musculu<br>s              |
| 1 | 1.00 | 1 | 1 | -0.05 | -0.05  | -0.033 | -0.05  | -0.049 | t | 96103  | APLLPHS<br>NLDHI              | Homo<br>sapiens                  |
| 1 | 1.00 | 1 | 1 | 0.01  | 0.024  | 0.026  | 0.011  | 0.01   | t | 36127  | LGGKPALV<br>PDRQVLY<br>QQYDE  | Homo<br>sapiens                  |

|   |      |   |   |       |        |        |        |        |   |        |                              |                       |
|---|------|---|---|-------|--------|--------|--------|--------|---|--------|------------------------------|-----------------------|
| 1 | 1.00 | 1 | 1 | 0.04  | 0.04   | 0.045  | 0.036  | 0.049  | t | 62851  | TAGGQY                       | Homo sapiens          |
| 1 | 1.00 | 1 | 1 | -0.02 | -0.02  | -0.004 | -0.02  | -0.018 | t | 78419  | IGHGLLPW<br>NNLVTHP<br>VLGKV | Mus musculus          |
| 1 | 1.00 | 1 | 1 | 0.01  | 0.014  | 0.029  | 0.013  | 0.019  | t | 75112  | YMSVNV                       | Homo sapiens          |
| 1 | 1.00 | 1 | 1 | 0.02  | 0.02   | 0.02   | 0.02   | 0.03   | t | 108580 | PQSPGSSFP                    | Homo sapiens          |
| 1 | 1.00 | 1 | 1 | 0.02  | 0.02   | 0.025  | 0.02   | 0.03   | t | 6281   | CGELGVDC                     | Mus musculus          |
| 1 | 1.00 | 1 | 1 | -0.01 | -0.01  | -0.003 | -0.01  | 0      | t | 56787  | SAFSPTHYK                    | Homo sapiens          |
| 1 | 1.00 | 1 | 1 | -0.03 | -0.034 | -0.029 | -0.033 | -0.02  | t | 79660  | TPHNPAI                      | Oryctolagus cuniculus |
| 1 | 1.00 | 1 | 1 | 0     | 0      | 0.012  | -0.004 | 0      | t | 33882  | KTTKKDHK<br>PQTT             | Homo sapiens          |
| 1 | 1.00 | 1 | 1 | 0.01  | 0.01   | 0.017  | 0.01   | 0.02   | t | 78436  | KTAISPT                      | Mus musculus          |
| 1 | 1.00 | 1 | 1 | -0.02 | -0.024 | -0.013 | -0.023 | -0.016 | t | 143851 | DPEQPAPL<br>FLVS             | Oryctolagus cuniculus |
| 1 | 1.00 | 1 | 1 | 0     | 0      | 0      | 0      | 0.009  | t | 104929 | PGTRLQP                      | Homo sapiens          |
| 1 | 1.00 | 1 | 1 | 0.01  | 0.008  | 0.015  | 0.009  | 0.02   | t | 104180 | PNAPDAS                      | Mus musculus          |
| 1 | 1.00 | 1 | 1 | -0.02 | -0.018 | 0.005  | -0.009 | -0.018 | t | 134236 | SNIMHSIN<br>GYVFDSLQ<br>LSVC | Homo sapiens          |
| 1 | 1.00 | 1 | 1 | 0.01  | 0.014  | 0.018  | 0.011  | 0.02   | t | 7188   | CTPATLLLC                    | Homo sapiens          |
| 1 | 1.00 | 1 | 1 | 0.01  | 0.01   | 0.017  | 0.01   | 0.02   | t | 127694 | IHKNSSV                      | Homo sapiens          |

|   |      |   |   |       |        |        |        |        |   |        |                              |                                  |
|---|------|---|---|-------|--------|--------|--------|--------|---|--------|------------------------------|----------------------------------|
| 1 | 1.00 | 1 | 1 | -0.02 | -0.023 | 0.001  | -0.019 | -0.02  | t | 22831  | GTSGWAE<br>VVVTPTHV<br>D     | Homo<br>sapiens                  |
| 1 | 1.00 | 1 | 1 | -0.02 | -0.015 | 0.001  | -0.019 | -0.02  | t | 22831  | GTSGWAE<br>VVVTPTHV<br>D     | Homo<br>sapiens                  |
| 1 | 1.00 | 1 | 1 | -0.03 | -0.023 | -0.023 | -0.03  | -0.028 | t | 159288 | LLHYSTISQ<br>DNLDISFG<br>ELQ | Aotus                            |
| 1 | 1.00 | 1 | 1 | -0.02 | -0.02  | -0.02  | -0.02  | -0.01  | t | 116978 | FPSHYWLY<br>PPPT             | Homo<br>sapiens                  |
| 1 | 1.00 | 1 | 1 | -0.04 | -0.043 | -0.011 | -0.037 | -0.04  | t | 48612  | PNCWVGL<br>TGAHSCFL          | Homo<br>sapiens                  |
| 1 | 1.00 | 1 | 1 | -0.04 | -0.042 | -0.038 | -0.047 | -0.038 | t | 117609 | PVQLETLSI<br>RGNNIR          | Mus<br>musculu<br>s              |
| 1 | 1.00 | 1 | 1 | -0.01 | -0.008 | -0.01  | -0.007 | 0      | t | 96521  | KVTKEKPT<br>PP               | Homo<br>sapiens(<br>human)       |
| 1 | 1.00 | 1 | 1 | 0     | 0      | 0.004  | 0      | 0.003  | t | 48993  | PQEQTQH<br>GSPYGRCA<br>NK    | Mus<br>musculu<br>s              |
| 1 | 1.00 | 1 | 1 | 0     | -0.002 | 0.007  | -0.007 | 0.001  | t | 144809 | VLAPGGT<br>HSRGLLE<br>M      | Mus<br>musculu<br>s              |
| 1 | 1.00 | 1 | 1 | -0.03 | -0.032 | -0.025 | -0.031 | -0.02  | t | 22231  | GRVFFLVR<br>P                | Mus<br>musculu<br>s              |
| 1 | 1.00 | 1 | 1 | -0.02 | -0.015 | -0.002 | -0.023 | -0.018 | t | 49137  | PQTTKPKE<br>VPTT             | Homo<br>sapiens                  |
| 1 | 1.00 | 1 | 1 | -0.01 | -0.014 | -0.01  | -0.017 | -0.01  | t | 129060 | KEIKKVAT<br>PKKASKPK<br>K    | Oryctola<br>gus<br>cuniculu<br>s |
| 1 | 1.00 | 1 | 1 | -0.03 | -0.028 | -0.012 | -0.029 | -0.028 | t | 149318 | FYYGKGLI<br>NVQAAAQ          | Cavia<br>porcellu<br>s           |
| 1 | 1.00 | 1 | 1 | 0.01  | 0.01   | 0.01   | 0.01   | 0.019  | t | 57530  | SELPQLS                      | Mus<br>musculu<br>s              |

|   |      |   |   |       |        |        |        |        |   |        |                      |                       |
|---|------|---|---|-------|--------|--------|--------|--------|---|--------|----------------------|-----------------------|
| 1 | 1.00 | 1 | 1 | -0.07 | -0.073 | -0.052 | -0.07  | -0.069 | t | 78431  | KKRW                 | Oryctolagus cuniculus |
| 1 | 1.00 | 1 | 1 | -0.09 | -0.09  | -0.089 | -0.09  | -0.088 | t | 138856 | GRGRGRGR             | Mus musculus          |
| 1 | 1.00 | 1 | 1 | 0     | -0.002 | 0.022  | 0.001  | 0.006  | t | 72866  | WMNSTGFTK            | Homo sapiens          |
| 1 | 1.00 | 1 | 1 | 0     | 0.002  | 0.016  | -0.003 | -0.001 | t | 28676  | ISQAVHAAHAEINEAGR    | Homo sapiens          |
| 1 | 1.00 | 1 | 1 | 0.05  | 0.048  | 0.051  | 0.049  | 0.06   | t | 144903 | HDFHDPTLEEQK         | Mus musculus          |
| 1 | 1.00 | 1 | 1 | 0.01  | 0.01   | 0.01   | 0.006  | 0.02   | t | 132887 | PYGLLTP              | Homo sapiens          |
| 1 | 1.00 | 1 | 1 | 0.02  | 0.022  | 0.033  | 0.023  | 0.022  | t | 35842  | LFGPSLRDPISAEIS      | Homo sapiens          |
| 1 | 1.00 | 1 | 1 | -0.02 | -0.016 | -0.004 | -0.02  | -0.02  | t | 44563  | NKNTLQARRQQTVSA      | Myodes glareolus      |
| 1 | 1.00 | 1 | 1 | -0.05 | -0.052 | -0.03  | -0.051 | -0.049 | t | 3886   | APVDSVFDRAFSAYL      | Mus musculus          |
| 1 | 1.00 | 1 | 1 | -0.01 | -0.01  | -0.013 | -0.01  | 0      | t | 45877  | NSKKIICTCKEPTPNAYYEG | Mus musculus          |
| 1 | 1.00 | 1 | 1 | 0.02  | 0.022  | 0.042  | 0.021  | 0.02   | t | 7528   | DAHFLSQTQKSGENLPYLVA | Homo sapiens          |
| 1 | 1.00 | 1 | 1 | -0.01 | -0.01  | 0.009  | -0.01  | -0.007 | t | 13743  | EPRCPYVGADHFDPCP     | Oryctolagus cuniculus |
| 1 | 1.00 | 1 | 1 | -0.03 | -0.026 | -0.012 | -0.03  | -0.028 | t | 149367 | LKGDSFYYGKGLINV      | Cavia porcellus       |
| 1 | 1.00 | 1 | 1 | -0.01 | -0.008 | -0.01  | -0.003 | 0      | t | 103892 | ERYWLRS              | Homo sapiens          |



|   |      |   |   |       |        |        |        |        |   |        |                              |                                  |
|---|------|---|---|-------|--------|--------|--------|--------|---|--------|------------------------------|----------------------------------|
| 1 | 1.00 | 1 | 1 | -0.04 | -0.037 | -0.03  | -0.04  | -0.038 | t | 50867  | QGGGTHS<br>QWNKPSK<br>PKTNMK | Mus<br>musculu<br>s              |
| 1 | 1.00 | 1 | 1 | -0.04 | -0.044 | -0.041 | -0.047 | -0.033 | t | 125529 | PVEGPAVI<br>CRCC             | Oryctola<br>gus<br>cuniculu<br>s |
| 1 | 1.00 | 1 | 1 | -0.02 | -0.013 | -0.004 | -0.02  | -0.018 | t | 159302 | YVLNSKLH<br>NSRSFDKF<br>KWIQ | Aotus                            |
| 1 | 1.00 | 1 | 1 | -0.02 | -0.018 | -0.002 | -0.023 | -0.018 | t | 50938  | QGPLPNT<br>ALL               | Homo<br>sapiens                  |
| 1 | 1.00 | 1 | 1 | -0.01 | -0.008 | 0.007  | -0.009 | -0.01  | t | 57286  | SDSNVSGK<br>LEDSDKAT<br>LNKE | Homo<br>sapiens                  |
| 1 | 1.00 | 1 | 1 | -0.06 | -0.06  | -0.039 | -0.057 | -0.06  | t | 58193  | SGPRHRD<br>GVRRPQK<br>RPSCIG | Homo<br>sapiens                  |
| 1 | 1.00 | 1 | 1 | -0.01 | -0.008 | 0.008  | -0.007 | -0.01  | t | 59210  | SLKAVNPS<br>DPLVYKRQ<br>TAKF | Ovis<br>aries                    |
| 1 | 1.00 | 1 | 1 | -0.01 | -0.008 | 0.008  | -0.007 | -0.01  | t | 59210  | SLKAVNPS<br>DPLVYKRQ<br>TAKF | Ovis<br>aries                    |
| 1 | 1.00 | 1 | 1 | 0.04  | 0.04   | 0.04   | 0.04   | 0.05   | t | 153349 | ACTDFEG<br>MLCGGS            | Mus<br>musculu<br>s              |
| 1 | 1.00 | 1 | 1 | -0.02 | -0.02  | -0.02  | -0.02  | -0.01  | t | 103929 | GKLPIPY                      | Homo<br>sapiens                  |
| 1 | 1.00 | 1 | 1 | -0.05 | -0.046 | -0.029 | -0.047 | -0.05  | t | 65086  | TLTFGAGV<br>NVPAGAG          | Homo<br>sapiens                  |
| 1 | 1.00 | 1 | 1 | 0.01  | 0.012  | 0.01   | 0.011  | 0.02   | t | 117053 | PHPSTMF<br>DRQED             | Homo<br>sapiens                  |
| 1 | 1.00 | 1 | 1 | 0.03  | 0.03   | 0.03   | 0.03   | 0.04   | t | 117096 | TLSQDQSE<br>TLNY             | Homo<br>sapiens                  |
| 1 | 1.00 | 1 | 1 | 0     | -0.002 | 0      | 0      | 0.009  | t | 130635 | WGPRVIFE<br>DVTV             | Mus<br>musculu<br>s              |

|   |      |   |   |       |        |        |        |        |   |        |                              |                                  |
|---|------|---|---|-------|--------|--------|--------|--------|---|--------|------------------------------|----------------------------------|
| 1 | 1.00 | 1 | 1 | 0     | -0.002 | 0      | 0      | 0.009  | t | 130471 | DWPAVIFE<br>DTRA             | Mus<br>musculu<br>s              |
| 1 | 1.00 | 1 | 1 | 0     | -0.002 | 0      | 0      | 0.009  | t | 130634 | WEWDWP<br>RIELNI             | Mus<br>musculu<br>s              |
| 1 | 1.00 | 1 | 1 | 0.03  | 0.03   | 0.05   | 0.03   | 0.03   | t | 61977  | STVKEQLIE<br>KLIEDDEN<br>SQC | Oryctola<br>gus<br>cuniculu<br>s |
| 1 | 1.00 | 1 | 1 | 0.03  | -0.007 | 0.05   | 0.03   | 0.03   | t | 61977  | STVKEQLIE<br>KLIEDDEN<br>SQC | Papio<br>cynocep<br>halus        |
| 1 | 1.00 | 1 | 1 | -0.01 | -0.01  | 0.013  | -0.007 | -0.01  | t | 49366  | PSFPTQRT<br>SKTLKVLTP<br>PTT | Homo<br>sapiens                  |
| 1 | 1.00 | 1 | 1 | -0.04 | -0.038 | -0.029 | -0.041 | -0.04  | t | 36312  | LGRWKAV<br>EKSVAMK<br>H      | Homo<br>sapiens                  |
| 1 | 1.00 | 1 | 1 | 0     | -0.002 | 0      | -0.007 | 0.005  | t | 74871  | YLPVGGLR<br>RIGG             | Mus<br>musculu<br>s              |
| 1 | 1.00 | 1 | 1 | -0.01 | -0.008 | -0.01  | -0.003 | 0      | t | 108141 | SPSDAKSH<br>VRVADLI          | Homo<br>sapiens                  |
| 1 | 1.00 | 1 | 1 | -0.01 | -0.012 | 0.012  | -0.011 | -0.01  | t | 23354  | GYHGSSLY                     | Mus<br>musculu<br>s              |
| 1 | 1.00 | 1 | 1 | -0.04 | -0.036 | -0.023 | -0.04  | -0.038 | t | 66347  | TSNTHACR<br>TCSNPCR          | Homo<br>sapiens                  |
| 1 | 1.00 | 1 | 1 | -0.03 | -0.03  | -0.005 | -0.03  | -0.028 | t | 20852  | GLFGKGGI<br>VTCAMFT<br>C     | Mus<br>musculu<br>s              |
| 1 | 1.00 | 1 | 1 | 0.02  | 0.02   | 0.025  | 0.02   | 0.03   | t | 44896  | NLTDILP                      | Oryctola<br>gus<br>cuniculu<br>s |
| 1 | 1.00 | 1 | 1 | -0.03 | -0.028 | -0.012 | -0.029 | -0.028 | t | 149511 | VLGVAPSA<br>SLYAVKV          | Cavia<br>porcellu<br>s           |

|   |      |   |   |       |        |        |        |        |   |        |                              |                                  |
|---|------|---|---|-------|--------|--------|--------|--------|---|--------|------------------------------|----------------------------------|
| 1 | 1.00 | 1 | 1 | -0.04 | -0.04  | -0.04  | -0.04  | -0.033 | t | 108666 | TRCAQCH<br>TLK               | Homo<br>sapiens                  |
| 1 | 1.00 | 1 | 1 | -0.02 | -0.02  | -0.02  | -0.02  | -0.01  | t | 131232 | LHAYNPFL<br>LSWP             | Homo<br>sapiens                  |
| 1 | 1.00 | 1 | 1 | -0.02 | -0.022 | -0.013 | -0.027 | -0.019 | t | 144779 | SGTHWFL<br>AGCIS             | Mus<br>musculu<br>s              |
| 1 | 1.00 | 1 | 1 | -0.04 | -0.043 | -0.027 | -0.039 | -0.038 | t | 20519  | GKATVLLG<br>MVLSLMA<br>LVVVW | Canis<br>lupus                   |
| 1 | 1.00 | 1 | 1 | 0.01  | 0.01   | 0.01   | 0.01   | 0.02   | t | 121778 | RDDPQLFA<br>EAYAFCF          | Mus<br>musculu<br>s              |
| 1 | 1.00 | 1 | 1 | -0.01 | -0.013 | 0.004  | -0.01  | -0.008 | t | 95057  | AEGSSSVE<br>YINNWEQ<br>AK    | Oryctola<br>gus<br>cuniculu<br>s |
| 1 | 1.00 | 1 | 1 | 0.03  | 0.027  | 0.021  | 0.03   | 0.04   | t | 59316  | SLLTEVETP<br>IR              | Oryctola<br>gus<br>cuniculu<br>s |
| 1 | 1.00 | 1 | 1 | -0.04 | -0.039 | -0.028 | -0.034 | -0.027 | t | 78243  | PLFRPS                       | Equus<br>caballus                |
| 1 | 1.00 | 1 | 1 | -0.03 | -0.034 | -0.001 | -0.031 | -0.03  | t | 71531  | VTTSGGRR<br>Q                | Oryctola<br>gus<br>cuniculu<br>s |
| 1 | 1.00 | 1 | 1 | 0     | 0.004  | 0.007  | 0.007  | 0.011  | t | 105032 | VSRSLLD                      | Homo<br>sapiens                  |
| 1 | 1.00 | 1 | 1 | 0.05  | 0.052  | 0.05   | 0.051  | 0.06   | t | 117096 | TLSQDQSE<br>TLNY             | Homo<br>sapiens                  |
| 1 | 1.00 | 1 | 1 | 0     | 0      | 0.022  | 0.003  | 0.002  | t | 53422  | RDSAWDV<br>RPLTETRG          | Homo<br>sapiens                  |
| 1 | 1.00 | 1 | 1 | 0     | -0.002 | 0.025  | -0.001 | -0.002 | t | 19504  | GFCDGYCK<br>THLKASS          | Mus<br>musculu<br>s              |
| 1 | 1.00 | 1 | 1 | 0     | -0.002 | 0.025  | -0.001 | -0.002 | t | 19504  | GFCDGYCK<br>THLKASS          | Mus<br>musculu<br>s              |
| 1 | 1.00 | 1 | 1 | -0.05 | -0.048 | -0.036 | -0.049 | -0.048 | t | 67976  | VDHRPGG<br>GLC               | Homo<br>sapiens                  |

|   |      |   |   |       |        |        |        |        |   |        |                              |                                  |
|---|------|---|---|-------|--------|--------|--------|--------|---|--------|------------------------------|----------------------------------|
| 1 | 1.00 | 1 | 1 | -0.02 | -0.018 | -0.005 | -0.023 | -0.02  | t | 48594  | PNAKSVKE<br>YLDKVRAT<br>VGC  | Homo<br>sapiens                  |
| 1 | 1.00 | 1 | 1 | -0.03 | -0.032 | -0.003 | -0.031 | -0.03  | t | 62050  | SVARTRGL<br>YDDG             | Mus<br>musculu<br>s              |
| 1 | 1.00 | 1 | 1 | -0.01 | -0.016 | 0.011  | -0.01  | -0.01  | t | 93488  | NGTLFSWL<br>PALASNFD<br>Q    | Oryctola<br>gus<br>cuniculu<br>s |
| 1 | 1.00 | 1 | 1 | 0     | 0.003  | 0.008  | 0      | 0.001  | t | 64555  | TKETETEA<br>PAAPAEGE<br>KPAE | Mus<br>musculu<br>s              |
| 1 | 1.00 | 1 | 1 | 0     | 0      | -0.002 | 0      | 0.007  | t | 119672 | WNPADYG<br>GIKKIRLPS<br>DD   | Rattus<br>norvegic<br>us         |
| 1 | 1.00 | 1 | 1 | -0.01 | -0.008 | 0      | -0.007 | 0      | t | 50186  | PYVIWK                       | Homo<br>sapiens                  |
| 1 | 1.00 | 1 | 1 | -0.06 | -0.06  | -0.046 | -0.06  | -0.06  | t | 28265  | IRAWVAW<br>RAHCQNR<br>D      | Mus<br>musculu<br>s              |
| 1 | 1.00 | 1 | 1 | 0.01  | 0.01   | 0.005  | -0.001 | 0.012  | t | 16468  | FKTTKKDH<br>KPQT             | Homo<br>sapiens                  |
| 1 | 1.00 | 1 | 1 | -0.02 | -0.02  | -0.004 | -0.02  | -0.019 | t | 49447  | PSNCHTHE<br>GGQLHCT          | Mus<br>musculu<br>s              |
| 1 | 1.00 | 1 | 1 | -0.01 | -0.008 | 0.01   | -0.013 | -0.008 | t | 10531  | DTYTQKLS<br>VP               | Homo<br>sapiens                  |
| 1 | 1.00 | 1 | 1 | 0     | -0.002 | 0.01   | -0.001 | 0.004  | t | 1164   | AESLRAVIP<br>PTTTP           | Anas<br>platyrhy<br>nchos        |
| 1 | 1.00 | 1 | 1 | -0.02 | -0.023 | -0.004 | -0.02  | -0.018 | t | 45160  | NNLEDPAS<br>RDLVVNYV         | Oryctola<br>gus<br>cuniculu<br>s |
| 1 | 1.00 | 1 | 1 | 0.01  | 0.01   | 0.028  | 0.01   | 0.011  | t | 118829 | GVLGQA<br>SQLNA              | Mus<br>musculu<br>s              |
| 1 | 1.00 | 1 | 1 | -0.08 | -0.08  | -0.08  | -0.08  | -0.078 | t | 117667 | VAGRGRG<br>RGRGRGR<br>G      | Homo<br>sapiens                  |

|   |      |   |   |       |        |        |        |        |   |        |                              |                                  |
|---|------|---|---|-------|--------|--------|--------|--------|---|--------|------------------------------|----------------------------------|
| 1 | 1.00 | 1 | 1 | 0     | -0.002 | 0      | -0.007 | 0.005  | t | 122932 | VCTPKSDE<br>FNPCEDIM<br>GYK  | Mus<br>musculu<br>s              |
| 1 | 1.00 | 1 | 1 | 0     | -0.002 | 0      | -0.007 | 0.005  | t | 125472 | LDAVYLNK<br>NKYLTVID<br>KDAF | Mus<br>musculu<br>s              |
| 1 | 1.00 | 1 | 1 | -0.02 | -0.024 | -0.002 | -0.017 | -0.018 | t | 117366 | RRREGPDR<br>SPR              | Oryctola<br>gus<br>cuniculu<br>s |
| 1 | 1.00 | 1 | 1 | -0.11 | -0.11  | -0.11  | -0.11  | -0.108 | t | 117234 | SRGQHQA<br>HSLERVCH<br>CL    | Mus<br>musculu<br>s              |
| 1 | 1.00 | 1 | 1 | 0.03  | 0.03   | 0.03   | 0.03   | 0.04   | t | 108085 | QTATYLT<br>HLKV              | Mus<br>musculu<br>s              |
| 1 | 1.00 | 1 | 1 | 0     | 0      | 0.002  | 0      | 0.01   | t | 77960  | NAFQLSPT<br>RLLM             | Mus<br>musculu<br>s              |
| 1 | 1.00 | 1 | 1 | 0     | 0.002  | 0.02   | 0.001  | 0      | t | 55739  | RRSGGSG<br>GGFWGDR<br>VDSQ   | Homo<br>sapiens                  |
| 1 | 1.00 | 1 | 1 | 0     | 0.003  | 0.002  | 0      | 0.007  | t | 122290 | CSNSSSSQ<br>FQIHGPRQ         | Mus<br>musculu<br>s              |
| 1 | 1.00 | 1 | 1 | 0     | 0      | 0      | 0      | 0.01   | t | 117085 | SQMPEYLL<br>KADN             | Homo<br>sapiens                  |
| 1 | 1.00 | 1 | 1 | -0.02 | -0.02  | -0.02  | -0.02  | -0.01  | t | 108582 | PSFPALR<br>L                 | Homo<br>sapiens                  |
| 1 | 1.00 | 1 | 1 | -0.06 | -0.06  | -0.041 | -0.06  | -0.06  | t | 4941   | ATEKSNVV<br>RGWV             | Homo<br>sapiens                  |
| 1 | 1.00 | 1 | 1 | -0.02 | -0.028 | -0.013 | -0.02  | -0.014 | t | 136676 | TGDVDRA<br>VYWHL             | Mus<br>musculu<br>s              |
| 1 | 1.00 | 1 | 1 | -0.02 | -0.02  | -0.013 | -0.02  | -0.014 | t | 136676 | TGDVDRA<br>VYWHL             | Mus<br>musculu<br>s              |
| 1 | 1.00 | 1 | 1 | -0.07 | -0.067 | -0.053 | -0.07  | -0.07  | t | 19210  | GEASGLCC<br>RWSLRVV          | Mus<br>musculu<br>s              |
| 1 | 1.00 | 1 | 1 | 0     | 0      | 0.028  | 0      | -0.002 | t | 21738  | GPPVDPTS<br>G                | Oryctola<br>gus<br>cuniculu<br>s |

|   |      |   |   |       |        |        |        |        |   |        |                              |                                  |
|---|------|---|---|-------|--------|--------|--------|--------|---|--------|------------------------------|----------------------------------|
| 1 | 1.00 | 1 | 1 | -0.01 | -0.014 | 0.01   | -0.011 | -0.01  | t | 60596  | SQWNNKPS<br>KPKTN            | Oryctola<br>gus<br>cuniculu<br>s |
| 1 | 1.00 | 1 | 1 | 0.02  | 0.02   | 0.032  | 0.02   | 0.021  | t | 126422 | KLASIPHT<br>SPL              | Mus<br>musculu<br>s              |
| 1 | 1.00 | 1 | 1 | 0.01  | 0.012  | 0.025  | 0.011  | 0.012  | t | 52882  | QYDEMEE<br>CSQSAPYI<br>EQAQA | Homo<br>sapiens                  |
| 1 | 1.00 | 1 | 1 | 0.02  | 0.023  | 0.03   | 0.02   | 0.023  | t | 14540  | ETSEVSTT<br>DKIADITIII<br>P  | Mus<br>musculu<br>s              |
| 1 | 1.00 | 1 | 1 | 0.02  | 0.026  | 0.03   | 0.02   | 0.023  | t | 14540  | ETSEVSTT<br>DKIADITIII<br>P  | Equus<br>caballus                |
| 1 | 1.00 | 1 | 1 | -0.06 | -0.057 | -0.059 | -0.057 | -0.05  | t | 78217  | NKNWWS                       | Equus<br>caballus                |
| 1 | 1.00 | 1 | 1 | -0.02 | -0.018 | -0.004 | -0.019 | -0.02  | t | 33776  | KTMIRFGD<br>VGLDLDFS<br>AFDA | Homo<br>sapiens                  |
| 1 | 1.00 | 1 | 1 | -0.01 | -0.008 | -0.005 | -0.007 | 0.001  | t | 4396   | ASFDRS                       | Homo<br>sapiens                  |
| 1 | 1.00 | 1 | 1 | -0.01 | -0.01  | 0.011  | -0.014 | -0.01  | t | 18588  | GAGGGAG<br>GAGAGGG<br>AGGAGA | Homo<br>sapiens                  |
| 1 | 1.00 | 1 | 1 | -0.03 | -0.026 | -0.003 | -0.03  | -0.031 | t | 29943  | KASFDVTG<br>AFKAPRYK<br>S    | Aotus<br>nancyma<br>ae           |
| 1 | 1.00 | 1 | 1 | 0     | 0.004  | 0.018  | 0      | 0.002  | t | 149304 | ENTTTLKG<br>DSFYYGK          | Cavia<br>porcellu<br>s           |
| 1 | 1.00 | 1 | 1 | -0.02 | -0.017 | 0.007  | -0.02  | -0.019 | t | 44250  | NIIRTKKQ                     | Mus<br>musculu<br>s              |
| 1 | 1.00 | 1 | 1 | 0.02  | 0.02   | 0.03   | 0.02   | 0.022  | t | 137769 | SHQESTKG<br>KSKGKSGK<br>SGS  | Mus<br>musculu<br>s              |
| 1 | 1.00 | 1 | 1 | 0.01  | 0.008  | 0.009  | 0.013  | 0.022  | t | 106921 | TPYTNNPD<br>LLFT             | Mus<br>musculu<br>s              |

|   |      |   |   |       |        |        |        |        |   |        |                              |                                  |
|---|------|---|---|-------|--------|--------|--------|--------|---|--------|------------------------------|----------------------------------|
| 1 | 1.00 | 1 | 1 | 0.01  | 0.006  | 0.017  | 0.003  | 0.01   | t | 126928 | RHVIQVSN<br>EVVTDDDR         | Oryctola<br>gus<br>cuniculu<br>s |
| 1 | 1.00 | 1 | 1 | 0     | 0      | 0      | 0      | 0.009  | t | 103972 | HNPINAGT<br>ELSATGN          | Oryctola<br>gus<br>cuniculu<br>s |
| 1 | 1.00 | 1 | 1 | 0.01  | 0.01   | 0.01   | 0.01   | 0.02   | t | 55086  | RNVFLIRTE                    | Mus<br>musculu<br>s              |
| 1 | 1.00 | 1 | 1 | -0.04 | -0.04  | -0.018 | -0.038 | -0.04  | t | 30235  | KDRRSTGK<br>SWGK             | Homo<br>sapiens                  |
| 1 | 1.00 | 1 | 1 | -0.03 | -0.03  | -0.02  | -0.03  | -0.02  | t | 79253  | IARLIS                       | Mus<br>musculu<br>s              |
| 1 | 1.00 | 1 | 1 | -0.01 | -0.01  | 0.006  | -0.01  | -0.01  | t | 75764  | YSIISSMKK<br>HSLSI           | Mus<br>musculu<br>s              |
| 1 | 1.00 | 1 | 1 | 0.02  | 0.02   | 0.02   | 0.02   | 0.03   | t | 127654 | FPKNSTV                      | Homo<br>sapiens                  |
| 1 | 1.00 | 1 | 1 | -0.01 | -0.01  | 0.01   | -0.01  | -0.008 | t | 114236 | VGWYRSP<br>FSR               | Rattus<br>norvegic<br>us         |
| 1 | 1.00 | 1 | 1 | -0.01 | -0.008 | -0.025 | -0.009 | 0.002  | t | 32862  | KPRDTLPP<br>PLNRPPP          | Homo<br>sapiens                  |
| 1 | 1.00 | 1 | 1 | -0.02 | -0.02  | 0.006  | -0.02  | -0.02  | t | 75829  | YSNIGVCK                     | Mus<br>musculu<br>s              |
| 1 | 1.00 | 1 | 1 | 0.03  | 0.028  | 0.03   | 0.023  | 0.031  | t | 113994 | VIISINGQS<br>VVSANDV<br>SDVI | Mus<br>musculu<br>s              |
| 1 | 1.00 | 1 | 1 | 0.03  | 0.028  | 0.03   | 0.023  | 0.031  | t | 113994 | VIISINGQS<br>VVSANDV<br>SDVI | Mus<br>musculu<br>s              |
| 1 | 1.00 | 1 | 1 | -0.01 | -0.01  | -0.01  | -0.01  | 0      | t | 132691 | TCSADGRT<br>LFYNLCL          | Mus<br>musculu<br>s              |
| 1 | 1.00 | 1 | 1 | -0.03 | -0.032 | -0.008 | -0.031 | -0.031 | t | 33     | AAAGAVV<br>GGLGGYM<br>LG     | Mus<br>musculu<br>s              |
| 1 | 1.00 | 1 | 1 | 0.06  | 0.06   | 0.067  | 0.06   | 0.072  | t | 127767 | PPSKMET                      | Homo<br>sapiens                  |

|   |      |   |   |       |        |        |        |        |   |        |                              |                          |
|---|------|---|---|-------|--------|--------|--------|--------|---|--------|------------------------------|--------------------------|
| 1 | 1.00 | 1 | 1 | 0     | 0      | 0      | 0      | 0.009  | t | 142435 | KTDGKGEE<br>SE               | Homo<br>sapiens          |
| 1 | 1.00 | 1 | 1 | 0     | 0      | 0      | 0      | 0.009  | t | 96526  | LAANNPA                      | Mus<br>musculu<br>s      |
| 1 | 1.00 | 1 | 1 | 0     | 0      | 0      | 0      | 0.009  | t | 79356  | RAVIWAW<br>MWE               | Mus<br>musculu<br>s      |
| 1 | 1.00 | 1 | 1 | -0.02 | -0.022 | -0.027 | -0.013 | -0.011 | t | 136751 | YCWLRRQ<br>AALQRRLS<br>AMEKG | Rattus<br>norvegic<br>us |
| 1 | 1.00 | 1 | 1 | -0.05 | -0.049 | -0.033 | -0.047 | -0.05  | t | 52042  | QQINHHW<br>HKSGSSIG<br>KAFTT | Equus<br>caballus        |
| 1 | 1.00 | 1 | 1 | -0.04 | -0.036 | -0.022 | -0.04  | -0.038 | t | 149418 | PSASLYAV<br>KVLGADG          | Cavia<br>porcellu<br>s   |
| 1 | 1.00 | 1 | 1 | 0.02  | 0.018  | 0.02   | 0.019  | 0.029  | t | 153361 | APQNAKD<br>HLPGYGG<br>GS     | Mus<br>musculu<br>s      |
| 1 | 1.00 | 1 | 1 | -0.03 | -0.028 | -0.023 | -0.027 | -0.021 | t | 60807  | SRSPTRKKI<br>NNIILN          | Homo<br>sapiens          |
| 1 | 1.00 | 1 | 1 | 0.07  | 0.07   | 0.077  | 0.07   | 0.082  | t | 127715 | KQDPPSL                      | Homo<br>sapiens          |
| 1 | 1.00 | 1 | 1 | 0.01  | 0.013  | 0.037  | 0.01   | 0.011  | t | 42264  | MPDHALR<br>PQYSI             | Mus<br>musculu<br>s      |
| 1 | 1.00 | 1 | 1 | -0.01 | -0.008 | -0.008 | -0.009 | 0      | t | 6549   | CLDSSRGI<br>C                | Homo<br>sapiens          |
| 1 | 1.00 | 1 | 1 | -0.02 | -0.022 | -0.013 | -0.027 | -0.018 | t | 122340 | ERVTRLEW<br>PKNDPRI          | Mus<br>musculu<br>s      |
| 1 | 1.00 | 1 | 1 | 0.01  | 0.01   | 0.017  | 0.01   | 0.02   | t | 108644 | STLVPNKA<br>P                | Homo<br>sapiens          |
| 1 | 1.00 | 1 | 1 | -0.02 | -0.02  | 0.006  | -0.02  | -0.02  | t | 57300  | SDTRGDP<br>VFNLPFQF          | Mus<br>musculu<br>s      |



|   |      |   |   |       |        |        |        |        |   |        |                              |                         |
|---|------|---|---|-------|--------|--------|--------|--------|---|--------|------------------------------|-------------------------|
| 1 | 1.00 | 1 | 1 | 0.03  | 0.037  | 0.047  | 0.03   | 0.031  | t | 110794 | CDDDDDN<br>DGVPSDR<br>DNCRLV | Mus<br>musculu<br>s     |
| 1 | 1.00 | 1 | 1 | -0.02 | -0.012 | -0.02  | -0.02  | -0.015 | t | 29985  | KAVSAAG<br>VHFKAGG<br>PI     | Gallus<br>gallus        |
| 1 | 1.00 | 1 | 1 | -0.01 | -0.012 | -0.008 | -0.017 | -0.01  | t | 109247 | GSAGAPGI<br>AGAPGFP          | Mus<br>musculu<br>s     |
| 1 | 1.00 | 1 | 1 | -0.01 | -0.008 | 0.015  | -0.011 | -0.011 | t | 84423  | KKGLQQL<br>QEWDW<br>VGWIGN   | Felis<br>catus          |
| 1 | 1.00 | 1 | 1 | 0     | -0.002 | 0.016  | -0.007 | 0.001  | t | 135906 | DALAVDQ<br>MGRFG             | Mus<br>musculu<br>s     |
| 1 | 1.00 | 1 | 1 | -0.01 | -0.012 | -0.005 | -0.017 | -0.008 | t | 98699  | APKPAPQP<br>GPQPPQP          | Mus<br>musculu<br>s     |
| 1 | 1.00 | 1 | 1 | 0.01  | 0.012  | 0.031  | 0.017  | 0.021  | t | 108289 | ATNIFIEGT                    | Homo<br>sapiens         |
| 1 | 1.00 | 1 | 1 | -0.04 | -0.035 | -0.02  | -0.04  | -0.04  | t | 105265 | KLVFFAED<br>VGSNKGA          | Canis<br>familiari<br>s |
| 1 | 1.00 | 1 | 1 | -0.06 | -0.062 | -0.039 | -0.061 | -0.059 | t | 119562 | DYTGKIM<br>WTPPAIFK<br>S     | Mus<br>musculu<br>s     |
| 1 | 1.00 | 1 | 1 | 0     | 0      | 0.026  | 0      | 0.003  | t | 15468  | FDTGA FDP<br>DWPA            | Mus<br>musculu<br>s     |
| 1 | 1.00 | 1 | 1 | -0.02 | -0.02  | 0.002  | -0.02  | -0.02  | t | 58745  | SIVYEAAD<br>AILHTPGC<br>VPCV | Homo<br>sapiens         |
| 1 | 1.00 | 1 | 1 | 0.01  | 0.014  | 0.035  | 0.007  | 0.008  | t | 64391  | TINGLART<br>TADRQTA          | Homo<br>sapiens         |
| 1 | 1.00 | 1 | 1 | 0     | 0.002  | 0      | -0.001 | 0.003  | t | 130459 | CSKARLHL<br>QGRSNAC<br>AAC   | Homo<br>sapiens         |

|   |      |   |   |       |        |        |        |        |   |        |                              |                        |
|---|------|---|---|-------|--------|--------|--------|--------|---|--------|------------------------------|------------------------|
| 1 | 1.00 | 1 | 1 | -0.04 | -0.036 | -0.023 | -0.039 | -0.04  | t | 103961 | GVRATRKT<br>SERSQPRG<br>RRQP | Homo<br>sapiens        |
| 1 | 1.00 | 1 | 1 | -0.05 | -0.047 | -0.031 | -0.05  | -0.047 | t | 22230  | GRVCLR                       | Mus<br>musculu<br>s    |
| 1 | 1.00 | 1 | 1 | -0.03 | -0.03  | -0.008 | -0.028 | -0.03  | t | 10149  | DSITWQL<br>QAAVLHV           | Homo<br>sapiens        |
| 1 | 1.00 | 1 | 1 | -0.01 | -0.008 | 0.008  | -0.009 | -0.008 | t | 149445 | QSTLPGNK<br>YGAYNGT          | Cavia<br>porcellu<br>s |
| 1 | 1.00 | 1 | 1 | 0     | 0      | 0.007  | 0      | 0.009  | t | 108355 | EVAHPSVP<br>L                | Homo<br>sapiens        |
| 1 | 1.00 | 1 | 1 | -0.02 | -0.02  | 0      | -0.018 | -0.019 | t | 2772   | ALNDLCIK<br>VNNWDLF<br>FSPS  | Homo<br>sapiens        |
| 1 | 1.00 | 1 | 1 | 0.01  | 0.01   | 0.01   | 0.01   | 0.02   | t | 121736 | QCFLAITNI<br>QLILPY          | Mus<br>musculu<br>s    |
| 1 | 1.00 | 1 | 1 | -0.02 | -0.018 | -0.008 | -0.019 | -0.014 | t | 39977  | LTITQLLKR                    | Homo<br>sapiens        |
| 1 | 1.00 | 1 | 1 | 0     | 0      | 0      | -0.004 | 0.007  | t | 7491   | DAEFRHDS<br>GYEVHHQ<br>K     | Homo<br>sapiens        |
| 1 | 1.00 | 1 | 1 | -0.01 | -0.012 | -0.008 | -0.009 | 0      | t | 36372  | LHEQYYF                      | Mus<br>musculu<br>s    |
| 1 | 1.00 | 1 | 1 | 0.01  | 0.01   | 0.026  | 0.01   | 0.01   | t | 109326 | IEESDDRR<br>YDLVGP           | Mus<br>musculu<br>s    |
| 1 | 1.00 | 1 | 1 | 0.01  | -0.004 | 0.003  | 0.007  | 0.022  | t | 114740 | AQGHRPQ<br>DE                | Macaca<br>mulatta      |
| 1 | 1.00 | 1 | 1 | -0.02 | -0.018 | -0.009 | -0.023 | -0.017 | t | 108675 | VAGYSYTD<br>ANK              | Homo<br>sapiens        |
| 1 | 1.00 | 1 | 1 | 0.03  | 0.028  | 0.029  | 0.033  | 0.042  | t | 106245 | AKYSKHPD<br>ATLV             | Mus<br>musculu<br>s    |

|   |      |   |   |       |        |        |        |        |   |        |                              |                                  |
|---|------|---|---|-------|--------|--------|--------|--------|---|--------|------------------------------|----------------------------------|
| 1 | 1.00 | 1 | 1 | -0.02 | -0.02  | 0.002  | -0.02  | -0.02  | t | 56259  | RVEAQLH<br>VWIPPLN           | Homo<br>sapiens                  |
| 1 | 1.00 | 1 | 1 | -0.02 | -0.02  | 0.004  | -0.02  | -0.018 | t | 62720  | SYTESMA<br>GKR               | Mus<br>musculu<br>s              |
| 1 | 1.00 | 1 | 1 | -0.01 | -0.003 | 0.011  | -0.01  | -0.01  | t | 7938   | DEDKLDTN<br>SVYEPYYH<br>SDHA | Cavia<br>porcellu<br>s           |
| 1 | 1.00 | 1 | 1 | -0.01 | -0.007 | 0.011  | -0.01  | -0.01  | t | 7938   | DEDKLDTN<br>SVYEPYYH<br>SDHA | Mus<br>musculu<br>s              |
| 1 | 1.00 | 1 | 1 | 0     | 0.004  | 0.017  | -0.003 | 0      | t | 52128  | QQQQGGS<br>QSQKGKQ<br>Q      | Homo<br>sapiens                  |
| 1 | 1.00 | 1 | 1 | -0.03 | -0.032 | -0.013 | -0.027 | -0.028 | t | 147220 | QIGYYRRA<br>TR               | Mus<br>musculu<br>s              |
| 1 | 1.00 | 1 | 1 | 0     | 0      | 0      | 0      | 0.009  | t | 17814  | FSPSLEHPI<br>VVSWSWD         | Mus<br>musculu<br>s              |
| 1 | 1.00 | 1 | 1 | 0     | 0      | 0      | 0      | 0.009  | t | 11571  | EEEDDDM<br>GFGFLFD           | Mus<br>musculu<br>s              |
| 1 | 1.00 | 1 | 1 | 0.01  | 0.01   | 0.035  | 0.01   | 0.012  | t | 117389 | TSHPAQLG<br>LKSL             | Homo<br>sapiens                  |
| 1 | 1.00 | 1 | 1 | -0.01 | -0.01  | -0.01  | -0.01  | 0      | t | 54689  | RLNPVY                       | Mus<br>musculu<br>s              |
| 1 | 1.00 | 1 | 1 | -0.04 | -0.028 | -0.019 | -0.04  | -0.04  | t | 28603  | ISLTEWSM<br>WYRH             | Mus<br>musculu<br>s              |
| 1 | 1.00 | 1 | 1 | 0     | -0.003 | 0.015  | 0      | 0.002  | t | 18010  | FTLSPRRH<br>ETVQECNC<br>SIYP | Oryctola<br>gus<br>cuniculu<br>s |
| 1 | 1.00 | 1 | 1 | 0.01  | 0.01   | 0.01   | 0.01   | 0.02   | t | 121847 | SGVFLSVP<br>ESYFGSC          | Mus<br>musculu<br>s              |
| 1 | 1.00 | 1 | 1 | -0.02 | -0.016 | -0.009 | -0.023 | -0.019 | t | 111970 | YNQNLIRH<br>VGGGTPR          | Homo<br>sapiens                  |

|   |      |   |   |       |        |        |        |        |   |        |                              |                        |
|---|------|---|---|-------|--------|--------|--------|--------|---|--------|------------------------------|------------------------|
| 1 | 1.00 | 1 | 1 | -0.01 | -0.012 | -0.017 | -0.017 | 0.001  | t | 113204 | VDAAFKV<br>AAT               | Mus<br>musculu<br>s    |
| 1 | 1.00 | 1 | 1 | -0.07 | -0.068 | -0.054 | -0.073 | -0.068 | t | 12220  | EGLRMM<br>MRMMQ<br>QK        | Homo<br>sapiens        |
| 1 | 1.00 | 1 | 1 | -0.02 | -0.016 | -0.016 | -0.019 | -0.008 | t | 111118 | ARLLFGI                      | Homo<br>sapiens        |
| 1 | 1.00 | 1 | 1 | -0.02 | -0.018 | -0.02  | -0.013 | -0.009 | t | 107861 | GLEGQDT<br>KTITFDVS          | Homo<br>sapiens        |
| 1 | 1.00 | 1 | 1 | 0     | 0.002  | 0.022  | 0.001  | 0      | t | 32475  | KNEQAGQ<br>VQVLSSV           | Homo<br>sapiens        |
| 1 | 1.00 | 1 | 1 | 0.02  | 0.02   | 0.02   | 0.02   | 0.029  | t | 57531  | SELPQWD                      | Mus<br>musculu<br>s    |
| 1 | 1.00 | 1 | 1 | 0     | 0      | 0.017  | 0      | -0.001 | t | 4397   | ASFEAQG<br>ALANIAVD<br>KA    | Mus<br>musculu<br>s    |
| 1 | 1.00 | 1 | 1 | 0     | -0.002 | 0.005  | -0.001 | 0.01   | t | 3936   | AQAFDYV<br>PAWVV             | Mus<br>musculu<br>s    |
| 1 | 1.00 | 1 | 1 | 0     | 0.003  | 0      | 0      | 0.01   | t | 44554  | NKND                         | Mus<br>musculu<br>s    |
| 1 | 1.00 | 1 | 1 | 0     | 0      | 0      | 0      | 0.01   | t | 44554  | NKND                         | Mus<br>musculu<br>s    |
| 1 | 1.00 | 1 | 1 | 0     | 0      | 0.002  | 0      | 0.009  | t | 34329  | KWSDKPK                      | Mus<br>musculu<br>s    |
| 1 | 1.00 | 1 | 1 | -0.07 | -0.066 | -0.055 | -0.073 | -0.072 | t | 105177 | FARANRGL                     | Homo<br>sapiens        |
| 1 | 1.00 | 1 | 1 | -0.04 | -0.035 | -0.028 | -0.04  | -0.04  | t | 66649  | TTIHELLVR<br>MKRAELYC<br>PRP | Cavia<br>porcellu<br>s |

|   |      |   |   |       |        |        |        |        |   |        |                              |                                  |
|---|------|---|---|-------|--------|--------|--------|--------|---|--------|------------------------------|----------------------------------|
| 1 | 1.00 | 1 | 1 | -0.04 | -0.039 | -0.028 | -0.04  | -0.04  | t | 66649  | TTIHELLVR<br>MKRAELYC<br>PRP | Mus<br>musculu<br>s              |
| 1 | 1.00 | 1 | 1 | -0.02 | -0.02  | 0.012  | -0.023 | -0.022 | t | 26167  | IFSQNMNI<br>KLKMP            | Homo<br>sapiens                  |
| 1 | 1.00 | 1 | 1 | -0.02 | -0.02  | 0.012  | -0.023 | -0.022 | t | 26167  | IFSQNMNI<br>KLKMP            | Homo<br>sapiens                  |
| 1 | 1.00 | 1 | 1 | -0.02 | -0.02  | 0.012  | -0.023 | -0.022 | t | 26167  | IFSQNMNI<br>KLKMP            | Homo<br>sapiens                  |
| 1 | 1.00 | 1 | 1 | -0.03 | -0.016 | -0.009 | -0.029 | -0.03  | t | 33767  | KTLRNTNR<br>L                | Homo<br>sapiens                  |
| 1 | 1.00 | 1 | 1 | -0.07 | -0.07  | -0.063 | -0.07  | -0.067 | t | 130912 | KADILPEM<br>NSMRADR<br>M     | Mus<br>musculu<br>s              |
| 1 | 1.00 | 1 | 1 | 0.04  | 0.046  | 0.054  | 0.047  | 0.05   | t | 127762 | PGPSTTS                      | Homo<br>sapiens                  |
| 1 | 1.00 | 1 | 1 | -0.03 | -0.03  | -0.01  | -0.03  | -0.028 | t | 46006  | NSTLGVKS<br>AREF             | Mus<br>musculu<br>s              |
| 1 | 1.00 | 1 | 1 | 0.02  | 0.009  | 0.033  | 0.02   | 0.027  | t | 45316  | NPKD                         | Marmot<br>a monax                |
| 1 | 1.00 | 1 | 1 | -0.05 | -0.048 | -0.045 | -0.049 | -0.046 | t | 57540  | SELSPLLT<br>TTQWQVL<br>PCSF  | Homo<br>sapiens                  |
| 1 | 1.00 | 1 | 1 | 0     | 0.004  | 0.01   | 0      | 0.001  | t | 31736  | KKYASGNK<br>DNIVRNN<br>DRVY  | Homo<br>sapiens                  |
| 1 | 1.00 | 1 | 1 | 0     | 0.002  | 0      | 0.007  | 0.01   | t | 108098 | RIADTIHA<br>NNSRHIL          | Homo<br>sapiens                  |
| 1 | 1.00 | 1 | 1 | -0.02 | -0.018 | 0.001  | -0.019 | -0.022 | t | 5346   | AVGIMTVT<br>MTFKLGPR<br>KATG | Homo<br>sapiens                  |
| 1 | 1.00 | 1 | 1 | 0.02  | 0.02   | 0.02   | 0.02   | 0.03   | t | 144036 | PSIIGGSSV<br>DLV             | Oryctola<br>gus<br>cuniculu<br>s |

|   |      |   |   |       |        |        |        |        |   |        |                              |                                  |
|---|------|---|---|-------|--------|--------|--------|--------|---|--------|------------------------------|----------------------------------|
| 1 | 1.00 | 1 | 1 | -0.02 | -0.024 | 0.001  | -0.021 | -0.019 | t | 119642 | SEHETRLV<br>ANLLENYN<br>KVIR | Oryctola<br>gus<br>cuniculu<br>s |
| 1 | 1.00 | 1 | 1 | 0     | 0.002  | 0.018  | 0.001  | 0.002  | t | 149367 | LKGDSFY<br>Y GKGLINV         | Cavia<br>porcellu<br>s           |
| 1 | 1.00 | 1 | 1 | -0.02 | -0.018 | -0.002 | -0.019 | -0.018 | t | 149327 | GSAALKAA<br>VDKAVAS          | Cavia<br>porcellu<br>s           |
| 1 | 1.00 | 1 | 1 | -0.05 | -0.046 | -0.028 | -0.047 | -0.048 | t | 70428  | VPPPRRRR<br>AKVLTQ           | Homo<br>sapiens                  |
| 1 | 1.00 | 1 | 1 | 0.01  | 0.011  | 0.029  | 0.01   | 0.01   | t | 47839  | PHKAAVD<br>VGPLSVGP<br>QS    | Mus<br>musculu<br>s              |
| 1 | 1.00 | 1 | 1 | 0.01  | 0.011  | 0.029  | 0.01   | 0.01   | t | 47839  | PHKAAVD<br>VGPLSVGP<br>QS    | Mus<br>musculu<br>s              |
| 1 | 1.00 | 1 | 1 | 0     | 0.004  | 0      | 0      | 0.009  | t | 48668  | PNLRGDL<br>QVL               | Cavia<br>porcellu<br>s           |
| 1 | 1.00 | 1 | 1 | -0.03 | -0.024 | -0.032 | -0.037 | -0.029 | t | 125085 | GTPSHSRR<br>QPHVMS           | Macaca<br>fascicula<br>ris       |
| 1 | 1.00 | 1 | 1 | -0.02 | -0.022 | -0.009 | -0.019 | -0.018 | t | 28982  | ITLPQDAV<br>SRTQRRGR<br>TGRG | Homo<br>sapiens                  |
| 1 | 1.00 | 1 | 0 | -0.07 | -0.067 | -0.063 | -0.07  | -0.049 | t | 137452 | SHTFPPSW<br>LLVR             | Mus<br>musculu<br>s              |
| 1 | 1.00 | 1 | 1 | -0.02 | -0.018 | 0      | -0.023 | -0.02  | t | 35769  | LEYIVGRV<br>WI               | Homo<br>sapiens                  |
| 1 | 1.00 | 1 | 1 | -0.02 | -0.018 | -0.013 | -0.019 | -0.01  | t | 111118 | ARLLFGI                      | Homo<br>sapiens                  |
| 1 | 1.00 | 1 | 1 | 0.01  | 0.01   | 0.01   | 0.01   | 0.02   | t | 79400  | SRPTML                       | Mus<br>musculu<br>s              |

|   |      |   |   |       |        |        |        |        |   |        |                              |                            |
|---|------|---|---|-------|--------|--------|--------|--------|---|--------|------------------------------|----------------------------|
| 1 | 1.00 | 1 | 1 | -0.03 | -0.028 | -0.028 | -0.033 | -0.028 | t | 21851  | GQCKWV<br>NGREICND<br>RDRPTA | Homo<br>sapiens            |
| 1 | 1.00 | 1 | 1 | -0.04 | -0.038 | -0.023 | -0.043 | -0.039 | t | 50846  | QGDRRCQ<br>SQLERANL          | Homo<br>sapiens            |
| 1 | 1.00 | 1 | 1 | -0.01 | -0.006 | -0.003 | -0.009 | 0      | t | 102248 | YNPTYLL                      | Homo<br>sapiens            |
| 1 | 1.00 | 1 | 1 | -0.03 | -0.027 | -0.022 | -0.03  | -0.02  | t | 43884  | NFLPRP                       | Mus<br>musculu<br>s        |
| 1 | 1.00 | 1 | 1 | -0.03 | -0.03  | -0.022 | -0.03  | -0.02  | t | 43884  | NFLPRP                       | Mus<br>musculu<br>s        |
| 1 | 1.00 | 1 | 1 | 0     | -0.001 | 0      | 0.003  | 0.01   | t | 130612 | SPNTAHIT<br>SKSL             | Camelus<br>dromed<br>arius |
| 1 | 1.00 | 1 | 1 | -0.04 | -0.042 | -0.023 | -0.037 | -0.04  | t | 62403  | SVYAWER<br>KKISNCVA<br>DY    | Mus<br>musculu<br>s        |
| 1 | 1.00 | 1 | 1 | 0.03  | 0.03   | 0.03   | 0.03   | 0.039  | t | 149030 | DFRFESSLS<br>INDHA           | Rattus<br>norvegic<br>us   |
| 1 | 1.00 | 1 | 1 | 0.01  | 0.012  | 0.01   | 0.013  | 0.02   | t | 73098  | WSQMVPF<br>DPLRLLDG<br>S     | Homo<br>sapiens            |
| 1 | 1.00 | 1 | 1 | -0.04 | -0.038 | -0.024 | -0.039 | -0.038 | t | 49116  | PQRKTKR<br>NTNRR             | Homo<br>sapiens            |
| 1 | 1.00 | 1 | 1 | -0.02 | -0.018 | 0      | -0.023 | -0.02  | t | 48708  | PNTALLSL<br>VL               | Homo<br>sapiens            |
| 1 | 1.00 | 1 | 1 | -0.02 | -0.018 | 0.001  | -0.017 | -0.02  | t | 47838  | PHIVTPPS<br>ARPRIMAP<br>PVVR | Homo<br>sapiens            |
| 1 | 1.00 | 1 | 1 | -0.02 | -0.022 | 0.005  | -0.021 | -0.02  | t | 64762  | TLDVRMIN<br>IE               | Mus<br>musculu<br>s        |

|   |      |   |   |       |        |        |        |        |   |        |                              |                                  |
|---|------|---|---|-------|--------|--------|--------|--------|---|--------|------------------------------|----------------------------------|
| 1 | 1.00 | 1 | 1 | -0.02 | -0.018 | -0.002 | -0.019 | -0.018 | t | 149445 | QSTLPGNK<br>YGAYNGT          | Cavia<br>porcellu<br>s           |
| 1 | 1.00 | 1 | 1 | 0.01  | 0.01   | 0.01   | 0.01   | 0.02   | t | 121849 | SGVPLYSHI<br>SYVISC          | Mus<br>musculu<br>s              |
| 1 | 1.00 | 1 | 1 | -0.04 | -0.037 | -0.031 | -0.04  | -0.04  | t | 51074  | QIGYYRRA<br>TRRVRRG<br>DGK   | Mus<br>musculu<br>s              |
| 1 | 1.00 | 1 | 1 | -0.01 | -0.007 | 0.012  | -0.01  | -0.01  | t | 69324  | VKTKNTTT<br>TQTQ             | Mus<br>musculu<br>s              |
| 1 | 1.00 | 1 | 1 | -0.05 | -0.05  | -0.031 | -0.05  | -0.05  | t | 21477  | GNNDNVL<br>DHLTGRSC          | Oryctola<br>gus<br>cuniculu<br>s |
| 1 | 1.00 | 1 | 1 | -0.05 | -0.05  | -0.031 | -0.05  | -0.05  | t | 21477  | GNNDNVL<br>DHLTGRSC          | Oryctola<br>gus<br>cuniculu<br>s |
| 1 | 1.00 | 1 | 1 | -0.06 | -0.06  | -0.052 | -0.06  | -0.058 | t | 132640 | RTDDKMR<br>MHSHLSH<br>H      | Mus<br>musculu<br>s              |
| 1 | 1.00 | 1 | 1 | -0.05 | -0.046 | -0.033 | -0.049 | -0.05  | t | 104315 | TRKTSERS<br>QPRGRRQ<br>PIPKA | Homo<br>sapiens                  |
| 1 | 1.00 | 1 | 1 | 0     | 0      | 0      | 0      | 0.009  | t | 79356  | RAVIWAW<br>MWE               | Mus<br>musculu<br>s              |
| 1 | 1.00 | 1 | 1 | 0     | 0      | 0      | 0      | 0.009  | t | 39183  | LRRDLAS<br>REAKKQVE<br>KALE  | Mus<br>musculu<br>s              |
| 1 | 1.00 | 1 | 1 | 0     | 0      | 0      | 0      | 0.009  | t | 9463   | DNGKAIYE<br>RARERALQ<br>ELGP | Mus<br>musculu<br>s              |
| 1 | 1.00 | 1 | 1 | -0.01 | -0.01  | -0.008 | -0.01  | -0.001 | t | 78230  | PHMNYYH<br>L                 | Homo<br>sapiens                  |
| 1 | 1.00 | 1 | 1 | -0.02 | -0.024 | 0.002  | -0.021 | -0.02  | t | 58746  | SIVYETAD<br>MIMHTPG<br>CVPCV | Oryctola<br>gus<br>cuniculu<br>s |



|   |      |   |   |       |        |        |        |        |   |        |                              |                                  |
|---|------|---|---|-------|--------|--------|--------|--------|---|--------|------------------------------|----------------------------------|
| 1 | 1.00 | 1 | 1 | -0.02 | -0.022 | -0.02  | -0.027 | -0.019 | t | 119580 | FMESGEW<br>VIKESRGW<br>KH    | Mus<br>musculu<br>s              |
| 1 | 1.00 | 1 | 1 | -0.03 | -0.03  | 0.001  | -0.03  | -0.032 | t | 687    | ADINAVCP<br>SELK             | Homo<br>sapiens                  |
| 1 | 1.00 | 1 | 1 | -0.02 | -0.02  | 0      | -0.02  | -0.017 | t | 79528  | CPSKKPYE<br>EVTC             | Mus<br>musculu<br>s              |
| 1 | 1.00 | 1 | 1 | 0     | 0      | 0.019  | -0.002 | 0.001  | t | 33198  | KRNEKWD<br>EVYKYIVT<br>NWL A | Homo<br>sapiens                  |
| 1 | 1.00 | 1 | 1 | 0.02  | 0.018  | 0.012  | 0.017  | 0.029  | t | 102006 | QP VQQPS<br>GQQQQ            | Mus<br>musculu<br>s              |
| 1 | 1.00 | 1 | 1 | -0.08 | -0.084 | -0.082 | -0.087 | -0.076 | t | 119443 | DLKLRRSS<br>SVGYIS           | Oryctola<br>gus<br>cuniculu<br>s |
| 1 | 1.00 | 1 | 1 | -0.04 | -0.042 | -0.018 | -0.04  | -0.042 | t | 64058  | THNQWN<br>KPSKPKTN<br>MK     | Oryctola<br>gus<br>cuniculu<br>s |
| 1 | 1.00 | 1 | 1 | -0.03 | -0.027 | -0.029 | -0.027 | -0.019 | t | 113002 | GKGRGLSL<br>SR               | Mus<br>musculu<br>s              |
| 1 | 1.00 | 1 | 1 | -0.03 | -0.028 | -0.025 | -0.031 | -0.027 | t | 14819  | EVLYLLDLA<br>GVYRSLKK<br>QLE | Aotus<br>nancyma<br>ae           |
| 1 | 1.00 | 1 | 1 | 0     | 0.002  | 0.024  | -0.003 | -0.004 | t | 45627  | NQSLDLAE<br>QELVDCAS<br>QHGC | Homo<br>sapiens                  |
| 1 | 1.00 | 1 | 1 | 0.01  | 0.01   | 0.018  | 0.01   | 0.02   | t | 7188   | CTPATLLLC                    | Homo<br>sapiens                  |
| 1 | 1.00 | 1 | 1 | 0     | 0.004  | 0.022  | 0.007  | 0.01   | t | 104368 | YSYPANK                      | Homo<br>sapiens                  |
| 1 | 1.00 | 1 | 1 | 0.01  | 0.01   | 0.01   | 0.01   | 0.019  | t | 153345 | ACRDHYD<br>QMC GGGG S        | Mus<br>musculu<br>s              |

|   |      |   |   |       |        |        |        |        |   |        |                              |                                  |
|---|------|---|---|-------|--------|--------|--------|--------|---|--------|------------------------------|----------------------------------|
| 1 | 1.00 | 1 | 1 | -0.02 | -0.015 | 0.001  | -0.02  | -0.02  | t | 22831  | GTSGWAE<br>VVVTPTHV<br>D     | Homo<br>sapiens                  |
| 1 | 1.00 | 1 | 1 | -0.02 | -0.018 | -0.003 | -0.019 | -0.019 | t | 45250  | NNSPAVYL<br>LDGLRAQ<br>DDYNG | Homo<br>sapiens                  |
| 1 | 1.00 | 1 | 1 | -0.01 | -0.008 | 0.008  | -0.011 | -0.006 | t | 149507 | VFDSLQL                      | Homo<br>sapiens                  |
| 1 | 1.00 | 1 | 1 | -0.01 | -0.013 | 0.009  | -0.01  | -0.011 | t | 45433  | NPNNNAA<br>TVLQLPQG<br>TTLPK | Oryctola<br>gus<br>cuniculu<br>s |
| 1 | 1.00 | 1 | 1 | 0.04  | 0.04   | 0.043  | 0.03   | 0.041  | t | 98867  | LEENAGGE<br>QEERGQR          | Homo<br>sapiens                  |
| 1 | 1.00 | 1 | 1 | 0.03  | 0.03   | 0.049  | 0.03   | 0.033  | t | 144601 | CSGTHPSIS<br>SC              | Mus<br>musculu<br>s              |
| 1 | 1.00 | 1 | 1 | 0.01  | 0.012  | 0.017  | 0.017  | 0.02   | t | 107803 | DYANPRN<br>TPRVADNL          | Homo<br>sapiens                  |
| 1 | 1.00 | 1 | 1 | -0.01 | -0.008 | 0.006  | -0.009 | -0.006 | t | 66598  | TTESRC                       | Homo<br>sapiens                  |
| 1 | 1.00 | 1 | 1 | -0.03 | -0.032 | -0.002 | -0.031 | -0.028 | t | 12345  | EHKYSWK<br>S                 | Mus<br>musculu<br>s              |
| 1 | 1.00 | 1 | 1 | -0.01 | -0.01  | -0.001 | -0.004 | -0.003 | t | 113859 | SHHPARTA<br>HYGSLPQK         | Oryctola<br>gus<br>cuniculu<br>s |
| 1 | 1.00 | 1 | 1 | 0     | 0.002  | 0.007  | 0.001  | 0.002  | t | 41475  | MFANSSA<br>AAVTAAS<br>NSPQRS | Homo<br>sapiens                  |
| 1 | 1.00 | 1 | 1 | -0.02 | -0.018 | -0.02  | -0.019 | -0.01  | t | 116954 | DPTDYSTR<br>PHMW             | Homo<br>sapiens                  |
| 1 | 1.00 | 1 | 1 | -0.02 | -0.016 | -0.01  | -0.021 | -0.019 | t | 9863   | DQKPISNL<br>GNIHASN<br>NIMF  | Homo<br>sapiens                  |
| 1 | 1.00 | 1 | 1 | -0.05 | -0.05  | -0.03  | -0.05  | -0.053 | t | 136113 | ACKRGRQ<br>TPVLYAML<br>DHSRS | Rattus<br>norvegic<br>us         |

|   |      |   |   |       |        |        |        |        |   |        |                              |                |
|---|------|---|---|-------|--------|--------|--------|--------|---|--------|------------------------------|----------------|
| 1 | 1.00 | 1 | 1 | -0.02 | -0.017 | 0.002  | -0.02  | -0.019 | t | 51854  | QPHGGSW                      | Mus musculus   |
| 1 | 1.00 | 1 | 1 | 0.01  | 0.011  | 0.012  | 0.013  | 0.02   | t | 78243  | PLFRPS                       | Equus caballus |
| 1 | 1.00 | 1 | 1 | -0.02 | -0.018 | -0.02  | -0.02  | -0.01  | t | 144079 | SLMVSPW<br>PLHGV             | Homo sapiens   |
| 1 | 1.00 | 1 | 1 | -0.01 | -0.008 | 0.01   | -0.013 | -0.007 | t | 64882  | TLKQAPA                      | Homo sapiens   |
| 1 | 1.00 | 1 | 1 | -0.07 | -0.067 | -0.048 | -0.07  | -0.068 | t | 30953  | KGHVILRK<br>RV               | Mus musculus   |
| 1 | 1.00 | 1 | 1 | -0.03 | -0.027 | -0.024 | -0.03  | -0.027 | t | 119135 | EGVKYVLN<br>ETTNWLW<br>AFLAR | Mus musculus   |
| 1 | 1.00 | 1 | 1 | 0.01  | 0.01   | 0.035  | 0.01   | 0.01   | t | 25262  | IAETQHGT<br>I                | Mus musculus   |
| 1 | 1.00 | 1 | 1 | -0.03 | -0.032 | -0.03  | -0.037 | -0.03  | t | 112139 | GQFRVIGP<br>RHPICALV<br>GDEV | Mus musculus   |
| 1 | 1.00 | 1 | 1 | -0.03 | -0.029 | -0.01  | -0.031 | -0.029 | t | 32595  | KNQIQLFN<br>LESSKIEVIL<br>K  | Equus caballus |
| 1 | 1.00 | 1 | 1 | -0.03 | -0.023 | -0.01  | -0.031 | -0.029 | t | 32595  | KNQIQLFN<br>LESSKIEVIL<br>K  | Gallus gallus  |
| 1 | 1.00 | 1 | 1 | 0     | -0.002 | 0      | -0.007 | 0.004  | t | 119635 | RGWKHSV<br>TYSKCPDT<br>PY    | Mus musculus   |
| 1 | 1.00 | 1 | 1 | -0.05 | -0.05  | -0.037 | -0.05  | -0.048 | t | 63967  | TGSQDFV<br>RSIG              | Mus musculus   |
| 1 | 1.00 | 1 | 1 | -0.05 | -0.05  | -0.037 | -0.05  | -0.048 | t | 63967  | TGSQDFV<br>RSIG              | Mus musculus   |

|   |      |   |   |       |       |        |       |        |   |        |                              |                                  |
|---|------|---|---|-------|-------|--------|-------|--------|---|--------|------------------------------|----------------------------------|
| 1 | 1.00 | 1 | 1 | -0.05 | -0.05 | -0.037 | -0.05 | -0.048 | t | 63967  | TGSQDFFV<br>RSIG             | Mus<br>musculu<br>s              |
| 1 | 1.00 | 1 | 1 | -0.05 | -0.05 | -0.037 | -0.05 | -0.048 | t | 63967  | TGSQDFFV<br>RSIG             | Mus<br>musculu<br>s              |
| 1 | 1.00 | 1 | 1 | 0.02  | 0.02  | 0.02   | 0.02  | 0.03   | t | 108615 | RRGPEAH<br>QA                | Homo<br>sapiens                  |
| 1 | 1.00 | 1 | 1 | 0.02  | 0.022 | 0.02   | 0.02  | 0.03   | t | 108298 | CKYSMSKC                     | Homo<br>sapiens                  |
| 1 | 1.00 | 1 | 1 | -0.01 | -0.01 | 0.008  | -0.01 | -0.006 | t | 149269 | AVFDEGKS<br>W                | Homo<br>sapiens                  |
| 1 | 1.00 | 1 | 1 | 0.01  | 0.007 | 0.02   | 0.01  | 0.012  | t | 14386  | ETGERSVL<br>TVPSTDIEK<br>EIL | Oryctola<br>gus<br>cuniculu<br>s |
| 1 | 1.00 | 1 | 1 | 0     | 0     | 0      | 0     | 0.009  | t | 140582 | PWATLVA<br>ES                | Mus<br>musculu<br>s              |
| 1 | 1.00 | 1 | 1 | 0     | 0     | 0      | 0     | 0.009  | t | 141534 | DRMNLQT<br>LRGY              | Mus<br>musculu<br>s              |
| 1 | 1.00 | 1 | 1 | 0     | 0     | 0      | 0     | 0.009  | t | 137418 | HHILPPKA<br>LLFG             | Mus<br>musculu<br>s              |
| 1 | 1.00 | 1 | 1 | 0     | 0     | 0      | 0     | 0.009  | t | 137432 | NHNYPPLS<br>LLTF             | Mus<br>musculu<br>s              |
| 1 | 1.00 | 1 | 1 | 0     | 0     | 0      | 0     | 0.009  | t | 137470 | YSVKPPLP<br>YLPP             | Mus<br>musculu<br>s              |
| 1 | 1.00 | 1 | 1 | 0     | 0     | 0      | 0     | 0.009  | t | 134170 | MVRHENR<br>CVA               | Mus<br>musculu<br>s              |
| 1 | 1.00 | 1 | 1 | 0     | 0     | 0      | 0     | 0.009  | t | 142505 | ADWADW<br>LDYPG              | Mus<br>musculu<br>s              |
| 1 | 1.00 | 1 | 1 | 0     | 0     | 0      | 0     | 0.009  | t | 137452 | SHTFPPSW<br>LLVR             | Mus<br>musculu<br>s              |
| 1 | 1.00 | 1 | 1 | 0     | 0     | 0      | 0     | 0.009  | t | 142576 | DGASYSW<br>MYEA              | Mus<br>musculu<br>s              |
| 1 | 1.00 | 1 | 1 | 0     | 0     | 0      | 0     | 0.009  | t | 140546 | CNLWEVM<br>HGTC              | Mus<br>musculu<br>s              |

|   |      |   |   |   |   |   |   |       |   |        |                  |                     |
|---|------|---|---|---|---|---|---|-------|---|--------|------------------|---------------------|
| 1 | 1.00 | 1 | 1 | 0 | 0 | 0 | 0 | 0.009 | t | 137446 | SHDWRLM<br>LSHLQ | Mus<br>musculu<br>s |
| 1 | 1.00 | 1 | 1 | 0 | 0 | 0 | 0 | 0.009 | t | 140606 | TMWDALE<br>AP    | Mus<br>musculu<br>s |
| 1 | 1.00 | 1 | 1 | 0 | 0 | 0 | 0 | 0.009 | t | 118060 | PPPGMRP<br>P     | Homo<br>sapiens     |
| 1 | 1.00 | 1 | 1 | 0 | 0 | 0 | 0 | 0.009 | t | 131306 | REKAKW           | Homo<br>sapiens     |
| 1 | 1.00 | 1 | 1 | 0 | 0 | 0 | 0 | 0.009 | t | 118060 | PPPGMRP<br>P     | Homo<br>sapiens     |
| 1 | 1.00 | 1 | 1 | 0 | 0 | 0 | 0 | 0.009 | t | 125600 | WESYPFRV<br>GTSL | Mus<br>musculu<br>s |
| 1 | 1.00 | 1 | 1 | 0 | 0 | 0 | 0 | 0.009 | t | 132276 | ERIYHFV          | Mus<br>musculu<br>s |
| 1 | 1.00 | 1 | 1 | 0 | 0 | 0 | 0 | 0.009 | t | 125363 | APKTYVSV<br>SGMV | Mus<br>musculu<br>s |
| 1 | 1.00 | 1 | 1 | 0 | 0 | 0 | 0 | 0.009 | t | 131304 | PVVWKN           | Homo<br>sapiens     |
| 1 | 1.00 | 1 | 1 | 0 | 0 | 0 | 0 | 0.009 | t | 132468 | LYWFTLY          | Homo<br>sapiens     |
| 1 | 1.00 | 1 | 1 | 0 | 0 | 0 | 0 | 0.009 | t | 101311 | TPLDRGT<br>WLFTK | Mus<br>musculu<br>s |
| 1 | 1.00 | 1 | 1 | 0 | 0 | 0 | 0 | 0.009 | t | 100992 | KSLSRHDH<br>IHHH | Mus<br>musculu<br>s |
| 1 | 1.00 | 1 | 1 | 0 | 0 | 0 | 0 | 0.009 | t | 101096 | NTFNEFW<br>PSNSW | Mus<br>musculu<br>s |
| 1 | 1.00 | 1 | 1 | 0 | 0 | 0 | 0 | 0.009 | t | 101139 | PSLSRQRH<br>SYPA | Mus<br>musculu<br>s |
| 1 | 1.00 | 1 | 1 | 0 | 0 | 0 | 0 | 0.009 | t | 100992 | KSLSRHDH<br>IHHH | Ovis<br>aries       |
| 1 | 1.00 | 1 | 1 | 0 | 0 | 0 | 0 | 0.009 | t | 101345 | TWLTPSFP<br>FYLG | Mus<br>musculu<br>s |
| 1 | 1.00 | 1 | 1 | 0 | 0 | 0 | 0 | 0.009 | t | 100901 | GTVLPDLS<br>RNPY | Mus<br>musculu<br>s |

|   |      |   |   |   |   |   |   |       |   |        |                     |                        |
|---|------|---|---|---|---|---|---|-------|---|--------|---------------------|------------------------|
| 1 | 1.00 | 1 | 1 | 0 | 0 | 0 | 0 | 0.009 | t | 115268 | GLQYTPS<br>WLVG     | Mus<br>musculu<br>s    |
| 1 | 1.00 | 1 | 1 | 0 | 0 | 0 | 0 | 0.009 | t | 115268 | GLQYTPS<br>WLVG     | Mus<br>musculu<br>s    |
| 1 | 1.00 | 1 | 1 | 0 | 0 | 0 | 0 | 0.009 | t | 66347  | TSNTHACR<br>TCSNPCR | Mus<br>musculu<br>s    |
| 1 | 1.00 | 1 | 1 | 0 | 0 | 0 | 0 | 0.009 | t | 66121  | TRVPRR              | Pan<br>troglody<br>tes |
| 1 | 1.00 | 1 | 1 | 0 | 0 | 0 | 0 | 0.009 | t | 62328  | SVSLPYAN<br>LATH    | Mus<br>musculu<br>s    |
| 1 | 1.00 | 1 | 1 | 0 | 0 | 0 | 0 | 0.009 | t | 97594  | QTPLTETA<br>LKWH    | Mus<br>musculu<br>s    |
| 1 | 1.00 | 1 | 1 | 0 | 0 | 0 | 0 | 0.009 | t | 97287  | ETPLTETAL<br>KWH    | Mus<br>musculu<br>s    |
| 1 | 1.00 | 1 | 1 | 0 | 0 | 0 | 0 | 0.009 | t | 62641  | SYLPQLG             | Mus<br>musculu<br>s    |
| 1 | 1.00 | 1 | 1 | 0 | 0 | 0 | 0 | 0.009 | t | 78436  | KTAISPT             | Mus<br>musculu<br>s    |
| 1 | 1.00 | 1 | 1 | 0 | 0 | 0 | 0 | 0.009 | t | 78558  | VSIFPPA             | Mus<br>musculu<br>s    |
| 1 | 1.00 | 1 | 1 | 0 | 0 | 0 | 0 | 0.009 | t | 61635  | STGPCR              | Pan<br>troglody<br>tes |
| 1 | 1.00 | 1 | 1 | 0 | 0 | 0 | 0 | 0.009 | t | 97288  | ETQLTTAG<br>LRLL    | Mus<br>musculu<br>s    |
| 1 | 1.00 | 1 | 1 | 0 | 0 | 0 | 0 | 0.009 | t | 64837  | TLHLPHLW<br>RPLS    | Mus<br>musculu<br>s    |
| 1 | 1.00 | 1 | 1 | 0 | 0 | 0 | 0 | 0.009 | t | 97595  | QTPLTMA<br>ALELF    | Mus<br>musculu<br>s    |
| 1 | 1.00 | 1 | 1 | 0 | 0 | 0 | 0 | 0.009 | t | 97596  | QTPLTMA<br>ALELL    | Mus<br>musculu<br>s    |
| 1 | 1.00 | 1 | 1 | 0 | 0 | 0 | 0 | 0.009 | t | 40858  | LYMPQLS             | Mus<br>musculu<br>s    |
| 1 | 1.00 | 1 | 1 | 0 | 0 | 0 | 0 | 0.009 | t | 43232  | NANNPD<br>WDF       | Mus<br>musculu<br>s    |

|   |      |   |   |      |      |      |      |       |   |       |                             |                 |
|---|------|---|---|------|------|------|------|-------|---|-------|-----------------------------|-----------------|
| 1 | 1.00 | 1 | 1 | 0    | 0    | 0    | 0    | 0.009 | t | 45059 | NNDNPQ                      | Mus<br>musculus |
| 1 | 1.00 | 1 | 1 | 0    | 0    | 0    | 0    | 0.009 | t | 47805 | PHDGNRA<br>FPRTKVT<br>M     | Mus<br>musculus |
| 1 | 1.00 | 1 | 1 | 0    | 0    | 0    | 0    | 0.009 | t | 48154 | PKTHNSGR<br>SNVD            | Mus<br>musculus |
| 1 | 1.00 | 1 | 1 | 0    | 0    | 0    | 0    | 0.009 | t | 57530 | SELPQLS                     | Mus<br>musculus |
| 1 | 1.00 | 1 | 1 | 0    | 0    | 0    | 0    | 0.009 | t | 57556 | SEMPQLP                     | Mus<br>musculus |
| 1 | 1.00 | 1 | 1 | 0    | 0    | 0    | 0    | 0.009 | t | 59714 | SMMPQLA                     | Mus<br>musculus |
| 1 | 1.00 | 1 | 1 | 0    | 0    | 0    | 0    | 0.009 | t | 44617 | NKVIWEA<br>DWAFS            | Mus<br>musculus |
| 1 | 1.00 | 1 | 1 | 0    | 0    | 0    | 0    | 0.009 | t | 24438 | HPDSIHPF<br>LASP            | Mus<br>musculus |
| 1 | 1.00 | 1 | 1 | 0    | 0    | 0    | 0    | 0.009 | t | 15982 | FGGETFTP<br>DWMMEV<br>AIDNE | Mus<br>musculus |
| 1 | 1.00 | 1 | 1 | 0    | 0    | 0    | 0    | 0.009 | t | 24019 | HSHSILQ<br>SDWF             | Mus<br>musculus |
| 1 | 1.00 | 1 | 1 | 0    | 0    | 0    | 0    | 0.009 | t | 610   | ACYLPFQL<br>SCGGKS          | Mus<br>musculus |
| 1 | 1.00 | 1 | 1 | 0    | 0    | 0    | 0    | 0.009 | t | 6020  | CAQQWPE<br>WYPC             | Mus<br>musculus |
| 1 | 1.00 | 1 | 1 | 0    | 0    | 0    | 0    | 0.009 | t | 6501  | CKLSQGAP<br>DSC             | Mus<br>musculus |
| 1 | 1.00 | 1 | 1 | 0    | 0    | 0    | 0    | 0.009 | t | 6249  | CFPYCYP<br>ESA              | Mus<br>musculus |
| 1 | 1.00 | 1 | 1 | 0    | 0    | 0    | 0    | 0.009 | t | 6940  | CRQTRTM<br>PGC              | Mus<br>musculus |
| 1 | 1.00 | 1 | 1 | 0    | 0    | 0    | 0    | 0.009 | t | 6276  | CGAVIDDC                    | Mus<br>musculus |
| 1 | 1.00 | 1 | 1 | 0.01 | 0.01 | 0.01 | 0.01 | 0.02  | t | 77951 | LPTMLSPT<br>GLSR            | Mus<br>musculus |

|   |      |   |   |       |        |        |        |        |   |        |                              |                                  |
|---|------|---|---|-------|--------|--------|--------|--------|---|--------|------------------------------|----------------------------------|
| 1 | 1.00 | 1 | 1 | -0.02 | -0.017 | 0.007  | -0.02  | -0.018 | t | 44250  | NIIRTKKQ                     | Mus<br>musculu<br>s              |
| 1 | 1.00 | 1 | 1 | -0.11 | -0.107 | -0.083 | -0.11  | -0.11  | t | 78554  | VMRQEC<br>WWWPCN<br>DLY      | Mus<br>musculu<br>s              |
| 1 | 1.00 | 1 | 1 | -0.02 | -0.015 | -0.022 | -0.019 | -0.01  | t | 20936  | GLISDSGFL<br>IPSKRR          | Homo<br>sapiens                  |
| 1 | 1.00 | 1 | 1 | -0.04 | -0.033 | -0.03  | -0.04  | -0.038 | t | 153907 | YSKISEYRH<br>YCYSLYGT<br>TLE | Cavia<br>porcellu<br>s           |
| 1 | 1.00 | 1 | 1 | 0     | 0      | 0      | 0      | 0.012  | t | 133029 | CVWLWE<br>QC                 | Oryctola<br>gus<br>cuniculu<br>s |
| 1 | 1.00 | 1 | 1 | 0.02  | 0.018  | 0.019  | 0.023  | 0.032  | t | 106473 | GPYVPYPE<br>DQFV             | Mus<br>musculu<br>s              |
| 1 | 1.00 | 1 | 1 | -0.02 | -0.02  | -0.013 | -0.014 | -0.011 | t | 125185 | NSSSSQFQ<br>IHG              | Mus<br>musculu<br>s              |
| 1 | 1.00 | 1 | 1 | -0.01 | -0.006 | 0.007  | -0.013 | -0.007 | t | 32083  | KLPLTKG                      | Homo<br>sapiens                  |
| 1 | 1.00 | 1 | 0 | -0.06 | -0.058 | -0.021 | -0.059 | -0.05  | t | 98216  | LKPIRKKV<br>GIVFQFP          | Homo<br>sapiens                  |
| 1 | 1.00 | 1 | 1 | -0.02 | -0.01  | -0.017 | -0.021 | -0.008 | t | 61635  | STGPCR                       | Pan<br>troglody<br>tes           |
| 1 | 1.00 | 1 | 1 | -0.02 | -0.023 | -0.003 | -0.02  | -0.02  | t | 42546  | MSESHVKI<br>SRTIIRGTS<br>PST | Oryctola<br>gus<br>cuniculu<br>s |
| 1 | 1.00 | 1 | 1 | -0.06 | -0.056 | -0.044 | -0.06  | -0.06  | t | 40099  | LTPGRFRTI<br>VCGLF           | Myodes<br>glareolu<br>s          |
| 1 | 1.00 | 1 | 1 | 0.04  | 0.04   | 0.062  | 0.04   | 0.04   | t | 73345  | YAEPTKDP<br>DQRPYCW<br>HYPPQ | Mus<br>musculu<br>s              |



|   |      |   |   |       |        |        |        |        |   |        |                              |                 |
|---|------|---|---|-------|--------|--------|--------|--------|---|--------|------------------------------|-----------------|
| 1 | 1.00 | 1 | 1 | -0.04 | -0.036 | -0.023 | -0.039 | -0.038 | t | 104227 | RQPIPKAR<br>RPEGRTW<br>AQPGY | Homo sapiens    |
| 1 | 1.00 | 1 | 1 | -0.04 | -0.042 | -0.032 | -0.041 | -0.032 | t | 55524  | RRAL                         | Mus musculus    |
| 1 | 1.00 | 1 | 1 | 0     | 0      | 0.007  | 0      | 0.009  | t | 108508 | KSGPIDIIG                    | Homo sapiens    |
| 1 | 1.00 | 1 | 1 | -0.03 | -0.028 | -0.035 | -0.033 | -0.022 | t | 136000 | SRFSWGA<br>EGQ               | Cavia porcellus |
| 1 | 1.00 | 1 | 1 | -0.03 | -0.033 | -0.004 | -0.031 | -0.03  | t | 74801  | YLLQKLRN                     | Mus musculus    |
| 1 | 1.00 | 1 | 1 | -0.03 | -0.033 | -0.004 | -0.031 | -0.03  | t | 74801  | YLLQKLRN                     | Mus musculus    |
| 1 | 1.00 | 1 | 1 | 0.01  | 0.014  | 0.027  | 0.007  | 0.01   | t | 52128  | QQQQGGS<br>QSQKGKQ<br>Q      | Homo sapiens    |
| 1 | 1.00 | 1 | 1 | 0     | 0.002  | 0.024  | 0.001  | 0      | t | 68618  | VGAESCGR<br>PFGSLG           | Homo sapiens    |
| 1 | 1.00 | 1 | 1 | -0.05 | -0.05  | -0.031 | -0.05  | -0.047 | t | 58207  | SGQARVLY<br>SEFINAL          | Mus musculus    |
| 1 | 1.00 | 1 | 1 | -0.04 | -0.04  | -0.04  | -0.047 | -0.04  | t | 112304 | SAHKGFKG<br>VDAQGTL<br>SKIFK | Homo sapiens    |
| 1 | 1.00 | 1 | 1 | 0.01  | 0.01   | 0.01   | 0.01   | 0.02   | t | 140548 | CSLSDAFN<br>GSC              | Mus musculus    |
| 1 | 1.00 | 1 | 1 | -0.03 | -0.03  | -0.008 | -0.03  | -0.03  | t | 68157  | VEEEIYQC<br>CNLEPE           | Homo sapiens    |
| 1 | 1.00 | 1 | 1 | -0.04 | -0.04  | -0.028 | -0.04  | -0.039 | t | 120347 | YRGWKH<br>WVYYTCC<br>PDTPYLD | Mus musculus    |
| 1 | 1.00 | 1 | 1 | -0.01 | -0.008 | 0.004  | -0.009 | -0.008 | t | 50809  | QFPFNASD<br>SVGQQIKV<br>IPVD | Homo sapiens    |
| 1 | 1.00 | 1 | 1 | -0.02 | -0.02  | 0.007  | -0.023 | -0.02  | t | 15430  | FDMATNP                      | Homo sapiens    |

|   |      |   |   |       |        |        |        |        |   |        |                              |                                  |
|---|------|---|---|-------|--------|--------|--------|--------|---|--------|------------------------------|----------------------------------|
| 1 | 1.00 | 1 | 1 | -0.04 | -0.037 | -0.02  | -0.04  | -0.039 | t | 105570 | VGGVVIA                      | Mus<br>musculu<br>s              |
| 1 | 1.00 | 1 | 1 | 0     | -0.002 | 0.01   | -0.007 | 0      | t | 131876 | FAKANKQ<br>VCTDI             | Mus<br>musculu<br>s              |
| 1 | 1.00 | 1 | 1 | -0.02 | -0.018 | 0.009  | -0.013 | -0.019 | t | 119497 | MRKANSP<br>PT                | Homo<br>sapiens                  |
| 1 | 1.00 | 1 | 1 | -0.02 | -0.022 | -0.003 | -0.021 | -0.02  | t | 20268  | GIGAVLKV<br>LTTGLPALI<br>SWI | Mus<br>musculu<br>s              |
| 1 | 1.00 | 1 | 1 | -0.02 | -0.019 | 0.012  | -0.02  | -0.022 | t | 19713  | GGE GEGG<br>KGGRGAA<br>K     | Oryctola<br>gus<br>cuniculu<br>s |
| 1 | 1.00 | 1 | 1 | -0.03 | -0.03  | -0.019 | -0.027 | -0.029 | t | 48779  | PPFSLSPV<br>PTLGSRSR<br>R    | Homo<br>sapiens                  |
| 1 | 1.00 | 1 | 1 | -0.06 | -0.062 | -0.037 | -0.061 | -0.06  | t | 65684  | TPPHSARS<br>KFGYGA           | Mus<br>musculu<br>s              |
| 1 | 1.00 | 1 | 1 | -0.04 | -0.04  | -0.019 | -0.04  | -0.04  | t | 55733  | RRRTQKAP<br>KRIRLPH          | Mus<br>musculu<br>s              |
| 1 | 1.00 | 1 | 1 | 0.01  | 0.008  | 0.013  | 0.003  | 0.013  | t | 113365 | EHPVTGC<br>GERTEGRC<br>LHYTV | Mus<br>musculu<br>s              |
| 1 | 1.00 | 1 | 1 | 0.01  | 0.012  | 0.028  | 0.009  | 0.014  | t | 149522 | VTGVTTQ<br>GVK               | Homo<br>sapiens                  |
| 1 | 1.00 | 1 | 1 | 0.04  | 0.042  | 0.061  | 0.041  | 0.041  | t | 53435  | RDVSDFTD<br>SVRDPKTS<br>EI   | Homo<br>sapiens                  |
| 1 | 1.00 | 1 | 1 | -0.03 | -0.032 | -0.013 | -0.027 | -0.028 | t | 147220 | QIGYYRRA<br>TR               | Mus<br>musculu<br>s              |
| 1 | 1.00 | 1 | 1 | 0.01  | 0.01   | 0.01   | 0.01   | 0.019  | t | 107881 | HDKPPDLS<br>MQRL             | Mus<br>musculu<br>s              |
| 1 | 1.00 | 1 | 1 | 0     | 0      | 0      | 0.001  | 0.01   | t | 24591  | HQLDPAF<br>GANSTNP<br>D      | Mus<br>musculu<br>s              |

|   |      |   |   |       |        |        |        |        |   |        |                              |                                  |
|---|------|---|---|-------|--------|--------|--------|--------|---|--------|------------------------------|----------------------------------|
| 1 | 1.00 | 1 | 1 | 0.02  | 0.024  | 0.037  | 0.021  | 0.022  | t | 41004  | MAARLCC<br>QLDPARD<br>V      | Homo<br>sapiens                  |
| 1 | 1.00 | 1 | 1 | -0.04 | -0.04  | -0.011 | -0.04  | -0.042 | t | 78008  | SLYDKNRG<br>QFGS             | Mus<br>musculu<br>s              |
| 1 | 1.00 | 1 | 1 | -0.03 | -0.033 | 0.008  | -0.03  | -0.03  | t | 133575 | FMRF                         | Oryctola<br>gus<br>cuniculu<br>s |
| 1 | 1.00 | 1 | 1 | 0.01  | 0.01   | 0.017  | 0.01   | 0.019  | t | 133520 | ASNWTF<br>RVTDR              | Mus<br>musculu<br>s              |
| 1 | 1.00 | 1 | 1 | -0.03 | -0.03  | -0.03  | -0.03  | -0.02  | t | 79185  | DLWSVL                       | Mus<br>musculu<br>s              |
| 1 | 1.00 | 1 | 1 | 0.01  | 0.013  | 0.024  | 0.01   | 0.013  | t | 3598   | APIDTCISE<br>CITPNGSI        | Mus<br>musculu<br>s              |
| 1 | 1.00 | 1 | 1 | 0.02  | 0.016  | 0.021  | 0.017  | 0.03   | t | 79542  | EQTINQW                      | Oryctola<br>gus<br>cuniculu<br>s |
| 1 | 1.00 | 1 | 1 | -0.04 | -0.036 | -0.023 | -0.039 | -0.038 | t | 104187 | PRRGPRLG<br>VRATRKT<br>SERSQ | Homo<br>sapiens                  |
| 1 | 1.00 | 1 | 1 | 0.02  | -0.007 | 0.016  | 0.014  | 0.03   | t | 106905 | THTYSPAP<br>FTLI             | Mus<br>musculu<br>s              |
| 1 | 1.00 | 1 | 1 | 0     | 0.003  | 0.007  | 0      | 0.008  | t | 106763 | QYTMHPL<br>ELLVT             | Mus<br>musculu<br>s              |
| 1 | 1.00 | 1 | 1 | 0     | 0      | 0      | 0      | 0.01   | t | 11150  | EANSKLAA<br>LEKLNKELE<br>ESK | Mus<br>musculu<br>s              |
| 1 | 1.00 | 1 | 1 | -0.03 | -0.028 | -0.03  | -0.024 | -0.021 | t | 138197 | KLTSRLRY<br>NSPPLCF          | Homo<br>sapiens                  |
| 1 | 1.00 | 1 | 1 | 0.02  | 0.022  | 0.033  | 0.023  | 0.022  | t | 35842  | LFGPSLRD<br>PISAEIS          | Homo<br>sapiens                  |

|   |      |   |   |       |        |        |        |        |   |        |                              |                   |
|---|------|---|---|-------|--------|--------|--------|--------|---|--------|------------------------------|-------------------|
| 1 | 1.00 | 1 | 1 | 0.01  | 0.014  | 0.029  | 0.013  | 0.019  | t | 5560   | AVTGID                       | Homo sapiens      |
| 1 | 1.00 | 1 | 1 | -0.05 | -0.053 | -0.029 | -0.051 | -0.05  | t | 10291  | DTAGLAGL<br>FNLGPKQT         | Mus musculus      |
| 1 | 1.00 | 1 | 1 | 0     | -0.002 | 0.025  | 0.003  | 0.003  | t | 113703 | PQKSQRS<br>QDENG             | Rattus norvegicus |
| 1 | 1.00 | 1 | 1 | 0.02  | 0.02   | 0.02   | 0.02   | 0.03   | t | 79156  | APHELR                       | Mus musculus      |
| 1 | 1.00 | 1 | 1 | 0     | 0      | 0      | 0      | 0.01   | t | 610    | ACYLPFQL<br>SCGGKS           | Mus musculus      |
| 1 | 1.00 | 1 | 1 | -0.01 | -0.01  | 0.017  | -0.013 | -0.01  | t | 20537  | GKDRSIQ                      | Homo sapiens      |
| 1 | 1.00 | 1 | 1 | 0.02  | 0.028  | 0.035  | 0.02   | 0.025  | t | 43383  | NCPYVSYG<br>KFCIKPDG<br>SIST | Gallus gallus     |
| 1 | 1.00 | 1 | 1 | 0     | 0.003  | 0.001  | 0.003  | 0.01   | t | 78277  | TIHGSN                       | Equus caballus    |
| 1 | 1.00 | 1 | 1 | -0.01 | -0.01  | -0.005 | -0.01  | -0.006 | t | 144252 | EIINVGHSE<br>HVNFDNDNR       | Homo sapiens      |
| 1 | 1.00 | 1 | 1 | 0     | 0.003  | 0.007  | 0      | 0.01   | t | 137414 | HAPRYHTI<br>YGWP             | Mus musculus      |
| 1 | 1.00 | 1 | 1 | -0.01 | -0.012 | 0.007  | -0.011 | -0.007 | t | 155291 | NNAYP                        | Mus musculus      |
| 1 | 1.00 | 1 | 1 | -0.01 | -0.003 | 0.008  | -0.011 | -0.007 | t | 32781  | KPLASDPL<br>GAMP             | Gallus gallus     |
| 1 | 1.00 | 1 | 1 | -0.03 | -0.029 | -0.005 | -0.027 | -0.03  | t | 69255  | VKKSGR                       | Equus caballus    |
| 1 | 1.00 | 1 | 1 | -0.01 | -0.012 | 0.001  | -0.011 | 0      | t | 58365  | SHHKFSP                      | Mus musculus      |

|   |      |   |   |       |        |        |        |        |   |        |                              |                          |
|---|------|---|---|-------|--------|--------|--------|--------|---|--------|------------------------------|--------------------------|
| 1 | 1.00 | 1 | 1 | -0.03 | -0.028 | -0.005 | -0.029 | -0.028 | t | 52680  | QVCGPVY<br>CFT               | Homo<br>sapiens          |
| 1 | 1.00 | 1 | 1 | 0.02  | 0.018  | 0.027  | 0.013  | 0.02   | t | 115664 | YGSLPQKA<br>QGHRPQD<br>ENG   | Rattus<br>norvegicus     |
| 1 | 1.00 | 1 | 1 | -0.06 | -0.058 | -0.046 | -0.059 | -0.054 | t | 12535  | EINRVASCLR                   | Homo<br>sapiens          |
| 1 | 1.00 | 1 | 1 | 0.02  | 0.02   | 0.027  | 0.02   | 0.029  | t | 108541 | LVGTPQKT<br>K                | Homo<br>sapiens          |
| 1 | 1.00 | 1 | 1 | 0     | -0.002 | 0.019  | -0.003 | 0      | t | 96228  | EGLLKLL<br>DTLENML<br>K      | Mus<br>musculus          |
| 1 | 1.00 | 1 | 1 | 0.04  | 0.04   | 0.04   | 0.04   | 0.049  | t | 149033 | EDFRFESSLSINDHA              | Rattus<br>norvegicus     |
| 1 | 1.00 | 1 | 1 | 0.01  | 0.012  | 0.033  | 0.009  | 0.011  | t | 40982  | LYVGGPMTNSKGQS               | Homo<br>sapiens          |
| 1 | 1.00 | 1 | 1 | -0.03 | -0.028 | -0.011 | -0.029 | -0.03  | t | 46198  | NTNSGPD<br>DQIGYYRR<br>ATR   | Homo<br>sapiens          |
| 1 | 1.00 | 1 | 1 | 0.01  | 0.012  | 0.028  | 0.011  | 0.012  | t | 149477 | SSSTVGYP<br>GKYPSVI          | Cavia<br>porcellus       |
| 1 | 1.00 | 1 | 1 | -0.02 | -0.02  | -0.02  | -0.02  | -0.008 | t | 133029 | CVWLWE<br>QC                 | Oryctolagus<br>cuniculus |
| 1 | 1.00 | 1 | 1 | 0     | 0.002  | 0.022  | -0.003 | 0.002  | t | 66793  | TTQTQPSK<br>PTTK             | Homo<br>sapiens          |
| 1 | 1.00 | 1 | 1 | 0     | 0.003  | 0.01   | 0      | 0.003  | t | 110840 | EVTIGDIEE<br>PPILEVVPE<br>TH | Bos<br>taurus            |
| 1 | 1.00 | 1 | 1 | -0.04 | -0.042 | -0.015 | -0.037 | -0.039 | t | 6892   | CQQFLSVRALC                  | Mus<br>musculus          |
| 1 | 1.00 | 1 | 1 | 0     | 0.002  | 0.012  | 0      | 0      | t | 100460 | REREREED<br>WRQPRED<br>WRRPS | Homo<br>sapiens          |

|   |      |   |   |       |        |        |        |        |   |        |                              |                              |
|---|------|---|---|-------|--------|--------|--------|--------|---|--------|------------------------------|------------------------------|
| 1 | 1.00 | 1 | 1 | -0.06 | -0.06  | -0.039 | -0.06  | -0.059 | t | 57557  | SEMPQLPS<br>EMPQLP           | Mus<br>musculus              |
| 1 | 1.00 | 1 | 1 | -0.03 | -0.026 | -0.012 | -0.03  | -0.028 | t | 149318 | FYYGKGLI<br>NVQAAAQ          | Cavia<br>porcellus           |
| 1 | 1.00 | 1 | 1 | -0.03 | -0.03  | -0.006 | -0.027 | -0.028 | t | 33215  | KRRLRPSR<br>VRIE             | Rattus<br>norvegicus         |
| 1 | 1.00 | 1 | 1 | -0.05 | -0.045 | -0.027 | -0.043 | -0.05  | t | 108631 | SHQESTRG<br>RSRGRSGR<br>SGS  | Homo<br>sapiens              |
| 1 | 1.00 | 1 | 1 | -0.02 | -0.02  | -0.013 | -0.01  | -0.008 | t | 106707 | PGPSRAHF<br>L                | Homo<br>sapiens              |
| 1 | 1.00 | 1 | 1 | 0     | -0.004 | 0.021  | -0.001 | 0      | t | 65238  | TMPFSPDF<br>SNVD             | Oryctola<br>gus<br>cuniculus |
| 1 | 1.00 | 1 | 1 | -0.01 | -0.01  | 0.007  | -0.01  | -0.01  | t | 51456  | QLNRALSG<br>IAAEQDRN<br>T    | Mus<br>musculus              |
| 1 | 1.00 | 1 | 1 | -0.01 | -0.01  | 0.009  | -0.01  | -0.01  | t | 144797 | TGGCTHG<br>CLAVP             | Mus<br>musculus              |
| 1 | 1.00 | 1 | 1 | 0.01  | 0.01   | 0.014  | 0.013  | 0.022  | t | 111563 | MPVNDTK                      | Homo<br>sapiens              |
| 1 | 1.00 | 1 | 1 | -0.01 | -0.008 | -0.008 | -0.007 | 0      | t | 23948  | HGRYFHV<br>PGYPWGS<br>A      | Homo<br>sapiens              |
| 1 | 1.00 | 1 | 1 | -0.04 | -0.041 | -0.032 | -0.04  | -0.037 | t | 1453   | AGARRGD<br>LAHLAAAH<br>ARHLP | Bos<br>taurus                |
| 1 | 1.00 | 1 | 1 | -0.02 | -0.015 | -0.001 | -0.019 | -0.018 | t | 78840  | SRS�PRQS<br>LIQPPTFH<br>PPSS | Homo<br>sapiens              |

|   |      |   |   |       |        |        |        |        |   |        |                              |                     |
|---|------|---|---|-------|--------|--------|--------|--------|---|--------|------------------------------|---------------------|
| 1 | 1.00 | 1 | 1 | -0.02 | -0.022 | -0.001 | -0.019 | -0.018 | t | 78840  | SRSLPQRS<br>LIQPPTFH<br>PPSS | Homo<br>sapiens     |
| 1 | 1.00 | 1 | 1 | 0.01  | 0.01   | 0.017  | 0.01   | 0.02   | t | 108650 | TFRDLHQ<br>QQ                | Homo<br>sapiens     |
| 1 | 1.00 | 1 | 1 | 0     | 0      | 0      | 0      | 0.009  | t | 153339 | ACPPYET<br>WWCGGG<br>S       | Mus<br>musculu<br>s |
| 1 | 1.00 | 1 | 1 | 0.04  | 0.038  | 0.043  | 0.047  | 0.053  | t | 103477 | PGSGFWS<br>FGSEDGS           | Mus<br>musculu<br>s |
| 1 | 1.00 | 1 | 1 | 0.01  | 0.008  | 0.023  | 0.009  | 0.01   | t | 77939  | LAAKHMS<br>NTFLAGLA<br>QYYTQ | Mus<br>musculu<br>s |
| 1 | 1.00 | 1 | 1 | 0     | 0      | 0      | 0.001  | 0.01   | t | 70541  | VQDKYGR<br>VCYGD             | Mus<br>musculu<br>s |
| 1 | 1.00 | 1 | 1 | 0     | 0      | 0      | 0.001  | 0.01   | t | 70946  | VSGDPRG<br>RYEDI             | Mus<br>musculu<br>s |
| 1 | 1.00 | 1 | 1 | 0     | 0      | 0      | 0.001  | 0.01   | t | 47670  | PGGRERGI<br>YHIE             | Mus<br>musculu<br>s |
| 1 | 1.00 | 1 | 1 | 0     | 0      | 0      | 0.001  | 0.01   | t | 53194  | RARGIYET<br>ETRA             | Mus<br>musculu<br>s |
| 1 | 1.00 | 1 | 1 | 0     | 0      | 0      | 0.001  | 0.01   | t | 14260  | ESRPRGVY<br>PTEQ             | Mus<br>musculu<br>s |
| 1 | 1.00 | 1 | 1 | -0.03 | -0.028 | -0.02  | -0.029 | -0.03  | t | 89316  | SYTNNSKK<br>GYAEWVI<br>NTRQV | Homo<br>sapiens     |
| 1 | 1.00 | 1 | 1 | -0.01 | -0.004 | -0.01  | -0.013 | 0      | t | 6924   | CRGDDEF<br>AWYC              | Mus<br>musculu<br>s |
| 1 | 1.00 | 1 | 1 | -0.02 | -0.02  | 0.004  | -0.02  | -0.02  | t | 78854  | TKDTNNN<br>LKG               | Mus<br>musculu<br>s |
| 1 | 1.00 | 1 | 1 | -0.02 | -0.017 | 0.002  | -0.02  | -0.019 | t | 51854  | QPHGGSW                      | Mus<br>musculu<br>s |

|   |      |   |   |       |        |        |        |        |   |        |                              |                                  |
|---|------|---|---|-------|--------|--------|--------|--------|---|--------|------------------------------|----------------------------------|
| 1 | 1.00 | 1 | 1 | -0.02 | -0.022 | 0.004  | -0.02  | -0.02  | t | 141701 | LNDKHSN<br>GTIKDRSP<br>YR    | Oryctola<br>gus<br>cuniculu<br>s |
| 1 | 1.00 | 1 | 1 | 0.01  | 0.01   | 0.01   | 0.01   | 0.02   | t | 125374 | DHTFMQR<br>YHTHQ             | Mus<br>musculu<br>s              |
| 1 | 1.00 | 1 | 1 | 0.01  | 0.01   | 0.01   | 0.01   | 0.02   | t | 125374 | DHTFMQR<br>YHTHQ             | Mus<br>musculu<br>s              |
| 1 | 1.00 | 1 | 1 | -0.01 | -0.006 | 0.012  | -0.003 | 0      | t | 104254 | SPFLKAF                      | Homo<br>sapiens                  |
| 1 | 1.00 | 1 | 1 | -0.02 | -0.026 | -0.02  | -0.027 | -0.019 | t | 131297 | FSLRLMEE<br>NWNAEKR<br>SPTF  | Callithrix<br>pygmae<br>a        |
| 1 | 1.00 | 1 | 1 | 0.01  | 0.016  | 0.028  | 0.013  | 0.009  | t | 74005  | YGGIPGGI<br>STPITQQS<br>EKSK | Equus<br>caballus                |
| 1 | 1.00 | 1 | 1 | 0.01  | 0.012  | 0.031  | 0.017  | 0.021  | t | 108287 | ATADYPQ<br>KS                | Homo<br>sapiens                  |
| 1 | 1.00 | 1 | 1 | 0.02  | 0.022  | 0.044  | 0.023  | 0.022  | t | 10131  | DSGSRTTP<br>DELALS           | Homo<br>sapiens                  |
| 1 | 1.00 | 1 | 1 | -0.02 | -0.016 | -0.016 | -0.019 | -0.008 | t | 111118 | ARLLFGI                      | Homo<br>sapiens                  |
| 1 | 1.00 | 1 | 1 | 0.03  | 0.03   | 0.03   | 0.03   | 0.04   | t | 79231  | GISHTG                       | Mus<br>musculu<br>s              |
| 1 | 1.00 | 1 | 1 | -0.03 | -0.03  | -0.016 | -0.03  | -0.03  | t | 78460  | LVTHPVLG<br>KVLILNQM<br>ANFS | Mus<br>musculu<br>s              |
| 1 | 1.00 | 1 | 1 | -0.02 | -0.02  | 0.007  | -0.023 | -0.02  | t | 14000  | ERHLTFT                      | Homo<br>sapiens                  |
| 1 | 1.00 | 1 | 1 | -0.08 | -0.08  | -0.051 | -0.08  | -0.081 | t | 80049  | TGELTMYW<br>VW               | Mus<br>musculu<br>s              |
| 1 | 1.00 | 1 | 1 | 0.01  | 0.01   | 0.01   | 0.003  | 0.01   | t | 112048 | ATASTMD<br>HARHGFLP<br>RHRDT | Homo<br>sapiens                  |



|   |      |   |   |       |        |        |        |        |   |        |                              |                       |
|---|------|---|---|-------|--------|--------|--------|--------|---|--------|------------------------------|-----------------------|
| 1 | 1.00 | 1 | 1 | -0.02 | -0.018 | -0.01  | -0.019 | -0.013 | t | 56330  | RVKN                         | Homo sapiens          |
| 1 | 1.00 | 1 | 1 | -0.02 | -0.02  | -0.018 | -0.02  | -0.011 | t | 78229  | PHMNNFHL                     | Homo sapiens          |
| 1 | 1.00 | 1 | 1 | -0.03 | -0.026 | -0.012 | -0.03  | -0.028 | t | 149511 | VLGVAPSA<br>SLYAVKV          | Cavia porcellus       |
| 1 | 1.00 | 1 | 1 | 0.01  | 0.01   | 0.016  | 0.01   | 0.017  | t | 76287  | YVGPLTQT<br>LYGM             | Mus musculus          |
| 1 | 1.00 | 1 | 1 | 0     | 0.003  | 0.017  | 0.003  | 0      | t | 111033 | STYDRDN<br>DGWLTSD<br>PRKQCS | Mus musculus          |
| 1 | 1.00 | 1 | 1 | -0.02 | -0.019 | 0.014  | -0.02  | -0.022 | t | 70216  | VNVPYKIS<br>TSTNCAT          | Oryctolagus cuniculus |
| 1 | 1.00 | 1 | 1 | -0.07 | -0.072 | -0.063 | -0.077 | -0.07  | t | 122400 | HSAHRGP<br>TYDPRVLH          | Mus musculus          |
| 1 | 1.00 | 1 | 1 | -0.04 | -0.037 | -0.013 | -0.04  | -0.04  | t | 32731  | KPHFPLA                      | Mus musculus          |
| 1 | 1.00 | 1 | 1 | 0.02  | 0.02   | 0.02   | 0.02   | 0.029  | t | 78076  | YMSPTGR<br>VMTTQ             | Mus musculus          |
| 1 | 1.00 | 1 | 1 | 0.01  | 0.01   | 0.01   | 0.01   | 0.02   | t | 104125 | MNKTFVP                      | Homo sapiens          |
| 1 | 1.00 | 1 | 1 | -0.05 | -0.048 | -0.043 | -0.053 | -0.05  | t | 107170 | GSRPSPIG<br>SKWALQP          | Homo sapiens          |
| 1 | 1.00 | 1 | 1 | 0.05  | 0.048  | 0.049  | 0.053  | 0.062  | t | 107032 | YTQSPTPD<br>LMAV             | Mus musculus          |
| 1 | 1.00 | 1 | 1 | 0     | 0      | 0      | 0      | 0.009  | t | 145643 | YDASLEDQ<br>KGLVA            | Oryctolagus cuniculus |
| 1 | 1.00 | 1 | 1 | 0     | 0      | 0      | 0      | 0.009  | t | 139524 | ISSQT                        | Mus musculus          |

|   |      |   |   |       |        |        |        |        |   |        |                              |                                  |
|---|------|---|---|-------|--------|--------|--------|--------|---|--------|------------------------------|----------------------------------|
| 1 | 1.00 | 1 | 1 | 0     | 0      | 0      | 0      | 0.009  | t | 30093  | KCTSDQDE<br>QFIPKGCS<br>K    | Oryctola<br>gus<br>cuniculu<br>s |
| 1 | 1.00 | 1 | 1 | 0     | -0.003 | 0      | 0      | 0.009  | t | 8132   | DEQFIPK                      | Oryctola<br>gus<br>cuniculu<br>s |
| 1 | 1.00 | 1 | 1 | 0     | 0      | 0      | 0      | 0.009  | t | 8132   | DEQFIPK                      | Mus<br>musculu<br>s              |
| 1 | 1.00 | 1 | 1 | 0     | 0      | 0      | 0      | 0.009  | t | 8132   | DEQFIPK                      | Oryctola<br>gus<br>cuniculu<br>s |
| 1 | 1.00 | 1 | 1 | -0.02 | -0.018 | 0      | -0.023 | -0.02  | t | 46423  | NVLMVPK<br>PQG               | Homo<br>sapiens                  |
| 1 | 1.00 | 1 | 1 | 0.01  | 0.01   | 0.005  | 0.01   | 0.019  | t | 122760 | EVPFRLM<br>HPQPEDP<br>DTAKES | Rattus<br>norvegic<br>us         |
| 1 | 1.00 | 1 | 1 | -0.01 | -0.01  | -0.01  | -0.01  | -0.001 | t | 106941 | TVKQLYTL<br>YPAA             | Mus<br>musculu<br>s              |
| 1 | 1.00 | 1 | 1 | -0.05 | -0.05  | -0.021 | -0.05  | -0.052 | t | 77985  | QTCCDKN<br>QGIFM             | Mus<br>musculu<br>s              |
| 1 | 1.00 | 1 | 1 | -0.02 | -0.023 | 0      | -0.02  | -0.02  | t | 61531  | STASSHQ<br>HTDS              | Oryctola<br>gus<br>cuniculu<br>s |
| 1 | 1.00 | 1 | 1 | -0.02 | -0.024 | -0.002 | -0.02  | -0.018 | t | 21841  | GPYAGPM<br>ERQKPLK           | Bos<br>taurus                    |
| 1 | 1.00 | 1 | 1 | -0.02 | -0.024 | -0.002 | -0.02  | -0.018 | t | 21841  | GPYAGPM<br>ERQKPLK           | Bos<br>taurus                    |
| 1 | 1.00 | 1 | 1 | 0.01  | 0.009  | 0.035  | 0.01   | 0.012  | t | 38945  | LQPGDDPL                     | Anas<br>platyrhy<br>nchos        |
| 1 | 1.00 | 1 | 1 | 0     | 0      | 0.028  | 0      | 0      | t | 102941 | YGCYCGA<br>GG                | Mus<br>musculu<br>s              |

|   |      |   |   |       |        |        |        |        |   |        |                              |                                  |
|---|------|---|---|-------|--------|--------|--------|--------|---|--------|------------------------------|----------------------------------|
| 1 | 1.00 | 1 | 1 | 0.04  | 0.042  | 0.04   | 0.041  | 0.05   | t | 133604 | HSLSMYFD<br>WVPH             | Homo<br>sapiens                  |
| 1 | 1.00 | 1 | 1 | 0.01  | 0.012  | 0.017  | 0.017  | 0.02   | t | 108416 | HAKKTPPA<br>S                | Homo<br>sapiens                  |
| 1 | 1.00 | 1 | 1 | -0.02 | -0.022 | 0.002  | -0.023 | -0.022 | t | 96955  | TGVRRGD<br>LAHLAAA           | Mus<br>musculu<br>s              |
| 1 | 1.00 | 1 | 1 | 0.01  | 0.008  | 0.04   | 0.009  | 0.009  | t | 8644   | DIFTNSRG<br>KRASKG           | Mus<br>musculu<br>s              |
| 1 | 1.00 | 1 | 1 | -0.02 | -0.02  | -0.02  | -0.02  | -0.011 | t | 112940 | DQMAVEK<br>LSDGIRKF          | Homo<br>sapiens                  |
| 1 | 1.00 | 1 | 1 | 0.02  | 0.02   | 0.027  | 0.02   | 0.024  | t | 133545 | DRGDQST<br>DYGIFQIN<br>SR    | Mus<br>musculu<br>s              |
| 1 | 1.00 | 1 | 1 | -0.08 | -0.08  | -0.057 | -0.08  | -0.079 | t | 100554 | THARHLP                      | Sus<br>scrofa                    |
| 1 | 1.00 | 1 | 1 | -0.01 | -0.004 | 0.004  | -0.007 | 0      | t | 132887 | PYGLLTP                      | Homo<br>sapiens                  |
| 1 | 1.00 | 1 | 1 | -0.04 | -0.038 | -0.024 | -0.039 | -0.038 | t | 49116  | PQRKTKR<br>NTNRR             | Homo<br>sapiens                  |
| 1 | 1.00 | 1 | 1 | 0.04  | 0.04   | 0.04   | 0.04   | 0.05   | t | 78321  | YKANAS                       | Equus<br>caballus                |
| 1 | 1.00 | 1 | 1 | 0     | -0.004 | 0      | -0.001 | 0.009  | t | 118060 | PPPGMRP<br>P                 | Oryctola<br>gus<br>cuniculu<br>s |
| 1 | 1.00 | 1 | 1 | -0.03 | -0.03  | -0.014 | -0.03  | -0.03  | t | 18564  | GAEASTSL<br>FHFRIPRSY<br>FLR | Rattus<br>norvegic<br>us         |
| 1 | 1.00 | 1 | 1 | -0.02 | -0.02  | 0.004  | -0.02  | -0.02  | t | 62721  | SYTESMA<br>GKREMVII<br>TIKSG | Mus<br>musculu<br>s              |
| 1 | 1.00 | 1 | 1 | 0.02  | 0.024  | 0.025  | 0.023  | 0.029  | t | 24755  | HSIRSTTRL<br>HTTSL           | Homo<br>sapiens                  |

|   |      |   |   |       |        |        |        |        |   |        |                               |                                  |
|---|------|---|---|-------|--------|--------|--------|--------|---|--------|-------------------------------|----------------------------------|
| 1 | 1.00 | 1 | 1 | -0.06 | -0.054 | -0.024 | -0.053 | -0.062 | t | 127776 | PRSRHPG<br>GPGTPQIR           | Homo<br>sapiens                  |
| 1 | 1.00 | 1 | 1 | -0.01 | -0.01  | -0.01  | -0.01  | -0.001 | t | 72552  | WHRTPSTL<br>WGV I             | Mus<br>musculu<br>s              |
| 1 | 1.00 | 1 | 1 | 0.02  | 0.022  | 0.045  | 0.019  | 0.02   | t | 84423  | KKGLQQL<br>QEWEDW<br>VGWIGN   | Felis<br>catus                   |
| 1 | 1.00 | 1 | 1 | 0     | 0.012  | 0.022  | 0      | 0      | t | 61068  | SSHLQLIY<br>NLTLCELN<br>G     | Sus<br>scrofa                    |
| 1 | 1.00 | 1 | 1 | 0     | 0      | 0      | 0      | 0.01   | t | 121676 | NVKVLLVA<br>SPLVDPF           | Mus<br>musculu<br>s              |
| 1 | 1.00 | 1 | 1 | 0.02  | 0.016  | 0.02   | 0.019  | 0.03   | t | 144036 | PSIIGGSSV<br>DLV              | Oryctola<br>gus<br>cuniculu<br>s |
| 1 | 1.00 | 1 | 1 | 0     | 0.003  | 0.014  | 0      | 0.001  | t | 44468  | NKCKMNL<br>QDNNGN<br>DIGFIG   | Mus<br>musculu<br>s              |
| 1 | 1.00 | 1 | 1 | -0.02 | -0.02  | 0.006  | -0.02  | -0.019 | t | 57300  | SDTRGDP<br>VFNLPFQF           | Mus<br>musculu<br>s              |
| 1 | 1.00 | 1 | 1 | -0.04 | -0.042 | -0.033 | -0.047 | -0.039 | t | 107768 | CIAPKRHN<br>SAC               | Mus<br>musculu<br>s              |
| 1 | 1.00 | 1 | 1 | -0.07 | -0.068 | -0.047 | -0.073 | -0.072 | t | 7947   | DEDSYGR<br>DPYSPSQD           | Homo<br>sapiens                  |
| 1 | 1.00 | 1 | 1 | -0.03 | -0.028 | -0.03  | -0.029 | -0.02  | t | 116954 | DPTDYSTR<br>PHMW              | Homo<br>sapiens                  |
| 1 | 1.00 | 1 | 1 | 0     | 0.002  | 0.008  | 0      | 0.01   | t | 6330   | CGPFFLSP<br>TSC               | Homo<br>sapiens                  |
| 1 | 1.00 | 1 | 1 | 0     | 0.004  | 0.008  | 0      | 0.01   | t | 6330   | CGPFFLSP<br>TSC               | Homo<br>sapiens                  |
| 1 | 1.00 | 1 | 1 | -0.05 | -0.05  | -0.05  | -0.057 | -0.05  | t | 112144 | GRGLSLSR<br>FSWGAEG<br>QRP GF | Homo<br>sapiens                  |
| 1 | 1.00 | 1 | 1 | -0.03 | -0.028 | -0.013 | -0.029 | -0.03  | t | 9043   | DLDFSAFD<br>ASLSPFMI<br>REAG  | Homo<br>sapiens                  |

|   |      |   |   |       |        |        |        |        |   |        |                              |                                  |
|---|------|---|---|-------|--------|--------|--------|--------|---|--------|------------------------------|----------------------------------|
| 1 | 1.00 | 1 | 1 | 0     | 0.002  | 0      | 0.001  | 0.01   | t | 117053 | PHPSTMF<br>DRQED             | Homo<br>sapiens                  |
| 1 | 1.00 | 1 | 1 | -0.02 | -0.02  | 0.002  | -0.02  | -0.02  | t | 45046  | NMYRYPN<br>QVYRPPV<br>D      | Mus<br>musculu<br>s              |
| 1 | 1.00 | 1 | 1 | -0.05 | -0.048 | -0.026 | -0.049 | -0.05  | t | 68600  | VFVLGGCR<br>HKLVCAPA<br>PCNF | Homo<br>sapiens                  |
| 1 | 1.00 | 1 | 1 | -0.02 | -0.02  | 0.004  | -0.02  | -0.02  | t | 78854  | TKDTNNN<br>LKG               | Mus<br>musculu<br>s              |
| 1 | 1.00 | 1 | 1 | 0.04  | 0.042  | 0.04   | 0.041  | 0.05   | t | 133601 | HPMYPTW<br>YSWQP             | Homo<br>sapiens                  |
| 1 | 1.00 | 1 | 1 | 0.02  | 0.02   | 0.02   | 0.02   | 0.03   | t | 108085 | QTATYLTP<br>HLKV             | Mus<br>musculu<br>s              |
| 1 | 1.00 | 1 | 1 | -0.05 | -0.048 | -0.034 | -0.049 | -0.05  | t | 35143  | LDENGLLL<br>GVHPRLA<br>QRILF | Homo<br>sapiens                  |
| 1 | 1.00 | 1 | 1 | -0.02 | -0.017 | -0.01  | -0.02  | -0.017 | t | 46954  | PASTNRQS<br>GRQP             | Mus<br>musculu<br>s              |
| 1 | 1.00 | 1 | 1 | -0.02 | -0.017 | -0.01  | -0.02  | -0.017 | t | 46954  | PASTNRQS<br>GRQP             | Mus<br>musculu<br>s              |
| 1 | 1.00 | 1 | 1 | 0     | 0      | 0.028  | 0      | 0.001  | t | 7397   | CYKKVWR<br>DHRGTI            | Mus<br>musculu<br>s              |
| 1 | 1.00 | 1 | 1 | 0     | 0      | 0.028  | 0      | 0.001  | t | 7397   | CYKKVWR<br>DHRGTI            | Mus<br>musculu<br>s              |
| 1 | 1.00 | 1 | 1 | -0.03 | -0.028 | -0.028 | -0.031 | -0.024 | t | 10686  | DVNLHSSR                     | Homo<br>sapiens                  |
| 1 | 1.00 | 1 | 1 | 0.01  | 0.007  | 0.035  | 0.01   | 0.008  | t | 46081  | NTECTLKK<br>GSSGYCA          | Oryctola<br>gus<br>cuniculu<br>s |
| 1 | 1.00 | 1 | 1 | 0.01  | 0.013  | 0.035  | 0.01   | 0.008  | t | 46081  | NTECTLKK<br>GSSGYCA          | Equus<br>caballus                |

|   |      |   |   |       |        |        |        |        |   |        |                              |                       |
|---|------|---|---|-------|--------|--------|--------|--------|---|--------|------------------------------|-----------------------|
| 1 | 1.00 | 1 | 1 | -0.02 | -0.022 | -0.008 | -0.023 | -0.019 | t | 110875 | GSLPQKSQ<br>RTQDENP<br>VVHF  | Rattus<br>norvegicus  |
| 1 | 1.00 | 1 | 1 | -0.01 | -0.01  | 0.004  | -0.01  | -0.009 | t | 133542 | DGRRDVV<br>VRSATFYL          | Mus<br>musculus       |
| 1 | 1.00 | 1 | 1 | 0     | 0      | 0.026  | 0      | 0.003  | t | 15468  | FDTGA FDP<br>DWPA            | Mus<br>musculus       |
| 1 | 1.00 | 1 | 1 | -0.02 | -0.02  | 0.005  | -0.017 | -0.018 | t | 134237 | SQWN                         | Mus<br>musculus       |
| 1 | 1.00 | 1 | 1 | 0     | 0      | 0.024  | 0.003  | 0.001  | t | 49455  | PSPEAHVP<br>PPYVEPTT<br>TQCF | Homo<br>sapiens       |
| 1 | 1.00 | 1 | 1 | 0.04  | 0.04   | 0.047  | 0.04   | 0.052  | t | 127713 | KNWTTPL                      | Homo<br>sapiens       |
| 1 | 1.00 | 1 | 1 | -0.04 | -0.028 | -0.024 | -0.04  | -0.038 | t | 49116  | PQRKTKR<br>NTNRR             | Pan<br>troglodytes    |
| 1 | 1.00 | 1 | 1 | 0.01  | 0.008  | 0.017  | 0.003  | 0.011  | t | 119601 | KGNNVHG<br>FQKQIIRSF<br>Y    | Rattus<br>norvegicus  |
| 1 | 1.00 | 1 | 1 | -0.07 | -0.072 | -0.063 | -0.073 | -0.069 | t | 139484 | DWFKAFY<br>DKVAEKFK<br>EAF   | Mus<br>musculus       |
| 1 | 1.00 | 1 | 1 | 0.01  | 0.01   | 0.021  | 0.01   | 0.016  | t | 64810  | TLGFGAY<br>MSK               | Homo<br>sapiens       |
| 1 | 1.00 | 1 | 1 | 0     | 0.002  | 0.027  | -0.003 | 0      | t | 35547  | LEKGTPW                      | Homo<br>sapiens       |
| 1 | 1.00 | 1 | 1 | 0.02  | 0.02   | 0.02   | 0.02   | 0.03   | t | 45878  | NSKNPVP<br>VKKEAKLS<br>EAEL  | Mus<br>musculus       |
| 1 | 1.00 | 1 | 1 | -0.08 | -0.081 | -0.067 | -0.08  | -0.078 | t | 18607  | GAGRRVGL                     | Anas<br>platyrhynchos |
| 1 | 1.00 | 1 | 1 | -0.05 | -0.046 | -0.038 | -0.049 | -0.05  | t | 65848  | TQGCNCSI<br>YPGHITGH<br>RMAW | Homo<br>sapiens       |

|   |      |   |   |       |        |        |        |        |   |        |                              |                                  |
|---|------|---|---|-------|--------|--------|--------|--------|---|--------|------------------------------|----------------------------------|
| 1 | 1.00 | 1 | 1 | -0.04 | -0.039 | -0.018 | -0.04  | -0.04  | t | 13527  | ENMYRYP<br>NQVYYRP<br>VDQYSN | Mus<br>musculu<br>s              |
| 1 | 1.00 | 1 | 1 | -0.04 | -0.039 | -0.018 | -0.04  | -0.04  | t | 13527  | ENMYRYP<br>NQVYYRP<br>VDQYSN | Mus<br>musculu<br>s              |
| 1 | 1.00 | 1 | 1 | -0.03 | -0.03  | -0.03  | -0.03  | -0.02  | t | 103928 | GKLPIAM                      | Homo<br>sapiens                  |
| 1 | 1.00 | 1 | 1 | 0     | 0.003  | 0.007  | 0.001  | 0.007  | t | 136630 | SGKEQRLT<br>SPGR             | Dicentra<br>rchus<br>labrax      |
| 1 | 1.00 | 1 | 1 | -0.02 | -0.02  | 0.004  | -0.02  | -0.02  | t | 82891  | GSPNCHG<br>PDWASPV<br>CQRHS  | Mus<br>musculu<br>s              |
| 1 | 1.00 | 1 | 1 | -0.01 | -0.01  | -0.003 | -0.006 | 0.002  | t | 107798 | DSARNTFK<br>TTTAPYS          | Homo<br>sapiens                  |
| 1 | 1.00 | 1 | 1 | -0.01 | -0.008 | 0.008  | -0.011 | -0.006 | t | 149316 | FMAYTDE<br>TFK               | Homo<br>sapiens                  |
| 1 | 1.00 | 1 | 1 | -0.03 | -0.03  | -0.023 | -0.024 | -0.022 | t | 108200 | VSLGKWL<br>GHPDKF            | Mus<br>musculu<br>s              |
| 1 | 1.00 | 1 | 1 | -0.01 | -0.01  | -0.01  | -0.017 | -0.01  | t | 112127 | GGDRGAP<br>KRGSGKDS<br>HHPAR | Homo<br>sapiens                  |
| 1 | 1.00 | 1 | 1 | -0.03 | -0.033 | -0.006 | -0.03  | -0.028 | t | 45239  | NNSFLDPE<br>YWNFRNG          | Oryctola<br>gus<br>cuniculu<br>s |
| 1 | 1.00 | 1 | 1 | 0.01  | 0.01   | 0.01   | 0.01   | 0.019  | t | 149039 | FLHTRLFV<br>SDGINS           | Rattus<br>norvegic<br>us         |
| 1 | 1.00 | 1 | 1 | -0.01 | -0.008 | -0.01  | -0.01  | -0.005 | t | 122933 | VEGTDAA<br>GRRVTNTK<br>VLRC  | Rattus<br>norvegic<br>us         |
| 1 | 1.00 | 1 | 1 | -0.02 | -0.018 | 0      | -0.023 | -0.019 | t | 141735 | RARLSPGD<br>VLVIPAG          | Homo<br>sapiens                  |
| 1 | 1.00 | 1 | 1 | 0.01  | 0.008  | 0.01   | 0.009  | 0.019  | t | 153345 | ACRDHYD<br>QMC GGGS          | Mus<br>musculu<br>s              |

|   |      |   |   |       |        |        |        |        |   |        |                             |                       |
|---|------|---|---|-------|--------|--------|--------|--------|---|--------|-----------------------------|-----------------------|
| 1 | 1.00 | 1 | 1 | -0.03 | -0.03  | 0.005  | -0.027 | -0.03  | t | 32683  | KPDYEPPV                    | Homo sapiens          |
| 1 | 1.00 | 1 | 1 | -0.02 | -0.02  | -0.004 | -0.02  | -0.018 | t | 49447  | PSNCHTHE<br>GGQLHCT         | Mus musculus          |
| 1 | 1.00 | 1 | 1 | -0.02 | -0.025 | -0.005 | -0.023 | -0.02  | t | 97075  | VSCYGKTK<br>CTASNKNR        | Oryctolagus cuniculus |
| 1 | 1.00 | 1 | 1 | -0.01 | -0.01  | -0.01  | -0.01  | -0.001 | t | 153356 | ACWPSMR<br>DHC GGGS         | Mus musculus          |
| 1 | 1.00 | 1 | 1 | 0.03  | 0.032  | 0.052  | 0.031  | 0.03   | t | 8877   | DKGSDVES<br>YSSMPPLE<br>GEP | Homo sapiens          |
| 1 | 1.00 | 1 | 1 | -0.01 | -0.006 | -0.002 | -0.01  | 0      | t | 6329   | CGPFFLAA<br>SVC             | Homo sapiens          |
| 1 | 1.00 | 1 | 1 | -0.04 | -0.038 | -0.033 | -0.037 | -0.03  | t | 132941 | WGSNVYN<br>SPFHS            | Homo sapiens          |
| 1 | 1.00 | 1 | 1 | 0.02  | 0.018  | 0.027  | 0.013  | 0.024  | t | 122386 | GRLERPSE<br>PRLPLLA         | Mus musculus          |
| 1 | 1.00 | 1 | 1 | 0.02  | 0.018  | 0.027  | 0.023  | 0.032  | t | 106576 | KSAITPT                     | Mus musculus          |
| 1 | 1.00 | 1 | 1 | -0.03 | -0.032 | -0.023 | -0.037 | -0.027 | t | 121398 | IAPKRHNS<br>A               | Mus musculus          |
| 1 | 1.00 | 1 | 1 | -0.01 | -0.012 | 0.003  | -0.011 | -0.01  | t | 32316  | KMGDYGE<br>VTVECEPR<br>SGLN | Mus musculus          |
| 1 | 1.00 | 1 | 1 | -0.01 | -0.012 | -0.01  | -0.017 | -0.008 | t | 132634 | RSFSQNPP<br>VLKRHQR         | Mus musculus          |
| 1 | 1.00 | 1 | 1 | 0.02  | 0.02   | 0.02   | 0.02   | 0.03   | t | 153361 | APQNAKD<br>HLPGYGG<br>GS    | Mus musculus          |
| 1 | 1.00 | 1 | 1 | 0     | 0      | 0      | 0      | 0.01   | t | 121685 | NVVPLIVA<br>SPYVDAF         | Mus musculus          |
| 1 | 1.00 | 1 | 1 | 0.01  | 0.01   | 0.035  | 0.01   | 0.012  | t | 51822  | QFPQPPEL<br>PYPQPQ          | Mus musculus          |



|   |      |   |   |       |        |        |        |        |   |        |                              |                     |
|---|------|---|---|-------|--------|--------|--------|--------|---|--------|------------------------------|---------------------|
| 1 | 1.00 | 1 | 1 | 0.01  | 0.01   | 0.035  | 0.01   | 0.012  | t | 51822  | QPFQPEL<br>PYPQPQ            | Mus<br>musculu<br>s |
| 1 | 1.00 | 1 | 1 | 0.01  | 0.008  | 0.029  | 0.009  | 0.01   | t | 36940  | LKLKSIWS<br>WAKKVL           | Mus<br>musculu<br>s |
| 1 | 1.00 | 1 | 1 | 0.01  | 0.01   | 0.02   | 0.01   | 0.014  | t | 133545 | DRGDQST<br>DYGIFQIN<br>SR    | Mus<br>musculu<br>s |
| 1 | 1.00 | 1 | 1 | 0.03  | 0.032  | 0.05   | 0.03   | 0.031  | t | 57988  | SGAVILLEF<br>IPEIAIPVL<br>G  | Homo<br>sapiens     |
| 1 | 1.00 | 1 | 1 | 0.02  | 0.02   | 0.02   | 0.02   | 0.03   | t | 133709 | SWTPDKW<br>LRPSG             | Mus<br>musculu<br>s |
| 1 | 1.00 | 1 | 1 | 0.01  | 0.01   | 0.01   | 0.01   | 0.02   | t | 112721 | WHAPQTP<br>YWASM             | Homo<br>sapiens     |
| 1 | 1.00 | 1 | 1 | -0.05 | -0.05  | -0.05  | -0.054 | -0.048 | t | 117910 | HLLTNHLK<br>SKEVWKA<br>L     | Homo<br>sapiens     |
| 1 | 1.00 | 1 | 1 | 0     | 0      | 0.017  | 0      | 0      | t | 79258  | IGYSGTGE<br>GNHIENDP<br>LKIK | Mus<br>musculu<br>s |
| 1 | 1.00 | 1 | 1 | -0.05 | -0.046 | -0.028 | -0.047 | -0.048 | t | 70428  | VPPPRRRR<br>AKVLTQ           | Homo<br>sapiens     |
| 1 | 1.00 | 1 | 1 | 0.03  | 0.03   | 0.03   | 0.03   | 0.04   | t | 112723 | WHQTYTS<br>SLWES             | Homo<br>sapiens     |
| 1 | 1.00 | 1 | 1 | 0.01  | 0.01   | 0.01   | 0.01   | 0.02   | t | 121734 | QCCLADD<br>ECLLSLPY          | Mus<br>musculu<br>s |
| 1 | 1.00 | 1 | 1 | -0.01 | -0.006 | 0.005  | -0.013 | -0.01  | t | 30661  | KEVPALTA<br>VETGAT           | Homo<br>sapiens     |
| 1 | 1.00 | 1 | 1 | -0.03 | -0.028 | -0.014 | -0.023 | -0.021 | t | 108518 | LGLHALQS<br>P                | Homo<br>sapiens     |
| 1 | 1.00 | 1 | 1 | 0.01  | 0.012  | 0.01   | 0.016  | 0.02   | t | 138182 | GHRYTSSV<br>SLTEACP          | Homo<br>sapiens     |
| 1 | 1.00 | 1 | 1 | -0.03 | -0.027 | -0.023 | -0.03  | -0.02  | t | 137413 | HAPRWH<br>W                  | Mus<br>musculu<br>s |

|   |      |   |   |       |        |        |        |        |   |        |                              |                                  |
|---|------|---|---|-------|--------|--------|--------|--------|---|--------|------------------------------|----------------------------------|
| 1 | 1.00 | 1 | 1 | 0.02  | 0.02   | 0.02   | 0.02   | 0.03   | t | 121671 | NVKELLVA<br>SPLVDPF          | Mus<br>musculu<br>s              |
| 1 | 1.00 | 1 | 1 | -0.08 | -0.08  | -0.051 | -0.08  | -0.08  | t | 80049  | TGELTMY<br>WV                | Mus<br>musculu<br>s              |
| 1 | 1.00 | 1 | 1 | 0.02  | 0.018  | 0.019  | 0.023  | 0.032  | t | 106298 | AYFNLHPT<br>TQLV             | Mus<br>musculu<br>s              |
| 1 | 1.00 | 1 | 1 | -0.04 | -0.042 | -0.041 | -0.037 | -0.028 | t | 106874 | SSVYSPSPL<br>SLV             | Mus<br>musculu<br>s              |
| 1 | 1.00 | 1 | 1 | -0.02 | -0.013 | -0.022 | -0.021 | -0.01  | t | 4283   | ARWVEW                       | Gallus<br>gallus                 |
| 1 | 1.00 | 1 | 1 | 0     | -0.003 | 0.007  | 0      | 0.008  | t | 279    | AALGDSLY<br>GAASLNDF<br>GILA | Oryctola<br>gus<br>cuniculu<br>s |
| 1 | 1.00 | 1 | 1 | 0     | -0.002 | 0.028  | 0.003  | 0.002  | t | 41209  | MCWDCTL<br>HARSD             | Mus<br>musculu<br>s              |
| 1 | 1.00 | 1 | 1 | -0.01 | -0.008 | -0.005 | -0.009 | 0      | t | 7143   | CTGDARH<br>C                 | Homo<br>sapiens                  |
| 1 | 1.00 | 1 | 1 | -0.03 | -0.034 | -0.03  | -0.037 | -0.03  | t | 115829 | KRGSGKDS<br>HHPARTA<br>HY    | Oryctola<br>gus<br>cuniculu<br>s |
| 1 | 1.00 | 1 | 1 | 0.01  | 0.008  | 0.009  | 0.013  | 0.022  | t | 106424 | FPFTPHPE<br>EYFL             | Mus<br>musculu<br>s              |
| 1 | 1.00 | 1 | 1 | -0.03 | -0.027 | -0.023 | -0.03  | -0.02  | t | 137412 | HAPRWHL                      | Mus<br>musculu<br>s              |
| 1 | 1.00 | 1 | 1 | -0.01 | -0.012 | 0.012  | -0.007 | -0.007 | t | 116745 | GSNKGAIL<br>GLMVGGV<br>VIA   | Mus<br>musculu<br>s              |
| 1 | 1.00 | 1 | 1 | 0     | 0.006  | 0.007  | 0.003  | 0.012  | t | 78109  | AVPTKA                       | Equus<br>caballus                |
| 1 | 1.00 | 1 | 1 | 0.04  | 0.04   | 0.055  | 0.043  | 0.05   | t | 149134 | YTHNETE                      | Sus<br>scrofa                    |

|   |      |   |   |       |        |        |        |        |   |        |                             |                       |
|---|------|---|---|-------|--------|--------|--------|--------|---|--------|-----------------------------|-----------------------|
| 1 | 1.00 | 1 | 1 | 0     | 0      | 0      | 0.006  | 0.01   | t | 65613  | TPIQTQRIK<br>RHHLRR         | Homo sapiens          |
| 1 | 1.00 | 1 | 1 | 0     | 0      | 0      | 0      | 0.01   | t | 121968 | VFTPRPPD<br>NYKVIPS         | Mus musculus          |
| 1 | 1.00 | 1 | 1 | 0.01  | 0.01   | 0.01   | 0.01   | 0.022  | t | 158618 | TYMVPAP                     | Homo sapiens          |
| 1 | 1.00 | 1 | 1 | -0.05 | -0.05  | -0.045 | -0.05  | -0.041 | t | 35907  | LFLPRV                      | Mus musculus          |
| 1 | 1.00 | 1 | 1 | -0.01 | -0.01  | -0.01  | -0.01  | 0.002  | t | 133028 | CVWLWE<br>NC                | Oryctolagus cuniculus |
| 1 | 1.00 | 1 | 1 | 0.06  | 0.058  | 0.07   | 0.059  | 0.071  | t | 38438  | LPDTLSS                     | Mus musculus          |
| 1 | 1.00 | 1 | 1 | -0.01 | -0.01  | -0.01  | -0.01  | 0      | t | 131257 | RHFPNDY<br>NPFL             | Homo sapiens          |
| 1 | 1.00 | 1 | 1 | -0.03 | -0.03  | -0.03  | -0.03  | -0.02  | t | 78196  | LNGLV                       | Equus caballus        |
| 1 | 1.00 | 1 | 1 | -0.05 | -0.05  | -0.05  | -0.05  | -0.04  | t | 69988  | VMLPRR                      | Homo sapiens          |
| 1 | 1.00 | 1 | 1 | -0.01 | -0.008 | 0.017  | -0.01  | -0.01  | t | 62353  | SVTEEIAEE<br>DKSVTEEI<br>AV | Homo sapiens          |
| 1 | 1.00 | 1 | 1 | -0.01 | -0.006 | 0.017  | -0.01  | -0.01  | t | 62353  | SVTEEIAEE<br>DKSVTEEI<br>AV | Homo sapiens          |
| 1 | 1.00 | 1 | 1 | 0     | -0.003 | 0.022  | 0      | 0.001  | t | 43438  | NDFPINELI<br>LDTDLISKI<br>E | Homo sapiens          |
| 1 | 1.00 | 1 | 1 | 0     | -0.004 | 0.022  | 0      | 0.001  | t | 43438  | NDFPINELI<br>LDTDLISKI<br>E | Mus musculus          |
| 1 | 1.00 | 1 | 1 | -0.02 | -0.022 | 0.008  | -0.017 | -0.018 | t | 68869  | VHLSDP<br>SVRQWH            | Mus musculus          |
| 1 | 1.00 | 1 | 1 | -0.01 | -0.012 | -0.011 | -0.007 | 0.002  | t | 106856 | SMNPFPG<br>QLVSN            | Mus musculus          |

|   |      |   |   |       |        |        |        |        |   |        |                              |                                  |
|---|------|---|---|-------|--------|--------|--------|--------|---|--------|------------------------------|----------------------------------|
| 1 | 1.00 | 1 | 1 | -0.02 | -0.02  | 0.005  | -0.02  | -0.019 | t | 124024 | DPAQPPR<br>DLTEAFLA          | Homo<br>sapiens                  |
| 1 | 1.00 | 1 | 1 | -0.04 | -0.036 | -0.013 | -0.04  | -0.041 | t | 29944  | KASFHVTG<br>AFMSDRW<br>KS    | Aotus<br>nancyma<br>ae           |
| 1 | 1.00 | 1 | 1 | -0.02 | -0.02  | 0.007  | -0.02  | -0.02  | t | 32800  | KPMKTLQ<br>FFPGL             | Mus<br>musculu<br>s              |
| 1 | 1.00 | 1 | 1 | -0.05 | -0.048 | -0.032 | -0.047 | -0.048 | t | 32684  | KPDYEPPV<br>VHGCPPLP<br>P    | Homo<br>sapiens                  |
| 1 | 1.00 | 1 | 1 | -0.02 | -0.02  | -0.005 | -0.02  | -0.02  | t | 78253  | QGGCGRG<br>WAFSATG<br>AIEA   | Mus<br>musculu<br>s              |
| 1 | 1.00 | 1 | 1 | 0.01  | 0.006  | 0.011  | 0.007  | 0.02   | t | 79539  | EHQTGTW                      | Oryctola<br>gus<br>cuniculu<br>s |
| 1 | 1.00 | 1 | 1 | -0.01 | -0.005 | 0.017  | -0.009 | -0.01  | t | 59425  | SLQTYVTQ<br>QLIRAAEIR        | Homo<br>sapiens                  |
| 1 | 1.00 | 1 | 1 | -0.02 | -0.022 | -0.013 | -0.023 | -0.02  | t | 115664 | YGSLPQKA<br>QGHRPQD<br>ENG   | Rattus<br>norvegic<br>us         |
| 1 | 1.00 | 1 | 1 | 0.01  | 0.01   | 0.01   | 0.01   | 0.02   | t | 132690 | TCSADGGT<br>LFYNLCL          | Mus<br>musculu<br>s              |
| 1 | 1.00 | 1 | 1 | -0.04 | -0.036 | -0.017 | -0.039 | -0.039 | t | 46738  | PAADRAA<br>APDAVAA           | Homo<br>sapiens                  |
| 1 | 1.00 | 1 | 1 | 0     | 0.002  | 0.032  | -0.003 | -0.003 | t | 105084 | AFNRFGEG<br>LVQR             | Homo<br>sapiens                  |
| 1 | 1.00 | 1 | 1 | -0.02 | -0.02  | 0.007  | -0.018 | -0.02  | t | 5059   | ATMPCLS<br>HPSVCKHL<br>Y     | Homo<br>sapiens                  |
| 1 | 1.00 | 1 | 1 | 0.02  | 0.022  | 0.045  | 0.021  | 0.02   | t | 34981  | LATCPEHQ<br>LTWDPID<br>GRVVS | Homo<br>sapiens                  |
| 1 | 1.00 | 1 | 1 | 0.01  | 0.01   | 0.016  | 0.01   | 0.02   | t | 60329  | SPVTLTES<br>VFPFLR           | Homo<br>sapiens                  |

|   |      |   |   |       |        |        |        |        |   |        |                          |                                  |
|---|------|---|---|-------|--------|--------|--------|--------|---|--------|--------------------------|----------------------------------|
| 1 | 1.00 | 1 | 1 | 0.01  | 0.01   | 0.01   | 0.01   | 0.02   | t | 140610 | TQWQGFS<br>VA            | Mus<br>musculu<br>s              |
| 1 | 1.00 | 1 | 1 | 0     | 0.004  | 0.018  | 0      | 0.002  | t | 149367 | LKGDSFYF<br>GKGLINV      | Cavia<br>porcellu<br>s           |
| 1 | 1.00 | 1 | 1 | -0.02 | -0.022 | 0.002  | -0.021 | -0.02  | t | 43578  | NEDQKIGI<br>EIIKRALKI    | Mus<br>musculu<br>s              |
| 1 | 1.00 | 1 | 1 | -0.02 | -0.022 | 0.002  | -0.021 | -0.02  | t | 43578  | NEDQKIGI<br>EIIKRALKI    | Mus<br>musculu<br>s              |
| 1 | 1.00 | 1 | 1 | 0.02  | 0.017  | 0.025  | 0.02   | 0.03   | t | 44897  | NLTDINL                  | Oryctola<br>gus<br>cuniculu<br>s |
| 1 | 1.00 | 1 | 1 | 0.02  | 0.02   | 0.025  | 0.02   | 0.03   | t | 44897  | NLTDINL                  | Oryctola<br>gus<br>cuniculu<br>s |
| 1 | 1.00 | 1 | 1 | 0.02  | 0.018  | 0.027  | 0.021  | 0.029  | t | 130599 | RQGEEVY<br>MWRDSTM<br>PA | Mus<br>musculu<br>s              |
| 1 | 1.00 | 1 | 1 | 0     | 0.002  | 0      | 0.001  | 0.01   | t | 117122 | YTYTDYST<br>RPHY         | Homo<br>sapiens                  |
| 1 | 1.00 | 1 | 1 | -0.01 | -0.012 | 0.015  | -0.007 | -0.009 | t | 50049  | PWRELWA<br>SR            | Mus<br>musculu<br>s              |
| 1 | 1.00 | 1 | 1 | 0     | 0      | 0      | 0      | 0.01   | t | 116838 | SYEFRHH                  | Oryctola<br>gus<br>cuniculu<br>s |
| 1 | 1.00 | 1 | 1 | -0.03 | -0.027 | -0.019 | -0.03  | -0.023 | t | 136688 | TPAGWFR<br>WGIWD         | Mus<br>musculu<br>s              |
| 1 | 1.00 | 1 | 1 | 0.02  | 0.024  | 0.024  | 0.021  | 0.032  | t | 111311 | GEADFNM                  | Homo<br>sapiens                  |
| 1 | 1.00 | 1 | 1 | -0.06 | -0.06  | -0.044 | -0.06  | -0.06  | t | 19064  | GDNNTYG<br>GWFKDGQ<br>W  | Mus<br>musculu<br>s              |
| 1 | 1.00 | 1 | 1 | 0     | 0.003  | 0.007  | 0.001  | 0.007  | t | 136136 | APDGAVF<br>QLDRP         | Dicentra<br>rchus<br>labrax      |

|   |      |   |   |       |        |        |        |        |   |        |                              |                          |
|---|------|---|---|-------|--------|--------|--------|--------|---|--------|------------------------------|--------------------------|
| 1 | 1.00 | 1 | 1 | -0.01 | -0.012 | -0.011 | -0.007 | 0.002  | t | 106274 | ATLAPNPQ<br>SMMV             | Mus<br>musculu<br>s      |
| 1 | 1.00 | 1 | 1 | -0.03 | -0.028 | -0.008 | -0.023 | -0.02  | t | 104254 | SPFLKAF                      | Homo<br>sapiens          |
| 1 | 1.00 | 1 | 1 | -0.02 | -0.018 | -0.002 | -0.021 | -0.016 | t | 149506 | VEFTDHLF                     | Homo<br>sapiens          |
| 1 | 1.00 | 1 | 1 | -0.01 | -0.01  | -0.01  | -0.01  | -0.001 | t | 153332 | ACKDHAT<br>DLCGGGS           | Mus<br>musculu<br>s      |
| 1 | 1.00 | 1 | 1 | -0.03 | -0.026 | -0.004 | -0.033 | -0.03  | t | 3828   | APSWGLS<br>RI                | Homo<br>sapiens          |
| 1 | 1.00 | 1 | 1 | 0.01  | 0.008  | 0.017  | 0.003  | 0.013  | t | 113014 | GSLPQKSQ<br>RSQDENG          | Rattus<br>norvegic<br>us |
| 1 | 1.00 | 1 | 1 | 0     | 0.004  | 0.027  | 0      | 0.001  | t | 14778  | EVLYHMPL<br>AGVYRALK<br>KQLE | Aotus<br>nancyma<br>ae   |
| 1 | 1.00 | 1 | 1 | 0     | 0.004  | 0.027  | 0      | 0.001  | t | 14778  | EVLYHMPL<br>AGVYRALK<br>KQLE | Aotus<br>nancyma<br>ae   |
| 1 | 1.00 | 1 | 1 | -0.02 | -0.017 | 0.007  | -0.02  | -0.018 | t | 44250  | NIIRTKKQ                     | Mus<br>musculu<br>s      |
| 1 | 1.00 | 1 | 1 | 0     | 0      | 0      | 0      | 0.009  | t | 153344 | ACRDHSDL<br>WCGGGS           | Mus<br>musculu<br>s      |
| 1 | 1.00 | 1 | 1 | -0.03 | -0.026 | -0.004 | -0.029 | -0.028 | t | 44844  | NLPSTETR<br>HVTR             | Homo<br>sapiens          |
| 1 | 1.00 | 1 | 1 | -0.02 | -0.014 | -0.006 | -0.013 | -0.01  | t | 127629 | DRWSSLF                      | Homo<br>sapiens          |
| 1 | 1.00 | 1 | 1 | -0.03 | -0.027 | -0.003 | -0.03  | -0.03  | t | 141615 | DHDLRIRR<br>TAQI             | Mus<br>musculu<br>s      |

|   |      |   |   |       |        |        |        |        |   |        |                       |                |
|---|------|---|---|-------|--------|--------|--------|--------|---|--------|-----------------------|----------------|
| 1 | 1.00 | 1 | 1 | -0.03 | -0.03  | -0.003 | -0.03  | -0.03  | t | 141615 | DHDLIRRTAQI           | Mus musculus   |
| 1 | 1.00 | 1 | 1 | 0.05  | 0.052  | 0.05   | 0.051  | 0.06   | t | 133602 | HSIYSEWQPMWP          | Homo sapiens   |
| 1 | 1.00 | 1 | 1 | 0     | 0.002  | 0.014  | 0.001  | 0.01   | t | 48511  | PLTNSK                | Homo sapiens   |
| 1 | 1.00 | 1 | 1 | 0     | 0      | 0      | 0      | 0.01   | t | 78214  | MWPQKT                | Equus caballus |
| 1 | 1.00 | 1 | 1 | -0.02 | -0.018 | 0.002  | -0.013 | -0.01  | t | 104320 | TTYYLRS               | Homo sapiens   |
| 1 | 1.00 | 1 | 1 | -0.03 | -0.028 | -0.007 | -0.029 | -0.028 | t | 24595  | HQNILRVAQ             | Homo sapiens   |
| 1 | 1.00 | 1 | 1 | -0.05 | -0.052 | -0.048 | -0.051 | -0.043 | t | 115613 | HCLGKWLGHDPKF         | Mus musculus   |
| 1 | 1.00 | 1 | 1 | -0.02 | -0.02  | -0.006 | -0.02  | -0.019 | t | 46795  | PAFLGCCSRFSGSFSGVEP   | Mus musculus   |
| 1 | 1.00 | 1 | 1 | 0     | -0.002 | 0.017  | 0      | 0.001  | t | 110834 | EQLKGQGGKSRLGDLYEEEMR | Mus musculus   |
| 1 | 1.00 | 1 | 1 | -0.08 | -0.082 | -0.053 | -0.081 | -0.082 | t | 8529   | DHARPTSVWLSR          | Mus musculus   |
| 1 | 1.00 | 1 | 1 | -0.01 | -0.01  | 0.004  | -0.01  | -0.009 | t | 133542 | DGRRDVVRSATFYL        | Mus musculus   |
| 1 | 1.00 | 1 | 1 | -0.02 | -0.02  | 0.001  | -0.017 | -0.02  | t | 57211  | SDGYPPNRQDPRFTDTLVD   | Homo sapiens   |
| 1 | 1.00 | 1 | 1 | 0.01  | 0.012  | 0.017  | 0.011  | 0.022  | t | 78251  | PTNNLDHL              | Homo sapiens   |
| 1 | 1.00 | 1 | 1 | 0     | 0.007  | 0.025  | 0.003  | 0.003  | t | 113703 | PQKSQRSQDENG          | Gallus gallus  |
| 1 | 1.00 | 1 | 1 | 0     | 0      | 0      | 0      | 0.01   | t | 5583   | AVTRGTINDPQRAKEALD    | Mus musculus   |

|   |      |   |   |       |        |        |        |        |   |        |                              |                              |
|---|------|---|---|-------|--------|--------|--------|--------|---|--------|------------------------------|------------------------------|
| 1 | 1.00 | 1 | 1 | 0     | 0      | 0.025  | 0      | 0.002  | t | 8035   | DEIVSYNT<br>KNKPLN           | Mus<br>musculus              |
| 1 | 1.00 | 1 | 1 | 0.02  | 0.015  | 0.025  | 0.02   | 0.032  | t | 40938  | LYRPSDSSL<br>AGP             | Bos<br>taurus                |
| 1 | 1.00 | 1 | 1 | -0.03 | -0.03  | -0.011 | -0.03  | -0.03  | t | 46198  | NTNSGPD<br>DQIGYYRR<br>ATR   | Mus<br>musculus              |
| 1 | 1.00 | 1 | 1 | 0     | 0.002  | 0.007  | 0.001  | 0.012  | t | 78247  | PQNAFDH<br>L                 | Homo<br>sapiens              |
| 1 | 1.00 | 1 | 1 | 0.04  | 0.04   | 0.045  | 0.036  | 0.05   | t | 62851  | TAGGQY                       | Homo<br>sapiens              |
| 1 | 1.00 | 1 | 1 | 0     | -0.003 | 0.007  | 0      | 0.01   | t | 59687  | SMIRDLL                      | Oryctola<br>gus<br>cuniculus |
| 1 | 1.00 | 1 | 1 | -0.04 | -0.036 | -0.011 | -0.04  | -0.038 | t | 10240  | DSSPDYTF<br>TSAR             | Mus<br>musculus              |
| 1 | 1.00 | 1 | 1 | 0.01  | 0.01   | 0.01   | 0.01   | 0.02   | t | 141754 | SSSKTWG<br>APLYY             | Mus<br>musculus              |
| 1 | 1.00 | 1 | 1 | -0.03 | -0.03  | -0.03  | -0.037 | -0.03  | t | 112304 | SAHKGFKG<br>VDAQGTL<br>SKIFK | Homo<br>sapiens              |
| 1 | 1.00 | 1 | 1 | -0.06 | -0.056 | -0.043 | -0.059 | -0.058 | t | 104184 | PRGRRQPI<br>PKARRPEG<br>RTWA | Homo<br>sapiens              |
| 1 | 1.00 | 1 | 1 | -0.01 | -0.008 | -0.01  | -0.009 | 0      | t | 117088 | SRLPLSQP<br>SPNS             | Homo<br>sapiens              |
| 1 | 1.00 | 1 | 1 | -0.01 | -0.004 | -0.003 | -0.007 | 0      | t | 78208  | MPTKSL                       | Equus<br>caballus            |
| 1 | 1.00 | 1 | 1 | -0.01 | -0.01  | -0.01  | -0.017 | -0.01  | t | 112048 | ATASTMD<br>HARHGFLP<br>RHRDT | Homo<br>sapiens              |
| 1 | 1.00 | 1 | 1 | -0.02 | -0.022 | -0.005 | -0.017 | -0.018 | t | 9600   | DPARDCV<br>HNICIFAG          | Mus<br>musculus              |



|   |      |   |   |       |        |        |        |        |   |        |                              |                  |
|---|------|---|---|-------|--------|--------|--------|--------|---|--------|------------------------------|------------------|
| 1 | 1.00 | 1 | 1 | -0.01 | -0.008 | 0.011  | -0.009 | -0.01  | t | 45398  | NPLYGSRL<br>GVPDTLG<br>GDPKF | Homo sapiens     |
| 1 | 1.00 | 1 | 1 | -0.01 | -0.007 | -0.003 | -0.01  | 0      | t | 106881 | SVMTSNP<br>DRTFI             | Mus musculus     |
| 1 | 1.00 | 1 | 1 | 0.01  | 0.012  | 0.01   | 0.011  | 0.02   | t | 117099 | TSPHKTTL<br>DLNA             | Homo sapiens     |
| 1 | 1.00 | 1 | 1 | -0.03 | -0.025 | -0.01  | -0.03  | -0.03  | t | 105265 | KLVFFAED<br>VGSNKGA          | Canis familiaris |
| 1 | 1.00 | 1 | 1 | 0     | 0.006  | 0.014  | 0.007  | 0.01   | t | 127677 | GTNTAQK                      | Homo sapiens     |
| 1 | 1.00 | 1 | 1 | 0.02  | 0.02   | 0.046  | 0.023  | 0.02   | t | 9635   | DPGDLVEY<br>IMNYTGN<br>QQSR  | Homo sapiens     |
| 1 | 1.00 | 1 | 1 | -0.03 | -0.03  | -0.007 | -0.03  | -0.028 | t | 51296  | QLCQLL                       | Mus musculus     |
| 1 | 1.00 | 1 | 1 | -0.02 | -0.017 | -0.011 | -0.02  | -0.01  | t | 79291  | LIPFNS                       | Mus musculus     |
| 1 | 1.00 | 1 | 1 | -0.02 | -0.018 | 0      | -0.023 | -0.02  | t | 52599  | QTQPSKPT<br>TKQR             | Homo sapiens     |
| 1 | 1.00 | 1 | 1 | -0.03 | -0.032 | -0.02  | -0.023 | -0.024 | t | 23180  | GVTSAPDT<br>RPAGSTA          | Mus musculus     |
| 1 | 1.00 | 1 | 1 | 0     | 0      | 0.019  | -0.003 | 0.001  | t | 33198  | KRNEKWD<br>EVYKYIVT<br>NWLA  | Homo sapiens     |
| 1 | 1.00 | 1 | 1 | 0     | 0.001  | 0.019  | -0.003 | 0.001  | t | 33198  | KRNEKWD<br>EVYKYIVT<br>NWLA  | Equus caballus   |
| 1 | 1.00 | 1 | 1 | 0     | 0.007  | 0.019  | -0.003 | 0.001  | t | 33198  | KRNEKWD<br>EVYKYIVT<br>NWLA  | Gallus gallus    |

|   |      |   |   |       |        |        |        |        |   |        |                              |                 |
|---|------|---|---|-------|--------|--------|--------|--------|---|--------|------------------------------|-----------------|
| 1 | 1.00 | 1 | 1 | 0     | 0      | 0.007  | 0      | 0.01   | t | 130761 | CSRTSSRTC                    | Homo sapiens    |
| 1 | 1.00 | 1 | 1 | 0     | 0.002  | 0      | 0.007  | 0.01   | t | 104230 | RTRNQPN                      | Homo sapiens    |
| 1 | 1.00 | 1 | 1 | 0     | 0      | 0.025  | 0.001  | 0      | t | 70908  | VSDTEAEE<br>EEEQPKVD<br>ANAD | Canis lupus     |
| 1 | 1.00 | 1 | 1 | 0.03  | 0.03   | 0.03   | 0.03   | 0.04   | t | 106850 | SLQQLYDE<br>YPGP             | Mus musculus    |
| 1 | 1.00 | 1 | 1 | -0.05 | -0.048 | -0.028 | -0.049 | -0.049 | t | 46255  | NTRVTGG<br>VQS               | Homo sapiens    |
| 1 | 1.00 | 1 | 1 | -0.04 | -0.036 | -0.03  | -0.04  | -0.038 | t | 153907 | YSKISEYRH<br>YCYSLYGT<br>TLE | Cavia porcellus |
| 1 | 1.00 | 1 | 1 | 0.03  | 0.03   | 0.047  | 0.03   | 0.034  | t | 120849 | NSQPEILE<br>RTRAELD          | Mus musculus    |
| 1 | 1.00 | 1 | 1 | -0.02 | -0.013 | -0.002 | -0.021 | -0.017 | t | 32780  | KPLAMDP<br>LHVST             | Gallus gallus   |
| 1 | 1.00 | 1 | 1 | -0.02 | -0.016 | 0      | -0.023 | -0.022 | t | 157220 | ERRQSRRG<br>GRDD             | Homo sapiens    |
| 1 | 1.00 | 1 | 1 | 0     | 0      | 0.017  | -0.007 | 0      | t | 112319 | SKIFKLGGR<br>DSRSGSP<br>MARR | Homo sapiens    |
| 1 | 1.00 | 1 | 1 | -0.01 | -0.006 | -0.006 | -0.009 | 0.002  | t | 111412 | IANYYGG                      | Homo sapiens    |
| 1 | 1.00 | 1 | 1 | 0.05  | 0.048  | 0.056  | 0.048  | 0.06   | t | 53194  | RARGIYET<br>ETRA             | Mus musculus    |
| 1 | 1.00 | 1 | 1 | -0.01 | -0.004 | 0.017  | -0.01  | -0.009 | t | 41727  | MIKAAFLP<br>TGAFMAD<br>RYKSH | Aotus nancymae  |
| 1 | 1.00 | 1 | 1 | 0     | 0      | 0.019  | 0      | 0.002  | t | 13680  | EPKKDKKK<br>KTDEAQPL         | Homo sapiens    |
| 1 | 1.00 | 1 | 1 | 0.03  | 0.03   | 0.03   | 0.03   | 0.04   | t | 106874 | SSVYSPSPL<br>SLV             | Mus musculus    |

|   |      |   |   |       |        |        |        |        |   |        |                              |                                  |
|---|------|---|---|-------|--------|--------|--------|--------|---|--------|------------------------------|----------------------------------|
| 1 | 1.00 | 1 | 1 | 0     | 0.002  | 0.008  | 0      | 0.01   | t | 6331   | CGPFYLSA<br>PQC              | Homo<br>sapiens                  |
| 1 | 1.00 | 1 | 1 | 0     | 0.004  | 0.008  | 0      | 0.01   | t | 6331   | CGPFYLSA<br>PQC              | Homo<br>sapiens                  |
| 1 | 1.00 | 1 | 1 | 0.01  | 0.01   | 0.028  | 0.01   | 0.012  | t | 118829 | GVLGQA<br>SQLNA              | Mus<br>musculu<br>s              |
| 1 | 1.00 | 1 | 1 | 0.01  | 0.01   | 0.01   | 0.01   | 0.02   | t | 78069  | WIEEWMF<br>IPVMS             | Mus<br>musculu<br>s              |
| 1 | 1.00 | 1 | 1 | -0.03 | -0.032 | -0.02  | -0.029 | -0.02  | t | 78943  | CTRLHTGY<br>WVC              | Mus<br>musculu<br>s              |
| 1 | 1.00 | 1 | 1 | 0.01  | 0.01   | 0.033  | 0.006  | 0.012  | t | 32809  | KPNNDFH<br>FEVFN             | Homo<br>sapiens                  |
| 1 | 1.00 | 1 | 1 | -0.04 | -0.044 | -0.042 | -0.047 | -0.036 | t | 119454 | GGIKKIRLP<br>SDDVWLP<br>D    | Oryctola<br>gus<br>cuniculu<br>s |
| 1 | 1.00 | 1 | 1 | -0.05 | -0.051 | -0.035 | -0.05  | -0.049 | t | 105809 | GDFGSLAP<br>RVARQLPA<br>SFNY | Bos<br>taurus                    |
| 1 | 1.00 | 1 | 1 | -0.02 | -0.02  | -0.02  | -0.02  | -0.01  | t | 78214  | MWPQKT                       | Equus<br>caballus                |
| 1 | 1.00 | 1 | 1 | -0.05 | -0.05  | -0.037 | -0.054 | -0.049 | t | 67164  | TVSRVPW<br>TAWAFHG<br>Y      | Homo<br>sapiens                  |
| 1 | 1.00 | 1 | 1 | -0.04 | -0.038 | -0.04  | -0.039 | -0.031 | t | 133525 | ATWYEW<br>NPPWVS             | Homo<br>sapiens                  |
| 1 | 1.00 | 1 | 1 | -0.01 | -0.01  | -0.01  | -0.01  | 0      | t | 79297  | LQKVHR                       | Mus<br>musculu<br>s              |
| 1 | 1.00 | 1 | 1 | -0.06 | -0.06  | -0.031 | -0.06  | -0.062 | t | 139227 | RGDLQVLT<br>PK               | Sus<br>scrofa                    |
| 1 | 1.00 | 1 | 1 | -0.03 | -0.03  | -0.03  | -0.03  | -0.02  | t | 140556 | DWRHFME<br>S                 | Mus<br>musculu<br>s              |

|   |      |   |   |       |        |        |        |        |   |        |                              |                                  |
|---|------|---|---|-------|--------|--------|--------|--------|---|--------|------------------------------|----------------------------------|
| 1 | 1.00 | 1 | 1 | -0.02 | -0.017 | 0.002  | -0.02  | -0.016 | t | 97601  | RGRRQP                       | Mus<br>musculu<br>s              |
| 1 | 1.00 | 1 | 1 | 0.01  | 0.01   | 0.01   | 0.01   | 0.02   | t | 117113 | WPMNTD<br>DSTRPR             | Homo<br>sapiens                  |
| 1 | 1.00 | 1 | 1 | 0     | 0.002  | 0.008  | -0.001 | 0.004  | t | 149393 | NMERDLA<br>SGLIGPL           | Homo<br>sapiens                  |
| 1 | 1.00 | 1 | 1 | 0.02  | 0.017  | 0.021  | 0.02   | 0.029  | t | 65996  | TRAPRREE<br>LEWDDDED<br>H    | Oryctola<br>gus<br>cuniculu<br>s |
| 1 | 1.00 | 1 | 1 | -0.02 | -0.024 | -0.007 | -0.021 | -0.02  | t | 10152  | DSKGNVP<br>AGVTPSKY<br>GLGGD | Oryctola<br>gus<br>cuniculu<br>s |
| 1 | 1.00 | 1 | 1 | 0.05  | 0.05   | 0.05   | 0.05   | 0.062  | t | 110067 | VSTLIELPD<br>EIP             | Mus<br>musculu<br>s              |
| 1 | 1.00 | 1 | 1 | -0.01 | -0.012 | 0      | -0.003 | -0.004 | t | 23180  | GVTSA PDT<br>RPAPGSTA        | Mus<br>musculu<br>s              |
| 1 | 1.00 | 1 | 1 | -0.04 | -0.028 | -0.024 | -0.04  | -0.038 | t | 49116  | PQRKTKR<br>NTNRR             | Pan<br>troglody<br>tes           |
| 1 | 1.00 | 1 | 1 | 0.01  | 0.008  | 0.015  | 0.009  | 0.02   | t | 7514   | DAGDSAYS<br>Q                | Mus<br>musculu<br>s              |
| 1 | 1.00 | 1 | 1 | 0     | 0      | 0.022  | 0      | 0      | t | 38659  | LPQSGPIG<br>GIKSMGIT<br>TLVQ | Homo<br>sapiens                  |
| 1 | 1.00 | 1 | 1 | 0.01  | 0.008  | 0.022  | 0.007  | 0.011  | t | 77776  | CNCKAPET<br>ALCARRCQ<br>QH   | Mus<br>musculu<br>s              |
| 1 | 1.00 | 1 | 1 | 0.02  | 0.022  | 0.043  | 0.017  | 0.021  | t | 98379  | QNTK                         | Homo<br>sapiens                  |
| 1 | 1.00 | 1 | 1 | -0.03 | -0.028 | -0.013 | -0.029 | -0.03  | t | 52117  | QQQGQTV<br>TKKSAAEA<br>SKK   | Homo<br>sapiens                  |
| 1 | 1.00 | 1 | 1 | 0.02  | 0.02   | 0.02   | 0.02   | 0.03   | t | 153351 | ACTYSPRD<br>MCGGGS           | Mus<br>musculu<br>s              |
| 1 | 1.00 | 1 | 1 | 0.02  | 0.02   | 0.02   | 0.02   | 0.03   | t | 104123 | MNKTFSA                      | Homo<br>sapiens                  |

|   |      |   |   |       |        |        |        |        |   |        |                              |                       |
|---|------|---|---|-------|--------|--------|--------|--------|---|--------|------------------------------|-----------------------|
| 1 | 1.00 | 1 | 1 | -0.01 | -0.008 | -0.005 | -0.003 | 0      | t | 107950 | KSQPNQT<br>NNYHLLRT          | Homo sapiens          |
| 1 | 1.00 | 1 | 1 | 0     | 0.002  | 0.022  | 0.001  | 0      | t | 14110  | ESAGTQED<br>AAALRAFT<br>EAMT | Homo sapiens          |
| 1 | 1.00 | 1 | 1 | -0.01 | -0.01  | -0.01  | -0.014 | -0.01  | t | 109917 | SHQESTRG<br>RSRGRSGR<br>SGS  | Homo sapiens          |
| 1 | 1.00 | 1 | 1 | 0     | 0      | 0      | -0.007 | 0      | t | 112127 | GGDRGAP<br>KRGSGKDS<br>HHPAR | Homo sapiens          |
| 1 | 1.00 | 1 | 1 | -0.04 | -0.04  | -0.017 | -0.04  | -0.038 | t | 67719  | VAPSMAX<br>SIPAK             | Oryctolagus cuniculus |
| 1 | 1.00 | 1 | 1 | -0.02 | -0.01  | -0.013 | -0.021 | -0.01  | t | 66121  | TRVPRR                       | Pan troglodytes       |
| 1 | 1.00 | 1 | 1 | -0.03 | -0.03  | -0.03  | -0.03  | -0.02  | t | 116954 | DPTDYSTR<br>PHMW             | Homo sapiens          |
| 1 | 1.00 | 1 | 1 | 0     | 0      | 0.008  | -0.001 | 0.01   | t | 6330   | CGPFFLSP<br>TSC              | Homo sapiens          |
| 1 | 1.00 | 1 | 1 | 0.03  | 0.03   | 0.035  | 0.03   | 0.04   | t | 33364  | KSKDLQSA<br>P                | Homo sapiens          |
| 1 | 1.00 | 1 | 1 | -0.05 | -0.043 | -0.031 | -0.05  | -0.052 | t | 159302 | YVLNSKLH<br>NSRSFDKF<br>KWIQ | Aotus                 |
| 1 | 1.00 | 1 | 1 | -0.02 | -0.017 | 0.004  | -0.02  | -0.017 | t | 59952  | SNYCQIYP<br>PNANKIR          | Mus musculus          |
| 1 | 1.00 | 1 | 1 | 0.01  | 0.012  | 0.017  | 0.013  | 0.02   | t | 53874  | RGGDQPYI<br>FLFAHIP          | Homo sapiens          |
| 1 | 1.00 | 1 | 1 | -0.03 | -0.028 | -0.013 | -0.027 | -0.029 | t | 9043   | DLDFSADF<br>ASLSPFMI<br>REAG | Homo sapiens          |
| 1 | 1.00 | 1 | 1 | -0.03 | -0.028 | -0.03  | -0.029 | -0.02  | t | 116953 | DNHSPVNI<br>AHKL             | Homo sapiens          |
| 1 | 1.00 | 1 | 1 | -0.06 | -0.06  | -0.031 | -0.06  | -0.062 | t | 77979  | QPPQWL<br>WPQKEV             | Mus musculus          |

|   |      |   |   |       |        |        |        |        |   |        |                              |                     |
|---|------|---|---|-------|--------|--------|--------|--------|---|--------|------------------------------|---------------------|
| 1 | 1.00 | 1 | 1 | -0.01 | -0.008 | 0.005  | -0.013 | -0.009 | t | 26996  | ILDGDNLF<br>PKVAPQAI         | Homo<br>sapiens     |
| 1 | 1.00 | 1 | 1 | 0.01  | 0.01   | 0.01   | 0.01   | 0.02   | t | 127737 | MHETTKA                      | Homo<br>sapiens     |
| 1 | 1.00 | 1 | 1 | -0.02 | -0.018 | -0.02  | -0.014 | -0.011 | t | 138200 | KSTSSLRD<br>NSPPVCF          | Homo<br>sapiens     |
| 1 | 1.00 | 1 | 1 | 0.01  | 0.01   | 0.017  | 0.01   | 0.02   | t | 108037 | MTQMPT<br>NHAMQLI<br>LE      | Homo<br>sapiens     |
| 1 | 1.00 | 1 | 1 | 0.01  | 0.012  | 0.037  | 0.007  | 0.011  | t | 74462  | YKIGDNW                      | Homo<br>sapiens     |
| 1 | 1.00 | 1 | 1 | -0.02 | -0.022 | -0.004 | -0.027 | -0.019 | t | 135906 | DALAVDQ<br>MGRFG             | Mus<br>musculu<br>s |
| 1 | 1.00 | 1 | 1 | -0.04 | -0.043 | -0.035 | -0.043 | -0.036 | t | 108599 | QGDAKKG<br>ANLFKTRC          | Homo<br>sapiens     |
| 1 | 1.00 | 1 | 1 | -0.04 | -0.042 | -0.015 | -0.037 | -0.04  | t | 34153  | KVPAWAR<br>RL                | Mus<br>musculu<br>s |
| 1 | 1.00 | 1 | 1 | -0.01 | -0.021 | -0.01  | -0.01  | 0      | t | 134170 | MVRHENR<br>CVA               | Mus<br>musculu<br>s |
| 1 | 1.00 | 1 | 1 | 0.01  | 0.01   | 0.01   | 0.01   | 0.02   | t | 140610 | TQWQGFS<br>VA                | Mus<br>musculu<br>s |
| 1 | 1.00 | 1 | 1 | -0.02 | -0.018 | 0.007  | -0.017 | -0.02  | t | 6200   | CESSLCLM<br>YSLGPPA          | Homo<br>sapiens     |
| 1 | 1.00 | 1 | 1 | 0.01  | 0.008  | 0.025  | 0.009  | 0.01   | t | 53545  | REKEELKR<br>DKEGKVST<br>LPLD | Mus<br>musculu<br>s |
| 1 | 1.00 | 1 | 1 | 0.01  | 0.008  | 0.025  | 0.009  | 0.01   | t | 53545  | REKEELKR<br>DKEGKVST<br>LPLD | Mus<br>musculu<br>s |
| 1 | 1.00 | 1 | 1 | 0.01  | 0.008  | 0.025  | 0.009  | 0.01   | t | 53545  | REKEELKR<br>DKEGKVST<br>LPLD | Mus<br>musculu<br>s |

|   |      |   |   |   |        |   |   |      |   |        |                              |                                  |
|---|------|---|---|---|--------|---|---|------|---|--------|------------------------------|----------------------------------|
| 1 | 1.00 | 1 | 1 | 0 | 0      | 0 | 0 | 0.01 | t | 142435 | KTDGKGEE<br>SE               | Homo<br>sapiens                  |
| 1 | 1.00 | 1 | 1 | 0 | 0      | 0 | 0 | 0.01 | t | 125870 | EEEEEEEE                     | Mus<br>musculu<br>s              |
| 1 | 1.00 | 1 | 1 | 0 | -0.003 | 0 | 0 | 0.01 | t | 125871 | EEEEEEEE<br>E                | Oryctola<br>gus<br>cuniculu<br>s |
| 1 | 1.00 | 1 | 1 | 0 | 0      | 0 | 0 | 0.01 | t | 125870 | EEEEEEEE                     | Mus<br>musculu<br>s              |
| 1 | 1.00 | 1 | 1 | 0 | 0      | 0 | 0 | 0.01 | t | 125871 | EEEEEEEE<br>E                | Mus<br>musculu<br>s              |
| 1 | 1.00 | 1 | 1 | 0 | 0      | 0 | 0 | 0.01 | t | 125870 | EEEEEEEE                     | Mus<br>musculu<br>s              |
| 1 | 1.00 | 1 | 1 | 0 | 0      | 0 | 0 | 0.01 | t | 80002  | RKADLEKA<br>LEGAM            | Oryctola<br>gus<br>cuniculu<br>s |
| 1 | 1.00 | 1 | 1 | 0 | 0      | 0 | 0 | 0.01 | t | 63122  | TDAYNQKL<br>SERRAN           | Mus<br>musculu<br>s              |
| 1 | 1.00 | 1 | 1 | 0 | 0      | 0 | 0 | 0.01 | t | 63122  | TDAYNQKL<br>SERRAN           | Mus<br>musculu<br>s              |
| 1 | 1.00 | 1 | 1 | 0 | 0      | 0 | 0 | 0.01 | t | 79356  | RAVIWAW<br>MWE               | Mus<br>musculu<br>s              |
| 1 | 1.00 | 1 | 1 | 0 | 0      | 0 | 0 | 0.01 | t | 96674  | NGDGNPR<br>EVIED             | Mus<br>musculu<br>s              |
| 1 | 1.00 | 1 | 1 | 0 | 0      | 0 | 0 | 0.01 | t | 79743  | AALAARKA<br>DLEKALEG<br>AM   | Oryctola<br>gus<br>cuniculu<br>s |
| 1 | 1.00 | 1 | 1 | 0 | 0      | 0 | 0 | 0.01 | t | 64334  | TIITRDIAR<br>DPDKLRKI<br>AEN | Mus<br>musculu<br>s              |
| 1 | 1.00 | 1 | 1 | 0 | 0      | 0 | 0 | 0.01 | t | 63122  | TDAYNQKL<br>SERRAN           | Mus<br>musculu<br>s              |

|   |      |   |   |   |        |   |   |      |   |       |                              |                                  |
|---|------|---|---|---|--------|---|---|------|---|-------|------------------------------|----------------------------------|
| 1 | 1.00 | 1 | 1 | 0 | 0      | 0 | 0 | 0.01 | t | 65343 | TNINSDSQ<br>GRQQMT           | Mus<br>musculu<br>s              |
| 1 | 1.00 | 1 | 1 | 0 | 0      | 0 | 0 | 0.01 | t | 45880 | NSKTPAPA<br>PAVPVKKE<br>ATK  | Mus<br>musculu<br>s              |
| 1 | 1.00 | 1 | 1 | 0 | -0.003 | 0 | 0 | 0.01 | t | 56290 | RVFPRGTV<br>ENPDKARE<br>LLNK | Oryctola<br>gus<br>cuniculu<br>s |
| 1 | 1.00 | 1 | 1 | 0 | 0      | 0 | 0 | 0.01 | t | 44852 | NLQKDEP<br>NGRASDT           | Oryctola<br>gus<br>cuniculu<br>s |
| 1 | 1.00 | 1 | 1 | 0 | 0      | 0 | 0 | 0.01 | t | 56432 | RVTTTSQA<br>QDAAGLK<br>EKAD  | Mus<br>musculu<br>s              |
| 1 | 1.00 | 1 | 1 | 0 | 0      | 0 | 0 | 0.01 | t | 39183 | LRRDLAS<br>REAKKQVE<br>KALE  | Mus<br>musculu<br>s              |
| 1 | 1.00 | 1 | 1 | 0 | 0      | 0 | 0 | 0.01 | t | 44174 | NHVRIPIG<br>YWAV             | Mus<br>musculu<br>s              |
| 1 | 1.00 | 1 | 1 | 0 | 0      | 0 | 0 | 0.01 | t | 56432 | RVTTTSQA<br>QDAAGLK<br>EKAD  | Mus<br>musculu<br>s              |
| 1 | 1.00 | 1 | 1 | 0 | 0      | 0 | 0 | 0.01 | t | 56290 | RVFPRGTV<br>ENPDKARE<br>LLNK | Oryctola<br>gus<br>cuniculu<br>s |
| 1 | 1.00 | 1 | 1 | 0 | 0      | 0 | 0 | 0.01 | t | 39183 | LRRDLAS<br>REAKKQVE<br>KALE  | Mus<br>musculu<br>s              |
| 1 | 1.00 | 1 | 1 | 0 | 0      | 0 | 0 | 0.01 | t | 56432 | RVTTTSQA<br>QDAAGLK<br>EKAD  | Mus<br>musculu<br>s              |
| 1 | 1.00 | 1 | 1 | 0 | 0      | 0 | 0 | 0.01 | t | 56432 | RVTTTSQA<br>QDAAGLK<br>EKAD  | Mus<br>musculu<br>s              |



|   |      |   |   |   |   |   |   |      |   |       |                              |                          |
|---|------|---|---|---|---|---|---|------|---|-------|------------------------------|--------------------------|
| 1 | 1.00 | 1 | 1 | 0 | 0 | 0 | 0 | 0.01 | t | 43796 | NEYGVEG<br>GRVNAV            | Mus<br>musculu<br>s      |
| 1 | 1.00 | 1 | 1 | 0 | 0 | 0 | 0 | 0.01 | t | 39183 | LRRDLAS<br>REAKKQVE<br>KALE  | Mus<br>musculu<br>s      |
| 1 | 1.00 | 1 | 1 | 0 | 0 | 0 | 0 | 0.01 | t | 56290 | RVFPRGT<br>ENPDKARE<br>LLNK  | Mus<br>musculu<br>s      |
| 1 | 1.00 | 1 | 1 | 0 | 0 | 0 | 0 | 0.01 | t | 36963 | LKMLNRD<br>LEQAYNEL<br>SGEAL | Mus<br>musculu<br>s      |
| 1 | 1.00 | 1 | 1 | 0 | 0 | 0 | 0 | 0.01 | t | 45878 | NSKNPVP<br>VKKEAKLS<br>EAL   | Mus<br>musculu<br>s      |
| 1 | 1.00 | 1 | 1 | 0 | 0 | 0 | 0 | 0.01 | t | 39183 | LRRDLAS<br>REAKKQVE<br>KALE  | Rattus<br>norvegic<br>us |
| 1 | 1.00 | 1 | 1 | 0 | 0 | 0 | 0 | 0.01 | t | 39183 | LRRDLAS<br>REAKKQVE<br>KALE  | Mus<br>musculu<br>s      |
| 1 | 1.00 | 1 | 1 | 0 | 0 | 0 | 0 | 0.01 | t | 43317 | NATAEGR<br>AINRRVE           | Mus<br>musculu<br>s      |
| 1 | 1.00 | 1 | 1 | 0 | 0 | 0 | 0 | 0.01 | t | 43796 | NEYGVEG<br>GRVNAV            | Mus<br>musculu<br>s      |
| 1 | 1.00 | 1 | 1 | 0 | 0 | 0 | 0 | 0.01 | t | 43317 | NATAEGR<br>AINRRVE           | Mus<br>musculu<br>s      |
| 1 | 1.00 | 1 | 1 | 0 | 0 | 0 | 0 | 0.01 | t | 39183 | LRRDLAS<br>REAKKQVE<br>KALE  | Mus<br>musculu<br>s      |
| 1 | 1.00 | 1 | 1 | 0 | 0 | 0 | 0 | 0.01 | t | 39183 | LRRDLAS<br>REAKKQVE<br>KALE  | Homo<br>sapiens          |

|   |      |   |   |   |   |   |   |      |   |       |                              |                     |
|---|------|---|---|---|---|---|---|------|---|-------|------------------------------|---------------------|
| 1 | 1.00 | 1 | 1 | 0 | 0 | 0 | 0 | 0.01 | t | 39183 | LRRDLAS<br>REAKKQVE<br>KALE  | Homo<br>sapiens     |
| 1 | 1.00 | 1 | 1 | 0 | 0 | 0 | 0 | 0.01 | t | 43415 | NDDITSMT<br>PILSGVGP<br>GNA  | Mus<br>musculu<br>s |
| 1 | 1.00 | 1 | 1 | 0 | 0 | 0 | 0 | 0.01 | t | 39183 | LRRDLAS<br>REAKKQVE<br>KALE  | Homo<br>sapiens     |
| 1 | 1.00 | 1 | 1 | 0 | 0 | 0 | 0 | 0.01 | t | 52910 | QYGLEKRD<br>NGHQGE           | Mus<br>musculu<br>s |
| 1 | 1.00 | 1 | 1 | 0 | 0 | 0 | 0 | 0.01 | t | 43317 | NATAEGR<br>AINRRVE           | Mus<br>musculu<br>s |
| 1 | 1.00 | 1 | 1 | 0 | 0 | 0 | 0 | 0.01 | t | 48513 | PLTRATAD<br>NKDELIKR<br>ANDY | Mus<br>musculu<br>s |
| 1 | 1.00 | 1 | 1 | 0 | 0 | 0 | 0 | 0.01 | t | 50716 | QEVFSLVK<br>EPILKQTQ<br>ASSS | Mus<br>musculu<br>s |
| 1 | 1.00 | 1 | 1 | 0 | 0 | 0 | 0 | 0.01 | t | 43796 | NEYGVEG<br>GRVNAV            | Mus<br>musculu<br>s |
| 1 | 1.00 | 1 | 1 | 0 | 0 | 0 | 0 | 0.01 | t | 23341 | GYGESRPV<br>ADN              | Mus<br>musculu<br>s |
| 1 | 1.00 | 1 | 1 | 0 | 0 | 0 | 0 | 0.01 | t | 30704 | KFDFDKSK<br>VKENSY           | Mus<br>musculu<br>s |
| 1 | 1.00 | 1 | 1 | 0 | 0 | 0 | 0 | 0.01 | t | 11603 | EEERTFTEL<br>PYEARYKA<br>WKS | Mus<br>musculu<br>s |
| 1 | 1.00 | 1 | 1 | 0 | 0 | 0 | 0 | 0.01 | t | 11155 | EAPKSHSIS<br>NNEQLINE<br>LND | Mus<br>musculu<br>s |

|   |      |   |   |   |   |   |   |      |   |       |                              |                                  |
|---|------|---|---|---|---|---|---|------|---|-------|------------------------------|----------------------------------|
| 1 | 1.00 | 1 | 1 | 0 | 0 | 0 | 0 | 0.01 | t | 11893 | EETKNKEL<br>DKKNKELD<br>SRVT | Mus<br>musculu<br>s              |
| 1 | 1.00 | 1 | 1 | 0 | 0 | 0 | 0 | 0.01 | t | 24587 | HQLADAA<br>RREVLKGE<br>TVPA  | Mus<br>musculu<br>s              |
| 1 | 1.00 | 1 | 1 | 0 | 0 | 0 | 0 | 0.01 | t | 14772 | EVLTRRQS<br>QDPKYVT<br>QRIS  | Mus<br>musculu<br>s              |
| 1 | 1.00 | 1 | 1 | 0 | 0 | 0 | 0 | 0.01 | t | 14279 | ESSTVKA<br>ESSTVKAES<br>STIS | Mus<br>musculu<br>s              |
| 1 | 1.00 | 1 | 1 | 0 | 0 | 0 | 0 | 0.01 | t | 12536 | EINTEEEG<br>TPDQISSLI<br>EK  | Mus<br>musculu<br>s              |
| 1 | 1.00 | 1 | 1 | 0 | 0 | 0 | 0 | 0.01 | t | 14300 | ESVLQAQ<br>MAAQQLP<br>VIGGIA | Mus<br>musculu<br>s              |
| 1 | 1.00 | 1 | 1 | 0 | 0 | 0 | 0 | 0.01 | t | 14280 | ESSVDRRP<br>METVSKD<br>S     | Mus<br>musculu<br>s              |
| 1 | 1.00 | 1 | 1 | 0 | 0 | 0 | 0 | 0.01 | t | 33025 | KQLIAKDP<br>KNKETYEK<br>N    | Mus<br>musculu<br>s              |
| 1 | 1.00 | 1 | 1 | 0 | 0 | 0 | 0 | 0.01 | t | 31718 | KKTKDTKP<br>VVKKEERQ<br>NVN  | Mus<br>musculu<br>s              |
| 1 | 1.00 | 1 | 1 | 0 | 0 | 0 | 0 | 0.01 | t | 12229 | EGNARLA<br>QAQEEAL<br>RDVLN  | Mus<br>musculu<br>s              |
| 1 | 1.00 | 1 | 1 | 0 | 0 | 0 | 0 | 0.01 | t | 9463  | DNGKAIYE<br>RARERALQ<br>ELGP | Mus<br>musculu<br>s              |
| 1 | 1.00 | 1 | 1 | 0 | 0 | 0 | 0 | 0.01 | t | 5562  | AVTKGTIN<br>DPEA             | Oryctola<br>gus<br>cuniculu<br>s |

|   |      |   |   |   |   |   |   |      |   |       |                              |                                  |
|---|------|---|---|---|---|---|---|------|---|-------|------------------------------|----------------------------------|
| 1 | 1.00 | 1 | 1 | 0 | 0 | 0 | 0 | 0.01 | t | 10204 | DSPIEQPRI<br>IPNGGTLT<br>N   | Mus<br>musculu<br>s              |
| 1 | 1.00 | 1 | 1 | 0 | 0 | 0 | 0 | 0.01 | t | 9463  | DNGKAIYE<br>RARERALQ<br>ELGP | Mus<br>musculu<br>s              |
| 1 | 1.00 | 1 | 1 | 0 | 0 | 0 | 0 | 0.01 | t | 2156  | AKAVAAW<br>TLKAAA            | Mus<br>musculu<br>s              |
| 1 | 1.00 | 1 | 1 | 0 | 0 | 0 | 0 | 0.01 | t | 5563  | AVTKGTIN<br>DPQAAKE<br>ALDKY | Oryctola<br>gus<br>cuniculu<br>s |
| 1 | 1.00 | 1 | 1 | 0 | 0 | 0 | 0 | 0.01 | t | 745   | ADPQKQN<br>SVSNDSVT<br>INVYN | Mus<br>musculu<br>s              |
| 1 | 1.00 | 1 | 1 | 0 | 0 | 0 | 0 | 0.01 | t | 675   | ADHPSYTA<br>AKDEVLSH<br>FSV  | Mus<br>musculu<br>s              |
| 1 | 1.00 | 1 | 1 | 0 | 0 | 0 | 0 | 0.01 | t | 1015  | AEKKVEAK<br>VEVAENN<br>VSSVA | Mus<br>musculu<br>s              |
| 1 | 1.00 | 1 | 1 | 0 | 0 | 0 | 0 | 0.01 | t | 9538  | DNPSSVPK<br>KAAELYDK<br>IK   | Mus<br>musculu<br>s              |
| 1 | 1.00 | 1 | 1 | 0 | 0 | 0 | 0 | 0.01 | t | 9463  | DNGKAIYE<br>RARERALQ<br>ELGP | Mus<br>musculu<br>s              |
| 1 | 1.00 | 1 | 1 | 0 | 0 | 0 | 0 | 0.01 | t | 9888  | DQPVDHH<br>RYTEANDA<br>VLQGR | Mus<br>musculu<br>s              |
| 1 | 1.00 | 1 | 1 | 0 | 0 | 0 | 0 | 0.01 | t | 9537  | DNPRYTD<br>AHNAVTVQ<br>GRTVP | Mus<br>musculu<br>s              |
| 1 | 1.00 | 1 | 1 | 0 | 0 | 0 | 0 | 0.01 | t | 562   | ACHNTSKP<br>SNTDSVFS<br>LTGK | Mus<br>musculu<br>s              |
| 1 | 1.00 | 1 | 1 | 0 | 0 | 0 | 0 | 0.01 | t | 9539  | DNPSSVPV<br>KAAELYD<br>KIK   | Mus<br>musculu<br>s              |

|   |      |   |   |   |   |   |   |      |   |      |                              |                                  |
|---|------|---|---|---|---|---|---|------|---|------|------------------------------|----------------------------------|
| 1 | 1.00 | 1 | 1 | 0 | 0 | 0 | 0 | 0.01 | t | 8000 | DEGPKDIT<br>DSLPA<br>WRDKA   | Mus<br>musculu<br>s              |
| 1 | 1.00 | 1 | 1 | 0 | 0 | 0 | 0 | 0.01 | t | 4429 | ASGQ                         | Mus<br>musculu<br>s              |
| 1 | 1.00 | 1 | 1 | 0 | 0 | 0 | 0 | 0.01 | t | 8566 | DHSDLVAE<br>KQRL             | Mus<br>musculu<br>s              |
| 1 | 1.00 | 1 | 1 | 0 | 0 | 0 | 0 | 0.01 | t | 5582 | AVTRGTIN<br>DPQRAKE          | Oryctola<br>gus<br>cuniculu<br>s |
| 1 | 1.00 | 1 | 1 | 0 | 0 | 0 | 0 | 0.01 | t | 5584 | AVTRGTIN<br>DPQRAKE<br>ALDKY | Mus<br>musculu<br>s              |
| 1 | 1.00 | 1 | 1 | 0 | 0 | 0 | 0 | 0.01 | t | 8469 | DGPQKSV<br>SQGGVSL<br>DLYSKL | Mus<br>musculu<br>s              |
| 1 | 1.00 | 1 | 1 | 0 | 0 | 0 | 0 | 0.01 | t | 4013 | AQNFRNI<br>MHGSDSF<br>FYTFTS | Mus<br>musculu<br>s              |
| 1 | 1.00 | 1 | 1 | 0 | 0 | 0 | 0 | 0.01 | t | 4740 | ASREAKKQ<br>VEKALE           | Mus<br>musculu<br>s              |
| 1 | 1.00 | 1 | 1 | 0 | 0 | 0 | 0 | 0.01 | t | 7093 | CSTLVEKD<br>VAPKDELE<br>MLAW | Mus<br>musculu<br>s              |
| 1 | 1.00 | 1 | 1 | 0 | 0 | 0 | 0 | 0.01 | t | 8841 | DKARELLN<br>KYDVENS<br>MLQAN | Oryctola<br>gus<br>cuniculu<br>s |
| 1 | 1.00 | 1 | 1 | 0 | 0 | 0 | 0 | 0.01 | t | 5582 | AVTRGTIN<br>DPQRAKE          | Mus<br>musculu<br>s              |
| 1 | 1.00 | 1 | 1 | 0 | 0 | 0 | 0 | 0.01 | t | 4740 | ASREAKKQ<br>VEKALE           | Mus<br>musculu<br>s              |

|   |      |   |   |       |        |        |        |        |   |        |                              |                     |
|---|------|---|---|-------|--------|--------|--------|--------|---|--------|------------------------------|---------------------|
| 1 | 1.00 | 1 | 1 | 0     | 0      | 0      | 0      | 0.01   | t | 7629   | DARSVNG<br>EFPRHVKL<br>KNEIE | Mus<br>musculu<br>s |
| 1 | 1.00 | 1 | 1 | 0     | 0      | 0      | 0      | 0.01   | t | 4740   | ASREAKKQ<br>VEKALE           | Mus<br>musculu<br>s |
| 1 | 1.00 | 1 | 1 | 0     | 0      | 0      | 0      | 0.01   | t | 280    | AALGHQH<br>AHNEYQA<br>KLAEKD | Mus<br>musculu<br>s |
| 1 | 1.00 | 1 | 1 | 0     | 0      | 0      | 0      | 0.01   | t | 643    | ADDHPGA<br>VAARNDV<br>LSGFS  | Mus<br>musculu<br>s |
| 1 | 1.00 | 1 | 1 | -0.03 | -0.027 | -0.01  | -0.03  | -0.03  | t | 105164 | EFRHDSG                      | Mus<br>musculu<br>s |
| 1 | 1.00 | 1 | 1 | 0.02  | 0.02   | 0.02   | 0.02   | 0.03   | t | 121368 | HDDPQLG<br>AEAQAFTF          | Mus<br>musculu<br>s |
| 1 | 1.00 | 1 | 1 | -0.02 | -0.02  | -0.02  | -0.02  | -0.01  | t | 117095 | TISNRDYIR<br>PMD             | Homo<br>sapiens     |
| 1 | 1.00 | 1 | 1 | 0     | 0      | 0.007  | 0      | 0.009  | t | 103991 | IMEQCFEI<br>GCPATN           | Homo<br>sapiens     |
| 1 | 1.00 | 1 | 1 | 0     | 0.008  | 0.016  | 0      | 0.002  | t | 60978  | SSEVAVLY<br>QDVNCTD<br>V     | Gallus<br>gallus    |
| 1 | 1.00 | 1 | 1 | -0.02 | -0.019 | 0.006  | -0.021 | -0.02  | t | 49393  | PSGYCGRE<br>CGIKKGS          | Equus<br>caballus   |
| 1 | 1.00 | 1 | 1 | -0.04 | -0.042 | -0.005 | -0.039 | -0.041 | t | 149350 | KRIHIGPG<br>RAFYTT           | Homo<br>sapiens     |
| 1 | 1.00 | 1 | 1 | -0.05 | -0.046 | -0.024 | -0.049 | -0.05  | t | 33851  | KTRVYTNN<br>S                | Homo<br>sapiens     |
| 1 | 1.00 | 1 | 1 | -0.02 | -0.02  | 0.004  | -0.019 | -0.019 | t | 78854  | TKDTNNN<br>LKG               | Mus<br>musculu<br>s |
| 1 | 1.00 | 1 | 1 | -0.05 | -0.05  | -0.034 | -0.05  | -0.048 | t | 914    | AEGCVGR<br>VCDSTRAM<br>AVM   | Mus<br>musculu<br>s |

|   |      |   |   |       |        |        |        |        |   |        |                              |                                  |
|---|------|---|---|-------|--------|--------|--------|--------|---|--------|------------------------------|----------------------------------|
| 1 | 1.00 | 1 | 1 | -0.02 | -0.016 | 0.008  | -0.017 | -0.02  | t | 104309 | TLPQPPCA<br>HGQHYGH<br>HHHQL | Homo<br>sapiens                  |
| 1 | 1.00 | 1 | 1 | 0.01  | 0.012  | 0.03   | 0.011  | 0.012  | t | 53046  | QYVLATYD<br>TSRVEHA          | Homo<br>sapiens                  |
| 1 | 1.00 | 1 | 1 | 0.01  | 0.008  | 0.03   | 0.013  | 0.01   | t | 39664  | LSSKAVNH<br>IRSVWKDL<br>LEDT | Mus<br>musculu<br>s              |
| 1 | 1.00 | 1 | 1 | -0.05 | -0.05  | -0.05  | -0.057 | -0.05  | t | 112273 | QRPFGFY<br>GGRASDY<br>KSAHKG | Homo<br>sapiens                  |
| 1 | 1.00 | 1 | 1 | 0.01  | 0.014  | 0.028  | 0.01   | 0.012  | t | 149477 | SSSTVGYP<br>GKYPSVI          | Cavia<br>porcellu<br>s           |
| 1 | 1.00 | 1 | 1 | 0     | 0      | 0      | 0      | 0.01   | t | 121741 | QCVLAIFN<br>DVYWLPY          | Mus<br>musculu<br>s              |
| 1 | 1.00 | 1 | 1 | -0.04 | -0.04  | -0.033 | -0.04  | -0.031 | t | 64837  | TLHLPHLW<br>RPLS             | Mus<br>musculu<br>s              |
| 1 | 1.00 | 1 | 1 | -0.02 | -0.022 | -0.021 | -0.017 | -0.008 | t | 106535 | IFPSFLRPD<br>PPL             | Mus<br>musculu<br>s              |
| 1 | 1.00 | 1 | 1 | -0.01 | -0.01  | -0.003 | -0.01  | -0.001 | t | 124013 | DKRQLQS<br>GQ                | Homo<br>sapiens                  |
| 1 | 1.00 | 1 | 1 | -0.03 | -0.034 | -0.029 | -0.033 | -0.02  | t | 79658  | THQRPAT                      | Oryctola<br>gus<br>cuniculu<br>s |
| 1 | 1.00 | 1 | 1 | 0.01  | 0.01   | 0.01   | 0.01   | 0.02   | t | 127739 | MHLNTAS                      | Homo<br>sapiens                  |
| 1 | 1.00 | 1 | 1 | -0.04 | -0.038 | -0.04  | -0.034 | -0.031 | t | 138196 | KLTSSLRC<br>NCPPLRF          | Homo<br>sapiens                  |
| 1 | 1.00 | 1 | 1 | 0.04  | 0.038  | 0.045  | 0.033  | 0.05   | t | 156755 | SGFSY                        | Mus<br>musculu<br>s              |
| 1 | 1.00 | 1 | 1 | -0.02 | -0.018 | 0.001  | -0.023 | -0.02  | t | 31885  | KLKGFGAA<br>RV               | Homo<br>sapiens                  |

|   |      |   |   |       |        |        |        |        |   |        |                     |                |
|---|------|---|---|-------|--------|--------|--------|--------|---|--------|---------------------|----------------|
| 1 | 1.00 | 1 | 1 | -0.03 | -0.03  | 0      | -0.03  | -0.028 | t | 63832  | TGGAGYFY            | Mus musculus   |
| 1 | 1.00 | 1 | 1 | -0.03 | -0.027 | 0      | -0.03  | -0.028 | t | 63832  | TGGAGYFY            | Equus caballus |
| 1 | 1.00 | 1 | 1 | -0.01 | -0.012 | 0.017  | -0.011 | -0.01  | t | 21510  | GNRPVRP<br>QVYFSASS | Mus musculus   |
| 1 | 1.00 | 1 | 1 | 0     | 0      | 0.002  | 0      | 0.01   | t | 142576 | DGASYSW<br>MYEA     | Mus musculus   |
| 1 | 1.00 | 1 | 1 | 0     | 0      | 0.002  | 0      | 0.01   | t | 142576 | DGASYSW<br>MYEA     | Mus musculus   |
| 1 | 1.00 | 1 | 1 | -0.03 | -0.032 | -0.026 | -0.037 | -0.03  | t | 106427 | FSYLNHLIT<br>NMAQRT | Mus musculus   |
| 1 | 1.00 | 1 | 1 | 0     | 0.003  | 0.001  | 0.003  | 0.01   | t | 78191  | KVRVSD              | Equus caballus |
| 1 | 1.00 | 1 | 1 | 0.01  | 0.01   | 0.01   | 0.01   | 0.02   | t | 153343 | ACRDHLY<br>GSCGGGS  | Mus musculus   |
| 1 | 1.00 | 1 | 1 | 0.01  | 0.01   | 0.01   | 0.01   | 0.02   | t | 121183 | CVRGEYST<br>CSAFRVF | Mus musculus   |
| 1 | 1.00 | 1 | 1 | -0.03 | -0.03  | -0.03  | -0.03  | -0.02  | t | 78261  | RKFLAA              | Equus caballus |
| 1 | 1.00 | 1 | 1 | 0.04  | 0.042  | 0.066  | 0.037  | 0.038  | t | 96063  | AEDKEDD<br>AED      | Homo sapiens   |
| 1 | 1.00 | 1 | 1 | 0.04  | 0.042  | 0.066  | 0.037  | 0.038  | t | 96063  | AEDKEDD<br>AED      | Homo sapiens   |
| 1 | 1.00 | 1 | 1 | 0.04  | 0.044  | 0.066  | 0.037  | 0.038  | t | 96063  | AEDKEDD<br>AED      | Homo sapiens   |
| 1 | 1.00 | 1 | 1 | -0.01 | -0.008 | 0.012  | -0.013 | -0.01  | t | 66879  | TTTTQTQP<br>SKPT    | Homo sapiens   |



|   |      |   |   |       |        |        |        |        |   |        |                              |                     |
|---|------|---|---|-------|--------|--------|--------|--------|---|--------|------------------------------|---------------------|
| 1 | 1.00 | 1 | 1 | -0.01 | -0.01  | -0.001 | -0.007 | -0.008 | t | 110955 | NQNPGSP<br>RPGSTGT<br>WNPSS  | Mus<br>musculu<br>s |
| 1 | 1.00 | 1 | 1 | -0.01 | -0.008 | 0.005  | -0.013 | -0.009 | t | 48594  | PNAKSVKE<br>YLDKVRAT<br>VGC  | Homo<br>sapiens     |
| 1 | 1.00 | 1 | 1 | 0     | 0      | 0      | 0      | 0.01   | t | 112721 | WHAPQTP<br>YWASM             | Homo<br>sapiens     |
| 1 | 1.00 | 1 | 1 | -0.05 | -0.046 | -0.023 | -0.047 | -0.05  | t | 45178  | NNMSCLS<br>HETICGRN<br>P     | Homo<br>sapiens     |
| 1 | 1.00 | 1 | 1 | -0.01 | -0.01  | 0.007  | -0.007 | -0.004 | t | 52020  | QQFGRD                       | Homo<br>sapiens     |
| 1 | 1.00 | 1 | 1 | -0.02 | -0.02  | 0      | -0.02  | -0.018 | t | 52599  | QTQPSKPT<br>TKQR             | Mus<br>musculu<br>s |
| 1 | 1.00 | 1 | 1 | 0.02  | 0.02   | 0.02   | 0.016  | 0.029  | t | 132780 | APHWGQ<br>N                  | Homo<br>sapiens     |
| 1 | 1.00 | 1 | 1 | -0.04 | -0.04  | -0.04  | -0.04  | -0.031 | t | 79185  | DLWSVL                       | Mus<br>musculu<br>s |
| 1 | 1.00 | 1 | 1 | 0.01  | 0.01   | 0.01   | 0.01   | 0.02   | t | 121739 | QCSLAIRIP<br>YQKLPY          | Mus<br>musculu<br>s |
| 1 | 1.00 | 1 | 1 | -0.01 | -0.01  | 0.015  | -0.01  | -0.008 | t | 147400 | VVILVAVN<br>EK               | Homo<br>sapiens     |
| 1 | 1.00 | 1 | 1 | 0.02  | 0.02   | 0.027  | 0.02   | 0.022  | t | 126341 | ITGHCQG<br>DGYRVGF<br>G      | Mus<br>musculu<br>s |
| 1 | 1.00 | 1 | 1 | 0     | -0.002 | 0      | -0.007 | 0.003  | t | 130518 | ITQSTQSF<br>NDFTRVV          | Mus<br>musculu<br>s |
| 1 | 1.00 | 1 | 1 | 0     | 0      | 0      | 0      | 0.009  | t | 137414 | HAPRYHTI<br>YGWP             | Mus<br>musculu<br>s |
| 1 | 1.00 | 1 | 1 | -0.02 | -0.018 | 0      | -0.023 | -0.018 | t | 48708  | PNTALLSL<br>VL               | Homo<br>sapiens     |
| 1 | 1.00 | 1 | 1 | -0.02 | -0.018 | -0.004 | -0.017 | -0.018 | t | 33776  | KTMIRFGD<br>VGLDLDFS<br>AFDA | Homo<br>sapiens     |

|   |      |   |   |       |        |        |        |        |   |        |                            |                                  |
|---|------|---|---|-------|--------|--------|--------|--------|---|--------|----------------------------|----------------------------------|
| 1 | 1.00 | 1 | 1 | -0.01 | -0.01  | -0.003 | -0.01  | -0.001 | t | 108825 | AVLMLPV<br>WACLS           | Mus<br>musculu<br>s              |
| 1 | 1.00 | 1 | 1 | 0     | 0      | 0.007  | 0      | 0.005  | t | 131083 | SQTTANPS<br>CPEAT          | Rattus<br>norvegic<br>us         |
| 1 | 1.00 | 1 | 1 | -0.02 | -0.022 | -0.021 | -0.017 | -0.008 | t | 106853 | SLWTPYPD<br>QLSR           | Mus<br>musculu<br>s              |
| 1 | 1.00 | 1 | 1 | -0.05 | -0.048 | -0.025 | -0.053 | -0.047 | t | 45770  | NSARVGTS<br>SCRI           | Homo<br>sapiens                  |
| 1 | 1.00 | 1 | 1 | 0     | 0      | 0.01   | 0      | 0.01   | t | 35128  | LDDWGV                     | Homo<br>sapiens                  |
| 1 | 1.00 | 1 | 1 | -0.01 | -0.008 | 0.007  | -0.009 | -0.01  | t | 51484  | QLPQGTTL<br>PKGFYAEG<br>SR | Homo<br>sapiens                  |
| 1 | 1.00 | 1 | 1 | -0.03 | -0.025 | -0.01  | -0.03  | -0.03  | t | 105265 | KLVFFAED<br>VGSNKGA        | Canis<br>familiari<br>s          |
| 1 | 1.00 | 1 | 1 | -0.02 | -0.018 | -0.013 | -0.013 | -0.011 | t | 104955 | QRSGRGP                    | Homo<br>sapiens                  |
| 1 | 1.00 | 1 | 1 | 0     | -0.002 | 0.005  | -0.001 | 0.01   | t | 66390  | TSQPRWH<br>QKPAT           | Mus<br>musculu<br>s              |
| 1 | 1.00 | 1 | 1 | -0.01 | -0.008 | -0.005 | -0.009 | 0      | t | 6725   | CNRLPREL<br>C              | Homo<br>sapiens                  |
| 1 | 1.00 | 1 | 1 | -0.02 | -0.016 | 0      | -0.02  | -0.02  | t | 44563  | NKNTLQA<br>RQQTVSA         | Myodes<br>glareolu<br>s          |
| 1 | 1.00 | 1 | 1 | -0.01 | -0.014 | -0.009 | -0.013 | 0      | t | 79547  | FHQMPDA                    | Oryctola<br>gus<br>cuniculu<br>s |
| 1 | 1.00 | 1 | 1 | -0.03 | -0.032 | -0.007 | -0.031 | -0.029 | t | 119563 | EDHRQVV<br>EVTVGLQL<br>I   | Mus<br>musculu<br>s              |
| 1 | 1.00 | 1 | 1 | -0.03 | -0.027 | -0.007 | -0.031 | -0.029 | t | 119563 | EDHRQVV<br>EVTVGLQL<br>I   | Mus<br>musculu<br>s              |

|   |      |   |   |       |        |        |        |        |   |        |                              |                                  |
|---|------|---|---|-------|--------|--------|--------|--------|---|--------|------------------------------|----------------------------------|
| 1 | 1.00 | 1 | 1 | -0.01 | -0.01  | -0.01  | -0.01  | 0      | t | 5584   | AVTRGTIN<br>DPQRAKE<br>ALDKY | Mus<br>musculu<br>s              |
| 1 | 1.00 | 1 | 1 | 0.01  | 0.012  | 0.031  | 0.017  | 0.022  | t | 108289 | ATNIFIEGT                    | Homo<br>sapiens                  |
| 1 | 1.00 | 1 | 1 | -0.04 | -0.04  | -0.04  | -0.033 | -0.029 | t | 117519 | GRGTVAA<br>AAAAAT            | Mus<br>musculu<br>s              |
| 1 | 1.00 | 1 | 1 | -0.02 | -0.018 | -0.003 | -0.019 | -0.018 | t | 45250  | NNSPAVYL<br>LDGLRAQ<br>DDYNG | Homo<br>sapiens                  |
| 1 | 1.00 | 1 | 1 | -0.05 | -0.048 | -0.032 | -0.049 | -0.048 | t | 149468 | SKHPNWT<br>NTQVRSSL          | Cavia<br>porcellu<br>s           |
| 1 | 1.00 | 1 | 1 | 0.02  | 0.02   | 0.02   | 0.02   | 0.03   | t | 147563 | CYGTEPW<br>MC                | Homo<br>sapiens                  |
| 1 | 1.00 | 1 | 1 | 0     | 0      | 0      | 0      | 0.01   | t | 72561  | WHWTWL<br>SDYPPP             | Oryctola<br>gus<br>cuniculu<br>s |
| 1 | 1.00 | 1 | 1 | -0.04 | -0.036 | -0.013 | -0.043 | -0.038 | t | 16397  | FKLKAIE                      | Homo<br>sapiens                  |
| 1 | 1.00 | 1 | 1 | 0     | 0.005  | 0.022  | -0.001 | 0.001  | t | 43438  | NDFPINELI<br>LDTDLISKI<br>E  | Homo<br>sapiens                  |
| 1 | 1.00 | 1 | 1 | 0     | 0.002  | 0.009  | 0.007  | 0.008  | t | 108086 | QTRGFPSC<br>ERGYLSP          | Homo<br>sapiens                  |
| 1 | 1.00 | 1 | 1 | 0     | -0.002 | 0.007  | -0.001 | 0.007  | t | 117140 | DWEYSVW<br>LSN               | Mus<br>musculu<br>s              |
| 1 | 1.00 | 1 | 1 | 0.01  | 0.012  | 0.015  | 0.017  | 0.021  | t | 108380 | GGETLLH<br>MA                | Homo<br>sapiens                  |
| 1 | 1.00 | 1 | 1 | 0     | 0      | 0.007  | 0      | 0.012  | t | 127683 | HFHRPYS                      | Homo<br>sapiens                  |
| 1 | 1.00 | 1 | 1 | 0.01  | 0.01   | 0.01   | 0.01   | 0.02   | t | 79156  | APHELR                       | Mus<br>musculu<br>s              |
| 1 | 1.00 | 1 | 1 | -0.01 | -0.008 | -0.014 | -0.013 | 0      | t | 78372  | ELAASAIV<br>G                | Homo<br>sapiens                  |

|   |      |   |   |       |        |        |        |        |   |        |                             |                                  |
|---|------|---|---|-------|--------|--------|--------|--------|---|--------|-----------------------------|----------------------------------|
| 1 | 1.00 | 1 | 1 | -0.04 | -0.037 | 0.007  | -0.034 | -0.04  | t | 54393  | RKLWCHH<br>FC               | Capra<br>hircus                  |
| 1 | 1.00 | 1 | 1 | 0.01  | 0.008  | 0.009  | 0.013  | 0.022  | t | 106923 | TQQSAWP<br>DTSFV            | Mus<br>musculu<br>s              |
| 1 | 1.00 | 1 | 1 | -0.02 | -0.022 | -0.02  | -0.027 | -0.016 | t | 119635 | RGWKHSV<br>TYS CCPDT<br>PY  | Mus<br>musculu<br>s              |
| 1 | 1.00 | 1 | 1 | -0.04 | -0.038 | -0.005 | -0.033 | -0.038 | t | 128812 | GTFKAFDK                    | Homo<br>sapiens                  |
| 1 | 1.00 | 1 | 1 | 0     | -0.007 | 0.028  | -0.003 | -0.002 | t | 98682  | AEPEQSLA<br>CQ              | Homo<br>sapiens                  |
| 1 | 1.00 | 1 | 1 | 0.01  | 0.01   | 0.036  | 0.01   | 0.01   | t | 24013  | HHPVDLA<br>DWELIESP<br>ED   | Sus<br>scrofa                    |
| 1 | 1.00 | 1 | 1 | 0     | 0.004  | 0.014  | -0.001 | 0.001  | t | 44468  | NKCKMNL<br>QDNNGN<br>DIGFIG | Homo<br>sapiens                  |
| 1 | 1.00 | 1 | 1 | 0.01  | 0.01   | 0.01   | 0.01   | 0.02   | t | 112723 | WHQTYTS<br>SLWES            | Homo<br>sapiens                  |
| 1 | 1.00 | 1 | 1 | -0.01 | -0.01  | -0.01  | -0.01  | 0      | t | 133659 | NPWYNDL<br>SLLTA            | Homo<br>sapiens                  |
| 1 | 1.00 | 1 | 1 | 0     | -0.002 | -0.008 | -0.007 | 0.005  | t | 124202 | GPAQITCT<br>PRGWDSP         | Mus<br>musculu<br>s              |
| 1 | 1.00 | 1 | 1 | -0.04 | -0.042 | -0.02  | -0.041 | -0.04  | t | 43589  | NEECTKLK<br>GESGYCQ         | Mus<br>musculu<br>s              |
| 1 | 1.00 | 1 | 1 | -0.04 | -0.042 | -0.038 | -0.047 | -0.037 | t | 132233 | DSGCVIN<br>WKGRELK<br>C     | Mus<br>musculu<br>s              |
| 1 | 1.00 | 1 | 1 | 0     | 0      | 0      | 0      | 0.01   | t | 24591  | HQLDPAF<br>GANSTNP<br>D     | Mus<br>musculu<br>s              |
| 1 | 1.00 | 1 | 1 | -0.03 | -0.03  | -0.017 | -0.03  | -0.027 | t | 136818 | ANFIIFRPV<br>V              | Mus<br>musculu<br>s              |
| 1 | 1.00 | 1 | 1 | -0.02 | -0.023 | -0.02  | -0.019 | -0.011 | t | 17553  | FQWSWYT<br>PPRPS            | Oryctola<br>gus<br>cuniculu<br>s |

|   |      |   |   |       |        |        |        |        |   |        |                            |                                  |
|---|------|---|---|-------|--------|--------|--------|--------|---|--------|----------------------------|----------------------------------|
| 1 | 1.00 | 1 | 1 | 0     | 0.007  | 0.023  | 0.003  | 0.002  | t | 67519  | VAAKGAD<br>TKSRSNQG<br>TRD | Gallus<br>gallus                 |
| 1 | 1.00 | 1 | 1 | -0.01 | -0.01  | -0.013 | -0.01  | 0.002  | t | 79038  | PFWLSD                     | Mus<br>musculu<br>s              |
| 1 | 1.00 | 1 | 1 | 0     | 0      | 0      | 0      | 0.012  | t | 78025  | TALSPTGL<br>RLQF           | Mus<br>musculu<br>s              |
| 1 | 1.00 | 1 | 1 | -0.01 | -0.006 | 0.018  | -0.007 | -0.01  | t | 21729  | GPPLGCLS<br>LSCYDVA        | Homo<br>sapiens                  |
| 1 | 1.00 | 1 | 1 | 0.03  | 0.03   | 0.039  | 0.03   | 0.04   | t | 12225  | EGLTATTF<br>EEDGVAA        | Mus<br>musculu<br>s              |
| 1 | 1.00 | 1 | 1 | -0.04 | -0.038 | -0.038 | -0.039 | -0.033 | t | 10686  | DVNLHSSR                   | Homo<br>sapiens                  |
| 1 | 1.00 | 1 | 1 | 0.04  | 0.04   | 0.047  | 0.04   | 0.052  | t | 108619 | SESTIQNLR                  | Homo<br>sapiens                  |
| 1 | 1.00 | 1 | 1 | -0.02 | -0.022 | -0.013 | -0.023 | -0.02  | t | 115664 | YGSLPQKA<br>QGHRPQD<br>ENG | Rattus<br>norvegic<br>us         |
| 1 | 1.00 | 1 | 1 | 0.02  | 0.016  | 0.029  | 0.023  | 0.031  | t | 99633  | RQNNLSL<br>MFFAG           | Oryctola<br>gus<br>cuniculu<br>s |
| 1 | 1.00 | 1 | 1 | 0.01  | 0.01   | 0.01   | 0.01   | 0.02   | t | 121673 | NVKKLCVA<br>KPLVDSF        | Mus<br>musculu<br>s              |
| 1 | 1.00 | 1 | 1 | 0     | 0      | 0.002  | 0      | 0.009  | t | 78310  | WHTSYLP                    | Homo<br>sapiens                  |
| 1 | 1.00 | 1 | 1 | 0     | 0      | 0      | 0      | 0.01   | t | 121679 | NVQVLCV<br>ASPLVDVF        | Mus<br>musculu<br>s              |
| 1 | 1.00 | 1 | 1 | -0.04 | -0.04  | -0.014 | -0.04  | -0.041 | t | 94765  | AAPSTLTA<br>RENIP          | Oryctola<br>gus<br>cuniculu<br>s |
| 1 | 1.00 | 1 | 1 | 0.01  | 0.008  | 0.013  | 0.017  | 0.023  | t | 103477 | PGSGFWS<br>FGSEDGS         | Mus<br>musculu<br>s              |

|   |      |   |   |       |        |        |        |        |   |        |                              |                                  |
|---|------|---|---|-------|--------|--------|--------|--------|---|--------|------------------------------|----------------------------------|
| 1 | 1.00 | 1 | 1 | -0.01 | -0.012 | -0.004 | -0.004 | -0.001 | t | 73159  | WTTCQSIA<br>FPSKTSASI<br>GSL | Mus<br>musculu<br>s              |
| 1 | 1.00 | 1 | 1 | -0.03 | -0.03  | 0      | -0.03  | -0.03  | t | 105600 | WRSKRDA<br>FTNG              | Homo<br>sapiens                  |
| 1 | 1.00 | 1 | 1 | 0.04  | 0.05   | 0.047  | 0.042  | 0.047  | t | 136561 | PTDNDHT<br>FDALQ             | Dicentra<br>rchus<br>labrax      |
| 1 | 1.00 | 1 | 1 | -0.08 | -0.08  | -0.051 | -0.08  | -0.08  | t | 80049  | TGELTMY<br>WV                | Mus<br>musculu<br>s              |
| 1 | 1.00 | 1 | 1 | 0.01  | 0.01   | 0.019  | 0.01   | 0.019  | t | 122387 | GVGARLPE<br>QPPPFV           | Mus<br>musculu<br>s              |
| 1 | 1.00 | 1 | 1 | 0.03  | 0.028  | 0.054  | 0.029  | 0.03   | t | 42441  | MQWNST<br>TFHQTLQ            | Mus<br>musculu<br>s              |
| 1 | 1.00 | 1 | 1 | 0.01  | 0.012  | 0.028  | 0.011  | 0.012  | t | 149364 | LGGPSGSA<br>ALKAAVD          | Cavia<br>porcellu<br>s           |
| 1 | 1.00 | 1 | 1 | -0.01 | -0.01  | -0.01  | -0.01  | -0.001 | t | 153358 | AHPPWPL<br>QYVFRGG<br>GS     | Mus<br>musculu<br>s              |
| 1 | 1.00 | 1 | 1 | -0.01 | -0.01  | 0.018  | -0.01  | -0.01  | t | 67651  | VAKQHVR<br>DGRKDSL<br>DGF    | Homo<br>sapiens                  |
| 1 | 1.00 | 1 | 1 | 0     | 0      | 0.023  | 0      | 0.003  | t | 65788  | TPTPTPT<br>SPTP              | Oryctola<br>gus<br>cuniculu<br>s |
| 1 | 1.00 | 1 | 1 | -0.02 | -0.022 | -0.021 | -0.017 | -0.008 | t | 106741 | QQFAPWP<br>NWTLV             | Mus<br>musculu<br>s              |
| 1 | 1.00 | 1 | 1 | -0.01 | -0.01  | -0.002 | -0.01  | 0      | t | 638    | ADAVSRKK<br>MD               | Mus<br>musculu<br>s              |
| 1 | 1.00 | 1 | 1 | -0.12 | -0.12  | -0.104 | -0.12  | -0.119 | t | 144873 | ATWVDLV<br>LEGDSCLTI         | Mus<br>musculu<br>s              |

|   |      |   |   |       |        |        |        |        |   |        |                              |                                  |
|---|------|---|---|-------|--------|--------|--------|--------|---|--------|------------------------------|----------------------------------|
| 1 | 1.00 | 1 | 1 | -0.03 | -0.019 | -0.021 | -0.03  | -0.02  | t | 14583  | ETVARMF<br>PDFR              | Gallus<br>gallus                 |
| 1 | 1.00 | 1 | 1 | -0.03 | -0.027 | -0.018 | -0.03  | -0.021 | t | 76556  | YYNMAY                       | Mus<br>musculu<br>s              |
| 1 | 1.00 | 1 | 1 | -0.03 | -0.032 | -0.028 | -0.031 | -0.021 | t | 20105  | GGYPQQ<br>MVRHFA             | Sus<br>scrofa                    |
| 1 | 1.00 | 1 | 1 | -0.01 | -0.008 | -0.01  | -0.009 | 0      | t | 96521  | KVTKEKPT<br>PP               | Homo<br>sapiens(<br>human)       |
| 1 | 1.00 | 1 | 1 | 0.01  | 0.007  | 0.016  | 0.01   | 0.019  | t | 79519  | AQGNSVK                      | Oryctola<br>gus<br>cuniculu<br>s |
| 1 | 1.00 | 1 | 1 | 0.03  | 0.028  | 0.034  | 0.023  | 0.032  | t | 106427 | FSYLNHLIT<br>NMAQRT          | Mus<br>musculu<br>s              |
| 1 | 1.00 | 1 | 1 | 0     | 0      | 0      | 0      | 0.01   | t | 125426 | GQQQPFP<br>PQ                | Mus<br>musculu<br>s              |
| 1 | 1.00 | 1 | 1 | 0.01  | 0.016  | 0.024  | 0.013  | 0.02   | t | 132820 | FGSNDPY                      | Homo<br>sapiens                  |
| 1 | 1.00 | 1 | 1 | -0.01 | -0.008 | -0.01  | -0.013 | -0.008 | t | 97170  | ADQELGD<br>APFLDRLR<br>RDQKS | Homo<br>sapiens                  |
| 1 | 1.00 | 1 | 1 | 0     | 0.002  | 0.021  | 0.001  | 0.002  | t | 35840  | LFGKGG                       | Homo<br>sapiens                  |
| 1 | 1.00 | 1 | 1 | -0.02 | -0.02  | -0.014 | -0.014 | -0.011 | t | 10432  | DTNLASSTI<br>IKEGIDKTV       | Rattus<br>norvegic<br>us         |
| 1 | 1.00 | 1 | 1 | -0.01 | -0.014 | -0.009 | -0.013 | 0      | t | 79658  | THQRPAT                      | Oryctola<br>gus<br>cuniculu<br>s |
| 1 | 1.00 | 1 | 1 | -0.02 | -0.023 | -0.028 | -0.02  | -0.013 | t | 141056 | MSDGAVQ<br>PDGGQPA<br>VRNER  | Canis<br>lupus                   |

|   |      |   |   |       |        |        |        |        |   |        |                               |                 |
|---|------|---|---|-------|--------|--------|--------|--------|---|--------|-------------------------------|-----------------|
| 1 | 1.00 | 1 | 1 | 0.01  | 0.01   | 0.01   | 0.01   | 0.02   | t | 153345 | ACRDHYD<br>QMC GGGS           | Mus<br>musculus |
| 1 | 1.00 | 1 | 1 | -0.01 | -0.01  | -0.01  | -0.01  | 0      | t | 117088 | SRLPLSQP<br>SPNS              | Homo<br>sapiens |
| 1 | 1.00 | 1 | 1 | -0.01 | -0.01  | 0.011  | -0.016 | -0.01  | t | 18588  | GAGGGAG<br>GAGAGGG<br>AGGAGA  | Homo<br>sapiens |
| 1 | 1.00 | 1 | 1 | 0     | 0      | 0      | 0      | 0.01   | t | 58405  | SHRLLQTY<br>WSSA              | Mus<br>musculus |
| 1 | 1.00 | 1 | 1 | -0.04 | -0.04  | -0.008 | -0.04  | -0.04  | t | 105080 | AFNHFG<br>RLVQR               | Homo<br>sapiens |
| 1 | 1.00 | 1 | 1 | -0.01 | -0.012 | 0.007  | -0.01  | -0.009 | t | 110955 | NQNPGSP<br>RPGSTGT<br>WNP GSS | Mus<br>musculus |
| 1 | 1.00 | 1 | 1 | -0.04 | -0.04  | -0.018 | -0.04  | -0.04  | t | 30235  | KDRRSTGK<br>SWGK              | Homo<br>sapiens |
| 1 | 1.00 | 1 | 1 | 0.01  | 0.01   | 0.01   | 0.01   | 0.02   | t | 117099 | TSPHKTTL<br>DLNA              | Homo<br>sapiens |
| 1 | 1.00 | 1 | 1 | -0.05 | -0.047 | -0.023 | -0.05  | -0.05  | t | 141615 | DHDLIR<br>RTAQI               | Mus<br>musculus |
| 1 | 1.00 | 1 | 1 | -0.01 | -0.008 | 0.01   | -0.013 | -0.006 | t | 64882  | TLKQAPA                       | Homo<br>sapiens |
| 1 | 1.00 | 1 | 1 | -0.04 | -0.037 | -0.02  | -0.04  | -0.039 | t | 105127 | DAEFRHD                       | Mus<br>musculus |
| 1 | 1.00 | 1 | 1 | -0.04 | -0.037 | -0.02  | -0.04  | -0.039 | t | 105127 | DAEFRHD                       | Mus<br>musculus |
| 1 | 1.00 | 1 | 1 | -0.04 | -0.037 | -0.02  | -0.04  | -0.039 | t | 105127 | DAEFRHD                       | Mus<br>musculus |
| 1 | 1.00 | 1 | 1 | -0.01 | -0.007 | 0.005  | -0.011 | -0.01  | t | 74376  | YISQKFMP<br>QHNPLQD           | Capra<br>hircus |
| 1 | 1.00 | 1 | 1 | 0.01  | 0.01   | 0.012  | 0.003  | 0.011  | t | 104246 | SHITAETA<br>KRRLARGS<br>PPSL  | Homo<br>sapiens |



|   |      |   |   |       |        |        |        |        |   |        |                              |                     |
|---|------|---|---|-------|--------|--------|--------|--------|---|--------|------------------------------|---------------------|
| 1 | 1.00 | 1 | 1 | -0.04 | -0.038 | -0.024 | -0.039 | -0.038 | t | 12218  | EGLLLLDV<br>TPLTLGIET<br>AGG | Homo<br>sapiens     |
| 1 | 1.00 | 1 | 1 | 0.01  | 0.01   | 0.01   | 0.01   | 0.02   | t | 10853  | DYAWDQT<br>HQ                | Mus<br>musculu<br>s |
| 1 | 1.00 | 1 | 1 | 0.05  | 0.048  | 0.049  | 0.053  | 0.062  | t | 106608 | LIQIDHPES<br>LLV             | Mus<br>musculu<br>s |
| 1 | 1.00 | 1 | 1 | -0.02 | -0.02  | -0.02  | -0.02  | -0.01  | t | 79376  | RRIFRD                       | Mus<br>musculu<br>s |
| 1 | 1.00 | 1 | 1 | -0.07 | -0.068 | -0.047 | -0.069 | -0.071 | t | 9619   | DPDYVPPV<br>VHGCP LPP<br>T   | Homo<br>sapiens     |
| 1 | 1.00 | 1 | 1 | -0.01 | -0.008 | 0.019  | -0.003 | -0.008 | t | 119498 | MRKSTGT<br>AS                | Homo<br>sapiens     |
| 1 | 1.00 | 1 | 1 | 0.05  | 0.05   | 0.057  | 0.05   | 0.062  | t | 57531  | SELPQWD                      | Mus<br>musculu<br>s |
| 1 | 1.00 | 1 | 1 | -0.02 | -0.02  | 0      | -0.02  | -0.018 | t | 52599  | QTQPSKPT<br>TKQR             | Homo<br>sapiens     |
| 1 | 1.00 | 1 | 1 | 0     | 0      | 0      | 0      | 0.01   | t | 153352 | ACVLPWS<br>HVC GGS           | Mus<br>musculu<br>s |
| 1 | 1.00 | 1 | 1 | 0     | 0      | 0      | 0      | 0.01   | t | 153355 | ACWLPLTR<br>LC GGS           | Mus<br>musculu<br>s |
| 1 | 1.00 | 1 | 1 | 0     | 0      | 0      | 0      | 0.01   | t | 138089 | WLRPPTS                      | Mus<br>musculu<br>s |
| 1 | 1.00 | 1 | 1 | 0     | 0      | 0      | 0      | 0.01   | t | 137941 | PFRSYTK                      | Mus<br>musculu<br>s |
| 1 | 1.00 | 1 | 1 | 0     | 0      | 0      | 0      | 0.01   | t | 153358 | AHPPWPL<br>QYVFRGG<br>GS     | Mus<br>musculu<br>s |
| 1 | 1.00 | 1 | 1 | 0     | 0      | 0      | 0      | 0.01   | t | 138088 | WLDLSKT                      | Mus<br>musculu<br>s |
| 1 | 1.00 | 1 | 1 | 0     | 0      | 0      | 0      | 0.01   | t | 144081 | SLWQDRL<br>NAMQS             | Mus<br>musculu<br>s |
| 1 | 1.00 | 1 | 1 | 0     | 0      | 0      | 0      | 0.01   | t | 137432 | NHNYPPLS<br>LLTF             | Mus<br>musculu<br>s |

|   |      |   |   |   |   |   |   |      |   |        |                     |                            |
|---|------|---|---|---|---|---|---|------|---|--------|---------------------|----------------------------|
| 1 | 1.00 | 1 | 1 | 0 | 0 | 0 | 0 | 0.01 | t | 143932 | HNIWSAP<br>RLIFN    | Homo<br>sapiens            |
| 1 | 1.00 | 1 | 1 | 0 | 0 | 0 | 0 | 0.01 | t | 138097 | YPYPLIS             | Mus<br>musculu<br>s        |
| 1 | 1.00 | 1 | 1 | 0 | 0 | 0 | 0 | 0.01 | t | 153455 | RVPNVLP<br>LPFLGGGS | Mus<br>musculu<br>s        |
| 1 | 1.00 | 1 | 1 | 0 | 0 | 0 | 0 | 0.01 | t | 121842 | SGGVLLPC<br>YSFSWSC | Mus<br>musculu<br>s        |
| 1 | 1.00 | 1 | 1 | 0 | 0 | 0 | 0 | 0.01 | t | 131914 | IKKEKPF<br>SNKVECA  | Homo<br>sapiens            |
| 1 | 1.00 | 1 | 1 | 0 | 0 | 0 | 0 | 0.01 | t | 121978 | VIEPVT<br>PRNYIGIP  | Mus<br>musculu<br>s        |
| 1 | 1.00 | 1 | 1 | 0 | 0 | 0 | 0 | 0.01 | t | 130555 | MHNRTQA<br>LEDSR    | Camelus<br>dromed<br>arius |
| 1 | 1.00 | 1 | 1 | 0 | 0 | 0 | 0 | 0.01 | t | 121735 | QCCLAIPH<br>TENSPLY | Mus<br>musculu<br>s        |
| 1 | 1.00 | 1 | 1 | 0 | 0 | 0 | 0 | 0.01 | t | 121847 | SGVFLSVP<br>ESYFGSC | Mus<br>musculu<br>s        |
| 1 | 1.00 | 1 | 1 | 0 | 0 | 0 | 0 | 0.01 | t | 121843 | SGLGLFPY<br>SSFIWSC | Mus<br>musculu<br>s        |
| 1 | 1.00 | 1 | 1 | 0 | 0 | 0 | 0 | 0.01 | t | 118060 | PPPGMRP<br>P        | Homo<br>sapiens            |
| 1 | 1.00 | 1 | 1 | 0 | 0 | 0 | 0 | 0.01 | t | 121948 | VAKPRDPI<br>NYLHIPS | Mus<br>musculu<br>s        |
| 1 | 1.00 | 1 | 1 | 0 | 0 | 0 | 0 | 0.01 | t | 121701 | PDSPQRV<br>AEAEAVSF | Mus<br>musculu<br>s        |
| 1 | 1.00 | 1 | 1 | 0 | 0 | 0 | 0 | 0.01 | t | 121736 | QCFLAITNI<br>QLILPY | Mus<br>musculu<br>s        |
| 1 | 1.00 | 1 | 1 | 0 | 0 | 0 | 0 | 0.01 | t | 121670 | NVFQLEVA<br>MALVDGL | Mus<br>musculu<br>s        |
| 1 | 1.00 | 1 | 1 | 0 | 0 | 0 | 0 | 0.01 | t | 121671 | NVKELLVA<br>SPLVDPF | Mus<br>musculu<br>s        |
| 1 | 1.00 | 1 | 1 | 0 | 0 | 0 | 0 | 0.01 | t | 121183 | CVRGEYST<br>CSAFRVF | Mus<br>musculu<br>s        |

|   |      |   |   |   |   |   |   |      |   |        |                              |                            |
|---|------|---|---|---|---|---|---|------|---|--------|------------------------------|----------------------------|
| 1 | 1.00 | 1 | 1 | 0 | 0 | 0 | 0 | 0.01 | t | 130612 | SPNTAHIT<br>SKSL             | Camelus<br>dromed<br>arius |
| 1 | 1.00 | 1 | 1 | 0 | 0 | 0 | 0 | 0.01 | t | 130859 | GLLAQQM<br>DY                | Homo<br>sapiens            |
| 1 | 1.00 | 1 | 1 | 0 | 0 | 0 | 0 | 0.01 | t | 122013 | VTLPHP<br>WVLINIVS           | Mus<br>musculu<br>s        |
| 1 | 1.00 | 1 | 1 | 0 | 0 | 0 | 0 | 0.01 | t | 131856 | EGSTDVDE<br>PLEVFISAP<br>RSE | Homo<br>sapiens            |
| 1 | 1.00 | 1 | 1 | 0 | 0 | 0 | 0 | 0.01 | t | 121672 | NVKHLSVA<br>YPLVDPF          | Mus<br>musculu<br>s        |
| 1 | 1.00 | 1 | 1 | 0 | 0 | 0 | 0 | 0.01 | t | 131165 | YRWLPSS<br>A                 | Homo<br>sapiens            |
| 1 | 1.00 | 1 | 1 | 0 | 0 | 0 | 0 | 0.01 | t | 121846 | SGVCLLPRI<br>SDVVSC          | Mus<br>musculu<br>s        |
| 1 | 1.00 | 1 | 1 | 0 | 0 | 0 | 0 | 0.01 | t | 121686 | NVVPLSVA<br>NPLVDAF          | Mus<br>musculu<br>s        |
| 1 | 1.00 | 1 | 1 | 0 | 0 | 0 | 0 | 0.01 | t | 121674 | NVKKLLVA<br>KPLVDWF          | Mus<br>musculu<br>s        |
| 1 | 1.00 | 1 | 1 | 0 | 0 | 0 | 0 | 0.01 | t | 130622 | TGLVAQG<br>TDSIG             | Camelus<br>dromed<br>arius |
| 1 | 1.00 | 1 | 1 | 0 | 0 | 0 | 0 | 0.01 | t | 121970 | VGNPFRPK<br>NYSGIPS          | Mus<br>musculu<br>s        |
| 1 | 1.00 | 1 | 1 | 0 | 0 | 0 | 0 | 0.01 | t | 121827 | RVVPLLVA<br>DPLVDPF          | Mus<br>musculu<br>s        |
| 1 | 1.00 | 1 | 1 | 0 | 0 | 0 | 0 | 0.01 | t | 132712 | TWSADGG<br>TLFCNMC<br>H      | Mus<br>musculu<br>s        |
| 1 | 1.00 | 1 | 1 | 0 | 0 | 0 | 0 | 0.01 | t | 121675 | NVKKLLVA<br>NPLVDSF          | Mus<br>musculu<br>s        |
| 1 | 1.00 | 1 | 1 | 0 | 0 | 0 | 0 | 0.01 | t | 121368 | HDDPQLG<br>AEAQAFTF          | Mus<br>musculu<br>s        |
| 1 | 1.00 | 1 | 1 | 0 | 0 | 0 | 0 | 0.01 | t | 130614 | STLPYLPTY<br>SKH             | Camelus<br>dromed<br>arius |
| 1 | 1.00 | 1 | 1 | 0 | 0 | 0 | 0 | 0.01 | t | 121849 | SGVPLYSHI<br>SYVISC          | Mus<br>musculu<br>s        |

|   |      |   |   |   |   |   |   |      |   |        |                   |                     |
|---|------|---|---|---|---|---|---|------|---|--------|-------------------|---------------------|
| 1 | 1.00 | 1 | 1 | 0 | 0 | 0 | 0 | 0.01 | t | 121184 | CVWGYSTPRPFRVS    | Mus musculus        |
| 1 | 1.00 | 1 | 1 | 0 | 0 | 0 | 0 | 0.01 | t | 130509 | HKKDFAR GPGWS     | Mus musculus        |
| 1 | 1.00 | 1 | 1 | 0 | 0 | 0 | 0 | 0.01 | t | 121769 | QVRLAIDC PNHDAPS  | Mus musculus        |
| 1 | 1.00 | 1 | 1 | 0 | 0 | 0 | 0 | 0.01 | t | 132640 | RTDDKMR MSHSLSH H | Mus musculus        |
| 1 | 1.00 | 1 | 1 | 0 | 0 | 0 | 0 | 0.01 | t | 121737 | QCRLAISRYVSGLPY   | Mus musculus        |
| 1 | 1.00 | 1 | 1 | 0 | 0 | 0 | 0 | 0.01 | t | 132149 | AHRRREPT REITDYR  | Mus musculus        |
| 1 | 1.00 | 1 | 1 | 0 | 0 | 0 | 0 | 0.01 | t | 121685 | NVVPLIVA SPYVDAF  | Mus musculus        |
| 1 | 1.00 | 1 | 1 | 0 | 0 | 0 | 0 | 0.01 | t | 130607 | SHNLVSSA FPSA     | Camelus dromedarius |
| 1 | 1.00 | 1 | 1 | 0 | 0 | 0 | 0 | 0.01 | t | 121677 | NVLALCVH SYLVDGA  | Mus musculus        |
| 1 | 1.00 | 1 | 1 | 0 | 0 | 0 | 0 | 0.01 | t | 132690 | TCSADGGT LFYNLCL  | Mus musculus        |
| 1 | 1.00 | 1 | 1 | 0 | 0 | 0 | 0 | 0.01 | t | 121743 | QCYLAIYN FFLLPY   | Mus musculus        |
| 1 | 1.00 | 1 | 1 | 0 | 0 | 0 | 0 | 0.01 | t | 121742 | QCVLAIFN NVYGLPY  | Mus musculus        |
| 1 | 1.00 | 1 | 1 | 0 | 0 | 0 | 0 | 0.01 | t | 121370 | HDSPQFIA EASAFHF  | Mus musculus        |
| 1 | 1.00 | 1 | 1 | 0 | 0 | 0 | 0 | 0.01 | t | 121679 | NVQVLCV ASPLVDVF  | Mus musculus        |
| 1 | 1.00 | 1 | 1 | 0 | 0 | 0 | 0 | 0.01 | t | 121844 | SGRALAPA VSWPLHV  | Mus musculus        |
| 1 | 1.00 | 1 | 1 | 0 | 0 | 0 | 0 | 0.01 | t | 121600 | LVLGHYST DGRFRVP  | Mus musculus        |
| 1 | 1.00 | 1 | 1 | 0 | 0 | 0 | 0 | 0.01 | t | 121841 | SGGSCLPV ISHYASC  | Mus musculus        |

|   |      |   |   |   |   |   |   |      |   |        |                         |                     |
|---|------|---|---|---|---|---|---|------|---|--------|-------------------------|---------------------|
| 1 | 1.00 | 1 | 1 | 0 | 0 | 0 | 0 | 0.01 | t | 132767 | YRDKSYPS<br>PFWCHRT     | Mus<br>musculu<br>s |
| 1 | 1.00 | 1 | 1 | 0 | 0 | 0 | 0 | 0.01 | t | 132689 | TCSADGGT<br>LFYNLCH     | Mus<br>musculu<br>s |
| 1 | 1.00 | 1 | 1 | 0 | 0 | 0 | 0 | 0.01 | t | 125376 | DHTLFSTG<br>HSHG        | Mus<br>musculu<br>s |
| 1 | 1.00 | 1 | 1 | 0 | 0 | 0 | 0 | 0.01 | t | 132403 | KHRPHGY<br>NSLVNTQ<br>V | Mus<br>musculu<br>s |
| 1 | 1.00 | 1 | 1 | 0 | 0 | 0 | 0 | 0.01 | t | 121717 | PRRPVDV<br>GNYWNIP<br>S | Mus<br>musculu<br>s |
| 1 | 1.00 | 1 | 1 | 0 | 0 | 0 | 0 | 0.01 | t | 121740 | QCSLAITIR<br>PWMLPY     | Mus<br>musculu<br>s |
| 1 | 1.00 | 1 | 1 | 0 | 0 | 0 | 0 | 0.01 | t | 121725 | PVHGLYST<br>NLDFRVK     | Mus<br>musculu<br>s |
| 1 | 1.00 | 1 | 1 | 0 | 0 | 0 | 0 | 0.01 | t | 121972 | VHAPSNP<br>ANYCTIPS     | Mus<br>musculu<br>s |
| 1 | 1.00 | 1 | 1 | 0 | 0 | 0 | 0 | 0.01 | t | 130599 | RQGEEVY<br>MWRDSM<br>PA | Mus<br>musculu<br>s |
| 1 | 1.00 | 1 | 1 | 0 | 0 | 0 | 0 | 0.01 | t | 121458 | KDTPQTSA<br>EAEAF LF    | Mus<br>musculu<br>s |
| 1 | 1.00 | 1 | 1 | 0 | 0 | 0 | 0 | 0.01 | t | 131048 | RQSDGQY<br>QM           | Homo<br>sapiens     |
| 1 | 1.00 | 1 | 1 | 0 | 0 | 0 | 0 | 0.01 | t | 121680 | NVQVLSV<br>ARPLVDYF     | Mus<br>musculu<br>s |
| 1 | 1.00 | 1 | 1 | 0 | 0 | 0 | 0 | 0.01 | t | 121848 | SGVPLCPL<br>ESNVISC     | Mus<br>musculu<br>s |
| 1 | 1.00 | 1 | 1 | 0 | 0 | 0 | 0 | 0.01 | t | 121361 | GVHAAYST<br>YPFFRVK     | Mus<br>musculu<br>s |
| 1 | 1.00 | 1 | 1 | 0 | 0 | 0 | 0 | 0.01 | t | 121164 | CDNPQAE<br>AEAHA FVF    | Mus<br>musculu<br>s |
| 1 | 1.00 | 1 | 1 | 0 | 0 | 0 | 0 | 0.01 | t | 121826 | RVVGPYST<br>STWFRVK     | Mus<br>musculu<br>s |
| 1 | 1.00 | 1 | 1 | 0 | 0 | 0 | 0 | 0.01 | t | 122022 | VVFPVPPP<br>NYINIPS     | Mus<br>musculu<br>s |

|   |      |   |   |   |   |   |   |      |   |        |                     |                                  |
|---|------|---|---|---|---|---|---|------|---|--------|---------------------|----------------------------------|
| 1 | 1.00 | 1 | 1 | 0 | 0 | 0 | 0 | 0.01 | t | 121695 | PDAPQAT<br>AEANAFGF | Mus<br>musculu<br>s              |
| 1 | 1.00 | 1 | 1 | 0 | 0 | 0 | 0 | 0.01 | t | 121778 | RDDPQLFA<br>EAYAFCF | Mus<br>musculu<br>s              |
| 1 | 1.00 | 1 | 1 | 0 | 0 | 0 | 0 | 0.01 | t | 131041 | RLVGQQV<br>MQ       | Homo<br>sapiens                  |
| 1 | 1.00 | 1 | 1 | 0 | 0 | 0 | 0 | 0.01 | t | 121779 | RDIPQRFA<br>EAQAFNF | Mus<br>musculu<br>s              |
| 1 | 1.00 | 1 | 1 | 0 | 0 | 0 | 0 | 0.01 | t | 121734 | QCCLADD<br>ECLLSLPY | Mus<br>musculu<br>s              |
| 1 | 1.00 | 1 | 1 | 0 | 0 | 0 | 0 | 0.01 | t | 121733 | QCALAIW<br>NDRKVLPI | Mus<br>musculu<br>s              |
| 1 | 1.00 | 1 | 1 | 0 | 0 | 0 | 0 | 0.01 | t | 130787 | EDFDIYDE<br>DE      | Mus<br>musculu<br>s              |
| 1 | 1.00 | 1 | 1 | 0 | 0 | 0 | 0 | 0.01 | t | 121739 | QCSLAIRIP<br>YQKLPI | Mus<br>musculu<br>s              |
| 1 | 1.00 | 1 | 1 | 0 | 0 | 0 | 0 | 0.01 | t | 121845 | SGRALLEF<br>SCFKGSC | Mus<br>musculu<br>s              |
| 1 | 1.00 | 1 | 1 | 0 | 0 | 0 | 0 | 0.01 | t | 121850 | SGVRLAPF<br>FSTRTSC | Mus<br>musculu<br>s              |
| 1 | 1.00 | 1 | 1 | 0 | 0 | 0 | 0 | 0.01 | t | 121986 | VLCFWGP<br>VNYEASPS | Mus<br>musculu<br>s              |
| 1 | 1.00 | 1 | 1 | 0 | 0 | 0 | 0 | 0.01 | t | 122020 | VVDPHGP<br>PNYINIPS | Mus<br>musculu<br>s              |
| 1 | 1.00 | 1 | 1 | 0 | 0 | 0 | 0 | 0.01 | t | 116978 | FPSHYWLY<br>PPPT    | Homo<br>sapiens                  |
| 1 | 1.00 | 1 | 1 | 0 | 0 | 0 | 0 | 0.01 | t | 117059 | PQTDGSTR<br>PRGL    | Homo<br>sapiens                  |
| 1 | 1.00 | 1 | 1 | 0 | 0 | 0 | 0 | 0.01 | t | 115268 | GLQYTPS<br>WLVG     | Mus<br>musculu<br>s              |
| 1 | 1.00 | 1 | 1 | 0 | 0 | 0 | 0 | 0.01 | t | 115268 | GLQYTPS<br>WLVG     | Mus<br>musculu<br>s              |
| 1 | 1.00 | 1 | 1 | 0 | 0 | 0 | 0 | 0.01 | t | 103104 | DFLIEEIERL<br>GQDL  | Oryctola<br>gus<br>cuniculu<br>s |
| 1 | 1.00 | 1 | 1 | 0 | 0 | 0 | 0 | 0.01 | t | 116954 | DPTDYSTR<br>PHMW    | Homo<br>sapiens                  |

|   |      |   |   |   |        |   |   |      |   |        |                      |                                  |
|---|------|---|---|---|--------|---|---|------|---|--------|----------------------|----------------------------------|
| 1 | 1.00 | 1 | 1 | 0 | -0.003 | 0 | 0 | 0.01 | t | 103104 | DFLIEEIERL<br>GQDL   | Oryctola<br>gus<br>cuniculu<br>s |
| 1 | 1.00 | 1 | 1 | 0 | 0      | 0 | 0 | 0.01 | t | 106428 | FVEIYSP              | Homo<br>sapiens                  |
| 1 | 1.00 | 1 | 1 | 0 | 0      | 0 | 0 | 0.01 | t | 102069 | SKSSITITN<br>KRLTRKC | Homo<br>sapiens                  |
| 1 | 1.00 | 1 | 1 | 0 | 0      | 0 | 0 | 0.01 | t | 106642 | MHLNTPP              | Homo<br>sapiens                  |
| 1 | 1.00 | 1 | 1 | 0 | 0      | 0 | 0 | 0.01 | t | 106429 | FVLPWRI              | Homo<br>sapiens                  |
| 1 | 1.00 | 1 | 1 | 0 | 0      | 0 | 0 | 0.01 | t | 106628 | LSSREPQA<br>R        | Homo<br>sapiens                  |
| 1 | 1.00 | 1 | 1 | 0 | 0      | 0 | 0 | 0.01 | t | 103477 | PGSGFWS<br>FGSEDGS   | Mus<br>musculu<br>s              |
| 1 | 1.00 | 1 | 1 | 0 | 0      | 0 | 0 | 0.01 | t | 106647 | MHLTTNI              | Homo<br>sapiens                  |
| 1 | 1.00 | 1 | 1 | 0 | 0      | 0 | 0 | 0.01 | t | 106235 | AGFNVPW              | Homo<br>sapiens                  |
| 1 | 1.00 | 1 | 1 | 0 | 0      | 0 | 0 | 0.01 | t | 103104 | DFLIEEIERL<br>GQDL   | Mus<br>musculu<br>s              |
| 1 | 1.00 | 1 | 1 | 0 | 0      | 0 | 0 | 0.01 | t | 106652 | MHTPNRSR             | Homo<br>sapiens                  |
| 1 | 1.00 | 1 | 1 | 0 | 0      | 0 | 0 | 0.01 | t | 97595  | QTPLTMA<br>ALELF     | Mus<br>musculu<br>s              |
| 1 | 1.00 | 1 | 1 | 0 | 0      | 0 | 0 | 0.01 | t | 61212  | SSMGAYW<br>GG        | Homo<br>sapiens                  |
| 1 | 1.00 | 1 | 1 | 0 | 0      | 0 | 0 | 0.01 | t | 76287  | YVGPLTQT<br>LYGM     | Mus<br>musculu<br>s              |
| 1 | 1.00 | 1 | 1 | 0 | 0      | 0 | 0 | 0.01 | t | 65409  | TNRNPQ               | Mus<br>musculu<br>s              |
| 1 | 1.00 | 1 | 1 | 0 | 0      | 0 | 0 | 0.01 | t | 72561  | WHWTWL<br>SDYPPP     | Oryctola<br>gus<br>cuniculu<br>s |
| 1 | 1.00 | 1 | 1 | 0 | -0.003 | 0 | 0 | 0.01 | t | 62440  | SWFDNFL<br>YPTH      | Oryctola<br>gus<br>cuniculu<br>s |
| 1 | 1.00 | 1 | 1 | 0 | -0.002 | 0 | 0 | 0.01 | t | 66347  | TSNTHACR<br>TCSNPCR  | Mus<br>musculu<br>s              |
| 1 | 1.00 | 1 | 1 | 0 | 0      | 0 | 0 | 0.01 | t | 91218  | DVLEATYA<br>MVQHVAK  | Capra<br>hircus                  |

|   |      |   |   |   |        |   |   |      |   |       |                     |                                  |
|---|------|---|---|---|--------|---|---|------|---|-------|---------------------|----------------------------------|
| 1 | 1.00 | 1 | 1 | 0 | 0      | 0 | 0 | 0.01 | t | 91222 | EAITDRIM<br>LYQE    | Capra<br>hircus                  |
| 1 | 1.00 | 1 | 1 | 0 | 0      | 0 | 0 | 0.01 | t | 63697 | TFLARG              | Mus<br>musculu<br>s              |
| 1 | 1.00 | 1 | 1 | 0 | 0      | 0 | 0 | 0.01 | t | 97288 | ETQLTTAG<br>LRLL    | Mus<br>musculu<br>s              |
| 1 | 1.00 | 1 | 1 | 0 | 0      | 0 | 0 | 0.01 | t | 97359 | GPGR                | Mus<br>musculu<br>s              |
| 1 | 1.00 | 1 | 1 | 0 | 0      | 0 | 0 | 0.01 | t | 97601 | RGRRQP              | Mus<br>musculu<br>s              |
| 1 | 1.00 | 1 | 1 | 0 | 0      | 0 | 0 | 0.01 | t | 65409 | TNRNPQ              | Mus<br>musculu<br>s              |
| 1 | 1.00 | 1 | 1 | 0 | 0      | 0 | 0 | 0.01 | t | 66347 | TSNTHACR<br>TCSNPCR | Mus<br>musculu<br>s              |
| 1 | 1.00 | 1 | 1 | 0 | -0.003 | 0 | 0 | 0.01 | t | 65568 | TPFHHQH<br>STGFT    | Oryctola<br>gus<br>cuniculu<br>s |
| 1 | 1.00 | 1 | 1 | 0 | 0      | 0 | 0 | 0.01 | t | 70499 | VPVDAPH<br>AGTKPHSA | Homo<br>sapiens                  |
| 1 | 1.00 | 1 | 1 | 0 | 0      | 0 | 0 | 0.01 | t | 72562 | WHWTWL<br>SEYPPP    | Oryctola<br>gus<br>cuniculu<br>s |
| 1 | 1.00 | 1 | 1 | 0 | 0      | 0 | 0 | 0.01 | t | 62502 | SWWNLP<br>QIG       | Homo<br>sapiens                  |
| 1 | 1.00 | 1 | 1 | 0 | 0      | 0 | 0 | 0.01 | t | 75588 | YREACTNG<br>KCFVLK  | Homo<br>sapiens                  |
| 1 | 1.00 | 1 | 1 | 0 | 0      | 0 | 0 | 0.01 | t | 97594 | QTPLTETA<br>LKWH    | Mus<br>musculu<br>s              |
| 1 | 1.00 | 1 | 1 | 0 | 0      | 0 | 0 | 0.01 | t | 63451 | TELKLAPP<br>VLNAPPL | Homo<br>sapiens                  |
| 1 | 1.00 | 1 | 1 | 0 | 0      | 0 | 0 | 0.01 | t | 73015 | WQWTWL<br>CEHPPP    | Oryctola<br>gus<br>cuniculu<br>s |
| 1 | 1.00 | 1 | 1 | 0 | 0      | 0 | 0 | 0.01 | t | 62328 | SVSLPYAN<br>LATH    | Mus<br>musculu<br>s              |



|   |      |   |   |   |        |   |   |      |   |       |                              |                       |
|---|------|---|---|---|--------|---|---|------|---|-------|------------------------------|-----------------------|
| 1 | 1.00 | 1 | 1 | 0 | 0      | 0 | 0 | 0.01 | t | 78256 | QYPALTA                      | Mus musculus          |
| 1 | 1.00 | 1 | 1 | 0 | 0      | 0 | 0 | 0.01 | t | 97596 | QTPLTMA<br>ALELL             | Mus musculus          |
| 1 | 1.00 | 1 | 1 | 0 | 0      | 0 | 0 | 0.01 | t | 72551 | WHRPPW<br>WPSSSL             | Oryctolagus cuniculus |
| 1 | 1.00 | 1 | 1 | 0 | 0      | 0 | 0 | 0.01 | t | 46371 | NVESQPG<br>GQPNT             | Bos taurus            |
| 1 | 1.00 | 1 | 1 | 0 | 0      | 0 | 0 | 0.01 | t | 57754 | SFFD                         | Mus musculus          |
| 1 | 1.00 | 1 | 1 | 0 | 0      | 0 | 0 | 0.01 | t | 42546 | MSESHVKI<br>SRTIIRGTS<br>PST | Oryctolagus cuniculus |
| 1 | 1.00 | 1 | 1 | 0 | -0.003 | 0 | 0 | 0.01 | t | 45006 | NMMRFTE<br>LSTPS             | Oryctolagus cuniculus |
| 1 | 1.00 | 1 | 1 | 0 | 0      | 0 | 0 | 0.01 | t | 39160 | LRPFHQILY<br>GMS             | Mus musculus          |
| 1 | 1.00 | 1 | 1 | 0 | -0.003 | 0 | 0 | 0.01 | t | 45004 | NMMKYIS<br>PPIFL             | Oryctolagus cuniculus |
| 1 | 1.00 | 1 | 1 | 0 | 0      | 0 | 0 | 0.01 | t | 45004 | NMMKYIS<br>PPIFL             | Oryctolagus cuniculus |
| 1 | 1.00 | 1 | 1 | 0 | 0      | 0 | 0 | 0.01 | t | 46677 | NYNWKR                       | Mus musculus          |
| 1 | 1.00 | 1 | 1 | 0 | 0      | 0 | 0 | 0.01 | t | 40938 | LYRPSDSSL<br>AGP             | Bos taurus            |
| 1 | 1.00 | 1 | 1 | 0 | 0      | 0 | 0 | 0.01 | t | 60292 | SPTRAVNE<br>LFGM             | Mus musculus          |
| 1 | 1.00 | 1 | 1 | 0 | 0      | 0 | 0 | 0.01 | t | 59227 | SLKLMATL<br>FSTYASAD         | Mus musculus          |
| 1 | 1.00 | 1 | 1 | 0 | 0      | 0 | 0 | 0.01 | t | 51372 | QLINTNGS<br>WHINSTA          | Homo sapiens          |

|   |      |   |   |   |   |   |   |      |   |       |                             |                                  |
|---|------|---|---|---|---|---|---|------|---|-------|-----------------------------|----------------------------------|
| 1 | 1.00 | 1 | 1 | 0 | 0 | 0 | 0 | 0.01 | t | 44554 | NKND                        | Mus<br>musculu<br>s              |
| 1 | 1.00 | 1 | 1 | 0 | 0 | 0 | 0 | 0.01 | t | 17553 | FQWSWYT<br>PPRPS            | Oryctola<br>gus<br>cuniculu<br>s |
| 1 | 1.00 | 1 | 1 | 0 | 0 | 0 | 0 | 0.01 | t | 33364 | KSKDLQSA<br>P               | Homo<br>sapiens                  |
| 1 | 1.00 | 1 | 1 | 0 | 0 | 0 | 0 | 0.01 | t | 25126 | HWGNHSK<br>SHPQR            | Mus<br>musculu<br>s              |
| 1 | 1.00 | 1 | 1 | 0 | 0 | 0 | 0 | 0.01 | t | 24950 | HTNLPQAL<br>WGMQ            | Mus<br>musculu<br>s              |
| 1 | 1.00 | 1 | 1 | 0 | 0 | 0 | 0 | 0.01 | t | 32862 | KPRDTLPP<br>PLNRPPP         | Homo<br>sapiens                  |
| 1 | 1.00 | 1 | 1 | 0 | 0 | 0 | 0 | 0.01 | t | 33414 | KSLKNINR<br>P               | Homo<br>sapiens                  |
| 1 | 1.00 | 1 | 1 | 0 | 0 | 0 | 0 | 0.01 | t | 24391 | HNNQRLM<br>LYGMH            | Mus<br>musculu<br>s              |
| 1 | 1.00 | 1 | 1 | 0 | 0 | 0 | 0 | 0.01 | t | 33767 | KTLRNTNR<br>L               | Homo<br>sapiens                  |
| 1 | 1.00 | 1 | 1 | 0 | 0 | 0 | 0 | 0.01 | t | 30980 | KGIPNTKA<br>P               | Homo<br>sapiens                  |
| 1 | 1.00 | 1 | 1 | 0 | 0 | 0 | 0 | 0.01 | t | 33846 | KTRRMRID<br>Q               | Homo<br>sapiens                  |
| 1 | 1.00 | 1 | 1 | 0 | 0 | 0 | 0 | 0.01 | t | 20420 | GIREVWP<br>AG               | Homo<br>sapiens                  |
| 1 | 1.00 | 1 | 1 | 0 | 0 | 0 | 0 | 0.01 | t | 33851 | KTRVYTNN<br>S               | Homo<br>sapiens                  |
| 1 | 1.00 | 1 | 1 | 0 | 0 | 0 | 0 | 0.01 | t | 31079 | KGTTGVR<br>NT               | Homo<br>sapiens                  |
| 1 | 1.00 | 1 | 1 | 0 | 0 | 0 | 0 | 0.01 | t | 15468 | FDTGA FDP<br>DWPA           | Mus<br>musculu<br>s              |
| 1 | 1.00 | 1 | 1 | 0 | 0 | 0 | 0 | 0.01 | t | 15982 | FGGETFTP<br>DWMMEV<br>AIDNE | Mus<br>musculu<br>s              |
| 1 | 1.00 | 1 | 1 | 0 | 0 | 0 | 0 | 0.01 | t | 15468 | FDTGA FDP<br>DWPA           | Mus<br>musculu<br>s              |
| 1 | 1.00 | 1 | 1 | 0 | 0 | 0 | 0 | 0.01 | t | 33850 | KTRTHTNA<br>T               | Homo<br>sapiens                  |
| 1 | 1.00 | 1 | 1 | 0 | 0 | 0 | 0 | 0.01 | t | 952   | AEGQLG                      | Mus<br>musculu<br>s              |

|   |      |   |   |       |        |        |        |        |   |        |                              |                 |
|---|------|---|---|-------|--------|--------|--------|--------|---|--------|------------------------------|-----------------|
| 1 | 1.00 | 1 | 1 | 0     | 0      | 0      | 0      | 0.01   | t | 610    | ACYLPFQL<br>SCGGKS           | Mus<br>musculus |
| 1 | 1.00 | 1 | 1 | 0     | 0      | 0      | 0      | 0.01   | t | 6020   | CAQQWPE<br>WYPC              | Mus<br>musculus |
| 1 | 1.00 | 1 | 1 | 0     | 0      | 0      | 0      | 0.01   | t | 9362   | DMFQIGK<br>YG                | Homo<br>sapiens |
| 1 | 1.00 | 1 | 1 | 0     | 0      | 0      | 0      | 0.01   | t | 563    | ACHPLFDA<br>RCGGKS           | Mus<br>musculus |
| 1 | 1.00 | 1 | 1 | 0     | 0      | 0      | 0      | 0.01   | t | 6924   | CRGDDFP<br>AWYC              | Mus<br>musculus |
| 1 | 1.00 | 1 | 1 | 0     | 0      | 0      | 0      | 0.01   | t | 6276   | CGAVIDDC                     | Mus<br>musculus |
| 1 | 1.00 | 1 | 1 | 0     | 0      | 0      | 0      | 0.01   | t | 6020   | CAQQWPE<br>WYPC              | Mus<br>musculus |
| 1 | 1.00 | 1 | 1 | 0     | 0      | 0      | 0      | 0.01   | t | 1570   | AGISYTKT<br>W                | Homo<br>sapiens |
| 1 | 1.00 | 1 | 1 | 0     | 0      | 0      | 0      | 0.01   | t | 6249   | CFPYCYP<br>ESA               | Mus<br>musculus |
| 1 | 1.00 | 1 | 1 | 0     | 0      | 0      | 0      | 0.01   | t | 6510   | CKPIDAER<br>GLC              | Mus<br>musculus |
| 1 | 1.00 | 1 | 1 | 0     | 0      | 0      | 0      | 0.01   | t | 6501   | CKLSQGAP<br>DSC              | Mus<br>musculus |
| 1 | 1.00 | 1 | 1 | 0     | 0      | 0      | 0      | 0.01   | t | 6501   | CKLSQGAP<br>DSC              | Mus<br>musculus |
| 1 | 1.00 | 1 | 1 | -0.08 | -0.076 | -0.068 | -0.079 | -0.074 | t | 6405   | CHRPHPG<br>G                 | Homo<br>sapiens |
| 1 | 1.00 | 1 | 1 | 0     | 0.004  | 0.007  | 0.007  | 0.011  | t | 104991 | STGERIQ                      | Homo<br>sapiens |
| 1 | 1.00 | 1 | 1 | 0.04  | 0.04   | 0.04   | 0.04   | 0.052  | t | 132798 | EDFDIYDE<br>DENQSP           | Mus<br>musculus |
| 1 | 1.00 | 1 | 1 | 0     | -0.002 | 0.002  | -0.007 | 0      | t | 112191 | KYLATAST<br>MDHARH<br>GFLPRH | Mus<br>musculus |
| 1 | 1.00 | 1 | 1 | -0.01 | -0.01  | -0.003 | -0.01  | -0.001 | t | 108825 | AVLMLPV<br>WACLS             | Mus<br>musculus |

|   |      |   |   |       |        |        |        |        |   |        |                              |                                  |
|---|------|---|---|-------|--------|--------|--------|--------|---|--------|------------------------------|----------------------------------|
| 1 | 1.00 | 1 | 1 | 0.02  | 0.023  | 0.02   | 0.02   | 0.032  | t | 34963  | LASLCNPK<br>PSDAPVT          | Mus<br>musculu<br>s              |
| 1 | 1.00 | 1 | 1 | 0     | 0.004  | 0.027  | 0      | 0.001  | t | 14778  | EVLYHMPL<br>AGVYRALK<br>KQLE | Aotus<br>nancyma<br>ae           |
| 1 | 1.00 | 1 | 1 | 0     | 0.002  | 0      | 0.001  | 0.01   | t | 116953 | DNHSPVNI<br>AHKL             | Homo<br>sapiens                  |
| 1 | 1.00 | 1 | 1 | 0     | -0.002 | 0.019  | -0.001 | 0.002  | t | 13680  | EPKKDKKK<br>KTDEAQPL         | Mus<br>musculu<br>s              |
| 1 | 1.00 | 1 | 1 | -0.03 | -0.028 | -0.003 | -0.027 | -0.03  | t | 6200   | CESSLCLM<br>YSLGPPA          | Homo<br>sapiens                  |
| 1 | 1.00 | 1 | 1 | -0.02 | -0.02  | -0.02  | -0.027 | -0.02  | t | 112127 | GGDRGAP<br>KRGSGKDS<br>HHPAR | Homo<br>sapiens                  |
| 1 | 1.00 | 1 | 1 | -0.01 | -0.01  | -0.008 | -0.01  | -0.001 | t | 78232  | PHSNKSHL                     | Homo<br>sapiens                  |
| 1 | 1.00 | 1 | 1 | -0.01 | -0.008 | 0.003  | -0.01  | -0.01  | t | 35001  | LAVFRPW<br>KARNNGT<br>NEYRSR | Rattus<br>norvegic<br>us         |
| 1 | 1.00 | 1 | 1 | -0.02 | -0.018 | -0.019 | -0.019 | -0.01  | t | 102199 | VPILNQNP<br>TALL             | Homo<br>sapiens                  |
| 1 | 1.00 | 1 | 1 | -0.04 | -0.043 | -0.021 | -0.04  | -0.041 | t | 34589  | KYRYLRHG<br>KLRFPERD         | Oryctola<br>gus<br>cuniculu<br>s |
| 1 | 1.00 | 1 | 1 | 0.02  | 0.022  | 0.04   | 0.021  | 0.022  | t | 50998  | QHEQDRP<br>TPSPAPSR<br>PFSVL | Homo<br>sapiens                  |
| 1 | 1.00 | 1 | 1 | 0     | 0      | 0.008  | -0.001 | 0.01   | t | 6331   | CGPFYLSA<br>PQC              | Homo<br>sapiens                  |
| 1 | 1.00 | 1 | 1 | 0     | -0.002 | 0.013  | 0.003  | 0.005  | t | 116677 | ASATQLYK<br>TCKQAGT<br>CPPD  | Mus<br>musculu<br>s              |

|   |      |   |   |       |        |        |        |        |   |        |                              |                                  |
|---|------|---|---|-------|--------|--------|--------|--------|---|--------|------------------------------|----------------------------------|
| 1 | 1.00 | 1 | 1 | 0     | 0      | 0      | 0      | 0.01   | t | 121672 | NVKHLSVA<br>YPLVDPF          | Mus<br>musculu<br>s              |
| 1 | 1.00 | 1 | 1 | 0.03  | 0.03   | 0.031  | 0.033  | 0.04   | t | 59536  | SLVDNS                       | Homo<br>sapiens                  |
| 1 | 1.00 | 1 | 1 | -0.01 | -0.01  | -0.01  | -0.01  | 0      | t | 79297  | LQKVHR                       | Mus<br>musculu<br>s              |
| 1 | 1.00 | 1 | 1 | -0.01 | 0.002  | -0.01  | -0.01  | 0      | t | 61635  | STGPCR                       | Pan<br>troglody<br>tes           |
| 1 | 1.00 | 1 | 1 | 0     | -0.003 | 0.027  | 0      | 0      | t | 101538 | DGVMQG<br>AIQSIIQGE          | Oryctola<br>gus<br>cuniculu<br>s |
| 1 | 1.00 | 1 | 1 | -0.03 | -0.026 | -0.013 | -0.029 | -0.028 | t | 104050 | LPRRGPRL<br>GVRATRKT<br>SERS | Homo<br>sapiens                  |
| 1 | 1.00 | 1 | 1 | 0.04  | 0.04   | 0.04   | 0.04   | 0.05   | t | 106856 | SMNPFPG<br>QLVSN             | Mus<br>musculu<br>s              |
| 1 | 1.00 | 1 | 1 | 0     | -0.003 | 0.022  | -0.001 | 0.001  | t | 43438  | NDFPINELI<br>LDTDLISKI<br>E  | Homo<br>sapiens                  |
| 1 | 1.00 | 1 | 1 | 0.01  | 0.014  | 0.014  | 0.011  | 0.022  | t | 111837 | TLQALPS                      | Homo<br>sapiens                  |
| 1 | 1.00 | 1 | 1 | 0     | 0      | 0      | 0      | 0.01   | t | 33847  | KTRRNTNY<br>Q                | Homo<br>sapiens                  |
| 1 | 1.00 | 1 | 1 | 0     | 0.002  | 0.017  | 0.001  | 0.002  | t | 52117  | QQQGQTV<br>TKKSAAEA<br>SKK   | Homo<br>sapiens                  |
| 1 | 1.00 | 1 | 1 | 0     | 0.002  | 0.017  | 0.001  | 0.002  | t | 52117  | QQQGQTV<br>TKKSAAEA<br>SKK   | Homo<br>sapiens                  |
| 1 | 1.00 | 1 | 1 | -0.05 | -0.046 | -0.029 | -0.049 | -0.05  | t | 75905  | YSTPWRYL<br>DFNALNLF<br>FSPL | Homo<br>sapiens                  |
| 1 | 1.00 | 1 | 1 | -0.05 | -0.048 | -0.029 | -0.049 | -0.05  | t | 75905  | YSTPWRYL<br>DFNALNLF<br>FSPL | Homo<br>sapiens                  |
| 1 | 1.00 | 1 | 1 | 0.02  | 0.02   | 0.02   | 0.02   | 0.03   | t | 106860 | SNMSLHPL<br>ATFI             | Mus<br>musculu<br>s              |

|   |      |   |   |       |        |        |        |        |   |        |                              |                     |
|---|------|---|---|-------|--------|--------|--------|--------|---|--------|------------------------------|---------------------|
| 1 | 1.00 | 1 | 1 | 0.01  | 0.012  | 0.01   | 0.011  | 0.023  | t | 102113 | TETPYYPD<br>YNLL             | Homo<br>sapiens     |
| 1 | 1.00 | 1 | 1 | -0.02 | -0.013 | -0.013 | -0.02  | -0.018 | t | 159287 | KTQGHSY<br>HLRRKNG<br>VKHPVY | Aotus               |
| 1 | 1.00 | 1 | 1 | -0.01 | -0.01  | -0.012 | -0.01  | 0.002  | t | 156755 | SGFSY                        | Mus<br>musculu<br>s |
| 1 | 1.00 | 1 | 1 | -0.05 | -0.047 | -0.03  | -0.05  | -0.049 | t | 105127 | DAEFRHD                      | Mus<br>musculu<br>s |
| 1 | 1.00 | 1 | 1 | -0.02 | -0.02  | 0.007  | -0.023 | -0.019 | t | 15430  | FDMATNP                      | Homo<br>sapiens     |
| 1 | 1.00 | 1 | 1 | 0     | 0.003  | 0.006  | 0      | 0.01   | t | 25490  | ICACLCCA<br>CSYNSV           | Mus<br>musculu<br>s |
| 1 | 1.00 | 1 | 1 | 0     | 0      | 0      | 0      | 0.01   | t | 121986 | VLCFWGP<br>VNYEASPS          | Mus<br>musculu<br>s |
| 1 | 1.00 | 1 | 1 | 0.01  | 0.009  | 0.013  | 0.01   | 0.02   | t | 73190  | WVEWAM<br>KNFTAV             | Mus<br>musculu<br>s |
| 1 | 1.00 | 1 | 1 | -0.08 | -0.079 | -0.068 | -0.074 | -0.067 | t | 78185  | KKWLAA                       | Equus<br>caballus   |
| 1 | 1.00 | 1 | 1 | 0.04  | 0.038  | 0.039  | 0.043  | 0.052  | t | 106676 | NELSTNPN<br>QLMV             | Mus<br>musculu<br>s |
| 1 | 1.00 | 1 | 1 | -0.05 | -0.052 | -0.046 | -0.051 | -0.044 | t | 63459  | TELRYSWK<br>TWGKAK<br>M      | Mus<br>musculu<br>s |
| 1 | 1.00 | 1 | 1 | -0.05 | -0.048 | -0.033 | -0.049 | -0.048 | t | 104315 | TRKTSERS<br>QPRGRRQ<br>PIPKA | Homo<br>sapiens     |
| 1 | 1.00 | 1 | 1 | 0.01  | 0.01   | 0.01   | 0.01   | 0.02   | t | 106646 | MHLTQSP                      | Homo<br>sapiens     |
| 1 | 1.00 | 1 | 1 | -0.03 | -0.027 | -0.023 | -0.03  | -0.02  | t | 106883 | SWTPYPDL<br>LSPR             | Mus<br>musculu<br>s |
| 1 | 1.00 | 1 | 1 | -0.04 | -0.028 | -0.019 | -0.04  | -0.039 | t | 28603  | ISLTEWSM<br>WYRH             | Mus<br>musculu<br>s |

|   |      |   |   |       |        |        |        |        |   |        |                     |                       |
|---|------|---|---|-------|--------|--------|--------|--------|---|--------|---------------------|-----------------------|
| 1 | 1.00 | 1 | 1 | -0.04 | -0.04  | -0.028 | -0.04  | -0.03  | t | 127885 | VTKWYSR             | Homo sapiens          |
| 1 | 1.00 | 1 | 1 | 0.03  | 0.027  | 0.039  | 0.03   | 0.04   | t | 79652  | SSFSPST             | Oryctolagus cuniculus |
| 1 | 1.00 | 1 | 1 | -0.02 | -0.017 | -0.013 | -0.02  | -0.01  | t | 106884 | SWYSPNP<br>GDWLS    | Mus musculus          |
| 1 | 1.00 | 1 | 1 | 0.01  | 0.01   | 0.01   | 0.01   | 0.02   | t | 107881 | HDKPPDLS<br>MQRL    | Mus musculus          |
| 1 | 1.00 | 1 | 1 | 0.01  | 0.007  | 0.017  | 0.01   | 0.02   | t | 79684  | YHQTTP              | Oryctolagus cuniculus |
| 1 | 1.00 | 1 | 1 | 0     | 0.004  | 0.005  | 0.003  | 0.01   | t | 60719  | SRKQKNIQ<br>LRSSNNS | Homo sapiens          |
| 1 | 1.00 | 1 | 1 | -0.03 | -0.03  | -0.01  | -0.03  | -0.03  | t | 105239 | HDSGYEV<br>HHQK     | Oryctolagus cuniculus |
| 1 | 1.00 | 1 | 1 | -0.08 | -0.08  | -0.051 | -0.08  | -0.08  | t | 80049  | TGELTMYW<br>VW      | Mus musculus          |
| 1 | 1.00 | 1 | 1 | -0.01 | -0.006 | 0.012  | -0.003 | 0      | t | 104048 | LPNYETR             | Homo sapiens          |
| 1 | 1.00 | 1 | 1 | 0     | 0.004  | 0.007  | 0.007  | 0.009  | t | 107803 | DYANPRN<br>TPRVADNL | Homo sapiens          |
| 1 | 1.00 | 1 | 1 | -0.03 | -0.03  | -0.029 | -0.03  | -0.019 | t | 20690  | GKTAKSNI<br>VSQVYLN | Oryctolagus cuniculus |
| 1 | 1.00 | 1 | 1 | -0.03 | -0.028 | -0.03  | -0.024 | -0.02  | t | 138197 | KLTSSLRY<br>NSPPLCF | Homo sapiens          |
| 1 | 1.00 | 1 | 1 | -0.03 | -0.03  | -0.023 | -0.024 | -0.021 | t | 108200 | VSLGKWL<br>GHPDKF   | Mus musculus          |

|   |      |   |   |       |        |        |        |        |   |        |                              |                     |
|---|------|---|---|-------|--------|--------|--------|--------|---|--------|------------------------------|---------------------|
| 1 | 1.00 | 1 | 1 | 0.01  | 0.01   | 0.024  | 0.006  | 0.011  | t | 18615  | GAHETSLS<br>ASGNSIIHY<br>TNI | Homo<br>sapiens     |
| 1 | 1.00 | 1 | 1 | 0.01  | 0.014  | 0.029  | 0.013  | 0.02   | t | 5560   | AVTGID                       | Homo<br>sapiens     |
| 1 | 1.00 | 1 | 1 | -0.07 | -0.068 | -0.044 | -0.067 | -0.07  | t | 7945   | DESDSSD<br>GYPPNRQ           | Homo<br>sapiens     |
| 1 | 1.00 | 1 | 1 | -0.03 | -0.038 | -0.023 | -0.03  | -0.023 | t | 136357 | HLKKFAGN<br>AGTP             | Mus<br>musculu<br>s |
| 1 | 1.00 | 1 | 1 | 0.02  | 0.02   | 0.02   | 0.02   | 0.03   | t | 79415  | TCTSDILPT<br>PHPCT           | Mus<br>musculu<br>s |
| 1 | 1.00 | 1 | 1 | 0     | 0      | 0      | 0.002  | 0.011  | t | 50637  | QELDCWH<br>YQHCVTS<br>TKS    | MD                  |
| 1 | 1.00 | 1 | 1 | 0.01  | 0.01   | 0.01   | 0.01   | 0.02   | t | 121686 | NVVPLSVA<br>NPLVDAF          | Mus<br>musculu<br>s |
| 1 | 1.00 | 1 | 1 | -0.02 | -0.02  | 0.012  | -0.026 | -0.022 | t | 26167  | IFSQNMNI<br>CLKMP            | Homo<br>sapiens     |
| 1 | 1.00 | 1 | 1 | -0.02 | -0.02  | 0.012  | -0.026 | -0.022 | t | 26167  | IFSQNMNI<br>CLKMP            | Homo<br>sapiens     |
| 1 | 1.00 | 1 | 1 | -0.01 | -0.01  | 0.017  | -0.013 | -0.009 | t | 20537  | GKDRSIQ                      | Homo<br>sapiens     |
| 1 | 1.00 | 1 | 1 | 0.01  | 0.012  | 0.028  | 0.009  | 0.01   | t | 8637   | DIETPRAG<br>KKESTVMT<br>SGSA | Ovis<br>aries       |
| 1 | 1.00 | 1 | 1 | 0.03  | 0.032  | 0.035  | 0.031  | 0.04   | t | 7283   | CVLESHYE<br>C                | Homo<br>sapiens     |
| 1 | 1.00 | 1 | 1 | 0     | 0.008  | 0.027  | 0      | 0.003  | t | 32781  | KPLASDPL<br>GAMP             | Gallus<br>gallus    |
| 1 | 1.00 | 1 | 1 | -0.04 | -0.04  | -0.015 | -0.04  | -0.04  | t | 62340  | SVSVGMMK<br>PSPRP            | Mus<br>musculu<br>s |



|   |      |   |   |       |        |        |        |        |   |        |                                  |                                  |
|---|------|---|---|-------|--------|--------|--------|--------|---|--------|----------------------------------|----------------------------------|
| 1 | 1.00 | 1 | 1 | -0.02 | -0.017 | -0.013 | -0.019 | -0.013 | t | 136676 | TGDVDRA<br>VYWHL                 | Dicentra<br>rchus<br>labrax      |
| 1 | 1.00 | 1 | 1 | -0.03 | -0.026 | -0.018 | -0.027 | -0.02  | t | 58395  | SHPGAV                           | Homo<br>sapiens                  |
| 1 | 1.00 | 1 | 1 | -0.05 | -0.046 | -0.028 | -0.049 | -0.048 | t | 70428  | VPPPRRRR<br>AKVLTQ               | Homo<br>sapiens                  |
| 1 | 1.00 | 1 | 1 | 0     | 0.004  | 0.027  | 0      | 0.001  | t | 14777  | EVLYHKPL<br>AGVYRALK<br>KQLE     | Aotus<br>nancyma<br>ae           |
| 1 | 1.00 | 1 | 1 | 0.02  | 0.022  | 0.02   | 0.023  | 0.033  | t | 132839 | HSISLGATP<br>TLP                 | Homo<br>sapiens                  |
| 1 | 1.00 | 1 | 1 | 0.03  | 0.03   | 0.037  | 0.03   | 0.042  | t | 57532  | SELPQWI                          | Mus<br>musculu<br>s              |
| 1 | 1.00 | 1 | 1 | -0.01 | -0.01  | -0.005 | -0.01  | 0.001  | t | 39160  | LRPFHQILY<br>GMS                 | Mus<br>musculu<br>s              |
| 1 | 1.00 | 1 | 1 | 0.02  | 0.02   | 0.02   | 0.02   | 0.03   | t | 153350 | ACTSPNQ<br>WLCGGGS               | Mus<br>musculu<br>s              |
| 1 | 1.00 | 1 | 1 | -0.07 | -0.063 | -0.053 | -0.07  | -0.069 | t | 111042 | TIHAHPGS<br>RRGGRHG<br>YHH       | Mus<br>musculu<br>s              |
| 1 | 1.00 | 1 | 1 | 0.02  | 0.018  | 0.019  | 0.023  | 0.032  | t | 106888 | SYSIWPD<br>RVSL                  | Mus<br>musculu<br>s              |
| 1 | 1.00 | 1 | 1 | -0.01 | -0.013 | 0.007  | -0.01  | -0.01  | t | 66142  | TSADSLGN<br>IDQGS<br>LIET<br>GES | Oryctola<br>gus<br>cuniculu<br>s |
| 1 | 1.00 | 1 | 1 | -0.04 | -0.038 | -0.015 | -0.04  | -0.04  | t | 44665  | NLDFRDLY<br>DPRDKAKL<br>LYNN     | Homo<br>sapiens                  |
| 1 | 1.00 | 1 | 1 | 0.03  | 0.033  | 0.035  | 0.03   | 0.04   | t | 121071 | YAINSEQS<br>KE                   | Mus<br>musculu<br>s              |
| 1 | 1.00 | 1 | 1 | 0.03  | 0.03   | 0.03   | 0.03   | 0.04   | t | 127742 | MHSPSTQ                          | Homo<br>sapiens                  |

|   |      |   |   |       |        |        |        |        |   |        |                     |                                  |
|---|------|---|---|-------|--------|--------|--------|--------|---|--------|---------------------|----------------------------------|
| 1 | 1.00 | 1 | 1 | -0.01 | -0.012 | -0.011 | -0.007 | 0.002  | t | 106922 | TQHWSPF<br>PESLV    | Mus<br>musculu<br>s              |
| 1 | 1.00 | 1 | 1 | -0.03 | -0.03  | -0.03  | -0.024 | -0.021 | t | 42293  | MPMRRKR<br>KNIRSIVS | Homo<br>sapiens                  |
| 1 | 1.00 | 1 | 1 | -0.01 | -0.013 | 0.002  | -0.01  | -0.007 | t | 57751  | SFERFEIFP<br>KE     | Oryctola<br>gus<br>cuniculu<br>s |
| 1 | 1.00 | 1 | 1 | 0     | 0      | -0.002 | 0      | 0.009  | t | 79365  | RCYNPAE<br>WAEPLCY  | Mus<br>musculu<br>s              |
| 1 | 1.00 | 1 | 1 | 0.02  | 0.016  | 0.029  | 0.023  | 0.031  | t | 99736  | TTLNSFMR<br>SFPP    | Oryctola<br>gus<br>cuniculu<br>s |
| 1 | 1.00 | 1 | 1 | -0.04 | -0.04  | -0.033 | -0.04  | -0.03  | t | 130763 | CTRWAGR<br>PC       | Homo<br>sapiens                  |
| 1 | 1.00 | 1 | 1 | 0     | 0      | 0.025  | 0      | -0.002 | t | 43348  | NAYCDKLC<br>KDKKADS | Mus<br>musculu<br>s              |
| 1 | 1.00 | 1 | 1 | 0     | -0.003 | 0.025  | 0      | -0.002 | t | 43348  | NAYCDKLC<br>KDKKADS | Oryctola<br>gus<br>cuniculu<br>s |
| 1 | 1.00 | 1 | 1 | -0.05 | -0.048 | -0.043 | -0.053 | -0.049 | t | 107170 | GSRPSPIG<br>SKWALQP | Homo<br>sapiens                  |
| 1 | 1.00 | 1 | 1 | 0.01  | 0.014  | 0.017  | 0.011  | 0.02   | t | 102250 | YNQQSLL             | Homo<br>sapiens                  |
| 1 | 1.00 | 1 | 1 | -0.01 | -0.01  | -0.01  | -0.01  | 0      | t | 121970 | VGNPFRPK<br>NYSGIPS | Mus<br>musculu<br>s              |
| 1 | 1.00 | 1 | 1 | -0.05 | -0.052 | -0.051 | -0.047 | -0.038 | t | 106874 | SSVYSPSPL<br>SLV    | Mus<br>musculu<br>s              |
| 1 | 1.00 | 1 | 1 | -0.03 | -0.028 | -0.023 | -0.027 | -0.021 | t | 107162 | GMLDIFAP<br>IRHV    | Homo<br>sapiens                  |

|   |      |   |   |       |        |        |        |        |   |        |                              |                                  |
|---|------|---|---|-------|--------|--------|--------|--------|---|--------|------------------------------|----------------------------------|
| 1 | 1.00 | 1 | 1 | -0.03 | -0.033 | -0.008 | -0.03  | -0.03  | t | 32877  | KPSKPKTN<br>LKHVAGA<br>A     | Oryctola<br>gus<br>cuniculu<br>s |
| 1 | 1.00 | 1 | 1 | 0.02  | 0.022  | 0.033  | 0.023  | 0.028  | t | 8379   | DGEPPED<br>DDSATGLA<br>FRTPN | Homo<br>sapiens                  |
| 1 | 1.00 | 1 | 1 | -0.02 | -0.02  | -0.013 | -0.02  | -0.013 | t | 125185 | NSSSSQFQ<br>IHG              | Mus<br>musculu<br>s              |
| 1 | 1.00 | 1 | 1 | 0     | 0      | 0      | 0      | 0.01   | t | 153339 | ACPPYET<br>WWCGGG<br>S       | Mus<br>musculu<br>s              |
| 1 | 1.00 | 1 | 1 | -0.02 | -0.024 | -0.005 | -0.017 | -0.011 | t | 13903  | EQPYLHV                      | Oryctola<br>gus<br>cuniculu<br>s |
| 1 | 1.00 | 1 | 1 | 0.03  | 0.03   | 0.03   | 0.03   | 0.04   | t | 140548 | CSLSDAFN<br>GSC              | Mus<br>musculu<br>s              |
| 1 | 1.00 | 1 | 1 | -0.03 | -0.034 | -0.017 | -0.031 | -0.029 | t | 48782  | PPFTSAVG<br>GVDHRS           | Mus<br>musculu<br>s              |
| 1 | 1.00 | 1 | 1 | -0.03 | -0.032 | -0.03  | -0.033 | -0.02  | t | 122488 | MSAKAAL<br>EPRLAPG           | Mus<br>musculu<br>s              |
| 1 | 1.00 | 1 | 1 | 0.02  | 0.018  | 0.019  | 0.023  | 0.032  | t | 107021 | YNRYPEM<br>MLVTG             | Mus<br>musculu<br>s              |
| 1 | 1.00 | 1 | 1 | -0.01 | -0.006 | 0.012  | -0.009 | -0.01  | t | 36999  | LKQKALGL<br>LQTATKQA<br>EAAA | Homo<br>sapiens                  |
| 1 | 1.00 | 1 | 1 | -0.01 | -0.008 | -0.01  | -0.004 | 0.002  | t | 132614 | RLPNPDTD<br>LYWFTLY          | Homo<br>sapiens                  |
| 1 | 1.00 | 1 | 1 | -0.03 | -0.03  | -0.03  | -0.03  | -0.02  | t | 153330 | ACILPWKH<br>ICGGGS           | Mus<br>musculu<br>s              |
| 1 | 1.00 | 1 | 1 | -0.06 | -0.062 | -0.038 | -0.06  | -0.061 | t | 96216  | EEEGLLKKS<br>ADTLWN<br>MQK   | Mus<br>musculu<br>s              |
| 1 | 1.00 | 1 | 1 | 0.02  | 0.023  | 0.029  | 0.02   | 0.03   | t | 79391  | SGVGQA                       | Mus<br>musculu<br>s              |

|   |      |   |   |       |        |        |        |        |   |        |                             |                       |
|---|------|---|---|-------|--------|--------|--------|--------|---|--------|-----------------------------|-----------------------|
| 1 | 1.00 | 1 | 1 | -0.02 | -0.02  | 0.007  | -0.023 | -0.019 | t | 14000  | ERHLTFT                     | Homo sapiens          |
| 1 | 1.00 | 1 | 1 | 0     | 0      | 0.007  | 0      | 0.012  | t | 127714 | KPWKHLK                     | Homo sapiens          |
| 1 | 1.00 | 1 | 1 | 0     | -0.002 | -0.002 | -0.007 | 0.004  | t | 120084 | LRQQWID<br>VRLRWNP<br>AD    | Mus musculus          |
| 1 | 1.00 | 1 | 1 | -0.03 | -0.034 | -0.029 | -0.033 | -0.02  | t | 79555  | GHQVSRL                     | Oryctolagus cuniculus |
| 1 | 1.00 | 1 | 1 | -0.03 | -0.033 | -0.013 | -0.03  | -0.03  | t | 125537 | QPVWQDE<br>GQRLRPSK         | Oryctolagus cuniculus |
| 1 | 1.00 | 1 | 1 | -0.05 | -0.05  | -0.023 | -0.05  | -0.05  | t | 44156  | NHLYSPSV<br>RVNH            | Mus musculus          |
| 1 | 1.00 | 1 | 1 | 0     | 0      | 0.025  | 0      | 0.002  | t | 46927  | PARDVLCL<br>RPVGAES         | Homo sapiens          |
| 1 | 1.00 | 1 | 1 | 0.02  | 0.02   | 0.011  | 0.021  | 0.032  | t | 2136   | AIYHTENA<br>YVSVVSSH<br>YNR | Mus musculus          |
| 1 | 1.00 | 1 | 1 | -0.02 | -0.023 | -0.004 | -0.02  | -0.018 | t | 67972  | VDHFHLG<br>DDMDPEL          | Oryctolagus cuniculus |
| 1 | 1.00 | 1 | 1 | 0.03  | 0.03   | 0.03   | 0.03   | 0.04   | t | 106827 | SESPYPSL<br>MMVS            | Mus musculus          |
| 1 | 1.00 | 1 | 1 | 0.02  | 0.02   | 0.02   | 0.02   | 0.03   | t | 78076  | YMSPTGR<br>VMTTQ            | Mus musculus          |
| 1 | 1.00 | 1 | 1 | -0.02 | -0.02  | -0.02  | -0.02  | -0.01  | t | 112721 | WHAPQTP<br>YWASM            | Homo sapiens          |
| 1 | 1.00 | 1 | 1 | -0.05 | -0.048 | -0.025 | -0.049 | -0.048 | t | 38799  | LQAAVLH<br>VPGCVPC          | Homo sapiens          |
| 1 | 1.00 | 1 | 1 | -0.03 | -0.026 | -0.004 | -0.027 | -0.028 | t | 75904  | YSTPSSILD<br>THPLYK         | Homo sapiens          |

|   |      |   |   |       |        |        |        |        |   |        |                              |                                  |
|---|------|---|---|-------|--------|--------|--------|--------|---|--------|------------------------------|----------------------------------|
| 1 | 1.00 | 1 | 1 | -0.04 | -0.037 | -0.02  | -0.04  | -0.041 | t | 105561 | VAVVRTPP<br>KSPSSAK          | Mus<br>musculu<br>s              |
| 1 | 1.00 | 1 | 1 | -0.04 | -0.04  | -0.02  | -0.04  | -0.041 | t | 105562 | VAVVRTPP<br>KSPSSAK          | Oryctola<br>gus<br>cuniculu<br>s |
| 1 | 1.00 | 1 | 1 | -0.04 | -0.042 | -0.04  | -0.039 | -0.031 | t | 72551  | WHRPPW<br>WPSSSL             | Oryctola<br>gus<br>cuniculu<br>s |
| 1 | 1.00 | 1 | 1 | 0.03  | 0.032  | 0.035  | 0.03   | 0.04   | t | 130751 | CIGSPSTN<br>C                | Homo<br>sapiens                  |
| 1 | 1.00 | 1 | 1 | 0.04  | 0.04   | 0.04   | 0.04   | 0.05   | t | 107861 | GLEGQDT<br>KTITFDVS          | Homo<br>sapiens                  |
| 1 | 1.00 | 1 | 1 | -0.02 | -0.02  | -0.02  | -0.02  | -0.011 | t | 153340 | ACQMPH<br>WWHCGG<br>GS       | Mus<br>musculu<br>s              |
| 1 | 1.00 | 1 | 1 | 0     | 0.002  | 0.012  | 0      | 0.001  | t | 45416  | NPNANPN<br>ANPNANP<br>NENPNA | Homo<br>sapiens                  |
| 1 | 1.00 | 1 | 1 | -0.02 | -0.022 | -0.015 | -0.021 | -0.008 | t | 50043  | PWNPAY                       | Mus<br>musculu<br>s              |
| 1 | 1.00 | 1 | 1 | -0.06 | -0.064 | -0.059 | -0.063 | -0.05  | t | 79556  | GHWTRFA                      | Oryctola<br>gus<br>cuniculu<br>s |
| 1 | 1.00 | 1 | 1 | -0.01 | -0.004 | 0.017  | -0.01  | -0.009 | t | 36966  | LKMTNNAI<br>SFMSISASL<br>EKK | Aotus<br>nancyma<br>ae           |
| 1 | 1.00 | 1 | 1 | -0.02 | -0.026 | -0.02  | -0.027 | -0.019 | t | 131297 | FSLRLMEE<br>NWNAEKR<br>SPTF  | Callithrix<br>pygmae<br>a        |
| 1 | 1.00 | 1 | 1 | -0.03 | -0.03  | 0.005  | -0.03  | -0.031 | t | 79797  | DVLIRWGE<br>VA               | Mus<br>musculu<br>s              |
| 1 | 1.00 | 1 | 1 | -0.01 | -0.01  | -0.01  | -0.01  | 0      | t | 121680 | NVQVLSV<br>ARPLVDYF          | Mus<br>musculu<br>s              |
| 1 | 1.00 | 1 | 1 | -0.03 | -0.03  | -0.025 | -0.03  | -0.02  | t | 50742  | QFCGWGE<br>FEVRVLW<br>P      | Homo<br>sapiens                  |

|   |      |   |   |       |        |        |        |        |   |        |                              |                                  |
|---|------|---|---|-------|--------|--------|--------|--------|---|--------|------------------------------|----------------------------------|
| 1 | 1.00 | 1 | 1 | -0.01 | -0.01  | -0.01  | -0.01  | 0      | t | 106860 | SNMSLHPL<br>ATFI             | Mus<br>musculu<br>s              |
| 1 | 1.00 | 1 | 1 | -0.03 | -0.03  | -0.028 | -0.027 | -0.02  | t | 48944  | PPVLYLPW<br>LPWGPSV          | Homo<br>sapiens                  |
| 1 | 1.00 | 1 | 1 | -0.02 | -0.022 | -0.013 | -0.027 | -0.017 | t | 141581 | YVYRWVE<br>AECVA             | Mus<br>musculu<br>s              |
| 1 | 1.00 | 1 | 1 | 0.07  | 0.07   | 0.07   | 0.07   | 0.081  | t | 132798 | EDFDIYDE<br>DENQSP           | Mus<br>musculu<br>s              |
| 1 | 1.00 | 1 | 1 | -0.01 | -0.006 | -0.006 | -0.009 | 0.002  | t | 111435 | IVQLTQW                      | Homo<br>sapiens                  |
| 1 | 1.00 | 1 | 1 | 0.01  | 0.007  | 0.032  | 0.01   | 0.012  | t | 23520  | HADQLTP<br>AWRIYSTG<br>NN    | Oryctola<br>gus<br>cuniculu<br>s |
| 1 | 1.00 | 1 | 1 | 0.01  | 0.01   | 0.032  | 0.01   | 0.012  | t | 23520  | HADQLTP<br>AWRIYSTG<br>NN    | Mus<br>musculu<br>s              |
| 1 | 1.00 | 1 | 1 | 0.02  | 0.02   | 0.036  | 0.02   | 0.03   | t | 111444 | KDQTNYP                      | Homo<br>sapiens                  |
| 1 | 1.00 | 1 | 1 | -0.02 | -0.017 | -0.013 | -0.02  | -0.012 | t | 106741 | QQFAPWP<br>NWTLV             | Mus<br>musculu<br>s              |
| 1 | 1.00 | 1 | 1 | 0.01  | 0.013  | 0.006  | 0.01   | 0.019  | t | 144439 | QALTGTNT<br>GGAIDGVS<br>TTD  | Mus<br>musculu<br>s              |
| 1 | 1.00 | 1 | 1 | 0     | 0      | 0.001  | -0.003 | 0.01   | t | 140559 | FPYELLMQ<br>G                | Mus<br>musculu<br>s              |
| 1 | 1.00 | 1 | 1 | -0.04 | -0.04  | -0.04  | -0.047 | -0.04  | t | 112319 | SKIFKLGGR<br>DSRSGSP<br>MARR | Homo<br>sapiens                  |
| 1 | 1.00 | 1 | 1 | 0.01  | 0.01   | 0.01   | 0.01   | 0.02   | t | 30980  | KGIPNTKA<br>P                | Homo<br>sapiens                  |

|   |      |   |   |       |        |        |        |        |   |        |                              |                |
|---|------|---|---|-------|--------|--------|--------|--------|---|--------|------------------------------|----------------|
| 1 | 1.00 | 1 | 1 | 0.01  | 0.014  | 0.017  | 0.017  | 0.022  | t | 108162 | TKTSNKTT<br>TTPFLGP          | Homo sapiens   |
| 1 | 1.00 | 1 | 1 | 0     | 0.002  | -0.012 | -0.003 | 0.01   | t | 78553  | VGHDGSV<br>WAQSSSF<br>PQFKPQ | Homo sapiens   |
| 1 | 1.00 | 1 | 1 | -0.02 | -0.02  | -0.02  | -0.02  | -0.01  | t | 121674 | NVKKLLVA<br>KPLVDWF          | Mus musculus   |
| 1 | 1.00 | 1 | 1 | -0.04 | -0.036 | -0.012 | -0.037 | -0.04  | t | 104309 | TLPQPPCA<br>HGQHYGH<br>HHHQL | Homo sapiens   |
| 1 | 1.00 | 1 | 1 | 0     | 0.002  | 0.027  | -0.003 | 0.001  | t | 35547  | LEKGPW                       | Homo sapiens   |
| 1 | 1.00 | 1 | 1 | -0.01 | -0.01  | -0.003 | 0      | 0.002  | t | 106652 | MHTPNR                       | Homo sapiens   |
| 1 | 1.00 | 1 | 1 | -0.07 | -0.068 | -0.053 | -0.067 | -0.068 | t | 62074  | SVDDCRW<br>NLNCEPPP          | Homo sapiens   |
| 1 | 1.00 | 1 | 1 | -0.02 | -0.02  | 0.017  | -0.02  | -0.019 | t | 79781  | DLKRPGSS<br>PMEV             | Mus musculus   |
| 1 | 1.00 | 1 | 1 | 0.01  | 0.016  | 0.028  | 0.01   | 0.009  | t | 74004  | YGGIPGGI<br>STPITQQS<br>EK   | Equus caballus |
| 1 | 1.00 | 1 | 1 | -0.04 | -0.036 | -0.033 | -0.039 | -0.03  | t | 102249 | YNPWPLL                      | Homo sapiens   |
| 1 | 1.00 | 1 | 1 | 0.01  | 0.012  | 0.031  | 0.017  | 0.022  | t | 108289 | ATNIFIEGT                    | Homo sapiens   |
| 1 | 1.00 | 1 | 1 | 0     | 0      | 0.005  | 0      | 0.01   | t | 6940   | CRQTRTM<br>PGC               | Mus musculus   |
| 1 | 1.00 | 1 | 1 | -0.02 | -0.018 | -0.003 | -0.019 | -0.018 | t | 45250  | NNSPAVYL<br>LDGLRAQ<br>DDYNG | Homo sapiens   |
| 1 | 1.00 | 1 | 1 | 0.04  | 0.038  | 0.039  | 0.043  | 0.052  | t | 107032 | YTQSPTPD<br>LMAV             | Mus musculus   |

|   |      |   |   |       |        |        |        |        |   |        |                              |                       |
|---|------|---|---|-------|--------|--------|--------|--------|---|--------|------------------------------|-----------------------|
| 1 | 1.00 | 1 | 1 | 0     | 0.002  | 0.012  | 0      | 0.001  | t | 45416  | NPNANPN<br>ANPNANP<br>NENPNA | Homo sapiens          |
| 1 | 1.00 | 1 | 1 | 0.02  | 0.017  | 0.023  | 0.021  | 0.03   | t | 75442  | YPYDVPDY<br>AS               | Mus musculus          |
| 1 | 1.00 | 1 | 1 | 0.02  | 0.02   | 0.023  | 0.021  | 0.03   | t | 75442  | YPYDVPDY<br>AS               | Mus musculus          |
| 1 | 1.00 | 1 | 1 | -0.02 | -0.02  | -0.02  | -0.02  | -0.01  | t | 153329 | ACFLPHPS<br>RCGGGS           | Mus musculus          |
| 1 | 1.00 | 1 | 1 | -0.02 | -0.023 | -0.008 | -0.019 | -0.01  | t | 72561  | WHWTWL<br>SDYPPP             | Oryctolagus cuniculus |
| 1 | 1.00 | 1 | 1 | -0.01 | -0.01  | -0.01  | -0.01  | 0      | t | 121678 | NVLTLRVA<br>KPLVDTF          | Mus musculus          |
| 1 | 1.00 | 1 | 1 | -0.01 | -0.006 | 0.012  | -0.009 | -0.01  | t | 103    | AAEESKLPI<br>NPLSNSLL<br>RH  | Homo sapiens          |
| 1 | 1.00 | 1 | 1 | -0.02 | -0.024 | 0.009  | -0.02  | -0.021 | t | 41218  | MDDDTER<br>FPTHRSLP          | Mus musculus          |
| 1 | 1.00 | 1 | 1 | 0     | -0.002 | 0      | -0.001 | 0.01   | t | 58405  | SHRLLQTY<br>WSSA             | Mus musculus          |
| 1 | 1.00 | 1 | 1 | -0.09 | -0.093 | -0.076 | -0.09  | -0.087 | t | 125858 | EAFQQYV<br>GPYEGYDS<br>T     | Oryctolagus cuniculus |
| 1 | 1.00 | 1 | 1 | 0     | 0      | 0      | 0      | 0.01   | t | 121670 | NVFQLEVA<br>MALVDGL          | Mus musculus          |
| 1 | 1.00 | 1 | 1 | -0.05 | -0.048 | -0.034 | -0.049 | -0.04  | t | 111215 | DSFTPRA                      | Homo sapiens          |
| 1 | 1.00 | 1 | 1 | -0.05 | -0.048 | -0.034 | -0.049 | -0.04  | t | 111215 | DSFTPRA                      | Homo sapiens          |
| 1 | 1.00 | 1 | 1 | -0.04 | -0.035 | -0.018 | -0.04  | -0.038 | t | 22716  | GTIVIR                       | Homo sapiens          |



|   |      |   |   |       |        |        |        |        |   |        |                     |                                  |
|---|------|---|---|-------|--------|--------|--------|--------|---|--------|---------------------|----------------------------------|
| 1 | 1.00 | 1 | 1 | -0.01 | -0.01  | -0.01  | -0.01  | 0      | t | 153356 | ACWPSMR<br>DHCGGS   | Mus<br>musculu<br>s              |
| 1 | 1.00 | 1 | 1 | -0.02 | -0.018 | -0.008 | -0.023 | -0.012 | t | 108345 | ENPKKYIP<br>GTK     | Homo<br>sapiens                  |
| 1 | 1.00 | 1 | 1 | 0.01  | 0.01   | 0.012  | 0.01   | 0.019  | t | 78308  | WHSSMSP             | Homo<br>sapiens                  |
| 1 | 1.00 | 1 | 1 | -0.03 | -0.034 | -0.028 | -0.031 | -0.02  | t | 79660  | TPHNPAI             | Oryctola<br>gus<br>cuniculu<br>s |
| 1 | 1.00 | 1 | 1 | -0.04 | -0.037 | -0.018 | -0.04  | -0.04  | t | 56122  | RTLTMFS<br>LGARQKI  | Mus<br>musculu<br>s              |
| 1 | 1.00 | 1 | 1 | -0.02 | -0.02  | 0.005  | -0.02  | -0.02  | t | 3656   | APMSTPS<br>ATSVR    | Mus<br>musculu<br>s              |
| 1 | 1.00 | 1 | 1 | -0.02 | -0.02  | 0.005  | -0.02  | -0.02  | t | 3656   | APMSTPS<br>ATSVR    | Mus<br>musculu<br>s              |
| 1 | 1.00 | 1 | 1 | 0.01  | 0.006  | 0.029  | 0.009  | 0.011  | t | 36940  | LKLKSIVS<br>WAKKVL  | Oryctola<br>gus<br>cuniculu<br>s |
| 1 | 1.00 | 1 | 1 | -0.02 | -0.016 | -0.015 | -0.017 | -0.01  | t | 60718  | SRKQKKIR<br>LRSSNNT | Homo<br>sapiens                  |
| 1 | 1.00 | 1 | 1 | 0.03  | 0.027  | 0.025  | 0.03   | 0.042  | t | 4938   | ATEINDNS<br>WKDTLS  | Oryctola<br>gus<br>cuniculu<br>s |
| 1 | 1.00 | 1 | 1 | 0     | 0      | 0      | 0      | 0.01   | t | 121842 | SGGVLLPC<br>YSFSWSC | Mus<br>musculu<br>s              |
| 1 | 1.00 | 1 | 1 | 0     | -0.004 | 0      | -0.001 | 0.01   | t | 144036 | PSIIGGSSV<br>DLV    | Oryctola<br>gus<br>cuniculu<br>s |
| 1 | 1.00 | 1 | 1 | 0     | -0.004 | 0      | -0.001 | 0.01   | t | 144046 | QLNKLQIP<br>LSII    | Oryctola<br>gus<br>cuniculu<br>s |

|   |      |   |   |       |        |       |        |        |   |        |                              |                                  |
|---|------|---|---|-------|--------|-------|--------|--------|---|--------|------------------------------|----------------------------------|
| 1 | 1.00 | 1 | 1 | 0     | -0.004 | 0     | -0.001 | 0.01   | t | 144102 | TMPWNQ<br>SALTLI             | Oryctola<br>gus<br>cuniculu<br>s |
| 1 | 1.00 | 1 | 1 | 0     | -0.004 | 0     | -0.001 | 0.01   | t | 144059 | RKVPLLSG<br>TLPQ             | Oryctola<br>gus<br>cuniculu<br>s |
| 1 | 1.00 | 1 | 1 | 0     | -0.004 | 0     | -0.001 | 0.01   | t | 143818 | APIQAHPL<br>GLIR             | Oryctola<br>gus<br>cuniculu<br>s |
| 1 | 1.00 | 1 | 1 | 0     | -0.002 | 0     | -0.001 | 0.01   | t | 75047  | YMDTQTT<br>LPIMW             | Mus<br>musculu<br>s              |
| 1 | 1.00 | 1 | 1 | 0     | -0.002 | 0     | -0.001 | 0.01   | t | 42623  | MSPRATI                      | Mus<br>musculu<br>s              |
| 1 | 1.00 | 1 | 1 | 0     | -0.004 | 0     | -0.001 | 0.01   | t | 42623  | MSPRATI                      | Oryctola<br>gus<br>cuniculu<br>s |
| 1 | 1.00 | 1 | 1 | 0     | -0.002 | 0     | -0.001 | 0.01   | t | 58405  | SHRLLQTY<br>WSSA             | Mus<br>musculu<br>s              |
| 1 | 1.00 | 1 | 1 | 0     | -0.002 | 0.01  | 0.001  | 0.01   | t | 78977  | GDGRFHFL<br>RGFFDSD          | Mus<br>musculu<br>s              |
| 1 | 1.00 | 1 | 1 | 0     | -0.003 | 0.007 | 0.004  | 0.01   | t | 130607 | SHNLVSSA<br>FPSA             | Camelus<br>dromed<br>arius       |
| 1 | 1.00 | 1 | 1 | -0.01 | -0.014 | 0.013 | -0.007 | -0.009 | t | 7266   | CVFKDWE<br>ELGEEIRLK<br>V    | Oryctola<br>gus<br>cuniculu<br>s |
| 1 | 1.00 | 1 | 1 | -0.04 | -0.038 | -0.04 | -0.034 | -0.031 | t | 138234 | RRTDPNAV<br>SPWQLTY          | Homo<br>sapiens                  |
| 1 | 1.00 | 1 | 1 | -0.03 | -0.03  | -0.03 | -0.03  | -0.02  | t | 40552  | LVRAYAGL<br>ARIILKW          | Mus<br>musculu<br>s              |
| 1 | 1.00 | 1 | 1 | 0.03  | 0.028  | 0.048 | 0.033  | 0.033  | t | 117260 | ANNGNLQ<br>LRNKEVT<br>WEVLEG | Mus<br>musculu<br>s              |
| 1 | 1.00 | 1 | 1 | 0     | 0      | 0     | 0      | 0.01   | t | 127740 | MHRPNLE                      | Homo<br>sapiens                  |
| 1 | 1.00 | 1 | 1 | 0     | 0      | 0     | 0      | 0.01   | t | 116953 | DNHSPVNI<br>AHKL             | Homo<br>sapiens                  |

|   |      |   |   |       |        |        |        |        |   |        |                              |              |
|---|------|---|---|-------|--------|--------|--------|--------|---|--------|------------------------------|--------------|
| 1 | 1.00 | 1 | 1 | 0     | -0.002 | 0      | 0.003  | 0.012  | t | 6249   | CFPYCYPSES                   | Mus musculus |
| 1 | 1.00 | 1 | 1 | 0.02  | 0.022  | 0.042  | 0.021  | 0.022  | t | 7528   | DAHFLSQT<br>KQSGENLP<br>YLVA | Homo sapiens |
| 1 | 1.00 | 1 | 1 | -0.03 | -0.026 | -0.014 | -0.023 | -0.02  | t | 108518 | LGLHALQSP                    | Homo sapiens |
| 1 | 1.00 | 1 | 1 | -0.01 | -0.008 | -0.008 | -0.009 | 0.001  | t | 6549   | CLDSSRGIC                    | Homo sapiens |
| 1 | 1.00 | 1 | 1 | -0.03 | -0.028 | -0.023 | -0.027 | -0.021 | t | 107162 | GMLDIFAP<br>IRHV             | Homo sapiens |
| 1 | 1.00 | 1 | 1 | 0.01  | 0.01   | 0.02   | 0.01   | 0.02   | t | 79254  | ICADDEE<br>WYSAMCA           | Mus musculus |
| 1 | 1.00 | 1 | 1 | 0     | 0      | 0      | 0      | 0.01   | t | 121675 | NVKKLLVANPLVDSF              | Mus musculus |
| 1 | 1.00 | 1 | 1 | -0.03 | -0.032 | -0.03  | -0.03  | -0.029 | t | 103840 | DAEKPAES<br>GGSQPPR<br>AAARK | Mus musculus |
| 1 | 1.00 | 1 | 1 | -0.01 | -0.008 | 0.015  | -0.011 | -0.01  | t | 84423  | KKGLQQL<br>QEWEDW<br>VGWIGN  | Felis catus  |
| 1 | 1.00 | 1 | 1 | 0.03  | 0.032  | 0.039  | 0.037  | 0.043  | t | 122194 | STVQDCV                      | Homo sapiens |
| 1 | 1.00 | 1 | 1 | 0.04  | 0.04   | 0.047  | 0.04   | 0.051  | t | 127632 | DYKNSSV                      | Homo sapiens |
| 1 | 1.00 | 1 | 1 | -0.03 | -0.03  | -0.009 | -0.03  | -0.029 | t | 49629  | PTGDRHK<br>QPLVAPAK<br>QLL   | Mus musculus |
| 1 | 1.00 | 1 | 1 | 0     | 0.005  | 0.022  | -0.002 | 0.001  | t | 43438  | NDFPINELI<br>LDTDLSKIE       | Homo sapiens |
| 1 | 1.00 | 1 | 1 | 0     | -0.001 | 0.034  | 0      | 0      | t | 5311   | AVEVDPD<br>DVN               | Mus musculus |

|   |      |   |   |       |        |        |        |       |   |        |                               |                                  |
|---|------|---|---|-------|--------|--------|--------|-------|---|--------|-------------------------------|----------------------------------|
| 1 | 1.00 | 1 | 1 | -0.03 | -0.034 | -0.009 | -0.031 | -0.03 | t | 45667  | NRDQGRK<br>PTPPTPP            | Oryctola<br>gus<br>cuniculu<br>s |
| 1 | 1.00 | 1 | 1 | 0     | 0      | 0      | 0      | 0.01  | t | 153338 | ACPNFELH<br>WCGGGS            | Mus<br>musculu<br>s              |
| 1 | 1.00 | 1 | 1 | 0.03  | 0.03   | 0.03   | 0.03   | 0.042 | t | 9585   | DPAF                          | Mus<br>musculu<br>s              |
| 1 | 1.00 | 1 | 1 | 0     | 0      | 0      | 0      | 0.01  | t | 109785 | RAHYNIVT<br>FCKKCD            | Mus<br>musculu<br>s              |
| 1 | 1.00 | 1 | 1 | 0     | 0      | 0      | 0      | 0.01  | t | 11571  | EEEDDDM<br>GGLFD              | Mus<br>musculu<br>s              |
| 1 | 1.00 | 1 | 1 | 0     | 0      | 0      | 0      | 0.01  | t | 11571  | EEEDDDM<br>GGLFD              | Mus<br>musculu<br>s              |
| 1 | 1.00 | 1 | 1 | 0     | 0      | 0      | 0      | 0.01  | t | 11571  | EEEDDDM<br>GGLFD              | Homo<br>sapiens                  |
| 1 | 1.00 | 1 | 1 | 0     | -0.003 | 0      | 0      | 0.01  | t | 30093  | KCTSDQDE<br>QFIPKGC<br>S<br>K | Oryctola<br>gus<br>cuniculu<br>s |
| 1 | 1.00 | 1 | 1 | 0.01  | 0.01   | 0.01   | 0.01   | 0.02  | t | 121848 | SGVPLCPL<br>ESNVISC           | Mus<br>musculu<br>s              |
| 1 | 1.00 | 1 | 1 | -0.01 | -0.01  | -0.01  | -0.01  | 0     | t | 97286  | ETPLTEPA<br>FKRH              | Mus<br>musculu<br>s              |
| 1 | 1.00 | 1 | 1 | 0.05  | 0.049  | 0.05   | 0.047  | 0.06  | t | 78316  | WQTTYSA                       | Homo<br>sapiens                  |
| 1 | 1.00 | 1 | 1 | -0.02 | -0.02  | -0.02  | -0.02  | -0.01 | t | 153455 | RVPNVLPL<br>FPFLGGGS          | Mus<br>musculu<br>s              |
| 1 | 1.00 | 1 | 1 | 0.01  | 0.01   | 0.026  | 0.01   | 0.013 | t | 24012  | HHPSTNQ<br>EQTSLYVQ<br>AS     | Mus<br>musculu<br>s              |
| 1 | 1.00 | 1 | 1 | 0     | -0.002 | -0.001 | 0.003  | 0.012 | t | 106995 | WMTYPDS<br>LIISA              | Mus<br>musculu<br>s              |
| 1 | 1.00 | 1 | 1 | 0.02  | 0.022  | 0.044  | 0.021  | 0.022 | t | 10131  | DSGSRTTP<br>DELALS            | Homo<br>sapiens                  |

|   |      |   |   |       |       |       |       |       |   |        |                              |                                  |
|---|------|---|---|-------|-------|-------|-------|-------|---|--------|------------------------------|----------------------------------|
| 1 | 1.00 | 1 | 1 | -0.02 | -0.02 | 0.002 | -0.02 | -0.02 | t | 10646  | DVKMME<br>RVVEQMC<br>VTQYQKE | Mus<br>musculu<br>s              |
| 1 | 1.00 | 1 | 1 | 0     | 0     | 0     | 0     | 0.01  | t | 149833 | LTVGHPYY<br>QVTVGDK          | Oryctola<br>gus<br>cuniculu<br>s |
| 1 | 1.00 | 1 | 1 | 0     | 0     | 0     | 0     | 0.01  | t | 149989 | TRNSSKPA<br>KRKKIKA          | Oryctola<br>gus<br>cuniculu<br>s |
| 1 | 1.00 | 1 | 1 | 0     | 0     | 0     | 0     | 0.01  | t | 61801  | STNSGINN                     | Mus<br>musculu<br>s              |
| 1 | 1.00 | 1 | 1 | 0     | 0     | 0     | 0     | 0.01  | t | 61800  | STNS                         | Mus<br>musculu<br>s              |
| 1 | 1.00 | 1 | 1 | 0     | 0     | 0     | 0     | 0.01  | t | 89660  | TQKIPKAN<br>AADADTD<br>TT    | Mus<br>musculu<br>s              |
| 1 | 1.00 | 1 | 1 | 0     | 0     | 0     | 0     | 0.01  | t | 45252  | NNSTNSGI                     | Mus<br>musculu<br>s              |
| 1 | 1.00 | 1 | 1 | 0     | 0     | 0     | 0     | 0.01  | t | 46008  | NSTNSGIN                     | Mus<br>musculu<br>s              |
| 1 | 1.00 | 1 | 1 | 0     | 0     | 0     | 0     | 0.01  | t | 51371  | QLINTNGS<br>WHIN             | Mus<br>musculu<br>s              |
| 1 | 1.00 | 1 | 1 | 0     | 0     | 0     | 0     | 0.01  | t | 28299  | IRGDTFAT<br>R                | Mus<br>musculu<br>s              |
| 1 | 1.00 | 1 | 1 | 0     | 0     | 0     | 0     | 0.01  | t | 32570  | KNNNSTN<br>S                 | Mus<br>musculu<br>s              |
| 1 | 1.00 | 1 | 1 | 0     | 0     | 0     | 0     | 0.01  | t | 9516   | DNNLVSG<br>P                 | Mus<br>musculu<br>s              |
| 1 | 1.00 | 1 | 1 | 0.01  | 0.01  | 0.01  | 0.01  | 0.02  | t | 122589 | SRLDPDPR<br>LFLRMSTN         | Mus<br>musculu<br>s              |

|   |      |   |   |       |        |        |        |        |   |        |                         |                                  |
|---|------|---|---|-------|--------|--------|--------|--------|---|--------|-------------------------|----------------------------------|
| 1 | 1.00 | 1 | 1 | -0.05 | -0.05  | -0.041 | -0.044 | -0.043 | t | 113859 | SHHPARTA<br>HYGSLPQK    | Oryctola<br>gus<br>cuniculu<br>s |
| 1 | 1.00 | 1 | 1 | -0.01 | -0.01  | 0.019  | -0.01  | -0.01  | t | 77985  | QTCCDKN<br>QGIFM        | Mus<br>musculu<br>s              |
| 1 | 1.00 | 1 | 1 | -0.01 | -0.012 | -0.01  | -0.007 | 0      | t | 103887 | EQWSLPW                 | Mus<br>musculu<br>s              |
| 1 | 1.00 | 1 | 1 | -0.01 | -0.013 | 0.011  | -0.01  | -0.01  | t | 7661   | DAVLAPHI<br>GGEAGSS     | Oryctola<br>gus<br>cuniculu<br>s |
| 1 | 1.00 | 1 | 1 | 0.02  | 0.016  | 0.021  | 0.017  | 0.03   | t | 79542  | EQTINQW                 | Oryctola<br>gus<br>cuniculu<br>s |
| 1 | 1.00 | 1 | 1 | 0     | 0      | 0.005  | 0.003  | 0.01   | t | 60719  | SRKQKNIQ<br>LRSSNNS     | Homo<br>sapiens                  |
| 1 | 1.00 | 1 | 1 | -0.02 | -0.016 | -0.009 | -0.023 | -0.018 | t | 111970 | YNQNLIRH<br>VGGGTPR     | Homo<br>sapiens                  |
| 1 | 1.00 | 1 | 1 | 0.01  | 0.01   | 0.036  | 0.01   | 0.012  | t | 32811  | KPNRNGG<br>GYYSASYS     | Homo<br>sapiens                  |
| 1 | 1.00 | 1 | 1 | -0.02 | -0.017 | -0.02  | -0.02  | -0.008 | t | 131151 | WTELDDV<br>KR           | Mus<br>musculu<br>s              |
| 1 | 1.00 | 1 | 1 | -0.07 | -0.07  | -0.043 | -0.07  | -0.069 | t | 47805  | PHDGNRA<br>FPRTKVT<br>M | Mus<br>musculu<br>s              |
| 1 | 1.00 | 1 | 1 | 0     | 0      | 0      | 0      | 0.009  | t | 107753 | ATNMKMS<br>NMHTLIG<br>A | Homo<br>sapiens                  |
| 1 | 1.00 | 1 | 1 | -0.03 | -0.03  | -0.03  | -0.03  | -0.021 | t | 72552  | WHRTPSTL<br>WGVI        | Mus<br>musculu<br>s              |
| 1 | 1.00 | 1 | 1 | 0.03  | 0.04   | 0.037  | 0.032  | 0.037  | t | 136561 | PTDNDHT<br>FDALQ        | Dicentra<br>rchus<br>labrax      |

|   |      |   |   |       |        |        |        |        |   |        |                             |                                  |
|---|------|---|---|-------|--------|--------|--------|--------|---|--------|-----------------------------|----------------------------------|
| 1 | 1.00 | 1 | 1 | -0.04 | -0.036 | -0.022 | -0.043 | -0.04  | t | 20469  | GIVAHQR<br>GNQ              | Homo<br>sapiens                  |
| 1 | 1.00 | 1 | 1 | -0.04 | -0.04  | -0.04  | -0.039 | -0.03  | t | 106245 | AKYSKHPD<br>ATLV            | Mus<br>musculu<br>s              |
| 1 | 1.00 | 1 | 1 | -0.08 | -0.083 | -0.056 | -0.079 | -0.08  | t | 73904  | YFSMVGN<br>WAKVLVV<br>LLFAG | Homo<br>sapiens                  |
| 1 | 1.00 | 1 | 1 | -0.01 | -0.01  | -0.008 | -0.01  | -0.001 | t | 78309  | WHTLLAA                     | Homo<br>sapiens                  |
| 1 | 1.00 | 1 | 1 | -0.03 | -0.033 | -0.003 | -0.033 | -0.032 | t | 763    | ADRQTAC<br>NCLKNLAG         | Homo<br>sapiens                  |
| 1 | 1.00 | 1 | 1 | -0.01 | -0.01  | -0.01  | -0.01  | 0      | t | 131222 | GWYSPFQ<br>LGWPQ            | Homo<br>sapiens                  |
| 1 | 1.00 | 1 | 1 | -0.02 | -0.02  | 0.002  | -0.02  | -0.02  | t | 15356  | FCVQPEKG<br>GRKPAR          | Homo<br>sapiens                  |
| 1 | 1.00 | 1 | 1 | -0.02 | -0.02  | 0.002  | -0.02  | -0.02  | t | 15356  | FCVQPEKG<br>GRKPAR          | Homo<br>sapiens                  |
| 1 | 1.00 | 1 | 1 | 0.01  | 0.008  | 0.01   | 0.009  | 0.02   | t | 29816  | KAHDLSTA<br>SRPHVVT         | Mus<br>musculu<br>s              |
| 1 | 1.00 | 1 | 1 | 0     | 0      | 0.023  | 0      | 0.002  | t | 40023  | LTLNYADN<br>V               | Rattus<br>norvegic<br>us         |
| 1 | 1.00 | 1 | 1 | -0.07 | -0.066 | -0.063 | -0.063 | -0.058 | t | 104149 | NHYFLRS                     | Homo<br>sapiens                  |
| 1 | 1.00 | 1 | 1 | 0.01  | 0.014  | 0.028  | 0.01   | 0.012  | t | 149364 | LGGPSGSA<br>ALKAAVD         | Cavia<br>porcellu<br>s           |
| 1 | 1.00 | 1 | 1 | 0     | 0      | 0      | 0      | 0.01   | t | 153344 | ACRDHSDL<br>WCGGGS          | Mus<br>musculu<br>s              |
| 1 | 1.00 | 1 | 1 | 0     | 0      | 0      | 0      | 0.01   | t | 78219  | NKQWYL                      | Equus<br>caballus                |
| 1 | 1.00 | 1 | 1 | -0.02 | -0.023 | -0.008 | -0.019 | -0.01  | t | 72562  | WHWTWL<br>SEYPPP            | Oryctola<br>gus<br>cuniculu<br>s |

|   |      |   |   |       |        |        |        |        |   |        |                           |                                  |
|---|------|---|---|-------|--------|--------|--------|--------|---|--------|---------------------------|----------------------------------|
| 1 | 1.00 | 1 | 1 | -0.02 | -0.023 | -0.008 | -0.019 | -0.01  | t | 72562  | WHWTWL<br>SEYPPP          | Oryctola<br>gus<br>cuniculu<br>s |
| 1 | 1.00 | 1 | 1 | -0.02 | -0.023 | -0.008 | -0.019 | -0.01  | t | 72562  | WHWTWL<br>SEYPPP          | Oryctola<br>gus<br>cuniculu<br>s |
| 1 | 1.00 | 1 | 1 | 0     | 0      | 0      | 0      | 0.01   | t | 79416  | TCYSFPM<br>QRAAAP         | Mus<br>musculu<br>s              |
| 1 | 1.00 | 1 | 1 | 0.02  | 0.022  | 0.022  | 0.027  | 0.034  | t | 119598 | INPESDQP<br>DLSNFMES<br>G | Homo<br>sapiens                  |
| 1 | 1.00 | 1 | 1 | 0.02  | 0.02   | 0.02   | 0.02   | 0.032  | t | 140585 | PWNTFAT<br>NA             | Mus<br>musculu<br>s              |
| 1 | 1.00 | 1 | 1 | 0     | -0.002 | 0      | -0.001 | 0.009  | t | 153479 | TPGVERD<br>HFVRLGG<br>GS  | Mus<br>musculu<br>s              |
| 1 | 1.00 | 1 | 1 | -0.04 | -0.04  | -0.04  | -0.033 | -0.029 | t | 117519 | GRGTVA<br>AAAAAT          | Mus<br>musculu<br>s              |
| 1 | 1.00 | 1 | 1 | -0.02 | -0.032 | -0.015 | -0.02  | -0.01  | t | 55655  | RRLPSAFH<br>P             | Mus<br>musculu<br>s              |
| 1 | 1.00 | 1 | 1 | 0.02  | 0.022  | 0.025  | 0.021  | 0.03   | t | 61847  | STQHGPQ                   | Homo<br>sapiens                  |
| 1 | 1.00 | 1 | 1 | 0     | 0      | 0      | 0      | 0.01   | t | 153353 | ACWALRD<br>PLCGGGS        | Mus<br>musculu<br>s              |
| 1 | 1.00 | 1 | 1 | 0     | 0.002  | 0      | 0.001  | 0.01   | t | 133660 | NSTWHD<br>WNSWTH          | Homo<br>sapiens                  |
| 1 | 1.00 | 1 | 1 | 0.01  | 0.014  | 0.017  | 0.017  | 0.021  | t | 108380 | GGETLLH<br>MA             | Homo<br>sapiens                  |
| 1 | 1.00 | 1 | 1 | 0.02  | 0.022  | 0.026  | 0.023  | 0.029  | t | 47856  | PHVRGS                    | Homo<br>sapiens                  |
| 1 | 1.00 | 1 | 1 | -0.04 | -0.042 | -0.013 | -0.041 | -0.042 | t | 73663  | YEGFWTG<br>VTQNAKGI<br>T  | Mus<br>musculu<br>s              |
| 1 | 1.00 | 1 | 1 | -0.01 | -0.008 | 0.006  | -0.009 | 0      | t | 111350 | GLLTAYV                   | Homo<br>sapiens                  |



|   |      |   |   |       |        |        |        |        |   |        |                              |                 |
|---|------|---|---|-------|--------|--------|--------|--------|---|--------|------------------------------|-----------------|
| 1 | 1.00 | 1 | 1 | 0.01  | 0.01   | 0.01   | 0.01   | 0.02   | t | 141753 | SSNDTKA<br>WGFAV             | Mus<br>musculus |
| 1 | 1.00 | 1 | 1 | 0     | 0      | 0.022  | 0      | 0.006  | t | 46096  | NTGEIPFY<br>GK               | Homo<br>sapiens |
| 1 | 1.00 | 1 | 1 | 0.03  | 0.028  | 0.047  | 0.027  | 0.031  | t | 110794 | CDDDDDN<br>DGVPSR<br>DNCRLV  | Mus<br>musculus |
| 1 | 1.00 | 1 | 1 | -0.01 | -0.01  | 0.007  | -0.01  | -0.006 | t | 127932 | ALYHTENA<br>YVSVSSH<br>YSR   | Mus<br>musculus |
| 1 | 1.00 | 1 | 1 | 0.01  | 0.01   | 0.012  | 0.01   | 0.019  | t | 122561 | RRFDEPRL<br>STPALLR          | Mus<br>musculus |
| 1 | 1.00 | 1 | 1 | 0.01  | 0.01   | 0.01   | 0.01   | 0.022  | t | 78230  | PHMNYYH<br>L                 | Homo<br>sapiens |
| 1 | 1.00 | 1 | 1 | -0.02 | -0.018 | -0.02  | -0.017 | -0.008 | t | 48944  | PPVLYLPW<br>LPWGPSV          | Homo<br>sapiens |
| 1 | 1.00 | 1 | 1 | -0.01 | -0.006 | 0.012  | -0.013 | -0.01  | t | 69324  | VKTKNTTT<br>TQTQ             | Homo<br>sapiens |
| 1 | 1.00 | 1 | 1 | -0.03 | -0.032 | -0.03  | -0.037 | -0.029 | t | 103839 | DAEFRHDS<br>GYEVH            | Mus<br>musculus |
| 1 | 1.00 | 1 | 1 | 0.02  | 0.016  | 0.028  | 0.02   | 0.03   | t | 31098  | KHAQYVS<br>AESFL             | Mus<br>musculus |
| 1 | 1.00 | 1 | 1 | -0.02 | -0.02  | -0.02  | -0.02  | -0.01  | t | 121683 | NVSLLLVA<br>RPKYLLF          | Mus<br>musculus |
| 1 | 1.00 | 1 | 1 | -0.05 | -0.048 | -0.033 | -0.049 | -0.048 | t | 104315 | TRKTSERS<br>QPRGRRQ<br>PIPKA | Homo<br>sapiens |
| 1 | 1.00 | 1 | 1 | -0.04 | -0.04  | -0.035 | -0.04  | -0.03  | t | 50742  | QFCGWGE<br>FEVRVLW<br>P      | Homo<br>sapiens |
| 1 | 1.00 | 1 | 1 | 0     | 0.004  | 0.004  | 0.001  | 0.012  | t | 111115 | APYKLAM<br>RDQA              | Homo<br>sapiens |
| 1 | 1.00 | 1 | 1 | 0.03  | 0.03   | 0.026  | 0.024  | 0.039  | t | 114972 | VEQGASV<br>DKR               | Homo<br>sapiens |

|   |      |   |   |       |        |        |        |        |   |        |                              |                             |
|---|------|---|---|-------|--------|--------|--------|--------|---|--------|------------------------------|-----------------------------|
| 1 | 1.00 | 1 | 1 | 0.02  | 0.024  | 0.024  | 0.021  | 0.032  | t | 111774 | SGMMSN<br>ATIANV             | Homo<br>sapiens             |
| 1 | 1.00 | 1 | 1 | -0.01 | -0.01  | -0.003 | -0.014 | -0.008 | t | 117690 | WGVPIEKI<br>YNKTSGRS<br>LPW  | Homo<br>sapiens             |
| 1 | 1.00 | 1 | 1 | -0.02 | -0.018 | 0.002  | -0.019 | -0.02  | t | 27722  | INPTPFQQ<br>GGLICAM<br>VPGDQ | Homo<br>sapiens             |
| 1 | 1.00 | 1 | 1 | 0     | 0.005  | 0.011  | -0.003 | 0.003  | t | 30292  | KEAIPMAV<br>EMAKSQ           | Homo<br>sapiens             |
| 1 | 1.00 | 1 | 1 | -0.02 | -0.018 | -0.006 | -0.019 | -0.014 | t | 10664  | DVLLLNNT<br>R                | Homo<br>sapiens             |
| 1 | 1.00 | 1 | 1 | 0.02  | 0.03   | 0.034  | 0.013  | 0.026  | t | 136136 | APDGAVF<br>QLDRP             | Dicentra<br>rchus<br>labrax |
| 1 | 1.00 | 1 | 1 | -0.01 | -0.008 | 0.007  | -0.009 | -0.008 | t | 51456  | QLNRALSG<br>IAAEQDRN<br>T    | Homo<br>sapiens             |
| 1 | 1.00 | 1 | 1 | 0     | -0.002 | 0      | -0.007 | 0.007  | t | 125297 | VFFEEQED<br>EIIGFG           | Mus<br>musculu<br>s         |
| 1 | 1.00 | 1 | 1 | -0.06 | -0.058 | -0.053 | -0.053 | -0.048 | t | 130754 | CLKRSKLR<br>C                | Homo<br>sapiens             |
| 1 | 1.00 | 1 | 1 | -0.03 | -0.03  | -0.001 | -0.03  | -0.032 | t | 127609 | AVLRAPQ<br>NPPPPGP<br>Q      | Homo<br>sapiens             |
| 1 | 1.00 | 1 | 1 | -0.01 | -0.002 | 0.017  | -0.01  | -0.007 | t | 32780  | KPLAMDP<br>LHVST             | Gallus<br>gallus            |
| 1 | 1.00 | 1 | 1 | -0.04 | -0.036 | -0.023 | -0.039 | -0.038 | t | 103961 | GVRATRKT<br>SERSQPRG<br>RRQP | Homo<br>sapiens             |
| 1 | 1.00 | 1 | 1 | -0.02 | -0.02  | -0.013 | -0.02  | -0.008 | t | 72904  | WNPVYA                       | Mus<br>musculu<br>s         |
| 1 | 1.00 | 1 | 1 | 0     | 0      | 0.014  | 0      | 0.01   | t | 62712  | SYSWMYE                      | Mus<br>musculu<br>s         |
| 1 | 1.00 | 1 | 1 | 0     | -0.002 | 0      | -0.001 | 0.01   | t | 143808 | AHKDHVV<br>STWVP             | Mus<br>musculu<br>s         |

|   |      |   |   |       |        |        |        |        |   |        |                              |                                  |
|---|------|---|---|-------|--------|--------|--------|--------|---|--------|------------------------------|----------------------------------|
| 1 | 1.00 | 1 | 1 | 0     | 0      | 0      | 0      | 0.01   | t | 153458 | SELSPAML<br>HFMFGGG<br>S     | Mus<br>musculu<br>s              |
| 1 | 1.00 | 1 | 0 | -0.03 | -0.028 | -0.011 | -0.029 | -0.01  | t | 45875  | NSKGKMN<br>TCHKVGN<br>S      | Homo<br>sapiens                  |
| 1 | 1.00 | 1 | 1 | -0.05 | -0.043 | -0.031 | -0.05  | -0.051 | t | 159302 | YVLNSKLH<br>NSRSFDKF<br>KWIQ | Aotus                            |
| 1 | 1.00 | 1 | 1 | -0.01 | -0.01  | -0.008 | -0.01  | 0.002  | t | 72904  | WNPVYA                       | Mus<br>musculu<br>s              |
| 1 | 1.00 | 1 | 1 | 0     | 0      | 0      | 0      | 0.01   | t | 107881 | HDKPPDLS<br>MQRL             | Mus<br>musculu<br>s              |
| 1 | 1.00 | 1 | 1 | -0.05 | -0.046 | -0.028 | -0.049 | -0.048 | t | 70428  | VPPPRRRR<br>AKVLTQ           | Homo<br>sapiens                  |
| 1 | 1.00 | 1 | 1 | -0.03 | -0.034 | -0.013 | -0.027 | -0.028 | t | 125537 | QPVWQDE<br>GQRLRPSK          | Oryctola<br>gus<br>cuniculu<br>s |
| 1 | 1.00 | 1 | 1 | 0     | 0.002  | 0      | -0.003 | 0.01   | t | 6892   | CQQFLSVR<br>ALC              | Homo<br>sapiens                  |
| 1 | 1.00 | 1 | 1 | -0.06 | -0.058 | -0.049 | -0.063 | -0.057 | t | 108666 | TRCAQCH<br>TLK               | Homo<br>sapiens                  |
| 1 | 1.00 | 1 | 1 | 0.01  | 0.01   | 0.01   | 0.01   | 0.02   | t | 122020 | VVDPHGP<br>PNYINIPS          | Mus<br>musculu<br>s              |
| 1 | 1.00 | 1 | 1 | -0.01 | -0.01  | -0.01  | -0.01  | 0      | t | 121369 | HDDPQRF<br>ADAQVFP<br>F      | Mus<br>musculu<br>s              |
| 1 | 1.00 | 1 | 1 | -0.01 | -0.006 | 0.017  | -0.013 | -0.012 | t | 105086 | AGESHGP<br>DQGHD             | Homo<br>sapiens                  |
| 1 | 1.00 | 1 | 1 | 0     | 0      | 0      | 0      | 0.01   | t | 122589 | SRLDP DPR<br>LFLRMSTN        | Mus<br>musculu<br>s              |
| 1 | 1.00 | 1 | 1 | 0.01  | 0.006  | 0.021  | 0.016  | 0.017  | t | 112472 | DEGGYTCF<br>FRDHSYQ          | Mus<br>musculu<br>s              |
| 1 | 1.00 | 1 | 1 | 0.01  | 0.013  | 0.021  | 0.016  | 0.017  | t | 112472 | DEGGYTCF<br>FRDHSYQ          | Mus<br>musculu<br>s              |

|   |      |   |   |       |        |        |        |        |   |        |                              |                                  |
|---|------|---|---|-------|--------|--------|--------|--------|---|--------|------------------------------|----------------------------------|
| 1 | 1.00 | 1 | 1 | 0.01  | 0.01   | 0.01   | 0.003  | 0.017  | t | 125553 | RRPEMGD<br>QAHMPYT<br>TAVIHE | Homo<br>sapiens                  |
| 1 | 1.00 | 1 | 1 | -0.02 | -0.018 | 0.011  | -0.017 | -0.018 | t | 60649  | SREQLNKL<br>FGIE             | Homo<br>sapiens                  |
| 1 | 1.00 | 1 | 1 | -0.02 | -0.022 | -0.02  | -0.021 | -0.011 | t | 153340 | ACQMPH<br>WWHCGG<br>GS       | Mus<br>musculu<br>s              |
| 1 | 1.00 | 1 | 1 | -0.01 | -0.01  | -0.01  | -0.01  | 0      | t | 122589 | SRLDPDPR<br>LFLRMSTN         | Mus<br>musculu<br>s              |
| 1 | 1.00 | 1 | 1 | -0.01 | -0.007 | -0.004 | -0.01  | 0      | t | 23974  | HGYSAHA<br>ASPNF             | Mus<br>musculu<br>s              |
| 1 | 1.00 | 1 | 1 | -0.01 | -0.01  | -0.01  | -0.01  | 0      | t | 117059 | PQTDGSTR<br>PRGL             | Homo<br>sapiens                  |
| 1 | 1.00 | 1 | 1 | -0.04 | -0.042 | -0.018 | -0.037 | -0.04  | t | 67462  | TYSKCGSG<br>PWLTPRC<br>MVDYP | Mus<br>musculu<br>s              |
| 1 | 1.00 | 1 | 1 | -0.04 | -0.044 | -0.045 | -0.04  | -0.031 | t | 123867 | YKTAEIPG<br>CPRHVTPY         | Mus<br>musculu<br>s              |
| 1 | 1.00 | 1 | 1 | -0.06 | -0.06  | -0.027 | -0.06  | -0.06  | t | 55616  | RRIRMKH<br>GTKYRR            | Oryctola<br>gus<br>cuniculu<br>s |
| 1 | 1.00 | 1 | 1 | -0.04 | -0.04  | -0.017 | -0.04  | -0.037 | t | 67719  | VAPSMAC<br>SIPAK             | Oryctola<br>gus<br>cuniculu<br>s |
| 1 | 1.00 | 1 | 1 | -0.02 | -0.02  | -0.013 | -0.02  | -0.008 | t | 127682 | HFHRPYH                      | Homo<br>sapiens                  |
| 1 | 1.00 | 1 | 1 | 0.01  | 0.011  | 0.022  | 0.016  | 0.023  | t | 78277  | TIHGSN                       | Equus<br>caballus                |
| 1 | 1.00 | 1 | 1 | -0.01 | -0.012 | -0.011 | -0.007 | 0.002  | t | 106516 | HNSTRAPE<br>KLMI             | Mus<br>musculu<br>s              |
| 1 | 1.00 | 1 | 1 | -0.02 | -0.018 | 0.006  | -0.023 | -0.022 | t | 96277  | FAEAPFSN<br>KG               | Homo<br>sapiens                  |
| 1 | 1.00 | 1 | 1 | -0.02 | -0.016 | 0.006  | -0.023 | -0.022 | t | 96277  | FAEAPFSN<br>KG               | Homo<br>sapiens                  |

|   |      |   |   |       |        |        |        |        |   |        |                             |                                  |
|---|------|---|---|-------|--------|--------|--------|--------|---|--------|-----------------------------|----------------------------------|
| 1 | 1.00 | 1 | 1 | -0.01 | -0.01  | 0.019  | -0.01  | -0.01  | t | 65631  | TPLDDTNP<br>MENYFH<br>WG    | Sus<br>crofa                     |
| 1 | 1.00 | 1 | 1 | -0.04 | -0.044 | -0.011 | -0.04  | -0.04  | t | 54058  | RHKQKIVA<br>PVKQTL          | Bos<br>taurus                    |
| 1 | 1.00 | 1 | 1 | 0.01  | 0.01   | 0.01   | 0.01   | 0.022  | t | 140605 | TLYDALGA<br>V               | Mus<br>musculu<br>s              |
| 1 | 1.00 | 1 | 1 | -0.02 | -0.018 | -0.02  | -0.014 | -0.01  | t | 138200 | KSTSSLRD<br>NSPPVCF         | Homo<br>sapiens                  |
| 1 | 1.00 | 1 | 1 | -0.06 | -0.056 | -0.034 | -0.059 | -0.06  | t | 33850  | KTRTHTNA<br>T               | Homo<br>sapiens                  |
| 1 | 1.00 | 1 | 1 | 0.01  | 0.007  | 0.015  | 0.01   | 0.012  | t | 126374 | KALRDGD<br>WFWWEN<br>SHVFTD | Oryctola<br>gus<br>cuniculu<br>s |
| 1 | 1.00 | 1 | 1 | -0.02 | -0.016 | -0.013 | -0.019 | -0.01  | t | 101902 | MFNDPRL<br>LAGPN            | Homo<br>sapiens                  |
| 1 | 1.00 | 1 | 1 | -0.05 | -0.052 | -0.037 | -0.051 | -0.047 | t | 67164  | TVSRVPW<br>TAWAFHG<br>Y     | Mus<br>musculu<br>s              |
| 1 | 1.00 | 1 | 1 | -0.02 | -0.016 | 0.002  | -0.013 | -0.01  | t | 103871 | EDYWLRs                     | Homo<br>sapiens                  |
| 1 | 1.00 | 1 | 1 | -0.02 | -0.02  | 0.012  | -0.023 | -0.022 | t | 16032  | FGPNAGQ<br>R                | Homo<br>sapiens                  |
| 1 | 1.00 | 1 | 1 | -0.03 | -0.03  | -0.015 | -0.026 | -0.022 | t | 142434 | KSTEDLSV<br>AKDK            | Homo<br>sapiens                  |
| 1 | 1.00 | 1 | 1 | 0     | 0      | 0      | 0      | 0.011  | t | 96526  | LAANNPA                     | Mus<br>musculu<br>s              |
| 1 | 1.00 | 1 | 1 | 0     | 0      | 0      | 0      | 0.011  | t | 63122  | TDAYNQKL<br>SERRAN          | Mus<br>musculu<br>s              |

|   |      |   |   |       |        |        |        |        |   |        |                             |                                  |
|---|------|---|---|-------|--------|--------|--------|--------|---|--------|-----------------------------|----------------------------------|
| 1 | 1.00 | 1 | 1 | 0     | 0      | 0      | 0      | 0.011  | t | 80002  | RKADLEKA<br>LEGAM           | Oryctola<br>gus<br>cuniculu<br>s |
| 1 | 1.00 | 1 | 1 | 0     | 0      | 0      | 0      | 0.011  | t | 39183  | LRRDLAS<br>REAKKQVE<br>KALE | Homo<br>sapiens                  |
| 1 | 1.00 | 1 | 1 | 0     | 0      | 0      | 0      | 0.011  | t | 43317  | NATAEGR<br>AINRRVE          | Mus<br>musculu<br>s              |
| 1 | 1.00 | 1 | 1 | 0     | 0      | 0      | 0      | 0.011  | t | 10433  | DTNNN                       | Mus<br>musculu<br>s              |
| 1 | 1.00 | 1 | 1 | 0     | 0      | 0      | 0      | 0.011  | t | 4429   | ASGQ                        | Mus<br>musculu<br>s              |
| 1 | 1.00 | 1 | 1 | -0.03 | -0.027 | -0.01  | -0.03  | -0.029 | t | 105164 | EFRHDSG                     | Mus<br>musculu<br>s              |
| 1 | 1.00 | 1 | 1 | -0.04 | -0.04  | -0.037 | -0.04  | -0.03  | t | 55523  | RRAGRCPP                    | Homo<br>sapiens                  |
| 1 | 1.00 | 1 | 1 | 0.01  | 0.01   | 0.015  | 0.01   | 0.02   | t | 153424 | MQDSRLR<br>LALSAGGG<br>S    | Mus<br>musculu<br>s              |
| 1 | 1.00 | 1 | 1 | 0.01  | 0.01   | 0.01   | 0.01   | 0.022  | t | 78026  | TAQWLSR<br>TQMDS            | Mus<br>musculu<br>s              |
| 1 | 1.00 | 1 | 1 | 0.01  | 0.006  | 0.012  | 0.004  | 0.02   | t | 23717  | HELSQIIS<br>TTS             | Oryctola<br>gus<br>cuniculu<br>s |
| 1 | 1.00 | 1 | 1 | -0.01 | -0.008 | 0.005  | -0.013 | -0.007 | t | 48594  | PNAKSVKE<br>YLDKVRAT<br>VGC | Homo<br>sapiens                  |
| 1 | 1.00 | 1 | 1 | 0.01  | 0.014  | 0.032  | 0.013  | 0.012  | t | 9511   | DNNDSGH<br>STGADTG          | Homo<br>sapiens                  |
| 1 | 1.00 | 1 | 1 | 0     | 0      | 0      | 0.001  | 0.011  | t | 75442  | YPYDVPDY<br>AS              | Mus<br>musculu<br>s              |

|   |      |   |   |       |        |        |        |        |   |        |                     |                             |
|---|------|---|---|-------|--------|--------|--------|--------|---|--------|---------------------|-----------------------------|
| 1 | 1.00 | 1 | 1 | -0.01 | -0.012 | 0.004  | -0.017 | -0.004 | t | 136518 | MVRKGEK<br>KLAKP    | Mus<br>musculu<br>s         |
| 1 | 1.00 | 1 | 1 | 0.03  | 0.03   | 0.03   | 0.03   | 0.042  | t | 61800  | STNS                | Mus<br>musculu<br>s         |
| 1 | 1.00 | 1 | 1 | -0.01 | -0.008 | 0.002  | -0.009 | 0      | t | 14294  | ESTLYTRT<br>WS      | Homo<br>sapiens             |
| 1 | 1.00 | 1 | 1 | -0.11 | -0.11  | -0.093 | -0.11  | -0.107 | t | 125845 | DSDFPIQN<br>LPYGVFS | Mus<br>musculu<br>s         |
| 1 | 1.00 | 1 | 1 | -0.03 | -0.016 | -0.016 | -0.029 | -0.023 | t | 136334 | GRLLLCVG<br>NNT     | Dicentra<br>rchus<br>labrax |
| 1 | 1.00 | 1 | 1 | -0.01 | -0.008 | 0.006  | -0.009 | 0      | t | 111949 | WTYSPIA             | Homo<br>sapiens             |
| 1 | 1.00 | 1 | 1 | 0.01  | 0.01   | 0.01   | 0.01   | 0.02   | t | 121742 | QCVLAIFN<br>NVYGLPY | Mus<br>musculu<br>s         |
| 1 | 1.00 | 1 | 1 | -0.01 | -0.01  | -0.003 | -0.01  | 0      | t | 124013 | DKRQLQS<br>GQ       | Homo<br>sapiens             |
| 1 | 1.00 | 1 | 1 | 0     | 0      | 0      | 0      | 0.01   | t | 141755 | STDIIWK<br>HWGS     | Mus<br>musculu<br>s         |
| 1 | 1.00 | 1 | 1 | -0.02 | -0.02  | -0.02  | -0.02  | -0.01  | t | 133507 | ALPLHGSP<br>WKWY    | Homo<br>sapiens             |
| 1 | 1.00 | 1 | 1 | -0.02 | -0.016 | -0.009 | -0.013 | -0.01  | t | 138154 | DHRSPPW<br>LTSLLTIS | Homo<br>sapiens             |
| 1 | 1.00 | 1 | 1 | 0.01  | 0.012  | 0.031  | 0.017  | 0.022  | t | 108287 | ATADYPQ<br>KS       | Homo<br>sapiens             |
| 1 | 1.00 | 1 | 1 | -0.03 | -0.028 | -0.025 | -0.029 | -0.02  | t | 7143   | CTGDARH<br>C        | Homo<br>sapiens             |
| 1 | 1.00 | 1 | 1 | 0.01  | 0.013  | 0.01   | 0.01   | 0.022  | t | 79285  | LDPEYWN<br>FRNGDLT  | Mus<br>musculu<br>s         |
| 1 | 1.00 | 1 | 1 | -0.02 | -0.018 | 0.001  | -0.023 | -0.019 | t | 31885  | KLKFGAA<br>RV       | Homo<br>sapiens             |

|   |      |   |   |       |        |        |        |        |   |        |                              |                   |
|---|------|---|---|-------|--------|--------|--------|--------|---|--------|------------------------------|-------------------|
| 1 | 1.00 | 1 | 1 | 0.02  | 0.02   | 0.02   | 0.02   | 0.029  | t | 130599 | RQGEEVY<br>MWRDSTM<br>PA     | Mus<br>musculus   |
| 1 | 1.00 | 1 | 1 | 0.02  | 0.018  | 0.012  | 0.017  | 0.031  | t | 102006 | QPVQQPS<br>GQQQQ             | Mus<br>musculus   |
| 1 | 1.00 | 1 | 1 | -0.04 | -0.04  | -0.03  | -0.04  | -0.038 | t | 137755 | HQCHQES<br>TGRSRGRC<br>GRSGS | Mus<br>musculus   |
| 1 | 1.00 | 1 | 1 | -0.02 | -0.02  | -0.01  | -0.016 | -0.01  | t | 22879  | GTVTLGRF<br>SRLSLFG          | Homo<br>sapiens   |
| 1 | 1.00 | 1 | 1 | -0.04 | -0.04  | -0.04  | -0.04  | -0.03  | t | 79185  | DLWSVL                       | Mus<br>musculus   |
| 1 | 1.00 | 1 | 1 | 0.01  | 0.01   | 0.01   | 0.01   | 0.021  | t | 132847 | KKEDFDIY<br>DEDENQS<br>P     | Mus<br>musculus   |
| 1 | 1.00 | 1 | 1 | 0.01  | 0.01   | 0.012  | 0.01   | 0.019  | t | 78307  | WHSQLSP                      | Homo<br>sapiens   |
| 1 | 1.00 | 1 | 1 | -0.03 | -0.006 | -0.03  | -0.03  | -0.02  | t | 141579 | WKVRKSFF<br>KLQG             | Rattus            |
| 1 | 1.00 | 1 | 1 | 0.01  | 0.01   | 0.017  | 0.01   | 0.02   | t | 108048 | NPQPNISL<br>SQRGYPQ          | Homo<br>sapiens   |
| 1 | 1.00 | 1 | 1 | -0.03 | -0.029 | -0.018 | -0.024 | -0.017 | t | 78262  | RKLGAA                       | Equus<br>caballus |
| 1 | 1.00 | 1 | 1 | 0     | 0      | 0.01   | 0      | 0.01   | t | 51991  | QPYKLQA<br>AATLY             | Mus<br>musculus   |
| 1 | 1.00 | 1 | 1 | 0     | 0.004  | 0.004  | 0.001  | 0.012  | t | 111444 | KDQTNYP                      | Homo<br>sapiens   |
| 1 | 1.00 | 1 | 1 | 0.01  | 0.008  | 0.017  | 0.013  | 0.022  | t | 106763 | QYTMHPL<br>ELLVT             | Mus<br>musculus   |
| 1 | 1.00 | 1 | 1 | -0.03 | -0.028 | -0.018 | -0.029 | -0.024 | t | 10664  | DVLLNNT<br>R                 | Homo<br>sapiens   |



|   |      |   |   |       |        |        |        |        |   |        |                              |                                  |
|---|------|---|---|-------|--------|--------|--------|--------|---|--------|------------------------------|----------------------------------|
| 1 | 1.00 | 1 | 1 | -0.03 | -0.03  | -0.006 | -0.03  | -0.028 | t | 33215  | KRRLRPSR<br>VRIE             | Mus<br>musculu<br>s              |
| 1 | 1.00 | 1 | 1 | -0.06 | -0.06  | -0.047 | -0.06  | -0.059 | t | 104472 | ELLEKTVK<br>DKIAKEQE<br>NKET | Rattus<br>norvegic<br>us         |
| 1 | 1.00 | 1 | 1 | -0.03 | -0.024 | -0.016 | -0.027 | -0.02  | t | 132822 | FGSNVHF                      | Homo<br>sapiens                  |
| 1 | 1.00 | 1 | 1 | 0     | -0.004 | 0.001  | -0.003 | 0.01   | t | 79545  | FGGDADR                      | Oryctola<br>gus<br>cuniculu<br>s |
| 1 | 1.00 | 1 | 1 | -0.02 | -0.02  | 0.007  | -0.018 | -0.02  | t | 12813  | EKMACLST<br>LDVCMEN<br>P     | Homo<br>sapiens                  |
| 1 | 1.00 | 1 | 1 | 0.01  | 0.012  | 0.017  | 0.017  | 0.02   | t | 108471 | HLRQGRN<br>TA                | Homo<br>sapiens                  |
| 1 | 1.00 | 1 | 1 | -0.01 | -0.01  | -0.01  | -0.01  | 0      | t | 132689 | TCSADGGT<br>LFYNLCH          | Mus<br>musculu<br>s              |
| 1 | 1.00 | 1 | 1 | -0.14 | -0.14  | -0.119 | -0.14  | -0.137 | t | 125843 | DRPVYPY                      | Mus<br>musculu<br>s              |
| 1 | 1.00 | 1 | 1 | -0.02 | -0.018 | -0.013 | -0.02  | -0.01  | t | 104348 | WHNAPNI                      | Homo<br>sapiens                  |
| 1 | 1.00 | 1 | 1 | -0.02 | -0.024 | -0.005 | -0.017 | -0.011 | t | 13904  | EQPYRSM                      | Oryctola<br>gus<br>cuniculu<br>s |
| 1 | 1.00 | 1 | 1 | 0.04  | 0.04   | 0.062  | 0.04   | 0.042  | t | 73345  | YAEPTKDP<br>DQRPYCW<br>HYPPQ | Mus<br>musculu<br>s              |
| 1 | 1.00 | 1 | 1 | 0.02  | 0.02   | 0.029  | 0.02   | 0.032  | t | 127777 | PR SRLTP                     | Homo<br>sapiens                  |
| 1 | 1.00 | 1 | 1 | -0.02 | -0.017 | -0.013 | -0.02  | -0.01  | t | 79453  | VFVKLP                       | Mus<br>musculu<br>s              |
| 1 | 1.00 | 1 | 1 | -0.04 | -0.036 | -0.013 | -0.043 | -0.037 | t | 16397  | FKLKAIE                      | Homo<br>sapiens                  |

|   |      |   |   |       |        |        |        |        |   |        |                             |                             |
|---|------|---|---|-------|--------|--------|--------|--------|---|--------|-----------------------------|-----------------------------|
| 1 | 1.00 | 1 | 1 | 0.01  | 0.01   | 0.017  | 0.019  | 0.022  | t | 130999 | PHESDATV<br>R               | Homo<br>sapiens             |
| 1 | 1.00 | 1 | 1 | 0.01  | 0.01   | 0.016  | 0.01   | 0.02   | t | 60329  | SPVLTLES<br>VFPFLR          | Homo<br>sapiens             |
| 1 | 1.00 | 1 | 1 | -0.01 | 0      | 0.004  | -0.017 | -0.004 | t | 136518 | MVRKGEK<br>KLAKP            | Dicentra<br>rchus<br>labrax |
| 1 | 1.00 | 1 | 1 | -0.04 | -0.037 | 0.007  | -0.034 | -0.039 | t | 54393  | RKLWCHH<br>FC               | Capra<br>hircus             |
| 1 | 1.00 | 1 | 1 | -0.06 | -0.06  | -0.034 | -0.06  | -0.059 | t | 6343   | CGRVCLRC                    | Mus<br>musculu<br>s         |
| 1 | 1.00 | 1 | 1 | -0.06 | -0.06  | -0.034 | -0.06  | -0.059 | t | 6343   | CGRVCLRC                    | Mus<br>musculu<br>s         |
| 1 | 1.00 | 1 | 1 | -0.03 | -0.031 | -0.001 | -0.03  | -0.03  | t | 66317  | TSLSWSKP<br>PTRSSPI         | Equus<br>caballus           |
| 1 | 1.00 | 1 | 1 | 0     | 0.003  | 0.021  | 0      | 0.002  | t | 74416  | YIWPRND<br>YDGFLNA<br>HEHHG | Mus<br>musculu<br>s         |
| 1 | 1.00 | 1 | 1 | -0.08 | -0.08  | -0.055 | -0.08  | -0.08  | t | 104461 | EFRHDS                      | Mus<br>musculu<br>s         |
| 1 | 1.00 | 1 | 1 | -0.02 | -0.023 | 0.002  | -0.02  | -0.019 | t | 53998  | RGTIGQV<br>DRLKDKV<br>NNTL  | Homo<br>sapiens             |
| 1 | 1.00 | 1 | 1 | -0.02 | -0.021 | 0.002  | -0.02  | -0.019 | t | 53998  | RGTIGQV<br>DRLKDKV<br>NNTL  | Equus<br>caballus           |
| 1 | 1.00 | 1 | 1 | -0.02 | -0.013 | 0.002  | -0.02  | -0.019 | t | 53998  | RGTIGQV<br>DRLKDKV<br>NNTL  | Equus<br>caballus           |
| 1 | 1.00 | 1 | 1 | -0.02 | -0.016 | 0.018  | -0.019 | -0.02  | t | 98035  | FGPKNF                      | Homo<br>sapiens             |
| 1 | 1.00 | 1 | 1 | -0.02 | -0.018 | 0.018  | -0.019 | -0.02  | t | 98035  | FGPKNF                      | Homo<br>sapiens             |

|   |      |   |   |       |        |        |        |        |   |        |                             |                                  |
|---|------|---|---|-------|--------|--------|--------|--------|---|--------|-----------------------------|----------------------------------|
| 1 | 1.00 | 1 | 1 | -0.02 | -0.02  | -0.02  | -0.024 | -0.01  | t | 131232 | LHAYNPFL<br>LSWP            | Homo<br>sapiens                  |
| 1 | 1.00 | 1 | 1 | 0     | 0      | 0      | 0      | 0.009  | t | 107875 | GTYKAGN<br>QHNHVKY<br>G     | Homo<br>sapiens                  |
| 1 | 1.00 | 1 | 1 | -0.06 | -0.06  | -0.047 | -0.06  | -0.059 | t | 104480 | ESKENKA<br>LNELLEKT<br>VKDK | Rattus<br>norvegic<br>us         |
| 1 | 1.00 | 1 | 1 | -0.02 | -0.018 | 0.009  | -0.013 | -0.017 | t | 119497 | MRKANSP<br>PT               | Homo<br>sapiens                  |
| 1 | 1.00 | 1 | 1 | -0.12 | -0.12  | -0.104 | -0.12  | -0.118 | t | 144873 | ATWVDLV<br>LEGDSCLTI        | Mus<br>musculu<br>s              |
| 1 | 1.00 | 1 | 1 | -0.01 | -0.014 | -0.009 | -0.013 | 0      | t | 79538  | EHQLNRA                     | Oryctola<br>gus<br>cuniculu<br>s |
| 1 | 1.00 | 1 | 1 | -0.01 | -0.007 | -0.001 | -0.01  | 0      | t | 79289  | LGPVNS                      | Mus<br>musculu<br>s              |
| 1 | 1.00 | 1 | 1 | -0.01 | -0.013 | -0.01  | -0.01  | 0.001  | t | 46240  | NTREVFA<br>QVKQMYK<br>TPT   | Oryctola<br>gus<br>cuniculu<br>s |
| 1 | 1.00 | 1 | 1 | 0.01  | 0.012  | 0.03   | 0.01   | 0.011  | t | 37638  | LLNYIDEN<br>KLYLIGSAE<br>YE | Homo<br>sapiens                  |
| 1 | 1.00 | 1 | 1 | 0     | -0.002 | 0.005  | -0.001 | 0.012  | t | 5284   | AVAYPVSA<br>YVPAWVS         | Mus<br>musculu<br>s              |
| 1 | 1.00 | 1 | 1 | -0.02 | -0.017 | 0.002  | -0.02  | -0.015 | t | 97601  | RGRRRQP                     | Mus<br>musculu<br>s              |
| 1 | 1.00 | 1 | 1 | -0.02 | -0.02  | -0.001 | -0.02  | -0.018 | t | 67979  | VDHVGLG<br>TAFENSIY         | Sus<br>scrofa                    |
| 1 | 1.00 | 1 | 1 | -0.03 | -0.03  | -0.019 | -0.037 | -0.024 | t | 136688 | TPAGWFR<br>WGIWD            | Mus<br>musculu<br>s              |
| 1 | 1.00 | 1 | 1 | 0.01  | 0.01   | 0.01   | 0.01   | 0.02   | t | 1785   | AHIRHHK<br>MPVTTSA<br>T     | Mus<br>musculu<br>s              |

|   |      |   |   |       |        |        |        |        |   |        |                              |                                  |
|---|------|---|---|-------|--------|--------|--------|--------|---|--------|------------------------------|----------------------------------|
| 1 | 1.00 | 1 | 1 | 0     | -0.004 | 0.015  | -0.007 | 0      | t | 136078 | QQKKEGPI<br>PPDAQNP          | Oryctola<br>gus<br>cuniculu<br>s |
| 1 | 1.00 | 1 | 1 | 0.05  | 0.05   | 0.05   | 0.04   | 0.058  | t | 108612 | RNDLITFLE<br>QETK            | Homo<br>sapiens                  |
| 1 | 1.00 | 1 | 1 | 0.02  | 0.018  | 0.019  | 0.023  | 0.032  | t | 106690 | NSDHFLQP<br>DPPL             | Mus<br>musculu<br>s              |
| 1 | 1.00 | 1 | 1 | 0     | 0      | 0.002  | 0      | 0.01   | t | 122590 | SRLERADP<br>RLSSRYG          | Mus<br>musculu<br>s              |
| 1 | 1.00 | 1 | 1 | -0.03 | -0.028 | -0.014 | -0.033 | -0.03  | t | 18564  | GAEASTSL<br>FHFRIPRSY<br>FLR | Homo<br>sapiens                  |
| 1 | 1.00 | 1 | 1 | -0.08 | -0.075 | -0.056 | -0.08  | -0.08  | t | 73904  | YFSMVGN<br>WAKVLVV<br>LLLFAG | Homo<br>sapiens                  |
| 1 | 1.00 | 1 | 1 | 0.01  | 0.012  | 0.015  | 0.011  | 0.02   | t | 16101  | FHENWPS                      | Homo<br>sapiens                  |
| 1 | 1.00 | 1 | 1 | 0.03  | 0.027  | 0.03   | 0.03   | 0.04   | t | 79597  | LETDELH                      | Oryctola<br>gus<br>cuniculu<br>s |
| 1 | 1.00 | 1 | 1 | -0.03 | -0.025 | -0.003 | -0.033 | -0.032 | t | 763    | ADRQTAC<br>NCLKNLAG          | Homo<br>sapiens                  |
| 1 | 1.00 | 1 | 1 | -0.04 | -0.042 | -0.036 | -0.04  | -0.028 | t | 42276  | MPHGFIN<br>WHGAF             | Mus<br>musculu<br>s              |
| 1 | 1.00 | 1 | 1 | 0     | 0      | 0.007  | 0.003  | 0.012  | t | 111691 | QTIGNAKP<br>LGRV             | Homo<br>sapiens                  |
| 1 | 1.00 | 1 | 1 | -0.04 | -0.04  | -0.02  | -0.044 | -0.04  | t | 54019  | RGWVIHP<br>LGL               | Homo<br>sapiens                  |
| 1 | 1.00 | 1 | 1 | -0.04 | -0.036 | -0.018 | -0.033 | -0.03  | t | 104130 | MPLQRTL                      | Homo<br>sapiens                  |
| 1 | 1.00 | 1 | 1 | -0.01 | -0.008 | -0.003 | -0.003 | 0.002  | t | 138159 | DTWPTAR<br>LTSSMQYI          | Homo<br>sapiens                  |

|   |      |   |   |       |        |        |        |        |   |        |                              |                                  |
|---|------|---|---|-------|--------|--------|--------|--------|---|--------|------------------------------|----------------------------------|
| 1 | 1.00 | 1 | 1 | -0.01 | -0.008 | 0.008  | -0.009 | -0.007 | t | 125423 | GKVLRFQK<br>AFLTQLDE<br>LLTE | Homo<br>sapiens                  |
| 1 | 1.00 | 1 | 1 | -0.01 | -0.006 | -0.006 | -0.009 | 0.002  | t | 111552 | MKVSNSK                      | Homo<br>sapiens                  |
| 1 | 1.00 | 1 | 1 | 0.04  | 0.042  | 0.047  | 0.047  | 0.052  | t | 103991 | IMEQCFEI<br>GCPATN           | Homo<br>sapiens                  |
| 1 | 1.00 | 1 | 1 | -0.01 | -0.01  | -0.012 | -0.01  | -0.001 | t | 79364  | RCVDSFVI<br>NNHMCD           | Mus<br>musculu<br>s              |
| 1 | 1.00 | 1 | 1 | 0.03  | 0.027  | 0.021  | 0.03   | 0.042  | t | 59316  | SLLTEVETP<br>IR              | Oryctola<br>gus<br>cuniculu<br>s |
| 1 | 1.00 | 1 | 1 | 0.03  | 0.03   | 0.035  | 0.028  | 0.04   | t | 33364  | KSKDLQSA<br>P                | Homo<br>sapiens                  |
| 1 | 1.00 | 1 | 1 | 0.07  | 0.07   | 0.077  | 0.063  | 0.08   | t | 104059 | LTSSSQH                      | Mus<br>musculu<br>s              |
| 1 | 1.00 | 1 | 1 | 0.02  | 0.025  | 0.034  | 0.02   | 0.03   | t | 132850 | KLDLYLSYP<br>QPY             | Mus<br>musculu<br>s              |
| 1 | 1.00 | 1 | 1 | 0     | -0.005 | 0.01   | -0.003 | 0.003  | t | 110840 | EVTIGDIEE<br>PPILEVVPE<br>TH | Bos<br>taurus                    |
| 1 | 1.00 | 1 | 1 | -0.05 | -0.047 | -0.042 | -0.05  | -0.04  | t | 32035  | KLMTHWP                      | Mus<br>musculu<br>s              |
| 1 | 1.00 | 1 | 1 | -0.05 | -0.05  | -0.042 | -0.05  | -0.04  | t | 32035  | KLMTHWP                      | Mus<br>musculu<br>s              |
| 1 | 1.00 | 1 | 1 | -0.03 | -0.028 | -0.013 | -0.029 | -0.029 | t | 9043   | DLDFSAFD<br>ASLSPFMI<br>REAG | Homo<br>sapiens                  |
| 1 | 1.00 | 1 | 1 | -0.05 | -0.048 | -0.025 | -0.053 | -0.05  | t | 20109  | GHADFGG<br>RA                | Homo<br>sapiens                  |

|   |      |   |   |       |        |        |        |        |   |        |                              |                     |
|---|------|---|---|-------|--------|--------|--------|--------|---|--------|------------------------------|---------------------|
| 1 | 1.00 | 1 | 1 | -0.02 | -0.018 | 0.005  | -0.019 | -0.018 | t | 44662  | NLDDRDR<br>SELSPLLS<br>TTEW  | Homo<br>sapiens     |
| 1 | 1.00 | 1 | 1 | -0.02 | -0.019 | -0.006 | -0.021 | -0.018 | t | 56173  | RTRVHGD<br>KATAHGR<br>K      | Capra<br>hircus     |
| 1 | 1.00 | 1 | 1 | 0     | 0.004  | 0.004  | 0.001  | 0.012  | t | 111115 | APYKLAM<br>RDQA              | Homo<br>sapiens     |
| 1 | 1.00 | 1 | 1 | 0.01  | 0.012  | 0.006  | 0.011  | 0.022  | t | 137824 | DQAVSLG<br>Q                 | Homo<br>sapiens     |
| 1 | 1.00 | 1 | 1 | 0     | 0      | 0      | 0      | 0.011  | t | 141963 | MVDRGW<br>G                  | Mus<br>musculu<br>s |
| 1 | 1.00 | 1 | 1 | 0     | 0      | 0      | 0      | 0.011  | t | 139029 | DLQVLT                       | Mus<br>musculu<br>s |
| 1 | 1.00 | 1 | 1 | 0     | 0      | 0      | 0      | 0.011  | t | 151493 | VVDGPETK<br>EC               | Mus<br>musculu<br>s |
| 1 | 1.00 | 1 | 1 | 0     | 0      | 0      | 0      | 0.011  | t | 141935 | KKPGGPG                      | Mus<br>musculu<br>s |
| 1 | 1.00 | 1 | 1 | 0     | 0      | 0      | 0      | 0.011  | t | 151456 | TATTEK                       | Mus<br>musculu<br>s |
| 1 | 1.00 | 1 | 1 | 0     | 0      | 0      | 0      | 0.011  | t | 125351 | AALWGVK<br>VRHVS             | Mus<br>musculu<br>s |
| 1 | 1.00 | 1 | 1 | 0     | 0      | 0      | 0      | 0.011  | t | 125600 | WESYPFRV<br>GTSL             | Mus<br>musculu<br>s |
| 1 | 1.00 | 1 | 1 | 0     | 0      | 0      | 0      | 0.011  | t | 125363 | APKTYVSV<br>SGMV             | Mus<br>musculu<br>s |
| 1 | 1.00 | 1 | 1 | 0     | 0      | 0      | 0      | 0.011  | t | 131671 | SPPPYVP                      | Mus<br>musculu<br>s |
| 1 | 1.00 | 1 | 1 | 0     | 0      | 0      | 0      | 0.011  | t | 118609 | SNVYADSF<br>VVKGDDV<br>RQIAP | Mus<br>musculu<br>s |
| 1 | 1.00 | 1 | 1 | 0     | 0      | 0      | 0      | 0.011  | t | 132276 | ERIYHFV                      | Mus<br>musculu<br>s |

|   |      |   |   |       |        |        |        |        |   |        |                              |                                  |
|---|------|---|---|-------|--------|--------|--------|--------|---|--------|------------------------------|----------------------------------|
| 1 | 1.00 | 1 | 1 | 0     | 0      | 0      | 0      | 0.011  | t | 100992 | KSLSRHDH<br>IH HH            | Ovis<br>aries                    |
| 1 | 1.00 | 1 | 1 | 0     | 0      | 0      | 0      | 0.011  | t | 65409  | TNRNPQ                       | Mus<br>musculu<br>s              |
| 1 | 1.00 | 1 | 1 | 0     | 0      | 0      | 0      | 0.011  | t | 72373  | WESDKPK                      | Mus<br>musculu<br>s              |
| 1 | 1.00 | 1 | 1 | 0     | 0      | 0      | 0      | 0.011  | t | 65409  | TNRNPQ                       | Mus<br>musculu<br>s              |
| 1 | 1.00 | 1 | 1 | 0     | 0      | 0      | 0      | 0.011  | t | 75217  | YNSDKPK                      | Mus<br>musculu<br>s              |
| 1 | 1.00 | 1 | 1 | 0     | 0      | 0      | 0      | 0.011  | t | 55057  | RNSDKPK                      | Mus<br>musculu<br>s              |
| 1 | 1.00 | 1 | 1 | 0     | 0      | 0      | 0      | 0.011  | t | 57276  | SDSDKPK                      | Mus<br>musculu<br>s              |
| 1 | 1.00 | 1 | 1 | 0     | 0      | 0      | 0      | 0.011  | t | 59900  | SNSDKPK                      | Mus<br>musculu<br>s              |
| 1 | 1.00 | 1 | 1 | 0     | 0      | 0      | 0      | 0.011  | t | 34329  | KWSDKPK                      | Mus<br>musculu<br>s              |
| 1 | 1.00 | 1 | 1 | 0     | 0      | 0      | 0      | 0.011  | t | 36372  | LHEQYYF                      | Mus<br>musculu<br>s              |
| 1 | 1.00 | 1 | 1 | -0.05 | -0.036 | -0.034 | -0.049 | -0.05  | t | 33859  | KTSESRQP<br>RGRRQPIP<br>KARR | Homo<br>sapiens                  |
| 1 | 1.00 | 1 | 1 | -0.04 | -0.042 | -0.023 | -0.04  | -0.039 | t | 111033 | STYDRDN<br>DGWLTSD<br>PRKQCS | Mus<br>musculu<br>s              |
| 1 | 1.00 | 1 | 1 | 0     | 0      | 0.005  | 0.003  | 0.01   | t | 651    | ADDTPYTL<br>SFAPHRH          | Homo<br>sapiens                  |
| 1 | 1.00 | 1 | 1 | 0.02  | 0.02   | 0.025  | 0.02   | 0.032  | t | 44896  | NLTDILP                      | Oryctola<br>gus<br>cuniculu<br>s |
| 1 | 1.00 | 1 | 1 | 0     | 0      | 0      | 0      | 0.009  | t | 107757 | AVSNRPRL<br>KDTTYRL          | Homo<br>sapiens                  |
| 1 | 1.00 | 1 | 1 | 0.02  | 0.018  | 0.027  | 0.023  | 0.032  | t | 106818 | SDDYAPFG<br>LDII             | Mus<br>musculu<br>s              |
| 1 | 1.00 | 1 | 1 | 0     | 0      | 0.017  | 0      | 0.001  | t | 4397   | ASFEAQG<br>ALANIAVD<br>KA    | Mus<br>musculu<br>s              |

|   |      |   |   |   |   |       |   |       |   |        |                           |                                  |
|---|------|---|---|---|---|-------|---|-------|---|--------|---------------------------|----------------------------------|
| 1 | 1.00 | 1 | 1 | 0 | 0 | 0.017 | 0 | 0.001 | t | 4397   | ASFEAQG<br>ALANIAVD<br>KA | Mus<br>musculu<br>s              |
| 1 | 1.00 | 1 | 1 | 0 | 0 | 0     | 0 | 0.011 | t | 137827 | DVKSALIEG                 | Rattus<br>norvegic<br>us         |
| 1 | 1.00 | 1 | 1 | 0 | 0 | 0     | 0 | 0.011 | t | 97370  | GTVLVTRK<br>AL            | Mus<br>musculu<br>s              |
| 1 | 1.00 | 1 | 1 | 0 | 0 | 0     | 0 | 0.011 | t | 65273  | TMVTPGE<br>L              | Mus<br>musculu<br>s              |
| 1 | 1.00 | 1 | 1 | 0 | 0 | 0     | 0 | 0.011 | t | 66351  | TSPAEGVT<br>ETKTLVIQ      | Oryctola<br>gus<br>cuniculu<br>s |
| 1 | 1.00 | 1 | 1 | 0 | 0 | 0     | 0 | 0.011 | t | 61801  | STNSGINN                  | Mus<br>musculu<br>s              |
| 1 | 1.00 | 1 | 1 | 0 | 0 | 0     | 0 | 0.011 | t | 65421  | TNSGINNS                  | Mus<br>musculu<br>s              |
| 1 | 1.00 | 1 | 1 | 0 | 0 | 0     | 0 | 0.011 | t | 66833  | TTSTGPCK<br>TCTTPAQ       | Mus<br>musculu<br>s              |
| 1 | 1.00 | 1 | 1 | 0 | 0 | 0     | 0 | 0.011 | t | 60725  | SRLLENET                  | Mus<br>musculu<br>s              |
| 1 | 1.00 | 1 | 1 | 0 | 0 | 0     | 0 | 0.011 | t | 61800  | STNS                      | Mus<br>musculu<br>s              |
| 1 | 1.00 | 1 | 1 | 0 | 0 | 0     | 0 | 0.011 | t | 94832  | GLFGNNE<br>NQTKV          | Oryctola<br>gus<br>cuniculu<br>s |
| 1 | 1.00 | 1 | 1 | 0 | 0 | 0     | 0 | 0.011 | t | 97717  | TYNYFKDE<br>L             | Mus<br>musculu<br>s              |
| 1 | 1.00 | 1 | 1 | 0 | 0 | 0     | 0 | 0.011 | t | 53018  | QYPALT                    | Mus<br>musculu<br>s              |



|   |      |   |   |       |        |        |        |        |   |        |                            |                                  |
|---|------|---|---|-------|--------|--------|--------|--------|---|--------|----------------------------|----------------------------------|
| 1 | 1.00 | 1 | 1 | 0     | 0      | 0      | 0      | 0.011  | t | 46008  | NSTNSGIN                   | Mus<br>musculus                  |
| 1 | 1.00 | 1 | 1 | 0     | 0      | 0      | 0      | 0.011  | t | 45252  | NNSTNSGI                   | Mus<br>musculus                  |
| 1 | 1.00 | 1 | 1 | 0     | 0      | 0      | 0      | 0.011  | t | 11571  | EEEDDDM<br>GFGLFD          | Mus<br>musculus                  |
| 1 | 1.00 | 1 | 1 | 0     | 0      | 0      | 0      | 0.011  | t | 3952   | AQEPPRQ                    | Mus<br>musculus                  |
| 1 | 1.00 | 1 | 1 | 0     | 0      | 0      | 0      | 0.011  | t | 7841   | DDPF                       | Mus<br>musculus                  |
| 1 | 1.00 | 1 | 1 | 0     | 0      | 0      | 0      | 0.011  | t | 4225   | ARQPYGFF<br>LETEEVYQ<br>PG | Oryctola<br>gus<br>cuniculu<br>s |
| 1 | 1.00 | 1 | 1 | 0     | 0      | 0      | 0      | 0.011  | t | 9586   | DPAFR                      | Mus<br>musculus                  |
| 1 | 1.00 | 1 | 1 | 0.01  | 0.011  | 0.021  | 0.011  | 0.02   | t | 61847  | STQHGPQ                    | Homo<br>sapiens                  |
| 1 | 1.00 | 1 | 1 | -0.03 | -0.028 | -0.014 | -0.029 | -0.025 | t | 10125  | DSGCVVS<br>WKNKELK<br>C    | Homo<br>sapiens                  |
| 1 | 1.00 | 1 | 1 | 0.02  | 0.02   | 0.027  | 0.02   | 0.029  | t | 107032 | YTQSPTPD<br>LMAV           | Mus<br>musculus                  |
| 1 | 1.00 | 1 | 1 | -0.07 | -0.07  | -0.056 | -0.07  | -0.064 | t | 136537 | NTDVVNV<br>SVLCR           | Mus<br>musculus                  |
| 1 | 1.00 | 1 | 1 | -0.01 | -0.01  | -0.008 | -0.017 | -0.003 | t | 125463 | KLTPLEA<br>RLDLSSW<br>FTVG | Homo<br>sapiens                  |
| 1 | 1.00 | 1 | 1 | 0     | -0.003 | 0.027  | 0      | 0.001  | t | 101538 | DGVMQG<br>AIQSIIQGE        | Oryctola<br>gus<br>cuniculu<br>s |

|   |      |   |   |       |        |        |        |        |   |        |                           |                         |
|---|------|---|---|-------|--------|--------|--------|--------|---|--------|---------------------------|-------------------------|
| 1 | 1.00 | 1 | 1 | 0     | 0      | 0      | 0.002  | 0.012  | t | 50637  | QELDCWH<br>YQHCVTS<br>TKS | MD                      |
| 1 | 1.00 | 1 | 1 | -0.04 | -0.04  | -0.018 | -0.04  | -0.039 | t | 52868  | QWYDDR                    | Mus<br>musculu<br>s     |
| 1 | 1.00 | 1 | 1 | -0.04 | -0.037 | -0.018 | -0.04  | -0.039 | t | 52868  | QWYDDR                    | Mus<br>musculu<br>s     |
| 1 | 1.00 | 1 | 1 | -0.03 | -0.034 | -0.017 | -0.031 | -0.028 | t | 48782  | PPFTSAVG<br>GVDHRS        | Mus<br>musculu<br>s     |
| 1 | 1.00 | 1 | 1 | -0.01 | -0.006 | -0.006 | -0.009 | 0.002  | t | 111435 | IVQLTQW                   | Homo<br>sapiens         |
| 1 | 1.00 | 1 | 1 | -0.01 | -0.01  | 0.007  | -0.01  | -0.008 | t | 51456  | QLNRALSG<br>IAAEQDRN<br>T | Mus<br>musculu<br>s     |
| 1 | 1.00 | 1 | 1 | -0.01 | -0.008 | 0      | -0.013 | -0.007 | t | 28676  | ISQAVHAA<br>HAEINEAG<br>R | Homo<br>sapiens         |
| 1 | 1.00 | 1 | 1 | -0.04 | -0.038 | -0.039 | -0.039 | -0.03  | t | 78291  | VHRNPWH<br>L              | Homo<br>sapiens         |
| 1 | 1.00 | 1 | 1 | -0.07 | -0.068 | -0.047 | -0.069 | -0.07  | t | 9619   | DPDYVPPV<br>VHGCPLPP<br>T | Homo<br>sapiens         |
| 1 | 1.00 | 1 | 1 | -0.01 | -0.01  | -0.005 | -0.01  | 0.002  | t | 39160  | LRPFHQILY<br>GMS          | Mus<br>musculu<br>s     |
| 1 | 1.00 | 1 | 1 | -0.04 | -0.036 | -0.019 | -0.04  | -0.038 | t | 61862  | STRGRQTV<br>KENKGT        | Myodes<br>glareolu<br>s |
| 1 | 1.00 | 1 | 1 | -0.05 | -0.052 | -0.04  | -0.049 | -0.04  | t | 78997  | IGCHFPCS<br>FGPVWPS       | Mus<br>musculu<br>s     |
| 1 | 1.00 | 1 | 1 | -0.01 | -0.006 | 0.009  | -0.009 | -0.004 | t | 51281  | QLAEQFK<br>QK             | Homo<br>sapiens         |

|   |      |   |   |       |        |        |        |        |   |        |                              |                                  |
|---|------|---|---|-------|--------|--------|--------|--------|---|--------|------------------------------|----------------------------------|
| 1 | 1.00 | 1 | 1 | -0.05 | -0.051 | -0.037 | -0.049 | -0.048 | t | 29914  | KAPSGASG<br>VKRSHRR<br>WRPGT | Canis<br>lupus                   |
| 1 | 1.00 | 1 | 1 | -0.04 | -0.038 | -0.019 | -0.033 | -0.029 | t | 108286 | ASKAKARP<br>V                | Homo<br>sapiens                  |
| 1 | 1.00 | 1 | 1 | -0.1  | -0.096 | -0.075 | -0.103 | -0.102 | t | 105525 | SPRHRHGL                     | Homo<br>sapiens                  |
| 1 | 1.00 | 1 | 1 | 0     | 0      | 0      | 0.001  | 0.012  | t | 56810  | SAHSTP                       | Mus<br>musculu<br>s              |
| 1 | 1.00 | 1 | 1 | -0.06 | -0.062 | -0.038 | -0.061 | -0.06  | t | 43578  | NEDQKIGI<br>EIIKRALKI        | Mus<br>musculu<br>s              |
| 1 | 1.00 | 1 | 1 | -0.04 | -0.038 | -0.018 | -0.039 | -0.038 | t | 65414  | TNRRPQD<br>VKFPGGG<br>Q      | Homo<br>sapiens                  |
| 1 | 1.00 | 1 | 1 | 0.01  | 0.014  | 0.032  | 0.01   | 0.013  | t | 64383  | TIMPFDLI<br>YTNDTILIE<br>M   | Homo<br>sapiens                  |
| 1 | 1.00 | 1 | 1 | -0.01 | -0.01  | 0.005  | -0.01  | -0.004 | t | 10222  | DSRGSLLS<br>PR               | Homo<br>sapiens                  |
| 1 | 1.00 | 1 | 1 | -0.02 | -0.018 | -0.009 | -0.019 | -0.018 | t | 42699  | MSTNPKP<br>QRKTKRNT<br>NRRPQ | Homo<br>sapiens                  |
| 1 | 1.00 | 1 | 1 | -0.02 | -0.018 | -0.009 | -0.019 | -0.018 | t | 42699  | MSTNPKP<br>QRKTKRNT<br>NRRPQ | Homo<br>sapiens                  |
| 1 | 1.00 | 1 | 1 | -0.04 | -0.037 | -0.033 | -0.04  | -0.035 | t | 159280 | DNKTYGN<br>KSNFNAV           | Mus<br>musculu<br>s              |
| 1 | 1.00 | 1 | 1 | 0.02  | 0.02   | 0.02   | 0.02   | 0.032  | t | 140591 | PYHQFQT<br>GQ                | Mus<br>musculu<br>s              |
| 1 | 1.00 | 1 | 1 | 0.02  | 0.016  | 0.029  | 0.023  | 0.032  | t | 99736  | TTLNSFMR<br>SFPP             | Oryctola<br>gus<br>cuniculu<br>s |
| 1 | 1.00 | 1 | 1 | 0.01  | 0.01   | 0.017  | 0.01   | 0.022  | t | 127726 | LPYKLTQ                      | Homo<br>sapiens                  |
| 1 | 1.00 | 1 | 1 | -0.05 | -0.05  | -0.044 | -0.05  | -0.04  | t | 133507 | ALPLHGSP<br>WKWY             | Homo<br>sapiens                  |

|   |      |   |   |       |        |        |        |        |   |        |                              |                                  |
|---|------|---|---|-------|--------|--------|--------|--------|---|--------|------------------------------|----------------------------------|
| 1 | 1.00 | 1 | 1 | -0.02 | -0.018 | -0.004 | -0.019 | -0.018 | t | 33776  | KTMIRFGD<br>VGLDLDFS<br>AFDA | Homo<br>sapiens                  |
| 1 | 1.00 | 1 | 1 | -0.03 | -0.027 | -0.023 | -0.03  | -0.018 | t | 104293 | SYPNTWP                      | Mus<br>musculu<br>s              |
| 1 | 1.00 | 1 | 1 | -0.01 | -0.007 | -0.008 | -0.01  | 0      | t | 141755 | STDIISWK<br>HWGS             | Mus<br>musculu<br>s              |
| 1 | 1.00 | 1 | 1 | 0.03  | 0.041  | 0.041  | 0.023  | 0.036  | t | 136409 | KASTVTGF<br>GRGT             | Dicentra<br>rchus<br>labrax      |
| 1 | 1.00 | 1 | 1 | 0.01  | 0.013  | 0.01   | 0.01   | 0.02   | t | 1785   | AHIRHHK<br>MPVTTS<br>A<br>T  | Mus<br>musculu<br>s              |
| 1 | 1.00 | 1 | 1 | 0     | 0      | 0      | 0      | 0.01   | t | 127687 | HSSHRLS                      | Homo<br>sapiens                  |
| 1 | 1.00 | 1 | 1 | 0     | 0      | 0      | 0      | 0.011  | t | 145643 | YDASLEDQ<br>KGLVA            | Oryctola<br>gus<br>cuniculu<br>s |
| 1 | 1.00 | 1 | 1 | 0     | 0      | 0      | 0      | 0.011  | t | 139618 | TGQLVHRF                     | Mus<br>musculu<br>s              |
| 1 | 1.00 | 1 | 1 | 0     | 0      | 0      | 0      | 0.011  | t | 118058 | PPPGIRGP                     | Oryctola<br>gus<br>cuniculu<br>s |
| 1 | 1.00 | 1 | 1 | 0     | 0      | 0      | 0      | 0.011  | t | 103972 | HNPINAGT<br>ELSATGN          | Oryctola<br>gus<br>cuniculu<br>s |
| 1 | 1.00 | 1 | 1 | 0     | 0      | 0      | 0      | 0.011  | t | 30093  | KCTSDQDE<br>QFIPKGCS<br>K    | Oryctola<br>gus<br>cuniculu<br>s |
| 1 | 1.00 | 1 | 1 | 0     | 0      | 0      | 0      | 0.011  | t | 30093  | KCTSDQDE<br>QFIPKGCS<br>K    | Mus<br>musculu<br>s              |
| 1 | 1.00 | 1 | 1 | -0.05 | -0.05  | -0.05  | -0.05  | -0.04  | t | 39211  | LRSLHLVR<br>G                | Mus<br>musculu<br>s              |
| 1 | 1.00 | 1 | 1 | -0.01 | -0.01  | 0.006  | -0.01  | -0.008 | t | 75764  | YSIISSMKK<br>HSLSI           | Mus<br>musculu<br>s              |

|   |      |   |   |       |        |        |        |        |   |        |                         |                                  |
|---|------|---|---|-------|--------|--------|--------|--------|---|--------|-------------------------|----------------------------------|
| 1 | 1.00 | 1 | 1 | -0.01 | -0.008 | -0.005 | -0.013 | -0.001 | t | 6023   | CAREYGTN<br>RWVC        | Homo<br>sapiens                  |
| 1 | 1.00 | 1 | 1 | -0.01 | -0.01  | -0.013 | -0.01  | 0.002  | t | 78943  | CTRLHTGY<br>WVC         | Mus<br>musculu<br>s              |
| 1 | 1.00 | 1 | 1 | 0.03  | 0.028  | 0.037  | 0.023  | 0.039  | t | 109845 | RPLGLQEE<br>SLDG        | Mus<br>musculu<br>s              |
| 1 | 1.00 | 1 | 1 | -0.01 | -0.008 | -0.01  | -0.009 | 0      | t | 117113 | WPMNTD<br>DSTRPR        | Homo<br>sapiens                  |
| 1 | 1.00 | 1 | 1 | -0.01 | -0.006 | 0.012  | -0.003 | 0      | t | 104149 | NHYFLRS                 | Homo<br>sapiens                  |
| 1 | 1.00 | 1 | 1 | -0.02 | -0.022 | -0.015 | -0.021 | -0.01  | t | 7516   | DAGEGGP<br>RV           | Mus<br>musculu<br>s              |
| 1 | 1.00 | 1 | 1 | -0.01 | -0.01  | 0.016  | -0.01  | -0.008 | t | 39490  | LSLNYAGA<br>E           | Rattus<br>norvegic<br>us         |
| 1 | 1.00 | 1 | 1 | -0.01 | -0.012 | -0.009 | -0.009 | 0      | t | 70946  | VSGDPRG<br>RYEDI        | Mus<br>musculu<br>s              |
| 1 | 1.00 | 1 | 1 | 0.02  | 0.02   | 0.022  | 0.02   | 0.029  | t | 122555 | RITNRDPRI<br>SSGSLS     | Mus<br>musculu<br>s              |
| 1 | 1.00 | 1 | 1 | -0.01 | -0.01  | -0.01  | -0.01  | 0      | t | 144093 | THNHQVP<br>LAIS         | Oryctola<br>gus<br>cuniculu<br>s |
| 1 | 1.00 | 1 | 1 | -0.04 | -0.037 | 0.007  | -0.036 | -0.04  | t | 54393  | RKLWCHH<br>FC           | Capra<br>hircus                  |
| 1 | 1.00 | 1 | 1 | 0.01  | 0.01   | 0.01   | 0.01   | 0.022  | t | 140583 | PWDKFBH<br>EQ           | Mus<br>musculu<br>s              |
| 1 | 1.00 | 1 | 1 | -0.04 | -0.044 | -0.026 | -0.041 | -0.038 | t | 56173  | RTRVHGD<br>KATAHGR<br>K | Sus<br>scrofa                    |
| 1 | 1.00 | 1 | 1 | -0.04 | -0.039 | -0.026 | -0.041 | -0.038 | t | 56173  | RTRVHGD<br>KATAHGR<br>K | Capra<br>hircus                  |
| 1 | 1.00 | 1 | 1 | -0.01 | -0.01  | -0.01  | -0.01  | 0      | t | 121826 | RVVGPYST<br>STWFRVK     | Mus<br>musculu<br>s              |
| 1 | 1.00 | 1 | 1 | 0.02  | 0.02   | 0.02   | 0.02   | 0.032  | t | 77901  | HELSPTGL<br>KTSW        | Mus<br>musculu<br>s              |

|   |      |   |   |       |        |        |        |        |   |        |                              |                     |
|---|------|---|---|-------|--------|--------|--------|--------|---|--------|------------------------------|---------------------|
| 1 | 1.00 | 1 | 1 | 0     | 0.002  | 0.001  | 0.001  | 0.01   | t | 63451  | TELKLAPP<br>VLNAPPL          | Homo<br>sapiens     |
| 1 | 1.00 | 1 | 1 | 0     | 0.002  | 0.001  | 0.001  | 0.01   | t | 63451  | TELKLAPP<br>VLNAPPL          | Homo<br>sapiens     |
| 1 | 1.00 | 1 | 1 | 0.01  | 0.008  | 0.036  | 0.012  | 0.012  | t | 8900   | DKILVQAN<br>EAETTTA          | Homo<br>sapiens     |
| 1 | 1.00 | 1 | 1 | -0.03 | -0.03  | -0.03  | -0.03  | -0.02  | t | 103900 | FNKSWFP                      | Homo<br>sapiens     |
| 1 | 1.00 | 1 | 1 | -0.01 | -0.01  | 0.009  | -0.01  | -0.008 | t | 144797 | TGGCTHG<br>CLAVP             | Mus<br>musculu<br>s |
| 1 | 1.00 | 1 | 1 | 0.01  | 0.01   | 0.01   | 0.01   | 0.02   | t | 79227  | GCKLAMT<br>TTTLACH           | Mus<br>musculu<br>s |
| 1 | 1.00 | 1 | 1 | -0.09 | -0.087 | -0.063 | -0.09  | -0.09  | t | 40564  | LVRRFVHH<br>RPHVESQ          | Mus<br>musculu<br>s |
| 1 | 1.00 | 1 | 1 | -0.09 | -0.09  | -0.063 | -0.09  | -0.09  | t | 40564  | LVRRFVHH<br>RPHVESQ          | Mus<br>musculu<br>s |
| 1 | 1.00 | 1 | 1 | 0     | 0      | 0      | 0      | 0.01   | t | 153479 | TPGVERD<br>HFVRLGG<br>GS     | Mus<br>musculu<br>s |
| 1 | 1.00 | 1 | 1 | -0.06 | -0.06  | -0.044 | -0.06  | -0.059 | t | 19064  | GDNNTYG<br>GWFKDGG<br>W      | Mus<br>musculu<br>s |
| 1 | 1.00 | 1 | 1 | -0.01 | -0.01  | 0.017  | -0.011 | -0.009 | t | 43232  | NANNPD<br>WDF                | Mus<br>musculu<br>s |
| 1 | 1.00 | 1 | 1 | -0.07 | -0.07  | -0.052 | -0.071 | -0.07  | t | 10282  | DSYIVVGR<br>GEQQINH<br>HWHKS | Equus<br>caballus   |
| 1 | 1.00 | 1 | 1 | -0.01 | -0.01  | -0.008 | -0.01  | 0.002  | t | 72904  | WNPVYA                       | Mus<br>musculu<br>s |
| 1 | 1.00 | 1 | 1 | -0.04 | -0.038 | -0.018 | -0.039 | -0.04  | t | 78857  | TLTAWQN<br>GLLPFHST<br>LTPPG | Homo<br>sapiens     |

|   |      |   |   |       |        |        |        |        |   |        |                              |                                  |
|---|------|---|---|-------|--------|--------|--------|--------|---|--------|------------------------------|----------------------------------|
| 1 | 1.00 | 1 | 1 | -0.02 | -0.024 | 0.009  | -0.02  | -0.02  | t | 41218  | MDDDTER<br>FPTHRSLP          | Mus<br>musculu<br>s              |
| 1 | 1.00 | 1 | 1 | -0.02 | -0.024 | 0.009  | -0.02  | -0.02  | t | 41218  | MDDDTER<br>FPTHRSLP          | Mus<br>musculu<br>s              |
| 1 | 1.00 | 1 | 1 | -0.02 | -0.016 | 0.009  | -0.02  | -0.02  | t | 41218  | MDDDTER<br>FPTHRSLP          | Mus<br>musculu<br>s              |
| 1 | 1.00 | 1 | 1 | 0     | 0      | 0      | 0      | 0.011  | t | 106842 | SKDEIDSA<br>VKMLVSLK<br>MSY  | Mus<br>musculu<br>s              |
| 1 | 1.00 | 1 | 1 | 0     | 0      | 0      | 0      | 0.011  | t | 49680  | PTKEFFRE<br>A                | Mus<br>musculu<br>s              |
| 1 | 1.00 | 1 | 1 | 0.03  | 0.036  | 0.044  | 0.033  | 0.04   | t | 132821 | FGSNQSQ                      | Homo<br>sapiens                  |
| 1 | 1.00 | 1 | 1 | -0.03 | -0.033 | -0.011 | -0.03  | -0.03  | t | 89665  | TQQGGAY<br>GRCPNGT<br>RA     | Oryctola<br>gus<br>cuniculu<br>s |
| 1 | 1.00 | 1 | 1 | 0.02  | 0.02   | 0.02   | 0.02   | 0.031  | t | 144903 | HDFHDPTL<br>EEQK             | Mus<br>musculu<br>s              |
| 1 | 1.00 | 1 | 1 | -0.03 | -0.03  | -0.03  | -0.03  | -0.02  | t | 145565 | TNTLTPHK<br>LQML             | Homo<br>sapiens                  |
| 1 | 1.00 | 1 | 1 | 0     | 0.002  | 0.004  | -0.003 | 0.008  | t | 136000 | SRFSWGA<br>EGQ               | Cavia<br>porcellu<br>s           |
| 1 | 1.00 | 1 | 1 | -0.04 | -0.042 | -0.03  | -0.039 | -0.03  | t | 78983  | GPLWLHY<br>AGAFLHP           | Mus<br>musculu<br>s              |
| 1 | 1.00 | 1 | 1 | -0.03 | -0.03  | -0.03  | -0.024 | -0.02  | t | 42293  | MPMRRKR<br>KNIRSIVS          | Homo<br>sapiens                  |
| 1 | 1.00 | 1 | 1 | -0.01 | -0.01  | -0.01  | -0.01  | 0      | t | 104120 | MNKSYHL                      | Homo<br>sapiens                  |
| 1 | 1.00 | 1 | 1 | -0.06 | -0.058 | -0.033 | -0.06  | -0.061 | t | 45062  | NNDRIYD<br>MNHLMIK<br>MHILAI | Aotus<br>sp.                     |
| 1 | 1.00 | 1 | 1 | -0.02 | -0.022 | -0.015 | -0.021 | -0.01  | t | 7513   | DAGDHS<br>PQ                 | Mus<br>musculu<br>s              |

|   |      |   |   |       |        |        |        |        |   |        |                              |                                  |
|---|------|---|---|-------|--------|--------|--------|--------|---|--------|------------------------------|----------------------------------|
| 1 | 1.00 | 1 | 1 | -0.02 | -0.02  | -0.013 | -0.02  | -0.011 | t | 108151 | SYEYNERL<br>KFYT             | Mus<br>musculu<br>s              |
| 1 | 1.00 | 1 | 1 | -0.02 | -0.02  | -0.013 | -0.02  | -0.011 | t | 140620 | YSLYQALT<br>A                | Mus<br>musculu<br>s              |
| 1 | 1.00 | 1 | 1 | -0.01 | -0.013 | -0.005 | -0.01  | 0      | t | 50971  | QGTRTAAI<br>VET              | Gallus<br>gallus                 |
| 1 | 1.00 | 1 | 1 | -0.03 | -0.033 | -0.013 | -0.03  | -0.029 | t | 125537 | QPVWQDE<br>GQRLRPSK          | Oryctola<br>gus<br>cuniculu<br>s |
| 1 | 1.00 | 1 | 1 | -0.03 | -0.027 | -0.023 | -0.03  | -0.02  | t | 121436 | IVIGRYSTQ<br>PWFRVG          | Mus<br>musculu<br>s              |
| 1 | 1.00 | 1 | 1 | 0.02  | 0.02   | 0.025  | 0.02   | 0.03   | t | 37683  | LLPRRGAP<br>S                | Homo<br>sapiens                  |
| 1 | 1.00 | 1 | 1 | -0.04 | -0.052 | 0.003  | -0.04  | -0.042 | t | 75429  | YPWH                         | Mus<br>musculu<br>s              |
| 1 | 1.00 | 1 | 1 | -0.03 | -0.026 | -0.023 | -0.029 | -0.02  | t | 78315  | WQTFYSP                      | Homo<br>sapiens                  |
| 1 | 1.00 | 1 | 1 | -0.05 | -0.05  | -0.033 | -0.05  | -0.05  | t | 61746  | STLPETTV<br>VRRRGRSP<br>RRRT | Homo<br>sapiens                  |
| 1 | 1.00 | 1 | 1 | -0.04 | -0.044 | -0.011 | -0.04  | -0.04  | t | 55899  | RSLYLRWV<br>NAVCGDA          | Bos<br>taurus                    |
| 1 | 1.00 | 1 | 1 | 0     | 0.002  | 0.018  | -0.001 | 0.004  | t | 149311 | FDDDNSPS<br>FIQIR            | Homo<br>sapiens                  |
| 1 | 1.00 | 1 | 1 | -0.02 | -0.02  | 0.017  | -0.02  | -0.018 | t | 79781  | DLKRPGSS<br>PMEV             | Mus<br>musculu<br>s              |
| 1 | 1.00 | 1 | 1 | -0.02 | -0.02  | 0.017  | -0.02  | -0.018 | t | 79781  | DLKRPGSS<br>PMEV             | Mus<br>musculu<br>s              |
| 1 | 1.00 | 1 | 1 | 0.01  | -0.004 | 0.003  | 0.003  | 0.022  | t | 114740 | AQGHRPQ<br>DE                | Macaca<br>mulatta                |



|   |      |   |   |       |        |        |        |        |   |        |                              |                                  |
|---|------|---|---|-------|--------|--------|--------|--------|---|--------|------------------------------|----------------------------------|
| 1 | 1.00 | 1 | 1 | -0.03 | -0.034 | -0.016 | -0.031 | -0.028 | t | 56173  | RTRVHGD<br>KATAHGR<br>K      | Sus<br>scrofa                    |
| 1 | 1.00 | 1 | 1 | 0     | 0      | 0      | 0      | 0.011  | t | 144820 | YLEDWIKY<br>NNQK             | Mus<br>musculu<br>s              |
| 1 | 1.00 | 1 | 1 | 0     | 0      | 0      | 0      | 0.011  | t | 68401  | VEVPGSQ<br>HIDSQKKA          | Mus<br>musculu<br>s              |
| 1 | 1.00 | 1 | 1 | -0.01 | -0.008 | 0.022  | -0.011 | -0.011 | t | 84423  | KKGLQQL<br>QEWEWDW<br>VGWIGN | Felis<br>catus                   |
| 1 | 1.00 | 1 | 1 | -0.04 | -0.036 | -0.013 | -0.043 | -0.04  | t | 55078  | RNTRHPPP<br>WSAE             | Homo<br>sapiens                  |
| 1 | 1.00 | 1 | 1 | -0.01 | -0.005 | 0.012  | -0.01  | -0.008 | t | 22717  | GTIVIRVQ<br>YEG              | Homo<br>sapiens                  |
| 1 | 1.00 | 1 | 1 | -0.02 | -0.02  | -0.009 | -0.02  | -0.017 | t | 46444  | NVPEKQT<br>RGIFGAIA<br>GFIE  | Mus<br>musculu<br>s              |
| 1 | 1.00 | 1 | 1 | -0.06 | -0.058 | -0.038 | -0.059 | -0.06  | t | 10639  | DVKFPGG<br>GQIVGGV<br>YLLPRR | Homo<br>sapiens                  |
| 1 | 1.00 | 1 | 1 | -0.04 | -0.04  | -0.033 | -0.04  | -0.031 | t | 108487 | IRYHTNWS<br>S                | Homo<br>sapiens                  |
| 1 | 1.00 | 1 | 1 | -0.06 | -0.064 | -0.038 | -0.06  | -0.06  | t | 96216  | EEEGLLKKS<br>ADTLWN<br>MQK   | Oryctola<br>gus<br>cuniculu<br>s |
| 1 | 1.00 | 1 | 1 | -0.02 | -0.02  | -0.02  | -0.02  | -0.008 | t | 140590 | PYHLALAG<br>V                | Mus<br>musculu<br>s              |
| 1 | 1.00 | 1 | 1 | 0     | -0.001 | 0      | 0.003  | 0.012  | t | 130612 | SPNTAHIT<br>SKSL             | Camelus<br>dromed<br>arius       |
| 1 | 1.00 | 1 | 1 | 0.01  | 0.01   | 0.01   | 0.01   | 0.02   | t | 138231 | RDGQRLTS<br>SKTMLPY          | Homo<br>sapiens                  |
| 1 | 1.00 | 1 | 1 | -0.01 | -0.01  | -0.01  | -0.011 | 0      | t | 91218  | DVLEATYA<br>MVQHVAK          | Capra<br>hircus                  |
| 1 | 1.00 | 1 | 1 | 0.04  | 0.04   | 0.04   | 0.04   | 0.05   | t | 104059 | LTSSSQH                      | Mus<br>musculu<br>s              |

|   |      |   |   |       |        |        |        |        |   |        |                              |                              |
|---|------|---|---|-------|--------|--------|--------|--------|---|--------|------------------------------|------------------------------|
| 1 | 1.00 | 1 | 1 | 0.01  | 0.008  | 0.017  | 0.013  | 0.022  | t | 106730 | QHFTKNP<br>ALLMA             | Mus<br>musculus              |
| 1 | 1.00 | 1 | 1 | -0.02 | -0.02  | -0.02  | -0.02  | -0.008 | t | 158620 | VLNWHPF                      | Homo<br>sapiens              |
| 1 | 1.00 | 1 | 1 | -0.02 | -0.016 | 0.015  | -0.02  | -0.018 | t | 94494  | ECCNPAC<br>GRH               | Capra<br>hircus              |
| 1 | 1.00 | 1 | 1 | -0.02 | -0.02  | -0.013 | -0.016 | -0.01  | t | 124373 | KPSARFSG<br>L                | Homo<br>sapiens              |
| 1 | 1.00 | 1 | 1 | 0.01  | 0.01   | 0.017  | 0.019  | 0.022  | t | 131000 | PHNRQES<br>PA                | Homo<br>sapiens              |
| 1 | 1.00 | 1 | 1 | -0.02 | -0.013 | 0.002  | -0.021 | -0.019 | t | 53998  | RGTIGQV<br>DRLKDKV<br>NNTL   | Equus<br>caballus            |
| 1 | 1.00 | 1 | 1 | 0     | 0      | 0      | 0      | 0.01   | t | 122590 | SRLERADP<br>RLSSRYG          | Mus<br>musculus              |
| 1 | 1.00 | 1 | 1 | -0.02 | -0.02  | -0.02  | -0.02  | -0.01  | t | 153340 | ACQMPH<br>WWHCGG<br>GS       | Mus<br>musculus              |
| 1 | 1.00 | 1 | 1 | 0.02  | 0.018  | 0.019  | 0.023  | 0.032  | t | 106516 | HNSTRAPE<br>KLMI             | Mus<br>musculus              |
| 1 | 1.00 | 1 | 1 | -0.02 | -0.023 | 0.004  | -0.02  | -0.02  | t | 3528   | APEDQSPE<br>TRRLDRL<br>SR    | Oryctola<br>gus<br>cuniculus |
| 1 | 1.00 | 1 | 1 | -0.03 | -0.03  | -0.007 | -0.028 | -0.03  | t | 38810  | LQAMRKY<br>SPFRNGY<br>MEPTLG | Homo<br>sapiens              |
| 1 | 1.00 | 1 | 1 | 0     | 0.004  | 0.028  | 0.001  | 0      | t | 48150  | PKSSCTQN<br>PILCAILS         | Homo<br>sapiens              |
| 1 | 1.00 | 1 | 1 | 0.01  | 0.01   | 0.035  | 0.01   | 0.013  | t | 51822  | QPFQPEL<br>PYPQPQ            | Mus<br>musculus              |
| 1 | 1.00 | 1 | 1 | -0.01 | -0.01  | -0.01  | -0.01  | 0      | t | 122590 | SRLERADP<br>RLSSRYG          | Mus<br>musculus              |
| 1 | 1.00 | 1 | 1 | -0.02 | -0.02  | -0.02  | -0.02  | -0.01  | t | 121846 | SGVCLLPRI<br>SDVVSC          | Mus<br>musculus              |

|   |      |   |   |       |        |        |        |        |   |        |                              |                                  |
|---|------|---|---|-------|--------|--------|--------|--------|---|--------|------------------------------|----------------------------------|
| 1 | 1.00 | 1 | 1 | -0.02 | -0.022 | -0.001 | -0.021 | -0.019 | t | 61398  | SSTKNLIYT<br>STLCELNV<br>TGF | Sus<br>scrofa                    |
| 1 | 1.00 | 1 | 1 | 0     | 0.002  | 0.005  | 0      | 0.01   | t | 6946   | CRTCAHP<br>GEHA              | Homo<br>sapiens                  |
| 1 | 1.00 | 1 | 1 | -0.02 | -0.02  | -0.01  | -0.02  | -0.01  | t | 79255  | ICTSHQHIL<br>KPMCE           | Mus<br>musculu<br>s              |
| 1 | 1.00 | 1 | 1 | -0.04 | -0.042 | -0.04  | -0.043 | -0.03  | t | 122490 | MTPNDRR<br>IHRYEPR           | Mus<br>musculu<br>s              |
| 1 | 1.00 | 1 | 1 | -0.01 | -0.015 | 0.007  | -0.01  | -0.01  | t | 17140  | FNDSQRQ<br>ATKDAGTI<br>AGLEV | Canis<br>lupus                   |
| 1 | 1.00 | 1 | 1 | -0.04 | -0.036 | -0.036 | -0.039 | -0.028 | t | 111550 | MKVNILR                      | Homo<br>sapiens                  |
| 1 | 1.00 | 1 | 1 | 0.01  | 0.01   | 0.017  | 0.014  | 0.016  | t | 138251 | THDLSSRA<br>SSSLSYN          | Homo<br>sapiens                  |
| 1 | 1.00 | 1 | 1 | -0.02 | -0.022 | -0.015 | -0.021 | -0.01  | t | 56007  | RSYQHDLR<br>AYGFWRL          | Mus<br>musculu<br>s              |
| 1 | 1.00 | 1 | 1 | 0.02  | 0.02   | 0.02   | 0.02   | 0.032  | t | 106514 | HKMTNFP<br>DSLLT             | Mus<br>musculu<br>s              |
| 1 | 1.00 | 1 | 1 | 0.01  | 0.01   | 0.025  | 0.013  | 0.022  | t | 149133 | YLPNVTQ                      | Sus<br>scrofa                    |
| 1 | 1.00 | 1 | 1 | 0.05  | 0.046  | 0.06   | 0.051  | 0.06   | t | 73015  | WQWTWL<br>CEHPPP             | Oryctola<br>gus<br>cuniculu<br>s |
| 1 | 1.00 | 1 | 1 | 0     | 0.003  | 0.011  | 0      | 0.009  | t | 106347 | DMQLYPV<br>LPTPH             | Mus<br>musculu<br>s              |
| 1 | 1.00 | 1 | 1 | -0.01 | -0.008 | 0.006  | -0.009 | 0      | t | 111944 | WAPYMT<br>N                  | Homo<br>sapiens                  |
| 1 | 1.00 | 1 | 1 | -0.06 | -0.054 | -0.046 | -0.053 | -0.05  | t | 127777 | PR SRLTP                     | Homo<br>sapiens                  |

|   |      |   |   |       |        |        |        |        |   |        |                              |                       |
|---|------|---|---|-------|--------|--------|--------|--------|---|--------|------------------------------|-----------------------|
| 1 | 1.00 | 1 | 1 | 0.05  | 0.054  | 0.055  | 0.047  | 0.06   | t | 23440  | GYQSSS                       | Homo sapiens          |
| 1 | 1.00 | 1 | 1 | -0.04 | -0.043 | 0.006  | -0.04  | -0.043 | t | 80093  | VTTSGGGR<br>QG               | Oryctolagus cuniculus |
| 1 | 1.00 | 1 | 1 | -0.05 | -0.052 | -0.042 | -0.051 | -0.04  | t | 32035  | KLMTHWP                      | Mus musculus          |
| 1 | 1.00 | 1 | 1 | -0.03 | -0.026 | -0.018 | -0.033 | -0.025 | t | 30290  | KEAFRLKN<br>GRQE             | Homo sapiens          |
| 1 | 1.00 | 1 | 1 | -0.02 | -0.02  | 0.005  | -0.02  | -0.018 | t | 44662  | NLDDRDR<br>SELSPLLLS<br>TTEW | Mus musculus          |
| 1 | 1.00 | 1 | 1 | -0.02 | -0.018 | 0.002  | -0.013 | -0.008 | t | 104320 | TTYYLRS                      | Homo sapiens          |
| 1 | 1.00 | 1 | 1 | 0.05  | 0.05   | 0.062  | 0.05   | 0.059  | t | 146228 | EYSDSGIE<br>V                | Oryctolagus cuniculus |
| 1 | 1.00 | 1 | 1 | 0     | 0      | 0.002  | 0      | 0.011  | t | 47131  | PDKILTYIA<br>ADHC            | Mus musculus          |
| 1 | 1.00 | 1 | 1 | 0     | 0      | 0.002  | 0      | 0.011  | t | 9614   | DPDKILTYI<br>AA              | Mus musculus          |
| 1 | 1.00 | 1 | 1 | -0.04 | -0.038 | -0.003 | -0.039 | -0.04  | t | 53955  | RGQKAKS<br>NPNRPLPV<br>PRN   | Homo sapiens          |
| 1 | 1.00 | 1 | 1 | -0.01 | -0.008 | -0.009 | -0.009 | 0      | t | 102096 | SVDWMN<br>DPRLLM             | Homo sapiens          |
| 1 | 1.00 | 1 | 1 | 0.02  | 0.016  | 0.027  | 0.013  | 0.03   | t | 139510 | GPIDDAF                      | Oryctolagus cuniculus |
| 1 | 1.00 | 1 | 1 | 0.03  | 0.028  | 0.054  | 0.029  | 0.031  | t | 42441  | MQWNST<br>TFHQTLQ            | Mus musculus          |
| 1 | 1.00 | 1 | 1 | -0.01 | -0.01  | -0.01  | -0.01  | 0      | t | 132813 | FGENNNM                      | Homo sapiens          |

|   |      |   |   |       |        |        |        |        |   |        |                              |                     |
|---|------|---|---|-------|--------|--------|--------|--------|---|--------|------------------------------|---------------------|
| 1 | 1.00 | 1 | 1 | -0.02 | -0.02  | -0.003 | -0.02  | -0.02  | t | 71009  | VSKGNCS<br>GPTTIRGQ          | Mus<br>musculu<br>s |
| 1 | 1.00 | 1 | 1 | 0.01  | 0.01   | 0.032  | 0.013  | 0.012  | t | 12994  | ELDQENEA<br>ALENGIKN<br>EENT | Homo<br>sapiens     |
| 1 | 1.00 | 1 | 1 | -0.01 | -0.006 | 0.009  | -0.01  | -0.002 | t | 31712  | KKTGIDPR                     | MD                  |
| 1 | 1.00 | 1 | 1 | 0     | 0      | -0.003 | 0      | 0.012  | t | 41232  | MDIDPYKE<br>FG               | Mus<br>musculu<br>s |
| 1 | 1.00 | 1 | 1 | 0     | 0      | 0      | 0      | 0.012  | t | 1187   | AETHLFTG                     | Mus<br>musculu<br>s |
| 1 | 1.00 | 1 | 1 | 0     | 0      | 0.005  | 0      | 0.009  | t | 24391  | HNNQRLM<br>LYGMH             | Mus<br>musculu<br>s |
| 1 | 1.00 | 1 | 1 | 0     | 0.003  | 0.021  | 0      | 0.002  | t | 74416  | YIWPRND<br>YDGFLENA<br>HEHHG | Mus<br>musculu<br>s |
| 1 | 1.00 | 1 | 1 | 0     | 0      | 0      | -0.003 | 0.01   | t | 49651  | PTHYISTSL                    | Homo<br>sapiens     |
| 1 | 1.00 | 1 | 1 | 0     | 0      | 0      | -0.003 | 0.01   | t | 38397  | LPAHGPSL<br>S                | Homo<br>sapiens     |
| 1 | 1.00 | 1 | 1 | 0     | 0      | 0      | -0.003 | 0.01   | t | 20563  | GKFPGSKP<br>S                | Homo<br>sapiens     |
| 1 | 1.00 | 1 | 1 | -0.02 | -0.02  | -0.014 | -0.023 | -0.01  | t | 21657  | GPHPRSV                      | Homo<br>sapiens     |
| 1 | 1.00 | 1 | 1 | -0.05 | -0.05  | -0.014 | -0.05  | -0.05  | t | 94483  | CYKKVWR<br>DHRGTIER<br>GC    | Mus<br>musculu<br>s |
| 1 | 1.00 | 1 | 1 | 0.03  | 0.03   | 0.03   | 0.03   | 0.039  | t | 138251 | THDLSSRA<br>SSSLSYN          | Homo<br>sapiens     |
| 1 | 1.00 | 1 | 1 | -0.01 | -0.003 | 0.023  | -0.01  | -0.013 | t | 39684  | LSSSSSTR                     | Capra<br>hircus     |
| 1 | 1.00 | 1 | 1 | -0.01 | -0.01  | -0.01  | -0.013 | 0      | t | 49652  | PTHYLLSQ<br>P                | Homo<br>sapiens     |

|   |      |   |   |       |        |        |        |        |   |        |                            |                     |
|---|------|---|---|-------|--------|--------|--------|--------|---|--------|----------------------------|---------------------|
| 1 | 1.00 | 1 | 1 | -0.01 | -0.006 | -0.006 | -0.009 | 0.002  | t | 111182 | CYETGPW<br>AC              | Homo<br>sapiens     |
| 1 | 1.00 | 1 | 1 | -0.06 | -0.062 | -0.037 | -0.061 | -0.058 | t | 65684  | TPPHSARS<br>KFGYGA         | Mus<br>musculu<br>s |
| 1 | 1.00 | 1 | 1 | 0.02  | 0.02   | 0.02   | 0.02   | 0.03   | t | 111548 | MHQTTAQ<br>PLRSP           | Homo<br>sapiens     |
| 1 | 1.00 | 1 | 1 | 0.01  | 0.012  | 0.005  | 0.01   | 0.023  | t | 57062  | SAYTPAYY<br>TKDTNNN<br>LTL | Homo<br>sapiens     |
| 1 | 1.00 | 1 | 1 | 0.03  | 0.032  | 0.037  | 0.031  | 0.042  | t | 133561 | ESTWYM<br>WQSRSE           | Homo<br>sapiens     |
| 1 | 1.00 | 1 | 1 | -0.04 | -0.04  | -0.043 | -0.04  | -0.028 | t | 79037  | PFWLRD                     | Mus<br>musculu<br>s |
| 1 | 1.00 | 1 | 1 | -0.02 | -0.022 | 0.006  | -0.018 | -0.018 | t | 30220  | KDNRIPSY<br>GVLSVDL        | Homo<br>sapiens     |
| 1 | 1.00 | 1 | 1 | -0.02 | -0.018 | 0      | -0.023 | -0.018 | t | 52599  | QTQPSKPT<br>TKQR           | Homo<br>sapiens     |
| 1 | 1.00 | 1 | 1 | -0.04 | -0.04  | -0.04  | -0.04  | -0.029 | t | 107860 | GHSYYISPE<br>LKP           | Mus<br>musculu<br>s |
| 1 | 1.00 | 1 | 1 | -0.01 | -0.01  | -0.01  | -0.01  | 0      | t | 153473 | THRPLSHN<br>FRDFGGGS       | Mus<br>musculu<br>s |
| 1 | 1.00 | 1 | 1 | 0     | 0      | 0      | 0      | 0.012  | t | 158610 | SFGTFLW                    | Homo<br>sapiens     |
| 1 | 1.00 | 1 | 1 | -0.04 | -0.04  | -0.011 | -0.04  | -0.04  | t | 78008  | SLYDKNRG<br>QFGS           | Mus<br>musculu<br>s |
| 1 | 1.00 | 1 | 1 | -0.03 | -0.03  | -0.023 | -0.03  | -0.021 | t | 108575 | PLTNRRLR<br>G              | Homo<br>sapiens     |
| 1 | 1.00 | 1 | 1 | 0.01  | 0.008  | 0.023  | 0.009  | 0.02   | t | 138097 | YPYPLIS                    | Mus<br>musculu<br>s |
| 1 | 1.00 | 1 | 1 | -0.06 | -0.057 | -0.048 | -0.06  | -0.053 | t | 137941 | PFRSYTK                    | Mus<br>musculu<br>s |

|   |      |   |   |       |        |        |        |        |   |        |                              |                                  |
|---|------|---|---|-------|--------|--------|--------|--------|---|--------|------------------------------|----------------------------------|
| 1 | 1.00 | 1 | 1 | -0.01 | -0.009 | 0.01   | -0.01  | -0.01  | t | 7885   | DDVNKNT<br>LQARQQT           | Myodes<br>glareolu<br>s          |
| 1 | 1.00 | 1 | 1 | -0.04 | -0.028 | -0.019 | -0.04  | -0.037 | t | 29088  | ITSHTGYL<br>QLRL             | Mus<br>musculu<br>s              |
| 1 | 1.00 | 1 | 1 | 0.02  | 0.02   | 0.038  | 0.02   | 0.023  | t | 114226 | QKSHGRT<br>QDENPVV<br>HF     | Mus<br>musculu<br>s              |
| 1 | 1.00 | 1 | 1 | -0.05 | -0.048 | -0.028 | -0.049 | -0.047 | t | 46255  | NTRVTGG<br>VQS               | Homo<br>sapiens                  |
| 1 | 1.00 | 1 | 1 | -0.01 | -0.012 | -0.01  | -0.011 | 0      | t | 133494 | ADNPIKW<br>DRART             | Mus<br>musculu<br>s              |
| 1 | 1.00 | 1 | 1 | 0.03  | 0.032  | 0.047  | 0.033  | 0.04   | t | 59536  | SLVDNS                       | Homo<br>sapiens                  |
| 1 | 1.00 | 1 | 1 | -0.02 | -0.016 | 0.002  | -0.019 | -0.02  | t | 38311  | LNPSVAAT<br>LGFGAYM<br>SKAHG | Homo<br>sapiens                  |
| 1 | 1.00 | 1 | 1 | -0.01 | -0.012 | 0.018  | -0.011 | -0.01  | t | 46795  | PAFLGCSS<br>RFSGSFSG<br>VEP  | Mus<br>musculu<br>s              |
| 1 | 1.00 | 1 | 1 | -0.06 | -0.056 | -0.037 | -0.061 | -0.058 | t | 71323  | VTGHRMA<br>WDMMM<br>NWS      | Homo<br>sapiens                  |
| 1 | 1.00 | 1 | 1 | 0     | -0.002 | 0.002  | -0.001 | 0.01   | t | 1796   | AHLRLPTR<br>TSMPKVT          | Mus<br>musculu<br>s              |
| 1 | 1.00 | 1 | 1 | 0     | 0.006  | 0.014  | 0.003  | 0.01   | t | 132871 | MWGENT<br>P                  | Homo<br>sapiens                  |
| 1 | 1.00 | 1 | 1 | 0.04  | 0.04   | 0.04   | 0.04   | 0.052  | t | 158617 | TVQPQFH                      | Homo<br>sapiens                  |
| 1 | 1.00 | 1 | 1 | -0.03 | -0.034 | -0.009 | -0.031 | -0.029 | t | 45667  | NRDQGRK<br>PTPPTPP           | Oryctola<br>gus<br>cuniculu<br>s |
| 1 | 1.00 | 1 | 1 | 0.01  | 0.01   | 0.01   | 0.01   | 0.022  | t | 78069  | WIEEWMF<br>IPVMS             | Mus<br>musculu<br>s              |
| 1 | 1.00 | 1 | 1 | 0     | 0      | 0      | 0      | 0.012  | t | 158605 | QFGTFLW                      | Homo<br>sapiens                  |

|   |      |   |   |       |        |        |        |        |   |        |                              |                                  |
|---|------|---|---|-------|--------|--------|--------|--------|---|--------|------------------------------|----------------------------------|
| 1 | 1.00 | 1 | 1 | -0.04 | -0.042 | -0.012 | -0.037 | -0.037 | t | 14181  | ESKHSCQI<br>WCDNML           | Mus<br>musculu<br>s              |
| 1 | 1.00 | 1 | 1 | 0.01  | 0.014  | 0.032  | 0.011  | 0.012  | t | 9511   | DNNDSGH<br>STGADTG           | Homo<br>sapiens                  |
| 1 | 1.00 | 1 | 1 | -0.01 | -0.01  | -0.01  | -0.01  | 0      | t | 117113 | WPMNTD<br>DSTRPR             | Homo<br>sapiens                  |
| 1 | 1.00 | 1 | 1 | 0.01  | 0.01   | 0.01   | 0.01   | 0.022  | t | 132847 | KKEDFDIY<br>DEDENQS<br>P     | Mus<br>musculu<br>s              |
| 1 | 1.00 | 1 | 1 | -0.06 | -0.06  | -0.06  | -0.06  | -0.05  | t | 79644  | SHLSTMV                      | Oryctola<br>gus<br>cuniculu<br>s |
| 1 | 1.00 | 1 | 1 | -0.05 | -0.05  | -0.024 | -0.05  | -0.049 | t | 96228  | EGLLKLL<br>DTLENML<br>K      | Oryctola<br>gus<br>cuniculu<br>s |
| 1 | 1.00 | 1 | 1 | -0.06 | -0.058 | -0.02  | -0.062 | -0.063 | t | 105493 | RDRARVPL                     | Homo<br>sapiens                  |
| 1 | 1.00 | 1 | 1 | -0.03 | -0.03  | -0.03  | -0.03  | -0.02  | t | 121844 | SGRALAPA<br>VSWPLHV          | Mus<br>musculu<br>s              |
| 1 | 1.00 | 1 | 1 | -0.05 | -0.051 | -0.05  | -0.053 | -0.04  | t | 78295  | WADLYSP                      | Homo<br>sapiens                  |
| 1 | 1.00 | 1 | 1 | -0.02 | -0.018 | -0.005 | -0.023 | -0.017 | t | 48594  | PNAKSVKE<br>YLDKVRAT<br>VGC  | Homo<br>sapiens                  |
| 1 | 1.00 | 1 | 1 | -0.02 | -0.02  | -0.02  | -0.023 | -0.01  | t | 49649  | PTHYFGSP<br>M                | Homo<br>sapiens                  |
| 1 | 1.00 | 1 | 1 | -0.02 | -0.028 | -0.013 | -0.02  | -0.016 | t | 125212 | QHWSYGL<br>RPGQHWS<br>YGLRPG | Sus<br>scrofa                    |
| 1 | 1.00 | 1 | 1 | -0.02 | -0.02  | -0.013 | -0.02  | -0.01  | t | 106841 | SHWTRQP<br>DTIMI             | Mus<br>musculu<br>s              |
| 1 | 1.00 | 1 | 1 | -0.05 | -0.051 | -0.05  | -0.053 | -0.04  | t | 78312  | WLHYYPSP                     | Homo<br>sapiens                  |
| 1 | 1.00 | 1 | 1 | -0.05 | -0.046 | -0.027 | -0.051 | -0.048 | t | 71324  | VTGHRMA<br>WDMMQ<br>NWS      | Homo<br>sapiens                  |
| 1 | 1.00 | 1 | 1 | -0.03 | -0.032 | -0.03  | -0.037 | -0.029 | t | 103839 | DAEFRHDS<br>GYEVH            | Mus<br>musculu<br>s              |



|   |      |   |   |       |        |        |        |        |   |        |                              |                     |
|---|------|---|---|-------|--------|--------|--------|--------|---|--------|------------------------------|---------------------|
| 1 | 1.00 | 1 | 1 | -0.04 | -0.035 | -0.012 | -0.039 | -0.04  | t | 49750  | PTPSPAPS<br>RPFSVLRA<br>NDVL | Homo<br>sapiens     |
| 1 | 1.00 | 1 | 1 | 0     | -0.003 | 0      | -0.003 | 0.01   | t | 78083  | YTSPTFPN<br>FFLS             | Mus<br>musculu<br>s |
| 1 | 1.00 | 1 | 1 | -0.05 | -0.052 | -0.045 | -0.051 | -0.04  | t | 3582   | APGRVPAL<br>LIPPWAW          | Mus<br>musculu<br>s |
| 1 | 1.00 | 1 | 1 | -0.02 | -0.018 | 0.007  | -0.017 | -0.018 | t | 6200   | CESSLCLM<br>YSLGPPA          | Homo<br>sapiens     |
| 1 | 1.00 | 1 | 1 | -0.03 | -0.03  | -0.025 | -0.031 | -0.021 | t | 46547  | NWKFAPP                      | Mus<br>musculu<br>s |
| 1 | 1.00 | 1 | 1 | -0.04 | -0.038 | -0.018 | -0.039 | -0.038 | t | 65414  | TNRRPQD<br>VKFPGGG<br>Q      | Homo<br>sapiens     |
| 1 | 1.00 | 1 | 1 | 0     | 0      | 0.016  | 0.003  | 0.01   | t | 49348  | PSDRLFP<br>G<br>LSDFGCS      | Homo<br>sapiens     |
| 1 | 1.00 | 1 | 1 | 0     | 0      | 0      | 0      | 0.012  | t | 78295  | WADLYSP                      | Homo<br>sapiens     |
| 1 | 1.00 | 1 | 1 | -0.02 | -0.016 | 0.009  | -0.021 | -0.02  | t | 41218  | MDDDT<br>TER<br>FPTHRSLP     | Mus<br>musculu<br>s |
| 1 | 1.00 | 1 | 1 | -0.02 | -0.016 | 0.009  | -0.021 | -0.02  | t | 41218  | MDDDT<br>TER<br>FPTHRSLP     | Mus<br>musculu<br>s |
| 1 | 1.00 | 1 | 1 | -0.01 | -0.01  | -0.01  | -0.01  | 0.002  | t | 109232 | GRGGAIW<br>DRPEF             | Mus<br>musculu<br>s |
| 1 | 1.00 | 1 | 1 | -0.02 | -0.02  | -0.015 | -0.02  | -0.01  | t | 60283  | SPTHRINA<br>Q                | Homo<br>sapiens     |
| 1 | 1.00 | 1 | 1 | 0     | 0      | 0      | 0      | 0.012  | t | 158596 | KFGTALW                      | Homo<br>sapiens     |
| 1 | 1.00 | 1 | 1 | 0     | 0      | 0      | 0      | 0.01   | t | 79414  | TCSPGLRE<br>WAHNCL           | Mus<br>musculu<br>s |
| 1 | 1.00 | 1 | 1 | -0.03 | -0.03  | -0.023 | -0.03  | -0.018 | t | 127684 | HHKYWHR                      | Homo<br>sapiens     |
| 1 | 1.00 | 1 | 1 | 0     | 0.002  | 0.012  | 0.003  | 0.01   | t | 107257 | TSPILDVLT<br>PPR             | Homo<br>sapiens     |

|   |      |   |   |       |        |        |        |        |   |        |                              |                              |
|---|------|---|---|-------|--------|--------|--------|--------|---|--------|------------------------------|------------------------------|
| 1 | 1.00 | 1 | 1 | 0     | 0.005  | 0.029  | 0      | -0.001 | t | 53015  | QYNTGNF<br>SDGLYPFT<br>N     | Gallus<br>gallus             |
| 1 | 1.00 | 1 | 1 | -0.02 | -0.02  | -0.02  | -0.02  | -0.01  | t | 78217  | NKNWWS                       | Equus<br>caballus            |
| 1 | 1.00 | 1 | 1 | 0.01  | 0.01   | 0.01   | 0.01   | 0.022  | t | 158597 | KWPIIDT                      | Homo<br>sapiens              |
| 1 | 1.00 | 1 | 1 | 0     | 0.002  | 0.022  | -0.003 | 0      | t | 70045  | VNAGFKT<br>AVAAAAAN<br>V     | Homo<br>sapiens              |
| 1 | 1.00 | 1 | 1 | -0.02 | -0.02  | -0.014 | -0.014 | -0.009 | t | 10432  | DTNLASSTI<br>IKEGIDKTV       | Rattus<br>norvegicus         |
| 1 | 1.00 | 1 | 1 | 0     | 0.002  | 0.005  | -0.003 | 0.01   | t | 6292   | CGGTPPSL<br>PTC              | Homo<br>sapiens              |
| 1 | 1.00 | 1 | 1 | 0.02  | 0.016  | 0.029  | 0.023  | 0.032  | t | 99482  | NALDEYFT<br>KPSL             | Oryctola<br>gus<br>cuniculus |
| 1 | 1.00 | 1 | 1 | -0.04 | -0.042 | 0.003  | -0.041 | -0.042 | t | 75429  | YPWH                         | Mus<br>musculus              |
| 1 | 1.00 | 1 | 1 | -0.01 | -0.01  | -0.01  | -0.01  | 0.002  | t | 78305  | WHSMFAP                      | Homo<br>sapiens              |
| 1 | 1.00 | 1 | 1 | 0     | -0.006 | 0.039  | -0.003 | -0.001 | t | 74114  | YHIQAGLP<br>DP               | Oryctola<br>gus<br>cuniculus |
| 1 | 1.00 | 1 | 1 | -0.02 | -0.02  | 0.004  | -0.02  | -0.018 | t | 62721  | SYTESMA<br>GKREMVII<br>TIKSG | Mus<br>musculus              |
| 1 | 1.00 | 1 | 1 | -0.01 | -0.01  | 0.016  | -0.01  | -0.008 | t | 39490  | LSLNYAGAE                    | Rattus<br>norvegicus         |
| 1 | 1.00 | 1 | 1 | 0     | -0.002 | 0.025  | -0.001 | 0      | t | 54008  | RGVGSTV<br>VILDANFV          | Sus<br>scrofa                |
| 1 | 1.00 | 1 | 1 | -0.01 | -0.01  | -0.002 | -0.01  | 0      | t | 62401  | SVYALPDL<br>SVPVWVR          | Mus<br>musculus              |
| 1 | 1.00 | 1 | 1 | 0     | -0.002 | 0      | -0.007 | 0.01   | t | 132276 | ERIYHFV                      | Mus<br>musculus              |

|   |      |   |   |       |        |        |        |        |   |        |                              |                                  |
|---|------|---|---|-------|--------|--------|--------|--------|---|--------|------------------------------|----------------------------------|
| 1 | 1.00 | 1 | 1 | -0.02 | -0.02  | 0.006  | -0.02  | -0.017 | t | 57300  | SDTRGDP<br>VFNLPFQF          | Mus<br>musculu<br>s              |
| 1 | 1.00 | 1 | 1 | 0.02  | 0.02   | 0.02   | 0.02   | 0.032  | t | 131856 | EGSTDVDE<br>PLEVFISAP<br>RSE | Homo<br>sapiens                  |
| 1 | 1.00 | 1 | 1 | 0.02  | 0.023  | 0.02   | 0.02   | 0.03   | t | 153430 | NMSLRDH<br>YSPSPGGG<br>S     | Mus<br>musculu<br>s              |
| 1 | 1.00 | 1 | 1 | -0.04 | -0.037 | -0.018 | -0.04  | -0.039 | t | 56122  | RTLTMFS<br>LGARQKI           | Mus<br>musculu<br>s              |
| 1 | 1.00 | 1 | 1 | -0.01 | -0.01  | -0.012 | -0.01  | -0.001 | t | 79363  | RCSCRPPS<br>EATTCK           | Mus<br>musculu<br>s              |
| 1 | 1.00 | 1 | 1 | -0.04 | -0.042 | -0.04  | -0.037 | -0.031 | t | 72936  | WPHNHST<br>HSRTH             | Mus<br>musculu<br>s              |
| 1 | 1.00 | 1 | 1 | 0     | -0.004 | 0      | -0.003 | 0.01   | t | 144059 | RKVPLLSG<br>TLPQ             | Oryctola<br>gus<br>cuniculu<br>s |
| 1 | 1.00 | 1 | 1 | 0     | -0.004 | 0      | -0.003 | 0.01   | t | 144102 | TMPWNQ<br>SALTLI             | Oryctola<br>gus<br>cuniculu<br>s |
| 1 | 1.00 | 1 | 1 | 0     | -0.004 | 0      | -0.003 | 0.01   | t | 143941 | IDIINPAQ<br>NRLR             | Oryctola<br>gus<br>cuniculu<br>s |
| 1 | 1.00 | 1 | 1 | -0.01 | -0.01  | -0.01  | -0.01  | 0      | t | 9537   | DNPRYTD<br>AHNAVTVQ<br>GRTVP | Mus<br>musculu<br>s              |
| 1 | 1.00 | 1 | 1 | -0.01 | -0.012 | -0.003 | -0.007 | 0      | t | 16469  | FKTVDSGR<br>SMHN             | Mus<br>musculu<br>s              |
| 1 | 1.00 | 1 | 1 | 0     | 0      | 0      | 0      | 0.011  | t | 106327 | DDDKLEQI<br>RRDYTSQA         | Mus<br>musculu<br>s              |
| 1 | 1.00 | 1 | 1 | 0     | 0      | 0      | 0      | 0.011  | t | 43232  | NANNPD<br>WDF                | Mus<br>musculu<br>s              |

|   |      |   |   |       |        |        |        |        |   |        |                              |                                  |
|---|------|---|---|-------|--------|--------|--------|--------|---|--------|------------------------------|----------------------------------|
| 1 | 1.00 | 1 | 1 | 0     | 0.003  | 0.024  | 0.003  | 0.012  | t | 78121  | DMTMLK                       | Equus<br>caballus                |
| 1 | 1.00 | 1 | 1 | 0.01  | 0.01   | 0.01   | 0.01   | 0.022  | t | 78232  | PHSNKSHL                     | Homo<br>sapiens                  |
| 1 | 1.00 | 1 | 1 | -0.04 | -0.032 | -0.024 | -0.04  | -0.038 | t | 3528   | APEDQSPE<br>TRRLDRL<br>SR    | Gallus<br>gallus                 |
| 1 | 1.00 | 1 | 1 | 0     | 0      | 0.005  | 0      | 0.01   | t | 24778  | HSLGKWA<br>GHPDKF            | Mus<br>musculu<br>s              |
| 1 | 1.00 | 1 | 1 | -0.05 | -0.05  | -0.032 | -0.05  | -0.046 | t | 149470 | SNAWRPQ<br>VNNPK             | Homo<br>sapiens                  |
| 1 | 1.00 | 1 | 1 | 0.02  | 0.02   | 0.02   | 0.02   | 0.032  | t | 147563 | CYGTEPW<br>MC                | Homo<br>sapiens                  |
| 1 | 1.00 | 1 | 1 | -0.01 | -0.01  | -0.003 | -0.01  | -0.001 | t | 108615 | RRGPEAH<br>QA                | Homo<br>sapiens                  |
| 1 | 1.00 | 1 | 1 | -0.03 | -0.03  | -0.023 | -0.03  | -0.018 | t | 127684 | HHKYWHR                      | Homo<br>sapiens                  |
| 1 | 1.00 | 1 | 1 | -0.01 | -0.006 | 0.003  | -0.013 | -0.01  | t | 35001  | LAVFRPW<br>KARNNGT<br>NEYRSR | Homo<br>sapiens                  |
| 1 | 1.00 | 1 | 1 | -0.06 | -0.053 | -0.036 | -0.06  | -0.058 | t | 61833  | STPPVPPP<br>SVSRRKP          | Capra<br>hircus                  |
| 1 | 1.00 | 1 | 1 | -0.01 | -0.01  | -0.001 | -0.01  | -0.001 | t | 122311 | DRIQRTQP<br>LTAIPLL          | Mus<br>musculu<br>s              |
| 1 | 1.00 | 1 | 1 | 0     | 0      | 0      | 0      | 0.012  | t | 10538  | DVAGLEK<br>DPVA              | Mus<br>musculu<br>s              |
| 1 | 1.00 | 1 | 1 | -0.01 | -0.01  | -0.01  | -0.01  | 0.002  | t | 140586 | PWQLPLN<br>FQ                | Mus<br>musculu<br>s              |
| 1 | 1.00 | 1 | 1 | 0     | -0.002 | 0.005  | -0.001 | 0.012  | t | 24360  | HNAKYVS<br>AESWG             | Mus<br>musculu<br>s              |
| 1 | 1.00 | 1 | 1 | 0.02  | 0.016  | 0.027  | 0.013  | 0.03   | t | 139609 | SMPTYNK                      | Oryctola<br>gus<br>cuniculu<br>s |

|   |      |   |   |       |        |        |        |        |   |        |                              |                           |
|---|------|---|---|-------|--------|--------|--------|--------|---|--------|------------------------------|---------------------------|
| 1 | 1.00 | 1 | 1 | -0.05 | -0.046 | -0.029 | -0.05  | -0.05  | t | 100671 | YVALQGS<br>MFDRVRV<br>FWMARG | Ovis<br>aries             |
| 1 | 1.00 | 1 | 1 | 0     | -0.003 | 0      | 0      | 0.012  | t | 141935 | KKPGGPG                      | Mus<br>musculu<br>s       |
| 1 | 1.00 | 1 | 1 | 0.01  | 0.014  | 0.014  | 0.011  | 0.022  | t | 111434 | IVGTGPQP<br>SSTV             | Homo<br>sapiens           |
| 1 | 1.00 | 1 | 1 | -0.02 | -0.02  | -0.014 | -0.027 | -0.01  | t | 55276  | RPPTRYH                      | Homo<br>sapiens           |
| 1 | 1.00 | 1 | 1 | -0.04 | -0.04  | -0.013 | -0.04  | -0.04  | t | 29757  | KAAPKRAA<br>PKRAAPKK<br>AAPK | Homo<br>sapiens           |
| 1 | 1.00 | 1 | 1 | -0.04 | -0.04  | -0.013 | -0.04  | -0.04  | t | 29757  | KAAPKRAA<br>PKRAAPKK<br>AAPK | Homo<br>sapiens           |
| 1 | 1.00 | 1 | 1 | 0.01  | 0.01   | 0.01   | 0.01   | 0.02   | t | 78164  | GERLIV                       | Equus<br>caballus         |
| 1 | 1.00 | 1 | 1 | 0.01  | 0.01   | 0.036  | 0.01   | 0.012  | t | 24013  | HHPVDLA<br>DWELIESP<br>ED    | Sus<br>scrofa             |
| 1 | 1.00 | 1 | 1 | -0.03 | -0.027 | -0.01  | -0.03  | -0.027 | t | 44491  | NKFLNQCS<br>VSYLMNS<br>MIPY  | Equus<br>caballus         |
| 1 | 1.00 | 1 | 1 | 0.01  | 0.013  | 0.032  | 0.01   | 0.013  | t | 23919  | HGKSRIAL<br>TNSVNEAL<br>LNP  | Equus<br>caballus         |
| 1 | 1.00 | 1 | 1 | 0.01  | 0.021  | 0.032  | 0.01   | 0.013  | t | 23919  | HGKSRIAL<br>TNSVNEAL<br>LNP  | Gallus<br>gallus          |
| 1 | 1.00 | 1 | 1 | -0.02 | -0.029 | 0.011  | -0.02  | -0.02  | t | 19715  | GGEILLNQ                     | Anas<br>platyrhy<br>nchos |
| 1 | 1.00 | 1 | 1 | -0.01 | -0.01  | -0.005 | -0.013 | 0      | t | 18314  | FVVEYTKK<br>W                | Homo<br>sapiens           |
| 1 | 1.00 | 1 | 1 | 0.01  | 0.014  | 0.017  | 0.013  | 0.021  | t | 49348  | PSDRLFPG<br>LSDFGCS          | Homo<br>sapiens           |
| 1 | 1.00 | 1 | 1 | -0.01 | -0.008 | 0.008  | -0.009 | -0.008 | t | 33541  | KSVCGPVY<br>CFTPSPVV<br>VGTT | Homo<br>sapiens           |

|   |      |   |   |       |        |        |        |        |   |        |                              |                       |
|---|------|---|---|-------|--------|--------|--------|--------|---|--------|------------------------------|-----------------------|
| 1 | 1.00 | 1 | 1 | -0.01 | -0.01  | -0.01  | -0.01  | 0.002  | t | 153465 | SNWRDHY<br>GLGAGGG<br>GS     | Mus<br>musculu<br>s   |
| 1 | 1.00 | 1 | 1 | 0     | 0.002  | 0.012  | 0      | 0.002  | t | 45416  | NPNANPN<br>ANPNANP<br>NENPNA | Homo<br>sapiens       |
| 1 | 1.00 | 1 | 1 | -0.01 | -0.01  | -0.01  | -0.01  | 0.002  | t | 78303  | WHSIFAP                      | Homo<br>sapiens       |
| 1 | 1.00 | 1 | 1 | -0.13 | -0.126 | -0.101 | -0.123 | -0.13  | t | 127897 | WWARRR<br>RRWRRW<br>KRR      | Homo<br>sapiens       |
| 1 | 1.00 | 1 | 1 | -0.01 | -0.01  | 0.019  | -0.01  | -0.009 | t | 74006  | YGGIYMN<br>G                 | Mus<br>musculu<br>s   |
| 1 | 1.00 | 1 | 1 | 0     | -0.002 | 0      | -0.001 | 0.01   | t | 133497 | AEPFYSW<br>DRASR             | Mus<br>musculu<br>s   |
| 1 | 1.00 | 1 | 1 | -0.01 | -0.01  | 0      | -0.01  | 0.002  | t | 141767 | TPPPTYKL<br>WGAL             | Mus<br>musculu<br>s   |
| 1 | 1.00 | 1 | 1 | 0     | 0      | 0      | 0      | 0.012  | t | 140589 | PYHELEQV<br>P                | Mus<br>musculu<br>s   |
| 1 | 1.00 | 1 | 1 | 0     | -0.002 | 0.012  | 0.003  | 0.013  | t | 115378 | LYYIGTHSL<br>NSY             | Mus<br>musculu<br>s   |
| 1 | 1.00 | 1 | 1 | 0     | 0      | 0.007  | 0      | 0.012  | t | 132042 | RFEQPRV                      | Homo<br>sapiens       |
| 1 | 1.00 | 1 | 1 | 0.02  | 0.023  | 0.02   | 0.02   | 0.03   | t | 153424 | MQDSRLR<br>LALSAGGG<br>S     | Mus<br>musculu<br>s   |
| 1 | 1.00 | 1 | 1 | -0.01 | -0.016 | -0.01  | -0.017 | -0.009 | t | 131313 | SQWSRSA<br>SRNRRHVT<br>EEADV | Callithrix<br>pygmaea |
| 1 | 1.00 | 1 | 1 | 0.01  | 0.01   | 0.017  | 0.01   | 0.021  | t | 104254 | SPFLKAF                      | Homo<br>sapiens       |
| 1 | 1.00 | 1 | 1 | 0.03  | 0.028  | 0.037  | 0.027  | 0.04   | t | 132381 | IGFTLYERS<br>LWE             | Mus<br>musculu<br>s   |
| 1 | 1.00 | 1 | 1 | 0     | -0.002 | 0.01   | -0.001 | 0.01   | t | 10021  | DRNIYLVR<br>Q                | Mus<br>musculu<br>s   |
| 1 | 1.00 | 1 | 1 | 0.02  | 0.02   | 0.02   | 0.02   | 0.03   | t | 78165  | GERVGY                       | Equus<br>caballus     |

|   |      |   |   |       |        |        |        |        |   |        |                              |                                  |
|---|------|---|---|-------|--------|--------|--------|--------|---|--------|------------------------------|----------------------------------|
| 1 | 1.00 | 1 | 1 | -0.01 | -0.006 | 0.015  | -0.009 | -0.007 | t | 116563 | TGKIPWILL<br>PGR             | Ovis<br>aries                    |
| 1 | 1.00 | 1 | 1 | -0.02 | -0.022 | -0.015 | -0.021 | -0.01  | t | 79121  | YASPFSSQ<br>GGPRWLA          | Mus<br>musculu<br>s              |
| 1 | 1.00 | 1 | 1 | -0.01 | -0.01  | -0.01  | -0.011 | 0.001  | t | 79121  | YASPFSSQ<br>GGPRWLA          | Mus<br>musculu<br>s              |
| 1 | 1.00 | 1 | 1 | -0.08 | -0.08  | -0.08  | -0.08  | -0.07  | t | 79645  | SLGMHPL                      | Oryctola<br>gus<br>cuniculu<br>s |
| 1 | 1.00 | 1 | 1 | 0.03  | 0.03   | 0.03   | 0.03   | 0.04   | t | 138182 | GHRYTSSV<br>SLTEACP          | Homo<br>sapiens                  |
| 1 | 1.00 | 1 | 1 | 0.01  | 0.008  | 0.01   | 0.01   | 0.015  | t | 131313 | SQWSRSA<br>SRNRRHVT<br>EEADV | Callithrix<br>pygmae<br>a        |
| 1 | 1.00 | 1 | 1 | -0.04 | -0.034 | -0.026 | -0.037 | -0.03  | t | 132822 | FGSNVHF                      | Homo<br>sapiens                  |
| 1 | 1.00 | 1 | 1 | 0     | 0      | 0      | 0      | 0.012  | t | 140583 | PWDKFVH<br>EQ                | Mus<br>musculu<br>s              |
| 1 | 1.00 | 1 | 1 | -0.03 | -0.03  | -0.005 | -0.03  | -0.03  | t | 54016  | RGWGNG                       | Homo<br>sapiens                  |
| 1 | 1.00 | 1 | 1 | 0     | 0      | 0.007  | 0      | 0.012  | t | 132062 | SKDERRF                      | Homo<br>sapiens                  |
| 1 | 1.00 | 1 | 1 | 0.05  | 0.05   | 0.069  | 0.06   | 0.062  | t | 104991 | STGERIQ                      | Homo<br>sapiens                  |
| 1 | 1.00 | 1 | 1 | 0     | 0      | 0.002  | 0      | 0.012  | t | 38516  | LPGTPhi                      | Mus<br>musculu<br>s              |
| 1 | 1.00 | 1 | 1 | 0     | 0      | 0      | 0      | 0.012  | t | 147562 | CYGSLPW<br>MC                | Homo<br>sapiens                  |
| 1 | 1.00 | 1 | 1 | -0.02 | -0.016 | 0.002  | -0.013 | -0.008 | t | 103960 | GTYFLRS                      | Homo<br>sapiens                  |
| 1 | 1.00 | 1 | 1 | 0.03  | 0.03   | 0.049  | 0.04   | 0.042  | t | 104929 | PGTRLQP                      | Homo<br>sapiens                  |
| 1 | 1.00 | 1 | 1 | -0.04 | -0.04  | -0.033 | -0.04  | -0.031 | t | 108614 | RPPHSAS<br>WR                | Homo<br>sapiens                  |

|   |      |   |   |       |        |        |        |        |   |        |                              |                                  |
|---|------|---|---|-------|--------|--------|--------|--------|---|--------|------------------------------|----------------------------------|
| 1 | 1.00 | 1 | 1 | -0.07 | -0.068 | -0.043 | -0.07  | -0.071 | t | 45062  | NNDRIYD<br>MNHLMIK<br>MHILAI | Aotus<br>sp.                     |
| 1 | 1.00 | 1 | 1 | 0     | -0.008 | 0.005  | 0      | 0.01   | t | 43382  | NCNPLEK<br>WCPTVEQ<br>TPWY   | Mus<br>musculu<br>s              |
| 1 | 1.00 | 1 | 1 | -0.03 | -0.027 | -0.005 | -0.03  | -0.028 | t | 142827 | KVEFWPC<br>SPITQGDR          | Sus<br>scrofa                    |
| 1 | 1.00 | 1 | 1 | 0     | 0.003  | 0.011  | 0      | 0.01   | t | 79741  | AAASSPDA<br>HVPF             | Mus<br>musculu<br>s              |
| 1 | 1.00 | 1 | 1 | 0     | 0.003  | 0.011  | 0      | 0.01   | t | 79741  | AAASSPDA<br>HVPF             | Mus<br>musculu<br>s              |
| 1 | 1.00 | 1 | 1 | 0.03  | 0.032  | 0.06   | 0.03   | 0.033  | t | 68100  | VDYLKEKT<br>KDQDL            | Homo<br>sapiens                  |
| 1 | 1.00 | 1 | 1 | 0.02  | 0.02   | 0.025  | 0.02   | 0.032  | t | 44897  | NLTDINL                      | Oryctola<br>gus<br>cuniculu<br>s |
| 1 | 1.00 | 1 | 1 | -0.03 | -0.03  | -0.023 | -0.027 | -0.018 | t | 111452 | KHARTSE                      | Homo<br>sapiens                  |
| 1 | 1.00 | 1 | 1 | -0.06 | -0.055 | -0.031 | -0.063 | -0.059 | t | 18100  | FTWGGLR<br>DKS               | Homo<br>sapiens                  |
| 1 | 1.00 | 1 | 1 | -0.01 | -0.003 | -0.004 | -0.011 | 0      | t | 24119  | HKAEVKKF<br>L                | Gallus<br>gallus                 |
| 1 | 1.00 | 1 | 1 | 0     | -0.003 | 0      | 0      | 0.012  | t | 38687  | LPRRLRPQ<br>RSPQ             | Oryctola<br>gus<br>cuniculu<br>s |
| 1 | 1.00 | 1 | 1 | 0     | -0.003 | 0      | 0      | 0.012  | t | 33531  | KSTQRSTR<br>RNLS             | Oryctola<br>gus<br>cuniculu<br>s |
| 1 | 1.00 | 1 | 1 | -0.03 | -0.03  | -0.023 | -0.03  | -0.02  | t | 137436 | QHDRLLM<br>LSYLV             | Mus<br>musculu<br>s              |



|   |      |   |   |       |        |        |       |        |   |        |                           |                     |
|---|------|---|---|-------|--------|--------|-------|--------|---|--------|---------------------------|---------------------|
| 1 | 1.00 | 1 | 1 | -0.03 | -0.034 | -0.001 | -0.03 | -0.03  | t | 55899  | RSLYLRWV<br>NAVCGDA       | Bos<br>taurus       |
| 1 | 1.00 | 1 | 1 | 0.02  | 0.018  | 0.027  | 0.023 | 0.032  | t | 27073  | ILGHVGFA<br>NWQT          | Mus<br>musculu<br>s |
| 1 | 1.00 | 1 | 1 | 0.01  | 0.01   | 0.014  | 0.007 | 0.019  | t | 133999 | AGWILTEL<br>EQSATVM<br>KS | Mus<br>musculu<br>s |
| 1 | 1.00 | 1 | 1 | -0.06 | -0.057 | -0.053 | -0.06 | -0.055 | t | 159280 | DNKTYGN<br>KSNFSNAV       | Mus<br>musculu<br>s |
| 1 | 1.00 | 1 | 1 | -0.05 | -0.05  | -0.026 | -0.05 | -0.048 | t | 18705  | GANSNNP<br>DW             | Mus<br>musculu<br>s |
| 1 | 1.00 | 1 | 1 | 0.01  | 0.008  | 0.015  | 0.009 | 0.02   | t | 55654  | RRLPEELH<br>R             | Mus<br>musculu<br>s |
| 1 | 1.00 | 1 | 1 | -0.04 | -0.04  | -0.04  | -0.04 | -0.03  | t | 9705   | DPNKYVSK<br>HSWF          | Mus<br>musculu<br>s |
| 1 | 1.00 | 1 | 1 | 0     | 0      | 0      | 0     | 0.012  | t | 61801  | STNSGINN                  | Mus<br>musculu<br>s |
| 1 | 1.00 | 1 | 1 | 0     | 0      | 0      | 0     | 0.012  | t | 61800  | STNS                      | Mus<br>musculu<br>s |
| 1 | 1.00 | 1 | 1 | 0     | 0      | 0      | 0     | 0.012  | t | 65421  | TNSGINNS                  | Mus<br>musculu<br>s |
| 1 | 1.00 | 1 | 1 | 0     | 0      | 0      | 0     | 0.012  | t | 46008  | NSTNSGIN                  | Mus<br>musculu<br>s |
| 1 | 1.00 | 1 | 1 | 0     | 0      | 0      | 0     | 0.012  | t | 45252  | NNSTNSGI                  | Mus<br>musculu<br>s |
| 1 | 1.00 | 1 | 1 | 0     | 0      | 0      | 0     | 0.012  | t | 9516   | DNNLVSG<br>P              | Mus<br>musculu<br>s |

|   |      |   |   |       |        |        |        |        |   |        |                      |                       |
|---|------|---|---|-------|--------|--------|--------|--------|---|--------|----------------------|-----------------------|
| 1 | 1.00 | 1 | 1 | 0     | 0      | 0      | 0      | 0.012  | t | 9516   | DNNLVSGP             | Mus musculus          |
| 1 | 1.00 | 1 | 1 | -0.04 | -0.037 | -0.014 | -0.04  | -0.039 | t | 62879  | TAHPSYPPPSRS         | Mus musculus          |
| 1 | 1.00 | 1 | 1 | -0.03 | -0.03  | -0.03  | -0.03  | -0.02  | t | 127689 | HWHRPTN              | Homo sapiens          |
| 1 | 1.00 | 1 | 1 | -0.02 | -0.02  | -0.02  | -0.02  | -0.008 | t | 140546 | CNLWEVMHGTC          | Mus musculus          |
| 1 | 1.00 | 1 | 1 | 0     | -0.003 | 0.027  | 0      | 0.002  | t | 101538 | DGVMQQAIQSIIQGE      | Oryctolagus cuniculus |
| 1 | 1.00 | 1 | 1 | -0.01 | -0.01  | 0.001  | -0.01  | 0      | t | 153463 | SLMHVYRDHSTSGGGS     | Mus musculus          |
| 1 | 1.00 | 1 | 1 | 0     | 0      | 0.007  | 0      | 0.01   | t | 132373 | IATKRERGM LGQ        | Mus musculus          |
| 1 | 1.00 | 1 | 1 | 0.02  | 0.018  | 0.026  | 0.013  | 0.029  | t | 144888 | FLPTLEENKGFA         | Mus musculus          |
| 1 | 1.00 | 1 | 1 | -0.02 | -0.016 | 0.002  | -0.019 | -0.02  | t | 38311  | LNPSVAATLGFGAYMSKAHG | Homo sapiens          |
| 1 | 1.00 | 1 | 1 | -0.02 | -0.018 | 0.002  | -0.019 | -0.02  | t | 38311  | LNPSVAATLGFGAYMSKAHG | Homo sapiens          |
| 1 | 1.00 | 1 | 1 | -0.02 | -0.014 | -0.013 | -0.017 | -0.01  | t | 78212  | MTNNRI               | Equus caballus        |
| 1 | 1.00 | 1 | 1 | 0.01  | 0.01   | 0.01   | 0.01   | 0.022  | t | 140585 | PWNTFATNA            | Mus musculus          |
| 1 | 1.00 | 1 | 1 | 0     | 0      | 0      | 0      | 0.01   | t | 107875 | GTWKAGNQHNHVKYG      | Homo sapiens          |
| 1 | 1.00 | 1 | 1 | 0.01  | 0.008  | 0.01   | 0.003  | 0.019  | t | 140605 | TLYDALGAV            | Mus musculus          |
| 1 | 1.00 | 1 | 1 | -0.03 | -0.03  | -0.03  | -0.03  | -0.02  | t | 133660 | NSTWHDWNSWTH         | Homo sapiens          |

|   |      |   |   |       |        |        |        |        |   |        |                            |                     |
|---|------|---|---|-------|--------|--------|--------|--------|---|--------|----------------------------|---------------------|
| 1 | 1.00 | 1 | 1 | 0.01  | 0.013  | 0.01   | 0.01   | 0.02   | t | 49658  | PTIAGAGD<br>VK TSAEG       | Mus<br>musculu<br>s |
| 1 | 1.00 | 1 | 1 | 0.01  | 0.01   | 0.01   | 0.01   | 0.022  | t | 106938 | TTVQLYST<br>YPAP           | Mus<br>musculu<br>s |
| 1 | 1.00 | 1 | 1 | -0.01 | -0.012 | -0.005 | -0.011 | 0      | t | 67401  | TYNRSSYL<br>ASWP           | Mus<br>musculu<br>s |
| 1 | 1.00 | 1 | 1 | -0.04 | -0.037 | -0.024 | -0.037 | -0.03  | t | 78261  | RKFLAA                     | Equus<br>caballus   |
| 1 | 1.00 | 1 | 1 | -0.11 | -0.106 | -0.085 | -0.113 | -0.112 | t | 105525 | SPRHRHGL                   | Homo<br>sapiens     |
| 1 | 1.00 | 1 | 1 | 0     | -0.002 | 0.027  | -0.001 | 0      | t | 21325  | GMQAFFR<br>PRCAKTL<br>S CA | Mus<br>musculu<br>s |
| 1 | 1.00 | 1 | 1 | 0.01  | 0.016  | 0.024  | 0.013  | 0.02   | t | 132883 | PRSENGV                    | Homo<br>sapiens     |
| 1 | 1.00 | 1 | 1 | -0.02 | -0.018 | -0.002 | -0.021 | -0.016 | t | 149366 | LISSSQDG<br>HQW            | Homo<br>sapiens     |
| 1 | 1.00 | 1 | 1 | -0.02 | -0.017 | -0.004 | -0.017 | -0.01  | t | 78260  | RIVSIT                     | Equus<br>caballus   |
| 1 | 1.00 | 1 | 1 | 0     | 0      | 0      | 0      | 0.01   | t | 79211  | FCPGVG<br>RY PVRQCY        | Mus<br>musculu<br>s |
| 1 | 1.00 | 1 | 1 | -0.07 | -0.072 | -0.053 | -0.073 | -0.069 | t | 111042 | TIHAHPGS<br>RRGGRHG<br>YHH | Mus<br>musculu<br>s |
| 1 | 1.00 | 1 | 1 | 0     | 0.004  | 0.005  | 0.003  | 0.012  | t | 60719  | SRKQKNIQ<br>LRSSNNS        | Homo<br>sapiens     |
| 1 | 1.00 | 1 | 1 | 0.03  | 0.03   | 0.03   | 0.03   | 0.039  | t | 79282  | LCEETPPN<br>ETTPCI         | Mus<br>musculu<br>s |
| 1 | 1.00 | 1 | 1 | -0.05 | -0.046 | -0.046 | -0.049 | -0.038 | t | 111398 | HLVCRPS                    | Homo<br>sapiens     |

|   |      |   |   |       |        |        |        |        |   |        |                           |                     |
|---|------|---|---|-------|--------|--------|--------|--------|---|--------|---------------------------|---------------------|
| 1 | 1.00 | 1 | 1 | 0.01  | 0.01   | 0.017  | 0.01   | 0.022  | t | 133520 | ASNWTF<br>RVTDR           | Mus<br>musculu<br>s |
| 1 | 1.00 | 1 | 1 | -0.06 | -0.053 | -0.031 | -0.06  | -0.06  | t | 66326  | TSMARYV<br>RHSNYKH<br>M   | Equus<br>caballus   |
| 1 | 1.00 | 1 | 1 | -0.01 | -0.006 | 0.012  | -0.003 | 0.002  | t | 104048 | LPNYETR                   | Homo<br>sapiens     |
| 1 | 1.00 | 1 | 1 | -0.01 | -0.012 | 0      | -0.013 | 0      | t | 73287  | WYNVVY                    | Mus<br>musculu<br>s |
| 1 | 1.00 | 1 | 1 | 0     | 0      | 0.017  | 0      | 0.002  | t | 4397   | ASFEAQG<br>ALANIAVD<br>KA | Mus<br>musculu<br>s |
| 1 | 1.00 | 1 | 1 | 0.01  | 0.012  | 0.028  | 0.009  | 0.014  | t | 149485 | SWYLTENI<br>QR            | Homo<br>sapiens     |
| 1 | 1.00 | 1 | 1 | 0     | 0.004  | 0.004  | 0.001  | 0.012  | t | 111774 | SGMMSN<br>ATIANV          | Homo<br>sapiens     |
| 1 | 1.00 | 1 | 1 | -0.01 | -0.008 | -0.009 | -0.009 | 0      | t | 102094 | STSPWVQ<br>WQPMR          | Homo<br>sapiens     |
| 1 | 1.00 | 1 | 1 | 0.01  | 0.01   | 0.01   | 0.01   | 0.022  | t | 78076  | YMSPTGR<br>VMTTQ          | Mus<br>musculu<br>s |
| 1 | 1.00 | 1 | 1 | 0     | 0.003  | 0.009  | 0      | 0.009  | t | 97337  | GHVTTL<br>LSLR            | Mus<br>musculu<br>s |
| 1 | 1.00 | 1 | 1 | -0.02 | -0.017 | -0.008 | -0.021 | -0.009 | t | 79109  | VKLSPF                    | Mus<br>musculu<br>s |
| 1 | 1.00 | 1 | 1 | -0.02 | -0.02  | -0.015 | -0.02  | -0.01  | t | 66390  | TSQPRWH<br>QKPAT          | Mus<br>musculu<br>s |
| 1 | 1.00 | 1 | 1 | 0     | -0.002 | 0.002  | 0.003  | 0.012  | t | 50324  | QANRIASE<br>AQKHLKN<br>S  | Mus<br>musculu<br>s |
| 1 | 1.00 | 1 | 1 | -0.01 | -0.01  | -0.01  | -0.01  | 0      | t | 61158  | SSLGSDHN<br>ARWVKRF       | Mus<br>musculu<br>s |
| 1 | 1.00 | 1 | 1 | -0.05 | -0.05  | -0.034 | -0.05  | -0.04  | t | 111166 | CPVIKPC                   | Homo<br>sapiens     |

|   |      |   |   |       |        |        |        |        |   |        |                       |                       |
|---|------|---|---|-------|--------|--------|--------|--------|---|--------|-----------------------|-----------------------|
| 1 | 1.00 | 1 | 1 | -0.04 | -0.036 | -0.018 | -0.033 | -0.03  | t | 103966 | HALTPSR               | Homo sapiens          |
| 1 | 1.00 | 1 | 1 | -0.05 | -0.046 | -0.034 | -0.043 | -0.04  | t | 108519 | LGRDANA WK            | Homo sapiens          |
| 1 | 1.00 | 1 | 1 | -0.02 | -0.022 | -0.013 | -0.017 | -0.008 | t | 106567 | KLPDYILSP TSS         | Mus musculus          |
| 1 | 1.00 | 1 | 1 | -0.05 | -0.047 | -0.024 | -0.05  | -0.049 | t | 62878  | TAHPAYPP PSRA         | Mus musculus          |
| 1 | 1.00 | 1 | 1 | 0     | -0.002 | 0.024  | 0.003  | 0      | t | 64005  | TGYGTVT MECSPT GLDFNE | Mus musculus          |
| 1 | 1.00 | 1 | 1 | 0     | 0      | 0      | 0      | 0.01   | t | 107757 | AVSNRPRL KDTTYRL      | Homo sapiens          |
| 1 | 1.00 | 1 | 1 | -0.06 | -0.06  | -0.031 | -0.06  | -0.06  | t | 77976  | QESTRLTY AVWM         | Mus musculus          |
| 1 | 1.00 | 1 | 1 | 0.01  | 0.014  | 0.032  | 0.011  | 0.012  | t | 9511   | DNNDSGH STGADTG       | Homo sapiens          |
| 1 | 1.00 | 1 | 1 | -0.04 | -0.042 | -0.026 | -0.047 | -0.04  | t | 874    | AEEDRKRR EEADVRN QAE  | Mus musculus          |
| 1 | 1.00 | 1 | 1 | 0.02  | 0.02   | 0.062  | 0.02   | 0.021  | t | 72954  | WPMVIPA SISTM         | Mus musculus          |
| 1 | 1.00 | 1 | 1 | -0.02 | -0.022 | -0.013 | -0.023 | -0.011 | t | 142576 | DGASYSW MYEA          | Mus musculus          |
| 1 | 1.00 | 1 | 1 | -0.02 | -0.022 | -0.013 | -0.023 | -0.011 | t | 142576 | DGASYSW MYEA          | Mus musculus          |
| 1 | 1.00 | 1 | 1 | -0.03 | -0.032 | -0.028 | -0.027 | -0.018 | t | 45773  | NSAVHFQ RQFSQ         | Sus scrofa            |
| 1 | 1.00 | 1 | 1 | 0     | -0.004 | 0.009  | 0.003  | 0.011  | t | 99434  | LNQWFRP SPTSG         | Oryctolagus cuniculus |

|   |      |   |   |       |        |        |        |        |   |        |                              |                                  |
|---|------|---|---|-------|--------|--------|--------|--------|---|--------|------------------------------|----------------------------------|
| 1 | 1.00 | 1 | 1 | -0.04 | -0.042 | -0.021 | -0.041 | -0.035 | t | 66442  | TSSRRRYTE<br>VYL             | Mus<br>musculu<br>s              |
| 1 | 1.00 | 1 | 1 | -0.06 | -0.06  | -0.048 | -0.051 | -0.048 | t | 124827 | VNSHGWP<br>IH                | Homo<br>sapiens                  |
| 1 | 1.00 | 1 | 1 | -0.01 | -0.01  | 0.009  | -0.01  | -0.007 | t | 144797 | TGGCTHG<br>CLAVP             | Mus<br>musculu<br>s              |
| 1 | 1.00 | 1 | 1 | -0.05 | -0.05  | -0.028 | -0.05  | -0.05  | t | 94429  | AICKRIPNK<br>KPG             | Mus<br>musculu<br>s              |
| 1 | 1.00 | 1 | 1 | -0.04 | -0.04  | -0.04  | -0.04  | -0.028 | t | 140590 | PYHLALAG<br>V                | Mus<br>musculu<br>s              |
| 1 | 1.00 | 1 | 1 | 0.03  | 0.03   | 0.03   | 0.03   | 0.04   | t | 79328  | PCSRAETN<br>PTMQCP           | Mus<br>musculu<br>s              |
| 1 | 1.00 | 1 | 1 | -0.01 | -0.01  | -0.009 | -0.01  | 0      | t | 1816   | AHSSRLYS<br>PTISKHR          | Mus<br>musculu<br>s              |
| 1 | 1.00 | 1 | 1 | -0.04 | -0.04  | -0.04  | -0.04  | -0.03  | t | 62049  | SVARHKLP<br>THTLRR           | Mus<br>musculu<br>s              |
| 1 | 1.00 | 1 | 1 | -0.01 | -0.006 | 0.011  | -0.007 | -0.009 | t | 30665  | KEVTQND<br>GTTTIANN<br>LTSTV | Homo<br>sapiens                  |
| 1 | 1.00 | 1 | 1 | -0.01 | -0.012 | -0.019 | -0.017 | 0      | t | 134509 | RHFFNRSG<br>TV               | Mus<br>musculu<br>s              |
| 1 | 1.00 | 1 | 1 | -0.03 | -0.027 | -0.007 | -0.03  | -0.027 | t | 3872   | APTQCSQT<br>WPCPSHL          | Mus<br>musculu<br>s              |
| 1 | 1.00 | 1 | 1 | 0.03  | 0.03   | 0.049  | 0.04   | 0.042  | t | 104928 | PGSRLQP                      | Homo<br>sapiens                  |
| 1 | 1.00 | 1 | 1 | 0.02  | 0.018  | 0.027  | 0.023  | 0.032  | t | 106567 | KLPDYILSP<br>TSS             | Mus<br>musculu<br>s              |
| 1 | 1.00 | 1 | 1 | -0.01 | -0.01  | 0.003  | -0.014 | -0.01  | t | 35001  | LAVFRPW<br>KARNNGT<br>NEYRSR | Homo<br>sapiens                  |
| 1 | 1.00 | 1 | 1 | -0.03 | -0.033 | -0.013 | -0.03  | -0.028 | t | 125537 | QPVWQDE<br>GQRLRPSK          | Oryctola<br>gus<br>cuniculu<br>s |

|   |      |   |   |       |        |        |        |        |   |        |                              |                                  |
|---|------|---|---|-------|--------|--------|--------|--------|---|--------|------------------------------|----------------------------------|
| 1 | 1.00 | 1 | 1 | -0.03 | -0.034 | -0.007 | -0.03  | -0.03  | t | 1722   | AGVRRGD<br>LAHLAAAH<br>ARHLP | Bos<br>taurus                    |
| 1 | 1.00 | 1 | 1 | -0.01 | -0.006 | -0.006 | -0.009 | 0.002  | t | 111836 | TLKLQIRLP<br>ETI             | Homo<br>sapiens                  |
| 1 | 1.00 | 1 | 1 | 0     | 0.002  | 0.016  | 0.001  | 0.01   | t | 111796 | SPLFLDQR<br>SLTP             | Homo<br>sapiens                  |
| 1 | 1.00 | 1 | 1 | -0.01 | -0.01  | -0.01  | -0.01  | 0.002  | t | 78067  | VVSPTGLS<br>KHAP             | Mus<br>musculu<br>s              |
| 1 | 1.00 | 1 | 1 | -0.03 | -0.028 | -0.014 | -0.023 | -0.019 | t | 108518 | LGLHALQS<br>P                | Homo<br>sapiens                  |
| 1 | 1.00 | 1 | 1 | 0.01  | 0.012  | 0.026  | 0.011  | 0.02   | t | 111412 | IANYYGG                      | Homo<br>sapiens                  |
| 1 | 1.00 | 1 | 1 | 0.02  | 0.02   | 0.02   | 0.02   | 0.032  | t | 78076  | YMSPTGR<br>VMTTQ             | Mus<br>musculu<br>s              |
| 1 | 1.00 | 1 | 1 | -0.05 | -0.054 | -0.023 | -0.051 | -0.05  | t | 1963   | AIKATRV<br>T<br>ELLYRLK      | Oryctola<br>gus<br>cuniculu<br>s |
| 1 | 1.00 | 1 | 1 | -0.01 | -0.009 | 0      | -0.01  | 0      | t | 59642  | SMDPRFY                      | Mus<br>musculu<br>s              |
| 1 | 1.00 | 1 | 1 | 0     | 0      | 0      | 0      | 0.012  | t | 158583 | APPHLPP                      | Homo<br>sapiens                  |
| 1 | 1.00 | 1 | 1 | 0.01  | 0.008  | 0.005  | 0.003  | 0.019  | t | 113159 | SDEGGYTC<br>FFRDHSYQ<br>EE   | Rattus<br>norvegic<br>us         |
| 1 | 1.00 | 1 | 1 | 0.01  | 0.01   | 0.037  | 0.01   | 0.013  | t | 6389   | CHHSPEEY<br>QPC              | Mus<br>musculu<br>s              |
| 1 | 1.00 | 1 | 1 | 0.03  | 0.034  | 0.058  | 0.03   | 0.034  | t | 98555  | TVNDLK                       | Ovis<br>aries                    |
| 1 | 1.00 | 1 | 1 | -0.01 | -0.01  | -0.01  | -0.01  | 0.002  | t | 145776 | FDTGA FDP<br>DWPY            | Mus<br>musculu<br>s              |
| 1 | 1.00 | 1 | 1 | -0.04 | -0.044 | -0.015 | -0.041 | -0.04  | t | 9979   | DRGWGN<br>GC                 | Oryctola<br>gus<br>cuniculu<br>s |

|   |      |   |   |       |        |        |        |        |   |        |                         |                                  |
|---|------|---|---|-------|--------|--------|--------|--------|---|--------|-------------------------|----------------------------------|
| 1 | 1.00 | 1 | 1 | -0.04 | -0.037 | 0.007  | -0.036 | -0.039 | t | 54393  | RKLWCHH<br>FC           | Capra<br>hircus                  |
| 1 | 1.00 | 1 | 1 | -0.01 | -0.01  | 0.009  | -0.007 | 0.002  | t | 111944 | WAPYMT<br>N             | Homo<br>sapiens                  |
| 1 | 1.00 | 1 | 1 | -0.01 | -0.013 | -0.01  | -0.01  | 0      | t | 79596  | LERTPGK                 | Oryctola<br>gus<br>cuniculu<br>s |
| 1 | 1.00 | 1 | 1 | 0.01  | 0.01   | 0.029  | 0.02   | 0.022  | t | 105023 | VIQGSQ                  | Homo<br>sapiens                  |
| 1 | 1.00 | 1 | 1 | 0.01  | 0.006  | 0.02   | 0.007  | 0.02   | t | 59688  | SMITDLL                 | Oryctola<br>gus<br>cuniculu<br>s |
| 1 | 1.00 | 1 | 1 | 0     | 0      | 0      | -0.006 | 0.01   | t | 52587  | QTNYRG                  | Homo<br>sapiens                  |
| 1 | 1.00 | 1 | 1 | -0.01 | -0.01  | -0.004 | -0.013 | 0      | t | 1885   | AIDTRPW                 | Homo<br>sapiens                  |
| 1 | 1.00 | 1 | 1 | -0.02 | -0.022 | -0.02  | -0.019 | -0.008 | t | 21657  | GPHPRSV                 | Homo<br>sapiens                  |
| 1 | 1.00 | 1 | 1 | -0.04 | -0.042 | -0.023 | -0.041 | -0.034 | t | 12285  | EGSYPKLK<br>NSYVNK      | Mus<br>musculu<br>s              |
| 1 | 1.00 | 1 | 1 | 0     | 0.002  | 0.019  | 0.003  | 0.01   | t | 640    | ADCTLWF<br>CPQTSN       | Homo<br>sapiens                  |
| 1 | 1.00 | 1 | 1 | -0.09 | -0.09  | -0.09  | -0.096 | -0.086 | t | 138836 | CRTVYPSE<br>EETGE       | Homo<br>sapiens                  |
| 1 | 1.00 | 1 | 1 | -0.01 | -0.002 | 0.001  | -0.01  | 0      | t | 45631  | NQTARDEI<br>RRA         | Gallus<br>gallus                 |
| 1 | 1.00 | 1 | 1 | 0.01  | 0.01   | 0.01   | 0.01   | 0.022  | t | 78235  | PHSNSYHT                | Homo<br>sapiens                  |
| 1 | 1.00 | 1 | 1 | -0.04 | -0.042 | -0.033 | -0.041 | -0.03  | t | 47805  | PHDGNRA<br>FPRTKVT<br>M | Mus<br>musculu<br>s              |
| 1 | 1.00 | 1 | 1 | -0.02 | -0.019 | -0.013 | -0.02  | -0.011 | t | 99313  | HANLNG<br>WLRTLS        | Oryctola<br>gus<br>cuniculu<br>s |



|   |      |   |   |       |        |        |        |        |   |        |                              |                                  |
|---|------|---|---|-------|--------|--------|--------|--------|---|--------|------------------------------|----------------------------------|
| 1 | 1.00 | 1 | 1 | 0.02  | 0.016  | 0.029  | 0.023  | 0.031  | t | 99503  | NNINQFFR<br>SQPF             | Oryctola<br>gus<br>cuniculu<br>s |
| 1 | 1.00 | 1 | 1 | 0     | 0.003  | 0.024  | 0      | 0.002  | t | 49829  | PVAIEAVR<br>SEATDGM<br>LKIQF | Mus<br>musculu<br>s              |
| 1 | 1.00 | 1 | 1 | 0     | 0.002  | -0.004 | 0.001  | 0.012  | t | 137935 | NFNTVRY<br>DYYGD             | Homo<br>sapiens                  |
| 1 | 1.00 | 1 | 1 | 0.01  | 0.01   | 0.026  | 0.01   | 0.02   | t | 111690 | QTATLTY                      | Homo<br>sapiens                  |
| 1 | 1.00 | 1 | 1 | -0.06 | -0.059 | -0.044 | -0.061 | -0.058 | t | 40099  | LTPGRFRTI<br>VCGLF           | Myodes<br>glareolu<br>s          |
| 1 | 1.00 | 1 | 1 | -0.02 | -0.022 | -0.013 | -0.021 | -0.01  | t | 62288  | SVPPPHTR<br>SASG             | Mus<br>musculu<br>s              |
| 1 | 1.00 | 1 | 1 | -0.03 | -0.03  | -0.004 | -0.03  | -0.028 | t | 39489  | LSLNWGSS<br>A                | Rattus<br>norvegic<br>us         |
| 1 | 1.00 | 1 | 1 | 0.01  | 0.008  | 0.017  | 0.013  | 0.022  | t | 106365 | DWYSPFP<br>TSQFA             | Mus<br>musculu<br>s              |
| 1 | 1.00 | 1 | 1 | -0.01 | -0.006 | 0.015  | -0.01  | -0.007 | t | 116563 | TGKIPWILL<br>PGR             | Ovis<br>aries                    |
| 1 | 1.00 | 1 | 1 | -0.01 | -0.01  | 0.017  | -0.01  | -0.007 | t | 43232  | NANNPD<br>WDF                | Mus<br>musculu<br>s              |
| 1 | 1.00 | 1 | 1 | 0.04  | 0.043  | 0.028  | 0.04   | 0.055  | t | 75418  | YPTFGEHK<br>QEKDLEY          | Mus<br>musculu<br>s              |
| 1 | 1.00 | 1 | 1 | 0.04  | 0.04   | 0.028  | 0.04   | 0.055  | t | 75418  | YPTFGEHK<br>QEKDLEY          | Mus<br>musculu<br>s              |
| 1 | 1.00 | 1 | 1 | -0.01 | -0.012 | -0.01  | -0.011 | 0      | t | 1784   | AHIRHHK<br>MPVTNLR<br>H      | Mus<br>musculu<br>s              |
| 1 | 1.00 | 1 | 1 | -0.03 | -0.032 | -0.013 | -0.031 | -0.024 | t | 12284  | EGSYPKLK<br>NSYENK           | Mus<br>musculu<br>s              |

|   |      |   |   |       |        |        |        |        |   |        |                           |                                  |
|---|------|---|---|-------|--------|--------|--------|--------|---|--------|---------------------------|----------------------------------|
| 1 | 1.00 | 1 | 1 | 0.02  | 0.023  | 0.027  | 0.02   | 0.032  | t | 106263 | AQWSPNP<br>DMSVS          | Mus<br>musculu<br>s              |
| 1 | 1.00 | 1 | 1 | -0.02 | -0.02  | -0.008 | -0.02  | -0.01  | t | 79109  | VKLSPF                    | Mus<br>musculu<br>s              |
| 1 | 1.00 | 1 | 1 | -0.05 | -0.053 | -0.038 | -0.05  | -0.04  | t | 31445  | KITKRRML<br>RLMT          | Oryctola<br>gus<br>cuniculu<br>s |
| 1 | 1.00 | 1 | 1 | -0.02 | -0.022 | -0.013 | -0.017 | -0.01  | t | 78064  | VPLSPTME<br>FMRK          | Mus<br>musculu<br>s              |
| 1 | 1.00 | 1 | 1 | -0.02 | -0.018 | -0.022 | -0.017 | -0.008 | t | 54053  | RHKIINIRPI<br>RRIKL       | Homo<br>sapiens                  |
| 1 | 1.00 | 1 | 1 | 0     | 0.003  | 0.002  | 0      | 0.012  | t | 141754 | SSSKTWG<br>APLYY          | Mus<br>musculu<br>s              |
| 1 | 1.00 | 1 | 1 | 0     | 0      | 0      | 0      | 0.012  | t | 24591  | HQLDPAF<br>GANSTNP<br>D   | Mus<br>musculu<br>s              |
| 1 | 1.00 | 1 | 1 | -0.07 | -0.07  | -0.056 | -0.067 | -0.063 | t | 23102  | GVPPLRV<br>WR             | Homo<br>sapiens                  |
| 1 | 1.00 | 1 | 1 | -0.04 | -0.04  | -0.04  | -0.046 | -0.033 | t | 109599 | MPGERGA<br>AGIAGPK        | Mus<br>musculu<br>s              |
| 1 | 1.00 | 1 | 1 | -0.03 | -0.028 | 0.005  | -0.029 | -0.031 | t | 7672   | DAVSSPA<br>QPD            | Homo<br>sapiens                  |
| 1 | 1.00 | 1 | 1 | 0     | 0      | 0      | 0      | 0.01   | t | 111546 | MHPSNSK<br>SPPRH          | Homo<br>sapiens                  |
| 1 | 1.00 | 1 | 1 | -0.03 | -0.03  | -0.03  | -0.03  | -0.018 | t | 78298  | WHHMYV<br>P               | Homo<br>sapiens                  |
| 1 | 1.00 | 1 | 1 | 0.01  | 0.01   | 0.028  | 0.01   | 0.014  | t | 149366 | LISSSQDG<br>HQW           | Homo<br>sapiens                  |
| 1 | 1.00 | 1 | 1 | -0.03 | -0.028 | -0.002 | -0.029 | -0.03  | t | 77968  | PPPYAPNP<br>GPPPPYTG<br>A | Homo<br>sapiens                  |
| 1 | 1.00 | 1 | 1 | -0.07 | -0.07  | -0.043 | -0.07  | -0.07  | t | 66298  | TSLHRGPH<br>GFPL          | Mus<br>musculu<br>s              |

|   |      |   |   |       |        |        |        |        |   |        |                      |                                  |
|---|------|---|---|-------|--------|--------|--------|--------|---|--------|----------------------|----------------------------------|
| 1 | 1.00 | 1 | 1 | -0.07 | -0.07  | -0.043 | -0.07  | -0.07  | t | 66298  | TSLHRGPH<br>GFPL     | Mus<br>musculu<br>s              |
| 1 | 1.00 | 1 | 1 | -0.04 | -0.04  | -0.02  | -0.04  | -0.039 | t | 105562 | VAVVRTPP<br>KSPSSAK  | Oryctola<br>gus<br>cuniculu<br>s |
| 1 | 1.00 | 1 | 1 | -0.04 | -0.037 | -0.02  | -0.04  | -0.039 | t | 105561 | VAVVRTPP<br>KSPSSAK  | Mus<br>musculu<br>s              |
| 1 | 1.00 | 1 | 1 | 0     | 0      | 0.005  | 0      | 0.01   | t | 651    | ADDTPYTL<br>SFAPHRH  | Homo<br>sapiens                  |
| 1 | 1.00 | 1 | 1 | -0.02 | -0.02  | -0.02  | -0.02  | -0.009 | t | 72363  | WENWM<br>MGNA        | Mus<br>musculu<br>s              |
| 1 | 1.00 | 1 | 1 | -0.01 | -0.012 | -0.015 | -0.007 | 0.002  | t | 106327 | DDDKLEQI<br>RRDYTSGA | Mus<br>musculu<br>s              |
| 1 | 1.00 | 1 | 1 | -0.02 | -0.016 | 0.001  | -0.019 | -0.014 | t | 10222  | DSRGSLLS<br>PR       | Homo<br>sapiens                  |
| 1 | 1.00 | 1 | 1 | -0.01 | -0.01  | -0.01  | -0.01  | 0.002  | t | 10021  | DRNIYLVR<br>Q        | Mus<br>musculu<br>s              |
| 1 | 1.00 | 1 | 1 | -0.02 | -0.016 | -0.015 | -0.017 | -0.008 | t | 60718  | SRKQKKIR<br>LRSSNNT  | Homo<br>sapiens                  |
| 1 | 1.00 | 1 | 1 | -0.06 | -0.055 | -0.031 | -0.063 | -0.059 | t | 18100  | FTWGGCLR<br>DKS      | Homo<br>sapiens                  |
| 1 | 1.00 | 1 | 1 | -0.03 | -0.032 | -0.001 | -0.033 | -0.027 | t | 44174  | NHVRIPIG<br>YWAV     | Mus<br>musculu<br>s              |
| 1 | 1.00 | 1 | 1 | -0.01 | -0.008 | -0.005 | -0.013 | 0      | t | 6023   | CAREYGTN<br>RWVC     | Homo<br>sapiens                  |
| 1 | 1.00 | 1 | 0 | 0.03  | 0.03   | 0.057  | 0.027  | 0.051  | t | 101642 | FNSLTLL              | Homo<br>sapiens                  |

|   |      |   |   |       |        |        |        |        |   |        |                               |                                  |
|---|------|---|---|-------|--------|--------|--------|--------|---|--------|-------------------------------|----------------------------------|
| 1 | 1.00 | 1 | 1 | -0.03 | -0.028 | -0.008 | -0.029 | -0.03  | t | 78840  | SRS LPRQS<br>LIQPPTFH<br>PPSS | Homo<br>sapiens                  |
| 1 | 1.00 | 1 | 1 | 0.02  | 0.02   | 0.033  | 0.02   | 0.023  | t | 146906 | EVDHTNFK<br>YNYSVIEG          | Homo<br>sapiens                  |
| 1 | 1.00 | 1 | 1 | 0.03  | 0.03   | 0.037  | 0.03   | 0.04   | t | 121827 | RVVPLLVA<br>DPLVDPF           | Mus<br>musculu<br>s              |
| 1 | 1.00 | 1 | 1 | -0.02 | -0.025 | -0.013 | -0.017 | -0.008 | t | 44041  | NGNRSPTT<br>LMGP              | Bos<br>taurus                    |
| 1 | 1.00 | 1 | 1 | 0.01  | 0.006  | 0.015  | 0.009  | 0.022  | t | 55707  | RRRFGARA<br>MV                | Oryctola<br>gus<br>cuniculu<br>s |
| 1 | 1.00 | 1 | 1 | 0.02  | 0.02   | 0.02   | 0.02   | 0.032  | t | 140588 | PWSRFSL<br>SE                 | Mus<br>musculu<br>s              |
| 1 | 1.00 | 1 | 1 | -0.05 | -0.048 | -0.032 | -0.051 | -0.046 | t | 149470 | SNAWRPQ<br>VNNPK              | Homo<br>sapiens                  |
| 1 | 1.00 | 1 | 1 | -0.04 | -0.036 | -0.015 | -0.04  | -0.038 | t | 61862  | STRGRQTV<br>KENKGT            | Myodes<br>glareolu<br>s          |
| 1 | 1.00 | 1 | 1 | 0.02  | 0.018  | 0.031  | 0.014  | 0.024  | t | 14260  | ESRPRGVY<br>PTEQ              | Mus<br>musculu<br>s              |
| 1 | 1.00 | 1 | 1 | 0     | 0      | 0.005  | 0      | 0.01   | t | 7283   | CVLESHYE<br>C                 | Homo<br>sapiens                  |
| 1 | 1.00 | 1 | 1 | -0.03 | -0.019 | -0.021 | -0.03  | -0.018 | t | 14583  | ETVARMF<br>PDFR               | Gallus<br>gallus                 |
| 1 | 1.00 | 1 | 1 | -0.05 | -0.05  | -0.03  | -0.05  | -0.047 | t | 79529  | CSTDKCNH<br>PPKRQPG           | Mus<br>musculu<br>s              |
| 1 | 1.00 | 1 | 1 | 0     | -0.003 | 0      | 0      | 0.012  | t | 120407 | APGYKHEI<br>KYNC              | Oryctola<br>gus<br>cuniculu<br>s |
| 1 | 1.00 | 1 | 1 | 0     | -0.003 | 0      | 0      | 0.012  | t | 68401  | VEVPGSQ<br>HIDSQKKA           | Oryctola<br>gus<br>cuniculu<br>s |

|   |      |   |   |       |        |        |        |        |   |        |                              |                                  |
|---|------|---|---|-------|--------|--------|--------|--------|---|--------|------------------------------|----------------------------------|
| 1 | 1.00 | 1 | 1 | 0     | -0.003 | 0      | 0      | 0.012  | t | 30093  | KCTSDQDE<br>QFIPKGCS<br>K    | Oryctola<br>gus<br>cuniculu<br>s |
| 1 | 1.00 | 1 | 1 | -0.05 | -0.052 | -0.023 | -0.051 | -0.052 | t | 73671  | YEGRSWT<br>GVTQNKA<br>KGIT   | Mus<br>musculu<br>s              |
| 1 | 1.00 | 1 | 1 | -0.02 | -0.02  | -0.01  | -0.016 | -0.01  | t | 107798 | DSARNTFK<br>TTTAPYS          | Homo<br>sapiens                  |
| 1 | 1.00 | 1 | 1 | 0     | 0      | 0      | 0      | 0.012  | t | 102384 | EFRH                         | Cavia<br>porcellu<br>s           |
| 1 | 1.00 | 1 | 1 | 0     | 0      | 0      | 0      | 0.012  | t | 78424  | IPRSRQIDL<br>QIG             | Mus<br>musculu<br>s              |
| 1 | 1.00 | 1 | 1 | 0     | 0      | 0      | 0      | 0.012  | t | 48933  | PPTAPPLL<br>PHSNL            | Homo<br>sapiens                  |
| 1 | 1.00 | 1 | 1 | 0     | 0      | 0      | 0      | 0.012  | t | 48906  | PPRRVS                       | Mus<br>musculu<br>s              |
| 1 | 1.00 | 1 | 1 | -0.02 | -0.022 | -0.013 | -0.027 | -0.02  | t | 115664 | YGSLPQKA<br>QGHRPQD<br>ENG   | Rattus<br>norvegic<br>us         |
| 1 | 1.00 | 1 | 1 | 0     | 0.004  | 0.007  | 0.007  | 0.01   | t | 107946 | KNAASER<br>GSFTDLKS          | Homo<br>sapiens                  |
| 1 | 1.00 | 1 | 1 | -0.01 | -0.008 | 0.001  | -0.009 | -0.001 | t | 7808   | DDKDPQF<br>KDNVILLN<br>KHIDA | Homo<br>sapiens                  |
| 1 | 1.00 | 1 | 1 | -0.02 | -0.02  | -0.013 | -0.02  | -0.008 | t | 132794 | DRLYAQYP<br>VPTP             | Mus<br>musculu<br>s              |
| 1 | 1.00 | 1 | 1 | -0.06 | -0.054 | -0.046 | -0.053 | -0.05  | t | 127777 | PR SRLTP                     | Homo<br>sapiens                  |
| 1 | 1.00 | 1 | 1 | 0     | 0      | 0.002  | 0      | 0.012  | t | 38516  | LPGT PHI                     | Mus<br>musculu<br>s              |

|   |      |   |   |       |        |        |        |        |   |        |                              |                                  |
|---|------|---|---|-------|--------|--------|--------|--------|---|--------|------------------------------|----------------------------------|
| 1 | 1.00 | 1 | 1 | -0.01 | -0.007 | -0.001 | -0.01  | -0.001 | t | 97337  | GHVTTLSL<br>LSLR             | Mus<br>musculu<br>s              |
| 1 | 1.00 | 1 | 1 | 0     | 0      | 0      | 0      | 0.012  | t | 58405  | SHRLLQTY<br>WSSA             | Mus<br>musculu<br>s              |
| 1 | 1.00 | 1 | 1 | 0     | 0      | 0      | 0      | 0.012  | t | 30093  | KCTSDQDE<br>QFIPKGCS<br>K    | Oryctola<br>gus<br>cuniculu<br>s |
| 1 | 1.00 | 1 | 1 | -0.01 | -0.013 | 0.011  | -0.01  | -0.008 | t | 7661   | DAVLAPHI<br>GGEAGSS          | Oryctola<br>gus<br>cuniculu<br>s |
| 1 | 1.00 | 1 | 1 | -0.06 | -0.053 | -0.031 | -0.061 | -0.06  | t | 66326  | TSMARYV<br>RHSNYKH<br>M      | Equus<br>caballus                |
| 1 | 1.00 | 1 | 1 | -0.05 | -0.049 | -0.031 | -0.044 | -0.038 | t | 78121  | DMTMLK                       | Equus<br>caballus                |
| 1 | 1.00 | 1 | 1 | 0.03  | 0.028  | 0.037  | 0.023  | 0.039  | t | 140620 | YSLYQALT<br>A                | Mus<br>musculu<br>s              |
| 1 | 1.00 | 1 | 1 | -0.02 | -0.022 | -0.015 | -0.021 | -0.01  | t | 14717  | EVHLPPLH<br>RSAT             | Mus<br>musculu<br>s              |
| 1 | 1.00 | 1 | 1 | 0     | 0      | 0      | 0      | 0.012  | t | 138097 | YPYPLIS                      | Mus<br>musculu<br>s              |
| 1 | 1.00 | 1 | 1 | 0     | 0      | 0      | 0      | 0.012  | t | 138088 | WLDLSKT                      | Mus<br>musculu<br>s              |
| 1 | 1.00 | 1 | 1 | 0     | 0      | 0      | 0      | 0.012  | t | 153266 | IVTARARH<br>DWNWVQ<br>RSSRSL | Mus<br>musculu<br>s              |
| 1 | 1.00 | 1 | 1 | 0     | 0      | 0      | 0      | 0.012  | t | 134530 | SGTVGESV<br>P                | Mus<br>musculu<br>s              |
| 1 | 1.00 | 1 | 1 | 0     | 0      | 0      | 0      | 0.012  | t | 137947 | PNTMKTQ                      | Mus<br>musculu<br>s              |
| 1 | 1.00 | 1 | 1 | 0     | 0      | 0      | 0      | 0.012  | t | 139029 | DLQVLT                       | Mus<br>musculu<br>s              |
| 1 | 1.00 | 1 | 1 | 0     | 0      | 0      | 0      | 0.012  | t | 134509 | RHFFNRSG<br>TV               | Mus<br>musculu<br>s              |

|   |      |   |   |   |   |   |   |       |   |        |                  |                            |
|---|------|---|---|---|---|---|---|-------|---|--------|------------------|----------------------------|
| 1 | 1.00 | 1 | 1 | 0 | 0 | 0 | 0 | 0.012 | t | 134170 | MVRHENR<br>CVA   | Mus<br>musculu<br>s        |
| 1 | 1.00 | 1 | 1 | 0 | 0 | 0 | 0 | 0.012 | t | 138047 | SSKPVSY          | Mus<br>musculu<br>s        |
| 1 | 1.00 | 1 | 1 | 0 | 0 | 0 | 0 | 0.012 | t | 134343 | DLYIK            | Mus<br>musculu<br>s        |
| 1 | 1.00 | 1 | 1 | 0 | 0 | 0 | 0 | 0.012 | t | 141963 | MVDRGW<br>G      | Mus<br>musculu<br>s        |
| 1 | 1.00 | 1 | 1 | 0 | 0 | 0 | 0 | 0.012 | t | 134516 | RSGTVG           | Mus<br>musculu<br>s        |
| 1 | 1.00 | 1 | 1 | 0 | 0 | 0 | 0 | 0.012 | t | 137432 | NHNYPPLS<br>LLTF | Mus<br>musculu<br>s        |
| 1 | 1.00 | 1 | 1 | 0 | 0 | 0 | 0 | 0.012 | t | 130787 | EDFDIYDE<br>DE   | Mus<br>musculu<br>s        |
| 1 | 1.00 | 1 | 1 | 0 | 0 | 0 | 0 | 0.012 | t | 132850 | KLDLYLSYP<br>QPY | Mus<br>musculu<br>s        |
| 1 | 1.00 | 1 | 1 | 0 | 0 | 0 | 0 | 0.012 | t | 130555 | MHNRTQA<br>LEDSR | Camelus<br>dromed<br>arius |
| 1 | 1.00 | 1 | 1 | 0 | 0 | 0 | 0 | 0.012 | t | 130469 | DQPPTSRV<br>PSLR | Camelus<br>dromed<br>arius |
| 1 | 1.00 | 1 | 1 | 0 | 0 | 0 | 0 | 0.012 | t | 130622 | TGLVAQG<br>TDSIG | Camelus<br>dromed<br>arius |
| 1 | 1.00 | 1 | 1 | 0 | 0 | 0 | 0 | 0.012 | t | 130614 | STLPYLPTY<br>SKH | Camelus<br>dromed<br>arius |
| 1 | 1.00 | 1 | 1 | 0 | 0 | 0 | 0 | 0.012 | t | 130513 | IGYQPSMP<br>LDMP | Camelus<br>dromed<br>arius |
| 1 | 1.00 | 1 | 1 | 0 | 0 | 0 | 0 | 0.012 | t | 130612 | SPNTAHIT<br>SKSL | Camelus<br>dromed<br>arius |
| 1 | 1.00 | 1 | 1 | 0 | 0 | 0 | 0 | 0.012 | t | 106938 | TTVQLYST<br>YPAP | Mus<br>musculu<br>s        |
| 1 | 1.00 | 1 | 1 | 0 | 0 | 0 | 0 | 0.012 | t | 106690 | NSDHFLQP<br>DPPL | Mus<br>musculu<br>s        |
| 1 | 1.00 | 1 | 1 | 0 | 0 | 0 | 0 | 0.012 | t | 106515 | HLPSFLRP<br>DPPL | Mus<br>musculu<br>s        |

|   |      |   |   |   |        |   |   |       |   |        |                           |                                  |
|---|------|---|---|---|--------|---|---|-------|---|--------|---------------------------|----------------------------------|
| 1 | 1.00 | 1 | 1 | 0 | 0      | 0 | 0 | 0.012 | t | 106850 | SLQQLYDE<br>YPGP          | Mus<br>musculu<br>s              |
| 1 | 1.00 | 1 | 1 | 0 | 0      | 0 | 0 | 0.012 | t | 106976 | VPTQLYNL<br>YPPL          | Mus<br>musculu<br>s              |
| 1 | 1.00 | 1 | 1 | 0 | 0      | 0 | 0 | 0.012 | t | 106487 | GTSTEVWL<br>APDP          | Mus<br>musculu<br>s              |
| 1 | 1.00 | 1 | 1 | 0 | 0      | 0 | 0 | 0.012 | t | 106429 | FVLPWRI                   | Homo<br>sapiens                  |
| 1 | 1.00 | 1 | 1 | 0 | 0      | 0 | 0 | 0.012 | t | 106347 | DMQLYPV<br>LTPH           | Mus<br>musculu<br>s              |
| 1 | 1.00 | 1 | 1 | 0 | 0      | 0 | 0 | 0.012 | t | 106646 | MHLTQSP                   | Homo<br>sapiens                  |
| 1 | 1.00 | 1 | 1 | 0 | 0      | 0 | 0 | 0.012 | t | 106535 | IFPSFLRPD<br>PPL          | Mus<br>musculu<br>s              |
| 1 | 1.00 | 1 | 1 | 0 | 0      | 0 | 0 | 0.012 | t | 106642 | MHLNTPP                   | Homo<br>sapiens                  |
| 1 | 1.00 | 1 | 1 | 0 | 0      | 0 | 0 | 0.012 | t | 106363 | DVYWLMPP<br>DPPTS         | Mus<br>musculu<br>s              |
| 1 | 1.00 | 1 | 1 | 0 | 0      | 0 | 0 | 0.012 | t | 106909 | TISQLYSSY<br>PSP          | Mus<br>musculu<br>s              |
| 1 | 1.00 | 1 | 1 | 0 | 0      | 0 | 0 | 0.012 | t | 62286  | SVPNP                     | Mus<br>musculu<br>s              |
| 1 | 1.00 | 1 | 1 | 0 | -0.003 | 0 | 0 | 0.012 | t | 62440  | SWFDNFL<br>YPTH           | Oryctola<br>gus<br>cuniculu<br>s |
| 1 | 1.00 | 1 | 1 | 0 | 0      | 0 | 0 | 0.012 | t | 79280  | LAPISGTV<br>QSAHLIRF<br>D | Mus<br>musculu<br>s              |
| 1 | 1.00 | 1 | 1 | 0 | 0      | 0 | 0 | 0.012 | t | 79285  | LDPEYWN<br>FRNGDLT        | Mus<br>musculu<br>s              |
| 1 | 1.00 | 1 | 1 | 0 | 0      | 0 | 0 | 0.012 | t | 63697  | TFLARG                    | Mus<br>musculu<br>s              |
| 1 | 1.00 | 1 | 1 | 0 | 0      | 0 | 0 | 0.012 | t | 46677  | NYNWKR                    | Mus<br>musculu<br>s              |
| 1 | 1.00 | 1 | 1 | 0 | 0      | 0 | 0 | 0.012 | t | 57754  | SFFD                      | Mus<br>musculu<br>s              |



|   |      |   |   |       |        |        |        |        |   |        |                             |                        |
|---|------|---|---|-------|--------|--------|--------|--------|---|--------|-----------------------------|------------------------|
| 1 | 1.00 | 1 | 1 | 0     | 0      | 0      | 0      | 0.012  | t | 48947  | PPWDFDA<br>GEGIH            | Mus<br>musculu<br>s    |
| 1 | 1.00 | 1 | 1 | 0     | 0      | 0      | 0      | 0.012  | t | 15473  | FDVTTLNP<br>TIAGAGDV<br>K   | Mus<br>musculu<br>s    |
| 1 | 1.00 | 1 | 1 | 0     | 0      | 0      | 0      | 0.012  | t | 10853  | DYAWDQT<br>HQ               | Mus<br>musculu<br>s    |
| 1 | 1.00 | 1 | 1 | 0     | 0      | 0      | 0      | 0.012  | t | 10538  | DVAGLEK<br>DPVA             | Mus<br>musculu<br>s    |
| 1 | 1.00 | 1 | 1 | 0.01  | 0.01   | 0.017  | 0.01   | 0.02   | t | 127644 | ESMPALS                     | Homo<br>sapiens        |
| 1 | 1.00 | 1 | 1 | -0.01 | -0.008 | -0.01  | -0.004 | 0.004  | t | 132614 | RLPNPDTD<br>LYWFTLY         | Homo<br>sapiens        |
| 1 | 1.00 | 1 | 1 | -0.01 | -0.012 | -0.009 | -0.014 | 0.001  | t | 113002 | GKGRGLSL<br>SR              | Mus<br>musculu<br>s    |
| 1 | 1.00 | 1 | 1 | -0.03 | -0.028 | 0.005  | -0.033 | -0.03  | t | 101459 | AACNCLK<br>QLS              | Homo<br>sapiens        |
| 1 | 1.00 | 1 | 1 | -0.08 | -0.082 | -0.073 | -0.081 | -0.074 | t | 130980 | NCAYKTTQ<br>ANKQAQI<br>HGPR | Mus<br>musculu<br>s    |
| 1 | 1.00 | 1 | 1 | 0     | -0.005 | 0.01   | 0      | 0.01   | t | 53039  | QYTDHHSS<br>LLGP            | Bos<br>taurus          |
| 1 | 1.00 | 1 | 1 | -0.03 | -0.028 | -0.002 | -0.027 | -0.029 | t | 30637  | KETNNSISF<br>MSNAGSL<br>EKK | Aotus<br>nancyma<br>ae |
| 1 | 1.00 | 1 | 1 | 0.01  | 0.014  | 0.014  | 0.011  | 0.022  | t | 111434 | IVGTGPQP<br>SSTV            | Homo<br>sapiens        |
| 1 | 1.00 | 1 | 1 | 0.02  | 0.023  | 0.035  | 0.02   | 0.032  | t | 79051  | QKSSPY                      | Mus<br>musculu<br>s    |
| 1 | 1.00 | 1 | 1 | 0     | 0      | -0.003 | 0      | 0.013  | t | 41232  | MDIDPYKE<br>FG              | Mus<br>musculu<br>s    |
| 1 | 1.00 | 1 | 1 | -0.03 | -0.028 | -0.023 | -0.027 | -0.019 | t | 107162 | GMLDIFAP<br>IRHV            | Homo<br>sapiens        |

|   |      |   |   |       |        |        |        |        |   |        |                           |                     |
|---|------|---|---|-------|--------|--------|--------|--------|---|--------|---------------------------|---------------------|
| 1 | 1.00 | 1 | 1 | -0.05 | -0.05  | -0.027 | -0.05  | -0.047 | t | 51297  | QLCQLLGA<br>MI            | Mus<br>musculu<br>s |
| 1 | 1.00 | 1 | 1 | -0.05 | -0.05  | -0.014 | -0.05  | -0.049 | t | 94483  | CYKKVWR<br>DHRGTIER<br>GC | Mus<br>musculu<br>s |
| 1 | 1.00 | 1 | 1 | 0.03  | 0.03   | 0.03   | 0.03   | 0.04   | t | 138251 | THDLSSRA<br>SSSLSYN       | Homo<br>sapiens     |
| 1 | 1.00 | 1 | 1 | -0.06 | -0.06  | -0.046 | -0.06  | -0.057 | t | 28265  | IRAWVAW<br>RAHCQNR<br>D   | Mus<br>musculu<br>s |
| 1 | 1.00 | 1 | 1 | -0.03 | -0.03  | -0.01  | -0.03  | -0.025 | t | 46006  | NSTLGVKS<br>AREF          | Mus<br>musculu<br>s |
| 1 | 1.00 | 1 | 1 | 0.01  | 0.01   | 0.01   | -0.001 | 0.012  | t | 20961  | GLKNCTV<br>QPWDATD<br>VCD | Homo<br>sapiens     |
| 1 | 1.00 | 1 | 1 | 0.01  | 0.01   | 0.01   | 0.01   | 0.022  | t | 158584 | APPHQMP                   | Homo<br>sapiens     |
| 1 | 1.00 | 1 | 1 | 0.01  | 0.008  | 0.017  | 0.003  | 0.019  | t | 122440 | KLYPDGDP<br>RLSSYSL       | Mus<br>musculu<br>s |
| 1 | 1.00 | 1 | 1 | -0.01 | -0.011 | 0.019  | -0.01  | -0.01  | t | 14084  | ERTLPGQK<br>ACDDVN        | Bos<br>taurus       |
| 1 | 1.00 | 1 | 1 | -0.01 | -0.011 | 0.019  | -0.01  | -0.01  | t | 14084  | ERTLPGQK<br>ACDDVN        | Bos<br>taurus       |
| 1 | 1.00 | 1 | 1 | -0.02 | -0.016 | -0.016 | -0.019 | -0.008 | t | 111551 | MKVSNHK<br>DIPPL          | Homo<br>sapiens     |
| 1 | 1.00 | 1 | 1 | -0.02 | -0.02  | -0.02  | -0.02  | -0.008 | t | 78236  | PHSSLWHL                  | Homo<br>sapiens     |
| 1 | 1.00 | 1 | 1 | -0.01 | -0.01  | 0.018  | -0.01  | -0.01  | t | 11374  | EDKSVTEEI<br>AEEDKSVT     | Mus<br>musculu<br>s |
| 1 | 1.00 | 1 | 1 | -0.07 | -0.072 | -0.036 | -0.071 | -0.07  | t | 33328  | KSGRC                     | Mus<br>musculu<br>s |

|   |      |   |   |       |        |        |        |        |   |        |                              |                        |
|---|------|---|---|-------|--------|--------|--------|--------|---|--------|------------------------------|------------------------|
| 1 | 1.00 | 1 | 1 | 0.04  | 0.04   | 0.062  | 0.04   | 0.046  | t | 21330  | GMQLAEQ<br>FK                | Homo<br>sapiens        |
| 1 | 1.00 | 1 | 1 | 0     | 0      | 0.017  | 0      | 0.002  | t | 4397   | ASFEAQG<br>ALANIAVD<br>KA    | Mus<br>musculu<br>s    |
| 1 | 1.00 | 1 | 1 | 0.01  | 0.014  | 0.022  | 0.013  | 0.019  | t | 132905 | SVHMPV<br>WGQNTS             | Homo<br>sapiens        |
| 1 | 1.00 | 1 | 1 | -0.02 | -0.016 | -0.013 | -0.023 | -0.012 | t | 30292  | KEAIPMAV<br>EMAKSQ           | Homo<br>sapiens        |
| 1 | 1.00 | 1 | 1 | -0.04 | -0.042 | -0.035 | -0.041 | -0.03  | t | 60766  | SRPPSLFR<br>P                | Mus<br>musculu<br>s    |
| 1 | 1.00 | 1 | 1 | -0.02 | -0.022 | 0.014  | -0.023 | -0.02  | t | 36456  | LIAHTLAIR<br>YAN             | Mus<br>musculu<br>s    |
| 1 | 1.00 | 1 | 1 | -0.01 | -0.01  | 0      | -0.013 | 0      | t | 61212  | SSMGAYW<br>GG                | Homo<br>sapiens        |
| 1 | 1.00 | 1 | 1 | -0.04 | -0.038 | -0.028 | -0.037 | -0.03  | t | 9288   | DLSVLGSR<br>RPFFVWA          | Homo<br>sapiens        |
| 1 | 1.00 | 1 | 1 | -0.01 | -0.004 | 0.017  | -0.01  | -0.007 | t | 41727  | MIKAAFLP<br>TGAFMAD<br>RYKSH | Aotus<br>nancyma<br>ae |
| 1 | 1.00 | 1 | 1 | 0     | 0.004  | 0.007  | 0.001  | 0.012  | t | 60256  | SPSHYLAR<br>R                | Homo<br>sapiens        |
| 1 | 1.00 | 1 | 1 | -0.01 | -0.012 | -0.003 | -0.007 | 0      | t | 77853  | DMQYRSP<br>TGLST             | Mus<br>musculu<br>s    |
| 1 | 1.00 | 1 | 1 | -0.01 | -0.006 | -0.003 | -0.007 | 0      | t | 107257 | TSPILDVLT<br>PPR             | Homo<br>sapiens        |
| 1 | 1.00 | 1 | 1 | -0.05 | -0.046 | -0.044 | -0.049 | -0.038 | t | 133507 | ALPLHGSP<br>WKWY             | Homo<br>sapiens        |

|   |      |   |   |       |        |        |        |        |   |        |                             |                                  |
|---|------|---|---|-------|--------|--------|--------|--------|---|--------|-----------------------------|----------------------------------|
| 1 | 1.00 | 1 | 1 | -0.01 | -0.007 | 0.022  | -0.013 | -0.011 | t | 7244   | CTWQQW<br>ERELQGYD          | Capra<br>hircus                  |
| 1 | 1.00 | 1 | 1 | -0.05 | -0.05  | -0.04  | -0.05  | -0.038 | t | 79376  | RRIFRD                      | Mus<br>musculu<br>s              |
| 1 | 1.00 | 1 | 1 | 0.01  | 0.006  | 0.022  | 0.01   | 0.02   | t | 146167 | ALSENKLR<br>V               | Oryctola<br>gus<br>cuniculu<br>s |
| 1 | 1.00 | 1 | 1 | 0.01  | 0.008  | 0.017  | 0.013  | 0.022  | t | 106909 | TISQLYSSY<br>PSP            | Mus<br>musculu<br>s              |
| 1 | 1.00 | 1 | 1 | 0.01  | 0.01   | 0.01   | 0.01   | 0.022  | t | 75422  | YPTPMLN<br>RSSFT            | Mus<br>musculu<br>s              |
| 1 | 1.00 | 1 | 1 | -0.04 | -0.036 | -0.033 | -0.033 | -0.028 | t | 104144 | NDSQCWK<br>LGCIAEK          | Homo<br>sapiens                  |
| 1 | 1.00 | 1 | 1 | -0.01 | -0.01  | -0.01  | -0.01  | 0.002  | t | 140547 | CSIGEALS<br>HGC             | Mus<br>musculu<br>s              |
| 1 | 1.00 | 1 | 1 | -0.01 | -0.008 | 0.007  | -0.009 | -0.003 | t | 63729  | TFPPTPEK                    | Homo<br>sapiens                  |
| 1 | 1.00 | 1 | 1 | 0.01  | 0.01   | 0.034  | 0.01   | 0.015  | t | 156546 | STEDSGLT<br>GVKDSSS         | Mus<br>musculu<br>s              |
| 1 | 1.00 | 1 | 1 | 0.02  | 0.017  | 0.02   | 0.02   | 0.032  | t | 97369  | GTVALTAG<br>A               | Oryctola<br>gus<br>cuniculu<br>s |
| 1 | 1.00 | 1 | 1 | -0.02 | -0.02  | 0.017  | -0.02  | -0.021 | t | 63837  | TGGLVSLF<br>NPGPSQD         | Mus<br>musculu<br>s              |
| 1 | 1.00 | 1 | 1 | 0.01  | 0.01   | 0.034  | 0.01   | 0.01   | t | 44189  | NIASHISSI<br>SARTGDPV<br>TN | Mus<br>musculu<br>s              |
| 1 | 1.00 | 1 | 1 | 0.01  | 0.01   | 0.034  | 0.01   | 0.01   | t | 44189  | NIASHISSI<br>SARTGDPV<br>TN | Mus<br>musculu<br>s              |
| 1 | 1.00 | 1 | 1 | 0.01  | 0.01   | 0.01   | 0.01   | 0.02   | t | 79210  | FCLPTREST<br>GRACP          | Mus<br>musculu<br>s              |

|   |      |   |   |       |        |        |        |        |   |        |                      |                                  |
|---|------|---|---|-------|--------|--------|--------|--------|---|--------|----------------------|----------------------------------|
| 1 | 1.00 | 1 | 1 | 0     | 0      | 0      | 0      | 0.012  | t | 135449 | CATLRVYK<br>GG       | Homo<br>sapiens                  |
| 1 | 1.00 | 1 | 1 | 0     | 0      | 0      | 0      | 0.012  | t | 135471 | KDKATFGC<br>HDGC     | Homo<br>sapiens                  |
| 1 | 1.00 | 1 | 1 | 0     | 0      | 0      | 0      | 0.012  | t | 135191 | NTLKTPRV<br>GGC      | Homo<br>sapiens                  |
| 1 | 1.00 | 1 | 1 | 0.01  | 0.008  | 0.037  | 0.013  | 0.02   | t | 38438  | LPDTLSS              | Mus<br>musculu<br>s              |
| 1 | 1.00 | 1 | 1 | 0.01  | 0.01   | 0.016  | 0.01   | 0.022  | t | 1802   | AHMFQRS<br>PFQRY PNS | Mus<br>musculu<br>s              |
| 1 | 1.00 | 1 | 1 | 0     | -0.002 | 0.007  | 0.003  | 0.012  | t | 106363 | DVYWLMP<br>DPPTS     | Mus<br>musculu<br>s              |
| 1 | 1.00 | 1 | 1 | -0.01 | -0.006 | -0.006 | -0.009 | 0.002  | t | 111506 | LPLGQH QF<br>NPSG    | Homo<br>sapiens                  |
| 1 | 1.00 | 1 | 1 | -0.01 | -0.01  | -0.01  | -0.01  | 0.002  | t | 110074 | VTPPW T<br>APKSR     | Mus<br>musculu<br>s              |
| 1 | 1.00 | 1 | 1 | -0.02 | -0.023 | 0.025  | -0.02  | -0.017 | t | 133575 | FMRF                 | Oryctola<br>gus<br>cuniculu<br>s |
| 1 | 1.00 | 1 | 1 | -0.02 | -0.019 | -0.001 | -0.014 | -0.008 | t | 78196  | LNGLVL               | Equus<br>caballus                |
| 1 | 1.00 | 1 | 1 | 0.01  | 0.014  | 0.029  | 0.017  | 0.021  | t | 121072 | YANETCCD<br>FFT NQ   | Homo<br>sapiens                  |
| 1 | 1.00 | 1 | 1 | -0.02 | -0.02  | -0.02  | -0.02  | -0.008 | t | 140588 | PWSRFSL S<br>E       | Mus<br>musculu<br>s              |
| 1 | 1.00 | 1 | 1 | 0     | -0.002 | -0.004 | 0      | 0.012  | t | 137935 | NFNTVRY<br>DYYGD     | Oryctola<br>gus<br>cuniculu<br>s |
| 1 | 1.00 | 1 | 1 | -0.02 | -0.023 | 0.026  | -0.02  | -0.02  | t | 79778  | DGVREARS<br>G        | Oryctola<br>gus<br>cuniculu<br>s |
| 1 | 1.00 | 1 | 1 | 0     | 0      | -0.003 | 0      | 0.012  | t | 78997  | IGCHF PSC<br>FGPVWPS | Mus<br>musculu<br>s              |

|   |      |   |   |       |        |        |        |        |   |        |                              |                       |
|---|------|---|---|-------|--------|--------|--------|--------|---|--------|------------------------------|-----------------------|
| 1 | 1.00 | 1 | 1 | -0.02 | -0.016 | 0.002  | -0.013 | -0.008 | t | 103871 | EDYWLRS                      | Homo sapiens          |
| 1 | 1.00 | 1 | 1 | -0.03 | -0.03  | -0.025 | -0.031 | -0.02  | t | 46547  | NWKFAPP                      | Mus musculus          |
| 1 | 1.00 | 1 | 1 | -0.04 | -0.042 | -0.04  | -0.041 | -0.03  | t | 133655 | NIAHPDR<br>WDRLR             | Mus musculus          |
| 1 | 1.00 | 1 | 1 | -0.01 | -0.013 | 0.015  | -0.01  | -0.007 | t | 77810  | YSASVKGR<br>FIVS             | Mus                   |
| 1 | 1.00 | 1 | 1 | -0.05 | -0.023 | -0.044 | -0.05  | -0.038 | t | 141542 | GRKSFHKL<br>DGSF             | Rattus                |
| 1 | 1.00 | 1 | 1 | -0.03 | -0.032 | -0.023 | -0.027 | -0.018 | t | 106976 | VPTQLYNL<br>YPPL             | Mus musculus          |
| 1 | 1.00 | 1 | 1 | 0.01  | 0.013  | 0.028  | 0.013  | 0.012  | t | 74005  | YGGIPGGI<br>STPITQQS<br>EKSK | Equus caballus        |
| 1 | 1.00 | 1 | 1 | 0     | 0      | 0.007  | 0      | 0.012  | t | 103991 | IMEQCFEI<br>GCPATN           | Homo sapiens          |
| 1 | 1.00 | 1 | 1 | -0.03 | -0.027 | -0.03  | -0.031 | -0.02  | t | 72560  | WHWNKPI<br>RPPLR             | Mus musculus          |
| 1 | 1.00 | 1 | 1 | -0.01 | -0.012 | -0.011 | -0.007 | 0.002  | t | 106998 | WTVARNP<br>DELRV             | Mus musculus          |
| 1 | 1.00 | 1 | 1 | 0.02  | 0.023  | 0.029  | 0.02   | 0.032  | t | 79391  | SGVGQA                       | Mus musculus          |
| 1 | 1.00 | 1 | 1 | 0     | 0.002  | 0.032  | -0.003 | 0      | t | 105084 | AFNRFGEG<br>LVQR             | Homo sapiens          |
| 1 | 1.00 | 1 | 1 | 0     | -0.002 | 0.007  | 0.003  | 0.012  | t | 106969 | VKWTPAP<br>DSLIL             | Mus musculus          |
| 1 | 1.00 | 1 | 1 | -0.02 | -0.023 | -0.02  | -0.02  | -0.01  | t | 144818 | YCAWPAC<br>YGGGLPDS<br>VKI   | Oryctolagus cuniculus |

|   |      |   |   |       |        |        |        |        |   |        |                              |                              |
|---|------|---|---|-------|--------|--------|--------|--------|---|--------|------------------------------|------------------------------|
| 1 | 1.00 | 1 | 1 | -0.02 | -0.022 | -0.013 | -0.017 | -0.008 | t | 23871  | HFTGGVL<br>NWFS              | Mus<br>musculus              |
| 1 | 1.00 | 1 | 1 | 0     | -0.002 | 0      | -0.003 | 0.011  | t | 114746 | ASQKRPSQ<br>RSKYLATA<br>STMD | Mus<br>musculus              |
| 1 | 1.00 | 1 | 1 | -0.03 | -0.032 | -0.03  | -0.037 | -0.02  | t | 122488 | MSAKAAL<br>EPRLAPG           | Mus<br>musculus              |
| 1 | 1.00 | 1 | 1 | -0.06 | -0.06  | -0.05  | -0.057 | -0.049 | t | 69988  | VMLPRR                       | Homo<br>sapiens              |
| 1 | 1.00 | 1 | 1 | 0     | 0      | 0.007  | 0      | 0.01   | t | 131275 | WHDDNPF<br>FFEAP             | Homo<br>sapiens              |
| 1 | 1.00 | 1 | 1 | 0.03  | 0.028  | 0.04   | 0.029  | 0.04   | t | 97596  | QTPLTMA<br>ALELL             | Mus<br>musculus              |
| 1 | 1.00 | 1 | 1 | 0.02  | 0.02   | 0.062  | 0.02   | 0.022  | t | 72959  | WPPPNML<br>TS                | Mus<br>musculus              |
| 1 | 1.00 | 1 | 1 | -0.01 | -0.013 | -0.003 | -0.01  | -0.003 | t | 134659 | EASPERPS<br>PAFP             | Oryctola<br>gus<br>cuniculus |
| 1 | 1.00 | 1 | 1 | -0.03 | -0.028 | -0.025 | -0.029 | -0.02  | t | 55276  | RPPTRYH                      | Homo<br>sapiens              |
| 1 | 1.00 | 1 | 1 | 0     | -0.002 | 0.001  | -0.001 | 0.01   | t | 72689  | WKMPRAT<br>DWNLR             | Mus<br>musculus              |
| 1 | 1.00 | 1 | 1 | -0.02 | -0.02  | -0.02  | -0.02  | -0.008 | t | 106642 | MHLNTPP                      | Homo<br>sapiens              |
| 1 | 1.00 | 1 | 1 | 0     | -0.002 | 0.007  | 0.003  | 0.01   | t | 24438  | HPDSIHPF<br>LASP             | Mus<br>musculus              |
| 1 | 1.00 | 1 | 1 | -0.03 | -0.03  | -0.007 | -0.03  | -0.028 | t | 34165  | KVPPWAR<br>TA                | Mus<br>musculus              |
| 1 | 1.00 | 1 | 1 | 0     | -0.003 | 0      | -0.001 | 0.012  | t | 151493 | VVDGPETK<br>EC               | Mus<br>musculus              |
| 1 | 1.00 | 1 | 1 | 0     | -0.003 | 0.007  | 0      | 0.01   | t | 130607 | SHNLVSSA<br>FPSA             | Camelus<br>dromedarius       |
| 1 | 1.00 | 1 | 1 | 0     | 0.003  | 0.022  | 0      | 0.01   | t | 104159 | NSLLVSI                      | Mus<br>musculus              |

|   |      |   |   |       |        |        |        |        |   |        |                              |              |
|---|------|---|---|-------|--------|--------|--------|--------|---|--------|------------------------------|--------------|
| 1 | 1.00 | 1 | 1 | -0.01 | -0.006 | -0.006 | -0.009 | 0.002  | t | 111290 | FQRDDLRL                     | Homo sapiens |
| 1 | 1.00 | 1 | 1 | -0.03 | -0.03  | -0.023 | -0.03  | -0.02  | t | 131165 | YRWLPPSSA                    | Homo sapiens |
| 1 | 1.00 | 1 | 1 | -0.03 | -0.03  | -0.025 | -0.031 | -0.02  | t | 46547  | NWKFAPP                      | Mus musculus |
| 1 | 1.00 | 1 | 1 | -0.03 | -0.03  | -0.025 | -0.031 | -0.02  | t | 46547  | NWKFAPP                      | Mus musculus |
| 1 | 1.00 | 1 | 1 | -0.04 | -0.042 | -0.04  | -0.037 | -0.03  | t | 72936  | WPHNHSTHSRTH                 | Mus musculus |
| 1 | 1.00 | 1 | 1 | -0.04 | -0.04  | -0.039 | -0.037 | -0.03  | t | 60807  | SRSPTRKKI<br>NNIILN          | Homo sapiens |
| 1 | 1.00 | 1 | 1 | -0.07 | -0.068 | -0.047 | -0.069 | -0.069 | t | 9619   | DPDYVPPV<br>VHGCLPP<br>T     | Homo sapiens |
| 1 | 1.00 | 1 | 1 | -0.03 | -0.032 | -0.029 | -0.03  | -0.02  | t | 56007  | RSYQHDRL<br>AYGFWRL          | Mus musculus |
| 1 | 1.00 | 1 | 1 | -0.02 | -0.017 | 0.007  | -0.02  | -0.017 | t | 45013  | NMPASMK<br>RVRIE             | Mus musculus |
| 1 | 1.00 | 1 | 1 | -0.01 | -0.01  | -0.01  | -0.01  | 0.002  | t | 77910  | HTSPTGLR<br>FQVQ             | Mus musculus |
| 1 | 1.00 | 1 | 1 | 0     | -0.002 | 0      | -0.001 | 0.012  | t | 11872  | EESDDDM<br>GFGFLD            | Mus musculus |
| 1 | 1.00 | 1 | 1 | 0     | -0.002 | 0      | -0.001 | 0.012  | t | 11872  | EESDDDM<br>GFGFLD            | Mus musculus |
| 1 | 1.00 | 1 | 1 | 0     | 0.002  | 0.042  | -0.001 | 0.002  | t | 156480 | YKEQDFTP<br>VV               | Homo sapiens |
| 1 | 1.00 | 1 | 1 | 0.05  | 0.045  | 0.096  | 0.053  | 0.05   | t | 47233  | PEADTDPL                     | Bos taurus   |
| 1 | 1.00 | 1 | 1 | 0.01  | 0.01   | 0.015  | 0.007  | 0.02   | t | 16101  | FHENWPS                      | Homo sapiens |
| 1 | 1.00 | 1 | 1 | -0.02 | -0.02  | 0.012  | -0.02  | -0.02  | t | 78006  | SIPYLSAAD<br>YAYTASDV<br>AET | Mus musculus |



|   |      |   |   |       |        |        |        |        |   |        |                              |                          |
|---|------|---|---|-------|--------|--------|--------|--------|---|--------|------------------------------|--------------------------|
| 1 | 1.00 | 1 | 1 | -0.05 | -0.05  | -0.03  | -0.05  | -0.05  | t | 136113 | ACKRGRQ<br>TPVLYAML<br>DHSRS | Rattus<br>norvegicus     |
| 1 | 1.00 | 1 | 1 | 0.05  | 0.052  | 0.057  | 0.051  | 0.061  | t | 108022 | LTNSNAPS<br>ITVQGLE          | Homo<br>sapiens          |
| 1 | 1.00 | 1 | 1 | -0.06 | -0.06  | -0.039 | -0.057 | -0.059 | t | 44731  | NLGRAVF<br>QAKKRVLE<br>PLGLV | Homo<br>sapiens          |
| 1 | 1.00 | 1 | 1 | 0.01  | 0.014  | 0.022  | 0.013  | 0.022  | t | 132883 | PRSENGV                      | Homo<br>sapiens          |
| 1 | 1.00 | 1 | 1 | 0     | 0      | 0      | 0      | 0.012  | t | 158609 | SFGTALW                      | Homo<br>sapiens          |
| 1 | 1.00 | 1 | 1 | 0.03  | 0.028  | 0.03   | 0.023  | 0.039  | t | 107747 | ASNTNYIT<br>STLK             | Mus<br>musculus          |
| 1 | 1.00 | 1 | 1 | -0.03 | -0.03  | -0.03  | -0.03  | -0.018 | t | 77912  | HYSPTGLR<br>WTTM             | Mus<br>musculus          |
| 1 | 1.00 | 1 | 1 | 0.01  | 0.013  | 0.017  | 0.01   | 0.02   | t | 79231  | GISHTG                       | Mus<br>musculus          |
| 1 | 1.00 | 1 | 1 | -0.06 | -0.06  | -0.053 | -0.06  | -0.048 | t | 72901  | WNPKFH<br>W                  | Mus<br>musculus          |
| 1 | 1.00 | 1 | 1 | 0.07  | 0.066  | 0.082  | 0.07   | 0.08   | t | 146228 | EYSDSGIE<br>V                | Oryctolagus<br>cuniculus |
| 1 | 1.00 | 1 | 1 | -0.03 | -0.028 | -0.023 | -0.029 | -0.018 | t | 133604 | HSLSMYFD<br>WVPH             | Homo<br>sapiens          |
| 1 | 1.00 | 1 | 1 | -0.04 | -0.036 | -0.018 | -0.033 | -0.028 | t | 104130 | MPLQRTL                      | Homo<br>sapiens          |
| 1 | 1.00 | 1 | 1 | -0.02 | -0.02  | 0.007  | -0.02  | -0.019 | t | 65417  | TNSDMTI<br>NTCLIEQC<br>HVSVT | Mus<br>musculus          |
| 1 | 1.00 | 1 | 1 | -0.01 | -0.01  | 0.019  | -0.01  | -0.008 | t | 74006  | YGGIYMN<br>G                 | Mus<br>musculus          |

|   |      |   |   |       |        |        |        |        |   |        |                             |                 |
|---|------|---|---|-------|--------|--------|--------|--------|---|--------|-----------------------------|-----------------|
| 1 | 1.00 | 1 | 1 | -0.02 | -0.02  | -0.013 | -0.02  | -0.01  | t | 132645 | SAKRRALE<br>AHVA            | Mus<br>musculus |
| 1 | 1.00 | 1 | 1 | -0.01 | -0.01  | -0.01  | -0.014 | 0      | t | 131222 | GWYSPFQ<br>LGWPQ            | Homo<br>sapiens |
| 1 | 1.00 | 1 | 1 | 0     | 0.004  | 0.007  | 0.001  | 0.011  | t | 6549   | CLDSSRGI<br>C               | Homo<br>sapiens |
| 1 | 1.00 | 1 | 1 | -0.03 | -0.03  | -0.023 | -0.03  | -0.022 | t | 108200 | VSLGKWL<br>GHPDKF           | Mus<br>musculus |
| 1 | 1.00 | 1 | 1 | 0     | -0.002 | 0.015  | 0.003  | 0.012  | t | 137470 | YSVKPPLP<br>YLPP            | Mus<br>musculus |
| 1 | 1.00 | 1 | 1 | -0.02 | -0.02  | 0.005  | -0.017 | -0.015 | t | 134237 | SQWN                        | Mus<br>musculus |
| 1 | 1.00 | 1 | 1 | -0.05 | -0.05  | -0.043 | -0.046 | -0.039 | t | 143850 | DLTIMPW<br>SLYPP            | Homo<br>sapiens |
| 1 | 1.00 | 1 | 1 | -0.06 | -0.061 | -0.06  | -0.063 | -0.05  | t | 78309  | WHTLLAA                     | Homo<br>sapiens |
| 1 | 1.00 | 1 | 1 | 0.05  | 0.05   | 0.057  | 0.043  | 0.06   | t | 104059 | LTSSSQH                     | Mus<br>musculus |
| 1 | 1.00 | 1 | 1 | -0.04 | -0.038 | -0.021 | -0.039 | -0.041 | t | 63202  | TDNNQNG<br>GRNGARP<br>KQRRP | Homo<br>sapiens |
| 1 | 1.00 | 1 | 1 | 0.01  | 0.012  | 0.019  | 0.011  | 0.022  | t | 102113 | TETPYTD<br>YNLL             | Homo<br>sapiens |
| 1 | 1.00 | 1 | 1 | 0     | 0.004  | 0.019  | 0.003  | 0.01   | t | 5560   | AVTGID                      | Homo<br>sapiens |
| 1 | 1.00 | 1 | 1 | -0.03 | -0.028 | -0.012 | -0.031 | -0.026 | t | 149334 | HNIFNPPII<br>AR             | Homo<br>sapiens |
| 1 | 1.00 | 1 | 1 | 0     | 0.002  | 0      | -0.009 | 0.009  | t | 6892   | CQQFLSVR<br>ALC             | Homo<br>sapiens |
| 1 | 1.00 | 1 | 1 | 0     | 0.002  | 0.042  | 0.007  | 0.006  | t | 156480 | YKEQDFTP<br>VV              | Homo<br>sapiens |
| 1 | 1.00 | 1 | 1 | -0.01 | -0.008 | -0.004 | -0.009 | 0      | t | 56787  | SAFSPTHY<br>K               | Homo<br>sapiens |

|   |      |   |   |       |        |        |        |        |   |        |                              |                                  |
|---|------|---|---|-------|--------|--------|--------|--------|---|--------|------------------------------|----------------------------------|
| 1 | 1.00 | 1 | 1 | 0.01  | 0.012  | 0.028  | 0.009  | 0.014  | t | 149366 | LISSSQDG<br>HQW              | Homo<br>sapiens                  |
| 1 | 1.00 | 1 | 1 | -0.02 | -0.02  | 0.002  | -0.02  | -0.018 | t | 10646  | DVKMME<br>RVVEQMC<br>VTQYQKE | Mus<br>musculu<br>s              |
| 1 | 1.00 | 1 | 1 | 0.03  | 0.028  | 0.037  | 0.027  | 0.04   | t | 110088 | WDSGFELS<br>GPGK             | Mus<br>musculu<br>s              |
| 1 | 1.00 | 1 | 1 | -0.02 | -0.02  | -0.009 | -0.02  | -0.01  | t | 153465 | SNWRDHY<br>GLGAGGG<br>GS     | Mus<br>musculu<br>s              |
| 1 | 1.00 | 1 | 1 | -0.02 | -0.019 | -0.01  | -0.02  | -0.01  | t | 21127  | GLSLPPG                      | Mus<br>musculu<br>s              |
| 1 | 1.00 | 1 | 1 | -0.05 | -0.044 | -0.03  | -0.05  | -0.047 | t | 11800  | EENISLDLI<br>QQYYLT FN<br>FD | Equus<br>caballus                |
| 1 | 1.00 | 1 | 1 | 0.01  | 0.008  | 0.017  | 0.013  | 0.02   | t | 77837  | ATISPTGLV<br>YQT             | Mus<br>musculu<br>s              |
| 1 | 1.00 | 1 | 1 | 0     | 0.001  | 0.041  | 0.001  | 0      | t | 5310   | AVEVDPD<br>DVN               | Homo<br>sapiens                  |
| 1 | 1.00 | 1 | 1 | -0.04 | -0.04  | -0.04  | -0.033 | -0.026 | t | 117519 | GRGTVA<br>AAAAAT             | Mus<br>musculu<br>s              |
| 1 | 1.00 | 1 | 1 | 0.02  | 0.012  | 0.036  | 0.02   | 0.03   | t | 109951 | SSLSDMH<br>DCESV             | Mus<br>musculu<br>s              |
| 1 | 1.00 | 1 | 1 | 0.03  | 0.027  | 0.03   | 0.031  | 0.042  | t | 43216  | NALTSHTA<br>SPAP             | Oryctola<br>gus<br>cuniculu<br>s |
| 1 | 1.00 | 1 | 1 | -0.04 | -0.04  | -0.007 | -0.044 | -0.04  | t | 98809  | GWCR                         | Homo<br>sapiens                  |
| 1 | 1.00 | 1 | 1 | 0.02  | 0.022  | 0.024  | 0.013  | 0.028  | t | 136000 | SRFSWGA<br>EGQ               | Cavia<br>porcellu<br>s           |
| 1 | 1.00 | 1 | 1 | 0.02  | 0.02   | 0.062  | 0.02   | 0.022  | t | 72954  | WPMVIPA<br>SISTM             | Mus<br>musculu<br>s              |
| 1 | 1.00 | 1 | 1 | -0.01 | -0.01  | -0.008 | -0.009 | 0      | t | 153266 | IVTARARH<br>DWNWVQ<br>RSSRSL | Mus<br>musculu<br>s              |

|   |      |   |   |       |        |        |        |        |   |        |                             |                                  |
|---|------|---|---|-------|--------|--------|--------|--------|---|--------|-----------------------------|----------------------------------|
| 1 | 1.00 | 1 | 1 | -0.01 | -0.008 | 0.022  | -0.011 | -0.01  | t | 84423  | KKGLQQL<br>QEWEDW<br>VGWIGN | Felis<br>catus                   |
| 1 | 1.00 | 1 | 1 | -0.01 | -0.014 | -0.003 | -0.007 | 0.002  | t | 44779  | NLLHKKPK<br>ITQL            | Oryctola<br>gus<br>cuniculu<br>s |
| 1 | 1.00 | 1 | 1 | -0.03 | -0.027 | -0.02  | -0.031 | -0.02  | t | 36189  | LGKPLPNA<br>LRSH            | Mus<br>musculu<br>s              |
| 1 | 1.00 | 1 | 1 | -0.02 | -0.017 | 0.002  | -0.02  | -0.01  | t | 104174 | PIDQLLY                     | Mus<br>musculu<br>s              |
| 1 | 1.00 | 1 | 1 | 0     | -0.002 | 0      | -0.007 | 0.01   | t | 133999 | AGWILTEL<br>EQSATVM<br>KS   | Mus<br>musculu<br>s              |
| 1 | 1.00 | 1 | 1 | 0.02  | 0.022  | 0.022  | 0.023  | 0.034  | t | 119598 | INPESDQP<br>DLSNFMES<br>G   | Homo<br>sapiens                  |
| 1 | 1.00 | 1 | 1 | 0     | 0      | 0      | 0      | 0.009  | t | 118735 | AETREER<br>MERKRRE          | Homo<br>sapiens                  |
| 1 | 1.00 | 1 | 1 | -0.01 | -0.005 | 0.004  | -0.01  | 0      | t | 132850 | KLDLYLSYP<br>QPY            | Mus<br>musculu<br>s              |
| 1 | 1.00 | 1 | 1 | -0.03 | -0.032 | -0.023 | -0.027 | -0.02  | t | 77844  | CLAAPTGL<br>KLAP            | Mus<br>musculu<br>s              |
| 1 | 1.00 | 1 | 1 | -0.02 | -0.018 | -0.003 | -0.02  | -0.012 | t | 121070 | WVYYTCC<br>PDTPYL           | Rattus<br>norvegic<br>us         |
| 1 | 1.00 | 1 | 1 | 0.03  | 0.03   | 0.03   | 0.03   | 0.04   | t | 79282  | LCEETPPN<br>ETTPCI          | Mus<br>musculu<br>s              |
| 1 | 1.00 | 1 | 1 | 0.03  | 0.03   | 0.037  | 0.03   | 0.04   | t | 146228 | EYSDSGIE<br>V               | Oryctola<br>gus<br>cuniculu<br>s |
| 1 | 1.00 | 1 | 1 | -0.03 | -0.03  | -0.03  | -0.03  | -0.018 | t | 78302  | WHRLAI                      | Homo<br>sapiens                  |
| 1 | 1.00 | 1 | 1 | -0.01 | -0.022 | 0.012  | -0.01  | -0.007 | t | 94823  | GAVDSILG<br>GVATYGA         | Macaca<br>mulatta                |

|   |      |   |   |       |        |        |        |        |   |        |                              |                                  |
|---|------|---|---|-------|--------|--------|--------|--------|---|--------|------------------------------|----------------------------------|
| 1 | 1.00 | 1 | 1 | -0.05 | -0.028 | -0.044 | -0.051 | -0.038 | t | 141542 | GRKSFHKL<br>DGSF             | Rattus                           |
| 1 | 1.00 | 1 | 1 | -0.05 | -0.052 | -0.043 | -0.049 | -0.04  | t | 122400 | HSAHRGP<br>TYDPRVLH          | Mus<br>musculu<br>s              |
| 1 | 1.00 | 1 | 1 | -0.01 | -0.008 | 0.006  | -0.009 | 0      | t | 111109 | AMGYQHP                      | Homo<br>sapiens                  |
| 1 | 1.00 | 1 | 1 | -0.01 | -0.01  | -0.01  | -0.01  | 0.002  | t | 77982  | QPYDKNR<br>GPTLN             | Mus<br>musculu<br>s              |
| 1 | 1.00 | 1 | 1 | -0.02 | -0.02  | -0.013 | -0.02  | -0.01  | t | 132416 | KSRANGG<br>AGSSA             | Mus<br>musculu<br>s              |
| 1 | 1.00 | 1 | 1 | 0.01  | 0.006  | 0.01   | 0.003  | 0.02   | t | 134122 | KVNERGEY<br>FW               | Oryctola<br>gus<br>cuniculu<br>s |
| 1 | 1.00 | 1 | 1 | 0.01  | 0.006  | 0.01   | 0.003  | 0.02   | t | 134122 | KVNERGEY<br>FW               | Oryctola<br>gus<br>cuniculu<br>s |
| 1 | 1.00 | 1 | 1 | -0.11 | -0.11  | -0.077 | -0.113 | -0.11  | t | 42310  | MPRARYG<br>L                 | Homo<br>sapiens                  |
| 1 | 1.00 | 1 | 1 | 0     | -0.003 | 0.024  | 0      | 0.001  | t | 45627  | NQSLDLAE<br>QELVDCAS<br>QHGC | Oryctola<br>gus<br>cuniculu<br>s |
| 1 | 1.00 | 1 | 1 | 0.02  | 0.022  | 0.032  | 0.021  | 0.03   | t | 133723 | TTTSPYND<br>RQLL             | Homo<br>sapiens                  |
| 1 | 1.00 | 1 | 1 | -0.05 | -0.046 | -0.03  | -0.05  | -0.047 | t | 11800  | EENISLDLI<br>QQYYLTFN<br>FD  | Homo<br>sapiens                  |
| 1 | 1.00 | 1 | 1 | -0.05 | -0.044 | -0.03  | -0.05  | -0.047 | t | 11800  | EENISLDLI<br>QQYYLTFN<br>FD  | Equus<br>caballus                |
| 1 | 1.00 | 1 | 1 | -0.05 | -0.039 | -0.03  | -0.05  | -0.047 | t | 11800  | EENISLDLI<br>QQYYLTFN<br>FD  | Gallus<br>gallus                 |
| 1 | 1.00 | 1 | 1 | -0.02 | -0.018 | -0.013 | -0.019 | -0.008 | t | 133602 | HSIYSEWQ<br>PMWP             | Homo<br>sapiens                  |

|   |      |   |   |       |        |        |        |        |   |        |                            |                     |
|---|------|---|---|-------|--------|--------|--------|--------|---|--------|----------------------------|---------------------|
| 1 | 1.00 | 1 | 1 | -0.01 | -0.007 | -0.004 | -0.01  | 0.002  | t | 23974  | HGYSAHA<br>ASPNF           | Mus<br>musculu<br>s |
| 1 | 1.00 | 1 | 1 | -0.01 | -0.01  | -0.004 | -0.01  | 0.002  | t | 23974  | HGYSAHA<br>ASPNF           | Mus<br>musculu<br>s |
| 1 | 1.00 | 1 | 1 | 0     | 0      | 0      | 0.001  | 0.013  | t | 9586   | DPAFR                      | Mus<br>musculu<br>s |
| 1 | 1.00 | 1 | 1 | 0     | -0.002 | 0      | -0.007 | 0.009  | t | 140546 | CNLWEVM<br>HGTC            | Mus<br>musculu<br>s |
| 1 | 1.00 | 1 | 1 | 0     | -0.002 | 0      | -0.007 | 0.009  | t | 140547 | CSIGEALS<br>HGC            | Mus<br>musculu<br>s |
| 1 | 1.00 | 1 | 1 | 0     | -0.002 | 0      | -0.007 | 0.009  | t | 140606 | TMWDALE<br>AP              | Mus<br>musculu<br>s |
| 1 | 1.00 | 1 | 1 | 0     | -0.002 | 0      | -0.007 | 0.009  | t | 140582 | PWATLVA<br>ES              | Mus<br>musculu<br>s |
| 1 | 1.00 | 1 | 1 | 0     | -0.002 | 0      | -0.007 | 0.009  | t | 125602 | WMSYPDR<br>TLRTS           | Mus<br>musculu<br>s |
| 1 | 1.00 | 1 | 1 | 0     | -0.002 | 0      | -0.007 | 0.009  | t | 125363 | APKTYVSV<br>SGMV           | Mus<br>musculu<br>s |
| 1 | 1.00 | 1 | 1 | 0     | -0.002 | 0      | -0.007 | 0.009  | t | 125600 | WESYPFRV<br>GTSL           | Mus<br>musculu<br>s |
| 1 | 1.00 | 1 | 1 | 0     | -0.002 | 0      | -0.007 | 0.009  | t | 125351 | AALWGVK<br>VRHVS           | Mus<br>musculu<br>s |
| 1 | 1.00 | 1 | 1 | -0.03 | -0.03  | -0.025 | -0.03  | -0.02  | t | 55276  | RPPTRYH                    | Homo<br>sapiens     |
| 1 | 1.00 | 1 | 1 | 0.01  | 0.008  | 0.025  | 0.013  | 0.022  | t | 137470 | YSVKPPLP<br>YLPP           | Mus<br>musculu<br>s |
| 1 | 1.00 | 1 | 1 | 0     | 0.003  | 0.024  | 0      | 0.004  | t | 9515   | DNNKTAT                    | Mus<br>musculu<br>s |
| 1 | 1.00 | 1 | 1 | 0.02  | 0.018  | 0.025  | 0.019  | 0.03   | t | 63092  | TCPGEDC<br>HTMYPFTY<br>RGY | Mus<br>musculu<br>s |
| 1 | 1.00 | 1 | 1 | -0.02 | -0.02  | -0.02  | -0.02  | -0.008 | t | 140587 | PWQRGLR<br>DL              | Mus<br>musculu<br>s |

|   |      |   |   |       |        |        |        |        |   |        |                              |                                  |
|---|------|---|---|-------|--------|--------|--------|--------|---|--------|------------------------------|----------------------------------|
| 1 | 1.00 | 1 | 1 | -0.03 | -0.034 | -0.025 | -0.029 | -0.02  | t | 19958  | GGPIPTIPR<br>PTL             | Oryctola<br>gus<br>cuniculu<br>s |
| 1 | 1.00 | 1 | 1 | -0.05 | -0.047 | -0.05  | -0.05  | -0.04  | t | 153450 | QSFKDHLP<br>AGMRGG<br>GS     | Mus<br>musculu<br>s              |
| 1 | 1.00 | 1 | 1 | 0.02  | 0.022  | 0.027  | 0.027  | 0.034  | t | 138224 | QAPRLMS<br>SLSYFPQS          | Homo<br>sapiens                  |
| 1 | 1.00 | 1 | 1 | -0.02 | -0.016 | 0.002  | -0.013 | -0.008 | t | 103871 | EDYWLR                       | Homo<br>sapiens                  |
| 1 | 1.00 | 1 | 1 | 0     | 0      | 0.007  | 0      | 0.01   | t | 145634 | WHWRQP<br>TWLQVI             | Homo<br>sapiens                  |
| 1 | 1.00 | 1 | 1 | 0.02  | 0.018  | 0.031  | 0.021  | 0.03   | t | 63092  | TCPGEDC<br>HTMYPFTY<br>RGY   | Mus<br>musculu<br>s              |
| 1 | 1.00 | 1 | 1 | 0.02  | 0.016  | 0.035  | 0.023  | 0.032  | t | 13904  | EQPYRSM                      | Oryctola<br>gus<br>cuniculu<br>s |
| 1 | 1.00 | 1 | 1 | -0.01 | -0.01  | 0.013  | -0.007 | -0.003 | t | 13293  | ELTPAETS<br>VR               | Homo<br>sapiens                  |
| 1 | 1.00 | 1 | 1 | -0.01 | -0.01  | 0.009  | -0.01  | -0.01  | t | 94552  | IEDNWYT<br>HYLVCNYG<br>PGGND | Mus<br>musculu<br>s              |
| 1 | 1.00 | 1 | 1 | -0.03 | -0.028 | -0.012 | -0.04  | -0.031 | t | 138793 | MKGLRGH<br>PGLQGMP<br>GPSGPS | Homo<br>sapiens                  |
| 1 | 1.00 | 1 | 1 | 0     | -0.007 | 0.016  | 0.001  | 0.01   | t | 109298 | HNAQPMT<br>SWPIN             | Homo<br>sapiens                  |
| 1 | 1.00 | 1 | 1 | -0.03 | -0.033 | -0.013 | -0.03  | -0.027 | t | 125537 | QPVWQDE<br>GQRLRPSK          | Oryctola<br>gus<br>cuniculu<br>s |
| 1 | 1.00 | 1 | 1 | -0.03 | -0.033 | -0.021 | -0.03  | -0.02  | t | 79655  | TASFHRN                      | Oryctola<br>gus<br>cuniculu<br>s |
| 1 | 1.00 | 1 | 1 | 0.02  | 0.02   | 0.021  | 0.02   | 0.03   | t | 62566  | SYHSDNN                      | Homo<br>sapiens                  |

|   |      |   |   |       |        |        |        |        |   |        |                             |                                  |
|---|------|---|---|-------|--------|--------|--------|--------|---|--------|-----------------------------|----------------------------------|
| 1 | 1.00 | 1 | 1 | 0     | 0.003  | 0.02   | 0      | 0.003  | t | 64525  | TKAIINYQY<br>NQYTEEEK<br>NN | Equus<br>caballus                |
| 1 | 1.00 | 1 | 1 | -0.03 | -0.024 | -0.016 | -0.027 | -0.02  | t | 132780 | APHWGQ<br>N                 | Homo<br>sapiens                  |
| 1 | 1.00 | 1 | 1 | 0     | 0      | 0.016  | 0      | 0.01   | t | 111086 | AASMRTLE<br>AHSK            | Homo<br>sapiens                  |
| 1 | 1.00 | 1 | 1 | -0.01 | -0.01  | 0.019  | -0.01  | -0.008 | t | 74006  | YGGIYMN<br>G                | Mus<br>musculu<br>s              |
| 1 | 1.00 | 1 | 1 | -0.04 | -0.043 | -0.01  | -0.04  | -0.039 | t | 78459  | LTRAIARA<br>AYV             | Oryctola<br>gus<br>cuniculu<br>s |
| 1 | 1.00 | 1 | 1 | -0.01 | -0.006 | 0.011  | -0.011 | -0.007 | t | 65615  | TPISPPLRD<br>SHP            | Mus<br>musculu<br>s              |
| 1 | 1.00 | 1 | 1 | -0.01 | -0.006 | 0.011  | -0.011 | -0.007 | t | 65615  | TPISPPLRD<br>SHP            | Mus<br>musculu<br>s              |
| 1 | 1.00 | 1 | 1 | -0.01 | -0.032 | 0.002  | -0.009 | 0.002  | t | 101632 | FHPYYNPI<br>GLLH            | Homo<br>sapiens                  |
| 1 | 1.00 | 1 | 1 | -0.01 | -0.01  | -0.01  | -0.01  | 0.003  | t | 145776 | FDTGA FDP<br>DWPY           | Mus<br>musculu<br>s              |
| 1 | 1.00 | 1 | 1 | 0.02  | 0.018  | 0.031  | 0.021  | 0.03   | t | 63091  | TCPGEDC<br>HSMYPFTY<br>RGY  | Mus<br>musculu<br>s              |
| 1 | 1.00 | 1 | 1 | -0.05 | -0.052 | -0.045 | -0.053 | -0.04  | t | 25490  | ICACLCCA<br>CSYNSV          | Mus<br>musculu<br>s              |
| 1 | 1.00 | 1 | 1 | 0.03  | 0.03   | 0.03   | 0.03   | 0.042  | t | 77910  | HTSPTGLR<br>FQVQ            | Mus<br>musculu<br>s              |
| 1 | 1.00 | 1 | 1 | -0.03 | -0.03  | -0.03  | -0.03  | -0.018 | t | 158585 | APPHVMP                     | Homo<br>sapiens                  |
| 1 | 1.00 | 1 | 1 | -0.03 | -0.03  | -0.007 | -0.03  | -0.028 | t | 34165  | KVPPWAR<br>TA               | Mus<br>musculu<br>s              |
| 1 | 1.00 | 1 | 1 | -0.03 | -0.027 | -0.018 | -0.03  | -0.02  | t | 54919  | RMLPASLH<br>L               | Mus<br>musculu<br>s              |



|   |      |   |   |       |        |        |        |        |   |        |                              |                 |
|---|------|---|---|-------|--------|--------|--------|--------|---|--------|------------------------------|-----------------|
| 1 | 1.00 | 1 | 1 | -0.06 | -0.062 | -0.043 | -0.063 | -0.059 | t | 111042 | TIHAHPGS<br>RRGGRHGYHH       | Mus<br>musculus |
| 1 | 1.00 | 1 | 1 | -0.02 | -0.02  | -0.013 | -0.02  | -0.009 | t | 106841 | SHWTRQPD<br>TIMI             | Mus<br>musculus |
| 1 | 1.00 | 1 | 1 | 0.01  | 0.008  | 0.036  | 0.008  | 0.012  | t | 8900   | DKILVQAN<br>EAETTA           | Homo<br>sapiens |
| 1 | 1.00 | 1 | 1 | -0.01 | -0.01  | 0.016  | -0.01  | -0.01  | t | 49539  | PSTSSKLRP<br>RWTFTSPP<br>VTT | Mus<br>musculus |
| 1 | 1.00 | 1 | 1 | -0.05 | -0.047 | -0.05  | -0.05  | -0.04  | t | 153448 | QPNHRDH<br>FKLPAGGGS         | Mus<br>musculus |
| 1 | 1.00 | 1 | 1 | 0     | -0.004 | 0.008  | 0      | 0.01   | t | 140592 | PYHQLTH<br>GS                | Mus<br>musculus |
| 1 | 1.00 | 1 | 1 | -0.01 | -0.012 | 0.015  | -0.011 | -0.01  | t | 16296  | FISEAIIHVL<br>HSR            | Mus<br>musculus |
| 1 | 1.00 | 1 | 1 | 0.01  | 0.01   | 0.01   | 0.01   | 0.022  | t | 77912  | HYSPTGLR<br>WTTM             | Mus<br>musculus |
| 1 | 1.00 | 1 | 1 | -0.02 | -0.02  | -0.001 | -0.01  | -0.008 | t | 105024 | VIQGSRL                      | Homo<br>sapiens |
| 1 | 1.00 | 1 | 1 | -0.03 | -0.026 | -0.008 | -0.023 | -0.02  | t | 104230 | RTRNQPN                      | Homo<br>sapiens |
| 1 | 1.00 | 1 | 1 | -0.03 | -0.027 | -0.018 | -0.03  | -0.018 | t | 76556  | YYNMAY                       | Mus<br>musculus |
| 1 | 1.00 | 1 | 1 | -0.01 | -0.007 | -0.001 | -0.01  | 0.002  | t | 79289  | LGPVNS                       | Mus<br>musculus |
| 1 | 1.00 | 1 | 1 | -0.01 | -0.01  | -0.005 | -0.007 | 0.001  | t | 72021  | VYFLPLRG<br>ERVKSVD          | Homo<br>sapiens |
| 1 | 1.00 | 1 | 1 | -0.01 | -0.01  | -0.01  | -0.01  | -0.001 | t | 79281  | LCAPCAVP<br>GNEAWS           | Mus<br>musculus |

|   |      |   |   |       |        |        |        |        |   |        |                              |                                  |
|---|------|---|---|-------|--------|--------|--------|--------|---|--------|------------------------------|----------------------------------|
| 1 | 1.00 | 1 | 1 | 0     | 0      | 0.022  | 0      | 0.001  | t | 40729  | LYDAAKAY<br>AEQLKEN<br>GVINY | Mus<br>musculu<br>s              |
| 1 | 1.00 | 1 | 1 | -0.02 | -0.018 | -0.015 | -0.023 | -0.01  | t | 6293   | CGGTRRPI<br>ASC              | Homo<br>sapiens                  |
| 1 | 1.00 | 1 | 1 | -0.02 | -0.023 | -0.006 | -0.02  | -0.01  | t | 79645  | SLGMHPL                      | Oryctola<br>gus<br>cuniculu<br>s |
| 1 | 1.00 | 1 | 1 | 0     | 0      | 0.002  | 0      | 0.012  | t | 46803  | PAGEIKVG<br>KLRQLQR          | Mus<br>musculu<br>s              |
| 1 | 1.00 | 1 | 1 | 0     | 0      | 0.002  | 0      | 0.012  | t | 46803  | PAGEIKVG<br>KLRQLQR          | Mus<br>musculu<br>s              |
| 1 | 1.00 | 1 | 1 | -0.03 | -0.028 | -0.023 | -0.029 | -0.018 | t | 133604 | HSLSMYFD<br>WVPH             | Homo<br>sapiens                  |
| 1 | 1.00 | 1 | 1 | -0.03 | -0.028 | -0.004 | -0.029 | -0.021 | t | 53162  | RALSMPP                      | Homo<br>sapiens                  |
| 1 | 1.00 | 1 | 1 | -0.04 | -0.036 | -0.018 | -0.033 | -0.028 | t | 104130 | MPLQRTL                      | Homo<br>sapiens                  |
| 1 | 1.00 | 1 | 1 | -0.03 | -0.033 | 0.016  | -0.03  | -0.03  | t | 80092  | VTTSGGGK<br>QG               | Oryctola<br>gus<br>cuniculu<br>s |
| 1 | 1.00 | 1 | 1 | -0.03 | -0.03  | -0.023 | -0.03  | -0.02  | t | 127904 | YPMSWRG                      | Homo<br>sapiens                  |
| 1 | 1.00 | 1 | 1 | -0.02 | -0.018 | -0.002 | -0.017 | -0.01  | t | 65501  | TPALNSLP<br>YVFLFSY          | Homo<br>sapiens                  |
| 1 | 1.00 | 1 | 1 | -0.01 | -0.012 | 0.018  | -0.011 | -0.008 | t | 46795  | PAFLGCSS<br>RFGSFSFG<br>VEP  | Mus<br>musculu<br>s              |
| 1 | 1.00 | 1 | 1 | 0.01  | 0.008  | 0.01   | 0.007  | 0.02   | t | 49394  | PSHDILAS<br>HGFP             | Mus<br>musculu<br>s              |
| 1 | 1.00 | 1 | 1 | -0.05 | -0.053 | -0.05  | -0.05  | -0.04  | t | 42505  | MRTKRRT<br>RRIMM             | Oryctola<br>gus<br>cuniculu<br>s |
| 1 | 1.00 | 1 | 1 | 0     | -0.003 | 0      | 0      | 0.013  | t | 571    | ACKSTQDP<br>MFTPKGCDN        | Oryctola<br>gus<br>cuniculu<br>s |

|   |      |   |   |       |        |        |        |        |   |        |                              |                                  |
|---|------|---|---|-------|--------|--------|--------|--------|---|--------|------------------------------|----------------------------------|
| 1 | 1.00 | 1 | 1 | -0.04 | -0.036 | -0.015 | -0.039 | -0.04  | t | 42289  | MPKTRRQ<br>RTRRARRN<br>RPPTP | Homo<br>sapiens                  |
| 1 | 1.00 | 1 | 1 | -0.02 | -0.016 | 0.003  | -0.021 | -0.017 | t | 34165  | KVPPWAR<br>TA                | Mus<br>musculu<br>s              |
| 1 | 1.00 | 1 | 1 | -0.05 | -0.05  | -0.019 | -0.05  | -0.048 | t | 60722  | SRLGRSSA<br>WV               | Mus<br>musculu<br>s              |
| 1 | 1.00 | 1 | 1 | -0.05 | -0.05  | -0.015 | -0.048 | -0.05  | t | 32684  | KPDYEPPV<br>VHGCPLPP<br>P    | Homo<br>sapiens                  |
| 1 | 1.00 | 1 | 1 | -0.04 | -0.043 | 0.006  | -0.04  | -0.041 | t | 80093  | VTTSGGGR<br>QG               | Oryctola<br>gus<br>cuniculu<br>s |
| 1 | 1.00 | 1 | 1 | 0.01  | 0.008  | 0.017  | 0.013  | 0.02   | t | 77837  | ATISPTGLV<br>YQT             | Mus<br>musculu<br>s              |
| 1 | 1.00 | 1 | 1 | 0     | 0      | 0      | 0      | 0.012  | t | 77910  | HTSPTGLR<br>FQVQ             | Mus<br>musculu<br>s              |
| 1 | 1.00 | 1 | 1 | 0     | 0      | 0.009  | 0.007  | 0.012  | t | 138193 | HTYTSHLR<br>YVPPISL          | Homo<br>sapiens                  |
| 1 | 1.00 | 1 | 1 | 0     | 0.005  | 0.007  | 0      | 0.01   | t | 132903 | SQSSWKS<br>VGSQW             | Mus<br>musculu<br>s              |
| 1 | 1.00 | 1 | 1 | -0.01 | -0.012 | -0.003 | -0.007 | 0.002  | t | 106298 | AYFNLHPT<br>TQLV             | Mus<br>musculu<br>s              |
| 1 | 1.00 | 1 | 1 | -0.01 | -0.01  | 0.015  | -0.016 | -0.011 | t | 138791 | MKGLRGH<br>GGLQGMP<br>GPNGPS | Homo<br>sapiens                  |
| 1 | 1.00 | 1 | 1 | -0.01 | -0.01  | 0.015  | -0.016 | -0.011 | t | 138793 | MKGLRGH<br>PGLQGMP<br>GPSGPS | Homo<br>sapiens                  |
| 1 | 1.00 | 1 | 1 | -0.01 | -0.01  | 0.015  | -0.016 | -0.011 | t | 138792 | MKGLRGH<br>PGLQGMP<br>GPNGPS | Homo<br>sapiens                  |
| 1 | 1.00 | 1 | 1 | -0.03 | -0.033 | -0.003 | -0.03  | -0.028 | t | 101954 | PDPLSPGE<br>QLLYNK           | Oryctola<br>gus<br>cuniculu<br>s |

|   |      |   |   |       |        |        |        |        |   |        |                              |                          |
|---|------|---|---|-------|--------|--------|--------|--------|---|--------|------------------------------|--------------------------|
| 1 | 1.00 | 1 | 1 | -0.01 | -0.01  | -0.01  | -0.01  | 0.002  | t | 140591 | PYHQFQT<br>GQ                | Mus<br>musculu<br>s      |
| 1 | 1.00 | 1 | 1 | -0.02 | -0.02  | -0.02  | -0.02  | -0.008 | t | 77912  | HYSPTGLR<br>WTTM             | Mus<br>musculu<br>s      |
| 1 | 1.00 | 1 | 1 | -0.02 | -0.017 | 0.007  | -0.02  | -0.017 | t | 45013  | NMPASMK<br>RVRIE             | Mus<br>musculu<br>s      |
| 1 | 1.00 | 1 | 1 | -0.06 | -0.058 | -0.02  | -0.063 | -0.062 | t | 105493 | RDRARVPL                     | Homo<br>sapiens          |
| 1 | 1.00 | 1 | 1 | -0.04 | -0.037 | -0.024 | -0.037 | -0.03  | t | 78262  | RKLGAA                       | Equus<br>caballus        |
| 1 | 1.00 | 1 | 1 | -0.05 | -0.053 | -0.008 | -0.05  | -0.05  | t | 31740  | KKYRYYLK<br>PLCKK            | Mus<br>musculu<br>s      |
| 1 | 1.00 | 1 | 1 | -0.02 | -0.022 | -0.008 | -0.017 | -0.011 | t | 24438  | HPDSIHPF<br>LASP             | Mus<br>musculu<br>s      |
| 1 | 1.00 | 1 | 1 | -0.05 | -0.05  | -0.023 | -0.054 | -0.049 | t | 67164  | TVSRVPW<br>TAWAFHG<br>Y      | Homo<br>sapiens          |
| 1 | 1.00 | 1 | 1 | -0.01 | -0.007 | -0.008 | -0.01  | 0.002  | t | 141755 | STDIISSW<br>KHWGS            | Mus<br>musculu<br>s      |
| 1 | 1.00 | 1 | 1 | -0.02 | -0.018 | 0.007  | -0.021 | -0.021 | t | 32485  | KNESKYSN<br>TFQVNAY<br>NMSIR | Aotus<br>nancyma<br>ae   |
| 1 | 1.00 | 1 | 1 | -0.01 | -0.01  | 0.016  | -0.01  | -0.007 | t | 56807  | SAHGTSTG<br>VRGP             | Mus<br>musculu<br>s      |
| 1 | 1.00 | 1 | 1 | -0.05 | -0.05  | -0.023 | -0.05  | -0.05  | t | 13447  | ENAVRSSL<br>KVATSGDC<br>FVHG | Mus<br>musculu<br>s      |
| 1 | 1.00 | 1 | 1 | -0.03 | -0.032 | -0.023 | -0.027 | -0.018 | t | 106888 | SYSIWPD<br>T RVSL            | Mus<br>musculu<br>s      |
| 1 | 1.00 | 1 | 1 | -0.05 | -0.05  | -0.03  | -0.044 | -0.046 | t | 136113 | ACKRGRQ<br>TPVLYAML<br>DHSRS | Rattus<br>norvegic<br>us |
| 1 | 1.00 | 1 | 1 | -0.04 | -0.035 | -0.011 | -0.033 | -0.03  | t | 108660 | TLTFTLNKL<br>R               | Homo<br>sapiens          |

|   |      |   |   |       |        |        |        |        |   |        |                              |                     |
|---|------|---|---|-------|--------|--------|--------|--------|---|--------|------------------------------|---------------------|
| 1 | 1.00 | 1 | 1 | 0.01  | 0.008  | 0.017  | 0.003  | 0.02   | t | 122440 | KLYPDGDP<br>RLSSYSL          | Mus<br>musculu<br>s |
| 1 | 1.00 | 1 | 1 | -0.06 | -0.058 | -0.021 | -0.053 | -0.058 | t | 107828 | ERGLKGHR<br>GFT              | Homo<br>sapiens     |
| 1 | 1.00 | 1 | 1 | -0.06 | -0.062 | -0.032 | -0.057 | -0.057 | t | 14181  | ESKHSCQI<br>WCDNML           | Mus<br>musculu<br>s |
| 1 | 1.00 | 1 | 1 | -0.07 | -0.07  | -0.06  | -0.07  | -0.061 | t | 79055  | QRARSHR<br>PHGLPWL<br>M      | Mus<br>musculu<br>s |
| 1 | 1.00 | 1 | 1 | -0.05 | -0.052 | -0.05  | -0.051 | -0.04  | t | 133655 | NIAHPDR<br>WDRLR             | Mus<br>musculu<br>s |
| 1 | 1.00 | 1 | 1 | 0     | 0      | 0      | 0      | 0.013  | t | 44174  | NHVRIPIG<br>YWAV             | Mus<br>musculu<br>s |
| 1 | 1.00 | 1 | 1 | 0     | 0      | 0      | 0      | 0.013  | t | 5582   | AVTRGTIN<br>DPQRAKE          | Mus<br>musculu<br>s |
| 1 | 1.00 | 1 | 1 | -0.01 | -0.01  | 0.018  | -0.01  | -0.009 | t | 11374  | EDKSVTEEI<br>AEEDKSVT        | Mus<br>musculu<br>s |
| 1 | 1.00 | 1 | 1 | -0.05 | -0.048 | -0.034 | -0.049 | -0.04  | t | 111096 | AGNDRM<br>H                  | Homo<br>sapiens     |
| 1 | 1.00 | 1 | 1 | -0.05 | -0.026 | -0.043 | -0.05  | -0.04  | t | 141557 | PTTRKWW<br>LKLDG             | Rattus              |
| 1 | 1.00 | 1 | 1 | 0.01  | 0.013  | 0.017  | 0.01   | 0.022  | t | 143214 | WDGQWD<br>TLNW               | Mus<br>musculu<br>s |
| 1 | 1.00 | 1 | 1 | 0.01  | 0.013  | 0.017  | 0.01   | 0.022  | t | 143214 | WDGQWD<br>TLNW               | Mus<br>musculu<br>s |
| 1 | 1.00 | 1 | 1 | 0     | 0.003  | 0.01   | 0      | 0.008  | t | 130872 | GSFLTKEP<br>SKLNDRA          | Mus<br>musculu<br>s |
| 1 | 1.00 | 1 | 1 | -0.02 | -0.02  | -0.02  | -0.019 | -0.011 | t | 153266 | IVTARARH<br>DWNWVQ<br>RSSRSL | Mus<br>musculu<br>s |

|   |      |   |   |       |        |        |        |        |   |        |                               |                                  |
|---|------|---|---|-------|--------|--------|--------|--------|---|--------|-------------------------------|----------------------------------|
| 1 | 1.00 | 1 | 1 | -0.06 | -0.06  | -0.036 | -0.06  | -0.059 | t | 61799  | STNRQSG<br>RQPTPLSP           | Mus<br>musculu<br>s              |
| 1 | 1.00 | 1 | 1 | 0.01  | 0.012  | 0.014  | 0.013  | 0.022  | t | 122198 | TEADVNP<br>KPIPSQMPT<br>SP    | Homo<br>sapiens                  |
| 1 | 1.00 | 1 | 1 | 0.02  | 0.02   | 0.062  | 0.02   | 0.023  | t | 72959  | WPPPNML<br>TS                 | Mus<br>musculu<br>s              |
| 1 | 1.00 | 1 | 1 | -0.01 | -0.006 | -0.003 | -0.003 | 0      | t | 108065 | PGRMTDN<br>SGPQRFSA           | Homo<br>sapiens                  |
| 1 | 1.00 | 1 | 1 | -0.05 | -0.039 | -0.03  | -0.05  | -0.047 | t | 11800  | EENISLDLI<br>QQYYLT<br>FD     | Gallus<br>gallus                 |
| 1 | 1.00 | 1 | 1 | -0.05 | -0.044 | -0.03  | -0.05  | -0.047 | t | 11800  | EENISLDLI<br>QQYYLT<br>FD     | Equus<br>caballus                |
| 1 | 1.00 | 1 | 1 | -0.01 | -0.01  | 0.016  | -0.011 | -0.008 | t | 60062  | SPGGLEPP<br>SEKHFRET<br>EV    | Homo<br>sapiens                  |
| 1 | 1.00 | 1 | 1 | -0.01 | -0.01  | -0.012 | -0.01  | 0.002  | t | 66830  | TTSSGLASL<br>FNSGARQ<br>H     | Mus<br>musculu<br>s              |
| 1 | 1.00 | 1 | 1 | 0     | -0.003 | 0      | 0      | 0.013  | t | 57064  | SCATTVDA<br>KFRPNGCT<br>D     | Oryctola<br>gus<br>cuniculu<br>s |
| 1 | 1.00 | 1 | 1 | 0     | -0.003 | 0      | 0      | 0.013  | t | 30093  | KCTSDQDE<br>QFIPKGC<br>S<br>K | Oryctola<br>gus<br>cuniculu<br>s |
| 1 | 1.00 | 1 | 1 | 0     | 0      | 0      | 0      | 0.013  | t | 11571  | EEEDDDM<br>GFGFLD             | Homo<br>sapiens                  |
| 1 | 1.00 | 1 | 1 | 0     | 0      | 0      | 0      | 0.013  | t | 11571  | EEEDDDM<br>GFGFLD             | Mus<br>musculu<br>s              |
| 1 | 1.00 | 1 | 1 | 0     | 0      | 0      | 0      | 0.013  | t | 11872  | EESDDDM<br>GFGFLD             | Homo<br>sapiens                  |
| 1 | 1.00 | 1 | 1 | 0     | -0.003 | 0      | 0      | 0.013  | t | 571    | ACKSTQDP<br>MFTPKGC<br>DN     | Oryctola<br>gus<br>cuniculu<br>s |

|   |      |   |   |       |        |        |        |        |   |        |                              |                        |
|---|------|---|---|-------|--------|--------|--------|--------|---|--------|------------------------------|------------------------|
| 1 | 1.00 | 1 | 1 | -0.05 | -0.05  | -0.043 | -0.05  | -0.041 | t | 124013 | DKRQLQS<br>GQ                | Homo<br>sapiens        |
| 1 | 1.00 | 1 | 1 | -0.01 | -0.008 | 0.017  | -0.013 | -0.01  | t | 60270  | SPSSTKSSS<br>PSSTKSSS        | Homo<br>sapiens        |
| 1 | 1.00 | 1 | 1 | 0.01  | 0.008  | 0.02   | 0.009  | 0.02   | t | 97384  | HLQDGSP<br>PSSPH             | Mus<br>musculu<br>s    |
| 1 | 1.00 | 1 | 1 | -0.02 | -0.016 | -0.01  | -0.019 | -0.009 | t | 49792  | PTTPKSILH<br>FLFPLF          | Homo<br>sapiens        |
| 1 | 1.00 | 1 | 1 | -0.01 | -0.01  | -0.01  | -0.01  | 0.003  | t | 145775 | FDTGA FDP<br>DWPA            | Mus<br>musculu<br>s    |
| 1 | 1.00 | 1 | 1 | -0.02 | -0.018 | 0.007  | -0.019 | -0.02  | t | 74601  | YLDFNALN<br>LFFSPLEFQ<br>HLI | Homo<br>sapiens        |
| 1 | 1.00 | 1 | 1 | -0.06 | -0.06  | -0.023 | -0.06  | -0.059 | t | 79854  | HVPFCFGK<br>DLKR             | Mus<br>musculu<br>s    |
| 1 | 1.00 | 1 | 1 | -0.03 | -0.026 | -0.026 | -0.029 | -0.018 | t | 111394 | HDQTLPG<br>GVRLH             | Homo<br>sapiens        |
| 1 | 1.00 | 1 | 1 | 0     | 0.002  | 0.004  | -0.007 | 0.008  | t | 136000 | SRFSWGA<br>EGQ               | Cavia<br>porcellu<br>s |
| 1 | 1.00 | 1 | 1 | 0.01  | 0.01   | 0.017  | 0.01   | 0.022  | t | 124827 | VNSHGWP<br>IH                | Homo<br>sapiens        |
| 1 | 1.00 | 1 | 1 | -0.06 | -0.058 | -0.038 | -0.059 | -0.058 | t | 10639  | DVKFPGG<br>GQIVGGV<br>YLLPRR | Homo<br>sapiens        |
| 1 | 1.00 | 1 | 1 | 0     | 0      | 0.002  | 0      | 0.012  | t | 31098  | KHAQYVS<br>AESFL             | Mus<br>musculu<br>s    |
| 1 | 1.00 | 1 | 1 | -0.04 | -0.042 | -0.029 | -0.041 | -0.03  | t | 29112  | ITTFSKRHL<br>WTYKLN          | Mus<br>musculu<br>s    |
| 1 | 1.00 | 1 | 1 | 0.01  | 0.013  | 0.032  | 0.01   | 0.02   | t | 104000 | KALSSPY                      | Mus<br>musculu<br>s    |

|   |      |   |   |       |        |        |        |        |   |        |                               |                                  |
|---|------|---|---|-------|--------|--------|--------|--------|---|--------|-------------------------------|----------------------------------|
| 1 | 1.00 | 1 | 1 | -0.03 | -0.032 | -0.018 | -0.027 | -0.017 | t | 115547 | VRAPWHQ<br>HYTPP              | Mus<br>musculu<br>s              |
| 1 | 1.00 | 1 | 1 | -0.05 | -0.05  | -0.05  | -0.05  | -0.038 | t | 153458 | SELSPAML<br>HFMFGGG<br>S      | Mus<br>musculu<br>s              |
| 1 | 1.00 | 1 | 1 | 0     | 0.004  | 0.022  | 0.007  | 0.01   | t | 104155 | NPEDCFKT<br>GCNSPT            | Homo<br>sapiens                  |
| 1 | 1.00 | 1 | 1 | -0.01 | -0.01  | -0.003 | -0.01  | 0.002  | t | 108825 | AVLMLPV<br>WACLS              | Mus<br>musculu<br>s              |
| 1 | 1.00 | 1 | 1 | -0.01 | -0.01  | -0.003 | -0.01  | 0.002  | t | 19527  | GFFSRLN<br>WLTKS              | Oryctola<br>gus<br>cuniculu<br>s |
| 1 | 1.00 | 1 | 1 | -0.03 | -0.026 | -0.009 | -0.029 | -0.028 | t | 65774  | TPSPVVVG<br>TTDRSGAP<br>TYSW  | Homo<br>sapiens                  |
| 1 | 1.00 | 1 | 1 | 0     | -0.003 | 0      | -0.003 | 0.012  | t | 63931  | TGPGTNN<br>PENPITES<br>AHLNV  | Oryctola<br>gus<br>cuniculu<br>s |
| 1 | 1.00 | 1 | 1 | -0.03 | -0.03  | -0.005 | -0.03  | -0.03  | t | 41775  | MISGPCPK<br>AGQPSSLVV<br>QSSL | Homo<br>sapiens                  |
| 1 | 1.00 | 1 | 1 | 0.03  | 0.033  | 0.037  | 0.03   | 0.04   | t | 79328  | PCSRAETN<br>PTMQCP            | Mus<br>musculu<br>s              |
| 1 | 1.00 | 1 | 1 | 0.03  | 0.033  | 0.037  | 0.03   | 0.04   | t | 79328  | PCSRAETN<br>PTMQCP            | Mus<br>musculu<br>s              |
| 1 | 1.00 | 1 | 1 | -0.01 | -0.012 | -0.002 | -0.011 | 0      | t | 48154  | PKTHNSGR<br>SNVD              | Mus<br>musculu<br>s              |
| 1 | 1.00 | 1 | 1 | -0.02 | -0.02  | 0.007  | -0.02  | -0.018 | t | 65417  | TNSDMTI<br>NTCLIEQC<br>HVSVT  | Mus<br>musculu<br>s              |
| 1 | 1.00 | 1 | 1 | 0.02  | 0.024  | 0.042  | 0.027  | 0.032  | t | 103934 | GKVQAQS                       | Homo<br>sapiens                  |



|   |      |   |   |       |        |        |        |        |   |        |                              |                                  |
|---|------|---|---|-------|--------|--------|--------|--------|---|--------|------------------------------|----------------------------------|
| 1 | 1.00 | 1 | 1 | -0.03 | -0.032 | -0.031 | -0.027 | -0.018 | t | 106741 | QQFAPWP<br>NWTLV             | Mus<br>musculu<br>s              |
| 1 | 1.00 | 1 | 1 | -0.06 | -0.06  | -0.025 | -0.058 | -0.06  | t | 32684  | KPDYEPPV<br>VHGCLPP<br>P     | Homo<br>sapiens                  |
| 1 | 1.00 | 1 | 1 | -0.03 | -0.034 | -0.024 | -0.032 | -0.02  | t | 24487  | HPPGHRLT<br>LIPH             | Oryctola<br>gus<br>cuniculu<br>s |
| 1 | 1.00 | 1 | 1 | -0.05 | -0.052 | -0.038 | -0.047 | -0.041 | t | 56138  | RTNHSGN<br>SVPDK             | Mus<br>musculu<br>s              |
| 1 | 1.00 | 1 | 1 | 0.01  | 0.014  | 0.025  | 0.013  | 0.02   | t | 148260 | SPLFAMLA<br>PAVD             | Homo<br>sapiens                  |
| 1 | 1.00 | 1 | 1 | -0.02 | -0.02  | 0.005  | -0.02  | -0.018 | t | 67979  | VDHVGLG<br>TAFENSIY          | Sus<br>scrofa                    |
| 1 | 1.00 | 1 | 1 | -0.02 | -0.02  | -0.004 | -0.02  | -0.01  | t | 111447 | KESPTNHK<br>TRLW             | Homo<br>sapiens                  |
| 1 | 1.00 | 1 | 1 | -0.03 | -0.03  | -0.007 | -0.03  | -0.027 | t | 34165  | KVPPWAR<br>TA                | Mus<br>musculu<br>s              |
| 1 | 1.00 | 1 | 1 | -0.02 | -0.02  | -0.02  | -0.02  | -0.01  | t | 153473 | THRPLSHN<br>FRDFGGGS         | Mus<br>musculu<br>s              |
| 1 | 1.00 | 1 | 1 | 0.03  | 0.03   | 0.047  | 0.03   | 0.042  | t | 79301  | LSNQSG                       | Mus<br>musculu<br>s              |
| 1 | 1.00 | 1 | 1 | -0.05 | -0.026 | -0.043 | -0.05  | -0.04  | t | 141557 | PTTRKWW<br>LKLDG             | Rattus                           |
| 1 | 1.00 | 1 | 1 | -0.03 | -0.03  | -0.014 | -0.03  | -0.02  | t | 79400  | SRPTML                       | Mus<br>musculu<br>s              |
| 1 | 1.00 | 1 | 1 | 0     | 0      | 0.022  | 0      | 0.001  | t | 40729  | LYDAAKAY<br>AEQLKEN<br>GVINY | Mus<br>musculu<br>s              |
| 1 | 1.00 | 1 | 1 | -0.02 | -0.017 | -0.007 | -0.02  | -0.01  | t | 28210  | IQQRASFG<br>PHGF             | Mus<br>musculu<br>s              |

|   |      |   |   |       |        |        |        |        |   |        |                     |                                  |
|---|------|---|---|-------|--------|--------|--------|--------|---|--------|---------------------|----------------------------------|
| 1 | 1.00 | 1 | 1 | -0.01 | -0.012 | -0.003 | -0.007 | 0.003  | t | 141772 | VDQNAKS<br>WGQMK    | Mus<br>musculu<br>s              |
| 1 | 1.00 | 1 | 1 | -0.03 | -0.032 | -0.023 | -0.027 | -0.017 | t | 141637 | EHWPQW<br>GLALKR    | Mus<br>musculu<br>s              |
| 1 | 1.00 | 1 | 1 | -0.01 | -0.014 | 0.003  | -0.007 | -0.001 | t | 33531  | KSTQRSTR<br>RNLS    | Oryctola<br>gus<br>cuniculu<br>s |
| 1 | 1.00 | 1 | 1 | -0.04 | -0.042 | -0.04  | -0.047 | -0.03  | t | 122490 | MTPNDRR<br>IHRYPERL | Mus<br>musculu<br>s              |
| 1 | 1.00 | 1 | 1 | -0.02 | -0.02  | -0.015 | -0.02  | -0.01  | t | 38397  | LPAHGPSL<br>S       | Homo<br>sapiens                  |
| 1 | 1.00 | 1 | 1 | 0     | -0.002 | 0      | -0.001 | 0.013  | t | 11571  | EEEDDDM<br>GFGFLFD  | Mus<br>musculu<br>s              |
| 1 | 1.00 | 1 | 1 | 0     | -0.002 | 0      | -0.001 | 0.013  | t | 11571  | EEEDDDM<br>GFGFLFD  | Mus<br>musculu<br>s              |
| 1 | 1.00 | 1 | 1 | 0.01  | 0.012  | 0.012  | 0.011  | 0.024  | t | 102076 | SNPIELL             | Homo<br>sapiens                  |
| 1 | 1.00 | 1 | 1 | -0.02 | -0.02  | 0.035  | -0.02  | -0.023 | t | 135454 | DYEDRY              | Mus<br>musculu<br>s              |
| 1 | 1.00 | 1 | 1 | -0.03 | -0.03  | -0.024 | -0.029 | -0.018 | t | 1448   | AGAPDRA<br>RGQYP    | Mus<br>musculu<br>s              |
| 1 | 1.00 | 1 | 1 | 0     | 0.003  | 0.006  | 0      | 0.012  | t | 55057  | RNSDKPK             | Mus<br>musculu<br>s              |
| 1 | 1.00 | 1 | 1 | 0     | 0      | 0      | 0      | 0.013  | t | 145775 | FDTGA FDP<br>DWPA   | Mus<br>musculu<br>s              |
| 1 | 1.00 | 1 | 1 | 0     | -0.004 | 0.012  | 0.003  | 0.012  | t | 51870  | QPLHSPL             | Oryctola<br>gus<br>cuniculu<br>s |
| 1 | 1.00 | 1 | 1 | 0.01  | 0.006  | 0.017  | 0.003  | 0.02   | t | 146256 | FTPEGDHR<br>P       | Oryctola<br>gus<br>cuniculu<br>s |
| 1 | 1.00 | 1 | 1 | -0.01 | -0.002 | 0.001  | -0.01  | 0      | t | 28382  | IRRA                | Gallus<br>gallus                 |

|   |      |   |   |       |        |        |        |        |   |        |                              |                                  |
|---|------|---|---|-------|--------|--------|--------|--------|---|--------|------------------------------|----------------------------------|
| 1 | 1.00 | 1 | 1 | 0     | 0      | 0      | -0.003 | 0.012  | t | 51372  | QLINTNGS<br>WHINSTA          | Homo<br>sapiens                  |
| 1 | 1.00 | 1 | 1 | 0     | 0      | 0      | -0.003 | 0.012  | t | 51372  | QLINTNGS<br>WHINSTA          | Homo<br>sapiens                  |
| 1 | 1.00 | 1 | 1 | 0     | 0      | 0      | 0      | 0.013  | t | 68401  | VEVPGSQ<br>HIDSQKKA          | Mus<br>musculu<br>s              |
| 1 | 1.00 | 1 | 1 | 0     | -0.004 | 0.012  | 0      | 0.01   | t | 146256 | FTPEGDHR<br>P                | Oryctola<br>gus<br>cuniculu<br>s |
| 1 | 1.00 | 1 | 1 | -0.02 | -0.02  | -0.02  | -0.02  | -0.008 | t | 158584 | APPHQMP                      | Homo<br>sapiens                  |
| 1 | 1.00 | 1 | 1 | -0.02 | -0.022 | -0.013 | -0.017 | -0.008 | t | 106981 | VRWTTSP<br>NLLFV             | Mus<br>musculu<br>s              |
| 1 | 1.00 | 1 | 1 | -0.04 | -0.042 | 0.007  | -0.041 | -0.04  | t | 54393  | RKLWCHH<br>FC                | Mus<br>musculu<br>s              |
| 1 | 1.00 | 1 | 1 | -0.03 | -0.032 | -0.023 | -0.037 | -0.021 | t | 122544 | QVIKMDLP<br>QYEPRLA          | Mus<br>musculu<br>s              |
| 1 | 1.00 | 1 | 1 | -0.04 | -0.04  | -0.04  | -0.04  | -0.028 | t | 140587 | PWQRGLR<br>DL                | Mus<br>musculu<br>s              |
| 1 | 1.00 | 1 | 1 | 0     | -0.002 | 0.007  | 0.003  | 0.012  | t | 106298 | AYFNLHPT<br>TQLV             | Mus<br>musculu<br>s              |
| 1 | 1.00 | 1 | 1 | -0.05 | -0.046 | -0.025 | -0.049 | -0.05  | t | 42289  | MPKTRRQ<br>RTRRARRN<br>RPPTP | Homo<br>sapiens                  |
| 1 | 1.00 | 1 | 1 | -0.01 | -0.012 | -0.009 | -0.011 | 0      | t | 62328  | SVSLPYAN<br>LATH             | Mus<br>musculu<br>s              |
| 1 | 1.00 | 1 | 1 | -0.01 | -0.01  | -0.003 | -0.01  | 0.002  | t | 6232   | CFKGVRLD<br>GTPC             | Homo<br>sapiens                  |
| 1 | 1.00 | 1 | 1 | -0.02 | -0.02  | -0.002 | -0.02  | -0.01  | t | 15856  | FFNIAY                       | Mus<br>musculu<br>s              |
| 1 | 1.00 | 1 | 1 | -0.04 | -0.036 | -0.018 | -0.033 | -0.028 | t | 103966 | HALTPSR                      | Homo<br>sapiens                  |
| 1 | 1.00 | 1 | 1 | 0     | 0      | 0      | 0      | 0.012  | t | 137421 | HSPRYHSE<br>PQFG             | Mus<br>musculu<br>s              |

|   |      |   |   |       |        |        |        |        |   |        |                     |                                  |
|---|------|---|---|-------|--------|--------|--------|--------|---|--------|---------------------|----------------------------------|
| 1 | 1.00 | 1 | 1 | 0.01  | 0.006  | 0.015  | 0.009  | 0.02   | t | 54399  | RKNPQRST<br>LRIN    | Oryctola<br>gus<br>cuniculu<br>s |
| 1 | 1.00 | 1 | 1 | 0.01  | 0.008  | 0.01   | 0.003  | 0.019  | t | 107991 | LDHRTPRP<br>DLLK    | Mus<br>musculu<br>s              |
| 1 | 1.00 | 1 | 1 | -0.03 | -0.03  | -0.025 | -0.027 | -0.02  | t | 65578  | TPGNHWG<br>ETTFPALR | Homo<br>sapiens                  |
| 1 | 1.00 | 1 | 1 | 0.02  | 0.022  | 0.027  | 0.019  | 0.029  | t | 131262 | SLPPWYSP<br>FKLD    | Homo<br>sapiens                  |
| 1 | 1.00 | 1 | 1 | 0     | -0.003 | 0      | 0      | 0.013  | t | 53018  | QYPALT              | Oryctola<br>gus<br>cuniculu<br>s |
| 1 | 1.00 | 1 | 1 | 0     | 0.004  | 0      | 0      | 0.013  | t | 53018  | QYPALT              | Ovis<br>aries                    |
| 1 | 1.00 | 1 | 1 | -0.02 | -0.018 | -0.001 | -0.019 | -0.011 | t | 78283  | TLSNLTHV            | Homo<br>sapiens                  |
| 1 | 1.00 | 1 | 1 | 0     | 0      | 0.009  | 0.007  | 0.012  | t | 138193 | HTYTSHLR<br>YVPPISL | Homo<br>sapiens                  |
| 1 | 1.00 | 1 | 1 | -0.02 | -0.02  | -0.02  | -0.02  | -0.008 | t | 158586 | APSHPPP             | Homo<br>sapiens                  |
| 1 | 1.00 | 1 | 1 | -0.02 | -0.016 | 0.002  | -0.023 | -0.01  | t | 104047 | LNKTFYY             | Homo<br>sapiens                  |
| 1 | 1.00 | 1 | 1 | 0.01  | 0.008  | 0.031  | 0.01   | 0.02   | t | 118793 | FDYSKHV             | Mus<br>musculu<br>s              |
| 1 | 1.00 | 1 | 1 | -0.01 | -0.012 | -0.003 | -0.011 | 0      | t | 49394  | PSHDILAS<br>HGFP    | Mus<br>musculu<br>s              |
| 1 | 1.00 | 1 | 1 | 0.01  | 0.014  | 0.026  | 0.011  | 0.02   | t | 111972 | YSHADTM             | Homo<br>sapiens                  |

|   |      |   |   |       |        |        |        |        |   |        |                     |                       |
|---|------|---|---|-------|--------|--------|--------|--------|---|--------|---------------------|-----------------------|
| 1 | 1.00 | 1 | 1 | 0.01  | 0.012  | 0.031  | 0.011  | 0.02   | t | 61389  | SSTHSAP             | Homo sapiens          |
| 1 | 1.00 | 1 | 1 | -0.01 | -0.004 | 0.004  | -0.007 | 0      | t | 132905 | SVHMPV<br>WGQNTS    | Homo sapiens          |
| 1 | 1.00 | 1 | 1 | -0.05 | -0.05  | -0.028 | -0.05  | -0.048 | t | 94429  | AICKRIPNK<br>KPG    | Mus musculus          |
| 1 | 1.00 | 1 | 0 | 0     | 0      | 0.027  | 0.004  | 0.021  | t | 101722 | HTQPYAYE<br>ARDH    | Homo sapiens          |
| 1 | 1.00 | 1 | 1 | -0.03 | -0.03  | -0.03  | -0.03  | -0.021 | t | 79472  | YCTPSDRFI<br>PHPCS  | Mus musculus          |
| 1 | 1.00 | 1 | 1 | 0.01  | 0.01   | 0.015  | 0.01   | 0.02   | t | 56679  | RYVSAESN<br>GFGW    | Mus musculus          |
| 1 | 1.00 | 1 | 1 | -0.02 | -0.02  | -0.015 | -0.02  | -0.01  | t | 74100  | YHACPPW<br>VGIHRCEL | Mus musculus          |
| 1 | 1.00 | 1 | 1 | -0.03 | -0.036 | -0.02  | -0.031 | -0.018 | t | 99421  | LITFFRWT<br>TPLK    | Oryctolagus cuniculus |
| 1 | 1.00 | 1 | 1 | 0     | 0      | 0.008  | 0      | 0.01   | t | 90647  | WYSLNGKI<br>RAVDVPK | Homo sapiens          |
| 1 | 1.00 | 1 | 1 | -0.03 | -0.027 | -0.019 | -0.03  | -0.021 | t | 4463   | ASHTVKPR<br>HHPTQRR | Mus musculus          |
| 1 | 1.00 | 1 | 0 | 0     | -0.002 | 0.027  | -0.003 | 0.021  | t | 102086 | SSAFYPK             | Mus musculus          |
| 1 | 1.00 | 1 | 1 | -0.02 | -0.017 | -0.007 | -0.02  | -0.01  | t | 52291  | QSAQYTIN<br>RVMM    | Mus musculus          |
| 1 | 1.00 | 1 | 1 | 0     | -0.006 | 0.039  | -0.003 | 0.001  | t | 74114  | YHIQAGLP<br>DP      | Oryctolagus cuniculus |

|   |      |   |   |       |        |       |        |        |   |        |                     |                                  |
|---|------|---|---|-------|--------|-------|--------|--------|---|--------|---------------------|----------------------------------|
| 1 | 1.00 | 1 | 1 | 0     | 0.002  | 0.01  | 0.001  | 0.01   | t | 20563  | GKFPGSKP<br>S       | Homo<br>sapiens                  |
| 1 | 1.00 | 1 | 1 | -0.01 | -0.013 | 0.001 | -0.01  | 0      | t | 99108  | ANSLDNW<br>FRIFP    | Oryctola<br>gus<br>cuniculu<br>s |
| 1 | 1.00 | 1 | 1 | -0.08 | -0.084 | -0.08 | -0.087 | -0.075 | t | 150739 | YLFKANPN<br>YAGNSIK | Oryctola<br>gus<br>cuniculu<br>s |
| 1 | 1.00 | 1 | 1 | 0.03  | 0.028  | 0.03  | 0.023  | 0.04   | t | 106232 | AFMTPFPE<br>SLTP    | Mus<br>musculu<br>s              |
| 1 | 1.00 | 1 | 1 | 0.01  | 0.006  | 0.017 | 0.003  | 0.02   | t | 139624 | TPTAPRQ             | Oryctola<br>gus<br>cuniculu<br>s |
| 1 | 1.00 | 1 | 1 | 0.01  | 0.01   | 0.015 | 0.007  | 0.02   | t | 6232   | CFKGVRLD<br>GTPC    | Homo<br>sapiens                  |
| 1 | 1.00 | 1 | 1 | 0     | 0      | 0     | 0      | 0.014  | t | 97288  | ETQLTTAG<br>LRL     | Mus<br>musculu<br>s              |
| 1 | 1.00 | 1 | 1 | 0     | 0      | 0     | 0      | 0.014  | t | 97594  | QTPLTETA<br>LKWH    | Mus<br>musculu<br>s              |
| 1 | 1.00 | 1 | 1 | 0     | 0      | 0     | 0      | 0.014  | t | 97595  | QTPLTMA<br>ALELF    | Mus<br>musculu<br>s              |
| 1 | 1.00 | 1 | 1 | -0.02 | -0.02  | -0.02 | -0.02  | -0.011 | t | 79283  | LCKTEART<br>RAAPCA  | Mus<br>musculu<br>s              |
| 1 | 1.00 | 1 | 0 | 0.03  | 0.03   | 0.057 | 0.027  | 0.051  | t | 102076 | SNPIELL             | Homo<br>sapiens                  |
| 1 | 1.00 | 1 | 1 | -0.02 | -0.015 | 0.009 | -0.013 | -0.01  | t | 108661 | TPDSLGRP<br>S       | Homo<br>sapiens                  |
| 1 | 1.00 | 1 | 1 | 0     | 0.003  | 0.011 | 0      | 0.011  | t | 106347 | DMQLYPV<br>LTPH     | Mus<br>musculu<br>s              |
| 1 | 1.00 | 1 | 1 | 0.01  | 0.023  | 0.036 | 0.01   | 0.019  | t | 59960  | SNYNPQ              | Mus<br>musculu<br>s              |
| 1 | 1.00 | 1 | 1 | 0.01  | 0.006  | 0.02  | 0.008  | 0.02   | t | 43216  | NALTSHTA<br>SPAP    | Oryctola<br>gus<br>cuniculu<br>s |

|   |      |   |   |       |        |        |        |        |   |        |                    |                |
|---|------|---|---|-------|--------|--------|--------|--------|---|--------|--------------------|----------------|
| 1 | 1.00 | 1 | 1 | -0.04 | -0.037 | -0.024 | -0.037 | -0.03  | t | 78185  | KKWLAA             | Equus caballus |
| 1 | 1.00 | 1 | 1 | -0.06 | -0.062 | -0.053 | -0.057 | -0.05  | t | 77851  | DLPRWPG<br>WYKNR   | Mus musculus   |
| 1 | 1.00 | 1 | 1 | -0.02 | -0.02  | -0.008 | -0.02  | -0.008 | t | 79109  | VKLSPF             | Mus musculus   |
| 1 | 1.00 | 1 | 1 | -0.02 | -0.02  | 0.031  | -0.022 | -0.021 | t | 99055  | WQDCC              | Homo sapiens   |
| 1 | 1.00 | 1 | 0 | -0.01 | -0.01  | 0.017  | -0.013 | 0.011  | t | 102077 | SNPLPLL            | Homo sapiens   |
| 1 | 1.00 | 1 | 1 | 0     | 0.002  | 0.011  | 0.003  | 0.012  | t | 34264  | KVYKYF             | Homo sapiens   |
| 1 | 1.00 | 1 | 1 | -0.02 | -0.022 | -0.013 | -0.017 | -0.008 | t | 58031  | SGFHGRS<br>NPNDV   | Mus musculus   |
| 1 | 1.00 | 1 | 1 | -0.01 | -0.007 | -0.003 | -0.01  | -0.001 | t | 107991 | LDHRTPRP<br>DLLK   | Mus musculus   |
| 1 | 1.00 | 1 | 1 | 0     | -0.002 | 0      | -0.007 | 0.01   | t | 103104 | DFLIEEIERL<br>GQDL | Mus musculus   |
| 1 | 1.00 | 1 | 1 | -0.04 | -0.036 | -0.024 | -0.039 | -0.028 | t | 111786 | SLPKMLS            | Homo sapiens   |
| 1 | 1.00 | 1 | 1 | 0.02  | 0.022  | 0.027  | 0.021  | 0.031  | t | 133659 | NPWYNDL<br>SLLTA   | Homo sapiens   |
| 1 | 1.00 | 1 | 1 | -0.03 | -0.024 | -0.016 | -0.027 | -0.02  | t | 132905 | SVHMPV<br>WGQNTS   | Homo sapiens   |
| 1 | 1.00 | 1 | 1 | 0.02  | 0.022  | 0.027  | 0.019  | 0.029  | t | 131262 | SLPPWYSP<br>FKLD   | Homo sapiens   |
| 1 | 1.00 | 1 | 1 | -0.01 | -0.006 | 0.003  | -0.009 | 0      | t | 5179   | ATTVPAS            | Homo sapiens   |
| 1 | 1.00 | 1 | 1 | 0     | 0      | 0      | 0      | 0.014  | t | 11571  | EEEDDDM<br>GGLFD   | Mus musculus   |

|   |      |   |   |       |        |        |        |        |   |        |                              |                                  |
|---|------|---|---|-------|--------|--------|--------|--------|---|--------|------------------------------|----------------------------------|
| 1 | 1.00 | 1 | 1 | 0     | 0      | 0      | 0      | 0.014  | t | 17814  | FSPSLEHPI<br>VVSWSWD         | Mus<br>musculu<br>s              |
| 1 | 1.00 | 1 | 1 | 0     | 0      | 0      | 0      | 0.014  | t | 28299  | IRGDTFAT<br>R                | Mus<br>musculu<br>s              |
| 1 | 1.00 | 1 | 1 | 0     | 0      | 0      | 0      | 0.014  | t | 3952   | AQEPPRQ                      | Mus<br>musculu<br>s              |
| 1 | 1.00 | 1 | 1 | -0.01 | -0.008 | -0.001 | -0.01  | 0      | t | 8464   | DGNPPEV<br>KSVGLGN<br>VNGVTL | Homo<br>sapiens                  |
| 1 | 1.00 | 1 | 1 | -0.08 | -0.082 | -0.068 | -0.077 | -0.067 | t | 115451 | QPWHAKH<br>YKTYH             | Mus<br>musculu<br>s              |
| 1 | 1.00 | 1 | 1 | 0.02  | 0.018  | 0.027  | 0.013  | 0.029  | t | 108151 | SYEYNERL<br>KFYT             | Mus<br>musculu<br>s              |
| 1 | 1.00 | 1 | 1 | 0.01  | 0.013  | 0.021  | 0.01   | 0.017  | t | 112472 | DEGGYTCF<br>FRDHSYQ          | Mus<br>musculu<br>s              |
| 1 | 1.00 | 1 | 1 | 0.01  | 0.006  | 0.021  | 0.01   | 0.017  | t | 112472 | DEGGYTCF<br>FRDHSYQ          | Mus<br>musculu<br>s              |
| 1 | 1.00 | 1 | 1 | 0.01  | 0.007  | 0.015  | 0.01   | 0.015  | t | 126374 | KALRDGD<br>WFWWEN<br>SHVFTD  | Oryctola<br>gus<br>cuniculu<br>s |
| 1 | 1.00 | 1 | 1 | 0     | -0.002 | 0.011  | -0.003 | 0.01   | t | 53263  | RCDLYPDG<br>NLWGMP<br>CPTY   | Mus<br>musculu<br>s              |
| 1 | 1.00 | 1 | 1 | 0.02  | 0.02   | 0.025  | 0.02   | 0.031  | t | 106263 | AQWSPNP<br>DMSVS             | Mus<br>musculu<br>s              |
| 1 | 1.00 | 1 | 1 | -0.06 | -0.063 | -0.029 | -0.06  | -0.06  | t | 7671   | DAVSRKK<br>MDTKPTD           | Oryctola<br>gus<br>cuniculu<br>s |
| 1 | 1.00 | 1 | 1 | 0.01  | 0.01   | 0.029  | 0.01   | 0.019  | t | 122426 | KAYTVPSG<br>PYVEPRL          | Mus<br>musculu<br>s              |
| 1 | 1.00 | 1 | 1 | -0.04 | -0.04  | -0.03  | -0.04  | -0.028 | t | 45773  | NSAVHFQ<br>RQFSQ             | Sus<br>scrofa                    |



|   |      |   |   |       |        |        |        |        |   |        |                              |                                  |
|---|------|---|---|-------|--------|--------|--------|--------|---|--------|------------------------------|----------------------------------|
| 1 | 1.00 | 1 | 1 | -0.04 | -0.04  | -0.028 | -0.04  | -0.031 | t | 122395 | HKFDRDN<br>WYLGISDL          | Mus<br>musculu<br>s              |
| 1 | 1.00 | 1 | 1 | 0     | 0      | 0.022  | 0      | 0.002  | t | 40729  | LYDAAKAY<br>AEQLKEN<br>GVINY | Mus<br>musculu<br>s              |
| 1 | 1.00 | 1 | 1 | -0.05 | -0.05  | -0.016 | -0.05  | -0.05  | t | 14551  | ETSWGQQ<br>ST                | Mus<br>musculu<br>s              |
| 1 | 1.00 | 1 | 1 | 0     | -0.002 | 0.013  | -0.001 | 0.01   | t | 52291  | QSAQYTIN<br>RVMM             | Mus<br>musculu<br>s              |
| 1 | 1.00 | 1 | 1 | -0.01 | -0.01  | 0.019  | -0.01  | -0.007 | t | 74006  | YGGIYMN<br>G                 | Mus<br>musculu<br>s              |
| 1 | 1.00 | 1 | 1 | -0.01 | -0.007 | 0.022  | -0.013 | -0.01  | t | 7244   | CTWQQW<br>ERELQGYD           | Capra<br>hircus                  |
| 1 | 1.00 | 1 | 1 | -0.02 | -0.022 | 0.019  | -0.021 | -0.022 | t | 8644   | DIFTNSRG<br>KRASKG           | Mus<br>musculu<br>s              |
| 1 | 1.00 | 1 | 1 | 0.03  | 0.032  | 0.037  | 0.027  | 0.04   | t | 78463  | MCDIDGQ<br>GEEL              | Homo<br>sapiens                  |
| 1 | 1.00 | 1 | 1 | -0.01 | -0.01  | -0.003 | -0.01  | 0      | t | 131276 | WHEAQPS<br>PGLLR             | Homo<br>sapiens                  |
| 1 | 1.00 | 1 | 1 | -0.01 | -0.013 | -0.013 | -0.01  | 0.002  | t | 122150 | MSKTLHA<br>QLGFKKT           | Oryctola<br>gus<br>cuniculu<br>s |
| 1 | 1.00 | 1 | 1 | 0.03  | 0.028  | 0.037  | 0.023  | 0.04   | t | 132381 | IGFTLYERS<br>LWE             | Mus<br>musculu<br>s              |
| 1 | 1.00 | 1 | 1 | -0.06 | -0.057 | -0.048 | -0.06  | -0.051 | t | 137941 | PFRSYTK                      | Mus<br>musculu<br>s              |
| 1 | 1.00 | 1 | 1 | 0     | 0.003  | 0.009  | 0      | 0.012  | t | 79349  | QCYPHVST<br>LGWSCE           | Mus<br>musculu<br>s              |
| 1 | 1.00 | 1 | 1 | -0.03 | -0.03  | -0.007 | -0.03  | -0.027 | t | 34165  | KVPPWAR<br>TA                | Mus<br>musculu<br>s              |

|   |      |   |   |       |        |        |        |        |   |        |                             |                                  |
|---|------|---|---|-------|--------|--------|--------|--------|---|--------|-----------------------------|----------------------------------|
| 1 | 1.00 | 1 | 1 | -0.01 | 0.017  | -0.004 | -0.01  | 0.002  | t | 141579 | WKVRKSFF<br>KLQG            | Rattus                           |
| 1 | 1.00 | 1 | 1 | -0.15 | -0.155 | -0.143 | -0.157 | -0.146 | t | 138837 | CSSWYRG<br>AC               | Canis<br>lupus                   |
| 1 | 1.00 | 1 | 1 | -0.04 | -0.043 | 0.006  | -0.04  | -0.04  | t | 80093  | VTTSGGGR<br>QG              | Oryctola<br>gus<br>cuniculu<br>s |
| 1 | 1.00 | 1 | 1 | -0.03 | -0.026 | -0.024 | -0.027 | -0.018 | t | 65940  | TQSRKTQS<br>PMLIIQL         | Homo<br>sapiens                  |
| 1 | 1.00 | 1 | 1 | 0.01  | 0.006  | 0.022  | 0.013  | 0.02   | t | 44779  | NLLHKKPK<br>ITQL            | Oryctola<br>gus<br>cuniculu<br>s |
| 1 | 1.00 | 1 | 1 | 0.01  | 0.013  | 0.023  | 0.01   | 0.02   | t | 796    | ADWADW<br>LDYP              | Mus<br>musculu<br>s              |
| 1 | 1.00 | 1 | 1 | -0.02 | -0.022 | -0.004 | -0.019 | -0.009 | t | 111447 | KESPTNHK<br>TRLW            | Homo<br>sapiens                  |
| 1 | 1.00 | 1 | 1 | -0.05 | -0.052 | -0.038 | -0.047 | -0.037 | t | 115561 | WPWHVA<br>HYGHYT            | Mus<br>musculu<br>s              |
| 1 | 1.00 | 1 | 1 | 0.01  | 0.01   | 0.015  | 0.01   | 0.021  | t | 56679  | RYVSAESN<br>GFGW            | Mus<br>musculu<br>s              |
| 1 | 1.00 | 1 | 1 | 0     | 0.001  | 0.01   | 0      | 0.01   | t | 50832  | QGASGN<br>WFHMTL            | Mus<br>musculu<br>s              |
| 1 | 1.00 | 1 | 1 | 0     | 0      | 0      | 0      | 0.014  | t | 119673 | WNPDDYG<br>GVK              | Rattus<br>norvegic<br>us         |
| 1 | 1.00 | 1 | 1 | 0.02  | 0.018  | 0.025  | 0.017  | 0.03   | t | 63092  | TCPGEDC<br>HTMYPFTY<br>RGY  | Mus<br>musculu<br>s              |
| 1 | 1.00 | 1 | 1 | -0.01 | -0.012 | 0.018  | -0.011 | -0.007 | t | 46795  | PAFLGCSS<br>RFSGSFSG<br>VEP | Mus<br>musculu<br>s              |
| 1 | 1.00 | 1 | 0 | -0.03 | -0.03  | -0.003 | -0.033 | -0.009 | t | 101642 | FNSLTLL                     | Homo<br>sapiens                  |
| 1 | 1.00 | 1 | 1 | -0.05 | -0.05  | -0.043 | -0.05  | -0.04  | t | 99421  | LITFFRWT<br>TPLK            | Oryctola<br>gus<br>cuniculu<br>s |

|   |      |   |   |       |        |        |        |        |   |        |                              |                                  |
|---|------|---|---|-------|--------|--------|--------|--------|---|--------|------------------------------|----------------------------------|
| 1 | 1.00 | 1 | 1 | -0.03 | -0.033 | 0.012  | -0.03  | -0.03  | t | 78423  | INFLRMDD<br>FARHFNR          | Oryctola<br>gus<br>cuniculu<br>s |
| 1 | 1.00 | 1 | 1 | 0     | 0      | 0.017  | 0.003  | 0.012  | t | 102250 | YNQQSLL                      | Homo<br>sapiens                  |
| 1 | 1.00 | 1 | 1 | -0.01 | -0.012 | 0      | -0.009 | 0      | t | 57980  | SGARGKYE<br>GPGQ             | Mus<br>musculu<br>s              |
| 1 | 1.00 | 1 | 1 | -0.04 | -0.036 | -0.018 | -0.033 | -0.028 | t | 103966 | HALTPSR                      | Homo<br>sapiens                  |
| 1 | 1.00 | 1 | 1 | -0.01 | -0.004 | 0.017  | -0.01  | -0.005 | t | 41727  | MIKAAFLP<br>TGAFMAD<br>RYKSH | Aotus<br>nancyma<br>ae           |
| 1 | 1.00 | 1 | 1 | -0.02 | 0.007  | -0.014 | -0.02  | -0.008 | t | 141578 | WKVRKAF<br>LFAKN             | Rattus                           |
| 1 | 1.00 | 1 | 1 | -0.06 | -0.058 | -0.02  | -0.063 | -0.061 | t | 105493 | RDRARVPL                     | Homo<br>sapiens                  |
| 1 | 1.00 | 1 | 1 | 0     | 0.019  | 0      | 0      | 0.014  | t | 21851  | GQCKWV<br>NGREICND<br>RDRPTA | Macaca<br>fuscata                |
| 1 | 1.00 | 1 | 1 | 0.03  | 0.03   | 0.047  | 0.033  | 0.042  | t | 102250 | YNQQSLL                      | Homo<br>sapiens                  |
| 1 | 1.00 | 1 | 1 | -0.01 | -0.007 | 0.002  | -0.01  | 0.001  | t | 64328  | TIIPYIGPA<br>LNIGNMLY<br>K   | Equus<br>caballus                |
| 1 | 1.00 | 1 | 1 | -0.01 | -0.002 | 0.002  | -0.01  | 0.001  | t | 64328  | TIIPYIGPA<br>LNIGNMLY<br>K   | Gallus<br>gallus                 |
| 1 | 1.00 | 1 | 1 | -0.01 | -0.01  | 0.009  | -0.01  | -0.009 | t | 94552  | IEDNWYT<br>HYLVCNYG<br>PGGND | Mus<br>musculu<br>s              |
| 1 | 1.00 | 1 | 1 | -0.04 | -0.038 | 0.006  | -0.037 | -0.038 | t | 116563 | TGKIPWILL<br>PGR             | Ovis<br>aries                    |

|   |      |   |   |       |        |        |        |        |   |        |                              |                     |
|---|------|---|---|-------|--------|--------|--------|--------|---|--------|------------------------------|---------------------|
| 1 | 1.00 | 1 | 1 | -0.08 | -0.078 | -0.058 | -0.077 | -0.078 | t | 61792  | STNPKPQR<br>KTKRNTNR<br>RPQD | Homo<br>sapiens     |
| 1 | 1.00 | 1 | 1 | 0.02  | 0.018  | 0.025  | 0.017  | 0.03   | t | 63091  | TCPGEDC<br>HSMYPFTY<br>RGY   | Mus<br>musculu<br>s |
| 1 | 1.00 | 1 | 1 | -0.06 | -0.06  | -0.036 | -0.06  | -0.058 | t | 61799  | STNRQSG<br>RQPTPLSP          | Mus<br>musculu<br>s |
| 1 | 1.00 | 1 | 1 | -0.05 | -0.046 | -0.01  | -0.049 | -0.05  | t | 103946 | GQKAKSN<br>PNRPLPVP<br>RNPCR | Homo<br>sapiens     |
| 1 | 1.00 | 1 | 1 | -0.01 | -0.01  | -0.009 | -0.01  | 0.002  | t | 1816   | AHSSRLYS<br>PTISKHR          | Mus<br>musculu<br>s |
| 1 | 1.00 | 1 | 1 | 0     | 0.002  | 0.019  | 0.001  | 0.009  | t | 78285  | TSSNADHL                     | Homo<br>sapiens     |
| 1 | 1.00 | 1 | 1 | 0     | 0.002  | 0.019  | 0.001  | 0.009  | t | 78285  | TSSNADHL                     | Homo<br>sapiens     |
| 1 | 1.00 | 1 | 1 | -0.02 | -0.02  | 0.012  | -0.02  | -0.02  | t | 77969  | PQIKVYAN<br>IAPTNVHV<br>AGEF | Mus<br>musculu<br>s |
| 1 | 1.00 | 1 | 1 | 0.01  | 0.008  | 0.013  | 0.009  | 0.023  | t | 103104 | DFLIEEIERL<br>GQDL           | Mus<br>musculu<br>s |
| 1 | 1.00 | 1 | 1 | -0.02 | -0.016 | -0.008 | -0.019 | -0.009 | t | 37683  | LLPRRGAP<br>S                | Homo<br>sapiens     |
| 1 | 1.00 | 1 | 1 | -0.02 | -0.022 | -0.008 | -0.017 | -0.01  | t | 24438  | HPDSIHFP<br>LASP             | Mus<br>musculu<br>s |
| 1 | 1.00 | 1 | 1 | 0     | 0.008  | 0.029  | 0      | 0.002  | t | 53015  | QYNTGNF<br>SDGLYPFT<br>N     | Gallus<br>gallus    |
| 1 | 1.00 | 1 | 1 | -0.01 | -0.006 | 0.006  | -0.009 | 0.002  | t | 111376 | GSGLPLYM<br>LWLT             | Homo<br>sapiens     |

|   |      |   |   |       |        |        |        |        |   |        |                           |              |
|---|------|---|---|-------|--------|--------|--------|--------|---|--------|---------------------------|--------------|
| 1 | 1.00 | 1 | 0 | 0     | 0      | 0.027  | -0.003 | 0.021  | t | 102077 | SNPLPLL                   | Homo sapiens |
| 1 | 1.00 | 1 | 1 | -0.01 | -0.01  | -0.002 | -0.01  | 0      | t | 90720  | YEVEKPLE<br>PAPVAPS       | Homo sapiens |
| 1 | 1.00 | 1 | 1 | -0.03 | -0.032 | -0.018 | -0.027 | -0.017 | t | 115560 | WPWHTS<br>HYNTAQ          | Mus musculus |
| 1 | 1.00 | 1 | 1 | -0.05 | -0.052 | -0.038 | -0.047 | -0.04  | t | 7613   | DAPHWLA<br>SPPFA          | Mus musculus |
| 1 | 1.00 | 1 | 1 | -0.01 | -0.012 | -0.004 | -0.011 | 0      | t | 144903 | HDFHDPTL<br>EEQK          | Mus musculus |
| 1 | 1.00 | 1 | 1 | -0.05 | -0.05  | -0.033 | -0.047 | -0.038 | t | 102249 | YNPWPLL                   | Homo sapiens |
| 1 | 1.00 | 1 | 1 | -0.01 | -0.01  | -0.014 | -0.02  | -0.001 | t | 114971 | VDKRHDG<br>GCR            | Homo sapiens |
| 1 | 1.00 | 1 | 1 | -0.01 | -0.008 | -0.004 | -0.009 | 0.001  | t | 56787  | SAFSPTHY<br>K             | Homo sapiens |
| 1 | 1.00 | 1 | 1 | -0.05 | -0.052 | -0.023 | -0.051 | -0.047 | t | 67164  | TVSRVPW<br>TAWAFHG<br>Y   | Mus musculus |
| 1 | 1.00 | 1 | 1 | -0.02 | 0.007  | -0.014 | -0.02  | -0.008 | t | 141576 | WKLRKWF<br>FKDGG          | Rattus       |
| 1 | 1.00 | 1 | 1 | -0.05 | -0.052 | -0.038 | -0.047 | -0.037 | t | 115451 | QPWHAKH<br>YKTYH          | Mus musculus |
| 1 | 1.00 | 1 | 1 | -0.04 | -0.04  | -0.035 | -0.04  | -0.03  | t | 45875  | NSKGKMN<br>TCHKVGN<br>S   | Homo sapiens |
| 1 | 1.00 | 1 | 1 | -0.01 | -0.01  | 0.01   | -0.01  | -0.003 | t | 38657  | LPQRQKK<br>Q              | Homo sapiens |
| 1 | 1.00 | 1 | 1 | -0.01 | -0.01  | 0.007  | -0.007 | 0.002  | t | 102164 | TTTWYSW                   | Homo sapiens |
| 1 | 1.00 | 1 | 1 | -0.05 | -0.05  | -0.013 | -0.05  | -0.051 | t | 63835  | TGGIGNLP<br>IRNWNFD<br>FG | Mus musculus |

|   |      |   |   |       |        |        |        |        |   |        |                              |                       |
|---|------|---|---|-------|--------|--------|--------|--------|---|--------|------------------------------|-----------------------|
| 1 | 1.00 | 1 | 1 | -0.05 | -0.046 | -0.028 | -0.043 | -0.038 | t | 103944 | GNYNLRR                      | Homo sapiens          |
| 1 | 1.00 | 1 | 1 | -0.03 | -0.03  | -0.006 | -0.03  | -0.025 | t | 33215  | KRRLRPSR<br>VRIE             | Mus musculus          |
| 1 | 1.00 | 1 | 1 | -0.03 | -0.028 | -0.002 | -0.029 | -0.028 | t | 77968  | PPPYAPNP<br>GPPPPYTG<br>A    | Homo sapiens          |
| 1 | 1.00 | 1 | 1 | -0.04 | -0.04  | -0.008 | -0.04  | -0.04  | t | 78032  | THGKADG<br>DALVVLAS<br>AGKDF | Mus musculus          |
| 1 | 1.00 | 1 | 1 | 0.02  | 0.02   | 0.022  | 0.02   | 0.034  | t | 119598 | INPESDQP<br>DLSNFMES<br>G    | Mus musculus          |
| 1 | 1.00 | 1 | 1 | -0.01 | 0.012  | -0.004 | -0.011 | 0.002  | t | 141579 | WKVRKSFF<br>KLQG             | Rattus                |
| 1 | 1.00 | 1 | 1 | 0     | -0.005 | 0.012  | 0.003  | 0.012  | t | 53039  | QYTDHHSS<br>LLGP             | Bos taurus            |
| 1 | 1.00 | 1 | 1 | -0.01 | -0.01  | 0.015  | -0.016 | -0.01  | t | 138792 | MKGLRGH<br>PGLQGMP<br>GPNGPS | Homo sapiens          |
| 1 | 1.00 | 1 | 1 | -0.01 | -0.01  | 0.015  | -0.016 | -0.01  | t | 138793 | MKGLRGH<br>PGLQGMP<br>GPSGPS | Homo sapiens          |
| 1 | 1.00 | 1 | 1 | -0.03 | -0.03  | -0.022 | -0.03  | -0.02  | t | 89610  | TMYPNRQ<br>PGSGWDS<br>S      | Homo sapiens          |
| 1 | 1.00 | 1 | 1 | -0.01 | -0.012 | -0.005 | -0.011 | 0      | t | 72689  | WKMPRAT<br>DWNLR             | Mus musculus          |
| 1 | 1.00 | 1 | 1 | -0.02 | -0.024 | -0.009 | -0.02  | -0.01  | t | 56087  | RTIRNTMT<br>MPNL             | Oryctolagus cuniculus |
| 1 | 1.00 | 1 | 1 | -0.02 | -0.02  | 0.005  | -0.017 | -0.013 | t | 134237 | SQWN                         | Mus musculus          |

|   |      |   |   |       |        |        |        |        |   |        |                              |                                  |
|---|------|---|---|-------|--------|--------|--------|--------|---|--------|------------------------------|----------------------------------|
| 1 | 1.00 | 1 | 1 | -0.02 | -0.02  | -0.018 | -0.019 | -0.007 | t | 70479  | VPSLHQTT<br>HPTP             | Oryctola<br>gus<br>cuniculu<br>s |
| 1 | 1.00 | 1 | 0 | 0.01  | 0.01   | 0.037  | 0.007  | 0.031  | t | 101712 | HNDPLLL                      | Homo<br>sapiens                  |
| 1 | 1.00 | 1 | 1 | 0     | 0      | 0.022  | 0      | 0.002  | t | 40729  | LYDAAKAY<br>AEQLKEN<br>GVINY | Mus<br>musculu<br>s              |
| 1 | 1.00 | 1 | 1 | -0.03 | -0.026 | -0.014 | -0.029 | -0.019 | t | 111488 | LKLRHLP                      | Homo<br>sapiens                  |
| 1 | 1.00 | 1 | 1 | -0.02 | 0.007  | -0.014 | -0.02  | -0.008 | t | 141577 | WKMRKSF<br>HKVPG             | Rattus                           |
| 1 | 1.00 | 1 | 1 | -0.03 | -0.032 | -0.025 | -0.031 | -0.02  | t | 2977   | ALVNSPLT<br>RAPM             | Sus<br>scrofa                    |
| 1 | 1.00 | 1 | 1 | -0.02 | -0.023 | 0.013  | -0.02  | -0.021 | t | 110124 | YGGFLRKY<br>PK               | Oryctola<br>gus<br>cuniculu<br>s |
| 1 | 1.00 | 1 | 1 | 0     | 0      | 0.012  | 0      | 0.01   | t | 59900  | SNSDKPK                      | Mus<br>musculu<br>s              |
| 1 | 1.00 | 1 | 1 | -0.01 | -0.007 | -0.004 | -0.01  | 0.004  | t | 23974  | HGYSAHA<br>ASPNF             | Mus<br>musculu<br>s              |
| 1 | 1.00 | 1 | 1 | 0.02  | 0.022  | 0.048  | 0.016  | 0.02   | t | 1368   | AFNRASD                      | Homo<br>sapiens                  |
| 1 | 1.00 | 1 | 1 | 0.02  | 0.022  | 0.048  | 0.016  | 0.02   | t | 1368   | AFNRASD                      | Homo<br>sapiens                  |
| 1 | 1.00 | 1 | 1 | 0     | -0.002 | 0.01   | -0.003 | 0.01   | t | 2977   | ALVNSPLT<br>RAPM             | Sus<br>scrofa                    |
| 1 | 1.00 | 1 | 1 | -0.05 | -0.047 | -0.034 | -0.047 | -0.04  | t | 78258  | RGNVLR                       | Equus<br>caballus                |
| 1 | 1.00 | 1 | 1 | -0.01 | -0.007 | 0.033  | -0.01  | -0.009 | t | 13471  | ENFSTSF<br>WIRIPKYFNSI<br>S  | Equus<br>caballus                |

|   |      |   |   |       |        |        |        |        |   |        |                            |                       |
|---|------|---|---|-------|--------|--------|--------|--------|---|--------|----------------------------|-----------------------|
| 1 | 1.00 | 1 | 1 | -0.02 | -0.02  | -0.01  | -0.02  | -0.01  | t | 107798 | DSARNTFK<br>TTTAPYS        | Homo sapiens          |
| 1 | 1.00 | 1 | 1 | 0     | 0      | 0.052  | 0      | -0.002 | t | 10908  | DYKDDDD<br>K               | Mus musculus          |
| 1 | 1.00 | 1 | 1 | -0.04 | -0.04  | -0.04  | -0.041 | -0.028 | t | 62049  | SVARHKLP<br>THTLRR         | Mus musculus          |
| 1 | 1.00 | 1 | 1 | -0.05 | -0.052 | -0.043 | -0.057 | -0.041 | t | 122548 | RAFDVVG<br>AGLDHRLT        | Mus musculus          |
| 1 | 1.00 | 1 | 1 | 0     | -0.002 | 0.007  | -0.001 | 0.01   | t | 57125  | SCPGEDCH<br>TMYPFTYK<br>GY | Mus musculus          |
| 1 | 1.00 | 1 | 1 | 0.01  | 0.006  | 0.016  | 0.009  | 0.019  | t | 65996  | TRAPRREE<br>LEWDDDED<br>H  | Oryctolagus cuniculus |
| 1 | 1.00 | 1 | 1 | 0.01  | 0.012  | 0.017  | 0.013  | 0.022  | t | 132905 | SVHMPV<br>WGQNTS           | Homo sapiens          |
| 1 | 1.00 | 1 | 1 | -0.01 | -0.007 | 0.012  | -0.01  | 0      | t | 104159 | NSLLVSI                    | Mus musculus          |
| 1 | 1.00 | 1 | 1 | -0.02 | -0.017 | 0.002  | -0.02  | -0.008 | t | 104174 | PIDQLLY                    | Mus musculus          |
| 1 | 1.00 | 1 | 1 | -0.05 | -0.048 | -0.019 | -0.053 | -0.048 | t | 60722  | SRLGRSSA<br>WV             | Homo sapiens          |
| 1 | 1.00 | 1 | 1 | -0.06 | -0.063 | -0.021 | -0.06  | -0.061 | t | 150877 | PSVYVRQE<br>LTPDQR         | Oryctolagus cuniculus |
| 1 | 1.00 | 1 | 1 | -0.02 | -0.022 | -0.013 | -0.017 | -0.01  | t | 77832  | ANSFWVN<br>HPTIT           | Mus musculus          |
| 1 | 1.00 | 1 | 1 | -0.02 | -0.022 | -0.015 | -0.021 | -0.008 | t | 46557  | NWRFHDT                    | Mus musculus          |
| 1 | 1.00 | 1 | 1 | -0.01 | -0.014 | -0.003 | -0.01  | 0      | t | 2193   | AKGHSLPR<br>LVTS           | Oryctolagus cuniculus |



|   |      |   |   |       |        |        |        |        |   |        |                 |                       |
|---|------|---|---|-------|--------|--------|--------|--------|---|--------|-----------------|-----------------------|
| 1 | 1.00 | 1 | 1 | 0.03  | 0.03   | 0.047  | 0.03   | 0.043  | t | 79301  | LSNQSG          | Mus musculus          |
| 1 | 1.00 | 1 | 1 | -0.01 | -0.006 | 0.023  | -0.01  | -0.01  | t | 39684  | LSSSSSTR        | Capra hircus          |
| 1 | 1.00 | 1 | 1 | 0.03  | 0.026  | 0.037  | 0.027  | 0.04   | t | 139510 | GPIDDAF         | Oryctolagus cuniculus |
| 1 | 1.00 | 1 | 1 | -0.04 | -0.037 | -0.018 | -0.04  | -0.03  | t | 103963 | GWWSALY         | Mus musculus          |
| 1 | 1.00 | 1 | 1 | 0     | 0.003  | 0.009  | 0      | 0.012  | t | 79349  | QCYPHVSTLGWSCE  | Mus musculus          |
| 1 | 1.00 | 1 | 1 | -0.04 | -0.04  | -0.028 | -0.04  | -0.031 | t | 122397 | HPHKFQSSRQDYRLT | Mus musculus          |
| 1 | 1.00 | 1 | 1 | 0.03  | 0.03   | 0.046  | 0.03   | 0.04   | t | 79330  | PDVAPS          | Mus musculus          |
| 1 | 1.00 | 1 | 1 | 0     | -0.003 | 0.014  | 0      | 0.012  | t | 79644  | SHLSTMV         | Oryctolagus cuniculus |
| 1 | 1.00 | 1 | 1 | -0.06 | -0.056 | -0.051 | -0.059 | -0.048 | t | 60256  | SPSHYLAR R      | Homo sapiens          |
| 1 | 1.00 | 1 | 1 | 0.01  | 0.01   | 0.016  | 0.01   | 0.022  | t | 76287  | YVGPLTQTLYGM    | Mus musculus          |
| 1 | 1.00 | 1 | 1 | 0     | 0.003  | 0.009  | 0      | 0.012  | t | 97337  | GHVTTLSSL LSLR  | Mus musculus          |
| 1 | 1.00 | 1 | 1 | 0     | -0.004 | 0      | 0      | 0.014  | t | 48669  | PNLRGDLQVLA     | Sus scrofa            |

|   |      |   |   |       |        |        |        |        |   |        |                              |                           |
|---|------|---|---|-------|--------|--------|--------|--------|---|--------|------------------------------|---------------------------|
| 1 | 1.00 | 1 | 1 | 0     | 0      | 0      | 0      | 0.014  | t | 48669  | PNLRGDL<br>QVLA              | Sus<br>scrofa             |
| 1 | 1.00 | 1 | 1 | 0     | 0      | 0      | 0      | 0.014  | t | 48669  | PNLRGDL<br>QVLA              | Cavia<br>porcellu<br>s    |
| 1 | 1.00 | 1 | 1 | 0.04  | 0.04   | 0.056  | 0.04   | 0.05   | t | 109274 | GVDGLDLP<br>LEQL             | Mus<br>musculu<br>s       |
| 1 | 1.00 | 1 | 1 | -0.01 | -0.01  | 0.024  | -0.013 | -0.01  | t | 35488  | LEGKPALV<br>PDKEVLYQ<br>QYDE | Homo<br>sapiens           |
| 1 | 1.00 | 1 | 1 | -0.03 | -0.027 | -0.018 | -0.03  | -0.02  | t | 72542  | WHKLPGH<br>PRTV              | Mus<br>musculu<br>s       |
| 1 | 1.00 | 1 | 1 | -0.03 | -0.03  | -0.018 | -0.03  | -0.02  | t | 72542  | WHKLPGH<br>PRTV              | Mus<br>musculu<br>s       |
| 1 | 1.00 | 1 | 1 | -0.03 | -0.028 | -0.008 | -0.027 | -0.02  | t | 52345  | QSIRSTTRL<br>HITLSL          | Homo<br>sapiens           |
| 1 | 1.00 | 1 | 1 | -0.03 | -0.03  | -0.022 | -0.033 | -0.02  | t | 7435   | CYRGVTLA<br>GHRC             | Homo<br>sapiens           |
| 1 | 1.00 | 1 | 1 | 0     | 0.003  | 0.024  | 0      | 0.005  | t | 9515   | DNNKTAT                      | Mus<br>musculu<br>s       |
| 1 | 1.00 | 1 | 1 | -0.02 | -0.026 | -0.02  | -0.027 | -0.013 | t | 131297 | FSLRLMEE<br>NWNAEKR<br>SPTF  | Callithrix<br>pygmae<br>a |
| 1 | 1.00 | 1 | 1 | -0.08 | -0.078 | -0.058 | -0.077 | -0.078 | t | 61792  | STNPKPQR<br>KTKRNTNR<br>RPQD | Homo<br>sapiens           |
| 1 | 1.00 | 1 | 0 | -0.01 | -0.01  | 0.017  | -0.013 | 0.011  | t | 101991 | QATWYT<br>W                  | Homo<br>sapiens           |

|   |      |   |   |       |        |        |        |        |   |        |                              |                   |
|---|------|---|---|-------|--------|--------|--------|--------|---|--------|------------------------------|-------------------|
| 1 | 1.00 | 1 | 1 | -0.03 | -0.026 | -0.014 | -0.029 | -0.02  | t | 111162 | CNTRLHNC                     | Homo sapiens      |
| 1 | 1.00 | 1 | 1 | -0.06 | -0.06  | -0.025 | -0.06  | -0.06  | t | 32684  | KPDYEPPV<br>VHGCPLPP         | Homo sapiens      |
| 1 | 1.00 | 1 | 1 | 0     | 0.002  | 0.014  | 0.001  | 0.01   | t | 10200  | DSPDADLI<br>EANLLWR<br>QEMG  | Homo sapiens      |
| 1 | 1.00 | 1 | 1 | -0.02 | -0.017 | -0.009 | -0.02  | -0.01  | t | 7092   | CSTKAIGR<br>TILKENIKY<br>EVA | Equus caballus    |
| 1 | 1.00 | 1 | 1 | -0.02 | -0.022 | -0.008 | -0.017 | -0.007 | t | 56138  | RTNHSGN<br>SVPDK             | Mus musculus      |
| 1 | 1.00 | 1 | 0 | -0.02 | -0.02  | 0.007  | -0.023 | 0.001  | t | 101497 | ATMWWE<br>W                  | Homo sapiens      |
| 1 | 1.00 | 1 | 1 | -0.02 | -0.02  | -0.004 | -0.022 | -0.01  | t | 111447 | KESPTNHK<br>TRLW             | Homo sapiens      |
| 1 | 1.00 | 1 | 1 | 0     | 0      | -0.002 | 0      | 0.012  | t | 119672 | WNPADYG<br>GIKKIRLPS<br>DD   | Rattus norvegicus |
| 1 | 1.00 | 1 | 1 | -0.01 | -0.01  | 0.009  | -0.01  | -0.008 | t | 94552  | IEDNWYT<br>HYLVCNYG<br>PGGND | Mus musculus      |
| 1 | 1.00 | 1 | 1 | 0     | 0      | 0.03   | 0.007  | 0.01   | t | 108348 | EQAQSQT<br>LP                | Homo sapiens      |
| 1 | 1.00 | 1 | 1 | 0     | 0.005  | 0.03   | 0.007  | 0.01   | t | 108348 | EQAQSQT<br>LP                | Homo sapiens      |
| 1 | 1.00 | 1 | 1 | -0.05 | -0.046 | -0.028 | -0.049 | -0.044 | t | 39977  | LTITQLLKR                    | Homo sapiens      |
| 1 | 1.00 | 1 | 1 | -0.03 | -0.03  | -0.002 | -0.03  | -0.028 | t | 77968  | PPPYAPNP<br>GPPPPYTGA        | Mus musculus      |

|   |      |   |   |       |        |        |        |        |   |        |                              |                |
|---|------|---|---|-------|--------|--------|--------|--------|---|--------|------------------------------|----------------|
| 1 | 1.00 | 1 | 1 | -0.02 | -0.02  | 0.002  | -0.02  | -0.01  | t | 104293 | SYPNTWP                      | Mus musculus   |
| 1 | 1.00 | 1 | 1 | 0     | 0.003  | 0.021  | 0      | 0.01   | t | 40887  | LYNVVY                       | Mus musculus   |
| 1 | 1.00 | 1 | 1 | -0.01 | -0.01  | 0.003  | -0.007 | 0      | t | 54072  | RHNTIRQ<br>QRRKNHHL          | Homo sapiens   |
| 1 | 1.00 | 1 | 1 | -0.04 | -0.039 | -0.021 | -0.034 | -0.028 | t | 78241  | PIQIGA                       | Equus caballus |
| 1 | 1.00 | 1 | 1 | -0.04 | -0.042 | -0.035 | -0.041 | -0.03  | t | 2978   | ALVNWHG<br>VYNYR             | Sus scrofa     |
| 1 | 1.00 | 1 | 1 | -0.02 | -0.02  | -0.013 | -0.02  | -0.01  | t | 47856  | PHVRGS                       | Homo sapiens   |
| 1 | 1.00 | 1 | 1 | 0.01  | 0.008  | 0.02   | 0.007  | 0.02   | t | 5284   | AVAYPVSA<br>YVPAWVS          | Mus musculus   |
| 1 | 1.00 | 1 | 1 | -0.02 | -0.022 | -0.008 | -0.017 | -0.007 | t | 115284 | HPYPGHH<br>LSSH              | Mus musculus   |
| 1 | 1.00 | 1 | 1 | 0     | -0.002 | 0      | -0.007 | 0.011  | t | 114746 | ASQKRPSQ<br>RSKYLATA<br>STMD | Mus musculus   |
| 1 | 1.00 | 1 | 1 | -0.01 | -0.012 | 0      | -0.013 | 0      | t | 2978   | ALVNWHG<br>VYNYR             | Sus scrofa     |
| 1 | 1.00 | 1 | 1 | -0.02 | -0.02  | -0.02  | -0.02  | -0.01  | t | 79283  | LCKTEART<br>RAAPCA           | Mus musculus   |
| 1 | 1.00 | 1 | 1 | -0.01 | -0.008 | -0.003 | -0.004 | 0.002  | t | 106628 | LSSREPQAR                    | Homo sapiens   |
| 1 | 1.00 | 1 | 1 | -0.01 | -0.01  | -0.005 | -0.01  | 0.002  | t | 5592   | AVVAVPSY<br>IPTWIG           | Mus musculus   |
| 1 | 1.00 | 1 | 1 | -0.02 | -0.018 | -0.013 | -0.021 | -0.011 | t | 131200 | DHSSADLI<br>NPVA             | Homo sapiens   |
| 1 | 1.00 | 1 | 1 | -0.03 | -0.027 | -0.024 | -0.03  | -0.02  | t | 74100  | YHACPPW<br>VGIHRCEL          | Mus musculus   |
| 1 | 1.00 | 1 | 1 | -0.02 | -0.022 | 0.019  | -0.021 | -0.021 | t | 8644   | DIFTNSRG<br>KRASKG           | Mus musculus   |

|   |      |   |   |       |        |        |        |        |   |        |                          |                       |
|---|------|---|---|-------|--------|--------|--------|--------|---|--------|--------------------------|-----------------------|
| 1 | 1.00 | 1 | 1 | -0.04 | -0.041 | -0.04  | -0.043 | -0.03  | t | 78291  | VHRNPWHL                 | Homo sapiens          |
| 1 | 1.00 | 1 | 1 | -0.02 | 0.002  | -0.014 | -0.021 | -0.008 | t | 141577 | WKMRKSFHKVPG             | Rattus                |
| 1 | 1.00 | 1 | 1 | -0.02 | -0.02  | 0.012  | -0.02  | -0.018 | t | 78006  | SIPYLSAADYAYTASDV<br>AET | Mus musculus          |
| 1 | 1.00 | 1 | 1 | -0.03 | -0.028 | 0.005  | -0.029 | -0.028 | t | 7672   | DAVSSPAQPD               | Homo sapiens          |
| 1 | 1.00 | 1 | 1 | -0.02 | -0.015 | 0.009  | -0.019 | -0.017 | t | 11800  | EENISLDLI<br>QQYYLTFFD   | Gallus gallus         |
| 1 | 1.00 | 1 | 1 | -0.02 | -0.021 | 0.009  | -0.019 | -0.017 | t | 11800  | EENISLDLI<br>QQYYLTFFD   | Equus caballus        |
| 1 | 1.00 | 1 | 1 | -0.02 | -0.023 | -0.006 | -0.02  | -0.008 | t | 79645  | SLGMHPL                  | Oryctolagus cuniculus |
| 1 | 1.00 | 1 | 1 | 0     | -0.002 | 0.007  | -0.007 | 0.01   | t | 132718 | VLAVHRGREFGF             | Mus musculus          |
| 1 | 1.00 | 1 | 1 | -0.04 | -0.037 | -0.013 | -0.04  | -0.03  | t | 78558  | VSIFPPA                  | Mus musculus          |
| 1 | 1.00 | 1 | 1 | -0.03 | -0.03  | -0.023 | -0.023 | -0.018 | t | 135494 | RGGLGLVNGRSLRH           | Mus musculus          |
| 1 | 1.00 | 1 | 1 | 0     | 0      | 0.002  | 0      | 0.014  | t | 47131  | PDKILTYIADHC             | Mus musculus          |
| 1 | 1.00 | 1 | 1 | -0.01 | -0.01  | 0.018  | -0.01  | -0.008 | t | 11374  | EDKSVTEEIAEEDKSVT        | Mus musculus          |
| 1 | 1.00 | 1 | 1 | 0.01  | 0.01   | 0.029  | 0.01   | 0.02   | t | 122426 | KAYTVPSGPYVEPRL          | Mus musculus          |
| 1 | 1.00 | 1 | 1 | -0.01 | -0.01  | 0.007  | -0.007 | 0.002  | t | 102158 | TSTWLQW                  | Homo sapiens          |

|   |      |   |   |       |        |        |        |        |   |        |                              |                                  |
|---|------|---|---|-------|--------|--------|--------|--------|---|--------|------------------------------|----------------------------------|
| 1 | 1.00 | 1 | 1 | -0.01 | -0.014 | -0.003 | -0.011 | 0      | t | 2193   | AKGHSLPR<br>LVTS             | Oryctola<br>gus<br>cuniculu<br>s |
| 1 | 1.00 | 1 | 1 | 0     | -0.002 | 0.027  | 0.003  | 0.009  | t | 59784  | SMYGSYN                      | Mus<br>musculu<br>s              |
| 1 | 1.00 | 1 | 1 | 0.03  | 0.028  | 0.037  | 0.023  | 0.039  | t | 121701 | PDSPQRV<br>AEAEAVSF          | Mus<br>musculu<br>s              |
| 1 | 1.00 | 1 | 1 | -0.02 | -0.017 | -0.011 | -0.02  | -0.008 | t | 79211  | FCPGVGRY<br>PVRQCY           | Mus<br>musculu<br>s              |
| 1 | 1.00 | 1 | 1 | -0.02 | -0.016 | 0.002  | -0.013 | -0.008 | t | 104153 | NMPQQN<br>R                  | Homo<br>sapiens                  |
| 1 | 1.00 | 1 | 1 | -0.04 | -0.044 | -0.035 | -0.039 | -0.03  | t | 17553  | FQWSWYT<br>PPRPS             | Oryctola<br>gus<br>cuniculu<br>s |
| 1 | 1.00 | 1 | 1 | 0.01  | 0.01   | 0.015  | 0.004  | 0.02   | t | 6232   | CFKGVRLD<br>GTPC             | Homo<br>sapiens                  |
| 1 | 1.00 | 1 | 1 | -0.04 | -0.042 | -0.035 | -0.041 | -0.03  | t | 2976   | ALVNNST<br>MPLW              | Sus<br>scrofa                    |
| 1 | 1.00 | 1 | 1 | -0.01 | -0.012 | 0.007  | -0.011 | 0      | t | 79165  | CCTMPNC<br>TLVLCE            | Mus<br>musculu<br>s              |
| 1 | 1.00 | 1 | 1 | -0.05 | -0.05  | -0.05  | -0.049 | -0.041 | t | 153266 | IVTARARH<br>DWNWVQ<br>RSSRSL | Mus<br>musculu<br>s              |
| 1 | 1.00 | 1 | 1 | -0.02 | -0.017 | 0.002  | -0.02  | -0.008 | t | 104174 | PIDQLLY                      | Mus<br>musculu<br>s              |
| 1 | 1.00 | 1 | 1 | -0.04 | -0.04  | -0.023 | -0.037 | -0.028 | t | 102167 | TVTWWHF                      | Homo<br>sapiens                  |
| 1 | 1.00 | 1 | 1 | -0.03 | -0.028 | -0.018 | -0.029 | -0.02  | t | 133604 | HSLSMYFD<br>WVPH             | Homo<br>sapiens                  |
| 1 | 1.00 | 1 | 1 | -0.08 | -0.078 | -0.075 | -0.077 | -0.07  | t | 66790  | TTQRIINRR<br>RRRRSR          | Homo<br>sapiens                  |
| 1 | 1.00 | 1 | 1 | 0     | 0.002  | -0.007 | -0.003 | 0.012  | t | 78341  | AALTAENT<br>AIKKRNAD<br>AKA  | Homo<br>sapiens                  |

|   |      |   |   |       |        |        |        |        |   |        |                              |                             |
|---|------|---|---|-------|--------|--------|--------|--------|---|--------|------------------------------|-----------------------------|
| 1 | 1.00 | 1 | 1 | 0     | 0.003  | 0.022  | 0      | 0.01   | t | 104356 | YGSHSNI                      | Mus<br>musculu<br>s         |
| 1 | 1.00 | 1 | 1 | -0.02 | -0.022 | -0.013 | -0.023 | -0.01  | t | 78064  | VPLSPTME<br>FMRK             | Mus<br>musculu<br>s         |
| 1 | 1.00 | 1 | 1 | -0.04 | -0.042 | -0.038 | -0.041 | -0.031 | t | 131879 | FLVAHTRA<br>RAPSAGER<br>ARRS | Mus<br>musculu<br>s         |
| 1 | 1.00 | 1 | 1 | -0.04 | -0.04  | -0.036 | -0.04  | -0.026 | t | 62286  | SVPNP                        | Mus<br>musculu<br>s         |
| 1 | 1.00 | 1 | 1 | -0.03 | -0.019 | -0.006 | -0.029 | -0.022 | t | 136676 | TGDDVRA<br>VYWHL             | Dicentra<br>rchus<br>labrax |
| 1 | 1.00 | 1 | 1 | 0     | 0      | 0      | 0      | 0.015  | t | 28299  | IRGDTFAT<br>R                | Mus<br>musculu<br>s         |
| 1 | 1.00 | 1 | 1 | 0     | 0.002  | 0      | 0.001  | 0.014  | t | 133660 | NSTWHD<br>WNSWTH             | Homo<br>sapiens             |
| 1 | 1.00 | 1 | 1 | -0.01 | -0.01  | 0.002  | -0.01  | 0      | t | 153450 | QSFKDHL<br>PAGMRGG<br>GS     | Mus<br>musculu<br>s         |
| 1 | 1.00 | 1 | 1 | -0.01 | -0.01  | 0.002  | -0.01  | 0      | t | 133709 | SWTPDKW<br>LRPSG             | Mus<br>musculu<br>s         |
| 1 | 1.00 | 1 | 0 | 0     | -0.002 | 0.027  | -0.003 | 0.021  | t | 102086 | SSAFYPK                      | Mus<br>musculu<br>s         |
| 1 | 1.00 | 1 | 1 | -0.01 | -0.01  | -0.005 | -0.01  | 0      | t | 52265  | QRSECSTS<br>KCFVRK           | Homo<br>sapiens             |
| 1 | 1.00 | 1 | 1 | -0.03 | -0.028 | -0.018 | -0.029 | -0.02  | t | 133601 | HPMYPTW<br>YSWQP             | Homo<br>sapiens             |
| 1 | 1.00 | 1 | 1 | 0.04  | 0.039  | 0.052  | 0.041  | 0.05   | t | 42246  | MNVTLSS<br>LDGP              | Bos<br>taurus               |
| 1 | 1.00 | 1 | 1 | -0.01 | -0.008 | -0.001 | -0.009 | 0.004  | t | 133696 | SINLNYS<br>PSLL              | Homo<br>sapiens             |
| 1 | 1.00 | 1 | 1 | -0.05 | -0.05  | -0.043 | -0.051 | -0.039 | t | 122400 | HSAHRGP<br>TYDPRVLH          | Mus<br>musculu<br>s         |
| 1 | 1.00 | 1 | 1 | 0     | 0      | 0.012  | 0      | 0.01   | t | 127723 | LHSDARD                      | Homo<br>sapiens             |

|   |      |   |   |       |        |        |        |        |   |        |                            |                                  |
|---|------|---|---|-------|--------|--------|--------|--------|---|--------|----------------------------|----------------------------------|
| 1 | 1.00 | 1 | 1 | 0     | -0.003 | -0.003 | 0      | 0.012  | t | 122153 | NASGLSRP<br>SPSAH          | Oryctola<br>gus<br>cuniculu<br>s |
| 1 | 1.00 | 1 | 1 | -0.01 | -0.007 | -0.001 | -0.01  | 0.002  | t | 53306  | RCQFSVW<br>SWESLRCE<br>FPY | Mus<br>musculu<br>s              |
| 1 | 1.00 | 1 | 1 | 0.01  | 0.013  | 0.023  | 0.01   | 0.02   | t | 796    | ADWADW<br>LDYP             | Mus<br>musculu<br>s              |
| 1 | 1.00 | 1 | 1 | 0.01  | 0.01   | 0.022  | 0.01   | 0.022  | t | 127762 | PGPSTTS                    | Homo<br>sapiens                  |
| 1 | 1.00 | 1 | 1 | 0.02  | 0.022  | 0.032  | 0.021  | 0.03   | t | 133723 | TTTSPYND<br>RQLL           | Homo<br>sapiens                  |
| 1 | 1.00 | 1 | 1 | -0.01 | -0.01  | 0      | -0.01  | 0      | t | 132950 | YSVPPWG<br>SNVMY           | Homo<br>sapiens                  |
| 1 | 1.00 | 1 | 1 | -0.05 | -0.053 | -0.045 | -0.05  | -0.04  | t | 134129 | LCPPGMV<br>RHENRCV<br>ALER | Oryctola<br>gus<br>cuniculu<br>s |
| 1 | 1.00 | 1 | 1 | 0.01  | 0.021  | 0.025  | 0.01   | 0.019  | t | 8130   | DEQDYQIR                   | Gallus<br>gallus                 |
| 1 | 1.00 | 1 | 1 | -0.05 | -0.047 | -0.004 | -0.047 | -0.049 | t | 78101  | AKINAS                     | Equus<br>caballus                |
| 1 | 1.00 | 1 | 1 | 0     | 0.003  | 0.024  | 0      | 0.006  | t | 9515   | DNNKTAT                    | Mus<br>musculu<br>s              |
| 1 | 1.00 | 1 | 1 | 0.01  | 0.01   | 0.029  | 0.01   | 0.019  | t | 122417 | ITREPEPRL<br>RFSQNL        | Mus<br>musculu<br>s              |
| 1 | 1.00 | 1 | 1 | -0.01 | -0.012 | -0.003 | -0.017 | -0.001 | t | 108143 | SQLPYNPL<br>LKPR           | Mus<br>musculu<br>s              |
| 1 | 1.00 | 1 | 1 | 0     | 0      | 0.012  | 0      | 0.01   | t | 153423 | MPKDMPL<br>YANPNGG<br>GS   | Mus<br>musculu<br>s              |



|   |      |   |   |       |        |        |        |        |   |        |                           |                                  |
|---|------|---|---|-------|--------|--------|--------|--------|---|--------|---------------------------|----------------------------------|
| 1 | 1.00 | 1 | 1 | 0.02  | 0.02   | 0.047  | 0.027  | 0.03   | t | 107815 | EIDGYNN<br>QFKKSPLP       | Homo<br>sapiens                  |
| 1 | 1.00 | 1 | 1 | -0.03 | -0.033 | 0.008  | -0.03  | -0.03  | t | 32879  | KPSKPKTN<br>MKHMAG<br>AA  | Oryctola<br>gus<br>cuniculu<br>s |
| 1 | 1.00 | 1 | 1 | -0.03 | -0.034 | 0.008  | -0.03  | -0.03  | t | 32879  | KPSKPKTN<br>MKHMAG<br>AA  | Oryctola<br>gus<br>cuniculu<br>s |
| 1 | 1.00 | 1 | 1 | 0.02  | 0.024  | 0.032  | 0.023  | 0.032  | t | 132883 | PRSENGV                   | Homo<br>sapiens                  |
| 1 | 1.00 | 1 | 1 | 0.01  | 0.012  | 0.015  | 0.011  | 0.022  | t | 97368  | GTTYIRAIA<br>ALEGLK       | Homo<br>sapiens                  |
| 1 | 1.00 | 1 | 1 | 0     | 0.004  | 0.022  | 0.007  | 0.012  | t | 104155 | NPEDCFKT<br>GCNSPT        | Homo<br>sapiens                  |
| 1 | 1.00 | 1 | 1 | -0.01 | -0.006 | 0.008  | -0.009 | 0.002  | t | 111207 | DPASLFH                   | Homo<br>sapiens                  |
| 1 | 1.00 | 1 | 1 | -0.03 | -0.033 | -0.023 | -0.03  | -0.018 | t | 139521 | HSSPTLS                   | Oryctola<br>gus<br>cuniculu<br>s |
| 1 | 1.00 | 1 | 1 | -0.02 | -0.022 | -0.009 | -0.027 | -0.011 | t | 106730 | QHFTKNP<br>ALLMA          | Mus<br>musculu<br>s              |
| 1 | 1.00 | 1 | 1 | -0.05 | -0.047 | -0.009 | -0.05  | -0.05  | t | 32657  | KPAPKPTP<br>PKPAPKPA<br>P | Mus<br>musculu<br>s              |
| 1 | 1.00 | 1 | 0 | -0.02 | -0.02  | 0.007  | -0.023 | 0.001  | t | 101991 | QATWYT<br>W               | Homo<br>sapiens                  |
| 1 | 1.00 | 1 | 1 | -0.01 | -0.008 | 0.006  | -0.009 | 0      | t | 111506 | LPLGQHQP<br>NPSG          | Homo<br>sapiens                  |
| 1 | 1.00 | 1 | 1 | -0.02 | -0.02  | -0.011 | -0.02  | -0.01  | t | 133589 | GMLPPQL<br>FDRHH          | Mus<br>musculu<br>s              |

|   |      |   |   |       |        |        |        |        |   |        |                              |                                  |
|---|------|---|---|-------|--------|--------|--------|--------|---|--------|------------------------------|----------------------------------|
| 1 | 1.00 | 1 | 1 | -0.02 | -0.02  | -0.011 | -0.02  | -0.01  | t | 133589 | GMLPPQL<br>FDRHH             | Mus<br>musculu<br>s              |
| 1 | 1.00 | 1 | 1 | -0.05 | -0.05  | -0.045 | -0.05  | -0.039 | t | 112139 | GQFRVIGP<br>RHPIRALV<br>GDEV | Mus<br>musculu<br>s              |
| 1 | 1.00 | 1 | 1 | 0.01  | 0.014  | 0.026  | 0.011  | 0.021  | t | 111972 | YSHADTM                      | Homo<br>sapiens                  |
| 1 | 1.00 | 1 | 1 | -0.05 | -0.048 | -0.028 | -0.053 | -0.048 | t | 94429  | AICKRIPNK<br>KPG             | Homo<br>sapiens                  |
| 1 | 1.00 | 1 | 1 | -0.03 | -0.036 | -0.02  | -0.031 | -0.018 | t | 99469  | MLGMDD<br>PRMRR              | Oryctola<br>gus<br>cuniculu<br>s |
| 1 | 1.00 | 1 | 1 | -0.02 | -0.018 | -0.008 | -0.019 | -0.01  | t | 133602 | HSIYSEWQ<br>PMWP             | Homo<br>sapiens                  |
| 1 | 1.00 | 1 | 1 | -0.06 | -0.058 | -0.029 | -0.059 | -0.058 | t | 7671   | DAVSRKK<br>MDTKPTD           | Homo<br>sapiens                  |
| 1 | 1.00 | 1 | 1 | 0     | 0      | 0.012  | 0      | 0.011  | t | 4225   | ARQPYGFF<br>LETEEVYQ<br>PG   | Oryctola<br>gus<br>cuniculu<br>s |
| 1 | 1.00 | 1 | 1 | 0.01  | 0.008  | 0.017  | 0.003  | 0.022  | t | 127670 | GNVALSSR<br>VNA              | Mus<br>musculu<br>s              |
| 1 | 1.00 | 1 | 1 | -0.01 | -0.012 | -0.003 | -0.013 | 0      | t | 77853  | DMQYRSP<br>TGLST             | Mus<br>musculu<br>s              |
| 1 | 1.00 | 1 | 1 | 0     | 0      | 0.022  | 0      | 0.003  | t | 40729  | LYDAAKAY<br>AEQLKEN<br>GVINY | Mus<br>musculu<br>s              |
| 1 | 1.00 | 1 | 1 | -0.06 | -0.057 | -0.038 | -0.06  | -0.05  | t | 103975 | HRDLLRF                      | Mus<br>musculu<br>s              |
| 1 | 1.00 | 1 | 1 | -0.02 | -0.023 | -0.015 | -0.02  | -0.008 | t | 120404 | AMMIARF<br>KMFPEVKE<br>K     | Oryctola<br>gus<br>cuniculu<br>s |
| 1 | 1.00 | 1 | 1 | -0.02 | -0.023 | 0.013  | -0.02  | -0.02  | t | 110124 | YGGFLRKY<br>PK               | Oryctola<br>gus<br>cuniculu<br>s |

|   |      |   |   |       |        |        |        |        |   |        |                            |                              |
|---|------|---|---|-------|--------|--------|--------|--------|---|--------|----------------------------|------------------------------|
| 1 | 1.00 | 1 | 1 | -0.02 | -0.02  | 0.017  | -0.02  | -0.018 | t | 63837  | TGGLVSLF<br>NPGPSQD        | Mus<br>musculus              |
| 1 | 1.00 | 1 | 1 | -0.06 | -0.062 | -0.02  | -0.061 | -0.061 | t | 43470  | NDKLYRM<br>EYWKTIKK<br>DVW | Aotus<br>sp.                 |
| 1 | 1.00 | 1 | 1 | -0.01 | -0.006 | 0.012  | -0.013 | 0      | t | 104364 | YNKSFFP                    | Homo<br>sapiens              |
| 1 | 1.00 | 1 | 1 | -0.02 | -0.02  | -0.002 | -0.02  | -0.008 | t | 15856  | FFNIAY                     | Mus<br>musculus              |
| 1 | 1.00 | 1 | 1 | 0     | 0      | 0.052  | 0      | -0.001 | t | 10908  | DYKDDDD<br>K               | Sus<br>scrofa                |
| 1 | 1.00 | 1 | 1 | -0.01 | -0.012 | 0      | -0.013 | 0      | t | 25126  | HWGNHSH<br>SHPQR           | Mus<br>musculus              |
| 1 | 1.00 | 1 | 1 | -0.02 | -0.016 | 0.002  | -0.023 | -0.008 | t | 104047 | LNKTFYY                    | Homo<br>sapiens              |
| 1 | 1.00 | 1 | 1 | 0.02  | 0.022  | 0.048  | 0.016  | 0.021  | t | 1368   | AFNRASD                    | Homo<br>sapiens              |
| 1 | 1.00 | 1 | 1 | -0.04 | -0.044 | 0      | -0.047 | -0.04  | t | 124028 | DPTQPPR<br>H               | Oryctola<br>gus<br>cuniculus |
| 1 | 1.00 | 1 | 1 | -0.04 | -0.044 | 0      | -0.047 | -0.04  | t | 124028 | DPTQPPR<br>H               | Oryctola<br>gus<br>cuniculus |
| 1 | 1.00 | 1 | 0 | -0.06 | -0.06  | -0.033 | -0.063 | -0.039 | t | 101991 | QATWYT<br>W                | Homo<br>sapiens              |
| 1 | 1.00 | 1 | 1 | 0     | 0      | 0.052  | 0      | -0.001 | t | 10908  | DYKDDDD<br>K               | Mus<br>musculus              |
| 1 | 1.00 | 1 | 1 | -0.05 | -0.052 | -0.043 | -0.057 | -0.04  | t | 122548 | RAFDVVG<br>AGLDHRLT        | Mus<br>musculus              |
| 1 | 1.00 | 1 | 1 | 0     | 0.002  | 0.01   | 0.001  | 0.012  | t | 78248  | PQSNLAKT                   | Homo<br>sapiens              |

|   |      |   |   |       |        |        |        |        |   |        |                            |                                  |
|---|------|---|---|-------|--------|--------|--------|--------|---|--------|----------------------------|----------------------------------|
| 1 | 1.00 | 1 | 1 | 0.01  | 0.01   | 0.015  | 0.01   | 0.022  | t | 56679  | RYVSAESN<br>GFGW           | Mus<br>musculu<br>s              |
| 1 | 1.00 | 1 | 1 | 0     | 0.003  | 0.022  | 0.003  | 0.01   | t | 78272  | STLSKS                     | Equus<br>caballus                |
| 1 | 1.00 | 1 | 1 | 0.03  | 0.026  | 0.055  | 0.033  | 0.04   | t | 59688  | SMITDLL                    | Oryctola<br>gus<br>cuniculu<br>s |
| 1 | 1.00 | 1 | 0 | -0.01 | -0.01  | 0.017  | -0.006 | 0.011  | t | 101722 | HTQPYAYE<br>ARDH           | Homo<br>sapiens                  |
| 1 | 1.00 | 1 | 1 | -0.05 | -0.052 | -0.011 | -0.047 | -0.048 | t | 114853 | HICKGFQC<br>FKKPRTTP<br>PK | Rattus<br>norvegic<br>us         |
| 1 | 1.00 | 1 | 1 | 0.01  | 0.008  | 0.023  | 0.009  | 0.02   | t | 796    | ADWADW<br>LDYP             | Mus<br>musculu<br>s              |
| 1 | 1.00 | 1 | 1 | -0.04 | -0.04  | -0.033 | -0.04  | -0.03  | t | 132421 | LANKHEV<br>GIIVR           | Mus<br>musculu<br>s              |
| 1 | 1.00 | 1 | 1 | -0.06 | -0.06  | -0.053 | -0.06  | -0.05  | t | 62288  | SVPPPHTR<br>SASG           | Mus<br>musculu<br>s              |
| 1 | 1.00 | 1 | 1 | 0.04  | 0.04   | 0.056  | 0.04   | 0.051  | t | 109274 | GVDGLDLP<br>LEQL           | Mus<br>musculu<br>s              |
| 1 | 1.00 | 1 | 1 | 0.03  | 0.034  | 0.048  | 0.031  | 0.042  | t | 111718 | RFNPDQA<br>PSWPP           | Homo<br>sapiens                  |
| 1 | 1.00 | 1 | 1 | -0.06 | -0.063 | -0.021 | -0.06  | -0.06  | t | 150877 | PSVYVRQE<br>LTPDQR         | Oryctola<br>gus<br>cuniculu<br>s |
| 1 | 1.00 | 1 | 1 | -0.01 | -0.007 | -0.001 | -0.01  | 0.002  | t | 79210  | FCLPTREST<br>GRACP         | Mus<br>musculu<br>s              |
| 1 | 1.00 | 1 | 1 | 0.02  | 0.02   | 0.027  | 0.02   | 0.032  | t | 132740 | WQKAAQ<br>NGGQVL           | Mus<br>musculu<br>s              |
| 1 | 1.00 | 1 | 1 | -0.06 | -0.058 | -0.005 | -0.053 | -0.06  | t | 135453 | CNAEVYV<br>VPWEKK          | Homo<br>sapiens                  |

|   |      |   |   |       |        |        |        |        |   |        |                              |                                  |
|---|------|---|---|-------|--------|--------|--------|--------|---|--------|------------------------------|----------------------------------|
| 1 | 1.00 | 1 | 1 | -0.08 | -0.08  | -0.043 | -0.08  | -0.078 | t | 80041  | SVAMKPY<br>EVTPT             | Mus<br>musculu<br>s              |
| 1 | 1.00 | 1 | 1 | -0.07 | -0.066 | -0.055 | -0.073 | -0.06  | t | 78552  | VERLGDYLI<br>DQGL            | Homo<br>sapiens                  |
| 1 | 1.00 | 1 | 1 | -0.11 | -0.112 | -0.098 | -0.107 | -0.097 | t | 115501 | SWPHHHR<br>MPLLA             | Mus<br>musculu<br>s              |
| 1 | 1.00 | 1 | 1 | -0.02 | -0.016 | -0.001 | -0.023 | -0.01  | t | 5559   | AVTFSGK                      | Homo<br>sapiens                  |
| 1 | 1.00 | 1 | 1 | -0.02 | -0.016 | 0.002  | -0.023 | -0.01  | t | 104363 | YNKSFFM                      | Homo<br>sapiens                  |
| 1 | 1.00 | 1 | 1 | -0.05 | -0.045 | -0.021 | -0.043 | -0.04  | t | 108660 | TLTFTLNKL<br>R               | Homo<br>sapiens                  |
| 1 | 1.00 | 1 | 1 | -0.06 | -0.057 | -0.038 | -0.06  | -0.048 | t | 104193 | PWYAPFR                      | Mus<br>musculu<br>s              |
| 1 | 1.00 | 1 | 1 | 0.03  | 0.03   | 0.046  | 0.03   | 0.04   | t | 79415  | TCTSDILPT<br>PHPCT           | Mus<br>musculu<br>s              |
| 1 | 1.00 | 1 | 1 | -0.03 | -0.03  | -0.023 | -0.03  | -0.019 | t | 133494 | ADNPIKW<br>DRART             | Mus<br>musculu<br>s              |
| 1 | 1.00 | 1 | 1 | -0.03 | -0.029 | 0.002  | -0.029 | -0.03  | t | 74580  | YLCHARAI<br>DTTCIWPE<br>PCFD | Myodes<br>glareolu<br>s          |
| 1 | 1.00 | 1 | 1 | 0     | 0.002  | 0.012  | 0.001  | 0.01   | t | 133721 | TSKNTSWF<br>DWQA             | Homo<br>sapiens                  |
| 1 | 1.00 | 1 | 1 | 0.01  | 0.01   | 0.022  | 0.016  | 0.022  | t | 54072  | RHNTIRQ<br>QRRKNHH<br>L      | Homo<br>sapiens                  |
| 1 | 1.00 | 1 | 1 | -0.01 | -0.007 | 0.003  | -0.01  | 0      | t | 73447  | YASPSLFG<br>FPFALEA          | Mus<br>musculu<br>s              |
| 1 | 1.00 | 1 | 1 | -0.03 | -0.028 | 0.005  | -0.029 | -0.028 | t | 7672   | DAVSSPA<br>QPD               | Homo<br>sapiens                  |
| 1 | 1.00 | 1 | 1 | -0.06 | -0.063 | -0.029 | -0.06  | -0.058 | t | 7671   | DAVSRKK<br>MDTKPTD           | Oryctola<br>gus<br>cuniculu<br>s |

|   |      |   |   |       |        |        |        |        |   |        |                         |                              |
|---|------|---|---|-------|--------|--------|--------|--------|---|--------|-------------------------|------------------------------|
| 1 | 1.00 | 1 | 1 | -0.01 | -0.01  | 0.002  | -0.01  | 0      | t | 122490 | MTPNDRR<br>IHRYPERL     | Mus<br>musculus              |
| 1 | 1.00 | 1 | 0 | -0.06 | -0.06  | -0.033 | -0.063 | -0.039 | t | 101823 | KTLWWQ<br>W             | Homo<br>sapiens              |
| 1 | 1.00 | 1 | 1 | -0.05 | -0.05  | -0.016 | -0.05  | -0.048 | t | 14551  | ETSWGQQ<br>ST           | Mus<br>musculus              |
| 1 | 1.00 | 1 | 1 | 0     | 0.003  | 0.022  | 0      | 0.01   | t | 103874 | EEHSRPQ                 | Mus<br>musculus              |
| 1 | 1.00 | 1 | 1 | -0.03 | -0.03  | -0.028 | -0.03  | -0.018 | t | 9600   | DPARDCV<br>HNICIFAG     | Mus<br>musculus              |
| 1 | 1.00 | 1 | 1 | 0.01  | 0.013  | 0.036  | 0.01   | 0.021  | t | 59960  | SNYNPQ                  | Mus<br>musculus              |
| 1 | 1.00 | 1 | 1 | -0.02 | -0.022 | 0.019  | -0.021 | -0.02  | t | 8644   | DIFTNSRG<br>KRASKG      | Mus<br>musculus              |
| 1 | 1.00 | 1 | 1 | 0.03  | 0.032  | 0.042  | 0.031  | 0.04   | t | 133558 | EKVTSTWT<br>DWQY        | Homo<br>sapiens              |
| 1 | 1.00 | 1 | 1 | -0.02 | -0.016 | 0.006  | -0.019 | -0.01  | t | 52747  | QVMPYVQ                 | Homo<br>sapiens              |
| 1 | 1.00 | 1 | 1 | -0.02 | -0.018 | -0.002 | -0.017 | -0.008 | t | 65501  | TPALNSLP<br>YVFLFSY     | Homo<br>sapiens              |
| 1 | 1.00 | 1 | 1 | -0.03 | -0.03  | -0.019 | -0.03  | -0.02  | t | 99736  | TTLNSFMR<br>SFPP        | Oryctola<br>gus<br>cuniculus |
| 1 | 1.00 | 1 | 1 | -0.03 | -0.03  | 0.008  | -0.03  | -0.029 | t | 32878  | KPSKPKTN<br>MKHMAG<br>A | Mus<br>musculus              |
| 1 | 1.00 | 1 | 1 | -0.03 | -0.032 | -0.023 | -0.033 | -0.02  | t | 77844  | CLAAPTGL<br>KLAP        | Mus<br>musculus              |
| 1 | 1.00 | 1 | 1 | -0.05 | -0.052 | -0.03  | -0.051 | -0.04  | t | 16636  | FLHAPHSP<br>RVWL        | Mus<br>musculus              |

|   |      |   |   |       |        |        |        |        |   |        |                              |                                  |
|---|------|---|---|-------|--------|--------|--------|--------|---|--------|------------------------------|----------------------------------|
| 1 | 1.00 | 1 | 1 | -0.03 | -0.03  | -0.03  | -0.03  | -0.02  | t | 79471  | YCRTNQS<br>GAFARCT           | Mus<br>musculu<br>s              |
| 1 | 1.00 | 1 | 1 | -0.03 | -0.033 | -0.005 | -0.03  | -0.028 | t | 49421  | PSLIGLAM<br>GDAGGYK<br>AADMW | Oryctola<br>gus<br>cuniculu<br>s |
| 1 | 1.00 | 1 | 1 | -0.03 | -0.03  | -0.014 | -0.03  | -0.02  | t | 111691 | QTIGNAKP<br>LGRV             | Homo<br>sapiens                  |
| 1 | 1.00 | 1 | 1 | 0     | 0.002  | 0.007  | 0.001  | 0.011  | t | 133660 | NSTWHD<br>WNSWTH             | Homo<br>sapiens                  |
| 1 | 1.00 | 1 | 1 | 0.04  | 0.038  | 0.047  | 0.037  | 0.05   | t | 109864 | RSDDTDER<br>SESG             | Mus<br>musculu<br>s              |
| 1 | 1.00 | 1 | 1 | -0.01 | -0.008 | 0      | -0.009 | 0.002  | t | 78251  | PTNNLDHL                     | Homo<br>sapiens                  |
| 1 | 1.00 | 1 | 1 | -0.02 | -0.018 | -0.01  | -0.019 | -0.008 | t | 78247  | PQNAFDH<br>L                 | Homo<br>sapiens                  |
| 1 | 1.00 | 1 | 1 | -0.03 | -0.03  | -0.015 | -0.027 | -0.018 | t | 50742  | QFCGWGE<br>FEVRVLW<br>P      | Homo<br>sapiens                  |
| 1 | 1.00 | 1 | 1 | -0.02 | -0.02  | 0.012  | -0.02  | -0.018 | t | 77969  | PQIKVYAN<br>IAPTNVHV<br>AGEF | Mus<br>musculu<br>s              |
| 1 | 1.00 | 1 | 0 | -0.04 | -0.04  | -0.013 | -0.043 | -0.019 | t | 101991 | QATWYT<br>W                  | Homo<br>sapiens                  |
| 1 | 1.00 | 1 | 1 | -0.01 | -0.01  | 0.004  | -0.01  | 0      | t | 133633 | LSNTANP<br>WSWDR             | Mus<br>musculu<br>s              |
| 1 | 1.00 | 1 | 1 | -0.03 | -0.033 | 0.012  | -0.03  | -0.028 | t | 78423  | INFLRMDD<br>FARHFNR          | Oryctola<br>gus<br>cuniculu<br>s |
| 1 | 1.00 | 1 | 1 | 0.02  | 0.018  | 0.027  | 0.017  | 0.03   | t | 109855 | RQTEVDS<br>GRDLE             | Mus<br>musculu<br>s              |
| 1 | 1.00 | 1 | 1 | 0.03  | 0.032  | 0.043  | 0.033  | 0.042  | t | 65776  | TPSTEQFD<br>SFYDPLR          | Homo<br>sapiens                  |

|   |      |   |   |      |       |       |      |      |   |       |
|---|------|---|---|------|-------|-------|------|------|---|-------|
| 1 | 1.00 | 1 | 1 | 0.03 | 0.033 | 0.047 | 0.03 | 0.04 | t | 68711 |
|---|------|---|---|------|-------|-------|------|------|---|-------|
